# Supplementary material for: Predicting Chemical Toxicity Effects Based on Chemical-Chemical Interactions
Source: PubMed Central journal article supplement (PMC3574107; doi:10.1371/journal.pone.0056517), 2013-02-15
Supplement: pone.0056517.s002.pdf [file pone.0056517.s002.pdf]

**Table S2:** 323,432 interaction units used to predict compound toxicity, each unit contains two compounds and one confidence score.

| Compound #1 | Compound #2 | Confidence score | Compound #1 | Compound #2 | Confidence score |
|-------------|-------------|------------------|-------------|-------------|------------------|
| A00001      | A00009      | 374              | A00001      | A00010      | 374              |
| A00001      | A00026      | 561              | A00001      | A00041      | 489              |
| A00001      | A00042      | 490              | A00001      | A00046      | 263              |
| A00001      | A00047      | 558              | A00001      | A00058      | 465              |
| A00001      | A00064      | 154              | A00001      | A00073      | 631              |
| A00001      | A00074      | 489              | A00001      | A00090      | 618              |
| A00001      | A00138      | 491              | A00001      | A00162      | 202              |
| A00001      | A00183      | 559              | A00001      | A00185      | 221              |
| A00001      | A00198      | 291              | A00001      | A00207      | 383              |
| A00001      | A00210      | 291              | A00001      | A00214      | 486              |
| A00001      | A00234      | 240              | A00001      | A00239      | 291              |
| A00001      | A00240      | 291              | A00001      | A00241      | 291              |
| A00001      | A00243      | 291              | A00001      | A00254      | 283              |
| A00001      | A00261      | 291              | A00001      | A00316      | 152              |
| A00001      | A00371      | 334              | A00001      | A00382      | 63               |
| A00001      | A00433      | 334              | A00001      | A00600      | 185              |
| A00001      | A00641      | 550              | A00001      | A00696      | 366              |
| A00001      | A00706      | 334              | A00001      | A00973      | 334              |
| A00001      | A01113      | 334              | A00001      | A01192      | 334              |
| A00001      | A01474      | 260              | A00001      | A01560      | 185              |
| A00001      | A01596      | 291              | A00001      | A01648      | 334              |
| A00001      | A01792      | 219              | A00001      | A01914      | 484              |
| A00001      | A01920      | 291              | A00001      | A02342      | 188              |
| A00001      | A03446      | 63               | A00001      | A03560      | 334              |
| A00001      | A03784      | 180              | A00001      | A04012      | 945              |
| A00001      | A04567      | 165              | A00001      | A04731      | 174              |
| A00001      | A05029      | 334              | A00001      | A05633      | 488              |
| A00001      | A06197      | 229              | A00001      | A06200      | 195              |
| A00001      | A07027      | 177              | A00001      | A07167      | 271              |
| A00001      | A07311      | 391              | A00001      | A07378      | 334              |
| A00001      | A08091      | 235              | A00001      | A08118      | 291              |
| A00001      | A09591      | 334              | A00001      | A11129      | 226              |
| A00001      | A11929      | 235              | A00001      | A12054      | 358              |
| A00001      | A12988      | 488              | A00001      | A13198      | 477              |
| A00001      | A13199      | 374              | A00001      | A13250      | 291              |
| A00001      | A13511      | 229              | A00001      | A13743      | 465              |
| A00001      | A14178      | 334              | A00001      | A14198      | 193              |
| A00001      | A14299      | 291              | A00001      | A14704      | 291              |
| A00001      | A15347      | 187              | A00001      | A15636      | 241              |
| A00001      | A16594      | 373              | A00001      | A17088      | 334              |
| A00002      | A00035      | 160              | A00002      | A00042      | 915              |

|        |        |     |        |        |     |
|--------|--------|-----|--------|--------|-----|
| A00002 | A00052 | 904 | A00002 | A00067 | 899 |
| A00002 | A00123 | 371 | A00002 | A00140 | 350 |
| A00002 | A00148 | 353 | A00002 | A00151 | 941 |
| A00002 | A00152 | 63  | A00002 | A00159 | 63  |
| A00002 | A00189 | 281 | A00002 | A00222 | 193 |
| A00002 | A00224 | 902 | A00002 | A00226 | 375 |
| A00002 | A00381 | 187 | A00002 | A00759 | 208 |
| A00002 | A00760 | 235 | A00002 | A01189 | 279 |
| A00002 | A01527 | 904 | A00002 | A01558 | 899 |
| A00002 | A01588 | 899 | A00002 | A01597 | 191 |
| A00002 | A01709 | 477 | A00002 | A01844 | 63  |
| A00002 | A02400 | 346 | A00002 | A02415 | 226 |
| A00002 | A02487 | 230 | A00002 | A02564 | 146 |
| A00002 | A02641 | 291 | A00002 | A02737 | 162 |
| A00002 | A02836 | 160 | A00002 | A02881 | 414 |
| A00002 | A02904 | 316 | A00002 | A02908 | 162 |
| A00002 | A03010 | 224 | A00002 | A03338 | 457 |
| A00002 | A03654 | 230 | A00002 | A03809 | 168 |
| A00002 | A03965 | 229 | A00002 | A04853 | 265 |
| A00002 | A05065 | 232 | A00002 | A06149 | 274 |
| A00002 | A06398 | 408 | A00002 | A06601 | 215 |
| A00002 | A07187 | 252 | A00002 | A08768 | 401 |
| A00002 | A10899 | 249 | A00002 | A15230 | 236 |
| A00003 | A00045 | 483 | A00003 | A00167 | 491 |
| A00003 | A00210 | 311 | A00003 | A00212 | 490 |
| A00003 | A00316 | 458 | A00003 | A00338 | 481 |
| A00003 | A00395 | 375 | A00003 | A00449 | 385 |
| A00003 | A00471 | 170 | A00003 | A00472 | 480 |
| A00003 | A00473 | 409 | A00003 | A00477 | 390 |
| A00003 | A00485 | 435 | A00003 | A00546 | 229 |
| A00003 | A00562 | 445 | A00003 | A00576 | 179 |
| A00003 | A00625 | 447 | A00003 | A00733 | 491 |
| A00003 | A00752 | 480 | A00003 | A00887 | 193 |
| A00003 | A00981 | 463 | A00003 | A01004 | 232 |
| A00003 | A01009 | 447 | A00003 | A01018 | 424 |
| A00003 | A01052 | 488 | A00003 | A01161 | 490 |
| A00003 | A01212 | 241 | A00003 | A01256 | 163 |
| A00003 | A01332 | 249 | A00003 | A01363 | 229 |
| A00003 | A01367 | 229 | A00003 | A01478 | 260 |
| A00003 | A01557 | 241 | A00003 | A01578 | 213 |
| A00003 | A01582 | 217 | A00003 | A01602 | 899 |
| A00003 | A01656 | 259 | A00003 | A01688 | 213 |
| A00003 | A01694 | 491 | A00003 | A01725 | 601 |
| A00003 | A01728 | 614 | A00003 | A01743 | 606 |
| A00003 | A01749 | 162 | A00003 | A01758 | 260 |
| A00003 | A01790 | 484 | A00003 | A01931 | 491 |

|        |        |     |        |        |     |
|--------|--------|-----|--------|--------|-----|
| A00003 | A01936 | 202 | A00003 | A01972 | 63  |
| A00003 | A02028 | 480 | A00003 | A02075 | 343 |
| A00003 | A02096 | 152 | A00003 | A02104 | 152 |
| A00003 | A02109 | 366 | A00003 | A02116 | 486 |
| A00003 | A02117 | 165 | A00003 | A02120 | 457 |
| A00003 | A02148 | 484 | A00003 | A02194 | 238 |
| A00003 | A02222 | 461 | A00003 | A02332 | 160 |
| A00003 | A02333 | 490 | A00003 | A02434 | 428 |
| A00003 | A02436 | 441 | A00003 | A02443 | 491 |
| A00003 | A02450 | 491 | A00003 | A02469 | 343 |
| A00003 | A02476 | 491 | A00003 | A02477 | 434 |
| A00003 | A02492 | 307 | A00003 | A02535 | 401 |
| A00003 | A02540 | 291 | A00003 | A02673 | 485 |
| A00003 | A02691 | 400 | A00003 | A02698 | 258 |
| A00003 | A02727 | 218 | A00003 | A02753 | 243 |
| A00003 | A02785 | 185 | A00003 | A02885 | 201 |
| A00003 | A02921 | 174 | A00003 | A02931 | 218 |
| A00003 | A03028 | 404 | A00003 | A03043 | 188 |
| A00003 | A03056 | 123 | A00003 | A03104 | 430 |
| A00003 | A03107 | 216 | A00003 | A03186 | 330 |
| A00003 | A03202 | 193 | A00003 | A03223 | 484 |
| A00003 | A03246 | 462 | A00003 | A03417 | 219 |
| A00003 | A03434 | 232 | A00003 | A03451 | 481 |
| A00003 | A03709 | 288 | A00003 | A03811 | 238 |
| A00003 | A03819 | 409 | A00003 | A03926 | 427 |
| A00003 | A03928 | 238 | A00003 | A03945 | 180 |
| A00003 | A03968 | 308 | A00003 | A04019 | 259 |
| A00003 | A04062 | 388 | A00003 | A04075 | 491 |
| A00003 | A04210 | 363 | A00003 | A04212 | 485 |
| A00003 | A04220 | 313 | A00003 | A04228 | 427 |
| A00003 | A04389 | 486 | A00003 | A04442 | 246 |
| A00003 | A04449 | 483 | A00003 | A04460 | 156 |
| A00003 | A04520 | 151 | A00003 | A04736 | 174 |
| A00003 | A04867 | 358 | A00003 | A04879 | 470 |
| A00003 | A05096 | 152 | A00003 | A05128 | 467 |
| A00003 | A05155 | 470 | A00003 | A05293 | 291 |
| A00003 | A05297 | 414 | A00003 | A05355 | 156 |
| A00003 | A05381 | 223 | A00003 | A05439 | 191 |
| A00003 | A05838 | 481 | A00003 | A05929 | 291 |
| A00003 | A06277 | 488 | A00003 | A06281 | 353 |
| A00003 | A06298 | 491 | A00003 | A06405 | 283 |
| A00003 | A06660 | 485 | A00003 | A06718 | 154 |
| A00003 | A06729 | 353 | A00003 | A06731 | 252 |
| A00003 | A06819 | 475 | A00003 | A06855 | 462 |
| A00003 | A06953 | 200 | A00003 | A07209 | 187 |
| A00003 | A07286 | 223 | A00003 | A07391 | 152 |

|        |        |     |        |        |     |
|--------|--------|-----|--------|--------|-----|
| A00003 | A07442 | 435 | A00003 | A07605 | 480 |
| A00003 | A07613 | 302 | A00003 | A08097 | 350 |
| A00003 | A08163 | 288 | A00003 | A08690 | 480 |
| A00003 | A08725 | 238 | A00003 | A08758 | 163 |
| A00003 | A08857 | 488 | A00003 | A08867 | 485 |
| A00003 | A08878 | 480 | A00003 | A08951 | 185 |
| A00003 | A09216 | 238 | A00003 | A09364 | 180 |
| A00003 | A09452 | 446 | A00003 | A09457 | 238 |
| A00003 | A09878 | 195 | A00003 | A10004 | 291 |
| A00003 | A10126 | 398 | A00003 | A10180 | 212 |
| A00003 | A10407 | 291 | A00003 | A10414 | 187 |
| A00003 | A10696 | 152 | A00003 | A10752 | 296 |
| A00003 | A10768 | 193 | A00003 | A10882 | 394 |
| A00003 | A11068 | 945 | A00003 | A11101 | 441 |
| A00003 | A11282 | 199 | A00003 | A11300 | 160 |
| A00003 | A11313 | 196 | A00003 | A11317 | 400 |
| A00003 | A11454 | 176 | A00003 | A11602 | 187 |
| A00003 | A11727 | 188 | A00003 | A11900 | 152 |
| A00003 | A11983 | 945 | A00003 | A12010 | 156 |
| A00003 | A12033 | 201 | A00003 | A12273 | 213 |
| A00003 | A12402 | 291 | A00003 | A12464 | 223 |
| A00003 | A13110 | 223 | A00003 | A13154 | 212 |
| A00003 | A13212 | 457 | A00003 | A13338 | 154 |
| A00003 | A13361 | 409 | A00003 | A13369 | 475 |
| A00003 | A14055 | 152 | A00003 | A14246 | 208 |
| A00003 | A14281 | 177 | A00003 | A14366 | 434 |
| A00003 | A14373 | 270 | A00003 | A14377 | 491 |
| A00003 | A14406 | 249 | A00003 | A14554 | 483 |
| A00003 | A14570 | 185 | A00003 | A14603 | 180 |
| A00003 | A14621 | 491 | A00003 | A14634 | 160 |
| A00003 | A14828 | 441 | A00003 | A15226 | 163 |
| A00003 | A15241 | 171 | A00003 | A15270 | 152 |
| A00003 | A15272 | 160 | A00003 | A15282 | 488 |
| A00003 | A15295 | 416 | A00003 | A15324 | 450 |
| A00003 | A15395 | 183 | A00003 | A15396 | 340 |
| A00003 | A15422 | 319 | A00003 | A15495 | 288 |
| A00003 | A15498 | 251 | A00003 | A15586 | 377 |
| A00003 | A15605 | 388 | A00003 | A15606 | 486 |
| A00003 | A15608 | 165 | A00003 | A15875 | 254 |
| A00003 | A15883 | 259 | A00003 | A15917 | 172 |
| A00003 | A15956 | 291 | A00003 | A16004 | 156 |
| A00003 | A16036 | 223 | A00003 | A16477 | 160 |
| A00003 | A16533 | 168 | A00004 | A00007 | 945 |
| A00004 | A00008 | 945 | A00004 | A00041 | 337 |
| A00004 | A00045 | 473 | A00004 | A00052 | 396 |
| A00004 | A00068 | 899 | A00004 | A00071 | 483 |

|        |        |     |        |        |     |
|--------|--------|-----|--------|--------|-----|
| A00004 | A00142 | 277 | A00004 | A00152 | 491 |
| A00004 | A00171 | 152 | A00004 | A00190 | 477 |
| A00004 | A00204 | 404 | A00004 | A00227 | 218 |
| A00004 | A00264 | 489 | A00004 | A00309 | 317 |
| A00004 | A00351 | 485 | A00004 | A00408 | 247 |
| A00004 | A00449 | 257 | A00004 | A00657 | 472 |
| A00004 | A00659 | 254 | A00004 | A00662 | 400 |
| A00004 | A00663 | 205 | A00004 | A00669 | 407 |
| A00004 | A00688 | 252 | A00004 | A00694 | 196 |
| A00004 | A00736 | 361 | A00004 | A00747 | 452 |
| A00004 | A00794 | 401 | A00004 | A00820 | 490 |
| A00004 | A00914 | 226 | A00004 | A00997 | 159 |
| A00004 | A01005 | 406 | A00004 | A01138 | 218 |
| A00004 | A01161 | 224 | A00004 | A01400 | 429 |
| A00004 | A01404 | 388 | A00004 | A01428 | 246 |
| A00004 | A01460 | 272 | A00004 | A01461 | 475 |
| A00004 | A01515 | 452 | A00004 | A01551 | 491 |
| A00004 | A01573 | 488 | A00004 | A01575 | 204 |
| A00004 | A01668 | 491 | A00004 | A01670 | 486 |
| A00004 | A01675 | 221 | A00004 | A01676 | 184 |
| A00004 | A01705 | 491 | A00004 | A01725 | 310 |
| A00004 | A01726 | 485 | A00004 | A01728 | 333 |
| A00004 | A01729 | 236 | A00004 | A01730 | 296 |
| A00004 | A01731 | 364 | A00004 | A01732 | 344 |
| A00004 | A01736 | 488 | A00004 | A01737 | 491 |
| A00004 | A01741 | 486 | A00004 | A01743 | 491 |
| A00004 | A01746 | 396 | A00004 | A01751 | 286 |
| A00004 | A01753 | 351 | A00004 | A01754 | 213 |
| A00004 | A01757 | 489 | A00004 | A01758 | 491 |
| A00004 | A01762 | 124 | A00004 | A01767 | 229 |
| A00004 | A01769 | 330 | A00004 | A01772 | 180 |
| A00004 | A01776 | 172 | A00004 | A01787 | 201 |
| A00004 | A01788 | 110 | A00004 | A01794 | 447 |
| A00004 | A01802 | 65  | A00004 | A01850 | 182 |
| A00004 | A01872 | 373 | A00004 | A01874 | 249 |
| A00004 | A01883 | 490 | A00004 | A01893 | 491 |
| A00004 | A01894 | 491 | A00004 | A01895 | 266 |
| A00004 | A01896 | 91  | A00004 | A01899 | 151 |
| A00004 | A01909 | 491 | A00004 | A01926 | 491 |
| A00004 | A02006 | 165 | A00004 | A02075 | 402 |
| A00004 | A02117 | 440 | A00004 | A02167 | 252 |
| A00004 | A02300 | 462 | A00004 | A02307 | 154 |
| A00004 | A02315 | 277 | A00004 | A02333 | 170 |
| A00004 | A02335 | 467 | A00004 | A02338 | 446 |
| A00004 | A02402 | 277 | A00004 | A02419 | 172 |
| A00004 | A02435 | 191 | A00004 | A02436 | 187 |

|        |        |     |        |        |     |
|--------|--------|-----|--------|--------|-----|
| A00004 | A02490 | 232 | A00004 | A02491 | 406 |
| A00004 | A02613 | 249 | A00004 | A02668 | 260 |
| A00004 | A02687 | 356 | A00004 | A02691 | 491 |
| A00004 | A02700 | 486 | A00004 | A02701 | 351 |
| A00004 | A02705 | 223 | A00004 | A02706 | 380 |
| A00004 | A02707 | 107 | A00004 | A02752 | 368 |
| A00004 | A02771 | 205 | A00004 | A02785 | 480 |
| A00004 | A02814 | 412 | A00004 | A02817 | 168 |
| A00004 | A02836 | 202 | A00004 | A02837 | 423 |
| A00004 | A02859 | 486 | A00004 | A02874 | 405 |
| A00004 | A02893 | 205 | A00004 | A02895 | 157 |
| A00004 | A02906 | 269 | A00004 | A02988 | 162 |
| A00004 | A03034 | 279 | A00004 | A03225 | 318 |
| A00004 | A03238 | 457 | A00004 | A03259 | 297 |
| A00004 | A03268 | 475 | A00004 | A03284 | 185 |
| A00004 | A03520 | 160 | A00004 | A03585 | 274 |
| A00004 | A03593 | 249 | A00004 | A03594 | 378 |
| A00004 | A03611 | 491 | A00004 | A03624 | 249 |
| A00004 | A03653 | 154 | A00004 | A03866 | 168 |
| A00004 | A03870 | 205 | A00004 | A03872 | 351 |
| A00004 | A03890 | 405 | A00004 | A03983 | 191 |
| A00004 | A03990 | 443 | A00004 | A04005 | 434 |
| A00004 | A04045 | 235 | A00004 | A04062 | 338 |
| A00004 | A04118 | 270 | A00004 | A04135 | 263 |
| A00004 | A04209 | 291 | A00004 | A04279 | 345 |
| A00004 | A04285 | 344 | A00004 | A04286 | 299 |
| A00004 | A04304 | 290 | A00004 | A04314 | 319 |
| A00004 | A04397 | 213 | A00004 | A04443 | 266 |
| A00004 | A04449 | 167 | A00004 | A04510 | 241 |
| A00004 | A04530 | 329 | A00004 | A04591 | 270 |
| A00004 | A04620 | 463 | A00004 | A04729 | 319 |
| A00004 | A04763 | 358 | A00004 | A04797 | 270 |
| A00004 | A04822 | 343 | A00004 | A04953 | 270 |
| A00004 | A04973 | 205 | A00004 | A05057 | 213 |
| A00004 | A05122 | 279 | A00004 | A05309 | 236 |
| A00004 | A05376 | 352 | A00004 | A05415 | 491 |
| A00004 | A05459 | 176 | A00004 | A05665 | 238 |
| A00004 | A05666 | 154 | A00004 | A05709 | 260 |
| A00004 | A05746 | 249 | A00004 | A05767 | 216 |
| A00004 | A05858 | 249 | A00004 | A05901 | 198 |
| A00004 | A05911 | 154 | A00004 | A06021 | 293 |
| A00004 | A06554 | 196 | A00004 | A06579 | 232 |
| A00004 | A06607 | 462 | A00004 | A06635 | 455 |
| A00004 | A06659 | 299 | A00004 | A06678 | 205 |
| A00004 | A06852 | 213 | A00004 | A06868 | 183 |
| A00004 | A06897 | 319 | A00004 | A06949 | 294 |

|        |        |     |        |        |     |
|--------|--------|-----|--------|--------|-----|
| A00004 | A07165 | 473 | A00004 | A07167 | 160 |
| A00004 | A07171 | 235 | A00004 | A07177 | 251 |
| A00004 | A07178 | 210 | A00004 | A07200 | 491 |
| A00004 | A07350 | 270 | A00004 | A07486 | 271 |
| A00004 | A07552 | 180 | A00004 | A07663 | 270 |
| A00004 | A07736 | 484 | A00004 | A07848 | 210 |
| A00004 | A07943 | 301 | A00004 | A08070 | 185 |
| A00004 | A08484 | 165 | A00004 | A08626 | 163 |
| A00004 | A08724 | 279 | A00004 | A08989 | 259 |
| A00004 | A09145 | 216 | A00004 | A09147 | 180 |
| A00004 | A09162 | 285 | A00004 | A09209 | 160 |
| A00004 | A09404 | 185 | A00004 | A09406 | 213 |
| A00004 | A09492 | 270 | A00004 | A09699 | 180 |
| A00004 | A09790 | 247 | A00004 | A09882 | 274 |
| A00004 | A09929 | 191 | A00004 | A09955 | 172 |
| A00004 | A09989 | 160 | A00004 | A10018 | 368 |
| A00004 | A10247 | 491 | A00004 | A10382 | 210 |
| A00004 | A10424 | 160 | A00004 | A10495 | 301 |
| A00004 | A10575 | 201 | A00004 | A10743 | 210 |
| A00004 | A10950 | 301 | A00004 | A11279 | 185 |
| A00004 | A11316 | 235 | A00004 | A11348 | 210 |
| A00004 | A11476 | 243 | A00004 | A12335 | 249 |
| A00004 | A13348 | 391 | A00004 | A13548 | 270 |
| A00004 | A13897 | 249 | A00004 | A14120 | 399 |
| A00004 | A14247 | 467 | A00004 | A14389 | 310 |
| A00004 | A14405 | 491 | A00004 | A14440 | 484 |
| A00004 | A14790 | 249 | A00004 | A15282 | 193 |
| A00004 | A15368 | 310 | A00004 | A15564 | 388 |
| A00004 | A15623 | 301 | A00004 | A15717 | 414 |
| A00004 | A15747 | 246 | A00004 | A15838 | 168 |
| A00004 | A16877 | 212 | A00005 | A00012 | 294 |
| A00005 | A00013 | 356 | A00005 | A00085 | 333 |
| A00005 | A00106 | 423 | A00005 | A00155 | 488 |
| A00005 | A00196 | 468 | A00005 | A00204 | 328 |
| A00005 | A00212 | 297 | A00005 | A00216 | 101 |
| A00005 | A00218 | 451 | A00005 | A00219 | 348 |
| A00005 | A00264 | 460 | A00005 | A00301 | 154 |
| A00005 | A00661 | 187 | A00005 | A00663 | 152 |
| A00005 | A00914 | 151 | A00005 | A01137 | 213 |
| A00005 | A01138 | 491 | A00005 | A01400 | 154 |
| A00005 | A01590 | 201 | A00005 | A01668 | 208 |
| A00005 | A01669 | 299 | A00005 | A01670 | 173 |
| A00005 | A01726 | 372 | A00005 | A01894 | 218 |
| A00005 | A01982 | 277 | A00005 | A02071 | 491 |
| A00005 | A02074 | 173 | A00005 | A02075 | 452 |
| A00005 | A02077 | 358 | A00005 | A02083 | 340 |

|        |        |     |        |        |     |
|--------|--------|-----|--------|--------|-----|
| A00005 | A02129 | 324 | A00005 | A02133 | 384 |
| A00005 | A02187 | 256 | A00005 | A02215 | 375 |
| A00005 | A02298 | 236 | A00005 | A02300 | 489 |
| A00005 | A02306 | 213 | A00005 | A02314 | 330 |
| A00005 | A02317 | 374 | A00005 | A02329 | 490 |
| A00005 | A02330 | 413 | A00005 | A02443 | 151 |
| A00005 | A02545 | 228 | A00005 | A02644 | 210 |
| A00005 | A02665 | 384 | A00005 | A02669 | 382 |
| A00005 | A02671 | 63  | A00005 | A02754 | 170 |
| A00005 | A02774 | 484 | A00005 | A02785 | 491 |
| A00005 | A02788 | 213 | A00005 | A02859 | 268 |
| A00005 | A02874 | 213 | A00005 | A02918 | 152 |
| A00005 | A02929 | 191 | A00005 | A02947 | 267 |
| A00005 | A02951 | 230 | A00005 | A03050 | 490 |
| A00005 | A03099 | 213 | A00005 | A03213 | 221 |
| A00005 | A03275 | 170 | A00005 | A03346 | 165 |
| A00005 | A03427 | 221 | A00005 | A03486 | 219 |
| A00005 | A03545 | 232 | A00005 | A03744 | 163 |
| A00005 | A04023 | 484 | A00005 | A04051 | 276 |
| A00005 | A04162 | 299 | A00005 | A04256 | 196 |
| A00005 | A04267 | 163 | A00005 | A04369 | 490 |
| A00005 | A04371 | 412 | A00005 | A04436 | 455 |
| A00005 | A04555 | 400 | A00005 | A04608 | 281 |
| A00005 | A04612 | 243 | A00005 | A04614 | 210 |
| A00005 | A04633 | 481 | A00005 | A04635 | 477 |
| A00005 | A04865 | 229 | A00005 | A04974 | 409 |
| A00005 | A04975 | 466 | A00005 | A05070 | 223 |
| A00005 | A05217 | 446 | A00005 | A05390 | 226 |
| A00005 | A05494 | 183 | A00005 | A05505 | 366 |
| A00005 | A05659 | 195 | A00005 | A05868 | 240 |
| A00005 | A05992 | 360 | A00005 | A06607 | 408 |
| A00005 | A06747 | 193 | A00005 | A06762 | 224 |
| A00005 | A06874 | 398 | A00005 | A07158 | 240 |
| A00005 | A07200 | 337 | A00005 | A07217 | 281 |
| A00005 | A07297 | 470 | A00005 | A07407 | 228 |
| A00005 | A07442 | 217 | A00005 | A07491 | 193 |
| A00005 | A07515 | 406 | A00005 | A07541 | 319 |
| A00005 | A07542 | 199 | A00005 | A07543 | 205 |
| A00005 | A07561 | 174 | A00005 | A07630 | 288 |
| A00005 | A07634 | 165 | A00005 | A09020 | 245 |
| A00005 | A14423 | 358 | A00005 | A14430 | 299 |
| A00005 | A17078 | 290 | A00006 | A00015 | 481 |
| A00006 | A00018 | 283 | A00006 | A00021 | 312 |
| A00006 | A00034 | 389 | A00006 | A00053 | 475 |
| A00006 | A00067 | 899 | A00006 | A00069 | 945 |
| A00006 | A00074 | 411 | A00006 | A00081 | 491 |



|        |        |     |        |        |     |
|--------|--------|-----|--------|--------|-----|
| A00006 | A00089 | 210 | A00006 | A00127 | 424 |
| A00006 | A00140 | 899 | A00006 | A00150 | 486 |
| A00006 | A00159 | 899 | A00006 | A00167 | 462 |
| A00006 | A00178 | 170 | A00006 | A00209 | 899 |
| A00006 | A00210 | 149 | A00006 | A00219 | 379 |
| A00006 | A00230 | 900 | A00006 | A00246 | 899 |
| A00006 | A00294 | 363 | A00006 | A00309 | 405 |
| A00006 | A00315 | 455 | A00006 | A00328 | 247 |
| A00006 | A00335 | 163 | A00006 | A00370 | 174 |
| A00006 | A00400 | 341 | A00006 | A00446 | 307 |
| A00006 | A00642 | 159 | A00006 | A00643 | 490 |
| A00006 | A00747 | 191 | A00006 | A00806 | 223 |
| A00006 | A00815 | 491 | A00006 | A00967 | 154 |
| A00006 | A00989 | 63  | A00006 | A01052 | 899 |
| A00006 | A01112 | 347 | A00006 | A01257 | 279 |
| A00006 | A01277 | 273 | A00006 | A01425 | 347 |
| A00006 | A01527 | 899 | A00006 | A01550 | 943 |
| A00006 | A01554 | 936 | A00006 | A01558 | 899 |
| A00006 | A01601 | 230 | A00006 | A01615 | 989 |
| A00006 | A01640 | 187 | A00006 | A01709 | 472 |
| A00006 | A01722 | 104 | A00006 | A01740 | 157 |
| A00006 | A02213 | 218 | A00006 | A02223 | 154 |
| A00006 | A02397 | 168 | A00006 | A02424 | 115 |
| A00006 | A02425 | 371 | A00006 | A02429 | 308 |
| A00006 | A02465 | 121 | A00006 | A02860 | 157 |
| A00006 | A03053 | 193 | A00006 | A03054 | 283 |
| A00006 | A03110 | 154 | A00006 | A03188 | 196 |
| A00006 | A03209 | 193 | A00006 | A03244 | 207 |
| A00006 | A03445 | 235 | A00006 | A03458 | 407 |
| A00006 | A03750 | 434 | A00006 | A03818 | 226 |
| A00006 | A03963 | 232 | A00006 | A03981 | 328 |
| A00006 | A04033 | 196 | A00006 | A04218 | 219 |
| A00006 | A04348 | 269 | A00006 | A04351 | 202 |
| A00006 | A04380 | 378 | A00006 | A04471 | 238 |
| A00006 | A05158 | 296 | A00006 | A05165 | 374 |
| A00006 | A05229 | 285 | A00006 | A05377 | 177 |
| A00006 | A05949 | 174 | A00006 | A06814 | 229 |
| A00006 | A07143 | 263 | A00006 | A07311 | 281 |
| A00006 | A07568 | 318 | A00006 | A07726 | 488 |
| A00006 | A08092 | 308 | A00006 | A08583 | 213 |
| A00006 | A09078 | 63  | A00006 | A09104 | 213 |
| A00006 | A09644 | 182 | A00006 | A09983 | 245 |
| A00006 | A10645 | 174 | A00006 | A10683 | 179 |
| A00006 | A10711 | 256 | A00006 | A10766 | 236 |
| A00006 | A11125 | 899 | A00006 | A11392 | 165 |
| A00006 | A11444 | 480 | A00006 | A11604 | 386 |

|        |        |     |        |        |     |
|--------|--------|-----|--------|--------|-----|
| A00006 | A12227 | 294 | A00006 | A12299 | 291 |
| A00006 | A13340 | 311 | A00006 | A13443 | 319 |
| A00006 | A14212 | 357 | A00006 | A14410 | 159 |
| A00006 | A14693 | 484 | A00006 | A15430 | 489 |
| A00006 | A15669 | 480 | A00006 | A16436 | 481 |
| A00007 | A00008 | 945 | A00007 | A00042 | 475 |
| A00007 | A00071 | 945 | A00007 | A00123 | 361 |
| A00007 | A00135 | 489 | A00007 | A00153 | 191 |
| A00007 | A00160 | 425 | A00007 | A00161 | 926 |
| A00007 | A00263 | 151 | A00007 | A00269 | 154 |
| A00007 | A00337 | 434 | A00007 | A00416 | 302 |
| A00007 | A00485 | 196 | A00007 | A00561 | 443 |
| A00007 | A00625 | 474 | A00007 | A00669 | 366 |
| A00007 | A00799 | 174 | A00007 | A00877 | 491 |
| A00007 | A01125 | 267 | A00007 | A01161 | 221 |
| A00007 | A01527 | 899 | A00007 | A01650 | 319 |
| A00007 | A01705 | 91  | A00007 | A01736 | 425 |
| A00007 | A01737 | 491 | A00007 | A01757 | 196 |
| A00007 | A01758 | 193 | A00007 | A01759 | 279 |
| A00007 | A01787 | 85  | A00007 | A01796 | 129 |
| A00007 | A01839 | 241 | A00007 | A01890 | 329 |
| A00007 | A01895 | 366 | A00007 | A01899 | 154 |
| A00007 | A01909 | 263 | A00007 | A01914 | 380 |
| A00007 | A02382 | 152 | A00007 | A02501 | 157 |
| A00007 | A02687 | 196 | A00007 | A02691 | 412 |
| A00007 | A02698 | 490 | A00007 | A02700 | 366 |
| A00007 | A02701 | 168 | A00007 | A02711 | 147 |
| A00007 | A02714 | 168 | A00007 | A02873 | 246 |
| A00007 | A02877 | 152 | A00007 | A02893 | 302 |
| A00007 | A02906 | 456 | A00007 | A02926 | 296 |
| A00007 | A02986 | 226 | A00007 | A03518 | 296 |
| A00007 | A03575 | 254 | A00007 | A03585 | 247 |
| A00007 | A03654 | 152 | A00007 | A03866 | 270 |
| A00007 | A03986 | 291 | A00007 | A04004 | 204 |
| A00007 | A04035 | 205 | A00007 | A04118 | 347 |
| A00007 | A04256 | 163 | A00007 | A04279 | 162 |
| A00007 | A04287 | 369 | A00007 | A04303 | 347 |
| A00007 | A04304 | 379 | A00007 | A04449 | 230 |
| A00007 | A04623 | 180 | A00007 | A04805 | 414 |
| A00007 | A04953 | 347 | A00007 | A05008 | 286 |
| A00007 | A05015 | 279 | A00007 | A05094 | 170 |
| A00007 | A05305 | 202 | A00007 | A06277 | 236 |
| A00007 | A06379 | 329 | A00007 | A06603 | 491 |
| A00007 | A06607 | 318 | A00007 | A06868 | 312 |
| A00007 | A06926 | 247 | A00007 | A07167 | 467 |
| A00007 | A07182 | 302 | A00007 | A07465 | 347 |

|        |        |     |        |        |     |
|--------|--------|-----|--------|--------|-----|
| A00007 | A08503 | 338 | A00007 | A08571 | 470 |
| A00007 | A08615 | 314 | A00007 | A08717 | 274 |
| A00007 | A08934 | 329 | A00007 | A09554 | 369 |
| A00007 | A09728 | 341 | A00007 | A10602 | 263 |
| A00007 | A11023 | 241 | A00007 | A11150 | 424 |
| A00007 | A11180 | 473 | A00007 | A11258 | 157 |
| A00007 | A11281 | 234 | A00007 | A11348 | 462 |
| A00007 | A11450 | 390 | A00007 | A11478 | 467 |
| A00007 | A11547 | 480 | A00007 | A11665 | 457 |
| A00007 | A11915 | 226 | A00007 | A12335 | 423 |
| A00007 | A12586 | 369 | A00007 | A13927 | 468 |
| A00007 | A13978 | 281 | A00007 | A14236 | 398 |
| A00007 | A14405 | 360 | A00007 | A15035 | 252 |
| A00007 | A15368 | 278 | A00007 | A15383 | 213 |
| A00007 | A15603 | 196 | A00007 | A15605 | 163 |
| A00007 | A15623 | 369 | A00008 | A00042 | 462 |
| A00008 | A00071 | 945 | A00008 | A00152 | 343 |
| A00008 | A00153 | 293 | A00008 | A00161 | 334 |
| A00008 | A00190 | 334 | A00008 | A00233 | 208 |
| A00008 | A00546 | 321 | A00008 | A00799 | 191 |
| A00008 | A00887 | 200 | A00008 | A00914 | 121 |
| A00008 | A00951 | 190 | A00008 | A01044 | 306 |
| A00008 | A01364 | 188 | A00008 | A01393 | 160 |
| A00008 | A01450 | 369 | A00008 | A01527 | 899 |
| A00008 | A01565 | 177 | A00008 | A01629 | 154 |
| A00008 | A01676 | 174 | A00008 | A01705 | 63  |
| A00008 | A01726 | 469 | A00008 | A01730 | 152 |
| A00008 | A01737 | 481 | A00008 | A01749 | 91  |
| A00008 | A01755 | 152 | A00008 | A01757 | 210 |
| A00008 | A01768 | 227 | A00008 | A01769 | 200 |
| A00008 | A01775 | 226 | A00008 | A01782 | 154 |
| A00008 | A01789 | 454 | A00008 | A01794 | 213 |
| A00008 | A01796 | 80  | A00008 | A01861 | 256 |
| A00008 | A01867 | 201 | A00008 | A01873 | 324 |
| A00008 | A01883 | 439 | A00008 | A01893 | 245 |
| A00008 | A01895 | 374 | A00008 | A01899 | 299 |
| A00008 | A01902 | 157 | A00008 | A01914 | 157 |
| A00008 | A02109 | 205 | A00008 | A02154 | 232 |
| A00008 | A02301 | 183 | A00008 | A02319 | 324 |
| A00008 | A02336 | 247 | A00008 | A02341 | 324 |
| A00008 | A02342 | 232 | A00008 | A02392 | 301 |
| A00008 | A02417 | 281 | A00008 | A02469 | 185 |
| A00008 | A02488 | 160 | A00008 | A02541 | 229 |
| A00008 | A02546 | 285 | A00008 | A02565 | 152 |
| A00008 | A02574 | 162 | A00008 | A02629 | 208 |
| A00008 | A02686 | 201 | A00008 | A02687 | 367 |

|        |        |     |        |        |     |
|--------|--------|-----|--------|--------|-----|
| A00008 | A02691 | 483 | A00008 | A02692 | 185 |
| A00008 | A02700 | 374 | A00008 | A02701 | 180 |
| A00008 | A02702 | 165 | A00008 | A02707 | 221 |
| A00008 | A02710 | 188 | A00008 | A02714 | 182 |
| A00008 | A02758 | 210 | A00008 | A02785 | 270 |
| A00008 | A02786 | 160 | A00008 | A02811 | 213 |
| A00008 | A02814 | 281 | A00008 | A02820 | 258 |
| A00008 | A02873 | 258 | A00008 | A02893 | 311 |
| A00008 | A02906 | 432 | A00008 | A02908 | 386 |
| A00008 | A02943 | 296 | A00008 | A02988 | 337 |
| A00008 | A03007 | 279 | A00008 | A03086 | 234 |
| A00008 | A03120 | 311 | A00008 | A03224 | 316 |
| A00008 | A03264 | 236 | A00008 | A03488 | 258 |
| A00008 | A03537 | 301 | A00008 | A03583 | 278 |
| A00008 | A03585 | 479 | A00008 | A03653 | 168 |
| A00008 | A03847 | 333 | A00008 | A03870 | 311 |
| A00008 | A03984 | 353 | A00008 | A04004 | 490 |
| A00008 | A04005 | 288 | A00008 | A04031 | 265 |
| A00008 | A04118 | 356 | A00008 | A04123 | 311 |
| A00008 | A04125 | 267 | A00008 | A04287 | 374 |
| A00008 | A04304 | 489 | A00008 | A04314 | 216 |
| A00008 | A04372 | 306 | A00008 | A04443 | 254 |
| A00008 | A04531 | 386 | A00008 | A04541 | 288 |
| A00008 | A04560 | 278 | A00008 | A04574 | 329 |
| A00008 | A04620 | 263 | A00008 | A04728 | 167 |
| A00008 | A04805 | 229 | A00008 | A04870 | 216 |
| A00008 | A04905 | 363 | A00008 | A04939 | 232 |
| A00008 | A04953 | 356 | A00008 | A05036 | 296 |
| A00008 | A05310 | 167 | A00008 | A05438 | 246 |
| A00008 | A05550 | 182 | A00008 | A06211 | 273 |
| A00008 | A06379 | 163 | A00008 | A06558 | 333 |
| A00008 | A06603 | 443 | A00008 | A06708 | 193 |
| A00008 | A06765 | 267 | A00008 | A06778 | 196 |
| A00008 | A06877 | 245 | A00008 | A07167 | 469 |
| A00008 | A07199 | 377 | A00008 | A07200 | 224 |
| A00008 | A07943 | 374 | A00008 | A08615 | 324 |
| A00008 | A10332 | 226 | A00008 | A11166 | 407 |
| A00008 | A11167 | 278 | A00008 | A11285 | 305 |
| A00008 | A11292 | 262 | A00008 | A11348 | 412 |
| A00008 | A11725 | 235 | A00008 | A12024 | 324 |
| A00008 | A13906 | 263 | A00008 | A14405 | 371 |
| A00008 | A14685 | 311 | A00008 | A15282 | 156 |
| A00008 | A15470 | 160 | A00008 | A16152 | 187 |
| A00008 | A17155 | 247 | A00009 | A00010 | 945 |
| A00009 | A00011 | 490 | A00009 | A00014 | 439 |
| A00009 | A00041 | 299 | A00009 | A00044 | 170 |

|        |        |     |        |        |     |
|--------|--------|-----|--------|--------|-----|
| A00009 | A00046 | 193 | A00009 | A00052 | 901 |
| A00009 | A00067 | 899 | A00009 | A00074 | 311 |
| A00009 | A00090 | 422 | A00009 | A00093 | 910 |
| A00009 | A00116 | 385 | A00009 | A00130 | 258 |
| A00009 | A00136 | 113 | A00009 | A00138 | 377 |
| A00009 | A00145 | 74  | A00009 | A00153 | 899 |
| A00009 | A00159 | 899 | A00009 | A00160 | 104 |
| A00009 | A00161 | 87  | A00009 | A00162 | 249 |
| A00009 | A00175 | 283 | A00009 | A00183 | 252 |
| A00009 | A00185 | 121 | A00009 | A00205 | 254 |
| A00009 | A00207 | 409 | A00009 | A00211 | 899 |
| A00009 | A00214 | 63  | A00009 | A00224 | 216 |
| A00009 | A00234 | 386 | A00009 | A00240 | 343 |
| A00009 | A00242 | 904 | A00009 | A00246 | 939 |
| A00009 | A00254 | 462 | A00009 | A00261 | 193 |
| A00009 | A00273 | 179 | A00009 | A00601 | 357 |
| A00009 | A01052 | 899 | A00009 | A01524 | 912 |
| A00009 | A01527 | 943 | A00009 | A01553 | 901 |
| A00009 | A01605 | 899 | A00009 | A01628 | 945 |
| A00009 | A01640 | 899 | A00009 | A01680 | 899 |
| A00009 | A01688 | 899 | A00009 | A01692 | 177 |
| A00009 | A01708 | 945 | A00009 | A01719 | 943 |
| A00009 | A01879 | 918 | A00009 | A01880 | 933 |
| A00009 | A01908 | 432 | A00009 | A01920 | 944 |
| A00009 | A02304 | 187 | A00009 | A02337 | 213 |
| A00009 | A02803 | 157 | A00009 | A03019 | 132 |
| A00009 | A03204 | 193 | A00009 | A03271 | 143 |
| A00009 | A03817 | 919 | A00009 | A03854 | 899 |
| A00009 | A03965 | 154 | A00009 | A04018 | 246 |
| A00009 | A04091 | 160 | A00009 | A04138 | 916 |
| A00009 | A06289 | 170 | A00009 | A07157 | 476 |
| A00009 | A07311 | 926 | A00009 | A07760 | 177 |
| A00009 | A07803 | 188 | A00009 | A08417 | 159 |
| A00009 | A09218 | 213 | A00009 | A09220 | 121 |
| A00009 | A09401 | 143 | A00009 | A09643 | 937 |
| A00009 | A09660 | 163 | A00009 | A09937 | 490 |
| A00009 | A10580 | 918 | A00009 | A10639 | 293 |
| A00009 | A11124 | 401 | A00009 | A11369 | 246 |
| A00009 | A12009 | 210 | A00009 | A12886 | 486 |
| A00009 | A12932 | 165 | A00009 | A13198 | 386 |
| A00009 | A14008 | 143 | A00009 | A14033 | 318 |
| A00009 | A14034 | 389 | A00009 | A14043 | 899 |
| A00009 | A14187 | 899 | A00009 | A14208 | 219 |
| A00009 | A14426 | 204 | A00009 | A14433 | 899 |
| A00009 | A14443 | 899 | A00009 | A15773 | 195 |
| A00009 | A15841 | 303 | A00009 | A16084 | 930 |

|        |        |     |        |        |     |
|--------|--------|-----|--------|--------|-----|
| A00010 | A00011 | 945 | A00010 | A00014 | 945 |
| A00010 | A00015 | 419 | A00010 | A00019 | 903 |
| A00010 | A00021 | 63  | A00010 | A00022 | 936 |
| A00010 | A00025 | 942 | A00010 | A00029 | 945 |
| A00010 | A00031 | 198 | A00010 | A00035 | 407 |
| A00010 | A00036 | 933 | A00010 | A00041 | 945 |
| A00010 | A00042 | 931 | A00010 | A00046 | 906 |
| A00010 | A00048 | 944 | A00010 | A00050 | 324 |
| A00010 | A00052 | 967 | A00010 | A00058 | 305 |
| A00010 | A00064 | 385 | A00010 | A00066 | 924 |
| A00010 | A00067 | 953 | A00010 | A00074 | 975 |
| A00010 | A00081 | 167 | A00010 | A00082 | 174 |
| A00010 | A00090 | 488 | A00010 | A00091 | 402 |
| A00010 | A00093 | 913 | A00010 | A00098 | 443 |
| A00010 | A00099 | 899 | A00010 | A00100 | 900 |
| A00010 | A00113 | 945 | A00010 | A00114 | 198 |
| A00010 | A00115 | 899 | A00010 | A00116 | 404 |
| A00010 | A00118 | 204 | A00010 | A00120 | 162 |
| A00010 | A00122 | 416 | A00010 | A00124 | 146 |
| A00010 | A00130 | 899 | A00010 | A00132 | 477 |
| A00010 | A00133 | 899 | A00010 | A00136 | 188 |
| A00010 | A00137 | 235 | A00010 | A00138 | 543 |
| A00010 | A00139 | 430 | A00010 | A00140 | 899 |
| A00010 | A00141 | 262 | A00010 | A00145 | 417 |
| A00010 | A00146 | 369 | A00010 | A00147 | 269 |
| A00010 | A00152 | 420 | A00010 | A00153 | 900 |
| A00010 | A00156 | 960 | A00010 | A00157 | 901 |
| A00010 | A00158 | 358 | A00010 | A00159 | 949 |
| A00010 | A00161 | 947 | A00010 | A00162 | 952 |
| A00010 | A00163 | 951 | A00010 | A00166 | 937 |
| A00010 | A00167 | 928 | A00010 | A00169 | 993 |
| A00010 | A00171 | 255 | A00010 | A00172 | 899 |
| A00010 | A00174 | 919 | A00010 | A00175 | 944 |
| A00010 | A00182 | 941 | A00010 | A00183 | 551 |
| A00010 | A00184 | 899 | A00010 | A00185 | 945 |
| A00010 | A00186 | 901 | A00010 | A00189 | 176 |
| A00010 | A00190 | 899 | A00010 | A00200 | 899 |
| A00010 | A00205 | 945 | A00010 | A00207 | 956 |
| A00010 | A00208 | 518 | A00010 | A00209 | 994 |
| A00010 | A00211 | 943 | A00010 | A00214 | 322 |
| A00010 | A00220 | 899 | A00010 | A00221 | 319 |
| A00010 | A00224 | 949 | A00010 | A00230 | 928 |
| A00010 | A00233 | 899 | A00010 | A00234 | 488 |
| A00010 | A00236 | 912 | A00010 | A00239 | 543 |
| A00010 | A00240 | 994 | A00010 | A00241 | 477 |
| A00010 | A00242 | 994 | A00010 | A00243 | 159 |

|        |        |     |        |        |     |
|--------|--------|-----|--------|--------|-----|
| A00010 | A00246 | 945 | A00010 | A00252 | 899 |
| A00010 | A00254 | 960 | A00010 | A00255 | 957 |
| A00010 | A00257 | 994 | A00010 | A00261 | 571 |
| A00010 | A00263 | 585 | A00010 | A00270 | 355 |
| A00010 | A00271 | 899 | A00010 | A00276 | 185 |
| A00010 | A00312 | 940 | A00010 | A00316 | 477 |
| A00010 | A00324 | 993 | A00010 | A00388 | 899 |
| A00010 | A00418 | 942 | A00010 | A00669 | 939 |
| A00010 | A00696 | 426 | A00010 | A00808 | 942 |
| A00010 | A00811 | 191 | A00010 | A00932 | 919 |
| A00010 | A00933 | 899 | A00010 | A00981 | 417 |
| A00010 | A01052 | 935 | A00010 | A01176 | 899 |
| A00010 | A01212 | 562 | A00010 | A01286 | 63  |
| A00010 | A01289 | 899 | A00010 | A01307 | 63  |
| A00010 | A01310 | 65  | A00010 | A01357 | 151 |
| A00010 | A01435 | 218 | A00010 | A01512 | 912 |
| A00010 | A01524 | 997 | A00010 | A01527 | 994 |
| A00010 | A01536 | 900 | A00010 | A01540 | 162 |
| A00010 | A01553 | 949 | A00010 | A01554 | 938 |
| A00010 | A01558 | 994 | A00010 | A01560 | 962 |
| A00010 | A01561 | 949 | A00010 | A01562 | 945 |
| A00010 | A01572 | 466 | A00010 | A01588 | 917 |
| A00010 | A01592 | 910 | A00010 | A01601 | 899 |
| A00010 | A01602 | 900 | A00010 | A01605 | 945 |
| A00010 | A01612 | 899 | A00010 | A01615 | 917 |
| A00010 | A01628 | 949 | A00010 | A01636 | 907 |
| A00010 | A01637 | 899 | A00010 | A01638 | 899 |
| A00010 | A01639 | 914 | A00010 | A01640 | 944 |
| A00010 | A01651 | 899 | A00010 | A01665 | 899 |
| A00010 | A01680 | 899 | A00010 | A01688 | 908 |
| A00010 | A01692 | 945 | A00010 | A01697 | 367 |
| A00010 | A01698 | 63  | A00010 | A01702 | 914 |
| A00010 | A01708 | 943 | A00010 | A01709 | 908 |
| A00010 | A01718 | 939 | A00010 | A01719 | 941 |
| A00010 | A01730 | 353 | A00010 | A01742 | 899 |
| A00010 | A01844 | 344 | A00010 | A01880 | 899 |
| A00010 | A01914 | 464 | A00010 | A01995 | 491 |
| A00010 | A02088 | 223 | A00010 | A02159 | 176 |
| A00010 | A02254 | 385 | A00010 | A02284 | 901 |
| A00010 | A02337 | 899 | A00010 | A02411 | 247 |
| A00010 | A02419 | 63  | A00010 | A02482 | 249 |
| A00010 | A02502 | 925 | A00010 | A02642 | 899 |
| A00010 | A02678 | 419 | A00010 | A02699 | 899 |
| A00010 | A02702 | 187 | A00010 | A02711 | 182 |
| A00010 | A02723 | 905 | A00010 | A02803 | 308 |
| A00010 | A03019 | 899 | A00010 | A03087 | 270 |

|        |        |     |        |        |     |
|--------|--------|-----|--------|--------|-----|
| A00010 | A03099 | 899 | A00010 | A03195 | 63  |
| A00010 | A03225 | 165 | A00010 | A03271 | 110 |
| A00010 | A03292 | 182 | A00010 | A03436 | 267 |
| A00010 | A03445 | 899 | A00010 | A03451 | 205 |
| A00010 | A03536 | 182 | A00010 | A03591 | 942 |
| A00010 | A03651 | 199 | A00010 | A03748 | 454 |
| A00010 | A03784 | 462 | A00010 | A03809 | 950 |
| A00010 | A03854 | 913 | A00010 | A03910 | 151 |
| A00010 | A04012 | 943 | A00010 | A04248 | 899 |
| A00010 | A04314 | 165 | A00010 | A04422 | 917 |
| A00010 | A04451 | 157 | A00010 | A04484 | 899 |
| A00010 | A04622 | 255 | A00010 | A04686 | 899 |
| A00010 | A04699 | 899 | A00010 | A05025 | 238 |
| A00010 | A05065 | 191 | A00010 | A05082 | 918 |
| A00010 | A05090 | 899 | A00010 | A05208 | 902 |
| A00010 | A05216 | 899 | A00010 | A05326 | 899 |
| A00010 | A05363 | 162 | A00010 | A05453 | 945 |
| A00010 | A05633 | 489 | A00010 | A05867 | 213 |
| A00010 | A06077 | 154 | A00010 | A06197 | 228 |
| A00010 | A06289 | 139 | A00010 | A06397 | 154 |
| A00010 | A06409 | 198 | A00010 | A06427 | 168 |
| A00010 | A06588 | 191 | A00010 | A06608 | 899 |
| A00010 | A06610 | 475 | A00010 | A06762 | 899 |
| A00010 | A06893 | 899 | A00010 | A07118 | 160 |
| A00010 | A07165 | 899 | A00010 | A07275 | 243 |
| A00010 | A07311 | 978 | A00010 | A07422 | 899 |
| A00010 | A07460 | 899 | A00010 | A07565 | 176 |
| A00010 | A08280 | 407 | A00010 | A08608 | 418 |
| A00010 | A08701 | 79  | A00010 | A08902 | 291 |
| A00010 | A08941 | 301 | A00010 | A09149 | 177 |
| A00010 | A09181 | 922 | A00010 | A09201 | 899 |
| A00010 | A09218 | 435 | A00010 | A09220 | 915 |
| A00010 | A09319 | 899 | A00010 | A09349 | 160 |
| A00010 | A09383 | 259 | A00010 | A09401 | 91  |
| A00010 | A09506 | 202 | A00010 | A09511 | 208 |
| A00010 | A09542 | 899 | A00010 | A09556 | 152 |
| A00010 | A09568 | 937 | A00010 | A09660 | 945 |
| A00010 | A09803 | 305 | A00010 | A09804 | 294 |
| A00010 | A09937 | 452 | A00010 | A10174 | 899 |
| A00010 | A10175 | 302 | A00010 | A10205 | 486 |
| A00010 | A10233 | 899 | A00010 | A10365 | 925 |
| A00010 | A10580 | 899 | A00010 | A10735 | 215 |
| A00010 | A10756 | 338 | A00010 | A10801 | 933 |
| A00010 | A10813 | 900 | A00010 | A11089 | 213 |
| A00010 | A11124 | 460 | A00010 | A11125 | 899 |
| A00010 | A11198 | 235 | A00010 | A11369 | 468 |



|        |        |     |        |        |     |
|--------|--------|-----|--------|--------|-----|
| A00010 | A11707 | 326 | A00010 | A11708 | 176 |
| A00010 | A11983 | 938 | A00010 | A12383 | 946 |
| A00010 | A12409 | 151 | A00010 | A12705 | 899 |
| A00010 | A12886 | 419 | A00010 | A12932 | 945 |
| A00010 | A12969 | 945 | A00010 | A12971 | 900 |
| A00010 | A12990 | 353 | A00010 | A12992 | 76  |
| A00010 | A13003 | 899 | A00010 | A13181 | 157 |
| A00010 | A13362 | 353 | A00010 | A13390 | 899 |
| A00010 | A13391 | 941 | A00010 | A13393 | 899 |
| A00010 | A13401 | 899 | A00010 | A13511 | 466 |
| A00010 | A13605 | 900 | A00010 | A13924 | 230 |
| A00010 | A13958 | 899 | A00010 | A13975 | 215 |
| A00010 | A13980 | 221 | A00010 | A13981 | 899 |
| A00010 | A13984 | 942 | A00010 | A13985 | 910 |
| A00010 | A13987 | 992 | A00010 | A13991 | 899 |
| A00010 | A13999 | 899 | A00010 | A14004 | 945 |
| A00010 | A14008 | 90  | A00010 | A14010 | 992 |
| A00010 | A14027 | 176 | A00010 | A14031 | 921 |
| A00010 | A14032 | 969 | A00010 | A14033 | 185 |
| A00010 | A14035 | 911 | A00010 | A14038 | 925 |
| A00010 | A14042 | 899 | A00010 | A14043 | 899 |
| A00010 | A14045 | 916 | A00010 | A14061 | 899 |
| A00010 | A14065 | 899 | A00010 | A14066 | 899 |
| A00010 | A14069 | 899 | A00010 | A14103 | 198 |
| A00010 | A14128 | 174 | A00010 | A14187 | 943 |
| A00010 | A14188 | 944 | A00010 | A14198 | 953 |
| A00010 | A14208 | 338 | A00010 | A14242 | 899 |
| A00010 | A14400 | 383 | A00010 | A14402 | 266 |
| A00010 | A14426 | 162 | A00010 | A14433 | 945 |
| A00010 | A14443 | 992 | A00010 | A14444 | 907 |
| A00010 | A14452 | 135 | A00010 | A14472 | 899 |
| A00010 | A14827 | 152 | A00010 | A15292 | 899 |
| A00010 | A15312 | 899 | A00010 | A15325 | 414 |
| A00010 | A15726 | 63  | A00010 | A15786 | 274 |
| A00010 | A16084 | 901 | A00010 | A16085 | 899 |
| A00010 | A17188 | 899 | A00011 | A00014 | 456 |
| A00011 | A00021 | 104 | A00011 | A00022 | 281 |
| A00011 | A00025 | 232 | A00011 | A00029 | 171 |
| A00011 | A00041 | 942 | A00011 | A00042 | 449 |
| A00011 | A00046 | 274 | A00011 | A00052 | 945 |
| A00011 | A00067 | 906 | A00011 | A00073 | 263 |
| A00011 | A00074 | 900 | A00011 | A00094 | 928 |
| A00011 | A00116 | 485 | A00011 | A00124 | 945 |
| A00011 | A00133 | 899 | A00011 | A00138 | 469 |
| A00011 | A00140 | 899 | A00011 | A00141 | 207 |
| A00011 | A00145 | 65  | A00011 | A00156 | 71  |

|        |        |     |        |        |     |
|--------|--------|-----|--------|--------|-----|
| A00011 | A00160 | 199 | A00011 | A00161 | 135 |
| A00011 | A00162 | 945 | A00011 | A00165 | 940 |
| A00011 | A00175 | 265 | A00011 | A00184 | 899 |
| A00011 | A00185 | 99  | A00011 | A00188 | 944 |
| A00011 | A00205 | 490 | A00011 | A00207 | 945 |
| A00011 | A00208 | 118 | A00011 | A00209 | 899 |
| A00011 | A00211 | 228 | A00011 | A00214 | 63  |
| A00011 | A00224 | 929 | A00011 | A00230 | 901 |
| A00011 | A00233 | 323 | A00011 | A00234 | 945 |
| A00011 | A00239 | 633 | A00011 | A00240 | 958 |
| A00011 | A00241 | 318 | A00011 | A00242 | 378 |
| A00011 | A00246 | 944 | A00011 | A00248 | 232 |
| A00011 | A00254 | 940 | A00011 | A00261 | 281 |
| A00011 | A01512 | 908 | A00011 | A01524 | 903 |
| A00011 | A01527 | 938 | A00011 | A01553 | 477 |
| A00011 | A01554 | 944 | A00011 | A01558 | 911 |
| A00011 | A01560 | 461 | A00011 | A01561 | 63  |
| A00011 | A01562 | 908 | A00011 | A01588 | 899 |
| A00011 | A01596 | 207 | A00011 | A01615 | 899 |
| A00011 | A01628 | 935 | A00011 | A01638 | 899 |
| A00011 | A01639 | 944 | A00011 | A01651 | 899 |
| A00011 | A01708 | 943 | A00011 | A01709 | 966 |
| A00011 | A01719 | 944 | A00011 | A01726 | 446 |
| A00011 | A01748 | 383 | A00011 | A01793 | 95  |
| A00011 | A01883 | 162 | A00011 | A01908 | 65  |
| A00011 | A01920 | 324 | A00011 | A02171 | 217 |
| A00011 | A02178 | 154 | A00011 | A02304 | 165 |
| A00011 | A02326 | 210 | A00011 | A02734 | 185 |
| A00011 | A03019 | 63  | A00011 | A03204 | 177 |
| A00011 | A03263 | 124 | A00011 | A03465 | 71  |
| A00011 | A03598 | 252 | A00011 | A03656 | 252 |
| A00011 | A03685 | 339 | A00011 | A03780 | 210 |
| A00011 | A04138 | 205 | A00011 | A04280 | 247 |
| A00011 | A04314 | 191 | A00011 | A04320 | 327 |
| A00011 | A04699 | 941 | A00011 | A05150 | 188 |
| A00011 | A05453 | 296 | A00011 | A05944 | 249 |
| A00011 | A06055 | 154 | A00011 | A06289 | 301 |
| A00011 | A07212 | 154 | A00011 | A07311 | 942 |
| A00011 | A08114 | 266 | A00011 | A08278 | 480 |
| A00011 | A08279 | 252 | A00011 | A08571 | 196 |
| A00011 | A08608 | 135 | A00011 | A09162 | 154 |
| A00011 | A09181 | 461 | A00011 | A09470 | 156 |
| A00011 | A09542 | 63  | A00011 | A09577 | 917 |
| A00011 | A09804 | 899 | A00011 | A09937 | 491 |
| A00011 | A10294 | 174 | A00011 | A10560 | 899 |
| A00011 | A10623 | 905 | A00011 | A10791 | 201 |

|        |        |     |        |        |     |
|--------|--------|-----|--------|--------|-----|
| A00011 | A10801 | 168 | A00011 | A10982 | 407 |
| A00011 | A11124 | 174 | A00011 | A11125 | 930 |
| A00011 | A11369 | 441 | A00011 | A11943 | 899 |
| A00011 | A12664 | 899 | A00011 | A12886 | 447 |
| A00011 | A12980 | 232 | A00011 | A13440 | 340 |
| A00011 | A13510 | 187 | A00011 | A13917 | 190 |
| A00011 | A13946 | 193 | A00011 | A13977 | 252 |
| A00011 | A13980 | 93  | A00011 | A14022 | 899 |
| A00011 | A14027 | 297 | A00011 | A14043 | 899 |
| A00011 | A14188 | 165 | A00011 | A14242 | 899 |
| A00011 | A14364 | 255 | A00011 | A14402 | 188 |
| A00011 | A14426 | 439 | A00011 | A14438 | 937 |
| A00011 | A16084 | 200 | A00011 | A16994 | 156 |
| A00012 | A00013 | 458 | A00012 | A00021 | 274 |
| A00012 | A00072 | 942 | A00012 | A00155 | 469 |
| A00012 | A00162 | 899 | A00012 | A00168 | 407 |
| A00012 | A00209 | 899 | A00012 | A00310 | 926 |
| A00012 | A00567 | 399 | A00012 | A01138 | 373 |
| A00012 | A01527 | 899 | A00012 | A01590 | 223 |
| A00012 | A02083 | 252 | A00012 | A02306 | 452 |
| A00012 | A02330 | 942 | A00012 | A02877 | 154 |
| A00012 | A04441 | 469 | A00012 | A08878 | 899 |
| A00012 | A09072 | 308 | A00012 | A11983 | 899 |
| A00012 | A14443 | 915 | A00012 | A14444 | 218 |
| A00013 | A00021 | 207 | A00013 | A00034 | 249 |
| A00013 | A00080 | 201 | A00013 | A00085 | 307 |
| A00013 | A00087 | 172 | A00013 | A00142 | 172 |
| A00013 | A00155 | 267 | A00013 | A00196 | 160 |
| A00013 | A00216 | 484 | A00013 | A00219 | 477 |
| A00013 | A00264 | 283 | A00013 | A00312 | 385 |
| A00013 | A00498 | 217 | A00013 | A01117 | 474 |
| A00013 | A01137 | 427 | A00013 | A01138 | 490 |
| A00013 | A01230 | 254 | A00013 | A01404 | 441 |
| A00013 | A01462 | 343 | A00013 | A01590 | 479 |
| A00013 | A01626 | 159 | A00013 | A01679 | 288 |
| A00013 | A01722 | 216 | A00013 | A01867 | 391 |
| A00013 | A01884 | 334 | A00013 | A01926 | 443 |
| A00013 | A02074 | 481 | A00013 | A02083 | 486 |
| A00013 | A02148 | 279 | A00013 | A02156 | 469 |
| A00013 | A02183 | 157 | A00013 | A02213 | 319 |
| A00013 | A02268 | 400 | A00013 | A02275 | 241 |
| A00013 | A02305 | 430 | A00013 | A02306 | 483 |
| A00013 | A02309 | 286 | A00013 | A02317 | 468 |
| A00013 | A02330 | 488 | A00013 | A02454 | 321 |
| A00013 | A02524 | 254 | A00013 | A02751 | 288 |
| A00013 | A02759 | 434 | A00013 | A02785 | 274 |

|        |        |     |        |        |     |
|--------|--------|-----|--------|--------|-----|
| A00013 | A03091 | 257 | A00013 | A03099 | 488 |
| A00013 | A03186 | 374 | A00013 | A03238 | 343 |
| A00013 | A03468 | 297 | A00013 | A03484 | 271 |
| A00013 | A04010 | 296 | A00013 | A04162 | 468 |
| A00013 | A04163 | 270 | A00013 | A04258 | 463 |
| A00013 | A04850 | 240 | A00013 | A04981 | 454 |
| A00013 | A05277 | 417 | A00013 | A05370 | 277 |
| A00013 | A05533 | 249 | A00013 | A05610 | 360 |
| A00013 | A06101 | 296 | A00013 | A06134 | 288 |
| A00013 | A06263 | 438 | A00013 | A06473 | 249 |
| A00013 | A06607 | 306 | A00013 | A06769 | 341 |
| A00013 | A07037 | 327 | A00013 | A07156 | 395 |
| A00013 | A07757 | 277 | A00013 | A08746 | 252 |
| A00013 | A11646 | 274 | A00013 | A14071 | 316 |
| A00013 | A14198 | 196 | A00013 | A14423 | 465 |
| A00013 | A14525 | 202 | A00013 | A15498 | 389 |
| A00013 | A16219 | 279 | A00014 | A00018 | 173 |
| A00014 | A00019 | 391 | A00014 | A00021 | 195 |
| A00014 | A00048 | 697 | A00014 | A00052 | 899 |
| A00014 | A00067 | 899 | A00014 | A00074 | 492 |
| A00014 | A00082 | 228 | A00014 | A00091 | 698 |
| A00014 | A00113 | 984 | A00014 | A00116 | 246 |
| A00014 | A00156 | 961 | A00014 | A00162 | 291 |
| A00014 | A00180 | 172 | A00014 | A00182 | 899 |
| A00014 | A00185 | 152 | A00014 | A00205 | 207 |
| A00014 | A00207 | 669 | A00014 | A00214 | 63  |
| A00014 | A00224 | 899 | A00014 | A00228 | 296 |
| A00014 | A00240 | 505 | A00014 | A00247 | 212 |
| A00014 | A00254 | 416 | A00014 | A00255 | 202 |
| A00014 | A00451 | 183 | A00014 | A00932 | 213 |
| A00014 | A01310 | 193 | A00014 | A01485 | 183 |
| A00014 | A01524 | 929 | A00014 | A01527 | 905 |
| A00014 | A01558 | 899 | A00014 | A01560 | 151 |
| A00014 | A01561 | 73  | A00014 | A01562 | 457 |
| A00014 | A01588 | 899 | A00014 | A01718 | 154 |
| A00014 | A02239 | 247 | A00014 | A02254 | 230 |
| A00014 | A02304 | 154 | A00014 | A02586 | 177 |
| A00014 | A03087 | 232 | A00014 | A03784 | 281 |
| A00014 | A03830 | 213 | A00014 | A04012 | 187 |
| A00014 | A04323 | 269 | A00014 | A05165 | 255 |
| A00014 | A06660 | 170 | A00014 | A07311 | 909 |
| A00014 | A09660 | 243 | A00014 | A09906 | 357 |
| A00014 | A09937 | 441 | A00014 | A10342 | 346 |
| A00014 | A10801 | 263 | A00014 | A10813 | 272 |
| A00014 | A11708 | 362 | A00014 | A12886 | 302 |
| A00014 | A12932 | 243 | A00014 | A12969 | 379 |

|        |        |     |        |        |     |
|--------|--------|-----|--------|--------|-----|
| A00014 | A12971 | 899 | A00014 | A12990 | 152 |
| A00014 | A13362 | 335 | A00014 | A13364 | 268 |
| A00014 | A14004 | 430 | A00014 | A14198 | 180 |
| A00014 | A14433 | 224 | A00014 | A14443 | 899 |
| A00014 | A15325 | 446 | A00014 | A16084 | 288 |
| A00015 | A00018 | 126 | A00015 | A00020 | 369 |
| A00015 | A00021 | 491 | A00015 | A00023 | 899 |
| A00015 | A00026 | 335 | A00015 | A00029 | 899 |
| A00015 | A00030 | 452 | A00015 | A00031 | 945 |
| A00015 | A00032 | 475 | A00015 | A00034 | 945 |
| A00015 | A00041 | 420 | A00015 | A00045 | 246 |
| A00015 | A00052 | 162 | A00015 | A00053 | 443 |
| A00015 | A00056 | 317 | A00015 | A00057 | 177 |
| A00015 | A00063 | 167 | A00015 | A00067 | 899 |
| A00015 | A00069 | 491 | A00015 | A00074 | 215 |
| A00015 | A00076 | 380 | A00015 | A00079 | 299 |
| A00015 | A00081 | 490 | A00015 | A00083 | 462 |
| A00015 | A00085 | 286 | A00015 | A00087 | 396 |
| A00015 | A00089 | 491 | A00015 | A00106 | 941 |
| A00015 | A00111 | 488 | A00015 | A00112 | 235 |
| A00015 | A00125 | 296 | A00015 | A00127 | 486 |
| A00015 | A00131 | 198 | A00015 | A00150 | 252 |
| A00015 | A00153 | 899 | A00015 | A00159 | 899 |
| A00015 | A00166 | 480 | A00015 | A00167 | 941 |
| A00015 | A00168 | 475 | A00015 | A00177 | 379 |
| A00015 | A00185 | 408 | A00015 | A00190 | 489 |
| A00015 | A00196 | 400 | A00015 | A00203 | 63  |
| A00015 | A00207 | 436 | A00015 | A00209 | 938 |
| A00015 | A00210 | 224 | A00015 | A00218 | 480 |
| A00015 | A00219 | 491 | A00015 | A00221 | 480 |
| A00015 | A00227 | 945 | A00015 | A00231 | 899 |
| A00015 | A00245 | 456 | A00015 | A00254 | 483 |
| A00015 | A00274 | 945 | A00015 | A00292 | 432 |
| A00015 | A00315 | 483 | A00015 | A00324 | 899 |
| A00015 | A00340 | 258 | A00015 | A00349 | 346 |
| A00015 | A00440 | 162 | A00015 | A00616 | 488 |
| A00015 | A00752 | 324 | A00015 | A00815 | 491 |
| A00015 | A00969 | 232 | A00015 | A01257 | 461 |
| A00015 | A01463 | 378 | A00015 | A01476 | 313 |
| A00015 | A01485 | 380 | A00015 | A01493 | 408 |
| A00015 | A01524 | 931 | A00015 | A01527 | 904 |
| A00015 | A01557 | 177 | A00015 | A01590 | 162 |
| A00015 | A01601 | 232 | A00015 | A01605 | 358 |
| A00015 | A01626 | 176 | A00015 | A01629 | 458 |
| A00015 | A01640 | 235 | A00015 | A01722 | 480 |
| A00015 | A01741 | 260 | A00015 | A01790 | 193 |

|        |        |     |        |        |     |
|--------|--------|-----|--------|--------|-----|
| A00015 | A01844 | 899 | A00015 | A01925 | 288 |
| A00015 | A01929 | 185 | A00015 | A02048 | 424 |
| A00015 | A02126 | 230 | A00015 | A02174 | 213 |
| A00015 | A02176 | 162 | A00015 | A02213 | 177 |
| A00015 | A02215 | 301 | A00015 | A02236 | 489 |
| A00015 | A02251 | 196 | A00015 | A02282 | 193 |
| A00015 | A02324 | 235 | A00015 | A02406 | 230 |
| A00015 | A02423 | 110 | A00015 | A02424 | 84  |
| A00015 | A02425 | 945 | A00015 | A02429 | 358 |
| A00015 | A02431 | 461 | A00015 | A02433 | 205 |
| A00015 | A02454 | 129 | A00015 | A02464 | 390 |
| A00015 | A02465 | 296 | A00015 | A02468 | 462 |
| A00015 | A02472 | 234 | A00015 | A02481 | 944 |
| A00015 | A02508 | 188 | A00015 | A02624 | 144 |
| A00015 | A02671 | 491 | A00015 | A02759 | 228 |
| A00015 | A02772 | 174 | A00015 | A03071 | 424 |
| A00015 | A03079 | 205 | A00015 | A03080 | 191 |
| A00015 | A03081 | 238 | A00015 | A03085 | 276 |
| A00015 | A03109 | 149 | A00015 | A03110 | 945 |
| A00015 | A03115 | 249 | A00015 | A03126 | 399 |
| A00015 | A03127 | 317 | A00015 | A03156 | 221 |
| A00015 | A03183 | 308 | A00015 | A03196 | 241 |
| A00015 | A03209 | 933 | A00015 | A03219 | 945 |
| A00015 | A03259 | 483 | A00015 | A03314 | 173 |
| A00015 | A03458 | 294 | A00015 | A03633 | 319 |
| A00015 | A03639 | 488 | A00015 | A03644 | 174 |
| A00015 | A03744 | 286 | A00015 | A03782 | 162 |
| A00015 | A03799 | 446 | A00015 | A03800 | 337 |
| A00015 | A03893 | 226 | A00015 | A03910 | 168 |
| A00015 | A03942 | 491 | A00015 | A03961 | 488 |
| A00015 | A03975 | 180 | A00015 | A04169 | 321 |
| A00015 | A04180 | 185 | A00015 | A04202 | 301 |
| A00015 | A04216 | 314 | A00015 | A04218 | 179 |
| A00015 | A04256 | 224 | A00015 | A04380 | 450 |
| A00015 | A04398 | 283 | A00015 | A04422 | 340 |
| A00015 | A04454 | 205 | A00015 | A04471 | 199 |
| A00015 | A04488 | 226 | A00015 | A04490 | 455 |
| A00015 | A04492 | 151 | A00015 | A04647 | 308 |
| A00015 | A04676 | 490 | A00015 | A04696 | 185 |
| A00015 | A05091 | 306 | A00015 | A05118 | 265 |
| A00015 | A05182 | 177 | A00015 | A05229 | 249 |
| A00015 | A05246 | 230 | A00015 | A05248 | 276 |
| A00015 | A05288 | 317 | A00015 | A05359 | 180 |
| A00015 | A05491 | 230 | A00015 | A05517 | 159 |
| A00015 | A05533 | 447 | A00015 | A05706 | 173 |
| A00015 | A05784 | 333 | A00015 | A05965 | 276 |

|        |        |     |        |        |     |
|--------|--------|-----|--------|--------|-----|
| A00015 | A06086 | 223 | A00015 | A06118 | 321 |
| A00015 | A06344 | 173 | A00015 | A06997 | 232 |
| A00015 | A07141 | 213 | A00015 | A07209 | 236 |
| A00015 | A07311 | 899 | A00015 | A07422 | 932 |
| A00015 | A07726 | 311 | A00015 | A07803 | 470 |
| A00015 | A08031 | 333 | A00015 | A08714 | 334 |
| A00015 | A08834 | 388 | A00015 | A08840 | 366 |
| A00015 | A08859 | 243 | A00015 | A09036 | 188 |
| A00015 | A09062 | 483 | A00015 | A09085 | 191 |
| A00015 | A09127 | 218 | A00015 | A09208 | 361 |
| A00015 | A09217 | 389 | A00015 | A09222 | 177 |
| A00015 | A09239 | 485 | A00015 | A09374 | 180 |
| A00015 | A09390 | 301 | A00015 | A09480 | 199 |
| A00015 | A09732 | 489 | A00015 | A09733 | 217 |
| A00015 | A09744 | 288 | A00015 | A09984 | 265 |
| A00015 | A10040 | 201 | A00015 | A10090 | 249 |
| A00015 | A10164 | 308 | A00015 | A10208 | 477 |
| A00015 | A10336 | 440 | A00015 | A10580 | 923 |
| A00015 | A10716 | 333 | A00015 | A11190 | 326 |
| A00015 | A11412 | 369 | A00015 | A11415 | 226 |
| A00015 | A11537 | 230 | A00015 | A11558 | 401 |
| A00015 | A12393 | 401 | A00015 | A13084 | 156 |
| A00015 | A13124 | 422 | A00015 | A13225 | 899 |
| A00015 | A13336 | 226 | A00015 | A13363 | 202 |
| A00015 | A13435 | 241 | A00015 | A13546 | 288 |
| A00015 | A13826 | 385 | A00015 | A13849 | 257 |
| A00015 | A13860 | 263 | A00015 | A13899 | 235 |
| A00015 | A13944 | 420 | A00015 | A13987 | 401 |
| A00015 | A14010 | 390 | A00015 | A14190 | 490 |
| A00015 | A14202 | 367 | A00015 | A14210 | 491 |
| A00015 | A14369 | 485 | A00015 | A14370 | 465 |
| A00015 | A14371 | 491 | A00015 | A14372 | 165 |
| A00015 | A14379 | 452 | A00015 | A14408 | 281 |
| A00015 | A14443 | 900 | A00015 | A14444 | 899 |
| A00015 | A14511 | 491 | A00015 | A14536 | 337 |
| A00015 | A14539 | 353 | A00015 | A14577 | 201 |
| A00015 | A14604 | 433 | A00015 | A14667 | 305 |
| A00015 | A14722 | 276 | A00015 | A14930 | 165 |
| A00015 | A15230 | 388 | A00015 | A15292 | 491 |
| A00015 | A15312 | 318 | A00015 | A15313 | 469 |
| A00015 | A15317 | 441 | A00015 | A15318 | 409 |
| A00015 | A15333 | 227 | A00015 | A15348 | 406 |
| A00015 | A15349 | 488 | A00015 | A15352 | 454 |
| A00015 | A15381 | 324 | A00015 | A15396 | 334 |
| A00015 | A15404 | 435 | A00015 | A15419 | 323 |
| A00015 | A15431 | 162 | A00015 | A15435 | 254 |

|        |        |     |        |        |     |
|--------|--------|-----|--------|--------|-----|
| A00015 | A15441 | 213 | A00015 | A15444 | 400 |
| A00015 | A15445 | 274 | A00015 | A15447 | 414 |
| A00015 | A15452 | 273 | A00015 | A15480 | 436 |
| A00015 | A15481 | 279 | A00015 | A15485 | 157 |
| A00015 | A15495 | 486 | A00015 | A15515 | 184 |
| A00015 | A15792 | 171 | A00015 | A15800 | 241 |
| A00015 | A15804 | 329 | A00015 | A15813 | 154 |
| A00015 | A15830 | 160 | A00015 | A15913 | 170 |
| A00015 | A16107 | 246 | A00015 | A16177 | 188 |
| A00015 | A16300 | 350 | A00015 | A16493 | 371 |
| A00016 | A00029 | 307 | A00016 | A00036 | 201 |
| A00016 | A00048 | 173 | A00016 | A00052 | 899 |
| A00016 | A00059 | 477 | A00016 | A00100 | 910 |
| A00016 | A00119 | 930 | A00016 | A00123 | 167 |
| A00016 | A00167 | 936 | A00016 | A00180 | 184 |
| A00016 | A00195 | 942 | A00016 | A00209 | 899 |
| A00016 | A00228 | 176 | A00016 | A00230 | 899 |
| A00016 | A00236 | 469 | A00016 | A00252 | 945 |
| A00016 | A00253 | 945 | A00016 | A00255 | 345 |
| A00016 | A00323 | 411 | A00016 | A00329 | 322 |
| A00016 | A00454 | 450 | A00016 | A00762 | 241 |
| A00016 | A00910 | 343 | A00016 | A01042 | 352 |
| A00016 | A01083 | 180 | A00016 | A01300 | 305 |
| A00016 | A01378 | 170 | A00016 | A01527 | 899 |
| A00016 | A01558 | 899 | A00016 | A01615 | 909 |
| A00016 | A01920 | 928 | A00016 | A02698 | 419 |
| A00016 | A02703 | 172 | A00016 | A03740 | 418 |
| A00016 | A03820 | 157 | A00016 | A04914 | 268 |
| A00016 | A08054 | 232 | A00016 | A09818 | 379 |
| A00016 | A09888 | 345 | A00016 | A09964 | 357 |
| A00016 | A11921 | 273 | A00016 | A11932 | 254 |
| A00016 | A14013 | 327 | A00016 | A14319 | 273 |
| A00016 | A15275 | 314 | A00016 | A15699 | 319 |
| A00016 | A16080 | 438 | A00016 | A16764 | 468 |
| A00017 | A00052 | 899 | A00017 | A00163 | 424 |
| A00017 | A00198 | 905 | A00017 | A02495 | 335 |
| A00017 | A02507 | 480 | A00017 | A02638 | 277 |
| A00017 | A02784 | 254 | A00017 | A02790 | 435 |
| A00017 | A02819 | 347 | A00017 | A02861 | 318 |
| A00017 | A03602 | 221 | A00017 | A03609 | 207 |
| A00017 | A04512 | 384 | A00017 | A04516 | 329 |
| A00017 | A04529 | 322 | A00017 | A04560 | 347 |
| A00017 | A04810 | 391 | A00017 | A05120 | 328 |
| A00017 | A05122 | 226 | A00017 | A09073 | 270 |
| A00017 | A14378 | 157 | A00017 | A14543 | 299 |
| A00017 | A14674 | 291 | A00017 | A15838 | 350 |



|        |        |     |        |        |     |
|--------|--------|-----|--------|--------|-----|
| A00017 | A15840 | 260 | A00018 | A00019 | 945 |
| A00018 | A00037 | 205 | A00018 | A00053 | 975 |
| A00018 | A00067 | 899 | A00018 | A00069 | 427 |
| A00018 | A00095 | 344 | A00018 | A00127 | 409 |
| A00018 | A00149 | 334 | A00018 | A00156 | 262 |
| A00018 | A00159 | 899 | A00018 | A00166 | 369 |
| A00018 | A00167 | 391 | A00018 | A00175 | 478 |
| A00018 | A00198 | 241 | A00018 | A00209 | 919 |
| A00018 | A00210 | 88  | A00018 | A00228 | 473 |
| A00018 | A00237 | 156 | A00018 | A00240 | 399 |
| A00018 | A00242 | 204 | A00018 | A00243 | 536 |
| A00018 | A00244 | 293 | A00018 | A00247 | 967 |
| A00018 | A00400 | 334 | A00018 | A00900 | 165 |
| A00018 | A00932 | 491 | A00018 | A00967 | 334 |
| A00018 | A01151 | 334 | A00018 | A01485 | 469 |
| A00018 | A01524 | 903 | A00018 | A01527 | 378 |
| A00018 | A01553 | 922 | A00018 | A01629 | 259 |
| A00018 | A01718 | 491 | A00018 | A01844 | 899 |
| A00018 | A01926 | 334 | A00018 | A02035 | 185 |
| A00018 | A02174 | 184 | A00018 | A02239 | 286 |
| A00018 | A02324 | 281 | A00018 | A02397 | 176 |
| A00018 | A02425 | 488 | A00018 | A02481 | 334 |
| A00018 | A02624 | 193 | A00018 | A02673 | 221 |
| A00018 | A03315 | 205 | A00018 | A03571 | 277 |
| A00018 | A03873 | 334 | A00018 | A04074 | 940 |
| A00018 | A04202 | 185 | A00018 | A04347 | 972 |
| A00018 | A04415 | 205 | A00018 | A04449 | 334 |
| A00018 | A04665 | 221 | A00018 | A04780 | 238 |
| A00018 | A06212 | 187 | A00018 | A07107 | 168 |
| A00018 | A07803 | 162 | A00018 | A08850 | 334 |
| A00018 | A09247 | 188 | A00018 | A09906 | 445 |
| A00018 | A10040 | 249 | A00018 | A10210 | 281 |
| A00018 | A11559 | 334 | A00018 | A12373 | 334 |
| A00018 | A12465 | 340 | A00018 | A12990 | 701 |
| A00018 | A14210 | 334 | A00018 | A14371 | 334 |
| A00018 | A14636 | 334 | A00018 | A14722 | 314 |
| A00018 | A16025 | 286 | A00018 | A16916 | 259 |
| A00019 | A00037 | 454 | A00019 | A00053 | 945 |
| A00019 | A00113 | 199 | A00019 | A00116 | 156 |
| A00019 | A00156 | 267 | A00019 | A00162 | 227 |
| A00019 | A00167 | 401 | A00019 | A00175 | 363 |
| A00019 | A00191 | 270 | A00019 | A00192 | 281 |
| A00019 | A00198 | 374 | A00019 | A00209 | 901 |
| A00019 | A00228 | 286 | A00019 | A00240 | 640 |
| A00019 | A00242 | 208 | A00019 | A00243 | 676 |
| A00019 | A00244 | 297 | A00019 | A00247 | 491 |

|        |        |     |        |        |     |
|--------|--------|-----|--------|--------|-----|
| A00019 | A00275 | 374 | A00019 | A00356 | 462 |
| A00019 | A00643 | 207 | A00019 | A00932 | 747 |
| A00019 | A01291 | 458 | A00019 | A01485 | 462 |
| A00019 | A01524 | 899 | A00019 | A01553 | 900 |
| A00019 | A01561 | 328 | A00019 | A01623 | 260 |
| A00019 | A01718 | 712 | A00019 | A01974 | 337 |
| A00019 | A02151 | 208 | A00019 | A02239 | 157 |
| A00019 | A02407 | 174 | A00019 | A02425 | 210 |
| A00019 | A03571 | 149 | A00019 | A04202 | 294 |
| A00019 | A04347 | 446 | A00019 | A04761 | 246 |
| A00019 | A06219 | 301 | A00019 | A06466 | 263 |
| A00019 | A06950 | 162 | A00019 | A07311 | 911 |
| A00019 | A07803 | 168 | A00019 | A09906 | 401 |
| A00019 | A10210 | 283 | A00019 | A11279 | 258 |
| A00019 | A12618 | 208 | A00019 | A12752 | 419 |
| A00019 | A12897 | 170 | A00019 | A12990 | 491 |
| A00019 | A14061 | 899 | A00019 | A15498 | 216 |
| A00019 | A15551 | 260 | A00019 | A16025 | 288 |
| A00020 | A00026 | 484 | A00020 | A00032 | 466 |
| A00020 | A00034 | 358 | A00020 | A00085 | 184 |
| A00020 | A00089 | 223 | A00020 | A00112 | 375 |
| A00020 | A00122 | 159 | A00020 | A00127 | 401 |
| A00020 | A00209 | 899 | A00020 | A00221 | 273 |
| A00020 | A00353 | 182 | A00020 | A00616 | 281 |
| A00020 | A01527 | 899 | A00020 | A01688 | 899 |
| A00020 | A01880 | 254 | A00020 | A02049 | 157 |
| A00020 | A02152 | 243 | A00020 | A02236 | 291 |
| A00020 | A02425 | 409 | A00020 | A02675 | 184 |
| A00020 | A02785 | 152 | A00020 | A03014 | 247 |
| A00020 | A03110 | 435 | A00020 | A03470 | 310 |
| A00020 | A03639 | 229 | A00020 | A03800 | 474 |
| A00020 | A04490 | 489 | A00020 | A04914 | 277 |
| A00020 | A04929 | 267 | A00020 | A08408 | 249 |
| A00020 | A09218 | 305 | A00020 | A09238 | 218 |
| A00020 | A09550 | 348 | A00020 | A10164 | 324 |
| A00020 | A11412 | 196 | A00020 | A11415 | 269 |
| A00020 | A13511 | 358 | A00020 | A13824 | 187 |
| A00020 | A13944 | 406 | A00020 | A13987 | 154 |
| A00020 | A14210 | 438 | A00020 | A14259 | 440 |
| A00020 | A14370 | 489 | A00020 | A14371 | 446 |
| A00020 | A14379 | 357 | A00020 | A14430 | 156 |
| A00020 | A14511 | 467 | A00020 | A15292 | 152 |
| A00020 | A15312 | 254 | A00020 | A15313 | 270 |
| A00020 | A15335 | 274 | A00020 | A15452 | 176 |
| A00020 | A15457 | 334 | A00020 | A15459 | 291 |
| A00020 | A15480 | 196 | A00020 | A15498 | 265 |

|        |        |     |        |        |     |
|--------|--------|-----|--------|--------|-----|
| A00021 | A00030 | 177 | A00021 | A00034 | 491 |
| A00021 | A00038 | 218 | A00021 | A00041 | 232 |
| A00021 | A00048 | 445 | A00021 | A00053 | 469 |
| A00021 | A00056 | 440 | A00021 | A00057 | 307 |
| A00021 | A00067 | 899 | A00021 | A00069 | 491 |
| A00021 | A00081 | 475 | A00021 | A00083 | 167 |
| A00021 | A00097 | 238 | A00021 | A00106 | 477 |
| A00021 | A00131 | 201 | A00021 | A00166 | 323 |
| A00021 | A00168 | 481 | A00021 | A00174 | 195 |
| A00021 | A00196 | 273 | A00021 | A00207 | 63  |
| A00021 | A00209 | 899 | A00021 | A00212 | 470 |
| A00021 | A00219 | 481 | A00021 | A00221 | 329 |
| A00021 | A00227 | 165 | A00021 | A00254 | 945 |
| A00021 | A00264 | 180 | A00021 | A00274 | 240 |
| A00021 | A00292 | 452 | A00021 | A00309 | 157 |
| A00021 | A00312 | 344 | A00021 | A00315 | 329 |
| A00021 | A00616 | 475 | A00021 | A00815 | 477 |
| A00021 | A01125 | 350 | A00021 | A01257 | 419 |
| A00021 | A01527 | 899 | A00021 | A01590 | 274 |
| A00021 | A01603 | 213 | A00021 | A01629 | 283 |
| A00021 | A01722 | 409 | A00021 | A01973 | 314 |
| A00021 | A02109 | 201 | A00021 | A02126 | 400 |
| A00021 | A02176 | 232 | A00021 | A02215 | 208 |
| A00021 | A02423 | 435 | A00021 | A02425 | 466 |
| A00021 | A02444 | 257 | A00021 | A02464 | 171 |
| A00021 | A02465 | 449 | A00021 | A02468 | 301 |
| A00021 | A02644 | 187 | A00021 | A02668 | 294 |
| A00021 | A02671 | 490 | A00021 | A02756 | 212 |
| A00021 | A02759 | 176 | A00021 | A02760 | 218 |
| A00021 | A02785 | 263 | A00021 | A02984 | 235 |
| A00021 | A03047 | 269 | A00021 | A03053 | 221 |
| A00021 | A03110 | 481 | A00021 | A03114 | 269 |
| A00021 | A03115 | 340 | A00021 | A03141 | 162 |
| A00021 | A03224 | 179 | A00021 | A03402 | 226 |
| A00021 | A03498 | 418 | A00021 | A03584 | 162 |
| A00021 | A03633 | 255 | A00021 | A03639 | 443 |
| A00021 | A03784 | 210 | A00021 | A03961 | 945 |
| A00021 | A04023 | 199 | A00021 | A04216 | 249 |
| A00021 | A04256 | 173 | A00021 | A04398 | 446 |
| A00021 | A04647 | 245 | A00021 | A05048 | 329 |
| A00021 | A05184 | 219 | A00021 | A05288 | 263 |
| A00021 | A05494 | 160 | A00021 | A05533 | 480 |
| A00021 | A06762 | 202 | A00021 | A07367 | 170 |
| A00021 | A07509 | 238 | A00021 | A09062 | 274 |
| A00021 | A09217 | 329 | A00021 | A09660 | 170 |
| A00021 | A09812 | 269 | A00021 | A10079 | 432 |

|        |        |     |        |        |     |
|--------|--------|-----|--------|--------|-----|
| A00021 | A10208 | 353 | A00021 | A10841 | 353 |
| A00021 | A12932 | 171 | A00021 | A14198 | 165 |
| A00021 | A14210 | 299 | A00021 | A14369 | 195 |
| A00021 | A15230 | 468 | A00021 | A15325 | 232 |
| A00021 | A15913 | 262 | A00021 | A16636 | 185 |
| A00022 | A00093 | 215 | A00022 | A00094 | 710 |
| A00022 | A00098 | 163 | A00022 | A00116 | 224 |
| A00022 | A00133 | 899 | A00022 | A00160 | 157 |
| A00022 | A00161 | 152 | A00022 | A00163 | 968 |
| A00022 | A00188 | 224 | A00022 | A00205 | 184 |
| A00022 | A00207 | 338 | A00022 | A00246 | 899 |
| A00022 | A00257 | 238 | A00022 | A00262 | 420 |
| A00022 | A00324 | 378 | A00022 | A00336 | 249 |
| A00022 | A00477 | 185 | A00022 | A01507 | 208 |
| A00022 | A01512 | 935 | A00022 | A01560 | 188 |
| A00022 | A01606 | 157 | A00022 | A01628 | 162 |
| A00022 | A01698 | 307 | A00022 | A01776 | 322 |
| A00022 | A01850 | 255 | A00022 | A02250 | 230 |
| A00022 | A02774 | 245 | A00022 | A04023 | 249 |
| A00022 | A04288 | 249 | A00022 | A04449 | 223 |
| A00022 | A05556 | 160 | A00022 | A05601 | 291 |
| A00022 | A05854 | 204 | A00022 | A06579 | 273 |
| A00022 | A07311 | 899 | A00022 | A07561 | 204 |
| A00022 | A08093 | 229 | A00022 | A08692 | 252 |
| A00022 | A09162 | 440 | A00022 | A10623 | 187 |
| A00022 | A10808 | 406 | A00022 | A10982 | 405 |
| A00022 | A11313 | 193 | A00022 | A13977 | 198 |
| A00022 | A13980 | 159 | A00022 | A14925 | 185 |
| A00022 | A16438 | 290 | A00022 | A16835 | 486 |
| A00023 | A00024 | 943 | A00023 | A00031 | 457 |
| A00023 | A00045 | 152 | A00023 | A00056 | 414 |
| A00023 | A00057 | 163 | A00023 | A00061 | 251 |
| A00023 | A00085 | 937 | A00023 | A00109 | 270 |
| A00023 | A00123 | 216 | A00023 | A00125 | 281 |
| A00023 | A00141 | 177 | A00023 | A00145 | 199 |
| A00023 | A00160 | 241 | A00023 | A00209 | 899 |
| A00023 | A00246 | 171 | A00023 | A00264 | 274 |
| A00023 | A00274 | 391 | A00023 | A00440 | 200 |
| A00023 | A00815 | 914 | A00023 | A00870 | 195 |
| A00023 | A01092 | 299 | A00023 | A01142 | 346 |
| A00023 | A01524 | 902 | A00023 | A01527 | 899 |
| A00023 | A01654 | 340 | A00023 | A01880 | 288 |
| A00023 | A01889 | 274 | A00023 | A02141 | 353 |
| A00023 | A02143 | 419 | A00023 | A02179 | 213 |
| A00023 | A02288 | 366 | A00023 | A02313 | 302 |
| A00023 | A02425 | 932 | A00023 | A02447 | 357 |

|        |        |     |        |        |     |
|--------|--------|-----|--------|--------|-----|
| A00023 | A02495 | 240 | A00023 | A02711 | 191 |
| A00023 | A02837 | 266 | A00023 | A02917 | 288 |
| A00023 | A03081 | 408 | A00023 | A03305 | 319 |
| A00023 | A03651 | 198 | A00023 | A03661 | 210 |
| A00023 | A03744 | 274 | A00023 | A04492 | 334 |
| A00023 | A04759 | 316 | A00023 | A06623 | 246 |
| A00023 | A07173 | 263 | A00023 | A08572 | 375 |
| A00023 | A08911 | 307 | A00023 | A09570 | 477 |
| A00023 | A13370 | 441 | A00023 | A14236 | 255 |
| A00023 | A14393 | 162 | A00023 | A15952 | 412 |
| A00024 | A00030 | 417 | A00024 | A00034 | 199 |
| A00024 | A00057 | 191 | A00024 | A00069 | 247 |
| A00024 | A00081 | 88  | A00024 | A00085 | 942 |
| A00024 | A00209 | 899 | A00024 | A00616 | 213 |
| A00024 | A00815 | 221 | A00024 | A01142 | 477 |
| A00024 | A01277 | 319 | A00024 | A01524 | 899 |
| A00024 | A01527 | 904 | A00024 | A01790 | 165 |
| A00024 | A02313 | 416 | A00024 | A02425 | 934 |
| A00024 | A02772 | 363 | A00024 | A02839 | 274 |
| A00024 | A02864 | 246 | A00024 | A02897 | 348 |
| A00024 | A04147 | 417 | A00024 | A06858 | 337 |
| A00024 | A09570 | 443 | A00024 | A12111 | 269 |
| A00024 | A13370 | 480 | A00024 | A14077 | 174 |
| A00024 | A14604 | 286 | A00024 | A15795 | 302 |
| A00025 | A00140 | 899 | A00025 | A00157 | 899 |
| A00025 | A00205 | 380 | A00025 | A00207 | 262 |
| A00025 | A00221 | 177 | A00025 | A00224 | 909 |
| A00025 | A00239 | 358 | A00025 | A00240 | 213 |
| A00025 | A00243 | 329 | A00025 | A00533 | 193 |
| A00025 | A01461 | 177 | A00025 | A01527 | 932 |
| A00025 | A01554 | 963 | A00025 | A01574 | 201 |
| A00025 | A05216 | 899 | A00025 | A07311 | 916 |
| A00025 | A07706 | 249 | A00025 | A09319 | 967 |
| A00025 | A09804 | 297 | A00025 | A13368 | 369 |
| A00025 | A13980 | 241 | A00025 | A13991 | 335 |
| A00026 | A00031 | 246 | A00026 | A00032 | 483 |
| A00026 | A00034 | 480 | A00026 | A00041 | 353 |
| A00026 | A00048 | 201 | A00026 | A00052 | 179 |
| A00026 | A00053 | 154 | A00026 | A00057 | 219 |
| A00026 | A00069 | 317 | A00026 | A00079 | 152 |
| A00026 | A00081 | 425 | A00026 | A00087 | 302 |
| A00026 | A00090 | 414 | A00026 | A00091 | 173 |
| A00026 | A00112 | 398 | A00026 | A00116 | 173 |
| A00026 | A00127 | 188 | A00026 | A00138 | 208 |
| A00026 | A00166 | 389 | A00026 | A00173 | 283 |
| A00026 | A00177 | 63  | A00026 | A00209 | 899 |

|        |        |     |        |        |     |
|--------|--------|-----|--------|--------|-----|
| A00026 | A00211 | 255 | A00026 | A00217 | 91  |
| A00026 | A00219 | 451 | A00026 | A00221 | 491 |
| A00026 | A00223 | 400 | A00026 | A00230 | 899 |
| A00026 | A00234 | 450 | A00026 | A00240 | 899 |
| A00026 | A00254 | 305 | A00026 | A00341 | 285 |
| A00026 | A00401 | 257 | A00026 | A00446 | 185 |
| A00026 | A00616 | 427 | A00026 | A00641 | 561 |
| A00026 | A00651 | 63  | A00026 | A00696 | 428 |
| A00026 | A00752 | 226 | A00026 | A00766 | 232 |
| A00026 | A00791 | 305 | A00026 | A00815 | 165 |
| A00026 | A00868 | 221 | A00026 | A00884 | 369 |
| A00026 | A00939 | 157 | A00026 | A00975 | 163 |
| A00026 | A01014 | 235 | A00026 | A01128 | 132 |
| A00026 | A01339 | 347 | A00026 | A01527 | 989 |
| A00026 | A01558 | 899 | A00026 | A01604 | 355 |
| A00026 | A01605 | 119 | A00026 | A01615 | 899 |
| A00026 | A01640 | 474 | A00026 | A01908 | 173 |
| A00026 | A02044 | 182 | A00026 | A02054 | 188 |
| A00026 | A02120 | 246 | A00026 | A02236 | 332 |
| A00026 | A02268 | 223 | A00026 | A02292 | 160 |
| A00026 | A02415 | 157 | A00026 | A02419 | 312 |
| A00026 | A02423 | 176 | A00026 | A02425 | 232 |
| A00026 | A02510 | 278 | A00026 | A02544 | 162 |
| A00026 | A02579 | 154 | A00026 | A02582 | 374 |
| A00026 | A02790 | 168 | A00026 | A03110 | 441 |
| A00026 | A03126 | 217 | A00026 | A03183 | 159 |
| A00026 | A03260 | 213 | A00026 | A03470 | 224 |
| A00026 | A03630 | 288 | A00026 | A03788 | 382 |
| A00026 | A03800 | 469 | A00026 | A03944 | 246 |
| A00026 | A04176 | 234 | A00026 | A04223 | 259 |
| A00026 | A04310 | 285 | A00026 | A04422 | 185 |
| A00026 | A04490 | 457 | A00026 | A04682 | 201 |
| A00026 | A04706 | 293 | A00026 | A04731 | 204 |
| A00026 | A04827 | 297 | A00026 | A05091 | 353 |
| A00026 | A05129 | 340 | A00026 | A05283 | 293 |
| A00026 | A05337 | 335 | A00026 | A05477 | 274 |
| A00026 | A05506 | 254 | A00026 | A05606 | 462 |
| A00026 | A05679 | 243 | A00026 | A05741 | 254 |
| A00026 | A06997 | 179 | A00026 | A07138 | 238 |
| A00026 | A07141 | 316 | A00026 | A07143 | 162 |
| A00026 | A07457 | 165 | A00026 | A08580 | 340 |
| A00026 | A08714 | 180 | A00026 | A08949 | 168 |
| A00026 | A08990 | 263 | A00026 | A09201 | 174 |
| A00026 | A09206 | 226 | A00026 | A09644 | 428 |
| A00026 | A10581 | 213 | A00026 | A10599 | 173 |
| A00026 | A10744 | 384 | A00026 | A11307 | 184 |

|        |        |     |        |        |     |
|--------|--------|-----|--------|--------|-----|
| A00026 | A11381 | 398 | A00026 | A11986 | 328 |
| A00026 | A12009 | 216 | A00026 | A12419 | 216 |
| A00026 | A12824 | 219 | A00026 | A13484 | 162 |
| A00026 | A13944 | 217 | A00026 | A13987 | 263 |
| A00026 | A14190 | 491 | A00026 | A14198 | 249 |
| A00026 | A14210 | 475 | A00026 | A14364 | 279 |
| A00026 | A14369 | 193 | A00026 | A14370 | 449 |
| A00026 | A14371 | 445 | A00026 | A14374 | 200 |
| A00026 | A14379 | 413 | A00026 | A14418 | 281 |
| A00026 | A14511 | 355 | A00026 | A14532 | 243 |
| A00026 | A14553 | 353 | A00026 | A15292 | 238 |
| A00026 | A15347 | 238 | A00026 | A15432 | 221 |
| A00026 | A15440 | 204 | A00026 | A15459 | 201 |
| A00026 | A15607 | 238 | A00026 | A15608 | 185 |
| A00026 | A15639 | 151 | A00026 | A15780 | 274 |
| A00026 | A15862 | 329 | A00026 | A15904 | 302 |
| A00026 | A16001 | 373 | A00026 | A16540 | 226 |
| A00026 | A16650 | 279 | A00026 | A16880 | 322 |
| A00026 | A16989 | 373 | A00026 | A17105 | 288 |
| A00027 | A00028 | 899 | A00027 | A00104 | 380 |
| A00027 | A00228 | 232 | A00027 | A00247 | 162 |
| A00027 | A00485 | 167 | A00027 | A01410 | 283 |
| A00027 | A02499 | 395 | A00027 | A02749 | 190 |
| A00027 | A09215 | 424 | A00027 | A10532 | 226 |
| A00027 | A10907 | 407 | A00027 | A13879 | 288 |
| A00027 | A14132 | 428 | A00027 | A15696 | 341 |
| A00027 | A16124 | 899 | A00028 | A16124 | 899 |
| A00029 | A00035 | 622 | A00029 | A00036 | 491 |
| A00029 | A00037 | 273 | A00029 | A00041 | 903 |
| A00029 | A00047 | 949 | A00029 | A00048 | 899 |
| A00029 | A00052 | 933 | A00029 | A00058 | 945 |
| A00029 | A00064 | 65  | A00029 | A00065 | 154 |
| A00029 | A00067 | 899 | A00029 | A00073 | 648 |
| A00029 | A00074 | 135 | A00029 | A00089 | 899 |
| A00029 | A00091 | 899 | A00029 | A00093 | 286 |
| A00029 | A00113 | 445 | A00029 | A00114 | 490 |
| A00029 | A00120 | 941 | A00029 | A00122 | 63  |
| A00029 | A00124 | 63  | A00029 | A00127 | 490 |
| A00029 | A00128 | 291 | A00029 | A00130 | 483 |
| A00029 | A00132 | 489 | A00029 | A00136 | 63  |
| A00029 | A00137 | 290 | A00029 | A00138 | 95  |
| A00029 | A00146 | 157 | A00029 | A00150 | 949 |
| A00029 | A00152 | 888 | A00029 | A00155 | 480 |
| A00029 | A00156 | 899 | A00029 | A00157 | 907 |
| A00029 | A00159 | 899 | A00029 | A00167 | 903 |
| A00029 | A00169 | 899 | A00029 | A00180 | 388 |

|        |        |     |        |        |     |
|--------|--------|-----|--------|--------|-----|
| A00029 | A00185 | 918 | A00029 | A00191 | 924 |
| A00029 | A00207 | 324 | A00029 | A00208 | 899 |
| A00029 | A00209 | 899 | A00029 | A00227 | 899 |
| A00029 | A00234 | 512 | A00029 | A00236 | 958 |
| A00029 | A00239 | 506 | A00029 | A00240 | 954 |
| A00029 | A00242 | 427 | A00029 | A00243 | 319 |
| A00029 | A00244 | 286 | A00029 | A00246 | 899 |
| A00029 | A00247 | 463 | A00029 | A00250 | 425 |
| A00029 | A00252 | 469 | A00029 | A00253 | 452 |
| A00029 | A00254 | 976 | A00029 | A00255 | 955 |
| A00029 | A00257 | 566 | A00029 | A00263 | 167 |
| A00029 | A00271 | 899 | A00029 | A00280 | 199 |
| A00029 | A00284 | 255 | A00029 | A00285 | 477 |
| A00029 | A00288 | 466 | A00029 | A00298 | 466 |
| A00029 | A00304 | 213 | A00029 | A00323 | 491 |
| A00029 | A00329 | 491 | A00029 | A00334 | 356 |
| A00029 | A00336 | 455 | A00029 | A00340 | 274 |
| A00029 | A00343 | 489 | A00029 | A00345 | 167 |
| A00029 | A00348 | 584 | A00029 | A00352 | 526 |
| A00029 | A00356 | 490 | A00029 | A00405 | 490 |
| A00029 | A00409 | 297 | A00029 | A00419 | 489 |
| A00029 | A00433 | 343 | A00029 | A00439 | 285 |
| A00029 | A00448 | 204 | A00029 | A00451 | 899 |
| A00029 | A00454 | 613 | A00029 | A00457 | 249 |
| A00029 | A00460 | 395 | A00029 | A00517 | 333 |
| A00029 | A00521 | 319 | A00029 | A00537 | 530 |
| A00029 | A00543 | 383 | A00029 | A00553 | 159 |
| A00029 | A00561 | 235 | A00029 | A00604 | 542 |
| A00029 | A00605 | 534 | A00029 | A00621 | 63  |
| A00029 | A00626 | 390 | A00029 | A00648 | 434 |
| A00029 | A00651 | 435 | A00029 | A00653 | 788 |
| A00029 | A00697 | 567 | A00029 | A00698 | 383 |
| A00029 | A00700 | 348 | A00029 | A00724 | 168 |
| A00029 | A00741 | 687 | A00029 | A00747 | 165 |
| A00029 | A00758 | 481 | A00029 | A00759 | 427 |
| A00029 | A00761 | 394 | A00029 | A00773 | 486 |
| A00029 | A00783 | 491 | A00029 | A00785 | 491 |
| A00029 | A00786 | 163 | A00029 | A00787 | 261 |
| A00029 | A00790 | 491 | A00029 | A00805 | 425 |
| A00029 | A00808 | 945 | A00029 | A00809 | 491 |
| A00029 | A00811 | 490 | A00029 | A00833 | 432 |
| A00029 | A00839 | 491 | A00029 | A00841 | 486 |
| A00029 | A00843 | 207 | A00029 | A00848 | 486 |
| A00029 | A00849 | 249 | A00029 | A00870 | 449 |
| A00029 | A00876 | 193 | A00029 | A00878 | 174 |
| A00029 | A00909 | 484 | A00029 | A00910 | 491 |



|        |        |     |        |        |     |
|--------|--------|-----|--------|--------|-----|
| A00029 | A00911 | 481 | A00029 | A00912 | 472 |
| A00029 | A00922 | 585 | A00029 | A00923 | 366 |
| A00029 | A00932 | 491 | A00029 | A00935 | 485 |
| A00029 | A00953 | 480 | A00029 | A00970 | 425 |
| A00029 | A00971 | 499 | A00029 | A01027 | 491 |
| A00029 | A01038 | 170 | A00029 | A01042 | 491 |
| A00029 | A01052 | 905 | A00029 | A01054 | 490 |
| A00029 | A01055 | 95  | A00029 | A01083 | 491 |
| A00029 | A01090 | 260 | A00029 | A01098 | 481 |
| A00029 | A01112 | 490 | A00029 | A01115 | 473 |
| A00029 | A01127 | 422 | A00029 | A01148 | 110 |
| A00029 | A01150 | 491 | A00029 | A01161 | 546 |
| A00029 | A01178 | 490 | A00029 | A01189 | 154 |
| A00029 | A01192 | 575 | A00029 | A01194 | 416 |
| A00029 | A01206 | 328 | A00029 | A01216 | 385 |
| A00029 | A01232 | 584 | A00029 | A01249 | 168 |
| A00029 | A01256 | 355 | A00029 | A01261 | 296 |
| A00029 | A01265 | 491 | A00029 | A01287 | 252 |
| A00029 | A01289 | 450 | A00029 | A01291 | 949 |
| A00029 | A01300 | 560 | A00029 | A01306 | 430 |
| A00029 | A01335 | 484 | A00029 | A01354 | 417 |
| A00029 | A01390 | 63  | A00029 | A01399 | 475 |
| A00029 | A01413 | 283 | A00029 | A01431 | 491 |
| A00029 | A01434 | 204 | A00029 | A01435 | 664 |
| A00029 | A01443 | 411 | A00029 | A01446 | 491 |
| A00029 | A01447 | 358 | A00029 | A01448 | 469 |
| A00029 | A01470 | 495 | A00029 | A01492 | 903 |
| A00029 | A01522 | 229 | A00029 | A01524 | 916 |
| A00029 | A01527 | 899 | A00029 | A01539 | 473 |
| A00029 | A01540 | 491 | A00029 | A01553 | 965 |
| A00029 | A01554 | 302 | A00029 | A01558 | 303 |
| A00029 | A01560 | 529 | A00029 | A01561 | 416 |
| A00029 | A01562 | 385 | A00029 | A01565 | 199 |
| A00029 | A01569 | 480 | A00029 | A01574 | 477 |
| A00029 | A01577 | 399 | A00029 | A01579 | 488 |
| A00029 | A01588 | 899 | A00029 | A01628 | 922 |
| A00029 | A01631 | 475 | A00029 | A01638 | 899 |
| A00029 | A01640 | 899 | A00029 | A01646 | 352 |
| A00029 | A01647 | 176 | A00029 | A01649 | 401 |
| A00029 | A01688 | 899 | A00029 | A01692 | 491 |
| A00029 | A01697 | 63  | A00029 | A01698 | 899 |
| A00029 | A01707 | 491 | A00029 | A01708 | 292 |
| A00029 | A01709 | 294 | A00029 | A01719 | 294 |
| A00029 | A01730 | 499 | A00029 | A01776 | 174 |
| A00029 | A01787 | 285 | A00029 | A01822 | 516 |
| A00029 | A01837 | 319 | A00029 | A01850 | 945 |

|        |        |     |        |        |     |
|--------|--------|-----|--------|--------|-----|
| A00029 | A01860 | 176 | A00029 | A02084 | 93  |
| A00029 | A02350 | 484 | A00029 | A02424 | 171 |
| A00029 | A02429 | 899 | A00029 | A02433 | 900 |
| A00029 | A02481 | 899 | A00029 | A02502 | 899 |
| A00029 | A02607 | 406 | A00029 | A02698 | 199 |
| A00029 | A02703 | 283 | A00029 | A02715 | 441 |
| A00029 | A02791 | 401 | A00029 | A02803 | 63  |
| A00029 | A02805 | 899 | A00029 | A02864 | 427 |
| A00029 | A02872 | 205 | A00029 | A02877 | 899 |
| A00029 | A03082 | 899 | A00029 | A03126 | 899 |
| A00029 | A03269 | 198 | A00029 | A03271 | 212 |
| A00029 | A03289 | 352 | A00029 | A03293 | 451 |
| A00029 | A03294 | 290 | A00029 | A03298 | 424 |
| A00029 | A03422 | 259 | A00029 | A03446 | 428 |
| A00029 | A03451 | 334 | A00029 | A03516 | 469 |
| A00029 | A03557 | 335 | A00029 | A03567 | 462 |
| A00029 | A03591 | 461 | A00029 | A03596 | 63  |
| A00029 | A03665 | 259 | A00029 | A03740 | 491 |
| A00029 | A03752 | 491 | A00029 | A03776 | 369 |
| A00029 | A03785 | 263 | A00029 | A03797 | 899 |
| A00029 | A03809 | 960 | A00029 | A03830 | 899 |
| A00029 | A03959 | 461 | A00029 | A03981 | 288 |
| A00029 | A04028 | 490 | A00029 | A04280 | 263 |
| A00029 | A04342 | 266 | A00029 | A04446 | 477 |
| A00029 | A04484 | 899 | A00029 | A04644 | 205 |
| A00029 | A04682 | 63  | A00029 | A04686 | 414 |
| A00029 | A04699 | 63  | A00029 | A04957 | 112 |
| A00029 | A05086 | 485 | A00029 | A05453 | 329 |
| A00029 | A05501 | 288 | A00029 | A05577 | 199 |
| A00029 | A05867 | 932 | A00029 | A05910 | 322 |
| A00029 | A05938 | 205 | A00029 | A05939 | 258 |
| A00029 | A06037 | 461 | A00029 | A06158 | 63  |
| A00029 | A06256 | 110 | A00029 | A06289 | 121 |
| A00029 | A06466 | 491 | A00029 | A06554 | 204 |
| A00029 | A06599 | 176 | A00029 | A06703 | 82  |
| A00029 | A06748 | 167 | A00029 | A06965 | 205 |
| A00029 | A07208 | 612 | A00029 | A07247 | 472 |
| A00029 | A07311 | 998 | A00029 | A07394 | 306 |
| A00029 | A07451 | 306 | A00029 | A07527 | 210 |
| A00029 | A07726 | 160 | A00029 | A07798 | 491 |
| A00029 | A08053 | 473 | A00029 | A08054 | 491 |
| A00029 | A08061 | 285 | A00029 | A08096 | 167 |
| A00029 | A08131 | 193 | A00029 | A08137 | 344 |
| A00029 | A08315 | 276 | A00029 | A08359 | 382 |
| A00029 | A08519 | 229 | A00029 | A08571 | 945 |
| A00029 | A08815 | 408 | A00029 | A08826 | 167 |

|        |        |     |        |        |     |
|--------|--------|-----|--------|--------|-----|
| A00029 | A08835 | 611 | A00029 | A08850 | 199 |
| A00029 | A08860 | 490 | A00029 | A08943 | 159 |
| A00029 | A08987 | 468 | A00029 | A09127 | 207 |
| A00029 | A09253 | 348 | A00029 | A09263 | 74  |
| A00029 | A09336 | 174 | A00029 | A09476 | 491 |
| A00029 | A09502 | 486 | A00029 | A09505 | 205 |
| A00029 | A09543 | 110 | A00029 | A09577 | 433 |
| A00029 | A09581 | 85  | A00029 | A09591 | 340 |
| A00029 | A09592 | 224 | A00029 | A09792 | 306 |
| A00029 | A09804 | 307 | A00029 | A09873 | 357 |
| A00029 | A09896 | 205 | A00029 | A09902 | 343 |
| A00029 | A09933 | 63  | A00029 | A10014 | 63  |
| A00029 | A10175 | 204 | A00029 | A10233 | 941 |
| A00029 | A10328 | 196 | A00029 | A10365 | 491 |
| A00029 | A10532 | 634 | A00029 | A10623 | 152 |
| A00029 | A10728 | 488 | A00029 | A10735 | 63  |
| A00029 | A10797 | 491 | A00029 | A10798 | 491 |
| A00029 | A10799 | 328 | A00029 | A10902 | 141 |
| A00029 | A10913 | 68  | A00029 | A10971 | 167 |
| A00029 | A11124 | 71  | A00029 | A11125 | 63  |
| A00029 | A11244 | 486 | A00029 | A11286 | 252 |
| A00029 | A11296 | 491 | A00029 | A11297 | 369 |
| A00029 | A11302 | 491 | A00029 | A11322 | 491 |
| A00029 | A11337 | 490 | A00029 | A11338 | 486 |
| A00029 | A11356 | 205 | A00029 | A11372 | 491 |
| A00029 | A11374 | 490 | A00029 | A11419 | 486 |
| A00029 | A11427 | 490 | A00029 | A11677 | 475 |
| A00029 | A11707 | 63  | A00029 | A11724 | 489 |
| A00029 | A11731 | 187 | A00029 | A11821 | 205 |
| A00029 | A11833 | 254 | A00029 | A11974 | 353 |
| A00029 | A11975 | 218 | A00029 | A12167 | 232 |
| A00029 | A12221 | 165 | A00029 | A12328 | 491 |
| A00029 | A12383 | 455 | A00029 | A12791 | 205 |
| A00029 | A12988 | 299 | A00029 | A12990 | 212 |
| A00029 | A13023 | 199 | A00029 | A13149 | 447 |
| A00029 | A13255 | 291 | A00029 | A13282 | 205 |
| A00029 | A13320 | 159 | A00029 | A13335 | 272 |
| A00029 | A13340 | 491 | A00029 | A13521 | 445 |
| A00029 | A13830 | 165 | A00029 | A13903 | 174 |
| A00029 | A13970 | 899 | A00029 | A13983 | 127 |
| A00029 | A13984 | 219 | A00029 | A13989 | 950 |
| A00029 | A14006 | 468 | A00029 | A14008 | 118 |
| A00029 | A14013 | 138 | A00029 | A14031 | 205 |
| A00029 | A14073 | 491 | A00029 | A14138 | 347 |
| A00029 | A14148 | 899 | A00029 | A14150 | 202 |
| A00029 | A14188 | 906 | A00029 | A14198 | 909 |

|        |        |     |        |        |     |
|--------|--------|-----|--------|--------|-----|
| A00029 | A14216 | 471 | A00029 | A14246 | 899 |
| A00029 | A14275 | 79  | A00029 | A14366 | 199 |
| A00029 | A14596 | 535 | A00029 | A14642 | 439 |
| A00029 | A14738 | 151 | A00029 | A14845 | 489 |
| A00029 | A15119 | 205 | A00029 | A15244 | 489 |
| A00029 | A15275 | 462 | A00029 | A15297 | 899 |
| A00029 | A15324 | 899 | A00029 | A15325 | 899 |
| A00029 | A15353 | 899 | A00029 | A15359 | 899 |
| A00029 | A15490 | 167 | A00029 | A15546 | 180 |
| A00029 | A15547 | 900 | A00029 | A15614 | 899 |
| A00029 | A15653 | 445 | A00029 | A15660 | 490 |
| A00029 | A15666 | 472 | A00029 | A15684 | 475 |
| A00029 | A15694 | 361 | A00029 | A15695 | 301 |
| A00029 | A15699 | 481 | A00029 | A15726 | 139 |
| A00029 | A15769 | 307 | A00029 | A15938 | 440 |
| A00029 | A16060 | 486 | A00029 | A16157 | 490 |
| A00029 | A16289 | 167 | A00029 | A16371 | 486 |
| A00029 | A16430 | 174 | A00029 | A16449 | 404 |
| A00029 | A16540 | 269 | A00029 | A16587 | 168 |
| A00029 | A16633 | 418 | A00029 | A16640 | 200 |
| A00029 | A16830 | 152 | A00029 | A16993 | 167 |
| A00029 | A17128 | 375 | A00029 | A17140 | 240 |
| A00029 | A17188 | 907 | A00030 | A00031 | 491 |
| A00030 | A00032 | 177 | A00030 | A00034 | 491 |
| A00030 | A00056 | 269 | A00030 | A00057 | 460 |
| A00030 | A00067 | 899 | A00030 | A00069 | 200 |
| A00030 | A00080 | 305 | A00030 | A00081 | 71  |
| A00030 | A00085 | 274 | A00030 | A00089 | 77  |
| A00030 | A00166 | 291 | A00030 | A00190 | 380 |
| A00030 | A00211 | 185 | A00030 | A00219 | 456 |
| A00030 | A00230 | 899 | A00030 | A00246 | 899 |
| A00030 | A00274 | 489 | A00030 | A00324 | 179 |
| A00030 | A00616 | 945 | A00030 | A00701 | 256 |
| A00030 | A00736 | 179 | A00030 | A01137 | 258 |
| A00030 | A01162 | 151 | A00030 | A01192 | 321 |
| A00030 | A01276 | 168 | A00030 | A01277 | 229 |
| A00030 | A01605 | 914 | A00030 | A01639 | 899 |
| A00030 | A01944 | 326 | A00030 | A01982 | 180 |
| A00030 | A02186 | 229 | A00030 | A02229 | 260 |
| A00030 | A02265 | 183 | A00030 | A02454 | 159 |
| A00030 | A02464 | 229 | A00030 | A02476 | 263 |
| A00030 | A02667 | 196 | A00030 | A02772 | 401 |
| A00030 | A02791 | 213 | A00030 | A02868 | 265 |
| A00030 | A02897 | 272 | A00030 | A02983 | 340 |
| A00030 | A03093 | 263 | A00030 | A03110 | 445 |
| A00030 | A03219 | 408 | A00030 | A03224 | 235 |

|        |        |     |        |        |     |
|--------|--------|-----|--------|--------|-----|
| A00030 | A03259 | 184 | A00030 | A03314 | 193 |
| A00030 | A03373 | 205 | A00030 | A03435 | 156 |
| A00030 | A03436 | 246 | A00030 | A03639 | 323 |
| A00030 | A03799 | 307 | A00030 | A03800 | 240 |
| A00030 | A03949 | 249 | A00030 | A04076 | 208 |
| A00030 | A04487 | 374 | A00030 | A04504 | 343 |
| A00030 | A04813 | 279 | A00030 | A05118 | 358 |
| A00030 | A05533 | 221 | A00030 | A06209 | 398 |
| A00030 | A06769 | 182 | A00030 | A06798 | 449 |
| A00030 | A07143 | 221 | A00030 | A07415 | 363 |
| A00030 | A07422 | 899 | A00030 | A07834 | 180 |
| A00030 | A08911 | 241 | A00030 | A10018 | 201 |
| A00030 | A10336 | 162 | A00030 | A10469 | 347 |
| A00030 | A10998 | 358 | A00030 | A11578 | 490 |
| A00030 | A12521 | 398 | A00030 | A13348 | 272 |
| A00030 | A13826 | 185 | A00030 | A13978 | 899 |
| A00030 | A14072 | 162 | A00030 | A14210 | 299 |
| A00030 | A14371 | 452 | A00030 | A14554 | 196 |
| A00030 | A15795 | 207 | A00030 | A16224 | 202 |
| A00030 | A16877 | 263 | A00030 | A17060 | 343 |
| A00031 | A00032 | 438 | A00031 | A00034 | 945 |
| A00031 | A00038 | 218 | A00031 | A00041 | 423 |
| A00031 | A00042 | 162 | A00031 | A00045 | 213 |
| A00031 | A00052 | 183 | A00031 | A00056 | 491 |
| A00031 | A00057 | 436 | A00031 | A00067 | 899 |
| A00031 | A00069 | 443 | A00031 | A00076 | 285 |
| A00031 | A00080 | 339 | A00031 | A00081 | 102 |
| A00031 | A00085 | 95  | A00031 | A00089 | 63  |
| A00031 | A00095 | 191 | A00031 | A00111 | 328 |
| A00031 | A00125 | 423 | A00031 | A00150 | 899 |
| A00031 | A00152 | 216 | A00031 | A00162 | 176 |
| A00031 | A00166 | 324 | A00031 | A00168 | 269 |
| A00031 | A00189 | 174 | A00031 | A00190 | 457 |
| A00031 | A00209 | 903 | A00031 | A00211 | 458 |
| A00031 | A00212 | 260 | A00031 | A00219 | 486 |
| A00031 | A00221 | 330 | A00031 | A00224 | 902 |
| A00031 | A00230 | 899 | A00031 | A00246 | 899 |
| A00031 | A00255 | 353 | A00031 | A00264 | 926 |
| A00031 | A00274 | 491 | A00031 | A00440 | 435 |
| A00031 | A00616 | 945 | A00031 | A00736 | 345 |
| A00031 | A01125 | 196 | A00031 | A01163 | 247 |
| A00031 | A01257 | 241 | A00031 | A01278 | 96  |
| A00031 | A01289 | 168 | A00031 | A01425 | 291 |
| A00031 | A01524 | 907 | A00031 | A01527 | 908 |
| A00031 | A01605 | 406 | A00031 | A01640 | 246 |
| A00031 | A01741 | 193 | A00031 | A01767 | 221 |

|        |        |     |        |        |     |
|--------|--------|-----|--------|--------|-----|
| A00031 | A01926 | 256 | A00031 | A02052 | 270 |
| A00031 | A02088 | 436 | A00031 | A02143 | 483 |
| A00031 | A02174 | 213 | A00031 | A02217 | 314 |
| A00031 | A02282 | 262 | A00031 | A02331 | 156 |
| A00031 | A02382 | 451 | A00031 | A02423 | 177 |
| A00031 | A02425 | 113 | A00031 | A02429 | 205 |
| A00031 | A02454 | 324 | A00031 | A02461 | 256 |
| A00031 | A02464 | 484 | A00031 | A02468 | 168 |
| A00031 | A02472 | 63  | A00031 | A02481 | 68  |
| A00031 | A02494 | 152 | A00031 | A02582 | 156 |
| A00031 | A02600 | 330 | A00031 | A02615 | 229 |
| A00031 | A02616 | 361 | A00031 | A02624 | 216 |
| A00031 | A02711 | 263 | A00031 | A02732 | 184 |
| A00031 | A02768 | 188 | A00031 | A02772 | 246 |
| A00031 | A02983 | 167 | A00031 | A03055 | 260 |
| A00031 | A03081 | 185 | A00031 | A03093 | 411 |
| A00031 | A03109 | 417 | A00031 | A03110 | 491 |
| A00031 | A03183 | 491 | A00031 | A03185 | 389 |
| A00031 | A03219 | 489 | A00031 | A03259 | 353 |
| A00031 | A03305 | 332 | A00031 | A03314 | 265 |
| A00031 | A03458 | 232 | A00031 | A03639 | 262 |
| A00031 | A03753 | 394 | A00031 | A03800 | 184 |
| A00031 | A03942 | 490 | A00031 | A03955 | 213 |
| A00031 | A03964 | 240 | A00031 | A04007 | 205 |
| A00031 | A04076 | 152 | A00031 | A04078 | 193 |
| A00031 | A04257 | 436 | A00031 | A04422 | 319 |
| A00031 | A04473 | 428 | A00031 | A04478 | 221 |
| A00031 | A04487 | 406 | A00031 | A04490 | 184 |
| A00031 | A04492 | 221 | A00031 | A04643 | 323 |
| A00031 | A04759 | 196 | A00031 | A05366 | 330 |
| A00031 | A05533 | 163 | A00031 | A05706 | 414 |
| A00031 | A06118 | 258 | A00031 | A06798 | 256 |
| A00031 | A07143 | 163 | A00031 | A07145 | 419 |
| A00031 | A07753 | 234 | A00031 | A09070 | 340 |
| A00031 | A09092 | 246 | A00031 | A09570 | 270 |
| A00031 | A10336 | 229 | A00031 | A11007 | 308 |
| A00031 | A11544 | 193 | A00031 | A11578 | 473 |
| A00031 | A11750 | 413 | A00031 | A11757 | 323 |
| A00031 | A11986 | 196 | A00031 | A12419 | 218 |
| A00031 | A13768 | 243 | A00031 | A13826 | 460 |
| A00031 | A13860 | 412 | A00031 | A13987 | 162 |
| A00031 | A14004 | 182 | A00031 | A14038 | 235 |
| A00031 | A14126 | 252 | A00031 | A14190 | 458 |
| A00031 | A14210 | 490 | A00031 | A14366 | 288 |
| A00031 | A14371 | 491 | A00031 | A14378 | 165 |
| A00031 | A14379 | 263 | A00031 | A14427 | 340 |

|        |        |     |        |        |     |
|--------|--------|-----|--------|--------|-----|
| A00031 | A14444 | 901 | A00031 | A14490 | 241 |
| A00031 | A14511 | 401 | A00031 | A14604 | 260 |
| A00031 | A14605 | 200 | A00031 | A15285 | 252 |
| A00031 | A15318 | 428 | A00031 | A15346 | 286 |
| A00031 | A15411 | 213 | A00031 | A15486 | 221 |
| A00031 | A15487 | 319 | A00031 | A15518 | 260 |
| A00031 | A15792 | 241 | A00031 | A15840 | 165 |
| A00031 | A15916 | 235 | A00031 | A16021 | 340 |
| A00031 | A16114 | 218 | A00031 | A16224 | 369 |
| A00031 | A17060 | 303 | A00032 | A00034 | 491 |
| A00032 | A00041 | 279 | A00032 | A00048 | 419 |
| A00032 | A00053 | 255 | A00032 | A00067 | 899 |
| A00032 | A00069 | 427 | A00032 | A00081 | 285 |
| A00032 | A00083 | 167 | A00032 | A00085 | 377 |
| A00032 | A00087 | 200 | A00032 | A00089 | 180 |
| A00032 | A00091 | 173 | A00032 | A00112 | 266 |
| A00032 | A00127 | 945 | A00032 | A00150 | 379 |
| A00032 | A00166 | 486 | A00032 | A00167 | 489 |
| A00032 | A00168 | 191 | A00032 | A00200 | 200 |
| A00032 | A00209 | 909 | A00032 | A00211 | 969 |
| A00032 | A00212 | 260 | A00032 | A00219 | 477 |
| A00032 | A00221 | 491 | A00032 | A00223 | 480 |
| A00032 | A00254 | 416 | A00032 | A00255 | 469 |
| A00032 | A00270 | 306 | A00032 | A00277 | 174 |
| A00032 | A00292 | 272 | A00032 | A00315 | 329 |
| A00032 | A00324 | 899 | A00032 | A00333 | 188 |
| A00032 | A00335 | 307 | A00032 | A00356 | 358 |
| A00032 | A00400 | 208 | A00032 | A00568 | 162 |
| A00032 | A00616 | 945 | A00032 | A00815 | 165 |
| A00032 | A00868 | 63  | A00032 | A00870 | 165 |
| A00032 | A01056 | 160 | A00032 | A01098 | 324 |
| A00032 | A01140 | 207 | A00032 | A01299 | 260 |
| A00032 | A01425 | 490 | A00032 | A01477 | 308 |
| A00032 | A01524 | 196 | A00032 | A01527 | 899 |
| A00032 | A01605 | 469 | A00032 | A01629 | 152 |
| A00032 | A01640 | 372 | A00032 | A02111 | 270 |
| A00032 | A02243 | 262 | A00032 | A02265 | 252 |
| A00032 | A02275 | 154 | A00032 | A02305 | 165 |
| A00032 | A02306 | 288 | A00032 | A02356 | 235 |
| A00032 | A02397 | 198 | A00032 | A02411 | 428 |
| A00032 | A02425 | 454 | A00032 | A02464 | 899 |
| A00032 | A02467 | 174 | A00032 | A02597 | 286 |
| A00032 | A02678 | 193 | A00032 | A02791 | 156 |
| A00032 | A03029 | 219 | A00032 | A03083 | 160 |
| A00032 | A03091 | 172 | A00032 | A03110 | 458 |
| A00032 | A03470 | 451 | A00032 | A03584 | 294 |

|        |        |     |        |        |     |
|--------|--------|-----|--------|--------|-----|
| A00032 | A03633 | 255 | A00032 | A03799 | 483 |
| A00032 | A03800 | 477 | A00032 | A03873 | 162 |
| A00032 | A03942 | 351 | A00032 | A04038 | 196 |
| A00032 | A04230 | 391 | A00032 | A04323 | 198 |
| A00032 | A04422 | 477 | A00032 | A04490 | 491 |
| A00032 | A04562 | 195 | A00032 | A04600 | 179 |
| A00032 | A04813 | 226 | A00032 | A04843 | 416 |
| A00032 | A04914 | 318 | A00032 | A05118 | 322 |
| A00032 | A05143 | 249 | A00032 | A05183 | 281 |
| A00032 | A05288 | 416 | A00032 | A05337 | 205 |
| A00032 | A05373 | 322 | A00032 | A05407 | 388 |
| A00032 | A05459 | 286 | A00032 | A05869 | 243 |
| A00032 | A06588 | 378 | A00032 | A06814 | 196 |
| A00032 | A07024 | 259 | A00032 | A07143 | 162 |
| A00032 | A07159 | 213 | A00032 | A07581 | 152 |
| A00032 | A08052 | 293 | A00032 | A08714 | 313 |
| A00032 | A08724 | 180 | A00032 | A08869 | 341 |
| A00032 | A09077 | 288 | A00032 | A09247 | 208 |
| A00032 | A09829 | 210 | A00032 | A10336 | 394 |
| A00032 | A11646 | 440 | A00032 | A12009 | 217 |
| A00032 | A13944 | 347 | A00032 | A14038 | 477 |
| A00032 | A14190 | 328 | A00032 | A14194 | 195 |
| A00032 | A14198 | 165 | A00032 | A14210 | 213 |
| A00032 | A14370 | 221 | A00032 | A14371 | 423 |
| A00032 | A14433 | 151 | A00032 | A14443 | 992 |
| A00032 | A14444 | 899 | A00032 | A14511 | 400 |
| A00032 | A15230 | 168 | A00032 | A15292 | 165 |
| A00032 | A15310 | 160 | A00032 | A15440 | 205 |
| A00032 | A15459 | 201 | A00032 | A15485 | 228 |
| A00033 | A00158 | 200 | A00033 | A00189 | 154 |
| A00033 | A00209 | 899 | A00033 | A00417 | 195 |
| A00033 | A00799 | 229 | A00033 | A01524 | 903 |
| A00033 | A01575 | 213 | A00033 | A01576 | 452 |
| A00033 | A02698 | 154 | A00033 | A03293 | 922 |
| A00033 | A08137 | 347 | A00033 | A08300 | 296 |
| A00033 | A11543 | 291 | A00033 | A15606 | 468 |
| A00034 | A00038 | 263 | A00034 | A00041 | 480 |
| A00034 | A00048 | 177 | A00034 | A00052 | 204 |
| A00034 | A00053 | 481 | A00034 | A00056 | 461 |
| A00034 | A00057 | 384 | A00034 | A00063 | 337 |
| A00034 | A00064 | 221 | A00034 | A00067 | 899 |
| A00034 | A00069 | 491 | A00034 | A00076 | 452 |
| A00034 | A00080 | 436 | A00034 | A00081 | 491 |
| A00034 | A00083 | 302 | A00034 | A00085 | 479 |
| A00034 | A00087 | 439 | A00034 | A00089 | 491 |
| A00034 | A00091 | 310 | A00034 | A00095 | 319 |



|        |        |     |        |        |     |
|--------|--------|-----|--------|--------|-----|
| A00034 | A00106 | 445 | A00034 | A00111 | 366 |
| A00034 | A00112 | 344 | A00034 | A00127 | 364 |
| A00034 | A00166 | 429 | A00034 | A00167 | 484 |
| A00034 | A00168 | 488 | A00034 | A00190 | 944 |
| A00034 | A00196 | 246 | A00034 | A00204 | 360 |
| A00034 | A00209 | 943 | A00034 | A00210 | 490 |
| A00034 | A00211 | 443 | A00034 | A00212 | 156 |
| A00034 | A00219 | 945 | A00034 | A00221 | 488 |
| A00034 | A00224 | 910 | A00034 | A00227 | 389 |
| A00034 | A00230 | 914 | A00034 | A00234 | 307 |
| A00034 | A00245 | 413 | A00034 | A00246 | 899 |
| A00034 | A00254 | 483 | A00034 | A00264 | 473 |
| A00034 | A00274 | 491 | A00034 | A00292 | 475 |
| A00034 | A00315 | 490 | A00034 | A00324 | 899 |
| A00034 | A00349 | 202 | A00034 | A00354 | 252 |
| A00034 | A00420 | 405 | A00034 | A00440 | 221 |
| A00034 | A00484 | 217 | A00034 | A00509 | 380 |
| A00034 | A00616 | 945 | A00034 | A00669 | 236 |
| A00034 | A00736 | 363 | A00034 | A00815 | 491 |
| A00034 | A00861 | 162 | A00034 | A00989 | 63  |
| A00034 | A01009 | 63  | A00034 | A01070 | 278 |
| A00034 | A01124 | 63  | A00034 | A01125 | 436 |
| A00034 | A01137 | 366 | A00034 | A01163 | 429 |
| A00034 | A01235 | 173 | A00034 | A01257 | 463 |
| A00034 | A01277 | 307 | A00034 | A01278 | 180 |
| A00034 | A01404 | 249 | A00034 | A01475 | 71  |
| A00034 | A01476 | 299 | A00034 | A01477 | 235 |
| A00034 | A01485 | 301 | A00034 | A01493 | 324 |
| A00034 | A01524 | 922 | A00034 | A01527 | 899 |
| A00034 | A01558 | 899 | A00034 | A01599 | 205 |
| A00034 | A01602 | 899 | A00034 | A01605 | 443 |
| A00034 | A01615 | 899 | A00034 | A01629 | 407 |
| A00034 | A01640 | 314 | A00034 | A01701 | 185 |
| A00034 | A01722 | 945 | A00034 | A01741 | 465 |
| A00034 | A01797 | 294 | A00034 | A01856 | 202 |
| A00034 | A01923 | 152 | A00034 | A01924 | 165 |
| A00034 | A01925 | 278 | A00034 | A01926 | 458 |
| A00034 | A01929 | 306 | A00034 | A01985 | 127 |
| A00034 | A02104 | 195 | A00034 | A02125 | 278 |
| A00034 | A02126 | 347 | A00034 | A02143 | 102 |
| A00034 | A02156 | 183 | A00034 | A02183 | 234 |
| A00034 | A02236 | 435 | A00034 | A02251 | 179 |
| A00034 | A02260 | 266 | A00034 | A02262 | 160 |
| A00034 | A02268 | 491 | A00034 | A02272 | 486 |
| A00034 | A02275 | 491 | A00034 | A02278 | 467 |
| A00034 | A02282 | 313 | A00034 | A02305 | 195 |

|        |        |     |        |        |     |
|--------|--------|-----|--------|--------|-----|
| A00034 | A02306 | 154 | A00034 | A02419 | 424 |
| A00034 | A02423 | 383 | A00034 | A02424 | 74  |
| A00034 | A02425 | 491 | A00034 | A02429 | 457 |
| A00034 | A02431 | 185 | A00034 | A02451 | 235 |
| A00034 | A02454 | 491 | A00034 | A02464 | 489 |
| A00034 | A02465 | 452 | A00034 | A02468 | 199 |
| A00034 | A02472 | 473 | A00034 | A02481 | 430 |
| A00034 | A02490 | 238 | A00034 | A02508 | 174 |
| A00034 | A02524 | 200 | A00034 | A02624 | 132 |
| A00034 | A02644 | 107 | A00034 | A02668 | 160 |
| A00034 | A02669 | 294 | A00034 | A02671 | 484 |
| A00034 | A02756 | 276 | A00034 | A02772 | 162 |
| A00034 | A02782 | 207 | A00034 | A02783 | 188 |
| A00034 | A02787 | 191 | A00034 | A02859 | 216 |
| A00034 | A02875 | 265 | A00034 | A03014 | 210 |
| A00034 | A03053 | 362 | A00034 | A03054 | 216 |
| A00034 | A03055 | 177 | A00034 | A03081 | 104 |
| A00034 | A03091 | 491 | A00034 | A03099 | 238 |
| A00034 | A03109 | 266 | A00034 | A03110 | 945 |
| A00034 | A03126 | 283 | A00034 | A03141 | 281 |
| A00034 | A03154 | 170 | A00034 | A03165 | 157 |
| A00034 | A03173 | 278 | A00034 | A03183 | 479 |
| A00034 | A03209 | 408 | A00034 | A03219 | 472 |
| A00034 | A03259 | 440 | A00034 | A03314 | 393 |
| A00034 | A03458 | 420 | A00034 | A03470 | 271 |
| A00034 | A03633 | 389 | A00034 | A03634 | 243 |
| A00034 | A03639 | 424 | A00034 | A03750 | 163 |
| A00034 | A03753 | 213 | A00034 | A03799 | 465 |
| A00034 | A03800 | 450 | A00034 | A03809 | 313 |
| A00034 | A03845 | 154 | A00034 | A03942 | 491 |
| A00034 | A03961 | 469 | A00034 | A04087 | 160 |
| A00034 | A04111 | 223 | A00034 | A04155 | 223 |
| A00034 | A04156 | 263 | A00034 | A04160 | 235 |
| A00034 | A04169 | 294 | A00034 | A04180 | 172 |
| A00034 | A04196 | 207 | A00034 | A04216 | 301 |
| A00034 | A04218 | 468 | A00034 | A04297 | 217 |
| A00034 | A04380 | 409 | A00034 | A04398 | 396 |
| A00034 | A04407 | 188 | A00034 | A04422 | 390 |
| A00034 | A04423 | 157 | A00034 | A04454 | 191 |
| A00034 | A04468 | 202 | A00034 | A04471 | 438 |
| A00034 | A04472 | 418 | A00034 | A04473 | 162 |
| A00034 | A04484 | 212 | A00034 | A04487 | 340 |
| A00034 | A04490 | 427 | A00034 | A04504 | 229 |
| A00034 | A04647 | 380 | A00034 | A04676 | 424 |
| A00034 | A04679 | 182 | A00034 | A04751 | 944 |
| A00034 | A04813 | 446 | A00034 | A05112 | 254 |

|        |        |     |        |        |     |
|--------|--------|-----|--------|--------|-----|
| A00034 | A05140 | 182 | A00034 | A05288 | 299 |
| A00034 | A05311 | 202 | A00034 | A05407 | 195 |
| A00034 | A05494 | 188 | A00034 | A05506 | 172 |
| A00034 | A05533 | 296 | A00034 | A05617 | 258 |
| A00034 | A05706 | 256 | A00034 | A05784 | 324 |
| A00034 | A05965 | 263 | A00034 | A06118 | 307 |
| A00034 | A06159 | 465 | A00034 | A06167 | 485 |
| A00034 | A06312 | 182 | A00034 | A06578 | 165 |
| A00034 | A06610 | 160 | A00034 | A07140 | 168 |
| A00034 | A07145 | 165 | A00034 | A07422 | 160 |
| A00034 | A07658 | 195 | A00034 | A07803 | 438 |
| A00034 | A08031 | 324 | A00034 | A08600 | 278 |
| A00034 | A08714 | 385 | A00034 | A08840 | 193 |
| A00034 | A09022 | 238 | A00034 | A09036 | 174 |
| A00034 | A09062 | 328 | A00034 | A09202 | 87  |
| A00034 | A09217 | 263 | A00034 | A09375 | 195 |
| A00034 | A09480 | 185 | A00034 | A09535 | 195 |
| A00034 | A09559 | 223 | A00034 | A09732 | 425 |
| A00034 | A09733 | 193 | A00034 | A10018 | 165 |
| A00034 | A10039 | 170 | A00034 | A10208 | 385 |
| A00034 | A10408 | 263 | A00034 | A10638 | 177 |
| A00034 | A10716 | 324 | A00034 | A10744 | 188 |
| A00034 | A11007 | 235 | A00034 | A11039 | 162 |
| A00034 | A11123 | 182 | A00034 | A11415 | 208 |
| A00034 | A11713 | 199 | A00034 | A11885 | 269 |
| A00034 | A12393 | 344 | A00034 | A12518 | 243 |
| A00034 | A13178 | 296 | A00034 | A13218 | 202 |
| A00034 | A13826 | 439 | A00034 | A13849 | 243 |
| A00034 | A13948 | 306 | A00034 | A13981 | 899 |
| A00034 | A13987 | 205 | A00034 | A14007 | 195 |
| A00034 | A14072 | 361 | A00034 | A14126 | 170 |
| A00034 | A14190 | 490 | A00034 | A14198 | 419 |
| A00034 | A14210 | 491 | A00034 | A14364 | 353 |
| A00034 | A14369 | 481 | A00034 | A14370 | 470 |
| A00034 | A14371 | 491 | A00034 | A14379 | 484 |
| A00034 | A14382 | 263 | A00034 | A14427 | 278 |
| A00034 | A14430 | 488 | A00034 | A14438 | 157 |
| A00034 | A14443 | 905 | A00034 | A14444 | 899 |
| A00034 | A14511 | 491 | A00034 | A14523 | 162 |
| A00034 | A14536 | 324 | A00034 | A14604 | 249 |
| A00034 | A14667 | 183 | A00034 | A15230 | 200 |
| A00034 | A15292 | 481 | A00034 | A15294 | 419 |
| A00034 | A15312 | 221 | A00034 | A15313 | 401 |
| A00034 | A15318 | 352 | A00034 | A15320 | 438 |
| A00034 | A15327 | 240 | A00034 | A15334 | 154 |
| A00034 | A15346 | 363 | A00034 | A15349 | 249 |

|        |        |     |        |        |     |
|--------|--------|-----|--------|--------|-----|
| A00034 | A15352 | 430 | A00034 | A15495 | 457 |
| A00034 | A15498 | 218 | A00034 | A15506 | 480 |
| A00034 | A15515 | 165 | A00034 | A15645 | 235 |
| A00034 | A15792 | 425 | A00034 | A15909 | 285 |
| A00034 | A16192 | 199 | A00034 | A16224 | 271 |
| A00034 | A17060 | 917 | A00035 | A00036 | 143 |
| A00035 | A00052 | 905 | A00035 | A00067 | 899 |
| A00035 | A00068 | 194 | A00035 | A00074 | 281 |
| A00035 | A00075 | 490 | A00035 | A00112 | 238 |
| A00035 | A00114 | 132 | A00035 | A00137 | 63  |
| A00035 | A00149 | 205 | A00035 | A00157 | 899 |
| A00035 | A00166 | 288 | A00035 | A00170 | 968 |
| A00035 | A00191 | 481 | A00035 | A00206 | 204 |
| A00035 | A00211 | 219 | A00035 | A00221 | 259 |
| A00035 | A00229 | 994 | A00035 | A00236 | 263 |
| A00035 | A00239 | 434 | A00035 | A00240 | 977 |
| A00035 | A00242 | 469 | A00035 | A00243 | 173 |
| A00035 | A00254 | 707 | A00035 | A00255 | 163 |
| A00035 | A00272 | 758 | A00035 | A00275 | 235 |
| A00035 | A00294 | 904 | A00035 | A00309 | 205 |
| A00035 | A00338 | 276 | A00035 | A00391 | 241 |
| A00035 | A00483 | 241 | A00035 | A00548 | 241 |
| A00035 | A00565 | 157 | A00035 | A00571 | 340 |
| A00035 | A00621 | 63  | A00035 | A00643 | 558 |
| A00035 | A00653 | 373 | A00035 | A00688 | 241 |
| A00035 | A00808 | 945 | A00035 | A00811 | 310 |
| A00035 | A00868 | 176 | A00035 | A00875 | 302 |
| A00035 | A00929 | 204 | A00035 | A00987 | 219 |
| A00035 | A01004 | 241 | A00035 | A01083 | 63  |
| A00035 | A01086 | 313 | A00035 | A01161 | 537 |
| A00035 | A01178 | 252 | A00035 | A01305 | 363 |
| A00035 | A01310 | 741 | A00035 | A01409 | 302 |
| A00035 | A01417 | 241 | A00035 | A01452 | 219 |
| A00035 | A01507 | 266 | A00035 | A01553 | 457 |
| A00035 | A01558 | 899 | A00035 | A01560 | 63  |
| A00035 | A01562 | 63  | A00035 | A01582 | 337 |
| A00035 | A01588 | 899 | A00035 | A01602 | 467 |
| A00035 | A01631 | 63  | A00035 | A01660 | 266 |
| A00035 | A01661 | 241 | A00035 | A01719 | 63  |
| A00035 | A01724 | 440 | A00035 | A01763 | 252 |
| A00035 | A02077 | 188 | A00035 | A02289 | 218 |
| A00035 | A02411 | 191 | A00035 | A02416 | 241 |
| A00035 | A02419 | 66  | A00035 | A02473 | 422 |
| A00035 | A02526 | 252 | A00035 | A02634 | 185 |
| A00035 | A02755 | 173 | A00035 | A02836 | 758 |
| A00035 | A03050 | 576 | A00035 | A03157 | 486 |

|        |        |     |        |        |     |
|--------|--------|-----|--------|--------|-----|
| A00035 | A03233 | 327 | A00035 | A03263 | 279 |
| A00035 | A03304 | 159 | A00035 | A03435 | 219 |
| A00035 | A03440 | 491 | A00035 | A03465 | 380 |
| A00035 | A03591 | 154 | A00035 | A04033 | 425 |
| A00035 | A04160 | 187 | A00035 | A04436 | 187 |
| A00035 | A04449 | 243 | A00035 | A04630 | 468 |
| A00035 | A05854 | 291 | A00035 | A06039 | 199 |
| A00035 | A07158 | 252 | A00035 | A07311 | 773 |
| A00035 | A07366 | 274 | A00035 | A07442 | 213 |
| A00035 | A07471 | 399 | A00035 | A07475 | 366 |
| A00035 | A07511 | 232 | A00035 | A07515 | 157 |
| A00035 | A08141 | 362 | A00035 | A08377 | 154 |
| A00035 | A08463 | 389 | A00035 | A08550 | 174 |
| A00035 | A08621 | 235 | A00035 | A08785 | 168 |
| A00035 | A08861 | 241 | A00035 | A09156 | 152 |
| A00035 | A09933 | 63  | A00035 | A10253 | 402 |
| A00035 | A10365 | 63  | A00035 | A10848 | 217 |
| A00035 | A11211 | 167 | A00035 | A11346 | 199 |
| A00035 | A11414 | 195 | A00035 | A11433 | 277 |
| A00035 | A11496 | 160 | A00035 | A11614 | 424 |
| A00035 | A11707 | 491 | A00035 | A11735 | 296 |
| A00035 | A11834 | 449 | A00035 | A11914 | 219 |
| A00035 | A11943 | 424 | A00035 | A11964 | 157 |
| A00035 | A11983 | 377 | A00035 | A12115 | 252 |
| A00035 | A12254 | 235 | A00035 | A12858 | 296 |
| A00035 | A12897 | 488 | A00035 | A13111 | 367 |
| A00035 | A13323 | 152 | A00035 | A13553 | 217 |
| A00035 | A13809 | 213 | A00035 | A13983 | 219 |
| A00035 | A14013 | 126 | A00035 | A14062 | 761 |
| A00035 | A14150 | 176 | A00035 | A14191 | 271 |
| A00035 | A14265 | 486 | A00035 | A14289 | 260 |
| A00035 | A14299 | 241 | A00035 | A14540 | 180 |
| A00035 | A14635 | 454 | A00035 | A14653 | 483 |
| A00035 | A14739 | 187 | A00035 | A15294 | 204 |
| A00035 | A15295 | 335 | A00035 | A15296 | 449 |
| A00035 | A15376 | 319 | A00035 | A15519 | 160 |
| A00035 | A15541 | 167 | A00035 | A15613 | 238 |
| A00035 | A15626 | 199 | A00035 | A15660 | 457 |
| A00035 | A15711 | 168 | A00035 | A16157 | 183 |
| A00035 | A16343 | 294 | A00035 | A16565 | 185 |
| A00035 | A16587 | 199 | A00035 | A16788 | 232 |
| A00035 | A16815 | 157 | A00035 | A16908 | 187 |
| A00036 | A00041 | 925 | A00036 | A00048 | 90  |
| A00036 | A00052 | 905 | A00036 | A00064 | 212 |
| A00036 | A00065 | 934 | A00036 | A00067 | 899 |
| A00036 | A00082 | 281 | A00036 | A00091 | 168 |

|        |        |     |        |        |     |
|--------|--------|-----|--------|--------|-----|
| A00036 | A00098 | 899 | A00036 | A00113 | 319 |
| A00036 | A00114 | 296 | A00036 | A00120 | 445 |
| A00036 | A00130 | 479 | A00036 | A00136 | 115 |
| A00036 | A00139 | 905 | A00036 | A00156 | 944 |
| A00036 | A00167 | 899 | A00036 | A00180 | 383 |
| A00036 | A00183 | 899 | A00036 | A00184 | 899 |
| A00036 | A00209 | 899 | A00036 | A00234 | 177 |
| A00036 | A00236 | 173 | A00036 | A00257 | 467 |
| A00036 | A00276 | 414 | A00036 | A00323 | 456 |
| A00036 | A00329 | 489 | A00036 | A00336 | 326 |
| A00036 | A00419 | 475 | A00036 | A00454 | 491 |
| A00036 | A00470 | 262 | A00036 | A00653 | 288 |
| A00036 | A00697 | 112 | A00036 | A00747 | 241 |
| A00036 | A00783 | 404 | A00036 | A00811 | 160 |
| A00036 | A00848 | 316 | A00036 | A00910 | 480 |
| A00036 | A00912 | 351 | A00036 | A01042 | 491 |
| A00036 | A01083 | 420 | A00036 | A01150 | 251 |
| A00036 | A01390 | 373 | A00036 | A01435 | 63  |
| A00036 | A01470 | 187 | A00036 | A01524 | 899 |
| A00036 | A01527 | 899 | A00036 | A01540 | 258 |
| A00036 | A01553 | 232 | A00036 | A01560 | 63  |
| A00036 | A01561 | 63  | A00036 | A01562 | 945 |
| A00036 | A01568 | 477 | A00036 | A01692 | 470 |
| A00036 | A01709 | 74  | A00036 | A01719 | 82  |
| A00036 | A01850 | 362 | A00036 | A02803 | 260 |
| A00036 | A02805 | 247 | A00036 | A03271 | 65  |
| A00036 | A03591 | 307 | A00036 | A03740 | 491 |
| A00036 | A03798 | 151 | A00036 | A03965 | 157 |
| A00036 | A04061 | 202 | A00036 | A04280 | 170 |
| A00036 | A04446 | 195 | A00036 | A04699 | 168 |
| A00036 | A04706 | 377 | A00036 | A04957 | 452 |
| A00036 | A05462 | 210 | A00036 | A05673 | 249 |
| A00036 | A05867 | 337 | A00036 | A06289 | 63  |
| A00036 | A07054 | 170 | A00036 | A07220 | 188 |
| A00036 | A07311 | 903 | A00036 | A07709 | 490 |
| A00036 | A08053 | 419 | A00036 | A08054 | 477 |
| A00036 | A08525 | 201 | A00036 | A09441 | 265 |
| A00036 | A09476 | 165 | A00036 | A09502 | 229 |
| A00036 | A09660 | 165 | A00036 | A10233 | 210 |
| A00036 | A10365 | 82  | A00036 | A10645 | 200 |
| A00036 | A10813 | 196 | A00036 | A11302 | 268 |
| A00036 | A12383 | 906 | A00036 | A12969 | 184 |
| A00036 | A12971 | 196 | A00036 | A12988 | 165 |
| A00036 | A13255 | 285 | A00036 | A13340 | 167 |
| A00036 | A13401 | 899 | A00036 | A13604 | 294 |
| A00036 | A13999 | 899 | A00036 | A14031 | 932 |

|        |        |     |        |        |     |
|--------|--------|-----|--------|--------|-----|
| A00036 | A14033 | 927 | A00036 | A14035 | 941 |
| A00036 | A14073 | 391 | A00036 | A14642 | 208 |
| A00036 | A15660 | 218 | A00036 | A15699 | 366 |
| A00036 | A15938 | 285 | A00036 | A16218 | 252 |
| A00037 | A00038 | 208 | A00037 | A00041 | 566 |
| A00037 | A00047 | 219 | A00037 | A00067 | 899 |
| A00037 | A00069 | 160 | A00037 | A00105 | 514 |
| A00037 | A00127 | 491 | A00037 | A00150 | 697 |
| A00037 | A00173 | 491 | A00037 | A00174 | 177 |
| A00037 | A00175 | 372 | A00037 | A00177 | 631 |
| A00037 | A00191 | 491 | A00037 | A00192 | 945 |
| A00037 | A00205 | 184 | A00037 | A00209 | 914 |
| A00037 | A00223 | 430 | A00037 | A00240 | 389 |
| A00037 | A00243 | 246 | A00037 | A00258 | 972 |
| A00037 | A00268 | 457 | A00037 | A00280 | 491 |
| A00037 | A00283 | 578 | A00037 | A00299 | 488 |
| A00037 | A00325 | 473 | A00037 | A00334 | 491 |
| A00037 | A00335 | 490 | A00037 | A00355 | 350 |
| A00037 | A00356 | 790 | A00037 | A00357 | 491 |
| A00037 | A00358 | 491 | A00037 | A00360 | 257 |
| A00037 | A00361 | 355 | A00037 | A00362 | 294 |
| A00037 | A00390 | 469 | A00037 | A00403 | 274 |
| A00037 | A00427 | 383 | A00037 | A00454 | 334 |
| A00037 | A00467 | 491 | A00037 | A00489 | 172 |
| A00037 | A00521 | 489 | A00037 | A00571 | 502 |
| A00037 | A00590 | 663 | A00037 | A00603 | 491 |
| A00037 | A00604 | 604 | A00037 | A00605 | 491 |
| A00037 | A00629 | 739 | A00037 | A00648 | 491 |
| A00037 | A00651 | 488 | A00037 | A00653 | 581 |
| A00037 | A00697 | 324 | A00037 | A00700 | 491 |
| A00037 | A00701 | 491 | A00037 | A00705 | 337 |
| A00037 | A00713 | 170 | A00037 | A00763 | 491 |
| A00037 | A00783 | 240 | A00037 | A00787 | 665 |
| A00037 | A00806 | 180 | A00037 | A00839 | 491 |
| A00037 | A00870 | 461 | A00037 | A00878 | 491 |
| A00037 | A00900 | 167 | A00037 | A00902 | 489 |
| A00037 | A00906 | 283 | A00037 | A00923 | 491 |
| A00037 | A00965 | 637 | A00037 | A00966 | 182 |
| A00037 | A00972 | 286 | A00037 | A00983 | 151 |
| A00037 | A00990 | 351 | A00037 | A01000 | 490 |
| A00037 | A01012 | 198 | A00037 | A01017 | 160 |
| A00037 | A01025 | 664 | A00037 | A01042 | 419 |
| A00037 | A01047 | 488 | A00037 | A01056 | 488 |
| A00037 | A01067 | 383 | A00037 | A01072 | 488 |
| A00037 | A01085 | 241 | A00037 | A01090 | 481 |
| A00037 | A01098 | 547 | A00037 | A01101 | 483 |

|        |        |     |        |        |     |
|--------|--------|-----|--------|--------|-----|
| A00037 | A01112 | 489 | A00037 | A01115 | 475 |
| A00037 | A01127 | 491 | A00037 | A01140 | 491 |
| A00037 | A01150 | 466 | A00037 | A01166 | 484 |
| A00037 | A01184 | 445 | A00037 | A01186 | 238 |
| A00037 | A01189 | 260 | A00037 | A01192 | 412 |
| A00037 | A01206 | 252 | A00037 | A01212 | 488 |
| A00037 | A01216 | 207 | A00037 | A01234 | 445 |
| A00037 | A01238 | 160 | A00037 | A01240 | 63  |
| A00037 | A01249 | 665 | A00037 | A01291 | 988 |
| A00037 | A01292 | 288 | A00037 | A01294 | 212 |
| A00037 | A01306 | 578 | A00037 | A01335 | 514 |
| A00037 | A01360 | 165 | A00037 | A01392 | 605 |
| A00037 | A01425 | 560 | A00037 | A01431 | 357 |
| A00037 | A01433 | 383 | A00037 | A01436 | 450 |
| A00037 | A01437 | 485 | A00037 | A01457 | 485 |
| A00037 | A01458 | 441 | A00037 | A01464 | 483 |
| A00037 | A01468 | 491 | A00037 | A01470 | 462 |
| A00037 | A01478 | 160 | A00037 | A01492 | 469 |
| A00037 | A01496 | 475 | A00037 | A01540 | 451 |
| A00037 | A01569 | 466 | A00037 | A01579 | 491 |
| A00037 | A01586 | 491 | A00037 | A01601 | 749 |
| A00037 | A01605 | 369 | A00037 | A01617 | 394 |
| A00037 | A01618 | 63  | A00037 | A01649 | 486 |
| A00037 | A01718 | 945 | A00037 | A02350 | 398 |
| A00037 | A02597 | 165 | A00037 | A02601 | 290 |
| A00037 | A03048 | 85  | A00037 | A03069 | 479 |
| A00037 | A03171 | 63  | A00037 | A03304 | 290 |
| A00037 | A03331 | 168 | A00037 | A03332 | 489 |
| A00037 | A03437 | 441 | A00037 | A03461 | 180 |
| A00037 | A03531 | 462 | A00037 | A03567 | 582 |
| A00037 | A03570 | 435 | A00037 | A03705 | 451 |
| A00037 | A03740 | 422 | A00037 | A03754 | 395 |
| A00037 | A03885 | 165 | A00037 | A03913 | 221 |
| A00037 | A03939 | 452 | A00037 | A03981 | 441 |
| A00037 | A04099 | 457 | A00037 | A04754 | 384 |
| A00037 | A04761 | 485 | A00037 | A04827 | 180 |
| A00037 | A05044 | 212 | A00037 | A05121 | 165 |
| A00037 | A05411 | 204 | A00037 | A05443 | 714 |
| A00037 | A05501 | 475 | A00037 | A05996 | 452 |
| A00037 | A06279 | 486 | A00037 | A06351 | 414 |
| A00037 | A06428 | 452 | A00037 | A06814 | 200 |
| A00037 | A06861 | 565 | A00037 | A06965 | 491 |
| A00037 | A06973 | 346 | A00037 | A07243 | 154 |
| A00037 | A07323 | 290 | A00037 | A07398 | 682 |
| A00037 | A07449 | 317 | A00037 | A07451 | 491 |
| A00037 | A07968 | 212 | A00037 | A08011 | 654 |



|        |        |     |        |        |     |
|--------|--------|-----|--------|--------|-----|
| A00037 | A08055 | 395 | A00037 | A08357 | 424 |
| A00037 | A08359 | 332 | A00037 | A08398 | 414 |
| A00037 | A08452 | 479 | A00037 | A08547 | 260 |
| A00037 | A08717 | 160 | A00037 | A08773 | 199 |
| A00037 | A08972 | 228 | A00037 | A09282 | 297 |
| A00037 | A09322 | 246 | A00037 | A09332 | 457 |
| A00037 | A09581 | 317 | A00037 | A09722 | 224 |
| A00037 | A09852 | 243 | A00037 | A10234 | 224 |
| A00037 | A10599 | 389 | A00037 | A10616 | 283 |
| A00037 | A10949 | 419 | A00037 | A11190 | 249 |
| A00037 | A11390 | 382 | A00037 | A11400 | 283 |
| A00037 | A11438 | 468 | A00037 | A11480 | 191 |
| A00037 | A11704 | 302 | A00037 | A12079 | 193 |
| A00037 | A12433 | 154 | A00037 | A12643 | 302 |
| A00037 | A12651 | 269 | A00037 | A12653 | 443 |
| A00037 | A12925 | 174 | A00037 | A12990 | 395 |
| A00037 | A13249 | 440 | A00037 | A13549 | 212 |
| A00037 | A13989 | 548 | A00037 | A13992 | 491 |
| A00037 | A14029 | 321 | A00037 | A14172 | 411 |
| A00037 | A14482 | 191 | A00037 | A14505 | 358 |
| A00037 | A15221 | 157 | A00037 | A15660 | 490 |
| A00037 | A15684 | 490 | A00037 | A15894 | 491 |
| A00037 | A15988 | 490 | A00037 | A16118 | 490 |
| A00037 | A16159 | 334 | A00037 | A16418 | 279 |
| A00037 | A16631 | 254 | A00037 | A17095 | 187 |
| A00038 | A00039 | 928 | A00038 | A00150 | 340 |
| A00038 | A00209 | 246 | A00038 | A00258 | 374 |
| A00038 | A00292 | 159 | A00038 | A00306 | 196 |
| A00038 | A00324 | 243 | A00038 | A00642 | 180 |
| A00038 | A00643 | 157 | A00038 | A00736 | 257 |
| A00038 | A01002 | 899 | A00038 | A01605 | 486 |
| A00038 | A01640 | 380 | A00038 | A01697 | 184 |
| A00038 | A01718 | 290 | A00038 | A02984 | 208 |
| A00038 | A03281 | 393 | A00038 | A03512 | 199 |
| A00038 | A03600 | 246 | A00038 | A03929 | 299 |
| A00038 | A06240 | 152 | A00038 | A10460 | 299 |
| A00038 | A14025 | 241 | A00038 | A15649 | 273 |
| A00038 | A16420 | 348 | A00038 | A16766 | 162 |
| A00039 | A00210 | 374 | A00039 | A00230 | 313 |
| A00039 | A00347 | 173 | A00039 | A01002 | 899 |
| A00039 | A01296 | 291 | A00039 | A01315 | 201 |
| A00039 | A01325 | 379 | A00039 | A01596 | 217 |
| A00039 | A01605 | 160 | A00039 | A01697 | 224 |
| A00039 | A02797 | 291 | A00039 | A02908 | 230 |
| A00039 | A05986 | 165 | A00039 | A09524 | 377 |
| A00039 | A09785 | 341 | A00039 | A10580 | 458 |

|        |        |     |        |        |     |
|--------|--------|-----|--------|--------|-----|
| A00039 | A15649 | 316 | A00040 | A00041 | 469 |
| A00040 | A00042 | 205 | A00040 | A00043 | 232 |
| A00040 | A00045 | 475 | A00040 | A00052 | 312 |
| A00040 | A00055 | 195 | A00040 | A00057 | 165 |
| A00040 | A00061 | 208 | A00040 | A00062 | 441 |
| A00040 | A00063 | 404 | A00040 | A00064 | 156 |
| A00040 | A00067 | 199 | A00040 | A00068 | 199 |
| A00040 | A00073 | 113 | A00040 | A00074 | 488 |
| A00040 | A00081 | 414 | A00040 | A00123 | 340 |
| A00040 | A00127 | 486 | A00040 | A00141 | 243 |
| A00040 | A00149 | 366 | A00040 | A00152 | 491 |
| A00040 | A00156 | 277 | A00040 | A00157 | 63  |
| A00040 | A00159 | 491 | A00040 | A00160 | 907 |
| A00040 | A00161 | 951 | A00040 | A00162 | 63  |
| A00040 | A00180 | 160 | A00040 | A00184 | 334 |
| A00040 | A00190 | 486 | A00040 | A00204 | 291 |
| A00040 | A00208 | 343 | A00040 | A00213 | 341 |
| A00040 | A00214 | 351 | A00040 | A00219 | 313 |
| A00040 | A00224 | 527 | A00040 | A00225 | 245 |
| A00040 | A00232 | 491 | A00040 | A00233 | 468 |
| A00040 | A00234 | 193 | A00040 | A00254 | 491 |
| A00040 | A00310 | 296 | A00040 | A00324 | 210 |
| A00040 | A00335 | 360 | A00040 | A00356 | 491 |
| A00040 | A00440 | 241 | A00040 | A00450 | 185 |
| A00040 | A00495 | 489 | A00040 | A00556 | 463 |
| A00040 | A00557 | 260 | A00040 | A00691 | 260 |
| A00040 | A00736 | 491 | A00040 | A00747 | 462 |
| A00040 | A00799 | 384 | A00040 | A00812 | 152 |
| A00040 | A00820 | 483 | A00040 | A00878 | 195 |
| A00040 | A00914 | 489 | A00040 | A00926 | 167 |
| A00040 | A00993 | 480 | A00040 | A01046 | 151 |
| A00040 | A01075 | 185 | A00040 | A01082 | 167 |
| A00040 | A01164 | 355 | A00040 | A01209 | 205 |
| A00040 | A01213 | 236 | A00040 | A01239 | 185 |
| A00040 | A01286 | 257 | A00040 | A01307 | 480 |
| A00040 | A01396 | 399 | A00040 | A01452 | 194 |
| A00040 | A01468 | 258 | A00040 | A01473 | 480 |
| A00040 | A01527 | 899 | A00040 | A01557 | 236 |
| A00040 | A01558 | 199 | A00040 | A01559 | 236 |
| A00040 | A01572 | 491 | A00040 | A01592 | 158 |
| A00040 | A01668 | 474 | A00040 | A01676 | 269 |
| A00040 | A01697 | 179 | A00040 | A01718 | 177 |
| A00040 | A01726 | 491 | A00040 | A01741 | 352 |
| A00040 | A01743 | 462 | A00040 | A01749 | 63  |
| A00040 | A01769 | 452 | A00040 | A01775 | 241 |
| A00040 | A01789 | 63  | A00040 | A01796 | 218 |

|        |        |     |        |        |     |
|--------|--------|-----|--------|--------|-----|
| A00040 | A01799 | 63  | A00040 | A01844 | 488 |
| A00040 | A01846 | 350 | A00040 | A01847 | 483 |
| A00040 | A01887 | 63  | A00040 | A01888 | 240 |
| A00040 | A01900 | 491 | A00040 | A01941 | 485 |
| A00040 | A01959 | 240 | A00040 | A02011 | 374 |
| A00040 | A02086 | 491 | A00040 | A02114 | 177 |
| A00040 | A02226 | 382 | A00040 | A02250 | 314 |
| A00040 | A02331 | 490 | A00040 | A02345 | 152 |
| A00040 | A02377 | 489 | A00040 | A02380 | 235 |
| A00040 | A02481 | 480 | A00040 | A02491 | 451 |
| A00040 | A02513 | 347 | A00040 | A02521 | 468 |
| A00040 | A02535 | 401 | A00040 | A02564 | 294 |
| A00040 | A02637 | 213 | A00040 | A02639 | 383 |
| A00040 | A02650 | 202 | A00040 | A02651 | 162 |
| A00040 | A02689 | 210 | A00040 | A02690 | 180 |
| A00040 | A02697 | 162 | A00040 | A02704 | 406 |
| A00040 | A02710 | 63  | A00040 | A02717 | 489 |
| A00040 | A02731 | 343 | A00040 | A02735 | 430 |
| A00040 | A02739 | 441 | A00040 | A02745 | 63  |
| A00040 | A02753 | 418 | A00040 | A02754 | 174 |
| A00040 | A02770 | 324 | A00040 | A02777 | 486 |
| A00040 | A02807 | 401 | A00040 | A02808 | 157 |
| A00040 | A02825 | 63  | A00040 | A02828 | 491 |
| A00040 | A02837 | 288 | A00040 | A02847 | 317 |
| A00040 | A02856 | 424 | A00040 | A02864 | 479 |
| A00040 | A02869 | 441 | A00040 | A02872 | 489 |
| A00040 | A02877 | 296 | A00040 | A02882 | 486 |
| A00040 | A02883 | 157 | A00040 | A02888 | 477 |
| A00040 | A02896 | 237 | A00040 | A02897 | 322 |
| A00040 | A02908 | 491 | A00040 | A02918 | 491 |
| A00040 | A02919 | 417 | A00040 | A02925 | 481 |
| A00040 | A02929 | 447 | A00040 | A02941 | 228 |
| A00040 | A02942 | 475 | A00040 | A02947 | 213 |
| A00040 | A02948 | 329 | A00040 | A02961 | 269 |
| A00040 | A02968 | 486 | A00040 | A02975 | 196 |
| A00040 | A02976 | 307 | A00040 | A02982 | 480 |
| A00040 | A02983 | 477 | A00040 | A03001 | 95  |
| A00040 | A03019 | 491 | A00040 | A03223 | 472 |
| A00040 | A03259 | 486 | A00040 | A03287 | 326 |
| A00040 | A03321 | 491 | A00040 | A03335 | 358 |
| A00040 | A03611 | 475 | A00040 | A03742 | 458 |
| A00040 | A03803 | 489 | A00040 | A03821 | 480 |
| A00040 | A03837 | 218 | A00040 | A03965 | 358 |
| A00040 | A04020 | 490 | A00040 | A04115 | 260 |
| A00040 | A04117 | 486 | A00040 | A04139 | 177 |
| A00040 | A04161 | 489 | A00040 | A04207 | 424 |

|        |        |     |        |        |     |
|--------|--------|-----|--------|--------|-----|
| A00040 | A04362 | 173 | A00040 | A04446 | 228 |
| A00040 | A04540 | 480 | A00040 | A04553 | 477 |
| A00040 | A04568 | 477 | A00040 | A04600 | 246 |
| A00040 | A04622 | 419 | A00040 | A04809 | 204 |
| A00040 | A04867 | 475 | A00040 | A04902 | 491 |
| A00040 | A04908 | 238 | A00040 | A04938 | 204 |
| A00040 | A05008 | 177 | A00040 | A05015 | 242 |
| A00040 | A05114 | 291 | A00040 | A05280 | 165 |
| A00040 | A05410 | 167 | A00040 | A05428 | 461 |
| A00040 | A05443 | 324 | A00040 | A05456 | 202 |
| A00040 | A05568 | 477 | A00040 | A05570 | 213 |
| A00040 | A05584 | 193 | A00040 | A05591 | 418 |
| A00040 | A05760 | 479 | A00040 | A05767 | 213 |
| A00040 | A05817 | 199 | A00040 | A05832 | 207 |
| A00040 | A05853 | 490 | A00040 | A05876 | 419 |
| A00040 | A05878 | 245 | A00040 | A05879 | 401 |
| A00040 | A05958 | 238 | A00040 | A06004 | 172 |
| A00040 | A06094 | 255 | A00040 | A06131 | 297 |
| A00040 | A06190 | 401 | A00040 | A06339 | 260 |
| A00040 | A06414 | 191 | A00040 | A06416 | 205 |
| A00040 | A06438 | 202 | A00040 | A06591 | 339 |
| A00040 | A06610 | 491 | A00040 | A06631 | 263 |
| A00040 | A06642 | 475 | A00040 | A06644 | 461 |
| A00040 | A06971 | 224 | A00040 | A07135 | 360 |
| A00040 | A07140 | 234 | A00040 | A07157 | 63  |
| A00040 | A07164 | 167 | A00040 | A07165 | 484 |
| A00040 | A07186 | 132 | A00040 | A07201 | 430 |
| A00040 | A07218 | 379 | A00040 | A07242 | 486 |
| A00040 | A07311 | 199 | A00040 | A07483 | 475 |
| A00040 | A07486 | 241 | A00040 | A07488 | 202 |
| A00040 | A07570 | 240 | A00040 | A07593 | 491 |
| A00040 | A07900 | 484 | A00040 | A07961 | 414 |
| A00040 | A08004 | 202 | A00040 | A08133 | 199 |
| A00040 | A08193 | 199 | A00040 | A08402 | 157 |
| A00040 | A08714 | 251 | A00040 | A08732 | 486 |
| A00040 | A08735 | 202 | A00040 | A08917 | 296 |
| A00040 | A09242 | 384 | A00040 | A09488 | 165 |
| A00040 | A09535 | 162 | A00040 | A09559 | 199 |
| A00040 | A09766 | 441 | A00040 | A09988 | 489 |
| A00040 | A09999 | 360 | A00040 | A10159 | 195 |
| A00040 | A10247 | 480 | A00040 | A10431 | 184 |
| A00040 | A10601 | 218 | A00040 | A10626 | 235 |
| A00040 | A10791 | 172 | A00040 | A10798 | 236 |
| A00040 | A10823 | 102 | A00040 | A11248 | 202 |
| A00040 | A11369 | 447 | A00040 | A11546 | 311 |
| A00040 | A11604 | 199 | A00040 | A11639 | 165 |

|        |        |     |        |        |     |
|--------|--------|-----|--------|--------|-----|
| A00040 | A11750 | 154 | A00040 | A11964 | 177 |
| A00040 | A12111 | 404 | A00040 | A12365 | 274 |
| A00040 | A12544 | 202 | A00040 | A12546 | 202 |
| A00040 | A12547 | 202 | A00040 | A12717 | 165 |
| A00040 | A12902 | 240 | A00040 | A13202 | 202 |
| A00040 | A13212 | 423 | A00040 | A13615 | 202 |
| A00040 | A13734 | 152 | A00040 | A13824 | 183 |
| A00040 | A13829 | 311 | A00040 | A13869 | 352 |
| A00040 | A13983 | 185 | A00040 | A13989 | 427 |
| A00040 | A14197 | 469 | A00040 | A14279 | 160 |
| A00040 | A14346 | 165 | A00040 | A14431 | 276 |
| A00040 | A14540 | 152 | A00040 | A14570 | 335 |
| A00040 | A14575 | 340 | A00040 | A14652 | 235 |
| A00040 | A14886 | 402 | A00040 | A15296 | 358 |
| A00040 | A15356 | 490 | A00040 | A15532 | 171 |
| A00040 | A15613 | 385 | A00040 | A15962 | 180 |
| A00040 | A16012 | 202 | A00040 | A16453 | 205 |
| A00041 | A00042 | 985 | A00041 | A00043 | 491 |
| A00041 | A00044 | 491 | A00041 | A00045 | 491 |
| A00041 | A00046 | 945 | A00041 | A00047 | 899 |
| A00041 | A00048 | 466 | A00041 | A00050 | 395 |
| A00041 | A00052 | 945 | A00041 | A00053 | 334 |
| A00041 | A00055 | 190 | A00041 | A00056 | 480 |
| A00041 | A00057 | 353 | A00041 | A00058 | 439 |
| A00041 | A00061 | 414 | A00041 | A00062 | 491 |
| A00041 | A00063 | 491 | A00041 | A00064 | 971 |
| A00041 | A00066 | 899 | A00041 | A00067 | 951 |
| A00041 | A00068 | 152 | A00041 | A00069 | 441 |
| A00041 | A00071 | 486 | A00041 | A00073 | 945 |
| A00041 | A00074 | 945 | A00041 | A00075 | 463 |
| A00041 | A00079 | 185 | A00041 | A00081 | 479 |
| A00041 | A00083 | 899 | A00041 | A00085 | 361 |
| A00041 | A00087 | 458 | A00041 | A00089 | 435 |
| A00041 | A00090 | 491 | A00041 | A00091 | 461 |
| A00041 | A00094 | 945 | A00041 | A00099 | 899 |
| A00041 | A00106 | 217 | A00041 | A00109 | 334 |
| A00041 | A00112 | 217 | A00041 | A00118 | 285 |
| A00041 | A00122 | 491 | A00041 | A00123 | 362 |
| A00041 | A00126 | 899 | A00041 | A00127 | 491 |
| A00041 | A00132 | 480 | A00041 | A00133 | 899 |
| A00041 | A00135 | 452 | A00041 | A00136 | 266 |
| A00041 | A00138 | 626 | A00041 | A00140 | 899 |
| A00041 | A00141 | 945 | A00041 | A00145 | 405 |
| A00041 | A00146 | 205 | A00041 | A00147 | 475 |
| A00041 | A00152 | 977 | A00041 | A00153 | 488 |
| A00041 | A00154 | 283 | A00041 | A00156 | 486 |

|        |        |     |        |        |     |
|--------|--------|-----|--------|--------|-----|
| A00041 | A00157 | 899 | A00041 | A00158 | 390 |
| A00041 | A00159 | 578 | A00041 | A00160 | 391 |
| A00041 | A00161 | 490 | A00041 | A00162 | 961 |
| A00041 | A00163 | 945 | A00041 | A00165 | 899 |
| A00041 | A00166 | 238 | A00041 | A00167 | 954 |
| A00041 | A00168 | 468 | A00041 | A00169 | 473 |
| A00041 | A00171 | 472 | A00041 | A00173 | 945 |
| A00041 | A00183 | 262 | A00041 | A00184 | 900 |
| A00041 | A00185 | 945 | A00041 | A00186 | 147 |
| A00041 | A00188 | 936 | A00041 | A00189 | 82  |
| A00041 | A00190 | 945 | A00041 | A00191 | 899 |
| A00041 | A00192 | 417 | A00041 | A00193 | 196 |
| A00041 | A00196 | 490 | A00041 | A00204 | 405 |
| A00041 | A00205 | 63  | A00041 | A00207 | 960 |
| A00041 | A00208 | 491 | A00041 | A00209 | 909 |
| A00041 | A00211 | 190 | A00041 | A00212 | 401 |
| A00041 | A00214 | 950 | A00041 | A00215 | 290 |
| A00041 | A00216 | 491 | A00041 | A00219 | 952 |
| A00041 | A00220 | 455 | A00041 | A00221 | 582 |
| A00041 | A00224 | 958 | A00041 | A00225 | 274 |
| A00041 | A00227 | 391 | A00041 | A00228 | 312 |
| A00041 | A00230 | 942 | A00041 | A00231 | 450 |
| A00041 | A00232 | 481 | A00041 | A00233 | 491 |
| A00041 | A00234 | 953 | A00041 | A00236 | 899 |
| A00041 | A00238 | 205 | A00041 | A00240 | 188 |
| A00041 | A00246 | 945 | A00041 | A00248 | 485 |
| A00041 | A00252 | 899 | A00041 | A00254 | 945 |
| A00041 | A00255 | 901 | A00041 | A00257 | 456 |
| A00041 | A00262 | 357 | A00041 | A00264 | 491 |
| A00041 | A00265 | 491 | A00041 | A00272 | 457 |
| A00041 | A00274 | 485 | A00041 | A00292 | 425 |
| A00041 | A00294 | 422 | A00041 | A00305 | 454 |
| A00041 | A00309 | 424 | A00041 | A00310 | 218 |
| A00041 | A00312 | 469 | A00041 | A00316 | 479 |
| A00041 | A00324 | 944 | A00041 | A00333 | 285 |
| A00041 | A00356 | 491 | A00041 | A00358 | 899 |
| A00041 | A00370 | 422 | A00041 | A00375 | 430 |
| A00041 | A00377 | 170 | A00041 | A00381 | 347 |
| A00041 | A00436 | 154 | A00041 | A00457 | 488 |
| A00041 | A00517 | 159 | A00041 | A00525 | 327 |
| A00041 | A00552 | 446 | A00041 | A00556 | 475 |
| A00041 | A00557 | 152 | A00041 | A00558 | 481 |
| A00041 | A00574 | 352 | A00041 | A00601 | 229 |
| A00041 | A00616 | 475 | A00041 | A00641 | 484 |
| A00041 | A00643 | 152 | A00041 | A00650 | 319 |
| A00041 | A00654 | 254 | A00041 | A00660 | 157 |

|        |        |     |        |        |     |
|--------|--------|-----|--------|--------|-----|
| A00041 | A00671 | 162 | A00041 | A00696 | 217 |
| A00041 | A00719 | 157 | A00041 | A00722 | 380 |
| A00041 | A00728 | 187 | A00041 | A00736 | 491 |
| A00041 | A00747 | 491 | A00041 | A00752 | 414 |
| A00041 | A00761 | 314 | A00041 | A00791 | 208 |
| A00041 | A00799 | 238 | A00041 | A00815 | 191 |
| A00041 | A00820 | 489 | A00041 | A00826 | 416 |
| A00041 | A00832 | 461 | A00041 | A00866 | 402 |
| A00041 | A00868 | 428 | A00041 | A00883 | 490 |
| A00041 | A00887 | 368 | A00041 | A00914 | 491 |
| A00041 | A00926 | 393 | A00041 | A00930 | 455 |
| A00041 | A00939 | 953 | A00041 | A00961 | 441 |
| A00041 | A00981 | 319 | A00041 | A00985 | 213 |
| A00041 | A00993 | 378 | A00041 | A01009 | 260 |
| A00041 | A01022 | 200 | A00041 | A01052 | 914 |
| A00041 | A01070 | 903 | A00041 | A01102 | 223 |
| A00041 | A01125 | 457 | A00041 | A01127 | 439 |
| A00041 | A01137 | 224 | A00041 | A01140 | 468 |
| A00041 | A01142 | 307 | A00041 | A01144 | 265 |
| A00041 | A01169 | 235 | A00041 | A01172 | 223 |
| A00041 | A01178 | 324 | A00041 | A01212 | 411 |
| A00041 | A01257 | 438 | A00041 | A01275 | 154 |
| A00041 | A01277 | 243 | A00041 | A01291 | 949 |
| A00041 | A01307 | 491 | A00041 | A01317 | 162 |
| A00041 | A01318 | 332 | A00041 | A01320 | 285 |
| A00041 | A01324 | 291 | A00041 | A01339 | 477 |
| A00041 | A01396 | 486 | A00041 | A01409 | 254 |
| A00041 | A01422 | 344 | A00041 | A01423 | 252 |
| A00041 | A01438 | 460 | A00041 | A01450 | 276 |
| A00041 | A01452 | 572 | A00041 | A01468 | 195 |
| A00041 | A01473 | 486 | A00041 | A01492 | 899 |
| A00041 | A01499 | 468 | A00041 | A01501 | 278 |
| A00041 | A01509 | 172 | A00041 | A01512 | 922 |
| A00041 | A01515 | 166 | A00041 | A01524 | 974 |
| A00041 | A01527 | 974 | A00041 | A01548 | 163 |
| A00041 | A01553 | 954 | A00041 | A01554 | 933 |
| A00041 | A01555 | 213 | A00041 | A01558 | 919 |
| A00041 | A01560 | 959 | A00041 | A01561 | 899 |
| A00041 | A01562 | 929 | A00041 | A01572 | 491 |
| A00041 | A01573 | 467 | A00041 | A01576 | 620 |
| A00041 | A01588 | 899 | A00041 | A01593 | 899 |
| A00041 | A01602 | 945 | A00041 | A01604 | 475 |
| A00041 | A01606 | 424 | A00041 | A01615 | 899 |
| A00041 | A01626 | 467 | A00041 | A01628 | 185 |
| A00041 | A01638 | 899 | A00041 | A01639 | 920 |
| A00041 | A01640 | 382 | A00041 | A01651 | 899 |

|        |        |     |        |        |     |
|--------|--------|-----|--------|--------|-----|
| A00041 | A01653 | 302 | A00041 | A01654 | 463 |
| A00041 | A01668 | 491 | A00041 | A01675 | 63  |
| A00041 | A01676 | 488 | A00041 | A01677 | 486 |
| A00041 | A01678 | 259 | A00041 | A01683 | 199 |
| A00041 | A01691 | 195 | A00041 | A01692 | 934 |
| A00041 | A01702 | 436 | A00041 | A01704 | 278 |
| A00041 | A01706 | 581 | A00041 | A01708 | 443 |
| A00041 | A01709 | 440 | A00041 | A01710 | 263 |
| A00041 | A01719 | 283 | A00041 | A01726 | 489 |
| A00041 | A01727 | 430 | A00041 | A01729 | 432 |
| A00041 | A01730 | 489 | A00041 | A01731 | 290 |
| A00041 | A01733 | 677 | A00041 | A01737 | 455 |
| A00041 | A01740 | 162 | A00041 | A01741 | 491 |
| A00041 | A01742 | 167 | A00041 | A01743 | 491 |
| A00041 | A01749 | 296 | A00041 | A01754 | 279 |
| A00041 | A01759 | 457 | A00041 | A01767 | 236 |
| A00041 | A01770 | 216 | A00041 | A01775 | 413 |
| A00041 | A01781 | 443 | A00041 | A01792 | 452 |
| A00041 | A01796 | 490 | A00041 | A01797 | 491 |
| A00041 | A01798 | 488 | A00041 | A01813 | 357 |
| A00041 | A01830 | 198 | A00041 | A01844 | 491 |
| A00041 | A01847 | 238 | A00041 | A01850 | 168 |
| A00041 | A01870 | 481 | A00041 | A01876 | 373 |
| A00041 | A01879 | 473 | A00041 | A01880 | 98  |
| A00041 | A01887 | 399 | A00041 | A01888 | 455 |
| A00041 | A01890 | 200 | A00041 | A01894 | 470 |
| A00041 | A01897 | 260 | A00041 | A01900 | 484 |
| A00041 | A01902 | 477 | A00041 | A01903 | 486 |
| A00041 | A01905 | 252 | A00041 | A01908 | 491 |
| A00041 | A01914 | 428 | A00041 | A01920 | 271 |
| A00041 | A01926 | 238 | A00041 | A01941 | 260 |
| A00041 | A01978 | 385 | A00041 | A01983 | 360 |
| A00041 | A02008 | 165 | A00041 | A02010 | 371 |
| A00041 | A02011 | 407 | A00041 | A02049 | 154 |
| A00041 | A02054 | 450 | A00041 | A02056 | 260 |
| A00041 | A02076 | 318 | A00041 | A02083 | 215 |
| A00041 | A02088 | 272 | A00041 | A02117 | 443 |
| A00041 | A02133 | 156 | A00041 | A02138 | 187 |
| A00041 | A02143 | 201 | A00041 | A02148 | 234 |
| A00041 | A02158 | 328 | A00041 | A02180 | 205 |
| A00041 | A02183 | 491 | A00041 | A02208 | 350 |
| A00041 | A02217 | 165 | A00041 | A02224 | 159 |
| A00041 | A02226 | 441 | A00041 | A02228 | 185 |
| A00041 | A02254 | 347 | A00041 | A02268 | 252 |
| A00041 | A02278 | 352 | A00041 | A02303 | 200 |
| A00041 | A02304 | 308 | A00041 | A02306 | 462 |



|        |        |     |        |        |     |
|--------|--------|-----|--------|--------|-----|
| A00041 | A02337 | 159 | A00041 | A02345 | 63  |
| A00041 | A02353 | 352 | A00041 | A02361 | 215 |
| A00041 | A02367 | 156 | A00041 | A02369 | 269 |
| A00041 | A02370 | 212 | A00041 | A02377 | 347 |
| A00041 | A02382 | 491 | A00041 | A02411 | 174 |
| A00041 | A02416 | 319 | A00041 | A02425 | 457 |
| A00041 | A02436 | 274 | A00041 | A02454 | 288 |
| A00041 | A02481 | 433 | A00041 | A02488 | 201 |
| A00041 | A02491 | 312 | A00041 | A02502 | 230 |
| A00041 | A02553 | 177 | A00041 | A02564 | 413 |
| A00041 | A02578 | 439 | A00041 | A02630 | 440 |
| A00041 | A02632 | 219 | A00041 | A02635 | 473 |
| A00041 | A02636 | 279 | A00041 | A02637 | 443 |
| A00041 | A02638 | 324 | A00041 | A02639 | 475 |
| A00041 | A02654 | 267 | A00041 | A02659 | 407 |
| A00041 | A02672 | 251 | A00041 | A02695 | 347 |
| A00041 | A02698 | 195 | A00041 | A02699 | 247 |
| A00041 | A02705 | 162 | A00041 | A02706 | 491 |
| A00041 | A02709 | 388 | A00041 | A02711 | 162 |
| A00041 | A02714 | 138 | A00041 | A02715 | 490 |
| A00041 | A02718 | 213 | A00041 | A02731 | 229 |
| A00041 | A02732 | 63  | A00041 | A02735 | 283 |
| A00041 | A02739 | 491 | A00041 | A02740 | 243 |
| A00041 | A02745 | 288 | A00041 | A02746 | 63  |
| A00041 | A02747 | 177 | A00041 | A02749 | 491 |
| A00041 | A02753 | 193 | A00041 | A02759 | 193 |
| A00041 | A02768 | 480 | A00041 | A02770 | 319 |
| A00041 | A02787 | 218 | A00041 | A02788 | 224 |
| A00041 | A02801 | 156 | A00041 | A02803 | 945 |
| A00041 | A02808 | 446 | A00041 | A02816 | 335 |
| A00041 | A02828 | 360 | A00041 | A02830 | 454 |
| A00041 | A02834 | 156 | A00041 | A02836 | 469 |
| A00041 | A02837 | 489 | A00041 | A02842 | 159 |
| A00041 | A02843 | 172 | A00041 | A02854 | 213 |
| A00041 | A02856 | 172 | A00041 | A02859 | 582 |
| A00041 | A02864 | 486 | A00041 | A02872 | 236 |
| A00041 | A02874 | 469 | A00041 | A02877 | 414 |
| A00041 | A02887 | 395 | A00041 | A02896 | 504 |
| A00041 | A02902 | 491 | A00041 | A02908 | 165 |
| A00041 | A02918 | 314 | A00041 | A02927 | 323 |
| A00041 | A02933 | 281 | A00041 | A02936 | 263 |
| A00041 | A02944 | 212 | A00041 | A02945 | 340 |
| A00041 | A02970 | 455 | A00041 | A02982 | 355 |
| A00041 | A02983 | 440 | A00041 | A02991 | 190 |
| A00041 | A03006 | 319 | A00041 | A03010 | 195 |
| A00041 | A03019 | 422 | A00041 | A03034 | 262 |

|        |        |     |        |        |     |
|--------|--------|-----|--------|--------|-----|
| A00041 | A03050 | 200 | A00041 | A03076 | 177 |
| A00041 | A03084 | 185 | A00041 | A03095 | 235 |
| A00041 | A03099 | 473 | A00041 | A03110 | 486 |
| A00041 | A03112 | 491 | A00041 | A03121 | 361 |
| A00041 | A03134 | 270 | A00041 | A03157 | 234 |
| A00041 | A03171 | 472 | A00041 | A03174 | 177 |
| A00041 | A03183 | 408 | A00041 | A03186 | 188 |
| A00041 | A03204 | 256 | A00041 | A03209 | 319 |
| A00041 | A03213 | 347 | A00041 | A03219 | 357 |
| A00041 | A03223 | 402 | A00041 | A03224 | 456 |
| A00041 | A03225 | 337 | A00041 | A03243 | 252 |
| A00041 | A03259 | 491 | A00041 | A03263 | 355 |
| A00041 | A03270 | 162 | A00041 | A03271 | 960 |
| A00041 | A03275 | 484 | A00041 | A03280 | 566 |
| A00041 | A03327 | 457 | A00041 | A03332 | 474 |
| A00041 | A03451 | 477 | A00041 | A03452 | 472 |
| A00041 | A03477 | 386 | A00041 | A03520 | 375 |
| A00041 | A03523 | 162 | A00041 | A03570 | 489 |
| A00041 | A03587 | 63  | A00041 | A03591 | 932 |
| A00041 | A03596 | 270 | A00041 | A03598 | 63  |
| A00041 | A03609 | 274 | A00041 | A03610 | 235 |
| A00041 | A03611 | 465 | A00041 | A03618 | 486 |
| A00041 | A03626 | 204 | A00041 | A03639 | 899 |
| A00041 | A03655 | 156 | A00041 | A03657 | 217 |
| A00041 | A03661 | 389 | A00041 | A03722 | 314 |
| A00041 | A03725 | 480 | A00041 | A03726 | 899 |
| A00041 | A03732 | 154 | A00041 | A03739 | 380 |
| A00041 | A03799 | 344 | A00041 | A03803 | 200 |
| A00041 | A03809 | 944 | A00041 | A03815 | 393 |
| A00041 | A03817 | 491 | A00041 | A03818 | 324 |
| A00041 | A03821 | 490 | A00041 | A03843 | 422 |
| A00041 | A03846 | 408 | A00041 | A03851 | 180 |
| A00041 | A03887 | 185 | A00041 | A03889 | 406 |
| A00041 | A03894 | 260 | A00041 | A03904 | 202 |
| A00041 | A03910 | 177 | A00041 | A03922 | 243 |
| A00041 | A03942 | 451 | A00041 | A03961 | 294 |
| A00041 | A03965 | 154 | A00041 | A03990 | 470 |
| A00041 | A04010 | 348 | A00041 | A04015 | 224 |
| A00041 | A04038 | 305 | A00041 | A04040 | 198 |
| A00041 | A04050 | 587 | A00041 | A04051 | 409 |
| A00041 | A04062 | 227 | A00041 | A04078 | 168 |
| A00041 | A04117 | 945 | A00041 | A04121 | 165 |
| A00041 | A04130 | 210 | A00041 | A04138 | 251 |
| A00041 | A04160 | 154 | A00041 | A04161 | 468 |
| A00041 | A04238 | 195 | A00041 | A04248 | 398 |
| A00041 | A04264 | 400 | A00041 | A04287 | 156 |

|        |        |     |        |        |     |
|--------|--------|-----|--------|--------|-----|
| A00041 | A04292 | 432 | A00041 | A04293 | 154 |
| A00041 | A04300 | 156 | A00041 | A04342 | 232 |
| A00041 | A04426 | 156 | A00041 | A04442 | 241 |
| A00041 | A04476 | 156 | A00041 | A04536 | 469 |
| A00041 | A04540 | 409 | A00041 | A04568 | 216 |
| A00041 | A04587 | 177 | A00041 | A04589 | 306 |
| A00041 | A04611 | 385 | A00041 | A04613 | 177 |
| A00041 | A04622 | 491 | A00041 | A04699 | 899 |
| A00041 | A04730 | 177 | A00041 | A04761 | 195 |
| A00041 | A04814 | 165 | A00041 | A04879 | 483 |
| A00041 | A04880 | 428 | A00041 | A04902 | 251 |
| A00041 | A04969 | 217 | A00041 | A05020 | 352 |
| A00041 | A05024 | 261 | A00041 | A05037 | 912 |
| A00041 | A05044 | 160 | A00041 | A05054 | 165 |
| A00041 | A05082 | 903 | A00041 | A05107 | 163 |
| A00041 | A05122 | 258 | A00041 | A05174 | 263 |
| A00041 | A05200 | 247 | A00041 | A05202 | 247 |
| A00041 | A05216 | 491 | A00041 | A05221 | 486 |
| A00041 | A05280 | 243 | A00041 | A05283 | 224 |
| A00041 | A05288 | 491 | A00041 | A05309 | 440 |
| A00041 | A05336 | 156 | A00041 | A05421 | 156 |
| A00041 | A05443 | 662 | A00041 | A05446 | 157 |
| A00041 | A05490 | 299 | A00041 | A05656 | 156 |
| A00041 | A05750 | 215 | A00041 | A05795 | 324 |
| A00041 | A05816 | 188 | A00041 | A05818 | 156 |
| A00041 | A05854 | 899 | A00041 | A05867 | 916 |
| A00041 | A05944 | 353 | A00041 | A05985 | 229 |
| A00041 | A06001 | 195 | A00041 | A06037 | 246 |
| A00041 | A06039 | 199 | A00041 | A06054 | 267 |
| A00041 | A06055 | 252 | A00041 | A06190 | 227 |
| A00041 | A06197 | 154 | A00041 | A06251 | 154 |
| A00041 | A06289 | 199 | A00041 | A06294 | 156 |
| A00041 | A06298 | 452 | A00041 | A06359 | 352 |
| A00041 | A06410 | 177 | A00041 | A06415 | 446 |
| A00041 | A06416 | 63  | A00041 | A06428 | 366 |
| A00041 | A06449 | 195 | A00041 | A06465 | 215 |
| A00041 | A06491 | 345 | A00041 | A06521 | 154 |
| A00041 | A06581 | 491 | A00041 | A06588 | 152 |
| A00041 | A06595 | 219 | A00041 | A06597 | 491 |
| A00041 | A06607 | 396 | A00041 | A06608 | 486 |
| A00041 | A06610 | 488 | A00041 | A06615 | 213 |
| A00041 | A06623 | 484 | A00041 | A06648 | 281 |
| A00041 | A06733 | 157 | A00041 | A06769 | 364 |
| A00041 | A06849 | 195 | A00041 | A06854 | 154 |
| A00041 | A06872 | 156 | A00041 | A06949 | 296 |
| A00041 | A07070 | 156 | A00041 | A07118 | 243 |

|        |        |     |        |        |     |
|--------|--------|-----|--------|--------|-----|
| A00041 | A07127 | 156 | A00041 | A07135 | 945 |
| A00041 | A07145 | 348 | A00041 | A07148 | 274 |
| A00041 | A07151 | 296 | A00041 | A07152 | 240 |
| A00041 | A07157 | 486 | A00041 | A07158 | 455 |
| A00041 | A07161 | 428 | A00041 | A07163 | 156 |
| A00041 | A07164 | 575 | A00041 | A07165 | 488 |
| A00041 | A07166 | 483 | A00041 | A07173 | 445 |
| A00041 | A07180 | 226 | A00041 | A07200 | 468 |
| A00041 | A07201 | 406 | A00041 | A07209 | 335 |
| A00041 | A07240 | 156 | A00041 | A07311 | 954 |
| A00041 | A07339 | 483 | A00041 | A07388 | 156 |
| A00041 | A07422 | 899 | A00041 | A07461 | 307 |
| A00041 | A07574 | 154 | A00041 | A07622 | 195 |
| A00041 | A07643 | 352 | A00041 | A07771 | 279 |
| A00041 | A07900 | 167 | A00041 | A07935 | 160 |
| A00041 | A07942 | 340 | A00041 | A07999 | 234 |
| A00041 | A08338 | 156 | A00041 | A08413 | 156 |
| A00041 | A08418 | 286 | A00041 | A08563 | 167 |
| A00041 | A08597 | 156 | A00041 | A08608 | 345 |
| A00041 | A08611 | 156 | A00041 | A08616 | 156 |
| A00041 | A08692 | 126 | A00041 | A08697 | 156 |
| A00041 | A08707 | 477 | A00041 | A08821 | 314 |
| A00041 | A08836 | 204 | A00041 | A08837 | 346 |
| A00041 | A08860 | 549 | A00041 | A08880 | 171 |
| A00041 | A08896 | 312 | A00041 | A08902 | 899 |
| A00041 | A08972 | 260 | A00041 | A09003 | 247 |
| A00041 | A09018 | 256 | A00041 | A09050 | 297 |
| A00041 | A09124 | 215 | A00041 | A09126 | 173 |
| A00041 | A09137 | 156 | A00041 | A09218 | 230 |
| A00041 | A09220 | 472 | A00041 | A09401 | 63  |
| A00041 | A09405 | 156 | A00041 | A09406 | 165 |
| A00041 | A09509 | 232 | A00041 | A09556 | 314 |
| A00041 | A09568 | 899 | A00041 | A09804 | 302 |
| A00041 | A09823 | 156 | A00041 | A09833 | 430 |
| A00041 | A09841 | 156 | A00041 | A09842 | 485 |
| A00041 | A10006 | 198 | A00041 | A10159 | 899 |
| A00041 | A10174 | 441 | A00041 | A10336 | 455 |
| A00041 | A10368 | 156 | A00041 | A10392 | 899 |
| A00041 | A10464 | 156 | A00041 | A10519 | 154 |
| A00041 | A10530 | 195 | A00041 | A10537 | 156 |
| A00041 | A10556 | 353 | A00041 | A10580 | 915 |
| A00041 | A10596 | 159 | A00041 | A10611 | 302 |
| A00041 | A10623 | 899 | A00041 | A10625 | 288 |
| A00041 | A10735 | 475 | A00041 | A10739 | 208 |
| A00041 | A10740 | 288 | A00041 | A10801 | 918 |
| A00041 | A10813 | 899 | A00041 | A10854 | 352 |

|        |        |     |        |        |     |
|--------|--------|-----|--------|--------|-----|
| A00041 | A10870 | 177 | A00041 | A11079 | 199 |
| A00041 | A11133 | 243 | A00041 | A11369 | 963 |
| A00041 | A11405 | 491 | A00041 | A11431 | 185 |
| A00041 | A11474 | 174 | A00041 | A11487 | 170 |
| A00041 | A11526 | 172 | A00041 | A11604 | 899 |
| A00041 | A11614 | 290 | A00041 | A11646 | 167 |
| A00041 | A11715 | 268 | A00041 | A11789 | 156 |
| A00041 | A11801 | 156 | A00041 | A11921 | 899 |
| A00041 | A11943 | 411 | A00041 | A11978 | 156 |
| A00041 | A11983 | 899 | A00041 | A12009 | 154 |
| A00041 | A12101 | 379 | A00041 | A12255 | 256 |
| A00041 | A12329 | 223 | A00041 | A12383 | 433 |
| A00041 | A12408 | 199 | A00041 | A12453 | 156 |
| A00041 | A12680 | 156 | A00041 | A12732 | 156 |
| A00041 | A12824 | 416 | A00041 | A13039 | 156 |
| A00041 | A13040 | 156 | A00041 | A13058 | 154 |
| A00041 | A13364 | 180 | A00041 | A13373 | 236 |
| A00041 | A13390 | 899 | A00041 | A13391 | 899 |
| A00041 | A13393 | 899 | A00041 | A13401 | 899 |
| A00041 | A13511 | 480 | A00041 | A13531 | 191 |
| A00041 | A13593 | 252 | A00041 | A13734 | 190 |
| A00041 | A13826 | 402 | A00041 | A13827 | 183 |
| A00041 | A13828 | 156 | A00041 | A13840 | 156 |
| A00041 | A13860 | 489 | A00041 | A13873 | 486 |
| A00041 | A13899 | 347 | A00041 | A13975 | 307 |
| A00041 | A13980 | 943 | A00041 | A13981 | 899 |
| A00041 | A13982 | 934 | A00041 | A13983 | 572 |
| A00041 | A13984 | 899 | A00041 | A13986 | 449 |
| A00041 | A13989 | 899 | A00041 | A13997 | 257 |
| A00041 | A14007 | 229 | A00041 | A14027 | 899 |
| A00041 | A14031 | 909 | A00041 | A14035 | 899 |
| A00041 | A14131 | 195 | A00041 | A14140 | 156 |
| A00041 | A14143 | 232 | A00041 | A14146 | 283 |
| A00041 | A14187 | 414 | A00041 | A14188 | 486 |
| A00041 | A14190 | 475 | A00041 | A14191 | 433 |
| A00041 | A14198 | 491 | A00041 | A14199 | 279 |
| A00041 | A14201 | 196 | A00041 | A14208 | 955 |
| A00041 | A14210 | 480 | A00041 | A14236 | 234 |
| A00041 | A14364 | 491 | A00041 | A14366 | 414 |
| A00041 | A14371 | 439 | A00041 | A14374 | 379 |
| A00041 | A14395 | 484 | A00041 | A14399 | 306 |
| A00041 | A14402 | 923 | A00041 | A14426 | 408 |
| A00041 | A14430 | 647 | A00041 | A14433 | 180 |
| A00041 | A14440 | 479 | A00041 | A14452 | 480 |
| A00041 | A14472 | 899 | A00041 | A14511 | 408 |
| A00041 | A14513 | 156 | A00041 | A14564 | 156 |

|        |        |     |        |        |     |
|--------|--------|-----|--------|--------|-----|
| A00041 | A14596 | 483 | A00041 | A14599 | 441 |
| A00041 | A14642 | 386 | A00041 | A14643 | 466 |
| A00041 | A14647 | 373 | A00041 | A14662 | 899 |
| A00041 | A14741 | 329 | A00041 | A14767 | 156 |
| A00041 | A14899 | 154 | A00041 | A14930 | 899 |
| A00041 | A14943 | 463 | A00041 | A14964 | 361 |
| A00041 | A14992 | 156 | A00041 | A15075 | 156 |
| A00041 | A15076 | 156 | A00041 | A15150 | 156 |
| A00041 | A15232 | 156 | A00041 | A15291 | 230 |
| A00041 | A15293 | 899 | A00041 | A15294 | 899 |
| A00041 | A15297 | 899 | A00041 | A15302 | 152 |
| A00041 | A15308 | 384 | A00041 | A15314 | 396 |
| A00041 | A15323 | 922 | A00041 | A15324 | 899 |
| A00041 | A15325 | 899 | A00041 | A15328 | 179 |
| A00041 | A15331 | 174 | A00041 | A15346 | 451 |
| A00041 | A15349 | 435 | A00041 | A15353 | 899 |
| A00041 | A15359 | 899 | A00041 | A15369 | 199 |
| A00041 | A15394 | 473 | A00041 | A15395 | 537 |
| A00041 | A15403 | 154 | A00041 | A15420 | 177 |
| A00041 | A15425 | 424 | A00041 | A15487 | 221 |
| A00041 | A15498 | 422 | A00041 | A15510 | 385 |
| A00041 | A15521 | 154 | A00041 | A15529 | 252 |
| A00041 | A15576 | 154 | A00041 | A15597 | 299 |
| A00041 | A15624 | 205 | A00041 | A15638 | 286 |
| A00041 | A15647 | 460 | A00041 | A15660 | 489 |
| A00041 | A15726 | 491 | A00041 | A15801 | 182 |
| A00041 | A15806 | 288 | A00041 | A15896 | 247 |
| A00041 | A15935 | 480 | A00041 | A15963 | 156 |
| A00041 | A15964 | 330 | A00041 | A15966 | 319 |
| A00041 | A15967 | 156 | A00041 | A15974 | 419 |
| A00041 | A15979 | 412 | A00041 | A15991 | 156 |
| A00041 | A16010 | 156 | A00041 | A16074 | 291 |
| A00041 | A16216 | 334 | A00041 | A16224 | 162 |
| A00041 | A16228 | 296 | A00041 | A16230 | 230 |
| A00041 | A16269 | 400 | A00041 | A16274 | 490 |
| A00041 | A16300 | 386 | A00041 | A16310 | 195 |
| A00041 | A16562 | 156 | A00041 | A16623 | 159 |
| A00041 | A16636 | 484 | A00041 | A16845 | 156 |
| A00041 | A16901 | 475 | A00041 | A17052 | 156 |
| A00041 | A17063 | 406 | A00041 | A17160 | 899 |
| A00041 | A17198 | 399 | A00042 | A00043 | 63  |
| A00042 | A00044 | 945 | A00042 | A00045 | 491 |
| A00042 | A00046 | 943 | A00042 | A00052 | 994 |
| A00042 | A00056 | 945 | A00042 | A00057 | 262 |
| A00042 | A00058 | 899 | A00042 | A00059 | 937 |
| A00042 | A00060 | 340 | A00042 | A00061 | 491 |

|        |        |     |        |        |     |
|--------|--------|-----|--------|--------|-----|
| A00042 | A00062 | 485 | A00042 | A00063 | 490 |
| A00042 | A00064 | 302 | A00042 | A00065 | 899 |
| A00042 | A00067 | 972 | A00042 | A00068 | 951 |
| A00042 | A00069 | 371 | A00042 | A00070 | 899 |
| A00042 | A00073 | 899 | A00042 | A00074 | 942 |
| A00042 | A00082 | 917 | A00042 | A00086 | 353 |
| A00042 | A00094 | 921 | A00042 | A00098 | 216 |
| A00042 | A00109 | 489 | A00042 | A00111 | 154 |
| A00042 | A00122 | 270 | A00042 | A00123 | 962 |
| A00042 | A00124 | 899 | A00042 | A00125 | 296 |
| A00042 | A00138 | 491 | A00042 | A00141 | 491 |
| A00042 | A00145 | 454 | A00042 | A00147 | 160 |
| A00042 | A00149 | 899 | A00042 | A00150 | 201 |
| A00042 | A00151 | 992 | A00042 | A00152 | 999 |
| A00042 | A00153 | 491 | A00042 | A00157 | 899 |
| A00042 | A00158 | 486 | A00042 | A00159 | 958 |
| A00042 | A00160 | 490 | A00042 | A00161 | 63  |
| A00042 | A00162 | 944 | A00042 | A00163 | 944 |
| A00042 | A00167 | 945 | A00042 | A00169 | 271 |
| A00042 | A00171 | 899 | A00042 | A00174 | 462 |
| A00042 | A00185 | 903 | A00042 | A00186 | 443 |
| A00042 | A00189 | 604 | A00042 | A00190 | 945 |
| A00042 | A00193 | 165 | A00042 | A00200 | 915 |
| A00042 | A00201 | 899 | A00042 | A00204 | 911 |
| A00042 | A00205 | 262 | A00042 | A00207 | 586 |
| A00042 | A00208 | 63  | A00042 | A00209 | 993 |
| A00042 | A00214 | 899 | A00042 | A00219 | 171 |
| A00042 | A00220 | 457 | A00042 | A00224 | 910 |
| A00042 | A00226 | 154 | A00042 | A00230 | 928 |
| A00042 | A00231 | 207 | A00042 | A00232 | 195 |
| A00042 | A00233 | 491 | A00042 | A00238 | 929 |
| A00042 | A00239 | 443 | A00042 | A00240 | 481 |
| A00042 | A00246 | 994 | A00042 | A00248 | 424 |
| A00042 | A00250 | 899 | A00042 | A00254 | 942 |
| A00042 | A00255 | 456 | A00042 | A00256 | 425 |
| A00042 | A00261 | 721 | A00042 | A00264 | 945 |
| A00042 | A00270 | 899 | A00042 | A00274 | 302 |
| A00042 | A00275 | 899 | A00042 | A00324 | 905 |
| A00042 | A00381 | 899 | A00042 | A00400 | 191 |
| A00042 | A00561 | 944 | A00042 | A00572 | 485 |
| A00042 | A00576 | 154 | A00042 | A00643 | 335 |
| A00042 | A00694 | 747 | A00042 | A00736 | 405 |
| A00042 | A00799 | 945 | A00042 | A00887 | 152 |
| A00042 | A00914 | 945 | A00042 | A00963 | 205 |
| A00042 | A00981 | 162 | A00042 | A00985 | 255 |
| A00042 | A01088 | 217 | A00042 | A01138 | 240 |

|        |        |     |        |        |     |
|--------|--------|-----|--------|--------|-----|
| A00042 | A01140 | 460 | A00042 | A01161 | 462 |
| A00042 | A01198 | 899 | A00042 | A01211 | 196 |
| A00042 | A01289 | 480 | A00042 | A01473 | 369 |
| A00042 | A01489 | 899 | A00042 | A01507 | 938 |
| A00042 | A01512 | 899 | A00042 | A01522 | 899 |
| A00042 | A01524 | 997 | A00042 | A01527 | 997 |
| A00042 | A01551 | 414 | A00042 | A01553 | 918 |
| A00042 | A01554 | 916 | A00042 | A01558 | 989 |
| A00042 | A01559 | 263 | A00042 | A01560 | 904 |
| A00042 | A01588 | 989 | A00042 | A01604 | 434 |
| A00042 | A01606 | 199 | A00042 | A01615 | 990 |
| A00042 | A01631 | 906 | A00042 | A01632 | 390 |
| A00042 | A01634 | 899 | A00042 | A01640 | 899 |
| A00042 | A01647 | 199 | A00042 | A01651 | 899 |
| A00042 | A01654 | 491 | A00042 | A01668 | 227 |
| A00042 | A01683 | 899 | A00042 | A01692 | 180 |
| A00042 | A01702 | 899 | A00042 | A01704 | 483 |
| A00042 | A01708 | 899 | A00042 | A01709 | 944 |
| A00042 | A01718 | 903 | A00042 | A01726 | 486 |
| A00042 | A01727 | 929 | A00042 | A01729 | 225 |
| A00042 | A01740 | 210 | A00042 | A01741 | 943 |
| A00042 | A01743 | 339 | A00042 | A01746 | 208 |
| A00042 | A01747 | 180 | A00042 | A01759 | 149 |
| A00042 | A01765 | 899 | A00042 | A01775 | 944 |
| A00042 | A01787 | 279 | A00042 | A01789 | 156 |
| A00042 | A01790 | 358 | A00042 | A01797 | 911 |
| A00042 | A01802 | 154 | A00042 | A01844 | 909 |
| A00042 | A01870 | 368 | A00042 | A01873 | 168 |
| A00042 | A01876 | 491 | A00042 | A01878 | 167 |
| A00042 | A01879 | 490 | A00042 | A01880 | 490 |
| A00042 | A01881 | 449 | A00042 | A01887 | 475 |
| A00042 | A01888 | 491 | A00042 | A01889 | 385 |
| A00042 | A01895 | 90  | A00042 | A01902 | 445 |
| A00042 | A01905 | 904 | A00042 | A01908 | 162 |
| A00042 | A01914 | 228 | A00042 | A01931 | 227 |
| A00042 | A02056 | 452 | A00042 | A02176 | 273 |
| A00042 | A02179 | 456 | A00042 | A02278 | 382 |
| A00042 | A02298 | 454 | A00042 | A02319 | 168 |
| A00042 | A02337 | 252 | A00042 | A02340 | 329 |
| A00042 | A02372 | 221 | A00042 | A02382 | 679 |
| A00042 | A02384 | 216 | A00042 | A02416 | 291 |
| A00042 | A02447 | 379 | A00042 | A02481 | 409 |
| A00042 | A02490 | 481 | A00042 | A02491 | 452 |
| A00042 | A02594 | 180 | A00042 | A02608 | 196 |
| A00042 | A02615 | 430 | A00042 | A02619 | 899 |
| A00042 | A02631 | 247 | A00042 | A02637 | 475 |



|        |        |     |        |        |     |
|--------|--------|-----|--------|--------|-----|
| A00042 | A02639 | 486 | A00042 | A02696 | 245 |
| A00042 | A02697 | 481 | A00042 | A02698 | 491 |
| A00042 | A02709 | 288 | A00042 | A02711 | 491 |
| A00042 | A02714 | 274 | A00042 | A02730 | 440 |
| A00042 | A02732 | 348 | A00042 | A02739 | 489 |
| A00042 | A02741 | 63  | A00042 | A02749 | 428 |
| A00042 | A02769 | 190 | A00042 | A02787 | 243 |
| A00042 | A02788 | 405 | A00042 | A02812 | 469 |
| A00042 | A02832 | 319 | A00042 | A02837 | 152 |
| A00042 | A02859 | 899 | A00042 | A02863 | 945 |
| A00042 | A02870 | 260 | A00042 | A02873 | 201 |
| A00042 | A02896 | 432 | A00042 | A02908 | 238 |
| A00042 | A02917 | 486 | A00042 | A02942 | 899 |
| A00042 | A02945 | 477 | A00042 | A02962 | 246 |
| A00042 | A02964 | 218 | A00042 | A02982 | 345 |
| A00042 | A02983 | 312 | A00042 | A02985 | 123 |
| A00042 | A02988 | 277 | A00042 | A03010 | 306 |
| A00042 | A03033 | 213 | A00042 | A03051 | 260 |
| A00042 | A03095 | 346 | A00042 | A03096 | 218 |
| A00042 | A03183 | 154 | A00042 | A03188 | 213 |
| A00042 | A03204 | 472 | A00042 | A03211 | 452 |
| A00042 | A03259 | 491 | A00042 | A03275 | 252 |
| A00042 | A03293 | 899 | A00042 | A03304 | 429 |
| A00042 | A03331 | 899 | A00042 | A03332 | 455 |
| A00042 | A03420 | 899 | A00042 | A03436 | 274 |
| A00042 | A03451 | 475 | A00042 | A03585 | 205 |
| A00042 | A03610 | 462 | A00042 | A03611 | 491 |
| A00042 | A03632 | 198 | A00042 | A03650 | 168 |
| A00042 | A03661 | 251 | A00042 | A03783 | 196 |
| A00042 | A03790 | 374 | A00042 | A03809 | 159 |
| A00042 | A03822 | 440 | A00042 | A03934 | 266 |
| A00042 | A03966 | 235 | A00042 | A04004 | 328 |
| A00042 | A04010 | 255 | A00042 | A04016 | 159 |
| A00042 | A04033 | 491 | A00042 | A04041 | 196 |
| A00042 | A04117 | 481 | A00042 | A04118 | 218 |
| A00042 | A04138 | 163 | A00042 | A04206 | 196 |
| A00042 | A04248 | 489 | A00042 | A04280 | 399 |
| A00042 | A04284 | 180 | A00042 | A04287 | 254 |
| A00042 | A04302 | 212 | A00042 | A04315 | 196 |
| A00042 | A04320 | 446 | A00042 | A04324 | 180 |
| A00042 | A04398 | 337 | A00042 | A04419 | 180 |
| A00042 | A04478 | 154 | A00042 | A04484 | 252 |
| A00042 | A04529 | 361 | A00042 | A04535 | 205 |
| A00042 | A04536 | 235 | A00042 | A04548 | 288 |
| A00042 | A04569 | 168 | A00042 | A04585 | 254 |
| A00042 | A04652 | 281 | A00042 | A04699 | 903 |

|        |        |     |        |        |     |
|--------|--------|-----|--------|--------|-----|
| A00042 | A04717 | 168 | A00042 | A04718 | 420 |
| A00042 | A04754 | 247 | A00042 | A04791 | 219 |
| A00042 | A04800 | 218 | A00042 | A04877 | 252 |
| A00042 | A04878 | 434 | A00042 | A04879 | 472 |
| A00042 | A04909 | 165 | A00042 | A04953 | 218 |
| A00042 | A05103 | 247 | A00042 | A05174 | 171 |
| A00042 | A05219 | 899 | A00042 | A05272 | 254 |
| A00042 | A05309 | 416 | A00042 | A05315 | 899 |
| A00042 | A05317 | 168 | A00042 | A05463 | 152 |
| A00042 | A05490 | 899 | A00042 | A05943 | 180 |
| A00042 | A05944 | 439 | A00042 | A06054 | 278 |
| A00042 | A06142 | 218 | A00042 | A06156 | 180 |
| A00042 | A06175 | 180 | A00042 | A06212 | 235 |
| A00042 | A06289 | 899 | A00042 | A06324 | 308 |
| A00042 | A06414 | 171 | A00042 | A06415 | 355 |
| A00042 | A06422 | 229 | A00042 | A06448 | 168 |
| A00042 | A06506 | 168 | A00042 | A06601 | 899 |
| A00042 | A06608 | 902 | A00042 | A06610 | 243 |
| A00042 | A06618 | 218 | A00042 | A06635 | 232 |
| A00042 | A06650 | 483 | A00042 | A06686 | 218 |
| A00042 | A07006 | 159 | A00042 | A07061 | 899 |
| A00042 | A07091 | 899 | A00042 | A07110 | 196 |
| A00042 | A07135 | 441 | A00042 | A07145 | 281 |
| A00042 | A07152 | 378 | A00042 | A07154 | 152 |
| A00042 | A07157 | 757 | A00042 | A07158 | 346 |
| A00042 | A07160 | 473 | A00042 | A07161 | 470 |
| A00042 | A07173 | 480 | A00042 | A07200 | 303 |
| A00042 | A07269 | 347 | A00042 | A07310 | 196 |
| A00042 | A07339 | 932 | A00042 | A07422 | 939 |
| A00042 | A07565 | 159 | A00042 | A07622 | 313 |
| A00042 | A07668 | 218 | A00042 | A07747 | 196 |
| A00042 | A07902 | 291 | A00042 | A08030 | 420 |
| A00042 | A08117 | 413 | A00042 | A08216 | 302 |
| A00042 | A08289 | 328 | A00042 | A08360 | 179 |
| A00042 | A08378 | 168 | A00042 | A08445 | 188 |
| A00042 | A08588 | 430 | A00042 | A08607 | 218 |
| A00042 | A08615 | 168 | A00042 | A08675 | 254 |
| A00042 | A08697 | 254 | A00042 | A08730 | 168 |
| A00042 | A08835 | 361 | A00042 | A08869 | 899 |
| A00042 | A08880 | 168 | A00042 | A08941 | 281 |
| A00042 | A09014 | 180 | A00042 | A09112 | 281 |
| A00042 | A09263 | 419 | A00042 | A09319 | 899 |
| A00042 | A09405 | 254 | A00042 | A09438 | 152 |
| A00042 | A09499 | 159 | A00042 | A09523 | 218 |
| A00042 | A09558 | 899 | A00042 | A09568 | 229 |
| A00042 | A09575 | 302 | A00042 | A09577 | 899 |

|        |        |     |        |        |     |
|--------|--------|-----|--------|--------|-----|
| A00042 | A09644 | 899 | A00042 | A09732 | 306 |
| A00042 | A09804 | 899 | A00042 | A09884 | 143 |
| A00042 | A09898 | 196 | A00042 | A09959 | 180 |
| A00042 | A10049 | 208 | A00042 | A10174 | 899 |
| A00042 | A10233 | 246 | A00042 | A10307 | 159 |
| A00042 | A10365 | 899 | A00042 | A10459 | 177 |
| A00042 | A10496 | 254 | A00042 | A10580 | 899 |
| A00042 | A10584 | 899 | A00042 | A10615 | 899 |
| A00042 | A10633 | 491 | A00042 | A10754 | 899 |
| A00042 | A10791 | 484 | A00042 | A10808 | 899 |
| A00042 | A10811 | 899 | A00042 | A10844 | 268 |
| A00042 | A10899 | 193 | A00042 | A11090 | 260 |
| A00042 | A11124 | 899 | A00042 | A11125 | 942 |
| A00042 | A11306 | 260 | A00042 | A11348 | 235 |
| A00042 | A11400 | 339 | A00042 | A11411 | 185 |
| A00042 | A11413 | 236 | A00042 | A11431 | 353 |
| A00042 | A11474 | 260 | A00042 | A11543 | 285 |
| A00042 | A11983 | 923 | A00042 | A12296 | 196 |
| A00042 | A12383 | 327 | A00042 | A12393 | 303 |
| A00042 | A12897 | 357 | A00042 | A12913 | 196 |
| A00042 | A12927 | 223 | A00042 | A13002 | 232 |
| A00042 | A13182 | 168 | A00042 | A13464 | 254 |
| A00042 | A13828 | 254 | A00042 | A13860 | 301 |
| A00042 | A13946 | 330 | A00042 | A13976 | 168 |
| A00042 | A13978 | 154 | A00042 | A13983 | 229 |
| A00042 | A13984 | 463 | A00042 | A14002 | 899 |
| A00042 | A14008 | 899 | A00042 | A14094 | 899 |
| A00042 | A14191 | 185 | A00042 | A14193 | 245 |
| A00042 | A14204 | 518 | A00042 | A14208 | 899 |
| A00042 | A14216 | 193 | A00042 | A14220 | 899 |
| A00042 | A14232 | 899 | A00042 | A14236 | 491 |
| A00042 | A14273 | 378 | A00042 | A14364 | 901 |
| A00042 | A14366 | 297 | A00042 | A14373 | 216 |
| A00042 | A14391 | 428 | A00042 | A14392 | 212 |
| A00042 | A14393 | 938 | A00042 | A14401 | 414 |
| A00042 | A14426 | 382 | A00042 | A14432 | 299 |
| A00042 | A14442 | 238 | A00042 | A14444 | 989 |
| A00042 | A14498 | 187 | A00042 | A14527 | 899 |
| A00042 | A14635 | 361 | A00042 | A14643 | 302 |
| A00042 | A14724 | 254 | A00042 | A14784 | 254 |
| A00042 | A15029 | 159 | A00042 | A15136 | 180 |
| A00042 | A15241 | 491 | A00042 | A15290 | 196 |
| A00042 | A15323 | 504 | A00042 | A15394 | 230 |
| A00042 | A15395 | 457 | A00042 | A15416 | 440 |
| A00042 | A15601 | 256 | A00042 | A15603 | 232 |
| A00042 | A15605 | 335 | A00042 | A15606 | 486 |

|        |        |     |        |        |     |
|--------|--------|-----|--------|--------|-----|
| A00042 | A15607 | 177 | A00042 | A15902 | 205 |
| A00042 | A15910 | 168 | A00042 | A15981 | 353 |
| A00042 | A15994 | 218 | A00042 | A16044 | 180 |
| A00042 | A16397 | 152 | A00042 | A16636 | 485 |
| A00042 | A16791 | 899 | A00042 | A17050 | 218 |
| A00043 | A00045 | 389 | A00043 | A00050 | 152 |
| A00043 | A00052 | 490 | A00043 | A00057 | 162 |
| A00043 | A00058 | 63  | A00043 | A00064 | 190 |
| A00043 | A00074 | 262 | A00043 | A00149 | 435 |
| A00043 | A00154 | 491 | A00043 | A00157 | 74  |
| A00043 | A00159 | 945 | A00043 | A00161 | 63  |
| A00043 | A00163 | 452 | A00043 | A00169 | 396 |
| A00043 | A00171 | 430 | A00043 | A00173 | 425 |
| A00043 | A00175 | 193 | A00043 | A00190 | 486 |
| A00043 | A00193 | 457 | A00043 | A00208 | 63  |
| A00043 | A00214 | 899 | A00043 | A00219 | 210 |
| A00043 | A00232 | 490 | A00043 | A00233 | 208 |
| A00043 | A00234 | 241 | A00043 | A00271 | 262 |
| A00043 | A00298 | 165 | A00043 | A00305 | 205 |
| A00043 | A00322 | 163 | A00043 | A00377 | 191 |
| A00043 | A00379 | 276 | A00043 | A00381 | 457 |
| A00043 | A00384 | 162 | A00043 | A00395 | 467 |
| A00043 | A00433 | 260 | A00043 | A00449 | 302 |
| A00043 | A00469 | 485 | A00043 | A00556 | 377 |
| A00043 | A00597 | 424 | A00043 | A00616 | 208 |
| A00043 | A00747 | 221 | A00043 | A00800 | 235 |
| A00043 | A00887 | 473 | A00043 | A00914 | 196 |
| A00043 | A01018 | 488 | A00043 | A01021 | 199 |
| A00043 | A01038 | 238 | A00043 | A01051 | 274 |
| A00043 | A01113 | 416 | A00043 | A01115 | 288 |
| A00043 | A01156 | 234 | A00043 | A01173 | 479 |
| A00043 | A01192 | 490 | A00043 | A01222 | 154 |
| A00043 | A01225 | 311 | A00043 | A01276 | 414 |
| A00043 | A01289 | 357 | A00043 | A01483 | 345 |
| A00043 | A01527 | 899 | A00043 | A01553 | 63  |
| A00043 | A01557 | 302 | A00043 | A01561 | 899 |
| A00043 | A01572 | 255 | A00043 | A01576 | 899 |
| A00043 | A01608 | 208 | A00043 | A01676 | 489 |
| A00043 | A01690 | 474 | A00043 | A01730 | 430 |
| A00043 | A01740 | 180 | A00043 | A01741 | 486 |
| A00043 | A01755 | 82  | A00043 | A01768 | 368 |
| A00043 | A01878 | 285 | A00043 | A01890 | 255 |
| A00043 | A01897 | 491 | A00043 | A01898 | 76  |
| A00043 | A01899 | 303 | A00043 | A01900 | 259 |
| A00043 | A01901 | 491 | A00043 | A01902 | 291 |
| A00043 | A01913 | 281 | A00043 | A01983 | 200 |

|        |        |     |        |        |     |
|--------|--------|-----|--------|--------|-----|
| A00043 | A02026 | 307 | A00043 | A02027 | 183 |
| A00043 | A02052 | 193 | A00043 | A02184 | 229 |
| A00043 | A02213 | 168 | A00043 | A02214 | 271 |
| A00043 | A02303 | 333 | A00043 | A02344 | 283 |
| A00043 | A02484 | 154 | A00043 | A02495 | 367 |
| A00043 | A02592 | 414 | A00043 | A02598 | 407 |
| A00043 | A02618 | 154 | A00043 | A02629 | 255 |
| A00043 | A02642 | 172 | A00043 | A02658 | 235 |
| A00043 | A02703 | 63  | A00043 | A02705 | 454 |
| A00043 | A02706 | 333 | A00043 | A02709 | 157 |
| A00043 | A02733 | 346 | A00043 | A02743 | 246 |
| A00043 | A02796 | 168 | A00043 | A02816 | 302 |
| A00043 | A02817 | 218 | A00043 | A02827 | 218 |
| A00043 | A02861 | 378 | A00043 | A02862 | 396 |
| A00043 | A02864 | 899 | A00043 | A02869 | 272 |
| A00043 | A02874 | 636 | A00043 | A02877 | 224 |
| A00043 | A02884 | 191 | A00043 | A02901 | 177 |
| A00043 | A02968 | 899 | A00043 | A03144 | 160 |
| A00043 | A03222 | 218 | A00043 | A03259 | 257 |
| A00043 | A03321 | 63  | A00043 | A03392 | 241 |
| A00043 | A03412 | 160 | A00043 | A03421 | 215 |
| A00043 | A03511 | 205 | A00043 | A03585 | 180 |
| A00043 | A03646 | 258 | A00043 | A03795 | 475 |
| A00043 | A03883 | 328 | A00043 | A03922 | 434 |
| A00043 | A03928 | 283 | A00043 | A04017 | 223 |
| A00043 | A04046 | 213 | A00043 | A04121 | 249 |
| A00043 | A04179 | 191 | A00043 | A04228 | 322 |
| A00043 | A04305 | 486 | A00043 | A04307 | 180 |
| A00043 | A04316 | 405 | A00043 | A04382 | 258 |
| A00043 | A04383 | 180 | A00043 | A04423 | 163 |
| A00043 | A04446 | 486 | A00043 | A04476 | 328 |
| A00043 | A04502 | 393 | A00043 | A04542 | 241 |
| A00043 | A04576 | 360 | A00043 | A04579 | 159 |
| A00043 | A04595 | 177 | A00043 | A04618 | 167 |
| A00043 | A04622 | 288 | A00043 | A04627 | 266 |
| A00043 | A04661 | 467 | A00043 | A04706 | 301 |
| A00043 | A04739 | 286 | A00043 | A04743 | 205 |
| A00043 | A04816 | 258 | A00043 | A04838 | 177 |
| A00043 | A05045 | 218 | A00043 | A05071 | 258 |
| A00043 | A05163 | 241 | A00043 | A05388 | 347 |
| A00043 | A05545 | 193 | A00043 | A05670 | 313 |
| A00043 | A05677 | 213 | A00043 | A06109 | 360 |
| A00043 | A06158 | 283 | A00043 | A06439 | 340 |
| A00043 | A06649 | 176 | A00043 | A06663 | 208 |
| A00043 | A06701 | 254 | A00043 | A06821 | 416 |
| A00043 | A06846 | 477 | A00043 | A07014 | 162 |

|        |        |     |        |        |     |
|--------|--------|-----|--------|--------|-----|
| A00043 | A07049 | 328 | A00043 | A07143 | 375 |
| A00043 | A07153 | 488 | A00043 | A07163 | 446 |
| A00043 | A07165 | 152 | A00043 | A07201 | 489 |
| A00043 | A07232 | 445 | A00043 | A07239 | 313 |
| A00043 | A07281 | 356 | A00043 | A07335 | 301 |
| A00043 | A07739 | 235 | A00043 | A08064 | 191 |
| A00043 | A08261 | 265 | A00043 | A08390 | 452 |
| A00043 | A08999 | 283 | A00043 | A09104 | 165 |
| A00043 | A09263 | 384 | A00043 | A09323 | 162 |
| A00043 | A09438 | 141 | A00043 | A09456 | 328 |
| A00043 | A09471 | 193 | A00043 | A09591 | 490 |
| A00043 | A09784 | 165 | A00043 | A09911 | 177 |
| A00043 | A09917 | 229 | A00043 | A09942 | 328 |
| A00043 | A09999 | 165 | A00043 | A10186 | 269 |
| A00043 | A10316 | 168 | A00043 | A10458 | 198 |
| A00043 | A10696 | 201 | A00043 | A11021 | 356 |
| A00043 | A11064 | 193 | A00043 | A11113 | 411 |
| A00043 | A11135 | 241 | A00043 | A11206 | 174 |
| A00043 | A11211 | 223 | A00043 | A11344 | 256 |
| A00043 | A11548 | 201 | A00043 | A11759 | 204 |
| A00043 | A12060 | 283 | A00043 | A12080 | 223 |
| A00043 | A12329 | 479 | A00043 | A12710 | 269 |
| A00043 | A13044 | 235 | A00043 | A13232 | 269 |
| A00043 | A13592 | 193 | A00043 | A13623 | 269 |
| A00043 | A13738 | 333 | A00043 | A13986 | 360 |
| A00043 | A13997 | 200 | A00043 | A14014 | 188 |
| A00043 | A14094 | 425 | A00043 | A14151 | 152 |
| A00043 | A14273 | 188 | A00043 | A14443 | 899 |
| A00043 | A14513 | 328 | A00043 | A14643 | 491 |
| A00043 | A14648 | 489 | A00043 | A14686 | 198 |
| A00043 | A15519 | 398 | A00043 | A15629 | 160 |
| A00043 | A15653 | 485 | A00043 | A15660 | 278 |
| A00043 | A15684 | 219 | A00043 | A15970 | 154 |
| A00043 | A16163 | 283 | A00043 | A16258 | 198 |
| A00043 | A16325 | 218 | A00043 | A16676 | 316 |
| A00044 | A00045 | 461 | A00044 | A00046 | 313 |
| A00044 | A00056 | 419 | A00044 | A00061 | 276 |
| A00044 | A00062 | 491 | A00044 | A00063 | 423 |
| A00044 | A00064 | 414 | A00044 | A00067 | 944 |
| A00044 | A00074 | 491 | A00044 | A00079 | 221 |
| A00044 | A00086 | 185 | A00044 | A00109 | 305 |
| A00044 | A00111 | 157 | A00044 | A00122 | 63  |
| A00044 | A00138 | 491 | A00044 | A00141 | 945 |
| A00044 | A00145 | 424 | A00044 | A00152 | 945 |
| A00044 | A00156 | 63  | A00044 | A00158 | 246 |
| A00044 | A00159 | 488 | A00044 | A00160 | 260 |

|        |        |     |        |        |     |
|--------|--------|-----|--------|--------|-----|
| A00044 | A00161 | 63  | A00044 | A00162 | 63  |
| A00044 | A00173 | 483 | A00044 | A00183 | 301 |
| A00044 | A00185 | 171 | A00044 | A00188 | 173 |
| A00044 | A00189 | 450 | A00044 | A00190 | 236 |
| A00044 | A00205 | 195 | A00044 | A00207 | 296 |
| A00044 | A00220 | 193 | A00044 | A00224 | 162 |
| A00044 | A00232 | 276 | A00044 | A00233 | 330 |
| A00044 | A00234 | 363 | A00044 | A00246 | 943 |
| A00044 | A00248 | 269 | A00044 | A00254 | 463 |
| A00044 | A00261 | 405 | A00044 | A00391 | 201 |
| A00044 | A00616 | 173 | A00044 | A00914 | 210 |
| A00044 | A00981 | 260 | A00044 | A01452 | 191 |
| A00044 | A01473 | 430 | A00044 | A01524 | 924 |
| A00044 | A01527 | 943 | A00044 | A01553 | 82  |
| A00044 | A01554 | 63  | A00044 | A01560 | 63  |
| A00044 | A01572 | 405 | A00044 | A01604 | 425 |
| A00044 | A01654 | 450 | A00044 | A01704 | 236 |
| A00044 | A01709 | 193 | A00044 | A01870 | 396 |
| A00044 | A01876 | 160 | A00044 | A01879 | 473 |
| A00044 | A01880 | 229 | A00044 | A01887 | 454 |
| A00044 | A01888 | 485 | A00044 | A01908 | 63  |
| A00044 | A02141 | 201 | A00044 | A02337 | 167 |
| A00044 | A02340 | 243 | A00044 | A02382 | 441 |
| A00044 | A02383 | 165 | A00044 | A02416 | 202 |
| A00044 | A02438 | 165 | A00044 | A02578 | 191 |
| A00044 | A02582 | 224 | A00044 | A02639 | 249 |
| A00044 | A02658 | 259 | A00044 | A02659 | 290 |
| A00044 | A02711 | 263 | A00044 | A02713 | 182 |
| A00044 | A02730 | 246 | A00044 | A02731 | 185 |
| A00044 | A02769 | 328 | A00044 | A02795 | 176 |
| A00044 | A02816 | 157 | A00044 | A02851 | 191 |
| A00044 | A02864 | 491 | A00044 | A02884 | 218 |
| A00044 | A02945 | 378 | A00044 | A02962 | 163 |
| A00044 | A03010 | 486 | A00044 | A03204 | 449 |
| A00044 | A03259 | 463 | A00044 | A03271 | 63  |
| A00044 | A03316 | 218 | A00044 | A03470 | 173 |
| A00044 | A03610 | 363 | A00044 | A03817 | 297 |
| A00044 | A03821 | 163 | A00044 | A04138 | 176 |
| A00044 | A04207 | 218 | A00044 | A04244 | 312 |
| A00044 | A04248 | 401 | A00044 | A04263 | 218 |
| A00044 | A04280 | 199 | A00044 | A04320 | 488 |
| A00044 | A04321 | 281 | A00044 | A04374 | 303 |
| A00044 | A04473 | 193 | A00044 | A04478 | 386 |
| A00044 | A04518 | 210 | A00044 | A04536 | 324 |
| A00044 | A04682 | 151 | A00044 | A04736 | 247 |
| A00044 | A04865 | 377 | A00044 | A04866 | 235 |

|        |        |     |        |        |     |
|--------|--------|-----|--------|--------|-----|
| A00044 | A05127 | 383 | A00044 | A05741 | 205 |
| A00044 | A05816 | 227 | A00044 | A05931 | 281 |
| A00044 | A05944 | 210 | A00044 | A05985 | 407 |
| A00044 | A06095 | 207 | A00044 | A06107 | 243 |
| A00044 | A06415 | 246 | A00044 | A06422 | 285 |
| A00044 | A06465 | 303 | A00044 | A06780 | 235 |
| A00044 | A06818 | 191 | A00044 | A07031 | 379 |
| A00044 | A07138 | 188 | A00044 | A07148 | 438 |
| A00044 | A07152 | 165 | A00044 | A07157 | 489 |
| A00044 | A07158 | 63  | A00044 | A07173 | 191 |
| A00044 | A07421 | 418 | A00044 | A08360 | 457 |
| A00044 | A09123 | 171 | A00044 | A09220 | 184 |
| A00044 | A10083 | 361 | A00044 | A10650 | 291 |
| A00044 | A10744 | 221 | A00044 | A10791 | 484 |
| A00044 | A10827 | 319 | A00044 | A11064 | 221 |
| A00044 | A11123 | 215 | A00044 | A11369 | 296 |
| A00044 | A11543 | 210 | A00044 | A12886 | 187 |
| A00044 | A13181 | 208 | A00044 | A13860 | 296 |
| A00044 | A13986 | 456 | A00044 | A14007 | 458 |
| A00044 | A14198 | 447 | A00044 | A14299 | 379 |
| A00044 | A14432 | 200 | A00044 | A14452 | 195 |
| A00044 | A14981 | 345 | A00044 | A15394 | 327 |
| A00044 | A15395 | 195 | A00044 | A15420 | 440 |
| A00044 | A15603 | 286 | A00044 | A15605 | 346 |
| A00044 | A15608 | 358 | A00044 | A15640 | 281 |
| A00044 | A15726 | 441 | A00044 | A15981 | 182 |
| A00044 | A16636 | 171 | A00045 | A00052 | 489 |
| A00045 | A00056 | 490 | A00045 | A00057 | 412 |
| A00045 | A00061 | 491 | A00045 | A00062 | 411 |
| A00045 | A00063 | 491 | A00045 | A00064 | 490 |
| A00045 | A00067 | 945 | A00045 | A00068 | 243 |
| A00045 | A00074 | 369 | A00045 | A00084 | 177 |
| A00045 | A00086 | 446 | A00045 | A00087 | 358 |
| A00045 | A00089 | 480 | A00045 | A00092 | 452 |
| A00045 | A00094 | 285 | A00045 | A00109 | 313 |
| A00045 | A00111 | 424 | A00045 | A00123 | 491 |
| A00045 | A00125 | 480 | A00045 | A00138 | 182 |
| A00045 | A00141 | 481 | A00045 | A00145 | 335 |
| A00045 | A00147 | 430 | A00045 | A00149 | 484 |
| A00045 | A00151 | 168 | A00045 | A00152 | 491 |
| A00045 | A00153 | 687 | A00045 | A00154 | 435 |
| A00045 | A00155 | 419 | A00045 | A00159 | 490 |
| A00045 | A00160 | 229 | A00045 | A00162 | 63  |
| A00045 | A00163 | 944 | A00045 | A00167 | 486 |
| A00045 | A00169 | 173 | A00045 | A00171 | 385 |
| A00045 | A00188 | 297 | A00045 | A00189 | 943 |



|        |        |     |        |        |     |
|--------|--------|-----|--------|--------|-----|
| A00045 | A00190 | 491 | A00045 | A00196 | 467 |
| A00045 | A00204 | 343 | A00045 | A00209 | 925 |
| A00045 | A00212 | 491 | A00045 | A00214 | 443 |
| A00045 | A00215 | 435 | A00045 | A00216 | 246 |
| A00045 | A00218 | 321 | A00045 | A00219 | 491 |
| A00045 | A00224 | 945 | A00045 | A00230 | 899 |
| A00045 | A00232 | 490 | A00045 | A00233 | 491 |
| A00045 | A00234 | 385 | A00045 | A00238 | 254 |
| A00045 | A00246 | 184 | A00045 | A00248 | 465 |
| A00045 | A00254 | 291 | A00045 | A00264 | 491 |
| A00045 | A00274 | 457 | A00045 | A00292 | 290 |
| A00045 | A00294 | 418 | A00045 | A00305 | 208 |
| A00045 | A00309 | 452 | A00045 | A00322 | 184 |
| A00045 | A00324 | 486 | A00045 | A00338 | 486 |
| A00045 | A00376 | 232 | A00045 | A00395 | 213 |
| A00045 | A00437 | 432 | A00045 | A00449 | 187 |
| A00045 | A00470 | 407 | A00045 | A00472 | 490 |
| A00045 | A00485 | 479 | A00045 | A00541 | 396 |
| A00045 | A00556 | 294 | A00045 | A00557 | 249 |
| A00045 | A00574 | 475 | A00045 | A00576 | 474 |
| A00045 | A00577 | 234 | A00045 | A00600 | 162 |
| A00045 | A00614 | 302 | A00045 | A00616 | 438 |
| A00045 | A00628 | 434 | A00045 | A00641 | 218 |
| A00045 | A00654 | 409 | A00045 | A00659 | 241 |
| A00045 | A00663 | 307 | A00045 | A00681 | 430 |
| A00045 | A00688 | 480 | A00045 | A00695 | 235 |
| A00045 | A00736 | 491 | A00045 | A00738 | 254 |
| A00045 | A00770 | 301 | A00045 | A00773 | 353 |
| A00045 | A00799 | 469 | A00045 | A00820 | 491 |
| A00045 | A00826 | 188 | A00045 | A00914 | 945 |
| A00045 | A00939 | 405 | A00045 | A00962 | 429 |
| A00045 | A00995 | 243 | A00045 | A01022 | 236 |
| A00045 | A01161 | 490 | A00045 | A01172 | 466 |
| A00045 | A01174 | 199 | A00045 | A01178 | 157 |
| A00045 | A01230 | 183 | A00045 | A01256 | 480 |
| A00045 | A01257 | 296 | A00045 | A01307 | 398 |
| A00045 | A01317 | 334 | A00045 | A01318 | 411 |
| A00045 | A01320 | 377 | A00045 | A01324 | 260 |
| A00045 | A01328 | 360 | A00045 | A01396 | 358 |
| A00045 | A01432 | 332 | A00045 | A01481 | 156 |
| A00045 | A01485 | 240 | A00045 | A01524 | 929 |
| A00045 | A01527 | 374 | A00045 | A01551 | 491 |
| A00045 | A01556 | 408 | A00045 | A01557 | 318 |
| A00045 | A01558 | 899 | A00045 | A01567 | 260 |
| A00045 | A01572 | 316 | A00045 | A01578 | 491 |
| A00045 | A01582 | 373 | A00045 | A01590 | 204 |

|        |        |     |        |        |     |
|--------|--------|-----|--------|--------|-----|
| A00045 | A01602 | 208 | A00045 | A01604 | 259 |
| A00045 | A01615 | 899 | A00045 | A01632 | 489 |
| A00045 | A01635 | 402 | A00045 | A01654 | 486 |
| A00045 | A01661 | 899 | A00045 | A01668 | 491 |
| A00045 | A01676 | 491 | A00045 | A01694 | 341 |
| A00045 | A01704 | 455 | A00045 | A01705 | 474 |
| A00045 | A01713 | 188 | A00045 | A01726 | 279 |
| A00045 | A01728 | 160 | A00045 | A01729 | 462 |
| A00045 | A01730 | 246 | A00045 | A01733 | 491 |
| A00045 | A01741 | 491 | A00045 | A01743 | 491 |
| A00045 | A01746 | 486 | A00045 | A01748 | 357 |
| A00045 | A01752 | 157 | A00045 | A01754 | 63  |
| A00045 | A01755 | 283 | A00045 | A01757 | 171 |
| A00045 | A01758 | 236 | A00045 | A01759 | 351 |
| A00045 | A01764 | 286 | A00045 | A01766 | 165 |
| A00045 | A01767 | 467 | A00045 | A01769 | 484 |
| A00045 | A01774 | 63  | A00045 | A01775 | 491 |
| A00045 | A01784 | 152 | A00045 | A01785 | 393 |
| A00045 | A01786 | 935 | A00045 | A01789 | 190 |
| A00045 | A01791 | 457 | A00045 | A01792 | 65  |
| A00045 | A01796 | 486 | A00045 | A01797 | 469 |
| A00045 | A01798 | 485 | A00045 | A01844 | 473 |
| A00045 | A01872 | 165 | A00045 | A01875 | 461 |
| A00045 | A01876 | 491 | A00045 | A01879 | 480 |
| A00045 | A01880 | 491 | A00045 | A01881 | 425 |
| A00045 | A01883 | 290 | A00045 | A01887 | 486 |
| A00045 | A01888 | 747 | A00045 | A01889 | 400 |
| A00045 | A01890 | 255 | A00045 | A01894 | 414 |
| A00045 | A01896 | 156 | A00045 | A01900 | 388 |
| A00045 | A01902 | 491 | A00045 | A01905 | 224 |
| A00045 | A01908 | 341 | A00045 | A01909 | 269 |
| A00045 | A01923 | 177 | A00045 | A01926 | 395 |
| A00045 | A01931 | 323 | A00045 | A01941 | 475 |
| A00045 | A01961 | 171 | A00045 | A01972 | 290 |
| A00045 | A02011 | 215 | A00045 | A02049 | 188 |
| A00045 | A02071 | 191 | A00045 | A02086 | 204 |
| A00045 | A02098 | 157 | A00045 | A02117 | 380 |
| A00045 | A02122 | 322 | A00045 | A02156 | 241 |
| A00045 | A02199 | 230 | A00045 | A02251 | 458 |
| A00045 | A02252 | 183 | A00045 | A02278 | 490 |
| A00045 | A02298 | 435 | A00045 | A02300 | 247 |
| A00045 | A02316 | 185 | A00045 | A02331 | 154 |
| A00045 | A02333 | 384 | A00045 | A02337 | 105 |
| A00045 | A02340 | 490 | A00045 | A02347 | 235 |
| A00045 | A02351 | 236 | A00045 | A02372 | 243 |
| A00045 | A02380 | 260 | A00045 | A02382 | 452 |

|        |        |     |        |        |     |
|--------|--------|-----|--------|--------|-----|
| A00045 | A02384 | 165 | A00045 | A02415 | 299 |
| A00045 | A02416 | 490 | A00045 | A02466 | 245 |
| A00045 | A02489 | 162 | A00045 | A02490 | 489 |
| A00045 | A02491 | 491 | A00045 | A02495 | 168 |
| A00045 | A02513 | 218 | A00045 | A02564 | 341 |
| A00045 | A02571 | 293 | A00045 | A02582 | 294 |
| A00045 | A02586 | 165 | A00045 | A02591 | 157 |
| A00045 | A02605 | 165 | A00045 | A02615 | 293 |
| A00045 | A02620 | 173 | A00045 | A02639 | 451 |
| A00045 | A02668 | 454 | A00045 | A02685 | 171 |
| A00045 | A02686 | 313 | A00045 | A02687 | 172 |
| A00045 | A02691 | 386 | A00045 | A02695 | 477 |
| A00045 | A02696 | 223 | A00045 | A02697 | 443 |
| A00045 | A02698 | 490 | A00045 | A02705 | 405 |
| A00045 | A02706 | 227 | A00045 | A02709 | 352 |
| A00045 | A02711 | 266 | A00045 | A02729 | 419 |
| A00045 | A02730 | 491 | A00045 | A02732 | 210 |
| A00045 | A02735 | 218 | A00045 | A02738 | 378 |
| A00045 | A02741 | 490 | A00045 | A02745 | 382 |
| A00045 | A02746 | 310 | A00045 | A02749 | 480 |
| A00045 | A02753 | 213 | A00045 | A02754 | 407 |
| A00045 | A02756 | 405 | A00045 | A02770 | 263 |
| A00045 | A02780 | 235 | A00045 | A02783 | 241 |
| A00045 | A02785 | 481 | A00045 | A02787 | 425 |
| A00045 | A02788 | 490 | A00045 | A02808 | 182 |
| A00045 | A02812 | 491 | A00045 | A02828 | 440 |
| A00045 | A02830 | 271 | A00045 | A02832 | 172 |
| A00045 | A02834 | 190 | A00045 | A02836 | 294 |
| A00045 | A02837 | 491 | A00045 | A02840 | 337 |
| A00045 | A02841 | 483 | A00045 | A02854 | 477 |
| A00045 | A02856 | 168 | A00045 | A02859 | 491 |
| A00045 | A02862 | 218 | A00045 | A02863 | 484 |
| A00045 | A02869 | 363 | A00045 | A02874 | 491 |
| A00045 | A02875 | 364 | A00045 | A02877 | 151 |
| A00045 | A02883 | 193 | A00045 | A02886 | 357 |
| A00045 | A02896 | 399 | A00045 | A02908 | 404 |
| A00045 | A02917 | 303 | A00045 | A02918 | 238 |
| A00045 | A02924 | 294 | A00045 | A02929 | 322 |
| A00045 | A02953 | 363 | A00045 | A02969 | 152 |
| A00045 | A02982 | 462 | A00045 | A02983 | 357 |
| A00045 | A02984 | 408 | A00045 | A02985 | 91  |
| A00045 | A02986 | 218 | A00045 | A02992 | 160 |
| A00045 | A03008 | 180 | A00045 | A03010 | 945 |
| A00045 | A03019 | 193 | A00045 | A03034 | 188 |
| A00045 | A03050 | 163 | A00045 | A03056 | 318 |
| A00045 | A03080 | 460 | A00045 | A03095 | 372 |

|        |        |     |        |        |     |
|--------|--------|-----|--------|--------|-----|
| A00045 | A03100 | 484 | A00045 | A03107 | 168 |
| A00045 | A03112 | 490 | A00045 | A03126 | 486 |
| A00045 | A03131 | 340 | A00045 | A03144 | 241 |
| A00045 | A03167 | 449 | A00045 | A03168 | 337 |
| A00045 | A03184 | 232 | A00045 | A03204 | 245 |
| A00045 | A03211 | 485 | A00045 | A03223 | 462 |
| A00045 | A03243 | 193 | A00045 | A03259 | 491 |
| A00045 | A03260 | 339 | A00045 | A03275 | 489 |
| A00045 | A03293 | 168 | A00045 | A03304 | 441 |
| A00045 | A03356 | 251 | A00045 | A03436 | 152 |
| A00045 | A03451 | 373 | A00045 | A03477 | 283 |
| A00045 | A03520 | 443 | A00045 | A03534 | 274 |
| A00045 | A03539 | 157 | A00045 | A03583 | 182 |
| A00045 | A03590 | 187 | A00045 | A03602 | 218 |
| A00045 | A03609 | 404 | A00045 | A03610 | 401 |
| A00045 | A03611 | 316 | A00045 | A03620 | 143 |
| A00045 | A03661 | 191 | A00045 | A03739 | 445 |
| A00045 | A03803 | 307 | A00045 | A03807 | 374 |
| A00045 | A03821 | 379 | A00045 | A03851 | 255 |
| A00045 | A03923 | 185 | A00045 | A03934 | 218 |
| A00045 | A03964 | 227 | A00045 | A03984 | 159 |
| A00045 | A03991 | 228 | A00045 | A04010 | 481 |
| A00045 | A04033 | 443 | A00045 | A04041 | 157 |
| A00045 | A04080 | 207 | A00045 | A04091 | 369 |
| A00045 | A04117 | 488 | A00045 | A04138 | 481 |
| A00045 | A04144 | 212 | A00045 | A04169 | 252 |
| A00045 | A04206 | 329 | A00045 | A04211 | 182 |
| A00045 | A04238 | 187 | A00045 | A04248 | 402 |
| A00045 | A04263 | 489 | A00045 | A04274 | 212 |
| A00045 | A04275 | 412 | A00045 | A04276 | 357 |
| A00045 | A04280 | 434 | A00045 | A04288 | 243 |
| A00045 | A04302 | 345 | A00045 | A04303 | 180 |
| A00045 | A04309 | 256 | A00045 | A04320 | 274 |
| A00045 | A04334 | 232 | A00045 | A04337 | 396 |
| A00045 | A04342 | 439 | A00045 | A04361 | 265 |
| A00045 | A04380 | 199 | A00045 | A04398 | 439 |
| A00045 | A04410 | 353 | A00045 | A04484 | 205 |
| A00045 | A04520 | 182 | A00045 | A04535 | 154 |
| A00045 | A04536 | 463 | A00045 | A04559 | 218 |
| A00045 | A04567 | 405 | A00045 | A04589 | 165 |
| A00045 | A04603 | 154 | A00045 | A04622 | 489 |
| A00045 | A04685 | 152 | A00045 | A04714 | 260 |
| A00045 | A04715 | 210 | A00045 | A04734 | 401 |
| A00045 | A04783 | 157 | A00045 | A04798 | 218 |
| A00045 | A04800 | 272 | A00045 | A04805 | 204 |
| A00045 | A04806 | 274 | A00045 | A04839 | 152 |

|        |        |     |        |        |     |
|--------|--------|-----|--------|--------|-----|
| A00045 | A04851 | 182 | A00045 | A04855 | 259 |
| A00045 | A04865 | 330 | A00045 | A04878 | 302 |
| A00045 | A04891 | 313 | A00045 | A04902 | 486 |
| A00045 | A04908 | 419 | A00045 | A04927 | 167 |
| A00045 | A04939 | 171 | A00045 | A04949 | 296 |
| A00045 | A05007 | 296 | A00045 | A05032 | 172 |
| A00045 | A05094 | 205 | A00045 | A05098 | 223 |
| A00045 | A05102 | 272 | A00045 | A05106 | 281 |
| A00045 | A05155 | 364 | A00045 | A05214 | 180 |
| A00045 | A05254 | 218 | A00045 | A05279 | 157 |
| A00045 | A05297 | 475 | A00045 | A05305 | 180 |
| A00045 | A05309 | 491 | A00045 | A05356 | 404 |
| A00045 | A05406 | 180 | A00045 | A05416 | 362 |
| A00045 | A05444 | 218 | A00045 | A05451 | 187 |
| A00045 | A05462 | 185 | A00045 | A05472 | 163 |
| A00045 | A05473 | 288 | A00045 | A05515 | 218 |
| A00045 | A05516 | 157 | A00045 | A05551 | 157 |
| A00045 | A05582 | 274 | A00045 | A05601 | 177 |
| A00045 | A05603 | 441 | A00045 | A05643 | 286 |
| A00045 | A05659 | 329 | A00045 | A05679 | 204 |
| A00045 | A05742 | 428 | A00045 | A05744 | 180 |
| A00045 | A05759 | 255 | A00045 | A05838 | 434 |
| A00045 | A05891 | 360 | A00045 | A05929 | 218 |
| A00045 | A05933 | 218 | A00045 | A05958 | 281 |
| A00045 | A05969 | 157 | A00045 | A05985 | 488 |
| A00045 | A06065 | 157 | A00045 | A06067 | 177 |
| A00045 | A06072 | 218 | A00045 | A06088 | 168 |
| A00045 | A06339 | 286 | A00045 | A06346 | 185 |
| A00045 | A06358 | 291 | A00045 | A06377 | 157 |
| A00045 | A06402 | 162 | A00045 | A06415 | 313 |
| A00045 | A06422 | 413 | A00045 | A06445 | 218 |
| A00045 | A06525 | 180 | A00045 | A06581 | 335 |
| A00045 | A06592 | 269 | A00045 | A06597 | 165 |
| A00045 | A06605 | 157 | A00045 | A06607 | 218 |
| A00045 | A06610 | 491 | A00045 | A06615 | 372 |
| A00045 | A06623 | 249 | A00045 | A06626 | 212 |
| A00045 | A06650 | 439 | A00045 | A06686 | 156 |
| A00045 | A06716 | 218 | A00045 | A06731 | 218 |
| A00045 | A06834 | 198 | A00045 | A06835 | 180 |
| A00045 | A06866 | 180 | A00045 | A06931 | 157 |
| A00045 | A06949 | 305 | A00045 | A06984 | 218 |
| A00045 | A07031 | 899 | A00045 | A07061 | 198 |
| A00045 | A07109 | 319 | A00045 | A07122 | 393 |
| A00045 | A07127 | 277 | A00045 | A07135 | 443 |
| A00045 | A07146 | 408 | A00045 | A07153 | 416 |
| A00045 | A07154 | 477 | A00045 | A07157 | 454 |

|        |        |     |        |        |     |
|--------|--------|-----|--------|--------|-----|
| A00045 | A07158 | 477 | A00045 | A07160 | 208 |
| A00045 | A07163 | 205 | A00045 | A07164 | 435 |
| A00045 | A07165 | 491 | A00045 | A07173 | 383 |
| A00045 | A07191 | 358 | A00045 | A07193 | 180 |
| A00045 | A07197 | 382 | A00045 | A07198 | 424 |
| A00045 | A07200 | 486 | A00045 | A07201 | 413 |
| A00045 | A07209 | 306 | A00045 | A07211 | 218 |
| A00045 | A07218 | 306 | A00045 | A07222 | 187 |
| A00045 | A07413 | 321 | A00045 | A07440 | 252 |
| A00045 | A07442 | 368 | A00045 | A07477 | 345 |
| A00045 | A07494 | 180 | A00045 | A07501 | 457 |
| A00045 | A07590 | 277 | A00045 | A07605 | 160 |
| A00045 | A07736 | 391 | A00045 | A07790 | 218 |
| A00045 | A07800 | 432 | A00045 | A07803 | 215 |
| A00045 | A07810 | 180 | A00045 | A07931 | 347 |
| A00045 | A07973 | 235 | A00045 | A08099 | 279 |
| A00045 | A08238 | 232 | A00045 | A08296 | 263 |
| A00045 | A08595 | 180 | A00045 | A08623 | 180 |
| A00045 | A08649 | 180 | A00045 | A08670 | 180 |
| A00045 | A08751 | 177 | A00045 | A08764 | 180 |
| A00045 | A08857 | 323 | A00045 | A08867 | 460 |
| A00045 | A09018 | 256 | A00045 | A09046 | 229 |
| A00045 | A09070 | 157 | A00045 | A09073 | 196 |
| A00045 | A09123 | 458 | A00045 | A09124 | 202 |
| A00045 | A09170 | 180 | A00045 | A09199 | 324 |
| A00045 | A09261 | 218 | A00045 | A09263 | 63  |
| A00045 | A09357 | 191 | A00045 | A09403 | 157 |
| A00045 | A09420 | 157 | A00045 | A09732 | 480 |
| A00045 | A09733 | 204 | A00045 | A09826 | 216 |
| A00045 | A09833 | 272 | A00045 | A09882 | 154 |
| A00045 | A09951 | 180 | A00045 | A10027 | 218 |
| A00045 | A10033 | 157 | A00045 | A10060 | 157 |
| A00045 | A10066 | 291 | A00045 | A10096 | 157 |
| A00045 | A10189 | 180 | A00045 | A10215 | 193 |
| A00045 | A10219 | 313 | A00045 | A10230 | 218 |
| A00045 | A10326 | 218 | A00045 | A10335 | 180 |
| A00045 | A10337 | 152 | A00045 | A10364 | 314 |
| A00045 | A10397 | 157 | A00045 | A10435 | 218 |
| A00045 | A10456 | 221 | A00045 | A10611 | 396 |
| A00045 | A10637 | 180 | A00045 | A10656 | 218 |
| A00045 | A10658 | 241 | A00045 | A10672 | 154 |
| A00045 | A10677 | 246 | A00045 | A10702 | 350 |
| A00045 | A10712 | 157 | A00045 | A10735 | 455 |
| A00045 | A10986 | 165 | A00045 | A11005 | 180 |
| A00045 | A11051 | 218 | A00045 | A11136 | 218 |
| A00045 | A11309 | 366 | A00045 | A11331 | 182 |

|        |        |     |        |        |     |
|--------|--------|-----|--------|--------|-----|
| A00045 | A11412 | 461 | A00045 | A11591 | 216 |
| A00045 | A11683 | 263 | A00045 | A12038 | 218 |
| A00045 | A12144 | 182 | A00045 | A12324 | 157 |
| A00045 | A12383 | 228 | A00045 | A12418 | 218 |
| A00045 | A12428 | 218 | A00045 | A12586 | 218 |
| A00045 | A12648 | 157 | A00045 | A12656 | 157 |
| A00045 | A12698 | 180 | A00045 | A12832 | 218 |
| A00045 | A12844 | 218 | A00045 | A12897 | 382 |
| A00045 | A12898 | 157 | A00045 | A12913 | 157 |
| A00045 | A12927 | 465 | A00045 | A12967 | 218 |
| A00045 | A13084 | 204 | A00045 | A13181 | 201 |
| A00045 | A13262 | 218 | A00045 | A13355 | 218 |
| A00045 | A13369 | 452 | A00045 | A13435 | 228 |
| A00045 | A13464 | 218 | A00045 | A13471 | 218 |
| A00045 | A13593 | 276 | A00045 | A13627 | 180 |
| A00045 | A13667 | 477 | A00045 | A13735 | 283 |
| A00045 | A13824 | 238 | A00045 | A13826 | 475 |
| A00045 | A13829 | 435 | A00045 | A13871 | 324 |
| A00045 | A13935 | 900 | A00045 | A13996 | 274 |
| A00045 | A14202 | 210 | A00045 | A14210 | 332 |
| A00045 | A14229 | 243 | A00045 | A14236 | 483 |
| A00045 | A14245 | 314 | A00045 | A14303 | 213 |
| A00045 | A14313 | 236 | A00045 | A14361 | 218 |
| A00045 | A14371 | 312 | A00045 | A14392 | 299 |
| A00045 | A14394 | 268 | A00045 | A14405 | 205 |
| A00045 | A14541 | 180 | A00045 | A14632 | 157 |
| A00045 | A14643 | 369 | A00045 | A14664 | 180 |
| A00045 | A14741 | 417 | A00045 | A14784 | 218 |
| A00045 | A14857 | 277 | A00045 | A14930 | 294 |
| A00045 | A14934 | 180 | A00045 | A14986 | 160 |
| A00045 | A15241 | 491 | A00045 | A15277 | 179 |
| A00045 | A15292 | 380 | A00045 | A15314 | 414 |
| A00045 | A15322 | 484 | A00045 | A15346 | 229 |
| A00045 | A15349 | 276 | A00045 | A15352 | 263 |
| A00045 | A15357 | 396 | A00045 | A15398 | 303 |
| A00045 | A15402 | 447 | A00045 | A15480 | 213 |
| A00045 | A15497 | 212 | A00045 | A15804 | 165 |
| A00045 | A15881 | 157 | A00045 | A15917 | 271 |
| A00045 | A15952 | 180 | A00045 | A16002 | 210 |
| A00045 | A16034 | 267 | A00045 | A16052 | 157 |
| A00045 | A16113 | 180 | A00045 | A16121 | 255 |
| A00045 | A16216 | 396 | A00045 | A16286 | 256 |
| A00045 | A16300 | 339 | A00045 | A16346 | 157 |
| A00045 | A16432 | 184 | A00045 | A16529 | 322 |
| A00045 | A16636 | 491 | A00045 | A16965 | 314 |
| A00045 | A17078 | 335 | A00045 | A17198 | 452 |

|        |        |     |        |        |     |
|--------|--------|-----|--------|--------|-----|
| A00046 | A00052 | 915 | A00046 | A00064 | 915 |
| A00046 | A00066 | 491 | A00046 | A00067 | 933 |
| A00046 | A00074 | 930 | A00046 | A00126 | 332 |
| A00046 | A00135 | 190 | A00046 | A00138 | 460 |
| A00046 | A00141 | 340 | A00046 | A00157 | 899 |
| A00046 | A00162 | 899 | A00046 | A00167 | 919 |
| A00046 | A00169 | 332 | A00046 | A00207 | 913 |
| A00046 | A00208 | 215 | A00046 | A00209 | 899 |
| A00046 | A00210 | 221 | A00046 | A00224 | 945 |
| A00046 | A00230 | 943 | A00046 | A00234 | 917 |
| A00046 | A00246 | 899 | A00046 | A00254 | 358 |
| A00046 | A00257 | 912 | A00046 | A00341 | 255 |
| A00046 | A00381 | 198 | A00046 | A00669 | 173 |
| A00046 | A01052 | 902 | A00046 | A01452 | 224 |
| A00046 | A01524 | 924 | A00046 | A01527 | 907 |
| A00046 | A01548 | 63  | A00046 | A01553 | 899 |
| A00046 | A01558 | 944 | A00046 | A01560 | 474 |
| A00046 | A01562 | 899 | A00046 | A01588 | 935 |
| A00046 | A01602 | 899 | A00046 | A01615 | 899 |
| A00046 | A01638 | 899 | A00046 | A01651 | 899 |
| A00046 | A01655 | 154 | A00046 | A01844 | 899 |
| A00046 | A02747 | 236 | A00046 | A03790 | 168 |
| A00046 | A04195 | 274 | A00046 | A04282 | 168 |
| A00046 | A04807 | 227 | A00046 | A04809 | 160 |
| A00046 | A05150 | 174 | A00046 | A05621 | 286 |
| A00046 | A05822 | 243 | A00046 | A05958 | 363 |
| A00046 | A06148 | 221 | A00046 | A06610 | 274 |
| A00046 | A07155 | 356 | A00046 | A07311 | 899 |
| A00046 | A08571 | 316 | A00046 | A09121 | 347 |
| A00046 | A09937 | 177 | A00046 | A10542 | 274 |
| A00046 | A10580 | 899 | A00046 | A10615 | 357 |
| A00046 | A10801 | 899 | A00046 | A13984 | 384 |
| A00046 | A14006 | 198 | A00046 | A14198 | 257 |
| A00046 | A14443 | 347 | A00046 | A14548 | 190 |
| A00046 | A15120 | 355 | A00046 | A15325 | 196 |
| A00046 | A15422 | 256 | A00046 | A15726 | 162 |
| A00046 | A16560 | 226 | A00047 | A00055 | 490 |
| A00047 | A00058 | 520 | A00047 | A00064 | 927 |
| A00047 | A00073 | 981 | A00047 | A00127 | 483 |
| A00047 | A00146 | 63  | A00047 | A00150 | 967 |
| A00047 | A00169 | 170 | A00047 | A00191 | 899 |
| A00047 | A00199 | 372 | A00047 | A00203 | 452 |
| A00047 | A00214 | 899 | A00047 | A00215 | 475 |
| A00047 | A00225 | 527 | A00047 | A00234 | 904 |
| A00047 | A00245 | 435 | A00047 | A00258 | 485 |
| A00047 | A00261 | 201 | A00047 | A00265 | 457 |



|        |        |     |        |        |     |
|--------|--------|-----|--------|--------|-----|
| A00047 | A00280 | 452 | A00047 | A00285 | 480 |
| A00047 | A00286 | 490 | A00047 | A00288 | 486 |
| A00047 | A00289 | 188 | A00047 | A00296 | 488 |
| A00047 | A00303 | 364 | A00047 | A00308 | 491 |
| A00047 | A00316 | 238 | A00047 | A00323 | 271 |
| A00047 | A00325 | 472 | A00047 | A00329 | 452 |
| A00047 | A00330 | 167 | A00047 | A00339 | 152 |
| A00047 | A00348 | 491 | A00047 | A00355 | 371 |
| A00047 | A00356 | 488 | A00047 | A00358 | 458 |
| A00047 | A00366 | 463 | A00047 | A00367 | 260 |
| A00047 | A00368 | 334 | A00047 | A00369 | 486 |
| A00047 | A00371 | 491 | A00047 | A00372 | 467 |
| A00047 | A00382 | 659 | A00047 | A00389 | 229 |
| A00047 | A00397 | 552 | A00047 | A00403 | 378 |
| A00047 | A00412 | 468 | A00047 | A00421 | 491 |
| A00047 | A00430 | 274 | A00047 | A00433 | 356 |
| A00047 | A00440 | 604 | A00047 | A00444 | 659 |
| A00047 | A00448 | 163 | A00047 | A00452 | 223 |
| A00047 | A00453 | 411 | A00047 | A00454 | 486 |
| A00047 | A00457 | 195 | A00047 | A00458 | 491 |
| A00047 | A00469 | 265 | A00047 | A00489 | 659 |
| A00047 | A00491 | 180 | A00047 | A00494 | 165 |
| A00047 | A00496 | 477 | A00047 | A00500 | 489 |
| A00047 | A00501 | 466 | A00047 | A00508 | 168 |
| A00047 | A00517 | 455 | A00047 | A00520 | 199 |
| A00047 | A00527 | 439 | A00047 | A00531 | 538 |
| A00047 | A00532 | 532 | A00047 | A00535 | 201 |
| A00047 | A00553 | 486 | A00047 | A00560 | 472 |
| A00047 | A00570 | 477 | A00047 | A00571 | 434 |
| A00047 | A00574 | 469 | A00047 | A00589 | 338 |
| A00047 | A00605 | 491 | A00047 | A00609 | 455 |
| A00047 | A00629 | 452 | A00047 | A00640 | 491 |
| A00047 | A00648 | 438 | A00047 | A00651 | 520 |
| A00047 | A00652 | 251 | A00047 | A00655 | 463 |
| A00047 | A00658 | 402 | A00047 | A00666 | 457 |
| A00047 | A00667 | 488 | A00047 | A00670 | 224 |
| A00047 | A00687 | 484 | A00047 | A00691 | 402 |
| A00047 | A00693 | 299 | A00047 | A00700 | 486 |
| A00047 | A00703 | 447 | A00047 | A00705 | 462 |
| A00047 | A00706 | 491 | A00047 | A00740 | 154 |
| A00047 | A00746 | 196 | A00047 | A00764 | 199 |
| A00047 | A00767 | 312 | A00047 | A00810 | 475 |
| A00047 | A00822 | 491 | A00047 | A00826 | 399 |
| A00047 | A00831 | 491 | A00047 | A00835 | 486 |
| A00047 | A00837 | 184 | A00047 | A00839 | 530 |
| A00047 | A00841 | 486 | A00047 | A00843 | 609 |

|        |        |     |        |        |     |
|--------|--------|-----|--------|--------|-----|
| A00047 | A00848 | 491 | A00047 | A00849 | 374 |
| A00047 | A00853 | 177 | A00047 | A00856 | 341 |
| A00047 | A00871 | 217 | A00047 | A00875 | 157 |
| A00047 | A00883 | 491 | A00047 | A00905 | 491 |
| A00047 | A00909 | 361 | A00047 | A00916 | 540 |
| A00047 | A00918 | 479 | A00047 | A00922 | 283 |
| A00047 | A00923 | 491 | A00047 | A00928 | 451 |
| A00047 | A00932 | 469 | A00047 | A00939 | 914 |
| A00047 | A00954 | 472 | A00047 | A00958 | 477 |
| A00047 | A00962 | 205 | A00047 | A00970 | 491 |
| A00047 | A00975 | 188 | A00047 | A00980 | 475 |
| A00047 | A00987 | 404 | A00047 | A01000 | 479 |
| A00047 | A01017 | 480 | A00047 | A01025 | 351 |
| A00047 | A01031 | 188 | A00047 | A01038 | 205 |
| A00047 | A01040 | 310 | A00047 | A01042 | 491 |
| A00047 | A01052 | 238 | A00047 | A01069 | 558 |
| A00047 | A01075 | 491 | A00047 | A01077 | 263 |
| A00047 | A01082 | 246 | A00047 | A01087 | 443 |
| A00047 | A01088 | 491 | A00047 | A01090 | 484 |
| A00047 | A01091 | 490 | A00047 | A01097 | 440 |
| A00047 | A01098 | 580 | A00047 | A01101 | 396 |
| A00047 | A01107 | 180 | A00047 | A01112 | 491 |
| A00047 | A01113 | 420 | A00047 | A01115 | 659 |
| A00047 | A01119 | 440 | A00047 | A01120 | 401 |
| A00047 | A01127 | 299 | A00047 | A01136 | 491 |
| A00047 | A01140 | 252 | A00047 | A01150 | 491 |
| A00047 | A01157 | 251 | A00047 | A01166 | 491 |
| A00047 | A01181 | 177 | A00047 | A01189 | 274 |
| A00047 | A01192 | 425 | A00047 | A01194 | 491 |
| A00047 | A01196 | 273 | A00047 | A01201 | 165 |
| A00047 | A01206 | 491 | A00047 | A01211 | 484 |
| A00047 | A01215 | 491 | A00047 | A01219 | 307 |
| A00047 | A01221 | 193 | A00047 | A01224 | 174 |
| A00047 | A01231 | 171 | A00047 | A01234 | 530 |
| A00047 | A01242 | 732 | A00047 | A01243 | 491 |
| A00047 | A01249 | 172 | A00047 | A01259 | 283 |
| A00047 | A01261 | 207 | A00047 | A01266 | 202 |
| A00047 | A01267 | 251 | A00047 | A01268 | 235 |
| A00047 | A01291 | 958 | A00047 | A01299 | 491 |
| A00047 | A01305 | 162 | A00047 | A01306 | 483 |
| A00047 | A01311 | 491 | A00047 | A01326 | 323 |
| A00047 | A01335 | 490 | A00047 | A01339 | 177 |
| A00047 | A01347 | 154 | A00047 | A01351 | 340 |
| A00047 | A01353 | 477 | A00047 | A01354 | 491 |
| A00047 | A01384 | 445 | A00047 | A01393 | 291 |
| A00047 | A01406 | 485 | A00047 | A01411 | 404 |

|        |        |     |        |        |     |
|--------|--------|-----|--------|--------|-----|
| A00047 | A01418 | 400 | A00047 | A01420 | 481 |
| A00047 | A01425 | 581 | A00047 | A01431 | 491 |
| A00047 | A01439 | 159 | A00047 | A01441 | 165 |
| A00047 | A01468 | 491 | A00047 | A01470 | 491 |
| A00047 | A01474 | 224 | A00047 | A01492 | 955 |
| A00047 | A01495 | 465 | A00047 | A01496 | 224 |
| A00047 | A01506 | 480 | A00047 | A01508 | 467 |
| A00047 | A01539 | 659 | A00047 | A01540 | 361 |
| A00047 | A01541 | 608 | A00047 | A01548 | 491 |
| A00047 | A01555 | 477 | A00047 | A01558 | 945 |
| A00047 | A01560 | 489 | A00047 | A01562 | 899 |
| A00047 | A01569 | 491 | A00047 | A01577 | 582 |
| A00047 | A01579 | 491 | A00047 | A01586 | 154 |
| A00047 | A01588 | 949 | A00047 | A01593 | 899 |
| A00047 | A01597 | 345 | A00047 | A01598 | 530 |
| A00047 | A01612 | 611 | A00047 | A01614 | 491 |
| A00047 | A01615 | 174 | A00047 | A01638 | 937 |
| A00047 | A01649 | 491 | A00047 | A01684 | 480 |
| A00047 | A01692 | 899 | A00047 | A01707 | 491 |
| A00047 | A01747 | 462 | A00047 | A01749 | 199 |
| A00047 | A01770 | 491 | A00047 | A01822 | 528 |
| A00047 | A01841 | 391 | A00047 | A01917 | 479 |
| A00047 | A02003 | 168 | A00047 | A02064 | 463 |
| A00047 | A02212 | 258 | A00047 | A02353 | 491 |
| A00047 | A02452 | 429 | A00047 | A02512 | 281 |
| A00047 | A02715 | 416 | A00047 | A02718 | 484 |
| A00047 | A02719 | 252 | A00047 | A02737 | 606 |
| A00047 | A02787 | 279 | A00047 | A02803 | 899 |
| A00047 | A02825 | 259 | A00047 | A02830 | 347 |
| A00047 | A02877 | 401 | A00047 | A02916 | 322 |
| A00047 | A02980 | 251 | A00047 | A03271 | 899 |
| A00047 | A03298 | 488 | A00047 | A03304 | 358 |
| A00047 | A03438 | 230 | A00047 | A03446 | 659 |
| A00047 | A03448 | 208 | A00047 | A03453 | 393 |
| A00047 | A03476 | 480 | A00047 | A03477 | 491 |
| A00047 | A03488 | 294 | A00047 | A03494 | 473 |
| A00047 | A03557 | 159 | A00047 | A03560 | 491 |
| A00047 | A03567 | 491 | A00047 | A03569 | 491 |
| A00047 | A03570 | 308 | A00047 | A03572 | 288 |
| A00047 | A03586 | 443 | A00047 | A03591 | 184 |
| A00047 | A03665 | 326 | A00047 | A03669 | 288 |
| A00047 | A03705 | 360 | A00047 | A03738 | 491 |
| A00047 | A03740 | 491 | A00047 | A03752 | 491 |
| A00047 | A03783 | 215 | A00047 | A03785 | 463 |
| A00047 | A03817 | 429 | A00047 | A03859 | 435 |
| A00047 | A03860 | 589 | A00047 | A03863 | 490 |

|        |        |     |        |        |     |
|--------|--------|-----|--------|--------|-----|
| A00047 | A04021 | 363 | A00047 | A04124 | 385 |
| A00047 | A04563 | 218 | A00047 | A04754 | 201 |
| A00047 | A04949 | 251 | A00047 | A05025 | 404 |
| A00047 | A05029 | 572 | A00047 | A05037 | 899 |
| A00047 | A05288 | 579 | A00047 | A05331 | 199 |
| A00047 | A05417 | 372 | A00047 | A05449 | 157 |
| A00047 | A05501 | 402 | A00047 | A05557 | 213 |
| A00047 | A05712 | 491 | A00047 | A05760 | 899 |
| A00047 | A05995 | 465 | A00047 | A06039 | 199 |
| A00047 | A06051 | 281 | A00047 | A06109 | 236 |
| A00047 | A06182 | 272 | A00047 | A06198 | 151 |
| A00047 | A06275 | 267 | A00047 | A06287 | 302 |
| A00047 | A06342 | 151 | A00047 | A06359 | 174 |
| A00047 | A06466 | 491 | A00047 | A06489 | 396 |
| A00047 | A06531 | 223 | A00047 | A06543 | 475 |
| A00047 | A06554 | 393 | A00047 | A06599 | 344 |
| A00047 | A06819 | 409 | A00047 | A06880 | 151 |
| A00047 | A06892 | 260 | A00047 | A06907 | 510 |
| A00047 | A06965 | 369 | A00047 | A07004 | 535 |
| A00047 | A07225 | 151 | A00047 | A07247 | 491 |
| A00047 | A07311 | 613 | A00047 | A07359 | 151 |
| A00047 | A07451 | 227 | A00047 | A07487 | 238 |
| A00047 | A07583 | 293 | A00047 | A07594 | 98  |
| A00047 | A07604 | 490 | A00047 | A07706 | 559 |
| A00047 | A07744 | 455 | A00047 | A07746 | 472 |
| A00047 | A07798 | 488 | A00047 | A07851 | 419 |
| A00047 | A08022 | 432 | A00047 | A08061 | 491 |
| A00047 | A08098 | 241 | A00047 | A08118 | 446 |
| A00047 | A08131 | 173 | A00047 | A08137 | 528 |
| A00047 | A08178 | 159 | A00047 | A08267 | 188 |
| A00047 | A08281 | 438 | A00047 | A08357 | 489 |
| A00047 | A08359 | 491 | A00047 | A08382 | 285 |
| A00047 | A08390 | 408 | A00047 | A08439 | 185 |
| A00047 | A08476 | 374 | A00047 | A08546 | 641 |
| A00047 | A08567 | 196 | A00047 | A08571 | 958 |
| A00047 | A08679 | 330 | A00047 | A08896 | 445 |
| A00047 | A08978 | 480 | A00047 | A08987 | 230 |
| A00047 | A08991 | 340 | A00047 | A09024 | 486 |
| A00047 | A09032 | 151 | A00047 | A09252 | 208 |
| A00047 | A09269 | 217 | A00047 | A09327 | 163 |
| A00047 | A09587 | 329 | A00047 | A09591 | 480 |
| A00047 | A09619 | 307 | A00047 | A09641 | 367 |
| A00047 | A09708 | 243 | A00047 | A09857 | 458 |
| A00047 | A09902 | 314 | A00047 | A10006 | 490 |
| A00047 | A10159 | 907 | A00047 | A10208 | 199 |
| A00047 | A10238 | 484 | A00047 | A10266 | 291 |

|        |        |     |        |        |     |
|--------|--------|-----|--------|--------|-----|
| A00047 | A10321 | 371 | A00047 | A10331 | 151 |
| A00047 | A10399 | 491 | A00047 | A10456 | 462 |
| A00047 | A10490 | 419 | A00047 | A10532 | 866 |
| A00047 | A10574 | 338 | A00047 | A10586 | 208 |
| A00047 | A10615 | 390 | A00047 | A10624 | 491 |
| A00047 | A10728 | 441 | A00047 | A10847 | 423 |
| A00047 | A10853 | 224 | A00047 | A11240 | 372 |
| A00047 | A11277 | 457 | A00047 | A11291 | 377 |
| A00047 | A11297 | 486 | A00047 | A11301 | 405 |
| A00047 | A11302 | 348 | A00047 | A11312 | 456 |
| A00047 | A11316 | 489 | A00047 | A11337 | 236 |
| A00047 | A11344 | 198 | A00047 | A11368 | 380 |
| A00047 | A11387 | 427 | A00047 | A11409 | 491 |
| A00047 | A11420 | 377 | A00047 | A11476 | 446 |
| A00047 | A11535 | 162 | A00047 | A11621 | 446 |
| A00047 | A11670 | 401 | A00047 | A11704 | 441 |
| A00047 | A11705 | 405 | A00047 | A11811 | 201 |
| A00047 | A11822 | 172 | A00047 | A11933 | 277 |
| A00047 | A11945 | 221 | A00047 | A11965 | 154 |
| A00047 | A12096 | 151 | A00047 | A12111 | 460 |
| A00047 | A12242 | 329 | A00047 | A12325 | 458 |
| A00047 | A12329 | 286 | A00047 | A12365 | 489 |
| A00047 | A12390 | 174 | A00047 | A12647 | 172 |
| A00047 | A12672 | 353 | A00047 | A12722 | 170 |
| A00047 | A12813 | 247 | A00047 | A12839 | 467 |
| A00047 | A13135 | 348 | A00047 | A13210 | 151 |
| A00047 | A13310 | 330 | A00047 | A13311 | 328 |
| A00047 | A13313 | 154 | A00047 | A13321 | 439 |
| A00047 | A13340 | 485 | A00047 | A13353 | 151 |
| A00047 | A13376 | 238 | A00047 | A13388 | 427 |
| A00047 | A13478 | 151 | A00047 | A13498 | 188 |
| A00047 | A13552 | 188 | A00047 | A13584 | 151 |
| A00047 | A13608 | 151 | A00047 | A13609 | 491 |
| A00047 | A13616 | 151 | A00047 | A13654 | 151 |
| A00047 | A13661 | 107 | A00047 | A13662 | 151 |
| A00047 | A13723 | 151 | A00047 | A13870 | 447 |
| A00047 | A13875 | 187 | A00047 | A13928 | 245 |
| A00047 | A13989 | 950 | A00047 | A14006 | 491 |
| A00047 | A14073 | 491 | A00047 | A14074 | 262 |
| A00047 | A14147 | 208 | A00047 | A14148 | 899 |
| A00047 | A14150 | 299 | A00047 | A14151 | 246 |
| A00047 | A14169 | 491 | A00047 | A14182 | 251 |
| A00047 | A14192 | 204 | A00047 | A14196 | 527 |
| A00047 | A14200 | 486 | A00047 | A14208 | 899 |
| A00047 | A14216 | 448 | A00047 | A14220 | 491 |
| A00047 | A14221 | 150 | A00047 | A14246 | 938 |

|        |        |     |        |        |     |
|--------|--------|-----|--------|--------|-----|
| A00047 | A14257 | 462 | A00047 | A14351 | 457 |
| A00047 | A14395 | 154 | A00047 | A14476 | 339 |
| A00047 | A14481 | 199 | A00047 | A14508 | 281 |
| A00047 | A14525 | 243 | A00047 | A14551 | 423 |
| A00047 | A14559 | 273 | A00047 | A14594 | 223 |
| A00047 | A14596 | 491 | A00047 | A14597 | 479 |
| A00047 | A14636 | 273 | A00047 | A14659 | 337 |
| A00047 | A14662 | 899 | A00047 | A14672 | 363 |
| A00047 | A14701 | 324 | A00047 | A14819 | 276 |
| A00047 | A14836 | 171 | A00047 | A14939 | 151 |
| A00047 | A15141 | 168 | A00047 | A15142 | 151 |
| A00047 | A15156 | 167 | A00047 | A15209 | 151 |
| A00047 | A15244 | 477 | A00047 | A15257 | 265 |
| A00047 | A15297 | 952 | A00047 | A15309 | 152 |
| A00047 | A15323 | 899 | A00047 | A15324 | 945 |
| A00047 | A15338 | 490 | A00047 | A15353 | 945 |
| A00047 | A15359 | 899 | A00047 | A15366 | 209 |
| A00047 | A15500 | 229 | A00047 | A15507 | 379 |
| A00047 | A15547 | 899 | A00047 | A15559 | 637 |
| A00047 | A15564 | 486 | A00047 | A15614 | 903 |
| A00047 | A15659 | 308 | A00047 | A15660 | 491 |
| A00047 | A15684 | 491 | A00047 | A15696 | 353 |
| A00047 | A15698 | 628 | A00047 | A15717 | 285 |
| A00047 | A15720 | 168 | A00047 | A15725 | 229 |
| A00047 | A15729 | 473 | A00047 | A15744 | 151 |
| A00047 | A15747 | 484 | A00047 | A15752 | 221 |
| A00047 | A15763 | 489 | A00047 | A15769 | 433 |
| A00047 | A15773 | 241 | A00047 | A15867 | 190 |
| A00047 | A15918 | 363 | A00047 | A15933 | 327 |
| A00047 | A15935 | 294 | A00047 | A15946 | 226 |
| A00047 | A15947 | 276 | A00047 | A16060 | 458 |
| A00047 | A16096 | 477 | A00047 | A16118 | 249 |
| A00047 | A16144 | 226 | A00047 | A16320 | 389 |
| A00047 | A16394 | 179 | A00047 | A16400 | 163 |
| A00047 | A16490 | 217 | A00047 | A16756 | 154 |
| A00047 | A16798 | 352 | A00047 | A16824 | 343 |
| A00047 | A16834 | 441 | A00047 | A17063 | 491 |
| A00047 | A17127 | 347 | A00047 | A17131 | 302 |
| A00047 | A17135 | 173 | A00047 | A17140 | 246 |
| A00047 | A17142 | 363 | A00048 | A00052 | 174 |
| A00048 | A00064 | 363 | A00048 | A00067 | 915 |
| A00048 | A00074 | 588 | A00048 | A00085 | 157 |
| A00048 | A00090 | 470 | A00048 | A00091 | 770 |
| A00048 | A00113 | 708 | A00048 | A00118 | 221 |
| A00048 | A00122 | 219 | A00048 | A00130 | 906 |
| A00048 | A00138 | 152 | A00048 | A00156 | 682 |

|        |        |     |        |        |     |
|--------|--------|-----|--------|--------|-----|
| A00048 | A00161 | 190 | A00048 | A00162 | 195 |
| A00048 | A00180 | 172 | A00048 | A00184 | 130 |
| A00048 | A00185 | 491 | A00048 | A00207 | 662 |
| A00048 | A00208 | 470 | A00048 | A00214 | 63  |
| A00048 | A00221 | 424 | A00048 | A00224 | 260 |
| A00048 | A00227 | 462 | A00048 | A00234 | 285 |
| A00048 | A00254 | 491 | A00048 | A00292 | 218 |
| A00048 | A00333 | 374 | A00048 | A00451 | 490 |
| A00048 | A00478 | 450 | A00048 | A00641 | 414 |
| A00048 | A00659 | 480 | A00048 | A00697 | 63  |
| A00048 | A00747 | 183 | A00048 | A00911 | 374 |
| A00048 | A00939 | 176 | A00048 | A01212 | 180 |
| A00048 | A01286 | 770 | A00048 | A01307 | 345 |
| A00048 | A01310 | 93  | A00048 | A01357 | 167 |
| A00048 | A01390 | 63  | A00048 | A01473 | 63  |
| A00048 | A01524 | 901 | A00048 | A01527 | 899 |
| A00048 | A01560 | 430 | A00048 | A01562 | 274 |
| A00048 | A01692 | 63  | A00048 | A01737 | 396 |
| A00048 | A01752 | 208 | A00048 | A01754 | 176 |
| A00048 | A01769 | 251 | A00048 | A01832 | 338 |
| A00048 | A01846 | 335 | A00048 | A01849 | 193 |
| A00048 | A01908 | 224 | A00048 | A02011 | 446 |
| A00048 | A02012 | 299 | A00048 | A02014 | 210 |
| A00048 | A02015 | 256 | A00048 | A02027 | 227 |
| A00048 | A02419 | 277 | A00048 | A02425 | 188 |
| A00048 | A02481 | 480 | A00048 | A02574 | 491 |
| A00048 | A02598 | 245 | A00048 | A02611 | 483 |
| A00048 | A02649 | 446 | A00048 | A02661 | 219 |
| A00048 | A02678 | 160 | A00048 | A02689 | 193 |
| A00048 | A02696 | 312 | A00048 | A02787 | 477 |
| A00048 | A02788 | 477 | A00048 | A02803 | 215 |
| A00048 | A02811 | 176 | A00048 | A02849 | 355 |
| A00048 | A02864 | 481 | A00048 | A02874 | 450 |
| A00048 | A02875 | 340 | A00048 | A02887 | 63  |
| A00048 | A02908 | 348 | A00048 | A02915 | 414 |
| A00048 | A02931 | 84  | A00048 | A02944 | 196 |
| A00048 | A03019 | 63  | A00048 | A03034 | 490 |
| A00048 | A03036 | 382 | A00048 | A03071 | 190 |
| A00048 | A03092 | 401 | A00048 | A03126 | 160 |
| A00048 | A03144 | 321 | A00048 | A03195 | 479 |
| A00048 | A03247 | 198 | A00048 | A03251 | 355 |
| A00048 | A03254 | 396 | A00048 | A03271 | 474 |
| A00048 | A03282 | 162 | A00048 | A03480 | 265 |
| A00048 | A03611 | 371 | A00048 | A03683 | 363 |
| A00048 | A03684 | 324 | A00048 | A03752 | 371 |
| A00048 | A03784 | 391 | A00048 | A03803 | 443 |

|        |        |     |        |        |     |
|--------|--------|-----|--------|--------|-----|
| A00048 | A03809 | 177 | A00048 | A03830 | 491 |
| A00048 | A03831 | 281 | A00048 | A03940 | 281 |
| A00048 | A03973 | 296 | A00048 | A03990 | 151 |
| A00048 | A04012 | 224 | A00048 | A04037 | 260 |
| A00048 | A04080 | 247 | A00048 | A04111 | 270 |
| A00048 | A04242 | 270 | A00048 | A04323 | 454 |
| A00048 | A04422 | 152 | A00048 | A04578 | 456 |
| A00048 | A04579 | 202 | A00048 | A04600 | 368 |
| A00048 | A04615 | 195 | A00048 | A04697 | 200 |
| A00048 | A04731 | 432 | A00048 | A04807 | 329 |
| A00048 | A04830 | 188 | A00048 | A04958 | 288 |
| A00048 | A04968 | 256 | A00048 | A04972 | 213 |
| A00048 | A05111 | 265 | A00048 | A05218 | 185 |
| A00048 | A05339 | 382 | A00048 | A05617 | 425 |
| A00048 | A06053 | 270 | A00048 | A06138 | 340 |
| A00048 | A06187 | 333 | A00048 | A06289 | 63  |
| A00048 | A07056 | 219 | A00048 | A07141 | 168 |
| A00048 | A07142 | 457 | A00048 | A07155 | 229 |
| A00048 | A07311 | 940 | A00048 | A07342 | 168 |
| A00048 | A07373 | 198 | A00048 | A07697 | 485 |
| A00048 | A07798 | 408 | A00048 | A07860 | 306 |
| A00048 | A08731 | 422 | A00048 | A09115 | 355 |
| A00048 | A09229 | 191 | A00048 | A09334 | 260 |
| A00048 | A09401 | 240 | A00048 | A09890 | 232 |
| A00048 | A09897 | 333 | A00048 | A09901 | 157 |
| A00048 | A09983 | 241 | A00048 | A09997 | 176 |
| A00048 | A10214 | 165 | A00048 | A10365 | 384 |
| A00048 | A10510 | 252 | A00048 | A10937 | 306 |
| A00048 | A11129 | 221 | A00048 | A11307 | 151 |
| A00048 | A11900 | 245 | A00048 | A12969 | 154 |
| A00048 | A12971 | 167 | A00048 | A13216 | 208 |
| A00048 | A13605 | 172 | A00048 | A13829 | 63  |
| A00048 | A13983 | 63  | A00048 | A14071 | 170 |
| A00048 | A14188 | 358 | A00048 | A14198 | 446 |
| A00048 | A14344 | 401 | A00048 | A14402 | 176 |
| A00048 | A14433 | 241 | A00048 | A14438 | 208 |
| A00048 | A14452 | 63  | A00048 | A15325 | 330 |
| A00048 | A15382 | 162 | A00048 | A15726 | 63  |
| A00048 | A15862 | 306 | A00048 | A15913 | 218 |
| A00048 | A16300 | 229 | A00048 | A16547 | 339 |
| A00048 | A16594 | 247 | A00048 | A16989 | 355 |
| A00049 | A00050 | 945 | A00049 | A00052 | 944 |
| A00049 | A00067 | 918 | A00049 | A00162 | 945 |
| A00049 | A00167 | 899 | A00049 | A00205 | 177 |
| A00049 | A00209 | 902 | A00049 | A00224 | 899 |
| A00049 | A00235 | 327 | A00049 | A00270 | 945 |



|        |        |     |        |        |     |
|--------|--------|-----|--------|--------|-----|
| A00049 | A00271 | 899 | A00049 | A00381 | 382 |
| A00049 | A00400 | 447 | A00049 | A00531 | 406 |
| A00049 | A01139 | 294 | A00049 | A01359 | 435 |
| A00049 | A01558 | 899 | A00049 | A01560 | 249 |
| A00049 | A01588 | 899 | A00049 | A02502 | 443 |
| A00049 | A03651 | 228 | A00049 | A03939 | 235 |
| A00049 | A06610 | 207 | A00049 | A09258 | 252 |
| A00049 | A09377 | 317 | A00049 | A09451 | 210 |
| A00049 | A09515 | 208 | A00049 | A09538 | 402 |
| A00049 | A10340 | 319 | A00049 | A10833 | 470 |
| A00049 | A11492 | 357 | A00049 | A13250 | 173 |
| A00049 | A13981 | 899 | A00049 | A13990 | 945 |
| A00049 | A14278 | 162 | A00050 | A00052 | 755 |
| A00050 | A00058 | 172 | A00050 | A00066 | 257 |
| A00050 | A00067 | 953 | A00050 | A00112 | 384 |
| A00050 | A00132 | 400 | A00050 | A00138 | 191 |
| A00050 | A00146 | 165 | A00050 | A00147 | 274 |
| A00050 | A00162 | 945 | A00050 | A00167 | 927 |
| A00050 | A00206 | 341 | A00050 | A00209 | 899 |
| A00050 | A00235 | 455 | A00050 | A00254 | 258 |
| A00050 | A00257 | 291 | A00050 | A00263 | 174 |
| A00050 | A00269 | 582 | A00050 | A00270 | 968 |
| A00050 | A00271 | 899 | A00050 | A00275 | 899 |
| A00050 | A00381 | 274 | A00050 | A00400 | 491 |
| A00050 | A00437 | 260 | A00050 | A00471 | 408 |
| A00050 | A00531 | 277 | A00050 | A00874 | 174 |
| A00050 | A01044 | 256 | A00050 | A01139 | 273 |
| A00050 | A01212 | 374 | A00050 | A01359 | 400 |
| A00050 | A01410 | 207 | A00050 | A01524 | 174 |
| A00050 | A01527 | 899 | A00050 | A01560 | 208 |
| A00050 | A01591 | 333 | A00050 | A01703 | 212 |
| A00050 | A02195 | 224 | A00050 | A02473 | 202 |
| A00050 | A02502 | 302 | A00050 | A03101 | 159 |
| A00050 | A03307 | 270 | A00050 | A03492 | 391 |
| A00050 | A03651 | 456 | A00050 | A03768 | 235 |
| A00050 | A04025 | 185 | A00050 | A04491 | 160 |
| A00050 | A05315 | 205 | A00050 | A05467 | 174 |
| A00050 | A05734 | 193 | A00050 | A06118 | 204 |
| A00050 | A07311 | 269 | A00050 | A07655 | 168 |
| A00050 | A08148 | 224 | A00050 | A08571 | 461 |
| A00050 | A08688 | 302 | A00050 | A09218 | 296 |
| A00050 | A09229 | 170 | A00050 | A09258 | 286 |
| A00050 | A09377 | 232 | A00050 | A09411 | 221 |
| A00050 | A09538 | 316 | A00050 | A10340 | 235 |
| A00050 | A10384 | 343 | A00050 | A10833 | 286 |
| A00050 | A11492 | 288 | A00050 | A11621 | 185 |

|        |        |     |        |        |     |
|--------|--------|-----|--------|--------|-----|
| A00050 | A11696 | 291 | A00050 | A12204 | 380 |
| A00050 | A12284 | 238 | A00050 | A12532 | 301 |
| A00050 | A12534 | 270 | A00050 | A13511 | 195 |
| A00050 | A13826 | 183 | A00050 | A13929 | 281 |
| A00050 | A13980 | 394 | A00050 | A13990 | 945 |
| A00050 | A14290 | 196 | A00050 | A14496 | 499 |
| A00050 | A14584 | 245 | A00050 | A15916 | 180 |
| A00050 | A16665 | 212 | A00051 | A00094 | 899 |
| A00051 | A00095 | 918 | A00051 | A00142 | 919 |
| A00051 | A00143 | 924 | A00051 | A00168 | 899 |
| A00051 | A00200 | 899 | A00051 | A00212 | 467 |
| A00051 | A00215 | 945 | A00051 | A00457 | 205 |
| A00051 | A00666 | 205 | A00051 | A00962 | 154 |
| A00051 | A01008 | 141 | A00051 | A01211 | 218 |
| A00051 | A01482 | 390 | A00051 | A01508 | 210 |
| A00051 | A03477 | 461 | A00051 | A04202 | 256 |
| A00051 | A05310 | 313 | A00051 | A05703 | 408 |
| A00051 | A06608 | 899 | A00051 | A06979 | 344 |
| A00051 | A07189 | 395 | A00051 | A10420 | 241 |
| A00051 | A13474 | 404 | A00051 | A14122 | 252 |
| A00051 | A14511 | 180 | A00052 | A00053 | 944 |
| A00052 | A00056 | 416 | A00052 | A00058 | 483 |
| A00052 | A00064 | 491 | A00052 | A00065 | 944 |
| A00052 | A00066 | 969 | A00052 | A00067 | 980 |
| A00052 | A00068 | 489 | A00052 | A00069 | 928 |
| A00052 | A00071 | 326 | A00052 | A00073 | 491 |
| A00052 | A00074 | 945 | A00052 | A00081 | 435 |
| A00052 | A00085 | 296 | A00052 | A00086 | 185 |
| A00052 | A00090 | 944 | A00052 | A00093 | 899 |
| A00052 | A00094 | 968 | A00052 | A00099 | 899 |
| A00052 | A00100 | 936 | A00052 | A00111 | 335 |
| A00052 | A00113 | 154 | A00052 | A00117 | 899 |
| A00052 | A00120 | 899 | A00052 | A00121 | 899 |
| A00052 | A00122 | 380 | A00052 | A00123 | 904 |
| A00052 | A00124 | 938 | A00052 | A00127 | 899 |
| A00052 | A00128 | 926 | A00052 | A00132 | 475 |
| A00052 | A00133 | 899 | A00052 | A00135 | 899 |
| A00052 | A00136 | 371 | A00052 | A00137 | 200 |
| A00052 | A00138 | 796 | A00052 | A00140 | 899 |
| A00052 | A00141 | 902 | A00052 | A00145 | 901 |
| A00052 | A00146 | 201 | A00052 | A00147 | 491 |
| A00052 | A00149 | 899 | A00052 | A00150 | 903 |
| A00052 | A00151 | 944 | A00052 | A00152 | 575 |
| A00052 | A00153 | 945 | A00052 | A00154 | 945 |
| A00052 | A00156 | 281 | A00052 | A00157 | 913 |
| A00052 | A00158 | 196 | A00052 | A00159 | 995 |

|        |        |     |        |        |     |
|--------|--------|-----|--------|--------|-----|
| A00052 | A00162 | 945 | A00052 | A00163 | 945 |
| A00052 | A00165 | 899 | A00052 | A00167 | 949 |
| A00052 | A00169 | 945 | A00052 | A00170 | 899 |
| A00052 | A00171 | 945 | A00052 | A00173 | 945 |
| A00052 | A00174 | 899 | A00052 | A00175 | 899 |
| A00052 | A00184 | 900 | A00052 | A00185 | 484 |
| A00052 | A00186 | 902 | A00052 | A00188 | 945 |
| A00052 | A00189 | 899 | A00052 | A00190 | 491 |
| A00052 | A00191 | 904 | A00052 | A00196 | 321 |
| A00052 | A00198 | 899 | A00052 | A00200 | 945 |
| A00052 | A00201 | 491 | A00052 | A00203 | 899 |
| A00052 | A00204 | 306 | A00052 | A00205 | 917 |
| A00052 | A00206 | 822 | A00052 | A00207 | 968 |
| A00052 | A00208 | 994 | A00052 | A00209 | 994 |
| A00052 | A00210 | 907 | A00052 | A00211 | 899 |
| A00052 | A00219 | 945 | A00052 | A00220 | 899 |
| A00052 | A00221 | 972 | A00052 | A00223 | 945 |
| A00052 | A00224 | 958 | A00052 | A00225 | 185 |
| A00052 | A00229 | 930 | A00052 | A00230 | 904 |
| A00052 | A00231 | 271 | A00052 | A00233 | 940 |
| A00052 | A00234 | 949 | A00052 | A00235 | 323 |
| A00052 | A00236 | 951 | A00052 | A00237 | 899 |
| A00052 | A00239 | 479 | A00052 | A00240 | 945 |
| A00052 | A00241 | 899 | A00052 | A00242 | 899 |
| A00052 | A00246 | 938 | A00052 | A00248 | 944 |
| A00052 | A00250 | 925 | A00052 | A00252 | 944 |
| A00052 | A00253 | 945 | A00052 | A00254 | 945 |
| A00052 | A00255 | 910 | A00052 | A00256 | 491 |
| A00052 | A00257 | 945 | A00052 | A00261 | 911 |
| A00052 | A00263 | 164 | A00052 | A00264 | 490 |
| A00052 | A00265 | 491 | A00052 | A00266 | 903 |
| A00052 | A00268 | 899 | A00052 | A00269 | 926 |
| A00052 | A00270 | 949 | A00052 | A00271 | 943 |
| A00052 | A00272 | 933 | A00052 | A00275 | 899 |
| A00052 | A00276 | 901 | A00052 | A00294 | 909 |
| A00052 | A00316 | 477 | A00052 | A00324 | 992 |
| A00052 | A00337 | 230 | A00052 | A00340 | 304 |
| A00052 | A00348 | 168 | A00052 | A00356 | 899 |
| A00052 | A00358 | 899 | A00052 | A00378 | 942 |
| A00052 | A00381 | 485 | A00052 | A00469 | 199 |
| A00052 | A00509 | 247 | A00052 | A00517 | 449 |
| A00052 | A00552 | 312 | A00052 | A00556 | 491 |
| A00052 | A00558 | 488 | A00052 | A00616 | 485 |
| A00052 | A00624 | 227 | A00052 | A00630 | 228 |
| A00052 | A00640 | 484 | A00052 | A00651 | 899 |
| A00052 | A00655 | 218 | A00052 | A00660 | 154 |

|        |        |     |        |        |     |
|--------|--------|-----|--------|--------|-----|
| A00052 | A00669 | 899 | A00052 | A00696 | 208 |
| A00052 | A00697 | 712 | A00052 | A00724 | 290 |
| A00052 | A00736 | 491 | A00052 | A00747 | 945 |
| A00052 | A00786 | 899 | A00052 | A00820 | 335 |
| A00052 | A00825 | 310 | A00052 | A00826 | 230 |
| A00052 | A00832 | 490 | A00052 | A00839 | 185 |
| A00052 | A00851 | 899 | A00052 | A00914 | 486 |
| A00052 | A00930 | 157 | A00052 | A00933 | 899 |
| A00052 | A00939 | 899 | A00052 | A00980 | 200 |
| A00052 | A00999 | 423 | A00052 | A01002 | 899 |
| A00052 | A01052 | 910 | A00052 | A01056 | 899 |
| A00052 | A01070 | 899 | A00052 | A01077 | 177 |
| A00052 | A01098 | 165 | A00052 | A01102 | 481 |
| A00052 | A01125 | 165 | A00052 | A01131 | 277 |
| A00052 | A01168 | 899 | A00052 | A01176 | 929 |
| A00052 | A01178 | 491 | A00052 | A01189 | 435 |
| A00052 | A01244 | 899 | A00052 | A01289 | 960 |
| A00052 | A01291 | 903 | A00052 | A01309 | 230 |
| A00052 | A01310 | 180 | A00052 | A01354 | 491 |
| A00052 | A01400 | 316 | A00052 | A01404 | 272 |
| A00052 | A01405 | 249 | A00052 | A01415 | 899 |
| A00052 | A01425 | 905 | A00052 | A01452 | 439 |
| A00052 | A01485 | 229 | A00052 | A01496 | 899 |
| A00052 | A01507 | 899 | A00052 | A01512 | 909 |
| A00052 | A01524 | 945 | A00052 | A01527 | 994 |
| A00052 | A01553 | 949 | A00052 | A01554 | 949 |
| A00052 | A01558 | 901 | A00052 | A01560 | 976 |
| A00052 | A01561 | 949 | A00052 | A01562 | 944 |
| A00052 | A01563 | 160 | A00052 | A01571 | 228 |
| A00052 | A01572 | 680 | A00052 | A01588 | 989 |
| A00052 | A01591 | 989 | A00052 | A01592 | 938 |
| A00052 | A01593 | 899 | A00052 | A01594 | 230 |
| A00052 | A01600 | 401 | A00052 | A01602 | 908 |
| A00052 | A01604 | 899 | A00052 | A01605 | 945 |
| A00052 | A01607 | 204 | A00052 | A01615 | 994 |
| A00052 | A01626 | 377 | A00052 | A01628 | 945 |
| A00052 | A01629 | 235 | A00052 | A01632 | 469 |
| A00052 | A01633 | 171 | A00052 | A01636 | 899 |
| A00052 | A01638 | 899 | A00052 | A01639 | 945 |
| A00052 | A01640 | 945 | A00052 | A01650 | 991 |
| A00052 | A01651 | 899 | A00052 | A01661 | 391 |
| A00052 | A01665 | 899 | A00052 | A01668 | 489 |
| A00052 | A01675 | 905 | A00052 | A01676 | 467 |
| A00052 | A01680 | 899 | A00052 | A01686 | 899 |
| A00052 | A01688 | 899 | A00052 | A01692 | 982 |
| A00052 | A01697 | 974 | A00052 | A01702 | 951 |

|        |        |     |        |        |     |
|--------|--------|-----|--------|--------|-----|
| A00052 | A01708 | 941 | A00052 | A01709 | 929 |
| A00052 | A01717 | 899 | A00052 | A01718 | 921 |
| A00052 | A01719 | 932 | A00052 | A01726 | 490 |
| A00052 | A01727 | 467 | A00052 | A01729 | 489 |
| A00052 | A01730 | 951 | A00052 | A01731 | 377 |
| A00052 | A01733 | 241 | A00052 | A01739 | 218 |
| A00052 | A01740 | 491 | A00052 | A01741 | 491 |
| A00052 | A01742 | 163 | A00052 | A01743 | 489 |
| A00052 | A01746 | 435 | A00052 | A01747 | 283 |
| A00052 | A01748 | 286 | A00052 | A01752 | 486 |
| A00052 | A01755 | 229 | A00052 | A01760 | 272 |
| A00052 | A01763 | 260 | A00052 | A01770 | 491 |
| A00052 | A01774 | 380 | A00052 | A01775 | 363 |
| A00052 | A01781 | 266 | A00052 | A01796 | 165 |
| A00052 | A01797 | 475 | A00052 | A01798 | 259 |
| A00052 | A01812 | 474 | A00052 | A01844 | 942 |
| A00052 | A01876 | 369 | A00052 | A01877 | 407 |
| A00052 | A01878 | 180 | A00052 | A01894 | 191 |
| A00052 | A01897 | 345 | A00052 | A01898 | 899 |
| A00052 | A01900 | 938 | A00052 | A01903 | 446 |
| A00052 | A01905 | 919 | A00052 | A01907 | 160 |
| A00052 | A01908 | 489 | A00052 | A01930 | 171 |
| A00052 | A02020 | 394 | A00052 | A02045 | 154 |
| A00052 | A02054 | 162 | A00052 | A02094 | 902 |
| A00052 | A02110 | 200 | A00052 | A02117 | 343 |
| A00052 | A02143 | 317 | A00052 | A02180 | 407 |
| A00052 | A02185 | 188 | A00052 | A02196 | 154 |
| A00052 | A02218 | 154 | A00052 | A02278 | 414 |
| A00052 | A02388 | 152 | A00052 | A02390 | 224 |
| A00052 | A02407 | 168 | A00052 | A02411 | 922 |
| A00052 | A02463 | 162 | A00052 | A02469 | 207 |
| A00052 | A02470 | 236 | A00052 | A02491 | 152 |
| A00052 | A02493 | 316 | A00052 | A02494 | 490 |
| A00052 | A02495 | 445 | A00052 | A02501 | 279 |
| A00052 | A02502 | 906 | A00052 | A02512 | 443 |
| A00052 | A02544 | 273 | A00052 | A02562 | 318 |
| A00052 | A02564 | 480 | A00052 | A02568 | 435 |
| A00052 | A02575 | 201 | A00052 | A02586 | 160 |
| A00052 | A02593 | 440 | A00052 | A02614 | 152 |
| A00052 | A02621 | 229 | A00052 | A02632 | 294 |
| A00052 | A02636 | 162 | A00052 | A02672 | 154 |
| A00052 | A02687 | 160 | A00052 | A02695 | 445 |
| A00052 | A02698 | 489 | A00052 | A02702 | 151 |
| A00052 | A02703 | 490 | A00052 | A02704 | 454 |
| A00052 | A02705 | 383 | A00052 | A02706 | 921 |
| A00052 | A02711 | 229 | A00052 | A02715 | 267 |

|        |        |     |        |        |     |
|--------|--------|-----|--------|--------|-----|
| A00052 | A02722 | 255 | A00052 | A02737 | 251 |
| A00052 | A02741 | 353 | A00052 | A02749 | 475 |
| A00052 | A02752 | 210 | A00052 | A02754 | 221 |
| A00052 | A02758 | 201 | A00052 | A02766 | 193 |
| A00052 | A02779 | 944 | A00052 | A02788 | 180 |
| A00052 | A02792 | 400 | A00052 | A02795 | 249 |
| A00052 | A02803 | 489 | A00052 | A02815 | 152 |
| A00052 | A02816 | 490 | A00052 | A02819 | 180 |
| A00052 | A02827 | 364 | A00052 | A02830 | 490 |
| A00052 | A02836 | 469 | A00052 | A02837 | 330 |
| A00052 | A02842 | 156 | A00052 | A02859 | 411 |
| A00052 | A02860 | 467 | A00052 | A02861 | 190 |
| A00052 | A02874 | 249 | A00052 | A02877 | 491 |
| A00052 | A02878 | 491 | A00052 | A02895 | 457 |
| A00052 | A02902 | 229 | A00052 | A02904 | 389 |
| A00052 | A02908 | 899 | A00052 | A02914 | 360 |
| A00052 | A02924 | 465 | A00052 | A02927 | 435 |
| A00052 | A02930 | 229 | A00052 | A02968 | 899 |
| A00052 | A02982 | 396 | A00052 | A02995 | 235 |
| A00052 | A03012 | 452 | A00052 | A03028 | 172 |
| A00052 | A03056 | 443 | A00052 | A03057 | 447 |
| A00052 | A03112 | 491 | A00052 | A03115 | 167 |
| A00052 | A03121 | 472 | A00052 | A03157 | 328 |
| A00052 | A03211 | 481 | A00052 | A03212 | 378 |
| A00052 | A03213 | 156 | A00052 | A03259 | 245 |
| A00052 | A03271 | 923 | A00052 | A03276 | 319 |
| A00052 | A03288 | 283 | A00052 | A03321 | 490 |
| A00052 | A03332 | 899 | A00052 | A03338 | 215 |
| A00052 | A03415 | 472 | A00052 | A03423 | 226 |
| A00052 | A03431 | 457 | A00052 | A03436 | 452 |
| A00052 | A03451 | 491 | A00052 | A03523 | 391 |
| A00052 | A03568 | 279 | A00052 | A03575 | 899 |
| A00052 | A03591 | 987 | A00052 | A03596 | 406 |
| A00052 | A03609 | 180 | A00052 | A03611 | 473 |
| A00052 | A03622 | 154 | A00052 | A03649 | 385 |
| A00052 | A03661 | 419 | A00052 | A03662 | 928 |
| A00052 | A03663 | 157 | A00052 | A03725 | 168 |
| A00052 | A03726 | 899 | A00052 | A03739 | 489 |
| A00052 | A03741 | 899 | A00052 | A03752 | 899 |
| A00052 | A03796 | 213 | A00052 | A03817 | 480 |
| A00052 | A03843 | 491 | A00052 | A03913 | 899 |
| A00052 | A03936 | 157 | A00052 | A03990 | 291 |
| A00052 | A04006 | 293 | A00052 | A04012 | 553 |
| A00052 | A04046 | 207 | A00052 | A04117 | 260 |
| A00052 | A04161 | 582 | A00052 | A04209 | 245 |
| A00052 | A04245 | 163 | A00052 | A04280 | 489 |

|        |        |     |        |        |     |
|--------|--------|-----|--------|--------|-----|
| A00052 | A04308 | 297 | A00052 | A04342 | 374 |
| A00052 | A04367 | 163 | A00052 | A04536 | 439 |
| A00052 | A04571 | 215 | A00052 | A04600 | 899 |
| A00052 | A04622 | 491 | A00052 | A04699 | 901 |
| A00052 | A04722 | 165 | A00052 | A04761 | 899 |
| A00052 | A04861 | 369 | A00052 | A05008 | 899 |
| A00052 | A05009 | 899 | A00052 | A05015 | 899 |
| A00052 | A05029 | 899 | A00052 | A05032 | 430 |
| A00052 | A05034 | 412 | A00052 | A05045 | 899 |
| A00052 | A05058 | 202 | A00052 | A05062 | 899 |
| A00052 | A05070 | 313 | A00052 | A05105 | 154 |
| A00052 | A05112 | 424 | A00052 | A05122 | 205 |
| A00052 | A05216 | 935 | A00052 | A05288 | 734 |
| A00052 | A05336 | 154 | A00052 | A05418 | 443 |
| A00052 | A05432 | 490 | A00052 | A05453 | 945 |
| A00052 | A05508 | 202 | A00052 | A05573 | 290 |
| A00052 | A05574 | 163 | A00052 | A05656 | 154 |
| A00052 | A05719 | 171 | A00052 | A05795 | 157 |
| A00052 | A05832 | 323 | A00052 | A05866 | 172 |
| A00052 | A05867 | 899 | A00052 | A05871 | 249 |
| A00052 | A05913 | 154 | A00052 | A05933 | 154 |
| A00052 | A05960 | 267 | A00052 | A05961 | 394 |
| A00052 | A05996 | 899 | A00052 | A06039 | 199 |
| A00052 | A06132 | 152 | A00052 | A06216 | 162 |
| A00052 | A06241 | 215 | A00052 | A06258 | 232 |
| A00052 | A06286 | 402 | A00052 | A06313 | 152 |
| A00052 | A06333 | 165 | A00052 | A06442 | 154 |
| A00052 | A06449 | 296 | A00052 | A06511 | 154 |
| A00052 | A06581 | 488 | A00052 | A06588 | 491 |
| A00052 | A06597 | 491 | A00052 | A06600 | 212 |
| A00052 | A06606 | 165 | A00052 | A06607 | 491 |
| A00052 | A06608 | 945 | A00052 | A06609 | 901 |
| A00052 | A06610 | 582 | A00052 | A06615 | 63  |
| A00052 | A06623 | 452 | A00052 | A06646 | 154 |
| A00052 | A06648 | 438 | A00052 | A06650 | 488 |
| A00052 | A06677 | 176 | A00052 | A06688 | 491 |
| A00052 | A06714 | 154 | A00052 | A06748 | 243 |
| A00052 | A06795 | 313 | A00052 | A06797 | 466 |
| A00052 | A06818 | 207 | A00052 | A06949 | 491 |
| A00052 | A07059 | 157 | A00052 | A07096 | 425 |
| A00052 | A07123 | 350 | A00052 | A07135 | 553 |
| A00052 | A07141 | 383 | A00052 | A07158 | 439 |
| A00052 | A07163 | 490 | A00052 | A07165 | 940 |
| A00052 | A07177 | 156 | A00052 | A07311 | 980 |
| A00052 | A07320 | 213 | A00052 | A07339 | 489 |
| A00052 | A07381 | 247 | A00052 | A07393 | 154 |

|        |        |     |        |        |     |
|--------|--------|-----|--------|--------|-----|
| A00052 | A07422 | 945 | A00052 | A07476 | 154 |
| A00052 | A07486 | 385 | A00052 | A07546 | 193 |
| A00052 | A07628 | 154 | A00052 | A07695 | 199 |
| A00052 | A07723 | 462 | A00052 | A07964 | 154 |
| A00052 | A07971 | 371 | A00052 | A08065 | 154 |
| A00052 | A08076 | 243 | A00052 | A08221 | 346 |
| A00052 | A08349 | 154 | A00052 | A08438 | 290 |
| A00052 | A08571 | 903 | A00052 | A08572 | 436 |
| A00052 | A08608 | 402 | A00052 | A08643 | 268 |
| A00052 | A08701 | 232 | A00052 | A08738 | 258 |
| A00052 | A08782 | 154 | A00052 | A08839 | 899 |
| A00052 | A08858 | 899 | A00052 | A08862 | 386 |
| A00052 | A08865 | 899 | A00052 | A08904 | 199 |
| A00052 | A08943 | 180 | A00052 | A09016 | 154 |
| A00052 | A09020 | 358 | A00052 | A09033 | 416 |
| A00052 | A09095 | 213 | A00052 | A09220 | 904 |
| A00052 | A09260 | 154 | A00052 | A09261 | 154 |
| A00052 | A09319 | 899 | A00052 | A09383 | 930 |
| A00052 | A09428 | 200 | A00052 | A09542 | 899 |
| A00052 | A09568 | 966 | A00052 | A09577 | 927 |
| A00052 | A09644 | 283 | A00052 | A09804 | 346 |
| A00052 | A09931 | 154 | A00052 | A09937 | 217 |
| A00052 | A10014 | 200 | A00052 | A10018 | 207 |
| A00052 | A10103 | 469 | A00052 | A10148 | 434 |
| A00052 | A10174 | 899 | A00052 | A10182 | 243 |
| A00052 | A10185 | 899 | A00052 | A10233 | 899 |
| A00052 | A10238 | 246 | A00052 | A10247 | 466 |
| A00052 | A10313 | 294 | A00052 | A10365 | 932 |
| A00052 | A10392 | 899 | A00052 | A10430 | 290 |
| A00052 | A10463 | 154 | A00052 | A10510 | 200 |
| A00052 | A10512 | 154 | A00052 | A10560 | 899 |
| A00052 | A10580 | 899 | A00052 | A10623 | 899 |
| A00052 | A10625 | 455 | A00052 | A10744 | 176 |
| A00052 | A10756 | 422 | A00052 | A10801 | 899 |
| A00052 | A10808 | 917 | A00052 | A10811 | 899 |
| A00052 | A10833 | 928 | A00052 | A10857 | 154 |
| A00052 | A10888 | 213 | A00052 | A11078 | 213 |
| A00052 | A11124 | 414 | A00052 | A11125 | 899 |
| A00052 | A11174 | 243 | A00052 | A11335 | 308 |
| A00052 | A11369 | 475 | A00052 | A11392 | 174 |
| A00052 | A11485 | 196 | A00052 | A11487 | 167 |
| A00052 | A11499 | 154 | A00052 | A11820 | 704 |
| A00052 | A11896 | 243 | A00052 | A11943 | 945 |
| A00052 | A11981 | 160 | A00052 | A12124 | 374 |
| A00052 | A12373 | 301 | A00052 | A12383 | 942 |
| A00052 | A12393 | 334 | A00052 | A12510 | 154 |



|        |        |     |        |        |     |
|--------|--------|-----|--------|--------|-----|
| A00052 | A12654 | 160 | A00052 | A12664 | 899 |
| A00052 | A12705 | 899 | A00052 | A12835 | 480 |
| A00052 | A12890 | 243 | A00052 | A12915 | 243 |
| A00052 | A12916 | 213 | A00052 | A12971 | 899 |
| A00052 | A12988 | 234 | A00052 | A12993 | 154 |
| A00052 | A13207 | 188 | A00052 | A13240 | 212 |
| A00052 | A13250 | 899 | A00052 | A13391 | 916 |
| A00052 | A13393 | 899 | A00052 | A13511 | 236 |
| A00052 | A13531 | 420 | A00052 | A13584 | 154 |
| A00052 | A13615 | 154 | A00052 | A13712 | 154 |
| A00052 | A13734 | 413 | A00052 | A13917 | 475 |
| A00052 | A13945 | 899 | A00052 | A13977 | 899 |
| A00052 | A13978 | 930 | A00052 | A13981 | 989 |
| A00052 | A13985 | 899 | A00052 | A13989 | 899 |
| A00052 | A13990 | 916 | A00052 | A13999 | 899 |
| A00052 | A14000 | 899 | A00052 | A14005 | 205 |
| A00052 | A14015 | 899 | A00052 | A14019 | 899 |
| A00052 | A14024 | 899 | A00052 | A14027 | 899 |
| A00052 | A14033 | 912 | A00052 | A14035 | 899 |
| A00052 | A14038 | 899 | A00052 | A14062 | 240 |
| A00052 | A14065 | 899 | A00052 | A14188 | 899 |
| A00052 | A14190 | 945 | A00052 | A14198 | 952 |
| A00052 | A14208 | 899 | A00052 | A14366 | 182 |
| A00052 | A14371 | 486 | A00052 | A14399 | 345 |
| A00052 | A14402 | 943 | A00052 | A14443 | 989 |
| A00052 | A14444 | 899 | A00052 | A14496 | 229 |
| A00052 | A14506 | 899 | A00052 | A14511 | 174 |
| A00052 | A14605 | 490 | A00052 | A14638 | 174 |
| A00052 | A14643 | 486 | A00052 | A14648 | 485 |
| A00052 | A14784 | 154 | A00052 | A14808 | 243 |
| A00052 | A14938 | 154 | A00052 | A14975 | 154 |
| A00052 | A15233 | 314 | A00052 | A15242 | 154 |
| A00052 | A15293 | 899 | A00052 | A15294 | 907 |
| A00052 | A15295 | 544 | A00052 | A15498 | 330 |
| A00052 | A15611 | 908 | A00052 | A15665 | 245 |
| A00052 | A15726 | 944 | A00052 | A15869 | 152 |
| A00052 | A15910 | 177 | A00052 | A15932 | 200 |
| A00052 | A15935 | 207 | A00052 | A16003 | 154 |
| A00052 | A16029 | 154 | A00052 | A16100 | 215 |
| A00052 | A16281 | 235 | A00052 | A16399 | 193 |
| A00052 | A16636 | 190 | A00052 | A16741 | 449 |
| A00052 | A16847 | 290 | A00052 | A16909 | 899 |
| A00052 | A17160 | 899 | A00052 | A17188 | 899 |
| A00052 | A17203 | 163 | A00052 | A17204 | 154 |
| A00053 | A00056 | 74  | A00053 | A00057 | 63  |
| A00053 | A00067 | 899 | A00053 | A00069 | 945 |

|        |        |     |        |        |     |
|--------|--------|-----|--------|--------|-----|
| A00053 | A00081 | 490 | A00053 | A00095 | 456 |
| A00053 | A00131 | 199 | A00053 | A00157 | 899 |
| A00053 | A00159 | 899 | A00053 | A00173 | 945 |
| A00053 | A00175 | 204 | A00053 | A00196 | 372 |
| A00053 | A00209 | 899 | A00053 | A00210 | 491 |
| A00053 | A00212 | 256 | A00053 | A00219 | 288 |
| A00053 | A00221 | 286 | A00053 | A00224 | 904 |
| A00053 | A00227 | 154 | A00053 | A00228 | 461 |
| A00053 | A00230 | 902 | A00053 | A00239 | 252 |
| A00053 | A00240 | 551 | A00053 | A00243 | 412 |
| A00053 | A00246 | 905 | A00053 | A00247 | 491 |
| A00053 | A00254 | 154 | A00053 | A00267 | 324 |
| A00053 | A00309 | 165 | A00053 | A00358 | 238 |
| A00053 | A00385 | 279 | A00053 | A00413 | 213 |
| A00053 | A00446 | 228 | A00053 | A00469 | 191 |
| A00053 | A00470 | 156 | A00053 | A00473 | 171 |
| A00053 | A00776 | 268 | A00053 | A00781 | 475 |
| A00053 | A00805 | 195 | A00053 | A00816 | 446 |
| A00053 | A00932 | 491 | A00053 | A00975 | 458 |
| A00053 | A00989 | 63  | A00053 | A01009 | 63  |
| A00053 | A01014 | 299 | A00053 | A01057 | 294 |
| A00053 | A01077 | 162 | A00053 | A01124 | 107 |
| A00053 | A01157 | 191 | A00053 | A01163 | 177 |
| A00053 | A01169 | 219 | A00053 | A01289 | 156 |
| A00053 | A01325 | 395 | A00053 | A01363 | 98  |
| A00053 | A01462 | 213 | A00053 | A01485 | 483 |
| A00053 | A01524 | 902 | A00053 | A01527 | 929 |
| A00053 | A01553 | 917 | A00053 | A01558 | 899 |
| A00053 | A01561 | 927 | A00053 | A01593 | 157 |
| A00053 | A01605 | 241 | A00053 | A01615 | 899 |
| A00053 | A01624 | 235 | A00053 | A01629 | 90  |
| A00053 | A01640 | 905 | A00053 | A01718 | 945 |
| A00053 | A01722 | 165 | A00053 | A01974 | 167 |
| A00053 | A01985 | 141 | A00053 | A02017 | 170 |
| A00053 | A02035 | 267 | A00053 | A02049 | 468 |
| A00053 | A02072 | 240 | A00053 | A02091 | 266 |
| A00053 | A02106 | 489 | A00053 | A02124 | 419 |
| A00053 | A02126 | 230 | A00053 | A02148 | 241 |
| A00053 | A02185 | 469 | A00053 | A02189 | 165 |
| A00053 | A02191 | 455 | A00053 | A02233 | 288 |
| A00053 | A02239 | 227 | A00053 | A02251 | 91  |
| A00053 | A02260 | 149 | A00053 | A02278 | 363 |
| A00053 | A02291 | 152 | A00053 | A02303 | 396 |
| A00053 | A02304 | 347 | A00053 | A02322 | 199 |
| A00053 | A02360 | 174 | A00053 | A02392 | 235 |
| A00053 | A02423 | 110 | A00053 | A02424 | 288 |

|        |        |     |        |        |     |
|--------|--------|-----|--------|--------|-----|
| A00053 | A02425 | 238 | A00053 | A02463 | 151 |
| A00053 | A02465 | 191 | A00053 | A02467 | 942 |
| A00053 | A02481 | 63  | A00053 | A02501 | 215 |
| A00053 | A02583 | 180 | A00053 | A02666 | 160 |
| A00053 | A02671 | 193 | A00053 | A02760 | 279 |
| A00053 | A03041 | 380 | A00053 | A03045 | 180 |
| A00053 | A03053 | 152 | A00053 | A03054 | 398 |
| A00053 | A03055 | 191 | A00053 | A03096 | 307 |
| A00053 | A03097 | 167 | A00053 | A03110 | 346 |
| A00053 | A03115 | 333 | A00053 | A03126 | 63  |
| A00053 | A03176 | 307 | A00053 | A03177 | 472 |
| A00053 | A03209 | 467 | A00053 | A03331 | 429 |
| A00053 | A03531 | 434 | A00053 | A03633 | 319 |
| A00053 | A03642 | 276 | A00053 | A03753 | 230 |
| A00053 | A03820 | 382 | A00053 | A03942 | 345 |
| A00053 | A04074 | 479 | A00053 | A04098 | 333 |
| A00053 | A04171 | 213 | A00053 | A04180 | 185 |
| A00053 | A04181 | 213 | A00053 | A04218 | 180 |
| A00053 | A04280 | 168 | A00053 | A04347 | 759 |
| A00053 | A04351 | 162 | A00053 | A04381 | 276 |
| A00053 | A04388 | 333 | A00053 | A04394 | 230 |
| A00053 | A04417 | 230 | A00053 | A04423 | 172 |
| A00053 | A04465 | 241 | A00053 | A04471 | 199 |
| A00053 | A04751 | 173 | A00053 | A04759 | 252 |
| A00053 | A04808 | 230 | A00053 | A04813 | 156 |
| A00053 | A04911 | 299 | A00053 | A05005 | 159 |
| A00053 | A05052 | 204 | A00053 | A05276 | 165 |
| A00053 | A05826 | 235 | A00053 | A05899 | 257 |
| A00053 | A05965 | 276 | A00053 | A06234 | 241 |
| A00053 | A06243 | 257 | A00053 | A06409 | 276 |
| A00053 | A06489 | 319 | A00053 | A06517 | 266 |
| A00053 | A06538 | 333 | A00053 | A06623 | 327 |
| A00053 | A06648 | 172 | A00053 | A07063 | 213 |
| A00053 | A07091 | 899 | A00053 | A07311 | 899 |
| A00053 | A07485 | 333 | A00053 | A07614 | 288 |
| A00053 | A07615 | 333 | A00053 | A08070 | 340 |
| A00053 | A08194 | 307 | A00053 | A08810 | 274 |
| A00053 | A08869 | 360 | A00053 | A09076 | 196 |
| A00053 | A09111 | 350 | A00053 | A09196 | 266 |
| A00053 | A09200 | 184 | A00053 | A09230 | 235 |
| A00053 | A09360 | 307 | A00053 | A09784 | 174 |
| A00053 | A09814 | 199 | A00053 | A09906 | 249 |
| A00053 | A09943 | 196 | A00053 | A09970 | 288 |
| A00053 | A10210 | 235 | A00053 | A10221 | 230 |
| A00053 | A10665 | 205 | A00053 | A10949 | 272 |
| A00053 | A11014 | 168 | A00053 | A11352 | 276 |

|        |        |     |        |        |     |
|--------|--------|-----|--------|--------|-----|
| A00053 | A11584 | 202 | A00053 | A12651 | 480 |
| A00053 | A12990 | 730 | A00053 | A13443 | 288 |
| A00053 | A13537 | 266 | A00053 | A13925 | 333 |
| A00053 | A14096 | 218 | A00053 | A14190 | 283 |
| A00053 | A14267 | 308 | A00053 | A14352 | 184 |
| A00053 | A14371 | 390 | A00053 | A14443 | 900 |
| A00053 | A14642 | 215 | A00053 | A14722 | 276 |
| A00053 | A15277 | 216 | A00053 | A15493 | 235 |
| A00053 | A15498 | 385 | A00053 | A15543 | 491 |
| A00053 | A15551 | 208 | A00053 | A15704 | 213 |
| A00053 | A15795 | 193 | A00053 | A15809 | 358 |
| A00053 | A16042 | 165 | A00053 | A16911 | 210 |
| A00054 | A01307 | 201 | A00054 | A03569 | 183 |
| A00054 | A14196 | 118 | A00054 | A14208 | 168 |
| A00054 | A15314 | 174 | A00054 | A15330 | 310 |
| A00054 | A15360 | 290 | A00054 | A15361 | 257 |
| A00055 | A00073 | 165 | A00055 | A00153 | 208 |
| A00055 | A00163 | 279 | A00055 | A00166 | 352 |
| A00055 | A00167 | 438 | A00055 | A00168 | 359 |
| A00055 | A00171 | 302 | A00055 | A00211 | 290 |
| A00055 | A00219 | 247 | A00055 | A00253 | 366 |
| A00055 | A00286 | 243 | A00055 | A00294 | 256 |
| A00055 | A00316 | 454 | A00055 | A00372 | 488 |
| A00055 | A00386 | 281 | A00055 | A00396 | 744 |
| A00055 | A00400 | 201 | A00055 | A00413 | 378 |
| A00055 | A00421 | 202 | A00055 | A00426 | 490 |
| A00055 | A00429 | 486 | A00055 | A00445 | 489 |
| A00055 | A00446 | 483 | A00055 | A00496 | 154 |
| A00055 | A00498 | 417 | A00055 | A00532 | 491 |
| A00055 | A00541 | 223 | A00055 | A00552 | 441 |
| A00055 | A00560 | 232 | A00055 | A00565 | 658 |
| A00055 | A00568 | 317 | A00055 | A00571 | 491 |
| A00055 | A00609 | 227 | A00055 | A00614 | 223 |
| A00055 | A00645 | 190 | A00055 | A00658 | 490 |
| A00055 | A00664 | 544 | A00055 | A00670 | 262 |
| A00055 | A00684 | 313 | A00055 | A00718 | 165 |
| A00055 | A00719 | 536 | A00055 | A00805 | 408 |
| A00055 | A00826 | 163 | A00055 | A00831 | 165 |
| A00055 | A00835 | 486 | A00055 | A00853 | 488 |
| A00055 | A00855 | 649 | A00055 | A00862 | 490 |
| A00055 | A00868 | 353 | A00055 | A00878 | 241 |
| A00055 | A00883 | 491 | A00055 | A00888 | 396 |
| A00055 | A00916 | 307 | A00055 | A00939 | 179 |
| A00055 | A00957 | 257 | A00055 | A00968 | 553 |
| A00055 | A00971 | 232 | A00055 | A00981 | 291 |
| A00055 | A01021 | 491 | A00055 | A01022 | 313 |

|        |        |     |        |        |     |
|--------|--------|-----|--------|--------|-----|
| A00055 | A01036 | 207 | A00055 | A01052 | 217 |
| A00055 | A01074 | 709 | A00055 | A01075 | 429 |
| A00055 | A01088 | 301 | A00055 | A01091 | 491 |
| A00055 | A01097 | 165 | A00055 | A01105 | 317 |
| A00055 | A01125 | 322 | A00055 | A01132 | 224 |
| A00055 | A01143 | 162 | A00055 | A01172 | 157 |
| A00055 | A01189 | 223 | A00055 | A01209 | 642 |
| A00055 | A01211 | 480 | A00055 | A01215 | 447 |
| A00055 | A01234 | 458 | A00055 | A01243 | 441 |
| A00055 | A01244 | 463 | A00055 | A01259 | 490 |
| A00055 | A01352 | 224 | A00055 | A01353 | 488 |
| A00055 | A01354 | 256 | A00055 | A01373 | 441 |
| A00055 | A01375 | 491 | A00055 | A01386 | 241 |
| A00055 | A01406 | 491 | A00055 | A01451 | 486 |
| A00055 | A01558 | 417 | A00055 | A01588 | 268 |
| A00055 | A01598 | 204 | A00055 | A01612 | 443 |
| A00055 | A01622 | 327 | A00055 | A01660 | 409 |
| A00055 | A01679 | 317 | A00055 | A01705 | 168 |
| A00055 | A01730 | 327 | A00055 | A01995 | 413 |
| A00055 | A02180 | 461 | A00055 | A02206 | 177 |
| A00055 | A02212 | 456 | A00055 | A02219 | 481 |
| A00055 | A02335 | 223 | A00055 | A02452 | 491 |
| A00055 | A02500 | 177 | A00055 | A02789 | 223 |
| A00055 | A03057 | 486 | A00055 | A03297 | 217 |
| A00055 | A03390 | 236 | A00055 | A03401 | 491 |
| A00055 | A03436 | 346 | A00055 | A03569 | 252 |
| A00055 | A03710 | 367 | A00055 | A03719 | 223 |
| A00055 | A03728 | 486 | A00055 | A03752 | 223 |
| A00055 | A03764 | 481 | A00055 | A03817 | 301 |
| A00055 | A03990 | 454 | A00055 | A04171 | 249 |
| A00055 | A04178 | 218 | A00055 | A04189 | 263 |
| A00055 | A04190 | 190 | A00055 | A04403 | 205 |
| A00055 | A04640 | 312 | A00055 | A04773 | 235 |
| A00055 | A04844 | 254 | A00055 | A05016 | 232 |
| A00055 | A05058 | 196 | A00055 | A05327 | 258 |
| A00055 | A05332 | 317 | A00055 | A05609 | 317 |
| A00055 | A05690 | 163 | A00055 | A05967 | 276 |
| A00055 | A06010 | 173 | A00055 | A06085 | 328 |
| A00055 | A06162 | 491 | A00055 | A06472 | 428 |
| A00055 | A06502 | 312 | A00055 | A06660 | 201 |
| A00055 | A06689 | 223 | A00055 | A06819 | 223 |
| A00055 | A06907 | 428 | A00055 | A06924 | 486 |
| A00055 | A06990 | 165 | A00055 | A07054 | 317 |
| A00055 | A07222 | 317 | A00055 | A07333 | 317 |
| A00055 | A07339 | 361 | A00055 | A07571 | 317 |
| A00055 | A07598 | 174 | A00055 | A07604 | 423 |

|        |        |     |        |        |     |
|--------|--------|-----|--------|--------|-----|
| A00055 | A07706 | 180 | A00055 | A07880 | 481 |
| A00055 | A07927 | 263 | A00055 | A07942 | 157 |
| A00055 | A07953 | 263 | A00055 | A07956 | 274 |
| A00055 | A07974 | 321 | A00055 | A08097 | 317 |
| A00055 | A08137 | 451 | A00055 | A08281 | 367 |
| A00055 | A08376 | 168 | A00055 | A08571 | 424 |
| A00055 | A08982 | 419 | A00055 | A09067 | 285 |
| A00055 | A09340 | 317 | A00055 | A09346 | 202 |
| A00055 | A09781 | 263 | A00055 | A10090 | 160 |
| A00055 | A11121 | 355 | A00055 | A11277 | 224 |
| A00055 | A11291 | 361 | A00055 | A11385 | 380 |
| A00055 | A11394 | 245 | A00055 | A11398 | 201 |
| A00055 | A11574 | 411 | A00055 | A11614 | 414 |
| A00055 | A11767 | 191 | A00055 | A12020 | 240 |
| A00055 | A12363 | 245 | A00055 | A12415 | 263 |
| A00055 | A12598 | 190 | A00055 | A12966 | 312 |
| A00055 | A13081 | 168 | A00055 | A13822 | 223 |
| A00055 | A13876 | 224 | A00055 | A14006 | 267 |
| A00055 | A14196 | 548 | A00055 | A14221 | 271 |
| A00055 | A14266 | 260 | A00055 | A14272 | 188 |
| A00055 | A14394 | 274 | A00055 | A14452 | 443 |
| A00055 | A14511 | 396 | A00055 | A14525 | 223 |
| A00055 | A14690 | 290 | A00055 | A14804 | 223 |
| A00055 | A15232 | 263 | A00055 | A15237 | 374 |
| A00055 | A15273 | 235 | A00055 | A15297 | 491 |
| A00055 | A15309 | 488 | A00055 | A15323 | 537 |
| A00055 | A15324 | 324 | A00055 | A15338 | 291 |
| A00055 | A15355 | 208 | A00055 | A15366 | 473 |
| A00055 | A15372 | 310 | A00055 | A15419 | 451 |
| A00055 | A15431 | 408 | A00055 | A15510 | 180 |
| A00055 | A15559 | 486 | A00055 | A15564 | 310 |
| A00055 | A15747 | 380 | A00055 | A15788 | 512 |
| A00055 | A15837 | 491 | A00055 | A15867 | 223 |
| A00055 | A16219 | 223 | A00055 | A16410 | 249 |
| A00055 | A16531 | 223 | A00055 | A16861 | 190 |
| A00055 | A17063 | 475 | A00056 | A00057 | 945 |
| A00056 | A00058 | 899 | A00056 | A00059 | 900 |
| A00056 | A00061 | 491 | A00056 | A00063 | 463 |
| A00056 | A00067 | 909 | A00056 | A00069 | 443 |
| A00056 | A00073 | 899 | A00056 | A00076 | 200 |
| A00056 | A00078 | 124 | A00056 | A00080 | 375 |
| A00056 | A00081 | 63  | A00056 | A00085 | 198 |
| A00056 | A00086 | 213 | A00056 | A00109 | 491 |
| A00056 | A00111 | 173 | A00056 | A00112 | 407 |
| A00056 | A00119 | 204 | A00056 | A00123 | 945 |
| A00056 | A00125 | 490 | A00056 | A00152 | 952 |

|        |        |     |        |        |     |
|--------|--------|-----|--------|--------|-----|
| A00056 | A00153 | 490 | A00056 | A00157 | 915 |
| A00056 | A00158 | 447 | A00056 | A00163 | 488 |
| A00056 | A00167 | 937 | A00056 | A00173 | 256 |
| A00056 | A00174 | 293 | A00056 | A00189 | 396 |
| A00056 | A00190 | 484 | A00056 | A00195 | 283 |
| A00056 | A00196 | 419 | A00056 | A00198 | 398 |
| A00056 | A00204 | 929 | A00056 | A00209 | 942 |
| A00056 | A00210 | 115 | A00056 | A00219 | 484 |
| A00056 | A00220 | 491 | A00056 | A00221 | 180 |
| A00056 | A00233 | 239 | A00056 | A00234 | 251 |
| A00056 | A00238 | 899 | A00056 | A00239 | 362 |
| A00056 | A00240 | 154 | A00056 | A00246 | 899 |
| A00056 | A00248 | 332 | A00056 | A00255 | 346 |
| A00056 | A00261 | 372 | A00056 | A00264 | 945 |
| A00056 | A00274 | 491 | A00056 | A00292 | 486 |
| A00056 | A00309 | 260 | A00056 | A00331 | 207 |
| A00056 | A00338 | 339 | A00056 | A00472 | 308 |
| A00056 | A00476 | 460 | A00056 | A00561 | 899 |
| A00056 | A00616 | 574 | A00056 | A00625 | 195 |
| A00056 | A00630 | 356 | A00056 | A00688 | 465 |
| A00056 | A00694 | 451 | A00056 | A00736 | 347 |
| A00056 | A00752 | 475 | A00056 | A00786 | 202 |
| A00056 | A00799 | 899 | A00056 | A00804 | 160 |
| A00056 | A00875 | 356 | A00056 | A00911 | 208 |
| A00056 | A00914 | 369 | A00056 | A00981 | 541 |
| A00056 | A01009 | 479 | A00056 | A01049 | 385 |
| A00056 | A01125 | 163 | A00056 | A01138 | 213 |
| A00056 | A01161 | 276 | A00056 | A01169 | 537 |
| A00056 | A01178 | 65  | A00056 | A01277 | 260 |
| A00056 | A01289 | 457 | A00056 | A01461 | 190 |
| A00056 | A01514 | 188 | A00056 | A01515 | 216 |
| A00056 | A01524 | 945 | A00056 | A01527 | 945 |
| A00056 | A01574 | 224 | A00056 | A01575 | 168 |
| A00056 | A01585 | 185 | A00056 | A01604 | 490 |
| A00056 | A01640 | 160 | A00056 | A01650 | 152 |
| A00056 | A01654 | 491 | A00056 | A01658 | 469 |
| A00056 | A01663 | 383 | A00056 | A01668 | 277 |
| A00056 | A01683 | 256 | A00056 | A01691 | 399 |
| A00056 | A01704 | 416 | A00056 | A01709 | 899 |
| A00056 | A01729 | 229 | A00056 | A01741 | 479 |
| A00056 | A01743 | 373 | A00056 | A01747 | 470 |
| A00056 | A01767 | 297 | A00056 | A01799 | 213 |
| A00056 | A01867 | 297 | A00056 | A01870 | 488 |
| A00056 | A01876 | 179 | A00056 | A01879 | 383 |
| A00056 | A01880 | 485 | A00056 | A01881 | 409 |
| A00056 | A01887 | 172 | A00056 | A01888 | 488 |

|        |        |     |        |        |     |
|--------|--------|-----|--------|--------|-----|
| A00056 | A01889 | 297 | A00056 | A01890 | 307 |
| A00056 | A01936 | 215 | A00056 | A01984 | 177 |
| A00056 | A02000 | 191 | A00056 | A02006 | 245 |
| A00056 | A02015 | 173 | A00056 | A02044 | 77  |
| A00056 | A02052 | 374 | A00056 | A02111 | 296 |
| A00056 | A02138 | 174 | A00056 | A02141 | 135 |
| A00056 | A02143 | 491 | A00056 | A02164 | 229 |
| A00056 | A02170 | 369 | A00056 | A02176 | 238 |
| A00056 | A02186 | 157 | A00056 | A02217 | 210 |
| A00056 | A02247 | 322 | A00056 | A02248 | 474 |
| A00056 | A02249 | 190 | A00056 | A02251 | 473 |
| A00056 | A02263 | 177 | A00056 | A02278 | 401 |
| A00056 | A02281 | 267 | A00056 | A02288 | 157 |
| A00056 | A02298 | 205 | A00056 | A02299 | 173 |
| A00056 | A02300 | 162 | A00056 | A02307 | 249 |
| A00056 | A02333 | 461 | A00056 | A02337 | 221 |
| A00056 | A02382 | 490 | A00056 | A02384 | 279 |
| A00056 | A02416 | 491 | A00056 | A02417 | 297 |
| A00056 | A02418 | 138 | A00056 | A02423 | 347 |
| A00056 | A02424 | 63  | A00056 | A02439 | 380 |
| A00056 | A02464 | 71  | A00056 | A02465 | 129 |
| A00056 | A02471 | 154 | A00056 | A02473 | 363 |
| A00056 | A02481 | 63  | A00056 | A02488 | 322 |
| A00056 | A02490 | 486 | A00056 | A02491 | 490 |
| A00056 | A02493 | 396 | A00056 | A02494 | 490 |
| A00056 | A02495 | 234 | A00056 | A02497 | 322 |
| A00056 | A02515 | 201 | A00056 | A02575 | 341 |
| A00056 | A02579 | 234 | A00056 | A02582 | 378 |
| A00056 | A02585 | 168 | A00056 | A02590 | 301 |
| A00056 | A02593 | 177 | A00056 | A02606 | 399 |
| A00056 | A02609 | 188 | A00056 | A02615 | 484 |
| A00056 | A02616 | 468 | A00056 | A02624 | 386 |
| A00056 | A02629 | 202 | A00056 | A02632 | 260 |
| A00056 | A02638 | 435 | A00056 | A02639 | 458 |
| A00056 | A02659 | 208 | A00056 | A02668 | 177 |
| A00056 | A02674 | 177 | A00056 | A02693 | 268 |
| A00056 | A02698 | 488 | A00056 | A02711 | 454 |
| A00056 | A02730 | 260 | A00056 | A02733 | 196 |
| A00056 | A02745 | 228 | A00056 | A02749 | 184 |
| A00056 | A02756 | 288 | A00056 | A02769 | 353 |
| A00056 | A02771 | 112 | A00056 | A02783 | 327 |
| A00056 | A02787 | 391 | A00056 | A02788 | 486 |
| A00056 | A02812 | 205 | A00056 | A02819 | 463 |
| A00056 | A02836 | 452 | A00056 | A02837 | 291 |
| A00056 | A02854 | 245 | A00056 | A02859 | 363 |
| A00056 | A02863 | 477 | A00056 | A02874 | 188 |



|        |        |     |        |        |     |
|--------|--------|-----|--------|--------|-----|
| A00056 | A02875 | 199 | A00056 | A02884 | 151 |
| A00056 | A02896 | 456 | A00056 | A02917 | 484 |
| A00056 | A02931 | 366 | A00056 | A02944 | 252 |
| A00056 | A02945 | 486 | A00056 | A02955 | 174 |
| A00056 | A03014 | 308 | A00056 | A03051 | 283 |
| A00056 | A03053 | 107 | A00056 | A03055 | 366 |
| A00056 | A03063 | 201 | A00056 | A03068 | 944 |
| A00056 | A03081 | 480 | A00056 | A03093 | 208 |
| A00056 | A03095 | 205 | A00056 | A03110 | 446 |
| A00056 | A03128 | 219 | A00056 | A03129 | 173 |
| A00056 | A03183 | 486 | A00056 | A03185 | 380 |
| A00056 | A03186 | 416 | A00056 | A03218 | 216 |
| A00056 | A03219 | 435 | A00056 | A03224 | 480 |
| A00056 | A03228 | 400 | A00056 | A03243 | 208 |
| A00056 | A03259 | 507 | A00056 | A03263 | 408 |
| A00056 | A03282 | 191 | A00056 | A03305 | 297 |
| A00056 | A03315 | 232 | A00056 | A03319 | 157 |
| A00056 | A03386 | 297 | A00056 | A03390 | 223 |
| A00056 | A03399 | 180 | A00056 | A03436 | 151 |
| A00056 | A03438 | 477 | A00056 | A03451 | 463 |
| A00056 | A03488 | 452 | A00056 | A03537 | 188 |
| A00056 | A03540 | 168 | A00056 | A03610 | 412 |
| A00056 | A03630 | 435 | A00056 | A03636 | 238 |
| A00056 | A03639 | 196 | A00056 | A03695 | 201 |
| A00056 | A03748 | 243 | A00056 | A03753 | 270 |
| A00056 | A03790 | 375 | A00056 | A03797 | 173 |
| A00056 | A03844 | 165 | A00056 | A03848 | 157 |
| A00056 | A03898 | 267 | A00056 | A03934 | 322 |
| A00056 | A03942 | 343 | A00056 | A03949 | 490 |
| A00056 | A03976 | 251 | A00056 | A03989 | 151 |
| A00056 | A04030 | 210 | A00056 | A04040 | 246 |
| A00056 | A04078 | 185 | A00056 | A04138 | 232 |
| A00056 | A04159 | 219 | A00056 | A04201 | 271 |
| A00056 | A04226 | 246 | A00056 | A04237 | 195 |
| A00056 | A04238 | 297 | A00056 | A04244 | 335 |
| A00056 | A04248 | 475 | A00056 | A04257 | 451 |
| A00056 | A04263 | 313 | A00056 | A04267 | 210 |
| A00056 | A04276 | 230 | A00056 | A04280 | 451 |
| A00056 | A04289 | 219 | A00056 | A04334 | 167 |
| A00056 | A04370 | 177 | A00056 | A04372 | 195 |
| A00056 | A04398 | 945 | A00056 | A04402 | 195 |
| A00056 | A04417 | 167 | A00056 | A04439 | 201 |
| A00056 | A04449 | 212 | A00056 | A04462 | 210 |
| A00056 | A04468 | 168 | A00056 | A04473 | 352 |
| A00056 | A04484 | 435 | A00056 | A04488 | 177 |
| A00056 | A04492 | 224 | A00056 | A04517 | 335 |

|        |        |     |        |        |     |
|--------|--------|-----|--------|--------|-----|
| A00056 | A04536 | 345 | A00056 | A04539 | 188 |
| A00056 | A04541 | 173 | A00056 | A04567 | 191 |
| A00056 | A04589 | 393 | A00056 | A04609 | 168 |
| A00056 | A04614 | 283 | A00056 | A04622 | 432 |
| A00056 | A04643 | 348 | A00056 | A04690 | 246 |
| A00056 | A04750 | 201 | A00056 | A04759 | 188 |
| A00056 | A04762 | 267 | A00056 | A04794 | 246 |
| A00056 | A04795 | 154 | A00056 | A04842 | 162 |
| A00056 | A04855 | 219 | A00056 | A04865 | 380 |
| A00056 | A04878 | 401 | A00056 | A04909 | 335 |
| A00056 | A04961 | 265 | A00056 | A04985 | 481 |
| A00056 | A04989 | 183 | A00056 | A04992 | 201 |
| A00056 | A04996 | 210 | A00056 | A05066 | 177 |
| A00056 | A05090 | 183 | A00056 | A05155 | 682 |
| A00056 | A05236 | 246 | A00056 | A05250 | 307 |
| A00056 | A05283 | 183 | A00056 | A05309 | 229 |
| A00056 | A05350 | 201 | A00056 | A05431 | 452 |
| A00056 | A05545 | 154 | A00056 | A05558 | 201 |
| A00056 | A05607 | 483 | A00056 | A05613 | 173 |
| A00056 | A05679 | 414 | A00056 | A05709 | 257 |
| A00056 | A05901 | 195 | A00056 | A05959 | 173 |
| A00056 | A05960 | 210 | A00056 | A05985 | 383 |
| A00056 | A05989 | 219 | A00056 | A06095 | 271 |
| A00056 | A06211 | 286 | A00056 | A06313 | 363 |
| A00056 | A06414 | 401 | A00056 | A06415 | 484 |
| A00056 | A06623 | 461 | A00056 | A06650 | 229 |
| A00056 | A06672 | 297 | A00056 | A06728 | 210 |
| A00056 | A06807 | 177 | A00056 | A06825 | 265 |
| A00056 | A06901 | 246 | A00056 | A06955 | 157 |
| A00056 | A07116 | 168 | A00056 | A07131 | 383 |
| A00056 | A07134 | 246 | A00056 | A07142 | 168 |
| A00056 | A07145 | 490 | A00056 | A07152 | 318 |
| A00056 | A07157 | 435 | A00056 | A07158 | 345 |
| A00056 | A07161 | 262 | A00056 | A07164 | 383 |
| A00056 | A07165 | 351 | A00056 | A07166 | 355 |
| A00056 | A07173 | 491 | A00056 | A07192 | 232 |
| A00056 | A07205 | 162 | A00056 | A07227 | 384 |
| A00056 | A07242 | 167 | A00056 | A07331 | 195 |
| A00056 | A07372 | 165 | A00056 | A07421 | 483 |
| A00056 | A07495 | 163 | A00056 | A07557 | 177 |
| A00056 | A07587 | 173 | A00056 | A07665 | 229 |
| A00056 | A08254 | 267 | A00056 | A08612 | 334 |
| A00056 | A08704 | 201 | A00056 | A08828 | 188 |
| A00056 | A08930 | 160 | A00056 | A09011 | 307 |
| A00056 | A09017 | 183 | A00056 | A09070 | 246 |
| A00056 | A09112 | 201 | A00056 | A09120 | 195 |

|        |        |     |        |        |     |
|--------|--------|-----|--------|--------|-----|
| A00056 | A09208 | 188 | A00056 | A09263 | 176 |
| A00056 | A09390 | 246 | A00056 | A09433 | 383 |
| A00056 | A09449 | 199 | A00056 | A09464 | 204 |
| A00056 | A09513 | 210 | A00056 | A09523 | 267 |
| A00056 | A09548 | 389 | A00056 | A09555 | 246 |
| A00056 | A09570 | 424 | A00056 | A09871 | 908 |
| A00056 | A09959 | 232 | A00056 | A09967 | 246 |
| A00056 | A09970 | 246 | A00056 | A10055 | 173 |
| A00056 | A10074 | 267 | A00056 | A10084 | 210 |
| A00056 | A10166 | 297 | A00056 | A10273 | 232 |
| A00056 | A10455 | 173 | A00056 | A10655 | 356 |
| A00056 | A10731 | 246 | A00056 | A10791 | 491 |
| A00056 | A10940 | 195 | A00056 | A10977 | 246 |
| A00056 | A10985 | 232 | A00056 | A11004 | 297 |
| A00056 | A11023 | 341 | A00056 | A11086 | 154 |
| A00056 | A11090 | 183 | A00056 | A11125 | 906 |
| A00056 | A11150 | 255 | A00056 | A11281 | 417 |
| A00056 | A11400 | 210 | A00056 | A11487 | 199 |
| A00056 | A11779 | 456 | A00056 | A11937 | 165 |
| A00056 | A12365 | 356 | A00056 | A12529 | 232 |
| A00056 | A12913 | 246 | A00056 | A12971 | 196 |
| A00056 | A13369 | 587 | A00056 | A13617 | 180 |
| A00056 | A13860 | 311 | A00056 | A13872 | 177 |
| A00056 | A13902 | 356 | A00056 | A14071 | 422 |
| A00056 | A14146 | 212 | A00056 | A14190 | 469 |
| A00056 | A14194 | 294 | A00056 | A14202 | 308 |
| A00056 | A14236 | 488 | A00056 | A14366 | 491 |
| A00056 | A14372 | 191 | A00056 | A14374 | 467 |
| A00056 | A14378 | 408 | A00056 | A14391 | 483 |
| A00056 | A14399 | 236 | A00056 | A14439 | 160 |
| A00056 | A14443 | 899 | A00056 | A14511 | 174 |
| A00056 | A14535 | 177 | A00056 | A14544 | 232 |
| A00056 | A14554 | 208 | A00056 | A14606 | 232 |
| A00056 | A14613 | 177 | A00056 | A14642 | 215 |
| A00056 | A14643 | 226 | A00056 | A14680 | 297 |
| A00056 | A14784 | 297 | A00056 | A14924 | 297 |
| A00056 | A15241 | 479 | A00056 | A15278 | 210 |
| A00056 | A15336 | 293 | A00056 | A15394 | 485 |
| A00056 | A15395 | 486 | A00056 | A15425 | 423 |
| A00056 | A15427 | 363 | A00056 | A15506 | 173 |
| A00056 | A15518 | 366 | A00056 | A15601 | 326 |
| A00056 | A15603 | 446 | A00056 | A15605 | 396 |
| A00056 | A15608 | 279 | A00056 | A15630 | 159 |
| A00056 | A15641 | 368 | A00056 | A15795 | 438 |
| A00056 | A15806 | 408 | A00056 | A15964 | 446 |
| A00056 | A15973 | 210 | A00056 | A16047 | 246 |

|        |        |     |        |        |     |
|--------|--------|-----|--------|--------|-----|
| A00056 | A16112 | 383 | A00056 | A16222 | 358 |
| A00056 | A16300 | 238 | A00056 | A16450 | 224 |
| A00056 | A16636 | 458 | A00056 | A16738 | 240 |
| A00057 | A00063 | 488 | A00057 | A00069 | 469 |
| A00057 | A00077 | 167 | A00057 | A00079 | 168 |
| A00057 | A00080 | 486 | A00057 | A00081 | 221 |
| A00057 | A00083 | 291 | A00057 | A00085 | 477 |
| A00057 | A00106 | 63  | A00057 | A00111 | 235 |
| A00057 | A00112 | 458 | A00057 | A00125 | 267 |
| A00057 | A00152 | 491 | A00057 | A00153 | 373 |
| A00057 | A00167 | 943 | A00057 | A00168 | 157 |
| A00057 | A00190 | 491 | A00057 | A00196 | 388 |
| A00057 | A00204 | 488 | A00057 | A00209 | 935 |
| A00057 | A00210 | 63  | A00057 | A00212 | 200 |
| A00057 | A00219 | 491 | A00057 | A00220 | 477 |
| A00057 | A00227 | 195 | A00057 | A00232 | 486 |
| A00057 | A00233 | 465 | A00057 | A00264 | 945 |
| A00057 | A00274 | 417 | A00057 | A00292 | 477 |
| A00057 | A00352 | 329 | A00057 | A00438 | 151 |
| A00057 | A00473 | 412 | A00057 | A00476 | 491 |
| A00057 | A00478 | 322 | A00057 | A00509 | 374 |
| A00057 | A00519 | 223 | A00057 | A00524 | 223 |
| A00057 | A00526 | 223 | A00057 | A00616 | 491 |
| A00057 | A00658 | 223 | A00057 | A00659 | 301 |
| A00057 | A00687 | 231 | A00057 | A00715 | 223 |
| A00057 | A00736 | 477 | A00057 | A00752 | 474 |
| A00057 | A00797 | 163 | A00057 | A00799 | 226 |
| A00057 | A00871 | 530 | A00057 | A00914 | 480 |
| A00057 | A00986 | 223 | A00057 | A01006 | 154 |
| A00057 | A01009 | 479 | A00057 | A01111 | 223 |
| A00057 | A01118 | 223 | A00057 | A01161 | 313 |
| A00057 | A01202 | 223 | A00057 | A01208 | 223 |
| A00057 | A01215 | 230 | A00057 | A01228 | 223 |
| A00057 | A01235 | 160 | A00057 | A01257 | 159 |
| A00057 | A01277 | 443 | A00057 | A01307 | 281 |
| A00057 | A01353 | 323 | A00057 | A01524 | 152 |
| A00057 | A01527 | 944 | A00057 | A01567 | 424 |
| A00057 | A01604 | 491 | A00057 | A01628 | 213 |
| A00057 | A01629 | 167 | A00057 | A01654 | 396 |
| A00057 | A01658 | 281 | A00057 | A01663 | 191 |
| A00057 | A01668 | 404 | A00057 | A01676 | 352 |
| A00057 | A01704 | 462 | A00057 | A01736 | 223 |
| A00057 | A01741 | 435 | A00057 | A01743 | 450 |
| A00057 | A01775 | 270 | A00057 | A01791 | 157 |
| A00057 | A01809 | 401 | A00057 | A01867 | 329 |
| A00057 | A01870 | 491 | A00057 | A01879 | 218 |

|        |        |     |        |        |     |
|--------|--------|-----|--------|--------|-----|
| A00057 | A01899 | 182 | A00057 | A01931 | 63  |
| A00057 | A01944 | 195 | A00057 | A02030 | 299 |
| A00057 | A02041 | 223 | A00057 | A02051 | 223 |
| A00057 | A02074 | 165 | A00057 | A02089 | 200 |
| A00057 | A02111 | 151 | A00057 | A02143 | 481 |
| A00057 | A02170 | 228 | A00057 | A02174 | 177 |
| A00057 | A02186 | 193 | A00057 | A02242 | 174 |
| A00057 | A02248 | 107 | A00057 | A02250 | 95  |
| A00057 | A02251 | 477 | A00057 | A02255 | 318 |
| A00057 | A02260 | 256 | A00057 | A02262 | 152 |
| A00057 | A02268 | 467 | A00057 | A02275 | 171 |
| A00057 | A02278 | 204 | A00057 | A02281 | 396 |
| A00057 | A02298 | 436 | A00057 | A02299 | 200 |
| A00057 | A02307 | 288 | A00057 | A02309 | 238 |
| A00057 | A02319 | 246 | A00057 | A02331 | 469 |
| A00057 | A02333 | 441 | A00057 | A02350 | 156 |
| A00057 | A02367 | 318 | A00057 | A02380 | 168 |
| A00057 | A02381 | 159 | A00057 | A02382 | 269 |
| A00057 | A02415 | 405 | A00057 | A02416 | 463 |
| A00057 | A02417 | 324 | A00057 | A02418 | 173 |
| A00057 | A02423 | 201 | A00057 | A02424 | 70  |
| A00057 | A02427 | 218 | A00057 | A02454 | 457 |
| A00057 | A02460 | 345 | A00057 | A02465 | 162 |
| A00057 | A02468 | 293 | A00057 | A02471 | 180 |
| A00057 | A02488 | 356 | A00057 | A02490 | 485 |
| A00057 | A02491 | 457 | A00057 | A02493 | 443 |
| A00057 | A02494 | 462 | A00057 | A02498 | 337 |
| A00057 | A02505 | 171 | A00057 | A02546 | 195 |
| A00057 | A02549 | 177 | A00057 | A02575 | 314 |
| A00057 | A02578 | 152 | A00057 | A02579 | 404 |
| A00057 | A02582 | 353 | A00057 | A02590 | 333 |
| A00057 | A02607 | 63  | A00057 | A02620 | 180 |
| A00057 | A02624 | 488 | A00057 | A02654 | 469 |
| A00057 | A02667 | 151 | A00057 | A02668 | 457 |
| A00057 | A02669 | 154 | A00057 | A02709 | 215 |
| A00057 | A02727 | 263 | A00057 | A02745 | 165 |
| A00057 | A02754 | 263 | A00057 | A02756 | 384 |
| A00057 | A02771 | 243 | A00057 | A02772 | 154 |
| A00057 | A02787 | 485 | A00057 | A02788 | 296 |
| A00057 | A02820 | 297 | A00057 | A02839 | 213 |
| A00057 | A02847 | 238 | A00057 | A02851 | 152 |
| A00057 | A02859 | 455 | A00057 | A02864 | 246 |
| A00057 | A02865 | 174 | A00057 | A02874 | 204 |
| A00057 | A02875 | 165 | A00057 | A02885 | 236 |
| A00057 | A02896 | 486 | A00057 | A02901 | 163 |
| A00057 | A02916 | 180 | A00057 | A02920 | 291 |

|        |        |     |        |        |     |
|--------|--------|-----|--------|--------|-----|
| A00057 | A02931 | 198 | A00057 | A02944 | 363 |
| A00057 | A02945 | 389 | A00057 | A02947 | 156 |
| A00057 | A02953 | 221 | A00057 | A02961 | 297 |
| A00057 | A02971 | 317 | A00057 | A02972 | 323 |
| A00057 | A02975 | 174 | A00057 | A03045 | 425 |
| A00057 | A03049 | 160 | A00057 | A03053 | 132 |
| A00057 | A03063 | 229 | A00057 | A03081 | 210 |
| A00057 | A03110 | 367 | A00057 | A03124 | 290 |
| A00057 | A03127 | 162 | A00057 | A03128 | 246 |
| A00057 | A03156 | 193 | A00057 | A03157 | 198 |
| A00057 | A03169 | 223 | A00057 | A03173 | 271 |
| A00057 | A03185 | 188 | A00057 | A03186 | 345 |
| A00057 | A03206 | 356 | A00057 | A03224 | 945 |
| A00057 | A03259 | 208 | A00057 | A03271 | 313 |
| A00057 | A03275 | 157 | A00057 | A03312 | 317 |
| A00057 | A03316 | 311 | A00057 | A03540 | 195 |
| A00057 | A03610 | 221 | A00057 | A03630 | 335 |
| A00057 | A03639 | 419 | A00057 | A03749 | 154 |
| A00057 | A03788 | 382 | A00057 | A03803 | 306 |
| A00057 | A03821 | 202 | A00057 | A03904 | 238 |
| A00057 | A03913 | 285 | A00057 | A03935 | 204 |
| A00057 | A03949 | 324 | A00057 | A03977 | 154 |
| A00057 | A03989 | 177 | A00057 | A04040 | 278 |
| A00057 | A04051 | 234 | A00057 | A04092 | 205 |
| A00057 | A04110 | 322 | A00057 | A04159 | 246 |
| A00057 | A04206 | 160 | A00057 | A04218 | 157 |
| A00057 | A04221 | 210 | A00057 | A04225 | 215 |
| A00057 | A04226 | 271 | A00057 | A04237 | 221 |
| A00057 | A04244 | 269 | A00057 | A04247 | 215 |
| A00057 | A04257 | 180 | A00057 | A04304 | 180 |
| A00057 | A04372 | 221 | A00057 | A04398 | 424 |
| A00057 | A04402 | 221 | A00057 | A04447 | 223 |
| A00057 | A04450 | 195 | A00057 | A04462 | 236 |
| A00057 | A04467 | 271 | A00057 | A04468 | 195 |
| A00057 | A04481 | 204 | A00057 | A04508 | 290 |
| A00057 | A04566 | 257 | A00057 | A04613 | 180 |
| A00057 | A04620 | 168 | A00057 | A04741 | 221 |
| A00057 | A04748 | 215 | A00057 | A04750 | 229 |
| A00057 | A04756 | 243 | A00057 | A04854 | 257 |
| A00057 | A04912 | 236 | A00057 | A04916 | 257 |
| A00057 | A04985 | 308 | A00057 | A04989 | 210 |
| A00057 | A05079 | 200 | A00057 | A05124 | 185 |
| A00057 | A05353 | 157 | A00057 | A05463 | 353 |
| A00057 | A05477 | 188 | A00057 | A05641 | 168 |
| A00057 | A05709 | 156 | A00057 | A05952 | 246 |
| A00057 | A05959 | 200 | A00057 | A05965 | 257 |

|        |        |     |        |        |     |
|--------|--------|-----|--------|--------|-----|
| A00057 | A05968 | 200 | A00057 | A05985 | 409 |
| A00057 | A06095 | 167 | A00057 | A06149 | 341 |
| A00057 | A06211 | 180 | A00057 | A06370 | 191 |
| A00057 | A06414 | 446 | A00057 | A06415 | 422 |
| A00057 | A06558 | 257 | A00057 | A06807 | 204 |
| A00057 | A06901 | 271 | A00057 | A06911 | 236 |
| A00057 | A06927 | 318 | A00057 | A07006 | 236 |
| A00057 | A07087 | 215 | A00057 | A07131 | 396 |
| A00057 | A07135 | 323 | A00057 | A07138 | 481 |
| A00057 | A07140 | 394 | A00057 | A07141 | 177 |
| A00057 | A07145 | 393 | A00057 | A07152 | 204 |
| A00057 | A07157 | 413 | A00057 | A07164 | 218 |
| A00057 | A07173 | 457 | A00057 | A07209 | 489 |
| A00057 | A07265 | 223 | A00057 | A07421 | 243 |
| A00057 | A07588 | 223 | A00057 | A07655 | 260 |
| A00057 | A07748 | 191 | A00057 | A08163 | 191 |
| A00057 | A08612 | 356 | A00057 | A08667 | 271 |
| A00057 | A08688 | 443 | A00057 | A08929 | 241 |
| A00057 | A08955 | 223 | A00057 | A08971 | 223 |
| A00057 | A09013 | 318 | A00057 | A09017 | 210 |
| A00057 | A09148 | 246 | A00057 | A09163 | 318 |
| A00057 | A09219 | 172 | A00057 | A09263 | 219 |
| A00057 | A09388 | 251 | A00057 | A09390 | 447 |
| A00057 | A09433 | 191 | A00057 | A09890 | 174 |
| A00057 | A09979 | 271 | A00057 | A09985 | 180 |
| A00057 | A10018 | 154 | A00057 | A10190 | 271 |
| A00057 | A10254 | 271 | A00057 | A10470 | 345 |
| A00057 | A10640 | 267 | A00057 | A10755 | 223 |
| A00057 | A10791 | 441 | A00057 | A10905 | 160 |
| A00057 | A11020 | 246 | A00057 | A11070 | 215 |
| A00057 | A11140 | 299 | A00057 | A11195 | 215 |
| A00057 | A11202 | 223 | A00057 | A11206 | 160 |
| A00057 | A11262 | 167 | A00057 | A11318 | 366 |
| A00057 | A11556 | 163 | A00057 | A11566 | 257 |
| A00057 | A11667 | 375 | A00057 | A12581 | 271 |
| A00057 | A12719 | 229 | A00057 | A13298 | 223 |
| A00057 | A13419 | 257 | A00057 | A13447 | 204 |
| A00057 | A13726 | 252 | A00057 | A13872 | 213 |
| A00057 | A13906 | 168 | A00057 | A14190 | 163 |
| A00057 | A14199 | 201 | A00057 | A14216 | 223 |
| A00057 | A14366 | 424 | A00057 | A14374 | 489 |
| A00057 | A14387 | 383 | A00057 | A14391 | 328 |
| A00057 | A14416 | 167 | A00057 | A14430 | 333 |
| A00057 | A14439 | 469 | A00057 | A14554 | 333 |
| A00057 | A14599 | 385 | A00057 | A14603 | 215 |
| A00057 | A14604 | 322 | A00057 | A14643 | 188 |

|        |        |     |        |        |     |
|--------|--------|-----|--------|--------|-----|
| A00057 | A14650 | 229 | A00057 | A14685 | 229 |
| A00057 | A15285 | 428 | A00057 | A15290 | 160 |
| A00057 | A15394 | 480 | A00057 | A15395 | 383 |
| A00057 | A15425 | 182 | A00057 | A15516 | 294 |
| A00057 | A15517 | 236 | A00057 | A15518 | 168 |
| A00057 | A15603 | 339 | A00057 | A15640 | 246 |
| A00057 | A15642 | 180 | A00057 | A15789 | 210 |
| A00057 | A15795 | 485 | A00057 | A15800 | 385 |
| A00057 | A15806 | 154 | A00057 | A15826 | 191 |
| A00057 | A15832 | 236 | A00057 | A15962 | 165 |
| A00057 | A16007 | 160 | A00057 | A16008 | 172 |
| A00057 | A16010 | 318 | A00057 | A16014 | 257 |
| A00057 | A16037 | 257 | A00057 | A16112 | 191 |
| A00057 | A16232 | 221 | A00057 | A16323 | 152 |
| A00057 | A16636 | 460 | A00057 | A16887 | 229 |
| A00057 | A17155 | 154 | A00058 | A00059 | 945 |
| A00058 | A00067 | 899 | A00058 | A00073 | 958 |
| A00058 | A00074 | 455 | A00058 | A00094 | 571 |
| A00058 | A00118 | 711 | A00058 | A00129 | 341 |
| A00058 | A00132 | 707 | A00058 | A00138 | 477 |
| A00058 | A00140 | 65  | A00058 | A00146 | 971 |
| A00058 | A00147 | 441 | A00058 | A00150 | 199 |
| A00058 | A00151 | 88  | A00058 | A00152 | 484 |
| A00058 | A00153 | 899 | A00058 | A00157 | 294 |
| A00058 | A00159 | 576 | A00058 | A00161 | 63  |
| A00058 | A00162 | 63  | A00058 | A00163 | 213 |
| A00058 | A00165 | 870 | A00058 | A00167 | 907 |
| A00058 | A00171 | 899 | A00058 | A00180 | 404 |
| A00058 | A00187 | 438 | A00058 | A00190 | 343 |
| A00058 | A00201 | 297 | A00058 | A00208 | 63  |
| A00058 | A00209 | 899 | A00058 | A00210 | 193 |
| A00058 | A00220 | 899 | A00058 | A00224 | 899 |
| A00058 | A00225 | 576 | A00058 | A00226 | 348 |
| A00058 | A00230 | 899 | A00058 | A00232 | 179 |
| A00058 | A00239 | 225 | A00058 | A00240 | 197 |
| A00058 | A00243 | 560 | A00058 | A00248 | 228 |
| A00058 | A00250 | 945 | A00058 | A00254 | 485 |
| A00058 | A00257 | 724 | A00058 | A00260 | 288 |
| A00058 | A00265 | 491 | A00058 | A00420 | 324 |
| A00058 | A00691 | 314 | A00058 | A00736 | 205 |
| A00058 | A00843 | 457 | A00058 | A00883 | 163 |
| A00058 | A01083 | 472 | A00058 | A01088 | 241 |
| A00058 | A01173 | 263 | A00058 | A01213 | 290 |
| A00058 | A01410 | 489 | A00058 | A01473 | 582 |
| A00058 | A01527 | 899 | A00058 | A01553 | 288 |
| A00058 | A01554 | 85  | A00058 | A01558 | 899 |



|        |        |     |        |        |     |
|--------|--------|-----|--------|--------|-----|
| A00058 | A01560 | 229 | A00058 | A01572 | 477 |
| A00058 | A01588 | 899 | A00058 | A01596 | 821 |
| A00058 | A01615 | 327 | A00058 | A01631 | 138 |
| A00058 | A01639 | 945 | A00058 | A01709 | 63  |
| A00058 | A01730 | 477 | A00058 | A01770 | 900 |
| A00058 | A02183 | 183 | A00058 | A02236 | 208 |
| A00058 | A02487 | 71  | A00058 | A02564 | 121 |
| A00058 | A02724 | 324 | A00058 | A02736 | 173 |
| A00058 | A02737 | 966 | A00058 | A02805 | 462 |
| A00058 | A02806 | 63  | A00058 | A02825 | 964 |
| A00058 | A02860 | 190 | A00058 | A02904 | 180 |
| A00058 | A03213 | 63  | A00058 | A03223 | 469 |
| A00058 | A03575 | 193 | A00058 | A03802 | 154 |
| A00058 | A04012 | 532 | A00058 | A04205 | 174 |
| A00058 | A04248 | 899 | A00058 | A04346 | 190 |
| A00058 | A04740 | 154 | A00058 | A05029 | 655 |
| A00058 | A05104 | 367 | A00058 | A05579 | 204 |
| A00058 | A05620 | 311 | A00058 | A05645 | 241 |
| A00058 | A05712 | 911 | A00058 | A06004 | 236 |
| A00058 | A06601 | 232 | A00058 | A06642 | 190 |
| A00058 | A06914 | 314 | A00058 | A06936 | 255 |
| A00058 | A07201 | 63  | A00058 | A07207 | 307 |
| A00058 | A07311 | 488 | A00058 | A07324 | 176 |
| A00058 | A07422 | 961 | A00058 | A07748 | 168 |
| A00058 | A08074 | 185 | A00058 | A08571 | 899 |
| A00058 | A08742 | 408 | A00058 | A08858 | 230 |
| A00058 | A09121 | 144 | A00058 | A09162 | 374 |
| A00058 | A09218 | 396 | A00058 | A09383 | 173 |
| A00058 | A09577 | 63  | A00058 | A09934 | 255 |
| A00058 | A10014 | 79  | A00058 | A10580 | 941 |
| A00058 | A10623 | 944 | A00058 | A10801 | 899 |
| A00058 | A11369 | 63  | A00058 | A11522 | 384 |
| A00058 | A11601 | 281 | A00058 | A11872 | 173 |
| A00058 | A11879 | 255 | A00058 | A11894 | 240 |
| A00058 | A12383 | 469 | A00058 | A12550 | 240 |
| A00058 | A12680 | 925 | A00058 | A12720 | 255 |
| A00058 | A12794 | 305 | A00058 | A12882 | 152 |
| A00058 | A12988 | 685 | A00058 | A13465 | 229 |
| A00058 | A13511 | 490 | A00058 | A13521 | 196 |
| A00058 | A13551 | 255 | A00058 | A13986 | 235 |
| A00058 | A14364 | 236 | A00058 | A14385 | 196 |
| A00058 | A14443 | 930 | A00058 | A14925 | 213 |
| A00058 | A16513 | 162 | A00059 | A00061 | 160 |
| A00059 | A00073 | 945 | A00059 | A00109 | 180 |
| A00059 | A00123 | 407 | A00059 | A00146 | 452 |
| A00059 | A00151 | 279 | A00059 | A00158 | 205 |

|        |        |     |        |        |     |
|--------|--------|-----|--------|--------|-----|
| A00059 | A00160 | 281 | A00059 | A00162 | 146 |
| A00059 | A00167 | 916 | A00059 | A00180 | 272 |
| A00059 | A00209 | 936 | A00059 | A00220 | 899 |
| A00059 | A00250 | 345 | A00059 | A00255 | 173 |
| A00059 | A00265 | 190 | A00059 | A00324 | 240 |
| A00059 | A00694 | 409 | A00059 | A00696 | 179 |
| A00059 | A00843 | 319 | A00059 | A01410 | 322 |
| A00059 | A01475 | 180 | A00059 | A01524 | 455 |
| A00059 | A01527 | 993 | A00059 | A01615 | 183 |
| A00059 | A01688 | 200 | A00059 | A01770 | 899 |
| A00059 | A02737 | 937 | A00059 | A02825 | 929 |
| A00059 | A02863 | 198 | A00059 | A02883 | 184 |
| A00059 | A02904 | 159 | A00059 | A03436 | 395 |
| A00059 | A04248 | 899 | A00059 | A04537 | 307 |
| A00059 | A05712 | 899 | A00059 | A05854 | 196 |
| A00059 | A06610 | 343 | A00059 | A07173 | 174 |
| A00059 | A10072 | 249 | A00059 | A10623 | 179 |
| A00059 | A12971 | 243 | A00059 | A14211 | 216 |
| A00059 | A14443 | 899 | A00059 | A14665 | 188 |
| A00060 | A00095 | 386 | A00060 | A00193 | 235 |
| A00060 | A00212 | 360 | A00060 | A00215 | 65  |
| A00060 | A00224 | 490 | A00060 | A00294 | 224 |
| A00060 | A00301 | 152 | A00060 | A00740 | 187 |
| A00060 | A00911 | 274 | A00060 | A01156 | 152 |
| A00060 | A01161 | 386 | A00060 | A01172 | 479 |
| A00060 | A01396 | 157 | A00060 | A01481 | 152 |
| A00060 | A01529 | 328 | A00060 | A01530 | 246 |
| A00060 | A01544 | 296 | A00060 | A01548 | 475 |
| A00060 | A01569 | 449 | A00060 | A01832 | 329 |
| A00060 | A01855 | 263 | A00060 | A02075 | 157 |
| A00060 | A02231 | 245 | A00060 | A02325 | 188 |
| A00060 | A02353 | 383 | A00060 | A02678 | 414 |
| A00060 | A02739 | 423 | A00060 | A02803 | 193 |
| A00060 | A03216 | 329 | A00060 | A03451 | 152 |
| A00060 | A03477 | 479 | A00060 | A03575 | 218 |
| A00060 | A04140 | 201 | A00060 | A04182 | 229 |
| A00060 | A04362 | 249 | A00060 | A04364 | 352 |
| A00060 | A04435 | 196 | A00060 | A04486 | 310 |
| A00060 | A04492 | 241 | A00060 | A04519 | 327 |
| A00060 | A04556 | 259 | A00060 | A04578 | 445 |
| A00060 | A04850 | 174 | A00060 | A04879 | 454 |
| A00060 | A04880 | 475 | A00060 | A04888 | 369 |
| A00060 | A05065 | 318 | A00060 | A05111 | 450 |
| A00060 | A05240 | 196 | A00060 | A05284 | 195 |
| A00060 | A05701 | 160 | A00060 | A06086 | 193 |
| A00060 | A06516 | 335 | A00060 | A06610 | 159 |

|        |        |     |        |        |     |
|--------|--------|-----|--------|--------|-----|
| A00060 | A06634 | 290 | A00060 | A06773 | 266 |
| A00060 | A07091 | 202 | A00060 | A07660 | 281 |
| A00060 | A07737 | 252 | A00060 | A07746 | 208 |
| A00060 | A07834 | 367 | A00060 | A07935 | 318 |
| A00060 | A08240 | 383 | A00060 | A08693 | 196 |
| A00060 | A09236 | 259 | A00060 | A09647 | 405 |
| A00060 | A09738 | 273 | A00060 | A09897 | 364 |
| A00060 | A09911 | 273 | A00060 | A10540 | 313 |
| A00060 | A10547 | 176 | A00060 | A10894 | 383 |
| A00060 | A11335 | 245 | A00060 | A11553 | 273 |
| A00060 | A11590 | 281 | A00060 | A11683 | 341 |
| A00060 | A11750 | 232 | A00060 | A11889 | 383 |
| A00060 | A12520 | 383 | A00060 | A13228 | 449 |
| A00060 | A13330 | 228 | A00060 | A13331 | 335 |
| A00060 | A13373 | 324 | A00060 | A13403 | 353 |
| A00060 | A14369 | 215 | A00060 | A15277 | 187 |
| A00060 | A16109 | 160 | A00060 | A16216 | 154 |
| A00061 | A00063 | 945 | A00061 | A00064 | 481 |
| A00061 | A00067 | 218 | A00061 | A00068 | 319 |
| A00061 | A00109 | 491 | A00061 | A00110 | 165 |
| A00061 | A00123 | 491 | A00061 | A00141 | 521 |
| A00061 | A00152 | 489 | A00061 | A00153 | 451 |
| A00061 | A00158 | 324 | A00061 | A00159 | 263 |
| A00061 | A00160 | 324 | A00061 | A00163 | 199 |
| A00061 | A00167 | 160 | A00061 | A00189 | 249 |
| A00061 | A00190 | 419 | A00061 | A00220 | 458 |
| A00061 | A00233 | 467 | A00061 | A00248 | 157 |
| A00061 | A00255 | 252 | A00061 | A00264 | 384 |
| A00061 | A00317 | 351 | A00061 | A00407 | 217 |
| A00061 | A00478 | 255 | A00061 | A00799 | 180 |
| A00061 | A00820 | 466 | A00061 | A00914 | 456 |
| A00061 | A01211 | 259 | A00061 | A01524 | 939 |
| A00061 | A01527 | 942 | A00061 | A01654 | 491 |
| A00061 | A01704 | 201 | A00061 | A01741 | 405 |
| A00061 | A01747 | 179 | A00061 | A01879 | 339 |
| A00061 | A01880 | 489 | A00061 | A01881 | 319 |
| A00061 | A01887 | 338 | A00061 | A01888 | 580 |
| A00061 | A01909 | 270 | A00061 | A01936 | 210 |
| A00061 | A02065 | 170 | A00061 | A02105 | 215 |
| A00061 | A02191 | 177 | A00061 | A02220 | 305 |
| A00061 | A02307 | 160 | A00061 | A02337 | 345 |
| A00061 | A02382 | 462 | A00061 | A02416 | 174 |
| A00061 | A02497 | 294 | A00061 | A02498 | 332 |
| A00061 | A02568 | 177 | A00061 | A02569 | 351 |
| A00061 | A02582 | 151 | A00061 | A02606 | 226 |
| A00061 | A02615 | 224 | A00061 | A02616 | 230 |

|        |        |     |        |        |     |
|--------|--------|-----|--------|--------|-----|
| A00061 | A02637 | 296 | A00061 | A02639 | 385 |
| A00061 | A02658 | 299 | A00061 | A02659 | 205 |
| A00061 | A02661 | 249 | A00061 | A02695 | 452 |
| A00061 | A02696 | 345 | A00061 | A02698 | 490 |
| A00061 | A02709 | 173 | A00061 | A02711 | 425 |
| A00061 | A02730 | 385 | A00061 | A02732 | 177 |
| A00061 | A02739 | 176 | A00061 | A02741 | 96  |
| A00061 | A02780 | 241 | A00061 | A02785 | 156 |
| A00061 | A02788 | 281 | A00061 | A02803 | 71  |
| A00061 | A02808 | 208 | A00061 | A02812 | 258 |
| A00061 | A02816 | 323 | A00061 | A02817 | 173 |
| A00061 | A02826 | 152 | A00061 | A02830 | 173 |
| A00061 | A02834 | 213 | A00061 | A02854 | 290 |
| A00061 | A02863 | 491 | A00061 | A02896 | 246 |
| A00061 | A02917 | 491 | A00061 | A02927 | 311 |
| A00061 | A02945 | 480 | A00061 | A02962 | 210 |
| A00061 | A03010 | 152 | A00061 | A03081 | 180 |
| A00061 | A03083 | 156 | A00061 | A03100 | 273 |
| A00061 | A03259 | 361 | A00061 | A03275 | 232 |
| A00061 | A03451 | 185 | A00061 | A03531 | 177 |
| A00061 | A03612 | 180 | A00061 | A03790 | 406 |
| A00061 | A03817 | 167 | A00061 | A03878 | 281 |
| A00061 | A03934 | 294 | A00061 | A03966 | 152 |
| A00061 | A04011 | 235 | A00061 | A04033 | 449 |
| A00061 | A04110 | 187 | A00061 | A04238 | 388 |
| A00061 | A04248 | 486 | A00061 | A04249 | 266 |
| A00061 | A04263 | 278 | A00061 | A04280 | 171 |
| A00061 | A04320 | 343 | A00061 | A04364 | 199 |
| A00061 | A04493 | 170 | A00061 | A04536 | 205 |
| A00061 | A04567 | 191 | A00061 | A04598 | 272 |
| A00061 | A04865 | 204 | A00061 | A04878 | 356 |
| A00061 | A04909 | 224 | A00061 | A04944 | 334 |
| A00061 | A05113 | 157 | A00061 | A05349 | 182 |
| A00061 | A05487 | 154 | A00061 | A05860 | 319 |
| A00061 | A05944 | 363 | A00061 | A06054 | 177 |
| A00061 | A06088 | 263 | A00061 | A06211 | 266 |
| A00061 | A06415 | 241 | A00061 | A06422 | 200 |
| A00061 | A06530 | 276 | A00061 | A06650 | 241 |
| A00061 | A06654 | 201 | A00061 | A06686 | 193 |
| A00061 | A06780 | 278 | A00061 | A07146 | 356 |
| A00061 | A07161 | 168 | A00061 | A07164 | 240 |
| A00061 | A07165 | 205 | A00061 | A07173 | 490 |
| A00061 | A07192 | 149 | A00061 | A07310 | 338 |
| A00061 | A07311 | 199 | A00061 | A07390 | 226 |
| A00061 | A07685 | 338 | A00061 | A08133 | 199 |
| A00061 | A08193 | 199 | A00061 | A09570 | 266 |

|        |        |     |        |        |     |
|--------|--------|-----|--------|--------|-----|
| A00061 | A09959 | 327 | A00061 | A10344 | 351 |
| A00061 | A10626 | 255 | A00061 | A10813 | 198 |
| A00061 | A11604 | 199 | A00061 | A14236 | 491 |
| A00061 | A14366 | 281 | A00061 | A14369 | 191 |
| A00061 | A14387 | 251 | A00061 | A14635 | 249 |
| A00061 | A15241 | 486 | A00061 | A15370 | 163 |
| A00061 | A15395 | 458 | A00061 | A15599 | 190 |
| A00061 | A15601 | 347 | A00061 | A15602 | 266 |
| A00061 | A15603 | 201 | A00061 | A15604 | 380 |
| A00061 | A15606 | 441 | A00061 | A15806 | 241 |
| A00061 | A15839 | 228 | A00061 | A15885 | 338 |
| A00061 | A15981 | 475 | A00061 | A16527 | 286 |
| A00061 | A16636 | 177 | A00062 | A00063 | 428 |
| A00062 | A00064 | 330 | A00062 | A00067 | 380 |
| A00062 | A00074 | 458 | A00062 | A00086 | 156 |
| A00062 | A00108 | 138 | A00062 | A00138 | 490 |
| A00062 | A00141 | 491 | A00062 | A00145 | 162 |
| A00062 | A00152 | 491 | A00062 | A00159 | 491 |
| A00062 | A00190 | 299 | A00062 | A00220 | 251 |
| A00062 | A00232 | 491 | A00062 | A00233 | 424 |
| A00062 | A00234 | 173 | A00062 | A00246 | 306 |
| A00062 | A00254 | 485 | A00062 | A00914 | 463 |
| A00062 | A01473 | 162 | A00062 | A01553 | 63  |
| A00062 | A01572 | 294 | A00062 | A01604 | 267 |
| A00062 | A01654 | 279 | A00062 | A01704 | 198 |
| A00062 | A01775 | 63  | A00062 | A01790 | 63  |
| A00062 | A01844 | 63  | A00062 | A01849 | 218 |
| A00062 | A01879 | 335 | A00062 | A01887 | 486 |
| A00062 | A01888 | 486 | A00062 | A01908 | 267 |
| A00062 | A02340 | 162 | A00062 | A02372 | 191 |
| A00062 | A02382 | 154 | A00062 | A02464 | 163 |
| A00062 | A02630 | 196 | A00062 | A02639 | 238 |
| A00062 | A02659 | 334 | A00062 | A02717 | 119 |
| A00062 | A02730 | 165 | A00062 | A02731 | 486 |
| A00062 | A02787 | 95  | A00062 | A02800 | 235 |
| A00062 | A02808 | 205 | A00062 | A02828 | 63  |
| A00062 | A02837 | 63  | A00062 | A02843 | 260 |
| A00062 | A02853 | 310 | A00062 | A02864 | 491 |
| A00062 | A02884 | 260 | A00062 | A02896 | 180 |
| A00062 | A02908 | 306 | A00062 | A02932 | 310 |
| A00062 | A02977 | 179 | A00062 | A02986 | 228 |
| A00062 | A03010 | 420 | A00062 | A03019 | 63  |
| A00062 | A03195 | 174 | A00062 | A03204 | 326 |
| A00062 | A03259 | 216 | A00062 | A03470 | 218 |
| A00062 | A03610 | 185 | A00062 | A03816 | 369 |
| A00062 | A03817 | 162 | A00062 | A03821 | 491 |

|        |        |     |        |        |     |
|--------|--------|-----|--------|--------|-----|
| A00062 | A04018 | 246 | A00062 | A04040 | 230 |
| A00062 | A04110 | 184 | A00062 | A04138 | 221 |
| A00062 | A04207 | 458 | A00062 | A04248 | 291 |
| A00062 | A04320 | 210 | A00062 | A04518 | 252 |
| A00062 | A04519 | 167 | A00062 | A04968 | 279 |
| A00062 | A05888 | 266 | A00062 | A06149 | 201 |
| A00062 | A06415 | 321 | A00062 | A06422 | 329 |
| A00062 | A07138 | 232 | A00062 | A07148 | 230 |
| A00062 | A07157 | 458 | A00062 | A07161 | 165 |
| A00062 | A07166 | 256 | A00062 | A07186 | 247 |
| A00062 | A10605 | 228 | A00062 | A10639 | 291 |
| A00062 | A11369 | 245 | A00062 | A13872 | 180 |
| A00062 | A14452 | 279 | A00062 | A15394 | 279 |
| A00062 | A15726 | 154 | A00062 | A15806 | 238 |
| A00063 | A00064 | 491 | A00063 | A00073 | 390 |
| A00063 | A00074 | 152 | A00063 | A00081 | 193 |
| A00063 | A00086 | 491 | A00063 | A00089 | 383 |
| A00063 | A00094 | 357 | A00063 | A00123 | 434 |
| A00063 | A00138 | 462 | A00063 | A00141 | 310 |
| A00063 | A00145 | 63  | A00063 | A00152 | 582 |
| A00063 | A00154 | 204 | A00063 | A00159 | 489 |
| A00063 | A00167 | 451 | A00063 | A00176 | 490 |
| A00063 | A00182 | 168 | A00063 | A00190 | 491 |
| A00063 | A00204 | 491 | A00063 | A00212 | 265 |
| A00063 | A00218 | 399 | A00063 | A00219 | 491 |
| A00063 | A00224 | 489 | A00063 | A00227 | 191 |
| A00063 | A00231 | 417 | A00063 | A00232 | 486 |
| A00063 | A00233 | 582 | A00063 | A00234 | 488 |
| A00063 | A00238 | 180 | A00063 | A00248 | 302 |
| A00063 | A00254 | 454 | A00063 | A00264 | 491 |
| A00063 | A00274 | 424 | A00063 | A00322 | 378 |
| A00063 | A00324 | 281 | A00063 | A00338 | 433 |
| A00063 | A00438 | 188 | A00063 | A00457 | 207 |
| A00063 | A00472 | 435 | A00063 | A00478 | 216 |
| A00063 | A00496 | 407 | A00063 | A00556 | 473 |
| A00063 | A00557 | 63  | A00063 | A00558 | 224 |
| A00063 | A00560 | 202 | A00063 | A00658 | 187 |
| A00063 | A00724 | 151 | A00063 | A00736 | 490 |
| A00063 | A00799 | 230 | A00063 | A00914 | 491 |
| A00063 | A01052 | 384 | A00063 | A01150 | 224 |
| A00063 | A01161 | 176 | A00063 | A01178 | 195 |
| A00063 | A01234 | 408 | A00063 | A01287 | 271 |
| A00063 | A01307 | 357 | A00063 | A01353 | 188 |
| A00063 | A01396 | 228 | A00063 | A01452 | 357 |
| A00063 | A01473 | 68  | A00063 | A01474 | 329 |
| A00063 | A01524 | 904 | A00063 | A01527 | 936 |

|        |        |     |        |        |     |
|--------|--------|-----|--------|--------|-----|
| A00063 | A01551 | 347 | A00063 | A01553 | 899 |
| A00063 | A01572 | 223 | A00063 | A01604 | 483 |
| A00063 | A01640 | 400 | A00063 | A01654 | 340 |
| A00063 | A01668 | 491 | A00063 | A01676 | 364 |
| A00063 | A01704 | 491 | A00063 | A01705 | 243 |
| A00063 | A01733 | 230 | A00063 | A01741 | 491 |
| A00063 | A01743 | 491 | A00063 | A01749 | 63  |
| A00063 | A01759 | 177 | A00063 | A01767 | 152 |
| A00063 | A01775 | 491 | A00063 | A01785 | 311 |
| A00063 | A01789 | 405 | A00063 | A01790 | 63  |
| A00063 | A01796 | 438 | A00063 | A01797 | 285 |
| A00063 | A01798 | 200 | A00063 | A01836 | 174 |
| A00063 | A01844 | 188 | A00063 | A01849 | 84  |
| A00063 | A01879 | 491 | A00063 | A01880 | 180 |
| A00063 | A01882 | 167 | A00063 | A01887 | 491 |
| A00063 | A01888 | 486 | A00063 | A01900 | 160 |
| A00063 | A01902 | 172 | A00063 | A01908 | 395 |
| A00063 | A01945 | 63  | A00063 | A02183 | 283 |
| A00063 | A02221 | 363 | A00063 | A02298 | 202 |
| A00063 | A02300 | 177 | A00063 | A02340 | 200 |
| A00063 | A02349 | 71  | A00063 | A02372 | 330 |
| A00063 | A02382 | 249 | A00063 | A02416 | 333 |
| A00063 | A02490 | 477 | A00063 | A02491 | 402 |
| A00063 | A02569 | 234 | A00063 | A02582 | 454 |
| A00063 | A02586 | 160 | A00063 | A02605 | 252 |
| A00063 | A02611 | 322 | A00063 | A02637 | 469 |
| A00063 | A02649 | 212 | A00063 | A02659 | 263 |
| A00063 | A02686 | 65  | A00063 | A02695 | 460 |
| A00063 | A02699 | 243 | A00063 | A02709 | 217 |
| A00063 | A02714 | 215 | A00063 | A02717 | 63  |
| A00063 | A02726 | 269 | A00063 | A02730 | 357 |
| A00063 | A02731 | 63  | A00063 | A02735 | 63  |
| A00063 | A02741 | 407 | A00063 | A02742 | 193 |
| A00063 | A02745 | 490 | A00063 | A02746 | 375 |
| A00063 | A02756 | 378 | A00063 | A02780 | 210 |
| A00063 | A02785 | 299 | A00063 | A02787 | 480 |
| A00063 | A02788 | 479 | A00063 | A02800 | 380 |
| A00063 | A02803 | 443 | A00063 | A02808 | 451 |
| A00063 | A02811 | 162 | A00063 | A02812 | 407 |
| A00063 | A02814 | 408 | A00063 | A02816 | 302 |
| A00063 | A02826 | 177 | A00063 | A02837 | 479 |
| A00063 | A02847 | 314 | A00063 | A02851 | 207 |
| A00063 | A02854 | 343 | A00063 | A02859 | 491 |
| A00063 | A02864 | 439 | A00063 | A02874 | 486 |
| A00063 | A02883 | 151 | A00063 | A02886 | 411 |
| A00063 | A02888 | 246 | A00063 | A02896 | 491 |

|        |        |     |        |        |     |
|--------|--------|-----|--------|--------|-----|
| A00063 | A02897 | 77  | A00063 | A02916 | 491 |
| A00063 | A02917 | 269 | A00063 | A02922 | 374 |
| A00063 | A02935 | 160 | A00063 | A02944 | 491 |
| A00063 | A02951 | 439 | A00063 | A02953 | 238 |
| A00063 | A02961 | 488 | A00063 | A02971 | 249 |
| A00063 | A02972 | 441 | A00063 | A02976 | 91  |
| A00063 | A02988 | 246 | A00063 | A03001 | 63  |
| A00063 | A03010 | 96  | A00063 | A03110 | 246 |
| A00063 | A03112 | 367 | A00063 | A03139 | 165 |
| A00063 | A03157 | 353 | A00063 | A03183 | 182 |
| A00063 | A03204 | 488 | A00063 | A03206 | 167 |
| A00063 | A03223 | 446 | A00063 | A03256 | 373 |
| A00063 | A03259 | 582 | A00063 | A03271 | 475 |
| A00063 | A03274 | 167 | A00063 | A03275 | 491 |
| A00063 | A03279 | 372 | A00063 | A03280 | 393 |
| A00063 | A03282 | 443 | A00063 | A03739 | 408 |
| A00063 | A03817 | 218 | A00063 | A03821 | 363 |
| A00063 | A03851 | 447 | A00063 | A03910 | 302 |
| A00063 | A03942 | 283 | A00063 | A03996 | 269 |
| A00063 | A03999 | 234 | A00063 | A04010 | 456 |
| A00063 | A04027 | 152 | A00063 | A04030 | 174 |
| A00063 | A04047 | 297 | A00063 | A04088 | 296 |
| A00063 | A04111 | 152 | A00063 | A04169 | 389 |
| A00063 | A04206 | 427 | A00063 | A04247 | 152 |
| A00063 | A04248 | 195 | A00063 | A04265 | 196 |
| A00063 | A04273 | 167 | A00063 | A04298 | 196 |
| A00063 | A04304 | 245 | A00063 | A04528 | 213 |
| A00063 | A04536 | 276 | A00063 | A04538 | 308 |
| A00063 | A04542 | 167 | A00063 | A04566 | 196 |
| A00063 | A04567 | 385 | A00063 | A04568 | 165 |
| A00063 | A04589 | 489 | A00063 | A04613 | 245 |
| A00063 | A04622 | 380 | A00063 | A04657 | 196 |
| A00063 | A04734 | 241 | A00063 | A04741 | 160 |
| A00063 | A04798 | 152 | A00063 | A04826 | 196 |
| A00063 | A04865 | 343 | A00063 | A04866 | 262 |
| A00063 | A04879 | 199 | A00063 | A04951 | 213 |
| A00063 | A04955 | 185 | A00063 | A05150 | 162 |
| A00063 | A05163 | 167 | A00063 | A05284 | 207 |
| A00063 | A05309 | 247 | A00063 | A05349 | 430 |
| A00063 | A05860 | 185 | A00063 | A05929 | 269 |
| A00063 | A06001 | 229 | A00063 | A06127 | 213 |
| A00063 | A06149 | 263 | A00063 | A06286 | 176 |
| A00063 | A06295 | 356 | A00063 | A06422 | 481 |
| A00063 | A06486 | 152 | A00063 | A06610 | 486 |
| A00063 | A06642 | 406 | A00063 | A06643 | 185 |
| A00063 | A06770 | 167 | A00063 | A06854 | 167 |



|        |        |     |        |        |     |
|--------|--------|-----|--------|--------|-----|
| A00063 | A06907 | 219 | A00063 | A07045 | 213 |
| A00063 | A07135 | 379 | A00063 | A07146 | 193 |
| A00063 | A07154 | 174 | A00063 | A07157 | 491 |
| A00063 | A07161 | 358 | A00063 | A07164 | 491 |
| A00063 | A07165 | 445 | A00063 | A07166 | 424 |
| A00063 | A07200 | 160 | A00063 | A07209 | 432 |
| A00063 | A07218 | 177 | A00063 | A07236 | 201 |
| A00063 | A07651 | 234 | A00063 | A08301 | 391 |
| A00063 | A08368 | 196 | A00063 | A08458 | 160 |
| A00063 | A08594 | 63  | A00063 | A08657 | 234 |
| A00063 | A08786 | 185 | A00063 | A08805 | 152 |
| A00063 | A08828 | 152 | A00063 | A08829 | 234 |
| A00063 | A08834 | 456 | A00063 | A09038 | 174 |
| A00063 | A09380 | 205 | A00063 | A09732 | 201 |
| A00063 | A09799 | 185 | A00063 | A09835 | 213 |
| A00063 | A09847 | 215 | A00063 | A09848 | 441 |
| A00063 | A09863 | 152 | A00063 | A10009 | 107 |
| A00063 | A10069 | 174 | A00063 | A10078 | 291 |
| A00063 | A10101 | 234 | A00063 | A10278 | 157 |
| A00063 | A10401 | 291 | A00063 | A10823 | 167 |
| A00063 | A11191 | 271 | A00063 | A11291 | 447 |
| A00063 | A11412 | 152 | A00063 | A11461 | 152 |
| A00063 | A11466 | 174 | A00063 | A11487 | 208 |
| A00063 | A11537 | 301 | A00063 | A11567 | 252 |
| A00063 | A11658 | 221 | A00063 | A11848 | 154 |
| A00063 | A12003 | 196 | A00063 | A12330 | 174 |
| A00063 | A12342 | 196 | A00063 | A12560 | 234 |
| A00063 | A13269 | 269 | A00063 | A13816 | 63  |
| A00063 | A13824 | 170 | A00063 | A13826 | 462 |
| A00063 | A13827 | 124 | A00063 | A13829 | 352 |
| A00063 | A13851 | 152 | A00063 | A13860 | 162 |
| A00063 | A13909 | 234 | A00063 | A13975 | 519 |
| A00063 | A13987 | 184 | A00063 | A14072 | 165 |
| A00063 | A14198 | 469 | A00063 | A14208 | 474 |
| A00063 | A14210 | 343 | A00063 | A14220 | 171 |
| A00063 | A14236 | 271 | A00063 | A14290 | 218 |
| A00063 | A14364 | 322 | A00063 | A14371 | 154 |
| A00063 | A14387 | 224 | A00063 | A14394 | 152 |
| A00063 | A14511 | 324 | A00063 | A14515 | 234 |
| A00063 | A14632 | 213 | A00063 | A14635 | 413 |
| A00063 | A14643 | 200 | A00063 | A14667 | 418 |
| A00063 | A14689 | 461 | A00063 | A14852 | 269 |
| A00063 | A15089 | 234 | A00063 | A15292 | 483 |
| A00063 | A15310 | 269 | A00063 | A15312 | 317 |
| A00063 | A15313 | 408 | A00063 | A15317 | 424 |
| A00063 | A15318 | 345 | A00063 | A15331 | 411 |

|        |        |     |        |        |     |
|--------|--------|-----|--------|--------|-----|
| A00063 | A15333 | 210 | A00063 | A15336 | 172 |
| A00063 | A15348 | 480 | A00063 | A15349 | 443 |
| A00063 | A15352 | 486 | A00063 | A15366 | 401 |
| A00063 | A15394 | 176 | A00063 | A15413 | 188 |
| A00063 | A15447 | 353 | A00063 | A15451 | 193 |
| A00063 | A15454 | 360 | A00063 | A15460 | 180 |
| A00063 | A15484 | 255 | A00063 | A15488 | 281 |
| A00063 | A15489 | 152 | A00063 | A15515 | 430 |
| A00063 | A15523 | 196 | A00063 | A15614 | 234 |
| A00063 | A15639 | 379 | A00063 | A15640 | 185 |
| A00063 | A15795 | 165 | A00063 | A15799 | 268 |
| A00063 | A15800 | 374 | A00063 | A15806 | 210 |
| A00063 | A15815 | 152 | A00063 | A15817 | 167 |
| A00063 | A15887 | 299 | A00063 | A15916 | 299 |
| A00063 | A16000 | 269 | A00063 | A16224 | 371 |
| A00063 | A16300 | 389 | A00063 | A16549 | 185 |
| A00063 | A16636 | 488 | A00063 | A16687 | 285 |
| A00063 | A16717 | 234 | A00063 | A17086 | 167 |
| A00063 | A17175 | 234 | A00063 | A17230 | 152 |
| A00064 | A00065 | 165 | A00064 | A00067 | 491 |
| A00064 | A00071 | 457 | A00064 | A00074 | 479 |
| A00064 | A00081 | 352 | A00064 | A00085 | 269 |
| A00064 | A00090 | 491 | A00064 | A00091 | 170 |
| A00064 | A00094 | 486 | A00064 | A00114 | 63  |
| A00064 | A00118 | 144 | A00064 | A00122 | 93  |
| A00064 | A00123 | 63  | A00064 | A00124 | 63  |
| A00064 | A00126 | 385 | A00064 | A00136 | 215 |
| A00064 | A00138 | 613 | A00064 | A00141 | 291 |
| A00064 | A00145 | 63  | A00064 | A00152 | 542 |
| A00064 | A00153 | 286 | A00064 | A00156 | 526 |
| A00064 | A00158 | 63  | A00064 | A00159 | 951 |
| A00064 | A00161 | 63  | A00064 | A00162 | 262 |
| A00064 | A00173 | 489 | A00064 | A00185 | 419 |
| A00064 | A00186 | 63  | A00064 | A00187 | 432 |
| A00064 | A00188 | 441 | A00064 | A00189 | 63  |
| A00064 | A00190 | 463 | A00064 | A00204 | 180 |
| A00064 | A00205 | 63  | A00064 | A00207 | 360 |
| A00064 | A00208 | 63  | A00064 | A00214 | 952 |
| A00064 | A00215 | 358 | A00064 | A00219 | 199 |
| A00064 | A00221 | 618 | A00064 | A00224 | 899 |
| A00064 | A00225 | 195 | A00064 | A00233 | 490 |
| A00064 | A00234 | 965 | A00064 | A00236 | 205 |
| A00064 | A00246 | 902 | A00064 | A00248 | 398 |
| A00064 | A00252 | 168 | A00064 | A00253 | 224 |
| A00064 | A00254 | 491 | A00064 | A00265 | 469 |
| A00064 | A00270 | 224 | A00064 | A00295 | 245 |

|        |        |     |        |        |     |
|--------|--------|-----|--------|--------|-----|
| A00064 | A00314 | 416 | A00064 | A00419 | 260 |
| A00064 | A00421 | 396 | A00064 | A00553 | 296 |
| A00064 | A00562 | 207 | A00064 | A00574 | 420 |
| A00064 | A00616 | 469 | A00064 | A00641 | 491 |
| A00064 | A00652 | 426 | A00064 | A00654 | 322 |
| A00064 | A00660 | 196 | A00064 | A00697 | 469 |
| A00064 | A00752 | 157 | A00064 | A00757 | 185 |
| A00064 | A00852 | 491 | A00064 | A00864 | 553 |
| A00064 | A00868 | 190 | A00064 | A00905 | 252 |
| A00064 | A00914 | 419 | A00064 | A00939 | 945 |
| A00064 | A00989 | 297 | A00064 | A00993 | 63  |
| A00064 | A01041 | 414 | A00064 | A01097 | 427 |
| A00064 | A01267 | 426 | A00064 | A01286 | 63  |
| A00064 | A01291 | 899 | A00064 | A01307 | 472 |
| A00064 | A01309 | 344 | A00064 | A01310 | 63  |
| A00064 | A01332 | 201 | A00064 | A01423 | 208 |
| A00064 | A01451 | 362 | A00064 | A01452 | 489 |
| A00064 | A01492 | 899 | A00064 | A01527 | 899 |
| A00064 | A01537 | 388 | A00064 | A01542 | 168 |
| A00064 | A01553 | 355 | A00064 | A01558 | 899 |
| A00064 | A01560 | 419 | A00064 | A01562 | 917 |
| A00064 | A01566 | 246 | A00064 | A01572 | 477 |
| A00064 | A01588 | 899 | A00064 | A01593 | 899 |
| A00064 | A01603 | 491 | A00064 | A01612 | 477 |
| A00064 | A01628 | 283 | A00064 | A01631 | 63  |
| A00064 | A01639 | 344 | A00064 | A01640 | 363 |
| A00064 | A01654 | 400 | A00064 | A01660 | 543 |
| A00064 | A01676 | 399 | A00064 | A01692 | 936 |
| A00064 | A01697 | 63  | A00064 | A01704 | 63  |
| A00064 | A01709 | 899 | A00064 | A01719 | 238 |
| A00064 | A01785 | 104 | A00064 | A01792 | 396 |
| A00064 | A01793 | 63  | A00064 | A01797 | 63  |
| A00064 | A01850 | 63  | A00064 | A01870 | 152 |
| A00064 | A01879 | 219 | A00064 | A01880 | 63  |
| A00064 | A01887 | 87  | A00064 | A01888 | 99  |
| A00064 | A01900 | 441 | A00064 | A01905 | 353 |
| A00064 | A01908 | 491 | A00064 | A01909 | 198 |
| A00064 | A01943 | 154 | A00064 | A01983 | 484 |
| A00064 | A02183 | 435 | A00064 | A02228 | 469 |
| A00064 | A02254 | 297 | A00064 | A02305 | 156 |
| A00064 | A02340 | 63  | A00064 | A02350 | 90  |
| A00064 | A02353 | 420 | A00064 | A02369 | 221 |
| A00064 | A02370 | 285 | A00064 | A02419 | 63  |
| A00064 | A02425 | 441 | A00064 | A02608 | 188 |
| A00064 | A02610 | 191 | A00064 | A02630 | 218 |
| A00064 | A02634 | 63  | A00064 | A02635 | 63  |

|        |        |     |        |        |     |
|--------|--------|-----|--------|--------|-----|
| A00064 | A02637 | 486 | A00064 | A02645 | 174 |
| A00064 | A02656 | 144 | A00064 | A02659 | 229 |
| A00064 | A02662 | 191 | A00064 | A02681 | 198 |
| A00064 | A02695 | 190 | A00064 | A02718 | 276 |
| A00064 | A02730 | 252 | A00064 | A02731 | 63  |
| A00064 | A02734 | 130 | A00064 | A02739 | 329 |
| A00064 | A02740 | 343 | A00064 | A02741 | 63  |
| A00064 | A02751 | 63  | A00064 | A02769 | 286 |
| A00064 | A02787 | 63  | A00064 | A02788 | 71  |
| A00064 | A02800 | 436 | A00064 | A02803 | 994 |
| A00064 | A02808 | 321 | A00064 | A02812 | 180 |
| A00064 | A02837 | 63  | A00064 | A02860 | 279 |
| A00064 | A02863 | 139 | A00064 | A02864 | 204 |
| A00064 | A02887 | 481 | A00064 | A02896 | 63  |
| A00064 | A02914 | 152 | A00064 | A02917 | 229 |
| A00064 | A02931 | 317 | A00064 | A02940 | 191 |
| A00064 | A02945 | 188 | A00064 | A02950 | 341 |
| A00064 | A02975 | 63  | A00064 | A03010 | 76  |
| A00064 | A03019 | 466 | A00064 | A03110 | 351 |
| A00064 | A03116 | 213 | A00064 | A03117 | 174 |
| A00064 | A03171 | 443 | A00064 | A03174 | 217 |
| A00064 | A03195 | 63  | A00064 | A03224 | 265 |
| A00064 | A03263 | 63  | A00064 | A03270 | 205 |
| A00064 | A03271 | 945 | A00064 | A03327 | 372 |
| A00064 | A03335 | 459 | A00064 | A03477 | 467 |
| A00064 | A03496 | 680 | A00064 | A03569 | 596 |
| A00064 | A03596 | 66  | A00064 | A03625 | 82  |
| A00064 | A03784 | 232 | A00064 | A03809 | 486 |
| A00064 | A03817 | 491 | A00064 | A03821 | 468 |
| A00064 | A03942 | 236 | A00064 | A03962 | 274 |
| A00064 | A04042 | 162 | A00064 | A04049 | 198 |
| A00064 | A04050 | 485 | A00064 | A04105 | 227 |
| A00064 | A04138 | 157 | A00064 | A04161 | 452 |
| A00064 | A04205 | 329 | A00064 | A04216 | 188 |
| A00064 | A04245 | 154 | A00064 | A04248 | 159 |
| A00064 | A04249 | 217 | A00064 | A04323 | 405 |
| A00064 | A04519 | 328 | A00064 | A04536 | 404 |
| A00064 | A04540 | 278 | A00064 | A04551 | 154 |
| A00064 | A04587 | 296 | A00064 | A04589 | 306 |
| A00064 | A04634 | 191 | A00064 | A04673 | 191 |
| A00064 | A04682 | 408 | A00064 | A04699 | 899 |
| A00064 | A04730 | 296 | A00064 | A04755 | 379 |
| A00064 | A04880 | 479 | A00064 | A05008 | 234 |
| A00064 | A05020 | 420 | A00064 | A05037 | 899 |
| A00064 | A05224 | 246 | A00064 | A05270 | 191 |
| A00064 | A05288 | 226 | A00064 | A05470 | 191 |

|        |        |     |        |        |     |
|--------|--------|-----|--------|--------|-----|
| A00064 | A05490 | 174 | A00064 | A05607 | 322 |
| A00064 | A05617 | 414 | A00064 | A05712 | 174 |
| A00064 | A05760 | 899 | A00064 | A05773 | 432 |
| A00064 | A05944 | 199 | A00064 | A05985 | 413 |
| A00064 | A06054 | 269 | A00064 | A06055 | 416 |
| A00064 | A06095 | 198 | A00064 | A06108 | 249 |
| A00064 | A06224 | 362 | A00064 | A06289 | 77  |
| A00064 | A06359 | 420 | A00064 | A06449 | 308 |
| A00064 | A06676 | 154 | A00064 | A06701 | 226 |
| A00064 | A06737 | 213 | A00064 | A06758 | 346 |
| A00064 | A06854 | 276 | A00064 | A06899 | 188 |
| A00064 | A06900 | 249 | A00064 | A06907 | 539 |
| A00064 | A06955 | 167 | A00064 | A07131 | 213 |
| A00064 | A07135 | 445 | A00064 | A07143 | 152 |
| A00064 | A07146 | 74  | A00064 | A07147 | 405 |
| A00064 | A07157 | 274 | A00064 | A07158 | 157 |
| A00064 | A07161 | 469 | A00064 | A07164 | 384 |
| A00064 | A07166 | 319 | A00064 | A07200 | 386 |
| A00064 | A07201 | 173 | A00064 | A07218 | 455 |
| A00064 | A07311 | 483 | A00064 | A07390 | 160 |
| A00064 | A07618 | 899 | A00064 | A07798 | 491 |
| A00064 | A07885 | 257 | A00064 | A08137 | 401 |
| A00064 | A08206 | 154 | A00064 | A08280 | 279 |
| A00064 | A08535 | 491 | A00064 | A08608 | 221 |
| A00064 | A08616 | 249 | A00064 | A09220 | 96  |
| A00064 | A09263 | 344 | A00064 | A09401 | 63  |
| A00064 | A09625 | 395 | A00064 | A09842 | 247 |
| A00064 | A09937 | 138 | A00064 | A10014 | 63  |
| A00064 | A10159 | 899 | A00064 | A10174 | 899 |
| A00064 | A10208 | 491 | A00064 | A10365 | 63  |
| A00064 | A10510 | 235 | A00064 | A10528 | 262 |
| A00064 | A10735 | 361 | A00064 | A10744 | 319 |
| A00064 | A10801 | 110 | A00064 | A10854 | 420 |
| A00064 | A11089 | 191 | A00064 | A11125 | 899 |
| A00064 | A11369 | 967 | A00064 | A11591 | 165 |
| A00064 | A12009 | 65  | A00064 | A12287 | 174 |
| A00064 | A12383 | 254 | A00064 | A12664 | 899 |
| A00064 | A12835 | 277 | A00064 | A13146 | 899 |
| A00064 | A13561 | 174 | A00064 | A13587 | 167 |
| A00064 | A13592 | 217 | A00064 | A13743 | 176 |
| A00064 | A13744 | 249 | A00064 | A13824 | 229 |
| A00064 | A13849 | 154 | A00064 | A13980 | 63  |
| A00064 | A13983 | 244 | A00064 | A13985 | 899 |
| A00064 | A13986 | 340 | A00064 | A13989 | 899 |
| A00064 | A14164 | 213 | A00064 | A14190 | 335 |
| A00064 | A14192 | 557 | A00064 | A14193 | 544 |

|        |        |     |        |        |     |
|--------|--------|-----|--------|--------|-----|
| A00064 | A14196 | 196 | A00064 | A14198 | 491 |
| A00064 | A14208 | 945 | A00064 | A14210 | 274 |
| A00064 | A14263 | 572 | A00064 | A14299 | 185 |
| A00064 | A14303 | 430 | A00064 | A14364 | 945 |
| A00064 | A14366 | 419 | A00064 | A14395 | 303 |
| A00064 | A14440 | 301 | A00064 | A14452 | 63  |
| A00064 | A14516 | 283 | A00064 | A14647 | 226 |
| A00064 | A14662 | 899 | A00064 | A15101 | 191 |
| A00064 | A15297 | 918 | A00064 | A15314 | 406 |
| A00064 | A15323 | 899 | A00064 | A15324 | 899 |
| A00064 | A15353 | 899 | A00064 | A15359 | 899 |
| A00064 | A15388 | 193 | A00064 | A15506 | 152 |
| A00064 | A15559 | 195 | A00064 | A15578 | 332 |
| A00064 | A15620 | 183 | A00064 | A15712 | 224 |
| A00064 | A15726 | 418 | A00064 | A15839 | 162 |
| A00064 | A15865 | 368 | A00064 | A15904 | 268 |
| A00064 | A15935 | 472 | A00064 | A15968 | 162 |
| A00064 | A15999 | 174 | A00064 | A16009 | 249 |
| A00064 | A16083 | 191 | A00064 | A16188 | 174 |
| A00064 | A16216 | 291 | A00064 | A16308 | 374 |
| A00064 | A16310 | 174 | A00064 | A16716 | 191 |
| A00064 | A16853 | 154 | A00065 | A00067 | 899 |
| A00065 | A00100 | 491 | A00065 | A00113 | 313 |
| A00065 | A00119 | 485 | A00065 | A00130 | 922 |
| A00065 | A00138 | 452 | A00065 | A00147 | 323 |
| A00065 | A00156 | 185 | A00065 | A00157 | 899 |
| A00065 | A00167 | 355 | A00065 | A00169 | 305 |
| A00065 | A00180 | 219 | A00065 | A00184 | 903 |
| A00065 | A00190 | 351 | A00065 | A00195 | 404 |
| A00065 | A00223 | 491 | A00065 | A00224 | 914 |
| A00065 | A00236 | 968 | A00065 | A00239 | 369 |
| A00065 | A00240 | 939 | A00065 | A00252 | 945 |
| A00065 | A00253 | 491 | A00065 | A00265 | 447 |
| A00065 | A00268 | 279 | A00065 | A00293 | 390 |
| A00065 | A00324 | 901 | A00065 | A00331 | 210 |
| A00065 | A00335 | 204 | A00065 | A00358 | 157 |
| A00065 | A00430 | 299 | A00065 | A00630 | 364 |
| A00065 | A00652 | 491 | A00065 | A00747 | 481 |
| A00065 | A00848 | 63  | A00065 | A00887 | 286 |
| A00065 | A00902 | 163 | A00065 | A01098 | 340 |
| A00065 | A01140 | 302 | A00065 | A01178 | 488 |
| A00065 | A01289 | 407 | A00065 | A01291 | 433 |
| A00065 | A01425 | 491 | A00065 | A01524 | 899 |
| A00065 | A01527 | 899 | A00065 | A01550 | 489 |
| A00065 | A01554 | 899 | A00065 | A01558 | 899 |
| A00065 | A01562 | 945 | A00065 | A01588 | 899 |

|        |        |     |        |        |     |
|--------|--------|-----|--------|--------|-----|
| A00065 | A01606 | 193 | A00065 | A01692 | 964 |
| A00065 | A01730 | 451 | A00065 | A01740 | 477 |
| A00065 | A01741 | 268 | A00065 | A01755 | 90  |
| A00065 | A01796 | 436 | A00065 | A01877 | 446 |
| A00065 | A01886 | 134 | A00065 | A02325 | 491 |
| A00065 | A02418 | 446 | A00065 | A02421 | 258 |
| A00065 | A02434 | 291 | A00065 | A02494 | 485 |
| A00065 | A02502 | 906 | A00065 | A02647 | 243 |
| A00065 | A02703 | 399 | A00065 | A02786 | 226 |
| A00065 | A02816 | 456 | A00065 | A02827 | 227 |
| A00065 | A02860 | 456 | A00065 | A02877 | 308 |
| A00065 | A02895 | 389 | A00065 | A02912 | 162 |
| A00065 | A02965 | 195 | A00065 | A03057 | 374 |
| A00065 | A03112 | 303 | A00065 | A03286 | 277 |
| A00065 | A03451 | 371 | A00065 | A03472 | 196 |
| A00065 | A03575 | 899 | A00065 | A03591 | 170 |
| A00065 | A03739 | 343 | A00065 | A04020 | 236 |
| A00065 | A04312 | 307 | A00065 | A04342 | 491 |
| A00065 | A04964 | 243 | A00065 | A05077 | 334 |
| A00065 | A05418 | 218 | A00065 | A05621 | 451 |
| A00065 | A05811 | 297 | A00065 | A05958 | 232 |
| A00065 | A06138 | 174 | A00065 | A06324 | 190 |
| A00065 | A07163 | 240 | A00065 | A07311 | 899 |
| A00065 | A07399 | 190 | A00065 | A07422 | 914 |
| A00065 | A07791 | 227 | A00065 | A08858 | 899 |
| A00065 | A08899 | 945 | A00065 | A09092 | 177 |
| A00065 | A09121 | 185 | A00065 | A09123 | 154 |
| A00065 | A09423 | 407 | A00065 | A09562 | 162 |
| A00065 | A09923 | 307 | A00065 | A10233 | 278 |
| A00065 | A10247 | 238 | A00065 | A10311 | 267 |
| A00065 | A10346 | 227 | A00065 | A10580 | 899 |
| A00065 | A10588 | 173 | A00065 | A11921 | 469 |
| A00065 | A12996 | 290 | A00065 | A13255 | 451 |
| A00065 | A13795 | 249 | A00065 | A13977 | 899 |
| A00065 | A14035 | 249 | A00065 | A14164 | 408 |
| A00065 | A15483 | 258 | A00065 | A16718 | 171 |
| A00066 | A00067 | 914 | A00066 | A00074 | 188 |
| A00066 | A00099 | 899 | A00066 | A00126 | 398 |
| A00066 | A00159 | 926 | A00066 | A00163 | 165 |
| A00066 | A00200 | 899 | A00066 | A00206 | 677 |
| A00066 | A00207 | 399 | A00066 | A00221 | 443 |
| A00066 | A00224 | 945 | A00066 | A00230 | 944 |
| A00066 | A00236 | 932 | A00066 | A00240 | 326 |
| A00066 | A00252 | 311 | A00066 | A00254 | 945 |
| A00066 | A00269 | 486 | A00066 | A00271 | 899 |
| A00066 | A00341 | 224 | A00066 | A00400 | 436 |

|        |        |     |        |        |     |
|--------|--------|-----|--------|--------|-----|
| A00066 | A00697 | 265 | A00066 | A01524 | 899 |
| A00066 | A01533 | 335 | A00066 | A01558 | 934 |
| A00066 | A01560 | 945 | A00066 | A01561 | 943 |
| A00066 | A01568 | 414 | A00066 | A01588 | 941 |
| A00066 | A01591 | 386 | A00066 | A01592 | 945 |
| A00066 | A01602 | 899 | A00066 | A01615 | 899 |
| A00066 | A01638 | 455 | A00066 | A01639 | 899 |
| A00066 | A01651 | 993 | A00066 | A01692 | 960 |
| A00066 | A01697 | 207 | A00066 | A02564 | 191 |
| A00066 | A03591 | 961 | A00066 | A04195 | 246 |
| A00066 | A04305 | 218 | A00066 | A04699 | 899 |
| A00066 | A05082 | 190 | A00066 | A05453 | 374 |
| A00066 | A06148 | 190 | A00066 | A06608 | 899 |
| A00066 | A07311 | 945 | A00066 | A07762 | 491 |
| A00066 | A07876 | 224 | A00066 | A08608 | 422 |
| A00066 | A08862 | 283 | A00066 | A09568 | 971 |
| A00066 | A10365 | 899 | A00066 | A10833 | 971 |
| A00066 | A11478 | 224 | A00066 | A11820 | 302 |
| A00066 | A11983 | 899 | A00066 | A12383 | 899 |
| A00066 | A12987 | 291 | A00066 | A13390 | 899 |
| A00066 | A13391 | 912 | A00066 | A13511 | 283 |
| A00066 | A13917 | 477 | A00066 | A13984 | 944 |
| A00066 | A13990 | 899 | A00066 | A14039 | 213 |
| A00066 | A14188 | 162 | A00066 | A14472 | 906 |
| A00066 | A14548 | 159 | A00066 | A14577 | 470 |
| A00066 | A16741 | 488 | A00067 | A00068 | 955 |
| A00067 | A00069 | 899 | A00067 | A00074 | 973 |
| A00067 | A00075 | 899 | A00067 | A00079 | 899 |
| A00067 | A00081 | 899 | A00067 | A00085 | 165 |
| A00067 | A00087 | 899 | A00067 | A00089 | 899 |
| A00067 | A00091 | 921 | A00067 | A00094 | 945 |
| A00067 | A00099 | 899 | A00067 | A00100 | 899 |
| A00067 | A00113 | 899 | A00067 | A00116 | 899 |
| A00067 | A00117 | 899 | A00067 | A00118 | 150 |
| A00067 | A00120 | 899 | A00067 | A00121 | 899 |
| A00067 | A00122 | 490 | A00067 | A00124 | 939 |
| A00067 | A00128 | 899 | A00067 | A00130 | 899 |
| A00067 | A00133 | 899 | A00067 | A00134 | 899 |
| A00067 | A00135 | 931 | A00067 | A00138 | 528 |
| A00067 | A00140 | 899 | A00067 | A00141 | 923 |
| A00067 | A00149 | 899 | A00067 | A00150 | 903 |
| A00067 | A00151 | 942 | A00067 | A00152 | 959 |
| A00067 | A00153 | 942 | A00067 | A00156 | 918 |
| A00067 | A00157 | 899 | A00067 | A00158 | 308 |
| A00067 | A00159 | 944 | A00067 | A00160 | 196 |
| A00067 | A00161 | 955 | A00067 | A00162 | 954 |



|        |        |     |        |        |     |
|--------|--------|-----|--------|--------|-----|
| A00067 | A00163 | 945 | A00067 | A00166 | 899 |
| A00067 | A00167 | 903 | A00067 | A00169 | 899 |
| A00067 | A00170 | 899 | A00067 | A00172 | 899 |
| A00067 | A00173 | 899 | A00067 | A00174 | 899 |
| A00067 | A00175 | 904 | A00067 | A00180 | 159 |
| A00067 | A00182 | 899 | A00067 | A00184 | 899 |
| A00067 | A00185 | 945 | A00067 | A00186 | 925 |
| A00067 | A00189 | 899 | A00067 | A00190 | 945 |
| A00067 | A00192 | 899 | A00067 | A00196 | 404 |
| A00067 | A00200 | 931 | A00067 | A00201 | 491 |
| A00067 | A00203 | 899 | A00067 | A00205 | 908 |
| A00067 | A00206 | 899 | A00067 | A00207 | 997 |
| A00067 | A00208 | 951 | A00067 | A00209 | 945 |
| A00067 | A00210 | 899 | A00067 | A00211 | 899 |
| A00067 | A00214 | 929 | A00067 | A00218 | 389 |
| A00067 | A00219 | 942 | A00067 | A00220 | 899 |
| A00067 | A00221 | 899 | A00067 | A00223 | 899 |
| A00067 | A00224 | 932 | A00067 | A00226 | 899 |
| A00067 | A00227 | 899 | A00067 | A00229 | 899 |
| A00067 | A00230 | 899 | A00067 | A00233 | 266 |
| A00067 | A00234 | 950 | A00067 | A00236 | 899 |
| A00067 | A00240 | 906 | A00067 | A00244 | 899 |
| A00067 | A00245 | 899 | A00067 | A00246 | 940 |
| A00067 | A00247 | 899 | A00067 | A00248 | 942 |
| A00067 | A00250 | 899 | A00067 | A00252 | 899 |
| A00067 | A00253 | 899 | A00067 | A00254 | 956 |
| A00067 | A00255 | 923 | A00067 | A00256 | 491 |
| A00067 | A00257 | 899 | A00067 | A00258 | 899 |
| A00067 | A00261 | 588 | A00067 | A00264 | 490 |
| A00067 | A00265 | 934 | A00067 | A00266 | 899 |
| A00067 | A00268 | 899 | A00067 | A00270 | 899 |
| A00067 | A00271 | 899 | A00067 | A00272 | 899 |
| A00067 | A00275 | 899 | A00067 | A00312 | 899 |
| A00067 | A00324 | 899 | A00067 | A00335 | 899 |
| A00067 | A00378 | 952 | A00067 | A00449 | 191 |
| A00067 | A00451 | 899 | A00067 | A00616 | 924 |
| A00067 | A00665 | 318 | A00067 | A00679 | 899 |
| A00067 | A00696 | 490 | A00067 | A00700 | 899 |
| A00067 | A00704 | 232 | A00067 | A00707 | 438 |
| A00067 | A00724 | 489 | A00067 | A00743 | 322 |
| A00067 | A00744 | 491 | A00067 | A00747 | 899 |
| A00067 | A00769 | 598 | A00067 | A00841 | 578 |
| A00067 | A00849 | 199 | A00067 | A00871 | 168 |
| A00067 | A00887 | 899 | A00067 | A00909 | 631 |
| A00067 | A00914 | 934 | A00067 | A00922 | 224 |
| A00067 | A00983 | 358 | A00067 | A01002 | 899 |

|        |        |     |        |        |     |
|--------|--------|-----|--------|--------|-----|
| A00067 | A01009 | 480 | A00067 | A01022 | 202 |
| A00067 | A01024 | 216 | A00067 | A01027 | 156 |
| A00067 | A01052 | 899 | A00067 | A01070 | 899 |
| A00067 | A01148 | 899 | A00067 | A01150 | 470 |
| A00067 | A01173 | 899 | A00067 | A01232 | 629 |
| A00067 | A01244 | 899 | A00067 | A01291 | 903 |
| A00067 | A01293 | 491 | A00067 | A01311 | 514 |
| A00067 | A01325 | 234 | A00067 | A01404 | 899 |
| A00067 | A01415 | 899 | A00067 | A01425 | 899 |
| A00067 | A01439 | 435 | A00067 | A01452 | 447 |
| A00067 | A01477 | 899 | A00067 | A01512 | 899 |
| A00067 | A01524 | 950 | A00067 | A01527 | 904 |
| A00067 | A01542 | 212 | A00067 | A01550 | 899 |
| A00067 | A01553 | 906 | A00067 | A01554 | 902 |
| A00067 | A01558 | 992 | A00067 | A01560 | 945 |
| A00067 | A01561 | 899 | A00067 | A01562 | 899 |
| A00067 | A01571 | 467 | A00067 | A01572 | 578 |
| A00067 | A01588 | 899 | A00067 | A01592 | 899 |
| A00067 | A01593 | 899 | A00067 | A01601 | 899 |
| A00067 | A01602 | 899 | A00067 | A01604 | 899 |
| A00067 | A01605 | 899 | A00067 | A01612 | 904 |
| A00067 | A01613 | 288 | A00067 | A01615 | 899 |
| A00067 | A01617 | 899 | A00067 | A01628 | 899 |
| A00067 | A01636 | 899 | A00067 | A01637 | 899 |
| A00067 | A01638 | 899 | A00067 | A01639 | 899 |
| A00067 | A01640 | 899 | A00067 | A01651 | 899 |
| A00067 | A01665 | 899 | A00067 | A01680 | 899 |
| A00067 | A01688 | 899 | A00067 | A01692 | 899 |
| A00067 | A01698 | 899 | A00067 | A01702 | 899 |
| A00067 | A01708 | 899 | A00067 | A01709 | 899 |
| A00067 | A01718 | 899 | A00067 | A01719 | 899 |
| A00067 | A01725 | 168 | A00067 | A01726 | 945 |
| A00067 | A01729 | 167 | A00067 | A01730 | 462 |
| A00067 | A01733 | 490 | A00067 | A01737 | 414 |
| A00067 | A01743 | 202 | A00067 | A01744 | 356 |
| A00067 | A01746 | 419 | A00067 | A01755 | 914 |
| A00067 | A01765 | 329 | A00067 | A01769 | 490 |
| A00067 | A01778 | 195 | A00067 | A01779 | 302 |
| A00067 | A01812 | 215 | A00067 | A01844 | 899 |
| A00067 | A01850 | 899 | A00067 | A01870 | 230 |
| A00067 | A01875 | 358 | A00067 | A01876 | 484 |
| A00067 | A01879 | 904 | A00067 | A01880 | 899 |
| A00067 | A01888 | 357 | A00067 | A01894 | 337 |
| A00067 | A01908 | 260 | A00067 | A01920 | 899 |
| A00067 | A01944 | 212 | A00067 | A02104 | 899 |
| A00067 | A02105 | 899 | A00067 | A02126 | 899 |

|        |        |     |        |        |     |
|--------|--------|-----|--------|--------|-----|
| A00067 | A02183 | 173 | A00067 | A02284 | 899 |
| A00067 | A02337 | 899 | A00067 | A02382 | 372 |
| A00067 | A02401 | 162 | A00067 | A02416 | 899 |
| A00067 | A02429 | 899 | A00067 | A02433 | 899 |
| A00067 | A02464 | 899 | A00067 | A02481 | 909 |
| A00067 | A02490 | 363 | A00067 | A02502 | 899 |
| A00067 | A02508 | 163 | A00067 | A02544 | 899 |
| A00067 | A02637 | 199 | A00067 | A02641 | 191 |
| A00067 | A02695 | 288 | A00067 | A02711 | 63  |
| A00067 | A02714 | 400 | A00067 | A02723 | 899 |
| A00067 | A02748 | 187 | A00067 | A02754 | 468 |
| A00067 | A02756 | 196 | A00067 | A02779 | 899 |
| A00067 | A02783 | 168 | A00067 | A02803 | 187 |
| A00067 | A02825 | 899 | A00067 | A02834 | 168 |
| A00067 | A02849 | 162 | A00067 | A02859 | 485 |
| A00067 | A02875 | 167 | A00067 | A02896 | 199 |
| A00067 | A02982 | 484 | A00067 | A03010 | 899 |
| A00067 | A03014 | 472 | A00067 | A03019 | 899 |
| A00067 | A03050 | 575 | A00067 | A03054 | 899 |
| A00067 | A03056 | 179 | A00067 | A03099 | 899 |
| A00067 | A03110 | 904 | A00067 | A03121 | 400 |
| A00067 | A03126 | 899 | A00067 | A03204 | 899 |
| A00067 | A03259 | 199 | A00067 | A03275 | 380 |
| A00067 | A03417 | 486 | A00067 | A03451 | 899 |
| A00067 | A03478 | 374 | A00067 | A03498 | 899 |
| A00067 | A03544 | 212 | A00067 | A03575 | 899 |
| A00067 | A03591 | 900 | A00067 | A03633 | 899 |
| A00067 | A03639 | 899 | A00067 | A03662 | 945 |
| A00067 | A03799 | 899 | A00067 | A03830 | 899 |
| A00067 | A03843 | 358 | A00067 | A03854 | 899 |
| A00067 | A03861 | 899 | A00067 | A03913 | 899 |
| A00067 | A03942 | 912 | A00067 | A04012 | 899 |
| A00067 | A04051 | 191 | A00067 | A04062 | 899 |
| A00067 | A04130 | 230 | A00067 | A04147 | 899 |
| A00067 | A04248 | 899 | A00067 | A04286 | 195 |
| A00067 | A04287 | 162 | A00067 | A04316 | 202 |
| A00067 | A04320 | 899 | A00067 | A04346 | 446 |
| A00067 | A04398 | 927 | A00067 | A04422 | 899 |
| A00067 | A04444 | 396 | A00067 | A04536 | 277 |
| A00067 | A04751 | 899 | A00067 | A04783 | 157 |
| A00067 | A04807 | 899 | A00067 | A04879 | 173 |
| A00067 | A05082 | 899 | A00067 | A05141 | 216 |
| A00067 | A05208 | 899 | A00067 | A05216 | 899 |
| A00067 | A05288 | 477 | A00067 | A05326 | 899 |
| A00067 | A05418 | 229 | A00067 | A05533 | 899 |
| A00067 | A05742 | 441 | A00067 | A05854 | 899 |

|        |        |     |        |        |     |
|--------|--------|-----|--------|--------|-----|
| A00067 | A05944 | 899 | A00067 | A05981 | 477 |
| A00067 | A05985 | 491 | A00067 | A06039 | 199 |
| A00067 | A06415 | 179 | A00067 | A06591 | 899 |
| A00067 | A06597 | 451 | A00067 | A06608 | 899 |
| A00067 | A06609 | 899 | A00067 | A06650 | 491 |
| A00067 | A06762 | 899 | A00067 | A06795 | 168 |
| A00067 | A06926 | 163 | A00067 | A07091 | 899 |
| A00067 | A07157 | 899 | A00067 | A07165 | 899 |
| A00067 | A07166 | 209 | A00067 | A07311 | 914 |
| A00067 | A07370 | 418 | A00067 | A07422 | 899 |
| A00067 | A07460 | 899 | A00067 | A07744 | 469 |
| A00067 | A07911 | 489 | A00067 | A08133 | 199 |
| A00067 | A08193 | 207 | A00067 | A08228 | 452 |
| A00067 | A08278 | 899 | A00067 | A08548 | 368 |
| A00067 | A08571 | 899 | A00067 | A08589 | 162 |
| A00067 | A08714 | 899 | A00067 | A08858 | 899 |
| A00067 | A08869 | 302 | A00067 | A08899 | 899 |
| A00067 | A08904 | 199 | A00067 | A09181 | 899 |
| A00067 | A09201 | 899 | A00067 | A09220 | 945 |
| A00067 | A09319 | 899 | A00067 | A09363 | 899 |
| A00067 | A09383 | 899 | A00067 | A09542 | 899 |
| A00067 | A09577 | 899 | A00067 | A09660 | 899 |
| A00067 | A09842 | 277 | A00067 | A09919 | 162 |
| A00067 | A10028 | 162 | A00067 | A10185 | 899 |
| A00067 | A10392 | 899 | A00067 | A10512 | 162 |
| A00067 | A10542 | 899 | A00067 | A10560 | 899 |
| A00067 | A10580 | 943 | A00067 | A10601 | 899 |
| A00067 | A10623 | 899 | A00067 | A10801 | 912 |
| A00067 | A10919 | 162 | A00067 | A10941 | 243 |
| A00067 | A11125 | 899 | A00067 | A11326 | 488 |
| A00067 | A11369 | 933 | A00067 | A11522 | 899 |
| A00067 | A11604 | 914 | A00067 | A11834 | 899 |
| A00067 | A11931 | 333 | A00067 | A11983 | 899 |
| A00067 | A12383 | 899 | A00067 | A12680 | 899 |
| A00067 | A12932 | 899 | A00067 | A12988 | 899 |
| A00067 | A13003 | 899 | A00067 | A13250 | 899 |
| A00067 | A13307 | 416 | A00067 | A13391 | 899 |
| A00067 | A13401 | 899 | A00067 | A13605 | 899 |
| A00067 | A13667 | 185 | A00067 | A13734 | 223 |
| A00067 | A13788 | 185 | A00067 | A13958 | 899 |
| A00067 | A13977 | 899 | A00067 | A13978 | 899 |
| A00067 | A13980 | 955 | A00067 | A13981 | 899 |
| A00067 | A13983 | 899 | A00067 | A13985 | 899 |
| A00067 | A13987 | 899 | A00067 | A13989 | 899 |
| A00067 | A13990 | 925 | A00067 | A13991 | 899 |
| A00067 | A13992 | 899 | A00067 | A13995 | 899 |

|        |        |     |        |        |     |
|--------|--------|-----|--------|--------|-----|
| A00067 | A13999 | 899 | A00067 | A14001 | 899 |
| A00067 | A14010 | 899 | A00067 | A14027 | 901 |
| A00067 | A14030 | 899 | A00067 | A14031 | 899 |
| A00067 | A14032 | 899 | A00067 | A14033 | 899 |
| A00067 | A14038 | 899 | A00067 | A14043 | 899 |
| A00067 | A14044 | 899 | A00067 | A14046 | 899 |
| A00067 | A14055 | 899 | A00067 | A14059 | 899 |
| A00067 | A14062 | 899 | A00067 | A14063 | 989 |
| A00067 | A14065 | 899 | A00067 | A14111 | 201 |
| A00067 | A14187 | 899 | A00067 | A14188 | 899 |
| A00067 | A14194 | 259 | A00067 | A14198 | 945 |
| A00067 | A14210 | 899 | A00067 | A14242 | 899 |
| A00067 | A14245 | 168 | A00067 | A14330 | 207 |
| A00067 | A14371 | 899 | A00067 | A14408 | 899 |
| A00067 | A14433 | 899 | A00067 | A14438 | 899 |
| A00067 | A14443 | 989 | A00067 | A14444 | 899 |
| A00067 | A14654 | 899 | A00067 | A14699 | 660 |
| A00067 | A14778 | 258 | A00067 | A14930 | 899 |
| A00067 | A14943 | 377 | A00067 | A14975 | 162 |
| A00067 | A14992 | 162 | A00067 | A15242 | 162 |
| A00067 | A15292 | 899 | A00067 | A15293 | 899 |
| A00067 | A15294 | 899 | A00067 | A15304 | 899 |
| A00067 | A15308 | 325 | A00067 | A15312 | 899 |
| A00067 | A15321 | 899 | A00067 | A15325 | 899 |
| A00067 | A15340 | 899 | A00067 | A15350 | 899 |
| A00067 | A15356 | 485 | A00067 | A15357 | 157 |
| A00067 | A15634 | 899 | A00067 | A15746 | 201 |
| A00067 | A15841 | 899 | A00067 | A15974 | 199 |
| A00067 | A16030 | 899 | A00067 | A16048 | 401 |
| A00067 | A16081 | 329 | A00067 | A16084 | 899 |
| A00067 | A16636 | 201 | A00067 | A16912 | 159 |
| A00067 | A16988 | 899 | A00067 | A17195 | 899 |
| A00067 | A17196 | 152 | A00067 | A17215 | 899 |
| A00067 | A17216 | 899 | A00068 | A00076 | 260 |
| A00068 | A00086 | 198 | A00068 | A00094 | 491 |
| A00068 | A00105 | 202 | A00068 | A00129 | 899 |
| A00068 | A00131 | 469 | A00068 | A00141 | 199 |
| A00068 | A00147 | 218 | A00068 | A00151 | 256 |
| A00068 | A00153 | 914 | A00068 | A00159 | 899 |
| A00068 | A00163 | 945 | A00068 | A00167 | 481 |
| A00068 | A00169 | 335 | A00068 | A00171 | 485 |
| A00068 | A00184 | 458 | A00068 | A00190 | 486 |
| A00068 | A00199 | 217 | A00068 | A00200 | 491 |
| A00068 | A00201 | 491 | A00068 | A00209 | 945 |
| A00068 | A00212 | 428 | A00068 | A00224 | 899 |
| A00068 | A00246 | 899 | A00068 | A00248 | 188 |

|        |        |     |        |        |     |
|--------|--------|-----|--------|--------|-----|
| A00068 | A00254 | 329 | A00068 | A00256 | 491 |
| A00068 | A00264 | 945 | A00068 | A00294 | 899 |
| A00068 | A00301 | 328 | A00068 | A00308 | 491 |
| A00068 | A00338 | 490 | A00068 | A00377 | 168 |
| A00068 | A00472 | 485 | A00068 | A00485 | 480 |
| A00068 | A00535 | 322 | A00068 | A00600 | 170 |
| A00068 | A00643 | 405 | A00068 | A00799 | 396 |
| A00068 | A00805 | 154 | A00068 | A00909 | 296 |
| A00068 | A00931 | 899 | A00068 | A00939 | 347 |
| A00068 | A00958 | 234 | A00068 | A00981 | 208 |
| A00068 | A00985 | 283 | A00068 | A00986 | 322 |
| A00068 | A01022 | 491 | A00068 | A01161 | 557 |
| A00068 | A01211 | 491 | A00068 | A01299 | 174 |
| A00068 | A01441 | 291 | A00068 | A01451 | 208 |
| A00068 | A01481 | 480 | A00068 | A01500 | 195 |
| A00068 | A01512 | 899 | A00068 | A01524 | 933 |
| A00068 | A01551 | 313 | A00068 | A01558 | 899 |
| A00068 | A01582 | 432 | A00068 | A01588 | 899 |
| A00068 | A01590 | 167 | A00068 | A01639 | 899 |
| A00068 | A01668 | 899 | A00068 | A01726 | 452 |
| A00068 | A01728 | 183 | A00068 | A01729 | 85  |
| A00068 | A01733 | 488 | A00068 | A01737 | 480 |
| A00068 | A01743 | 490 | A00068 | A01746 | 472 |
| A00068 | A01754 | 160 | A00068 | A01763 | 446 |
| A00068 | A01775 | 270 | A00068 | A01844 | 899 |
| A00068 | A01876 | 227 | A00068 | A01888 | 249 |
| A00068 | A02124 | 191 | A00068 | A02306 | 251 |
| A00068 | A02411 | 899 | A00068 | A02477 | 473 |
| A00068 | A02482 | 273 | A00068 | A02485 | 380 |
| A00068 | A02490 | 368 | A00068 | A02491 | 288 |
| A00068 | A02493 | 899 | A00068 | A02548 | 268 |
| A00068 | A02637 | 199 | A00068 | A02695 | 312 |
| A00068 | A02697 | 429 | A00068 | A02698 | 480 |
| A00068 | A02714 | 258 | A00068 | A02785 | 940 |
| A00068 | A02822 | 899 | A00068 | A02896 | 199 |
| A00068 | A02908 | 899 | A00068 | A02924 | 489 |
| A00068 | A02982 | 388 | A00068 | A02983 | 151 |
| A00068 | A03259 | 199 | A00068 | A03268 | 899 |
| A00068 | A03292 | 226 | A00068 | A03304 | 329 |
| A00068 | A03402 | 380 | A00068 | A03417 | 374 |
| A00068 | A03459 | 303 | A00068 | A03661 | 341 |
| A00068 | A03662 | 452 | A00068 | A03676 | 251 |
| A00068 | A03686 | 227 | A00068 | A04096 | 899 |
| A00068 | A04337 | 490 | A00068 | A04449 | 188 |
| A00068 | A04532 | 402 | A00068 | A04614 | 906 |
| A00068 | A04652 | 432 | A00068 | A04659 | 906 |

|        |        |     |        |        |     |
|--------|--------|-----|--------|--------|-----|
| A00068 | A04737 | 199 | A00068 | A04962 | 234 |
| A00068 | A05115 | 208 | A00068 | A05117 | 156 |
| A00068 | A05245 | 317 | A00068 | A05288 | 480 |
| A00068 | A05295 | 213 | A00068 | A05309 | 485 |
| A00068 | A05331 | 324 | A00068 | A05356 | 573 |
| A00068 | A05418 | 436 | A00068 | A05577 | 288 |
| A00068 | A05891 | 229 | A00068 | A06544 | 327 |
| A00068 | A06607 | 486 | A00068 | A06615 | 899 |
| A00068 | A06628 | 385 | A00068 | A06650 | 491 |
| A00068 | A06954 | 215 | A00068 | A06999 | 170 |
| A00068 | A07011 | 358 | A00068 | A07311 | 257 |
| A00068 | A07339 | 488 | A00068 | A07422 | 899 |
| A00068 | A07442 | 481 | A00068 | A07697 | 899 |
| A00068 | A07911 | 465 | A00068 | A07997 | 200 |
| A00068 | A08093 | 449 | A00068 | A08133 | 199 |
| A00068 | A08158 | 170 | A00068 | A08193 | 199 |
| A00068 | A08255 | 296 | A00068 | A08404 | 486 |
| A00068 | A08627 | 343 | A00068 | A09170 | 170 |
| A00068 | A09592 | 420 | A00068 | A09978 | 268 |
| A00068 | A10532 | 553 | A00068 | A10580 | 899 |
| A00068 | A10667 | 425 | A00068 | A10778 | 375 |
| A00068 | A11299 | 455 | A00068 | A11308 | 339 |
| A00068 | A11313 | 241 | A00068 | A11324 | 371 |
| A00068 | A11326 | 363 | A00068 | A11403 | 215 |
| A00068 | A11411 | 435 | A00068 | A11513 | 467 |
| A00068 | A11604 | 199 | A00068 | A11982 | 180 |
| A00068 | A12373 | 486 | A00068 | A12883 | 246 |
| A00068 | A12897 | 151 | A00068 | A13824 | 899 |
| A00068 | A13873 | 157 | A00068 | A13978 | 899 |
| A00068 | A14211 | 899 | A00068 | A14236 | 246 |
| A00068 | A14272 | 369 | A00068 | A14398 | 170 |
| A00068 | A14444 | 152 | A00068 | A14449 | 284 |
| A00068 | A14759 | 174 | A00068 | A15282 | 241 |
| A00068 | A15292 | 899 | A00068 | A15295 | 958 |
| A00068 | A15296 | 973 | A00068 | A15322 | 200 |
| A00068 | A15422 | 444 | A00068 | A15596 | 269 |
| A00068 | A15766 | 170 | A00068 | A15917 | 391 |
| A00068 | A16016 | 208 | A00068 | A16083 | 899 |
| A00068 | A16120 | 156 | A00068 | A16636 | 432 |
| A00069 | A00072 | 294 | A00069 | A00074 | 402 |
| A00069 | A00076 | 341 | A00069 | A00079 | 157 |
| A00069 | A00080 | 491 | A00069 | A00081 | 945 |
| A00069 | A00083 | 491 | A00069 | A00085 | 491 |
| A00069 | A00087 | 480 | A00069 | A00088 | 229 |
| A00069 | A00089 | 491 | A00069 | A00095 | 481 |
| A00069 | A00097 | 457 | A00069 | A00106 | 489 |

|        |        |     |        |        |     |
|--------|--------|-----|--------|--------|-----|
| A00069 | A00111 | 945 | A00069 | A00127 | 491 |
| A00069 | A00131 | 456 | A00069 | A00150 | 578 |
| A00069 | A00159 | 899 | A00069 | A00166 | 406 |
| A00069 | A00167 | 547 | A00069 | A00168 | 491 |
| A00069 | A00173 | 481 | A00069 | A00177 | 642 |
| A00069 | A00178 | 235 | A00069 | A00190 | 479 |
| A00069 | A00191 | 195 | A00069 | A00193 | 252 |
| A00069 | A00196 | 491 | A00069 | A00203 | 193 |
| A00069 | A00208 | 252 | A00069 | A00209 | 945 |
| A00069 | A00212 | 480 | A00069 | A00216 | 246 |
| A00069 | A00218 | 483 | A00069 | A00219 | 945 |
| A00069 | A00221 | 456 | A00069 | A00222 | 374 |
| A00069 | A00223 | 457 | A00069 | A00227 | 369 |
| A00069 | A00245 | 491 | A00069 | A00254 | 477 |
| A00069 | A00264 | 491 | A00069 | A00274 | 483 |
| A00069 | A00292 | 438 | A00069 | A00294 | 171 |
| A00069 | A00309 | 455 | A00069 | A00315 | 230 |
| A00069 | A00324 | 947 | A00069 | A00327 | 283 |
| A00069 | A00328 | 462 | A00069 | A00335 | 414 |
| A00069 | A00338 | 363 | A00069 | A00350 | 177 |
| A00069 | A00352 | 243 | A00069 | A00356 | 162 |
| A00069 | A00363 | 389 | A00069 | A00370 | 297 |
| A00069 | A00377 | 252 | A00069 | A00405 | 314 |
| A00069 | A00406 | 183 | A00069 | A00440 | 299 |
| A00069 | A00472 | 385 | A00069 | A00485 | 316 |
| A00069 | A00500 | 360 | A00069 | A00532 | 221 |
| A00069 | A00616 | 491 | A00069 | A00643 | 477 |
| A00069 | A00651 | 330 | A00069 | A00668 | 171 |
| A00069 | A00700 | 241 | A00069 | A00736 | 486 |
| A00069 | A00747 | 294 | A00069 | A00752 | 201 |
| A00069 | A00760 | 472 | A00069 | A00815 | 491 |
| A00069 | A00820 | 172 | A00069 | A00831 | 291 |
| A00069 | A00882 | 294 | A00069 | A00916 | 483 |
| A00069 | A00931 | 350 | A00069 | A00981 | 270 |
| A00069 | A00997 | 204 | A00069 | A01005 | 279 |
| A00069 | A01022 | 344 | A00069 | A01075 | 290 |
| A00069 | A01091 | 435 | A00069 | A01112 | 431 |
| A00069 | A01125 | 642 | A00069 | A01137 | 484 |
| A00069 | A01140 | 477 | A00069 | A01157 | 228 |
| A00069 | A01161 | 547 | A00069 | A01166 | 399 |
| A00069 | A01196 | 281 | A00069 | A01211 | 221 |
| A00069 | A01225 | 185 | A00069 | A01235 | 462 |
| A00069 | A01248 | 193 | A00069 | A01257 | 491 |
| A00069 | A01277 | 346 | A00069 | A01291 | 288 |
| A00069 | A01419 | 290 | A00069 | A01425 | 484 |
| A00069 | A01460 | 480 | A00069 | A01461 | 589 |



|        |        |     |        |        |     |
|--------|--------|-----|--------|--------|-----|
| A00069 | A01468 | 474 | A00069 | A01470 | 256 |
| A00069 | A01476 | 204 | A00069 | A01485 | 490 |
| A00069 | A01487 | 435 | A00069 | A01488 | 229 |
| A00069 | A01492 | 553 | A00069 | A01515 | 491 |
| A00069 | A01524 | 920 | A00069 | A01525 | 159 |
| A00069 | A01527 | 914 | A00069 | A01531 | 451 |
| A00069 | A01553 | 899 | A00069 | A01558 | 899 |
| A00069 | A01573 | 571 | A00069 | A01579 | 470 |
| A00069 | A01588 | 899 | A00069 | A01590 | 379 |
| A00069 | A01597 | 321 | A00069 | A01598 | 162 |
| A00069 | A01601 | 623 | A00069 | A01605 | 484 |
| A00069 | A01612 | 152 | A00069 | A01640 | 154 |
| A00069 | A01722 | 449 | A00069 | A01740 | 344 |
| A00069 | A01741 | 424 | A00069 | A01743 | 162 |
| A00069 | A01775 | 899 | A00069 | A01790 | 241 |
| A00069 | A01925 | 204 | A00069 | A01926 | 446 |
| A00069 | A01931 | 439 | A00069 | A01995 | 262 |
| A00069 | A02044 | 207 | A00069 | A02048 | 205 |
| A00069 | A02049 | 286 | A00069 | A02074 | 238 |
| A00069 | A02083 | 193 | A00069 | A02104 | 906 |
| A00069 | A02105 | 901 | A00069 | A02111 | 475 |
| A00069 | A02126 | 270 | A00069 | A02133 | 260 |
| A00069 | A02143 | 419 | A00069 | A02148 | 465 |
| A00069 | A02156 | 251 | A00069 | A02161 | 159 |
| A00069 | A02174 | 483 | A00069 | A02176 | 361 |
| A00069 | A02179 | 424 | A00069 | A02180 | 202 |
| A00069 | A02186 | 277 | A00069 | A02213 | 445 |
| A00069 | A02215 | 490 | A00069 | A02228 | 446 |
| A00069 | A02229 | 474 | A00069 | A02236 | 235 |
| A00069 | A02245 | 255 | A00069 | A02251 | 243 |
| A00069 | A02265 | 263 | A00069 | A02278 | 283 |
| A00069 | A02298 | 251 | A00069 | A02303 | 187 |
| A00069 | A02304 | 468 | A00069 | A02305 | 96  |
| A00069 | A02306 | 480 | A00069 | A02309 | 245 |
| A00069 | A02313 | 485 | A00069 | A02318 | 196 |
| A00069 | A02326 | 82  | A00069 | A02364 | 414 |
| A00069 | A02377 | 259 | A00069 | A02383 | 160 |
| A00069 | A02390 | 906 | A00069 | A02393 | 204 |
| A00069 | A02397 | 490 | A00069 | A02401 | 159 |
| A00069 | A02405 | 414 | A00069 | A02419 | 201 |
| A00069 | A02423 | 474 | A00069 | A02425 | 486 |
| A00069 | A02431 | 375 | A00069 | A02449 | 177 |
| A00069 | A02465 | 489 | A00069 | A02468 | 183 |
| A00069 | A02482 | 157 | A00069 | A02490 | 449 |
| A00069 | A02491 | 216 | A00069 | A02504 | 193 |
| A00069 | A02545 | 168 | A00069 | A02572 | 160 |

|        |        |     |        |        |     |
|--------|--------|-----|--------|--------|-----|
| A00069 | A02588 | 167 | A00069 | A02644 | 63  |
| A00069 | A02667 | 217 | A00069 | A02668 | 423 |
| A00069 | A02671 | 404 | A00069 | A02672 | 356 |
| A00069 | A02673 | 490 | A00069 | A02756 | 439 |
| A00069 | A02758 | 329 | A00069 | A02759 | 196 |
| A00069 | A02772 | 91  | A00069 | A02785 | 433 |
| A00069 | A02836 | 360 | A00069 | A02864 | 238 |
| A00069 | A02877 | 301 | A00069 | A02959 | 344 |
| A00069 | A02983 | 371 | A00069 | A03053 | 168 |
| A00069 | A03054 | 945 | A00069 | A03070 | 438 |
| A00069 | A03076 | 400 | A00069 | A03077 | 152 |
| A00069 | A03080 | 283 | A00069 | A03083 | 170 |
| A00069 | A03099 | 395 | A00069 | A03104 | 483 |
| A00069 | A03110 | 491 | A00069 | A03112 | 213 |
| A00069 | A03115 | 245 | A00069 | A03141 | 219 |
| A00069 | A03160 | 168 | A00069 | A03183 | 254 |
| A00069 | A03186 | 383 | A00069 | A03191 | 226 |
| A00069 | A03201 | 215 | A00069 | A03203 | 223 |
| A00069 | A03219 | 472 | A00069 | A03259 | 316 |
| A00069 | A03300 | 413 | A00069 | A03304 | 213 |
| A00069 | A03310 | 99  | A00069 | A03314 | 484 |
| A00069 | A03315 | 79  | A00069 | A03379 | 322 |
| A00069 | A03402 | 465 | A00069 | A03413 | 215 |
| A00069 | A03438 | 191 | A00069 | A03451 | 160 |
| A00069 | A03458 | 283 | A00069 | A03498 | 168 |
| A00069 | A03573 | 243 | A00069 | A03578 | 143 |
| A00069 | A03584 | 174 | A00069 | A03588 | 167 |
| A00069 | A03633 | 927 | A00069 | A03639 | 491 |
| A00069 | A03726 | 165 | A00069 | A03744 | 221 |
| A00069 | A03748 | 205 | A00069 | A03749 | 223 |
| A00069 | A03752 | 179 | A00069 | A03786 | 188 |
| A00069 | A03787 | 159 | A00069 | A03799 | 454 |
| A00069 | A03818 | 341 | A00069 | A03880 | 424 |
| A00069 | A03893 | 341 | A00069 | A03910 | 708 |
| A00069 | A03942 | 466 | A00069 | A03960 | 229 |
| A00069 | A03961 | 491 | A00069 | A03963 | 477 |
| A00069 | A04082 | 168 | A00069 | A04092 | 204 |
| A00069 | A04163 | 301 | A00069 | A04166 | 291 |
| A00069 | A04169 | 433 | A00069 | A04180 | 213 |
| A00069 | A04202 | 945 | A00069 | A04225 | 276 |
| A00069 | A04230 | 350 | A00069 | A04256 | 347 |
| A00069 | A04326 | 152 | A00069 | A04337 | 420 |
| A00069 | A04366 | 168 | A00069 | A04380 | 353 |
| A00069 | A04423 | 297 | A00069 | A04430 | 276 |
| A00069 | A04449 | 489 | A00069 | A04464 | 188 |
| A00069 | A04490 | 208 | A00069 | A04504 | 283 |

|        |        |     |        |        |     |
|--------|--------|-----|--------|--------|-----|
| A00069 | A04605 | 152 | A00069 | A04626 | 204 |
| A00069 | A04633 | 173 | A00069 | A04643 | 177 |
| A00069 | A04668 | 314 | A00069 | A04676 | 291 |
| A00069 | A04697 | 362 | A00069 | A04751 | 343 |
| A00069 | A04816 | 177 | A00069 | A04843 | 177 |
| A00069 | A04976 | 480 | A00069 | A05011 | 204 |
| A00069 | A05015 | 263 | A00069 | A05048 | 188 |
| A00069 | A05091 | 226 | A00069 | A05118 | 310 |
| A00069 | A05131 | 159 | A00069 | A05155 | 332 |
| A00069 | A05182 | 305 | A00069 | A05184 | 486 |
| A00069 | A05208 | 183 | A00069 | A05216 | 899 |
| A00069 | A05234 | 421 | A00069 | A05288 | 272 |
| A00069 | A05337 | 385 | A00069 | A05356 | 583 |
| A00069 | A05366 | 188 | A00069 | A05377 | 468 |
| A00069 | A05418 | 278 | A00069 | A05439 | 451 |
| A00069 | A05443 | 299 | A00069 | A05457 | 167 |
| A00069 | A05494 | 380 | A00069 | A05533 | 491 |
| A00069 | A05534 | 167 | A00069 | A05535 | 291 |
| A00069 | A05588 | 188 | A00069 | A05653 | 435 |
| A00069 | A05654 | 401 | A00069 | A05812 | 411 |
| A00069 | A05906 | 260 | A00069 | A05944 | 226 |
| A00069 | A05959 | 258 | A00069 | A05992 | 447 |
| A00069 | A06008 | 204 | A00069 | A06033 | 204 |
| A00069 | A06100 | 290 | A00069 | A06249 | 204 |
| A00069 | A06286 | 414 | A00069 | A06340 | 427 |
| A00069 | A06343 | 177 | A00069 | A06371 | 384 |
| A00069 | A06379 | 157 | A00069 | A06423 | 258 |
| A00069 | A06452 | 226 | A00069 | A06534 | 294 |
| A00069 | A06606 | 180 | A00069 | A06607 | 235 |
| A00069 | A06610 | 391 | A00069 | A06719 | 297 |
| A00069 | A06762 | 467 | A00069 | A06922 | 177 |
| A00069 | A07047 | 162 | A00069 | A07115 | 270 |
| A00069 | A07143 | 174 | A00069 | A07163 | 165 |
| A00069 | A07189 | 152 | A00069 | A07209 | 450 |
| A00069 | A07296 | 283 | A00069 | A07297 | 159 |
| A00069 | A07398 | 346 | A00069 | A07422 | 945 |
| A00069 | A07460 | 322 | A00069 | A07495 | 262 |
| A00069 | A07581 | 156 | A00069 | A07623 | 188 |
| A00069 | A07726 | 230 | A00069 | A07803 | 389 |
| A00069 | A07815 | 238 | A00069 | A07968 | 177 |
| A00069 | A08284 | 243 | A00069 | A08288 | 188 |
| A00069 | A08408 | 318 | A00069 | A08424 | 152 |
| A00069 | A08484 | 159 | A00069 | A08630 | 229 |
| A00069 | A08667 | 180 | A00069 | A08714 | 115 |
| A00069 | A08859 | 479 | A00069 | A09028 | 491 |
| A00069 | A09054 | 692 | A00069 | A09070 | 204 |

|        |        |     |        |        |     |
|--------|--------|-----|--------|--------|-----|
| A00069 | A09075 | 335 | A00069 | A09198 | 188 |
| A00069 | A09213 | 389 | A00069 | A09235 | 152 |
| A00069 | A09238 | 255 | A00069 | A09245 | 455 |
| A00069 | A09254 | 314 | A00069 | A09319 | 899 |
| A00069 | A09429 | 93  | A00069 | A09480 | 330 |
| A00069 | A09550 | 475 | A00069 | A09552 | 299 |
| A00069 | A09732 | 490 | A00069 | A09733 | 462 |
| A00069 | A09743 | 352 | A00069 | A09868 | 159 |
| A00069 | A09942 | 260 | A00069 | A09958 | 260 |
| A00069 | A10040 | 234 | A00069 | A10090 | 159 |
| A00069 | A10113 | 177 | A00069 | A10145 | 322 |
| A00069 | A10306 | 226 | A00069 | A10336 | 490 |
| A00069 | A10482 | 226 | A00069 | A10525 | 472 |
| A00069 | A10633 | 456 | A00069 | A10645 | 457 |
| A00069 | A10779 | 226 | A00069 | A10841 | 226 |
| A00069 | A10928 | 204 | A00069 | A11170 | 167 |
| A00069 | A11190 | 480 | A00069 | A11279 | 154 |
| A00069 | A11313 | 456 | A00069 | A11327 | 294 |
| A00069 | A11387 | 291 | A00069 | A11415 | 281 |
| A00069 | A11522 | 353 | A00069 | A11527 | 319 |
| A00069 | A11548 | 718 | A00069 | A11846 | 384 |
| A00069 | A11857 | 180 | A00069 | A11893 | 167 |
| A00069 | A11913 | 152 | A00069 | A11983 | 512 |
| A00069 | A12082 | 187 | A00069 | A12108 | 167 |
| A00069 | A12246 | 247 | A00069 | A12265 | 177 |
| A00069 | A12273 | 491 | A00069 | A12393 | 334 |
| A00069 | A12459 | 167 | A00069 | A12560 | 899 |
| A00069 | A12682 | 335 | A00069 | A12897 | 337 |
| A00069 | A13063 | 657 | A00069 | A13108 | 310 |
| A00069 | A13344 | 204 | A00069 | A13667 | 224 |
| A00069 | A13832 | 480 | A00069 | A13849 | 167 |
| A00069 | A13874 | 491 | A00069 | A13875 | 167 |
| A00069 | A13888 | 226 | A00069 | A13944 | 462 |
| A00069 | A13987 | 221 | A00069 | A13989 | 719 |
| A00069 | A13994 | 462 | A00069 | A14007 | 201 |
| A00069 | A14010 | 462 | A00069 | A14051 | 226 |
| A00069 | A14052 | 486 | A00069 | A14053 | 260 |
| A00069 | A14190 | 462 | A00069 | A14198 | 165 |
| A00069 | A14202 | 351 | A00069 | A14210 | 490 |
| A00069 | A14247 | 617 | A00069 | A14371 | 477 |
| A00069 | A14378 | 228 | A00069 | A14399 | 430 |
| A00069 | A14443 | 246 | A00069 | A14490 | 243 |
| A00069 | A14496 | 366 | A00069 | A14511 | 491 |
| A00069 | A14579 | 156 | A00069 | A14604 | 435 |
| A00069 | A14693 | 157 | A00069 | A14722 | 188 |
| A00069 | A14901 | 177 | A00069 | A15229 | 429 |

|        |        |     |        |        |     |
|--------|--------|-----|--------|--------|-----|
| A00069 | A15230 | 480 | A00069 | A15268 | 466 |
| A00069 | A15292 | 635 | A00069 | A15312 | 414 |
| A00069 | A15313 | 489 | A00069 | A15317 | 156 |
| A00069 | A15321 | 230 | A00069 | A15322 | 255 |
| A00069 | A15345 | 262 | A00069 | A15349 | 469 |
| A00069 | A15352 | 385 | A00069 | A15381 | 461 |
| A00069 | A15384 | 414 | A00069 | A15396 | 205 |
| A00069 | A15419 | 460 | A00069 | A15431 | 184 |
| A00069 | A15432 | 277 | A00069 | A15435 | 468 |
| A00069 | A15436 | 440 | A00069 | A15437 | 207 |
| A00069 | A15447 | 216 | A00069 | A15452 | 475 |
| A00069 | A15456 | 238 | A00069 | A15457 | 216 |
| A00069 | A15463 | 210 | A00069 | A15478 | 433 |
| A00069 | A15480 | 205 | A00069 | A15495 | 341 |
| A00069 | A15498 | 489 | A00069 | A15552 | 484 |
| A00069 | A15598 | 467 | A00069 | A15671 | 213 |
| A00069 | A15904 | 152 | A00069 | A15909 | 412 |
| A00069 | A15913 | 491 | A00069 | A16001 | 260 |
| A00069 | A16107 | 369 | A00069 | A16254 | 260 |
| A00069 | A16257 | 351 | A00069 | A16636 | 470 |
| A00069 | A16648 | 177 | A00069 | A16778 | 252 |
| A00069 | A17061 | 450 | A00069 | A17201 | 226 |
| A00070 | A00157 | 899 | A00070 | A00190 | 899 |
| A00070 | A00209 | 899 | A00070 | A01640 | 899 |
| A00070 | A09644 | 899 | A00071 | A00074 | 168 |
| A00071 | A00127 | 466 | A00071 | A00160 | 73  |
| A00071 | A00161 | 944 | A00071 | A00162 | 99  |
| A00071 | A00190 | 398 | A00071 | A00208 | 63  |
| A00071 | A00262 | 367 | A00071 | A00561 | 274 |
| A00071 | A00747 | 293 | A00071 | A00911 | 196 |
| A00071 | A01191 | 154 | A00071 | A01400 | 374 |
| A00071 | A01527 | 899 | A00071 | A01551 | 174 |
| A00071 | A01668 | 294 | A00071 | A01675 | 491 |
| A00071 | A01691 | 441 | A00071 | A01722 | 443 |
| A00071 | A01729 | 156 | A00071 | A01737 | 372 |
| A00071 | A01741 | 340 | A00071 | A01746 | 218 |
| A00071 | A01751 | 302 | A00071 | A01757 | 157 |
| A00071 | A01758 | 474 | A00071 | A01768 | 174 |
| A00071 | A01787 | 137 | A00071 | A01793 | 271 |
| A00071 | A01796 | 491 | A00071 | A01797 | 443 |
| A00071 | A01873 | 285 | A00071 | A01890 | 425 |
| A00071 | A01894 | 363 | A00071 | A01895 | 443 |
| A00071 | A01896 | 473 | A00071 | A01899 | 467 |
| A00071 | A01908 | 112 | A00071 | A01909 | 213 |
| A00071 | A01914 | 491 | A00071 | A01951 | 276 |
| A00071 | A02109 | 152 | A00071 | A02183 | 296 |

|        |        |     |        |        |     |
|--------|--------|-----|--------|--------|-----|
| A00071 | A02208 | 486 | A00071 | A02228 | 229 |
| A00071 | A02327 | 195 | A00071 | A02338 | 154 |
| A00071 | A02341 | 417 | A00071 | A02342 | 162 |
| A00071 | A02392 | 257 | A00071 | A02417 | 234 |
| A00071 | A02425 | 168 | A00071 | A02435 | 277 |
| A00071 | A02498 | 156 | A00071 | A02586 | 396 |
| A00071 | A02616 | 319 | A00071 | A02629 | 290 |
| A00071 | A02632 | 201 | A00071 | A02638 | 263 |
| A00071 | A02687 | 419 | A00071 | A02700 | 335 |
| A00071 | A02702 | 236 | A00071 | A02707 | 168 |
| A00071 | A02734 | 452 | A00071 | A02749 | 379 |
| A00071 | A02758 | 157 | A00071 | A02766 | 188 |
| A00071 | A02811 | 162 | A00071 | A02819 | 183 |
| A00071 | A02905 | 174 | A00071 | A02906 | 205 |
| A00071 | A02943 | 251 | A00071 | A02988 | 401 |
| A00071 | A03024 | 230 | A00071 | A03041 | 182 |
| A00071 | A03120 | 269 | A00071 | A03186 | 447 |
| A00071 | A03225 | 475 | A00071 | A03242 | 160 |
| A00071 | A03263 | 319 | A00071 | A03434 | 450 |
| A00071 | A03537 | 257 | A00071 | A03583 | 230 |
| A00071 | A03585 | 210 | A00071 | A03593 | 307 |
| A00071 | A03594 | 224 | A00071 | A03598 | 355 |
| A00071 | A03611 | 154 | A00071 | A03638 | 202 |
| A00071 | A03847 | 294 | A00071 | A03870 | 269 |
| A00071 | A03964 | 401 | A00071 | A04004 | 297 |
| A00071 | A04031 | 215 | A00071 | A04053 | 154 |
| A00071 | A04123 | 269 | A00071 | A04228 | 258 |
| A00071 | A04304 | 418 | A00071 | A04314 | 480 |
| A00071 | A04315 | 202 | A00071 | A04432 | 294 |
| A00071 | A04443 | 335 | A00071 | A04560 | 230 |
| A00071 | A04594 | 307 | A00071 | A04623 | 489 |
| A00071 | A04880 | 451 | A00071 | A04904 | 246 |
| A00071 | A04905 | 319 | A00071 | A05036 | 251 |
| A00071 | A05216 | 187 | A00071 | A05247 | 162 |
| A00071 | A05253 | 241 | A00071 | A05390 | 154 |
| A00071 | A05440 | 416 | A00071 | A05463 | 172 |
| A00071 | A05493 | 218 | A00071 | A05494 | 235 |
| A00071 | A05533 | 238 | A00071 | A05575 | 238 |
| A00071 | A05683 | 389 | A00071 | A05899 | 276 |
| A00071 | A05940 | 195 | A00071 | A05984 | 294 |
| A00071 | A06157 | 323 | A00071 | A06579 | 177 |
| A00071 | A06603 | 422 | A00071 | A06607 | 472 |
| A00071 | A06623 | 434 | A00071 | A06703 | 241 |
| A00071 | A07167 | 439 | A00071 | A07177 | 339 |
| A00071 | A07199 | 208 | A00071 | A07200 | 423 |
| A00071 | A07335 | 196 | A00071 | A08397 | 294 |

|        |        |     |        |        |     |
|--------|--------|-----|--------|--------|-----|
| A00071 | A08911 | 135 | A00071 | A09084 | 424 |
| A00071 | A09438 | 170 | A00071 | A10239 | 294 |
| A00071 | A10332 | 174 | A00071 | A10645 | 156 |
| A00071 | A11408 | 168 | A00071 | A11460 | 218 |
| A00071 | A11539 | 458 | A00071 | A11606 | 469 |
| A00071 | A11646 | 366 | A00071 | A11900 | 230 |
| A00071 | A13917 | 154 | A00071 | A14036 | 154 |
| A00071 | A14332 | 409 | A00071 | A14405 | 449 |
| A00071 | A14426 | 294 | A00071 | A14440 | 190 |
| A00071 | A14533 | 307 | A00071 | A14642 | 389 |
| A00071 | A14643 | 348 | A00071 | A14647 | 159 |
| A00071 | A14942 | 152 | A00071 | A16281 | 491 |
| A00071 | A16438 | 196 | A00071 | A16739 | 157 |
| A00071 | A16744 | 165 | A00071 | A16792 | 174 |
| A00072 | A00085 | 207 | A00072 | A00155 | 423 |
| A00072 | A00168 | 475 | A00072 | A00209 | 899 |
| A00072 | A00216 | 452 | A00072 | A00219 | 361 |
| A00072 | A00312 | 257 | A00072 | A00567 | 479 |
| A00072 | A01137 | 324 | A00072 | A01257 | 160 |
| A00072 | A01404 | 160 | A00072 | A01527 | 899 |
| A00072 | A01590 | 396 | A00072 | A02083 | 213 |
| A00072 | A02143 | 210 | A00072 | A02306 | 461 |
| A00072 | A02313 | 443 | A00072 | A02330 | 229 |
| A00072 | A02416 | 190 | A00072 | A02667 | 258 |
| A00072 | A02749 | 165 | A00072 | A02759 | 288 |
| A00072 | A02785 | 308 | A00072 | A03051 | 251 |
| A00072 | A03087 | 274 | A00072 | A03099 | 441 |
| A00072 | A03183 | 274 | A00072 | A03402 | 224 |
| A00072 | A03408 | 180 | A00072 | A03584 | 278 |
| A00072 | A03639 | 251 | A00072 | A03961 | 374 |
| A00072 | A04162 | 260 | A00072 | A04428 | 362 |
| A00072 | A04463 | 344 | A00072 | A04746 | 324 |
| A00072 | A05533 | 278 | A00072 | A06607 | 168 |
| A00072 | A08878 | 899 | A00072 | A09072 | 474 |
| A00072 | A09442 | 462 | A00072 | A09480 | 353 |
| A00072 | A10018 | 260 | A00072 | A11485 | 210 |
| A00072 | A11983 | 899 | A00072 | A15913 | 251 |
| A00073 | A00074 | 480 | A00073 | A00094 | 156 |
| A00073 | A00110 | 899 | A00073 | A00127 | 374 |
| A00073 | A00132 | 664 | A00073 | A00138 | 550 |
| A00073 | A00140 | 901 | A00073 | A00146 | 678 |
| A00073 | A00147 | 475 | A00073 | A00150 | 949 |
| A00073 | A00151 | 190 | A00073 | A00152 | 485 |
| A00073 | A00156 | 164 | A00073 | A00157 | 63  |
| A00073 | A00159 | 965 | A00073 | A00163 | 234 |
| A00073 | A00165 | 702 | A00073 | A00167 | 944 |

|        |        |     |        |        |     |
|--------|--------|-----|--------|--------|-----|
| A00073 | A00180 | 168 | A00073 | A00187 | 480 |
| A00073 | A00198 | 243 | A00073 | A00206 | 701 |
| A00073 | A00209 | 899 | A00073 | A00210 | 151 |
| A00073 | A00213 | 486 | A00073 | A00214 | 631 |
| A00073 | A00220 | 899 | A00073 | A00224 | 950 |
| A00073 | A00225 | 976 | A00073 | A00226 | 491 |
| A00073 | A00230 | 899 | A00073 | A00233 | 159 |
| A00073 | A00234 | 434 | A00073 | A00239 | 184 |
| A00073 | A00243 | 196 | A00073 | A00246 | 899 |
| A00073 | A00248 | 324 | A00073 | A00250 | 552 |
| A00073 | A00252 | 901 | A00073 | A00253 | 941 |
| A00073 | A00254 | 486 | A00073 | A00257 | 491 |
| A00073 | A00261 | 488 | A00073 | A00265 | 597 |
| A00073 | A00285 | 462 | A00073 | A00286 | 417 |
| A00073 | A00306 | 470 | A00073 | A00316 | 485 |
| A00073 | A00348 | 483 | A00073 | A00356 | 353 |
| A00073 | A00371 | 628 | A00073 | A00378 | 424 |
| A00073 | A00382 | 469 | A00073 | A00395 | 191 |
| A00073 | A00420 | 457 | A00073 | A00433 | 334 |
| A00073 | A00436 | 234 | A00073 | A00444 | 481 |
| A00073 | A00489 | 470 | A00073 | A00500 | 296 |
| A00073 | A00517 | 486 | A00073 | A00531 | 180 |
| A00073 | A00532 | 434 | A00073 | A00552 | 305 |
| A00073 | A00557 | 269 | A00073 | A00587 | 215 |
| A00073 | A00640 | 481 | A00073 | A00658 | 473 |
| A00073 | A00706 | 530 | A00073 | A00736 | 491 |
| A00073 | A00740 | 346 | A00073 | A00757 | 346 |
| A00073 | A00764 | 195 | A00073 | A00805 | 473 |
| A00073 | A00831 | 275 | A00073 | A00832 | 902 |
| A00073 | A00835 | 353 | A00073 | A00843 | 647 |
| A00073 | A00847 | 469 | A00073 | A00848 | 490 |
| A00073 | A00878 | 205 | A00073 | A00905 | 249 |
| A00073 | A00932 | 372 | A00073 | A00962 | 261 |
| A00073 | A00970 | 491 | A00073 | A00971 | 709 |
| A00073 | A00973 | 390 | A00073 | A01021 | 207 |
| A00073 | A01022 | 180 | A00073 | A01042 | 307 |
| A00073 | A01052 | 483 | A00073 | A01069 | 491 |
| A00073 | A01077 | 408 | A00073 | A01083 | 422 |
| A00073 | A01088 | 170 | A00073 | A01090 | 361 |
| A00073 | A01112 | 285 | A00073 | A01113 | 577 |
| A00073 | A01115 | 491 | A00073 | A01141 | 210 |
| A00073 | A01150 | 232 | A00073 | A01161 | 241 |
| A00073 | A01173 | 355 | A00073 | A01192 | 627 |
| A00073 | A01194 | 488 | A00073 | A01212 | 401 |
| A00073 | A01214 | 185 | A00073 | A01215 | 435 |
| A00073 | A01242 | 207 | A00073 | A01291 | 943 |



|        |        |     |        |        |     |
|--------|--------|-----|--------|--------|-----|
| A00073 | A01307 | 481 | A00073 | A01311 | 486 |
| A00073 | A01353 | 251 | A00073 | A01354 | 491 |
| A00073 | A01361 | 384 | A00073 | A01410 | 301 |
| A00073 | A01419 | 327 | A00073 | A01425 | 185 |
| A00073 | A01438 | 313 | A00073 | A01457 | 156 |
| A00073 | A01473 | 465 | A00073 | A01492 | 903 |
| A00073 | A01506 | 270 | A00073 | A01508 | 229 |
| A00073 | A01527 | 899 | A00073 | A01539 | 473 |
| A00073 | A01541 | 234 | A00073 | A01543 | 344 |
| A00073 | A01548 | 483 | A00073 | A01551 | 407 |
| A00073 | A01553 | 327 | A00073 | A01554 | 950 |
| A00073 | A01558 | 900 | A00073 | A01560 | 565 |
| A00073 | A01562 | 346 | A00073 | A01569 | 491 |
| A00073 | A01572 | 491 | A00073 | A01574 | 180 |
| A00073 | A01576 | 560 | A00073 | A01577 | 475 |
| A00073 | A01579 | 172 | A00073 | A01580 | 327 |
| A00073 | A01588 | 899 | A00073 | A01591 | 443 |
| A00073 | A01592 | 270 | A00073 | A01596 | 687 |
| A00073 | A01610 | 469 | A00073 | A01628 | 305 |
| A00073 | A01636 | 906 | A00073 | A01637 | 490 |
| A00073 | A01639 | 490 | A00073 | A01640 | 221 |
| A00073 | A01648 | 334 | A00073 | A01650 | 490 |
| A00073 | A01651 | 940 | A00073 | A01655 | 440 |
| A00073 | A01664 | 491 | A00073 | A01668 | 449 |
| A00073 | A01707 | 490 | A00073 | A01709 | 294 |
| A00073 | A01730 | 720 | A00073 | A01770 | 945 |
| A00073 | A01781 | 193 | A00073 | A01844 | 942 |
| A00073 | A01920 | 486 | A00073 | A01995 | 156 |
| A00073 | A02030 | 329 | A00073 | A02164 | 162 |
| A00073 | A02353 | 461 | A00073 | A02452 | 407 |
| A00073 | A02470 | 240 | A00073 | A02487 | 409 |
| A00073 | A02512 | 160 | A00073 | A02564 | 159 |
| A00073 | A02715 | 491 | A00073 | A02736 | 274 |
| A00073 | A02737 | 962 | A00073 | A02825 | 962 |
| A00073 | A02826 | 79  | A00073 | A02833 | 469 |
| A00073 | A02870 | 90  | A00073 | A02881 | 66  |
| A00073 | A02904 | 472 | A00073 | A03112 | 63  |
| A00073 | A03214 | 63  | A00073 | A03321 | 358 |
| A00073 | A03335 | 324 | A00073 | A03338 | 432 |
| A00073 | A03436 | 156 | A00073 | A03446 | 486 |
| A00073 | A03453 | 152 | A00073 | A03476 | 267 |
| A00073 | A03477 | 481 | A00073 | A03560 | 614 |
| A00073 | A03568 | 208 | A00073 | A03569 | 407 |
| A00073 | A03575 | 152 | A00073 | A03586 | 367 |
| A00073 | A03652 | 196 | A00073 | A03665 | 195 |
| A00073 | A03738 | 463 | A00073 | A03740 | 347 |

|        |        |     |        |        |     |
|--------|--------|-----|--------|--------|-----|
| A00073 | A03752 | 465 | A00073 | A03837 | 200 |
| A00073 | A03863 | 224 | A00073 | A03886 | 434 |
| A00073 | A03893 | 291 | A00073 | A03990 | 254 |
| A00073 | A04012 | 949 | A00073 | A04050 | 358 |
| A00073 | A04115 | 252 | A00073 | A04161 | 229 |
| A00073 | A04248 | 899 | A00073 | A04346 | 270 |
| A00073 | A04537 | 462 | A00073 | A04697 | 446 |
| A00073 | A05029 | 975 | A00073 | A05232 | 168 |
| A00073 | A05313 | 396 | A00073 | A05633 | 322 |
| A00073 | A05645 | 477 | A00073 | A05683 | 230 |
| A00073 | A05712 | 945 | A00073 | A05760 | 899 |
| A00073 | A05857 | 205 | A00073 | A05995 | 252 |
| A00073 | A06025 | 301 | A00073 | A06051 | 218 |
| A00073 | A06115 | 168 | A00073 | A06198 | 205 |
| A00073 | A06235 | 154 | A00073 | A06398 | 452 |
| A00073 | A06466 | 252 | A00073 | A06489 | 486 |
| A00073 | A06581 | 252 | A00073 | A06597 | 488 |
| A00073 | A06701 | 491 | A00073 | A06892 | 332 |
| A00073 | A06907 | 457 | A00073 | A07247 | 490 |
| A00073 | A07309 | 398 | A00073 | A07311 | 491 |
| A00073 | A07378 | 334 | A00073 | A07422 | 932 |
| A00073 | A07589 | 130 | A00073 | A07594 | 368 |
| A00073 | A07604 | 319 | A00073 | A07726 | 939 |
| A00073 | A07798 | 227 | A00073 | A07803 | 351 |
| A00073 | A07814 | 201 | A00073 | A07985 | 399 |
| A00073 | A08061 | 491 | A00073 | A08261 | 408 |
| A00073 | A08293 | 162 | A00073 | A08541 | 258 |
| A00073 | A08546 | 195 | A00073 | A08860 | 692 |
| A00073 | A08896 | 380 | A00073 | A08978 | 204 |
| A00073 | A09162 | 360 | A00073 | A09218 | 414 |
| A00073 | A09323 | 430 | A00073 | A09591 | 334 |
| A00073 | A09641 | 259 | A00073 | A09837 | 170 |
| A00073 | A09873 | 252 | A00073 | A09977 | 218 |
| A00073 | A10006 | 486 | A00073 | A10014 | 63  |
| A00073 | A10082 | 99  | A00073 | A10159 | 343 |
| A00073 | A10174 | 899 | A00073 | A10183 | 205 |
| A00073 | A10238 | 486 | A00073 | A10244 | 168 |
| A00073 | A10266 | 130 | A00073 | A10365 | 202 |
| A00073 | A10459 | 202 | A00073 | A10480 | 205 |
| A00073 | A10490 | 235 | A00073 | A10532 | 567 |
| A00073 | A10575 | 899 | A00073 | A10580 | 259 |
| A00073 | A10601 | 183 | A00073 | A10623 | 278 |
| A00073 | A10847 | 274 | A00073 | A11028 | 168 |
| A00073 | A11409 | 344 | A00073 | A11474 | 447 |
| A00073 | A11487 | 334 | A00073 | A11622 | 168 |
| A00073 | A11623 | 168 | A00073 | A11639 | 168 |

|        |        |     |        |        |     |
|--------|--------|-----|--------|--------|-----|
| A00073 | A12383 | 903 | A00073 | A12988 | 481 |
| A00073 | A13210 | 205 | A00073 | A13231 | 263 |
| A00073 | A13395 | 205 | A00073 | A13465 | 436 |
| A00073 | A13511 | 610 | A00073 | A13552 | 355 |
| A00073 | A13609 | 490 | A00073 | A13694 | 188 |
| A00073 | A13824 | 398 | A00073 | A13829 | 173 |
| A00073 | A13975 | 373 | A00073 | A13989 | 945 |
| A00073 | A14006 | 491 | A00073 | A14073 | 263 |
| A00073 | A14074 | 324 | A00073 | A14178 | 334 |
| A00073 | A14196 | 491 | A00073 | A14207 | 199 |
| A00073 | A14208 | 609 | A00073 | A14218 | 291 |
| A00073 | A14246 | 162 | A00073 | A14299 | 540 |
| A00073 | A14351 | 267 | A00073 | A14379 | 367 |
| A00073 | A14399 | 202 | A00073 | A14443 | 949 |
| A00073 | A14559 | 154 | A00073 | A15244 | 180 |
| A00073 | A15291 | 486 | A00073 | A15314 | 656 |
| A00073 | A15336 | 180 | A00073 | A15361 | 246 |
| A00073 | A15386 | 333 | A00073 | A15612 | 188 |
| A00073 | A15696 | 180 | A00073 | A15698 | 322 |
| A00073 | A16216 | 496 | A00073 | A16217 | 311 |
| A00073 | A16705 | 210 | A00073 | A16784 | 205 |
| A00073 | A17063 | 311 | A00073 | A17088 | 334 |
| A00074 | A00076 | 184 | A00074 | A00081 | 441 |
| A00074 | A00089 | 232 | A00074 | A00090 | 489 |
| A00074 | A00091 | 438 | A00074 | A00094 | 450 |
| A00074 | A00099 | 899 | A00074 | A00108 | 63  |
| A00074 | A00113 | 301 | A00074 | A00114 | 63  |
| A00074 | A00122 | 491 | A00074 | A00132 | 491 |
| A00074 | A00137 | 63  | A00074 | A00138 | 614 |
| A00074 | A00140 | 63  | A00074 | A00141 | 491 |
| A00074 | A00145 | 374 | A00074 | A00146 | 351 |
| A00074 | A00147 | 430 | A00074 | A00149 | 899 |
| A00074 | A00152 | 945 | A00074 | A00153 | 165 |
| A00074 | A00156 | 563 | A00074 | A00157 | 905 |
| A00074 | A00158 | 188 | A00074 | A00159 | 950 |
| A00074 | A00161 | 490 | A00074 | A00162 | 945 |
| A00074 | A00163 | 994 | A00074 | A00164 | 187 |
| A00074 | A00167 | 554 | A00074 | A00171 | 899 |
| A00074 | A00173 | 486 | A00074 | A00183 | 362 |
| A00074 | A00185 | 969 | A00074 | A00189 | 213 |
| A00074 | A00190 | 945 | A00074 | A00205 | 907 |
| A00074 | A00206 | 296 | A00074 | A00207 | 977 |
| A00074 | A00208 | 491 | A00074 | A00211 | 899 |
| A00074 | A00214 | 950 | A00074 | A00216 | 184 |
| A00074 | A00221 | 369 | A00074 | A00224 | 953 |
| A00074 | A00227 | 163 | A00074 | A00228 | 475 |

|        |        |     |        |        |     |
|--------|--------|-----|--------|--------|-----|
| A00074 | A00230 | 945 | A00074 | A00232 | 232 |
| A00074 | A00234 | 945 | A00074 | A00240 | 936 |
| A00074 | A00246 | 944 | A00074 | A00250 | 899 |
| A00074 | A00253 | 419 | A00074 | A00254 | 985 |
| A00074 | A00255 | 382 | A00074 | A00257 | 462 |
| A00074 | A00261 | 249 | A00074 | A00265 | 355 |
| A00074 | A00270 | 532 | A00074 | A00274 | 212 |
| A00074 | A00294 | 374 | A00074 | A00316 | 462 |
| A00074 | A00324 | 912 | A00074 | A00370 | 465 |
| A00074 | A00378 | 293 | A00074 | A00400 | 478 |
| A00074 | A00470 | 899 | A00074 | A00552 | 201 |
| A00074 | A00553 | 899 | A00074 | A00556 | 307 |
| A00074 | A00566 | 427 | A00074 | A00641 | 907 |
| A00074 | A00643 | 556 | A00074 | A00670 | 439 |
| A00074 | A00671 | 486 | A00074 | A00687 | 486 |
| A00074 | A00697 | 109 | A00074 | A00747 | 486 |
| A00074 | A00814 | 160 | A00074 | A00820 | 262 |
| A00074 | A00875 | 254 | A00074 | A00914 | 913 |
| A00074 | A00981 | 160 | A00074 | A01052 | 901 |
| A00074 | A01158 | 184 | A00074 | A01164 | 200 |
| A00074 | A01209 | 200 | A00074 | A01275 | 489 |
| A00074 | A01286 | 188 | A00074 | A01357 | 63  |
| A00074 | A01410 | 228 | A00074 | A01452 | 474 |
| A00074 | A01473 | 490 | A00074 | A01474 | 419 |
| A00074 | A01489 | 899 | A00074 | A01524 | 971 |
| A00074 | A01527 | 995 | A00074 | A01553 | 263 |
| A00074 | A01554 | 76  | A00074 | A01558 | 994 |
| A00074 | A01560 | 945 | A00074 | A01561 | 905 |
| A00074 | A01562 | 932 | A00074 | A01572 | 950 |
| A00074 | A01576 | 201 | A00074 | A01587 | 899 |
| A00074 | A01588 | 994 | A00074 | A01592 | 899 |
| A00074 | A01602 | 945 | A00074 | A01605 | 899 |
| A00074 | A01615 | 992 | A00074 | A01628 | 899 |
| A00074 | A01636 | 899 | A00074 | A01637 | 899 |
| A00074 | A01638 | 899 | A00074 | A01639 | 899 |
| A00074 | A01640 | 989 | A00074 | A01650 | 899 |
| A00074 | A01688 | 899 | A00074 | A01692 | 486 |
| A00074 | A01697 | 171 | A00074 | A01702 | 212 |
| A00074 | A01708 | 899 | A00074 | A01709 | 899 |
| A00074 | A01737 | 187 | A00074 | A01741 | 463 |
| A00074 | A01775 | 899 | A00074 | A01789 | 899 |
| A00074 | A01796 | 198 | A00074 | A01797 | 899 |
| A00074 | A01844 | 945 | A00074 | A01845 | 324 |
| A00074 | A01846 | 347 | A00074 | A01847 | 434 |
| A00074 | A01848 | 321 | A00074 | A01900 | 341 |
| A00074 | A01914 | 475 | A00074 | A01920 | 899 |

|        |        |     |        |        |     |
|--------|--------|-----|--------|--------|-----|
| A00074 | A01995 | 544 | A00074 | A02086 | 475 |
| A00074 | A02121 | 196 | A00074 | A02162 | 272 |
| A00074 | A02163 | 324 | A00074 | A02183 | 212 |
| A00074 | A02268 | 224 | A00074 | A02304 | 201 |
| A00074 | A02411 | 914 | A00074 | A02424 | 899 |
| A00074 | A02564 | 326 | A00074 | A02678 | 655 |
| A00074 | A02749 | 199 | A00074 | A02802 | 294 |
| A00074 | A02803 | 210 | A00074 | A02872 | 899 |
| A00074 | A02887 | 63  | A00074 | A02902 | 191 |
| A00074 | A02908 | 899 | A00074 | A02942 | 916 |
| A00074 | A02968 | 899 | A00074 | A03014 | 298 |
| A00074 | A03019 | 251 | A00074 | A03049 | 165 |
| A00074 | A03050 | 571 | A00074 | A03110 | 200 |
| A00074 | A03112 | 326 | A00074 | A03213 | 491 |
| A00074 | A03219 | 184 | A00074 | A03271 | 379 |
| A00074 | A03273 | 319 | A00074 | A03275 | 210 |
| A00074 | A03292 | 359 | A00074 | A03304 | 435 |
| A00074 | A03321 | 184 | A00074 | A03435 | 180 |
| A00074 | A03465 | 420 | A00074 | A03575 | 899 |
| A00074 | A03591 | 911 | A00074 | A03592 | 162 |
| A00074 | A03719 | 184 | A00074 | A03784 | 363 |
| A00074 | A03809 | 210 | A00074 | A03854 | 899 |
| A00074 | A04012 | 386 | A00074 | A04051 | 297 |
| A00074 | A04269 | 162 | A00074 | A04622 | 456 |
| A00074 | A04696 | 372 | A00074 | A04796 | 200 |
| A00074 | A04797 | 162 | A00074 | A05111 | 188 |
| A00074 | A05158 | 413 | A00074 | A05216 | 945 |
| A00074 | A05339 | 188 | A00074 | A05428 | 899 |
| A00074 | A05453 | 314 | A00074 | A05454 | 177 |
| A00074 | A05560 | 899 | A00074 | A05633 | 382 |
| A00074 | A05760 | 908 | A00074 | A05762 | 200 |
| A00074 | A06067 | 184 | A00074 | A06082 | 360 |
| A00074 | A06159 | 180 | A00074 | A06167 | 154 |
| A00074 | A06408 | 380 | A00074 | A06496 | 285 |
| A00074 | A06578 | 184 | A00074 | A06581 | 301 |
| A00074 | A06597 | 535 | A00074 | A06610 | 488 |
| A00074 | A06783 | 358 | A00074 | A07004 | 491 |
| A00074 | A07011 | 899 | A00074 | A07017 | 163 |
| A00074 | A07154 | 63  | A00074 | A07165 | 989 |
| A00074 | A07183 | 420 | A00074 | A07190 | 436 |
| A00074 | A07311 | 994 | A00074 | A07339 | 929 |
| A00074 | A07350 | 162 | A00074 | A07399 | 232 |
| A00074 | A07421 | 262 | A00074 | A07568 | 238 |
| A00074 | A07598 | 184 | A00074 | A07833 | 238 |
| A00074 | A08207 | 363 | A00074 | A08345 | 226 |
| A00074 | A08360 | 246 | A00074 | A08521 | 252 |

|        |        |     |        |        |     |
|--------|--------|-----|--------|--------|-----|
| A00074 | A08571 | 899 | A00074 | A08648 | 200 |
| A00074 | A08732 | 899 | A00074 | A08905 | 229 |
| A00074 | A08993 | 232 | A00074 | A09078 | 246 |
| A00074 | A09119 | 200 | A00074 | A09176 | 141 |
| A00074 | A09181 | 899 | A00074 | A09188 | 271 |
| A00074 | A09218 | 461 | A00074 | A09220 | 338 |
| A00074 | A09251 | 413 | A00074 | A09319 | 899 |
| A00074 | A09351 | 184 | A00074 | A09392 | 385 |
| A00074 | A09401 | 63  | A00074 | A09542 | 899 |
| A00074 | A09577 | 899 | A00074 | A09580 | 174 |
| A00074 | A09598 | 151 | A00074 | A09643 | 899 |
| A00074 | A09937 | 82  | A00074 | A10115 | 162 |
| A00074 | A10155 | 296 | A00074 | A10365 | 899 |
| A00074 | A10576 | 63  | A00074 | A10615 | 899 |
| A00074 | A10623 | 899 | A00074 | A10666 | 180 |
| A00074 | A10735 | 383 | A00074 | A10756 | 291 |
| A00074 | A10801 | 992 | A00074 | A10899 | 63  |
| A00074 | A11042 | 162 | A00074 | A11316 | 429 |
| A00074 | A11369 | 486 | A00074 | A11476 | 260 |
| A00074 | A11487 | 177 | A00074 | A11558 | 184 |
| A00074 | A11591 | 273 | A00074 | A11604 | 899 |
| A00074 | A11729 | 432 | A00074 | A11851 | 184 |
| A00074 | A11983 | 909 | A00074 | A12246 | 266 |
| A00074 | A12383 | 928 | A00074 | A12680 | 200 |
| A00074 | A12927 | 899 | A00074 | A13225 | 899 |
| A00074 | A13356 | 184 | A00074 | A13364 | 488 |
| A00074 | A13433 | 271 | A00074 | A13511 | 490 |
| A00074 | A13605 | 141 | A00074 | A13841 | 296 |
| A00074 | A13882 | 352 | A00074 | A13902 | 254 |
| A00074 | A13975 | 480 | A00074 | A13980 | 462 |
| A00074 | A13981 | 989 | A00074 | A13983 | 63  |
| A00074 | A13986 | 488 | A00074 | A13998 | 899 |
| A00074 | A14004 | 469 | A00074 | A14007 | 472 |
| A00074 | A14019 | 115 | A00074 | A14047 | 350 |
| A00074 | A14187 | 945 | A00074 | A14188 | 945 |
| A00074 | A14198 | 955 | A00074 | A14202 | 899 |
| A00074 | A14208 | 475 | A00074 | A14210 | 184 |
| A00074 | A14299 | 171 | A00074 | A14400 | 207 |
| A00074 | A14405 | 228 | A00074 | A14430 | 443 |
| A00074 | A14433 | 945 | A00074 | A14440 | 236 |
| A00074 | A14443 | 899 | A00074 | A14444 | 899 |
| A00074 | A14452 | 452 | A00074 | A14596 | 556 |
| A00074 | A14635 | 274 | A00074 | A14643 | 302 |
| A00074 | A14930 | 913 | A00074 | A15182 | 924 |
| A00074 | A15294 | 167 | A00074 | A15420 | 446 |
| A00074 | A15624 | 391 | A00074 | A15675 | 899 |

|        |        |     |        |        |     |
|--------|--------|-----|--------|--------|-----|
| A00074 | A15726 | 577 | A00074 | A16068 | 899 |
| A00074 | A16073 | 929 | A00074 | A16152 | 184 |
| A00074 | A16298 | 243 | A00074 | A16304 | 270 |
| A00074 | A16421 | 200 | A00074 | A16770 | 200 |
| A00074 | A16791 | 899 | A00074 | A17042 | 180 |
| A00075 | A00167 | 899 | A00075 | A00170 | 918 |
| A00075 | A00209 | 929 | A00075 | A00216 | 188 |
| A00075 | A00229 | 484 | A00075 | A00234 | 481 |
| A00075 | A00272 | 945 | A00075 | A00298 | 321 |
| A00075 | A00343 | 236 | A00075 | A00731 | 188 |
| A00075 | A01639 | 909 | A00075 | A01798 | 152 |
| A00075 | A02329 | 215 | A00075 | A02545 | 396 |
| A00075 | A02836 | 467 | A00075 | A03050 | 472 |
| A00075 | A03070 | 184 | A00075 | A03172 | 271 |
| A00075 | A03322 | 224 | A00075 | A03854 | 232 |
| A00075 | A04074 | 170 | A00075 | A05081 | 385 |
| A00075 | A05701 | 165 | A00075 | A06701 | 170 |
| A00075 | A07422 | 916 | A00075 | A09072 | 187 |
| A00075 | A09220 | 281 | A00075 | A10392 | 899 |
| A00075 | A11834 | 973 | A00075 | A13978 | 899 |
| A00075 | A14062 | 472 | A00075 | A14063 | 327 |
| A00075 | A14964 | 188 | A00076 | A00089 | 458 |
| A00076 | A00144 | 488 | A00076 | A00159 | 899 |
| A00076 | A00164 | 548 | A00076 | A00167 | 899 |
| A00076 | A00168 | 185 | A00076 | A00190 | 484 |
| A00076 | A00196 | 396 | A00076 | A00202 | 477 |
| A00076 | A00209 | 899 | A00076 | A00212 | 470 |
| A00076 | A00216 | 184 | A00076 | A00218 | 247 |
| A00076 | A00219 | 184 | A00076 | A00238 | 411 |
| A00076 | A00274 | 490 | A00076 | A00338 | 374 |
| A00076 | A00377 | 236 | A00076 | A00385 | 313 |
| A00076 | A00434 | 357 | A00076 | A00446 | 486 |
| A00076 | A00472 | 374 | A00076 | A00476 | 210 |
| A00076 | A00477 | 446 | A00076 | A00483 | 489 |
| A00076 | A00485 | 469 | A00076 | A00576 | 491 |
| A00076 | A00577 | 251 | A00076 | A00591 | 475 |
| A00076 | A00661 | 288 | A00076 | A00697 | 180 |
| A00076 | A00736 | 399 | A00076 | A00752 | 457 |
| A00076 | A00799 | 307 | A00076 | A00802 | 486 |
| A00076 | A00849 | 179 | A00076 | A00863 | 201 |
| A00076 | A00882 | 425 | A00076 | A00981 | 177 |
| A00076 | A00985 | 477 | A00076 | A00986 | 391 |
| A00076 | A01004 | 491 | A00076 | A01022 | 423 |
| A00076 | A01027 | 299 | A00076 | A01043 | 238 |
| A00076 | A01102 | 285 | A00076 | A01156 | 486 |
| A00076 | A01158 | 637 | A00076 | A01161 | 578 |

|        |        |     |        |        |     |
|--------|--------|-----|--------|--------|-----|
| A00076 | A01169 | 319 | A00076 | A01183 | 270 |
| A00076 | A01252 | 899 | A00076 | A01276 | 466 |
| A00076 | A01288 | 265 | A00076 | A01326 | 488 |
| A00076 | A01329 | 389 | A00076 | A01343 | 302 |
| A00076 | A01385 | 486 | A00076 | A01465 | 218 |
| A00076 | A01524 | 899 | A00076 | A01543 | 281 |
| A00076 | A01578 | 251 | A00076 | A01585 | 474 |
| A00076 | A01593 | 899 | A00076 | A01602 | 184 |
| A00076 | A01632 | 434 | A00076 | A01661 | 489 |
| A00076 | A01727 | 235 | A00076 | A01741 | 943 |
| A00076 | A01743 | 391 | A00076 | A01870 | 288 |
| A00076 | A01970 | 184 | A00076 | A01971 | 366 |
| A00076 | A01997 | 402 | A00076 | A02046 | 157 |
| A00076 | A02056 | 485 | A00076 | A02062 | 191 |
| A00076 | A02099 | 241 | A00076 | A02143 | 384 |
| A00076 | A02158 | 258 | A00076 | A02180 | 443 |
| A00076 | A02182 | 480 | A00076 | A02214 | 474 |
| A00076 | A02240 | 371 | A00076 | A02249 | 152 |
| A00076 | A02292 | 260 | A00076 | A02418 | 276 |
| A00076 | A02511 | 168 | A00076 | A02604 | 154 |
| A00076 | A02609 | 380 | A00076 | A02624 | 358 |
| A00076 | A02654 | 435 | A00076 | A02655 | 154 |
| A00076 | A02727 | 441 | A00076 | A02859 | 232 |
| A00076 | A02885 | 182 | A00076 | A03045 | 326 |
| A00076 | A03079 | 488 | A00076 | A03080 | 335 |
| A00076 | A03081 | 319 | A00076 | A03093 | 273 |
| A00076 | A03109 | 456 | A00076 | A03110 | 479 |
| A00076 | A03170 | 165 | A00076 | A03211 | 215 |
| A00076 | A03219 | 184 | A00076 | A03224 | 226 |
| A00076 | A03239 | 375 | A00076 | A03259 | 265 |
| A00076 | A03304 | 402 | A00076 | A03314 | 152 |
| A00076 | A03399 | 288 | A00076 | A03408 | 458 |
| A00076 | A03412 | 151 | A00076 | A03501 | 347 |
| A00076 | A03719 | 244 | A00076 | A03721 | 167 |
| A00076 | A03724 | 490 | A00076 | A03731 | 344 |
| A00076 | A03732 | 491 | A00076 | A03746 | 193 |
| A00076 | A03763 | 489 | A00076 | A03831 | 173 |
| A00076 | A03879 | 398 | A00076 | A03899 | 432 |
| A00076 | A03910 | 480 | A00076 | A03942 | 423 |
| A00076 | A03945 | 490 | A00076 | A03946 | 440 |
| A00076 | A04020 | 480 | A00076 | A04061 | 485 |
| A00076 | A04169 | 340 | A00076 | A04192 | 173 |
| A00076 | A04252 | 480 | A00076 | A04337 | 486 |
| A00076 | A04351 | 201 | A00076 | A04362 | 454 |
| A00076 | A04418 | 154 | A00076 | A04422 | 488 |
| A00076 | A04448 | 204 | A00076 | A04492 | 185 |



|        |        |     |        |        |     |
|--------|--------|-----|--------|--------|-----|
| A00076 | A04652 | 232 | A00076 | A04668 | 345 |
| A00076 | A04671 | 260 | A00076 | A04985 | 286 |
| A00076 | A04987 | 486 | A00076 | A05047 | 274 |
| A00076 | A05155 | 467 | A00076 | A05289 | 152 |
| A00076 | A05309 | 154 | A00076 | A05356 | 254 |
| A00076 | A05397 | 218 | A00076 | A05439 | 152 |
| A00076 | A05492 | 274 | A00076 | A05601 | 429 |
| A00076 | A05621 | 458 | A00076 | A05688 | 218 |
| A00076 | A05689 | 324 | A00076 | A05777 | 159 |
| A00076 | A05786 | 154 | A00076 | A06067 | 184 |
| A00076 | A06126 | 241 | A00076 | A06177 | 445 |
| A00076 | A06253 | 265 | A00076 | A06578 | 184 |
| A00076 | A06623 | 329 | A00076 | A06719 | 213 |
| A00076 | A06750 | 157 | A00076 | A06828 | 390 |
| A00076 | A06956 | 340 | A00076 | A07145 | 251 |
| A00076 | A07180 | 314 | A00076 | A07209 | 263 |
| A00076 | A07273 | 154 | A00076 | A07296 | 165 |
| A00076 | A07339 | 361 | A00076 | A07379 | 191 |
| A00076 | A07442 | 491 | A00076 | A07483 | 174 |
| A00076 | A07598 | 184 | A00076 | A07703 | 241 |
| A00076 | A08093 | 712 | A00076 | A08097 | 401 |
| A00076 | A08168 | 364 | A00076 | A08630 | 152 |
| A00076 | A08817 | 180 | A00076 | A08836 | 294 |
| A00076 | A08866 | 451 | A00076 | A09205 | 489 |
| A00076 | A09206 | 193 | A00076 | A09217 | 204 |
| A00076 | A09233 | 469 | A00076 | A09254 | 152 |
| A00076 | A09334 | 486 | A00076 | A09351 | 285 |
| A00076 | A09734 | 205 | A00076 | A09777 | 274 |
| A00076 | A09863 | 160 | A00076 | A10083 | 180 |
| A00076 | A10532 | 951 | A00076 | A10589 | 204 |
| A00076 | A10640 | 417 | A00076 | A10754 | 474 |
| A00076 | A10927 | 364 | A00076 | A11044 | 266 |
| A00076 | A11173 | 299 | A00076 | A11299 | 160 |
| A00076 | A11422 | 385 | A00076 | A11495 | 274 |
| A00076 | A11558 | 184 | A00076 | A11738 | 430 |
| A00076 | A11835 | 408 | A00076 | A11851 | 184 |
| A00076 | A12121 | 182 | A00076 | A12458 | 182 |
| A00076 | A12861 | 160 | A00076 | A12975 | 160 |
| A00076 | A13007 | 218 | A00076 | A13214 | 274 |
| A00076 | A13220 | 374 | A00076 | A13338 | 226 |
| A00076 | A13344 | 899 | A00076 | A13356 | 200 |
| A00076 | A13369 | 484 | A00076 | A13371 | 182 |
| A00076 | A13372 | 204 | A00076 | A13644 | 218 |
| A00076 | A13826 | 418 | A00076 | A13899 | 183 |
| A00076 | A13935 | 338 | A00076 | A13987 | 463 |
| A00076 | A14060 | 180 | A00076 | A14115 | 467 |

|        |        |     |        |        |     |
|--------|--------|-----|--------|--------|-----|
| A00076 | A14122 | 341 | A00076 | A14125 | 335 |
| A00076 | A14190 | 491 | A00076 | A14199 | 217 |
| A00076 | A14202 | 394 | A00076 | A14210 | 556 |
| A00076 | A14272 | 358 | A00076 | A14350 | 440 |
| A00076 | A14366 | 481 | A00076 | A14368 | 180 |
| A00076 | A14369 | 489 | A00076 | A14370 | 290 |
| A00076 | A14371 | 486 | A00076 | A14372 | 358 |
| A00076 | A14374 | 330 | A00076 | A14378 | 269 |
| A00076 | A14379 | 307 | A00076 | A14391 | 340 |
| A00076 | A14399 | 306 | A00076 | A14418 | 270 |
| A00076 | A14427 | 218 | A00076 | A14444 | 899 |
| A00076 | A14449 | 409 | A00076 | A14511 | 490 |
| A00076 | A14544 | 204 | A00076 | A14550 | 241 |
| A00076 | A14554 | 408 | A00076 | A14557 | 899 |
| A00076 | A14598 | 199 | A00076 | A14611 | 486 |
| A00076 | A14642 | 157 | A00076 | A14648 | 223 |
| A00076 | A14667 | 188 | A00076 | A14838 | 196 |
| A00076 | A15285 | 330 | A00076 | A15292 | 485 |
| A00076 | A15300 | 221 | A00076 | A15312 | 462 |
| A00076 | A15313 | 367 | A00076 | A15315 | 174 |
| A00076 | A15318 | 491 | A00076 | A15321 | 719 |
| A00076 | A15322 | 269 | A00076 | A15329 | 481 |
| A00076 | A15346 | 463 | A00076 | A15348 | 154 |
| A00076 | A15349 | 488 | A00076 | A15352 | 429 |
| A00076 | A15365 | 232 | A00076 | A15391 | 255 |
| A00076 | A15411 | 174 | A00076 | A15414 | 360 |
| A00076 | A15415 | 174 | A00076 | A15417 | 326 |
| A00076 | A15419 | 491 | A00076 | A15420 | 486 |
| A00076 | A15421 | 451 | A00076 | A15422 | 971 |
| A00076 | A15425 | 160 | A00076 | A15436 | 241 |
| A00076 | A15442 | 165 | A00076 | A15452 | 318 |
| A00076 | A15459 | 160 | A00076 | A15475 | 347 |
| A00076 | A15480 | 165 | A00076 | A15495 | 338 |
| A00076 | A15498 | 391 | A00076 | A15513 | 185 |
| A00076 | A15515 | 252 | A00076 | A15516 | 296 |
| A00076 | A15795 | 470 | A00076 | A15808 | 307 |
| A00076 | A15813 | 468 | A00076 | A15820 | 414 |
| A00076 | A15886 | 380 | A00076 | A15897 | 241 |
| A00076 | A15902 | 454 | A00076 | A15904 | 165 |
| A00076 | A15932 | 489 | A00076 | A16001 | 274 |
| A00076 | A16014 | 204 | A00076 | A16031 | 182 |
| A00076 | A16117 | 420 | A00076 | A16139 | 204 |
| A00076 | A16152 | 552 | A00076 | A16224 | 170 |
| A00076 | A16300 | 455 | A00076 | A16383 | 274 |
| A00076 | A16414 | 252 | A00076 | A16662 | 191 |
| A00076 | A16983 | 160 | A00076 | A17196 | 165 |

|        |        |     |        |        |     |
|--------|--------|-----|--------|--------|-----|
| A00077 | A00078 | 942 | A00077 | A00167 | 234 |
| A00077 | A00209 | 914 | A00077 | A00274 | 393 |
| A00077 | A00752 | 303 | A00077 | A01046 | 172 |
| A00077 | A01527 | 899 | A00077 | A01733 | 171 |
| A00077 | A01752 | 260 | A00077 | A01790 | 363 |
| A00077 | A01870 | 335 | A00077 | A01931 | 485 |
| A00077 | A01983 | 232 | A00077 | A02136 | 345 |
| A00077 | A02138 | 394 | A00077 | A02247 | 382 |
| A00077 | A02333 | 339 | A00077 | A02412 | 434 |
| A00077 | A02413 | 308 | A00077 | A02416 | 463 |
| A00077 | A02458 | 270 | A00077 | A02460 | 944 |
| A00077 | A02468 | 297 | A00077 | A02654 | 278 |
| A00077 | A02655 | 385 | A00077 | A02669 | 351 |
| A00077 | A02697 | 159 | A00077 | A02812 | 195 |
| A00077 | A02826 | 288 | A00077 | A02983 | 196 |
| A00077 | A02984 | 249 | A00077 | A03239 | 277 |
| A00077 | A03540 | 373 | A00077 | A03788 | 357 |
| A00077 | A03882 | 259 | A00077 | A03900 | 343 |
| A00077 | A03975 | 931 | A00077 | A04040 | 347 |
| A00077 | A04260 | 263 | A00077 | A04337 | 184 |
| A00077 | A04454 | 367 | A00077 | A04510 | 343 |
| A00077 | A04737 | 312 | A00077 | A05079 | 374 |
| A00077 | A05577 | 187 | A00077 | A06414 | 344 |
| A00077 | A06415 | 317 | A00077 | A06604 | 366 |
| A00077 | A07442 | 213 | A00077 | A10731 | 294 |
| A00077 | A13419 | 400 | A00077 | A14199 | 200 |
| A00077 | A14372 | 265 | A00077 | A14374 | 223 |
| A00077 | A14391 | 228 | A00077 | A14439 | 302 |
| A00077 | A14599 | 313 | A00077 | A14930 | 265 |
| A00078 | A00079 | 269 | A00078 | A00190 | 227 |
| A00078 | A00209 | 899 | A00078 | A00274 | 380 |
| A00078 | A00666 | 162 | A00078 | A00752 | 450 |
| A00078 | A01046 | 154 | A00078 | A01211 | 176 |
| A00078 | A01527 | 899 | A00078 | A01870 | 470 |
| A00078 | A02136 | 333 | A00078 | A02138 | 428 |
| A00078 | A02236 | 307 | A00078 | A02240 | 257 |
| A00078 | A02412 | 243 | A00078 | A02439 | 236 |
| A00078 | A02456 | 319 | A00078 | A02458 | 479 |
| A00078 | A02460 | 943 | A00078 | A02606 | 329 |
| A00078 | A02615 | 328 | A00078 | A02654 | 379 |
| A00078 | A02655 | 374 | A00078 | A03081 | 294 |
| A00078 | A03104 | 168 | A00078 | A03239 | 260 |
| A00078 | A03788 | 412 | A00078 | A03934 | 374 |
| A00078 | A03975 | 929 | A00078 | A04040 | 335 |
| A00078 | A04130 | 260 | A00078 | A04484 | 368 |
| A00078 | A05037 | 252 | A00078 | A05124 | 279 |

|        |        |     |        |        |     |
|--------|--------|-----|--------|--------|-----|
| A00078 | A05517 | 456 | A00078 | A05577 | 385 |
| A00078 | A05679 | 362 | A00078 | A06414 | 332 |
| A00078 | A06415 | 430 | A00078 | A06604 | 356 |
| A00078 | A07126 | 409 | A00078 | A07152 | 420 |
| A00078 | A07885 | 165 | A00078 | A08596 | 313 |
| A00078 | A09421 | 341 | A00078 | A10585 | 319 |
| A00078 | A10586 | 297 | A00078 | A11740 | 418 |
| A00078 | A12927 | 185 | A00078 | A13903 | 398 |
| A00078 | A13988 | 412 | A00078 | A14012 | 422 |
| A00078 | A14125 | 268 | A00078 | A14146 | 413 |
| A00078 | A14199 | 182 | A00078 | A14366 | 191 |
| A00078 | A14371 | 165 | A00078 | A14372 | 247 |
| A00078 | A14374 | 445 | A00078 | A14391 | 411 |
| A00078 | A14394 | 347 | A00078 | A14439 | 286 |
| A00078 | A14599 | 299 | A00078 | A15317 | 229 |
| A00078 | A15336 | 196 | A00078 | A16738 | 294 |
| A00078 | A17213 | 317 | A00079 | A00089 | 319 |
| A00079 | A00109 | 168 | A00079 | A00111 | 486 |
| A00079 | A00140 | 185 | A00079 | A00219 | 323 |
| A00079 | A00220 | 162 | A00079 | A00245 | 302 |
| A00079 | A00274 | 467 | A00079 | A00752 | 491 |
| A00079 | A00848 | 163 | A00079 | A01604 | 386 |
| A00079 | A01654 | 227 | A00079 | A01870 | 218 |
| A00079 | A01880 | 191 | A00079 | A01889 | 174 |
| A00079 | A02074 | 183 | A00079 | A02138 | 290 |
| A00079 | A02142 | 265 | A00079 | A02154 | 259 |
| A00079 | A02174 | 254 | A00079 | A02240 | 475 |
| A00079 | A02242 | 399 | A00079 | A02245 | 455 |
| A00079 | A02278 | 229 | A00079 | A02337 | 249 |
| A00079 | A02356 | 266 | A00079 | A02370 | 274 |
| A00079 | A02383 | 371 | A00079 | A02431 | 323 |
| A00079 | A02439 | 372 | A00079 | A02491 | 345 |
| A00079 | A02608 | 279 | A00079 | A02659 | 364 |
| A00079 | A02769 | 276 | A00079 | A02795 | 258 |
| A00079 | A02851 | 272 | A00079 | A03010 | 188 |
| A00079 | A03049 | 179 | A00079 | A03093 | 241 |
| A00079 | A03110 | 434 | A00079 | A03183 | 191 |
| A00079 | A03239 | 469 | A00079 | A03259 | 224 |
| A00079 | A03310 | 283 | A00079 | A03757 | 296 |
| A00079 | A03788 | 251 | A00079 | A03817 | 228 |
| A00079 | A03873 | 195 | A00079 | A03942 | 159 |
| A00079 | A03961 | 170 | A00079 | A04103 | 358 |
| A00079 | A04130 | 174 | A00079 | A04248 | 405 |
| A00079 | A04415 | 258 | A00079 | A04603 | 228 |
| A00079 | A04748 | 322 | A00079 | A04870 | 243 |
| A00079 | A05390 | 423 | A00079 | A05517 | 259 |

|        |        |     |        |        |     |
|--------|--------|-----|--------|--------|-----|
| A00079 | A05653 | 299 | A00079 | A05679 | 372 |
| A00079 | A05944 | 310 | A00079 | A05985 | 283 |
| A00079 | A06054 | 413 | A00079 | A06055 | 409 |
| A00079 | A06780 | 307 | A00079 | A07031 | 173 |
| A00079 | A07143 | 485 | A00079 | A07148 | 268 |
| A00079 | A07161 | 205 | A00079 | A07166 | 167 |
| A00079 | A07173 | 162 | A00079 | A08465 | 313 |
| A00079 | A08677 | 262 | A00079 | A08714 | 491 |
| A00079 | A09238 | 154 | A00079 | A09422 | 317 |
| A00079 | A09480 | 294 | A00079 | A09855 | 216 |
| A00079 | A12393 | 319 | A00079 | A13119 | 324 |
| A00079 | A13151 | 246 | A00079 | A14190 | 291 |
| A00079 | A14210 | 945 | A00079 | A14366 | 393 |
| A00079 | A14370 | 252 | A00079 | A14371 | 457 |
| A00079 | A14372 | 294 | A00079 | A14376 | 271 |
| A00079 | A14379 | 165 | A00079 | A14381 | 163 |
| A00079 | A14391 | 347 | A00079 | A14442 | 241 |
| A00079 | A14511 | 337 | A00079 | A14554 | 480 |
| A00079 | A14570 | 190 | A00079 | A14599 | 219 |
| A00079 | A14603 | 322 | A00079 | A14604 | 162 |
| A00079 | A14667 | 188 | A00079 | A15292 | 229 |
| A00079 | A15394 | 188 | A00079 | A15395 | 165 |
| A00079 | A15425 | 258 | A00079 | A15605 | 205 |
| A00079 | A15608 | 347 | A00079 | A15642 | 193 |
| A00079 | A15795 | 182 | A00079 | A16040 | 350 |
| A00080 | A00081 | 144 | A00080 | A00083 | 945 |
| A00080 | A00085 | 491 | A00080 | A00091 | 167 |
| A00080 | A00095 | 455 | A00080 | A00111 | 489 |
| A00080 | A00112 | 491 | A00080 | A00123 | 185 |
| A00080 | A00167 | 290 | A00080 | A00168 | 475 |
| A00080 | A00190 | 256 | A00080 | A00196 | 479 |
| A00080 | A00209 | 899 | A00080 | A00212 | 474 |
| A00080 | A00216 | 215 | A00080 | A00219 | 491 |
| A00080 | A00245 | 247 | A00080 | A00264 | 945 |
| A00080 | A00292 | 262 | A00080 | A00350 | 455 |
| A00080 | A00420 | 219 | A00080 | A00455 | 193 |
| A00080 | A00506 | 157 | A00080 | A00568 | 154 |
| A00080 | A00616 | 491 | A00080 | A00799 | 407 |
| A00080 | A01137 | 490 | A00080 | A01138 | 204 |
| A00080 | A01232 | 63  | A00080 | A01257 | 489 |
| A00080 | A01277 | 480 | A00080 | A01278 | 91  |
| A00080 | A01485 | 391 | A00080 | A01527 | 899 |
| A00080 | A01590 | 346 | A00080 | A01741 | 234 |
| A00080 | A01855 | 452 | A00080 | A01856 | 297 |
| A00080 | A01888 | 163 | A00080 | A01894 | 379 |
| A00080 | A01926 | 241 | A00080 | A01982 | 241 |

|        |        |     |        |        |     |
|--------|--------|-----|--------|--------|-----|
| A00080 | A01983 | 204 | A00080 | A01985 | 204 |
| A00080 | A02083 | 420 | A00080 | A02092 | 246 |
| A00080 | A02102 | 335 | A00080 | A02107 | 379 |
| A00080 | A02111 | 486 | A00080 | A02122 | 196 |
| A00080 | A02132 | 310 | A00080 | A02134 | 310 |
| A00080 | A02138 | 232 | A00080 | A02142 | 488 |
| A00080 | A02143 | 419 | A00080 | A02146 | 401 |
| A00080 | A02147 | 256 | A00080 | A02148 | 428 |
| A00080 | A02156 | 91  | A00080 | A02180 | 170 |
| A00080 | A02245 | 337 | A00080 | A02250 | 174 |
| A00080 | A02251 | 278 | A00080 | A02278 | 165 |
| A00080 | A02291 | 235 | A00080 | A02298 | 485 |
| A00080 | A02300 | 227 | A00080 | A02305 | 291 |
| A00080 | A02306 | 490 | A00080 | A02309 | 473 |
| A00080 | A02313 | 475 | A00080 | A02326 | 419 |
| A00080 | A02352 | 290 | A00080 | A02396 | 369 |
| A00080 | A02405 | 152 | A00080 | A02423 | 432 |
| A00080 | A02465 | 273 | A00080 | A02468 | 294 |
| A00080 | A02490 | 484 | A00080 | A02491 | 451 |
| A00080 | A02554 | 293 | A00080 | A02582 | 279 |
| A00080 | A02587 | 380 | A00080 | A02600 | 326 |
| A00080 | A02644 | 488 | A00080 | A02667 | 262 |
| A00080 | A02668 | 466 | A00080 | A02751 | 201 |
| A00080 | A02756 | 420 | A00080 | A02759 | 386 |
| A00080 | A02772 | 454 | A00080 | A02788 | 174 |
| A00080 | A02841 | 185 | A00080 | A02961 | 230 |
| A00080 | A03053 | 414 | A00080 | A03054 | 174 |
| A00080 | A03063 | 406 | A00080 | A03099 | 485 |
| A00080 | A03107 | 218 | A00080 | A03186 | 347 |
| A00080 | A03310 | 429 | A00080 | A03314 | 353 |
| A00080 | A03408 | 160 | A00080 | A03540 | 276 |
| A00080 | A03578 | 138 | A00080 | A03584 | 156 |
| A00080 | A03639 | 480 | A00080 | A03914 | 165 |
| A00080 | A03915 | 445 | A00080 | A03919 | 451 |
| A00080 | A03934 | 293 | A00080 | A03968 | 452 |
| A00080 | A04086 | 329 | A00080 | A04092 | 433 |
| A00080 | A04125 | 258 | A00080 | A04163 | 489 |
| A00080 | A04256 | 299 | A00080 | A04258 | 196 |
| A00080 | A04392 | 335 | A00080 | A04422 | 179 |
| A00080 | A04423 | 235 | A00080 | A04437 | 218 |
| A00080 | A04482 | 279 | A00080 | A04510 | 224 |
| A00080 | A04562 | 188 | A00080 | A04600 | 306 |
| A00080 | A04652 | 176 | A00080 | A04673 | 335 |
| A00080 | A04976 | 385 | A00080 | A05117 | 260 |
| A00080 | A05208 | 353 | A00080 | A05459 | 279 |
| A00080 | A05533 | 157 | A00080 | A05751 | 193 |

|        |        |     |        |        |     |
|--------|--------|-----|--------|--------|-----|
| A00080 | A05934 | 303 | A00080 | A06055 | 168 |
| A00080 | A06762 | 196 | A00080 | A06831 | 279 |
| A00080 | A06922 | 317 | A00080 | A07143 | 377 |
| A00080 | A08655 | 229 | A00080 | A08905 | 204 |
| A00080 | A09217 | 326 | A00080 | A09236 | 232 |
| A00080 | A09429 | 363 | A00080 | A09480 | 434 |
| A00080 | A09559 | 293 | A00080 | A10044 | 317 |
| A00080 | A10045 | 317 | A00080 | A10046 | 418 |
| A00080 | A10258 | 293 | A00080 | A10306 | 350 |
| A00080 | A10650 | 326 | A00080 | A11064 | 380 |
| A00080 | A11123 | 258 | A00080 | A13909 | 350 |
| A00080 | A14405 | 268 | A00080 | A14430 | 257 |
| A00080 | A14438 | 235 | A00080 | A15230 | 162 |
| A00080 | A15233 | 221 | A00080 | A15809 | 198 |
| A00080 | A15930 | 191 | A00080 | A16257 | 168 |
| A00080 | A16636 | 463 | A00080 | A16802 | 168 |
| A00081 | A00083 | 63  | A00081 | A00087 | 184 |
| A00081 | A00089 | 435 | A00081 | A00090 | 407 |
| A00081 | A00095 | 316 | A00081 | A00106 | 63  |
| A00081 | A00111 | 470 | A00081 | A00112 | 391 |
| A00081 | A00122 | 216 | A00081 | A00124 | 489 |
| A00081 | A00131 | 477 | A00081 | A00133 | 899 |
| A00081 | A00152 | 440 | A00081 | A00159 | 906 |
| A00081 | A00161 | 662 | A00081 | A00166 | 232 |
| A00081 | A00167 | 491 | A00081 | A00168 | 246 |
| A00081 | A00173 | 228 | A00081 | A00184 | 180 |
| A00081 | A00185 | 432 | A00081 | A00190 | 943 |
| A00081 | A00193 | 201 | A00081 | A00196 | 491 |
| A00081 | A00204 | 369 | A00081 | A00208 | 406 |
| A00081 | A00209 | 899 | A00081 | A00210 | 489 |
| A00081 | A00212 | 201 | A00081 | A00218 | 488 |
| A00081 | A00219 | 491 | A00081 | A00221 | 407 |
| A00081 | A00227 | 485 | A00081 | A00230 | 899 |
| A00081 | A00232 | 418 | A00081 | A00234 | 247 |
| A00081 | A00246 | 989 | A00081 | A00254 | 452 |
| A00081 | A00264 | 363 | A00081 | A00270 | 480 |
| A00081 | A00292 | 307 | A00081 | A00294 | 213 |
| A00081 | A00304 | 251 | A00081 | A00312 | 286 |
| A00081 | A00315 | 486 | A00081 | A00316 | 489 |
| A00081 | A00338 | 296 | A00081 | A00352 | 490 |
| A00081 | A00370 | 345 | A00081 | A00377 | 491 |
| A00081 | A00378 | 299 | A00081 | A00400 | 332 |
| A00081 | A00418 | 432 | A00081 | A00421 | 488 |
| A00081 | A00437 | 490 | A00081 | A00438 | 488 |
| A00081 | A00446 | 788 | A00081 | A00451 | 256 |
| A00081 | A00457 | 383 | A00081 | A00473 | 241 |

|        |        |     |        |        |     |
|--------|--------|-----|--------|--------|-----|
| A00081 | A00506 | 183 | A00081 | A00531 | 490 |
| A00081 | A00537 | 279 | A00081 | A00548 | 316 |
| A00081 | A00553 | 302 | A00081 | A00556 | 483 |
| A00081 | A00558 | 430 | A00081 | A00568 | 180 |
| A00081 | A00572 | 326 | A00081 | A00600 | 267 |
| A00081 | A00601 | 454 | A00081 | A00616 | 228 |
| A00081 | A00641 | 322 | A00081 | A00643 | 486 |
| A00081 | A00653 | 408 | A00081 | A00656 | 238 |
| A00081 | A00671 | 167 | A00081 | A00674 | 545 |
| A00081 | A00680 | 243 | A00081 | A00681 | 238 |
| A00081 | A00691 | 314 | A00081 | A00697 | 485 |
| A00081 | A00714 | 160 | A00081 | A00735 | 335 |
| A00081 | A00736 | 269 | A00081 | A00751 | 254 |
| A00081 | A00761 | 212 | A00081 | A00766 | 519 |
| A00081 | A00781 | 474 | A00081 | A00791 | 542 |
| A00081 | A00801 | 425 | A00081 | A00805 | 486 |
| A00081 | A00813 | 329 | A00081 | A00814 | 212 |
| A00081 | A00815 | 945 | A00081 | A00821 | 218 |
| A00081 | A00868 | 621 | A00081 | A00871 | 176 |
| A00081 | A00883 | 545 | A00081 | A00884 | 185 |
| A00081 | A00914 | 240 | A00081 | A00926 | 544 |
| A00081 | A00927 | 160 | A00081 | A00930 | 445 |
| A00081 | A00975 | 544 | A00081 | A00989 | 491 |
| A00081 | A01009 | 945 | A00081 | A01039 | 160 |
| A00081 | A01058 | 184 | A00081 | A01077 | 483 |
| A00081 | A01080 | 434 | A00081 | A01088 | 247 |
| A00081 | A01091 | 430 | A00081 | A01097 | 408 |
| A00081 | A01117 | 218 | A00081 | A01122 | 484 |
| A00081 | A01124 | 477 | A00081 | A01137 | 251 |
| A00081 | A01156 | 491 | A00081 | A01161 | 524 |
| A00081 | A01164 | 411 | A00081 | A01169 | 491 |
| A00081 | A01212 | 491 | A00081 | A01235 | 291 |
| A00081 | A01257 | 462 | A00081 | A01267 | 169 |
| A00081 | A01277 | 489 | A00081 | A01278 | 697 |
| A00081 | A01281 | 491 | A00081 | A01317 | 208 |
| A00081 | A01322 | 172 | A00081 | A01327 | 484 |
| A00081 | A01329 | 486 | A00081 | A01331 | 470 |
| A00081 | A01339 | 160 | A00081 | A01342 | 544 |
| A00081 | A01359 | 419 | A00081 | A01363 | 368 |
| A00081 | A01370 | 452 | A00081 | A01385 | 435 |
| A00081 | A01404 | 276 | A00081 | A01417 | 232 |
| A00081 | A01476 | 68  | A00081 | A01477 | 436 |
| A00081 | A01485 | 193 | A00081 | A01507 | 252 |
| A00081 | A01512 | 899 | A00081 | A01524 | 899 |
| A00081 | A01527 | 899 | A00081 | A01536 | 221 |
| A00081 | A01552 | 470 | A00081 | A01558 | 899 |



|        |        |     |        |        |     |
|--------|--------|-----|--------|--------|-----|
| A00081 | A01582 | 486 | A00081 | A01588 | 193 |
| A00081 | A01593 | 205 | A00081 | A01598 | 324 |
| A00081 | A01602 | 310 | A00081 | A01605 | 196 |
| A00081 | A01615 | 899 | A00081 | A01640 | 159 |
| A00081 | A01661 | 486 | A00081 | A01722 | 63  |
| A00081 | A01726 | 491 | A00081 | A01741 | 454 |
| A00081 | A01796 | 201 | A00081 | A01861 | 156 |
| A00081 | A01941 | 157 | A00081 | A01985 | 185 |
| A00081 | A02044 | 353 | A00081 | A02048 | 174 |
| A00081 | A02054 | 354 | A00081 | A02062 | 137 |
| A00081 | A02104 | 87  | A00081 | A02112 | 63  |
| A00081 | A02125 | 163 | A00081 | A02126 | 472 |
| A00081 | A02143 | 945 | A00081 | A02148 | 343 |
| A00081 | A02156 | 201 | A00081 | A02212 | 160 |
| A00081 | A02215 | 374 | A00081 | A02223 | 443 |
| A00081 | A02238 | 259 | A00081 | A02251 | 480 |
| A00081 | A02260 | 63  | A00081 | A02268 | 375 |
| A00081 | A02272 | 63  | A00081 | A02278 | 465 |
| A00081 | A02282 | 168 | A00081 | A02313 | 63  |
| A00081 | A02361 | 420 | A00081 | A02410 | 74  |
| A00081 | A02423 | 346 | A00081 | A02425 | 490 |
| A00081 | A02429 | 177 | A00081 | A02431 | 63  |
| A00081 | A02454 | 234 | A00081 | A02464 | 63  |
| A00081 | A02465 | 226 | A00081 | A02472 | 63  |
| A00081 | A02481 | 205 | A00081 | A02847 | 324 |
| A00081 | A03043 | 330 | A00081 | A03044 | 241 |
| A00081 | A03046 | 452 | A00081 | A03047 | 466 |
| A00081 | A03053 | 358 | A00081 | A03054 | 352 |
| A00081 | A03061 | 351 | A00081 | A03082 | 283 |
| A00081 | A03091 | 124 | A00081 | A03110 | 481 |
| A00081 | A03115 | 277 | A00081 | A03126 | 63  |
| A00081 | A03152 | 159 | A00081 | A03163 | 174 |
| A00081 | A03175 | 457 | A00081 | A03177 | 63  |
| A00081 | A03185 | 87  | A00081 | A03186 | 177 |
| A00081 | A03188 | 405 | A00081 | A03209 | 258 |
| A00081 | A03213 | 235 | A00081 | A03219 | 63  |
| A00081 | A03223 | 255 | A00081 | A03271 | 393 |
| A00081 | A03305 | 63  | A00081 | A03340 | 163 |
| A00081 | A03379 | 204 | A00081 | A03402 | 180 |
| A00081 | A03458 | 463 | A00081 | A03462 | 223 |
| A00081 | A03497 | 328 | A00081 | A03498 | 481 |
| A00081 | A03503 | 485 | A00081 | A03633 | 71  |
| A00081 | A03639 | 187 | A00081 | A03676 | 441 |
| A00081 | A03749 | 491 | A00081 | A03750 | 491 |
| A00081 | A03880 | 462 | A00081 | A03902 | 296 |
| A00081 | A03942 | 413 | A00081 | A03960 | 176 |

|        |        |     |        |        |     |
|--------|--------|-----|--------|--------|-----|
| A00081 | A04033 | 424 | A00081 | A04050 | 899 |
| A00081 | A04147 | 288 | A00081 | A04180 | 462 |
| A00081 | A04216 | 152 | A00081 | A04379 | 380 |
| A00081 | A04449 | 234 | A00081 | A04562 | 160 |
| A00081 | A04666 | 283 | A00081 | A04853 | 165 |
| A00081 | A04962 | 378 | A00081 | A05158 | 243 |
| A00081 | A05249 | 449 | A00081 | A05377 | 266 |
| A00081 | A05418 | 489 | A00081 | A05457 | 254 |
| A00081 | A05465 | 185 | A00081 | A05497 | 369 |
| A00081 | A05546 | 307 | A00081 | A05577 | 369 |
| A00081 | A05675 | 185 | A00081 | A05784 | 223 |
| A00081 | A06028 | 223 | A00081 | A06032 | 174 |
| A00081 | A06214 | 223 | A00081 | A06261 | 163 |
| A00081 | A06272 | 488 | A00081 | A06286 | 241 |
| A00081 | A06513 | 223 | A00081 | A06581 | 210 |
| A00081 | A06588 | 184 | A00081 | A06642 | 347 |
| A00081 | A06650 | 389 | A00081 | A06750 | 369 |
| A00081 | A06822 | 163 | A00081 | A06907 | 247 |
| A00081 | A06914 | 491 | A00081 | A07034 | 185 |
| A00081 | A07062 | 252 | A00081 | A07096 | 160 |
| A00081 | A07226 | 160 | A00081 | A07311 | 180 |
| A00081 | A07315 | 311 | A00081 | A07422 | 904 |
| A00081 | A07433 | 899 | A00081 | A07575 | 427 |
| A00081 | A07621 | 193 | A00081 | A07726 | 473 |
| A00081 | A07756 | 255 | A00081 | A07803 | 316 |
| A00081 | A07813 | 218 | A00081 | A07902 | 190 |
| A00081 | A07920 | 159 | A00081 | A07961 | 185 |
| A00081 | A08032 | 188 | A00081 | A08123 | 185 |
| A00081 | A08182 | 357 | A00081 | A08608 | 167 |
| A00081 | A08612 | 119 | A00081 | A08701 | 356 |
| A00081 | A08834 | 160 | A00081 | A08875 | 226 |
| A00081 | A08882 | 303 | A00081 | A09062 | 188 |
| A00081 | A09078 | 412 | A00081 | A09203 | 163 |
| A00081 | A09387 | 272 | A00081 | A09627 | 160 |
| A00081 | A09644 | 232 | A00081 | A09801 | 87  |
| A00081 | A09807 | 185 | A00081 | A09811 | 185 |
| A00081 | A09999 | 65  | A00081 | A10021 | 406 |
| A00081 | A10037 | 185 | A00081 | A10161 | 163 |
| A00081 | A10372 | 160 | A00081 | A10453 | 491 |
| A00081 | A10491 | 163 | A00081 | A10539 | 163 |
| A00081 | A10632 | 469 | A00081 | A11060 | 185 |
| A00081 | A11270 | 223 | A00081 | A11365 | 160 |
| A00081 | A11598 | 236 | A00081 | A11649 | 460 |
| A00081 | A11735 | 160 | A00081 | A11737 | 160 |
| A00081 | A11747 | 266 | A00081 | A11914 | 160 |
| A00081 | A12319 | 243 | A00081 | A12325 | 168 |

|        |        |     |        |        |     |
|--------|--------|-----|--------|--------|-----|
| A00081 | A12395 | 223 | A00081 | A12658 | 160 |
| A00081 | A12824 | 545 | A00081 | A12900 | 163 |
| A00081 | A12994 | 223 | A00081 | A13084 | 213 |
| A00081 | A13248 | 163 | A00081 | A13268 | 223 |
| A00081 | A13290 | 314 | A00081 | A13447 | 314 |
| A00081 | A13492 | 223 | A00081 | A13511 | 358 |
| A00081 | A13613 | 223 | A00081 | A13829 | 174 |
| A00081 | A13831 | 362 | A00081 | A14007 | 541 |
| A00081 | A14020 | 185 | A00081 | A14080 | 303 |
| A00081 | A14154 | 234 | A00081 | A14180 | 391 |
| A00081 | A14190 | 490 | A00081 | A14193 | 462 |
| A00081 | A14196 | 536 | A00081 | A14210 | 480 |
| A00081 | A14345 | 319 | A00081 | A14366 | 199 |
| A00081 | A14369 | 318 | A00081 | A14371 | 473 |
| A00081 | A14379 | 190 | A00081 | A14410 | 433 |
| A00081 | A14430 | 450 | A00081 | A14443 | 899 |
| A00081 | A14511 | 470 | A00081 | A14570 | 205 |
| A00081 | A14636 | 427 | A00081 | A15136 | 279 |
| A00081 | A15257 | 307 | A00081 | A15292 | 358 |
| A00081 | A15295 | 501 | A00081 | A15297 | 602 |
| A00081 | A15318 | 332 | A00081 | A15324 | 220 |
| A00081 | A15338 | 246 | A00081 | A15340 | 899 |
| A00081 | A15349 | 265 | A00081 | A15350 | 899 |
| A00081 | A15356 | 491 | A00081 | A15379 | 217 |
| A00081 | A15427 | 154 | A00081 | A15498 | 596 |
| A00081 | A15556 | 462 | A00081 | A15559 | 393 |
| A00081 | A15624 | 395 | A00081 | A15644 | 529 |
| A00081 | A15683 | 416 | A00081 | A15788 | 174 |
| A00081 | A15795 | 154 | A00081 | A15809 | 256 |
| A00081 | A15858 | 172 | A00081 | A15896 | 305 |
| A00081 | A16636 | 340 | A00081 | A16782 | 279 |
| A00081 | A17215 | 899 | A00081 | A17216 | 899 |
| A00082 | A00126 | 467 | A00082 | A00151 | 268 |
| A00082 | A00214 | 435 | A00082 | A00224 | 941 |
| A00082 | A00226 | 488 | A00082 | A00246 | 912 |
| A00082 | A00257 | 451 | A00082 | A00439 | 152 |
| A00082 | A00825 | 162 | A00082 | A00933 | 483 |
| A00082 | A01307 | 406 | A00082 | A01553 | 916 |
| A00082 | A01558 | 899 | A00082 | A01588 | 899 |
| A00082 | A01762 | 269 | A00082 | A01951 | 338 |
| A00082 | A02018 | 229 | A00082 | A02094 | 290 |
| A00082 | A03739 | 291 | A00082 | A04115 | 163 |
| A00082 | A04783 | 190 | A00082 | A05064 | 406 |
| A00082 | A05284 | 207 | A00082 | A06597 | 485 |
| A00082 | A06608 | 177 | A00082 | A06735 | 240 |
| A00082 | A07155 | 290 | A00082 | A09417 | 294 |

|        |        |     |        |        |     |
|--------|--------|-----|--------|--------|-----|
| A00082 | A10506 | 470 | A00082 | A11850 | 271 |
| A00082 | A12886 | 269 | A00082 | A14996 | 180 |
| A00082 | A15291 | 345 | A00082 | A16331 | 267 |
| A00083 | A00085 | 488 | A00083 | A00087 | 132 |
| A00083 | A00106 | 176 | A00083 | A00111 | 379 |
| A00083 | A00123 | 254 | A00083 | A00159 | 899 |
| A00083 | A00168 | 63  | A00083 | A00196 | 428 |
| A00083 | A00204 | 363 | A00083 | A00209 | 919 |
| A00083 | A00218 | 151 | A00083 | A00219 | 475 |
| A00083 | A00245 | 480 | A00083 | A00264 | 945 |
| A00083 | A00294 | 185 | A00083 | A00616 | 486 |
| A00083 | A00815 | 110 | A00083 | A01257 | 307 |
| A00083 | A01527 | 899 | A00083 | A01734 | 185 |
| A00083 | A01775 | 902 | A00083 | A01985 | 255 |
| A00083 | A02028 | 179 | A00083 | A02070 | 367 |
| A00083 | A02108 | 452 | A00083 | A02176 | 274 |
| A00083 | A02215 | 481 | A00083 | A02251 | 200 |
| A00083 | A02298 | 361 | A00083 | A02303 | 305 |
| A00083 | A02309 | 251 | A00083 | A02310 | 251 |
| A00083 | A02311 | 238 | A00083 | A02313 | 450 |
| A00083 | A02383 | 262 | A00083 | A02397 | 367 |
| A00083 | A02423 | 224 | A00083 | A02425 | 156 |
| A00083 | A02465 | 402 | A00083 | A02490 | 443 |
| A00083 | A02582 | 201 | A00083 | A02615 | 271 |
| A00083 | A02668 | 407 | A00083 | A02672 | 293 |
| A00083 | A02756 | 446 | A00083 | A02785 | 326 |
| A00083 | A02944 | 162 | A00083 | A02983 | 228 |
| A00083 | A03107 | 152 | A00083 | A03219 | 193 |
| A00083 | A03282 | 241 | A00083 | A03402 | 151 |
| A00083 | A03639 | 491 | A00083 | A03818 | 180 |
| A00083 | A03915 | 332 | A00083 | A03961 | 470 |
| A00083 | A04147 | 224 | A00083 | A04237 | 335 |
| A00083 | A04365 | 335 | A00083 | A04914 | 230 |
| A00083 | A04976 | 411 | A00083 | A05288 | 173 |
| A00083 | A05494 | 207 | A00083 | A05533 | 490 |
| A00083 | A05534 | 346 | A00083 | A05535 | 425 |
| A00083 | A05923 | 272 | A00083 | A05992 | 375 |
| A00083 | A06033 | 367 | A00083 | A06762 | 457 |
| A00083 | A07141 | 272 | A00083 | A09213 | 299 |
| A00083 | A09480 | 305 | A00083 | A09550 | 477 |
| A00083 | A13879 | 199 | A00083 | A14511 | 173 |
| A00083 | A15230 | 216 | A00083 | A16636 | 340 |
| A00084 | A00089 | 943 | A00084 | A00274 | 196 |
| A00084 | A02431 | 302 | A00084 | A03110 | 235 |
| A00084 | A07803 | 171 | A00084 | A08859 | 151 |
| A00084 | A09732 | 329 | A00084 | A09733 | 251 |

|        |        |     |        |        |     |
|--------|--------|-----|--------|--------|-----|
| A00084 | A11412 | 374 | A00084 | A14369 | 329 |
| A00084 | A15292 | 229 | A00084 | A15348 | 247 |
| A00084 | A15349 | 167 | A00084 | A15452 | 234 |
| A00084 | A15515 | 291 | A00084 | A15876 | 369 |
| A00085 | A00087 | 154 | A00085 | A00106 | 215 |
| A00085 | A00109 | 224 | A00085 | A00111 | 490 |
| A00085 | A00112 | 406 | A00085 | A00153 | 213 |
| A00085 | A00154 | 899 | A00085 | A00167 | 171 |
| A00085 | A00168 | 472 | A00085 | A00173 | 391 |
| A00085 | A00196 | 479 | A00085 | A00209 | 899 |
| A00085 | A00212 | 481 | A00085 | A00219 | 491 |
| A00085 | A00221 | 191 | A00085 | A00245 | 401 |
| A00085 | A00254 | 217 | A00085 | A00264 | 491 |
| A00085 | A00350 | 486 | A00085 | A00455 | 157 |
| A00085 | A00476 | 157 | A00085 | A00616 | 491 |
| A00085 | A00730 | 159 | A00085 | A00752 | 452 |
| A00085 | A00815 | 462 | A00085 | A00820 | 302 |
| A00085 | A00914 | 188 | A00085 | A01124 | 247 |
| A00085 | A01137 | 489 | A00085 | A01138 | 168 |
| A00085 | A01142 | 333 | A00085 | A01163 | 413 |
| A00085 | A01257 | 490 | A00085 | A01277 | 139 |
| A00085 | A01425 | 63  | A00085 | A01485 | 366 |
| A00085 | A01527 | 899 | A00085 | A01567 | 228 |
| A00085 | A01590 | 223 | A00085 | A01605 | 156 |
| A00085 | A01766 | 213 | A00085 | A01797 | 385 |
| A00085 | A01903 | 230 | A00085 | A01946 | 199 |
| A00085 | A01983 | 472 | A00085 | A02083 | 350 |
| A00085 | A02107 | 235 | A00085 | A02111 | 465 |
| A00085 | A02132 | 288 | A00085 | A02134 | 288 |
| A00085 | A02138 | 443 | A00085 | A02142 | 443 |
| A00085 | A02143 | 74  | A00085 | A02146 | 297 |
| A00085 | A02148 | 452 | A00085 | A02245 | 312 |
| A00085 | A02246 | 306 | A00085 | A02268 | 179 |
| A00085 | A02278 | 198 | A00085 | A02293 | 205 |
| A00085 | A02298 | 462 | A00085 | A02299 | 256 |
| A00085 | A02300 | 191 | A00085 | A02306 | 486 |
| A00085 | A02309 | 484 | A00085 | A02313 | 481 |
| A00085 | A02314 | 288 | A00085 | A02317 | 330 |
| A00085 | A02324 | 270 | A00085 | A02326 | 483 |
| A00085 | A02405 | 351 | A00085 | A02423 | 366 |
| A00085 | A02425 | 479 | A00085 | A02454 | 407 |
| A00085 | A02461 | 223 | A00085 | A02465 | 240 |
| A00085 | A02470 | 201 | A00085 | A02490 | 455 |
| A00085 | A02491 | 383 | A00085 | A02505 | 246 |
| A00085 | A02604 | 265 | A00085 | A02620 | 363 |
| A00085 | A02644 | 474 | A00085 | A02668 | 468 |

|        |        |     |        |        |     |
|--------|--------|-----|--------|--------|-----|
| A00085 | A02691 | 154 | A00085 | A02756 | 480 |
| A00085 | A02757 | 356 | A00085 | A02759 | 418 |
| A00085 | A02760 | 184 | A00085 | A02772 | 446 |
| A00085 | A02785 | 405 | A00085 | A02787 | 168 |
| A00085 | A02788 | 235 | A00085 | A02789 | 180 |
| A00085 | A02803 | 302 | A00085 | A02811 | 177 |
| A00085 | A02918 | 217 | A00085 | A02945 | 329 |
| A00085 | A02952 | 207 | A00085 | A03053 | 322 |
| A00085 | A03099 | 441 | A00085 | A03129 | 256 |
| A00085 | A03184 | 210 | A00085 | A03186 | 413 |
| A00085 | A03212 | 157 | A00085 | A03310 | 418 |
| A00085 | A03314 | 451 | A00085 | A03484 | 154 |
| A00085 | A03550 | 205 | A00085 | A03633 | 223 |
| A00085 | A03639 | 486 | A00085 | A03788 | 165 |
| A00085 | A03799 | 198 | A00085 | A03817 | 195 |
| A00085 | A03818 | 428 | A00085 | A03887 | 160 |
| A00085 | A03915 | 385 | A00085 | A03919 | 332 |
| A00085 | A04007 | 170 | A00085 | A04086 | 388 |
| A00085 | A04092 | 463 | A00085 | A04157 | 218 |
| A00085 | A04163 | 285 | A00085 | A04256 | 477 |
| A00085 | A04326 | 276 | A00085 | A04391 | 235 |
| A00085 | A04422 | 152 | A00085 | A04482 | 472 |
| A00085 | A04484 | 260 | A00085 | A04487 | 299 |
| A00085 | A04679 | 232 | A00085 | A04746 | 188 |
| A00085 | A04914 | 151 | A00085 | A04975 | 245 |
| A00085 | A04976 | 368 | A00085 | A04981 | 218 |
| A00085 | A05117 | 235 | A00085 | A05138 | 185 |
| A00085 | A05208 | 406 | A00085 | A05709 | 213 |
| A00085 | A05768 | 182 | A00085 | A05815 | 260 |
| A00085 | A05825 | 256 | A00085 | A05826 | 270 |
| A00085 | A05934 | 281 | A00085 | A05985 | 419 |
| A00085 | A06033 | 318 | A00085 | A06091 | 160 |
| A00085 | A06588 | 188 | A00085 | A06818 | 210 |
| A00085 | A06944 | 167 | A00085 | A07037 | 224 |
| A00085 | A07143 | 441 | A00085 | A07154 | 185 |
| A00085 | A07460 | 306 | A00085 | A07757 | 160 |
| A00085 | A08749 | 356 | A00085 | A08905 | 310 |
| A00085 | A09026 | 219 | A00085 | A09480 | 423 |
| A00085 | A09570 | 363 | A00085 | A10040 | 238 |
| A00085 | A10103 | 190 | A00085 | A10609 | 348 |
| A00085 | A10650 | 306 | A00085 | A10801 | 157 |
| A00085 | A11064 | 238 | A00085 | A11123 | 232 |
| A00085 | A11485 | 163 | A00085 | A12667 | 171 |
| A00085 | A13222 | 165 | A00085 | A13370 | 432 |
| A00085 | A13872 | 152 | A00085 | A13909 | 333 |
| A00085 | A14027 | 288 | A00085 | A14194 | 294 |

|        |        |     |        |        |     |
|--------|--------|-----|--------|--------|-----|
| A00085 | A14198 | 324 | A00085 | A14220 | 162 |
| A00085 | A14392 | 188 | A00085 | A14402 | 177 |
| A00085 | A14432 | 218 | A00085 | A14438 | 208 |
| A00085 | A15230 | 265 | A00085 | A15426 | 318 |
| A00085 | A15607 | 205 | A00085 | A15637 | 154 |
| A00085 | A15966 | 270 | A00085 | A16636 | 474 |
| A00086 | A00090 | 931 | A00086 | A00109 | 913 |
| A00086 | A00152 | 435 | A00086 | A00159 | 899 |
| A00086 | A00190 | 479 | A00086 | A00196 | 413 |
| A00086 | A00204 | 945 | A00086 | A00209 | 899 |
| A00086 | A00218 | 212 | A00086 | A00219 | 285 |
| A00086 | A00233 | 399 | A00086 | A00245 | 157 |
| A00086 | A00264 | 491 | A00086 | A00556 | 468 |
| A00086 | A00627 | 226 | A00086 | A00736 | 238 |
| A00086 | A00820 | 160 | A00086 | A00914 | 467 |
| A00086 | A00939 | 899 | A00086 | A01527 | 899 |
| A00086 | A01551 | 196 | A00086 | A01588 | 899 |
| A00086 | A01604 | 180 | A00086 | A01615 | 899 |
| A00086 | A01626 | 191 | A00086 | A01654 | 424 |
| A00086 | A01668 | 391 | A00086 | A01704 | 411 |
| A00086 | A01726 | 160 | A00086 | A01733 | 416 |
| A00086 | A01741 | 475 | A00086 | A01743 | 404 |
| A00086 | A01744 | 154 | A00086 | A01745 | 247 |
| A00086 | A01752 | 353 | A00086 | A01775 | 484 |
| A00086 | A01784 | 195 | A00086 | A01785 | 347 |
| A00086 | A01873 | 274 | A00086 | A01875 | 296 |
| A00086 | A01879 | 163 | A00086 | A01902 | 210 |
| A00086 | A01907 | 281 | A00086 | A01931 | 152 |
| A00086 | A01936 | 152 | A00086 | A02080 | 162 |
| A00086 | A02145 | 168 | A00086 | A02177 | 79  |
| A00086 | A02298 | 484 | A00086 | A02300 | 255 |
| A00086 | A02307 | 226 | A00086 | A02337 | 157 |
| A00086 | A02347 | 396 | A00086 | A02385 | 183 |
| A00086 | A02411 | 899 | A00086 | A02412 | 171 |
| A00086 | A02439 | 162 | A00086 | A02490 | 480 |
| A00086 | A02491 | 424 | A00086 | A02582 | 424 |
| A00086 | A02605 | 272 | A00086 | A02615 | 167 |
| A00086 | A02646 | 188 | A00086 | A02668 | 477 |
| A00086 | A02674 | 235 | A00086 | A02695 | 486 |
| A00086 | A02696 | 404 | A00086 | A02716 | 257 |
| A00086 | A02729 | 374 | A00086 | A02745 | 207 |
| A00086 | A02756 | 439 | A00086 | A02764 | 205 |
| A00086 | A02783 | 389 | A00086 | A02785 | 165 |
| A00086 | A02787 | 229 | A00086 | A02812 | 945 |
| A00086 | A02813 | 334 | A00086 | A02830 | 272 |
| A00086 | A02837 | 407 | A00086 | A02843 | 208 |

|        |        |     |        |        |     |
|--------|--------|-----|--------|--------|-----|
| A00086 | A02859 | 945 | A00086 | A02863 | 313 |
| A00086 | A02866 | 238 | A00086 | A02874 | 491 |
| A00086 | A02883 | 193 | A00086 | A02884 | 339 |
| A00086 | A02896 | 486 | A00086 | A02898 | 141 |
| A00086 | A02905 | 162 | A00086 | A02921 | 238 |
| A00086 | A02922 | 491 | A00086 | A02923 | 382 |
| A00086 | A02932 | 265 | A00086 | A02936 | 172 |
| A00086 | A02944 | 449 | A00086 | A02951 | 945 |
| A00086 | A02953 | 260 | A00086 | A02961 | 340 |
| A00086 | A02963 | 362 | A00086 | A02966 | 152 |
| A00086 | A02974 | 350 | A00086 | A02977 | 252 |
| A00086 | A02982 | 299 | A00086 | A02984 | 154 |
| A00086 | A03112 | 180 | A00086 | A03129 | 229 |
| A00086 | A03204 | 269 | A00086 | A03275 | 945 |
| A00086 | A03281 | 257 | A00086 | A03282 | 358 |
| A00086 | A03415 | 488 | A00086 | A03419 | 195 |
| A00086 | A03426 | 221 | A00086 | A03475 | 396 |
| A00086 | A03664 | 366 | A00086 | A03746 | 165 |
| A00086 | A03799 | 160 | A00086 | A03865 | 174 |
| A00086 | A03914 | 396 | A00086 | A03927 | 176 |
| A00086 | A04010 | 490 | A00086 | A04011 | 179 |
| A00086 | A04040 | 177 | A00086 | A04051 | 945 |
| A00086 | A04052 | 195 | A00086 | A04088 | 171 |
| A00086 | A04138 | 299 | A00086 | A04142 | 235 |
| A00086 | A04143 | 368 | A00086 | A04240 | 283 |
| A00086 | A04244 | 386 | A00086 | A04262 | 257 |
| A00086 | A04267 | 193 | A00086 | A04278 | 430 |
| A00086 | A04288 | 416 | A00086 | A04332 | 238 |
| A00086 | A04391 | 409 | A00086 | A04449 | 899 |
| A00086 | A04494 | 200 | A00086 | A04520 | 279 |
| A00086 | A04526 | 257 | A00086 | A04548 | 252 |
| A00086 | A04567 | 263 | A00086 | A04589 | 176 |
| A00086 | A04598 | 218 | A00086 | A04607 | 933 |
| A00086 | A04608 | 945 | A00086 | A04609 | 919 |
| A00086 | A04614 | 408 | A00086 | A04622 | 154 |
| A00086 | A04652 | 483 | A00086 | A04727 | 200 |
| A00086 | A04735 | 251 | A00086 | A04745 | 257 |
| A00086 | A04851 | 218 | A00086 | A04906 | 174 |
| A00086 | A04941 | 157 | A00086 | A04961 | 193 |
| A00086 | A05071 | 274 | A00086 | A05113 | 945 |
| A00086 | A05202 | 202 | A00086 | A05309 | 491 |
| A00086 | A05314 | 283 | A00086 | A05315 | 899 |
| A00086 | A05349 | 945 | A00086 | A05506 | 195 |
| A00086 | A05861 | 347 | A00086 | A05878 | 154 |
| A00086 | A05879 | 369 | A00086 | A05920 | 257 |
| A00086 | A05931 | 274 | A00086 | A05985 | 165 |



|        |        |     |        |        |     |
|--------|--------|-----|--------|--------|-----|
| A00086 | A06055 | 238 | A00086 | A06073 | 329 |
| A00086 | A06149 | 279 | A00086 | A06286 | 213 |
| A00086 | A06465 | 296 | A00086 | A06642 | 219 |
| A00086 | A06682 | 296 | A00086 | A06793 | 198 |
| A00086 | A06980 | 296 | A00086 | A07025 | 283 |
| A00086 | A07141 | 374 | A00086 | A07147 | 179 |
| A00086 | A07148 | 177 | A00086 | A07157 | 218 |
| A00086 | A07164 | 268 | A00086 | A07165 | 324 |
| A00086 | A07173 | 281 | A00086 | A07191 | 160 |
| A00086 | A07200 | 193 | A00086 | A08420 | 283 |
| A00086 | A08603 | 183 | A00086 | A08627 | 474 |
| A00086 | A08657 | 313 | A00086 | A08677 | 171 |
| A00086 | A08755 | 274 | A00086 | A08827 | 165 |
| A00086 | A08829 | 313 | A00086 | A09319 | 899 |
| A00086 | A09381 | 167 | A00086 | A10173 | 193 |
| A00086 | A10791 | 160 | A00086 | A11476 | 216 |
| A00086 | A12897 | 447 | A00086 | A14208 | 899 |
| A00086 | A14236 | 165 | A00086 | A14393 | 899 |
| A00086 | A14440 | 173 | A00086 | A14658 | 265 |
| A00086 | A14735 | 185 | A00086 | A15314 | 900 |
| A00086 | A15607 | 177 | A00086 | A15981 | 172 |
| A00086 | A16636 | 484 | A00086 | A16965 | 238 |
| A00087 | A00089 | 943 | A00087 | A00095 | 384 |
| A00087 | A00111 | 389 | A00087 | A00127 | 310 |
| A00087 | A00168 | 475 | A00087 | A00190 | 393 |
| A00087 | A00219 | 486 | A00087 | A00221 | 188 |
| A00087 | A00245 | 945 | A00087 | A00274 | 441 |
| A00087 | A00315 | 380 | A00087 | A00616 | 286 |
| A00087 | A00931 | 185 | A00087 | A01137 | 63  |
| A00087 | A01157 | 247 | A00087 | A01173 | 443 |
| A00087 | A01235 | 252 | A00087 | A01257 | 491 |
| A00087 | A01485 | 185 | A00087 | A01524 | 899 |
| A00087 | A01547 | 170 | A00087 | A01610 | 371 |
| A00087 | A01616 | 190 | A00087 | A01668 | 416 |
| A00087 | A01817 | 221 | A00087 | A02174 | 74  |
| A00087 | A02213 | 212 | A00087 | A02236 | 163 |
| A00087 | A02306 | 63  | A00087 | A02425 | 290 |
| A00087 | A02429 | 386 | A00087 | A02440 | 330 |
| A00087 | A02498 | 385 | A00087 | A02544 | 352 |
| A00087 | A02550 | 249 | A00087 | A02639 | 191 |
| A00087 | A02673 | 198 | A00087 | A02859 | 356 |
| A00087 | A02959 | 151 | A00087 | A03056 | 210 |
| A00087 | A03110 | 246 | A00087 | A03115 | 195 |
| A00087 | A03259 | 466 | A00087 | A03314 | 322 |
| A00087 | A03466 | 279 | A00087 | A03639 | 449 |
| A00087 | A03748 | 234 | A00087 | A03800 | 463 |

|        |        |     |        |        |     |
|--------|--------|-----|--------|--------|-----|
| A00087 | A03818 | 450 | A00087 | A03910 | 236 |
| A00087 | A03942 | 380 | A00087 | A03961 | 490 |
| A00087 | A04169 | 323 | A00087 | A04256 | 267 |
| A00087 | A04482 | 254 | A00087 | A04616 | 200 |
| A00087 | A05052 | 247 | A00087 | A05184 | 184 |
| A00087 | A05270 | 316 | A00087 | A05404 | 353 |
| A00087 | A05546 | 480 | A00087 | A05736 | 216 |
| A00087 | A05881 | 213 | A00087 | A05992 | 176 |
| A00087 | A06762 | 167 | A00087 | A07019 | 291 |
| A00087 | A07021 | 303 | A00087 | A07051 | 317 |
| A00087 | A07296 | 274 | A00087 | A07297 | 279 |
| A00087 | A07315 | 154 | A00087 | A07559 | 272 |
| A00087 | A08730 | 446 | A00087 | A08859 | 180 |
| A00087 | A09062 | 455 | A00087 | A09074 | 254 |
| A00087 | A09211 | 313 | A00087 | A09394 | 198 |
| A00087 | A09729 | 176 | A00087 | A09732 | 480 |
| A00087 | A09733 | 472 | A00087 | A09734 | 198 |
| A00087 | A09955 | 372 | A00087 | A10665 | 240 |
| A00087 | A11014 | 407 | A00087 | A11412 | 402 |
| A00087 | A11537 | 274 | A00087 | A11868 | 449 |
| A00087 | A11875 | 154 | A00087 | A12108 | 286 |
| A00087 | A12478 | 294 | A00087 | A13861 | 303 |
| A00087 | A13942 | 366 | A00087 | A13944 | 182 |
| A00087 | A13987 | 294 | A00087 | A14072 | 283 |
| A00087 | A14139 | 240 | A00087 | A14190 | 185 |
| A00087 | A14210 | 367 | A00087 | A14364 | 399 |
| A00087 | A14371 | 345 | A00087 | A14378 | 405 |
| A00087 | A14716 | 486 | A00087 | A15292 | 484 |
| A00087 | A15310 | 251 | A00087 | A15313 | 185 |
| A00087 | A15317 | 363 | A00087 | A15327 | 163 |
| A00087 | A15348 | 462 | A00087 | A15349 | 469 |
| A00087 | A15352 | 367 | A00087 | A15376 | 486 |
| A00087 | A15432 | 278 | A00087 | A15440 | 168 |
| A00087 | A15456 | 165 | A00087 | A15459 | 165 |
| A00087 | A15515 | 229 | A00087 | A15641 | 160 |
| A00087 | A15671 | 221 | A00087 | A15799 | 176 |
| A00087 | A16300 | 399 | A00087 | A16323 | 208 |
| A00087 | A17117 | 279 | A00088 | A00196 | 489 |
| A00088 | A00472 | 193 | A00088 | A00725 | 205 |
| A00088 | A01556 | 200 | A00088 | A02000 | 274 |
| A00088 | A02148 | 463 | A00088 | A03141 | 408 |
| A00088 | A03186 | 414 | A00088 | A03379 | 223 |
| A00088 | A03651 | 210 | A00088 | A03906 | 475 |
| A00088 | A05891 | 281 | A00088 | A13816 | 262 |
| A00088 | A14838 | 229 | A00089 | A00095 | 184 |
| A00089 | A00122 | 291 | A00089 | A00127 | 221 |

|        |        |     |        |        |     |
|--------|--------|-----|--------|--------|-----|
| A00089 | A00150 | 210 | A00089 | A00152 | 489 |
| A00089 | A00167 | 491 | A00089 | A00168 | 483 |
| A00089 | A00179 | 286 | A00089 | A00190 | 491 |
| A00089 | A00209 | 899 | A00089 | A00210 | 63  |
| A00089 | A00219 | 491 | A00089 | A00221 | 252 |
| A00089 | A00233 | 180 | A00089 | A00245 | 945 |
| A00089 | A00274 | 489 | A00089 | A00315 | 195 |
| A00089 | A00382 | 402 | A00089 | A00531 | 489 |
| A00089 | A00722 | 162 | A00089 | A00752 | 333 |
| A00089 | A00815 | 488 | A00089 | A00916 | 332 |
| A00089 | A00930 | 497 | A00089 | A00989 | 63  |
| A00089 | A01009 | 63  | A00089 | A01091 | 229 |
| A00089 | A01124 | 63  | A00089 | A01125 | 286 |
| A00089 | A01235 | 491 | A00089 | A01257 | 486 |
| A00089 | A01354 | 486 | A00089 | A01359 | 400 |
| A00089 | A01539 | 472 | A00089 | A01593 | 899 |
| A00089 | A01610 | 363 | A00089 | A01654 | 249 |
| A00089 | A01659 | 247 | A00089 | A01668 | 422 |
| A00089 | A01676 | 183 | A00089 | A01741 | 297 |
| A00089 | A01763 | 173 | A00089 | A01790 | 424 |
| A00089 | A01822 | 226 | A00089 | A01936 | 218 |
| A00089 | A02006 | 165 | A00089 | A02052 | 157 |
| A00089 | A02138 | 246 | A00089 | A02139 | 123 |
| A00089 | A02143 | 63  | A00089 | A02144 | 177 |
| A00089 | A02236 | 374 | A00089 | A02251 | 235 |
| A00089 | A02253 | 205 | A00089 | A02260 | 226 |
| A00089 | A02288 | 160 | A00089 | A02425 | 246 |
| A00089 | A02429 | 310 | A00089 | A02431 | 491 |
| A00089 | A02433 | 160 | A00089 | A02454 | 63  |
| A00089 | A02464 | 73  | A00089 | A02467 | 347 |
| A00089 | A02471 | 157 | A00089 | A02472 | 63  |
| A00089 | A02839 | 259 | A00089 | A02859 | 465 |
| A00089 | A02959 | 491 | A00089 | A03104 | 480 |
| A00089 | A03110 | 491 | A00089 | A03129 | 308 |
| A00089 | A03136 | 288 | A00089 | A03157 | 221 |
| A00089 | A03183 | 422 | A00089 | A03209 | 321 |
| A00089 | A03219 | 223 | A00089 | A03259 | 491 |
| A00089 | A03275 | 174 | A00089 | A03305 | 91  |
| A00089 | A03580 | 185 | A00089 | A03639 | 446 |
| A00089 | A03748 | 249 | A00089 | A03788 | 213 |
| A00089 | A03799 | 485 | A00089 | A03818 | 202 |
| A00089 | A03851 | 417 | A00089 | A03887 | 281 |
| A00089 | A03910 | 446 | A00089 | A03925 | 351 |
| A00089 | A03942 | 945 | A00089 | A03961 | 404 |
| A00089 | A03963 | 160 | A00089 | A04033 | 288 |
| A00089 | A04076 | 440 | A00089 | A04166 | 205 |

|        |        |     |        |        |     |
|--------|--------|-----|--------|--------|-----|
| A00089 | A04169 | 491 | A00089 | A04253 | 185 |
| A00089 | A04305 | 152 | A00089 | A04361 | 216 |
| A00089 | A04380 | 434 | A00089 | A04449 | 452 |
| A00089 | A04472 | 191 | A00089 | A04490 | 176 |
| A00089 | A04881 | 490 | A00089 | A04976 | 162 |
| A00089 | A05093 | 462 | A00089 | A05157 | 491 |
| A00089 | A05184 | 226 | A00089 | A05221 | 291 |
| A00089 | A05229 | 205 | A00089 | A05270 | 249 |
| A00089 | A05339 | 185 | A00089 | A05439 | 420 |
| A00089 | A05786 | 185 | A00089 | A05944 | 307 |
| A00089 | A06207 | 213 | A00089 | A06494 | 223 |
| A00089 | A06569 | 179 | A00089 | A06588 | 290 |
| A00089 | A06762 | 202 | A00089 | A06997 | 274 |
| A00089 | A07021 | 234 | A00089 | A07209 | 491 |
| A00089 | A07229 | 177 | A00089 | A07296 | 198 |
| A00089 | A07297 | 205 | A00089 | A07311 | 899 |
| A00089 | A07803 | 491 | A00089 | A07912 | 185 |
| A00089 | A08465 | 313 | A00089 | A08561 | 191 |
| A00089 | A08600 | 249 | A00089 | A08630 | 491 |
| A00089 | A08641 | 218 | A00089 | A08707 | 605 |
| A00089 | A08714 | 174 | A00089 | A08814 | 157 |
| A00089 | A08834 | 445 | A00089 | A08840 | 296 |
| A00089 | A08859 | 791 | A00089 | A08875 | 182 |
| A00089 | A09022 | 469 | A00089 | A09062 | 296 |
| A00089 | A09208 | 324 | A00089 | A09238 | 481 |
| A00089 | A09239 | 490 | A00089 | A09245 | 425 |
| A00089 | A09387 | 147 | A00089 | A09422 | 477 |
| A00089 | A09550 | 167 | A00089 | A09559 | 191 |
| A00089 | A09570 | 157 | A00089 | A09609 | 160 |
| A00089 | A09732 | 491 | A00089 | A09733 | 491 |
| A00089 | A09734 | 385 | A00089 | A09742 | 208 |
| A00089 | A09828 | 173 | A00089 | A09843 | 408 |
| A00089 | A09855 | 177 | A00089 | A09875 | 180 |
| A00089 | A09970 | 249 | A00089 | A09984 | 223 |
| A00089 | A10164 | 489 | A00089 | A10167 | 180 |
| A00089 | A10202 | 384 | A00089 | A10336 | 240 |
| A00089 | A10579 | 260 | A00089 | A10580 | 906 |
| A00089 | A10619 | 177 | A00089 | A10723 | 217 |
| A00089 | A10858 | 234 | A00089 | A10985 | 234 |
| A00089 | A11144 | 154 | A00089 | A11412 | 491 |
| A00089 | A11415 | 491 | A00089 | A11471 | 193 |
| A00089 | A11537 | 352 | A00089 | A11542 | 165 |
| A00089 | A11616 | 168 | A00089 | A11735 | 257 |
| A00089 | A11737 | 174 | A00089 | A11875 | 467 |
| A00089 | A11914 | 168 | A00089 | A11946 | 223 |
| A00089 | A11983 | 374 | A00089 | A12254 | 182 |

|        |        |     |        |        |     |
|--------|--------|-----|--------|--------|-----|
| A00089 | A12393 | 491 | A00089 | A12826 | 269 |
| A00089 | A12850 | 162 | A00089 | A12854 | 332 |
| A00089 | A12858 | 329 | A00089 | A13003 | 321 |
| A00089 | A13119 | 474 | A00089 | A13151 | 219 |
| A00089 | A13169 | 183 | A00089 | A13546 | 491 |
| A00089 | A13587 | 351 | A00089 | A13826 | 469 |
| A00089 | A13860 | 316 | A00089 | A13899 | 408 |
| A00089 | A13944 | 223 | A00089 | A13973 | 205 |
| A00089 | A13987 | 488 | A00089 | A13989 | 283 |
| A00089 | A14000 | 457 | A00089 | A14010 | 263 |
| A00089 | A14072 | 447 | A00089 | A14111 | 265 |
| A00089 | A14122 | 474 | A00089 | A14129 | 473 |
| A00089 | A14133 | 263 | A00089 | A14190 | 490 |
| A00089 | A14202 | 491 | A00089 | A14210 | 491 |
| A00089 | A14221 | 201 | A00089 | A14229 | 286 |
| A00089 | A14251 | 171 | A00089 | A14270 | 198 |
| A00089 | A14364 | 313 | A00089 | A14369 | 475 |
| A00089 | A14370 | 473 | A00089 | A14371 | 491 |
| A00089 | A14379 | 460 | A00089 | A14399 | 345 |
| A00089 | A14490 | 382 | A00089 | A14511 | 491 |
| A00089 | A14523 | 258 | A00089 | A14536 | 160 |
| A00089 | A14539 | 290 | A00089 | A14569 | 152 |
| A00089 | A14570 | 486 | A00089 | A14579 | 232 |
| A00089 | A14635 | 477 | A00089 | A14667 | 486 |
| A00089 | A14733 | 238 | A00089 | A14739 | 205 |
| A00089 | A14930 | 491 | A00089 | A15184 | 249 |
| A00089 | A15230 | 259 | A00089 | A15233 | 335 |
| A00089 | A15260 | 234 | A00089 | A15277 | 427 |
| A00089 | A15292 | 491 | A00089 | A15310 | 385 |
| A00089 | A15312 | 489 | A00089 | A15313 | 489 |
| A00089 | A15314 | 489 | A00089 | A15317 | 491 |
| A00089 | A15318 | 425 | A00089 | A15322 | 486 |
| A00089 | A15331 | 228 | A00089 | A15335 | 173 |
| A00089 | A15346 | 171 | A00089 | A15348 | 489 |
| A00089 | A15349 | 491 | A00089 | A15352 | 491 |
| A00089 | A15366 | 456 | A00089 | A15396 | 355 |
| A00089 | A15400 | 196 | A00089 | A15402 | 368 |
| A00089 | A15404 | 360 | A00089 | A15413 | 176 |
| A00089 | A15419 | 247 | A00089 | A15431 | 297 |
| A00089 | A15435 | 473 | A00089 | A15436 | 208 |
| A00089 | A15444 | 436 | A00089 | A15445 | 461 |
| A00089 | A15447 | 458 | A00089 | A15452 | 491 |
| A00089 | A15454 | 347 | A00089 | A15456 | 303 |
| A00089 | A15478 | 154 | A00089 | A15480 | 488 |
| A00089 | A15495 | 491 | A00089 | A15498 | 207 |
| A00089 | A15515 | 463 | A00089 | A15630 | 409 |

|        |        |     |        |        |     |
|--------|--------|-----|--------|--------|-----|
| A00089 | A15638 | 165 | A00089 | A15684 | 322 |
| A00089 | A15711 | 193 | A00089 | A15799 | 385 |
| A00089 | A15804 | 151 | A00089 | A15819 | 168 |
| A00089 | A15828 | 226 | A00089 | A15850 | 198 |
| A00089 | A15886 | 191 | A00089 | A15916 | 245 |
| A00089 | A16157 | 226 | A00089 | A16177 | 418 |
| A00089 | A16187 | 174 | A00089 | A16192 | 167 |
| A00089 | A16260 | 205 | A00089 | A16565 | 215 |
| A00089 | A16585 | 157 | A00089 | A16587 | 324 |
| A00089 | A16691 | 167 | A00089 | A16695 | 185 |
| A00089 | A16711 | 303 | A00089 | A16788 | 249 |
| A00089 | A16815 | 174 | A00089 | A16904 | 567 |
| A00089 | A17081 | 191 | A00089 | A17120 | 269 |
| A00089 | A17124 | 249 | A00090 | A00091 | 79  |
| A00090 | A00098 | 101 | A00090 | A00109 | 917 |
| A00090 | A00113 | 63  | A00090 | A00138 | 491 |
| A00090 | A00145 | 463 | A00090 | A00152 | 451 |
| A00090 | A00156 | 63  | A00090 | A00159 | 945 |
| A00090 | A00171 | 899 | A00090 | A00182 | 463 |
| A00090 | A00183 | 488 | A00090 | A00185 | 481 |
| A00090 | A00204 | 943 | A00090 | A00207 | 432 |
| A00090 | A00213 | 63  | A00090 | A00214 | 491 |
| A00090 | A00219 | 151 | A00090 | A00220 | 215 |
| A00090 | A00230 | 899 | A00090 | A00232 | 190 |
| A00090 | A00234 | 491 | A00090 | A00254 | 490 |
| A00090 | A00267 | 174 | A00090 | A00274 | 198 |
| A00090 | A00316 | 418 | A00090 | A00418 | 369 |
| A00090 | A00433 | 230 | A00090 | A00600 | 196 |
| A00090 | A00641 | 662 | A00090 | A00696 | 200 |
| A00090 | A00697 | 488 | A00090 | A00939 | 491 |
| A00090 | A01164 | 420 | A00090 | A01203 | 208 |
| A00090 | A01212 | 469 | A00090 | A01286 | 299 |
| A00090 | A01307 | 491 | A00090 | A01419 | 160 |
| A00090 | A01423 | 160 | A00090 | A01428 | 429 |
| A00090 | A01520 | 63  | A00090 | A01521 | 63  |
| A00090 | A01527 | 993 | A00090 | A01553 | 297 |
| A00090 | A01558 | 899 | A00090 | A01560 | 456 |
| A00090 | A01562 | 168 | A00090 | A01603 | 366 |
| A00090 | A01604 | 456 | A00090 | A01605 | 189 |
| A00090 | A01612 | 178 | A00090 | A01615 | 899 |
| A00090 | A01628 | 174 | A00090 | A01639 | 899 |
| A00090 | A01654 | 65  | A00090 | A01692 | 305 |
| A00090 | A01718 | 255 | A00090 | A01719 | 66  |
| A00090 | A01850 | 200 | A00090 | A01908 | 318 |
| A00090 | A01914 | 470 | A00090 | A02043 | 221 |
| A00090 | A02147 | 157 | A00090 | A02251 | 249 |

|        |        |     |        |        |     |
|--------|--------|-----|--------|--------|-----|
| A00090 | A02419 | 184 | A00090 | A02425 | 265 |
| A00090 | A02604 | 195 | A00090 | A02610 | 258 |
| A00090 | A02611 | 241 | A00090 | A02637 | 241 |
| A00090 | A02651 | 112 | A00090 | A02659 | 477 |
| A00090 | A02740 | 277 | A00090 | A02798 | 170 |
| A00090 | A02801 | 307 | A00090 | A02803 | 491 |
| A00090 | A02816 | 168 | A00090 | A02847 | 80  |
| A00090 | A02851 | 361 | A00090 | A02853 | 221 |
| A00090 | A02854 | 344 | A00090 | A02859 | 226 |
| A00090 | A02887 | 490 | A00090 | A02896 | 340 |
| A00090 | A02916 | 63  | A00090 | A02917 | 259 |
| A00090 | A02920 | 144 | A00090 | A02924 | 362 |
| A00090 | A02931 | 490 | A00090 | A02944 | 391 |
| A00090 | A02945 | 132 | A00090 | A02950 | 396 |
| A00090 | A02961 | 187 | A00090 | A02972 | 93  |
| A00090 | A02975 | 256 | A00090 | A03014 | 285 |
| A00090 | A03019 | 216 | A00090 | A03028 | 243 |
| A00090 | A03109 | 238 | A00090 | A03183 | 157 |
| A00090 | A03195 | 413 | A00090 | A03271 | 491 |
| A00090 | A03275 | 263 | A00090 | A03282 | 96  |
| A00090 | A03428 | 205 | A00090 | A03523 | 391 |
| A00090 | A03568 | 265 | A00090 | A03569 | 355 |
| A00090 | A03625 | 63  | A00090 | A03666 | 190 |
| A00090 | A03686 | 63  | A00090 | A03817 | 277 |
| A00090 | A03830 | 373 | A00090 | A03834 | 254 |
| A00090 | A03835 | 208 | A00090 | A03984 | 489 |
| A00090 | A03985 | 218 | A00090 | A04010 | 201 |
| A00090 | A04012 | 530 | A00090 | A04031 | 157 |
| A00090 | A04042 | 232 | A00090 | A04050 | 491 |
| A00090 | A04115 | 213 | A00090 | A04244 | 251 |
| A00090 | A04251 | 258 | A00090 | A04300 | 307 |
| A00090 | A04450 | 180 | A00090 | A04494 | 154 |
| A00090 | A04536 | 363 | A00090 | A04587 | 358 |
| A00090 | A04657 | 257 | A00090 | A04682 | 216 |
| A00090 | A04730 | 232 | A00090 | A04731 | 218 |
| A00090 | A04755 | 157 | A00090 | A04854 | 243 |
| A00090 | A04860 | 221 | A00090 | A04864 | 333 |
| A00090 | A05211 | 333 | A00090 | A05212 | 371 |
| A00090 | A05331 | 165 | A00090 | A05333 | 207 |
| A00090 | A05349 | 899 | A00090 | A05475 | 277 |
| A00090 | A05606 | 302 | A00090 | A05633 | 484 |
| A00090 | A05902 | 165 | A00090 | A05904 | 258 |
| A00090 | A05946 | 258 | A00090 | A06028 | 307 |
| A00090 | A06224 | 409 | A00090 | A06237 | 232 |
| A00090 | A06289 | 63  | A00090 | A06567 | 221 |
| A00090 | A06610 | 484 | A00090 | A07135 | 163 |

|        |        |     |        |        |     |
|--------|--------|-----|--------|--------|-----|
| A00090 | A07148 | 260 | A00090 | A07157 | 358 |
| A00090 | A07161 | 466 | A00090 | A07166 | 221 |
| A00090 | A07167 | 172 | A00090 | A07171 | 243 |
| A00090 | A07173 | 406 | A00090 | A07207 | 63  |
| A00090 | A07311 | 483 | A00090 | A07422 | 899 |
| A00090 | A07807 | 207 | A00090 | A08345 | 391 |
| A00090 | A08608 | 486 | A00090 | A09060 | 259 |
| A00090 | A09145 | 329 | A00090 | A09263 | 414 |
| A00090 | A09279 | 99  | A00090 | A09392 | 162 |
| A00090 | A09395 | 241 | A00090 | A09441 | 165 |
| A00090 | A09488 | 277 | A00090 | A09549 | 358 |
| A00090 | A09581 | 343 | A00090 | A09754 | 188 |
| A00090 | A09937 | 110 | A00090 | A10214 | 98  |
| A00090 | A10288 | 232 | A00090 | A10562 | 277 |
| A00090 | A10735 | 212 | A00090 | A11129 | 622 |
| A00090 | A11307 | 441 | A00090 | A11308 | 162 |
| A00090 | A11369 | 274 | A00090 | A11929 | 317 |
| A00090 | A13198 | 310 | A00090 | A13437 | 258 |
| A00090 | A13774 | 277 | A00090 | A13824 | 152 |
| A00090 | A13872 | 195 | A00090 | A13978 | 900 |
| A00090 | A13983 | 63  | A00090 | A13994 | 160 |
| A00090 | A14196 | 252 | A00090 | A14208 | 491 |
| A00090 | A14364 | 384 | A00090 | A14367 | 118 |
| A00090 | A14369 | 307 | A00090 | A14400 | 269 |
| A00090 | A14426 | 224 | A00090 | A14431 | 224 |
| A00090 | A14439 | 177 | A00090 | A14540 | 207 |
| A00090 | A14830 | 484 | A00090 | A15314 | 491 |
| A00090 | A15337 | 258 | A00090 | A15361 | 310 |
| A00090 | A15386 | 85  | A00090 | A15510 | 223 |
| A00090 | A15603 | 219 | A00090 | A15609 | 213 |
| A00090 | A15630 | 265 | A00090 | A15780 | 469 |
| A00090 | A15781 | 277 | A00090 | A15782 | 243 |
| A00090 | A15832 | 221 | A00090 | A15834 | 265 |
| A00090 | A16216 | 384 | A00090 | A16430 | 240 |
| A00090 | A16461 | 213 | A00090 | A16594 | 391 |
| A00091 | A00113 | 578 | A00091 | A00156 | 712 |
| A00091 | A00184 | 216 | A00091 | A00185 | 480 |
| A00091 | A00204 | 63  | A00091 | A00207 | 565 |
| A00091 | A00208 | 177 | A00091 | A00221 | 217 |
| A00091 | A00230 | 899 | A00091 | A00234 | 228 |
| A00091 | A00254 | 470 | A00091 | A00291 | 269 |
| A00091 | A00333 | 240 | A00091 | A00451 | 488 |
| A00091 | A00616 | 226 | A00091 | A01286 | 316 |
| A00091 | A01307 | 63  | A00091 | A01553 | 908 |
| A00091 | A01558 | 899 | A00091 | A01615 | 899 |
| A00091 | A01645 | 201 | A00091 | A01908 | 243 |



|        |        |     |        |        |     |
|--------|--------|-----|--------|--------|-----|
| A00091 | A02419 | 452 | A00091 | A02425 | 162 |
| A00091 | A02511 | 196 | A00091 | A02636 | 218 |
| A00091 | A02783 | 213 | A00091 | A02787 | 147 |
| A00091 | A02788 | 252 | A00091 | A02803 | 115 |
| A00091 | A02874 | 429 | A00091 | A02875 | 446 |
| A00091 | A02887 | 107 | A00091 | A02961 | 167 |
| A00091 | A03054 | 232 | A00091 | A03271 | 104 |
| A00091 | A03282 | 247 | A00091 | A03683 | 411 |
| A00091 | A03684 | 388 | A00091 | A03830 | 477 |
| A00091 | A03974 | 199 | A00091 | A03975 | 296 |
| A00091 | A04012 | 273 | A00091 | A04037 | 329 |
| A00091 | A04422 | 238 | A00091 | A04451 | 196 |
| A00091 | A04578 | 317 | A00091 | A04600 | 232 |
| A00091 | A04639 | 249 | A00091 | A04864 | 335 |
| A00091 | A04965 | 174 | A00091 | A04972 | 293 |
| A00091 | A05111 | 332 | A00091 | A05679 | 171 |
| A00091 | A07056 | 297 | A00091 | A07148 | 395 |
| A00091 | A07167 | 223 | A00091 | A07311 | 899 |
| A00091 | A07860 | 362 | A00091 | A08070 | 176 |
| A00091 | A09902 | 218 | A00091 | A10898 | 408 |
| A00091 | A13605 | 257 | A00091 | A14004 | 232 |
| A00091 | A14163 | 174 | A00091 | A14190 | 215 |
| A00091 | A14198 | 252 | A00091 | A14210 | 190 |
| A00091 | A14364 | 443 | A00091 | A14404 | 274 |
| A00091 | A15834 | 216 | A00092 | A00095 | 322 |
| A00092 | A00163 | 265 | A00092 | A00200 | 408 |
| A00092 | A00212 | 475 | A00092 | A00216 | 269 |
| A00092 | A00219 | 347 | A00092 | A00301 | 154 |
| A00092 | A00316 | 462 | A00092 | A00348 | 318 |
| A00092 | A00351 | 491 | A00092 | A00370 | 157 |
| A00092 | A00474 | 201 | A00092 | A00482 | 195 |
| A00092 | A00509 | 196 | A00092 | A00568 | 184 |
| A00092 | A01161 | 305 | A00092 | A01249 | 205 |
| A00092 | A01475 | 291 | A00092 | A01485 | 411 |
| A00092 | A01551 | 274 | A00092 | A01582 | 213 |
| A00092 | A01629 | 173 | A00092 | A01656 | 364 |
| A00092 | A01733 | 160 | A00092 | A01755 | 305 |
| A00092 | A01767 | 485 | A00092 | A01772 | 207 |
| A00092 | A01857 | 251 | A00092 | A01876 | 176 |
| A00092 | A01880 | 180 | A00092 | A01905 | 491 |
| A00092 | A02074 | 173 | A00092 | A02075 | 157 |
| A00092 | A02111 | 490 | A00092 | A02181 | 276 |
| A00092 | A02216 | 168 | A00092 | A02306 | 213 |
| A00092 | A02317 | 252 | A00092 | A02320 | 346 |
| A00092 | A02330 | 262 | A00092 | A02338 | 224 |
| A00092 | A02427 | 213 | A00092 | A02436 | 176 |

|        |        |     |        |        |     |
|--------|--------|-----|--------|--------|-----|
| A00092 | A02468 | 190 | A00092 | A02691 | 329 |
| A00092 | A02701 | 199 | A00092 | A02738 | 491 |
| A00092 | A02759 | 198 | A00092 | A02830 | 208 |
| A00092 | A02924 | 151 | A00092 | A03099 | 316 |
| A00092 | A03213 | 306 | A00092 | A03314 | 157 |
| A00092 | A03511 | 296 | A00092 | A03904 | 228 |
| A00092 | A03919 | 254 | A00092 | A04077 | 337 |
| A00092 | A04078 | 213 | A00092 | A04092 | 407 |
| A00092 | A04258 | 352 | A00092 | A04289 | 473 |
| A00092 | A04321 | 473 | A00092 | A04349 | 172 |
| A00092 | A04374 | 432 | A00092 | A04460 | 296 |
| A00092 | A04510 | 252 | A00092 | A04569 | 424 |
| A00092 | A04580 | 462 | A00092 | A04683 | 319 |
| A00092 | A04840 | 445 | A00092 | A04870 | 360 |
| A00092 | A04965 | 274 | A00092 | A05106 | 171 |
| A00092 | A05123 | 455 | A00092 | A05172 | 432 |
| A00092 | A05288 | 483 | A00092 | A05351 | 276 |
| A00092 | A05381 | 344 | A00092 | A05865 | 243 |
| A00092 | A05944 | 165 | A00092 | A06293 | 260 |
| A00092 | A06346 | 335 | A00092 | A06608 | 344 |
| A00092 | A06711 | 268 | A00092 | A06891 | 260 |
| A00092 | A07200 | 152 | A00092 | A07384 | 232 |
| A00092 | A07705 | 323 | A00092 | A08671 | 462 |
| A00092 | A08746 | 188 | A00092 | A08961 | 272 |
| A00092 | A09123 | 488 | A00092 | A09283 | 314 |
| A00092 | A09364 | 314 | A00092 | A09440 | 364 |
| A00092 | A09927 | 383 | A00092 | A10013 | 462 |
| A00092 | A10049 | 440 | A00092 | A10140 | 311 |
| A00092 | A10203 | 364 | A00092 | A10417 | 183 |
| A00092 | A10619 | 205 | A00092 | A10744 | 396 |
| A00092 | A10825 | 460 | A00092 | A10827 | 438 |
| A00092 | A11318 | 255 | A00092 | A11388 | 438 |
| A00092 | A11709 | 353 | A00092 | A12387 | 383 |
| A00092 | A12898 | 353 | A00092 | A12963 | 383 |
| A00092 | A13173 | 474 | A00092 | A13820 | 432 |
| A00092 | A14255 | 168 | A00092 | A14377 | 278 |
| A00092 | A14430 | 193 | A00092 | A14443 | 177 |
| A00092 | A14444 | 902 | A00092 | A14886 | 232 |
| A00092 | A14918 | 224 | A00092 | A15258 | 252 |
| A00092 | A15277 | 188 | A00092 | A15398 | 241 |
| A00092 | A15989 | 344 | A00092 | A16764 | 167 |
| A00093 | A00116 | 217 | A00093 | A00133 | 899 |
| A00093 | A00240 | 419 | A00093 | A00242 | 152 |
| A00093 | A00246 | 899 | A00093 | A00336 | 241 |
| A00093 | A00399 | 254 | A00093 | A00446 | 228 |
| A00093 | A00487 | 249 | A00093 | A00562 | 224 |

|        |        |     |        |        |     |
|--------|--------|-----|--------|--------|-----|
| A00093 | A00648 | 177 | A00093 | A00709 | 232 |
| A00093 | A00725 | 221 | A00093 | A00808 | 401 |
| A00093 | A00897 | 208 | A00093 | A01064 | 283 |
| A00093 | A01070 | 899 | A00093 | A01133 | 171 |
| A00093 | A01369 | 227 | A00093 | A01512 | 909 |
| A00093 | A01553 | 937 | A00093 | A01554 | 433 |
| A00093 | A01560 | 424 | A00093 | A01680 | 491 |
| A00093 | A01708 | 899 | A00093 | A01914 | 210 |
| A00093 | A02667 | 183 | A00093 | A02791 | 199 |
| A00093 | A03244 | 162 | A00093 | A04650 | 357 |
| A00093 | A06564 | 243 | A00093 | A07311 | 933 |
| A00093 | A08255 | 177 | A00093 | A08418 | 179 |
| A00093 | A09220 | 168 | A00093 | A10601 | 479 |
| A00093 | A10808 | 193 | A00093 | A10982 | 323 |
| A00093 | A11559 | 218 | A00093 | A11658 | 227 |
| A00093 | A11850 | 151 | A00093 | A11929 | 185 |
| A00093 | A14030 | 283 | A00093 | A14073 | 213 |
| A00093 | A14256 | 63  | A00093 | A14490 | 159 |
| A00093 | A14546 | 238 | A00093 | A15188 | 167 |
| A00093 | A15291 | 490 | A00093 | A15293 | 899 |
| A00093 | A15294 | 899 | A00093 | A15501 | 262 |
| A00093 | A15612 | 171 | A00093 | A15614 | 334 |
| A00093 | A15649 | 205 | A00093 | A15680 | 338 |
| A00093 | A15722 | 245 | A00093 | A16293 | 190 |
| A00093 | A16467 | 461 | A00094 | A00095 | 899 |
| A00094 | A00098 | 413 | A00094 | A00116 | 167 |
| A00094 | A00129 | 340 | A00094 | A00133 | 944 |
| A00094 | A00135 | 361 | A00094 | A00136 | 168 |
| A00094 | A00138 | 486 | A00094 | A00140 | 899 |
| A00094 | A00142 | 899 | A00094 | A00143 | 899 |
| A00094 | A00146 | 316 | A00094 | A00149 | 462 |
| A00094 | A00152 | 356 | A00094 | A00157 | 899 |
| A00094 | A00159 | 906 | A00094 | A00163 | 958 |
| A00094 | A00165 | 981 | A00094 | A00167 | 490 |
| A00094 | A00168 | 154 | A00094 | A00169 | 944 |
| A00094 | A00171 | 490 | A00094 | A00173 | 491 |
| A00094 | A00179 | 256 | A00094 | A00183 | 456 |
| A00094 | A00185 | 346 | A00094 | A00187 | 481 |
| A00094 | A00188 | 491 | A00094 | A00190 | 490 |
| A00094 | A00200 | 474 | A00094 | A00201 | 396 |
| A00094 | A00209 | 945 | A00094 | A00212 | 899 |
| A00094 | A00215 | 899 | A00094 | A00219 | 455 |
| A00094 | A00224 | 484 | A00094 | A00230 | 205 |
| A00094 | A00233 | 306 | A00094 | A00234 | 489 |
| A00094 | A00239 | 458 | A00094 | A00240 | 679 |
| A00094 | A00246 | 899 | A00094 | A00248 | 491 |

|        |        |     |        |        |     |
|--------|--------|-----|--------|--------|-----|
| A00094 | A00254 | 945 | A00094 | A00256 | 491 |
| A00094 | A00257 | 583 | A00094 | A00259 | 449 |
| A00094 | A00261 | 429 | A00094 | A00262 | 486 |
| A00094 | A00264 | 490 | A00094 | A00265 | 480 |
| A00094 | A00266 | 263 | A00094 | A00272 | 529 |
| A00094 | A00274 | 193 | A00094 | A00309 | 450 |
| A00094 | A00324 | 491 | A00094 | A00327 | 400 |
| A00094 | A00328 | 238 | A00094 | A00400 | 234 |
| A00094 | A00476 | 187 | A00094 | A00548 | 389 |
| A00094 | A00616 | 441 | A00094 | A00630 | 306 |
| A00094 | A00656 | 490 | A00094 | A00679 | 401 |
| A00094 | A00693 | 221 | A00094 | A00696 | 465 |
| A00094 | A00736 | 388 | A00094 | A00738 | 152 |
| A00094 | A00743 | 252 | A00094 | A00773 | 488 |
| A00094 | A00791 | 462 | A00094 | A00822 | 481 |
| A00094 | A00868 | 461 | A00094 | A00887 | 474 |
| A00094 | A00922 | 491 | A00094 | A00926 | 466 |
| A00094 | A00981 | 418 | A00094 | A01021 | 329 |
| A00094 | A01052 | 466 | A00094 | A01064 | 191 |
| A00094 | A01070 | 160 | A00094 | A01102 | 425 |
| A00094 | A01125 | 174 | A00094 | A01178 | 232 |
| A00094 | A01225 | 230 | A00094 | A01329 | 446 |
| A00094 | A01364 | 457 | A00094 | A01378 | 384 |
| A00094 | A01452 | 462 | A00094 | A01475 | 221 |
| A00094 | A01507 | 944 | A00094 | A01512 | 945 |
| A00094 | A01524 | 903 | A00094 | A01553 | 930 |
| A00094 | A01554 | 943 | A00094 | A01560 | 368 |
| A00094 | A01571 | 396 | A00094 | A01589 | 393 |
| A00094 | A01604 | 391 | A00094 | A01606 | 485 |
| A00094 | A01615 | 899 | A00094 | A01626 | 236 |
| A00094 | A01639 | 994 | A00094 | A01653 | 240 |
| A00094 | A01668 | 201 | A00094 | A01669 | 348 |
| A00094 | A01688 | 475 | A00094 | A01692 | 235 |
| A00094 | A01698 | 460 | A00094 | A01729 | 469 |
| A00094 | A01741 | 477 | A00094 | A01742 | 490 |
| A00094 | A01746 | 491 | A00094 | A01756 | 432 |
| A00094 | A01763 | 232 | A00094 | A01775 | 174 |
| A00094 | A01776 | 357 | A00094 | A01797 | 165 |
| A00094 | A01850 | 429 | A00094 | A01894 | 193 |
| A00094 | A01908 | 391 | A00094 | A01910 | 195 |
| A00094 | A01932 | 168 | A00094 | A01983 | 352 |
| A00094 | A01995 | 185 | A00094 | A02180 | 160 |
| A00094 | A02183 | 481 | A00094 | A02235 | 190 |
| A00094 | A02298 | 340 | A00094 | A02343 | 185 |
| A00094 | A02383 | 413 | A00094 | A02420 | 210 |
| A00094 | A02467 | 358 | A00094 | A02490 | 429 |

|        |        |     |        |        |     |
|--------|--------|-----|--------|--------|-----|
| A00094 | A02498 | 229 | A00094 | A02502 | 899 |
| A00094 | A02505 | 475 | A00094 | A02581 | 182 |
| A00094 | A02639 | 224 | A00094 | A02668 | 156 |
| A00094 | A02670 | 361 | A00094 | A02695 | 324 |
| A00094 | A02699 | 486 | A00094 | A02715 | 224 |
| A00094 | A02724 | 195 | A00094 | A02756 | 351 |
| A00094 | A02789 | 477 | A00094 | A02821 | 434 |
| A00094 | A02834 | 254 | A00094 | A02859 | 265 |
| A00094 | A02866 | 195 | A00094 | A02871 | 205 |
| A00094 | A02873 | 416 | A00094 | A02909 | 449 |
| A00094 | A02963 | 449 | A00094 | A03004 | 176 |
| A00094 | A03007 | 240 | A00094 | A03014 | 417 |
| A00094 | A03095 | 491 | A00094 | A03172 | 307 |
| A00094 | A03181 | 187 | A00094 | A03218 | 477 |
| A00094 | A03244 | 449 | A00094 | A03268 | 160 |
| A00094 | A03304 | 314 | A00094 | A03312 | 344 |
| A00094 | A03420 | 229 | A00094 | A03422 | 170 |
| A00094 | A03451 | 288 | A00094 | A03500 | 195 |
| A00094 | A03520 | 210 | A00094 | A03541 | 488 |
| A00094 | A03598 | 160 | A00094 | A03612 | 475 |
| A00094 | A03632 | 224 | A00094 | A03653 | 221 |
| A00094 | A03662 | 945 | A00094 | A03726 | 922 |
| A00094 | A03741 | 971 | A00094 | A03778 | 483 |
| A00094 | A03822 | 400 | A00094 | A03826 | 385 |
| A00094 | A03832 | 491 | A00094 | A03846 | 361 |
| A00094 | A03861 | 257 | A00094 | A03869 | 243 |
| A00094 | A03871 | 259 | A00094 | A03917 | 296 |
| A00094 | A03921 | 180 | A00094 | A03922 | 234 |
| A00094 | A03930 | 168 | A00094 | A03970 | 168 |
| A00094 | A03989 | 460 | A00094 | A04020 | 213 |
| A00094 | A04049 | 441 | A00094 | A04071 | 180 |
| A00094 | A04089 | 156 | A00094 | A04248 | 152 |
| A00094 | A04249 | 156 | A00094 | A04275 | 462 |
| A00094 | A04310 | 182 | A00094 | A04334 | 422 |
| A00094 | A04391 | 152 | A00094 | A04445 | 279 |
| A00094 | A04449 | 583 | A00094 | A04481 | 188 |
| A00094 | A04513 | 168 | A00094 | A04536 | 491 |
| A00094 | A04577 | 168 | A00094 | A04603 | 440 |
| A00094 | A04654 | 205 | A00094 | A04699 | 911 |
| A00094 | A04728 | 305 | A00094 | A04732 | 195 |
| A00094 | A04858 | 185 | A00094 | A04865 | 152 |
| A00094 | A04911 | 200 | A00094 | A04922 | 434 |
| A00094 | A04996 | 447 | A00094 | A05012 | 205 |
| A00094 | A05073 | 221 | A00094 | A05216 | 177 |
| A00094 | A05288 | 758 | A00094 | A05312 | 168 |
| A00094 | A05398 | 235 | A00094 | A05407 | 165 |

|        |        |     |        |        |     |
|--------|--------|-----|--------|--------|-----|
| A00094 | A05418 | 480 | A00094 | A05489 | 358 |
| A00094 | A05556 | 485 | A00094 | A05755 | 205 |
| A00094 | A05771 | 210 | A00094 | A05805 | 168 |
| A00094 | A05963 | 205 | A00094 | A06055 | 489 |
| A00094 | A06254 | 386 | A00094 | A06295 | 170 |
| A00094 | A06362 | 205 | A00094 | A06394 | 205 |
| A00094 | A06550 | 207 | A00094 | A06581 | 393 |
| A00094 | A06583 | 205 | A00094 | A06588 | 424 |
| A00094 | A06597 | 491 | A00094 | A06601 | 388 |
| A00094 | A06606 | 227 | A00094 | A06607 | 491 |
| A00094 | A06628 | 379 | A00094 | A06650 | 274 |
| A00094 | A06703 | 182 | A00094 | A06760 | 230 |
| A00094 | A06801 | 168 | A00094 | A06877 | 450 |
| A00094 | A06986 | 205 | A00094 | A07047 | 326 |
| A00094 | A07166 | 216 | A00094 | A07201 | 208 |
| A00094 | A07339 | 488 | A00094 | A07390 | 424 |
| A00094 | A07422 | 974 | A00094 | A07695 | 180 |
| A00094 | A07834 | 380 | A00094 | A07955 | 168 |
| A00094 | A08274 | 152 | A00094 | A08527 | 224 |
| A00094 | A08658 | 182 | A00094 | A08692 | 299 |
| A00094 | A08850 | 433 | A00094 | A08878 | 941 |
| A00094 | A08902 | 171 | A00094 | A09016 | 205 |
| A00094 | A09018 | 276 | A00094 | A09046 | 361 |
| A00094 | A09162 | 486 | A00094 | A09492 | 168 |
| A00094 | A09509 | 171 | A00094 | A09573 | 339 |
| A00094 | A09607 | 491 | A00094 | A09804 | 480 |
| A00094 | A09814 | 152 | A00094 | A09976 | 201 |
| A00094 | A09986 | 205 | A00094 | A10001 | 191 |
| A00094 | A10166 | 205 | A00094 | A10173 | 229 |
| A00094 | A10174 | 899 | A00094 | A10207 | 205 |
| A00094 | A10263 | 205 | A00094 | A10368 | 205 |
| A00094 | A10417 | 212 | A00094 | A10424 | 160 |
| A00094 | A10501 | 188 | A00094 | A10506 | 180 |
| A00094 | A10573 | 168 | A00094 | A10580 | 899 |
| A00094 | A10623 | 945 | A00094 | A10728 | 486 |
| A00094 | A10745 | 168 | A00094 | A10808 | 945 |
| A00094 | A10811 | 899 | A00094 | A10914 | 205 |
| A00094 | A10982 | 491 | A00094 | A11184 | 199 |
| A00094 | A11335 | 180 | A00094 | A11513 | 249 |
| A00094 | A11559 | 474 | A00094 | A11673 | 160 |
| A00094 | A11805 | 205 | A00094 | A11943 | 486 |
| A00094 | A11983 | 954 | A00094 | A12357 | 185 |
| A00094 | A12373 | 463 | A00094 | A12514 | 168 |
| A00094 | A12515 | 205 | A00094 | A12516 | 205 |
| A00094 | A12517 | 205 | A00094 | A12662 | 235 |
| A00094 | A12664 | 279 | A00094 | A12687 | 202 |

|        |        |     |        |        |     |
|--------|--------|-----|--------|--------|-----|
| A00094 | A12897 | 440 | A00094 | A13111 | 156 |
| A00094 | A13146 | 926 | A00094 | A13397 | 380 |
| A00094 | A13652 | 205 | A00094 | A13734 | 307 |
| A00094 | A13864 | 156 | A00094 | A13946 | 165 |
| A00094 | A13978 | 993 | A00094 | A13986 | 422 |
| A00094 | A13997 | 351 | A00094 | A14005 | 480 |
| A00094 | A14007 | 411 | A00094 | A14164 | 168 |
| A00094 | A14198 | 491 | A00094 | A14364 | 183 |
| A00094 | A14396 | 277 | A00094 | A14440 | 190 |
| A00094 | A14443 | 943 | A00094 | A14444 | 378 |
| A00094 | A14452 | 341 | A00094 | A14489 | 198 |
| A00094 | A14498 | 317 | A00094 | A14502 | 338 |
| A00094 | A14524 | 277 | A00094 | A14539 | 490 |
| A00094 | A14585 | 218 | A00094 | A14589 | 205 |
| A00094 | A14620 | 168 | A00094 | A14623 | 156 |
| A00094 | A14643 | 481 | A00094 | A14648 | 446 |
| A00094 | A14653 | 152 | A00094 | A14659 | 236 |
| A00094 | A14669 | 168 | A00094 | A14674 | 430 |
| A00094 | A14784 | 205 | A00094 | A14797 | 168 |
| A00094 | A14916 | 205 | A00094 | A14924 | 205 |
| A00094 | A14925 | 399 | A00094 | A15237 | 362 |
| A00094 | A15293 | 385 | A00094 | A15294 | 246 |
| A00094 | A15324 | 234 | A00094 | A15353 | 268 |
| A00094 | A15420 | 429 | A00094 | A15465 | 210 |
| A00094 | A15506 | 411 | A00094 | A15726 | 477 |
| A00094 | A15821 | 205 | A00094 | A15954 | 474 |
| A00094 | A16427 | 205 | A00094 | A16512 | 168 |
| A00094 | A16636 | 425 | A00094 | A16738 | 202 |
| A00094 | A16874 | 185 | A00094 | A17050 | 168 |
| A00094 | A17160 | 899 | A00094 | A17174 | 205 |
| A00095 | A00142 | 900 | A00095 | A00143 | 904 |
| A00095 | A00166 | 163 | A00095 | A00167 | 390 |
| A00095 | A00168 | 945 | A00095 | A00169 | 188 |
| A00095 | A00193 | 486 | A00095 | A00200 | 899 |
| A00095 | A00202 | 73  | A00095 | A00209 | 249 |
| A00095 | A00210 | 489 | A00095 | A00212 | 491 |
| A00095 | A00215 | 899 | A00095 | A00219 | 486 |
| A00095 | A00224 | 488 | A00095 | A00245 | 188 |
| A00095 | A00274 | 168 | A00095 | A00316 | 193 |
| A00095 | A00322 | 308 | A00095 | A00347 | 160 |
| A00095 | A00348 | 484 | A00095 | A00349 | 243 |
| A00095 | A00350 | 188 | A00095 | A00351 | 452 |
| A00095 | A00377 | 491 | A00095 | A00426 | 443 |
| A00095 | A00472 | 258 | A00095 | A00570 | 230 |
| A00095 | A00616 | 391 | A00095 | A00630 | 195 |
| A00095 | A00712 | 213 | A00095 | A00863 | 188 |

|        |        |     |        |        |     |
|--------|--------|-----|--------|--------|-----|
| A00095 | A00989 | 378 | A00095 | A01124 | 229 |
| A00095 | A01125 | 488 | A00095 | A01137 | 221 |
| A00095 | A01156 | 490 | A00095 | A01161 | 271 |
| A00095 | A01163 | 205 | A00095 | A01211 | 283 |
| A00095 | A01257 | 475 | A00095 | A01481 | 306 |
| A00095 | A01485 | 491 | A00095 | A01502 | 157 |
| A00095 | A01527 | 286 | A00095 | A01547 | 452 |
| A00095 | A01582 | 179 | A00095 | A01632 | 241 |
| A00095 | A01700 | 485 | A00095 | A01790 | 255 |
| A00095 | A01889 | 218 | A00095 | A01910 | 375 |
| A00095 | A02082 | 208 | A00095 | A02091 | 288 |
| A00095 | A02111 | 425 | A00095 | A02148 | 400 |
| A00095 | A02154 | 185 | A00095 | A02188 | 346 |
| A00095 | A02192 | 173 | A00095 | A02221 | 443 |
| A00095 | A02301 | 360 | A00095 | A02303 | 196 |
| A00095 | A02304 | 235 | A00095 | A02310 | 162 |
| A00095 | A02312 | 484 | A00095 | A02392 | 262 |
| A00095 | A02467 | 259 | A00095 | A02470 | 443 |
| A00095 | A02477 | 154 | A00095 | A02501 | 249 |
| A00095 | A02504 | 490 | A00095 | A02531 | 314 |
| A00095 | A02541 | 183 | A00095 | A02583 | 207 |
| A00095 | A02584 | 218 | A00095 | A02598 | 235 |
| A00095 | A02618 | 485 | A00095 | A02621 | 407 |
| A00095 | A02671 | 369 | A00095 | A02672 | 408 |
| A00095 | A02673 | 491 | A00095 | A02699 | 154 |
| A00095 | A02703 | 384 | A00095 | A02760 | 174 |
| A00095 | A02761 | 246 | A00095 | A02822 | 195 |
| A00095 | A03068 | 198 | A00095 | A03115 | 185 |
| A00095 | A03178 | 96  | A00095 | A03186 | 118 |
| A00095 | A03209 | 176 | A00095 | A03211 | 204 |
| A00095 | A03264 | 191 | A00095 | A03314 | 208 |
| A00095 | A03334 | 488 | A00095 | A03477 | 307 |
| A00095 | A03535 | 383 | A00095 | A03573 | 235 |
| A00095 | A03579 | 311 | A00095 | A03583 | 361 |
| A00095 | A03589 | 256 | A00095 | A03609 | 174 |
| A00095 | A03642 | 299 | A00095 | A03713 | 191 |
| A00095 | A03723 | 154 | A00095 | A03795 | 195 |
| A00095 | A03961 | 424 | A00095 | A03992 | 407 |
| A00095 | A04081 | 391 | A00095 | A04092 | 414 |
| A00095 | A04183 | 232 | A00095 | A04222 | 480 |
| A00095 | A04256 | 490 | A00095 | A04418 | 286 |
| A00095 | A04423 | 405 | A00095 | A04424 | 160 |
| A00095 | A04445 | 188 | A00095 | A04491 | 390 |
| A00095 | A04556 | 196 | A00095 | A04723 | 201 |
| A00095 | A04751 | 208 | A00095 | A04813 | 183 |
| A00095 | A04821 | 246 | A00095 | A04990 | 246 |



|        |        |     |        |        |     |
|--------|--------|-----|--------|--------|-----|
| A00095 | A05075 | 281 | A00095 | A05249 | 213 |
| A00095 | A05252 | 288 | A00095 | A05306 | 350 |
| A00095 | A05442 | 311 | A00095 | A05462 | 172 |
| A00095 | A05825 | 456 | A00095 | A06277 | 308 |
| A00095 | A06400 | 446 | A00095 | A06606 | 163 |
| A00095 | A06608 | 899 | A00095 | A06671 | 205 |
| A00095 | A06739 | 353 | A00095 | A06922 | 288 |
| A00095 | A07014 | 196 | A00095 | A08064 | 353 |
| A00095 | A08136 | 246 | A00095 | A09118 | 326 |
| A00095 | A09240 | 246 | A00095 | A09269 | 382 |
| A00095 | A09366 | 350 | A00095 | A09471 | 229 |
| A00095 | A09812 | 229 | A00095 | A10072 | 162 |
| A00095 | A10141 | 288 | A00095 | A10237 | 262 |
| A00095 | A10476 | 409 | A00095 | A10541 | 350 |
| A00095 | A10622 | 262 | A00095 | A10844 | 185 |
| A00095 | A10887 | 262 | A00095 | A11353 | 243 |
| A00095 | A11378 | 252 | A00095 | A11467 | 267 |
| A00095 | A12453 | 350 | A00095 | A12654 | 484 |
| A00095 | A13025 | 350 | A00095 | A13346 | 491 |
| A00095 | A13917 | 344 | A00095 | A13965 | 420 |
| A00095 | A14002 | 326 | A00095 | A15230 | 252 |
| A00095 | A15233 | 185 | A00095 | A15498 | 486 |
| A00095 | A16075 | 283 | A00095 | A16087 | 238 |
| A00095 | A16374 | 188 | A00095 | A16433 | 216 |
| A00095 | A16627 | 335 | A00096 | A00103 | 338 |
| A00096 | A00104 | 307 | A00096 | A00199 | 413 |
| A00096 | A00236 | 229 | A00096 | A00430 | 491 |
| A00096 | A00675 | 176 | A00096 | A00863 | 254 |
| A00096 | A00970 | 377 | A00096 | A01380 | 140 |
| A00096 | A03584 | 185 | A00096 | A03738 | 343 |
| A00096 | A03747 | 449 | A00096 | A03790 | 227 |
| A00096 | A04191 | 491 | A00096 | A04192 | 455 |
| A00096 | A04280 | 208 | A00096 | A04573 | 301 |
| A00096 | A04614 | 212 | A00096 | A04964 | 265 |
| A00096 | A05288 | 195 | A00096 | A05830 | 312 |
| A00096 | A05995 | 240 | A00096 | A06359 | 160 |
| A00096 | A06473 | 185 | A00096 | A07163 | 484 |
| A00096 | A07245 | 301 | A00096 | A07247 | 340 |
| A00096 | A07634 | 167 | A00096 | A08093 | 481 |
| A00096 | A08679 | 283 | A00096 | A08978 | 215 |
| A00096 | A09210 | 483 | A00096 | A09271 | 338 |
| A00096 | A10490 | 193 | A00096 | A10519 | 326 |
| A00096 | A10532 | 491 | A00096 | A10589 | 460 |
| A00096 | A10830 | 366 | A00096 | A10907 | 433 |
| A00096 | A11240 | 347 | A00096 | A11299 | 296 |
| A00096 | A11705 | 235 | A00096 | A12818 | 353 |

|        |        |     |        |        |     |
|--------|--------|-----|--------|--------|-----|
| A00096 | A12839 | 475 | A00096 | A13084 | 249 |
| A00096 | A13344 | 353 | A00096 | A13875 | 182 |
| A00096 | A13944 | 241 | A00096 | A14132 | 491 |
| A00096 | A15696 | 369 | A00096 | A17085 | 480 |
| A00097 | A00125 | 266 | A00097 | A00141 | 293 |
| A00097 | A00158 | 162 | A00097 | A00168 | 374 |
| A00097 | A00219 | 205 | A00097 | A01520 | 171 |
| A00097 | A01524 | 461 | A00097 | A01527 | 268 |
| A00097 | A02000 | 246 | A00097 | A02668 | 195 |
| A00097 | A02785 | 307 | A00097 | A06463 | 329 |
| A00097 | A07011 | 204 | A00097 | A09749 | 390 |
| A00097 | A11313 | 458 | A00097 | A12531 | 417 |
| A00097 | A12560 | 406 | A00097 | A14471 | 174 |
| A00097 | A15317 | 353 | A00097 | A15505 | 258 |
| A00097 | A15598 | 307 | A00097 | A15913 | 249 |
| A00097 | A16559 | 398 | A00098 | A00165 | 167 |
| A00098 | A00167 | 485 | A00098 | A00182 | 490 |
| A00098 | A00183 | 945 | A00098 | A00214 | 63  |
| A00098 | A00219 | 324 | A00098 | A00235 | 899 |
| A00098 | A00262 | 369 | A00098 | A00324 | 374 |
| A00098 | A00679 | 351 | A00098 | A01088 | 152 |
| A00098 | A01213 | 226 | A00098 | A01378 | 187 |
| A00098 | A01507 | 372 | A00098 | A01524 | 388 |
| A00098 | A01527 | 942 | A00098 | A01606 | 246 |
| A00098 | A01688 | 227 | A00098 | A01698 | 240 |
| A00098 | A01850 | 177 | A00098 | A01995 | 257 |
| A00098 | A02210 | 308 | A00098 | A02427 | 183 |
| A00098 | A02698 | 157 | A00098 | A02822 | 452 |
| A00098 | A03451 | 177 | A00098 | A03778 | 491 |
| A00098 | A03893 | 297 | A00098 | A03895 | 271 |
| A00098 | A04007 | 196 | A00098 | A04202 | 202 |
| A00098 | A04449 | 490 | A00098 | A05181 | 173 |
| A00098 | A05221 | 389 | A00098 | A05489 | 272 |
| A00098 | A06254 | 396 | A00098 | A06317 | 236 |
| A00098 | A06588 | 460 | A00098 | A07422 | 899 |
| A00098 | A07803 | 340 | A00098 | A08022 | 174 |
| A00098 | A08878 | 408 | A00098 | A09072 | 154 |
| A00098 | A09235 | 272 | A00098 | A09256 | 900 |
| A00098 | A09363 | 165 | A00098 | A10014 | 168 |
| A00098 | A11983 | 443 | A00098 | A12897 | 446 |
| A00098 | A13946 | 207 | A00098 | A13994 | 285 |
| A00098 | A13997 | 445 | A00098 | A14055 | 472 |
| A00098 | A14211 | 296 | A00098 | A14316 | 245 |
| A00098 | A14636 | 180 | A00098 | A14925 | 254 |
| A00098 | A15293 | 379 | A00098 | A15726 | 899 |
| A00098 | A16904 | 190 | A00099 | A00122 | 118 |

|        |        |     |        |        |     |
|--------|--------|-----|--------|--------|-----|
| A00099 | A00134 | 899 | A00099 | A00136 | 433 |
| A00099 | A00137 | 328 | A00099 | A00138 | 63  |
| A00099 | A00139 | 170 | A00099 | A00140 | 409 |
| A00099 | A00141 | 899 | A00099 | A00157 | 905 |
| A00099 | A00167 | 899 | A00099 | A00169 | 899 |
| A00099 | A00172 | 899 | A00099 | A00182 | 899 |
| A00099 | A00184 | 916 | A00099 | A00187 | 138 |
| A00099 | A00207 | 899 | A00099 | A00208 | 899 |
| A00099 | A00209 | 899 | A00099 | A00224 | 899 |
| A00099 | A00230 | 899 | A00099 | A00233 | 899 |
| A00099 | A00239 | 899 | A00099 | A00240 | 899 |
| A00099 | A00241 | 899 | A00099 | A00242 | 899 |
| A00099 | A00246 | 899 | A00099 | A00247 | 899 |
| A00099 | A00254 | 899 | A00099 | A00458 | 360 |
| A00099 | A00669 | 899 | A00099 | A00871 | 179 |
| A00099 | A00933 | 899 | A00099 | A01052 | 899 |
| A00099 | A01075 | 176 | A00099 | A01176 | 899 |
| A00099 | A01214 | 163 | A00099 | A01524 | 899 |
| A00099 | A01527 | 899 | A00099 | A01553 | 928 |
| A00099 | A01554 | 912 | A00099 | A01558 | 899 |
| A00099 | A01560 | 943 | A00099 | A01561 | 899 |
| A00099 | A01562 | 921 | A00099 | A01588 | 899 |
| A00099 | A01592 | 899 | A00099 | A01602 | 899 |
| A00099 | A01605 | 191 | A00099 | A01615 | 899 |
| A00099 | A01628 | 901 | A00099 | A01629 | 207 |
| A00099 | A01651 | 899 | A00099 | A01680 | 899 |
| A00099 | A01688 | 899 | A00099 | A01692 | 924 |
| A00099 | A01697 | 908 | A00099 | A01702 | 899 |
| A00099 | A01709 | 899 | A00099 | A01718 | 899 |
| A00099 | A01844 | 899 | A00099 | A01920 | 899 |
| A00099 | A02717 | 180 | A00099 | A03331 | 179 |
| A00099 | A03338 | 238 | A00099 | A03435 | 152 |
| A00099 | A03451 | 899 | A00099 | A03525 | 165 |
| A00099 | A03565 | 278 | A00099 | A03591 | 900 |
| A00099 | A04447 | 190 | A00099 | A04699 | 899 |
| A00099 | A04853 | 252 | A00099 | A05086 | 212 |
| A00099 | A05216 | 899 | A00099 | A05453 | 899 |
| A00099 | A07311 | 917 | A00099 | A09577 | 905 |
| A00099 | A10365 | 899 | A00099 | A10801 | 899 |
| A00099 | A10833 | 899 | A00099 | A11125 | 899 |
| A00099 | A11983 | 899 | A00099 | A12383 | 207 |
| A00099 | A12473 | 308 | A00099 | A12705 | 899 |
| A00099 | A13605 | 899 | A00099 | A13985 | 899 |
| A00099 | A13991 | 899 | A00099 | A14024 | 899 |
| A00099 | A14188 | 899 | A00099 | A14198 | 899 |
| A00099 | A14452 | 85  | A00099 | A14472 | 899 |

|        |        |     |        |        |     |
|--------|--------|-----|--------|--------|-----|
| A00099 | A15195 | 363 | A00099 | A17168 | 443 |
| A00100 | A00114 | 249 | A00100 | A00119 | 477 |
| A00100 | A00163 | 430 | A00100 | A00167 | 909 |
| A00100 | A00195 | 366 | A00100 | A00209 | 899 |
| A00100 | A00224 | 899 | A00100 | A00236 | 945 |
| A00100 | A00240 | 401 | A00100 | A00252 | 945 |
| A00100 | A00253 | 994 | A00100 | A00264 | 396 |
| A00100 | A00294 | 218 | A00100 | A00309 | 479 |
| A00100 | A00652 | 488 | A00100 | A00736 | 299 |
| A00100 | A00747 | 491 | A00100 | A01104 | 341 |
| A00100 | A01189 | 167 | A00100 | A01405 | 163 |
| A00100 | A01498 | 286 | A00100 | A01524 | 899 |
| A00100 | A01527 | 905 | A00100 | A01550 | 945 |
| A00100 | A01660 | 380 | A00100 | A01692 | 480 |
| A00100 | A01730 | 207 | A00100 | A01740 | 63  |
| A00100 | A01741 | 379 | A00100 | A01763 | 162 |
| A00100 | A01775 | 358 | A00100 | A01886 | 451 |
| A00100 | A01897 | 102 | A00100 | A01904 | 165 |
| A00100 | A02304 | 232 | A00100 | A02325 | 486 |
| A00100 | A02336 | 200 | A00100 | A02339 | 308 |
| A00100 | A02349 | 162 | A00100 | A02359 | 296 |
| A00100 | A02410 | 216 | A00100 | A02418 | 235 |
| A00100 | A02421 | 279 | A00100 | A02494 | 177 |
| A00100 | A02507 | 334 | A00100 | A02525 | 363 |
| A00100 | A02647 | 265 | A00100 | A02676 | 221 |
| A00100 | A02695 | 177 | A00100 | A02703 | 441 |
| A00100 | A02744 | 84  | A00100 | A02766 | 191 |
| A00100 | A02775 | 308 | A00100 | A02786 | 183 |
| A00100 | A02789 | 267 | A00100 | A02816 | 165 |
| A00100 | A02827 | 249 | A00100 | A02830 | 212 |
| A00100 | A02836 | 213 | A00100 | A02837 | 480 |
| A00100 | A02842 | 491 | A00100 | A02859 | 420 |
| A00100 | A02868 | 297 | A00100 | A02869 | 316 |
| A00100 | A02880 | 279 | A00100 | A02902 | 344 |
| A00100 | A02903 | 229 | A00100 | A02912 | 187 |
| A00100 | A02921 | 254 | A00100 | A02958 | 213 |
| A00100 | A03112 | 347 | A00100 | A03186 | 207 |
| A00100 | A03229 | 236 | A00100 | A03286 | 296 |
| A00100 | A03287 | 174 | A00100 | A03305 | 285 |
| A00100 | A03321 | 63  | A00100 | A03338 | 270 |
| A00100 | A03415 | 165 | A00100 | A03427 | 424 |
| A00100 | A03450 | 241 | A00100 | A03451 | 443 |
| A00100 | A03657 | 249 | A00100 | A03725 | 273 |
| A00100 | A03919 | 188 | A00100 | A03922 | 329 |
| A00100 | A03976 | 179 | A00100 | A04059 | 201 |
| A00100 | A04085 | 234 | A00100 | A04180 | 210 |

|        |        |     |        |        |     |
|--------|--------|-----|--------|--------|-----|
| A00100 | A04216 | 205 | A00100 | A04277 | 348 |
| A00100 | A04440 | 182 | A00100 | A04710 | 317 |
| A00100 | A04720 | 308 | A00100 | A04729 | 168 |
| A00100 | A04818 | 156 | A00100 | A04847 | 396 |
| A00100 | A05036 | 254 | A00100 | A05039 | 279 |
| A00100 | A05077 | 348 | A00100 | A05122 | 299 |
| A00100 | A05141 | 413 | A00100 | A05185 | 173 |
| A00100 | A05302 | 345 | A00100 | A05578 | 236 |
| A00100 | A05868 | 486 | A00100 | A05902 | 353 |
| A00100 | A05967 | 180 | A00100 | A06200 | 180 |
| A00100 | A06581 | 330 | A00100 | A06595 | 201 |
| A00100 | A06683 | 279 | A00100 | A06949 | 152 |
| A00100 | A07167 | 252 | A00100 | A07311 | 899 |
| A00100 | A08576 | 205 | A00100 | A08655 | 191 |
| A00100 | A08837 | 199 | A00100 | A08899 | 446 |
| A00100 | A09125 | 308 | A00100 | A09127 | 257 |
| A00100 | A09221 | 154 | A00100 | A09476 | 483 |
| A00100 | A09504 | 177 | A00100 | A09668 | 218 |
| A00100 | A10081 | 245 | A00100 | A10148 | 213 |
| A00100 | A10233 | 386 | A00100 | A10311 | 286 |
| A00100 | A10337 | 230 | A00100 | A10346 | 249 |
| A00100 | A11921 | 462 | A00100 | A12246 | 236 |
| A00100 | A12705 | 899 | A00100 | A13161 | 348 |
| A00100 | A13255 | 457 | A00100 | A13985 | 899 |
| A00100 | A14013 | 213 | A00100 | A14449 | 308 |
| A00100 | A14648 | 324 | A00100 | A14726 | 348 |
| A00100 | A15282 | 177 | A00100 | A15675 | 254 |
| A00100 | A16300 | 283 | A00100 | A16624 | 234 |
| A00100 | A16973 | 229 | A00100 | A17088 | 151 |
| A00101 | A00104 | 944 | A00101 | A00209 | 899 |
| A00101 | A01524 | 899 | A00101 | A06608 | 251 |
| A00101 | A07163 | 363 | A00101 | A08093 | 385 |
| A00101 | A08679 | 328 | A00101 | A10532 | 939 |
| A00102 | A00104 | 899 | A00102 | A00209 | 899 |
| A00102 | A01161 | 208 | A00102 | A01524 | 899 |
| A00102 | A10532 | 193 | A00102 | A10589 | 899 |
| A00102 | A10830 | 899 | A00102 | A17214 | 899 |
| A00103 | A00104 | 899 | A00103 | A00173 | 160 |
| A00103 | A00209 | 899 | A00103 | A00430 | 341 |
| A00103 | A01125 | 232 | A00103 | A01524 | 899 |
| A00103 | A02006 | 314 | A00103 | A02836 | 204 |
| A00103 | A03817 | 218 | A00103 | A10532 | 329 |
| A00103 | A14557 | 899 | A00104 | A00430 | 313 |
| A00104 | A02499 | 311 | A00104 | A02749 | 221 |
| A00104 | A04191 | 357 | A00104 | A05601 | 391 |
| A00104 | A07163 | 329 | A00104 | A08093 | 475 |

|        |        |     |        |        |     |
|--------|--------|-----|--------|--------|-----|
| A00104 | A09215 | 432 | A00104 | A10532 | 472 |
| A00104 | A11299 | 406 | A00104 | A14132 | 436 |
| A00104 | A16124 | 899 | A00105 | A00106 | 899 |
| A00105 | A00107 | 926 | A00105 | A00150 | 587 |
| A00105 | A00157 | 899 | A00105 | A00199 | 182 |
| A00105 | A00209 | 899 | A00105 | A00288 | 424 |
| A00105 | A00405 | 249 | A00105 | A00414 | 475 |
| A00105 | A00426 | 390 | A00105 | A00427 | 657 |
| A00105 | A00521 | 480 | A00105 | A00537 | 461 |
| A00105 | A00571 | 179 | A00105 | A00576 | 424 |
| A00105 | A00590 | 664 | A00105 | A00603 | 445 |
| A00105 | A00604 | 176 | A00105 | A00605 | 490 |
| A00105 | A00648 | 738 | A00105 | A00651 | 816 |
| A00105 | A00653 | 418 | A00105 | A00697 | 450 |
| A00105 | A00700 | 417 | A00105 | A00706 | 179 |
| A00105 | A00763 | 330 | A00105 | A00787 | 665 |
| A00105 | A00809 | 445 | A00105 | A00839 | 486 |
| A00105 | A00870 | 396 | A00105 | A00878 | 491 |
| A00105 | A00923 | 212 | A00105 | A00935 | 469 |
| A00105 | A00953 | 176 | A00105 | A00965 | 662 |
| A00105 | A00966 | 687 | A00105 | A00970 | 484 |
| A00105 | A00985 | 224 | A00105 | A00986 | 534 |
| A00105 | A00994 | 411 | A00105 | A01012 | 835 |
| A00105 | A01025 | 664 | A00105 | A01027 | 455 |
| A00105 | A01034 | 491 | A00105 | A01037 | 488 |
| A00105 | A01038 | 475 | A00105 | A01067 | 665 |
| A00105 | A01072 | 199 | A00105 | A01085 | 486 |
| A00105 | A01090 | 688 | A00105 | A01095 | 346 |
| A00105 | A01101 | 162 | A00105 | A01108 | 212 |
| A00105 | A01112 | 312 | A00105 | A01119 | 457 |
| A00105 | A01140 | 460 | A00105 | A01144 | 716 |
| A00105 | A01156 | 446 | A00105 | A01168 | 462 |
| A00105 | A01206 | 373 | A00105 | A01238 | 196 |
| A00105 | A01247 | 329 | A00105 | A01249 | 383 |
| A00105 | A01263 | 337 | A00105 | A01291 | 597 |
| A00105 | A01294 | 486 | A00105 | A01295 | 333 |
| A00105 | A01335 | 600 | A00105 | A01366 | 224 |
| A00105 | A01372 | 374 | A00105 | A01385 | 355 |
| A00105 | A01392 | 665 | A00105 | A01416 | 436 |
| A00105 | A01433 | 665 | A00105 | A01436 | 660 |
| A00105 | A01447 | 468 | A00105 | A01468 | 380 |
| A00105 | A01496 | 688 | A00105 | A01524 | 899 |
| A00105 | A01579 | 368 | A00105 | A01586 | 207 |
| A00105 | A01601 | 346 | A00105 | A01649 | 208 |
| A00105 | A01718 | 383 | A00105 | A02164 | 63  |
| A00105 | A02165 | 462 | A00105 | A03438 | 113 |

|        |        |     |        |        |     |
|--------|--------|-----|--------|--------|-----|
| A00105 | A03738 | 157 | A00105 | A03981 | 682 |
| A00105 | A05501 | 218 | A00105 | A05577 | 221 |
| A00105 | A06084 | 247 | A00105 | A06351 | 479 |
| A00105 | A06356 | 303 | A00105 | A06814 | 358 |
| A00105 | A06825 | 229 | A00105 | A06965 | 157 |
| A00105 | A07237 | 227 | A00105 | A08011 | 665 |
| A00105 | A08055 | 187 | A00105 | A08150 | 196 |
| A00105 | A08301 | 165 | A00105 | A08359 | 441 |
| A00105 | A08377 | 491 | A00105 | A08543 | 319 |
| A00105 | A08550 | 684 | A00105 | A08556 | 168 |
| A00105 | A08653 | 127 | A00105 | A08773 | 491 |
| A00105 | A08812 | 456 | A00105 | A08973 | 489 |
| A00105 | A09332 | 182 | A00105 | A09592 | 162 |
| A00105 | A10316 | 375 | A00105 | A10532 | 491 |
| A00105 | A11240 | 450 | A00105 | A11254 | 307 |
| A00105 | A11297 | 481 | A00105 | A11334 | 457 |
| A00105 | A11550 | 190 | A00105 | A11728 | 208 |
| A00105 | A11992 | 389 | A00105 | A12433 | 489 |
| A00105 | A13375 | 267 | A00105 | A13720 | 920 |
| A00105 | A13963 | 382 | A00105 | A13989 | 491 |
| A00105 | A14172 | 200 | A00105 | A14216 | 773 |
| A00105 | A14447 | 368 | A00105 | A14482 | 477 |
| A00105 | A14569 | 165 | A00105 | A14843 | 423 |
| A00105 | A14937 | 324 | A00105 | A15666 | 488 |
| A00105 | A15931 | 489 | A00105 | A15932 | 483 |
| A00105 | A15988 | 475 | A00105 | A16157 | 174 |
| A00106 | A00107 | 899 | A00106 | A00157 | 899 |
| A00106 | A00209 | 904 | A00106 | A00210 | 121 |
| A00106 | A00216 | 246 | A00106 | A00219 | 457 |
| A00106 | A00264 | 327 | A00106 | A00310 | 218 |
| A00106 | A00312 | 491 | A00106 | A00616 | 350 |
| A00106 | A00661 | 307 | A00106 | A00815 | 912 |
| A00106 | A01137 | 372 | A00106 | A01138 | 327 |
| A00106 | A01462 | 286 | A00106 | A01463 | 190 |
| A00106 | A01466 | 314 | A00106 | A01475 | 447 |
| A00106 | A01476 | 432 | A00106 | A01485 | 243 |
| A00106 | A01490 | 483 | A00106 | A01493 | 462 |
| A00106 | A01527 | 899 | A00106 | A01590 | 411 |
| A00106 | A01594 | 188 | A00106 | A01629 | 160 |
| A00106 | A01722 | 491 | A00106 | A01731 | 199 |
| A00106 | A01883 | 193 | A00106 | A02071 | 182 |
| A00106 | A02083 | 224 | A00106 | A02104 | 283 |
| A00106 | A02215 | 489 | A00106 | A02236 | 210 |
| A00106 | A02251 | 162 | A00106 | A02284 | 419 |
| A00106 | A02299 | 293 | A00106 | A02301 | 400 |
| A00106 | A02306 | 480 | A00106 | A02329 | 199 |

|        |        |     |        |        |     |
|--------|--------|-----|--------|--------|-----|
| A00106 | A02413 | 324 | A00106 | A02419 | 188 |
| A00106 | A02423 | 458 | A00106 | A02424 | 152 |
| A00106 | A02425 | 939 | A00106 | A02465 | 488 |
| A00106 | A02472 | 127 | A00106 | A02481 | 73  |
| A00106 | A02621 | 177 | A00106 | A02666 | 238 |
| A00106 | A02669 | 252 | A00106 | A02671 | 193 |
| A00106 | A02758 | 216 | A00106 | A02759 | 438 |
| A00106 | A02785 | 435 | A00106 | A03053 | 452 |
| A00106 | A03054 | 491 | A00106 | A03099 | 373 |
| A00106 | A03110 | 310 | A00106 | A03498 | 358 |
| A00106 | A03583 | 283 | A00106 | A03633 | 435 |
| A00106 | A03639 | 272 | A00106 | A03776 | 190 |
| A00106 | A03873 | 172 | A00106 | A04001 | 279 |
| A00106 | A04218 | 375 | A00106 | A04226 | 899 |
| A00106 | A04271 | 152 | A00106 | A04369 | 157 |
| A00106 | A04471 | 274 | A00106 | A04612 | 230 |
| A00106 | A04614 | 198 | A00106 | A04633 | 235 |
| A00106 | A04842 | 184 | A00106 | A04910 | 346 |
| A00106 | A05217 | 286 | A00106 | A05277 | 260 |
| A00106 | A05487 | 301 | A00106 | A05493 | 484 |
| A00106 | A05494 | 386 | A00106 | A05533 | 491 |
| A00106 | A05573 | 165 | A00106 | A05992 | 221 |
| A00106 | A06037 | 224 | A00106 | A06607 | 438 |
| A00106 | A06734 | 263 | A00106 | A06762 | 412 |
| A00106 | A06912 | 232 | A00106 | A07061 | 151 |
| A00106 | A07200 | 379 | A00106 | A07471 | 322 |
| A00106 | A07475 | 168 | A00106 | A07538 | 286 |
| A00106 | A07908 | 358 | A00106 | A08210 | 265 |
| A00106 | A08385 | 210 | A00106 | A08444 | 277 |
| A00106 | A09031 | 321 | A00106 | A09509 | 110 |
| A00106 | A10131 | 224 | A00106 | A10306 | 358 |
| A00106 | A10841 | 358 | A00106 | A13162 | 159 |
| A00106 | A13734 | 286 | A00106 | A13879 | 428 |
| A00106 | A14187 | 205 | A00106 | A14402 | 218 |
| A00106 | A14735 | 255 | A00106 | A15230 | 177 |
| A00106 | A16636 | 286 | A00107 | A00157 | 899 |
| A00107 | A02695 | 299 | A00107 | A15498 | 262 |
| A00108 | A00141 | 176 | A00108 | A00159 | 243 |
| A00108 | A00224 | 177 | A00108 | A01473 | 491 |
| A00108 | A01527 | 921 | A00108 | A02076 | 938 |
| A00108 | A02120 | 269 | A00108 | A02864 | 112 |
| A00108 | A02897 | 241 | A00108 | A03722 | 168 |
| A00108 | A03894 | 183 | A00108 | A04687 | 259 |
| A00108 | A07135 | 154 | A00108 | A10587 | 327 |
| A00108 | A10721 | 305 | A00108 | A10899 | 207 |
| A00108 | A11415 | 199 | A00108 | A12843 | 384 |



|        |        |     |        |        |     |
|--------|--------|-----|--------|--------|-----|
| A00108 | A12848 | 433 | A00108 | A14011 | 195 |
| A00108 | A14300 | 308 | A00108 | A14452 | 328 |
| A00108 | A15626 | 484 | A00108 | A15726 | 74  |
| A00108 | A16994 | 218 | A00109 | A00111 | 462 |
| A00109 | A00123 | 490 | A00109 | A00125 | 167 |
| A00109 | A00141 | 347 | A00109 | A00153 | 317 |
| A00109 | A00188 | 283 | A00109 | A00204 | 942 |
| A00109 | A00209 | 899 | A00109 | A00213 | 74  |
| A00109 | A00214 | 99  | A00109 | A00220 | 449 |
| A00109 | A00230 | 899 | A00109 | A00233 | 229 |
| A00109 | A00248 | 364 | A00109 | A00274 | 346 |
| A00109 | A00616 | 179 | A00109 | A00752 | 252 |
| A00109 | A01009 | 344 | A00109 | A01043 | 204 |
| A00109 | A01524 | 162 | A00109 | A01527 | 927 |
| A00109 | A01558 | 899 | A00109 | A01604 | 443 |
| A00109 | A01615 | 899 | A00109 | A01654 | 491 |
| A00109 | A01702 | 162 | A00109 | A01704 | 330 |
| A00109 | A01743 | 263 | A00109 | A01802 | 176 |
| A00109 | A01870 | 488 | A00109 | A01880 | 391 |
| A00109 | A01888 | 458 | A00109 | A01902 | 170 |
| A00109 | A02033 | 311 | A00109 | A02152 | 162 |
| A00109 | A02220 | 321 | A00109 | A02251 | 170 |
| A00109 | A02337 | 423 | A00109 | A02382 | 440 |
| A00109 | A02416 | 378 | A00109 | A02439 | 443 |
| A00109 | A02458 | 373 | A00109 | A02459 | 200 |
| A00109 | A02460 | 243 | A00109 | A02479 | 208 |
| A00109 | A02481 | 171 | A00109 | A02490 | 157 |
| A00109 | A02578 | 259 | A00109 | A02582 | 172 |
| A00109 | A02604 | 307 | A00109 | A02606 | 369 |
| A00109 | A02608 | 382 | A00109 | A02611 | 297 |
| A00109 | A02615 | 243 | A00109 | A02637 | 483 |
| A00109 | A02639 | 172 | A00109 | A02654 | 294 |
| A00109 | A02655 | 465 | A00109 | A02659 | 226 |
| A00109 | A02661 | 268 | A00109 | A02698 | 286 |
| A00109 | A02711 | 362 | A00109 | A02730 | 481 |
| A00109 | A02769 | 380 | A00109 | A02788 | 205 |
| A00109 | A02803 | 188 | A00109 | A02808 | 357 |
| A00109 | A02851 | 259 | A00109 | A02854 | 477 |
| A00109 | A02863 | 491 | A00109 | A02876 | 165 |
| A00109 | A02886 | 427 | A00109 | A02896 | 477 |
| A00109 | A02898 | 219 | A00109 | A02917 | 491 |
| A00109 | A02927 | 199 | A00109 | A02931 | 249 |
| A00109 | A02932 | 327 | A00109 | A02935 | 353 |
| A00109 | A02944 | 443 | A00109 | A02945 | 491 |
| A00109 | A02955 | 445 | A00109 | A02962 | 480 |
| A00109 | A03049 | 162 | A00109 | A03113 | 240 |

|        |        |     |        |        |     |
|--------|--------|-----|--------|--------|-----|
| A00109 | A03177 | 183 | A00109 | A03185 | 290 |
| A00109 | A03195 | 199 | A00109 | A03239 | 160 |
| A00109 | A03259 | 433 | A00109 | A03271 | 435 |
| A00109 | A03276 | 246 | A00109 | A03280 | 221 |
| A00109 | A03305 | 216 | A00109 | A03610 | 446 |
| A00109 | A03783 | 266 | A00109 | A03900 | 247 |
| A00109 | A04010 | 212 | A00109 | A04033 | 193 |
| A00109 | A04130 | 160 | A00109 | A04138 | 243 |
| A00109 | A04238 | 293 | A00109 | A04248 | 458 |
| A00109 | A04257 | 394 | A00109 | A04263 | 385 |
| A00109 | A04267 | 291 | A00109 | A04272 | 257 |
| A00109 | A04320 | 358 | A00109 | A04478 | 363 |
| A00109 | A04519 | 191 | A00109 | A04598 | 290 |
| A00109 | A04600 | 196 | A00109 | A04609 | 196 |
| A00109 | A04659 | 260 | A00109 | A04734 | 441 |
| A00109 | A04865 | 224 | A00109 | A04878 | 249 |
| A00109 | A04962 | 218 | A00109 | A05113 | 179 |
| A00109 | A05177 | 316 | A00109 | A05305 | 420 |
| A00109 | A05487 | 176 | A00109 | A05577 | 174 |
| A00109 | A05679 | 263 | A00109 | A05860 | 333 |
| A00109 | A05944 | 475 | A00109 | A05985 | 486 |
| A00109 | A06054 | 405 | A00109 | A06055 | 324 |
| A00109 | A06314 | 274 | A00109 | A06344 | 259 |
| A00109 | A06414 | 249 | A00109 | A06415 | 489 |
| A00109 | A06422 | 350 | A00109 | A06650 | 152 |
| A00109 | A06747 | 188 | A00109 | A06899 | 382 |
| A00109 | A07031 | 290 | A00109 | A07142 | 296 |
| A00109 | A07146 | 249 | A00109 | A07148 | 254 |
| A00109 | A07152 | 484 | A00109 | A07157 | 430 |
| A00109 | A07161 | 400 | A00109 | A07164 | 266 |
| A00109 | A07166 | 152 | A00109 | A07173 | 491 |
| A00109 | A07372 | 293 | A00109 | A07390 | 246 |
| A00109 | A09570 | 283 | A00109 | A09981 | 380 |
| A00109 | A10214 | 216 | A00109 | A13821 | 281 |
| A00109 | A13872 | 204 | A00109 | A14071 | 399 |
| A00109 | A14146 | 356 | A00109 | A14231 | 176 |
| A00109 | A14366 | 308 | A00109 | A14373 | 279 |
| A00109 | A14374 | 391 | A00109 | A14376 | 257 |
| A00109 | A14391 | 466 | A00109 | A14392 | 352 |
| A00109 | A14393 | 246 | A00109 | A14432 | 382 |
| A00109 | A14439 | 324 | A00109 | A14442 | 227 |
| A00109 | A14554 | 156 | A00109 | A14598 | 246 |
| A00109 | A14599 | 408 | A00109 | A15241 | 322 |
| A00109 | A15394 | 389 | A00109 | A15395 | 479 |
| A00109 | A15403 | 272 | A00109 | A15426 | 430 |
| A00109 | A15475 | 221 | A00109 | A15601 | 454 |

|        |        |     |        |        |     |
|--------|--------|-----|--------|--------|-----|
| A00109 | A15602 | 283 | A00109 | A15603 | 484 |
| A00109 | A15605 | 472 | A00109 | A15606 | 368 |
| A00109 | A15607 | 483 | A00109 | A15608 | 462 |
| A00109 | A15795 | 299 | A00109 | A15819 | 193 |
| A00109 | A15865 | 321 | A00109 | A15959 | 363 |
| A00109 | A15964 | 353 | A00109 | A15981 | 371 |
| A00110 | A00150 | 899 | A00110 | A00198 | 901 |
| A00110 | A00252 | 899 | A00110 | A00253 | 899 |
| A00110 | A00261 | 364 | A00110 | A00267 | 221 |
| A00110 | A00380 | 196 | A00110 | A00469 | 303 |
| A00110 | A00832 | 899 | A00110 | A00981 | 227 |
| A00110 | A01267 | 190 | A00110 | A01291 | 899 |
| A00110 | A01354 | 265 | A00110 | A01380 | 165 |
| A00110 | A01410 | 401 | A00110 | A01492 | 899 |
| A00110 | A01527 | 430 | A00110 | A01664 | 180 |
| A00110 | A01770 | 906 | A00110 | A01974 | 469 |
| A00110 | A02231 | 271 | A00110 | A02428 | 491 |
| A00110 | A03512 | 372 | A00110 | A03536 | 162 |
| A00110 | A03886 | 260 | A00110 | A04361 | 191 |
| A00110 | A04928 | 247 | A00110 | A05240 | 224 |
| A00110 | A06088 | 307 | A00110 | A06120 | 329 |
| A00110 | A06346 | 269 | A00110 | A06403 | 338 |
| A00110 | A07004 | 391 | A00110 | A07422 | 899 |
| A00110 | A07726 | 932 | A00110 | A09778 | 290 |
| A00110 | A10525 | 329 | A00110 | A10575 | 899 |
| A00110 | A10604 | 219 | A00110 | A11129 | 296 |
| A00110 | A13147 | 168 | A00110 | A13989 | 899 |
| A00110 | A14299 | 418 | A00110 | A14334 | 394 |
| A00110 | A14526 | 368 | A00110 | A15257 | 170 |
| A00110 | A15559 | 255 | A00111 | A00152 | 224 |
| A00111 | A00159 | 317 | A00111 | A00163 | 483 |
| A00111 | A00167 | 613 | A00111 | A00168 | 481 |
| A00111 | A00171 | 257 | A00111 | A00176 | 625 |
| A00111 | A00177 | 177 | A00111 | A00181 | 338 |
| A00111 | A00190 | 441 | A00111 | A00196 | 265 |
| A00111 | A00200 | 152 | A00111 | A00212 | 168 |
| A00111 | A00216 | 191 | A00111 | A00219 | 491 |
| A00111 | A00220 | 395 | A00111 | A00245 | 491 |
| A00111 | A00264 | 443 | A00111 | A00274 | 491 |
| A00111 | A00324 | 899 | A00111 | A00420 | 409 |
| A00111 | A00440 | 307 | A00111 | A00503 | 232 |
| A00111 | A00556 | 286 | A00111 | A00616 | 490 |
| A00111 | A00736 | 481 | A00111 | A00752 | 491 |
| A00111 | A00815 | 297 | A00111 | A00829 | 201 |
| A00111 | A00850 | 367 | A00111 | A01009 | 257 |
| A00111 | A01091 | 200 | A00111 | A01137 | 477 |

|        |        |     |        |        |     |
|--------|--------|-----|--------|--------|-----|
| A00111 | A01163 | 386 | A00111 | A01164 | 256 |
| A00111 | A01235 | 183 | A00111 | A01257 | 472 |
| A00111 | A01277 | 316 | A00111 | A01524 | 201 |
| A00111 | A01530 | 208 | A00111 | A01534 | 205 |
| A00111 | A01542 | 359 | A00111 | A01590 | 401 |
| A00111 | A01604 | 402 | A00111 | A01605 | 151 |
| A00111 | A01654 | 322 | A00111 | A01741 | 227 |
| A00111 | A01766 | 154 | A00111 | A01870 | 310 |
| A00111 | A01903 | 241 | A00111 | A02010 | 212 |
| A00111 | A02092 | 176 | A00111 | A02099 | 185 |
| A00111 | A02111 | 351 | A00111 | A02134 | 249 |
| A00111 | A02138 | 472 | A00111 | A02142 | 157 |
| A00111 | A02143 | 281 | A00111 | A02144 | 109 |
| A00111 | A02148 | 224 | A00111 | A02174 | 491 |
| A00111 | A02176 | 479 | A00111 | A02213 | 168 |
| A00111 | A02228 | 481 | A00111 | A02236 | 439 |
| A00111 | A02245 | 491 | A00111 | A02283 | 198 |
| A00111 | A02298 | 347 | A00111 | A02303 | 333 |
| A00111 | A02304 | 481 | A00111 | A02306 | 435 |
| A00111 | A02309 | 352 | A00111 | A02313 | 319 |
| A00111 | A02326 | 154 | A00111 | A02381 | 185 |
| A00111 | A02382 | 475 | A00111 | A02383 | 270 |
| A00111 | A02416 | 159 | A00111 | A02425 | 224 |
| A00111 | A02482 | 373 | A00111 | A02490 | 177 |
| A00111 | A02491 | 374 | A00111 | A02502 | 322 |
| A00111 | A02505 | 474 | A00111 | A02545 | 63  |
| A00111 | A02578 | 299 | A00111 | A02587 | 327 |
| A00111 | A02604 | 223 | A00111 | A02608 | 390 |
| A00111 | A02618 | 154 | A00111 | A02621 | 207 |
| A00111 | A02624 | 138 | A00111 | A02637 | 283 |
| A00111 | A02644 | 232 | A00111 | A02655 | 163 |
| A00111 | A02668 | 171 | A00111 | A02673 | 484 |
| A00111 | A02759 | 319 | A00111 | A02764 | 188 |
| A00111 | A02769 | 302 | A00111 | A02851 | 165 |
| A00111 | A02854 | 199 | A00111 | A02917 | 195 |
| A00111 | A02945 | 271 | A00111 | A03049 | 407 |
| A00111 | A03076 | 491 | A00111 | A03077 | 180 |
| A00111 | A03081 | 228 | A00111 | A03099 | 435 |
| A00111 | A03104 | 436 | A00111 | A03109 | 364 |
| A00111 | A03110 | 491 | A00111 | A03183 | 469 |
| A00111 | A03219 | 177 | A00111 | A03271 | 276 |
| A00111 | A03284 | 223 | A00111 | A03292 | 232 |
| A00111 | A03305 | 121 | A00111 | A03310 | 484 |
| A00111 | A03314 | 480 | A00111 | A03315 | 422 |
| A00111 | A03319 | 198 | A00111 | A03402 | 63  |
| A00111 | A03413 | 112 | A00111 | A03458 | 154 |

|        |        |     |        |        |     |
|--------|--------|-----|--------|--------|-----|
| A00111 | A03578 | 174 | A00111 | A03584 | 199 |
| A00111 | A03639 | 483 | A00111 | A03771 | 358 |
| A00111 | A03799 | 236 | A00111 | A03818 | 263 |
| A00111 | A03919 | 154 | A00111 | A03942 | 460 |
| A00111 | A03961 | 269 | A00111 | A04033 | 491 |
| A00111 | A04092 | 223 | A00111 | A04130 | 173 |
| A00111 | A04163 | 396 | A00111 | A04180 | 177 |
| A00111 | A04216 | 173 | A00111 | A04248 | 308 |
| A00111 | A04256 | 213 | A00111 | A04257 | 193 |
| A00111 | A04423 | 163 | A00111 | A04478 | 366 |
| A00111 | A04504 | 235 | A00111 | A04637 | 316 |
| A00111 | A04676 | 425 | A00111 | A04748 | 229 |
| A00111 | A04755 | 185 | A00111 | A04756 | 260 |
| A00111 | A04976 | 407 | A00111 | A05149 | 188 |
| A00111 | A05249 | 177 | A00111 | A05408 | 299 |
| A00111 | A05418 | 190 | A00111 | A05538 | 249 |
| A00111 | A05545 | 193 | A00111 | A05588 | 269 |
| A00111 | A05679 | 382 | A00111 | A05696 | 433 |
| A00111 | A05706 | 345 | A00111 | A05736 | 390 |
| A00111 | A05737 | 269 | A00111 | A05786 | 418 |
| A00111 | A05815 | 466 | A00111 | A05944 | 406 |
| A00111 | A05985 | 443 | A00111 | A06054 | 451 |
| A00111 | A06095 | 313 | A00111 | A06415 | 195 |
| A00111 | A06581 | 191 | A00111 | A06588 | 339 |
| A00111 | A06610 | 445 | A00111 | A06727 | 154 |
| A00111 | A06847 | 159 | A00111 | A06922 | 258 |
| A00111 | A07031 | 402 | A00111 | A07126 | 440 |
| A00111 | A07143 | 469 | A00111 | A07145 | 355 |
| A00111 | A07148 | 160 | A00111 | A07152 | 227 |
| A00111 | A07157 | 191 | A00111 | A07161 | 213 |
| A00111 | A07166 | 162 | A00111 | A07173 | 447 |
| A00111 | A07209 | 278 | A00111 | A07339 | 449 |
| A00111 | A07372 | 335 | A00111 | A07390 | 374 |
| A00111 | A07422 | 900 | A00111 | A07833 | 182 |
| A00111 | A07912 | 351 | A00111 | A08078 | 162 |
| A00111 | A08264 | 269 | A00111 | A08714 | 326 |
| A00111 | A08749 | 328 | A00111 | A08878 | 384 |
| A00111 | A09078 | 274 | A00111 | A09125 | 283 |
| A00111 | A09480 | 440 | A00111 | A09509 | 293 |
| A00111 | A09870 | 208 | A00111 | A10021 | 191 |
| A00111 | A10168 | 249 | A00111 | A10287 | 299 |
| A00111 | A10336 | 305 | A00111 | A11007 | 241 |
| A00111 | A11014 | 160 | A00111 | A11983 | 422 |
| A00111 | A12682 | 283 | A00111 | A14025 | 606 |
| A00111 | A14055 | 374 | A00111 | A14190 | 377 |
| A00111 | A14210 | 491 | A00111 | A14371 | 379 |

|        |        |     |        |        |     |
|--------|--------|-----|--------|--------|-----|
| A00111 | A14376 | 163 | A00111 | A14410 | 268 |
| A00111 | A14423 | 260 | A00111 | A14432 | 173 |
| A00111 | A14475 | 449 | A00111 | A14511 | 456 |
| A00111 | A14536 | 198 | A00111 | A14554 | 486 |
| A00111 | A14589 | 391 | A00111 | A14604 | 489 |
| A00111 | A14635 | 435 | A00111 | A15230 | 208 |
| A00111 | A15264 | 351 | A00111 | A15296 | 198 |
| A00111 | A15312 | 235 | A00111 | A15327 | 246 |
| A00111 | A15330 | 170 | A00111 | A15395 | 160 |
| A00111 | A15426 | 283 | A00111 | A15605 | 213 |
| A00111 | A15607 | 293 | A00111 | A15916 | 157 |
| A00111 | A15969 | 241 | A00111 | A16043 | 183 |
| A00111 | A16055 | 167 | A00111 | A16125 | 208 |
| A00111 | A16138 | 201 | A00111 | A16194 | 249 |
| A00111 | A16636 | 185 | A00112 | A00127 | 179 |
| A00112 | A00128 | 177 | A00112 | A00157 | 899 |
| A00112 | A00190 | 443 | A00112 | A00219 | 479 |
| A00112 | A00221 | 457 | A00112 | A00234 | 193 |
| A00112 | A00264 | 491 | A00112 | A00270 | 473 |
| A00112 | A00292 | 491 | A00112 | A00352 | 193 |
| A00112 | A00418 | 455 | A00112 | A00420 | 243 |
| A00112 | A00478 | 177 | A00112 | A00577 | 260 |
| A00112 | A00616 | 489 | A00112 | A00815 | 167 |
| A00112 | A00926 | 152 | A00112 | A00932 | 251 |
| A00112 | A00999 | 229 | A00112 | A01164 | 212 |
| A00112 | A01212 | 316 | A00112 | A01888 | 439 |
| A00112 | A01936 | 152 | A00112 | A02088 | 246 |
| A00112 | A02105 | 156 | A00112 | A02250 | 341 |
| A00112 | A02260 | 157 | A00112 | A02278 | 429 |
| A00112 | A02388 | 328 | A00112 | A02416 | 185 |
| A00112 | A02419 | 340 | A00112 | A02490 | 474 |
| A00112 | A02491 | 488 | A00112 | A02496 | 294 |
| A00112 | A02581 | 228 | A00112 | A02668 | 458 |
| A00112 | A02749 | 302 | A00112 | A02756 | 480 |
| A00112 | A02841 | 430 | A00112 | A02859 | 368 |
| A00112 | A03053 | 160 | A00112 | A03156 | 232 |
| A00112 | A03224 | 456 | A00112 | A03259 | 481 |
| A00112 | A03458 | 168 | A00112 | A03539 | 294 |
| A00112 | A03750 | 468 | A00112 | A03780 | 168 |
| A00112 | A03798 | 210 | A00112 | A03834 | 212 |
| A00112 | A04038 | 357 | A00112 | A04169 | 196 |
| A00112 | A04194 | 168 | A00112 | A04200 | 272 |
| A00112 | A04201 | 196 | A00112 | A04242 | 243 |
| A00112 | A04254 | 283 | A00112 | A04255 | 283 |
| A00112 | A04288 | 266 | A00112 | A04398 | 490 |
| A00112 | A04416 | 355 | A00112 | A04419 | 283 |

|        |        |     |        |        |     |
|--------|--------|-----|--------|--------|-----|
| A00112 | A04471 | 207 | A00112 | A04490 | 438 |
| A00112 | A04888 | 163 | A00112 | A05084 | 249 |
| A00112 | A05144 | 296 | A00112 | A05780 | 249 |
| A00112 | A06008 | 294 | A00112 | A06251 | 256 |
| A00112 | A06306 | 193 | A00112 | A06622 | 327 |
| A00112 | A06742 | 272 | A00112 | A06825 | 240 |
| A00112 | A06955 | 232 | A00112 | A07138 | 177 |
| A00112 | A07164 | 162 | A00112 | A07589 | 283 |
| A00112 | A08022 | 398 | A00112 | A08194 | 424 |
| A00112 | A08221 | 183 | A00112 | A08541 | 210 |
| A00112 | A08738 | 157 | A00112 | A08817 | 480 |
| A00112 | A08880 | 227 | A00112 | A09062 | 217 |
| A00112 | A09085 | 198 | A00112 | A09218 | 377 |
| A00112 | A09390 | 176 | A00112 | A09493 | 263 |
| A00112 | A09654 | 107 | A00112 | A09778 | 185 |
| A00112 | A10182 | 312 | A00112 | A10650 | 283 |
| A00112 | A10756 | 446 | A00112 | A10791 | 293 |
| A00112 | A11064 | 488 | A00112 | A11123 | 488 |
| A00112 | A11129 | 193 | A00112 | A11725 | 168 |
| A00112 | A13348 | 154 | A00112 | A13396 | 272 |
| A00112 | A13743 | 313 | A00112 | A13986 | 200 |
| A00112 | A14007 | 230 | A00112 | A14190 | 456 |
| A00112 | A14366 | 391 | A00112 | A14368 | 154 |
| A00112 | A14370 | 291 | A00112 | A14418 | 224 |
| A00112 | A14511 | 170 | A00112 | A14526 | 446 |
| A00112 | A15420 | 433 | A00112 | A15429 | 179 |
| A00112 | A15498 | 480 | A00112 | A15913 | 438 |
| A00112 | A16636 | 491 | A00112 | A16664 | 188 |
| A00112 | A16674 | 302 | A00112 | A17171 | 338 |
| A00113 | A00130 | 82  | A00113 | A00133 | 899 |
| A00113 | A00156 | 938 | A00113 | A00165 | 63  |
| A00113 | A00167 | 899 | A00113 | A00180 | 491 |
| A00113 | A00185 | 172 | A00113 | A00207 | 554 |
| A00113 | A00209 | 899 | A00113 | A00230 | 899 |
| A00113 | A00231 | 586 | A00113 | A00240 | 360 |
| A00113 | A00250 | 162 | A00113 | A00257 | 405 |
| A00113 | A00284 | 160 | A00113 | A00285 | 258 |
| A00113 | A00300 | 223 | A00113 | A00388 | 273 |
| A00113 | A00439 | 427 | A00113 | A00698 | 433 |
| A00113 | A00809 | 160 | A00113 | A00833 | 160 |
| A00113 | A00876 | 160 | A00113 | A00922 | 160 |
| A00113 | A00932 | 402 | A00113 | A00933 | 365 |
| A00113 | A00980 | 160 | A00113 | A01161 | 160 |
| A00113 | A01261 | 160 | A00113 | A01307 | 63  |
| A00113 | A01357 | 182 | A00113 | A01410 | 351 |
| A00113 | A01423 | 246 | A00113 | A01435 | 104 |

|        |        |     |        |        |     |
|--------|--------|-----|--------|--------|-----|
| A00113 | A01479 | 167 | A00113 | A01507 | 63  |
| A00113 | A01512 | 899 | A00113 | A01527 | 899 |
| A00113 | A01536 | 915 | A00113 | A01558 | 899 |
| A00113 | A01560 | 486 | A00113 | A01561 | 113 |
| A00113 | A01562 | 842 | A00113 | A01588 | 899 |
| A00113 | A01615 | 899 | A00113 | A01674 | 486 |
| A00113 | A01692 | 447 | A00113 | A01708 | 934 |
| A00113 | A01709 | 66  | A00113 | A01719 | 74  |
| A00113 | A01822 | 160 | A00113 | A02058 | 291 |
| A00113 | A02411 | 235 | A00113 | A02473 | 249 |
| A00113 | A02732 | 163 | A00113 | A02790 | 151 |
| A00113 | A02887 | 63  | A00113 | A03451 | 157 |
| A00113 | A03591 | 386 | A00113 | A03677 | 160 |
| A00113 | A03752 | 457 | A00113 | A04012 | 168 |
| A00113 | A04073 | 374 | A00113 | A04553 | 277 |
| A00113 | A06289 | 149 | A00113 | A06466 | 408 |
| A00113 | A06950 | 160 | A00113 | A07311 | 945 |
| A00113 | A07798 | 463 | A00113 | A08259 | 171 |
| A00113 | A08533 | 160 | A00113 | A08902 | 484 |
| A00113 | A09018 | 213 | A00113 | A09218 | 200 |
| A00113 | A09263 | 221 | A00113 | A09297 | 160 |
| A00113 | A09424 | 317 | A00113 | A09568 | 219 |
| A00113 | A09643 | 258 | A00113 | A09647 | 159 |
| A00113 | A09660 | 488 | A00113 | A09803 | 219 |
| A00113 | A09804 | 286 | A00113 | A09902 | 532 |
| A00113 | A10047 | 232 | A00113 | A10332 | 204 |
| A00113 | A10365 | 266 | A00113 | A10728 | 467 |
| A00113 | A10801 | 172 | A00113 | A10813 | 183 |
| A00113 | A10982 | 255 | A00113 | A11604 | 263 |
| A00113 | A12043 | 160 | A00113 | A12227 | 160 |
| A00113 | A12383 | 112 | A00113 | A12932 | 423 |
| A00113 | A12969 | 491 | A00113 | A12971 | 945 |
| A00113 | A12990 | 270 | A00113 | A13149 | 419 |
| A00113 | A13340 | 160 | A00113 | A13397 | 168 |
| A00113 | A13511 | 243 | A00113 | A14004 | 489 |
| A00113 | A14013 | 238 | A00113 | A14738 | 160 |
| A00113 | A15004 | 266 | A00113 | A15106 | 283 |
| A00113 | A15244 | 160 | A00113 | A15677 | 204 |
| A00113 | A15932 | 160 | A00113 | A15933 | 160 |
| A00113 | A16084 | 202 | A00113 | A16272 | 160 |
| A00113 | A16318 | 160 | A00113 | A16437 | 160 |
| A00113 | A16446 | 160 | A00113 | A16585 | 160 |
| A00113 | A16678 | 262 | A00114 | A00120 | 256 |
| A00114 | A00122 | 112 | A00114 | A00130 | 71  |
| A00114 | A00165 | 63  | A00114 | A00257 | 229 |
| A00114 | A00419 | 223 | A00114 | A00454 | 288 |



|        |        |     |        |        |     |
|--------|--------|-----|--------|--------|-----|
| A00114 | A00851 | 179 | A00114 | A00910 | 173 |
| A00114 | A00912 | 271 | A00114 | A00981 | 483 |
| A00114 | A01042 | 433 | A00114 | A01083 | 489 |
| A00114 | A01357 | 246 | A00114 | A01628 | 71  |
| A00114 | A01631 | 385 | A00114 | A01692 | 467 |
| A00114 | A01709 | 113 | A00114 | A01719 | 124 |
| A00114 | A01797 | 157 | A00114 | A01889 | 188 |
| A00114 | A03649 | 170 | A00114 | A03740 | 438 |
| A00114 | A03785 | 230 | A00114 | A05037 | 182 |
| A00114 | A06289 | 257 | A00114 | A06748 | 443 |
| A00114 | A06950 | 419 | A00114 | A07311 | 205 |
| A00114 | A09476 | 488 | A00114 | A10047 | 291 |
| A00114 | A11124 | 367 | A00114 | A12383 | 196 |
| A00114 | A12988 | 217 | A00114 | A13240 | 210 |
| A00114 | A13429 | 234 | A00114 | A14006 | 163 |
| A00114 | A15573 | 324 | A00114 | A16060 | 265 |
| A00115 | A00932 | 926 | A00115 | A01983 | 360 |
| A00115 | A04415 | 414 | A00115 | A07311 | 899 |
| A00115 | A14188 | 899 | A00116 | A00124 | 402 |
| A00116 | A00129 | 474 | A00116 | A00152 | 224 |
| A00116 | A00162 | 260 | A00116 | A00165 | 301 |
| A00116 | A00167 | 441 | A00116 | A00179 | 144 |
| A00116 | A00187 | 266 | A00116 | A00188 | 465 |
| A00116 | A00205 | 185 | A00116 | A00207 | 340 |
| A00116 | A00209 | 899 | A00116 | A00211 | 395 |
| A00116 | A00224 | 899 | A00116 | A00239 | 301 |
| A00116 | A00240 | 938 | A00116 | A00242 | 296 |
| A00116 | A00248 | 396 | A00116 | A00643 | 188 |
| A00116 | A01527 | 902 | A00116 | A01639 | 944 |
| A00116 | A01640 | 919 | A00116 | A01726 | 489 |
| A00116 | A01790 | 344 | A00116 | A01889 | 195 |
| A00116 | A01931 | 324 | A00116 | A02075 | 322 |
| A00116 | A02343 | 202 | A00116 | A02412 | 177 |
| A00116 | A03436 | 241 | A00116 | A03528 | 224 |
| A00116 | A03719 | 176 | A00116 | A04205 | 228 |
| A00116 | A05944 | 945 | A00116 | A07311 | 165 |
| A00116 | A07422 | 160 | A00116 | A09937 | 380 |
| A00116 | A10392 | 936 | A00116 | A10623 | 188 |
| A00116 | A10677 | 217 | A00116 | A11335 | 388 |
| A00116 | A12886 | 395 | A00116 | A13181 | 196 |
| A00116 | A13917 | 152 | A00116 | A13977 | 479 |
| A00116 | A14426 | 379 | A00116 | A15241 | 414 |
| A00116 | A15813 | 274 | A00116 | A16083 | 940 |
| A00117 | A00121 | 899 | A00117 | A00152 | 195 |
| A00117 | A00171 | 364 | A00117 | A00261 | 369 |
| A00117 | A00422 | 235 | A00117 | A01600 | 184 |

|        |        |     |        |        |     |
|--------|--------|-----|--------|--------|-----|
| A00117 | A01615 | 339 | A00117 | A01691 | 263 |
| A00117 | A02836 | 291 | A00117 | A03419 | 163 |
| A00117 | A03566 | 172 | A00117 | A04279 | 260 |
| A00117 | A04639 | 281 | A00117 | A08289 | 257 |
| A00117 | A08571 | 224 | A00117 | A08681 | 278 |
| A00117 | A08753 | 266 | A00117 | A10525 | 236 |
| A00117 | A11332 | 255 | A00117 | A13672 | 288 |
| A00117 | A15416 | 193 | A00117 | A15726 | 245 |
| A00118 | A00122 | 99  | A00118 | A00132 | 165 |
| A00118 | A00138 | 432 | A00118 | A00146 | 263 |
| A00118 | A00156 | 401 | A00118 | A00158 | 63  |
| A00118 | A00161 | 63  | A00118 | A00162 | 899 |
| A00118 | A00165 | 848 | A00118 | A00185 | 619 |
| A00118 | A00186 | 156 | A00118 | A00198 | 362 |
| A00118 | A00201 | 271 | A00118 | A00208 | 104 |
| A00118 | A00234 | 857 | A00118 | A00243 | 475 |
| A00118 | A00254 | 959 | A00118 | A00261 | 157 |
| A00118 | A00340 | 193 | A00118 | A01553 | 63  |
| A00118 | A01554 | 63  | A00118 | A01580 | 241 |
| A00118 | A01596 | 763 | A00118 | A01709 | 63  |
| A00118 | A01792 | 82  | A00118 | A01888 | 335 |
| A00118 | A01908 | 63  | A00118 | A02988 | 156 |
| A00118 | A03019 | 63  | A00118 | A03470 | 385 |
| A00118 | A03784 | 286 | A00118 | A04012 | 165 |
| A00118 | A04088 | 174 | A00118 | A04293 | 201 |
| A00118 | A04323 | 477 | A00118 | A05009 | 469 |
| A00118 | A06077 | 247 | A00118 | A06914 | 297 |
| A00118 | A07422 | 165 | A00118 | A08494 | 204 |
| A00118 | A08552 | 257 | A00118 | A09220 | 623 |
| A00118 | A09401 | 313 | A00118 | A09577 | 63  |
| A00118 | A10285 | 340 | A00118 | A10510 | 229 |
| A00118 | A10580 | 152 | A00118 | A10735 | 183 |
| A00118 | A10913 | 212 | A00118 | A11129 | 330 |
| A00118 | A12009 | 159 | A00118 | A12499 | 159 |
| A00118 | A13216 | 318 | A00118 | A13340 | 240 |
| A00118 | A13980 | 256 | A00118 | A14032 | 338 |
| A00118 | A14157 | 316 | A00118 | A14299 | 167 |
| A00118 | A14433 | 903 | A00118 | A14438 | 185 |
| A00118 | A15512 | 154 | A00118 | A16547 | 588 |
| A00118 | A16560 | 204 | A00119 | A00167 | 912 |
| A00119 | A00195 | 945 | A00119 | A00209 | 899 |
| A00119 | A00236 | 968 | A00119 | A00252 | 969 |
| A00119 | A00253 | 970 | A00119 | A00293 | 377 |
| A00119 | A00295 | 432 | A00119 | A00652 | 490 |
| A00119 | A00852 | 213 | A00119 | A01045 | 469 |
| A00119 | A01550 | 457 | A00119 | A01551 | 408 |

|        |        |     |        |        |     |
|--------|--------|-----|--------|--------|-----|
| A00119 | A01566 | 213 | A00119 | A01660 | 269 |
| A00119 | A01692 | 479 | A00119 | A01772 | 201 |
| A00119 | A02323 | 360 | A00119 | A02325 | 438 |
| A00119 | A02647 | 314 | A00119 | A02854 | 177 |
| A00119 | A03819 | 171 | A00119 | A04015 | 182 |
| A00119 | A04209 | 232 | A00119 | A04342 | 441 |
| A00119 | A08881 | 152 | A00119 | A10311 | 457 |
| A00119 | A11921 | 491 | A00119 | A13255 | 447 |
| A00119 | A14443 | 899 | A00119 | A14648 | 165 |
| A00119 | A16080 | 941 | A00119 | A16764 | 160 |
| A00120 | A00128 | 945 | A00120 | A00132 | 485 |
| A00120 | A00209 | 899 | A00120 | A00236 | 338 |
| A00120 | A00271 | 899 | A00120 | A00419 | 380 |
| A00120 | A01527 | 899 | A00120 | A01562 | 424 |
| A00120 | A01692 | 341 | A00120 | A03436 | 152 |
| A00120 | A03643 | 329 | A00120 | A03740 | 241 |
| A00120 | A04957 | 313 | A00120 | A07311 | 63  |
| A00120 | A08845 | 180 | A00120 | A09124 | 152 |
| A00120 | A09253 | 432 | A00120 | A10813 | 286 |
| A00120 | A11125 | 899 | A00120 | A13984 | 283 |
| A00121 | A00157 | 899 | A00121 | A00160 | 267 |
| A00121 | A00171 | 196 | A00121 | A00189 | 491 |
| A00121 | A00261 | 201 | A00121 | A00309 | 210 |
| A00121 | A00879 | 213 | A00121 | A01029 | 288 |
| A00121 | A02249 | 227 | A00121 | A02293 | 268 |
| A00121 | A02711 | 490 | A00121 | A03181 | 182 |
| A00121 | A03276 | 260 | A00121 | A03399 | 156 |
| A00121 | A03651 | 212 | A00121 | A04737 | 218 |
| A00121 | A06731 | 156 | A00121 | A07004 | 263 |
| A00121 | A07524 | 162 | A00121 | A08327 | 407 |
| A00121 | A08416 | 486 | A00121 | A09038 | 187 |
| A00121 | A09431 | 305 | A00121 | A10059 | 350 |
| A00121 | A10580 | 899 | A00121 | A10599 | 205 |
| A00121 | A10813 | 234 | A00121 | A11543 | 491 |
| A00121 | A12897 | 267 | A00121 | A12971 | 232 |
| A00121 | A14236 | 152 | A00121 | A14621 | 424 |
| A00121 | A14925 | 165 | A00121 | A15606 | 243 |
| A00121 | A16476 | 302 | A00122 | A00138 | 491 |
| A00122 | A00145 | 63  | A00122 | A00152 | 454 |
| A00122 | A00156 | 356 | A00122 | A00159 | 341 |
| A00122 | A00161 | 469 | A00122 | A00185 | 490 |
| A00122 | A00207 | 489 | A00122 | A00208 | 491 |
| A00122 | A00224 | 450 | A00122 | A00234 | 308 |
| A00122 | A00246 | 489 | A00122 | A00254 | 491 |
| A00122 | A01275 | 265 | A00122 | A01473 | 402 |
| A00122 | A01524 | 450 | A00122 | A01527 | 241 |

|        |        |     |        |        |     |
|--------|--------|-----|--------|--------|-----|
| A00122 | A01553 | 126 | A00122 | A01554 | 63  |
| A00122 | A01560 | 104 | A00122 | A01561 | 63  |
| A00122 | A01572 | 490 | A00122 | A01628 | 63  |
| A00122 | A01692 | 63  | A00122 | A01697 | 219 |
| A00122 | A01698 | 77  | A00122 | A01719 | 63  |
| A00122 | A01887 | 165 | A00122 | A01908 | 63  |
| A00122 | A02326 | 174 | A00122 | A02350 | 63  |
| A00122 | A02411 | 170 | A00122 | A02578 | 185 |
| A00122 | A02656 | 260 | A00122 | A02659 | 151 |
| A00122 | A02676 | 208 | A00122 | A02678 | 135 |
| A00122 | A02800 | 185 | A00122 | A02958 | 200 |
| A00122 | A03209 | 427 | A00122 | A03465 | 113 |
| A00122 | A03685 | 171 | A00122 | A03809 | 196 |
| A00122 | A04107 | 208 | A00122 | A04111 | 246 |
| A00122 | A04556 | 182 | A00122 | A05072 | 260 |
| A00122 | A05247 | 152 | A00122 | A05339 | 241 |
| A00122 | A05888 | 217 | A00122 | A06138 | 185 |
| A00122 | A06289 | 63  | A00122 | A07148 | 313 |
| A00122 | A07311 | 63  | A00122 | A07370 | 417 |
| A00122 | A09220 | 79  | A00122 | A09540 | 208 |
| A00122 | A09863 | 246 | A00122 | A09913 | 213 |
| A00122 | A10437 | 224 | A00122 | A10801 | 357 |
| A00122 | A11369 | 337 | A00122 | A13151 | 157 |
| A00122 | A13291 | 412 | A00122 | A13312 | 191 |
| A00122 | A13605 | 369 | A00122 | A13827 | 217 |
| A00122 | A13860 | 198 | A00122 | A13980 | 391 |
| A00122 | A13983 | 63  | A00122 | A14004 | 347 |
| A00122 | A14019 | 260 | A00122 | A14027 | 267 |
| A00122 | A14187 | 361 | A00122 | A14188 | 475 |
| A00122 | A14198 | 491 | A00122 | A14371 | 402 |
| A00122 | A14402 | 152 | A00122 | A14430 | 452 |
| A00122 | A14433 | 313 | A00122 | A14438 | 183 |
| A00122 | A14452 | 63  | A00122 | A14511 | 179 |
| A00122 | A14543 | 152 | A00122 | A14686 | 217 |
| A00122 | A14930 | 82  | A00122 | A15290 | 193 |
| A00122 | A15352 | 269 | A00122 | A15387 | 196 |
| A00122 | A15515 | 200 | A00122 | A15726 | 110 |
| A00122 | A15916 | 177 | A00123 | A00125 | 466 |
| A00123 | A00141 | 479 | A00123 | A00152 | 486 |
| A00123 | A00153 | 486 | A00123 | A00158 | 475 |
| A00123 | A00159 | 179 | A00123 | A00160 | 472 |
| A00123 | A00167 | 258 | A00123 | A00174 | 154 |
| A00123 | A00189 | 688 | A00123 | A00190 | 475 |
| A00123 | A00212 | 256 | A00123 | A00220 | 480 |
| A00123 | A00224 | 899 | A00123 | A00226 | 247 |
| A00123 | A00232 | 486 | A00123 | A00233 | 491 |

|        |        |     |        |        |     |
|--------|--------|-----|--------|--------|-----|
| A00123 | A00234 | 943 | A00123 | A00248 | 353 |
| A00123 | A00255 | 446 | A00123 | A00264 | 424 |
| A00123 | A00338 | 274 | A00123 | A00407 | 180 |
| A00123 | A00561 | 463 | A00123 | A00600 | 165 |
| A00123 | A00694 | 490 | A00123 | A00739 | 249 |
| A00123 | A00820 | 281 | A00123 | A00887 | 205 |
| A00123 | A00914 | 469 | A00123 | A01138 | 159 |
| A00123 | A01140 | 219 | A00123 | A01161 | 457 |
| A00123 | A01524 | 491 | A00123 | A01527 | 945 |
| A00123 | A01559 | 467 | A00123 | A01615 | 918 |
| A00123 | A01654 | 491 | A00123 | A01704 | 152 |
| A00123 | A01726 | 191 | A00123 | A01733 | 408 |
| A00123 | A01734 | 319 | A00123 | A01741 | 457 |
| A00123 | A01747 | 196 | A00123 | A01767 | 165 |
| A00123 | A01769 | 419 | A00123 | A01776 | 246 |
| A00123 | A01792 | 96  | A00123 | A01876 | 266 |
| A00123 | A01879 | 191 | A00123 | A01880 | 491 |
| A00123 | A01881 | 449 | A00123 | A01882 | 276 |
| A00123 | A01884 | 229 | A00123 | A01887 | 294 |
| A00123 | A01888 | 490 | A00123 | A01889 | 428 |
| A00123 | A01890 | 165 | A00123 | A01894 | 188 |
| A00123 | A01895 | 210 | A00123 | A01908 | 63  |
| A00123 | A01936 | 307 | A00123 | A02143 | 256 |
| A00123 | A02220 | 276 | A00123 | A02247 | 263 |
| A00123 | A02293 | 198 | A00123 | A02337 | 177 |
| A00123 | A02338 | 162 | A00123 | A02340 | 353 |
| A00123 | A02382 | 766 | A00123 | A02383 | 177 |
| A00123 | A02384 | 353 | A00123 | A02416 | 221 |
| A00123 | A02460 | 168 | A00123 | A02464 | 259 |
| A00123 | A02497 | 263 | A00123 | A02515 | 276 |
| A00123 | A02542 | 193 | A00123 | A02606 | 323 |
| A00123 | A02615 | 439 | A00123 | A02616 | 195 |
| A00123 | A02639 | 456 | A00123 | A02657 | 249 |
| A00123 | A02661 | 213 | A00123 | A02694 | 159 |
| A00123 | A02695 | 188 | A00123 | A02696 | 200 |
| A00123 | A02698 | 491 | A00123 | A02709 | 369 |
| A00123 | A02711 | 474 | A00123 | A02730 | 412 |
| A00123 | A02732 | 143 | A00123 | A02741 | 71  |
| A00123 | A02766 | 196 | A00123 | A02788 | 311 |
| A00123 | A02798 | 172 | A00123 | A02808 | 173 |
| A00123 | A02812 | 399 | A00123 | A02816 | 172 |
| A00123 | A02828 | 326 | A00123 | A02851 | 202 |
| A00123 | A02854 | 346 | A00123 | A02863 | 491 |
| A00123 | A02917 | 490 | A00123 | A02945 | 450 |
| A00123 | A02955 | 193 | A00123 | A02982 | 430 |
| A00123 | A02984 | 182 | A00123 | A02986 | 195 |

|        |        |     |        |        |     |
|--------|--------|-----|--------|--------|-----|
| A00123 | A02988 | 281 | A00123 | A03010 | 240 |
| A00123 | A03019 | 63  | A00123 | A03035 | 196 |
| A00123 | A03100 | 110 | A00123 | A03259 | 358 |
| A00123 | A03275 | 172 | A00123 | A03451 | 179 |
| A00123 | A03537 | 263 | A00123 | A03610 | 283 |
| A00123 | A03611 | 361 | A00123 | A03639 | 208 |
| A00123 | A03780 | 191 | A00123 | A03790 | 382 |
| A00123 | A03807 | 249 | A00123 | A03934 | 380 |
| A00123 | A03965 | 246 | A00123 | A04016 | 283 |
| A00123 | A04023 | 159 | A00123 | A04033 | 486 |
| A00123 | A04041 | 313 | A00123 | A04088 | 191 |
| A00123 | A04105 | 196 | A00123 | A04138 | 187 |
| A00123 | A04206 | 210 | A00123 | A04207 | 229 |
| A00123 | A04238 | 241 | A00123 | A04248 | 486 |
| A00123 | A04263 | 334 | A00123 | A04267 | 221 |
| A00123 | A04280 | 367 | A00123 | A04364 | 162 |
| A00123 | A04473 | 205 | A00123 | A04474 | 254 |
| A00123 | A04484 | 374 | A00123 | A04493 | 262 |
| A00123 | A04510 | 191 | A00123 | A04517 | 322 |
| A00123 | A04518 | 221 | A00123 | A04529 | 200 |
| A00123 | A04536 | 156 | A00123 | A04545 | 270 |
| A00123 | A04567 | 156 | A00123 | A04659 | 205 |
| A00123 | A04723 | 202 | A00123 | A04794 | 313 |
| A00123 | A04798 | 263 | A00123 | A04865 | 168 |
| A00123 | A04878 | 326 | A00123 | A04879 | 424 |
| A00123 | A04888 | 185 | A00123 | A04944 | 185 |
| A00123 | A05278 | 338 | A00123 | A05305 | 388 |
| A00123 | A05309 | 379 | A00123 | A05741 | 216 |
| A00123 | A05860 | 291 | A00123 | A05944 | 327 |
| A00123 | A06055 | 263 | A00123 | A06211 | 232 |
| A00123 | A06422 | 163 | A00123 | A06610 | 258 |
| A00123 | A06635 | 193 | A00123 | A06650 | 458 |
| A00123 | A06654 | 165 | A00123 | A06728 | 283 |
| A00123 | A07145 | 223 | A00123 | A07146 | 326 |
| A00123 | A07173 | 490 | A00123 | A07182 | 276 |
| A00123 | A07199 | 345 | A00123 | A07200 | 152 |
| A00123 | A07227 | 172 | A00123 | A07295 | 276 |
| A00123 | A07310 | 313 | A00123 | A07311 | 899 |
| A00123 | A07626 | 185 | A00123 | A07985 | 190 |
| A00123 | A08623 | 328 | A00123 | A09112 | 276 |
| A00123 | A09220 | 91  | A00123 | A09559 | 263 |
| A00123 | A09570 | 232 | A00123 | A09959 | 301 |
| A00123 | A09981 | 352 | A00123 | A10598 | 157 |
| A00123 | A10626 | 221 | A00123 | A10901 | 259 |
| A00123 | A11023 | 201 | A00123 | A11348 | 168 |
| A00123 | A11369 | 63  | A00123 | A11411 | 335 |

|        |        |     |        |        |     |
|--------|--------|-----|--------|--------|-----|
| A00123 | A11707 | 154 | A00123 | A11881 | 285 |
| A00123 | A12913 | 313 | A00123 | A12971 | 293 |
| A00123 | A13050 | 208 | A00123 | A13391 | 207 |
| A00123 | A13555 | 208 | A00123 | A13667 | 285 |
| A00123 | A13978 | 245 | A00123 | A14029 | 902 |
| A00123 | A14236 | 491 | A00123 | A14391 | 152 |
| A00123 | A14393 | 235 | A00123 | A14426 | 302 |
| A00123 | A14635 | 343 | A00123 | A15241 | 490 |
| A00123 | A15395 | 480 | A00123 | A15486 | 180 |
| A00123 | A15598 | 380 | A00123 | A15599 | 286 |
| A00123 | A15601 | 394 | A00123 | A15602 | 358 |
| A00123 | A15603 | 299 | A00123 | A15604 | 356 |
| A00123 | A15605 | 262 | A00123 | A15606 | 461 |
| A00123 | A15630 | 283 | A00123 | A15641 | 154 |
| A00123 | A15981 | 472 | A00123 | A16527 | 254 |
| A00123 | A16741 | 402 | A00124 | A00136 | 77  |
| A00124 | A00163 | 929 | A00124 | A00167 | 288 |
| A00124 | A00185 | 378 | A00124 | A00209 | 899 |
| A00124 | A00224 | 911 | A00124 | A00230 | 899 |
| A00124 | A00236 | 385 | A00124 | A00239 | 345 |
| A00124 | A00240 | 945 | A00124 | A00252 | 439 |
| A00124 | A00253 | 400 | A00124 | A00284 | 425 |
| A00124 | A00300 | 398 | A00124 | A00312 | 396 |
| A00124 | A00316 | 165 | A00124 | A00552 | 302 |
| A00124 | A00601 | 202 | A00124 | A00621 | 401 |
| A00124 | A00624 | 296 | A00124 | A00660 | 205 |
| A00124 | A00698 | 323 | A00124 | A00930 | 486 |
| A00124 | A01235 | 436 | A00124 | A01553 | 268 |
| A00124 | A01554 | 185 | A00124 | A01558 | 899 |
| A00124 | A01560 | 63  | A00124 | A01631 | 942 |
| A00124 | A01639 | 937 | A00124 | A01660 | 380 |
| A00124 | A01680 | 424 | A00124 | A01717 | 291 |
| A00124 | A01726 | 945 | A00124 | A01748 | 473 |
| A00124 | A01897 | 93  | A00124 | A02054 | 360 |
| A00124 | A02323 | 163 | A00124 | A02696 | 408 |
| A00124 | A02982 | 357 | A00124 | A03164 | 372 |
| A00124 | A03331 | 283 | A00124 | A05363 | 288 |
| A00124 | A05424 | 160 | A00124 | A06000 | 491 |
| A00124 | A06466 | 486 | A00124 | A06650 | 265 |
| A00124 | A06914 | 490 | A00124 | A07257 | 157 |
| A00124 | A07311 | 385 | A00124 | A07366 | 204 |
| A00124 | A07422 | 945 | A00124 | A07771 | 383 |
| A00124 | A08707 | 470 | A00124 | A09464 | 151 |
| A00124 | A09577 | 379 | A00124 | A10392 | 91  |
| A00124 | A10534 | 475 | A00124 | A10632 | 171 |
| A00124 | A10698 | 288 | A00124 | A10720 | 252 |

|        |        |     |        |        |     |
|--------|--------|-----|--------|--------|-----|
| A00124 | A10808 | 99  | A00124 | A13340 | 185 |
| A00124 | A13684 | 279 | A00124 | A13946 | 160 |
| A00124 | A13977 | 942 | A00124 | A14055 | 899 |
| A00124 | A14073 | 488 | A00124 | A14252 | 466 |
| A00124 | A14961 | 318 | A00124 | A15356 | 491 |
| A00124 | A15726 | 63  | A00124 | A15964 | 152 |
| A00124 | A16272 | 382 | A00124 | A16331 | 182 |
| A00124 | A16453 | 272 | A00125 | A00153 | 386 |
| A00125 | A00158 | 484 | A00125 | A00160 | 358 |
| A00125 | A00174 | 224 | A00125 | A00189 | 411 |
| A00125 | A00210 | 66  | A00125 | A00212 | 63  |
| A00125 | A00220 | 160 | A00125 | A00255 | 475 |
| A00125 | A00407 | 249 | A00125 | A00694 | 283 |
| A00125 | A00697 | 177 | A00125 | A00733 | 258 |
| A00125 | A00911 | 154 | A00125 | A00937 | 172 |
| A00125 | A00981 | 458 | A00125 | A01022 | 219 |
| A00125 | A01125 | 245 | A00125 | A01520 | 374 |
| A00125 | A01524 | 958 | A00125 | A01527 | 384 |
| A00125 | A01629 | 481 | A00125 | A01658 | 269 |
| A00125 | A01699 | 223 | A00125 | A01767 | 257 |
| A00125 | A01792 | 159 | A00125 | A01799 | 173 |
| A00125 | A01880 | 322 | A00125 | A01889 | 171 |
| A00125 | A01905 | 375 | A00125 | A02000 | 789 |
| A00125 | A02046 | 229 | A00125 | A02141 | 279 |
| A00125 | A02143 | 405 | A00125 | A02171 | 266 |
| A00125 | A02217 | 335 | A00125 | A02247 | 321 |
| A00125 | A02249 | 353 | A00125 | A02337 | 247 |
| A00125 | A02382 | 307 | A00125 | A02416 | 322 |
| A00125 | A02447 | 441 | A00125 | A02468 | 473 |
| A00125 | A02473 | 388 | A00125 | A02479 | 484 |
| A00125 | A02494 | 191 | A00125 | A02502 | 179 |
| A00125 | A02615 | 375 | A00125 | A02616 | 380 |
| A00125 | A02620 | 294 | A00125 | A02624 | 243 |
| A00125 | A02632 | 274 | A00125 | A02639 | 188 |
| A00125 | A02669 | 272 | A00125 | A02732 | 213 |
| A00125 | A02788 | 429 | A00125 | A02819 | 151 |
| A00125 | A02837 | 223 | A00125 | A03041 | 258 |
| A00125 | A03071 | 430 | A00125 | A03081 | 344 |
| A00125 | A03093 | 238 | A00125 | A03100 | 310 |
| A00125 | A03195 | 212 | A00125 | A03219 | 176 |
| A00125 | A03451 | 252 | A00125 | A03522 | 411 |
| A00125 | A03790 | 468 | A00125 | A03906 | 318 |
| A00125 | A03926 | 457 | A00125 | A04007 | 232 |
| A00125 | A04078 | 466 | A00125 | A04201 | 283 |
| A00125 | A04280 | 462 | A00125 | A04473 | 385 |
| A00125 | A04517 | 257 | A00125 | A04681 | 151 |



|        |        |     |        |        |     |
|--------|--------|-----|--------|--------|-----|
| A00125 | A04759 | 224 | A00125 | A04764 | 358 |
| A00125 | A04960 | 160 | A00125 | A05030 | 291 |
| A00125 | A05065 | 193 | A00125 | A05082 | 452 |
| A00125 | A05155 | 418 | A00125 | A05741 | 281 |
| A00125 | A05868 | 246 | A00125 | A06107 | 313 |
| A00125 | A06578 | 173 | A00125 | A06813 | 474 |
| A00125 | A07054 | 154 | A00125 | A07127 | 246 |
| A00125 | A07145 | 475 | A00125 | A07163 | 154 |
| A00125 | A07570 | 286 | A00125 | A08926 | 224 |
| A00125 | A09240 | 308 | A00125 | A09390 | 945 |
| A00125 | A09419 | 251 | A00125 | A09428 | 267 |
| A00125 | A10148 | 170 | A00125 | A10156 | 191 |
| A00125 | A10369 | 159 | A00125 | A11038 | 404 |
| A00125 | A11576 | 160 | A00125 | A12383 | 277 |
| A00125 | A13110 | 348 | A00125 | A13181 | 307 |
| A00125 | A13369 | 642 | A00125 | A13387 | 174 |
| A00125 | A13555 | 274 | A00125 | A14366 | 223 |
| A00125 | A14452 | 390 | A00125 | A15641 | 224 |
| A00125 | A16003 | 386 | A00125 | A16039 | 386 |
| A00126 | A00186 | 174 | A00126 | A00206 | 152 |
| A00126 | A00224 | 944 | A00126 | A00230 | 490 |
| A00126 | A00341 | 457 | A00126 | A00388 | 491 |
| A00126 | A00748 | 173 | A00126 | A00812 | 457 |
| A00126 | A00933 | 416 | A00126 | A00937 | 343 |
| A00126 | A01052 | 467 | A00126 | A01071 | 343 |
| A00126 | A01478 | 452 | A00126 | A01537 | 489 |
| A00126 | A01558 | 899 | A00126 | A01588 | 899 |
| A00126 | A01595 | 352 | A00126 | A01660 | 490 |
| A00126 | A01687 | 486 | A00126 | A01689 | 173 |
| A00126 | A02030 | 316 | A00126 | A02381 | 490 |
| A00126 | A02676 | 227 | A00126 | A03225 | 172 |
| A00126 | A03575 | 271 | A00126 | A03927 | 198 |
| A00126 | A04080 | 240 | A00126 | A05009 | 245 |
| A00126 | A05064 | 254 | A00126 | A05185 | 313 |
| A00126 | A05278 | 258 | A00126 | A05284 | 461 |
| A00126 | A05454 | 425 | A00126 | A05880 | 343 |
| A00126 | A05895 | 419 | A00126 | A05987 | 238 |
| A00126 | A06348 | 491 | A00126 | A06572 | 343 |
| A00126 | A06597 | 362 | A00126 | A07425 | 432 |
| A00126 | A07433 | 352 | A00126 | A07593 | 276 |
| A00126 | A08097 | 343 | A00126 | A08184 | 299 |
| A00126 | A08196 | 343 | A00126 | A08503 | 343 |
| A00126 | A08549 | 343 | A00126 | A08560 | 343 |
| A00126 | A08812 | 343 | A00126 | A08839 | 174 |
| A00126 | A08844 | 343 | A00126 | A08853 | 393 |
| A00126 | A08854 | 311 | A00126 | A08855 | 316 |

|        |        |     |        |        |     |
|--------|--------|-----|--------|--------|-----|
| A00126 | A11369 | 899 | A00126 | A11656 | 352 |
| A00126 | A11766 | 302 | A00126 | A11884 | 191 |
| A00126 | A14048 | 302 | A00126 | A14084 | 343 |
| A00126 | A14133 | 340 | A00126 | A14227 | 474 |
| A00126 | A14279 | 491 | A00126 | A14285 | 343 |
| A00126 | A14309 | 355 | A00126 | A15533 | 258 |
| A00126 | A16391 | 208 | A00126 | A16602 | 313 |
| A00127 | A00150 | 950 | A00127 | A00152 | 538 |
| A00127 | A00166 | 475 | A00127 | A00167 | 899 |
| A00127 | A00177 | 491 | A00127 | A00191 | 427 |
| A00127 | A00192 | 466 | A00127 | A00203 | 137 |
| A00127 | A00209 | 899 | A00127 | A00211 | 126 |
| A00127 | A00221 | 489 | A00127 | A00223 | 490 |
| A00127 | A00245 | 163 | A00127 | A00255 | 205 |
| A00127 | A00257 | 447 | A00127 | A00270 | 477 |
| A00127 | A00279 | 326 | A00127 | A00280 | 467 |
| A00127 | A00284 | 247 | A00127 | A00285 | 455 |
| A00127 | A00288 | 488 | A00127 | A00289 | 152 |
| A00127 | A00304 | 491 | A00127 | A00318 | 480 |
| A00127 | A00324 | 899 | A00127 | A00327 | 228 |
| A00127 | A00328 | 480 | A00127 | A00334 | 491 |
| A00127 | A00335 | 491 | A00127 | A00340 | 212 |
| A00127 | A00356 | 491 | A00127 | A00366 | 481 |
| A00127 | A00411 | 326 | A00127 | A00414 | 491 |
| A00127 | A00454 | 424 | A00127 | A00467 | 488 |
| A00127 | A00469 | 174 | A00127 | A00521 | 417 |
| A00127 | A00561 | 481 | A00127 | A00571 | 457 |
| A00127 | A00605 | 480 | A00127 | A00648 | 489 |
| A00127 | A00651 | 945 | A00127 | A00653 | 417 |
| A00127 | A00700 | 491 | A00127 | A00701 | 458 |
| A00127 | A00705 | 396 | A00127 | A00713 | 446 |
| A00127 | A00763 | 461 | A00127 | A00782 | 456 |
| A00127 | A00783 | 391 | A00127 | A00787 | 438 |
| A00127 | A00812 | 491 | A00127 | A00815 | 184 |
| A00127 | A00839 | 491 | A00127 | A00841 | 486 |
| A00127 | A00851 | 286 | A00127 | A00870 | 380 |
| A00127 | A00878 | 327 | A00127 | A00923 | 414 |
| A00127 | A00966 | 450 | A00127 | A00970 | 479 |
| A00127 | A00972 | 447 | A00127 | A01012 | 577 |
| A00127 | A01025 | 177 | A00127 | A01037 | 420 |
| A00127 | A01042 | 475 | A00127 | A01054 | 427 |
| A00127 | A01056 | 945 | A00127 | A01072 | 157 |
| A00127 | A01090 | 491 | A00127 | A01098 | 374 |
| A00127 | A01112 | 491 | A00127 | A01115 | 457 |
| A00127 | A01121 | 290 | A00127 | A01127 | 443 |
| A00127 | A01140 | 491 | A00127 | A01168 | 899 |

|        |        |     |        |        |     |
|--------|--------|-----|--------|--------|-----|
| A00127 | A01196 | 435 | A00127 | A01206 | 313 |
| A00127 | A01212 | 490 | A00127 | A01216 | 479 |
| A00127 | A01243 | 249 | A00127 | A01249 | 319 |
| A00127 | A01261 | 279 | A00127 | A01263 | 262 |
| A00127 | A01291 | 491 | A00127 | A01306 | 704 |
| A00127 | A01335 | 491 | A00127 | A01365 | 462 |
| A00127 | A01400 | 286 | A00127 | A01411 | 168 |
| A00127 | A01425 | 485 | A00127 | A01431 | 456 |
| A00127 | A01447 | 281 | A00127 | A01457 | 491 |
| A00127 | A01461 | 180 | A00127 | A01468 | 491 |
| A00127 | A01478 | 468 | A00127 | A01492 | 491 |
| A00127 | A01496 | 945 | A00127 | A01527 | 899 |
| A00127 | A01560 | 435 | A00127 | A01569 | 162 |
| A00127 | A01579 | 673 | A00127 | A01586 | 380 |
| A00127 | A01595 | 199 | A00127 | A01597 | 409 |
| A00127 | A01601 | 491 | A00127 | A01604 | 63  |
| A00127 | A01605 | 481 | A00127 | A01606 | 160 |
| A00127 | A01649 | 446 | A00127 | A01675 | 310 |
| A00127 | A01718 | 278 | A00127 | A01777 | 157 |
| A00127 | A01787 | 418 | A00127 | A01796 | 420 |
| A00127 | A01822 | 472 | A00127 | A01914 | 477 |
| A00127 | A01995 | 156 | A00127 | A02179 | 409 |
| A00127 | A02243 | 229 | A00127 | A02265 | 198 |
| A00127 | A02350 | 491 | A00127 | A02397 | 241 |
| A00127 | A02405 | 63  | A00127 | A02597 | 135 |
| A00127 | A03069 | 156 | A00127 | A03110 | 299 |
| A00127 | A03219 | 154 | A00127 | A03314 | 217 |
| A00127 | A03332 | 450 | A00127 | A03445 | 491 |
| A00127 | A03461 | 380 | A00127 | A03639 | 475 |
| A00127 | A03645 | 157 | A00127 | A03740 | 395 |
| A00127 | A03752 | 475 | A00127 | A03799 | 369 |
| A00127 | A03800 | 303 | A00127 | A03809 | 218 |
| A00127 | A03942 | 277 | A00127 | A03961 | 223 |
| A00127 | A03963 | 434 | A00127 | A03981 | 609 |
| A00127 | A04202 | 406 | A00127 | A04230 | 430 |
| A00127 | A04422 | 411 | A00127 | A04446 | 185 |
| A00127 | A04490 | 491 | A00127 | A04623 | 374 |
| A00127 | A04761 | 224 | A00127 | A04843 | 182 |
| A00127 | A05076 | 340 | A00127 | A05091 | 230 |
| A00127 | A05373 | 182 | A00127 | A05407 | 347 |
| A00127 | A05443 | 491 | A00127 | A05449 | 340 |
| A00127 | A05450 | 238 | A00127 | A05501 | 360 |
| A00127 | A05863 | 210 | A00127 | A05866 | 180 |
| A00127 | A05996 | 227 | A00127 | A06037 | 427 |
| A00127 | A06351 | 435 | A00127 | A06466 | 481 |
| A00127 | A06534 | 302 | A00127 | A06564 | 407 |

|        |        |     |        |        |     |
|--------|--------|-----|--------|--------|-----|
| A00127 | A06607 | 477 | A00127 | A06814 | 491 |
| A00127 | A06897 | 394 | A00127 | A06965 | 167 |
| A00127 | A06973 | 330 | A00127 | A07028 | 210 |
| A00127 | A07075 | 182 | A00127 | A07306 | 210 |
| A00127 | A07307 | 174 | A00127 | A07311 | 490 |
| A00127 | A07323 | 467 | A00127 | A07398 | 491 |
| A00127 | A07422 | 899 | A00127 | A07451 | 468 |
| A00127 | A07706 | 199 | A00127 | A07726 | 491 |
| A00127 | A08052 | 265 | A00127 | A08131 | 475 |
| A00127 | A08301 | 420 | A00127 | A08309 | 328 |
| A00127 | A08315 | 313 | A00127 | A08357 | 461 |
| A00127 | A08358 | 443 | A00127 | A08359 | 491 |
| A00127 | A08452 | 254 | A00127 | A08457 | 424 |
| A00127 | A08476 | 232 | A00127 | A08487 | 210 |
| A00127 | A08685 | 386 | A00127 | A08686 | 490 |
| A00127 | A08753 | 433 | A00127 | A08761 | 152 |
| A00127 | A08835 | 467 | A00127 | A08869 | 229 |
| A00127 | A09062 | 249 | A00127 | A09263 | 188 |
| A00127 | A09297 | 154 | A00127 | A09308 | 327 |
| A00127 | A09332 | 241 | A00127 | A09591 | 271 |
| A00127 | A09620 | 477 | A00127 | A09674 | 198 |
| A00127 | A09704 | 182 | A00127 | A09741 | 188 |
| A00127 | A09829 | 428 | A00127 | A09893 | 182 |
| A00127 | A09960 | 193 | A00127 | A10336 | 489 |
| A00127 | A10518 | 182 | A00127 | A10532 | 486 |
| A00127 | A10633 | 375 | A00127 | A10645 | 424 |
| A00127 | A10748 | 271 | A00127 | A11096 | 217 |
| A00127 | A11190 | 460 | A00127 | A11263 | 337 |
| A00127 | A11278 | 458 | A00127 | A11298 | 322 |
| A00127 | A11333 | 404 | A00127 | A11392 | 236 |
| A00127 | A11463 | 172 | A00127 | A11846 | 428 |
| A00127 | A11974 | 193 | A00127 | A12305 | 230 |
| A00127 | A12310 | 230 | A00127 | A12329 | 302 |
| A00127 | A12404 | 157 | A00127 | A12653 | 226 |
| A00127 | A12813 | 163 | A00127 | A12970 | 383 |
| A00127 | A13107 | 322 | A00127 | A13126 | 152 |
| A00127 | A13336 | 270 | A00127 | A13340 | 489 |
| A00127 | A13830 | 278 | A00127 | A13944 | 472 |
| A00127 | A13989 | 491 | A00127 | A13992 | 441 |
| A00127 | A14010 | 259 | A00127 | A14038 | 191 |
| A00127 | A14055 | 463 | A00127 | A14172 | 188 |
| A00127 | A14210 | 294 | A00127 | A14216 | 545 |
| A00127 | A14247 | 270 | A00127 | A14443 | 899 |
| A00127 | A14508 | 326 | A00127 | A14511 | 446 |
| A00127 | A14566 | 177 | A00127 | A15229 | 330 |
| A00127 | A15236 | 182 | A00127 | A15268 | 485 |

|        |        |     |        |        |     |
|--------|--------|-----|--------|--------|-----|
| A00127 | A15278 | 172 | A00127 | A15292 | 469 |
| A00127 | A15348 | 272 | A00127 | A15349 | 413 |
| A00127 | A15381 | 485 | A00127 | A15416 | 388 |
| A00127 | A15498 | 191 | A00127 | A15500 | 446 |
| A00127 | A15660 | 485 | A00127 | A15684 | 491 |
| A00127 | A15988 | 177 | A00127 | A16107 | 414 |
| A00127 | A16272 | 241 | A00127 | A16281 | 491 |
| A00127 | A16437 | 301 | A00127 | A16575 | 274 |
| A00127 | A16686 | 188 | A00127 | A16778 | 469 |
| A00128 | A00132 | 474 | A00128 | A00138 | 171 |
| A00128 | A00167 | 899 | A00128 | A00209 | 899 |
| A00128 | A00246 | 899 | A00128 | A00697 | 252 |
| A00128 | A01527 | 899 | A00128 | A01553 | 918 |
| A00128 | A01692 | 521 | A00128 | A03436 | 183 |
| A00128 | A03591 | 373 | A00128 | A03643 | 347 |
| A00128 | A03739 | 162 | A00128 | A09253 | 283 |
| A00128 | A11322 | 246 | A00129 | A00135 | 152 |
| A00129 | A00146 | 350 | A00129 | A00153 | 899 |
| A00129 | A00165 | 319 | A00129 | A00187 | 323 |
| A00129 | A00188 | 944 | A00129 | A00209 | 900 |
| A00129 | A00248 | 480 | A00129 | A00621 | 223 |
| A00129 | A01604 | 172 | A00129 | A01639 | 484 |
| A00129 | A01664 | 238 | A00129 | A01717 | 180 |
| A00129 | A01850 | 899 | A00129 | A01900 | 915 |
| A00129 | A01902 | 259 | A00129 | A02059 | 323 |
| A00129 | A02578 | 329 | A00129 | A02608 | 335 |
| A00129 | A02637 | 254 | A00129 | A02889 | 341 |
| A00129 | A03049 | 252 | A00129 | A03076 | 202 |
| A00129 | A03224 | 281 | A00129 | A05634 | 337 |
| A00129 | A05944 | 249 | A00129 | A05953 | 348 |
| A00129 | A06055 | 278 | A00129 | A06601 | 252 |
| A00129 | A09256 | 162 | A00129 | A09937 | 308 |
| A00129 | A10392 | 469 | A00129 | A10580 | 899 |
| A00129 | A13181 | 249 | A00129 | A13977 | 252 |
| A00129 | A14376 | 329 | A00129 | A14444 | 167 |
| A00129 | A15605 | 276 | A00129 | A16083 | 899 |
| A00130 | A00159 | 899 | A00130 | A00164 | 217 |
| A00130 | A00184 | 899 | A00130 | A00216 | 217 |
| A00130 | A00240 | 167 | A00130 | A00347 | 291 |
| A00130 | A00384 | 440 | A00130 | A00419 | 168 |
| A00130 | A00446 | 368 | A00130 | A00470 | 488 |
| A00130 | A00583 | 217 | A00130 | A00852 | 326 |
| A00130 | A00981 | 502 | A00130 | A01172 | 460 |
| A00130 | A01372 | 217 | A00130 | A01390 | 898 |
| A00130 | A01524 | 899 | A00130 | A01548 | 358 |
| A00130 | A01561 | 63  | A00130 | A01562 | 945 |

|        |        |     |        |        |     |
|--------|--------|-----|--------|--------|-----|
| A00130 | A01628 | 63  | A00130 | A01640 | 899 |
| A00130 | A01692 | 228 | A00130 | A01705 | 546 |
| A00130 | A01719 | 63  | A00130 | A01844 | 210 |
| A00130 | A01907 | 196 | A00130 | A02208 | 269 |
| A00130 | A02278 | 199 | A00130 | A02366 | 213 |
| A00130 | A02419 | 77  | A00130 | A02437 | 269 |
| A00130 | A02598 | 163 | A00130 | A02642 | 941 |
| A00130 | A02687 | 414 | A00130 | A02803 | 88  |
| A00130 | A02860 | 183 | A00130 | A02895 | 159 |
| A00130 | A02942 | 173 | A00130 | A03019 | 63  |
| A00130 | A03271 | 491 | A00130 | A03416 | 163 |
| A00130 | A03611 | 234 | A00130 | A03625 | 63  |
| A00130 | A03873 | 217 | A00130 | A03892 | 141 |
| A00130 | A04015 | 154 | A00130 | A04104 | 174 |
| A00130 | A04957 | 486 | A00130 | A04972 | 262 |
| A00130 | A04986 | 270 | A00130 | A05765 | 410 |
| A00130 | A06135 | 177 | A00130 | A06159 | 180 |
| A00130 | A06167 | 160 | A00130 | A06236 | 270 |
| A00130 | A06289 | 205 | A00130 | A06675 | 492 |
| A00130 | A06941 | 638 | A00130 | A07311 | 899 |
| A00130 | A07866 | 301 | A00130 | A07956 | 217 |
| A00130 | A08096 | 270 | A00130 | A08248 | 217 |
| A00130 | A08484 | 165 | A00130 | A08627 | 322 |
| A00130 | A08899 | 899 | A00130 | A08982 | 217 |
| A00130 | A09084 | 204 | A00130 | A09441 | 157 |
| A00130 | A09826 | 460 | A00130 | A10174 | 900 |
| A00130 | A10247 | 383 | A00130 | A10286 | 269 |
| A00130 | A10766 | 152 | A00130 | A10813 | 307 |
| A00130 | A11544 | 217 | A00130 | A11649 | 217 |
| A00130 | A12383 | 229 | A00130 | A12764 | 224 |
| A00130 | A13250 | 899 | A00130 | A13282 | 301 |
| A00130 | A13892 | 217 | A00130 | A13977 | 899 |
| A00130 | A14016 | 338 | A00130 | A14033 | 224 |
| A00130 | A14362 | 217 | A00130 | A15321 | 502 |
| A00130 | A15338 | 217 | A00130 | A15495 | 259 |
| A00130 | A15544 | 157 | A00130 | A15555 | 269 |
| A00130 | A15564 | 217 | A00130 | A15966 | 191 |
| A00130 | A15979 | 185 | A00130 | A16255 | 269 |
| A00130 | A16614 | 217 | A00131 | A00155 | 270 |
| A00131 | A00196 | 491 | A00131 | A00204 | 215 |
| A00131 | A00209 | 903 | A00131 | A00216 | 486 |
| A00131 | A00218 | 491 | A00131 | A00219 | 488 |
| A00131 | A00264 | 319 | A00131 | A00301 | 216 |
| A00131 | A00311 | 254 | A00131 | A00338 | 288 |
| A00131 | A00385 | 223 | A00131 | A00472 | 368 |
| A00131 | A00656 | 491 | A00131 | A00662 | 408 |

|        |        |     |        |        |     |
|--------|--------|-----|--------|--------|-----|
| A00131 | A00736 | 452 | A00131 | A00815 | 301 |
| A00131 | A01373 | 196 | A00131 | A01432 | 474 |
| A00131 | A01527 | 899 | A00131 | A01829 | 188 |
| A00131 | A01934 | 152 | A00131 | A01939 | 240 |
| A00131 | A01982 | 475 | A00131 | A02002 | 151 |
| A00131 | A02010 | 228 | A00131 | A02037 | 240 |
| A00131 | A02048 | 491 | A00131 | A02049 | 491 |
| A00131 | A02074 | 241 | A00131 | A02083 | 269 |
| A00131 | A02145 | 441 | A00131 | A02146 | 467 |
| A00131 | A02158 | 422 | A00131 | A02186 | 445 |
| A00131 | A02190 | 255 | A00131 | A02215 | 491 |
| A00131 | A02226 | 485 | A00131 | A02291 | 374 |
| A00131 | A02305 | 441 | A00131 | A02306 | 485 |
| A00131 | A02317 | 196 | A00131 | A02328 | 193 |
| A00131 | A02385 | 208 | A00131 | A02495 | 283 |
| A00131 | A02545 | 486 | A00131 | A02759 | 272 |
| A00131 | A02776 | 173 | A00131 | A02785 | 462 |
| A00131 | A03050 | 414 | A00131 | A03080 | 489 |
| A00131 | A03099 | 235 | A00131 | A03319 | 240 |
| A00131 | A03369 | 213 | A00131 | A03370 | 481 |
| A00131 | A03371 | 212 | A00131 | A03373 | 400 |
| A00131 | A03379 | 418 | A00131 | A03390 | 238 |
| A00131 | A03401 | 457 | A00131 | A03402 | 491 |
| A00131 | A03403 | 450 | A00131 | A03408 | 435 |
| A00131 | A03498 | 400 | A00131 | A03725 | 394 |
| A00131 | A03744 | 452 | A00131 | A03976 | 193 |
| A00131 | A03989 | 234 | A00131 | A04437 | 400 |
| A00131 | A04633 | 191 | A00131 | A04672 | 317 |
| A00131 | A04775 | 255 | A00131 | A04843 | 296 |
| A00131 | A05087 | 196 | A00131 | A05184 | 185 |
| A00131 | A05190 | 332 | A00131 | A05337 | 170 |
| A00131 | A05356 | 491 | A00131 | A05377 | 171 |
| A00131 | A05457 | 288 | A00131 | A05494 | 408 |
| A00131 | A05581 | 255 | A00131 | A05731 | 213 |
| A00131 | A05945 | 490 | A00131 | A06033 | 317 |
| A00131 | A06331 | 355 | A00131 | A06607 | 491 |
| A00131 | A06696 | 314 | A00131 | A06797 | 151 |
| A00131 | A07218 | 473 | A00131 | A07292 | 483 |
| A00131 | A07376 | 210 | A00131 | A07438 | 411 |
| A00131 | A07468 | 200 | A00131 | A07471 | 429 |
| A00131 | A07475 | 407 | A00131 | A07496 | 263 |
| A00131 | A07509 | 408 | A00131 | A07510 | 432 |
| A00131 | A07567 | 269 | A00131 | A07634 | 333 |
| A00131 | A07635 | 167 | A00131 | A07652 | 407 |
| A00131 | A07653 | 463 | A00131 | A07656 | 447 |
| A00131 | A07660 | 232 | A00131 | A07673 | 472 |

|        |        |     |        |        |     |
|--------|--------|-----|--------|--------|-----|
| A00131 | A07740 | 446 | A00131 | A07741 | 281 |
| A00131 | A07754 | 491 | A00131 | A07827 | 332 |
| A00131 | A07913 | 491 | A00131 | A07914 | 483 |
| A00131 | A07916 | 414 | A00131 | A07928 | 205 |
| A00131 | A07950 | 305 | A00131 | A07958 | 260 |
| A00131 | A08165 | 355 | A00131 | A08173 | 407 |
| A00131 | A08210 | 224 | A00131 | A08217 | 355 |
| A00131 | A08218 | 441 | A00131 | A08246 | 443 |
| A00131 | A08288 | 468 | A00131 | A08347 | 355 |
| A00131 | A08395 | 332 | A00131 | A08404 | 491 |
| A00131 | A08785 | 428 | A00131 | A09131 | 255 |
| A00131 | A09199 | 302 | A00131 | A09394 | 199 |
| A00131 | A09807 | 332 | A00131 | A09831 | 269 |
| A00131 | A09928 | 205 | A00131 | A10021 | 234 |
| A00131 | A10436 | 355 | A00131 | A10563 | 327 |
| A00131 | A10944 | 281 | A00131 | A10951 | 355 |
| A00131 | A11428 | 251 | A00131 | A11442 | 420 |
| A00131 | A11552 | 200 | A00131 | A11738 | 170 |
| A00131 | A12347 | 281 | A00131 | A12641 | 420 |
| A00131 | A12758 | 355 | A00131 | A13872 | 152 |
| A00131 | A15803 | 281 | A00132 | A00138 | 529 |
| A00132 | A00141 | 313 | A00132 | A00146 | 346 |
| A00132 | A00147 | 435 | A00132 | A00150 | 199 |
| A00132 | A00153 | 899 | A00132 | A00157 | 899 |
| A00132 | A00159 | 199 | A00132 | A00165 | 424 |
| A00132 | A00167 | 904 | A00132 | A00169 | 271 |
| A00132 | A00183 | 424 | A00132 | A00209 | 908 |
| A00132 | A00224 | 624 | A00132 | A00225 | 490 |
| A00132 | A00226 | 375 | A00132 | A00234 | 174 |
| A00132 | A00239 | 162 | A00132 | A00250 | 938 |
| A00132 | A00254 | 490 | A00132 | A00257 | 698 |
| A00132 | A00265 | 457 | A00132 | A00270 | 527 |
| A00132 | A00271 | 899 | A00132 | A00318 | 417 |
| A00132 | A00322 | 307 | A00132 | A00340 | 466 |
| A00132 | A00440 | 369 | A00132 | A00531 | 549 |
| A00132 | A00769 | 246 | A00132 | A00841 | 402 |
| A00132 | A00871 | 179 | A00132 | A00887 | 474 |
| A00132 | A00909 | 307 | A00132 | A00962 | 271 |
| A00132 | A01141 | 245 | A00132 | A01157 | 369 |
| A00132 | A01232 | 307 | A00132 | A01311 | 202 |
| A00132 | A01358 | 168 | A00132 | A01473 | 207 |
| A00132 | A01522 | 286 | A00132 | A01558 | 945 |
| A00132 | A01560 | 491 | A00132 | A01562 | 218 |
| A00132 | A01588 | 994 | A00132 | A01615 | 485 |
| A00132 | A01692 | 951 | A00132 | A01694 | 245 |
| A00132 | A01914 | 333 | A00132 | A02117 | 235 |



|        |        |     |        |        |     |
|--------|--------|-----|--------|--------|-----|
| A00132 | A02164 | 193 | A00132 | A02434 | 167 |
| A00132 | A02702 | 162 | A00132 | A03575 | 154 |
| A00132 | A03591 | 462 | A00132 | A04012 | 390 |
| A00132 | A04072 | 180 | A00132 | A04077 | 171 |
| A00132 | A04337 | 172 | A00132 | A04449 | 155 |
| A00132 | A04540 | 218 | A00132 | A04610 | 199 |
| A00132 | A04949 | 369 | A00132 | A05164 | 263 |
| A00132 | A05418 | 179 | A00132 | A05603 | 185 |
| A00132 | A06554 | 307 | A00132 | A06597 | 581 |
| A00132 | A06599 | 271 | A00132 | A06721 | 208 |
| A00132 | A07309 | 404 | A00132 | A07311 | 527 |
| A00132 | A07422 | 899 | A00132 | A07552 | 369 |
| A00132 | A08171 | 475 | A00132 | A08172 | 486 |
| A00132 | A08299 | 256 | A00132 | A08309 | 401 |
| A00132 | A08453 | 316 | A00132 | A08459 | 219 |
| A00132 | A08571 | 455 | A00132 | A08635 | 278 |
| A00132 | A08685 | 372 | A00132 | A08686 | 483 |
| A00132 | A08753 | 347 | A00132 | A08860 | 729 |
| A00132 | A09218 | 447 | A00132 | A09253 | 486 |
| A00132 | A09401 | 484 | A00132 | A09585 | 160 |
| A00132 | A10735 | 324 | A00132 | A11207 | 152 |
| A00132 | A11278 | 440 | A00132 | A11298 | 205 |
| A00132 | A11321 | 358 | A00132 | A11333 | 332 |
| A00132 | A11487 | 296 | A00132 | A12156 | 256 |
| A00132 | A12478 | 388 | A00132 | A12619 | 219 |
| A00132 | A12620 | 256 | A00132 | A12824 | 236 |
| A00132 | A13511 | 488 | A00132 | A13551 | 199 |
| A00132 | A13928 | 152 | A00132 | A14331 | 199 |
| A00132 | A14334 | 256 | A00132 | A14699 | 369 |
| A00132 | A15295 | 260 | A00132 | A15345 | 173 |
| A00132 | A15347 | 215 | A00132 | A15506 | 483 |
| A00132 | A15638 | 491 | A00132 | A16281 | 167 |
| A00132 | A16682 | 177 | A00132 | A16766 | 170 |
| A00132 | A16908 | 152 | A00132 | A17209 | 219 |
| A00133 | A00134 | 899 | A00133 | A00136 | 208 |
| A00133 | A00140 | 930 | A00133 | A00141 | 899 |
| A00133 | A00150 | 899 | A00133 | A00157 | 899 |
| A00133 | A00158 | 63  | A00133 | A00163 | 920 |
| A00133 | A00165 | 491 | A00133 | A00167 | 902 |
| A00133 | A00171 | 391 | A00133 | A00178 | 899 |
| A00133 | A00179 | 174 | A00133 | A00184 | 899 |
| A00133 | A00187 | 462 | A00133 | A00190 | 899 |
| A00133 | A00203 | 899 | A00133 | A00209 | 904 |
| A00133 | A00224 | 899 | A00133 | A00230 | 899 |
| A00133 | A00246 | 899 | A00133 | A00254 | 899 |
| A00133 | A00305 | 183 | A00133 | A00324 | 904 |

|        |        |     |        |        |     |
|--------|--------|-----|--------|--------|-----|
| A00133 | A00378 | 475 | A00133 | A00887 | 899 |
| A00133 | A00997 | 185 | A00133 | A01002 | 899 |
| A00133 | A01148 | 377 | A00133 | A01178 | 283 |
| A00133 | A01291 | 899 | A00133 | A01492 | 899 |
| A00133 | A01512 | 930 | A00133 | A01524 | 899 |
| A00133 | A01527 | 899 | A00133 | A01553 | 899 |
| A00133 | A01554 | 910 | A00133 | A01558 | 899 |
| A00133 | A01562 | 899 | A00133 | A01588 | 899 |
| A00133 | A01591 | 899 | A00133 | A01596 | 356 |
| A00133 | A01601 | 899 | A00133 | A01602 | 899 |
| A00133 | A01615 | 899 | A00133 | A01628 | 899 |
| A00133 | A01636 | 899 | A00133 | A01639 | 902 |
| A00133 | A01651 | 899 | A00133 | A01680 | 899 |
| A00133 | A01688 | 899 | A00133 | A01698 | 102 |
| A00133 | A01708 | 899 | A00133 | A01709 | 899 |
| A00133 | A01920 | 899 | A00133 | A02343 | 251 |
| A00133 | A02411 | 899 | A00133 | A03699 | 174 |
| A00133 | A04320 | 899 | A00133 | A04449 | 127 |
| A00133 | A04699 | 899 | A00133 | A04744 | 277 |
| A00133 | A04807 | 899 | A00133 | A05082 | 899 |
| A00133 | A05169 | 256 | A00133 | A05216 | 899 |
| A00133 | A05312 | 338 | A00133 | A06216 | 196 |
| A00133 | A06277 | 899 | A00133 | A06305 | 899 |
| A00133 | A06601 | 246 | A00133 | A07311 | 899 |
| A00133 | A07422 | 899 | A00133 | A08878 | 899 |
| A00133 | A09162 | 251 | A00133 | A09319 | 899 |
| A00133 | A10580 | 899 | A00133 | A10623 | 905 |
| A00133 | A10743 | 182 | A00133 | A10808 | 936 |
| A00133 | A11125 | 899 | A00133 | A11379 | 165 |
| A00133 | A11440 | 228 | A00133 | A11604 | 899 |
| A00133 | A11983 | 899 | A00133 | A12373 | 199 |
| A00133 | A12664 | 899 | A00133 | A13971 | 277 |
| A00133 | A13985 | 899 | A00133 | A13989 | 899 |
| A00133 | A14005 | 929 | A00133 | A14044 | 899 |
| A00133 | A14055 | 899 | A00133 | A14059 | 899 |
| A00133 | A16786 | 184 | A00133 | A17160 | 899 |
| A00134 | A00184 | 899 | A00134 | A00209 | 213 |
| A00134 | A00224 | 899 | A00134 | A00246 | 899 |
| A00134 | A01512 | 914 | A00134 | A01524 | 899 |
| A00134 | A01527 | 899 | A00134 | A01558 | 899 |
| A00134 | A01560 | 899 | A00134 | A01562 | 899 |
| A00134 | A01574 | 174 | A00134 | A01588 | 899 |
| A00134 | A01628 | 914 | A00134 | A01639 | 484 |
| A00134 | A01709 | 908 | A00134 | A04699 | 899 |
| A00134 | A06550 | 235 | A00134 | A09162 | 422 |
| A00134 | A09542 | 899 | A00134 | A11125 | 899 |

|        |        |     |        |        |     |
|--------|--------|-----|--------|--------|-----|
| A00134 | A12705 | 899 | A00134 | A13985 | 899 |
| A00135 | A00147 | 430 | A00135 | A00159 | 899 |
| A00135 | A00165 | 390 | A00135 | A00190 | 944 |
| A00135 | A00209 | 899 | A00135 | A00224 | 165 |
| A00135 | A00246 | 899 | A00135 | A00262 | 260 |
| A00135 | A00265 | 469 | A00135 | A00324 | 302 |
| A00135 | A00416 | 488 | A00135 | A00450 | 458 |
| A00135 | A00546 | 217 | A00135 | A00625 | 491 |
| A00135 | A00679 | 163 | A00135 | A00786 | 321 |
| A00135 | A00877 | 491 | A00135 | A00971 | 213 |
| A00135 | A01017 | 163 | A00135 | A01036 | 488 |
| A00135 | A01217 | 165 | A00135 | A01378 | 472 |
| A00135 | A01451 | 174 | A00135 | A01452 | 281 |
| A00135 | A01454 | 333 | A00135 | A01507 | 395 |
| A00135 | A01524 | 989 | A00135 | A01527 | 899 |
| A00135 | A01568 | 490 | A00135 | A01580 | 326 |
| A00135 | A01606 | 480 | A00135 | A01687 | 286 |
| A00135 | A01698 | 251 | A00135 | A01724 | 135 |
| A00135 | A01730 | 433 | A00135 | A01732 | 160 |
| A00135 | A01736 | 310 | A00135 | A01742 | 401 |
| A00135 | A01749 | 177 | A00135 | A01769 | 465 |
| A00135 | A01850 | 260 | A00135 | A02400 | 230 |
| A00135 | A02698 | 491 | A00135 | A02715 | 118 |
| A00135 | A02724 | 353 | A00135 | A02822 | 162 |
| A00135 | A02908 | 899 | A00135 | A02982 | 940 |
| A00135 | A03304 | 398 | A00135 | A03632 | 171 |
| A00135 | A03983 | 230 | A00135 | A04249 | 329 |
| A00135 | A04449 | 491 | A00135 | A04905 | 160 |
| A00135 | A06277 | 235 | A00135 | A06601 | 902 |
| A00135 | A07227 | 361 | A00135 | A07242 | 491 |
| A00135 | A07483 | 475 | A00135 | A07495 | 491 |
| A00135 | A07665 | 470 | A00135 | A07788 | 226 |
| A00135 | A07816 | 413 | A00135 | A07893 | 486 |
| A00135 | A07944 | 216 | A00135 | A08022 | 302 |
| A00135 | A08056 | 338 | A00135 | A08536 | 162 |
| A00135 | A08934 | 467 | A00135 | A08962 | 252 |
| A00135 | A09162 | 255 | A00135 | A09624 | 447 |
| A00135 | A09804 | 916 | A00135 | A09842 | 408 |
| A00135 | A11023 | 461 | A00135 | A11149 | 414 |
| A00135 | A11150 | 455 | A00135 | A11180 | 413 |
| A00135 | A11281 | 458 | A00135 | A11293 | 480 |
| A00135 | A11346 | 152 | A00135 | A11389 | 201 |
| A00135 | A11547 | 452 | A00135 | A11665 | 470 |
| A00135 | A11940 | 165 | A00135 | A11983 | 291 |
| A00135 | A12047 | 473 | A00135 | A12048 | 272 |
| A00135 | A12051 | 260 | A00135 | A12091 | 272 |

|        |        |     |        |        |     |
|--------|--------|-----|--------|--------|-----|
| A00135 | A12102 | 272 | A00135 | A12215 | 185 |
| A00135 | A12420 | 899 | A00135 | A12421 | 916 |
| A00135 | A13213 | 208 | A00135 | A13511 | 271 |
| A00135 | A13667 | 485 | A00135 | A13927 | 452 |
| A00135 | A14002 | 160 | A00135 | A14059 | 256 |
| A00135 | A14260 | 162 | A00135 | A14389 | 216 |
| A00135 | A14443 | 900 | A00135 | A14539 | 399 |
| A00135 | A14925 | 400 | A00135 | A15035 | 399 |
| A00135 | A16343 | 221 | A00135 | A16647 | 226 |
| A00135 | A16806 | 226 | A00135 | A17019 | 230 |
| A00135 | A17030 | 168 | A00136 | A00137 | 414 |
| A00136 | A00138 | 286 | A00136 | A00139 | 235 |
| A00136 | A00140 | 481 | A00136 | A00157 | 486 |
| A00136 | A00159 | 110 | A00136 | A00161 | 165 |
| A00136 | A00162 | 614 | A00136 | A00165 | 63  |
| A00136 | A00175 | 154 | A00136 | A00184 | 159 |
| A00136 | A00185 | 63  | A00136 | A00187 | 457 |
| A00136 | A00207 | 63  | A00136 | A00208 | 308 |
| A00136 | A00217 | 469 | A00136 | A00240 | 217 |
| A00136 | A00267 | 302 | A00136 | A00273 | 491 |
| A00136 | A00275 | 168 | A00136 | A01010 | 193 |
| A00136 | A01512 | 259 | A00136 | A01553 | 572 |
| A00136 | A01554 | 468 | A00136 | A01560 | 263 |
| A00136 | A01561 | 293 | A00136 | A01562 | 259 |
| A00136 | A01605 | 402 | A00136 | A01628 | 454 |
| A00136 | A01639 | 204 | A00136 | A01640 | 238 |
| A00136 | A01667 | 176 | A00136 | A01680 | 420 |
| A00136 | A01692 | 258 | A00136 | A01697 | 374 |
| A00136 | A01702 | 319 | A00136 | A01708 | 450 |
| A00136 | A01709 | 452 | A00136 | A01718 | 344 |
| A00136 | A01719 | 409 | A00136 | A01907 | 252 |
| A00136 | A02413 | 179 | A00136 | A02616 | 232 |
| A00136 | A02669 | 241 | A00136 | A02803 | 73  |
| A00136 | A03213 | 63  | A00136 | A03273 | 63  |
| A00136 | A03417 | 152 | A00136 | A04015 | 162 |
| A00136 | A04439 | 306 | A00136 | A04452 | 328 |
| A00136 | A04968 | 283 | A00136 | A05878 | 212 |
| A00136 | A07051 | 216 | A00136 | A07174 | 232 |
| A00136 | A07311 | 278 | A00136 | A08077 | 180 |
| A00136 | A08194 | 154 | A00136 | A08238 | 240 |
| A00136 | A09162 | 408 | A00136 | A09504 | 219 |
| A00136 | A09577 | 68  | A00136 | A09643 | 276 |
| A00136 | A10808 | 146 | A00136 | A11278 | 200 |
| A00136 | A11369 | 63  | A00136 | A11767 | 235 |
| A00136 | A12383 | 438 | A00136 | A13729 | 229 |
| A00136 | A13872 | 317 | A00136 | A14008 | 146 |

|        |        |     |        |        |     |
|--------|--------|-----|--------|--------|-----|
| A00136 | A14038 | 232 | A00136 | A14303 | 171 |
| A00136 | A17014 | 383 | A00137 | A00140 | 307 |
| A00137 | A00157 | 190 | A00137 | A00187 | 224 |
| A00137 | A00217 | 226 | A00137 | A00267 | 193 |
| A00137 | A00273 | 205 | A00137 | A00284 | 171 |
| A00137 | A01358 | 154 | A00137 | A01554 | 63  |
| A00137 | A01560 | 364 | A00137 | A01561 | 463 |
| A00137 | A01562 | 119 | A00137 | A01570 | 205 |
| A00137 | A01605 | 245 | A00137 | A01628 | 216 |
| A00137 | A01692 | 63  | A00137 | A01700 | 157 |
| A00137 | A01702 | 168 | A00137 | A02088 | 202 |
| A00137 | A02411 | 87  | A00137 | A02862 | 207 |
| A00137 | A06727 | 252 | A00137 | A07311 | 436 |
| A00137 | A08171 | 210 | A00137 | A08172 | 162 |
| A00137 | A09568 | 139 | A00137 | A09894 | 323 |
| A00137 | A11820 | 254 | A00137 | A12383 | 263 |
| A00137 | A14452 | 63  | A00137 | A14925 | 154 |
| A00137 | A15726 | 63  | A00138 | A00140 | 63  |
| A00138 | A00141 | 491 | A00138 | A00145 | 491 |
| A00138 | A00146 | 274 | A00138 | A00147 | 391 |
| A00138 | A00152 | 761 | A00138 | A00153 | 340 |
| A00138 | A00156 | 352 | A00138 | A00157 | 99  |
| A00138 | A00158 | 483 | A00138 | A00159 | 785 |
| A00138 | A00160 | 63  | A00138 | A00161 | 491 |
| A00138 | A00162 | 446 | A00138 | A00163 | 527 |
| A00138 | A00167 | 179 | A00138 | A00183 | 658 |
| A00138 | A00185 | 490 | A00138 | A00186 | 63  |
| A00138 | A00189 | 765 | A00138 | A00201 | 323 |
| A00138 | A00205 | 208 | A00138 | A00207 | 751 |
| A00138 | A00208 | 490 | A00138 | A00214 | 554 |
| A00138 | A00224 | 792 | A00138 | A00225 | 488 |
| A00138 | A00232 | 484 | A00138 | A00233 | 477 |
| A00138 | A00234 | 562 | A00138 | A00235 | 199 |
| A00138 | A00236 | 224 | A00138 | A00246 | 956 |
| A00138 | A00247 | 319 | A00138 | A00254 | 785 |
| A00138 | A00256 | 369 | A00138 | A00257 | 491 |
| A00138 | A00261 | 831 | A00138 | A00265 | 468 |
| A00138 | A00270 | 706 | A00138 | A00292 | 449 |
| A00138 | A00316 | 491 | A00138 | A00340 | 432 |
| A00138 | A00351 | 218 | A00138 | A00378 | 410 |
| A00138 | A00418 | 273 | A00138 | A00448 | 241 |
| A00138 | A00464 | 201 | A00138 | A00471 | 183 |
| A00138 | A00552 | 332 | A00138 | A00561 | 218 |
| A00138 | A00641 | 296 | A00138 | A00654 | 199 |
| A00138 | A00662 | 152 | A00138 | A00691 | 191 |
| A00138 | A00696 | 157 | A00138 | A00697 | 193 |

|        |        |     |        |        |     |
|--------|--------|-----|--------|--------|-----|
| A00138 | A00724 | 462 | A00138 | A00744 | 184 |
| A00138 | A00757 | 318 | A00138 | A00769 | 401 |
| A00138 | A00799 | 405 | A00138 | A00841 | 491 |
| A00138 | A00875 | 321 | A00138 | A00879 | 384 |
| A00138 | A00909 | 484 | A00138 | A00916 | 520 |
| A00138 | A00935 | 171 | A00138 | A00981 | 538 |
| A00138 | A01017 | 218 | A00138 | A01020 | 343 |
| A00138 | A01061 | 274 | A00138 | A01150 | 589 |
| A00138 | A01173 | 475 | A00138 | A01212 | 424 |
| A00138 | A01234 | 489 | A00138 | A01329 | 233 |
| A00138 | A01396 | 405 | A00138 | A01419 | 308 |
| A00138 | A01425 | 446 | A00138 | A01452 | 490 |
| A00138 | A01458 | 491 | A00138 | A01473 | 491 |
| A00138 | A01474 | 480 | A00138 | A01492 | 536 |
| A00138 | A01524 | 631 | A00138 | A01527 | 949 |
| A00138 | A01553 | 485 | A00138 | A01558 | 572 |
| A00138 | A01560 | 558 | A00138 | A01572 | 526 |
| A00138 | A01588 | 489 | A00138 | A01610 | 452 |
| A00138 | A01615 | 490 | A00138 | A01640 | 530 |
| A00138 | A01692 | 524 | A00138 | A01697 | 63  |
| A00138 | A01843 | 63  | A00138 | A01844 | 63  |
| A00138 | A01879 | 63  | A00138 | A01880 | 63  |
| A00138 | A01887 | 110 | A00138 | A01888 | 63  |
| A00138 | A01894 | 402 | A00138 | A01908 | 486 |
| A00138 | A01914 | 687 | A00138 | A01995 | 562 |
| A00138 | A02076 | 205 | A00138 | A02163 | 578 |
| A00138 | A02183 | 490 | A00138 | A02223 | 171 |
| A00138 | A02331 | 491 | A00138 | A02342 | 414 |
| A00138 | A02372 | 432 | A00138 | A02382 | 392 |
| A00138 | A02411 | 246 | A00138 | A02425 | 165 |
| A00138 | A02630 | 117 | A00138 | A02732 | 63  |
| A00138 | A02734 | 259 | A00138 | A02803 | 490 |
| A00138 | A02864 | 454 | A00138 | A03010 | 63  |
| A00138 | A03110 | 241 | A00138 | A03225 | 326 |
| A00138 | A03271 | 479 | A00138 | A03292 | 231 |
| A00138 | A03327 | 491 | A00138 | A03436 | 477 |
| A00138 | A03470 | 160 | A00138 | A03478 | 433 |
| A00138 | A03512 | 363 | A00138 | A03569 | 393 |
| A00138 | A03591 | 525 | A00138 | A03598 | 93  |
| A00138 | A03784 | 369 | A00138 | A03803 | 474 |
| A00138 | A03809 | 596 | A00138 | A03817 | 469 |
| A00138 | A03821 | 489 | A00138 | A03962 | 196 |
| A00138 | A04012 | 531 | A00138 | A04033 | 371 |
| A00138 | A04060 | 352 | A00138 | A04066 | 171 |
| A00138 | A04161 | 288 | A00138 | A04288 | 238 |
| A00138 | A04314 | 469 | A00138 | A04323 | 296 |

|        |        |     |        |        |     |
|--------|--------|-----|--------|--------|-----|
| A00138 | A04536 | 179 | A00138 | A04914 | 314 |
| A00138 | A05212 | 267 | A00138 | A05288 | 466 |
| A00138 | A05453 | 257 | A00138 | A05638 | 384 |
| A00138 | A05880 | 481 | A00138 | A05985 | 447 |
| A00138 | A06197 | 399 | A00138 | A06258 | 165 |
| A00138 | A06273 | 339 | A00138 | A06400 | 265 |
| A00138 | A06543 | 322 | A00138 | A06572 | 286 |
| A00138 | A06597 | 425 | A00138 | A07004 | 501 |
| A00138 | A07167 | 162 | A00138 | A07200 | 333 |
| A00138 | A07311 | 580 | A00138 | A07409 | 491 |
| A00138 | A07524 | 473 | A00138 | A07726 | 441 |
| A00138 | A07732 | 474 | A00138 | A07803 | 218 |
| A00138 | A07924 | 286 | A00138 | A08118 | 303 |
| A00138 | A08185 | 204 | A00138 | A08196 | 224 |
| A00138 | A08280 | 172 | A00138 | A08345 | 422 |
| A00138 | A08450 | 243 | A00138 | A08571 | 536 |
| A00138 | A08608 | 234 | A00138 | A08701 | 447 |
| A00138 | A08860 | 734 | A00138 | A08878 | 293 |
| A00138 | A09176 | 208 | A00138 | A09181 | 273 |
| A00138 | A09220 | 452 | A00138 | A09341 | 340 |
| A00138 | A09401 | 382 | A00138 | A09542 | 289 |
| A00138 | A09764 | 218 | A00138 | A09888 | 191 |
| A00138 | A09937 | 137 | A00138 | A10014 | 63  |
| A00138 | A10365 | 63  | A00138 | A10510 | 347 |
| A00138 | A10557 | 202 | A00138 | A10666 | 191 |
| A00138 | A10711 | 191 | A00138 | A10721 | 257 |
| A00138 | A10735 | 491 | A00138 | A10744 | 168 |
| A00138 | A10766 | 157 | A00138 | A10801 | 330 |
| A00138 | A10854 | 218 | A00138 | A10899 | 63  |
| A00138 | A11124 | 250 | A00138 | A11369 | 592 |
| A00138 | A11487 | 543 | A00138 | A11591 | 316 |
| A00138 | A11983 | 678 | A00138 | A12009 | 63  |
| A00138 | A12548 | 294 | A00138 | A12660 | 176 |
| A00138 | A12835 | 200 | A00138 | A13216 | 193 |
| A00138 | A13391 | 63  | A00138 | A13511 | 488 |
| A00138 | A13605 | 63  | A00138 | A13743 | 193 |
| A00138 | A13910 | 208 | A00138 | A13975 | 491 |
| A00138 | A13980 | 479 | A00138 | A13986 | 475 |
| A00138 | A13989 | 527 | A00138 | A14006 | 467 |
| A00138 | A14007 | 321 | A00138 | A14019 | 63  |
| A00138 | A14034 | 63  | A00138 | A14187 | 291 |
| A00138 | A14188 | 378 | A00138 | A14190 | 313 |
| A00138 | A14198 | 491 | A00138 | A14208 | 602 |
| A00138 | A14215 | 63  | A00138 | A14299 | 377 |
| A00138 | A14364 | 436 | A00138 | A14426 | 441 |
| A00138 | A14430 | 481 | A00138 | A14433 | 317 |

|        |        |     |        |        |     |
|--------|--------|-----|--------|--------|-----|
| A00138 | A14440 | 380 | A00138 | A14444 | 906 |
| A00138 | A14452 | 286 | A00138 | A14635 | 368 |
| A00138 | A14986 | 177 | A00138 | A15294 | 747 |
| A00138 | A15386 | 218 | A00138 | A15506 | 819 |
| A00138 | A15692 | 115 | A00138 | A15726 | 491 |
| A00138 | A15854 | 218 | A00138 | A15935 | 254 |
| A00138 | A16048 | 361 | A00138 | A16084 | 63  |
| A00138 | A16529 | 182 | A00138 | A16994 | 521 |
| A00138 | A17102 | 252 | A00139 | A00157 | 257 |
| A00139 | A00180 | 313 | A00139 | A00187 | 294 |
| A00139 | A00912 | 221 | A00139 | A01527 | 899 |
| A00139 | A01562 | 63  | A00139 | A01692 | 63  |
| A00139 | A01789 | 361 | A00139 | A05128 | 361 |
| A00139 | A06615 | 198 | A00139 | A07163 | 200 |
| A00139 | A07311 | 63  | A00139 | A08321 | 154 |
| A00139 | A09127 | 366 | A00139 | A10247 | 157 |
| A00139 | A12383 | 603 | A00139 | A14268 | 215 |
| A00140 | A00151 | 899 | A00140 | A00153 | 899 |
| A00140 | A00157 | 933 | A00140 | A00161 | 899 |
| A00140 | A00162 | 899 | A00140 | A00165 | 63  |
| A00140 | A00167 | 899 | A00140 | A00173 | 900 |
| A00140 | A00184 | 928 | A00140 | A00187 | 340 |
| A00140 | A00205 | 910 | A00140 | A00208 | 77  |
| A00140 | A00209 | 899 | A00140 | A00217 | 401 |
| A00140 | A00224 | 899 | A00140 | A00226 | 906 |
| A00140 | A00230 | 899 | A00140 | A00244 | 215 |
| A00140 | A00246 | 901 | A00140 | A00248 | 899 |
| A00140 | A00250 | 899 | A00140 | A00266 | 899 |
| A00140 | A00267 | 205 | A00140 | A00273 | 475 |
| A00140 | A01512 | 927 | A00140 | A01524 | 899 |
| A00140 | A01527 | 899 | A00140 | A01553 | 899 |
| A00140 | A01554 | 943 | A00140 | A01558 | 899 |
| A00140 | A01560 | 63  | A00140 | A01588 | 899 |
| A00140 | A01605 | 263 | A00140 | A01615 | 899 |
| A00140 | A01623 | 183 | A00140 | A01628 | 236 |
| A00140 | A01636 | 899 | A00140 | A01639 | 900 |
| A00140 | A01651 | 899 | A00140 | A01697 | 121 |
| A00140 | A01702 | 185 | A00140 | A01709 | 484 |
| A00140 | A01718 | 913 | A00140 | A01844 | 63  |
| A00140 | A02825 | 914 | A00140 | A03019 | 63  |
| A00140 | A03331 | 157 | A00140 | A03575 | 899 |
| A00140 | A06601 | 179 | A00140 | A06648 | 165 |
| A00140 | A06708 | 351 | A00140 | A07311 | 899 |
| A00140 | A07422 | 899 | A00140 | A08571 | 899 |
| A00140 | A08858 | 899 | A00140 | A09162 | 394 |
| A00140 | A09319 | 906 | A00140 | A09577 | 914 |



|        |        |     |        |        |     |
|--------|--------|-----|--------|--------|-----|
| A00140 | A09643 | 180 | A00140 | A10392 | 911 |
| A00140 | A10580 | 902 | A00140 | A10601 | 899 |
| A00140 | A10623 | 899 | A00140 | A10808 | 182 |
| A00140 | A10934 | 221 | A00140 | A11125 | 899 |
| A00140 | A11767 | 268 | A00140 | A12383 | 177 |
| A00140 | A13729 | 380 | A00140 | A13980 | 908 |
| A00140 | A13985 | 899 | A00140 | A14030 | 899 |
| A00140 | A14157 | 899 | A00140 | A14539 | 299 |
| A00140 | A16095 | 154 | A00141 | A00145 | 229 |
| A00141 | A00152 | 479 | A00141 | A00157 | 899 |
| A00141 | A00158 | 269 | A00141 | A00159 | 389 |
| A00141 | A00160 | 435 | A00141 | A00169 | 480 |
| A00141 | A00183 | 173 | A00141 | A00185 | 165 |
| A00141 | A00188 | 283 | A00141 | A00189 | 491 |
| A00141 | A00220 | 449 | A00141 | A00224 | 462 |
| A00141 | A00230 | 274 | A00141 | A00239 | 162 |
| A00141 | A00240 | 468 | A00141 | A00246 | 926 |
| A00141 | A00248 | 470 | A00141 | A00254 | 223 |
| A00141 | A00274 | 324 | A00141 | A00669 | 491 |
| A00141 | A00754 | 299 | A00141 | A00887 | 400 |
| A00141 | A00914 | 302 | A00141 | A00997 | 170 |
| A00141 | A01052 | 360 | A00141 | A01070 | 899 |
| A00141 | A01146 | 386 | A00141 | A01512 | 899 |
| A00141 | A01524 | 944 | A00141 | A01527 | 945 |
| A00141 | A01548 | 183 | A00141 | A01557 | 160 |
| A00141 | A01560 | 899 | A00141 | A01588 | 297 |
| A00141 | A01615 | 188 | A00141 | A01654 | 486 |
| A00141 | A01688 | 260 | A00141 | A01697 | 899 |
| A00141 | A01709 | 901 | A00141 | A01828 | 263 |
| A00141 | A01835 | 205 | A00141 | A01846 | 157 |
| A00141 | A01870 | 404 | A00141 | A01879 | 383 |
| A00141 | A01880 | 475 | A00141 | A01887 | 323 |
| A00141 | A01888 | 579 | A00141 | A01889 | 171 |
| A00141 | A01891 | 249 | A00141 | A01902 | 291 |
| A00141 | A01907 | 70  | A00141 | A01946 | 154 |
| A00141 | A02141 | 174 | A00141 | A02148 | 224 |
| A00141 | A02178 | 162 | A00141 | A02304 | 263 |
| A00141 | A02337 | 462 | A00141 | A02340 | 98  |
| A00141 | A02370 | 385 | A00141 | A02382 | 455 |
| A00141 | A02383 | 269 | A00141 | A02439 | 238 |
| A00141 | A02510 | 205 | A00141 | A02578 | 297 |
| A00141 | A02592 | 188 | A00141 | A02604 | 223 |
| A00141 | A02617 | 328 | A00141 | A02630 | 251 |
| A00141 | A02637 | 551 | A00141 | A02654 | 174 |
| A00141 | A02657 | 413 | A00141 | A02659 | 259 |
| A00141 | A02668 | 171 | A00141 | A02681 | 313 |

|        |        |     |        |        |     |
|--------|--------|-----|--------|--------|-----|
| A00141 | A02695 | 177 | A00141 | A02708 | 223 |
| A00141 | A02711 | 491 | A00141 | A02730 | 212 |
| A00141 | A02749 | 413 | A00141 | A02788 | 88  |
| A00141 | A02795 | 281 | A00141 | A02798 | 216 |
| A00141 | A02808 | 263 | A00141 | A02841 | 263 |
| A00141 | A02851 | 297 | A00141 | A02854 | 460 |
| A00141 | A02863 | 440 | A00141 | A02864 | 389 |
| A00141 | A02874 | 172 | A00141 | A02886 | 369 |
| A00141 | A02896 | 448 | A00141 | A02917 | 443 |
| A00141 | A02935 | 355 | A00141 | A02945 | 433 |
| A00141 | A03010 | 457 | A00141 | A03019 | 63  |
| A00141 | A03049 | 358 | A00141 | A03163 | 195 |
| A00141 | A03181 | 409 | A00141 | A03204 | 346 |
| A00141 | A03259 | 551 | A00141 | A03552 | 171 |
| A00141 | A03611 | 221 | A00141 | A03744 | 171 |
| A00141 | A03790 | 252 | A00141 | A03807 | 213 |
| A00141 | A03817 | 296 | A00141 | A03845 | 160 |
| A00141 | A03854 | 475 | A00141 | A03966 | 193 |
| A00141 | A04062 | 246 | A00141 | A04176 | 466 |
| A00141 | A04248 | 489 | A00141 | A04263 | 439 |
| A00141 | A04265 | 157 | A00141 | A04320 | 491 |
| A00141 | A04426 | 328 | A00141 | A04432 | 269 |
| A00141 | A04450 | 208 | A00141 | A04473 | 167 |
| A00141 | A04518 | 316 | A00141 | A04536 | 396 |
| A00141 | A04734 | 401 | A00141 | A04736 | 223 |
| A00141 | A04748 | 228 | A00141 | A04755 | 185 |
| A00141 | A04807 | 491 | A00141 | A04865 | 469 |
| A00141 | A04866 | 208 | A00141 | A04968 | 213 |
| A00141 | A05064 | 899 | A00141 | A05082 | 491 |
| A00141 | A05278 | 396 | A00141 | A05329 | 196 |
| A00141 | A05558 | 241 | A00141 | A05621 | 160 |
| A00141 | A05701 | 433 | A00141 | A05741 | 177 |
| A00141 | A05815 | 218 | A00141 | A05940 | 165 |
| A00141 | A05944 | 488 | A00141 | A05985 | 241 |
| A00141 | A06054 | 223 | A00141 | A06055 | 385 |
| A00141 | A06107 | 414 | A00141 | A06142 | 299 |
| A00141 | A06344 | 165 | A00141 | A06404 | 316 |
| A00141 | A06422 | 408 | A00141 | A06451 | 218 |
| A00141 | A06779 | 201 | A00141 | A06780 | 208 |
| A00141 | A06818 | 384 | A00141 | A07135 | 229 |
| A00141 | A07148 | 160 | A00141 | A07157 | 480 |
| A00141 | A07158 | 485 | A00141 | A07161 | 462 |
| A00141 | A07166 | 265 | A00141 | A07173 | 257 |
| A00141 | A07311 | 199 | A00141 | A07338 | 269 |
| A00141 | A07390 | 283 | A00141 | A07683 | 258 |
| A00141 | A08133 | 199 | A00141 | A08193 | 199 |

|        |        |     |        |        |     |
|--------|--------|-----|--------|--------|-----|
| A00141 | A08360 | 391 | A00141 | A08497 | 258 |
| A00141 | A08623 | 299 | A00141 | A08644 | 269 |
| A00141 | A08658 | 213 | A00141 | A08711 | 228 |
| A00141 | A08729 | 446 | A00141 | A09124 | 457 |
| A00141 | A09803 | 293 | A00141 | A10504 | 185 |
| A00141 | A10721 | 177 | A00141 | A10852 | 299 |
| A00141 | A10894 | 405 | A00141 | A10901 | 223 |
| A00141 | A11125 | 899 | A00141 | A11206 | 899 |
| A00141 | A11369 | 380 | A00141 | A11543 | 278 |
| A00141 | A11604 | 199 | A00141 | A11771 | 180 |
| A00141 | A11854 | 177 | A00141 | A11901 | 299 |
| A00141 | A11983 | 899 | A00141 | A12560 | 299 |
| A00141 | A12720 | 281 | A00141 | A12900 | 281 |
| A00141 | A13181 | 480 | A00141 | A13344 | 281 |
| A00141 | A13860 | 322 | A00141 | A13981 | 899 |
| A00141 | A14029 | 326 | A00141 | A14132 | 151 |
| A00141 | A14236 | 243 | A00141 | A14299 | 475 |
| A00141 | A14373 | 188 | A00141 | A14432 | 173 |
| A00141 | A15293 | 899 | A00141 | A15294 | 899 |
| A00141 | A15394 | 190 | A00141 | A15403 | 180 |
| A00141 | A15605 | 316 | A00141 | A15608 | 229 |
| A00141 | A15952 | 299 | A00141 | A15981 | 154 |
| A00141 | A16328 | 465 | A00141 | A16839 | 446 |
| A00142 | A00143 | 945 | A00142 | A00152 | 900 |
| A00142 | A00212 | 939 | A00142 | A00215 | 944 |
| A00142 | A00224 | 473 | A00142 | A00351 | 377 |
| A00142 | A00574 | 474 | A00142 | A00654 | 418 |
| A00142 | A00786 | 249 | A00142 | A01461 | 318 |
| A00142 | A01573 | 418 | A00142 | A01741 | 343 |
| A00142 | A01859 | 273 | A00142 | A01866 | 207 |
| A00142 | A01926 | 262 | A00142 | A02046 | 165 |
| A00142 | A02353 | 306 | A00142 | A02695 | 490 |
| A00142 | A02718 | 317 | A00142 | A02723 | 353 |
| A00142 | A03004 | 188 | A00142 | A03059 | 229 |
| A00142 | A03238 | 208 | A00142 | A03431 | 479 |
| A00142 | A03477 | 945 | A00142 | A03500 | 263 |
| A00142 | A03861 | 340 | A00142 | A03890 | 201 |
| A00142 | A04193 | 193 | A00142 | A04784 | 380 |
| A00142 | A04834 | 321 | A00142 | A04849 | 323 |
| A00142 | A04850 | 491 | A00142 | A04888 | 440 |
| A00142 | A05277 | 218 | A00142 | A05356 | 213 |
| A00142 | A05515 | 200 | A00142 | A05937 | 226 |
| A00142 | A06170 | 317 | A00142 | A06359 | 473 |
| A00142 | A06473 | 475 | A00142 | A06577 | 332 |
| A00142 | A06597 | 191 | A00142 | A06634 | 240 |
| A00142 | A06775 | 201 | A00142 | A07128 | 172 |

|        |        |     |        |        |     |
|--------|--------|-----|--------|--------|-----|
| A00142 | A07256 | 240 | A00142 | A08785 | 259 |
| A00142 | A09236 | 205 | A00142 | A09913 | 931 |
| A00142 | A10229 | 355 | A00142 | A10952 | 355 |
| A00142 | A11683 | 352 | A00142 | A13234 | 383 |
| A00142 | A13330 | 172 | A00142 | A14247 | 193 |
| A00142 | A16048 | 162 | A00142 | A16799 | 229 |
| A00143 | A00168 | 899 | A00143 | A00200 | 899 |
| A00143 | A00212 | 924 | A00143 | A00215 | 943 |
| A00143 | A00224 | 162 | A00143 | A00461 | 246 |
| A00143 | A00574 | 481 | A00143 | A00614 | 483 |
| A00143 | A00654 | 470 | A00143 | A00739 | 318 |
| A00143 | A01667 | 312 | A00143 | A01859 | 199 |
| A00143 | A01866 | 260 | A00143 | A02109 | 223 |
| A00143 | A02488 | 179 | A00143 | A02695 | 484 |
| A00143 | A02719 | 201 | A00143 | A02723 | 390 |
| A00143 | A03053 | 243 | A00143 | A03431 | 477 |
| A00143 | A03477 | 255 | A00143 | A04784 | 451 |
| A00143 | A04834 | 366 | A00143 | A04850 | 491 |
| A00143 | A04995 | 215 | A00143 | A06086 | 193 |
| A00143 | A06359 | 291 | A00143 | A06473 | 477 |
| A00143 | A06608 | 899 | A00143 | A06756 | 195 |
| A00143 | A07109 | 380 | A00143 | A07542 | 198 |
| A00143 | A07543 | 204 | A00143 | A07710 | 221 |
| A00143 | A09878 | 229 | A00143 | A10229 | 383 |
| A00143 | A10701 | 180 | A00143 | A16134 | 252 |
| A00144 | A00166 | 307 | A00144 | A00167 | 271 |
| A00144 | A00221 | 661 | A00144 | A00232 | 173 |
| A00144 | A00385 | 210 | A00144 | A00483 | 173 |
| A00144 | A00561 | 210 | A00144 | A00719 | 165 |
| A00144 | A00752 | 329 | A00144 | A01277 | 246 |
| A00144 | A01500 | 414 | A00144 | A01759 | 230 |
| A00144 | A01841 | 184 | A00144 | A01856 | 245 |
| A00144 | A01970 | 288 | A00144 | A02048 | 350 |
| A00144 | A02092 | 313 | A00144 | A02099 | 321 |
| A00144 | A02116 | 156 | A00144 | A02143 | 165 |
| A00144 | A02157 | 185 | A00144 | A02158 | 152 |
| A00144 | A02214 | 286 | A00144 | A02330 | 185 |
| A00144 | A02336 | 307 | A00144 | A02338 | 273 |
| A00144 | A02353 | 213 | A00144 | A02355 | 307 |
| A00144 | A02492 | 187 | A00144 | A02608 | 313 |
| A00144 | A02727 | 400 | A00144 | A02738 | 201 |
| A00144 | A03037 | 404 | A00144 | A03183 | 232 |
| A00144 | A03314 | 208 | A00144 | A03399 | 198 |
| A00144 | A03477 | 391 | A00144 | A03719 | 196 |
| A00144 | A03744 | 414 | A00144 | A04202 | 170 |
| A00144 | A04361 | 216 | A00144 | A04422 | 258 |

|        |        |     |        |        |     |
|--------|--------|-----|--------|--------|-----|
| A00144 | A04428 | 335 | A00144 | A04879 | 296 |
| A00144 | A04928 | 271 | A00144 | A04965 | 196 |
| A00144 | A05020 | 260 | A00144 | A05027 | 601 |
| A00144 | A05439 | 167 | A00144 | A05457 | 362 |
| A00144 | A05473 | 374 | A00144 | A05688 | 380 |
| A00144 | A05689 | 367 | A00144 | A06067 | 240 |
| A00144 | A06346 | 163 | A00144 | A06609 | 246 |
| A00144 | A06956 | 321 | A00144 | A07409 | 213 |
| A00144 | A09028 | 272 | A00144 | A09205 | 274 |
| A00144 | A09211 | 283 | A00144 | A09559 | 348 |
| A00144 | A14007 | 172 | A00144 | A14196 | 263 |
| A00144 | A14350 | 367 | A00144 | A14366 | 369 |
| A00144 | A14368 | 285 | A00144 | A14369 | 382 |
| A00144 | A14374 | 159 | A00144 | A14391 | 163 |
| A00144 | A14554 | 343 | A00144 | A15329 | 288 |
| A00144 | A15419 | 184 | A00144 | A15422 | 380 |
| A00144 | A15795 | 352 | A00144 | A15820 | 293 |
| A00145 | A00152 | 665 | A00145 | A00153 | 910 |
| A00145 | A00158 | 758 | A00145 | A00159 | 996 |
| A00145 | A00160 | 491 | A00145 | A00161 | 63  |
| A00145 | A00162 | 286 | A00145 | A00163 | 249 |
| A00145 | A00189 | 490 | A00145 | A00190 | 488 |
| A00145 | A00205 | 85  | A00145 | A00207 | 480 |
| A00145 | A00208 | 63  | A00145 | A00224 | 960 |
| A00145 | A00232 | 263 | A00145 | A00234 | 159 |
| A00145 | A00246 | 907 | A00145 | A00294 | 899 |
| A00145 | A00316 | 160 | A00145 | A00370 | 899 |
| A00145 | A00533 | 176 | A00145 | A00930 | 193 |
| A00145 | A01052 | 899 | A00145 | A01473 | 491 |
| A00145 | A01474 | 190 | A00145 | A01524 | 441 |
| A00145 | A01527 | 941 | A00145 | A01553 | 63  |
| A00145 | A01554 | 255 | A00145 | A01558 | 899 |
| A00145 | A01560 | 440 | A00145 | A01572 | 213 |
| A00145 | A01588 | 899 | A00145 | A01914 | 243 |
| A00145 | A02076 | 467 | A00145 | A02639 | 156 |
| A00145 | A02711 | 480 | A00145 | A02731 | 63  |
| A00145 | A02732 | 127 | A00145 | A02865 | 208 |
| A00145 | A03010 | 477 | A00145 | A03019 | 63  |
| A00145 | A03141 | 438 | A00145 | A03178 | 188 |
| A00145 | A03569 | 367 | A00145 | A03687 | 255 |
| A00145 | A03780 | 174 | A00145 | A03821 | 461 |
| A00145 | A04011 | 183 | A00145 | A04138 | 170 |
| A00145 | A04221 | 243 | A00145 | A04320 | 159 |
| A00145 | A05704 | 229 | A00145 | A06414 | 176 |
| A00145 | A06610 | 151 | A00145 | A07062 | 273 |
| A00145 | A07165 | 900 | A00145 | A09888 | 356 |

|        |        |     |        |        |     |
|--------|--------|-----|--------|--------|-----|
| A00145 | A10062 | 234 | A00145 | A10514 | 217 |
| A00145 | A10544 | 168 | A00145 | A10721 | 469 |
| A00145 | A10735 | 84  | A00145 | A10899 | 440 |
| A00145 | A11369 | 457 | A00145 | A11487 | 246 |
| A00145 | A11591 | 310 | A00145 | A11885 | 465 |
| A00145 | A12383 | 291 | A00145 | A13491 | 260 |
| A00145 | A13581 | 176 | A00145 | A13975 | 726 |
| A00145 | A13980 | 479 | A00145 | A13986 | 290 |
| A00145 | A14208 | 481 | A00145 | A14250 | 412 |
| A00145 | A14452 | 184 | A00145 | A14825 | 215 |
| A00145 | A15263 | 316 | A00145 | A15726 | 469 |
| A00145 | A15896 | 217 | A00145 | A15952 | 316 |
| A00145 | A16994 | 353 | A00145 | A17212 | 254 |
| A00146 | A00147 | 399 | A00146 | A00153 | 899 |
| A00146 | A00157 | 899 | A00146 | A00165 | 770 |
| A00146 | A00167 | 899 | A00146 | A00209 | 899 |
| A00146 | A00224 | 903 | A00146 | A00225 | 441 |
| A00146 | A00226 | 296 | A00146 | A00230 | 899 |
| A00146 | A00234 | 168 | A00146 | A00243 | 217 |
| A00146 | A00250 | 976 | A00146 | A00254 | 454 |
| A00146 | A00257 | 460 | A00146 | A00265 | 408 |
| A00146 | A00736 | 162 | A00146 | A01410 | 362 |
| A00146 | A01527 | 899 | A00146 | A01553 | 63  |
| A00146 | A01558 | 899 | A00146 | A01596 | 712 |
| A00146 | A01639 | 905 | A00146 | A01730 | 215 |
| A00146 | A01768 | 217 | A00146 | A01898 | 156 |
| A00146 | A02678 | 319 | A00146 | A02702 | 154 |
| A00146 | A02737 | 461 | A00146 | A02825 | 296 |
| A00146 | A02993 | 263 | A00146 | A03213 | 93  |
| A00146 | A04012 | 202 | A00146 | A04288 | 193 |
| A00146 | A04537 | 266 | A00146 | A04578 | 385 |
| A00146 | A04639 | 191 | A00146 | A05064 | 159 |
| A00146 | A05111 | 396 | A00146 | A06654 | 200 |
| A00146 | A07422 | 899 | A00146 | A08571 | 899 |
| A00146 | A09218 | 212 | A00146 | A09383 | 273 |
| A00146 | A09502 | 227 | A00146 | A09543 | 310 |
| A00146 | A09577 | 66  | A00146 | A10580 | 942 |
| A00146 | A10596 | 200 | A00146 | A10623 | 920 |
| A00146 | A10735 | 249 | A00146 | A10756 | 196 |
| A00146 | A11601 | 251 | A00146 | A11639 | 348 |
| A00146 | A11731 | 221 | A00146 | A12341 | 899 |
| A00146 | A12383 | 409 | A00146 | A13244 | 317 |
| A00146 | A13511 | 441 | A00146 | A14187 | 188 |
| A00146 | A14443 | 936 | A00146 | A14444 | 899 |
| A00146 | A14666 | 243 | A00146 | A15064 | 174 |
| A00146 | A15321 | 167 | A00146 | A15555 | 232 |

|        |        |     |        |        |     |
|--------|--------|-----|--------|--------|-----|
| A00147 | A00152 | 188 | A00147 | A00154 | 168 |
| A00147 | A00163 | 339 | A00147 | A00169 | 223 |
| A00147 | A00171 | 230 | A00147 | A00190 | 486 |
| A00147 | A00200 | 420 | A00147 | A00202 | 327 |
| A00147 | A00219 | 213 | A00147 | A00223 | 184 |
| A00147 | A00236 | 251 | A00147 | A00248 | 332 |
| A00147 | A00250 | 173 | A00147 | A00254 | 419 |
| A00147 | A00257 | 396 | A00147 | A00264 | 257 |
| A00147 | A00265 | 945 | A00147 | A00266 | 219 |
| A00147 | A00312 | 491 | A00147 | A00314 | 154 |
| A00147 | A00574 | 160 | A00147 | A00660 | 202 |
| A00147 | A00680 | 286 | A00147 | A00688 | 152 |
| A00147 | A00747 | 208 | A00147 | A00912 | 172 |
| A00147 | A01157 | 215 | A00147 | A01211 | 174 |
| A00147 | A01276 | 160 | A00147 | A01354 | 173 |
| A00147 | A01543 | 338 | A00147 | A01566 | 469 |
| A00147 | A01582 | 466 | A00147 | A01600 | 473 |
| A00147 | A01607 | 249 | A00147 | A01632 | 491 |
| A00147 | A01676 | 945 | A00147 | A01685 | 174 |
| A00147 | A01729 | 299 | A00147 | A01730 | 945 |
| A00147 | A01740 | 491 | A00147 | A01741 | 351 |
| A00147 | A01755 | 483 | A00147 | A01760 | 182 |
| A00147 | A01768 | 168 | A00147 | A01770 | 462 |
| A00147 | A01775 | 205 | A00147 | A01776 | 230 |
| A00147 | A01841 | 159 | A00147 | A01877 | 465 |
| A00147 | A01896 | 272 | A00147 | A01915 | 165 |
| A00147 | A01916 | 374 | A00147 | A02068 | 263 |
| A00147 | A02082 | 196 | A00147 | A02085 | 288 |
| A00147 | A02310 | 371 | A00147 | A02344 | 173 |
| A00147 | A02407 | 266 | A00147 | A02434 | 172 |
| A00147 | A02494 | 461 | A00147 | A02501 | 454 |
| A00147 | A02511 | 307 | A00147 | A02564 | 210 |
| A00147 | A02583 | 193 | A00147 | A02618 | 176 |
| A00147 | A02664 | 240 | A00147 | A02687 | 434 |
| A00147 | A02695 | 296 | A00147 | A02702 | 227 |
| A00147 | A02703 | 484 | A00147 | A02736 | 419 |
| A00147 | A02737 | 418 | A00147 | A02744 | 168 |
| A00147 | A02786 | 165 | A00147 | A02805 | 198 |
| A00147 | A02816 | 486 | A00147 | A02825 | 238 |
| A00147 | A02827 | 363 | A00147 | A02830 | 491 |
| A00147 | A02836 | 188 | A00147 | A02867 | 288 |
| A00147 | A02877 | 491 | A00147 | A02878 | 491 |
| A00147 | A02904 | 268 | A00147 | A02921 | 243 |
| A00147 | A02927 | 458 | A00147 | A02939 | 413 |
| A00147 | A02943 | 243 | A00147 | A02962 | 291 |
| A00147 | A03001 | 193 | A00147 | A03082 | 160 |

|        |        |     |        |        |     |
|--------|--------|-----|--------|--------|-----|
| A00147 | A03112 | 447 | A00147 | A03126 | 278 |
| A00147 | A03211 | 491 | A00147 | A03223 | 212 |
| A00147 | A03276 | 456 | A00147 | A03321 | 63  |
| A00147 | A03415 | 152 | A00147 | A03447 | 165 |
| A00147 | A03451 | 447 | A00147 | A03591 | 945 |
| A00147 | A03611 | 82  | A00147 | A03613 | 227 |
| A00147 | A03839 | 179 | A00147 | A04229 | 207 |
| A00147 | A04235 | 288 | A00147 | A04282 | 279 |
| A00147 | A04305 | 433 | A00147 | A04308 | 441 |
| A00147 | A04310 | 235 | A00147 | A04342 | 195 |
| A00147 | A04493 | 243 | A00147 | A04533 | 279 |
| A00147 | A04543 | 163 | A00147 | A04576 | 256 |
| A00147 | A04675 | 262 | A00147 | A04737 | 355 |
| A00147 | A04815 | 217 | A00147 | A04944 | 400 |
| A00147 | A04964 | 344 | A00147 | A04965 | 356 |
| A00147 | A04972 | 191 | A00147 | A05106 | 210 |
| A00147 | A05247 | 154 | A00147 | A05250 | 360 |
| A00147 | A05288 | 491 | A00147 | A05296 | 235 |
| A00147 | A05315 | 204 | A00147 | A05462 | 483 |
| A00147 | A05490 | 288 | A00147 | A05645 | 170 |
| A00147 | A05703 | 288 | A00147 | A05866 | 170 |
| A00147 | A06010 | 168 | A00147 | A06078 | 179 |
| A00147 | A06151 | 389 | A00147 | A06152 | 262 |
| A00147 | A06400 | 258 | A00147 | A06442 | 341 |
| A00147 | A06535 | 360 | A00147 | A06607 | 436 |
| A00147 | A06608 | 394 | A00147 | A06626 | 243 |
| A00147 | A06648 | 191 | A00147 | A06650 | 308 |
| A00147 | A06666 | 371 | A00147 | A06688 | 481 |
| A00147 | A06871 | 301 | A00147 | A07016 | 205 |
| A00147 | A07066 | 256 | A00147 | A07163 | 489 |
| A00147 | A07179 | 270 | A00147 | A07217 | 208 |
| A00147 | A07399 | 311 | A00147 | A07684 | 157 |
| A00147 | A07856 | 240 | A00147 | A08135 | 305 |
| A00147 | A08417 | 333 | A00147 | A08655 | 180 |
| A00147 | A09058 | 323 | A00147 | A09218 | 296 |
| A00147 | A09247 | 152 | A00147 | A09248 | 160 |
| A00147 | A09402 | 288 | A00147 | A09409 | 288 |
| A00147 | A09441 | 217 | A00147 | A09457 | 301 |
| A00147 | A09575 | 278 | A00147 | A09770 | 404 |
| A00147 | A09976 | 371 | A00147 | A10082 | 256 |
| A00147 | A10103 | 430 | A00147 | A10284 | 353 |
| A00147 | A11104 | 165 | A00147 | A11404 | 190 |
| A00147 | A11411 | 188 | A00147 | A11468 | 288 |
| A00147 | A11513 | 210 | A00147 | A11621 | 490 |
| A00147 | A12049 | 217 | A00147 | A12246 | 227 |
| A00147 | A13157 | 288 | A00147 | A13362 | 353 |



|        |        |     |        |        |     |
|--------|--------|-----|--------|--------|-----|
| A00147 | A13511 | 491 | A00147 | A13886 | 185 |
| A00147 | A14302 | 341 | A00147 | A14444 | 179 |
| A00147 | A14800 | 404 | A00147 | A15018 | 227 |
| A00147 | A15910 | 278 | A00147 | A15929 | 317 |
| A00147 | A16877 | 152 | A00147 | A16969 | 341 |
| A00148 | A00163 | 297 | A00148 | A00165 | 193 |
| A00148 | A00171 | 469 | A00148 | A00209 | 901 |
| A00148 | A00224 | 899 | A00148 | A00232 | 218 |
| A00148 | A00305 | 263 | A00148 | A00476 | 347 |
| A00148 | A01483 | 480 | A00148 | A01527 | 899 |
| A00148 | A01733 | 179 | A00148 | A01748 | 167 |
| A00148 | A02308 | 176 | A00148 | A02488 | 193 |
| A00148 | A03338 | 221 | A00148 | A03861 | 188 |
| A00148 | A04429 | 288 | A00148 | A04495 | 196 |
| A00148 | A04769 | 299 | A00148 | A04977 | 217 |
| A00148 | A06203 | 340 | A00148 | A06379 | 311 |
| A00148 | A07277 | 361 | A00148 | A09431 | 307 |
| A00148 | A10580 | 196 | A00148 | A10899 | 218 |
| A00148 | A13978 | 329 | A00148 | A14299 | 483 |
| A00148 | A14444 | 927 | A00148 | A15726 | 314 |
| A00149 | A00151 | 238 | A00149 | A00152 | 489 |
| A00149 | A00153 | 899 | A00149 | A00154 | 916 |
| A00149 | A00159 | 945 | A00149 | A00163 | 989 |
| A00149 | A00167 | 424 | A00149 | A00171 | 195 |
| A00149 | A00175 | 334 | A00149 | A00188 | 204 |
| A00149 | A00190 | 490 | A00149 | A00209 | 899 |
| A00149 | A00219 | 899 | A00149 | A00228 | 210 |
| A00149 | A00232 | 491 | A00149 | A00233 | 243 |
| A00149 | A00248 | 945 | A00149 | A00260 | 423 |
| A00149 | A00309 | 440 | A00149 | A00324 | 899 |
| A00149 | A00336 | 198 | A00149 | A00400 | 619 |
| A00149 | A00410 | 165 | A00149 | A00472 | 258 |
| A00149 | A00496 | 199 | A00149 | A00628 | 199 |
| A00149 | A00643 | 419 | A00149 | A00704 | 171 |
| A00149 | A00781 | 899 | A00149 | A00820 | 196 |
| A00149 | A00852 | 446 | A00149 | A00883 | 899 |
| A00149 | A00887 | 899 | A00149 | A00914 | 937 |
| A00149 | A00967 | 334 | A00149 | A00968 | 218 |
| A00149 | A01052 | 207 | A00149 | A01151 | 334 |
| A00149 | A01361 | 174 | A00149 | A01524 | 989 |
| A00149 | A01527 | 989 | A00149 | A01537 | 404 |
| A00149 | A01558 | 199 | A00149 | A01562 | 899 |
| A00149 | A01572 | 486 | A00149 | A01588 | 899 |
| A00149 | A01628 | 899 | A00149 | A01638 | 899 |
| A00149 | A01668 | 411 | A00149 | A01669 | 945 |
| A00149 | A01676 | 491 | A00149 | A01693 | 313 |

|        |        |     |        |        |     |
|--------|--------|-----|--------|--------|-----|
| A00149 | A01708 | 899 | A00149 | A01729 | 297 |
| A00149 | A01741 | 940 | A00149 | A01743 | 157 |
| A00149 | A01775 | 210 | A00149 | A01781 | 899 |
| A00149 | A01797 | 152 | A00149 | A01844 | 899 |
| A00149 | A01882 | 205 | A00149 | A01908 | 899 |
| A00149 | A01926 | 334 | A00149 | A01992 | 160 |
| A00149 | A02086 | 356 | A00149 | A02159 | 213 |
| A00149 | A02411 | 899 | A00149 | A02481 | 334 |
| A00149 | A02491 | 384 | A00149 | A02606 | 899 |
| A00149 | A02625 | 301 | A00149 | A02717 | 345 |
| A00149 | A02718 | 199 | A00149 | A02753 | 467 |
| A00149 | A02797 | 899 | A00149 | A02837 | 193 |
| A00149 | A02903 | 160 | A00149 | A02908 | 901 |
| A00149 | A02968 | 899 | A00149 | A03095 | 489 |
| A00149 | A03097 | 899 | A00149 | A03302 | 191 |
| A00149 | A03401 | 207 | A00149 | A03406 | 183 |
| A00149 | A03434 | 356 | A00149 | A03539 | 249 |
| A00149 | A03873 | 334 | A00149 | A03893 | 313 |
| A00149 | A04187 | 899 | A00149 | A04395 | 176 |
| A00149 | A04410 | 171 | A00149 | A04449 | 380 |
| A00149 | A04477 | 899 | A00149 | A04488 | 180 |
| A00149 | A04512 | 235 | A00149 | A04622 | 274 |
| A00149 | A04627 | 207 | A00149 | A04743 | 168 |
| A00149 | A04847 | 223 | A00149 | A04908 | 313 |
| A00149 | A04996 | 317 | A00149 | A05307 | 198 |
| A00149 | A05367 | 305 | A00149 | A05583 | 191 |
| A00149 | A06039 | 199 | A00149 | A06289 | 899 |
| A00149 | A06476 | 235 | A00149 | A06581 | 196 |
| A00149 | A06609 | 899 | A00149 | A07091 | 899 |
| A00149 | A07096 | 288 | A00149 | A07153 | 344 |
| A00149 | A07165 | 260 | A00149 | A07185 | 176 |
| A00149 | A07187 | 179 | A00149 | A07201 | 462 |
| A00149 | A07209 | 279 | A00149 | A07222 | 160 |
| A00149 | A07307 | 899 | A00149 | A07311 | 899 |
| A00149 | A07339 | 903 | A00149 | A07495 | 199 |
| A00149 | A07799 | 154 | A00149 | A07961 | 286 |
| A00149 | A07974 | 213 | A00149 | A08133 | 199 |
| A00149 | A08567 | 899 | A00149 | A08571 | 899 |
| A00149 | A08572 | 185 | A00149 | A08751 | 160 |
| A00149 | A08850 | 334 | A00149 | A08878 | 899 |
| A00149 | A09490 | 213 | A00149 | A09577 | 899 |
| A00149 | A09603 | 198 | A00149 | A09654 | 899 |
| A00149 | A10174 | 899 | A00149 | A10234 | 235 |
| A00149 | A10240 | 198 | A00149 | A10272 | 301 |
| A00149 | A10291 | 383 | A00149 | A10508 | 154 |
| A00149 | A10773 | 152 | A00149 | A11242 | 223 |

|        |        |     |        |        |     |
|--------|--------|-----|--------|--------|-----|
| A00149 | A11339 | 198 | A00149 | A11343 | 185 |
| A00149 | A11559 | 334 | A00149 | A11687 | 154 |
| A00149 | A11749 | 270 | A00149 | A11905 | 191 |
| A00149 | A11907 | 301 | A00149 | A11964 | 176 |
| A00149 | A11983 | 937 | A00149 | A12373 | 334 |
| A00149 | A12390 | 160 | A00149 | A12662 | 367 |
| A00149 | A13225 | 899 | A00149 | A13737 | 899 |
| A00149 | A13750 | 899 | A00149 | A13963 | 899 |
| A00149 | A13975 | 899 | A00149 | A14019 | 899 |
| A00149 | A14023 | 899 | A00149 | A14098 | 191 |
| A00149 | A14148 | 174 | A00149 | A14193 | 469 |
| A00149 | A14194 | 899 | A00149 | A14210 | 334 |
| A00149 | A14247 | 899 | A00149 | A14371 | 334 |
| A00149 | A14444 | 989 | A00149 | A14636 | 555 |
| A00149 | A14643 | 180 | A00149 | A15856 | 899 |
| A00149 | A15949 | 899 | A00149 | A16068 | 899 |
| A00149 | A16297 | 899 | A00149 | A16644 | 154 |
| A00149 | A17047 | 899 | A00150 | A00152 | 633 |
| A00150 | A00159 | 199 | A00150 | A00162 | 466 |
| A00150 | A00167 | 903 | A00150 | A00177 | 741 |
| A00150 | A00178 | 906 | A00150 | A00191 | 950 |
| A00150 | A00192 | 486 | A00150 | A00203 | 945 |
| A00150 | A00204 | 199 | A00150 | A00209 | 914 |
| A00150 | A00212 | 720 | A00150 | A00219 | 375 |
| A00150 | A00221 | 238 | A00150 | A00222 | 479 |
| A00150 | A00223 | 967 | A00150 | A00231 | 899 |
| A00150 | A00240 | 395 | A00150 | A00243 | 200 |
| A00150 | A00247 | 536 | A00150 | A00252 | 899 |
| A00150 | A00253 | 899 | A00150 | A00257 | 610 |
| A00150 | A00258 | 986 | A00150 | A00268 | 396 |
| A00150 | A00270 | 154 | A00150 | A00279 | 491 |
| A00150 | A00280 | 491 | A00150 | A00281 | 491 |
| A00150 | A00283 | 648 | A00150 | A00284 | 488 |
| A00150 | A00285 | 491 | A00150 | A00286 | 193 |
| A00150 | A00288 | 641 | A00150 | A00289 | 491 |
| A00150 | A00292 | 188 | A00150 | A00296 | 452 |
| A00150 | A00299 | 489 | A00150 | A00304 | 491 |
| A00150 | A00323 | 467 | A00150 | A00325 | 429 |
| A00150 | A00327 | 443 | A00150 | A00328 | 491 |
| A00150 | A00329 | 404 | A00150 | A00334 | 491 |
| A00150 | A00335 | 956 | A00150 | A00337 | 163 |
| A00150 | A00340 | 586 | A00150 | A00348 | 446 |
| A00150 | A00355 | 180 | A00150 | A00356 | 865 |
| A00150 | A00357 | 490 | A00150 | A00358 | 488 |
| A00150 | A00366 | 490 | A00150 | A00368 | 401 |
| A00150 | A00371 | 340 | A00150 | A00374 | 170 |

|        |        |     |        |        |     |
|--------|--------|-----|--------|--------|-----|
| A00150 | A00404 | 481 | A00150 | A00406 | 302 |
| A00150 | A00409 | 384 | A00150 | A00411 | 491 |
| A00150 | A00414 | 491 | A00150 | A00423 | 491 |
| A00150 | A00427 | 420 | A00150 | A00433 | 306 |
| A00150 | A00439 | 152 | A00150 | A00444 | 351 |
| A00150 | A00454 | 491 | A00150 | A00458 | 368 |
| A00150 | A00467 | 491 | A00150 | A00469 | 491 |
| A00150 | A00489 | 347 | A00150 | A00494 | 465 |
| A00150 | A00500 | 417 | A00150 | A00501 | 193 |
| A00150 | A00505 | 329 | A00150 | A00507 | 418 |
| A00150 | A00520 | 207 | A00150 | A00521 | 491 |
| A00150 | A00531 | 620 | A00150 | A00554 | 170 |
| A00150 | A00560 | 404 | A00150 | A00561 | 491 |
| A00150 | A00571 | 582 | A00150 | A00589 | 157 |
| A00150 | A00590 | 651 | A00150 | A00593 | 490 |
| A00150 | A00595 | 170 | A00150 | A00603 | 491 |
| A00150 | A00605 | 491 | A00150 | A00629 | 581 |
| A00150 | A00643 | 167 | A00150 | A00648 | 595 |
| A00150 | A00651 | 984 | A00150 | A00653 | 528 |
| A00150 | A00694 | 548 | A00150 | A00698 | 427 |
| A00150 | A00700 | 945 | A00150 | A00701 | 491 |
| A00150 | A00705 | 491 | A00150 | A00711 | 486 |
| A00150 | A00713 | 550 | A00150 | A00727 | 177 |
| A00150 | A00749 | 170 | A00150 | A00763 | 491 |
| A00150 | A00767 | 170 | A00150 | A00782 | 491 |
| A00150 | A00783 | 460 | A00150 | A00787 | 553 |
| A00150 | A00788 | 313 | A00150 | A00805 | 391 |
| A00150 | A00806 | 489 | A00150 | A00809 | 236 |
| A00150 | A00811 | 414 | A00150 | A00812 | 341 |
| A00150 | A00826 | 163 | A00150 | A00831 | 461 |
| A00150 | A00832 | 899 | A00150 | A00833 | 428 |
| A00150 | A00839 | 802 | A00150 | A00841 | 489 |
| A00150 | A00843 | 414 | A00150 | A00848 | 485 |
| A00150 | A00861 | 499 | A00150 | A00870 | 479 |
| A00150 | A00872 | 170 | A00150 | A00876 | 380 |
| A00150 | A00878 | 491 | A00150 | A00879 | 490 |
| A00150 | A00902 | 454 | A00150 | A00905 | 490 |
| A00150 | A00910 | 230 | A00150 | A00916 | 600 |
| A00150 | A00918 | 170 | A00150 | A00919 | 423 |
| A00150 | A00922 | 491 | A00150 | A00923 | 491 |
| A00150 | A00932 | 490 | A00150 | A00934 | 170 |
| A00150 | A00945 | 480 | A00150 | A00955 | 585 |
| A00150 | A00965 | 481 | A00150 | A00966 | 491 |
| A00150 | A00970 | 491 | A00150 | A00972 | 489 |
| A00150 | A00973 | 187 | A00150 | A00980 | 546 |
| A00150 | A00983 | 210 | A00150 | A00986 | 281 |

|        |        |     |        |        |     |
|--------|--------|-----|--------|--------|-----|
| A00150 | A00990 | 383 | A00150 | A00991 | 279 |
| A00150 | A00992 | 389 | A00150 | A01000 | 490 |
| A00150 | A01012 | 586 | A00150 | A01017 | 491 |
| A00150 | A01025 | 491 | A00150 | A01028 | 210 |
| A00150 | A01029 | 486 | A00150 | A01032 | 236 |
| A00150 | A01034 | 384 | A00150 | A01037 | 526 |
| A00150 | A01038 | 578 | A00150 | A01042 | 491 |
| A00150 | A01047 | 424 | A00150 | A01054 | 469 |
| A00150 | A01056 | 956 | A00150 | A01069 | 307 |
| A00150 | A01072 | 491 | A00150 | A01082 | 377 |
| A00150 | A01083 | 433 | A00150 | A01085 | 491 |
| A00150 | A01090 | 491 | A00150 | A01091 | 899 |
| A00150 | A01092 | 408 | A00150 | A01098 | 627 |
| A00150 | A01101 | 489 | A00150 | A01112 | 695 |
| A00150 | A01115 | 491 | A00150 | A01120 | 484 |
| A00150 | A01121 | 475 | A00150 | A01127 | 587 |
| A00150 | A01129 | 170 | A00150 | A01130 | 208 |
| A00150 | A01139 | 218 | A00150 | A01140 | 491 |
| A00150 | A01144 | 184 | A00150 | A01150 | 491 |
| A00150 | A01154 | 486 | A00150 | A01160 | 176 |
| A00150 | A01166 | 491 | A00150 | A01168 | 943 |
| A00150 | A01184 | 480 | A00150 | A01186 | 430 |
| A00150 | A01189 | 490 | A00150 | A01192 | 400 |
| A00150 | A01193 | 154 | A00150 | A01194 | 438 |
| A00150 | A01196 | 491 | A00150 | A01201 | 363 |
| A00150 | A01206 | 491 | A00150 | A01212 | 491 |
| A00150 | A01216 | 563 | A00150 | A01217 | 414 |
| A00150 | A01219 | 480 | A00150 | A01221 | 246 |
| A00150 | A01234 | 491 | A00150 | A01238 | 240 |
| A00150 | A01243 | 470 | A00150 | A01247 | 491 |
| A00150 | A01249 | 491 | A00150 | A01261 | 390 |
| A00150 | A01263 | 625 | A00150 | A01270 | 491 |
| A00150 | A01275 | 435 | A00150 | A01282 | 390 |
| A00150 | A01288 | 472 | A00150 | A01291 | 991 |
| A00150 | A01294 | 294 | A00150 | A01306 | 661 |
| A00150 | A01309 | 163 | A00150 | A01335 | 491 |
| A00150 | A01337 | 485 | A00150 | A01351 | 170 |
| A00150 | A01356 | 170 | A00150 | A01362 | 306 |
| A00150 | A01365 | 491 | A00150 | A01369 | 490 |
| A00150 | A01384 | 488 | A00150 | A01392 | 318 |
| A00150 | A01393 | 215 | A00150 | A01406 | 475 |
| A00150 | A01407 | 358 | A00150 | A01411 | 549 |
| A00150 | A01425 | 962 | A00150 | A01431 | 491 |
| A00150 | A01433 | 485 | A00150 | A01435 | 443 |
| A00150 | A01436 | 296 | A00150 | A01437 | 491 |
| A00150 | A01447 | 457 | A00150 | A01449 | 458 |

|        |        |     |        |        |     |
|--------|--------|-----|--------|--------|-----|
| A00150 | A01457 | 543 | A00150 | A01458 | 534 |
| A00150 | A01461 | 624 | A00150 | A01464 | 481 |
| A00150 | A01468 | 563 | A00150 | A01470 | 491 |
| A00150 | A01473 | 199 | A00150 | A01487 | 350 |
| A00150 | A01488 | 485 | A00150 | A01492 | 975 |
| A00150 | A01495 | 369 | A00150 | A01496 | 945 |
| A00150 | A01503 | 527 | A00150 | A01512 | 899 |
| A00150 | A01522 | 307 | A00150 | A01527 | 903 |
| A00150 | A01530 | 330 | A00150 | A01531 | 413 |
| A00150 | A01538 | 535 | A00150 | A01539 | 535 |
| A00150 | A01540 | 401 | A00150 | A01558 | 899 |
| A00150 | A01560 | 491 | A00150 | A01561 | 621 |
| A00150 | A01569 | 491 | A00150 | A01572 | 333 |
| A00150 | A01579 | 651 | A00150 | A01586 | 563 |
| A00150 | A01588 | 899 | A00150 | A01597 | 467 |
| A00150 | A01598 | 581 | A00150 | A01601 | 991 |
| A00150 | A01605 | 949 | A00150 | A01606 | 455 |
| A00150 | A01612 | 537 | A00150 | A01614 | 540 |
| A00150 | A01618 | 277 | A00150 | A01638 | 899 |
| A00150 | A01649 | 587 | A00150 | A01652 | 212 |
| A00150 | A01684 | 475 | A00150 | A01707 | 491 |
| A00150 | A01718 | 489 | A00150 | A01740 | 396 |
| A00150 | A01764 | 210 | A00150 | A01770 | 899 |
| A00150 | A01787 | 491 | A00150 | A01822 | 534 |
| A00150 | A01917 | 378 | A00150 | A01995 | 615 |
| A00150 | A02148 | 260 | A00150 | A02179 | 491 |
| A00150 | A02216 | 452 | A00150 | A02227 | 363 |
| A00150 | A02265 | 529 | A00150 | A02270 | 401 |
| A00150 | A02350 | 491 | A00150 | A02397 | 293 |
| A00150 | A02437 | 63  | A00150 | A02494 | 579 |
| A00150 | A02592 | 77  | A00150 | A02675 | 152 |
| A00150 | A02877 | 486 | A00150 | A02928 | 281 |
| A00150 | A02950 | 398 | A00150 | A02978 | 404 |
| A00150 | A03048 | 185 | A00150 | A03049 | 210 |
| A00150 | A03069 | 491 | A00150 | A03070 | 483 |
| A00150 | A03083 | 470 | A00150 | A03164 | 486 |
| A00150 | A03188 | 260 | A00150 | A03298 | 470 |
| A00150 | A03304 | 490 | A00150 | A03332 | 324 |
| A00150 | A03438 | 540 | A00150 | A03445 | 491 |
| A00150 | A03446 | 488 | A00150 | A03461 | 486 |
| A00150 | A03493 | 404 | A00150 | A03567 | 582 |
| A00150 | A03569 | 486 | A00150 | A03571 | 461 |
| A00150 | A03625 | 899 | A00150 | A03639 | 259 |
| A00150 | A03645 | 199 | A00150 | A03652 | 170 |
| A00150 | A03686 | 899 | A00150 | A03726 | 935 |
| A00150 | A03738 | 457 | A00150 | A03740 | 491 |

|        |        |     |        |        |     |
|--------|--------|-----|--------|--------|-----|
| A00150 | A03752 | 533 | A00150 | A03754 | 308 |
| A00150 | A03809 | 491 | A00150 | A03858 | 183 |
| A00150 | A03859 | 480 | A00150 | A03860 | 183 |
| A00150 | A03939 | 218 | A00150 | A03963 | 940 |
| A00150 | A03981 | 621 | A00150 | A04099 | 454 |
| A00150 | A04202 | 467 | A00150 | A04230 | 491 |
| A00150 | A04846 | 455 | A00150 | A04856 | 231 |
| A00150 | A04858 | 255 | A00150 | A04988 | 455 |
| A00150 | A05029 | 283 | A00150 | A05076 | 286 |
| A00150 | A05086 | 213 | A00150 | A05090 | 179 |
| A00150 | A05149 | 382 | A00150 | A05230 | 180 |
| A00150 | A05298 | 259 | A00150 | A05411 | 218 |
| A00150 | A05418 | 407 | A00150 | A05443 | 491 |
| A00150 | A05449 | 491 | A00150 | A05450 | 373 |
| A00150 | A05499 | 391 | A00150 | A05501 | 491 |
| A00150 | A05557 | 489 | A00150 | A05654 | 486 |
| A00150 | A06037 | 480 | A00150 | A06121 | 382 |
| A00150 | A06275 | 193 | A00150 | A06277 | 327 |
| A00150 | A06279 | 490 | A00150 | A06286 | 330 |
| A00150 | A06351 | 489 | A00150 | A06356 | 170 |
| A00150 | A06466 | 527 | A00150 | A06534 | 490 |
| A00150 | A06564 | 490 | A00150 | A06696 | 160 |
| A00150 | A06779 | 210 | A00150 | A06785 | 215 |
| A00150 | A06812 | 199 | A00150 | A06814 | 608 |
| A00150 | A06861 | 536 | A00150 | A06897 | 491 |
| A00150 | A06965 | 491 | A00150 | A06973 | 491 |
| A00150 | A07047 | 491 | A00150 | A07201 | 569 |
| A00150 | A07243 | 393 | A00150 | A07244 | 170 |
| A00150 | A07247 | 490 | A00150 | A07307 | 413 |
| A00150 | A07311 | 848 | A00150 | A07323 | 491 |
| A00150 | A07349 | 475 | A00150 | A07398 | 563 |
| A00150 | A07422 | 899 | A00150 | A07451 | 491 |
| A00150 | A07506 | 436 | A00150 | A07524 | 714 |
| A00150 | A07533 | 160 | A00150 | A07536 | 481 |
| A00150 | A07581 | 491 | A00150 | A07726 | 958 |
| A00150 | A07798 | 373 | A00150 | A07803 | 195 |
| A00150 | A07924 | 468 | A00150 | A07962 | 207 |
| A00150 | A07965 | 176 | A00150 | A08011 | 587 |
| A00150 | A08052 | 274 | A00150 | A08061 | 463 |
| A00150 | A08131 | 491 | A00150 | A08137 | 530 |
| A00150 | A08154 | 480 | A00150 | A08211 | 170 |
| A00150 | A08273 | 212 | A00150 | A08277 | 452 |
| A00150 | A08301 | 490 | A00150 | A08315 | 272 |
| A00150 | A08321 | 382 | A00150 | A08327 | 477 |
| A00150 | A08357 | 491 | A00150 | A08358 | 491 |
| A00150 | A08359 | 491 | A00150 | A08369 | 563 |

|        |        |     |        |        |     |
|--------|--------|-----|--------|--------|-----|
| A00150 | A08377 | 486 | A00150 | A08398 | 454 |
| A00150 | A08408 | 491 | A00150 | A08419 | 457 |
| A00150 | A08452 | 484 | A00150 | A08457 | 491 |
| A00150 | A08462 | 452 | A00150 | A08466 | 452 |
| A00150 | A08476 | 491 | A00150 | A08489 | 395 |
| A00150 | A08501 | 490 | A00150 | A08521 | 302 |
| A00150 | A08533 | 441 | A00150 | A08543 | 491 |
| A00150 | A08546 | 385 | A00150 | A08550 | 314 |
| A00150 | A08556 | 491 | A00150 | A08559 | 491 |
| A00150 | A08567 | 163 | A00150 | A08571 | 955 |
| A00150 | A08682 | 475 | A00150 | A08707 | 210 |
| A00150 | A08748 | 241 | A00150 | A08760 | 247 |
| A00150 | A08761 | 258 | A00150 | A08773 | 581 |
| A00150 | A08835 | 479 | A00150 | A08859 | 210 |
| A00150 | A08869 | 418 | A00150 | A08872 | 401 |
| A00150 | A08929 | 303 | A00150 | A08973 | 583 |
| A00150 | A08983 | 372 | A00150 | A08991 | 229 |
| A00150 | A09044 | 286 | A00150 | A09054 | 163 |
| A00150 | A09263 | 247 | A00150 | A09277 | 154 |
| A00150 | A09285 | 335 | A00150 | A09297 | 468 |
| A00150 | A09308 | 488 | A00150 | A09322 | 581 |
| A00150 | A09332 | 241 | A00150 | A09337 | 279 |
| A00150 | A09352 | 63  | A00150 | A09539 | 165 |
| A00150 | A09550 | 79  | A00150 | A09577 | 353 |
| A00150 | A09590 | 177 | A00150 | A09592 | 290 |
| A00150 | A09607 | 210 | A00150 | A09610 | 297 |
| A00150 | A09613 | 157 | A00150 | A09620 | 467 |
| A00150 | A09622 | 475 | A00150 | A09655 | 268 |
| A00150 | A09657 | 170 | A00150 | A09674 | 283 |
| A00150 | A09697 | 170 | A00150 | A09722 | 259 |
| A00150 | A09726 | 449 | A00150 | A09741 | 193 |
| A00150 | A09808 | 177 | A00150 | A09852 | 490 |
| A00150 | A09862 | 452 | A00150 | A09865 | 243 |
| A00150 | A09893 | 63  | A00150 | A09902 | 291 |
| A00150 | A09960 | 157 | A00150 | A09999 | 291 |
| A00150 | A10001 | 581 | A00150 | A10034 | 160 |
| A00150 | A10336 | 452 | A00150 | A10362 | 450 |
| A00150 | A10367 | 306 | A00150 | A10417 | 63  |
| A00150 | A10425 | 247 | A00150 | A10430 | 210 |
| A00150 | A10490 | 210 | A00150 | A10518 | 388 |
| A00150 | A10532 | 826 | A00150 | A10564 | 63  |
| A00150 | A10575 | 899 | A00150 | A10616 | 328 |
| A00150 | A10633 | 491 | A00150 | A10645 | 490 |
| A00150 | A10711 | 406 | A00150 | A10728 | 185 |
| A00150 | A10748 | 483 | A00150 | A10797 | 217 |
| A00150 | A10798 | 180 | A00150 | A11096 | 424 |



|        |        |     |        |        |     |
|--------|--------|-----|--------|--------|-----|
| A00150 | A11139 | 347 | A00150 | A11190 | 491 |
| A00150 | A11254 | 224 | A00150 | A11263 | 340 |
| A00150 | A11286 | 310 | A00150 | A11295 | 201 |
| A00150 | A11297 | 490 | A00150 | A11302 | 204 |
| A00150 | A11331 | 302 | A00150 | A11334 | 491 |
| A00150 | A11344 | 488 | A00150 | A11346 | 254 |
| A00150 | A11372 | 414 | A00150 | A11390 | 195 |
| A00150 | A11392 | 447 | A00150 | A11400 | 361 |
| A00150 | A11420 | 491 | A00150 | A11438 | 466 |
| A00150 | A11440 | 587 | A00150 | A11462 | 313 |
| A00150 | A11480 | 451 | A00150 | A11487 | 189 |
| A00150 | A11522 | 374 | A00150 | A11535 | 480 |
| A00150 | A11544 | 446 | A00150 | A11550 | 491 |
| A00150 | A11562 | 486 | A00150 | A11572 | 440 |
| A00150 | A11593 | 193 | A00150 | A11597 | 378 |
| A00150 | A11616 | 488 | A00150 | A11688 | 462 |
| A00150 | A11705 | 151 | A00150 | A11728 | 491 |
| A00150 | A11808 | 369 | A00150 | A11846 | 486 |
| A00150 | A11853 | 944 | A00150 | A11857 | 490 |
| A00150 | A11861 | 485 | A00150 | A11922 | 224 |
| A00150 | A11924 | 428 | A00150 | A11936 | 468 |
| A00150 | A11937 | 445 | A00150 | A11945 | 462 |
| A00150 | A11981 | 389 | A00150 | A11983 | 903 |
| A00150 | A12011 | 335 | A00150 | A12042 | 160 |
| A00150 | A12068 | 423 | A00150 | A12079 | 297 |
| A00150 | A12160 | 224 | A00150 | A12168 | 362 |
| A00150 | A12193 | 281 | A00150 | A12259 | 405 |
| A00150 | A12269 | 486 | A00150 | A12270 | 491 |
| A00150 | A12305 | 207 | A00150 | A12328 | 483 |
| A00150 | A12329 | 490 | A00150 | A12404 | 286 |
| A00150 | A12618 | 180 | A00150 | A12813 | 210 |
| A00150 | A12821 | 491 | A00150 | A12970 | 362 |
| A00150 | A13002 | 299 | A00150 | A13012 | 210 |
| A00150 | A13052 | 170 | A00150 | A13063 | 962 |
| A00150 | A13107 | 252 | A00150 | A13126 | 480 |
| A00150 | A13207 | 174 | A00150 | A13311 | 486 |
| A00150 | A13335 | 388 | A00150 | A13340 | 491 |
| A00150 | A13357 | 396 | A00150 | A13375 | 221 |
| A00150 | A13403 | 177 | A00150 | A13425 | 424 |
| A00150 | A13525 | 168 | A00150 | A13527 | 177 |
| A00150 | A13581 | 269 | A00150 | A13609 | 208 |
| A00150 | A13626 | 152 | A00150 | A13702 | 207 |
| A00150 | A13708 | 163 | A00150 | A13710 | 491 |
| A00150 | A13752 | 351 | A00150 | A13824 | 899 |
| A00150 | A13829 | 899 | A00150 | A13830 | 491 |
| A00150 | A13874 | 358 | A00150 | A13875 | 435 |

|        |        |     |        |        |     |
|--------|--------|-----|--------|--------|-----|
| A00150 | A13889 | 189 | A00150 | A13944 | 163 |
| A00150 | A13989 | 989 | A00150 | A13992 | 587 |
| A00150 | A13994 | 358 | A00150 | A14025 | 340 |
| A00150 | A14038 | 940 | A00150 | A14055 | 925 |
| A00150 | A14073 | 488 | A00150 | A14090 | 468 |
| A00150 | A14148 | 899 | A00150 | A14150 | 406 |
| A00150 | A14152 | 461 | A00150 | A14169 | 488 |
| A00150 | A14172 | 558 | A00150 | A14176 | 491 |
| A00150 | A14188 | 489 | A00150 | A14192 | 151 |
| A00150 | A14206 | 401 | A00150 | A14216 | 915 |
| A00150 | A14246 | 899 | A00150 | A14249 | 185 |
| A00150 | A14257 | 389 | A00150 | A14386 | 224 |
| A00150 | A14410 | 379 | A00150 | A14443 | 989 |
| A00150 | A14447 | 157 | A00150 | A14476 | 154 |
| A00150 | A14496 | 216 | A00150 | A14505 | 283 |
| A00150 | A14508 | 491 | A00150 | A14530 | 457 |
| A00150 | A14566 | 477 | A00150 | A14568 | 291 |
| A00150 | A14591 | 267 | A00150 | A14738 | 480 |
| A00150 | A14758 | 199 | A00150 | A14908 | 286 |
| A00150 | A14923 | 412 | A00150 | A14937 | 586 |
| A00150 | A14948 | 199 | A00150 | A15034 | 277 |
| A00150 | A15183 | 162 | A00150 | A15202 | 491 |
| A00150 | A15225 | 491 | A00150 | A15229 | 378 |
| A00150 | A15235 | 481 | A00150 | A15236 | 383 |
| A00150 | A15244 | 581 | A00150 | A15268 | 945 |
| A00150 | A15297 | 905 | A00150 | A15324 | 899 |
| A00150 | A15353 | 899 | A00150 | A15359 | 899 |
| A00150 | A15376 | 291 | A00150 | A15381 | 491 |
| A00150 | A15499 | 368 | A00150 | A15500 | 582 |
| A00150 | A15507 | 513 | A00150 | A15547 | 924 |
| A00150 | A15559 | 899 | A00150 | A15614 | 903 |
| A00150 | A15658 | 174 | A00150 | A15660 | 539 |
| A00150 | A15684 | 738 | A00150 | A15708 | 319 |
| A00150 | A15711 | 483 | A00150 | A15732 | 491 |
| A00150 | A15743 | 379 | A00150 | A15751 | 207 |
| A00150 | A15769 | 409 | A00150 | A15771 | 286 |
| A00150 | A15778 | 419 | A00150 | A15931 | 491 |
| A00150 | A15932 | 229 | A00150 | A15933 | 235 |
| A00150 | A15938 | 256 | A00150 | A15971 | 297 |
| A00150 | A15988 | 488 | A00150 | A16053 | 177 |
| A00150 | A16060 | 465 | A00150 | A16088 | 489 |
| A00150 | A16092 | 173 | A00150 | A16107 | 943 |
| A00150 | A16118 | 489 | A00150 | A16218 | 462 |
| A00150 | A16266 | 232 | A00150 | A16272 | 477 |
| A00150 | A16318 | 180 | A00150 | A16410 | 199 |
| A00150 | A16418 | 332 | A00150 | A16437 | 435 |

|        |        |     |        |        |     |
|--------|--------|-----|--------|--------|-----|
| A00150 | A16462 | 249 | A00150 | A16575 | 228 |
| A00150 | A16627 | 339 | A00150 | A16658 | 484 |
| A00150 | A16682 | 474 | A00150 | A16686 | 491 |
| A00150 | A16724 | 246 | A00150 | A16768 | 393 |
| A00150 | A16778 | 313 | A00150 | A16822 | 285 |
| A00150 | A16837 | 246 | A00150 | A16839 | 468 |
| A00150 | A16847 | 210 | A00150 | A16904 | 163 |
| A00150 | A16937 | 179 | A00150 | A17134 | 446 |
| A00150 | A17140 | 477 | A00150 | A17171 | 199 |
| A00150 | A17189 | 249 | A00151 | A00152 | 920 |
| A00151 | A00157 | 324 | A00151 | A00159 | 911 |
| A00151 | A00160 | 205 | A00151 | A00190 | 921 |
| A00151 | A00208 | 63  | A00151 | A00224 | 923 |
| A00151 | A00226 | 902 | A00151 | A00230 | 899 |
| A00151 | A00233 | 912 | A00151 | A00236 | 151 |
| A00151 | A00246 | 899 | A00151 | A00315 | 180 |
| A00151 | A00324 | 188 | A00151 | A00336 | 316 |
| A00151 | A00581 | 490 | A00151 | A00609 | 185 |
| A00151 | A00747 | 395 | A00151 | A00914 | 157 |
| A00151 | A01092 | 291 | A00151 | A01189 | 226 |
| A00151 | A01553 | 71  | A00151 | A01554 | 937 |
| A00151 | A01558 | 899 | A00151 | A01588 | 899 |
| A00151 | A01636 | 899 | A00151 | A01651 | 899 |
| A00151 | A01661 | 204 | A00151 | A01709 | 252 |
| A00151 | A01730 | 196 | A00151 | A01779 | 185 |
| A00151 | A01856 | 154 | A00151 | A02116 | 174 |
| A00151 | A02170 | 182 | A00151 | A02325 | 152 |
| A00151 | A02353 | 180 | A00151 | A02487 | 146 |
| A00151 | A02564 | 491 | A00151 | A02641 | 446 |
| A00151 | A02695 | 236 | A00151 | A02703 | 80  |
| A00151 | A02737 | 942 | A00151 | A02775 | 329 |
| A00151 | A02795 | 212 | A00151 | A02816 | 420 |
| A00151 | A02825 | 942 | A00151 | A02826 | 141 |
| A00151 | A02847 | 219 | A00151 | A02860 | 171 |
| A00151 | A02866 | 279 | A00151 | A02878 | 245 |
| A00151 | A02881 | 249 | A00151 | A02904 | 491 |
| A00151 | A02908 | 190 | A00151 | A02918 | 240 |
| A00151 | A03123 | 285 | A00151 | A03185 | 260 |
| A00151 | A03305 | 183 | A00151 | A03321 | 121 |
| A00151 | A03338 | 488 | A00151 | A03436 | 151 |
| A00151 | A04226 | 329 | A00151 | A04288 | 184 |
| A00151 | A04346 | 456 | A00151 | A04517 | 213 |
| A00151 | A04541 | 385 | A00151 | A04714 | 191 |
| A00151 | A04956 | 439 | A00151 | A05222 | 279 |
| A00151 | A05769 | 364 | A00151 | A06404 | 243 |
| A00151 | A07146 | 218 | A00151 | A07422 | 899 |

|        |        |     |        |        |     |
|--------|--------|-----|--------|--------|-----|
| A00151 | A07426 | 291 | A00151 | A07693 | 490 |
| A00151 | A07900 | 174 | A00151 | A08182 | 252 |
| A00151 | A08403 | 221 | A00151 | A08572 | 395 |
| A00151 | A08660 | 171 | A00151 | A08667 | 216 |
| A00151 | A08911 | 168 | A00151 | A09009 | 182 |
| A00151 | A09643 | 899 | A00151 | A09937 | 198 |
| A00151 | A10034 | 176 | A00151 | A10363 | 183 |
| A00151 | A10717 | 344 | A00151 | A10744 | 255 |
| A00151 | A10811 | 163 | A00151 | A10825 | 319 |
| A00151 | A11452 | 177 | A00151 | A11564 | 296 |
| A00151 | A11639 | 344 | A00151 | A11808 | 241 |
| A00151 | A13191 | 899 | A00151 | A13978 | 274 |
| A00151 | A14008 | 899 | A00151 | A14013 | 241 |
| A00151 | A14092 | 180 | A00151 | A14196 | 899 |
| A00151 | A15230 | 152 | A00151 | A15463 | 179 |
| A00151 | A15507 | 899 | A00151 | A15877 | 172 |
| A00151 | A16145 | 302 | A00152 | A00153 | 490 |
| A00152 | A00154 | 485 | A00152 | A00158 | 206 |
| A00152 | A00159 | 974 | A00152 | A00160 | 107 |
| A00152 | A00161 | 299 | A00152 | A00162 | 731 |
| A00152 | A00163 | 454 | A00152 | A00165 | 185 |
| A00152 | A00167 | 958 | A00152 | A00174 | 263 |
| A00152 | A00182 | 234 | A00152 | A00190 | 997 |
| A00152 | A00204 | 666 | A00152 | A00207 | 725 |
| A00152 | A00209 | 922 | A00152 | A00212 | 491 |
| A00152 | A00214 | 480 | A00152 | A00219 | 491 |
| A00152 | A00220 | 232 | A00152 | A00224 | 970 |
| A00152 | A00231 | 477 | A00152 | A00232 | 491 |
| A00152 | A00233 | 582 | A00152 | A00234 | 528 |
| A00152 | A00238 | 945 | A00152 | A00245 | 252 |
| A00152 | A00246 | 919 | A00152 | A00248 | 229 |
| A00152 | A00254 | 491 | A00152 | A00256 | 272 |
| A00152 | A00257 | 472 | A00152 | A00261 | 698 |
| A00152 | A00264 | 491 | A00152 | A00274 | 457 |
| A00152 | A00294 | 363 | A00152 | A00309 | 271 |
| A00152 | A00316 | 423 | A00152 | A00324 | 474 |
| A00152 | A00328 | 259 | A00152 | A00338 | 439 |
| A00152 | A00352 | 382 | A00152 | A00356 | 528 |
| A00152 | A00377 | 534 | A00152 | A00421 | 198 |
| A00152 | A00438 | 412 | A00152 | A00446 | 949 |
| A00152 | A00454 | 393 | A00152 | A00457 | 489 |
| A00152 | A00458 | 177 | A00152 | A00485 | 486 |
| A00152 | A00489 | 187 | A00152 | A00496 | 361 |
| A00152 | A00521 | 462 | A00152 | A00531 | 603 |
| A00152 | A00556 | 489 | A00152 | A00558 | 473 |
| A00152 | A00560 | 157 | A00152 | A00561 | 625 |

|        |        |     |        |        |     |
|--------|--------|-----|--------|--------|-----|
| A00152 | A00565 | 258 | A00152 | A00572 | 529 |
| A00152 | A00576 | 490 | A00152 | A00600 | 180 |
| A00152 | A00604 | 150 | A00152 | A00643 | 460 |
| A00152 | A00648 | 165 | A00152 | A00651 | 489 |
| A00152 | A00653 | 753 | A00152 | A00671 | 259 |
| A00152 | A00688 | 182 | A00152 | A00694 | 581 |
| A00152 | A00700 | 327 | A00152 | A00704 | 485 |
| A00152 | A00722 | 236 | A00152 | A00724 | 369 |
| A00152 | A00728 | 428 | A00152 | A00736 | 491 |
| A00152 | A00741 | 228 | A00152 | A00783 | 491 |
| A00152 | A00785 | 491 | A00152 | A00790 | 432 |
| A00152 | A00799 | 945 | A00152 | A00820 | 491 |
| A00152 | A00849 | 475 | A00152 | A00876 | 480 |
| A00152 | A00883 | 491 | A00152 | A00914 | 945 |
| A00152 | A00919 | 208 | A00152 | A00926 | 228 |
| A00152 | A00953 | 430 | A00152 | A00963 | 217 |
| A00152 | A00970 | 297 | A00152 | A00973 | 152 |
| A00152 | A00980 | 215 | A00152 | A00981 | 401 |
| A00152 | A00985 | 173 | A00152 | A00987 | 230 |
| A00152 | A01009 | 221 | A00152 | A01011 | 228 |
| A00152 | A01012 | 154 | A00152 | A01022 | 396 |
| A00152 | A01024 | 165 | A00152 | A01042 | 490 |
| A00152 | A01046 | 477 | A00152 | A01052 | 319 |
| A00152 | A01054 | 483 | A00152 | A01071 | 198 |
| A00152 | A01082 | 432 | A00152 | A01087 | 449 |
| A00152 | A01091 | 213 | A00152 | A01098 | 177 |
| A00152 | A01100 | 357 | A00152 | A01108 | 252 |
| A00152 | A01127 | 377 | A00152 | A01140 | 373 |
| A00152 | A01150 | 627 | A00152 | A01161 | 532 |
| A00152 | A01176 | 228 | A00152 | A01192 | 210 |
| A00152 | A01198 | 899 | A00152 | A01211 | 162 |
| A00152 | A01235 | 286 | A00152 | A01252 | 199 |
| A00152 | A01265 | 491 | A00152 | A01275 | 491 |
| A00152 | A01287 | 288 | A00152 | A01289 | 406 |
| A00152 | A01291 | 521 | A00152 | A01303 | 317 |
| A00152 | A01306 | 293 | A00152 | A01307 | 463 |
| A00152 | A01399 | 477 | A00152 | A01431 | 489 |
| A00152 | A01443 | 193 | A00152 | A01446 | 486 |
| A00152 | A01448 | 446 | A00152 | A01452 | 593 |
| A00152 | A01457 | 544 | A00152 | A01461 | 199 |
| A00152 | A01473 | 651 | A00152 | A01489 | 899 |
| A00152 | A01492 | 168 | A00152 | A01496 | 467 |
| A00152 | A01524 | 997 | A00152 | A01527 | 995 |
| A00152 | A01540 | 580 | A00152 | A01543 | 406 |
| A00152 | A01551 | 491 | A00152 | A01553 | 224 |
| A00152 | A01560 | 404 | A00152 | A01561 | 363 |

|        |        |     |        |        |     |
|--------|--------|-----|--------|--------|-----|
| A00152 | A01572 | 619 | A00152 | A01579 | 242 |
| A00152 | A01582 | 483 | A00152 | A01588 | 899 |
| A00152 | A01599 | 163 | A00152 | A01604 | 486 |
| A00152 | A01606 | 486 | A00152 | A01612 | 253 |
| A00152 | A01615 | 989 | A00152 | A01627 | 174 |
| A00152 | A01631 | 899 | A00152 | A01632 | 491 |
| A00152 | A01645 | 480 | A00152 | A01654 | 423 |
| A00152 | A01668 | 491 | A00152 | A01676 | 491 |
| A00152 | A01704 | 491 | A00152 | A01705 | 301 |
| A00152 | A01711 | 363 | A00152 | A01712 | 162 |
| A00152 | A01727 | 903 | A00152 | A01733 | 406 |
| A00152 | A01741 | 491 | A00152 | A01743 | 491 |
| A00152 | A01746 | 443 | A00152 | A01767 | 151 |
| A00152 | A01769 | 458 | A00152 | A01775 | 491 |
| A00152 | A01778 | 172 | A00152 | A01782 | 198 |
| A00152 | A01785 | 427 | A00152 | A01789 | 491 |
| A00152 | A01790 | 379 | A00152 | A01796 | 491 |
| A00152 | A01797 | 469 | A00152 | A01798 | 433 |
| A00152 | A01802 | 277 | A00152 | A01822 | 366 |
| A00152 | A01844 | 944 | A00152 | A01859 | 180 |
| A00152 | A01860 | 198 | A00152 | A01863 | 260 |
| A00152 | A01870 | 314 | A00152 | A01875 | 252 |
| A00152 | A01876 | 409 | A00152 | A01879 | 491 |
| A00152 | A01880 | 274 | A00152 | A01887 | 491 |
| A00152 | A01888 | 491 | A00152 | A01894 | 364 |
| A00152 | A01902 | 430 | A00152 | A01903 | 472 |
| A00152 | A01905 | 157 | A00152 | A01908 | 399 |
| A00152 | A01931 | 249 | A00152 | A01941 | 263 |
| A00152 | A02031 | 241 | A00152 | A02086 | 475 |
| A00152 | A02117 | 217 | A00152 | A02138 | 227 |
| A00152 | A02163 | 261 | A00152 | A02167 | 218 |
| A00152 | A02179 | 364 | A00152 | A02183 | 475 |
| A00152 | A02252 | 260 | A00152 | A02260 | 172 |
| A00152 | A02268 | 168 | A00152 | A02298 | 390 |
| A00152 | A02370 | 232 | A00152 | A02371 | 185 |
| A00152 | A02372 | 460 | A00152 | A02380 | 432 |
| A00152 | A02382 | 698 | A00152 | A02411 | 899 |
| A00152 | A02416 | 291 | A00152 | A02427 | 899 |
| A00152 | A02436 | 491 | A00152 | A02447 | 372 |
| A00152 | A02454 | 241 | A00152 | A02462 | 172 |
| A00152 | A02477 | 401 | A00152 | A02490 | 474 |
| A00152 | A02491 | 481 | A00152 | A02564 | 281 |
| A00152 | A02567 | 176 | A00152 | A02578 | 154 |
| A00152 | A02582 | 160 | A00152 | A02611 | 385 |
| A00152 | A02633 | 312 | A00152 | A02637 | 466 |
| A00152 | A02659 | 419 | A00152 | A02695 | 419 |

|        |        |     |        |        |     |
|--------|--------|-----|--------|--------|-----|
| A00152 | A02698 | 302 | A00152 | A02705 | 63  |
| A00152 | A02709 | 483 | A00152 | A02710 | 63  |
| A00152 | A02714 | 240 | A00152 | A02730 | 440 |
| A00152 | A02731 | 281 | A00152 | A02735 | 266 |
| A00152 | A02739 | 405 | A00152 | A02742 | 135 |
| A00152 | A02745 | 412 | A00152 | A02746 | 380 |
| A00152 | A02749 | 235 | A00152 | A02751 | 210 |
| A00152 | A02756 | 384 | A00152 | A02769 | 302 |
| A00152 | A02787 | 481 | A00152 | A02788 | 438 |
| A00152 | A02798 | 457 | A00152 | A02803 | 389 |
| A00152 | A02812 | 485 | A00152 | A02819 | 360 |
| A00152 | A02820 | 63  | A00152 | A02828 | 416 |
| A00152 | A02830 | 411 | A00152 | A02834 | 167 |
| A00152 | A02835 | 418 | A00152 | A02837 | 491 |
| A00152 | A02847 | 480 | A00152 | A02851 | 458 |
| A00152 | A02859 | 491 | A00152 | A02863 | 210 |
| A00152 | A02864 | 488 | A00152 | A02869 | 63  |
| A00152 | A02872 | 481 | A00152 | A02874 | 490 |
| A00152 | A02896 | 491 | A00152 | A02898 | 308 |
| A00152 | A02904 | 184 | A00152 | A02908 | 942 |
| A00152 | A02912 | 479 | A00152 | A02916 | 475 |
| A00152 | A02918 | 452 | A00152 | A02925 | 457 |
| A00152 | A02929 | 260 | A00152 | A02944 | 489 |
| A00152 | A02945 | 154 | A00152 | A02951 | 420 |
| A00152 | A02953 | 283 | A00152 | A02961 | 466 |
| A00152 | A02968 | 899 | A00152 | A02972 | 366 |
| A00152 | A02983 | 180 | A00152 | A02988 | 489 |
| A00152 | A03010 | 308 | A00152 | A03018 | 413 |
| A00152 | A03044 | 154 | A00152 | A03046 | 246 |
| A00152 | A03051 | 174 | A00152 | A03070 | 152 |
| A00152 | A03104 | 435 | A00152 | A03110 | 326 |
| A00152 | A03112 | 457 | A00152 | A03131 | 190 |
| A00152 | A03157 | 379 | A00152 | A03162 | 180 |
| A00152 | A03183 | 384 | A00152 | A03188 | 449 |
| A00152 | A03204 | 481 | A00152 | A03211 | 491 |
| A00152 | A03223 | 473 | A00152 | A03224 | 183 |
| A00152 | A03259 | 582 | A00152 | A03271 | 475 |
| A00152 | A03275 | 491 | A00152 | A03280 | 313 |
| A00152 | A03282 | 338 | A00152 | A03293 | 307 |
| A00152 | A03304 | 489 | A00152 | A03332 | 489 |
| A00152 | A03336 | 174 | A00152 | A03431 | 326 |
| A00152 | A03436 | 279 | A00152 | A03451 | 276 |
| A00152 | A03557 | 247 | A00152 | A03585 | 324 |
| A00152 | A03611 | 491 | A00152 | A03657 | 329 |
| A00152 | A03676 | 379 | A00152 | A03739 | 221 |
| A00152 | A03740 | 489 | A00152 | A03752 | 199 |

|        |        |     |        |        |     |
|--------|--------|-----|--------|--------|-----|
| A00152 | A03776 | 899 | A00152 | A03788 | 263 |
| A00152 | A03809 | 490 | A00152 | A03821 | 490 |
| A00152 | A03843 | 172 | A00152 | A03851 | 470 |
| A00152 | A03858 | 211 | A00152 | A03887 | 202 |
| A00152 | A03910 | 334 | A00152 | A03940 | 213 |
| A00152 | A03942 | 195 | A00152 | A03959 | 486 |
| A00152 | A03981 | 276 | A00152 | A04010 | 480 |
| A00152 | A04015 | 196 | A00152 | A04033 | 491 |
| A00152 | A04051 | 462 | A00152 | A04062 | 491 |
| A00152 | A04110 | 162 | A00152 | A04117 | 441 |
| A00152 | A04164 | 363 | A00152 | A04169 | 350 |
| A00152 | A04206 | 311 | A00152 | A04248 | 419 |
| A00152 | A04275 | 456 | A00152 | A04304 | 288 |
| A00152 | A04418 | 294 | A00152 | A04449 | 366 |
| A00152 | A04504 | 201 | A00152 | A04536 | 191 |
| A00152 | A04548 | 356 | A00152 | A04589 | 380 |
| A00152 | A04622 | 491 | A00152 | A04650 | 159 |
| A00152 | A04652 | 379 | A00152 | A04668 | 154 |
| A00152 | A04718 | 406 | A00152 | A04798 | 190 |
| A00152 | A04848 | 451 | A00152 | A04879 | 236 |
| A00152 | A04880 | 224 | A00152 | A04902 | 447 |
| A00152 | A04908 | 477 | A00152 | A04931 | 343 |
| A00152 | A04939 | 330 | A00152 | A04949 | 542 |
| A00152 | A04964 | 414 | A00152 | A04985 | 467 |
| A00152 | A05044 | 899 | A00152 | A05220 | 173 |
| A00152 | A05221 | 268 | A00152 | A05234 | 219 |
| A00152 | A05278 | 477 | A00152 | A05288 | 281 |
| A00152 | A05309 | 486 | A00152 | A05349 | 446 |
| A00152 | A05398 | 208 | A00152 | A05418 | 284 |
| A00152 | A05449 | 486 | A00152 | A05577 | 557 |
| A00152 | A05679 | 157 | A00152 | A05724 | 400 |
| A00152 | A05982 | 207 | A00152 | A06039 | 199 |
| A00152 | A06082 | 374 | A00152 | A06286 | 236 |
| A00152 | A06324 | 260 | A00152 | A06339 | 180 |
| A00152 | A06415 | 463 | A00152 | A06422 | 414 |
| A00152 | A06466 | 491 | A00152 | A06569 | 162 |
| A00152 | A06610 | 491 | A00152 | A06615 | 266 |
| A00152 | A06623 | 477 | A00152 | A06631 | 151 |
| A00152 | A06642 | 472 | A00152 | A06686 | 240 |
| A00152 | A06758 | 193 | A00152 | A06997 | 243 |
| A00152 | A07061 | 195 | A00152 | A07062 | 346 |
| A00152 | A07126 | 306 | A00152 | A07140 | 174 |
| A00152 | A07149 | 174 | A00152 | A07153 | 167 |
| A00152 | A07157 | 752 | A00152 | A07160 | 466 |
| A00152 | A07161 | 481 | A00152 | A07164 | 417 |
| A00152 | A07165 | 491 | A00152 | A07166 | 375 |



|        |        |     |        |        |     |
|--------|--------|-----|--------|--------|-----|
| A00152 | A07200 | 223 | A00152 | A07201 | 430 |
| A00152 | A07208 | 605 | A00152 | A07209 | 484 |
| A00152 | A07229 | 368 | A00152 | A07258 | 353 |
| A00152 | A07311 | 482 | A00152 | A07314 | 433 |
| A00152 | A07339 | 571 | A00152 | A07422 | 468 |
| A00152 | A07442 | 417 | A00152 | A07451 | 329 |
| A00152 | A07747 | 283 | A00152 | A07803 | 452 |
| A00152 | A07961 | 488 | A00152 | A08133 | 195 |
| A00152 | A08137 | 199 | A00152 | A08280 | 549 |
| A00152 | A08438 | 281 | A00152 | A08445 | 159 |
| A00152 | A08452 | 375 | A00152 | A08461 | 260 |
| A00152 | A08533 | 172 | A00152 | A08591 | 201 |
| A00152 | A08718 | 157 | A00152 | A08732 | 218 |
| A00152 | A08834 | 430 | A00152 | A08835 | 422 |
| A00152 | A08850 | 243 | A00152 | A08851 | 458 |
| A00152 | A08878 | 314 | A00152 | A08885 | 228 |
| A00152 | A08957 | 162 | A00152 | A08987 | 165 |
| A00152 | A09120 | 288 | A00152 | A09180 | 254 |
| A00152 | A09201 | 364 | A00152 | A09263 | 254 |
| A00152 | A09422 | 201 | A00152 | A09556 | 899 |
| A00152 | A09592 | 491 | A00152 | A09643 | 899 |
| A00152 | A09670 | 213 | A00152 | A09732 | 481 |
| A00152 | A09852 | 310 | A00152 | A09860 | 332 |
| A00152 | A09913 | 907 | A00152 | A10156 | 185 |
| A00152 | A10214 | 441 | A00152 | A10279 | 180 |
| A00152 | A10314 | 160 | A00152 | A10532 | 491 |
| A00152 | A10556 | 395 | A00152 | A10624 | 899 |
| A00152 | A10633 | 491 | A00152 | A10797 | 480 |
| A00152 | A10798 | 491 | A00152 | A10905 | 171 |
| A00152 | A10935 | 180 | A00152 | A11244 | 335 |
| A00152 | A11296 | 339 | A00152 | A11297 | 456 |
| A00152 | A11300 | 385 | A00152 | A11322 | 196 |
| A00152 | A11337 | 396 | A00152 | A11346 | 195 |
| A00152 | A11369 | 457 | A00152 | A11400 | 205 |
| A00152 | A11419 | 384 | A00152 | A11431 | 469 |
| A00152 | A11487 | 207 | A00152 | A11673 | 218 |
| A00152 | A11684 | 422 | A00152 | A11714 | 419 |
| A00152 | A11983 | 634 | A00152 | A12047 | 899 |
| A00152 | A12216 | 180 | A00152 | A12897 | 488 |
| A00152 | A13002 | 425 | A00152 | A13328 | 182 |
| A00152 | A13340 | 486 | A00152 | A13617 | 199 |
| A00152 | A13620 | 198 | A00152 | A13826 | 451 |
| A00152 | A13829 | 299 | A00152 | A13860 | 576 |
| A00152 | A13975 | 422 | A00152 | A13986 | 678 |
| A00152 | A13989 | 170 | A00152 | A14008 | 899 |
| A00152 | A14071 | 468 | A00152 | A14073 | 352 |

|        |        |     |        |        |     |
|--------|--------|-----|--------|--------|-----|
| A00152 | A14122 | 371 | A00152 | A14191 | 472 |
| A00152 | A14196 | 414 | A00152 | A14198 | 490 |
| A00152 | A14202 | 480 | A00152 | A14204 | 486 |
| A00152 | A14208 | 577 | A00152 | A14210 | 475 |
| A00152 | A14216 | 752 | A00152 | A14231 | 749 |
| A00152 | A14232 | 899 | A00152 | A14236 | 296 |
| A00152 | A14364 | 358 | A00152 | A14366 | 420 |
| A00152 | A14371 | 413 | A00152 | A14374 | 184 |
| A00152 | A14381 | 454 | A00152 | A14387 | 180 |
| A00152 | A14391 | 252 | A00152 | A14394 | 545 |
| A00152 | A14395 | 363 | A00152 | A14410 | 400 |
| A00152 | A14430 | 519 | A00152 | A14439 | 168 |
| A00152 | A14443 | 899 | A00152 | A14449 | 165 |
| A00152 | A14452 | 491 | A00152 | A14475 | 325 |
| A00152 | A14481 | 199 | A00152 | A14483 | 435 |
| A00152 | A14496 | 355 | A00152 | A14511 | 486 |
| A00152 | A14570 | 357 | A00152 | A14596 | 542 |
| A00152 | A14624 | 159 | A00152 | A14635 | 491 |
| A00152 | A14643 | 585 | A00152 | A14648 | 252 |
| A00152 | A14659 | 518 | A00152 | A14667 | 310 |
| A00152 | A14701 | 486 | A00152 | A14716 | 195 |
| A00152 | A14738 | 226 | A00152 | A14930 | 358 |
| A00152 | A15029 | 226 | A00152 | A15220 | 180 |
| A00152 | A15230 | 208 | A00152 | A15282 | 451 |
| A00152 | A15292 | 553 | A00152 | A15293 | 242 |
| A00152 | A15297 | 491 | A00152 | A15302 | 215 |
| A00152 | A15310 | 321 | A00152 | A15312 | 313 |
| A00152 | A15313 | 355 | A00152 | A15314 | 489 |
| A00152 | A15317 | 241 | A00152 | A15322 | 486 |
| A00152 | A15323 | 583 | A00152 | A15324 | 455 |
| A00152 | A15328 | 441 | A00152 | A15331 | 358 |
| A00152 | A15346 | 200 | A00152 | A15348 | 306 |
| A00152 | A15349 | 479 | A00152 | A15352 | 447 |
| A00152 | A15376 | 299 | A00152 | A15416 | 435 |
| A00152 | A15432 | 311 | A00152 | A15436 | 323 |
| A00152 | A15452 | 286 | A00152 | A15454 | 226 |
| A00152 | A15480 | 334 | A00152 | A15484 | 177 |
| A00152 | A15487 | 249 | A00152 | A15495 | 358 |
| A00152 | A15507 | 428 | A00152 | A15535 | 474 |
| A00152 | A15537 | 163 | A00152 | A15540 | 457 |
| A00152 | A15601 | 174 | A00152 | A15606 | 489 |
| A00152 | A15613 | 152 | A00152 | A15660 | 556 |
| A00152 | A15684 | 524 | A00152 | A15726 | 491 |
| A00152 | A15795 | 372 | A00152 | A15806 | 159 |
| A00152 | A15896 | 210 | A00152 | A15930 | 188 |
| A00152 | A15931 | 491 | A00152 | A15962 | 491 |

|        |        |     |        |        |     |
|--------|--------|-----|--------|--------|-----|
| A00152 | A15988 | 480 | A00152 | A16006 | 401 |
| A00152 | A16114 | 167 | A00152 | A16218 | 318 |
| A00152 | A16224 | 377 | A00152 | A16272 | 232 |
| A00152 | A16300 | 343 | A00152 | A16491 | 213 |
| A00152 | A16520 | 171 | A00152 | A16636 | 491 |
| A00152 | A16791 | 899 | A00152 | A16910 | 215 |
| A00152 | A16916 | 152 | A00152 | A16960 | 157 |
| A00152 | A17085 | 269 | A00152 | A17134 | 224 |
| A00152 | A17136 | 223 | A00153 | A00154 | 88  |
| A00153 | A00157 | 899 | A00153 | A00158 | 438 |
| A00153 | A00159 | 329 | A00153 | A00160 | 456 |
| A00153 | A00162 | 151 | A00153 | A00163 | 483 |
| A00153 | A00167 | 938 | A00153 | A00169 | 469 |
| A00153 | A00171 | 229 | A00153 | A00173 | 271 |
| A00153 | A00174 | 152 | A00153 | A00180 | 252 |
| A00153 | A00184 | 899 | A00153 | A00189 | 409 |
| A00153 | A00190 | 945 | A00153 | A00191 | 899 |
| A00153 | A00192 | 899 | A00153 | A00200 | 485 |
| A00153 | A00201 | 382 | A00153 | A00207 | 245 |
| A00153 | A00209 | 921 | A00153 | A00214 | 375 |
| A00153 | A00219 | 475 | A00153 | A00220 | 306 |
| A00153 | A00224 | 915 | A00153 | A00226 | 899 |
| A00153 | A00234 | 238 | A00153 | A00240 | 326 |
| A00153 | A00246 | 899 | A00153 | A00250 | 899 |
| A00153 | A00254 | 899 | A00153 | A00256 | 425 |
| A00153 | A00264 | 398 | A00153 | A00268 | 156 |
| A00153 | A00270 | 899 | A00153 | A00271 | 899 |
| A00153 | A00274 | 221 | A00153 | A00275 | 899 |
| A00153 | A00531 | 899 | A00153 | A00557 | 462 |
| A00153 | A00597 | 201 | A00153 | A00694 | 457 |
| A00153 | A00736 | 491 | A00153 | A00799 | 449 |
| A00153 | A00820 | 488 | A00153 | A00911 | 216 |
| A00153 | A00914 | 340 | A00153 | A01003 | 360 |
| A00153 | A01139 | 899 | A00153 | A01161 | 213 |
| A00153 | A01257 | 434 | A00153 | A01289 | 944 |
| A00153 | A01297 | 199 | A00153 | A01359 | 899 |
| A00153 | A01472 | 899 | A00153 | A01524 | 943 |
| A00153 | A01527 | 949 | A00153 | A01554 | 925 |
| A00153 | A01558 | 899 | A00153 | A01588 | 899 |
| A00153 | A01593 | 899 | A00153 | A01632 | 235 |
| A00153 | A01639 | 899 | A00153 | A01654 | 356 |
| A00153 | A01669 | 899 | A00153 | A01718 | 899 |
| A00153 | A01730 | 935 | A00153 | A01732 | 899 |
| A00153 | A01743 | 294 | A00153 | A01747 | 355 |
| A00153 | A01781 | 899 | A00153 | A01790 | 402 |
| A00153 | A01791 | 327 | A00153 | A01858 | 167 |

|        |        |     |        |        |     |
|--------|--------|-----|--------|--------|-----|
| A00153 | A01880 | 446 | A00153 | A01881 | 246 |
| A00153 | A01888 | 648 | A00153 | A01890 | 167 |
| A00153 | A02006 | 267 | A00153 | A02124 | 899 |
| A00153 | A02143 | 224 | A00153 | A02180 | 163 |
| A00153 | A02208 | 323 | A00153 | A02217 | 183 |
| A00153 | A02247 | 160 | A00153 | A02382 | 208 |
| A00153 | A02416 | 348 | A00153 | A02425 | 263 |
| A00153 | A02497 | 160 | A00153 | A02501 | 899 |
| A00153 | A02609 | 160 | A00153 | A02639 | 475 |
| A00153 | A02698 | 481 | A00153 | A02709 | 411 |
| A00153 | A02711 | 433 | A00153 | A02714 | 228 |
| A00153 | A02723 | 899 | A00153 | A02730 | 303 |
| A00153 | A02732 | 319 | A00153 | A02741 | 228 |
| A00153 | A02788 | 305 | A00153 | A02826 | 191 |
| A00153 | A02836 | 322 | A00153 | A02863 | 274 |
| A00153 | A02886 | 195 | A00153 | A02917 | 196 |
| A00153 | A02945 | 319 | A00153 | A02983 | 213 |
| A00153 | A03010 | 190 | A00153 | A03025 | 151 |
| A00153 | A03051 | 151 | A00153 | A03095 | 173 |
| A00153 | A03101 | 177 | A00153 | A03110 | 907 |
| A00153 | A03121 | 488 | A00153 | A03211 | 279 |
| A00153 | A03255 | 288 | A00153 | A03259 | 363 |
| A00153 | A03451 | 454 | A00153 | A03457 | 200 |
| A00153 | A03576 | 151 | A00153 | A03611 | 486 |
| A00153 | A03711 | 205 | A00153 | A03726 | 899 |
| A00153 | A03753 | 313 | A00153 | A03766 | 270 |
| A00153 | A03790 | 267 | A00153 | A03809 | 305 |
| A00153 | A03821 | 188 | A00153 | A03822 | 443 |
| A00153 | A03846 | 380 | A00153 | A03858 | 199 |
| A00153 | A03994 | 160 | A00153 | A04117 | 491 |
| A00153 | A04138 | 196 | A00153 | A04144 | 156 |
| A00153 | A04192 | 174 | A00153 | A04201 | 236 |
| A00153 | A04250 | 174 | A00153 | A04263 | 268 |
| A00153 | A04280 | 382 | A00153 | A04294 | 183 |
| A00153 | A04303 | 241 | A00153 | A04351 | 201 |
| A00153 | A04367 | 183 | A00153 | A04489 | 241 |
| A00153 | A04530 | 167 | A00153 | A04551 | 183 |
| A00153 | A04584 | 156 | A00153 | A04614 | 900 |
| A00153 | A04659 | 960 | A00153 | A04759 | 152 |
| A00153 | A04796 | 276 | A00153 | A04797 | 241 |
| A00153 | A04806 | 205 | A00153 | A04855 | 193 |
| A00153 | A04859 | 241 | A00153 | A04872 | 241 |
| A00153 | A04996 | 173 | A00153 | A05373 | 193 |
| A00153 | A05795 | 483 | A00153 | A05869 | 319 |
| A00153 | A06142 | 241 | A00153 | A06226 | 174 |
| A00153 | A06607 | 328 | A00153 | A06650 | 417 |

|        |        |     |        |        |     |
|--------|--------|-----|--------|--------|-----|
| A00153 | A06658 | 276 | A00153 | A06686 | 156 |
| A00153 | A06783 | 157 | A00153 | A06795 | 483 |
| A00153 | A07004 | 207 | A00153 | A07145 | 168 |
| A00153 | A07154 | 185 | A00153 | A07158 | 416 |
| A00153 | A07173 | 361 | A00153 | A07189 | 167 |
| A00153 | A07192 | 472 | A00153 | A07270 | 221 |
| A00153 | A07422 | 899 | A00153 | A07426 | 167 |
| A00153 | A07960 | 221 | A00153 | A08275 | 276 |
| A00153 | A08403 | 208 | A00153 | A08589 | 276 |
| A00153 | A08609 | 151 | A00153 | A08730 | 193 |
| A00153 | A09047 | 221 | A00153 | A09112 | 174 |
| A00153 | A09258 | 899 | A00153 | A09365 | 205 |
| A00153 | A09377 | 899 | A00153 | A09419 | 188 |
| A00153 | A09526 | 475 | A00153 | A09781 | 276 |
| A00153 | A09884 | 301 | A00153 | A09900 | 385 |
| A00153 | A09941 | 167 | A00153 | A09957 | 276 |
| A00153 | A09964 | 294 | A00153 | A10005 | 319 |
| A00153 | A10160 | 151 | A00153 | A10340 | 899 |
| A00153 | A10489 | 193 | A00153 | A10532 | 899 |
| A00153 | A10580 | 944 | A00153 | A10589 | 899 |
| A00153 | A10601 | 899 | A00153 | A10623 | 899 |
| A00153 | A10735 | 484 | A00153 | A10830 | 899 |
| A00153 | A10907 | 221 | A00153 | A11104 | 291 |
| A00153 | A11582 | 335 | A00153 | A11850 | 899 |
| A00153 | A11894 | 205 | A00153 | A11983 | 899 |
| A00153 | A12086 | 272 | A00153 | A12275 | 156 |
| A00153 | A12341 | 205 | A00153 | A12415 | 276 |
| A00153 | A12983 | 160 | A00153 | A13390 | 183 |
| A00153 | A13795 | 174 | A00153 | A13924 | 241 |
| A00153 | A13972 | 160 | A00153 | A14016 | 208 |
| A00153 | A14038 | 205 | A00153 | A14127 | 454 |
| A00153 | A14158 | 221 | A00153 | A14208 | 252 |
| A00153 | A14231 | 899 | A00153 | A14236 | 210 |
| A00153 | A14330 | 477 | A00153 | A14366 | 246 |
| A00153 | A14393 | 335 | A00153 | A14444 | 899 |
| A00153 | A14484 | 899 | A00153 | A14644 | 463 |
| A00153 | A14893 | 201 | A00153 | A15241 | 469 |
| A00153 | A15292 | 899 | A00153 | A15295 | 899 |
| A00153 | A15296 | 899 | A00153 | A15549 | 174 |
| A00153 | A15605 | 218 | A00153 | A15606 | 468 |
| A00153 | A15609 | 174 | A00153 | A15795 | 179 |
| A00153 | A15933 | 899 | A00153 | A15951 | 899 |
| A00153 | A16081 | 436 | A00153 | A16083 | 899 |
| A00153 | A16112 | 267 | A00153 | A16442 | 221 |
| A00153 | A16636 | 316 | A00153 | A16671 | 156 |
| A00153 | A16887 | 174 | A00153 | A16910 | 210 |

|        |        |     |        |        |     |
|--------|--------|-----|--------|--------|-----|
| A00153 | A17136 | 311 | A00154 | A00159 | 489 |
| A00154 | A00163 | 945 | A00154 | A00171 | 457 |
| A00154 | A00173 | 246 | A00154 | A00185 | 899 |
| A00154 | A00190 | 491 | A00154 | A00196 | 159 |
| A00154 | A00209 | 899 | A00154 | A00216 | 899 |
| A00154 | A00219 | 274 | A00154 | A00232 | 470 |
| A00154 | A00233 | 475 | A00154 | A00254 | 899 |
| A00154 | A00260 | 156 | A00154 | A00263 | 461 |
| A00154 | A00266 | 165 | A00154 | A00294 | 899 |
| A00154 | A00298 | 407 | A00154 | A00343 | 391 |
| A00154 | A00385 | 408 | A00154 | A00469 | 446 |
| A00154 | A00736 | 272 | A00154 | A00804 | 168 |
| A00154 | A00832 | 226 | A00154 | A00914 | 329 |
| A00154 | A01070 | 899 | A00154 | A01157 | 278 |
| A00154 | A01189 | 258 | A00154 | A01257 | 899 |
| A00154 | A01325 | 190 | A00154 | A01527 | 899 |
| A00154 | A01572 | 491 | A00154 | A01595 | 302 |
| A00154 | A01668 | 420 | A00154 | A01676 | 491 |
| A00154 | A01730 | 210 | A00154 | A01741 | 481 |
| A00154 | A01745 | 486 | A00154 | A01746 | 221 |
| A00154 | A01796 | 377 | A00154 | A01835 | 172 |
| A00154 | A01844 | 224 | A00154 | A01897 | 472 |
| A00154 | A01901 | 491 | A00154 | A01906 | 262 |
| A00154 | A02086 | 243 | A00154 | A02145 | 243 |
| A00154 | A02169 | 247 | A00154 | A02180 | 277 |
| A00154 | A02219 | 400 | A00154 | A02377 | 254 |
| A00154 | A02384 | 156 | A00154 | A02549 | 159 |
| A00154 | A02586 | 160 | A00154 | A02633 | 347 |
| A00154 | A02676 | 156 | A00154 | A02689 | 179 |
| A00154 | A02703 | 210 | A00154 | A02711 | 457 |
| A00154 | A02714 | 281 | A00154 | A02733 | 310 |
| A00154 | A02743 | 204 | A00154 | A02749 | 371 |
| A00154 | A02754 | 234 | A00154 | A02819 | 190 |
| A00154 | A02836 | 385 | A00154 | A02844 | 196 |
| A00154 | A02869 | 221 | A00154 | A02877 | 345 |
| A00154 | A03070 | 443 | A00154 | A03275 | 252 |
| A00154 | A03309 | 190 | A00154 | A03401 | 414 |
| A00154 | A03611 | 246 | A00154 | A03614 | 176 |
| A00154 | A03744 | 224 | A00154 | A03814 | 162 |
| A00154 | A03821 | 329 | A00154 | A03883 | 303 |
| A00154 | A03947 | 172 | A00154 | A04017 | 323 |
| A00154 | A04045 | 238 | A00154 | A04260 | 202 |
| A00154 | A04305 | 343 | A00154 | A04307 | 234 |
| A00154 | A04316 | 310 | A00154 | A04351 | 346 |
| A00154 | A04355 | 157 | A00154 | A04375 | 195 |
| A00154 | A04417 | 177 | A00154 | A04476 | 303 |

|        |        |     |        |        |     |
|--------|--------|-----|--------|--------|-----|
| A00154 | A04573 | 176 | A00154 | A04576 | 462 |
| A00154 | A04622 | 288 | A00154 | A04627 | 213 |
| A00154 | A04952 | 238 | A00154 | A04977 | 283 |
| A00154 | A04990 | 180 | A00154 | A05112 | 212 |
| A00154 | A05163 | 210 | A00154 | A05219 | 165 |
| A00154 | A05282 | 218 | A00154 | A05283 | 190 |
| A00154 | A05415 | 160 | A00154 | A05473 | 184 |
| A00154 | A05681 | 185 | A00154 | A05798 | 165 |
| A00154 | A05967 | 238 | A00154 | A06199 | 254 |
| A00154 | A06231 | 414 | A00154 | A06295 | 899 |
| A00154 | A06330 | 238 | A00154 | A06606 | 184 |
| A00154 | A06608 | 299 | A00154 | A06623 | 262 |
| A00154 | A06736 | 363 | A00154 | A07127 | 330 |
| A00154 | A07153 | 491 | A00154 | A07165 | 469 |
| A00154 | A07201 | 477 | A00154 | A07217 | 152 |
| A00154 | A07243 | 174 | A00154 | A07282 | 491 |
| A00154 | A07311 | 899 | A00154 | A07339 | 288 |
| A00154 | A07641 | 234 | A00154 | A08567 | 899 |
| A00154 | A08851 | 406 | A00154 | A09120 | 334 |
| A00154 | A09370 | 152 | A00154 | A09402 | 238 |
| A00154 | A09492 | 274 | A00154 | A09900 | 191 |
| A00154 | A09989 | 165 | A00154 | A10005 | 184 |
| A00154 | A10279 | 254 | A00154 | A10284 | 172 |
| A00154 | A10525 | 235 | A00154 | A10529 | 185 |
| A00154 | A10564 | 180 | A00154 | A10625 | 385 |
| A00154 | A11394 | 302 | A00154 | A11404 | 470 |
| A00154 | A11852 | 382 | A00154 | A12079 | 210 |
| A00154 | A12192 | 254 | A00154 | A14014 | 156 |
| A00154 | A14035 | 210 | A00154 | A14198 | 899 |
| A00154 | A14596 | 899 | A00154 | A14643 | 457 |
| A00154 | A15272 | 176 | A00154 | A15293 | 899 |
| A00154 | A15294 | 899 | A00154 | A15596 | 224 |
| A00154 | A15716 | 185 | A00154 | A16110 | 159 |
| A00154 | A16275 | 274 | A00155 | A00196 | 190 |
| A00155 | A00204 | 475 | A00155 | A00215 | 491 |
| A00155 | A00216 | 491 | A00155 | A00218 | 446 |
| A00155 | A00310 | 196 | A00155 | A00312 | 378 |
| A00155 | A00338 | 386 | A00155 | A00343 | 274 |
| A00155 | A00351 | 167 | A00155 | A00395 | 489 |
| A00155 | A00449 | 491 | A00155 | A00472 | 480 |
| A00155 | A00476 | 481 | A00155 | A00541 | 489 |
| A00155 | A00567 | 241 | A00155 | A00574 | 491 |
| A00155 | A00600 | 157 | A00155 | A00614 | 445 |
| A00155 | A00628 | 475 | A00155 | A00633 | 455 |
| A00155 | A00645 | 333 | A00155 | A00654 | 491 |
| A00155 | A00660 | 162 | A00155 | A00662 | 491 |

|        |        |     |        |        |     |
|--------|--------|-----|--------|--------|-----|
| A00155 | A00663 | 491 | A00155 | A00666 | 486 |
| A00155 | A00681 | 490 | A00155 | A00695 | 391 |
| A00155 | A00696 | 356 | A00155 | A00738 | 429 |
| A00155 | A00770 | 457 | A00155 | A00771 | 414 |
| A00155 | A00773 | 486 | A00155 | A00785 | 383 |
| A00155 | A00807 | 188 | A00155 | A00962 | 491 |
| A00155 | A00995 | 283 | A00155 | A01005 | 491 |
| A00155 | A01008 | 491 | A00155 | A01018 | 483 |
| A00155 | A01035 | 491 | A00155 | A01138 | 413 |
| A00155 | A01161 | 491 | A00155 | A01174 | 409 |
| A00155 | A01175 | 414 | A00155 | A01207 | 307 |
| A00155 | A01223 | 335 | A00155 | A01227 | 165 |
| A00155 | A01233 | 441 | A00155 | A01256 | 491 |
| A00155 | A01297 | 479 | A00155 | A01347 | 257 |
| A00155 | A01367 | 353 | A00155 | A01397 | 294 |
| A00155 | A01409 | 490 | A00155 | A01481 | 430 |
| A00155 | A01508 | 474 | A00155 | A01520 | 187 |
| A00155 | A01540 | 466 | A00155 | A01551 | 243 |
| A00155 | A01556 | 296 | A00155 | A01590 | 477 |
| A00155 | A01600 | 291 | A00155 | A01635 | 490 |
| A00155 | A01670 | 174 | A00155 | A01705 | 465 |
| A00155 | A01713 | 491 | A00155 | A01714 | 238 |
| A00155 | A01738 | 238 | A00155 | A01743 | 307 |
| A00155 | A01857 | 196 | A00155 | A01866 | 210 |
| A00155 | A01882 | 171 | A00155 | A01926 | 452 |
| A00155 | A01947 | 232 | A00155 | A01972 | 484 |
| A00155 | A02012 | 154 | A00155 | A02066 | 273 |
| A00155 | A02071 | 484 | A00155 | A02075 | 363 |
| A00155 | A02083 | 484 | A00155 | A02168 | 335 |
| A00155 | A02215 | 491 | A00155 | A02254 | 340 |
| A00155 | A02257 | 179 | A00155 | A02306 | 299 |
| A00155 | A02316 | 480 | A00155 | A02317 | 196 |
| A00155 | A02329 | 240 | A00155 | A02330 | 324 |
| A00155 | A02338 | 71  | A00155 | A02402 | 252 |
| A00155 | A02443 | 394 | A00155 | A02521 | 352 |
| A00155 | A02538 | 180 | A00155 | A02600 | 201 |
| A00155 | A02601 | 435 | A00155 | A02774 | 247 |
| A00155 | A02785 | 489 | A00155 | A02814 | 91  |
| A00155 | A02859 | 489 | A00155 | A02874 | 286 |
| A00155 | A02992 | 491 | A00155 | A03016 | 462 |
| A00155 | A03027 | 276 | A00155 | A03050 | 491 |
| A00155 | A03080 | 241 | A00155 | A03099 | 347 |
| A00155 | A03167 | 477 | A00155 | A03303 | 217 |
| A00155 | A03347 | 243 | A00155 | A03353 | 405 |
| A00155 | A03369 | 223 | A00155 | A03370 | 386 |
| A00155 | A03379 | 301 | A00155 | A03402 | 310 |



|        |        |     |        |        |     |
|--------|--------|-----|--------|--------|-----|
| A00155 | A03429 | 180 | A00155 | A03441 | 256 |
| A00155 | A03513 | 369 | A00155 | A03545 | 455 |
| A00155 | A03563 | 296 | A00155 | A03618 | 428 |
| A00155 | A03740 | 414 | A00155 | A03917 | 383 |
| A00155 | A04010 | 180 | A00155 | A04023 | 154 |
| A00155 | A04027 | 290 | A00155 | A04053 | 260 |
| A00155 | A04211 | 446 | A00155 | A04212 | 180 |
| A00155 | A04258 | 157 | A00155 | A04369 | 491 |
| A00155 | A04371 | 157 | A00155 | A04556 | 208 |
| A00155 | A04633 | 457 | A00155 | A04645 | 188 |
| A00155 | A04660 | 188 | A00155 | A04744 | 157 |
| A00155 | A04791 | 335 | A00155 | A04834 | 185 |
| A00155 | A04839 | 491 | A00155 | A04883 | 274 |
| A00155 | A04927 | 445 | A00155 | A04995 | 246 |
| A00155 | A05007 | 389 | A00155 | A05036 | 152 |
| A00155 | A05045 | 219 | A00155 | A05102 | 217 |
| A00155 | A05153 | 361 | A00155 | A05207 | 217 |
| A00155 | A05356 | 490 | A00155 | A05390 | 449 |
| A00155 | A05393 | 378 | A00155 | A05416 | 390 |
| A00155 | A05418 | 283 | A00155 | A05487 | 423 |
| A00155 | A05532 | 188 | A00155 | A05573 | 390 |
| A00155 | A05586 | 188 | A00155 | A05659 | 212 |
| A00155 | A05770 | 263 | A00155 | A05774 | 235 |
| A00155 | A05858 | 217 | A00155 | A05926 | 424 |
| A00155 | A05957 | 163 | A00155 | A06092 | 462 |
| A00155 | A06237 | 188 | A00155 | A06252 | 213 |
| A00155 | A06263 | 382 | A00155 | A06295 | 260 |
| A00155 | A06316 | 217 | A00155 | A06358 | 419 |
| A00155 | A06405 | 159 | A00155 | A06439 | 424 |
| A00155 | A06527 | 489 | A00155 | A06592 | 213 |
| A00155 | A06607 | 481 | A00155 | A06630 | 180 |
| A00155 | A06633 | 174 | A00155 | A06641 | 274 |
| A00155 | A06689 | 366 | A00155 | A06696 | 177 |
| A00155 | A06709 | 201 | A00155 | A06756 | 451 |
| A00155 | A06874 | 351 | A00155 | A06908 | 402 |
| A00155 | A06970 | 218 | A00155 | A06979 | 401 |
| A00155 | A07059 | 322 | A00155 | A07122 | 480 |
| A00155 | A07209 | 159 | A00155 | A07218 | 241 |
| A00155 | A07238 | 283 | A00155 | A07297 | 171 |
| A00155 | A07300 | 383 | A00155 | A07407 | 486 |
| A00155 | A07413 | 371 | A00155 | A07452 | 472 |
| A00155 | A07471 | 430 | A00155 | A07475 | 190 |
| A00155 | A07477 | 385 | A00155 | A07520 | 396 |
| A00155 | A07527 | 163 | A00155 | A07541 | 491 |
| A00155 | A07542 | 489 | A00155 | A07543 | 490 |
| A00155 | A07544 | 163 | A00155 | A07553 | 205 |

|        |        |     |        |        |     |
|--------|--------|-----|--------|--------|-----|
| A00155 | A07561 | 486 | A00155 | A07610 | 480 |
| A00155 | A07629 | 213 | A00155 | A07630 | 249 |
| A00155 | A07631 | 322 | A00155 | A07632 | 238 |
| A00155 | A07633 | 157 | A00155 | A07634 | 485 |
| A00155 | A07635 | 157 | A00155 | A07662 | 188 |
| A00155 | A07674 | 398 | A00155 | A07736 | 434 |
| A00155 | A07800 | 480 | A00155 | A07823 | 171 |
| A00155 | A07958 | 406 | A00155 | A07973 | 274 |
| A00155 | A08404 | 401 | A00155 | A08656 | 180 |
| A00155 | A08693 | 366 | A00155 | A08785 | 208 |
| A00155 | A08858 | 366 | A00155 | A09711 | 217 |
| A00155 | A09908 | 273 | A00155 | A10056 | 480 |
| A00155 | A10429 | 188 | A00155 | A10456 | 317 |
| A00155 | A10536 | 273 | A00155 | A10686 | 221 |
| A00155 | A10967 | 477 | A00155 | A11309 | 279 |
| A00155 | A11414 | 180 | A00155 | A11983 | 205 |
| A00155 | A12793 | 340 | A00155 | A13033 | 217 |
| A00155 | A13369 | 364 | A00155 | A13530 | 238 |
| A00155 | A13871 | 491 | A00155 | A13879 | 335 |
| A00155 | A14121 | 201 | A00155 | A14247 | 228 |
| A00155 | A14502 | 488 | A00155 | A14635 | 279 |
| A00155 | A14827 | 160 | A00155 | A15675 | 152 |
| A00155 | A15699 | 218 | A00155 | A15992 | 249 |
| A00155 | A16027 | 208 | A00155 | A16028 | 193 |
| A00155 | A16371 | 234 | A00155 | A16649 | 238 |
| A00155 | A16741 | 323 | A00155 | A17078 | 491 |
| A00156 | A00161 | 168 | A00156 | A00180 | 550 |
| A00156 | A00183 | 292 | A00156 | A00184 | 119 |
| A00156 | A00185 | 491 | A00156 | A00207 | 960 |
| A00156 | A00208 | 944 | A00156 | A00214 | 194 |
| A00156 | A00224 | 906 | A00156 | A00227 | 352 |
| A00156 | A00228 | 246 | A00156 | A00234 | 469 |
| A00156 | A00239 | 445 | A00156 | A00240 | 945 |
| A00156 | A00241 | 396 | A00156 | A00242 | 922 |
| A00156 | A00246 | 932 | A00156 | A00247 | 419 |
| A00156 | A00254 | 491 | A00156 | A00261 | 194 |
| A00156 | A00276 | 288 | A00156 | A00379 | 391 |
| A00156 | A00418 | 479 | A00156 | A00451 | 472 |
| A00156 | A00460 | 285 | A00156 | A00600 | 157 |
| A00156 | A00696 | 234 | A00156 | A00805 | 192 |
| A00156 | A00820 | 162 | A00156 | A00821 | 257 |
| A00156 | A00883 | 191 | A00156 | A00978 | 152 |
| A00156 | A01212 | 630 | A00156 | A01286 | 460 |
| A00156 | A01524 | 938 | A00156 | A01527 | 942 |
| A00156 | A01553 | 224 | A00156 | A01558 | 899 |
| A00156 | A01560 | 475 | A00156 | A01562 | 718 |

|        |        |     |        |        |     |
|--------|--------|-----|--------|--------|-----|
| A00156 | A01588 | 899 | A00156 | A01615 | 899 |
| A00156 | A01628 | 148 | A00156 | A01636 | 216 |
| A00156 | A01692 | 63  | A00156 | A01718 | 597 |
| A00156 | A01813 | 252 | A00156 | A01822 | 340 |
| A00156 | A01908 | 360 | A00156 | A01914 | 308 |
| A00156 | A02027 | 217 | A00156 | A02056 | 188 |
| A00156 | A02344 | 185 | A00156 | A02481 | 263 |
| A00156 | A02511 | 219 | A00156 | A02702 | 241 |
| A00156 | A02751 | 163 | A00156 | A02766 | 401 |
| A00156 | A02788 | 124 | A00156 | A02803 | 110 |
| A00156 | A02805 | 210 | A00156 | A02841 | 63  |
| A00156 | A02874 | 176 | A00156 | A02875 | 385 |
| A00156 | A02881 | 221 | A00156 | A02887 | 63  |
| A00156 | A02897 | 389 | A00156 | A02931 | 77  |
| A00156 | A03001 | 210 | A00156 | A03019 | 135 |
| A00156 | A03100 | 223 | A00156 | A03271 | 335 |
| A00156 | A03282 | 152 | A00156 | A03335 | 509 |
| A00156 | A03683 | 355 | A00156 | A03684 | 394 |
| A00156 | A03784 | 484 | A00156 | A03817 | 247 |
| A00156 | A03830 | 480 | A00156 | A03831 | 272 |
| A00156 | A03892 | 63  | A00156 | A04012 | 433 |
| A00156 | A04037 | 249 | A00156 | A04111 | 260 |
| A00156 | A04123 | 272 | A00156 | A04242 | 260 |
| A00156 | A04314 | 168 | A00156 | A04323 | 465 |
| A00156 | A04517 | 185 | A00156 | A04578 | 235 |
| A00156 | A04600 | 263 | A00156 | A04686 | 208 |
| A00156 | A04697 | 188 | A00156 | A04731 | 160 |
| A00156 | A04807 | 215 | A00156 | A04972 | 202 |
| A00156 | A05111 | 255 | A00156 | A05208 | 188 |
| A00156 | A05216 | 899 | A00156 | A05337 | 160 |
| A00156 | A05339 | 255 | A00156 | A05364 | 310 |
| A00156 | A05621 | 255 | A00156 | A06256 | 279 |
| A00156 | A06269 | 235 | A00156 | A06289 | 63  |
| A00156 | A06610 | 297 | A00156 | A06691 | 324 |
| A00156 | A06707 | 162 | A00156 | A07056 | 210 |
| A00156 | A07311 | 949 | A00156 | A07860 | 297 |
| A00156 | A08621 | 201 | A00156 | A09076 | 221 |
| A00156 | A09220 | 297 | A00156 | A09401 | 328 |
| A00156 | A09568 | 185 | A00156 | A09897 | 324 |
| A00156 | A10294 | 151 | A00156 | A10510 | 366 |
| A00156 | A10630 | 230 | A00156 | A10898 | 221 |
| A00156 | A11108 | 324 | A00156 | A11124 | 452 |
| A00156 | A11129 | 446 | A00156 | A11369 | 63  |
| A00156 | A12047 | 278 | A00156 | A12383 | 85  |
| A00156 | A12969 | 276 | A00156 | A12971 | 288 |
| A00156 | A13216 | 329 | A00156 | A13335 | 156 |

|        |        |     |        |        |     |
|--------|--------|-----|--------|--------|-----|
| A00156 | A13340 | 213 | A00156 | A13511 | 208 |
| A00156 | A13555 | 205 | A00156 | A13824 | 63  |
| A00156 | A13980 | 172 | A00156 | A13983 | 63  |
| A00156 | A14032 | 466 | A00156 | A14035 | 934 |
| A00156 | A14071 | 156 | A00156 | A14128 | 436 |
| A00156 | A14164 | 324 | A00156 | A14188 | 480 |
| A00156 | A14198 | 490 | A00156 | A14292 | 179 |
| A00156 | A14299 | 552 | A00156 | A14364 | 393 |
| A00156 | A14402 | 165 | A00156 | A14433 | 329 |
| A00156 | A14438 | 198 | A00156 | A14443 | 903 |
| A00156 | A14930 | 93  | A00156 | A14944 | 249 |
| A00156 | A15325 | 490 | A00156 | A15506 | 173 |
| A00156 | A15726 | 63  | A00156 | A16547 | 198 |
| A00156 | A16939 | 434 | A00157 | A00159 | 899 |
| A00157 | A00161 | 914 | A00157 | A00162 | 922 |
| A00157 | A00163 | 899 | A00157 | A00167 | 899 |
| A00157 | A00190 | 899 | A00157 | A00198 | 899 |
| A00157 | A00205 | 899 | A00157 | A00206 | 188 |
| A00157 | A00208 | 441 | A00157 | A00209 | 899 |
| A00157 | A00217 | 207 | A00157 | A00221 | 899 |
| A00157 | A00224 | 903 | A00157 | A00229 | 899 |
| A00157 | A00230 | 899 | A00157 | A00236 | 901 |
| A00157 | A00240 | 990 | A00157 | A00246 | 899 |
| A00157 | A00248 | 899 | A00157 | A00250 | 930 |
| A00157 | A00252 | 899 | A00157 | A00253 | 899 |
| A00157 | A00254 | 902 | A00157 | A00257 | 930 |
| A00157 | A00266 | 899 | A00157 | A00271 | 899 |
| A00157 | A00273 | 346 | A00157 | A00324 | 899 |
| A00157 | A00334 | 228 | A00157 | A00408 | 199 |
| A00157 | A00587 | 229 | A00157 | A00630 | 297 |
| A00157 | A00651 | 187 | A00157 | A00668 | 160 |
| A00157 | A00747 | 899 | A00157 | A00875 | 297 |
| A00157 | A00922 | 207 | A00157 | A00981 | 193 |
| A00157 | A01002 | 899 | A00157 | A01244 | 899 |
| A00157 | A01283 | 198 | A00157 | A01345 | 199 |
| A00157 | A01415 | 899 | A00157 | A01478 | 199 |
| A00157 | A01512 | 915 | A00157 | A01524 | 899 |
| A00157 | A01527 | 989 | A00157 | A01553 | 995 |
| A00157 | A01554 | 994 | A00157 | A01558 | 989 |
| A00157 | A01560 | 993 | A00157 | A01561 | 960 |
| A00157 | A01562 | 994 | A00157 | A01588 | 899 |
| A00157 | A01602 | 182 | A00157 | A01605 | 993 |
| A00157 | A01615 | 989 | A00157 | A01628 | 994 |
| A00157 | A01639 | 994 | A00157 | A01640 | 994 |
| A00157 | A01683 | 199 | A00157 | A01688 | 899 |
| A00157 | A01692 | 918 | A00157 | A01697 | 993 |

|        |        |     |        |        |     |
|--------|--------|-----|--------|--------|-----|
| A00157 | A01702 | 941 | A00157 | A01708 | 942 |
| A00157 | A01709 | 993 | A00157 | A01718 | 993 |
| A00157 | A01719 | 938 | A00157 | A01844 | 899 |
| A00157 | A02344 | 165 | A00157 | A02390 | 899 |
| A00157 | A02517 | 899 | A00157 | A02877 | 899 |
| A00157 | A03082 | 899 | A00157 | A03213 | 916 |
| A00157 | A03247 | 168 | A00157 | A03273 | 899 |
| A00157 | A03331 | 168 | A00157 | A03575 | 899 |
| A00157 | A03750 | 899 | A00157 | A04104 | 340 |
| A00157 | A04320 | 899 | A00157 | A04449 | 899 |
| A00157 | A04699 | 899 | A00157 | A04807 | 899 |
| A00157 | A05064 | 899 | A00157 | A05082 | 899 |
| A00157 | A05216 | 899 | A00157 | A06277 | 899 |
| A00157 | A06466 | 175 | A00157 | A06559 | 255 |
| A00157 | A06851 | 457 | A00157 | A07311 | 994 |
| A00157 | A07339 | 899 | A00157 | A07398 | 201 |
| A00157 | A07422 | 899 | A00157 | A07797 | 899 |
| A00157 | A08571 | 199 | A00157 | A08732 | 899 |
| A00157 | A08858 | 899 | A00157 | A08878 | 899 |
| A00157 | A08969 | 249 | A00157 | A09162 | 345 |
| A00157 | A09218 | 899 | A00157 | A09297 | 299 |
| A00157 | A09319 | 899 | A00157 | A09577 | 902 |
| A00157 | A09804 | 899 | A00157 | A09871 | 899 |
| A00157 | A10047 | 188 | A00157 | A10185 | 899 |
| A00157 | A10365 | 913 | A00157 | A10392 | 902 |
| A00157 | A10580 | 914 | A00157 | A10615 | 899 |
| A00157 | A10623 | 902 | A00157 | A10655 | 297 |
| A00157 | A11125 | 899 | A00157 | A11206 | 899 |
| A00157 | A11376 | 481 | A00157 | A11549 | 272 |
| A00157 | A11937 | 226 | A00157 | A11983 | 899 |
| A00157 | A12000 | 226 | A00157 | A12341 | 899 |
| A00157 | A12383 | 994 | A00157 | A12408 | 190 |
| A00157 | A12990 | 286 | A00157 | A13340 | 162 |
| A00157 | A13729 | 302 | A00157 | A13824 | 989 |
| A00157 | A13902 | 297 | A00157 | A13980 | 899 |
| A00157 | A13981 | 989 | A00157 | A14005 | 899 |
| A00157 | A14073 | 820 | A00157 | A14268 | 156 |
| A00157 | A14404 | 160 | A00157 | A14443 | 899 |
| A00157 | A14444 | 899 | A00157 | A14843 | 335 |
| A00157 | A15324 | 899 | A00157 | A15336 | 238 |
| A00157 | A15353 | 899 | A00157 | A15932 | 297 |
| A00157 | A15944 | 899 | A00157 | A16093 | 899 |
| A00157 | A16585 | 559 | A00158 | A00159 | 955 |
| A00158 | A00160 | 491 | A00158 | A00161 | 296 |
| A00158 | A00162 | 414 | A00158 | A00167 | 288 |
| A00158 | A00185 | 63  | A00158 | A00189 | 491 |

|        |        |     |        |        |     |
|--------|--------|-----|--------|--------|-----|
| A00158 | A00205 | 162 | A00158 | A00207 | 173 |
| A00158 | A00208 | 63  | A00158 | A00220 | 263 |
| A00158 | A00224 | 687 | A00158 | A00230 | 229 |
| A00158 | A00231 | 475 | A00158 | A00232 | 152 |
| A00158 | A00240 | 343 | A00158 | A00246 | 912 |
| A00158 | A00254 | 184 | A00158 | A00255 | 428 |
| A00158 | A00407 | 488 | A00158 | A00421 | 401 |
| A00158 | A00457 | 272 | A00158 | A00532 | 152 |
| A00158 | A00655 | 467 | A00158 | A00694 | 260 |
| A00158 | A00696 | 299 | A00158 | A00697 | 191 |
| A00158 | A00905 | 432 | A00158 | A00981 | 356 |
| A00158 | A01289 | 228 | A00158 | A01385 | 477 |
| A00158 | A01406 | 259 | A00158 | A01445 | 156 |
| A00158 | A01473 | 491 | A00158 | A01524 | 491 |
| A00158 | A01527 | 944 | A00158 | A01553 | 152 |
| A00158 | A01554 | 85  | A00158 | A01558 | 899 |
| A00158 | A01560 | 63  | A00158 | A01572 | 168 |
| A00158 | A01588 | 899 | A00158 | A01628 | 73  |
| A00158 | A01688 | 191 | A00158 | A01719 | 63  |
| A00158 | A01880 | 198 | A00158 | A01975 | 162 |
| A00158 | A02000 | 340 | A00158 | A02076 | 263 |
| A00158 | A02141 | 177 | A00158 | A02382 | 299 |
| A00158 | A02698 | 296 | A00158 | A02709 | 160 |
| A00158 | A02711 | 491 | A00158 | A02732 | 110 |
| A00158 | A02795 | 152 | A00158 | A02803 | 63  |
| A00158 | A03001 | 76  | A00158 | A03010 | 441 |
| A00158 | A03436 | 310 | A00158 | A03685 | 152 |
| A00158 | A03790 | 484 | A00158 | A03822 | 305 |
| A00158 | A04033 | 281 | A00158 | A04078 | 241 |
| A00158 | A04105 | 249 | A00158 | A04280 | 243 |
| A00158 | A04320 | 271 | A00158 | A04805 | 281 |
| A00158 | A05285 | 200 | A00158 | A05986 | 162 |
| A00158 | A06147 | 243 | A00158 | A06404 | 185 |
| A00158 | A07004 | 335 | A00158 | A07173 | 159 |
| A00158 | A08137 | 185 | A00158 | A08300 | 481 |
| A00158 | A08926 | 457 | A00158 | A09562 | 156 |
| A00158 | A10265 | 219 | A00158 | A10544 | 151 |
| A00158 | A10570 | 329 | A00158 | A10721 | 466 |
| A00158 | A10735 | 71  | A00158 | A10813 | 350 |
| A00158 | A10899 | 486 | A00158 | A11121 | 216 |
| A00158 | A11262 | 183 | A00158 | A11369 | 173 |
| A00158 | A11487 | 313 | A00158 | A11543 | 485 |
| A00158 | A12548 | 348 | A00158 | A12560 | 302 |
| A00158 | A12927 | 156 | A00158 | A12992 | 944 |
| A00158 | A13074 | 152 | A00158 | A13110 | 271 |
| A00158 | A13555 | 469 | A00158 | A13860 | 378 |

|        |        |     |        |        |     |
|--------|--------|-----|--------|--------|-----|
| A00158 | A13975 | 371 | A00158 | A13980 | 489 |
| A00158 | A13983 | 405 | A00158 | A13986 | 341 |
| A00158 | A14236 | 246 | A00158 | A14250 | 193 |
| A00158 | A14290 | 176 | A00158 | A14452 | 491 |
| A00158 | A15263 | 302 | A00158 | A15292 | 357 |
| A00158 | A15599 | 243 | A00158 | A15726 | 491 |
| A00158 | A16192 | 207 | A00158 | A16476 | 204 |
| A00158 | A16994 | 414 | A00158 | A16996 | 353 |
| A00159 | A00161 | 913 | A00159 | A00162 | 600 |
| A00159 | A00163 | 905 | A00159 | A00167 | 913 |
| A00159 | A00171 | 906 | A00159 | A00173 | 165 |
| A00159 | A00182 | 327 | A00159 | A00185 | 932 |
| A00159 | A00189 | 717 | A00159 | A00190 | 945 |
| A00159 | A00200 | 899 | A00159 | A00205 | 903 |
| A00159 | A00206 | 922 | A00159 | A00207 | 974 |
| A00159 | A00208 | 900 | A00159 | A00209 | 899 |
| A00159 | A00212 | 905 | A00159 | A00213 | 481 |
| A00159 | A00214 | 950 | A00159 | A00219 | 945 |
| A00159 | A00220 | 899 | A00159 | A00221 | 908 |
| A00159 | A00223 | 899 | A00159 | A00224 | 980 |
| A00159 | A00225 | 491 | A00159 | A00226 | 363 |
| A00159 | A00230 | 424 | A00159 | A00231 | 900 |
| A00159 | A00232 | 636 | A00159 | A00233 | 945 |
| A00159 | A00234 | 994 | A00159 | A00239 | 899 |
| A00159 | A00240 | 899 | A00159 | A00241 | 899 |
| A00159 | A00242 | 899 | A00159 | A00246 | 993 |
| A00159 | A00252 | 899 | A00159 | A00253 | 899 |
| A00159 | A00254 | 491 | A00159 | A00256 | 899 |
| A00159 | A00257 | 914 | A00159 | A00263 | 903 |
| A00159 | A00264 | 899 | A00159 | A00265 | 358 |
| A00159 | A00269 | 914 | A00159 | A00270 | 906 |
| A00159 | A00294 | 989 | A00159 | A00306 | 302 |
| A00159 | A00316 | 356 | A00159 | A00324 | 945 |
| A00159 | A00330 | 899 | A00159 | A00340 | 899 |
| A00159 | A00370 | 899 | A00159 | A00378 | 899 |
| A00159 | A00395 | 176 | A00159 | A00408 | 173 |
| A00159 | A00420 | 229 | A00159 | A00421 | 458 |
| A00159 | A00470 | 899 | A00159 | A00482 | 899 |
| A00159 | A00495 | 235 | A00159 | A00496 | 899 |
| A00159 | A00531 | 913 | A00159 | A00533 | 941 |
| A00159 | A00552 | 263 | A00159 | A00557 | 443 |
| A00159 | A00587 | 191 | A00159 | A00597 | 899 |
| A00159 | A00640 | 899 | A00159 | A00641 | 942 |
| A00159 | A00652 | 302 | A00159 | A00736 | 491 |
| A00159 | A00744 | 899 | A00159 | A00786 | 185 |
| A00159 | A00820 | 488 | A00159 | A00832 | 910 |

|        |        |     |        |        |     |
|--------|--------|-----|--------|--------|-----|
| A00159 | A00853 | 899 | A00159 | A00874 | 404 |
| A00159 | A00883 | 899 | A00159 | A00914 | 945 |
| A00159 | A00916 | 685 | A00159 | A00939 | 932 |
| A00159 | A00981 | 176 | A00159 | A01022 | 165 |
| A00159 | A01052 | 945 | A00159 | A01070 | 913 |
| A00159 | A01077 | 899 | A00159 | A01088 | 552 |
| A00159 | A01137 | 347 | A00159 | A01149 | 899 |
| A00159 | A01172 | 475 | A00159 | A01173 | 465 |
| A00159 | A01198 | 899 | A00159 | A01234 | 469 |
| A00159 | A01235 | 243 | A00159 | A01257 | 899 |
| A00159 | A01259 | 435 | A00159 | A01275 | 899 |
| A00159 | A01281 | 484 | A00159 | A01286 | 347 |
| A00159 | A01295 | 899 | A00159 | A01307 | 491 |
| A00159 | A01308 | 899 | A00159 | A01361 | 176 |
| A00159 | A01396 | 480 | A00159 | A01415 | 899 |
| A00159 | A01419 | 306 | A00159 | A01438 | 243 |
| A00159 | A01450 | 251 | A00159 | A01451 | 905 |
| A00159 | A01452 | 576 | A00159 | A01458 | 472 |
| A00159 | A01470 | 375 | A00159 | A01473 | 582 |
| A00159 | A01486 | 899 | A00159 | A01489 | 899 |
| A00159 | A01491 | 899 | A00159 | A01492 | 542 |
| A00159 | A01494 | 899 | A00159 | A01503 | 905 |
| A00159 | A01512 | 899 | A00159 | A01521 | 899 |
| A00159 | A01524 | 945 | A00159 | A01527 | 994 |
| A00159 | A01528 | 899 | A00159 | A01539 | 157 |
| A00159 | A01550 | 899 | A00159 | A01553 | 943 |
| A00159 | A01554 | 930 | A00159 | A01557 | 276 |
| A00159 | A01558 | 995 | A00159 | A01559 | 470 |
| A00159 | A01560 | 957 | A00159 | A01561 | 927 |
| A00159 | A01562 | 899 | A00159 | A01570 | 320 |
| A00159 | A01572 | 966 | A00159 | A01575 | 235 |
| A00159 | A01576 | 502 | A00159 | A01585 | 904 |
| A00159 | A01588 | 989 | A00159 | A01591 | 899 |
| A00159 | A01592 | 899 | A00159 | A01593 | 899 |
| A00159 | A01601 | 899 | A00159 | A01602 | 934 |
| A00159 | A01603 | 475 | A00159 | A01605 | 899 |
| A00159 | A01612 | 955 | A00159 | A01615 | 908 |
| A00159 | A01626 | 918 | A00159 | A01628 | 901 |
| A00159 | A01634 | 899 | A00159 | A01636 | 900 |
| A00159 | A01637 | 910 | A00159 | A01638 | 899 |
| A00159 | A01639 | 899 | A00159 | A01640 | 899 |
| A00159 | A01646 | 899 | A00159 | A01650 | 297 |
| A00159 | A01651 | 905 | A00159 | A01668 | 416 |
| A00159 | A01676 | 945 | A00159 | A01686 | 899 |
| A00159 | A01688 | 906 | A00159 | A01692 | 931 |
| A00159 | A01702 | 899 | A00159 | A01708 | 899 |



|        |        |     |        |        |     |
|--------|--------|-----|--------|--------|-----|
| A00159 | A01709 | 909 | A00159 | A01718 | 899 |
| A00159 | A01719 | 899 | A00159 | A01730 | 418 |
| A00159 | A01733 | 375 | A00159 | A01741 | 899 |
| A00159 | A01742 | 900 | A00159 | A01775 | 940 |
| A00159 | A01785 | 283 | A00159 | A01796 | 249 |
| A00159 | A01797 | 899 | A00159 | A01804 | 152 |
| A00159 | A01844 | 945 | A00159 | A01849 | 360 |
| A00159 | A01850 | 899 | A00159 | A01877 | 899 |
| A00159 | A01879 | 427 | A00159 | A01900 | 941 |
| A00159 | A01905 | 899 | A00159 | A01908 | 204 |
| A00159 | A01914 | 283 | A00159 | A01920 | 899 |
| A00159 | A01926 | 899 | A00159 | A02002 | 285 |
| A00159 | A02054 | 212 | A00159 | A02058 | 899 |
| A00159 | A02076 | 427 | A00159 | A02086 | 484 |
| A00159 | A02088 | 899 | A00159 | A02124 | 899 |
| A00159 | A02148 | 899 | A00159 | A02163 | 921 |
| A00159 | A02174 | 899 | A00159 | A02183 | 454 |
| A00159 | A02215 | 899 | A00159 | A02226 | 278 |
| A00159 | A02268 | 218 | A00159 | A02305 | 899 |
| A00159 | A02341 | 291 | A00159 | A02342 | 481 |
| A00159 | A02343 | 485 | A00159 | A02350 | 899 |
| A00159 | A02362 | 247 | A00159 | A02382 | 353 |
| A00159 | A02389 | 899 | A00159 | A02411 | 899 |
| A00159 | A02429 | 899 | A00159 | A02432 | 491 |
| A00159 | A02465 | 899 | A00159 | A02481 | 154 |
| A00159 | A02494 | 899 | A00159 | A02513 | 318 |
| A00159 | A02517 | 899 | A00159 | A02564 | 302 |
| A00159 | A02578 | 174 | A00159 | A02635 | 199 |
| A00159 | A02639 | 470 | A00159 | A02680 | 361 |
| A00159 | A02682 | 183 | A00159 | A02686 | 63  |
| A00159 | A02698 | 283 | A00159 | A02709 | 302 |
| A00159 | A02717 | 398 | A00159 | A02731 | 466 |
| A00159 | A02749 | 156 | A00159 | A02760 | 210 |
| A00159 | A02778 | 899 | A00159 | A02789 | 899 |
| A00159 | A02803 | 901 | A00159 | A02828 | 899 |
| A00159 | A02833 | 429 | A00159 | A02864 | 943 |
| A00159 | A02869 | 900 | A00159 | A02872 | 899 |
| A00159 | A02897 | 132 | A00159 | A02904 | 152 |
| A00159 | A02908 | 943 | A00159 | A02919 | 899 |
| A00159 | A02942 | 901 | A00159 | A02949 | 899 |
| A00159 | A02951 | 154 | A00159 | A02958 | 899 |
| A00159 | A02968 | 899 | A00159 | A02975 | 369 |
| A00159 | A02976 | 196 | A00159 | A03001 | 472 |
| A00159 | A03010 | 457 | A00159 | A03014 | 176 |
| A00159 | A03098 | 199 | A00159 | A03171 | 899 |
| A00159 | A03204 | 105 | A00159 | A03214 | 899 |

|        |        |     |        |        |     |
|--------|--------|-----|--------|--------|-----|
| A00159 | A03222 | 340 | A00159 | A03223 | 449 |
| A00159 | A03259 | 899 | A00159 | A03271 | 241 |
| A00159 | A03292 | 63  | A00159 | A03331 | 899 |
| A00159 | A03338 | 63  | A00159 | A03406 | 899 |
| A00159 | A03419 | 356 | A00159 | A03569 | 419 |
| A00159 | A03575 | 929 | A00159 | A03591 | 899 |
| A00159 | A03606 | 184 | A00159 | A03639 | 899 |
| A00159 | A03685 | 899 | A00159 | A03686 | 899 |
| A00159 | A03726 | 899 | A00159 | A03741 | 899 |
| A00159 | A03752 | 899 | A00159 | A03771 | 249 |
| A00159 | A03776 | 899 | A00159 | A03817 | 899 |
| A00159 | A03821 | 945 | A00159 | A03834 | 212 |
| A00159 | A03835 | 246 | A00159 | A03837 | 363 |
| A00159 | A03873 | 290 | A00159 | A03892 | 899 |
| A00159 | A03984 | 446 | A00159 | A03985 | 372 |
| A00159 | A03990 | 460 | A00159 | A04010 | 386 |
| A00159 | A04012 | 177 | A00159 | A04050 | 944 |
| A00159 | A04051 | 468 | A00159 | A04073 | 899 |
| A00159 | A04096 | 404 | A00159 | A04097 | 429 |
| A00159 | A04105 | 477 | A00159 | A04115 | 353 |
| A00159 | A04117 | 463 | A00159 | A04207 | 367 |
| A00159 | A04318 | 899 | A00159 | A04368 | 899 |
| A00159 | A04527 | 378 | A00159 | A04600 | 899 |
| A00159 | A04608 | 188 | A00159 | A04622 | 484 |
| A00159 | A04652 | 377 | A00159 | A04668 | 899 |
| A00159 | A04683 | 899 | A00159 | A04687 | 408 |
| A00159 | A04914 | 486 | A00159 | A04949 | 545 |
| A00159 | A05009 | 899 | A00159 | A05029 | 940 |
| A00159 | A05035 | 899 | A00159 | A05044 | 899 |
| A00159 | A05062 | 899 | A00159 | A05212 | 446 |
| A00159 | A05309 | 151 | A00159 | A05315 | 899 |
| A00159 | A05349 | 936 | A00159 | A05370 | 899 |
| A00159 | A05414 | 910 | A00159 | A05428 | 899 |
| A00159 | A05709 | 899 | A00159 | A05760 | 900 |
| A00159 | A05762 | 183 | A00159 | A05888 | 439 |
| A00159 | A05938 | 899 | A00159 | A05993 | 899 |
| A00159 | A06046 | 899 | A00159 | A06118 | 899 |
| A00159 | A06161 | 208 | A00159 | A06289 | 899 |
| A00159 | A06295 | 899 | A00159 | A06314 | 899 |
| A00159 | A06438 | 183 | A00159 | A06458 | 183 |
| A00159 | A06597 | 442 | A00159 | A06601 | 899 |
| A00159 | A06610 | 491 | A00159 | A06615 | 474 |
| A00159 | A06631 | 288 | A00159 | A06642 | 452 |
| A00159 | A06770 | 190 | A00159 | A07004 | 201 |
| A00159 | A07034 | 899 | A00159 | A07051 | 213 |
| A00159 | A07061 | 899 | A00159 | A07091 | 899 |

|        |        |     |        |        |     |
|--------|--------|-----|--------|--------|-----|
| A00159 | A07135 | 491 | A00159 | A07155 | 899 |
| A00159 | A07157 | 303 | A00159 | A07165 | 942 |
| A00159 | A07176 | 258 | A00159 | A07187 | 338 |
| A00159 | A07190 | 395 | A00159 | A07201 | 485 |
| A00159 | A07303 | 183 | A00159 | A07307 | 899 |
| A00159 | A07311 | 945 | A00159 | A07314 | 390 |
| A00159 | A07335 | 470 | A00159 | A07339 | 928 |
| A00159 | A07590 | 188 | A00159 | A07798 | 899 |
| A00159 | A07803 | 302 | A00159 | A08133 | 914 |
| A00159 | A08259 | 899 | A00159 | A08280 | 537 |
| A00159 | A08400 | 910 | A00159 | A08557 | 899 |
| A00159 | A08566 | 899 | A00159 | A08567 | 899 |
| A00159 | A08571 | 957 | A00159 | A08598 | 259 |
| A00159 | A08732 | 939 | A00159 | A08745 | 165 |
| A00159 | A08755 | 317 | A00159 | A08818 | 157 |
| A00159 | A08839 | 899 | A00159 | A08858 | 899 |
| A00159 | A08859 | 899 | A00159 | A08863 | 899 |
| A00159 | A09078 | 474 | A00159 | A09127 | 899 |
| A00159 | A09195 | 216 | A00159 | A09220 | 369 |
| A00159 | A09298 | 899 | A00159 | A09319 | 899 |
| A00159 | A09335 | 190 | A00159 | A09388 | 417 |
| A00159 | A09391 | 305 | A00159 | A09395 | 294 |
| A00159 | A09524 | 157 | A00159 | A09542 | 899 |
| A00159 | A09545 | 899 | A00159 | A09556 | 914 |
| A00159 | A09558 | 899 | A00159 | A09568 | 899 |
| A00159 | A09577 | 899 | A00159 | A09627 | 152 |
| A00159 | A09644 | 899 | A00159 | A09654 | 899 |
| A00159 | A09727 | 899 | A00159 | A09754 | 899 |
| A00159 | A09785 | 467 | A00159 | A09804 | 899 |
| A00159 | A09913 | 899 | A00159 | A10159 | 165 |
| A00159 | A10174 | 923 | A00159 | A10175 | 899 |
| A00159 | A10218 | 168 | A00159 | A10355 | 165 |
| A00159 | A10365 | 899 | A00159 | A10392 | 899 |
| A00159 | A10452 | 371 | A00159 | A10466 | 317 |
| A00159 | A10501 | 71  | A00159 | A10615 | 899 |
| A00159 | A10624 | 899 | A00159 | A10721 | 347 |
| A00159 | A10732 | 71  | A00159 | A10735 | 450 |
| A00159 | A10757 | 252 | A00159 | A10789 | 899 |
| A00159 | A10800 | 276 | A00159 | A10801 | 910 |
| A00159 | A10808 | 899 | A00159 | A10828 | 183 |
| A00159 | A10869 | 899 | A00159 | A10893 | 183 |
| A00159 | A10899 | 82  | A00159 | A10904 | 101 |
| A00159 | A10913 | 63  | A00159 | A11206 | 899 |
| A00159 | A11262 | 899 | A00159 | A11283 | 899 |
| A00159 | A11369 | 475 | A00159 | A11487 | 475 |
| A00159 | A11507 | 183 | A00159 | A11513 | 411 |

|        |        |     |        |        |     |
|--------|--------|-----|--------|--------|-----|
| A00159 | A11612 | 899 | A00159 | A11735 | 899 |
| A00159 | A11866 | 899 | A00159 | A11931 | 367 |
| A00159 | A11964 | 152 | A00159 | A11968 | 183 |
| A00159 | A11983 | 915 | A00159 | A12047 | 899 |
| A00159 | A12341 | 899 | A00159 | A12383 | 926 |
| A00159 | A12507 | 899 | A00159 | A12548 | 340 |
| A00159 | A12652 | 899 | A00159 | A12705 | 899 |
| A00159 | A12990 | 899 | A00159 | A13099 | 213 |
| A00159 | A13146 | 899 | A00159 | A13191 | 899 |
| A00159 | A13225 | 899 | A00159 | A13231 | 243 |
| A00159 | A13234 | 203 | A00159 | A13250 | 899 |
| A00159 | A13397 | 899 | A00159 | A13508 | 183 |
| A00159 | A13511 | 594 | A00159 | A13555 | 184 |
| A00159 | A13737 | 899 | A00159 | A13824 | 992 |
| A00159 | A13827 | 63  | A00159 | A13829 | 914 |
| A00159 | A13849 | 899 | A00159 | A13963 | 899 |
| A00159 | A13975 | 997 | A00159 | A13978 | 899 |
| A00159 | A13980 | 490 | A00159 | A13981 | 899 |
| A00159 | A13982 | 347 | A00159 | A13984 | 899 |
| A00159 | A13986 | 729 | A00159 | A13989 | 528 |
| A00159 | A13991 | 899 | A00159 | A13997 | 913 |
| A00159 | A13998 | 899 | A00159 | A14002 | 899 |
| A00159 | A14007 | 462 | A00159 | A14008 | 899 |
| A00159 | A14019 | 917 | A00159 | A14022 | 899 |
| A00159 | A14023 | 899 | A00159 | A14025 | 899 |
| A00159 | A14039 | 899 | A00159 | A14086 | 899 |
| A00159 | A14088 | 899 | A00159 | A14096 | 899 |
| A00159 | A14159 | 899 | A00159 | A14191 | 909 |
| A00159 | A14195 | 899 | A00159 | A14196 | 993 |
| A00159 | A14197 | 905 | A00159 | A14198 | 945 |
| A00159 | A14200 | 899 | A00159 | A14202 | 899 |
| A00159 | A14206 | 899 | A00159 | A14207 | 899 |
| A00159 | A14208 | 951 | A00159 | A14210 | 902 |
| A00159 | A14218 | 266 | A00159 | A14226 | 899 |
| A00159 | A14247 | 903 | A00159 | A14252 | 899 |
| A00159 | A14265 | 185 | A00159 | A14300 | 199 |
| A00159 | A14303 | 210 | A00159 | A14364 | 191 |
| A00159 | A14367 | 930 | A00159 | A14379 | 899 |
| A00159 | A14393 | 899 | A00159 | A14395 | 191 |
| A00159 | A14430 | 256 | A00159 | A14431 | 363 |
| A00159 | A14443 | 992 | A00159 | A14444 | 899 |
| A00159 | A14452 | 944 | A00159 | A14471 | 283 |
| A00159 | A14490 | 899 | A00159 | A14496 | 190 |
| A00159 | A14527 | 899 | A00159 | A14643 | 260 |
| A00159 | A14741 | 217 | A00159 | A14771 | 276 |
| A00159 | A14856 | 899 | A00159 | A15092 | 183 |

|        |        |     |        |        |     |
|--------|--------|-----|--------|--------|-----|
| A00159 | A15105 | 899 | A00159 | A15291 | 455 |
| A00159 | A15292 | 899 | A00159 | A15293 | 932 |
| A00159 | A15294 | 990 | A00159 | A15314 | 641 |
| A00159 | A15323 | 185 | A00159 | A15336 | 165 |
| A00159 | A15356 | 899 | A00159 | A15386 | 320 |
| A00159 | A15420 | 408 | A00159 | A15506 | 921 |
| A00159 | A15507 | 318 | A00159 | A15510 | 425 |
| A00159 | A15511 | 263 | A00159 | A15543 | 899 |
| A00159 | A15547 | 973 | A00159 | A15563 | 899 |
| A00159 | A15575 | 162 | A00159 | A15578 | 208 |
| A00159 | A15612 | 193 | A00159 | A15613 | 486 |
| A00159 | A15617 | 905 | A00159 | A15665 | 899 |
| A00159 | A15670 | 899 | A00159 | A15681 | 899 |
| A00159 | A15701 | 474 | A00159 | A15726 | 491 |
| A00159 | A15834 | 473 | A00159 | A15944 | 899 |
| A00159 | A15948 | 899 | A00159 | A15949 | 899 |
| A00159 | A16073 | 899 | A00159 | A16084 | 915 |
| A00159 | A16211 | 899 | A00159 | A16216 | 577 |
| A00159 | A16297 | 899 | A00159 | A16363 | 307 |
| A00159 | A16450 | 212 | A00159 | A16791 | 899 |
| A00159 | A16809 | 199 | A00159 | A16909 | 899 |
| A00159 | A16994 | 241 | A00159 | A17011 | 899 |
| A00159 | A17013 | 899 | A00159 | A17017 | 899 |
| A00159 | A17034 | 899 | A00159 | A17113 | 267 |
| A00159 | A17198 | 152 | A00159 | A17210 | 899 |
| A00160 | A00161 | 945 | A00160 | A00162 | 945 |
| A00160 | A00167 | 255 | A00160 | A00189 | 491 |
| A00160 | A00190 | 271 | A00160 | A00200 | 168 |
| A00160 | A00205 | 489 | A00160 | A00208 | 485 |
| A00160 | A00224 | 925 | A00160 | A00239 | 350 |
| A00160 | A00241 | 384 | A00160 | A00243 | 477 |
| A00160 | A00244 | 299 | A00160 | A00407 | 205 |
| A00160 | A00799 | 165 | A00160 | A01524 | 286 |
| A00160 | A01527 | 919 | A00160 | A01553 | 132 |
| A00160 | A01554 | 384 | A00160 | A01558 | 899 |
| A00160 | A01588 | 899 | A00160 | A01600 | 193 |
| A00160 | A01602 | 899 | A00160 | A01615 | 899 |
| A00160 | A01623 | 263 | A00160 | A01709 | 152 |
| A00160 | A01876 | 369 | A00160 | A01880 | 274 |
| A00160 | A01881 | 174 | A00160 | A01889 | 254 |
| A00160 | A02295 | 199 | A00160 | A02304 | 174 |
| A00160 | A02382 | 468 | A00160 | A02383 | 202 |
| A00160 | A02697 | 183 | A00160 | A02698 | 466 |
| A00160 | A02706 | 263 | A00160 | A02709 | 260 |
| A00160 | A02711 | 491 | A00160 | A02795 | 213 |
| A00160 | A02820 | 241 | A00160 | A02825 | 154 |

|        |        |     |        |        |     |
|--------|--------|-----|--------|--------|-----|
| A00160 | A02906 | 238 | A00160 | A02986 | 348 |
| A00160 | A03010 | 490 | A00160 | A03081 | 168 |
| A00160 | A03218 | 200 | A00160 | A03536 | 218 |
| A00160 | A03587 | 196 | A00160 | A03650 | 311 |
| A00160 | A03685 | 344 | A00160 | A04033 | 294 |
| A00160 | A04279 | 157 | A00160 | A04320 | 333 |
| A00160 | A04419 | 319 | A00160 | A04449 | 152 |
| A00160 | A04478 | 205 | A00160 | A04535 | 243 |
| A00160 | A04567 | 180 | A00160 | A04699 | 159 |
| A00160 | A04922 | 198 | A00160 | A05070 | 185 |
| A00160 | A05094 | 165 | A00160 | A05106 | 358 |
| A00160 | A05272 | 366 | A00160 | A05335 | 156 |
| A00160 | A05587 | 256 | A00160 | A05847 | 216 |
| A00160 | A06225 | 411 | A00160 | A06404 | 245 |
| A00160 | A06603 | 317 | A00160 | A06708 | 174 |
| A00160 | A06868 | 306 | A00160 | A07293 | 344 |
| A00160 | A07390 | 216 | A00160 | A07891 | 262 |
| A00160 | A08171 | 174 | A00160 | A08926 | 180 |
| A00160 | A09487 | 202 | A00160 | A09884 | 291 |
| A00160 | A09937 | 198 | A00160 | A10358 | 173 |
| A00160 | A10626 | 245 | A00160 | A10813 | 187 |
| A00160 | A10899 | 488 | A00160 | A11109 | 277 |
| A00160 | A11348 | 193 | A00160 | A11369 | 79  |
| A00160 | A11413 | 435 | A00160 | A11450 | 386 |
| A00160 | A11543 | 409 | A00160 | A11654 | 311 |
| A00160 | A12086 | 269 | A00160 | A12371 | 219 |
| A00160 | A12586 | 366 | A00160 | A12668 | 925 |
| A00160 | A12992 | 198 | A00160 | A13860 | 347 |
| A00160 | A13978 | 274 | A00160 | A13980 | 313 |
| A00160 | A14250 | 373 | A00160 | A15241 | 279 |
| A00160 | A15263 | 344 | A00160 | A15726 | 474 |
| A00160 | A15952 | 344 | A00160 | A15981 | 218 |
| A00160 | A16844 | 201 | A00161 | A00162 | 973 |
| A00161 | A00167 | 955 | A00161 | A00168 | 424 |
| A00161 | A00180 | 268 | A00161 | A00185 | 936 |
| A00161 | A00190 | 297 | A00161 | A00205 | 971 |
| A00161 | A00207 | 480 | A00161 | A00208 | 983 |
| A00161 | A00209 | 947 | A00161 | A00214 | 193 |
| A00161 | A00224 | 949 | A00161 | A00230 | 186 |
| A00161 | A00232 | 195 | A00161 | A00234 | 328 |
| A00161 | A00240 | 190 | A00161 | A00243 | 357 |
| A00161 | A00246 | 909 | A00161 | A00254 | 943 |
| A00161 | A00255 | 184 | A00161 | A00262 | 217 |
| A00161 | A00292 | 375 | A00161 | A00451 | 429 |
| A00161 | A00566 | 249 | A00161 | A00696 | 301 |
| A00161 | A00911 | 151 | A00161 | A00931 | 446 |

|        |        |     |        |        |     |
|--------|--------|-----|--------|--------|-----|
| A00161 | A01131 | 257 | A00161 | A01155 | 366 |
| A00161 | A01286 | 187 | A00161 | A01307 | 333 |
| A00161 | A01342 | 462 | A00161 | A01493 | 154 |
| A00161 | A01524 | 993 | A00161 | A01527 | 899 |
| A00161 | A01553 | 903 | A00161 | A01554 | 900 |
| A00161 | A01560 | 234 | A00161 | A01572 | 343 |
| A00161 | A01726 | 394 | A00161 | A01796 | 466 |
| A00161 | A01824 | 173 | A00161 | A01914 | 434 |
| A00161 | A01941 | 234 | A00161 | A02013 | 263 |
| A00161 | A02086 | 489 | A00161 | A02331 | 491 |
| A00161 | A02420 | 191 | A00161 | A02502 | 283 |
| A00161 | A02658 | 324 | A00161 | A02708 | 313 |
| A00161 | A02711 | 440 | A00161 | A02746 | 118 |
| A00161 | A02877 | 435 | A00161 | A02878 | 205 |
| A00161 | A02882 | 121 | A00161 | A02908 | 340 |
| A00161 | A02982 | 491 | A00161 | A03019 | 63  |
| A00161 | A03047 | 151 | A00161 | A03225 | 446 |
| A00161 | A03234 | 167 | A00161 | A03259 | 63  |
| A00161 | A03681 | 247 | A00161 | A03685 | 229 |
| A00161 | A03742 | 234 | A00161 | A03800 | 168 |
| A00161 | A03803 | 473 | A00161 | A03809 | 454 |
| A00161 | A03821 | 152 | A00161 | A03837 | 346 |
| A00161 | A03880 | 462 | A00161 | A04006 | 412 |
| A00161 | A04115 | 391 | A00161 | A04117 | 260 |
| A00161 | A04288 | 294 | A00161 | A04521 | 243 |
| A00161 | A04956 | 174 | A00161 | A05339 | 179 |
| A00161 | A05621 | 191 | A00161 | A05816 | 157 |
| A00161 | A05876 | 328 | A00161 | A07311 | 930 |
| A00161 | A08324 | 243 | A00161 | A09220 | 335 |
| A00161 | A09363 | 899 | A00161 | A09577 | 63  |
| A00161 | A09719 | 154 | A00161 | A09913 | 151 |
| A00161 | A10379 | 294 | A00161 | A10724 | 157 |
| A00161 | A10801 | 899 | A00161 | A10899 | 167 |
| A00161 | A10913 | 147 | A00161 | A10941 | 458 |
| A00161 | A11120 | 191 | A00161 | A11369 | 491 |
| A00161 | A11413 | 160 | A00161 | A13504 | 217 |
| A00161 | A13980 | 796 | A00161 | A13990 | 252 |
| A00161 | A14033 | 217 | A00161 | A14062 | 152 |
| A00161 | A14127 | 324 | A00161 | A14193 | 644 |
| A00161 | A14198 | 266 | A00161 | A14209 | 191 |
| A00161 | A14393 | 191 | A00161 | A14433 | 906 |
| A00161 | A14443 | 899 | A00161 | A14444 | 933 |
| A00161 | A14644 | 440 | A00161 | A14686 | 154 |
| A00161 | A15263 | 263 | A00161 | A15319 | 174 |
| A00161 | A15323 | 243 | A00161 | A15556 | 462 |
| A00161 | A15644 | 462 | A00161 | A16986 | 372 |

|        |        |     |        |        |     |
|--------|--------|-----|--------|--------|-----|
| A00162 | A00163 | 283 | A00162 | A00166 | 340 |
| A00162 | A00167 | 941 | A00162 | A00169 | 245 |
| A00162 | A00180 | 291 | A00162 | A00184 | 899 |
| A00162 | A00185 | 945 | A00162 | A00186 | 99  |
| A00162 | A00189 | 394 | A00162 | A00190 | 266 |
| A00162 | A00205 | 970 | A00162 | A00207 | 969 |
| A00162 | A00208 | 977 | A00162 | A00209 | 899 |
| A00162 | A00211 | 185 | A00162 | A00214 | 238 |
| A00162 | A00224 | 965 | A00162 | A00230 | 911 |
| A00162 | A00234 | 615 | A00162 | A00239 | 201 |
| A00162 | A00240 | 639 | A00162 | A00241 | 205 |
| A00162 | A00242 | 156 | A00162 | A00243 | 363 |
| A00162 | A00246 | 942 | A00162 | A00250 | 922 |
| A00162 | A00254 | 945 | A00162 | A00255 | 457 |
| A00162 | A00261 | 407 | A00162 | A00270 | 334 |
| A00162 | A00271 | 899 | A00162 | A00292 | 281 |
| A00162 | A00310 | 899 | A00162 | A00312 | 903 |
| A00162 | A00324 | 266 | A00162 | A00340 | 918 |
| A00162 | A00381 | 256 | A00162 | A00566 | 224 |
| A00162 | A00820 | 249 | A00162 | A00825 | 185 |
| A00162 | A01052 | 899 | A00162 | A01070 | 899 |
| A00162 | A01112 | 445 | A00162 | A01291 | 312 |
| A00162 | A01310 | 354 | A00162 | A01452 | 742 |
| A00162 | A01473 | 899 | A00162 | A01498 | 218 |
| A00162 | A01524 | 945 | A00162 | A01527 | 944 |
| A00162 | A01553 | 976 | A00162 | A01554 | 944 |
| A00162 | A01558 | 899 | A00162 | A01560 | 481 |
| A00162 | A01562 | 899 | A00162 | A01572 | 491 |
| A00162 | A01588 | 899 | A00162 | A01606 | 238 |
| A00162 | A01615 | 899 | A00162 | A01624 | 187 |
| A00162 | A01628 | 899 | A00162 | A01688 | 899 |
| A00162 | A01708 | 899 | A00162 | A01709 | 929 |
| A00162 | A01730 | 918 | A00162 | A01740 | 899 |
| A00162 | A01747 | 201 | A00162 | A01759 | 234 |
| A00162 | A01787 | 378 | A00162 | A01794 | 205 |
| A00162 | A01800 | 208 | A00162 | A01894 | 247 |
| A00162 | A01910 | 180 | A00162 | A01914 | 644 |
| A00162 | A02284 | 899 | A00162 | A02304 | 323 |
| A00162 | A02330 | 899 | A00162 | A02502 | 454 |
| A00162 | A02711 | 489 | A00162 | A02747 | 152 |
| A00162 | A02749 | 63  | A00162 | A02803 | 208 |
| A00162 | A02985 | 172 | A00162 | A03010 | 232 |
| A00162 | A03099 | 926 | A00162 | A03123 | 187 |
| A00162 | A03213 | 930 | A00162 | A03225 | 423 |
| A00162 | A03263 | 216 | A00162 | A03273 | 927 |
| A00162 | A03280 | 200 | A00162 | A03598 | 288 |



|        |        |     |        |        |     |
|--------|--------|-----|--------|--------|-----|
| A00162 | A03646 | 218 | A00162 | A03685 | 454 |
| A00162 | A03804 | 162 | A00162 | A03822 | 228 |
| A00162 | A03878 | 172 | A00162 | A03971 | 152 |
| A00162 | A04006 | 229 | A00162 | A04051 | 296 |
| A00162 | A04280 | 228 | A00162 | A04301 | 326 |
| A00162 | A04451 | 213 | A00162 | A04623 | 180 |
| A00162 | A04857 | 296 | A00162 | A05064 | 332 |
| A00162 | A05208 | 899 | A00162 | A05621 | 172 |
| A00162 | A05780 | 193 | A00162 | A06039 | 199 |
| A00162 | A06166 | 193 | A00162 | A06202 | 167 |
| A00162 | A06610 | 458 | A00162 | A06616 | 172 |
| A00162 | A06655 | 172 | A00162 | A06762 | 899 |
| A00162 | A06926 | 363 | A00162 | A07311 | 945 |
| A00162 | A07460 | 899 | A00162 | A09181 | 212 |
| A00162 | A09214 | 218 | A00162 | A09220 | 942 |
| A00162 | A09363 | 899 | A00162 | A09377 | 167 |
| A00162 | A09418 | 201 | A00162 | A09542 | 925 |
| A00162 | A09577 | 63  | A00162 | A09694 | 193 |
| A00162 | A09801 | 160 | A00162 | A09937 | 462 |
| A00162 | A10249 | 208 | A00162 | A10340 | 172 |
| A00162 | A10580 | 912 | A00162 | A10801 | 989 |
| A00162 | A10899 | 170 | A00162 | A10941 | 460 |
| A00162 | A11125 | 899 | A00162 | A11369 | 394 |
| A00162 | A11392 | 188 | A00162 | A11512 | 296 |
| A00162 | A11535 | 223 | A00162 | A11707 | 187 |
| A00162 | A11758 | 230 | A00162 | A12040 | 246 |
| A00162 | A12494 | 266 | A00162 | A12765 | 246 |
| A00162 | A13131 | 152 | A00162 | A13975 | 208 |
| A00162 | A13980 | 977 | A00162 | A13989 | 486 |
| A00162 | A13990 | 945 | A00162 | A14027 | 208 |
| A00162 | A14033 | 218 | A00162 | A14043 | 899 |
| A00162 | A14198 | 945 | A00162 | A14208 | 426 |
| A00162 | A14209 | 172 | A00162 | A14389 | 172 |
| A00162 | A14402 | 422 | A00162 | A14433 | 917 |
| A00162 | A14442 | 208 | A00162 | A14443 | 899 |
| A00162 | A14444 | 991 | A00162 | A14503 | 218 |
| A00162 | A14776 | 266 | A00162 | A14943 | 232 |
| A00162 | A15241 | 185 | A00162 | A15263 | 266 |
| A00162 | A15293 | 899 | A00162 | A15294 | 899 |
| A00162 | A15315 | 157 | A00162 | A15394 | 440 |
| A00162 | A15395 | 350 | A00162 | A15952 | 266 |
| A00162 | A15964 | 420 | A00162 | A16231 | 347 |
| A00163 | A00165 | 152 | A00163 | A00167 | 491 |
| A00163 | A00168 | 486 | A00163 | A00169 | 945 |
| A00163 | A00171 | 491 | A00163 | A00173 | 452 |
| A00163 | A00176 | 198 | A00163 | A00185 | 490 |

|        |        |     |        |        |     |
|--------|--------|-----|--------|--------|-----|
| A00163 | A00189 | 299 | A00163 | A00190 | 491 |
| A00163 | A00200 | 994 | A00163 | A00207 | 276 |
| A00163 | A00208 | 343 | A00163 | A00209 | 955 |
| A00163 | A00216 | 395 | A00163 | A00219 | 486 |
| A00163 | A00224 | 944 | A00163 | A00230 | 899 |
| A00163 | A00231 | 157 | A00163 | A00239 | 322 |
| A00163 | A00240 | 202 | A00163 | A00243 | 195 |
| A00163 | A00245 | 425 | A00163 | A00246 | 899 |
| A00163 | A00248 | 900 | A00163 | A00254 | 565 |
| A00163 | A00256 | 351 | A00163 | A00257 | 200 |
| A00163 | A00264 | 475 | A00163 | A00265 | 916 |
| A00163 | A00270 | 899 | A00163 | A00271 | 899 |
| A00163 | A00294 | 490 | A00163 | A00301 | 173 |
| A00163 | A00305 | 411 | A00163 | A00309 | 491 |
| A00163 | A00316 | 491 | A00163 | A00324 | 944 |
| A00163 | A00331 | 339 | A00163 | A00340 | 274 |
| A00163 | A00370 | 447 | A00163 | A00378 | 291 |
| A00163 | A00400 | 324 | A00163 | A00552 | 491 |
| A00163 | A00597 | 422 | A00163 | A00600 | 469 |
| A00163 | A00601 | 183 | A00163 | A00628 | 260 |
| A00163 | A00643 | 395 | A00163 | A00649 | 283 |
| A00163 | A00661 | 247 | A00163 | A00662 | 218 |
| A00163 | A00691 | 346 | A00163 | A00696 | 402 |
| A00163 | A00733 | 168 | A00163 | A00736 | 475 |
| A00163 | A00747 | 451 | A00163 | A00757 | 491 |
| A00163 | A00822 | 418 | A00163 | A00883 | 185 |
| A00163 | A00887 | 944 | A00163 | A00914 | 257 |
| A00163 | A00939 | 404 | A00163 | A00981 | 489 |
| A00163 | A00997 | 433 | A00163 | A01022 | 358 |
| A00163 | A01052 | 490 | A00163 | A01088 | 270 |
| A00163 | A01125 | 408 | A00163 | A01157 | 468 |
| A00163 | A01178 | 156 | A00163 | A01211 | 458 |
| A00163 | A01213 | 319 | A00163 | A01235 | 480 |
| A00163 | A01256 | 475 | A00163 | A01257 | 252 |
| A00163 | A01289 | 283 | A00163 | A01512 | 991 |
| A00163 | A01524 | 944 | A00163 | A01527 | 945 |
| A00163 | A01531 | 247 | A00163 | A01558 | 485 |
| A00163 | A01559 | 218 | A00163 | A01560 | 209 |
| A00163 | A01571 | 461 | A00163 | A01602 | 430 |
| A00163 | A01626 | 180 | A00163 | A01655 | 277 |
| A00163 | A01665 | 899 | A00163 | A01667 | 383 |
| A00163 | A01668 | 465 | A00163 | A01676 | 432 |
| A00163 | A01688 | 433 | A00163 | A01700 | 435 |
| A00163 | A01718 | 899 | A00163 | A01726 | 945 |
| A00163 | A01727 | 446 | A00163 | A01729 | 440 |
| A00163 | A01730 | 477 | A00163 | A01733 | 172 |

|        |        |     |        |        |     |
|--------|--------|-----|--------|--------|-----|
| A00163 | A01737 | 243 | A00163 | A01740 | 218 |
| A00163 | A01741 | 491 | A00163 | A01743 | 489 |
| A00163 | A01747 | 491 | A00163 | A01748 | 465 |
| A00163 | A01754 | 177 | A00163 | A01763 | 467 |
| A00163 | A01767 | 412 | A00163 | A01784 | 151 |
| A00163 | A01786 | 945 | A00163 | A01797 | 162 |
| A00163 | A01841 | 441 | A00163 | A01844 | 904 |
| A00163 | A01876 | 307 | A00163 | A01878 | 485 |
| A00163 | A01886 | 162 | A00163 | A01888 | 905 |
| A00163 | A01891 | 345 | A00163 | A01897 | 322 |
| A00163 | A01900 | 488 | A00163 | A01903 | 170 |
| A00163 | A01931 | 283 | A00163 | A01990 | 187 |
| A00163 | A01995 | 599 | A00163 | A02006 | 246 |
| A00163 | A02117 | 353 | A00163 | A02180 | 472 |
| A00163 | A02199 | 371 | A00163 | A02228 | 260 |
| A00163 | A02369 | 177 | A00163 | A02411 | 899 |
| A00163 | A02477 | 196 | A00163 | A02482 | 491 |
| A00163 | A02491 | 324 | A00163 | A02494 | 283 |
| A00163 | A02495 | 491 | A00163 | A02502 | 380 |
| A00163 | A02507 | 457 | A00163 | A02548 | 196 |
| A00163 | A02559 | 172 | A00163 | A02574 | 162 |
| A00163 | A02611 | 335 | A00163 | A02614 | 235 |
| A00163 | A02628 | 259 | A00163 | A02639 | 317 |
| A00163 | A02673 | 291 | A00163 | A02694 | 159 |
| A00163 | A02695 | 267 | A00163 | A02696 | 157 |
| A00163 | A02697 | 477 | A00163 | A02698 | 468 |
| A00163 | A02705 | 491 | A00163 | A02706 | 491 |
| A00163 | A02707 | 443 | A00163 | A02708 | 210 |
| A00163 | A02731 | 455 | A00163 | A02733 | 160 |
| A00163 | A02812 | 224 | A00163 | A02817 | 491 |
| A00163 | A02818 | 488 | A00163 | A02819 | 481 |
| A00163 | A02820 | 390 | A00163 | A02822 | 899 |
| A00163 | A02830 | 402 | A00163 | A02836 | 488 |
| A00163 | A02837 | 457 | A00163 | A02855 | 483 |
| A00163 | A02859 | 468 | A00163 | A02861 | 481 |
| A00163 | A02862 | 475 | A00163 | A02874 | 347 |
| A00163 | A02915 | 443 | A00163 | A02921 | 210 |
| A00163 | A02924 | 293 | A00163 | A02928 | 469 |
| A00163 | A02968 | 899 | A00163 | A03014 | 218 |
| A00163 | A03027 | 268 | A00163 | A03034 | 227 |
| A00163 | A03051 | 174 | A00163 | A03068 | 286 |
| A00163 | A03070 | 235 | A00163 | A03076 | 458 |
| A00163 | A03095 | 212 | A00163 | A03112 | 434 |
| A00163 | A03141 | 312 | A00163 | A03167 | 170 |
| A00163 | A03228 | 486 | A00163 | A03244 | 207 |
| A00163 | A03275 | 290 | A00163 | A03292 | 491 |

|        |        |     |        |        |     |
|--------|--------|-----|--------|--------|-----|
| A00163 | A03304 | 485 | A00163 | A03434 | 455 |
| A00163 | A03435 | 208 | A00163 | A03436 | 489 |
| A00163 | A03451 | 473 | A00163 | A03459 | 313 |
| A00163 | A03520 | 372 | A00163 | A03587 | 418 |
| A00163 | A03611 | 461 | A00163 | A03649 | 491 |
| A00163 | A03653 | 174 | A00163 | A03662 | 412 |
| A00163 | A03719 | 215 | A00163 | A03723 | 156 |
| A00163 | A03725 | 316 | A00163 | A03726 | 899 |
| A00163 | A03739 | 471 | A00163 | A03749 | 483 |
| A00163 | A03762 | 154 | A00163 | A03771 | 491 |
| A00163 | A03775 | 279 | A00163 | A03811 | 157 |
| A00163 | A03841 | 489 | A00163 | A03926 | 291 |
| A00163 | A03933 | 321 | A00163 | A03949 | 490 |
| A00163 | A03976 | 308 | A00163 | A03990 | 674 |
| A00163 | A04006 | 414 | A00163 | A04020 | 240 |
| A00163 | A04046 | 418 | A00163 | A04080 | 346 |
| A00163 | A04091 | 491 | A00163 | A04096 | 899 |
| A00163 | A04134 | 307 | A00163 | A04142 | 204 |
| A00163 | A04174 | 152 | A00163 | A04270 | 273 |
| A00163 | A04280 | 445 | A00163 | A04355 | 441 |
| A00163 | A04417 | 201 | A00163 | A04449 | 221 |
| A00163 | A04456 | 180 | A00163 | A04483 | 235 |
| A00163 | A04500 | 180 | A00163 | A04516 | 245 |
| A00163 | A04532 | 475 | A00163 | A04533 | 423 |
| A00163 | A04539 | 321 | A00163 | A04561 | 227 |
| A00163 | A04590 | 180 | A00163 | A04606 | 180 |
| A00163 | A04607 | 899 | A00163 | A04622 | 469 |
| A00163 | A04683 | 227 | A00163 | A04684 | 180 |
| A00163 | A04698 | 462 | A00163 | A04731 | 167 |
| A00163 | A04740 | 263 | A00163 | A04747 | 154 |
| A00163 | A04758 | 218 | A00163 | A04763 | 326 |
| A00163 | A04804 | 218 | A00163 | A04810 | 157 |
| A00163 | A04813 | 291 | A00163 | A05018 | 157 |
| A00163 | A05034 | 443 | A00163 | A05052 | 468 |
| A00163 | A05070 | 485 | A00163 | A05093 | 235 |
| A00163 | A05216 | 491 | A00163 | A05219 | 324 |
| A00163 | A05240 | 272 | A00163 | A05250 | 198 |
| A00163 | A05287 | 218 | A00163 | A05288 | 491 |
| A00163 | A05331 | 232 | A00163 | A05351 | 256 |
| A00163 | A05353 | 241 | A00163 | A05392 | 157 |
| A00163 | A05418 | 489 | A00163 | A05470 | 157 |
| A00163 | A05473 | 286 | A00163 | A05537 | 218 |
| A00163 | A05546 | 488 | A00163 | A05574 | 246 |
| A00163 | A05592 | 313 | A00163 | A05671 | 313 |
| A00163 | A05866 | 291 | A00163 | A05877 | 218 |
| A00163 | A05940 | 317 | A00163 | A05979 | 196 |

|        |        |     |        |        |     |
|--------|--------|-----|--------|--------|-----|
| A00163 | A06092 | 329 | A00163 | A06195 | 299 |
| A00163 | A06214 | 218 | A00163 | A06225 | 477 |
| A00163 | A06258 | 232 | A00163 | A06261 | 157 |
| A00163 | A06332 | 218 | A00163 | A06379 | 371 |
| A00163 | A06392 | 218 | A00163 | A06400 | 491 |
| A00163 | A06520 | 218 | A00163 | A06543 | 263 |
| A00163 | A06544 | 422 | A00163 | A06581 | 472 |
| A00163 | A06588 | 454 | A00163 | A06592 | 330 |
| A00163 | A06597 | 361 | A00163 | A06606 | 480 |
| A00163 | A06607 | 472 | A00163 | A06608 | 900 |
| A00163 | A06609 | 913 | A00163 | A06610 | 438 |
| A00163 | A06615 | 388 | A00163 | A06623 | 348 |
| A00163 | A06683 | 246 | A00163 | A06688 | 335 |
| A00163 | A06798 | 469 | A00163 | A06949 | 196 |
| A00163 | A07006 | 246 | A00163 | A07163 | 162 |
| A00163 | A07165 | 400 | A00163 | A07197 | 486 |
| A00163 | A07198 | 486 | A00163 | A07311 | 940 |
| A00163 | A07315 | 472 | A00163 | A07339 | 709 |
| A00163 | A07350 | 180 | A00163 | A07381 | 301 |
| A00163 | A07400 | 218 | A00163 | A07421 | 491 |
| A00163 | A07422 | 899 | A00163 | A07442 | 291 |
| A00163 | A07564 | 157 | A00163 | A07576 | 218 |
| A00163 | A07659 | 329 | A00163 | A08070 | 475 |
| A00163 | A08389 | 198 | A00163 | A08630 | 152 |
| A00163 | A08727 | 204 | A00163 | A08837 | 469 |
| A00163 | A08861 | 201 | A00163 | A08897 | 218 |
| A00163 | A09014 | 366 | A00163 | A09020 | 199 |
| A00163 | A09078 | 491 | A00163 | A09170 | 313 |
| A00163 | A09235 | 337 | A00163 | A09319 | 899 |
| A00163 | A09363 | 267 | A00163 | A09367 | 157 |
| A00163 | A09371 | 157 | A00163 | A09408 | 180 |
| A00163 | A09457 | 157 | A00163 | A09462 | 180 |
| A00163 | A09561 | 404 | A00163 | A09832 | 157 |
| A00163 | A09882 | 371 | A00163 | A09944 | 218 |
| A00163 | A09951 | 180 | A00163 | A10049 | 157 |
| A00163 | A10072 | 379 | A00163 | A10102 | 218 |
| A00163 | A10114 | 226 | A00163 | A10223 | 157 |
| A00163 | A10233 | 185 | A00163 | A10324 | 313 |
| A00163 | A10360 | 218 | A00163 | A10532 | 446 |
| A00163 | A10631 | 484 | A00163 | A10936 | 218 |
| A00163 | A10960 | 185 | A00163 | A10975 | 218 |
| A00163 | A10986 | 281 | A00163 | A11169 | 154 |
| A00163 | A11193 | 405 | A00163 | A11215 | 180 |
| A00163 | A11275 | 177 | A00163 | A11487 | 491 |
| A00163 | A11663 | 198 | A00163 | A11779 | 489 |
| A00163 | A11932 | 182 | A00163 | A11978 | 218 |

|        |        |     |        |        |     |
|--------|--------|-----|--------|--------|-----|
| A00163 | A11983 | 472 | A00163 | A12147 | 157 |
| A00163 | A12373 | 944 | A00163 | A12523 | 291 |
| A00163 | A12592 | 291 | A00163 | A12752 | 157 |
| A00163 | A12796 | 180 | A00163 | A12897 | 420 |
| A00163 | A12898 | 291 | A00163 | A13079 | 180 |
| A00163 | A13080 | 180 | A00163 | A13146 | 899 |
| A00163 | A13147 | 396 | A00163 | A13168 | 180 |
| A00163 | A13229 | 321 | A00163 | A13250 | 900 |
| A00163 | A13373 | 185 | A00163 | A13437 | 157 |
| A00163 | A13617 | 299 | A00163 | A13648 | 180 |
| A00163 | A13824 | 899 | A00163 | A13865 | 180 |
| A00163 | A13945 | 430 | A00163 | A13977 | 899 |
| A00163 | A13980 | 899 | A00163 | A14006 | 491 |
| A00163 | A14024 | 291 | A00163 | A14055 | 899 |
| A00163 | A14198 | 614 | A00163 | A14210 | 899 |
| A00163 | A14308 | 180 | A00163 | A14332 | 151 |
| A00163 | A14386 | 483 | A00163 | A14390 | 438 |
| A00163 | A14399 | 188 | A00163 | A14434 | 455 |
| A00163 | A14436 | 210 | A00163 | A14443 | 313 |
| A00163 | A14577 | 296 | A00163 | A14589 | 204 |
| A00163 | A14643 | 466 | A00163 | A14649 | 462 |
| A00163 | A14674 | 357 | A00163 | A14712 | 345 |
| A00163 | A14715 | 180 | A00163 | A14729 | 259 |
| A00163 | A14742 | 218 | A00163 | A14765 | 218 |
| A00163 | A14811 | 378 | A00163 | A14824 | 180 |
| A00163 | A14857 | 188 | A00163 | A14930 | 899 |
| A00163 | A15041 | 218 | A00163 | A15046 | 218 |
| A00163 | A15293 | 585 | A00163 | A15294 | 177 |
| A00163 | A15318 | 152 | A00163 | A15504 | 256 |
| A00163 | A15506 | 533 | A00163 | A15675 | 210 |
| A00163 | A15840 | 486 | A00163 | A15841 | 235 |
| A00163 | A15927 | 157 | A00163 | A15971 | 235 |
| A00163 | A16300 | 469 | A00163 | A16317 | 157 |
| A00163 | A16347 | 180 | A00163 | A16348 | 218 |
| A00163 | A16363 | 360 | A00163 | A16500 | 218 |
| A00163 | A16677 | 157 | A00163 | A16679 | 177 |
| A00163 | A16718 | 226 | A00163 | A16741 | 241 |
| A00163 | A16795 | 187 | A00163 | A16887 | 235 |
| A00164 | A00216 | 262 | A00164 | A00446 | 599 |
| A00164 | A00583 | 262 | A00164 | A00691 | 193 |
| A00164 | A00981 | 217 | A00164 | A01158 | 233 |
| A00164 | A01358 | 241 | A00164 | A01372 | 597 |
| A00164 | A01390 | 217 | A00164 | A01602 | 184 |
| A00164 | A02565 | 408 | A00164 | A02658 | 157 |
| A00164 | A02942 | 422 | A00164 | A03219 | 184 |
| A00164 | A03484 | 224 | A00164 | A03719 | 184 |

|        |        |     |        |        |     |
|--------|--------|-----|--------|--------|-----|
| A00164 | A03859 | 486 | A00164 | A03873 | 262 |
| A00164 | A06067 | 184 | A00164 | A06578 | 184 |
| A00164 | A06608 | 441 | A00164 | A07346 | 486 |
| A00164 | A07598 | 546 | A00164 | A07956 | 262 |
| A00164 | A08248 | 262 | A00164 | A08524 | 491 |
| A00164 | A08982 | 262 | A00164 | A09351 | 364 |
| A00164 | A11544 | 262 | A00164 | A11558 | 184 |
| A00164 | A11649 | 262 | A00164 | A11675 | 151 |
| A00164 | A11851 | 532 | A00164 | A12052 | 182 |
| A00164 | A12723 | 236 | A00164 | A13356 | 556 |
| A00164 | A13781 | 271 | A00164 | A13784 | 375 |
| A00164 | A13855 | 340 | A00164 | A13892 | 262 |
| A00164 | A14167 | 208 | A00164 | A14210 | 184 |
| A00164 | A14214 | 221 | A00164 | A14362 | 262 |
| A00164 | A15321 | 575 | A00164 | A15338 | 262 |
| A00164 | A15559 | 268 | A00164 | A15564 | 262 |
| A00164 | A16152 | 184 | A00164 | A16215 | 419 |
| A00164 | A16588 | 163 | A00164 | A16611 | 191 |
| A00164 | A16614 | 262 | A00164 | A16690 | 450 |
| A00164 | A16866 | 171 | A00164 | A17133 | 173 |
| A00165 | A00167 | 213 | A00165 | A00179 | 177 |
| A00165 | A00183 | 273 | A00165 | A00187 | 319 |
| A00165 | A00188 | 422 | A00165 | A00198 | 491 |
| A00165 | A00201 | 560 | A00165 | A00224 | 919 |
| A00165 | A00230 | 913 | A00165 | A00239 | 593 |
| A00165 | A00240 | 704 | A00165 | A00243 | 601 |
| A00165 | A00246 | 899 | A00165 | A00248 | 335 |
| A00165 | A00257 | 535 | A00165 | A00262 | 262 |
| A00165 | A00269 | 183 | A00165 | A00270 | 488 |
| A00165 | A00324 | 483 | A00165 | A00440 | 350 |
| A00165 | A00590 | 265 | A00165 | A00621 | 301 |
| A00165 | A00691 | 232 | A00165 | A00765 | 485 |
| A00165 | A00813 | 172 | A00165 | A00822 | 163 |
| A00165 | A01088 | 172 | A00165 | A01148 | 157 |
| A00165 | A01178 | 458 | A00165 | A01213 | 208 |
| A00165 | A01252 | 443 | A00165 | A01263 | 232 |
| A00165 | A01312 | 356 | A00165 | A01378 | 413 |
| A00165 | A01410 | 243 | A00165 | A01507 | 480 |
| A00165 | A01512 | 944 | A00165 | A01524 | 932 |
| A00165 | A01527 | 899 | A00165 | A01554 | 936 |
| A00165 | A01558 | 899 | A00165 | A01560 | 224 |
| A00165 | A01576 | 642 | A00165 | A01580 | 517 |
| A00165 | A01588 | 899 | A00165 | A01596 | 949 |
| A00165 | A01601 | 488 | A00165 | A01606 | 489 |
| A00165 | A01628 | 63  | A00165 | A01639 | 945 |
| A00165 | A01688 | 317 | A00165 | A01697 | 63  |

|        |        |     |        |        |     |
|--------|--------|-----|--------|--------|-----|
| A00165 | A01809 | 327 | A00165 | A01850 | 402 |
| A00165 | A01974 | 375 | A00165 | A02361 | 386 |
| A00165 | A02382 | 417 | A00165 | A02411 | 159 |
| A00165 | A02703 | 265 | A00165 | A03329 | 252 |
| A00165 | A03445 | 162 | A00165 | A03575 | 677 |
| A00165 | A03741 | 497 | A00165 | A03822 | 271 |
| A00165 | A04033 | 489 | A00165 | A04449 | 543 |
| A00165 | A04686 | 156 | A00165 | A04699 | 917 |
| A00165 | A05009 | 463 | A00165 | A05015 | 218 |
| A00165 | A05029 | 152 | A00165 | A05032 | 485 |
| A00165 | A05553 | 208 | A00165 | A06277 | 168 |
| A00165 | A06348 | 229 | A00165 | A06466 | 230 |
| A00165 | A06601 | 469 | A00165 | A06701 | 480 |
| A00165 | A06779 | 327 | A00165 | A06914 | 232 |
| A00165 | A07311 | 138 | A00165 | A07422 | 951 |
| A00165 | A08308 | 160 | A00165 | A08356 | 165 |
| A00165 | A08552 | 236 | A00165 | A08571 | 950 |
| A00165 | A08692 | 394 | A00165 | A08858 | 445 |
| A00165 | A08869 | 177 | A00165 | A08878 | 229 |
| A00165 | A09162 | 446 | A00165 | A09767 | 435 |
| A00165 | A09804 | 301 | A00165 | A09976 | 241 |
| A00165 | A10365 | 63  | A00165 | A10392 | 154 |
| A00165 | A10580 | 952 | A00165 | A10623 | 491 |
| A00165 | A10728 | 491 | A00165 | A10743 | 200 |
| A00165 | A10808 | 480 | A00165 | A10982 | 469 |
| A00165 | A11300 | 251 | A00165 | A11379 | 489 |
| A00165 | A11621 | 491 | A00165 | A11983 | 703 |
| A00165 | A12036 | 234 | A00165 | A12047 | 509 |
| A00165 | A12664 | 324 | A00165 | A12824 | 386 |
| A00165 | A12920 | 317 | A00165 | A12971 | 104 |
| A00165 | A13274 | 160 | A00165 | A13977 | 363 |
| A00165 | A13997 | 185 | A00165 | A14005 | 598 |
| A00165 | A14055 | 356 | A00165 | A14182 | 188 |
| A00165 | A14208 | 235 | A00165 | A14229 | 246 |
| A00165 | A14299 | 488 | A00165 | A14443 | 237 |
| A00165 | A14571 | 193 | A00165 | A14635 | 436 |
| A00165 | A14653 | 63  | A00165 | A15322 | 463 |
| A00165 | A15357 | 333 | A00165 | A15381 | 468 |
| A00165 | A15741 | 305 | A00165 | A15945 | 265 |
| A00165 | A16400 | 208 | A00165 | A17160 | 899 |
| A00166 | A00168 | 598 | A00166 | A00209 | 926 |
| A00166 | A00211 | 982 | A00166 | A00217 | 353 |
| A00166 | A00219 | 296 | A00166 | A00221 | 491 |
| A00166 | A00229 | 329 | A00166 | A00230 | 899 |
| A00166 | A00815 | 467 | A00166 | A01125 | 510 |
| A00166 | A01258 | 286 | A00166 | A01310 | 794 |



|        |        |     |        |        |     |
|--------|--------|-----|--------|--------|-----|
| A00166 | A01605 | 945 | A00166 | A01640 | 452 |
| A00166 | A01914 | 403 | A00166 | A02088 | 162 |
| A00166 | A02313 | 288 | A00166 | A02323 | 199 |
| A00166 | A02507 | 228 | A00166 | A02673 | 224 |
| A00166 | A03228 | 157 | A00166 | A03690 | 176 |
| A00166 | A03799 | 217 | A00166 | A03800 | 296 |
| A00166 | A03942 | 229 | A00166 | A04012 | 168 |
| A00166 | A04367 | 299 | A00166 | A04422 | 468 |
| A00166 | A04490 | 428 | A00166 | A04749 | 249 |
| A00166 | A04756 | 323 | A00166 | A04790 | 406 |
| A00166 | A05090 | 277 | A00166 | A05091 | 341 |
| A00166 | A05221 | 490 | A00166 | A05337 | 185 |
| A00166 | A05407 | 258 | A00166 | A06032 | 184 |
| A00166 | A06392 | 363 | A00166 | A06578 | 347 |
| A00166 | A07141 | 187 | A00166 | A07311 | 899 |
| A00166 | A07367 | 281 | A00166 | A07422 | 899 |
| A00166 | A09077 | 273 | A00166 | A10040 | 251 |
| A00166 | A11313 | 247 | A00166 | A11392 | 176 |
| A00166 | A11614 | 818 | A00166 | A11646 | 171 |
| A00166 | A12897 | 238 | A00166 | A13370 | 269 |
| A00166 | A14038 | 215 | A00166 | A14198 | 288 |
| A00166 | A14371 | 216 | A00166 | A15304 | 899 |
| A00166 | A15305 | 927 | A00166 | A15342 | 218 |
| A00166 | A15455 | 235 | A00166 | A16904 | 435 |
| A00166 | A17102 | 185 | A00167 | A00168 | 491 |
| A00167 | A00169 | 663 | A00167 | A00171 | 491 |
| A00167 | A00172 | 899 | A00167 | A00173 | 352 |
| A00167 | A00174 | 899 | A00167 | A00175 | 899 |
| A00167 | A00176 | 961 | A00167 | A00177 | 266 |
| A00167 | A00178 | 899 | A00167 | A00179 | 491 |
| A00167 | A00180 | 176 | A00167 | A00181 | 171 |
| A00167 | A00182 | 369 | A00167 | A00183 | 486 |
| A00167 | A00184 | 899 | A00167 | A00185 | 943 |
| A00167 | A00189 | 944 | A00167 | A00190 | 945 |
| A00167 | A00191 | 944 | A00167 | A00195 | 936 |
| A00167 | A00199 | 899 | A00167 | A00200 | 491 |
| A00167 | A00202 | 488 | A00167 | A00203 | 899 |
| A00167 | A00205 | 899 | A00167 | A00206 | 899 |
| A00167 | A00207 | 899 | A00167 | A00208 | 945 |
| A00167 | A00209 | 998 | A00167 | A00212 | 276 |
| A00167 | A00216 | 278 | A00167 | A00219 | 491 |
| A00167 | A00220 | 990 | A00167 | A00221 | 910 |
| A00167 | A00223 | 993 | A00167 | A00224 | 962 |
| A00167 | A00228 | 363 | A00167 | A00230 | 899 |
| A00167 | A00231 | 931 | A00167 | A00233 | 281 |
| A00167 | A00236 | 944 | A00167 | A00239 | 899 |

|        |        |     |        |        |     |
|--------|--------|-----|--------|--------|-----|
| A00167 | A00240 | 899 | A00167 | A00241 | 901 |
| A00167 | A00242 | 899 | A00167 | A00243 | 899 |
| A00167 | A00244 | 899 | A00167 | A00245 | 491 |
| A00167 | A00246 | 899 | A00167 | A00247 | 899 |
| A00167 | A00250 | 899 | A00167 | A00252 | 945 |
| A00167 | A00253 | 945 | A00167 | A00254 | 491 |
| A00167 | A00256 | 383 | A00167 | A00257 | 474 |
| A00167 | A00258 | 436 | A00167 | A00262 | 424 |
| A00167 | A00263 | 486 | A00167 | A00268 | 899 |
| A00167 | A00270 | 949 | A00167 | A00271 | 920 |
| A00167 | A00272 | 899 | A00167 | A00274 | 914 |
| A00167 | A00275 | 899 | A00167 | A00276 | 899 |
| A00167 | A00294 | 491 | A00167 | A00304 | 239 |
| A00167 | A00308 | 327 | A00167 | A00309 | 490 |
| A00167 | A00322 | 294 | A00167 | A00324 | 491 |
| A00167 | A00330 | 560 | A00167 | A00337 | 257 |
| A00167 | A00351 | 266 | A00167 | A00356 | 905 |
| A00167 | A00358 | 899 | A00167 | A00370 | 404 |
| A00167 | A00377 | 418 | A00167 | A00400 | 491 |
| A00167 | A00411 | 204 | A00167 | A00420 | 491 |
| A00167 | A00440 | 612 | A00167 | A00449 | 404 |
| A00167 | A00472 | 477 | A00167 | A00482 | 412 |
| A00167 | A00485 | 154 | A00167 | A00496 | 274 |
| A00167 | A00531 | 899 | A00167 | A00546 | 489 |
| A00167 | A00556 | 472 | A00167 | A00560 | 286 |
| A00167 | A00587 | 422 | A00167 | A00600 | 432 |
| A00167 | A00616 | 474 | A00167 | A00630 | 162 |
| A00167 | A00643 | 537 | A00167 | A00651 | 905 |
| A00167 | A00656 | 245 | A00167 | A00669 | 335 |
| A00167 | A00671 | 491 | A00167 | A00696 | 471 |
| A00167 | A00719 | 191 | A00167 | A00743 | 363 |
| A00167 | A00747 | 385 | A00167 | A00752 | 342 |
| A00167 | A00757 | 362 | A00167 | A00781 | 352 |
| A00167 | A00799 | 399 | A00167 | A00815 | 477 |
| A00167 | A00820 | 491 | A00167 | A00835 | 157 |
| A00167 | A00851 | 899 | A00167 | A00853 | 367 |
| A00167 | A00875 | 370 | A00167 | A00883 | 490 |
| A00167 | A00887 | 556 | A00167 | A00900 | 277 |
| A00167 | A00914 | 486 | A00167 | A00921 | 398 |
| A00167 | A00937 | 454 | A00167 | A00957 | 480 |
| A00167 | A00967 | 180 | A00167 | A00981 | 539 |
| A00167 | A00997 | 202 | A00167 | A01009 | 259 |
| A00167 | A01011 | 609 | A00167 | A01022 | 229 |
| A00167 | A01052 | 491 | A00167 | A01056 | 937 |
| A00167 | A01070 | 937 | A00167 | A01091 | 491 |
| A00167 | A01112 | 549 | A00167 | A01125 | 491 |

|        |        |     |        |        |     |
|--------|--------|-----|--------|--------|-----|
| A00167 | A01137 | 491 | A00167 | A01139 | 899 |
| A00167 | A01140 | 591 | A00167 | A01143 | 491 |
| A00167 | A01157 | 411 | A00167 | A01163 | 213 |
| A00167 | A01164 | 490 | A00167 | A01168 | 899 |
| A00167 | A01209 | 530 | A00167 | A01211 | 200 |
| A00167 | A01213 | 477 | A00167 | A01235 | 490 |
| A00167 | A01252 | 909 | A00167 | A01257 | 462 |
| A00167 | A01289 | 958 | A00167 | A01291 | 903 |
| A00167 | A01295 | 176 | A00167 | A01299 | 491 |
| A00167 | A01305 | 472 | A00167 | A01332 | 316 |
| A00167 | A01359 | 899 | A00167 | A01378 | 461 |
| A00167 | A01405 | 200 | A00167 | A01406 | 251 |
| A00167 | A01425 | 942 | A00167 | A01454 | 506 |
| A00167 | A01474 | 465 | A00167 | A01475 | 238 |
| A00167 | A01478 | 364 | A00167 | A01485 | 310 |
| A00167 | A01492 | 899 | A00167 | A01494 | 905 |
| A00167 | A01496 | 899 | A00167 | A01500 | 185 |
| A00167 | A01507 | 484 | A00167 | A01512 | 934 |
| A00167 | A01524 | 958 | A00167 | A01527 | 957 |
| A00167 | A01531 | 472 | A00167 | A01542 | 903 |
| A00167 | A01543 | 396 | A00167 | A01554 | 899 |
| A00167 | A01557 | 541 | A00167 | A01558 | 904 |
| A00167 | A01560 | 899 | A00167 | A01562 | 935 |
| A00167 | A01565 | 259 | A00167 | A01576 | 899 |
| A00167 | A01582 | 483 | A00167 | A01588 | 899 |
| A00167 | A01590 | 475 | A00167 | A01593 | 899 |
| A00167 | A01602 | 488 | A00167 | A01604 | 899 |
| A00167 | A01605 | 945 | A00167 | A01606 | 480 |
| A00167 | A01607 | 154 | A00167 | A01615 | 899 |
| A00167 | A01630 | 288 | A00167 | A01632 | 152 |
| A00167 | A01639 | 380 | A00167 | A01640 | 902 |
| A00167 | A01654 | 485 | A00167 | A01658 | 899 |
| A00167 | A01660 | 681 | A00167 | A01661 | 223 |
| A00167 | A01668 | 254 | A00167 | A01670 | 174 |
| A00167 | A01676 | 373 | A00167 | A01688 | 481 |
| A00167 | A01698 | 489 | A00167 | A01702 | 480 |
| A00167 | A01718 | 899 | A00167 | A01722 | 303 |
| A00167 | A01723 | 468 | A00167 | A01726 | 490 |
| A00167 | A01729 | 255 | A00167 | A01730 | 940 |
| A00167 | A01733 | 448 | A00167 | A01740 | 899 |
| A00167 | A01741 | 462 | A00167 | A01747 | 490 |
| A00167 | A01763 | 395 | A00167 | A01775 | 491 |
| A00167 | A01781 | 159 | A00167 | A01790 | 491 |
| A00167 | A01796 | 358 | A00167 | A01844 | 942 |
| A00167 | A01850 | 276 | A00167 | A01892 | 154 |
| A00167 | A01902 | 334 | A00167 | A01903 | 491 |

|        |        |     |        |        |     |
|--------|--------|-----|--------|--------|-----|
| A00167 | A01905 | 330 | A00167 | A01926 | 160 |
| A00167 | A01931 | 491 | A00167 | A01936 | 340 |
| A00167 | A01959 | 480 | A00167 | A01974 | 899 |
| A00167 | A01994 | 461 | A00167 | A01995 | 539 |
| A00167 | A02000 | 157 | A00167 | A02004 | 296 |
| A00167 | A02010 | 472 | A00167 | A02020 | 472 |
| A00167 | A02044 | 899 | A00167 | A02074 | 230 |
| A00167 | A02083 | 475 | A00167 | A02148 | 348 |
| A00167 | A02149 | 173 | A00167 | A02156 | 307 |
| A00167 | A02163 | 925 | A00167 | A02174 | 379 |
| A00167 | A02192 | 151 | A00167 | A02198 | 179 |
| A00167 | A02199 | 491 | A00167 | A02212 | 347 |
| A00167 | A02226 | 322 | A00167 | A02228 | 491 |
| A00167 | A02229 | 367 | A00167 | A02235 | 176 |
| A00167 | A02278 | 469 | A00167 | A02304 | 491 |
| A00167 | A02306 | 483 | A00167 | A02313 | 383 |
| A00167 | A02333 | 340 | A00167 | A02382 | 473 |
| A00167 | A02397 | 305 | A00167 | A02411 | 905 |
| A00167 | A02412 | 491 | A00167 | A02431 | 252 |
| A00167 | A02443 | 255 | A00167 | A02452 | 293 |
| A00167 | A02467 | 441 | A00167 | A02477 | 162 |
| A00167 | A02481 | 167 | A00167 | A02482 | 375 |
| A00167 | A02490 | 293 | A00167 | A02491 | 457 |
| A00167 | A02494 | 610 | A00167 | A02501 | 160 |
| A00167 | A02502 | 489 | A00167 | A02505 | 488 |
| A00167 | A02531 | 167 | A00167 | A02564 | 168 |
| A00167 | A02621 | 165 | A00167 | A02624 | 433 |
| A00167 | A02673 | 486 | A00167 | A02687 | 184 |
| A00167 | A02698 | 612 | A00167 | A02704 | 303 |
| A00167 | A02711 | 484 | A00167 | A02759 | 305 |
| A00167 | A02761 | 475 | A00167 | A02787 | 441 |
| A00167 | A02788 | 422 | A00167 | A02812 | 420 |
| A00167 | A02833 | 391 | A00167 | A02836 | 474 |
| A00167 | A02839 | 491 | A00167 | A02874 | 435 |
| A00167 | A02875 | 480 | A00167 | A02877 | 462 |
| A00167 | A02887 | 899 | A00167 | A02902 | 321 |
| A00167 | A02917 | 899 | A00167 | A02924 | 157 |
| A00167 | A02945 | 191 | A00167 | A02959 | 235 |
| A00167 | A02981 | 427 | A00167 | A03007 | 154 |
| A00167 | A03018 | 281 | A00167 | A03034 | 297 |
| A00167 | A03051 | 270 | A00167 | A03056 | 398 |
| A00167 | A03076 | 945 | A00167 | A03077 | 441 |
| A00167 | A03080 | 241 | A00167 | A03081 | 945 |
| A00167 | A03095 | 491 | A00167 | A03099 | 490 |
| A00167 | A03104 | 491 | A00167 | A03136 | 469 |
| A00167 | A03141 | 483 | A00167 | A03186 | 217 |

|        |        |     |        |        |     |
|--------|--------|-----|--------|--------|-----|
| A00167 | A03188 | 491 | A00167 | A03211 | 468 |
| A00167 | A03213 | 481 | A00167 | A03219 | 899 |
| A00167 | A03292 | 198 | A00167 | A03304 | 491 |
| A00167 | A03312 | 180 | A00167 | A03314 | 279 |
| A00167 | A03315 | 363 | A00167 | A03332 | 899 |
| A00167 | A03334 | 357 | A00167 | A03415 | 463 |
| A00167 | A03434 | 603 | A00167 | A03435 | 240 |
| A00167 | A03436 | 489 | A00167 | A03444 | 899 |
| A00167 | A03451 | 684 | A00167 | A03584 | 152 |
| A00167 | A03591 | 441 | A00167 | A03611 | 385 |
| A00167 | A03639 | 269 | A00167 | A03697 | 205 |
| A00167 | A03719 | 485 | A00167 | A03726 | 544 |
| A00167 | A03739 | 204 | A00167 | A03771 | 440 |
| A00167 | A03778 | 791 | A00167 | A03799 | 439 |
| A00167 | A03800 | 435 | A00167 | A03819 | 339 |
| A00167 | A03854 | 469 | A00167 | A03878 | 205 |
| A00167 | A03882 | 184 | A00167 | A03893 | 613 |
| A00167 | A03906 | 477 | A00167 | A03909 | 234 |
| A00167 | A03913 | 899 | A00167 | A03946 | 438 |
| A00167 | A03961 | 469 | A00167 | A04002 | 488 |
| A00167 | A04020 | 160 | A00167 | A04033 | 491 |
| A00167 | A04050 | 428 | A00167 | A04071 | 277 |
| A00167 | A04079 | 357 | A00167 | A04082 | 235 |
| A00167 | A04152 | 157 | A00167 | A04162 | 477 |
| A00167 | A04163 | 329 | A00167 | A04169 | 333 |
| A00167 | A04202 | 483 | A00167 | A04222 | 424 |
| A00167 | A04250 | 152 | A00167 | A04259 | 176 |
| A00167 | A04275 | 200 | A00167 | A04282 | 262 |
| A00167 | A04316 | 184 | A00167 | A04334 | 422 |
| A00167 | A04361 | 200 | A00167 | A04441 | 199 |
| A00167 | A04449 | 625 | A00167 | A04454 | 266 |
| A00167 | A04548 | 460 | A00167 | A04569 | 176 |
| A00167 | A04622 | 424 | A00167 | A04737 | 216 |
| A00167 | A04746 | 235 | A00167 | A04761 | 899 |
| A00167 | A04770 | 174 | A00167 | A04773 | 486 |
| A00167 | A04818 | 312 | A00167 | A04830 | 162 |
| A00167 | A04873 | 407 | A00167 | A04949 | 386 |
| A00167 | A05027 | 259 | A00167 | A05029 | 899 |
| A00167 | A05087 | 318 | A00167 | A05221 | 489 |
| A00167 | A05264 | 277 | A00167 | A05288 | 491 |
| A00167 | A05309 | 428 | A00167 | A05315 | 899 |
| A00167 | A05377 | 324 | A00167 | A05418 | 864 |
| A00167 | A05439 | 472 | A00167 | A05449 | 159 |
| A00167 | A05450 | 474 | A00167 | A05533 | 212 |
| A00167 | A05556 | 344 | A00167 | A05607 | 176 |
| A00167 | A05666 | 436 | A00167 | A05701 | 196 |

|        |        |     |        |        |     |
|--------|--------|-----|--------|--------|-----|
| A00167 | A05721 | 402 | A00167 | A05809 | 900 |
| A00167 | A05810 | 447 | A00167 | A05853 | 486 |
| A00167 | A05854 | 416 | A00167 | A05867 | 899 |
| A00167 | A05869 | 480 | A00167 | A05886 | 160 |
| A00167 | A05887 | 173 | A00167 | A05891 | 473 |
| A00167 | A05944 | 486 | A00167 | A05979 | 235 |
| A00167 | A05996 | 899 | A00167 | A06038 | 283 |
| A00167 | A06057 | 162 | A00167 | A06092 | 406 |
| A00167 | A06190 | 323 | A00167 | A06277 | 491 |
| A00167 | A06286 | 217 | A00167 | A06298 | 402 |
| A00167 | A06305 | 899 | A00167 | A06317 | 469 |
| A00167 | A06415 | 160 | A00167 | A06554 | 218 |
| A00167 | A06578 | 258 | A00167 | A06581 | 512 |
| A00167 | A06588 | 645 | A00167 | A06591 | 495 |
| A00167 | A06599 | 186 | A00167 | A06607 | 491 |
| A00167 | A06608 | 425 | A00167 | A06609 | 899 |
| A00167 | A06610 | 455 | A00167 | A06615 | 489 |
| A00167 | A06628 | 232 | A00167 | A06650 | 491 |
| A00167 | A06688 | 491 | A00167 | A06731 | 324 |
| A00167 | A06769 | 484 | A00167 | A06814 | 428 |
| A00167 | A06907 | 491 | A00167 | A06914 | 364 |
| A00167 | A06999 | 241 | A00167 | A07054 | 274 |
| A00167 | A07132 | 260 | A00167 | A07149 | 302 |
| A00167 | A07165 | 413 | A00167 | A07173 | 210 |
| A00167 | A07176 | 491 | A00167 | A07192 | 399 |
| A00167 | A07206 | 157 | A00167 | A07209 | 491 |
| A00167 | A07242 | 644 | A00167 | A07311 | 952 |
| A00167 | A07314 | 404 | A00167 | A07339 | 491 |
| A00167 | A07387 | 154 | A00167 | A07422 | 899 |
| A00167 | A07726 | 546 | A00167 | A07803 | 491 |
| A00167 | A07833 | 490 | A00167 | A07934 | 283 |
| A00167 | A07967 | 199 | A00167 | A08280 | 457 |
| A00167 | A08315 | 160 | A00167 | A08325 | 241 |
| A00167 | A08402 | 294 | A00167 | A08643 | 204 |
| A00167 | A08659 | 154 | A00167 | A08718 | 491 |
| A00167 | A08746 | 163 | A00167 | A08837 | 208 |
| A00167 | A08850 | 274 | A00167 | A08859 | 684 |
| A00167 | A08869 | 488 | A00167 | A08875 | 490 |
| A00167 | A08878 | 966 | A00167 | A08929 | 353 |
| A00167 | A08943 | 899 | A00167 | A09018 | 407 |
| A00167 | A09078 | 474 | A00167 | A09124 | 308 |
| A00167 | A09149 | 187 | A00167 | A09162 | 424 |
| A00167 | A09199 | 193 | A00167 | A09215 | 154 |
| A00167 | A09235 | 224 | A00167 | A09236 | 335 |
| A00167 | A09238 | 180 | A00167 | A09258 | 899 |
| A00167 | A09377 | 899 | A00167 | A09380 | 277 |

|        |        |     |        |        |     |
|--------|--------|-----|--------|--------|-----|
| A00167 | A09382 | 265 | A00167 | A09416 | 477 |
| A00167 | A09479 | 252 | A00167 | A09493 | 162 |
| A00167 | A09509 | 491 | A00167 | A09513 | 398 |
| A00167 | A09732 | 484 | A00167 | A09733 | 443 |
| A00167 | A09734 | 267 | A00167 | A09742 | 171 |
| A00167 | A09791 | 229 | A00167 | A09825 | 249 |
| A00167 | A10018 | 151 | A00167 | A10156 | 151 |
| A00167 | A10174 | 899 | A00167 | A10175 | 427 |
| A00167 | A10228 | 900 | A00167 | A10233 | 899 |
| A00167 | A10336 | 423 | A00167 | A10340 | 899 |
| A00167 | A10365 | 899 | A00167 | A10453 | 216 |
| A00167 | A10532 | 899 | A00167 | A10580 | 899 |
| A00167 | A10596 | 313 | A00167 | A10597 | 914 |
| A00167 | A10599 | 297 | A00167 | A10619 | 469 |
| A00167 | A10645 | 193 | A00167 | A10731 | 467 |
| A00167 | A10743 | 899 | A00167 | A10833 | 899 |
| A00167 | A11007 | 152 | A00167 | A11104 | 160 |
| A00167 | A11287 | 157 | A00167 | A11291 | 177 |
| A00167 | A11293 | 335 | A00167 | A11300 | 485 |
| A00167 | A11369 | 294 | A00167 | A11387 | 368 |
| A00167 | A11405 | 324 | A00167 | A11415 | 346 |
| A00167 | A11487 | 385 | A00167 | A11513 | 276 |
| A00167 | A11522 | 432 | A00167 | A11523 | 465 |
| A00167 | A11531 | 296 | A00167 | A11548 | 185 |
| A00167 | A11560 | 294 | A00167 | A11684 | 217 |
| A00167 | A11727 | 190 | A00167 | A11834 | 899 |
| A00167 | A11846 | 303 | A00167 | A11875 | 224 |
| A00167 | A11897 | 277 | A00167 | A11899 | 191 |
| A00167 | A11932 | 435 | A00167 | A11983 | 982 |
| A00167 | A12111 | 490 | A00167 | A12356 | 154 |
| A00167 | A12365 | 569 | A00167 | A12371 | 263 |
| A00167 | A12373 | 490 | A00167 | A12385 | 154 |
| A00167 | A12393 | 363 | A00167 | A12410 | 154 |
| A00167 | A12466 | 154 | A00167 | A12474 | 279 |
| A00167 | A12488 | 154 | A00167 | A12490 | 154 |
| A00167 | A12507 | 187 | A00167 | A12513 | 316 |
| A00167 | A12666 | 899 | A00167 | A12699 | 154 |
| A00167 | A12818 | 899 | A00167 | A12854 | 151 |
| A00167 | A12897 | 613 | A00167 | A12971 | 899 |
| A00167 | A13063 | 370 | A00167 | A13241 | 944 |
| A00167 | A13287 | 152 | A00167 | A13344 | 899 |
| A00167 | A13587 | 490 | A00167 | A13605 | 899 |
| A00167 | A13874 | 217 | A00167 | A13889 | 184 |
| A00167 | A13928 | 477 | A00167 | A13944 | 152 |
| A00167 | A13975 | 905 | A00167 | A13987 | 196 |
| A00167 | A13989 | 904 | A00167 | A13994 | 313 |

|        |        |     |        |        |     |
|--------|--------|-----|--------|--------|-----|
| A00167 | A13997 | 247 | A00167 | A14010 | 168 |
| A00167 | A14017 | 899 | A00167 | A14025 | 511 |
| A00167 | A14032 | 899 | A00167 | A14033 | 912 |
| A00167 | A14038 | 913 | A00167 | A14055 | 945 |
| A00167 | A14120 | 266 | A00167 | A14148 | 490 |
| A00167 | A14188 | 899 | A00167 | A14190 | 905 |
| A00167 | A14196 | 531 | A00167 | A14202 | 553 |
| A00167 | A14208 | 581 | A00167 | A14210 | 490 |
| A00167 | A14211 | 238 | A00167 | A14220 | 465 |
| A00167 | A14221 | 473 | A00167 | A14229 | 343 |
| A00167 | A14236 | 338 | A00167 | A14247 | 277 |
| A00167 | A14258 | 159 | A00167 | A14299 | 489 |
| A00167 | A14366 | 916 | A00167 | A14371 | 475 |
| A00167 | A14378 | 281 | A00167 | A14382 | 191 |
| A00167 | A14391 | 899 | A00167 | A14399 | 173 |
| A00167 | A14410 | 612 | A00167 | A14430 | 312 |
| A00167 | A14442 | 406 | A00167 | A14443 | 994 |
| A00167 | A14444 | 993 | A00167 | A14457 | 263 |
| A00167 | A14472 | 380 | A00167 | A14474 | 204 |
| A00167 | A14498 | 195 | A00167 | A14506 | 899 |
| A00167 | A14511 | 490 | A00167 | A14557 | 899 |
| A00167 | A14570 | 484 | A00167 | A14589 | 473 |
| A00167 | A14604 | 485 | A00167 | A14635 | 491 |
| A00167 | A14636 | 491 | A00167 | A14643 | 491 |
| A00167 | A14650 | 408 | A00167 | A14659 | 204 |
| A00167 | A14660 | 457 | A00167 | A14667 | 473 |
| A00167 | A14886 | 274 | A00167 | A14925 | 456 |
| A00167 | A14930 | 157 | A00167 | A14949 | 154 |
| A00167 | A15002 | 154 | A00167 | A15056 | 154 |
| A00167 | A15233 | 246 | A00167 | A15237 | 227 |
| A00167 | A15238 | 310 | A00167 | A15241 | 230 |
| A00167 | A15277 | 366 | A00167 | A15282 | 491 |
| A00167 | A15290 | 899 | A00167 | A15292 | 491 |
| A00167 | A15293 | 949 | A00167 | A15294 | 925 |
| A00167 | A15296 | 557 | A00167 | A15309 | 163 |
| A00167 | A15312 | 430 | A00167 | A15313 | 445 |
| A00167 | A15314 | 491 | A00167 | A15318 | 491 |
| A00167 | A15322 | 490 | A00167 | A15323 | 430 |
| A00167 | A15337 | 491 | A00167 | A15339 | 380 |
| A00167 | A15349 | 479 | A00167 | A15352 | 435 |
| A00167 | A15355 | 435 | A00167 | A15356 | 945 |
| A00167 | A15360 | 162 | A00167 | A15361 | 180 |
| A00167 | A15366 | 490 | A00167 | A15403 | 308 |
| A00167 | A15431 | 386 | A00167 | A15447 | 291 |
| A00167 | A15452 | 481 | A00167 | A15478 | 255 |
| A00167 | A15480 | 229 | A00167 | A15481 | 154 |



|        |        |     |        |        |     |
|--------|--------|-----|--------|--------|-----|
| A00167 | A15484 | 151 | A00167 | A15492 | 167 |
| A00167 | A15495 | 418 | A00167 | A15506 | 528 |
| A00167 | A15559 | 358 | A00167 | A15599 | 345 |
| A00167 | A15605 | 180 | A00167 | A15606 | 584 |
| A00167 | A15608 | 368 | A00167 | A15630 | 488 |
| A00167 | A15834 | 269 | A00167 | A15852 | 238 |
| A00167 | A15868 | 229 | A00167 | A15909 | 408 |
| A00167 | A15911 | 269 | A00167 | A15917 | 406 |
| A00167 | A16080 | 935 | A00167 | A16087 | 302 |
| A00167 | A16257 | 452 | A00167 | A16379 | 326 |
| A00167 | A16453 | 272 | A00167 | A16511 | 435 |
| A00167 | A16625 | 154 | A00167 | A16626 | 463 |
| A00167 | A16635 | 312 | A00167 | A16792 | 165 |
| A00167 | A16812 | 899 | A00167 | A16814 | 160 |
| A00167 | A16911 | 356 | A00167 | A16916 | 432 |
| A00167 | A17063 | 436 | A00167 | A17188 | 899 |
| A00167 | A17190 | 176 | A00167 | A17198 | 435 |
| A00167 | A17214 | 899 | A00168 | A00169 | 388 |
| A00168 | A00176 | 219 | A00168 | A00177 | 434 |
| A00168 | A00185 | 232 | A00168 | A00190 | 447 |
| A00168 | A00200 | 899 | A00168 | A00208 | 348 |
| A00168 | A00209 | 489 | A00168 | A00211 | 350 |
| A00168 | A00212 | 491 | A00168 | A00216 | 438 |
| A00168 | A00219 | 632 | A00168 | A00231 | 447 |
| A00168 | A00245 | 491 | A00168 | A00254 | 486 |
| A00168 | A00264 | 395 | A00168 | A00294 | 165 |
| A00168 | A00309 | 303 | A00168 | A00315 | 384 |
| A00168 | A00316 | 152 | A00168 | A00349 | 260 |
| A00168 | A00370 | 385 | A00168 | A00451 | 488 |
| A00168 | A00485 | 369 | A00168 | A00491 | 484 |
| A00168 | A00561 | 484 | A00168 | A00567 | 401 |
| A00168 | A00612 | 195 | A00168 | A00616 | 489 |
| A00168 | A00664 | 163 | A00168 | A00718 | 486 |
| A00168 | A00736 | 356 | A00168 | A00752 | 168 |
| A00168 | A00757 | 299 | A00168 | A00815 | 443 |
| A00168 | A00875 | 235 | A00168 | A00883 | 185 |
| A00168 | A00921 | 170 | A00168 | A00931 | 491 |
| A00168 | A00937 | 307 | A00168 | A00940 | 207 |
| A00168 | A00958 | 258 | A00168 | A00981 | 639 |
| A00168 | A01070 | 474 | A00168 | A01125 | 785 |
| A00168 | A01137 | 491 | A00168 | A01161 | 353 |
| A00168 | A01209 | 305 | A00168 | A01235 | 477 |
| A00168 | A01244 | 457 | A00168 | A01257 | 491 |
| A00168 | A01360 | 473 | A00168 | A01454 | 337 |
| A00168 | A01475 | 488 | A00168 | A01485 | 422 |
| A00168 | A01512 | 174 | A00168 | A01524 | 417 |

|        |        |     |        |        |     |
|--------|--------|-----|--------|--------|-----|
| A00168 | A01531 | 174 | A00168 | A01546 | 252 |
| A00168 | A01547 | 475 | A00168 | A01590 | 433 |
| A00168 | A01600 | 520 | A00168 | A01601 | 319 |
| A00168 | A01640 | 180 | A00168 | A01647 | 445 |
| A00168 | A01671 | 470 | A00168 | A01741 | 318 |
| A00168 | A01775 | 348 | A00168 | A01925 | 210 |
| A00168 | A01926 | 465 | A00168 | A01929 | 221 |
| A00168 | A01941 | 380 | A00168 | A01995 | 409 |
| A00168 | A02000 | 345 | A00168 | A02006 | 172 |
| A00168 | A02010 | 438 | A00168 | A02063 | 168 |
| A00168 | A02074 | 323 | A00168 | A02083 | 208 |
| A00168 | A02111 | 401 | A00168 | A02143 | 201 |
| A00168 | A02156 | 199 | A00168 | A02161 | 165 |
| A00168 | A02212 | 458 | A00168 | A02215 | 227 |
| A00168 | A02228 | 226 | A00168 | A02229 | 461 |
| A00168 | A02278 | 457 | A00168 | A02304 | 177 |
| A00168 | A02306 | 461 | A00168 | A02313 | 486 |
| A00168 | A02317 | 188 | A00168 | A02397 | 420 |
| A00168 | A02425 | 360 | A00168 | A02452 | 157 |
| A00168 | A02464 | 428 | A00168 | A02466 | 468 |
| A00168 | A02482 | 398 | A00168 | A02502 | 374 |
| A00168 | A02559 | 162 | A00168 | A02572 | 452 |
| A00168 | A02588 | 173 | A00168 | A02660 | 463 |
| A00168 | A02673 | 490 | A00168 | A02716 | 165 |
| A00168 | A02731 | 472 | A00168 | A02759 | 360 |
| A00168 | A02785 | 179 | A00168 | A02836 | 154 |
| A00168 | A03051 | 350 | A00168 | A03076 | 212 |
| A00168 | A03099 | 374 | A00168 | A03104 | 489 |
| A00168 | A03110 | 176 | A00168 | A03141 | 485 |
| A00168 | A03165 | 93  | A00168 | A03181 | 163 |
| A00168 | A03183 | 335 | A00168 | A03186 | 90  |
| A00168 | A03219 | 157 | A00168 | A03259 | 179 |
| A00168 | A03292 | 177 | A00168 | A03304 | 446 |
| A00168 | A03310 | 104 | A00168 | A03314 | 491 |
| A00168 | A03315 | 456 | A00168 | A03402 | 230 |
| A00168 | A03436 | 260 | A00168 | A03451 | 193 |
| A00168 | A03457 | 412 | A00168 | A03459 | 232 |
| A00168 | A03578 | 63  | A00168 | A03584 | 271 |
| A00168 | A03639 | 475 | A00168 | A03688 | 308 |
| A00168 | A03694 | 330 | A00168 | A03723 | 468 |
| A00168 | A03771 | 243 | A00168 | A03818 | 352 |
| A00168 | A03862 | 303 | A00168 | A03906 | 329 |
| A00168 | A03961 | 491 | A00168 | A04012 | 340 |
| A00168 | A04086 | 252 | A00168 | A04092 | 364 |
| A00168 | A04101 | 205 | A00168 | A04133 | 185 |
| A00168 | A04152 | 405 | A00168 | A04162 | 236 |

|        |        |     |        |        |     |
|--------|--------|-----|--------|--------|-----|
| A00168 | A04202 | 477 | A00168 | A04282 | 252 |
| A00168 | A04365 | 157 | A00168 | A04449 | 475 |
| A00168 | A04491 | 168 | A00168 | A04492 | 174 |
| A00168 | A04504 | 157 | A00168 | A04626 | 210 |
| A00168 | A04749 | 400 | A00168 | A04770 | 240 |
| A00168 | A04790 | 160 | A00168 | A04813 | 182 |
| A00168 | A04976 | 347 | A00168 | A05048 | 195 |
| A00168 | A05087 | 187 | A00168 | A05118 | 183 |
| A00168 | A05221 | 184 | A00168 | A05228 | 173 |
| A00168 | A05288 | 445 | A00168 | A05297 | 154 |
| A00168 | A05356 | 290 | A00168 | A05366 | 195 |
| A00168 | A05377 | 469 | A00168 | A05439 | 491 |
| A00168 | A05494 | 268 | A00168 | A05533 | 472 |
| A00168 | A05534 | 390 | A00168 | A05571 | 232 |
| A00168 | A05629 | 218 | A00168 | A05653 | 345 |
| A00168 | A05737 | 195 | A00168 | A05886 | 230 |
| A00168 | A05887 | 456 | A00168 | A05965 | 195 |
| A00168 | A06008 | 210 | A00168 | A06038 | 422 |
| A00168 | A06156 | 195 | A00168 | A06245 | 152 |
| A00168 | A06253 | 151 | A00168 | A06277 | 328 |
| A00168 | A06578 | 446 | A00168 | A06607 | 307 |
| A00168 | A06608 | 899 | A00168 | A06609 | 201 |
| A00168 | A06610 | 428 | A00168 | A06769 | 468 |
| A00168 | A06777 | 195 | A00168 | A06815 | 165 |
| A00168 | A07054 | 310 | A00168 | A07143 | 273 |
| A00168 | A07209 | 486 | A00168 | A07211 | 267 |
| A00168 | A07339 | 446 | A00168 | A07454 | 210 |
| A00168 | A07803 | 268 | A00168 | A07893 | 515 |
| A00168 | A07934 | 435 | A00168 | A08039 | 183 |
| A00168 | A08244 | 173 | A00168 | A08358 | 180 |
| A00168 | A08630 | 240 | A00168 | A09036 | 326 |
| A00168 | A09072 | 420 | A00168 | A09078 | 215 |
| A00168 | A09235 | 486 | A00168 | A09236 | 303 |
| A00168 | A09241 | 455 | A00168 | A09246 | 355 |
| A00168 | A09272 | 477 | A00168 | A09363 | 290 |
| A00168 | A09429 | 382 | A00168 | A09480 | 338 |
| A00168 | A09493 | 173 | A00168 | A09729 | 488 |
| A00168 | A09812 | 243 | A00168 | A09837 | 256 |
| A00168 | A09956 | 232 | A00168 | A09970 | 210 |
| A00168 | A09971 | 183 | A00168 | A10079 | 358 |
| A00168 | A10470 | 152 | A00168 | A10645 | 252 |
| A00168 | A11132 | 310 | A00168 | A11237 | 267 |
| A00168 | A11313 | 457 | A00168 | A11327 | 200 |
| A00168 | A11614 | 462 | A00168 | A11788 | 210 |
| A00168 | A11819 | 232 | A00168 | A11893 | 307 |
| A00168 | A11983 | 486 | A00168 | A12265 | 317 |

|        |        |     |        |        |     |
|--------|--------|-----|--------|--------|-----|
| A00168 | A12298 | 307 | A00168 | A12366 | 232 |
| A00168 | A12650 | 277 | A00168 | A12654 | 396 |
| A00168 | A12897 | 466 | A00168 | A13299 | 396 |
| A00168 | A13344 | 210 | A00168 | A13736 | 196 |
| A00168 | A13782 | 195 | A00168 | A13811 | 163 |
| A00168 | A13849 | 173 | A00168 | A13853 | 243 |
| A00168 | A13994 | 183 | A00168 | A14060 | 433 |
| A00168 | A14072 | 491 | A00168 | A14128 | 218 |
| A00168 | A14188 | 382 | A00168 | A14193 | 486 |
| A00168 | A14196 | 401 | A00168 | A14198 | 486 |
| A00168 | A14299 | 279 | A00168 | A14399 | 177 |
| A00168 | A14423 | 160 | A00168 | A14443 | 477 |
| A00168 | A14444 | 488 | A00168 | A14511 | 447 |
| A00168 | A14589 | 185 | A00168 | A14596 | 302 |
| A00168 | A14604 | 212 | A00168 | A14635 | 208 |
| A00168 | A14667 | 174 | A00168 | A14933 | 267 |
| A00168 | A15230 | 486 | A00168 | A15282 | 157 |
| A00168 | A15293 | 491 | A00168 | A15294 | 319 |
| A00168 | A15321 | 622 | A00168 | A15337 | 263 |
| A00168 | A15496 | 307 | A00168 | A15498 | 488 |
| A00168 | A15506 | 490 | A00168 | A15555 | 322 |
| A00168 | A15598 | 489 | A00168 | A15600 | 183 |
| A00168 | A15682 | 182 | A00168 | A15913 | 491 |
| A00168 | A15971 | 165 | A00168 | A16260 | 165 |
| A00168 | A16261 | 401 | A00168 | A16519 | 210 |
| A00168 | A16608 | 396 | A00168 | A16916 | 469 |
| A00169 | A00171 | 484 | A00169 | A00185 | 993 |
| A00169 | A00190 | 452 | A00169 | A00200 | 994 |
| A00169 | A00201 | 484 | A00169 | A00207 | 408 |
| A00169 | A00208 | 301 | A00169 | A00209 | 936 |
| A00169 | A00213 | 279 | A00169 | A00214 | 491 |
| A00169 | A00216 | 900 | A00169 | A00219 | 303 |
| A00169 | A00224 | 490 | A00169 | A00229 | 180 |
| A00169 | A00230 | 931 | A00169 | A00234 | 211 |
| A00169 | A00239 | 467 | A00169 | A00240 | 491 |
| A00169 | A00245 | 252 | A00169 | A00246 | 930 |
| A00169 | A00254 | 935 | A00169 | A00255 | 899 |
| A00169 | A00263 | 395 | A00169 | A00294 | 919 |
| A00169 | A00308 | 406 | A00169 | A00309 | 159 |
| A00169 | A00315 | 154 | A00169 | A00316 | 313 |
| A00169 | A00324 | 491 | A00169 | A00366 | 307 |
| A00169 | A00381 | 474 | A00169 | A00411 | 485 |
| A00169 | A00440 | 539 | A00169 | A00469 | 204 |
| A00169 | A00486 | 196 | A00169 | A00638 | 486 |
| A00169 | A00643 | 512 | A00169 | A00669 | 757 |
| A00169 | A00696 | 489 | A00169 | A00832 | 420 |

|        |        |     |        |        |     |
|--------|--------|-----|--------|--------|-----|
| A00169 | A00864 | 480 | A00169 | A00875 | 452 |
| A00169 | A00887 | 469 | A00169 | A00905 | 321 |
| A00169 | A00911 | 405 | A00169 | A00958 | 383 |
| A00169 | A00981 | 177 | A00169 | A00997 | 491 |
| A00169 | A01003 | 491 | A00169 | A01011 | 162 |
| A00169 | A01052 | 480 | A00169 | A01070 | 899 |
| A00169 | A01078 | 324 | A00169 | A01157 | 534 |
| A00169 | A01161 | 235 | A00169 | A01172 | 257 |
| A00169 | A01214 | 395 | A00169 | A01289 | 469 |
| A00169 | A01307 | 399 | A00169 | A01322 | 490 |
| A00169 | A01325 | 454 | A00169 | A01450 | 171 |
| A00169 | A01512 | 301 | A00169 | A01524 | 938 |
| A00169 | A01527 | 945 | A00169 | A01529 | 368 |
| A00169 | A01548 | 217 | A00169 | A01553 | 363 |
| A00169 | A01554 | 937 | A00169 | A01558 | 899 |
| A00169 | A01560 | 942 | A00169 | A01561 | 389 |
| A00169 | A01571 | 339 | A00169 | A01588 | 899 |
| A00169 | A01602 | 230 | A00169 | A01615 | 903 |
| A00169 | A01629 | 419 | A00169 | A01630 | 433 |
| A00169 | A01636 | 899 | A00169 | A01639 | 218 |
| A00169 | A01650 | 378 | A00169 | A01668 | 322 |
| A00169 | A01688 | 445 | A00169 | A01692 | 223 |
| A00169 | A01697 | 335 | A00169 | A01709 | 402 |
| A00169 | A01730 | 488 | A00169 | A01747 | 491 |
| A00169 | A01796 | 218 | A00169 | A01822 | 249 |
| A00169 | A01839 | 347 | A00169 | A01842 | 154 |
| A00169 | A01897 | 249 | A00169 | A01920 | 899 |
| A00169 | A02211 | 165 | A00169 | A02217 | 182 |
| A00169 | A02221 | 330 | A00169 | A02493 | 306 |
| A00169 | A02494 | 378 | A00169 | A02502 | 488 |
| A00169 | A02504 | 475 | A00169 | A02598 | 260 |
| A00169 | A02618 | 303 | A00169 | A02639 | 236 |
| A00169 | A02640 | 488 | A00169 | A02673 | 247 |
| A00169 | A02687 | 165 | A00169 | A02711 | 198 |
| A00169 | A02738 | 296 | A00169 | A02748 | 191 |
| A00169 | A02749 | 469 | A00169 | A02752 | 176 |
| A00169 | A02788 | 174 | A00169 | A02826 | 188 |
| A00169 | A02840 | 174 | A00169 | A02877 | 729 |
| A00169 | A02895 | 210 | A00169 | A03056 | 435 |
| A00169 | A03188 | 419 | A00169 | A03203 | 241 |
| A00169 | A03216 | 182 | A00169 | A03226 | 483 |
| A00169 | A03244 | 205 | A00169 | A03292 | 270 |
| A00169 | A03304 | 380 | A00169 | A03321 | 224 |
| A00169 | A03401 | 152 | A00169 | A03435 | 366 |
| A00169 | A03436 | 460 | A00169 | A03451 | 491 |
| A00169 | A03477 | 184 | A00169 | A03591 | 366 |

|        |        |     |        |        |     |
|--------|--------|-----|--------|--------|-----|
| A00169 | A03611 | 486 | A00169 | A03758 | 321 |
| A00169 | A03771 | 173 | A00169 | A03854 | 488 |
| A00169 | A03904 | 165 | A00169 | A04006 | 184 |
| A00169 | A04038 | 254 | A00169 | A04050 | 491 |
| A00169 | A04062 | 256 | A00169 | A04133 | 196 |
| A00169 | A04140 | 414 | A00169 | A04222 | 217 |
| A00169 | A04239 | 327 | A00169 | A04266 | 174 |
| A00169 | A04280 | 165 | A00169 | A04282 | 491 |
| A00169 | A04349 | 177 | A00169 | A04358 | 160 |
| A00169 | A04359 | 191 | A00169 | A04360 | 281 |
| A00169 | A04413 | 174 | A00169 | A04414 | 274 |
| A00169 | A04449 | 340 | A00169 | A04484 | 899 |
| A00169 | A04486 | 154 | A00169 | A04513 | 241 |
| A00169 | A04534 | 165 | A00169 | A04569 | 191 |
| A00169 | A04680 | 174 | A00169 | A04699 | 305 |
| A00169 | A04704 | 245 | A00169 | A04719 | 191 |
| A00169 | A04807 | 477 | A00169 | A04841 | 218 |
| A00169 | A04853 | 156 | A00169 | A04949 | 534 |
| A00169 | A04973 | 174 | A00169 | A05082 | 450 |
| A00169 | A05247 | 171 | A00169 | A05288 | 491 |
| A00169 | A05415 | 443 | A00169 | A05418 | 633 |
| A00169 | A05432 | 180 | A00169 | A05453 | 167 |
| A00169 | A05519 | 218 | A00169 | A05680 | 191 |
| A00169 | A05701 | 491 | A00169 | A05721 | 351 |
| A00169 | A05722 | 324 | A00169 | A05763 | 218 |
| A00169 | A05990 | 401 | A00169 | A06147 | 174 |
| A00169 | A06161 | 467 | A00169 | A06212 | 168 |
| A00169 | A06268 | 343 | A00169 | A06295 | 899 |
| A00169 | A06400 | 322 | A00169 | A06554 | 485 |
| A00169 | A06597 | 224 | A00169 | A06599 | 452 |
| A00169 | A06608 | 945 | A00169 | A06610 | 363 |
| A00169 | A06623 | 329 | A00169 | A06648 | 151 |
| A00169 | A06660 | 160 | A00169 | A06701 | 208 |
| A00169 | A06728 | 182 | A00169 | A06752 | 398 |
| A00169 | A06767 | 204 | A00169 | A07019 | 251 |
| A00169 | A07158 | 346 | A00169 | A07163 | 407 |
| A00169 | A07165 | 388 | A00169 | A07206 | 327 |
| A00169 | A07260 | 274 | A00169 | A07311 | 949 |
| A00169 | A07339 | 491 | A00169 | A07668 | 241 |
| A00169 | A07706 | 216 | A00169 | A07782 | 218 |
| A00169 | A07908 | 241 | A00169 | A08047 | 274 |
| A00169 | A08175 | 174 | A00169 | A08236 | 160 |
| A00169 | A08310 | 174 | A00169 | A08342 | 218 |
| A00169 | A08720 | 191 | A00169 | A08747 | 191 |
| A00169 | A08946 | 154 | A00169 | A09018 | 272 |
| A00169 | A09078 | 238 | A00169 | A09123 | 468 |

|        |        |     |        |        |     |
|--------|--------|-----|--------|--------|-----|
| A00169 | A09124 | 467 | A00169 | A09149 | 477 |
| A00169 | A09319 | 277 | A00169 | A09361 | 409 |
| A00169 | A09380 | 213 | A00169 | A09464 | 165 |
| A00169 | A09479 | 174 | A00169 | A09500 | 165 |
| A00169 | A09577 | 193 | A00169 | A09746 | 160 |
| A00169 | A09964 | 160 | A00169 | A09982 | 241 |
| A00169 | A10072 | 165 | A00169 | A10111 | 165 |
| A00169 | A10203 | 241 | A00169 | A10247 | 395 |
| A00169 | A10252 | 364 | A00169 | A10278 | 401 |
| A00169 | A10364 | 154 | A00169 | A10525 | 454 |
| A00169 | A10743 | 167 | A00169 | A10808 | 903 |
| A00169 | A10941 | 160 | A00169 | A10982 | 380 |
| A00169 | A10986 | 174 | A00169 | A11014 | 208 |
| A00169 | A11125 | 310 | A00169 | A11252 | 204 |
| A00169 | A11262 | 335 | A00169 | A11264 | 249 |
| A00169 | A11300 | 360 | A00169 | A11342 | 165 |
| A00169 | A11483 | 160 | A00169 | A11513 | 176 |
| A00169 | A11586 | 314 | A00169 | A11619 | 274 |
| A00169 | A11788 | 218 | A00169 | A11977 | 204 |
| A00169 | A12010 | 477 | A00169 | A12108 | 182 |
| A00169 | A12365 | 488 | A00169 | A12373 | 446 |
| A00169 | A12432 | 218 | A00169 | A12434 | 241 |
| A00169 | A12435 | 218 | A00169 | A12518 | 182 |
| A00169 | A12535 | 241 | A00169 | A12638 | 174 |
| A00169 | A12656 | 218 | A00169 | A12657 | 154 |
| A00169 | A12743 | 274 | A00169 | A12778 | 274 |
| A00169 | A12830 | 274 | A00169 | A12860 | 274 |
| A00169 | A12965 | 218 | A00169 | A13138 | 274 |
| A00169 | A13234 | 191 | A00169 | A13795 | 174 |
| A00169 | A13862 | 174 | A00169 | A13997 | 294 |
| A00169 | A14006 | 323 | A00169 | A14045 | 899 |
| A00169 | A14198 | 930 | A00169 | A14319 | 443 |
| A00169 | A14321 | 314 | A00169 | A14393 | 470 |
| A00169 | A14410 | 425 | A00169 | A14596 | 899 |
| A00169 | A14605 | 340 | A00169 | A14642 | 417 |
| A00169 | A14650 | 462 | A00169 | A14660 | 278 |
| A00169 | A14689 | 165 | A00169 | A14732 | 204 |
| A00169 | A14834 | 274 | A00169 | A15293 | 905 |
| A00169 | A15294 | 899 | A00169 | A15325 | 201 |
| A00169 | A15606 | 279 | A00169 | A15651 | 267 |
| A00169 | A15838 | 266 | A00169 | A15840 | 429 |
| A00169 | A15952 | 241 | A00169 | A16043 | 435 |
| A00169 | A16138 | 260 | A00169 | A16150 | 241 |
| A00169 | A16171 | 218 | A00169 | A16174 | 204 |
| A00169 | A16195 | 204 | A00169 | A16339 | 241 |
| A00169 | A16397 | 279 | A00169 | A16442 | 218 |

|        |        |     |        |        |     |
|--------|--------|-----|--------|--------|-----|
| A00169 | A16489 | 204 | A00169 | A16718 | 383 |
| A00169 | A16721 | 395 | A00169 | A16732 | 266 |
| A00169 | A16775 | 241 | A00169 | A16887 | 307 |
| A00169 | A17096 | 274 | A00169 | A17188 | 899 |
| A00170 | A00229 | 984 | A00170 | A00240 | 953 |
| A00170 | A00272 | 991 | A00170 | A00653 | 372 |
| A00170 | A02473 | 362 | A00170 | A02836 | 739 |
| A00170 | A07153 | 184 | A00170 | A07311 | 547 |
| A00170 | A07422 | 899 | A00170 | A14062 | 974 |
| A00170 | A14191 | 201 | A00171 | A00173 | 491 |
| A00171 | A00185 | 393 | A00171 | A00190 | 480 |
| A00171 | A00196 | 188 | A00171 | A00200 | 238 |
| A00171 | A00208 | 932 | A00171 | A00209 | 952 |
| A00171 | A00212 | 293 | A00171 | A00214 | 899 |
| A00171 | A00219 | 491 | A00171 | A00224 | 491 |
| A00171 | A00230 | 296 | A00171 | A00234 | 941 |
| A00171 | A00235 | 463 | A00171 | A00238 | 475 |
| A00171 | A00239 | 157 | A00171 | A00240 | 462 |
| A00171 | A00242 | 911 | A00171 | A00246 | 899 |
| A00171 | A00258 | 252 | A00171 | A00262 | 899 |
| A00171 | A00294 | 483 | A00171 | A00301 | 154 |
| A00171 | A00305 | 491 | A00171 | A00309 | 484 |
| A00171 | A00316 | 899 | A00171 | A00324 | 944 |
| A00171 | A00338 | 399 | A00171 | A00366 | 443 |
| A00171 | A00417 | 439 | A00171 | A00421 | 490 |
| A00171 | A00422 | 183 | A00171 | A00431 | 152 |
| A00171 | A00446 | 156 | A00171 | A00447 | 286 |
| A00171 | A00457 | 162 | A00171 | A00470 | 162 |
| A00171 | A00485 | 470 | A00171 | A00493 | 491 |
| A00171 | A00531 | 445 | A00171 | A00562 | 290 |
| A00171 | A00581 | 262 | A00171 | A00589 | 241 |
| A00171 | A00604 | 452 | A00171 | A00605 | 486 |
| A00171 | A00609 | 491 | A00171 | A00616 | 188 |
| A00171 | A00617 | 475 | A00171 | A00669 | 491 |
| A00171 | A00680 | 218 | A00171 | A00697 | 313 |
| A00171 | A00718 | 491 | A00171 | A00736 | 422 |
| A00171 | A00747 | 430 | A00171 | A00778 | 480 |
| A00171 | A00779 | 485 | A00171 | A00797 | 474 |
| A00171 | A00832 | 485 | A00171 | A00851 | 154 |
| A00171 | A00853 | 188 | A00171 | A00868 | 254 |
| A00171 | A00883 | 491 | A00171 | A00887 | 369 |
| A00171 | A00905 | 419 | A00171 | A00907 | 488 |
| A00171 | A00914 | 907 | A00171 | A00937 | 174 |
| A00171 | A00942 | 286 | A00171 | A00954 | 480 |
| A00171 | A00997 | 491 | A00171 | A01021 | 490 |
| A00171 | A01022 | 445 | A00171 | A01026 | 491 |



|        |        |     |        |        |     |
|--------|--------|-----|--------|--------|-----|
| A00171 | A01065 | 450 | A00171 | A01091 | 438 |
| A00171 | A01100 | 393 | A00171 | A01120 | 307 |
| A00171 | A01136 | 436 | A00171 | A01161 | 467 |
| A00171 | A01189 | 467 | A00171 | A01211 | 346 |
| A00171 | A01243 | 288 | A00171 | A01269 | 229 |
| A00171 | A01313 | 486 | A00171 | A01325 | 235 |
| A00171 | A01356 | 163 | A00171 | A01359 | 199 |
| A00171 | A01375 | 466 | A00171 | A01377 | 491 |
| A00171 | A01384 | 322 | A00171 | A01386 | 375 |
| A00171 | A01472 | 193 | A00171 | A01483 | 491 |
| A00171 | A01527 | 937 | A00171 | A01529 | 154 |
| A00171 | A01554 | 899 | A00171 | A01560 | 472 |
| A00171 | A01582 | 362 | A00171 | A01591 | 172 |
| A00171 | A01592 | 176 | A00171 | A01593 | 899 |
| A00171 | A01601 | 276 | A00171 | A01612 | 486 |
| A00171 | A01615 | 937 | A00171 | A01626 | 899 |
| A00171 | A01632 | 389 | A00171 | A01634 | 254 |
| A00171 | A01649 | 224 | A00171 | A01666 | 393 |
| A00171 | A01675 | 319 | A00171 | A01676 | 391 |
| A00171 | A01688 | 335 | A00171 | A01694 | 277 |
| A00171 | A01702 | 945 | A00171 | A01718 | 901 |
| A00171 | A01730 | 430 | A00171 | A01741 | 488 |
| A00171 | A01747 | 416 | A00171 | A01748 | 274 |
| A00171 | A01767 | 151 | A00171 | A01789 | 899 |
| A00171 | A01797 | 317 | A00171 | A01822 | 346 |
| A00171 | A01839 | 286 | A00171 | A01844 | 945 |
| A00171 | A01900 | 258 | A00171 | A02049 | 160 |
| A00171 | A02180 | 468 | A00171 | A02212 | 199 |
| A00171 | A02215 | 257 | A00171 | A02278 | 361 |
| A00171 | A02292 | 200 | A00171 | A02293 | 157 |
| A00171 | A02333 | 299 | A00171 | A02352 | 490 |
| A00171 | A02354 | 180 | A00171 | A02361 | 257 |
| A00171 | A02411 | 915 | A00171 | A02477 | 263 |
| A00171 | A02494 | 385 | A00171 | A02563 | 286 |
| A00171 | A02640 | 312 | A00171 | A02675 | 241 |
| A00171 | A02704 | 353 | A00171 | A02711 | 299 |
| A00171 | A02749 | 273 | A00171 | A02763 | 185 |
| A00171 | A02784 | 436 | A00171 | A02789 | 224 |
| A00171 | A02797 | 210 | A00171 | A02816 | 339 |
| A00171 | A02836 | 491 | A00171 | A02837 | 213 |
| A00171 | A02864 | 899 | A00171 | A02872 | 899 |
| A00171 | A02877 | 466 | A00171 | A02878 | 457 |
| A00171 | A02908 | 899 | A00171 | A02942 | 899 |
| A00171 | A02968 | 899 | A00171 | A03014 | 462 |
| A00171 | A03095 | 324 | A00171 | A03101 | 221 |
| A00171 | A03102 | 245 | A00171 | A03112 | 391 |

|        |        |     |        |        |     |
|--------|--------|-----|--------|--------|-----|
| A00171 | A03181 | 191 | A00171 | A03211 | 358 |
| A00171 | A03213 | 490 | A00171 | A03214 | 913 |
| A00171 | A03232 | 152 | A00171 | A03258 | 154 |
| A00171 | A03273 | 481 | A00171 | A03321 | 313 |
| A00171 | A03406 | 488 | A00171 | A03412 | 350 |
| A00171 | A03415 | 443 | A00171 | A03420 | 491 |
| A00171 | A03421 | 335 | A00171 | A03422 | 479 |
| A00171 | A03423 | 63  | A00171 | A03446 | 303 |
| A00171 | A03451 | 283 | A00171 | A03494 | 291 |
| A00171 | A03515 | 188 | A00171 | A03566 | 285 |
| A00171 | A03569 | 414 | A00171 | A03591 | 439 |
| A00171 | A03611 | 480 | A00171 | A03725 | 485 |
| A00171 | A03736 | 218 | A00171 | A03771 | 260 |
| A00171 | A03778 | 152 | A00171 | A03854 | 373 |
| A00171 | A03860 | 318 | A00171 | A03922 | 454 |
| A00171 | A03977 | 168 | A00171 | A04006 | 196 |
| A00171 | A04050 | 899 | A00171 | A04080 | 162 |
| A00171 | A04145 | 461 | A00171 | A04160 | 414 |
| A00171 | A04175 | 484 | A00171 | A04249 | 307 |
| A00171 | A04288 | 396 | A00171 | A04310 | 228 |
| A00171 | A04337 | 402 | A00171 | A04429 | 288 |
| A00171 | A04507 | 202 | A00171 | A04622 | 451 |
| A00171 | A04629 | 439 | A00171 | A04645 | 154 |
| A00171 | A04681 | 469 | A00171 | A04737 | 491 |
| A00171 | A04743 | 386 | A00171 | A04879 | 428 |
| A00171 | A04977 | 375 | A00171 | A05015 | 303 |
| A00171 | A05052 | 386 | A00171 | A05122 | 339 |
| A00171 | A05141 | 162 | A00171 | A05155 | 343 |
| A00171 | A05182 | 170 | A00171 | A05216 | 324 |
| A00171 | A05226 | 180 | A00171 | A05240 | 241 |
| A00171 | A05307 | 256 | A00171 | A05315 | 899 |
| A00171 | A05353 | 477 | A00171 | A05443 | 899 |
| A00171 | A05450 | 278 | A00171 | A05474 | 374 |
| A00171 | A05504 | 274 | A00171 | A05525 | 235 |
| A00171 | A05568 | 247 | A00171 | A05621 | 199 |
| A00171 | A05701 | 398 | A00171 | A05767 | 162 |
| A00171 | A05873 | 180 | A00171 | A05891 | 420 |
| A00171 | A05939 | 165 | A00171 | A06045 | 240 |
| A00171 | A06189 | 274 | A00171 | A06268 | 384 |
| A00171 | A06379 | 486 | A00171 | A06458 | 240 |
| A00171 | A06472 | 157 | A00171 | A06478 | 180 |
| A00171 | A06581 | 440 | A00171 | A06590 | 202 |
| A00171 | A06606 | 418 | A00171 | A06609 | 235 |
| A00171 | A06615 | 479 | A00171 | A06752 | 452 |
| A00171 | A06814 | 515 | A00171 | A06819 | 201 |
| A00171 | A06924 | 411 | A00171 | A06949 | 434 |

|        |        |     |        |        |     |
|--------|--------|-----|--------|--------|-----|
| A00171 | A07091 | 899 | A00171 | A07111 | 221 |
| A00171 | A07153 | 185 | A00171 | A07163 | 307 |
| A00171 | A07165 | 314 | A00171 | A07209 | 177 |
| A00171 | A07232 | 429 | A00171 | A07311 | 176 |
| A00171 | A07339 | 491 | A00171 | A07558 | 474 |
| A00171 | A07575 | 454 | A00171 | A07583 | 249 |
| A00171 | A07621 | 218 | A00171 | A07693 | 267 |
| A00171 | A07848 | 274 | A00171 | A07973 | 208 |
| A00171 | A08051 | 180 | A00171 | A08101 | 240 |
| A00171 | A08113 | 473 | A00171 | A08171 | 388 |
| A00171 | A08172 | 483 | A00171 | A08222 | 468 |
| A00171 | A08263 | 474 | A00171 | A08281 | 483 |
| A00171 | A08299 | 240 | A00171 | A08319 | 408 |
| A00171 | A08327 | 356 | A00171 | A08346 | 285 |
| A00171 | A08357 | 472 | A00171 | A08402 | 483 |
| A00171 | A08416 | 313 | A00171 | A08453 | 299 |
| A00171 | A08460 | 240 | A00171 | A08484 | 446 |
| A00171 | A08506 | 160 | A00171 | A08571 | 452 |
| A00171 | A08615 | 154 | A00171 | A08694 | 154 |
| A00171 | A08732 | 899 | A00171 | A08960 | 475 |
| A00171 | A08975 | 188 | A00171 | A09019 | 202 |
| A00171 | A09028 | 286 | A00171 | A09118 | 202 |
| A00171 | A09124 | 172 | A00171 | A09142 | 240 |
| A00171 | A09170 | 202 | A00171 | A09242 | 380 |
| A00171 | A09265 | 441 | A00171 | A09271 | 154 |
| A00171 | A09292 | 228 | A00171 | A09298 | 296 |
| A00171 | A09327 | 188 | A00171 | A09343 | 456 |
| A00171 | A09387 | 191 | A00171 | A09423 | 343 |
| A00171 | A09431 | 427 | A00171 | A09448 | 174 |
| A00171 | A09449 | 547 | A00171 | A09490 | 274 |
| A00171 | A09525 | 202 | A00171 | A09537 | 274 |
| A00171 | A09556 | 458 | A00171 | A09644 | 899 |
| A00171 | A09707 | 247 | A00171 | A09727 | 899 |
| A00171 | A09816 | 265 | A00171 | A09876 | 481 |
| A00171 | A09934 | 314 | A00171 | A09995 | 179 |
| A00171 | A10015 | 443 | A00171 | A10078 | 291 |
| A00171 | A10123 | 202 | A00171 | A10148 | 424 |
| A00171 | A10156 | 486 | A00171 | A10160 | 335 |
| A00171 | A10174 | 907 | A00171 | A10408 | 165 |
| A00171 | A10496 | 899 | A00171 | A10731 | 218 |
| A00171 | A10801 | 899 | A00171 | A10894 | 177 |
| A00171 | A10955 | 240 | A00171 | A10996 | 202 |
| A00171 | A11082 | 240 | A00171 | A11284 | 470 |
| A00171 | A11382 | 256 | A00171 | A11465 | 180 |
| A00171 | A11712 | 180 | A00171 | A11942 | 257 |
| A00171 | A12020 | 423 | A00171 | A12045 | 154 |

|        |        |     |        |        |     |
|--------|--------|-----|--------|--------|-----|
| A00171 | A12046 | 154 | A00171 | A12070 | 154 |
| A00171 | A12089 | 240 | A00171 | A12178 | 240 |
| A00171 | A12179 | 367 | A00171 | A12371 | 154 |
| A00171 | A12373 | 483 | A00171 | A12413 | 202 |
| A00171 | A12632 | 240 | A00171 | A12634 | 154 |
| A00171 | A12685 | 240 | A00171 | A12702 | 240 |
| A00171 | A12759 | 202 | A00171 | A12762 | 335 |
| A00171 | A12807 | 202 | A00171 | A12858 | 254 |
| A00171 | A12879 | 240 | A00171 | A12897 | 477 |
| A00171 | A12955 | 202 | A00171 | A13120 | 202 |
| A00171 | A13172 | 165 | A00171 | A13369 | 281 |
| A00171 | A13468 | 180 | A00171 | A13587 | 574 |
| A00171 | A13623 | 165 | A00171 | A13725 | 202 |
| A00171 | A13737 | 899 | A00171 | A13824 | 899 |
| A00171 | A13873 | 457 | A00171 | A13968 | 307 |
| A00171 | A13981 | 899 | A00171 | A13991 | 899 |
| A00171 | A14004 | 165 | A00171 | A14039 | 903 |
| A00171 | A14077 | 423 | A00171 | A14092 | 424 |
| A00171 | A14191 | 489 | A00171 | A14196 | 491 |
| A00171 | A14202 | 899 | A00171 | A14220 | 187 |
| A00171 | A14272 | 491 | A00171 | A14381 | 227 |
| A00171 | A14443 | 899 | A00171 | A14444 | 899 |
| A00171 | A14459 | 240 | A00171 | A14484 | 260 |
| A00171 | A14589 | 374 | A00171 | A14597 | 446 |
| A00171 | A14636 | 362 | A00171 | A14643 | 419 |
| A00171 | A14649 | 251 | A00171 | A14664 | 174 |
| A00171 | A14701 | 488 | A00171 | A14707 | 477 |
| A00171 | A14840 | 329 | A00171 | A14925 | 436 |
| A00171 | A14949 | 240 | A00171 | A15256 | 307 |
| A00171 | A15269 | 154 | A00171 | A15292 | 899 |
| A00171 | A15296 | 224 | A00171 | A15297 | 432 |
| A00171 | A15305 | 165 | A00171 | A15338 | 232 |
| A00171 | A15367 | 489 | A00171 | A15452 | 899 |
| A00171 | A15490 | 202 | A00171 | A15559 | 485 |
| A00171 | A15564 | 472 | A00171 | A15638 | 245 |
| A00171 | A15678 | 165 | A00171 | A15726 | 480 |
| A00171 | A15877 | 481 | A00171 | A16300 | 422 |
| A00171 | A16311 | 374 | A00171 | A16325 | 235 |
| A00171 | A16418 | 480 | A00171 | A16423 | 274 |
| A00171 | A16816 | 335 | A00171 | A16819 | 899 |
| A00171 | A16915 | 456 | A00172 | A00207 | 924 |
| A00172 | A00209 | 899 | A00172 | A00224 | 899 |
| A00172 | A00227 | 899 | A00172 | A00230 | 899 |
| A00172 | A00247 | 944 | A00172 | A00254 | 915 |
| A00172 | A01524 | 916 | A00172 | A01527 | 935 |
| A00172 | A01560 | 943 | A00172 | A07311 | 899 |

|        |        |     |        |        |     |
|--------|--------|-----|--------|--------|-----|
| A00172 | A10365 | 363 | A00172 | A13605 | 929 |
| A00172 | A14188 | 899 | A00172 | A14198 | 924 |
| A00173 | A00174 | 468 | A00173 | A00175 | 486 |
| A00173 | A00185 | 477 | A00173 | A00190 | 489 |
| A00173 | A00191 | 491 | A00173 | A00192 | 491 |
| A00173 | A00196 | 491 | A00173 | A00209 | 989 |
| A00173 | A00219 | 491 | A00173 | A00221 | 190 |
| A00173 | A00223 | 462 | A00173 | A00234 | 479 |
| A00173 | A00239 | 234 | A00173 | A00240 | 491 |
| A00173 | A00246 | 932 | A00173 | A00248 | 328 |
| A00173 | A00254 | 329 | A00173 | A00262 | 215 |
| A00173 | A00264 | 460 | A00173 | A00267 | 247 |
| A00173 | A00268 | 477 | A00173 | A00280 | 469 |
| A00173 | A00325 | 374 | A00173 | A00334 | 160 |
| A00173 | A00355 | 481 | A00173 | A00356 | 491 |
| A00173 | A00357 | 477 | A00173 | A00358 | 491 |
| A00173 | A00360 | 479 | A00173 | A00361 | 488 |
| A00173 | A00375 | 329 | A00173 | A00403 | 313 |
| A00173 | A00469 | 398 | A00173 | A00484 | 265 |
| A00173 | A00499 | 151 | A00173 | A00616 | 490 |
| A00173 | A00632 | 382 | A00173 | A00656 | 302 |
| A00173 | A00675 | 489 | A00173 | A00719 | 367 |
| A00173 | A00736 | 408 | A00173 | A00751 | 293 |
| A00173 | A00814 | 490 | A00173 | A00832 | 439 |
| A00173 | A00882 | 491 | A00173 | A00900 | 491 |
| A00173 | A00923 | 450 | A00173 | A00930 | 310 |
| A00173 | A00938 | 221 | A00173 | A00990 | 332 |
| A00173 | A01000 | 456 | A00173 | A01009 | 313 |
| A00173 | A01047 | 399 | A00173 | A01064 | 226 |
| A00173 | A01101 | 321 | A00173 | A01127 | 185 |
| A00173 | A01140 | 385 | A00173 | A01184 | 396 |
| A00173 | A01189 | 477 | A00173 | A01240 | 458 |
| A00173 | A01249 | 312 | A00173 | A01291 | 491 |
| A00173 | A01325 | 340 | A00173 | A01338 | 461 |
| A00173 | A01425 | 204 | A00173 | A01442 | 443 |
| A00173 | A01464 | 368 | A00173 | A01467 | 188 |
| A00173 | A01468 | 424 | A00173 | A01469 | 460 |
| A00173 | A01473 | 488 | A00173 | A01483 | 491 |
| A00173 | A01524 | 899 | A00173 | A01527 | 899 |
| A00173 | A01531 | 265 | A00173 | A01536 | 204 |
| A00173 | A01553 | 313 | A00173 | A01554 | 945 |
| A00173 | A01568 | 477 | A00173 | A01572 | 467 |
| A00173 | A01589 | 491 | A00173 | A01594 | 337 |
| A00173 | A01604 | 588 | A00173 | A01605 | 301 |
| A00173 | A01617 | 260 | A00173 | A01618 | 483 |
| A00173 | A01624 | 353 | A00173 | A01649 | 245 |

|        |        |     |        |        |     |
|--------|--------|-----|--------|--------|-----|
| A00173 | A01659 | 455 | A00173 | A01661 | 468 |
| A00173 | A01669 | 193 | A00173 | A01686 | 489 |
| A00173 | A01692 | 460 | A00173 | A01709 | 195 |
| A00173 | A01718 | 960 | A00173 | A01729 | 167 |
| A00173 | A01740 | 454 | A00173 | A01741 | 179 |
| A00173 | A01747 | 377 | A00173 | A01797 | 272 |
| A00173 | A01870 | 469 | A00173 | A01897 | 408 |
| A00173 | A01908 | 424 | A00173 | A01983 | 491 |
| A00173 | A01986 | 160 | A00173 | A02006 | 366 |
| A00173 | A02049 | 491 | A00173 | A02054 | 171 |
| A00173 | A02068 | 457 | A00173 | A02128 | 246 |
| A00173 | A02178 | 393 | A00173 | A02180 | 491 |
| A00173 | A02183 | 273 | A00173 | A02184 | 441 |
| A00173 | A02185 | 491 | A00173 | A02213 | 180 |
| A00173 | A02278 | 294 | A00173 | A02291 | 469 |
| A00173 | A02292 | 276 | A00173 | A02293 | 489 |
| A00173 | A02352 | 472 | A00173 | A02393 | 188 |
| A00173 | A02473 | 446 | A00173 | A02501 | 152 |
| A00173 | A02505 | 290 | A00173 | A02542 | 215 |
| A00173 | A02668 | 174 | A00173 | A02675 | 469 |
| A00173 | A02788 | 218 | A00173 | A02803 | 333 |
| A00173 | A02836 | 491 | A00173 | A02858 | 201 |
| A00173 | A02874 | 255 | A00173 | A02877 | 486 |
| A00173 | A02878 | 182 | A00173 | A02935 | 224 |
| A00173 | A02978 | 210 | A00173 | A02983 | 180 |
| A00173 | A02988 | 191 | A00173 | A03048 | 210 |
| A00173 | A03069 | 328 | A00173 | A03070 | 488 |
| A00173 | A03095 | 193 | A00173 | A03102 | 154 |
| A00173 | A03126 | 377 | A00173 | A03171 | 484 |
| A00173 | A03177 | 236 | A00173 | A03190 | 188 |
| A00173 | A03209 | 396 | A00173 | A03228 | 380 |
| A00173 | A03269 | 162 | A00173 | A03271 | 252 |
| A00173 | A03331 | 489 | A00173 | A03332 | 484 |
| A00173 | A03356 | 63  | A00173 | A03390 | 68  |
| A00173 | A03391 | 63  | A00173 | A03395 | 160 |
| A00173 | A03401 | 63  | A00173 | A03406 | 483 |
| A00173 | A03407 | 466 | A00173 | A03408 | 491 |
| A00173 | A03411 | 380 | A00173 | A03412 | 311 |
| A00173 | A03413 | 274 | A00173 | A03434 | 302 |
| A00173 | A03437 | 216 | A00173 | A03451 | 372 |
| A00173 | A03531 | 486 | A00173 | A03567 | 473 |
| A00173 | A03651 | 296 | A00173 | A03661 | 228 |
| A00173 | A03705 | 270 | A00173 | A03753 | 491 |
| A00173 | A03754 | 457 | A00173 | A03773 | 176 |
| A00173 | A03775 | 491 | A00173 | A03813 | 335 |
| A00173 | A03817 | 440 | A00173 | A03888 | 428 |

|        |        |     |        |        |     |
|--------|--------|-----|--------|--------|-----|
| A00173 | A03913 | 489 | A00173 | A03922 | 191 |
| A00173 | A04007 | 216 | A00173 | A04020 | 446 |
| A00173 | A04034 | 366 | A00173 | A04117 | 328 |
| A00173 | A04158 | 151 | A00173 | A04175 | 196 |
| A00173 | A04234 | 151 | A00173 | A04276 | 151 |
| A00173 | A04280 | 353 | A00173 | A04363 | 160 |
| A00173 | A04367 | 151 | A00173 | A04415 | 152 |
| A00173 | A04536 | 369 | A00173 | A04706 | 425 |
| A00173 | A04754 | 399 | A00173 | A04761 | 491 |
| A00173 | A04792 | 151 | A00173 | A04795 | 157 |
| A00173 | A04886 | 160 | A00173 | A04977 | 177 |
| A00173 | A04993 | 273 | A00173 | A05004 | 484 |
| A00173 | A05018 | 188 | A00173 | A05044 | 480 |
| A00173 | A05052 | 353 | A00173 | A05174 | 160 |
| A00173 | A05195 | 340 | A00173 | A05252 | 160 |
| A00173 | A05288 | 469 | A00173 | A05301 | 469 |
| A00173 | A05411 | 411 | A00173 | A05414 | 899 |
| A00173 | A05427 | 366 | A00173 | A05443 | 491 |
| A00173 | A05723 | 160 | A00173 | A05996 | 483 |
| A00173 | A06055 | 254 | A00173 | A06113 | 188 |
| A00173 | A06242 | 491 | A00173 | A06371 | 191 |
| A00173 | A06409 | 173 | A00173 | A06591 | 372 |
| A00173 | A06601 | 273 | A00173 | A06606 | 408 |
| A00173 | A06615 | 299 | A00173 | A06750 | 321 |
| A00173 | A06793 | 193 | A00173 | A06864 | 455 |
| A00173 | A06870 | 246 | A00173 | A06943 | 372 |
| A00173 | A06965 | 439 | A00173 | A07025 | 173 |
| A00173 | A07068 | 210 | A00173 | A07079 | 259 |
| A00173 | A07098 | 246 | A00173 | A07143 | 457 |
| A00173 | A07152 | 260 | A00173 | A07163 | 424 |
| A00173 | A07165 | 260 | A00173 | A07173 | 163 |
| A00173 | A07201 | 218 | A00173 | A07238 | 288 |
| A00173 | A07305 | 173 | A00173 | A07319 | 490 |
| A00173 | A07421 | 247 | A00173 | A07466 | 461 |
| A00173 | A07480 | 475 | A00173 | A07534 | 469 |
| A00173 | A07582 | 160 | A00173 | A07603 | 481 |
| A00173 | A07647 | 241 | A00173 | A07902 | 477 |
| A00173 | A07989 | 188 | A00173 | A07996 | 486 |
| A00173 | A08000 | 247 | A00173 | A08024 | 307 |
| A00173 | A08030 | 486 | A00173 | A08117 | 486 |
| A00173 | A08172 | 188 | A00173 | A08194 | 491 |
| A00173 | A08208 | 307 | A00173 | A08402 | 346 |
| A00173 | A08452 | 260 | A00173 | A08458 | 414 |
| A00173 | A08572 | 151 | A00173 | A08580 | 188 |
| A00173 | A08624 | 188 | A00173 | A08669 | 424 |
| A00173 | A08753 | 174 | A00173 | A08810 | 232 |

|        |        |     |        |        |     |
|--------|--------|-----|--------|--------|-----|
| A00173 | A08835 | 490 | A00173 | A08849 | 188 |
| A00173 | A08921 | 249 | A00173 | A08929 | 398 |
| A00173 | A08949 | 240 | A00173 | A09032 | 246 |
| A00173 | A09095 | 188 | A00173 | A09124 | 463 |
| A00173 | A09322 | 274 | A00173 | A09409 | 173 |
| A00173 | A09469 | 477 | A00173 | A09499 | 151 |
| A00173 | A09601 | 151 | A00173 | A09661 | 188 |
| A00173 | A09704 | 160 | A00173 | A09758 | 396 |
| A00173 | A09790 | 165 | A00173 | A09802 | 246 |
| A00173 | A09808 | 188 | A00173 | A09809 | 486 |
| A00173 | A09840 | 332 | A00173 | A09865 | 210 |
| A00173 | A09895 | 246 | A00173 | A09968 | 188 |
| A00173 | A10080 | 173 | A00173 | A10088 | 210 |
| A00173 | A10297 | 246 | A00173 | A10314 | 193 |
| A00173 | A10333 | 246 | A00173 | A10529 | 243 |
| A00173 | A10616 | 168 | A00173 | A10743 | 369 |
| A00173 | A10887 | 130 | A00173 | A10949 | 414 |
| A00173 | A11087 | 246 | A00173 | A11195 | 353 |
| A00173 | A11323 | 479 | A00173 | A11324 | 477 |
| A00173 | A11400 | 470 | A00173 | A11480 | 318 |
| A00173 | A11522 | 479 | A00173 | A11612 | 447 |
| A00173 | A11699 | 201 | A00173 | A11704 | 344 |
| A00173 | A11784 | 170 | A00173 | A11791 | 347 |
| A00173 | A11943 | 488 | A00173 | A12197 | 173 |
| A00173 | A12233 | 159 | A00173 | A12241 | 152 |
| A00173 | A12493 | 188 | A00173 | A12540 | 173 |
| A00173 | A12592 | 321 | A00173 | A12651 | 422 |
| A00173 | A12653 | 443 | A00173 | A12729 | 188 |
| A00173 | A12738 | 266 | A00173 | A12822 | 173 |
| A00173 | A12831 | 172 | A00173 | A12897 | 256 |
| A00173 | A12990 | 699 | A00173 | A13166 | 188 |
| A00173 | A13207 | 491 | A00173 | A13241 | 434 |
| A00173 | A13460 | 491 | A00173 | A13561 | 173 |
| A00173 | A13663 | 173 | A00173 | A13716 | 177 |
| A00173 | A13930 | 929 | A00173 | A13945 | 490 |
| A00173 | A13975 | 899 | A00173 | A13986 | 481 |
| A00173 | A13992 | 229 | A00173 | A13998 | 246 |
| A00173 | A14007 | 490 | A00173 | A14060 | 321 |
| A00173 | A14079 | 491 | A00173 | A14149 | 347 |
| A00173 | A14151 | 259 | A00173 | A14273 | 490 |
| A00173 | A14366 | 219 | A00173 | A14372 | 162 |
| A00173 | A14374 | 479 | A00173 | A14392 | 193 |
| A00173 | A14417 | 273 | A00173 | A14452 | 458 |
| A00173 | A14460 | 467 | A00173 | A14598 | 259 |
| A00173 | A14642 | 157 | A00173 | A14643 | 268 |
| A00173 | A14721 | 221 | A00173 | A14737 | 210 |



|        |        |     |        |        |     |
|--------|--------|-----|--------|--------|-----|
| A00173 | A14755 | 210 | A00173 | A14827 | 218 |
| A00173 | A14893 | 469 | A00173 | A14927 | 446 |
| A00173 | A14930 | 162 | A00173 | A14932 | 472 |
| A00173 | A14941 | 347 | A00173 | A15237 | 558 |
| A00173 | A15245 | 210 | A00173 | A15251 | 188 |
| A00173 | A15274 | 167 | A00173 | A15369 | 296 |
| A00173 | A15394 | 393 | A00173 | A15395 | 361 |
| A00173 | A15416 | 465 | A00173 | A15418 | 389 |
| A00173 | A15420 | 491 | A00173 | A15427 | 196 |
| A00173 | A15496 | 151 | A00173 | A15516 | 241 |
| A00173 | A15607 | 167 | A00173 | A15638 | 452 |
| A00173 | A15641 | 429 | A00173 | A15726 | 469 |
| A00173 | A15809 | 731 | A00173 | A15894 | 302 |
| A00173 | A15922 | 488 | A00173 | A15964 | 454 |
| A00173 | A16030 | 488 | A00173 | A16040 | 173 |
| A00173 | A16042 | 398 | A00173 | A16073 | 414 |
| A00173 | A16127 | 469 | A00173 | A16128 | 435 |
| A00173 | A16129 | 440 | A00173 | A16159 | 151 |
| A00173 | A16218 | 317 | A00173 | A16225 | 174 |
| A00173 | A16261 | 251 | A00173 | A16290 | 210 |
| A00173 | A16300 | 283 | A00173 | A16317 | 188 |
| A00173 | A16331 | 165 | A00173 | A16598 | 467 |
| A00173 | A16606 | 371 | A00173 | A16613 | 446 |
| A00173 | A16679 | 217 | A00173 | A16754 | 417 |
| A00173 | A16878 | 188 | A00173 | A16928 | 210 |
| A00173 | A16930 | 151 | A00173 | A16960 | 396 |
| A00173 | A16997 | 210 | A00173 | A17059 | 297 |
| A00173 | A17107 | 162 | A00173 | A17136 | 489 |
| A00173 | A17145 | 306 | A00173 | A17195 | 213 |
| A00173 | A17198 | 195 | A00174 | A00175 | 945 |
| A00174 | A00190 | 520 | A00174 | A00204 | 532 |
| A00174 | A00207 | 185 | A00174 | A00209 | 899 |
| A00174 | A00220 | 681 | A00174 | A00246 | 396 |
| A00174 | A00255 | 202 | A00174 | A00268 | 944 |
| A00174 | A00312 | 198 | A00174 | A00356 | 218 |
| A00174 | A00694 | 347 | A00174 | A00802 | 217 |
| A00174 | A00882 | 290 | A00174 | A01011 | 470 |
| A00174 | A01140 | 424 | A00174 | A01291 | 163 |
| A00174 | A01524 | 899 | A00174 | A01527 | 905 |
| A00174 | A01605 | 217 | A00174 | A01640 | 901 |
| A00174 | A01718 | 944 | A00174 | A01983 | 168 |
| A00174 | A02185 | 163 | A00174 | A02247 | 348 |
| A00174 | A02826 | 230 | A00174 | A03331 | 330 |
| A00174 | A03332 | 224 | A00174 | A03753 | 470 |
| A00174 | A03775 | 198 | A00174 | A03822 | 177 |
| A00174 | A03913 | 945 | A00174 | A04398 | 213 |

|        |        |     |        |        |     |
|--------|--------|-----|--------|--------|-----|
| A00174 | A05424 | 185 | A00174 | A05438 | 307 |
| A00174 | A06324 | 318 | A00174 | A07157 | 485 |
| A00174 | A07311 | 899 | A00174 | A08280 | 477 |
| A00174 | A09469 | 394 | A00174 | A10214 | 532 |
| A00174 | A10233 | 283 | A00174 | A11149 | 228 |
| A00174 | A11300 | 532 | A00174 | A11983 | 428 |
| A00174 | A13860 | 523 | A00174 | A13945 | 422 |
| A00174 | A14231 | 515 | A00174 | A15323 | 401 |
| A00174 | A16030 | 310 | A00175 | A00192 | 249 |
| A00175 | A00205 | 303 | A00175 | A00207 | 319 |
| A00175 | A00209 | 899 | A00175 | A00211 | 454 |
| A00175 | A00239 | 174 | A00175 | A00240 | 379 |
| A00175 | A00241 | 316 | A00175 | A00246 | 932 |
| A00175 | A00261 | 212 | A00175 | A00268 | 306 |
| A00175 | A00283 | 168 | A00175 | A00356 | 369 |
| A00175 | A00400 | 334 | A00175 | A00900 | 224 |
| A00175 | A00930 | 303 | A00175 | A00932 | 430 |
| A00175 | A00967 | 334 | A00175 | A01151 | 334 |
| A00175 | A01527 | 899 | A00175 | A01553 | 899 |
| A00175 | A01605 | 270 | A00175 | A01640 | 906 |
| A00175 | A01718 | 945 | A00175 | A01926 | 334 |
| A00175 | A01983 | 356 | A00175 | A02110 | 183 |
| A00175 | A02481 | 334 | A00175 | A03126 | 489 |
| A00175 | A03331 | 428 | A00175 | A03470 | 260 |
| A00175 | A03753 | 345 | A00175 | A03873 | 334 |
| A00175 | A03913 | 944 | A00175 | A04347 | 265 |
| A00175 | A04398 | 435 | A00175 | A04415 | 263 |
| A00175 | A04449 | 334 | A00175 | A04878 | 268 |
| A00175 | A05996 | 226 | A00175 | A07311 | 899 |
| A00175 | A08850 | 334 | A00175 | A09469 | 251 |
| A00175 | A11559 | 334 | A00175 | A12373 | 334 |
| A00175 | A12500 | 224 | A00175 | A13716 | 390 |
| A00175 | A13945 | 335 | A00175 | A13992 | 235 |
| A00175 | A14210 | 334 | A00175 | A14371 | 334 |
| A00175 | A14636 | 334 | A00175 | A16030 | 279 |
| A00176 | A00181 | 768 | A00176 | A00250 | 328 |
| A00176 | A00371 | 278 | A00176 | A00415 | 491 |
| A00176 | A00418 | 278 | A00176 | A00471 | 250 |
| A00176 | A00534 | 486 | A00176 | A00597 | 491 |
| A00176 | A00730 | 391 | A00176 | A00885 | 294 |
| A00176 | A00886 | 491 | A00176 | A00889 | 491 |
| A00176 | A00890 | 485 | A00176 | A00891 | 488 |
| A00176 | A00892 | 491 | A00176 | A00893 | 485 |
| A00176 | A00894 | 488 | A00176 | A00895 | 473 |
| A00176 | A00896 | 299 | A00176 | A00897 | 475 |
| A00176 | A00898 | 491 | A00176 | A00899 | 182 |

|        |        |     |        |        |     |
|--------|--------|-----|--------|--------|-----|
| A00176 | A00914 | 223 | A00176 | A00999 | 347 |
| A00176 | A01169 | 204 | A00176 | A01212 | 191 |
| A00176 | A01236 | 229 | A00176 | A01329 | 340 |
| A00176 | A01494 | 864 | A00176 | A01524 | 899 |
| A00176 | A01537 | 430 | A00176 | A01542 | 732 |
| A00176 | A01596 | 393 | A00176 | A01605 | 903 |
| A00176 | A01606 | 191 | A00176 | A01668 | 457 |
| A00176 | A01729 | 475 | A00176 | A01745 | 232 |
| A00176 | A01766 | 468 | A00176 | A01797 | 318 |
| A00176 | A01830 | 339 | A00176 | A01888 | 278 |
| A00176 | A01903 | 305 | A00176 | A02006 | 484 |
| A00176 | A02086 | 491 | A00176 | A02105 | 232 |
| A00176 | A02175 | 417 | A00176 | A02358 | 434 |
| A00176 | A02627 | 193 | A00176 | A03051 | 438 |
| A00176 | A03151 | 479 | A00176 | A03205 | 180 |
| A00176 | A03300 | 179 | A00176 | A03339 | 215 |
| A00176 | A03408 | 460 | A00176 | A03551 | 193 |
| A00176 | A03569 | 333 | A00176 | A03809 | 204 |
| A00176 | A03834 | 172 | A00176 | A03854 | 383 |
| A00176 | A04117 | 291 | A00176 | A04260 | 480 |
| A00176 | A04334 | 185 | A00176 | A04575 | 154 |
| A00176 | A04698 | 435 | A00176 | A05216 | 172 |
| A00176 | A05386 | 191 | A00176 | A05449 | 219 |
| A00176 | A05526 | 193 | A00176 | A05623 | 243 |
| A00176 | A05859 | 481 | A00176 | A06368 | 443 |
| A00176 | A06492 | 173 | A00176 | A06581 | 825 |
| A00176 | A06588 | 340 | A00176 | A06599 | 479 |
| A00176 | A06606 | 491 | A00176 | A06607 | 491 |
| A00176 | A06621 | 490 | A00176 | A06673 | 441 |
| A00176 | A06688 | 353 | A00176 | A06737 | 154 |
| A00176 | A06992 | 154 | A00176 | A07111 | 491 |
| A00176 | A07314 | 202 | A00176 | A07339 | 188 |
| A00176 | A07446 | 257 | A00176 | A07768 | 488 |
| A00176 | A07791 | 171 | A00176 | A07815 | 396 |
| A00176 | A07844 | 204 | A00176 | A07874 | 154 |
| A00176 | A08137 | 157 | A00176 | A08435 | 406 |
| A00176 | A08572 | 355 | A00176 | A08891 | 491 |
| A00176 | A08903 | 326 | A00176 | A08907 | 154 |
| A00176 | A09008 | 424 | A00176 | A09073 | 217 |
| A00176 | A09124 | 449 | A00176 | A09149 | 168 |
| A00176 | A09209 | 243 | A00176 | A09882 | 411 |
| A00176 | A09923 | 154 | A00176 | A09930 | 154 |
| A00176 | A09986 | 193 | A00176 | A10087 | 486 |
| A00176 | A10466 | 491 | A00176 | A10731 | 314 |
| A00176 | A10810 | 443 | A00176 | A10964 | 154 |
| A00176 | A11288 | 457 | A00176 | A11440 | 288 |

|        |        |     |        |        |     |
|--------|--------|-----|--------|--------|-----|
| A00176 | A11475 | 208 | A00176 | A11692 | 347 |
| A00176 | A11735 | 183 | A00176 | A11759 | 440 |
| A00176 | A11931 | 243 | A00176 | A12891 | 218 |
| A00176 | A13017 | 324 | A00176 | A13365 | 286 |
| A00176 | A13671 | 193 | A00176 | A13706 | 489 |
| A00176 | A14025 | 978 | A00176 | A14127 | 204 |
| A00176 | A14148 | 243 | A00176 | A14174 | 491 |
| A00176 | A14197 | 286 | A00176 | A14204 | 491 |
| A00176 | A14286 | 154 | A00176 | A14299 | 288 |
| A00176 | A14449 | 204 | A00176 | A14475 | 745 |
| A00176 | A14485 | 486 | A00176 | A14496 | 278 |
| A00176 | A14569 | 191 | A00176 | A14585 | 490 |
| A00176 | A14589 | 491 | A00176 | A14638 | 322 |
| A00176 | A14643 | 620 | A00176 | A14674 | 179 |
| A00176 | A14792 | 294 | A00176 | A15189 | 167 |
| A00176 | A15578 | 193 | A00176 | A15626 | 199 |
| A00176 | A15726 | 302 | A00176 | A16400 | 219 |
| A00176 | A16547 | 278 | A00176 | A16664 | 191 |
| A00176 | A16977 | 154 | A00176 | A17191 | 193 |
| A00177 | A00178 | 401 | A00177 | A00203 | 105 |
| A00177 | A00211 | 146 | A00177 | A00217 | 63  |
| A00177 | A00219 | 483 | A00177 | A00223 | 196 |
| A00177 | A00240 | 479 | A00177 | A00243 | 241 |
| A00177 | A00245 | 435 | A00177 | A00258 | 543 |
| A00177 | A00270 | 168 | A00177 | A00279 | 378 |
| A00177 | A00288 | 374 | A00177 | A00304 | 475 |
| A00177 | A00334 | 491 | A00177 | A00335 | 489 |
| A00177 | A00356 | 610 | A00177 | A00404 | 152 |
| A00177 | A00414 | 291 | A00177 | A00467 | 468 |
| A00177 | A00531 | 180 | A00177 | A00550 | 232 |
| A00177 | A00605 | 454 | A00177 | A00634 | 224 |
| A00177 | A00648 | 357 | A00177 | A00651 | 414 |
| A00177 | A00700 | 491 | A00177 | A00742 | 279 |
| A00177 | A00812 | 488 | A00177 | A00839 | 490 |
| A00177 | A00878 | 157 | A00177 | A00930 | 224 |
| A00177 | A00931 | 408 | A00177 | A00970 | 185 |
| A00177 | A00972 | 201 | A00177 | A01056 | 340 |
| A00177 | A01072 | 314 | A00177 | A01090 | 168 |
| A00177 | A01098 | 249 | A00177 | A01112 | 660 |
| A00177 | A01120 | 154 | A00177 | A01127 | 409 |
| A00177 | A01128 | 152 | A00177 | A01140 | 489 |
| A00177 | A01196 | 205 | A00177 | A01257 | 176 |
| A00177 | A01291 | 599 | A00177 | A01306 | 232 |
| A00177 | A01320 | 260 | A00177 | A01415 | 366 |
| A00177 | A01425 | 272 | A00177 | A01457 | 195 |
| A00177 | A01468 | 490 | A00177 | A01478 | 185 |

|        |        |     |        |        |     |
|--------|--------|-----|--------|--------|-----|
| A00177 | A01492 | 636 | A00177 | A01496 | 378 |
| A00177 | A01531 | 219 | A00177 | A01579 | 491 |
| A00177 | A01580 | 302 | A00177 | A01586 | 163 |
| A00177 | A01601 | 861 | A00177 | A01605 | 486 |
| A00177 | A01640 | 416 | A00177 | A01649 | 363 |
| A00177 | A01684 | 180 | A00177 | A01718 | 362 |
| A00177 | A02179 | 322 | A00177 | A02213 | 163 |
| A00177 | A02318 | 160 | A00177 | A02350 | 489 |
| A00177 | A02397 | 435 | A00177 | A02405 | 188 |
| A00177 | A03083 | 188 | A00177 | A03219 | 352 |
| A00177 | A03304 | 348 | A00177 | A03314 | 257 |
| A00177 | A03332 | 174 | A00177 | A03445 | 347 |
| A00177 | A03639 | 424 | A00177 | A03787 | 236 |
| A00177 | A03961 | 260 | A00177 | A04099 | 457 |
| A00177 | A04202 | 395 | A00177 | A04321 | 254 |
| A00177 | A04580 | 278 | A00177 | A04689 | 236 |
| A00177 | A04856 | 485 | A00177 | A05356 | 254 |
| A00177 | A05359 | 302 | A00177 | A05443 | 355 |
| A00177 | A05906 | 324 | A00177 | A06371 | 456 |
| A00177 | A06814 | 255 | A00177 | A07398 | 473 |
| A00177 | A07696 | 344 | A00177 | A07726 | 409 |
| A00177 | A08357 | 286 | A00177 | A08359 | 469 |
| A00177 | A08869 | 384 | A00177 | A09249 | 229 |
| A00177 | A09644 | 63  | A00177 | A10580 | 268 |
| A00177 | A10599 | 422 | A00177 | A10660 | 278 |
| A00177 | A10725 | 127 | A00177 | A11190 | 380 |
| A00177 | A11392 | 481 | A00177 | A11400 | 162 |
| A00177 | A11522 | 470 | A00177 | A11846 | 306 |
| A00177 | A11932 | 419 | A00177 | A12047 | 212 |
| A00177 | A12137 | 236 | A00177 | A12329 | 254 |
| A00177 | A13336 | 213 | A00177 | A13549 | 374 |
| A00177 | A13944 | 358 | A00177 | A13989 | 730 |
| A00177 | A13994 | 490 | A00177 | A14060 | 262 |
| A00177 | A14072 | 296 | A00177 | A14172 | 379 |
| A00177 | A14216 | 200 | A00177 | A14294 | 213 |
| A00177 | A14371 | 184 | A00177 | A14511 | 461 |
| A00177 | A14633 | 254 | A00177 | A15229 | 180 |
| A00177 | A15256 | 188 | A00177 | A15671 | 173 |
| A00177 | A15684 | 189 | A00177 | A15884 | 160 |
| A00177 | A16682 | 152 | A00177 | A16686 | 196 |
| A00178 | A00202 | 177 | A00178 | A00203 | 941 |
| A00178 | A00209 | 899 | A00178 | A00441 | 329 |
| A00178 | A00605 | 168 | A00178 | A00690 | 455 |
| A00178 | A00916 | 445 | A00178 | A01120 | 283 |
| A00178 | A01166 | 171 | A00178 | A01206 | 425 |
| A00178 | A01234 | 168 | A00178 | A01235 | 162 |

|        |        |     |        |        |     |
|--------|--------|-----|--------|--------|-----|
| A00178 | A01384 | 272 | A00178 | A01425 | 160 |
| A00178 | A01470 | 425 | A00178 | A01488 | 294 |
| A00178 | A01492 | 945 | A00178 | A01512 | 899 |
| A00178 | A01527 | 899 | A00178 | A01601 | 152 |
| A00178 | A01605 | 223 | A00178 | A01649 | 463 |
| A00178 | A01730 | 899 | A00178 | A01734 | 217 |
| A00178 | A02265 | 335 | A00178 | A02501 | 243 |
| A00178 | A02564 | 157 | A00178 | A03480 | 168 |
| A00178 | A03617 | 226 | A00178 | A03863 | 195 |
| A00178 | A05563 | 185 | A00178 | A07347 | 185 |
| A00178 | A07422 | 899 | A00178 | A10616 | 177 |
| A00178 | A11209 | 306 | A00178 | A11983 | 899 |
| A00178 | A13875 | 236 | A00178 | A13989 | 933 |
| A00178 | A14055 | 899 | A00178 | A14151 | 299 |
| A00178 | A14410 | 162 | A00178 | A15660 | 291 |
| A00179 | A00187 | 395 | A00179 | A00248 | 369 |
| A00179 | A00260 | 236 | A00179 | A01248 | 213 |
| A00179 | A01639 | 486 | A00179 | A01653 | 367 |
| A00179 | A01790 | 208 | A00179 | A03071 | 195 |
| A00179 | A03095 | 491 | A00179 | A03612 | 154 |
| A00179 | A04109 | 260 | A00179 | A04446 | 162 |
| A00179 | A04449 | 177 | A00179 | A04969 | 263 |
| A00179 | A05367 | 256 | A00179 | A05418 | 578 |
| A00179 | A05453 | 285 | A00179 | A05944 | 339 |
| A00179 | A06289 | 440 | A00179 | A06588 | 742 |
| A00179 | A06650 | 174 | A00179 | A06688 | 314 |
| A00179 | A07206 | 340 | A00179 | A09018 | 201 |
| A00179 | A09778 | 218 | A00179 | A10392 | 452 |
| A00179 | A10599 | 276 | A00179 | A11304 | 215 |
| A00179 | A11379 | 162 | A00179 | A12667 | 174 |
| A00179 | A12897 | 285 | A00179 | A12971 | 172 |
| A00179 | A14201 | 174 | A00179 | A14511 | 236 |
| A00179 | A16792 | 195 | A00180 | A00184 | 140 |
| A00180 | A00185 | 163 | A00180 | A00208 | 191 |
| A00180 | A00234 | 844 | A00180 | A00243 | 183 |
| A00180 | A00250 | 484 | A00180 | A00276 | 936 |
| A00180 | A00900 | 162 | A00180 | A00912 | 335 |
| A00180 | A01083 | 466 | A00180 | A01128 | 232 |
| A00180 | A01410 | 247 | A00180 | A01489 | 385 |
| A00180 | A01524 | 899 | A00180 | A01562 | 610 |
| A00180 | A01628 | 77  | A00180 | A01631 | 215 |
| A00180 | A01692 | 379 | A00180 | A01718 | 168 |
| A00180 | A01719 | 71  | A00180 | A01790 | 376 |
| A00180 | A01822 | 161 | A00180 | A01904 | 321 |
| A00180 | A02088 | 160 | A00180 | A02179 | 160 |
| A00180 | A02411 | 439 | A00180 | A02470 | 218 |

|        |        |     |        |        |     |
|--------|--------|-----|--------|--------|-----|
| A00180 | A02473 | 245 | A00180 | A02675 | 172 |
| A00180 | A02877 | 666 | A00180 | A03632 | 401 |
| A00180 | A03739 | 401 | A00180 | A03812 | 347 |
| A00180 | A03837 | 662 | A00180 | A04115 | 649 |
| A00180 | A04342 | 173 | A00180 | A05530 | 446 |
| A00180 | A06289 | 141 | A00180 | A06748 | 339 |
| A00180 | A07061 | 245 | A00180 | A07163 | 469 |
| A00180 | A07311 | 232 | A00180 | A07399 | 347 |
| A00180 | A08259 | 400 | A00180 | A09218 | 196 |
| A00180 | A09504 | 201 | A00180 | A10332 | 199 |
| A00180 | A10506 | 191 | A00180 | A10822 | 290 |
| A00180 | A10844 | 205 | A00180 | A10949 | 188 |
| A00180 | A11124 | 174 | A00180 | A11359 | 339 |
| A00180 | A11608 | 230 | A00180 | A11694 | 249 |
| A00180 | A12383 | 491 | A00180 | A12969 | 489 |
| A00180 | A12971 | 469 | A00180 | A13824 | 183 |
| A00180 | A14004 | 157 | A00180 | A14034 | 262 |
| A00180 | A14035 | 290 | A00180 | A14205 | 279 |
| A00180 | A14209 | 441 | A00180 | A14495 | 290 |
| A00180 | A15308 | 366 | A00180 | A15321 | 191 |
| A00180 | A15323 | 191 | A00180 | A15512 | 400 |
| A00180 | A15665 | 470 | A00180 | A15677 | 406 |
| A00180 | A16840 | 281 | A00181 | A00191 | 533 |
| A00181 | A00212 | 470 | A00181 | A00216 | 303 |
| A00181 | A00270 | 195 | A00181 | A00312 | 219 |
| A00181 | A00316 | 270 | A00181 | A00352 | 473 |
| A00181 | A00374 | 313 | A00181 | A00457 | 322 |
| A00181 | A00497 | 235 | A00181 | A00521 | 228 |
| A00181 | A00537 | 446 | A00181 | A00600 | 307 |
| A00181 | A00662 | 316 | A00181 | A00674 | 185 |
| A00181 | A00891 | 491 | A00181 | A00916 | 480 |
| A00181 | A01022 | 210 | A00181 | A01161 | 466 |
| A00181 | A01216 | 259 | A00181 | A01234 | 490 |
| A00181 | A01244 | 229 | A00181 | A01311 | 162 |
| A00181 | A01361 | 183 | A00181 | A01451 | 486 |
| A00181 | A01453 | 408 | A00181 | A01457 | 531 |
| A00181 | A01458 | 615 | A00181 | A01461 | 532 |
| A00181 | A01492 | 526 | A00181 | A01494 | 835 |
| A00181 | A01503 | 528 | A00181 | A01515 | 418 |
| A00181 | A01520 | 247 | A00181 | A01522 | 322 |
| A00181 | A01542 | 893 | A00181 | A01573 | 157 |
| A00181 | A01574 | 486 | A00181 | A01576 | 546 |
| A00181 | A01585 | 548 | A00181 | A01593 | 450 |
| A00181 | A01601 | 124 | A00181 | A01607 | 313 |
| A00181 | A01612 | 382 | A00181 | A01798 | 462 |
| A00181 | A01923 | 208 | A00181 | A01927 | 196 |

|        |        |     |        |        |     |
|--------|--------|-----|--------|--------|-----|
| A00181 | A02148 | 236 | A00181 | A02188 | 313 |
| A00181 | A02215 | 486 | A00181 | A02545 | 405 |
| A00181 | A02607 | 366 | A00181 | A03050 | 430 |
| A00181 | A03186 | 320 | A00181 | A03205 | 490 |
| A00181 | A03444 | 263 | A00181 | A03524 | 259 |
| A00181 | A03569 | 425 | A00181 | A03597 | 256 |
| A00181 | A03962 | 171 | A00181 | A04368 | 154 |
| A00181 | A04686 | 491 | A00181 | A05153 | 160 |
| A00181 | A05234 | 240 | A00181 | A05356 | 490 |
| A00181 | A05807 | 204 | A00181 | A05914 | 219 |
| A00181 | A06581 | 567 | A00181 | A06735 | 313 |
| A00181 | A07020 | 167 | A00181 | A07111 | 491 |
| A00181 | A07452 | 400 | A00181 | A07468 | 469 |
| A00181 | A07471 | 416 | A00181 | A07541 | 439 |
| A00181 | A07610 | 193 | A00181 | A07633 | 201 |
| A00181 | A07815 | 432 | A00181 | A08193 | 172 |
| A00181 | A08404 | 201 | A00181 | A08785 | 473 |
| A00181 | A08817 | 185 | A00181 | A08882 | 458 |
| A00181 | A08903 | 491 | A00181 | A09583 | 218 |
| A00181 | A09932 | 334 | A00181 | A10451 | 204 |
| A00181 | A10458 | 159 | A00181 | A10616 | 227 |
| A00181 | A10643 | 299 | A00181 | A10810 | 640 |
| A00181 | A10886 | 204 | A00181 | A10967 | 414 |
| A00181 | A11311 | 159 | A00181 | A11363 | 399 |
| A00181 | A11508 | 276 | A00181 | A11621 | 183 |
| A00181 | A12107 | 467 | A00181 | A13327 | 201 |
| A00181 | A13329 | 241 | A00181 | A13428 | 167 |
| A00181 | A13830 | 461 | A00181 | A13831 | 481 |
| A00181 | A13989 | 490 | A00181 | A14025 | 590 |
| A00181 | A14127 | 183 | A00181 | A14204 | 528 |
| A00181 | A14247 | 347 | A00181 | A14475 | 633 |
| A00181 | A14485 | 486 | A00181 | A14562 | 252 |
| A00181 | A14585 | 491 | A00181 | A14589 | 573 |
| A00181 | A14637 | 353 | A00181 | A14643 | 490 |
| A00181 | A14655 | 178 | A00181 | A14907 | 167 |
| A00181 | A14986 | 286 | A00181 | A15295 | 294 |
| A00181 | A15498 | 154 | A00181 | A15617 | 228 |
| A00181 | A16082 | 430 | A00181 | A16876 | 208 |
| A00182 | A00183 | 491 | A00182 | A00187 | 180 |
| A00182 | A00190 | 234 | A00182 | A00204 | 188 |
| A00182 | A00207 | 902 | A00182 | A00214 | 430 |
| A00182 | A00224 | 899 | A00182 | A00246 | 899 |
| A00182 | A00630 | 329 | A00182 | A00641 | 207 |
| A00182 | A00671 | 196 | A00182 | A00887 | 172 |
| A00182 | A00921 | 217 | A00182 | A00939 | 218 |
| A00182 | A01052 | 187 | A00182 | A01103 | 205 |



|        |        |     |        |        |     |
|--------|--------|-----|--------|--------|-----|
| A00182 | A01125 | 260 | A00182 | A01148 | 168 |
| A00182 | A01307 | 340 | A00182 | A01507 | 176 |
| A00182 | A01524 | 294 | A00182 | A01527 | 945 |
| A00182 | A01558 | 899 | A00182 | A01560 | 899 |
| A00182 | A01588 | 899 | A00182 | A01603 | 196 |
| A00182 | A01615 | 899 | A00182 | A01639 | 188 |
| A00182 | A01724 | 217 | A00182 | A01730 | 436 |
| A00182 | A01775 | 199 | A00182 | A01995 | 246 |
| A00182 | A02340 | 157 | A00182 | A02621 | 154 |
| A00182 | A02640 | 160 | A00182 | A02739 | 165 |
| A00182 | A02769 | 235 | A00182 | A02790 | 157 |
| A00182 | A02822 | 226 | A00182 | A02859 | 490 |
| A00182 | A02889 | 247 | A00182 | A02896 | 174 |
| A00182 | A02912 | 218 | A00182 | A02954 | 279 |
| A00182 | A02961 | 223 | A00182 | A03018 | 391 |
| A00182 | A03224 | 165 | A00182 | A03275 | 305 |
| A00182 | A03279 | 223 | A00182 | A03280 | 191 |
| A00182 | A03316 | 255 | A00182 | A03778 | 458 |
| A00182 | A03834 | 274 | A00182 | A03984 | 337 |
| A00182 | A03985 | 440 | A00182 | A04096 | 460 |
| A00182 | A04097 | 469 | A00182 | A04375 | 174 |
| A00182 | A04449 | 335 | A00182 | A04494 | 247 |
| A00182 | A04557 | 213 | A00182 | A04678 | 263 |
| A00182 | A04682 | 190 | A00182 | A04692 | 188 |
| A00182 | A04731 | 191 | A00182 | A04954 | 271 |
| A00182 | A05065 | 152 | A00182 | A05168 | 217 |
| A00182 | A05169 | 267 | A00182 | A05212 | 307 |
| A00182 | A05583 | 288 | A00182 | A06254 | 313 |
| A00182 | A06317 | 232 | A00182 | A06434 | 217 |
| A00182 | A07106 | 249 | A00182 | A07149 | 162 |
| A00182 | A07157 | 188 | A00182 | A07167 | 157 |
| A00182 | A07311 | 899 | A00182 | A07314 | 443 |
| A00182 | A07560 | 395 | A00182 | A08759 | 321 |
| A00182 | A08878 | 238 | A00182 | A09241 | 176 |
| A00182 | A09395 | 340 | A00182 | A09542 | 899 |
| A00182 | A09647 | 165 | A00182 | A10109 | 260 |
| A00182 | A10580 | 615 | A00182 | A10811 | 168 |
| A00182 | A11983 | 221 | A00182 | A12997 | 313 |
| A00182 | A13667 | 313 | A00182 | A13860 | 168 |
| A00182 | A14208 | 463 | A00182 | A14211 | 380 |
| A00182 | A14218 | 380 | A00182 | A14443 | 926 |
| A00182 | A14646 | 183 | A00182 | A15103 | 208 |
| A00182 | A15314 | 218 | A00182 | A15361 | 173 |
| A00182 | A15578 | 201 | A00182 | A15639 | 445 |
| A00182 | A15834 | 151 | A00182 | A15976 | 271 |
| A00182 | A16068 | 180 | A00182 | A16216 | 429 |

|        |        |     |        |        |     |
|--------|--------|-----|--------|--------|-----|
| A00182 | A16635 | 204 | A00183 | A00185 | 205 |
| A00183 | A00191 | 451 | A00183 | A00198 | 558 |
| A00183 | A00207 | 391 | A00183 | A00210 | 460 |
| A00183 | A00230 | 899 | A00183 | A00235 | 899 |
| A00183 | A00239 | 313 | A00183 | A00240 | 492 |
| A00183 | A00241 | 568 | A00183 | A00243 | 316 |
| A00183 | A00246 | 374 | A00183 | A00254 | 427 |
| A00183 | A00257 | 423 | A00183 | A00261 | 869 |
| A00183 | A00324 | 272 | A00183 | A00416 | 157 |
| A00183 | A00445 | 198 | A00183 | A00537 | 173 |
| A00183 | A00630 | 330 | A00183 | A00641 | 216 |
| A00183 | A00643 | 313 | A00183 | A00679 | 439 |
| A00183 | A00696 | 243 | A00183 | A00809 | 432 |
| A00183 | A00931 | 159 | A00183 | A00981 | 328 |
| A00183 | A01052 | 450 | A00183 | A01151 | 195 |
| A00183 | A01213 | 234 | A00183 | A01507 | 358 |
| A00183 | A01524 | 439 | A00183 | A01527 | 944 |
| A00183 | A01539 | 353 | A00183 | A01558 | 924 |
| A00183 | A01596 | 579 | A00183 | A01606 | 399 |
| A00183 | A01615 | 899 | A00183 | A01636 | 224 |
| A00183 | A01676 | 174 | A00183 | A01688 | 235 |
| A00183 | A01730 | 329 | A00183 | A01790 | 246 |
| A00183 | A01850 | 366 | A00183 | A01914 | 433 |
| A00183 | A01920 | 706 | A00183 | A01995 | 319 |
| A00183 | A02210 | 210 | A00183 | A02698 | 235 |
| A00183 | A02803 | 213 | A00183 | A02968 | 246 |
| A00183 | A03188 | 245 | A00183 | A03591 | 205 |
| A00183 | A03752 | 170 | A00183 | A03778 | 491 |
| A00183 | A03893 | 204 | A00183 | A04012 | 506 |
| A00183 | A04033 | 491 | A00183 | A04449 | 491 |
| A00183 | A05221 | 468 | A00183 | A05288 | 201 |
| A00183 | A05583 | 439 | A00183 | A05944 | 216 |
| A00183 | A06190 | 360 | A00183 | A06197 | 271 |
| A00183 | A06254 | 486 | A00183 | A06277 | 466 |
| A00183 | A06373 | 391 | A00183 | A06588 | 460 |
| A00183 | A06814 | 224 | A00183 | A07004 | 490 |
| A00183 | A07149 | 162 | A00183 | A07229 | 400 |
| A00183 | A07422 | 913 | A00183 | A07495 | 170 |
| A00183 | A07803 | 484 | A00183 | A07966 | 297 |
| A00183 | A08079 | 151 | A00183 | A08118 | 291 |
| A00183 | A08420 | 232 | A00183 | A08550 | 407 |
| A00183 | A08571 | 225 | A00183 | A08859 | 360 |
| A00183 | A08869 | 269 | A00183 | A08878 | 480 |
| A00183 | A09256 | 899 | A00183 | A09460 | 219 |
| A00183 | A09750 | 321 | A00183 | A09870 | 168 |
| A00183 | A10165 | 157 | A00183 | A10580 | 435 |

|        |        |     |        |        |     |
|--------|--------|-----|--------|--------|-----|
| A00183 | A10666 | 278 | A00183 | A10913 | 151 |
| A00183 | A11124 | 496 | A00183 | A11487 | 236 |
| A00183 | A11727 | 303 | A00183 | A11983 | 491 |
| A00183 | A12125 | 188 | A00183 | A12365 | 366 |
| A00183 | A12534 | 210 | A00183 | A12897 | 291 |
| A00183 | A13250 | 899 | A00183 | A13809 | 238 |
| A00183 | A14055 | 413 | A00183 | A14202 | 450 |
| A00183 | A14220 | 224 | A00183 | A14299 | 614 |
| A00183 | A14410 | 377 | A00183 | A14570 | 167 |
| A00183 | A14635 | 475 | A00183 | A14653 | 373 |
| A00183 | A14704 | 291 | A00183 | A14925 | 353 |
| A00183 | A15322 | 393 | A00183 | A15357 | 160 |
| A00183 | A15360 | 472 | A00183 | A15402 | 218 |
| A00183 | A15506 | 759 | A00183 | A15510 | 199 |
| A00183 | A15606 | 430 | A00183 | A15726 | 899 |
| A00183 | A16036 | 232 | A00183 | A16157 | 446 |
| A00184 | A00187 | 252 | A00184 | A00207 | 899 |
| A00184 | A00209 | 899 | A00184 | A00224 | 899 |
| A00184 | A00236 | 903 | A00184 | A00246 | 899 |
| A00184 | A00252 | 903 | A00184 | A00253 | 165 |
| A00184 | A00267 | 215 | A00184 | A00271 | 899 |
| A00184 | A00273 | 355 | A00184 | A00276 | 930 |
| A00184 | A00308 | 367 | A00184 | A00548 | 154 |
| A00184 | A00679 | 899 | A00184 | A00868 | 235 |
| A00184 | A00926 | 154 | A00184 | A01052 | 899 |
| A00184 | A01148 | 899 | A00184 | A01254 | 177 |
| A00184 | A01512 | 899 | A00184 | A01524 | 899 |
| A00184 | A01527 | 899 | A00184 | A01553 | 899 |
| A00184 | A01554 | 165 | A00184 | A01558 | 899 |
| A00184 | A01560 | 899 | A00184 | A01562 | 944 |
| A00184 | A01588 | 899 | A00184 | A01602 | 899 |
| A00184 | A01615 | 899 | A00184 | A01628 | 899 |
| A00184 | A01639 | 173 | A00184 | A01665 | 899 |
| A00184 | A01688 | 899 | A00184 | A01692 | 904 |
| A00184 | A01697 | 130 | A00184 | A01708 | 904 |
| A00184 | A01709 | 899 | A00184 | A01719 | 906 |
| A00184 | A01844 | 899 | A00184 | A02492 | 154 |
| A00184 | A02717 | 167 | A00184 | A03126 | 899 |
| A00184 | A03517 | 338 | A00184 | A03703 | 420 |
| A00184 | A04699 | 899 | A00184 | A07101 | 216 |
| A00184 | A07166 | 177 | A00184 | A07311 | 899 |
| A00184 | A08899 | 899 | A00184 | A09577 | 899 |
| A00184 | A09766 | 201 | A00184 | A10560 | 899 |
| A00184 | A10813 | 899 | A00184 | A11125 | 899 |
| A00184 | A11983 | 899 | A00184 | A12664 | 899 |
| A00184 | A12705 | 899 | A00184 | A12969 | 899 |

|        |        |     |        |        |     |
|--------|--------|-----|--------|--------|-----|
| A00184 | A12971 | 899 | A00184 | A13401 | 899 |
| A00184 | A13977 | 899 | A00184 | A13978 | 201 |
| A00184 | A13985 | 899 | A00184 | A13999 | 899 |
| A00184 | A14033 | 899 | A00184 | A14043 | 899 |
| A00184 | A14188 | 899 | A00184 | A14242 | 899 |
| A00184 | A15296 | 461 | A00184 | A15726 | 63  |
| A00184 | A16993 | 899 | A00185 | A00186 | 454 |
| A00185 | A00190 | 435 | A00185 | A00200 | 899 |
| A00185 | A00205 | 82  | A00185 | A00207 | 945 |
| A00185 | A00208 | 945 | A00185 | A00209 | 899 |
| A00185 | A00213 | 447 | A00185 | A00214 | 481 |
| A00185 | A00224 | 945 | A00185 | A00227 | 481 |
| A00185 | A00234 | 491 | A00185 | A00240 | 931 |
| A00185 | A00246 | 909 | A00185 | A00247 | 486 |
| A00185 | A00254 | 969 | A00185 | A00271 | 899 |
| A00185 | A00285 | 156 | A00185 | A00294 | 446 |
| A00185 | A00309 | 475 | A00185 | A00316 | 491 |
| A00185 | A00320 | 227 | A00185 | A00324 | 899 |
| A00185 | A00333 | 241 | A00185 | A00340 | 491 |
| A00185 | A00385 | 241 | A00185 | A00418 | 369 |
| A00185 | A00439 | 452 | A00185 | A00451 | 491 |
| A00185 | A00552 | 215 | A00185 | A00557 | 193 |
| A00185 | A00624 | 409 | A00185 | A00688 | 232 |
| A00185 | A00736 | 221 | A00185 | A00747 | 316 |
| A00185 | A00887 | 413 | A00185 | A00932 | 469 |
| A00185 | A00933 | 373 | A00185 | A00939 | 302 |
| A00185 | A00963 | 443 | A00185 | A00997 | 307 |
| A00185 | A01009 | 157 | A00185 | A01036 | 180 |
| A00185 | A01052 | 486 | A00185 | A01070 | 899 |
| A00185 | A01104 | 201 | A00185 | A01212 | 463 |
| A00185 | A01286 | 485 | A00185 | A01307 | 185 |
| A00185 | A01473 | 369 | A00185 | A01524 | 994 |
| A00185 | A01527 | 935 | A00185 | A01553 | 63  |
| A00185 | A01554 | 63  | A00185 | A01558 | 989 |
| A00185 | A01560 | 491 | A00185 | A01562 | 899 |
| A00185 | A01572 | 368 | A00185 | A01588 | 989 |
| A00185 | A01605 | 899 | A00185 | A01615 | 899 |
| A00185 | A01640 | 899 | A00185 | A01651 | 899 |
| A00185 | A01667 | 899 | A00185 | A01675 | 171 |
| A00185 | A01676 | 908 | A00185 | A01702 | 899 |
| A00185 | A01709 | 63  | A00185 | A01718 | 899 |
| A00185 | A01741 | 312 | A00185 | A01748 | 278 |
| A00185 | A01832 | 428 | A00185 | A01844 | 899 |
| A00185 | A01890 | 269 | A00185 | A01907 | 302 |
| A00185 | A01946 | 201 | A00185 | A01995 | 491 |
| A00185 | A02027 | 240 | A00185 | A02115 | 241 |

|        |        |     |        |        |     |
|--------|--------|-----|--------|--------|-----|
| A00185 | A02215 | 272 | A00185 | A02278 | 154 |
| A00185 | A02401 | 307 | A00185 | A02414 | 226 |
| A00185 | A02481 | 486 | A00185 | A02482 | 408 |
| A00185 | A02586 | 176 | A00185 | A02629 | 165 |
| A00185 | A02634 | 352 | A00185 | A02636 | 480 |
| A00185 | A02638 | 417 | A00185 | A02639 | 180 |
| A00185 | A02678 | 696 | A00185 | A02695 | 483 |
| A00185 | A02743 | 340 | A00185 | A02749 | 440 |
| A00185 | A02752 | 252 | A00185 | A02753 | 424 |
| A00185 | A02768 | 485 | A00185 | A02819 | 347 |
| A00185 | A02836 | 238 | A00185 | A02842 | 273 |
| A00185 | A02877 | 477 | A00185 | A02882 | 174 |
| A00185 | A02908 | 899 | A00185 | A02981 | 198 |
| A00185 | A03080 | 154 | A00185 | A03099 | 180 |
| A00185 | A03126 | 433 | A00185 | A03254 | 183 |
| A00185 | A03271 | 406 | A00185 | A03292 | 272 |
| A00185 | A03309 | 154 | A00185 | A03331 | 218 |
| A00185 | A03413 | 241 | A00185 | A03415 | 367 |
| A00185 | A03419 | 252 | A00185 | A03436 | 404 |
| A00185 | A03451 | 486 | A00185 | A03459 | 241 |
| A00185 | A03634 | 162 | A00185 | A03685 | 302 |
| A00185 | A03752 | 490 | A00185 | A03784 | 485 |
| A00185 | A03809 | 167 | A00185 | A03830 | 450 |
| A00185 | A03864 | 288 | A00185 | A03910 | 172 |
| A00185 | A03976 | 198 | A00185 | A03990 | 316 |
| A00185 | A04020 | 216 | A00185 | A04080 | 367 |
| A00185 | A04117 | 388 | A00185 | A04229 | 257 |
| A00185 | A04293 | 399 | A00185 | A04297 | 154 |
| A00185 | A04314 | 174 | A00185 | A04323 | 339 |
| A00185 | A04442 | 216 | A00185 | A04616 | 205 |
| A00185 | A04651 | 219 | A00185 | A04696 | 234 |
| A00185 | A04706 | 198 | A00185 | A04731 | 480 |
| A00185 | A04795 | 212 | A00185 | A04801 | 219 |
| A00185 | A04804 | 276 | A00185 | A04864 | 294 |
| A00185 | A04965 | 391 | A00185 | A04991 | 344 |
| A00185 | A05072 | 174 | A00185 | A05082 | 316 |
| A00185 | A05084 | 301 | A00185 | A05165 | 417 |
| A00185 | A05216 | 902 | A00185 | A05339 | 154 |
| A00185 | A05373 | 193 | A00185 | A05400 | 241 |
| A00185 | A05440 | 241 | A00185 | A05458 | 228 |
| A00185 | A05473 | 319 | A00185 | A05570 | 260 |
| A00185 | A05633 | 196 | A00185 | A05701 | 163 |
| A00185 | A06077 | 160 | A00185 | A06256 | 183 |
| A00185 | A06466 | 491 | A00185 | A06586 | 157 |
| A00185 | A06609 | 899 | A00185 | A06610 | 257 |
| A00185 | A06665 | 278 | A00185 | A06879 | 276 |

|        |        |     |        |        |     |
|--------|--------|-----|--------|--------|-----|
| A00185 | A07033 | 241 | A00185 | A07091 | 899 |
| A00185 | A07118 | 167 | A00185 | A07127 | 286 |
| A00185 | A07135 | 367 | A00185 | A07163 | 318 |
| A00185 | A07201 | 899 | A00185 | A07279 | 167 |
| A00185 | A07311 | 945 | A00185 | A07339 | 483 |
| A00185 | A07421 | 154 | A00185 | A07555 | 241 |
| A00185 | A07726 | 329 | A00185 | A07762 | 255 |
| A00185 | A07798 | 490 | A00185 | A08070 | 350 |
| A00185 | A08183 | 435 | A00185 | A08541 | 254 |
| A00185 | A08608 | 190 | A00185 | A08640 | 276 |
| A00185 | A08732 | 899 | A00185 | A08869 | 313 |
| A00185 | A08878 | 904 | A00185 | A08911 | 235 |
| A00185 | A08998 | 263 | A00185 | A09018 | 198 |
| A00185 | A09078 | 180 | A00185 | A09176 | 219 |
| A00185 | A09220 | 694 | A00185 | A09239 | 460 |
| A00185 | A09249 | 167 | A00185 | A09251 | 154 |
| A00185 | A09399 | 174 | A00185 | A09418 | 174 |
| A00185 | A09486 | 241 | A00185 | A09488 | 241 |
| A00185 | A09536 | 335 | A00185 | A09577 | 85  |
| A00185 | A09742 | 490 | A00185 | A09791 | 238 |
| A00185 | A09804 | 219 | A00185 | A09902 | 291 |
| A00185 | A09937 | 177 | A00185 | A10125 | 219 |
| A00185 | A10126 | 167 | A00185 | A10133 | 193 |
| A00185 | A10174 | 899 | A00185 | A10220 | 276 |
| A00185 | A10337 | 185 | A00185 | A10365 | 361 |
| A00185 | A10468 | 276 | A00185 | A10471 | 326 |
| A00185 | A10538 | 193 | A00185 | A10728 | 294 |
| A00185 | A10735 | 146 | A00185 | A10801 | 423 |
| A00185 | A10833 | 899 | A00185 | A10913 | 124 |
| A00185 | A11206 | 329 | A00185 | A11286 | 486 |
| A00185 | A11369 | 246 | A00185 | A11431 | 477 |
| A00185 | A11504 | 219 | A00185 | A11604 | 945 |
| A00185 | A11672 | 154 | A00185 | A11769 | 183 |
| A00185 | A11891 | 219 | A00185 | A11911 | 286 |
| A00185 | A11983 | 372 | A00185 | A12328 | 273 |
| A00185 | A12343 | 307 | A00185 | A12393 | 469 |
| A00185 | A12409 | 160 | A00185 | A13145 | 174 |
| A00185 | A13149 | 488 | A00185 | A13172 | 335 |
| A00185 | A13335 | 162 | A00185 | A13340 | 485 |
| A00185 | A13364 | 154 | A00185 | A13394 | 205 |
| A00185 | A13413 | 167 | A00185 | A13445 | 276 |
| A00185 | A13605 | 432 | A00185 | A13625 | 276 |
| A00185 | A13718 | 276 | A00185 | A13974 | 205 |
| A00185 | A13975 | 234 | A00185 | A13980 | 260 |
| A00185 | A13983 | 91  | A00185 | A13986 | 405 |
| A00185 | A13997 | 229 | A00185 | A14007 | 419 |

|        |        |     |        |        |     |
|--------|--------|-----|--------|--------|-----|
| A00185 | A14019 | 928 | A00185 | A14157 | 241 |
| A00185 | A14187 | 447 | A00185 | A14188 | 491 |
| A00185 | A14198 | 945 | A00185 | A14210 | 173 |
| A00185 | A14364 | 177 | A00185 | A14371 | 374 |
| A00185 | A14378 | 396 | A00185 | A14399 | 436 |
| A00185 | A14401 | 224 | A00185 | A14402 | 276 |
| A00185 | A14410 | 273 | A00185 | A14426 | 173 |
| A00185 | A14433 | 943 | A00185 | A14438 | 425 |
| A00185 | A14443 | 899 | A00185 | A14452 | 157 |
| A00185 | A14511 | 378 | A00185 | A14635 | 174 |
| A00185 | A14643 | 353 | A00185 | A14738 | 152 |
| A00185 | A14827 | 170 | A00185 | A15230 | 212 |
| A00185 | A15293 | 911 | A00185 | A15294 | 916 |
| A00185 | A15301 | 422 | A00185 | A15302 | 467 |
| A00185 | A15325 | 377 | A00185 | A15335 | 229 |
| A00185 | A15366 | 433 | A00185 | A15413 | 485 |
| A00185 | A15420 | 281 | A00185 | A15428 | 167 |
| A00185 | A15463 | 462 | A00185 | A15487 | 160 |
| A00185 | A15506 | 362 | A00185 | A15510 | 488 |
| A00185 | A15512 | 174 | A00185 | A15674 | 196 |
| A00185 | A15734 | 259 | A00185 | A15832 | 183 |
| A00185 | A15862 | 335 | A00185 | A15913 | 152 |
| A00185 | A15927 | 219 | A00185 | A15977 | 326 |
| A00185 | A16300 | 447 | A00185 | A16450 | 385 |
| A00185 | A16985 | 183 | A00186 | A00224 | 899 |
| A00186 | A00230 | 899 | A00186 | A00234 | 213 |
| A00186 | A00246 | 899 | A00186 | A00255 | 221 |
| A00186 | A00340 | 382 | A00186 | A01128 | 224 |
| A00186 | A01475 | 229 | A00186 | A01524 | 906 |
| A00186 | A01527 | 917 | A00186 | A01553 | 902 |
| A00186 | A01558 | 899 | A00186 | A01588 | 899 |
| A00186 | A01615 | 899 | A00186 | A01727 | 162 |
| A00186 | A01749 | 171 | A00186 | A01787 | 177 |
| A00186 | A01895 | 326 | A00186 | A01900 | 296 |
| A00186 | A01920 | 905 | A00186 | A02335 | 404 |
| A00186 | A03661 | 168 | A00186 | A03821 | 202 |
| A00186 | A04002 | 378 | A00186 | A04315 | 480 |
| A00186 | A04323 | 285 | A00186 | A04490 | 272 |
| A00186 | A04879 | 180 | A00186 | A04933 | 344 |
| A00186 | A05866 | 307 | A00186 | A05944 | 236 |
| A00186 | A06635 | 486 | A00186 | A07311 | 899 |
| A00186 | A09220 | 944 | A00186 | A13593 | 177 |
| A00186 | A14401 | 490 | A00187 | A00217 | 388 |
| A00187 | A00243 | 154 | A00187 | A00248 | 291 |
| A00187 | A00257 | 450 | A00187 | A00267 | 443 |
| A00187 | A00273 | 488 | A00187 | A01512 | 472 |

|        |        |     |        |        |     |
|--------|--------|-----|--------|--------|-----|
| A00187 | A01554 | 294 | A00187 | A01560 | 63  |
| A00187 | A01562 | 491 | A00187 | A01596 | 319 |
| A00187 | A01628 | 413 | A00187 | A01639 | 491 |
| A00187 | A01640 | 171 | A00187 | A01653 | 265 |
| A00187 | A01664 | 477 | A00187 | A01692 | 63  |
| A00187 | A01697 | 152 | A00187 | A01702 | 385 |
| A00187 | A01708 | 363 | A00187 | A01709 | 480 |
| A00187 | A01718 | 481 | A00187 | A01719 | 441 |
| A00187 | A01730 | 152 | A00187 | A01740 | 330 |
| A00187 | A01908 | 218 | A00187 | A02341 | 151 |
| A00187 | A03095 | 414 | A00187 | A03656 | 238 |
| A00187 | A03960 | 232 | A00187 | A04205 | 491 |
| A00187 | A04452 | 302 | A00187 | A04536 | 160 |
| A00187 | A04858 | 424 | A00187 | A06289 | 65  |
| A00187 | A06601 | 332 | A00187 | A06610 | 152 |
| A00187 | A06701 | 438 | A00187 | A07654 | 188 |
| A00187 | A08218 | 193 | A00187 | A08902 | 433 |
| A00187 | A09162 | 491 | A00187 | A10392 | 490 |
| A00187 | A10595 | 159 | A00187 | A10808 | 113 |
| A00187 | A11252 | 302 | A00187 | A11379 | 154 |
| A00187 | A11696 | 177 | A00187 | A11767 | 201 |
| A00187 | A11830 | 218 | A00187 | A11852 | 165 |
| A00187 | A12383 | 452 | A00187 | A13539 | 323 |
| A00188 | A00190 | 486 | A00188 | A00240 | 321 |
| A00188 | A00248 | 491 | A00188 | A00256 | 449 |
| A00188 | A00265 | 475 | A00188 | A00266 | 208 |
| A00188 | A00324 | 170 | A00188 | A00336 | 259 |
| A00188 | A01560 | 165 | A00188 | A01639 | 945 |
| A00188 | A01654 | 338 | A00188 | A01669 | 468 |
| A00188 | A01729 | 276 | A00188 | A01730 | 279 |
| A00188 | A01742 | 491 | A00188 | A01746 | 483 |
| A00188 | A01756 | 412 | A00188 | A01776 | 218 |
| A00188 | A01781 | 340 | A00188 | A01850 | 390 |
| A00188 | A01880 | 208 | A00188 | A01888 | 252 |
| A00188 | A01900 | 899 | A00188 | A01902 | 200 |
| A00188 | A01983 | 408 | A00188 | A02021 | 154 |
| A00188 | A02337 | 281 | A00188 | A02383 | 463 |
| A00188 | A02498 | 266 | A00188 | A02630 | 263 |
| A00188 | A02645 | 278 | A00188 | A02662 | 291 |
| A00188 | A02699 | 486 | A00188 | A02821 | 277 |
| A00188 | A02843 | 201 | A00188 | A02854 | 314 |
| A00188 | A02866 | 232 | A00188 | A02873 | 321 |
| A00188 | A02886 | 291 | A00188 | A02909 | 388 |
| A00188 | A02945 | 180 | A00188 | A03541 | 477 |
| A00188 | A03662 | 485 | A00188 | A03846 | 445 |
| A00188 | A03869 | 383 | A00188 | A03871 | 390 |



|        |        |     |        |        |     |
|--------|--------|-----|--------|--------|-----|
| A00188 | A03942 | 451 | A00188 | A04049 | 190 |
| A00188 | A04088 | 163 | A00188 | A04248 | 463 |
| A00188 | A04320 | 369 | A00188 | A04528 | 291 |
| A00188 | A04536 | 491 | A00188 | A04584 | 232 |
| A00188 | A04734 | 201 | A00188 | A04865 | 270 |
| A00188 | A04976 | 210 | A00188 | A05038 | 218 |
| A00188 | A05270 | 291 | A00188 | A05389 | 193 |
| A00188 | A05556 | 241 | A00188 | A05558 | 251 |
| A00188 | A05583 | 238 | A00188 | A05634 | 185 |
| A00188 | A05854 | 302 | A00188 | A05944 | 479 |
| A00188 | A06054 | 399 | A00188 | A06055 | 491 |
| A00188 | A06601 | 468 | A00188 | A06780 | 218 |
| A00188 | A07157 | 358 | A00188 | A07173 | 272 |
| A00188 | A07372 | 215 | A00188 | A07390 | 452 |
| A00188 | A07422 | 265 | A00188 | A08615 | 267 |
| A00188 | A08633 | 185 | A00188 | A08711 | 363 |
| A00188 | A08804 | 185 | A00188 | A09046 | 456 |
| A00188 | A09062 | 210 | A00188 | A09162 | 267 |
| A00188 | A09842 | 229 | A00188 | A10097 | 334 |
| A00188 | A10392 | 923 | A00188 | A10623 | 279 |
| A00188 | A10969 | 258 | A00188 | A10982 | 369 |
| A00188 | A11300 | 274 | A00188 | A14376 | 173 |
| A00188 | A14432 | 183 | A00188 | A15605 | 227 |
| A00188 | A15608 | 243 | A00189 | A00208 | 899 |
| A00189 | A00209 | 919 | A00189 | A00220 | 277 |
| A00189 | A00224 | 943 | A00189 | A00230 | 899 |
| A00189 | A00232 | 373 | A00189 | A00236 | 488 |
| A00189 | A00241 | 462 | A00189 | A00246 | 928 |
| A00189 | A00252 | 491 | A00189 | A00253 | 489 |
| A00189 | A00254 | 213 | A00189 | A00261 | 335 |
| A00189 | A00324 | 899 | A00189 | A00531 | 193 |
| A00189 | A00588 | 183 | A00189 | A00604 | 308 |
| A00189 | A00643 | 283 | A00189 | A00652 | 490 |
| A00189 | A00653 | 276 | A00189 | A00814 | 310 |
| A00189 | A00820 | 205 | A00189 | A01052 | 899 |
| A00189 | A01289 | 489 | A00189 | A01524 | 937 |
| A00189 | A01527 | 913 | A00189 | A01559 | 383 |
| A00189 | A01614 | 265 | A00189 | A01616 | 491 |
| A00189 | A01659 | 432 | A00189 | A01688 | 899 |
| A00189 | A01692 | 388 | A00189 | A01709 | 340 |
| A00189 | A01730 | 468 | A00189 | A01876 | 240 |
| A00189 | A01881 | 360 | A00189 | A01889 | 208 |
| A00189 | A02178 | 419 | A00189 | A02304 | 475 |
| A00189 | A02382 | 731 | A00189 | A02416 | 159 |
| A00189 | A02698 | 489 | A00189 | A02704 | 168 |
| A00189 | A02711 | 491 | A00189 | A02863 | 229 |

|        |        |     |        |        |     |
|--------|--------|-----|--------|--------|-----|
| A00189 | A03010 | 945 | A00189 | A03255 | 180 |
| A00189 | A03683 | 152 | A00189 | A03790 | 301 |
| A00189 | A03817 | 480 | A00189 | A03821 | 154 |
| A00189 | A03914 | 154 | A00189 | A03972 | 218 |
| A00189 | A04033 | 486 | A00189 | A04117 | 162 |
| A00189 | A04176 | 339 | A00189 | A04250 | 200 |
| A00189 | A04320 | 462 | A00189 | A04449 | 486 |
| A00189 | A04451 | 210 | A00189 | A04473 | 252 |
| A00189 | A04668 | 329 | A00189 | A04736 | 180 |
| A00189 | A04807 | 293 | A00189 | A05082 | 491 |
| A00189 | A05417 | 210 | A00189 | A05679 | 168 |
| A00189 | A06107 | 174 | A00189 | A06270 | 265 |
| A00189 | A06277 | 221 | A00189 | A06552 | 356 |
| A00189 | A06650 | 293 | A00189 | A06982 | 486 |
| A00189 | A07004 | 358 | A00189 | A07151 | 154 |
| A00189 | A07158 | 436 | A00189 | A07375 | 247 |
| A00189 | A08416 | 489 | A00189 | A08679 | 185 |
| A00189 | A08729 | 171 | A00189 | A08812 | 259 |
| A00189 | A09470 | 162 | A00189 | A09524 | 174 |
| A00189 | A09544 | 332 | A00189 | A09732 | 232 |
| A00189 | A09764 | 441 | A00189 | A10055 | 171 |
| A00189 | A10224 | 208 | A00189 | A10813 | 299 |
| A00189 | A10899 | 433 | A00189 | A11369 | 943 |
| A00189 | A11543 | 491 | A00189 | A11707 | 467 |
| A00189 | A11875 | 179 | A00189 | A11901 | 382 |
| A00189 | A11983 | 980 | A00189 | A12971 | 371 |
| A00189 | A13066 | 218 | A00189 | A13110 | 229 |
| A00189 | A13181 | 297 | A00189 | A13247 | 174 |
| A00189 | A13860 | 469 | A00189 | A13949 | 165 |
| A00189 | A13975 | 154 | A00189 | A13981 | 899 |
| A00189 | A13985 | 899 | A00189 | A13996 | 229 |
| A00189 | A14029 | 903 | A00189 | A14094 | 455 |
| A00189 | A14198 | 354 | A00189 | A14236 | 462 |
| A00189 | A14426 | 205 | A00189 | A14472 | 183 |
| A00189 | A14517 | 286 | A00189 | A14570 | 303 |
| A00189 | A14645 | 265 | A00189 | A14694 | 479 |
| A00189 | A15241 | 429 | A00189 | A15599 | 184 |
| A00189 | A15605 | 157 | A00189 | A15606 | 486 |
| A00189 | A15665 | 168 | A00189 | A15726 | 422 |
| A00189 | A16354 | 229 | A00189 | A16476 | 480 |
| A00189 | A16513 | 152 | A00190 | A00196 | 489 |
| A00190 | A00197 | 157 | A00190 | A00200 | 232 |
| A00190 | A00204 | 747 | A00190 | A00207 | 899 |
| A00190 | A00208 | 451 | A00190 | A00209 | 944 |
| A00190 | A00210 | 249 | A00190 | A00212 | 374 |
| A00190 | A00214 | 430 | A00190 | A00216 | 416 |

|        |        |     |        |        |     |
|--------|--------|-----|--------|--------|-----|
| A00190 | A00218 | 483 | A00190 | A00219 | 491 |
| A00190 | A00220 | 527 | A00190 | A00224 | 945 |
| A00190 | A00227 | 413 | A00190 | A00230 | 899 |
| A00190 | A00231 | 491 | A00190 | A00232 | 491 |
| A00190 | A00233 | 945 | A00190 | A00234 | 489 |
| A00190 | A00238 | 205 | A00190 | A00245 | 296 |
| A00190 | A00248 | 491 | A00190 | A00250 | 899 |
| A00190 | A00254 | 488 | A00190 | A00256 | 245 |
| A00190 | A00262 | 901 | A00190 | A00264 | 945 |
| A00190 | A00265 | 491 | A00190 | A00274 | 488 |
| A00190 | A00292 | 364 | A00190 | A00294 | 944 |
| A00190 | A00305 | 463 | A00190 | A00309 | 490 |
| A00190 | A00324 | 943 | A00190 | A00327 | 457 |
| A00190 | A00328 | 255 | A00190 | A00351 | 445 |
| A00190 | A00365 | 249 | A00190 | A00370 | 324 |
| A00190 | A00377 | 457 | A00190 | A00395 | 226 |
| A00190 | A00420 | 179 | A00190 | A00449 | 488 |
| A00190 | A00457 | 246 | A00190 | A00472 | 398 |
| A00190 | A00478 | 160 | A00190 | A00482 | 427 |
| A00190 | A00483 | 199 | A00190 | A00531 | 368 |
| A00190 | A00537 | 165 | A00190 | A00538 | 379 |
| A00190 | A00541 | 296 | A00190 | A00556 | 488 |
| A00190 | A00558 | 283 | A00190 | A00570 | 430 |
| A00190 | A00574 | 355 | A00190 | A00576 | 191 |
| A00190 | A00591 | 286 | A00190 | A00595 | 445 |
| A00190 | A00601 | 257 | A00190 | A00616 | 223 |
| A00190 | A00649 | 360 | A00190 | A00659 | 266 |
| A00190 | A00674 | 196 | A00190 | A00688 | 481 |
| A00190 | A00709 | 174 | A00190 | A00722 | 468 |
| A00190 | A00730 | 241 | A00190 | A00731 | 311 |
| A00190 | A00736 | 491 | A00190 | A00747 | 374 |
| A00190 | A00765 | 404 | A00190 | A00784 | 440 |
| A00190 | A00791 | 332 | A00190 | A00799 | 491 |
| A00190 | A00815 | 332 | A00190 | A00820 | 486 |
| A00190 | A00858 | 254 | A00190 | A00863 | 210 |
| A00190 | A00868 | 461 | A00190 | A00869 | 165 |
| A00190 | A00914 | 491 | A00190 | A00926 | 423 |
| A00190 | A00931 | 361 | A00190 | A00950 | 374 |
| A00190 | A00993 | 470 | A00190 | A01003 | 154 |
| A00190 | A01009 | 934 | A00190 | A01011 | 540 |
| A00190 | A01018 | 174 | A00190 | A01020 | 180 |
| A00190 | A01080 | 899 | A00190 | A01086 | 339 |
| A00190 | A01093 | 352 | A00190 | A01108 | 469 |
| A00190 | A01114 | 412 | A00190 | A01116 | 156 |
| A00190 | A01117 | 316 | A00190 | A01125 | 394 |
| A00190 | A01137 | 252 | A00190 | A01156 | 377 |

|        |        |     |        |        |     |
|--------|--------|-----|--------|--------|-----|
| A00190 | A01157 | 432 | A00190 | A01178 | 491 |
| A00190 | A01204 | 162 | A00190 | A01210 | 286 |
| A00190 | A01223 | 396 | A00190 | A01230 | 435 |
| A00190 | A01240 | 204 | A00190 | A01253 | 154 |
| A00190 | A01256 | 202 | A00190 | A01257 | 265 |
| A00190 | A01281 | 340 | A00190 | A01296 | 311 |
| A00190 | A01297 | 363 | A00190 | A01307 | 480 |
| A00190 | A01317 | 406 | A00190 | A01318 | 441 |
| A00190 | A01320 | 486 | A00190 | A01323 | 213 |
| A00190 | A01324 | 210 | A00190 | A01325 | 235 |
| A00190 | A01328 | 454 | A00190 | A01346 | 219 |
| A00190 | A01354 | 371 | A00190 | A01359 | 327 |
| A00190 | A01360 | 294 | A00190 | A01416 | 168 |
| A00190 | A01427 | 168 | A00190 | A01452 | 479 |
| A00190 | A01460 | 249 | A00190 | A01463 | 405 |
| A00190 | A01468 | 491 | A00190 | A01473 | 344 |
| A00190 | A01483 | 466 | A00190 | A01489 | 899 |
| A00190 | A01504 | 378 | A00190 | A01512 | 899 |
| A00190 | A01524 | 899 | A00190 | A01527 | 943 |
| A00190 | A01551 | 491 | A00190 | A01553 | 899 |
| A00190 | A01554 | 455 | A00190 | A01558 | 899 |
| A00190 | A01567 | 185 | A00190 | A01572 | 199 |
| A00190 | A01583 | 369 | A00190 | A01590 | 409 |
| A00190 | A01591 | 899 | A00190 | A01593 | 899 |
| A00190 | A01602 | 942 | A00190 | A01604 | 427 |
| A00190 | A01606 | 899 | A00190 | A01626 | 454 |
| A00190 | A01629 | 221 | A00190 | A01631 | 926 |
| A00190 | A01635 | 446 | A00190 | A01643 | 430 |
| A00190 | A01647 | 199 | A00190 | A01666 | 208 |
| A00190 | A01668 | 491 | A00190 | A01676 | 491 |
| A00190 | A01677 | 347 | A00190 | A01688 | 899 |
| A00190 | A01704 | 491 | A00190 | A01725 | 160 |
| A00190 | A01726 | 473 | A00190 | A01727 | 277 |
| A00190 | A01728 | 420 | A00190 | A01729 | 483 |
| A00190 | A01730 | 582 | A00190 | A01733 | 486 |
| A00190 | A01737 | 262 | A00190 | A01739 | 252 |
| A00190 | A01740 | 338 | A00190 | A01741 | 945 |
| A00190 | A01742 | 177 | A00190 | A01743 | 491 |
| A00190 | A01746 | 390 | A00190 | A01747 | 366 |
| A00190 | A01749 | 157 | A00190 | A01752 | 395 |
| A00190 | A01754 | 307 | A00190 | A01755 | 414 |
| A00190 | A01759 | 480 | A00190 | A01767 | 475 |
| A00190 | A01769 | 404 | A00190 | A01775 | 491 |
| A00190 | A01781 | 429 | A00190 | A01785 | 357 |
| A00190 | A01789 | 491 | A00190 | A01796 | 491 |
| A00190 | A01797 | 491 | A00190 | A01798 | 374 |

|        |        |     |        |        |     |
|--------|--------|-----|--------|--------|-----|
| A00190 | A01802 | 182 | A00190 | A01815 | 196 |
| A00190 | A01844 | 484 | A00190 | A01863 | 314 |
| A00190 | A01870 | 183 | A00190 | A01875 | 339 |
| A00190 | A01876 | 480 | A00190 | A01879 | 491 |
| A00190 | A01880 | 180 | A00190 | A01887 | 491 |
| A00190 | A01888 | 491 | A00190 | A01889 | 191 |
| A00190 | A01894 | 473 | A00190 | A01900 | 394 |
| A00190 | A01902 | 489 | A00190 | A01908 | 259 |
| A00190 | A01923 | 168 | A00190 | A01926 | 479 |
| A00190 | A01971 | 218 | A00190 | A01980 | 157 |
| A00190 | A01981 | 322 | A00190 | A01982 | 364 |
| A00190 | A02006 | 449 | A00190 | A02010 | 433 |
| A00190 | A02011 | 363 | A00190 | A02020 | 480 |
| A00190 | A02034 | 168 | A00190 | A02063 | 319 |
| A00190 | A02065 | 334 | A00190 | A02074 | 160 |
| A00190 | A02080 | 195 | A00190 | A02083 | 180 |
| A00190 | A02086 | 439 | A00190 | A02117 | 238 |
| A00190 | A02119 | 199 | A00190 | A02138 | 202 |
| A00190 | A02143 | 469 | A00190 | A02148 | 429 |
| A00190 | A02156 | 208 | A00190 | A02158 | 374 |
| A00190 | A02161 | 353 | A00190 | A02168 | 180 |
| A00190 | A02174 | 374 | A00190 | A02179 | 157 |
| A00190 | A02180 | 489 | A00190 | A02183 | 374 |
| A00190 | A02215 | 452 | A00190 | A02229 | 157 |
| A00190 | A02235 | 160 | A00190 | A02236 | 340 |
| A00190 | A02248 | 205 | A00190 | A02251 | 447 |
| A00190 | A02254 | 235 | A00190 | A02268 | 480 |
| A00190 | A02275 | 334 | A00190 | A02278 | 468 |
| A00190 | A02292 | 207 | A00190 | A02298 | 385 |
| A00190 | A02300 | 247 | A00190 | A02304 | 402 |
| A00190 | A02340 | 273 | A00190 | A02345 | 340 |
| A00190 | A02361 | 308 | A00190 | A02372 | 283 |
| A00190 | A02377 | 485 | A00190 | A02380 | 180 |
| A00190 | A02382 | 466 | A00190 | A02390 | 318 |
| A00190 | A02407 | 268 | A00190 | A02412 | 414 |
| A00190 | A02414 | 165 | A00190 | A02416 | 443 |
| A00190 | A02425 | 191 | A00190 | A02431 | 466 |
| A00190 | A02435 | 427 | A00190 | A02454 | 485 |
| A00190 | A02460 | 256 | A00190 | A02464 | 215 |
| A00190 | A02473 | 377 | A00190 | A02481 | 296 |
| A00190 | A02488 | 177 | A00190 | A02490 | 481 |
| A00190 | A02491 | 489 | A00190 | A02492 | 414 |
| A00190 | A02494 | 335 | A00190 | A02495 | 269 |
| A00190 | A02499 | 317 | A00190 | A02505 | 420 |
| A00190 | A02506 | 210 | A00190 | A02508 | 333 |
| A00190 | A02512 | 396 | A00190 | A02521 | 485 |

|        |        |     |        |        |     |
|--------|--------|-----|--------|--------|-----|
| A00190 | A02524 | 208 | A00190 | A02564 | 481 |
| A00190 | A02582 | 170 | A00190 | A02585 | 238 |
| A00190 | A02586 | 168 | A00190 | A02594 | 212 |
| A00190 | A02605 | 152 | A00190 | A02624 | 252 |
| A00190 | A02630 | 152 | A00190 | A02639 | 484 |
| A00190 | A02668 | 424 | A00190 | A02672 | 255 |
| A00190 | A02675 | 193 | A00190 | A02695 | 480 |
| A00190 | A02696 | 337 | A00190 | A02697 | 419 |
| A00190 | A02698 | 187 | A00190 | A02703 | 436 |
| A00190 | A02709 | 481 | A00190 | A02711 | 127 |
| A00190 | A02714 | 491 | A00190 | A02730 | 439 |
| A00190 | A02741 | 307 | A00190 | A02745 | 477 |
| A00190 | A02746 | 224 | A00190 | A02749 | 489 |
| A00190 | A02754 | 429 | A00190 | A02756 | 395 |
| A00190 | A02772 | 238 | A00190 | A02777 | 278 |
| A00190 | A02784 | 176 | A00190 | A02785 | 447 |
| A00190 | A02787 | 481 | A00190 | A02788 | 454 |
| A00190 | A02789 | 216 | A00190 | A02812 | 490 |
| A00190 | A02814 | 452 | A00190 | A02816 | 451 |
| A00190 | A02828 | 935 | A00190 | A02829 | 358 |
| A00190 | A02830 | 491 | A00190 | A02836 | 469 |
| A00190 | A02837 | 491 | A00190 | A02842 | 302 |
| A00190 | A02859 | 491 | A00190 | A02864 | 395 |
| A00190 | A02869 | 338 | A00190 | A02874 | 491 |
| A00190 | A02875 | 321 | A00190 | A02877 | 457 |
| A00190 | A02878 | 380 | A00190 | A02895 | 208 |
| A00190 | A02896 | 491 | A00190 | A02897 | 182 |
| A00190 | A02904 | 159 | A00190 | A02908 | 461 |
| A00190 | A02913 | 183 | A00190 | A02916 | 468 |
| A00190 | A02918 | 213 | A00190 | A02920 | 245 |
| A00190 | A02922 | 154 | A00190 | A02923 | 183 |
| A00190 | A02927 | 176 | A00190 | A02942 | 899 |
| A00190 | A02944 | 486 | A00190 | A02951 | 190 |
| A00190 | A02961 | 458 | A00190 | A02972 | 267 |
| A00190 | A02982 | 469 | A00190 | A02983 | 491 |
| A00190 | A02984 | 366 | A00190 | A02988 | 240 |
| A00190 | A03001 | 176 | A00190 | A03003 | 283 |
| A00190 | A03028 | 154 | A00190 | A03034 | 341 |
| A00190 | A03046 | 218 | A00190 | A03051 | 271 |
| A00190 | A03056 | 256 | A00190 | A03068 | 196 |
| A00190 | A03070 | 199 | A00190 | A03074 | 162 |
| A00190 | A03080 | 468 | A00190 | A03087 | 344 |
| A00190 | A03091 | 466 | A00190 | A03094 | 210 |
| A00190 | A03095 | 479 | A00190 | A03099 | 329 |
| A00190 | A03100 | 205 | A00190 | A03104 | 469 |
| A00190 | A03110 | 489 | A00190 | A03112 | 491 |

|        |        |     |        |        |     |
|--------|--------|-----|--------|--------|-----|
| A00190 | A03115 | 218 | A00190 | A03121 | 251 |
| A00190 | A03126 | 297 | A00190 | A03131 | 266 |
| A00190 | A03132 | 168 | A00190 | A03141 | 247 |
| A00190 | A03144 | 427 | A00190 | A03181 | 217 |
| A00190 | A03183 | 182 | A00190 | A03186 | 260 |
| A00190 | A03188 | 177 | A00190 | A03196 | 162 |
| A00190 | A03204 | 218 | A00190 | A03211 | 366 |
| A00190 | A03219 | 408 | A00190 | A03223 | 477 |
| A00190 | A03238 | 251 | A00190 | A03259 | 945 |
| A00190 | A03271 | 200 | A00190 | A03275 | 491 |
| A00190 | A03282 | 375 | A00190 | A03304 | 210 |
| A00190 | A03305 | 215 | A00190 | A03315 | 414 |
| A00190 | A03332 | 273 | A00190 | A03347 | 246 |
| A00190 | A03361 | 193 | A00190 | A03370 | 388 |
| A00190 | A03406 | 180 | A00190 | A03412 | 221 |
| A00190 | A03415 | 346 | A00190 | A03419 | 182 |
| A00190 | A03423 | 185 | A00190 | A03436 | 473 |
| A00190 | A03438 | 302 | A00190 | A03451 | 481 |
| A00190 | A03513 | 358 | A00190 | A03520 | 491 |
| A00190 | A03523 | 366 | A00190 | A03537 | 154 |
| A00190 | A03544 | 63  | A00190 | A03596 | 458 |
| A00190 | A03604 | 263 | A00190 | A03609 | 481 |
| A00190 | A03611 | 374 | A00190 | A03626 | 388 |
| A00190 | A03644 | 238 | A00190 | A03661 | 306 |
| A00190 | A03690 | 407 | A00190 | A03703 | 379 |
| A00190 | A03721 | 424 | A00190 | A03722 | 465 |
| A00190 | A03724 | 395 | A00190 | A03725 | 491 |
| A00190 | A03726 | 899 | A00190 | A03732 | 190 |
| A00190 | A03739 | 473 | A00190 | A03748 | 416 |
| A00190 | A03750 | 247 | A00190 | A03763 | 191 |
| A00190 | A03795 | 224 | A00190 | A03797 | 899 |
| A00190 | A03799 | 167 | A00190 | A03813 | 263 |
| A00190 | A03821 | 386 | A00190 | A03834 | 337 |
| A00190 | A03843 | 486 | A00190 | A03846 | 369 |
| A00190 | A03851 | 489 | A00190 | A03861 | 417 |
| A00190 | A03887 | 450 | A00190 | A03894 | 460 |
| A00190 | A03902 | 335 | A00190 | A03910 | 485 |
| A00190 | A03922 | 185 | A00190 | A03942 | 945 |
| A00190 | A03965 | 249 | A00190 | A03981 | 455 |
| A00190 | A03990 | 485 | A00190 | A03992 | 154 |
| A00190 | A04004 | 173 | A00190 | A04009 | 168 |
| A00190 | A04010 | 490 | A00190 | A04048 | 196 |
| A00190 | A04049 | 176 | A00190 | A04050 | 269 |
| A00190 | A04051 | 454 | A00190 | A04060 | 378 |
| A00190 | A04080 | 475 | A00190 | A04082 | 268 |
| A00190 | A04085 | 296 | A00190 | A04088 | 390 |

|        |        |     |        |        |     |
|--------|--------|-----|--------|--------|-----|
| A00190 | A04113 | 168 | A00190 | A04117 | 477 |
| A00190 | A04169 | 491 | A00190 | A04202 | 276 |
| A00190 | A04206 | 322 | A00190 | A04216 | 163 |
| A00190 | A04248 | 202 | A00190 | A04304 | 286 |
| A00190 | A04334 | 463 | A00190 | A04342 | 483 |
| A00190 | A04352 | 373 | A00190 | A04398 | 241 |
| A00190 | A04410 | 340 | A00190 | A04417 | 234 |
| A00190 | A04444 | 485 | A00190 | A04453 | 157 |
| A00190 | A04536 | 425 | A00190 | A04548 | 395 |
| A00190 | A04567 | 277 | A00190 | A04614 | 317 |
| A00190 | A04616 | 455 | A00190 | A04622 | 491 |
| A00190 | A04627 | 173 | A00190 | A04637 | 180 |
| A00190 | A04656 | 260 | A00190 | A04714 | 162 |
| A00190 | A04750 | 172 | A00190 | A04751 | 170 |
| A00190 | A04771 | 276 | A00190 | A04776 | 204 |
| A00190 | A04783 | 402 | A00190 | A04873 | 199 |
| A00190 | A04879 | 580 | A00190 | A04880 | 515 |
| A00190 | A04883 | 177 | A00190 | A04891 | 260 |
| A00190 | A04893 | 268 | A00190 | A04902 | 173 |
| A00190 | A04908 | 399 | A00190 | A04911 | 221 |
| A00190 | A04927 | 247 | A00190 | A04939 | 489 |
| A00190 | A05016 | 296 | A00190 | A05034 | 277 |
| A00190 | A05050 | 199 | A00190 | A05112 | 168 |
| A00190 | A05113 | 251 | A00190 | A05122 | 374 |
| A00190 | A05155 | 489 | A00190 | A05194 | 212 |
| A00190 | A05216 | 899 | A00190 | A05220 | 424 |
| A00190 | A05221 | 485 | A00190 | A05261 | 183 |
| A00190 | A05268 | 168 | A00190 | A05278 | 168 |
| A00190 | A05288 | 446 | A00190 | A05309 | 491 |
| A00190 | A05336 | 168 | A00190 | A05349 | 308 |
| A00190 | A05362 | 168 | A00190 | A05418 | 185 |
| A00190 | A05421 | 168 | A00190 | A05439 | 218 |
| A00190 | A05444 | 168 | A00190 | A05472 | 243 |
| A00190 | A05506 | 172 | A00190 | A05568 | 223 |
| A00190 | A05577 | 245 | A00190 | A05603 | 401 |
| A00190 | A05735 | 398 | A00190 | A05824 | 168 |
| A00190 | A05869 | 151 | A00190 | A05933 | 168 |
| A00190 | A05961 | 245 | A00190 | A05999 | 172 |
| A00190 | A06001 | 446 | A00190 | A06053 | 154 |
| A00190 | A06056 | 183 | A00190 | A06067 | 263 |
| A00190 | A06072 | 168 | A00190 | A06118 | 176 |
| A00190 | A06149 | 238 | A00190 | A06289 | 899 |
| A00190 | A06292 | 168 | A00190 | A06346 | 208 |
| A00190 | A06405 | 246 | A00190 | A06422 | 467 |
| A00190 | A06439 | 213 | A00190 | A06569 | 424 |
| A00190 | A06581 | 491 | A00190 | A06595 | 213 |



|        |        |     |        |        |     |
|--------|--------|-----|--------|--------|-----|
| A00190 | A06597 | 388 | A00190 | A06606 | 302 |
| A00190 | A06607 | 435 | A00190 | A06608 | 219 |
| A00190 | A06610 | 484 | A00190 | A06615 | 477 |
| A00190 | A06623 | 251 | A00190 | A06642 | 263 |
| A00190 | A06648 | 168 | A00190 | A06660 | 400 |
| A00190 | A06689 | 152 | A00190 | A06693 | 369 |
| A00190 | A06792 | 168 | A00190 | A06797 | 252 |
| A00190 | A06825 | 299 | A00190 | A06949 | 486 |
| A00190 | A06997 | 296 | A00190 | A07062 | 217 |
| A00190 | A07135 | 485 | A00190 | A07138 | 358 |
| A00190 | A07141 | 396 | A00190 | A07145 | 449 |
| A00190 | A07153 | 483 | A00190 | A07157 | 685 |
| A00190 | A07158 | 454 | A00190 | A07159 | 176 |
| A00190 | A07160 | 174 | A00190 | A07163 | 262 |
| A00190 | A07165 | 945 | A00190 | A07191 | 348 |
| A00190 | A07200 | 475 | A00190 | A07201 | 480 |
| A00190 | A07209 | 491 | A00190 | A07218 | 449 |
| A00190 | A07249 | 286 | A00190 | A07314 | 340 |
| A00190 | A07339 | 480 | A00190 | A07363 | 168 |
| A00190 | A07399 | 452 | A00190 | A07400 | 168 |
| A00190 | A07421 | 323 | A00190 | A07422 | 899 |
| A00190 | A07486 | 228 | A00190 | A07488 | 168 |
| A00190 | A07503 | 188 | A00190 | A07520 | 215 |
| A00190 | A07525 | 232 | A00190 | A07540 | 299 |
| A00190 | A07553 | 180 | A00190 | A07566 | 260 |
| A00190 | A07572 | 151 | A00190 | A07723 | 363 |
| A00190 | A07766 | 484 | A00190 | A07794 | 307 |
| A00190 | A07803 | 489 | A00190 | A07927 | 168 |
| A00190 | A07973 | 180 | A00190 | A07993 | 268 |
| A00190 | A08280 | 644 | A00190 | A08366 | 232 |
| A00190 | A08411 | 168 | A00190 | A08559 | 168 |
| A00190 | A08572 | 484 | A00190 | A08732 | 899 |
| A00190 | A08782 | 168 | A00190 | A08791 | 168 |
| A00190 | A08834 | 489 | A00190 | A08837 | 207 |
| A00190 | A08840 | 432 | A00190 | A08841 | 288 |
| A00190 | A08842 | 462 | A00190 | A08863 | 199 |
| A00190 | A08887 | 177 | A00190 | A09001 | 241 |
| A00190 | A09018 | 340 | A00190 | A09022 | 408 |
| A00190 | A09028 | 447 | A00190 | A09058 | 238 |
| A00190 | A09073 | 337 | A00190 | A09137 | 168 |
| A00190 | A09145 | 246 | A00190 | A09196 | 196 |
| A00190 | A09205 | 293 | A00190 | A09206 | 200 |
| A00190 | A09211 | 252 | A00190 | A09215 | 168 |
| A00190 | A09222 | 157 | A00190 | A09238 | 182 |
| A00190 | A09239 | 345 | A00190 | A09243 | 352 |
| A00190 | A09275 | 212 | A00190 | A09379 | 168 |

|        |        |     |        |        |     |
|--------|--------|-----|--------|--------|-----|
| A00190 | A09381 | 278 | A00190 | A09394 | 290 |
| A00190 | A09422 | 327 | A00190 | A09429 | 157 |
| A00190 | A09509 | 405 | A00190 | A09573 | 337 |
| A00190 | A09598 | 469 | A00190 | A09612 | 246 |
| A00190 | A09643 | 899 | A00190 | A09644 | 899 |
| A00190 | A09647 | 165 | A00190 | A09672 | 162 |
| A00190 | A09732 | 488 | A00190 | A09740 | 252 |
| A00190 | A09742 | 474 | A00190 | A09744 | 347 |
| A00190 | A09753 | 160 | A00190 | A09804 | 899 |
| A00190 | A09817 | 314 | A00190 | A09833 | 405 |
| A00190 | A09842 | 165 | A00190 | A09847 | 160 |
| A00190 | A09848 | 379 | A00190 | A09855 | 246 |
| A00190 | A09873 | 391 | A00190 | A09875 | 185 |
| A00190 | A09879 | 180 | A00190 | A09882 | 188 |
| A00190 | A09896 | 168 | A00190 | A09907 | 168 |
| A00190 | A09932 | 311 | A00190 | A10044 | 299 |
| A00190 | A10045 | 299 | A00190 | A10046 | 314 |
| A00190 | A10068 | 168 | A00190 | A10087 | 152 |
| A00190 | A10174 | 299 | A00190 | A10214 | 609 |
| A00190 | A10271 | 168 | A00190 | A10332 | 191 |
| A00190 | A10353 | 172 | A00190 | A10382 | 162 |
| A00190 | A10421 | 152 | A00190 | A10435 | 168 |
| A00190 | A10504 | 162 | A00190 | A10506 | 391 |
| A00190 | A10544 | 200 | A00190 | A10579 | 157 |
| A00190 | A10580 | 944 | A00190 | A10587 | 326 |
| A00190 | A10591 | 160 | A00190 | A10592 | 263 |
| A00190 | A10612 | 449 | A00190 | A10625 | 481 |
| A00190 | A10638 | 266 | A00190 | A10658 | 245 |
| A00190 | A10702 | 163 | A00190 | A10789 | 355 |
| A00190 | A10835 | 168 | A00190 | A10914 | 168 |
| A00190 | A10984 | 168 | A00190 | A11069 | 168 |
| A00190 | A11073 | 162 | A00190 | A11110 | 168 |
| A00190 | A11113 | 223 | A00190 | A11122 | 246 |
| A00190 | A11190 | 219 | A00190 | A11191 | 364 |
| A00190 | A11250 | 229 | A00190 | A11288 | 172 |
| A00190 | A11294 | 180 | A00190 | A11300 | 734 |
| A00190 | A11326 | 223 | A00190 | A11404 | 154 |
| A00190 | A11412 | 422 | A00190 | A11431 | 483 |
| A00190 | A11435 | 469 | A00190 | A11444 | 210 |
| A00190 | A11469 | 278 | A00190 | A11526 | 327 |
| A00190 | A11537 | 443 | A00190 | A11545 | 283 |
| A00190 | A11556 | 172 | A00190 | A11558 | 424 |
| A00190 | A11578 | 338 | A00190 | A11607 | 205 |
| A00190 | A11683 | 191 | A00190 | A11768 | 168 |
| A00190 | A11789 | 168 | A00190 | A11835 | 255 |
| A00190 | A11848 | 228 | A00190 | A11850 | 419 |

|        |        |     |        |        |     |
|--------|--------|-----|--------|--------|-----|
| A00190 | A11885 | 162 | A00190 | A11926 | 326 |
| A00190 | A11943 | 899 | A00190 | A11978 | 168 |
| A00190 | A11983 | 534 | A00190 | A12041 | 163 |
| A00190 | A12187 | 168 | A00190 | A12195 | 205 |
| A00190 | A12271 | 168 | A00190 | A12361 | 200 |
| A00190 | A12373 | 374 | A00190 | A12393 | 486 |
| A00190 | A12635 | 168 | A00190 | A12719 | 172 |
| A00190 | A12792 | 163 | A00190 | A12824 | 439 |
| A00190 | A12854 | 385 | A00190 | A12897 | 489 |
| A00190 | A12927 | 475 | A00190 | A13003 | 401 |
| A00190 | A13123 | 212 | A00190 | A13124 | 416 |
| A00190 | A13161 | 168 | A00190 | A13259 | 168 |
| A00190 | A13334 | 168 | A00190 | A13338 | 294 |
| A00190 | A13369 | 488 | A00190 | A13371 | 183 |
| A00190 | A13386 | 168 | A00190 | A13460 | 224 |
| A00190 | A13542 | 168 | A00190 | A13595 | 168 |
| A00190 | A13610 | 168 | A00190 | A13658 | 168 |
| A00190 | A13749 | 168 | A00190 | A13816 | 212 |
| A00190 | A13824 | 157 | A00190 | A13826 | 491 |
| A00190 | A13860 | 678 | A00190 | A13899 | 486 |
| A00190 | A13951 | 302 | A00190 | A13975 | 899 |
| A00190 | A13987 | 463 | A00190 | A13991 | 899 |
| A00190 | A14008 | 899 | A00190 | A14010 | 316 |
| A00190 | A14071 | 235 | A00190 | A14072 | 348 |
| A00190 | A14111 | 154 | A00190 | A14122 | 422 |
| A00190 | A14123 | 313 | A00190 | A14126 | 326 |
| A00190 | A14128 | 491 | A00190 | A14129 | 467 |
| A00190 | A14190 | 468 | A00190 | A14191 | 438 |
| A00190 | A14198 | 379 | A00190 | A14202 | 467 |
| A00190 | A14208 | 632 | A00190 | A14210 | 490 |
| A00190 | A14215 | 263 | A00190 | A14229 | 462 |
| A00190 | A14231 | 836 | A00190 | A14232 | 899 |
| A00190 | A14290 | 249 | A00190 | A14320 | 232 |
| A00190 | A14330 | 221 | A00190 | A14343 | 172 |
| A00190 | A14368 | 180 | A00190 | A14371 | 486 |
| A00190 | A14374 | 187 | A00190 | A14378 | 466 |
| A00190 | A14392 | 193 | A00190 | A14394 | 152 |
| A00190 | A14395 | 469 | A00190 | A14399 | 413 |
| A00190 | A14406 | 160 | A00190 | A14408 | 182 |
| A00190 | A14413 | 163 | A00190 | A14416 | 176 |
| A00190 | A14430 | 377 | A00190 | A14440 | 338 |
| A00190 | A14443 | 224 | A00190 | A14470 | 170 |
| A00190 | A14490 | 162 | A00190 | A14511 | 490 |
| A00190 | A14512 | 168 | A00190 | A14520 | 207 |
| A00190 | A14534 | 168 | A00190 | A14564 | 168 |
| A00190 | A14570 | 455 | A00190 | A14604 | 267 |

|        |        |     |        |        |     |
|--------|--------|-----|--------|--------|-----|
| A00190 | A14605 | 339 | A00190 | A14635 | 467 |
| A00190 | A14643 | 457 | A00190 | A14654 | 901 |
| A00190 | A14664 | 446 | A00190 | A14667 | 465 |
| A00190 | A14671 | 260 | A00190 | A14693 | 241 |
| A00190 | A14726 | 168 | A00190 | A14741 | 260 |
| A00190 | A14799 | 439 | A00190 | A14928 | 386 |
| A00190 | A14930 | 477 | A00190 | A15130 | 193 |
| A00190 | A15241 | 475 | A00190 | A15277 | 263 |
| A00190 | A15287 | 352 | A00190 | A15289 | 168 |
| A00190 | A15291 | 446 | A00190 | A15292 | 662 |
| A00190 | A15294 | 899 | A00190 | A15301 | 435 |
| A00190 | A15302 | 475 | A00190 | A15310 | 460 |
| A00190 | A15312 | 490 | A00190 | A15313 | 490 |
| A00190 | A15314 | 490 | A00190 | A15317 | 486 |
| A00190 | A15318 | 329 | A00190 | A15322 | 490 |
| A00190 | A15323 | 281 | A00190 | A15328 | 190 |
| A00190 | A15331 | 470 | A00190 | A15333 | 406 |
| A00190 | A15335 | 385 | A00190 | A15336 | 152 |
| A00190 | A15345 | 327 | A00190 | A15346 | 484 |
| A00190 | A15348 | 489 | A00190 | A15349 | 491 |
| A00190 | A15352 | 491 | A00190 | A15357 | 420 |
| A00190 | A15365 | 246 | A00190 | A15366 | 173 |
| A00190 | A15376 | 470 | A00190 | A15396 | 173 |
| A00190 | A15398 | 428 | A00190 | A15399 | 176 |
| A00190 | A15400 | 423 | A00190 | A15402 | 352 |
| A00190 | A15404 | 374 | A00190 | A15413 | 479 |
| A00190 | A15416 | 344 | A00190 | A15417 | 160 |
| A00190 | A15422 | 235 | A00190 | A15428 | 162 |
| A00190 | A15429 | 230 | A00190 | A15430 | 489 |
| A00190 | A15431 | 174 | A00190 | A15432 | 254 |
| A00190 | A15433 | 191 | A00190 | A15440 | 156 |
| A00190 | A15445 | 278 | A00190 | A15447 | 475 |
| A00190 | A15452 | 446 | A00190 | A15454 | 424 |
| A00190 | A15460 | 195 | A00190 | A15461 | 385 |
| A00190 | A15463 | 479 | A00190 | A15464 | 385 |
| A00190 | A15480 | 475 | A00190 | A15484 | 469 |
| A00190 | A15487 | 470 | A00190 | A15488 | 188 |
| A00190 | A15489 | 152 | A00190 | A15495 | 486 |
| A00190 | A15498 | 489 | A00190 | A15515 | 481 |
| A00190 | A15546 | 369 | A00190 | A15624 | 490 |
| A00190 | A15630 | 470 | A00190 | A15634 | 899 |
| A00190 | A15638 | 196 | A00190 | A15641 | 208 |
| A00190 | A15649 | 255 | A00190 | A15669 | 373 |
| A00190 | A15673 | 313 | A00190 | A15726 | 352 |
| A00190 | A15784 | 168 | A00190 | A15795 | 554 |
| A00190 | A15800 | 188 | A00190 | A15804 | 345 |

|        |        |     |        |        |     |
|--------|--------|-----|--------|--------|-----|
| A00190 | A15813 | 196 | A00190 | A15814 | 176 |
| A00190 | A15819 | 340 | A00190 | A15824 | 151 |
| A00190 | A15825 | 183 | A00190 | A15828 | 326 |
| A00190 | A15843 | 430 | A00190 | A15858 | 290 |
| A00190 | A15874 | 303 | A00190 | A15884 | 151 |
| A00190 | A15896 | 334 | A00190 | A15913 | 273 |
| A00190 | A15932 | 338 | A00190 | A15935 | 345 |
| A00190 | A15977 | 196 | A00190 | A15996 | 154 |
| A00190 | A16054 | 245 | A00190 | A16055 | 154 |
| A00190 | A16081 | 340 | A00190 | A16095 | 484 |
| A00190 | A16120 | 160 | A00190 | A16121 | 229 |
| A00190 | A16136 | 249 | A00190 | A16165 | 232 |
| A00190 | A16199 | 168 | A00190 | A16224 | 383 |
| A00190 | A16270 | 168 | A00190 | A16271 | 232 |
| A00190 | A16300 | 489 | A00190 | A16418 | 256 |
| A00190 | A16419 | 234 | A00190 | A16636 | 489 |
| A00190 | A16657 | 199 | A00190 | A16739 | 299 |
| A00190 | A16744 | 314 | A00190 | A16904 | 345 |
| A00190 | A16916 | 223 | A00190 | A16948 | 232 |
| A00190 | A16988 | 899 | A00190 | A16989 | 168 |
| A00190 | A17022 | 168 | A00190 | A17066 | 286 |
| A00190 | A17136 | 302 | A00190 | A17146 | 240 |
| A00190 | A17154 | 168 | A00191 | A00192 | 964 |
| A00191 | A00209 | 899 | A00191 | A00229 | 177 |
| A00191 | A00247 | 357 | A00191 | A00257 | 224 |
| A00191 | A00258 | 192 | A00191 | A00268 | 241 |
| A00191 | A00283 | 162 | A00191 | A00288 | 191 |
| A00191 | A00298 | 276 | A00191 | A00304 | 201 |
| A00191 | A00337 | 296 | A00191 | A00340 | 395 |
| A00191 | A00356 | 557 | A00191 | A00357 | 212 |
| A00191 | A00358 | 945 | A00191 | A00360 | 491 |
| A00191 | A00361 | 945 | A00191 | A00362 | 490 |
| A00191 | A00366 | 245 | A00191 | A00374 | 358 |
| A00191 | A00433 | 648 | A00191 | A00458 | 157 |
| A00191 | A00483 | 408 | A00191 | A00531 | 341 |
| A00191 | A00604 | 430 | A00191 | A00629 | 283 |
| A00191 | A00630 | 260 | A00191 | A00643 | 207 |
| A00191 | A00648 | 401 | A00191 | A00653 | 419 |
| A00191 | A00700 | 274 | A00191 | A00709 | 229 |
| A00191 | A00783 | 480 | A00191 | A00787 | 473 |
| A00191 | A00826 | 296 | A00191 | A00839 | 172 |
| A00191 | A00878 | 180 | A00191 | A00900 | 477 |
| A00191 | A00905 | 412 | A00191 | A00916 | 491 |
| A00191 | A00923 | 312 | A00191 | A00980 | 260 |
| A00191 | A00981 | 165 | A00191 | A00982 | 230 |
| A00191 | A01012 | 205 | A00191 | A01034 | 257 |

|        |        |     |        |        |     |
|--------|--------|-----|--------|--------|-----|
| A00191 | A01038 | 302 | A00191 | A01056 | 469 |
| A00191 | A01112 | 402 | A00191 | A01125 | 407 |
| A00191 | A01127 | 474 | A00191 | A01140 | 401 |
| A00191 | A01206 | 480 | A00191 | A01216 | 483 |
| A00191 | A01234 | 512 | A00191 | A01249 | 205 |
| A00191 | A01252 | 218 | A00191 | A01276 | 294 |
| A00191 | A01291 | 960 | A00191 | A01299 | 154 |
| A00191 | A01306 | 407 | A00191 | A01309 | 296 |
| A00191 | A01322 | 358 | A00191 | A01335 | 443 |
| A00191 | A01346 | 198 | A00191 | A01399 | 391 |
| A00191 | A01415 | 236 | A00191 | A01443 | 401 |
| A00191 | A01446 | 469 | A00191 | A01448 | 372 |
| A00191 | A01457 | 575 | A00191 | A01458 | 595 |
| A00191 | A01461 | 528 | A00191 | A01492 | 905 |
| A00191 | A01494 | 303 | A00191 | A01522 | 485 |
| A00191 | A01524 | 899 | A00191 | A01542 | 457 |
| A00191 | A01574 | 490 | A00191 | A01575 | 373 |
| A00191 | A01578 | 481 | A00191 | A01579 | 204 |
| A00191 | A01585 | 491 | A00191 | A01588 | 899 |
| A00191 | A01593 | 899 | A00191 | A01598 | 423 |
| A00191 | A01601 | 280 | A00191 | A01612 | 491 |
| A00191 | A01638 | 899 | A00191 | A01718 | 491 |
| A00191 | A01905 | 203 | A00191 | A01995 | 176 |
| A00191 | A02110 | 260 | A00191 | A02971 | 174 |
| A00191 | A03126 | 174 | A00191 | A03332 | 491 |
| A00191 | A03437 | 63  | A00191 | A03567 | 232 |
| A00191 | A03569 | 475 | A00191 | A03571 | 249 |
| A00191 | A03726 | 899 | A00191 | A03752 | 463 |
| A00191 | A03754 | 183 | A00191 | A03910 | 358 |
| A00191 | A03913 | 396 | A00191 | A03955 | 484 |
| A00191 | A04033 | 491 | A00191 | A04449 | 532 |
| A00191 | A04686 | 152 | A00191 | A04715 | 291 |
| A00191 | A04754 | 458 | A00191 | A04761 | 491 |
| A00191 | A05044 | 484 | A00191 | A05288 | 366 |
| A00191 | A05356 | 152 | A00191 | A05427 | 236 |
| A00191 | A05443 | 490 | A00191 | A05996 | 491 |
| A00191 | A06564 | 224 | A00191 | A06588 | 312 |
| A00191 | A06689 | 196 | A00191 | A06814 | 559 |
| A00191 | A06965 | 154 | A00191 | A07004 | 183 |
| A00191 | A07111 | 235 | A00191 | A07149 | 190 |
| A00191 | A07311 | 338 | A00191 | A07422 | 903 |
| A00191 | A07603 | 362 | A00191 | A07726 | 353 |
| A00191 | A07803 | 491 | A00191 | A07959 | 236 |
| A00191 | A08018 | 417 | A00191 | A08137 | 536 |
| A00191 | A08359 | 462 | A00191 | A08550 | 344 |
| A00191 | A08560 | 165 | A00191 | A08571 | 906 |

|        |        |     |        |        |     |
|--------|--------|-----|--------|--------|-----|
| A00191 | A08814 | 165 | A00191 | A08869 | 204 |
| A00191 | A08878 | 456 | A00191 | A08929 | 296 |
| A00191 | A09078 | 343 | A00191 | A09609 | 277 |
| A00191 | A10154 | 460 | A00191 | A10316 | 491 |
| A00191 | A10430 | 358 | A00191 | A10525 | 366 |
| A00191 | A10616 | 406 | A00191 | A11190 | 324 |
| A00191 | A11400 | 419 | A00191 | A11472 | 184 |
| A00191 | A11487 | 218 | A00191 | A11496 | 157 |
| A00191 | A11548 | 358 | A00191 | A11612 | 491 |
| A00191 | A11735 | 428 | A00191 | A11914 | 299 |
| A00191 | A11983 | 491 | A00191 | A12073 | 486 |
| A00191 | A12215 | 154 | A00191 | A12284 | 365 |
| A00191 | A12506 | 266 | A00191 | A12508 | 154 |
| A00191 | A12606 | 263 | A00191 | A12653 | 481 |
| A00191 | A12658 | 212 | A00191 | A12826 | 177 |
| A00191 | A12858 | 347 | A00191 | A12897 | 440 |
| A00191 | A13241 | 945 | A00191 | A13680 | 215 |
| A00191 | A13707 | 491 | A00191 | A13787 | 215 |
| A00191 | A13804 | 154 | A00191 | A13806 | 490 |
| A00191 | A13811 | 177 | A00191 | A13949 | 296 |
| A00191 | A13989 | 958 | A00191 | A13992 | 283 |
| A00191 | A14148 | 899 | A00191 | A14202 | 413 |
| A00191 | A14204 | 260 | A00191 | A14246 | 899 |
| A00191 | A14247 | 477 | A00191 | A14270 | 154 |
| A00191 | A14279 | 160 | A00191 | A14393 | 176 |
| A00191 | A14410 | 347 | A00191 | A14443 | 908 |
| A00191 | A14569 | 422 | A00191 | A14635 | 490 |
| A00191 | A14917 | 281 | A00191 | A15247 | 486 |
| A00191 | A15255 | 490 | A00191 | A15292 | 241 |
| A00191 | A15297 | 899 | A00191 | A15324 | 899 |
| A00191 | A15353 | 899 | A00191 | A15359 | 899 |
| A00191 | A15541 | 163 | A00191 | A15547 | 899 |
| A00191 | A15614 | 899 | A00191 | A15660 | 358 |
| A00191 | A15682 | 160 | A00191 | A15709 | 266 |
| A00191 | A15731 | 311 | A00191 | A15931 | 313 |
| A00191 | A16157 | 357 | A00191 | A16565 | 188 |
| A00191 | A16567 | 157 | A00191 | A16587 | 271 |
| A00191 | A16611 | 276 | A00191 | A16664 | 249 |
| A00191 | A16693 | 201 | A00191 | A16695 | 208 |
| A00191 | A16774 | 272 | A00191 | A16788 | 154 |
| A00191 | A16815 | 193 | A00191 | A16829 | 360 |
| A00191 | A16847 | 358 | A00192 | A00207 | 899 |
| A00192 | A00209 | 899 | A00192 | A00258 | 486 |
| A00192 | A00268 | 324 | A00192 | A00303 | 152 |
| A00192 | A00335 | 157 | A00192 | A00356 | 491 |
| A00192 | A00357 | 435 | A00192 | A00358 | 491 |

|        |        |     |        |        |     |
|--------|--------|-----|--------|--------|-----|
| A00192 | A00360 | 491 | A00192 | A00361 | 491 |
| A00192 | A00362 | 468 | A00192 | A00634 | 488 |
| A00192 | A00900 | 374 | A00192 | A00916 | 306 |
| A00192 | A00923 | 341 | A00192 | A01056 | 469 |
| A00192 | A01098 | 456 | A00192 | A01127 | 340 |
| A00192 | A01206 | 438 | A00192 | A01234 | 240 |
| A00192 | A01249 | 228 | A00192 | A01291 | 945 |
| A00192 | A01320 | 177 | A00192 | A01425 | 380 |
| A00192 | A01457 | 313 | A00192 | A01470 | 177 |
| A00192 | A01492 | 422 | A00192 | A01524 | 989 |
| A00192 | A01593 | 899 | A00192 | A01612 | 374 |
| A00192 | A01718 | 475 | A00192 | A02068 | 156 |
| A00192 | A02185 | 160 | A00192 | A02265 | 312 |
| A00192 | A02293 | 204 | A00192 | A03126 | 160 |
| A00192 | A03332 | 491 | A00192 | A03334 | 299 |
| A00192 | A03437 | 168 | A00192 | A03571 | 262 |
| A00192 | A03580 | 205 | A00192 | A03726 | 899 |
| A00192 | A03754 | 393 | A00192 | A03913 | 183 |
| A00192 | A03919 | 199 | A00192 | A04033 | 334 |
| A00192 | A04099 | 168 | A00192 | A04754 | 483 |
| A00192 | A04761 | 491 | A00192 | A05044 | 396 |
| A00192 | A05443 | 486 | A00192 | A05996 | 491 |
| A00192 | A06279 | 294 | A00192 | A06814 | 218 |
| A00192 | A07422 | 922 | A00192 | A08137 | 398 |
| A00192 | A09494 | 269 | A00192 | A10234 | 305 |
| A00192 | A11190 | 490 | A00192 | A11400 | 228 |
| A00192 | A11612 | 491 | A00192 | A11808 | 352 |
| A00192 | A12653 | 451 | A00192 | A12667 | 170 |
| A00192 | A13241 | 430 | A00192 | A13424 | 174 |
| A00192 | A13707 | 257 | A00192 | A13989 | 490 |
| A00192 | A13992 | 240 | A00192 | A15247 | 470 |
| A00192 | A15255 | 452 | A00192 | A15432 | 176 |
| A00192 | A15498 | 243 | A00193 | A00202 | 80  |
| A00193 | A00210 | 363 | A00193 | A00212 | 384 |
| A00193 | A00216 | 168 | A00193 | A00219 | 208 |
| A00193 | A00312 | 218 | A00193 | A00322 | 328 |
| A00193 | A00338 | 490 | A00193 | A00377 | 674 |
| A00193 | A00379 | 480 | A00193 | A00387 | 230 |
| A00193 | A00395 | 490 | A00193 | A00420 | 293 |
| A00193 | A00438 | 462 | A00193 | A00446 | 307 |
| A00193 | A00449 | 418 | A00193 | A00469 | 183 |
| A00193 | A00472 | 484 | A00193 | A00473 | 238 |
| A00193 | A00485 | 461 | A00193 | A00531 | 425 |
| A00193 | A00576 | 263 | A00193 | A00600 | 185 |
| A00193 | A00638 | 457 | A00193 | A00802 | 337 |
| A00193 | A00849 | 255 | A00193 | A00899 | 208 |



|        |        |     |        |        |     |
|--------|--------|-----|--------|--------|-----|
| A00193 | A00906 | 434 | A00193 | A00962 | 258 |
| A00193 | A01018 | 490 | A00193 | A01022 | 274 |
| A00193 | A01139 | 307 | A00193 | A01156 | 730 |
| A00193 | A01161 | 489 | A00193 | A01169 | 249 |
| A00193 | A01215 | 267 | A00193 | A01222 | 204 |
| A00193 | A01225 | 488 | A00193 | A01227 | 409 |
| A00193 | A01258 | 279 | A00193 | A01278 | 165 |
| A00193 | A01297 | 235 | A00193 | A01320 | 185 |
| A00193 | A01344 | 171 | A00193 | A01485 | 296 |
| A00193 | A01530 | 180 | A00193 | A01556 | 208 |
| A00193 | A01582 | 486 | A00193 | A01585 | 286 |
| A00193 | A01627 | 224 | A00193 | A01629 | 247 |
| A00193 | A01713 | 273 | A00193 | A01901 | 213 |
| A00193 | A02061 | 151 | A00193 | A02077 | 180 |
| A00193 | A02091 | 299 | A00193 | A02188 | 180 |
| A00193 | A02191 | 152 | A00193 | A02192 | 319 |
| A00193 | A02215 | 412 | A00193 | A02221 | 263 |
| A00193 | A02261 | 191 | A00193 | A02283 | 245 |
| A00193 | A02301 | 372 | A00193 | A02303 | 213 |
| A00193 | A02392 | 273 | A00193 | A02435 | 163 |
| A00193 | A02477 | 465 | A00193 | A02484 | 201 |
| A00193 | A02501 | 443 | A00193 | A02504 | 462 |
| A00193 | A02521 | 443 | A00193 | A02548 | 193 |
| A00193 | A02583 | 219 | A00193 | A02584 | 468 |
| A00193 | A02592 | 252 | A00193 | A02594 | 408 |
| A00193 | A02595 | 319 | A00193 | A02598 | 429 |
| A00193 | A02605 | 173 | A00193 | A02656 | 285 |
| A00193 | A02666 | 201 | A00193 | A02672 | 374 |
| A00193 | A02747 | 241 | A00193 | A02758 | 391 |
| A00193 | A02760 | 188 | A00193 | A02774 | 165 |
| A00193 | A02785 | 217 | A00193 | A02874 | 205 |
| A00193 | A03050 | 213 | A00193 | A03094 | 201 |
| A00193 | A03115 | 307 | A00193 | A03211 | 226 |
| A00193 | A03313 | 191 | A00193 | A03334 | 170 |
| A00193 | A03351 | 177 | A00193 | A03413 | 157 |
| A00193 | A03642 | 408 | A00193 | A03795 | 463 |
| A00193 | A03860 | 173 | A00193 | A03992 | 414 |
| A00193 | A04172 | 291 | A00193 | A04177 | 308 |
| A00193 | A04179 | 363 | A00193 | A04222 | 317 |
| A00193 | A04228 | 481 | A00193 | A04231 | 299 |
| A00193 | A04234 | 291 | A00193 | A04256 | 274 |
| A00193 | A04282 | 174 | A00193 | A04337 | 399 |
| A00193 | A04373 | 256 | A00193 | A04416 | 260 |
| A00193 | A04423 | 446 | A00193 | A04429 | 229 |
| A00193 | A04436 | 285 | A00193 | A04485 | 419 |
| A00193 | A04491 | 398 | A00193 | A04519 | 367 |

|        |        |     |        |        |     |
|--------|--------|-----|--------|--------|-----|
| A00193 | A04532 | 174 | A00193 | A04555 | 249 |
| A00193 | A04647 | 216 | A00193 | A04791 | 168 |
| A00193 | A04816 | 299 | A00193 | A04879 | 432 |
| A00193 | A05139 | 319 | A00193 | A05227 | 251 |
| A00193 | A05356 | 475 | A00193 | A05538 | 291 |
| A00193 | A05549 | 319 | A00193 | A05721 | 177 |
| A00193 | A05763 | 319 | A00193 | A05901 | 279 |
| A00193 | A06038 | 216 | A00193 | A06057 | 291 |
| A00193 | A06141 | 207 | A00193 | A06284 | 285 |
| A00193 | A06299 | 195 | A00193 | A06379 | 213 |
| A00193 | A06439 | 390 | A00193 | A06546 | 170 |
| A00193 | A06655 | 260 | A00193 | A06696 | 187 |
| A00193 | A07088 | 254 | A00193 | A07136 | 260 |
| A00193 | A07165 | 162 | A00193 | A07239 | 488 |
| A00193 | A07281 | 386 | A00193 | A07376 | 216 |
| A00193 | A07407 | 308 | A00193 | A07438 | 213 |
| A00193 | A07442 | 489 | A00193 | A07645 | 319 |
| A00193 | A07674 | 290 | A00193 | A07737 | 204 |
| A00193 | A07739 | 279 | A00193 | A08172 | 236 |
| A00193 | A09008 | 184 | A00193 | A09088 | 358 |
| A00193 | A09494 | 273 | A00193 | A10228 | 210 |
| A00193 | A10458 | 368 | A00193 | A10646 | 335 |
| A00193 | A10651 | 159 | A00193 | A10652 | 332 |
| A00193 | A10687 | 249 | A00193 | A10696 | 369 |
| A00193 | A10781 | 216 | A00193 | A11021 | 273 |
| A00193 | A11606 | 263 | A00193 | A11722 | 319 |
| A00193 | A12371 | 205 | A00193 | A12453 | 358 |
| A00193 | A13065 | 335 | A00193 | A13965 | 391 |
| A00193 | A14381 | 429 | A00193 | A14413 | 249 |
| A00193 | A14449 | 247 | A00193 | A15195 | 308 |
| A00193 | A15498 | 419 | A00193 | A15698 | 152 |
| A00193 | A15917 | 428 | A00193 | A16112 | 252 |
| A00193 | A17006 | 213 | A00193 | A17078 | 210 |
| A00194 | A00220 | 317 | A00194 | A00221 | 243 |
| A00194 | A00222 | 943 | A00194 | A00223 | 347 |
| A00194 | A00763 | 185 | A00194 | A01056 | 254 |
| A00194 | A01492 | 157 | A00194 | A01730 | 184 |
| A00194 | A07422 | 899 | A00194 | A08012 | 404 |
| A00194 | A13989 | 63  | A00195 | A00209 | 899 |
| A00195 | A00236 | 491 | A00195 | A00252 | 945 |
| A00195 | A00253 | 945 | A00195 | A00293 | 302 |
| A00195 | A00420 | 174 | A00195 | A00652 | 468 |
| A00195 | A01045 | 419 | A00195 | A01405 | 171 |
| A00195 | A01550 | 420 | A00195 | A01551 | 199 |
| A00195 | A01664 | 200 | A00195 | A01692 | 226 |
| A00195 | A02325 | 235 | A00195 | A02647 | 348 |

|        |        |     |        |        |     |
|--------|--------|-----|--------|--------|-----|
| A00195 | A03472 | 218 | A00195 | A03596 | 213 |
| A00195 | A04209 | 160 | A00195 | A04342 | 208 |
| A00195 | A05811 | 294 | A00195 | A08815 | 191 |
| A00195 | A08881 | 204 | A00195 | A10233 | 279 |
| A00195 | A10311 | 363 | A00195 | A11412 | 167 |
| A00195 | A11921 | 491 | A00195 | A13255 | 339 |
| A00195 | A14443 | 989 | A00195 | A16080 | 944 |
| A00195 | A16764 | 213 | A00196 | A00202 | 347 |
| A00196 | A00204 | 486 | A00196 | A00209 | 913 |
| A00196 | A00212 | 432 | A00196 | A00216 | 441 |
| A00196 | A00218 | 491 | A00196 | A00219 | 491 |
| A00196 | A00227 | 430 | A00196 | A00264 | 491 |
| A00196 | A00294 | 483 | A00196 | A00312 | 441 |
| A00196 | A00338 | 412 | A00196 | A00449 | 321 |
| A00196 | A00472 | 491 | A00196 | A00485 | 401 |
| A00196 | A00556 | 367 | A00196 | A00574 | 246 |
| A00196 | A00616 | 486 | A00196 | A00656 | 491 |
| A00196 | A00662 | 217 | A00196 | A00663 | 159 |
| A00196 | A00688 | 454 | A00196 | A00815 | 484 |
| A00196 | A00921 | 252 | A00196 | A00930 | 414 |
| A00196 | A01048 | 235 | A00196 | A01058 | 180 |
| A00196 | A01125 | 317 | A00196 | A01138 | 491 |
| A00196 | A01161 | 159 | A00196 | A01211 | 188 |
| A00196 | A01325 | 484 | A00196 | A01406 | 441 |
| A00196 | A01477 | 168 | A00196 | A01481 | 321 |
| A00196 | A01483 | 174 | A00196 | A01526 | 491 |
| A00196 | A01527 | 902 | A00196 | A01556 | 491 |
| A00196 | A01581 | 154 | A00196 | A01635 | 462 |
| A00196 | A01640 | 241 | A00196 | A01658 | 422 |
| A00196 | A01663 | 355 | A00196 | A01668 | 468 |
| A00196 | A01676 | 486 | A00196 | A01726 | 472 |
| A00196 | A01727 | 221 | A00196 | A01741 | 480 |
| A00196 | A01743 | 485 | A00196 | A01748 | 152 |
| A00196 | A01758 | 328 | A00196 | A01891 | 177 |
| A00196 | A01894 | 424 | A00196 | A01946 | 193 |
| A00196 | A01982 | 491 | A00196 | A02000 | 215 |
| A00196 | A02006 | 318 | A00196 | A02010 | 465 |
| A00196 | A02019 | 297 | A00196 | A02028 | 221 |
| A00196 | A02044 | 223 | A00196 | A02046 | 486 |
| A00196 | A02048 | 491 | A00196 | A02049 | 486 |
| A00196 | A02054 | 299 | A00196 | A02065 | 208 |
| A00196 | A02074 | 171 | A00196 | A02075 | 228 |
| A00196 | A02108 | 430 | A00196 | A02111 | 152 |
| A00196 | A02126 | 281 | A00196 | A02143 | 407 |
| A00196 | A02145 | 441 | A00196 | A02146 | 491 |
| A00196 | A02147 | 434 | A00196 | A02148 | 491 |

|        |        |     |        |        |     |
|--------|--------|-----|--------|--------|-----|
| A00196 | A02149 | 188 | A00196 | A02176 | 193 |
| A00196 | A02177 | 212 | A00196 | A02180 | 491 |
| A00196 | A02183 | 338 | A00196 | A02186 | 491 |
| A00196 | A02187 | 418 | A00196 | A02188 | 389 |
| A00196 | A02205 | 489 | A00196 | A02213 | 213 |
| A00196 | A02215 | 491 | A00196 | A02222 | 249 |
| A00196 | A02223 | 477 | A00196 | A02224 | 176 |
| A00196 | A02233 | 213 | A00196 | A02234 | 435 |
| A00196 | A02237 | 404 | A00196 | A02238 | 490 |
| A00196 | A02245 | 167 | A00196 | A02278 | 229 |
| A00196 | A02291 | 491 | A00196 | A02292 | 184 |
| A00196 | A02295 | 402 | A00196 | A02298 | 491 |
| A00196 | A02300 | 477 | A00196 | A02305 | 281 |
| A00196 | A02306 | 293 | A00196 | A02307 | 396 |
| A00196 | A02309 | 157 | A00196 | A02328 | 291 |
| A00196 | A02338 | 256 | A00196 | A02352 | 347 |
| A00196 | A02385 | 313 | A00196 | A02390 | 296 |
| A00196 | A02393 | 213 | A00196 | A02400 | 286 |
| A00196 | A02401 | 168 | A00196 | A02409 | 154 |
| A00196 | A02412 | 416 | A00196 | A02416 | 452 |
| A00196 | A02423 | 213 | A00196 | A02450 | 286 |
| A00196 | A02465 | 378 | A00196 | A02468 | 286 |
| A00196 | A02478 | 199 | A00196 | A02490 | 491 |
| A00196 | A02491 | 491 | A00196 | A02536 | 177 |
| A00196 | A02545 | 317 | A00196 | A02559 | 360 |
| A00196 | A02582 | 385 | A00196 | A02587 | 345 |
| A00196 | A02605 | 391 | A00196 | A02639 | 162 |
| A00196 | A02643 | 213 | A00196 | A02668 | 491 |
| A00196 | A02669 | 212 | A00196 | A02691 | 363 |
| A00196 | A02697 | 452 | A00196 | A02698 | 217 |
| A00196 | A02704 | 171 | A00196 | A02756 | 488 |
| A00196 | A02771 | 443 | A00196 | A02774 | 420 |
| A00196 | A02785 | 486 | A00196 | A02832 | 263 |
| A00196 | A02836 | 299 | A00196 | A02859 | 472 |
| A00196 | A02869 | 152 | A00196 | A02874 | 480 |
| A00196 | A02877 | 411 | A00196 | A02922 | 475 |
| A00196 | A02938 | 160 | A00196 | A02945 | 152 |
| A00196 | A02946 | 270 | A00196 | A02948 | 177 |
| A00196 | A02951 | 488 | A00196 | A02961 | 185 |
| A00196 | A02977 | 229 | A00196 | A02982 | 152 |
| A00196 | A03021 | 160 | A00196 | A03027 | 401 |
| A00196 | A03053 | 285 | A00196 | A03067 | 330 |
| A00196 | A03069 | 473 | A00196 | A03070 | 486 |
| A00196 | A03073 | 263 | A00196 | A03077 | 168 |
| A00196 | A03080 | 491 | A00196 | A03082 | 404 |
| A00196 | A03084 | 297 | A00196 | A03099 | 341 |

|        |        |     |        |        |     |
|--------|--------|-----|--------|--------|-----|
| A00196 | A03107 | 358 | A00196 | A03141 | 491 |
| A00196 | A03145 | 154 | A00196 | A03171 | 422 |
| A00196 | A03172 | 217 | A00196 | A03178 | 456 |
| A00196 | A03184 | 208 | A00196 | A03186 | 491 |
| A00196 | A03275 | 408 | A00196 | A03310 | 226 |
| A00196 | A03314 | 226 | A00196 | A03346 | 490 |
| A00196 | A03347 | 491 | A00196 | A03348 | 235 |
| A00196 | A03351 | 480 | A00196 | A03353 | 489 |
| A00196 | A03358 | 394 | A00196 | A03361 | 490 |
| A00196 | A03369 | 491 | A00196 | A03370 | 491 |
| A00196 | A03371 | 491 | A00196 | A03373 | 491 |
| A00196 | A03374 | 251 | A00196 | A03378 | 483 |
| A00196 | A03379 | 491 | A00196 | A03390 | 167 |
| A00196 | A03391 | 157 | A00196 | A03392 | 302 |
| A00196 | A03394 | 302 | A00196 | A03396 | 168 |
| A00196 | A03397 | 433 | A00196 | A03402 | 488 |
| A00196 | A03403 | 229 | A00196 | A03408 | 483 |
| A00196 | A03414 | 490 | A00196 | A03479 | 271 |
| A00196 | A03532 | 187 | A00196 | A03634 | 479 |
| A00196 | A03639 | 424 | A00196 | A03661 | 171 |
| A00196 | A03719 | 201 | A00196 | A03722 | 245 |
| A00196 | A03733 | 457 | A00196 | A03744 | 313 |
| A00196 | A03755 | 274 | A00196 | A03773 | 360 |
| A00196 | A03824 | 232 | A00196 | A03906 | 491 |
| A00196 | A03914 | 469 | A00196 | A03915 | 375 |
| A00196 | A03936 | 357 | A00196 | A03944 | 213 |
| A00196 | A03976 | 430 | A00196 | A04048 | 193 |
| A00196 | A04051 | 491 | A00196 | A04070 | 319 |
| A00196 | A04080 | 307 | A00196 | A04086 | 157 |
| A00196 | A04092 | 306 | A00196 | A04152 | 407 |
| A00196 | A04159 | 438 | A00196 | A04160 | 168 |
| A00196 | A04193 | 468 | A00196 | A04260 | 213 |
| A00196 | A04271 | 159 | A00196 | A04278 | 396 |
| A00196 | A04327 | 340 | A00196 | A04333 | 176 |
| A00196 | A04338 | 235 | A00196 | A04342 | 435 |
| A00196 | A04344 | 286 | A00196 | A04351 | 193 |
| A00196 | A04353 | 235 | A00196 | A04366 | 183 |
| A00196 | A04391 | 243 | A00196 | A04409 | 333 |
| A00196 | A04437 | 288 | A00196 | A04449 | 188 |
| A00196 | A04456 | 235 | A00196 | A04457 | 199 |
| A00196 | A04492 | 179 | A00196 | A04607 | 337 |
| A00196 | A04608 | 452 | A00196 | A04609 | 409 |
| A00196 | A04614 | 318 | A00196 | A04618 | 314 |
| A00196 | A04672 | 213 | A00196 | A04742 | 177 |
| A00196 | A04763 | 386 | A00196 | A04830 | 408 |
| A00196 | A04875 | 263 | A00196 | A04882 | 235 |

|        |        |     |        |        |     |
|--------|--------|-----|--------|--------|-----|
| A00196 | A04923 | 213 | A00196 | A04989 | 479 |
| A00196 | A04992 | 168 | A00196 | A05113 | 457 |
| A00196 | A05117 | 341 | A00196 | A05131 | 302 |
| A00196 | A05136 | 430 | A00196 | A05264 | 165 |
| A00196 | A05309 | 303 | A00196 | A05349 | 463 |
| A00196 | A05356 | 462 | A00196 | A05373 | 187 |
| A00196 | A05427 | 404 | A00196 | A05469 | 457 |
| A00196 | A05494 | 343 | A00196 | A05521 | 270 |
| A00196 | A05533 | 347 | A00196 | A05543 | 213 |
| A00196 | A05578 | 355 | A00196 | A05612 | 154 |
| A00196 | A05731 | 317 | A00196 | A05858 | 213 |
| A00196 | A05901 | 160 | A00196 | A05920 | 168 |
| A00196 | A05999 | 302 | A00196 | A06033 | 213 |
| A00196 | A06346 | 207 | A00196 | A06358 | 176 |
| A00196 | A06415 | 274 | A00196 | A06463 | 191 |
| A00196 | A06473 | 191 | A00196 | A06607 | 447 |
| A00196 | A06642 | 451 | A00196 | A06681 | 235 |
| A00196 | A06732 | 235 | A00196 | A06782 | 177 |
| A00196 | A06847 | 200 | A00196 | A06935 | 213 |
| A00196 | A07049 | 270 | A00196 | A07141 | 380 |
| A00196 | A07163 | 445 | A00196 | A07165 | 205 |
| A00196 | A07200 | 272 | A00196 | A07217 | 398 |
| A00196 | A07218 | 491 | A00196 | A07263 | 270 |
| A00196 | A07273 | 281 | A00196 | A07420 | 199 |
| A00196 | A07440 | 226 | A00196 | A07620 | 310 |
| A00196 | A07754 | 218 | A00196 | A07765 | 213 |
| A00196 | A07771 | 167 | A00196 | A08044 | 199 |
| A00196 | A08192 | 202 | A00196 | A08200 | 330 |
| A00196 | A08222 | 235 | A00196 | A08288 | 199 |
| A00196 | A08300 | 168 | A00196 | A08404 | 271 |
| A00196 | A08632 | 154 | A00196 | A08707 | 449 |
| A00196 | A08755 | 187 | A00196 | A08861 | 243 |
| A00196 | A08926 | 385 | A00196 | A09028 | 152 |
| A00196 | A09084 | 154 | A00196 | A09090 | 168 |
| A00196 | A09145 | 167 | A00196 | A09200 | 324 |
| A00196 | A09266 | 344 | A00196 | A09480 | 243 |
| A00196 | A09939 | 238 | A00196 | A09983 | 251 |
| A00196 | A10020 | 213 | A00196 | A10074 | 235 |
| A00196 | A10080 | 199 | A00196 | A10148 | 154 |
| A00196 | A10486 | 235 | A00196 | A10625 | 232 |
| A00196 | A10639 | 154 | A00196 | A10698 | 199 |
| A00196 | A10943 | 154 | A00196 | A11101 | 159 |
| A00196 | A11231 | 270 | A00196 | A11313 | 368 |
| A00196 | A11334 | 157 | A00196 | A11370 | 235 |
| A00196 | A11371 | 235 | A00196 | A11748 | 154 |
| A00196 | A11897 | 314 | A00196 | A12179 | 310 |

|        |        |     |        |        |     |
|--------|--------|-----|--------|--------|-----|
| A00196 | A12183 | 270 | A00196 | A12459 | 177 |
| A00196 | A12605 | 177 | A00196 | A12674 | 168 |
| A00196 | A12824 | 310 | A00196 | A12897 | 483 |
| A00196 | A12927 | 274 | A00196 | A12949 | 177 |
| A00196 | A13063 | 177 | A00196 | A13734 | 456 |
| A00196 | A13879 | 330 | A00196 | A13886 | 207 |
| A00196 | A13926 | 193 | A00196 | A14047 | 199 |
| A00196 | A14194 | 328 | A00196 | A14198 | 296 |
| A00196 | A14399 | 288 | A00196 | A14423 | 163 |
| A00196 | A14430 | 386 | A00196 | A14443 | 276 |
| A00196 | A14470 | 177 | A00196 | A15137 | 235 |
| A00196 | A15282 | 368 | A00196 | A15356 | 180 |
| A00196 | A15649 | 361 | A00196 | A15809 | 462 |
| A00196 | A15914 | 270 | A00196 | A16051 | 260 |
| A00196 | A16636 | 491 | A00196 | A16862 | 177 |
| A00197 | A00245 | 179 | A00197 | A00705 | 243 |
| A00197 | A01060 | 324 | A00197 | A01173 | 303 |
| A00197 | A01252 | 324 | A00197 | A01352 | 172 |
| A00197 | A01610 | 154 | A00197 | A01673 | 324 |
| A00197 | A02859 | 180 | A00197 | A02983 | 185 |
| A00197 | A03748 | 462 | A00197 | A03851 | 191 |
| A00197 | A03910 | 151 | A00197 | A06941 | 324 |
| A00197 | A08484 | 324 | A00197 | A08785 | 324 |
| A00197 | A09734 | 368 | A00197 | A11279 | 384 |
| A00197 | A11287 | 324 | A00197 | A11542 | 445 |
| A00197 | A12289 | 401 | A00197 | A13222 | 324 |
| A00197 | A13987 | 486 | A00197 | A14010 | 368 |
| A00197 | A14122 | 218 | A00197 | A14182 | 307 |
| A00197 | A14258 | 324 | A00197 | A14378 | 319 |
| A00197 | A14392 | 236 | A00197 | A14408 | 380 |
| A00197 | A14511 | 276 | A00197 | A14661 | 325 |
| A00197 | A14711 | 307 | A00197 | A14844 | 324 |
| A00197 | A14877 | 324 | A00197 | A15292 | 369 |
| A00197 | A15301 | 353 | A00197 | A15312 | 377 |
| A00197 | A15313 | 432 | A00197 | A15352 | 450 |
| A00197 | A15366 | 411 | A00197 | A15396 | 299 |
| A00197 | A15404 | 347 | A00197 | A15413 | 243 |
| A00197 | A15419 | 236 | A00197 | A15432 | 355 |
| A00197 | A15435 | 328 | A00197 | A15447 | 230 |
| A00197 | A15451 | 337 | A00197 | A15452 | 205 |
| A00197 | A15462 | 241 | A00197 | A15463 | 369 |
| A00197 | A15495 | 173 | A00197 | A15513 | 329 |
| A00197 | A15669 | 278 | A00197 | A15804 | 357 |
| A00197 | A15833 | 372 | A00197 | A17061 | 324 |
| A00198 | A00208 | 196 | A00198 | A00210 | 581 |
| A00198 | A00224 | 907 | A00198 | A00228 | 224 |

|        |        |     |        |        |     |
|--------|--------|-----|--------|--------|-----|
| A00198 | A00230 | 899 | A00198 | A00239 | 616 |
| A00198 | A00240 | 616 | A00198 | A00241 | 616 |
| A00198 | A00242 | 489 | A00198 | A00243 | 615 |
| A00198 | A00244 | 467 | A00198 | A00261 | 616 |
| A00198 | A00263 | 249 | A00198 | A00330 | 363 |
| A00198 | A00451 | 260 | A00198 | A00472 | 443 |
| A00198 | A00625 | 319 | A00198 | A00865 | 152 |
| A00198 | A00931 | 417 | A00198 | A01169 | 443 |
| A00198 | A01198 | 899 | A00198 | A01512 | 899 |
| A00198 | A01524 | 407 | A00198 | A01527 | 995 |
| A00198 | A01558 | 899 | A00198 | A01561 | 899 |
| A00198 | A01574 | 201 | A00198 | A01588 | 899 |
| A00198 | A01596 | 616 | A00198 | A01615 | 989 |
| A00198 | A01623 | 443 | A00198 | A01718 | 296 |
| A00198 | A01844 | 899 | A00198 | A01920 | 614 |
| A00198 | A01974 | 491 | A00198 | A02674 | 188 |
| A00198 | A02942 | 899 | A00198 | A02968 | 899 |
| A00198 | A03314 | 218 | A00198 | A03512 | 246 |
| A00198 | A03536 | 481 | A00198 | A03654 | 159 |
| A00198 | A03762 | 151 | A00198 | A03832 | 460 |
| A00198 | A04155 | 199 | A00198 | A04226 | 256 |
| A00198 | A04449 | 335 | A00198 | A05026 | 168 |
| A00198 | A05155 | 443 | A00198 | A05431 | 561 |
| A00198 | A06191 | 396 | A00198 | A06379 | 152 |
| A00198 | A07004 | 243 | A00198 | A07242 | 281 |
| A00198 | A07311 | 899 | A00198 | A07422 | 899 |
| A00198 | A08118 | 598 | A00198 | A09596 | 205 |
| A00198 | A10580 | 204 | A00198 | A12204 | 232 |
| A00198 | A12365 | 485 | A00198 | A13250 | 291 |
| A00198 | A13369 | 462 | A00198 | A14072 | 436 |
| A00198 | A14153 | 321 | A00198 | A14202 | 451 |
| A00198 | A14204 | 491 | A00198 | A14299 | 616 |
| A00198 | A14444 | 903 | A00198 | A14704 | 394 |
| A00198 | A14705 | 157 | A00198 | A14777 | 243 |
| A00198 | A15347 | 348 | A00198 | A15665 | 232 |
| A00198 | A15712 | 152 | A00198 | A15726 | 899 |
| A00198 | A16764 | 456 | A00199 | A00209 | 899 |
| A00199 | A00371 | 179 | A00199 | A00382 | 372 |
| A00199 | A00430 | 363 | A00199 | A00444 | 372 |
| A00199 | A00489 | 372 | A00199 | A00970 | 454 |
| A00199 | A01115 | 402 | A00199 | A01119 | 319 |
| A00199 | A01150 | 176 | A00199 | A01539 | 372 |
| A00199 | A01684 | 191 | A00199 | A02192 | 207 |
| A00199 | A02352 | 154 | A00199 | A03446 | 372 |
| A00199 | A03747 | 277 | A00199 | A04191 | 340 |
| A00199 | A04192 | 301 | A00199 | A05168 | 218 |



|        |        |     |        |        |     |
|--------|--------|-----|--------|--------|-----|
| A00199 | A05995 | 207 | A00199 | A06084 | 217 |
| A00199 | A07247 | 198 | A00199 | A08102 | 174 |
| A00199 | A08524 | 408 | A00199 | A08546 | 372 |
| A00199 | A08570 | 234 | A00199 | A09210 | 218 |
| A00199 | A09423 | 183 | A00199 | A10519 | 404 |
| A00199 | A10532 | 730 | A00199 | A10589 | 417 |
| A00199 | A11240 | 583 | A00199 | A12818 | 334 |
| A00199 | A12839 | 314 | A00199 | A14132 | 218 |
| A00199 | A14482 | 152 | A00199 | A14709 | 179 |
| A00199 | A15698 | 502 | A00199 | A16690 | 213 |
| A00199 | A17085 | 177 | A00200 | A00201 | 945 |
| A00200 | A00209 | 941 | A00200 | A00212 | 274 |
| A00200 | A00218 | 183 | A00200 | A00219 | 408 |
| A00200 | A00224 | 932 | A00200 | A00246 | 899 |
| A00200 | A00256 | 491 | A00200 | A00258 | 408 |
| A00200 | A00264 | 944 | A00200 | A00382 | 305 |
| A00200 | A00455 | 473 | A00200 | A00472 | 273 |
| A00200 | A00634 | 318 | A00200 | A00643 | 162 |
| A00200 | A00763 | 452 | A00200 | A00822 | 462 |
| A00200 | A00887 | 899 | A00200 | A01088 | 942 |
| A00200 | A01274 | 160 | A00200 | A01299 | 427 |
| A00200 | A01385 | 443 | A00200 | A01419 | 462 |
| A00200 | A01524 | 899 | A00200 | A01527 | 899 |
| A00200 | A01558 | 899 | A00200 | A01561 | 899 |
| A00200 | A01571 | 374 | A00200 | A01576 | 160 |
| A00200 | A01588 | 899 | A00200 | A01600 | 470 |
| A00200 | A01632 | 428 | A00200 | A01733 | 238 |
| A00200 | A01741 | 177 | A00200 | A01743 | 355 |
| A00200 | A01747 | 156 | A00200 | A01767 | 389 |
| A00200 | A01844 | 899 | A00200 | A01905 | 937 |
| A00200 | A01976 | 318 | A00200 | A02111 | 405 |
| A00200 | A02143 | 212 | A00200 | A02220 | 168 |
| A00200 | A02298 | 208 | A00200 | A02411 | 899 |
| A00200 | A02427 | 238 | A00200 | A02470 | 291 |
| A00200 | A02483 | 288 | A00200 | A02490 | 301 |
| A00200 | A02501 | 198 | A00200 | A02564 | 465 |
| A00200 | A02697 | 200 | A00200 | A02698 | 398 |
| A00200 | A02711 | 246 | A00200 | A02738 | 213 |
| A00200 | A02835 | 316 | A00200 | A02878 | 462 |
| A00200 | A02968 | 899 | A00200 | A03080 | 185 |
| A00200 | A03105 | 236 | A00200 | A03107 | 899 |
| A00200 | A03121 | 446 | A00200 | A03211 | 435 |
| A00200 | A03221 | 188 | A00200 | A03304 | 154 |
| A00200 | A03451 | 215 | A00200 | A03591 | 579 |
| A00200 | A03661 | 240 | A00200 | A03928 | 215 |
| A00200 | A03961 | 151 | A00200 | A03968 | 326 |

|        |        |     |        |        |     |
|--------|--------|-----|--------|--------|-----|
| A00200 | A04044 | 271 | A00200 | A04047 | 301 |
| A00200 | A04077 | 188 | A00200 | A04159 | 188 |
| A00200 | A04193 | 191 | A00200 | A04250 | 302 |
| A00200 | A04289 | 321 | A00200 | A04309 | 229 |
| A00200 | A04329 | 205 | A00200 | A04382 | 188 |
| A00200 | A04507 | 236 | A00200 | A04525 | 901 |
| A00200 | A04527 | 899 | A00200 | A04535 | 229 |
| A00200 | A04543 | 179 | A00200 | A04545 | 162 |
| A00200 | A04928 | 335 | A00200 | A05247 | 400 |
| A00200 | A05288 | 705 | A00200 | A05346 | 177 |
| A00200 | A05399 | 200 | A00200 | A05432 | 278 |
| A00200 | A05521 | 271 | A00200 | A05621 | 199 |
| A00200 | A05660 | 162 | A00200 | A05701 | 154 |
| A00200 | A05795 | 425 | A00200 | A05869 | 210 |
| A00200 | A06151 | 191 | A00200 | A06153 | 345 |
| A00200 | A06154 | 215 | A00200 | A06181 | 188 |
| A00200 | A06346 | 463 | A00200 | A06581 | 404 |
| A00200 | A06588 | 462 | A00200 | A06597 | 414 |
| A00200 | A06607 | 157 | A00200 | A06608 | 945 |
| A00200 | A06609 | 899 | A00200 | A06628 | 436 |
| A00200 | A06650 | 491 | A00200 | A06711 | 218 |
| A00200 | A06712 | 200 | A00200 | A06841 | 168 |
| A00200 | A06885 | 271 | A00200 | A06903 | 195 |
| A00200 | A06998 | 200 | A00200 | A07218 | 341 |
| A00200 | A07311 | 899 | A00200 | A07339 | 200 |
| A00200 | A07676 | 271 | A00200 | A07704 | 307 |
| A00200 | A07705 | 355 | A00200 | A07706 | 308 |
| A00200 | A07828 | 215 | A00200 | A08128 | 271 |
| A00200 | A08203 | 247 | A00200 | A08224 | 168 |
| A00200 | A08292 | 281 | A00200 | A08611 | 271 |
| A00200 | A08629 | 215 | A00200 | A08679 | 216 |
| A00200 | A08738 | 427 | A00200 | A08869 | 486 |
| A00200 | A09391 | 899 | A00200 | A09409 | 200 |
| A00200 | A09456 | 271 | A00200 | A09470 | 408 |
| A00200 | A09518 | 188 | A00200 | A09705 | 340 |
| A00200 | A10174 | 899 | A00200 | A10218 | 899 |
| A00200 | A10290 | 271 | A00200 | A10449 | 162 |
| A00200 | A10450 | 399 | A00200 | A10900 | 236 |
| A00200 | A11056 | 236 | A00200 | A11300 | 446 |
| A00200 | A11310 | 208 | A00200 | A11320 | 227 |
| A00200 | A11510 | 271 | A00200 | A11621 | 207 |
| A00200 | A11970 | 271 | A00200 | A11983 | 294 |
| A00200 | A12134 | 271 | A00200 | A12135 | 271 |
| A00200 | A12298 | 177 | A00200 | A12373 | 945 |
| A00200 | A12388 | 271 | A00200 | A12552 | 321 |
| A00200 | A12797 | 271 | A00200 | A12803 | 271 |

|        |        |     |        |        |     |
|--------|--------|-----|--------|--------|-----|
| A00200 | A12878 | 188 | A00200 | A12897 | 199 |
| A00200 | A12898 | 215 | A00200 | A12984 | 236 |
| A00200 | A13173 | 200 | A00200 | A14198 | 208 |
| A00200 | A14330 | 201 | A00200 | A14444 | 899 |
| A00200 | A14605 | 151 | A00200 | A14660 | 466 |
| A00200 | A14883 | 399 | A00200 | A15297 | 319 |
| A00200 | A15570 | 188 | A00200 | A15847 | 177 |
| A00200 | A15981 | 196 | A00200 | A16140 | 271 |
| A00200 | A16168 | 271 | A00200 | A16169 | 271 |
| A00200 | A16172 | 271 | A00200 | A16175 | 271 |
| A00200 | A16178 | 271 | A00200 | A16179 | 271 |
| A00200 | A16184 | 271 | A00200 | A16185 | 271 |
| A00200 | A16186 | 271 | A00200 | A16636 | 441 |
| A00200 | A16648 | 188 | A00201 | A00209 | 486 |
| A00201 | A00256 | 489 | A00201 | A00263 | 380 |
| A00201 | A00519 | 491 | A00201 | A00561 | 486 |
| A00201 | A00605 | 457 | A00201 | A00621 | 274 |
| A00201 | A00653 | 616 | A00201 | A00658 | 151 |
| A00201 | A00711 | 491 | A00201 | A00724 | 708 |
| A00201 | A00736 | 703 | A00201 | A00769 | 616 |
| A00201 | A00783 | 488 | A00201 | A00785 | 491 |
| A00201 | A00810 | 414 | A00201 | A00824 | 491 |
| A00201 | A00841 | 708 | A00201 | A00865 | 469 |
| A00201 | A00871 | 491 | A00201 | A00909 | 708 |
| A00201 | A00922 | 616 | A00201 | A00927 | 400 |
| A00201 | A00934 | 398 | A00201 | A00953 | 228 |
| A00201 | A00983 | 491 | A00201 | A00986 | 488 |
| A00201 | A01006 | 708 | A00201 | A01017 | 341 |
| A00201 | A01027 | 616 | A00201 | A01069 | 491 |
| A00201 | A01088 | 470 | A00201 | A01101 | 469 |
| A00201 | A01150 | 491 | A00201 | A01208 | 393 |
| A00201 | A01221 | 438 | A00201 | A01232 | 616 |
| A00201 | A01242 | 335 | A00201 | A01293 | 708 |
| A00201 | A01305 | 157 | A00201 | A01311 | 491 |
| A00201 | A01346 | 229 | A00201 | A01431 | 291 |
| A00201 | A01439 | 353 | A00201 | A01458 | 228 |
| A00201 | A01492 | 491 | A00201 | A01512 | 899 |
| A00201 | A01538 | 213 | A00201 | A01572 | 171 |
| A00201 | A01577 | 491 | A00201 | A01596 | 544 |
| A00201 | A01598 | 414 | A00201 | A01613 | 435 |
| A00201 | A01727 | 430 | A00201 | A01748 | 490 |
| A00201 | A01764 | 232 | A00201 | A01765 | 176 |
| A00201 | A01775 | 434 | A00201 | A01778 | 187 |
| A00201 | A01779 | 348 | A00201 | A01780 | 296 |
| A00201 | A01844 | 899 | A00201 | A01894 | 644 |
| A00201 | A02235 | 299 | A00201 | A02321 | 218 |

|        |        |     |        |        |     |
|--------|--------|-----|--------|--------|-----|
| A00201 | A02479 | 156 | A00201 | A03121 | 489 |
| A00201 | A03169 | 210 | A00201 | A03291 | 258 |
| A00201 | A03438 | 477 | A00201 | A03454 | 490 |
| A00201 | A03557 | 208 | A00201 | A03608 | 477 |
| A00201 | A03677 | 323 | A00201 | A03809 | 291 |
| A00201 | A03901 | 210 | A00201 | A04885 | 303 |
| A00201 | A04895 | 283 | A00201 | A05009 | 473 |
| A00201 | A05227 | 604 | A00201 | A05288 | 491 |
| A00201 | A05318 | 299 | A00201 | A05432 | 446 |
| A00201 | A05702 | 249 | A00201 | A05742 | 486 |
| A00201 | A05795 | 475 | A00201 | A05853 | 160 |
| A00201 | A06287 | 484 | A00201 | A06543 | 488 |
| A00201 | A06608 | 937 | A00201 | A06609 | 201 |
| A00201 | A06637 | 491 | A00201 | A06650 | 491 |
| A00201 | A06783 | 156 | A00201 | A06795 | 475 |
| A00201 | A07339 | 368 | A00201 | A07360 | 380 |
| A00201 | A07744 | 491 | A00201 | A07881 | 616 |
| A00201 | A07911 | 708 | A00201 | A08098 | 491 |
| A00201 | A08178 | 486 | A00201 | A08228 | 616 |
| A00201 | A08491 | 480 | A00201 | A08548 | 615 |
| A00201 | A08763 | 480 | A00201 | A09210 | 216 |
| A00201 | A10580 | 454 | A00201 | A10851 | 163 |
| A00201 | A11296 | 191 | A00201 | A11300 | 353 |
| A00201 | A11326 | 180 | A00201 | A11381 | 317 |
| A00201 | A11387 | 272 | A00201 | A11555 | 246 |
| A00201 | A11560 | 288 | A00201 | A11907 | 223 |
| A00201 | A12373 | 945 | A00201 | A13773 | 185 |
| A00201 | A13989 | 279 | A00201 | A14083 | 491 |
| A00201 | A14330 | 466 | A00201 | A14443 | 263 |
| A00201 | A14605 | 254 | A00201 | A14633 | 290 |
| A00201 | A14699 | 616 | A00201 | A14778 | 616 |
| A00201 | A15375 | 463 | A00201 | A15660 | 490 |
| A00201 | A15684 | 491 | A00201 | A15746 | 480 |
| A00201 | A15937 | 457 | A00201 | A16048 | 458 |
| A00201 | A16081 | 433 | A00201 | A16104 | 185 |
| A00201 | A16912 | 213 | A00202 | A00209 | 900 |
| A00202 | A00219 | 177 | A00202 | A00259 | 259 |
| A00202 | A00264 | 351 | A00202 | A00265 | 483 |
| A00202 | A00338 | 439 | A00202 | A00420 | 303 |
| A00202 | A00485 | 174 | A00202 | A00524 | 188 |
| A00202 | A00571 | 177 | A00202 | A00849 | 269 |
| A00202 | A00878 | 406 | A00202 | A01022 | 420 |
| A00202 | A01026 | 152 | A00202 | A01157 | 165 |
| A00202 | A01161 | 483 | A00202 | A01481 | 185 |
| A00202 | A01524 | 927 | A00202 | A01547 | 317 |
| A00202 | A01566 | 265 | A00202 | A01582 | 486 |

|        |        |     |        |        |     |
|--------|--------|-----|--------|--------|-----|
| A00202 | A01629 | 258 | A00202 | A01632 | 419 |
| A00202 | A01730 | 185 | A00202 | A01741 | 340 |
| A00202 | A01743 | 243 | A00202 | A01755 | 408 |
| A00202 | A01774 | 302 | A00202 | A01877 | 399 |
| A00202 | A01896 | 176 | A00202 | A01916 | 188 |
| A00202 | A01931 | 470 | A00202 | A01936 | 193 |
| A00202 | A01941 | 329 | A00202 | A01957 | 413 |
| A00202 | A02033 | 279 | A00202 | A02044 | 160 |
| A00202 | A02045 | 362 | A00202 | A02048 | 307 |
| A00202 | A02049 | 319 | A00202 | A02068 | 168 |
| A00202 | A02072 | 429 | A00202 | A02091 | 306 |
| A00202 | A02110 | 251 | A00202 | A02144 | 160 |
| A00202 | A02170 | 176 | A00202 | A02174 | 184 |
| A00202 | A02179 | 265 | A00202 | A02192 | 479 |
| A00202 | A02221 | 171 | A00202 | A02250 | 159 |
| A00202 | A02278 | 296 | A00202 | A02301 | 157 |
| A00202 | A02303 | 391 | A00202 | A02310 | 436 |
| A00202 | A02318 | 417 | A00202 | A02376 | 228 |
| A00202 | A02392 | 279 | A00202 | A02429 | 184 |
| A00202 | A02459 | 160 | A00202 | A02466 | 457 |
| A00202 | A02467 | 374 | A00202 | A02471 | 249 |
| A00202 | A02477 | 489 | A00202 | A02495 | 302 |
| A00202 | A02501 | 491 | A00202 | A02505 | 262 |
| A00202 | A02525 | 163 | A00202 | A02531 | 202 |
| A00202 | A02532 | 422 | A00202 | A02568 | 294 |
| A00202 | A02583 | 355 | A00202 | A02621 | 369 |
| A00202 | A02666 | 208 | A00202 | A02672 | 423 |
| A00202 | A02758 | 185 | A00202 | A02760 | 404 |
| A00202 | A02773 | 279 | A00202 | A02787 | 185 |
| A00202 | A02814 | 251 | A00202 | A02816 | 301 |
| A00202 | A02817 | 154 | A00202 | A02830 | 333 |
| A00202 | A02837 | 218 | A00202 | A02874 | 296 |
| A00202 | A02924 | 466 | A00202 | A02927 | 160 |
| A00202 | A03076 | 185 | A00202 | A03080 | 424 |
| A00202 | A03094 | 340 | A00202 | A03112 | 414 |
| A00202 | A03211 | 323 | A00202 | A03276 | 340 |
| A00202 | A03377 | 340 | A00202 | A03576 | 385 |
| A00202 | A03642 | 314 | A00202 | A03798 | 263 |
| A00202 | A03857 | 326 | A00202 | A03904 | 185 |
| A00202 | A04087 | 221 | A00202 | A04172 | 297 |
| A00202 | A04229 | 343 | A00202 | A04256 | 152 |
| A00202 | A04333 | 356 | A00202 | A04418 | 391 |
| A00202 | A04423 | 219 | A00202 | A04477 | 430 |
| A00202 | A04479 | 306 | A00202 | A04491 | 195 |
| A00202 | A04493 | 152 | A00202 | A04548 | 165 |
| A00202 | A04710 | 245 | A00202 | A04763 | 228 |

|        |        |     |        |        |     |
|--------|--------|-----|--------|--------|-----|
| A00202 | A04816 | 306 | A00202 | A04942 | 350 |
| A00202 | A05184 | 198 | A00202 | A05259 | 221 |
| A00202 | A05260 | 416 | A00202 | A05467 | 208 |
| A00202 | A05472 | 267 | A00202 | A05736 | 229 |
| A00202 | A06126 | 340 | A00202 | A06400 | 429 |
| A00202 | A06620 | 171 | A00202 | A06648 | 335 |
| A00202 | A06654 | 185 | A00202 | A06722 | 418 |
| A00202 | A07218 | 479 | A00202 | A07442 | 395 |
| A00202 | A08694 | 407 | A00202 | A08718 | 472 |
| A00202 | A09149 | 262 | A00202 | A09243 | 251 |
| A00202 | A09340 | 163 | A00202 | A09394 | 212 |
| A00202 | A09464 | 185 | A00202 | A09507 | 344 |
| A00202 | A09573 | 205 | A00202 | A09777 | 267 |
| A00202 | A09978 | 201 | A00202 | A10033 | 326 |
| A00202 | A10071 | 314 | A00202 | A10156 | 363 |
| A00202 | A10731 | 418 | A00202 | A11211 | 274 |
| A00202 | A11911 | 358 | A00202 | A12654 | 241 |
| A00202 | A13397 | 165 | A00202 | A14060 | 195 |
| A00202 | A14381 | 234 | A00202 | A14410 | 168 |
| A00202 | A14498 | 486 | A00202 | A14521 | 151 |
| A00202 | A14589 | 481 | A00202 | A14643 | 439 |
| A00202 | A14648 | 207 | A00202 | A14886 | 188 |
| A00202 | A15422 | 173 | A00202 | A15911 | 160 |
| A00202 | A15917 | 433 | A00202 | A16257 | 374 |
| A00202 | A16739 | 185 | A00202 | A16744 | 193 |
| A00203 | A00209 | 899 | A00203 | A00223 | 316 |
| A00203 | A00302 | 259 | A00203 | A00501 | 360 |
| A00203 | A00518 | 151 | A00203 | A00559 | 152 |
| A00203 | A00605 | 483 | A00203 | A00626 | 183 |
| A00203 | A00648 | 491 | A00203 | A00713 | 160 |
| A00203 | A00835 | 218 | A00203 | A00839 | 188 |
| A00203 | A00916 | 412 | A00203 | A00932 | 247 |
| A00203 | A00970 | 429 | A00203 | A01085 | 470 |
| A00203 | A01112 | 486 | A00203 | A01113 | 260 |
| A00203 | A01140 | 469 | A00203 | A01166 | 252 |
| A00203 | A01206 | 445 | A00203 | A01224 | 185 |
| A00203 | A01234 | 400 | A00203 | A01291 | 480 |
| A00203 | A01425 | 468 | A00203 | A01433 | 162 |
| A00203 | A01468 | 465 | A00203 | A01470 | 473 |
| A00203 | A01487 | 260 | A00203 | A01488 | 396 |
| A00203 | A01491 | 63  | A00203 | A01492 | 944 |
| A00203 | A01505 | 159 | A00203 | A01512 | 899 |
| A00203 | A01527 | 899 | A00203 | A01541 | 467 |
| A00203 | A01601 | 899 | A00203 | A01614 | 401 |
| A00203 | A01649 | 490 | A00203 | A01684 | 170 |
| A00203 | A01707 | 477 | A00203 | A01730 | 899 |

|        |        |     |        |        |     |
|--------|--------|-----|--------|--------|-----|
| A00203 | A01740 | 162 | A00203 | A02265 | 218 |
| A00203 | A02638 | 157 | A00203 | A03298 | 208 |
| A00203 | A03446 | 201 | A00203 | A03461 | 170 |
| A00203 | A03738 | 283 | A00203 | A06340 | 372 |
| A00203 | A06466 | 483 | A00203 | A06897 | 196 |
| A00203 | A07247 | 176 | A00203 | A07311 | 260 |
| A00203 | A07422 | 899 | A00203 | A07451 | 195 |
| A00203 | A07677 | 210 | A00203 | A08137 | 170 |
| A00203 | A08357 | 332 | A00203 | A08571 | 318 |
| A00203 | A09577 | 218 | A00203 | A09655 | 162 |
| A00203 | A10365 | 154 | A00203 | A10532 | 456 |
| A00203 | A11379 | 165 | A00203 | A11745 | 205 |
| A00203 | A11942 | 210 | A00203 | A11983 | 899 |
| A00203 | A12020 | 249 | A00203 | A12167 | 180 |
| A00203 | A12328 | 193 | A00203 | A12329 | 201 |
| A00203 | A13340 | 363 | A00203 | A13944 | 191 |
| A00203 | A13989 | 945 | A00203 | A14006 | 413 |
| A00203 | A14055 | 899 | A00203 | A14151 | 205 |
| A00203 | A14216 | 485 | A00203 | A14467 | 157 |
| A00203 | A14506 | 899 | A00203 | A15146 | 323 |
| A00203 | A15391 | 171 | A00203 | A15660 | 154 |
| A00203 | A15777 | 263 | A00203 | A16060 | 170 |
| A00203 | A16092 | 245 | A00203 | A16463 | 154 |
| A00204 | A00209 | 899 | A00204 | A00210 | 346 |
| A00204 | A00212 | 299 | A00204 | A00214 | 63  |
| A00204 | A00215 | 224 | A00204 | A00216 | 477 |
| A00204 | A00218 | 489 | A00204 | A00219 | 490 |
| A00204 | A00220 | 592 | A00204 | A00224 | 945 |
| A00204 | A00232 | 481 | A00204 | A00233 | 491 |
| A00204 | A00264 | 491 | A00204 | A00311 | 201 |
| A00204 | A00312 | 235 | A00204 | A00316 | 401 |
| A00204 | A00351 | 246 | A00204 | A00374 | 375 |
| A00204 | A00406 | 407 | A00204 | A00438 | 317 |
| A00204 | A00448 | 458 | A00204 | A00449 | 452 |
| A00204 | A00459 | 235 | A00204 | A00472 | 249 |
| A00204 | A00473 | 302 | A00204 | A00531 | 172 |
| A00204 | A00556 | 386 | A00204 | A00557 | 380 |
| A00204 | A00571 | 345 | A00204 | A00574 | 224 |
| A00204 | A00641 | 262 | A00204 | A00642 | 210 |
| A00204 | A00658 | 274 | A00204 | A00659 | 188 |
| A00204 | A00660 | 171 | A00204 | A00662 | 470 |
| A00204 | A00663 | 369 | A00204 | A00674 | 218 |
| A00204 | A00696 | 180 | A00204 | A00732 | 318 |
| A00204 | A00736 | 467 | A00204 | A00781 | 391 |
| A00204 | A00841 | 469 | A00204 | A00864 | 199 |
| A00204 | A00868 | 461 | A00204 | A00871 | 339 |

|        |        |     |        |        |     |
|--------|--------|-----|--------|--------|-----|
| A00204 | A00904 | 174 | A00204 | A00909 | 355 |
| A00204 | A00914 | 475 | A00204 | A00926 | 361 |
| A00204 | A00939 | 218 | A00204 | A01009 | 162 |
| A00204 | A01011 | 470 | A00204 | A01020 | 420 |
| A00204 | A01077 | 229 | A00204 | A01087 | 185 |
| A00204 | A01116 | 317 | A00204 | A01137 | 249 |
| A00204 | A01184 | 358 | A00204 | A01201 | 367 |
| A00204 | A01203 | 157 | A00204 | A01215 | 373 |
| A00204 | A01234 | 423 | A00204 | A01291 | 199 |
| A00204 | A01307 | 311 | A00204 | A01353 | 451 |
| A00204 | A01400 | 310 | A00204 | A01473 | 208 |
| A00204 | A01485 | 190 | A00204 | A01527 | 899 |
| A00204 | A01551 | 384 | A00204 | A01554 | 481 |
| A00204 | A01572 | 199 | A00204 | A01573 | 188 |
| A00204 | A01590 | 484 | A00204 | A01603 | 160 |
| A00204 | A01604 | 455 | A00204 | A01612 | 199 |
| A00204 | A01615 | 899 | A00204 | A01626 | 183 |
| A00204 | A01667 | 177 | A00204 | A01668 | 491 |
| A00204 | A01676 | 290 | A00204 | A01700 | 474 |
| A00204 | A01704 | 491 | A00204 | A01713 | 416 |
| A00204 | A01741 | 489 | A00204 | A01743 | 358 |
| A00204 | A01747 | 179 | A00204 | A01775 | 420 |
| A00204 | A01781 | 281 | A00204 | A01792 | 230 |
| A00204 | A01822 | 154 | A00204 | A01861 | 232 |
| A00204 | A01870 | 566 | A00204 | A01879 | 390 |
| A00204 | A01887 | 418 | A00204 | A01888 | 380 |
| A00204 | A01923 | 156 | A00204 | A01980 | 224 |
| A00204 | A01982 | 218 | A00204 | A02011 | 217 |
| A00204 | A02048 | 445 | A00204 | A02049 | 154 |
| A00204 | A02083 | 419 | A00204 | A02111 | 375 |
| A00204 | A02174 | 353 | A00204 | A02180 | 221 |
| A00204 | A02215 | 490 | A00204 | A02220 | 176 |
| A00204 | A02275 | 346 | A00204 | A02279 | 241 |
| A00204 | A02298 | 414 | A00204 | A02300 | 272 |
| A00204 | A02306 | 358 | A00204 | A02314 | 185 |
| A00204 | A02324 | 162 | A00204 | A02329 | 247 |
| A00204 | A02364 | 174 | A00204 | A02382 | 213 |
| A00204 | A02402 | 266 | A00204 | A02412 | 221 |
| A00204 | A02447 | 400 | A00204 | A02454 | 364 |
| A00204 | A02457 | 160 | A00204 | A02465 | 180 |
| A00204 | A02472 | 409 | A00204 | A02490 | 488 |
| A00204 | A02521 | 324 | A00204 | A02545 | 333 |
| A00204 | A02578 | 219 | A00204 | A02582 | 477 |
| A00204 | A02601 | 173 | A00204 | A02605 | 451 |
| A00204 | A02611 | 337 | A00204 | A02637 | 180 |
| A00204 | A02644 | 243 | A00204 | A02653 | 157 |



|        |        |     |        |        |     |
|--------|--------|-----|--------|--------|-----|
| A00204 | A02654 | 329 | A00204 | A02655 | 243 |
| A00204 | A02659 | 355 | A00204 | A02668 | 423 |
| A00204 | A02681 | 238 | A00204 | A02699 | 157 |
| A00204 | A02714 | 316 | A00204 | A02730 | 306 |
| A00204 | A02739 | 307 | A00204 | A02751 | 241 |
| A00204 | A02756 | 353 | A00204 | A02785 | 477 |
| A00204 | A02803 | 216 | A00204 | A02812 | 271 |
| A00204 | A02837 | 369 | A00204 | A02847 | 480 |
| A00204 | A02851 | 219 | A00204 | A02859 | 491 |
| A00204 | A02874 | 490 | A00204 | A02876 | 182 |
| A00204 | A02877 | 240 | A00204 | A02878 | 154 |
| A00204 | A02883 | 252 | A00204 | A02886 | 301 |
| A00204 | A02896 | 491 | A00204 | A02897 | 185 |
| A00204 | A02905 | 193 | A00204 | A02916 | 491 |
| A00204 | A02922 | 337 | A00204 | A02923 | 185 |
| A00204 | A02924 | 230 | A00204 | A02932 | 185 |
| A00204 | A02936 | 461 | A00204 | A02938 | 302 |
| A00204 | A02944 | 491 | A00204 | A02946 | 277 |
| A00204 | A02951 | 481 | A00204 | A02953 | 484 |
| A00204 | A02961 | 491 | A00204 | A02966 | 360 |
| A00204 | A02971 | 443 | A00204 | A02972 | 479 |
| A00204 | A02976 | 183 | A00204 | A02982 | 477 |
| A00204 | A03019 | 269 | A00204 | A03034 | 188 |
| A00204 | A03050 | 474 | A00204 | A03080 | 417 |
| A00204 | A03087 | 198 | A00204 | A03099 | 435 |
| A00204 | A03112 | 274 | A00204 | A03144 | 405 |
| A00204 | A03157 | 373 | A00204 | A03189 | 185 |
| A00204 | A03224 | 229 | A00204 | A03253 | 277 |
| A00204 | A03259 | 432 | A00204 | A03275 | 490 |
| A00204 | A03279 | 312 | A00204 | A03280 | 270 |
| A00204 | A03281 | 424 | A00204 | A03282 | 491 |
| A00204 | A03346 | 170 | A00204 | A03347 | 168 |
| A00204 | A03370 | 435 | A00204 | A03379 | 313 |
| A00204 | A03401 | 160 | A00204 | A03408 | 157 |
| A00204 | A03410 | 219 | A00204 | A03432 | 243 |
| A00204 | A03520 | 167 | A00204 | A03522 | 283 |
| A00204 | A03523 | 208 | A00204 | A03534 | 207 |
| A00204 | A03545 | 491 | A00204 | A03557 | 193 |
| A00204 | A03568 | 217 | A00204 | A03635 | 221 |
| A00204 | A03682 | 468 | A00204 | A03831 | 176 |
| A00204 | A03922 | 424 | A00204 | A03923 | 182 |
| A00204 | A03991 | 168 | A00204 | A04010 | 475 |
| A00204 | A04023 | 160 | A00204 | A04045 | 338 |
| A00204 | A04051 | 486 | A00204 | A04079 | 204 |
| A00204 | A04095 | 238 | A00204 | A04110 | 249 |
| A00204 | A04144 | 157 | A00204 | A04155 | 162 |

|        |        |     |        |        |     |
|--------|--------|-----|--------|--------|-----|
| A00204 | A04157 | 229 | A00204 | A04159 | 195 |
| A00204 | A04168 | 185 | A00204 | A04200 | 195 |
| A00204 | A04206 | 330 | A00204 | A04240 | 207 |
| A00204 | A04244 | 460 | A00204 | A04247 | 162 |
| A00204 | A04254 | 207 | A00204 | A04298 | 207 |
| A00204 | A04326 | 302 | A00204 | A04369 | 385 |
| A00204 | A04392 | 221 | A00204 | A04436 | 176 |
| A00204 | A04481 | 152 | A00204 | A04526 | 176 |
| A00204 | A04554 | 243 | A00204 | A04566 | 207 |
| A00204 | A04567 | 156 | A00204 | A04584 | 157 |
| A00204 | A04589 | 298 | A00204 | A04605 | 168 |
| A00204 | A04612 | 191 | A00204 | A04613 | 353 |
| A00204 | A04645 | 195 | A00204 | A04734 | 350 |
| A00204 | A04735 | 168 | A00204 | A04813 | 196 |
| A00204 | A04839 | 245 | A00204 | A04854 | 207 |
| A00204 | A04855 | 195 | A00204 | A04860 | 185 |
| A00204 | A04862 | 195 | A00204 | A04865 | 353 |
| A00204 | A04877 | 152 | A00204 | A04923 | 221 |
| A00204 | A04955 | 195 | A00204 | A04981 | 229 |
| A00204 | A05051 | 199 | A00204 | A05107 | 279 |
| A00204 | A05110 | 277 | A00204 | A05112 | 156 |
| A00204 | A05113 | 202 | A00204 | A05136 | 176 |
| A00204 | A05153 | 462 | A00204 | A05211 | 162 |
| A00204 | A05307 | 168 | A00204 | A05349 | 475 |
| A00204 | A05356 | 277 | A00204 | A05455 | 162 |
| A00204 | A05467 | 201 | A00204 | A05469 | 185 |
| A00204 | A05485 | 157 | A00204 | A05532 | 195 |
| A00204 | A05577 | 385 | A00204 | A05592 | 243 |
| A00204 | A05608 | 185 | A00204 | A05668 | 221 |
| A00204 | A05826 | 162 | A00204 | A05945 | 156 |
| A00204 | A05957 | 168 | A00204 | A05985 | 419 |
| A00204 | A05999 | 176 | A00204 | A06149 | 405 |
| A00204 | A06199 | 351 | A00204 | A06224 | 168 |
| A00204 | A06284 | 176 | A00204 | A06286 | 424 |
| A00204 | A06312 | 347 | A00204 | A06395 | 277 |
| A00204 | A06415 | 378 | A00204 | A06422 | 350 |
| A00204 | A06567 | 318 | A00204 | A06607 | 414 |
| A00204 | A06642 | 332 | A00204 | A06709 | 207 |
| A00204 | A06752 | 402 | A00204 | A06778 | 152 |
| A00204 | A06800 | 221 | A00204 | A06980 | 221 |
| A00204 | A07130 | 165 | A00204 | A07135 | 398 |
| A00204 | A07138 | 215 | A00204 | A07141 | 162 |
| A00204 | A07147 | 215 | A00204 | A07157 | 653 |
| A00204 | A07161 | 369 | A00204 | A07165 | 474 |
| A00204 | A07166 | 369 | A00204 | A07171 | 207 |
| A00204 | A07173 | 401 | A00204 | A07200 | 245 |

|        |        |     |        |        |     |
|--------|--------|-----|--------|--------|-----|
| A00204 | A07218 | 477 | A00204 | A07308 | 221 |
| A00204 | A07347 | 321 | A00204 | A07349 | 174 |
| A00204 | A07468 | 419 | A00204 | A07484 | 207 |
| A00204 | A07520 | 252 | A00204 | A07541 | 258 |
| A00204 | A07555 | 243 | A00204 | A07563 | 195 |
| A00204 | A07568 | 283 | A00204 | A07700 | 151 |
| A00204 | A07750 | 277 | A00204 | A07807 | 168 |
| A00204 | A07919 | 157 | A00204 | A07961 | 364 |
| A00204 | A08063 | 207 | A00204 | A08137 | 199 |
| A00204 | A08199 | 210 | A00204 | A08280 | 508 |
| A00204 | A08403 | 210 | A00204 | A08404 | 229 |
| A00204 | A08647 | 215 | A00204 | A09062 | 265 |
| A00204 | A09153 | 185 | A00204 | A09435 | 294 |
| A00204 | A09540 | 249 | A00204 | A09556 | 423 |
| A00204 | A09644 | 174 | A00204 | A09857 | 457 |
| A00204 | A10011 | 277 | A00204 | A10163 | 195 |
| A00204 | A10214 | 683 | A00204 | A10413 | 277 |
| A00204 | A10521 | 168 | A00204 | A10527 | 269 |
| A00204 | A10541 | 277 | A00204 | A10553 | 221 |
| A00204 | A10567 | 243 | A00204 | A10635 | 193 |
| A00204 | A10673 | 172 | A00204 | A10675 | 162 |
| A00204 | A10682 | 185 | A00204 | A10692 | 168 |
| A00204 | A10700 | 157 | A00204 | A10791 | 296 |
| A00204 | A10823 | 176 | A00204 | A10963 | 243 |
| A00204 | A10967 | 413 | A00204 | A10973 | 243 |
| A00204 | A11009 | 207 | A00204 | A11062 | 162 |
| A00204 | A11098 | 243 | A00204 | A11300 | 542 |
| A00204 | A11432 | 176 | A00204 | A11442 | 243 |
| A00204 | A11452 | 252 | A00204 | A11567 | 265 |
| A00204 | A11770 | 277 | A00204 | A11896 | 243 |
| A00204 | A11983 | 428 | A00204 | A12136 | 152 |
| A00204 | A12307 | 243 | A00204 | A12392 | 199 |
| A00204 | A12419 | 184 | A00204 | A12439 | 243 |
| A00204 | A12793 | 279 | A00204 | A12809 | 195 |
| A00204 | A12824 | 469 | A00204 | A12970 | 176 |
| A00204 | A13191 | 152 | A00204 | A13383 | 157 |
| A00204 | A13782 | 207 | A00204 | A13824 | 63  |
| A00204 | A13860 | 527 | A00204 | A13872 | 385 |
| A00204 | A13909 | 243 | A00204 | A13944 | 185 |
| A00204 | A13954 | 340 | A00204 | A14231 | 677 |
| A00204 | A14374 | 463 | A00204 | A14430 | 151 |
| A00204 | A14440 | 224 | A00204 | A14566 | 272 |
| A00204 | A14599 | 246 | A00204 | A14603 | 162 |
| A00204 | A14720 | 176 | A00204 | A14722 | 207 |
| A00204 | A15111 | 185 | A00204 | A15323 | 401 |
| A00204 | A15394 | 279 | A00204 | A15395 | 154 |

|        |        |     |        |        |     |
|--------|--------|-----|--------|--------|-----|
| A00204 | A15611 | 165 | A00204 | A15639 | 422 |
| A00204 | A15786 | 152 | A00204 | A15795 | 182 |
| A00204 | A15806 | 324 | A00204 | A15832 | 185 |
| A00204 | A15956 | 277 | A00204 | A15992 | 259 |
| A00204 | A15993 | 168 | A00204 | A16104 | 243 |
| A00204 | A16216 | 301 | A00204 | A16343 | 152 |
| A00204 | A16423 | 185 | A00204 | A16636 | 357 |
| A00204 | A16693 | 152 | A00204 | A16695 | 157 |
| A00204 | A16959 | 210 | A00204 | A17019 | 162 |
| A00204 | A17078 | 313 | A00204 | A17108 | 347 |
| A00204 | A17171 | 199 | A00205 | A00207 | 945 |
| A00205 | A00208 | 685 | A00205 | A00209 | 899 |
| A00205 | A00211 | 271 | A00205 | A00224 | 296 |
| A00205 | A00230 | 387 | A00205 | A00240 | 344 |
| A00205 | A00246 | 900 | A00205 | A00254 | 277 |
| A00205 | A00261 | 235 | A00205 | A00262 | 152 |
| A00205 | A00314 | 224 | A00205 | A01512 | 63  |
| A00205 | A01524 | 930 | A00205 | A01527 | 940 |
| A00205 | A01553 | 942 | A00205 | A01554 | 945 |
| A00205 | A01558 | 899 | A00205 | A01560 | 113 |
| A00205 | A01572 | 229 | A00205 | A01588 | 899 |
| A00205 | A01615 | 900 | A00205 | A01697 | 218 |
| A00205 | A01730 | 167 | A00205 | A01914 | 168 |
| A00205 | A02711 | 177 | A00205 | A02790 | 182 |
| A00205 | A02791 | 168 | A00205 | A03654 | 174 |
| A00205 | A03784 | 224 | A00205 | A04117 | 160 |
| A00205 | A04162 | 156 | A00205 | A04222 | 267 |
| A00205 | A04490 | 195 | A00205 | A06610 | 408 |
| A00205 | A07311 | 937 | A00205 | A09181 | 353 |
| A00205 | A09542 | 344 | A00205 | A09577 | 356 |
| A00205 | A09888 | 291 | A00205 | A09937 | 419 |
| A00205 | A10580 | 899 | A00205 | A10791 | 235 |
| A00205 | A10941 | 307 | A00205 | A11369 | 457 |
| A00205 | A12086 | 291 | A00205 | A13605 | 218 |
| A00205 | A13980 | 974 | A00205 | A13985 | 219 |
| A00205 | A13991 | 989 | A00205 | A14033 | 329 |
| A00205 | A14198 | 187 | A00205 | A15726 | 63  |
| A00205 | A16257 | 188 | A00206 | A00209 | 899 |
| A00206 | A00221 | 669 | A00206 | A00229 | 249 |
| A00206 | A00230 | 940 | A00206 | A00235 | 269 |
| A00206 | A00254 | 296 | A00206 | A00263 | 477 |
| A00206 | A00269 | 655 | A00206 | A00270 | 473 |
| A00206 | A00295 | 436 | A00206 | A00400 | 594 |
| A00206 | A00600 | 174 | A00206 | A00697 | 465 |
| A00206 | A00786 | 458 | A00206 | A00941 | 452 |
| A00206 | A00973 | 396 | A00206 | A01070 | 903 |

|        |        |     |        |        |     |
|--------|--------|-----|--------|--------|-----|
| A00206 | A01161 | 342 | A00206 | A01192 | 435 |
| A00206 | A01310 | 319 | A00206 | A01478 | 488 |
| A00206 | A01479 | 170 | A00206 | A01527 | 899 |
| A00206 | A01533 | 490 | A00206 | A01551 | 427 |
| A00206 | A01558 | 899 | A00206 | A01560 | 480 |
| A00206 | A01568 | 270 | A00206 | A01572 | 430 |
| A00206 | A01576 | 186 | A00206 | A01588 | 899 |
| A00206 | A01591 | 680 | A00206 | A01592 | 975 |
| A00206 | A01596 | 257 | A00206 | A01615 | 900 |
| A00206 | A01636 | 516 | A00206 | A01638 | 479 |
| A00206 | A01650 | 491 | A00206 | A01660 | 413 |
| A00206 | A01667 | 391 | A00206 | A01669 | 156 |
| A00206 | A01692 | 655 | A00206 | A01703 | 173 |
| A00206 | A02411 | 188 | A00206 | A02429 | 235 |
| A00206 | A02507 | 154 | A00206 | A03422 | 470 |
| A00206 | A03471 | 441 | A00206 | A03492 | 202 |
| A00206 | A03496 | 221 | A00206 | A03566 | 467 |
| A00206 | A03575 | 450 | A00206 | A03591 | 820 |
| A00206 | A03656 | 183 | A00206 | A04175 | 243 |
| A00206 | A04740 | 171 | A00206 | A05008 | 396 |
| A00206 | A05009 | 428 | A00206 | A05015 | 247 |
| A00206 | A05029 | 307 | A00206 | A05101 | 229 |
| A00206 | A05202 | 171 | A00206 | A05315 | 899 |
| A00206 | A06701 | 413 | A00206 | A07339 | 899 |
| A00206 | A07762 | 425 | A00206 | A07997 | 271 |
| A00206 | A08518 | 156 | A00206 | A08571 | 425 |
| A00206 | A08862 | 440 | A00206 | A09195 | 474 |
| A00206 | A09370 | 171 | A00206 | A09449 | 450 |
| A00206 | A09551 | 235 | A00206 | A09568 | 302 |
| A00206 | A09820 | 361 | A00206 | A10183 | 317 |
| A00206 | A10510 | 193 | A00206 | A10833 | 994 |
| A00206 | A11027 | 160 | A00206 | A11736 | 288 |
| A00206 | A11820 | 383 | A00206 | A12047 | 176 |
| A00206 | A12902 | 899 | A00206 | A13391 | 154 |
| A00206 | A13488 | 202 | A00206 | A13530 | 288 |
| A00206 | A13917 | 465 | A00206 | A13997 | 899 |
| A00206 | A14198 | 407 | A00206 | A14352 | 160 |
| A00206 | A14443 | 899 | A00206 | A14444 | 991 |
| A00206 | A14577 | 709 | A00206 | A15293 | 899 |
| A00206 | A15294 | 918 | A00206 | A15295 | 196 |
| A00206 | A15604 | 176 | A00206 | A15649 | 490 |
| A00206 | A15726 | 926 | A00207 | A00208 | 945 |
| A00207 | A00209 | 899 | A00207 | A00214 | 171 |
| A00207 | A00221 | 385 | A00207 | A00224 | 976 |
| A00207 | A00230 | 906 | A00207 | A00233 | 899 |
| A00207 | A00234 | 945 | A00207 | A00239 | 942 |

|        |        |     |        |        |     |
|--------|--------|-----|--------|--------|-----|
| A00207 | A00240 | 945 | A00207 | A00241 | 932 |
| A00207 | A00242 | 993 | A00207 | A00246 | 994 |
| A00207 | A00247 | 422 | A00207 | A00254 | 945 |
| A00207 | A00261 | 631 | A00207 | A00316 | 440 |
| A00207 | A00324 | 936 | A00207 | A00332 | 243 |
| A00207 | A00340 | 232 | A00207 | A00341 | 170 |
| A00207 | A00669 | 932 | A00207 | A00696 | 249 |
| A00207 | A00887 | 154 | A00207 | A00933 | 899 |
| A00207 | A00997 | 208 | A00207 | A01027 | 187 |
| A00207 | A01052 | 438 | A00207 | A01452 | 557 |
| A00207 | A01474 | 196 | A00207 | A01524 | 994 |
| A00207 | A01527 | 994 | A00207 | A01551 | 224 |
| A00207 | A01553 | 470 | A00207 | A01554 | 329 |
| A00207 | A01558 | 993 | A00207 | A01560 | 970 |
| A00207 | A01561 | 916 | A00207 | A01562 | 939 |
| A00207 | A01572 | 456 | A00207 | A01588 | 936 |
| A00207 | A01602 | 902 | A00207 | A01612 | 899 |
| A00207 | A01615 | 919 | A00207 | A01628 | 907 |
| A00207 | A01636 | 899 | A00207 | A01637 | 899 |
| A00207 | A01638 | 899 | A00207 | A01640 | 152 |
| A00207 | A01688 | 924 | A00207 | A01692 | 388 |
| A00207 | A01697 | 939 | A00207 | A01709 | 923 |
| A00207 | A01718 | 252 | A00207 | A01719 | 63  |
| A00207 | A01790 | 183 | A00207 | A01844 | 931 |
| A00207 | A01914 | 249 | A00207 | A01995 | 488 |
| A00207 | A02369 | 154 | A00207 | A02482 | 238 |
| A00207 | A02678 | 288 | A00207 | A03110 | 255 |
| A00207 | A03292 | 160 | A00207 | A03436 | 340 |
| A00207 | A03591 | 921 | A00207 | A03778 | 201 |
| A00207 | A03809 | 204 | A00207 | A03942 | 339 |
| A00207 | A04012 | 505 | A00207 | A04117 | 473 |
| A00207 | A04530 | 191 | A00207 | A04699 | 899 |
| A00207 | A04796 | 296 | A00207 | A04797 | 265 |
| A00207 | A05124 | 329 | A00207 | A05216 | 899 |
| A00207 | A05633 | 318 | A00207 | A06295 | 899 |
| A00207 | A06582 | 208 | A00207 | A06610 | 469 |
| A00207 | A07118 | 191 | A00207 | A07135 | 190 |
| A00207 | A07165 | 899 | A00207 | A07311 | 955 |
| A00207 | A07339 | 909 | A00207 | A08280 | 296 |
| A00207 | A08732 | 899 | A00207 | A09181 | 926 |
| A00207 | A09188 | 243 | A00207 | A09241 | 281 |
| A00207 | A09434 | 416 | A00207 | A09542 | 900 |
| A00207 | A09577 | 63  | A00207 | A09804 | 157 |
| A00207 | A09937 | 210 | A00207 | A10365 | 899 |
| A00207 | A10735 | 63  | A00207 | A10756 | 443 |
| A00207 | A10801 | 994 | A00207 | A11125 | 899 |

|        |        |     |        |        |     |
|--------|--------|-----|--------|--------|-----|
| A00207 | A11369 | 945 | A00207 | A11652 | 174 |
| A00207 | A11934 | 154 | A00207 | A12705 | 899 |
| A00207 | A12924 | 157 | A00207 | A13250 | 899 |
| A00207 | A13364 | 441 | A00207 | A13433 | 243 |
| A00207 | A13605 | 937 | A00207 | A13841 | 265 |
| A00207 | A13975 | 386 | A00207 | A13980 | 429 |
| A00207 | A13981 | 899 | A00207 | A13983 | 63  |
| A00207 | A13991 | 899 | A00207 | A14004 | 270 |
| A00207 | A14013 | 138 | A00207 | A14019 | 358 |
| A00207 | A14027 | 899 | A00207 | A14032 | 274 |
| A00207 | A14033 | 218 | A00207 | A14047 | 229 |
| A00207 | A14059 | 167 | A00207 | A14187 | 440 |
| A00207 | A14188 | 943 | A00207 | A14198 | 945 |
| A00207 | A14207 | 899 | A00207 | A14208 | 510 |
| A00207 | A14426 | 310 | A00207 | A14433 | 945 |
| A00207 | A14443 | 899 | A00207 | A14452 | 63  |
| A00207 | A14496 | 452 | A00207 | A15182 | 912 |
| A00207 | A15294 | 899 | A00207 | A15325 | 235 |
| A00207 | A15361 | 899 | A00207 | A15726 | 163 |
| A00207 | A15848 | 243 | A00207 | A15893 | 457 |
| A00207 | A16084 | 104 | A00208 | A00209 | 899 |
| A00208 | A00211 | 899 | A00208 | A00216 | 201 |
| A00208 | A00224 | 949 | A00208 | A00227 | 383 |
| A00208 | A00230 | 541 | A00208 | A00233 | 168 |
| A00208 | A00234 | 436 | A00208 | A00240 | 295 |
| A00208 | A00243 | 491 | A00208 | A00246 | 942 |
| A00208 | A00254 | 945 | A00208 | A00261 | 212 |
| A00208 | A00270 | 538 | A00208 | A00292 | 208 |
| A00208 | A00294 | 395 | A00208 | A00309 | 477 |
| A00208 | A00400 | 477 | A00208 | A00418 | 377 |
| A00208 | A00463 | 230 | A00208 | A00491 | 168 |
| A00208 | A00511 | 195 | A00208 | A00556 | 219 |
| A00208 | A00566 | 566 | A00208 | A00643 | 236 |
| A00208 | A00747 | 450 | A00208 | A00799 | 246 |
| A00208 | A00805 | 272 | A00208 | A00858 | 503 |
| A00208 | A00922 | 212 | A00208 | A00931 | 208 |
| A00208 | A01006 | 430 | A00208 | A01052 | 899 |
| A00208 | A01061 | 452 | A00208 | A01104 | 243 |
| A00208 | A01114 | 276 | A00208 | A01125 | 361 |
| A00208 | A01137 | 294 | A00208 | A01155 | 278 |
| A00208 | A01212 | 440 | A00208 | A01406 | 159 |
| A00208 | A01473 | 283 | A00208 | A01498 | 168 |
| A00208 | A01524 | 989 | A00208 | A01527 | 992 |
| A00208 | A01553 | 63  | A00208 | A01554 | 85  |
| A00208 | A01558 | 989 | A00208 | A01560 | 899 |
| A00208 | A01572 | 466 | A00208 | A01588 | 899 |

|        |        |     |        |        |     |
|--------|--------|-----|--------|--------|-----|
| A00208 | A01602 | 486 | A00208 | A01612 | 899 |
| A00208 | A01615 | 989 | A00208 | A01639 | 899 |
| A00208 | A01688 | 899 | A00208 | A01741 | 452 |
| A00208 | A01796 | 234 | A00208 | A01797 | 170 |
| A00208 | A01800 | 157 | A00208 | A01914 | 490 |
| A00208 | A01949 | 252 | A00208 | A01970 | 152 |
| A00208 | A01974 | 180 | A00208 | A02072 | 198 |
| A00208 | A02111 | 199 | A00208 | A02304 | 204 |
| A00208 | A02327 | 184 | A00208 | A02342 | 265 |
| A00208 | A02361 | 290 | A00208 | A02481 | 463 |
| A00208 | A02562 | 408 | A00208 | A02564 | 899 |
| A00208 | A02671 | 202 | A00208 | A02695 | 162 |
| A00208 | A02711 | 401 | A00208 | A02715 | 179 |
| A00208 | A02877 | 346 | A00208 | A02882 | 288 |
| A00208 | A02902 | 188 | A00208 | A02908 | 296 |
| A00208 | A02988 | 274 | A00208 | A03213 | 484 |
| A00208 | A03225 | 419 | A00208 | A03259 | 262 |
| A00208 | A03273 | 247 | A00208 | A03514 | 301 |
| A00208 | A03637 | 346 | A00208 | A03681 | 377 |
| A00208 | A03685 | 451 | A00208 | A03725 | 469 |
| A00208 | A03784 | 238 | A00208 | A03837 | 268 |
| A00208 | A04085 | 396 | A00208 | A04092 | 188 |
| A00208 | A04115 | 302 | A00208 | A04163 | 199 |
| A00208 | A04209 | 344 | A00208 | A04238 | 235 |
| A00208 | A04314 | 383 | A00208 | A04622 | 283 |
| A00208 | A04685 | 201 | A00208 | A04770 | 215 |
| A00208 | A04814 | 157 | A00208 | A04943 | 157 |
| A00208 | A05107 | 221 | A00208 | A05112 | 430 |
| A00208 | A05184 | 152 | A00208 | A05216 | 945 |
| A00208 | A05280 | 217 | A00208 | A05288 | 213 |
| A00208 | A05533 | 160 | A00208 | A05618 | 217 |
| A00208 | A05760 | 899 | A00208 | A05891 | 433 |
| A00208 | A06513 | 252 | A00208 | A06579 | 159 |
| A00208 | A06581 | 371 | A00208 | A06597 | 491 |
| A00208 | A06649 | 198 | A00208 | A06650 | 439 |
| A00208 | A06769 | 241 | A00208 | A06911 | 157 |
| A00208 | A06926 | 204 | A00208 | A06949 | 385 |
| A00208 | A07033 | 217 | A00208 | A07191 | 224 |
| A00208 | A07311 | 901 | A00208 | A07339 | 489 |
| A00208 | A07422 | 899 | A00208 | A07460 | 180 |
| A00208 | A07900 | 207 | A00208 | A08732 | 899 |
| A00208 | A08911 | 467 | A00208 | A09072 | 157 |
| A00208 | A09123 | 156 | A00208 | A09236 | 179 |
| A00208 | A09241 | 201 | A00208 | A10161 | 195 |
| A00208 | A10174 | 152 | A00208 | A10203 | 217 |
| A00208 | A11369 | 479 | A00208 | A11460 | 213 |



|        |        |     |        |        |     |
|--------|--------|-----|--------|--------|-----|
| A00208 | A11512 | 252 | A00208 | A11764 | 252 |
| A00208 | A11832 | 324 | A00208 | A11983 | 901 |
| A00208 | A12108 | 157 | A00208 | A12965 | 195 |
| A00208 | A13386 | 252 | A00208 | A13605 | 907 |
| A00208 | A13860 | 243 | A00208 | A13899 | 272 |
| A00208 | A13978 | 899 | A00208 | A13980 | 753 |
| A00208 | A13981 | 899 | A00208 | A13991 | 899 |
| A00208 | A14055 | 420 | A00208 | A14073 | 230 |
| A00208 | A14188 | 491 | A00208 | A14198 | 945 |
| A00208 | A14220 | 481 | A00208 | A14399 | 267 |
| A00208 | A14433 | 924 | A00208 | A14444 | 899 |
| A00208 | A14683 | 177 | A00208 | A15315 | 193 |
| A00208 | A15323 | 172 | A00208 | A15347 | 177 |
| A00208 | A15621 | 168 | A00208 | A15764 | 489 |
| A00208 | A15862 | 180 | A00208 | A15913 | 185 |
| A00208 | A15932 | 302 | A00208 | A15935 | 335 |
| A00208 | A16257 | 268 | A00208 | A16438 | 185 |
| A00208 | A16734 | 157 | A00209 | A00211 | 911 |
| A00209 | A00216 | 899 | A00209 | A00218 | 384 |
| A00209 | A00219 | 945 | A00209 | A00220 | 912 |
| A00209 | A00221 | 900 | A00209 | A00223 | 899 |
| A00209 | A00224 | 924 | A00209 | A00225 | 899 |
| A00209 | A00227 | 899 | A00209 | A00230 | 915 |
| A00209 | A00231 | 921 | A00209 | A00236 | 899 |
| A00209 | A00239 | 899 | A00209 | A00240 | 899 |
| A00209 | A00241 | 899 | A00209 | A00242 | 899 |
| A00209 | A00243 | 899 | A00209 | A00244 | 899 |
| A00209 | A00246 | 899 | A00209 | A00247 | 899 |
| A00209 | A00248 | 899 | A00209 | A00250 | 899 |
| A00209 | A00252 | 899 | A00209 | A00253 | 899 |
| A00209 | A00254 | 949 | A00209 | A00255 | 899 |
| A00209 | A00256 | 369 | A00209 | A00257 | 899 |
| A00209 | A00258 | 934 | A00209 | A00264 | 994 |
| A00209 | A00265 | 899 | A00209 | A00268 | 899 |
| A00209 | A00269 | 899 | A00209 | A00270 | 909 |
| A00209 | A00271 | 899 | A00209 | A00272 | 899 |
| A00209 | A00274 | 899 | A00209 | A00275 | 899 |
| A00209 | A00276 | 899 | A00209 | A00283 | 199 |
| A00209 | A00294 | 943 | A00209 | A00301 | 318 |
| A00209 | A00309 | 405 | A00209 | A00310 | 899 |
| A00209 | A00312 | 899 | A00209 | A00324 | 343 |
| A00209 | A00356 | 899 | A00209 | A00358 | 899 |
| A00209 | A00361 | 899 | A00209 | A00377 | 899 |
| A00209 | A00396 | 899 | A00209 | A00400 | 215 |
| A00209 | A00440 | 398 | A00209 | A00472 | 176 |
| A00209 | A00531 | 899 | A00209 | A00571 | 199 |

|        |        |     |        |        |     |
|--------|--------|-----|--------|--------|-----|
| A00209 | A00616 | 932 | A00209 | A00625 | 899 |
| A00209 | A00629 | 199 | A00209 | A00635 | 162 |
| A00209 | A00643 | 557 | A00209 | A00651 | 899 |
| A00209 | A00656 | 913 | A00209 | A00671 | 191 |
| A00209 | A00688 | 401 | A00209 | A00696 | 188 |
| A00209 | A00700 | 899 | A00209 | A00815 | 899 |
| A00209 | A00841 | 918 | A00209 | A00851 | 899 |
| A00209 | A00914 | 922 | A00209 | A00931 | 899 |
| A00209 | A00939 | 912 | A00209 | A00981 | 944 |
| A00209 | A01022 | 483 | A00209 | A01026 | 899 |
| A00209 | A01056 | 899 | A00209 | A01070 | 930 |
| A00209 | A01098 | 207 | A00209 | A01125 | 489 |
| A00209 | A01138 | 899 | A00209 | A01139 | 899 |
| A00209 | A01157 | 461 | A00209 | A01161 | 414 |
| A00209 | A01168 | 899 | A00209 | A01211 | 483 |
| A00209 | A01252 | 899 | A00209 | A01257 | 908 |
| A00209 | A01289 | 899 | A00209 | A01291 | 914 |
| A00209 | A01305 | 154 | A00209 | A01306 | 199 |
| A00209 | A01359 | 899 | A00209 | A01425 | 914 |
| A00209 | A01457 | 899 | A00209 | A01458 | 899 |
| A00209 | A01461 | 899 | A00209 | A01472 | 899 |
| A00209 | A01475 | 466 | A00209 | A01477 | 899 |
| A00209 | A01485 | 899 | A00209 | A01492 | 899 |
| A00209 | A01493 | 899 | A00209 | A01496 | 899 |
| A00209 | A01503 | 899 | A00209 | A01512 | 899 |
| A00209 | A01515 | 899 | A00209 | A01522 | 899 |
| A00209 | A01524 | 995 | A00209 | A01527 | 944 |
| A00209 | A01531 | 208 | A00209 | A01553 | 899 |
| A00209 | A01554 | 899 | A00209 | A01558 | 899 |
| A00209 | A01560 | 899 | A00209 | A01562 | 899 |
| A00209 | A01568 | 221 | A00209 | A01572 | 899 |
| A00209 | A01574 | 899 | A00209 | A01576 | 899 |
| A00209 | A01585 | 899 | A00209 | A01588 | 899 |
| A00209 | A01593 | 899 | A00209 | A01601 | 914 |
| A00209 | A01602 | 899 | A00209 | A01604 | 899 |
| A00209 | A01605 | 899 | A00209 | A01606 | 922 |
| A00209 | A01615 | 899 | A00209 | A01626 | 899 |
| A00209 | A01634 | 899 | A00209 | A01636 | 899 |
| A00209 | A01639 | 899 | A00209 | A01640 | 916 |
| A00209 | A01646 | 899 | A00209 | A01658 | 899 |
| A00209 | A01661 | 900 | A00209 | A01662 | 215 |
| A00209 | A01665 | 899 | A00209 | A01669 | 899 |
| A00209 | A01676 | 937 | A00209 | A01683 | 899 |
| A00209 | A01688 | 899 | A00209 | A01692 | 899 |
| A00209 | A01708 | 899 | A00209 | A01718 | 914 |
| A00209 | A01719 | 899 | A00209 | A01722 | 173 |

|        |        |     |        |        |     |
|--------|--------|-----|--------|--------|-----|
| A00209 | A01726 | 899 | A00209 | A01730 | 899 |
| A00209 | A01737 | 899 | A00209 | A01740 | 899 |
| A00209 | A01741 | 475 | A00209 | A01743 | 160 |
| A00209 | A01745 | 188 | A00209 | A01749 | 899 |
| A00209 | A01755 | 899 | A00209 | A01775 | 249 |
| A00209 | A01781 | 899 | A00209 | A01786 | 899 |
| A00209 | A01790 | 473 | A00209 | A01844 | 907 |
| A00209 | A01860 | 899 | A00209 | A01870 | 899 |
| A00209 | A01878 | 899 | A00209 | A01880 | 428 |
| A00209 | A01905 | 903 | A00209 | A01931 | 473 |
| A00209 | A01974 | 899 | A00209 | A01983 | 899 |
| A00209 | A01995 | 263 | A00209 | A02010 | 439 |
| A00209 | A02043 | 156 | A00209 | A02044 | 899 |
| A00209 | A02083 | 900 | A00209 | A02094 | 903 |
| A00209 | A02104 | 905 | A00209 | A02105 | 899 |
| A00209 | A02124 | 899 | A00209 | A02126 | 899 |
| A00209 | A02142 | 170 | A00209 | A02148 | 256 |
| A00209 | A02156 | 899 | A00209 | A02163 | 903 |
| A00209 | A02172 | 177 | A00209 | A02174 | 899 |
| A00209 | A02215 | 912 | A00209 | A02221 | 899 |
| A00209 | A02226 | 418 | A00209 | A02278 | 277 |
| A00209 | A02284 | 899 | A00209 | A02326 | 165 |
| A00209 | A02330 | 899 | A00209 | A02333 | 168 |
| A00209 | A02356 | 172 | A00209 | A02387 | 157 |
| A00209 | A02390 | 899 | A00209 | A02393 | 193 |
| A00209 | A02412 | 235 | A00209 | A02416 | 330 |
| A00209 | A02425 | 901 | A00209 | A02460 | 899 |
| A00209 | A02464 | 899 | A00209 | A02465 | 899 |
| A00209 | A02481 | 899 | A00209 | A02482 | 204 |
| A00209 | A02490 | 229 | A00209 | A02491 | 455 |
| A00209 | A02502 | 187 | A00209 | A02504 | 174 |
| A00209 | A02505 | 424 | A00209 | A02590 | 916 |
| A00209 | A02615 | 900 | A00209 | A02668 | 901 |
| A00209 | A02723 | 899 | A00209 | A02754 | 285 |
| A00209 | A02756 | 918 | A00209 | A02785 | 187 |
| A00209 | A02787 | 900 | A00209 | A02788 | 918 |
| A00209 | A02836 | 393 | A00209 | A02874 | 190 |
| A00209 | A02887 | 899 | A00209 | A02917 | 899 |
| A00209 | A02982 | 910 | A00209 | A03010 | 899 |
| A00209 | A03054 | 913 | A00209 | A03076 | 899 |
| A00209 | A03095 | 465 | A00209 | A03099 | 899 |
| A00209 | A03104 | 319 | A00209 | A03107 | 901 |
| A00209 | A03110 | 899 | A00209 | A03141 | 419 |
| A00209 | A03186 | 360 | A00209 | A03188 | 257 |
| A00209 | A03209 | 899 | A00209 | A03213 | 899 |
| A00209 | A03219 | 899 | A00209 | A03224 | 899 |

|        |        |     |        |        |     |
|--------|--------|-----|--------|--------|-----|
| A00209 | A03273 | 899 | A00209 | A03292 | 335 |
| A00209 | A03293 | 899 | A00209 | A03304 | 259 |
| A00209 | A03315 | 343 | A00209 | A03331 | 899 |
| A00209 | A03332 | 899 | A00209 | A03415 | 438 |
| A00209 | A03434 | 386 | A00209 | A03436 | 466 |
| A00209 | A03498 | 899 | A00209 | A03509 | 899 |
| A00209 | A03567 | 199 | A00209 | A03591 | 953 |
| A00209 | A03625 | 899 | A00209 | A03633 | 899 |
| A00209 | A03639 | 920 | A00209 | A03723 | 899 |
| A00209 | A03726 | 899 | A00209 | A03778 | 296 |
| A00209 | A03794 | 185 | A00209 | A03803 | 899 |
| A00209 | A03893 | 217 | A00209 | A03904 | 374 |
| A00209 | A03913 | 899 | A00209 | A03942 | 899 |
| A00209 | A03946 | 152 | A00209 | A03961 | 936 |
| A00209 | A04012 | 899 | A00209 | A04033 | 196 |
| A00209 | A04063 | 424 | A00209 | A04202 | 939 |
| A00209 | A04225 | 899 | A00209 | A04226 | 899 |
| A00209 | A04237 | 899 | A00209 | A04294 | 156 |
| A00209 | A04337 | 208 | A00209 | A04347 | 899 |
| A00209 | A04403 | 899 | A00209 | A04422 | 899 |
| A00209 | A04449 | 195 | A00209 | A04473 | 899 |
| A00209 | A04484 | 906 | A00209 | A04548 | 196 |
| A00209 | A04569 | 165 | A00209 | A04571 | 249 |
| A00209 | A04761 | 899 | A00209 | A04818 | 218 |
| A00209 | A04832 | 469 | A00209 | A04873 | 357 |
| A00209 | A04949 | 638 | A00209 | A04965 | 159 |
| A00209 | A04981 | 902 | A00209 | A05029 | 899 |
| A00209 | A05040 | 251 | A00209 | A05208 | 901 |
| A00209 | A05216 | 899 | A00209 | A05221 | 401 |
| A00209 | A05264 | 380 | A00209 | A05288 | 486 |
| A00209 | A05372 | 156 | A00209 | A05418 | 799 |
| A00209 | A05474 | 165 | A00209 | A05533 | 902 |
| A00209 | A05597 | 899 | A00209 | A05621 | 199 |
| A00209 | A05723 | 165 | A00209 | A05809 | 908 |
| A00209 | A05867 | 899 | A00209 | A05886 | 311 |
| A00209 | A05887 | 262 | A00209 | A05965 | 177 |
| A00209 | A05979 | 152 | A00209 | A05988 | 899 |
| A00209 | A05992 | 899 | A00209 | A05996 | 899 |
| A00209 | A06038 | 184 | A00209 | A06219 | 156 |
| A00209 | A06295 | 899 | A00209 | A06305 | 899 |
| A00209 | A06554 | 329 | A00209 | A06578 | 201 |
| A00209 | A06581 | 913 | A00209 | A06588 | 450 |
| A00209 | A06599 | 293 | A00209 | A06603 | 899 |
| A00209 | A06608 | 899 | A00209 | A06609 | 899 |
| A00209 | A06615 | 491 | A00209 | A06628 | 352 |
| A00209 | A06650 | 481 | A00209 | A06731 | 235 |

|        |        |     |        |        |     |
|--------|--------|-----|--------|--------|-----|
| A00209 | A06762 | 906 | A00209 | A06818 | 180 |
| A00209 | A06861 | 199 | A00209 | A06986 | 251 |
| A00209 | A06999 | 215 | A00209 | A07006 | 899 |
| A00209 | A07165 | 899 | A00209 | A07201 | 899 |
| A00209 | A07209 | 152 | A00209 | A07283 | 899 |
| A00209 | A07297 | 899 | A00209 | A07311 | 903 |
| A00209 | A07339 | 944 | A00209 | A07370 | 168 |
| A00209 | A07422 | 899 | A00209 | A07460 | 899 |
| A00209 | A07483 | 899 | A00209 | A07803 | 360 |
| A00209 | A07999 | 263 | A00209 | A08575 | 251 |
| A00209 | A08602 | 899 | A00209 | A08718 | 419 |
| A00209 | A08859 | 199 | A00209 | A08875 | 350 |
| A00209 | A08878 | 908 | A00209 | A08943 | 899 |
| A00209 | A09028 | 452 | A00209 | A09036 | 201 |
| A00209 | A09072 | 902 | A00209 | A09173 | 193 |
| A00209 | A09184 | 193 | A00209 | A09201 | 899 |
| A00209 | A09210 | 899 | A00209 | A09235 | 347 |
| A00209 | A09241 | 899 | A00209 | A09258 | 899 |
| A00209 | A09322 | 199 | A00209 | A09377 | 899 |
| A00209 | A09453 | 165 | A00209 | A09467 | 177 |
| A00209 | A09509 | 176 | A00209 | A09513 | 156 |
| A00209 | A09543 | 899 | A00209 | A09660 | 902 |
| A00209 | A10005 | 494 | A00209 | A10064 | 165 |
| A00209 | A10113 | 165 | A00209 | A10148 | 196 |
| A00209 | A10214 | 899 | A00209 | A10228 | 899 |
| A00209 | A10233 | 899 | A00209 | A10278 | 899 |
| A00209 | A10340 | 899 | A00209 | A10365 | 899 |
| A00209 | A10392 | 899 | A00209 | A10532 | 899 |
| A00209 | A10542 | 908 | A00209 | A10580 | 899 |
| A00209 | A10584 | 899 | A00209 | A10597 | 899 |
| A00209 | A10601 | 899 | A00209 | A10666 | 212 |
| A00209 | A10731 | 314 | A00209 | A10743 | 899 |
| A00209 | A10801 | 899 | A00209 | A10825 | 177 |
| A00209 | A10833 | 899 | A00209 | A10875 | 156 |
| A00209 | A11125 | 899 | A00209 | A11369 | 904 |
| A00209 | A11392 | 210 | A00209 | A11492 | 177 |
| A00209 | A11522 | 899 | A00209 | A11834 | 931 |
| A00209 | A11839 | 899 | A00209 | A11850 | 899 |
| A00209 | A11893 | 156 | A00209 | A11897 | 195 |
| A00209 | A11911 | 219 | A00209 | A11932 | 469 |
| A00209 | A11951 | 179 | A00209 | A11983 | 943 |
| A00209 | A12265 | 165 | A00209 | A12273 | 254 |
| A00209 | A12365 | 326 | A00209 | A12373 | 932 |
| A00209 | A12383 | 899 | A00209 | A12420 | 899 |
| A00209 | A12421 | 899 | A00209 | A12459 | 156 |
| A00209 | A12474 | 165 | A00209 | A12605 | 156 |

|        |        |     |        |        |     |
|--------|--------|-----|--------|--------|-----|
| A00209 | A12666 | 899 | A00209 | A12693 | 193 |
| A00209 | A12818 | 899 | A00209 | A12883 | 165 |
| A00209 | A12897 | 491 | A00209 | A12932 | 903 |
| A00209 | A12959 | 156 | A00209 | A12971 | 899 |
| A00209 | A12990 | 899 | A00209 | A13003 | 899 |
| A00209 | A13063 | 899 | A00209 | A13180 | 165 |
| A00209 | A13241 | 224 | A00209 | A13344 | 899 |
| A00209 | A13369 | 899 | A00209 | A13580 | 899 |
| A00209 | A13605 | 899 | A00209 | A13720 | 899 |
| A00209 | A13824 | 899 | A00209 | A13860 | 899 |
| A00209 | A13873 | 914 | A00209 | A13886 | 179 |
| A00209 | A13924 | 196 | A00209 | A13930 | 899 |
| A00209 | A13935 | 903 | A00209 | A13958 | 899 |
| A00209 | A13975 | 899 | A00209 | A13977 | 899 |
| A00209 | A13978 | 899 | A00209 | A13981 | 899 |
| A00209 | A13987 | 899 | A00209 | A13988 | 899 |
| A00209 | A13989 | 899 | A00209 | A13992 | 899 |
| A00209 | A13994 | 899 | A00209 | A13999 | 899 |
| A00209 | A14003 | 899 | A00209 | A14010 | 899 |
| A00209 | A14017 | 899 | A00209 | A14030 | 899 |
| A00209 | A14032 | 899 | A00209 | A14033 | 899 |
| A00209 | A14038 | 901 | A00209 | A14046 | 899 |
| A00209 | A14055 | 914 | A00209 | A14056 | 899 |
| A00209 | A14060 | 908 | A00209 | A14061 | 899 |
| A00209 | A14071 | 900 | A00209 | A14128 | 268 |
| A00209 | A14133 | 899 | A00209 | A14139 | 899 |
| A00209 | A14188 | 899 | A00209 | A14190 | 899 |
| A00209 | A14191 | 917 | A00209 | A14193 | 899 |
| A00209 | A14196 | 913 | A00209 | A14198 | 952 |
| A00209 | A14208 | 899 | A00209 | A14229 | 927 |
| A00209 | A14245 | 899 | A00209 | A14246 | 899 |
| A00209 | A14299 | 477 | A00209 | A14319 | 288 |
| A00209 | A14366 | 899 | A00209 | A14369 | 899 |
| A00209 | A14371 | 899 | A00209 | A14374 | 899 |
| A00209 | A14391 | 899 | A00209 | A14392 | 901 |
| A00209 | A14393 | 928 | A00209 | A14397 | 899 |
| A00209 | A14410 | 265 | A00209 | A14443 | 995 |
| A00209 | A14444 | 994 | A00209 | A14456 | 899 |
| A00209 | A14484 | 899 | A00209 | A14506 | 899 |
| A00209 | A14511 | 899 | A00209 | A14557 | 899 |
| A00209 | A14561 | 177 | A00209 | A14577 | 358 |
| A00209 | A14596 | 899 | A00209 | A14604 | 899 |
| A00209 | A14608 | 177 | A00209 | A14635 | 221 |
| A00209 | A14650 | 313 | A00209 | A14654 | 899 |
| A00209 | A14661 | 899 | A00209 | A14925 | 183 |
| A00209 | A15290 | 899 | A00209 | A15291 | 899 |

|        |        |     |        |        |     |
|--------|--------|-----|--------|--------|-----|
| A00209 | A15292 | 903 | A00209 | A15293 | 943 |
| A00209 | A15294 | 899 | A00209 | A15295 | 899 |
| A00209 | A15296 | 938 | A00209 | A15297 | 899 |
| A00209 | A15300 | 899 | A00209 | A15301 | 899 |
| A00209 | A15302 | 899 | A00209 | A15304 | 899 |
| A00209 | A15305 | 899 | A00209 | A15307 | 899 |
| A00209 | A15312 | 899 | A00209 | A15314 | 942 |
| A00209 | A15315 | 899 | A00209 | A15318 | 245 |
| A00209 | A15322 | 943 | A00209 | A15323 | 899 |
| A00209 | A15337 | 899 | A00209 | A15340 | 899 |
| A00209 | A15341 | 911 | A00209 | A15342 | 902 |
| A00209 | A15343 | 904 | A00209 | A15344 | 899 |
| A00209 | A15347 | 899 | A00209 | A15350 | 899 |
| A00209 | A15355 | 899 | A00209 | A15356 | 899 |
| A00209 | A15357 | 912 | A00209 | A15361 | 899 |
| A00209 | A15366 | 899 | A00209 | A15398 | 900 |
| A00209 | A15400 | 899 | A00209 | A15402 | 899 |
| A00209 | A15422 | 899 | A00209 | A15480 | 899 |
| A00209 | A15496 | 156 | A00209 | A15506 | 414 |
| A00209 | A15617 | 899 | A00209 | A15620 | 899 |
| A00209 | A15634 | 899 | A00209 | A15726 | 199 |
| A00209 | A15821 | 251 | A00209 | A15854 | 391 |
| A00209 | A15933 | 899 | A00209 | A15951 | 899 |
| A00209 | A15997 | 899 | A00209 | A16030 | 899 |
| A00209 | A16080 | 899 | A00209 | A16083 | 899 |
| A00209 | A16253 | 899 | A00209 | A16323 | 180 |
| A00209 | A16357 | 251 | A00209 | A16424 | 899 |
| A00209 | A16581 | 899 | A00209 | A16734 | 156 |
| A00209 | A16812 | 899 | A00209 | A16916 | 899 |
| A00209 | A16988 | 899 | A00209 | A17060 | 899 |
| A00209 | A17188 | 899 | A00209 | A17214 | 899 |
| A00209 | A17215 | 899 | A00209 | A17216 | 899 |
| A00209 | A17217 | 899 | A00210 | A00212 | 367 |
| A00210 | A00219 | 236 | A00210 | A00224 | 910 |
| A00210 | A00227 | 168 | A00210 | A00230 | 936 |
| A00210 | A00239 | 536 | A00210 | A00240 | 470 |
| A00210 | A00241 | 542 | A00210 | A00243 | 291 |
| A00210 | A00246 | 899 | A00210 | A00261 | 586 |
| A00210 | A00273 | 193 | A00210 | A00304 | 515 |
| A00210 | A00315 | 424 | A00210 | A00316 | 204 |
| A00210 | A00322 | 747 | A00210 | A00347 | 755 |
| A00210 | A00418 | 477 | A00210 | A00473 | 491 |
| A00210 | A00565 | 208 | A00210 | A00593 | 172 |
| A00210 | A00638 | 467 | A00210 | A00688 | 278 |
| A00210 | A00815 | 310 | A00210 | A00856 | 490 |
| A00210 | A00911 | 731 | A00210 | A00989 | 305 |

|        |        |     |        |        |     |
|--------|--------|-----|--------|--------|-----|
| A00210 | A01050 | 353 | A00210 | A01117 | 458 |
| A00210 | A01124 | 975 | A00210 | A01214 | 486 |
| A00210 | A01215 | 491 | A00210 | A01244 | 488 |
| A00210 | A01278 | 229 | A00210 | A01296 | 746 |
| A00210 | A01312 | 177 | A00210 | A01317 | 278 |
| A00210 | A01318 | 274 | A00210 | A01320 | 827 |
| A00210 | A01322 | 468 | A00210 | A01325 | 945 |
| A00210 | A01327 | 413 | A00210 | A01328 | 480 |
| A00210 | A01331 | 198 | A00210 | A01415 | 449 |
| A00210 | A01477 | 216 | A00210 | A01485 | 441 |
| A00210 | A01529 | 283 | A00210 | A01530 | 411 |
| A00210 | A01558 | 899 | A00210 | A01559 | 168 |
| A00210 | A01561 | 899 | A00210 | A01588 | 899 |
| A00210 | A01593 | 899 | A00210 | A01596 | 840 |
| A00210 | A01615 | 899 | A00210 | A01629 | 490 |
| A00210 | A01722 | 364 | A00210 | A01741 | 257 |
| A00210 | A01920 | 611 | A00210 | A01929 | 152 |
| A00210 | A01930 | 165 | A00210 | A01993 | 296 |
| A00210 | A02051 | 162 | A00210 | A02072 | 299 |
| A00210 | A02091 | 234 | A00210 | A02104 | 174 |
| A00210 | A02110 | 324 | A00210 | A02143 | 151 |
| A00210 | A02144 | 191 | A00210 | A02147 | 159 |
| A00210 | A02148 | 312 | A00210 | A02188 | 483 |
| A00210 | A02221 | 490 | A00210 | A02228 | 184 |
| A00210 | A02231 | 246 | A00210 | A02267 | 308 |
| A00210 | A02278 | 170 | A00210 | A02303 | 207 |
| A00210 | A02392 | 201 | A00210 | A02424 | 467 |
| A00210 | A02425 | 475 | A00210 | A02435 | 205 |
| A00210 | A02454 | 168 | A00210 | A02463 | 340 |
| A00210 | A02465 | 329 | A00210 | A02470 | 152 |
| A00210 | A02477 | 156 | A00210 | A02487 | 430 |
| A00210 | A02501 | 168 | A00210 | A02531 | 246 |
| A00210 | A02589 | 168 | A00210 | A02595 | 260 |
| A00210 | A02666 | 252 | A00210 | A02672 | 343 |
| A00210 | A02673 | 449 | A00210 | A02760 | 236 |
| A00210 | A02830 | 265 | A00210 | A03017 | 208 |
| A00210 | A03043 | 218 | A00210 | A03044 | 416 |
| A00210 | A03046 | 215 | A00210 | A03055 | 157 |
| A00210 | A03090 | 168 | A00210 | A03114 | 168 |
| A00210 | A03115 | 473 | A00210 | A03152 | 152 |
| A00210 | A03155 | 208 | A00210 | A03186 | 371 |
| A00210 | A03193 | 456 | A00210 | A03209 | 441 |
| A00210 | A03328 | 450 | A00210 | A03334 | 385 |
| A00210 | A03434 | 210 | A00210 | A03451 | 456 |
| A00210 | A03642 | 245 | A00210 | A03820 | 268 |
| A00210 | A04074 | 238 | A00210 | A04184 | 152 |



|        |        |     |        |        |     |
|--------|--------|-----|--------|--------|-----|
| A00210 | A04218 | 276 | A00210 | A04305 | 168 |
| A00210 | A04380 | 187 | A00210 | A04423 | 267 |
| A00210 | A04429 | 154 | A00210 | A04468 | 182 |
| A00210 | A04471 | 165 | A00210 | A04715 | 190 |
| A00210 | A04911 | 260 | A00210 | A04948 | 260 |
| A00210 | A05183 | 182 | A00210 | A05294 | 179 |
| A00210 | A05297 | 324 | A00210 | A05357 | 201 |
| A00210 | A05685 | 288 | A00210 | A05690 | 488 |
| A00210 | A05825 | 187 | A00210 | A06028 | 308 |
| A00210 | A06137 | 393 | A00210 | A06212 | 391 |
| A00210 | A06270 | 279 | A00210 | A06455 | 234 |
| A00210 | A06616 | 187 | A00210 | A06739 | 279 |
| A00210 | A06822 | 260 | A00210 | A07062 | 462 |
| A00210 | A07118 | 208 | A00210 | A07311 | 901 |
| A00210 | A07339 | 308 | A00210 | A07540 | 234 |
| A00210 | A07605 | 157 | A00210 | A07646 | 308 |
| A00210 | A08118 | 291 | A00210 | A08126 | 224 |
| A00210 | A08209 | 367 | A00210 | A08317 | 216 |
| A00210 | A08884 | 291 | A00210 | A08951 | 208 |
| A00210 | A09375 | 307 | A00210 | A09387 | 159 |
| A00210 | A09441 | 168 | A00210 | A09652 | 182 |
| A00210 | A09668 | 159 | A00210 | A09854 | 177 |
| A00210 | A09917 | 201 | A00210 | A10039 | 281 |
| A00210 | A10082 | 208 | A00210 | A10141 | 234 |
| A00210 | A10183 | 308 | A00210 | A10278 | 935 |
| A00210 | A10580 | 474 | A00210 | A10671 | 182 |
| A00210 | A10881 | 245 | A00210 | A10884 | 216 |
| A00210 | A11107 | 260 | A00210 | A11166 | 208 |
| A00210 | A11167 | 174 | A00210 | A11315 | 188 |
| A00210 | A11467 | 208 | A00210 | A11483 | 443 |
| A00210 | A11486 | 212 | A00210 | A11744 | 378 |
| A00210 | A11840 | 377 | A00210 | A12047 | 293 |
| A00210 | A12720 | 260 | A00210 | A12971 | 385 |
| A00210 | A13250 | 291 | A00210 | A13382 | 899 |
| A00210 | A13925 | 308 | A00210 | A14190 | 374 |
| A00210 | A14210 | 163 | A00210 | A14299 | 560 |
| A00210 | A14366 | 196 | A00210 | A14443 | 899 |
| A00210 | A14452 | 215 | A00210 | A14697 | 177 |
| A00210 | A14704 | 291 | A00210 | A14888 | 157 |
| A00210 | A15195 | 245 | A00210 | A15498 | 249 |
| A00210 | A15641 | 312 | A00210 | A15896 | 446 |
| A00210 | A15989 | 245 | A00211 | A00219 | 259 |
| A00211 | A00221 | 394 | A00211 | A00229 | 316 |
| A00211 | A00230 | 899 | A00211 | A00240 | 308 |
| A00211 | A00246 | 899 | A00211 | A00400 | 221 |
| A00211 | A00867 | 183 | A00211 | A01125 | 433 |

|        |        |     |        |        |     |
|--------|--------|-----|--------|--------|-----|
| A00211 | A01310 | 599 | A00211 | A01524 | 923 |
| A00211 | A01527 | 939 | A00211 | A01553 | 899 |
| A00211 | A01560 | 229 | A00211 | A01601 | 63  |
| A00211 | A01605 | 945 | A00211 | A01628 | 899 |
| A00211 | A01639 | 899 | A00211 | A01640 | 945 |
| A00211 | A01718 | 400 | A00211 | A01902 | 293 |
| A00211 | A02313 | 183 | A00211 | A02323 | 899 |
| A00211 | A02411 | 283 | A00211 | A02636 | 173 |
| A00211 | A03219 | 152 | A00211 | A03470 | 969 |
| A00211 | A03799 | 899 | A00211 | A04062 | 899 |
| A00211 | A04117 | 235 | A00211 | A04196 | 291 |
| A00211 | A04271 | 151 | A00211 | A04490 | 323 |
| A00211 | A04790 | 261 | A00211 | A05090 | 299 |
| A00211 | A05221 | 480 | A00211 | A06578 | 372 |
| A00211 | A06601 | 152 | A00211 | A06914 | 589 |
| A00211 | A06989 | 345 | A00211 | A07081 | 229 |
| A00211 | A07149 | 183 | A00211 | A07311 | 903 |
| A00211 | A07367 | 177 | A00211 | A07422 | 899 |
| A00211 | A07718 | 152 | A00211 | A07935 | 303 |
| A00211 | A09644 | 112 | A00211 | A11544 | 200 |
| A00211 | A11614 | 787 | A00211 | A12886 | 427 |
| A00211 | A13181 | 151 | A00211 | A13716 | 252 |
| A00211 | A13978 | 899 | A00211 | A14032 | 899 |
| A00211 | A14038 | 932 | A00211 | A14190 | 256 |
| A00211 | A14371 | 920 | A00211 | A14426 | 347 |
| A00211 | A15304 | 899 | A00211 | A15343 | 188 |
| A00211 | A15480 | 229 | A00211 | A16904 | 383 |
| A00212 | A00214 | 296 | A00212 | A00215 | 945 |
| A00212 | A00216 | 477 | A00212 | A00218 | 182 |
| A00212 | A00219 | 848 | A00212 | A00221 | 351 |
| A00212 | A00224 | 944 | A00212 | A00225 | 185 |
| A00212 | A00238 | 373 | A00212 | A00264 | 411 |
| A00212 | A00274 | 165 | A00212 | A00312 | 408 |
| A00212 | A00313 | 200 | A00212 | A00316 | 491 |
| A00212 | A00318 | 174 | A00212 | A00338 | 491 |
| A00212 | A00349 | 167 | A00212 | A00350 | 329 |
| A00212 | A00351 | 491 | A00212 | A00377 | 491 |
| A00212 | A00449 | 185 | A00212 | A00472 | 483 |
| A00212 | A00485 | 491 | A00212 | A00556 | 388 |
| A00212 | A00558 | 187 | A00212 | A00561 | 229 |
| A00212 | A00574 | 463 | A00212 | A00576 | 491 |
| A00212 | A00577 | 290 | A00212 | A00600 | 404 |
| A00212 | A00601 | 462 | A00212 | A00609 | 184 |
| A00212 | A00616 | 490 | A00212 | A00661 | 329 |
| A00212 | A00694 | 232 | A00212 | A00736 | 213 |
| A00212 | A00752 | 323 | A00212 | A00770 | 343 |

|        |        |     |        |        |     |
|--------|--------|-----|--------|--------|-----|
| A00212 | A00799 | 490 | A00212 | A00802 | 296 |
| A00212 | A00849 | 479 | A00212 | A00911 | 446 |
| A00212 | A00939 | 486 | A00212 | A00985 | 333 |
| A00212 | A01008 | 945 | A00212 | A01022 | 391 |
| A00212 | A01032 | 699 | A00212 | A01052 | 205 |
| A00212 | A01102 | 288 | A00212 | A01125 | 483 |
| A00212 | A01137 | 491 | A00212 | A01156 | 469 |
| A00212 | A01161 | 491 | A00212 | A01162 | 491 |
| A00212 | A01230 | 335 | A00212 | A01257 | 455 |
| A00212 | A01278 | 274 | A00212 | A01320 | 285 |
| A00212 | A01326 | 235 | A00212 | A01385 | 461 |
| A00212 | A01404 | 293 | A00212 | A01425 | 383 |
| A00212 | A01451 | 302 | A00212 | A01460 | 369 |
| A00212 | A01461 | 601 | A00212 | A01485 | 491 |
| A00212 | A01515 | 798 | A00212 | A01520 | 661 |
| A00212 | A01522 | 779 | A00212 | A01527 | 279 |
| A00212 | A01529 | 260 | A00212 | A01530 | 793 |
| A00212 | A01542 | 562 | A00212 | A01543 | 385 |
| A00212 | A01551 | 480 | A00212 | A01559 | 477 |
| A00212 | A01582 | 491 | A00212 | A01585 | 539 |
| A00212 | A01591 | 472 | A00212 | A01593 | 945 |
| A00212 | A01603 | 389 | A00212 | A01627 | 281 |
| A00212 | A01629 | 413 | A00212 | A01632 | 491 |
| A00212 | A01656 | 265 | A00212 | A01676 | 278 |
| A00212 | A01686 | 472 | A00212 | A01729 | 160 |
| A00212 | A01743 | 224 | A00212 | A01758 | 413 |
| A00212 | A01844 | 191 | A00212 | A01894 | 297 |
| A00212 | A01895 | 356 | A00212 | A01926 | 278 |
| A00212 | A02046 | 193 | A00212 | A02083 | 452 |
| A00212 | A02084 | 187 | A00212 | A02104 | 159 |
| A00212 | A02111 | 491 | A00212 | A02117 | 435 |
| A00212 | A02148 | 840 | A00212 | A02156 | 201 |
| A00212 | A02188 | 577 | A00212 | A02215 | 243 |
| A00212 | A02221 | 447 | A00212 | A02222 | 491 |
| A00212 | A02257 | 228 | A00212 | A02299 | 171 |
| A00212 | A02306 | 484 | A00212 | A02313 | 160 |
| A00212 | A02314 | 208 | A00212 | A02330 | 432 |
| A00212 | A02333 | 234 | A00212 | A02377 | 160 |
| A00212 | A02427 | 182 | A00212 | A02428 | 273 |
| A00212 | A02442 | 449 | A00212 | A02443 | 480 |
| A00212 | A02464 | 154 | A00212 | A02468 | 334 |
| A00212 | A02469 | 273 | A00212 | A02470 | 480 |
| A00212 | A02477 | 491 | A00212 | A02485 | 266 |
| A00212 | A02491 | 208 | A00212 | A02492 | 160 |
| A00212 | A02511 | 213 | A00212 | A02533 | 208 |
| A00212 | A02543 | 200 | A00212 | A02598 | 159 |

|        |        |     |        |        |     |
|--------|--------|-----|--------|--------|-----|
| A00212 | A02618 | 398 | A00212 | A02644 | 454 |
| A00212 | A02667 | 358 | A00212 | A02695 | 340 |
| A00212 | A02759 | 450 | A00212 | A02785 | 201 |
| A00212 | A02792 | 200 | A00212 | A02935 | 308 |
| A00212 | A02942 | 899 | A00212 | A02949 | 180 |
| A00212 | A02953 | 184 | A00212 | A03047 | 152 |
| A00212 | A03053 | 223 | A00212 | A03063 | 332 |
| A00212 | A03099 | 486 | A00212 | A03107 | 361 |
| A00212 | A03174 | 152 | A00212 | A03178 | 281 |
| A00212 | A03184 | 251 | A00212 | A03186 | 724 |
| A00212 | A03211 | 486 | A00212 | A03304 | 488 |
| A00212 | A03314 | 477 | A00212 | A03391 | 201 |
| A00212 | A03473 | 343 | A00212 | A03477 | 945 |
| A00212 | A03511 | 382 | A00212 | A03537 | 187 |
| A00212 | A03584 | 243 | A00212 | A03598 | 156 |
| A00212 | A03726 | 994 | A00212 | A03910 | 347 |
| A00212 | A03935 | 176 | A00212 | A03945 | 190 |
| A00212 | A03959 | 184 | A00212 | A03961 | 488 |
| A00212 | A03968 | 469 | A00212 | A03990 | 238 |
| A00212 | A03998 | 234 | A00212 | A04074 | 301 |
| A00212 | A04092 | 491 | A00212 | A04157 | 470 |
| A00212 | A04162 | 212 | A00212 | A04168 | 340 |
| A00212 | A04183 | 156 | A00212 | A04185 | 193 |
| A00212 | A04215 | 229 | A00212 | A04222 | 268 |
| A00212 | A04256 | 428 | A00212 | A04258 | 301 |
| A00212 | A04275 | 474 | A00212 | A04326 | 193 |
| A00212 | A04337 | 469 | A00212 | A04378 | 159 |
| A00212 | A04379 | 247 | A00212 | A04383 | 362 |
| A00212 | A04427 | 296 | A00212 | A04444 | 160 |
| A00212 | A04463 | 412 | A00212 | A04468 | 167 |
| A00212 | A04486 | 180 | A00212 | A04487 | 193 |
| A00212 | A04493 | 260 | A00212 | A04520 | 165 |
| A00212 | A04551 | 208 | A00212 | A04622 | 156 |
| A00212 | A04668 | 475 | A00212 | A04671 | 297 |
| A00212 | A04717 | 218 | A00212 | A04750 | 332 |
| A00212 | A04813 | 229 | A00212 | A04850 | 414 |
| A00212 | A04879 | 490 | A00212 | A04880 | 152 |
| A00212 | A04944 | 374 | A00212 | A04964 | 371 |
| A00212 | A04969 | 176 | A00212 | A04975 | 159 |
| A00212 | A04976 | 159 | A00212 | A04985 | 262 |
| A00212 | A05006 | 480 | A00212 | A05094 | 165 |
| A00212 | A05126 | 193 | A00212 | A05284 | 159 |
| A00212 | A05288 | 480 | A00212 | A05317 | 347 |
| A00212 | A05333 | 193 | A00212 | A05356 | 276 |
| A00212 | A05374 | 245 | A00212 | A05398 | 205 |
| A00212 | A05504 | 208 | A00212 | A05525 | 176 |

|        |        |     |        |        |     |
|--------|--------|-----|--------|--------|-----|
| A00212 | A05556 | 313 | A00212 | A05577 | 185 |
| A00212 | A05601 | 235 | A00212 | A05606 | 156 |
| A00212 | A05703 | 229 | A00212 | A05751 | 490 |
| A00212 | A05829 | 208 | A00212 | A05919 | 193 |
| A00212 | A05986 | 168 | A00212 | A06277 | 224 |
| A00212 | A06283 | 245 | A00212 | A06359 | 288 |
| A00212 | A06473 | 385 | A00212 | A06474 | 176 |
| A00212 | A06530 | 221 | A00212 | A06535 | 388 |
| A00212 | A06610 | 219 | A00212 | A06650 | 180 |
| A00212 | A06729 | 484 | A00212 | A06769 | 267 |
| A00212 | A06868 | 177 | A00212 | A06925 | 208 |
| A00212 | A06953 | 313 | A00212 | A06956 | 274 |
| A00212 | A07122 | 411 | A00212 | A07189 | 193 |
| A00212 | A07310 | 245 | A00212 | A07442 | 486 |
| A00212 | A07471 | 276 | A00212 | A07613 | 176 |
| A00212 | A07707 | 265 | A00212 | A07834 | 265 |
| A00212 | A08093 | 267 | A00212 | A08163 | 162 |
| A00212 | A08581 | 193 | A00212 | A08602 | 162 |
| A00212 | A08913 | 152 | A00212 | A09204 | 324 |
| A00212 | A09277 | 187 | A00212 | A09416 | 257 |
| A00212 | A09539 | 411 | A00212 | A09637 | 377 |
| A00212 | A09939 | 278 | A00212 | A09989 | 156 |
| A00212 | A10079 | 382 | A00212 | A10090 | 332 |
| A00212 | A10371 | 274 | A00212 | A10882 | 319 |
| A00212 | A11311 | 156 | A00212 | A11318 | 240 |
| A00212 | A11321 | 314 | A00212 | A11424 | 171 |
| A00212 | A11432 | 200 | A00212 | A11485 | 279 |
| A00212 | A11654 | 218 | A00212 | A11655 | 162 |
| A00212 | A11683 | 490 | A00212 | A11765 | 252 |
| A00212 | A11913 | 307 | A00212 | A12449 | 229 |
| A00212 | A12581 | 245 | A00212 | A12590 | 296 |
| A00212 | A12715 | 218 | A00212 | A13045 | 200 |
| A00212 | A13154 | 218 | A00212 | A13228 | 176 |
| A00212 | A13485 | 218 | A00212 | A13824 | 160 |
| A00212 | A13987 | 270 | A00212 | A14048 | 205 |
| A00212 | A14197 | 168 | A00212 | A14272 | 156 |
| A00212 | A14381 | 395 | A00212 | A14410 | 187 |
| A00212 | A14418 | 167 | A00212 | A14443 | 177 |
| A00212 | A14444 | 899 | A00212 | A14936 | 183 |
| A00212 | A15226 | 305 | A00212 | A15230 | 491 |
| A00212 | A15233 | 229 | A00212 | A15271 | 162 |
| A00212 | A15272 | 167 | A00212 | A15292 | 443 |
| A00212 | A15295 | 491 | A00212 | A15381 | 159 |
| A00212 | A15422 | 481 | A00212 | A15498 | 491 |
| A00212 | A15624 | 260 | A00212 | A15684 | 489 |
| A00212 | A15917 | 480 | A00212 | A15932 | 429 |

|        |        |     |        |        |     |
|--------|--------|-----|--------|--------|-----|
| A00212 | A16112 | 162 | A00212 | A16751 | 176 |
| A00212 | A16757 | 265 | A00212 | A17078 | 191 |
| A00213 | A00214 | 820 | A00213 | A00224 | 922 |
| A00213 | A00225 | 388 | A00213 | A00226 | 913 |
| A00213 | A00234 | 327 | A00213 | A00405 | 199 |
| A00213 | A00557 | 480 | A00213 | A00601 | 322 |
| A00213 | A00736 | 583 | A00213 | A00939 | 273 |
| A00213 | A01052 | 232 | A00213 | A01307 | 488 |
| A00213 | A01524 | 901 | A00213 | A01527 | 902 |
| A00213 | A01558 | 899 | A00213 | A01576 | 615 |
| A00213 | A01588 | 902 | A00213 | A02833 | 208 |
| A00213 | A02962 | 361 | A00213 | A02974 | 205 |
| A00213 | A02977 | 230 | A00213 | A03457 | 152 |
| A00213 | A03625 | 63  | A00213 | A03699 | 199 |
| A00213 | A03817 | 170 | A00213 | A03892 | 63  |
| A00213 | A03965 | 302 | A00213 | A03998 | 283 |
| A00213 | A04012 | 423 | A00213 | A04050 | 364 |
| A00213 | A04115 | 157 | A00213 | A04218 | 171 |
| A00213 | A04471 | 191 | A00213 | A04611 | 360 |
| A00213 | A04659 | 489 | A00213 | A05082 | 426 |
| A00213 | A05467 | 152 | A00213 | A05633 | 489 |
| A00213 | A06161 | 459 | A00213 | A06695 | 258 |
| A00213 | A06891 | 162 | A00213 | A06903 | 154 |
| A00213 | A07174 | 466 | A00213 | A07210 | 252 |
| A00213 | A07276 | 177 | A00213 | A08133 | 199 |
| A00213 | A09642 | 283 | A00213 | A09743 | 168 |
| A00213 | A09754 | 456 | A00213 | A10217 | 299 |
| A00213 | A10247 | 355 | A00213 | A10460 | 260 |
| A00213 | A10601 | 936 | A00213 | A10871 | 205 |
| A00213 | A11676 | 165 | A00213 | A11850 | 221 |
| A00213 | A11906 | 188 | A00213 | A12054 | 328 |
| A00213 | A12175 | 393 | A00213 | A12727 | 185 |
| A00213 | A13199 | 208 | A00213 | A13824 | 63  |
| A00213 | A13826 | 205 | A00213 | A13975 | 430 |
| A00213 | A14030 | 301 | A00213 | A14196 | 508 |
| A00213 | A14204 | 191 | A00213 | A14208 | 484 |
| A00213 | A14262 | 223 | A00213 | A14276 | 198 |
| A00213 | A14395 | 517 | A00213 | A14456 | 928 |
| A00213 | A14882 | 157 | A00213 | A15241 | 180 |
| A00213 | A15291 | 420 | A00213 | A15303 | 270 |
| A00213 | A15314 | 574 | A00213 | A15507 | 457 |
| A00213 | A15510 | 423 | A00213 | A15547 | 396 |
| A00213 | A15575 | 241 | A00213 | A15597 | 269 |
| A00213 | A15607 | 160 | A00213 | A15612 | 252 |
| A00213 | A15614 | 905 | A00213 | A15972 | 283 |
| A00213 | A15973 | 249 | A00213 | A15974 | 177 |

|        |        |     |        |        |     |
|--------|--------|-----|--------|--------|-----|
| A00213 | A15978 | 235 | A00213 | A16216 | 162 |
| A00213 | A16316 | 228 | A00213 | A16397 | 352 |
| A00213 | A16496 | 241 | A00213 | A16832 | 201 |
| A00214 | A00224 | 394 | A00214 | A00225 | 353 |
| A00214 | A00226 | 343 | A00214 | A00230 | 899 |
| A00214 | A00234 | 996 | A00214 | A00246 | 899 |
| A00214 | A00254 | 490 | A00214 | A00258 | 899 |
| A00214 | A00310 | 270 | A00214 | A00316 | 435 |
| A00214 | A00324 | 932 | A00214 | A00395 | 196 |
| A00214 | A00451 | 174 | A00214 | A00557 | 962 |
| A00214 | A00587 | 398 | A00214 | A00600 | 489 |
| A00214 | A00601 | 441 | A00214 | A00641 | 491 |
| A00214 | A00655 | 401 | A00214 | A00736 | 445 |
| A00214 | A00757 | 477 | A00214 | A00765 | 450 |
| A00214 | A00818 | 414 | A00214 | A00868 | 229 |
| A00214 | A00901 | 199 | A00214 | A00916 | 240 |
| A00214 | A00939 | 945 | A00214 | A00987 | 167 |
| A00214 | A01052 | 241 | A00214 | A01070 | 899 |
| A00214 | A01088 | 174 | A00214 | A01132 | 193 |
| A00214 | A01133 | 457 | A00214 | A01173 | 263 |
| A00214 | A01286 | 224 | A00214 | A01291 | 899 |
| A00214 | A01307 | 954 | A00214 | A01385 | 263 |
| A00214 | A01419 | 463 | A00214 | A01438 | 449 |
| A00214 | A01474 | 226 | A00214 | A01492 | 899 |
| A00214 | A01520 | 63  | A00214 | A01524 | 902 |
| A00214 | A01527 | 920 | A00214 | A01558 | 899 |
| A00214 | A01560 | 917 | A00214 | A01562 | 899 |
| A00214 | A01572 | 471 | A00214 | A01576 | 958 |
| A00214 | A01588 | 899 | A00214 | A01593 | 989 |
| A00214 | A01603 | 318 | A00214 | A01615 | 903 |
| A00214 | A01628 | 85  | A00214 | A01660 | 260 |
| A00214 | A01668 | 469 | A00214 | A01692 | 904 |
| A00214 | A01719 | 65  | A00214 | A01748 | 479 |
| A00214 | A01785 | 174 | A00214 | A01792 | 151 |
| A00214 | A01870 | 238 | A00214 | A01914 | 486 |
| A00214 | A01920 | 252 | A00214 | A01995 | 407 |
| A00214 | A02460 | 157 | A00214 | A02604 | 241 |
| A00214 | A02651 | 227 | A00214 | A02803 | 934 |
| A00214 | A02850 | 241 | A00214 | A02859 | 441 |
| A00214 | A02864 | 899 | A00214 | A02877 | 270 |
| A00214 | A02887 | 187 | A00214 | A02912 | 151 |
| A00214 | A02920 | 174 | A00214 | A02931 | 345 |
| A00214 | A02950 | 401 | A00214 | A02956 | 299 |
| A00214 | A02962 | 311 | A00214 | A02968 | 899 |
| A00214 | A02972 | 272 | A00214 | A02975 | 490 |
| A00214 | A02976 | 193 | A00214 | A02977 | 333 |

|        |        |     |        |        |     |
|--------|--------|-----|--------|--------|-----|
| A00214 | A03034 | 324 | A00214 | A03128 | 154 |
| A00214 | A03271 | 945 | A00214 | A03275 | 368 |
| A00214 | A03279 | 154 | A00214 | A03335 | 476 |
| A00214 | A03569 | 339 | A00214 | A03625 | 63  |
| A00214 | A03699 | 399 | A00214 | A03834 | 490 |
| A00214 | A03835 | 491 | A00214 | A03836 | 182 |
| A00214 | A03837 | 678 | A00214 | A03838 | 290 |
| A00214 | A03851 | 232 | A00214 | A03892 | 104 |
| A00214 | A03900 | 151 | A00214 | A03984 | 213 |
| A00214 | A04012 | 529 | A00214 | A04050 | 996 |
| A00214 | A04051 | 489 | A00214 | A04096 | 469 |
| A00214 | A04097 | 491 | A00214 | A04115 | 714 |
| A00214 | A04278 | 299 | A00214 | A04362 | 157 |
| A00214 | A04608 | 216 | A00214 | A04609 | 375 |
| A00214 | A04614 | 441 | A00214 | A04618 | 168 |
| A00214 | A04657 | 427 | A00214 | A04659 | 366 |
| A00214 | A04685 | 409 | A00214 | A04864 | 249 |
| A00214 | A05029 | 436 | A00214 | A05037 | 945 |
| A00214 | A05213 | 154 | A00214 | A05315 | 899 |
| A00214 | A05401 | 196 | A00214 | A05446 | 479 |
| A00214 | A05633 | 491 | A00214 | A05674 | 335 |
| A00214 | A05679 | 196 | A00214 | A05747 | 241 |
| A00214 | A05776 | 379 | A00214 | A05936 | 182 |
| A00214 | A05994 | 241 | A00214 | A06092 | 276 |
| A00214 | A06161 | 436 | A00214 | A06163 | 182 |
| A00214 | A06273 | 224 | A00214 | A06333 | 196 |
| A00214 | A06415 | 352 | A00214 | A06492 | 205 |
| A00214 | A06597 | 157 | A00214 | A06608 | 229 |
| A00214 | A06615 | 154 | A00214 | A06631 | 177 |
| A00214 | A06737 | 204 | A00214 | A06903 | 151 |
| A00214 | A07000 | 154 | A00214 | A07004 | 481 |
| A00214 | A07069 | 180 | A00214 | A07135 | 358 |
| A00214 | A07167 | 429 | A00214 | A07173 | 152 |
| A00214 | A07175 | 157 | A00214 | A07311 | 431 |
| A00214 | A07346 | 332 | A00214 | A07697 | 473 |
| A00214 | A07803 | 338 | A00214 | A08133 | 195 |
| A00214 | A08280 | 279 | A00214 | A08293 | 187 |
| A00214 | A08327 | 199 | A00214 | A08345 | 462 |
| A00214 | A08608 | 461 | A00214 | A08780 | 188 |
| A00214 | A08834 | 319 | A00214 | A08840 | 208 |
| A00214 | A08863 | 484 | A00214 | A08877 | 177 |
| A00214 | A09176 | 314 | A00214 | A09279 | 428 |
| A00214 | A09400 | 241 | A00214 | A09405 | 241 |
| A00214 | A09411 | 208 | A00214 | A09769 | 204 |
| A00214 | A09785 | 332 | A00214 | A09804 | 899 |
| A00214 | A09818 | 165 | A00214 | A09833 | 369 |



|        |        |     |        |        |     |
|--------|--------|-----|--------|--------|-----|
| A00214 | A09993 | 208 | A00214 | A10159 | 941 |
| A00214 | A10174 | 899 | A00214 | A10178 | 335 |
| A00214 | A10247 | 406 | A00214 | A10459 | 260 |
| A00214 | A10571 | 154 | A00214 | A10601 | 484 |
| A00214 | A10735 | 223 | A00214 | A10871 | 218 |
| A00214 | A11042 | 204 | A00214 | A11487 | 389 |
| A00214 | A11559 | 483 | A00214 | A11591 | 254 |
| A00214 | A11604 | 313 | A00214 | A11850 | 445 |
| A00214 | A11906 | 373 | A00214 | A11929 | 491 |
| A00214 | A11983 | 899 | A00214 | A12523 | 182 |
| A00214 | A12652 | 317 | A00214 | A12833 | 154 |
| A00214 | A12988 | 232 | A00214 | A13018 | 457 |
| A00214 | A13491 | 266 | A00214 | A13824 | 934 |
| A00214 | A13826 | 491 | A00214 | A13829 | 157 |
| A00214 | A13899 | 463 | A00214 | A13975 | 568 |
| A00214 | A13983 | 227 | A00214 | A13989 | 899 |
| A00214 | A14030 | 168 | A00214 | A14110 | 165 |
| A00214 | A14153 | 210 | A00214 | A14191 | 452 |
| A00214 | A14193 | 906 | A00214 | A14196 | 955 |
| A00214 | A14199 | 324 | A00214 | A14204 | 528 |
| A00214 | A14207 | 929 | A00214 | A14208 | 997 |
| A00214 | A14218 | 945 | A00214 | A14238 | 245 |
| A00214 | A14276 | 391 | A00214 | A14339 | 241 |
| A00214 | A14364 | 265 | A00214 | A14367 | 945 |
| A00214 | A14392 | 245 | A00214 | A14393 | 899 |
| A00214 | A14395 | 477 | A00214 | A14400 | 168 |
| A00214 | A14424 | 165 | A00214 | A14431 | 165 |
| A00214 | A14443 | 899 | A00214 | A14444 | 899 |
| A00214 | A14662 | 899 | A00214 | A14691 | 899 |
| A00214 | A14843 | 425 | A00214 | A15224 | 256 |
| A00214 | A15291 | 491 | A00214 | A15293 | 899 |
| A00214 | A15294 | 899 | A00214 | A15297 | 899 |
| A00214 | A15303 | 235 | A00214 | A15308 | 479 |
| A00214 | A15314 | 954 | A00214 | A15323 | 907 |
| A00214 | A15324 | 899 | A00214 | A15328 | 491 |
| A00214 | A15330 | 944 | A00214 | A15346 | 486 |
| A00214 | A15353 | 899 | A00214 | A15359 | 899 |
| A00214 | A15360 | 945 | A00214 | A15361 | 945 |
| A00214 | A15374 | 899 | A00214 | A15386 | 649 |
| A00214 | A15387 | 180 | A00214 | A15388 | 488 |
| A00214 | A15400 | 235 | A00214 | A15402 | 311 |
| A00214 | A15410 | 285 | A00214 | A15411 | 368 |
| A00214 | A15425 | 419 | A00214 | A15505 | 316 |
| A00214 | A15506 | 201 | A00214 | A15510 | 491 |
| A00214 | A15566 | 205 | A00214 | A15575 | 490 |
| A00214 | A15576 | 412 | A00214 | A15578 | 484 |

|        |        |     |        |        |     |
|--------|--------|-----|--------|--------|-----|
| A00214 | A15597 | 165 | A00214 | A15612 | 285 |
| A00214 | A15613 | 405 | A00214 | A15630 | 433 |
| A00214 | A15639 | 195 | A00214 | A15642 | 216 |
| A00214 | A15676 | 360 | A00214 | A15726 | 425 |
| A00214 | A15834 | 394 | A00214 | A15914 | 241 |
| A00214 | A15974 | 228 | A00214 | A15976 | 435 |
| A00214 | A16216 | 589 | A00214 | A16217 | 942 |
| A00214 | A16224 | 465 | A00214 | A16467 | 433 |
| A00214 | A16802 | 241 | A00214 | A17056 | 204 |
| A00215 | A00216 | 436 | A00215 | A00221 | 515 |
| A00215 | A00224 | 423 | A00215 | A00312 | 202 |
| A00215 | A00338 | 199 | A00215 | A00376 | 463 |
| A00215 | A00395 | 467 | A00215 | A00449 | 490 |
| A00215 | A00453 | 491 | A00215 | A00485 | 301 |
| A00215 | A00541 | 489 | A00215 | A00573 | 322 |
| A00215 | A00574 | 771 | A00215 | A00614 | 488 |
| A00215 | A00654 | 731 | A00215 | A00658 | 561 |
| A00215 | A00661 | 174 | A00215 | A00662 | 402 |
| A00215 | A00663 | 475 | A00215 | A00666 | 491 |
| A00215 | A00681 | 491 | A00215 | A00695 | 480 |
| A00215 | A00696 | 245 | A00215 | A00738 | 491 |
| A00215 | A00739 | 435 | A00215 | A00770 | 491 |
| A00215 | A00911 | 270 | A00215 | A00962 | 491 |
| A00215 | A00995 | 477 | A00215 | A01005 | 422 |
| A00215 | A01008 | 491 | A00215 | A01046 | 199 |
| A00215 | A01069 | 216 | A00215 | A01109 | 474 |
| A00215 | A01156 | 185 | A00215 | A01161 | 484 |
| A00215 | A01174 | 488 | A00215 | A01175 | 485 |
| A00215 | A01211 | 176 | A00215 | A01223 | 260 |
| A00215 | A01227 | 263 | A00215 | A01230 | 473 |
| A00215 | A01233 | 485 | A00215 | A01242 | 156 |
| A00215 | A01272 | 205 | A00215 | A01277 | 185 |
| A00215 | A01297 | 427 | A00215 | A01311 | 421 |
| A00215 | A01360 | 171 | A00215 | A01409 | 313 |
| A00215 | A01481 | 458 | A00215 | A01482 | 407 |
| A00215 | A01508 | 486 | A00215 | A01548 | 462 |
| A00215 | A01569 | 446 | A00215 | A01582 | 346 |
| A00215 | A01635 | 491 | A00215 | A01642 | 173 |
| A00215 | A01714 | 297 | A00215 | A01735 | 210 |
| A00215 | A01743 | 269 | A00215 | A01746 | 251 |
| A00215 | A01747 | 462 | A00215 | A01841 | 445 |
| A00215 | A01855 | 488 | A00215 | A01933 | 302 |
| A00215 | A01986 | 238 | A00215 | A02053 | 151 |
| A00215 | A02168 | 162 | A00215 | A02252 | 360 |
| A00215 | A02285 | 167 | A00215 | A02316 | 235 |
| A00215 | A02353 | 767 | A00215 | A02363 | 467 |

|        |        |     |        |        |     |
|--------|--------|-----|--------|--------|-----|
| A00215 | A02477 | 165 | A00215 | A02520 | 306 |
| A00215 | A02695 | 762 | A00215 | A02718 | 694 |
| A00215 | A02719 | 372 | A00215 | A02761 | 174 |
| A00215 | A02859 | 411 | A00215 | A02991 | 188 |
| A00215 | A02992 | 408 | A00215 | A03002 | 151 |
| A00215 | A03004 | 439 | A00215 | A03008 | 283 |
| A00215 | A03016 | 391 | A00215 | A03050 | 256 |
| A00215 | A03167 | 420 | A00215 | A03168 | 191 |
| A00215 | A03223 | 170 | A00215 | A03311 | 317 |
| A00215 | A03322 | 219 | A00215 | A03429 | 356 |
| A00215 | A03430 | 229 | A00215 | A03441 | 335 |
| A00215 | A03477 | 771 | A00215 | A03487 | 272 |
| A00215 | A03513 | 190 | A00215 | A03586 | 429 |
| A00215 | A03783 | 285 | A00215 | A03861 | 157 |
| A00215 | A03863 | 201 | A00215 | A03968 | 198 |
| A00215 | A04079 | 154 | A00215 | A04229 | 393 |
| A00215 | A04299 | 238 | A00215 | A04307 | 152 |
| A00215 | A04674 | 229 | A00215 | A04779 | 466 |
| A00215 | A04782 | 204 | A00215 | A04784 | 201 |
| A00215 | A04791 | 219 | A00215 | A04834 | 480 |
| A00215 | A04850 | 396 | A00215 | A04883 | 268 |
| A00215 | A04937 | 285 | A00215 | A04995 | 477 |
| A00215 | A05006 | 486 | A00215 | A05007 | 491 |
| A00215 | A05013 | 221 | A00215 | A05020 | 767 |
| A00215 | A05023 | 195 | A00215 | A05088 | 191 |
| A00215 | A05098 | 207 | A00215 | A05102 | 488 |
| A00215 | A05216 | 402 | A00215 | A05277 | 154 |
| A00215 | A05310 | 488 | A00215 | A05416 | 446 |
| A00215 | A05418 | 358 | A00215 | A05472 | 270 |
| A00215 | A05515 | 360 | A00215 | A05516 | 489 |
| A00215 | A05573 | 347 | A00215 | A05600 | 276 |
| A00215 | A05615 | 162 | A00215 | A05699 | 201 |
| A00215 | A05703 | 249 | A00215 | A05751 | 391 |
| A00215 | A05759 | 452 | A00215 | A05772 | 173 |
| A00215 | A05774 | 483 | A00215 | A05937 | 294 |
| A00215 | A06063 | 313 | A00215 | A06088 | 303 |
| A00215 | A06089 | 356 | A00215 | A06091 | 384 |
| A00215 | A06098 | 221 | A00215 | A06252 | 462 |
| A00215 | A06358 | 488 | A00215 | A06359 | 770 |
| A00215 | A06405 | 241 | A00215 | A06428 | 208 |
| A00215 | A06439 | 226 | A00215 | A06473 | 477 |
| A00215 | A06474 | 196 | A00215 | A06597 | 413 |
| A00215 | A06632 | 201 | A00215 | A06633 | 489 |
| A00215 | A06634 | 310 | A00215 | A06641 | 236 |
| A00215 | A06668 | 188 | A00215 | A06689 | 157 |
| A00215 | A06692 | 180 | A00215 | A06699 | 303 |

|        |        |     |        |        |     |
|--------|--------|-----|--------|--------|-----|
| A00215 | A06700 | 422 | A00215 | A06756 | 474 |
| A00215 | A06860 | 170 | A00215 | A06934 | 157 |
| A00215 | A06970 | 378 | A00215 | A07080 | 477 |
| A00215 | A07109 | 384 | A00215 | A07122 | 491 |
| A00215 | A07135 | 180 | A00215 | A07189 | 344 |
| A00215 | A07238 | 406 | A00215 | A07256 | 469 |
| A00215 | A07267 | 475 | A00215 | A07288 | 399 |
| A00215 | A07304 | 391 | A00215 | A07322 | 278 |
| A00215 | A07413 | 384 | A00215 | A07477 | 449 |
| A00215 | A07530 | 268 | A00215 | A07590 | 334 |
| A00215 | A07688 | 439 | A00215 | A07721 | 238 |
| A00215 | A07736 | 447 | A00215 | A07746 | 484 |
| A00215 | A07809 | 229 | A00215 | A07973 | 432 |
| A00215 | A08751 | 310 | A00215 | A08817 | 339 |
| A00215 | A09043 | 177 | A00215 | A09089 | 313 |
| A00215 | A09425 | 154 | A00215 | A09507 | 266 |
| A00215 | A09603 | 213 | A00215 | A09639 | 313 |
| A00215 | A09640 | 238 | A00215 | A09774 | 173 |
| A00215 | A09819 | 313 | A00215 | A10020 | 265 |
| A00215 | A10027 | 313 | A00215 | A10147 | 313 |
| A00215 | A10355 | 201 | A00215 | A10550 | 383 |
| A00215 | A10694 | 151 | A00215 | A11304 | 408 |
| A00215 | A11414 | 229 | A00215 | A11432 | 221 |
| A00215 | A11433 | 180 | A00215 | A11632 | 313 |
| A00215 | A11683 | 256 | A00215 | A12055 | 409 |
| A00215 | A13154 | 238 | A00215 | A13474 | 238 |
| A00215 | A13609 | 352 | A00215 | A14196 | 207 |
| A00215 | A14827 | 413 | A00215 | A15230 | 360 |
| A00215 | A15874 | 353 | A00215 | A15905 | 484 |
| A00215 | A16026 | 486 | A00215 | A16027 | 462 |
| A00215 | A16325 | 196 | A00215 | A16346 | 265 |
| A00215 | A16741 | 446 | A00215 | A17078 | 488 |
| A00215 | A17194 | 265 | A00216 | A00218 | 440 |
| A00216 | A00219 | 491 | A00216 | A00224 | 899 |
| A00216 | A00254 | 939 | A00216 | A00264 | 434 |
| A00216 | A00272 | 274 | A00216 | A00310 | 485 |
| A00216 | A00311 | 484 | A00216 | A00312 | 488 |
| A00216 | A00313 | 184 | A00216 | A00314 | 290 |
| A00216 | A00316 | 664 | A00216 | A00318 | 279 |
| A00216 | A00322 | 270 | A00216 | A00350 | 399 |
| A00216 | A00351 | 486 | A00216 | A00395 | 436 |
| A00216 | A00446 | 262 | A00216 | A00449 | 490 |
| A00216 | A00472 | 473 | A00216 | A00478 | 321 |
| A00216 | A00485 | 347 | A00216 | A00552 | 608 |
| A00216 | A00574 | 484 | A00216 | A00583 | 262 |
| A00216 | A00616 | 329 | A00216 | A00647 | 491 |

|        |        |     |        |        |     |
|--------|--------|-----|--------|--------|-----|
| A00216 | A00654 | 152 | A00216 | A00659 | 330 |
| A00216 | A00660 | 340 | A00216 | A00662 | 486 |
| A00216 | A00663 | 488 | A00216 | A00681 | 286 |
| A00216 | A00696 | 408 | A00216 | A00719 | 383 |
| A00216 | A00736 | 384 | A00216 | A00747 | 213 |
| A00216 | A00770 | 313 | A00216 | A00825 | 434 |
| A00216 | A00846 | 345 | A00216 | A00962 | 391 |
| A00216 | A00981 | 217 | A00216 | A01005 | 408 |
| A00216 | A01008 | 198 | A00216 | A01043 | 154 |
| A00216 | A01070 | 904 | A00216 | A01137 | 491 |
| A00216 | A01138 | 316 | A00216 | A01158 | 184 |
| A00216 | A01230 | 374 | A00216 | A01276 | 346 |
| A00216 | A01297 | 396 | A00216 | A01372 | 262 |
| A00216 | A01390 | 217 | A00216 | A01404 | 409 |
| A00216 | A01409 | 270 | A00216 | A01426 | 383 |
| A00216 | A01490 | 329 | A00216 | A01524 | 899 |
| A00216 | A01527 | 899 | A00216 | A01529 | 380 |
| A00216 | A01530 | 486 | A00216 | A01550 | 367 |
| A00216 | A01551 | 232 | A00216 | A01558 | 899 |
| A00216 | A01588 | 899 | A00216 | A01590 | 491 |
| A00216 | A01602 | 184 | A00216 | A01635 | 465 |
| A00216 | A01676 | 899 | A00216 | A01713 | 361 |
| A00216 | A01743 | 385 | A00216 | A01793 | 205 |
| A00216 | A01884 | 262 | A00216 | A01923 | 435 |
| A00216 | A01924 | 399 | A00216 | A01926 | 488 |
| A00216 | A01972 | 474 | A00216 | A01982 | 151 |
| A00216 | A01995 | 576 | A00216 | A02008 | 305 |
| A00216 | A02011 | 232 | A00216 | A02014 | 229 |
| A00216 | A02028 | 165 | A00216 | A02071 | 416 |
| A00216 | A02074 | 480 | A00216 | A02083 | 491 |
| A00216 | A02111 | 470 | A00216 | A02114 | 306 |
| A00216 | A02117 | 436 | A00216 | A02148 | 173 |
| A00216 | A02156 | 168 | A00216 | A02186 | 230 |
| A00216 | A02215 | 490 | A00216 | A02240 | 177 |
| A00216 | A02252 | 312 | A00216 | A02254 | 205 |
| A00216 | A02257 | 286 | A00216 | A02284 | 259 |
| A00216 | A02299 | 154 | A00216 | A02306 | 491 |
| A00216 | A02314 | 191 | A00216 | A02316 | 416 |
| A00216 | A02317 | 484 | A00216 | A02329 | 462 |
| A00216 | A02330 | 491 | A00216 | A02359 | 213 |
| A00216 | A02405 | 406 | A00216 | A02410 | 407 |
| A00216 | A02449 | 201 | A00216 | A02468 | 224 |
| A00216 | A02545 | 490 | A00216 | A02644 | 425 |
| A00216 | A02671 | 240 | A00216 | A02698 | 484 |
| A00216 | A02749 | 457 | A00216 | A02759 | 489 |
| A00216 | A02774 | 399 | A00216 | A02784 | 294 |

|        |        |     |        |        |     |
|--------|--------|-----|--------|--------|-----|
| A00216 | A02785 | 428 | A00216 | A02859 | 443 |
| A00216 | A02902 | 491 | A00216 | A02969 | 268 |
| A00216 | A02992 | 460 | A00216 | A03016 | 174 |
| A00216 | A03034 | 266 | A00216 | A03050 | 491 |
| A00216 | A03051 | 491 | A00216 | A03066 | 165 |
| A00216 | A03080 | 286 | A00216 | A03087 | 362 |
| A00216 | A03099 | 491 | A00216 | A03123 | 170 |
| A00216 | A03144 | 165 | A00216 | A03146 | 235 |
| A00216 | A03148 | 297 | A00216 | A03172 | 489 |
| A00216 | A03174 | 266 | A00216 | A03175 | 290 |
| A00216 | A03216 | 191 | A00216 | A03219 | 184 |
| A00216 | A03223 | 217 | A00216 | A03238 | 430 |
| A00216 | A03239 | 420 | A00216 | A03370 | 227 |
| A00216 | A03402 | 488 | A00216 | A03427 | 168 |
| A00216 | A03465 | 278 | A00216 | A03513 | 205 |
| A00216 | A03545 | 419 | A00216 | A03719 | 184 |
| A00216 | A03725 | 491 | A00216 | A03726 | 480 |
| A00216 | A03873 | 262 | A00216 | A03917 | 329 |
| A00216 | A03940 | 184 | A00216 | A03961 | 332 |
| A00216 | A03968 | 640 | A00216 | A04070 | 407 |
| A00216 | A04079 | 281 | A00216 | A04087 | 330 |
| A00216 | A04162 | 488 | A00216 | A04163 | 254 |
| A00216 | A04258 | 486 | A00216 | A04326 | 177 |
| A00216 | A04337 | 316 | A00216 | A04349 | 195 |
| A00216 | A04365 | 177 | A00216 | A04366 | 202 |
| A00216 | A04368 | 414 | A00216 | A04369 | 491 |
| A00216 | A04371 | 468 | A00216 | A04373 | 151 |
| A00216 | A04377 | 383 | A00216 | A04437 | 205 |
| A00216 | A04486 | 165 | A00216 | A04597 | 159 |
| A00216 | A04633 | 422 | A00216 | A04635 | 372 |
| A00216 | A04637 | 252 | A00216 | A04646 | 229 |
| A00216 | A04822 | 386 | A00216 | A04883 | 208 |
| A00216 | A04920 | 249 | A00216 | A04974 | 454 |
| A00216 | A04975 | 446 | A00216 | A04981 | 490 |
| A00216 | A05123 | 184 | A00216 | A05153 | 491 |
| A00216 | A05184 | 490 | A00216 | A05222 | 475 |
| A00216 | A05224 | 159 | A00216 | A05237 | 447 |
| A00216 | A05277 | 243 | A00216 | A05330 | 440 |
| A00216 | A05356 | 491 | A00216 | A05365 | 243 |
| A00216 | A05376 | 419 | A00216 | A05389 | 252 |
| A00216 | A05390 | 491 | A00216 | A05393 | 218 |
| A00216 | A05394 | 474 | A00216 | A05416 | 384 |
| A00216 | A05418 | 434 | A00216 | A05424 | 388 |
| A00216 | A05459 | 286 | A00216 | A05696 | 201 |
| A00216 | A05736 | 479 | A00216 | A05737 | 213 |
| A00216 | A05777 | 173 | A00216 | A05786 | 165 |

|        |        |     |        |        |     |
|--------|--------|-----|--------|--------|-----|
| A00216 | A05820 | 213 | A00216 | A05878 | 191 |
| A00216 | A05926 | 461 | A00216 | A05945 | 491 |
| A00216 | A05954 | 283 | A00216 | A05992 | 291 |
| A00216 | A06063 | 252 | A00216 | A06067 | 184 |
| A00216 | A06196 | 201 | A00216 | A06245 | 170 |
| A00216 | A06263 | 491 | A00216 | A06293 | 327 |
| A00216 | A06410 | 201 | A00216 | A06473 | 435 |
| A00216 | A06571 | 249 | A00216 | A06578 | 184 |
| A00216 | A06607 | 491 | A00216 | A06609 | 899 |
| A00216 | A06641 | 366 | A00216 | A06663 | 151 |
| A00216 | A06769 | 467 | A00216 | A06831 | 154 |
| A00216 | A06874 | 481 | A00216 | A06970 | 251 |
| A00216 | A06979 | 185 | A00216 | A07010 | 334 |
| A00216 | A07059 | 185 | A00216 | A07117 | 159 |
| A00216 | A07135 | 263 | A00216 | A07201 | 899 |
| A00216 | A07217 | 255 | A00216 | A07218 | 386 |
| A00216 | A07239 | 313 | A00216 | A07296 | 177 |
| A00216 | A07316 | 283 | A00216 | A07339 | 182 |
| A00216 | A07407 | 436 | A00216 | A07452 | 291 |
| A00216 | A07455 | 213 | A00216 | A07468 | 491 |
| A00216 | A07469 | 380 | A00216 | A07471 | 396 |
| A00216 | A07520 | 269 | A00216 | A07529 | 269 |
| A00216 | A07541 | 274 | A00216 | A07548 | 356 |
| A00216 | A07564 | 229 | A00216 | A07567 | 490 |
| A00216 | A07598 | 184 | A00216 | A07617 | 246 |
| A00216 | A07638 | 283 | A00216 | A07652 | 323 |
| A00216 | A07653 | 329 | A00216 | A07654 | 422 |
| A00216 | A07673 | 457 | A00216 | A07754 | 435 |
| A00216 | A07764 | 344 | A00216 | A07808 | 249 |
| A00216 | A07912 | 429 | A00216 | A07913 | 462 |
| A00216 | A07928 | 327 | A00216 | A07956 | 262 |
| A00216 | A07958 | 162 | A00216 | A08002 | 317 |
| A00216 | A08248 | 262 | A00216 | A08310 | 396 |
| A00216 | A08404 | 491 | A00216 | A08746 | 412 |
| A00216 | A08785 | 439 | A00216 | A08878 | 899 |
| A00216 | A08982 | 262 | A00216 | A09072 | 945 |
| A00216 | A09080 | 201 | A00216 | A09119 | 283 |
| A00216 | A09173 | 229 | A00216 | A09351 | 184 |
| A00216 | A09561 | 154 | A00216 | A09791 | 383 |
| A00216 | A10013 | 229 | A00216 | A10105 | 184 |
| A00216 | A10252 | 249 | A00216 | A10346 | 291 |
| A00216 | A10700 | 165 | A00216 | A10757 | 154 |
| A00216 | A10967 | 491 | A00216 | A11315 | 329 |
| A00216 | A11424 | 375 | A00216 | A11466 | 191 |
| A00216 | A11544 | 262 | A00216 | A11558 | 184 |
| A00216 | A11646 | 260 | A00216 | A11649 | 262 |

|        |        |     |        |        |     |
|--------|--------|-----|--------|--------|-----|
| A00216 | A11851 | 184 | A00216 | A11911 | 358 |
| A00216 | A11983 | 899 | A00216 | A12115 | 249 |
| A00216 | A12622 | 283 | A00216 | A12793 | 480 |
| A00216 | A12909 | 283 | A00216 | A13140 | 191 |
| A00216 | A13258 | 249 | A00216 | A13280 | 213 |
| A00216 | A13327 | 303 | A00216 | A13329 | 201 |
| A00216 | A13356 | 184 | A00216 | A13734 | 299 |
| A00216 | A13892 | 262 | A00216 | A14071 | 180 |
| A00216 | A14198 | 899 | A00216 | A14210 | 184 |
| A00216 | A14362 | 268 | A00216 | A14380 | 165 |
| A00216 | A14381 | 323 | A00216 | A14436 | 165 |
| A00216 | A14443 | 899 | A00216 | A14600 | 184 |
| A00216 | A14625 | 151 | A00216 | A14652 | 333 |
| A00216 | A14767 | 283 | A00216 | A15060 | 201 |
| A00216 | A15293 | 908 | A00216 | A15294 | 899 |
| A00216 | A15321 | 217 | A00216 | A15338 | 262 |
| A00216 | A15422 | 160 | A00216 | A15475 | 179 |
| A00216 | A15498 | 291 | A00216 | A15532 | 346 |
| A00216 | A15564 | 262 | A00216 | A16152 | 184 |
| A00216 | A16171 | 229 | A00216 | A16174 | 213 |
| A00216 | A16195 | 213 | A00216 | A16562 | 283 |
| A00216 | A16614 | 262 | A00216 | A16741 | 174 |
| A00216 | A17052 | 283 | A00216 | A17078 | 152 |
| A00216 | A17108 | 435 | A00217 | A00221 | 187 |
| A00217 | A00252 | 441 | A00217 | A00267 | 265 |
| A00217 | A00273 | 481 | A00217 | A00407 | 185 |
| A00217 | A01281 | 418 | A00217 | A01512 | 195 |
| A00217 | A01550 | 254 | A00217 | A01553 | 168 |
| A00217 | A01559 | 414 | A00217 | A01572 | 436 |
| A00217 | A01592 | 491 | A00217 | A01594 | 285 |
| A00217 | A01604 | 307 | A00217 | A01605 | 151 |
| A00217 | A01628 | 337 | A00217 | A01640 | 424 |
| A00217 | A01660 | 345 | A00217 | A01702 | 180 |
| A00217 | A03057 | 367 | A00217 | A04452 | 303 |
| A00217 | A04668 | 215 | A00217 | A04809 | 475 |
| A00217 | A04957 | 200 | A00217 | A06253 | 167 |
| A00217 | A06919 | 154 | A00217 | A08827 | 190 |
| A00217 | A08899 | 221 | A00217 | A08926 | 159 |
| A00217 | A09111 | 252 | A00217 | A09124 | 218 |
| A00217 | A09162 | 234 | A00217 | A09413 | 196 |
| A00217 | A09644 | 276 | A00217 | A09752 | 165 |
| A00217 | A09866 | 252 | A00217 | A11549 | 400 |
| A00217 | A11574 | 252 | A00217 | A11767 | 201 |
| A00217 | A12014 | 294 | A00217 | A13741 | 460 |
| A00217 | A14009 | 490 | A00217 | A14594 | 249 |
| A00217 | A14694 | 389 | A00217 | A15030 | 208 |



|        |        |     |        |        |     |
|--------|--------|-----|--------|--------|-----|
| A00217 | A16051 | 246 | A00217 | A17075 | 221 |
| A00218 | A00219 | 452 | A00218 | A00227 | 486 |
| A00218 | A00258 | 562 | A00218 | A00264 | 489 |
| A00218 | A00294 | 491 | A00218 | A00301 | 348 |
| A00218 | A00311 | 243 | A00218 | A00338 | 488 |
| A00218 | A00359 | 451 | A00218 | A00385 | 290 |
| A00218 | A00449 | 456 | A00218 | A00472 | 491 |
| A00218 | A00485 | 348 | A00218 | A00556 | 226 |
| A00218 | A00656 | 491 | A00218 | A00659 | 312 |
| A00218 | A00662 | 329 | A00218 | A00663 | 196 |
| A00218 | A00688 | 177 | A00218 | A01138 | 347 |
| A00218 | A01157 | 185 | A00218 | A01209 | 185 |
| A00218 | A01478 | 270 | A00218 | A01526 | 491 |
| A00218 | A01556 | 491 | A00218 | A01578 | 454 |
| A00218 | A01640 | 491 | A00218 | A01663 | 163 |
| A00218 | A01726 | 373 | A00218 | A01741 | 443 |
| A00218 | A01743 | 483 | A00218 | A01758 | 201 |
| A00218 | A01900 | 191 | A00218 | A01982 | 491 |
| A00218 | A02000 | 490 | A00218 | A02010 | 291 |
| A00218 | A02021 | 481 | A00218 | A02046 | 299 |
| A00218 | A02048 | 491 | A00218 | A02049 | 488 |
| A00218 | A02071 | 260 | A00218 | A02126 | 182 |
| A00218 | A02146 | 486 | A00218 | A02148 | 481 |
| A00218 | A02157 | 159 | A00218 | A02180 | 473 |
| A00218 | A02183 | 481 | A00218 | A02186 | 490 |
| A00218 | A02205 | 486 | A00218 | A02215 | 491 |
| A00218 | A02223 | 435 | A00218 | A02238 | 302 |
| A00218 | A02291 | 382 | A00218 | A02295 | 213 |
| A00218 | A02300 | 461 | A00218 | A02328 | 232 |
| A00218 | A02329 | 455 | A00218 | A02450 | 348 |
| A00218 | A02478 | 232 | A00218 | A02490 | 223 |
| A00218 | A02542 | 174 | A00218 | A02575 | 390 |
| A00218 | A02587 | 154 | A00218 | A02620 | 154 |
| A00218 | A02668 | 252 | A00218 | A02756 | 390 |
| A00218 | A02774 | 468 | A00218 | A02785 | 272 |
| A00218 | A02859 | 480 | A00218 | A02874 | 243 |
| A00218 | A02876 | 310 | A00218 | A02951 | 379 |
| A00218 | A02977 | 358 | A00218 | A02982 | 208 |
| A00218 | A03028 | 223 | A00218 | A03034 | 389 |
| A00218 | A03067 | 439 | A00218 | A03070 | 252 |
| A00218 | A03071 | 452 | A00218 | A03080 | 491 |
| A00218 | A03107 | 232 | A00218 | A03186 | 435 |
| A00218 | A03259 | 196 | A00218 | A03346 | 490 |
| A00218 | A03347 | 491 | A00218 | A03348 | 447 |
| A00218 | A03349 | 307 | A00218 | A03351 | 491 |
| A00218 | A03353 | 491 | A00218 | A03357 | 160 |

|        |        |     |        |        |     |
|--------|--------|-----|--------|--------|-----|
| A00218 | A03358 | 468 | A00218 | A03360 | 210 |
| A00218 | A03361 | 491 | A00218 | A03362 | 188 |
| A00218 | A03363 | 368 | A00218 | A03365 | 383 |
| A00218 | A03369 | 491 | A00218 | A03370 | 491 |
| A00218 | A03371 | 491 | A00218 | A03373 | 491 |
| A00218 | A03374 | 378 | A00218 | A03375 | 348 |
| A00218 | A03376 | 477 | A00218 | A03378 | 490 |
| A00218 | A03379 | 491 | A00218 | A03388 | 236 |
| A00218 | A03390 | 484 | A00218 | A03391 | 485 |
| A00218 | A03397 | 364 | A00218 | A03401 | 479 |
| A00218 | A03402 | 230 | A00218 | A03414 | 274 |
| A00218 | A03499 | 201 | A00218 | A03504 | 193 |
| A00218 | A03532 | 443 | A00218 | A03697 | 274 |
| A00218 | A03729 | 486 | A00218 | A03733 | 491 |
| A00218 | A03744 | 484 | A00218 | A03755 | 177 |
| A00218 | A03895 | 163 | A00218 | A04051 | 491 |
| A00218 | A04070 | 348 | A00218 | A04154 | 348 |
| A00218 | A04159 | 219 | A00218 | A04193 | 234 |
| A00218 | A04278 | 475 | A00218 | A04329 | 247 |
| A00218 | A04337 | 353 | A00218 | A04338 | 266 |
| A00218 | A04344 | 188 | A00218 | A04385 | 316 |
| A00218 | A04407 | 154 | A00218 | A04409 | 418 |
| A00218 | A04456 | 266 | A00218 | A04614 | 179 |
| A00218 | A04617 | 160 | A00218 | A04618 | 254 |
| A00218 | A04672 | 246 | A00218 | A04708 | 219 |
| A00218 | A04790 | 406 | A00218 | A04830 | 327 |
| A00218 | A04875 | 168 | A00218 | A04882 | 383 |
| A00218 | A04923 | 369 | A00218 | A04928 | 195 |
| A00218 | A04989 | 182 | A00218 | A05000 | 266 |
| A00218 | A05084 | 193 | A00218 | A05117 | 151 |
| A00218 | A05136 | 334 | A00218 | A05156 | 172 |
| A00218 | A05189 | 266 | A00218 | A05286 | 266 |
| A00218 | A05356 | 429 | A00218 | A05382 | 232 |
| A00218 | A05390 | 200 | A00218 | A05427 | 461 |
| A00218 | A05457 | 340 | A00218 | A05469 | 210 |
| A00218 | A05543 | 246 | A00218 | A05578 | 163 |
| A00218 | A05612 | 188 | A00218 | A05716 | 160 |
| A00218 | A05723 | 219 | A00218 | A05731 | 489 |
| A00218 | A05968 | 172 | A00218 | A05999 | 201 |
| A00218 | A06069 | 177 | A00218 | A06192 | 297 |
| A00218 | A06322 | 266 | A00218 | A06346 | 416 |
| A00218 | A06401 | 177 | A00218 | A06483 | 297 |
| A00218 | A06527 | 154 | A00218 | A06574 | 279 |
| A00218 | A06597 | 259 | A00218 | A06606 | 191 |
| A00218 | A06642 | 486 | A00218 | A06712 | 232 |
| A00218 | A06729 | 407 | A00218 | A06782 | 210 |

|        |        |     |        |        |     |
|--------|--------|-----|--------|--------|-----|
| A00218 | A06838 | 172 | A00218 | A06935 | 246 |
| A00218 | A07066 | 193 | A00218 | A07218 | 491 |
| A00218 | A07249 | 446 | A00218 | A07442 | 247 |
| A00218 | A07561 | 228 | A00218 | A07572 | 418 |
| A00218 | A07601 | 296 | A00218 | A07605 | 238 |
| A00218 | A07620 | 210 | A00218 | A08033 | 297 |
| A00218 | A08034 | 201 | A00218 | A08295 | 232 |
| A00218 | A09067 | 193 | A00218 | A09141 | 400 |
| A00218 | A09951 | 266 | A00218 | A09983 | 290 |
| A00218 | A10000 | 369 | A00218 | A10666 | 402 |
| A00218 | A10937 | 232 | A00218 | A10948 | 297 |
| A00218 | A11031 | 297 | A00218 | A11154 | 383 |
| A00218 | A11313 | 210 | A00218 | A11317 | 480 |
| A00218 | A11394 | 160 | A00218 | A11446 | 290 |
| A00218 | A11558 | 193 | A00218 | A11573 | 151 |
| A00218 | A11599 | 266 | A00218 | A11713 | 163 |
| A00218 | A11872 | 163 | A00218 | A11879 | 246 |
| A00218 | A12019 | 369 | A00218 | A12351 | 266 |
| A00218 | A12430 | 297 | A00218 | A12459 | 463 |
| A00218 | A12496 | 297 | A00218 | A12594 | 297 |
| A00218 | A12917 | 210 | A00218 | A12982 | 302 |
| A00218 | A12991 | 266 | A00218 | A13124 | 323 |
| A00218 | A13597 | 296 | A00218 | A13734 | 465 |
| A00218 | A13851 | 188 | A00218 | A14128 | 655 |
| A00218 | A14190 | 569 | A00218 | A14399 | 291 |
| A00218 | A14430 | 474 | A00218 | A14661 | 179 |
| A00218 | A14820 | 193 | A00218 | A15649 | 177 |
| A00218 | A15880 | 160 | A00218 | A15911 | 276 |
| A00218 | A16040 | 232 | A00218 | A16636 | 259 |
| A00218 | A16811 | 201 | A00218 | A16967 | 219 |
| A00219 | A00221 | 423 | A00219 | A00223 | 168 |
| A00219 | A00224 | 945 | A00219 | A00227 | 380 |
| A00219 | A00233 | 281 | A00219 | A00234 | 451 |
| A00219 | A00240 | 469 | A00219 | A00245 | 491 |
| A00219 | A00246 | 901 | A00219 | A00256 | 326 |
| A00219 | A00264 | 491 | A00219 | A00274 | 489 |
| A00219 | A00292 | 249 | A00219 | A00305 | 176 |
| A00219 | A00310 | 347 | A00219 | A00311 | 475 |
| A00219 | A00312 | 484 | A00219 | A00314 | 160 |
| A00219 | A00315 | 441 | A00219 | A00316 | 485 |
| A00219 | A00324 | 943 | A00219 | A00338 | 454 |
| A00219 | A00349 | 177 | A00219 | A00350 | 486 |
| A00219 | A00351 | 481 | A00219 | A00370 | 279 |
| A00219 | A00377 | 943 | A00219 | A00420 | 491 |
| A00219 | A00449 | 232 | A00219 | A00454 | 156 |
| A00219 | A00455 | 193 | A00219 | A00470 | 899 |

|        |        |     |        |        |     |
|--------|--------|-----|--------|--------|-----|
| A00219 | A00472 | 491 | A00219 | A00556 | 490 |
| A00219 | A00558 | 243 | A00219 | A00568 | 465 |
| A00219 | A00597 | 171 | A00219 | A00602 | 168 |
| A00219 | A00616 | 491 | A00219 | A00659 | 337 |
| A00219 | A00669 | 262 | A00219 | A00688 | 434 |
| A00219 | A00736 | 491 | A00219 | A00747 | 180 |
| A00219 | A00752 | 490 | A00219 | A00786 | 177 |
| A00219 | A00815 | 356 | A00219 | A00820 | 480 |
| A00219 | A00832 | 462 | A00219 | A00914 | 491 |
| A00219 | A01032 | 485 | A00219 | A01091 | 184 |
| A00219 | A01125 | 614 | A00219 | A01137 | 491 |
| A00219 | A01138 | 385 | A00219 | A01161 | 198 |
| A00219 | A01162 | 216 | A00219 | A01163 | 307 |
| A00219 | A01164 | 488 | A00219 | A01213 | 319 |
| A00219 | A01230 | 162 | A00219 | A01232 | 190 |
| A00219 | A01235 | 363 | A00219 | A01257 | 491 |
| A00219 | A01277 | 396 | A00219 | A01278 | 400 |
| A00219 | A01379 | 168 | A00219 | A01404 | 484 |
| A00219 | A01425 | 577 | A00219 | A01461 | 303 |
| A00219 | A01483 | 215 | A00219 | A01485 | 474 |
| A00219 | A01515 | 657 | A00219 | A01518 | 426 |
| A00219 | A01520 | 465 | A00219 | A01522 | 839 |
| A00219 | A01524 | 899 | A00219 | A01530 | 561 |
| A00219 | A01551 | 196 | A00219 | A01553 | 183 |
| A00219 | A01556 | 358 | A00219 | A01567 | 232 |
| A00219 | A01571 | 446 | A00219 | A01572 | 433 |
| A00219 | A01590 | 491 | A00219 | A01593 | 934 |
| A00219 | A01601 | 229 | A00219 | A01602 | 379 |
| A00219 | A01604 | 372 | A00219 | A01605 | 945 |
| A00219 | A01626 | 193 | A00219 | A01640 | 460 |
| A00219 | A01668 | 491 | A00219 | A01676 | 474 |
| A00219 | A01740 | 182 | A00219 | A01741 | 945 |
| A00219 | A01743 | 488 | A00219 | A01747 | 227 |
| A00219 | A01775 | 481 | A00219 | A01790 | 230 |
| A00219 | A01796 | 491 | A00219 | A01797 | 416 |
| A00219 | A01817 | 235 | A00219 | A01844 | 323 |
| A00219 | A01894 | 490 | A00219 | A01903 | 445 |
| A00219 | A01907 | 319 | A00219 | A01923 | 217 |
| A00219 | A01924 | 224 | A00219 | A01926 | 491 |
| A00219 | A01931 | 238 | A00219 | A01937 | 238 |
| A00219 | A01939 | 162 | A00219 | A01944 | 177 |
| A00219 | A01983 | 477 | A00219 | A02048 | 205 |
| A00219 | A02074 | 490 | A00219 | A02083 | 491 |
| A00219 | A02086 | 187 | A00219 | A02088 | 188 |
| A00219 | A02092 | 440 | A00219 | A02107 | 256 |
| A00219 | A02111 | 491 | A00219 | A02117 | 483 |

|        |        |     |        |        |     |
|--------|--------|-----|--------|--------|-----|
| A00219 | A02138 | 485 | A00219 | A02142 | 480 |
| A00219 | A02143 | 489 | A00219 | A02145 | 278 |
| A00219 | A02148 | 859 | A00219 | A02156 | 484 |
| A00219 | A02161 | 223 | A00219 | A02174 | 486 |
| A00219 | A02176 | 196 | A00219 | A02180 | 399 |
| A00219 | A02196 | 207 | A00219 | A02215 | 477 |
| A00219 | A02222 | 480 | A00219 | A02228 | 353 |
| A00219 | A02229 | 485 | A00219 | A02245 | 434 |
| A00219 | A02268 | 401 | A00219 | A02271 | 207 |
| A00219 | A02278 | 294 | A00219 | A02284 | 224 |
| A00219 | A02298 | 483 | A00219 | A02300 | 216 |
| A00219 | A02304 | 227 | A00219 | A02305 | 484 |
| A00219 | A02306 | 491 | A00219 | A02309 | 481 |
| A00219 | A02313 | 314 | A00219 | A02316 | 159 |
| A00219 | A02317 | 468 | A00219 | A02326 | 446 |
| A00219 | A02329 | 202 | A00219 | A02330 | 491 |
| A00219 | A02331 | 204 | A00219 | A02356 | 401 |
| A00219 | A02377 | 185 | A00219 | A02381 | 288 |
| A00219 | A02382 | 480 | A00219 | A02383 | 171 |
| A00219 | A02390 | 276 | A00219 | A02393 | 279 |
| A00219 | A02397 | 353 | A00219 | A02405 | 488 |
| A00219 | A02411 | 899 | A00219 | A02412 | 462 |
| A00219 | A02416 | 461 | A00219 | A02423 | 367 |
| A00219 | A02425 | 461 | A00219 | A02429 | 151 |
| A00219 | A02451 | 223 | A00219 | A02454 | 446 |
| A00219 | A02460 | 243 | A00219 | A02461 | 466 |
| A00219 | A02464 | 452 | A00219 | A02465 | 314 |
| A00219 | A02467 | 246 | A00219 | A02468 | 232 |
| A00219 | A02481 | 185 | A00219 | A02490 | 490 |
| A00219 | A02491 | 490 | A00219 | A02493 | 213 |
| A00219 | A02494 | 398 | A00219 | A02501 | 154 |
| A00219 | A02505 | 425 | A00219 | A02544 | 223 |
| A00219 | A02545 | 440 | A00219 | A02552 | 440 |
| A00219 | A02558 | 274 | A00219 | A02572 | 170 |
| A00219 | A02582 | 402 | A00219 | A02587 | 395 |
| A00219 | A02618 | 468 | A00219 | A02624 | 252 |
| A00219 | A02644 | 491 | A00219 | A02660 | 171 |
| A00219 | A02667 | 485 | A00219 | A02668 | 481 |
| A00219 | A02672 | 364 | A00219 | A02673 | 205 |
| A00219 | A02698 | 168 | A00219 | A02711 | 174 |
| A00219 | A02749 | 394 | A00219 | A02756 | 408 |
| A00219 | A02759 | 491 | A00219 | A02771 | 156 |
| A00219 | A02772 | 435 | A00219 | A02785 | 491 |
| A00219 | A02787 | 488 | A00219 | A02788 | 484 |
| A00219 | A02789 | 490 | A00219 | A02791 | 205 |
| A00219 | A02803 | 191 | A00219 | A02836 | 379 |

|        |        |     |        |        |     |
|--------|--------|-----|--------|--------|-----|
| A00219 | A02837 | 314 | A00219 | A02859 | 465 |
| A00219 | A02874 | 485 | A00219 | A02875 | 196 |
| A00219 | A02877 | 156 | A00219 | A02878 | 193 |
| A00219 | A02888 | 221 | A00219 | A02896 | 308 |
| A00219 | A02908 | 899 | A00219 | A02935 | 241 |
| A00219 | A02945 | 232 | A00219 | A02959 | 411 |
| A00219 | A02982 | 274 | A00219 | A02983 | 240 |
| A00219 | A03003 | 312 | A00219 | A03034 | 384 |
| A00219 | A03063 | 223 | A00219 | A03080 | 348 |
| A00219 | A03082 | 170 | A00219 | A03086 | 279 |
| A00219 | A03087 | 212 | A00219 | A03095 | 188 |
| A00219 | A03099 | 491 | A00219 | A03103 | 168 |
| A00219 | A03104 | 467 | A00219 | A03110 | 489 |
| A00219 | A03112 | 457 | A00219 | A03144 | 213 |
| A00219 | A03174 | 159 | A00219 | A03183 | 408 |
| A00219 | A03186 | 491 | A00219 | A03219 | 247 |
| A00219 | A03223 | 443 | A00219 | A03238 | 432 |
| A00219 | A03259 | 472 | A00219 | A03304 | 152 |
| A00219 | A03305 | 353 | A00219 | A03310 | 418 |
| A00219 | A03314 | 491 | A00219 | A03319 | 162 |
| A00219 | A03321 | 196 | A00219 | A03402 | 486 |
| A00219 | A03408 | 362 | A00219 | A03451 | 384 |
| A00219 | A03458 | 283 | A00219 | A03459 | 168 |
| A00219 | A03511 | 173 | A00219 | A03520 | 168 |
| A00219 | A03578 | 243 | A00219 | A03584 | 477 |
| A00219 | A03586 | 326 | A00219 | A03633 | 380 |
| A00219 | A03639 | 489 | A00219 | A03653 | 435 |
| A00219 | A03725 | 461 | A00219 | A03726 | 945 |
| A00219 | A03739 | 291 | A00219 | A03757 | 341 |
| A00219 | A03760 | 168 | A00219 | A03766 | 481 |
| A00219 | A03771 | 184 | A00219 | A03788 | 480 |
| A00219 | A03799 | 486 | A00219 | A03800 | 375 |
| A00219 | A03818 | 475 | A00219 | A03854 | 185 |
| A00219 | A03893 | 418 | A00219 | A03910 | 316 |
| A00219 | A03914 | 167 | A00219 | A03919 | 446 |
| A00219 | A03942 | 486 | A00219 | A03961 | 491 |
| A00219 | A03968 | 456 | A00219 | A03976 | 396 |
| A00219 | A04002 | 451 | A00219 | A04037 | 190 |
| A00219 | A04050 | 899 | A00219 | A04051 | 327 |
| A00219 | A04079 | 195 | A00219 | A04092 | 485 |
| A00219 | A04101 | 215 | A00219 | A04117 | 440 |
| A00219 | A04157 | 414 | A00219 | A04162 | 488 |
| A00219 | A04163 | 488 | A00219 | A04169 | 391 |
| A00219 | A04180 | 319 | A00219 | A04196 | 184 |
| A00219 | A04202 | 491 | A00219 | A04230 | 249 |
| A00219 | A04256 | 454 | A00219 | A04258 | 472 |

|        |        |     |        |        |     |
|--------|--------|-----|--------|--------|-----|
| A00219 | A04295 | 207 | A00219 | A04318 | 168 |
| A00219 | A04326 | 213 | A00219 | A04343 | 177 |
| A00219 | A04348 | 196 | A00219 | A04366 | 182 |
| A00219 | A04368 | 159 | A00219 | A04371 | 205 |
| A00219 | A04373 | 281 | A00219 | A04378 | 271 |
| A00219 | A04379 | 363 | A00219 | A04387 | 207 |
| A00219 | A04437 | 466 | A00219 | A04454 | 162 |
| A00219 | A04482 | 288 | A00219 | A04487 | 221 |
| A00219 | A04490 | 188 | A00219 | A04504 | 213 |
| A00219 | A04562 | 215 | A00219 | A04622 | 470 |
| A00219 | A04679 | 446 | A00219 | A04746 | 266 |
| A00219 | A04749 | 154 | A00219 | A04751 | 945 |
| A00219 | A04770 | 393 | A00219 | A04780 | 420 |
| A00219 | A04813 | 457 | A00219 | A04822 | 398 |
| A00219 | A04888 | 273 | A00219 | A04965 | 347 |
| A00219 | A04974 | 301 | A00219 | A04975 | 401 |
| A00219 | A04976 | 433 | A00219 | A04981 | 480 |
| A00219 | A05049 | 207 | A00219 | A05117 | 256 |
| A00219 | A05151 | 207 | A00219 | A05157 | 168 |
| A00219 | A05158 | 286 | A00219 | A05208 | 458 |
| A00219 | A05221 | 341 | A00219 | A05224 | 190 |
| A00219 | A05277 | 232 | A00219 | A05288 | 480 |
| A00219 | A05311 | 358 | A00219 | A05315 | 177 |
| A00219 | A05330 | 318 | A00219 | A05355 | 173 |
| A00219 | A05356 | 154 | A00219 | A05376 | 402 |
| A00219 | A05377 | 485 | A00219 | A05408 | 168 |
| A00219 | A05409 | 260 | A00219 | A05439 | 382 |
| A00219 | A05446 | 383 | A00219 | A05459 | 363 |
| A00219 | A05533 | 475 | A00219 | A05577 | 353 |
| A00219 | A05587 | 159 | A00219 | A05653 | 162 |
| A00219 | A05658 | 207 | A00219 | A05706 | 221 |
| A00219 | A05736 | 228 | A00219 | A05744 | 168 |
| A00219 | A05815 | 190 | A00219 | A05891 | 162 |
| A00219 | A05923 | 191 | A00219 | A05985 | 296 |
| A00219 | A06033 | 369 | A00219 | A06037 | 188 |
| A00219 | A06086 | 168 | A00219 | A06160 | 168 |
| A00219 | A06248 | 168 | A00219 | A06263 | 485 |
| A00219 | A06581 | 234 | A00219 | A06588 | 490 |
| A00219 | A06591 | 195 | A00219 | A06601 | 182 |
| A00219 | A06607 | 491 | A00219 | A06608 | 294 |
| A00219 | A06610 | 457 | A00219 | A06615 | 307 |
| A00219 | A06642 | 160 | A00219 | A06650 | 480 |
| A00219 | A06688 | 412 | A00219 | A06729 | 446 |
| A00219 | A06731 | 468 | A00219 | A06769 | 490 |
| A00219 | A06798 | 235 | A00219 | A06831 | 184 |
| A00219 | A06874 | 462 | A00219 | A06953 | 374 |

|        |        |     |        |        |     |
|--------|--------|-----|--------|--------|-----|
| A00219 | A07109 | 383 | A00219 | A07135 | 943 |
| A00219 | A07138 | 404 | A00219 | A07140 | 389 |
| A00219 | A07141 | 165 | A00219 | A07143 | 491 |
| A00219 | A07157 | 467 | A00219 | A07158 | 313 |
| A00219 | A07164 | 296 | A00219 | A07165 | 441 |
| A00219 | A07200 | 416 | A00219 | A07209 | 491 |
| A00219 | A07210 | 362 | A00219 | A07339 | 466 |
| A00219 | A07343 | 207 | A00219 | A07353 | 290 |
| A00219 | A07407 | 151 | A00219 | A07577 | 168 |
| A00219 | A07601 | 173 | A00219 | A07605 | 277 |
| A00219 | A07641 | 177 | A00219 | A07650 | 281 |
| A00219 | A07653 | 212 | A00219 | A07745 | 207 |
| A00219 | A07803 | 489 | A00219 | A07833 | 314 |
| A00219 | A07834 | 305 | A00219 | A07912 | 301 |
| A00219 | A08280 | 260 | A00219 | A08289 | 162 |
| A00219 | A08311 | 260 | A00219 | A08404 | 302 |
| A00219 | A08455 | 168 | A00219 | A08551 | 276 |
| A00219 | A08714 | 407 | A00219 | A08738 | 262 |
| A00219 | A08746 | 436 | A00219 | A08749 | 207 |
| A00219 | A08826 | 302 | A00219 | A08851 | 491 |
| A00219 | A08859 | 491 | A00219 | A08864 | 401 |
| A00219 | A08949 | 160 | A00219 | A09013 | 207 |
| A00219 | A09028 | 457 | A00219 | A09072 | 286 |
| A00219 | A09125 | 279 | A00219 | A09212 | 246 |
| A00219 | A09217 | 260 | A00219 | A09260 | 207 |
| A00219 | A09442 | 159 | A00219 | A09467 | 260 |
| A00219 | A09480 | 256 | A00219 | A09509 | 232 |
| A00219 | A09539 | 212 | A00219 | A09540 | 252 |
| A00219 | A09550 | 173 | A00219 | A09559 | 307 |
| A00219 | A09732 | 417 | A00219 | A09733 | 489 |
| A00219 | A09797 | 278 | A00219 | A09886 | 168 |
| A00219 | A09890 | 151 | A00219 | A09942 | 207 |
| A00219 | A10002 | 260 | A00219 | A10004 | 207 |
| A00219 | A10010 | 207 | A00219 | A10018 | 241 |
| A00219 | A10044 | 404 | A00219 | A10045 | 404 |
| A00219 | A10046 | 412 | A00219 | A10074 | 168 |
| A00219 | A10145 | 260 | A00219 | A10237 | 205 |
| A00219 | A10278 | 902 | A00219 | A10336 | 491 |
| A00219 | A10508 | 154 | A00219 | A10540 | 205 |
| A00219 | A10594 | 152 | A00219 | A10609 | 317 |
| A00219 | A10611 | 177 | A00219 | A10625 | 201 |
| A00219 | A10725 | 243 | A00219 | A10743 | 312 |
| A00219 | A10963 | 168 | A00219 | A11123 | 151 |
| A00219 | A11124 | 899 | A00219 | A11132 | 385 |
| A00219 | A11313 | 485 | A00219 | A11415 | 313 |
| A00219 | A11424 | 184 | A00219 | A11446 | 162 |



|        |        |     |        |        |     |
|--------|--------|-----|--------|--------|-----|
| A00219 | A11485 | 380 | A00219 | A11523 | 162 |
| A00219 | A11548 | 168 | A00219 | A11602 | 302 |
| A00219 | A11614 | 358 | A00219 | A11683 | 229 |
| A00219 | A11787 | 168 | A00219 | A12261 | 168 |
| A00219 | A12317 | 207 | A00219 | A12361 | 177 |
| A00219 | A12393 | 385 | A00219 | A12412 | 168 |
| A00219 | A12578 | 207 | A00219 | A12622 | 207 |
| A00219 | A12897 | 458 | A00219 | A13140 | 234 |
| A00219 | A13176 | 207 | A00219 | A13224 | 168 |
| A00219 | A13225 | 899 | A00219 | A13252 | 207 |
| A00219 | A13281 | 207 | A00219 | A13310 | 165 |
| A00219 | A13734 | 216 | A00219 | A13812 | 152 |
| A00219 | A13829 | 330 | A00219 | A13849 | 234 |
| A00219 | A13860 | 294 | A00219 | A13904 | 168 |
| A00219 | A13944 | 171 | A00219 | A13987 | 182 |
| A00219 | A13994 | 446 | A00219 | A14072 | 380 |
| A00219 | A14111 | 168 | A00219 | A14135 | 162 |
| A00219 | A14188 | 366 | A00219 | A14190 | 485 |
| A00219 | A14198 | 219 | A00219 | A14202 | 265 |
| A00219 | A14210 | 491 | A00219 | A14258 | 446 |
| A00219 | A14371 | 491 | A00219 | A14379 | 371 |
| A00219 | A14399 | 174 | A00219 | A14405 | 306 |
| A00219 | A14430 | 190 | A00219 | A14440 | 388 |
| A00219 | A14443 | 912 | A00219 | A14483 | 212 |
| A00219 | A14511 | 491 | A00219 | A14554 | 408 |
| A00219 | A14570 | 191 | A00219 | A14667 | 205 |
| A00219 | A14733 | 193 | A00219 | A14892 | 207 |
| A00219 | A14930 | 477 | A00219 | A15024 | 207 |
| A00219 | A15089 | 168 | A00219 | A15230 | 353 |
| A00219 | A15233 | 188 | A00219 | A15268 | 420 |
| A00219 | A15292 | 486 | A00219 | A15295 | 660 |
| A00219 | A15312 | 404 | A00219 | A15313 | 462 |
| A00219 | A15318 | 426 | A00219 | A15348 | 162 |
| A00219 | A15349 | 419 | A00219 | A15352 | 318 |
| A00219 | A15381 | 420 | A00219 | A15422 | 245 |
| A00219 | A15463 | 180 | A00219 | A15484 | 221 |
| A00219 | A15495 | 490 | A00219 | A15498 | 491 |
| A00219 | A15506 | 160 | A00219 | A15598 | 457 |
| A00219 | A15630 | 210 | A00219 | A15726 | 439 |
| A00219 | A15913 | 491 | A00219 | A16001 | 207 |
| A00219 | A16114 | 171 | A00219 | A16257 | 401 |
| A00219 | A16300 | 252 | A00219 | A16636 | 491 |
| A00219 | A17076 | 163 | A00219 | A17106 | 207 |
| A00219 | A17155 | 218 | A00219 | A17183 | 207 |
| A00220 | A00221 | 945 | A00220 | A00222 | 360 |
| A00220 | A00223 | 994 | A00220 | A00230 | 899 |

|        |        |     |        |        |     |
|--------|--------|-----|--------|--------|-----|
| A00220 | A00231 | 210 | A00220 | A00246 | 899 |
| A00220 | A00274 | 427 | A00220 | A00318 | 205 |
| A00220 | A00476 | 319 | A00220 | A00616 | 274 |
| A00220 | A00694 | 323 | A00220 | A00752 | 443 |
| A00220 | A00870 | 408 | A00220 | A00914 | 210 |
| A00220 | A01009 | 446 | A00220 | A01011 | 470 |
| A00220 | A01198 | 369 | A00220 | A01425 | 308 |
| A00220 | A01524 | 447 | A00220 | A01527 | 918 |
| A00220 | A01553 | 899 | A00220 | A01558 | 899 |
| A00220 | A01604 | 945 | A00220 | A01615 | 899 |
| A00220 | A01640 | 942 | A00220 | A01654 | 490 |
| A00220 | A01669 | 154 | A00220 | A01755 | 160 |
| A00220 | A01867 | 210 | A00220 | A01870 | 486 |
| A00220 | A01877 | 221 | A00220 | A01880 | 468 |
| A00220 | A02012 | 210 | A00220 | A02065 | 185 |
| A00220 | A02074 | 380 | A00220 | A02105 | 229 |
| A00220 | A02111 | 372 | A00220 | A02247 | 307 |
| A00220 | A02251 | 383 | A00220 | A02333 | 490 |
| A00220 | A02337 | 475 | A00220 | A02370 | 374 |
| A00220 | A02381 | 258 | A00220 | A02382 | 484 |
| A00220 | A02384 | 386 | A00220 | A02416 | 475 |
| A00220 | A02457 | 210 | A00220 | A02458 | 277 |
| A00220 | A02459 | 193 | A00220 | A02460 | 337 |
| A00220 | A02490 | 460 | A00220 | A02491 | 490 |
| A00220 | A02494 | 165 | A00220 | A02498 | 215 |
| A00220 | A02502 | 154 | A00220 | A02505 | 165 |
| A00220 | A02590 | 212 | A00220 | A02592 | 165 |
| A00220 | A02606 | 425 | A00220 | A02608 | 260 |
| A00220 | A02617 | 378 | A00220 | A02630 | 213 |
| A00220 | A02637 | 427 | A00220 | A02639 | 163 |
| A00220 | A02654 | 154 | A00220 | A02657 | 294 |
| A00220 | A02659 | 416 | A00220 | A02661 | 262 |
| A00220 | A02711 | 174 | A00220 | A02731 | 180 |
| A00220 | A02732 | 193 | A00220 | A02751 | 218 |
| A00220 | A02761 | 174 | A00220 | A02764 | 274 |
| A00220 | A02812 | 177 | A00220 | A02851 | 252 |
| A00220 | A02854 | 389 | A00220 | A02863 | 384 |
| A00220 | A02896 | 205 | A00220 | A02917 | 455 |
| A00220 | A02945 | 463 | A00220 | A02977 | 196 |
| A00220 | A03006 | 324 | A00220 | A03035 | 246 |
| A00220 | A03049 | 290 | A00220 | A03100 | 157 |
| A00220 | A03109 | 230 | A00220 | A03177 | 177 |
| A00220 | A03224 | 400 | A00220 | A03228 | 322 |
| A00220 | A03316 | 276 | A00220 | A03451 | 216 |
| A00220 | A03610 | 202 | A00220 | A03753 | 323 |
| A00220 | A03771 | 157 | A00220 | A03817 | 424 |

|        |        |     |        |        |     |
|--------|--------|-----|--------|--------|-----|
| A00220 | A03898 | 358 | A00220 | A03919 | 243 |
| A00220 | A03937 | 202 | A00220 | A03976 | 348 |
| A00220 | A04082 | 232 | A00220 | A04130 | 154 |
| A00220 | A04217 | 180 | A00220 | A04238 | 288 |
| A00220 | A04244 | 425 | A00220 | A04248 | 490 |
| A00220 | A04263 | 294 | A00220 | A04320 | 227 |
| A00220 | A04398 | 281 | A00220 | A04415 | 363 |
| A00220 | A04478 | 422 | A00220 | A04490 | 193 |
| A00220 | A04492 | 358 | A00220 | A04854 | 337 |
| A00220 | A04909 | 238 | A00220 | A05078 | 285 |
| A00220 | A05124 | 176 | A00220 | A05305 | 351 |
| A00220 | A05679 | 353 | A00220 | A05815 | 297 |
| A00220 | A05944 | 491 | A00220 | A05959 | 294 |
| A00220 | A05985 | 477 | A00220 | A06054 | 485 |
| A00220 | A06055 | 319 | A00220 | A06095 | 267 |
| A00220 | A06404 | 384 | A00220 | A06414 | 427 |
| A00220 | A06415 | 263 | A00220 | A06780 | 291 |
| A00220 | A06818 | 374 | A00220 | A06968 | 160 |
| A00220 | A07143 | 174 | A00220 | A07145 | 286 |
| A00220 | A07151 | 182 | A00220 | A07157 | 641 |
| A00220 | A07161 | 396 | A00220 | A07166 | 277 |
| A00220 | A07173 | 481 | A00220 | A07311 | 899 |
| A00220 | A07372 | 396 | A00220 | A07390 | 241 |
| A00220 | A08012 | 302 | A00220 | A08280 | 477 |
| A00220 | A08518 | 154 | A00220 | A08580 | 347 |
| A00220 | A08585 | 347 | A00220 | A08612 | 413 |
| A00220 | A08714 | 191 | A00220 | A08908 | 229 |
| A00220 | A09259 | 257 | A00220 | A09419 | 422 |
| A00220 | A09939 | 274 | A00220 | A10214 | 532 |
| A00220 | A10249 | 323 | A00220 | A10319 | 152 |
| A00220 | A10469 | 317 | A00220 | A10760 | 170 |
| A00220 | A11096 | 262 | A00220 | A11300 | 532 |
| A00220 | A11309 | 260 | A00220 | A11544 | 202 |
| A00220 | A11561 | 276 | A00220 | A11881 | 335 |
| A00220 | A11911 | 221 | A00220 | A11932 | 313 |
| A00220 | A11983 | 428 | A00220 | A12913 | 347 |
| A00220 | A13860 | 523 | A00220 | A13872 | 405 |
| A00220 | A13886 | 251 | A00220 | A14038 | 428 |
| A00220 | A14231 | 515 | A00220 | A14236 | 260 |
| A00220 | A14266 | 167 | A00220 | A14366 | 443 |
| A00220 | A14373 | 274 | A00220 | A14376 | 251 |
| A00220 | A14392 | 247 | A00220 | A14439 | 185 |
| A00220 | A14442 | 221 | A00220 | A14443 | 899 |
| A00220 | A14554 | 281 | A00220 | A14598 | 241 |
| A00220 | A14599 | 199 | A00220 | A15323 | 401 |
| A00220 | A15394 | 165 | A00220 | A15395 | 419 |

|        |        |     |        |        |     |
|--------|--------|-----|--------|--------|-----|
| A00220 | A15425 | 474 | A00220 | A15427 | 202 |
| A00220 | A15518 | 269 | A00220 | A15601 | 422 |
| A00220 | A15603 | 475 | A00220 | A15605 | 477 |
| A00220 | A15607 | 247 | A00220 | A15608 | 441 |
| A00220 | A15642 | 306 | A00220 | A15795 | 160 |
| A00220 | A15832 | 323 | A00220 | A15958 | 358 |
| A00220 | A15964 | 218 | A00220 | A15981 | 243 |
| A00220 | A16010 | 378 | A00220 | A16024 | 323 |
| A00221 | A00222 | 425 | A00221 | A00223 | 945 |
| A00221 | A00229 | 308 | A00221 | A00230 | 899 |
| A00221 | A00231 | 183 | A00221 | A00234 | 472 |
| A00221 | A00254 | 435 | A00221 | A00255 | 157 |
| A00221 | A00264 | 357 | A00221 | A00292 | 485 |
| A00221 | A00335 | 279 | A00221 | A00356 | 277 |
| A00221 | A00400 | 299 | A00221 | A00574 | 646 |
| A00221 | A00601 | 168 | A00221 | A00616 | 462 |
| A00221 | A00654 | 420 | A00221 | A00688 | 198 |
| A00221 | A00697 | 375 | A00221 | A00752 | 174 |
| A00221 | A00868 | 299 | A00221 | A00870 | 399 |
| A00221 | A00926 | 195 | A00221 | A01056 | 219 |
| A00221 | A01098 | 190 | A00221 | A01127 | 256 |
| A00221 | A01140 | 221 | A00221 | A01161 | 210 |
| A00221 | A01172 | 184 | A00221 | A01310 | 408 |
| A00221 | A01339 | 152 | A00221 | A01425 | 466 |
| A00221 | A01500 | 270 | A00221 | A01524 | 989 |
| A00221 | A01527 | 903 | A00221 | A01536 | 491 |
| A00221 | A01558 | 899 | A00221 | A01561 | 899 |
| A00221 | A01568 | 332 | A00221 | A01604 | 486 |
| A00221 | A01605 | 388 | A00221 | A01615 | 899 |
| A00221 | A01640 | 490 | A00221 | A01652 | 162 |
| A00221 | A01692 | 358 | A00221 | A01908 | 473 |
| A00221 | A01939 | 200 | A00221 | A01978 | 165 |
| A00221 | A02054 | 330 | A00221 | A02058 | 446 |
| A00221 | A02088 | 229 | A00221 | A02111 | 173 |
| A00221 | A02151 | 422 | A00221 | A02170 | 249 |
| A00221 | A02243 | 188 | A00221 | A02251 | 369 |
| A00221 | A02278 | 246 | A00221 | A02333 | 469 |
| A00221 | A02353 | 633 | A00221 | A02369 | 200 |
| A00221 | A02419 | 327 | A00221 | A02425 | 314 |
| A00221 | A02465 | 185 | A00221 | A02490 | 445 |
| A00221 | A02491 | 489 | A00221 | A02494 | 207 |
| A00221 | A02507 | 172 | A00221 | A02547 | 362 |
| A00221 | A02570 | 252 | A00221 | A02592 | 475 |
| A00221 | A02597 | 216 | A00221 | A02608 | 176 |
| A00221 | A02718 | 500 | A00221 | A02730 | 216 |
| A00221 | A02769 | 172 | A00221 | A02803 | 445 |

|        |        |     |        |        |     |
|--------|--------|-----|--------|--------|-----|
| A00221 | A02812 | 223 | A00221 | A03029 | 276 |
| A00221 | A03071 | 279 | A00221 | A03110 | 268 |
| A00221 | A03165 | 165 | A00221 | A03171 | 157 |
| A00221 | A03228 | 391 | A00221 | A03271 | 474 |
| A00221 | A03470 | 281 | A00221 | A03477 | 737 |
| A00221 | A03591 | 623 | A00221 | A03639 | 162 |
| A00221 | A03731 | 191 | A00221 | A03744 | 174 |
| A00221 | A03798 | 443 | A00221 | A03800 | 330 |
| A00221 | A03817 | 485 | A00221 | A03826 | 321 |
| A00221 | A03937 | 241 | A00221 | A03942 | 154 |
| A00221 | A04016 | 252 | A00221 | A04069 | 236 |
| A00221 | A04073 | 491 | A00221 | A04161 | 234 |
| A00221 | A04169 | 172 | A00221 | A04218 | 174 |
| A00221 | A04230 | 219 | A00221 | A04249 | 196 |
| A00221 | A04398 | 942 | A00221 | A04422 | 489 |
| A00221 | A04450 | 212 | A00221 | A04471 | 193 |
| A00221 | A04490 | 490 | A00221 | A04492 | 277 |
| A00221 | A04755 | 188 | A00221 | A04819 | 230 |
| A00221 | A04827 | 230 | A00221 | A04879 | 350 |
| A00221 | A04914 | 232 | A00221 | A04917 | 252 |
| A00221 | A05020 | 735 | A00221 | A05027 | 497 |
| A00221 | A05082 | 174 | A00221 | A05091 | 302 |
| A00221 | A05129 | 285 | A00221 | A05183 | 212 |
| A00221 | A05276 | 160 | A00221 | A05337 | 353 |
| A00221 | A05373 | 260 | A00221 | A05407 | 408 |
| A00221 | A05422 | 236 | A00221 | A05606 | 406 |
| A00221 | A05670 | 396 | A00221 | A05815 | 221 |
| A00221 | A05944 | 281 | A00221 | A06037 | 483 |
| A00221 | A06054 | 430 | A00221 | A06286 | 193 |
| A00221 | A06306 | 313 | A00221 | A06359 | 723 |
| A00221 | A06392 | 329 | A00221 | A06769 | 152 |
| A00221 | A06814 | 330 | A00221 | A06852 | 252 |
| A00221 | A06899 | 176 | A00221 | A06902 | 329 |
| A00221 | A07135 | 302 | A00221 | A07138 | 165 |
| A00221 | A07143 | 204 | A00221 | A07164 | 246 |
| A00221 | A07174 | 160 | A00221 | A07390 | 154 |
| A00221 | A07751 | 243 | A00221 | A08052 | 374 |
| A00221 | A08199 | 380 | A00221 | A08293 | 380 |
| A00221 | A08570 | 168 | A00221 | A08574 | 226 |
| A00221 | A08882 | 335 | A00221 | A08932 | 185 |
| A00221 | A09077 | 221 | A00221 | A09218 | 943 |
| A00221 | A09295 | 236 | A00221 | A09305 | 221 |
| A00221 | A09644 | 366 | A00221 | A09672 | 468 |
| A00221 | A09983 | 200 | A00221 | A10231 | 443 |
| A00221 | A10599 | 218 | A00221 | A10668 | 216 |
| A00221 | A10679 | 162 | A00221 | A10756 | 945 |

|        |        |     |        |        |     |
|--------|--------|-----|--------|--------|-----|
| A00221 | A10923 | 216 | A00221 | A11086 | 196 |
| A00221 | A11422 | 165 | A00221 | A11561 | 193 |
| A00221 | A11628 | 160 | A00221 | A11771 | 183 |
| A00221 | A11792 | 177 | A00221 | A11940 | 165 |
| A00221 | A12155 | 285 | A00221 | A12215 | 185 |
| A00221 | A12658 | 367 | A00221 | A13162 | 364 |
| A00221 | A13225 | 899 | A00221 | A13546 | 151 |
| A00221 | A13904 | 302 | A00221 | A13983 | 338 |
| A00221 | A14190 | 488 | A00221 | A14194 | 344 |
| A00221 | A14196 | 299 | A00221 | A14198 | 340 |
| A00221 | A14210 | 390 | A00221 | A14260 | 162 |
| A00221 | A14371 | 276 | A00221 | A14438 | 165 |
| A00221 | A14511 | 283 | A00221 | A15292 | 167 |
| A00221 | A15294 | 299 | A00221 | A15498 | 246 |
| A00221 | A15607 | 162 | A00221 | A16024 | 252 |
| A00221 | A16343 | 221 | A00221 | A17019 | 230 |
| A00222 | A00223 | 491 | A00222 | A00292 | 174 |
| A00222 | A00595 | 246 | A00222 | A00651 | 283 |
| A00222 | A00690 | 165 | A00222 | A00700 | 205 |
| A00222 | A00870 | 77  | A00222 | A00916 | 344 |
| A00222 | A00992 | 79  | A00222 | A01053 | 174 |
| A00222 | A01065 | 246 | A00222 | A01092 | 486 |
| A00222 | A01098 | 491 | A00222 | A01120 | 293 |
| A00222 | A01127 | 190 | A00222 | A01140 | 301 |
| A00222 | A01206 | 205 | A00222 | A01234 | 230 |
| A00222 | A01291 | 363 | A00222 | A01351 | 96  |
| A00222 | A01425 | 486 | A00222 | A01457 | 174 |
| A00222 | A01468 | 224 | A00222 | A01470 | 208 |
| A00222 | A01492 | 491 | A00222 | A01496 | 110 |
| A00222 | A01598 | 207 | A00222 | A01599 | 177 |
| A00222 | A01649 | 241 | A00222 | A01877 | 215 |
| A00222 | A02164 | 63  | A00222 | A02179 | 374 |
| A00222 | A02250 | 185 | A00222 | A02265 | 258 |
| A00222 | A02355 | 249 | A00222 | A02414 | 436 |
| A00222 | A02415 | 294 | A00222 | A02494 | 259 |
| A00222 | A02584 | 263 | A00222 | A02895 | 173 |
| A00222 | A03338 | 188 | A00222 | A03438 | 101 |
| A00222 | A03571 | 172 | A00222 | A04230 | 313 |
| A00222 | A05370 | 330 | A00222 | A06821 | 221 |
| A00222 | A06825 | 265 | A00222 | A07139 | 324 |
| A00222 | A07157 | 210 | A00222 | A07422 | 912 |
| A00222 | A08012 | 296 | A00222 | A11853 | 268 |
| A00222 | A13126 | 149 | A00222 | A13989 | 490 |
| A00222 | A14428 | 63  | A00222 | A15764 | 180 |
| A00223 | A00236 | 491 | A00223 | A00252 | 491 |
| A00223 | A00253 | 491 | A00223 | A00265 | 188 |

|        |        |     |        |        |     |
|--------|--------|-----|--------|--------|-----|
| A00223 | A00268 | 486 | A00223 | A00277 | 285 |
| A00223 | A00283 | 469 | A00223 | A00292 | 252 |
| A00223 | A00304 | 401 | A00223 | A00327 | 470 |
| A00223 | A00328 | 490 | A00223 | A00334 | 162 |
| A00223 | A00335 | 741 | A00223 | A00356 | 746 |
| A00223 | A00357 | 171 | A00223 | A00358 | 441 |
| A00223 | A00362 | 324 | A00223 | A00414 | 263 |
| A00223 | A00501 | 286 | A00223 | A00504 | 157 |
| A00223 | A00531 | 358 | A00223 | A00571 | 229 |
| A00223 | A00589 | 389 | A00223 | A00603 | 162 |
| A00223 | A00605 | 477 | A00223 | A00648 | 477 |
| A00223 | A00651 | 491 | A00223 | A00653 | 216 |
| A00223 | A00700 | 486 | A00223 | A00701 | 271 |
| A00223 | A00713 | 216 | A00223 | A00759 | 899 |
| A00223 | A00763 | 477 | A00223 | A00782 | 245 |
| A00223 | A00787 | 434 | A00223 | A00839 | 477 |
| A00223 | A00861 | 473 | A00223 | A00870 | 489 |
| A00223 | A00872 | 364 | A00223 | A00878 | 470 |
| A00223 | A00902 | 369 | A00223 | A00906 | 319 |
| A00223 | A00916 | 401 | A00223 | A00923 | 355 |
| A00223 | A00966 | 457 | A00223 | A00972 | 469 |
| A00223 | A00990 | 491 | A00223 | A01012 | 452 |
| A00223 | A01037 | 468 | A00223 | A01053 | 279 |
| A00223 | A01056 | 747 | A00223 | A01065 | 281 |
| A00223 | A01072 | 436 | A00223 | A01088 | 352 |
| A00223 | A01090 | 473 | A00223 | A01092 | 361 |
| A00223 | A01098 | 688 | A00223 | A01112 | 469 |
| A00223 | A01120 | 461 | A00223 | A01127 | 714 |
| A00223 | A01129 | 401 | A00223 | A01130 | 477 |
| A00223 | A01140 | 491 | A00223 | A01160 | 313 |
| A00223 | A01166 | 470 | A00223 | A01168 | 486 |
| A00223 | A01178 | 371 | A00223 | A01198 | 263 |
| A00223 | A01206 | 456 | A00223 | A01234 | 452 |
| A00223 | A01238 | 199 | A00223 | A01240 | 452 |
| A00223 | A01249 | 265 | A00223 | A01288 | 463 |
| A00223 | A01289 | 491 | A00223 | A01291 | 969 |
| A00223 | A01294 | 188 | A00223 | A01306 | 379 |
| A00223 | A01423 | 296 | A00223 | A01425 | 773 |
| A00223 | A01433 | 373 | A00223 | A01464 | 486 |
| A00223 | A01468 | 490 | A00223 | A01470 | 462 |
| A00223 | A01492 | 953 | A00223 | A01496 | 490 |
| A00223 | A01527 | 899 | A00223 | A01538 | 316 |
| A00223 | A01540 | 321 | A00223 | A01546 | 316 |
| A00223 | A01558 | 899 | A00223 | A01579 | 484 |
| A00223 | A01586 | 419 | A00223 | A01598 | 364 |
| A00223 | A01601 | 486 | A00223 | A01604 | 944 |

|        |        |     |        |        |     |
|--------|--------|-----|--------|--------|-----|
| A00223 | A01605 | 408 | A00223 | A01614 | 313 |
| A00223 | A01618 | 406 | A00223 | A01620 | 310 |
| A00223 | A01640 | 944 | A00223 | A01649 | 470 |
| A00223 | A01718 | 159 | A00223 | A01730 | 490 |
| A00223 | A01740 | 486 | A00223 | A01741 | 330 |
| A00223 | A01755 | 249 | A00223 | A01822 | 196 |
| A00223 | A01877 | 466 | A00223 | A01888 | 184 |
| A00223 | A02089 | 188 | A00223 | A02164 | 394 |
| A00223 | A02165 | 63  | A00223 | A02179 | 475 |
| A00223 | A02216 | 245 | A00223 | A02243 | 160 |
| A00223 | A02265 | 481 | A00223 | A02325 | 405 |
| A00223 | A02413 | 88  | A00223 | A02414 | 290 |
| A00223 | A02416 | 63  | A00223 | A02418 | 157 |
| A00223 | A02434 | 252 | A00223 | A02437 | 157 |
| A00223 | A02490 | 63  | A00223 | A02491 | 160 |
| A00223 | A02494 | 747 | A00223 | A02550 | 184 |
| A00223 | A02582 | 156 | A00223 | A02592 | 71  |
| A00223 | A02597 | 188 | A00223 | A02703 | 424 |
| A00223 | A02815 | 217 | A00223 | A02816 | 470 |
| A00223 | A02860 | 460 | A00223 | A02877 | 159 |
| A00223 | A02895 | 465 | A00223 | A02914 | 249 |
| A00223 | A03069 | 384 | A00223 | A03083 | 430 |
| A00223 | A03112 | 157 | A00223 | A03228 | 187 |
| A00223 | A03308 | 310 | A00223 | A03331 | 208 |
| A00223 | A03334 | 386 | A00223 | A03437 | 323 |
| A00223 | A03438 | 490 | A00223 | A03451 | 230 |
| A00223 | A03461 | 210 | A00223 | A03544 | 184 |
| A00223 | A03567 | 347 | A00223 | A03571 | 483 |
| A00223 | A03582 | 362 | A00223 | A03604 | 210 |
| A00223 | A03625 | 899 | A00223 | A03645 | 210 |
| A00223 | A03671 | 308 | A00223 | A03686 | 899 |
| A00223 | A03705 | 196 | A00223 | A03753 | 188 |
| A00223 | A03773 | 313 | A00223 | A03774 | 204 |
| A00223 | A03796 | 260 | A00223 | A03888 | 350 |
| A00223 | A03977 | 273 | A00223 | A03981 | 491 |
| A00223 | A04116 | 198 | A00223 | A04230 | 491 |
| A00223 | A04234 | 226 | A00223 | A04312 | 279 |
| A00223 | A04342 | 475 | A00223 | A04415 | 126 |
| A00223 | A04418 | 212 | A00223 | A04422 | 374 |
| A00223 | A04490 | 441 | A00223 | A04492 | 243 |
| A00223 | A04507 | 279 | A00223 | A04622 | 159 |
| A00223 | A05085 | 246 | A00223 | A05086 | 428 |
| A00223 | A05090 | 198 | A00223 | A05360 | 335 |
| A00223 | A05370 | 313 | A00223 | A05385 | 157 |
| A00223 | A05411 | 326 | A00223 | A05477 | 434 |
| A00223 | A05501 | 335 | A00223 | A05601 | 99  |



|        |        |     |        |        |     |
|--------|--------|-----|--------|--------|-----|
| A00223 | A05616 | 310 | A00223 | A05654 | 87  |
| A00223 | A06279 | 187 | A00223 | A06324 | 375 |
| A00223 | A06351 | 361 | A00223 | A06486 | 204 |
| A00223 | A06812 | 210 | A00223 | A06814 | 491 |
| A00223 | A06825 | 489 | A00223 | A06965 | 160 |
| A00223 | A06987 | 168 | A00223 | A07001 | 179 |
| A00223 | A07138 | 361 | A00223 | A07143 | 167 |
| A00223 | A07163 | 160 | A00223 | A07201 | 491 |
| A00223 | A07243 | 467 | A00223 | A07251 | 180 |
| A00223 | A07307 | 404 | A00223 | A07398 | 188 |
| A00223 | A07412 | 329 | A00223 | A07506 | 210 |
| A00223 | A07536 | 151 | A00223 | A07546 | 246 |
| A00223 | A07726 | 346 | A00223 | A07935 | 168 |
| A00223 | A08052 | 480 | A00223 | A08070 | 207 |
| A00223 | A08273 | 414 | A00223 | A08315 | 307 |
| A00223 | A08357 | 385 | A00223 | A08559 | 438 |
| A00223 | A08571 | 899 | A00223 | A08653 | 130 |
| A00223 | A08662 | 279 | A00223 | A08682 | 146 |
| A00223 | A08835 | 385 | A00223 | A09044 | 163 |
| A00223 | A09248 | 338 | A00223 | A09292 | 262 |
| A00223 | A09494 | 335 | A00223 | A09550 | 180 |
| A00223 | A09620 | 419 | A00223 | A09644 | 327 |
| A00223 | A09722 | 246 | A00223 | A09960 | 246 |
| A00223 | A10034 | 308 | A00223 | A10080 | 246 |
| A00223 | A10092 | 310 | A00223 | A10247 | 171 |
| A00223 | A10249 | 226 | A00223 | A10417 | 486 |
| A00223 | A10569 | 235 | A00223 | A10633 | 202 |
| A00223 | A10748 | 238 | A00223 | A10814 | 157 |
| A00223 | A10839 | 374 | A00223 | A11096 | 283 |
| A00223 | A11331 | 355 | A00223 | A11392 | 383 |
| A00223 | A11400 | 441 | A00223 | A11932 | 490 |
| A00223 | A11981 | 377 | A00223 | A11992 | 152 |
| A00223 | A12661 | 259 | A00223 | A12687 | 265 |
| A00223 | A12970 | 217 | A00223 | A13052 | 184 |
| A00223 | A13107 | 152 | A00223 | A13126 | 419 |
| A00223 | A13581 | 259 | A00223 | A13824 | 899 |
| A00223 | A13829 | 899 | A00223 | A13862 | 217 |
| A00223 | A13875 | 262 | A00223 | A13989 | 974 |
| A00223 | A13992 | 205 | A00223 | A14038 | 260 |
| A00223 | A14169 | 215 | A00223 | A14216 | 486 |
| A00223 | A14246 | 899 | A00223 | A14443 | 899 |
| A00223 | A14561 | 246 | A00223 | A14843 | 174 |
| A00223 | A15063 | 279 | A00223 | A15174 | 260 |
| A00223 | A15235 | 351 | A00223 | A15297 | 899 |
| A00223 | A15559 | 899 | A00223 | A15743 | 339 |
| A00223 | A16024 | 226 | A00223 | A16686 | 170 |

|        |        |     |        |        |     |
|--------|--------|-----|--------|--------|-----|
| A00223 | A17193 | 475 | A00224 | A00225 | 945 |
| A00224 | A00226 | 945 | A00224 | A00227 | 899 |
| A00224 | A00228 | 899 | A00224 | A00230 | 965 |
| A00224 | A00231 | 226 | A00224 | A00232 | 475 |
| A00224 | A00233 | 483 | A00224 | A00234 | 926 |
| A00224 | A00235 | 955 | A00224 | A00236 | 909 |
| A00224 | A00239 | 972 | A00224 | A00240 | 959 |
| A00224 | A00241 | 955 | A00224 | A00242 | 485 |
| A00224 | A00243 | 493 | A00224 | A00244 | 951 |
| A00224 | A00245 | 235 | A00224 | A00246 | 932 |
| A00224 | A00247 | 899 | A00224 | A00248 | 899 |
| A00224 | A00250 | 899 | A00224 | A00252 | 943 |
| A00224 | A00253 | 945 | A00224 | A00254 | 949 |
| A00224 | A00257 | 904 | A00224 | A00261 | 959 |
| A00224 | A00262 | 899 | A00224 | A00263 | 950 |
| A00224 | A00264 | 899 | A00224 | A00265 | 458 |
| A00224 | A00266 | 899 | A00224 | A00269 | 955 |
| A00224 | A00270 | 950 | A00224 | A00271 | 903 |
| A00224 | A00275 | 899 | A00224 | A00283 | 199 |
| A00224 | A00285 | 228 | A00224 | A00294 | 943 |
| A00224 | A00309 | 235 | A00224 | A00316 | 491 |
| A00224 | A00324 | 945 | A00224 | A00341 | 227 |
| A00224 | A00378 | 452 | A00224 | A00381 | 302 |
| A00224 | A00418 | 425 | A00224 | A00431 | 173 |
| A00224 | A00440 | 283 | A00224 | A00457 | 474 |
| A00224 | A00482 | 404 | A00224 | A00523 | 899 |
| A00224 | A00526 | 899 | A00224 | A00531 | 245 |
| A00224 | A00533 | 945 | A00224 | A00552 | 463 |
| A00224 | A00556 | 490 | A00224 | A00557 | 154 |
| A00224 | A00561 | 899 | A00224 | A00566 | 160 |
| A00224 | A00638 | 199 | A00224 | A00643 | 512 |
| A00224 | A00658 | 283 | A00224 | A00666 | 481 |
| A00224 | A00669 | 944 | A00224 | A00671 | 276 |
| A00224 | A00696 | 174 | A00224 | A00736 | 579 |
| A00224 | A00747 | 942 | A00224 | A00748 | 489 |
| A00224 | A00757 | 480 | A00224 | A00786 | 899 |
| A00224 | A00801 | 340 | A00224 | A00815 | 180 |
| A00224 | A00820 | 491 | A00224 | A00825 | 942 |
| A00224 | A00829 | 209 | A00224 | A00832 | 945 |
| A00224 | A00835 | 430 | A00224 | A00858 | 174 |
| A00224 | A00887 | 943 | A00224 | A00914 | 945 |
| A00224 | A00926 | 461 | A00224 | A00930 | 162 |
| A00224 | A00933 | 417 | A00224 | A00939 | 165 |
| A00224 | A00993 | 413 | A00224 | A00997 | 443 |
| A00224 | A01002 | 899 | A00224 | A01016 | 899 |
| A00224 | A01017 | 173 | A00224 | A01052 | 949 |

|        |        |     |        |        |     |
|--------|--------|-----|--------|--------|-----|
| A00224 | A01053 | 172 | A00224 | A01070 | 899 |
| A00224 | A01109 | 187 | A00224 | A01124 | 273 |
| A00224 | A01125 | 256 | A00224 | A01162 | 199 |
| A00224 | A01172 | 408 | A00224 | A01173 | 333 |
| A00224 | A01176 | 899 | A00224 | A01178 | 472 |
| A00224 | A01194 | 378 | A00224 | A01210 | 156 |
| A00224 | A01237 | 199 | A00224 | A01244 | 899 |
| A00224 | A01259 | 165 | A00224 | A01277 | 480 |
| A00224 | A01291 | 920 | A00224 | A01297 | 199 |
| A00224 | A01302 | 193 | A00224 | A01307 | 419 |
| A00224 | A01396 | 188 | A00224 | A01406 | 435 |
| A00224 | A01415 | 899 | A00224 | A01425 | 899 |
| A00224 | A01430 | 393 | A00224 | A01445 | 173 |
| A00224 | A01450 | 180 | A00224 | A01452 | 490 |
| A00224 | A01461 | 254 | A00224 | A01473 | 954 |
| A00224 | A01478 | 908 | A00224 | A01501 | 154 |
| A00224 | A01512 | 926 | A00224 | A01524 | 966 |
| A00224 | A01527 | 970 | A00224 | A01540 | 199 |
| A00224 | A01548 | 398 | A00224 | A01553 | 940 |
| A00224 | A01554 | 940 | A00224 | A01558 | 971 |
| A00224 | A01560 | 955 | A00224 | A01561 | 903 |
| A00224 | A01562 | 918 | A00224 | A01570 | 173 |
| A00224 | A01572 | 949 | A00224 | A01576 | 905 |
| A00224 | A01588 | 945 | A00224 | A01591 | 950 |
| A00224 | A01592 | 955 | A00224 | A01593 | 936 |
| A00224 | A01600 | 171 | A00224 | A01602 | 945 |
| A00224 | A01605 | 905 | A00224 | A01610 | 269 |
| A00224 | A01612 | 967 | A00224 | A01615 | 949 |
| A00224 | A01628 | 899 | A00224 | A01636 | 952 |
| A00224 | A01637 | 922 | A00224 | A01638 | 943 |
| A00224 | A01639 | 899 | A00224 | A01640 | 948 |
| A00224 | A01645 | 193 | A00224 | A01647 | 199 |
| A00224 | A01650 | 949 | A00224 | A01651 | 944 |
| A00224 | A01660 | 199 | A00224 | A01665 | 899 |
| A00224 | A01668 | 491 | A00224 | A01675 | 899 |
| A00224 | A01676 | 451 | A00224 | A01680 | 899 |
| A00224 | A01688 | 942 | A00224 | A01692 | 947 |
| A00224 | A01694 | 254 | A00224 | A01697 | 263 |
| A00224 | A01700 | 273 | A00224 | A01702 | 943 |
| A00224 | A01705 | 198 | A00224 | A01708 | 899 |
| A00224 | A01709 | 914 | A00224 | A01712 | 442 |
| A00224 | A01718 | 899 | A00224 | A01719 | 899 |
| A00224 | A01741 | 491 | A00224 | A01743 | 491 |
| A00224 | A01789 | 329 | A00224 | A01790 | 480 |
| A00224 | A01796 | 491 | A00224 | A01797 | 488 |
| A00224 | A01798 | 369 | A00224 | A01812 | 168 |

|        |        |     |        |        |     |
|--------|--------|-----|--------|--------|-----|
| A00224 | A01819 | 213 | A00224 | A01839 | 279 |
| A00224 | A01844 | 955 | A00224 | A01850 | 152 |
| A00224 | A01855 | 491 | A00224 | A01856 | 462 |
| A00224 | A01859 | 489 | A00224 | A01861 | 152 |
| A00224 | A01864 | 481 | A00224 | A01876 | 380 |
| A00224 | A01900 | 489 | A00224 | A01941 | 449 |
| A00224 | A01959 | 338 | A00224 | A01974 | 160 |
| A00224 | A01995 | 467 | A00224 | A01996 | 899 |
| A00224 | A02030 | 491 | A00224 | A02050 | 160 |
| A00224 | A02086 | 299 | A00224 | A02148 | 281 |
| A00224 | A02163 | 954 | A00224 | A02211 | 899 |
| A00224 | A02226 | 202 | A00224 | A02268 | 323 |
| A00224 | A02304 | 433 | A00224 | A02308 | 199 |
| A00224 | A02311 | 340 | A00224 | A02331 | 481 |
| A00224 | A02361 | 216 | A00224 | A02362 | 467 |
| A00224 | A02377 | 432 | A00224 | A02381 | 472 |
| A00224 | A02382 | 946 | A00224 | A02393 | 163 |
| A00224 | A02411 | 899 | A00224 | A02416 | 899 |
| A00224 | A02419 | 899 | A00224 | A02454 | 446 |
| A00224 | A02464 | 899 | A00224 | A02520 | 358 |
| A00224 | A02562 | 246 | A00224 | A02564 | 486 |
| A00224 | A02639 | 157 | A00224 | A02671 | 477 |
| A00224 | A02695 | 447 | A00224 | A02703 | 313 |
| A00224 | A02711 | 200 | A00224 | A02723 | 358 |
| A00224 | A02741 | 235 | A00224 | A02776 | 291 |
| A00224 | A02829 | 171 | A00224 | A02830 | 361 |
| A00224 | A02836 | 184 | A00224 | A02837 | 486 |
| A00224 | A02859 | 418 | A00224 | A02895 | 270 |
| A00224 | A02981 | 190 | A00224 | A03003 | 475 |
| A00224 | A03007 | 438 | A00224 | A03019 | 441 |
| A00224 | A03057 | 373 | A00224 | A03091 | 281 |
| A00224 | A03110 | 899 | A00224 | A03112 | 491 |
| A00224 | A03113 | 217 | A00224 | A03186 | 460 |
| A00224 | A03209 | 902 | A00224 | A03213 | 443 |
| A00224 | A03214 | 340 | A00224 | A03223 | 489 |
| A00224 | A03259 | 489 | A00224 | A03267 | 223 |
| A00224 | A03275 | 446 | A00224 | A03292 | 162 |
| A00224 | A03321 | 490 | A00224 | A03422 | 943 |
| A00224 | A03432 | 430 | A00224 | A03434 | 330 |
| A00224 | A03436 | 488 | A00224 | A03451 | 425 |
| A00224 | A03477 | 489 | A00224 | A03480 | 251 |
| A00224 | A03500 | 160 | A00224 | A03512 | 490 |
| A00224 | A03536 | 230 | A00224 | A03569 | 472 |
| A00224 | A03575 | 949 | A00224 | A03586 | 413 |
| A00224 | A03591 | 919 | A00224 | A03611 | 488 |
| A00224 | A03641 | 223 | A00224 | A03686 | 899 |

|        |        |     |        |        |     |
|--------|--------|-----|--------|--------|-----|
| A00224 | A03726 | 901 | A00224 | A03741 | 904 |
| A00224 | A03752 | 199 | A00224 | A03803 | 470 |
| A00224 | A03817 | 899 | A00224 | A03818 | 174 |
| A00224 | A03843 | 402 | A00224 | A03858 | 199 |
| A00224 | A03861 | 491 | A00224 | A03946 | 276 |
| A00224 | A03990 | 945 | A00224 | A04010 | 224 |
| A00224 | A04012 | 906 | A00224 | A04050 | 329 |
| A00224 | A04053 | 219 | A00224 | A04062 | 899 |
| A00224 | A04110 | 293 | A00224 | A04117 | 422 |
| A00224 | A04175 | 218 | A00224 | A04398 | 899 |
| A00224 | A04622 | 483 | A00224 | A04699 | 932 |
| A00224 | A04751 | 945 | A00224 | A04790 | 386 |
| A00224 | A04807 | 357 | A00224 | A04849 | 472 |
| A00224 | A04850 | 490 | A00224 | A04861 | 173 |
| A00224 | A04888 | 452 | A00224 | A04902 | 480 |
| A00224 | A04938 | 196 | A00224 | A04949 | 196 |
| A00224 | A05006 | 435 | A00224 | A05008 | 944 |
| A00224 | A05009 | 940 | A00224 | A05015 | 945 |
| A00224 | A05029 | 906 | A00224 | A05062 | 954 |
| A00224 | A05064 | 258 | A00224 | A05070 | 157 |
| A00224 | A05082 | 490 | A00224 | A05112 | 406 |
| A00224 | A05127 | 235 | A00224 | A05216 | 945 |
| A00224 | A05278 | 404 | A00224 | A05284 | 480 |
| A00224 | A05288 | 491 | A00224 | A05415 | 263 |
| A00224 | A05418 | 446 | A00224 | A05428 | 936 |
| A00224 | A05446 | 475 | A00224 | A05453 | 899 |
| A00224 | A05454 | 303 | A00224 | A05482 | 899 |
| A00224 | A05506 | 157 | A00224 | A05767 | 446 |
| A00224 | A05880 | 423 | A00224 | A06063 | 213 |
| A00224 | A06258 | 157 | A00224 | A06268 | 490 |
| A00224 | A06277 | 899 | A00224 | A06289 | 899 |
| A00224 | A06295 | 899 | A00224 | A06379 | 283 |
| A00224 | A06504 | 473 | A00224 | A06581 | 490 |
| A00224 | A06597 | 881 | A00224 | A06608 | 935 |
| A00224 | A06610 | 945 | A00224 | A06615 | 490 |
| A00224 | A06648 | 462 | A00224 | A06660 | 920 |
| A00224 | A06687 | 401 | A00224 | A06735 | 173 |
| A00224 | A06764 | 246 | A00224 | A06765 | 425 |
| A00224 | A06819 | 195 | A00224 | A06825 | 151 |
| A00224 | A06882 | 899 | A00224 | A06907 | 578 |
| A00224 | A07004 | 335 | A00224 | A07091 | 449 |
| A00224 | A07157 | 464 | A00224 | A07165 | 921 |
| A00224 | A07190 | 486 | A00224 | A07191 | 486 |
| A00224 | A07311 | 950 | A00224 | A07339 | 486 |
| A00224 | A07422 | 899 | A00224 | A07570 | 172 |
| A00224 | A07604 | 413 | A00224 | A07762 | 272 |

|        |        |     |        |        |     |
|--------|--------|-----|--------|--------|-----|
| A00224 | A07797 | 899 | A00224 | A07798 | 475 |
| A00224 | A07834 | 489 | A00224 | A08013 | 306 |
| A00224 | A08137 | 529 | A00224 | A08205 | 199 |
| A00224 | A08207 | 191 | A00224 | A08280 | 531 |
| A00224 | A08571 | 951 | A00224 | A08700 | 176 |
| A00224 | A08836 | 385 | A00224 | A08839 | 929 |
| A00224 | A08858 | 951 | A00224 | A08860 | 154 |
| A00224 | A08878 | 935 | A00224 | A08944 | 279 |
| A00224 | A09059 | 392 | A00224 | A09084 | 277 |
| A00224 | A09110 | 271 | A00224 | A09256 | 944 |
| A00224 | A09263 | 196 | A00224 | A09319 | 945 |
| A00224 | A09383 | 899 | A00224 | A09416 | 151 |
| A00224 | A09542 | 899 | A00224 | A09556 | 491 |
| A00224 | A09568 | 905 | A00224 | A09752 | 199 |
| A00224 | A09758 | 199 | A00224 | A09842 | 229 |
| A00224 | A09913 | 939 | A00224 | A09977 | 469 |
| A00224 | A10065 | 266 | A00224 | A10174 | 466 |
| A00224 | A10185 | 899 | A00224 | A10247 | 263 |
| A00224 | A10330 | 193 | A00224 | A10365 | 899 |
| A00224 | A10392 | 899 | A00224 | A10506 | 452 |
| A00224 | A10544 | 425 | A00224 | A10547 | 549 |
| A00224 | A10580 | 906 | A00224 | A10581 | 899 |
| A00224 | A10601 | 916 | A00224 | A10615 | 945 |
| A00224 | A10623 | 899 | A00224 | A10624 | 341 |
| A00224 | A10625 | 467 | A00224 | A10673 | 450 |
| A00224 | A10743 | 319 | A00224 | A10801 | 899 |
| A00224 | A10813 | 899 | A00224 | A10833 | 901 |
| A00224 | A10875 | 199 | A00224 | A10894 | 490 |
| A00224 | A10899 | 212 | A00224 | A11019 | 899 |
| A00224 | A11023 | 266 | A00224 | A11027 | 224 |
| A00224 | A11125 | 899 | A00224 | A11149 | 259 |
| A00224 | A11180 | 179 | A00224 | A11184 | 279 |
| A00224 | A11286 | 429 | A00224 | A11291 | 469 |
| A00224 | A11304 | 475 | A00224 | A11346 | 275 |
| A00224 | A11369 | 944 | A00224 | A11430 | 489 |
| A00224 | A11478 | 423 | A00224 | A11487 | 945 |
| A00224 | A11493 | 329 | A00224 | A11543 | 306 |
| A00224 | A11567 | 199 | A00224 | A11601 | 899 |
| A00224 | A11683 | 491 | A00224 | A11834 | 899 |
| A00224 | A11850 | 903 | A00224 | A11858 | 238 |
| A00224 | A11902 | 326 | A00224 | A11923 | 657 |
| A00224 | A11943 | 450 | A00224 | A11983 | 964 |
| A00224 | A11993 | 160 | A00224 | A12132 | 223 |
| A00224 | A12195 | 252 | A00224 | A12383 | 935 |
| A00224 | A12664 | 925 | A00224 | A12705 | 931 |
| A00224 | A12730 | 373 | A00224 | A12897 | 286 |

|        |        |     |        |        |     |
|--------|--------|-----|--------|--------|-----|
| A00224 | A13147 | 457 | A00224 | A13228 | 235 |
| A00224 | A13250 | 899 | A00224 | A13346 | 490 |
| A00224 | A13368 | 900 | A00224 | A13373 | 172 |
| A00224 | A13390 | 915 | A00224 | A13391 | 899 |
| A00224 | A13393 | 899 | A00224 | A13516 | 311 |
| A00224 | A13517 | 201 | A00224 | A13605 | 899 |
| A00224 | A13607 | 193 | A00224 | A13617 | 255 |
| A00224 | A13667 | 191 | A00224 | A13759 | 353 |
| A00224 | A13824 | 903 | A00224 | A13829 | 472 |
| A00224 | A13928 | 444 | A00224 | A13975 | 945 |
| A00224 | A13977 | 899 | A00224 | A13978 | 899 |
| A00224 | A13980 | 581 | A00224 | A13981 | 899 |
| A00224 | A13982 | 484 | A00224 | A13983 | 485 |
| A00224 | A13984 | 899 | A00224 | A13985 | 905 |
| A00224 | A13986 | 326 | A00224 | A13990 | 899 |
| A00224 | A13991 | 940 | A00224 | A13997 | 276 |
| A00224 | A14001 | 899 | A00224 | A14005 | 899 |
| A00224 | A14006 | 491 | A00224 | A14030 | 899 |
| A00224 | A14032 | 899 | A00224 | A14035 | 899 |
| A00224 | A14042 | 899 | A00224 | A14045 | 901 |
| A00224 | A14055 | 434 | A00224 | A14059 | 899 |
| A00224 | A14128 | 362 | A00224 | A14148 | 238 |
| A00224 | A14154 | 174 | A00224 | A14188 | 491 |
| A00224 | A14190 | 173 | A00224 | A14193 | 199 |
| A00224 | A14198 | 943 | A00224 | A14199 | 458 |
| A00224 | A14202 | 911 | A00224 | A14208 | 185 |
| A00224 | A14209 | 257 | A00224 | A14220 | 508 |
| A00224 | A14221 | 521 | A00224 | A14269 | 243 |
| A00224 | A14279 | 199 | A00224 | A14299 | 945 |
| A00224 | A14303 | 211 | A00224 | A14393 | 899 |
| A00224 | A14430 | 234 | A00224 | A14433 | 905 |
| A00224 | A14443 | 948 | A00224 | A14444 | 945 |
| A00224 | A14456 | 911 | A00224 | A14472 | 899 |
| A00224 | A14496 | 191 | A00224 | A14625 | 165 |
| A00224 | A14643 | 269 | A00224 | A14694 | 899 |
| A00224 | A14699 | 173 | A00224 | A14758 | 199 |
| A00224 | A14930 | 899 | A00224 | A14986 | 213 |
| A00224 | A15099 | 404 | A00224 | A15182 | 899 |
| A00224 | A15241 | 296 | A00224 | A15291 | 949 |
| A00224 | A15292 | 909 | A00224 | A15293 | 899 |
| A00224 | A15294 | 899 | A00224 | A15315 | 884 |
| A00224 | A15323 | 243 | A00224 | A15345 | 703 |
| A00224 | A15347 | 890 | A00224 | A15366 | 266 |
| A00224 | A15384 | 518 | A00224 | A15416 | 168 |
| A00224 | A15528 | 484 | A00224 | A15613 | 226 |
| A00224 | A15614 | 950 | A00224 | A15617 | 651 |

|        |        |     |        |        |     |
|--------|--------|-----|--------|--------|-----|
| A00224 | A15624 | 270 | A00224 | A15665 | 336 |
| A00224 | A15673 | 436 | A00224 | A15726 | 955 |
| A00224 | A15752 | 217 | A00224 | A15854 | 173 |
| A00224 | A15920 | 899 | A00224 | A15935 | 234 |
| A00224 | A16083 | 899 | A00224 | A16135 | 477 |
| A00224 | A16284 | 246 | A00224 | A16304 | 486 |
| A00224 | A16322 | 469 | A00224 | A16328 | 332 |
| A00224 | A16364 | 548 | A00224 | A16467 | 311 |
| A00224 | A16532 | 160 | A00224 | A16581 | 159 |
| A00224 | A16741 | 173 | A00224 | A16938 | 899 |
| A00224 | A17160 | 899 | A00225 | A00226 | 491 |
| A00225 | A00230 | 899 | A00225 | A00246 | 899 |
| A00225 | A00257 | 489 | A00225 | A00265 | 491 |
| A00225 | A00306 | 489 | A00225 | A00533 | 413 |
| A00225 | A00557 | 215 | A00225 | A00565 | 163 |
| A00225 | A00736 | 490 | A00225 | A00805 | 151 |
| A00225 | A00843 | 491 | A00225 | A00847 | 488 |
| A00225 | A00856 | 314 | A00225 | A01088 | 388 |
| A00225 | A01214 | 230 | A00225 | A01307 | 373 |
| A00225 | A01514 | 160 | A00225 | A01558 | 910 |
| A00225 | A01560 | 257 | A00225 | A01576 | 441 |
| A00225 | A01588 | 901 | A00225 | A01591 | 215 |
| A00225 | A01636 | 929 | A00225 | A01637 | 475 |
| A00225 | A01650 | 463 | A00225 | A01651 | 944 |
| A00225 | A01668 | 176 | A00225 | A01859 | 65  |
| A00225 | A01988 | 241 | A00225 | A02376 | 486 |
| A00225 | A02452 | 205 | A00225 | A02737 | 681 |
| A00225 | A02825 | 625 | A00225 | A02904 | 294 |
| A00225 | A03244 | 303 | A00225 | A03278 | 301 |
| A00225 | A03457 | 215 | A00225 | A03524 | 291 |
| A00225 | A03569 | 230 | A00225 | A04378 | 274 |
| A00225 | A04574 | 163 | A00225 | A04697 | 218 |
| A00225 | A04902 | 188 | A00225 | A05029 | 963 |
| A00225 | A05416 | 185 | A00225 | A05645 | 208 |
| A00225 | A05832 | 258 | A00225 | A06581 | 272 |
| A00225 | A06597 | 491 | A00225 | A06648 | 171 |
| A00225 | A06907 | 266 | A00225 | A06971 | 245 |
| A00225 | A06980 | 230 | A00225 | A07311 | 427 |
| A00225 | A07422 | 903 | A00225 | A07760 | 469 |
| A00225 | A07814 | 172 | A00225 | A08391 | 176 |
| A00225 | A08583 | 232 | A00225 | A08860 | 486 |
| A00225 | A09218 | 199 | A00225 | A09319 | 477 |
| A00225 | A09977 | 353 | A00225 | A10244 | 252 |
| A00225 | A10459 | 224 | A00225 | A10460 | 291 |
| A00225 | A10576 | 271 | A00225 | A10601 | 402 |
| A00225 | A11474 | 378 | A00225 | A11475 | 188 |



|        |        |     |        |        |     |
|--------|--------|-----|--------|--------|-----|
| A00225 | A12522 | 185 | A00225 | A12664 | 217 |
| A00225 | A12719 | 185 | A00225 | A13228 | 160 |
| A00225 | A13346 | 378 | A00225 | A13511 | 260 |
| A00225 | A13617 | 154 | A00225 | A13975 | 193 |
| A00225 | A14196 | 457 | A00225 | A14208 | 469 |
| A00225 | A14827 | 173 | A00225 | A15105 | 314 |
| A00225 | A15291 | 491 | A00225 | A15614 | 466 |
| A00225 | A16467 | 199 | A00225 | A16497 | 236 |
| A00225 | A16766 | 360 | A00225 | A16969 | 285 |
| A00226 | A00230 | 899 | A00226 | A00246 | 899 |
| A00226 | A00257 | 467 | A00226 | A00263 | 308 |
| A00226 | A00265 | 171 | A00226 | A00533 | 121 |
| A00226 | A00736 | 191 | A00226 | A00801 | 217 |
| A00226 | A01178 | 180 | A00226 | A01307 | 232 |
| A00226 | A01524 | 899 | A00226 | A01548 | 63  |
| A00226 | A01554 | 935 | A00226 | A01558 | 903 |
| A00226 | A01560 | 324 | A00226 | A01588 | 991 |
| A00226 | A01591 | 285 | A00226 | A01636 | 899 |
| A00226 | A01651 | 899 | A00226 | A01668 | 183 |
| A00226 | A01709 | 369 | A00226 | A02145 | 327 |
| A00226 | A02689 | 193 | A00226 | A02737 | 165 |
| A00226 | A02825 | 360 | A00226 | A02826 | 249 |
| A00226 | A02975 | 249 | A00226 | A03432 | 152 |
| A00226 | A04182 | 174 | A00226 | A04657 | 201 |
| A00226 | A04905 | 201 | A00226 | A05029 | 473 |
| A00226 | A05203 | 255 | A00226 | A06597 | 466 |
| A00226 | A06608 | 380 | A00226 | A06735 | 306 |
| A00226 | A07311 | 257 | A00226 | A07422 | 900 |
| A00226 | A08860 | 380 | A00226 | A09204 | 255 |
| A00226 | A09303 | 182 | A00226 | A09319 | 486 |
| A00226 | A09502 | 199 | A00226 | A09745 | 235 |
| A00226 | A10336 | 182 | A00226 | A10601 | 937 |
| A00226 | A11180 | 174 | A00226 | A11971 | 355 |
| A00226 | A11972 | 332 | A00226 | A12131 | 355 |
| A00226 | A12343 | 281 | A00226 | A12360 | 355 |
| A00226 | A12522 | 281 | A00226 | A13975 | 228 |
| A00226 | A13982 | 436 | A00226 | A14269 | 305 |
| A00226 | A14456 | 909 | A00226 | A14944 | 260 |
| A00226 | A15291 | 939 | A00226 | A15614 | 929 |
| A00226 | A16916 | 243 | A00227 | A00230 | 899 |
| A00227 | A00247 | 942 | A00227 | A00254 | 457 |
| A00227 | A00315 | 135 | A00227 | A00351 | 188 |
| A00227 | A00472 | 299 | A00227 | A00478 | 491 |
| A00227 | A00624 | 156 | A00227 | A00656 | 241 |
| A00227 | A00659 | 491 | A00227 | A00663 | 265 |
| A00227 | A00815 | 168 | A00227 | A01178 | 74  |

|        |        |     |        |        |     |
|--------|--------|-----|--------|--------|-----|
| A00227 | A01257 | 219 | A00227 | A01527 | 899 |
| A00227 | A01544 | 324 | A00227 | A01556 | 154 |
| A00227 | A01558 | 899 | A00227 | A01575 | 291 |
| A00227 | A01585 | 363 | A00227 | A01722 | 79  |
| A00227 | A01737 | 491 | A00227 | A01741 | 436 |
| A00227 | A01797 | 221 | A00227 | A01846 | 174 |
| A00227 | A01861 | 191 | A00227 | A01864 | 152 |
| A00227 | A01926 | 454 | A00227 | A01929 | 195 |
| A00227 | A01959 | 224 | A00227 | A01985 | 149 |
| A00227 | A02008 | 483 | A00227 | A02009 | 430 |
| A00227 | A02010 | 364 | A00227 | A02011 | 491 |
| A00227 | A02012 | 481 | A00227 | A02014 | 469 |
| A00227 | A02015 | 356 | A00227 | A02026 | 423 |
| A00227 | A02028 | 486 | A00227 | A02044 | 121 |
| A00227 | A02048 | 430 | A00227 | A02114 | 439 |
| A00227 | A02119 | 104 | A00227 | A02121 | 460 |
| A00227 | A02126 | 238 | A00227 | A02148 | 171 |
| A00227 | A02213 | 185 | A00227 | A02238 | 272 |
| A00227 | A02361 | 160 | A00227 | A02423 | 118 |
| A00227 | A02425 | 390 | A00227 | A02429 | 274 |
| A00227 | A02454 | 141 | A00227 | A02465 | 378 |
| A00227 | A02472 | 63  | A00227 | A02481 | 488 |
| A00227 | A02574 | 319 | A00227 | A02611 | 469 |
| A00227 | A02668 | 286 | A00227 | A02695 | 483 |
| A00227 | A02806 | 491 | A00227 | A02859 | 434 |
| A00227 | A02881 | 205 | A00227 | A02951 | 213 |
| A00227 | A03034 | 491 | A00227 | A03035 | 174 |
| A00227 | A03036 | 491 | A00227 | A03039 | 245 |
| A00227 | A03053 | 160 | A00227 | A03071 | 467 |
| A00227 | A03080 | 463 | A00227 | A03094 | 388 |
| A00227 | A03126 | 472 | A00227 | A03127 | 191 |
| A00227 | A03144 | 491 | A00227 | A03146 | 486 |
| A00227 | A03147 | 279 | A00227 | A03148 | 485 |
| A00227 | A03156 | 491 | A00227 | A03157 | 329 |
| A00227 | A03165 | 180 | A00227 | A03186 | 180 |
| A00227 | A03195 | 345 | A00227 | A03196 | 249 |
| A00227 | A03247 | 170 | A00227 | A03259 | 382 |
| A00227 | A03370 | 409 | A00227 | A03379 | 279 |
| A00227 | A03513 | 251 | A00227 | A03683 | 210 |
| A00227 | A03684 | 296 | A00227 | A03685 | 168 |
| A00227 | A03744 | 441 | A00227 | A03831 | 257 |
| A00227 | A03927 | 434 | A00227 | A03934 | 245 |
| A00227 | A03936 | 157 | A00227 | A04075 | 273 |
| A00227 | A04080 | 290 | A00227 | A04133 | 168 |
| A00227 | A04147 | 118 | A00227 | A04152 | 157 |
| A00227 | A04358 | 245 | A00227 | A04392 | 296 |

|        |        |     |        |        |     |
|--------|--------|-----|--------|--------|-----|
| A00227 | A04473 | 317 | A00227 | A04487 | 268 |
| A00227 | A04518 | 200 | A00227 | A04520 | 191 |
| A00227 | A04534 | 372 | A00227 | A04614 | 254 |
| A00227 | A04616 | 174 | A00227 | A05088 | 229 |
| A00227 | A05093 | 257 | A00227 | A05112 | 183 |
| A00227 | A05185 | 157 | A00227 | A05203 | 229 |
| A00227 | A05246 | 363 | A00227 | A05256 | 160 |
| A00227 | A05457 | 265 | A00227 | A05491 | 238 |
| A00227 | A05570 | 477 | A00227 | A05716 | 218 |
| A00227 | A05779 | 184 | A00227 | A05956 | 319 |
| A00227 | A05988 | 213 | A00227 | A06052 | 296 |
| A00227 | A06053 | 368 | A00227 | A06195 | 491 |
| A00227 | A06483 | 339 | A00227 | A06653 | 152 |
| A00227 | A06813 | 184 | A00227 | A06916 | 196 |
| A00227 | A07034 | 313 | A00227 | A07167 | 232 |
| A00227 | A07195 | 265 | A00227 | A07218 | 456 |
| A00227 | A07311 | 899 | A00227 | A07342 | 481 |
| A00227 | A07373 | 170 | A00227 | A07477 | 208 |
| A00227 | A07736 | 343 | A00227 | A09123 | 160 |
| A00227 | A09211 | 154 | A00227 | A09323 | 179 |
| A00227 | A09983 | 213 | A00227 | A09991 | 488 |
| A00227 | A10091 | 188 | A00227 | A10121 | 249 |
| A00227 | A10226 | 451 | A00227 | A10758 | 296 |
| A00227 | A11064 | 210 | A00227 | A11076 | 339 |
| A00227 | A11485 | 223 | A00227 | A12654 | 201 |
| A00227 | A12697 | 283 | A00227 | A12948 | 234 |
| A00227 | A12965 | 296 | A00227 | A13827 | 213 |
| A00227 | A14188 | 441 | A00227 | A14344 | 452 |
| A00227 | A15286 | 180 | A00227 | A15498 | 372 |
| A00227 | A15913 | 182 | A00227 | A15914 | 339 |
| A00227 | A16087 | 215 | A00227 | A16623 | 157 |
| A00227 | A16636 | 152 | A00227 | A16732 | 221 |
| A00227 | A16951 | 210 | A00228 | A00230 | 899 |
| A00228 | A00244 | 151 | A00228 | A00247 | 491 |
| A00228 | A00294 | 466 | A00228 | A00309 | 475 |
| A00228 | A00314 | 180 | A00228 | A00370 | 438 |
| A00228 | A00642 | 340 | A00228 | A00643 | 433 |
| A00228 | A00747 | 265 | A00228 | A00806 | 480 |
| A00228 | A00932 | 473 | A00228 | A01083 | 273 |
| A00228 | A01485 | 294 | A00228 | A01490 | 210 |
| A00228 | A01540 | 200 | A00228 | A01544 | 486 |
| A00228 | A01558 | 899 | A00228 | A01562 | 341 |
| A00228 | A01588 | 899 | A00228 | A01615 | 899 |
| A00228 | A01718 | 472 | A00228 | A01886 | 171 |
| A00228 | A01916 | 179 | A00228 | A01927 | 157 |
| A00228 | A02239 | 486 | A00228 | A02460 | 180 |

|        |        |     |        |        |     |
|--------|--------|-----|--------|--------|-----|
| A00228 | A02499 | 340 | A00228 | A02636 | 263 |
| A00228 | A02839 | 201 | A00228 | A03049 | 456 |
| A00228 | A03174 | 241 | A00228 | A03201 | 156 |
| A00228 | A03512 | 283 | A00228 | A03629 | 238 |
| A00228 | A03654 | 260 | A00228 | A03790 | 306 |
| A00228 | A03798 | 348 | A00228 | A04280 | 232 |
| A00228 | A04775 | 259 | A00228 | A04914 | 465 |
| A00228 | A04924 | 278 | A00228 | A05041 | 272 |
| A00228 | A05086 | 252 | A00228 | A05145 | 255 |
| A00228 | A05185 | 188 | A00228 | A05224 | 263 |
| A00228 | A05240 | 462 | A00228 | A05338 | 70  |
| A00228 | A05424 | 371 | A00228 | A05709 | 217 |
| A00228 | A07107 | 159 | A00228 | A07148 | 208 |
| A00228 | A07158 | 168 | A00228 | A08197 | 205 |
| A00228 | A08911 | 152 | A00228 | A09071 | 334 |
| A00228 | A09110 | 243 | A00228 | A09388 | 185 |
| A00228 | A09417 | 238 | A00228 | A09447 | 229 |
| A00228 | A09620 | 157 | A00228 | A09809 | 183 |
| A00228 | A09888 | 374 | A00228 | A09906 | 283 |
| A00228 | A10034 | 160 | A00228 | A10619 | 152 |
| A00228 | A10679 | 208 | A00228 | A10911 | 345 |
| A00228 | A11002 | 334 | A00228 | A11100 | 408 |
| A00228 | A11860 | 208 | A00228 | A12463 | 334 |
| A00228 | A12819 | 357 | A00228 | A12990 | 460 |
| A00228 | A13276 | 334 | A00228 | A13373 | 363 |
| A00228 | A13494 | 299 | A00228 | A13521 | 386 |
| A00228 | A13788 | 196 | A00228 | A14355 | 291 |
| A00228 | A14404 | 193 | A00228 | A14443 | 899 |
| A00228 | A14543 | 180 | A00228 | A14583 | 205 |
| A00228 | A14647 | 176 | A00228 | A15551 | 246 |
| A00228 | A15911 | 152 | A00228 | A15940 | 193 |
| A00228 | A16714 | 357 | A00228 | A16824 | 251 |
| A00228 | A16944 | 221 | A00229 | A00240 | 953 |
| A00229 | A00272 | 984 | A00229 | A00294 | 899 |
| A00229 | A00324 | 899 | A00229 | A00571 | 400 |
| A00229 | A00653 | 448 | A00229 | A00804 | 232 |
| A00229 | A00868 | 216 | A00229 | A00929 | 249 |
| A00229 | A00987 | 268 | A00229 | A01086 | 356 |
| A00229 | A01161 | 487 | A00229 | A01234 | 193 |
| A00229 | A01310 | 766 | A00229 | A01844 | 246 |
| A00229 | A02077 | 296 | A00229 | A02473 | 385 |
| A00229 | A02502 | 160 | A00229 | A02836 | 851 |
| A00229 | A03050 | 465 | A00229 | A03440 | 429 |
| A00229 | A03591 | 198 | A00229 | A03650 | 286 |
| A00229 | A03931 | 172 | A00229 | A04436 | 271 |
| A00229 | A04630 | 441 | A00229 | A05854 | 394 |

|        |        |     |        |        |     |
|--------|--------|-----|--------|--------|-----|
| A00229 | A06689 | 156 | A00229 | A07027 | 294 |
| A00229 | A07311 | 537 | A00229 | A07511 | 198 |
| A00229 | A10253 | 452 | A00229 | A10386 | 226 |
| A00229 | A11614 | 391 | A00229 | A11707 | 371 |
| A00229 | A11834 | 452 | A00229 | A14062 | 762 |
| A00229 | A14191 | 201 | A00229 | A14672 | 184 |
| A00229 | A15294 | 249 | A00229 | A15295 | 185 |
| A00230 | A00234 | 899 | A00230 | A00235 | 433 |
| A00230 | A00239 | 316 | A00230 | A00240 | 475 |
| A00230 | A00246 | 899 | A00230 | A00247 | 900 |
| A00230 | A00254 | 937 | A00230 | A00255 | 913 |
| A00230 | A00258 | 899 | A00230 | A00261 | 945 |
| A00230 | A00269 | 943 | A00230 | A00270 | 501 |
| A00230 | A00275 | 899 | A00230 | A00294 | 937 |
| A00230 | A00316 | 899 | A00230 | A00324 | 922 |
| A00230 | A00388 | 332 | A00230 | A00398 | 486 |
| A00230 | A00408 | 362 | A00230 | A00523 | 899 |
| A00230 | A00533 | 489 | A00230 | A00552 | 154 |
| A00230 | A00669 | 925 | A00230 | A00671 | 168 |
| A00230 | A00748 | 491 | A00230 | A00786 | 899 |
| A00230 | A00801 | 201 | A00230 | A00812 | 243 |
| A00230 | A00832 | 899 | A00230 | A00886 | 256 |
| A00230 | A00887 | 940 | A00230 | A00916 | 352 |
| A00230 | A00923 | 322 | A00230 | A00943 | 196 |
| A00230 | A00981 | 160 | A00230 | A00997 | 394 |
| A00230 | A01052 | 945 | A00230 | A01070 | 899 |
| A00230 | A01212 | 177 | A00230 | A01291 | 903 |
| A00230 | A01302 | 481 | A00230 | A01404 | 463 |
| A00230 | A01478 | 165 | A00230 | A01479 | 322 |
| A00230 | A01512 | 899 | A00230 | A01524 | 958 |
| A00230 | A01527 | 949 | A00230 | A01553 | 899 |
| A00230 | A01554 | 900 | A00230 | A01558 | 945 |
| A00230 | A01560 | 927 | A00230 | A01561 | 899 |
| A00230 | A01562 | 899 | A00230 | A01572 | 944 |
| A00230 | A01588 | 950 | A00230 | A01591 | 949 |
| A00230 | A01592 | 950 | A00230 | A01593 | 935 |
| A00230 | A01602 | 920 | A00230 | A01605 | 899 |
| A00230 | A01612 | 940 | A00230 | A01615 | 945 |
| A00230 | A01628 | 899 | A00230 | A01636 | 915 |
| A00230 | A01637 | 922 | A00230 | A01638 | 950 |
| A00230 | A01639 | 920 | A00230 | A01640 | 899 |
| A00230 | A01650 | 438 | A00230 | A01651 | 904 |
| A00230 | A01665 | 899 | A00230 | A01680 | 899 |
| A00230 | A01688 | 910 | A00230 | A01692 | 899 |
| A00230 | A01697 | 899 | A00230 | A01702 | 899 |
| A00230 | A01708 | 899 | A00230 | A01709 | 899 |

|        |        |     |        |        |     |
|--------|--------|-----|--------|--------|-----|
| A00230 | A01712 | 235 | A00230 | A01717 | 902 |
| A00230 | A01718 | 899 | A00230 | A01719 | 899 |
| A00230 | A01722 | 899 | A00230 | A01844 | 935 |
| A00230 | A01876 | 480 | A00230 | A01920 | 899 |
| A00230 | A01996 | 899 | A00230 | A02381 | 477 |
| A00230 | A02416 | 899 | A00230 | A02464 | 899 |
| A00230 | A02600 | 185 | A00230 | A02712 | 355 |
| A00230 | A02719 | 196 | A00230 | A03002 | 199 |
| A00230 | A03110 | 899 | A00230 | A03213 | 419 |
| A00230 | A03214 | 217 | A00230 | A03422 | 385 |
| A00230 | A03435 | 188 | A00230 | A03451 | 899 |
| A00230 | A03470 | 899 | A00230 | A03575 | 950 |
| A00230 | A03591 | 899 | A00230 | A03611 | 414 |
| A00230 | A03686 | 899 | A00230 | A03726 | 936 |
| A00230 | A03741 | 962 | A00230 | A03809 | 899 |
| A00230 | A03990 | 481 | A00230 | A04012 | 899 |
| A00230 | A04110 | 302 | A00230 | A04362 | 201 |
| A00230 | A04398 | 899 | A00230 | A04751 | 899 |
| A00230 | A04767 | 154 | A00230 | A04825 | 185 |
| A00230 | A04849 | 165 | A00230 | A04973 | 154 |
| A00230 | A05015 | 935 | A00230 | A05029 | 918 |
| A00230 | A05062 | 361 | A00230 | A05082 | 447 |
| A00230 | A05216 | 972 | A00230 | A05226 | 332 |
| A00230 | A05428 | 936 | A00230 | A05454 | 491 |
| A00230 | A05488 | 221 | A00230 | A05684 | 162 |
| A00230 | A05880 | 235 | A00230 | A05885 | 185 |
| A00230 | A05987 | 168 | A00230 | A06268 | 240 |
| A00230 | A06289 | 899 | A00230 | A06348 | 270 |
| A00230 | A06390 | 258 | A00230 | A06415 | 232 |
| A00230 | A06581 | 901 | A00230 | A06597 | 490 |
| A00230 | A06610 | 443 | A00230 | A06642 | 408 |
| A00230 | A06648 | 335 | A00230 | A06687 | 490 |
| A00230 | A06819 | 419 | A00230 | A07091 | 288 |
| A00230 | A07135 | 899 | A00230 | A07311 | 903 |
| A00230 | A07339 | 340 | A00230 | A07422 | 899 |
| A00230 | A07433 | 467 | A00230 | A07565 | 429 |
| A00230 | A07797 | 899 | A00230 | A07834 | 364 |
| A00230 | A08555 | 454 | A00230 | A08571 | 950 |
| A00230 | A08836 | 321 | A00230 | A08839 | 922 |
| A00230 | A08858 | 952 | A00230 | A08859 | 199 |
| A00230 | A08865 | 899 | A00230 | A08878 | 899 |
| A00230 | A09218 | 899 | A00230 | A09220 | 899 |
| A00230 | A09242 | 324 | A00230 | A09256 | 202 |
| A00230 | A09298 | 483 | A00230 | A09457 | 200 |
| A00230 | A09542 | 899 | A00230 | A09577 | 899 |
| A00230 | A09644 | 899 | A00230 | A09913 | 329 |

|        |        |     |        |        |     |
|--------|--------|-----|--------|--------|-----|
| A00230 | A10319 | 286 | A00230 | A10365 | 899 |
| A00230 | A10392 | 899 | A00230 | A10506 | 268 |
| A00230 | A10547 | 240 | A00230 | A10580 | 902 |
| A00230 | A10615 | 932 | A00230 | A10623 | 899 |
| A00230 | A10750 | 424 | A00230 | A10756 | 899 |
| A00230 | A10801 | 899 | A00230 | A10894 | 351 |
| A00230 | A11019 | 173 | A00230 | A11118 | 200 |
| A00230 | A11369 | 899 | A00230 | A11604 | 914 |
| A00230 | A11902 | 322 | A00230 | A11923 | 816 |
| A00230 | A11983 | 899 | A00230 | A12373 | 899 |
| A00230 | A12383 | 899 | A00230 | A12604 | 185 |
| A00230 | A13147 | 941 | A00230 | A13250 | 899 |
| A00230 | A13824 | 900 | A00230 | A13944 | 899 |
| A00230 | A13975 | 906 | A00230 | A13977 | 899 |
| A00230 | A13978 | 899 | A00230 | A13980 | 939 |
| A00230 | A13981 | 899 | A00230 | A13983 | 491 |
| A00230 | A14032 | 899 | A00230 | A14044 | 899 |
| A00230 | A14053 | 258 | A00230 | A14139 | 899 |
| A00230 | A14146 | 899 | A00230 | A14188 | 927 |
| A00230 | A14196 | 899 | A00230 | A14198 | 899 |
| A00230 | A14199 | 486 | A00230 | A14208 | 899 |
| A00230 | A14210 | 899 | A00230 | A14221 | 163 |
| A00230 | A14299 | 908 | A00230 | A14371 | 899 |
| A00230 | A14374 | 933 | A00230 | A14379 | 899 |
| A00230 | A14397 | 899 | A00230 | A14408 | 899 |
| A00230 | A14439 | 185 | A00230 | A14443 | 927 |
| A00230 | A14444 | 899 | A00230 | A14472 | 899 |
| A00230 | A14511 | 899 | A00230 | A14930 | 899 |
| A00230 | A15120 | 258 | A00230 | A15293 | 899 |
| A00230 | A15294 | 899 | A00230 | A15314 | 899 |
| A00230 | A15321 | 899 | A00230 | A15342 | 935 |
| A00230 | A15366 | 899 | A00230 | A15422 | 899 |
| A00230 | A15642 | 252 | A00230 | A15726 | 955 |
| A00230 | A15920 | 899 | A00230 | A15995 | 258 |
| A00230 | A16253 | 899 | A00230 | A16304 | 645 |
| A00230 | A16317 | 200 | A00230 | A16424 | 899 |
| A00230 | A16581 | 955 | A00230 | A16741 | 328 |
| A00230 | A17060 | 899 | A00230 | A17160 | 899 |
| A00231 | A00239 | 313 | A00231 | A00240 | 382 |
| A00231 | A00251 | 899 | A00231 | A00630 | 288 |
| A00231 | A00875 | 177 | A00231 | A00914 | 469 |
| A00231 | A01125 | 419 | A00231 | A01157 | 384 |
| A00231 | A01289 | 208 | A00231 | A01473 | 288 |
| A00231 | A01527 | 180 | A00231 | A01562 | 479 |
| A00231 | A01605 | 229 | A00231 | A01688 | 176 |
| A00231 | A01730 | 489 | A00231 | A01887 | 191 |

|        |        |     |        |        |     |
|--------|--------|-----|--------|--------|-----|
| A00231 | A02001 | 215 | A00231 | A02074 | 235 |
| A00231 | A02076 | 462 | A00231 | A02163 | 425 |
| A00231 | A02380 | 221 | A00231 | A02482 | 409 |
| A00231 | A02502 | 470 | A00231 | A02513 | 196 |
| A00231 | A02836 | 467 | A00231 | A02896 | 236 |
| A00231 | A03141 | 201 | A00231 | A03209 | 902 |
| A00231 | A03434 | 374 | A00231 | A03436 | 475 |
| A00231 | A03451 | 391 | A00231 | A04101 | 205 |
| A00231 | A04202 | 480 | A00231 | A04546 | 243 |
| A00231 | A04639 | 291 | A00231 | A04773 | 232 |
| A00231 | A05417 | 249 | A00231 | A05436 | 265 |
| A00231 | A05450 | 157 | A00231 | A05563 | 177 |
| A00231 | A05989 | 291 | A00231 | A06717 | 277 |
| A00231 | A07315 | 152 | A00231 | A10009 | 347 |
| A00231 | A10332 | 436 | A00231 | A10595 | 425 |
| A00231 | A10870 | 157 | A00231 | A10905 | 213 |
| A00231 | A11932 | 486 | A00231 | A12111 | 283 |
| A00231 | A12971 | 162 | A00231 | A13989 | 899 |
| A00231 | A14416 | 219 | A00231 | A14443 | 390 |
| A00231 | A15241 | 385 | A00231 | A15293 | 388 |
| A00231 | A15506 | 160 | A00231 | A16537 | 202 |
| A00232 | A00233 | 491 | A00232 | A00234 | 488 |
| A00232 | A00246 | 63  | A00232 | A00254 | 270 |
| A00232 | A00350 | 406 | A00232 | A00352 | 360 |
| A00232 | A00377 | 286 | A00232 | A00388 | 338 |
| A00232 | A00437 | 305 | A00232 | A00537 | 156 |
| A00232 | A00557 | 357 | A00232 | A00604 | 384 |
| A00232 | A00653 | 486 | A00232 | A00659 | 288 |
| A00232 | A00736 | 430 | A00232 | A00752 | 182 |
| A00232 | A00799 | 343 | A00232 | A00868 | 324 |
| A00232 | A00914 | 491 | A00232 | A00926 | 391 |
| A00232 | A00927 | 207 | A00232 | A00939 | 481 |
| A00232 | A00953 | 488 | A00232 | A00987 | 268 |
| A00232 | A01032 | 466 | A00232 | A01046 | 347 |
| A00232 | A01088 | 402 | A00232 | A01117 | 236 |
| A00232 | A01119 | 424 | A00232 | A01150 | 419 |
| A00232 | A01161 | 416 | A00232 | A01230 | 236 |
| A00232 | A01307 | 176 | A00232 | A01396 | 472 |
| A00232 | A01404 | 321 | A00232 | A01452 | 196 |
| A00232 | A01458 | 154 | A00232 | A01461 | 329 |
| A00232 | A01473 | 488 | A00232 | A01557 | 232 |
| A00232 | A01572 | 491 | A00232 | A01573 | 294 |
| A00232 | A01574 | 301 | A00232 | A01644 | 352 |
| A00232 | A01671 | 274 | A00232 | A01676 | 488 |
| A00232 | A01704 | 110 | A00232 | A01726 | 407 |
| A00232 | A01733 | 299 | A00232 | A01741 | 172 |



|        |        |     |        |        |     |
|--------|--------|-----|--------|--------|-----|
| A00232 | A01749 | 63  | A00232 | A01769 | 393 |
| A00232 | A01775 | 286 | A00232 | A01789 | 63  |
| A00232 | A01799 | 107 | A00232 | A01834 | 165 |
| A00232 | A01837 | 63  | A00232 | A01844 | 63  |
| A00232 | A01847 | 457 | A00232 | A01849 | 102 |
| A00232 | A01879 | 63  | A00232 | A01887 | 404 |
| A00232 | A01888 | 424 | A00232 | A01900 | 490 |
| A00232 | A01908 | 63  | A00232 | A02011 | 243 |
| A00232 | A02086 | 485 | A00232 | A02252 | 236 |
| A00232 | A02268 | 205 | A00232 | A02278 | 207 |
| A00232 | A02338 | 184 | A00232 | A02342 | 210 |
| A00232 | A02343 | 63  | A00232 | A02362 | 360 |
| A00232 | A02372 | 360 | A00232 | A02380 | 441 |
| A00232 | A02454 | 279 | A00232 | A02513 | 328 |
| A00232 | A02564 | 467 | A00232 | A02610 | 235 |
| A00232 | A02649 | 243 | A00232 | A02653 | 171 |
| A00232 | A02657 | 160 | A00232 | A02680 | 183 |
| A00232 | A02699 | 176 | A00232 | A02717 | 411 |
| A00232 | A02731 | 491 | A00232 | A02735 | 480 |
| A00232 | A02739 | 379 | A00232 | A02745 | 63  |
| A00232 | A02770 | 413 | A00232 | A02802 | 290 |
| A00232 | A02808 | 198 | A00232 | A02828 | 389 |
| A00232 | A02830 | 208 | A00232 | A02837 | 63  |
| A00232 | A02847 | 491 | A00232 | A02851 | 238 |
| A00232 | A02856 | 270 | A00232 | A02864 | 485 |
| A00232 | A02869 | 63  | A00232 | A02888 | 177 |
| A00232 | A02896 | 63  | A00232 | A02897 | 480 |
| A00232 | A02908 | 491 | A00232 | A02920 | 246 |
| A00232 | A02925 | 491 | A00232 | A02929 | 236 |
| A00232 | A02931 | 288 | A00232 | A02942 | 379 |
| A00232 | A02960 | 208 | A00232 | A02961 | 475 |
| A00232 | A02968 | 312 | A00232 | A02972 | 168 |
| A00232 | A02976 | 358 | A00232 | A02982 | 486 |
| A00232 | A03001 | 101 | A00232 | A03010 | 489 |
| A00232 | A03011 | 157 | A00232 | A03019 | 460 |
| A00232 | A03046 | 283 | A00232 | A03095 | 170 |
| A00232 | A03206 | 190 | A00232 | A03212 | 167 |
| A00232 | A03223 | 486 | A00232 | A03279 | 328 |
| A00232 | A03281 | 432 | A00232 | A03340 | 235 |
| A00232 | A03556 | 432 | A00232 | A03589 | 171 |
| A00232 | A03687 | 260 | A00232 | A03742 | 210 |
| A00232 | A03780 | 105 | A00232 | A03821 | 491 |
| A00232 | A03864 | 171 | A00232 | A04005 | 160 |
| A00232 | A04030 | 199 | A00232 | A04050 | 180 |
| A00232 | A04105 | 63  | A00232 | A04117 | 180 |
| A00232 | A04207 | 484 | A00232 | A04288 | 82  |

|        |        |     |        |        |     |
|--------|--------|-----|--------|--------|-----|
| A00232 | A04446 | 469 | A00232 | A04468 | 157 |
| A00232 | A04504 | 183 | A00232 | A04622 | 168 |
| A00232 | A04717 | 208 | A00232 | A04813 | 215 |
| A00232 | A04908 | 490 | A00232 | A05157 | 201 |
| A00232 | A05211 | 457 | A00232 | A05213 | 208 |
| A00232 | A05279 | 235 | A00232 | A05280 | 256 |
| A00232 | A05297 | 293 | A00232 | A05309 | 63  |
| A00232 | A05402 | 162 | A00232 | A05539 | 196 |
| A00232 | A05577 | 486 | A00232 | A05591 | 180 |
| A00232 | A05679 | 235 | A00232 | A05760 | 418 |
| A00232 | A05794 | 221 | A00232 | A05847 | 104 |
| A00232 | A05888 | 277 | A00232 | A05893 | 288 |
| A00232 | A05936 | 235 | A00232 | A06015 | 152 |
| A00232 | A06107 | 165 | A00232 | A06156 | 221 |
| A00232 | A06244 | 190 | A00232 | A06271 | 177 |
| A00232 | A06285 | 235 | A00232 | A06339 | 485 |
| A00232 | A06370 | 152 | A00232 | A06415 | 439 |
| A00232 | A06421 | 183 | A00232 | A06422 | 185 |
| A00232 | A06470 | 257 | A00232 | A06471 | 299 |
| A00232 | A06510 | 177 | A00232 | A06631 | 265 |
| A00232 | A06643 | 340 | A00232 | A06644 | 170 |
| A00232 | A06758 | 205 | A00232 | A07140 | 196 |
| A00232 | A07157 | 107 | A00232 | A07165 | 393 |
| A00232 | A07168 | 183 | A00232 | A07186 | 127 |
| A00232 | A07199 | 254 | A00232 | A07201 | 486 |
| A00232 | A07259 | 208 | A00232 | A07324 | 332 |
| A00232 | A07335 | 340 | A00232 | A07510 | 160 |
| A00232 | A07655 | 384 | A00232 | A07748 | 324 |
| A00232 | A07795 | 208 | A00232 | A07799 | 416 |
| A00232 | A07900 | 168 | A00232 | A07955 | 256 |
| A00232 | A07961 | 491 | A00232 | A08199 | 229 |
| A00232 | A08566 | 195 | A00232 | A08660 | 162 |
| A00232 | A08667 | 223 | A00232 | A08688 | 314 |
| A00232 | A08715 | 299 | A00232 | A08732 | 468 |
| A00232 | A08759 | 221 | A00232 | A09454 | 152 |
| A00232 | A09628 | 340 | A00232 | A09652 | 157 |
| A00232 | A10050 | 199 | A00232 | A10061 | 171 |
| A00232 | A10081 | 160 | A00232 | A10146 | 165 |
| A00232 | A10195 | 221 | A00232 | A10317 | 327 |
| A00232 | A10322 | 235 | A00232 | A10573 | 256 |
| A00232 | A10622 | 177 | A00232 | A10823 | 400 |
| A00232 | A10904 | 208 | A00232 | A10930 | 221 |
| A00232 | A11212 | 256 | A00232 | A11253 | 157 |
| A00232 | A11369 | 340 | A00232 | A11436 | 213 |
| A00232 | A11583 | 238 | A00232 | A11964 | 160 |
| A00232 | A12585 | 288 | A00232 | A12656 | 235 |

|        |        |     |        |        |     |
|--------|--------|-----|--------|--------|-----|
| A00232 | A13739 | 199 | A00232 | A13774 | 256 |
| A00232 | A13830 | 393 | A00232 | A13844 | 165 |
| A00232 | A13978 | 369 | A00232 | A13986 | 243 |
| A00232 | A13996 | 221 | A00232 | A14029 | 85  |
| A00232 | A14071 | 411 | A00232 | A14173 | 191 |
| A00232 | A14198 | 329 | A00232 | A14208 | 491 |
| A00232 | A14374 | 171 | A00232 | A14404 | 213 |
| A00232 | A14431 | 185 | A00232 | A14554 | 188 |
| A00232 | A14727 | 232 | A00232 | A14785 | 157 |
| A00232 | A15271 | 152 | A00232 | A15487 | 268 |
| A00232 | A15613 | 462 | A00232 | A15639 | 404 |
| A00232 | A15642 | 226 | A00232 | A15822 | 199 |
| A00232 | A15846 | 299 | A00232 | A15960 | 165 |
| A00232 | A15962 | 402 | A00232 | A16428 | 160 |
| A00232 | A16723 | 243 | A00232 | A16752 | 288 |
| A00232 | A16758 | 157 | A00232 | A16996 | 171 |
| A00232 | A17126 | 302 | A00232 | A17212 | 317 |
| A00233 | A00234 | 491 | A00233 | A00248 | 168 |
| A00233 | A00254 | 473 | A00233 | A00264 | 481 |
| A00233 | A00265 | 256 | A00233 | A00274 | 273 |
| A00233 | A00305 | 249 | A00233 | A00374 | 180 |
| A00233 | A00406 | 183 | A00233 | A00457 | 212 |
| A00233 | A00463 | 236 | A00233 | A00523 | 324 |
| A00233 | A00554 | 167 | A00233 | A00556 | 468 |
| A00233 | A00561 | 152 | A00233 | A00679 | 63  |
| A00233 | A00736 | 313 | A00233 | A00799 | 416 |
| A00233 | A00868 | 151 | A00233 | A00914 | 491 |
| A00233 | A00934 | 167 | A00233 | A01116 | 162 |
| A00233 | A01150 | 170 | A00233 | A01189 | 165 |
| A00233 | A01235 | 223 | A00233 | A01287 | 364 |
| A00233 | A01404 | 330 | A00233 | A01452 | 327 |
| A00233 | A01473 | 249 | A00233 | A01524 | 322 |
| A00233 | A01527 | 922 | A00233 | A01560 | 899 |
| A00233 | A01572 | 152 | A00233 | A01599 | 179 |
| A00233 | A01604 | 457 | A00233 | A01654 | 384 |
| A00233 | A01668 | 481 | A00233 | A01676 | 480 |
| A00233 | A01704 | 491 | A00233 | A01733 | 477 |
| A00233 | A01741 | 491 | A00233 | A01743 | 446 |
| A00233 | A01759 | 260 | A00233 | A01769 | 293 |
| A00233 | A01775 | 491 | A00233 | A01776 | 184 |
| A00233 | A01785 | 443 | A00233 | A01789 | 486 |
| A00233 | A01797 | 475 | A00233 | A01836 | 226 |
| A00233 | A01844 | 146 | A00233 | A01876 | 380 |
| A00233 | A01879 | 491 | A00233 | A01880 | 263 |
| A00233 | A01882 | 217 | A00233 | A01887 | 491 |
| A00233 | A01888 | 489 | A00233 | A01900 | 187 |

|        |        |     |        |        |     |
|--------|--------|-----|--------|--------|-----|
| A00233 | A01901 | 210 | A00233 | A01902 | 255 |
| A00233 | A01905 | 210 | A00233 | A01908 | 185 |
| A00233 | A02051 | 162 | A00233 | A02162 | 184 |
| A00233 | A02183 | 272 | A00233 | A02340 | 279 |
| A00233 | A02341 | 201 | A00233 | A02342 | 63  |
| A00233 | A02343 | 68  | A00233 | A02372 | 385 |
| A00233 | A02376 | 481 | A00233 | A02377 | 490 |
| A00233 | A02382 | 171 | A00233 | A02412 | 208 |
| A00233 | A02415 | 159 | A00233 | A02490 | 263 |
| A00233 | A02508 | 156 | A00233 | A02582 | 156 |
| A00233 | A02611 | 246 | A00233 | A02612 | 235 |
| A00233 | A02637 | 330 | A00233 | A02653 | 198 |
| A00233 | A02661 | 151 | A00233 | A02689 | 347 |
| A00233 | A02695 | 294 | A00233 | A02698 | 165 |
| A00233 | A02699 | 212 | A00233 | A02705 | 144 |
| A00233 | A02709 | 330 | A00233 | A02712 | 193 |
| A00233 | A02730 | 408 | A00233 | A02731 | 63  |
| A00233 | A02735 | 91  | A00233 | A02742 | 132 |
| A00233 | A02745 | 390 | A00233 | A02754 | 329 |
| A00233 | A02784 | 159 | A00233 | A02785 | 167 |
| A00233 | A02787 | 372 | A00233 | A02788 | 198 |
| A00233 | A02800 | 271 | A00233 | A02803 | 477 |
| A00233 | A02808 | 479 | A00233 | A02809 | 173 |
| A00233 | A02812 | 452 | A00233 | A02828 | 424 |
| A00233 | A02837 | 490 | A00233 | A02854 | 268 |
| A00233 | A02859 | 491 | A00233 | A02864 | 491 |
| A00233 | A02865 | 162 | A00233 | A02872 | 184 |
| A00233 | A02874 | 486 | A00233 | A02886 | 249 |
| A00233 | A02896 | 491 | A00233 | A02897 | 238 |
| A00233 | A02900 | 310 | A00233 | A02908 | 157 |
| A00233 | A02916 | 486 | A00233 | A02917 | 263 |
| A00233 | A02918 | 368 | A00233 | A02922 | 330 |
| A00233 | A02931 | 385 | A00233 | A02932 | 226 |
| A00233 | A02944 | 467 | A00233 | A02953 | 207 |
| A00233 | A02961 | 394 | A00233 | A02982 | 218 |
| A00233 | A02984 | 188 | A00233 | A02988 | 270 |
| A00233 | A03001 | 63  | A00233 | A03010 | 340 |
| A00233 | A03016 | 321 | A00233 | A03019 | 63  |
| A00233 | A03087 | 162 | A00233 | A03110 | 351 |
| A00233 | A03112 | 441 | A00233 | A03183 | 162 |
| A00233 | A03204 | 490 | A00233 | A03223 | 393 |
| A00233 | A03259 | 581 | A00233 | A03265 | 180 |
| A00233 | A03271 | 413 | A00233 | A03275 | 474 |
| A00233 | A03278 | 238 | A00233 | A03280 | 221 |
| A00233 | A03282 | 313 | A00233 | A03427 | 213 |
| A00233 | A03534 | 246 | A00233 | A03585 | 288 |

|        |        |     |        |        |     |
|--------|--------|-----|--------|--------|-----|
| A00233 | A03684 | 249 | A00233 | A03817 | 73  |
| A00233 | A03821 | 480 | A00233 | A03865 | 260 |
| A00233 | A03942 | 299 | A00233 | A03994 | 204 |
| A00233 | A04004 | 234 | A00233 | A04008 | 63  |
| A00233 | A04010 | 438 | A00233 | A04027 | 204 |
| A00233 | A04051 | 208 | A00233 | A04088 | 477 |
| A00233 | A04105 | 63  | A00233 | A04134 | 326 |
| A00233 | A04142 | 193 | A00233 | A04164 | 414 |
| A00233 | A04206 | 371 | A00233 | A04207 | 165 |
| A00233 | A04247 | 204 | A00233 | A04248 | 404 |
| A00233 | A04304 | 386 | A00233 | A04443 | 149 |
| A00233 | A04493 | 285 | A00233 | A04538 | 226 |
| A00233 | A04542 | 217 | A00233 | A04567 | 210 |
| A00233 | A04573 | 184 | A00233 | A04574 | 205 |
| A00233 | A04576 | 210 | A00233 | A04589 | 215 |
| A00233 | A04622 | 406 | A00233 | A04734 | 299 |
| A00233 | A04798 | 335 | A00233 | A04939 | 263 |
| A00233 | A04952 | 246 | A00233 | A04990 | 188 |
| A00233 | A05032 | 167 | A00233 | A05122 | 299 |
| A00233 | A05163 | 217 | A00233 | A05309 | 79  |
| A00233 | A05349 | 207 | A00233 | A05507 | 193 |
| A00233 | A05543 | 379 | A00233 | A05630 | 168 |
| A00233 | A05911 | 165 | A00233 | A06135 | 188 |
| A00233 | A06149 | 329 | A00233 | A06241 | 193 |
| A00233 | A06244 | 217 | A00233 | A06422 | 477 |
| A00233 | A06610 | 174 | A00233 | A06642 | 274 |
| A00233 | A06736 | 369 | A00233 | A06770 | 217 |
| A00233 | A06803 | 167 | A00233 | A07045 | 260 |
| A00233 | A07135 | 171 | A00233 | A07148 | 265 |
| A00233 | A07157 | 491 | A00233 | A07164 | 288 |
| A00233 | A07165 | 491 | A00233 | A07173 | 218 |
| A00233 | A07187 | 372 | A00233 | A07199 | 285 |
| A00233 | A07238 | 205 | A00233 | A07311 | 899 |
| A00233 | A07339 | 899 | A00233 | A07477 | 255 |
| A00233 | A07570 | 160 | A00233 | A07700 | 171 |
| A00233 | A07805 | 310 | A00233 | A07973 | 263 |
| A00233 | A07985 | 198 | A00233 | A08070 | 207 |
| A00233 | A08238 | 417 | A00233 | A08368 | 246 |
| A00233 | A08687 | 162 | A00233 | A08732 | 899 |
| A00233 | A08879 | 391 | A00233 | A09018 | 191 |
| A00233 | A09038 | 154 | A00233 | A09081 | 217 |
| A00233 | A09396 | 278 | A00233 | A09540 | 162 |
| A00233 | A09643 | 900 | A00233 | A10009 | 152 |
| A00233 | A10070 | 198 | A00233 | A10234 | 246 |
| A00233 | A10477 | 224 | A00233 | A10501 | 193 |
| A00233 | A10550 | 160 | A00233 | A10625 | 458 |

|        |        |     |        |        |     |
|--------|--------|-----|--------|--------|-----|
| A00233 | A10656 | 302 | A00233 | A10667 | 210 |
| A00233 | A10672 | 375 | A00233 | A10677 | 271 |
| A00233 | A10712 | 259 | A00233 | A10823 | 217 |
| A00233 | A11061 | 180 | A00233 | A11086 | 168 |
| A00233 | A11433 | 176 | A00233 | A11487 | 199 |
| A00233 | A11832 | 232 | A00233 | A12927 | 185 |
| A00233 | A13302 | 180 | A00233 | A13386 | 310 |
| A00233 | A13667 | 311 | A00233 | A13713 | 310 |
| A00233 | A13812 | 224 | A00233 | A13829 | 241 |
| A00233 | A14008 | 899 | A00233 | A14119 | 156 |
| A00233 | A14188 | 903 | A00233 | A14198 | 945 |
| A00233 | A14364 | 247 | A00233 | A14387 | 152 |
| A00233 | A14643 | 157 | A00233 | A14664 | 270 |
| A00233 | A14856 | 207 | A00233 | A15442 | 210 |
| A00233 | A15443 | 210 | A00233 | A15764 | 184 |
| A00233 | A15804 | 162 | A00233 | A15918 | 154 |
| A00233 | A16418 | 168 | A00233 | A16636 | 187 |
| A00233 | A17158 | 260 | A00234 | A00240 | 905 |
| A00234 | A00246 | 937 | A00234 | A00247 | 352 |
| A00234 | A00248 | 294 | A00234 | A00254 | 945 |
| A00234 | A00262 | 63  | A00234 | A00265 | 466 |
| A00234 | A00272 | 172 | A00234 | A00273 | 63  |
| A00234 | A00285 | 414 | A00234 | A00302 | 217 |
| A00234 | A00395 | 168 | A00234 | A00418 | 191 |
| A00234 | A00433 | 157 | A00234 | A00439 | 311 |
| A00234 | A00440 | 291 | A00234 | A00548 | 235 |
| A00234 | A00553 | 182 | A00234 | A00587 | 198 |
| A00234 | A00600 | 401 | A00234 | A00616 | 384 |
| A00234 | A00626 | 598 | A00234 | A00641 | 488 |
| A00234 | A00660 | 241 | A00234 | A00680 | 207 |
| A00234 | A00697 | 63  | A00234 | A00736 | 433 |
| A00234 | A00752 | 249 | A00234 | A00761 | 409 |
| A00234 | A00765 | 282 | A00234 | A00766 | 486 |
| A00234 | A00791 | 489 | A00234 | A00833 | 490 |
| A00234 | A00868 | 491 | A00234 | A00876 | 191 |
| A00234 | A00883 | 491 | A00234 | A00884 | 177 |
| A00234 | A00914 | 477 | A00234 | A00926 | 491 |
| A00234 | A00932 | 286 | A00234 | A00939 | 973 |
| A00234 | A00956 | 187 | A00234 | A00975 | 195 |
| A00234 | A00981 | 291 | A00234 | A01021 | 182 |
| A00234 | A01106 | 469 | A00234 | A01157 | 298 |
| A00234 | A01173 | 195 | A00234 | A01198 | 899 |
| A00234 | A01203 | 272 | A00234 | A01212 | 238 |
| A00234 | A01254 | 385 | A00234 | A01261 | 244 |
| A00234 | A01279 | 165 | A00234 | A01291 | 899 |
| A00234 | A01307 | 491 | A00234 | A01310 | 188 |

|        |        |     |        |        |     |
|--------|--------|-----|--------|--------|-----|
| A00234 | A01339 | 462 | A00234 | A01370 | 483 |
| A00234 | A01423 | 190 | A00234 | A01438 | 330 |
| A00234 | A01444 | 430 | A00234 | A01452 | 491 |
| A00234 | A01492 | 903 | A00234 | A01527 | 989 |
| A00234 | A01553 | 293 | A00234 | A01558 | 899 |
| A00234 | A01560 | 526 | A00234 | A01562 | 906 |
| A00234 | A01572 | 530 | A00234 | A01575 | 324 |
| A00234 | A01576 | 947 | A00234 | A01584 | 435 |
| A00234 | A01585 | 332 | A00234 | A01588 | 899 |
| A00234 | A01593 | 899 | A00234 | A01603 | 305 |
| A00234 | A01604 | 165 | A00234 | A01615 | 989 |
| A00234 | A01631 | 63  | A00234 | A01638 | 899 |
| A00234 | A01640 | 152 | A00234 | A01651 | 899 |
| A00234 | A01675 | 102 | A00234 | A01692 | 933 |
| A00234 | A01708 | 305 | A00234 | A01709 | 463 |
| A00234 | A01719 | 405 | A00234 | A01733 | 204 |
| A00234 | A01769 | 63  | A00234 | A01781 | 404 |
| A00234 | A01792 | 334 | A00234 | A01793 | 63  |
| A00234 | A01797 | 135 | A00234 | A01799 | 63  |
| A00234 | A01843 | 76  | A00234 | A01850 | 63  |
| A00234 | A01879 | 121 | A00234 | A01881 | 63  |
| A00234 | A01887 | 119 | A00234 | A01888 | 300 |
| A00234 | A01897 | 357 | A00234 | A01900 | 490 |
| A00234 | A01902 | 115 | A00234 | A01905 | 371 |
| A00234 | A01908 | 491 | A00234 | A01983 | 190 |
| A00234 | A02183 | 445 | A00234 | A02254 | 460 |
| A00234 | A02284 | 154 | A00234 | A02305 | 212 |
| A00234 | A02316 | 154 | A00234 | A02364 | 241 |
| A00234 | A02369 | 419 | A00234 | A02372 | 63  |
| A00234 | A02419 | 240 | A00234 | A02425 | 443 |
| A00234 | A02454 | 208 | A00234 | A02578 | 159 |
| A00234 | A02610 | 177 | A00234 | A02630 | 425 |
| A00234 | A02631 | 223 | A00234 | A02634 | 63  |
| A00234 | A02635 | 63  | A00234 | A02645 | 160 |
| A00234 | A02662 | 177 | A00234 | A02703 | 165 |
| A00234 | A02715 | 473 | A00234 | A02728 | 235 |
| A00234 | A02730 | 63  | A00234 | A02731 | 68  |
| A00234 | A02734 | 356 | A00234 | A02740 | 330 |
| A00234 | A02746 | 68  | A00234 | A02752 | 152 |
| A00234 | A02768 | 168 | A00234 | A02803 | 945 |
| A00234 | A02808 | 406 | A00234 | A02816 | 152 |
| A00234 | A02828 | 347 | A00234 | A02836 | 488 |
| A00234 | A02859 | 238 | A00234 | A02860 | 168 |
| A00234 | A02864 | 110 | A00234 | A02874 | 279 |
| A00234 | A02877 | 239 | A00234 | A02887 | 489 |
| A00234 | A02908 | 899 | A00234 | A02931 | 283 |

|        |        |     |        |        |     |
|--------|--------|-----|--------|--------|-----|
| A00234 | A02940 | 177 | A00234 | A02950 | 395 |
| A00234 | A02975 | 380 | A00234 | A03001 | 154 |
| A00234 | A03010 | 118 | A00234 | A03019 | 462 |
| A00234 | A03087 | 450 | A00234 | A03116 | 199 |
| A00234 | A03117 | 160 | A00234 | A03174 | 198 |
| A00234 | A03195 | 245 | A00234 | A03258 | 149 |
| A00234 | A03259 | 102 | A00234 | A03270 | 185 |
| A00234 | A03271 | 945 | A00234 | A03327 | 247 |
| A00234 | A03591 | 185 | A00234 | A03596 | 172 |
| A00234 | A03611 | 281 | A00234 | A03626 | 391 |
| A00234 | A03661 | 193 | A00234 | A03665 | 291 |
| A00234 | A03686 | 899 | A00234 | A03740 | 180 |
| A00234 | A03752 | 555 | A00234 | A03784 | 63  |
| A00234 | A03809 | 266 | A00234 | A03817 | 491 |
| A00234 | A03821 | 165 | A00234 | A03830 | 157 |
| A00234 | A03834 | 433 | A00234 | A03835 | 374 |
| A00234 | A03836 | 177 | A00234 | A03837 | 811 |
| A00234 | A03892 | 470 | A00234 | A03962 | 245 |
| A00234 | A04011 | 70  | A00234 | A04012 | 490 |
| A00234 | A04018 | 77  | A00234 | A04050 | 558 |
| A00234 | A04059 | 74  | A00234 | A04088 | 385 |
| A00234 | A04115 | 895 | A00234 | A04144 | 115 |
| A00234 | A04161 | 469 | A00234 | A04245 | 269 |
| A00234 | A04314 | 210 | A00234 | A04323 | 102 |
| A00234 | A04364 | 195 | A00234 | A04519 | 146 |
| A00234 | A04540 | 249 | A00234 | A04541 | 223 |
| A00234 | A04587 | 281 | A00234 | A04613 | 198 |
| A00234 | A04662 | 191 | A00234 | A04682 | 350 |
| A00234 | A04685 | 176 | A00234 | A04713 | 190 |
| A00234 | A04730 | 281 | A00234 | A04879 | 174 |
| A00234 | A04880 | 405 | A00234 | A04897 | 489 |
| A00234 | A04949 | 291 | A00234 | A05037 | 929 |
| A00234 | A05061 | 223 | A00234 | A05081 | 235 |
| A00234 | A05224 | 229 | A00234 | A05288 | 227 |
| A00234 | A05363 | 63  | A00234 | A05409 | 160 |
| A00234 | A05490 | 160 | A00234 | A05506 | 279 |
| A00234 | A05633 | 173 | A00234 | A05710 | 341 |
| A00234 | A06037 | 157 | A00234 | A06063 | 218 |
| A00234 | A06113 | 177 | A00234 | A06204 | 156 |
| A00234 | A06224 | 407 | A00234 | A06347 | 193 |
| A00234 | A06416 | 63  | A00234 | A06422 | 63  |
| A00234 | A06449 | 294 | A00234 | A06466 | 530 |
| A00234 | A06554 | 446 | A00234 | A06580 | 160 |
| A00234 | A06597 | 204 | A00234 | A06599 | 407 |
| A00234 | A06757 | 235 | A00234 | A06900 | 235 |
| A00234 | A06914 | 201 | A00234 | A07135 | 371 |



|        |        |     |        |        |     |
|--------|--------|-----|--------|--------|-----|
| A00234 | A07157 | 174 | A00234 | A07159 | 213 |
| A00234 | A07186 | 79  | A00234 | A07294 | 213 |
| A00234 | A07311 | 537 | A00234 | A07339 | 267 |
| A00234 | A07346 | 291 | A00234 | A07457 | 440 |
| A00234 | A07592 | 199 | A00234 | A07756 | 378 |
| A00234 | A07763 | 196 | A00234 | A07798 | 629 |
| A00234 | A07803 | 291 | A00234 | A07876 | 223 |
| A00234 | A08293 | 208 | A00234 | A08345 | 291 |
| A00234 | A08608 | 458 | A00234 | A08616 | 235 |
| A00234 | A08697 | 235 | A00234 | A08732 | 899 |
| A00234 | A08770 | 306 | A00234 | A08781 | 199 |
| A00234 | A09176 | 177 | A00234 | A09220 | 580 |
| A00234 | A09263 | 63  | A00234 | A09300 | 173 |
| A00234 | A09302 | 160 | A00234 | A09319 | 899 |
| A00234 | A09401 | 291 | A00234 | A09449 | 208 |
| A00234 | A09542 | 63  | A00234 | A09643 | 63  |
| A00234 | A09695 | 235 | A00234 | A09804 | 901 |
| A00234 | A09816 | 260 | A00234 | A09937 | 121 |
| A00234 | A10006 | 335 | A00234 | A10018 | 241 |
| A00234 | A10159 | 899 | A00234 | A10197 | 85  |
| A00234 | A10235 | 177 | A00234 | A10247 | 196 |
| A00234 | A10355 | 235 | A00234 | A10601 | 180 |
| A00234 | A10643 | 199 | A00234 | A10735 | 377 |
| A00234 | A10744 | 374 | A00234 | A10756 | 196 |
| A00234 | A10854 | 291 | A00234 | A11108 | 199 |
| A00234 | A11286 | 281 | A00234 | A11369 | 960 |
| A00234 | A11834 | 447 | A00234 | A11929 | 165 |
| A00234 | A11931 | 457 | A00234 | A12009 | 539 |
| A00234 | A12042 | 267 | A00234 | A12222 | 199 |
| A00234 | A12304 | 185 | A00234 | A12328 | 465 |
| A00234 | A12503 | 198 | A00234 | A12792 | 170 |
| A00234 | A12824 | 489 | A00234 | A12835 | 173 |
| A00234 | A12863 | 270 | A00234 | A12886 | 68  |
| A00234 | A13105 | 177 | A00234 | A13147 | 190 |
| A00234 | A13216 | 182 | A00234 | A13335 | 257 |
| A00234 | A13340 | 489 | A00234 | A13498 | 160 |
| A00234 | A13553 | 160 | A00234 | A13620 | 201 |
| A00234 | A13744 | 235 | A00234 | A13824 | 942 |
| A00234 | A13828 | 235 | A00234 | A13830 | 358 |
| A00234 | A13975 | 199 | A00234 | A13983 | 153 |
| A00234 | A13986 | 249 | A00234 | A13989 | 899 |
| A00234 | A14019 | 899 | A00234 | A14186 | 462 |
| A00234 | A14187 | 184 | A00234 | A14188 | 446 |
| A00234 | A14190 | 246 | A00234 | A14196 | 952 |
| A00234 | A14198 | 945 | A00234 | A14208 | 970 |
| A00234 | A14218 | 315 | A00234 | A14364 | 483 |

|        |        |     |        |        |     |
|--------|--------|-----|--------|--------|-----|
| A00234 | A14366 | 399 | A00234 | A14430 | 489 |
| A00234 | A14433 | 323 | A00234 | A14443 | 899 |
| A00234 | A14564 | 235 | A00234 | A14662 | 899 |
| A00234 | A14679 | 330 | A00234 | A14738 | 345 |
| A00234 | A15182 | 434 | A00234 | A15217 | 246 |
| A00234 | A15244 | 628 | A00234 | A15291 | 241 |
| A00234 | A15296 | 416 | A00234 | A15297 | 899 |
| A00234 | A15314 | 554 | A00234 | A15323 | 915 |
| A00234 | A15324 | 899 | A00234 | A15330 | 198 |
| A00234 | A15353 | 899 | A00234 | A15359 | 899 |
| A00234 | A15361 | 210 | A00234 | A15386 | 623 |
| A00234 | A15388 | 303 | A00234 | A15430 | 177 |
| A00234 | A15502 | 485 | A00234 | A15510 | 613 |
| A00234 | A15546 | 279 | A00234 | A15578 | 236 |
| A00234 | A15620 | 163 | A00234 | A15639 | 184 |
| A00234 | A15712 | 271 | A00234 | A15724 | 249 |
| A00234 | A15726 | 457 | A00234 | A15861 | 235 |
| A00234 | A15862 | 160 | A00234 | A15903 | 235 |
| A00234 | A15935 | 490 | A00234 | A15976 | 188 |
| A00234 | A15994 | 199 | A00234 | A16216 | 532 |
| A00234 | A16217 | 390 | A00234 | A16437 | 160 |
| A00234 | A16547 | 625 | A00234 | A16989 | 235 |
| A00235 | A00263 | 475 | A00235 | A00269 | 462 |
| A00235 | A00270 | 486 | A00235 | A00275 | 899 |
| A00235 | A00388 | 367 | A00235 | A00400 | 324 |
| A00235 | A00531 | 208 | A00235 | A00654 | 199 |
| A00235 | A00930 | 311 | A00235 | A01139 | 162 |
| A00235 | A01359 | 347 | A00235 | A01472 | 138 |
| A00235 | A01483 | 210 | A00235 | A01527 | 285 |
| A00235 | A01558 | 466 | A00235 | A01560 | 283 |
| A00235 | A01588 | 343 | A00235 | A01591 | 446 |
| A00235 | A01592 | 160 | A00235 | A01612 | 193 |
| A00235 | A01615 | 460 | A00235 | A01636 | 162 |
| A00235 | A01637 | 187 | A00235 | A01650 | 357 |
| A00235 | A01651 | 165 | A00235 | A01685 | 401 |
| A00235 | A01717 | 281 | A00235 | A02189 | 174 |
| A00235 | A02636 | 226 | A00235 | A03298 | 151 |
| A00235 | A03299 | 165 | A00235 | A03406 | 167 |
| A00235 | A03422 | 491 | A00235 | A03528 | 454 |
| A00235 | A03566 | 432 | A00235 | A03637 | 480 |
| A00235 | A03701 | 185 | A00235 | A05008 | 263 |
| A00235 | A05015 | 477 | A00235 | A05219 | 333 |
| A00235 | A05344 | 205 | A00235 | A06176 | 213 |
| A00235 | A06348 | 296 | A00235 | A06379 | 162 |
| A00235 | A06495 | 154 | A00235 | A07422 | 215 |
| A00235 | A07834 | 273 | A00235 | A08163 | 221 |

|        |        |     |        |        |     |
|--------|--------|-----|--------|--------|-----|
| A00235 | A08554 | 157 | A00235 | A08571 | 491 |
| A00235 | A08707 | 419 | A00235 | A08885 | 193 |
| A00235 | A09100 | 177 | A00235 | A09146 | 205 |
| A00235 | A09182 | 180 | A00235 | A09256 | 945 |
| A00235 | A09258 | 371 | A00235 | A09317 | 226 |
| A00235 | A09448 | 252 | A00235 | A09485 | 173 |
| A00235 | A09511 | 183 | A00235 | A09523 | 313 |
| A00235 | A09945 | 339 | A00235 | A09996 | 224 |
| A00235 | A10250 | 399 | A00235 | A10293 | 265 |
| A00235 | A10354 | 205 | A00235 | A10580 | 229 |
| A00235 | A10695 | 157 | A00235 | A10824 | 195 |
| A00235 | A11258 | 328 | A00235 | A11478 | 232 |
| A00235 | A12553 | 283 | A00235 | A12952 | 185 |
| A00235 | A13990 | 319 | A00235 | A14222 | 528 |
| A00235 | A14484 | 477 | A00235 | A14633 | 457 |
| A00235 | A15726 | 945 | A00235 | A15926 | 390 |
| A00235 | A16102 | 283 | A00235 | A16503 | 229 |
| A00236 | A00239 | 418 | A00236 | A00240 | 945 |
| A00236 | A00242 | 160 | A00236 | A00246 | 989 |
| A00236 | A00252 | 993 | A00236 | A00253 | 993 |
| A00236 | A00254 | 551 | A00236 | A00255 | 382 |
| A00236 | A00265 | 475 | A00236 | A00268 | 213 |
| A00236 | A00271 | 899 | A00236 | A00293 | 419 |
| A00236 | A00295 | 373 | A00236 | A00324 | 902 |
| A00236 | A00331 | 126 | A00236 | A00546 | 417 |
| A00236 | A00552 | 174 | A00236 | A00589 | 235 |
| A00236 | A00621 | 313 | A00236 | A00624 | 163 |
| A00236 | A00630 | 483 | A00236 | A00652 | 491 |
| A00236 | A00747 | 490 | A00236 | A00852 | 425 |
| A00236 | A00864 | 174 | A00236 | A00876 | 484 |
| A00236 | A00887 | 328 | A00236 | A01045 | 491 |
| A00236 | A01052 | 903 | A00236 | A01098 | 235 |
| A00236 | A01104 | 63  | A00236 | A01140 | 380 |
| A00236 | A01149 | 458 | A00236 | A01178 | 489 |
| A00236 | A01209 | 199 | A00236 | A01289 | 450 |
| A00236 | A01405 | 218 | A00236 | A01425 | 491 |
| A00236 | A01478 | 454 | A00236 | A01524 | 899 |
| A00236 | A01527 | 899 | A00236 | A01550 | 491 |
| A00236 | A01551 | 182 | A00236 | A01553 | 899 |
| A00236 | A01554 | 899 | A00236 | A01558 | 899 |
| A00236 | A01560 | 314 | A00236 | A01561 | 352 |
| A00236 | A01562 | 958 | A00236 | A01566 | 228 |
| A00236 | A01572 | 265 | A00236 | A01578 | 185 |
| A00236 | A01588 | 899 | A00236 | A01602 | 899 |
| A00236 | A01606 | 151 | A00236 | A01631 | 352 |
| A00236 | A01639 | 277 | A00236 | A01660 | 491 |

|        |        |     |        |        |     |
|--------|--------|-----|--------|--------|-----|
| A00236 | A01665 | 899 | A00236 | A01692 | 969 |
| A00236 | A01726 | 441 | A00236 | A01730 | 485 |
| A00236 | A01740 | 480 | A00236 | A01741 | 257 |
| A00236 | A01755 | 63  | A00236 | A01774 | 63  |
| A00236 | A01796 | 455 | A00236 | A01844 | 899 |
| A00236 | A01877 | 427 | A00236 | A01886 | 144 |
| A00236 | A01897 | 77  | A00236 | A02325 | 491 |
| A00236 | A02418 | 435 | A00236 | A02421 | 168 |
| A00236 | A02434 | 177 | A00236 | A02494 | 479 |
| A00236 | A02502 | 928 | A00236 | A02544 | 944 |
| A00236 | A02647 | 154 | A00236 | A02698 | 378 |
| A00236 | A02703 | 485 | A00236 | A02786 | 483 |
| A00236 | A02816 | 485 | A00236 | A02826 | 168 |
| A00236 | A02853 | 168 | A00236 | A02860 | 480 |
| A00236 | A02877 | 63  | A00236 | A02895 | 344 |
| A00236 | A02902 | 434 | A00236 | A02912 | 288 |
| A00236 | A02924 | 66  | A00236 | A02965 | 241 |
| A00236 | A03057 | 323 | A00236 | A03171 | 195 |
| A00236 | A03237 | 375 | A00236 | A03286 | 191 |
| A00236 | A03338 | 216 | A00236 | A03451 | 452 |
| A00236 | A03472 | 371 | A00236 | A03482 | 179 |
| A00236 | A03488 | 260 | A00236 | A03517 | 452 |
| A00236 | A03575 | 899 | A00236 | A03591 | 642 |
| A00236 | A03604 | 154 | A00236 | A03752 | 252 |
| A00236 | A03811 | 207 | A00236 | A03819 | 165 |
| A00236 | A03886 | 160 | A00236 | A03979 | 279 |
| A00236 | A04191 | 400 | A00236 | A04312 | 228 |
| A00236 | A04342 | 491 | A00236 | A04446 | 179 |
| A00236 | A04565 | 207 | A00236 | A04622 | 404 |
| A00236 | A04715 | 279 | A00236 | A04847 | 179 |
| A00236 | A05077 | 263 | A00236 | A05418 | 490 |
| A00236 | A05811 | 440 | A00236 | A05867 | 207 |
| A00236 | A05902 | 115 | A00236 | A06324 | 218 |
| A00236 | A06403 | 154 | A00236 | A06466 | 479 |
| A00236 | A06654 | 68  | A00236 | A07091 | 899 |
| A00236 | A07163 | 423 | A00236 | A07221 | 216 |
| A00236 | A07296 | 154 | A00236 | A07311 | 953 |
| A00236 | A07399 | 308 | A00236 | A07422 | 945 |
| A00236 | A08280 | 163 | A00236 | A08489 | 152 |
| A00236 | A08532 | 461 | A00236 | A08533 | 199 |
| A00236 | A08799 | 179 | A00236 | A08815 | 408 |
| A00236 | A08858 | 899 | A00236 | A08899 | 945 |
| A00236 | A09319 | 899 | A00236 | A09423 | 374 |
| A00236 | A09434 | 252 | A00236 | A09995 | 229 |
| A00236 | A10081 | 260 | A00236 | A10233 | 945 |
| A00236 | A10311 | 179 | A00236 | A10346 | 445 |

|        |        |     |        |        |     |
|--------|--------|-----|--------|--------|-----|
| A00236 | A10532 | 378 | A00236 | A10580 | 899 |
| A00236 | A10611 | 168 | A00236 | A10623 | 213 |
| A00236 | A11187 | 179 | A00236 | A11293 | 412 |
| A00236 | A11455 | 160 | A00236 | A11921 | 491 |
| A00236 | A13255 | 470 | A00236 | A13340 | 245 |
| A00236 | A13549 | 179 | A00236 | A13795 | 160 |
| A00236 | A13977 | 993 | A00236 | A13984 | 324 |
| A00236 | A14198 | 899 | A00236 | A14333 | 236 |
| A00236 | A14402 | 154 | A00236 | A14433 | 159 |
| A00236 | A14443 | 899 | A00236 | A14648 | 435 |
| A00236 | A15320 | 171 | A00236 | A15356 | 435 |
| A00236 | A15483 | 302 | A00236 | A15506 | 235 |
| A00236 | A16080 | 933 | A00236 | A16500 | 263 |
| A00236 | A17188 | 324 | A00237 | A00270 | 709 |
| A00237 | A00400 | 450 | A00237 | A00469 | 246 |
| A00237 | A00471 | 730 | A00237 | A00588 | 491 |
| A00237 | A00911 | 643 | A00237 | A01099 | 491 |
| A00237 | A01124 | 643 | A00237 | A01212 | 809 |
| A00237 | A01329 | 374 | A00237 | A01341 | 385 |
| A00237 | A01459 | 414 | A00237 | A01594 | 489 |
| A00237 | A01680 | 643 | A00237 | A02424 | 375 |
| A00237 | A05065 | 262 | A00237 | A05959 | 182 |
| A00237 | A06037 | 436 | A00237 | A07433 | 151 |
| A00237 | A07603 | 490 | A00237 | A07670 | 360 |
| A00237 | A08516 | 631 | A00237 | A08812 | 229 |
| A00237 | A09000 | 343 | A00237 | A09076 | 157 |
| A00237 | A09517 | 484 | A00237 | A09647 | 455 |
| A00237 | A09687 | 191 | A00237 | A09769 | 388 |
| A00237 | A10271 | 306 | A00237 | A10373 | 488 |
| A00237 | A11236 | 489 | A00237 | A11302 | 170 |
| A00237 | A12556 | 490 | A00237 | A12681 | 490 |
| A00237 | A14094 | 385 | A00237 | A14282 | 196 |
| A00237 | A14477 | 641 | A00237 | A14498 | 343 |
| A00237 | A14674 | 643 | A00237 | A14688 | 388 |
| A00237 | A14702 | 421 | A00237 | A15054 | 204 |
| A00237 | A16299 | 445 | A00237 | A16469 | 260 |
| A00237 | A16470 | 212 | A00237 | A16738 | 643 |
| A00237 | A17068 | 198 | A00238 | A00338 | 435 |
| A00238 | A00485 | 288 | A00238 | A00657 | 170 |
| A00238 | A00694 | 441 | A00238 | A00799 | 490 |
| A00238 | A00914 | 251 | A00238 | A01022 | 243 |
| A00238 | A01121 | 168 | A00238 | A01161 | 483 |
| A00238 | A01343 | 165 | A00238 | A01397 | 162 |
| A00238 | A01483 | 246 | A00238 | A01527 | 940 |
| A00238 | A01551 | 213 | A00238 | A01615 | 899 |
| A00238 | A01632 | 477 | A00238 | A01666 | 481 |

|        |        |     |        |        |     |
|--------|--------|-----|--------|--------|-----|
| A00238 | A01691 | 170 | A00238 | A01732 | 228 |
| A00238 | A01743 | 279 | A00238 | A01744 | 208 |
| A00238 | A01887 | 235 | A00238 | A02183 | 172 |
| A00238 | A02415 | 151 | A00238 | A02618 | 224 |
| A00238 | A02629 | 330 | A00238 | A02701 | 170 |
| A00238 | A02790 | 162 | A00238 | A02918 | 251 |
| A00238 | A03014 | 201 | A00238 | A03211 | 343 |
| A00238 | A03406 | 435 | A00238 | A03419 | 177 |
| A00238 | A03420 | 188 | A00238 | A03451 | 256 |
| A00238 | A03611 | 152 | A00238 | A03977 | 238 |
| A00238 | A04140 | 173 | A00238 | A04334 | 277 |
| A00238 | A04424 | 198 | A00238 | A04988 | 198 |
| A00238 | A05076 | 263 | A00238 | A05503 | 317 |
| A00238 | A05504 | 310 | A00238 | A05516 | 191 |
| A00238 | A05548 | 240 | A00238 | A05810 | 191 |
| A00238 | A05855 | 317 | A00238 | A06235 | 160 |
| A00238 | A07442 | 177 | A00238 | A07723 | 236 |
| A00238 | A07757 | 187 | A00238 | A07900 | 318 |
| A00238 | A07935 | 474 | A00238 | A08635 | 227 |
| A00238 | A09388 | 208 | A00238 | A09541 | 297 |
| A00238 | A11546 | 297 | A00238 | A11684 | 469 |
| A00238 | A14206 | 227 | A00238 | A14387 | 247 |
| A00238 | A15349 | 182 | A00238 | A15596 | 201 |
| A00238 | A15641 | 188 | A00238 | A16074 | 162 |
| A00238 | A16732 | 273 | A00238 | A17085 | 182 |
| A00239 | A00240 | 996 | A00239 | A00241 | 974 |
| A00239 | A00242 | 945 | A00239 | A00243 | 986 |
| A00239 | A00244 | 967 | A00239 | A00246 | 899 |
| A00239 | A00247 | 63  | A00239 | A00252 | 279 |
| A00239 | A00253 | 273 | A00239 | A00254 | 217 |
| A00239 | A00255 | 235 | A00239 | A00261 | 614 |
| A00239 | A00296 | 157 | A00239 | A00331 | 329 |
| A00239 | A00643 | 450 | A00239 | A00652 | 229 |
| A00239 | A00691 | 322 | A00239 | A00808 | 430 |
| A00239 | A00883 | 168 | A00239 | A00887 | 165 |
| A00239 | A00911 | 485 | A00239 | A00932 | 185 |
| A00239 | A00981 | 154 | A00239 | A01088 | 255 |
| A00239 | A01148 | 380 | A00239 | A01161 | 151 |
| A00239 | A01213 | 296 | A00239 | A01289 | 434 |
| A00239 | A01310 | 219 | A00239 | A01507 | 228 |
| A00239 | A01512 | 419 | A00239 | A01524 | 914 |
| A00239 | A01527 | 917 | A00239 | A01546 | 468 |
| A00239 | A01553 | 994 | A00239 | A01554 | 585 |
| A00239 | A01558 | 989 | A00239 | A01560 | 945 |
| A00239 | A01576 | 154 | A00239 | A01588 | 899 |
| A00239 | A01596 | 675 | A00239 | A01623 | 945 |

|        |        |     |        |        |     |
|--------|--------|-----|--------|--------|-----|
| A00239 | A01638 | 219 | A00239 | A01639 | 395 |
| A00239 | A01680 | 286 | A00239 | A01692 | 527 |
| A00239 | A01697 | 165 | A00239 | A01702 | 159 |
| A00239 | A01709 | 452 | A00239 | A01718 | 377 |
| A00239 | A01719 | 229 | A00239 | A01730 | 213 |
| A00239 | A01747 | 333 | A00239 | A01910 | 210 |
| A00239 | A01920 | 608 | A00239 | A01974 | 967 |
| A00239 | A02052 | 180 | A00239 | A02143 | 469 |
| A00239 | A02488 | 174 | A00239 | A02494 | 249 |
| A00239 | A02502 | 450 | A00239 | A02724 | 210 |
| A00239 | A02791 | 404 | A00239 | A03185 | 188 |
| A00239 | A03451 | 408 | A00239 | A03598 | 184 |
| A00239 | A03822 | 193 | A00239 | A04196 | 200 |
| A00239 | A04380 | 200 | A00239 | A04759 | 326 |
| A00239 | A04807 | 152 | A00239 | A04909 | 361 |
| A00239 | A05118 | 246 | A00239 | A06211 | 180 |
| A00239 | A06601 | 160 | A00239 | A06610 | 372 |
| A00239 | A06987 | 180 | A00239 | A07227 | 246 |
| A00239 | A07311 | 949 | A00239 | A07422 | 267 |
| A00239 | A07568 | 249 | A00239 | A07891 | 188 |
| A00239 | A08118 | 291 | A00239 | A08427 | 180 |
| A00239 | A08571 | 415 | A00239 | A09026 | 162 |
| A00239 | A09162 | 224 | A00239 | A09319 | 535 |
| A00239 | A09374 | 160 | A00239 | A09577 | 602 |
| A00239 | A09804 | 373 | A00239 | A09871 | 172 |
| A00239 | A10076 | 196 | A00239 | A10179 | 257 |
| A00239 | A10201 | 177 | A00239 | A10365 | 427 |
| A00239 | A10560 | 177 | A00239 | A10580 | 358 |
| A00239 | A10623 | 245 | A00239 | A10624 | 488 |
| A00239 | A10743 | 241 | A00239 | A10808 | 346 |
| A00239 | A10811 | 308 | A00239 | A10902 | 168 |
| A00239 | A10913 | 177 | A00239 | A11125 | 473 |
| A00239 | A11206 | 160 | A00239 | A11262 | 167 |
| A00239 | A11335 | 443 | A00239 | A11590 | 174 |
| A00239 | A11707 | 224 | A00239 | A11943 | 484 |
| A00239 | A12666 | 944 | A00239 | A13250 | 291 |
| A00239 | A13391 | 156 | A00239 | A13705 | 319 |
| A00239 | A13977 | 160 | A00239 | A13984 | 332 |
| A00239 | A14045 | 271 | A00239 | A14068 | 417 |
| A00239 | A14188 | 351 | A00239 | A14299 | 614 |
| A00239 | A14642 | 179 | A00239 | A14704 | 291 |
| A00239 | A15196 | 184 | A00239 | A15699 | 156 |
| A00239 | A16222 | 160 | A00239 | A17197 | 293 |
| A00240 | A00241 | 956 | A00240 | A00242 | 994 |
| A00240 | A00243 | 991 | A00240 | A00244 | 945 |
| A00240 | A00246 | 916 | A00240 | A00252 | 461 |

|        |        |     |        |        |     |
|--------|--------|-----|--------|--------|-----|
| A00240 | A00253 | 405 | A00240 | A00254 | 477 |
| A00240 | A00255 | 958 | A00240 | A00257 | 333 |
| A00240 | A00261 | 602 | A00240 | A00270 | 899 |
| A00240 | A00272 | 569 | A00240 | A00324 | 944 |
| A00240 | A00338 | 372 | A00240 | A00470 | 899 |
| A00240 | A00531 | 899 | A00240 | A00533 | 235 |
| A00240 | A00652 | 455 | A00240 | A00669 | 490 |
| A00240 | A00691 | 227 | A00240 | A00763 | 154 |
| A00240 | A00808 | 486 | A00240 | A00809 | 899 |
| A00240 | A00887 | 360 | A00240 | A00900 | 906 |
| A00240 | A00911 | 469 | A00240 | A00914 | 899 |
| A00240 | A00922 | 154 | A00240 | A00932 | 677 |
| A00240 | A00987 | 160 | A00240 | A00997 | 263 |
| A00240 | A01003 | 200 | A00240 | A01052 | 475 |
| A00240 | A01088 | 168 | A00240 | A01178 | 285 |
| A00240 | A01198 | 899 | A00240 | A01212 | 167 |
| A00240 | A01213 | 214 | A00240 | A01289 | 458 |
| A00240 | A01291 | 452 | A00240 | A01425 | 440 |
| A00240 | A01435 | 417 | A00240 | A01450 | 235 |
| A00240 | A01512 | 950 | A00240 | A01524 | 477 |
| A00240 | A01527 | 944 | A00240 | A01550 | 912 |
| A00240 | A01553 | 945 | A00240 | A01554 | 945 |
| A00240 | A01558 | 990 | A00240 | A01560 | 994 |
| A00240 | A01561 | 910 | A00240 | A01562 | 945 |
| A00240 | A01572 | 206 | A00240 | A01588 | 989 |
| A00240 | A01596 | 713 | A00240 | A01601 | 522 |
| A00240 | A01605 | 491 | A00240 | A01606 | 326 |
| A00240 | A01615 | 925 | A00240 | A01623 | 491 |
| A00240 | A01628 | 916 | A00240 | A01639 | 945 |
| A00240 | A01640 | 472 | A00240 | A01680 | 936 |
| A00240 | A01688 | 369 | A00240 | A01692 | 536 |
| A00240 | A01697 | 180 | A00240 | A01702 | 368 |
| A00240 | A01708 | 378 | A00240 | A01709 | 490 |
| A00240 | A01718 | 952 | A00240 | A01719 | 219 |
| A00240 | A01730 | 384 | A00240 | A01748 | 179 |
| A00240 | A01755 | 156 | A00240 | A01798 | 232 |
| A00240 | A01844 | 927 | A00240 | A01850 | 402 |
| A00240 | A01920 | 403 | A00240 | A01974 | 491 |
| A00240 | A02143 | 363 | A00240 | A02254 | 168 |
| A00240 | A02424 | 899 | A00240 | A02502 | 486 |
| A00240 | A02642 | 899 | A00240 | A02791 | 324 |
| A00240 | A02836 | 545 | A00240 | A02908 | 899 |
| A00240 | A02942 | 899 | A00240 | A02968 | 899 |
| A00240 | A03087 | 258 | A00240 | A03095 | 223 |
| A00240 | A03171 | 899 | A00240 | A03209 | 899 |
| A00240 | A03451 | 374 | A00240 | A03575 | 217 |



|        |        |     |        |        |     |
|--------|--------|-----|--------|--------|-----|
| A00240 | A03775 | 905 | A00240 | A03817 | 899 |
| A00240 | A03822 | 412 | A00240 | A03830 | 218 |
| A00240 | A03854 | 446 | A00240 | A03971 | 236 |
| A00240 | A03981 | 160 | A00240 | A04062 | 473 |
| A00240 | A04074 | 230 | A00240 | A04266 | 160 |
| A00240 | A04280 | 414 | A00240 | A04347 | 573 |
| A00240 | A04359 | 179 | A00240 | A04413 | 160 |
| A00240 | A04414 | 263 | A00240 | A04534 | 154 |
| A00240 | A04682 | 900 | A00240 | A04699 | 477 |
| A00240 | A04909 | 283 | A00240 | A05062 | 157 |
| A00240 | A05065 | 267 | A00240 | A05082 | 490 |
| A00240 | A05118 | 179 | A00240 | A05464 | 191 |
| A00240 | A05553 | 259 | A00240 | A05606 | 899 |
| A00240 | A05701 | 355 | A00240 | A05952 | 179 |
| A00240 | A05969 | 207 | A00240 | A05970 | 179 |
| A00240 | A06256 | 168 | A00240 | A06289 | 162 |
| A00240 | A06398 | 207 | A00240 | A06601 | 429 |
| A00240 | A06610 | 489 | A00240 | A06615 | 425 |
| A00240 | A06821 | 265 | A00240 | A07032 | 263 |
| A00240 | A07311 | 997 | A00240 | A07398 | 899 |
| A00240 | A07422 | 486 | A00240 | A07834 | 188 |
| A00240 | A08118 | 291 | A00240 | A08282 | 263 |
| A00240 | A08607 | 228 | A00240 | A08732 | 899 |
| A00240 | A09158 | 154 | A00240 | A09162 | 420 |
| A00240 | A09319 | 951 | A00240 | A09476 | 393 |
| A00240 | A09544 | 160 | A00240 | A09577 | 945 |
| A00240 | A09660 | 191 | A00240 | A09698 | 171 |
| A00240 | A09804 | 923 | A00240 | A09871 | 391 |
| A00240 | A09937 | 157 | A00240 | A10076 | 408 |
| A00240 | A10096 | 207 | A00240 | A10167 | 899 |
| A00240 | A10174 | 899 | A00240 | A10365 | 440 |
| A00240 | A10386 | 236 | A00240 | A10499 | 355 |
| A00240 | A10560 | 396 | A00240 | A10580 | 784 |
| A00240 | A10615 | 899 | A00240 | A10623 | 483 |
| A00240 | A10624 | 374 | A00240 | A10743 | 469 |
| A00240 | A10801 | 899 | A00240 | A10808 | 468 |
| A00240 | A10811 | 207 | A00240 | A10822 | 160 |
| A00240 | A10913 | 396 | A00240 | A10981 | 191 |
| A00240 | A10982 | 477 | A00240 | A11125 | 944 |
| A00240 | A11252 | 191 | A00240 | A11262 | 899 |
| A00240 | A11335 | 278 | A00240 | A11460 | 229 |
| A00240 | A11620 | 228 | A00240 | A11707 | 473 |
| A00240 | A11943 | 945 | A00240 | A12018 | 168 |
| A00240 | A12103 | 168 | A00240 | A12341 | 899 |
| A00240 | A12664 | 474 | A00240 | A12666 | 272 |
| A00240 | A12810 | 286 | A00240 | A12990 | 539 |

|        |        |     |        |        |     |
|--------|--------|-----|--------|--------|-----|
| A00240 | A12997 | 179 | A00240 | A13146 | 913 |
| A00240 | A13250 | 291 | A00240 | A13292 | 899 |
| A00240 | A13390 | 168 | A00240 | A13391 | 420 |
| A00240 | A13549 | 179 | A00240 | A13672 | 330 |
| A00240 | A13705 | 263 | A00240 | A13804 | 221 |
| A00240 | A13975 | 899 | A00240 | A13977 | 364 |
| A00240 | A13978 | 933 | A00240 | A13980 | 236 |
| A00240 | A13981 | 899 | A00240 | A13992 | 330 |
| A00240 | A14019 | 899 | A00240 | A14030 | 445 |
| A00240 | A14045 | 338 | A00240 | A14046 | 228 |
| A00240 | A14062 | 582 | A00240 | A14068 | 286 |
| A00240 | A14188 | 935 | A00240 | A14191 | 191 |
| A00240 | A14215 | 899 | A00240 | A14259 | 899 |
| A00240 | A14299 | 958 | A00240 | A14399 | 263 |
| A00240 | A14443 | 439 | A00240 | A14444 | 942 |
| A00240 | A14642 | 402 | A00240 | A14704 | 291 |
| A00240 | A14917 | 172 | A00240 | A14961 | 228 |
| A00240 | A14964 | 335 | A00240 | A15096 | 456 |
| A00240 | A15196 | 241 | A00240 | A16050 | 160 |
| A00240 | A16400 | 174 | A00240 | A16418 | 168 |
| A00240 | A16438 | 201 | A00240 | A16788 | 207 |
| A00240 | A16792 | 276 | A00240 | A16905 | 202 |
| A00240 | A16944 | 210 | A00240 | A17213 | 899 |
| A00241 | A00242 | 945 | A00241 | A00243 | 811 |
| A00241 | A00244 | 945 | A00241 | A00246 | 923 |
| A00241 | A00257 | 316 | A00241 | A00261 | 615 |
| A00241 | A00320 | 240 | A00241 | A00428 | 343 |
| A00241 | A00660 | 193 | A00241 | A00671 | 187 |
| A00241 | A00911 | 247 | A00241 | A01363 | 450 |
| A00241 | A01527 | 899 | A00241 | A01553 | 935 |
| A00241 | A01558 | 899 | A00241 | A01560 | 940 |
| A00241 | A01588 | 899 | A00241 | A01596 | 613 |
| A00241 | A01623 | 483 | A00241 | A01700 | 185 |
| A00241 | A01920 | 517 | A00241 | A01974 | 756 |
| A00241 | A01977 | 174 | A00241 | A02711 | 371 |
| A00241 | A02791 | 313 | A00241 | A03321 | 232 |
| A00241 | A04033 | 241 | A00241 | A04909 | 165 |
| A00241 | A05118 | 272 | A00241 | A05181 | 436 |
| A00241 | A07311 | 930 | A00241 | A07803 | 165 |
| A00241 | A07891 | 217 | A00241 | A08118 | 291 |
| A00241 | A08377 | 201 | A00241 | A08416 | 235 |
| A00241 | A08550 | 165 | A00241 | A09060 | 174 |
| A00241 | A09121 | 191 | A00241 | A09529 | 156 |
| A00241 | A09609 | 213 | A00241 | A10076 | 224 |
| A00241 | A10615 | 899 | A00241 | A10902 | 198 |
| A00241 | A11125 | 174 | A00241 | A11472 | 154 |

|        |        |     |        |        |     |
|--------|--------|-----|--------|--------|-----|
| A00241 | A11543 | 299 | A00241 | A11707 | 260 |
| A00241 | A11914 | 154 | A00241 | A12204 | 196 |
| A00241 | A12658 | 205 | A00241 | A12666 | 932 |
| A00241 | A13169 | 165 | A00241 | A13250 | 291 |
| A00241 | A13527 | 160 | A00241 | A13787 | 243 |
| A00241 | A13788 | 162 | A00241 | A13804 | 198 |
| A00241 | A13809 | 213 | A00241 | A14068 | 249 |
| A00241 | A14188 | 168 | A00241 | A14204 | 367 |
| A00241 | A14299 | 614 | A00241 | A14569 | 221 |
| A00241 | A14704 | 291 | A00241 | A14739 | 256 |
| A00241 | A14917 | 160 | A00241 | A15606 | 228 |
| A00241 | A15726 | 358 | A00241 | A16157 | 172 |
| A00241 | A16243 | 168 | A00241 | A16565 | 191 |
| A00241 | A16566 | 176 | A00241 | A16567 | 201 |
| A00241 | A16587 | 286 | A00241 | A16680 | 172 |
| A00241 | A16691 | 219 | A00241 | A16701 | 193 |
| A00241 | A16788 | 294 | A00241 | A16815 | 228 |
| A00241 | A16874 | 165 | A00242 | A00243 | 491 |
| A00242 | A00244 | 945 | A00242 | A00246 | 899 |
| A00242 | A00254 | 154 | A00242 | A00255 | 456 |
| A00242 | A00324 | 899 | A00242 | A00439 | 229 |
| A00242 | A00669 | 213 | A00242 | A00808 | 414 |
| A00242 | A00811 | 152 | A00242 | A00932 | 188 |
| A00242 | A00933 | 299 | A00242 | A01157 | 180 |
| A00242 | A01289 | 252 | A00242 | A01435 | 288 |
| A00242 | A01553 | 488 | A00242 | A01554 | 339 |
| A00242 | A01558 | 899 | A00242 | A01560 | 945 |
| A00242 | A01561 | 899 | A00242 | A01588 | 899 |
| A00242 | A01605 | 193 | A00242 | A01623 | 462 |
| A00242 | A01639 | 394 | A00242 | A01640 | 931 |
| A00242 | A01680 | 899 | A00242 | A01692 | 452 |
| A00242 | A01709 | 259 | A00242 | A01974 | 491 |
| A00242 | A02424 | 899 | A00242 | A02498 | 193 |
| A00242 | A03143 | 200 | A00242 | A03209 | 218 |
| A00242 | A03594 | 259 | A00242 | A03822 | 210 |
| A00242 | A04280 | 162 | A00242 | A04347 | 219 |
| A00242 | A04909 | 218 | A00242 | A05118 | 313 |
| A00242 | A06256 | 307 | A00242 | A07311 | 486 |
| A00242 | A08607 | 347 | A00242 | A09577 | 243 |
| A00242 | A10365 | 174 | A00242 | A10960 | 159 |
| A00242 | A11124 | 185 | A00242 | A11335 | 213 |
| A00242 | A11707 | 470 | A00242 | A12990 | 923 |
| A00242 | A13549 | 313 | A00242 | A14188 | 903 |
| A00242 | A14444 | 335 | A00243 | A00244 | 966 |
| A00243 | A00247 | 297 | A00243 | A00257 | 443 |
| A00243 | A00261 | 616 | A00243 | A00356 | 189 |

|        |        |     |        |        |     |
|--------|--------|-----|--------|--------|-----|
| A00243 | A00421 | 249 | A00243 | A00651 | 183 |
| A00243 | A00667 | 335 | A00243 | A00691 | 293 |
| A00243 | A00697 | 286 | A00243 | A00709 | 481 |
| A00243 | A00771 | 329 | A00243 | A00883 | 151 |
| A00243 | A00911 | 491 | A00243 | A00919 | 391 |
| A00243 | A00932 | 585 | A00243 | A00972 | 329 |
| A00243 | A00983 | 391 | A00243 | A01088 | 221 |
| A00243 | A01139 | 391 | A00243 | A01148 | 423 |
| A00243 | A01213 | 268 | A00243 | A01289 | 301 |
| A00243 | A01405 | 391 | A00243 | A01507 | 575 |
| A00243 | A01524 | 899 | A00243 | A01527 | 899 |
| A00243 | A01558 | 899 | A00243 | A01560 | 413 |
| A00243 | A01588 | 899 | A00243 | A01596 | 712 |
| A00243 | A01601 | 379 | A00243 | A01623 | 491 |
| A00243 | A01639 | 198 | A00243 | A01692 | 373 |
| A00243 | A01718 | 577 | A00243 | A01920 | 615 |
| A00243 | A01974 | 682 | A00243 | A02791 | 402 |
| A00243 | A03451 | 380 | A00243 | A03858 | 329 |
| A00243 | A03877 | 238 | A00243 | A03971 | 414 |
| A00243 | A04347 | 380 | A00243 | A04449 | 167 |
| A00243 | A05054 | 193 | A00243 | A05065 | 221 |
| A00243 | A05101 | 157 | A00243 | A06869 | 283 |
| A00243 | A06941 | 188 | A00243 | A06985 | 251 |
| A00243 | A07557 | 160 | A00243 | A08118 | 291 |
| A00243 | A08282 | 283 | A00243 | A09319 | 271 |
| A00243 | A10076 | 152 | A00243 | A10179 | 414 |
| A00243 | A10580 | 393 | A00243 | A10811 | 246 |
| A00243 | A10864 | 283 | A00243 | A11109 | 160 |
| A00243 | A11521 | 157 | A00243 | A11736 | 251 |
| A00243 | A12666 | 934 | A00243 | A12824 | 249 |
| A00243 | A12837 | 171 | A00243 | A12989 | 251 |
| A00243 | A12990 | 329 | A00243 | A13063 | 329 |
| A00243 | A13091 | 156 | A00243 | A13250 | 310 |
| A00243 | A13391 | 235 | A00243 | A13571 | 372 |
| A00243 | A14005 | 310 | A00243 | A14046 | 372 |
| A00243 | A14068 | 469 | A00243 | A14204 | 491 |
| A00243 | A14229 | 171 | A00243 | A14299 | 616 |
| A00243 | A14444 | 301 | A00243 | A14642 | 428 |
| A00243 | A14704 | 299 | A00243 | A15096 | 180 |
| A00243 | A15321 | 296 | A00243 | A15322 | 488 |
| A00243 | A15347 | 527 | A00244 | A00246 | 899 |
| A00244 | A01554 | 296 | A00244 | A01558 | 899 |
| A00244 | A01588 | 899 | A00244 | A01623 | 412 |
| A00244 | A01974 | 472 | A00244 | A05082 | 268 |
| A00244 | A06610 | 156 | A00244 | A10808 | 210 |
| A00244 | A12666 | 338 | A00244 | A14299 | 199 |

|        |        |     |        |        |     |
|--------|--------|-----|--------|--------|-----|
| A00244 | A14444 | 346 | A00245 | A00270 | 177 |
| A00245 | A00274 | 205 | A00245 | A00324 | 170 |
| A00245 | A00363 | 193 | A00245 | A00370 | 185 |
| A00245 | A00440 | 165 | A00245 | A00616 | 475 |
| A00245 | A00643 | 257 | A00245 | A00752 | 328 |
| A00245 | A00826 | 196 | A00245 | A00831 | 177 |
| A00245 | A00883 | 184 | A00245 | A00902 | 374 |
| A00245 | A00914 | 165 | A00245 | A00958 | 334 |
| A00245 | A01072 | 388 | A00245 | A01088 | 477 |
| A00245 | A01091 | 151 | A00245 | A01112 | 235 |
| A00245 | A01137 | 265 | A00245 | A01140 | 394 |
| A00245 | A01157 | 350 | A00245 | A01166 | 154 |
| A00245 | A01235 | 446 | A00245 | A01257 | 491 |
| A00245 | A01299 | 446 | A00245 | A01305 | 154 |
| A00245 | A01425 | 259 | A00245 | A01468 | 302 |
| A00245 | A01470 | 187 | A00245 | A01485 | 63  |
| A00245 | A01492 | 467 | A00245 | A01524 | 899 |
| A00245 | A01598 | 479 | A00245 | A01601 | 402 |
| A00245 | A01605 | 171 | A00245 | A01614 | 217 |
| A00245 | A01668 | 173 | A00245 | A01903 | 174 |
| A00245 | A01931 | 221 | A00245 | A02148 | 85  |
| A00245 | A02174 | 435 | A00245 | A02212 | 156 |
| A00245 | A02228 | 432 | A00245 | A02260 | 152 |
| A00245 | A02265 | 265 | A00245 | A02304 | 458 |
| A00245 | A02306 | 180 | A00245 | A02313 | 395 |
| A00245 | A02379 | 334 | A00245 | A02383 | 281 |
| A00245 | A02431 | 475 | A00245 | A02482 | 326 |
| A00245 | A02554 | 238 | A00245 | A02667 | 82  |
| A00245 | A02673 | 472 | A00245 | A02759 | 110 |
| A00245 | A02959 | 468 | A00245 | A03056 | 238 |
| A00245 | A03076 | 491 | A00245 | A03104 | 223 |
| A00245 | A03110 | 279 | A00245 | A03183 | 208 |
| A00245 | A03186 | 63  | A00245 | A03219 | 190 |
| A00245 | A03264 | 165 | A00245 | A03292 | 247 |
| A00245 | A03304 | 489 | A00245 | A03310 | 188 |
| A00245 | A03314 | 435 | A00245 | A03436 | 165 |
| A00245 | A03451 | 232 | A00245 | A03584 | 99  |
| A00245 | A03639 | 491 | A00245 | A03818 | 278 |
| A00245 | A03893 | 429 | A00245 | A03910 | 363 |
| A00245 | A03925 | 267 | A00245 | A03942 | 451 |
| A00245 | A03961 | 491 | A00245 | A03963 | 452 |
| A00245 | A04002 | 104 | A00245 | A04033 | 374 |
| A00245 | A04169 | 407 | A00245 | A04202 | 435 |
| A00245 | A04256 | 227 | A00245 | A04282 | 266 |
| A00245 | A04331 | 228 | A00245 | A04380 | 223 |
| A00245 | A04449 | 273 | A00245 | A04525 | 276 |

|        |        |     |        |        |     |
|--------|--------|-----|--------|--------|-----|
| A00245 | A04527 | 412 | A00245 | A04597 | 228 |
| A00245 | A04608 | 163 | A00245 | A04976 | 341 |
| A00245 | A05184 | 152 | A00245 | A05221 | 216 |
| A00245 | A05270 | 291 | A00245 | A05439 | 213 |
| A00245 | A05533 | 213 | A00245 | A05653 | 208 |
| A00245 | A05736 | 183 | A00245 | A05786 | 232 |
| A00245 | A05992 | 274 | A00245 | A06273 | 191 |
| A00245 | A06340 | 332 | A00245 | A06371 | 188 |
| A00245 | A06601 | 191 | A00245 | A06610 | 379 |
| A00245 | A06727 | 299 | A00245 | A06762 | 358 |
| A00245 | A07019 | 254 | A00245 | A07021 | 278 |
| A00245 | A07209 | 414 | A00245 | A07296 | 243 |
| A00245 | A07297 | 251 | A00245 | A07339 | 328 |
| A00245 | A07559 | 232 | A00245 | A07793 | 198 |
| A00245 | A07912 | 232 | A00245 | A08714 | 236 |
| A00245 | A08859 | 489 | A00245 | A09062 | 210 |
| A00245 | A09074 | 223 | A00245 | A09200 | 185 |
| A00245 | A09235 | 299 | A00245 | A09238 | 260 |
| A00245 | A09391 | 377 | A00245 | A09480 | 333 |
| A00245 | A09550 | 447 | A00245 | A09732 | 489 |
| A00245 | A09733 | 488 | A00245 | A09955 | 347 |
| A00245 | A10164 | 435 | A00245 | A10218 | 305 |
| A00245 | A10665 | 208 | A00245 | A11014 | 386 |
| A00245 | A11300 | 343 | A00245 | A11387 | 285 |
| A00245 | A11415 | 452 | A00245 | A11464 | 193 |
| A00245 | A11653 | 170 | A00245 | A11983 | 171 |
| A00245 | A12108 | 259 | A00245 | A12152 | 188 |
| A00245 | A12365 | 399 | A00245 | A12390 | 446 |
| A00245 | A12393 | 443 | A00245 | A12854 | 212 |
| A00245 | A12897 | 302 | A00245 | A13546 | 425 |
| A00245 | A13558 | 167 | A00245 | A13989 | 463 |
| A00245 | A14210 | 462 | A00245 | A14364 | 297 |
| A00245 | A14370 | 152 | A00245 | A14371 | 215 |
| A00245 | A14511 | 489 | A00245 | A14643 | 182 |
| A00245 | A14667 | 420 | A00245 | A15226 | 223 |
| A00245 | A15258 | 163 | A00245 | A15268 | 160 |
| A00245 | A15292 | 486 | A00245 | A15312 | 322 |
| A00245 | A15313 | 210 | A00245 | A15349 | 383 |
| A00245 | A15431 | 252 | A00245 | A15433 | 246 |
| A00245 | A15435 | 329 | A00245 | A15437 | 183 |
| A00245 | A15452 | 483 | A00245 | A15457 | 323 |
| A00245 | A15495 | 480 | A00245 | A15671 | 188 |
| A00245 | A15820 | 157 | A00245 | A16778 | 218 |
| A00245 | A17177 | 334 | A00246 | A00250 | 63  |
| A00246 | A00254 | 945 | A00246 | A00255 | 899 |
| A00246 | A00257 | 899 | A00246 | A00261 | 669 |

|        |        |     |        |        |     |
|--------|--------|-----|--------|--------|-----|
| A00246 | A00270 | 277 | A00246 | A00294 | 899 |
| A00246 | A00324 | 989 | A00246 | A00378 | 396 |
| A00246 | A00669 | 899 | A00246 | A00856 | 458 |
| A00246 | A00864 | 899 | A00246 | A00911 | 291 |
| A00246 | A00914 | 899 | A00246 | A01052 | 899 |
| A00246 | A01070 | 899 | A00246 | A01473 | 899 |
| A00246 | A01474 | 224 | A00246 | A01507 | 899 |
| A00246 | A01512 | 899 | A00246 | A01524 | 899 |
| A00246 | A01527 | 992 | A00246 | A01553 | 992 |
| A00246 | A01554 | 906 | A00246 | A01558 | 989 |
| A00246 | A01559 | 899 | A00246 | A01560 | 899 |
| A00246 | A01561 | 899 | A00246 | A01562 | 899 |
| A00246 | A01572 | 899 | A00246 | A01588 | 989 |
| A00246 | A01593 | 899 | A00246 | A01602 | 899 |
| A00246 | A01605 | 902 | A00246 | A01612 | 899 |
| A00246 | A01615 | 899 | A00246 | A01628 | 899 |
| A00246 | A01638 | 899 | A00246 | A01639 | 899 |
| A00246 | A01640 | 899 | A00246 | A01651 | 899 |
| A00246 | A01680 | 899 | A00246 | A01688 | 899 |
| A00246 | A01692 | 899 | A00246 | A01708 | 899 |
| A00246 | A01709 | 899 | A00246 | A01718 | 904 |
| A00246 | A01719 | 899 | A00246 | A01747 | 170 |
| A00246 | A01797 | 63  | A00246 | A01830 | 152 |
| A00246 | A01844 | 989 | A00246 | A01880 | 185 |
| A00246 | A01900 | 121 | A00246 | A01914 | 517 |
| A00246 | A01920 | 921 | A00246 | A02143 | 899 |
| A00246 | A02327 | 157 | A00246 | A02372 | 117 |
| A00246 | A02502 | 899 | A00246 | A02639 | 485 |
| A00246 | A02711 | 338 | A00246 | A02908 | 899 |
| A00246 | A02942 | 899 | A00246 | A02968 | 899 |
| A00246 | A03010 | 82  | A00246 | A03110 | 899 |
| A00246 | A03126 | 902 | A00246 | A03335 | 899 |
| A00246 | A03685 | 274 | A00246 | A03784 | 252 |
| A00246 | A04323 | 115 | A00246 | A04398 | 260 |
| A00246 | A04451 | 489 | A00246 | A04622 | 63  |
| A00246 | A04651 | 160 | A00246 | A04682 | 119 |
| A00246 | A04795 | 199 | A00246 | A05065 | 191 |
| A00246 | A05082 | 899 | A00246 | A05164 | 216 |
| A00246 | A05216 | 899 | A00246 | A05854 | 899 |
| A00246 | A06404 | 176 | A00246 | A06608 | 899 |
| A00246 | A06906 | 263 | A00246 | A07091 | 899 |
| A00246 | A07260 | 323 | A00246 | A07311 | 899 |
| A00246 | A07422 | 899 | A00246 | A07884 | 263 |
| A00246 | A08278 | 899 | A00246 | A08732 | 899 |
| A00246 | A08860 | 402 | A00246 | A08941 | 360 |
| A00246 | A08944 | 243 | A00246 | A09124 | 899 |

|        |        |     |        |        |     |
|--------|--------|-----|--------|--------|-----|
| A00246 | A09181 | 899 | A00246 | A09220 | 899 |
| A00246 | A09225 | 263 | A00246 | A09238 | 232 |
| A00246 | A09319 | 899 | A00246 | A09422 | 465 |
| A00246 | A09506 | 154 | A00246 | A09542 | 899 |
| A00246 | A09568 | 899 | A00246 | A09577 | 899 |
| A00246 | A09803 | 152 | A00246 | A09855 | 321 |
| A00246 | A09870 | 201 | A00246 | A09937 | 441 |
| A00246 | A09982 | 294 | A00246 | A10392 | 900 |
| A00246 | A10560 | 899 | A00246 | A10580 | 899 |
| A00246 | A10623 | 899 | A00246 | A10633 | 318 |
| A00246 | A10801 | 899 | A00246 | A10808 | 901 |
| A00246 | A10811 | 899 | A00246 | A11125 | 899 |
| A00246 | A11369 | 916 | A00246 | A11512 | 323 |
| A00246 | A11707 | 112 | A00246 | A11943 | 899 |
| A00246 | A11983 | 899 | A00246 | A12353 | 187 |
| A00246 | A12383 | 989 | A00246 | A12393 | 473 |
| A00246 | A12664 | 899 | A00246 | A12666 | 899 |
| A00246 | A12681 | 193 | A00246 | A12705 | 899 |
| A00246 | A12886 | 152 | A00246 | A12971 | 899 |
| A00246 | A12992 | 899 | A00246 | A13250 | 899 |
| A00246 | A13390 | 899 | A00246 | A13391 | 899 |
| A00246 | A13605 | 899 | A00246 | A13923 | 294 |
| A00246 | A13975 | 899 | A00246 | A13980 | 899 |
| A00246 | A13981 | 899 | A00246 | A13982 | 899 |
| A00246 | A13984 | 899 | A00246 | A13985 | 899 |
| A00246 | A13991 | 899 | A00246 | A14007 | 899 |
| A00246 | A14027 | 899 | A00246 | A14038 | 899 |
| A00246 | A14042 | 899 | A00246 | A14043 | 899 |
| A00246 | A14072 | 899 | A00246 | A14198 | 993 |
| A00246 | A14242 | 899 | A00246 | A14402 | 899 |
| A00246 | A14438 | 899 | A00246 | A14443 | 989 |
| A00246 | A14444 | 989 | A00246 | A14930 | 899 |
| A00246 | A15182 | 899 | A00246 | A15241 | 168 |
| A00246 | A15290 | 165 | A00246 | A15293 | 899 |
| A00246 | A15294 | 899 | A00246 | A15783 | 210 |
| A00246 | A15952 | 294 | A00246 | A16085 | 899 |
| A00246 | A16772 | 461 | A00246 | A17060 | 899 |
| A00246 | A17160 | 899 | A00247 | A00254 | 221 |
| A00247 | A00257 | 412 | A00247 | A00263 | 160 |
| A00247 | A00285 | 491 | A00247 | A00297 | 185 |
| A00247 | A00298 | 343 | A00247 | A00337 | 423 |
| A00247 | A00340 | 724 | A00247 | A00356 | 474 |
| A00247 | A00358 | 177 | A00247 | A00366 | 165 |
| A00247 | A00630 | 385 | A00247 | A00643 | 255 |
| A00247 | A00651 | 457 | A00247 | A00698 | 486 |
| A00247 | A00826 | 414 | A00247 | A00839 | 435 |



|        |        |     |        |        |     |
|--------|--------|-----|--------|--------|-----|
| A00247 | A00876 | 208 | A00247 | A00922 | 281 |
| A00247 | A00932 | 491 | A00247 | A00980 | 531 |
| A00247 | A01055 | 405 | A00247 | A01112 | 491 |
| A00247 | A01125 | 314 | A00247 | A01212 | 362 |
| A00247 | A01268 | 191 | A00247 | A01291 | 538 |
| A00247 | A01309 | 414 | A00247 | A01410 | 146 |
| A00247 | A01496 | 247 | A00247 | A01524 | 939 |
| A00247 | A01527 | 945 | A00247 | A01540 | 483 |
| A00247 | A01541 | 173 | A00247 | A01544 | 176 |
| A00247 | A01553 | 226 | A00247 | A01558 | 899 |
| A00247 | A01560 | 945 | A00247 | A01561 | 294 |
| A00247 | A01579 | 490 | A00247 | A01687 | 290 |
| A00247 | A01707 | 151 | A00247 | A01718 | 491 |
| A00247 | A01782 | 154 | A00247 | A01850 | 286 |
| A00247 | A01995 | 262 | A00247 | A02110 | 378 |
| A00247 | A02239 | 440 | A00247 | A03571 | 176 |
| A00247 | A03591 | 207 | A00247 | A03740 | 235 |
| A00247 | A03752 | 491 | A00247 | A04347 | 353 |
| A00247 | A04449 | 221 | A00247 | A05086 | 396 |
| A00247 | A05120 | 281 | A00247 | A05240 | 187 |
| A00247 | A05416 | 226 | A00247 | A06197 | 291 |
| A00247 | A06466 | 655 | A00247 | A07004 | 165 |
| A00247 | A07311 | 558 | A00247 | A07433 | 184 |
| A00247 | A07726 | 350 | A00247 | A07798 | 491 |
| A00247 | A08214 | 296 | A00247 | A09076 | 384 |
| A00247 | A09176 | 263 | A00247 | A09220 | 363 |
| A00247 | A09263 | 293 | A00247 | A09297 | 246 |
| A00247 | A09577 | 395 | A00247 | A09804 | 411 |
| A00247 | A09888 | 185 | A00247 | A09902 | 404 |
| A00247 | A09906 | 348 | A00247 | A10165 | 378 |
| A00247 | A10365 | 390 | A00247 | A10430 | 472 |
| A00247 | A10532 | 428 | A00247 | A10534 | 168 |
| A00247 | A10728 | 480 | A00247 | A10801 | 311 |
| A00247 | A11286 | 165 | A00247 | A11440 | 224 |
| A00247 | A11487 | 332 | A00247 | A11697 | 157 |
| A00247 | A11937 | 363 | A00247 | A12084 | 219 |
| A00247 | A12225 | 348 | A00247 | A12328 | 462 |
| A00247 | A12990 | 491 | A00247 | A13149 | 435 |
| A00247 | A13310 | 180 | A00247 | A13311 | 457 |
| A00247 | A13340 | 491 | A00247 | A13605 | 899 |
| A00247 | A14073 | 486 | A00247 | A14188 | 333 |
| A00247 | A14635 | 404 | A00247 | A14642 | 322 |
| A00247 | A14655 | 440 | A00247 | A15551 | 469 |
| A00247 | A15682 | 254 | A00247 | A15684 | 182 |
| A00247 | A15760 | 162 | A00247 | A15932 | 299 |
| A00247 | A16272 | 388 | A00247 | A16446 | 174 |

|        |        |     |        |        |     |
|--------|--------|-----|--------|--------|-----|
| A00247 | A16542 | 205 | A00247 | A16847 | 472 |
| A00248 | A00256 | 461 | A00248 | A00259 | 347 |
| A00248 | A00260 | 335 | A00248 | A00264 | 358 |
| A00248 | A00265 | 490 | A00248 | A00266 | 916 |
| A00248 | A00616 | 367 | A00248 | A00676 | 177 |
| A00248 | A00887 | 899 | A00248 | A00914 | 294 |
| A00248 | A01524 | 899 | A00248 | A01527 | 899 |
| A00248 | A01554 | 899 | A00248 | A01558 | 899 |
| A00248 | A01588 | 899 | A00248 | A01596 | 252 |
| A00248 | A01604 | 176 | A00248 | A01626 | 188 |
| A00248 | A01639 | 402 | A00248 | A01654 | 486 |
| A00248 | A01669 | 945 | A00248 | A01725 | 389 |
| A00248 | A01729 | 390 | A00248 | A01730 | 291 |
| A00248 | A01741 | 199 | A00248 | A01742 | 490 |
| A00248 | A01743 | 296 | A00248 | A01746 | 491 |
| A00248 | A01756 | 414 | A00248 | A01776 | 224 |
| A00248 | A01781 | 463 | A00248 | A01850 | 348 |
| A00248 | A01870 | 177 | A00248 | A01876 | 479 |
| A00248 | A01879 | 396 | A00248 | A01880 | 385 |
| A00248 | A01888 | 475 | A00248 | A01900 | 945 |
| A00248 | A01902 | 207 | A00248 | A01981 | 232 |
| A00248 | A01983 | 412 | A00248 | A02183 | 185 |
| A00248 | A02292 | 159 | A00248 | A02337 | 424 |
| A00248 | A02370 | 182 | A00248 | A02383 | 154 |
| A00248 | A02490 | 283 | A00248 | A02505 | 312 |
| A00248 | A02587 | 208 | A00248 | A02611 | 303 |
| A00248 | A02637 | 445 | A00248 | A02670 | 312 |
| A00248 | A02699 | 443 | A00248 | A02746 | 174 |
| A00248 | A02769 | 184 | A00248 | A02800 | 180 |
| A00248 | A02808 | 281 | A00248 | A02812 | 434 |
| A00248 | A02821 | 283 | A00248 | A02854 | 427 |
| A00248 | A02863 | 208 | A00248 | A02866 | 362 |
| A00248 | A02871 | 338 | A00248 | A02873 | 472 |
| A00248 | A02886 | 382 | A00248 | A02896 | 283 |
| A00248 | A02906 | 191 | A00248 | A02909 | 469 |
| A00248 | A02917 | 425 | A00248 | A02945 | 367 |
| A00248 | A02983 | 375 | A00248 | A03095 | 475 |
| A00248 | A03218 | 450 | A00248 | A03259 | 302 |
| A00248 | A03269 | 174 | A00248 | A03287 | 157 |
| A00248 | A03319 | 213 | A00248 | A03541 | 489 |
| A00248 | A03612 | 121 | A00248 | A03662 | 488 |
| A00248 | A03817 | 205 | A00248 | A03826 | 201 |
| A00248 | A03846 | 255 | A00248 | A03848 | 213 |
| A00248 | A03869 | 385 | A00248 | A03871 | 393 |
| A00248 | A03942 | 434 | A00248 | A04049 | 402 |
| A00248 | A04063 | 288 | A00248 | A04088 | 168 |

|        |        |     |        |        |     |
|--------|--------|-----|--------|--------|-----|
| A00248 | A04089 | 208 | A00248 | A04109 | 228 |
| A00248 | A04134 | 232 | A00248 | A04248 | 486 |
| A00248 | A04272 | 179 | A00248 | A04320 | 374 |
| A00248 | A04415 | 163 | A00248 | A04536 | 491 |
| A00248 | A04577 | 312 | A00248 | A04584 | 236 |
| A00248 | A04603 | 357 | A00248 | A04627 | 183 |
| A00248 | A04635 | 224 | A00248 | A04734 | 338 |
| A00248 | A04866 | 224 | A00248 | A04941 | 154 |
| A00248 | A04961 | 191 | A00248 | A04996 | 278 |
| A00248 | A05041 | 243 | A00248 | A05288 | 262 |
| A00248 | A05305 | 281 | A00248 | A05436 | 243 |
| A00248 | A05551 | 294 | A00248 | A05556 | 424 |
| A00248 | A05558 | 432 | A00248 | A05583 | 243 |
| A00248 | A05636 | 338 | A00248 | A05810 | 265 |
| A00248 | A05944 | 481 | A00248 | A05985 | 265 |
| A00248 | A06055 | 491 | A00248 | A06415 | 224 |
| A00248 | A06422 | 272 | A00248 | A06609 | 899 |
| A00248 | A06650 | 328 | A00248 | A07031 | 190 |
| A00248 | A07142 | 224 | A00248 | A07157 | 216 |
| A00248 | A07158 | 221 | A00248 | A07161 | 232 |
| A00248 | A07164 | 162 | A00248 | A07173 | 454 |
| A00248 | A07205 | 235 | A00248 | A07372 | 219 |
| A00248 | A07390 | 167 | A00248 | A08615 | 385 |
| A00248 | A08658 | 228 | A00248 | A08711 | 366 |
| A00248 | A09046 | 312 | A00248 | A09220 | 168 |
| A00248 | A09374 | 188 | A00248 | A09394 | 170 |
| A00248 | A09673 | 466 | A00248 | A10018 | 193 |
| A00248 | A10332 | 291 | A00248 | A10392 | 185 |
| A00248 | A10412 | 338 | A00248 | A10580 | 899 |
| A00248 | A10969 | 263 | A00248 | A11473 | 383 |
| A00248 | A11894 | 281 | A00248 | A12662 | 195 |
| A00248 | A14416 | 195 | A00248 | A14432 | 439 |
| A00248 | A14969 | 390 | A00248 | A15601 | 157 |
| A00248 | A15603 | 366 | A00248 | A15605 | 334 |
| A00248 | A15981 | 170 | A00248 | A16870 | 312 |
| A00249 | A14204 | 63  | A00249 | A15303 | 63  |
| A00249 | A16891 | 63  | A00249 | A16910 | 63  |
| A00250 | A00257 | 469 | A00250 | A00265 | 351 |
| A00250 | A00271 | 899 | A00250 | A00427 | 260 |
| A00250 | A00630 | 157 | A00250 | A00825 | 477 |
| A00250 | A01475 | 221 | A00250 | A01553 | 446 |
| A00250 | A01554 | 908 | A00250 | A01558 | 899 |
| A00250 | A01562 | 279 | A00250 | A01572 | 163 |
| A00250 | A01588 | 899 | A00250 | A01596 | 581 |
| A00250 | A01631 | 408 | A00250 | A01639 | 935 |
| A00250 | A01692 | 152 | A00250 | A01709 | 899 |

|        |        |     |        |        |     |
|--------|--------|-----|--------|--------|-----|
| A00250 | A01730 | 943 | A00250 | A01850 | 196 |
| A00250 | A01901 | 63  | A00250 | A01975 | 259 |
| A00250 | A02088 | 185 | A00250 | A02185 | 299 |
| A00250 | A02724 | 193 | A00250 | A02737 | 149 |
| A00250 | A02825 | 77  | A00250 | A02828 | 185 |
| A00250 | A02830 | 182 | A00250 | A03213 | 232 |
| A00250 | A03259 | 899 | A00250 | A03266 | 247 |
| A00250 | A03273 | 191 | A00250 | A03656 | 168 |
| A00250 | A03892 | 172 | A00250 | A04010 | 413 |
| A00250 | A04104 | 63  | A00250 | A04342 | 152 |
| A00250 | A04537 | 168 | A00250 | A04540 | 321 |
| A00250 | A04639 | 380 | A00250 | A05064 | 480 |
| A00250 | A05530 | 347 | A00250 | A06166 | 205 |
| A00250 | A06416 | 71  | A00250 | A06466 | 440 |
| A00250 | A06721 | 195 | A00250 | A06748 | 276 |
| A00250 | A06936 | 256 | A00250 | A07163 | 212 |
| A00250 | A07422 | 900 | A00250 | A07933 | 441 |
| A00250 | A08211 | 172 | A00250 | A09383 | 934 |
| A00250 | A09409 | 241 | A00250 | A09543 | 221 |
| A00250 | A09577 | 486 | A00250 | A09643 | 927 |
| A00250 | A10014 | 177 | A00250 | A10510 | 179 |
| A00250 | A10580 | 943 | A00250 | A10623 | 906 |
| A00250 | A10811 | 899 | A00250 | A10902 | 285 |
| A00250 | A11124 | 205 | A00250 | A11601 | 151 |
| A00250 | A11911 | 223 | A00250 | A11943 | 184 |
| A00250 | A12141 | 306 | A00250 | A12263 | 276 |
| A00250 | A12359 | 306 | A00250 | A12383 | 945 |
| A00250 | A12431 | 256 | A00250 | A12726 | 151 |
| A00250 | A12850 | 171 | A00250 | A13511 | 452 |
| A00250 | A13562 | 229 | A00250 | A13589 | 288 |
| A00250 | A13711 | 306 | A00250 | A13809 | 152 |
| A00250 | A14008 | 240 | A00250 | A14022 | 899 |
| A00250 | A14073 | 468 | A00250 | A14443 | 504 |
| A00250 | A14455 | 151 | A00250 | A14921 | 199 |
| A00250 | A15034 | 224 | A00250 | A15692 | 899 |
| A00250 | A15745 | 366 | A00250 | A16145 | 243 |
| A00250 | A16703 | 198 | A00250 | A16799 | 156 |
| A00250 | A16806 | 193 | A00250 | A16824 | 174 |
| A00251 | A01524 | 899 | A00251 | A01558 | 899 |
| A00251 | A01588 | 899 | A00251 | A03209 | 899 |
| A00252 | A00253 | 995 | A00252 | A00271 | 899 |
| A00252 | A00284 | 232 | A00252 | A00293 | 486 |
| A00252 | A00295 | 441 | A00252 | A00324 | 911 |
| A00252 | A00543 | 279 | A00252 | A00546 | 260 |
| A00252 | A00589 | 221 | A00252 | A00621 | 301 |
| A00252 | A00624 | 157 | A00252 | A00630 | 412 |

|        |        |     |        |        |     |
|--------|--------|-----|--------|--------|-----|
| A00252 | A00652 | 491 | A00252 | A00747 | 480 |
| A00252 | A00832 | 899 | A00252 | A00852 | 396 |
| A00252 | A00876 | 491 | A00252 | A00887 | 899 |
| A00252 | A00981 | 185 | A00252 | A00999 | 369 |
| A00252 | A01045 | 491 | A00252 | A01052 | 927 |
| A00252 | A01149 | 477 | A00252 | A01178 | 489 |
| A00252 | A01289 | 363 | A00252 | A01405 | 455 |
| A00252 | A01406 | 339 | A00252 | A01425 | 491 |
| A00252 | A01478 | 334 | A00252 | A01492 | 899 |
| A00252 | A01524 | 989 | A00252 | A01527 | 900 |
| A00252 | A01550 | 491 | A00252 | A01551 | 182 |
| A00252 | A01554 | 899 | A00252 | A01558 | 989 |
| A00252 | A01560 | 199 | A00252 | A01562 | 958 |
| A00252 | A01566 | 274 | A00252 | A01572 | 386 |
| A00252 | A01588 | 989 | A00252 | A01592 | 394 |
| A00252 | A01595 | 215 | A00252 | A01602 | 899 |
| A00252 | A01606 | 174 | A00252 | A01630 | 199 |
| A00252 | A01631 | 338 | A00252 | A01639 | 257 |
| A00252 | A01660 | 490 | A00252 | A01665 | 899 |
| A00252 | A01692 | 955 | A00252 | A01726 | 374 |
| A00252 | A01730 | 407 | A00252 | A01740 | 335 |
| A00252 | A01770 | 899 | A00252 | A01796 | 384 |
| A00252 | A01844 | 911 | A00252 | A02325 | 491 |
| A00252 | A02418 | 432 | A00252 | A02421 | 162 |
| A00252 | A02434 | 170 | A00252 | A02494 | 446 |
| A00252 | A02502 | 910 | A00252 | A02544 | 945 |
| A00252 | A02564 | 899 | A00252 | A02568 | 63  |
| A00252 | A02647 | 147 | A00252 | A02698 | 485 |
| A00252 | A02703 | 483 | A00252 | A02786 | 485 |
| A00252 | A02816 | 710 | A00252 | A02860 | 208 |
| A00252 | A02877 | 201 | A00252 | A02890 | 185 |
| A00252 | A02902 | 486 | A00252 | A02912 | 357 |
| A00252 | A02927 | 63  | A00252 | A02965 | 305 |
| A00252 | A03057 | 462 | A00252 | A03112 | 151 |
| A00252 | A03237 | 263 | A00252 | A03286 | 319 |
| A00252 | A03321 | 187 | A00252 | A03338 | 205 |
| A00252 | A03472 | 428 | A00252 | A03482 | 173 |
| A00252 | A03488 | 373 | A00252 | A03517 | 375 |
| A00252 | A03575 | 909 | A00252 | A03591 | 617 |
| A00252 | A03596 | 219 | A00252 | A03752 | 302 |
| A00252 | A03886 | 152 | A00252 | A04342 | 491 |
| A00252 | A04715 | 293 | A00252 | A04818 | 63  |
| A00252 | A05073 | 200 | A00252 | A05208 | 177 |
| A00252 | A05418 | 480 | A00252 | A05558 | 288 |
| A00252 | A05811 | 455 | A00252 | A05902 | 229 |
| A00252 | A06138 | 191 | A00252 | A06466 | 491 |

|        |        |     |        |        |     |
|--------|--------|-----|--------|--------|-----|
| A00252 | A06610 | 357 | A00252 | A06677 | 229 |
| A00252 | A07091 | 899 | A00252 | A07311 | 954 |
| A00252 | A07399 | 297 | A00252 | A07422 | 945 |
| A00252 | A07726 | 899 | A00252 | A07829 | 258 |
| A00252 | A08280 | 379 | A00252 | A08532 | 483 |
| A00252 | A08533 | 477 | A00252 | A08815 | 470 |
| A00252 | A08858 | 899 | A00252 | A08899 | 945 |
| A00252 | A09297 | 221 | A00252 | A09319 | 899 |
| A00252 | A09354 | 223 | A00252 | A09434 | 157 |
| A00252 | A09577 | 308 | A00252 | A09685 | 201 |
| A00252 | A09818 | 185 | A00252 | A09842 | 204 |
| A00252 | A09995 | 218 | A00252 | A10057 | 212 |
| A00252 | A10212 | 258 | A00252 | A10233 | 479 |
| A00252 | A10311 | 389 | A00252 | A10346 | 469 |
| A00252 | A10575 | 899 | A00252 | A10580 | 899 |
| A00252 | A10611 | 162 | A00252 | A11277 | 159 |
| A00252 | A11293 | 446 | A00252 | A11455 | 154 |
| A00252 | A11921 | 945 | A00252 | A11932 | 177 |
| A00252 | A11983 | 989 | A00252 | A12328 | 263 |
| A00252 | A12598 | 185 | A00252 | A13062 | 258 |
| A00252 | A13255 | 486 | A00252 | A13340 | 486 |
| A00252 | A13590 | 202 | A00252 | A13795 | 154 |
| A00252 | A13812 | 241 | A00252 | A13824 | 159 |
| A00252 | A13975 | 899 | A00252 | A13977 | 996 |
| A00252 | A13989 | 899 | A00252 | A14009 | 364 |
| A00252 | A14073 | 296 | A00252 | A14198 | 899 |
| A00252 | A14443 | 989 | A00252 | A14648 | 411 |
| A00252 | A15108 | 201 | A00252 | A15356 | 285 |
| A00252 | A15506 | 483 | A00252 | A16080 | 941 |
| A00252 | A16411 | 154 | A00253 | A00284 | 302 |
| A00253 | A00293 | 488 | A00253 | A00295 | 317 |
| A00253 | A00308 | 288 | A00253 | A00324 | 914 |
| A00253 | A00330 | 208 | A00253 | A00533 | 154 |
| A00253 | A00621 | 157 | A00253 | A00624 | 154 |
| A00253 | A00626 | 190 | A00253 | A00630 | 312 |
| A00253 | A00652 | 491 | A00253 | A00747 | 486 |
| A00253 | A00757 | 152 | A00253 | A00814 | 229 |
| A00253 | A00820 | 279 | A00253 | A00832 | 899 |
| A00253 | A00852 | 362 | A00253 | A00853 | 199 |
| A00253 | A00876 | 491 | A00253 | A00999 | 394 |
| A00253 | A01045 | 491 | A00253 | A01052 | 438 |
| A00253 | A01098 | 156 | A00253 | A01149 | 347 |
| A00253 | A01178 | 480 | A00253 | A01299 | 252 |
| A00253 | A01305 | 491 | A00253 | A01354 | 385 |
| A00253 | A01405 | 481 | A00253 | A01406 | 330 |
| A00253 | A01425 | 491 | A00253 | A01478 | 312 |

|        |        |     |        |        |     |
|--------|--------|-----|--------|--------|-----|
| A00253 | A01492 | 899 | A00253 | A01524 | 899 |
| A00253 | A01527 | 915 | A00253 | A01550 | 491 |
| A00253 | A01554 | 899 | A00253 | A01558 | 899 |
| A00253 | A01560 | 222 | A00253 | A01562 | 613 |
| A00253 | A01572 | 377 | A00253 | A01588 | 899 |
| A00253 | A01595 | 247 | A00253 | A01606 | 256 |
| A00253 | A01615 | 223 | A00253 | A01630 | 208 |
| A00253 | A01631 | 235 | A00253 | A01639 | 249 |
| A00253 | A01660 | 488 | A00253 | A01692 | 491 |
| A00253 | A01726 | 374 | A00253 | A01730 | 418 |
| A00253 | A01740 | 332 | A00253 | A01770 | 902 |
| A00253 | A01796 | 324 | A00253 | A01844 | 281 |
| A00253 | A01994 | 159 | A00253 | A02323 | 257 |
| A00253 | A02325 | 491 | A00253 | A02418 | 406 |
| A00253 | A02421 | 160 | A00253 | A02434 | 167 |
| A00253 | A02494 | 288 | A00253 | A02502 | 152 |
| A00253 | A02544 | 475 | A00253 | A02568 | 63  |
| A00253 | A02647 | 146 | A00253 | A02698 | 489 |
| A00253 | A02703 | 441 | A00253 | A02786 | 475 |
| A00253 | A02816 | 425 | A00253 | A02830 | 477 |
| A00253 | A02860 | 205 | A00253 | A02877 | 396 |
| A00253 | A02895 | 176 | A00253 | A02902 | 489 |
| A00253 | A02912 | 355 | A00253 | A02927 | 110 |
| A00253 | A02931 | 277 | A00253 | A02965 | 425 |
| A00253 | A03057 | 490 | A00253 | A03286 | 396 |
| A00253 | A03321 | 430 | A00253 | A03338 | 202 |
| A00253 | A03401 | 422 | A00253 | A03451 | 210 |
| A00253 | A03472 | 472 | A00253 | A03482 | 171 |
| A00253 | A03488 | 288 | A00253 | A03517 | 374 |
| A00253 | A03575 | 908 | A00253 | A03591 | 383 |
| A00253 | A03611 | 185 | A00253 | A03752 | 477 |
| A00253 | A04342 | 491 | A00253 | A04565 | 199 |
| A00253 | A04914 | 201 | A00253 | A05073 | 196 |
| A00253 | A05418 | 434 | A00253 | A05558 | 285 |
| A00253 | A05811 | 477 | A00253 | A05902 | 329 |
| A00253 | A06138 | 293 | A00253 | A06466 | 491 |
| A00253 | A06610 | 322 | A00253 | A06677 | 227 |
| A00253 | A06981 | 184 | A00253 | A07311 | 945 |
| A00253 | A07399 | 294 | A00253 | A07422 | 944 |
| A00253 | A07726 | 899 | A00253 | A07798 | 156 |
| A00253 | A08133 | 199 | A00253 | A08280 | 374 |
| A00253 | A08532 | 489 | A00253 | A08533 | 443 |
| A00253 | A08571 | 899 | A00253 | A08815 | 484 |
| A00253 | A08858 | 899 | A00253 | A08899 | 477 |
| A00253 | A09354 | 221 | A00253 | A09577 | 379 |
| A00253 | A09818 | 183 | A00253 | A09842 | 200 |

|        |        |     |        |        |     |
|--------|--------|-----|--------|--------|-----|
| A00253 | A09995 | 215 | A00253 | A10051 | 355 |
| A00253 | A10174 | 899 | A00253 | A10212 | 256 |
| A00253 | A10233 | 424 | A00253 | A10293 | 160 |
| A00253 | A10311 | 171 | A00253 | A10334 | 221 |
| A00253 | A10346 | 458 | A00253 | A10575 | 899 |
| A00253 | A10580 | 899 | A00253 | A10611 | 159 |
| A00253 | A10904 | 171 | A00253 | A11293 | 428 |
| A00253 | A11300 | 317 | A00253 | A11346 | 199 |
| A00253 | A11921 | 491 | A00253 | A11937 | 199 |
| A00253 | A11983 | 225 | A00253 | A12246 | 241 |
| A00253 | A12328 | 420 | A00253 | A12598 | 183 |
| A00253 | A13062 | 256 | A00253 | A13255 | 477 |
| A00253 | A13340 | 489 | A00253 | A13590 | 212 |
| A00253 | A13689 | 256 | A00253 | A13743 | 185 |
| A00253 | A13772 | 199 | A00253 | A13795 | 474 |
| A00253 | A13812 | 322 | A00253 | A13824 | 230 |
| A00253 | A13977 | 996 | A00253 | A13989 | 899 |
| A00253 | A14009 | 416 | A00253 | A14073 | 286 |
| A00253 | A14188 | 180 | A00253 | A14443 | 899 |
| A00253 | A14583 | 180 | A00253 | A14648 | 353 |
| A00253 | A15356 | 235 | A00253 | A16080 | 941 |
| A00253 | A16207 | 199 | A00253 | A16411 | 152 |
| A00253 | A17146 | 446 | A00254 | A00255 | 945 |
| A00254 | A00257 | 951 | A00254 | A00261 | 217 |
| A00254 | A00264 | 910 | A00254 | A00265 | 432 |
| A00254 | A00269 | 329 | A00254 | A00271 | 899 |
| A00254 | A00273 | 157 | A00254 | A00280 | 221 |
| A00254 | A00292 | 335 | A00254 | A00304 | 296 |
| A00254 | A00312 | 916 | A00254 | A00316 | 491 |
| A00254 | A00333 | 319 | A00254 | A00340 | 945 |
| A00254 | A00418 | 365 | A00254 | A00451 | 371 |
| A00254 | A00471 | 254 | A00254 | A00552 | 490 |
| A00254 | A00607 | 245 | A00254 | A00616 | 260 |
| A00254 | A00641 | 188 | A00254 | A00643 | 284 |
| A00254 | A00655 | 412 | A00254 | A00658 | 179 |
| A00254 | A00669 | 452 | A00254 | A00679 | 319 |
| A00254 | A00697 | 109 | A00254 | A00709 | 466 |
| A00254 | A00739 | 201 | A00254 | A00757 | 491 |
| A00254 | A00808 | 899 | A00254 | A00811 | 63  |
| A00254 | A00875 | 449 | A00254 | A00887 | 908 |
| A00254 | A00921 | 219 | A00254 | A00939 | 160 |
| A00254 | A00981 | 561 | A00254 | A00993 | 63  |
| A00254 | A00997 | 378 | A00254 | A01047 | 224 |
| A00254 | A01052 | 945 | A00254 | A01061 | 202 |
| A00254 | A01070 | 945 | A00254 | A01125 | 463 |
| A00254 | A01157 | 425 | A00254 | A01169 | 213 |



|        |        |     |        |        |     |
|--------|--------|-----|--------|--------|-----|
| A00254 | A01212 | 560 | A00254 | A01286 | 327 |
| A00254 | A01307 | 299 | A00254 | A01310 | 68  |
| A00254 | A01329 | 358 | A00254 | A01410 | 162 |
| A00254 | A01435 | 254 | A00254 | A01452 | 490 |
| A00254 | A01469 | 157 | A00254 | A01473 | 446 |
| A00254 | A01512 | 899 | A00254 | A01524 | 950 |
| A00254 | A01527 | 945 | A00254 | A01540 | 152 |
| A00254 | A01553 | 944 | A00254 | A01554 | 441 |
| A00254 | A01558 | 945 | A00254 | A01559 | 486 |
| A00254 | A01560 | 945 | A00254 | A01561 | 939 |
| A00254 | A01562 | 301 | A00254 | A01572 | 491 |
| A00254 | A01588 | 945 | A00254 | A01592 | 901 |
| A00254 | A01615 | 927 | A00254 | A01628 | 255 |
| A00254 | A01629 | 176 | A00254 | A01631 | 71  |
| A00254 | A01639 | 899 | A00254 | A01640 | 208 |
| A00254 | A01676 | 899 | A00254 | A01688 | 916 |
| A00254 | A01692 | 941 | A00254 | A01697 | 445 |
| A00254 | A01698 | 185 | A00254 | A01708 | 95  |
| A00254 | A01709 | 899 | A00254 | A01723 | 257 |
| A00254 | A01730 | 486 | A00254 | A01733 | 187 |
| A00254 | A01790 | 480 | A00254 | A01792 | 63  |
| A00254 | A01812 | 358 | A00254 | A01832 | 210 |
| A00254 | A01844 | 429 | A00254 | A01849 | 63  |
| A00254 | A01908 | 477 | A00254 | A01988 | 258 |
| A00254 | A01995 | 562 | A00254 | A02074 | 455 |
| A00254 | A02076 | 63  | A00254 | A02088 | 312 |
| A00254 | A02183 | 451 | A00254 | A02215 | 353 |
| A00254 | A02284 | 899 | A00254 | A02305 | 202 |
| A00254 | A02331 | 301 | A00254 | A02350 | 63  |
| A00254 | A02369 | 196 | A00254 | A02411 | 228 |
| A00254 | A02419 | 79  | A00254 | A02425 | 332 |
| A00254 | A02481 | 191 | A00254 | A02482 | 491 |
| A00254 | A02502 | 899 | A00254 | A02634 | 63  |
| A00254 | A02671 | 263 | A00254 | A02673 | 396 |
| A00254 | A02678 | 661 | A00254 | A02696 | 258 |
| A00254 | A02715 | 185 | A00254 | A02723 | 901 |
| A00254 | A02731 | 63  | A00254 | A02741 | 63  |
| A00254 | A02752 | 485 | A00254 | A02756 | 238 |
| A00254 | A02791 | 324 | A00254 | A02803 | 488 |
| A00254 | A02812 | 319 | A00254 | A02828 | 159 |
| A00254 | A02841 | 63  | A00254 | A02864 | 475 |
| A00254 | A02887 | 63  | A00254 | A03099 | 917 |
| A00254 | A03104 | 152 | A00254 | A03110 | 380 |
| A00254 | A03127 | 167 | A00254 | A03141 | 174 |
| A00254 | A03195 | 63  | A00254 | A03213 | 241 |
| A00254 | A03271 | 480 | A00254 | A03292 | 662 |

|        |        |     |        |        |     |
|--------|--------|-----|--------|--------|-----|
| A00254 | A03434 | 296 | A00254 | A03435 | 324 |
| A00254 | A03436 | 491 | A00254 | A03451 | 224 |
| A00254 | A03465 | 130 | A00254 | A03581 | 260 |
| A00254 | A03591 | 467 | A00254 | A03611 | 221 |
| A00254 | A03694 | 390 | A00254 | A03749 | 232 |
| A00254 | A03771 | 440 | A00254 | A03784 | 486 |
| A00254 | A03809 | 695 | A00254 | A03817 | 457 |
| A00254 | A03821 | 467 | A00254 | A03830 | 457 |
| A00254 | A03961 | 219 | A00254 | A03990 | 488 |
| A00254 | A04012 | 910 | A00254 | A04020 | 224 |
| A00254 | A04033 | 401 | A00254 | A04037 | 223 |
| A00254 | A04051 | 312 | A00254 | A04162 | 232 |
| A00254 | A04174 | 321 | A00254 | A04288 | 99  |
| A00254 | A04293 | 79  | A00254 | A04297 | 229 |
| A00254 | A04314 | 63  | A00254 | A04323 | 266 |
| A00254 | A04335 | 193 | A00254 | A04357 | 172 |
| A00254 | A04398 | 291 | A00254 | A04481 | 223 |
| A00254 | A04484 | 899 | A00254 | A04490 | 312 |
| A00254 | A04661 | 171 | A00254 | A04663 | 180 |
| A00254 | A04699 | 899 | A00254 | A04731 | 346 |
| A00254 | A04914 | 157 | A00254 | A05025 | 171 |
| A00254 | A05208 | 900 | A00254 | A05216 | 180 |
| A00254 | A05221 | 477 | A00254 | A05288 | 473 |
| A00254 | A05289 | 334 | A00254 | A05339 | 110 |
| A00254 | A05363 | 112 | A00254 | A05418 | 364 |
| A00254 | A05453 | 308 | A00254 | A05530 | 63  |
| A00254 | A05560 | 167 | A00254 | A05633 | 491 |
| A00254 | A05638 | 358 | A00254 | A05847 | 63  |
| A00254 | A05848 | 254 | A00254 | A06029 | 395 |
| A00254 | A06045 | 230 | A00254 | A06077 | 236 |
| A00254 | A06138 | 154 | A00254 | A06190 | 491 |
| A00254 | A06256 | 135 | A00254 | A06295 | 943 |
| A00254 | A06397 | 236 | A00254 | A06398 | 160 |
| A00254 | A06409 | 157 | A00254 | A06581 | 156 |
| A00254 | A06609 | 899 | A00254 | A06610 | 429 |
| A00254 | A06703 | 102 | A00254 | A06762 | 899 |
| A00254 | A06783 | 352 | A00254 | A06915 | 163 |
| A00254 | A07004 | 188 | A00254 | A07148 | 329 |
| A00254 | A07152 | 157 | A00254 | A07200 | 212 |
| A00254 | A07201 | 899 | A00254 | A07311 | 976 |
| A00254 | A07339 | 490 | A00254 | A07422 | 899 |
| A00254 | A07460 | 899 | A00254 | A07483 | 168 |
| A00254 | A07528 | 306 | A00254 | A07619 | 245 |
| A00254 | A07726 | 486 | A00254 | A07762 | 486 |
| A00254 | A07803 | 243 | A00254 | A07835 | 353 |
| A00254 | A08280 | 419 | A00254 | A08571 | 486 |

|        |        |     |        |        |     |
|--------|--------|-----|--------|--------|-----|
| A00254 | A08608 | 430 | A00254 | A08860 | 451 |
| A00254 | A08935 | 157 | A00254 | A09007 | 207 |
| A00254 | A09078 | 490 | A00254 | A09201 | 899 |
| A00254 | A09218 | 407 | A00254 | A09220 | 479 |
| A00254 | A09235 | 489 | A00254 | A09356 | 196 |
| A00254 | A09363 | 294 | A00254 | A09398 | 193 |
| A00254 | A09401 | 63  | A00254 | A09542 | 907 |
| A00254 | A09543 | 135 | A00254 | A09568 | 937 |
| A00254 | A09643 | 63  | A00254 | A09660 | 901 |
| A00254 | A09897 | 193 | A00254 | A09937 | 358 |
| A00254 | A09993 | 196 | A00254 | A10072 | 348 |
| A00254 | A10623 | 899 | A00254 | A10634 | 205 |
| A00254 | A10666 | 180 | A00254 | A10735 | 938 |
| A00254 | A10801 | 944 | A00254 | A10833 | 905 |
| A00254 | A10872 | 230 | A00254 | A10986 | 265 |
| A00254 | A11259 | 172 | A00254 | A11369 | 491 |
| A00254 | A11411 | 154 | A00254 | A11521 | 484 |
| A00254 | A11983 | 404 | A00254 | A11986 | 176 |
| A00254 | A12288 | 193 | A00254 | A12383 | 939 |
| A00254 | A12871 | 260 | A00254 | A12886 | 146 |
| A00254 | A12932 | 916 | A00254 | A13003 | 899 |
| A00254 | A13168 | 193 | A00254 | A13207 | 176 |
| A00254 | A13362 | 205 | A00254 | A13390 | 899 |
| A00254 | A13510 | 185 | A00254 | A13511 | 486 |
| A00254 | A13605 | 281 | A00254 | A13663 | 157 |
| A00254 | A13824 | 157 | A00254 | A13903 | 472 |
| A00254 | A13958 | 899 | A00254 | A13975 | 483 |
| A00254 | A13980 | 369 | A00254 | A13984 | 899 |
| A00254 | A13986 | 276 | A00254 | A13987 | 899 |
| A00254 | A13997 | 294 | A00254 | A14006 | 306 |
| A00254 | A14010 | 905 | A00254 | A14019 | 324 |
| A00254 | A14027 | 263 | A00254 | A14034 | 99  |
| A00254 | A14035 | 127 | A00254 | A14042 | 899 |
| A00254 | A14045 | 899 | A00254 | A14047 | 157 |
| A00254 | A14065 | 899 | A00254 | A14103 | 157 |
| A00254 | A14187 | 481 | A00254 | A14188 | 491 |
| A00254 | A14194 | 903 | A00254 | A14198 | 976 |
| A00254 | A14208 | 249 | A00254 | A14299 | 357 |
| A00254 | A14364 | 441 | A00254 | A14400 | 393 |
| A00254 | A14402 | 446 | A00254 | A14426 | 353 |
| A00254 | A14433 | 945 | A00254 | A14438 | 424 |
| A00254 | A14443 | 943 | A00254 | A14444 | 238 |
| A00254 | A14553 | 193 | A00254 | A14577 | 485 |
| A00254 | A14635 | 408 | A00254 | A14644 | 446 |
| A00254 | A14653 | 63  | A00254 | A15182 | 905 |
| A00254 | A15186 | 193 | A00254 | A15195 | 157 |

|        |        |     |        |        |     |
|--------|--------|-----|--------|--------|-----|
| A00254 | A15292 | 899 | A00254 | A15293 | 958 |
| A00254 | A15294 | 963 | A00254 | A15312 | 899 |
| A00254 | A15320 | 469 | A00254 | A15325 | 235 |
| A00254 | A15503 | 232 | A00254 | A15506 | 541 |
| A00254 | A15726 | 489 | A00254 | A15802 | 156 |
| A00254 | A16224 | 302 | A00254 | A16901 | 348 |
| A00254 | A16994 | 63  | A00254 | A17188 | 288 |
| A00255 | A00261 | 227 | A00255 | A00694 | 160 |
| A00255 | A00697 | 427 | A00255 | A00808 | 910 |
| A00255 | A00811 | 306 | A00255 | A00981 | 243 |
| A00255 | A01052 | 899 | A00255 | A01178 | 151 |
| A00255 | A01407 | 168 | A00255 | A01435 | 319 |
| A00255 | A01507 | 63  | A00255 | A01524 | 945 |
| A00255 | A01527 | 945 | A00255 | A01553 | 899 |
| A00255 | A01558 | 899 | A00255 | A01560 | 165 |
| A00255 | A01615 | 900 | A00255 | A01688 | 900 |
| A00255 | A01785 | 193 | A00255 | A01908 | 84  |
| A00255 | A01975 | 246 | A00255 | A02000 | 414 |
| A00255 | A02350 | 334 | A00255 | A02447 | 263 |
| A00255 | A02479 | 200 | A00255 | A02502 | 899 |
| A00255 | A02797 | 168 | A00255 | A02803 | 79  |
| A00255 | A02863 | 162 | A00255 | A02864 | 314 |
| A00255 | A02877 | 180 | A00255 | A02878 | 177 |
| A00255 | A02917 | 167 | A00255 | A03054 | 322 |
| A00255 | A03071 | 485 | A00255 | A03271 | 73  |
| A00255 | A03753 | 187 | A00255 | A03790 | 341 |
| A00255 | A03809 | 968 | A00255 | A03906 | 162 |
| A00255 | A03971 | 277 | A00255 | A04078 | 200 |
| A00255 | A04473 | 373 | A00255 | A04484 | 924 |
| A00255 | A04490 | 324 | A00255 | A04622 | 63  |
| A00255 | A05082 | 375 | A00255 | A05155 | 465 |
| A00255 | A06107 | 296 | A00255 | A06795 | 346 |
| A00255 | A07163 | 308 | A00255 | A07311 | 944 |
| A00255 | A09220 | 262 | A00255 | A09401 | 157 |
| A00255 | A09543 | 321 | A00255 | A09959 | 335 |
| A00255 | A10005 | 191 | A00255 | A11578 | 207 |
| A00255 | A13181 | 152 | A00255 | A13342 | 207 |
| A00255 | A13369 | 160 | A00255 | A14035 | 314 |
| A00255 | A14198 | 899 | A00255 | A15317 | 243 |
| A00255 | A15606 | 204 | A00255 | A17188 | 929 |
| A00256 | A00264 | 462 | A00256 | A00382 | 472 |
| A00256 | A00396 | 224 | A00256 | A00472 | 455 |
| A00256 | A00503 | 257 | A00256 | A00682 | 291 |
| A00256 | A00687 | 406 | A00256 | A01142 | 180 |
| A00256 | A01558 | 899 | A00256 | A01571 | 63  |
| A00256 | A01669 | 241 | A00256 | A01728 | 184 |

|        |        |     |        |        |     |
|--------|--------|-----|--------|--------|-----|
| A00256 | A01746 | 462 | A00256 | A01763 | 193 |
| A00256 | A01840 | 273 | A00256 | A02564 | 385 |
| A00256 | A02698 | 257 | A00256 | A02873 | 223 |
| A00256 | A02968 | 899 | A00256 | A03095 | 363 |
| A00256 | A03266 | 157 | A00256 | A03662 | 462 |
| A00256 | A03766 | 443 | A00256 | A03841 | 154 |
| A00256 | A03846 | 254 | A00256 | A04287 | 269 |
| A00256 | A04536 | 428 | A00256 | A05016 | 247 |
| A00256 | A05216 | 480 | A00256 | A05399 | 329 |
| A00256 | A05513 | 165 | A00256 | A05742 | 388 |
| A00256 | A05760 | 899 | A00256 | A05797 | 74  |
| A00256 | A05989 | 185 | A00256 | A06595 | 213 |
| A00256 | A06607 | 489 | A00256 | A06608 | 467 |
| A00256 | A06610 | 63  | A00256 | A06622 | 281 |
| A00256 | A06628 | 491 | A00256 | A06650 | 491 |
| A00256 | A06654 | 157 | A00256 | A06712 | 196 |
| A00256 | A06731 | 276 | A00256 | A06760 | 307 |
| A00256 | A07178 | 157 | A00256 | A07189 | 159 |
| A00256 | A08010 | 152 | A00256 | A08128 | 269 |
| A00256 | A08183 | 468 | A00256 | A08615 | 185 |
| A00256 | A08736 | 247 | A00256 | A08738 | 339 |
| A00256 | A08941 | 299 | A00256 | A08944 | 152 |
| A00256 | A09243 | 159 | A00256 | A09385 | 165 |
| A00256 | A11973 | 174 | A00256 | A12373 | 380 |
| A00256 | A13565 | 185 | A00256 | A14430 | 348 |
| A00256 | A14443 | 899 | A00256 | A15624 | 399 |
| A00256 | A15803 | 165 | A00256 | A15889 | 267 |
| A00256 | A16426 | 151 | A00256 | A16636 | 241 |
| A00257 | A00261 | 154 | A00257 | A00265 | 420 |
| A00257 | A00316 | 246 | A00257 | A00329 | 227 |
| A00257 | A00348 | 316 | A00257 | A00352 | 151 |
| A00257 | A00356 | 559 | A00257 | A00419 | 408 |
| A00257 | A00454 | 475 | A00257 | A00517 | 429 |
| A00257 | A00531 | 327 | A00257 | A00532 | 162 |
| A00257 | A00560 | 458 | A00257 | A00630 | 462 |
| A00257 | A00785 | 180 | A00257 | A00805 | 441 |
| A00257 | A00808 | 191 | A00257 | A00910 | 283 |
| A00257 | A00932 | 373 | A00257 | A01042 | 491 |
| A00257 | A01048 | 205 | A00257 | A01057 | 196 |
| A00257 | A01077 | 490 | A00257 | A01083 | 489 |
| A00257 | A01098 | 257 | A00257 | A01150 | 168 |
| A00257 | A01161 | 159 | A00257 | A01178 | 491 |
| A00257 | A01254 | 238 | A00257 | A01291 | 496 |
| A00257 | A01406 | 255 | A00257 | A01431 | 278 |
| A00257 | A01435 | 595 | A00257 | A01473 | 579 |
| A00257 | A01512 | 518 | A00257 | A01527 | 899 |

|        |        |     |        |        |     |
|--------|--------|-----|--------|--------|-----|
| A00257 | A01540 | 451 | A00257 | A01551 | 340 |
| A00257 | A01553 | 945 | A00257 | A01554 | 480 |
| A00257 | A01558 | 899 | A00257 | A01560 | 491 |
| A00257 | A01561 | 513 | A00257 | A01562 | 277 |
| A00257 | A01576 | 491 | A00257 | A01588 | 899 |
| A00257 | A01606 | 593 | A00257 | A01615 | 297 |
| A00257 | A01628 | 353 | A00257 | A01631 | 450 |
| A00257 | A01639 | 481 | A00257 | A01692 | 491 |
| A00257 | A01697 | 246 | A00257 | A01707 | 485 |
| A00257 | A01719 | 321 | A00257 | A01730 | 351 |
| A00257 | A01781 | 63  | A00257 | A01920 | 258 |
| A00257 | A01950 | 436 | A00257 | A02094 | 416 |
| A00257 | A02361 | 319 | A00257 | A02586 | 291 |
| A00257 | A02715 | 491 | A00257 | A02724 | 341 |
| A00257 | A02813 | 152 | A00257 | A03014 | 195 |
| A00257 | A03031 | 205 | A00257 | A03236 | 241 |
| A00257 | A03451 | 294 | A00257 | A03536 | 538 |
| A00257 | A03591 | 491 | A00257 | A03611 | 154 |
| A00257 | A03625 | 491 | A00257 | A03686 | 586 |
| A00257 | A03739 | 483 | A00257 | A03740 | 491 |
| A00257 | A03752 | 491 | A00257 | A03809 | 268 |
| A00257 | A03893 | 443 | A00257 | A04012 | 477 |
| A00257 | A04033 | 489 | A00257 | A04072 | 457 |
| A00257 | A04153 | 183 | A00257 | A04194 | 252 |
| A00257 | A04342 | 353 | A00257 | A04449 | 486 |
| A00257 | A04622 | 215 | A00257 | A05303 | 205 |
| A00257 | A05979 | 238 | A00257 | A06317 | 170 |
| A00257 | A06466 | 490 | A00257 | A06588 | 491 |
| A00257 | A06688 | 491 | A00257 | A06907 | 299 |
| A00257 | A07004 | 477 | A00257 | A07017 | 446 |
| A00257 | A07151 | 236 | A00257 | A07155 | 469 |
| A00257 | A07207 | 491 | A00257 | A07311 | 952 |
| A00257 | A07339 | 171 | A00257 | A07398 | 335 |
| A00257 | A07798 | 468 | A00257 | A07920 | 346 |
| A00257 | A08054 | 188 | A00257 | A08130 | 183 |
| A00257 | A08315 | 185 | A00257 | A08409 | 469 |
| A00257 | A08423 | 183 | A00257 | A08571 | 224 |
| A00257 | A08635 | 255 | A00257 | A08860 | 491 |
| A00257 | A08878 | 433 | A00257 | A09009 | 283 |
| A00257 | A09068 | 301 | A00257 | A09078 | 182 |
| A00257 | A09162 | 409 | A00257 | A09218 | 440 |
| A00257 | A09253 | 491 | A00257 | A09294 | 288 |
| A00257 | A09303 | 439 | A00257 | A09417 | 306 |
| A00257 | A09476 | 235 | A00257 | A09502 | 154 |
| A00257 | A09577 | 445 | A00257 | A09592 | 460 |
| A00257 | A09750 | 283 | A00257 | A09804 | 490 |

|        |        |     |        |        |     |
|--------|--------|-----|--------|--------|-----|
| A00257 | A09842 | 63  | A00257 | A09874 | 485 |
| A00257 | A09952 | 63  | A00257 | A10014 | 160 |
| A00257 | A10365 | 486 | A00257 | A10379 | 241 |
| A00257 | A10623 | 357 | A00257 | A10728 | 486 |
| A00257 | A10735 | 226 | A00257 | A10760 | 391 |
| A00257 | A10808 | 330 | A00257 | A10982 | 430 |
| A00257 | A11302 | 286 | A00257 | A11372 | 255 |
| A00257 | A11470 | 218 | A00257 | A11500 | 205 |
| A00257 | A11532 | 205 | A00257 | A11602 | 461 |
| A00257 | A11724 | 247 | A00257 | A11937 | 239 |
| A00257 | A11983 | 486 | A00257 | A12050 | 241 |
| A00257 | A12383 | 423 | A00257 | A12990 | 165 |
| A00257 | A13219 | 258 | A00257 | A13340 | 407 |
| A00257 | A13403 | 396 | A00257 | A13511 | 485 |
| A00257 | A13551 | 183 | A00257 | A13729 | 475 |
| A00257 | A13743 | 165 | A00257 | A13824 | 562 |
| A00257 | A13829 | 899 | A00257 | A13989 | 449 |
| A00257 | A14006 | 488 | A00257 | A14026 | 486 |
| A00257 | A14073 | 491 | A00257 | A14298 | 167 |
| A00257 | A14334 | 241 | A00257 | A14635 | 347 |
| A00257 | A14648 | 452 | A00257 | A14801 | 168 |
| A00257 | A15295 | 323 | A00257 | A15366 | 213 |
| A00257 | A15498 | 480 | A00257 | A15506 | 314 |
| A00257 | A15620 | 173 | A00257 | A15699 | 173 |
| A00257 | A15921 | 241 | A00257 | A16060 | 307 |
| A00257 | A16835 | 243 | A00257 | A16847 | 491 |
| A00257 | A17188 | 167 | A00258 | A00283 | 199 |
| A00258 | A00334 | 372 | A00258 | A00356 | 748 |
| A00258 | A00366 | 364 | A00258 | A00440 | 328 |
| A00258 | A00571 | 199 | A00258 | A00629 | 199 |
| A00258 | A00634 | 491 | A00258 | A00700 | 930 |
| A00258 | A01098 | 199 | A00258 | A01112 | 334 |
| A00258 | A01291 | 986 | A00258 | A01299 | 152 |
| A00258 | A01306 | 199 | A00258 | A01405 | 235 |
| A00258 | A01415 | 281 | A00258 | A01425 | 199 |
| A00258 | A01524 | 908 | A00258 | A01527 | 899 |
| A00258 | A01558 | 899 | A00258 | A01579 | 160 |
| A00258 | A01580 | 484 | A00258 | A01588 | 899 |
| A00258 | A01593 | 899 | A00258 | A01596 | 497 |
| A00258 | A01601 | 984 | A00258 | A01605 | 932 |
| A00258 | A01640 | 942 | A00258 | A01718 | 915 |
| A00258 | A02179 | 195 | A00258 | A02213 | 182 |
| A00258 | A03567 | 199 | A00258 | A03575 | 173 |
| A00258 | A03591 | 945 | A00258 | A03939 | 538 |
| A00258 | A04790 | 170 | A00258 | A05288 | 574 |
| A00258 | A06814 | 281 | A00258 | A06861 | 199 |

|        |        |     |        |        |     |
|--------|--------|-----|--------|--------|-----|
| A00258 | A07398 | 335 | A00258 | A07869 | 154 |
| A00258 | A08360 | 396 | A00258 | A08839 | 899 |
| A00258 | A09322 | 199 | A00258 | A09619 | 218 |
| A00258 | A10580 | 447 | A00258 | A10666 | 216 |
| A00258 | A12047 | 577 | A00258 | A12365 | 232 |
| A00258 | A12373 | 900 | A00258 | A13063 | 154 |
| A00258 | A13397 | 247 | A00258 | A13405 | 279 |
| A00258 | A13831 | 152 | A00258 | A13989 | 592 |
| A00258 | A13992 | 899 | A00258 | A13994 | 213 |
| A00258 | A14128 | 497 | A00258 | A14182 | 396 |
| A00258 | A14190 | 396 | A00258 | A14375 | 191 |
| A00258 | A14443 | 899 | A00258 | A14444 | 899 |
| A00258 | A16418 | 603 | A00258 | A17013 | 296 |
| A00259 | A00260 | 941 | A00259 | A00357 | 162 |
| A00259 | A00522 | 288 | A00259 | A00639 | 232 |
| A00259 | A01098 | 247 | A00259 | A01425 | 419 |
| A00259 | A01756 | 232 | A00259 | A01875 | 213 |
| A00259 | A02292 | 423 | A00259 | A02599 | 215 |
| A00259 | A02837 | 360 | A00259 | A02871 | 347 |
| A00259 | A02909 | 193 | A00259 | A03101 | 168 |
| A00259 | A03102 | 183 | A00259 | A03541 | 384 |
| A00259 | A03590 | 362 | A00259 | A03612 | 268 |
| A00259 | A03825 | 188 | A00259 | A03826 | 218 |
| A00259 | A03912 | 226 | A00259 | A03922 | 172 |
| A00259 | A04089 | 226 | A00259 | A04583 | 395 |
| A00259 | A05038 | 240 | A00259 | A05073 | 335 |
| A00259 | A05078 | 232 | A00259 | A05417 | 152 |
| A00259 | A06404 | 215 | A00259 | A06597 | 337 |
| A00259 | A06884 | 159 | A00259 | A07147 | 193 |
| A00259 | A07187 | 268 | A00259 | A09261 | 347 |
| A00259 | A09780 | 208 | A00259 | A10337 | 330 |
| A00259 | A10364 | 254 | A00259 | A10792 | 278 |
| A00259 | A11116 | 395 | A00259 | A12373 | 249 |
| A00259 | A13250 | 196 | A00259 | A14261 | 307 |
| A00259 | A14371 | 172 | A00259 | A15220 | 307 |
| A00259 | A16786 | 163 | A00260 | A00522 | 361 |
| A00260 | A01452 | 162 | A00260 | A01669 | 285 |
| A00260 | A02080 | 343 | A00260 | A02460 | 246 |
| A00260 | A03095 | 465 | A00260 | A03157 | 207 |
| A00260 | A03419 | 348 | A00260 | A04017 | 383 |
| A00260 | A04739 | 288 | A00260 | A04996 | 334 |
| A00260 | A07187 | 452 | A00260 | A09263 | 263 |
| A00260 | A11116 | 454 | A00260 | A15220 | 408 |
| A00260 | A16786 | 334 | A00261 | A00316 | 406 |
| A00261 | A00696 | 168 | A00261 | A00922 | 185 |
| A00261 | A00981 | 328 | A00261 | A01052 | 899 |



|        |        |     |        |        |     |
|--------|--------|-----|--------|--------|-----|
| A00261 | A01558 | 908 | A00261 | A01573 | 193 |
| A00261 | A01588 | 899 | A00261 | A01596 | 616 |
| A00261 | A01602 | 899 | A00261 | A01615 | 899 |
| A00261 | A01623 | 272 | A00261 | A01636 | 154 |
| A00261 | A01697 | 188 | A00261 | A01914 | 762 |
| A00261 | A01920 | 616 | A00261 | A01974 | 488 |
| A00261 | A02711 | 262 | A00261 | A02797 | 441 |
| A00261 | A03068 | 412 | A00261 | A03279 | 157 |
| A00261 | A03422 | 489 | A00261 | A04012 | 267 |
| A00261 | A04137 | 184 | A00261 | A04280 | 463 |
| A00261 | A04398 | 475 | A00261 | A04495 | 218 |
| A00261 | A04857 | 243 | A00261 | A05221 | 461 |
| A00261 | A05831 | 243 | A00261 | A06597 | 488 |
| A00261 | A07311 | 347 | A00261 | A07390 | 390 |
| A00261 | A07565 | 278 | A00261 | A07683 | 157 |
| A00261 | A08118 | 291 | A00261 | A08124 | 184 |
| A00261 | A08725 | 184 | A00261 | A08860 | 215 |
| A00261 | A09059 | 491 | A00261 | A09937 | 224 |
| A00261 | A10183 | 243 | A00261 | A10666 | 388 |
| A00261 | A11019 | 424 | A00261 | A11118 | 184 |
| A00261 | A11124 | 369 | A00261 | A12886 | 162 |
| A00261 | A13032 | 205 | A00261 | A13250 | 360 |
| A00261 | A14055 | 168 | A00261 | A14073 | 202 |
| A00261 | A14204 | 491 | A00261 | A14299 | 665 |
| A00261 | A14443 | 180 | A00261 | A14444 | 226 |
| A00261 | A14704 | 615 | A00261 | A14705 | 460 |
| A00261 | A14777 | 488 | A00261 | A14848 | 278 |
| A00261 | A14913 | 288 | A00261 | A15321 | 366 |
| A00261 | A15322 | 490 | A00261 | A15347 | 486 |
| A00261 | A15506 | 390 | A00261 | A15647 | 369 |
| A00261 | A15726 | 285 | A00261 | A15932 | 271 |
| A00262 | A00294 | 226 | A00262 | A00324 | 491 |
| A00262 | A00336 | 240 | A00262 | A00679 | 149 |
| A00262 | A01052 | 163 | A00262 | A01178 | 474 |
| A00262 | A01363 | 191 | A00262 | A01364 | 323 |
| A00262 | A01378 | 414 | A00262 | A01507 | 450 |
| A00262 | A01512 | 473 | A00262 | A01602 | 185 |
| A00262 | A01606 | 486 | A00262 | A01691 | 212 |
| A00262 | A01698 | 480 | A00262 | A01745 | 218 |
| A00262 | A01756 | 196 | A00262 | A01759 | 185 |
| A00262 | A01796 | 173 | A00262 | A01850 | 486 |
| A00262 | A01896 | 455 | A00262 | A01908 | 63  |
| A00262 | A02318 | 160 | A00262 | A02343 | 477 |
| A00262 | A02388 | 174 | A00262 | A02586 | 358 |
| A00262 | A02629 | 347 | A00262 | A02636 | 196 |
| A00262 | A02667 | 910 | A00262 | A02670 | 159 |

|        |        |     |        |        |     |
|--------|--------|-----|--------|--------|-----|
| A00262 | A02699 | 238 | A00262 | A02749 | 188 |
| A00262 | A02789 | 293 | A00262 | A02819 | 319 |
| A00262 | A02822 | 288 | A00262 | A03073 | 204 |
| A00262 | A03263 | 168 | A00262 | A03309 | 218 |
| A00262 | A03336 | 313 | A00262 | A03451 | 188 |
| A00262 | A03465 | 87  | A00262 | A03611 | 363 |
| A00262 | A03842 | 229 | A00262 | A03845 | 154 |
| A00262 | A03871 | 265 | A00262 | A03893 | 307 |
| A00262 | A04015 | 196 | A00262 | A04380 | 208 |
| A00262 | A04449 | 470 | A00262 | A04522 | 352 |
| A00262 | A04622 | 63  | A00262 | A05288 | 303 |
| A00262 | A05295 | 159 | A00262 | A05633 | 223 |
| A00262 | A05634 | 432 | A00262 | A05779 | 162 |
| A00262 | A05790 | 165 | A00262 | A06056 | 245 |
| A00262 | A06333 | 396 | A00262 | A06426 | 254 |
| A00262 | A06596 | 154 | A00262 | A06623 | 463 |
| A00262 | A06648 | 154 | A00262 | A06703 | 339 |
| A00262 | A06717 | 236 | A00262 | A06859 | 193 |
| A00262 | A07167 | 202 | A00262 | A07393 | 324 |
| A00262 | A07466 | 234 | A00262 | A08030 | 205 |
| A00262 | A08274 | 185 | A00262 | A08590 | 236 |
| A00262 | A08692 | 491 | A00262 | A09085 | 177 |
| A00262 | A09162 | 608 | A00262 | A09279 | 475 |
| A00262 | A09644 | 899 | A00262 | A09753 | 249 |
| A00262 | A09791 | 156 | A00262 | A10221 | 218 |
| A00262 | A10514 | 183 | A00262 | A10669 | 185 |
| A00262 | A10808 | 356 | A00262 | A11487 | 177 |
| A00262 | A11973 | 245 | A00262 | A11983 | 168 |
| A00262 | A13502 | 245 | A00262 | A13673 | 185 |
| A00262 | A13997 | 278 | A00262 | A14513 | 324 |
| A00262 | A14604 | 151 | A00262 | A14643 | 419 |
| A00262 | A14860 | 385 | A00262 | A14925 | 154 |
| A00262 | A16590 | 213 | A00262 | A16835 | 347 |
| A00263 | A00269 | 992 | A00263 | A00294 | 183 |
| A00263 | A00337 | 571 | A00263 | A00340 | 308 |
| A00263 | A00347 | 208 | A00263 | A00388 | 193 |
| A00263 | A00397 | 180 | A00263 | A00472 | 201 |
| A00263 | A00482 | 385 | A00263 | A00483 | 422 |
| A00263 | A00519 | 249 | A00263 | A00625 | 205 |
| A00263 | A00630 | 224 | A00263 | A00637 | 213 |
| A00263 | A00652 | 308 | A00263 | A00688 | 226 |
| A00263 | A00719 | 176 | A00263 | A00779 | 232 |
| A00263 | A00786 | 849 | A00263 | A00813 | 228 |
| A00263 | A00814 | 269 | A00263 | A00826 | 249 |
| A00263 | A00829 | 238 | A00263 | A00853 | 343 |
| A00263 | A00864 | 461 | A00263 | A00874 | 172 |

|        |        |     |        |        |     |
|--------|--------|-----|--------|--------|-----|
| A00263 | A00929 | 156 | A00263 | A00941 | 523 |
| A00263 | A00980 | 216 | A00263 | A01004 | 483 |
| A00263 | A01011 | 304 | A00263 | A01064 | 467 |
| A00263 | A01125 | 199 | A00263 | A01169 | 180 |
| A00263 | A01268 | 195 | A00263 | A01309 | 469 |
| A00263 | A01348 | 345 | A00263 | A01386 | 241 |
| A00263 | A01415 | 475 | A00263 | A01417 | 375 |
| A00263 | A01454 | 374 | A00263 | A01478 | 959 |
| A00263 | A01479 | 489 | A00263 | A01486 | 491 |
| A00263 | A01524 | 899 | A00263 | A01532 | 236 |
| A00263 | A01537 | 389 | A00263 | A01558 | 899 |
| A00263 | A01559 | 463 | A00263 | A01588 | 899 |
| A00263 | A01591 | 975 | A00263 | A01592 | 469 |
| A00263 | A01595 | 491 | A00263 | A01596 | 486 |
| A00263 | A01615 | 266 | A00263 | A01630 | 274 |
| A00263 | A01636 | 260 | A00263 | A01650 | 945 |
| A00263 | A01661 | 491 | A00263 | A01667 | 347 |
| A00263 | A01668 | 249 | A00263 | A01705 | 561 |
| A00263 | A01708 | 188 | A00263 | A01775 | 172 |
| A00263 | A01839 | 473 | A00263 | A01970 | 157 |
| A00263 | A02000 | 185 | A00263 | A02110 | 216 |
| A00263 | A02278 | 263 | A00263 | A02314 | 162 |
| A00263 | A02416 | 470 | A00263 | A02479 | 215 |
| A00263 | A02836 | 235 | A00263 | A02877 | 490 |
| A00263 | A03098 | 249 | A00263 | A03213 | 207 |
| A00263 | A03401 | 285 | A00263 | A03415 | 207 |
| A00263 | A03422 | 639 | A00263 | A03484 | 63  |
| A00263 | A03492 | 344 | A00263 | A03575 | 951 |
| A00263 | A03637 | 490 | A00263 | A03641 | 172 |
| A00263 | A03813 | 475 | A00263 | A03817 | 160 |
| A00263 | A03820 | 302 | A00263 | A03899 | 279 |
| A00263 | A04086 | 249 | A00263 | A04117 | 283 |
| A00263 | A04175 | 468 | A00263 | A04440 | 472 |
| A00263 | A04449 | 215 | A00263 | A04557 | 74  |
| A00263 | A04668 | 168 | A00263 | A04715 | 286 |
| A00263 | A04790 | 441 | A00263 | A04863 | 162 |
| A00263 | A04873 | 215 | A00263 | A04971 | 352 |
| A00263 | A05008 | 491 | A00263 | A05009 | 961 |
| A00263 | A05015 | 491 | A00263 | A05087 | 172 |
| A00263 | A05141 | 193 | A00263 | A05155 | 190 |
| A00263 | A05383 | 486 | A00263 | A05428 | 927 |
| A00263 | A05431 | 308 | A00263 | A05443 | 308 |
| A00263 | A05621 | 170 | A00263 | A05625 | 185 |
| A00263 | A05836 | 257 | A00263 | A05853 | 608 |
| A00263 | A05880 | 468 | A00263 | A05894 | 296 |
| A00263 | A05944 | 469 | A00263 | A06010 | 165 |

|        |        |     |        |        |     |
|--------|--------|-----|--------|--------|-----|
| A00263 | A06039 | 199 | A00263 | A06182 | 398 |
| A00263 | A06379 | 486 | A00263 | A06428 | 330 |
| A00263 | A06609 | 441 | A00263 | A06615 | 452 |
| A00263 | A06651 | 217 | A00263 | A06783 | 357 |
| A00263 | A07218 | 273 | A00263 | A07283 | 195 |
| A00263 | A07433 | 524 | A00263 | A07480 | 249 |
| A00263 | A07524 | 180 | A00263 | A07603 | 308 |
| A00263 | A07706 | 259 | A00263 | A07848 | 331 |
| A00263 | A08022 | 216 | A00263 | A08133 | 199 |
| A00263 | A08184 | 236 | A00263 | A08185 | 255 |
| A00263 | A08289 | 177 | A00263 | A08571 | 949 |
| A00263 | A08732 | 899 | A00263 | A08746 | 382 |
| A00263 | A08836 | 475 | A00263 | A08839 | 975 |
| A00263 | A08853 | 422 | A00263 | A08858 | 555 |
| A00263 | A08885 | 256 | A00263 | A09182 | 488 |
| A00263 | A09187 | 200 | A00263 | A09195 | 494 |
| A00263 | A09256 | 201 | A00263 | A09353 | 162 |
| A00263 | A09370 | 425 | A00263 | A09380 | 188 |
| A00263 | A09443 | 491 | A00263 | A09449 | 63  |
| A00263 | A09491 | 433 | A00263 | A09506 | 474 |
| A00263 | A09511 | 190 | A00263 | A09546 | 226 |
| A00263 | A09747 | 252 | A00263 | A10083 | 160 |
| A00263 | A10175 | 608 | A00263 | A10203 | 221 |
| A00263 | A10380 | 216 | A00263 | A10395 | 687 |
| A00263 | A10430 | 308 | A00263 | A10580 | 452 |
| A00263 | A10619 | 485 | A00263 | A10657 | 308 |
| A00263 | A11006 | 200 | A00263 | A11104 | 483 |
| A00263 | A11107 | 200 | A00263 | A11383 | 183 |
| A00263 | A11481 | 200 | A00263 | A11487 | 180 |
| A00263 | A11548 | 236 | A00263 | A11560 | 394 |
| A00263 | A11661 | 200 | A00263 | A11835 | 154 |
| A00263 | A11897 | 293 | A00263 | A12123 | 221 |
| A00263 | A12137 | 154 | A00263 | A12365 | 216 |
| A00263 | A12474 | 433 | A00263 | A12513 | 200 |
| A00263 | A12638 | 154 | A00263 | A12671 | 257 |
| A00263 | A12722 | 424 | A00263 | A12897 | 441 |
| A00263 | A13369 | 203 | A00263 | A13378 | 257 |
| A00263 | A13924 | 491 | A00263 | A13978 | 246 |
| A00263 | A14192 | 172 | A00263 | A14295 | 193 |
| A00263 | A14395 | 195 | A00263 | A14443 | 990 |
| A00263 | A14444 | 899 | A00263 | A14485 | 147 |
| A00263 | A14509 | 241 | A00263 | A14531 | 425 |
| A00263 | A14583 | 180 | A00263 | A14585 | 63  |
| A00263 | A14633 | 529 | A00263 | A14886 | 485 |
| A00263 | A15726 | 488 | A00263 | A15889 | 247 |
| A00263 | A15896 | 236 | A00263 | A15926 | 281 |

|        |        |     |        |        |     |
|--------|--------|-----|--------|--------|-----|
| A00263 | A16077 | 306 | A00263 | A16135 | 219 |
| A00263 | A16418 | 160 | A00263 | A16802 | 216 |
| A00263 | A16847 | 308 | A00263 | A17148 | 252 |
| A00263 | A17200 | 257 | A00264 | A00292 | 473 |
| A00264 | A00294 | 378 | A00264 | A00305 | 305 |
| A00264 | A00309 | 452 | A00264 | A00370 | 227 |
| A00264 | A00449 | 265 | A00264 | A00472 | 386 |
| A00264 | A00556 | 383 | A00264 | A00576 | 216 |
| A00264 | A00577 | 260 | A00264 | A00616 | 945 |
| A00264 | A00656 | 469 | A00264 | A00657 | 227 |
| A00264 | A00659 | 288 | A00264 | A00688 | 420 |
| A00264 | A00736 | 491 | A00264 | A00747 | 260 |
| A00264 | A00914 | 491 | A00264 | A00993 | 488 |
| A00264 | A01125 | 346 | A00264 | A01137 | 228 |
| A00264 | A01138 | 491 | A00264 | A01161 | 182 |
| A00264 | A01172 | 269 | A00264 | A01223 | 180 |
| A00264 | A01230 | 347 | A00264 | A01325 | 232 |
| A00264 | A01400 | 474 | A00264 | A01527 | 899 |
| A00264 | A01551 | 491 | A00264 | A01558 | 899 |
| A00264 | A01588 | 899 | A00264 | A01590 | 374 |
| A00264 | A01602 | 252 | A00264 | A01604 | 401 |
| A00264 | A01626 | 460 | A00264 | A01629 | 252 |
| A00264 | A01654 | 232 | A00264 | A01666 | 176 |
| A00264 | A01668 | 491 | A00264 | A01676 | 491 |
| A00264 | A01704 | 228 | A00264 | A01705 | 491 |
| A00264 | A01726 | 491 | A00264 | A01727 | 408 |
| A00264 | A01728 | 452 | A00264 | A01729 | 257 |
| A00264 | A01733 | 490 | A00264 | A01737 | 466 |
| A00264 | A01741 | 491 | A00264 | A01743 | 491 |
| A00264 | A01746 | 491 | A00264 | A01751 | 455 |
| A00264 | A01752 | 438 | A00264 | A01754 | 201 |
| A00264 | A01757 | 348 | A00264 | A01758 | 479 |
| A00264 | A01763 | 165 | A00264 | A01767 | 472 |
| A00264 | A01774 | 379 | A00264 | A01775 | 491 |
| A00264 | A01778 | 208 | A00264 | A01785 | 371 |
| A00264 | A01794 | 286 | A00264 | A01795 | 165 |
| A00264 | A01797 | 391 | A00264 | A01802 | 268 |
| A00264 | A01867 | 386 | A00264 | A01875 | 480 |
| A00264 | A01876 | 488 | A00264 | A01879 | 457 |
| A00264 | A01883 | 316 | A00264 | A01888 | 491 |
| A00264 | A01889 | 296 | A00264 | A01893 | 462 |
| A00264 | A01894 | 491 | A00264 | A01900 | 210 |
| A00264 | A01909 | 451 | A00264 | A01941 | 429 |
| A00264 | A01944 | 212 | A00264 | A01982 | 477 |
| A00264 | A02006 | 223 | A00264 | A02026 | 151 |
| A00264 | A02028 | 208 | A00264 | A02048 | 490 |

|        |        |     |        |        |     |
|--------|--------|-----|--------|--------|-----|
| A00264 | A02049 | 441 | A00264 | A02072 | 87  |
| A00264 | A02080 | 436 | A00264 | A02082 | 74  |
| A00264 | A02108 | 293 | A00264 | A02143 | 335 |
| A00264 | A02146 | 475 | A00264 | A02148 | 414 |
| A00264 | A02173 | 413 | A00264 | A02177 | 424 |
| A00264 | A02180 | 406 | A00264 | A02186 | 486 |
| A00264 | A02202 | 228 | A00264 | A02215 | 491 |
| A00264 | A02224 | 215 | A00264 | A02238 | 457 |
| A00264 | A02260 | 303 | A00264 | A02291 | 488 |
| A00264 | A02298 | 491 | A00264 | A02299 | 427 |
| A00264 | A02300 | 491 | A00264 | A02302 | 265 |
| A00264 | A02303 | 63  | A00264 | A02306 | 443 |
| A00264 | A02307 | 491 | A00264 | A02309 | 457 |
| A00264 | A02312 | 63  | A00264 | A02313 | 301 |
| A00264 | A02314 | 358 | A00264 | A02320 | 484 |
| A00264 | A02326 | 139 | A00264 | A02328 | 314 |
| A00264 | A02329 | 324 | A00264 | A02331 | 458 |
| A00264 | A02333 | 451 | A00264 | A02338 | 188 |
| A00264 | A02340 | 391 | A00264 | A02347 | 394 |
| A00264 | A02349 | 398 | A00264 | A02371 | 310 |
| A00264 | A02376 | 198 | A00264 | A02377 | 489 |
| A00264 | A02385 | 461 | A00264 | A02386 | 367 |
| A00264 | A02387 | 439 | A00264 | A02388 | 277 |
| A00264 | A02393 | 173 | A00264 | A02402 | 121 |
| A00264 | A02412 | 491 | A00264 | A02413 | 447 |
| A00264 | A02415 | 408 | A00264 | A02416 | 486 |
| A00264 | A02417 | 422 | A00264 | A02423 | 490 |
| A00264 | A02427 | 254 | A00264 | A02428 | 162 |
| A00264 | A02450 | 241 | A00264 | A02460 | 456 |
| A00264 | A02465 | 490 | A00264 | A02468 | 469 |
| A00264 | A02473 | 157 | A00264 | A02477 | 179 |
| A00264 | A02488 | 265 | A00264 | A02490 | 491 |
| A00264 | A02491 | 491 | A00264 | A02492 | 468 |
| A00264 | A02493 | 484 | A00264 | A02494 | 105 |
| A00264 | A02495 | 491 | A00264 | A02498 | 63  |
| A00264 | A02505 | 371 | A00264 | A02506 | 360 |
| A00264 | A02514 | 173 | A00264 | A02535 | 452 |
| A00264 | A02539 | 154 | A00264 | A02542 | 484 |
| A00264 | A02545 | 263 | A00264 | A02559 | 419 |
| A00264 | A02568 | 238 | A00264 | A02575 | 319 |
| A00264 | A02579 | 185 | A00264 | A02582 | 491 |
| A00264 | A02585 | 402 | A00264 | A02587 | 296 |
| A00264 | A02605 | 489 | A00264 | A02611 | 310 |
| A00264 | A02612 | 276 | A00264 | A02613 | 173 |
| A00264 | A02614 | 127 | A00264 | A02615 | 229 |
| A00264 | A02620 | 414 | A00264 | A02621 | 210 |

|        |        |     |        |        |     |
|--------|--------|-----|--------|--------|-----|
| A00264 | A02622 | 157 | A00264 | A02638 | 154 |
| A00264 | A02639 | 329 | A00264 | A02644 | 461 |
| A00264 | A02657 | 218 | A00264 | A02664 | 107 |
| A00264 | A02668 | 491 | A00264 | A02669 | 469 |
| A00264 | A02670 | 152 | A00264 | A02672 | 229 |
| A00264 | A02687 | 193 | A00264 | A02691 | 208 |
| A00264 | A02693 | 229 | A00264 | A02695 | 489 |
| A00264 | A02696 | 472 | A00264 | A02697 | 491 |
| A00264 | A02698 | 420 | A00264 | A02706 | 457 |
| A00264 | A02729 | 469 | A00264 | A02730 | 423 |
| A00264 | A02735 | 246 | A00264 | A02739 | 324 |
| A00264 | A02741 | 490 | A00264 | A02745 | 480 |
| A00264 | A02746 | 386 | A00264 | A02749 | 243 |
| A00264 | A02753 | 258 | A00264 | A02754 | 243 |
| A00264 | A02756 | 491 | A00264 | A02760 | 63  |
| A00264 | A02763 | 167 | A00264 | A02771 | 491 |
| A00264 | A02775 | 173 | A00264 | A02780 | 157 |
| A00264 | A02783 | 490 | A00264 | A02784 | 327 |
| A00264 | A02785 | 491 | A00264 | A02787 | 460 |
| A00264 | A02788 | 484 | A00264 | A02789 | 434 |
| A00264 | A02801 | 232 | A00264 | A02808 | 358 |
| A00264 | A02812 | 491 | A00264 | A02813 | 291 |
| A00264 | A02814 | 165 | A00264 | A02831 | 361 |
| A00264 | A02836 | 457 | A00264 | A02837 | 491 |
| A00264 | A02841 | 477 | A00264 | A02842 | 340 |
| A00264 | A02843 | 291 | A00264 | A02854 | 198 |
| A00264 | A02859 | 491 | A00264 | A02869 | 347 |
| A00264 | A02872 | 156 | A00264 | A02874 | 491 |
| A00264 | A02875 | 433 | A00264 | A02888 | 268 |
| A00264 | A02890 | 157 | A00264 | A02895 | 212 |
| A00264 | A02896 | 468 | A00264 | A02901 | 171 |
| A00264 | A02917 | 191 | A00264 | A02918 | 273 |
| A00264 | A02922 | 485 | A00264 | A02927 | 473 |
| A00264 | A02944 | 409 | A00264 | A02951 | 490 |
| A00264 | A02953 | 172 | A00264 | A02961 | 489 |
| A00264 | A02963 | 429 | A00264 | A02969 | 176 |
| A00264 | A02982 | 491 | A00264 | A02983 | 286 |
| A00264 | A02984 | 484 | A00264 | A03007 | 162 |
| A00264 | A03034 | 263 | A00264 | A03050 | 157 |
| A00264 | A03053 | 452 | A00264 | A03056 | 468 |
| A00264 | A03069 | 394 | A00264 | A03080 | 484 |
| A00264 | A03107 | 480 | A00264 | A03112 | 445 |
| A00264 | A03126 | 252 | A00264 | A03144 | 208 |
| A00264 | A03157 | 291 | A00264 | A03176 | 195 |
| A00264 | A03184 | 154 | A00264 | A03186 | 378 |
| A00264 | A03188 | 355 | A00264 | A03189 | 358 |

|        |        |     |        |        |     |
|--------|--------|-----|--------|--------|-----|
| A00264 | A03195 | 154 | A00264 | A03210 | 157 |
| A00264 | A03223 | 191 | A00264 | A03224 | 428 |
| A00264 | A03228 | 229 | A00264 | A03243 | 154 |
| A00264 | A03252 | 157 | A00264 | A03259 | 491 |
| A00264 | A03268 | 196 | A00264 | A03269 | 267 |
| A00264 | A03271 | 293 | A00264 | A03275 | 491 |
| A00264 | A03281 | 435 | A00264 | A03282 | 177 |
| A00264 | A03288 | 174 | A00264 | A03304 | 396 |
| A00264 | A03353 | 218 | A00264 | A03361 | 469 |
| A00264 | A03370 | 436 | A00264 | A03373 | 423 |
| A00264 | A03378 | 246 | A00264 | A03379 | 329 |
| A00264 | A03403 | 174 | A00264 | A03414 | 199 |
| A00264 | A03417 | 260 | A00264 | A03419 | 235 |
| A00264 | A03432 | 162 | A00264 | A03516 | 213 |
| A00264 | A03520 | 402 | A00264 | A03522 | 224 |
| A00264 | A03534 | 157 | A00264 | A03540 | 462 |
| A00264 | A03634 | 344 | A00264 | A03639 | 945 |
| A00264 | A03653 | 480 | A00264 | A03661 | 369 |
| A00264 | A03744 | 350 | A00264 | A03761 | 277 |
| A00264 | A03773 | 409 | A00264 | A03803 | 473 |
| A00264 | A03834 | 185 | A00264 | A03904 | 348 |
| A00264 | A03914 | 491 | A00264 | A03915 | 238 |
| A00264 | A03923 | 210 | A00264 | A03970 | 195 |
| A00264 | A03975 | 347 | A00264 | A03976 | 486 |
| A00264 | A03988 | 475 | A00264 | A03991 | 404 |
| A00264 | A04010 | 491 | A00264 | A04015 | 205 |
| A00264 | A04023 | 481 | A00264 | A04031 | 180 |
| A00264 | A04041 | 173 | A00264 | A04045 | 157 |
| A00264 | A04048 | 468 | A00264 | A04051 | 491 |
| A00264 | A04087 | 154 | A00264 | A04092 | 402 |
| A00264 | A04117 | 208 | A00264 | A04201 | 277 |
| A00264 | A04212 | 491 | A00264 | A04214 | 157 |
| A00264 | A04218 | 162 | A00264 | A04222 | 259 |
| A00264 | A04225 | 238 | A00264 | A04237 | 121 |
| A00264 | A04258 | 188 | A00264 | A04260 | 369 |
| A00264 | A04262 | 255 | A00264 | A04263 | 455 |
| A00264 | A04267 | 480 | A00264 | A04268 | 173 |
| A00264 | A04271 | 160 | A00264 | A04274 | 330 |
| A00264 | A04278 | 205 | A00264 | A04286 | 265 |
| A00264 | A04298 | 157 | A00264 | A04300 | 232 |
| A00264 | A04327 | 330 | A00264 | A04330 | 285 |
| A00264 | A04333 | 428 | A00264 | A04334 | 452 |
| A00264 | A04335 | 195 | A00264 | A04349 | 424 |
| A00264 | A04391 | 474 | A00264 | A04398 | 466 |
| A00264 | A04407 | 191 | A00264 | A04428 | 380 |
| A00264 | A04462 | 358 | A00264 | A04481 | 481 |



|        |        |     |        |        |     |
|--------|--------|-----|--------|--------|-----|
| A00264 | A04484 | 224 | A00264 | A04509 | 472 |
| A00264 | A04510 | 236 | A00264 | A04517 | 135 |
| A00264 | A04533 | 254 | A00264 | A04536 | 174 |
| A00264 | A04548 | 373 | A00264 | A04585 | 232 |
| A00264 | A04589 | 266 | A00264 | A04593 | 195 |
| A00264 | A04594 | 173 | A00264 | A04604 | 173 |
| A00264 | A04607 | 235 | A00264 | A04608 | 440 |
| A00264 | A04609 | 234 | A00264 | A04618 | 157 |
| A00264 | A04652 | 473 | A00264 | A04698 | 163 |
| A00264 | A04710 | 228 | A00264 | A04783 | 407 |
| A00264 | A04794 | 173 | A00264 | A04801 | 173 |
| A00264 | A04830 | 221 | A00264 | A04832 | 63  |
| A00264 | A04842 | 424 | A00264 | A04866 | 212 |
| A00264 | A04867 | 480 | A00264 | A04870 | 115 |
| A00264 | A04875 | 212 | A00264 | A04908 | 322 |
| A00264 | A04916 | 157 | A00264 | A04939 | 208 |
| A00264 | A04949 | 221 | A00264 | A04951 | 173 |
| A00264 | A04965 | 185 | A00264 | A04975 | 201 |
| A00264 | A04976 | 305 | A00264 | A04981 | 165 |
| A00264 | A04989 | 110 | A00264 | A05079 | 319 |
| A00264 | A05113 | 473 | A00264 | A05114 | 271 |
| A00264 | A05117 | 367 | A00264 | A05122 | 322 |
| A00264 | A05153 | 346 | A00264 | A05176 | 279 |
| A00264 | A05215 | 157 | A00264 | A05279 | 173 |
| A00264 | A05303 | 195 | A00264 | A05309 | 491 |
| A00264 | A05349 | 491 | A00264 | A05353 | 162 |
| A00264 | A05497 | 157 | A00264 | A05505 | 195 |
| A00264 | A05521 | 232 | A00264 | A05535 | 255 |
| A00264 | A05571 | 195 | A00264 | A05686 | 232 |
| A00264 | A05797 | 408 | A00264 | A05828 | 171 |
| A00264 | A05868 | 434 | A00264 | A05934 | 255 |
| A00264 | A05949 | 190 | A00264 | A06146 | 157 |
| A00264 | A06174 | 195 | A00264 | A06286 | 260 |
| A00264 | A06314 | 408 | A00264 | A06415 | 480 |
| A00264 | A06439 | 205 | A00264 | A06558 | 157 |
| A00264 | A06597 | 463 | A00264 | A06606 | 454 |
| A00264 | A06607 | 449 | A00264 | A06650 | 488 |
| A00264 | A06834 | 221 | A00264 | A06949 | 451 |
| A00264 | A07025 | 157 | A00264 | A07135 | 329 |
| A00264 | A07141 | 490 | A00264 | A07145 | 299 |
| A00264 | A07153 | 162 | A00264 | A07154 | 215 |
| A00264 | A07157 | 481 | A00264 | A07164 | 491 |
| A00264 | A07165 | 490 | A00264 | A07166 | 215 |
| A00264 | A07177 | 414 | A00264 | A07183 | 188 |
| A00264 | A07187 | 157 | A00264 | A07191 | 347 |
| A00264 | A07198 | 404 | A00264 | A07200 | 491 |

|        |        |     |        |        |     |
|--------|--------|-----|--------|--------|-----|
| A00264 | A07201 | 218 | A00264 | A07209 | 490 |
| A00264 | A07218 | 480 | A00264 | A07339 | 238 |
| A00264 | A07522 | 157 | A00264 | A07525 | 173 |
| A00264 | A07639 | 195 | A00264 | A07935 | 201 |
| A00264 | A08572 | 358 | A00264 | A08591 | 344 |
| A00264 | A08596 | 193 | A00264 | A08627 | 446 |
| A00264 | A08631 | 195 | A00264 | A08738 | 480 |
| A00264 | A08875 | 249 | A00264 | A08910 | 232 |
| A00264 | A09095 | 306 | A00264 | A09266 | 173 |
| A00264 | A09390 | 246 | A00264 | A09397 | 288 |
| A00264 | A09399 | 127 | A00264 | A09467 | 157 |
| A00264 | A09468 | 173 | A00264 | A09480 | 291 |
| A00264 | A09481 | 195 | A00264 | A09642 | 173 |
| A00264 | A09789 | 246 | A00264 | A10085 | 307 |
| A00264 | A10216 | 212 | A00264 | A10244 | 195 |
| A00264 | A10337 | 428 | A00264 | A10357 | 180 |
| A00264 | A10388 | 232 | A00264 | A10625 | 400 |
| A00264 | A10650 | 157 | A00264 | A10835 | 232 |
| A00264 | A11050 | 232 | A00264 | A11064 | 479 |
| A00264 | A11123 | 456 | A00264 | A11313 | 229 |
| A00264 | A11897 | 160 | A00264 | A11911 | 489 |
| A00264 | A12373 | 221 | A00264 | A12553 | 157 |
| A00264 | A12714 | 195 | A00264 | A12897 | 480 |
| A00264 | A12927 | 486 | A00264 | A13212 | 274 |
| A00264 | A13225 | 899 | A00264 | A13419 | 157 |
| A00264 | A13579 | 173 | A00264 | A13667 | 329 |
| A00264 | A13734 | 462 | A00264 | A13886 | 252 |
| A00264 | A13909 | 195 | A00264 | A14071 | 380 |
| A00264 | A14194 | 945 | A00264 | A14198 | 945 |
| A00264 | A14236 | 355 | A00264 | A14405 | 484 |
| A00264 | A14410 | 207 | A00264 | A14430 | 457 |
| A00264 | A14440 | 486 | A00264 | A14443 | 899 |
| A00264 | A14534 | 232 | A00264 | A14606 | 157 |
| A00264 | A14613 | 224 | A00264 | A14643 | 301 |
| A00264 | A14664 | 218 | A00264 | A15089 | 195 |
| A00264 | A15241 | 204 | A00264 | A15639 | 176 |
| A00264 | A15809 | 446 | A00264 | A15906 | 232 |
| A00264 | A15911 | 156 | A00264 | A15912 | 249 |
| A00264 | A15913 | 443 | A00264 | A15952 | 195 |
| A00264 | A15976 | 180 | A00264 | A16040 | 157 |
| A00264 | A16102 | 157 | A00264 | A16300 | 420 |
| A00264 | A16636 | 491 | A00264 | A17155 | 340 |
| A00265 | A00266 | 188 | A00265 | A00271 | 899 |
| A00265 | A00294 | 899 | A00265 | A00348 | 296 |
| A00265 | A00352 | 461 | A00265 | A00386 | 408 |
| A00265 | A00473 | 299 | A00265 | A00531 | 239 |

|        |        |     |        |        |     |
|--------|--------|-----|--------|--------|-----|
| A00265 | A00556 | 263 | A00265 | A00616 | 329 |
| A00265 | A00640 | 249 | A00265 | A00651 | 329 |
| A00265 | A00736 | 290 | A00265 | A00831 | 485 |
| A00265 | A00832 | 229 | A00265 | A00887 | 899 |
| A00265 | A00914 | 389 | A00265 | A01021 | 435 |
| A00265 | A01022 | 391 | A00265 | A01115 | 326 |
| A00265 | A01215 | 226 | A00265 | A01354 | 65  |
| A00265 | A01359 | 534 | A00265 | A01425 | 709 |
| A00265 | A01475 | 469 | A00265 | A01492 | 388 |
| A00265 | A01498 | 249 | A00265 | A01524 | 899 |
| A00265 | A01527 | 899 | A00265 | A01566 | 85  |
| A00265 | A01588 | 899 | A00265 | A01607 | 63  |
| A00265 | A01626 | 401 | A00265 | A01632 | 484 |
| A00265 | A01665 | 899 | A00265 | A01676 | 267 |
| A00265 | A01728 | 165 | A00265 | A01729 | 302 |
| A00265 | A01730 | 491 | A00265 | A01731 | 224 |
| A00265 | A01733 | 435 | A00265 | A01740 | 477 |
| A00265 | A01741 | 407 | A00265 | A01743 | 267 |
| A00265 | A01760 | 152 | A00265 | A01770 | 474 |
| A00265 | A01781 | 358 | A00265 | A01859 | 208 |
| A00265 | A01877 | 347 | A00265 | A01887 | 224 |
| A00265 | A01917 | 198 | A00265 | A01983 | 272 |
| A00265 | A02068 | 224 | A00265 | A02099 | 177 |
| A00265 | A02183 | 229 | A00265 | A02337 | 260 |
| A00265 | A02410 | 174 | A00265 | A02487 | 188 |
| A00265 | A02502 | 305 | A00265 | A02512 | 339 |
| A00265 | A02542 | 227 | A00265 | A02562 | 188 |
| A00265 | A02564 | 316 | A00265 | A02568 | 317 |
| A00265 | A02584 | 174 | A00265 | A02629 | 243 |
| A00265 | A02669 | 159 | A00265 | A02695 | 157 |
| A00265 | A02703 | 452 | A00265 | A02736 | 404 |
| A00265 | A02737 | 420 | A00265 | A02805 | 167 |
| A00265 | A02816 | 447 | A00265 | A02825 | 198 |
| A00265 | A02830 | 479 | A00265 | A02867 | 262 |
| A00265 | A02877 | 360 | A00265 | A02921 | 213 |
| A00265 | A02924 | 241 | A00265 | A02939 | 183 |
| A00265 | A02943 | 213 | A00265 | A03057 | 283 |
| A00265 | A03112 | 489 | A00265 | A03211 | 439 |
| A00265 | A03321 | 112 | A00265 | A03436 | 213 |
| A00265 | A03596 | 163 | A00265 | A03612 | 216 |
| A00265 | A03613 | 196 | A00265 | A03796 | 388 |
| A00265 | A03981 | 366 | A00265 | A04012 | 485 |
| A00265 | A04122 | 152 | A00265 | A04161 | 464 |
| A00265 | A04248 | 371 | A00265 | A04306 | 241 |
| A00265 | A04308 | 429 | A00265 | A04475 | 219 |
| A00265 | A04533 | 318 | A00265 | A04536 | 480 |

|        |        |     |        |        |     |
|--------|--------|-----|--------|--------|-----|
| A00265 | A04537 | 322 | A00265 | A04622 | 207 |
| A00265 | A04666 | 656 | A00265 | A04721 | 208 |
| A00265 | A04744 | 219 | A00265 | A04821 | 205 |
| A00265 | A04952 | 262 | A00265 | A05085 | 262 |
| A00265 | A05112 | 333 | A00265 | A05288 | 429 |
| A00265 | A05645 | 270 | A00265 | A05944 | 266 |
| A00265 | A06055 | 205 | A00265 | A06409 | 262 |
| A00265 | A06482 | 322 | A00265 | A06489 | 168 |
| A00265 | A06576 | 294 | A00265 | A06597 | 232 |
| A00265 | A06609 | 899 | A00265 | A06626 | 213 |
| A00265 | A06628 | 317 | A00265 | A06780 | 200 |
| A00265 | A06814 | 428 | A00265 | A06871 | 274 |
| A00265 | A06880 | 322 | A00265 | A06916 | 172 |
| A00265 | A07147 | 152 | A00265 | A07157 | 176 |
| A00265 | A07163 | 324 | A00265 | A07220 | 329 |
| A00265 | A07311 | 156 | A00265 | A07399 | 348 |
| A00265 | A07461 | 438 | A00265 | A07495 | 241 |
| A00265 | A08390 | 152 | A00265 | A08572 | 135 |
| A00265 | A09033 | 154 | A00265 | A09121 | 167 |
| A00265 | A09218 | 356 | A00265 | A09383 | 196 |
| A00265 | A09789 | 152 | A00265 | A09917 | 219 |
| A00265 | A09976 | 348 | A00265 | A10038 | 899 |
| A00265 | A10047 | 165 | A00265 | A10082 | 226 |
| A00265 | A10532 | 486 | A00265 | A10801 | 899 |
| A00265 | A11411 | 157 | A00265 | A11441 | 226 |
| A00265 | A12680 | 322 | A00265 | A12988 | 302 |
| A00265 | A13511 | 730 | A00265 | A13654 | 322 |
| A00265 | A13743 | 154 | A00265 | A13886 | 154 |
| A00265 | A14198 | 414 | A00265 | A14272 | 485 |
| A00265 | A14333 | 319 | A00265 | A14432 | 297 |
| A00265 | A14443 | 912 | A00265 | A14444 | 469 |
| A00265 | A14498 | 470 | A00265 | A14539 | 333 |
| A00265 | A14589 | 479 | A00265 | A14635 | 384 |
| A00265 | A14637 | 188 | A00265 | A14643 | 358 |
| A00265 | A14648 | 311 | A00265 | A14661 | 227 |
| A00265 | A14662 | 177 | A00265 | A14674 | 534 |
| A00265 | A15165 | 249 | A00265 | A15875 | 167 |
| A00265 | A16738 | 534 | A00266 | A00825 | 312 |
| A00266 | A01527 | 899 | A00266 | A01554 | 899 |
| A00266 | A01558 | 899 | A00266 | A01588 | 899 |
| A00266 | A01729 | 326 | A00266 | A01755 | 296 |
| A00266 | A01770 | 358 | A00266 | A02488 | 302 |
| A00266 | A02749 | 201 | A00266 | A02805 | 364 |
| A00266 | A02874 | 157 | A00266 | A03520 | 221 |
| A00266 | A03541 | 340 | A00266 | A04275 | 267 |
| A00266 | A04577 | 417 | A00266 | A07422 | 157 |

|        |        |     |        |        |     |
|--------|--------|-----|--------|--------|-----|
| A00266 | A07643 | 223 | A00266 | A09385 | 395 |
| A00266 | A10580 | 928 | A00266 | A13609 | 204 |
| A00267 | A00273 | 454 | A00267 | A00400 | 407 |
| A00267 | A01108 | 217 | A00267 | A01156 | 193 |
| A00267 | A01275 | 479 | A00267 | A01291 | 63  |
| A00267 | A01554 | 283 | A00267 | A01562 | 343 |
| A00267 | A01605 | 412 | A00267 | A01628 | 346 |
| A00267 | A01639 | 457 | A00267 | A01664 | 184 |
| A00267 | A01702 | 210 | A00267 | A01718 | 488 |
| A00267 | A02076 | 317 | A00267 | A02188 | 152 |
| A00267 | A02228 | 200 | A00267 | A02518 | 414 |
| A00267 | A03104 | 390 | A00267 | A03331 | 457 |
| A00267 | A04944 | 165 | A00267 | A05289 | 246 |
| A00267 | A06100 | 480 | A00267 | A07166 | 187 |
| A00267 | A07282 | 401 | A00267 | A07836 | 317 |
| A00267 | A08954 | 319 | A00267 | A10609 | 296 |
| A00267 | A10844 | 277 | A00267 | A11831 | 281 |
| A00267 | A12383 | 202 | A00267 | A13199 | 322 |
| A00267 | A14008 | 201 | A00267 | A14197 | 254 |
| A00267 | A15212 | 285 | A00267 | A15704 | 217 |
| A00268 | A00325 | 234 | A00268 | A00355 | 310 |
| A00268 | A00356 | 335 | A00268 | A00357 | 341 |
| A00268 | A00358 | 486 | A00268 | A00361 | 157 |
| A00268 | A00403 | 281 | A00268 | A00629 | 373 |
| A00268 | A00701 | 201 | A00268 | A00802 | 157 |
| A00268 | A00900 | 201 | A00268 | A00902 | 191 |
| A00268 | A00923 | 474 | A00268 | A00990 | 207 |
| A00268 | A01000 | 293 | A00268 | A01056 | 361 |
| A00268 | A01127 | 461 | A00268 | A01140 | 483 |
| A00268 | A01240 | 316 | A00268 | A01249 | 196 |
| A00268 | A01291 | 945 | A00268 | A01338 | 63  |
| A00268 | A01425 | 486 | A00268 | A01524 | 899 |
| A00268 | A01527 | 899 | A00268 | A01614 | 217 |
| A00268 | A01617 | 938 | A00268 | A01618 | 472 |
| A00268 | A01652 | 252 | A00268 | A01718 | 944 |
| A00268 | A01781 | 263 | A00268 | A01983 | 232 |
| A00268 | A02585 | 196 | A00268 | A02826 | 172 |
| A00268 | A03331 | 140 | A00268 | A03332 | 297 |
| A00268 | A03437 | 416 | A00268 | A03567 | 488 |
| A00268 | A03571 | 183 | A00268 | A03705 | 200 |
| A00268 | A03754 | 451 | A00268 | A03913 | 936 |
| A00268 | A04099 | 218 | A00268 | A04230 | 191 |
| A00268 | A04682 | 218 | A00268 | A04760 | 319 |
| A00268 | A04761 | 154 | A00268 | A04867 | 215 |
| A00268 | A05385 | 438 | A00268 | A05712 | 191 |
| A00268 | A06812 | 314 | A00268 | A06965 | 455 |

|        |        |     |        |        |     |
|--------|--------|-----|--------|--------|-----|
| A00268 | A07123 | 210 | A00268 | A07398 | 152 |
| A00268 | A07422 | 899 | A00268 | A07451 | 71  |
| A00268 | A08172 | 157 | A00268 | A08835 | 171 |
| A00268 | A09124 | 191 | A00268 | A09802 | 380 |
| A00268 | A10006 | 252 | A00268 | A10233 | 229 |
| A00268 | A11392 | 210 | A00268 | A11400 | 424 |
| A00268 | A13126 | 159 | A00268 | A13207 | 308 |
| A00268 | A13989 | 183 | A00268 | A13992 | 380 |
| A00268 | A15416 | 245 | A00268 | A15932 | 238 |
| A00268 | A16118 | 443 | A00269 | A00270 | 492 |
| A00269 | A00294 | 899 | A00269 | A00337 | 462 |
| A00269 | A00388 | 339 | A00269 | A00400 | 183 |
| A00269 | A00482 | 551 | A00269 | A00545 | 451 |
| A00269 | A00597 | 252 | A00269 | A00779 | 757 |
| A00269 | A00786 | 990 | A00269 | A00874 | 279 |
| A00269 | A00914 | 899 | A00269 | A00929 | 152 |
| A00269 | A00941 | 457 | A00269 | A01003 | 377 |
| A00269 | A01011 | 316 | A00269 | A01139 | 240 |
| A00269 | A01173 | 268 | A00269 | A01268 | 212 |
| A00269 | A01345 | 491 | A00269 | A01359 | 198 |
| A00269 | A01429 | 343 | A00269 | A01454 | 472 |
| A00269 | A01460 | 152 | A00269 | A01478 | 954 |
| A00269 | A01479 | 491 | A00269 | A01486 | 962 |
| A00269 | A01524 | 899 | A00269 | A01527 | 904 |
| A00269 | A01532 | 339 | A00269 | A01533 | 481 |
| A00269 | A01537 | 439 | A00269 | A01558 | 899 |
| A00269 | A01559 | 302 | A00269 | A01560 | 385 |
| A00269 | A01561 | 159 | A00269 | A01572 | 193 |
| A00269 | A01580 | 491 | A00269 | A01588 | 899 |
| A00269 | A01591 | 981 | A00269 | A01592 | 997 |
| A00269 | A01593 | 939 | A00269 | A01595 | 419 |
| A00269 | A01596 | 528 | A00269 | A01615 | 452 |
| A00269 | A01636 | 466 | A00269 | A01638 | 486 |
| A00269 | A01650 | 973 | A00269 | A01651 | 424 |
| A00269 | A01657 | 245 | A00269 | A01667 | 943 |
| A00269 | A01687 | 313 | A00269 | A01689 | 210 |
| A00269 | A01692 | 449 | A00269 | A01703 | 429 |
| A00269 | A01705 | 361 | A00269 | A01717 | 317 |
| A00269 | A01741 | 180 | A00269 | A01839 | 254 |
| A00269 | A02216 | 226 | A00269 | A02278 | 229 |
| A00269 | A02345 | 232 | A00269 | A02508 | 213 |
| A00269 | A02690 | 274 | A00269 | A02779 | 176 |
| A00269 | A03422 | 650 | A00269 | A03484 | 451 |
| A00269 | A03485 | 174 | A00269 | A03492 | 755 |
| A00269 | A03575 | 701 | A00269 | A03591 | 458 |
| A00269 | A03637 | 467 | A00269 | A03651 | 170 |

|        |        |     |        |        |     |
|--------|--------|-----|--------|--------|-----|
| A00269 | A03656 | 235 | A00269 | A04117 | 416 |
| A00269 | A04175 | 343 | A00269 | A04345 | 163 |
| A00269 | A04440 | 477 | A00269 | A04622 | 241 |
| A00269 | A04664 | 113 | A00269 | A04668 | 193 |
| A00269 | A04681 | 174 | A00269 | A04715 | 215 |
| A00269 | A04971 | 473 | A00269 | A05008 | 945 |
| A00269 | A05009 | 972 | A00269 | A05015 | 475 |
| A00269 | A05070 | 319 | A00269 | A05072 | 156 |
| A00269 | A05383 | 491 | A00269 | A05625 | 512 |
| A00269 | A05836 | 259 | A00269 | A05853 | 615 |
| A00269 | A05892 | 473 | A00269 | A05894 | 491 |
| A00269 | A05925 | 174 | A00269 | A06100 | 486 |
| A00269 | A06379 | 488 | A00269 | A06402 | 219 |
| A00269 | A06572 | 234 | A00269 | A06606 | 491 |
| A00269 | A06608 | 374 | A00269 | A06609 | 273 |
| A00269 | A06621 | 177 | A00269 | A06919 | 303 |
| A00269 | A07242 | 347 | A00269 | A07282 | 346 |
| A00269 | A07313 | 188 | A00269 | A07339 | 172 |
| A00269 | A07354 | 281 | A00269 | A07422 | 264 |
| A00269 | A07433 | 197 | A00269 | A07762 | 446 |
| A00269 | A07834 | 179 | A00269 | A07836 | 240 |
| A00269 | A08185 | 382 | A00269 | A08400 | 183 |
| A00269 | A08536 | 311 | A00269 | A08551 | 489 |
| A00269 | A08552 | 156 | A00269 | A08569 | 491 |
| A00269 | A08571 | 949 | A00269 | A08836 | 260 |
| A00269 | A08839 | 764 | A00269 | A08844 | 418 |
| A00269 | A08853 | 296 | A00269 | A08858 | 745 |
| A00269 | A08885 | 639 | A00269 | A08986 | 468 |
| A00269 | A09052 | 273 | A00269 | A09182 | 467 |
| A00269 | A09195 | 491 | A00269 | A09220 | 182 |
| A00269 | A09256 | 208 | A00269 | A09370 | 472 |
| A00269 | A09443 | 945 | A00269 | A09449 | 712 |
| A00269 | A09451 | 260 | A00269 | A09491 | 483 |
| A00269 | A09506 | 413 | A00269 | A09511 | 193 |
| A00269 | A09515 | 172 | A00269 | A09525 | 224 |
| A00269 | A09844 | 255 | A00269 | A10139 | 185 |
| A00269 | A10174 | 899 | A00269 | A10175 | 734 |
| A00269 | A10228 | 367 | A00269 | A10250 | 400 |
| A00269 | A10388 | 259 | A00269 | A10395 | 326 |
| A00269 | A10580 | 396 | A00269 | A10604 | 340 |
| A00269 | A10833 | 636 | A00269 | A11006 | 407 |
| A00269 | A11104 | 162 | A00269 | A11156 | 188 |
| A00269 | A11283 | 469 | A00269 | A11486 | 229 |
| A00269 | A11551 | 252 | A00269 | A11676 | 193 |
| A00269 | A11835 | 258 | A00269 | A11940 | 191 |
| A00269 | A11995 | 281 | A00269 | A12047 | 348 |

|        |        |     |        |        |     |
|--------|--------|-----|--------|--------|-----|
| A00269 | A12533 | 393 | A00269 | A12553 | 185 |
| A00269 | A12671 | 259 | A00269 | A13277 | 174 |
| A00269 | A13309 | 177 | A00269 | A13315 | 258 |
| A00269 | A13328 | 329 | A00269 | A13685 | 334 |
| A00269 | A13908 | 319 | A00269 | A13917 | 324 |
| A00269 | A13924 | 486 | A00269 | A13978 | 249 |
| A00269 | A13986 | 193 | A00269 | A14055 | 234 |
| A00269 | A14202 | 195 | A00269 | A14227 | 207 |
| A00269 | A14294 | 260 | A00269 | A14299 | 353 |
| A00269 | A14443 | 990 | A00269 | A14444 | 989 |
| A00269 | A14485 | 470 | A00269 | A14531 | 104 |
| A00269 | A14577 | 667 | A00269 | A14585 | 491 |
| A00269 | A14623 | 474 | A00269 | A14633 | 159 |
| A00269 | A14643 | 157 | A00269 | A14792 | 96  |
| A00269 | A15187 | 229 | A00269 | A15533 | 472 |
| A00269 | A15649 | 179 | A00269 | A15726 | 955 |
| A00269 | A15926 | 362 | A00269 | A16224 | 223 |
| A00269 | A16418 | 173 | A00269 | A16503 | 127 |
| A00269 | A16602 | 201 | A00269 | A16714 | 259 |
| A00269 | A16799 | 219 | A00269 | A16824 | 245 |
| A00269 | A16858 | 163 | A00269 | A16905 | 195 |
| A00270 | A00271 | 183 | A00270 | A00275 | 942 |
| A00270 | A00294 | 899 | A00270 | A00335 | 154 |
| A00270 | A00356 | 355 | A00270 | A00377 | 533 |
| A00270 | A00400 | 876 | A00270 | A00418 | 595 |
| A00270 | A00420 | 443 | A00270 | A00421 | 319 |
| A00270 | A00425 | 263 | A00270 | A00448 | 433 |
| A00270 | A00463 | 486 | A00270 | A00471 | 684 |
| A00270 | A00517 | 396 | A00270 | A00520 | 164 |
| A00270 | A00531 | 274 | A00270 | A00566 | 491 |
| A00270 | A00575 | 488 | A00270 | A00600 | 443 |
| A00270 | A00622 | 353 | A00270 | A00643 | 460 |
| A00270 | A00674 | 207 | A00270 | A00733 | 215 |
| A00270 | A00765 | 489 | A00270 | A00805 | 491 |
| A00270 | A00858 | 491 | A00270 | A00881 | 488 |
| A00270 | A00954 | 491 | A00270 | A00978 | 224 |
| A00270 | A01007 | 188 | A00270 | A01112 | 180 |
| A00270 | A01139 | 379 | A00270 | A01164 | 208 |
| A00270 | A01169 | 530 | A00270 | A01195 | 467 |
| A00270 | A01212 | 734 | A00270 | A01299 | 475 |
| A00270 | A01305 | 188 | A00270 | A01329 | 627 |
| A00270 | A01339 | 200 | A00270 | A01359 | 469 |
| A00270 | A01398 | 488 | A00270 | A01401 | 461 |
| A00270 | A01474 | 208 | A00270 | A01500 | 443 |
| A00270 | A01503 | 484 | A00270 | A01524 | 899 |
| A00270 | A01527 | 939 | A00270 | A01546 | 440 |



|        |        |     |        |        |     |
|--------|--------|-----|--------|--------|-----|
| A00270 | A01558 | 294 | A00270 | A01570 | 288 |
| A00270 | A01576 | 527 | A00270 | A01591 | 485 |
| A00270 | A01595 | 199 | A00270 | A01615 | 468 |
| A00270 | A01647 | 491 | A00270 | A01682 | 481 |
| A00270 | A01790 | 215 | A00270 | A01844 | 204 |
| A00270 | A02138 | 183 | A00270 | A02304 | 187 |
| A00270 | A02836 | 210 | A00270 | A03014 | 165 |
| A00270 | A03076 | 235 | A00270 | A03422 | 288 |
| A00270 | A03809 | 165 | A00270 | A03893 | 489 |
| A00270 | A03939 | 215 | A00270 | A04033 | 491 |
| A00270 | A04345 | 115 | A00270 | A04445 | 201 |
| A00270 | A04971 | 63  | A00270 | A05221 | 461 |
| A00270 | A05288 | 477 | A00270 | A05567 | 210 |
| A00270 | A06039 | 199 | A00270 | A06588 | 450 |
| A00270 | A06597 | 548 | A00270 | A06650 | 416 |
| A00270 | A06750 | 297 | A00270 | A06774 | 151 |
| A00270 | A06803 | 294 | A00270 | A07252 | 173 |
| A00270 | A07409 | 281 | A00270 | A07556 | 151 |
| A00270 | A07670 | 491 | A00270 | A07803 | 491 |
| A00270 | A07821 | 173 | A00270 | A07826 | 221 |
| A00270 | A07850 | 363 | A00270 | A07887 | 353 |
| A00270 | A07920 | 489 | A00270 | A08022 | 245 |
| A00270 | A08376 | 238 | A00270 | A08495 | 409 |
| A00270 | A08571 | 491 | A00270 | A08659 | 210 |
| A00270 | A08869 | 232 | A00270 | A08878 | 337 |
| A00270 | A09162 | 210 | A00270 | A09256 | 400 |
| A00270 | A09258 | 939 | A00270 | A09377 | 363 |
| A00270 | A09401 | 156 | A00270 | A09451 | 419 |
| A00270 | A09515 | 389 | A00270 | A09538 | 468 |
| A00270 | A09712 | 212 | A00270 | A09992 | 195 |
| A00270 | A10175 | 229 | A00270 | A10228 | 301 |
| A00270 | A10250 | 336 | A00270 | A10340 | 293 |
| A00270 | A10342 | 445 | A00270 | A10354 | 154 |
| A00270 | A10415 | 151 | A00270 | A10432 | 151 |
| A00270 | A10447 | 210 | A00270 | A10531 | 249 |
| A00270 | A10599 | 177 | A00270 | A11387 | 174 |
| A00270 | A11485 | 165 | A00270 | A11492 | 414 |
| A00270 | A11983 | 491 | A00270 | A12095 | 151 |
| A00270 | A12284 | 491 | A00270 | A12365 | 267 |
| A00270 | A12681 | 404 | A00270 | A12812 | 249 |
| A00270 | A12897 | 408 | A00270 | A13039 | 210 |
| A00270 | A13040 | 210 | A00270 | A13216 | 180 |
| A00270 | A13248 | 151 | A00270 | A13850 | 210 |
| A00270 | A13892 | 274 | A00270 | A14055 | 484 |
| A00270 | A14128 | 465 | A00270 | A14204 | 466 |
| A00270 | A14229 | 446 | A00270 | A14278 | 183 |

|        |        |     |        |        |     |
|--------|--------|-----|--------|--------|-----|
| A00270 | A14331 | 151 | A00270 | A14359 | 168 |
| A00270 | A14443 | 989 | A00270 | A14633 | 217 |
| A00270 | A14635 | 490 | A00270 | A14636 | 408 |
| A00270 | A14643 | 243 | A00270 | A14824 | 173 |
| A00270 | A14925 | 162 | A00270 | A14950 | 210 |
| A00270 | A15292 | 329 | A00270 | A15293 | 238 |
| A00270 | A15295 | 491 | A00270 | A15322 | 489 |
| A00270 | A15349 | 305 | A00270 | A15726 | 899 |
| A00270 | A16294 | 443 | A00270 | A16491 | 266 |
| A00270 | A16773 | 173 | A00270 | A16916 | 485 |
| A00271 | A00324 | 191 | A00271 | A00381 | 191 |
| A00271 | A00493 | 195 | A00271 | A00506 | 249 |
| A00271 | A00832 | 63  | A00271 | A00887 | 900 |
| A00271 | A01052 | 899 | A00271 | A01450 | 303 |
| A00271 | A01524 | 899 | A00271 | A01527 | 899 |
| A00271 | A01558 | 899 | A00271 | A01562 | 899 |
| A00271 | A01572 | 229 | A00271 | A01588 | 899 |
| A00271 | A01602 | 899 | A00271 | A01665 | 905 |
| A00271 | A01667 | 899 | A00271 | A01676 | 63  |
| A00271 | A01692 | 899 | A00271 | A01699 | 152 |
| A00271 | A02535 | 307 | A00271 | A02539 | 219 |
| A00271 | A02544 | 899 | A00271 | A02713 | 193 |
| A00271 | A02779 | 196 | A00271 | A02805 | 213 |
| A00271 | A03525 | 180 | A00271 | A03591 | 899 |
| A00271 | A03611 | 938 | A00271 | A03664 | 162 |
| A00271 | A03777 | 218 | A00271 | A03923 | 174 |
| A00271 | A04209 | 156 | A00271 | A04212 | 369 |
| A00271 | A04699 | 899 | A00271 | A04843 | 291 |
| A00271 | A04870 | 172 | A00271 | A05162 | 276 |
| A00271 | A05188 | 352 | A00271 | A05992 | 172 |
| A00271 | A06416 | 246 | A00271 | A06429 | 185 |
| A00271 | A06609 | 899 | A00271 | A07176 | 488 |
| A00271 | A07311 | 899 | A00271 | A07318 | 352 |
| A00271 | A08581 | 436 | A00271 | A09631 | 283 |
| A00271 | A10523 | 276 | A00271 | A10813 | 160 |
| A00271 | A11745 | 191 | A00271 | A12383 | 899 |
| A00271 | A13391 | 899 | A00271 | A13977 | 899 |
| A00271 | A13990 | 899 | A00271 | A14188 | 290 |
| A00271 | A14198 | 899 | A00271 | A14556 | 276 |
| A00271 | A14643 | 246 | A00271 | A14707 | 185 |
| A00272 | A00653 | 358 | A00272 | A00808 | 173 |
| A00272 | A01272 | 213 | A00272 | A01527 | 905 |
| A00272 | A01639 | 900 | A00272 | A02235 | 176 |
| A00272 | A02329 | 213 | A00272 | A02821 | 238 |
| A00272 | A02836 | 694 | A00272 | A03050 | 472 |
| A00272 | A03172 | 271 | A00272 | A03322 | 418 |

|        |        |     |        |        |     |
|--------|--------|-----|--------|--------|-----|
| A00272 | A05288 | 614 | A00272 | A07311 | 540 |
| A00272 | A07422 | 973 | A00272 | A07471 | 400 |
| A00272 | A07475 | 184 | A00272 | A07635 | 226 |
| A00272 | A09072 | 185 | A00272 | A10386 | 290 |
| A00272 | A10392 | 899 | A00272 | A11834 | 943 |
| A00272 | A13978 | 899 | A00272 | A14062 | 762 |
| A00272 | A14063 | 455 | A00272 | A14191 | 191 |
| A00273 | A00350 | 184 | A00273 | A01286 | 195 |
| A00273 | A01512 | 358 | A00273 | A01553 | 396 |
| A00273 | A01554 | 373 | A00273 | A01561 | 249 |
| A00273 | A01562 | 177 | A00273 | A01605 | 204 |
| A00273 | A01628 | 473 | A00273 | A01697 | 373 |
| A00273 | A01702 | 328 | A00273 | A01708 | 252 |
| A00273 | A01709 | 409 | A00273 | A01718 | 383 |
| A00273 | A01719 | 446 | A00273 | A01907 | 193 |
| A00273 | A01908 | 130 | A00273 | A03822 | 168 |
| A00273 | A04452 | 368 | A00273 | A06289 | 80  |
| A00273 | A06466 | 63  | A00273 | A07165 | 205 |
| A00273 | A09162 | 445 | A00273 | A09526 | 152 |
| A00273 | A09643 | 343 | A00273 | A09644 | 165 |
| A00273 | A11369 | 173 | A00273 | A11767 | 294 |
| A00273 | A12383 | 463 | A00273 | A13729 | 291 |
| A00273 | A13980 | 173 | A00273 | A14364 | 213 |
| A00273 | A14402 | 271 | A00273 | A14438 | 297 |
| A00273 | A16531 | 200 | A00274 | A00290 | 154 |
| A00274 | A00292 | 490 | A00274 | A00440 | 490 |
| A00274 | A00616 | 416 | A00274 | A00736 | 414 |
| A00274 | A00752 | 491 | A00274 | A00815 | 139 |
| A00274 | A01009 | 179 | A00274 | A01030 | 240 |
| A00274 | A01046 | 360 | A00274 | A01235 | 267 |
| A00274 | A01257 | 323 | A00274 | A01275 | 366 |
| A00274 | A01276 | 224 | A00274 | A01354 | 162 |
| A00274 | A01493 | 196 | A00274 | A01527 | 899 |
| A00274 | A01557 | 159 | A00274 | A01572 | 463 |
| A00274 | A01599 | 210 | A00274 | A01604 | 488 |
| A00274 | A01630 | 157 | A00274 | A01654 | 319 |
| A00274 | A01699 | 238 | A00274 | A01704 | 393 |
| A00274 | A01741 | 262 | A00274 | A01743 | 243 |
| A00274 | A01870 | 467 | A00274 | A01878 | 151 |
| A00274 | A01879 | 238 | A00274 | A01880 | 296 |
| A00274 | A01929 | 176 | A00274 | A01983 | 196 |
| A00274 | A02052 | 326 | A00274 | A02062 | 257 |
| A00274 | A02088 | 391 | A00274 | A02136 | 154 |
| A00274 | A02138 | 466 | A00274 | A02143 | 457 |
| A00274 | A02174 | 446 | A00274 | A02176 | 152 |
| A00274 | A02236 | 404 | A00274 | A02245 | 480 |

|        |        |     |        |        |     |
|--------|--------|-----|--------|--------|-----|
| A00274 | A02282 | 184 | A00274 | A02337 | 269 |
| A00274 | A02356 | 157 | A00274 | A02370 | 299 |
| A00274 | A02381 | 183 | A00274 | A02382 | 491 |
| A00274 | A02400 | 227 | A00274 | A02416 | 240 |
| A00274 | A02425 | 127 | A00274 | A02431 | 191 |
| A00274 | A02439 | 321 | A00274 | A02464 | 382 |
| A00274 | A02472 | 63  | A00274 | A02547 | 232 |
| A00274 | A02578 | 383 | A00274 | A02606 | 151 |
| A00274 | A02608 | 388 | A00274 | A02609 | 227 |
| A00274 | A02616 | 288 | A00274 | A02624 | 265 |
| A00274 | A02637 | 281 | A00274 | A02654 | 353 |
| A00274 | A02655 | 475 | A00274 | A02769 | 430 |
| A00274 | A02812 | 213 | A00274 | A02896 | 168 |
| A00274 | A02945 | 165 | A00274 | A03049 | 465 |
| A00274 | A03055 | 180 | A00274 | A03063 | 240 |
| A00274 | A03081 | 477 | A00274 | A03093 | 441 |
| A00274 | A03104 | 276 | A00274 | A03109 | 491 |
| A00274 | A03110 | 945 | A00274 | A03131 | 180 |
| A00274 | A03183 | 491 | A00274 | A03185 | 200 |
| A00274 | A03219 | 490 | A00274 | A03224 | 218 |
| A00274 | A03239 | 171 | A00274 | A03259 | 474 |
| A00274 | A03305 | 480 | A00274 | A03310 | 310 |
| A00274 | A03313 | 272 | A00274 | A03314 | 262 |
| A00274 | A03390 | 179 | A00274 | A03398 | 199 |
| A00274 | A03466 | 240 | A00274 | A03639 | 258 |
| A00274 | A03713 | 154 | A00274 | A03724 | 183 |
| A00274 | A03788 | 467 | A00274 | A03799 | 473 |
| A00274 | A03817 | 380 | A00274 | A03900 | 152 |
| A00274 | A03919 | 154 | A00274 | A03942 | 491 |
| A00274 | A03961 | 267 | A00274 | A04040 | 159 |
| A00274 | A04169 | 302 | A00274 | A04248 | 475 |
| A00274 | A04257 | 401 | A00274 | A04365 | 232 |
| A00274 | A04368 | 193 | A00274 | A04450 | 338 |
| A00274 | A04473 | 165 | A00274 | A04478 | 462 |
| A00274 | A04482 | 212 | A00274 | A04492 | 486 |
| A00274 | A04589 | 252 | A00274 | A04676 | 290 |
| A00274 | A04696 | 176 | A00274 | A04748 | 227 |
| A00274 | A04755 | 317 | A00274 | A04756 | 441 |
| A00274 | A04780 | 180 | A00274 | A04790 | 174 |
| A00274 | A04822 | 154 | A00274 | A04976 | 332 |
| A00274 | A05118 | 257 | A00274 | A05133 | 268 |
| A00274 | A05145 | 207 | A00274 | A05180 | 327 |
| A00274 | A05408 | 402 | A00274 | A05577 | 450 |
| A00274 | A05679 | 321 | A00274 | A05706 | 483 |
| A00274 | A05815 | 414 | A00274 | A05944 | 477 |
| A00274 | A06015 | 202 | A00274 | A06054 | 488 |

|        |        |     |        |        |     |
|--------|--------|-----|--------|--------|-----|
| A00274 | A06118 | 435 | A00274 | A06269 | 200 |
| A00274 | A06414 | 286 | A00274 | A06415 | 458 |
| A00274 | A06604 | 193 | A00274 | A06899 | 172 |
| A00274 | A07006 | 247 | A00274 | A07126 | 407 |
| A00274 | A07133 | 268 | A00274 | A07140 | 173 |
| A00274 | A07143 | 418 | A00274 | A07145 | 489 |
| A00274 | A07148 | 159 | A00274 | A07152 | 224 |
| A00274 | A07157 | 423 | A00274 | A07161 | 383 |
| A00274 | A07166 | 343 | A00274 | A07173 | 154 |
| A00274 | A07184 | 154 | A00274 | A07209 | 367 |
| A00274 | A07372 | 335 | A00274 | A07390 | 283 |
| A00274 | A07803 | 481 | A00274 | A08641 | 263 |
| A00274 | A08642 | 327 | A00274 | A08644 | 268 |
| A00274 | A08714 | 221 | A00274 | A08859 | 154 |
| A00274 | A08881 | 160 | A00274 | A09092 | 165 |
| A00274 | A09125 | 281 | A00274 | A09219 | 184 |
| A00274 | A09241 | 432 | A00274 | A09243 | 174 |
| A00274 | A09366 | 327 | A00274 | A09433 | 202 |
| A00274 | A09480 | 400 | A00274 | A09552 | 163 |
| A00274 | A09572 | 943 | A00274 | A09732 | 485 |
| A00274 | A09744 | 172 | A00274 | A09929 | 227 |
| A00274 | A10018 | 353 | A00274 | A10090 | 363 |
| A00274 | A10336 | 408 | A00274 | A10403 | 281 |
| A00274 | A10744 | 193 | A00274 | A10796 | 180 |
| A00274 | A10821 | 151 | A00274 | A11090 | 221 |
| A00274 | A11412 | 291 | A00274 | A11495 | 327 |
| A00274 | A11875 | 232 | A00274 | A12393 | 352 |
| A00274 | A13826 | 425 | A00274 | A13860 | 480 |
| A00274 | A13950 | 179 | A00274 | A14004 | 221 |
| A00274 | A14007 | 201 | A00274 | A14103 | 268 |
| A00274 | A14122 | 278 | A00274 | A14190 | 485 |
| A00274 | A14202 | 185 | A00274 | A14210 | 491 |
| A00274 | A14366 | 489 | A00274 | A14371 | 491 |
| A00274 | A14372 | 425 | A00274 | A14374 | 419 |
| A00274 | A14376 | 162 | A00274 | A14379 | 428 |
| A00274 | A14391 | 480 | A00274 | A14392 | 372 |
| A00274 | A14409 | 327 | A00274 | A14430 | 422 |
| A00274 | A14432 | 172 | A00274 | A14511 | 489 |
| A00274 | A14536 | 196 | A00274 | A14554 | 491 |
| A00274 | A14570 | 422 | A00274 | A14596 | 385 |
| A00274 | A14601 | 327 | A00274 | A14604 | 488 |
| A00274 | A14616 | 257 | A00274 | A14667 | 188 |
| A00274 | A14930 | 152 | A00274 | A15285 | 174 |
| A00274 | A15292 | 480 | A00274 | A15312 | 299 |
| A00274 | A15313 | 326 | A00274 | A15314 | 224 |
| A00274 | A15317 | 221 | A00274 | A15318 | 449 |

|        |        |     |        |        |     |
|--------|--------|-----|--------|--------|-----|
| A00274 | A15322 | 330 | A00274 | A15327 | 344 |
| A00274 | A15346 | 369 | A00274 | A15349 | 319 |
| A00274 | A15352 | 413 | A00274 | A15404 | 172 |
| A00274 | A15422 | 340 | A00274 | A15452 | 257 |
| A00274 | A15495 | 458 | A00274 | A15516 | 205 |
| A00274 | A15605 | 383 | A00274 | A15607 | 159 |
| A00274 | A15608 | 394 | A00274 | A15641 | 240 |
| A00274 | A15726 | 268 | A00274 | A15819 | 319 |
| A00274 | A15884 | 163 | A00274 | A15916 | 288 |
| A00274 | A15935 | 156 | A00274 | A16008 | 184 |
| A00274 | A16037 | 268 | A00274 | A16224 | 174 |
| A00274 | A16323 | 383 | A00274 | A17081 | 227 |
| A00275 | A00294 | 899 | A00275 | A00339 | 180 |
| A00275 | A00369 | 124 | A00275 | A00385 | 188 |
| A00275 | A00400 | 213 | A00275 | A00421 | 107 |
| A00275 | A00471 | 176 | A00275 | A00531 | 151 |
| A00275 | A00905 | 115 | A00275 | A01004 | 430 |
| A00275 | A01139 | 899 | A00275 | A01151 | 63  |
| A00275 | A01359 | 899 | A00275 | A01437 | 238 |
| A00275 | A01524 | 901 | A00275 | A01527 | 910 |
| A00275 | A01591 | 319 | A00275 | A01660 | 152 |
| A00275 | A02158 | 409 | A00275 | A02226 | 394 |
| A00275 | A02877 | 251 | A00275 | A03494 | 63  |
| A00275 | A04608 | 177 | A00275 | A05853 | 172 |
| A00275 | A06063 | 184 | A00275 | A06608 | 200 |
| A00275 | A07145 | 193 | A00275 | A08571 | 256 |
| A00275 | A08866 | 291 | A00275 | A09258 | 899 |
| A00275 | A09558 | 191 | A00275 | A12990 | 353 |
| A00275 | A13527 | 271 | A00275 | A14443 | 989 |
| A00275 | A14584 | 330 | A00275 | A15438 | 335 |
| A00275 | A15448 | 361 | A00275 | A15449 | 330 |
| A00275 | A15726 | 899 | A00275 | A16453 | 238 |
| A00275 | A16473 | 319 | A00276 | A01524 | 899 |
| A00276 | A01527 | 910 | A00276 | A01562 | 941 |
| A00276 | A01692 | 182 | A00276 | A02411 | 271 |
| A00276 | A04117 | 198 | A00276 | A04280 | 281 |
| A00276 | A04706 | 347 | A00276 | A05462 | 377 |
| A00276 | A14033 | 899 | A00276 | A15512 | 375 |
| A00276 | A15665 | 154 | A00277 | A00327 | 425 |
| A00277 | A00328 | 467 | A00277 | A00651 | 489 |
| A00277 | A00763 | 139 | A00277 | A00861 | 401 |
| A00277 | A00870 | 115 | A00277 | A00902 | 241 |
| A00277 | A01129 | 347 | A00277 | A01251 | 276 |
| A00277 | A01288 | 255 | A00277 | A01464 | 165 |
| A00277 | A01496 | 457 | A00277 | A01598 | 63  |
| A00277 | A01767 | 152 | A00277 | A02164 | 70  |

|        |        |     |        |        |     |
|--------|--------|-----|--------|--------|-----|
| A00277 | A02494 | 221 | A00277 | A03243 | 193 |
| A00277 | A03432 | 240 | A00277 | A03438 | 429 |
| A00277 | A03609 | 162 | A00277 | A03981 | 491 |
| A00277 | A04990 | 326 | A00277 | A05562 | 293 |
| A00277 | A06814 | 406 | A00277 | A06825 | 228 |
| A00277 | A07506 | 469 | A00277 | A08052 | 213 |
| A00277 | A08070 | 176 | A00277 | A08682 | 407 |
| A00277 | A08748 | 272 | A00277 | A08768 | 283 |
| A00277 | A10791 | 272 | A00277 | A11331 | 350 |
| A00277 | A11981 | 364 | A00277 | A12554 | 319 |
| A00277 | A13989 | 165 | A00277 | A14216 | 401 |
| A00277 | A15673 | 159 | A00278 | A00839 | 201 |
| A00278 | A00895 | 279 | A00278 | A01166 | 160 |
| A00278 | A01206 | 232 | A00278 | A01335 | 160 |
| A00278 | A01781 | 216 | A00278 | A03619 | 374 |
| A00278 | A07822 | 307 | A00278 | A08357 | 202 |
| A00278 | A11487 | 159 | A00278 | A15660 | 288 |
| A00278 | A15918 | 382 | A00278 | A15920 | 398 |
| A00278 | A15932 | 200 | A00278 | A15933 | 257 |
| A00278 | A16096 | 294 | A00279 | A00280 | 409 |
| A00279 | A00281 | 461 | A00279 | A00288 | 491 |
| A00279 | A00423 | 422 | A00279 | A00571 | 165 |
| A00279 | A00590 | 171 | A00279 | A00593 | 167 |
| A00279 | A00651 | 474 | A00279 | A00700 | 196 |
| A00279 | A00705 | 481 | A00279 | A00782 | 219 |
| A00279 | A00839 | 491 | A00279 | A00878 | 377 |
| A00279 | A00966 | 201 | A00279 | A01112 | 191 |
| A00279 | A01196 | 236 | A00279 | A01270 | 420 |
| A00279 | A01275 | 159 | A00279 | A01291 | 152 |
| A00279 | A01306 | 489 | A00279 | A01335 | 488 |
| A00279 | A01337 | 171 | A00279 | A01369 | 327 |
| A00279 | A01468 | 324 | A00279 | A01496 | 489 |
| A00279 | A01579 | 565 | A00279 | A03069 | 409 |
| A00279 | A03296 | 208 | A00279 | A03859 | 200 |
| A00279 | A04858 | 200 | A00279 | A05501 | 205 |
| A00279 | A06897 | 395 | A00279 | A06965 | 200 |
| A00279 | A06973 | 455 | A00279 | A07047 | 392 |
| A00279 | A07533 | 154 | A00279 | A07581 | 372 |
| A00279 | A08131 | 265 | A00279 | A08137 | 345 |
| A00279 | A08358 | 339 | A00279 | A08359 | 566 |
| A00279 | A08369 | 299 | A00279 | A08408 | 276 |
| A00279 | A08457 | 565 | A00279 | A08466 | 200 |
| A00279 | A08476 | 200 | A00279 | A08983 | 313 |
| A00279 | A09322 | 200 | A00279 | A11420 | 379 |
| A00279 | A11550 | 395 | A00279 | A11562 | 200 |
| A00279 | A11572 | 399 | A00279 | A11616 | 176 |

|        |        |     |        |        |     |
|--------|--------|-----|--------|--------|-----|
| A00279 | A11728 | 561 | A00279 | A11861 | 200 |
| A00279 | A11924 | 447 | A00279 | A12011 | 236 |
| A00279 | A12270 | 474 | A00279 | A12821 | 162 |
| A00279 | A13333 | 200 | A00279 | A14216 | 490 |
| A00279 | A14508 | 450 | A00279 | A14923 | 313 |
| A00279 | A14937 | 474 | A00279 | A15202 | 200 |
| A00279 | A15225 | 491 | A00279 | A15500 | 172 |
| A00279 | A15684 | 293 | A00279 | A15732 | 395 |
| A00279 | A15746 | 188 | A00279 | A15937 | 73  |
| A00280 | A00283 | 566 | A00280 | A00288 | 368 |
| A00280 | A00299 | 566 | A00280 | A00325 | 491 |
| A00280 | A00328 | 470 | A00280 | A00334 | 486 |
| A00280 | A00355 | 566 | A00280 | A00356 | 491 |
| A00280 | A00357 | 491 | A00280 | A00358 | 491 |
| A00280 | A00403 | 491 | A00280 | A00405 | 326 |
| A00280 | A00406 | 406 | A00280 | A00448 | 232 |
| A00280 | A00454 | 411 | A00280 | A00467 | 417 |
| A00280 | A00469 | 266 | A00280 | A00488 | 483 |
| A00280 | A00501 | 232 | A00280 | A00521 | 566 |
| A00280 | A00561 | 443 | A00280 | A00589 | 303 |
| A00280 | A00590 | 491 | A00280 | A00603 | 484 |
| A00280 | A00605 | 491 | A00280 | A00629 | 490 |
| A00280 | A00648 | 491 | A00280 | A00651 | 485 |
| A00280 | A00653 | 491 | A00280 | A00701 | 489 |
| A00280 | A00713 | 424 | A00280 | A00763 | 491 |
| A00280 | A00783 | 465 | A00280 | A00785 | 217 |
| A00280 | A00787 | 491 | A00280 | A00827 | 151 |
| A00280 | A00839 | 491 | A00280 | A00848 | 270 |
| A00280 | A00878 | 491 | A00280 | A00923 | 491 |
| A00280 | A00965 | 396 | A00280 | A00970 | 255 |
| A00280 | A00990 | 200 | A00280 | A01000 | 491 |
| A00280 | A01017 | 412 | A00280 | A01020 | 296 |
| A00280 | A01025 | 491 | A00280 | A01027 | 293 |
| A00280 | A01031 | 260 | A00280 | A01042 | 475 |
| A00280 | A01047 | 566 | A00280 | A01052 | 221 |
| A00280 | A01054 | 477 | A00280 | A01056 | 475 |
| A00280 | A01066 | 320 | A00280 | A01101 | 491 |
| A00280 | A01112 | 412 | A00280 | A01115 | 463 |
| A00280 | A01120 | 294 | A00280 | A01127 | 491 |
| A00280 | A01140 | 481 | A00280 | A01150 | 408 |
| A00280 | A01166 | 162 | A00280 | A01184 | 491 |
| A00280 | A01189 | 491 | A00280 | A01206 | 491 |
| A00280 | A01211 | 191 | A00280 | A01234 | 490 |
| A00280 | A01249 | 566 | A00280 | A01263 | 430 |
| A00280 | A01264 | 200 | A00280 | A01282 | 216 |
| A00280 | A01291 | 643 | A00280 | A01306 | 491 |



|        |        |     |        |        |     |
|--------|--------|-----|--------|--------|-----|
| A00280 | A01335 | 475 | A00280 | A01338 | 566 |
| A00280 | A01392 | 219 | A00280 | A01399 | 210 |
| A00280 | A01429 | 562 | A00280 | A01430 | 477 |
| A00280 | A01431 | 454 | A00280 | A01433 | 416 |
| A00280 | A01437 | 491 | A00280 | A01449 | 208 |
| A00280 | A01457 | 491 | A00280 | A01464 | 562 |
| A00280 | A01468 | 485 | A00280 | A01470 | 416 |
| A00280 | A01496 | 477 | A00280 | A01569 | 257 |
| A00280 | A01579 | 491 | A00280 | A01598 | 251 |
| A00280 | A01612 | 391 | A00280 | A01617 | 229 |
| A00280 | A01618 | 369 | A00280 | A01619 | 157 |
| A00280 | A01620 | 286 | A00280 | A01649 | 491 |
| A00280 | A01700 | 278 | A00280 | A01718 | 281 |
| A00280 | A01787 | 475 | A00280 | A01822 | 294 |
| A00280 | A01897 | 353 | A00280 | A02178 | 226 |
| A00280 | A02216 | 481 | A00280 | A02738 | 176 |
| A00280 | A02874 | 428 | A00280 | A02978 | 503 |
| A00280 | A03048 | 188 | A00280 | A03069 | 491 |
| A00280 | A03149 | 257 | A00280 | A03272 | 193 |
| A00280 | A03567 | 491 | A00280 | A03740 | 484 |
| A00280 | A03752 | 433 | A00280 | A03754 | 480 |
| A00280 | A03859 | 385 | A00280 | A04430 | 180 |
| A00280 | A04760 | 195 | A00280 | A05121 | 491 |
| A00280 | A05385 | 265 | A00280 | A05411 | 205 |
| A00280 | A05443 | 374 | A00280 | A05501 | 328 |
| A00280 | A06279 | 232 | A00280 | A06466 | 473 |
| A00280 | A06861 | 480 | A00280 | A06897 | 481 |
| A00280 | A06965 | 491 | A00280 | A06973 | 562 |
| A00280 | A07201 | 183 | A00280 | A07311 | 473 |
| A00280 | A07398 | 313 | A00280 | A07451 | 491 |
| A00280 | A07505 | 207 | A00280 | A07533 | 490 |
| A00280 | A07584 | 443 | A00280 | A08011 | 491 |
| A00280 | A08055 | 429 | A00280 | A08137 | 491 |
| A00280 | A08301 | 418 | A00280 | A08357 | 491 |
| A00280 | A08358 | 240 | A00280 | A08359 | 477 |
| A00280 | A08377 | 171 | A00280 | A08398 | 566 |
| A00280 | A08408 | 221 | A00280 | A08452 | 566 |
| A00280 | A08501 | 249 | A00280 | A08521 | 565 |
| A00280 | A08547 | 470 | A00280 | A08558 | 348 |
| A00280 | A08559 | 480 | A00280 | A08664 | 481 |
| A00280 | A08773 | 480 | A00280 | A08972 | 479 |
| A00280 | A08973 | 190 | A00280 | A09044 | 321 |
| A00280 | A09297 | 207 | A00280 | A09322 | 491 |
| A00280 | A09332 | 362 | A00280 | A09615 | 165 |
| A00280 | A09674 | 435 | A00280 | A09702 | 564 |
| A00280 | A09852 | 329 | A00280 | A10417 | 535 |

|        |        |     |        |        |     |
|--------|--------|-----|--------|--------|-----|
| A00280 | A10439 | 388 | A00280 | A10518 | 490 |
| A00280 | A10529 | 171 | A00280 | A10532 | 307 |
| A00280 | A10616 | 480 | A00280 | A11303 | 152 |
| A00280 | A11338 | 187 | A00280 | A11390 | 491 |
| A00280 | A11419 | 228 | A00280 | A11420 | 316 |
| A00280 | A11438 | 565 | A00280 | A11462 | 277 |
| A00280 | A11480 | 490 | A00280 | A11588 | 488 |
| A00280 | A11616 | 258 | A00280 | A11704 | 470 |
| A00280 | A11729 | 200 | A00280 | A11731 | 224 |
| A00280 | A11945 | 491 | A00280 | A11974 | 224 |
| A00280 | A12080 | 176 | A00280 | A12126 | 435 |
| A00280 | A12221 | 154 | A00280 | A12233 | 489 |
| A00280 | A12237 | 399 | A00280 | A12259 | 195 |
| A00280 | A12329 | 223 | A00280 | A12813 | 195 |
| A00280 | A13055 | 180 | A00280 | A13333 | 555 |
| A00280 | A13340 | 468 | A00280 | A13375 | 241 |
| A00280 | A13417 | 151 | A00280 | A13525 | 480 |
| A00280 | A13527 | 450 | A00280 | A13709 | 213 |
| A00280 | A13830 | 486 | A00280 | A13989 | 491 |
| A00280 | A13992 | 489 | A00280 | A14152 | 281 |
| A00280 | A14188 | 490 | A00280 | A14216 | 480 |
| A00280 | A14505 | 490 | A00280 | A15215 | 266 |
| A00280 | A15218 | 345 | A00280 | A15219 | 348 |
| A00280 | A15221 | 483 | A00280 | A15235 | 467 |
| A00280 | A15660 | 413 | A00280 | A15684 | 335 |
| A00280 | A15727 | 165 | A00280 | A15743 | 477 |
| A00280 | A15776 | 337 | A00280 | A15777 | 430 |
| A00280 | A15778 | 223 | A00280 | A15932 | 74  |
| A00280 | A15988 | 488 | A00280 | A16118 | 489 |
| A00280 | A16159 | 335 | A00280 | A16523 | 180 |
| A00280 | A16622 | 63  | A00280 | A16631 | 491 |
| A00280 | A16679 | 422 | A00280 | A16768 | 160 |
| A00280 | A16845 | 293 | A00280 | A17142 | 219 |
| A00280 | A17193 | 363 | A00281 | A00288 | 491 |
| A00281 | A00289 | 351 | A00281 | A00304 | 488 |
| A00281 | A00360 | 195 | A00281 | A00651 | 472 |
| A00281 | A00675 | 170 | A00281 | A00808 | 165 |
| A00281 | A00839 | 180 | A00281 | A01085 | 263 |
| A00281 | A01090 | 341 | A00281 | A01112 | 483 |
| A00281 | A01291 | 184 | A00281 | A01306 | 296 |
| A00281 | A01335 | 439 | A00281 | A01468 | 190 |
| A00281 | A01496 | 474 | A00281 | A01579 | 488 |
| A00281 | A01601 | 469 | A00281 | A01946 | 247 |
| A00281 | A03981 | 258 | A00281 | A06466 | 174 |
| A00281 | A06534 | 330 | A00281 | A07311 | 217 |
| A00281 | A07581 | 168 | A00281 | A08137 | 293 |

|        |        |     |        |        |     |
|--------|--------|-----|--------|--------|-----|
| A00281 | A08358 | 262 | A00281 | A08359 | 491 |
| A00281 | A08369 | 446 | A00281 | A08457 | 485 |
| A00281 | A08476 | 446 | A00281 | A08559 | 151 |
| A00281 | A08838 | 159 | A00281 | A09297 | 162 |
| A00281 | A11334 | 160 | A00281 | A11420 | 486 |
| A00281 | A11550 | 199 | A00281 | A11612 | 185 |
| A00281 | A11728 | 215 | A00281 | A11861 | 263 |
| A00281 | A11924 | 413 | A00281 | A12105 | 177 |
| A00281 | A12269 | 484 | A00281 | A12821 | 394 |
| A00281 | A13308 | 247 | A00281 | A13311 | 157 |
| A00281 | A13340 | 440 | A00281 | A14176 | 310 |
| A00281 | A14216 | 491 | A00281 | A14257 | 154 |
| A00281 | A15500 | 196 | A00281 | A16624 | 290 |
| A00281 | A16627 | 172 | A00281 | A16724 | 246 |
| A00281 | A16839 | 296 | A00282 | A00651 | 212 |
| A00282 | A00698 | 272 | A00282 | A00741 | 235 |
| A00282 | A00819 | 254 | A00282 | A00835 | 185 |
| A00282 | A00876 | 252 | A00282 | A01082 | 168 |
| A00282 | A01385 | 160 | A00282 | A01787 | 263 |
| A00282 | A01822 | 339 | A00282 | A06466 | 204 |
| A00282 | A07208 | 283 | A00282 | A07798 | 179 |
| A00282 | A09297 | 313 | A00282 | A10728 | 270 |
| A00282 | A11337 | 279 | A00282 | A12170 | 368 |
| A00282 | A12328 | 218 | A00282 | A15261 | 296 |
| A00282 | A15932 | 205 | A00282 | A16272 | 313 |
| A00282 | A16318 | 348 | A00282 | A16437 | 338 |
| A00282 | A16620 | 63  | A00283 | A00288 | 477 |
| A00283 | A00299 | 566 | A00283 | A00325 | 491 |
| A00283 | A00327 | 472 | A00283 | A00328 | 665 |
| A00283 | A00355 | 565 | A00283 | A00356 | 395 |
| A00283 | A00357 | 491 | A00283 | A00358 | 488 |
| A00283 | A00403 | 491 | A00283 | A00521 | 565 |
| A00283 | A00571 | 212 | A00283 | A00590 | 480 |
| A00283 | A00603 | 296 | A00283 | A00605 | 447 |
| A00283 | A00629 | 569 | A00283 | A00648 | 322 |
| A00283 | A00651 | 481 | A00283 | A00653 | 290 |
| A00283 | A00701 | 483 | A00283 | A00763 | 488 |
| A00283 | A00787 | 491 | A00283 | A00839 | 490 |
| A00283 | A00878 | 462 | A00283 | A00923 | 491 |
| A00283 | A00970 | 154 | A00283 | A00990 | 638 |
| A00283 | A01000 | 491 | A00283 | A01025 | 491 |
| A00283 | A01047 | 566 | A00283 | A01066 | 204 |
| A00283 | A01098 | 199 | A00283 | A01101 | 485 |
| A00283 | A01112 | 439 | A00283 | A01127 | 488 |
| A00283 | A01140 | 173 | A00283 | A01184 | 488 |
| A00283 | A01186 | 179 | A00283 | A01189 | 299 |

|        |        |     |        |        |     |
|--------|--------|-----|--------|--------|-----|
| A00283 | A01206 | 456 | A00283 | A01234 | 193 |
| A00283 | A01240 | 405 | A00283 | A01249 | 565 |
| A00283 | A01263 | 458 | A00283 | A01264 | 200 |
| A00283 | A01282 | 486 | A00283 | A01291 | 643 |
| A00283 | A01306 | 582 | A00283 | A01338 | 560 |
| A00283 | A01392 | 223 | A00283 | A01425 | 211 |
| A00283 | A01429 | 200 | A00283 | A01437 | 491 |
| A00283 | A01457 | 485 | A00283 | A01464 | 668 |
| A00283 | A01496 | 469 | A00283 | A01522 | 207 |
| A00283 | A01579 | 481 | A00283 | A01585 | 196 |
| A00283 | A01601 | 199 | A00283 | A01618 | 635 |
| A00283 | A01634 | 207 | A00283 | A01647 | 230 |
| A00283 | A01649 | 455 | A00283 | A01684 | 317 |
| A00283 | A01755 | 157 | A00283 | A01822 | 575 |
| A00283 | A02216 | 154 | A00283 | A02738 | 438 |
| A00283 | A02978 | 200 | A00283 | A03069 | 491 |
| A00283 | A03567 | 581 | A00283 | A03705 | 205 |
| A00283 | A03740 | 368 | A00283 | A03754 | 509 |
| A00283 | A03761 | 234 | A00283 | A03888 | 485 |
| A00283 | A03981 | 172 | A00283 | A05121 | 310 |
| A00283 | A05411 | 252 | A00283 | A05449 | 393 |
| A00283 | A05708 | 241 | A00283 | A06015 | 187 |
| A00283 | A06466 | 151 | A00283 | A06495 | 353 |
| A00283 | A06812 | 217 | A00283 | A06843 | 183 |
| A00283 | A06848 | 195 | A00283 | A06861 | 221 |
| A00283 | A06897 | 347 | A00283 | A06909 | 224 |
| A00283 | A06965 | 491 | A00283 | A06973 | 551 |
| A00283 | A07012 | 314 | A00283 | A07104 | 205 |
| A00283 | A07201 | 491 | A00283 | A07243 | 393 |
| A00283 | A07311 | 483 | A00283 | A07451 | 475 |
| A00283 | A08011 | 433 | A00283 | A08086 | 151 |
| A00283 | A08133 | 454 | A00283 | A08321 | 171 |
| A00283 | A08357 | 467 | A00283 | A08358 | 291 |
| A00283 | A08359 | 457 | A00283 | A08398 | 552 |
| A00283 | A08452 | 565 | A00283 | A08501 | 299 |
| A00283 | A08521 | 287 | A00283 | A08558 | 200 |
| A00283 | A08559 | 491 | A00283 | A08664 | 639 |
| A00283 | A08752 | 402 | A00283 | A08972 | 414 |
| A00283 | A09044 | 200 | A00283 | A09322 | 581 |
| A00283 | A09332 | 196 | A00283 | A09622 | 226 |
| A00283 | A09674 | 477 | A00283 | A09702 | 200 |
| A00283 | A09822 | 252 | A00283 | A09852 | 474 |
| A00283 | A10002 | 252 | A00283 | A10133 | 241 |
| A00283 | A10417 | 530 | A00283 | A10518 | 278 |
| A00283 | A10569 | 241 | A00283 | A10584 | 366 |
| A00283 | A11390 | 180 | A00283 | A11420 | 274 |

|        |        |     |        |        |     |
|--------|--------|-----|--------|--------|-----|
| A00283 | A11438 | 566 | A00283 | A11480 | 443 |
| A00283 | A11704 | 343 | A00283 | A11729 | 200 |
| A00283 | A11945 | 467 | A00283 | A11981 | 210 |
| A00283 | A12011 | 273 | A00283 | A12233 | 414 |
| A00283 | A12237 | 217 | A00283 | A12500 | 210 |
| A00283 | A12813 | 224 | A00283 | A13333 | 200 |
| A00283 | A13340 | 474 | A00283 | A13525 | 154 |
| A00283 | A13527 | 352 | A00283 | A13830 | 205 |
| A00283 | A13989 | 344 | A00283 | A13992 | 353 |
| A00283 | A14188 | 380 | A00283 | A14216 | 500 |
| A00283 | A14505 | 450 | A00283 | A14508 | 162 |
| A00283 | A14923 | 232 | A00283 | A15218 | 463 |
| A00283 | A15219 | 152 | A00283 | A15221 | 374 |
| A00283 | A15235 | 490 | A00283 | A15727 | 195 |
| A00283 | A15743 | 485 | A00283 | A16118 | 469 |
| A00283 | A16627 | 163 | A00283 | A16631 | 296 |
| A00283 | A16633 | 162 | A00283 | A16822 | 312 |
| A00283 | A16823 | 200 | A00284 | A00285 | 438 |
| A00284 | A00288 | 340 | A00284 | A00439 | 568 |
| A00284 | A00454 | 330 | A00284 | A00698 | 498 |
| A00284 | A00809 | 160 | A00284 | A00833 | 222 |
| A00284 | A00876 | 520 | A00284 | A00922 | 336 |
| A00284 | A00932 | 517 | A00284 | A00933 | 290 |
| A00284 | A00980 | 423 | A00284 | A01055 | 249 |
| A00284 | A01090 | 177 | A00284 | A01161 | 160 |
| A00284 | A01218 | 190 | A00284 | A01261 | 160 |
| A00284 | A01393 | 187 | A00284 | A01554 | 424 |
| A00284 | A01560 | 382 | A00284 | A01579 | 278 |
| A00284 | A01627 | 162 | A00284 | A01680 | 489 |
| A00284 | A01822 | 440 | A00284 | A02350 | 283 |
| A00284 | A03490 | 185 | A00284 | A03677 | 160 |
| A00284 | A03691 | 274 | A00284 | A03752 | 658 |
| A00284 | A03809 | 362 | A00284 | A04116 | 317 |
| A00284 | A06000 | 279 | A00284 | A06351 | 154 |
| A00284 | A06466 | 695 | A00284 | A06950 | 438 |
| A00284 | A07311 | 491 | A00284 | A07323 | 174 |
| A00284 | A07798 | 671 | A00284 | A08054 | 177 |
| A00284 | A08301 | 193 | A00284 | A08519 | 199 |
| A00284 | A08533 | 503 | A00284 | A09297 | 524 |
| A00284 | A09308 | 229 | A00284 | A09577 | 491 |
| A00284 | A09873 | 180 | A00284 | A09902 | 465 |
| A00284 | A10534 | 481 | A00284 | A11302 | 212 |
| A00284 | A11550 | 413 | A00284 | A12042 | 274 |
| A00284 | A12043 | 160 | A00284 | A12227 | 160 |
| A00284 | A12328 | 360 | A00284 | A12990 | 232 |
| A00284 | A13340 | 542 | A00284 | A14073 | 491 |

|        |        |     |        |        |     |
|--------|--------|-----|--------|--------|-----|
| A00284 | A14188 | 251 | A00284 | A14738 | 160 |
| A00284 | A15244 | 487 | A00284 | A15932 | 460 |
| A00284 | A15933 | 461 | A00284 | A16272 | 531 |
| A00284 | A16318 | 160 | A00284 | A16437 | 160 |
| A00284 | A16446 | 160 | A00284 | A16585 | 463 |
| A00284 | A16618 | 335 | A00285 | A00288 | 163 |
| A00285 | A00356 | 185 | A00285 | A00371 | 270 |
| A00285 | A00439 | 691 | A00285 | A00444 | 310 |
| A00285 | A00626 | 252 | A00285 | A00651 | 490 |
| A00285 | A00698 | 373 | A00285 | A00701 | 274 |
| A00285 | A00713 | 353 | A00285 | A00773 | 249 |
| A00285 | A00839 | 414 | A00285 | A00910 | 213 |
| A00285 | A00923 | 167 | A00285 | A00932 | 485 |
| A00285 | A00933 | 468 | A00285 | A01042 | 491 |
| A00285 | A01055 | 457 | A00285 | A01083 | 157 |
| A00285 | A01112 | 491 | A00285 | A01115 | 232 |
| A00285 | A01150 | 378 | A00285 | A01275 | 470 |
| A00285 | A01291 | 454 | A00285 | A01306 | 184 |
| A00285 | A01431 | 434 | A00285 | A01457 | 458 |
| A00285 | A01496 | 483 | A00285 | A01560 | 491 |
| A00285 | A01569 | 474 | A00285 | A01579 | 490 |
| A00285 | A01647 | 458 | A00285 | A01712 | 188 |
| A00285 | A01782 | 152 | A00285 | A01822 | 326 |
| A00285 | A02857 | 246 | A00285 | A03188 | 477 |
| A00285 | A03545 | 230 | A00285 | A03740 | 452 |
| A00285 | A03752 | 695 | A00285 | A05066 | 193 |
| A00285 | A06037 | 228 | A00285 | A06466 | 695 |
| A00285 | A06645 | 180 | A00285 | A06950 | 515 |
| A00285 | A07247 | 157 | A00285 | A07311 | 491 |
| A00285 | A07451 | 474 | A00285 | A07604 | 296 |
| A00285 | A07798 | 695 | A00285 | A08359 | 252 |
| A00285 | A08835 | 293 | A00285 | A09078 | 224 |
| A00285 | A09263 | 491 | A00285 | A09319 | 466 |
| A00285 | A09581 | 165 | A00285 | A09804 | 456 |
| A00285 | A09902 | 480 | A00285 | A10365 | 474 |
| A00285 | A10532 | 311 | A00285 | A10728 | 489 |
| A00285 | A11286 | 491 | A00285 | A12073 | 177 |
| A00285 | A12328 | 462 | A00285 | A13146 | 297 |
| A00285 | A13149 | 404 | A00285 | A13320 | 473 |
| A00285 | A13335 | 488 | A00285 | A13340 | 489 |
| A00285 | A13529 | 262 | A00285 | A13552 | 247 |
| A00285 | A13989 | 475 | A00285 | A14150 | 156 |
| A00285 | A14188 | 152 | A00285 | A14571 | 329 |
| A00285 | A14596 | 429 | A00285 | A15244 | 460 |
| A00285 | A15546 | 443 | A00285 | A16805 | 212 |
| A00286 | A00348 | 488 | A00286 | A00374 | 232 |

|        |        |     |        |        |     |
|--------|--------|-----|--------|--------|-----|
| A00286 | A00382 | 168 | A00286 | A00393 | 180 |
| A00286 | A00421 | 416 | A00286 | A00425 | 356 |
| A00286 | A00448 | 450 | A00286 | A00453 | 479 |
| A00286 | A00458 | 491 | A00286 | A00481 | 488 |
| A00286 | A00496 | 375 | A00286 | A00531 | 490 |
| A00286 | A00532 | 491 | A00286 | A00571 | 162 |
| A00286 | A00605 | 245 | A00286 | A00655 | 472 |
| A00286 | A00691 | 260 | A00286 | A00760 | 485 |
| A00286 | A00762 | 479 | A00286 | A00793 | 380 |
| A00286 | A00822 | 218 | A00286 | A00831 | 221 |
| A00286 | A00848 | 251 | A00286 | A00856 | 357 |
| A00286 | A00871 | 270 | A00286 | A00876 | 63  |
| A00286 | A00883 | 317 | A00286 | A00905 | 413 |
| A00286 | A00916 | 489 | A00286 | A00919 | 474 |
| A00286 | A00947 | 460 | A00286 | A01020 | 272 |
| A00286 | A01075 | 491 | A00286 | A01082 | 489 |
| A00286 | A01084 | 489 | A00286 | A01087 | 491 |
| A00286 | A01088 | 413 | A00286 | A01096 | 182 |
| A00286 | A01136 | 489 | A00286 | A01166 | 312 |
| A00286 | A01184 | 361 | A00286 | A01206 | 395 |
| A00286 | A01215 | 458 | A00286 | A01234 | 484 |
| A00286 | A01243 | 170 | A00286 | A01259 | 190 |
| A00286 | A01353 | 382 | A00286 | A01354 | 490 |
| A00286 | A01385 | 380 | A00286 | A01406 | 488 |
| A00286 | A01423 | 190 | A00286 | A01468 | 269 |
| A00286 | A01470 | 430 | A00286 | A01492 | 457 |
| A00286 | A01495 | 374 | A00286 | A01572 | 414 |
| A00286 | A01598 | 466 | A00286 | A01612 | 470 |
| A00286 | A01614 | 367 | A00286 | A01649 | 379 |
| A00286 | A01707 | 489 | A00286 | A01763 | 185 |
| A00286 | A02243 | 187 | A00286 | A02274 | 260 |
| A00286 | A02671 | 245 | A00286 | A03057 | 404 |
| A00286 | A03446 | 330 | A00286 | A03453 | 314 |
| A00286 | A03569 | 402 | A00286 | A03601 | 490 |
| A00286 | A03728 | 68  | A00286 | A05328 | 301 |
| A00286 | A05501 | 219 | A00286 | A05709 | 171 |
| A00286 | A07349 | 177 | A00286 | A07524 | 63  |
| A00286 | A07706 | 491 | A00286 | A08137 | 458 |
| A00286 | A08304 | 283 | A00286 | A08337 | 260 |
| A00286 | A08357 | 160 | A00286 | A08491 | 165 |
| A00286 | A08528 | 252 | A00286 | A08571 | 195 |
| A00286 | A09608 | 283 | A00286 | A09825 | 188 |
| A00286 | A10532 | 274 | A00286 | A10538 | 420 |
| A00286 | A11291 | 405 | A00286 | A11575 | 318 |
| A00286 | A11577 | 174 | A00286 | A11930 | 399 |
| A00286 | A13603 | 329 | A00286 | A13870 | 317 |

|        |        |     |        |        |     |
|--------|--------|-----|--------|--------|-----|
| A00286 | A13956 | 162 | A00286 | A13989 | 491 |
| A00286 | A14006 | 484 | A00286 | A14220 | 486 |
| A00286 | A14566 | 491 | A00286 | A14594 | 486 |
| A00286 | A15038 | 329 | A00286 | A15041 | 329 |
| A00286 | A15046 | 329 | A00286 | A15091 | 329 |
| A00286 | A15128 | 329 | A00286 | A15215 | 329 |
| A00286 | A15218 | 168 | A00286 | A15935 | 408 |
| A00286 | A16320 | 352 | A00286 | A17063 | 380 |
| A00287 | A00571 | 328 | A00287 | A00955 | 180 |
| A00287 | A01000 | 375 | A00287 | A01064 | 168 |
| A00287 | A01093 | 196 | A00287 | A01121 | 279 |
| A00287 | A01154 | 360 | A00287 | A01473 | 472 |
| A00287 | A01594 | 249 | A00287 | A01686 | 288 |
| A00287 | A02108 | 204 | A00287 | A03461 | 170 |
| A00287 | A04949 | 285 | A00287 | A05446 | 266 |
| A00287 | A08000 | 160 | A00287 | A08154 | 174 |
| A00287 | A08419 | 344 | A00287 | A09610 | 396 |
| A00287 | A09852 | 274 | A00287 | A11364 | 433 |
| A00287 | A12477 | 477 | A00287 | A13554 | 358 |
| A00287 | A15941 | 454 | A00288 | A00289 | 491 |
| A00288 | A00296 | 281 | A00288 | A00299 | 469 |
| A00288 | A00304 | 470 | A00288 | A00323 | 213 |
| A00288 | A00334 | 255 | A00288 | A00357 | 179 |
| A00288 | A00414 | 270 | A00288 | A00423 | 243 |
| A00288 | A00454 | 205 | A00288 | A00467 | 462 |
| A00288 | A00521 | 218 | A00288 | A00560 | 414 |
| A00288 | A00561 | 452 | A00288 | A00571 | 709 |
| A00288 | A00590 | 180 | A00288 | A00593 | 455 |
| A00288 | A00605 | 470 | A00288 | A00648 | 485 |
| A00288 | A00651 | 491 | A00288 | A00700 | 491 |
| A00288 | A00705 | 491 | A00288 | A00782 | 477 |
| A00288 | A00787 | 165 | A00288 | A00808 | 154 |
| A00288 | A00839 | 645 | A00288 | A00878 | 290 |
| A00288 | A00905 | 461 | A00288 | A00916 | 443 |
| A00288 | A00923 | 466 | A00288 | A00955 | 168 |
| A00288 | A00966 | 311 | A00288 | A00970 | 212 |
| A00288 | A01017 | 488 | A00288 | A01025 | 408 |
| A00288 | A01042 | 441 | A00288 | A01083 | 162 |
| A00288 | A01085 | 357 | A00288 | A01090 | 489 |
| A00288 | A01098 | 248 | A00288 | A01112 | 491 |
| A00288 | A01115 | 432 | A00288 | A01150 | 307 |
| A00288 | A01196 | 465 | A00288 | A01206 | 486 |
| A00288 | A01234 | 432 | A00288 | A01249 | 198 |
| A00288 | A01270 | 330 | A00288 | A01291 | 580 |
| A00288 | A01294 | 196 | A00288 | A01306 | 491 |
| A00288 | A01335 | 491 | A00288 | A01369 | 184 |



|        |        |     |        |        |     |
|--------|--------|-----|--------|--------|-----|
| A00288 | A01425 | 275 | A00288 | A01431 | 306 |
| A00288 | A01457 | 193 | A00288 | A01468 | 491 |
| A00288 | A01470 | 263 | A00288 | A01496 | 491 |
| A00288 | A01539 | 474 | A00288 | A01569 | 258 |
| A00288 | A01572 | 199 | A00288 | A01579 | 491 |
| A00288 | A01601 | 491 | A00288 | A01612 | 491 |
| A00288 | A01649 | 473 | A00288 | A01787 | 446 |
| A00288 | A02350 | 408 | A00288 | A03298 | 159 |
| A00288 | A03390 | 391 | A00288 | A03567 | 317 |
| A00288 | A03569 | 416 | A00288 | A03740 | 481 |
| A00288 | A03752 | 457 | A00288 | A03981 | 475 |
| A00288 | A04116 | 334 | A00288 | A05501 | 480 |
| A00288 | A06466 | 490 | A00288 | A06564 | 390 |
| A00288 | A06897 | 488 | A00288 | A06965 | 396 |
| A00288 | A06973 | 489 | A00288 | A07047 | 483 |
| A00288 | A07311 | 629 | A00288 | A07398 | 368 |
| A00288 | A07451 | 279 | A00288 | A07524 | 63  |
| A00288 | A07581 | 449 | A00288 | A08131 | 491 |
| A00288 | A08137 | 491 | A00288 | A08154 | 390 |
| A00288 | A08301 | 276 | A00288 | A08357 | 435 |
| A00288 | A08358 | 477 | A00288 | A08359 | 491 |
| A00288 | A08377 | 224 | A00288 | A08408 | 462 |
| A00288 | A08452 | 152 | A00288 | A08457 | 485 |
| A00288 | A08476 | 491 | A00288 | A08571 | 363 |
| A00288 | A08983 | 229 | A00288 | A09322 | 288 |
| A00288 | A09613 | 251 | A00288 | A09726 | 276 |
| A00288 | A10362 | 278 | A00288 | A10490 | 286 |
| A00288 | A10498 | 180 | A00288 | A10532 | 280 |
| A00288 | A10797 | 414 | A00288 | A11096 | 154 |
| A00288 | A11254 | 180 | A00288 | A11334 | 385 |
| A00288 | A11420 | 486 | A00288 | A11550 | 491 |
| A00288 | A11593 | 165 | A00288 | A11857 | 488 |
| A00288 | A11861 | 483 | A00288 | A12011 | 270 |
| A00288 | A12269 | 452 | A00288 | A12270 | 230 |
| A00288 | A12328 | 278 | A00288 | A12329 | 383 |
| A00288 | A12365 | 306 | A00288 | A12821 | 452 |
| A00288 | A13167 | 229 | A00288 | A13262 | 313 |
| A00288 | A13311 | 324 | A00288 | A13340 | 491 |
| A00288 | A13357 | 180 | A00288 | A13527 | 252 |
| A00288 | A13989 | 488 | A00288 | A14152 | 172 |
| A00288 | A14188 | 405 | A00288 | A14206 | 263 |
| A00288 | A14216 | 491 | A00288 | A14257 | 468 |
| A00288 | A14447 | 251 | A00288 | A14476 | 177 |
| A00288 | A14508 | 489 | A00288 | A14923 | 229 |
| A00288 | A15034 | 199 | A00288 | A15225 | 477 |
| A00288 | A15499 | 262 | A00288 | A15500 | 581 |

|        |        |     |        |        |     |
|--------|--------|-----|--------|--------|-----|
| A00288 | A15660 | 420 | A00288 | A15684 | 477 |
| A00288 | A15732 | 302 | A00288 | A15751 | 283 |
| A00288 | A15931 | 163 | A00288 | A16272 | 390 |
| A00288 | A16637 | 63  | A00288 | A16658 | 455 |
| A00288 | A16686 | 279 | A00288 | A16724 | 268 |
| A00288 | A16839 | 188 | A00288 | A17140 | 260 |
| A00289 | A00335 | 306 | A00289 | A00355 | 159 |
| A00289 | A00357 | 187 | A00289 | A00403 | 219 |
| A00289 | A00409 | 174 | A00289 | A00560 | 396 |
| A00289 | A00605 | 179 | A00289 | A00629 | 221 |
| A00289 | A00651 | 170 | A00289 | A00700 | 219 |
| A00289 | A00705 | 396 | A00289 | A00839 | 462 |
| A00289 | A00923 | 171 | A00289 | A00958 | 201 |
| A00289 | A00991 | 232 | A00289 | A01017 | 160 |
| A00289 | A01025 | 328 | A00289 | A01196 | 188 |
| A00289 | A01206 | 204 | A00289 | A01291 | 193 |
| A00289 | A01306 | 422 | A00289 | A01335 | 484 |
| A00289 | A01468 | 171 | A00289 | A01470 | 205 |
| A00289 | A01579 | 407 | A00289 | A01612 | 174 |
| A00289 | A02830 | 154 | A00289 | A03569 | 210 |
| A00289 | A03740 | 234 | A00289 | A03754 | 224 |
| A00289 | A04988 | 283 | A00289 | A05450 | 277 |
| A00289 | A05501 | 329 | A00289 | A06466 | 160 |
| A00289 | A06814 | 218 | A00289 | A06965 | 268 |
| A00289 | A06973 | 157 | A00289 | A07581 | 235 |
| A00289 | A07604 | 307 | A00289 | A08137 | 154 |
| A00289 | A08154 | 279 | A00289 | A08301 | 246 |
| A00289 | A08359 | 488 | A00289 | A09322 | 201 |
| A00289 | A10490 | 254 | A00289 | A11291 | 249 |
| A00289 | A11550 | 263 | A00289 | A11861 | 319 |
| A00289 | A12821 | 369 | A00289 | A14006 | 154 |
| A00289 | A14257 | 343 | A00289 | A15244 | 286 |
| A00289 | A15367 | 183 | A00289 | A16118 | 202 |
| A00290 | A00481 | 193 | A00290 | A00570 | 425 |
| A00290 | A00629 | 425 | A00290 | A00781 | 187 |
| A00290 | A00865 | 425 | A00290 | A00928 | 425 |
| A00290 | A00952 | 425 | A00290 | A01101 | 425 |
| A00290 | A01159 | 425 | A00290 | A01221 | 425 |
| A00290 | A01412 | 425 | A00290 | A01774 | 296 |
| A00290 | A02121 | 299 | A00290 | A02439 | 232 |
| A00290 | A02456 | 317 | A00290 | A02654 | 257 |
| A00290 | A02655 | 429 | A00290 | A02803 | 174 |
| A00290 | A02983 | 174 | A00290 | A03922 | 160 |
| A00290 | A04446 | 201 | A00290 | A05577 | 491 |
| A00290 | A05679 | 232 | A00290 | A06047 | 63  |
| A00290 | A06369 | 425 | A00290 | A06832 | 425 |

|        |        |     |        |        |     |
|--------|--------|-----|--------|--------|-----|
| A00290 | A07159 | 452 | A00290 | A08057 | 484 |
| A00290 | A13821 | 475 | A00290 | A14071 | 210 |
| A00290 | A14391 | 205 | A00290 | A14596 | 478 |
| A00290 | A14659 | 187 | A00290 | A14741 | 217 |
| A00291 | A00799 | 173 | A00291 | A00940 | 227 |
| A00291 | A01143 | 152 | A00291 | A01576 | 165 |
| A00291 | A01717 | 172 | A00291 | A01876 | 274 |
| A00291 | A02438 | 406 | A00291 | A02439 | 414 |
| A00291 | A02460 | 200 | A00291 | A03171 | 165 |
| A00291 | A03974 | 491 | A00291 | A03975 | 329 |
| A00291 | A05517 | 313 | A00291 | A05679 | 346 |
| A00291 | A06177 | 168 | A00291 | A06415 | 490 |
| A00291 | A06598 | 256 | A00291 | A08293 | 470 |
| A00291 | A08356 | 187 | A00291 | A08362 | 224 |
| A00291 | A08821 | 322 | A00291 | A09829 | 446 |
| A00291 | A11291 | 266 | A00291 | A12858 | 213 |
| A00291 | A13928 | 173 | A00291 | A13983 | 483 |
| A00291 | A14071 | 489 | A00291 | A14199 | 160 |
| A00291 | A14220 | 154 | A00291 | A15314 | 63  |
| A00292 | A00356 | 274 | A00292 | A00619 | 483 |
| A00292 | A00868 | 63  | A00292 | A00914 | 351 |
| A00292 | A00960 | 152 | A00292 | A00999 | 311 |
| A00292 | A01492 | 467 | A00292 | A01524 | 216 |
| A00292 | A01527 | 238 | A00292 | A01604 | 183 |
| A00292 | A01640 | 400 | A00292 | A01818 | 127 |
| A00292 | A02151 | 299 | A00292 | A02170 | 139 |
| A00292 | A02250 | 490 | A00292 | A02278 | 285 |
| A00292 | A02333 | 489 | A00292 | A02361 | 265 |
| A00292 | A02414 | 243 | A00292 | A02415 | 319 |
| A00292 | A02416 | 191 | A00292 | A02425 | 338 |
| A00292 | A02490 | 489 | A00292 | A02491 | 491 |
| A00292 | A02581 | 232 | A00292 | A02592 | 101 |
| A00292 | A02624 | 156 | A00292 | A02729 | 154 |
| A00292 | A02785 | 168 | A00292 | A02841 | 361 |
| A00292 | A02901 | 196 | A00292 | A03009 | 456 |
| A00292 | A03029 | 160 | A00292 | A03053 | 162 |
| A00292 | A03061 | 267 | A00292 | A03110 | 208 |
| A00292 | A03185 | 219 | A00292 | A03438 | 218 |
| A00292 | A03506 | 195 | A00292 | A03771 | 307 |
| A00292 | A03937 | 262 | A00292 | A03949 | 484 |
| A00292 | A04327 | 323 | A00292 | A04398 | 491 |
| A00292 | A04422 | 441 | A00292 | A04490 | 249 |
| A00292 | A04638 | 274 | A00292 | A04826 | 286 |
| A00292 | A04990 | 232 | A00292 | A05082 | 202 |
| A00292 | A05443 | 268 | A00292 | A05462 | 156 |
| A00292 | A05709 | 188 | A00292 | A05759 | 278 |

|        |        |     |        |        |     |
|--------|--------|-----|--------|--------|-----|
| A00292 | A06065 | 402 | A00292 | A06450 | 297 |
| A00292 | A07531 | 171 | A00292 | A08473 | 286 |
| A00292 | A08714 | 457 | A00292 | A09184 | 297 |
| A00292 | A10288 | 274 | A00292 | A10376 | 267 |
| A00292 | A10419 | 241 | A00292 | A10422 | 201 |
| A00292 | A10766 | 208 | A00292 | A10790 | 205 |
| A00292 | A11064 | 344 | A00292 | A11123 | 208 |
| A00292 | A11369 | 445 | A00292 | A11525 | 104 |
| A00292 | A11693 | 389 | A00292 | A11995 | 252 |
| A00292 | A13052 | 118 | A00292 | A13339 | 213 |
| A00292 | A13607 | 259 | A00292 | A13989 | 479 |
| A00292 | A14053 | 340 | A00292 | A15498 | 177 |
| A00292 | A15789 | 241 | A00292 | A15913 | 411 |
| A00292 | A15928 | 201 | A00292 | A16636 | 475 |
| A00292 | A17090 | 340 | A00293 | A00556 | 121 |
| A00293 | A00876 | 198 | A00293 | A02902 | 486 |
| A00293 | A02951 | 208 | A00293 | A03286 | 394 |
| A00293 | A03752 | 160 | A00293 | A04015 | 283 |
| A00293 | A05811 | 480 | A00293 | A06466 | 454 |
| A00293 | A07311 | 268 | A00293 | A09021 | 353 |
| A00293 | A09577 | 177 | A00293 | A10313 | 344 |
| A00293 | A11921 | 302 | A00293 | A12328 | 162 |
| A00293 | A13340 | 372 | A00293 | A14197 | 198 |
| A00294 | A00305 | 406 | A00294 | A00309 | 491 |
| A00294 | A00316 | 260 | A00294 | A00324 | 945 |
| A00294 | A00330 | 234 | A00294 | A00370 | 491 |
| A00294 | A00388 | 475 | A00294 | A00470 | 439 |
| A00294 | A00552 | 283 | A00294 | A00597 | 160 |
| A00294 | A00643 | 491 | A00294 | A00669 | 427 |
| A00294 | A00671 | 332 | A00294 | A00696 | 238 |
| A00294 | A00703 | 481 | A00294 | A00747 | 491 |
| A00294 | A00754 | 477 | A00294 | A00763 | 422 |
| A00294 | A00786 | 899 | A00294 | A00799 | 329 |
| A00294 | A00809 | 486 | A00294 | A00853 | 224 |
| A00294 | A00871 | 473 | A00294 | A00887 | 490 |
| A00294 | A00914 | 160 | A00294 | A00981 | 360 |
| A00294 | A01052 | 491 | A00294 | A01070 | 914 |
| A00294 | A01091 | 291 | A00294 | A01157 | 483 |
| A00294 | A01168 | 486 | A00294 | A01172 | 491 |
| A00294 | A01307 | 193 | A00294 | A01378 | 172 |
| A00294 | A01470 | 419 | A00294 | A01507 | 232 |
| A00294 | A01524 | 201 | A00294 | A01527 | 939 |
| A00294 | A01548 | 491 | A00294 | A01554 | 899 |
| A00294 | A01557 | 251 | A00294 | A01558 | 899 |
| A00294 | A01560 | 899 | A00294 | A01562 | 159 |
| A00294 | A01587 | 329 | A00294 | A01588 | 899 |

|        |        |     |        |        |     |
|--------|--------|-----|--------|--------|-----|
| A00294 | A01592 | 899 | A00294 | A01602 | 491 |
| A00294 | A01615 | 899 | A00294 | A01638 | 899 |
| A00294 | A01640 | 406 | A00294 | A01660 | 157 |
| A00294 | A01668 | 408 | A00294 | A01676 | 933 |
| A00294 | A01688 | 238 | A00294 | A01702 | 396 |
| A00294 | A01723 | 435 | A00294 | A01741 | 490 |
| A00294 | A01743 | 401 | A00294 | A01763 | 461 |
| A00294 | A01790 | 454 | A00294 | A01798 | 180 |
| A00294 | A01839 | 443 | A00294 | A01844 | 462 |
| A00294 | A01850 | 484 | A00294 | A01886 | 243 |
| A00294 | A01983 | 63  | A00294 | A02000 | 435 |
| A00294 | A02018 | 480 | A00294 | A02021 | 435 |
| A00294 | A02049 | 76  | A00294 | A02059 | 185 |
| A00294 | A02121 | 229 | A00294 | A02178 | 419 |
| A00294 | A02180 | 413 | A00294 | A02183 | 207 |
| A00294 | A02191 | 63  | A00294 | A02211 | 154 |
| A00294 | A02219 | 63  | A00294 | A02239 | 286 |
| A00294 | A02261 | 168 | A00294 | A02329 | 371 |
| A00294 | A02361 | 363 | A00294 | A02495 | 224 |
| A00294 | A02502 | 366 | A00294 | A02562 | 263 |
| A00294 | A02567 | 213 | A00294 | A02607 | 168 |
| A00294 | A02687 | 480 | A00294 | A02839 | 174 |
| A00294 | A02842 | 396 | A00294 | A02902 | 279 |
| A00294 | A02965 | 432 | A00294 | A03026 | 338 |
| A00294 | A03067 | 246 | A00294 | A03070 | 63  |
| A00294 | A03080 | 249 | A00294 | A03090 | 441 |
| A00294 | A03112 | 221 | A00294 | A03213 | 414 |
| A00294 | A03271 | 515 | A00294 | A03304 | 486 |
| A00294 | A03373 | 238 | A00294 | A03390 | 154 |
| A00294 | A03391 | 479 | A00294 | A03401 | 347 |
| A00294 | A03415 | 151 | A00294 | A03436 | 303 |
| A00294 | A03451 | 375 | A00294 | A03532 | 174 |
| A00294 | A03575 | 902 | A00294 | A03725 | 491 |
| A00294 | A03821 | 160 | A00294 | A03977 | 201 |
| A00294 | A03990 | 171 | A00294 | A04020 | 314 |
| A00294 | A04080 | 480 | A00294 | A04104 | 363 |
| A00294 | A04334 | 324 | A00294 | A04448 | 191 |
| A00294 | A04449 | 450 | A00294 | A04659 | 201 |
| A00294 | A04842 | 352 | A00294 | A04927 | 260 |
| A00294 | A04996 | 154 | A00294 | A05141 | 491 |
| A00294 | A05185 | 477 | A00294 | A05216 | 467 |
| A00294 | A05260 | 174 | A00294 | A05365 | 316 |
| A00294 | A05566 | 200 | A00294 | A05629 | 213 |
| A00294 | A05797 | 439 | A00294 | A05873 | 207 |
| A00294 | A05914 | 267 | A00294 | A06078 | 367 |
| A00294 | A06146 | 191 | A00294 | A06196 | 179 |

|        |        |     |        |        |     |
|--------|--------|-----|--------|--------|-----|
| A00294 | A06201 | 241 | A00294 | A06256 | 168 |
| A00294 | A06455 | 179 | A00294 | A06463 | 286 |
| A00294 | A06581 | 484 | A00294 | A06597 | 223 |
| A00294 | A06609 | 899 | A00294 | A06610 | 491 |
| A00294 | A06615 | 290 | A00294 | A06642 | 334 |
| A00294 | A07158 | 399 | A00294 | A07201 | 899 |
| A00294 | A07209 | 257 | A00294 | A07218 | 419 |
| A00294 | A07339 | 477 | A00294 | A07803 | 414 |
| A00294 | A08022 | 486 | A00294 | A08836 | 193 |
| A00294 | A08839 | 899 | A00294 | A08858 | 899 |
| A00294 | A08875 | 491 | A00294 | A09044 | 274 |
| A00294 | A09124 | 303 | A00294 | A09141 | 491 |
| A00294 | A09235 | 156 | A00294 | A09399 | 160 |
| A00294 | A09542 | 340 | A00294 | A09561 | 490 |
| A00294 | A09727 | 491 | A00294 | A09791 | 491 |
| A00294 | A09826 | 480 | A00294 | A09941 | 154 |
| A00294 | A09997 | 256 | A00294 | A10114 | 195 |
| A00294 | A10251 | 207 | A00294 | A10267 | 260 |
| A00294 | A10283 | 229 | A00294 | A10304 | 263 |
| A00294 | A10412 | 263 | A00294 | A10754 | 388 |
| A00294 | A10808 | 156 | A00294 | A10913 | 232 |
| A00294 | A10934 | 369 | A00294 | A11003 | 356 |
| A00294 | A11115 | 229 | A00294 | A11286 | 433 |
| A00294 | A11369 | 899 | A00294 | A11600 | 191 |
| A00294 | A11650 | 160 | A00294 | A12371 | 188 |
| A00294 | A12417 | 191 | A00294 | A12513 | 207 |
| A00294 | A12897 | 486 | A00294 | A12992 | 899 |
| A00294 | A13027 | 207 | A00294 | A13089 | 168 |
| A00294 | A13346 | 205 | A00294 | A13388 | 157 |
| A00294 | A13560 | 160 | A00294 | A13589 | 241 |
| A00294 | A13655 | 191 | A00294 | A13997 | 369 |
| A00294 | A14009 | 486 | A00294 | A14016 | 433 |
| A00294 | A14029 | 899 | A00294 | A14157 | 229 |
| A00294 | A14200 | 491 | A00294 | A14494 | 328 |
| A00294 | A14596 | 457 | A00294 | A14636 | 475 |
| A00294 | A14643 | 439 | A00294 | A14787 | 188 |
| A00294 | A15292 | 899 | A00294 | A15293 | 899 |
| A00294 | A15294 | 899 | A00294 | A15661 | 219 |
| A00294 | A15926 | 188 | A00294 | A15948 | 395 |
| A00294 | A16157 | 485 | A00294 | A16203 | 179 |
| A00294 | A16299 | 313 | A00294 | A16300 | 347 |
| A00294 | A16833 | 168 | A00294 | A16911 | 491 |
| A00295 | A00318 | 452 | A00295 | A00472 | 479 |
| A00295 | A00553 | 288 | A00295 | A00636 | 162 |
| A00295 | A00694 | 475 | A00295 | A00870 | 356 |
| A00295 | A00882 | 441 | A00295 | A00902 | 306 |

|        |        |     |        |        |     |
|--------|--------|-----|--------|--------|-----|
| A00295 | A01011 | 356 | A00295 | A01161 | 305 |
| A00295 | A01216 | 429 | A00295 | A01235 | 340 |
| A00295 | A01276 | 374 | A00295 | A01345 | 170 |
| A00295 | A01478 | 301 | A00295 | A01543 | 480 |
| A00295 | A01551 | 373 | A00295 | A01557 | 355 |
| A00295 | A01566 | 491 | A00295 | A01578 | 488 |
| A00295 | A01595 | 460 | A00295 | A01607 | 488 |
| A00295 | A01632 | 490 | A00295 | A01652 | 160 |
| A00295 | A01746 | 160 | A00295 | A01967 | 195 |
| A00295 | A02099 | 185 | A00295 | A02167 | 162 |
| A00295 | A02188 | 210 | A00295 | A02221 | 185 |
| A00295 | A02502 | 259 | A00295 | A02642 | 172 |
| A00295 | A02691 | 183 | A00295 | A02979 | 483 |
| A00295 | A03104 | 452 | A00295 | A03451 | 490 |
| A00295 | A03471 | 491 | A00295 | A03625 | 350 |
| A00295 | A03806 | 159 | A00295 | A04006 | 291 |
| A00295 | A04175 | 480 | A00295 | A04275 | 441 |
| A00295 | A04305 | 204 | A00295 | A04349 | 183 |
| A00295 | A04361 | 172 | A00295 | A04715 | 491 |
| A00295 | A04870 | 263 | A00295 | A05073 | 172 |
| A00295 | A05300 | 420 | A00295 | A05370 | 241 |
| A00295 | A05439 | 198 | A00295 | A05558 | 241 |
| A00295 | A05574 | 249 | A00295 | A06100 | 490 |
| A00295 | A06234 | 235 | A00295 | A06566 | 301 |
| A00295 | A06651 | 185 | A00295 | A06701 | 180 |
| A00295 | A06708 | 335 | A00295 | A06739 | 447 |
| A00295 | A07132 | 156 | A00295 | A07209 | 439 |
| A00295 | A07282 | 168 | A00295 | A07815 | 489 |
| A00295 | A07903 | 432 | A00295 | A07984 | 301 |
| A00295 | A08172 | 173 | A00295 | A08309 | 345 |
| A00295 | A08578 | 163 | A00295 | A08658 | 213 |
| A00295 | A08685 | 156 | A00295 | A08686 | 198 |
| A00295 | A08708 | 270 | A00295 | A08859 | 159 |
| A00295 | A09384 | 328 | A00295 | A09511 | 165 |
| A00295 | A09734 | 324 | A00295 | A09886 | 301 |
| A00295 | A10445 | 191 | A00295 | A10630 | 198 |
| A00295 | A11036 | 259 | A00295 | A11914 | 416 |
| A00295 | A11921 | 236 | A00295 | A11983 | 435 |
| A00295 | A12853 | 260 | A00295 | A13369 | 430 |
| A00295 | A13806 | 232 | A00295 | A13824 | 236 |
| A00295 | A14202 | 252 | A00295 | A14210 | 154 |
| A00295 | A14330 | 159 | A00295 | A14570 | 340 |
| A00295 | A14635 | 420 | A00295 | A14733 | 152 |
| A00295 | A14757 | 205 | A00295 | A15181 | 235 |
| A00295 | A15314 | 279 | A00295 | A15322 | 246 |
| A00295 | A15385 | 168 | A00295 | A15578 | 419 |

|        |        |     |        |        |     |
|--------|--------|-----|--------|--------|-----|
| A00295 | A15793 | 201 | A00295 | A16074 | 208 |
| A00295 | A16081 | 185 | A00295 | A16274 | 484 |
| A00295 | A16534 | 235 | A00295 | A17009 | 205 |
| A00296 | A00297 | 694 | A00296 | A00308 | 241 |
| A00296 | A00323 | 385 | A00296 | A00339 | 676 |
| A00296 | A00348 | 441 | A00296 | A00367 | 695 |
| A00296 | A00368 | 694 | A00296 | A00369 | 491 |
| A00296 | A00373 | 470 | A00296 | A00421 | 695 |
| A00296 | A00496 | 201 | A00296 | A00531 | 694 |
| A00296 | A00559 | 491 | A00296 | A00560 | 486 |
| A00296 | A00646 | 124 | A00296 | A00677 | 306 |
| A00296 | A00691 | 491 | A00296 | A00819 | 249 |
| A00296 | A00822 | 491 | A00296 | A00831 | 326 |
| A00296 | A00883 | 393 | A00296 | A00905 | 480 |
| A00296 | A00916 | 491 | A00296 | A00932 | 210 |
| A00296 | A01139 | 63  | A00296 | A01150 | 191 |
| A00296 | A01151 | 63  | A00296 | A01231 | 263 |
| A00296 | A01243 | 162 | A00296 | A01265 | 219 |
| A00296 | A01266 | 200 | A00296 | A01268 | 452 |
| A00296 | A01354 | 267 | A00296 | A01359 | 63  |
| A00296 | A01372 | 383 | A00296 | A01558 | 486 |
| A00296 | A01588 | 335 | A00296 | A01598 | 339 |
| A00296 | A01612 | 491 | A00296 | A01615 | 369 |
| A00296 | A01638 | 460 | A00296 | A01649 | 417 |
| A00296 | A01707 | 323 | A00296 | A02120 | 167 |
| A00296 | A03298 | 491 | A00296 | A03494 | 646 |
| A00296 | A03569 | 207 | A00296 | A03740 | 446 |
| A00296 | A03752 | 355 | A00296 | A04268 | 179 |
| A00296 | A06466 | 477 | A00296 | A06907 | 183 |
| A00296 | A07311 | 489 | A00296 | A07834 | 243 |
| A00296 | A08137 | 491 | A00296 | A08280 | 174 |
| A00296 | A08357 | 226 | A00296 | A08359 | 180 |
| A00296 | A08524 | 383 | A00296 | A08528 | 247 |
| A00296 | A08571 | 491 | A00296 | A08818 | 474 |
| A00296 | A08885 | 491 | A00296 | A09011 | 210 |
| A00296 | A09256 | 388 | A00296 | A09502 | 152 |
| A00296 | A09506 | 160 | A00296 | A09646 | 173 |
| A00296 | A10250 | 188 | A00296 | A10615 | 479 |
| A00296 | A10624 | 490 | A00296 | A10853 | 468 |
| A00296 | A10894 | 171 | A00296 | A11105 | 458 |
| A00296 | A11139 | 695 | A00296 | A11291 | 176 |
| A00296 | A11302 | 227 | A00296 | A11372 | 227 |
| A00296 | A11409 | 170 | A00296 | A11420 | 193 |
| A00296 | A11920 | 491 | A00296 | A11923 | 461 |
| A00296 | A11928 | 491 | A00296 | A12238 | 173 |
| A00296 | A12251 | 154 | A00296 | A12328 | 366 |



|        |        |     |        |        |     |
|--------|--------|-----|--------|--------|-----|
| A00296 | A12416 | 402 | A00296 | A12861 | 353 |
| A00296 | A13147 | 419 | A00296 | A13310 | 491 |
| A00296 | A13311 | 491 | A00296 | A13805 | 438 |
| A00296 | A13989 | 462 | A00296 | A14129 | 446 |
| A00296 | A14220 | 154 | A00296 | A14257 | 440 |
| A00296 | A14476 | 491 | A00296 | A14596 | 322 |
| A00296 | A14899 | 363 | A00296 | A15366 | 236 |
| A00296 | A15660 | 363 | A00296 | A15711 | 661 |
| A00296 | A15766 | 299 | A00296 | A16490 | 221 |
| A00296 | A16491 | 477 | A00296 | A16568 | 353 |
| A00296 | A16690 | 383 | A00296 | A16866 | 383 |
| A00296 | A16911 | 196 | A00296 | A16912 | 486 |
| A00297 | A00339 | 637 | A00297 | A00367 | 504 |
| A00297 | A00368 | 637 | A00297 | A00373 | 419 |
| A00297 | A00421 | 554 | A00297 | A00501 | 221 |
| A00297 | A00531 | 661 | A00297 | A00677 | 162 |
| A00297 | A00691 | 430 | A00297 | A00856 | 322 |
| A00297 | A00905 | 475 | A00297 | A01266 | 281 |
| A00297 | A01372 | 383 | A00297 | A01430 | 168 |
| A00297 | A01431 | 238 | A00297 | A01478 | 196 |
| A00297 | A01495 | 163 | A00297 | A01558 | 208 |
| A00297 | A01615 | 200 | A00297 | A01651 | 174 |
| A00297 | A03298 | 484 | A00297 | A03494 | 543 |
| A00297 | A07311 | 165 | A00297 | A07348 | 183 |
| A00297 | A07834 | 177 | A00297 | A08022 | 307 |
| A00297 | A08137 | 251 | A00297 | A08524 | 383 |
| A00297 | A08571 | 491 | A00297 | A09902 | 218 |
| A00297 | A10250 | 218 | A00297 | A10615 | 154 |
| A00297 | A10894 | 196 | A00297 | A11105 | 483 |
| A00297 | A11139 | 588 | A00297 | A13311 | 193 |
| A00297 | A13510 | 151 | A00297 | A13805 | 438 |
| A00297 | A13989 | 469 | A00297 | A14476 | 479 |
| A00297 | A15711 | 438 | A00297 | A16490 | 333 |
| A00297 | A16690 | 383 | A00297 | A16866 | 383 |
| A00298 | A00343 | 491 | A00298 | A00417 | 160 |
| A00298 | A00453 | 187 | A00298 | A00458 | 412 |
| A00298 | A00532 | 314 | A00298 | A00537 | 196 |
| A00298 | A00604 | 491 | A00298 | A00653 | 491 |
| A00298 | A00669 | 366 | A00298 | A00691 | 407 |
| A00298 | A00783 | 491 | A00298 | A00785 | 491 |
| A00298 | A00790 | 396 | A00298 | A00953 | 251 |
| A00298 | A01019 | 208 | A00298 | A01027 | 460 |
| A00298 | A01042 | 435 | A00298 | A01054 | 446 |
| A00298 | A01075 | 152 | A00298 | A01087 | 373 |
| A00298 | A01161 | 156 | A00298 | A01268 | 229 |
| A00298 | A01399 | 241 | A00298 | A01446 | 374 |

|        |        |     |        |        |     |
|--------|--------|-----|--------|--------|-----|
| A00298 | A01448 | 227 | A00298 | A01457 | 174 |
| A00298 | A01540 | 338 | A00298 | A01574 | 446 |
| A00298 | A01576 | 343 | A00298 | A01837 | 255 |
| A00298 | A02180 | 176 | A00298 | A02607 | 205 |
| A00298 | A03070 | 491 | A00298 | A03293 | 481 |
| A00298 | A03298 | 330 | A00298 | A03740 | 477 |
| A00298 | A03752 | 246 | A00298 | A03776 | 263 |
| A00298 | A04630 | 259 | A00298 | A04686 | 201 |
| A00298 | A05387 | 347 | A00298 | A06434 | 182 |
| A00298 | A06466 | 267 | A00298 | A07086 | 404 |
| A00298 | A07706 | 417 | A00298 | A07732 | 177 |
| A00298 | A08461 | 234 | A00298 | A08571 | 219 |
| A00298 | A08835 | 174 | A00298 | A10703 | 163 |
| A00298 | A10797 | 419 | A00298 | A10798 | 474 |
| A00298 | A11244 | 279 | A00298 | A11322 | 296 |
| A00298 | A11337 | 470 | A00298 | A11338 | 419 |
| A00298 | A11374 | 424 | A00298 | A11427 | 321 |
| A00298 | A11612 | 246 | A00298 | A12241 | 491 |
| A00298 | A13340 | 205 | A00298 | A14461 | 362 |
| A00298 | A14471 | 188 | A00298 | A16462 | 154 |
| A00298 | A17128 | 484 | A00298 | A17205 | 63  |
| A00299 | A00310 | 167 | A00299 | A00312 | 433 |
| A00299 | A00314 | 473 | A00299 | A00325 | 490 |
| A00299 | A00328 | 486 | A00299 | A00355 | 565 |
| A00299 | A00356 | 485 | A00299 | A00357 | 490 |
| A00299 | A00358 | 483 | A00299 | A00403 | 491 |
| A00299 | A00405 | 433 | A00299 | A00444 | 241 |
| A00299 | A00468 | 413 | A00299 | A00521 | 565 |
| A00299 | A00590 | 486 | A00299 | A00603 | 486 |
| A00299 | A00605 | 456 | A00299 | A00629 | 491 |
| A00299 | A00648 | 490 | A00299 | A00651 | 472 |
| A00299 | A00653 | 457 | A00299 | A00660 | 486 |
| A00299 | A00701 | 480 | A00299 | A00763 | 491 |
| A00299 | A00783 | 182 | A00299 | A00787 | 491 |
| A00299 | A00827 | 230 | A00299 | A00839 | 488 |
| A00299 | A00870 | 246 | A00299 | A00878 | 473 |
| A00299 | A00923 | 491 | A00299 | A00965 | 317 |
| A00299 | A00988 | 270 | A00299 | A00990 | 307 |
| A00299 | A01000 | 491 | A00299 | A01017 | 307 |
| A00299 | A01025 | 491 | A00299 | A01034 | 314 |
| A00299 | A01047 | 566 | A00299 | A01054 | 307 |
| A00299 | A01056 | 468 | A00299 | A01066 | 200 |
| A00299 | A01067 | 491 | A00299 | A01095 | 154 |
| A00299 | A01101 | 490 | A00299 | A01112 | 475 |
| A00299 | A01127 | 488 | A00299 | A01140 | 171 |
| A00299 | A01166 | 228 | A00299 | A01184 | 485 |

|        |        |     |        |        |     |
|--------|--------|-----|--------|--------|-----|
| A00299 | A01189 | 491 | A00299 | A01206 | 466 |
| A00299 | A01210 | 428 | A00299 | A01211 | 159 |
| A00299 | A01234 | 465 | A00299 | A01249 | 566 |
| A00299 | A01264 | 200 | A00299 | A01282 | 485 |
| A00299 | A01291 | 566 | A00299 | A01292 | 218 |
| A00299 | A01294 | 333 | A00299 | A01306 | 491 |
| A00299 | A01338 | 552 | A00299 | A01392 | 491 |
| A00299 | A01429 | 200 | A00299 | A01436 | 162 |
| A00299 | A01437 | 483 | A00299 | A01457 | 475 |
| A00299 | A01458 | 491 | A00299 | A01464 | 526 |
| A00299 | A01468 | 177 | A00299 | A01470 | 198 |
| A00299 | A01490 | 177 | A00299 | A01496 | 314 |
| A00299 | A01540 | 240 | A00299 | A01579 | 463 |
| A00299 | A01617 | 167 | A00299 | A01618 | 200 |
| A00299 | A01620 | 213 | A00299 | A01649 | 480 |
| A00299 | A01700 | 182 | A00299 | A01718 | 270 |
| A00299 | A02114 | 168 | A00299 | A02178 | 184 |
| A00299 | A02208 | 352 | A00299 | A02216 | 417 |
| A00299 | A02254 | 491 | A00299 | A02257 | 378 |
| A00299 | A02284 | 438 | A00299 | A02286 | 154 |
| A00299 | A02738 | 463 | A00299 | A02978 | 253 |
| A00299 | A03069 | 486 | A00299 | A03087 | 490 |
| A00299 | A03099 | 185 | A00299 | A03174 | 208 |
| A00299 | A03223 | 515 | A00299 | A03460 | 254 |
| A00299 | A03567 | 491 | A00299 | A03644 | 313 |
| A00299 | A03645 | 246 | A00299 | A03705 | 245 |
| A00299 | A03775 | 347 | A00299 | A03968 | 335 |
| A00299 | A04781 | 196 | A00299 | A05208 | 430 |
| A00299 | A05224 | 230 | A00299 | A05330 | 369 |
| A00299 | A05331 | 246 | A00299 | A05338 | 200 |
| A00299 | A05411 | 469 | A00299 | A05501 | 246 |
| A00299 | A06252 | 179 | A00299 | A06279 | 332 |
| A00299 | A06861 | 460 | A00299 | A06909 | 254 |
| A00299 | A06965 | 491 | A00299 | A06973 | 378 |
| A00299 | A07104 | 235 | A00299 | A07105 | 241 |
| A00299 | A07201 | 312 | A00299 | A07243 | 235 |
| A00299 | A07349 | 193 | A00299 | A07449 | 156 |
| A00299 | A07451 | 480 | A00299 | A07464 | 213 |
| A00299 | A07520 | 441 | A00299 | A08011 | 433 |
| A00299 | A08055 | 240 | A00299 | A08135 | 382 |
| A00299 | A08197 | 305 | A00299 | A08357 | 372 |
| A00299 | A08359 | 283 | A00299 | A08398 | 558 |
| A00299 | A08403 | 388 | A00299 | A08419 | 174 |
| A00299 | A08452 | 565 | A00299 | A08521 | 322 |
| A00299 | A08558 | 200 | A00299 | A08559 | 466 |
| A00299 | A08664 | 474 | A00299 | A08760 | 160 |

|        |        |     |        |        |     |
|--------|--------|-----|--------|--------|-----|
| A00299 | A08773 | 417 | A00299 | A08972 | 167 |
| A00299 | A09044 | 465 | A00299 | A09322 | 491 |
| A00299 | A09442 | 208 | A00299 | A09674 | 308 |
| A00299 | A09702 | 271 | A00299 | A09991 | 172 |
| A00299 | A10006 | 173 | A00299 | A10034 | 441 |
| A00299 | A10417 | 329 | A00299 | A10518 | 216 |
| A00299 | A10564 | 226 | A00299 | A10616 | 314 |
| A00299 | A10679 | 307 | A00299 | A11322 | 168 |
| A00299 | A11390 | 429 | A00299 | A11400 | 291 |
| A00299 | A11438 | 566 | A00299 | A11480 | 183 |
| A00299 | A11729 | 200 | A00299 | A11945 | 226 |
| A00299 | A11981 | 251 | A00299 | A11992 | 202 |
| A00299 | A12168 | 254 | A00299 | A12177 | 281 |
| A00299 | A12233 | 299 | A00299 | A12661 | 168 |
| A00299 | A12687 | 389 | A00299 | A12948 | 230 |
| A00299 | A13155 | 270 | A00299 | A13249 | 358 |
| A00299 | A13333 | 200 | A00299 | A13362 | 414 |
| A00299 | A13930 | 165 | A00299 | A13989 | 457 |
| A00299 | A13992 | 457 | A00299 | A14188 | 303 |
| A00299 | A14216 | 401 | A00299 | A15218 | 477 |
| A00299 | A15221 | 400 | A00299 | A15235 | 491 |
| A00299 | A15418 | 160 | A00299 | A15743 | 465 |
| A00299 | A15776 | 173 | A00299 | A15932 | 180 |
| A00299 | A15988 | 288 | A00299 | A16118 | 461 |
| A00299 | A17193 | 201 | A00300 | A00476 | 208 |
| A00300 | A00621 | 486 | A00300 | A01605 | 368 |
| A00300 | A01631 | 432 | A00300 | A01639 | 274 |
| A00300 | A01640 | 238 | A00300 | A01690 | 191 |
| A00300 | A01697 | 208 | A00300 | A01719 | 196 |
| A00300 | A01755 | 268 | A00300 | A01789 | 279 |
| A00300 | A01908 | 187 | A00300 | A02786 | 307 |
| A00300 | A02788 | 193 | A00300 | A02878 | 180 |
| A00300 | A03069 | 195 | A00300 | A03100 | 265 |
| A00300 | A03861 | 270 | A00300 | A04073 | 223 |
| A00300 | A06000 | 454 | A00300 | A06701 | 159 |
| A00300 | A10534 | 433 | A00300 | A14148 | 265 |
| A00300 | A14827 | 165 | A00301 | A00338 | 329 |
| A00301 | A00377 | 226 | A00301 | A00438 | 355 |
| A00301 | A00472 | 283 | A00301 | A00485 | 483 |
| A00301 | A00576 | 386 | A00301 | A00577 | 205 |
| A00301 | A00609 | 480 | A00301 | A00650 | 213 |
| A00301 | A00717 | 152 | A00301 | A00719 | 326 |
| A00301 | A00802 | 424 | A00301 | A00861 | 151 |
| A00301 | A00883 | 182 | A00301 | A00939 | 177 |
| A00301 | A01004 | 202 | A00301 | A01022 | 473 |
| A00301 | A01026 | 402 | A00301 | A01027 | 182 |

|        |        |     |        |        |     |
|--------|--------|-----|--------|--------|-----|
| A00301 | A01049 | 486 | A00301 | A01091 | 301 |
| A00301 | A01156 | 382 | A00301 | A01161 | 488 |
| A00301 | A01211 | 488 | A00301 | A01326 | 245 |
| A00301 | A01387 | 176 | A00301 | A01481 | 480 |
| A00301 | A01983 | 452 | A00301 | A02071 | 184 |
| A00301 | A02147 | 272 | A00301 | A02187 | 246 |
| A00301 | A02221 | 318 | A00301 | A02222 | 157 |
| A00301 | A02289 | 243 | A00301 | A02326 | 243 |
| A00301 | A02341 | 200 | A00301 | A02383 | 229 |
| A00301 | A02692 | 193 | A00301 | A02706 | 307 |
| A00301 | A02761 | 174 | A00301 | A02764 | 274 |
| A00301 | A02795 | 238 | A00301 | A02817 | 188 |
| A00301 | A02818 | 224 | A00301 | A02838 | 168 |
| A00301 | A03095 | 291 | A00301 | A03304 | 205 |
| A00301 | A03417 | 299 | A00301 | A03430 | 323 |
| A00301 | A03440 | 293 | A00301 | A03945 | 208 |
| A00301 | A03989 | 277 | A00301 | A04163 | 198 |
| A00301 | A04275 | 252 | A00301 | A04302 | 272 |
| A00301 | A04337 | 398 | A00301 | A04449 | 213 |
| A00301 | A04488 | 299 | A00301 | A04671 | 212 |
| A00301 | A04773 | 159 | A00301 | A04834 | 232 |
| A00301 | A04995 | 205 | A00301 | A05020 | 200 |
| A00301 | A05065 | 174 | A00301 | A05087 | 241 |
| A00301 | A05106 | 160 | A00301 | A05356 | 180 |
| A00301 | A05472 | 170 | A00301 | A05493 | 274 |
| A00301 | A05494 | 172 | A00301 | A05775 | 200 |
| A00301 | A06277 | 391 | A00301 | A06294 | 379 |
| A00301 | A06404 | 269 | A00301 | A06756 | 185 |
| A00301 | A06779 | 285 | A00301 | A06818 | 254 |
| A00301 | A06877 | 252 | A00301 | A06991 | 252 |
| A00301 | A07030 | 347 | A00301 | A07106 | 385 |
| A00301 | A07151 | 183 | A00301 | A07197 | 348 |
| A00301 | A07366 | 154 | A00301 | A07390 | 241 |
| A00301 | A07424 | 279 | A00301 | A08093 | 357 |
| A00301 | A08936 | 413 | A00301 | A09054 | 414 |
| A00301 | A09416 | 259 | A00301 | A09750 | 168 |
| A00301 | A09857 | 162 | A00301 | A09971 | 329 |
| A00301 | A10018 | 154 | A00301 | A10156 | 307 |
| A00301 | A10547 | 385 | A00301 | A10621 | 168 |
| A00301 | A10713 | 182 | A00301 | A10731 | 174 |
| A00301 | A10778 | 434 | A00301 | A11307 | 328 |
| A00301 | A11313 | 152 | A00301 | A11317 | 252 |
| A00301 | A11469 | 183 | A00301 | A11553 | 265 |
| A00301 | A11590 | 388 | A00301 | A11628 | 246 |
| A00301 | A11897 | 329 | A00301 | A12035 | 196 |
| A00301 | A12361 | 156 | A00301 | A12371 | 246 |

|        |        |     |        |        |     |
|--------|--------|-----|--------|--------|-----|
| A00301 | A12605 | 323 | A00301 | A13331 | 329 |
| A00301 | A13874 | 436 | A00301 | A14190 | 160 |
| A00301 | A14196 | 486 | A00301 | A14272 | 480 |
| A00301 | A14381 | 274 | A00301 | A14405 | 288 |
| A00301 | A14524 | 201 | A00301 | A14589 | 400 |
| A00301 | A14643 | 185 | A00301 | A15052 | 378 |
| A00301 | A15053 | 347 | A00301 | A15229 | 272 |
| A00301 | A15282 | 165 | A00301 | A15292 | 374 |
| A00301 | A15498 | 279 | A00301 | A15596 | 490 |
| A00301 | A15765 | 190 | A00301 | A15839 | 243 |
| A00301 | A15867 | 285 | A00301 | A16121 | 217 |
| A00301 | A16463 | 191 | A00301 | A16905 | 188 |
| A00302 | A00433 | 477 | A00302 | A00469 | 201 |
| A00302 | A00626 | 483 | A00302 | A00655 | 174 |
| A00302 | A00833 | 382 | A00302 | A00932 | 187 |
| A00302 | A09471 | 445 | A00302 | A09695 | 430 |
| A00302 | A12042 | 368 | A00302 | A12503 | 480 |
| A00303 | A00308 | 428 | A00303 | A00326 | 184 |
| A00303 | A00822 | 205 | A00303 | A00828 | 252 |
| A00303 | A00958 | 183 | A00303 | A01088 | 154 |
| A00303 | A01299 | 246 | A00303 | A01598 | 208 |
| A00303 | A02000 | 196 | A00303 | A03076 | 162 |
| A00303 | A03414 | 195 | A00303 | A03720 | 195 |
| A00303 | A03854 | 151 | A00303 | A05822 | 327 |
| A00303 | A06443 | 430 | A00303 | A06528 | 401 |
| A00303 | A08859 | 273 | A00303 | A11300 | 274 |
| A00303 | A11576 | 198 | A00303 | A14196 | 270 |
| A00303 | A14660 | 224 | A00304 | A00322 | 515 |
| A00304 | A00335 | 468 | A00304 | A00340 | 485 |
| A00304 | A00356 | 484 | A00304 | A00366 | 485 |
| A00304 | A00411 | 285 | A00304 | A00414 | 382 |
| A00304 | A00467 | 441 | A00304 | A00643 | 228 |
| A00304 | A00648 | 420 | A00304 | A00651 | 470 |
| A00304 | A00700 | 369 | A00304 | A00701 | 238 |
| A00304 | A00713 | 407 | A00304 | A00839 | 489 |
| A00304 | A00856 | 485 | A00304 | A00911 | 270 |
| A00304 | A00966 | 491 | A00304 | A00983 | 385 |
| A00304 | A01056 | 491 | A00304 | A01085 | 171 |
| A00304 | A01090 | 490 | A00304 | A01112 | 491 |
| A00304 | A01140 | 491 | A00304 | A01211 | 274 |
| A00304 | A01212 | 457 | A00304 | A01261 | 396 |
| A00304 | A01270 | 465 | A00304 | A01288 | 305 |
| A00304 | A01291 | 491 | A00304 | A01296 | 515 |
| A00304 | A01306 | 254 | A00304 | A01320 | 485 |
| A00304 | A01335 | 330 | A00304 | A01411 | 182 |
| A00304 | A01447 | 243 | A00304 | A01468 | 396 |

|        |        |     |        |        |     |
|--------|--------|-----|--------|--------|-----|
| A00304 | A01527 | 205 | A00304 | A01558 | 302 |
| A00304 | A01579 | 491 | A00304 | A01586 | 369 |
| A00304 | A01601 | 592 | A00304 | A01723 | 232 |
| A00304 | A01787 | 334 | A00304 | A01995 | 491 |
| A00304 | A02179 | 490 | A00304 | A02494 | 450 |
| A00304 | A02924 | 278 | A00304 | A02985 | 173 |
| A00304 | A03048 | 196 | A00304 | A03070 | 466 |
| A00304 | A03272 | 202 | A00304 | A03304 | 480 |
| A00304 | A03461 | 441 | A00304 | A03571 | 335 |
| A00304 | A03981 | 491 | A00304 | A04988 | 486 |
| A00304 | A05298 | 232 | A00304 | A05418 | 486 |
| A00304 | A05525 | 177 | A00304 | A06121 | 449 |
| A00304 | A06144 | 183 | A00304 | A06328 | 302 |
| A00304 | A06466 | 473 | A00304 | A06534 | 404 |
| A00304 | A06580 | 232 | A00304 | A06814 | 491 |
| A00304 | A06973 | 168 | A00304 | A07245 | 168 |
| A00304 | A07307 | 226 | A00304 | A07311 | 486 |
| A00304 | A07398 | 480 | A00304 | A07536 | 265 |
| A00304 | A07658 | 160 | A00304 | A07719 | 297 |
| A00304 | A07726 | 719 | A00304 | A07797 | 297 |
| A00304 | A08131 | 170 | A00304 | A08359 | 474 |
| A00304 | A08369 | 480 | A00304 | A08457 | 154 |
| A00304 | A08476 | 364 | A00304 | A08835 | 480 |
| A00304 | A08869 | 369 | A00304 | A08983 | 340 |
| A00304 | A09246 | 159 | A00304 | A09308 | 372 |
| A00304 | A09704 | 219 | A00304 | A10532 | 435 |
| A00304 | A10569 | 219 | A00304 | A10633 | 335 |
| A00304 | A10711 | 486 | A00304 | A10748 | 472 |
| A00304 | A11334 | 364 | A00304 | A11400 | 296 |
| A00304 | A11487 | 411 | A00304 | A11562 | 319 |
| A00304 | A11688 | 299 | A00304 | A11728 | 465 |
| A00304 | A11983 | 310 | A00304 | A12084 | 201 |
| A00304 | A12168 | 407 | A00304 | A12269 | 362 |
| A00304 | A12270 | 205 | A00304 | A12618 | 491 |
| A00304 | A13063 | 223 | A00304 | A13340 | 477 |
| A00304 | A13621 | 297 | A00304 | A13989 | 491 |
| A00304 | A14055 | 240 | A00304 | A14176 | 383 |
| A00304 | A14188 | 288 | A00304 | A14205 | 188 |
| A00304 | A14498 | 270 | A00304 | A14908 | 286 |
| A00304 | A14937 | 204 | A00304 | A15047 | 297 |
| A00304 | A15506 | 341 | A00304 | A15551 | 160 |
| A00304 | A15711 | 190 | A00304 | A16682 | 241 |
| A00304 | A16793 | 174 | A00304 | A16839 | 430 |
| A00305 | A00309 | 380 | A00305 | A00851 | 433 |
| A00305 | A01483 | 422 | A00305 | A01666 | 173 |
| A00305 | A01741 | 489 | A00305 | A01743 | 301 |

|        |        |     |        |        |     |
|--------|--------|-----|--------|--------|-----|
| A00305 | A01939 | 252 | A00305 | A02212 | 217 |
| A00305 | A02294 | 291 | A00305 | A02349 | 185 |
| A00305 | A02352 | 491 | A00305 | A02407 | 170 |
| A00305 | A02488 | 265 | A00305 | A02491 | 171 |
| A00305 | A02568 | 160 | A00305 | A02599 | 238 |
| A00305 | A02699 | 174 | A00305 | A02744 | 213 |
| A00305 | A02749 | 462 | A00305 | A02763 | 210 |
| A00305 | A02784 | 470 | A00305 | A02792 | 316 |
| A00305 | A02811 | 188 | A00305 | A02817 | 154 |
| A00305 | A02833 | 188 | A00305 | A02836 | 488 |
| A00305 | A02869 | 243 | A00305 | A02874 | 219 |
| A00305 | A02875 | 355 | A00305 | A03070 | 215 |
| A00305 | A03102 | 207 | A00305 | A03112 | 379 |
| A00305 | A03259 | 180 | A00305 | A03322 | 176 |
| A00305 | A03417 | 262 | A00305 | A03486 | 174 |
| A00305 | A03515 | 172 | A00305 | A03609 | 491 |
| A00305 | A03634 | 313 | A00305 | A03661 | 157 |
| A00305 | A03923 | 193 | A00305 | A03977 | 223 |
| A00305 | A04009 | 230 | A00305 | A04049 | 235 |
| A00305 | A04092 | 157 | A00305 | A04243 | 313 |
| A00305 | A04256 | 151 | A00305 | A04334 | 335 |
| A00305 | A04429 | 361 | A00305 | A04444 | 286 |
| A00305 | A04445 | 210 | A00305 | A04548 | 165 |
| A00305 | A04736 | 274 | A00305 | A04737 | 491 |
| A00305 | A04743 | 259 | A00305 | A04770 | 174 |
| A00305 | A04795 | 278 | A00305 | A04842 | 152 |
| A00305 | A04941 | 195 | A00305 | A04988 | 182 |
| A00305 | A05122 | 489 | A00305 | A05141 | 156 |
| A00305 | A05185 | 196 | A00305 | A05353 | 489 |
| A00305 | A05398 | 185 | A00305 | A05701 | 119 |
| A00305 | A05741 | 234 | A00305 | A06059 | 191 |
| A00305 | A06376 | 340 | A00305 | A06581 | 371 |
| A00305 | A07128 | 185 | A00305 | A07210 | 180 |
| A00305 | A07339 | 281 | A00305 | A08070 | 221 |
| A00305 | A08686 | 180 | A00305 | A08753 | 157 |
| A00305 | A09011 | 266 | A00305 | A09028 | 312 |
| A00305 | A09170 | 340 | A00305 | A09265 | 238 |
| A00305 | A09431 | 259 | A00305 | A09448 | 163 |
| A00305 | A09504 | 201 | A00305 | A09545 | 266 |
| A00305 | A09556 | 367 | A00305 | A09559 | 279 |
| A00305 | A09671 | 167 | A00305 | A09928 | 218 |
| A00305 | A10156 | 363 | A00305 | A11333 | 373 |
| A00305 | A11513 | 254 | A00305 | A12373 | 204 |
| A00305 | A13348 | 195 | A00305 | A13665 | 160 |
| A00305 | A13755 | 340 | A00305 | A13886 | 219 |
| A00305 | A14589 | 488 | A00305 | A14639 | 223 |



|        |        |     |        |        |     |
|--------|--------|-----|--------|--------|-----|
| A00305 | A14643 | 208 | A00305 | A16281 | 157 |
| A00305 | A16295 | 326 | A00305 | A16371 | 163 |
| A00305 | A16531 | 337 | A00305 | A16877 | 187 |
| A00305 | A17040 | 435 | A00306 | A00421 | 156 |
| A00306 | A00496 | 252 | A00306 | A00531 | 156 |
| A00306 | A00583 | 156 | A00306 | A00646 | 156 |
| A00306 | A00691 | 156 | A00306 | A00716 | 156 |
| A00306 | A00736 | 491 | A00306 | A00836 | 251 |
| A00306 | A00847 | 491 | A00306 | A00867 | 156 |
| A00306 | A00879 | 156 | A00306 | A00905 | 156 |
| A00306 | A00957 | 236 | A00306 | A01029 | 156 |
| A00306 | A01136 | 156 | A00306 | A01151 | 156 |
| A00306 | A01259 | 263 | A00306 | A01266 | 156 |
| A00306 | A01268 | 156 | A00306 | A01295 | 156 |
| A00306 | A01334 | 156 | A00306 | A01391 | 156 |
| A00306 | A01434 | 156 | A00306 | A01478 | 165 |
| A00306 | A01576 | 286 | A00306 | A02737 | 185 |
| A00306 | A02833 | 191 | A00306 | A02860 | 165 |
| A00306 | A03494 | 156 | A00306 | A03742 | 260 |
| A00306 | A05029 | 408 | A00306 | A06907 | 266 |
| A00306 | A07898 | 156 | A00306 | A08201 | 156 |
| A00306 | A08327 | 156 | A00306 | A08391 | 491 |
| A00306 | A08431 | 156 | A00306 | A08542 | 156 |
| A00306 | A08745 | 174 | A00306 | A09311 | 200 |
| A00306 | A09785 | 340 | A00306 | A10460 | 485 |
| A00306 | A11291 | 489 | A00306 | A11496 | 156 |
| A00306 | A11497 | 156 | A00306 | A11727 | 182 |
| A00306 | A12228 | 475 | A00306 | A12229 | 467 |
| A00306 | A12492 | 193 | A00306 | A12501 | 490 |
| A00306 | A12757 | 156 | A00306 | A13928 | 446 |
| A00306 | A14178 | 156 | A00306 | A14196 | 228 |
| A00306 | A14199 | 241 | A00306 | A14220 | 193 |
| A00306 | A14836 | 391 | A00306 | A15291 | 246 |
| A00306 | A15492 | 162 | A00306 | A16497 | 467 |
| A00306 | A16699 | 156 | A00306 | A17198 | 173 |
| A00307 | A00571 | 227 | A00307 | A00740 | 393 |
| A00307 | A00782 | 319 | A00307 | A00839 | 215 |
| A00307 | A00955 | 361 | A00307 | A01217 | 346 |
| A00307 | A01221 | 310 | A00307 | A01335 | 283 |
| A00307 | A01365 | 313 | A00307 | A01406 | 283 |
| A00307 | A02227 | 283 | A00307 | A06564 | 385 |
| A00307 | A09735 | 361 | A00307 | A10338 | 452 |
| A00307 | A14568 | 373 | A00308 | A00326 | 491 |
| A00308 | A00348 | 491 | A00308 | A00366 | 491 |
| A00308 | A00382 | 245 | A00308 | A00436 | 196 |
| A00308 | A00440 | 393 | A00308 | A00448 | 224 |

|        |        |     |        |        |     |
|--------|--------|-----|--------|--------|-----|
| A00308 | A00453 | 480 | A00308 | A00531 | 351 |
| A00308 | A00560 | 329 | A00308 | A00589 | 433 |
| A00308 | A00609 | 402 | A00308 | A00822 | 491 |
| A00308 | A00831 | 489 | A00308 | A00835 | 335 |
| A00308 | A00837 | 270 | A00308 | A00848 | 272 |
| A00308 | A00883 | 491 | A00308 | A00905 | 490 |
| A00308 | A00916 | 488 | A00308 | A00954 | 218 |
| A00308 | A00958 | 491 | A00308 | A01026 | 170 |
| A00308 | A01029 | 477 | A00308 | A01046 | 449 |
| A00308 | A01052 | 368 | A00308 | A01075 | 489 |
| A00308 | A01077 | 291 | A00308 | A01080 | 162 |
| A00308 | A01088 | 486 | A00308 | A01096 | 480 |
| A00308 | A01097 | 299 | A00308 | A01136 | 378 |
| A00308 | A01143 | 477 | A00308 | A01194 | 270 |
| A00308 | A01206 | 307 | A00308 | A01234 | 466 |
| A00308 | A01243 | 210 | A00308 | A01266 | 188 |
| A00308 | A01268 | 447 | A00308 | A01274 | 475 |
| A00308 | A01291 | 473 | A00308 | A01295 | 491 |
| A00308 | A01299 | 491 | A00308 | A01305 | 491 |
| A00308 | A01354 | 491 | A00308 | A01378 | 252 |
| A00308 | A01441 | 491 | A00308 | A01470 | 416 |
| A00308 | A01507 | 187 | A00308 | A01512 | 157 |
| A00308 | A01598 | 491 | A00308 | A01612 | 475 |
| A00308 | A01614 | 174 | A00308 | A01649 | 424 |
| A00308 | A02064 | 297 | A00308 | A02830 | 486 |
| A00308 | A02835 | 159 | A00308 | A02902 | 460 |
| A00308 | A02931 | 484 | A00308 | A03112 | 196 |
| A00308 | A03304 | 293 | A00308 | A03406 | 440 |
| A00308 | A03591 | 305 | A00308 | A04076 | 172 |
| A00308 | A04900 | 408 | A00308 | A05288 | 486 |
| A00308 | A05295 | 154 | A00308 | A05709 | 160 |
| A00308 | A06143 | 246 | A00308 | A06466 | 452 |
| A00308 | A07311 | 434 | A00308 | A07604 | 156 |
| A00308 | A07625 | 190 | A00308 | A07706 | 201 |
| A00308 | A08078 | 152 | A00308 | A08118 | 456 |
| A00308 | A08137 | 488 | A00308 | A08280 | 425 |
| A00308 | A08571 | 457 | A00308 | A09705 | 180 |
| A00308 | A09768 | 238 | A00308 | A09857 | 355 |
| A00308 | A10321 | 305 | A00308 | A10532 | 183 |
| A00308 | A10624 | 340 | A00308 | A11291 | 355 |
| A00308 | A11300 | 491 | A00308 | A11324 | 165 |
| A00308 | A11387 | 491 | A00308 | A11496 | 252 |
| A00308 | A11497 | 235 | A00308 | A11649 | 355 |
| A00308 | A12152 | 168 | A00308 | A12189 | 251 |
| A00308 | A12328 | 238 | A00308 | A12365 | 375 |
| A00308 | A12373 | 168 | A00308 | A12757 | 227 |

|        |        |     |        |        |     |
|--------|--------|-----|--------|--------|-----|
| A00308 | A13340 | 446 | A00308 | A13376 | 457 |
| A00308 | A13928 | 460 | A00308 | A13989 | 489 |
| A00308 | A14006 | 486 | A00308 | A14196 | 223 |
| A00308 | A14220 | 484 | A00308 | A14257 | 414 |
| A00308 | A14310 | 162 | A00308 | A14408 | 339 |
| A00308 | A14596 | 439 | A00308 | A14659 | 230 |
| A00308 | A14660 | 491 | A00308 | A15296 | 428 |
| A00308 | A15366 | 307 | A00308 | A15504 | 172 |
| A00308 | A15520 | 184 | A00308 | A15559 | 418 |
| A00308 | A15596 | 269 | A00308 | A15747 | 184 |
| A00308 | A15749 | 182 | A00308 | A15752 | 369 |
| A00308 | A16324 | 348 | A00308 | A16700 | 168 |
| A00308 | A16798 | 491 | A00308 | A17005 | 274 |
| A00308 | A17063 | 157 | A00309 | A00324 | 218 |
| A00309 | A00370 | 489 | A00309 | A00597 | 249 |
| A00309 | A00643 | 491 | A00309 | A00671 | 227 |
| A00309 | A00736 | 462 | A00309 | A00747 | 491 |
| A00309 | A00879 | 491 | A00309 | A00887 | 185 |
| A00309 | A00914 | 260 | A00309 | A01029 | 491 |
| A00309 | A01052 | 281 | A00309 | A01104 | 229 |
| A00309 | A01114 | 172 | A00309 | A01125 | 420 |
| A00309 | A01157 | 303 | A00309 | A01209 | 378 |
| A00309 | A01483 | 255 | A00309 | A01527 | 932 |
| A00309 | A01553 | 221 | A00309 | A01558 | 899 |
| A00309 | A01588 | 899 | A00309 | A01602 | 455 |
| A00309 | A01605 | 274 | A00309 | A01640 | 177 |
| A00309 | A01666 | 174 | A00309 | A01668 | 414 |
| A00309 | A01676 | 452 | A00309 | A01702 | 205 |
| A00309 | A01741 | 491 | A00309 | A01743 | 489 |
| A00309 | A01790 | 156 | A00309 | A01844 | 249 |
| A00309 | A01850 | 154 | A00309 | A01886 | 286 |
| A00309 | A01931 | 160 | A00309 | A01990 | 152 |
| A00309 | A02018 | 279 | A00309 | A02020 | 486 |
| A00309 | A02178 | 339 | A00309 | A02180 | 317 |
| A00309 | A02215 | 424 | A00309 | A02261 | 312 |
| A00309 | A02278 | 154 | A00309 | A02349 | 191 |
| A00309 | A02481 | 281 | A00309 | A02491 | 223 |
| A00309 | A02492 | 425 | A00309 | A02502 | 263 |
| A00309 | A02510 | 152 | A00309 | A02562 | 488 |
| A00309 | A02564 | 229 | A00309 | A02567 | 251 |
| A00309 | A02593 | 162 | A00309 | A02676 | 267 |
| A00309 | A02754 | 400 | A00309 | A02784 | 368 |
| A00309 | A02796 | 243 | A00309 | A02816 | 210 |
| A00309 | A02817 | 460 | A00309 | A02823 | 221 |
| A00309 | A02836 | 154 | A00309 | A02837 | 343 |
| A00309 | A02842 | 489 | A00309 | A02868 | 297 |

|        |        |     |        |        |     |
|--------|--------|-----|--------|--------|-----|
| A00309 | A02890 | 221 | A00309 | A02902 | 351 |
| A00309 | A03026 | 235 | A00309 | A03070 | 160 |
| A00309 | A03080 | 468 | A00309 | A03095 | 227 |
| A00309 | A03112 | 412 | A00309 | A03126 | 332 |
| A00309 | A03188 | 152 | A00309 | A03213 | 358 |
| A00309 | A03304 | 413 | A00309 | A03391 | 413 |
| A00309 | A03415 | 462 | A00309 | A03421 | 208 |
| A00309 | A03451 | 310 | A00309 | A03681 | 319 |
| A00309 | A03719 | 246 | A00309 | A03725 | 491 |
| A00309 | A03976 | 361 | A00309 | A03977 | 241 |
| A00309 | A04080 | 491 | A00309 | A04334 | 465 |
| A00309 | A04348 | 171 | A00309 | A04420 | 152 |
| A00309 | A04421 | 199 | A00309 | A04448 | 221 |
| A00309 | A04453 | 243 | A00309 | A04576 | 184 |
| A00309 | A04621 | 162 | A00309 | A04638 | 208 |
| A00309 | A04645 | 208 | A00309 | A04739 | 205 |
| A00309 | A04744 | 177 | A00309 | A04836 | 162 |
| A00309 | A04988 | 291 | A00309 | A05141 | 491 |
| A00309 | A05161 | 165 | A00309 | A05179 | 221 |
| A00309 | A05185 | 475 | A00309 | A05260 | 224 |
| A00309 | A05270 | 235 | A00309 | A05365 | 475 |
| A00309 | A05418 | 491 | A00309 | A05491 | 305 |
| A00309 | A05525 | 385 | A00309 | A05629 | 485 |
| A00309 | A05767 | 177 | A00309 | A05868 | 204 |
| A00309 | A06063 | 385 | A00309 | A06078 | 329 |
| A00309 | A06146 | 221 | A00309 | A06189 | 330 |
| A00309 | A06196 | 208 | A00309 | A06201 | 463 |
| A00309 | A06256 | 199 | A00309 | A06581 | 488 |
| A00309 | A06586 | 283 | A00309 | A06601 | 200 |
| A00309 | A06617 | 221 | A00309 | A06683 | 199 |
| A00309 | A06813 | 340 | A00309 | A07158 | 457 |
| A00309 | A07245 | 157 | A00309 | A07339 | 407 |
| A00309 | A07420 | 221 | A00309 | A07935 | 374 |
| A00309 | A08327 | 187 | A00309 | A08836 | 252 |
| A00309 | A08875 | 490 | A00309 | A09028 | 182 |
| A00309 | A09073 | 330 | A00309 | A09081 | 191 |
| A00309 | A09136 | 184 | A00309 | A09141 | 430 |
| A00309 | A09147 | 165 | A00309 | A09265 | 356 |
| A00309 | A09271 | 411 | A00309 | A09431 | 152 |
| A00309 | A09524 | 165 | A00309 | A09561 | 491 |
| A00309 | A09791 | 490 | A00309 | A09882 | 162 |
| A00309 | A10069 | 199 | A00309 | A10267 | 162 |
| A00309 | A10283 | 257 | A00309 | A10337 | 212 |
| A00309 | A10393 | 288 | A00309 | A10809 | 162 |
| A00309 | A10838 | 361 | A00309 | A10913 | 270 |
| A00309 | A10958 | 288 | A00309 | A11003 | 375 |

|        |        |     |        |        |     |
|--------|--------|-----|--------|--------|-----|
| A00309 | A11044 | 286 | A00309 | A11114 | 221 |
| A00309 | A11259 | 235 | A00309 | A11369 | 899 |
| A00309 | A11650 | 191 | A00309 | A12019 | 235 |
| A00309 | A12897 | 446 | A00309 | A13373 | 238 |
| A00309 | A13589 | 361 | A00309 | A13667 | 172 |
| A00309 | A13791 | 375 | A00309 | A13851 | 177 |
| A00309 | A13877 | 165 | A00309 | A13938 | 177 |
| A00309 | A14029 | 899 | A00309 | A14157 | 257 |
| A00309 | A14494 | 413 | A00309 | A14643 | 465 |
| A00309 | A14650 | 238 | A00309 | A14670 | 171 |
| A00309 | A14680 | 288 | A00309 | A14787 | 329 |
| A00309 | A15917 | 167 | A00309 | A15926 | 393 |
| A00309 | A16041 | 350 | A00309 | A16300 | 486 |
| A00309 | A16911 | 491 | A00310 | A00312 | 491 |
| A00310 | A00314 | 481 | A00310 | A00395 | 265 |
| A00310 | A00449 | 294 | A00310 | A00468 | 374 |
| A00310 | A00579 | 162 | A00310 | A00600 | 151 |
| A00310 | A00601 | 278 | A00310 | A00660 | 477 |
| A00310 | A00752 | 313 | A00310 | A00825 | 380 |
| A00310 | A00842 | 205 | A00310 | A01005 | 286 |
| A00310 | A01137 | 200 | A00310 | A01164 | 201 |
| A00310 | A01212 | 154 | A00310 | A01397 | 281 |
| A00310 | A01409 | 246 | A00310 | A01462 | 180 |
| A00310 | A01463 | 191 | A00310 | A01466 | 218 |
| A00310 | A01476 | 279 | A00310 | A01490 | 416 |
| A00310 | A01508 | 152 | A00310 | A01511 | 258 |
| A00310 | A01527 | 899 | A00310 | A01543 | 488 |
| A00310 | A01590 | 470 | A00310 | A01612 | 236 |
| A00310 | A01635 | 346 | A00310 | A01726 | 238 |
| A00310 | A01926 | 163 | A00310 | A01978 | 270 |
| A00310 | A02008 | 246 | A00310 | A02014 | 272 |
| A00310 | A02054 | 345 | A00310 | A02074 | 152 |
| A00310 | A02083 | 474 | A00310 | A02104 | 177 |
| A00310 | A02114 | 322 | A00310 | A02141 | 152 |
| A00310 | A02254 | 429 | A00310 | A02257 | 490 |
| A00310 | A02258 | 369 | A00310 | A02259 | 311 |
| A00310 | A02284 | 486 | A00310 | A02306 | 340 |
| A00310 | A02329 | 204 | A00310 | A02330 | 945 |
| A00310 | A02363 | 162 | A00310 | A02366 | 226 |
| A00310 | A02468 | 174 | A00310 | A02492 | 278 |
| A00310 | A02522 | 149 | A00310 | A02574 | 263 |
| A00310 | A02601 | 65  | A00310 | A03014 | 409 |
| A00310 | A03019 | 174 | A00310 | A03034 | 198 |
| A00310 | A03084 | 130 | A00310 | A03087 | 486 |
| A00310 | A03099 | 451 | A00310 | A03146 | 277 |
| A00310 | A03148 | 238 | A00310 | A03167 | 335 |

|        |        |     |        |        |     |
|--------|--------|-----|--------|--------|-----|
| A00310 | A03168 | 187 | A00310 | A03174 | 386 |
| A00310 | A03199 | 389 | A00310 | A03207 | 174 |
| A00310 | A03281 | 205 | A00310 | A03402 | 176 |
| A00310 | A03520 | 187 | A00310 | A03961 | 317 |
| A00310 | A04160 | 218 | A00310 | A04421 | 419 |
| A00310 | A04471 | 167 | A00310 | A04487 | 217 |
| A00310 | A04781 | 159 | A00310 | A04990 | 188 |
| A00310 | A05007 | 159 | A00310 | A05224 | 327 |
| A00310 | A05330 | 232 | A00310 | A05333 | 210 |
| A00310 | A05337 | 223 | A00310 | A05356 | 491 |
| A00310 | A05376 | 188 | A00310 | A05393 | 195 |
| A00310 | A05424 | 457 | A00310 | A05429 | 311 |
| A00310 | A05452 | 199 | A00310 | A05462 | 236 |
| A00310 | A05550 | 188 | A00310 | A05740 | 311 |
| A00310 | A05772 | 170 | A00310 | A05820 | 246 |
| A00310 | A05893 | 311 | A00310 | A06037 | 484 |
| A00310 | A06092 | 208 | A00310 | A06421 | 210 |
| A00310 | A06473 | 168 | A00310 | A06520 | 200 |
| A00310 | A06523 | 185 | A00310 | A06607 | 185 |
| A00310 | A06626 | 199 | A00310 | A06632 | 199 |
| A00310 | A06668 | 185 | A00310 | A06769 | 462 |
| A00310 | A06874 | 174 | A00310 | A06949 | 160 |
| A00310 | A06970 | 185 | A00310 | A06994 | 162 |
| A00310 | A07031 | 236 | A00310 | A07334 | 218 |
| A00310 | A07407 | 224 | A00310 | A07486 | 185 |
| A00310 | A07656 | 481 | A00310 | A07763 | 105 |
| A00310 | A07795 | 235 | A00310 | A07796 | 156 |
| A00310 | A07851 | 157 | A00310 | A08473 | 246 |
| A00310 | A08571 | 188 | A00310 | A08960 | 167 |
| A00310 | A09185 | 262 | A00310 | A09514 | 226 |
| A00310 | A10159 | 414 | A00310 | A10286 | 402 |
| A00310 | A10288 | 235 | A00310 | A10358 | 201 |
| A00310 | A10428 | 262 | A00310 | A10701 | 479 |
| A00310 | A11393 | 185 | A00310 | A11783 | 218 |
| A00310 | A13155 | 235 | A00310 | A13364 | 424 |
| A00310 | A13666 | 311 | A00310 | A13726 | 240 |
| A00310 | A14196 | 207 | A00310 | A14443 | 899 |
| A00310 | A14531 | 162 | A00310 | A14570 | 366 |
| A00310 | A14821 | 174 | A00310 | A14878 | 205 |
| A00310 | A15682 | 366 | A00310 | A15684 | 260 |
| A00310 | A15874 | 193 | A00310 | A16028 | 255 |
| A00310 | A16375 | 262 | A00310 | A17078 | 352 |
| A00311 | A00736 | 432 | A00311 | A01590 | 481 |
| A00311 | A01766 | 168 | A00311 | A01923 | 491 |
| A00311 | A01924 | 443 | A00311 | A01926 | 322 |
| A00311 | A02074 | 191 | A00311 | A02077 | 249 |

|        |        |     |        |        |     |
|--------|--------|-----|--------|--------|-----|
| A00311 | A02083 | 486 | A00311 | A02145 | 267 |
| A00311 | A02305 | 491 | A00311 | A02306 | 338 |
| A00311 | A02330 | 152 | A00311 | A02405 | 201 |
| A00311 | A02464 | 213 | A00311 | A02667 | 491 |
| A00311 | A02749 | 204 | A00311 | A02756 | 265 |
| A00311 | A02859 | 229 | A00311 | A03402 | 368 |
| A00311 | A03520 | 229 | A00311 | A03599 | 328 |
| A00311 | A04002 | 340 | A00311 | A04164 | 337 |
| A00311 | A04368 | 477 | A00311 | A04437 | 491 |
| A00311 | A04608 | 167 | A00311 | A04633 | 265 |
| A00311 | A04746 | 260 | A00311 | A04770 | 236 |
| A00311 | A04883 | 405 | A00311 | A04902 | 165 |
| A00311 | A05153 | 246 | A00311 | A05376 | 218 |
| A00311 | A05390 | 469 | A00311 | A05957 | 422 |
| A00311 | A06263 | 230 | A00311 | A06607 | 224 |
| A00311 | A06843 | 308 | A00311 | A07407 | 246 |
| A00311 | A07468 | 475 | A00311 | A07541 | 241 |
| A00311 | A07617 | 290 | A00311 | A07958 | 257 |
| A00311 | A09072 | 202 | A00311 | A10967 | 480 |
| A00311 | A12793 | 404 | A00311 | A14215 | 208 |
| A00311 | A16237 | 343 | A00311 | A17108 | 455 |
| A00312 | A00313 | 446 | A00312 | A00314 | 484 |
| A00312 | A00316 | 281 | A00312 | A00351 | 179 |
| A00312 | A00395 | 462 | A00312 | A00449 | 491 |
| A00312 | A00541 | 241 | A00312 | A00574 | 475 |
| A00312 | A00600 | 333 | A00312 | A00601 | 470 |
| A00312 | A00654 | 332 | A00312 | A00660 | 491 |
| A00312 | A00663 | 369 | A00312 | A00668 | 479 |
| A00312 | A00696 | 327 | A00312 | A00736 | 230 |
| A00312 | A00825 | 457 | A00312 | A00832 | 208 |
| A00312 | A00930 | 491 | A00312 | A00962 | 430 |
| A00312 | A01008 | 190 | A00312 | A01018 | 435 |
| A00312 | A01046 | 346 | A00312 | A01137 | 480 |
| A00312 | A01178 | 356 | A00312 | A01212 | 371 |
| A00312 | A01227 | 368 | A00312 | A01297 | 307 |
| A00312 | A01397 | 347 | A00312 | A01409 | 452 |
| A00312 | A01462 | 171 | A00312 | A01466 | 208 |
| A00312 | A01476 | 362 | A00312 | A01490 | 259 |
| A00312 | A01524 | 899 | A00312 | A01565 | 357 |
| A00312 | A01572 | 407 | A00312 | A01590 | 480 |
| A00312 | A01591 | 199 | A00312 | A01635 | 212 |
| A00312 | A01660 | 227 | A00312 | A01722 | 400 |
| A00312 | A01726 | 485 | A00312 | A01793 | 255 |
| A00312 | A01850 | 190 | A00312 | A01926 | 196 |
| A00312 | A01978 | 259 | A00312 | A02053 | 268 |
| A00312 | A02054 | 491 | A00312 | A02083 | 457 |

|        |        |     |        |        |     |
|--------|--------|-----|--------|--------|-----|
| A00312 | A02091 | 227 | A00312 | A02104 | 168 |
| A00312 | A02112 | 479 | A00312 | A02114 | 236 |
| A00312 | A02254 | 491 | A00312 | A02257 | 443 |
| A00312 | A02258 | 238 | A00312 | A02266 | 303 |
| A00312 | A02284 | 491 | A00312 | A02285 | 424 |
| A00312 | A02286 | 266 | A00312 | A02301 | 177 |
| A00312 | A02306 | 457 | A00312 | A02310 | 314 |
| A00312 | A02330 | 469 | A00312 | A02492 | 383 |
| A00312 | A02644 | 188 | A00312 | A02903 | 163 |
| A00312 | A03054 | 360 | A00312 | A03084 | 405 |
| A00312 | A03087 | 488 | A00312 | A03099 | 945 |
| A00312 | A03164 | 434 | A00312 | A03167 | 162 |
| A00312 | A03171 | 485 | A00312 | A03174 | 294 |
| A00312 | A03234 | 185 | A00312 | A03520 | 307 |
| A00312 | A03523 | 204 | A00312 | A03572 | 180 |
| A00312 | A03591 | 452 | A00312 | A04160 | 340 |
| A00312 | A04162 | 226 | A00312 | A04194 | 345 |
| A00312 | A04421 | 217 | A00312 | A04471 | 157 |
| A00312 | A04883 | 249 | A00312 | A05006 | 177 |
| A00312 | A05066 | 185 | A00312 | A05176 | 157 |
| A00312 | A05208 | 406 | A00312 | A05224 | 185 |
| A00312 | A05288 | 343 | A00312 | A05310 | 156 |
| A00312 | A05331 | 227 | A00312 | A05333 | 201 |
| A00312 | A05356 | 372 | A00312 | A05374 | 252 |
| A00312 | A05416 | 313 | A00312 | A05418 | 405 |
| A00312 | A05424 | 488 | A00312 | A05430 | 303 |
| A00312 | A05462 | 490 | A00312 | A05493 | 154 |
| A00312 | A05533 | 339 | A00312 | A05550 | 176 |
| A00312 | A05610 | 201 | A00312 | A05696 | 227 |
| A00312 | A05740 | 303 | A00312 | A05753 | 363 |
| A00312 | A05754 | 353 | A00312 | A05786 | 190 |
| A00312 | A06037 | 491 | A00312 | A06086 | 350 |
| A00312 | A06245 | 195 | A00312 | A06473 | 338 |
| A00312 | A06607 | 318 | A00312 | A06626 | 481 |
| A00312 | A06762 | 945 | A00312 | A06769 | 488 |
| A00312 | A06860 | 154 | A00312 | A06874 | 163 |
| A00312 | A06914 | 249 | A00312 | A07059 | 313 |
| A00312 | A07088 | 445 | A00312 | A07239 | 430 |
| A00312 | A07422 | 207 | A00312 | A07520 | 433 |
| A00312 | A07656 | 428 | A00312 | A07684 | 224 |
| A00312 | A07763 | 210 | A00312 | A07771 | 466 |
| A00312 | A07851 | 297 | A00312 | A08133 | 199 |
| A00312 | A08135 | 241 | A00312 | A08197 | 252 |
| A00312 | A08636 | 363 | A00312 | A08707 | 491 |
| A00312 | A08744 | 303 | A00312 | A09418 | 208 |
| A00312 | A09659 | 160 | A00312 | A09943 | 154 |



|        |        |     |        |        |     |
|--------|--------|-----|--------|--------|-----|
| A00312 | A09955 | 308 | A00312 | A10679 | 255 |
| A00312 | A11302 | 165 | A00312 | A11621 | 837 |
| A00312 | A13032 | 386 | A00312 | A13054 | 400 |
| A00312 | A13155 | 227 | A00312 | A13362 | 388 |
| A00312 | A13734 | 326 | A00312 | A13916 | 154 |
| A00312 | A14252 | 483 | A00312 | A14503 | 227 |
| A00312 | A14589 | 408 | A00312 | A15298 | 252 |
| A00312 | A15318 | 235 | A00312 | A15356 | 489 |
| A00312 | A16027 | 191 | A00312 | A16719 | 190 |
| A00312 | A17201 | 273 | A00313 | A00395 | 263 |
| A00313 | A00574 | 205 | A00313 | A00654 | 208 |
| A00313 | A00660 | 324 | A00313 | A00962 | 191 |
| A00313 | A01008 | 177 | A00313 | A01018 | 278 |
| A00313 | A01367 | 272 | A00313 | A01635 | 224 |
| A00313 | A02083 | 288 | A00313 | A02285 | 450 |
| A00313 | A02698 | 199 | A00313 | A03087 | 335 |
| A00313 | A03099 | 270 | A00313 | A03477 | 229 |
| A00313 | A04880 | 299 | A00313 | A05333 | 408 |
| A00313 | A07933 | 262 | A00313 | A08138 | 236 |
| A00313 | A10882 | 406 | A00314 | A00376 | 219 |
| A00314 | A00468 | 439 | A00314 | A00579 | 333 |
| A00314 | A00633 | 179 | A00314 | A00660 | 468 |
| A00314 | A00695 | 247 | A00314 | A00736 | 160 |
| A00314 | A01137 | 162 | A00314 | A01230 | 258 |
| A00314 | A01233 | 174 | A00314 | A01397 | 259 |
| A00314 | A01490 | 452 | A00314 | A01793 | 200 |
| A00314 | A01832 | 308 | A00314 | A01972 | 243 |
| A00314 | A02026 | 198 | A00314 | A02053 | 323 |
| A00314 | A02054 | 167 | A00314 | A02114 | 450 |
| A00314 | A02148 | 151 | A00314 | A02254 | 456 |
| A00314 | A02257 | 486 | A00314 | A02259 | 408 |
| A00314 | A02284 | 451 | A00314 | A02286 | 409 |
| A00314 | A02290 | 319 | A00314 | A02366 | 369 |
| A00314 | A02495 | 196 | A00314 | A02522 | 324 |
| A00314 | A02621 | 257 | A00314 | A02802 | 396 |
| A00314 | A02852 | 420 | A00314 | A02908 | 184 |
| A00314 | A02968 | 252 | A00314 | A03084 | 310 |
| A00314 | A03087 | 486 | A00314 | A03099 | 296 |
| A00314 | A03167 | 329 | A00314 | A03168 | 265 |
| A00314 | A03171 | 425 | A00314 | A03174 | 458 |
| A00314 | A03436 | 154 | A00314 | A03520 | 156 |
| A00314 | A04162 | 234 | A00314 | A04211 | 226 |
| A00314 | A05208 | 312 | A00314 | A05224 | 353 |
| A00314 | A05330 | 294 | A00314 | A05331 | 281 |
| A00314 | A05338 | 305 | A00314 | A05424 | 462 |
| A00314 | A05573 | 246 | A00314 | A05760 | 257 |

|        |        |     |        |        |     |
|--------|--------|-----|--------|--------|-----|
| A00314 | A06633 | 297 | A00314 | A06762 | 286 |
| A00314 | A06769 | 215 | A00314 | A06970 | 156 |
| A00314 | A07191 | 339 | A00314 | A07264 | 279 |
| A00314 | A07771 | 238 | A00314 | A07851 | 183 |
| A00314 | A08190 | 218 | A00314 | A08197 | 313 |
| A00314 | A08732 | 260 | A00314 | A09124 | 154 |
| A00314 | A09526 | 179 | A00314 | A10679 | 314 |
| A00314 | A13980 | 199 | A00314 | A16027 | 213 |
| A00314 | A16028 | 307 | A00314 | A16741 | 152 |
| A00315 | A00446 | 63  | A00315 | A00469 | 235 |
| A00315 | A00674 | 163 | A00315 | A00815 | 480 |
| A00315 | A00989 | 93  | A00315 | A01009 | 240 |
| A00315 | A01124 | 226 | A00315 | A01235 | 160 |
| A00315 | A01257 | 468 | A00315 | A01278 | 299 |
| A00315 | A01400 | 339 | A00315 | A01477 | 358 |
| A00315 | A02143 | 168 | A00315 | A02214 | 288 |
| A00315 | A02236 | 273 | A00315 | A02305 | 241 |
| A00315 | A02425 | 470 | A00315 | A02429 | 440 |
| A00315 | A02454 | 177 | A00315 | A02492 | 190 |
| A00315 | A02703 | 162 | A00315 | A03047 | 329 |
| A00315 | A03110 | 290 | A00315 | A03155 | 385 |
| A00315 | A03578 | 219 | A00315 | A03633 | 318 |
| A00315 | A03750 | 218 | A00315 | A03788 | 168 |
| A00315 | A03942 | 202 | A00315 | A03961 | 344 |
| A00315 | A04180 | 318 | A00315 | A04380 | 458 |
| A00315 | A04647 | 310 | A00315 | A04666 | 176 |
| A00315 | A04751 | 210 | A00315 | A04813 | 294 |
| A00315 | A05439 | 168 | A00315 | A05497 | 374 |
| A00315 | A05517 | 296 | A00315 | A05949 | 276 |
| A00315 | A05965 | 374 | A00315 | A06997 | 255 |
| A00315 | A07226 | 227 | A00315 | A08583 | 307 |
| A00315 | A08875 | 198 | A00315 | A09038 | 230 |
| A00315 | A09062 | 422 | A00315 | A09239 | 171 |
| A00315 | A10716 | 405 | A00315 | A12824 | 162 |
| A00315 | A13997 | 171 | A00315 | A14007 | 174 |
| A00315 | A14210 | 324 | A00315 | A14443 | 906 |
| A00315 | A14693 | 438 | A00315 | A15430 | 339 |
| A00316 | A00348 | 335 | A00316 | A00350 | 210 |
| A00316 | A00351 | 465 | A00316 | A00378 | 477 |
| A00316 | A00418 | 447 | A00316 | A00421 | 329 |
| A00316 | A00517 | 272 | A00316 | A00531 | 433 |
| A00316 | A00532 | 456 | A00316 | A00552 | 665 |
| A00316 | A00565 | 485 | A00316 | A00571 | 455 |
| A00316 | A00655 | 424 | A00316 | A00658 | 210 |
| A00316 | A00696 | 395 | A00316 | A00719 | 383 |
| A00316 | A00733 | 480 | A00316 | A00757 | 491 |

|        |        |     |        |        |     |
|--------|--------|-----|--------|--------|-----|
| A00316 | A00805 | 405 | A00316 | A00822 | 473 |
| A00316 | A00825 | 383 | A00316 | A00843 | 260 |
| A00316 | A00887 | 484 | A00316 | A00905 | 212 |
| A00316 | A00981 | 377 | A00316 | A01052 | 491 |
| A00316 | A01128 | 235 | A00316 | A01136 | 229 |
| A00316 | A01137 | 180 | A00316 | A01164 | 274 |
| A00316 | A01173 | 485 | A00316 | A01212 | 490 |
| A00316 | A01215 | 277 | A00316 | A01353 | 317 |
| A00316 | A01354 | 480 | A00316 | A01385 | 302 |
| A00316 | A01406 | 399 | A00316 | A01426 | 383 |
| A00316 | A01485 | 188 | A00316 | A01492 | 276 |
| A00316 | A01494 | 396 | A00316 | A01524 | 262 |
| A00316 | A01527 | 435 | A00316 | A01553 | 302 |
| A00316 | A01554 | 900 | A00316 | A01558 | 945 |
| A00316 | A01559 | 486 | A00316 | A01560 | 283 |
| A00316 | A01572 | 490 | A00316 | A01588 | 940 |
| A00316 | A01591 | 308 | A00316 | A01602 | 198 |
| A00316 | A01610 | 489 | A00316 | A01612 | 418 |
| A00316 | A01615 | 908 | A00316 | A01628 | 446 |
| A00316 | A01631 | 428 | A00316 | A01639 | 412 |
| A00316 | A01640 | 430 | A00316 | A01647 | 490 |
| A00316 | A01656 | 243 | A00316 | A01660 | 491 |
| A00316 | A01694 | 488 | A00316 | A01708 | 332 |
| A00316 | A01730 | 430 | A00316 | A01995 | 665 |
| A00316 | A02074 | 183 | A00316 | A02076 | 152 |
| A00316 | A02083 | 391 | A00316 | A02110 | 63  |
| A00316 | A02111 | 491 | A00316 | A02114 | 472 |
| A00316 | A02116 | 63  | A00316 | A02117 | 664 |
| A00316 | A02120 | 224 | A00316 | A02306 | 310 |
| A00316 | A02314 | 184 | A00316 | A02325 | 212 |
| A00316 | A02360 | 104 | A00316 | A02428 | 63  |
| A00316 | A02435 | 252 | A00316 | A02436 | 63  |
| A00316 | A02442 | 193 | A00316 | A02450 | 451 |
| A00316 | A02470 | 63  | A00316 | A02477 | 63  |
| A00316 | A02482 | 467 | A00316 | A02644 | 384 |
| A00316 | A02715 | 358 | A00316 | A02737 | 159 |
| A00316 | A03056 | 93  | A00316 | A03060 | 184 |
| A00316 | A03099 | 449 | A00316 | A03104 | 188 |
| A00316 | A03107 | 369 | A00316 | A03225 | 174 |
| A00316 | A03292 | 335 | A00316 | A03436 | 441 |
| A00316 | A03451 | 160 | A00316 | A03468 | 85  |
| A00316 | A03511 | 462 | A00316 | A03569 | 429 |
| A00316 | A03611 | 182 | A00316 | A03647 | 151 |
| A00316 | A03714 | 168 | A00316 | A03737 | 193 |
| A00316 | A03771 | 177 | A00316 | A03886 | 180 |
| A00316 | A03968 | 664 | A00316 | A03990 | 491 |

|        |        |     |        |        |     |
|--------|--------|-----|--------|--------|-----|
| A00316 | A04012 | 294 | A00316 | A04092 | 486 |
| A00316 | A04157 | 489 | A00316 | A04168 | 184 |
| A00316 | A04215 | 205 | A00316 | A04256 | 219 |
| A00316 | A04266 | 176 | A00316 | A04297 | 156 |
| A00316 | A04326 | 168 | A00316 | A04336 | 252 |
| A00316 | A04349 | 268 | A00316 | A04379 | 217 |
| A00316 | A04383 | 338 | A00316 | A04387 | 276 |
| A00316 | A04437 | 193 | A00316 | A04463 | 229 |
| A00316 | A04650 | 205 | A00316 | A04822 | 308 |
| A00316 | A04823 | 168 | A00316 | A04997 | 350 |
| A00316 | A05216 | 480 | A00316 | A05224 | 283 |
| A00316 | A05288 | 465 | A00316 | A05330 | 174 |
| A00316 | A05332 | 65  | A00316 | A05337 | 165 |
| A00316 | A05411 | 438 | A00316 | A05418 | 363 |
| A00316 | A05435 | 221 | A00316 | A05455 | 162 |
| A00316 | A05474 | 193 | A00316 | A05751 | 345 |
| A00316 | A05786 | 156 | A00316 | A06380 | 205 |
| A00316 | A06405 | 165 | A00316 | A06660 | 236 |
| A00316 | A06733 | 241 | A00316 | A06919 | 249 |
| A00316 | A07054 | 210 | A00316 | A07118 | 168 |
| A00316 | A07119 | 294 | A00316 | A07311 | 490 |
| A00316 | A07339 | 491 | A00316 | A07474 | 168 |
| A00316 | A07528 | 221 | A00316 | A07870 | 276 |
| A00316 | A08280 | 312 | A00316 | A08291 | 184 |
| A00316 | A08292 | 85  | A00316 | A08334 | 276 |
| A00316 | A08343 | 278 | A00316 | A08571 | 491 |
| A00316 | A09004 | 184 | A00316 | A09044 | 165 |
| A00316 | A09078 | 299 | A00316 | A09110 | 132 |
| A00316 | A09160 | 63  | A00316 | A09393 | 193 |
| A00316 | A09543 | 184 | A00316 | A09791 | 397 |
| A00316 | A09993 | 441 | A00316 | A10296 | 193 |
| A00316 | A10332 | 369 | A00316 | A10483 | 276 |
| A00316 | A10514 | 277 | A00316 | A10537 | 276 |
| A00316 | A11068 | 266 | A00316 | A11277 | 388 |
| A00316 | A11487 | 491 | A00316 | A11611 | 205 |
| A00316 | A12383 | 314 | A00316 | A12829 | 162 |
| A00316 | A12988 | 301 | A00316 | A13108 | 193 |
| A00316 | A13250 | 899 | A00316 | A13824 | 208 |
| A00316 | A13997 | 299 | A00316 | A14006 | 491 |
| A00316 | A14009 | 486 | A00316 | A14055 | 229 |
| A00316 | A14063 | 176 | A00316 | A14198 | 435 |
| A00316 | A14444 | 903 | A00316 | A14452 | 267 |
| A00316 | A14824 | 243 | A00316 | A15226 | 146 |
| A00316 | A15230 | 63  | A00316 | A15233 | 475 |
| A00316 | A15241 | 405 | A00316 | A15271 | 416 |
| A00316 | A15279 | 243 | A00316 | A15325 | 202 |

|        |        |     |        |        |     |
|--------|--------|-----|--------|--------|-----|
| A00316 | A15504 | 238 | A00316 | A15628 | 156 |
| A00316 | A15726 | 917 | A00316 | A15935 | 302 |
| A00316 | A16060 | 288 | A00316 | A16746 | 184 |
| A00316 | A16867 | 283 | A00316 | A16994 | 449 |
| A00316 | A17168 | 260 | A00317 | A04728 | 311 |
| A00317 | A04783 | 373 | A00317 | A07746 | 322 |
| A00318 | A00322 | 463 | A00318 | A00338 | 447 |
| A00318 | A00472 | 490 | A00318 | A00477 | 312 |
| A00318 | A00485 | 396 | A00318 | A00531 | 383 |
| A00318 | A00802 | 477 | A00318 | A00882 | 457 |
| A00318 | A01036 | 610 | A00318 | A01156 | 306 |
| A00318 | A01235 | 241 | A00318 | A01458 | 254 |
| A00318 | A01578 | 475 | A00318 | A01632 | 462 |
| A00318 | A02178 | 307 | A00318 | A02180 | 324 |
| A00318 | A02221 | 489 | A00318 | A02303 | 373 |
| A00318 | A02511 | 221 | A00318 | A02738 | 302 |
| A00318 | A02749 | 265 | A00318 | A02908 | 425 |
| A00318 | A02909 | 196 | A00318 | A03014 | 491 |
| A00318 | A03211 | 291 | A00318 | A03349 | 227 |
| A00318 | A03358 | 345 | A00318 | A03366 | 202 |
| A00318 | A03726 | 380 | A00318 | A03984 | 301 |
| A00318 | A04252 | 352 | A00318 | A04275 | 408 |
| A00318 | A04337 | 463 | A00318 | A04361 | 321 |
| A00318 | A04410 | 362 | A00318 | A04520 | 307 |
| A00318 | A04597 | 252 | A00318 | A04603 | 285 |
| A00318 | A04715 | 224 | A00318 | A04964 | 177 |
| A00318 | A05155 | 185 | A00318 | A05356 | 411 |
| A00318 | A05439 | 335 | A00318 | A05556 | 357 |
| A00318 | A05603 | 159 | A00318 | A05777 | 157 |
| A00318 | A06070 | 238 | A00318 | A06277 | 168 |
| A00318 | A06346 | 424 | A00318 | A06574 | 273 |
| A00318 | A06623 | 179 | A00318 | A06731 | 195 |
| A00318 | A06739 | 458 | A00318 | A07054 | 515 |
| A00318 | A07242 | 343 | A00318 | A07985 | 291 |
| A00318 | A08093 | 347 | A00318 | A08097 | 351 |
| A00318 | A08171 | 463 | A00318 | A08172 | 491 |
| A00318 | A08309 | 491 | A00318 | A08531 | 611 |
| A00318 | A08681 | 490 | A00318 | A08685 | 491 |
| A00318 | A08686 | 491 | A00318 | A08753 | 491 |
| A00318 | A08835 | 480 | A00318 | A08859 | 357 |
| A00318 | A09046 | 199 | A00318 | A10278 | 163 |
| A00318 | A10621 | 240 | A00318 | A11191 | 388 |
| A00318 | A11278 | 491 | A00318 | A11298 | 480 |
| A00318 | A11315 | 491 | A00318 | A11333 | 452 |
| A00318 | A11431 | 294 | A00318 | A11454 | 450 |
| A00318 | A11463 | 391 | A00318 | A11585 | 326 |

|        |        |     |        |        |     |
|--------|--------|-----|--------|--------|-----|
| A00318 | A11594 | 311 | A00318 | A12003 | 446 |
| A00318 | A12046 | 288 | A00318 | A12684 | 326 |
| A00318 | A12781 | 311 | A00318 | A13369 | 474 |
| A00318 | A13987 | 350 | A00318 | A14381 | 205 |
| A00318 | A14570 | 200 | A00318 | A14633 | 318 |
| A00318 | A15292 | 416 | A00318 | A15313 | 172 |
| A00318 | A15413 | 185 | A00318 | A15416 | 477 |
| A00318 | A15452 | 232 | A00318 | A15457 | 216 |
| A00318 | A15498 | 489 | A00318 | A15552 | 221 |
| A00318 | A15578 | 446 | A00318 | A15638 | 491 |
| A00318 | A16274 | 188 | A00318 | A16281 | 490 |
| A00319 | A01690 | 182 | A00319 | A01774 | 401 |
| A00319 | A01781 | 286 | A00319 | A01844 | 375 |
| A00319 | A02076 | 243 | A00319 | A02470 | 163 |
| A00319 | A02494 | 160 | A00319 | A02564 | 191 |
| A00319 | A02737 | 338 | A00319 | A02816 | 217 |
| A00319 | A02870 | 368 | A00319 | A02904 | 475 |
| A00319 | A03001 | 247 | A00319 | A03214 | 296 |
| A00319 | A03271 | 160 | A00319 | A04346 | 486 |
| A00319 | A04517 | 324 | A00319 | A06398 | 338 |
| A00319 | A06654 | 307 | A00319 | A10721 | 258 |
| A00320 | A00348 | 126 | A00320 | A00432 | 283 |
| A00320 | A00804 | 321 | A00320 | A01274 | 201 |
| A00320 | A01983 | 152 | A00320 | A02175 | 379 |
| A00320 | A02507 | 296 | A00320 | A02621 | 226 |
| A00320 | A02816 | 162 | A00320 | A03906 | 212 |
| A00320 | A04909 | 281 | A00320 | A05176 | 221 |
| A00320 | A05256 | 274 | A00320 | A05597 | 266 |
| A00320 | A06078 | 286 | A00320 | A07226 | 208 |
| A00320 | A08097 | 162 | A00320 | A09341 | 276 |
| A00320 | A09812 | 316 | A00320 | A10894 | 201 |
| A00321 | A00422 | 385 | A00321 | A01622 | 360 |
| A00321 | A03119 | 418 | A00321 | A03232 | 416 |
| A00321 | A04376 | 438 | A00321 | A04967 | 452 |
| A00321 | A05874 | 452 | A00321 | A07694 | 452 |
| A00321 | A08105 | 441 | A00321 | A09478 | 441 |
| A00321 | A10223 | 445 | A00322 | A00338 | 491 |
| A00322 | A00347 | 490 | A00322 | A00352 | 286 |
| A00322 | A00472 | 491 | A00322 | A00477 | 202 |
| A00322 | A00482 | 341 | A00322 | A00485 | 462 |
| A00322 | A00531 | 265 | A00322 | A00620 | 180 |
| A00322 | A00625 | 477 | A00322 | A00636 | 306 |
| A00322 | A00638 | 389 | A00322 | A00802 | 213 |
| A00322 | A00855 | 177 | A00322 | A00856 | 707 |
| A00322 | A00887 | 447 | A00322 | A00911 | 720 |
| A00322 | A00989 | 260 | A00322 | A01011 | 401 |

|        |        |     |        |        |     |
|--------|--------|-----|--------|--------|-----|
| A00322 | A01022 | 393 | A00322 | A01026 | 260 |
| A00322 | A01086 | 485 | A00322 | A01124 | 443 |
| A00322 | A01161 | 477 | A00322 | A01214 | 631 |
| A00322 | A01296 | 687 | A00322 | A01311 | 414 |
| A00322 | A01320 | 824 | A00322 | A01327 | 561 |
| A00322 | A01454 | 258 | A00322 | A01485 | 491 |
| A00322 | A01529 | 491 | A00322 | A01530 | 491 |
| A00322 | A01543 | 394 | A00322 | A01556 | 455 |
| A00322 | A01557 | 490 | A00322 | A01572 | 899 |
| A00322 | A01578 | 470 | A00322 | A01582 | 170 |
| A00322 | A01630 | 221 | A00322 | A01632 | 485 |
| A00322 | A01689 | 345 | A00322 | A01790 | 245 |
| A00322 | A01970 | 172 | A00322 | A02048 | 484 |
| A00322 | A02188 | 491 | A00322 | A02198 | 252 |
| A00322 | A02221 | 491 | A00322 | A02228 | 491 |
| A00322 | A02231 | 391 | A00322 | A02261 | 174 |
| A00322 | A02310 | 157 | A00322 | A02316 | 205 |
| A00322 | A02320 | 394 | A00322 | A02333 | 296 |
| A00322 | A02511 | 319 | A00322 | A02523 | 347 |
| A00322 | A02539 | 210 | A00322 | A02668 | 221 |
| A00322 | A02672 | 174 | A00322 | A02673 | 177 |
| A00322 | A02687 | 390 | A00322 | A02738 | 193 |
| A00322 | A02761 | 483 | A00322 | A02773 | 258 |
| A00322 | A02839 | 358 | A00322 | A03077 | 221 |
| A00322 | A03080 | 170 | A00322 | A03104 | 263 |
| A00322 | A03138 | 180 | A00322 | A03178 | 475 |
| A00322 | A03259 | 180 | A00322 | A03304 | 321 |
| A00322 | A03334 | 374 | A00322 | A03374 | 228 |
| A00322 | A03451 | 427 | A00322 | A03463 | 198 |
| A00322 | A03477 | 491 | A00322 | A03505 | 294 |
| A00322 | A03573 | 452 | A00322 | A03721 | 318 |
| A00322 | A03838 | 210 | A00322 | A03909 | 446 |
| A00322 | A04070 | 285 | A00322 | A04076 | 224 |
| A00322 | A04098 | 347 | A00322 | A04193 | 182 |
| A00322 | A04224 | 307 | A00322 | A04275 | 406 |
| A00322 | A04305 | 243 | A00322 | A04337 | 485 |
| A00322 | A04351 | 185 | A00322 | A04358 | 258 |
| A00322 | A04361 | 491 | A00322 | A04410 | 491 |
| A00322 | A04411 | 321 | A00322 | A04424 | 466 |
| A00322 | A04493 | 440 | A00322 | A04520 | 469 |
| A00322 | A04662 | 154 | A00322 | A04678 | 232 |
| A00322 | A04840 | 232 | A00322 | A04870 | 297 |
| A00322 | A04886 | 285 | A00322 | A04928 | 152 |
| A00322 | A04944 | 176 | A00322 | A04964 | 435 |
| A00322 | A05148 | 401 | A00322 | A05155 | 351 |
| A00322 | A05220 | 151 | A00322 | A05294 | 489 |

|        |        |     |        |        |     |
|--------|--------|-----|--------|--------|-----|
| A00322 | A05442 | 408 | A00322 | A05471 | 165 |
| A00322 | A05516 | 151 | A00322 | A05556 | 401 |
| A00322 | A05594 | 446 | A00322 | A05603 | 484 |
| A00322 | A05720 | 347 | A00322 | A05721 | 486 |
| A00322 | A05722 | 395 | A00322 | A05777 | 483 |
| A00322 | A05855 | 395 | A00322 | A05896 | 408 |
| A00322 | A05897 | 263 | A00322 | A05898 | 440 |
| A00322 | A05979 | 307 | A00322 | A06035 | 323 |
| A00322 | A06057 | 277 | A00322 | A06141 | 188 |
| A00322 | A06148 | 411 | A00322 | A06212 | 483 |
| A00322 | A06307 | 377 | A00322 | A06329 | 235 |
| A00322 | A06346 | 485 | A00322 | A06396 | 323 |
| A00322 | A06428 | 486 | A00322 | A06461 | 347 |
| A00322 | A06462 | 347 | A00322 | A06484 | 177 |
| A00322 | A06516 | 475 | A00322 | A06532 | 417 |
| A00322 | A06574 | 361 | A00322 | A06655 | 243 |
| A00322 | A06710 | 263 | A00322 | A06729 | 215 |
| A00322 | A06731 | 293 | A00322 | A06739 | 469 |
| A00322 | A06835 | 323 | A00322 | A06925 | 390 |
| A00322 | A07190 | 171 | A00322 | A07209 | 414 |
| A00322 | A07218 | 346 | A00322 | A07282 | 208 |
| A00322 | A07286 | 294 | A00322 | A07384 | 483 |
| A00322 | A07407 | 157 | A00322 | A07442 | 408 |
| A00322 | A07479 | 358 | A00322 | A07483 | 162 |
| A00322 | A07494 | 417 | A00322 | A07605 | 234 |
| A00322 | A07641 | 174 | A00322 | A07704 | 260 |
| A00322 | A07705 | 345 | A00322 | A07828 | 307 |
| A00322 | A07843 | 193 | A00322 | A08043 | 307 |
| A00322 | A08162 | 270 | A00322 | A08171 | 418 |
| A00322 | A08172 | 489 | A00322 | A08236 | 258 |
| A00322 | A08244 | 277 | A00322 | A08309 | 486 |
| A00322 | A08310 | 270 | A00322 | A08392 | 307 |
| A00322 | A08440 | 347 | A00322 | A08681 | 276 |
| A00322 | A08685 | 486 | A00322 | A08686 | 458 |
| A00322 | A08835 | 382 | A00322 | A08839 | 899 |
| A00322 | A08878 | 168 | A00322 | A09380 | 327 |
| A00322 | A09428 | 193 | A00322 | A09518 | 285 |
| A00322 | A09668 | 216 | A00322 | A10101 | 417 |
| A00322 | A10250 | 428 | A00322 | A10278 | 466 |
| A00322 | A10731 | 241 | A00322 | A10942 | 270 |
| A00322 | A10954 | 270 | A00322 | A11282 | 163 |
| A00322 | A11315 | 357 | A00322 | A11321 | 457 |
| A00322 | A11466 | 277 | A00322 | A11483 | 458 |
| A00322 | A11573 | 221 | A00322 | A12132 | 285 |
| A00322 | A12391 | 347 | A00322 | A12551 | 323 |
| A00322 | A12698 | 417 | A00322 | A12941 | 347 |



|        |        |     |        |        |     |
|--------|--------|-----|--------|--------|-----|
| A00322 | A13369 | 491 | A00322 | A14226 | 899 |
| A00322 | A14381 | 374 | A00322 | A14411 | 347 |
| A00322 | A14449 | 443 | A00322 | A14548 | 391 |
| A00322 | A14586 | 419 | A00322 | A14589 | 318 |
| A00322 | A14740 | 347 | A00322 | A15232 | 347 |
| A00322 | A15233 | 180 | A00322 | A15277 | 491 |
| A00322 | A15282 | 330 | A00322 | A15288 | 183 |
| A00322 | A15313 | 411 | A00322 | A15336 | 221 |
| A00322 | A15416 | 263 | A00322 | A15495 | 414 |
| A00322 | A15498 | 208 | A00322 | A15638 | 491 |
| A00322 | A16055 | 198 | A00322 | A16281 | 218 |
| A00322 | A17038 | 154 | A00323 | A00329 | 654 |
| A00323 | A00348 | 207 | A00323 | A00366 | 160 |
| A00323 | A00454 | 491 | A00323 | A00653 | 193 |
| A00323 | A00910 | 480 | A00323 | A00933 | 180 |
| A00323 | A01042 | 491 | A00323 | A01054 | 362 |
| A00323 | A01082 | 157 | A00323 | A01083 | 449 |
| A00323 | A01150 | 436 | A00323 | A01194 | 174 |
| A00323 | A01232 | 193 | A00323 | A01300 | 422 |
| A00323 | A01431 | 474 | A00323 | A01540 | 362 |
| A00323 | A01649 | 163 | A00323 | A02738 | 258 |
| A00323 | A03446 | 246 | A00323 | A03740 | 654 |
| A00323 | A03752 | 265 | A00323 | A03809 | 163 |
| A00323 | A05981 | 160 | A00323 | A06466 | 488 |
| A00323 | A07311 | 488 | A00323 | A07487 | 159 |
| A00323 | A07798 | 174 | A00323 | A08054 | 481 |
| A00323 | A08359 | 276 | A00323 | A08488 | 263 |
| A00323 | A08571 | 262 | A00323 | A09502 | 361 |
| A00323 | A11290 | 234 | A00323 | A11296 | 234 |
| A00323 | A11302 | 489 | A00323 | A11372 | 653 |
| A00323 | A11476 | 160 | A00323 | A11724 | 362 |
| A00323 | A11928 | 168 | A00323 | A11942 | 238 |
| A00323 | A12167 | 550 | A00323 | A12328 | 324 |
| A00323 | A13340 | 183 | A00323 | A14073 | 472 |
| A00323 | A15244 | 411 | A00323 | A15275 | 367 |
| A00323 | A15660 | 179 | A00323 | A15684 | 160 |
| A00323 | A15699 | 249 | A00323 | A15721 | 249 |
| A00323 | A16088 | 328 | A00323 | A16633 | 433 |
| A00324 | A00370 | 255 | A00324 | A00381 | 341 |
| A00324 | A00470 | 457 | A00324 | A00556 | 160 |
| A00324 | A00630 | 446 | A00324 | A00669 | 422 |
| A00324 | A00679 | 490 | A00324 | A00733 | 899 |
| A00324 | A00747 | 941 | A00324 | A00820 | 428 |
| A00324 | A00832 | 945 | A00324 | A00887 | 491 |
| A00324 | A00914 | 938 | A00324 | A00954 | 378 |
| A00324 | A01002 | 912 | A00324 | A01052 | 491 |

|        |        |     |        |        |     |
|--------|--------|-----|--------|--------|-----|
| A00324 | A01100 | 356 | A00324 | A01172 | 491 |
| A00324 | A01178 | 491 | A00324 | A01211 | 335 |
| A00324 | A01244 | 899 | A00324 | A01307 | 463 |
| A00324 | A01364 | 63  | A00324 | A01415 | 899 |
| A00324 | A01450 | 486 | A00324 | A01461 | 316 |
| A00324 | A01478 | 363 | A00324 | A01492 | 193 |
| A00324 | A01507 | 484 | A00324 | A01512 | 945 |
| A00324 | A01524 | 994 | A00324 | A01527 | 994 |
| A00324 | A01548 | 489 | A00324 | A01553 | 174 |
| A00324 | A01554 | 942 | A00324 | A01558 | 989 |
| A00324 | A01561 | 252 | A00324 | A01572 | 491 |
| A00324 | A01574 | 899 | A00324 | A01588 | 989 |
| A00324 | A01592 | 916 | A00324 | A01593 | 899 |
| A00324 | A01596 | 912 | A00324 | A01602 | 945 |
| A00324 | A01605 | 313 | A00324 | A01606 | 491 |
| A00324 | A01615 | 899 | A00324 | A01634 | 899 |
| A00324 | A01639 | 921 | A00324 | A01651 | 152 |
| A00324 | A01665 | 937 | A00324 | A01668 | 435 |
| A00324 | A01675 | 201 | A00324 | A01676 | 208 |
| A00324 | A01688 | 491 | A00324 | A01691 | 263 |
| A00324 | A01694 | 351 | A00324 | A01698 | 467 |
| A00324 | A01709 | 909 | A00324 | A01724 | 201 |
| A00324 | A01730 | 301 | A00324 | A01742 | 475 |
| A00324 | A01749 | 63  | A00324 | A01756 | 328 |
| A00324 | A01775 | 63  | A00324 | A01776 | 115 |
| A00324 | A01790 | 274 | A00324 | A01796 | 462 |
| A00324 | A01797 | 246 | A00324 | A01798 | 227 |
| A00324 | A01844 | 945 | A00324 | A01850 | 485 |
| A00324 | A01898 | 188 | A00324 | A02073 | 899 |
| A00324 | A02086 | 305 | A00324 | A02142 | 899 |
| A00324 | A02189 | 271 | A00324 | A02241 | 279 |
| A00324 | A02300 | 899 | A00324 | A02305 | 899 |
| A00324 | A02343 | 491 | A00324 | A02421 | 154 |
| A00324 | A02425 | 899 | A00324 | A02452 | 335 |
| A00324 | A02464 | 899 | A00324 | A02492 | 208 |
| A00324 | A02668 | 899 | A00324 | A02670 | 177 |
| A00324 | A02687 | 432 | A00324 | A02699 | 296 |
| A00324 | A02706 | 202 | A00324 | A02759 | 899 |
| A00324 | A02789 | 393 | A00324 | A02821 | 323 |
| A00324 | A02822 | 276 | A00324 | A02828 | 490 |
| A00324 | A02856 | 213 | A00324 | A02872 | 441 |
| A00324 | A02873 | 196 | A00324 | A02908 | 910 |
| A00324 | A02918 | 247 | A00324 | A02941 | 154 |
| A00324 | A02942 | 899 | A00324 | A02968 | 899 |
| A00324 | A03071 | 254 | A00324 | A03095 | 385 |
| A00324 | A03191 | 297 | A00324 | A03201 | 348 |

|        |        |     |        |        |     |
|--------|--------|-----|--------|--------|-----|
| A00324 | A03213 | 290 | A00324 | A03223 | 491 |
| A00324 | A03224 | 899 | A00324 | A03304 | 479 |
| A00324 | A03336 | 96  | A00324 | A03451 | 484 |
| A00324 | A03535 | 899 | A00324 | A03575 | 931 |
| A00324 | A03612 | 104 | A00324 | A03718 | 901 |
| A00324 | A03726 | 260 | A00324 | A03739 | 335 |
| A00324 | A03778 | 488 | A00324 | A03846 | 208 |
| A00324 | A03854 | 263 | A00324 | A03869 | 163 |
| A00324 | A03871 | 176 | A00324 | A03949 | 205 |
| A00324 | A03990 | 395 | A00324 | A04007 | 369 |
| A00324 | A04008 | 491 | A00324 | A04020 | 413 |
| A00324 | A04050 | 907 | A00324 | A04077 | 163 |
| A00324 | A04202 | 343 | A00324 | A04260 | 899 |
| A00324 | A04449 | 491 | A00324 | A04490 | 899 |
| A00324 | A04540 | 489 | A00324 | A04673 | 899 |
| A00324 | A05039 | 154 | A00324 | A05064 | 899 |
| A00324 | A05216 | 899 | A00324 | A05315 | 200 |
| A00324 | A05355 | 899 | A00324 | A05384 | 899 |
| A00324 | A05414 | 993 | A00324 | A05415 | 254 |
| A00324 | A05436 | 260 | A00324 | A05454 | 903 |
| A00324 | A05634 | 88  | A00324 | A05701 | 409 |
| A00324 | A05797 | 402 | A00324 | A05854 | 393 |
| A00324 | A06050 | 213 | A00324 | A06189 | 286 |
| A00324 | A06277 | 489 | A00324 | A06610 | 491 |
| A00324 | A06660 | 455 | A00324 | A06873 | 899 |
| A00324 | A06925 | 154 | A00324 | A07091 | 899 |
| A00324 | A07157 | 215 | A00324 | A07339 | 943 |
| A00324 | A07422 | 913 | A00324 | A07683 | 163 |
| A00324 | A07834 | 159 | A00324 | A08244 | 154 |
| A00324 | A08308 | 176 | A00324 | A08615 | 163 |
| A00324 | A08627 | 179 | A00324 | A08692 | 452 |
| A00324 | A08839 | 899 | A00324 | A08851 | 474 |
| A00324 | A08858 | 992 | A00324 | A08878 | 491 |
| A00324 | A09016 | 249 | A00324 | A09018 | 463 |
| A00324 | A09054 | 827 | A00324 | A09055 | 249 |
| A00324 | A09124 | 474 | A00324 | A09149 | 465 |
| A00324 | A09162 | 485 | A00324 | A09214 | 163 |
| A00324 | A09423 | 204 | A00324 | A09727 | 443 |
| A00324 | A09826 | 483 | A00324 | A10051 | 163 |
| A00324 | A10098 | 899 | A00324 | A10133 | 163 |
| A00324 | A10174 | 899 | A00324 | A10185 | 899 |
| A00324 | A10501 | 346 | A00324 | A10580 | 944 |
| A00324 | A10615 | 899 | A00324 | A10626 | 306 |
| A00324 | A10637 | 213 | A00324 | A10789 | 899 |
| A00324 | A10793 | 899 | A00324 | A10808 | 389 |
| A00324 | A10825 | 176 | A00324 | A10934 | 283 |

|        |        |     |        |        |     |
|--------|--------|-----|--------|--------|-----|
| A00324 | A10994 | 249 | A00324 | A11125 | 899 |
| A00324 | A11206 | 899 | A00324 | A11283 | 899 |
| A00324 | A11293 | 440 | A00324 | A11327 | 174 |
| A00324 | A11369 | 899 | A00324 | A11487 | 899 |
| A00324 | A11604 | 899 | A00324 | A11983 | 994 |
| A00324 | A12003 | 310 | A00324 | A12036 | 249 |
| A00324 | A12047 | 899 | A00324 | A12116 | 213 |
| A00324 | A12618 | 154 | A00324 | A12820 | 154 |
| A00324 | A13089 | 154 | A00324 | A13225 | 929 |
| A00324 | A13387 | 899 | A00324 | A13737 | 899 |
| A00324 | A13829 | 480 | A00324 | A13874 | 319 |
| A00324 | A13981 | 989 | A00324 | A13989 | 195 |
| A00324 | A13990 | 184 | A00324 | A13997 | 491 |
| A00324 | A14009 | 297 | A00324 | A14016 | 446 |
| A00324 | A14052 | 208 | A00324 | A14055 | 414 |
| A00324 | A14063 | 899 | A00324 | A14195 | 899 |
| A00324 | A14200 | 338 | A00324 | A14211 | 436 |
| A00324 | A14221 | 899 | A00324 | A14371 | 202 |
| A00324 | A14443 | 899 | A00324 | A14444 | 899 |
| A00324 | A14527 | 174 | A00324 | A14636 | 187 |
| A00324 | A14643 | 460 | A00324 | A14741 | 357 |
| A00324 | A14887 | 202 | A00324 | A14930 | 899 |
| A00324 | A15027 | 249 | A00324 | A16072 | 260 |
| A00324 | A16245 | 176 | A00324 | A16739 | 226 |
| A00325 | A00355 | 491 | A00325 | A00356 | 63  |
| A00325 | A00357 | 414 | A00325 | A00358 | 491 |
| A00325 | A00360 | 152 | A00325 | A00361 | 119 |
| A00325 | A00402 | 402 | A00325 | A00403 | 491 |
| A00325 | A00469 | 394 | A00325 | A00521 | 430 |
| A00325 | A00561 | 160 | A00325 | A00590 | 347 |
| A00325 | A00629 | 449 | A00325 | A00648 | 266 |
| A00325 | A00705 | 174 | A00325 | A00787 | 468 |
| A00325 | A00827 | 463 | A00325 | A00831 | 199 |
| A00325 | A00839 | 344 | A00325 | A00848 | 455 |
| A00325 | A00883 | 212 | A00325 | A00923 | 491 |
| A00325 | A01000 | 491 | A00325 | A01017 | 491 |
| A00325 | A01025 | 491 | A00325 | A01047 | 486 |
| A00325 | A01101 | 491 | A00325 | A01120 | 151 |
| A00325 | A01140 | 469 | A00325 | A01184 | 425 |
| A00325 | A01206 | 358 | A00325 | A01234 | 380 |
| A00325 | A01249 | 490 | A00325 | A01291 | 491 |
| A00325 | A01306 | 491 | A00325 | A01335 | 369 |
| A00325 | A01338 | 491 | A00325 | A01464 | 221 |
| A00325 | A01470 | 416 | A00325 | A01579 | 218 |
| A00325 | A01617 | 207 | A00325 | A01618 | 105 |
| A00325 | A01649 | 474 | A00325 | A01700 | 235 |

|        |        |     |        |        |     |
|--------|--------|-----|--------|--------|-----|
| A00325 | A01707 | 156 | A00325 | A02068 | 165 |
| A00325 | A02638 | 157 | A00325 | A02978 | 191 |
| A00325 | A02988 | 200 | A00325 | A03069 | 475 |
| A00325 | A03567 | 491 | A00325 | A03740 | 307 |
| A00325 | A03754 | 338 | A00325 | A03859 | 270 |
| A00325 | A05385 | 361 | A00325 | A06279 | 93  |
| A00325 | A06861 | 378 | A00325 | A06965 | 491 |
| A00325 | A07451 | 468 | A00325 | A08011 | 330 |
| A00325 | A08055 | 156 | A00325 | A08398 | 324 |
| A00325 | A08452 | 351 | A00325 | A08558 | 205 |
| A00325 | A08760 | 200 | A00325 | A09322 | 490 |
| A00325 | A09674 | 215 | A00325 | A09702 | 321 |
| A00325 | A10529 | 268 | A00325 | A11438 | 483 |
| A00325 | A11480 | 491 | A00325 | A11704 | 489 |
| A00325 | A11733 | 223 | A00325 | A11945 | 419 |
| A00325 | A12077 | 338 | A00325 | A12221 | 457 |
| A00325 | A12233 | 207 | A00325 | A12241 | 202 |
| A00325 | A12509 | 268 | A00325 | A13989 | 439 |
| A00325 | A14152 | 185 | A00325 | A14188 | 318 |
| A00325 | A14216 | 430 | A00325 | A14596 | 353 |
| A00325 | A15139 | 360 | A00325 | A15218 | 417 |
| A00325 | A15221 | 154 | A00325 | A16118 | 424 |
| A00325 | A16187 | 156 | A00325 | A16387 | 235 |
| A00325 | A16631 | 151 | A00325 | A17127 | 329 |
| A00326 | A00440 | 168 | A00326 | A00643 | 241 |
| A00326 | A00714 | 208 | A00326 | A01046 | 486 |
| A00326 | A01088 | 229 | A00326 | A01143 | 230 |
| A00326 | A01274 | 417 | A00326 | A01299 | 647 |
| A00326 | A01305 | 483 | A00326 | A01441 | 193 |
| A00326 | A01550 | 160 | A00326 | A01740 | 193 |
| A00326 | A02064 | 362 | A00326 | A02830 | 278 |
| A00326 | A02902 | 651 | A00326 | A02931 | 489 |
| A00326 | A03591 | 154 | A00326 | A05288 | 483 |
| A00326 | A06881 | 362 | A00326 | A07311 | 188 |
| A00326 | A08528 | 199 | A00326 | A09361 | 385 |
| A00326 | A11300 | 630 | A00326 | A11387 | 601 |
| A00326 | A11447 | 362 | A00326 | A11621 | 167 |
| A00326 | A11706 | 219 | A00326 | A11923 | 167 |
| A00326 | A11932 | 165 | A00326 | A12111 | 228 |
| A00326 | A12365 | 335 | A00326 | A12373 | 235 |
| A00326 | A12757 | 188 | A00326 | A13376 | 259 |
| A00326 | A14660 | 286 | A00326 | A15560 | 291 |
| A00326 | A15852 | 185 | A00326 | A16330 | 362 |
| A00326 | A16700 | 252 | A00326 | A16798 | 311 |
| A00327 | A00328 | 670 | A00327 | A00353 | 486 |
| A00327 | A00356 | 454 | A00327 | A00357 | 201 |

|        |        |     |        |        |     |
|--------|--------|-----|--------|--------|-----|
| A00327 | A00427 | 317 | A00327 | A00531 | 224 |
| A00327 | A00648 | 317 | A00327 | A00649 | 255 |
| A00327 | A00651 | 629 | A00327 | A00701 | 341 |
| A00327 | A00763 | 481 | A00327 | A00787 | 308 |
| A00327 | A00861 | 251 | A00327 | A00872 | 293 |
| A00327 | A00878 | 317 | A00327 | A00914 | 296 |
| A00327 | A00922 | 477 | A00327 | A00965 | 317 |
| A00327 | A00966 | 330 | A00327 | A00990 | 667 |
| A00327 | A00994 | 481 | A00327 | A01053 | 424 |
| A00327 | A01108 | 221 | A00327 | A01129 | 463 |
| A00327 | A01160 | 245 | A00327 | A01168 | 469 |
| A00327 | A01238 | 317 | A00327 | A01240 | 450 |
| A00327 | A01291 | 490 | A00327 | A01416 | 317 |
| A00327 | A01425 | 317 | A00327 | A01436 | 317 |
| A00327 | A01448 | 172 | A00327 | A01464 | 642 |
| A00327 | A01468 | 317 | A00327 | A01481 | 63  |
| A00327 | A01496 | 477 | A00327 | A01538 | 190 |
| A00327 | A01586 | 317 | A00327 | A01618 | 503 |
| A00327 | A01619 | 263 | A00327 | A01620 | 260 |
| A00327 | A01711 | 176 | A00327 | A01740 | 176 |
| A00327 | A01797 | 154 | A00327 | A01822 | 594 |
| A00327 | A02164 | 479 | A00327 | A02165 | 401 |
| A00327 | A02282 | 246 | A00327 | A02414 | 380 |
| A00327 | A02434 | 210 | A00327 | A02527 | 208 |
| A00327 | A02809 | 258 | A00327 | A02859 | 180 |
| A00327 | A03093 | 326 | A00327 | A03259 | 319 |
| A00327 | A03281 | 174 | A00327 | A03413 | 388 |
| A00327 | A03437 | 187 | A00327 | A03438 | 490 |
| A00327 | A03490 | 317 | A00327 | A03527 | 255 |
| A00327 | A03609 | 446 | A00327 | A03644 | 356 |
| A00327 | A03645 | 290 | A00327 | A03671 | 174 |
| A00327 | A03754 | 393 | A00327 | A03809 | 212 |
| A00327 | A03888 | 561 | A00327 | A03981 | 629 |
| A00327 | A04314 | 196 | A00327 | A05411 | 257 |
| A00327 | A05443 | 151 | A00327 | A05449 | 659 |
| A00327 | A05654 | 490 | A00327 | A06763 | 344 |
| A00327 | A06814 | 168 | A00327 | A06825 | 483 |
| A00327 | A06955 | 154 | A00327 | A07105 | 394 |
| A00327 | A07116 | 435 | A00327 | A07159 | 198 |
| A00327 | A07201 | 489 | A00327 | A07243 | 670 |
| A00327 | A07360 | 174 | A00327 | A07471 | 185 |
| A00327 | A07506 | 313 | A00327 | A08011 | 419 |
| A00327 | A08377 | 317 | A00327 | A08550 | 317 |
| A00327 | A08662 | 235 | A00327 | A08664 | 642 |
| A00327 | A08682 | 470 | A00327 | A08700 | 217 |
| A00327 | A08752 | 385 | A00327 | A08973 | 317 |

|        |        |     |        |        |     |
|--------|--------|-----|--------|--------|-----|
| A00327 | A09428 | 224 | A00327 | A10034 | 391 |
| A00327 | A10189 | 344 | A00327 | A10417 | 667 |
| A00327 | A10564 | 272 | A00327 | A10569 | 310 |
| A00327 | A10924 | 285 | A00327 | A11264 | 252 |
| A00327 | A11331 | 491 | A00327 | A11926 | 451 |
| A00327 | A11981 | 491 | A00327 | A12195 | 177 |
| A00327 | A12661 | 217 | A00327 | A12687 | 466 |
| A00327 | A13052 | 291 | A00327 | A13435 | 443 |
| A00327 | A13581 | 217 | A00327 | A13626 | 491 |
| A00327 | A13752 | 258 | A00327 | A13917 | 196 |
| A00327 | A14216 | 490 | A00327 | A14606 | 319 |
| A00327 | A14979 | 364 | A00327 | A15028 | 428 |
| A00327 | A15624 | 489 | A00327 | A15649 | 409 |
| A00327 | A15651 | 215 | A00327 | A15652 | 162 |
| A00327 | A15661 | 235 | A00327 | A15684 | 486 |
| A00327 | A16088 | 452 | A00327 | A16095 | 481 |
| A00327 | A16149 | 334 | A00327 | A16279 | 319 |
| A00328 | A00334 | 260 | A00328 | A00353 | 486 |
| A00328 | A00356 | 491 | A00328 | A00357 | 196 |
| A00328 | A00405 | 252 | A00328 | A00427 | 317 |
| A00328 | A00531 | 428 | A00328 | A00536 | 291 |
| A00328 | A00544 | 188 | A00328 | A00590 | 486 |
| A00328 | A00648 | 535 | A00328 | A00649 | 363 |
| A00328 | A00651 | 629 | A00328 | A00653 | 196 |
| A00328 | A00700 | 454 | A00328 | A00701 | 491 |
| A00328 | A00763 | 491 | A00328 | A00785 | 486 |
| A00328 | A00787 | 491 | A00328 | A00839 | 452 |
| A00328 | A00857 | 276 | A00328 | A00861 | 339 |
| A00328 | A00878 | 324 | A00328 | A00922 | 491 |
| A00328 | A00923 | 481 | A00328 | A00953 | 201 |
| A00328 | A00965 | 317 | A00328 | A00966 | 532 |
| A00328 | A00990 | 669 | A00328 | A00994 | 489 |
| A00328 | A01000 | 355 | A00328 | A01012 | 480 |
| A00328 | A01037 | 229 | A00328 | A01047 | 477 |
| A00328 | A01053 | 317 | A00328 | A01085 | 358 |
| A00328 | A01090 | 184 | A00328 | A01095 | 223 |
| A00328 | A01108 | 395 | A00328 | A01112 | 313 |
| A00328 | A01127 | 435 | A00328 | A01129 | 477 |
| A00328 | A01168 | 480 | A00328 | A01238 | 317 |
| A00328 | A01240 | 594 | A00328 | A01249 | 195 |
| A00328 | A01276 | 215 | A00328 | A01291 | 491 |
| A00328 | A01346 | 190 | A00328 | A01416 | 317 |
| A00328 | A01425 | 327 | A00328 | A01436 | 317 |
| A00328 | A01437 | 449 | A00328 | A01446 | 353 |
| A00328 | A01448 | 385 | A00328 | A01457 | 439 |
| A00328 | A01464 | 663 | A00328 | A01468 | 391 |

|        |        |     |        |        |     |
|--------|--------|-----|--------|--------|-----|
| A00328 | A01496 | 491 | A00328 | A01586 | 317 |
| A00328 | A01618 | 593 | A00328 | A01620 | 368 |
| A00328 | A01711 | 159 | A00328 | A01741 | 177 |
| A00328 | A01822 | 661 | A00328 | A02164 | 467 |
| A00328 | A02165 | 168 | A00328 | A02414 | 243 |
| A00328 | A02527 | 311 | A00328 | A02590 | 279 |
| A00328 | A02855 | 260 | A00328 | A03048 | 454 |
| A00328 | A03069 | 208 | A00328 | A03085 | 216 |
| A00328 | A03093 | 474 | A00328 | A03259 | 212 |
| A00328 | A03413 | 340 | A00328 | A03437 | 179 |
| A00328 | A03438 | 490 | A00328 | A03490 | 317 |
| A00328 | A03567 | 152 | A00328 | A03596 | 278 |
| A00328 | A03609 | 439 | A00328 | A03614 | 152 |
| A00328 | A03644 | 454 | A00328 | A03754 | 393 |
| A00328 | A03809 | 491 | A00328 | A03888 | 667 |
| A00328 | A03959 | 460 | A00328 | A03981 | 629 |
| A00328 | A04949 | 311 | A00328 | A05129 | 232 |
| A00328 | A05411 | 424 | A00328 | A05443 | 436 |
| A00328 | A05449 | 670 | A00328 | A05654 | 490 |
| A00328 | A06356 | 272 | A00328 | A06495 | 291 |
| A00328 | A06763 | 252 | A00328 | A06814 | 430 |
| A00328 | A06815 | 185 | A00328 | A06825 | 479 |
| A00328 | A07105 | 389 | A00328 | A07116 | 424 |
| A00328 | A07159 | 297 | A00328 | A07201 | 491 |
| A00328 | A07243 | 670 | A00328 | A07360 | 243 |
| A00328 | A07451 | 461 | A00328 | A07506 | 271 |
| A00328 | A08011 | 491 | A00328 | A08377 | 317 |
| A00328 | A08550 | 317 | A00328 | A08559 | 452 |
| A00328 | A08653 | 217 | A00328 | A08662 | 243 |
| A00328 | A08664 | 602 | A00328 | A08682 | 485 |
| A00328 | A08752 | 157 | A00328 | A08773 | 230 |
| A00328 | A08860 | 291 | A00328 | A08973 | 317 |
| A00328 | A09044 | 263 | A00328 | A09674 | 430 |
| A00328 | A09893 | 335 | A00328 | A10034 | 485 |
| A00328 | A10140 | 167 | A00328 | A10417 | 665 |
| A00328 | A10532 | 408 | A00328 | A10564 | 425 |
| A00328 | A10569 | 408 | A00328 | A10572 | 285 |
| A00328 | A10924 | 433 | A00328 | A11331 | 491 |
| A00328 | A11420 | 216 | A00328 | A11926 | 466 |
| A00328 | A11981 | 491 | A00328 | A12028 | 414 |
| A00328 | A12661 | 463 | A00328 | A12687 | 489 |
| A00328 | A13340 | 358 | A00328 | A13344 | 232 |
| A00328 | A13417 | 272 | A00328 | A13626 | 491 |
| A00328 | A13752 | 272 | A00328 | A13912 | 157 |
| A00328 | A13917 | 190 | A00328 | A13963 | 382 |
| A00328 | A13989 | 473 | A00328 | A14216 | 491 |



|        |        |     |        |        |     |
|--------|--------|-----|--------|--------|-----|
| A00328 | A14299 | 402 | A00328 | A14381 | 327 |
| A00328 | A14410 | 351 | A00328 | A14560 | 63  |
| A00328 | A14606 | 216 | A00328 | A15028 | 252 |
| A00328 | A15235 | 223 | A00328 | A15624 | 491 |
| A00328 | A15649 | 418 | A00328 | A15651 | 291 |
| A00328 | A15661 | 228 | A00328 | A15684 | 489 |
| A00328 | A15932 | 411 | A00328 | A15933 | 157 |
| A00328 | A16088 | 491 | A00328 | A16095 | 489 |
| A00328 | A16149 | 303 | A00328 | A16234 | 216 |
| A00328 | A16279 | 216 | A00328 | A17193 | 460 |
| A00329 | A00345 | 341 | A00329 | A00409 | 182 |
| A00329 | A00439 | 219 | A00329 | A00454 | 491 |
| A00329 | A00489 | 183 | A00329 | A00653 | 377 |
| A00329 | A00698 | 188 | A00329 | A00822 | 198 |
| A00329 | A00848 | 383 | A00329 | A00910 | 479 |
| A00329 | A00912 | 411 | A00329 | A00932 | 463 |
| A00329 | A00933 | 159 | A00329 | A00970 | 162 |
| A00329 | A01042 | 491 | A00329 | A01054 | 362 |
| A00329 | A01083 | 486 | A00329 | A01127 | 310 |
| A00329 | A01150 | 154 | A00329 | A01219 | 187 |
| A00329 | A01291 | 414 | A00329 | A01300 | 340 |
| A00329 | A01431 | 472 | A00329 | A01435 | 190 |
| A00329 | A01540 | 362 | A00329 | A01649 | 257 |
| A00329 | A01850 | 163 | A00329 | A02065 | 154 |
| A00329 | A02703 | 279 | A00329 | A03567 | 204 |
| A00329 | A03740 | 654 | A00329 | A03752 | 450 |
| A00329 | A03809 | 283 | A00329 | A06466 | 488 |
| A00329 | A07220 | 174 | A00329 | A07311 | 490 |
| A00329 | A07798 | 296 | A00329 | A08053 | 414 |
| A00329 | A08054 | 491 | A00329 | A08137 | 193 |
| A00329 | A08571 | 180 | A00329 | A09476 | 283 |
| A00329 | A09768 | 183 | A00329 | A10506 | 198 |
| A00329 | A11296 | 205 | A00329 | A11302 | 489 |
| A00329 | A11372 | 653 | A00329 | A11588 | 232 |
| A00329 | A11724 | 362 | A00329 | A12167 | 537 |
| A00329 | A12328 | 207 | A00329 | A12988 | 152 |
| A00329 | A12990 | 168 | A00329 | A13335 | 191 |
| A00329 | A13340 | 210 | A00329 | A13989 | 199 |
| A00329 | A14073 | 483 | A00329 | A14596 | 450 |
| A00329 | A15244 | 461 | A00329 | A15275 | 224 |
| A00329 | A15376 | 151 | A00329 | A15660 | 477 |
| A00329 | A15684 | 179 | A00329 | A15699 | 229 |
| A00329 | A16633 | 240 | A00330 | A00346 | 486 |
| A00330 | A00359 | 484 | A00330 | A00394 | 488 |
| A00330 | A00421 | 470 | A00330 | A00469 | 491 |
| A00330 | A00482 | 319 | A00330 | A00531 | 488 |

|        |        |     |        |        |     |
|--------|--------|-----|--------|--------|-----|
| A00330 | A00546 | 360 | A00330 | A00643 | 469 |
| A00330 | A00864 | 488 | A00330 | A00937 | 452 |
| A00330 | A00981 | 245 | A00330 | A01011 | 491 |
| A00330 | A01143 | 201 | A00330 | A01348 | 485 |
| A00330 | A01359 | 317 | A00330 | A01454 | 457 |
| A00330 | A01478 | 486 | A00330 | A01479 | 199 |
| A00330 | A01527 | 674 | A00330 | A01557 | 389 |
| A00330 | A01588 | 238 | A00330 | A01595 | 488 |
| A00330 | A01630 | 416 | A00330 | A01660 | 452 |
| A00330 | A01687 | 480 | A00330 | A01705 | 179 |
| A00330 | A01723 | 363 | A00330 | A01790 | 430 |
| A00330 | A01839 | 477 | A00330 | A02106 | 483 |
| A00330 | A02318 | 162 | A00330 | A02321 | 221 |
| A00330 | A02424 | 490 | A00330 | A02463 | 141 |
| A00330 | A02773 | 226 | A00330 | A03166 | 226 |
| A00330 | A03496 | 254 | A00330 | A03512 | 430 |
| A00330 | A03637 | 152 | A00330 | A03832 | 364 |
| A00330 | A04001 | 195 | A00330 | A04012 | 168 |
| A00330 | A04033 | 409 | A00330 | A04175 | 180 |
| A00330 | A04216 | 303 | A00330 | A04236 | 232 |
| A00330 | A04449 | 463 | A00330 | A04715 | 432 |
| A00330 | A04790 | 240 | A00330 | A04911 | 156 |
| A00330 | A05008 | 412 | A00330 | A05009 | 162 |
| A00330 | A05015 | 334 | A00330 | A05142 | 221 |
| A00330 | A05181 | 323 | A00330 | A05288 | 234 |
| A00330 | A06176 | 247 | A00330 | A06277 | 424 |
| A00330 | A06348 | 321 | A00330 | A06591 | 484 |
| A00330 | A07004 | 574 | A00330 | A07242 | 326 |
| A00330 | A07495 | 469 | A00330 | A07947 | 281 |
| A00330 | A08571 | 457 | A00330 | A08869 | 283 |
| A00330 | A09488 | 299 | A00330 | A09999 | 162 |
| A00330 | A10039 | 469 | A00330 | A10175 | 450 |
| A00330 | A10619 | 465 | A00330 | A11099 | 491 |
| A00330 | A11160 | 321 | A00330 | A11732 | 188 |
| A00330 | A12500 | 466 | A00330 | A13020 | 299 |
| A00330 | A13299 | 256 | A00330 | A14170 | 159 |
| A00330 | A14266 | 273 | A00330 | A14279 | 491 |
| A00330 | A14281 | 187 | A00330 | A14633 | 343 |
| A00330 | A14636 | 379 | A00330 | A14661 | 205 |
| A00330 | A14689 | 491 | A00330 | A15004 | 205 |
| A00330 | A15140 | 191 | A00330 | A15385 | 165 |
| A00330 | A16851 | 171 | A00330 | A16889 | 267 |
| A00330 | A16911 | 485 | A00330 | A17190 | 854 |
| A00331 | A00726 | 174 | A00331 | A00747 | 65  |
| A00331 | A00832 | 217 | A00331 | A00856 | 246 |
| A00331 | A01131 | 313 | A00331 | A01140 | 241 |

|        |        |     |        |        |     |
|--------|--------|-----|--------|--------|-----|
| A00331 | A01148 | 152 | A00331 | A01205 | 271 |
| A00331 | A01241 | 328 | A00331 | A01289 | 486 |
| A00331 | A01507 | 488 | A00331 | A01555 | 243 |
| A00331 | A01623 | 246 | A00331 | A01646 | 378 |
| A00331 | A02208 | 196 | A00331 | A02494 | 401 |
| A00331 | A02703 | 73  | A00331 | A02704 | 475 |
| A00331 | A02705 | 435 | A00331 | A02816 | 291 |
| A00331 | A02827 | 263 | A00331 | A02928 | 446 |
| A00331 | A03587 | 477 | A00331 | A04006 | 469 |
| A00331 | A04072 | 174 | A00331 | A04787 | 229 |
| A00331 | A04905 | 205 | A00331 | A05351 | 452 |
| A00331 | A08091 | 236 | A00331 | A09123 | 193 |
| A00331 | A09303 | 187 | A00331 | A09423 | 163 |
| A00331 | A10813 | 173 | A00331 | A12971 | 305 |
| A00331 | A13971 | 274 | A00331 | A14198 | 411 |
| A00331 | A14642 | 174 | A00331 | A16718 | 210 |
| A00332 | A00390 | 312 | A00332 | A01522 | 201 |
| A00332 | A01634 | 193 | A00332 | A03891 | 326 |
| A00332 | A04105 | 340 | A00332 | A04117 | 224 |
| A00332 | A04668 | 157 | A00332 | A12282 | 401 |
| A00332 | A13701 | 63  | A00333 | A00451 | 310 |
| A00333 | A00600 | 276 | A00333 | A00601 | 276 |
| A00333 | A00696 | 428 | A00333 | A01213 | 276 |
| A00333 | A01438 | 276 | A00333 | A01524 | 899 |
| A00333 | A01576 | 480 | A00333 | A01691 | 243 |
| A00333 | A03815 | 217 | A00333 | A03830 | 337 |
| A00333 | A04018 | 308 | A00333 | A04323 | 263 |
| A00333 | A04558 | 728 | A00333 | A05234 | 190 |
| A00333 | A05986 | 252 | A00333 | A08293 | 470 |
| A00333 | A08356 | 462 | A00333 | A08362 | 474 |
| A00333 | A08821 | 462 | A00333 | A08831 | 276 |
| A00333 | A08956 | 276 | A00333 | A09401 | 725 |
| A00333 | A09743 | 276 | A00333 | A09996 | 276 |
| A00333 | A12606 | 276 | A00333 | A13605 | 270 |
| A00333 | A13981 | 899 | A00333 | A13983 | 480 |
| A00333 | A14212 | 462 | A00333 | A14213 | 462 |
| A00333 | A14214 | 462 | A00333 | A15417 | 306 |
| A00333 | A15493 | 345 | A00333 | A16449 | 276 |
| A00333 | A16702 | 276 | A00334 | A00335 | 490 |
| A00334 | A00356 | 491 | A00334 | A00404 | 213 |
| A00334 | A00467 | 486 | A00334 | A00521 | 314 |
| A00334 | A00561 | 246 | A00334 | A00590 | 288 |
| A00334 | A00605 | 364 | A00334 | A00648 | 201 |
| A00334 | A00651 | 469 | A00334 | A00700 | 491 |
| A00334 | A00787 | 291 | A00334 | A00811 | 271 |
| A00334 | A00839 | 491 | A00334 | A00851 | 229 |

|        |        |     |        |        |     |
|--------|--------|-----|--------|--------|-----|
| A00334 | A00923 | 310 | A00334 | A00970 | 152 |
| A00334 | A01000 | 235 | A00334 | A01056 | 372 |
| A00334 | A01083 | 179 | A00334 | A01090 | 195 |
| A00334 | A01098 | 200 | A00334 | A01112 | 486 |
| A00334 | A01127 | 424 | A00334 | A01140 | 491 |
| A00334 | A01212 | 435 | A00334 | A01216 | 210 |
| A00334 | A01291 | 491 | A00334 | A01306 | 297 |
| A00334 | A01335 | 457 | A00334 | A01425 | 238 |
| A00334 | A01437 | 380 | A00334 | A01457 | 305 |
| A00334 | A01468 | 491 | A00334 | A01492 | 191 |
| A00334 | A01496 | 363 | A00334 | A01579 | 491 |
| A00334 | A01601 | 491 | A00334 | A01605 | 380 |
| A00334 | A01617 | 208 | A00334 | A01649 | 414 |
| A00334 | A01707 | 157 | A00334 | A01718 | 452 |
| A00334 | A02350 | 491 | A00334 | A03272 | 180 |
| A00334 | A03451 | 380 | A00334 | A03461 | 172 |
| A00334 | A03479 | 173 | A00334 | A03740 | 183 |
| A00334 | A03963 | 241 | A00334 | A03981 | 163 |
| A00334 | A03993 | 283 | A00334 | A04099 | 393 |
| A00334 | A04101 | 219 | A00334 | A04230 | 151 |
| A00334 | A04474 | 269 | A00334 | A04827 | 390 |
| A00334 | A05121 | 162 | A00334 | A05443 | 467 |
| A00334 | A06317 | 221 | A00334 | A06534 | 474 |
| A00334 | A06814 | 240 | A00334 | A06861 | 205 |
| A00334 | A06897 | 200 | A00334 | A06965 | 436 |
| A00334 | A06973 | 252 | A00334 | A07323 | 404 |
| A00334 | A07398 | 457 | A00334 | A07451 | 198 |
| A00334 | A07506 | 305 | A00334 | A08357 | 263 |
| A00334 | A08358 | 312 | A00334 | A08359 | 481 |
| A00334 | A08398 | 223 | A00334 | A08408 | 259 |
| A00334 | A08452 | 273 | A00334 | A08543 | 196 |
| A00334 | A08547 | 234 | A00334 | A08972 | 208 |
| A00334 | A09308 | 174 | A00334 | A09620 | 165 |
| A00334 | A09852 | 368 | A00334 | A10949 | 187 |
| A00334 | A11390 | 273 | A00334 | A11392 | 171 |
| A00334 | A11808 | 234 | A00334 | A11857 | 208 |
| A00334 | A13989 | 491 | A00334 | A13992 | 469 |
| A00334 | A14176 | 443 | A00334 | A14216 | 257 |
| A00334 | A14505 | 171 | A00334 | A15221 | 288 |
| A00334 | A16159 | 401 | A00334 | A16437 | 157 |
| A00334 | A16839 | 260 | A00335 | A00353 | 154 |
| A00335 | A00356 | 491 | A00335 | A00414 | 350 |
| A00335 | A00467 | 467 | A00335 | A00571 | 204 |
| A00335 | A00605 | 193 | A00335 | A00648 | 389 |
| A00335 | A00651 | 486 | A00335 | A00700 | 486 |
| A00335 | A00782 | 165 | A00335 | A00839 | 491 |

|        |        |     |        |        |     |
|--------|--------|-----|--------|--------|-----|
| A00335 | A00848 | 254 | A00335 | A00851 | 218 |
| A00335 | A00861 | 110 | A00335 | A00870 | 302 |
| A00335 | A00916 | 63  | A00335 | A00990 | 241 |
| A00335 | A01031 | 212 | A00335 | A01037 | 296 |
| A00335 | A01056 | 462 | A00335 | A01090 | 489 |
| A00335 | A01091 | 899 | A00335 | A01098 | 696 |
| A00335 | A01112 | 450 | A00335 | A01130 | 204 |
| A00335 | A01140 | 491 | A00335 | A01196 | 455 |
| A00335 | A01212 | 182 | A00335 | A01249 | 229 |
| A00335 | A01291 | 597 | A00335 | A01306 | 340 |
| A00335 | A01335 | 303 | A00335 | A01425 | 714 |
| A00335 | A01468 | 470 | A00335 | A01492 | 624 |
| A00335 | A01496 | 481 | A00335 | A01579 | 491 |
| A00335 | A01601 | 945 | A00335 | A01740 | 154 |
| A00335 | A02179 | 247 | A00335 | A02243 | 229 |
| A00335 | A02265 | 98  | A00335 | A02270 | 249 |
| A00335 | A02350 | 489 | A00335 | A03083 | 441 |
| A00335 | A03164 | 224 | A00335 | A03259 | 154 |
| A00335 | A03272 | 172 | A00335 | A03332 | 401 |
| A00335 | A03432 | 154 | A00335 | A03445 | 474 |
| A00335 | A03726 | 152 | A00335 | A03963 | 937 |
| A00335 | A03981 | 489 | A00335 | A04230 | 418 |
| A00335 | A05076 | 363 | A00335 | A05385 | 228 |
| A00335 | A05443 | 438 | A00335 | A05450 | 162 |
| A00335 | A05501 | 152 | A00335 | A05996 | 156 |
| A00335 | A06814 | 456 | A00335 | A06889 | 177 |
| A00335 | A06897 | 291 | A00335 | A06973 | 380 |
| A00335 | A06987 | 238 | A00335 | A07398 | 452 |
| A00335 | A07412 | 308 | A00335 | A07422 | 900 |
| A00335 | A07726 | 461 | A00335 | A08154 | 167 |
| A00335 | A08273 | 205 | A00335 | A08301 | 353 |
| A00335 | A09550 | 371 | A00335 | A09722 | 306 |
| A00335 | A09893 | 296 | A00335 | A09960 | 306 |
| A00335 | A10336 | 84  | A00335 | A10532 | 249 |
| A00335 | A10645 | 469 | A00335 | A10748 | 458 |
| A00335 | A11096 | 350 | A00335 | A11124 | 163 |
| A00335 | A11190 | 271 | A00335 | A12126 | 207 |
| A00335 | A12305 | 333 | A00335 | A12404 | 276 |
| A00335 | A12970 | 281 | A00335 | A13107 | 351 |
| A00335 | A13989 | 626 | A00335 | A14055 | 274 |
| A00335 | A14216 | 347 | A00335 | A14471 | 210 |
| A00335 | A15225 | 168 | A00335 | A15229 | 357 |
| A00335 | A15268 | 942 | A00335 | A15381 | 441 |
| A00335 | A15684 | 378 | A00335 | A16107 | 924 |
| A00335 | A16437 | 279 | A00335 | A16778 | 457 |
| A00336 | A00454 | 335 | A00336 | A00747 | 288 |

|        |        |     |        |        |     |
|--------|--------|-----|--------|--------|-----|
| A00336 | A01042 | 159 | A00336 | A01178 | 401 |
| A00336 | A01540 | 329 | A00336 | A01560 | 241 |
| A00336 | A01850 | 491 | A00336 | A01897 | 219 |
| A00336 | A02180 | 198 | A00336 | A02562 | 240 |
| A00336 | A02564 | 156 | A00336 | A02737 | 172 |
| A00336 | A02837 | 88  | A00336 | A02904 | 193 |
| A00336 | A03740 | 371 | A00336 | A03785 | 260 |
| A00336 | A04540 | 224 | A00336 | A04568 | 285 |
| A00336 | A06703 | 341 | A00336 | A07311 | 230 |
| A00336 | A07900 | 266 | A00336 | A08345 | 281 |
| A00336 | A08692 | 389 | A00336 | A09476 | 246 |
| A00336 | A09568 | 196 | A00336 | A09988 | 358 |
| A00336 | A10623 | 213 | A00336 | A10728 | 171 |
| A00336 | A12215 | 322 | A00336 | A13980 | 185 |
| A00336 | A14073 | 269 | A00337 | A00340 | 602 |
| A00337 | A00482 | 489 | A00337 | A00562 | 321 |
| A00337 | A00565 | 486 | A00337 | A00630 | 485 |
| A00337 | A00643 | 367 | A00337 | A00826 | 523 |
| A00337 | A00839 | 319 | A00337 | A00939 | 283 |
| A00337 | A00957 | 474 | A00337 | A00971 | 281 |
| A00337 | A00980 | 485 | A00337 | A01011 | 639 |
| A00337 | A01125 | 436 | A00337 | A01291 | 180 |
| A00337 | A01309 | 515 | A00337 | A01348 | 345 |
| A00337 | A01553 | 252 | A00337 | A01561 | 194 |
| A00337 | A01572 | 302 | A00337 | A01630 | 355 |
| A00337 | A01632 | 472 | A00337 | A01657 | 160 |
| A00337 | A01660 | 345 | A00337 | A01730 | 327 |
| A00337 | A01737 | 232 | A00337 | A01747 | 319 |
| A00337 | A01839 | 475 | A00337 | A01995 | 384 |
| A00337 | A02110 | 485 | A00337 | A02703 | 379 |
| A00337 | A03136 | 151 | A00337 | A03188 | 324 |
| A00337 | A03541 | 163 | A00337 | A03591 | 318 |
| A00337 | A04175 | 771 | A00337 | A04449 | 541 |
| A00337 | A04715 | 491 | A00337 | A04790 | 249 |
| A00337 | A05416 | 347 | A00337 | A05853 | 184 |
| A00337 | A06021 | 228 | A00337 | A06379 | 340 |
| A00337 | A06466 | 260 | A00337 | A06603 | 151 |
| A00337 | A06680 | 201 | A00337 | A06887 | 257 |
| A00337 | A07163 | 561 | A00337 | A07848 | 218 |
| A00337 | A07903 | 268 | A00337 | A08858 | 167 |
| A00337 | A09182 | 302 | A00337 | A09504 | 176 |
| A00337 | A09511 | 196 | A00337 | A09525 | 323 |
| A00337 | A09551 | 277 | A00337 | A09607 | 424 |
| A00337 | A09646 | 489 | A00337 | A09840 | 216 |
| A00337 | A10051 | 491 | A00337 | A10205 | 488 |
| A00337 | A10430 | 561 | A00337 | A10722 | 174 |

|        |        |     |        |        |     |
|--------|--------|-----|--------|--------|-----|
| A00337 | A11196 | 208 | A00337 | A11435 | 358 |
| A00337 | A11487 | 443 | A00337 | A11726 | 307 |
| A00337 | A11732 | 221 | A00337 | A11919 | 418 |
| A00337 | A11937 | 309 | A00337 | A12603 | 323 |
| A00337 | A13587 | 196 | A00337 | A13928 | 491 |
| A00337 | A14174 | 260 | A00337 | A14281 | 154 |
| A00337 | A14410 | 317 | A00337 | A14633 | 243 |
| A00337 | A15555 | 177 | A00337 | A15665 | 598 |
| A00337 | A15682 | 393 | A00337 | A16072 | 180 |
| A00337 | A16283 | 216 | A00337 | A16410 | 491 |
| A00337 | A16847 | 561 | A00337 | A17156 | 188 |
| A00338 | A00342 | 154 | A00338 | A00377 | 609 |
| A00338 | A00392 | 200 | A00338 | A00438 | 462 |
| A00338 | A00472 | 678 | A00338 | A00485 | 491 |
| A00338 | A00531 | 177 | A00338 | A00532 | 268 |
| A00338 | A00576 | 162 | A00338 | A00584 | 202 |
| A00338 | A00600 | 491 | A00338 | A00609 | 441 |
| A00338 | A00625 | 484 | A00338 | A00663 | 310 |
| A00338 | A00719 | 446 | A00338 | A00736 | 372 |
| A00338 | A00743 | 243 | A00338 | A00799 | 312 |
| A00338 | A00802 | 469 | A00338 | A00821 | 312 |
| A00338 | A00849 | 483 | A00338 | A00882 | 281 |
| A00338 | A00911 | 382 | A00338 | A00939 | 215 |
| A00338 | A00967 | 399 | A00338 | A00981 | 263 |
| A00338 | A00985 | 165 | A00338 | A01011 | 417 |
| A00338 | A01022 | 491 | A00338 | A01026 | 386 |
| A00338 | A01100 | 417 | A00338 | A01102 | 335 |
| A00338 | A01139 | 353 | A00338 | A01156 | 489 |
| A00338 | A01161 | 708 | A00338 | A01162 | 416 |
| A00338 | A01211 | 491 | A00338 | A01235 | 223 |
| A00338 | A01276 | 483 | A00338 | A01278 | 586 |
| A00338 | A01326 | 335 | A00338 | A01359 | 307 |
| A00338 | A01373 | 299 | A00338 | A01431 | 477 |
| A00338 | A01451 | 491 | A00338 | A01454 | 414 |
| A00338 | A01461 | 213 | A00338 | A01478 | 170 |
| A00338 | A01481 | 491 | A00338 | A01483 | 165 |
| A00338 | A01515 | 364 | A00338 | A01520 | 196 |
| A00338 | A01524 | 419 | A00338 | A01526 | 491 |
| A00338 | A01530 | 483 | A00338 | A01543 | 469 |
| A00338 | A01551 | 489 | A00338 | A01556 | 491 |
| A00338 | A01557 | 479 | A00338 | A01578 | 491 |
| A00338 | A01582 | 491 | A00338 | A01585 | 486 |
| A00338 | A01593 | 565 | A00338 | A01600 | 391 |
| A00338 | A01627 | 485 | A00338 | A01630 | 317 |
| A00338 | A01632 | 491 | A00338 | A01648 | 159 |
| A00338 | A01660 | 401 | A00338 | A01664 | 268 |

|        |        |     |        |        |     |
|--------|--------|-----|--------|--------|-----|
| A00338 | A01676 | 154 | A00338 | A01689 | 272 |
| A00338 | A01701 | 157 | A00338 | A01723 | 152 |
| A00338 | A01729 | 152 | A00338 | A01758 | 235 |
| A00338 | A01763 | 462 | A00338 | A01790 | 174 |
| A00338 | A01855 | 152 | A00338 | A01931 | 475 |
| A00338 | A01935 | 221 | A00338 | A02007 | 384 |
| A00338 | A02021 | 265 | A00338 | A02148 | 491 |
| A00338 | A02188 | 488 | A00338 | A02198 | 270 |
| A00338 | A02205 | 249 | A00338 | A02215 | 491 |
| A00338 | A02220 | 154 | A00338 | A02221 | 475 |
| A00338 | A02222 | 488 | A00338 | A02224 | 258 |
| A00338 | A02228 | 475 | A00338 | A02231 | 165 |
| A00338 | A02333 | 452 | A00338 | A02443 | 429 |
| A00338 | A02477 | 486 | A00338 | A02485 | 380 |
| A00338 | A02491 | 232 | A00338 | A02548 | 263 |
| A00338 | A02691 | 157 | A00338 | A02738 | 429 |
| A00338 | A02924 | 486 | A00338 | A03050 | 489 |
| A00338 | A03065 | 241 | A00338 | A03079 | 408 |
| A00338 | A03080 | 491 | A00338 | A03104 | 486 |
| A00338 | A03178 | 332 | A00338 | A03186 | 173 |
| A00338 | A03200 | 257 | A00338 | A03211 | 327 |
| A00338 | A03233 | 380 | A00338 | A03259 | 288 |
| A00338 | A03293 | 491 | A00338 | A03334 | 229 |
| A00338 | A03347 | 389 | A00338 | A03348 | 319 |
| A00338 | A03349 | 396 | A00338 | A03351 | 491 |
| A00338 | A03356 | 417 | A00338 | A03358 | 435 |
| A00338 | A03361 | 363 | A00338 | A03365 | 221 |
| A00338 | A03369 | 374 | A00338 | A03370 | 408 |
| A00338 | A03372 | 257 | A00338 | A03374 | 232 |
| A00338 | A03376 | 490 | A00338 | A03378 | 226 |
| A00338 | A03379 | 491 | A00338 | A03383 | 210 |
| A00338 | A03384 | 466 | A00338 | A03388 | 174 |
| A00338 | A03398 | 168 | A00338 | A03417 | 458 |
| A00338 | A03440 | 224 | A00338 | A03477 | 226 |
| A00338 | A03491 | 221 | A00338 | A03499 | 154 |
| A00338 | A03569 | 329 | A00338 | A03573 | 236 |
| A00338 | A03650 | 172 | A00338 | A03708 | 488 |
| A00338 | A03748 | 191 | A00338 | A03794 | 195 |
| A00338 | A03819 | 154 | A00338 | A03885 | 291 |
| A00338 | A03910 | 396 | A00338 | A03918 | 266 |
| A00338 | A03945 | 371 | A00338 | A03984 | 252 |
| A00338 | A04006 | 234 | A00338 | A04072 | 356 |
| A00338 | A04150 | 228 | A00338 | A04266 | 154 |
| A00338 | A04337 | 491 | A00338 | A04361 | 347 |
| A00338 | A04410 | 490 | A00338 | A04418 | 223 |
| A00338 | A04424 | 235 | A00338 | A04449 | 418 |



|        |        |     |        |        |     |
|--------|--------|-----|--------|--------|-----|
| A00338 | A04491 | 152 | A00338 | A04493 | 390 |
| A00338 | A04518 | 213 | A00338 | A04520 | 488 |
| A00338 | A04532 | 457 | A00338 | A04715 | 447 |
| A00338 | A04782 | 293 | A00338 | A04790 | 414 |
| A00338 | A04830 | 160 | A00338 | A04832 | 217 |
| A00338 | A04833 | 286 | A00338 | A04928 | 313 |
| A00338 | A04944 | 157 | A00338 | A04964 | 385 |
| A00338 | A05022 | 380 | A00338 | A05155 | 433 |
| A00338 | A05184 | 157 | A00338 | A05231 | 221 |
| A00338 | A05234 | 491 | A00338 | A05294 | 271 |
| A00338 | A05356 | 629 | A00338 | A05427 | 170 |
| A00338 | A05439 | 303 | A00338 | A05487 | 372 |
| A00338 | A05494 | 434 | A00338 | A05577 | 372 |
| A00338 | A05582 | 184 | A00338 | A05587 | 477 |
| A00338 | A05603 | 466 | A00338 | A05642 | 200 |
| A00338 | A05643 | 236 | A00338 | A05644 | 380 |
| A00338 | A05657 | 389 | A00338 | A05678 | 416 |
| A00338 | A05720 | 257 | A00338 | A05739 | 466 |
| A00338 | A05777 | 440 | A00338 | A05812 | 313 |
| A00338 | A05860 | 172 | A00338 | A05887 | 433 |
| A00338 | A05891 | 491 | A00338 | A05952 | 388 |
| A00338 | A05968 | 480 | A00338 | A05969 | 406 |
| A00338 | A05970 | 456 | A00338 | A05971 | 257 |
| A00338 | A06035 | 221 | A00338 | A06069 | 358 |
| A00338 | A06071 | 172 | A00338 | A06092 | 174 |
| A00338 | A06141 | 180 | A00338 | A06148 | 380 |
| A00338 | A06193 | 200 | A00338 | A06228 | 172 |
| A00338 | A06277 | 152 | A00338 | A06321 | 216 |
| A00338 | A06346 | 481 | A00338 | A06428 | 241 |
| A00338 | A06448 | 172 | A00338 | A06480 | 278 |
| A00338 | A06484 | 157 | A00338 | A06517 | 172 |
| A00338 | A06532 | 221 | A00338 | A06556 | 257 |
| A00338 | A06574 | 430 | A00338 | A06617 | 436 |
| A00338 | A06701 | 435 | A00338 | A06708 | 210 |
| A00338 | A06712 | 184 | A00338 | A06719 | 366 |
| A00338 | A06726 | 257 | A00338 | A06729 | 491 |
| A00338 | A06731 | 491 | A00338 | A06739 | 180 |
| A00338 | A06799 | 200 | A00338 | A06815 | 154 |
| A00338 | A06837 | 184 | A00338 | A06875 | 258 |
| A00338 | A06895 | 154 | A00338 | A06907 | 259 |
| A00338 | A06910 | 154 | A00338 | A06953 | 458 |
| A00338 | A06954 | 369 | A00338 | A07004 | 191 |
| A00338 | A07064 | 200 | A00338 | A07065 | 184 |
| A00338 | A07068 | 221 | A00338 | A07110 | 200 |
| A00338 | A07209 | 488 | A00338 | A07218 | 489 |
| A00338 | A07275 | 184 | A00338 | A07286 | 184 |

|        |        |     |        |        |     |
|--------|--------|-----|--------|--------|-----|
| A00338 | A07361 | 154 | A00338 | A07384 | 443 |
| A00338 | A07391 | 434 | A00338 | A07406 | 200 |
| A00338 | A07407 | 322 | A00338 | A07442 | 491 |
| A00338 | A07452 | 154 | A00338 | A07471 | 491 |
| A00338 | A07472 | 485 | A00338 | A07475 | 485 |
| A00338 | A07479 | 398 | A00338 | A07541 | 486 |
| A00338 | A07561 | 466 | A00338 | A07578 | 200 |
| A00338 | A07601 | 241 | A00338 | A07605 | 449 |
| A00338 | A07622 | 184 | A00338 | A07635 | 377 |
| A00338 | A07673 | 188 | A00338 | A07704 | 195 |
| A00338 | A07754 | 483 | A00338 | A07810 | 221 |
| A00338 | A07815 | 156 | A00338 | A07843 | 185 |
| A00338 | A07913 | 411 | A00338 | A07950 | 184 |
| A00338 | A07958 | 479 | A00338 | A07994 | 257 |
| A00338 | A08033 | 257 | A00338 | A08034 | 154 |
| A00338 | A08040 | 267 | A00338 | A08093 | 202 |
| A00338 | A08097 | 481 | A00338 | A08159 | 162 |
| A00338 | A08172 | 469 | A00338 | A08202 | 172 |
| A00338 | A08210 | 210 | A00338 | A08306 | 232 |
| A00338 | A08309 | 449 | A00338 | A08347 | 257 |
| A00338 | A08426 | 172 | A00338 | A08441 | 350 |
| A00338 | A08630 | 221 | A00338 | A08685 | 262 |
| A00338 | A08686 | 446 | A00338 | A08747 | 172 |
| A00338 | A08753 | 193 | A00338 | A08783 | 172 |
| A00338 | A08785 | 486 | A00338 | A08786 | 172 |
| A00338 | A09112 | 154 | A00338 | A09154 | 257 |
| A00338 | A09204 | 249 | A00338 | A09246 | 269 |
| A00338 | A09380 | 291 | A00338 | A09416 | 489 |
| A00338 | A09507 | 177 | A00338 | A09515 | 252 |
| A00338 | A09796 | 172 | A00338 | A09890 | 219 |
| A00338 | A10071 | 184 | A00338 | A10095 | 391 |
| A00338 | A10096 | 406 | A00338 | A10156 | 411 |
| A00338 | A10228 | 185 | A00338 | A10340 | 252 |
| A00338 | A10511 | 271 | A00338 | A10547 | 154 |
| A00338 | A10563 | 204 | A00338 | A10649 | 221 |
| A00338 | A10651 | 469 | A00338 | A10667 | 278 |
| A00338 | A10954 | 154 | A00338 | A10962 | 257 |
| A00338 | A10983 | 191 | A00338 | A11011 | 257 |
| A00338 | A11026 | 184 | A00338 | A11135 | 286 |
| A00338 | A11143 | 221 | A00338 | A11154 | 221 |
| A00338 | A11164 | 363 | A00338 | A11230 | 257 |
| A00338 | A11282 | 422 | A00338 | A11311 | 232 |
| A00338 | A11313 | 347 | A00338 | A11315 | 283 |
| A00338 | A11317 | 291 | A00338 | A11319 | 326 |
| A00338 | A11339 | 419 | A00338 | A11377 | 162 |
| A00338 | A11399 | 221 | A00338 | A11411 | 294 |

|        |        |     |        |        |     |
|--------|--------|-----|--------|--------|-----|
| A00338 | A11414 | 380 | A00338 | A11424 | 252 |
| A00338 | A11428 | 246 | A00338 | A11433 | 236 |
| A00338 | A11448 | 221 | A00338 | A11479 | 162 |
| A00338 | A11513 | 484 | A00338 | A11552 | 177 |
| A00338 | A11553 | 205 | A00338 | A11590 | 219 |
| A00338 | A11664 | 257 | A00338 | A11983 | 469 |
| A00338 | A12022 | 184 | A00338 | A12099 | 154 |
| A00338 | A12117 | 332 | A00338 | A12430 | 257 |
| A00338 | A12459 | 294 | A00338 | A12599 | 221 |
| A00338 | A12641 | 221 | A00338 | A12758 | 257 |
| A00338 | A12779 | 350 | A00338 | A12786 | 221 |
| A00338 | A12787 | 291 | A00338 | A13088 | 257 |
| A00338 | A13140 | 162 | A00338 | A13243 | 221 |
| A00338 | A13275 | 184 | A00338 | A13280 | 184 |
| A00338 | A13331 | 172 | A00338 | A13361 | 405 |
| A00338 | A13369 | 491 | A00338 | A13668 | 257 |
| A00338 | A13678 | 221 | A00338 | A13824 | 234 |
| A00338 | A13874 | 210 | A00338 | A14125 | 229 |
| A00338 | A14204 | 432 | A00338 | A14221 | 160 |
| A00338 | A14265 | 277 | A00338 | A14272 | 380 |
| A00338 | A14350 | 172 | A00338 | A14353 | 252 |
| A00338 | A14377 | 401 | A00338 | A14381 | 491 |
| A00338 | A14395 | 468 | A00338 | A14399 | 188 |
| A00338 | A14498 | 424 | A00338 | A14548 | 399 |
| A00338 | A14589 | 352 | A00338 | A14633 | 338 |
| A00338 | A14673 | 257 | A00338 | A14690 | 180 |
| A00338 | A14735 | 299 | A00338 | A14838 | 151 |
| A00338 | A15232 | 257 | A00338 | A15282 | 490 |
| A00338 | A15292 | 396 | A00338 | A15295 | 561 |
| A00338 | A15322 | 333 | A00338 | A15328 | 176 |
| A00338 | A15398 | 435 | A00338 | A15422 | 407 |
| A00338 | A15432 | 368 | A00338 | A15477 | 154 |
| A00338 | A15494 | 200 | A00338 | A15498 | 655 |
| A00338 | A15638 | 485 | A00338 | A15707 | 154 |
| A00338 | A15809 | 238 | A00338 | A15917 | 490 |
| A00338 | A15922 | 279 | A00338 | A16005 | 257 |
| A00338 | A16121 | 380 | A00338 | A16340 | 221 |
| A00338 | A16420 | 340 | A00338 | A16480 | 154 |
| A00338 | A16607 | 257 | A00338 | A17037 | 219 |
| A00338 | A17078 | 481 | A00339 | A00365 | 193 |
| A00339 | A00367 | 676 | A00339 | A00368 | 649 |
| A00339 | A00369 | 491 | A00339 | A00373 | 184 |
| A00339 | A00421 | 695 | A00339 | A00531 | 694 |
| A00339 | A00559 | 399 | A00339 | A00646 | 213 |
| A00339 | A00691 | 413 | A00339 | A00716 | 290 |
| A00339 | A00905 | 486 | A00339 | A00916 | 460 |

|        |        |     |        |        |     |
|--------|--------|-----|--------|--------|-----|
| A00339 | A01029 | 154 | A00339 | A01136 | 224 |
| A00339 | A01139 | 351 | A00339 | A01151 | 452 |
| A00339 | A01231 | 368 | A00339 | A01266 | 229 |
| A00339 | A01268 | 477 | A00339 | A01351 | 486 |
| A00339 | A01359 | 486 | A00339 | A01372 | 383 |
| A00339 | A01612 | 467 | A00339 | A03298 | 486 |
| A00339 | A03494 | 691 | A00339 | A03569 | 228 |
| A00339 | A03902 | 234 | A00339 | A06379 | 172 |
| A00339 | A08137 | 465 | A00339 | A08201 | 224 |
| A00339 | A08431 | 224 | A00339 | A08524 | 383 |
| A00339 | A08571 | 491 | A00339 | A08885 | 301 |
| A00339 | A08928 | 404 | A00339 | A08963 | 322 |
| A00339 | A09515 | 173 | A00339 | A09538 | 427 |
| A00339 | A09591 | 307 | A00339 | A09654 | 174 |
| A00339 | A10250 | 395 | A00339 | A10853 | 460 |
| A00339 | A11105 | 385 | A00339 | A11139 | 688 |
| A00339 | A11920 | 383 | A00339 | A13310 | 180 |
| A00339 | A13800 | 435 | A00339 | A13805 | 544 |
| A00339 | A14246 | 152 | A00339 | A14304 | 200 |
| A00339 | A14476 | 234 | A00339 | A14728 | 226 |
| A00339 | A15297 | 205 | A00339 | A15370 | 188 |
| A00339 | A15711 | 544 | A00339 | A16490 | 301 |
| A00339 | A16690 | 383 | A00339 | A16866 | 383 |
| A00339 | A16912 | 180 | A00340 | A00343 | 324 |
| A00340 | A00366 | 263 | A00340 | A00367 | 180 |
| A00340 | A00460 | 324 | A00340 | A00630 | 545 |
| A00340 | A00643 | 426 | A00340 | A00655 | 249 |
| A00340 | A00822 | 243 | A00340 | A00826 | 561 |
| A00340 | A00839 | 389 | A00340 | A00931 | 269 |
| A00340 | A00932 | 414 | A00340 | A00980 | 695 |
| A00340 | A01112 | 185 | A00340 | A01125 | 491 |
| A00340 | A01261 | 404 | A00340 | A01291 | 229 |
| A00340 | A01309 | 561 | A00340 | A01380 | 324 |
| A00340 | A01540 | 324 | A00340 | A01553 | 313 |
| A00340 | A01560 | 319 | A00340 | A01561 | 493 |
| A00340 | A01579 | 207 | A00340 | A01767 | 152 |
| A00340 | A01850 | 324 | A00340 | A01905 | 457 |
| A00340 | A01995 | 702 | A00340 | A02110 | 534 |
| A00340 | A02111 | 310 | A00340 | A02353 | 324 |
| A00340 | A02734 | 157 | A00340 | A02738 | 190 |
| A00340 | A03188 | 247 | A00340 | A03516 | 324 |
| A00340 | A03591 | 374 | A00340 | A03740 | 324 |
| A00340 | A03752 | 480 | A00340 | A03758 | 195 |
| A00340 | A03981 | 393 | A00340 | A04012 | 475 |
| A00340 | A04092 | 258 | A00340 | A04321 | 283 |
| A00340 | A04449 | 409 | A00340 | A04465 | 260 |

|        |        |     |        |        |     |
|--------|--------|-----|--------|--------|-----|
| A00340 | A04541 | 240 | A00340 | A04569 | 283 |
| A00340 | A05086 | 324 | A00340 | A05247 | 160 |
| A00340 | A05288 | 486 | A00340 | A05416 | 396 |
| A00340 | A06466 | 642 | A00340 | A06517 | 393 |
| A00340 | A06606 | 383 | A00340 | A07102 | 324 |
| A00340 | A07187 | 324 | A00340 | A07298 | 490 |
| A00340 | A07311 | 569 | A00340 | A07726 | 484 |
| A00340 | A07803 | 191 | A00340 | A07848 | 286 |
| A00340 | A08577 | 165 | A00340 | A08860 | 445 |
| A00340 | A08869 | 441 | A00340 | A09245 | 240 |
| A00340 | A09496 | 486 | A00340 | A09606 | 201 |
| A00340 | A10430 | 601 | A00340 | A10744 | 351 |
| A00340 | A11374 | 324 | A00340 | A11393 | 481 |
| A00340 | A11487 | 523 | A00340 | A11694 | 324 |
| A00340 | A11937 | 340 | A00340 | A11983 | 452 |
| A00340 | A13340 | 490 | A00340 | A14073 | 324 |
| A00340 | A14198 | 345 | A00340 | A14410 | 313 |
| A00340 | A14433 | 899 | A00340 | A14443 | 899 |
| A00340 | A14642 | 324 | A00340 | A15252 | 160 |
| A00340 | A15277 | 241 | A00340 | A15430 | 152 |
| A00340 | A15506 | 406 | A00340 | A15546 | 375 |
| A00340 | A15665 | 291 | A00340 | A15682 | 428 |
| A00340 | A15728 | 229 | A00340 | A15843 | 324 |
| A00340 | A15989 | 293 | A00340 | A16580 | 185 |
| A00340 | A16627 | 327 | A00340 | A16847 | 720 |
| A00340 | A16879 | 182 | A00340 | A16947 | 199 |
| A00341 | A00398 | 180 | A00341 | A00748 | 340 |
| A00341 | A00825 | 193 | A00341 | A00933 | 329 |
| A00341 | A01189 | 170 | A00341 | A06687 | 339 |
| A00341 | A07155 | 378 | A00341 | A09256 | 224 |
| A00341 | A13975 | 238 | A00342 | A00882 | 279 |
| A00342 | A01332 | 279 | A00342 | A01578 | 162 |
| A00342 | A02049 | 258 | A00342 | A08097 | 296 |
| A00342 | A11421 | 433 | A00342 | A14199 | 260 |
| A00342 | A14202 | 317 | A00342 | A14369 | 357 |
| A00342 | A14372 | 314 | A00342 | A14374 | 279 |
| A00342 | A14408 | 322 | A00342 | A14570 | 177 |
| A00342 | A14893 | 443 | A00342 | A15478 | 296 |
| A00342 | A16901 | 385 | A00343 | A00352 | 419 |
| A00343 | A00405 | 174 | A00343 | A00417 | 340 |
| A00343 | A00453 | 210 | A00343 | A00458 | 443 |
| A00343 | A00460 | 324 | A00343 | A00502 | 63  |
| A00343 | A00510 | 339 | A00343 | A00537 | 240 |
| A00343 | A00604 | 491 | A00343 | A00649 | 313 |
| A00343 | A00653 | 491 | A00343 | A00669 | 384 |
| A00343 | A00691 | 452 | A00343 | A00783 | 491 |

|        |        |     |        |        |     |
|--------|--------|-----|--------|--------|-----|
| A00343 | A00785 | 491 | A00343 | A00790 | 452 |
| A00343 | A00953 | 480 | A00343 | A00974 | 319 |
| A00343 | A01027 | 440 | A00343 | A01042 | 484 |
| A00343 | A01054 | 472 | A00343 | A01075 | 200 |
| A00343 | A01081 | 218 | A00343 | A01086 | 460 |
| A00343 | A01087 | 350 | A00343 | A01108 | 281 |
| A00343 | A01150 | 458 | A00343 | A01204 | 121 |
| A00343 | A01246 | 138 | A00343 | A01265 | 440 |
| A00343 | A01346 | 130 | A00343 | A01380 | 324 |
| A00343 | A01399 | 388 | A00343 | A01446 | 457 |
| A00343 | A01448 | 333 | A00343 | A01540 | 619 |
| A00343 | A01574 | 213 | A00343 | A01576 | 198 |
| A00343 | A01850 | 324 | A00343 | A02185 | 162 |
| A00343 | A02353 | 324 | A00343 | A03070 | 491 |
| A00343 | A03293 | 474 | A00343 | A03298 | 428 |
| A00343 | A03516 | 324 | A00343 | A03740 | 627 |
| A00343 | A03776 | 279 | A00343 | A03795 | 205 |
| A00343 | A03959 | 152 | A00343 | A05086 | 324 |
| A00343 | A05387 | 356 | A00343 | A05839 | 404 |
| A00343 | A06959 | 193 | A00343 | A07102 | 324 |
| A00343 | A07187 | 324 | A00343 | A07706 | 263 |
| A00343 | A08371 | 438 | A00343 | A08571 | 380 |
| A00343 | A08835 | 398 | A00343 | A08885 | 240 |
| A00343 | A09591 | 259 | A00343 | A09720 | 266 |
| A00343 | A11296 | 457 | A00343 | A11322 | 477 |
| A00343 | A11337 | 362 | A00343 | A11338 | 486 |
| A00343 | A11374 | 621 | A00343 | A11427 | 489 |
| A00343 | A11612 | 263 | A00343 | A11694 | 324 |
| A00343 | A11836 | 221 | A00343 | A11930 | 157 |
| A00343 | A12241 | 486 | A00343 | A13261 | 271 |
| A00343 | A14073 | 393 | A00343 | A14461 | 201 |
| A00343 | A14471 | 297 | A00343 | A14642 | 324 |
| A00343 | A14845 | 276 | A00343 | A15843 | 324 |
| A00343 | A16371 | 154 | A00343 | A17128 | 483 |
| A00344 | A15606 | 63  | A00345 | A00454 | 236 |
| A00345 | A01042 | 243 | A00345 | A01075 | 170 |
| A00345 | A01083 | 337 | A00345 | A03740 | 219 |
| A00346 | A00359 | 306 | A00346 | A00469 | 263 |
| A00346 | A00482 | 207 | A00346 | A00531 | 160 |
| A00346 | A01003 | 228 | A00346 | A01011 | 327 |
| A00346 | A01920 | 241 | A00346 | A03166 | 363 |
| A00346 | A03361 | 159 | A00346 | A04342 | 247 |
| A00346 | A10619 | 278 | A00346 | A11604 | 173 |
| A00346 | A14044 | 357 | A00347 | A00418 | 443 |
| A00347 | A00470 | 605 | A00347 | A00473 | 466 |
| A00347 | A00565 | 165 | A00347 | A00605 | 296 |

|        |        |     |        |        |     |
|--------|--------|-----|--------|--------|-----|
| A00347 | A00637 | 276 | A00347 | A00688 | 252 |
| A00347 | A00922 | 249 | A00347 | A00987 | 267 |
| A00347 | A01046 | 199 | A00347 | A01117 | 472 |
| A00347 | A01124 | 465 | A00347 | A01172 | 486 |
| A00347 | A01214 | 224 | A00347 | A01215 | 393 |
| A00347 | A01244 | 414 | A00347 | A01320 | 468 |
| A00347 | A01322 | 347 | A00347 | A01325 | 450 |
| A00347 | A01492 | 245 | A00347 | A01530 | 283 |
| A00347 | A01548 | 485 | A00347 | A01596 | 741 |
| A00347 | A01615 | 232 | A00347 | A01775 | 899 |
| A00347 | A01930 | 184 | A00347 | A01993 | 217 |
| A00347 | A02104 | 193 | A00347 | A02144 | 217 |
| A00347 | A02147 | 177 | A00347 | A02221 | 172 |
| A00347 | A02424 | 347 | A00347 | A02425 | 213 |
| A00347 | A02487 | 190 | A00347 | A02494 | 63  |
| A00347 | A02557 | 277 | A00347 | A02673 | 267 |
| A00347 | A02687 | 427 | A00347 | A02688 | 216 |
| A00347 | A03044 | 291 | A00347 | A03046 | 238 |
| A00347 | A03090 | 193 | A00347 | A03115 | 224 |
| A00347 | A03152 | 171 | A00347 | A03193 | 481 |
| A00347 | A03213 | 207 | A00347 | A03434 | 489 |
| A00347 | A04473 | 160 | A00347 | A04911 | 151 |
| A00347 | A05032 | 191 | A00347 | A05297 | 345 |
| A00347 | A05690 | 468 | A00347 | A05825 | 205 |
| A00347 | A05966 | 526 | A00347 | A06039 | 199 |
| A00347 | A06137 | 407 | A00347 | A06212 | 249 |
| A00347 | A06423 | 205 | A00347 | A06466 | 605 |
| A00347 | A06494 | 252 | A00347 | A06610 | 202 |
| A00347 | A06822 | 277 | A00347 | A07014 | 154 |
| A00347 | A07062 | 475 | A00347 | A07207 | 270 |
| A00347 | A07311 | 333 | A00347 | A07706 | 199 |
| A00347 | A07848 | 219 | A00347 | A08133 | 199 |
| A00347 | A08209 | 317 | A00347 | A08863 | 276 |
| A00347 | A08884 | 167 | A00347 | A09195 | 199 |
| A00347 | A09390 | 152 | A00347 | A09652 | 201 |
| A00347 | A09727 | 176 | A00347 | A09826 | 435 |
| A00347 | A09854 | 198 | A00347 | A10039 | 168 |
| A00347 | A10580 | 180 | A00347 | A10671 | 201 |
| A00347 | A11250 | 205 | A00347 | A11376 | 276 |
| A00347 | A11379 | 229 | A00347 | A11467 | 228 |
| A00347 | A11483 | 221 | A00347 | A11843 | 276 |
| A00347 | A11851 | 276 | A00347 | A11937 | 199 |
| A00347 | A12215 | 176 | A00347 | A13272 | 252 |
| A00347 | A13311 | 160 | A00347 | A13356 | 276 |
| A00347 | A13726 | 383 | A00347 | A14200 | 152 |
| A00347 | A14452 | 321 | A00347 | A14888 | 176 |

|        |        |     |        |        |     |
|--------|--------|-----|--------|--------|-----|
| A00347 | A14932 | 191 | A00347 | A15315 | 165 |
| A00347 | A15347 | 171 | A00347 | A15480 | 276 |
| A00347 | A15896 | 408 | A00347 | A16038 | 252 |
| A00347 | A16707 | 263 | A00347 | A16942 | 187 |
| A00348 | A00351 | 291 | A00348 | A00352 | 301 |
| A00348 | A00368 | 423 | A00348 | A00371 | 480 |
| A00348 | A00378 | 428 | A00348 | A00420 | 173 |
| A00348 | A00421 | 235 | A00348 | A00436 | 477 |
| A00348 | A00439 | 335 | A00348 | A00454 | 489 |
| A00348 | A00458 | 491 | A00348 | A00489 | 353 |
| A00348 | A00496 | 393 | A00348 | A00501 | 283 |
| A00348 | A00517 | 463 | A00348 | A00527 | 450 |
| A00348 | A00531 | 491 | A00348 | A00532 | 491 |
| A00348 | A00537 | 446 | A00348 | A00560 | 384 |
| A00348 | A00589 | 256 | A00348 | A00605 | 413 |
| A00348 | A00609 | 483 | A00348 | A00626 | 230 |
| A00348 | A00640 | 191 | A00348 | A00647 | 317 |
| A00348 | A00655 | 484 | A00348 | A00697 | 296 |
| A00348 | A00707 | 438 | A00348 | A00733 | 156 |
| A00348 | A00741 | 251 | A00348 | A00758 | 329 |
| A00348 | A00781 | 235 | A00348 | A00793 | 200 |
| A00348 | A00819 | 463 | A00348 | A00822 | 491 |
| A00348 | A00831 | 390 | A00348 | A00833 | 461 |
| A00348 | A00835 | 199 | A00348 | A00839 | 227 |
| A00348 | A00841 | 257 | A00348 | A00843 | 382 |
| A00348 | A00848 | 467 | A00348 | A00871 | 474 |
| A00348 | A00883 | 491 | A00348 | A00905 | 475 |
| A00348 | A00909 | 229 | A00348 | A00916 | 490 |
| A00348 | A00922 | 467 | A00348 | A00932 | 374 |
| A00348 | A00933 | 305 | A00348 | A00935 | 382 |
| A00348 | A00940 | 218 | A00348 | A00958 | 433 |
| A00348 | A00970 | 319 | A00348 | A01031 | 350 |
| A00348 | A01032 | 363 | A00348 | A01033 | 276 |
| A00348 | A01042 | 177 | A00348 | A01051 | 286 |
| A00348 | A01052 | 246 | A00348 | A01057 | 212 |
| A00348 | A01069 | 490 | A00348 | A01075 | 491 |
| A00348 | A01077 | 481 | A00348 | A01082 | 441 |
| A00348 | A01083 | 285 | A00348 | A01084 | 414 |
| A00348 | A01087 | 475 | A00348 | A01091 | 177 |
| A00348 | A01115 | 472 | A00348 | A01150 | 462 |
| A00348 | A01194 | 350 | A00348 | A01206 | 477 |
| A00348 | A01211 | 195 | A00348 | A01215 | 486 |
| A00348 | A01234 | 486 | A00348 | A01242 | 283 |
| A00348 | A01243 | 274 | A00348 | A01261 | 479 |
| A00348 | A01268 | 291 | A00348 | A01291 | 485 |
| A00348 | A01299 | 382 | A00348 | A01335 | 215 |



|        |        |     |        |        |     |
|--------|--------|-----|--------|--------|-----|
| A00348 | A01353 | 201 | A00348 | A01354 | 730 |
| A00348 | A01385 | 486 | A00348 | A01439 | 486 |
| A00348 | A01470 | 488 | A00348 | A01539 | 307 |
| A00348 | A01540 | 488 | A00348 | A01541 | 730 |
| A00348 | A01558 | 416 | A00348 | A01560 | 353 |
| A00348 | A01569 | 480 | A00348 | A01572 | 484 |
| A00348 | A01577 | 479 | A00348 | A01598 | 491 |
| A00348 | A01612 | 436 | A00348 | A01613 | 270 |
| A00348 | A01649 | 491 | A00348 | A01655 | 200 |
| A00348 | A01707 | 491 | A00348 | A01763 | 470 |
| A00348 | A01770 | 449 | A00348 | A01781 | 314 |
| A00348 | A01822 | 609 | A00348 | A02111 | 156 |
| A00348 | A02219 | 485 | A00348 | A02446 | 201 |
| A00348 | A02470 | 294 | A00348 | A02715 | 388 |
| A00348 | A02765 | 216 | A00348 | A02784 | 185 |
| A00348 | A02797 | 277 | A00348 | A02916 | 154 |
| A00348 | A03057 | 212 | A00348 | A03261 | 247 |
| A00348 | A03298 | 171 | A00348 | A03446 | 486 |
| A00348 | A03560 | 328 | A00348 | A03569 | 286 |
| A00348 | A03638 | 391 | A00348 | A03654 | 490 |
| A00348 | A03740 | 491 | A00348 | A03752 | 489 |
| A00348 | A03817 | 454 | A00348 | A03820 | 491 |
| A00348 | A03881 | 179 | A00348 | A03977 | 318 |
| A00348 | A03992 | 215 | A00348 | A04288 | 152 |
| A00348 | A04561 | 162 | A00348 | A04562 | 386 |
| A00348 | A04814 | 179 | A00348 | A04944 | 375 |
| A00348 | A05120 | 219 | A00348 | A05122 | 463 |
| A00348 | A05928 | 238 | A00348 | A06182 | 85  |
| A00348 | A06198 | 272 | A00348 | A06234 | 162 |
| A00348 | A06377 | 216 | A00348 | A06466 | 491 |
| A00348 | A06907 | 279 | A00348 | A07311 | 550 |
| A00348 | A07604 | 456 | A00348 | A07706 | 484 |
| A00348 | A07798 | 418 | A00348 | A08054 | 378 |
| A00348 | A08118 | 457 | A00348 | A08137 | 491 |
| A00348 | A08178 | 226 | A00348 | A08280 | 249 |
| A00348 | A08359 | 372 | A00348 | A08377 | 256 |
| A00348 | A08543 | 257 | A00348 | A08550 | 313 |
| A00348 | A08552 | 193 | A00348 | A08561 | 257 |
| A00348 | A08571 | 491 | A00348 | A08805 | 157 |
| A00348 | A08996 | 204 | A00348 | A09194 | 417 |
| A00348 | A09269 | 427 | A00348 | A09609 | 350 |
| A00348 | A09621 | 650 | A00348 | A09655 | 238 |
| A00348 | A09768 | 154 | A00348 | A09857 | 333 |
| A00348 | A10165 | 219 | A00348 | A10321 | 362 |
| A00348 | A10399 | 477 | A00348 | A10532 | 182 |
| A00348 | A10624 | 200 | A00348 | A10642 | 447 |

|        |        |     |        |        |     |
|--------|--------|-----|--------|--------|-----|
| A00348 | A10789 | 217 | A00348 | A10853 | 418 |
| A00348 | A10935 | 151 | A00348 | A11132 | 160 |
| A00348 | A11286 | 467 | A00348 | A11297 | 374 |
| A00348 | A11301 | 268 | A00348 | A11302 | 490 |
| A00348 | A11324 | 724 | A00348 | A11344 | 219 |
| A00348 | A11372 | 475 | A00348 | A11374 | 160 |
| A00348 | A11387 | 154 | A00348 | A11472 | 446 |
| A00348 | A11675 | 409 | A00348 | A11735 | 329 |
| A00348 | A11833 | 463 | A00348 | A11914 | 263 |
| A00348 | A11940 | 210 | A00348 | A11954 | 201 |
| A00348 | A12215 | 235 | A00348 | A12328 | 465 |
| A00348 | A12506 | 215 | A00348 | A12507 | 288 |
| A00348 | A12606 | 257 | A00348 | A12658 | 383 |
| A00348 | A12826 | 238 | A00348 | A12858 | 266 |
| A00348 | A13116 | 162 | A00348 | A13128 | 460 |
| A00348 | A13311 | 157 | A00348 | A13335 | 435 |
| A00348 | A13340 | 462 | A00348 | A13696 | 238 |
| A00348 | A13708 | 257 | A00348 | A13784 | 195 |
| A00348 | A13786 | 221 | A00348 | A13787 | 290 |
| A00348 | A13788 | 188 | A00348 | A13809 | 273 |
| A00348 | A13870 | 162 | A00348 | A13912 | 272 |
| A00348 | A13989 | 491 | A00348 | A14006 | 491 |
| A00348 | A14073 | 485 | A00348 | A14196 | 465 |
| A00348 | A14214 | 294 | A00348 | A14220 | 458 |
| A00348 | A14221 | 157 | A00348 | A14257 | 339 |
| A00348 | A14270 | 254 | A00348 | A14286 | 184 |
| A00348 | A14351 | 416 | A00348 | A14399 | 195 |
| A00348 | A14449 | 243 | A00348 | A14467 | 455 |
| A00348 | A14476 | 236 | A00348 | A14551 | 170 |
| A00348 | A14566 | 255 | A00348 | A14569 | 283 |
| A00348 | A14596 | 480 | A00348 | A14659 | 168 |
| A00348 | A14739 | 170 | A00348 | A14826 | 308 |
| A00348 | A14921 | 157 | A00348 | A15116 | 283 |
| A00348 | A15244 | 407 | A00348 | A15261 | 488 |
| A00348 | A15507 | 467 | A00348 | A15541 | 221 |
| A00348 | A15653 | 216 | A00348 | A15660 | 430 |
| A00348 | A15680 | 230 | A00348 | A15684 | 305 |
| A00348 | A15709 | 303 | A00348 | A15711 | 247 |
| A00348 | A15734 | 152 | A00348 | A15755 | 179 |
| A00348 | A15932 | 162 | A00348 | A16060 | 443 |
| A00348 | A16096 | 216 | A00348 | A16157 | 435 |
| A00348 | A16243 | 196 | A00348 | A16320 | 313 |
| A00348 | A16410 | 451 | A00348 | A16565 | 243 |
| A00348 | A16566 | 205 | A00348 | A16567 | 238 |
| A00348 | A16611 | 274 | A00348 | A16664 | 154 |
| A00348 | A16675 | 172 | A00348 | A16764 | 486 |

|        |        |     |        |        |     |
|--------|--------|-----|--------|--------|-----|
| A00348 | A16776 | 314 | A00348 | A16788 | 346 |
| A00348 | A16829 | 299 | A00348 | A16874 | 191 |
| A00348 | A16908 | 170 | A00348 | A17019 | 157 |
| A00348 | A17142 | 266 | A00348 | A17144 | 168 |
| A00348 | A17230 | 157 | A00349 | A00601 | 238 |
| A00349 | A00815 | 226 | A00349 | A01125 | 180 |
| A00349 | A01137 | 363 | A00349 | A01257 | 446 |
| A00349 | A01547 | 344 | A00349 | A02148 | 227 |
| A00349 | A02312 | 355 | A00349 | A02425 | 273 |
| A00349 | A02531 | 355 | A00349 | A02559 | 270 |
| A00349 | A02673 | 347 | A00349 | A02759 | 324 |
| A00349 | A03219 | 302 | A00349 | A03661 | 241 |
| A00349 | A03961 | 296 | A00349 | A04256 | 454 |
| A00349 | A05533 | 413 | A00349 | A06688 | 229 |
| A00349 | A13875 | 312 | A00349 | A15233 | 357 |
| A00350 | A00351 | 361 | A00350 | A00478 | 355 |
| A00350 | A00491 | 251 | A00350 | A00509 | 390 |
| A00350 | A00531 | 648 | A00350 | A00556 | 165 |
| A00350 | A00567 | 269 | A00350 | A00568 | 483 |
| A00350 | A00573 | 210 | A00350 | A00577 | 193 |
| A00350 | A00611 | 382 | A00350 | A00616 | 338 |
| A00350 | A00659 | 185 | A00350 | A00664 | 229 |
| A00350 | A00841 | 326 | A00350 | A00846 | 185 |
| A00350 | A00916 | 332 | A00350 | A01137 | 409 |
| A00350 | A01404 | 324 | A00350 | A01485 | 230 |
| A00350 | A01492 | 281 | A00350 | A01567 | 446 |
| A00350 | A01590 | 434 | A00350 | A01604 | 173 |
| A00350 | A01698 | 249 | A00350 | A01716 | 190 |
| A00350 | A01899 | 296 | A00350 | A01926 | 378 |
| A00350 | A02083 | 470 | A00350 | A02111 | 416 |
| A00350 | A02122 | 201 | A00350 | A02132 | 313 |
| A00350 | A02138 | 241 | A00350 | A02156 | 483 |
| A00350 | A02222 | 278 | A00350 | A02251 | 152 |
| A00350 | A02260 | 218 | A00350 | A02262 | 241 |
| A00350 | A02268 | 223 | A00350 | A02272 | 235 |
| A00350 | A02299 | 285 | A00350 | A02306 | 474 |
| A00350 | A02309 | 335 | A00350 | A02314 | 313 |
| A00350 | A02317 | 230 | A00350 | A02330 | 112 |
| A00350 | A02415 | 157 | A00350 | A02454 | 390 |
| A00350 | A02524 | 302 | A00350 | A02544 | 162 |
| A00350 | A02564 | 190 | A00350 | A02574 | 290 |
| A00350 | A02644 | 481 | A00350 | A02698 | 414 |
| A00350 | A02759 | 176 | A00350 | A02972 | 191 |
| A00350 | A03019 | 221 | A00350 | A03034 | 276 |
| A00350 | A03036 | 196 | A00350 | A03086 | 229 |
| A00350 | A03099 | 486 | A00350 | A03173 | 340 |

|        |        |     |        |        |     |
|--------|--------|-----|--------|--------|-----|
| A00350 | A03238 | 440 | A00350 | A03498 | 351 |
| A00350 | A03919 | 232 | A00350 | A03952 | 367 |
| A00350 | A03968 | 238 | A00350 | A04086 | 204 |
| A00350 | A04256 | 173 | A00350 | A04326 | 302 |
| A00350 | A04439 | 307 | A00350 | A04975 | 274 |
| A00350 | A04981 | 249 | A00350 | A05098 | 188 |
| A00350 | A05157 | 215 | A00350 | A05208 | 468 |
| A00350 | A05376 | 177 | A00350 | A05653 | 272 |
| A00350 | A05812 | 156 | A00350 | A05934 | 307 |
| A00350 | A06067 | 165 | A00350 | A06253 | 335 |
| A00350 | A06471 | 396 | A00350 | A06503 | 340 |
| A00350 | A06922 | 321 | A00350 | A07140 | 477 |
| A00350 | A07311 | 176 | A00350 | A07324 | 176 |
| A00350 | A07336 | 260 | A00350 | A07342 | 334 |
| A00350 | A07655 | 351 | A00350 | A07746 | 180 |
| A00350 | A07878 | 296 | A00350 | A08137 | 322 |
| A00350 | A08660 | 185 | A00350 | A08688 | 351 |
| A00350 | A10635 | 156 | A00350 | A13434 | 272 |
| A00350 | A14209 | 346 | A00350 | A14220 | 462 |
| A00350 | A14344 | 224 | A00350 | A14430 | 163 |
| A00350 | A14451 | 188 | A00350 | A14735 | 246 |
| A00350 | A15718 | 198 | A00350 | A16087 | 157 |
| A00351 | A00449 | 422 | A00351 | A00472 | 396 |
| A00351 | A00478 | 469 | A00351 | A00601 | 297 |
| A00351 | A00659 | 481 | A00351 | A00662 | 665 |
| A00351 | A00663 | 288 | A00351 | A00784 | 183 |
| A00351 | A00794 | 263 | A00351 | A00868 | 221 |
| A00351 | A00981 | 435 | A00351 | A01005 | 481 |
| A00351 | A01137 | 361 | A00351 | A01404 | 491 |
| A00351 | A01425 | 63  | A00351 | A01460 | 484 |
| A00351 | A01461 | 491 | A00351 | A01485 | 347 |
| A00351 | A01515 | 491 | A00351 | A01573 | 491 |
| A00351 | A01583 | 205 | A00351 | A01585 | 389 |
| A00351 | A01635 | 346 | A00351 | A01710 | 286 |
| A00351 | A01737 | 168 | A00351 | A01741 | 335 |
| A00351 | A01743 | 168 | A00351 | A01848 | 213 |
| A00351 | A01923 | 374 | A00351 | A01924 | 200 |
| A00351 | A01926 | 491 | A00351 | A01929 | 207 |
| A00351 | A01937 | 208 | A00351 | A01978 | 191 |
| A00351 | A02008 | 306 | A00351 | A02083 | 329 |
| A00351 | A02111 | 483 | A00351 | A02156 | 419 |
| A00351 | A02167 | 190 | A00351 | A02174 | 329 |
| A00351 | A02222 | 319 | A00351 | A02229 | 156 |
| A00351 | A02275 | 227 | A00351 | A02287 | 193 |
| A00351 | A02306 | 297 | A00351 | A02317 | 182 |
| A00351 | A02330 | 401 | A00351 | A02336 | 196 |

|        |        |     |        |        |     |
|--------|--------|-----|--------|--------|-----|
| A00351 | A02356 | 398 | A00351 | A02405 | 489 |
| A00351 | A02410 | 341 | A00351 | A02428 | 235 |
| A00351 | A02442 | 283 | A00351 | A02484 | 182 |
| A00351 | A02524 | 344 | A00351 | A02574 | 332 |
| A00351 | A02601 | 213 | A00351 | A02669 | 196 |
| A00351 | A02738 | 457 | A00351 | A02859 | 416 |
| A00351 | A03007 | 316 | A00351 | A03034 | 486 |
| A00351 | A03099 | 485 | A00351 | A03104 | 173 |
| A00351 | A03134 | 157 | A00351 | A03144 | 198 |
| A00351 | A03147 | 159 | A00351 | A03238 | 491 |
| A00351 | A03513 | 165 | A00351 | A03523 | 374 |
| A00351 | A03545 | 234 | A00351 | A03609 | 165 |
| A00351 | A03892 | 187 | A00351 | A03919 | 184 |
| A00351 | A03926 | 177 | A00351 | A03961 | 307 |
| A00351 | A03968 | 173 | A00351 | A04051 | 160 |
| A00351 | A04087 | 193 | A00351 | A04092 | 411 |
| A00351 | A04232 | 168 | A00351 | A04258 | 374 |
| A00351 | A04318 | 356 | A00351 | A04340 | 268 |
| A00351 | A04437 | 174 | A00351 | A04487 | 372 |
| A00351 | A04568 | 162 | A00351 | A04646 | 306 |
| A00351 | A04679 | 447 | A00351 | A04839 | 460 |
| A00351 | A04926 | 346 | A00351 | A05112 | 199 |
| A00351 | A05208 | 184 | A00351 | A05311 | 454 |
| A00351 | A05330 | 160 | A00351 | A05376 | 491 |
| A00351 | A05459 | 425 | A00351 | A05471 | 162 |
| A00351 | A05573 | 330 | A00351 | A05620 | 236 |
| A00351 | A05629 | 204 | A00351 | A05653 | 226 |
| A00351 | A05751 | 151 | A00351 | A05829 | 274 |
| A00351 | A05923 | 179 | A00351 | A06258 | 435 |
| A00351 | A06574 | 358 | A00351 | A06769 | 291 |
| A00351 | A06831 | 469 | A00351 | A07141 | 329 |
| A00351 | A07184 | 184 | A00351 | A07218 | 291 |
| A00351 | A07342 | 152 | A00351 | A07407 | 156 |
| A00351 | A07438 | 193 | A00351 | A07704 | 258 |
| A00351 | A07705 | 343 | A00351 | A07726 | 288 |
| A00351 | A07753 | 184 | A00351 | A08292 | 168 |
| A00351 | A08671 | 486 | A00351 | A09036 | 411 |
| A00351 | A09174 | 213 | A00351 | A09277 | 441 |
| A00351 | A09426 | 293 | A00351 | A09461 | 177 |
| A00351 | A10052 | 443 | A00351 | A10078 | 299 |
| A00351 | A10091 | 406 | A00351 | A10410 | 306 |
| A00351 | A10548 | 306 | A00351 | A10967 | 321 |
| A00351 | A11279 | 473 | A00351 | A11310 | 191 |
| A00351 | A11328 | 198 | A00351 | A11329 | 414 |
| A00351 | A11343 | 372 | A00351 | A11684 | 200 |
| A00351 | A11709 | 407 | A00351 | A12069 | 258 |

|        |        |     |        |        |     |
|--------|--------|-----|--------|--------|-----|
| A00351 | A12824 | 313 | A00351 | A12982 | 236 |
| A00351 | A13871 | 345 | A00351 | A13987 | 389 |
| A00351 | A14202 | 196 | A00351 | A14247 | 491 |
| A00351 | A14258 | 375 | A00351 | A14344 | 308 |
| A00351 | A14430 | 187 | A00351 | A14661 | 462 |
| A00351 | A15230 | 436 | A00351 | A15293 | 408 |
| A00351 | A15301 | 335 | A00351 | A15366 | 490 |
| A00351 | A15430 | 238 | A00351 | A15462 | 452 |
| A00351 | A15463 | 461 | A00351 | A15498 | 417 |
| A00351 | A15506 | 352 | A00351 | A16150 | 322 |
| A00351 | A16337 | 322 | A00351 | A16368 | 260 |
| A00351 | A16503 | 241 | A00351 | A16751 | 245 |
| A00352 | A00356 | 171 | A00352 | A00377 | 543 |
| A00352 | A00378 | 706 | A00352 | A00383 | 135 |
| A00352 | A00400 | 508 | A00352 | A00421 | 491 |
| A00352 | A00438 | 491 | A00352 | A00442 | 467 |
| A00352 | A00446 | 461 | A00352 | A00447 | 172 |
| A00352 | A00454 | 490 | A00352 | A00457 | 480 |
| A00352 | A00460 | 362 | A00352 | A00485 | 188 |
| A00352 | A00494 | 187 | A00352 | A00500 | 419 |
| A00352 | A00523 | 416 | A00352 | A00531 | 640 |
| A00352 | A00532 | 489 | A00352 | A00537 | 871 |
| A00352 | A00538 | 491 | A00352 | A00539 | 467 |
| A00352 | A00561 | 439 | A00352 | A00565 | 246 |
| A00352 | A00566 | 156 | A00352 | A00571 | 490 |
| A00352 | A00598 | 491 | A00352 | A00604 | 491 |
| A00352 | A00609 | 229 | A00352 | A00638 | 262 |
| A00352 | A00648 | 475 | A00352 | A00649 | 318 |
| A00352 | A00653 | 557 | A00352 | A00655 | 428 |
| A00352 | A00680 | 430 | A00352 | A00687 | 491 |
| A00352 | A00688 | 235 | A00352 | A00693 | 491 |
| A00352 | A00694 | 272 | A00352 | A00697 | 636 |
| A00352 | A00698 | 356 | A00352 | A00741 | 491 |
| A00352 | A00742 | 486 | A00352 | A00758 | 491 |
| A00352 | A00769 | 228 | A00352 | A00778 | 330 |
| A00352 | A00783 | 369 | A00352 | A00785 | 378 |
| A00352 | A00787 | 443 | A00352 | A00790 | 257 |
| A00352 | A00805 | 299 | A00352 | A00809 | 588 |
| A00352 | A00821 | 475 | A00352 | A00839 | 489 |
| A00352 | A00841 | 557 | A00352 | A00849 | 488 |
| A00352 | A00856 | 418 | A00352 | A00865 | 227 |
| A00352 | A00868 | 438 | A00352 | A00871 | 652 |
| A00352 | A00878 | 490 | A00352 | A00891 | 182 |
| A00352 | A00909 | 294 | A00352 | A00911 | 574 |
| A00352 | A00922 | 457 | A00352 | A00935 | 627 |
| A00352 | A00936 | 168 | A00352 | A00953 | 491 |

|        |        |     |        |        |     |
|--------|--------|-----|--------|--------|-----|
| A00352 | A00975 | 290 | A00352 | A00984 | 362 |
| A00352 | A00985 | 695 | A00352 | A00987 | 456 |
| A00352 | A00998 | 249 | A00352 | A01020 | 345 |
| A00352 | A01022 | 180 | A00352 | A01024 | 694 |
| A00352 | A01026 | 278 | A00352 | A01027 | 491 |
| A00352 | A01042 | 452 | A00352 | A01050 | 424 |
| A00352 | A01075 | 490 | A00352 | A01082 | 477 |
| A00352 | A01086 | 602 | A00352 | A01100 | 592 |
| A00352 | A01106 | 173 | A00352 | A01108 | 382 |
| A00352 | A01135 | 184 | A00352 | A01150 | 659 |
| A00352 | A01155 | 469 | A00352 | A01156 | 430 |
| A00352 | A01161 | 745 | A00352 | A01169 | 490 |
| A00352 | A01192 | 555 | A00352 | A01210 | 491 |
| A00352 | A01212 | 391 | A00352 | A01214 | 666 |
| A00352 | A01215 | 227 | A00352 | A01218 | 172 |
| A00352 | A01226 | 400 | A00352 | A01232 | 597 |
| A00352 | A01234 | 542 | A00352 | A01261 | 452 |
| A00352 | A01287 | 457 | A00352 | A01296 | 293 |
| A00352 | A01307 | 347 | A00352 | A01311 | 561 |
| A00352 | A01320 | 298 | A00352 | A01321 | 188 |
| A00352 | A01322 | 160 | A00352 | A01326 | 477 |
| A00352 | A01327 | 355 | A00352 | A01329 | 369 |
| A00352 | A01331 | 371 | A00352 | A01336 | 491 |
| A00352 | A01347 | 235 | A00352 | A01352 | 193 |
| A00352 | A01365 | 418 | A00352 | A01385 | 491 |
| A00352 | A01399 | 386 | A00352 | A01406 | 232 |
| A00352 | A01413 | 491 | A00352 | A01435 | 609 |
| A00352 | A01436 | 159 | A00352 | A01447 | 491 |
| A00352 | A01451 | 461 | A00352 | A01483 | 360 |
| A00352 | A01502 | 251 | A00352 | A01504 | 174 |
| A00352 | A01507 | 171 | A00352 | A01539 | 190 |
| A00352 | A01540 | 491 | A00352 | A01542 | 400 |
| A00352 | A01559 | 204 | A00352 | A01571 | 246 |
| A00352 | A01573 | 470 | A00352 | A01576 | 457 |
| A00352 | A01578 | 210 | A00352 | A01582 | 200 |
| A00352 | A01596 | 491 | A00352 | A01612 | 160 |
| A00352 | A01626 | 293 | A00352 | A01627 | 249 |
| A00352 | A01707 | 486 | A00352 | A01711 | 430 |
| A00352 | A01741 | 263 | A00352 | A01815 | 263 |
| A00352 | A01824 | 443 | A00352 | A01827 | 491 |
| A00352 | A01850 | 401 | A00352 | A01937 | 159 |
| A00352 | A01988 | 267 | A00352 | A02030 | 418 |
| A00352 | A02040 | 472 | A00352 | A02225 | 182 |
| A00352 | A02227 | 230 | A00352 | A02607 | 491 |
| A00352 | A02813 | 193 | A00352 | A02994 | 491 |
| A00352 | A02996 | 251 | A00352 | A02999 | 152 |

|        |        |     |        |        |     |
|--------|--------|-----|--------|--------|-----|
| A00352 | A03259 | 156 | A00352 | A03328 | 314 |
| A00352 | A03494 | 479 | A00352 | A03512 | 330 |
| A00352 | A03651 | 708 | A00352 | A03676 | 470 |
| A00352 | A03740 | 489 | A00352 | A03752 | 364 |
| A00352 | A03798 | 355 | A00352 | A03809 | 242 |
| A00352 | A03930 | 184 | A00352 | A03959 | 475 |
| A00352 | A04508 | 184 | A00352 | A04668 | 314 |
| A00352 | A04777 | 251 | A00352 | A04782 | 424 |
| A00352 | A04838 | 484 | A00352 | A05144 | 210 |
| A00352 | A05417 | 491 | A00352 | A05449 | 305 |
| A00352 | A05812 | 660 | A00352 | A05882 | 184 |
| A00352 | A05891 | 399 | A00352 | A06048 | 221 |
| A00352 | A06287 | 172 | A00352 | A06379 | 63  |
| A00352 | A06466 | 460 | A00352 | A06545 | 414 |
| A00352 | A06546 | 486 | A00352 | A06750 | 367 |
| A00352 | A06752 | 400 | A00352 | A06754 | 221 |
| A00352 | A07160 | 488 | A00352 | A07218 | 484 |
| A00352 | A07394 | 491 | A00352 | A07480 | 183 |
| A00352 | A07527 | 232 | A00352 | A07670 | 243 |
| A00352 | A07695 | 486 | A00352 | A07706 | 443 |
| A00352 | A07767 | 514 | A00352 | A07845 | 221 |
| A00352 | A07846 | 221 | A00352 | A07882 | 263 |
| A00352 | A07887 | 281 | A00352 | A08011 | 207 |
| A00352 | A08014 | 221 | A00352 | A08073 | 146 |
| A00352 | A08144 | 190 | A00352 | A08222 | 400 |
| A00352 | A08319 | 446 | A00352 | A08519 | 475 |
| A00352 | A08524 | 252 | A00352 | A08863 | 206 |
| A00352 | A08882 | 398 | A00352 | A08926 | 85  |
| A00352 | A09054 | 485 | A00352 | A09475 | 184 |
| A00352 | A09526 | 198 | A00352 | A09581 | 364 |
| A00352 | A09709 | 477 | A00352 | A09902 | 182 |
| A00352 | A10039 | 152 | A00352 | A10154 | 98  |
| A00352 | A10250 | 207 | A00352 | A10385 | 221 |
| A00352 | A10473 | 162 | A00352 | A10487 | 221 |
| A00352 | A10535 | 439 | A00352 | A10598 | 486 |
| A00352 | A10853 | 160 | A00352 | A11307 | 296 |
| A00352 | A11313 | 659 | A00352 | A11452 | 235 |
| A00352 | A11526 | 458 | A00352 | A11795 | 156 |
| A00352 | A11833 | 472 | A00352 | A11860 | 232 |
| A00352 | A12027 | 184 | A00352 | A12215 | 345 |
| A00352 | A12302 | 485 | A00352 | A12673 | 221 |
| A00352 | A12703 | 221 | A00352 | A12746 | 184 |
| A00352 | A12795 | 221 | A00352 | A12824 | 457 |
| A00352 | A13037 | 221 | A00352 | A13077 | 221 |
| A00352 | A13116 | 263 | A00352 | A13146 | 238 |
| A00352 | A13251 | 263 | A00352 | A13273 | 221 |



|        |        |     |        |        |     |
|--------|--------|-----|--------|--------|-----|
| A00352 | A13340 | 458 | A00352 | A13344 | 162 |
| A00352 | A13398 | 182 | A00352 | A13446 | 184 |
| A00352 | A13576 | 317 | A00352 | A13653 | 221 |
| A00352 | A13721 | 221 | A00352 | A13754 | 221 |
| A00352 | A13809 | 440 | A00352 | A13870 | 324 |
| A00352 | A14006 | 488 | A00352 | A14073 | 573 |
| A00352 | A14074 | 179 | A00352 | A14077 | 321 |
| A00352 | A14080 | 485 | A00352 | A14178 | 424 |
| A00352 | A14272 | 477 | A00352 | A14394 | 162 |
| A00352 | A14449 | 530 | A00352 | A14507 | 277 |
| A00352 | A14562 | 396 | A00352 | A14566 | 488 |
| A00352 | A14642 | 388 | A00352 | A14655 | 491 |
| A00352 | A14699 | 658 | A00352 | A14701 | 461 |
| A00352 | A14845 | 343 | A00352 | A15077 | 221 |
| A00352 | A15081 | 221 | A00352 | A15161 | 221 |
| A00352 | A15321 | 309 | A00352 | A15347 | 353 |
| A00352 | A15498 | 401 | A00352 | A15617 | 419 |
| A00352 | A15653 | 627 | A00352 | A15666 | 491 |
| A00352 | A15765 | 486 | A00352 | A15932 | 490 |
| A00352 | A15933 | 228 | A00352 | A16007 | 491 |
| A00352 | A16060 | 374 | A00352 | A16157 | 486 |
| A00352 | A16400 | 228 | A00352 | A16403 | 319 |
| A00352 | A16430 | 201 | A00352 | A16626 | 400 |
| A00352 | A16683 | 263 | A00353 | A00411 | 260 |
| A00353 | A00438 | 490 | A00353 | A00517 | 435 |
| A00353 | A00552 | 177 | A00353 | A00642 | 251 |
| A00353 | A00835 | 335 | A00353 | A00849 | 243 |
| A00353 | A00863 | 196 | A00353 | A00967 | 491 |
| A00353 | A00993 | 299 | A00353 | A01537 | 432 |
| A00353 | A01598 | 151 | A00353 | A01632 | 182 |
| A00353 | A01655 | 152 | A00353 | A01941 | 162 |
| A00353 | A02121 | 157 | A00353 | A02376 | 382 |
| A00353 | A02465 | 236 | A00353 | A02481 | 190 |
| A00353 | A03049 | 433 | A00353 | A03126 | 369 |
| A00353 | A03265 | 481 | A00353 | A03278 | 314 |
| A00353 | A03927 | 333 | A00353 | A03981 | 259 |
| A00353 | A04076 | 240 | A00353 | A04145 | 278 |
| A00353 | A04945 | 218 | A00353 | A05468 | 246 |
| A00353 | A05543 | 316 | A00353 | A05654 | 276 |
| A00353 | A06269 | 243 | A00353 | A06660 | 167 |
| A00353 | A09911 | 219 | A00353 | A11070 | 268 |
| A00353 | A11318 | 199 | A00353 | A11331 | 260 |
| A00353 | A11452 | 156 | A00353 | A11530 | 353 |
| A00353 | A11566 | 303 | A00353 | A11576 | 213 |
| A00353 | A11726 | 316 | A00353 | A11986 | 159 |
| A00353 | A12207 | 286 | A00353 | A12660 | 188 |

|        |        |     |        |        |     |
|--------|--------|-----|--------|--------|-----|
| A00353 | A12740 | 353 | A00353 | A13023 | 157 |
| A00353 | A13626 | 185 | A00353 | A14006 | 443 |
| A00353 | A14646 | 159 | A00353 | A16279 | 303 |
| A00353 | A16410 | 221 | A00354 | A00509 | 475 |
| A00354 | A01591 | 160 | A00354 | A02268 | 308 |
| A00354 | A05106 | 340 | A00354 | A07140 | 338 |
| A00354 | A07815 | 317 | A00354 | A07878 | 350 |
| A00354 | A08660 | 363 | A00354 | A14430 | 273 |
| A00355 | A00357 | 430 | A00355 | A00358 | 491 |
| A00355 | A00403 | 491 | A00355 | A00469 | 313 |
| A00355 | A00501 | 260 | A00355 | A00521 | 565 |
| A00355 | A00590 | 477 | A00355 | A00629 | 484 |
| A00355 | A00648 | 327 | A00355 | A00787 | 401 |
| A00355 | A00831 | 350 | A00355 | A00839 | 180 |
| A00355 | A00848 | 156 | A00355 | A00883 | 473 |
| A00355 | A00916 | 337 | A00355 | A00923 | 491 |
| A00355 | A00965 | 278 | A00355 | A00970 | 193 |
| A00355 | A00990 | 200 | A00355 | A01000 | 491 |
| A00355 | A01017 | 483 | A00355 | A01025 | 491 |
| A00355 | A01047 | 565 | A00355 | A01066 | 530 |
| A00355 | A01096 | 213 | A00355 | A01101 | 491 |
| A00355 | A01120 | 435 | A00355 | A01140 | 452 |
| A00355 | A01166 | 374 | A00355 | A01184 | 490 |
| A00355 | A01189 | 395 | A00355 | A01206 | 480 |
| A00355 | A01234 | 490 | A00355 | A01243 | 168 |
| A00355 | A01249 | 559 | A00355 | A01263 | 417 |
| A00355 | A01264 | 461 | A00355 | A01266 | 154 |
| A00355 | A01282 | 430 | A00355 | A01291 | 566 |
| A00355 | A01292 | 236 | A00355 | A01306 | 491 |
| A00355 | A01325 | 249 | A00355 | A01338 | 566 |
| A00355 | A01425 | 256 | A00355 | A01429 | 421 |
| A00355 | A01430 | 281 | A00355 | A01437 | 491 |
| A00355 | A01464 | 547 | A00355 | A01468 | 193 |
| A00355 | A01470 | 483 | A00355 | A01598 | 171 |
| A00355 | A01612 | 486 | A00355 | A01614 | 377 |
| A00355 | A01617 | 319 | A00355 | A01618 | 312 |
| A00355 | A01649 | 491 | A00355 | A01700 | 311 |
| A00355 | A01718 | 63  | A00355 | A01997 | 163 |
| A00355 | A02216 | 221 | A00355 | A02355 | 200 |
| A00355 | A02738 | 299 | A00355 | A02978 | 562 |
| A00355 | A02980 | 268 | A00355 | A03069 | 491 |
| A00355 | A03272 | 159 | A00355 | A03567 | 491 |
| A00355 | A03731 | 221 | A00355 | A03754 | 485 |
| A00355 | A03767 | 168 | A00355 | A03859 | 485 |
| A00355 | A04430 | 259 | A00355 | A05385 | 345 |
| A00355 | A05501 | 419 | A00355 | A06279 | 79  |

|        |        |     |        |        |     |
|--------|--------|-----|--------|--------|-----|
| A00355 | A06812 | 265 | A00355 | A06861 | 454 |
| A00355 | A06897 | 273 | A00355 | A06965 | 491 |
| A00355 | A06973 | 552 | A00355 | A07348 | 91  |
| A00355 | A07451 | 461 | A00355 | A07533 | 234 |
| A00355 | A08011 | 288 | A00355 | A08055 | 358 |
| A00355 | A08137 | 491 | A00355 | A08357 | 456 |
| A00355 | A08398 | 310 | A00355 | A08419 | 327 |
| A00355 | A08452 | 565 | A00355 | A08521 | 200 |
| A00355 | A08547 | 343 | A00355 | A08558 | 518 |
| A00355 | A08664 | 200 | A00355 | A08972 | 319 |
| A00355 | A09044 | 205 | A00355 | A09322 | 491 |
| A00355 | A09674 | 193 | A00355 | A09702 | 545 |
| A00355 | A10417 | 200 | A00355 | A10439 | 249 |
| A00355 | A10529 | 457 | A00355 | A10616 | 260 |
| A00355 | A11316 | 162 | A00355 | A11390 | 491 |
| A00355 | A11438 | 553 | A00355 | A11480 | 488 |
| A00355 | A11704 | 491 | A00355 | A11729 | 238 |
| A00355 | A11945 | 491 | A00355 | A12233 | 490 |
| A00355 | A12243 | 418 | A00355 | A12270 | 160 |
| A00355 | A12667 | 157 | A00355 | A13333 | 200 |
| A00355 | A13709 | 286 | A00355 | A13710 | 294 |
| A00355 | A13989 | 484 | A00355 | A14188 | 461 |
| A00355 | A14216 | 338 | A00355 | A14505 | 420 |
| A00355 | A15218 | 462 | A00355 | A15219 | 408 |
| A00355 | A15221 | 486 | A00355 | A15235 | 343 |
| A00355 | A15727 | 427 | A00355 | A15743 | 172 |
| A00355 | A15776 | 441 | A00355 | A15777 | 469 |
| A00355 | A15778 | 182 | A00355 | A16118 | 484 |
| A00355 | A16523 | 259 | A00355 | A16631 | 491 |
| A00355 | A16682 | 188 | A00355 | A16823 | 249 |
| A00356 | A00357 | 462 | A00356 | A00358 | 489 |
| A00356 | A00360 | 443 | A00356 | A00361 | 440 |
| A00356 | A00378 | 177 | A00356 | A00400 | 165 |
| A00356 | A00414 | 432 | A00356 | A00467 | 480 |
| A00356 | A00521 | 486 | A00356 | A00537 | 188 |
| A00356 | A00561 | 319 | A00356 | A00571 | 420 |
| A00356 | A00590 | 491 | A00356 | A00603 | 491 |
| A00356 | A00604 | 395 | A00356 | A00605 | 460 |
| A00356 | A00629 | 489 | A00356 | A00648 | 490 |
| A00356 | A00651 | 491 | A00356 | A00653 | 466 |
| A00356 | A00663 | 262 | A00356 | A00694 | 384 |
| A00356 | A00697 | 294 | A00356 | A00700 | 491 |
| A00356 | A00701 | 491 | A00356 | A00713 | 450 |
| A00356 | A00763 | 491 | A00356 | A00787 | 580 |
| A00356 | A00806 | 408 | A00356 | A00812 | 452 |
| A00356 | A00839 | 491 | A00356 | A00841 | 229 |

|        |        |     |        |        |     |
|--------|--------|-----|--------|--------|-----|
| A00356 | A00849 | 165 | A00356 | A00851 | 374 |
| A00356 | A00870 | 430 | A00356 | A00875 | 274 |
| A00356 | A00878 | 491 | A00356 | A00900 | 401 |
| A00356 | A00902 | 224 | A00356 | A00906 | 208 |
| A00356 | A00923 | 491 | A00356 | A00932 | 424 |
| A00356 | A00965 | 262 | A00356 | A00970 | 162 |
| A00356 | A00972 | 479 | A00356 | A01000 | 477 |
| A00356 | A01025 | 455 | A00356 | A01037 | 469 |
| A00356 | A01042 | 259 | A00356 | A01047 | 219 |
| A00356 | A01056 | 693 | A00356 | A01072 | 412 |
| A00356 | A01090 | 486 | A00356 | A01095 | 475 |
| A00356 | A01098 | 436 | A00356 | A01101 | 419 |
| A00356 | A01112 | 491 | A00356 | A01115 | 249 |
| A00356 | A01121 | 272 | A00356 | A01127 | 694 |
| A00356 | A01140 | 491 | A00356 | A01178 | 152 |
| A00356 | A01184 | 419 | A00356 | A01206 | 299 |
| A00356 | A01212 | 491 | A00356 | A01216 | 473 |
| A00356 | A01240 | 63  | A00356 | A01249 | 486 |
| A00356 | A01291 | 988 | A00356 | A01306 | 473 |
| A00356 | A01335 | 301 | A00356 | A01347 | 290 |
| A00356 | A01392 | 160 | A00356 | A01425 | 446 |
| A00356 | A01431 | 310 | A00356 | A01435 | 313 |
| A00356 | A01437 | 396 | A00356 | A01451 | 229 |
| A00356 | A01457 | 491 | A00356 | A01458 | 486 |
| A00356 | A01464 | 180 | A00356 | A01468 | 491 |
| A00356 | A01492 | 539 | A00356 | A01496 | 489 |
| A00356 | A01527 | 899 | A00356 | A01540 | 243 |
| A00356 | A01560 | 454 | A00356 | A01579 | 491 |
| A00356 | A01586 | 394 | A00356 | A01598 | 157 |
| A00356 | A01601 | 797 | A00356 | A01605 | 405 |
| A00356 | A01649 | 424 | A00356 | A01684 | 165 |
| A00356 | A01718 | 491 | A00356 | A02250 | 281 |
| A00356 | A02265 | 176 | A00356 | A02494 | 474 |
| A00356 | A02818 | 247 | A00356 | A02928 | 236 |
| A00356 | A03069 | 472 | A00356 | A03158 | 281 |
| A00356 | A03331 | 174 | A00356 | A03332 | 491 |
| A00356 | A03445 | 439 | A00356 | A03567 | 490 |
| A00356 | A03652 | 182 | A00356 | A03939 | 432 |
| A00356 | A03959 | 215 | A00356 | A03981 | 488 |
| A00356 | A04230 | 273 | A00356 | A04446 | 160 |
| A00356 | A04754 | 469 | A00356 | A04761 | 491 |
| A00356 | A04846 | 283 | A00356 | A05044 | 258 |
| A00356 | A05076 | 328 | A00356 | A05090 | 263 |
| A00356 | A05411 | 485 | A00356 | A05443 | 491 |
| A00356 | A05449 | 396 | A00356 | A05996 | 491 |
| A00356 | A06037 | 409 | A00356 | A06279 | 470 |

|        |        |     |        |        |     |
|--------|--------|-----|--------|--------|-----|
| A00356 | A06351 | 364 | A00356 | A06664 | 191 |
| A00356 | A06814 | 747 | A00356 | A06861 | 344 |
| A00356 | A06965 | 488 | A00356 | A07004 | 193 |
| A00356 | A07140 | 290 | A00356 | A07191 | 160 |
| A00356 | A07243 | 274 | A00356 | A07311 | 507 |
| A00356 | A07398 | 778 | A00356 | A07449 | 340 |
| A00356 | A07451 | 491 | A00356 | A07517 | 219 |
| A00356 | A07726 | 443 | A00356 | A07766 | 151 |
| A00356 | A08011 | 491 | A00356 | A08052 | 433 |
| A00356 | A08055 | 396 | A00356 | A08061 | 419 |
| A00356 | A08315 | 297 | A00356 | A08321 | 243 |
| A00356 | A08357 | 377 | A00356 | A08398 | 252 |
| A00356 | A08452 | 472 | A00356 | A08521 | 235 |
| A00356 | A08773 | 449 | A00356 | A09044 | 419 |
| A00356 | A09313 | 230 | A00356 | A09332 | 465 |
| A00356 | A09581 | 162 | A00356 | A09585 | 294 |
| A00356 | A09591 | 324 | A00356 | A09702 | 65  |
| A00356 | A09704 | 171 | A00356 | A09960 | 183 |
| A00356 | A10234 | 183 | A00356 | A10650 | 183 |
| A00356 | A10949 | 245 | A00356 | A11190 | 339 |
| A00356 | A11263 | 223 | A00356 | A11331 | 260 |
| A00356 | A11390 | 171 | A00356 | A11438 | 210 |
| A00356 | A11612 | 329 | A00356 | A11940 | 185 |
| A00356 | A11981 | 296 | A00356 | A12028 | 183 |
| A00356 | A12109 | 219 | A00356 | A12168 | 374 |
| A00356 | A12310 | 219 | A00356 | A12643 | 257 |
| A00356 | A12813 | 152 | A00356 | A12970 | 152 |
| A00356 | A12990 | 419 | A00356 | A13107 | 205 |
| A00356 | A13340 | 271 | A00356 | A13470 | 160 |
| A00356 | A13626 | 338 | A00356 | A13830 | 268 |
| A00356 | A13989 | 838 | A00356 | A13992 | 491 |
| A00356 | A14216 | 317 | A00356 | A14386 | 188 |
| A00356 | A14505 | 368 | A00356 | A15660 | 443 |
| A00356 | A15684 | 473 | A00356 | A15971 | 285 |
| A00356 | A15988 | 480 | A00356 | A16025 | 368 |
| A00356 | A16118 | 391 | A00356 | A16159 | 380 |
| A00357 | A00358 | 490 | A00357 | A00360 | 293 |
| A00357 | A00361 | 252 | A00357 | A00362 | 319 |
| A00357 | A00403 | 241 | A00357 | A00454 | 303 |
| A00357 | A00467 | 160 | A00357 | A00521 | 489 |
| A00357 | A00590 | 443 | A00357 | A00595 | 208 |
| A00357 | A00603 | 441 | A00357 | A00604 | 232 |
| A00357 | A00605 | 458 | A00357 | A00629 | 491 |
| A00357 | A00648 | 457 | A00357 | A00651 | 468 |
| A00357 | A00653 | 344 | A00357 | A00700 | 462 |
| A00357 | A00701 | 491 | A00357 | A00713 | 452 |

|        |        |     |        |        |     |
|--------|--------|-----|--------|--------|-----|
| A00357 | A00763 | 481 | A00357 | A00783 | 208 |
| A00357 | A00787 | 469 | A00357 | A00839 | 486 |
| A00357 | A00870 | 240 | A00357 | A00878 | 170 |
| A00357 | A00910 | 229 | A00357 | A00923 | 491 |
| A00357 | A00990 | 483 | A00357 | A01000 | 489 |
| A00357 | A01020 | 162 | A00357 | A01025 | 486 |
| A00357 | A01042 | 401 | A00357 | A01047 | 491 |
| A00357 | A01056 | 417 | A00357 | A01072 | 344 |
| A00357 | A01081 | 232 | A00357 | A01090 | 291 |
| A00357 | A01101 | 224 | A00357 | A01112 | 451 |
| A00357 | A01127 | 491 | A00357 | A01140 | 475 |
| A00357 | A01150 | 318 | A00357 | A01166 | 330 |
| A00357 | A01184 | 483 | A00357 | A01189 | 424 |
| A00357 | A01206 | 439 | A00357 | A01234 | 441 |
| A00357 | A01240 | 449 | A00357 | A01249 | 491 |
| A00357 | A01291 | 491 | A00357 | A01304 | 167 |
| A00357 | A01306 | 489 | A00357 | A01338 | 63  |
| A00357 | A01431 | 221 | A00357 | A01437 | 246 |
| A00357 | A01464 | 490 | A00357 | A01468 | 435 |
| A00357 | A01470 | 281 | A00357 | A01496 | 469 |
| A00357 | A01579 | 489 | A00357 | A01586 | 167 |
| A00357 | A01601 | 210 | A00357 | A01609 | 188 |
| A00357 | A01617 | 480 | A00357 | A01618 | 491 |
| A00357 | A01619 | 472 | A00357 | A01620 | 458 |
| A00357 | A01649 | 396 | A00357 | A01718 | 483 |
| A00357 | A01822 | 279 | A00357 | A02003 | 177 |
| A00357 | A02068 | 172 | A00357 | A03048 | 316 |
| A00357 | A03069 | 489 | A00357 | A03437 | 458 |
| A00357 | A03567 | 491 | A00357 | A03645 | 288 |
| A00357 | A03705 | 165 | A00357 | A03740 | 322 |
| A00357 | A03754 | 491 | A00357 | A03888 | 386 |
| A00357 | A03981 | 303 | A00357 | A04761 | 404 |
| A00357 | A05044 | 201 | A00357 | A05121 | 167 |
| A00357 | A05385 | 241 | A00357 | A05464 | 317 |
| A00357 | A05501 | 334 | A00357 | A06279 | 447 |
| A00357 | A06351 | 329 | A00357 | A06861 | 480 |
| A00357 | A06965 | 491 | A00357 | A06973 | 483 |
| A00357 | A07201 | 490 | A00357 | A07323 | 252 |
| A00357 | A07398 | 474 | A00357 | A07451 | 491 |
| A00357 | A08053 | 215 | A00357 | A08055 | 162 |
| A00357 | A08357 | 274 | A00357 | A08358 | 217 |
| A00357 | A08398 | 481 | A00357 | A08452 | 491 |
| A00357 | A08664 | 343 | A00357 | A08835 | 223 |
| A00357 | A09248 | 198 | A00357 | A09313 | 256 |
| A00357 | A09322 | 386 | A00357 | A09585 | 301 |
| A00357 | A10417 | 472 | A00357 | A10518 | 274 |

|        |        |     |        |        |     |
|--------|--------|-----|--------|--------|-----|
| A00357 | A10616 | 195 | A00357 | A11400 | 249 |
| A00357 | A11438 | 485 | A00357 | A11550 | 163 |
| A00357 | A11588 | 232 | A00357 | A11612 | 281 |
| A00357 | A11945 | 151 | A00357 | A11981 | 303 |
| A00357 | A12237 | 288 | A00357 | A12661 | 465 |
| A00357 | A13600 | 363 | A00357 | A13989 | 468 |
| A00357 | A13992 | 486 | A00357 | A14029 | 324 |
| A00357 | A14505 | 176 | A00357 | A15215 | 165 |
| A00357 | A15416 | 201 | A00357 | A15418 | 207 |
| A00357 | A15660 | 285 | A00357 | A15743 | 332 |
| A00357 | A15988 | 483 | A00357 | A16053 | 328 |
| A00357 | A16118 | 486 | A00357 | A16149 | 201 |
| A00357 | A17193 | 246 | A00358 | A00360 | 491 |
| A00358 | A00361 | 491 | A00358 | A00362 | 462 |
| A00358 | A00390 | 486 | A00358 | A00403 | 491 |
| A00358 | A00416 | 345 | A00358 | A00469 | 462 |
| A00358 | A00521 | 396 | A00358 | A00590 | 443 |
| A00358 | A00603 | 202 | A00358 | A00629 | 489 |
| A00358 | A00630 | 491 | A00358 | A00631 | 486 |
| A00358 | A00705 | 188 | A00358 | A00763 | 348 |
| A00358 | A00780 | 182 | A00358 | A00787 | 373 |
| A00358 | A00839 | 348 | A00358 | A00848 | 341 |
| A00358 | A00905 | 356 | A00358 | A00916 | 391 |
| A00358 | A00923 | 491 | A00358 | A01000 | 491 |
| A00358 | A01017 | 485 | A00358 | A01025 | 491 |
| A00358 | A01047 | 484 | A00358 | A01056 | 319 |
| A00358 | A01072 | 348 | A00358 | A01098 | 395 |
| A00358 | A01101 | 491 | A00358 | A01120 | 347 |
| A00358 | A01127 | 480 | A00358 | A01128 | 180 |
| A00358 | A01130 | 174 | A00358 | A01140 | 488 |
| A00358 | A01166 | 347 | A00358 | A01184 | 449 |
| A00358 | A01206 | 154 | A00358 | A01234 | 457 |
| A00358 | A01240 | 110 | A00358 | A01249 | 491 |
| A00358 | A01291 | 491 | A00358 | A01292 | 221 |
| A00358 | A01306 | 491 | A00358 | A01335 | 172 |
| A00358 | A01338 | 491 | A00358 | A01425 | 439 |
| A00358 | A01464 | 486 | A00358 | A01468 | 240 |
| A00358 | A01470 | 380 | A00358 | A01569 | 262 |
| A00358 | A01612 | 456 | A00358 | A01617 | 475 |
| A00358 | A01618 | 480 | A00358 | A01649 | 485 |
| A00358 | A01700 | 291 | A00358 | A01718 | 451 |
| A00358 | A01740 | 210 | A00358 | A02118 | 265 |
| A00358 | A02216 | 201 | A00358 | A02265 | 276 |
| A00358 | A02738 | 174 | A00358 | A02978 | 286 |
| A00358 | A03069 | 480 | A00358 | A03083 | 218 |
| A00358 | A03332 | 491 | A00358 | A03437 | 143 |

|        |        |     |        |        |     |
|--------|--------|-----|--------|--------|-----|
| A00358 | A03567 | 491 | A00358 | A03571 | 229 |
| A00358 | A03754 | 491 | A00358 | A03913 | 330 |
| A00358 | A03955 | 373 | A00358 | A04316 | 363 |
| A00358 | A04694 | 274 | A00358 | A04736 | 238 |
| A00358 | A04754 | 420 | A00358 | A04761 | 945 |
| A00358 | A04846 | 174 | A00358 | A04911 | 174 |
| A00358 | A05044 | 466 | A00358 | A05142 | 238 |
| A00358 | A05370 | 263 | A00358 | A05385 | 489 |
| A00358 | A05443 | 440 | A00358 | A05501 | 255 |
| A00358 | A05996 | 945 | A00358 | A06279 | 475 |
| A00358 | A06814 | 306 | A00358 | A06861 | 427 |
| A00358 | A06965 | 491 | A00358 | A06973 | 457 |
| A00358 | A07449 | 160 | A00358 | A07451 | 74  |
| A00358 | A07738 | 313 | A00358 | A08011 | 458 |
| A00358 | A08018 | 283 | A00358 | A08055 | 245 |
| A00358 | A08137 | 465 | A00358 | A08357 | 193 |
| A00358 | A08452 | 481 | A00358 | A08664 | 168 |
| A00358 | A08835 | 234 | A00358 | A08869 | 160 |
| A00358 | A09322 | 491 | A00358 | A09562 | 171 |
| A00358 | A09702 | 450 | A00358 | A10154 | 234 |
| A00358 | A10529 | 234 | A00358 | A11190 | 235 |
| A00358 | A11390 | 227 | A00358 | A11400 | 475 |
| A00358 | A11438 | 469 | A00358 | A11480 | 490 |
| A00358 | A11612 | 491 | A00358 | A11704 | 491 |
| A00358 | A11729 | 205 | A00358 | A12077 | 313 |
| A00358 | A12233 | 303 | A00358 | A12651 | 475 |
| A00358 | A12653 | 489 | A00358 | A12918 | 360 |
| A00358 | A13241 | 366 | A00358 | A13388 | 151 |
| A00358 | A13466 | 154 | A00358 | A13989 | 477 |
| A00358 | A13992 | 396 | A00358 | A14216 | 151 |
| A00358 | A14737 | 313 | A00358 | A15218 | 438 |
| A00358 | A15255 | 205 | A00358 | A15776 | 177 |
| A00358 | A15778 | 165 | A00358 | A16118 | 489 |
| A00358 | A16523 | 368 | A00358 | A16631 | 435 |
| A00358 | A16823 | 360 | A00358 | A17127 | 160 |
| A00359 | A00385 | 452 | A00359 | A00469 | 413 |
| A00359 | A00472 | 221 | A00359 | A00546 | 205 |
| A00359 | A00971 | 204 | A00359 | A01725 | 168 |
| A00359 | A02000 | 227 | A00359 | A02021 | 310 |
| A00359 | A02049 | 157 | A00359 | A02697 | 344 |
| A00359 | A02738 | 226 | A00359 | A03080 | 323 |
| A00359 | A03186 | 163 | A00359 | A03321 | 301 |
| A00359 | A03390 | 481 | A00359 | A03391 | 296 |
| A00359 | A03401 | 401 | A00359 | A03733 | 411 |
| A00359 | A03744 | 363 | A00359 | A04410 | 343 |
| A00359 | A05603 | 195 | A00359 | A06346 | 322 |



|        |        |     |        |        |     |
|--------|--------|-----|--------|--------|-----|
| A00359 | A06635 | 218 | A00359 | A09748 | 303 |
| A00359 | A09749 | 260 | A00359 | A10000 | 339 |
| A00359 | A11293 | 224 | A00360 | A00361 | 491 |
| A00360 | A00783 | 154 | A00360 | A00923 | 232 |
| A00360 | A01206 | 432 | A00360 | A01291 | 490 |
| A00360 | A01470 | 243 | A00360 | A01718 | 455 |
| A00360 | A03332 | 339 | A00360 | A03955 | 267 |
| A00360 | A04754 | 486 | A00360 | A04761 | 491 |
| A00360 | A05044 | 274 | A00360 | A05996 | 428 |
| A00360 | A06965 | 234 | A00360 | A08018 | 438 |
| A00360 | A08137 | 371 | A00360 | A10316 | 472 |
| A00360 | A11612 | 491 | A00360 | A11704 | 208 |
| A00360 | A12073 | 321 | A00360 | A13989 | 235 |
| A00360 | A15247 | 488 | A00360 | A15255 | 451 |
| A00361 | A00362 | 227 | A00361 | A00802 | 165 |
| A00361 | A00900 | 208 | A00361 | A01092 | 196 |
| A00361 | A01291 | 491 | A00361 | A01524 | 899 |
| A00361 | A01718 | 380 | A00361 | A02293 | 259 |
| A00361 | A02927 | 205 | A00361 | A03332 | 486 |
| A00361 | A03571 | 190 | A00361 | A03726 | 899 |
| A00361 | A04147 | 333 | A00361 | A04162 | 165 |
| A00361 | A04230 | 198 | A00361 | A04754 | 468 |
| A00361 | A04761 | 491 | A00361 | A05044 | 241 |
| A00361 | A05443 | 306 | A00361 | A05996 | 488 |
| A00361 | A08018 | 428 | A00361 | A10316 | 294 |
| A00361 | A11612 | 491 | A00361 | A12653 | 279 |
| A00361 | A12897 | 163 | A00361 | A13241 | 480 |
| A00361 | A13989 | 165 | A00361 | A13992 | 102 |
| A00361 | A15247 | 467 | A00361 | A15498 | 226 |
| A00362 | A00563 | 251 | A00362 | A00590 | 302 |
| A00362 | A00603 | 196 | A00362 | A00701 | 154 |
| A00362 | A00878 | 215 | A00362 | A00882 | 167 |
| A00362 | A00900 | 383 | A00362 | A01072 | 157 |
| A00362 | A01291 | 480 | A00362 | A01740 | 167 |
| A00362 | A02179 | 162 | A00362 | A02265 | 210 |
| A00362 | A03913 | 191 | A00362 | A04033 | 462 |
| A00362 | A04761 | 418 | A00362 | A05044 | 296 |
| A00362 | A05354 | 346 | A00362 | A07803 | 322 |
| A00362 | A08835 | 486 | A00362 | A09707 | 419 |
| A00362 | A10748 | 294 | A00362 | A11322 | 210 |
| A00362 | A11338 | 218 | A00362 | A11400 | 489 |
| A00362 | A12918 | 348 | A00362 | A14003 | 303 |
| A00362 | A15256 | 334 | A00362 | A15416 | 460 |
| A00363 | A00417 | 313 | A00363 | A00431 | 329 |
| A00363 | A00942 | 324 | A00363 | A01257 | 182 |
| A00363 | A03748 | 213 | A00363 | A03910 | 454 |

|        |        |     |        |        |     |
|--------|--------|-----|--------|--------|-----|
| A00363 | A04145 | 366 | A00363 | A04169 | 305 |
| A00363 | A04337 | 185 | A00363 | A07165 | 163 |
| A00363 | A08320 | 424 | A00363 | A08544 | 409 |
| A00363 | A09416 | 258 | A00363 | A10525 | 283 |
| A00363 | A11084 | 406 | A00363 | A13987 | 196 |
| A00363 | A14190 | 184 | A00363 | A14210 | 165 |
| A00363 | A14511 | 291 | A00363 | A14539 | 271 |
| A00363 | A15292 | 424 | A00363 | A15301 | 238 |
| A00363 | A15313 | 317 | A00363 | A15352 | 165 |
| A00363 | A15431 | 337 | A00363 | A15432 | 469 |
| A00363 | A15435 | 208 | A00363 | A15436 | 388 |
| A00363 | A15437 | 356 | A00363 | A15453 | 443 |
| A00363 | A15456 | 417 | A00363 | A15457 | 435 |
| A00364 | A00421 | 212 | A00364 | A00531 | 199 |
| A00364 | A00571 | 227 | A00364 | A00653 | 208 |
| A00364 | A01012 | 281 | A00364 | A01150 | 215 |
| A00364 | A01496 | 259 | A00364 | A08571 | 160 |
| A00364 | A14216 | 185 | A00365 | A00369 | 135 |
| A00365 | A00421 | 491 | A00365 | A00531 | 463 |
| A00365 | A00559 | 241 | A00365 | A00600 | 345 |
| A00365 | A00601 | 461 | A00365 | A00619 | 215 |
| A00365 | A00689 | 254 | A00365 | A00716 | 474 |
| A00365 | A00905 | 132 | A00365 | A00915 | 218 |
| A00365 | A01139 | 435 | A00365 | A01151 | 70  |
| A00365 | A01239 | 429 | A00365 | A01359 | 461 |
| A00365 | A01380 | 180 | A00365 | A01471 | 234 |
| A00365 | A01472 | 260 | A00365 | A01486 | 162 |
| A00365 | A01741 | 200 | A00365 | A02165 | 196 |
| A00365 | A02802 | 266 | A00365 | A03259 | 195 |
| A00365 | A03301 | 152 | A00365 | A03467 | 256 |
| A00365 | A03494 | 484 | A00365 | A03902 | 394 |
| A00365 | A04345 | 356 | A00365 | A07826 | 485 |
| A00365 | A08201 | 389 | A00365 | A09258 | 270 |
| A00365 | A09377 | 329 | A00365 | A09427 | 406 |
| A00365 | A09451 | 420 | A00365 | A09515 | 419 |
| A00365 | A09538 | 413 | A00365 | A10228 | 296 |
| A00365 | A10250 | 332 | A00365 | A10340 | 333 |
| A00365 | A10563 | 201 | A00365 | A10578 | 266 |
| A00365 | A11139 | 191 | A00365 | A15920 | 187 |
| A00365 | A17168 | 272 | A00366 | A00553 | 312 |
| A00366 | A00626 | 224 | A00366 | A00651 | 369 |
| A00366 | A00653 | 391 | A00366 | A00822 | 247 |
| A00366 | A00841 | 440 | A00366 | A00876 | 184 |
| A00366 | A00883 | 469 | A00366 | A00958 | 469 |
| A00366 | A00967 | 193 | A00366 | A01096 | 191 |
| A00366 | A01097 | 413 | A00366 | A01140 | 238 |

|        |        |     |        |        |     |
|--------|--------|-----|--------|--------|-----|
| A00366 | A01150 | 152 | A00366 | A01261 | 180 |
| A00366 | A01274 | 488 | A00366 | A01291 | 378 |
| A00366 | A01295 | 467 | A00366 | A01299 | 466 |
| A00366 | A01305 | 339 | A00366 | A01431 | 485 |
| A00366 | A01540 | 463 | A00366 | A01598 | 235 |
| A00366 | A01787 | 202 | A00366 | A01822 | 329 |
| A00366 | A02692 | 400 | A00366 | A02931 | 236 |
| A00366 | A03406 | 489 | A00366 | A03591 | 490 |
| A00366 | A03752 | 486 | A00366 | A03977 | 177 |
| A00366 | A03981 | 469 | A00366 | A04116 | 232 |
| A00366 | A04900 | 278 | A00366 | A05288 | 486 |
| A00366 | A05361 | 215 | A00366 | A05852 | 291 |
| A00366 | A06328 | 347 | A00366 | A06434 | 160 |
| A00366 | A06466 | 491 | A00366 | A06518 | 291 |
| A00366 | A06580 | 440 | A00366 | A07311 | 490 |
| A00366 | A07726 | 484 | A00366 | A08679 | 401 |
| A00366 | A08869 | 485 | A00366 | A10282 | 398 |
| A00366 | A10299 | 384 | A00366 | A10493 | 251 |
| A00366 | A11316 | 230 | A00366 | A11387 | 182 |
| A00366 | A11621 | 322 | A00366 | A11733 | 180 |
| A00366 | A12227 | 251 | A00366 | A12328 | 481 |
| A00366 | A12365 | 400 | A00366 | A12618 | 157 |
| A00366 | A12652 | 212 | A00366 | A13340 | 491 |
| A00366 | A13581 | 165 | A00366 | A13989 | 371 |
| A00366 | A14216 | 283 | A00366 | A14410 | 286 |
| A00366 | A14596 | 462 | A00366 | A14609 | 168 |
| A00366 | A14660 | 207 | A00366 | A15257 | 260 |
| A00366 | A15309 | 152 | A00366 | A15660 | 378 |
| A00366 | A15684 | 402 | A00366 | A15763 | 152 |
| A00366 | A15773 | 205 | A00366 | A15905 | 191 |
| A00366 | A17127 | 152 | A00367 | A00368 | 665 |
| A00367 | A00369 | 488 | A00367 | A00373 | 456 |
| A00367 | A00421 | 694 | A00367 | A00496 | 200 |
| A00367 | A00531 | 673 | A00367 | A00559 | 435 |
| A00367 | A00560 | 451 | A00367 | A00677 | 230 |
| A00367 | A00691 | 473 | A00367 | A00822 | 485 |
| A00367 | A00883 | 454 | A00367 | A00905 | 435 |
| A00367 | A00916 | 368 | A00367 | A00945 | 159 |
| A00367 | A01206 | 263 | A00367 | A01266 | 216 |
| A00367 | A01372 | 383 | A00367 | A01558 | 475 |
| A00367 | A01588 | 373 | A00367 | A01598 | 355 |
| A00367 | A01612 | 402 | A00367 | A01614 | 457 |
| A00367 | A01615 | 372 | A00367 | A01638 | 455 |
| A00367 | A02759 | 176 | A00367 | A03298 | 491 |
| A00367 | A03435 | 321 | A00367 | A03494 | 539 |
| A00367 | A03567 | 154 | A00367 | A03740 | 238 |

|        |        |     |        |        |     |
|--------|--------|-----|--------|--------|-----|
| A00367 | A04009 | 252 | A00367 | A06134 | 208 |
| A00367 | A06637 | 279 | A00367 | A06907 | 257 |
| A00367 | A08137 | 461 | A00367 | A08524 | 383 |
| A00367 | A08554 | 218 | A00367 | A08571 | 491 |
| A00367 | A08818 | 324 | A00367 | A08885 | 439 |
| A00367 | A10250 | 385 | A00367 | A10615 | 463 |
| A00367 | A10624 | 470 | A00367 | A10853 | 457 |
| A00367 | A11139 | 692 | A00367 | A11258 | 165 |
| A00367 | A11920 | 489 | A00367 | A11923 | 168 |
| A00367 | A11928 | 430 | A00367 | A11965 | 260 |
| A00367 | A12660 | 235 | A00367 | A13147 | 345 |
| A00367 | A13310 | 475 | A00367 | A13311 | 270 |
| A00367 | A13805 | 438 | A00367 | A13989 | 353 |
| A00367 | A14476 | 491 | A00367 | A14931 | 196 |
| A00367 | A15711 | 438 | A00367 | A16463 | 180 |
| A00367 | A16490 | 400 | A00367 | A16678 | 278 |
| A00367 | A16690 | 383 | A00367 | A16866 | 383 |
| A00367 | A16912 | 477 | A00368 | A00369 | 469 |
| A00368 | A00373 | 477 | A00368 | A00421 | 691 |
| A00368 | A00454 | 218 | A00368 | A00501 | 160 |
| A00368 | A00531 | 694 | A00368 | A00537 | 382 |
| A00368 | A00559 | 460 | A00368 | A00691 | 447 |
| A00368 | A00697 | 205 | A00368 | A00819 | 302 |
| A00368 | A00822 | 323 | A00368 | A00905 | 441 |
| A00368 | A01139 | 127 | A00368 | A01359 | 90  |
| A00368 | A01372 | 383 | A00368 | A01558 | 358 |
| A00368 | A01560 | 168 | A00368 | A01612 | 417 |
| A00368 | A01615 | 385 | A00368 | A02607 | 221 |
| A00368 | A03298 | 486 | A00368 | A03333 | 213 |
| A00368 | A03494 | 593 | A00368 | A03570 | 260 |
| A00368 | A03752 | 279 | A00368 | A03981 | 165 |
| A00368 | A04147 | 188 | A00368 | A06466 | 401 |
| A00368 | A07311 | 485 | A00368 | A08137 | 436 |
| A00368 | A08357 | 232 | A00368 | A08524 | 383 |
| A00368 | A08571 | 491 | A00368 | A08885 | 417 |
| A00368 | A09256 | 171 | A00368 | A10615 | 234 |
| A00368 | A10624 | 281 | A00368 | A10853 | 260 |
| A00368 | A11105 | 270 | A00368 | A11139 | 694 |
| A00368 | A11379 | 201 | A00368 | A11420 | 168 |
| A00368 | A11920 | 162 | A00368 | A11928 | 486 |
| A00368 | A12328 | 151 | A00368 | A13310 | 394 |
| A00368 | A13311 | 371 | A00368 | A13340 | 195 |
| A00368 | A13805 | 438 | A00368 | A13978 | 168 |
| A00368 | A14476 | 491 | A00368 | A15244 | 191 |
| A00368 | A15711 | 523 | A00368 | A16690 | 383 |
| A00368 | A16866 | 383 | A00368 | A16912 | 455 |

|        |        |     |        |        |     |
|--------|--------|-----|--------|--------|-----|
| A00369 | A00372 | 162 | A00369 | A00421 | 491 |
| A00369 | A00458 | 193 | A00369 | A00531 | 491 |
| A00369 | A00532 | 310 | A00369 | A00559 | 460 |
| A00369 | A00605 | 399 | A00369 | A00648 | 205 |
| A00369 | A00677 | 452 | A00369 | A00691 | 491 |
| A00369 | A00716 | 104 | A00369 | A00822 | 490 |
| A00369 | A00831 | 470 | A00369 | A00848 | 213 |
| A00369 | A00883 | 490 | A00369 | A00905 | 491 |
| A00369 | A00916 | 489 | A00369 | A00947 | 293 |
| A00369 | A01000 | 281 | A00369 | A01091 | 266 |
| A00369 | A01112 | 246 | A00369 | A01136 | 432 |
| A00369 | A01139 | 80  | A00369 | A01150 | 477 |
| A00369 | A01151 | 274 | A00369 | A01206 | 422 |
| A00369 | A01234 | 475 | A00369 | A01243 | 353 |
| A00369 | A01266 | 424 | A00369 | A01268 | 425 |
| A00369 | A01291 | 340 | A00369 | A01354 | 352 |
| A00369 | A01359 | 363 | A00369 | A01468 | 328 |
| A00369 | A01470 | 485 | A00369 | A01471 | 347 |
| A00369 | A01558 | 491 | A00369 | A01588 | 450 |
| A00369 | A01612 | 491 | A00369 | A01615 | 485 |
| A00369 | A01638 | 210 | A00369 | A01649 | 484 |
| A00369 | A03298 | 491 | A00369 | A03494 | 462 |
| A00369 | A03566 | 229 | A00369 | A03567 | 213 |
| A00369 | A03569 | 384 | A00369 | A03902 | 176 |
| A00369 | A04406 | 224 | A00369 | A05015 | 204 |
| A00369 | A06466 | 160 | A00369 | A06637 | 291 |
| A00369 | A07311 | 177 | A00369 | A07451 | 157 |
| A00369 | A07706 | 218 | A00369 | A08137 | 490 |
| A00369 | A08357 | 441 | A00369 | A08571 | 491 |
| A00369 | A08876 | 163 | A00369 | A08885 | 486 |
| A00369 | A09256 | 182 | A00369 | A10250 | 485 |
| A00369 | A10615 | 394 | A00369 | A10624 | 491 |
| A00369 | A10853 | 491 | A00369 | A11105 | 465 |
| A00369 | A11139 | 486 | A00369 | A11258 | 241 |
| A00369 | A11831 | 185 | A00369 | A11920 | 394 |
| A00369 | A11928 | 243 | A00369 | A13310 | 406 |
| A00369 | A13311 | 208 | A00369 | A13989 | 491 |
| A00369 | A14476 | 491 | A00369 | A14596 | 243 |
| A00369 | A15244 | 208 | A00369 | A15559 | 224 |
| A00369 | A15660 | 274 | A00369 | A15684 | 374 |
| A00369 | A16685 | 246 | A00369 | A16912 | 279 |
| A00370 | A00511 | 380 | A00370 | A00567 | 154 |
| A00370 | A00597 | 490 | A00370 | A00611 | 469 |
| A00370 | A00642 | 247 | A00370 | A00643 | 475 |
| A00370 | A00679 | 396 | A00370 | A00684 | 168 |
| A00370 | A00692 | 163 | A00370 | A00747 | 385 |

|        |        |     |        |        |     |
|--------|--------|-----|--------|--------|-----|
| A00370 | A00888 | 302 | A00370 | A01094 | 326 |
| A00370 | A01172 | 276 | A00370 | A01246 | 371 |
| A00370 | A01257 | 163 | A00370 | A01450 | 267 |
| A00370 | A01527 | 899 | A00370 | A01602 | 479 |
| A00370 | A01668 | 479 | A00370 | A01716 | 221 |
| A00370 | A02018 | 479 | A00370 | A02021 | 263 |
| A00370 | A02049 | 63  | A00370 | A02051 | 177 |
| A00370 | A02143 | 333 | A00370 | A02148 | 278 |
| A00370 | A02154 | 270 | A00370 | A02180 | 491 |
| A00370 | A02190 | 201 | A00370 | A02191 | 447 |
| A00370 | A02213 | 157 | A00370 | A02219 | 63  |
| A00370 | A02223 | 212 | A00370 | A02239 | 375 |
| A00370 | A02371 | 165 | A00370 | A02741 | 265 |
| A00370 | A03012 | 302 | A00370 | A03025 | 207 |
| A00370 | A03049 | 162 | A00370 | A03070 | 177 |
| A00370 | A03186 | 288 | A00370 | A03213 | 334 |
| A00370 | A03226 | 154 | A00370 | A03304 | 472 |
| A00370 | A03416 | 190 | A00370 | A03451 | 276 |
| A00370 | A03459 | 291 | A00370 | A03725 | 413 |
| A00370 | A03749 | 260 | A00370 | A03963 | 491 |
| A00370 | A04174 | 276 | A00370 | A04183 | 398 |
| A00370 | A04185 | 352 | A00370 | A04258 | 236 |
| A00370 | A04360 | 207 | A00370 | A04395 | 201 |
| A00370 | A04396 | 259 | A00370 | A04405 | 167 |
| A00370 | A04413 | 230 | A00370 | A04516 | 162 |
| A00370 | A04550 | 273 | A00370 | A04556 | 151 |
| A00370 | A04614 | 218 | A00370 | A04659 | 288 |
| A00370 | A04677 | 273 | A00370 | A04739 | 165 |
| A00370 | A04744 | 217 | A00370 | A04870 | 347 |
| A00370 | A04874 | 486 | A00370 | A05041 | 217 |
| A00370 | A05135 | 386 | A00370 | A05299 | 262 |
| A00370 | A05536 | 167 | A00370 | A05666 | 180 |
| A00370 | A05720 | 319 | A00370 | A05956 | 157 |
| A00370 | A06130 | 396 | A00370 | A07158 | 470 |
| A00370 | A07261 | 291 | A00370 | A08238 | 154 |
| A00370 | A08600 | 273 | A00370 | A08836 | 318 |
| A00370 | A09371 | 386 | A00370 | A09559 | 217 |
| A00370 | A09790 | 279 | A00370 | A09791 | 330 |
| A00370 | A09906 | 230 | A00370 | A10015 | 230 |
| A00370 | A10387 | 418 | A00370 | A10440 | 168 |
| A00370 | A10825 | 259 | A00370 | A11517 | 319 |
| A00370 | A12504 | 319 | A00370 | A12505 | 319 |
| A00370 | A12750 | 319 | A00370 | A13408 | 319 |
| A00370 | A13476 | 291 | A00370 | A13716 | 156 |
| A00370 | A13997 | 180 | A00370 | A14643 | 193 |
| A00370 | A15989 | 259 | A00370 | A16718 | 151 |

|        |        |     |        |        |     |
|--------|--------|-----|--------|--------|-----|
| A00370 | A16814 | 174 | A00371 | A00382 | 404 |
| A00371 | A00396 | 240 | A00371 | A00412 | 646 |
| A00371 | A00421 | 373 | A00371 | A00426 | 227 |
| A00371 | A00433 | 380 | A00371 | A00444 | 485 |
| A00371 | A00489 | 404 | A00371 | A00494 | 373 |
| A00371 | A00517 | 238 | A00371 | A00521 | 341 |
| A00371 | A00537 | 182 | A00371 | A00640 | 389 |
| A00371 | A00666 | 271 | A00371 | A00671 | 293 |
| A00371 | A00689 | 269 | A00371 | A00706 | 638 |
| A00371 | A00713 | 208 | A00371 | A00740 | 227 |
| A00371 | A00824 | 447 | A00371 | A00839 | 618 |
| A00371 | A00843 | 386 | A00371 | A00851 | 213 |
| A00371 | A00865 | 245 | A00371 | A00875 | 380 |
| A00371 | A00878 | 407 | A00371 | A00883 | 314 |
| A00371 | A00942 | 224 | A00371 | A00970 | 486 |
| A00371 | A00973 | 334 | A00371 | A00980 | 488 |
| A00371 | A00996 | 241 | A00371 | A00999 | 561 |
| A00371 | A01016 | 268 | A00371 | A01031 | 358 |
| A00371 | A01061 | 281 | A00371 | A01068 | 229 |
| A00371 | A01069 | 669 | A00371 | A01082 | 290 |
| A00371 | A01106 | 243 | A00371 | A01113 | 607 |
| A00371 | A01115 | 489 | A00371 | A01127 | 174 |
| A00371 | A01139 | 190 | A00371 | A01192 | 634 |
| A00371 | A01194 | 461 | A00371 | A01231 | 221 |
| A00371 | A01242 | 210 | A00371 | A01268 | 224 |
| A00371 | A01291 | 472 | A00371 | A01311 | 477 |
| A00371 | A01317 | 249 | A00371 | A01354 | 173 |
| A00371 | A01365 | 151 | A00371 | A01374 | 345 |
| A00371 | A01379 | 187 | A00371 | A01419 | 159 |
| A00371 | A01420 | 259 | A00371 | A01429 | 246 |
| A00371 | A01458 | 200 | A00371 | A01508 | 490 |
| A00371 | A01539 | 446 | A00371 | A01541 | 374 |
| A00371 | A01548 | 465 | A00371 | A01569 | 491 |
| A00371 | A01577 | 152 | A00371 | A01606 | 428 |
| A00371 | A01633 | 228 | A00371 | A01648 | 338 |
| A00371 | A01680 | 301 | A00371 | A01792 | 210 |
| A00371 | A02180 | 372 | A00371 | A02219 | 241 |
| A00371 | A02426 | 232 | A00371 | A03401 | 480 |
| A00371 | A03446 | 571 | A00371 | A03477 | 168 |
| A00371 | A03560 | 676 | A00371 | A03738 | 236 |
| A00371 | A03773 | 221 | A00371 | A03783 | 404 |
| A00371 | A03802 | 157 | A00371 | A03863 | 430 |
| A00371 | A03909 | 152 | A00371 | A04124 | 337 |
| A00371 | A04187 | 345 | A00371 | A04272 | 443 |
| A00371 | A04394 | 193 | A00371 | A04397 | 221 |
| A00371 | A05017 | 274 | A00371 | A05022 | 221 |

|        |        |     |        |        |     |
|--------|--------|-----|--------|--------|-----|
| A00371 | A05029 | 334 | A00371 | A05313 | 177 |
| A00371 | A05449 | 462 | A00371 | A05928 | 277 |
| A00371 | A06330 | 243 | A00371 | A06466 | 176 |
| A00371 | A06604 | 165 | A00371 | A06814 | 462 |
| A00371 | A06878 | 288 | A00371 | A07203 | 243 |
| A00371 | A07229 | 449 | A00371 | A07247 | 232 |
| A00371 | A07311 | 183 | A00371 | A07378 | 397 |
| A00371 | A07677 | 281 | A00371 | A07695 | 286 |
| A00371 | A07700 | 163 | A00371 | A08061 | 445 |
| A00371 | A08261 | 329 | A00371 | A08546 | 600 |
| A00371 | A08858 | 199 | A00371 | A08860 | 340 |
| A00371 | A08978 | 489 | A00371 | A08991 | 535 |
| A00371 | A09024 | 163 | A00371 | A09269 | 463 |
| A00371 | A09591 | 477 | A00371 | A09814 | 162 |
| A00371 | A10490 | 486 | A00371 | A10532 | 488 |
| A00371 | A10815 | 258 | A00371 | A11409 | 281 |
| A00371 | A11468 | 243 | A00371 | A11563 | 277 |
| A00371 | A11657 | 486 | A00371 | A11705 | 329 |
| A00371 | A11931 | 485 | A00371 | A12242 | 357 |
| A00371 | A12350 | 258 | A00371 | A12813 | 213 |
| A00371 | A13135 | 180 | A00371 | A13311 | 228 |
| A00371 | A13388 | 227 | A00371 | A13424 | 324 |
| A00371 | A13529 | 258 | A00371 | A13609 | 215 |
| A00371 | A13989 | 229 | A00371 | A14178 | 346 |
| A00371 | A14247 | 154 | A00371 | A14351 | 491 |
| A00371 | A14674 | 271 | A00371 | A14716 | 157 |
| A00371 | A15146 | 258 | A00371 | A15152 | 307 |
| A00371 | A15297 | 241 | A00371 | A15503 | 249 |
| A00371 | A15696 | 243 | A00371 | A15698 | 290 |
| A00371 | A15714 | 223 | A00371 | A15953 | 193 |
| A00371 | A16090 | 384 | A00371 | A16321 | 258 |
| A00371 | A16400 | 462 | A00371 | A16462 | 213 |
| A00371 | A16756 | 425 | A00371 | A16759 | 307 |
| A00371 | A16824 | 176 | A00371 | A17088 | 509 |
| A00372 | A00421 | 157 | A00372 | A00424 | 436 |
| A00372 | A00440 | 152 | A00372 | A00445 | 184 |
| A00372 | A00446 | 406 | A00372 | A00452 | 457 |
| A00372 | A00508 | 183 | A00372 | A00532 | 238 |
| A00372 | A00553 | 226 | A00372 | A00570 | 283 |
| A00372 | A00687 | 302 | A00372 | A00791 | 425 |
| A00372 | A00822 | 207 | A00372 | A00826 | 208 |
| A00372 | A00835 | 314 | A00372 | A00867 | 160 |
| A00372 | A00868 | 438 | A00372 | A00883 | 491 |
| A00372 | A00913 | 183 | A00372 | A00928 | 373 |
| A00372 | A01022 | 445 | A00372 | A01057 | 367 |
| A00372 | A01091 | 491 | A00372 | A01097 | 296 |



|        |        |     |        |        |     |
|--------|--------|-----|--------|--------|-----|
| A00372 | A01193 | 154 | A00372 | A01211 | 384 |
| A00372 | A01234 | 219 | A00372 | A01243 | 485 |
| A00372 | A01259 | 363 | A00372 | A01339 | 232 |
| A00372 | A01451 | 457 | A00372 | A01612 | 159 |
| A00372 | A01660 | 180 | A00372 | A01975 | 224 |
| A00372 | A02212 | 490 | A00372 | A02452 | 462 |
| A00372 | A03065 | 193 | A00372 | A03567 | 419 |
| A00372 | A04337 | 311 | A00372 | A04881 | 190 |
| A00372 | A04922 | 330 | A00372 | A05157 | 201 |
| A00372 | A06122 | 187 | A00372 | A07756 | 213 |
| A00372 | A07803 | 174 | A00372 | A07956 | 286 |
| A00372 | A08183 | 167 | A00372 | A08281 | 328 |
| A00372 | A08517 | 462 | A00372 | A08630 | 182 |
| A00372 | A08982 | 483 | A00372 | A08989 | 230 |
| A00372 | A08990 | 345 | A00372 | A10321 | 157 |
| A00372 | A10870 | 180 | A00372 | A11316 | 205 |
| A00372 | A11323 | 183 | A00372 | A11678 | 241 |
| A00372 | A12101 | 395 | A00372 | A12253 | 266 |
| A00372 | A12292 | 296 | A00372 | A12557 | 303 |
| A00372 | A14170 | 226 | A00372 | A14196 | 491 |
| A00372 | A14246 | 213 | A00372 | A14476 | 306 |
| A00372 | A14931 | 182 | A00372 | A15237 | 489 |
| A00372 | A15292 | 329 | A00372 | A15297 | 486 |
| A00372 | A15309 | 391 | A00372 | A15323 | 491 |
| A00372 | A15324 | 491 | A00372 | A15339 | 489 |
| A00372 | A15341 | 218 | A00372 | A15353 | 491 |
| A00372 | A15355 | 168 | A00372 | A15396 | 299 |
| A00372 | A15419 | 449 | A00372 | A15431 | 489 |
| A00372 | A15502 | 416 | A00372 | A15537 | 273 |
| A00372 | A15543 | 377 | A00372 | A15559 | 224 |
| A00372 | A15564 | 488 | A00372 | A15631 | 352 |
| A00372 | A15717 | 177 | A00372 | A15747 | 368 |
| A00372 | A15763 | 223 | A00372 | A15788 | 466 |
| A00372 | A15871 | 224 | A00372 | A16458 | 291 |
| A00372 | A16463 | 299 | A00372 | A16861 | 319 |
| A00372 | A17063 | 484 | A00373 | A00421 | 445 |
| A00373 | A00531 | 348 | A00373 | A00677 | 382 |
| A00373 | A00691 | 458 | A00373 | A01266 | 151 |
| A00373 | A01615 | 353 | A00373 | A01685 | 308 |
| A00373 | A03298 | 481 | A00373 | A03528 | 224 |
| A00373 | A03570 | 176 | A00373 | A05015 | 290 |
| A00373 | A08013 | 406 | A00373 | A08137 | 176 |
| A00373 | A08554 | 385 | A00373 | A08571 | 491 |
| A00373 | A08883 | 324 | A00373 | A08885 | 469 |
| A00373 | A09256 | 230 | A00373 | A10250 | 218 |
| A00373 | A10623 | 188 | A00373 | A11105 | 307 |

|        |        |     |        |        |     |
|--------|--------|-----|--------|--------|-----|
| A00373 | A11139 | 313 | A00373 | A11168 | 409 |
| A00373 | A11284 | 152 | A00373 | A11928 | 219 |
| A00373 | A13310 | 224 | A00373 | A13311 | 327 |
| A00373 | A13978 | 213 | A00373 | A14476 | 286 |
| A00373 | A14931 | 249 | A00373 | A15660 | 238 |
| A00374 | A00397 | 434 | A00374 | A00406 | 491 |
| A00374 | A00425 | 414 | A00374 | A00442 | 171 |
| A00374 | A00448 | 708 | A00374 | A00459 | 249 |
| A00374 | A00463 | 374 | A00374 | A00488 | 706 |
| A00374 | A00490 | 630 | A00374 | A00497 | 706 |
| A00374 | A00518 | 402 | A00374 | A00520 | 388 |
| A00374 | A00530 | 266 | A00374 | A00532 | 398 |
| A00374 | A00550 | 481 | A00374 | A00551 | 432 |
| A00374 | A00554 | 707 | A00374 | A00566 | 347 |
| A00374 | A00575 | 469 | A00374 | A00595 | 313 |
| A00374 | A00605 | 170 | A00374 | A00651 | 170 |
| A00374 | A00708 | 435 | A00374 | A00713 | 170 |
| A00374 | A00749 | 170 | A00374 | A00767 | 170 |
| A00374 | A00856 | 247 | A00374 | A00858 | 486 |
| A00374 | A00861 | 170 | A00374 | A00871 | 216 |
| A00374 | A00872 | 170 | A00374 | A00916 | 549 |
| A00374 | A00918 | 170 | A00374 | A00929 | 232 |
| A00374 | A00934 | 549 | A00374 | A00944 | 297 |
| A00374 | A00978 | 363 | A00374 | A00992 | 271 |
| A00374 | A01020 | 708 | A00374 | A01028 | 170 |
| A00374 | A01075 | 490 | A00374 | A01087 | 468 |
| A00374 | A01088 | 283 | A00374 | A01116 | 491 |
| A00374 | A01120 | 170 | A00374 | A01129 | 170 |
| A00374 | A01160 | 170 | A00374 | A01168 | 170 |
| A00374 | A01184 | 491 | A00374 | A01195 | 167 |
| A00374 | A01201 | 491 | A00374 | A01206 | 271 |
| A00374 | A01214 | 385 | A00374 | A01224 | 241 |
| A00374 | A01226 | 306 | A00374 | A01234 | 491 |
| A00374 | A01304 | 491 | A00374 | A01351 | 449 |
| A00374 | A01356 | 170 | A00374 | A01398 | 177 |
| A00374 | A01425 | 170 | A00374 | A01429 | 218 |
| A00374 | A01487 | 323 | A00374 | A01492 | 528 |
| A00374 | A01503 | 160 | A00374 | A01538 | 170 |
| A00374 | A01576 | 168 | A00374 | A01598 | 170 |
| A00374 | A01614 | 170 | A00374 | A01700 | 191 |
| A00374 | A01721 | 257 | A00374 | A01741 | 268 |
| A00374 | A02265 | 185 | A00374 | A02364 | 202 |
| A00374 | A02680 | 254 | A00374 | A03112 | 324 |
| A00374 | A03438 | 170 | A00374 | A03652 | 170 |
| A00374 | A03734 | 321 | A00374 | A03981 | 170 |
| A00374 | A05528 | 215 | A00374 | A05845 | 179 |

|        |        |     |        |        |     |
|--------|--------|-----|--------|--------|-----|
| A00374 | A06275 | 486 | A00374 | A06356 | 170 |
| A00374 | A07223 | 179 | A00374 | A07244 | 278 |
| A00374 | A07347 | 491 | A00374 | A07378 | 234 |
| A00374 | A07524 | 380 | A00374 | A07533 | 472 |
| A00374 | A07584 | 486 | A00374 | A07695 | 317 |
| A00374 | A07700 | 491 | A00374 | A07706 | 299 |
| A00374 | A07725 | 380 | A00374 | A07850 | 238 |
| A00374 | A07924 | 411 | A00374 | A08022 | 314 |
| A00374 | A08024 | 228 | A00374 | A08144 | 156 |
| A00374 | A08211 | 325 | A00374 | A08326 | 350 |
| A00374 | A08430 | 177 | A00374 | A08491 | 670 |
| A00374 | A09307 | 205 | A00374 | A09619 | 503 |
| A00374 | A09664 | 256 | A00374 | A09697 | 170 |
| A00374 | A10616 | 384 | A00374 | A13052 | 170 |
| A00374 | A13055 | 247 | A00374 | A13989 | 479 |
| A00374 | A14505 | 266 | A00375 | A00377 | 263 |
| A00375 | A00446 | 346 | A00375 | A00556 | 157 |
| A00375 | A00674 | 274 | A00375 | A00751 | 424 |
| A00375 | A00761 | 188 | A00375 | A00766 | 299 |
| A00375 | A00781 | 441 | A00375 | A00791 | 443 |
| A00375 | A00847 | 265 | A00375 | A00868 | 454 |
| A00375 | A00883 | 491 | A00375 | A00925 | 219 |
| A00375 | A00926 | 465 | A00375 | A00927 | 386 |
| A00375 | A00975 | 400 | A00375 | A01058 | 168 |
| A00375 | A01077 | 345 | A00375 | A01106 | 414 |
| A00375 | A01340 | 297 | A00375 | A01370 | 391 |
| A00375 | A02722 | 172 | A00375 | A03570 | 179 |
| A00375 | A03601 | 157 | A00375 | A05146 | 238 |
| A00375 | A05570 | 254 | A00375 | A06628 | 179 |
| A00375 | A06721 | 245 | A00375 | A06968 | 205 |
| A00375 | A08123 | 382 | A00375 | A08413 | 396 |
| A00375 | A11735 | 171 | A00375 | A12824 | 473 |
| A00375 | A15537 | 328 | A00376 | A00453 | 452 |
| A00376 | A00541 | 411 | A00376 | A00573 | 223 |
| A00376 | A00574 | 491 | A00376 | A00579 | 269 |
| A00376 | A00614 | 272 | A00376 | A00628 | 486 |
| A00376 | A00654 | 490 | A00376 | A00662 | 185 |
| A00376 | A00666 | 481 | A00376 | A00681 | 491 |
| A00376 | A00695 | 299 | A00376 | A00738 | 457 |
| A00376 | A00770 | 451 | A00376 | A00771 | 337 |
| A00376 | A00773 | 394 | A00376 | A00825 | 224 |
| A00376 | A00962 | 490 | A00376 | A00995 | 491 |
| A00376 | A01008 | 480 | A00376 | A01063 | 188 |
| A00376 | A01068 | 235 | A00376 | A01109 | 449 |
| A00376 | A01165 | 205 | A00376 | A01174 | 283 |
| A00376 | A01175 | 255 | A00376 | A01233 | 447 |

|        |        |     |        |        |     |
|--------|--------|-----|--------|--------|-----|
| A00376 | A01256 | 486 | A00376 | A01277 | 180 |
| A00376 | A01360 | 412 | A00376 | A01367 | 199 |
| A00376 | A01397 | 177 | A00376 | A01508 | 475 |
| A00376 | A01635 | 414 | A00376 | A01741 | 213 |
| A00376 | A01743 | 245 | A00376 | A01972 | 160 |
| A00376 | A02026 | 241 | A00376 | A02290 | 252 |
| A00376 | A02366 | 321 | A00376 | A02562 | 171 |
| A00376 | A02859 | 303 | A00376 | A02992 | 263 |
| A00376 | A03004 | 357 | A00376 | A03016 | 411 |
| A00376 | A03167 | 400 | A00376 | A03168 | 477 |
| A00376 | A03259 | 463 | A00376 | A03323 | 321 |
| A00376 | A03324 | 348 | A00376 | A03431 | 240 |
| A00376 | A03477 | 319 | A00376 | A03484 | 196 |
| A00376 | A03861 | 160 | A00376 | A04211 | 367 |
| A00376 | A04307 | 156 | A00376 | A04308 | 258 |
| A00376 | A04660 | 232 | A00376 | A04778 | 232 |
| A00376 | A04784 | 299 | A00376 | A04791 | 207 |
| A00376 | A04834 | 230 | A00376 | A04850 | 294 |
| A00376 | A04995 | 201 | A00376 | A05007 | 467 |
| A00376 | A05098 | 196 | A00376 | A05102 | 491 |
| A00376 | A05416 | 335 | A00376 | A05472 | 167 |
| A00376 | A05515 | 243 | A00376 | A05516 | 207 |
| A00376 | A05573 | 165 | A00376 | A05758 | 183 |
| A00376 | A05759 | 413 | A00376 | A05768 | 224 |
| A00376 | A05772 | 389 | A00376 | A05937 | 267 |
| A00376 | A06091 | 201 | A00376 | A06358 | 162 |
| A00376 | A06633 | 418 | A00376 | A06634 | 279 |
| A00376 | A06689 | 213 | A00376 | A06756 | 396 |
| A00376 | A06934 | 262 | A00376 | A06970 | 288 |
| A00376 | A06979 | 218 | A00376 | A07002 | 310 |
| A00376 | A07122 | 477 | A00376 | A07221 | 262 |
| A00376 | A07238 | 259 | A00376 | A07267 | 404 |
| A00376 | A07304 | 340 | A00376 | A07341 | 269 |
| A00376 | A07413 | 371 | A00376 | A07477 | 162 |
| A00376 | A07530 | 243 | A00376 | A07553 | 258 |
| A00376 | A07554 | 277 | A00376 | A07558 | 371 |
| A00376 | A07590 | 288 | A00376 | A07627 | 321 |
| A00376 | A07688 | 457 | A00376 | A07736 | 252 |
| A00376 | A07800 | 475 | A00376 | A07933 | 184 |
| A00376 | A07973 | 167 | A00376 | A08099 | 475 |
| A00376 | A08751 | 279 | A00376 | A08817 | 159 |
| A00376 | A09612 | 348 | A00376 | A10456 | 483 |
| A00376 | A10614 | 251 | A00376 | A10681 | 367 |
| A00376 | A10702 | 363 | A00376 | A10712 | 429 |
| A00376 | A10714 | 270 | A00376 | A11309 | 441 |
| A00376 | A11325 | 326 | A00376 | A13257 | 190 |

|        |        |     |        |        |     |
|--------|--------|-----|--------|--------|-----|
| A00376 | A14337 | 447 | A00376 | A14637 | 226 |
| A00376 | A14640 | 395 | A00376 | A14827 | 156 |
| A00376 | A15497 | 257 | A00376 | A15874 | 486 |
| A00376 | A15905 | 375 | A00376 | A16026 | 463 |
| A00376 | A16027 | 490 | A00376 | A16028 | 236 |
| A00376 | A16033 | 228 | A00376 | A16262 | 456 |
| A00376 | A16528 | 305 | A00376 | A16529 | 480 |
| A00376 | A16741 | 180 | A00376 | A16959 | 308 |
| A00376 | A17040 | 279 | A00377 | A00382 | 157 |
| A00377 | A00420 | 157 | A00377 | A00421 | 623 |
| A00377 | A00426 | 323 | A00377 | A00433 | 199 |
| A00377 | A00438 | 623 | A00377 | A00446 | 840 |
| A00377 | A00448 | 152 | A00377 | A00485 | 474 |
| A00377 | A00506 | 391 | A00377 | A00519 | 489 |
| A00377 | A00525 | 369 | A00377 | A00531 | 541 |
| A00377 | A00537 | 557 | A00377 | A00540 | 291 |
| A00377 | A00544 | 361 | A00377 | A00553 | 491 |
| A00377 | A00564 | 461 | A00377 | A00565 | 472 |
| A00377 | A00570 | 491 | A00377 | A00571 | 179 |
| A00377 | A00576 | 490 | A00377 | A00577 | 224 |
| A00377 | A00600 | 446 | A00377 | A00601 | 401 |
| A00377 | A00638 | 185 | A00377 | A00643 | 228 |
| A00377 | A00653 | 481 | A00377 | A00664 | 446 |
| A00377 | A00674 | 491 | A00377 | A00687 | 488 |
| A00377 | A00694 | 246 | A00377 | A00697 | 440 |
| A00377 | A00709 | 382 | A00377 | A00714 | 170 |
| A00377 | A00724 | 183 | A00377 | A00735 | 474 |
| A00377 | A00751 | 438 | A00377 | A00766 | 457 |
| A00377 | A00769 | 489 | A00377 | A00776 | 322 |
| A00377 | A00781 | 310 | A00377 | A00791 | 490 |
| A00377 | A00799 | 272 | A00377 | A00802 | 185 |
| A00377 | A00805 | 286 | A00377 | A00809 | 486 |
| A00377 | A00813 | 347 | A00377 | A00815 | 263 |
| A00377 | A00816 | 449 | A00377 | A00821 | 337 |
| A00377 | A00829 | 446 | A00377 | A00841 | 430 |
| A00377 | A00849 | 249 | A00377 | A00858 | 207 |
| A00377 | A00863 | 430 | A00377 | A00865 | 283 |
| A00377 | A00868 | 561 | A00377 | A00871 | 484 |
| A00377 | A00878 | 218 | A00377 | A00883 | 553 |
| A00377 | A00911 | 514 | A00377 | A00915 | 490 |
| A00377 | A00922 | 374 | A00377 | A00926 | 491 |
| A00377 | A00927 | 491 | A00377 | A00953 | 362 |
| A00377 | A00975 | 491 | A00377 | A00983 | 491 |
| A00377 | A00985 | 272 | A00377 | A00986 | 279 |
| A00377 | A00987 | 294 | A00377 | A01001 | 151 |
| A00377 | A01017 | 486 | A00377 | A01020 | 418 |

|        |        |     |        |        |     |
|--------|--------|-----|--------|--------|-----|
| A00377 | A01022 | 238 | A00377 | A01027 | 446 |
| A00377 | A01058 | 423 | A00377 | A01066 | 362 |
| A00377 | A01068 | 452 | A00377 | A01080 | 491 |
| A00377 | A01097 | 357 | A00377 | A01100 | 218 |
| A00377 | A01101 | 313 | A00377 | A01102 | 446 |
| A00377 | A01103 | 63  | A00377 | A01106 | 228 |
| A00377 | A01108 | 467 | A00377 | A01122 | 479 |
| A00377 | A01125 | 177 | A00377 | A01139 | 475 |
| A00377 | A01156 | 839 | A00377 | A01161 | 767 |
| A00377 | A01169 | 491 | A00377 | A01212 | 472 |
| A00377 | A01214 | 377 | A00377 | A01221 | 440 |
| A00377 | A01225 | 63  | A00377 | A01232 | 364 |
| A00377 | A01234 | 390 | A00377 | A01264 | 319 |
| A00377 | A01267 | 491 | A00377 | A01278 | 491 |
| A00377 | A01307 | 409 | A00377 | A01322 | 486 |
| A00377 | A01329 | 218 | A00377 | A01338 | 485 |
| A00377 | A01339 | 447 | A00377 | A01343 | 431 |
| A00377 | A01359 | 163 | A00377 | A01370 | 308 |
| A00377 | A01371 | 221 | A00377 | A01379 | 243 |
| A00377 | A01385 | 278 | A00377 | A01392 | 188 |
| A00377 | A01404 | 411 | A00377 | A01415 | 440 |
| A00377 | A01419 | 388 | A00377 | A01481 | 294 |
| A00377 | A01485 | 165 | A00377 | A01497 | 119 |
| A00377 | A01507 | 318 | A00377 | A01524 | 899 |
| A00377 | A01551 | 491 | A00377 | A01573 | 417 |
| A00377 | A01578 | 235 | A00377 | A01582 | 490 |
| A00377 | A01593 | 916 | A00377 | A01606 | 485 |
| A00377 | A01627 | 608 | A00377 | A01632 | 481 |
| A00377 | A01639 | 182 | A00377 | A01668 | 221 |
| A00377 | A01711 | 374 | A00377 | A01741 | 479 |
| A00377 | A01790 | 263 | A00377 | A01931 | 217 |
| A00377 | A01953 | 323 | A00377 | A01977 | 299 |
| A00377 | A01995 | 179 | A00377 | A02020 | 361 |
| A00377 | A02058 | 257 | A00377 | A02086 | 457 |
| A00377 | A02148 | 481 | A00377 | A02164 | 486 |
| A00377 | A02192 | 63  | A00377 | A02203 | 401 |
| A00377 | A02411 | 389 | A00377 | A02477 | 433 |
| A00377 | A02549 | 73  | A00377 | A02583 | 63  |
| A00377 | A02584 | 68  | A00377 | A02594 | 138 |
| A00377 | A02598 | 79  | A00377 | A02618 | 205 |
| A00377 | A02709 | 486 | A00377 | A02761 | 162 |
| A00377 | A02908 | 286 | A00377 | A02978 | 483 |
| A00377 | A03079 | 378 | A00377 | A03104 | 455 |
| A00377 | A03259 | 299 | A00377 | A03304 | 391 |
| A00377 | A03334 | 489 | A00377 | A03454 | 360 |
| A00377 | A03495 | 63  | A00377 | A03538 | 174 |

|        |        |     |        |        |     |
|--------|--------|-----|--------|--------|-----|
| A00377 | A03573 | 279 | A00377 | A03651 | 254 |
| A00377 | A03676 | 491 | A00377 | A03713 | 432 |
| A00377 | A03726 | 941 | A00377 | A03742 | 176 |
| A00377 | A03750 | 184 | A00377 | A03819 | 446 |
| A00377 | A03822 | 151 | A00377 | A03851 | 185 |
| A00377 | A03859 | 443 | A00377 | A03885 | 281 |
| A00377 | A03902 | 279 | A00377 | A03981 | 200 |
| A00377 | A03992 | 439 | A00377 | A04033 | 475 |
| A00377 | A04072 | 236 | A00377 | A04079 | 185 |
| A00377 | A04256 | 321 | A00377 | A04275 | 378 |
| A00377 | A04337 | 160 | A00377 | A04423 | 486 |
| A00377 | A04449 | 557 | A00377 | A04491 | 491 |
| A00377 | A04666 | 252 | A00377 | A04668 | 258 |
| A00377 | A04925 | 152 | A00377 | A05095 | 307 |
| A00377 | A05323 | 378 | A00377 | A05356 | 330 |
| A00377 | A05442 | 152 | A00377 | A05690 | 162 |
| A00377 | A05738 | 385 | A00377 | A05812 | 378 |
| A00377 | A06099 | 260 | A00377 | A06272 | 488 |
| A00377 | A06277 | 486 | A00377 | A06297 | 174 |
| A00377 | A06400 | 70  | A00377 | A06454 | 425 |
| A00377 | A06556 | 212 | A00377 | A06624 | 318 |
| A00377 | A06631 | 345 | A00377 | A06708 | 213 |
| A00377 | A06721 | 213 | A00377 | A06825 | 477 |
| A00377 | A06861 | 291 | A00377 | A06938 | 483 |
| A00377 | A07014 | 462 | A00377 | A07046 | 249 |
| A00377 | A07136 | 88  | A00377 | A07157 | 218 |
| A00377 | A07229 | 273 | A00377 | A07346 | 419 |
| A00377 | A07360 | 491 | A00377 | A07422 | 391 |
| A00377 | A07457 | 305 | A00377 | A07545 | 296 |
| A00377 | A07641 | 185 | A00377 | A07670 | 334 |
| A00377 | A07675 | 314 | A00377 | A07756 | 329 |
| A00377 | A07799 | 162 | A00377 | A07822 | 450 |
| A00377 | A08025 | 212 | A00377 | A08064 | 488 |
| A00377 | A08123 | 174 | A00377 | A08180 | 174 |
| A00377 | A08442 | 212 | A00377 | A08558 | 404 |
| A00377 | A08659 | 212 | A00377 | A08878 | 405 |
| A00377 | A08927 | 210 | A00377 | A09328 | 491 |
| A00377 | A09366 | 212 | A00377 | A09672 | 462 |
| A00377 | A09750 | 218 | A00377 | A09766 | 152 |
| A00377 | A09910 | 152 | A00377 | A10186 | 361 |
| A00377 | A10264 | 440 | A00377 | A10278 | 899 |
| A00377 | A10371 | 486 | A00377 | A10372 | 457 |
| A00377 | A10540 | 470 | A00377 | A10755 | 240 |
| A00377 | A11313 | 438 | A00377 | A11602 | 154 |
| A00377 | A11706 | 188 | A00377 | A11735 | 405 |
| A00377 | A11737 | 467 | A00377 | A11914 | 424 |

|        |        |     |        |        |     |
|--------|--------|-----|--------|--------|-----|
| A00377 | A11983 | 646 | A00377 | A12453 | 212 |
| A00377 | A12581 | 152 | A00377 | A12654 | 154 |
| A00377 | A12658 | 374 | A00377 | A12824 | 491 |
| A00377 | A13225 | 174 | A00377 | A13298 | 351 |
| A00377 | A13344 | 152 | A00377 | A13369 | 300 |
| A00377 | A13397 | 286 | A00377 | A13614 | 491 |
| A00377 | A13793 | 307 | A00377 | A14077 | 423 |
| A00377 | A14196 | 906 | A00377 | A14381 | 160 |
| A00377 | A14449 | 243 | A00377 | A14489 | 288 |
| A00377 | A14566 | 210 | A00377 | A14622 | 218 |
| A00377 | A14635 | 159 | A00377 | A14648 | 490 |
| A00377 | A14655 | 348 | A00377 | A14701 | 446 |
| A00377 | A14735 | 229 | A00377 | A15185 | 406 |
| A00377 | A15257 | 313 | A00377 | A15282 | 490 |
| A00377 | A15295 | 583 | A00377 | A15297 | 366 |
| A00377 | A15322 | 340 | A00377 | A15379 | 191 |
| A00377 | A15422 | 431 | A00377 | A15498 | 582 |
| A00377 | A15558 | 409 | A00377 | A15624 | 491 |
| A00377 | A15626 | 210 | A00377 | A15649 | 470 |
| A00377 | A15651 | 491 | A00377 | A15652 | 401 |
| A00377 | A15661 | 491 | A00377 | A15684 | 491 |
| A00377 | A15746 | 408 | A00377 | A15900 | 212 |
| A00377 | A15932 | 489 | A00377 | A15933 | 299 |
| A00377 | A15937 | 204 | A00377 | A16088 | 266 |
| A00377 | A16149 | 269 | A00377 | A16157 | 273 |
| A00377 | A16343 | 198 | A00377 | A16626 | 176 |
| A00377 | A16627 | 430 | A00377 | A16700 | 488 |
| A00378 | A00380 | 380 | A00378 | A00383 | 191 |
| A00378 | A00421 | 454 | A00378 | A00436 | 240 |
| A00378 | A00441 | 436 | A00378 | A00463 | 529 |
| A00378 | A00475 | 401 | A00378 | A00479 | 279 |
| A00378 | A00488 | 307 | A00378 | A00517 | 542 |
| A00378 | A00531 | 249 | A00378 | A00537 | 560 |
| A00378 | A00553 | 177 | A00378 | A00566 | 541 |
| A00378 | A00575 | 537 | A00378 | A00604 | 441 |
| A00378 | A00622 | 459 | A00378 | A00626 | 371 |
| A00378 | A00653 | 188 | A00378 | A00665 | 715 |
| A00378 | A00680 | 479 | A00378 | A00690 | 446 |
| A00378 | A00697 | 485 | A00378 | A00733 | 541 |
| A00378 | A00741 | 480 | A00378 | A00744 | 715 |
| A00378 | A00791 | 177 | A00378 | A00805 | 542 |
| A00378 | A00814 | 193 | A00378 | A00826 | 335 |
| A00378 | A00838 | 180 | A00378 | A00858 | 541 |
| A00378 | A00860 | 513 | A00378 | A00866 | 156 |
| A00378 | A00871 | 396 | A00378 | A00881 | 528 |
| A00378 | A00883 | 436 | A00378 | A00935 | 286 |



|        |        |     |        |        |     |
|--------|--------|-----|--------|--------|-----|
| A00378 | A00955 | 157 | A00378 | A00961 | 420 |
| A00378 | A00978 | 401 | A00378 | A00998 | 327 |
| A00378 | A01007 | 156 | A00378 | A01019 | 537 |
| A00378 | A01024 | 480 | A00378 | A01057 | 477 |
| A00378 | A01077 | 219 | A00378 | A01150 | 424 |
| A00378 | A01155 | 188 | A00378 | A01161 | 486 |
| A00378 | A01195 | 535 | A00378 | A01200 | 398 |
| A00378 | A01210 | 433 | A00378 | A01212 | 477 |
| A00378 | A01214 | 228 | A00378 | A01238 | 339 |
| A00378 | A01325 | 620 | A00378 | A01336 | 290 |
| A00378 | A01347 | 280 | A00378 | A01354 | 212 |
| A00378 | A01398 | 540 | A00378 | A01401 | 528 |
| A00378 | A01413 | 486 | A00378 | A01447 | 483 |
| A00378 | A01451 | 374 | A00378 | A01492 | 156 |
| A00378 | A01500 | 537 | A00378 | A01503 | 420 |
| A00378 | A01539 | 489 | A00378 | A01540 | 227 |
| A00378 | A01571 | 489 | A00378 | A01610 | 393 |
| A00378 | A01640 | 337 | A00378 | A01720 | 286 |
| A00378 | A01844 | 911 | A00378 | A01914 | 262 |
| A00378 | A02030 | 177 | A00378 | A02389 | 536 |
| A00378 | A02715 | 391 | A00378 | A02994 | 185 |
| A00378 | A03014 | 491 | A00378 | A03207 | 408 |
| A00378 | A03494 | 429 | A00378 | A03526 | 457 |
| A00378 | A03569 | 228 | A00378 | A03863 | 196 |
| A00378 | A03889 | 390 | A00378 | A04181 | 358 |
| A00378 | A04648 | 479 | A00378 | A04687 | 156 |
| A00378 | A04879 | 489 | A00378 | A04892 | 260 |
| A00378 | A05802 | 334 | A00378 | A05981 | 715 |
| A00378 | A06129 | 152 | A00378 | A06803 | 457 |
| A00378 | A07203 | 193 | A00378 | A07347 | 491 |
| A00378 | A07670 | 168 | A00378 | A07686 | 394 |
| A00378 | A07725 | 329 | A00378 | A07850 | 156 |
| A00378 | A07887 | 354 | A00378 | A08137 | 404 |
| A00378 | A08383 | 178 | A00378 | A08818 | 230 |
| A00378 | A08860 | 340 | A00378 | A09125 | 218 |
| A00378 | A09349 | 165 | A00378 | A09502 | 156 |
| A00378 | A09526 | 238 | A00378 | A09529 | 180 |
| A00378 | A09595 | 152 | A00378 | A09712 | 311 |
| A00378 | A09723 | 358 | A00378 | A09806 | 427 |
| A00378 | A10070 | 152 | A00378 | A10162 | 191 |
| A00378 | A11033 | 154 | A00378 | A11344 | 156 |
| A00378 | A11674 | 156 | A00378 | A11735 | 270 |
| A00378 | A11737 | 273 | A00378 | A11755 | 240 |
| A00378 | A11804 | 347 | A00378 | A12026 | 218 |
| A00378 | A12099 | 172 | A00378 | A12507 | 187 |
| A00378 | A13788 | 479 | A00378 | A14006 | 491 |

|        |        |     |        |        |     |
|--------|--------|-----|--------|--------|-----|
| A00378 | A14188 | 249 | A00378 | A14399 | 474 |
| A00378 | A14540 | 177 | A00378 | A15297 | 346 |
| A00378 | A15507 | 168 | A00378 | A15545 | 252 |
| A00378 | A15666 | 491 | A00378 | A15735 | 204 |
| A00378 | A16228 | 355 | A00378 | A16400 | 280 |
| A00378 | A16410 | 221 | A00378 | A16786 | 170 |
| A00379 | A00395 | 491 | A00379 | A00449 | 491 |
| A00379 | A00574 | 470 | A00379 | A00628 | 255 |
| A00379 | A00638 | 383 | A00379 | A00654 | 306 |
| A00379 | A00825 | 290 | A00379 | A00995 | 446 |
| A00379 | A01018 | 491 | A00379 | A01222 | 259 |
| A00379 | A01225 | 486 | A00379 | A01297 | 422 |
| A00379 | A01409 | 433 | A00379 | A01562 | 414 |
| A00379 | A01899 | 463 | A00379 | A02192 | 337 |
| A00379 | A02254 | 259 | A00379 | A02521 | 267 |
| A00379 | A02708 | 198 | A00379 | A02992 | 210 |
| A00379 | A03484 | 199 | A00379 | A03513 | 183 |
| A00379 | A03795 | 489 | A00379 | A04179 | 430 |
| A00379 | A04228 | 491 | A00379 | A05045 | 412 |
| A00379 | A05393 | 193 | A00379 | A05757 | 204 |
| A00379 | A05759 | 223 | A00379 | A05789 | 168 |
| A00379 | A06439 | 452 | A00379 | A06689 | 210 |
| A00379 | A06847 | 262 | A00379 | A06855 | 162 |
| A00379 | A06860 | 267 | A00379 | A07037 | 154 |
| A00379 | A07059 | 383 | A00379 | A07067 | 310 |
| A00379 | A07088 | 475 | A00379 | A07239 | 490 |
| A00379 | A07281 | 462 | A00379 | A07520 | 380 |
| A00379 | A07674 | 330 | A00379 | A07739 | 446 |
| A00379 | A08133 | 199 | A00379 | A08155 | 293 |
| A00379 | A08368 | 369 | A00379 | A08687 | 162 |
| A00379 | A09879 | 157 | A00379 | A10424 | 172 |
| A00379 | A10457 | 162 | A00379 | A10458 | 172 |
| A00379 | A10652 | 440 | A00379 | A10687 | 176 |
| A00379 | A10696 | 457 | A00379 | A10708 | 168 |
| A00379 | A11021 | 408 | A00379 | A13065 | 279 |
| A00379 | A14193 | 152 | A00379 | A14221 | 283 |
| A00379 | A16763 | 443 | A00379 | A17006 | 417 |
| A00379 | A17092 | 260 | A00380 | A00459 | 409 |
| A00380 | A00545 | 162 | A00380 | A00572 | 491 |
| A00380 | A00761 | 157 | A00380 | A00817 | 462 |
| A00380 | A00818 | 243 | A00380 | A00819 | 390 |
| A00380 | A00822 | 488 | A00380 | A00981 | 190 |
| A00380 | A01169 | 281 | A00380 | A01241 | 160 |
| A00380 | A01320 | 172 | A00380 | A01330 | 205 |
| A00380 | A01383 | 489 | A00380 | A01385 | 491 |
| A00380 | A01510 | 305 | A00380 | A01575 | 279 |

|        |        |     |        |        |     |
|--------|--------|-----|--------|--------|-----|
| A00380 | A01683 | 152 | A00380 | A02479 | 218 |
| A00380 | A03091 | 199 | A00380 | A03525 | 360 |
| A00380 | A03526 | 215 | A00380 | A04695 | 302 |
| A00380 | A04861 | 165 | A00380 | A05120 | 272 |
| A00380 | A07725 | 307 | A00380 | A07885 | 184 |
| A00380 | A09056 | 301 | A00380 | A09675 | 368 |
| A00380 | A10642 | 195 | A00380 | A11710 | 279 |
| A00380 | A14183 | 185 | A00381 | A00642 | 196 |
| A00381 | A00643 | 441 | A00381 | A00732 | 263 |
| A00381 | A00864 | 486 | A00381 | A01051 | 218 |
| A00381 | A01529 | 306 | A00381 | A01747 | 339 |
| A00381 | A01897 | 270 | A00381 | A01901 | 124 |
| A00381 | A02318 | 241 | A00381 | A02392 | 296 |
| A00381 | A02842 | 235 | A00381 | A03213 | 180 |
| A00381 | A03636 | 229 | A00381 | A03771 | 473 |
| A00381 | A03922 | 243 | A00381 | A04133 | 227 |
| A00381 | A04239 | 399 | A00381 | A04282 | 202 |
| A00381 | A04305 | 162 | A00381 | A04358 | 296 |
| A00381 | A04534 | 302 | A00381 | A04543 | 218 |
| A00381 | A05065 | 162 | A00381 | A05760 | 899 |
| A00381 | A05779 | 243 | A00381 | A05848 | 307 |
| A00381 | A06653 | 212 | A00381 | A06705 | 414 |
| A00381 | A06752 | 241 | A00381 | A07178 | 205 |
| A00381 | A07201 | 70  | A00381 | A07339 | 899 |
| A00381 | A07683 | 319 | A00381 | A08221 | 485 |
| A00381 | A08370 | 265 | A00381 | A09078 | 247 |
| A00381 | A09123 | 449 | A00381 | A09553 | 899 |
| A00381 | A09900 | 188 | A00381 | A10161 | 339 |
| A00381 | A10278 | 205 | A00381 | A10941 | 296 |
| A00381 | A11648 | 281 | A00381 | A11695 | 238 |
| A00381 | A11842 | 199 | A00381 | A12136 | 288 |
| A00381 | A12292 | 307 | A00381 | A12468 | 352 |
| A00381 | A12867 | 339 | A00381 | A12965 | 339 |
| A00381 | A13954 | 257 | A00381 | A13956 | 238 |
| A00381 | A13990 | 368 | A00381 | A14543 | 208 |
| A00381 | A14588 | 299 | A00381 | A14643 | 321 |
| A00381 | A14660 | 156 | A00381 | A15840 | 428 |
| A00381 | A16463 | 469 | A00381 | A16485 | 257 |
| A00381 | A16732 | 462 | A00382 | A00397 | 491 |
| A00382 | A00412 | 404 | A00382 | A00421 | 490 |
| A00382 | A00438 | 302 | A00382 | A00444 | 658 |
| A00382 | A00452 | 414 | A00382 | A00458 | 418 |
| A00382 | A00489 | 721 | A00382 | A00496 | 183 |
| A00382 | A00508 | 310 | A00382 | A00517 | 401 |
| A00382 | A00532 | 484 | A00382 | A00555 | 356 |
| A00382 | A00570 | 470 | A00382 | A00640 | 330 |

|        |        |     |        |        |     |
|--------|--------|-----|--------|--------|-----|
| A00382 | A00667 | 386 | A00382 | A00687 | 246 |
| A00382 | A00694 | 302 | A00382 | A00703 | 413 |
| A00382 | A00767 | 481 | A00382 | A00822 | 339 |
| A00382 | A00843 | 256 | A00382 | A00848 | 491 |
| A00382 | A00867 | 188 | A00382 | A00868 | 176 |
| A00382 | A00871 | 293 | A00382 | A00883 | 559 |
| A00382 | A00905 | 467 | A00382 | A00916 | 547 |
| A00382 | A00928 | 452 | A00382 | A00930 | 259 |
| A00382 | A00958 | 235 | A00382 | A00970 | 470 |
| A00382 | A00992 | 456 | A00382 | A01040 | 502 |
| A00382 | A01069 | 753 | A00382 | A01075 | 484 |
| A00382 | A01091 | 267 | A00382 | A01115 | 721 |
| A00382 | A01120 | 193 | A00382 | A01136 | 249 |
| A00382 | A01150 | 463 | A00382 | A01156 | 243 |
| A00382 | A01166 | 185 | A00382 | A01194 | 491 |
| A00382 | A01206 | 461 | A00382 | A01234 | 491 |
| A00382 | A01243 | 463 | A00382 | A01266 | 188 |
| A00382 | A01268 | 463 | A00382 | A01279 | 491 |
| A00382 | A01291 | 477 | A00382 | A01311 | 63  |
| A00382 | A01351 | 489 | A00382 | A01352 | 466 |
| A00382 | A01354 | 291 | A00382 | A01413 | 63  |
| A00382 | A01425 | 188 | A00382 | A01431 | 160 |
| A00382 | A01442 | 159 | A00382 | A01457 | 228 |
| A00382 | A01470 | 490 | A00382 | A01492 | 490 |
| A00382 | A01539 | 845 | A00382 | A01569 | 728 |
| A00382 | A01577 | 326 | A00382 | A01598 | 491 |
| A00382 | A01612 | 485 | A00382 | A01614 | 470 |
| A00382 | A01615 | 491 | A00382 | A01649 | 452 |
| A00382 | A01770 | 457 | A00382 | A01917 | 179 |
| A00382 | A02212 | 168 | A00382 | A02535 | 485 |
| A00382 | A02792 | 63  | A00382 | A03446 | 721 |
| A00382 | A03476 | 165 | A00382 | A03494 | 424 |
| A00382 | A03560 | 404 | A00382 | A03783 | 404 |
| A00382 | A03863 | 502 | A00382 | A04075 | 251 |
| A00382 | A04212 | 491 | A00382 | A04499 | 162 |
| A00382 | A05645 | 270 | A00382 | A05712 | 477 |
| A00382 | A05738 | 346 | A00382 | A06204 | 489 |
| A00382 | A06295 | 152 | A00382 | A06347 | 491 |
| A00382 | A06650 | 491 | A00382 | A06698 | 366 |
| A00382 | A06832 | 154 | A00382 | A06892 | 162 |
| A00382 | A07247 | 457 | A00382 | A07572 | 235 |
| A00382 | A07604 | 179 | A00382 | A07706 | 379 |
| A00382 | A08118 | 234 | A00382 | A08137 | 480 |
| A00382 | A08183 | 446 | A00382 | A08290 | 258 |
| A00382 | A08340 | 217 | A00382 | A08546 | 488 |
| A00382 | A08571 | 479 | A00382 | A08627 | 201 |

|        |        |     |        |        |     |
|--------|--------|-----|--------|--------|-----|
| A00382 | A08707 | 402 | A00382 | A08859 | 402 |
| A00382 | A08896 | 424 | A00382 | A08989 | 193 |
| A00382 | A08991 | 404 | A00382 | A09004 | 156 |
| A00382 | A09197 | 185 | A00382 | A09397 | 221 |
| A00382 | A09673 | 182 | A00382 | A10006 | 363 |
| A00382 | A10266 | 185 | A00382 | A10465 | 201 |
| A00382 | A10532 | 658 | A00382 | A10632 | 270 |
| A00382 | A11240 | 372 | A00382 | A11300 | 349 |
| A00382 | A11316 | 272 | A00382 | A11409 | 491 |
| A00382 | A11476 | 159 | A00382 | A11913 | 425 |
| A00382 | A12202 | 323 | A00382 | A12323 | 221 |
| A00382 | A12656 | 200 | A00382 | A12673 | 258 |
| A00382 | A12757 | 216 | A00382 | A12862 | 154 |
| A00382 | A13308 | 174 | A00382 | A13534 | 258 |
| A00382 | A13609 | 486 | A00382 | A13989 | 537 |
| A00382 | A14006 | 404 | A00382 | A14186 | 488 |
| A00382 | A14196 | 465 | A00382 | A14200 | 409 |
| A00382 | A14220 | 451 | A00382 | A14246 | 549 |
| A00382 | A14546 | 223 | A00382 | A14596 | 491 |
| A00382 | A15204 | 200 | A00382 | A15205 | 185 |
| A00382 | A15206 | 185 | A00382 | A15207 | 185 |
| A00382 | A15210 | 200 | A00382 | A15237 | 193 |
| A00382 | A15292 | 230 | A00382 | A15297 | 381 |
| A00382 | A15323 | 427 | A00382 | A15324 | 490 |
| A00382 | A15334 | 183 | A00382 | A15353 | 491 |
| A00382 | A15370 | 491 | A00382 | A15374 | 341 |
| A00382 | A15419 | 265 | A00382 | A15559 | 210 |
| A00382 | A15564 | 384 | A00382 | A15660 | 243 |
| A00382 | A15698 | 372 | A00382 | A15717 | 302 |
| A00382 | A15724 | 475 | A00382 | A15763 | 301 |
| A00382 | A15867 | 419 | A00382 | A16575 | 179 |
| A00382 | A16661 | 162 | A00382 | A16664 | 205 |
| A00382 | A16904 | 340 | A00382 | A17063 | 163 |
| A00382 | A17089 | 491 | A00383 | A00537 | 152 |
| A00383 | A00741 | 270 | A00383 | A00998 | 393 |
| A00383 | A01086 | 263 | A00383 | A01155 | 346 |
| A00383 | A01161 | 124 | A00383 | A01210 | 271 |
| A00383 | A01336 | 351 | A00383 | A01413 | 307 |
| A00383 | A01447 | 285 | A00383 | A01540 | 184 |
| A00383 | A09709 | 386 | A00384 | A00669 | 154 |
| A00384 | A00852 | 486 | A00384 | A00906 | 259 |
| A00384 | A01359 | 191 | A00384 | A02642 | 378 |
| A00384 | A03157 | 180 | A00384 | A13146 | 276 |
| A00385 | A00429 | 452 | A00385 | A00437 | 183 |
| A00385 | A00483 | 240 | A00385 | A00532 | 210 |
| A00385 | A00537 | 301 | A00385 | A00981 | 259 |

|        |        |     |        |        |     |
|--------|--------|-----|--------|--------|-----|
| A00385 | A01211 | 184 | A00385 | A01373 | 260 |
| A00385 | A01417 | 196 | A00385 | A01669 | 160 |
| A00385 | A01897 | 157 | A00385 | A01970 | 235 |
| A00385 | A01997 | 226 | A00385 | A02010 | 316 |
| A00385 | A02049 | 291 | A00385 | A02054 | 313 |
| A00385 | A02158 | 424 | A00385 | A02180 | 488 |
| A00385 | A02225 | 353 | A00385 | A02621 | 184 |
| A00385 | A02654 | 160 | A00385 | A02666 | 246 |
| A00385 | A02815 | 319 | A00385 | A02836 | 177 |
| A00385 | A03054 | 329 | A00385 | A03070 | 172 |
| A00385 | A03080 | 357 | A00385 | A03390 | 383 |
| A00385 | A03401 | 491 | A00385 | A03731 | 278 |
| A00385 | A03744 | 378 | A00385 | A03748 | 205 |
| A00385 | A03879 | 219 | A00385 | A03910 | 240 |
| A00385 | A04361 | 157 | A00385 | A04754 | 299 |
| A00385 | A04928 | 216 | A00385 | A05617 | 219 |
| A00385 | A06211 | 283 | A00385 | A06584 | 160 |
| A00385 | A06828 | 319 | A00385 | A07394 | 184 |
| A00385 | A09111 | 299 | A00385 | A09131 | 179 |
| A00385 | A09205 | 219 | A00385 | A09206 | 241 |
| A00385 | A09230 | 311 | A00385 | A09234 | 319 |
| A00385 | A09235 | 165 | A00385 | A09363 | 190 |
| A00385 | A09745 | 162 | A00385 | A09761 | 347 |
| A00385 | A10018 | 159 | A00385 | A11068 | 165 |
| A00385 | A11359 | 362 | A00385 | A11394 | 465 |
| A00385 | A11526 | 210 | A00385 | A11858 | 177 |
| A00385 | A12037 | 441 | A00385 | A12140 | 294 |
| A00385 | A12326 | 294 | A00385 | A12644 | 274 |
| A00385 | A12722 | 196 | A00385 | A13133 | 340 |
| A00385 | A13942 | 461 | A00385 | A14267 | 483 |
| A00385 | A14378 | 412 | A00385 | A14611 | 340 |
| A00385 | A15493 | 409 | A00385 | A15494 | 350 |
| A00385 | A15911 | 200 | A00385 | A16531 | 152 |
| A00386 | A00531 | 282 | A00386 | A00568 | 174 |
| A00386 | A00651 | 283 | A00386 | A00684 | 162 |
| A00386 | A01064 | 474 | A00386 | A01093 | 271 |
| A00386 | A01359 | 497 | A00386 | A01425 | 319 |
| A00386 | A01492 | 162 | A00386 | A01524 | 208 |
| A00386 | A01557 | 65  | A00386 | A01559 | 440 |
| A00386 | A01650 | 202 | A00386 | A01660 | 390 |
| A00386 | A02180 | 112 | A00386 | A02206 | 424 |
| A00386 | A02219 | 404 | A00386 | A02524 | 182 |
| A00386 | A03297 | 200 | A00386 | A03401 | 413 |
| A00386 | A03762 | 268 | A00386 | A03981 | 319 |
| A00386 | A04316 | 213 | A00386 | A04403 | 347 |
| A00386 | A04666 | 497 | A00386 | A04668 | 385 |

|        |        |     |        |        |     |
|--------|--------|-----|--------|--------|-----|
| A00386 | A05620 | 291 | A00386 | A05721 | 221 |
| A00386 | A06597 | 553 | A00386 | A06814 | 383 |
| A00386 | A07140 | 157 | A00386 | A07184 | 245 |
| A00386 | A08698 | 159 | A00386 | A09372 | 324 |
| A00386 | A10353 | 193 | A00386 | A10532 | 199 |
| A00386 | A14272 | 443 | A00386 | A14299 | 269 |
| A00386 | A14443 | 165 | A00386 | A14444 | 363 |
| A00386 | A14661 | 380 | A00386 | A14674 | 497 |
| A00386 | A15277 | 179 | A00386 | A15420 | 322 |
| A00386 | A15850 | 313 | A00386 | A15941 | 283 |
| A00386 | A16738 | 497 | A00387 | A00513 | 391 |
| A00387 | A00751 | 238 | A00387 | A01459 | 249 |
| A00387 | A02747 | 367 | A00387 | A07135 | 167 |
| A00387 | A11284 | 238 | A00387 | A12047 | 212 |
| A00387 | A12264 | 352 | A00388 | A00411 | 486 |
| A00388 | A00418 | 899 | A00388 | A00450 | 406 |
| A00388 | A00671 | 255 | A00388 | A00754 | 491 |
| A00388 | A00778 | 485 | A00388 | A00809 | 257 |
| A00388 | A00812 | 491 | A00388 | A01146 | 491 |
| A00388 | A01149 | 407 | A00388 | A01212 | 350 |
| A00388 | A01262 | 473 | A00388 | A01374 | 296 |
| A00388 | A01459 | 490 | A00388 | A01478 | 491 |
| A00388 | A01479 | 281 | A00388 | A01514 | 589 |
| A00388 | A01537 | 491 | A00388 | A01576 | 199 |
| A00388 | A01591 | 172 | A00388 | A01593 | 899 |
| A00388 | A01633 | 243 | A00388 | A01685 | 249 |
| A00388 | A01687 | 408 | A00388 | A01689 | 491 |
| A00388 | A01708 | 463 | A00388 | A01871 | 199 |
| A00388 | A01900 | 202 | A00388 | A01976 | 479 |
| A00388 | A01988 | 475 | A00388 | A02215 | 428 |
| A00388 | A02381 | 491 | A00388 | A02998 | 378 |
| A00388 | A03637 | 188 | A00388 | A04079 | 234 |
| A00388 | A04553 | 443 | A00388 | A04693 | 460 |
| A00388 | A05008 | 454 | A00388 | A05009 | 430 |
| A00388 | A05124 | 260 | A00388 | A05474 | 174 |
| A00388 | A05880 | 458 | A00388 | A05892 | 157 |
| A00388 | A06143 | 334 | A00388 | A06348 | 491 |
| A00388 | A06572 | 486 | A00388 | A06661 | 327 |
| A00388 | A06864 | 183 | A00388 | A07313 | 188 |
| A00388 | A07425 | 486 | A00388 | A07433 | 491 |
| A00388 | A07495 | 188 | A00388 | A07593 | 491 |
| A00388 | A07598 | 168 | A00388 | A07961 | 333 |
| A00388 | A08059 | 201 | A00388 | A08184 | 490 |
| A00388 | A08185 | 485 | A00388 | A08196 | 483 |
| A00388 | A08402 | 157 | A00388 | A08463 | 411 |
| A00388 | A08503 | 481 | A00388 | A08525 | 491 |

|        |        |     |        |        |     |
|--------|--------|-----|--------|--------|-----|
| A00388 | A08549 | 462 | A00388 | A08557 | 160 |
| A00388 | A08814 | 489 | A00388 | A08839 | 213 |
| A00388 | A08847 | 441 | A00388 | A08853 | 489 |
| A00388 | A08854 | 469 | A00388 | A08902 | 265 |
| A00388 | A09052 | 434 | A00388 | A09256 | 480 |
| A00388 | A09320 | 238 | A00388 | A09643 | 229 |
| A00388 | A09660 | 456 | A00388 | A09767 | 160 |
| A00388 | A10373 | 391 | A00388 | A10607 | 267 |
| A00388 | A10673 | 422 | A00388 | A11656 | 219 |
| A00388 | A11884 | 357 | A00388 | A12533 | 393 |
| A00388 | A12553 | 185 | A00388 | A12595 | 174 |
| A00388 | A12932 | 420 | A00388 | A13082 | 201 |
| A00388 | A13591 | 199 | A00388 | A13949 | 330 |
| A00388 | A14133 | 201 | A00388 | A14209 | 174 |
| A00388 | A14221 | 395 | A00388 | A14222 | 210 |
| A00388 | A14227 | 491 | A00388 | A14272 | 447 |
| A00388 | A14279 | 441 | A00388 | A14285 | 177 |
| A00388 | A14289 | 434 | A00388 | A14306 | 174 |
| A00388 | A14307 | 201 | A00388 | A14309 | 465 |
| A00388 | A15123 | 259 | A00388 | A15367 | 361 |
| A00388 | A15380 | 332 | A00388 | A15533 | 491 |
| A00388 | A15910 | 174 | A00388 | A15949 | 217 |
| A00388 | A16128 | 321 | A00388 | A16131 | 386 |
| A00388 | A16602 | 201 | A00388 | A16605 | 174 |
| A00389 | A00411 | 154 | A00389 | A00444 | 230 |
| A00389 | A00667 | 401 | A00389 | A00687 | 288 |
| A00389 | A00710 | 409 | A00389 | A00913 | 247 |
| A00389 | A00915 | 207 | A00389 | A01188 | 419 |
| A00389 | A01190 | 324 | A00389 | A01194 | 427 |
| A00389 | A01211 | 396 | A00389 | A01353 | 286 |
| A00389 | A01411 | 259 | A00389 | A01455 | 412 |
| A00389 | A01495 | 162 | A00389 | A01504 | 313 |
| A00389 | A01506 | 163 | A00389 | A01582 | 260 |
| A00389 | A01826 | 299 | A00389 | A01937 | 301 |
| A00389 | A02051 | 408 | A00389 | A02487 | 413 |
| A00389 | A02542 | 305 | A00389 | A02998 | 296 |
| A00389 | A03029 | 461 | A00389 | A03180 | 457 |
| A00389 | A03439 | 256 | A00389 | A03446 | 213 |
| A00389 | A03453 | 490 | A00389 | A03676 | 223 |
| A00389 | A04055 | 291 | A00389 | A04066 | 412 |
| A00389 | A04495 | 212 | A00389 | A05025 | 243 |
| A00389 | A05154 | 230 | A00389 | A06030 | 328 |
| A00389 | A09042 | 245 | A00389 | A09056 | 193 |
| A00389 | A09587 | 460 | A00389 | A10532 | 335 |
| A00389 | A11409 | 411 | A00389 | A12903 | 278 |
| A00389 | A13659 | 361 | A00389 | A14594 | 263 |



|        |        |     |        |        |     |
|--------|--------|-----|--------|--------|-----|
| A00389 | A14622 | 208 | A00389 | A15469 | 301 |
| A00389 | A15673 | 157 | A00389 | A15920 | 174 |
| A00390 | A00416 | 411 | A00390 | A00630 | 488 |
| A00390 | A00631 | 480 | A00390 | A00925 | 249 |
| A00390 | A01274 | 223 | A00390 | A01291 | 484 |
| A00390 | A01522 | 328 | A00390 | A01606 | 491 |
| A00390 | A01681 | 423 | A00390 | A01724 | 283 |
| A00390 | A01930 | 228 | A00390 | A03048 | 380 |
| A00390 | A03336 | 489 | A00390 | A03862 | 199 |
| A00390 | A03891 | 462 | A00390 | A04880 | 174 |
| A00390 | A05370 | 450 | A00390 | A06097 | 281 |
| A00390 | A07220 | 374 | A00390 | A08144 | 177 |
| A00390 | A09229 | 184 | A00390 | A09303 | 174 |
| A00390 | A09326 | 215 | A00390 | A11293 | 305 |
| A00390 | A11514 | 312 | A00390 | A12282 | 208 |
| A00390 | A13992 | 439 | A00391 | A00454 | 333 |
| A00391 | A00457 | 177 | A00391 | A00483 | 241 |
| A00391 | A00544 | 299 | A00391 | A00548 | 241 |
| A00391 | A00564 | 549 | A00391 | A00571 | 263 |
| A00391 | A00576 | 299 | A00391 | A00640 | 152 |
| A00391 | A00653 | 355 | A00391 | A00688 | 241 |
| A00391 | A00726 | 562 | A00391 | A00810 | 152 |
| A00391 | A00833 | 299 | A00391 | A00849 | 160 |
| A00391 | A00974 | 299 | A00391 | A00984 | 520 |
| A00391 | A00987 | 368 | A00391 | A01001 | 299 |
| A00391 | A01004 | 241 | A00391 | A01007 | 302 |
| A00391 | A01102 | 299 | A00391 | A01147 | 385 |
| A00391 | A01221 | 151 | A00391 | A01311 | 152 |
| A00391 | A01379 | 529 | A00391 | A01387 | 585 |
| A00391 | A01417 | 241 | A00391 | A01439 | 299 |
| A00391 | A01577 | 152 | A00391 | A01627 | 299 |
| A00391 | A01661 | 241 | A00391 | A01711 | 346 |
| A00391 | A02416 | 241 | A00391 | A02601 | 299 |
| A00391 | A03415 | 238 | A00391 | A03697 | 152 |
| A00391 | A03981 | 190 | A00391 | A04495 | 299 |
| A00391 | A06287 | 152 | A00391 | A07744 | 152 |
| A00391 | A08061 | 152 | A00391 | A08098 | 152 |
| A00391 | A08178 | 152 | A00391 | A08763 | 152 |
| A00391 | A08861 | 241 | A00391 | A08947 | 299 |
| A00391 | A09004 | 299 | A00391 | A10842 | 152 |
| A00391 | A14299 | 241 | A00391 | A14525 | 152 |
| A00391 | A14981 | 422 | A00391 | A15375 | 152 |
| A00391 | A15546 | 152 | A00392 | A15852 | 310 |
| A00393 | A00440 | 312 | A00393 | A00496 | 468 |
| A00393 | A00560 | 339 | A00393 | A00592 | 311 |
| A00393 | A00835 | 226 | A00393 | A00940 | 156 |

|        |        |     |        |        |     |
|--------|--------|-----|--------|--------|-----|
| A00393 | A00954 | 156 | A00393 | A00957 | 481 |
| A00393 | A01075 | 188 | A00393 | A01143 | 491 |
| A00393 | A01426 | 235 | A00393 | A03136 | 170 |
| A00393 | A04449 | 364 | A00393 | A11291 | 174 |
| A00393 | A11648 | 179 | A00393 | A13313 | 232 |
| A00393 | A13329 | 340 | A00393 | A13587 | 425 |
| A00393 | A13928 | 319 | A00393 | A14490 | 274 |
| A00393 | A14527 | 159 | A00393 | A15366 | 490 |
| A00393 | A15492 | 430 | A00393 | A15773 | 238 |
| A00393 | A15852 | 327 | A00393 | A15867 | 168 |
| A00393 | A16566 | 263 | A00393 | A16724 | 259 |
| A00394 | A01729 | 168 | A00394 | A02450 | 227 |
| A00394 | A03246 | 279 | A00395 | A00449 | 491 |
| A00395 | A00453 | 174 | A00395 | A00468 | 457 |
| A00395 | A00478 | 294 | A00395 | A00541 | 489 |
| A00395 | A00574 | 491 | A00395 | A00625 | 240 |
| A00395 | A00628 | 353 | A00395 | A00633 | 229 |
| A00395 | A00651 | 283 | A00395 | A00654 | 488 |
| A00395 | A00659 | 294 | A00395 | A00660 | 485 |
| A00395 | A00662 | 433 | A00395 | A00663 | 281 |
| A00395 | A00666 | 313 | A00395 | A00681 | 416 |
| A00395 | A00695 | 327 | A00395 | A00696 | 486 |
| A00395 | A00738 | 337 | A00395 | A00739 | 334 |
| A00395 | A00770 | 441 | A00395 | A00825 | 473 |
| A00395 | A00962 | 485 | A00395 | A01005 | 451 |
| A00395 | A01008 | 413 | A00395 | A01018 | 491 |
| A00395 | A01088 | 332 | A00395 | A01174 | 461 |
| A00395 | A01176 | 213 | A00395 | A01222 | 435 |
| A00395 | A01223 | 472 | A00395 | A01225 | 491 |
| A00395 | A01227 | 479 | A00395 | A01230 | 456 |
| A00395 | A01233 | 223 | A00395 | A01297 | 491 |
| A00395 | A01344 | 369 | A00395 | A01367 | 208 |
| A00395 | A01397 | 401 | A00395 | A01409 | 491 |
| A00395 | A01503 | 154 | A00395 | A01635 | 474 |
| A00395 | A01643 | 348 | A00395 | A01660 | 183 |
| A00395 | A01713 | 379 | A00395 | A01714 | 340 |
| A00395 | A01743 | 216 | A00395 | A01822 | 208 |
| A00395 | A01829 | 170 | A00395 | A01899 | 486 |
| A00395 | A01931 | 163 | A00395 | A01932 | 319 |
| A00395 | A01982 | 179 | A00395 | A02008 | 302 |
| A00395 | A02011 | 281 | A00395 | A02014 | 323 |
| A00395 | A02071 | 245 | A00395 | A02083 | 240 |
| A00395 | A02114 | 188 | A00395 | A02168 | 207 |
| A00395 | A02192 | 296 | A00395 | A02254 | 326 |
| A00395 | A02310 | 152 | A00395 | A02316 | 196 |
| A00395 | A02468 | 238 | A00395 | A02521 | 486 |

|        |        |     |        |        |     |
|--------|--------|-----|--------|--------|-----|
| A00395 | A02545 | 221 | A00395 | A02574 | 226 |
| A00395 | A02992 | 467 | A00395 | A03004 | 168 |
| A00395 | A03016 | 369 | A00395 | A03050 | 452 |
| A00395 | A03087 | 329 | A00395 | A03099 | 291 |
| A00395 | A03146 | 326 | A00395 | A03148 | 382 |
| A00395 | A03167 | 393 | A00395 | A03423 | 159 |
| A00395 | A03484 | 443 | A00395 | A03513 | 491 |
| A00395 | A03550 | 184 | A00395 | A03795 | 485 |
| A00395 | A03837 | 362 | A00395 | A04020 | 408 |
| A00395 | A04115 | 445 | A00395 | A04179 | 489 |
| A00395 | A04228 | 491 | A00395 | A04366 | 170 |
| A00395 | A04369 | 213 | A00395 | A04556 | 185 |
| A00395 | A04674 | 271 | A00395 | A04713 | 343 |
| A00395 | A04791 | 481 | A00395 | A04834 | 168 |
| A00395 | A04839 | 246 | A00395 | A04883 | 430 |
| A00395 | A04927 | 394 | A00395 | A05006 | 350 |
| A00395 | A05007 | 223 | A00395 | A05014 | 394 |
| A00395 | A05045 | 480 | A00395 | A05050 | 218 |
| A00395 | A05138 | 165 | A00395 | A05140 | 213 |
| A00395 | A05310 | 232 | A00395 | A05337 | 151 |
| A00395 | A05358 | 171 | A00395 | A05376 | 251 |
| A00395 | A05393 | 463 | A00395 | A05416 | 308 |
| A00395 | A05418 | 446 | A00395 | A05424 | 162 |
| A00395 | A05431 | 163 | A00395 | A05451 | 229 |
| A00395 | A05463 | 299 | A00395 | A05548 | 193 |
| A00395 | A05573 | 484 | A00395 | A05753 | 398 |
| A00395 | A05754 | 391 | A00395 | A05757 | 267 |
| A00395 | A05774 | 338 | A00395 | A05789 | 347 |
| A00395 | A05883 | 391 | A00395 | A05937 | 207 |
| A00395 | A06284 | 380 | A00395 | A06358 | 219 |
| A00395 | A06385 | 400 | A00395 | A06405 | 489 |
| A00395 | A06439 | 491 | A00395 | A06607 | 307 |
| A00395 | A06626 | 246 | A00395 | A06641 | 157 |
| A00395 | A06847 | 183 | A00395 | A06848 | 236 |
| A00395 | A06855 | 413 | A00395 | A06860 | 395 |
| A00395 | A06912 | 302 | A00395 | A06916 | 205 |
| A00395 | A06970 | 394 | A00395 | A06994 | 340 |
| A00395 | A07027 | 374 | A00395 | A07037 | 205 |
| A00395 | A07059 | 491 | A00395 | A07067 | 344 |
| A00395 | A07088 | 491 | A00395 | A07109 | 475 |
| A00395 | A07226 | 319 | A00395 | A07238 | 177 |
| A00395 | A07239 | 491 | A00395 | A07281 | 470 |
| A00395 | A07322 | 191 | A00395 | A07325 | 249 |
| A00395 | A07334 | 263 | A00395 | A07407 | 283 |
| A00395 | A07477 | 322 | A00395 | A07490 | 236 |
| A00395 | A07520 | 490 | A00395 | A07530 | 183 |

|        |        |     |        |        |     |
|--------|--------|-----|--------|--------|-----|
| A00395 | A07553 | 358 | A00395 | A07590 | 313 |
| A00395 | A07613 | 425 | A00395 | A07674 | 490 |
| A00395 | A07684 | 160 | A00395 | A07688 | 243 |
| A00395 | A07692 | 232 | A00395 | A07711 | 205 |
| A00395 | A07736 | 274 | A00395 | A07737 | 180 |
| A00395 | A07739 | 472 | A00395 | A07757 | 363 |
| A00395 | A07763 | 281 | A00395 | A07779 | 344 |
| A00395 | A07795 | 279 | A00395 | A07796 | 205 |
| A00395 | A07800 | 318 | A00395 | A07803 | 497 |
| A00395 | A07847 | 355 | A00395 | A07856 | 241 |
| A00395 | A07926 | 279 | A00395 | A07933 | 393 |
| A00395 | A07951 | 414 | A00395 | A08155 | 411 |
| A00395 | A08199 | 183 | A00395 | A08238 | 190 |
| A00395 | A08293 | 319 | A00395 | A08366 | 374 |
| A00395 | A08368 | 290 | A00395 | A08636 | 290 |
| A00395 | A08690 | 236 | A00395 | A10424 | 221 |
| A00395 | A10446 | 293 | A00395 | A10457 | 213 |
| A00395 | A10458 | 221 | A00395 | A10500 | 344 |
| A00395 | A10532 | 199 | A00395 | A10635 | 326 |
| A00395 | A10652 | 469 | A00395 | A10686 | 196 |
| A00395 | A10687 | 224 | A00395 | A10690 | 411 |
| A00395 | A10692 | 257 | A00395 | A10696 | 467 |
| A00395 | A10703 | 157 | A00395 | A10708 | 416 |
| A00395 | A10845 | 344 | A00395 | A11021 | 486 |
| A00395 | A11189 | 157 | A00395 | A11606 | 364 |
| A00395 | A12033 | 271 | A00395 | A12699 | 344 |
| A00395 | A13065 | 414 | A00395 | A14208 | 263 |
| A00395 | A14216 | 168 | A00395 | A14549 | 246 |
| A00395 | A15386 | 497 | A00395 | A15684 | 190 |
| A00395 | A15874 | 350 | A00395 | A15970 | 177 |
| A00395 | A16027 | 281 | A00395 | A16103 | 183 |
| A00395 | A16216 | 383 | A00395 | A16741 | 443 |
| A00395 | A16744 | 160 | A00395 | A17006 | 400 |
| A00395 | A17078 | 479 | A00396 | A00430 | 243 |
| A00396 | A00446 | 299 | A00396 | A00471 | 221 |
| A00396 | A00498 | 475 | A00396 | A00517 | 240 |
| A00396 | A00564 | 252 | A00396 | A00568 | 317 |
| A00396 | A00613 | 258 | A00396 | A00614 | 285 |
| A00396 | A00664 | 530 | A00396 | A00670 | 491 |
| A00396 | A00671 | 270 | A00396 | A00684 | 227 |
| A00396 | A00855 | 338 | A00396 | A00943 | 477 |
| A00396 | A00968 | 624 | A00396 | A01021 | 491 |
| A00396 | A01074 | 738 | A00396 | A01105 | 499 |
| A00396 | A01169 | 474 | A00396 | A01189 | 288 |
| A00396 | A01205 | 491 | A00396 | A01244 | 355 |
| A00396 | A01269 | 257 | A00396 | A01360 | 491 |

|        |        |     |        |        |     |
|--------|--------|-----|--------|--------|-----|
| A00396 | A01374 | 246 | A00396 | A01375 | 479 |
| A00396 | A01409 | 307 | A00396 | A01419 | 228 |
| A00396 | A01459 | 218 | A00396 | A01483 | 491 |
| A00396 | A01506 | 229 | A00396 | A01508 | 419 |
| A00396 | A01524 | 899 | A00396 | A01568 | 307 |
| A00396 | A01622 | 531 | A00396 | A01647 | 307 |
| A00396 | A01679 | 317 | A00396 | A01844 | 198 |
| A00396 | A01978 | 276 | A00396 | A02061 | 170 |
| A00396 | A02086 | 165 | A00396 | A02774 | 188 |
| A00396 | A03095 | 491 | A00396 | A03123 | 188 |
| A00396 | A03259 | 401 | A00396 | A03272 | 204 |
| A00396 | A03468 | 391 | A00396 | A03501 | 307 |
| A00396 | A03710 | 317 | A00396 | A03880 | 307 |
| A00396 | A04307 | 371 | A00396 | A04769 | 154 |
| A00396 | A04977 | 274 | A00396 | A05262 | 347 |
| A00396 | A05332 | 619 | A00396 | A05433 | 232 |
| A00396 | A05609 | 612 | A00396 | A06085 | 201 |
| A00396 | A06101 | 324 | A00396 | A06111 | 157 |
| A00396 | A06203 | 210 | A00396 | A06689 | 230 |
| A00396 | A06718 | 491 | A00396 | A06819 | 491 |
| A00396 | A06924 | 313 | A00396 | A06970 | 329 |
| A00396 | A06990 | 489 | A00396 | A07007 | 307 |
| A00396 | A07222 | 620 | A00396 | A07277 | 246 |
| A00396 | A07333 | 486 | A00396 | A07571 | 435 |
| A00396 | A07816 | 307 | A00396 | A07880 | 488 |
| A00396 | A07931 | 491 | A00396 | A07974 | 618 |
| A00396 | A07981 | 307 | A00396 | A08097 | 317 |
| A00396 | A08402 | 182 | A00396 | A08939 | 202 |
| A00396 | A09054 | 307 | A00396 | A09135 | 217 |
| A00396 | A09153 | 340 | A00396 | A09316 | 183 |
| A00396 | A09340 | 352 | A00396 | A09350 | 173 |
| A00396 | A09667 | 177 | A00396 | A10159 | 293 |
| A00396 | A11224 | 173 | A00396 | A13819 | 307 |
| A00396 | A13866 | 307 | A00396 | A14135 | 154 |
| A00396 | A14239 | 307 | A00396 | A14525 | 488 |
| A00396 | A14589 | 351 | A00396 | A14803 | 388 |
| A00396 | A14810 | 168 | A00396 | A14858 | 221 |
| A00396 | A15372 | 491 | A00396 | A15482 | 191 |
| A00396 | A15837 | 358 | A00396 | A16748 | 152 |
| A00396 | A16753 | 475 | A00396 | A16761 | 183 |
| A00396 | A16769 | 165 | A00396 | A16807 | 307 |
| A00397 | A00406 | 484 | A00397 | A00421 | 491 |
| A00397 | A00444 | 205 | A00397 | A00448 | 491 |
| A00397 | A00452 | 386 | A00397 | A00456 | 469 |
| A00397 | A00459 | 174 | A00397 | A00463 | 174 |
| A00397 | A00488 | 480 | A00397 | A00497 | 441 |

|        |        |     |        |        |     |
|--------|--------|-----|--------|--------|-----|
| A00397 | A00503 | 416 | A00397 | A00520 | 165 |
| A00397 | A00532 | 439 | A00397 | A00550 | 283 |
| A00397 | A00551 | 504 | A00397 | A00554 | 398 |
| A00397 | A00555 | 313 | A00397 | A00570 | 461 |
| A00397 | A00584 | 547 | A00397 | A00589 | 285 |
| A00397 | A00595 | 552 | A00397 | A00605 | 491 |
| A00397 | A00646 | 379 | A00397 | A00648 | 416 |
| A00397 | A00687 | 439 | A00397 | A00690 | 224 |
| A00397 | A00697 | 369 | A00397 | A00749 | 174 |
| A00397 | A00763 | 63  | A00397 | A00767 | 751 |
| A00397 | A00805 | 294 | A00397 | A00813 | 487 |
| A00397 | A00822 | 441 | A00397 | A00864 | 416 |
| A00397 | A00878 | 229 | A00397 | A00879 | 279 |
| A00397 | A00883 | 676 | A00397 | A00905 | 480 |
| A00397 | A00908 | 691 | A00397 | A00916 | 630 |
| A00397 | A00918 | 679 | A00397 | A00928 | 489 |
| A00397 | A00934 | 430 | A00397 | A00945 | 159 |
| A00397 | A00960 | 549 | A00397 | A00992 | 695 |
| A00397 | A01020 | 677 | A00397 | A01025 | 241 |
| A00397 | A01029 | 457 | A00397 | A01040 | 362 |
| A00397 | A01053 | 63  | A00397 | A01075 | 672 |
| A00397 | A01088 | 308 | A00397 | A01098 | 63  |
| A00397 | A01107 | 340 | A00397 | A01116 | 424 |
| A00397 | A01120 | 252 | A00397 | A01136 | 432 |
| A00397 | A01149 | 267 | A00397 | A01166 | 483 |
| A00397 | A01184 | 489 | A00397 | A01193 | 694 |
| A00397 | A01201 | 491 | A00397 | A01206 | 490 |
| A00397 | A01224 | 63  | A00397 | A01234 | 491 |
| A00397 | A01243 | 443 | A00397 | A01266 | 458 |
| A00397 | A01268 | 491 | A00397 | A01277 | 182 |
| A00397 | A01279 | 695 | A00397 | A01291 | 260 |
| A00397 | A01304 | 416 | A00397 | A01309 | 443 |
| A00397 | A01334 | 174 | A00397 | A01351 | 695 |
| A00397 | A01352 | 227 | A00397 | A01356 | 227 |
| A00397 | A01384 | 162 | A00397 | A01386 | 495 |
| A00397 | A01424 | 550 | A00397 | A01425 | 223 |
| A00397 | A01439 | 180 | A00397 | A01442 | 296 |
| A00397 | A01451 | 405 | A00397 | A01459 | 481 |
| A00397 | A01468 | 377 | A00397 | A01470 | 491 |
| A00397 | A01488 | 486 | A00397 | A01492 | 552 |
| A00397 | A01514 | 384 | A00397 | A01539 | 259 |
| A00397 | A01579 | 366 | A00397 | A01598 | 491 |
| A00397 | A01612 | 491 | A00397 | A01614 | 488 |
| A00397 | A01615 | 327 | A00397 | A01649 | 490 |
| A00397 | A01778 | 266 | A00397 | A01988 | 341 |
| A00397 | A02164 | 63  | A00397 | A02212 | 165 |

|        |        |     |        |        |     |
|--------|--------|-----|--------|--------|-----|
| A00397 | A02265 | 63  | A00397 | A02456 | 152 |
| A00397 | A02535 | 491 | A00397 | A03438 | 481 |
| A00397 | A03494 | 491 | A00397 | A03567 | 205 |
| A00397 | A03569 | 469 | A00397 | A03597 | 291 |
| A00397 | A04104 | 383 | A00397 | A04848 | 489 |
| A00397 | A05230 | 312 | A00397 | A05617 | 362 |
| A00397 | A06204 | 491 | A00397 | A06275 | 400 |
| A00397 | A06347 | 491 | A00397 | A06351 | 176 |
| A00397 | A06698 | 549 | A00397 | A06832 | 152 |
| A00397 | A07244 | 694 | A00397 | A07347 | 481 |
| A00397 | A07432 | 671 | A00397 | A07524 | 706 |
| A00397 | A07537 | 486 | A00397 | A07584 | 413 |
| A00397 | A07625 | 537 | A00397 | A07700 | 477 |
| A00397 | A07706 | 205 | A00397 | A07924 | 552 |
| A00397 | A08137 | 573 | A00397 | A08183 | 490 |
| A00397 | A08201 | 335 | A00397 | A08267 | 184 |
| A00397 | A08357 | 312 | A00397 | A08447 | 486 |
| A00397 | A08807 | 706 | A00397 | A08918 | 168 |
| A00397 | A08982 | 254 | A00397 | A09004 | 154 |
| A00397 | A09324 | 312 | A00397 | A09352 | 63  |
| A00397 | A09664 | 543 | A00397 | A10250 | 322 |
| A00397 | A10317 | 480 | A00397 | A10465 | 485 |
| A00397 | A10616 | 398 | A00397 | A10710 | 435 |
| A00397 | A11316 | 201 | A00397 | A11544 | 174 |
| A00397 | A11618 | 257 | A00397 | A11831 | 433 |
| A00397 | A11832 | 510 | A00397 | A11913 | 491 |
| A00397 | A11965 | 216 | A00397 | A12097 | 223 |
| A00397 | A12177 | 184 | A00397 | A12202 | 219 |
| A00397 | A12722 | 621 | A00397 | A12757 | 469 |
| A00397 | A13068 | 350 | A00397 | A13076 | 330 |
| A00397 | A13165 | 257 | A00397 | A13357 | 335 |
| A00397 | A13792 | 388 | A00397 | A13875 | 314 |
| A00397 | A13989 | 563 | A00397 | A14186 | 491 |
| A00397 | A14192 | 416 | A00397 | A14200 | 279 |
| A00397 | A14246 | 152 | A00397 | A14597 | 180 |
| A00397 | A15297 | 480 | A00397 | A15324 | 467 |
| A00397 | A15338 | 358 | A00397 | A15353 | 469 |
| A00397 | A15370 | 738 | A00397 | A15374 | 460 |
| A00397 | A15724 | 490 | A00397 | A15764 | 484 |
| A00397 | A16302 | 447 | A00397 | A16544 | 257 |
| A00397 | A16703 | 433 | A00397 | A17089 | 486 |
| A00398 | A00748 | 611 | A00398 | A00805 | 258 |
| A00398 | A00880 | 485 | A00398 | A01252 | 764 |
| A00398 | A01302 | 772 | A00398 | A01461 | 162 |
| A00398 | A01514 | 151 | A00398 | A01585 | 152 |
| A00398 | A01706 | 432 | A00398 | A05216 | 458 |

|        |        |     |        |        |     |
|--------|--------|-----|--------|--------|-----|
| A00398 | A05454 | 283 | A00398 | A06687 | 611 |
| A00398 | A07399 | 317 | A00398 | A08293 | 193 |
| A00398 | A08356 | 184 | A00398 | A08555 | 611 |
| A00398 | A08821 | 353 | A00398 | A09298 | 611 |
| A00398 | A09609 | 429 | A00398 | A10532 | 238 |
| A00398 | A11497 | 187 | A00398 | A11735 | 179 |
| A00398 | A12200 | 480 | A00398 | A12253 | 172 |
| A00398 | A12508 | 249 | A00398 | A12738 | 180 |
| A00398 | A12850 | 168 | A00398 | A12858 | 335 |
| A00398 | A13711 | 303 | A00398 | A13983 | 491 |
| A00398 | A14167 | 266 | A00398 | A14182 | 263 |
| A00398 | A14199 | 452 | A00398 | A14247 | 599 |
| A00398 | A14661 | 283 | A00398 | A14711 | 283 |
| A00398 | A15315 | 607 | A00398 | A15347 | 666 |
| A00398 | A15528 | 756 | A00398 | A15555 | 180 |
| A00398 | A15617 | 513 | A00398 | A16113 | 263 |
| A00398 | A16364 | 283 | A00399 | A00551 | 438 |
| A00399 | A00655 | 226 | A00399 | A00708 | 695 |
| A00399 | A00774 | 170 | A00399 | A00819 | 229 |
| A00399 | A00911 | 277 | A00399 | A00934 | 438 |
| A00399 | A00961 | 236 | A00399 | A00988 | 224 |
| A00399 | A01062 | 456 | A00399 | A01099 | 246 |
| A00399 | A01120 | 439 | A00399 | A01166 | 401 |
| A00399 | A01206 | 694 | A00399 | A01295 | 363 |
| A00399 | A01306 | 182 | A00399 | A01349 | 695 |
| A00399 | A01429 | 520 | A00399 | A01430 | 456 |
| A00399 | A01470 | 267 | A00399 | A01598 | 455 |
| A00399 | A02278 | 263 | A00399 | A03681 | 168 |
| A00399 | A07348 | 690 | A00399 | A07822 | 249 |
| A00399 | A08211 | 438 | A00399 | A08461 | 491 |
| A00399 | A09009 | 198 | A00399 | A11496 | 302 |
| A00399 | A11497 | 467 | A00399 | A12138 | 695 |
| A00399 | A12255 | 201 | A00399 | A14214 | 154 |
| A00399 | A14223 | 152 | A00399 | A14508 | 154 |
| A00399 | A15366 | 227 | A00399 | A15519 | 190 |
| A00399 | A15774 | 334 | A00400 | A00421 | 419 |
| A00400 | A00440 | 491 | A00400 | A00450 | 490 |
| A00400 | A00471 | 659 | A00400 | A00531 | 176 |
| A00400 | A00532 | 355 | A00400 | A00537 | 663 |
| A00400 | A00564 | 199 | A00400 | A00566 | 491 |
| A00400 | A00571 | 168 | A00400 | A00643 | 491 |
| A00400 | A00654 | 404 | A00400 | A00655 | 208 |
| A00400 | A00765 | 357 | A00400 | A00786 | 489 |
| A00400 | A00799 | 180 | A00400 | A00805 | 160 |
| A00400 | A00847 | 451 | A00400 | A00858 | 441 |
| A00400 | A00864 | 283 | A00400 | A00866 | 372 |



|        |        |     |        |        |     |
|--------|--------|-----|--------|--------|-----|
| A00400 | A00868 | 401 | A00400 | A00883 | 658 |
| A00400 | A00935 | 372 | A00400 | A00954 | 294 |
| A00400 | A00967 | 334 | A00400 | A00981 | 466 |
| A00400 | A01091 | 241 | A00400 | A01139 | 277 |
| A00400 | A01149 | 484 | A00400 | A01151 | 488 |
| A00400 | A01161 | 307 | A00400 | A01169 | 319 |
| A00400 | A01203 | 372 | A00400 | A01211 | 263 |
| A00400 | A01212 | 658 | A00400 | A01213 | 217 |
| A00400 | A01254 | 236 | A00400 | A01322 | 198 |
| A00400 | A01329 | 657 | A00400 | A01359 | 414 |
| A00400 | A01378 | 326 | A00400 | A01451 | 188 |
| A00400 | A01459 | 154 | A00400 | A01472 | 338 |
| A00400 | A01507 | 400 | A00400 | A01514 | 283 |
| A00400 | A01527 | 177 | A00400 | A01558 | 190 |
| A00400 | A01568 | 261 | A00400 | A01580 | 207 |
| A00400 | A01591 | 395 | A00400 | A01627 | 372 |
| A00400 | A01647 | 658 | A00400 | A01682 | 630 |
| A00400 | A01692 | 226 | A00400 | A01926 | 334 |
| A00400 | A01988 | 283 | A00400 | A01995 | 488 |
| A00400 | A02202 | 241 | A00400 | A02481 | 334 |
| A00400 | A03014 | 283 | A00400 | A03188 | 435 |
| A00400 | A03304 | 466 | A00400 | A03436 | 156 |
| A00400 | A03591 | 365 | A00400 | A03819 | 185 |
| A00400 | A03873 | 334 | A00400 | A03893 | 200 |
| A00400 | A03939 | 386 | A00400 | A03981 | 243 |
| A00400 | A04033 | 491 | A00400 | A04232 | 183 |
| A00400 | A04449 | 636 | A00400 | A04492 | 467 |
| A00400 | A04747 | 154 | A00400 | A04773 | 417 |
| A00400 | A05443 | 157 | A00400 | A05458 | 226 |
| A00400 | A05780 | 165 | A00400 | A05897 | 165 |
| A00400 | A06100 | 324 | A00400 | A06129 | 461 |
| A00400 | A06297 | 336 | A00400 | A06588 | 380 |
| A00400 | A06750 | 603 | A00400 | A07209 | 216 |
| A00400 | A07232 | 480 | A00400 | A07670 | 426 |
| A00400 | A07706 | 214 | A00400 | A07726 | 363 |
| A00400 | A07803 | 416 | A00400 | A08022 | 238 |
| A00400 | A08376 | 182 | A00400 | A08402 | 374 |
| A00400 | A08571 | 486 | A00400 | A08850 | 334 |
| A00400 | A08878 | 332 | A00400 | A09006 | 173 |
| A00400 | A09256 | 196 | A00400 | A09258 | 433 |
| A00400 | A09377 | 363 | A00400 | A09451 | 480 |
| A00400 | A09474 | 240 | A00400 | A09511 | 216 |
| A00400 | A09515 | 429 | A00400 | A09538 | 334 |
| A00400 | A09603 | 165 | A00400 | A09996 | 474 |
| A00400 | A10250 | 600 | A00400 | A10283 | 240 |
| A00400 | A10340 | 274 | A00400 | A10342 | 374 |

|        |        |     |        |        |     |
|--------|--------|-----|--------|--------|-----|
| A00400 | A10962 | 274 | A00400 | A11011 | 274 |
| A00400 | A11143 | 240 | A00400 | A11394 | 260 |
| A00400 | A11492 | 335 | A00400 | A11559 | 334 |
| A00400 | A11698 | 173 | A00400 | A11983 | 451 |
| A00400 | A12047 | 243 | A00400 | A12111 | 185 |
| A00400 | A12284 | 658 | A00400 | A12365 | 429 |
| A00400 | A12373 | 334 | A00400 | A12681 | 460 |
| A00400 | A12824 | 372 | A00400 | A13892 | 188 |
| A00400 | A13917 | 165 | A00400 | A13986 | 193 |
| A00400 | A14084 | 640 | A00400 | A14210 | 334 |
| A00400 | A14272 | 460 | A00400 | A14278 | 484 |
| A00400 | A14371 | 334 | A00400 | A14410 | 327 |
| A00400 | A14484 | 491 | A00400 | A14633 | 517 |
| A00400 | A14635 | 488 | A00400 | A14636 | 637 |
| A00400 | A14827 | 178 | A00400 | A15273 | 154 |
| A00400 | A15367 | 455 | A00400 | A16294 | 366 |
| A00400 | A16635 | 486 | A00401 | A00688 | 182 |
| A00401 | A00765 | 160 | A00401 | A00766 | 247 |
| A00401 | A00791 | 165 | A00401 | A00868 | 480 |
| A00401 | A00883 | 423 | A00401 | A00956 | 256 |
| A00401 | A01117 | 255 | A00401 | A01203 | 414 |
| A00401 | A01370 | 256 | A00401 | A01371 | 317 |
| A00401 | A03570 | 377 | A00401 | A06137 | 328 |
| A00401 | A08022 | 180 | A00401 | A14196 | 185 |
| A00401 | A15297 | 288 | A00402 | A00667 | 162 |
| A00402 | A00759 | 162 | A00402 | A00873 | 260 |
| A00402 | A00969 | 408 | A00402 | A01101 | 481 |
| A00402 | A01291 | 491 | A00402 | A02120 | 268 |
| A00402 | A03246 | 176 | A00402 | A04932 | 168 |
| A00402 | A07802 | 168 | A00402 | A08450 | 271 |
| A00402 | A08501 | 274 | A00402 | A08505 | 157 |
| A00402 | A08518 | 168 | A00402 | A08521 | 177 |
| A00402 | A08543 | 270 | A00402 | A08550 | 299 |
| A00402 | A08552 | 193 | A00402 | A08560 | 396 |
| A00402 | A08561 | 327 | A00402 | A08844 | 353 |
| A00402 | A09009 | 221 | A00402 | A09298 | 156 |
| A00402 | A09717 | 224 | A00402 | A09828 | 202 |
| A00402 | A10789 | 205 | A00402 | A11497 | 216 |
| A00402 | A11616 | 201 | A00402 | A11648 | 174 |
| A00402 | A11688 | 165 | A00402 | A11851 | 205 |
| A00402 | A11940 | 263 | A00402 | A12011 | 259 |
| A00402 | A12255 | 223 | A00402 | A12507 | 260 |
| A00402 | A12606 | 193 | A00402 | A12658 | 390 |
| A00402 | A12665 | 291 | A00402 | A12725 | 316 |
| A00402 | A12858 | 268 | A00402 | A12873 | 281 |
| A00402 | A13246 | 286 | A00402 | A13342 | 221 |

|        |        |     |        |        |     |
|--------|--------|-----|--------|--------|-----|
| A00402 | A13356 | 157 | A00402 | A13399 | 276 |
| A00402 | A13781 | 160 | A00402 | A13805 | 240 |
| A00402 | A13809 | 180 | A00402 | A14239 | 154 |
| A00402 | A14255 | 168 | A00402 | A14569 | 187 |
| A00402 | A14903 | 256 | A00402 | A15519 | 212 |
| A00402 | A15541 | 154 | A00402 | A15653 | 174 |
| A00402 | A16157 | 303 | A00402 | A16187 | 204 |
| A00402 | A16261 | 196 | A00402 | A16322 | 160 |
| A00402 | A16587 | 240 | A00402 | A16611 | 335 |
| A00402 | A16664 | 294 | A00402 | A16680 | 281 |
| A00402 | A16838 | 227 | A00402 | A16874 | 371 |
| A00402 | A17015 | 208 | A00403 | A00521 | 221 |
| A00403 | A00560 | 321 | A00403 | A00590 | 196 |
| A00403 | A00629 | 412 | A00403 | A00787 | 252 |
| A00403 | A00883 | 246 | A00403 | A00923 | 491 |
| A00403 | A01000 | 491 | A00403 | A01017 | 457 |
| A00403 | A01025 | 488 | A00403 | A01047 | 475 |
| A00403 | A01066 | 157 | A00403 | A01096 | 270 |
| A00403 | A01101 | 491 | A00403 | A01120 | 306 |
| A00403 | A01140 | 414 | A00403 | A01184 | 404 |
| A00403 | A01206 | 450 | A00403 | A01234 | 408 |
| A00403 | A01249 | 417 | A00403 | A01282 | 436 |
| A00403 | A01291 | 491 | A00403 | A01306 | 491 |
| A00403 | A01335 | 257 | A00403 | A01338 | 491 |
| A00403 | A01437 | 441 | A00403 | A01441 | 210 |
| A00403 | A01470 | 297 | A00403 | A01598 | 232 |
| A00403 | A01617 | 245 | A00403 | A01649 | 475 |
| A00403 | A01700 | 151 | A00403 | A01718 | 85  |
| A00403 | A02978 | 154 | A00403 | A03069 | 461 |
| A00403 | A03567 | 491 | A00403 | A03571 | 182 |
| A00403 | A03754 | 285 | A00403 | A03859 | 330 |
| A00403 | A05385 | 385 | A00403 | A05712 | 190 |
| A00403 | A06279 | 127 | A00403 | A06861 | 351 |
| A00403 | A06965 | 486 | A00403 | A07451 | 71  |
| A00403 | A07604 | 201 | A00403 | A08137 | 224 |
| A00403 | A08357 | 241 | A00403 | A08664 | 243 |
| A00403 | A09322 | 491 | A00403 | A09674 | 252 |
| A00403 | A09702 | 226 | A00403 | A11390 | 180 |
| A00403 | A11438 | 485 | A00403 | A11480 | 465 |
| A00403 | A11704 | 488 | A00403 | A12233 | 469 |
| A00403 | A12270 | 221 | A00403 | A13989 | 179 |
| A00403 | A13992 | 96  | A00403 | A14188 | 454 |
| A00403 | A14216 | 163 | A00403 | A15218 | 458 |
| A00403 | A15221 | 193 | A00403 | A15235 | 312 |
| A00403 | A15743 | 232 | A00403 | A16118 | 470 |
| A00403 | A16523 | 308 | A00403 | A16631 | 190 |

|        |        |     |        |        |     |
|--------|--------|-----|--------|--------|-----|
| A00404 | A00435 | 243 | A00404 | A00444 | 173 |
| A00404 | A00651 | 436 | A00404 | A00700 | 486 |
| A00404 | A00713 | 196 | A00404 | A00839 | 367 |
| A00404 | A01085 | 232 | A00404 | A01112 | 254 |
| A00404 | A01127 | 347 | A00404 | A01166 | 221 |
| A00404 | A01291 | 329 | A00404 | A01335 | 221 |
| A00404 | A01411 | 195 | A00404 | A01468 | 412 |
| A00404 | A01496 | 286 | A00404 | A01538 | 210 |
| A00404 | A01540 | 196 | A00404 | A01579 | 265 |
| A00404 | A01649 | 174 | A00404 | A03437 | 307 |
| A00404 | A05501 | 445 | A00404 | A07323 | 258 |
| A00404 | A09707 | 256 | A00404 | A11986 | 302 |
| A00404 | A13989 | 477 | A00404 | A15659 | 188 |
| A00404 | A15988 | 199 | A00405 | A00427 | 353 |
| A00405 | A00447 | 165 | A00405 | A00457 | 247 |
| A00405 | A00502 | 591 | A00405 | A00510 | 477 |
| A00405 | A00521 | 491 | A00405 | A00529 | 176 |
| A00405 | A00531 | 221 | A00405 | A00532 | 248 |
| A00405 | A00537 | 597 | A00405 | A00544 | 425 |
| A00405 | A00547 | 210 | A00405 | A00590 | 474 |
| A00405 | A00598 | 486 | A00405 | A00603 | 488 |
| A00405 | A00604 | 592 | A00405 | A00605 | 347 |
| A00405 | A00608 | 396 | A00405 | A00648 | 490 |
| A00405 | A00649 | 591 | A00405 | A00651 | 416 |
| A00405 | A00653 | 592 | A00405 | A00697 | 279 |
| A00405 | A00731 | 589 | A00405 | A00750 | 439 |
| A00405 | A00760 | 490 | A00405 | A00780 | 337 |
| A00405 | A00783 | 591 | A00405 | A00785 | 591 |
| A00405 | A00787 | 491 | A00405 | A00790 | 589 |
| A00405 | A00809 | 294 | A00405 | A00839 | 353 |
| A00405 | A00849 | 247 | A00405 | A00865 | 347 |
| A00405 | A00870 | 490 | A00405 | A00878 | 491 |
| A00405 | A00953 | 592 | A00405 | A00965 | 474 |
| A00405 | A00974 | 569 | A00405 | A00987 | 210 |
| A00405 | A00994 | 460 | A00405 | A01022 | 356 |
| A00405 | A01023 | 157 | A00405 | A01025 | 385 |
| A00405 | A01027 | 591 | A00405 | A01037 | 299 |
| A00405 | A01042 | 427 | A00405 | A01054 | 486 |
| A00405 | A01067 | 480 | A00405 | A01075 | 310 |
| A00405 | A01081 | 247 | A00405 | A01086 | 590 |
| A00405 | A01095 | 305 | A00405 | A01101 | 251 |
| A00405 | A01108 | 592 | A00405 | A01150 | 356 |
| A00405 | A01161 | 551 | A00405 | A01204 | 578 |
| A00405 | A01234 | 322 | A00405 | A01246 | 467 |
| A00405 | A01265 | 352 | A00405 | A01287 | 342 |
| A00405 | A01291 | 490 | A00405 | A01346 | 591 |

|        |        |     |        |        |     |
|--------|--------|-----|--------|--------|-----|
| A00405 | A01352 | 277 | A00405 | A01382 | 246 |
| A00405 | A01385 | 228 | A00405 | A01392 | 481 |
| A00405 | A01399 | 592 | A00405 | A01419 | 302 |
| A00405 | A01433 | 474 | A00405 | A01443 | 499 |
| A00405 | A01446 | 491 | A00405 | A01448 | 486 |
| A00405 | A01458 | 517 | A00405 | A01496 | 299 |
| A00405 | A01540 | 480 | A00405 | A01573 | 302 |
| A00405 | A01576 | 199 | A00405 | A01649 | 434 |
| A00405 | A01711 | 240 | A00405 | A02364 | 428 |
| A00405 | A02814 | 199 | A00405 | A02994 | 247 |
| A00405 | A03752 | 218 | A00405 | A03880 | 433 |
| A00405 | A03959 | 276 | A00405 | A03981 | 162 |
| A00405 | A04668 | 329 | A00405 | A04895 | 480 |
| A00405 | A05029 | 156 | A00405 | A05121 | 160 |
| A00405 | A05155 | 346 | A00405 | A05234 | 428 |
| A00405 | A05387 | 288 | A00405 | A06959 | 449 |
| A00405 | A07237 | 457 | A00405 | A07311 | 224 |
| A00405 | A07350 | 256 | A00405 | A07362 | 329 |
| A00405 | A07569 | 311 | A00405 | A07597 | 490 |
| A00405 | A07773 | 263 | A00405 | A07792 | 224 |
| A00405 | A08011 | 490 | A00405 | A08133 | 199 |
| A00405 | A08252 | 288 | A00405 | A08398 | 165 |
| A00405 | A08452 | 246 | A00405 | A08773 | 489 |
| A00405 | A08835 | 285 | A00405 | A08982 | 217 |
| A00405 | A08987 | 474 | A00405 | A08990 | 180 |
| A00405 | A09332 | 219 | A00405 | A10199 | 462 |
| A00405 | A10535 | 440 | A00405 | A11015 | 183 |
| A00405 | A11322 | 377 | A00405 | A11338 | 385 |
| A00405 | A11419 | 481 | A00405 | A11427 | 460 |
| A00405 | A11677 | 574 | A00405 | A13683 | 183 |
| A00405 | A13684 | 208 | A00405 | A13963 | 278 |
| A00405 | A13989 | 263 | A00405 | A14216 | 269 |
| A00405 | A14272 | 404 | A00405 | A14482 | 356 |
| A00405 | A14568 | 157 | A00405 | A14655 | 215 |
| A00405 | A14699 | 247 | A00405 | A14778 | 247 |
| A00405 | A14825 | 273 | A00405 | A14888 | 411 |
| A00405 | A15322 | 260 | A00405 | A15345 | 274 |
| A00405 | A15384 | 428 | A00405 | A15624 | 423 |
| A00405 | A15651 | 443 | A00405 | A15661 | 384 |
| A00405 | A15684 | 260 | A00405 | A15932 | 433 |
| A00405 | A15949 | 274 | A00405 | A16157 | 472 |
| A00405 | A16587 | 247 | A00405 | A16876 | 183 |
| A00406 | A00448 | 638 | A00406 | A00459 | 252 |
| A00406 | A00488 | 633 | A00406 | A00490 | 358 |
| A00406 | A00497 | 635 | A00406 | A00500 | 168 |
| A00406 | A00518 | 438 | A00406 | A00520 | 472 |

|        |        |     |        |        |     |
|--------|--------|-----|--------|--------|-----|
| A00406 | A00521 | 177 | A00406 | A00532 | 319 |
| A00406 | A00550 | 623 | A00406 | A00551 | 433 |
| A00406 | A00554 | 458 | A00406 | A00570 | 205 |
| A00406 | A00571 | 185 | A00406 | A00575 | 260 |
| A00406 | A00584 | 353 | A00406 | A00595 | 457 |
| A00406 | A00605 | 515 | A00406 | A00648 | 427 |
| A00406 | A00687 | 262 | A00406 | A00693 | 205 |
| A00406 | A00734 | 167 | A00406 | A00831 | 334 |
| A00406 | A00856 | 252 | A00406 | A00871 | 173 |
| A00406 | A00878 | 246 | A00406 | A00916 | 491 |
| A00406 | A00923 | 294 | A00406 | A00934 | 490 |
| A00406 | A00944 | 468 | A00406 | A00960 | 156 |
| A00406 | A00978 | 363 | A00406 | A00992 | 180 |
| A00406 | A01000 | 180 | A00406 | A01020 | 638 |
| A00406 | A01040 | 334 | A00406 | A01047 | 263 |
| A00406 | A01092 | 243 | A00406 | A01112 | 334 |
| A00406 | A01116 | 638 | A00406 | A01127 | 232 |
| A00406 | A01150 | 288 | A00406 | A01166 | 356 |
| A00406 | A01184 | 491 | A00406 | A01201 | 491 |
| A00406 | A01206 | 428 | A00406 | A01214 | 227 |
| A00406 | A01215 | 199 | A00406 | A01224 | 422 |
| A00406 | A01226 | 82  | A00406 | A01234 | 491 |
| A00406 | A01291 | 432 | A00406 | A01304 | 638 |
| A00406 | A01306 | 350 | A00406 | A01351 | 477 |
| A00406 | A01353 | 374 | A00406 | A01425 | 229 |
| A00406 | A01468 | 303 | A00406 | A01470 | 491 |
| A00406 | A01487 | 324 | A00406 | A01488 | 470 |
| A00406 | A01492 | 491 | A00406 | A01495 | 474 |
| A00406 | A01503 | 333 | A00406 | A01542 | 162 |
| A00406 | A01598 | 435 | A00406 | A01612 | 477 |
| A00406 | A01617 | 176 | A00406 | A01649 | 467 |
| A00406 | A01721 | 460 | A00406 | A01741 | 274 |
| A00406 | A01864 | 157 | A00406 | A02265 | 179 |
| A00406 | A02364 | 205 | A00406 | A02456 | 160 |
| A00406 | A02484 | 176 | A00406 | A03047 | 216 |
| A00406 | A03296 | 152 | A00406 | A03438 | 345 |
| A00406 | A03568 | 185 | A00406 | A03569 | 236 |
| A00406 | A03736 | 227 | A00406 | A04447 | 191 |
| A00406 | A05295 | 185 | A00406 | A05665 | 173 |
| A00406 | A05845 | 457 | A00406 | A06188 | 219 |
| A00406 | A06275 | 468 | A00406 | A06825 | 167 |
| A00406 | A06861 | 162 | A00406 | A06957 | 229 |
| A00406 | A06965 | 168 | A00406 | A07223 | 636 |
| A00406 | A07244 | 274 | A00406 | A07347 | 491 |
| A00406 | A07524 | 251 | A00406 | A07533 | 428 |
| A00406 | A07537 | 171 | A00406 | A07570 | 208 |

|        |        |     |        |        |     |
|--------|--------|-----|--------|--------|-----|
| A00406 | A07584 | 479 | A00406 | A07625 | 395 |
| A00406 | A07700 | 638 | A00406 | A07725 | 358 |
| A00406 | A07924 | 461 | A00406 | A08024 | 432 |
| A00406 | A08078 | 184 | A00406 | A08112 | 278 |
| A00406 | A08137 | 308 | A00406 | A08211 | 240 |
| A00406 | A08398 | 283 | A00406 | A08452 | 463 |
| A00406 | A08491 | 199 | A00406 | A08768 | 179 |
| A00406 | A08890 | 429 | A00406 | A08952 | 198 |
| A00406 | A09307 | 446 | A00406 | A09664 | 460 |
| A00406 | A09702 | 424 | A00406 | A10465 | 196 |
| A00406 | A10616 | 474 | A00406 | A10923 | 423 |
| A00406 | A11565 | 162 | A00406 | A11741 | 196 |
| A00406 | A11831 | 311 | A00406 | A11832 | 486 |
| A00406 | A12097 | 213 | A00406 | A12419 | 293 |
| A00406 | A13220 | 243 | A00406 | A13989 | 491 |
| A00406 | A14151 | 174 | A00406 | A14197 | 202 |
| A00406 | A14449 | 291 | A00406 | A14482 | 176 |
| A00406 | A14505 | 268 | A00406 | A15499 | 176 |
| A00406 | A15764 | 404 | A00406 | A16302 | 294 |
| A00406 | A17168 | 294 | A00407 | A00697 | 221 |
| A00407 | A01161 | 338 | A00407 | A01445 | 355 |
| A00407 | A01473 | 480 | A00407 | A01524 | 937 |
| A00407 | A03195 | 278 | A00407 | A03763 | 340 |
| A00407 | A03790 | 466 | A00407 | A04015 | 263 |
| A00407 | A05617 | 184 | A00407 | A08300 | 429 |
| A00407 | A08926 | 443 | A00407 | A13555 | 419 |
| A00407 | A13980 | 208 | A00407 | A15292 | 259 |
| A00407 | A15317 | 210 | A00408 | A00625 | 491 |
| A00408 | A00703 | 236 | A00408 | A00786 | 486 |
| A00408 | A00877 | 432 | A00408 | A00951 | 205 |
| A00408 | A01024 | 373 | A00408 | A01052 | 286 |
| A00408 | A01068 | 232 | A00408 | A01216 | 435 |
| A00408 | A01291 | 241 | A00408 | A01297 | 63  |
| A00408 | A01345 | 273 | A00408 | A01451 | 159 |
| A00408 | A01452 | 199 | A00408 | A01454 | 419 |
| A00408 | A01478 | 199 | A00408 | A01484 | 329 |
| A00408 | A01505 | 199 | A00408 | A01539 | 314 |
| A00408 | A01553 | 199 | A00408 | A01561 | 199 |
| A00408 | A01563 | 422 | A00408 | A01568 | 443 |
| A00408 | A01588 | 171 | A00408 | A01650 | 186 |
| A00408 | A01660 | 172 | A00408 | A01686 | 443 |
| A00408 | A02472 | 462 | A00408 | A02671 | 379 |
| A00408 | A02778 | 254 | A00408 | A03423 | 340 |
| A00408 | A03545 | 232 | A00408 | A04054 | 162 |
| A00408 | A04213 | 154 | A00408 | A04674 | 227 |
| A00408 | A04710 | 467 | A00408 | A05008 | 305 |

|        |        |     |        |        |     |
|--------|--------|-----|--------|--------|-----|
| A00408 | A05009 | 302 | A00408 | A05250 | 190 |
| A00408 | A05822 | 393 | A00408 | A05823 | 311 |
| A00408 | A06021 | 174 | A00408 | A06327 | 311 |
| A00408 | A06743 | 262 | A00408 | A06888 | 391 |
| A00408 | A06889 | 491 | A00408 | A06994 | 162 |
| A00408 | A07073 | 283 | A00408 | A07242 | 491 |
| A00408 | A07404 | 159 | A00408 | A07483 | 157 |
| A00408 | A07495 | 475 | A00408 | A07816 | 409 |
| A00408 | A08133 | 63  | A00408 | A08208 | 441 |
| A00408 | A08400 | 329 | A00408 | A08507 | 152 |
| A00408 | A08531 | 379 | A00408 | A08571 | 199 |
| A00408 | A08573 | 323 | A00408 | A09051 | 227 |
| A00408 | A09668 | 162 | A00408 | A10291 | 177 |
| A00408 | A10319 | 238 | A00408 | A10773 | 483 |
| A00408 | A11043 | 311 | A00408 | A11098 | 281 |
| A00408 | A12047 | 486 | A00408 | A12693 | 435 |
| A00408 | A13209 | 311 | A00408 | A13358 | 311 |
| A00408 | A13949 | 235 | A00408 | A14266 | 296 |
| A00408 | A14281 | 489 | A00408 | A14313 | 218 |
| A00408 | A14640 | 182 | A00408 | A15023 | 190 |
| A00408 | A15369 | 187 | A00408 | A15626 | 391 |
| A00408 | A15654 | 252 | A00408 | A15941 | 171 |
| A00408 | A16112 | 182 | A00408 | A16127 | 293 |
| A00409 | A00499 | 291 | A00409 | A00812 | 196 |
| A00409 | A00883 | 279 | A00409 | A01097 | 270 |
| A00409 | A01132 | 232 | A00409 | A01133 | 462 |
| A00409 | A01172 | 283 | A00409 | A01291 | 356 |
| A00409 | A01457 | 326 | A00409 | A01614 | 221 |
| A00409 | A01707 | 303 | A00409 | A01781 | 480 |
| A00409 | A03612 | 152 | A00409 | A03740 | 344 |
| A00409 | A03858 | 488 | A00409 | A03981 | 212 |
| A00409 | A04547 | 223 | A00409 | A05449 | 491 |
| A00409 | A07311 | 488 | A00409 | A08137 | 447 |
| A00409 | A09857 | 246 | A00409 | A10532 | 341 |
| A00409 | A11291 | 272 | A00409 | A11297 | 491 |
| A00409 | A13023 | 162 | A00409 | A14196 | 441 |
| A00409 | A14220 | 235 | A00409 | A14454 | 290 |
| A00409 | A14497 | 372 | A00409 | A14591 | 491 |
| A00409 | A14596 | 491 | A00409 | A14659 | 491 |
| A00409 | A14738 | 272 | A00409 | A14843 | 369 |
| A00409 | A15188 | 491 | A00409 | A15254 | 484 |
| A00409 | A15507 | 491 | A00409 | A15547 | 491 |
| A00409 | A15611 | 454 | A00409 | A15612 | 216 |
| A00409 | A15660 | 335 | A00409 | A15684 | 332 |
| A00409 | A15722 | 389 | A00409 | A15769 | 491 |
| A00409 | A16006 | 201 | A00409 | A16291 | 151 |



|        |        |     |        |        |     |
|--------|--------|-----|--------|--------|-----|
| A00409 | A16293 | 491 | A00409 | A16298 | 477 |
| A00409 | A16580 | 205 | A00409 | A16627 | 491 |
| A00409 | A16696 | 484 | A00409 | A16822 | 491 |
| A00409 | A16879 | 479 | A00409 | A16947 | 449 |
| A00409 | A17031 | 299 | A00410 | A00743 | 352 |
| A00410 | A01342 | 168 | A00410 | A01515 | 177 |
| A00410 | A02044 | 361 | A00410 | A05473 | 236 |
| A00410 | A07815 | 168 | A00410 | A08502 | 191 |
| A00410 | A09084 | 255 | A00410 | A09277 | 182 |
| A00410 | A10315 | 305 | A00410 | A11470 | 491 |
| A00410 | A13322 | 390 | A00410 | A13832 | 445 |
| A00410 | A14193 | 491 | A00410 | A14204 | 483 |
| A00410 | A14247 | 193 | A00410 | A14253 | 490 |
| A00410 | A14788 | 417 | A00410 | A15308 | 288 |
| A00410 | A15557 | 423 | A00410 | A15680 | 251 |
| A00410 | A15688 | 380 | A00410 | A15690 | 486 |
| A00410 | A15948 | 165 | A00410 | A16113 | 221 |
| A00410 | A16381 | 308 | A00410 | A16534 | 458 |
| A00411 | A00454 | 346 | A00411 | A00467 | 563 |
| A00411 | A00494 | 582 | A00411 | A00516 | 238 |
| A00411 | A00521 | 413 | A00411 | A00565 | 484 |
| A00411 | A00571 | 346 | A00411 | A00605 | 193 |
| A00411 | A00624 | 213 | A00411 | A00629 | 363 |
| A00411 | A00643 | 358 | A00411 | A00648 | 473 |
| A00411 | A00651 | 489 | A00411 | A00653 | 174 |
| A00411 | A00669 | 561 | A00411 | A00687 | 201 |
| A00411 | A00700 | 391 | A00411 | A00742 | 245 |
| A00411 | A00782 | 386 | A00411 | A00787 | 472 |
| A00411 | A00809 | 411 | A00411 | A00812 | 445 |
| A00411 | A00839 | 573 | A00411 | A00875 | 513 |
| A00411 | A00878 | 451 | A00411 | A00922 | 446 |
| A00411 | A00935 | 172 | A00411 | A00970 | 63  |
| A00411 | A00980 | 588 | A00411 | A00994 | 306 |
| A00411 | A01012 | 345 | A00411 | A01038 | 447 |
| A00411 | A01072 | 163 | A00411 | A01090 | 439 |
| A00411 | A01102 | 420 | A00411 | A01112 | 385 |
| A00411 | A01115 | 177 | A00411 | A01144 | 468 |
| A00411 | A01177 | 230 | A00411 | A01192 | 286 |
| A00411 | A01196 | 581 | A00411 | A01218 | 241 |
| A00411 | A01234 | 356 | A00411 | A01247 | 469 |
| A00411 | A01261 | 299 | A00411 | A01262 | 491 |
| A00411 | A01263 | 235 | A00411 | A01270 | 582 |
| A00411 | A01291 | 472 | A00411 | A01294 | 288 |
| A00411 | A01306 | 335 | A00411 | A01335 | 355 |
| A00411 | A01354 | 160 | A00411 | A01358 | 238 |
| A00411 | A01365 | 173 | A00411 | A01369 | 229 |

|        |        |     |        |        |     |
|--------|--------|-----|--------|--------|-----|
| A00411 | A01385 | 259 | A00411 | A01411 | 586 |
| A00411 | A01425 | 245 | A00411 | A01436 | 173 |
| A00411 | A01468 | 483 | A00411 | A01496 | 474 |
| A00411 | A01537 | 452 | A00411 | A01540 | 205 |
| A00411 | A01569 | 221 | A00411 | A01579 | 588 |
| A00411 | A01586 | 246 | A00411 | A01601 | 588 |
| A00411 | A01649 | 180 | A00411 | A01652 | 241 |
| A00411 | A01689 | 396 | A00411 | A01730 | 423 |
| A00411 | A01822 | 388 | A00411 | A01917 | 68  |
| A00411 | A02568 | 270 | A00411 | A02737 | 222 |
| A00411 | A02786 | 63  | A00411 | A02816 | 63  |
| A00411 | A03435 | 402 | A00411 | A04342 | 179 |
| A00411 | A05501 | 547 | A00411 | A05916 | 198 |
| A00411 | A06348 | 486 | A00411 | A06466 | 491 |
| A00411 | A06534 | 250 | A00411 | A06564 | 301 |
| A00411 | A06597 | 259 | A00411 | A06814 | 588 |
| A00411 | A06973 | 573 | A00411 | A07047 | 241 |
| A00411 | A07311 | 469 | A00411 | A07398 | 587 |
| A00411 | A07399 | 213 | A00411 | A07433 | 449 |
| A00411 | A07593 | 491 | A00411 | A07686 | 207 |
| A00411 | A08131 | 486 | A00411 | A08196 | 157 |
| A00411 | A08369 | 527 | A00411 | A08408 | 241 |
| A00411 | A08476 | 241 | A00411 | A08533 | 340 |
| A00411 | A08556 | 202 | A00411 | A08557 | 491 |
| A00411 | A08847 | 491 | A00411 | A08973 | 272 |
| A00411 | A08991 | 249 | A00411 | A09308 | 586 |
| A00411 | A09322 | 241 | A00411 | A09506 | 238 |
| A00411 | A09620 | 241 | A00411 | A11728 | 577 |
| A00411 | A12208 | 193 | A00411 | A12215 | 269 |
| A00411 | A12227 | 241 | A00411 | A12401 | 160 |
| A00411 | A13024 | 207 | A00411 | A13340 | 488 |
| A00411 | A13992 | 167 | A00411 | A14172 | 328 |
| A00411 | A14188 | 162 | A00411 | A14216 | 470 |
| A00411 | A14260 | 241 | A00411 | A14280 | 174 |
| A00411 | A14289 | 174 | A00411 | A14729 | 216 |
| A00411 | A14819 | 369 | A00411 | A14843 | 272 |
| A00411 | A15174 | 243 | A00411 | A15250 | 207 |
| A00411 | A15268 | 459 | A00411 | A15381 | 576 |
| A00411 | A15666 | 385 | A00411 | A15711 | 363 |
| A00411 | A15932 | 475 | A00411 | A16272 | 434 |
| A00411 | A16351 | 207 | A00411 | A16682 | 236 |
| A00412 | A00489 | 429 | A00412 | A00640 | 286 |
| A00412 | A00647 | 154 | A00412 | A00740 | 363 |
| A00412 | A01069 | 674 | A00412 | A01242 | 404 |
| A00412 | A01564 | 399 | A00412 | A01569 | 468 |
| A00412 | A01577 | 361 | A00412 | A02068 | 260 |

|        |        |     |        |        |     |
|--------|--------|-----|--------|--------|-----|
| A00412 | A02493 | 205 | A00412 | A03325 | 441 |
| A00412 | A03446 | 438 | A00412 | A03476 | 398 |
| A00412 | A03560 | 641 | A00412 | A03681 | 363 |
| A00412 | A03783 | 404 | A00412 | A03863 | 643 |
| A00412 | A07247 | 165 | A00412 | A08546 | 404 |
| A00412 | A08763 | 191 | A00412 | A08991 | 404 |
| A00412 | A09024 | 362 | A00412 | A13135 | 335 |
| A00412 | A13609 | 246 | A00413 | A00636 | 230 |
| A00413 | A00743 | 357 | A00413 | A00929 | 346 |
| A00413 | A00941 | 485 | A00413 | A01036 | 491 |
| A00413 | A01358 | 329 | A00413 | A01390 | 452 |
| A00413 | A01588 | 263 | A00413 | A01598 | 268 |
| A00413 | A02010 | 491 | A00413 | A03032 | 319 |
| A00413 | A03080 | 213 | A00413 | A03817 | 378 |
| A00413 | A06941 | 452 | A00413 | A07054 | 461 |
| A00413 | A07242 | 436 | A00413 | A09056 | 485 |
| A00413 | A09671 | 162 | A00413 | A11408 | 190 |
| A00413 | A12047 | 469 | A00413 | A12234 | 228 |
| A00413 | A12264 | 486 | A00413 | A14196 | 180 |
| A00413 | A14926 | 288 | A00413 | A15323 | 302 |
| A00413 | A15684 | 227 | A00413 | A15788 | 534 |
| A00414 | A00590 | 418 | A00414 | A00648 | 479 |
| A00414 | A00651 | 491 | A00414 | A00700 | 484 |
| A00414 | A00701 | 333 | A00414 | A00713 | 344 |
| A00414 | A00787 | 475 | A00414 | A00839 | 490 |
| A00414 | A00861 | 177 | A00414 | A00870 | 319 |
| A00414 | A00965 | 424 | A00414 | A00966 | 490 |
| A00414 | A01012 | 490 | A00414 | A01056 | 383 |
| A00414 | A01085 | 451 | A00414 | A01090 | 491 |
| A00414 | A01112 | 451 | A00414 | A01140 | 399 |
| A00414 | A01144 | 234 | A00414 | A01160 | 307 |
| A00414 | A01291 | 486 | A00414 | A01306 | 485 |
| A00414 | A01335 | 405 | A00414 | A01337 | 210 |
| A00414 | A01365 | 347 | A00414 | A01407 | 200 |
| A00414 | A01411 | 243 | A00414 | A01436 | 294 |
| A00414 | A01449 | 185 | A00414 | A01468 | 477 |
| A00414 | A01496 | 491 | A00414 | A01579 | 486 |
| A00414 | A01586 | 241 | A00414 | A01601 | 154 |
| A00414 | A01822 | 436 | A00414 | A02350 | 369 |
| A00414 | A03048 | 238 | A00414 | A03461 | 360 |
| A00414 | A03671 | 357 | A00414 | A03981 | 479 |
| A00414 | A04230 | 213 | A00414 | A05149 | 296 |
| A00414 | A05191 | 278 | A00414 | A05501 | 432 |
| A00414 | A06351 | 452 | A00414 | A06814 | 339 |
| A00414 | A07047 | 327 | A00414 | A07243 | 215 |
| A00414 | A07262 | 340 | A00414 | A07307 | 259 |

|        |        |     |        |        |     |
|--------|--------|-----|--------|--------|-----|
| A00414 | A07398 | 409 | A00414 | A07726 | 404 |
| A00414 | A08055 | 416 | A00414 | A08131 | 191 |
| A00414 | A08359 | 247 | A00414 | A08398 | 163 |
| A00414 | A08559 | 172 | A00414 | A09285 | 323 |
| A00414 | A11263 | 299 | A00414 | A11334 | 314 |
| A00414 | A11550 | 348 | A00414 | A12404 | 330 |
| A00414 | A12821 | 334 | A00414 | A13989 | 477 |
| A00414 | A14025 | 182 | A00414 | A14216 | 490 |
| A00414 | A14377 | 162 | A00414 | A15500 | 326 |
| A00414 | A16053 | 363 | A00415 | A00418 | 475 |
| A00415 | A00534 | 491 | A00415 | A00883 | 213 |
| A00415 | A00885 | 491 | A00415 | A00886 | 489 |
| A00415 | A00889 | 491 | A00415 | A00890 | 485 |
| A00415 | A00891 | 446 | A00415 | A00892 | 491 |
| A00415 | A00893 | 491 | A00415 | A00894 | 491 |
| A00415 | A00895 | 491 | A00415 | A00896 | 162 |
| A00415 | A00897 | 490 | A00415 | A00898 | 491 |
| A00415 | A00899 | 488 | A00415 | A01212 | 236 |
| A00415 | A01572 | 168 | A00415 | A01602 | 260 |
| A00415 | A02024 | 489 | A00415 | A02112 | 202 |
| A00415 | A03151 | 491 | A00415 | A05347 | 317 |
| A00415 | A06345 | 317 | A00415 | A06673 | 486 |
| A00415 | A06992 | 188 | A00415 | A07446 | 139 |
| A00415 | A08125 | 288 | A00415 | A08435 | 473 |
| A00415 | A08818 | 218 | A00415 | A08891 | 491 |
| A00415 | A09008 | 245 | A00415 | A10527 | 162 |
| A00415 | A10983 | 152 | A00415 | A11443 | 361 |
| A00415 | A11650 | 227 | A00415 | A11710 | 165 |
| A00415 | A13740 | 179 | A00415 | A14174 | 491 |
| A00415 | A16046 | 162 | A00415 | A17186 | 201 |
| A00416 | A00432 | 279 | A00416 | A00546 | 191 |
| A00416 | A00625 | 491 | A00416 | A00630 | 488 |
| A00416 | A00631 | 468 | A00416 | A00732 | 156 |
| A00416 | A00786 | 414 | A00416 | A00877 | 486 |
| A00416 | A00971 | 428 | A00416 | A01036 | 232 |
| A00416 | A01151 | 343 | A00416 | A01366 | 330 |
| A00416 | A01378 | 255 | A00416 | A01454 | 388 |
| A00416 | A01539 | 339 | A00416 | A01606 | 491 |
| A00416 | A01687 | 293 | A00416 | A01742 | 188 |
| A00416 | A03304 | 486 | A00416 | A03336 | 312 |
| A00416 | A03832 | 358 | A00416 | A04449 | 474 |
| A00416 | A05056 | 294 | A00416 | A05142 | 216 |
| A00416 | A06277 | 210 | A00416 | A06752 | 488 |
| A00416 | A07242 | 485 | A00416 | A07483 | 490 |
| A00416 | A07495 | 477 | A00416 | A07665 | 430 |
| A00416 | A07954 | 456 | A00416 | A08379 | 281 |

|        |        |     |        |        |     |
|--------|--------|-----|--------|--------|-----|
| A00416 | A08536 | 428 | A00416 | A08551 | 190 |
| A00416 | A08961 | 168 | A00416 | A09300 | 328 |
| A00416 | A09624 | 486 | A00416 | A10043 | 263 |
| A00416 | A10421 | 488 | A00416 | A10516 | 323 |
| A00416 | A10607 | 216 | A00416 | A11061 | 198 |
| A00416 | A11150 | 160 | A00416 | A11199 | 484 |
| A00416 | A11281 | 455 | A00416 | A11292 | 422 |
| A00416 | A11293 | 491 | A00416 | A11516 | 294 |
| A00416 | A11659 | 243 | A00416 | A11983 | 210 |
| A00416 | A12365 | 193 | A00416 | A12862 | 235 |
| A00416 | A13866 | 180 | A00416 | A14167 | 162 |
| A00416 | A14281 | 483 | A00416 | A15736 | 373 |
| A00416 | A16647 | 216 | A00417 | A00431 | 722 |
| A00417 | A00629 | 401 | A00417 | A00718 | 259 |
| A00417 | A00794 | 601 | A00417 | A00821 | 477 |
| A00417 | A00942 | 722 | A00417 | A01022 | 491 |
| A00417 | A01026 | 357 | A00417 | A01035 | 602 |
| A00417 | A01060 | 272 | A00417 | A01113 | 190 |
| A00417 | A01211 | 288 | A00417 | A01451 | 602 |
| A00417 | A01452 | 201 | A00417 | A01453 | 427 |
| A00417 | A01457 | 491 | A00417 | A01458 | 610 |
| A00417 | A01459 | 269 | A00417 | A01461 | 596 |
| A00417 | A01500 | 469 | A00417 | A01503 | 616 |
| A00417 | A01514 | 269 | A00417 | A01515 | 491 |
| A00417 | A01522 | 488 | A00417 | A01574 | 491 |
| A00417 | A01575 | 491 | A00417 | A01576 | 561 |
| A00417 | A01578 | 433 | A00417 | A01583 | 269 |
| A00417 | A01585 | 595 | A00417 | A01612 | 163 |
| A00417 | A01634 | 491 | A00417 | A01646 | 475 |
| A00417 | A01660 | 489 | A00417 | A01683 | 446 |
| A00417 | A01706 | 602 | A00417 | A01811 | 460 |
| A00417 | A03293 | 698 | A00417 | A03569 | 339 |
| A00417 | A03618 | 367 | A00417 | A03626 | 346 |
| A00417 | A03748 | 159 | A00417 | A03815 | 177 |
| A00417 | A03889 | 247 | A00417 | A03891 | 401 |
| A00417 | A03892 | 480 | A00417 | A03910 | 218 |
| A00417 | A04145 | 722 | A00417 | A04292 | 602 |
| A00417 | A04337 | 447 | A00417 | A04682 | 561 |
| A00417 | A04686 | 489 | A00417 | A04715 | 198 |
| A00417 | A04835 | 486 | A00417 | A04909 | 371 |
| A00417 | A05024 | 578 | A00417 | A05453 | 228 |
| A00417 | A05638 | 269 | A00417 | A06011 | 597 |
| A00417 | A06168 | 490 | A00417 | A06593 | 232 |
| A00417 | A06941 | 474 | A00417 | A07203 | 508 |
| A00417 | A07442 | 321 | A00417 | A07499 | 193 |
| A00417 | A07558 | 270 | A00417 | A07640 | 485 |

|        |        |     |        |        |     |
|--------|--------|-----|--------|--------|-----|
| A00417 | A08056 | 190 | A00417 | A08137 | 163 |
| A00417 | A08261 | 260 | A00417 | A08293 | 154 |
| A00417 | A08400 | 485 | A00417 | A08454 | 156 |
| A00417 | A08461 | 167 | A00417 | A08484 | 721 |
| A00417 | A08506 | 721 | A00417 | A08544 | 721 |
| A00417 | A09053 | 246 | A00417 | A09326 | 269 |
| A00417 | A09396 | 302 | A00417 | A09546 | 466 |
| A00417 | A09996 | 486 | A00417 | A10584 | 391 |
| A00417 | A10655 | 314 | A00417 | A10739 | 162 |
| A00417 | A10804 | 357 | A00417 | A11086 | 191 |
| A00417 | A11266 | 238 | A00417 | A11279 | 326 |
| A00417 | A11303 | 383 | A00417 | A11885 | 423 |
| A00417 | A12883 | 256 | A00417 | A13027 | 391 |
| A00417 | A13628 | 402 | A00417 | A13831 | 334 |
| A00417 | A13874 | 216 | A00417 | A13882 | 183 |
| A00417 | A13895 | 269 | A00417 | A14056 | 413 |
| A00417 | A14182 | 269 | A00417 | A14247 | 491 |
| A00417 | A14272 | 491 | A00417 | A14461 | 491 |
| A00417 | A14661 | 603 | A00417 | A14711 | 269 |
| A00417 | A14783 | 269 | A00417 | A14877 | 174 |
| A00417 | A14914 | 279 | A00417 | A14970 | 297 |
| A00417 | A15432 | 402 | A00417 | A15552 | 183 |
| A00417 | A16669 | 432 | A00418 | A00471 | 550 |
| A00418 | A00517 | 249 | A00418 | A00578 | 213 |
| A00418 | A00622 | 377 | A00418 | A00742 | 234 |
| A00418 | A00805 | 486 | A00418 | A00814 | 358 |
| A00418 | A00856 | 388 | A00418 | A00858 | 321 |
| A00418 | A00883 | 466 | A00418 | A00889 | 229 |
| A00418 | A00893 | 180 | A00418 | A00903 | 235 |
| A00418 | A00954 | 340 | A00418 | A01050 | 143 |
| A00418 | A01150 | 157 | A00418 | A01164 | 465 |
| A00418 | A01169 | 443 | A00418 | A01195 | 238 |
| A00418 | A01212 | 701 | A00418 | A01214 | 433 |
| A00418 | A01329 | 589 | A00418 | A01354 | 491 |
| A00418 | A01469 | 179 | A00418 | A01503 | 491 |
| A00418 | A01535 | 167 | A00418 | A01536 | 474 |
| A00418 | A01610 | 391 | A00418 | A01741 | 227 |
| A00418 | A01813 | 428 | A00418 | A01978 | 163 |
| A00418 | A02030 | 251 | A00418 | A02075 | 266 |
| A00418 | A02318 | 165 | A00418 | A02321 | 223 |
| A00418 | A02702 | 198 | A00418 | A02773 | 229 |
| A00418 | A02803 | 221 | A00418 | A03458 | 154 |
| A00418 | A03784 | 262 | A00418 | A03809 | 443 |
| A00418 | A03886 | 360 | A00418 | A04001 | 198 |
| A00418 | A04012 | 235 | A00418 | A04236 | 235 |
| A00418 | A04379 | 163 | A00418 | A04911 | 159 |

|        |        |     |        |        |     |
|--------|--------|-----|--------|--------|-----|
| A00418 | A05142 | 223 | A00418 | A05162 | 241 |
| A00418 | A05216 | 402 | A00418 | A05621 | 162 |
| A00418 | A06381 | 119 | A00418 | A06453 | 283 |
| A00418 | A07319 | 160 | A00418 | A07670 | 156 |
| A00418 | A08022 | 462 | A00418 | A08434 | 223 |
| A00418 | A09272 | 174 | A00418 | A09597 | 340 |
| A00418 | A09654 | 93  | A00418 | A09708 | 371 |
| A00418 | A11369 | 168 | A00418 | A11859 | 185 |
| A00418 | A13824 | 176 | A00418 | A14006 | 463 |
| A00418 | A14128 | 698 | A00418 | A14655 | 267 |
| A00418 | A15297 | 411 | A00418 | A15324 | 375 |
| A00418 | A15498 | 182 | A00418 | A15559 | 159 |
| A00418 | A16491 | 193 | A00419 | A00454 | 216 |
| A00419 | A00653 | 368 | A00419 | A00697 | 79  |
| A00419 | A00910 | 314 | A00419 | A01042 | 438 |
| A00419 | A01113 | 344 | A00419 | A01192 | 215 |
| A00419 | A01562 | 165 | A00419 | A01709 | 245 |
| A00419 | A02629 | 259 | A00419 | A03740 | 185 |
| A00419 | A07178 | 260 | A00419 | A08054 | 201 |
| A00419 | A10504 | 338 | A00419 | A10506 | 157 |
| A00419 | A12710 | 436 | A00419 | A14364 | 204 |
| A00419 | A15699 | 401 | A00420 | A00438 | 491 |
| A00420 | A00446 | 187 | A00420 | A00467 | 229 |
| A00420 | A00514 | 199 | A00420 | A00658 | 243 |
| A00420 | A00849 | 195 | A00420 | A00888 | 160 |
| A00420 | A00915 | 446 | A00420 | A00918 | 191 |
| A00420 | A01076 | 297 | A00420 | A01137 | 266 |
| A00420 | A01161 | 313 | A00420 | A01163 | 358 |
| A00420 | A01164 | 299 | A00420 | A01169 | 341 |
| A00420 | A01253 | 468 | A00420 | A01289 | 247 |
| A00420 | A01339 | 232 | A00420 | A01485 | 316 |
| A00420 | A01576 | 154 | A00420 | A01582 | 491 |
| A00420 | A01668 | 344 | A00420 | A01950 | 218 |
| A00420 | A01984 | 277 | A00420 | A02189 | 221 |
| A00420 | A02192 | 443 | A00420 | A02196 | 366 |
| A00420 | A02301 | 165 | A00420 | A02304 | 279 |
| A00420 | A02306 | 400 | A00420 | A02317 | 218 |
| A00420 | A02326 | 218 | A00420 | A02467 | 160 |
| A00420 | A02477 | 193 | A00420 | A02586 | 205 |
| A00420 | A02758 | 191 | A00420 | A02759 | 294 |
| A00420 | A02889 | 246 | A00420 | A03076 | 373 |
| A00420 | A03099 | 462 | A00420 | A03110 | 174 |
| A00420 | A03115 | 224 | A00420 | A03165 | 228 |
| A00420 | A03310 | 241 | A00420 | A03458 | 218 |
| A00420 | A03570 | 230 | A00420 | A03820 | 345 |
| A00420 | A03885 | 489 | A00420 | A04002 | 286 |

|        |        |     |        |        |     |
|--------|--------|-----|--------|--------|-----|
| A00420 | A04162 | 257 | A00420 | A04256 | 291 |
| A00420 | A04647 | 230 | A00420 | A04915 | 330 |
| A00420 | A04925 | 330 | A00420 | A04938 | 228 |
| A00420 | A05020 | 174 | A00420 | A05450 | 182 |
| A00420 | A05570 | 318 | A00420 | A05620 | 270 |
| A00420 | A05768 | 201 | A00420 | A05914 | 263 |
| A00420 | A06032 | 188 | A00420 | A06033 | 330 |
| A00420 | A06091 | 179 | A00420 | A06147 | 297 |
| A00420 | A06596 | 224 | A00420 | A06622 | 152 |
| A00420 | A06623 | 218 | A00420 | A06727 | 218 |
| A00420 | A07244 | 338 | A00420 | A07440 | 241 |
| A00420 | A07647 | 277 | A00420 | A07833 | 358 |
| A00420 | A08001 | 281 | A00420 | A08141 | 366 |
| A00420 | A08191 | 281 | A00420 | A08289 | 154 |
| A00420 | A08308 | 319 | A00420 | A08927 | 350 |
| A00420 | A09531 | 281 | A00420 | A10597 | 255 |
| A00420 | A11352 | 319 | A00420 | A13432 | 165 |
| A00420 | A14642 | 372 | A00420 | A15277 | 152 |
| A00420 | A15295 | 419 | A00420 | A15672 | 254 |
| A00421 | A00438 | 713 | A00421 | A00446 | 316 |
| A00421 | A00448 | 272 | A00421 | A00452 | 474 |
| A00421 | A00454 | 168 | A00421 | A00489 | 388 |
| A00421 | A00503 | 240 | A00421 | A00517 | 446 |
| A00421 | A00523 | 369 | A00421 | A00531 | 759 |
| A00421 | A00532 | 491 | A00421 | A00537 | 491 |
| A00421 | A00559 | 479 | A00421 | A00570 | 477 |
| A00421 | A00571 | 321 | A00421 | A00572 | 152 |
| A00421 | A00576 | 423 | A00421 | A00583 | 156 |
| A00421 | A00588 | 491 | A00421 | A00595 | 180 |
| A00421 | A00605 | 466 | A00421 | A00629 | 401 |
| A00421 | A00646 | 488 | A00421 | A00653 | 484 |
| A00421 | A00655 | 468 | A00421 | A00677 | 475 |
| A00421 | A00687 | 467 | A00421 | A00691 | 542 |
| A00421 | A00693 | 447 | A00421 | A00697 | 486 |
| A00421 | A00707 | 463 | A00421 | A00709 | 256 |
| A00421 | A00716 | 542 | A00421 | A00725 | 491 |
| A00421 | A00733 | 360 | A00421 | A00735 | 160 |
| A00421 | A00741 | 479 | A00421 | A00747 | 491 |
| A00421 | A00761 | 285 | A00421 | A00767 | 491 |
| A00421 | A00775 | 345 | A00421 | A00802 | 252 |
| A00421 | A00805 | 489 | A00421 | A00817 | 396 |
| A00421 | A00821 | 185 | A00421 | A00822 | 488 |
| A00421 | A00829 | 446 | A00421 | A00831 | 423 |
| A00421 | A00839 | 195 | A00421 | A00849 | 288 |
| A00421 | A00865 | 433 | A00421 | A00867 | 201 |
| A00421 | A00868 | 406 | A00421 | A00871 | 404 |



|        |        |     |        |        |     |
|--------|--------|-----|--------|--------|-----|
| A00421 | A00878 | 529 | A00421 | A00879 | 539 |
| A00421 | A00883 | 491 | A00421 | A00905 | 542 |
| A00421 | A00908 | 190 | A00421 | A00916 | 491 |
| A00421 | A00928 | 491 | A00421 | A00936 | 218 |
| A00421 | A00942 | 229 | A00421 | A00950 | 480 |
| A00421 | A00967 | 243 | A00421 | A00975 | 162 |
| A00421 | A00985 | 313 | A00421 | A00992 | 491 |
| A00421 | A00993 | 414 | A00421 | A01020 | 427 |
| A00421 | A01024 | 462 | A00421 | A01027 | 391 |
| A00421 | A01029 | 541 | A00421 | A01050 | 355 |
| A00421 | A01053 | 174 | A00421 | A01057 | 389 |
| A00421 | A01067 | 160 | A00421 | A01075 | 489 |
| A00421 | A01091 | 372 | A00421 | A01093 | 486 |
| A00421 | A01099 | 489 | A00421 | A01100 | 412 |
| A00421 | A01135 | 154 | A00421 | A01136 | 542 |
| A00421 | A01139 | 491 | A00421 | A01150 | 430 |
| A00421 | A01151 | 541 | A00421 | A01156 | 676 |
| A00421 | A01161 | 491 | A00421 | A01166 | 477 |
| A00421 | A01169 | 366 | A00421 | A01173 | 193 |
| A00421 | A01187 | 396 | A00421 | A01189 | 201 |
| A00421 | A01193 | 249 | A00421 | A01206 | 401 |
| A00421 | A01210 | 469 | A00421 | A01212 | 307 |
| A00421 | A01214 | 486 | A00421 | A01215 | 184 |
| A00421 | A01231 | 483 | A00421 | A01234 | 618 |
| A00421 | A01239 | 491 | A00421 | A01243 | 475 |
| A00421 | A01251 | 281 | A00421 | A01255 | 195 |
| A00421 | A01266 | 542 | A00421 | A01268 | 542 |
| A00421 | A01271 | 198 | A00421 | A01278 | 165 |
| A00421 | A01279 | 491 | A00421 | A01287 | 168 |
| A00421 | A01291 | 433 | A00421 | A01295 | 156 |
| A00421 | A01307 | 384 | A00421 | A01329 | 217 |
| A00421 | A01334 | 516 | A00421 | A01351 | 491 |
| A00421 | A01352 | 481 | A00421 | A01354 | 241 |
| A00421 | A01359 | 491 | A00421 | A01369 | 229 |
| A00421 | A01372 | 383 | A00421 | A01384 | 177 |
| A00421 | A01385 | 491 | A00421 | A01391 | 336 |
| A00421 | A01406 | 486 | A00421 | A01424 | 271 |
| A00421 | A01434 | 156 | A00421 | A01442 | 380 |
| A00421 | A01451 | 380 | A00421 | A01459 | 457 |
| A00421 | A01468 | 430 | A00421 | A01470 | 491 |
| A00421 | A01471 | 316 | A00421 | A01473 | 157 |
| A00421 | A01474 | 165 | A00421 | A01487 | 151 |
| A00421 | A01488 | 296 | A00421 | A01492 | 491 |
| A00421 | A01540 | 337 | A00421 | A01558 | 490 |
| A00421 | A01569 | 168 | A00421 | A01582 | 454 |
| A00421 | A01588 | 472 | A00421 | A01598 | 486 |

|        |        |     |        |        |     |
|--------|--------|-----|--------|--------|-----|
| A00421 | A01610 | 288 | A00421 | A01612 | 585 |
| A00421 | A01614 | 240 | A00421 | A01615 | 491 |
| A00421 | A01627 | 504 | A00421 | A01628 | 446 |
| A00421 | A01647 | 473 | A00421 | A01648 | 151 |
| A00421 | A01649 | 480 | A00421 | A01660 | 473 |
| A00421 | A01846 | 433 | A00421 | A01847 | 475 |
| A00421 | A01848 | 154 | A00421 | A01900 | 188 |
| A00421 | A01941 | 488 | A00421 | A01988 | 345 |
| A00421 | A02086 | 291 | A00421 | A02212 | 255 |
| A00421 | A02535 | 281 | A00421 | A02715 | 246 |
| A00421 | A02802 | 316 | A00421 | A02847 | 283 |
| A00421 | A03019 | 187 | A00421 | A03298 | 491 |
| A00421 | A03438 | 491 | A00421 | A03494 | 695 |
| A00421 | A03567 | 380 | A00421 | A03569 | 491 |
| A00421 | A03628 | 152 | A00421 | A03629 | 162 |
| A00421 | A03676 | 268 | A00421 | A03742 | 255 |
| A00421 | A03902 | 488 | A00421 | A04068 | 170 |
| A00421 | A04156 | 267 | A00421 | A04337 | 328 |
| A00421 | A04345 | 340 | A00421 | A04449 | 363 |
| A00421 | A04664 | 170 | A00421 | A04667 | 185 |
| A00421 | A04668 | 486 | A00421 | A05015 | 395 |
| A00421 | A05356 | 314 | A00421 | A06084 | 195 |
| A00421 | A06204 | 489 | A00421 | A06267 | 252 |
| A00421 | A06347 | 488 | A00421 | A06631 | 345 |
| A00421 | A06698 | 441 | A00421 | A06713 | 212 |
| A00421 | A06819 | 319 | A00421 | A06825 | 352 |
| A00421 | A06937 | 364 | A00421 | A07106 | 154 |
| A00421 | A07303 | 212 | A00421 | A07414 | 173 |
| A00421 | A07432 | 400 | A00421 | A07442 | 173 |
| A00421 | A07480 | 351 | A00421 | A07706 | 483 |
| A00421 | A07826 | 129 | A00421 | A07834 | 318 |
| A00421 | A07898 | 202 | A00421 | A08132 | 138 |
| A00421 | A08137 | 491 | A00421 | A08183 | 491 |
| A00421 | A08201 | 540 | A00421 | A08208 | 210 |
| A00421 | A08212 | 486 | A00421 | A08327 | 453 |
| A00421 | A08431 | 508 | A00421 | A08447 | 180 |
| A00421 | A08516 | 180 | A00421 | A08517 | 269 |
| A00421 | A08524 | 383 | A00421 | A08542 | 156 |
| A00421 | A08571 | 491 | A00421 | A08745 | 424 |
| A00421 | A08756 | 425 | A00421 | A08818 | 218 |
| A00421 | A08885 | 479 | A00421 | A08915 | 174 |
| A00421 | A08920 | 174 | A00421 | A08928 | 307 |
| A00421 | A08963 | 435 | A00421 | A08992 | 267 |
| A00421 | A09256 | 195 | A00421 | A09258 | 483 |
| A00421 | A09377 | 364 | A00421 | A09427 | 477 |
| A00421 | A09451 | 491 | A00421 | A09515 | 491 |

|        |        |     |        |        |     |
|--------|--------|-----|--------|--------|-----|
| A00421 | A09529 | 99  | A00421 | A09538 | 491 |
| A00421 | A09614 | 174 | A00421 | A09686 | 99  |
| A00421 | A09731 | 152 | A00421 | A09732 | 232 |
| A00421 | A09733 | 187 | A00421 | A09759 | 152 |
| A00421 | A09762 | 188 | A00421 | A09992 | 301 |
| A00421 | A10125 | 152 | A00421 | A10205 | 160 |
| A00421 | A10228 | 488 | A00421 | A10250 | 491 |
| A00421 | A10340 | 294 | A00421 | A10342 | 204 |
| A00421 | A10373 | 283 | A00421 | A10492 | 138 |
| A00421 | A10553 | 152 | A00421 | A10624 | 369 |
| A00421 | A10853 | 491 | A00421 | A10956 | 212 |
| A00421 | A10957 | 152 | A00421 | A11052 | 174 |
| A00421 | A11099 | 299 | A00421 | A11105 | 337 |
| A00421 | A11139 | 694 | A00421 | A11258 | 306 |
| A00421 | A11277 | 474 | A00421 | A11487 | 328 |
| A00421 | A11492 | 267 | A00421 | A11496 | 156 |
| A00421 | A11497 | 156 | A00421 | A11869 | 389 |
| A00421 | A11965 | 154 | A00421 | A12017 | 152 |
| A00421 | A12082 | 406 | A00421 | A12294 | 456 |
| A00421 | A12369 | 152 | A00421 | A12416 | 170 |
| A00421 | A12757 | 479 | A00421 | A13048 | 152 |
| A00421 | A13067 | 174 | A00421 | A13068 | 307 |
| A00421 | A13164 | 285 | A00421 | A13310 | 366 |
| A00421 | A13311 | 180 | A00421 | A13369 | 428 |
| A00421 | A13510 | 339 | A00421 | A13635 | 369 |
| A00421 | A13805 | 438 | A00421 | A13928 | 156 |
| A00421 | A13978 | 152 | A00421 | A13989 | 491 |
| A00421 | A14006 | 491 | A00421 | A14009 | 201 |
| A00421 | A14077 | 201 | A00421 | A14080 | 419 |
| A00421 | A14148 | 218 | A00421 | A14178 | 351 |
| A00421 | A14186 | 234 | A00421 | A14196 | 291 |
| A00421 | A14246 | 263 | A00421 | A14255 | 262 |
| A00421 | A14257 | 193 | A00421 | A14272 | 358 |
| A00421 | A14304 | 73  | A00421 | A14476 | 489 |
| A00421 | A14597 | 335 | A00421 | A14614 | 251 |
| A00421 | A14655 | 491 | A00421 | A14701 | 489 |
| A00421 | A14728 | 177 | A00421 | A14986 | 259 |
| A00421 | A15019 | 118 | A00421 | A15143 | 267 |
| A00421 | A15292 | 274 | A00421 | A15297 | 491 |
| A00421 | A15322 | 322 | A00421 | A15324 | 348 |
| A00421 | A15338 | 491 | A00421 | A15353 | 162 |
| A00421 | A15356 | 170 | A00421 | A15370 | 460 |
| A00421 | A15374 | 416 | A00421 | A15524 | 283 |
| A00421 | A15531 | 401 | A00421 | A15539 | 246 |
| A00421 | A15543 | 199 | A00421 | A15550 | 219 |
| A00421 | A15559 | 465 | A00421 | A15564 | 271 |

|        |        |     |        |        |     |
|--------|--------|-----|--------|--------|-----|
| A00421 | A15624 | 198 | A00421 | A15660 | 371 |
| A00421 | A15711 | 438 | A00421 | A15724 | 223 |
| A00421 | A15932 | 154 | A00421 | A15935 | 395 |
| A00421 | A16491 | 269 | A00421 | A16568 | 384 |
| A00421 | A16685 | 196 | A00421 | A16690 | 383 |
| A00421 | A16699 | 156 | A00421 | A16866 | 383 |
| A00421 | A16912 | 468 | A00421 | A17063 | 374 |
| A00421 | A17129 | 267 | A00422 | A01248 | 265 |
| A00422 | A01269 | 195 | A00422 | A01469 | 171 |
| A00422 | A01475 | 162 | A00422 | A01622 | 246 |
| A00422 | A01625 | 151 | A00422 | A01666 | 221 |
| A00422 | A01930 | 288 | A00422 | A02185 | 241 |
| A00422 | A02389 | 174 | A00422 | A02621 | 193 |
| A00422 | A02778 | 162 | A00422 | A02797 | 319 |
| A00422 | A02868 | 235 | A00422 | A03114 | 291 |
| A00422 | A03119 | 382 | A00422 | A03149 | 202 |
| A00422 | A03197 | 184 | A00422 | A03232 | 258 |
| A00422 | A03300 | 185 | A00422 | A03654 | 188 |
| A00422 | A03759 | 163 | A00422 | A03820 | 385 |
| A00422 | A03977 | 269 | A00422 | A04174 | 180 |
| A00422 | A04376 | 333 | A00422 | A04678 | 296 |
| A00422 | A04967 | 385 | A00422 | A05370 | 348 |
| A00422 | A05874 | 385 | A00422 | A05891 | 162 |
| A00422 | A06129 | 223 | A00422 | A06234 | 322 |
| A00422 | A06595 | 157 | A00422 | A06622 | 193 |
| A00422 | A06648 | 160 | A00422 | A06864 | 240 |
| A00422 | A06974 | 240 | A00422 | A07641 | 246 |
| A00422 | A07694 | 385 | A00422 | A08000 | 230 |
| A00422 | A08105 | 347 | A00422 | A08208 | 274 |
| A00422 | A08408 | 180 | A00422 | A09127 | 249 |
| A00422 | A09225 | 347 | A00422 | A09478 | 347 |
| A00422 | A09838 | 313 | A00422 | A10038 | 267 |
| A00422 | A10223 | 356 | A00422 | A11728 | 227 |
| A00422 | A12464 | 347 | A00422 | A12633 | 306 |
| A00422 | A13098 | 333 | A00422 | A13665 | 208 |
| A00422 | A14485 | 329 | A00422 | A14585 | 183 |
| A00422 | A14643 | 432 | A00422 | A15928 | 281 |
| A00422 | A15939 | 374 | A00422 | A15941 | 301 |
| A00422 | A15942 | 263 | A00422 | A16129 | 268 |
| A00422 | A16226 | 419 | A00422 | A16613 | 204 |
| A00422 | A16616 | 188 | A00423 | A00469 | 491 |
| A00423 | A00571 | 481 | A00423 | A00590 | 383 |
| A00423 | A00593 | 362 | A00423 | A00603 | 196 |
| A00423 | A00651 | 243 | A00423 | A00705 | 165 |
| A00423 | A00758 | 162 | A00423 | A00782 | 485 |
| A00423 | A00787 | 399 | A00423 | A00809 | 196 |

|        |        |     |        |        |     |
|--------|--------|-----|--------|--------|-----|
| A00423 | A00839 | 491 | A00423 | A00955 | 406 |
| A00423 | A01017 | 456 | A00423 | A01034 | 452 |
| A00423 | A01037 | 299 | A00423 | A01095 | 201 |
| A00423 | A01152 | 340 | A00423 | A01154 | 400 |
| A00423 | A01247 | 491 | A00423 | A01263 | 491 |
| A00423 | A01270 | 179 | A00423 | A01291 | 412 |
| A00423 | A01335 | 491 | A00423 | A01337 | 446 |
| A00423 | A01365 | 468 | A00423 | A01369 | 474 |
| A00423 | A01406 | 241 | A00423 | A01416 | 185 |
| A00423 | A01433 | 313 | A00423 | A01436 | 210 |
| A00423 | A01449 | 488 | A00423 | A01496 | 243 |
| A00423 | A01579 | 484 | A00423 | A03493 | 257 |
| A00423 | A05247 | 180 | A00423 | A05499 | 277 |
| A00423 | A05501 | 486 | A00423 | A05502 | 157 |
| A00423 | A07412 | 177 | A00423 | A07464 | 247 |
| A00423 | A07965 | 369 | A00423 | A08011 | 404 |
| A00423 | A08358 | 475 | A00423 | A08359 | 391 |
| A00423 | A08457 | 268 | A00423 | A08462 | 263 |
| A00423 | A08501 | 490 | A00423 | A08543 | 491 |
| A00423 | A08556 | 491 | A00423 | A08760 | 195 |
| A00423 | A08761 | 391 | A00423 | A08773 | 445 |
| A00423 | A08973 | 269 | A00423 | A09613 | 408 |
| A00423 | A09622 | 388 | A00423 | A09735 | 357 |
| A00423 | A09999 | 213 | A00423 | A11440 | 105 |
| A00423 | A11597 | 446 | A00423 | A11616 | 279 |
| A00423 | A11728 | 390 | A00423 | A11734 | 307 |
| A00423 | A11857 | 407 | A00423 | A11992 | 346 |
| A00423 | A12011 | 208 | A00423 | A12052 | 299 |
| A00423 | A12821 | 413 | A00423 | A13231 | 230 |
| A00423 | A13356 | 226 | A00423 | A13710 | 311 |
| A00423 | A14167 | 217 | A00423 | A14482 | 219 |
| A00423 | A14819 | 198 | A00423 | A15225 | 303 |
| A00423 | A15499 | 201 | A00423 | A15500 | 489 |
| A00423 | A15743 | 187 | A00423 | A15771 | 388 |
| A00423 | A16682 | 205 | A00423 | A16818 | 285 |
| A00423 | A17133 | 191 | A00424 | A00435 | 217 |
| A00424 | A00447 | 217 | A00424 | A00452 | 544 |
| A00424 | A00515 | 193 | A00424 | A00555 | 217 |
| A00424 | A00570 | 353 | A00424 | A00629 | 246 |
| A00424 | A00638 | 154 | A00424 | A00687 | 217 |
| A00424 | A00721 | 217 | A00424 | A00772 | 217 |
| A00424 | A00854 | 302 | A00424 | A00867 | 249 |
| A00424 | A00928 | 565 | A00424 | A00952 | 217 |
| A00424 | A00972 | 217 | A00424 | A00997 | 217 |
| A00424 | A01107 | 451 | A00424 | A01159 | 217 |
| A00424 | A01221 | 217 | A00424 | A01243 | 236 |

|        |        |     |        |        |     |
|--------|--------|-----|--------|--------|-----|
| A00424 | A01255 | 400 | A00424 | A01418 | 217 |
| A00424 | A02212 | 196 | A00424 | A03556 | 217 |
| A00424 | A03617 | 217 | A00424 | A04666 | 174 |
| A00424 | A04881 | 276 | A00424 | A05157 | 285 |
| A00424 | A05605 | 217 | A00424 | A06369 | 217 |
| A00424 | A06832 | 217 | A00424 | A07756 | 185 |
| A00424 | A08183 | 217 | A00424 | A08467 | 247 |
| A00424 | A08630 | 269 | A00424 | A09673 | 217 |
| A00424 | A14088 | 217 | A00424 | A15323 | 236 |
| A00424 | A15324 | 358 | A00424 | A15353 | 429 |
| A00424 | A15377 | 451 | A00424 | A15419 | 185 |
| A00424 | A15543 | 570 | A00424 | A15564 | 297 |
| A00424 | A15724 | 217 | A00424 | A16664 | 217 |
| A00424 | A17063 | 160 | A00425 | A00443 | 360 |
| A00425 | A00448 | 491 | A00425 | A00458 | 401 |
| A00425 | A00463 | 486 | A00425 | A00481 | 185 |
| A00425 | A00497 | 489 | A00425 | A00532 | 682 |
| A00425 | A00535 | 491 | A00425 | A00551 | 475 |
| A00425 | A00566 | 491 | A00425 | A00575 | 491 |
| A00425 | A00632 | 154 | A00425 | A00691 | 486 |
| A00425 | A00703 | 176 | A00425 | A00708 | 491 |
| A00425 | A00760 | 491 | A00425 | A00805 | 263 |
| A00425 | A00856 | 470 | A00425 | A00858 | 491 |
| A00425 | A00881 | 489 | A00425 | A00903 | 491 |
| A00425 | A00916 | 344 | A00425 | A00919 | 491 |
| A00425 | A00954 | 491 | A00425 | A00964 | 491 |
| A00425 | A01020 | 489 | A00425 | A01075 | 491 |
| A00425 | A01079 | 490 | A00425 | A01082 | 491 |
| A00425 | A01084 | 491 | A00425 | A01087 | 491 |
| A00425 | A01088 | 489 | A00425 | A01234 | 185 |
| A00425 | A01295 | 254 | A00425 | A01308 | 229 |
| A00425 | A01309 | 372 | A00425 | A01349 | 274 |
| A00425 | A01434 | 202 | A00425 | A01500 | 185 |
| A00425 | A01503 | 481 | A00425 | A01555 | 191 |
| A00425 | A01576 | 481 | A00425 | A01741 | 375 |
| A00425 | A02064 | 263 | A00425 | A02390 | 429 |
| A00425 | A03496 | 162 | A00425 | A03944 | 443 |
| A00425 | A04033 | 176 | A00425 | A05288 | 177 |
| A00425 | A06660 | 221 | A00425 | A06881 | 230 |
| A00425 | A07700 | 432 | A00425 | A07706 | 491 |
| A00425 | A08022 | 488 | A00425 | A08118 | 361 |
| A00425 | A08190 | 193 | A00425 | A08356 | 380 |
| A00425 | A08362 | 428 | A00425 | A08377 | 329 |
| A00425 | A08382 | 456 | A00425 | A08439 | 420 |
| A00425 | A08450 | 463 | A00425 | A08518 | 491 |
| A00425 | A08527 | 491 | A00425 | A08543 | 430 |

|        |        |     |        |        |     |
|--------|--------|-----|--------|--------|-----|
| A00425 | A08550 | 430 | A00425 | A08552 | 408 |
| A00425 | A08553 | 491 | A00425 | A08560 | 202 |
| A00425 | A08561 | 409 | A00425 | A08773 | 286 |
| A00425 | A08814 | 157 | A00425 | A08976 | 491 |
| A00425 | A08996 | 491 | A00425 | A09010 | 491 |
| A00425 | A09609 | 160 | A00425 | A09619 | 393 |
| A00425 | A10691 | 475 | A00425 | A10789 | 160 |
| A00425 | A10875 | 246 | A00425 | A11234 | 293 |
| A00425 | A11301 | 446 | A00425 | A11395 | 491 |
| A00425 | A11472 | 168 | A00425 | A11496 | 435 |
| A00425 | A11497 | 443 | A00425 | A11674 | 490 |
| A00425 | A11914 | 327 | A00425 | A11917 | 313 |
| A00425 | A12254 | 480 | A00425 | A12433 | 443 |
| A00425 | A12507 | 218 | A00425 | A12606 | 446 |
| A00425 | A12658 | 317 | A00425 | A12659 | 165 |
| A00425 | A12665 | 207 | A00425 | A12725 | 172 |
| A00425 | A12858 | 438 | A00425 | A12873 | 191 |
| A00425 | A13309 | 256 | A00425 | A13313 | 319 |
| A00425 | A13399 | 389 | A00425 | A13708 | 329 |
| A00425 | A13737 | 350 | A00425 | A13781 | 424 |
| A00425 | A13784 | 337 | A00425 | A13805 | 223 |
| A00425 | A13912 | 176 | A00425 | A13989 | 463 |
| A00425 | A14084 | 378 | A00425 | A14212 | 260 |
| A00425 | A14214 | 441 | A00425 | A14222 | 218 |
| A00425 | A14263 | 154 | A00425 | A14358 | 205 |
| A00425 | A14462 | 373 | A00425 | A14566 | 232 |
| A00425 | A14569 | 446 | A00425 | A14655 | 455 |
| A00425 | A14708 | 335 | A00425 | A14921 | 191 |
| A00425 | A15105 | 391 | A00425 | A15138 | 216 |
| A00425 | A15189 | 283 | A00425 | A15266 | 154 |
| A00425 | A15373 | 205 | A00425 | A15520 | 491 |
| A00425 | A15666 | 165 | A00425 | A15683 | 171 |
| A00425 | A15733 | 491 | A00425 | A15762 | 152 |
| A00425 | A15774 | 201 | A00425 | A15945 | 491 |
| A00425 | A15946 | 491 | A00425 | A16067 | 362 |
| A00425 | A16109 | 462 | A00425 | A16144 | 429 |
| A00425 | A16157 | 435 | A00425 | A16212 | 490 |
| A00425 | A16261 | 163 | A00425 | A16394 | 468 |
| A00425 | A16552 | 313 | A00425 | A16565 | 216 |
| A00425 | A16597 | 475 | A00425 | A16611 | 417 |
| A00425 | A16664 | 405 | A00425 | A16675 | 369 |
| A00425 | A16680 | 191 | A00425 | A16690 | 313 |
| A00425 | A16695 | 185 | A00425 | A16699 | 196 |
| A00425 | A16703 | 187 | A00425 | A16704 | 199 |
| A00425 | A16707 | 235 | A00425 | A16709 | 221 |
| A00425 | A16764 | 307 | A00425 | A16774 | 157 |

|        |        |     |        |        |     |
|--------|--------|-----|--------|--------|-----|
| A00425 | A16790 | 221 | A00425 | A16815 | 176 |
| A00425 | A16824 | 167 | A00425 | A16838 | 420 |
| A00425 | A16874 | 235 | A00425 | A16944 | 266 |
| A00425 | A17014 | 157 | A00425 | A17015 | 179 |
| A00425 | A17043 | 180 | A00426 | A00441 | 157 |
| A00426 | A00532 | 193 | A00426 | A00565 | 491 |
| A00426 | A00570 | 406 | A00426 | A00576 | 205 |
| A00426 | A00638 | 483 | A00426 | A00862 | 474 |
| A00426 | A00977 | 363 | A00426 | A01027 | 293 |
| A00426 | A01156 | 406 | A00426 | A01209 | 491 |
| A00426 | A01243 | 193 | A00426 | A01244 | 491 |
| A00426 | A01385 | 398 | A00426 | A01393 | 207 |
| A00426 | A02001 | 187 | A00426 | A02180 | 491 |
| A00426 | A03327 | 243 | A00426 | A03328 | 486 |
| A00426 | A03387 | 183 | A00426 | A03764 | 343 |
| A00426 | A04174 | 307 | A00426 | A04187 | 449 |
| A00426 | A04396 | 279 | A00426 | A04561 | 246 |
| A00426 | A04647 | 179 | A00426 | A04663 | 196 |
| A00426 | A05359 | 185 | A00426 | A05690 | 491 |
| A00426 | A06423 | 224 | A00426 | A06602 | 191 |
| A00426 | A06671 | 486 | A00426 | A06982 | 210 |
| A00426 | A07449 | 154 | A00426 | A07572 | 265 |
| A00426 | A08450 | 154 | A00426 | A08518 | 191 |
| A00426 | A08700 | 167 | A00426 | A08884 | 491 |
| A00426 | A09046 | 174 | A00426 | A09067 | 456 |
| A00426 | A09269 | 491 | A00426 | A09316 | 488 |
| A00426 | A09340 | 491 | A00426 | A09423 | 351 |
| A00426 | A10258 | 240 | A00426 | A10289 | 219 |
| A00426 | A10808 | 899 | A00426 | A11858 | 491 |
| A00426 | A13519 | 335 | A00426 | A13912 | 224 |
| A00426 | A14214 | 229 | A00426 | A14230 | 160 |
| A00426 | A14272 | 167 | A00426 | A14825 | 205 |
| A00426 | A14921 | 240 | A00426 | A15288 | 163 |
| A00426 | A15932 | 443 | A00426 | A15940 | 157 |
| A00426 | A16055 | 179 | A00426 | A16215 | 174 |
| A00426 | A16404 | 196 | A00426 | A16410 | 170 |
| A00426 | A16440 | 490 | A00426 | A16774 | 205 |
| A00426 | A16815 | 224 | A00427 | A00521 | 335 |
| A00427 | A00590 | 583 | A00427 | A00603 | 658 |
| A00427 | A00648 | 628 | A00427 | A00651 | 361 |
| A00427 | A00763 | 372 | A00427 | A00782 | 202 |
| A00427 | A00787 | 654 | A00427 | A00827 | 162 |
| A00427 | A00839 | 290 | A00427 | A00870 | 251 |
| A00427 | A00878 | 629 | A00427 | A00902 | 157 |
| A00427 | A00906 | 411 | A00427 | A00923 | 380 |
| A00427 | A00949 | 474 | A00427 | A00955 | 491 |



|        |        |     |        |        |     |
|--------|--------|-----|--------|--------|-----|
| A00427 | A00965 | 664 | A00427 | A00966 | 317 |
| A00427 | A01025 | 664 | A00427 | A01037 | 328 |
| A00427 | A01067 | 383 | A00427 | A01090 | 484 |
| A00427 | A01154 | 378 | A00427 | A01238 | 559 |
| A00427 | A01249 | 389 | A00427 | A01263 | 324 |
| A00427 | A01291 | 472 | A00427 | A01292 | 384 |
| A00427 | A01306 | 319 | A00427 | A01335 | 478 |
| A00427 | A01337 | 160 | A00427 | A01392 | 664 |
| A00427 | A01416 | 626 | A00427 | A01425 | 317 |
| A00427 | A01433 | 521 | A00427 | A01436 | 658 |
| A00427 | A01468 | 317 | A00427 | A01586 | 329 |
| A00427 | A01718 | 383 | A00427 | A01741 | 219 |
| A00427 | A02895 | 157 | A00427 | A03490 | 317 |
| A00427 | A03981 | 317 | A00427 | A05411 | 372 |
| A00427 | A05450 | 185 | A00427 | A05499 | 475 |
| A00427 | A05735 | 259 | A00427 | A06308 | 254 |
| A00427 | A06351 | 338 | A00427 | A06388 | 386 |
| A00427 | A06425 | 259 | A00427 | A06775 | 226 |
| A00427 | A07248 | 204 | A00427 | A07412 | 329 |
| A00427 | A07658 | 266 | A00427 | A08011 | 535 |
| A00427 | A08055 | 372 | A00427 | A08154 | 439 |
| A00427 | A08377 | 317 | A00427 | A08550 | 372 |
| A00427 | A08773 | 553 | A00427 | A08973 | 335 |
| A00427 | A09293 | 238 | A00427 | A09735 | 201 |
| A00427 | A09852 | 157 | A00427 | A09978 | 210 |
| A00427 | A10014 | 165 | A00427 | A11453 | 218 |
| A00427 | A13249 | 372 | A00427 | A14482 | 490 |
| A00427 | A14568 | 232 | A00427 | A15218 | 234 |
| A00427 | A15745 | 323 | A00427 | A15988 | 604 |
| A00427 | A17152 | 246 | A00428 | A00871 | 165 |
| A00428 | A00956 | 271 | A00428 | A01326 | 260 |
| A00428 | A01363 | 407 | A00428 | A03570 | 274 |
| A00428 | A08927 | 355 | A00428 | A14474 | 157 |
| A00428 | A16398 | 383 | A00429 | A00522 | 423 |
| A00429 | A00532 | 413 | A00429 | A00546 | 485 |
| A00429 | A00625 | 483 | A00429 | A00719 | 491 |
| A00429 | A00786 | 486 | A00429 | A00853 | 480 |
| A00429 | A00864 | 474 | A00429 | A00877 | 310 |
| A00429 | A00951 | 171 | A00429 | A00971 | 368 |
| A00429 | A01036 | 936 | A00429 | A01064 | 475 |
| A00429 | A01114 | 473 | A00429 | A01454 | 485 |
| A00429 | A01514 | 201 | A00429 | A01568 | 491 |
| A00429 | A01595 | 241 | A00429 | A01630 | 167 |
| A00429 | A01647 | 308 | A00429 | A01687 | 491 |
| A00429 | A01717 | 256 | A00429 | A02010 | 218 |
| A00429 | A02219 | 321 | A00429 | A02352 | 205 |

|        |        |     |        |        |     |
|--------|--------|-----|--------|--------|-----|
| A00429 | A02573 | 424 | A00429 | A02635 | 152 |
| A00429 | A02715 | 210 | A00429 | A03401 | 491 |
| A00429 | A03496 | 483 | A00429 | A03880 | 485 |
| A00429 | A04307 | 184 | A00429 | A04845 | 800 |
| A00429 | A04971 | 154 | A00429 | A05301 | 488 |
| A00429 | A05967 | 490 | A00429 | A06176 | 185 |
| A00429 | A06223 | 323 | A00429 | A06548 | 285 |
| A00429 | A06591 | 491 | A00429 | A06661 | 611 |
| A00429 | A06715 | 385 | A00429 | A07054 | 491 |
| A00429 | A07073 | 324 | A00429 | A07083 | 156 |
| A00429 | A07242 | 491 | A00429 | A07444 | 378 |
| A00429 | A07495 | 491 | A00429 | A07816 | 380 |
| A00429 | A07872 | 234 | A00429 | A07873 | 385 |
| A00429 | A07893 | 276 | A00429 | A07897 | 174 |
| A00429 | A07934 | 390 | A00429 | A07937 | 355 |
| A00429 | A07942 | 420 | A00429 | A07953 | 329 |
| A00429 | A07954 | 491 | A00429 | A08126 | 262 |
| A00429 | A08192 | 385 | A00429 | A08418 | 270 |
| A00429 | A08456 | 401 | A00429 | A08531 | 458 |
| A00429 | A08551 | 274 | A00429 | A08563 | 191 |
| A00429 | A08910 | 491 | A00429 | A09324 | 317 |
| A00429 | A09624 | 469 | A00429 | A09668 | 322 |
| A00429 | A09757 | 686 | A00429 | A09771 | 162 |
| A00429 | A10651 | 474 | A00429 | A10909 | 272 |
| A00429 | A11121 | 216 | A00429 | A11196 | 180 |
| A00429 | A11283 | 332 | A00429 | A11346 | 490 |
| A00429 | A11385 | 491 | A00429 | A11394 | 483 |
| A00429 | A11408 | 272 | A00429 | A11473 | 152 |
| A00429 | A11661 | 285 | A00429 | A11881 | 402 |
| A00429 | A11902 | 201 | A00429 | A11998 | 285 |
| A00429 | A12004 | 238 | A00429 | A12047 | 486 |
| A00429 | A12129 | 350 | A00429 | A12234 | 659 |
| A00429 | A12537 | 329 | A00429 | A12538 | 932 |
| A00429 | A12598 | 272 | A00429 | A12654 | 188 |
| A00429 | A12678 | 935 | A00429 | A12722 | 489 |
| A00429 | A12834 | 970 | A00429 | A13323 | 212 |
| A00429 | A13681 | 272 | A00429 | A13953 | 243 |
| A00429 | A14266 | 491 | A00429 | A14278 | 384 |
| A00429 | A14279 | 434 | A00429 | A14281 | 485 |
| A00429 | A14474 | 353 | A00429 | A14484 | 207 |
| A00429 | A14633 | 490 | A00429 | A15217 | 291 |
| A00429 | A15273 | 486 | A00429 | A15366 | 474 |
| A00429 | A15485 | 152 | A00429 | A15685 | 262 |
| A00429 | A15768 | 246 | A00429 | A16851 | 177 |
| A00430 | A00444 | 445 | A00430 | A00848 | 319 |
| A00430 | A00970 | 474 | A00430 | A01410 | 174 |

|        |        |     |        |        |     |
|--------|--------|-----|--------|--------|-----|
| A00430 | A01917 | 200 | A00430 | A02153 | 176 |
| A00430 | A02352 | 193 | A00430 | A02877 | 462 |
| A00430 | A03102 | 258 | A00430 | A03294 | 171 |
| A00430 | A03582 | 269 | A00430 | A03738 | 489 |
| A00430 | A03747 | 469 | A00430 | A03790 | 234 |
| A00430 | A04191 | 491 | A00430 | A04192 | 456 |
| A00430 | A04614 | 218 | A00430 | A05995 | 456 |
| A00430 | A06289 | 230 | A00430 | A07163 | 427 |
| A00430 | A07245 | 306 | A00430 | A07421 | 165 |
| A00430 | A08093 | 305 | A00430 | A09248 | 246 |
| A00430 | A09271 | 341 | A00430 | A10532 | 491 |
| A00430 | A10588 | 461 | A00430 | A10589 | 430 |
| A00430 | A10830 | 369 | A00430 | A10907 | 358 |
| A00430 | A11240 | 454 | A00430 | A11299 | 168 |
| A00430 | A12839 | 475 | A00430 | A12996 | 435 |
| A00430 | A13012 | 152 | A00430 | A13674 | 358 |
| A00430 | A13870 | 218 | A00430 | A14102 | 335 |
| A00430 | A14130 | 413 | A00430 | A14131 | 302 |
| A00430 | A14132 | 489 | A00430 | A15696 | 254 |
| A00430 | A15698 | 212 | A00430 | A15913 | 162 |
| A00430 | A17085 | 347 | A00431 | A00492 | 477 |
| A00431 | A00553 | 321 | A00431 | A00625 | 279 |
| A00431 | A00786 | 307 | A00431 | A00794 | 402 |
| A00431 | A00942 | 867 | A00431 | A01035 | 269 |
| A00431 | A01060 | 269 | A00431 | A01066 | 193 |
| A00431 | A01252 | 491 | A00431 | A01302 | 378 |
| A00431 | A01451 | 269 | A00431 | A01458 | 268 |
| A00431 | A01459 | 269 | A00431 | A01461 | 596 |
| A00431 | A01514 | 269 | A00431 | A01515 | 484 |
| A00431 | A01574 | 216 | A00431 | A01575 | 573 |
| A00431 | A01583 | 269 | A00431 | A01585 | 592 |
| A00431 | A01634 | 488 | A00431 | A01706 | 625 |
| A00431 | A03618 | 162 | A00431 | A04145 | 722 |
| A00431 | A04292 | 603 | A00431 | A05024 | 555 |
| A00431 | A05638 | 269 | A00431 | A06011 | 596 |
| A00431 | A06597 | 319 | A00431 | A06890 | 210 |
| A00431 | A07483 | 419 | A00431 | A07736 | 157 |
| A00431 | A08056 | 443 | A00431 | A08369 | 571 |
| A00431 | A08454 | 173 | A00431 | A08461 | 277 |
| A00431 | A08484 | 721 | A00431 | A08506 | 722 |
| A00431 | A08544 | 721 | A00431 | A08569 | 419 |
| A00431 | A09298 | 467 | A00431 | A09326 | 269 |
| A00431 | A11279 | 603 | A00431 | A11917 | 430 |
| A00431 | A12011 | 174 | A00431 | A12834 | 236 |
| A00431 | A12858 | 256 | A00431 | A13708 | 288 |
| A00431 | A13786 | 240 | A00431 | A13895 | 269 |

|        |        |     |        |        |     |
|--------|--------|-----|--------|--------|-----|
| A00431 | A14167 | 184 | A00431 | A14182 | 269 |
| A00431 | A14247 | 571 | A00431 | A14272 | 174 |
| A00431 | A14661 | 603 | A00431 | A14711 | 602 |
| A00431 | A14783 | 269 | A00431 | A14844 | 477 |
| A00431 | A14877 | 324 | A00431 | A15347 | 246 |
| A00431 | A15552 | 200 | A00431 | A15856 | 171 |
| A00431 | A16669 | 271 | A00431 | A16900 | 188 |
| A00431 | A17133 | 157 | A00432 | A00503 | 226 |
| A00432 | A00963 | 294 | A00432 | A01539 | 441 |
| A00432 | A02477 | 205 | A00432 | A02709 | 180 |
| A00432 | A02822 | 329 | A00432 | A05556 | 350 |
| A00432 | A05597 | 310 | A00432 | A05601 | 219 |
| A00432 | A08097 | 447 | A00432 | A08212 | 156 |
| A00432 | A09246 | 279 | A00432 | A09341 | 199 |
| A00432 | A11293 | 238 | A00432 | A14372 | 363 |
| A00432 | A14648 | 154 | A00433 | A00444 | 154 |
| A00433 | A00626 | 491 | A00433 | A00654 | 238 |
| A00433 | A00706 | 334 | A00433 | A00783 | 338 |
| A00433 | A00833 | 477 | A00433 | A00841 | 198 |
| A00433 | A00864 | 177 | A00433 | A00875 | 252 |
| A00433 | A00932 | 319 | A00433 | A00970 | 299 |
| A00433 | A00973 | 633 | A00433 | A01042 | 330 |
| A00433 | A01072 | 190 | A00433 | A01098 | 238 |
| A00433 | A01113 | 638 | A00433 | A01150 | 433 |
| A00433 | A01192 | 638 | A00433 | A01249 | 251 |
| A00433 | A01291 | 314 | A00433 | A01425 | 207 |
| A00433 | A01431 | 218 | A00433 | A01478 | 199 |
| A00433 | A01496 | 340 | A00433 | A01540 | 205 |
| A00433 | A01561 | 199 | A00433 | A01569 | 454 |
| A00433 | A01572 | 199 | A00433 | A01596 | 199 |
| A00433 | A01598 | 475 | A00433 | A01612 | 199 |
| A00433 | A01648 | 334 | A00433 | A01660 | 199 |
| A00433 | A01822 | 168 | A00433 | A01871 | 199 |
| A00433 | A02110 | 366 | A00433 | A02472 | 395 |
| A00433 | A03560 | 334 | A00433 | A03676 | 199 |
| A00433 | A03740 | 385 | A00433 | A03752 | 480 |
| A00433 | A04446 | 477 | A00433 | A05029 | 346 |
| A00433 | A06316 | 255 | A00433 | A06466 | 477 |
| A00433 | A06936 | 255 | A00433 | A07311 | 958 |
| A00433 | A07378 | 394 | A00433 | A07706 | 152 |
| A00433 | A07798 | 352 | A00433 | A07959 | 340 |
| A00433 | A08133 | 199 | A00433 | A08207 | 199 |
| A00433 | A08261 | 486 | A00433 | A08571 | 199 |
| A00433 | A08689 | 340 | A00433 | A08991 | 137 |
| A00433 | A09471 | 162 | A00433 | A09586 | 154 |
| A00433 | A09591 | 636 | A00433 | A09653 | 163 |

|        |        |     |        |        |     |
|--------|--------|-----|--------|--------|-----|
| A00433 | A09691 | 240 | A00433 | A10490 | 168 |
| A00433 | A12059 | 255 | A00433 | A12284 | 471 |
| A00433 | A12473 | 290 | A00433 | A12503 | 477 |
| A00433 | A12813 | 480 | A00433 | A13340 | 224 |
| A00433 | A13522 | 196 | A00433 | A13989 | 293 |
| A00433 | A14178 | 502 | A00433 | A14265 | 366 |
| A00433 | A14299 | 199 | A00433 | A14443 | 199 |
| A00433 | A14758 | 199 | A00433 | A15146 | 255 |
| A00433 | A15244 | 180 | A00433 | A16073 | 199 |
| A00433 | A17088 | 334 | A00434 | A00600 | 152 |
| A00434 | A01158 | 390 | A00434 | A01971 | 317 |
| A00434 | A04351 | 355 | A00434 | A06347 | 188 |
| A00434 | A09560 | 399 | A00435 | A00447 | 424 |
| A00435 | A00452 | 217 | A00435 | A00518 | 185 |
| A00435 | A00555 | 229 | A00435 | A00563 | 391 |
| A00435 | A00566 | 408 | A00435 | A00570 | 511 |
| A00435 | A00571 | 358 | A00435 | A00589 | 341 |
| A00435 | A00594 | 224 | A00435 | A00605 | 475 |
| A00435 | A00629 | 265 | A00435 | A00655 | 199 |
| A00435 | A00683 | 235 | A00435 | A00687 | 560 |
| A00435 | A00689 | 330 | A00435 | A00721 | 502 |
| A00435 | A00772 | 217 | A00435 | A00822 | 257 |
| A00435 | A00831 | 383 | A00435 | A00839 | 224 |
| A00435 | A00843 | 401 | A00435 | A00848 | 277 |
| A00435 | A00883 | 171 | A00435 | A00928 | 539 |
| A00435 | A00952 | 323 | A00435 | A00970 | 402 |
| A00435 | A00972 | 257 | A00435 | A00997 | 217 |
| A00435 | A01065 | 491 | A00435 | A01107 | 217 |
| A00435 | A01112 | 213 | A00435 | A01120 | 371 |
| A00435 | A01159 | 568 | A00435 | A01166 | 408 |
| A00435 | A01179 | 430 | A00435 | A01201 | 249 |
| A00435 | A01206 | 213 | A00435 | A01214 | 553 |
| A00435 | A01215 | 618 | A00435 | A01221 | 504 |
| A00435 | A01234 | 435 | A00435 | A01243 | 553 |
| A00435 | A01291 | 188 | A00435 | A01352 | 340 |
| A00435 | A01356 | 460 | A00435 | A01368 | 262 |
| A00435 | A01384 | 480 | A00435 | A01412 | 601 |
| A00435 | A01418 | 564 | A00435 | A01440 | 452 |
| A00435 | A01468 | 294 | A00435 | A01470 | 480 |
| A00435 | A01492 | 221 | A00435 | A01649 | 483 |
| A00435 | A01976 | 151 | A00435 | A03101 | 221 |
| A00435 | A03438 | 188 | A00435 | A03494 | 162 |
| A00435 | A03556 | 217 | A00435 | A03567 | 436 |
| A00435 | A03617 | 217 | A00435 | A05605 | 217 |
| A00435 | A06017 | 258 | A00435 | A06122 | 208 |
| A00435 | A06279 | 436 | A00435 | A06369 | 297 |

|        |        |     |        |        |     |
|--------|--------|-----|--------|--------|-----|
| A00435 | A06564 | 154 | A00435 | A06584 | 152 |
| A00435 | A06832 | 369 | A00435 | A07487 | 296 |
| A00435 | A08118 | 159 | A00435 | A08183 | 328 |
| A00435 | A08357 | 489 | A00435 | A09292 | 434 |
| A00435 | A09327 | 334 | A00435 | A09673 | 217 |
| A00435 | A09707 | 486 | A00435 | A10156 | 170 |
| A00435 | A11462 | 367 | A00435 | A13831 | 378 |
| A00435 | A14088 | 217 | A00435 | A14098 | 303 |
| A00435 | A14485 | 202 | A00435 | A14701 | 213 |
| A00435 | A15377 | 472 | A00435 | A15543 | 217 |
| A00435 | A15724 | 217 | A00435 | A16401 | 260 |
| A00435 | A16664 | 217 | A00436 | A00517 | 490 |
| A00436 | A00531 | 480 | A00436 | A00733 | 418 |
| A00436 | A00781 | 428 | A00436 | A00805 | 489 |
| A00436 | A00822 | 484 | A00436 | A00835 | 230 |
| A00436 | A00866 | 486 | A00436 | A00905 | 159 |
| A00436 | A00916 | 461 | A00436 | A01057 | 491 |
| A00436 | A01075 | 475 | A00436 | A01077 | 491 |
| A00436 | A01158 | 224 | A00436 | A01189 | 353 |
| A00436 | A01354 | 485 | A00436 | A01406 | 188 |
| A00436 | A01781 | 358 | A00436 | A01956 | 177 |
| A00436 | A02007 | 241 | A00436 | A02044 | 162 |
| A00436 | A02225 | 190 | A00436 | A02518 | 174 |
| A00436 | A02671 | 227 | A00436 | A02715 | 457 |
| A00436 | A03025 | 273 | A00436 | A03080 | 465 |
| A00436 | A03495 | 433 | A00436 | A04181 | 260 |
| A00436 | A04329 | 219 | A00436 | A04477 | 255 |
| A00436 | A05284 | 154 | A00436 | A06149 | 188 |
| A00436 | A06591 | 489 | A00436 | A06983 | 363 |
| A00436 | A07201 | 229 | A00436 | A07290 | 205 |
| A00436 | A07311 | 162 | A00436 | A07428 | 341 |
| A00436 | A08137 | 447 | A00436 | A08531 | 481 |
| A00436 | A08551 | 473 | A00436 | A08911 | 163 |
| A00436 | A09421 | 480 | A00436 | A09757 | 491 |
| A00436 | A09790 | 217 | A00436 | A09890 | 246 |
| A00436 | A09943 | 246 | A00436 | A10006 | 218 |
| A00436 | A11132 | 347 | A00436 | A13851 | 281 |
| A00436 | A14006 | 475 | A00436 | A14399 | 469 |
| A00436 | A14661 | 157 | A00436 | A15545 | 434 |
| A00436 | A16371 | 165 | A00437 | A00636 | 491 |
| A00437 | A00722 | 96  | A00437 | A00797 | 191 |
| A00437 | A00815 | 469 | A00437 | A00883 | 205 |
| A00437 | A00971 | 174 | A00437 | A01004 | 465 |
| A00437 | A01032 | 396 | A00437 | A01091 | 159 |
| A00437 | A01161 | 319 | A00437 | A01235 | 205 |
| A00437 | A01275 | 310 | A00437 | A01342 | 490 |

|        |        |     |        |        |     |
|--------|--------|-----|--------|--------|-----|
| A00437 | A01417 | 491 | A00437 | A01478 | 174 |
| A00437 | A01552 | 293 | A00437 | A01578 | 463 |
| A00437 | A01661 | 474 | A00437 | A01671 | 456 |
| A00437 | A01956 | 134 | A00437 | A01961 | 273 |
| A00437 | A02010 | 360 | A00437 | A02157 | 481 |
| A00437 | A02278 | 481 | A00437 | A02931 | 420 |
| A00437 | A02951 | 208 | A00437 | A02961 | 154 |
| A00437 | A03080 | 274 | A00437 | A03223 | 451 |
| A00437 | A03556 | 204 | A00437 | A03597 | 290 |
| A00437 | A03625 | 314 | A00437 | A03712 | 485 |
| A00437 | A03722 | 297 | A00437 | A04037 | 232 |
| A00437 | A04184 | 324 | A00437 | A04329 | 308 |
| A00437 | A04615 | 165 | A00437 | A05157 | 151 |
| A00437 | A05210 | 172 | A00437 | A05539 | 480 |
| A00437 | A06022 | 294 | A00437 | A06832 | 152 |
| A00437 | A06886 | 441 | A00437 | A06907 | 430 |
| A00437 | A07180 | 334 | A00437 | A07209 | 418 |
| A00437 | A07294 | 441 | A00437 | A07655 | 159 |
| A00437 | A08111 | 337 | A00437 | A08148 | 345 |
| A00437 | A08268 | 409 | A00437 | A08296 | 491 |
| A00437 | A08529 | 337 | A00437 | A08701 | 156 |
| A00437 | A09202 | 319 | A00437 | A09729 | 279 |
| A00437 | A09736 | 409 | A00437 | A09738 | 324 |
| A00437 | A09882 | 165 | A00437 | A10579 | 183 |
| A00437 | A10603 | 255 | A00437 | A10611 | 425 |
| A00437 | A11523 | 212 | A00437 | A12038 | 337 |
| A00437 | A12047 | 489 | A00437 | A12648 | 446 |
| A00437 | A12897 | 313 | A00437 | A13074 | 165 |
| A00437 | A13207 | 188 | A00437 | A14179 | 168 |
| A00437 | A14193 | 462 | A00437 | A14196 | 281 |
| A00437 | A14375 | 193 | A00437 | A15249 | 271 |
| A00437 | A15315 | 291 | A00437 | A15323 | 335 |
| A00437 | A15347 | 488 | A00437 | A15376 | 63  |
| A00437 | A15556 | 486 | A00437 | A15557 | 247 |
| A00437 | A15644 | 490 | A00437 | A15683 | 491 |
| A00437 | A15712 | 210 | A00437 | A15719 | 160 |
| A00437 | A15788 | 151 | A00437 | A16042 | 171 |
| A00437 | A16292 | 183 | A00437 | A16495 | 227 |
| A00437 | A16665 | 201 | A00437 | A17198 | 490 |
| A00438 | A00446 | 543 | A00438 | A00448 | 452 |
| A00438 | A00457 | 435 | A00438 | A00472 | 330 |
| A00438 | A00485 | 391 | A00438 | A00531 | 491 |
| A00438 | A00532 | 383 | A00438 | A00537 | 490 |
| A00438 | A00576 | 279 | A00438 | A00597 | 441 |
| A00438 | A00649 | 394 | A00438 | A00653 | 486 |
| A00438 | A00680 | 425 | A00438 | A00697 | 351 |

|        |        |     |        |        |     |
|--------|--------|-----|--------|--------|-----|
| A00438 | A00709 | 301 | A00438 | A00724 | 180 |
| A00438 | A00725 | 258 | A00438 | A00737 | 241 |
| A00438 | A00821 | 456 | A00438 | A00841 | 317 |
| A00438 | A00849 | 491 | A00438 | A00868 | 631 |
| A00438 | A00871 | 486 | A00438 | A00878 | 338 |
| A00438 | A00883 | 535 | A00438 | A00911 | 382 |
| A00438 | A00915 | 491 | A00438 | A00926 | 446 |
| A00438 | A00934 | 416 | A00438 | A00953 | 477 |
| A00438 | A00967 | 491 | A00438 | A00983 | 333 |
| A00438 | A00985 | 205 | A00438 | A01020 | 481 |
| A00438 | A01021 | 388 | A00438 | A01022 | 374 |
| A00438 | A01027 | 335 | A00438 | A01075 | 290 |
| A00438 | A01076 | 205 | A00438 | A01086 | 265 |
| A00438 | A01100 | 319 | A00438 | A01108 | 467 |
| A00438 | A01122 | 277 | A00438 | A01135 | 361 |
| A00438 | A01150 | 449 | A00438 | A01156 | 682 |
| A00438 | A01161 | 491 | A00438 | A01164 | 173 |
| A00438 | A01169 | 491 | A00438 | A01209 | 306 |
| A00438 | A01210 | 244 | A00438 | A01211 | 446 |
| A00438 | A01234 | 491 | A00438 | A01253 | 411 |
| A00438 | A01271 | 358 | A00438 | A01278 | 346 |
| A00438 | A01304 | 176 | A00438 | A01320 | 486 |
| A00438 | A01322 | 267 | A00438 | A01329 | 367 |
| A00438 | A01369 | 263 | A00438 | A01380 | 333 |
| A00438 | A01385 | 483 | A00438 | A01413 | 472 |
| A00438 | A01483 | 404 | A00438 | A01502 | 201 |
| A00438 | A01573 | 271 | A00438 | A01582 | 491 |
| A00438 | A01627 | 356 | A00438 | A01640 | 172 |
| A00438 | A01820 | 249 | A00438 | A01984 | 180 |
| A00438 | A02477 | 353 | A00438 | A02607 | 462 |
| A00438 | A03139 | 466 | A00438 | A03676 | 424 |
| A00438 | A03713 | 345 | A00438 | A03885 | 456 |
| A00438 | A03945 | 196 | A00438 | A04145 | 430 |
| A00438 | A04256 | 165 | A00438 | A04337 | 420 |
| A00438 | A04668 | 268 | A00438 | A04782 | 286 |
| A00438 | A04915 | 249 | A00438 | A04925 | 372 |
| A00438 | A05095 | 187 | A00438 | A05337 | 380 |
| A00438 | A05417 | 227 | A00438 | A05577 | 198 |
| A00438 | A05843 | 270 | A00438 | A05982 | 286 |
| A00438 | A06015 | 168 | A00438 | A06147 | 205 |
| A00438 | A06275 | 151 | A00438 | A06600 | 260 |
| A00438 | A06615 | 310 | A00438 | A07071 | 270 |
| A00438 | A07414 | 168 | A00438 | A07433 | 171 |
| A00438 | A07442 | 404 | A00438 | A07520 | 154 |
| A00438 | A07697 | 200 | A00438 | A07700 | 219 |
| A00438 | A07706 | 393 | A00438 | A07894 | 452 |



|        |        |     |        |        |     |
|--------|--------|-----|--------|--------|-----|
| A00438 | A08144 | 165 | A00438 | A08191 | 187 |
| A00438 | A08945 | 249 | A00438 | A09112 | 205 |
| A00438 | A09451 | 256 | A00438 | A09512 | 749 |
| A00438 | A09515 | 152 | A00438 | A09538 | 316 |
| A00438 | A10150 | 249 | A00438 | A10369 | 283 |
| A00438 | A11044 | 168 | A00438 | A11123 | 152 |
| A00438 | A11242 | 224 | A00438 | A11352 | 361 |
| A00438 | A11830 | 272 | A00438 | A12657 | 187 |
| A00438 | A12824 | 286 | A00438 | A12900 | 249 |
| A00438 | A13824 | 177 | A00438 | A13890 | 301 |
| A00438 | A14080 | 299 | A00438 | A14132 | 224 |
| A00438 | A14196 | 180 | A00438 | A14272 | 347 |
| A00438 | A14449 | 483 | A00438 | A14643 | 182 |
| A00438 | A14655 | 441 | A00438 | A14699 | 199 |
| A00438 | A14701 | 480 | A00438 | A14894 | 187 |
| A00438 | A15295 | 490 | A00438 | A15297 | 210 |
| A00438 | A15498 | 467 | A00438 | A15524 | 165 |
| A00438 | A15624 | 171 | A00438 | A15645 | 195 |
| A00438 | A15917 | 413 | A00438 | A16145 | 232 |
| A00438 | A16647 | 187 | A00438 | A16994 | 427 |
| A00438 | A17078 | 272 | A00439 | A00454 | 434 |
| A00439 | A00527 | 251 | A00439 | A00626 | 215 |
| A00439 | A00698 | 470 | A00439 | A00812 | 185 |
| A00439 | A00932 | 486 | A00439 | A00933 | 486 |
| A00439 | A01083 | 311 | A00439 | A01560 | 489 |
| A00439 | A01612 | 523 | A00439 | A02505 | 152 |
| A00439 | A02877 | 247 | A00439 | A03740 | 436 |
| A00439 | A03752 | 694 | A00439 | A04833 | 332 |
| A00439 | A05453 | 217 | A00439 | A06466 | 694 |
| A00439 | A06950 | 438 | A00439 | A07311 | 570 |
| A00439 | A07798 | 695 | A00439 | A08137 | 483 |
| A00439 | A08519 | 165 | A00439 | A09263 | 341 |
| A00439 | A09319 | 737 | A00439 | A09504 | 221 |
| A00439 | A09804 | 171 | A00439 | A09902 | 480 |
| A00439 | A10506 | 321 | A00439 | A10728 | 470 |
| A00439 | A11286 | 491 | A00439 | A11332 | 165 |
| A00439 | A12328 | 473 | A00439 | A12990 | 441 |
| A00439 | A13149 | 467 | A00439 | A13320 | 480 |
| A00439 | A13335 | 791 | A00439 | A13340 | 246 |
| A00439 | A14073 | 441 | A00439 | A14257 | 224 |
| A00439 | A14571 | 219 | A00439 | A14738 | 380 |
| A00439 | A15106 | 296 | A00439 | A15244 | 435 |
| A00439 | A15246 | 357 | A00439 | A15697 | 168 |
| A00439 | A15741 | 173 | A00439 | A16291 | 180 |
| A00439 | A16939 | 218 | A00439 | A17142 | 423 |
| A00440 | A00496 | 257 | A00440 | A00535 | 395 |

|        |        |     |        |        |     |
|--------|--------|-----|--------|--------|-----|
| A00440 | A00560 | 435 | A00440 | A00650 | 369 |
| A00440 | A00714 | 154 | A00440 | A00822 | 283 |
| A00440 | A00853 | 296 | A00440 | A00856 | 185 |
| A00440 | A00883 | 424 | A00440 | A00954 | 489 |
| A00440 | A00957 | 423 | A00440 | A00981 | 180 |
| A00440 | A01088 | 241 | A00440 | A01091 | 314 |
| A00440 | A01097 | 355 | A00440 | A01143 | 475 |
| A00440 | A01157 | 601 | A00440 | A01493 | 219 |
| A00440 | A01500 | 351 | A00440 | A01503 | 333 |
| A00440 | A01524 | 490 | A00440 | A01555 | 432 |
| A00440 | A01598 | 422 | A00440 | A01723 | 218 |
| A00440 | A01822 | 346 | A00440 | A01995 | 491 |
| A00440 | A02052 | 216 | A00440 | A02088 | 254 |
| A00440 | A02139 | 180 | A00440 | A02174 | 235 |
| A00440 | A02236 | 144 | A00440 | A02245 | 288 |
| A00440 | A02356 | 180 | A00440 | A02382 | 176 |
| A00440 | A02416 | 283 | A00440 | A02452 | 200 |
| A00440 | A02464 | 435 | A00440 | A03081 | 255 |
| A00440 | A03109 | 163 | A00440 | A03110 | 462 |
| A00440 | A03136 | 470 | A00440 | A03183 | 481 |
| A00440 | A03219 | 205 | A00440 | A03304 | 355 |
| A00440 | A03719 | 174 | A00440 | A03765 | 278 |
| A00440 | A03799 | 168 | A00440 | A03919 | 177 |
| A00440 | A03942 | 408 | A00440 | A04033 | 445 |
| A00440 | A04076 | 424 | A00440 | A04437 | 168 |
| A00440 | A04449 | 682 | A00440 | A04492 | 165 |
| A00440 | A04773 | 477 | A00440 | A04949 | 601 |
| A00440 | A05182 | 191 | A00440 | A05288 | 456 |
| A00440 | A05418 | 458 | A00440 | A05706 | 484 |
| A00440 | A06118 | 334 | A00440 | A06491 | 322 |
| A00440 | A06554 | 561 | A00440 | A06599 | 534 |
| A00440 | A06907 | 216 | A00440 | A07004 | 412 |
| A00440 | A07311 | 184 | A00440 | A07706 | 308 |
| A00440 | A07803 | 319 | A00440 | A08382 | 202 |
| A00440 | A08553 | 398 | A00440 | A08996 | 235 |
| A00440 | A09732 | 401 | A00440 | A09734 | 171 |
| A00440 | A10018 | 202 | A00440 | A10090 | 380 |
| A00440 | A10332 | 165 | A00440 | A11395 | 157 |
| A00440 | A11621 | 270 | A00440 | A12111 | 491 |
| A00440 | A12365 | 491 | A00440 | A12660 | 344 |
| A00440 | A12873 | 283 | A00440 | A13587 | 337 |
| A00440 | A13928 | 263 | A00440 | A14196 | 394 |
| A00440 | A14202 | 307 | A00440 | A14210 | 434 |
| A00440 | A14247 | 179 | A00440 | A14371 | 312 |
| A00440 | A14570 | 235 | A00440 | A14636 | 210 |
| A00440 | A14647 | 151 | A00440 | A15114 | 306 |

|        |        |     |        |        |     |
|--------|--------|-----|--------|--------|-----|
| A00440 | A15224 | 179 | A00440 | A15257 | 174 |
| A00440 | A15292 | 281 | A00440 | A15365 | 255 |
| A00440 | A15366 | 205 | A00440 | A15419 | 260 |
| A00440 | A15447 | 151 | A00440 | A15492 | 208 |
| A00440 | A15596 | 378 | A00440 | A15606 | 441 |
| A00440 | A15700 | 259 | A00440 | A15763 | 348 |
| A00440 | A15852 | 402 | A00440 | A15870 | 184 |
| A00440 | A15916 | 179 | A00440 | A15952 | 317 |
| A00440 | A16323 | 188 | A00440 | A16623 | 162 |
| A00440 | A16724 | 251 | A00440 | A16978 | 301 |
| A00441 | A00459 | 180 | A00441 | A00488 | 474 |
| A00441 | A00501 | 682 | A00441 | A00589 | 539 |
| A00441 | A00605 | 682 | A00441 | A00690 | 452 |
| A00441 | A00749 | 210 | A00441 | A00791 | 302 |
| A00441 | A00861 | 416 | A00441 | A00872 | 210 |
| A00441 | A00916 | 443 | A00441 | A01028 | 210 |
| A00441 | A01065 | 557 | A00441 | A01092 | 210 |
| A00441 | A01098 | 210 | A00441 | A01120 | 568 |
| A00441 | A01179 | 212 | A00441 | A01206 | 489 |
| A00441 | A01234 | 212 | A00441 | A01356 | 177 |
| A00441 | A01379 | 414 | A00441 | A01384 | 168 |
| A00441 | A01439 | 499 | A00441 | A01470 | 467 |
| A00441 | A01488 | 297 | A00441 | A01492 | 568 |
| A00441 | A01538 | 210 | A00441 | A01539 | 473 |
| A00441 | A01598 | 540 | A00441 | A01612 | 201 |
| A00441 | A01614 | 390 | A00441 | A01649 | 491 |
| A00441 | A02265 | 210 | A00441 | A02978 | 210 |
| A00441 | A05230 | 210 | A00441 | A06340 | 174 |
| A00441 | A07076 | 479 | A00441 | A07347 | 490 |
| A00441 | A07725 | 419 | A00441 | A08137 | 344 |
| A00441 | A08357 | 489 | A00441 | A09292 | 346 |
| A00441 | A09327 | 193 | A00441 | A13052 | 210 |
| A00441 | A13875 | 288 | A00441 | A13989 | 561 |
| A00441 | A14216 | 414 | A00441 | A14816 | 210 |
| A00441 | A14817 | 205 | A00441 | A15532 | 490 |
| A00441 | A15735 | 462 | A00441 | A15739 | 198 |
| A00442 | A00481 | 484 | A00442 | A00500 | 429 |
| A00442 | A00532 | 490 | A00442 | A00693 | 491 |
| A00442 | A00769 | 63  | A00442 | A00871 | 491 |
| A00442 | A01020 | 339 | A00442 | A01024 | 491 |
| A00442 | A01116 | 159 | A00442 | A01181 | 288 |
| A00442 | A01184 | 187 | A00442 | A01201 | 240 |
| A00442 | A01214 | 491 | A00442 | A01226 | 488 |
| A00442 | A01234 | 486 | A00442 | A01304 | 446 |
| A00442 | A01382 | 176 | A00442 | A06915 | 251 |
| A00442 | A07414 | 434 | A00442 | A07467 | 232 |

|        |        |     |        |        |     |
|--------|--------|-----|--------|--------|-----|
| A00442 | A07695 | 491 | A00442 | A08144 | 474 |
| A00442 | A08269 | 255 | A00442 | A08892 | 434 |
| A00442 | A08971 | 229 | A00442 | A10208 | 257 |
| A00442 | A12124 | 340 | A00442 | A12447 | 402 |
| A00442 | A13219 | 235 | A00442 | A13706 | 357 |
| A00442 | A14006 | 252 | A00442 | A14449 | 293 |
| A00442 | A14451 | 323 | A00442 | A14655 | 276 |
| A00442 | A16320 | 363 | A00442 | A17049 | 260 |
| A00443 | A00501 | 177 | A00443 | A00760 | 174 |
| A00443 | A00964 | 382 | A00443 | A01075 | 472 |
| A00443 | A01079 | 258 | A00443 | A01082 | 121 |
| A00443 | A01084 | 323 | A00443 | A01087 | 417 |
| A00443 | A03944 | 347 | A00443 | A07706 | 363 |
| A00443 | A08118 | 177 | A00443 | A08527 | 213 |
| A00443 | A08996 | 291 | A00443 | A11674 | 446 |
| A00443 | A15520 | 395 | A00443 | A15733 | 243 |
| A00443 | A15852 | 208 | A00444 | A00489 | 658 |
| A00444 | A00605 | 391 | A00444 | A00651 | 378 |
| A00444 | A00666 | 218 | A00444 | A00667 | 440 |
| A00444 | A00839 | 488 | A00444 | A00843 | 484 |
| A00444 | A00848 | 480 | A00444 | A00970 | 491 |
| A00444 | A01031 | 170 | A00444 | A01069 | 484 |
| A00444 | A01074 | 252 | A00444 | A01101 | 201 |
| A00444 | A01113 | 316 | A00444 | A01115 | 659 |
| A00444 | A01166 | 340 | A00444 | A01192 | 391 |
| A00444 | A01194 | 491 | A00444 | A01196 | 236 |
| A00444 | A01205 | 260 | A00444 | A01218 | 215 |
| A00444 | A01249 | 177 | A00444 | A01276 | 389 |
| A00444 | A01291 | 455 | A00444 | A01393 | 447 |
| A00444 | A01396 | 184 | A00444 | A01411 | 474 |
| A00444 | A01455 | 424 | A00444 | A01496 | 358 |
| A00444 | A01539 | 659 | A00444 | A01540 | 344 |
| A00444 | A01548 | 216 | A00444 | A01557 | 190 |
| A00444 | A01569 | 491 | A00444 | A01577 | 400 |
| A00444 | A01579 | 480 | A00444 | A01612 | 177 |
| A00444 | A01770 | 350 | A00444 | A02040 | 232 |
| A00444 | A02153 | 299 | A00444 | A02640 | 232 |
| A00444 | A02661 | 190 | A00444 | A02877 | 475 |
| A00444 | A03224 | 238 | A00444 | A03439 | 272 |
| A00444 | A03446 | 658 | A00444 | A03453 | 488 |
| A00444 | A03476 | 380 | A00444 | A03477 | 375 |
| A00444 | A03560 | 223 | A00444 | A03572 | 419 |
| A00444 | A03573 | 215 | A00444 | A03675 | 162 |
| A00444 | A03721 | 193 | A00444 | A03722 | 193 |
| A00444 | A03738 | 412 | A00444 | A03740 | 258 |
| A00444 | A03752 | 243 | A00444 | A03785 | 491 |

|        |        |     |        |        |     |
|--------|--------|-----|--------|--------|-----|
| A00444 | A04021 | 329 | A00444 | A04449 | 391 |
| A00444 | A04519 | 232 | A00444 | A04563 | 190 |
| A00444 | A04681 | 162 | A00444 | A04846 | 173 |
| A00444 | A05060 | 457 | A00444 | A05232 | 311 |
| A00444 | A05385 | 196 | A00444 | A05442 | 294 |
| A00444 | A05501 | 313 | A00444 | A05712 | 434 |
| A00444 | A05845 | 173 | A00444 | A05995 | 152 |
| A00444 | A06109 | 247 | A00444 | A06365 | 183 |
| A00444 | A06965 | 154 | A00444 | A07247 | 435 |
| A00444 | A07323 | 193 | A00444 | A07449 | 157 |
| A00444 | A08061 | 428 | A00444 | A08390 | 390 |
| A00444 | A08546 | 563 | A00444 | A08668 | 480 |
| A00444 | A08676 | 468 | A00444 | A08896 | 441 |
| A00444 | A08900 | 319 | A00444 | A08972 | 168 |
| A00444 | A08978 | 255 | A00444 | A09276 | 196 |
| A00444 | A09586 | 200 | A00444 | A09591 | 219 |
| A00444 | A09600 | 162 | A00444 | A09691 | 281 |
| A00444 | A10006 | 433 | A00444 | A10490 | 491 |
| A00444 | A10532 | 659 | A00444 | A11103 | 434 |
| A00444 | A11240 | 372 | A00444 | A11409 | 491 |
| A00444 | A11477 | 180 | A00444 | A12763 | 337 |
| A00444 | A12839 | 352 | A00444 | A13218 | 223 |
| A00444 | A13609 | 481 | A00444 | A13674 | 294 |
| A00444 | A13729 | 168 | A00444 | A13989 | 424 |
| A00444 | A14073 | 402 | A00444 | A14130 | 424 |
| A00444 | A14351 | 247 | A00444 | A14394 | 230 |
| A00444 | A14833 | 271 | A00444 | A15358 | 224 |
| A00444 | A15470 | 212 | A00444 | A15475 | 272 |
| A00444 | A15684 | 399 | A00444 | A15698 | 372 |
| A00444 | A15827 | 200 | A00444 | A16118 | 260 |
| A00444 | A16756 | 200 | A00444 | A16923 | 441 |
| A00445 | A00482 | 199 | A00445 | A00491 | 208 |
| A00445 | A00496 | 227 | A00445 | A00531 | 315 |
| A00445 | A00552 | 475 | A00445 | A00718 | 460 |
| A00445 | A00883 | 466 | A00445 | A01091 | 479 |
| A00445 | A01131 | 491 | A00445 | A01132 | 229 |
| A00445 | A01259 | 475 | A00445 | A01275 | 656 |
| A00445 | A01276 | 191 | A00445 | A01280 | 174 |
| A00445 | A01406 | 234 | A00445 | A01441 | 162 |
| A00445 | A01572 | 199 | A00445 | A02212 | 201 |
| A00445 | A02452 | 483 | A00445 | A03057 | 154 |
| A00445 | A03149 | 274 | A00445 | A03224 | 276 |
| A00445 | A03721 | 232 | A00445 | A04844 | 310 |
| A00445 | A05015 | 458 | A00445 | A06082 | 253 |
| A00445 | A06118 | 224 | A00445 | A06151 | 196 |
| A00445 | A06488 | 259 | A00445 | A06778 | 159 |

|        |        |     |        |        |     |
|--------|--------|-----|--------|--------|-----|
| A00445 | A06907 | 168 | A00445 | A09044 | 172 |
| A00445 | A09825 | 258 | A00445 | A09980 | 356 |
| A00445 | A11039 | 490 | A00445 | A11291 | 491 |
| A00445 | A11477 | 491 | A00445 | A11631 | 228 |
| A00445 | A11713 | 477 | A00445 | A12241 | 193 |
| A00445 | A12518 | 465 | A00445 | A12532 | 318 |
| A00445 | A12534 | 475 | A00445 | A12944 | 356 |
| A00445 | A12991 | 422 | A00445 | A13178 | 333 |
| A00445 | A13348 | 184 | A00445 | A14007 | 434 |
| A00445 | A14128 | 470 | A00445 | A14196 | 491 |
| A00445 | A14220 | 489 | A00445 | A14371 | 193 |
| A00445 | A14689 | 305 | A00445 | A14809 | 199 |
| A00445 | A15237 | 278 | A00445 | A15297 | 165 |
| A00445 | A15309 | 418 | A00445 | A15470 | 251 |
| A00445 | A15471 | 319 | A00445 | A15475 | 305 |
| A00445 | A15482 | 162 | A00445 | A15525 | 177 |
| A00445 | A15635 | 205 | A00445 | A15739 | 165 |
| A00445 | A15916 | 201 | A00445 | A17063 | 154 |
| A00445 | A17076 | 267 | A00446 | A00450 | 168 |
| A00446 | A00519 | 240 | A00446 | A00525 | 277 |
| A00446 | A00531 | 531 | A00446 | A00532 | 440 |
| A00446 | A00548 | 480 | A00446 | A00553 | 709 |
| A00446 | A00564 | 313 | A00446 | A00565 | 497 |
| A00446 | A00570 | 467 | A00446 | A00572 | 216 |
| A00446 | A00583 | 599 | A00446 | A00597 | 299 |
| A00446 | A00600 | 481 | A00446 | A00601 | 338 |
| A00446 | A00607 | 347 | A00446 | A00618 | 251 |
| A00446 | A00629 | 434 | A00446 | A00652 | 438 |
| A00446 | A00674 | 545 | A00446 | A00687 | 473 |
| A00446 | A00691 | 491 | A00446 | A00714 | 501 |
| A00446 | A00723 | 319 | A00446 | A00728 | 480 |
| A00446 | A00735 | 303 | A00446 | A00751 | 543 |
| A00446 | A00761 | 541 | A00446 | A00766 | 544 |
| A00446 | A00776 | 462 | A00446 | A00781 | 491 |
| A00446 | A00782 | 228 | A00446 | A00791 | 746 |
| A00446 | A00801 | 168 | A00446 | A00805 | 443 |
| A00446 | A00813 | 204 | A00446 | A00815 | 491 |
| A00446 | A00816 | 443 | A00446 | A00819 | 224 |
| A00446 | A00846 | 299 | A00446 | A00862 | 483 |
| A00446 | A00864 | 529 | A00446 | A00868 | 779 |
| A00446 | A00883 | 810 | A00446 | A00884 | 529 |
| A00446 | A00903 | 151 | A00446 | A00915 | 465 |
| A00446 | A00923 | 598 | A00446 | A00926 | 545 |
| A00446 | A00927 | 537 | A00446 | A00936 | 374 |
| A00446 | A00956 | 183 | A00446 | A00975 | 545 |
| A00446 | A00981 | 217 | A00446 | A00982 | 260 |

|        |        |     |        |        |     |
|--------|--------|-----|--------|--------|-----|
| A00446 | A00983 | 406 | A00446 | A00985 | 182 |
| A00446 | A00989 | 327 | A00446 | A01009 | 391 |
| A00446 | A01014 | 358 | A00446 | A01017 | 468 |
| A00446 | A01020 | 472 | A00446 | A01039 | 189 |
| A00446 | A01058 | 543 | A00446 | A01066 | 409 |
| A00446 | A01068 | 273 | A00446 | A01072 | 245 |
| A00446 | A01075 | 446 | A00446 | A01077 | 342 |
| A00446 | A01080 | 544 | A00446 | A01088 | 557 |
| A00446 | A01091 | 658 | A00446 | A01097 | 634 |
| A00446 | A01100 | 584 | A00446 | A01106 | 485 |
| A00446 | A01122 | 486 | A00446 | A01124 | 99  |
| A00446 | A01151 | 490 | A00446 | A01156 | 563 |
| A00446 | A01169 | 491 | A00446 | A01173 | 259 |
| A00446 | A01180 | 485 | A00446 | A01191 | 436 |
| A00446 | A01212 | 278 | A00446 | A01213 | 274 |
| A00446 | A01234 | 241 | A00446 | A01235 | 238 |
| A00446 | A01241 | 229 | A00446 | A01243 | 486 |
| A00446 | A01258 | 74  | A00446 | A01264 | 249 |
| A00446 | A01267 | 673 | A00446 | A01277 | 159 |
| A00446 | A01278 | 491 | A00446 | A01281 | 483 |
| A00446 | A01291 | 579 | A00446 | A01329 | 491 |
| A00446 | A01338 | 483 | A00446 | A01339 | 540 |
| A00446 | A01358 | 328 | A00446 | A01370 | 483 |
| A00446 | A01371 | 375 | A00446 | A01372 | 599 |
| A00446 | A01390 | 486 | A00446 | A01391 | 469 |
| A00446 | A01419 | 424 | A00446 | A01438 | 213 |
| A00446 | A01442 | 466 | A00446 | A01451 | 740 |
| A00446 | A01459 | 489 | A00446 | A01461 | 185 |
| A00446 | A01470 | 184 | A00446 | A01483 | 299 |
| A00446 | A01492 | 529 | A00446 | A01507 | 486 |
| A00446 | A01514 | 491 | A00446 | A01516 | 170 |
| A00446 | A01546 | 247 | A00446 | A01559 | 199 |
| A00446 | A01582 | 491 | A00446 | A01588 | 534 |
| A00446 | A01599 | 159 | A00446 | A01606 | 463 |
| A00446 | A01622 | 221 | A00446 | A01660 | 259 |
| A00446 | A01695 | 165 | A00446 | A01720 | 246 |
| A00446 | A01823 | 326 | A00446 | A01985 | 63  |
| A00446 | A01988 | 429 | A00446 | A02041 | 188 |
| A00446 | A02212 | 538 | A00446 | A02252 | 276 |
| A00446 | A02381 | 634 | A00446 | A02452 | 466 |
| A00446 | A02978 | 486 | A00446 | A03012 | 452 |
| A00446 | A03043 | 93  | A00446 | A03328 | 240 |
| A00446 | A03334 | 291 | A00446 | A03458 | 291 |
| A00446 | A03494 | 224 | A00446 | A03498 | 199 |
| A00446 | A03503 | 491 | A00446 | A03567 | 485 |
| A00446 | A03570 | 486 | A00446 | A03651 | 188 |

|        |        |     |        |        |     |
|--------|--------|-----|--------|--------|-----|
| A00446 | A03676 | 491 | A00446 | A03749 | 441 |
| A00446 | A03750 | 491 | A00446 | A03859 | 481 |
| A00446 | A03873 | 262 | A00446 | A03885 | 438 |
| A00446 | A03948 | 358 | A00446 | A04033 | 486 |
| A00446 | A04180 | 333 | A00446 | A04421 | 185 |
| A00446 | A04449 | 283 | A00446 | A04666 | 477 |
| A00446 | A04687 | 235 | A00446 | A04944 | 218 |
| A00446 | A04962 | 240 | A00446 | A05095 | 332 |
| A00446 | A05234 | 240 | A00446 | A05249 | 485 |
| A00446 | A05276 | 221 | A00446 | A05563 | 238 |
| A00446 | A05570 | 221 | A00446 | A06214 | 171 |
| A00446 | A06272 | 488 | A00446 | A06520 | 422 |
| A00446 | A06624 | 374 | A00446 | A06750 | 480 |
| A00446 | A06861 | 159 | A00446 | A06907 | 154 |
| A00446 | A06938 | 455 | A00446 | A07081 | 196 |
| A00446 | A07096 | 160 | A00446 | A07101 | 406 |
| A00446 | A07209 | 157 | A00446 | A07226 | 494 |
| A00446 | A07266 | 313 | A00446 | A07282 | 374 |
| A00446 | A07355 | 176 | A00446 | A07360 | 185 |
| A00446 | A07403 | 428 | A00446 | A07457 | 477 |
| A00446 | A07483 | 154 | A00446 | A07516 | 171 |
| A00446 | A07575 | 185 | A00446 | A07641 | 193 |
| A00446 | A07675 | 461 | A00446 | A07697 | 235 |
| A00446 | A07706 | 488 | A00446 | A07750 | 171 |
| A00446 | A07756 | 491 | A00446 | A07813 | 332 |
| A00446 | A07851 | 162 | A00446 | A07853 | 208 |
| A00446 | A07956 | 470 | A00446 | A08022 | 422 |
| A00446 | A08025 | 171 | A00446 | A08032 | 407 |
| A00446 | A08097 | 318 | A00446 | A08133 | 199 |
| A00446 | A08159 | 185 | A00446 | A08205 | 240 |
| A00446 | A08213 | 326 | A00446 | A08248 | 597 |
| A00446 | A08281 | 491 | A00446 | A08356 | 468 |
| A00446 | A08362 | 348 | A00446 | A08517 | 473 |
| A00446 | A08524 | 586 | A00446 | A08558 | 445 |
| A00446 | A08570 | 313 | A00446 | A08834 | 160 |
| A00446 | A08882 | 479 | A00446 | A08927 | 221 |
| A00446 | A08960 | 458 | A00446 | A08977 | 439 |
| A00446 | A08982 | 518 | A00446 | A08989 | 316 |
| A00446 | A08990 | 395 | A00446 | A09315 | 165 |
| A00446 | A09319 | 899 | A00446 | A09343 | 176 |
| A00446 | A09351 | 185 | A00446 | A09627 | 160 |
| A00446 | A09659 | 202 | A00446 | A09670 | 278 |
| A00446 | A09672 | 229 | A00446 | A09876 | 208 |
| A00446 | A09898 | 113 | A00446 | A10156 | 356 |
| A00446 | A10159 | 488 | A00446 | A10232 | 171 |
| A00446 | A10372 | 493 | A00446 | A11001 | 385 |



|        |        |     |        |        |     |
|--------|--------|-----|--------|--------|-----|
| A00446 | A11279 | 361 | A00446 | A11365 | 160 |
| A00446 | A11395 | 278 | A00446 | A11472 | 248 |
| A00446 | A11544 | 262 | A00446 | A11598 | 271 |
| A00446 | A11649 | 599 | A00446 | A11706 | 412 |
| A00446 | A11735 | 537 | A00446 | A11737 | 446 |
| A00446 | A11914 | 537 | A00446 | A12153 | 171 |
| A00446 | A12255 | 345 | A00446 | A12282 | 165 |
| A00446 | A12658 | 528 | A00446 | A12810 | 165 |
| A00446 | A12824 | 696 | A00446 | A13340 | 162 |
| A00446 | A13356 | 394 | A00446 | A13447 | 326 |
| A00446 | A13452 | 171 | A00446 | A13595 | 171 |
| A00446 | A13618 | 165 | A00446 | A13784 | 187 |
| A00446 | A13892 | 262 | A00446 | A14007 | 451 |
| A00446 | A14009 | 199 | A00446 | A14148 | 157 |
| A00446 | A14167 | 160 | A00446 | A14196 | 870 |
| A00446 | A14218 | 475 | A00446 | A14246 | 552 |
| A00446 | A14345 | 134 | A00446 | A14362 | 262 |
| A00446 | A14566 | 385 | A00446 | A14597 | 288 |
| A00446 | A14650 | 188 | A00446 | A14655 | 465 |
| A00446 | A14701 | 489 | A00446 | A14709 | 483 |
| A00446 | A15136 | 318 | A00446 | A15185 | 299 |
| A00446 | A15232 | 171 | A00446 | A15237 | 576 |
| A00446 | A15257 | 524 | A00446 | A15297 | 814 |
| A00446 | A15321 | 574 | A00446 | A15323 | 539 |
| A00446 | A15324 | 606 | A00446 | A15330 | 414 |
| A00446 | A15338 | 599 | A00446 | A15339 | 561 |
| A00446 | A15353 | 626 | A00446 | A15355 | 356 |
| A00446 | A15359 | 660 | A00446 | A15363 | 345 |
| A00446 | A15366 | 306 | A00446 | A15374 | 463 |
| A00446 | A15419 | 462 | A00446 | A15502 | 190 |
| A00446 | A15529 | 433 | A00446 | A15535 | 236 |
| A00446 | A15540 | 179 | A00446 | A15558 | 491 |
| A00446 | A15559 | 681 | A00446 | A15561 | 195 |
| A00446 | A15564 | 599 | A00446 | A15624 | 491 |
| A00446 | A15631 | 360 | A00446 | A15649 | 213 |
| A00446 | A15651 | 210 | A00446 | A15660 | 162 |
| A00446 | A15661 | 317 | A00446 | A15684 | 519 |
| A00446 | A15729 | 633 | A00446 | A15735 | 299 |
| A00446 | A15738 | 395 | A00446 | A15747 | 486 |
| A00446 | A15763 | 435 | A00446 | A15788 | 491 |
| A00446 | A15900 | 171 | A00446 | A15946 | 241 |
| A00446 | A15947 | 468 | A00446 | A16022 | 168 |
| A00446 | A16152 | 252 | A00446 | A16215 | 152 |
| A00446 | A16311 | 350 | A00446 | A16312 | 171 |
| A00446 | A16463 | 246 | A00446 | A16614 | 262 |
| A00446 | A16654 | 157 | A00446 | A16690 | 491 |

|        |        |     |        |        |     |
|--------|--------|-----|--------|--------|-----|
| A00446 | A16700 | 262 | A00446 | A16866 | 491 |
| A00446 | A16874 | 344 | A00446 | A16962 | 241 |
| A00446 | A17019 | 157 | A00446 | A17063 | 369 |
| A00446 | A17134 | 457 | A00447 | A00452 | 694 |
| A00447 | A00481 | 348 | A00447 | A00487 | 378 |
| A00447 | A00493 | 199 | A00447 | A00524 | 306 |
| A00447 | A00532 | 262 | A00447 | A00537 | 329 |
| A00447 | A00540 | 193 | A00447 | A00555 | 695 |
| A00447 | A00570 | 574 | A00447 | A00571 | 432 |
| A00447 | A00581 | 236 | A00447 | A00597 | 373 |
| A00447 | A00603 | 340 | A00447 | A00606 | 273 |
| A00447 | A00609 | 450 | A00447 | A00629 | 544 |
| A00447 | A00648 | 274 | A00447 | A00683 | 190 |
| A00447 | A00687 | 574 | A00447 | A00693 | 159 |
| A00447 | A00694 | 337 | A00447 | A00717 | 491 |
| A00447 | A00718 | 410 | A00447 | A00721 | 403 |
| A00447 | A00727 | 485 | A00447 | A00760 | 338 |
| A00447 | A00762 | 401 | A00447 | A00772 | 694 |
| A00447 | A00793 | 347 | A00447 | A00798 | 235 |
| A00447 | A00822 | 152 | A00447 | A00826 | 440 |
| A00447 | A00839 | 208 | A00447 | A00841 | 165 |
| A00447 | A00854 | 329 | A00447 | A00865 | 488 |
| A00447 | A00878 | 346 | A00447 | A00907 | 424 |
| A00447 | A00913 | 159 | A00447 | A00928 | 574 |
| A00447 | A00947 | 204 | A00447 | A00952 | 695 |
| A00447 | A00965 | 291 | A00447 | A00968 | 307 |
| A00447 | A00972 | 217 | A00447 | A00977 | 502 |
| A00447 | A00981 | 411 | A00447 | A00997 | 217 |
| A00447 | A01016 | 303 | A00447 | A01027 | 435 |
| A00447 | A01067 | 254 | A00447 | A01074 | 489 |
| A00447 | A01107 | 574 | A00447 | A01154 | 383 |
| A00447 | A01159 | 530 | A00447 | A01166 | 412 |
| A00447 | A01209 | 327 | A00447 | A01211 | 224 |
| A00447 | A01217 | 399 | A00447 | A01221 | 640 |
| A00447 | A01238 | 371 | A00447 | A01243 | 573 |
| A00447 | A01252 | 356 | A00447 | A01280 | 232 |
| A00447 | A01304 | 290 | A00447 | A01306 | 375 |
| A00447 | A01352 | 858 | A00447 | A01365 | 581 |
| A00447 | A01377 | 241 | A00447 | A01399 | 470 |
| A00447 | A01406 | 454 | A00447 | A01412 | 353 |
| A00447 | A01416 | 374 | A00447 | A01418 | 275 |
| A00447 | A01518 | 229 | A00447 | A01547 | 168 |
| A00447 | A02051 | 224 | A00447 | A02164 | 465 |
| A00447 | A03035 | 199 | A00447 | A03556 | 217 |
| A00447 | A03601 | 505 | A00447 | A03617 | 217 |
| A00447 | A03734 | 165 | A00447 | A04099 | 165 |

|        |        |     |        |        |     |
|--------|--------|-----|--------|--------|-----|
| A00447 | A04668 | 436 | A00447 | A05327 | 308 |
| A00447 | A05375 | 357 | A00447 | A05501 | 583 |
| A00447 | A05605 | 217 | A00447 | A06122 | 486 |
| A00447 | A06204 | 462 | A00447 | A06347 | 461 |
| A00447 | A06369 | 261 | A00447 | A06472 | 269 |
| A00447 | A06531 | 338 | A00447 | A06832 | 571 |
| A00447 | A06861 | 236 | A00447 | A07312 | 235 |
| A00447 | A07349 | 229 | A00447 | A08183 | 512 |
| A00447 | A08293 | 367 | A00447 | A08402 | 467 |
| A00447 | A08403 | 199 | A00447 | A08477 | 176 |
| A00447 | A08501 | 302 | A00447 | A08554 | 180 |
| A00447 | A08567 | 462 | A00447 | A08813 | 389 |
| A00447 | A08984 | 693 | A00447 | A09059 | 416 |
| A00447 | A09609 | 238 | A00447 | A09621 | 480 |
| A00447 | A09673 | 217 | A00447 | A10317 | 380 |
| A00447 | A10373 | 324 | A00447 | A10789 | 218 |
| A00447 | A11277 | 340 | A00447 | A11675 | 227 |
| A00447 | A11707 | 157 | A00447 | A11950 | 157 |
| A00447 | A12255 | 296 | A00447 | A12292 | 278 |
| A00447 | A12507 | 162 | A00447 | A12658 | 238 |
| A00447 | A12816 | 484 | A00447 | A13787 | 383 |
| A00447 | A13788 | 188 | A00447 | A13804 | 352 |
| A00447 | A13805 | 180 | A00447 | A13905 | 249 |
| A00447 | A13963 | 435 | A00447 | A14077 | 283 |
| A00447 | A14088 | 237 | A00447 | A14122 | 157 |
| A00447 | A14186 | 337 | A00447 | A14220 | 152 |
| A00447 | A14230 | 156 | A00447 | A14246 | 174 |
| A00447 | A14270 | 294 | A00447 | A14272 | 489 |
| A00447 | A14478 | 373 | A00447 | A14482 | 294 |
| A00447 | A14566 | 329 | A00447 | A14701 | 419 |
| A00447 | A14835 | 299 | A00447 | A14917 | 319 |
| A00447 | A15377 | 463 | A00447 | A15543 | 307 |
| A00447 | A15724 | 278 | A00447 | A15949 | 307 |
| A00447 | A16117 | 152 | A00447 | A16118 | 193 |
| A00447 | A16566 | 201 | A00447 | A16567 | 226 |
| A00447 | A16664 | 217 | A00447 | A16701 | 218 |
| A00447 | A16774 | 235 | A00447 | A16815 | 252 |
| A00447 | A16874 | 190 | A00447 | A17152 | 221 |
| A00448 | A00459 | 215 | A00448 | A00463 | 491 |
| A00448 | A00488 | 708 | A00448 | A00490 | 704 |
| A00448 | A00494 | 236 | A00448 | A00497 | 708 |
| A00448 | A00500 | 436 | A00448 | A00518 | 450 |
| A00448 | A00520 | 486 | A00448 | A00521 | 160 |
| A00448 | A00530 | 321 | A00448 | A00532 | 491 |
| A00448 | A00535 | 393 | A00448 | A00537 | 480 |
| A00448 | A00550 | 637 | A00448 | A00551 | 491 |

|        |        |     |        |        |     |
|--------|--------|-----|--------|--------|-----|
| A00448 | A00554 | 708 | A00448 | A00566 | 491 |
| A00448 | A00575 | 491 | A00448 | A00589 | 168 |
| A00448 | A00595 | 488 | A00448 | A00605 | 638 |
| A00448 | A00648 | 362 | A00448 | A00691 | 488 |
| A00448 | A00693 | 468 | A00448 | A00708 | 491 |
| A00448 | A00760 | 490 | A00448 | A00767 | 491 |
| A00448 | A00787 | 182 | A00448 | A00805 | 472 |
| A00448 | A00813 | 419 | A00448 | A00822 | 269 |
| A00448 | A00824 | 274 | A00448 | A00831 | 627 |
| A00448 | A00848 | 475 | A00448 | A00856 | 491 |
| A00448 | A00858 | 491 | A00448 | A00868 | 473 |
| A00448 | A00870 | 407 | A00448 | A00871 | 302 |
| A00448 | A00881 | 490 | A00448 | A00883 | 469 |
| A00448 | A00898 | 251 | A00448 | A00903 | 491 |
| A00448 | A00916 | 491 | A00448 | A00919 | 480 |
| A00448 | A00923 | 439 | A00448 | A00926 | 385 |
| A00448 | A00934 | 491 | A00448 | A00944 | 356 |
| A00448 | A00954 | 491 | A00448 | A00960 | 162 |
| A00448 | A00975 | 180 | A00448 | A00992 | 429 |
| A00448 | A01004 | 515 | A00448 | A01017 | 251 |
| A00448 | A01020 | 708 | A00448 | A01024 | 185 |
| A00448 | A01032 | 458 | A00448 | A01040 | 334 |
| A00448 | A01075 | 491 | A00448 | A01084 | 477 |
| A00448 | A01087 | 491 | A00448 | A01088 | 489 |
| A00448 | A01099 | 217 | A00448 | A01108 | 353 |
| A00448 | A01112 | 372 | A00448 | A01116 | 638 |
| A00448 | A01147 | 163 | A00448 | A01150 | 477 |
| A00448 | A01166 | 486 | A00448 | A01179 | 375 |
| A00448 | A01184 | 491 | A00448 | A01193 | 350 |
| A00448 | A01194 | 154 | A00448 | A01195 | 372 |
| A00448 | A01201 | 491 | A00448 | A01206 | 491 |
| A00448 | A01224 | 286 | A00448 | A01226 | 348 |
| A00448 | A01234 | 491 | A00448 | A01304 | 638 |
| A00448 | A01322 | 420 | A00448 | A01349 | 449 |
| A00448 | A01351 | 491 | A00448 | A01398 | 350 |
| A00448 | A01401 | 454 | A00448 | A01404 | 249 |
| A00448 | A01415 | 152 | A00448 | A01425 | 393 |
| A00448 | A01429 | 252 | A00448 | A01430 | 252 |
| A00448 | A01431 | 428 | A00448 | A01454 | 462 |
| A00448 | A01468 | 488 | A00448 | A01470 | 491 |
| A00448 | A01488 | 486 | A00448 | A01492 | 491 |
| A00448 | A01495 | 334 | A00448 | A01503 | 364 |
| A00448 | A01576 | 477 | A00448 | A01598 | 491 |
| A00448 | A01612 | 477 | A00448 | A01614 | 486 |
| A00448 | A01649 | 491 | A00448 | A01684 | 451 |
| A00448 | A01700 | 221 | A00448 | A01741 | 433 |

|        |        |     |        |        |     |
|--------|--------|-----|--------|--------|-----|
| A00448 | A01848 | 229 | A00448 | A02064 | 470 |
| A00448 | A02265 | 274 | A00448 | A03438 | 213 |
| A00448 | A03567 | 332 | A00448 | A03569 | 177 |
| A00448 | A03595 | 358 | A00448 | A03734 | 377 |
| A00448 | A04139 | 391 | A00448 | A04687 | 234 |
| A00448 | A05845 | 416 | A00448 | A05986 | 299 |
| A00448 | A06275 | 491 | A00448 | A06803 | 271 |
| A00448 | A06881 | 313 | A00448 | A07223 | 636 |
| A00448 | A07244 | 263 | A00448 | A07347 | 491 |
| A00448 | A07487 | 259 | A00448 | A07524 | 491 |
| A00448 | A07533 | 452 | A00448 | A07584 | 490 |
| A00448 | A07625 | 486 | A00448 | A07697 | 363 |
| A00448 | A07700 | 638 | A00448 | A07706 | 491 |
| A00448 | A07725 | 621 | A00448 | A07924 | 491 |
| A00448 | A08022 | 491 | A00448 | A08024 | 491 |
| A00448 | A08118 | 265 | A00448 | A08137 | 465 |
| A00448 | A08211 | 353 | A00448 | A08326 | 475 |
| A00448 | A08357 | 435 | A00448 | A08382 | 405 |
| A00448 | A08439 | 490 | A00448 | A08450 | 457 |
| A00448 | A08491 | 701 | A00448 | A08518 | 367 |
| A00448 | A08553 | 491 | A00448 | A08890 | 480 |
| A00448 | A09010 | 452 | A00448 | A09292 | 350 |
| A00448 | A09307 | 460 | A00448 | A09619 | 708 |
| A00448 | A09664 | 307 | A00448 | A09665 | 157 |
| A00448 | A09705 | 174 | A00448 | A09708 | 262 |
| A00448 | A09917 | 151 | A00448 | A10465 | 317 |
| A00448 | A10469 | 163 | A00448 | A10616 | 488 |
| A00448 | A10923 | 265 | A00448 | A11395 | 491 |
| A00448 | A11565 | 274 | A00448 | A11720 | 182 |
| A00448 | A12052 | 182 | A00448 | A12108 | 173 |
| A00448 | A12254 | 488 | A00448 | A12305 | 232 |
| A00448 | A12419 | 167 | A00448 | A12696 | 232 |
| A00448 | A12744 | 266 | A00448 | A12824 | 473 |
| A00448 | A13055 | 151 | A00448 | A13294 | 486 |
| A00448 | A13989 | 491 | A00448 | A14006 | 278 |
| A00448 | A14505 | 236 | A00448 | A14566 | 179 |
| A00448 | A14655 | 450 | A00448 | A14701 | 408 |
| A00448 | A15215 | 303 | A00448 | A15373 | 218 |
| A00448 | A15733 | 489 | A00448 | A15762 | 344 |
| A00448 | A15764 | 486 | A00448 | A15945 | 374 |
| A00448 | A15946 | 479 | A00448 | A16067 | 457 |
| A00448 | A16144 | 466 | A00448 | A16212 | 228 |
| A00448 | A16302 | 485 | A00448 | A16842 | 173 |
| A00449 | A00453 | 330 | A00449 | A00468 | 490 |
| A00449 | A00472 | 162 | A00449 | A00478 | 196 |
| A00449 | A00484 | 172 | A00449 | A00537 | 383 |

|        |        |     |        |        |     |
|--------|--------|-----|--------|--------|-----|
| A00449 | A00541 | 491 | A00449 | A00574 | 491 |
| A00449 | A00614 | 285 | A00449 | A00628 | 440 |
| A00449 | A00633 | 436 | A00449 | A00651 | 152 |
| A00449 | A00654 | 491 | A00449 | A00659 | 174 |
| A00449 | A00660 | 488 | A00449 | A00661 | 446 |
| A00449 | A00662 | 488 | A00449 | A00663 | 456 |
| A00449 | A00666 | 457 | A00449 | A00681 | 486 |
| A00449 | A00695 | 419 | A00449 | A00696 | 491 |
| A00449 | A00738 | 335 | A00449 | A00770 | 452 |
| A00449 | A00773 | 395 | A00449 | A00784 | 337 |
| A00449 | A00813 | 200 | A00449 | A00825 | 491 |
| A00449 | A00868 | 227 | A00449 | A00892 | 249 |
| A00449 | A00962 | 491 | A00449 | A00993 | 457 |
| A00449 | A00995 | 208 | A00449 | A01005 | 475 |
| A00449 | A01008 | 490 | A00449 | A01018 | 491 |
| A00449 | A01046 | 401 | A00449 | A01137 | 170 |
| A00449 | A01138 | 213 | A00449 | A01174 | 301 |
| A00449 | A01176 | 272 | A00449 | A01222 | 491 |
| A00449 | A01223 | 491 | A00449 | A01225 | 447 |
| A00449 | A01227 | 480 | A00449 | A01230 | 491 |
| A00449 | A01233 | 449 | A00449 | A01256 | 251 |
| A00449 | A01297 | 491 | A00449 | A01322 | 345 |
| A00449 | A01344 | 469 | A00449 | A01397 | 394 |
| A00449 | A01404 | 385 | A00449 | A01409 | 491 |
| A00449 | A01461 | 486 | A00449 | A01515 | 324 |
| A00449 | A01573 | 213 | A00449 | A01585 | 319 |
| A00449 | A01590 | 224 | A00449 | A01635 | 491 |
| A00449 | A01643 | 477 | A00449 | A01668 | 167 |
| A00449 | A01713 | 389 | A00449 | A01722 | 193 |
| A00449 | A01740 | 921 | A00449 | A01741 | 446 |
| A00449 | A01743 | 455 | A00449 | A01755 | 438 |
| A00449 | A01793 | 159 | A00449 | A01883 | 176 |
| A00449 | A01899 | 423 | A00449 | A01926 | 480 |
| A00449 | A02008 | 227 | A00449 | A02011 | 337 |
| A00449 | A02014 | 254 | A00449 | A02020 | 404 |
| A00449 | A02023 | 196 | A00449 | A02071 | 160 |
| A00449 | A02083 | 420 | A00449 | A02114 | 385 |
| A00449 | A02129 | 202 | A00449 | A02215 | 152 |
| A00449 | A02252 | 154 | A00449 | A02254 | 490 |
| A00449 | A02284 | 358 | A00449 | A02306 | 246 |
| A00449 | A02316 | 449 | A00449 | A02377 | 357 |
| A00449 | A02443 | 346 | A00449 | A02463 | 224 |
| A00449 | A02468 | 154 | A00449 | A02491 | 218 |
| A00449 | A02521 | 491 | A00449 | A02524 | 257 |
| A00449 | A02529 | 216 | A00449 | A02574 | 240 |
| A00449 | A02691 | 193 | A00449 | A02777 | 491 |

|        |        |     |        |        |     |
|--------|--------|-----|--------|--------|-----|
| A00449 | A02778 | 398 | A00449 | A02779 | 491 |
| A00449 | A02859 | 177 | A00449 | A02930 | 185 |
| A00449 | A02992 | 457 | A00449 | A03016 | 199 |
| A00449 | A03050 | 474 | A00449 | A03056 | 210 |
| A00449 | A03059 | 278 | A00449 | A03099 | 424 |
| A00449 | A03146 | 353 | A00449 | A03148 | 218 |
| A00449 | A03167 | 485 | A00449 | A03168 | 165 |
| A00449 | A03174 | 154 | A00449 | A03234 | 174 |
| A00449 | A03259 | 441 | A00449 | A03370 | 374 |
| A00449 | A03423 | 491 | A00449 | A03442 | 232 |
| A00449 | A03484 | 488 | A00449 | A03513 | 491 |
| A00449 | A03545 | 337 | A00449 | A03795 | 469 |
| A00449 | A03968 | 413 | A00449 | A04095 | 417 |
| A00449 | A04188 | 221 | A00449 | A04228 | 452 |
| A00449 | A04332 | 184 | A00449 | A04366 | 228 |
| A00449 | A04460 | 165 | A00449 | A04556 | 249 |
| A00449 | A04702 | 358 | A00449 | A04791 | 486 |
| A00449 | A04839 | 424 | A00449 | A04883 | 491 |
| A00449 | A04891 | 383 | A00449 | A04927 | 491 |
| A00449 | A05006 | 273 | A00449 | A05007 | 467 |
| A00449 | A05014 | 241 | A00449 | A05045 | 491 |
| A00449 | A05050 | 424 | A00449 | A05051 | 479 |
| A00449 | A05064 | 252 | A00449 | A05224 | 177 |
| A00449 | A05297 | 475 | A00449 | A05309 | 165 |
| A00449 | A05315 | 899 | A00449 | A05330 | 447 |
| A00449 | A05331 | 378 | A00449 | A05337 | 483 |
| A00449 | A05358 | 330 | A00449 | A05376 | 270 |
| A00449 | A05403 | 299 | A00449 | A05416 | 488 |
| A00449 | A05418 | 489 | A00449 | A05420 | 232 |
| A00449 | A05424 | 450 | A00449 | A05433 | 232 |
| A00449 | A05451 | 299 | A00449 | A05462 | 218 |
| A00449 | A05463 | 465 | A00449 | A05548 | 477 |
| A00449 | A05549 | 247 | A00449 | A05550 | 485 |
| A00449 | A05573 | 491 | A00449 | A05610 | 328 |
| A00449 | A05753 | 358 | A00449 | A05754 | 350 |
| A00449 | A05757 | 185 | A00449 | A05771 | 196 |
| A00449 | A05789 | 286 | A00449 | A05883 | 335 |
| A00449 | A05912 | 369 | A00449 | A05966 | 330 |
| A00449 | A05986 | 456 | A00449 | A06014 | 196 |
| A00449 | A06165 | 210 | A00449 | A06245 | 188 |
| A00449 | A06358 | 232 | A00449 | A06385 | 308 |
| A00449 | A06402 | 369 | A00449 | A06405 | 491 |
| A00449 | A06439 | 491 | A00449 | A06466 | 199 |
| A00449 | A06553 | 247 | A00449 | A06607 | 358 |
| A00449 | A06626 | 184 | A00449 | A06635 | 176 |
| A00449 | A06638 | 221 | A00449 | A06639 | 268 |

|        |        |     |        |        |     |
|--------|--------|-----|--------|--------|-----|
| A00449 | A06641 | 462 | A00449 | A06650 | 191 |
| A00449 | A06682 | 247 | A00449 | A06689 | 457 |
| A00449 | A06700 | 434 | A00449 | A06733 | 274 |
| A00449 | A06809 | 268 | A00449 | A06847 | 436 |
| A00449 | A06855 | 422 | A00449 | A06860 | 491 |
| A00449 | A06970 | 450 | A00449 | A06979 | 313 |
| A00449 | A06994 | 369 | A00449 | A07007 | 219 |
| A00449 | A07027 | 446 | A00449 | A07037 | 417 |
| A00449 | A07059 | 491 | A00449 | A07078 | 165 |
| A00449 | A07088 | 491 | A00449 | A07109 | 462 |
| A00449 | A07122 | 458 | A00449 | A07205 | 163 |
| A00449 | A07230 | 247 | A00449 | A07238 | 268 |
| A00449 | A07239 | 475 | A00449 | A07311 | 199 |
| A00449 | A07354 | 328 | A00449 | A07366 | 407 |
| A00449 | A07407 | 204 | A00449 | A07408 | 291 |
| A00449 | A07477 | 466 | A00449 | A07501 | 185 |
| A00449 | A07503 | 485 | A00449 | A07520 | 491 |
| A00449 | A07553 | 179 | A00449 | A07558 | 406 |
| A00449 | A07559 | 167 | A00449 | A07590 | 411 |
| A00449 | A07619 | 196 | A00449 | A07674 | 491 |
| A00449 | A07684 | 319 | A00449 | A07688 | 260 |
| A00449 | A07690 | 488 | A00449 | A07736 | 479 |
| A00449 | A07757 | 490 | A00449 | A07763 | 306 |
| A00449 | A07779 | 299 | A00449 | A07800 | 279 |
| A00449 | A07847 | 281 | A00449 | A07851 | 346 |
| A00449 | A07856 | 312 | A00449 | A07933 | 472 |
| A00449 | A07973 | 324 | A00449 | A08114 | 184 |
| A00449 | A08127 | 174 | A00449 | A08138 | 163 |
| A00449 | A08155 | 278 | A00449 | A08366 | 308 |
| A00449 | A08368 | 232 | A00449 | A08372 | 256 |
| A00449 | A08385 | 418 | A00449 | A08636 | 232 |
| A00449 | A08785 | 201 | A00449 | A09126 | 188 |
| A00449 | A09845 | 427 | A00449 | A10420 | 406 |
| A00449 | A10424 | 157 | A00449 | A10444 | 201 |
| A00449 | A10446 | 216 | A00449 | A10456 | 473 |
| A00449 | A10537 | 299 | A00449 | A10625 | 335 |
| A00449 | A10635 | 486 | A00449 | A10652 | 235 |
| A00449 | A10686 | 260 | A00449 | A10687 | 380 |
| A00449 | A10690 | 278 | A00449 | A10693 | 198 |
| A00449 | A10696 | 380 | A00449 | A10708 | 286 |
| A00449 | A10715 | 243 | A00449 | A10780 | 307 |
| A00449 | A10883 | 268 | A00449 | A10926 | 202 |
| A00449 | A11425 | 311 | A00449 | A11457 | 417 |
| A00449 | A12033 | 210 | A00449 | A12055 | 188 |
| A00449 | A12507 | 491 | A00449 | A13155 | 221 |
| A00449 | A13179 | 247 | A00449 | A13871 | 394 |



|        |        |     |        |        |     |
|--------|--------|-----|--------|--------|-----|
| A00449 | A14247 | 463 | A00449 | A14828 | 335 |
| A00449 | A14907 | 268 | A00449 | A15390 | 174 |
| A00449 | A15637 | 180 | A00449 | A15874 | 168 |
| A00449 | A16027 | 338 | A00449 | A16138 | 162 |
| A00449 | A16529 | 434 | A00449 | A16741 | 483 |
| A00449 | A16744 | 319 | A00449 | A17006 | 480 |
| A00449 | A17046 | 162 | A00449 | A17078 | 486 |
| A00450 | A00471 | 185 | A00450 | A00522 | 585 |
| A00450 | A00540 | 224 | A00450 | A00546 | 179 |
| A00450 | A00562 | 491 | A00450 | A00565 | 577 |
| A00450 | A00606 | 154 | A00450 | A00625 | 689 |
| A00450 | A00638 | 491 | A00450 | A00691 | 379 |
| A00450 | A00786 | 490 | A00450 | A00805 | 404 |
| A00450 | A00812 | 473 | A00450 | A00814 | 251 |
| A00450 | A00824 | 226 | A00450 | A00829 | 229 |
| A00450 | A00862 | 688 | A00450 | A00864 | 375 |
| A00450 | A00877 | 480 | A00450 | A00941 | 491 |
| A00450 | A00951 | 168 | A00450 | A00971 | 446 |
| A00450 | A00989 | 491 | A00450 | A01021 | 490 |
| A00450 | A01036 | 485 | A00450 | A01091 | 255 |
| A00450 | A01169 | 193 | A00450 | A01216 | 457 |
| A00450 | A01242 | 469 | A00450 | A01291 | 241 |
| A00450 | A01327 | 428 | A00450 | A01345 | 193 |
| A00450 | A01358 | 490 | A00450 | A01366 | 424 |
| A00450 | A01402 | 167 | A00450 | A01454 | 229 |
| A00450 | A01459 | 686 | A00450 | A01472 | 488 |
| A00450 | A01507 | 491 | A00450 | A01514 | 581 |
| A00450 | A01541 | 247 | A00450 | A01568 | 491 |
| A00450 | A01622 | 373 | A00450 | A01647 | 491 |
| A00450 | A01681 | 443 | A00450 | A01687 | 468 |
| A00450 | A01988 | 629 | A00450 | A02535 | 462 |
| A00450 | A03330 | 213 | A00450 | A03528 | 210 |
| A00450 | A03597 | 393 | A00450 | A03769 | 170 |
| A00450 | A05008 | 268 | A00450 | A05015 | 319 |
| A00450 | A05016 | 402 | A00450 | A05301 | 368 |
| A00450 | A05428 | 462 | A00450 | A05638 | 441 |
| A00450 | A05872 | 191 | A00450 | A05894 | 346 |
| A00450 | A06176 | 419 | A00450 | A06819 | 488 |
| A00450 | A06924 | 205 | A00450 | A06941 | 477 |
| A00450 | A07054 | 475 | A00450 | A07198 | 168 |
| A00450 | A07207 | 489 | A00450 | A07242 | 491 |
| A00450 | A07253 | 401 | A00450 | A07364 | 249 |
| A00450 | A07495 | 154 | A00450 | A07665 | 193 |
| A00450 | A07706 | 152 | A00450 | A07802 | 391 |
| A00450 | A07893 | 439 | A00450 | A07954 | 171 |
| A00450 | A08934 | 441 | A00450 | A08962 | 260 |

|        |        |     |        |        |     |
|--------|--------|-----|--------|--------|-----|
| A00450 | A09083 | 180 | A00450 | A09650 | 273 |
| A00450 | A10996 | 324 | A00450 | A11284 | 491 |
| A00450 | A12047 | 578 | A00450 | A12048 | 154 |
| A00450 | A13146 | 232 | A00450 | A13949 | 388 |
| A00450 | A14167 | 154 | A00450 | A14209 | 491 |
| A00450 | A14222 | 491 | A00450 | A14281 | 480 |
| A00450 | A14474 | 200 | A00450 | A14484 | 764 |
| A00450 | A14540 | 230 | A00450 | A14633 | 710 |
| A00450 | A14827 | 196 | A00450 | A15197 | 152 |
| A00450 | A15222 | 146 | A00450 | A15232 | 229 |
| A00450 | A15295 | 303 | A00450 | A15370 | 491 |
| A00450 | A15380 | 491 | A00450 | A15618 | 358 |
| A00450 | A15644 | 200 | A00450 | A15665 | 491 |
| A00450 | A16552 | 491 | A00450 | A16611 | 268 |
| A00450 | A16980 | 229 | A00451 | A00697 | 63  |
| A00451 | A00931 | 486 | A00451 | A01021 | 490 |
| A00451 | A01059 | 204 | A00451 | A01286 | 486 |
| A00451 | A01307 | 63  | A00451 | A01315 | 489 |
| A00451 | A01342 | 473 | A00451 | A01546 | 254 |
| A00451 | A01832 | 439 | A00451 | A02278 | 491 |
| A00451 | A02931 | 462 | A00451 | A03110 | 179 |
| A00451 | A03271 | 319 | A00451 | A03314 | 475 |
| A00451 | A03398 | 152 | A00451 | A03625 | 65  |
| A00451 | A03684 | 213 | A00451 | A03784 | 200 |
| A00451 | A03830 | 483 | A00451 | A04015 | 154 |
| A00451 | A04111 | 288 | A00451 | A04323 | 187 |
| A00451 | A04668 | 474 | A00451 | A04731 | 193 |
| A00451 | A04737 | 174 | A00451 | A05310 | 152 |
| A00451 | A05400 | 347 | A00451 | A05534 | 306 |
| A00451 | A06650 | 461 | A00451 | A06982 | 483 |
| A00451 | A07148 | 227 | A00451 | A07173 | 343 |
| A00451 | A07311 | 899 | A00451 | A07883 | 172 |
| A00451 | A08502 | 489 | A00451 | A09744 | 132 |
| A00451 | A09997 | 199 | A00451 | A10899 | 171 |
| A00451 | A13605 | 195 | A00451 | A13829 | 63  |
| A00451 | A13994 | 281 | A00451 | A14072 | 470 |
| A00451 | A14103 | 322 | A00451 | A14193 | 488 |
| A00451 | A14208 | 469 | A00451 | A14319 | 177 |
| A00451 | A14502 | 179 | A00451 | A15314 | 221 |
| A00451 | A15325 | 221 | A00451 | A15557 | 486 |
| A00451 | A15677 | 210 | A00451 | A15834 | 152 |
| A00451 | A16911 | 151 | A00452 | A00480 | 371 |
| A00452 | A00503 | 305 | A00452 | A00508 | 168 |
| A00452 | A00555 | 695 | A00452 | A00570 | 572 |
| A00452 | A00629 | 424 | A00452 | A00670 | 414 |
| A00452 | A00687 | 573 | A00452 | A00689 | 296 |

|        |        |     |        |        |     |
|--------|--------|-----|--------|--------|-----|
| A00452 | A00717 | 490 | A00452 | A00721 | 561 |
| A00452 | A00727 | 488 | A00452 | A00772 | 693 |
| A00452 | A00854 | 339 | A00452 | A00865 | 407 |
| A00452 | A00867 | 419 | A00452 | A00883 | 384 |
| A00452 | A00928 | 575 | A00452 | A00952 | 694 |
| A00452 | A00972 | 531 | A00452 | A00997 | 217 |
| A00452 | A01091 | 428 | A00452 | A01107 | 574 |
| A00452 | A01159 | 217 | A00452 | A01221 | 471 |
| A00452 | A01243 | 572 | A00452 | A01255 | 441 |
| A00452 | A01352 | 694 | A00452 | A01412 | 229 |
| A00452 | A01418 | 217 | A00452 | A01451 | 255 |
| A00452 | A01598 | 452 | A00452 | A02212 | 414 |
| A00452 | A02877 | 273 | A00452 | A02910 | 221 |
| A00452 | A03065 | 486 | A00452 | A03556 | 217 |
| A00452 | A03617 | 217 | A00452 | A03887 | 165 |
| A00452 | A04075 | 213 | A00452 | A05605 | 217 |
| A00452 | A06122 | 172 | A00452 | A06204 | 472 |
| A00452 | A06347 | 384 | A00452 | A06369 | 372 |
| A00452 | A06698 | 162 | A00452 | A06832 | 565 |
| A00452 | A07756 | 414 | A00452 | A07956 | 414 |
| A00452 | A08183 | 488 | A00452 | A08467 | 419 |
| A00452 | A08515 | 321 | A00452 | A08517 | 429 |
| A00452 | A08982 | 445 | A00452 | A08984 | 679 |
| A00452 | A08990 | 229 | A00452 | A09627 | 414 |
| A00452 | A09673 | 470 | A00452 | A09734 | 208 |
| A00452 | A10317 | 322 | A00452 | A11277 | 296 |
| A00452 | A11406 | 201 | A00452 | A11584 | 243 |
| A00452 | A13397 | 159 | A00452 | A14087 | 172 |
| A00452 | A14088 | 479 | A00452 | A14186 | 446 |
| A00452 | A14196 | 434 | A00452 | A14246 | 278 |
| A00452 | A14596 | 185 | A00452 | A14836 | 168 |
| A00452 | A15237 | 180 | A00452 | A15278 | 293 |
| A00452 | A15297 | 185 | A00452 | A15323 | 480 |
| A00452 | A15324 | 489 | A00452 | A15339 | 221 |
| A00452 | A15353 | 452 | A00452 | A15370 | 485 |
| A00452 | A15374 | 422 | A00452 | A15377 | 693 |
| A00452 | A15543 | 574 | A00452 | A15564 | 452 |
| A00452 | A15677 | 472 | A00452 | A15724 | 518 |
| A00452 | A16463 | 470 | A00452 | A16495 | 379 |
| A00452 | A16664 | 217 | A00452 | A17063 | 419 |
| A00453 | A00458 | 491 | A00453 | A00529 | 241 |
| A00453 | A00531 | 374 | A00453 | A00532 | 490 |
| A00453 | A00541 | 452 | A00453 | A00547 | 157 |
| A00453 | A00574 | 491 | A00453 | A00579 | 199 |
| A00453 | A00614 | 281 | A00453 | A00628 | 335 |
| A00453 | A00654 | 491 | A00453 | A00660 | 191 |

|        |        |     |        |        |     |
|--------|--------|-----|--------|--------|-----|
| A00453 | A00666 | 455 | A00453 | A00681 | 491 |
| A00453 | A00695 | 313 | A00453 | A00731 | 218 |
| A00453 | A00738 | 481 | A00453 | A00739 | 218 |
| A00453 | A00762 | 208 | A00453 | A00770 | 452 |
| A00453 | A00771 | 190 | A00453 | A00773 | 227 |
| A00453 | A00905 | 187 | A00453 | A00916 | 401 |
| A00453 | A00919 | 428 | A00453 | A00962 | 490 |
| A00453 | A00995 | 435 | A00453 | A01008 | 491 |
| A00453 | A01029 | 213 | A00453 | A01040 | 162 |
| A00453 | A01065 | 154 | A00453 | A01075 | 491 |
| A00453 | A01082 | 490 | A00453 | A01084 | 450 |
| A00453 | A01087 | 490 | A00453 | A01109 | 369 |
| A00453 | A01150 | 162 | A00453 | A01174 | 190 |
| A00453 | A01175 | 484 | A00453 | A01223 | 204 |
| A00453 | A01233 | 401 | A00453 | A01255 | 160 |
| A00453 | A01256 | 443 | A00453 | A01268 | 195 |
| A00453 | A01272 | 439 | A00453 | A01295 | 455 |
| A00453 | A01354 | 205 | A00453 | A01397 | 393 |
| A00453 | A01442 | 154 | A00453 | A01481 | 188 |
| A00453 | A01508 | 466 | A00453 | A01597 | 162 |
| A00453 | A01598 | 385 | A00453 | A01614 | 152 |
| A00453 | A01635 | 491 | A00453 | A01707 | 299 |
| A00453 | A01735 | 162 | A00453 | A01787 | 207 |
| A00453 | A01857 | 299 | A00453 | A02053 | 185 |
| A00453 | A02290 | 313 | A00453 | A02366 | 262 |
| A00453 | A02521 | 207 | A00453 | A02992 | 272 |
| A00453 | A03004 | 157 | A00453 | A03016 | 267 |
| A00453 | A03167 | 419 | A00453 | A03168 | 434 |
| A00453 | A03441 | 196 | A00453 | A03477 | 466 |
| A00453 | A03487 | 174 | A00453 | A03569 | 154 |
| A00453 | A03861 | 306 | A00453 | A04779 | 491 |
| A00453 | A04784 | 235 | A00453 | A04791 | 263 |
| A00453 | A04834 | 425 | A00453 | A04850 | 205 |
| A00453 | A04995 | 353 | A00453 | A05007 | 488 |
| A00453 | A05013 | 254 | A00453 | A05102 | 396 |
| A00453 | A05416 | 440 | A00453 | A05462 | 151 |
| A00453 | A05472 | 213 | A00453 | A05516 | 358 |
| A00453 | A05759 | 271 | A00453 | A05774 | 488 |
| A00453 | A05820 | 281 | A00453 | A05883 | 163 |
| A00453 | A06088 | 205 | A00453 | A06252 | 179 |
| A00453 | A06358 | 461 | A00453 | A06359 | 286 |
| A00453 | A06405 | 291 | A00453 | A06633 | 422 |
| A00453 | A06700 | 190 | A00453 | A06756 | 232 |
| A00453 | A06847 | 172 | A00453 | A06912 | 159 |
| A00453 | A06968 | 302 | A00453 | A06970 | 416 |
| A00453 | A07059 | 296 | A00453 | A07109 | 366 |

|        |        |     |        |        |     |
|--------|--------|-----|--------|--------|-----|
| A00453 | A07122 | 483 | A00453 | A07238 | 430 |
| A00453 | A07256 | 210 | A00453 | A07304 | 420 |
| A00453 | A07376 | 180 | A00453 | A07413 | 479 |
| A00453 | A07530 | 388 | A00453 | A07553 | 450 |
| A00453 | A07554 | 474 | A00453 | A07590 | 373 |
| A00453 | A07690 | 151 | A00453 | A07706 | 488 |
| A00453 | A07736 | 156 | A00453 | A07800 | 348 |
| A00453 | A07885 | 299 | A00453 | A08108 | 414 |
| A00453 | A08113 | 154 | A00453 | A08137 | 467 |
| A00453 | A08155 | 199 | A00453 | A08248 | 201 |
| A00453 | A08431 | 151 | A00453 | A08694 | 270 |
| A00453 | A08751 | 210 | A00453 | A08991 | 180 |
| A00453 | A09849 | 340 | A00453 | A10020 | 294 |
| A00453 | A10038 | 179 | A00453 | A10443 | 187 |
| A00453 | A10444 | 268 | A00453 | A10452 | 238 |
| A00453 | A10456 | 443 | A00453 | A10475 | 196 |
| A00453 | A10702 | 279 | A00453 | A10712 | 480 |
| A00453 | A10714 | 406 | A00453 | A10880 | 311 |
| A00453 | A10885 | 382 | A00453 | A11132 | 191 |
| A00453 | A11271 | 162 | A00453 | A11297 | 171 |
| A00453 | A11309 | 160 | A00453 | A11324 | 195 |
| A00453 | A11325 | 468 | A00453 | A11381 | 484 |
| A00453 | A11496 | 291 | A00453 | A11695 | 177 |
| A00453 | A11703 | 285 | A00453 | A11930 | 483 |
| A00453 | A11933 | 465 | A00453 | A12850 | 213 |
| A00453 | A13311 | 187 | A00453 | A13314 | 193 |
| A00453 | A13527 | 379 | A00453 | A13735 | 156 |
| A00453 | A13781 | 270 | A00453 | A13804 | 196 |
| A00453 | A13989 | 399 | A00453 | A14086 | 215 |
| A00453 | A14272 | 171 | A00453 | A14298 | 391 |
| A00453 | A14337 | 235 | A00453 | A14566 | 205 |
| A00453 | A14628 | 199 | A00453 | A14821 | 210 |
| A00453 | A14903 | 170 | A00453 | A14917 | 159 |
| A00453 | A15353 | 259 | A00453 | A15371 | 177 |
| A00453 | A15654 | 201 | A00453 | A15870 | 480 |
| A00453 | A15874 | 469 | A00453 | A15905 | 469 |
| A00453 | A15940 | 160 | A00453 | A15941 | 159 |
| A00453 | A15951 | 191 | A00453 | A16027 | 266 |
| A00453 | A16028 | 163 | A00453 | A16060 | 213 |
| A00453 | A16103 | 172 | A00453 | A16215 | 177 |
| A00453 | A16262 | 422 | A00453 | A16291 | 241 |
| A00453 | A16346 | 294 | A00453 | A16529 | 205 |
| A00453 | A16587 | 152 | A00453 | A16646 | 156 |
| A00453 | A16798 | 491 | A00453 | A16822 | 172 |
| A00453 | A16896 | 226 | A00453 | A16944 | 187 |
| A00453 | A16959 | 484 | A00453 | A17005 | 400 |

|        |        |     |        |        |     |
|--------|--------|-----|--------|--------|-----|
| A00453 | A17012 | 159 | A00453 | A17033 | 167 |
| A00453 | A17036 | 174 | A00453 | A17040 | 185 |
| A00453 | A17142 | 205 | A00454 | A00489 | 383 |
| A00454 | A00494 | 252 | A00454 | A00521 | 388 |
| A00454 | A00532 | 165 | A00454 | A00537 | 491 |
| A00454 | A00544 | 373 | A00454 | A00564 | 462 |
| A00454 | A00571 | 462 | A00454 | A00576 | 311 |
| A00454 | A00604 | 491 | A00454 | A00605 | 724 |
| A00454 | A00629 | 441 | A00454 | A00640 | 152 |
| A00454 | A00648 | 446 | A00454 | A00651 | 450 |
| A00454 | A00653 | 620 | A00454 | A00687 | 414 |
| A00454 | A00694 | 363 | A00454 | A00697 | 491 |
| A00454 | A00698 | 447 | A00454 | A00700 | 484 |
| A00454 | A00701 | 105 | A00454 | A00726 | 445 |
| A00454 | A00741 | 429 | A00454 | A00762 | 180 |
| A00454 | A00782 | 281 | A00454 | A00783 | 491 |
| A00454 | A00785 | 483 | A00454 | A00787 | 180 |
| A00454 | A00790 | 447 | A00454 | A00808 | 256 |
| A00454 | A00809 | 491 | A00454 | A00810 | 152 |
| A00454 | A00811 | 485 | A00454 | A00831 | 333 |
| A00454 | A00833 | 299 | A00454 | A00839 | 491 |
| A00454 | A00843 | 185 | A00454 | A00848 | 480 |
| A00454 | A00878 | 443 | A00454 | A00910 | 695 |
| A00454 | A00912 | 368 | A00454 | A00922 | 704 |
| A00454 | A00932 | 445 | A00454 | A00935 | 420 |
| A00454 | A00970 | 224 | A00454 | A00974 | 299 |
| A00454 | A00980 | 343 | A00454 | A00984 | 605 |
| A00454 | A00987 | 299 | A00454 | A01001 | 544 |
| A00454 | A01027 | 483 | A00454 | A01038 | 283 |
| A00454 | A01042 | 695 | A00454 | A01052 | 207 |
| A00454 | A01054 | 412 | A00454 | A01075 | 447 |
| A00454 | A01082 | 462 | A00454 | A01083 | 491 |
| A00454 | A01101 | 401 | A00454 | A01102 | 299 |
| A00454 | A01108 | 279 | A00454 | A01112 | 368 |
| A00454 | A01115 | 745 | A00454 | A01121 | 213 |
| A00454 | A01127 | 413 | A00454 | A01150 | 491 |
| A00454 | A01161 | 455 | A00454 | A01166 | 297 |
| A00454 | A01192 | 411 | A00454 | A01206 | 457 |
| A00454 | A01219 | 285 | A00454 | A01234 | 379 |
| A00454 | A01249 | 157 | A00454 | A01261 | 168 |
| A00454 | A01265 | 317 | A00454 | A01291 | 491 |
| A00454 | A01300 | 490 | A00454 | A01311 | 152 |
| A00454 | A01335 | 452 | A00454 | A01354 | 460 |
| A00454 | A01369 | 245 | A00454 | A01379 | 620 |
| A00454 | A01387 | 610 | A00454 | A01411 | 449 |
| A00454 | A01413 | 160 | A00454 | A01431 | 491 |

|        |        |     |        |        |     |
|--------|--------|-----|--------|--------|-----|
| A00454 | A01435 | 491 | A00454 | A01439 | 299 |
| A00454 | A01446 | 526 | A00454 | A01468 | 474 |
| A00454 | A01470 | 483 | A00454 | A01540 | 480 |
| A00454 | A01569 | 468 | A00454 | A01577 | 152 |
| A00454 | A01579 | 484 | A00454 | A01586 | 249 |
| A00454 | A01601 | 457 | A00454 | A01612 | 374 |
| A00454 | A01627 | 299 | A00454 | A01641 | 188 |
| A00454 | A01649 | 477 | A00454 | A01707 | 234 |
| A00454 | A01822 | 188 | A00454 | A01850 | 474 |
| A00454 | A02350 | 489 | A00454 | A02601 | 603 |
| A00454 | A02703 | 401 | A00454 | A02791 | 269 |
| A00454 | A02864 | 401 | A00454 | A03298 | 473 |
| A00454 | A03446 | 430 | A00454 | A03516 | 249 |
| A00454 | A03567 | 474 | A00454 | A03697 | 152 |
| A00454 | A03740 | 491 | A00454 | A03752 | 490 |
| A00454 | A03809 | 491 | A00454 | A03817 | 279 |
| A00454 | A03981 | 177 | A00454 | A04495 | 299 |
| A00454 | A05086 | 693 | A00454 | A05419 | 205 |
| A00454 | A05501 | 461 | A00454 | A06037 | 257 |
| A00454 | A06287 | 152 | A00454 | A06466 | 491 |
| A00454 | A06742 | 188 | A00454 | A07311 | 491 |
| A00454 | A07323 | 246 | A00454 | A07362 | 201 |
| A00454 | A07394 | 462 | A00454 | A07398 | 132 |
| A00454 | A07451 | 204 | A00454 | A07527 | 296 |
| A00454 | A07686 | 177 | A00454 | A07744 | 152 |
| A00454 | A07798 | 468 | A00454 | A08053 | 490 |
| A00454 | A08054 | 491 | A00454 | A08061 | 152 |
| A00454 | A08098 | 152 | A00454 | A08110 | 272 |
| A00454 | A08137 | 466 | A00454 | A08178 | 152 |
| A00454 | A08359 | 457 | A00454 | A08571 | 489 |
| A00454 | A08763 | 152 | A00454 | A08826 | 362 |
| A00454 | A08835 | 171 | A00454 | A08947 | 299 |
| A00454 | A09004 | 299 | A00454 | A09476 | 430 |
| A00454 | A09592 | 389 | A00454 | A09902 | 196 |
| A00454 | A10532 | 516 | A00454 | A10842 | 152 |
| A00454 | A11286 | 301 | A00454 | A11296 | 174 |
| A00454 | A11302 | 491 | A00454 | A11322 | 348 |
| A00454 | A11338 | 302 | A00454 | A11344 | 394 |
| A00454 | A11372 | 491 | A00454 | A11480 | 151 |
| A00454 | A11787 | 236 | A00454 | A11944 | 245 |
| A00454 | A12167 | 486 | A00454 | A12328 | 351 |
| A00454 | A12329 | 360 | A00454 | A12418 | 272 |
| A00454 | A12569 | 162 | A00454 | A13335 | 458 |
| A00454 | A13340 | 490 | A00454 | A13360 | 272 |
| A00454 | A13494 | 188 | A00454 | A13522 | 288 |
| A00454 | A13865 | 236 | A00454 | A13989 | 488 |

|        |        |     |        |        |     |
|--------|--------|-----|--------|--------|-----|
| A00454 | A14073 | 491 | A00454 | A14216 | 490 |
| A00454 | A14476 | 162 | A00454 | A14525 | 152 |
| A00454 | A14596 | 485 | A00454 | A14614 | 234 |
| A00454 | A14642 | 345 | A00454 | A14937 | 263 |
| A00454 | A15244 | 468 | A00454 | A15275 | 491 |
| A00454 | A15375 | 152 | A00454 | A15546 | 152 |
| A00454 | A15652 | 235 | A00454 | A15660 | 491 |
| A00454 | A15666 | 481 | A00454 | A15684 | 491 |
| A00454 | A15694 | 472 | A00454 | A15695 | 362 |
| A00454 | A15699 | 462 | A00454 | A15730 | 241 |
| A00454 | A15769 | 340 | A00454 | A15889 | 168 |
| A00454 | A15931 | 480 | A00454 | A15932 | 160 |
| A00454 | A15988 | 260 | A00454 | A16088 | 296 |
| A00454 | A16092 | 375 | A00454 | A16157 | 270 |
| A00454 | A16633 | 481 | A00454 | A17134 | 288 |
| A00454 | A17142 | 335 | A00454 | A17188 | 200 |
| A00455 | A00486 | 249 | A00455 | A00582 | 488 |
| A00455 | A00664 | 411 | A00455 | A00736 | 394 |
| A00455 | A01046 | 258 | A00455 | A01185 | 394 |
| A00455 | A01361 | 338 | A00455 | A01405 | 179 |
| A00455 | A01419 | 449 | A00455 | A01835 | 247 |
| A00455 | A01915 | 188 | A00455 | A01926 | 491 |
| A00455 | A02011 | 204 | A00455 | A02342 | 182 |
| A00455 | A02397 | 163 | A00455 | A02405 | 252 |
| A00455 | A02490 | 177 | A00455 | A02491 | 382 |
| A00455 | A02539 | 430 | A00455 | A02593 | 152 |
| A00455 | A02623 | 224 | A00455 | A02687 | 154 |
| A00455 | A02697 | 363 | A00455 | A02713 | 200 |
| A00455 | A02741 | 165 | A00455 | A02751 | 390 |
| A00455 | A02756 | 167 | A00455 | A02761 | 353 |
| A00455 | A02798 | 180 | A00455 | A02837 | 193 |
| A00455 | A02888 | 163 | A00455 | A02961 | 193 |
| A00455 | A03034 | 288 | A00455 | A03777 | 224 |
| A00455 | A04487 | 490 | A00455 | A04548 | 152 |
| A00455 | A04567 | 162 | A00455 | A04600 | 276 |
| A00455 | A04793 | 205 | A00455 | A04805 | 324 |
| A00455 | A04962 | 151 | A00455 | A05256 | 187 |
| A00455 | A05278 | 430 | A00455 | A05309 | 180 |
| A00455 | A05559 | 288 | A00455 | A05571 | 332 |
| A00455 | A05591 | 491 | A00455 | A05665 | 195 |
| A00455 | A05667 | 288 | A00455 | A05828 | 351 |
| A00455 | A05900 | 332 | A00455 | A07129 | 449 |
| A00455 | A07343 | 355 | A00455 | A07933 | 454 |
| A00455 | A08638 | 306 | A00455 | A09036 | 224 |
| A00455 | A10091 | 447 | A00455 | A10159 | 486 |
| A00455 | A10358 | 154 | A00455 | A10414 | 301 |



|        |        |     |        |        |     |
|--------|--------|-----|--------|--------|-----|
| A00455 | A10609 | 491 | A00455 | A10742 | 238 |
| A00455 | A11498 | 407 | A00455 | A12629 | 355 |
| A00455 | A13500 | 213 | A00455 | A13647 | 229 |
| A00455 | A14454 | 484 | A00455 | A15224 | 201 |
| A00455 | A15228 | 468 | A00455 | A16623 | 185 |
| A00456 | A00460 | 183 | A00456 | A00595 | 330 |
| A00456 | A00619 | 218 | A00456 | A00691 | 177 |
| A00456 | A00749 | 205 | A00456 | A00767 | 321 |
| A00456 | A00916 | 95  | A00456 | A00918 | 380 |
| A00456 | A00992 | 409 | A00456 | A01092 | 241 |
| A00456 | A01098 | 230 | A00456 | A01136 | 382 |
| A00456 | A01170 | 323 | A00456 | A01278 | 157 |
| A00456 | A01279 | 224 | A00456 | A01351 | 279 |
| A00456 | A01538 | 162 | A00456 | A02164 | 79  |
| A00456 | A02265 | 401 | A00456 | A03028 | 217 |
| A00456 | A03432 | 252 | A00456 | A03438 | 180 |
| A00456 | A03628 | 196 | A00456 | A03629 | 321 |
| A00456 | A05415 | 172 | A00456 | A07244 | 262 |
| A00456 | A07378 | 428 | A00456 | A16076 | 249 |
| A00457 | A00460 | 467 | A00457 | A00473 | 408 |
| A00457 | A00502 | 247 | A00457 | A00506 | 306 |
| A00457 | A00514 | 137 | A00457 | A00523 | 475 |
| A00457 | A00525 | 467 | A00457 | A00531 | 404 |
| A00457 | A00537 | 207 | A00457 | A00561 | 430 |
| A00457 | A00571 | 474 | A00457 | A00604 | 445 |
| A00457 | A00649 | 264 | A00457 | A00651 | 427 |
| A00457 | A00653 | 591 | A00457 | A00731 | 247 |
| A00457 | A00737 | 154 | A00457 | A00741 | 393 |
| A00457 | A00783 | 321 | A00457 | A00785 | 286 |
| A00457 | A00790 | 382 | A00457 | A00796 | 229 |
| A00457 | A00820 | 360 | A00457 | A00821 | 449 |
| A00457 | A00822 | 356 | A00457 | A00849 | 592 |
| A00457 | A00878 | 232 | A00457 | A00902 | 234 |
| A00457 | A00953 | 445 | A00457 | A00974 | 247 |
| A00457 | A00984 | 294 | A00457 | A00985 | 190 |
| A00457 | A00987 | 343 | A00457 | A00998 | 488 |
| A00457 | A01013 | 402 | A00457 | A01022 | 294 |
| A00457 | A01027 | 247 | A00457 | A01042 | 401 |
| A00457 | A01086 | 585 | A00457 | A01108 | 356 |
| A00457 | A01109 | 265 | A00457 | A01127 | 252 |
| A00457 | A01150 | 592 | A00457 | A01161 | 592 |
| A00457 | A01204 | 247 | A00457 | A01210 | 395 |
| A00457 | A01211 | 353 | A00457 | A01215 | 307 |
| A00457 | A01245 | 260 | A00457 | A01253 | 168 |
| A00457 | A01275 | 218 | A00457 | A01287 | 591 |
| A00457 | A01328 | 163 | A00457 | A01346 | 247 |

|        |        |     |        |        |     |
|--------|--------|-----|--------|--------|-----|
| A00457 | A01353 | 218 | A00457 | A01399 | 287 |
| A00457 | A01413 | 299 | A00457 | A01431 | 343 |
| A00457 | A01443 | 247 | A00457 | A01448 | 177 |
| A00457 | A01468 | 224 | A00457 | A01470 | 159 |
| A00457 | A01496 | 281 | A00457 | A01502 | 480 |
| A00457 | A01504 | 427 | A00457 | A01540 | 490 |
| A00457 | A01543 | 297 | A00457 | A01567 | 353 |
| A00457 | A01572 | 162 | A00457 | A01582 | 486 |
| A00457 | A01627 | 160 | A00457 | A01667 | 491 |
| A00457 | A01668 | 188 | A00457 | A01711 | 456 |
| A00457 | A01815 | 260 | A00457 | A01819 | 389 |
| A00457 | A01825 | 469 | A00457 | A01832 | 390 |
| A00457 | A01833 | 260 | A00457 | A01844 | 418 |
| A00457 | A01957 | 157 | A00457 | A02138 | 191 |
| A00457 | A02162 | 210 | A00457 | A02208 | 165 |
| A00457 | A02994 | 588 | A00457 | A03150 | 210 |
| A00457 | A03257 | 243 | A00457 | A03320 | 229 |
| A00457 | A03435 | 404 | A00457 | A03456 | 171 |
| A00457 | A03520 | 154 | A00457 | A03716 | 235 |
| A00457 | A03740 | 408 | A00457 | A03790 | 254 |
| A00457 | A03856 | 274 | A00457 | A03885 | 232 |
| A00457 | A03959 | 342 | A00457 | A04056 | 347 |
| A00457 | A04265 | 157 | A00457 | A04304 | 196 |
| A00457 | A04473 | 302 | A00457 | A04903 | 208 |
| A00457 | A05041 | 229 | A00457 | A05449 | 172 |
| A00457 | A05608 | 372 | A00457 | A05703 | 270 |
| A00457 | A05734 | 171 | A00457 | A06048 | 329 |
| A00457 | A06463 | 286 | A00457 | A06794 | 329 |
| A00457 | A06804 | 329 | A00457 | A07102 | 302 |
| A00457 | A07160 | 243 | A00457 | A07403 | 229 |
| A00457 | A07446 | 154 | A00457 | A07773 | 345 |
| A00457 | A07793 | 190 | A00457 | A07990 | 224 |
| A00457 | A08073 | 270 | A00457 | A08118 | 200 |
| A00457 | A08191 | 418 | A00457 | A08528 | 457 |
| A00457 | A08903 | 312 | A00457 | A09321 | 243 |
| A00457 | A09709 | 160 | A00457 | A09778 | 171 |
| A00457 | A09941 | 235 | A00457 | A10598 | 405 |
| A00457 | A11352 | 270 | A00457 | A11677 | 247 |
| A00457 | A12056 | 329 | A00457 | A12143 | 329 |
| A00457 | A13287 | 243 | A00457 | A13555 | 306 |
| A00457 | A13769 | 329 | A00457 | A14073 | 303 |
| A00457 | A14699 | 591 | A00457 | A14778 | 421 |
| A00457 | A14816 | 173 | A00457 | A15109 | 385 |
| A00457 | A15117 | 329 | A00457 | A15624 | 423 |
| A00457 | A15668 | 177 | A00457 | A15684 | 465 |
| A00457 | A15699 | 171 | A00457 | A15917 | 441 |

|        |        |     |        |        |     |
|--------|--------|-----|--------|--------|-----|
| A00457 | A16072 | 283 | A00457 | A16076 | 452 |
| A00457 | A16082 | 162 | A00457 | A16096 | 154 |
| A00457 | A16299 | 205 | A00457 | A16587 | 247 |
| A00458 | A00481 | 341 | A00458 | A00491 | 205 |
| A00458 | A00501 | 379 | A00458 | A00531 | 491 |
| A00458 | A00532 | 491 | A00458 | A00560 | 338 |
| A00458 | A00589 | 385 | A00458 | A00604 | 290 |
| A00458 | A00605 | 457 | A00458 | A00658 | 238 |
| A00458 | A00760 | 454 | A00458 | A00762 | 425 |
| A00458 | A00793 | 271 | A00458 | A00822 | 484 |
| A00458 | A00835 | 423 | A00458 | A00879 | 314 |
| A00458 | A00883 | 439 | A00458 | A00905 | 477 |
| A00458 | A00916 | 491 | A00458 | A00919 | 491 |
| A00458 | A00940 | 363 | A00458 | A00947 | 430 |
| A00458 | A01029 | 201 | A00458 | A01075 | 491 |
| A00458 | A01077 | 318 | A00458 | A01082 | 491 |
| A00458 | A01084 | 491 | A00458 | A01087 | 491 |
| A00458 | A01150 | 274 | A00458 | A01166 | 430 |
| A00458 | A01206 | 488 | A00458 | A01234 | 469 |
| A00458 | A01285 | 361 | A00458 | A01291 | 484 |
| A00458 | A01354 | 491 | A00458 | A01406 | 480 |
| A00458 | A01470 | 347 | A00458 | A01488 | 213 |
| A00458 | A01492 | 241 | A00458 | A01503 | 329 |
| A00458 | A01540 | 420 | A00458 | A01598 | 491 |
| A00458 | A01612 | 480 | A00458 | A01614 | 486 |
| A00458 | A01649 | 477 | A00458 | A01707 | 491 |
| A00458 | A01731 | 199 | A00458 | A03171 | 480 |
| A00458 | A03446 | 272 | A00458 | A03569 | 477 |
| A00458 | A03601 | 412 | A00458 | A03740 | 306 |
| A00458 | A03752 | 221 | A00458 | A03757 | 299 |
| A00458 | A03817 | 489 | A00458 | A05230 | 314 |
| A00458 | A05501 | 279 | A00458 | A05633 | 341 |
| A00458 | A06466 | 260 | A00458 | A06907 | 485 |
| A00458 | A07004 | 265 | A00458 | A07414 | 183 |
| A00458 | A07524 | 296 | A00458 | A07604 | 483 |
| A00458 | A07706 | 491 | A00458 | A07956 | 171 |
| A00458 | A08137 | 491 | A00458 | A08214 | 157 |
| A00458 | A08357 | 344 | A00458 | A08527 | 454 |
| A00458 | A08571 | 394 | A00458 | A09825 | 355 |
| A00458 | A10624 | 307 | A00458 | A11109 | 190 |
| A00458 | A11452 | 307 | A00458 | A11930 | 491 |
| A00458 | A11948 | 167 | A00458 | A12329 | 204 |
| A00458 | A12543 | 207 | A00458 | A12746 | 278 |
| A00458 | A13989 | 491 | A00458 | A14006 | 489 |
| A00458 | A14220 | 491 | A00458 | A14221 | 185 |
| A00458 | A14566 | 490 | A00458 | A14594 | 469 |

|        |        |     |        |        |     |
|--------|--------|-----|--------|--------|-----|
| A00458 | A14596 | 265 | A00458 | A14835 | 218 |
| A00458 | A15141 | 167 | A00458 | A15215 | 294 |
| A00458 | A15366 | 380 | A00458 | A15463 | 213 |
| A00458 | A15660 | 210 | A00458 | A15733 | 185 |
| A00458 | A15773 | 299 | A00458 | A16044 | 243 |
| A00458 | A16060 | 227 | A00458 | A16328 | 217 |
| A00458 | A16619 | 278 | A00458 | A17063 | 463 |
| A00458 | A17142 | 252 | A00459 | A00488 | 443 |
| A00459 | A00520 | 251 | A00459 | A00550 | 490 |
| A00459 | A00584 | 174 | A00459 | A00595 | 174 |
| A00459 | A00690 | 223 | A00459 | A00749 | 174 |
| A00459 | A00761 | 191 | A00459 | A00767 | 174 |
| A00459 | A00908 | 174 | A00459 | A00916 | 453 |
| A00459 | A00918 | 174 | A00459 | A00956 | 313 |
| A00459 | A00960 | 174 | A00459 | A00992 | 174 |
| A00459 | A01020 | 224 | A00459 | A01116 | 238 |
| A00459 | A01184 | 455 | A00459 | A01193 | 174 |
| A00459 | A01234 | 326 | A00459 | A01279 | 174 |
| A00459 | A01339 | 185 | A00459 | A01351 | 174 |
| A00459 | A01365 | 196 | A00459 | A01424 | 174 |
| A00459 | A01492 | 251 | A00459 | A01539 | 411 |
| A00459 | A02364 | 408 | A00459 | A05845 | 291 |
| A00459 | A06660 | 157 | A00459 | A06698 | 174 |
| A00459 | A07054 | 402 | A00459 | A07223 | 321 |
| A00459 | A07244 | 174 | A00459 | A07347 | 490 |
| A00459 | A07432 | 174 | A00459 | A07524 | 174 |
| A00459 | A07625 | 174 | A00459 | A07661 | 399 |
| A00459 | A07725 | 480 | A00459 | A07924 | 174 |
| A00459 | A07961 | 191 | A00459 | A11544 | 174 |
| A00459 | A11831 | 174 | A00459 | A11832 | 174 |
| A00459 | A14188 | 191 | A00459 | A15354 | 226 |
| A00460 | A00531 | 260 | A00460 | A00571 | 221 |
| A00460 | A00598 | 204 | A00460 | A00604 | 172 |
| A00460 | A00651 | 198 | A00460 | A00653 | 484 |
| A00460 | A00697 | 173 | A00460 | A00731 | 159 |
| A00460 | A00741 | 391 | A00460 | A00745 | 229 |
| A00460 | A00796 | 294 | A00460 | A00806 | 223 |
| A00460 | A00821 | 462 | A00460 | A00849 | 210 |
| A00460 | A00987 | 353 | A00460 | A01013 | 263 |
| A00460 | A01023 | 278 | A00460 | A01042 | 202 |
| A00460 | A01150 | 489 | A00460 | A01155 | 152 |
| A00460 | A01161 | 477 | A00460 | A01192 | 232 |
| A00460 | A01245 | 204 | A00460 | A01380 | 626 |
| A00460 | A01393 | 152 | A00460 | A01413 | 472 |
| A00460 | A01496 | 160 | A00460 | A01540 | 634 |
| A00460 | A01569 | 191 | A00460 | A01611 | 171 |

|        |        |     |        |        |     |
|--------|--------|-----|--------|--------|-----|
| A00460 | A01648 | 286 | A00460 | A01667 | 355 |
| A00460 | A01711 | 191 | A00460 | A01819 | 243 |
| A00460 | A01827 | 177 | A00460 | A01850 | 484 |
| A00460 | A02059 | 228 | A00460 | A02353 | 324 |
| A00460 | A02877 | 63  | A00460 | A03398 | 159 |
| A00460 | A03456 | 241 | A00460 | A03467 | 322 |
| A00460 | A03516 | 356 | A00460 | A03671 | 187 |
| A00460 | A03691 | 241 | A00460 | A03740 | 622 |
| A00460 | A03759 | 489 | A00460 | A04752 | 257 |
| A00460 | A05086 | 324 | A00460 | A05375 | 185 |
| A00460 | A06048 | 371 | A00460 | A07081 | 347 |
| A00460 | A07102 | 324 | A00460 | A07187 | 324 |
| A00460 | A07258 | 473 | A00460 | A07502 | 371 |
| A00460 | A09546 | 486 | A00460 | A11080 | 371 |
| A00460 | A11296 | 223 | A00460 | A11374 | 324 |
| A00460 | A11694 | 324 | A00460 | A14073 | 630 |
| A00460 | A14479 | 241 | A00460 | A14642 | 429 |
| A00460 | A14699 | 484 | A00460 | A15653 | 235 |
| A00460 | A15843 | 324 | A00460 | A15891 | 235 |
| A00460 | A16548 | 337 | A00461 | A00515 | 217 |
| A00461 | A00524 | 188 | A00461 | A01169 | 267 |
| A00461 | A03770 | 157 | A00461 | A04666 | 369 |
| A00461 | A08382 | 157 | A00461 | A09531 | 276 |
| A00461 | A10706 | 184 | A00461 | A10859 | 362 |
| A00461 | A14356 | 241 | A00462 | A00541 | 477 |
| A00462 | A00551 | 435 | A00462 | A00574 | 479 |
| A00462 | A00628 | 465 | A00462 | A00654 | 425 |
| A00462 | A00663 | 168 | A00462 | A00770 | 208 |
| A00462 | A00771 | 174 | A00462 | A00773 | 364 |
| A00462 | A00929 | 241 | A00462 | A00962 | 490 |
| A00462 | A01005 | 182 | A00462 | A01233 | 491 |
| A00462 | A01256 | 485 | A00462 | A01347 | 229 |
| A00462 | A01481 | 249 | A00462 | A01635 | 488 |
| A00462 | A02082 | 180 | A00462 | A02204 | 305 |
| A00462 | A02312 | 283 | A00462 | A02432 | 199 |
| A00462 | A02444 | 319 | A00462 | A02531 | 152 |
| A00462 | A02673 | 490 | A00462 | A03004 | 151 |
| A00462 | A03168 | 227 | A00462 | A04307 | 188 |
| A00462 | A05059 | 262 | A00462 | A05277 | 314 |
| A00462 | A05472 | 307 | A00462 | A05767 | 401 |
| A00462 | A05768 | 274 | A00462 | A05771 | 241 |
| A00462 | A06091 | 246 | A00462 | A06523 | 447 |
| A00462 | A06632 | 229 | A00462 | A06700 | 285 |
| A00462 | A07061 | 473 | A00462 | A07122 | 468 |
| A00462 | A07238 | 154 | A00462 | A07376 | 174 |
| A00462 | A07413 | 408 | A00462 | A07424 | 201 |

|        |        |     |        |        |     |
|--------|--------|-----|--------|--------|-----|
| A00462 | A07800 | 489 | A00462 | A08127 | 416 |
| A00462 | A08463 | 200 | A00462 | A09612 | 363 |
| A00462 | A11309 | 479 | A00462 | A15497 | 446 |
| A00462 | A15637 | 241 | A00462 | A15874 | 385 |
| A00462 | A16033 | 420 | A00462 | A16529 | 396 |
| A00462 | A16739 | 358 | A00462 | A16741 | 405 |
| A00462 | A16744 | 364 | A00463 | A00475 | 477 |
| A00463 | A00479 | 486 | A00463 | A00517 | 541 |
| A00463 | A00566 | 826 | A00463 | A00572 | 398 |
| A00463 | A00575 | 714 | A00463 | A00622 | 706 |
| A00463 | A00626 | 423 | A00463 | A00665 | 419 |
| A00463 | A00708 | 406 | A00463 | A00733 | 532 |
| A00463 | A00744 | 294 | A00463 | A00805 | 541 |
| A00463 | A00819 | 446 | A00463 | A00822 | 299 |
| A00463 | A00856 | 480 | A00463 | A00858 | 853 |
| A00463 | A00860 | 714 | A00463 | A00866 | 156 |
| A00463 | A00881 | 533 | A00463 | A00934 | 435 |
| A00463 | A00978 | 487 | A00463 | A01007 | 648 |
| A00463 | A01019 | 530 | A00463 | A01020 | 445 |
| A00463 | A01032 | 198 | A00463 | A01075 | 457 |
| A00463 | A01116 | 301 | A00463 | A01147 | 286 |
| A00463 | A01195 | 538 | A00463 | A01200 | 708 |
| A00463 | A01206 | 348 | A00463 | A01212 | 447 |
| A00463 | A01234 | 491 | A00463 | A01325 | 294 |
| A00463 | A01383 | 460 | A00463 | A01385 | 355 |
| A00463 | A01398 | 538 | A00463 | A01401 | 714 |
| A00463 | A01500 | 539 | A00463 | A01503 | 416 |
| A00463 | A01720 | 440 | A00463 | A02872 | 195 |
| A00463 | A03175 | 182 | A00463 | A03207 | 246 |
| A00463 | A03306 | 249 | A00463 | A03526 | 466 |
| A00463 | A04648 | 522 | A00463 | A04687 | 156 |
| A00463 | A05027 | 427 | A00463 | A06803 | 539 |
| A00463 | A07203 | 156 | A00463 | A07290 | 196 |
| A00463 | A07347 | 481 | A00463 | A07670 | 391 |
| A00463 | A07700 | 470 | A00463 | A07850 | 156 |
| A00463 | A07887 | 443 | A00463 | A08022 | 486 |
| A00463 | A08383 | 311 | A00463 | A08818 | 156 |
| A00463 | A09502 | 156 | A00463 | A09712 | 486 |
| A00463 | A10642 | 416 | A00463 | A11344 | 156 |
| A00463 | A11395 | 469 | A00463 | A11674 | 156 |
| A00463 | A13413 | 279 | A00463 | A15946 | 183 |
| A00463 | A16228 | 458 | A00464 | A00600 | 232 |
| A00464 | A00651 | 313 | A00464 | A00742 | 245 |
| A00464 | A00763 | 470 | A00464 | A00966 | 259 |
| A00464 | A01011 | 374 | A00464 | A01054 | 450 |
| A00464 | A01160 | 450 | A00464 | A01168 | 499 |

|        |        |     |        |        |     |
|--------|--------|-----|--------|--------|-----|
| A00464 | A01209 | 227 | A00464 | A01294 | 450 |
| A00464 | A01361 | 196 | A00464 | A01419 | 177 |
| A00464 | A01576 | 356 | A00464 | A01722 | 172 |
| A00464 | A02165 | 515 | A00464 | A03615 | 404 |
| A00464 | A03652 | 171 | A00464 | A03782 | 450 |
| A00464 | A05411 | 399 | A00464 | A06520 | 229 |
| A00464 | A06591 | 414 | A00464 | A07069 | 422 |
| A00464 | A07447 | 443 | A00464 | A07495 | 337 |
| A00464 | A09044 | 271 | A00464 | A11487 | 218 |
| A00464 | A11929 | 185 | A00464 | A13052 | 450 |
| A00464 | A14086 | 204 | A00464 | A14843 | 431 |
| A00464 | A15666 | 404 | A00464 | A15701 | 176 |
| A00464 | A16681 | 404 | A00465 | A01223 | 188 |
| A00465 | A01225 | 205 | A00465 | A01409 | 480 |
| A00465 | A02254 | 193 | A00465 | A04095 | 288 |
| A00465 | A04791 | 235 | A00465 | A04883 | 193 |
| A00465 | A04927 | 196 | A00465 | A05007 | 193 |
| A00465 | A05014 | 267 | A00465 | A05140 | 294 |
| A00465 | A05330 | 246 | A00465 | A05337 | 240 |
| A00465 | A05425 | 162 | A00465 | A05433 | 353 |
| A00465 | A05451 | 307 | A00465 | A05550 | 215 |
| A00465 | A05573 | 193 | A00465 | A05912 | 361 |
| A00465 | A05966 | 199 | A00465 | A06358 | 190 |
| A00465 | A06629 | 180 | A00465 | A06641 | 247 |
| A00465 | A06734 | 286 | A00465 | A06847 | 270 |
| A00465 | A06994 | 293 | A00465 | A07007 | 395 |
| A00465 | A07027 | 243 | A00465 | A07059 | 180 |
| A00465 | A07408 | 302 | A00465 | A07501 | 228 |
| A00465 | A07507 | 416 | A00465 | A07590 | 183 |
| A00465 | A07619 | 329 | A00465 | A07674 | 363 |
| A00465 | A07737 | 267 | A00465 | A07847 | 350 |
| A00465 | A08135 | 262 | A00465 | A10658 | 281 |
| A00465 | A10702 | 168 | A00465 | A10706 | 241 |
| A00465 | A14821 | 302 | A00465 | A17006 | 276 |
| A00466 | A00687 | 457 | A00466 | A01453 | 221 |
| A00466 | A07141 | 249 | A00466 | A08933 | 383 |
| A00466 | A13490 | 417 | A00466 | A15624 | 279 |
| A00466 | A15920 | 274 | A00466 | A15932 | 313 |
| A00467 | A00494 | 474 | A00467 | A00539 | 273 |
| A00467 | A00550 | 249 | A00467 | A00590 | 306 |
| A00467 | A00603 | 162 | A00467 | A00605 | 346 |
| A00467 | A00648 | 366 | A00467 | A00651 | 483 |
| A00467 | A00694 | 205 | A00467 | A00700 | 491 |
| A00467 | A00705 | 293 | A00467 | A00708 | 232 |
| A00467 | A00782 | 224 | A00467 | A00787 | 369 |
| A00467 | A00806 | 419 | A00467 | A00809 | 241 |

|        |        |     |        |        |     |
|--------|--------|-----|--------|--------|-----|
| A00467 | A00839 | 574 | A00467 | A00877 | 251 |
| A00467 | A00972 | 262 | A00467 | A00980 | 241 |
| A00467 | A01000 | 196 | A00467 | A01016 | 190 |
| A00467 | A01056 | 457 | A00467 | A01066 | 216 |
| A00467 | A01072 | 303 | A00467 | A01090 | 447 |
| A00467 | A01101 | 165 | A00467 | A01102 | 282 |
| A00467 | A01112 | 491 | A00467 | A01127 | 486 |
| A00467 | A01140 | 483 | A00467 | A01166 | 204 |
| A00467 | A01177 | 232 | A00467 | A01196 | 571 |
| A00467 | A01212 | 154 | A00467 | A01218 | 241 |
| A00467 | A01234 | 272 | A00467 | A01238 | 182 |
| A00467 | A01249 | 358 | A00467 | A01270 | 465 |
| A00467 | A01288 | 157 | A00467 | A01291 | 491 |
| A00467 | A01306 | 401 | A00467 | A01335 | 455 |
| A00467 | A01369 | 217 | A00467 | A01385 | 273 |
| A00467 | A01411 | 373 | A00467 | A01464 | 176 |
| A00467 | A01468 | 486 | A00467 | A01470 | 256 |
| A00467 | A01496 | 479 | A00467 | A01579 | 587 |
| A00467 | A01586 | 224 | A00467 | A01597 | 187 |
| A00467 | A01601 | 588 | A00467 | A01605 | 347 |
| A00467 | A01718 | 419 | A00467 | A01720 | 240 |
| A00467 | A02350 | 245 | A00467 | A02494 | 174 |
| A00467 | A02737 | 217 | A00467 | A03445 | 491 |
| A00467 | A03451 | 162 | A00467 | A03567 | 480 |
| A00467 | A04099 | 156 | A00467 | A04101 | 196 |
| A00467 | A04230 | 256 | A00467 | A04827 | 258 |
| A00467 | A04846 | 190 | A00467 | A05090 | 252 |
| A00467 | A05443 | 400 | A00467 | A05453 | 157 |
| A00467 | A05501 | 542 | A00467 | A06534 | 582 |
| A00467 | A06814 | 578 | A00467 | A06861 | 174 |
| A00467 | A06965 | 480 | A00467 | A06973 | 570 |
| A00467 | A06974 | 167 | A00467 | A07047 | 241 |
| A00467 | A07323 | 425 | A00467 | A07398 | 588 |
| A00467 | A07451 | 243 | A00467 | A08131 | 434 |
| A00467 | A08357 | 221 | A00467 | A08359 | 404 |
| A00467 | A08369 | 484 | A00467 | A08408 | 241 |
| A00467 | A08476 | 241 | A00467 | A08558 | 176 |
| A00467 | A09308 | 420 | A00467 | A09322 | 334 |
| A00467 | A09620 | 410 | A00467 | A09741 | 243 |
| A00467 | A10599 | 254 | A00467 | A10616 | 157 |
| A00467 | A11334 | 215 | A00467 | A11438 | 213 |
| A00467 | A11550 | 358 | A00467 | A11728 | 492 |
| A00467 | A11857 | 185 | A00467 | A12227 | 307 |
| A00467 | A13340 | 268 | A00467 | A13989 | 489 |
| A00467 | A13992 | 491 | A00467 | A14172 | 489 |
| A00467 | A14908 | 353 | A00467 | A15268 | 587 |



|        |        |     |        |        |     |
|--------|--------|-----|--------|--------|-----|
| A00467 | A15381 | 586 | A00467 | A15551 | 358 |
| A00467 | A15988 | 317 | A00467 | A16272 | 323 |
| A00467 | A16306 | 202 | A00467 | A16318 | 283 |
| A00467 | A16658 | 165 | A00467 | A16682 | 188 |
| A00467 | A17133 | 174 | A00468 | A00660 | 475 |
| A00468 | A00681 | 372 | A00468 | A00696 | 439 |
| A00468 | A00825 | 475 | A00468 | A01018 | 400 |
| A00468 | A01225 | 277 | A00468 | A01227 | 441 |
| A00468 | A01297 | 469 | A00468 | A01397 | 278 |
| A00468 | A01409 | 338 | A00468 | A01490 | 416 |
| A00468 | A01643 | 311 | A00468 | A01793 | 201 |
| A00468 | A01832 | 168 | A00468 | A01958 | 263 |
| A00468 | A02020 | 159 | A00468 | A02114 | 323 |
| A00468 | A02254 | 484 | A00468 | A02257 | 353 |
| A00468 | A02284 | 337 | A00468 | A02521 | 198 |
| A00468 | A02525 | 162 | A00468 | A03087 | 490 |
| A00468 | A03174 | 369 | A00468 | A03513 | 483 |
| A00468 | A03968 | 380 | A00468 | A04533 | 219 |
| A00468 | A04674 | 296 | A00468 | A04927 | 267 |
| A00468 | A05014 | 210 | A00468 | A05045 | 154 |
| A00468 | A05098 | 165 | A00468 | A05102 | 152 |
| A00468 | A05208 | 210 | A00468 | A05224 | 269 |
| A00468 | A05330 | 460 | A00468 | A05331 | 375 |
| A00468 | A05337 | 435 | A00468 | A05338 | 163 |
| A00468 | A05358 | 201 | A00468 | A05424 | 378 |
| A00468 | A05516 | 174 | A00468 | A05548 | 224 |
| A00468 | A05550 | 154 | A00468 | A05573 | 480 |
| A00468 | A05758 | 151 | A00468 | A05820 | 313 |
| A00468 | A05883 | 205 | A00468 | A05912 | 324 |
| A00468 | A06405 | 468 | A00468 | A06439 | 395 |
| A00468 | A06640 | 313 | A00468 | A06641 | 399 |
| A00468 | A06733 | 362 | A00468 | A06847 | 213 |
| A00468 | A06860 | 416 | A00468 | A06994 | 240 |
| A00468 | A07027 | 318 | A00468 | A07037 | 235 |
| A00468 | A07059 | 405 | A00468 | A07088 | 461 |
| A00468 | A07238 | 218 | A00468 | A07283 | 267 |
| A00468 | A07408 | 251 | A00468 | A07501 | 168 |
| A00468 | A07520 | 490 | A00468 | A07674 | 443 |
| A00468 | A07684 | 191 | A00468 | A07690 | 472 |
| A00468 | A07711 | 235 | A00468 | A07723 | 219 |
| A00468 | A07763 | 313 | A00468 | A07800 | 238 |
| A00468 | A07844 | 411 | A00468 | A07847 | 162 |
| A00468 | A07851 | 283 | A00468 | A07856 | 269 |
| A00468 | A07933 | 474 | A00468 | A07976 | 436 |
| A00468 | A08114 | 160 | A00468 | A08190 | 328 |
| A00468 | A08197 | 213 | A00468 | A08199 | 343 |

|        |        |     |        |        |     |
|--------|--------|-----|--------|--------|-----|
| A00468 | A08278 | 157 | A00468 | A08280 | 396 |
| A00468 | A08366 | 396 | A00468 | A08372 | 341 |
| A00468 | A08385 | 435 | A00468 | A08663 | 212 |
| A00468 | A08687 | 241 | A00468 | A09845 | 157 |
| A00468 | A09846 | 408 | A00468 | A09880 | 241 |
| A00468 | A10446 | 191 | A00468 | A10456 | 260 |
| A00468 | A10537 | 361 | A00468 | A10652 | 205 |
| A00468 | A10679 | 447 | A00468 | A10687 | 254 |
| A00468 | A10690 | 240 | A00468 | A10691 | 391 |
| A00468 | A10699 | 413 | A00468 | A10715 | 341 |
| A00468 | A10778 | 228 | A00468 | A10781 | 351 |
| A00468 | A10783 | 254 | A00468 | A11235 | 219 |
| A00468 | A11708 | 296 | A00468 | A12723 | 246 |
| A00468 | A13341 | 379 | A00468 | A14094 | 369 |
| A00468 | A14803 | 270 | A00468 | A15874 | 208 |
| A00468 | A16026 | 177 | A00468 | A16739 | 183 |
| A00468 | A16744 | 191 | A00468 | A16757 | 339 |
| A00468 | A17046 | 430 | A00468 | A17092 | 324 |
| A00469 | A00470 | 210 | A00469 | A00476 | 176 |
| A00469 | A00505 | 408 | A00469 | A00571 | 456 |
| A00469 | A00580 | 466 | A00469 | A00593 | 491 |
| A00469 | A00597 | 232 | A00469 | A00626 | 396 |
| A00469 | A00661 | 193 | A00469 | A00705 | 486 |
| A00469 | A00782 | 288 | A00469 | A00839 | 491 |
| A00469 | A00899 | 154 | A00469 | A00923 | 274 |
| A00469 | A00955 | 193 | A00469 | A01000 | 348 |
| A00469 | A01017 | 491 | A00469 | A01037 | 473 |
| A00469 | A01041 | 490 | A00469 | A01046 | 390 |
| A00469 | A01101 | 466 | A00469 | A01189 | 328 |
| A00469 | A01214 | 286 | A00469 | A01263 | 451 |
| A00469 | A01278 | 475 | A00469 | A01291 | 491 |
| A00469 | A01306 | 490 | A00469 | A01309 | 318 |
| A00469 | A01335 | 491 | A00469 | A01337 | 491 |
| A00469 | A01365 | 327 | A00469 | A01369 | 491 |
| A00469 | A01422 | 327 | A00469 | A01462 | 330 |
| A00469 | A01527 | 483 | A00469 | A01540 | 238 |
| A00469 | A01579 | 491 | A00469 | A01588 | 171 |
| A00469 | A01595 | 251 | A00469 | A01647 | 180 |
| A00469 | A01741 | 196 | A00469 | A01839 | 378 |
| A00469 | A01897 | 398 | A00469 | A01913 | 170 |
| A00469 | A01992 | 191 | A00469 | A02072 | 324 |
| A00469 | A02106 | 346 | A00469 | A02143 | 63  |
| A00469 | A02159 | 243 | A00469 | A02227 | 422 |
| A00469 | A02262 | 159 | A00469 | A02278 | 335 |
| A00469 | A02416 | 63  | A00469 | A02418 | 183 |
| A00469 | A02424 | 268 | A00469 | A02494 | 374 |

|        |        |     |        |        |     |
|--------|--------|-----|--------|--------|-----|
| A00469 | A02495 | 481 | A00469 | A02522 | 167 |
| A00469 | A02570 | 243 | A00469 | A02584 | 176 |
| A00469 | A02592 | 361 | A00469 | A02614 | 235 |
| A00469 | A02695 | 339 | A00469 | A02743 | 238 |
| A00469 | A02768 | 324 | A00469 | A02796 | 162 |
| A00469 | A02820 | 171 | A00469 | A02877 | 465 |
| A00469 | A03047 | 188 | A00469 | A03069 | 154 |
| A00469 | A03477 | 221 | A00469 | A03512 | 201 |
| A00469 | A03567 | 385 | A00469 | A03681 | 196 |
| A00469 | A03839 | 151 | A00469 | A03981 | 263 |
| A00469 | A04216 | 167 | A00469 | A04218 | 165 |
| A00469 | A04265 | 151 | A00469 | A04332 | 346 |
| A00469 | A04399 | 228 | A00469 | A04416 | 463 |
| A00469 | A04419 | 380 | A00469 | A04470 | 277 |
| A00469 | A04472 | 221 | A00469 | A04476 | 323 |
| A00469 | A04511 | 294 | A00469 | A04512 | 263 |
| A00469 | A04579 | 283 | A00469 | A04677 | 277 |
| A00469 | A04740 | 179 | A00469 | A04838 | 305 |
| A00469 | A04970 | 294 | A00469 | A05258 | 198 |
| A00469 | A05302 | 310 | A00469 | A05335 | 201 |
| A00469 | A05497 | 263 | A00469 | A05526 | 323 |
| A00469 | A05623 | 263 | A00469 | A06057 | 243 |
| A00469 | A06066 | 277 | A00469 | A06742 | 252 |
| A00469 | A06849 | 263 | A00469 | A06851 | 154 |
| A00469 | A07047 | 286 | A00469 | A07075 | 252 |
| A00469 | A07163 | 404 | A00469 | A07262 | 243 |
| A00469 | A07264 | 333 | A00469 | A07334 | 235 |
| A00469 | A07412 | 249 | A00469 | A07581 | 357 |
| A00469 | A07775 | 217 | A00469 | A07880 | 326 |
| A00469 | A07944 | 207 | A00469 | A07965 | 488 |
| A00469 | A08131 | 312 | A00469 | A08358 | 491 |
| A00469 | A08359 | 383 | A00469 | A08462 | 210 |
| A00469 | A08479 | 217 | A00469 | A08576 | 167 |
| A00469 | A08981 | 440 | A00469 | A09083 | 183 |
| A00469 | A09088 | 323 | A00469 | A09285 | 217 |
| A00469 | A09330 | 327 | A00469 | A09369 | 252 |
| A00469 | A09389 | 294 | A00469 | A09446 | 243 |
| A00469 | A09471 | 188 | A00469 | A09475 | 294 |
| A00469 | A09613 | 380 | A00469 | A09726 | 159 |
| A00469 | A09808 | 390 | A00469 | A09999 | 427 |
| A00469 | A10039 | 430 | A00469 | A10106 | 294 |
| A00469 | A10138 | 277 | A00469 | A10385 | 323 |
| A00469 | A10525 | 171 | A00469 | A11099 | 474 |
| A00469 | A11115 | 294 | A00469 | A11135 | 423 |
| A00469 | A11189 | 255 | A00469 | A11211 | 217 |
| A00469 | A11316 | 447 | A00469 | A11429 | 332 |

|        |        |     |        |        |     |
|--------|--------|-----|--------|--------|-----|
| A00469 | A11440 | 486 | A00469 | A11480 | 490 |
| A00469 | A11576 | 332 | A00469 | A11704 | 473 |
| A00469 | A11729 | 486 | A00469 | A11857 | 279 |
| A00469 | A11935 | 329 | A00469 | A11945 | 200 |
| A00469 | A12027 | 294 | A00469 | A12077 | 294 |
| A00469 | A12079 | 361 | A00469 | A12251 | 151 |
| A00469 | A12503 | 344 | A00469 | A12821 | 484 |
| A00469 | A13622 | 401 | A00469 | A13710 | 347 |
| A00469 | A13734 | 294 | A00469 | A14190 | 177 |
| A00469 | A14278 | 455 | A00469 | A14498 | 447 |
| A00469 | A14508 | 455 | A00469 | A14643 | 321 |
| A00469 | A14701 | 188 | A00469 | A14737 | 294 |
| A00469 | A15286 | 290 | A00469 | A15500 | 475 |
| A00469 | A15717 | 229 | A00469 | A15727 | 338 |
| A00469 | A15748 | 321 | A00469 | A15759 | 221 |
| A00469 | A16682 | 151 | A00469 | A16718 | 154 |
| A00469 | A16911 | 191 | A00469 | A17026 | 221 |
| A00469 | A17107 | 151 | A00469 | A17112 | 191 |
| A00470 | A00561 | 174 | A00470 | A00637 | 276 |
| A00470 | A00722 | 899 | A00470 | A00832 | 154 |
| A00470 | A00887 | 461 | A00470 | A00921 | 899 |
| A00470 | A01052 | 418 | A00470 | A01149 | 472 |
| A00470 | A01172 | 491 | A00470 | A01390 | 391 |
| A00470 | A01450 | 188 | A00470 | A01483 | 278 |
| A00470 | A01548 | 491 | A00470 | A01562 | 217 |
| A00470 | A01602 | 477 | A00470 | A01728 | 208 |
| A00470 | A01844 | 932 | A00470 | A01907 | 177 |
| A00470 | A02219 | 229 | A00470 | A02470 | 430 |
| A00470 | A02494 | 467 | A00470 | A02687 | 491 |
| A00470 | A02859 | 899 | A00470 | A02874 | 899 |
| A00470 | A02877 | 201 | A00470 | A02908 | 899 |
| A00470 | A02968 | 899 | A00470 | A03237 | 457 |
| A00470 | A03271 | 235 | A00470 | A03643 | 198 |
| A00470 | A03802 | 202 | A00470 | A03958 | 201 |
| A00470 | A04176 | 174 | A00470 | A04957 | 310 |
| A00470 | A05216 | 307 | A00470 | A05797 | 439 |
| A00470 | A06234 | 251 | A00470 | A06610 | 489 |
| A00470 | A08627 | 486 | A00470 | A08863 | 276 |
| A00470 | A09169 | 174 | A00470 | A09504 | 162 |
| A00470 | A09826 | 491 | A00470 | A10174 | 899 |
| A00470 | A11376 | 293 | A00470 | A11843 | 276 |
| A00470 | A11851 | 418 | A00470 | A11983 | 899 |
| A00470 | A12035 | 350 | A00470 | A12266 | 394 |
| A00470 | A12630 | 212 | A00470 | A12681 | 218 |
| A00470 | A13356 | 276 | A00470 | A13462 | 265 |
| A00470 | A13604 | 245 | A00470 | A14002 | 899 |

|        |        |     |        |        |     |
|--------|--------|-----|--------|--------|-----|
| A00470 | A14016 | 484 | A00470 | A14234 | 339 |
| A00470 | A14496 | 196 | A00470 | A14639 | 185 |
| A00470 | A15292 | 899 | A00470 | A15312 | 899 |
| A00470 | A15480 | 276 | A00470 | A16215 | 180 |
| A00470 | A16718 | 489 | A00470 | A16887 | 377 |
| A00471 | A00532 | 405 | A00471 | A00566 | 151 |
| A00471 | A00575 | 168 | A00471 | A00600 | 254 |
| A00471 | A00622 | 170 | A00471 | A00665 | 312 |
| A00471 | A00733 | 368 | A00471 | A00765 | 409 |
| A00471 | A00784 | 229 | A00471 | A00805 | 332 |
| A00471 | A00858 | 391 | A00471 | A00860 | 170 |
| A00471 | A00866 | 438 | A00471 | A00883 | 694 |
| A00471 | A00954 | 460 | A00471 | A00978 | 201 |
| A00471 | A00999 | 229 | A00471 | A01052 | 328 |
| A00471 | A01099 | 229 | A00471 | A01114 | 229 |
| A00471 | A01169 | 408 | A00471 | A01187 | 229 |
| A00471 | A01195 | 249 | A00471 | A01197 | 229 |
| A00471 | A01200 | 154 | A00471 | A01203 | 372 |
| A00471 | A01212 | 910 | A00471 | A01315 | 229 |
| A00471 | A01319 | 229 | A00471 | A01329 | 853 |
| A00471 | A01415 | 229 | A00471 | A01438 | 290 |
| A00471 | A01627 | 438 | A00471 | A01647 | 495 |
| A00471 | A01680 | 229 | A00471 | A01682 | 677 |
| A00471 | A01712 | 534 | A00471 | A03149 | 182 |
| A00471 | A03207 | 277 | A00471 | A03327 | 229 |
| A00471 | A03408 | 484 | A00471 | A03809 | 408 |
| A00471 | A04379 | 246 | A00471 | A04648 | 160 |
| A00471 | A05216 | 366 | A00471 | A05690 | 229 |
| A00471 | A06032 | 208 | A00471 | A06130 | 229 |
| A00471 | A06381 | 229 | A00471 | A06750 | 438 |
| A00471 | A06803 | 168 | A00471 | A07054 | 524 |
| A00471 | A07242 | 253 | A00471 | A07353 | 229 |
| A00471 | A07355 | 259 | A00471 | A07495 | 270 |
| A00471 | A07670 | 682 | A00471 | A07920 | 330 |
| A00471 | A08495 | 286 | A00471 | A09712 | 243 |
| A00471 | A09857 | 157 | A00471 | A11068 | 154 |
| A00471 | A12284 | 616 | A00471 | A12824 | 383 |
| A00471 | A13892 | 489 | A00471 | A13950 | 260 |
| A00471 | A14253 | 378 | A00471 | A14266 | 485 |
| A00471 | A14825 | 274 | A00471 | A15324 | 329 |
| A00471 | A15502 | 450 | A00471 | A15837 | 229 |
| A00471 | A16228 | 223 | A00471 | A16626 | 229 |
| A00471 | A16643 | 229 | A00472 | A00477 | 486 |
| A00472 | A00485 | 491 | A00472 | A00486 | 461 |
| A00472 | A00531 | 246 | A00472 | A00532 | 249 |
| A00472 | A00576 | 168 | A00472 | A00600 | 303 |

|        |        |     |        |        |     |
|--------|--------|-----|--------|--------|-----|
| A00472 | A00625 | 602 | A00472 | A00656 | 274 |
| A00472 | A00662 | 183 | A00472 | A00663 | 439 |
| A00472 | A00675 | 327 | A00472 | A00694 | 294 |
| A00472 | A00719 | 477 | A00472 | A00752 | 154 |
| A00472 | A00802 | 306 | A00472 | A00849 | 467 |
| A00472 | A00855 | 246 | A00472 | A00864 | 455 |
| A00472 | A00882 | 485 | A00472 | A00985 | 229 |
| A00472 | A01005 | 201 | A00472 | A01011 | 491 |
| A00472 | A01022 | 490 | A00472 | A01125 | 213 |
| A00472 | A01156 | 483 | A00472 | A01161 | 588 |
| A00472 | A01169 | 362 | A00472 | A01211 | 477 |
| A00472 | A01235 | 221 | A00472 | A01276 | 486 |
| A00472 | A01278 | 174 | A00472 | A01332 | 468 |
| A00472 | A01381 | 363 | A00472 | A01431 | 458 |
| A00472 | A01454 | 486 | A00472 | A01461 | 230 |
| A00472 | A01515 | 263 | A00472 | A01524 | 407 |
| A00472 | A01526 | 491 | A00472 | A01529 | 229 |
| A00472 | A01530 | 479 | A00472 | A01543 | 477 |
| A00472 | A01551 | 440 | A00472 | A01556 | 491 |
| A00472 | A01557 | 491 | A00472 | A01566 | 409 |
| A00472 | A01578 | 491 | A00472 | A01582 | 491 |
| A00472 | A01585 | 301 | A00472 | A01600 | 429 |
| A00472 | A01627 | 486 | A00472 | A01630 | 491 |
| A00472 | A01632 | 491 | A00472 | A01676 | 177 |
| A00472 | A01689 | 215 | A00472 | A01743 | 483 |
| A00472 | A01749 | 353 | A00472 | A01931 | 475 |
| A00472 | A01935 | 199 | A00472 | A01947 | 167 |
| A00472 | A01956 | 185 | A00472 | A01982 | 491 |
| A00472 | A02007 | 438 | A00472 | A02010 | 278 |
| A00472 | A02021 | 314 | A00472 | A02048 | 491 |
| A00472 | A02049 | 677 | A00472 | A02092 | 173 |
| A00472 | A02099 | 185 | A00472 | A02146 | 104 |
| A00472 | A02148 | 485 | A00472 | A02154 | 238 |
| A00472 | A02167 | 154 | A00472 | A02183 | 489 |
| A00472 | A02186 | 425 | A00472 | A02188 | 491 |
| A00472 | A02205 | 452 | A00472 | A02215 | 491 |
| A00472 | A02221 | 491 | A00472 | A02222 | 455 |
| A00472 | A02224 | 221 | A00472 | A02228 | 491 |
| A00472 | A02283 | 306 | A00472 | A02303 | 326 |
| A00472 | A02320 | 266 | A00472 | A02333 | 485 |
| A00472 | A02356 | 251 | A00472 | A02402 | 235 |
| A00472 | A02477 | 490 | A00472 | A02485 | 357 |
| A00472 | A02511 | 361 | A00472 | A02642 | 165 |
| A00472 | A02691 | 162 | A00472 | A02697 | 356 |
| A00472 | A02698 | 401 | A00472 | A02738 | 490 |
| A00472 | A02756 | 188 | A00472 | A02859 | 488 |

|        |        |     |        |        |     |
|--------|--------|-----|--------|--------|-----|
| A00472 | A02874 | 462 | A00472 | A02909 | 427 |
| A00472 | A02924 | 334 | A00472 | A02951 | 283 |
| A00472 | A03034 | 425 | A00472 | A03050 | 484 |
| A00472 | A03067 | 491 | A00472 | A03080 | 491 |
| A00472 | A03090 | 213 | A00472 | A03104 | 489 |
| A00472 | A03168 | 152 | A00472 | A03178 | 341 |
| A00472 | A03186 | 409 | A00472 | A03211 | 477 |
| A00472 | A03259 | 489 | A00472 | A03293 | 313 |
| A00472 | A03297 | 414 | A00472 | A03314 | 291 |
| A00472 | A03321 | 350 | A00472 | A03344 | 483 |
| A00472 | A03345 | 486 | A00472 | A03346 | 489 |
| A00472 | A03347 | 491 | A00472 | A03348 | 474 |
| A00472 | A03349 | 491 | A00472 | A03350 | 473 |
| A00472 | A03351 | 491 | A00472 | A03353 | 491 |
| A00472 | A03356 | 486 | A00472 | A03357 | 422 |
| A00472 | A03358 | 491 | A00472 | A03359 | 201 |
| A00472 | A03360 | 270 | A00472 | A03361 | 491 |
| A00472 | A03363 | 457 | A00472 | A03364 | 177 |
| A00472 | A03365 | 199 | A00472 | A03366 | 396 |
| A00472 | A03368 | 486 | A00472 | A03369 | 491 |
| A00472 | A03370 | 491 | A00472 | A03371 | 491 |
| A00472 | A03373 | 491 | A00472 | A03374 | 445 |
| A00472 | A03375 | 371 | A00472 | A03376 | 491 |
| A00472 | A03378 | 456 | A00472 | A03379 | 491 |
| A00472 | A03383 | 283 | A00472 | A03384 | 481 |
| A00472 | A03385 | 355 | A00472 | A03387 | 348 |
| A00472 | A03388 | 327 | A00472 | A03389 | 199 |
| A00472 | A03397 | 362 | A00472 | A03402 | 277 |
| A00472 | A03417 | 411 | A00472 | A03440 | 255 |
| A00472 | A03496 | 196 | A00472 | A03532 | 490 |
| A00472 | A03545 | 371 | A00472 | A03569 | 308 |
| A00472 | A03573 | 207 | A00472 | A03708 | 446 |
| A00472 | A03711 | 294 | A00472 | A03724 | 324 |
| A00472 | A03729 | 191 | A00472 | A03909 | 283 |
| A00472 | A03910 | 446 | A00472 | A03984 | 486 |
| A00472 | A04033 | 430 | A00472 | A04051 | 286 |
| A00472 | A04079 | 335 | A00472 | A04202 | 193 |
| A00472 | A04275 | 480 | A00472 | A04329 | 256 |
| A00472 | A04337 | 491 | A00472 | A04349 | 257 |
| A00472 | A04361 | 490 | A00472 | A04385 | 235 |
| A00472 | A04409 | 286 | A00472 | A04410 | 491 |
| A00472 | A04449 | 597 | A00472 | A04493 | 303 |
| A00472 | A04518 | 183 | A00472 | A04520 | 491 |
| A00472 | A04532 | 398 | A00472 | A04567 | 184 |
| A00472 | A04603 | 340 | A00472 | A04710 | 303 |
| A00472 | A04715 | 491 | A00472 | A04764 | 177 |

|        |        |     |        |        |     |
|--------|--------|-----|--------|--------|-----|
| A00472 | A04790 | 488 | A00472 | A04832 | 441 |
| A00472 | A04833 | 469 | A00472 | A04840 | 207 |
| A00472 | A04870 | 405 | A00472 | A04928 | 477 |
| A00472 | A04944 | 302 | A00472 | A04964 | 473 |
| A00472 | A05015 | 491 | A00472 | A05080 | 199 |
| A00472 | A05106 | 180 | A00472 | A05117 | 297 |
| A00472 | A05148 | 160 | A00472 | A05155 | 665 |
| A00472 | A05157 | 216 | A00472 | A05234 | 399 |
| A00472 | A05286 | 199 | A00472 | A05294 | 445 |
| A00472 | A05340 | 306 | A00472 | A05356 | 736 |
| A00472 | A05381 | 160 | A00472 | A05426 | 160 |
| A00472 | A05431 | 497 | A00472 | A05439 | 301 |
| A00472 | A05487 | 274 | A00472 | A05489 | 369 |
| A00472 | A05494 | 340 | A00472 | A05556 | 379 |
| A00472 | A05561 | 235 | A00472 | A05587 | 198 |
| A00472 | A05601 | 488 | A00472 | A05603 | 491 |
| A00472 | A05612 | 243 | A00472 | A05643 | 485 |
| A00472 | A05657 | 294 | A00472 | A05716 | 207 |
| A00472 | A05731 | 470 | A00472 | A05739 | 483 |
| A00472 | A05777 | 445 | A00472 | A05813 | 177 |
| A00472 | A05885 | 294 | A00472 | A05886 | 489 |
| A00472 | A05887 | 490 | A00472 | A05890 | 330 |
| A00472 | A05891 | 490 | A00472 | A05968 | 223 |
| A00472 | A05970 | 281 | A00472 | A06069 | 491 |
| A00472 | A06070 | 314 | A00472 | A06096 | 235 |
| A00472 | A06145 | 235 | A00472 | A06148 | 279 |
| A00472 | A06177 | 235 | A00472 | A06322 | 199 |
| A00472 | A06346 | 491 | A00472 | A06428 | 466 |
| A00472 | A06483 | 235 | A00472 | A06569 | 187 |
| A00472 | A06574 | 488 | A00472 | A06617 | 380 |
| A00472 | A06650 | 249 | A00472 | A06711 | 270 |
| A00472 | A06726 | 235 | A00472 | A06729 | 491 |
| A00472 | A06730 | 380 | A00472 | A06731 | 491 |
| A00472 | A06732 | 330 | A00472 | A06907 | 406 |
| A00472 | A06920 | 462 | A00472 | A06921 | 235 |
| A00472 | A06952 | 294 | A00472 | A06953 | 491 |
| A00472 | A06954 | 439 | A00472 | A07004 | 176 |
| A00472 | A07044 | 335 | A00472 | A07064 | 177 |
| A00472 | A07065 | 380 | A00472 | A07066 | 347 |
| A00472 | A07068 | 199 | A00472 | A07209 | 486 |
| A00472 | A07218 | 491 | A00472 | A07242 | 205 |
| A00472 | A07268 | 177 | A00472 | A07286 | 428 |
| A00472 | A07361 | 491 | A00472 | A07384 | 475 |
| A00472 | A07391 | 486 | A00472 | A07392 | 235 |
| A00472 | A07396 | 160 | A00472 | A07442 | 491 |
| A00472 | A07452 | 191 | A00472 | A07471 | 491 |



|        |        |     |        |        |     |
|--------|--------|-----|--------|--------|-----|
| A00472 | A07472 | 371 | A00472 | A07475 | 414 |
| A00472 | A07514 | 473 | A00472 | A07541 | 475 |
| A00472 | A07561 | 373 | A00472 | A07577 | 485 |
| A00472 | A07578 | 391 | A00472 | A07579 | 235 |
| A00472 | A07580 | 428 | A00472 | A07601 | 212 |
| A00472 | A07605 | 491 | A00472 | A07606 | 160 |
| A00472 | A07620 | 446 | A00472 | A07623 | 160 |
| A00472 | A07635 | 193 | A00472 | A07676 | 235 |
| A00472 | A07702 | 199 | A00472 | A07704 | 484 |
| A00472 | A07705 | 463 | A00472 | A07754 | 481 |
| A00472 | A07790 | 235 | A00472 | A07810 | 330 |
| A00472 | A07827 | 199 | A00472 | A07828 | 177 |
| A00472 | A07843 | 488 | A00472 | A07904 | 441 |
| A00472 | A07905 | 330 | A00472 | A07906 | 235 |
| A00472 | A07907 | 310 | A00472 | A07913 | 288 |
| A00472 | A07927 | 235 | A00472 | A07949 | 235 |
| A00472 | A07958 | 438 | A00472 | A07982 | 177 |
| A00472 | A07990 | 235 | A00472 | A08033 | 235 |
| A00472 | A08034 | 132 | A00472 | A08039 | 281 |
| A00472 | A08040 | 489 | A00472 | A08041 | 235 |
| A00472 | A08042 | 391 | A00472 | A08044 | 294 |
| A00472 | A08059 | 310 | A00472 | A08093 | 491 |
| A00472 | A08097 | 466 | A00472 | A08115 | 160 |
| A00472 | A08157 | 260 | A00472 | A08162 | 260 |
| A00472 | A08171 | 439 | A00472 | A08172 | 490 |
| A00472 | A08202 | 281 | A00472 | A08203 | 458 |
| A00472 | A08210 | 179 | A00472 | A08225 | 199 |
| A00472 | A08229 | 235 | A00472 | A08244 | 270 |
| A00472 | A08247 | 177 | A00472 | A08270 | 235 |
| A00472 | A08271 | 235 | A00472 | A08276 | 235 |
| A00472 | A08288 | 160 | A00472 | A08291 | 270 |
| A00472 | A08292 | 436 | A00472 | A08298 | 235 |
| A00472 | A08309 | 490 | A00472 | A08392 | 177 |
| A00472 | A08404 | 384 | A00472 | A08459 | 330 |
| A00472 | A08594 | 477 | A00472 | A08630 | 184 |
| A00472 | A08658 | 324 | A00472 | A08671 | 360 |
| A00472 | A08681 | 177 | A00472 | A08685 | 481 |
| A00472 | A08686 | 470 | A00472 | A08693 | 232 |
| A00472 | A08738 | 360 | A00472 | A08747 | 281 |
| A00472 | A08753 | 313 | A00472 | A08754 | 199 |
| A00472 | A08785 | 485 | A00472 | A08835 | 345 |
| A00472 | A08859 | 443 | A00472 | A08949 | 293 |
| A00472 | A09139 | 294 | A00472 | A09140 | 199 |
| A00472 | A09173 | 177 | A00472 | A09204 | 281 |
| A00472 | A09205 | 283 | A00472 | A09341 | 230 |
| A00472 | A09380 | 259 | A00472 | A09416 | 436 |

|        |        |     |        |        |     |
|--------|--------|-----|--------|--------|-----|
| A00472 | A09511 | 159 | A00472 | A09525 | 199 |
| A00472 | A09552 | 260 | A00472 | A09745 | 174 |
| A00472 | A09807 | 199 | A00472 | A09886 | 199 |
| A00472 | A10001 | 202 | A00472 | A10095 | 193 |
| A00472 | A10101 | 199 | A00472 | A10156 | 205 |
| A00472 | A10450 | 281 | A00472 | A10511 | 119 |
| A00472 | A10532 | 422 | A00472 | A10561 | 290 |
| A00472 | A10563 | 230 | A00472 | A10649 | 199 |
| A00472 | A10651 | 329 | A00472 | A10900 | 199 |
| A00472 | A11049 | 235 | A00472 | A11154 | 199 |
| A00472 | A11164 | 475 | A00472 | A11172 | 371 |
| A00472 | A11240 | 165 | A00472 | A11278 | 350 |
| A00472 | A11289 | 436 | A00472 | A11299 | 352 |
| A00472 | A11305 | 428 | A00472 | A11313 | 395 |
| A00472 | A11317 | 157 | A00472 | A11319 | 475 |
| A00472 | A11327 | 481 | A00472 | A11340 | 391 |
| A00472 | A11377 | 270 | A00472 | A11391 | 212 |
| A00472 | A11411 | 159 | A00472 | A11428 | 319 |
| A00472 | A11448 | 199 | A00472 | A11449 | 297 |
| A00472 | A11454 | 180 | A00472 | A11468 | 160 |
| A00472 | A11513 | 179 | A00472 | A11552 | 388 |
| A00472 | A11557 | 391 | A00472 | A11573 | 193 |
| A00472 | A11599 | 199 | A00472 | A11664 | 235 |
| A00472 | A11671 | 235 | A00472 | A11723 | 199 |
| A00472 | A11888 | 235 | A00472 | A11963 | 235 |
| A00472 | A11983 | 484 | A00472 | A11997 | 235 |
| A00472 | A12031 | 177 | A00472 | A12194 | 235 |
| A00472 | A12317 | 235 | A00472 | A12365 | 408 |
| A00472 | A12426 | 310 | A00472 | A12459 | 270 |
| A00472 | A12480 | 235 | A00472 | A12493 | 177 |
| A00472 | A12549 | 235 | A00472 | A12572 | 235 |
| A00472 | A12619 | 330 | A00472 | A12620 | 235 |
| A00472 | A12642 | 235 | A00472 | A12649 | 177 |
| A00472 | A12689 | 235 | A00472 | A12787 | 462 |
| A00472 | A12804 | 235 | A00472 | A12845 | 229 |
| A00472 | A12876 | 330 | A00472 | A12897 | 221 |
| A00472 | A12906 | 235 | A00472 | A12928 | 235 |
| A00472 | A12955 | 199 | A00472 | A13035 | 235 |
| A00472 | A13110 | 160 | A00472 | A13120 | 199 |
| A00472 | A13351 | 281 | A00472 | A13361 | 269 |
| A00472 | A13369 | 678 | A00472 | A13760 | 235 |
| A00472 | A13853 | 198 | A00472 | A13855 | 305 |
| A00472 | A13960 | 217 | A00472 | A14202 | 432 |
| A00472 | A14204 | 477 | A00472 | A14247 | 179 |
| A00472 | A14279 | 152 | A00472 | A14353 | 477 |
| A00472 | A14377 | 369 | A00472 | A14381 | 484 |

|        |        |     |        |        |     |
|--------|--------|-----|--------|--------|-----|
| A00472 | A14394 | 416 | A00472 | A14395 | 297 |
| A00472 | A14523 | 162 | A00472 | A14570 | 446 |
| A00472 | A14633 | 491 | A00472 | A14689 | 200 |
| A00472 | A14901 | 281 | A00472 | A14918 | 196 |
| A00472 | A15178 | 235 | A00472 | A15232 | 235 |
| A00472 | A15267 | 176 | A00472 | A15277 | 480 |
| A00472 | A15282 | 400 | A00472 | A15292 | 484 |
| A00472 | A15296 | 259 | A00472 | A15301 | 201 |
| A00472 | A15322 | 586 | A00472 | A15333 | 151 |
| A00472 | A15336 | 474 | A00472 | A15398 | 384 |
| A00472 | A15399 | 380 | A00472 | A15416 | 215 |
| A00472 | A15422 | 283 | A00472 | A15432 | 419 |
| A00472 | A15433 | 172 | A00472 | A15451 | 246 |
| A00472 | A15452 | 205 | A00472 | A15457 | 360 |
| A00472 | A15495 | 486 | A00472 | A15498 | 491 |
| A00472 | A15552 | 290 | A00472 | A15638 | 491 |
| A00472 | A15665 | 168 | A00472 | A15678 | 294 |
| A00472 | A15880 | 207 | A00472 | A15911 | 162 |
| A00472 | A15917 | 491 | A00472 | A16005 | 235 |
| A00472 | A16117 | 173 | A00472 | A16121 | 200 |
| A00472 | A16147 | 177 | A00472 | A16274 | 188 |
| A00472 | A16495 | 223 | A00472 | A16626 | 212 |
| A00472 | A17078 | 486 | A00472 | A17085 | 462 |
| A00472 | A17124 | 177 | A00473 | A00476 | 134 |
| A00473 | A00504 | 210 | A00473 | A00519 | 572 |
| A00473 | A00524 | 485 | A00473 | A00526 | 573 |
| A00473 | A00531 | 423 | A00473 | A00556 | 152 |
| A00473 | A00571 | 302 | A00473 | A00638 | 238 |
| A00473 | A00658 | 577 | A00473 | A00687 | 295 |
| A00473 | A00715 | 223 | A00473 | A00747 | 412 |
| A00473 | A00871 | 578 | A00473 | A00886 | 240 |
| A00473 | A00918 | 240 | A00473 | A00986 | 559 |
| A00473 | A01009 | 152 | A00473 | A01111 | 223 |
| A00473 | A01117 | 176 | A00473 | A01118 | 381 |
| A00473 | A01124 | 63  | A00473 | A01156 | 391 |
| A00473 | A01202 | 323 | A00473 | A01208 | 575 |
| A00473 | A01214 | 439 | A00473 | A01215 | 578 |
| A00473 | A01228 | 263 | A00473 | A01257 | 156 |
| A00473 | A01325 | 337 | A00473 | A01328 | 207 |
| A00473 | A01353 | 578 | A00473 | A01367 | 406 |
| A00473 | A01431 | 188 | A00473 | A01547 | 154 |
| A00473 | A01736 | 303 | A00473 | A01797 | 170 |
| A00473 | A01848 | 212 | A00473 | A01890 | 154 |
| A00473 | A01975 | 187 | A00473 | A02011 | 82  |
| A00473 | A02028 | 193 | A00473 | A02041 | 223 |
| A00473 | A02051 | 223 | A00473 | A02061 | 257 |

|        |        |     |        |        |     |
|--------|--------|-----|--------|--------|-----|
| A00473 | A02063 | 165 | A00473 | A02117 | 252 |
| A00473 | A02191 | 355 | A00473 | A02214 | 167 |
| A00473 | A02251 | 223 | A00473 | A02260 | 430 |
| A00473 | A02268 | 469 | A00473 | A02358 | 174 |
| A00473 | A02454 | 154 | A00473 | A02470 | 171 |
| A00473 | A02531 | 174 | A00473 | A02537 | 171 |
| A00473 | A02539 | 308 | A00473 | A02634 | 157 |
| A00473 | A02655 | 200 | A00473 | A02672 | 168 |
| A00473 | A02673 | 490 | A00473 | A02830 | 288 |
| A00473 | A02958 | 207 | A00473 | A03043 | 151 |
| A00473 | A03044 | 191 | A00473 | A03045 | 405 |
| A00473 | A03057 | 479 | A00473 | A03091 | 123 |
| A00473 | A03154 | 202 | A00473 | A03155 | 276 |
| A00473 | A03169 | 530 | A00473 | A03193 | 489 |
| A00473 | A03223 | 290 | A00473 | A03276 | 179 |
| A00473 | A03792 | 249 | A00473 | A03820 | 291 |
| A00473 | A03958 | 411 | A00473 | A03972 | 281 |
| A00473 | A03982 | 281 | A00473 | A04001 | 224 |
| A00473 | A04447 | 421 | A00473 | A04468 | 235 |
| A00473 | A04911 | 185 | A00473 | A05058 | 460 |
| A00473 | A05143 | 200 | A00473 | A05210 | 185 |
| A00473 | A05483 | 303 | A00473 | A05577 | 255 |
| A00473 | A05689 | 281 | A00473 | A05748 | 383 |
| A00473 | A06137 | 157 | A00473 | A06787 | 291 |
| A00473 | A06822 | 303 | A00473 | A06825 | 260 |
| A00473 | A07062 | 147 | A00473 | A07140 | 210 |
| A00473 | A07165 | 205 | A00473 | A07265 | 407 |
| A00473 | A07588 | 532 | A00473 | A07655 | 172 |
| A00473 | A07695 | 154 | A00473 | A07799 | 218 |
| A00473 | A08739 | 176 | A00473 | A08955 | 223 |
| A00473 | A08971 | 223 | A00473 | A09268 | 291 |
| A00473 | A09753 | 154 | A00473 | A09814 | 218 |
| A00473 | A09977 | 170 | A00473 | A10033 | 303 |
| A00473 | A10362 | 193 | A00473 | A10755 | 223 |
| A00473 | A10855 | 345 | A00473 | A11202 | 223 |
| A00473 | A11254 | 355 | A00473 | A13298 | 230 |
| A00473 | A13870 | 288 | A00473 | A13886 | 191 |
| A00473 | A14153 | 154 | A00473 | A14216 | 565 |
| A00473 | A14554 | 420 | A00473 | A14782 | 210 |
| A00473 | A15641 | 274 | A00473 | A15789 | 369 |
| A00473 | A16038 | 281 | A00473 | A16118 | 174 |
| A00474 | A00505 | 268 | A00474 | A00593 | 227 |
| A00474 | A00599 | 243 | A00474 | A00705 | 199 |
| A00474 | A00711 | 193 | A00474 | A00839 | 198 |
| A00474 | A00971 | 251 | A00474 | A01072 | 262 |
| A00474 | A01121 | 232 | A00474 | A01125 | 409 |

|        |        |     |        |        |     |
|--------|--------|-----|--------|--------|-----|
| A00474 | A01154 | 228 | A00474 | A01159 | 218 |
| A00474 | A01217 | 469 | A00474 | A01362 | 215 |
| A00474 | A01408 | 198 | A00474 | A01414 | 249 |
| A00474 | A01586 | 266 | A00474 | A03391 | 434 |
| A00474 | A03476 | 279 | A00474 | A03601 | 293 |
| A00474 | A05804 | 294 | A00474 | A06122 | 258 |
| A00474 | A06369 | 210 | A00474 | A06436 | 317 |
| A00474 | A06785 | 268 | A00474 | A06889 | 267 |
| A00474 | A07934 | 488 | A00474 | A09470 | 235 |
| A00474 | A09671 | 246 | A00474 | A10987 | 422 |
| A00474 | A11707 | 252 | A00474 | A13965 | 190 |
| A00474 | A14479 | 180 | A00474 | A15657 | 208 |
| A00475 | A00479 | 430 | A00475 | A00517 | 462 |
| A00475 | A00566 | 408 | A00475 | A00575 | 463 |
| A00475 | A00622 | 430 | A00475 | A00626 | 398 |
| A00475 | A00655 | 318 | A00475 | A00733 | 398 |
| A00475 | A00805 | 438 | A00475 | A00817 | 159 |
| A00475 | A00819 | 163 | A00475 | A00858 | 463 |
| A00475 | A00860 | 430 | A00475 | A00881 | 274 |
| A00475 | A00978 | 391 | A00475 | A01019 | 353 |
| A00475 | A01195 | 463 | A00475 | A01200 | 454 |
| A00475 | A01212 | 373 | A00475 | A01320 | 256 |
| A00475 | A01383 | 247 | A00475 | A01398 | 479 |
| A00475 | A01401 | 480 | A00475 | A01500 | 283 |
| A00475 | A01741 | 162 | A00475 | A01888 | 152 |
| A00475 | A02040 | 229 | A00475 | A03525 | 199 |
| A00475 | A03526 | 273 | A00475 | A03734 | 185 |
| A00475 | A04648 | 367 | A00475 | A06803 | 470 |
| A00475 | A07290 | 303 | A00475 | A07887 | 210 |
| A00475 | A08938 | 364 | A00475 | A09676 | 424 |
| A00475 | A09712 | 411 | A00475 | A10642 | 256 |
| A00475 | A10759 | 358 | A00475 | A14132 | 232 |
| A00475 | A14801 | 180 | A00475 | A15318 | 188 |
| A00475 | A15365 | 269 | A00475 | A15649 | 358 |
| A00475 | A15819 | 263 | A00475 | A16228 | 446 |
| A00476 | A00478 | 216 | A00476 | A00509 | 271 |
| A00476 | A00526 | 190 | A00476 | A00645 | 306 |
| A00476 | A00659 | 477 | A00476 | A00736 | 243 |
| A00476 | A00752 | 327 | A00476 | A01009 | 455 |
| A00476 | A01046 | 485 | A00476 | A01165 | 162 |
| A00476 | A01215 | 63  | A00476 | A01256 | 154 |
| A00476 | A01301 | 180 | A00476 | A01313 | 168 |
| A00476 | A01489 | 156 | A00476 | A01553 | 247 |
| A00476 | A01604 | 311 | A00476 | A01640 | 367 |
| A00476 | A01743 | 272 | A00476 | A01795 | 347 |
| A00476 | A01870 | 413 | A00476 | A02031 | 446 |

|        |        |     |        |        |     |
|--------|--------|-----|--------|--------|-----|
| A00476 | A02121 | 159 | A00476 | A02122 | 168 |
| A00476 | A02138 | 187 | A00476 | A02143 | 163 |
| A00476 | A02242 | 232 | A00476 | A02251 | 404 |
| A00476 | A02260 | 185 | A00476 | A02268 | 80  |
| A00476 | A02272 | 202 | A00476 | A02278 | 380 |
| A00476 | A02281 | 422 | A00476 | A02289 | 405 |
| A00476 | A02331 | 200 | A00476 | A02439 | 199 |
| A00476 | A02454 | 79  | A00476 | A02474 | 332 |
| A00476 | A02488 | 407 | A00476 | A02493 | 218 |
| A00476 | A02512 | 226 | A00476 | A02575 | 382 |
| A00476 | A02579 | 457 | A00476 | A02606 | 196 |
| A00476 | A02624 | 395 | A00476 | A02651 | 182 |
| A00476 | A02654 | 396 | A00476 | A02727 | 324 |
| A00476 | A02737 | 167 | A00476 | A02766 | 202 |
| A00476 | A02802 | 170 | A00476 | A02831 | 229 |
| A00476 | A02859 | 201 | A00476 | A02885 | 288 |
| A00476 | A03033 | 160 | A00476 | A03043 | 302 |
| A00476 | A03045 | 484 | A00476 | A03144 | 388 |
| A00476 | A03218 | 180 | A00476 | A03224 | 446 |
| A00476 | A03239 | 396 | A00476 | A03309 | 265 |
| A00476 | A03431 | 198 | A00476 | A03486 | 163 |
| A00476 | A03570 | 204 | A00476 | A03688 | 151 |
| A00476 | A03690 | 294 | A00476 | A03790 | 168 |
| A00476 | A03827 | 260 | A00476 | A03839 | 201 |
| A00476 | A03898 | 332 | A00476 | A03990 | 151 |
| A00476 | A04073 | 281 | A00476 | A04076 | 241 |
| A00476 | A04191 | 185 | A00476 | A04211 | 221 |
| A00476 | A04273 | 281 | A00476 | A04428 | 247 |
| A00476 | A04567 | 162 | A00476 | A04755 | 229 |
| A00476 | A04784 | 265 | A00476 | A05597 | 177 |
| A00476 | A05645 | 191 | A00476 | A05679 | 302 |
| A00476 | A05738 | 159 | A00476 | A06009 | 185 |
| A00476 | A06414 | 200 | A00476 | A06415 | 347 |
| A00476 | A06644 | 157 | A00476 | A07145 | 396 |
| A00476 | A07655 | 190 | A00476 | A08275 | 355 |
| A00476 | A08612 | 281 | A00476 | A08651 | 281 |
| A00476 | A08818 | 157 | A00476 | A09539 | 160 |
| A00476 | A09826 | 152 | A00476 | A10556 | 216 |
| A00476 | A10640 | 328 | A00476 | A10847 | 247 |
| A00476 | A11318 | 201 | A00476 | A11440 | 217 |
| A00476 | A11651 | 156 | A00476 | A11734 | 491 |
| A00476 | A12009 | 182 | A00476 | A12251 | 443 |
| A00476 | A13222 | 163 | A00476 | A13935 | 227 |
| A00476 | A13957 | 306 | A00476 | A14136 | 281 |
| A00476 | A14146 | 177 | A00476 | A14199 | 306 |
| A00476 | A14335 | 168 | A00476 | A14365 | 355 |

|        |        |     |        |        |     |
|--------|--------|-----|--------|--------|-----|
| A00476 | A14366 | 418 | A00476 | A14374 | 427 |
| A00476 | A14391 | 344 | A00476 | A14419 | 306 |
| A00476 | A14502 | 485 | A00476 | A14554 | 430 |
| A00476 | A14599 | 154 | A00476 | A15285 | 466 |
| A00476 | A15425 | 274 | A00476 | A15516 | 263 |
| A00476 | A15518 | 353 | A00476 | A15660 | 360 |
| A00476 | A15770 | 241 | A00476 | A15795 | 401 |
| A00476 | A15811 | 210 | A00476 | A15827 | 229 |
| A00476 | A15964 | 174 | A00476 | A15996 | 270 |
| A00476 | A16014 | 306 | A00476 | A16218 | 461 |
| A00476 | A16532 | 265 | A00476 | A16939 | 185 |
| A00477 | A00485 | 319 | A00477 | A00671 | 240 |
| A00477 | A00675 | 167 | A00477 | A00694 | 170 |
| A00477 | A00743 | 296 | A00477 | A00882 | 480 |
| A00477 | A01273 | 308 | A00477 | A01332 | 490 |
| A00477 | A01526 | 257 | A00477 | A01565 | 490 |
| A00477 | A01578 | 212 | A00477 | A01931 | 170 |
| A00477 | A02099 | 388 | A00477 | A02388 | 270 |
| A00477 | A02494 | 170 | A00477 | A02544 | 177 |
| A00477 | A02585 | 195 | A00477 | A02586 | 488 |
| A00477 | A02601 | 157 | A00477 | A02637 | 162 |
| A00477 | A02818 | 227 | A00477 | A02859 | 251 |
| A00477 | A02909 | 252 | A00477 | A03010 | 170 |
| A00477 | A03104 | 452 | A00477 | A03136 | 252 |
| A00477 | A03228 | 401 | A00477 | A03244 | 263 |
| A00477 | A03314 | 371 | A00477 | A03349 | 162 |
| A00477 | A03358 | 177 | A00477 | A03417 | 170 |
| A00477 | A03806 | 371 | A00477 | A03923 | 229 |
| A00477 | A04034 | 319 | A00477 | A04072 | 230 |
| A00477 | A04108 | 337 | A00477 | A04228 | 191 |
| A00477 | A04252 | 480 | A00477 | A04273 | 414 |
| A00477 | A04275 | 441 | A00477 | A04449 | 470 |
| A00477 | A04458 | 348 | A00477 | A04985 | 266 |
| A00477 | A05174 | 246 | A00477 | A05556 | 407 |
| A00477 | A05594 | 339 | A00477 | A05601 | 491 |
| A00477 | A05767 | 488 | A00477 | A05782 | 224 |
| A00477 | A05865 | 481 | A00477 | A06069 | 201 |
| A00477 | A06100 | 318 | A00477 | A06298 | 183 |
| A00477 | A06414 | 246 | A00477 | A06415 | 269 |
| A00477 | A06530 | 296 | A00477 | A07178 | 221 |
| A00477 | A07442 | 205 | A00477 | A07903 | 200 |
| A00477 | A08093 | 490 | A00477 | A08097 | 402 |
| A00477 | A08171 | 205 | A00477 | A08596 | 221 |
| A00477 | A08690 | 296 | A00477 | A08708 | 339 |
| A00477 | A08859 | 345 | A00477 | A09164 | 432 |
| A00477 | A09354 | 361 | A00477 | A09454 | 290 |

|        |        |     |        |        |     |
|--------|--------|-----|--------|--------|-----|
| A00477 | A09745 | 160 | A00477 | A09926 | 301 |
| A00477 | A10024 | 484 | A00477 | A10651 | 202 |
| A00477 | A11299 | 374 | A00477 | A11454 | 446 |
| A00477 | A11732 | 279 | A00477 | A11888 | 380 |
| A00477 | A11982 | 485 | A00477 | A11983 | 219 |
| A00477 | A12689 | 380 | A00477 | A12804 | 380 |
| A00477 | A13587 | 200 | A00477 | A13945 | 205 |
| A00477 | A14005 | 157 | A00477 | A14071 | 396 |
| A00477 | A14202 | 168 | A00477 | A14375 | 291 |
| A00477 | A14570 | 160 | A00477 | A14611 | 208 |
| A00477 | A14893 | 245 | A00477 | A15282 | 352 |
| A00477 | A15292 | 193 | A00477 | A15394 | 170 |
| A00477 | A15495 | 270 | A00477 | A15642 | 176 |
| A00478 | A00659 | 491 | A00478 | A00662 | 344 |
| A00478 | A00688 | 262 | A00478 | A01005 | 469 |
| A00478 | A01257 | 257 | A00478 | A01297 | 306 |
| A00478 | A01461 | 474 | A00478 | A01573 | 283 |
| A00478 | A01635 | 230 | A00478 | A01737 | 455 |
| A00478 | A01741 | 218 | A00478 | A01846 | 369 |
| A00478 | A01848 | 271 | A00478 | A01861 | 262 |
| A00478 | A01864 | 224 | A00478 | A01926 | 491 |
| A00478 | A01990 | 286 | A00478 | A02008 | 491 |
| A00478 | A02009 | 311 | A00478 | A02011 | 491 |
| A00478 | A02012 | 490 | A00478 | A02013 | 358 |
| A00478 | A02014 | 488 | A00478 | A02015 | 294 |
| A00478 | A02028 | 273 | A00478 | A02031 | 419 |
| A00478 | A02092 | 262 | A00478 | A02114 | 474 |
| A00478 | A02119 | 172 | A00478 | A02156 | 221 |
| A00478 | A02268 | 238 | A00478 | A02275 | 299 |
| A00478 | A02405 | 170 | A00478 | A02454 | 235 |
| A00478 | A02468 | 393 | A00478 | A02524 | 180 |
| A00478 | A02574 | 489 | A00478 | A02605 | 213 |
| A00478 | A02646 | 258 | A00478 | A02695 | 468 |
| A00478 | A02802 | 215 | A00478 | A02804 | 160 |
| A00478 | A02806 | 465 | A00478 | A02859 | 360 |
| A00478 | A02951 | 215 | A00478 | A02992 | 267 |
| A00478 | A03003 | 185 | A00478 | A03007 | 154 |
| A00478 | A03034 | 491 | A00478 | A03036 | 491 |
| A00478 | A03045 | 258 | A00478 | A03058 | 378 |
| A00478 | A03091 | 316 | A00478 | A03099 | 418 |
| A00478 | A03144 | 491 | A00478 | A03146 | 483 |
| A00478 | A03147 | 416 | A00478 | A03148 | 480 |
| A00478 | A03156 | 488 | A00478 | A03157 | 362 |
| A00478 | A03238 | 445 | A00478 | A03370 | 174 |
| A00478 | A03513 | 404 | A00478 | A03914 | 182 |
| A00478 | A04212 | 467 | A00478 | A04286 | 208 |



|        |        |     |        |        |     |
|--------|--------|-----|--------|--------|-----|
| A00478 | A04341 | 358 | A00478 | A04487 | 210 |
| A00478 | A04520 | 198 | A00478 | A04839 | 232 |
| A00478 | A05203 | 294 | A00478 | A05246 | 302 |
| A00478 | A05376 | 460 | A00478 | A05393 | 350 |
| A00478 | A05459 | 294 | A00478 | A05570 | 210 |
| A00478 | A06052 | 347 | A00478 | A06053 | 306 |
| A00478 | A06195 | 457 | A00478 | A06831 | 294 |
| A00478 | A06970 | 188 | A00478 | A07059 | 286 |
| A00478 | A07195 | 322 | A00478 | A07342 | 491 |
| A00478 | A07373 | 366 | A00478 | A07407 | 346 |
| A00478 | A07477 | 296 | A00478 | A07736 | 480 |
| A00478 | A08724 | 191 | A00478 | A09267 | 337 |
| A00478 | A09991 | 428 | A00478 | A10052 | 262 |
| A00478 | A10091 | 258 | A00478 | A10816 | 281 |
| A00478 | A11076 | 378 | A00478 | A11279 | 369 |
| A00478 | A12793 | 165 | A00478 | A13004 | 378 |
| A00478 | A13153 | 358 | A00478 | A14096 | 180 |
| A00478 | A14135 | 180 | A00478 | A14146 | 223 |
| A00478 | A14247 | 465 | A00478 | A14258 | 162 |
| A00478 | A14344 | 486 | A00478 | A15366 | 313 |
| A00478 | A15463 | 223 | A00478 | A15482 | 207 |
| A00478 | A15874 | 252 | A00478 | A16099 | 221 |
| A00478 | A16337 | 358 | A00478 | A16741 | 183 |
| A00479 | A00517 | 481 | A00479 | A00566 | 425 |
| A00479 | A00572 | 466 | A00479 | A00575 | 477 |
| A00479 | A00622 | 417 | A00479 | A00626 | 385 |
| A00479 | A00655 | 317 | A00479 | A00805 | 469 |
| A00479 | A00817 | 245 | A00479 | A00819 | 477 |
| A00479 | A00822 | 458 | A00479 | A00858 | 481 |
| A00479 | A00860 | 488 | A00479 | A00881 | 480 |
| A00479 | A00978 | 428 | A00479 | A01019 | 406 |
| A00479 | A01147 | 401 | A00479 | A01195 | 485 |
| A00479 | A01200 | 486 | A00479 | A01325 | 440 |
| A00479 | A01383 | 483 | A00479 | A01385 | 466 |
| A00479 | A01401 | 488 | A00479 | A03525 | 281 |
| A00479 | A03526 | 485 | A00479 | A04548 | 338 |
| A00479 | A04648 | 413 | A00479 | A06803 | 486 |
| A00479 | A07290 | 360 | A00479 | A09712 | 489 |
| A00479 | A10642 | 470 | A00479 | A16228 | 434 |
| A00480 | A00555 | 414 | A00480 | A00570 | 439 |
| A00480 | A00687 | 348 | A00480 | A00717 | 399 |
| A00480 | A00727 | 408 | A00480 | A00772 | 477 |
| A00480 | A00865 | 213 | A00480 | A00928 | 335 |
| A00480 | A00952 | 356 | A00480 | A01107 | 291 |
| A00480 | A01189 | 157 | A00480 | A01221 | 176 |
| A00480 | A01243 | 157 | A00480 | A01352 | 204 |

|        |        |     |        |        |     |
|--------|--------|-----|--------|--------|-----|
| A00480 | A02877 | 154 | A00480 | A07312 | 299 |
| A00480 | A13117 | 483 | A00480 | A14482 | 217 |
| A00480 | A14621 | 219 | A00480 | A15377 | 481 |
| A00481 | A00495 | 236 | A00481 | A00531 | 235 |
| A00481 | A00532 | 491 | A00481 | A00571 | 266 |
| A00481 | A00597 | 223 | A00481 | A00603 | 283 |
| A00481 | A00606 | 257 | A00481 | A00691 | 472 |
| A00481 | A00693 | 457 | A00481 | A00760 | 438 |
| A00481 | A00762 | 584 | A00481 | A00793 | 403 |
| A00481 | A00826 | 262 | A00481 | A00854 | 249 |
| A00481 | A00871 | 474 | A00481 | A00916 | 274 |
| A00481 | A00919 | 457 | A00481 | A00947 | 489 |
| A00481 | A00965 | 224 | A00481 | A00977 | 324 |
| A00481 | A00981 | 240 | A00481 | A01024 | 377 |
| A00481 | A01074 | 373 | A00481 | A01075 | 491 |
| A00481 | A01082 | 480 | A00481 | A01084 | 460 |
| A00481 | A01087 | 491 | A00481 | A01088 | 483 |
| A00481 | A01154 | 246 | A00481 | A01166 | 288 |
| A00481 | A01214 | 182 | A00481 | A01217 | 270 |
| A00481 | A01226 | 174 | A00481 | A01234 | 470 |
| A00481 | A01238 | 286 | A00481 | A01252 | 281 |
| A00481 | A01304 | 417 | A00481 | A01306 | 256 |
| A00481 | A01352 | 465 | A00481 | A01354 | 270 |
| A00481 | A01365 | 478 | A00481 | A01406 | 616 |
| A00481 | A01416 | 246 | A00481 | A01707 | 385 |
| A00481 | A01781 | 168 | A00481 | A03601 | 626 |
| A00481 | A03958 | 218 | A00481 | A05501 | 293 |
| A00481 | A07290 | 183 | A00481 | A07700 | 200 |
| A00481 | A07706 | 491 | A00481 | A08144 | 176 |
| A00481 | A08269 | 213 | A00481 | A08304 | 438 |
| A00481 | A08527 | 382 | A00481 | A08594 | 451 |
| A00481 | A08925 | 177 | A00481 | A08971 | 187 |
| A00481 | A09059 | 165 | A00481 | A09608 | 409 |
| A00481 | A10538 | 183 | A00481 | A11291 | 165 |
| A00481 | A11452 | 281 | A00481 | A12124 | 385 |
| A00481 | A13069 | 221 | A00481 | A13706 | 207 |
| A00481 | A13732 | 396 | A00481 | A13870 | 217 |
| A00481 | A13905 | 229 | A00481 | A13989 | 205 |
| A00481 | A14006 | 477 | A00481 | A14220 | 204 |
| A00481 | A14451 | 369 | A00481 | A14566 | 490 |
| A00481 | A14594 | 480 | A00481 | A15667 | 180 |
| A00481 | A15774 | 159 | A00481 | A16704 | 157 |
| A00481 | A16750 | 299 | A00481 | A17125 | 205 |
| A00482 | A00531 | 207 | A00482 | A00560 | 488 |
| A00482 | A00722 | 373 | A00482 | A00764 | 199 |
| A00482 | A00765 | 160 | A00482 | A00853 | 196 |

|        |        |     |        |        |     |
|--------|--------|-----|--------|--------|-----|
| A00482 | A00857 | 473 | A00482 | A01003 | 488 |
| A00482 | A01011 | 672 | A00482 | A01093 | 235 |
| A00482 | A01136 | 251 | A00482 | A01227 | 199 |
| A00482 | A01237 | 477 | A00482 | A01280 | 491 |
| A00482 | A01348 | 486 | A00482 | A01478 | 491 |
| A00482 | A01572 | 199 | A00482 | A01741 | 475 |
| A00482 | A01839 | 294 | A00482 | A01997 | 195 |
| A00482 | A02179 | 159 | A00482 | A02208 | 460 |
| A00482 | A02837 | 305 | A00482 | A03070 | 491 |
| A00482 | A03112 | 318 | A00482 | A03575 | 168 |
| A00482 | A03696 | 157 | A00482 | A03703 | 420 |
| A00482 | A03704 | 490 | A00482 | A03719 | 162 |
| A00482 | A03721 | 283 | A00482 | A03727 | 443 |
| A00482 | A03852 | 305 | A00482 | A04033 | 174 |
| A00482 | A04067 | 458 | A00482 | A04175 | 462 |
| A00482 | A04622 | 268 | A00482 | A04715 | 165 |
| A00482 | A04861 | 423 | A00482 | A05009 | 256 |
| A00482 | A05220 | 467 | A00482 | A05853 | 483 |
| A00482 | A06001 | 491 | A00482 | A06082 | 199 |
| A00482 | A06280 | 491 | A00482 | A06314 | 221 |
| A00482 | A06488 | 490 | A00482 | A06502 | 489 |
| A00482 | A07004 | 462 | A00482 | A07229 | 152 |
| A00482 | A07427 | 135 | A00482 | A08133 | 199 |
| A00482 | A08842 | 491 | A00482 | A08858 | 279 |
| A00482 | A08946 | 172 | A00482 | A09226 | 200 |
| A00482 | A09714 | 184 | A00482 | A09740 | 254 |
| A00482 | A09741 | 441 | A00482 | A09775 | 263 |
| A00482 | A09780 | 490 | A00482 | A09825 | 249 |
| A00482 | A10175 | 272 | A00482 | A10395 | 339 |
| A00482 | A11162 | 401 | A00482 | A11227 | 162 |
| A00482 | A11277 | 232 | A00482 | A11283 | 174 |
| A00482 | A11431 | 159 | A00482 | A11544 | 452 |
| A00482 | A11560 | 207 | A00482 | A11653 | 232 |
| A00482 | A11774 | 274 | A00482 | A11952 | 221 |
| A00482 | A12669 | 221 | A00482 | A12851 | 362 |
| A00482 | A12884 | 210 | A00482 | A12895 | 396 |
| A00482 | A12904 | 236 | A00482 | A13207 | 221 |
| A00482 | A13338 | 335 | A00482 | A13422 | 221 |
| A00482 | A13466 | 480 | A00482 | A13924 | 165 |
| A00482 | A13987 | 180 | A00482 | A14017 | 470 |
| A00482 | A14018 | 484 | A00482 | A14041 | 406 |
| A00482 | A14049 | 424 | A00482 | A14050 | 200 |
| A00482 | A14059 | 221 | A00482 | A14118 | 466 |
| A00482 | A14202 | 293 | A00482 | A14279 | 267 |
| A00482 | A14436 | 172 | A00482 | A14570 | 490 |
| A00482 | A14644 | 475 | A00482 | A14809 | 199 |

|        |        |     |        |        |     |
|--------|--------|-----|--------|--------|-----|
| A00482 | A15187 | 179 | A00482 | A15292 | 380 |
| A00482 | A15419 | 296 | A00482 | A15431 | 473 |
| A00482 | A15445 | 338 | A00482 | A15461 | 455 |
| A00482 | A15487 | 411 | A00482 | A15506 | 152 |
| A00482 | A15800 | 163 | A00482 | A15810 | 184 |
| A00482 | A16075 | 454 | A00482 | A16687 | 177 |
| A00482 | A16768 | 312 | A00482 | A16806 | 172 |
| A00482 | A17196 | 184 | A00483 | A00548 | 241 |
| A00483 | A00591 | 490 | A00483 | A00688 | 241 |
| A00483 | A00929 | 419 | A00483 | A01004 | 588 |
| A00483 | A01183 | 486 | A00483 | A01370 | 218 |
| A00483 | A01386 | 224 | A00483 | A01417 | 586 |
| A00483 | A01661 | 588 | A00483 | A01743 | 177 |
| A00483 | A01970 | 405 | A00483 | A01997 | 460 |
| A00483 | A02416 | 241 | A00483 | A02859 | 168 |
| A00483 | A02936 | 212 | A00483 | A02983 | 235 |
| A00483 | A03006 | 159 | A00483 | A03079 | 268 |
| A00483 | A03170 | 443 | A00483 | A03259 | 249 |
| A00483 | A03714 | 286 | A00483 | A03724 | 491 |
| A00483 | A03731 | 427 | A00483 | A03732 | 488 |
| A00483 | A03748 | 256 | A00483 | A03887 | 357 |
| A00483 | A03899 | 491 | A00483 | A03900 | 210 |
| A00483 | A03945 | 391 | A00483 | A04676 | 216 |
| A00483 | A04818 | 180 | A00483 | A04928 | 179 |
| A00483 | A05778 | 362 | A00483 | A06620 | 172 |
| A00483 | A06828 | 445 | A00483 | A06899 | 229 |
| A00483 | A07422 | 899 | A00483 | A07442 | 71  |
| A00483 | A07479 | 160 | A00483 | A08209 | 159 |
| A00483 | A08639 | 455 | A00483 | A08683 | 486 |
| A00483 | A08746 | 491 | A00483 | A08861 | 241 |
| A00483 | A08866 | 484 | A00483 | A09205 | 491 |
| A00483 | A09206 | 479 | A00483 | A09230 | 281 |
| A00483 | A09233 | 246 | A00483 | A09254 | 174 |
| A00483 | A11326 | 168 | A00483 | A11383 | 447 |
| A00483 | A11422 | 449 | A00483 | A12137 | 291 |
| A00483 | A12884 | 306 | A00483 | A12897 | 162 |
| A00483 | A12975 | 281 | A00483 | A13338 | 290 |
| A00483 | A13826 | 411 | A00483 | A13935 | 454 |
| A00483 | A13941 | 185 | A00483 | A13987 | 414 |
| A00483 | A14122 | 455 | A00483 | A14124 | 434 |
| A00483 | A14299 | 241 | A00483 | A14378 | 235 |
| A00483 | A14408 | 241 | A00483 | A14439 | 152 |
| A00483 | A14511 | 252 | A00483 | A14598 | 208 |
| A00483 | A15113 | 362 | A00483 | A15300 | 945 |
| A00483 | A15312 | 273 | A00483 | A15318 | 457 |
| A00483 | A15349 | 241 | A00483 | A15352 | 265 |

|        |        |     |        |        |     |
|--------|--------|-----|--------|--------|-----|
| A00483 | A15391 | 308 | A00483 | A15419 | 205 |
| A00483 | A15422 | 486 | A00483 | A15459 | 180 |
| A00483 | A15799 | 191 | A00483 | A15896 | 262 |
| A00483 | A16117 | 489 | A00483 | A16473 | 260 |
| A00483 | A17196 | 286 | A00484 | A01175 | 180 |
| A00484 | A01485 | 432 | A00484 | A01599 | 491 |
| A00484 | A01958 | 218 | A00484 | A02969 | 255 |
| A00484 | A03110 | 272 | A00484 | A03858 | 180 |
| A00484 | A03942 | 188 | A00484 | A03955 | 473 |
| A00484 | A04423 | 401 | A00484 | A05045 | 238 |
| A00484 | A05706 | 196 | A00484 | A06439 | 191 |
| A00484 | A06641 | 385 | A00484 | A06943 | 491 |
| A00484 | A07173 | 191 | A00484 | A08330 | 243 |
| A00484 | A09784 | 477 | A00484 | A09787 | 435 |
| A00484 | A09846 | 285 | A00484 | A14210 | 375 |
| A00484 | A14371 | 228 | A00484 | A14598 | 286 |
| A00484 | A15308 | 162 | A00484 | A16285 | 324 |
| A00485 | A00531 | 157 | A00485 | A00532 | 293 |
| A00485 | A00576 | 447 | A00485 | A00587 | 416 |
| A00485 | A00600 | 491 | A00485 | A00601 | 480 |
| A00485 | A00609 | 484 | A00485 | A00625 | 337 |
| A00485 | A00663 | 185 | A00485 | A00675 | 475 |
| A00485 | A00694 | 199 | A00485 | A00719 | 490 |
| A00485 | A00743 | 363 | A00485 | A00799 | 291 |
| A00485 | A00802 | 484 | A00485 | A00849 | 395 |
| A00485 | A00882 | 491 | A00485 | A00911 | 484 |
| A00485 | A00936 | 338 | A00485 | A00939 | 433 |
| A00485 | A00981 | 196 | A00485 | A00985 | 156 |
| A00485 | A01004 | 360 | A00485 | A01022 | 491 |
| A00485 | A01026 | 208 | A00485 | A01049 | 481 |
| A00485 | A01100 | 443 | A00485 | A01102 | 196 |
| A00485 | A01156 | 472 | A00485 | A01161 | 491 |
| A00485 | A01211 | 491 | A00485 | A01260 | 263 |
| A00485 | A01276 | 283 | A00485 | A01326 | 393 |
| A00485 | A01332 | 235 | A00485 | A01343 | 366 |
| A00485 | A01438 | 205 | A00485 | A01451 | 491 |
| A00485 | A01458 | 196 | A00485 | A01461 | 452 |
| A00485 | A01481 | 489 | A00485 | A01483 | 185 |
| A00485 | A01524 | 224 | A00485 | A01530 | 334 |
| A00485 | A01551 | 319 | A00485 | A01556 | 489 |
| A00485 | A01559 | 167 | A00485 | A01578 | 486 |
| A00485 | A01582 | 480 | A00485 | A01585 | 488 |
| A00485 | A01627 | 377 | A00485 | A01632 | 483 |
| A00485 | A01634 | 357 | A00485 | A01660 | 163 |
| A00485 | A01758 | 159 | A00485 | A01763 | 216 |
| A00485 | A01855 | 286 | A00485 | A01895 | 154 |

|        |        |     |        |        |     |
|--------|--------|-----|--------|--------|-----|
| A00485 | A01909 | 249 | A00485 | A01910 | 204 |
| A00485 | A01911 | 152 | A00485 | A01914 | 163 |
| A00485 | A01931 | 393 | A00485 | A01935 | 285 |
| A00485 | A02046 | 326 | A00485 | A02148 | 485 |
| A00485 | A02156 | 160 | A00485 | A02186 | 364 |
| A00485 | A02188 | 263 | A00485 | A02198 | 188 |
| A00485 | A02205 | 172 | A00485 | A02215 | 491 |
| A00485 | A02221 | 404 | A00485 | A02222 | 481 |
| A00485 | A02253 | 223 | A00485 | A02283 | 393 |
| A00485 | A02289 | 263 | A00485 | A02320 | 263 |
| A00485 | A02330 | 196 | A00485 | A02333 | 462 |
| A00485 | A02338 | 329 | A00485 | A02417 | 185 |
| A00485 | A02477 | 491 | A00485 | A02485 | 427 |
| A00485 | A02491 | 235 | A00485 | A02565 | 154 |
| A00485 | A02633 | 230 | A00485 | A02661 | 157 |
| A00485 | A02668 | 221 | A00485 | A02831 | 167 |
| A00485 | A02924 | 226 | A00485 | A03020 | 313 |
| A00485 | A03050 | 433 | A00485 | A03079 | 273 |
| A00485 | A03095 | 205 | A00485 | A03104 | 486 |
| A00485 | A03165 | 368 | A00485 | A03230 | 204 |
| A00485 | A03293 | 491 | A00485 | A03304 | 362 |
| A00485 | A03310 | 159 | A00485 | A03349 | 154 |
| A00485 | A03351 | 416 | A00485 | A03367 | 241 |
| A00485 | A03373 | 154 | A00485 | A03376 | 196 |
| A00485 | A03417 | 470 | A00485 | A03440 | 156 |
| A00485 | A03477 | 420 | A00485 | A03562 | 375 |
| A00485 | A03608 | 152 | A00485 | A03650 | 364 |
| A00485 | A03708 | 228 | A00485 | A03729 | 326 |
| A00485 | A03748 | 286 | A00485 | A03819 | 163 |
| A00485 | A03866 | 185 | A00485 | A03910 | 488 |
| A00485 | A03935 | 199 | A00485 | A03945 | 463 |
| A00485 | A04206 | 154 | A00485 | A04252 | 302 |
| A00485 | A04275 | 447 | A00485 | A04304 | 308 |
| A00485 | A04337 | 491 | A00485 | A04361 | 329 |
| A00485 | A04410 | 483 | A00485 | A04412 | 223 |
| A00485 | A04424 | 395 | A00485 | A04429 | 294 |
| A00485 | A04443 | 154 | A00485 | A04449 | 474 |
| A00485 | A04453 | 151 | A00485 | A04493 | 188 |
| A00485 | A04518 | 296 | A00485 | A04520 | 475 |
| A00485 | A04567 | 321 | A00485 | A04576 | 216 |
| A00485 | A04620 | 163 | A00485 | A04630 | 193 |
| A00485 | A04668 | 348 | A00485 | A04713 | 168 |
| A00485 | A04739 | 156 | A00485 | A04987 | 319 |
| A00485 | A05003 | 266 | A00485 | A05155 | 450 |
| A00485 | A05189 | 285 | A00485 | A05234 | 491 |
| A00485 | A05272 | 313 | A00485 | A05291 | 185 |

|        |        |     |        |        |     |
|--------|--------|-----|--------|--------|-----|
| A00485 | A05356 | 491 | A00485 | A05439 | 489 |
| A00485 | A05469 | 230 | A00485 | A05494 | 171 |
| A00485 | A05587 | 174 | A00485 | A05601 | 473 |
| A00485 | A05603 | 172 | A00485 | A05678 | 328 |
| A00485 | A05777 | 327 | A00485 | A05812 | 268 |
| A00485 | A05855 | 425 | A00485 | A05891 | 485 |
| A00485 | A06038 | 279 | A00485 | A06058 | 210 |
| A00485 | A06092 | 302 | A00485 | A06172 | 199 |
| A00485 | A06225 | 254 | A00485 | A06277 | 402 |
| A00485 | A06359 | 238 | A00485 | A06617 | 373 |
| A00485 | A06729 | 445 | A00485 | A06731 | 475 |
| A00485 | A06952 | 252 | A00485 | A07054 | 428 |
| A00485 | A07069 | 462 | A00485 | A07106 | 167 |
| A00485 | A07209 | 469 | A00485 | A07218 | 311 |
| A00485 | A07242 | 246 | A00485 | A07273 | 204 |
| A00485 | A07275 | 252 | A00485 | A07286 | 252 |
| A00485 | A07292 | 193 | A00485 | A07310 | 266 |
| A00485 | A07442 | 491 | A00485 | A07452 | 163 |
| A00485 | A07471 | 488 | A00485 | A07472 | 199 |
| A00485 | A07475 | 273 | A00485 | A07479 | 374 |
| A00485 | A07496 | 204 | A00485 | A07505 | 152 |
| A00485 | A07541 | 351 | A00485 | A07605 | 452 |
| A00485 | A07636 | 302 | A00485 | A07754 | 480 |
| A00485 | A07958 | 407 | A00485 | A08097 | 488 |
| A00485 | A08309 | 454 | A00485 | A08342 | 266 |
| A00485 | A08451 | 313 | A00485 | A08686 | 451 |
| A00485 | A08747 | 241 | A00485 | A08785 | 474 |
| A00485 | A08936 | 351 | A00485 | A09204 | 452 |
| A00485 | A09235 | 156 | A00485 | A09246 | 474 |
| A00485 | A09416 | 489 | A00485 | A09454 | 185 |
| A00485 | A09518 | 241 | A00485 | A09742 | 63  |
| A00485 | A09745 | 152 | A00485 | A09800 | 313 |
| A00485 | A09939 | 168 | A00485 | A10024 | 167 |
| A00485 | A10156 | 472 | A00485 | A10594 | 160 |
| A00485 | A10622 | 210 | A00485 | A10651 | 380 |
| A00485 | A10658 | 152 | A00485 | A10790 | 167 |
| A00485 | A10832 | 266 | A00485 | A10954 | 351 |
| A00485 | A11230 | 313 | A00485 | A11280 | 456 |
| A00485 | A11308 | 172 | A00485 | A11311 | 312 |
| A00485 | A11348 | 235 | A00485 | A11411 | 369 |
| A00485 | A11428 | 190 | A00485 | A11449 | 172 |
| A00485 | A11513 | 257 | A00485 | A11523 | 179 |
| A00485 | A11561 | 172 | A00485 | A11573 | 172 |
| A00485 | A11977 | 252 | A00485 | A11982 | 190 |
| A00485 | A11983 | 404 | A00485 | A12212 | 223 |
| A00485 | A12265 | 364 | A00485 | A12298 | 230 |

|        |        |     |        |        |     |
|--------|--------|-----|--------|--------|-----|
| A00485 | A12614 | 395 | A00485 | A12633 | 193 |
| A00485 | A12674 | 223 | A00485 | A12721 | 285 |
| A00485 | A12787 | 473 | A00485 | A12887 | 210 |
| A00485 | A13361 | 347 | A00485 | A13369 | 491 |
| A00485 | A13617 | 424 | A00485 | A13874 | 188 |
| A00485 | A13879 | 160 | A00485 | A13960 | 190 |
| A00485 | A13987 | 179 | A00485 | A14196 | 187 |
| A00485 | A14202 | 252 | A00485 | A14209 | 243 |
| A00485 | A14213 | 534 | A00485 | A14247 | 224 |
| A00485 | A14272 | 477 | A00485 | A14287 | 210 |
| A00485 | A14375 | 251 | A00485 | A14381 | 491 |
| A00485 | A14392 | 195 | A00485 | A14405 | 251 |
| A00485 | A14498 | 417 | A00485 | A14589 | 316 |
| A00485 | A15282 | 461 | A00485 | A15292 | 472 |
| A00485 | A15311 | 84  | A00485 | A15312 | 191 |
| A00485 | A15313 | 63  | A00485 | A15318 | 176 |
| A00485 | A15352 | 118 | A00485 | A15422 | 486 |
| A00485 | A15431 | 63  | A00485 | A15432 | 465 |
| A00485 | A15433 | 98  | A00485 | A15435 | 68  |
| A00485 | A15447 | 101 | A00485 | A15451 | 360 |
| A00485 | A15452 | 63  | A00485 | A15456 | 224 |
| A00485 | A15457 | 160 | A00485 | A15460 | 127 |
| A00485 | A15498 | 486 | A00485 | A15809 | 245 |
| A00485 | A15913 | 232 | A00485 | A15917 | 489 |
| A00485 | A15922 | 419 | A00485 | A16143 | 167 |
| A00485 | A16507 | 252 | A00485 | A16732 | 185 |
| A00485 | A16876 | 216 | A00485 | A17078 | 454 |
| A00486 | A00820 | 174 | A00486 | A01011 | 486 |
| A00486 | A01276 | 182 | A00486 | A01431 | 63  |
| A00486 | A01557 | 430 | A00486 | A01566 | 418 |
| A00486 | A01572 | 232 | A00486 | A01578 | 344 |
| A00486 | A01630 | 447 | A00486 | A01632 | 363 |
| A00486 | A01645 | 333 | A00486 | A01652 | 199 |
| A00486 | A01661 | 156 | A00486 | A01668 | 274 |
| A00486 | A01752 | 303 | A00486 | A01769 | 241 |
| A00486 | A01839 | 394 | A00486 | A01902 | 115 |
| A00486 | A01903 | 307 | A00486 | A01911 | 210 |
| A00486 | A01915 | 477 | A00486 | A02188 | 167 |
| A00486 | A02350 | 438 | A00486 | A02687 | 302 |
| A00486 | A02691 | 246 | A00486 | A02713 | 193 |
| A00486 | A03019 | 63  | A00486 | A03259 | 63  |
| A00486 | A03297 | 369 | A00486 | A03321 | 433 |
| A00486 | A03388 | 191 | A00486 | A03550 | 199 |
| A00486 | A03611 | 171 | A00486 | A03648 | 411 |
| A00486 | A03803 | 180 | A00486 | A03813 | 229 |
| A00486 | A04139 | 340 | A00486 | A04168 | 283 |



|        |        |     |        |        |     |
|--------|--------|-----|--------|--------|-----|
| A00486 | A04171 | 241 | A00486 | A04410 | 185 |
| A00486 | A04435 | 266 | A00486 | A04704 | 151 |
| A00486 | A04715 | 450 | A00486 | A04790 | 190 |
| A00486 | A04805 | 185 | A00486 | A04832 | 152 |
| A00486 | A04903 | 257 | A00486 | A04907 | 229 |
| A00486 | A05075 | 283 | A00486 | A05094 | 270 |
| A00486 | A05114 | 475 | A00486 | A05422 | 270 |
| A00486 | A05759 | 165 | A00486 | A05889 | 463 |
| A00486 | A06106 | 313 | A00486 | A06428 | 296 |
| A00486 | A06653 | 174 | A00486 | A07384 | 170 |
| A00486 | A07810 | 328 | A00486 | A08002 | 276 |
| A00486 | A09953 | 283 | A00486 | A11172 | 291 |
| A00486 | A12009 | 177 | A00486 | A12734 | 328 |
| A00486 | A13369 | 383 | A00486 | A13434 | 235 |
| A00486 | A13829 | 310 | A00486 | A14633 | 185 |
| A00486 | A16538 | 361 | A00487 | A00555 | 271 |
| A00487 | A00619 | 154 | A00487 | A00673 | 217 |
| A00487 | A00687 | 276 | A00487 | A00709 | 293 |
| A00487 | A00851 | 360 | A00487 | A01061 | 332 |
| A00487 | A01064 | 268 | A00487 | A01151 | 408 |
| A00487 | A01217 | 188 | A00487 | A01243 | 484 |
| A00487 | A01352 | 152 | A00487 | A01362 | 160 |
| A00487 | A02499 | 285 | A00487 | A02565 | 152 |
| A00487 | A02626 | 475 | A00487 | A03628 | 260 |
| A00487 | A03901 | 475 | A00487 | A06273 | 199 |
| A00487 | A06832 | 341 | A00487 | A07132 | 238 |
| A00487 | A08576 | 255 | A00487 | A09020 | 228 |
| A00487 | A09648 | 156 | A00487 | A09977 | 243 |
| A00487 | A11522 | 241 | A00487 | A13667 | 198 |
| A00487 | A14148 | 204 | A00487 | A14178 | 215 |
| A00487 | A14566 | 467 | A00487 | A14594 | 486 |
| A00487 | A14701 | 417 | A00487 | A16324 | 152 |
| A00488 | A00490 | 584 | A00488 | A00497 | 706 |
| A00488 | A00501 | 484 | A00488 | A00518 | 356 |
| A00488 | A00520 | 202 | A00488 | A00521 | 382 |
| A00488 | A00532 | 321 | A00488 | A00550 | 638 |
| A00488 | A00551 | 398 | A00488 | A00554 | 683 |
| A00488 | A00595 | 411 | A00488 | A00605 | 589 |
| A00488 | A00648 | 151 | A00488 | A00690 | 489 |
| A00488 | A00701 | 407 | A00488 | A00708 | 272 |
| A00488 | A00767 | 428 | A00488 | A00831 | 334 |
| A00488 | A00916 | 491 | A00488 | A00923 | 399 |
| A00488 | A00934 | 463 | A00488 | A00944 | 177 |
| A00488 | A01020 | 707 | A00488 | A01032 | 328 |
| A00488 | A01034 | 190 | A00488 | A01040 | 424 |
| A00488 | A01047 | 174 | A00488 | A01075 | 208 |

|        |        |     |        |        |     |
|--------|--------|-----|--------|--------|-----|
| A00488 | A01079 | 198 | A00488 | A01085 | 183 |
| A00488 | A01112 | 334 | A00488 | A01116 | 635 |
| A00488 | A01184 | 491 | A00488 | A01201 | 409 |
| A00488 | A01206 | 483 | A00488 | A01234 | 491 |
| A00488 | A01291 | 462 | A00488 | A01304 | 637 |
| A00488 | A01306 | 254 | A00488 | A01470 | 205 |
| A00488 | A01492 | 485 | A00488 | A01495 | 334 |
| A00488 | A01539 | 489 | A00488 | A01564 | 182 |
| A00488 | A01598 | 383 | A00488 | A01649 | 408 |
| A00488 | A03069 | 218 | A00488 | A03457 | 185 |
| A00488 | A03734 | 154 | A00488 | A06275 | 344 |
| A00488 | A06965 | 466 | A00488 | A07223 | 637 |
| A00488 | A07347 | 491 | A00488 | A07524 | 154 |
| A00488 | A07533 | 433 | A00488 | A07584 | 380 |
| A00488 | A07625 | 436 | A00488 | A07700 | 636 |
| A00488 | A07706 | 168 | A00488 | A07725 | 638 |
| A00488 | A07924 | 272 | A00488 | A08326 | 234 |
| A00488 | A08357 | 299 | A00488 | A08382 | 221 |
| A00488 | A08452 | 457 | A00488 | A08491 | 462 |
| A00488 | A08521 | 232 | A00488 | A08972 | 187 |
| A00488 | A09209 | 229 | A00488 | A09322 | 180 |
| A00488 | A09619 | 512 | A00488 | A09705 | 398 |
| A00488 | A10616 | 429 | A00488 | A13989 | 485 |
| A00488 | A14505 | 463 | A00488 | A15525 | 165 |
| A00488 | A15541 | 303 | A00488 | A15709 | 162 |
| A00488 | A15735 | 483 | A00488 | A15739 | 474 |
| A00488 | A16302 | 306 | A00488 | A16394 | 188 |
| A00489 | A00532 | 322 | A00489 | A00605 | 430 |
| A00489 | A00629 | 291 | A00489 | A00640 | 307 |
| A00489 | A00667 | 385 | A00489 | A00705 | 477 |
| A00489 | A00774 | 288 | A00489 | A00831 | 232 |
| A00489 | A00843 | 316 | A00489 | A00848 | 491 |
| A00489 | A00878 | 210 | A00489 | A00883 | 489 |
| A00489 | A00905 | 263 | A00489 | A00916 | 491 |
| A00489 | A00970 | 477 | A00489 | A01017 | 491 |
| A00489 | A01042 | 286 | A00489 | A01069 | 675 |
| A00489 | A01075 | 172 | A00489 | A01100 | 396 |
| A00489 | A01115 | 722 | A00489 | A01119 | 302 |
| A00489 | A01150 | 321 | A00489 | A01166 | 479 |
| A00489 | A01194 | 491 | A00489 | A01201 | 383 |
| A00489 | A01206 | 396 | A00489 | A01219 | 378 |
| A00489 | A01234 | 490 | A00489 | A01243 | 185 |
| A00489 | A01291 | 481 | A00489 | A01351 | 299 |
| A00489 | A01354 | 346 | A00489 | A01420 | 394 |
| A00489 | A01431 | 489 | A00489 | A01470 | 490 |
| A00489 | A01492 | 321 | A00489 | A01495 | 196 |

|        |        |     |        |        |     |
|--------|--------|-----|--------|--------|-----|
| A00489 | A01539 | 721 | A00489 | A01558 | 329 |
| A00489 | A01569 | 491 | A00489 | A01577 | 344 |
| A00489 | A01598 | 490 | A00489 | A01612 | 472 |
| A00489 | A01614 | 486 | A00489 | A01640 | 168 |
| A00489 | A01649 | 474 | A00489 | A01707 | 378 |
| A00489 | A01770 | 398 | A00489 | A01917 | 185 |
| A00489 | A02602 | 156 | A00489 | A02626 | 323 |
| A00489 | A03446 | 721 | A00489 | A03560 | 404 |
| A00489 | A03567 | 416 | A00489 | A03569 | 479 |
| A00489 | A03740 | 154 | A00489 | A03783 | 404 |
| A00489 | A03863 | 404 | A00489 | A04021 | 430 |
| A00489 | A05385 | 165 | A00489 | A05645 | 441 |
| A00489 | A05712 | 371 | A00489 | A06109 | 218 |
| A00489 | A06531 | 475 | A00489 | A07004 | 281 |
| A00489 | A07247 | 435 | A00489 | A07706 | 341 |
| A00489 | A08137 | 326 | A00489 | A08489 | 391 |
| A00489 | A08546 | 507 | A00489 | A08896 | 382 |
| A00489 | A08978 | 215 | A00489 | A08991 | 459 |
| A00489 | A09318 | 317 | A00489 | A10006 | 366 |
| A00489 | A10266 | 252 | A00489 | A10465 | 288 |
| A00489 | A10490 | 457 | A00489 | A10532 | 658 |
| A00489 | A11240 | 372 | A00489 | A11409 | 491 |
| A00489 | A11704 | 160 | A00489 | A11843 | 171 |
| A00489 | A13609 | 485 | A00489 | A13989 | 480 |
| A00489 | A14152 | 177 | A00489 | A14208 | 224 |
| A00489 | A14596 | 473 | A00489 | A14597 | 469 |
| A00489 | A14609 | 313 | A00489 | A14701 | 480 |
| A00489 | A15297 | 477 | A00489 | A15338 | 154 |
| A00489 | A15468 | 168 | A00489 | A15474 | 205 |
| A00489 | A15519 | 210 | A00489 | A15660 | 436 |
| A00489 | A15684 | 335 | A00489 | A15698 | 372 |
| A00489 | A16834 | 468 | A00489 | A17067 | 267 |
| A00490 | A00497 | 506 | A00490 | A00520 | 134 |
| A00490 | A00554 | 462 | A00490 | A00566 | 339 |
| A00490 | A00584 | 252 | A00490 | A00767 | 104 |
| A00490 | A00858 | 383 | A00490 | A00916 | 235 |
| A00490 | A00934 | 384 | A00490 | A00944 | 395 |
| A00490 | A00960 | 278 | A00490 | A01020 | 693 |
| A00490 | A01116 | 347 | A00490 | A01184 | 294 |
| A00490 | A01201 | 433 | A00490 | A01224 | 170 |
| A00490 | A01234 | 489 | A00490 | A01351 | 177 |
| A00490 | A06797 | 254 | A00490 | A07223 | 196 |
| A00490 | A07533 | 226 | A00490 | A07584 | 337 |
| A00490 | A07725 | 218 | A00490 | A07924 | 177 |
| A00490 | A08491 | 462 | A00490 | A09619 | 462 |
| A00490 | A09664 | 254 | A00490 | A14508 | 224 |

|        |        |     |        |        |     |
|--------|--------|-----|--------|--------|-----|
| A00491 | A00511 | 430 | A00491 | A00531 | 484 |
| A00491 | A00552 | 327 | A00491 | A00567 | 274 |
| A00491 | A00718 | 375 | A00491 | A00762 | 159 |
| A00491 | A00835 | 188 | A00491 | A01075 | 388 |
| A00491 | A01087 | 196 | A00491 | A01125 | 290 |
| A00491 | A01198 | 363 | A00491 | A01232 | 63  |
| A00491 | A01406 | 152 | A00491 | A01598 | 395 |
| A00491 | A01665 | 152 | A00491 | A01790 | 389 |
| A00491 | A02021 | 419 | A00491 | A02180 | 344 |
| A00491 | A02402 | 74  | A00491 | A02470 | 160 |
| A00491 | A02505 | 159 | A00491 | A02607 | 213 |
| A00491 | A02671 | 185 | A00491 | A02839 | 246 |
| A00491 | A03104 | 395 | A00491 | A03181 | 154 |
| A00491 | A03379 | 190 | A00491 | A03391 | 463 |
| A00491 | A03625 | 165 | A00491 | A03757 | 386 |
| A00491 | A03771 | 151 | A00491 | A04770 | 200 |
| A00491 | A04780 | 263 | A00491 | A05228 | 318 |
| A00491 | A05439 | 490 | A00491 | A05629 | 256 |
| A00491 | A05697 | 343 | A00491 | A06038 | 429 |
| A00491 | A06660 | 221 | A00491 | A06891 | 243 |
| A00491 | A06907 | 324 | A00491 | A07209 | 378 |
| A00491 | A07210 | 208 | A00491 | A08555 | 310 |
| A00491 | A08568 | 185 | A00491 | A09141 | 362 |
| A00491 | A09272 | 483 | A00491 | A09464 | 210 |
| A00491 | A09956 | 356 | A00491 | A10461 | 386 |
| A00491 | A11291 | 420 | A00491 | A11476 | 162 |
| A00491 | A11670 | 162 | A00491 | A12265 | 418 |
| A00491 | A12298 | 414 | A00491 | A13299 | 324 |
| A00491 | A14026 | 152 | A00491 | A14220 | 945 |
| A00491 | A15366 | 234 | A00491 | A15717 | 196 |
| A00491 | A16410 | 358 | A00491 | A16892 | 318 |
| A00492 | A00720 | 151 | A00492 | A00794 | 688 |
| A00492 | A00942 | 179 | A00492 | A01078 | 688 |
| A00492 | A01143 | 249 | A00492 | A01270 | 157 |
| A00492 | A01461 | 483 | A00492 | A01500 | 198 |
| A00492 | A01522 | 433 | A00492 | A01574 | 215 |
| A00492 | A01575 | 586 | A00492 | A01585 | 491 |
| A00492 | A01634 | 344 | A00492 | A01660 | 271 |
| A00492 | A01671 | 157 | A00492 | A02671 | 469 |
| A00492 | A03044 | 196 | A00492 | A03452 | 649 |
| A00492 | A03618 | 688 | A00492 | A03879 | 157 |
| A00492 | A03891 | 340 | A00492 | A03892 | 491 |
| A00492 | A04292 | 185 | A00492 | A04897 | 238 |
| A00492 | A06137 | 162 | A00492 | A07062 | 152 |
| A00492 | A07736 | 607 | A00492 | A08137 | 156 |
| A00492 | A08400 | 380 | A00492 | A08461 | 477 |

|        |        |     |        |        |     |
|--------|--------|-----|--------|--------|-----|
| A00492 | A09622 | 154 | A00492 | A10078 | 199 |
| A00492 | A10655 | 688 | A00492 | A11279 | 461 |
| A00492 | A11570 | 425 | A00492 | A12011 | 191 |
| A00492 | A12834 | 252 | A00492 | A13882 | 465 |
| A00492 | A13894 | 329 | A00492 | A13895 | 420 |
| A00492 | A13902 | 730 | A00492 | A14115 | 212 |
| A00492 | A14167 | 201 | A00492 | A14182 | 425 |
| A00492 | A14247 | 458 | A00492 | A14272 | 281 |
| A00492 | A14661 | 473 | A00492 | A15315 | 190 |
| A00492 | A15347 | 154 | A00492 | A15377 | 208 |
| A00492 | A15647 | 500 | A00492 | A15774 | 154 |
| A00492 | A17121 | 219 | A00492 | A17133 | 456 |
| A00493 | A00527 | 447 | A00493 | A00581 | 485 |
| A00493 | A00609 | 491 | A00493 | A00617 | 435 |
| A00493 | A00718 | 491 | A00493 | A00778 | 486 |
| A00493 | A00779 | 340 | A00493 | A00781 | 185 |
| A00493 | A00797 | 483 | A00493 | A00907 | 489 |
| A00493 | A00920 | 343 | A00493 | A00948 | 406 |
| A00493 | A01021 | 263 | A00493 | A01026 | 491 |
| A00493 | A01100 | 191 | A00493 | A01313 | 486 |
| A00493 | A01360 | 210 | A00493 | A01365 | 210 |
| A00493 | A01375 | 173 | A00493 | A01377 | 490 |
| A00493 | A01386 | 480 | A00493 | A02135 | 230 |
| A00493 | A02494 | 335 | A00493 | A02704 | 367 |
| A00493 | A02774 | 196 | A00493 | A02836 | 308 |
| A00493 | A02878 | 463 | A00493 | A03408 | 170 |
| A00493 | A03556 | 152 | A00493 | A04145 | 224 |
| A00493 | A05052 | 291 | A00493 | A06472 | 311 |
| A00493 | A06616 | 286 | A00493 | A07111 | 195 |
| A00493 | A07558 | 418 | A00493 | A07621 | 279 |
| A00493 | A07693 | 479 | A00493 | A08113 | 417 |
| A00493 | A08161 | 162 | A00493 | A08260 | 374 |
| A00493 | A08263 | 479 | A00493 | A08289 | 170 |
| A00493 | A08346 | 491 | A00493 | A08402 | 491 |
| A00493 | A08694 | 323 | A00493 | A08975 | 461 |
| A00493 | A09164 | 243 | A00493 | A09648 | 307 |
| A00493 | A12174 | 353 | A00493 | A13821 | 267 |
| A00493 | A13873 | 168 | A00493 | A14077 | 473 |
| A00493 | A14092 | 462 | A00493 | A14191 | 395 |
| A00493 | A14272 | 491 | A00493 | A14707 | 491 |
| A00493 | A14840 | 480 | A00493 | A15367 | 382 |
| A00493 | A15562 | 416 | A00493 | A15877 | 489 |
| A00493 | A16418 | 163 | A00493 | A17152 | 258 |
| A00494 | A00507 | 288 | A00494 | A00521 | 285 |
| A00494 | A00537 | 382 | A00494 | A00539 | 180 |
| A00494 | A00550 | 217 | A00494 | A00571 | 473 |

|        |        |     |        |        |     |
|--------|--------|-----|--------|--------|-----|
| A00494 | A00593 | 156 | A00494 | A00604 | 433 |
| A00494 | A00610 | 238 | A00494 | A00623 | 247 |
| A00494 | A00638 | 224 | A00494 | A00653 | 488 |
| A00494 | A00667 | 401 | A00494 | A00671 | 270 |
| A00494 | A00673 | 332 | A00494 | A00687 | 307 |
| A00494 | A00697 | 333 | A00494 | A00700 | 385 |
| A00494 | A00739 | 152 | A00494 | A00740 | 577 |
| A00494 | A00742 | 213 | A00494 | A00779 | 267 |
| A00494 | A00782 | 355 | A00494 | A00787 | 191 |
| A00494 | A00788 | 218 | A00494 | A00789 | 157 |
| A00494 | A00791 | 227 | A00494 | A00793 | 154 |
| A00494 | A00809 | 241 | A00494 | A00811 | 152 |
| A00494 | A00824 | 478 | A00494 | A00839 | 574 |
| A00494 | A00843 | 234 | A00494 | A00856 | 241 |
| A00494 | A00865 | 252 | A00494 | A00878 | 311 |
| A00494 | A00886 | 252 | A00494 | A00897 | 228 |
| A00494 | A00929 | 230 | A00494 | A00953 | 160 |
| A00494 | A00970 | 329 | A00494 | A00980 | 287 |
| A00494 | A00991 | 266 | A00494 | A00996 | 247 |
| A00494 | A01004 | 241 | A00494 | A01016 | 418 |
| A00494 | A01017 | 317 | A00494 | A01025 | 273 |
| A00494 | A01027 | 272 | A00494 | A01086 | 234 |
| A00494 | A01102 | 568 | A00494 | A01115 | 190 |
| A00494 | A01119 | 247 | A00494 | A01150 | 170 |
| A00494 | A01154 | 377 | A00494 | A01161 | 154 |
| A00494 | A01194 | 565 | A00494 | A01196 | 241 |
| A00494 | A01207 | 65  | A00494 | A01218 | 590 |
| A00494 | A01221 | 338 | A00494 | A01242 | 414 |
| A00494 | A01263 | 446 | A00494 | A01270 | 241 |
| A00494 | A01291 | 353 | A00494 | A01317 | 311 |
| A00494 | A01337 | 160 | A00494 | A01365 | 423 |
| A00494 | A01369 | 426 | A00494 | A01374 | 366 |
| A00494 | A01411 | 592 | A00494 | A01420 | 277 |
| A00494 | A01421 | 165 | A00494 | A01436 | 234 |
| A00494 | A01449 | 443 | A00494 | A01455 | 247 |
| A00494 | A01539 | 313 | A00494 | A01569 | 480 |
| A00494 | A01579 | 392 | A00494 | A01581 | 247 |
| A00494 | A01601 | 585 | A00494 | A01747 | 165 |
| A00494 | A01824 | 433 | A00494 | A01826 | 247 |
| A00494 | A01841 | 427 | A00494 | A02227 | 202 |
| A00494 | A02353 | 489 | A00494 | A02718 | 196 |
| A00494 | A02737 | 217 | A00494 | A02887 | 235 |
| A00494 | A03453 | 589 | A00494 | A03959 | 180 |
| A00494 | A04687 | 229 | A00494 | A05499 | 163 |
| A00494 | A05501 | 321 | A00494 | A05502 | 174 |
| A00494 | A05702 | 185 | A00494 | A06084 | 213 |

|        |        |     |        |        |     |
|--------|--------|-----|--------|--------|-----|
| A00494 | A06534 | 327 | A00494 | A06814 | 267 |
| A00494 | A06878 | 232 | A00494 | A06973 | 408 |
| A00494 | A07047 | 241 | A00494 | A07398 | 539 |
| A00494 | A07677 | 223 | A00494 | A07695 | 319 |
| A00494 | A07746 | 268 | A00494 | A08154 | 188 |
| A00494 | A08277 | 254 | A00494 | A08315 | 177 |
| A00494 | A08358 | 326 | A00494 | A08359 | 163 |
| A00494 | A08369 | 249 | A00494 | A08408 | 241 |
| A00494 | A08476 | 241 | A00494 | A08556 | 249 |
| A00494 | A08761 | 193 | A00494 | A08762 | 243 |
| A00494 | A09308 | 562 | A00494 | A09320 | 296 |
| A00494 | A09322 | 241 | A00494 | A09502 | 221 |
| A00494 | A09587 | 479 | A00494 | A09620 | 241 |
| A00494 | A09713 | 369 | A00494 | A09717 | 247 |
| A00494 | A09735 | 460 | A00494 | A10159 | 228 |
| A00494 | A10490 | 159 | A00494 | A11540 | 243 |
| A00494 | A11597 | 230 | A00494 | A11728 | 332 |
| A00494 | A12227 | 241 | A00494 | A13340 | 224 |
| A00494 | A13609 | 416 | A00494 | A14074 | 247 |
| A00494 | A14479 | 396 | A00494 | A14482 | 249 |
| A00494 | A14566 | 213 | A00494 | A15268 | 241 |
| A00494 | A15381 | 241 | A00494 | A15696 | 213 |
| A00494 | A15771 | 241 | A00494 | A16437 | 168 |
| A00495 | A00606 | 240 | A00495 | A00636 | 665 |
| A00495 | A00722 | 393 | A00495 | A01074 | 229 |
| A00495 | A01162 | 488 | A00495 | A01365 | 329 |
| A00495 | A01473 | 411 | A00495 | A02010 | 456 |
| A00495 | A02542 | 330 | A00495 | A02993 | 393 |
| A00495 | A03097 | 224 | A00495 | A03134 | 193 |
| A00495 | A03686 | 393 | A00495 | A03703 | 480 |
| A00495 | A03721 | 260 | A00495 | A03728 | 393 |
| A00495 | A04161 | 488 | A00495 | A05327 | 350 |
| A00495 | A06786 | 313 | A00495 | A06964 | 451 |
| A00495 | A07181 | 439 | A00495 | A09362 | 475 |
| A00495 | A12835 | 438 | A00495 | A14431 | 252 |
| A00495 | A14470 | 472 | A00495 | A17076 | 157 |
| A00496 | A00532 | 436 | A00496 | A00560 | 491 |
| A00496 | A00635 | 351 | A00496 | A00718 | 291 |
| A00496 | A00835 | 491 | A00496 | A00836 | 168 |
| A00496 | A00837 | 458 | A00496 | A00883 | 352 |
| A00496 | A00905 | 440 | A00496 | A00916 | 363 |
| A00496 | A00933 | 185 | A00496 | A00940 | 475 |
| A00496 | A00954 | 263 | A00496 | A00957 | 491 |
| A00496 | A01075 | 489 | A00496 | A01082 | 246 |
| A00496 | A01091 | 263 | A00496 | A01097 | 262 |
| A00496 | A01132 | 293 | A00496 | A01143 | 491 |

|        |        |     |        |        |     |
|--------|--------|-----|--------|--------|-----|
| A00496 | A01206 | 375 | A00496 | A01234 | 176 |
| A00496 | A01259 | 337 | A00496 | A01284 | 157 |
| A00496 | A01291 | 293 | A00496 | A01426 | 226 |
| A00496 | A01598 | 481 | A00496 | A01612 | 457 |
| A00496 | A01638 | 195 | A00496 | A01660 | 488 |
| A00496 | A03057 | 486 | A00496 | A03112 | 156 |
| A00496 | A03136 | 486 | A00496 | A03446 | 208 |
| A00496 | A03557 | 344 | A00496 | A03569 | 458 |
| A00496 | A04020 | 481 | A00496 | A04050 | 388 |
| A00496 | A04449 | 364 | A00496 | A06466 | 270 |
| A00496 | A06491 | 156 | A00496 | A06783 | 157 |
| A00496 | A06907 | 491 | A00496 | A07311 | 469 |
| A00496 | A07360 | 213 | A00496 | A07604 | 491 |
| A00496 | A08137 | 491 | A00496 | A08571 | 477 |
| A00496 | A09319 | 899 | A00496 | A09591 | 167 |
| A00496 | A10615 | 168 | A00496 | A11291 | 491 |
| A00496 | A11323 | 212 | A00496 | A11405 | 486 |
| A00496 | A11487 | 364 | A00496 | A11767 | 263 |
| A00496 | A11983 | 199 | A00496 | A12069 | 489 |
| A00496 | A12138 | 183 | A00496 | A12328 | 199 |
| A00496 | A12329 | 208 | A00496 | A12365 | 156 |
| A00496 | A12543 | 481 | A00496 | A12660 | 343 |
| A00496 | A12943 | 208 | A00496 | A13320 | 174 |
| A00496 | A13335 | 160 | A00496 | A13587 | 490 |
| A00496 | A13609 | 221 | A00496 | A13762 | 324 |
| A00496 | A13928 | 491 | A00496 | A13989 | 353 |
| A00496 | A14148 | 319 | A00496 | A14196 | 490 |
| A00496 | A14220 | 491 | A00496 | A14221 | 488 |
| A00496 | A14257 | 491 | A00496 | A14265 | 279 |
| A00496 | A14303 | 457 | A00496 | A14476 | 168 |
| A00496 | A14490 | 279 | A00496 | A14596 | 343 |
| A00496 | A14659 | 273 | A00496 | A14660 | 260 |
| A00496 | A14875 | 208 | A00496 | A14931 | 210 |
| A00496 | A15140 | 168 | A00496 | A15237 | 165 |
| A00496 | A15291 | 446 | A00496 | A15297 | 208 |
| A00496 | A15309 | 477 | A00496 | A15366 | 491 |
| A00496 | A15492 | 491 | A00496 | A15596 | 154 |
| A00496 | A15614 | 404 | A00496 | A15665 | 433 |
| A00496 | A15741 | 183 | A00496 | A15749 | 152 |
| A00496 | A15752 | 485 | A00496 | A15753 | 283 |
| A00496 | A15754 | 187 | A00496 | A15763 | 445 |
| A00496 | A15773 | 484 | A00496 | A15851 | 380 |
| A00496 | A15852 | 341 | A00496 | A15870 | 364 |
| A00496 | A15878 | 183 | A00496 | A16115 | 218 |
| A00496 | A16724 | 414 | A00496 | A16768 | 283 |
| A00496 | A16814 | 160 | A00496 | A16895 | 324 |



|        |        |     |        |        |     |
|--------|--------|-----|--------|--------|-----|
| A00496 | A16897 | 252 | A00496 | A16994 | 383 |
| A00496 | A17063 | 319 | A00496 | A17126 | 157 |
| A00496 | A17198 | 223 | A00497 | A00517 | 224 |
| A00497 | A00520 | 281 | A00497 | A00521 | 278 |
| A00497 | A00532 | 303 | A00497 | A00550 | 630 |
| A00497 | A00551 | 491 | A00497 | A00554 | 707 |
| A00497 | A00562 | 229 | A00497 | A00595 | 460 |
| A00497 | A00605 | 334 | A00497 | A00691 | 402 |
| A00497 | A00708 | 177 | A00497 | A00760 | 243 |
| A00497 | A00787 | 63  | A00497 | A00824 | 224 |
| A00497 | A00831 | 334 | A00497 | A00858 | 490 |
| A00497 | A00884 | 288 | A00497 | A00903 | 198 |
| A00497 | A00916 | 491 | A00497 | A00934 | 439 |
| A00497 | A00942 | 260 | A00497 | A00954 | 324 |
| A00497 | A00960 | 162 | A00497 | A01001 | 232 |
| A00497 | A01020 | 708 | A00497 | A01040 | 334 |
| A00497 | A01075 | 446 | A00497 | A01079 | 191 |
| A00497 | A01087 | 369 | A00497 | A01112 | 334 |
| A00497 | A01116 | 635 | A00497 | A01184 | 489 |
| A00497 | A01201 | 313 | A00497 | A01206 | 187 |
| A00497 | A01234 | 491 | A00497 | A01304 | 637 |
| A00497 | A01351 | 436 | A00497 | A01488 | 311 |
| A00497 | A01492 | 446 | A00497 | A01495 | 334 |
| A00497 | A01500 | 316 | A00497 | A01633 | 226 |
| A00497 | A01649 | 173 | A00497 | A01741 | 249 |
| A00497 | A06564 | 249 | A00497 | A07111 | 228 |
| A00497 | A07223 | 423 | A00497 | A07347 | 486 |
| A00497 | A07533 | 228 | A00497 | A07584 | 375 |
| A00497 | A07697 | 258 | A00497 | A07700 | 636 |
| A00497 | A07706 | 270 | A00497 | A07725 | 362 |
| A00497 | A08022 | 184 | A00497 | A08024 | 400 |
| A00497 | A08211 | 491 | A00497 | A08491 | 633 |
| A00497 | A08518 | 213 | A00497 | A08528 | 152 |
| A00497 | A08553 | 152 | A00497 | A08807 | 221 |
| A00497 | A08834 | 254 | A00497 | A09010 | 345 |
| A00497 | A09307 | 319 | A00497 | A09619 | 707 |
| A00497 | A09664 | 414 | A00497 | A10380 | 151 |
| A00497 | A10456 | 477 | A00497 | A10616 | 152 |
| A00497 | A11395 | 451 | A00497 | A12254 | 438 |
| A00497 | A13294 | 205 | A00497 | A13989 | 484 |
| A00497 | A14212 | 168 | A00497 | A14655 | 407 |
| A00497 | A14745 | 245 | A00497 | A15946 | 229 |
| A00497 | A16109 | 308 | A00497 | A16302 | 167 |
| A00498 | A00565 | 185 | A00498 | A00568 | 317 |
| A00498 | A00664 | 620 | A00498 | A00670 | 246 |
| A00498 | A00684 | 160 | A00498 | A00846 | 489 |

|        |        |     |        |        |     |
|--------|--------|-----|--------|--------|-----|
| A00498 | A00850 | 165 | A00498 | A00855 | 317 |
| A00498 | A00943 | 366 | A00498 | A00968 | 443 |
| A00498 | A01021 | 218 | A00498 | A01074 | 618 |
| A00498 | A01105 | 317 | A00498 | A01189 | 274 |
| A00498 | A01205 | 491 | A00498 | A01269 | 394 |
| A00498 | A01360 | 226 | A00498 | A01404 | 257 |
| A00498 | A01508 | 347 | A00498 | A01574 | 183 |
| A00498 | A01622 | 350 | A00498 | A01679 | 524 |
| A00498 | A01801 | 347 | A00498 | A01926 | 185 |
| A00498 | A01993 | 326 | A00498 | A02061 | 323 |
| A00498 | A02214 | 419 | A00498 | A02343 | 160 |
| A00498 | A02364 | 466 | A00498 | A02524 | 179 |
| A00498 | A02525 | 196 | A00498 | A03044 | 252 |
| A00498 | A03095 | 401 | A00498 | A03468 | 229 |
| A00498 | A03710 | 317 | A00498 | A03728 | 267 |
| A00498 | A03954 | 341 | A00498 | A03962 | 154 |
| A00498 | A05150 | 219 | A00498 | A05210 | 477 |
| A00498 | A05332 | 615 | A00498 | A05370 | 205 |
| A00498 | A05435 | 429 | A00498 | A05609 | 569 |
| A00498 | A05689 | 329 | A00498 | A06101 | 356 |
| A00498 | A06134 | 218 | A00498 | A06250 | 329 |
| A00498 | A06264 | 170 | A00498 | A06629 | 154 |
| A00498 | A06819 | 296 | A00498 | A07074 | 281 |
| A00498 | A07222 | 403 | A00498 | A07232 | 323 |
| A00498 | A07311 | 899 | A00498 | A07333 | 317 |
| A00498 | A07499 | 266 | A00498 | A07571 | 532 |
| A00498 | A07654 | 235 | A00498 | A07974 | 430 |
| A00498 | A08097 | 317 | A00498 | A09276 | 436 |
| A00498 | A09340 | 317 | A00498 | A09350 | 466 |
| A00498 | A10394 | 347 | A00498 | A10483 | 378 |
| A00498 | A10982 | 288 | A00498 | A11271 | 236 |
| A00498 | A11357 | 262 | A00498 | A13517 | 319 |
| A00498 | A14590 | 429 | A00498 | A14803 | 390 |
| A00498 | A14858 | 329 | A00498 | A15560 | 388 |
| A00498 | A15655 | 477 | A00498 | A16219 | 339 |
| A00498 | A16597 | 152 | A00498 | A16753 | 314 |
| A00499 | A01133 | 319 | A00499 | A02878 | 265 |
| A00499 | A05449 | 317 | A00499 | A11297 | 355 |
| A00499 | A15188 | 413 | A00499 | A15254 | 438 |
| A00499 | A15507 | 412 | A00499 | A15547 | 435 |
| A00499 | A16822 | 321 | A00500 | A00519 | 176 |
| A00500 | A00532 | 477 | A00500 | A00605 | 385 |
| A00500 | A00623 | 183 | A00500 | A00648 | 486 |
| A00500 | A00651 | 373 | A00500 | A00693 | 486 |
| A00500 | A00700 | 296 | A00500 | A00713 | 110 |
| A00500 | A00831 | 491 | A00500 | A00843 | 486 |

|        |        |     |        |        |     |
|--------|--------|-----|--------|--------|-----|
| A00500 | A00848 | 491 | A00500 | A00871 | 491 |
| A00500 | A00902 | 168 | A00500 | A00916 | 470 |
| A00500 | A00970 | 346 | A00500 | A00992 | 163 |
| A00500 | A01024 | 469 | A00500 | A01050 | 395 |
| A00500 | A01069 | 302 | A00500 | A01072 | 390 |
| A00500 | A01088 | 154 | A00500 | A01090 | 201 |
| A00500 | A01112 | 489 | A00500 | A01140 | 358 |
| A00500 | A01150 | 477 | A00500 | A01164 | 204 |
| A00500 | A01166 | 491 | A00500 | A01201 | 418 |
| A00500 | A01206 | 475 | A00500 | A01214 | 491 |
| A00500 | A01215 | 232 | A00500 | A01224 | 313 |
| A00500 | A01226 | 215 | A00500 | A01234 | 491 |
| A00500 | A01238 | 340 | A00500 | A01243 | 262 |
| A00500 | A01291 | 430 | A00500 | A01304 | 490 |
| A00500 | A01354 | 201 | A00500 | A01384 | 323 |
| A00500 | A01418 | 182 | A00500 | A01425 | 491 |
| A00500 | A01468 | 491 | A00500 | A01470 | 491 |
| A00500 | A01487 | 382 | A00500 | A01492 | 491 |
| A00500 | A01495 | 245 | A00500 | A01496 | 385 |
| A00500 | A01506 | 247 | A00500 | A01538 | 218 |
| A00500 | A01546 | 321 | A00500 | A01569 | 480 |
| A00500 | A01577 | 258 | A00500 | A01626 | 475 |
| A00500 | A01649 | 486 | A00500 | A01684 | 481 |
| A00500 | A01917 | 224 | A00500 | A03438 | 201 |
| A00500 | A03456 | 180 | A00500 | A03461 | 258 |
| A00500 | A03494 | 228 | A00500 | A03567 | 412 |
| A00500 | A03859 | 266 | A00500 | A04178 | 274 |
| A00500 | A04697 | 486 | A00500 | A05025 | 350 |
| A00500 | A06025 | 310 | A00500 | A07111 | 241 |
| A00500 | A07414 | 247 | A00500 | A07481 | 417 |
| A00500 | A07644 | 168 | A00500 | A07695 | 466 |
| A00500 | A07723 | 177 | A00500 | A08144 | 243 |
| A00500 | A08537 | 355 | A00500 | A08892 | 333 |
| A00500 | A09621 | 368 | A00500 | A09674 | 307 |
| A00500 | A10238 | 160 | A00500 | A10532 | 465 |
| A00500 | A10624 | 243 | A00500 | A13989 | 491 |
| A00500 | A14006 | 484 | A00500 | A14074 | 276 |
| A00500 | A14216 | 489 | A00500 | A14597 | 263 |
| A00501 | A00550 | 377 | A00501 | A00589 | 572 |
| A00501 | A00605 | 682 | A00501 | A00648 | 475 |
| A00501 | A00687 | 154 | A00501 | A00690 | 469 |
| A00501 | A00705 | 303 | A00501 | A00708 | 294 |
| A00501 | A00713 | 340 | A00501 | A00749 | 210 |
| A00501 | A00822 | 327 | A00501 | A00831 | 165 |
| A00501 | A00848 | 204 | A00501 | A00872 | 210 |
| A00501 | A00883 | 380 | A00501 | A00905 | 327 |

|        |        |     |        |        |     |
|--------|--------|-----|--------|--------|-----|
| A00501 | A00916 | 491 | A00501 | A00945 | 419 |
| A00501 | A00992 | 152 | A00501 | A01028 | 212 |
| A00501 | A01065 | 552 | A00501 | A01075 | 316 |
| A00501 | A01092 | 210 | A00501 | A01098 | 210 |
| A00501 | A01112 | 347 | A00501 | A01115 | 159 |
| A00501 | A01120 | 572 | A00501 | A01150 | 306 |
| A00501 | A01166 | 490 | A00501 | A01179 | 489 |
| A00501 | A01206 | 491 | A00501 | A01234 | 490 |
| A00501 | A01268 | 177 | A00501 | A01291 | 485 |
| A00501 | A01349 | 346 | A00501 | A01354 | 288 |
| A00501 | A01379 | 526 | A00501 | A01384 | 405 |
| A00501 | A01425 | 380 | A00501 | A01430 | 467 |
| A00501 | A01439 | 672 | A00501 | A01470 | 491 |
| A00501 | A01492 | 571 | A00501 | A01538 | 210 |
| A00501 | A01539 | 462 | A00501 | A01555 | 156 |
| A00501 | A01588 | 204 | A00501 | A01597 | 424 |
| A00501 | A01598 | 572 | A00501 | A01612 | 486 |
| A00501 | A01614 | 572 | A00501 | A01649 | 491 |
| A00501 | A02120 | 174 | A00501 | A02178 | 255 |
| A00501 | A02265 | 210 | A00501 | A02978 | 210 |
| A00501 | A05230 | 528 | A00501 | A06429 | 152 |
| A00501 | A06897 | 440 | A00501 | A07076 | 438 |
| A00501 | A07347 | 491 | A00501 | A07348 | 343 |
| A00501 | A07604 | 185 | A00501 | A07725 | 412 |
| A00501 | A07759 | 193 | A00501 | A08137 | 491 |
| A00501 | A08357 | 491 | A00501 | A08359 | 196 |
| A00501 | A08377 | 184 | A00501 | A08571 | 364 |
| A00501 | A08814 | 228 | A00501 | A08965 | 303 |
| A00501 | A09292 | 568 | A00501 | A09707 | 484 |
| A00501 | A11462 | 491 | A00501 | A11914 | 238 |
| A00501 | A11942 | 485 | A00501 | A11945 | 462 |
| A00501 | A12077 | 303 | A00501 | A13052 | 210 |
| A00501 | A13126 | 438 | A00501 | A13522 | 232 |
| A00501 | A13875 | 419 | A00501 | A13989 | 572 |
| A00501 | A14167 | 174 | A00501 | A14216 | 375 |
| A00501 | A14816 | 210 | A00501 | A14817 | 263 |
| A00501 | A14921 | 232 | A00501 | A15215 | 486 |
| A00501 | A15256 | 199 | A00501 | A15338 | 183 |
| A00501 | A15541 | 483 | A00501 | A15660 | 404 |
| A00501 | A15684 | 179 | A00501 | A15709 | 480 |
| A00501 | A15735 | 491 | A00501 | A15739 | 475 |
| A00501 | A16157 | 154 | A00501 | A16565 | 177 |
| A00501 | A16597 | 179 | A00501 | A16857 | 193 |
| A00501 | A17014 | 199 | A00501 | A17063 | 254 |
| A00501 | A17064 | 273 | A00502 | A00510 | 353 |
| A00502 | A00521 | 361 | A00502 | A00547 | 269 |

|        |        |     |        |        |     |
|--------|--------|-----|--------|--------|-----|
| A00502 | A00561 | 196 | A00502 | A00598 | 484 |
| A00502 | A00604 | 590 | A00502 | A00608 | 270 |
| A00502 | A00610 | 430 | A00502 | A00649 | 590 |
| A00502 | A00653 | 592 | A00502 | A00731 | 581 |
| A00502 | A00745 | 283 | A00502 | A00750 | 246 |
| A00502 | A00780 | 427 | A00502 | A00783 | 357 |
| A00502 | A00785 | 591 | A00502 | A00790 | 589 |
| A00502 | A00793 | 373 | A00502 | A00842 | 223 |
| A00502 | A00849 | 247 | A00502 | A00953 | 591 |
| A00502 | A00974 | 590 | A00502 | A00987 | 205 |
| A00502 | A01023 | 202 | A00502 | A01027 | 581 |
| A00502 | A01037 | 201 | A00502 | A01081 | 385 |
| A00502 | A01086 | 590 | A00502 | A01108 | 591 |
| A00502 | A01150 | 247 | A00502 | A01161 | 247 |
| A00502 | A01204 | 588 | A00502 | A01246 | 305 |
| A00502 | A01287 | 247 | A00502 | A01346 | 585 |
| A00502 | A01365 | 329 | A00502 | A01399 | 590 |
| A00502 | A01443 | 505 | A00502 | A01446 | 463 |
| A00502 | A01448 | 451 | A00502 | A01458 | 173 |
| A00502 | A01503 | 184 | A00502 | A01585 | 303 |
| A00502 | A01711 | 172 | A00502 | A01743 | 228 |
| A00502 | A02994 | 247 | A00502 | A03489 | 485 |
| A00502 | A03959 | 247 | A00502 | A04028 | 257 |
| A00502 | A04895 | 477 | A00502 | A05125 | 296 |
| A00502 | A05839 | 276 | A00502 | A06356 | 191 |
| A00502 | A06959 | 366 | A00502 | A07004 | 212 |
| A00502 | A07237 | 351 | A00502 | A07350 | 296 |
| A00502 | A07362 | 152 | A00502 | A07569 | 445 |
| A00502 | A07597 | 218 | A00502 | A07773 | 68  |
| A00502 | A07792 | 149 | A00502 | A07793 | 183 |
| A00502 | A08011 | 256 | A00502 | A08052 | 188 |
| A00502 | A08760 | 363 | A00502 | A09616 | 458 |
| A00502 | A10199 | 319 | A00502 | A10535 | 405 |
| A00502 | A11015 | 229 | A00502 | A11677 | 247 |
| A00502 | A13497 | 296 | A00502 | A14479 | 319 |
| A00502 | A14699 | 247 | A00502 | A14778 | 247 |
| A00502 | A16587 | 247 | A00503 | A00540 | 226 |
| A00503 | A00570 | 210 | A00503 | A00595 | 314 |
| A00503 | A00687 | 427 | A00503 | A00729 | 613 |
| A00503 | A00829 | 671 | A00503 | A00992 | 263 |
| A00503 | A00993 | 159 | A00503 | A01159 | 152 |
| A00503 | A01539 | 406 | A00503 | A02203 | 226 |
| A00503 | A02377 | 172 | A00503 | A02500 | 452 |
| A00503 | A03438 | 324 | A00503 | A03595 | 279 |
| A00503 | A03597 | 419 | A00503 | A03609 | 324 |
| A00503 | A03952 | 238 | A00503 | A04449 | 668 |

|        |        |     |        |        |     |
|--------|--------|-----|--------|--------|-----|
| A00503 | A05154 | 174 | A00503 | A05605 | 407 |
| A00503 | A05646 | 218 | A00503 | A06122 | 195 |
| A00503 | A06336 | 335 | A00503 | A07439 | 302 |
| A00503 | A08010 | 293 | A00503 | A08077 | 177 |
| A00503 | A08340 | 414 | A00503 | A08918 | 414 |
| A00503 | A10590 | 513 | A00503 | A12304 | 256 |
| A00503 | A12369 | 335 | A00503 | A12988 | 163 |
| A00503 | A13397 | 182 | A00503 | A14729 | 318 |
| A00503 | A15624 | 363 | A00503 | A15932 | 357 |
| A00504 | A00505 | 332 | A00504 | A00521 | 154 |
| A00504 | A00540 | 344 | A00504 | A00563 | 299 |
| A00504 | A00570 | 168 | A00504 | A00687 | 473 |
| A00504 | A00689 | 317 | A00504 | A00829 | 188 |
| A00504 | A00878 | 196 | A00504 | A00997 | 174 |
| A00504 | A01102 | 205 | A00504 | A01159 | 291 |
| A00504 | A01220 | 332 | A00504 | A01221 | 157 |
| A00504 | A01238 | 257 | A00504 | A01353 | 160 |
| A00504 | A01375 | 204 | A00504 | A01392 | 316 |
| A00504 | A01418 | 213 | A00504 | A01469 | 177 |
| A00504 | A01594 | 213 | A00504 | A01625 | 162 |
| A00504 | A01711 | 224 | A00504 | A02166 | 393 |
| A00504 | A02268 | 243 | A00504 | A02454 | 241 |
| A00504 | A02518 | 226 | A00504 | A02542 | 258 |
| A00504 | A03070 | 188 | A00504 | A03958 | 361 |
| A00504 | A04507 | 413 | A00504 | A05143 | 356 |
| A00504 | A05199 | 427 | A00504 | A06351 | 263 |
| A00504 | A06825 | 326 | A00504 | A08452 | 227 |
| A00504 | A09227 | 352 | A00504 | A14188 | 157 |
| A00504 | A14482 | 199 | A00505 | A00571 | 304 |
| A00505 | A00593 | 543 | A00505 | A00653 | 188 |
| A00505 | A00673 | 188 | A00505 | A00687 | 198 |
| A00505 | A00705 | 539 | A00505 | A00709 | 188 |
| A00505 | A00711 | 234 | A00505 | A00824 | 238 |
| A00505 | A00839 | 188 | A00505 | A00953 | 188 |
| A00505 | A00972 | 188 | A00505 | A01017 | 558 |
| A00505 | A01101 | 188 | A00505 | A01214 | 385 |
| A00505 | A01217 | 275 | A00505 | A01220 | 188 |
| A00505 | A01335 | 457 | A00505 | A01337 | 472 |
| A00505 | A01362 | 348 | A00505 | A01369 | 441 |
| A00505 | A01375 | 154 | A00505 | A01406 | 208 |
| A00505 | A01408 | 188 | A00505 | A01414 | 188 |
| A00505 | A01451 | 188 | A00505 | A01579 | 226 |
| A00505 | A01976 | 188 | A00505 | A01988 | 188 |
| A00505 | A03901 | 188 | A00505 | A04507 | 396 |
| A00505 | A05702 | 188 | A00505 | A06785 | 520 |
| A00505 | A07965 | 511 | A00505 | A08452 | 177 |

|        |        |     |        |        |     |
|--------|--------|-----|--------|--------|-----|
| A00505 | A09227 | 321 | A00505 | A11480 | 188 |
| A00505 | A13855 | 168 | A00505 | A14813 | 188 |
| A00505 | A15657 | 188 | A00505 | A16680 | 188 |
| A00506 | A00525 | 191 | A00506 | A00531 | 272 |
| A00506 | A00687 | 274 | A00506 | A00694 | 218 |
| A00506 | A00735 | 457 | A00506 | A00737 | 385 |
| A00506 | A00821 | 363 | A00506 | A00865 | 216 |
| A00506 | A00998 | 288 | A00506 | A01013 | 183 |
| A00506 | A01053 | 213 | A00506 | A01150 | 167 |
| A00506 | A01161 | 154 | A00506 | A01245 | 372 |
| A00506 | A01401 | 176 | A00506 | A01403 | 260 |
| A00506 | A01502 | 243 | A00506 | A01504 | 172 |
| A00506 | A01711 | 351 | A00506 | A01741 | 157 |
| A00506 | A01815 | 350 | A00506 | A01819 | 286 |
| A00506 | A01820 | 364 | A00506 | A01825 | 246 |
| A00506 | A01832 | 491 | A00506 | A01833 | 462 |
| A00506 | A02709 | 335 | A00506 | A02994 | 199 |
| A00506 | A03856 | 260 | A00506 | A03860 | 245 |
| A00506 | A03931 | 472 | A00506 | A04056 | 416 |
| A00506 | A04423 | 279 | A00506 | A05418 | 182 |
| A00506 | A06358 | 196 | A00506 | A08521 | 198 |
| A00506 | A09321 | 339 | A00506 | A15282 | 312 |
| A00506 | A15668 | 290 | A00506 | A16149 | 260 |
| A00507 | A00547 | 383 | A00507 | A00571 | 468 |
| A00507 | A00610 | 291 | A00507 | A00711 | 281 |
| A00507 | A00782 | 457 | A00507 | A00788 | 290 |
| A00507 | A00802 | 188 | A00507 | A00839 | 491 |
| A00507 | A00991 | 196 | A00507 | A01121 | 417 |
| A00507 | A01152 | 193 | A00507 | A01153 | 217 |
| A00507 | A01154 | 462 | A00507 | A01186 | 474 |
| A00507 | A01247 | 176 | A00507 | A01263 | 358 |
| A00507 | A01306 | 258 | A00507 | A01335 | 438 |
| A00507 | A01337 | 416 | A00507 | A01365 | 436 |
| A00507 | A01369 | 152 | A00507 | A01407 | 208 |
| A00507 | A01411 | 254 | A00507 | A01449 | 472 |
| A00507 | A01741 | 240 | A00507 | A02227 | 224 |
| A00507 | A02814 | 193 | A00507 | A05501 | 407 |
| A00507 | A05502 | 360 | A00507 | A07248 | 260 |
| A00507 | A07658 | 313 | A00507 | A08154 | 246 |
| A00507 | A08358 | 162 | A00507 | A09735 | 462 |
| A00507 | A11597 | 167 | A00507 | A11616 | 352 |
| A00507 | A11688 | 460 | A00507 | A12011 | 281 |
| A00507 | A12821 | 486 | A00507 | A13146 | 183 |
| A00507 | A14813 | 290 | A00507 | A15215 | 229 |
| A00507 | A15500 | 235 | A00507 | A15771 | 310 |
| A00508 | A00727 | 236 | A00508 | A00883 | 458 |

|        |        |     |        |        |     |
|--------|--------|-----|--------|--------|-----|
| A00508 | A00985 | 163 | A00508 | A01173 | 475 |
| A00508 | A01243 | 188 | A00508 | A01442 | 191 |
| A00508 | A03149 | 252 | A00508 | A03893 | 174 |
| A00508 | A05563 | 183 | A00508 | A05944 | 475 |
| A00508 | A07708 | 475 | A00508 | A07887 | 198 |
| A00508 | A08840 | 475 | A00508 | A08982 | 281 |
| A00508 | A11933 | 456 | A00508 | A14196 | 346 |
| A00508 | A15353 | 430 | A00508 | A15431 | 475 |
| A00508 | A15543 | 177 | A00508 | A15559 | 151 |
| A00508 | A15561 | 217 | A00508 | A15564 | 486 |
| A00508 | A15631 | 449 | A00508 | A15747 | 452 |
| A00508 | A15775 | 334 | A00509 | A00515 | 173 |
| A00509 | A00556 | 154 | A00509 | A00568 | 216 |
| A00509 | A00664 | 294 | A00509 | A00820 | 283 |
| A00509 | A01404 | 424 | A00509 | A01604 | 245 |
| A00509 | A01716 | 243 | A00509 | A01737 | 174 |
| A00509 | A01899 | 466 | A00509 | A02156 | 276 |
| A00509 | A02209 | 401 | A00509 | A02251 | 208 |
| A00509 | A02260 | 271 | A00509 | A02262 | 291 |
| A00509 | A02268 | 290 | A00509 | A02272 | 285 |
| A00509 | A02524 | 351 | A00509 | A02698 | 469 |
| A00509 | A02779 | 176 | A00509 | A02904 | 302 |
| A00509 | A03086 | 279 | A00509 | A03091 | 227 |
| A00509 | A03167 | 293 | A00509 | A03173 | 371 |
| A00509 | A03212 | 243 | A00509 | A03821 | 163 |
| A00509 | A04258 | 374 | A00509 | A05106 | 204 |
| A00509 | A05157 | 267 | A00509 | A05369 | 441 |
| A00509 | A05603 | 151 | A00509 | A06471 | 472 |
| A00509 | A06970 | 344 | A00509 | A07062 | 252 |
| A00509 | A07140 | 443 | A00509 | A07182 | 346 |
| A00509 | A07209 | 151 | A00509 | A07324 | 357 |
| A00509 | A07655 | 490 | A00509 | A07748 | 419 |
| A00509 | A07815 | 168 | A00509 | A07878 | 486 |
| A00509 | A08630 | 249 | A00509 | A08660 | 425 |
| A00509 | A08688 | 489 | A00509 | A10394 | 371 |
| A00509 | A10466 | 311 | A00509 | A10980 | 396 |
| A00509 | A11522 | 165 | A00509 | A11885 | 367 |
| A00509 | A12150 | 396 | A00509 | A14430 | 337 |
| A00510 | A00598 | 438 | A00510 | A00604 | 373 |
| A00510 | A00608 | 388 | A00510 | A00649 | 462 |
| A00510 | A00653 | 490 | A00510 | A00731 | 477 |
| A00510 | A00745 | 260 | A00510 | A00750 | 420 |
| A00510 | A00780 | 268 | A00510 | A00783 | 449 |
| A00510 | A00785 | 491 | A00510 | A00790 | 488 |
| A00510 | A00802 | 168 | A00510 | A00849 | 160 |
| A00510 | A00953 | 438 | A00510 | A00974 | 157 |



|        |        |     |        |        |     |
|--------|--------|-----|--------|--------|-----|
| A00510 | A01027 | 480 | A00510 | A01086 | 490 |
| A00510 | A01094 | 301 | A00510 | A01108 | 409 |
| A00510 | A01204 | 393 | A00510 | A01246 | 441 |
| A00510 | A01260 | 377 | A00510 | A01346 | 462 |
| A00510 | A01399 | 491 | A00510 | A01443 | 286 |
| A00510 | A01446 | 455 | A00510 | A01448 | 486 |
| A00510 | A01540 | 246 | A00510 | A01563 | 172 |
| A00510 | A04627 | 162 | A00510 | A04895 | 484 |
| A00510 | A05318 | 179 | A00510 | A06320 | 226 |
| A00510 | A06411 | 238 | A00510 | A06589 | 254 |
| A00510 | A06959 | 252 | A00510 | A07237 | 236 |
| A00510 | A07569 | 369 | A00510 | A07597 | 340 |
| A00510 | A08982 | 477 | A00510 | A08990 | 294 |
| A00510 | A09616 | 290 | A00510 | A10199 | 398 |
| A00510 | A10535 | 232 | A00510 | A11015 | 323 |
| A00510 | A11322 | 154 | A00510 | A11427 | 173 |
| A00510 | A11474 | 159 | A00510 | A13253 | 385 |
| A00510 | A13275 | 475 | A00510 | A13286 | 462 |
| A00510 | A13303 | 440 | A00510 | A15051 | 385 |
| A00511 | A00567 | 384 | A00511 | A00597 | 384 |
| A00511 | A00609 | 154 | A00511 | A00611 | 361 |
| A00511 | A00888 | 296 | A00511 | A01375 | 195 |
| A00511 | A01716 | 310 | A00511 | A02018 | 313 |
| A00511 | A04770 | 313 | A00511 | A08655 | 340 |
| A00511 | A10709 | 266 | A00511 | A15383 | 165 |
| A00511 | A16529 | 216 | A00512 | A00589 | 301 |
| A00512 | A00655 | 208 | A00512 | A00822 | 152 |
| A00512 | A00832 | 207 | A00512 | A01056 | 254 |
| A00512 | A01140 | 219 | A00512 | A01179 | 288 |
| A00512 | A01649 | 281 | A00512 | A06814 | 213 |
| A00512 | A06897 | 299 | A00512 | A08357 | 419 |
| A00512 | A09292 | 296 | A00512 | A09707 | 324 |
| A00512 | A11462 | 319 | A00513 | A00862 | 171 |
| A00513 | A00941 | 363 | A00513 | A01378 | 432 |
| A00513 | A01459 | 479 | A00513 | A01507 | 491 |
| A00513 | A02677 | 355 | A00513 | A03465 | 324 |
| A00513 | A03778 | 301 | A00513 | A04449 | 398 |
| A00513 | A04818 | 226 | A00513 | A06819 | 165 |
| A00513 | A07803 | 240 | A00513 | A08282 | 385 |
| A00513 | A08621 | 473 | A00513 | A10808 | 174 |
| A00513 | A11345 | 232 | A00513 | A12047 | 486 |
| A00514 | A00601 | 165 | A00514 | A00728 | 263 |
| A00514 | A00915 | 369 | A00514 | A00925 | 255 |
| A00514 | A01150 | 63  | A00514 | A01161 | 252 |
| A00514 | A01169 | 369 | A00514 | A01253 | 322 |
| A00514 | A01278 | 182 | A00514 | A01317 | 168 |

|        |        |     |        |        |     |
|--------|--------|-----|--------|--------|-----|
| A00514 | A01329 | 165 | A00514 | A01582 | 317 |
| A00514 | A01648 | 249 | A00514 | A01667 | 296 |
| A00514 | A03559 | 371 | A00514 | A03885 | 274 |
| A00514 | A04666 | 191 | A00514 | A05276 | 313 |
| A00514 | A08191 | 357 | A00514 | A11352 | 446 |
| A00514 | A13432 | 269 | A00514 | A15295 | 432 |
| A00514 | A15498 | 157 | A00515 | A00564 | 160 |
| A00515 | A00697 | 291 | A00515 | A00759 | 267 |
| A00515 | A00781 | 180 | A00515 | A00883 | 414 |
| A00515 | A00926 | 184 | A00515 | A01122 | 156 |
| A00515 | A01169 | 361 | A00515 | A01309 | 262 |
| A00515 | A01458 | 207 | A00515 | A01671 | 425 |
| A00515 | A01809 | 268 | A00515 | A02049 | 346 |
| A00515 | A04092 | 177 | A00515 | A04223 | 257 |
| A00515 | A04383 | 255 | A00515 | A04881 | 201 |
| A00515 | A05100 | 296 | A00515 | A05157 | 213 |
| A00515 | A05273 | 196 | A00515 | A05276 | 232 |
| A00515 | A05427 | 202 | A00515 | A05539 | 317 |
| A00515 | A06488 | 160 | A00515 | A06670 | 283 |
| A00515 | A07101 | 388 | A00515 | A07311 | 199 |
| A00515 | A07434 | 193 | A00515 | A07748 | 168 |
| A00515 | A07878 | 160 | A00515 | A08047 | 372 |
| A00515 | A08630 | 193 | A00515 | A08660 | 185 |
| A00515 | A08667 | 229 | A00515 | A10090 | 307 |
| A00515 | A10104 | 372 | A00515 | A10640 | 227 |
| A00515 | A13734 | 199 | A00515 | A14170 | 236 |
| A00515 | A14180 | 340 | A00515 | A15230 | 167 |
| A00516 | A00583 | 191 | A00516 | A00726 | 210 |
| A00516 | A00742 | 255 | A00516 | A00766 | 223 |
| A00516 | A00918 | 219 | A00516 | A00973 | 269 |
| A00516 | A01061 | 488 | A00516 | A01151 | 490 |
| A00516 | A01177 | 313 | A00516 | A01192 | 252 |
| A00516 | A01312 | 224 | A00516 | A01470 | 359 |
| A00516 | A07146 | 241 | A00516 | A07378 | 326 |
| A00516 | A08965 | 435 | A00516 | A09394 | 241 |
| A00516 | A14594 | 208 | A00516 | A15338 | 224 |
| A00516 | A17088 | 335 | A00517 | A00521 | 228 |
| A00517 | A00532 | 435 | A00517 | A00562 | 279 |
| A00517 | A00566 | 542 | A00517 | A00572 | 185 |
| A00517 | A00575 | 540 | A00517 | A00609 | 446 |
| A00517 | A00622 | 452 | A00517 | A00626 | 372 |
| A00517 | A00665 | 400 | A00517 | A00671 | 252 |
| A00517 | A00689 | 247 | A00517 | A00703 | 291 |
| A00517 | A00733 | 542 | A00517 | A00743 | 218 |
| A00517 | A00744 | 500 | A00517 | A00781 | 252 |
| A00517 | A00791 | 227 | A00517 | A00805 | 824 |

|        |        |     |        |        |     |
|--------|--------|-----|--------|--------|-----|
| A00517 | A00819 | 369 | A00517 | A00822 | 491 |
| A00517 | A00848 | 312 | A00517 | A00858 | 541 |
| A00517 | A00860 | 538 | A00517 | A00866 | 509 |
| A00517 | A00881 | 536 | A00517 | A00883 | 622 |
| A00517 | A00902 | 255 | A00517 | A00905 | 481 |
| A00517 | A00910 | 191 | A00517 | A00916 | 490 |
| A00517 | A00940 | 196 | A00517 | A00978 | 499 |
| A00517 | A00996 | 236 | A00517 | A01007 | 169 |
| A00517 | A01019 | 540 | A00517 | A01042 | 405 |
| A00517 | A01052 | 622 | A00517 | A01057 | 491 |
| A00517 | A01075 | 291 | A00517 | A01077 | 491 |
| A00517 | A01087 | 163 | A00517 | A01091 | 234 |
| A00517 | A01173 | 466 | A00517 | A01195 | 542 |
| A00517 | A01200 | 509 | A00517 | A01208 | 310 |
| A00517 | A01212 | 491 | A00517 | A01234 | 229 |
| A00517 | A01243 | 299 | A00517 | A01325 | 265 |
| A00517 | A01351 | 435 | A00517 | A01354 | 486 |
| A00517 | A01374 | 263 | A00517 | A01383 | 423 |
| A00517 | A01385 | 329 | A00517 | A01390 | 254 |
| A00517 | A01398 | 530 | A00517 | A01401 | 537 |
| A00517 | A01414 | 278 | A00517 | A01470 | 193 |
| A00517 | A01492 | 424 | A00517 | A01500 | 536 |
| A00517 | A01503 | 466 | A00517 | A01571 | 286 |
| A00517 | A01572 | 393 | A00517 | A01598 | 452 |
| A00517 | A01610 | 465 | A00517 | A01612 | 491 |
| A00517 | A01633 | 333 | A00517 | A01649 | 260 |
| A00517 | A01655 | 201 | A00517 | A01720 | 452 |
| A00517 | A01729 | 238 | A00517 | A01770 | 263 |
| A00517 | A01781 | 469 | A00517 | A02715 | 457 |
| A00517 | A03207 | 294 | A00517 | A03479 | 477 |
| A00517 | A03526 | 439 | A00517 | A03569 | 456 |
| A00517 | A03740 | 374 | A00517 | A03793 | 265 |
| A00517 | A04181 | 455 | A00517 | A04648 | 498 |
| A00517 | A04687 | 156 | A00517 | A05017 | 224 |
| A00517 | A05027 | 193 | A00517 | A05981 | 243 |
| A00517 | A06803 | 538 | A00517 | A06907 | 358 |
| A00517 | A07203 | 234 | A00517 | A07290 | 234 |
| A00517 | A07604 | 311 | A00517 | A07670 | 484 |
| A00517 | A07850 | 523 | A00517 | A07887 | 539 |
| A00517 | A07920 | 484 | A00517 | A08137 | 491 |
| A00517 | A08150 | 187 | A00517 | A08272 | 229 |
| A00517 | A08383 | 373 | A00517 | A08522 | 223 |
| A00517 | A08571 | 378 | A00517 | A08818 | 156 |
| A00517 | A08834 | 308 | A00517 | A08882 | 184 |
| A00517 | A09432 | 177 | A00517 | A09502 | 156 |
| A00517 | A09712 | 480 | A00517 | A09943 | 283 |

|        |        |     |        |        |     |
|--------|--------|-----|--------|--------|-----|
| A00517 | A10321 | 451 | A00517 | A10365 | 260 |
| A00517 | A10642 | 341 | A00517 | A11344 | 156 |
| A00517 | A11673 | 160 | A00517 | A11674 | 156 |
| A00517 | A11737 | 176 | A00517 | A13824 | 457 |
| A00517 | A14006 | 491 | A00517 | A14220 | 481 |
| A00517 | A14221 | 472 | A00517 | A14257 | 468 |
| A00517 | A14399 | 488 | A00517 | A14467 | 177 |
| A00517 | A14596 | 180 | A00517 | A14827 | 282 |
| A00517 | A15183 | 177 | A00517 | A15297 | 483 |
| A00517 | A15338 | 168 | A00517 | A15366 | 450 |
| A00517 | A15367 | 208 | A00517 | A15545 | 475 |
| A00517 | A15649 | 256 | A00517 | A15752 | 490 |
| A00517 | A16228 | 452 | A00517 | A16410 | 301 |
| A00518 | A00520 | 404 | A00518 | A00550 | 430 |
| A00518 | A00734 | 276 | A00518 | A00767 | 307 |
| A00518 | A00878 | 326 | A00518 | A00916 | 373 |
| A00518 | A00934 | 416 | A00518 | A00944 | 439 |
| A00518 | A01020 | 408 | A00518 | A01116 | 433 |
| A00518 | A01184 | 483 | A00518 | A01201 | 477 |
| A00518 | A01224 | 288 | A00518 | A01234 | 489 |
| A00518 | A01304 | 438 | A00518 | A01374 | 396 |
| A00518 | A01721 | 243 | A00518 | A03596 | 201 |
| A00518 | A04152 | 273 | A00518 | A04337 | 223 |
| A00518 | A04770 | 251 | A00518 | A05845 | 396 |
| A00518 | A06275 | 157 | A00518 | A06627 | 240 |
| A00518 | A07223 | 458 | A00518 | A07347 | 393 |
| A00518 | A07584 | 401 | A00518 | A07700 | 339 |
| A00518 | A08700 | 283 | A00518 | A09664 | 241 |
| A00518 | A10616 | 156 | A00518 | A11313 | 198 |
| A00518 | A12419 | 270 | A00518 | A13993 | 160 |
| A00518 | A14925 | 191 | A00519 | A00524 | 283 |
| A00519 | A00526 | 449 | A00519 | A00605 | 491 |
| A00519 | A00653 | 480 | A00519 | A00658 | 577 |
| A00519 | A00687 | 223 | A00519 | A00711 | 416 |
| A00519 | A00715 | 223 | A00519 | A00724 | 480 |
| A00519 | A00749 | 457 | A00519 | A00769 | 491 |
| A00519 | A00785 | 177 | A00519 | A00814 | 374 |
| A00519 | A00824 | 188 | A00519 | A00841 | 491 |
| A00519 | A00871 | 578 | A00519 | A00909 | 491 |
| A00519 | A00911 | 270 | A00519 | A00916 | 270 |
| A00519 | A00922 | 491 | A00519 | A00926 | 258 |
| A00519 | A00927 | 490 | A00519 | A00983 | 491 |
| A00519 | A00986 | 578 | A00519 | A00994 | 208 |
| A00519 | A01027 | 491 | A00519 | A01069 | 486 |
| A00519 | A01101 | 388 | A00519 | A01111 | 223 |
| A00519 | A01118 | 555 | A00519 | A01150 | 358 |

|        |        |     |        |        |     |
|--------|--------|-----|--------|--------|-----|
| A00519 | A01202 | 395 | A00519 | A01208 | 578 |
| A00519 | A01215 | 578 | A00519 | A01228 | 471 |
| A00519 | A01232 | 491 | A00519 | A01293 | 479 |
| A00519 | A01311 | 363 | A00519 | A01353 | 578 |
| A00519 | A01492 | 491 | A00519 | A01518 | 469 |
| A00519 | A01538 | 407 | A00519 | A01598 | 156 |
| A00519 | A01707 | 193 | A00519 | A01736 | 232 |
| A00519 | A01908 | 152 | A00519 | A01988 | 447 |
| A00519 | A02041 | 250 | A00519 | A02051 | 223 |
| A00519 | A02072 | 191 | A00519 | A02270 | 232 |
| A00519 | A03061 | 154 | A00519 | A03169 | 578 |
| A00519 | A03438 | 491 | A00519 | A03454 | 490 |
| A00519 | A03600 | 212 | A00519 | A03677 | 406 |
| A00519 | A03792 | 255 | A00519 | A03952 | 182 |
| A00519 | A03958 | 419 | A00519 | A03972 | 163 |
| A00519 | A04447 | 477 | A00519 | A05695 | 260 |
| A00519 | A06600 | 283 | A00519 | A07180 | 429 |
| A00519 | A07225 | 249 | A00519 | A07265 | 577 |
| A00519 | A07360 | 491 | A00519 | A07456 | 375 |
| A00519 | A07524 | 443 | A00519 | A07588 | 578 |
| A00519 | A07695 | 118 | A00519 | A07706 | 256 |
| A00519 | A07744 | 473 | A00519 | A07881 | 491 |
| A00519 | A08098 | 399 | A00519 | A08228 | 488 |
| A00519 | A08548 | 221 | A00519 | A08955 | 223 |
| A00519 | A08971 | 223 | A00519 | A09328 | 255 |
| A00519 | A09686 | 260 | A00519 | A09910 | 191 |
| A00519 | A10380 | 485 | A00519 | A10586 | 193 |
| A00519 | A10755 | 578 | A00519 | A11202 | 223 |
| A00519 | A11608 | 490 | A00519 | A11635 | 344 |
| A00519 | A11918 | 152 | A00519 | A13298 | 578 |
| A00519 | A13645 | 176 | A00519 | A14216 | 223 |
| A00519 | A14443 | 324 | A00519 | A14482 | 297 |
| A00519 | A14699 | 491 | A00519 | A14778 | 274 |
| A00519 | A15624 | 364 | A00519 | A15651 | 205 |
| A00519 | A15652 | 490 | A00519 | A15661 | 489 |
| A00519 | A15662 | 205 | A00519 | A15684 | 614 |
| A00519 | A15746 | 182 | A00519 | A15937 | 434 |
| A00519 | A16088 | 489 | A00519 | A16802 | 485 |
| A00520 | A00532 | 234 | A00520 | A00550 | 394 |
| A00520 | A00595 | 358 | A00520 | A00883 | 221 |
| A00520 | A00916 | 491 | A00520 | A00934 | 333 |
| A00520 | A00944 | 165 | A00520 | A00994 | 391 |
| A00520 | A01020 | 457 | A00520 | A01116 | 469 |
| A00520 | A01184 | 480 | A00520 | A01201 | 398 |
| A00520 | A01206 | 386 | A00520 | A01234 | 491 |
| A00520 | A01304 | 364 | A00520 | A01398 | 335 |

|        |        |     |        |        |     |
|--------|--------|-----|--------|--------|-----|
| A00520 | A01470 | 411 | A00520 | A01492 | 456 |
| A00520 | A01500 | 261 | A00520 | A01598 | 380 |
| A00520 | A01612 | 212 | A00520 | A01647 | 254 |
| A00520 | A01649 | 154 | A00520 | A02064 | 191 |
| A00520 | A03734 | 236 | A00520 | A04446 | 219 |
| A00520 | A04908 | 251 | A00520 | A05547 | 199 |
| A00520 | A05845 | 313 | A00520 | A06275 | 65  |
| A00520 | A06662 | 156 | A00520 | A06881 | 272 |
| A00520 | A07223 | 360 | A00520 | A07242 | 193 |
| A00520 | A07311 | 199 | A00520 | A07347 | 455 |
| A00520 | A07483 | 314 | A00520 | A07524 | 187 |
| A00520 | A07584 | 369 | A00520 | A07700 | 486 |
| A00520 | A07924 | 152 | A00520 | A08024 | 229 |
| A00520 | A08280 | 329 | A00520 | A09619 | 232 |
| A00520 | A09664 | 409 | A00520 | A09712 | 435 |
| A00520 | A10616 | 144 | A00520 | A10923 | 234 |
| A00520 | A11472 | 428 | A00520 | A11831 | 176 |
| A00520 | A11832 | 485 | A00520 | A12290 | 286 |
| A00520 | A12419 | 159 | A00520 | A12849 | 424 |
| A00520 | A13989 | 458 | A00520 | A14006 | 234 |
| A00520 | A14655 | 314 | A00520 | A14661 | 177 |
| A00520 | A15347 | 154 | A00520 | A15764 | 488 |
| A00520 | A16088 | 329 | A00520 | A16285 | 185 |
| A00520 | A16302 | 160 | A00520 | A16877 | 152 |
| A00521 | A00531 | 388 | A00521 | A00532 | 157 |
| A00521 | A00537 | 475 | A00521 | A00561 | 269 |
| A00521 | A00571 | 460 | A00521 | A00590 | 491 |
| A00521 | A00598 | 429 | A00521 | A00603 | 491 |
| A00521 | A00604 | 457 | A00521 | A00605 | 491 |
| A00521 | A00629 | 483 | A00521 | A00648 | 491 |
| A00521 | A00649 | 369 | A00521 | A00651 | 462 |
| A00521 | A00653 | 491 | A00521 | A00671 | 263 |
| A00521 | A00687 | 265 | A00521 | A00694 | 172 |
| A00521 | A00697 | 400 | A00521 | A00701 | 329 |
| A00521 | A00703 | 251 | A00521 | A00731 | 163 |
| A00521 | A00763 | 486 | A00521 | A00772 | 232 |
| A00521 | A00783 | 491 | A00521 | A00785 | 433 |
| A00521 | A00787 | 491 | A00521 | A00790 | 246 |
| A00521 | A00824 | 305 | A00521 | A00839 | 491 |
| A00521 | A00865 | 541 | A00521 | A00870 | 481 |
| A00521 | A00878 | 491 | A00521 | A00923 | 491 |
| A00521 | A00942 | 283 | A00521 | A00949 | 167 |
| A00521 | A00953 | 491 | A00521 | A00965 | 419 |
| A00521 | A00983 | 163 | A00521 | A00987 | 451 |
| A00521 | A00990 | 200 | A00521 | A00996 | 271 |
| A00521 | A01000 | 491 | A00521 | A01001 | 238 |

|        |        |     |        |        |     |
|--------|--------|-----|--------|--------|-----|
| A00521 | A01012 | 269 | A00521 | A01016 | 229 |
| A00521 | A01017 | 235 | A00521 | A01025 | 490 |
| A00521 | A01027 | 483 | A00521 | A01034 | 436 |
| A00521 | A01037 | 475 | A00521 | A01042 | 252 |
| A00521 | A01047 | 565 | A00521 | A01054 | 490 |
| A00521 | A01061 | 235 | A00521 | A01066 | 200 |
| A00521 | A01067 | 488 | A00521 | A01085 | 278 |
| A00521 | A01101 | 491 | A00521 | A01106 | 305 |
| A00521 | A01108 | 456 | A00521 | A01127 | 491 |
| A00521 | A01140 | 369 | A00521 | A01150 | 470 |
| A00521 | A01161 | 165 | A00521 | A01184 | 491 |
| A00521 | A01186 | 269 | A00521 | A01189 | 490 |
| A00521 | A01195 | 234 | A00521 | A01196 | 252 |
| A00521 | A01206 | 489 | A00521 | A01211 | 162 |
| A00521 | A01234 | 477 | A00521 | A01246 | 172 |
| A00521 | A01247 | 399 | A00521 | A01249 | 565 |
| A00521 | A01263 | 488 | A00521 | A01264 | 200 |
| A00521 | A01268 | 226 | A00521 | A01291 | 649 |
| A00521 | A01306 | 491 | A00521 | A01317 | 221 |
| A00521 | A01335 | 452 | A00521 | A01338 | 559 |
| A00521 | A01365 | 329 | A00521 | A01374 | 306 |
| A00521 | A01382 | 408 | A00521 | A01392 | 491 |
| A00521 | A01399 | 484 | A00521 | A01416 | 168 |
| A00521 | A01418 | 235 | A00521 | A01429 | 345 |
| A00521 | A01430 | 443 | A00521 | A01433 | 491 |
| A00521 | A01436 | 200 | A00521 | A01437 | 491 |
| A00521 | A01446 | 473 | A00521 | A01448 | 469 |
| A00521 | A01457 | 473 | A00521 | A01464 | 520 |
| A00521 | A01468 | 216 | A00521 | A01496 | 480 |
| A00521 | A01540 | 419 | A00521 | A01579 | 490 |
| A00521 | A01601 | 191 | A00521 | A01618 | 246 |
| A00521 | A01633 | 262 | A00521 | A01649 | 490 |
| A00521 | A01700 | 224 | A00521 | A01822 | 229 |
| A00521 | A02216 | 443 | A00521 | A02978 | 306 |
| A00521 | A03044 | 235 | A00521 | A03069 | 491 |
| A00521 | A03490 | 252 | A00521 | A03567 | 491 |
| A00521 | A03754 | 374 | A00521 | A04430 | 201 |
| A00521 | A04507 | 278 | A00521 | A04542 | 215 |
| A00521 | A05017 | 262 | A00521 | A05121 | 371 |
| A00521 | A05411 | 322 | A00521 | A05501 | 329 |
| A00521 | A06861 | 270 | A00521 | A06878 | 224 |
| A00521 | A06897 | 384 | A00521 | A06965 | 490 |
| A00521 | A06973 | 497 | A00521 | A07412 | 223 |
| A00521 | A07451 | 475 | A00521 | A07533 | 425 |
| A00521 | A07584 | 221 | A00521 | A07597 | 291 |
| A00521 | A07677 | 224 | A00521 | A07819 | 333 |

|        |        |     |        |        |     |
|--------|--------|-----|--------|--------|-----|
| A00521 | A08011 | 491 | A00521 | A08055 | 290 |
| A00521 | A08137 | 473 | A00521 | A08301 | 266 |
| A00521 | A08357 | 484 | A00521 | A08398 | 566 |
| A00521 | A08403 | 411 | A00521 | A08419 | 358 |
| A00521 | A08452 | 566 | A00521 | A08488 | 425 |
| A00521 | A08521 | 565 | A00521 | A08543 | 396 |
| A00521 | A08547 | 483 | A00521 | A08556 | 422 |
| A00521 | A08558 | 200 | A00521 | A08664 | 253 |
| A00521 | A08773 | 490 | A00521 | A08860 | 230 |
| A00521 | A08987 | 435 | A00521 | A09044 | 281 |
| A00521 | A09322 | 480 | A00521 | A09332 | 441 |
| A00521 | A09442 | 165 | A00521 | A09592 | 372 |
| A00521 | A09615 | 319 | A00521 | A09702 | 562 |
| A00521 | A10417 | 200 | A00521 | A10518 | 491 |
| A00521 | A10532 | 343 | A00521 | A10616 | 319 |
| A00521 | A10719 | 173 | A00521 | A11316 | 168 |
| A00521 | A11322 | 360 | A00521 | A11338 | 368 |
| A00521 | A11390 | 167 | A00521 | A11419 | 449 |
| A00521 | A11427 | 483 | A00521 | A11438 | 544 |
| A00521 | A11480 | 486 | A00521 | A11540 | 230 |
| A00521 | A11588 | 419 | A00521 | A11616 | 182 |
| A00521 | A11729 | 200 | A00521 | A11731 | 347 |
| A00521 | A11836 | 279 | A00521 | A11945 | 171 |
| A00521 | A12059 | 258 | A00521 | A12079 | 215 |
| A00521 | A12080 | 195 | A00521 | A12233 | 350 |
| A00521 | A12252 | 332 | A00521 | A12433 | 434 |
| A00521 | A12821 | 346 | A00521 | A13069 | 157 |
| A00521 | A13333 | 556 | A00521 | A13340 | 238 |
| A00521 | A13525 | 473 | A00521 | A13709 | 452 |
| A00521 | A13710 | 223 | A00521 | A13989 | 486 |
| A00521 | A13992 | 274 | A00521 | A14152 | 243 |
| A00521 | A14216 | 391 | A00521 | A14482 | 305 |
| A00521 | A14505 | 480 | A00521 | A14508 | 151 |
| A00521 | A14674 | 249 | A00521 | A14738 | 307 |
| A00521 | A14825 | 165 | A00521 | A15500 | 367 |
| A00521 | A15660 | 364 | A00521 | A15684 | 463 |
| A00521 | A15714 | 260 | A00521 | A15931 | 443 |
| A00521 | A15988 | 475 | A00521 | A16118 | 424 |
| A00521 | A16157 | 173 | A00521 | A17193 | 160 |
| A00522 | A00542 | 270 | A00522 | A00546 | 491 |
| A00522 | A00562 | 491 | A00522 | A00625 | 902 |
| A00522 | A00643 | 276 | A00522 | A00786 | 446 |
| A00522 | A00812 | 168 | A00522 | A00814 | 291 |
| A00522 | A00864 | 491 | A00522 | A00877 | 436 |
| A00522 | A00951 | 383 | A00522 | A00971 | 488 |
| A00522 | A01036 | 329 | A00522 | A01191 | 488 |



|        |        |     |        |        |     |
|--------|--------|-----|--------|--------|-----|
| A00522 | A01216 | 484 | A00522 | A01290 | 335 |
| A00522 | A01308 | 466 | A00522 | A01366 | 752 |
| A00522 | A01454 | 458 | A00522 | A01459 | 475 |
| A00522 | A01484 | 286 | A00522 | A01514 | 475 |
| A00522 | A01549 | 479 | A00522 | A01568 | 490 |
| A00522 | A01591 | 200 | A00522 | A01630 | 63  |
| A00522 | A01657 | 296 | A00522 | A01687 | 491 |
| A00522 | A01781 | 266 | A00522 | A01988 | 488 |
| A00522 | A02535 | 497 | A00522 | A02634 | 191 |
| A00522 | A02864 | 172 | A00522 | A03407 | 424 |
| A00522 | A04012 | 156 | A00522 | A04573 | 157 |
| A00522 | A04583 | 411 | A00522 | A04592 | 257 |
| A00522 | A05016 | 443 | A00522 | A05094 | 154 |
| A00522 | A05301 | 195 | A00522 | A05381 | 221 |
| A00522 | A05899 | 199 | A00522 | A06060 | 350 |
| A00522 | A06176 | 468 | A00522 | A06930 | 229 |
| A00522 | A07054 | 484 | A00522 | A07083 | 252 |
| A00522 | A07187 | 262 | A00522 | A07201 | 173 |
| A00522 | A07242 | 473 | A00522 | A07495 | 491 |
| A00522 | A07665 | 489 | A00522 | A07696 | 480 |
| A00522 | A07709 | 271 | A00522 | A07714 | 288 |
| A00522 | A07816 | 274 | A00522 | A07934 | 162 |
| A00522 | A07954 | 470 | A00522 | A08464 | 191 |
| A00522 | A08531 | 213 | A00522 | A09662 | 344 |
| A00522 | A09666 | 473 | A00522 | A10784 | 497 |
| A00522 | A11116 | 446 | A00522 | A11196 | 489 |
| A00522 | A11281 | 369 | A00522 | A11346 | 452 |
| A00522 | A11675 | 425 | A00522 | A12047 | 491 |
| A00522 | A12419 | 202 | A00522 | A13146 | 279 |
| A00522 | A13239 | 171 | A00522 | A13488 | 165 |
| A00522 | A13784 | 497 | A00522 | A14209 | 486 |
| A00522 | A14266 | 407 | A00522 | A14281 | 752 |
| A00522 | A14464 | 452 | A00522 | A14474 | 709 |
| A00522 | A14484 | 489 | A00522 | A14633 | 485 |
| A00522 | A14665 | 308 | A00522 | A15004 | 378 |
| A00522 | A15039 | 208 | A00522 | A15232 | 288 |
| A00522 | A15260 | 221 | A00522 | A15272 | 157 |
| A00522 | A15295 | 218 | A00522 | A15380 | 486 |
| A00523 | A00525 | 481 | A00523 | A00544 | 228 |
| A00523 | A00571 | 183 | A00523 | A00649 | 151 |
| A00523 | A00651 | 254 | A00523 | A00653 | 404 |
| A00523 | A00741 | 269 | A00523 | A00742 | 299 |
| A00523 | A00821 | 394 | A00523 | A00829 | 260 |
| A00523 | A00849 | 467 | A00523 | A00984 | 182 |
| A00523 | A00985 | 305 | A00523 | A00987 | 227 |
| A00523 | A00998 | 319 | A00523 | A01013 | 352 |

|        |        |     |        |        |     |
|--------|--------|-----|--------|--------|-----|
| A00523 | A01050 | 204 | A00523 | A01150 | 490 |
| A00523 | A01152 | 230 | A00523 | A01155 | 241 |
| A00523 | A01161 | 490 | A00523 | A01168 | 188 |
| A00523 | A01210 | 446 | A00523 | A01214 | 202 |
| A00523 | A01278 | 173 | A00523 | A01287 | 491 |
| A00523 | A01502 | 391 | A00523 | A01504 | 343 |
| A00523 | A01558 | 899 | A00523 | A01588 | 899 |
| A00523 | A01618 | 210 | A00523 | A01667 | 374 |
| A00523 | A01711 | 468 | A00523 | A01741 | 238 |
| A00523 | A01815 | 372 | A00523 | A01816 | 367 |
| A00523 | A01819 | 414 | A00523 | A01825 | 281 |
| A00523 | A02994 | 454 | A00523 | A02997 | 378 |
| A00523 | A03438 | 305 | A00523 | A03494 | 180 |
| A00523 | A03856 | 401 | A00523 | A03981 | 306 |
| A00523 | A04055 | 317 | A00523 | A04268 | 232 |
| A00523 | A05982 | 267 | A00523 | A10421 | 152 |
| A00523 | A10598 | 277 | A00523 | A14216 | 191 |
| A00523 | A14699 | 240 | A00523 | A14778 | 389 |
| A00523 | A15379 | 356 | A00523 | A15624 | 293 |
| A00523 | A15684 | 210 | A00524 | A00526 | 223 |
| A00524 | A00557 | 201 | A00524 | A00609 | 236 |
| A00524 | A00658 | 575 | A00524 | A00687 | 223 |
| A00524 | A00715 | 223 | A00524 | A00871 | 530 |
| A00524 | A00975 | 279 | A00524 | A00986 | 470 |
| A00524 | A01061 | 193 | A00524 | A01111 | 223 |
| A00524 | A01118 | 390 | A00524 | A01202 | 223 |
| A00524 | A01208 | 477 | A00524 | A01214 | 210 |
| A00524 | A01215 | 576 | A00524 | A01228 | 477 |
| A00524 | A01353 | 576 | A00524 | A01720 | 224 |
| A00524 | A01736 | 223 | A00524 | A01995 | 165 |
| A00524 | A02041 | 446 | A00524 | A02051 | 223 |
| A00524 | A02452 | 162 | A00524 | A02672 | 202 |
| A00524 | A03169 | 340 | A00524 | A03954 | 286 |
| A00524 | A03958 | 329 | A00524 | A03982 | 374 |
| A00524 | A03984 | 215 | A00524 | A04447 | 223 |
| A00524 | A04630 | 265 | A00524 | A04908 | 195 |
| A00524 | A07265 | 223 | A00524 | A07347 | 200 |
| A00524 | A07588 | 342 | A00524 | A08732 | 260 |
| A00524 | A08955 | 223 | A00524 | A08971 | 223 |
| A00524 | A10755 | 223 | A00524 | A11202 | 223 |
| A00524 | A12988 | 258 | A00524 | A13298 | 223 |
| A00524 | A14077 | 221 | A00524 | A14216 | 401 |
| A00524 | A15935 | 159 | A00525 | A00531 | 479 |
| A00525 | A00544 | 172 | A00525 | A00737 | 257 |
| A00525 | A00742 | 252 | A00525 | A00821 | 348 |
| A00525 | A00849 | 430 | A00525 | A00915 | 396 |

|        |        |     |        |        |     |
|--------|--------|-----|--------|--------|-----|
| A00525 | A00998 | 439 | A00525 | A01013 | 385 |
| A00525 | A01066 | 172 | A00525 | A01150 | 480 |
| A00525 | A01156 | 162 | A00525 | A01161 | 486 |
| A00525 | A01210 | 375 | A00525 | A01245 | 236 |
| A00525 | A01264 | 152 | A00525 | A01287 | 490 |
| A00525 | A01502 | 229 | A00525 | A01504 | 290 |
| A00525 | A01582 | 310 | A00525 | A01667 | 102 |
| A00525 | A01711 | 398 | A00525 | A01731 | 218 |
| A00525 | A01741 | 196 | A00525 | A01815 | 340 |
| A00525 | A01819 | 462 | A00525 | A01825 | 232 |
| A00525 | A01833 | 340 | A00525 | A02817 | 205 |
| A00525 | A02978 | 435 | A00525 | A02994 | 436 |
| A00525 | A03570 | 151 | A00525 | A03856 | 247 |
| A00525 | A03859 | 348 | A00525 | A04056 | 312 |
| A00525 | A05323 | 274 | A00525 | A05982 | 215 |
| A00525 | A06546 | 228 | A00525 | A07226 | 313 |
| A00525 | A07675 | 272 | A00525 | A08024 | 193 |
| A00525 | A08572 | 283 | A00525 | A09321 | 329 |
| A00525 | A11617 | 221 | A00525 | A14527 | 160 |
| A00525 | A14699 | 362 | A00525 | A14778 | 241 |
| A00525 | A15379 | 307 | A00525 | A15624 | 294 |
| A00525 | A15668 | 278 | A00526 | A00658 | 223 |
| A00526 | A00687 | 223 | A00526 | A00715 | 223 |
| A00526 | A00871 | 494 | A00526 | A00895 | 212 |
| A00526 | A00986 | 295 | A00526 | A01111 | 223 |
| A00526 | A01118 | 223 | A00526 | A01202 | 223 |
| A00526 | A01208 | 304 | A00526 | A01215 | 318 |
| A00526 | A01228 | 223 | A00526 | A01278 | 191 |
| A00526 | A01318 | 217 | A00526 | A01353 | 508 |
| A00526 | A01558 | 899 | A00526 | A01561 | 899 |
| A00526 | A01563 | 246 | A00526 | A01588 | 899 |
| A00526 | A01736 | 223 | A00526 | A02041 | 223 |
| A00526 | A02051 | 223 | A00526 | A02117 | 283 |
| A00526 | A02260 | 311 | A00526 | A02454 | 205 |
| A00526 | A03169 | 223 | A00526 | A04447 | 223 |
| A00526 | A04468 | 355 | A00526 | A04879 | 191 |
| A00526 | A06750 | 241 | A00526 | A07265 | 223 |
| A00526 | A07311 | 899 | A00526 | A07588 | 354 |
| A00526 | A08955 | 223 | A00526 | A08971 | 223 |
| A00526 | A10755 | 223 | A00526 | A11202 | 223 |
| A00526 | A13298 | 223 | A00526 | A14216 | 223 |
| A00526 | A14444 | 899 | A00527 | A00581 | 294 |
| A00527 | A00609 | 462 | A00527 | A00833 | 224 |
| A00527 | A00909 | 163 | A00527 | A00932 | 160 |
| A00527 | A00948 | 241 | A00527 | A01150 | 400 |
| A00527 | A01354 | 190 | A00527 | A01386 | 395 |

|        |        |     |        |        |     |
|--------|--------|-----|--------|--------|-----|
| A00527 | A01431 | 457 | A00527 | A01569 | 439 |
| A00527 | A01976 | 63  | A00527 | A02494 | 480 |
| A00527 | A02704 | 386 | A00527 | A03446 | 281 |
| A00527 | A03476 | 154 | A00527 | A03740 | 369 |
| A00527 | A03752 | 170 | A00527 | A06014 | 241 |
| A00527 | A06466 | 439 | A00527 | A07247 | 210 |
| A00527 | A07311 | 457 | A00527 | A07923 | 188 |
| A00527 | A08346 | 379 | A00527 | A09567 | 170 |
| A00527 | A11302 | 160 | A00527 | A11354 | 288 |
| A00527 | A12328 | 435 | A00527 | A13149 | 385 |
| A00527 | A13620 | 210 | A00527 | A14073 | 267 |
| A00527 | A14596 | 171 | A00527 | A14707 | 375 |
| A00527 | A15244 | 258 | A00527 | A15562 | 266 |
| A00527 | A17142 | 302 | A00528 | A01086 | 271 |
| A00528 | A01367 | 167 | A00528 | A01888 | 156 |
| A00528 | A02754 | 238 | A00528 | A02936 | 312 |
| A00528 | A03820 | 162 | A00528 | A04908 | 196 |
| A00528 | A07164 | 212 | A00528 | A07187 | 273 |
| A00529 | A00883 | 162 | A00529 | A01097 | 223 |
| A00529 | A08982 | 258 | A00529 | A08990 | 408 |
| A00529 | A14196 | 263 | A00529 | A15257 | 299 |
| A00530 | A00550 | 184 | A00530 | A00575 | 411 |
| A00530 | A00856 | 490 | A00530 | A01020 | 245 |
| A00530 | A01079 | 202 | A00530 | A01087 | 418 |
| A00530 | A01381 | 281 | A00530 | A01393 | 230 |
| A00530 | A01429 | 159 | A00530 | A01668 | 157 |
| A00530 | A02064 | 274 | A00530 | A03421 | 391 |
| A00530 | A03734 | 480 | A00530 | A07158 | 167 |
| A00530 | A07348 | 202 | A00530 | A09133 | 367 |
| A00530 | A15945 | 168 | A00531 | A00532 | 491 |
| A00531 | A00537 | 491 | A00531 | A00540 | 182 |
| A00531 | A00552 | 450 | A00531 | A00559 | 486 |
| A00531 | A00560 | 385 | A00531 | A00570 | 485 |
| A00531 | A00571 | 483 | A00531 | A00576 | 490 |
| A00531 | A00583 | 156 | A00531 | A00601 | 263 |
| A00531 | A00604 | 359 | A00531 | A00638 | 160 |
| A00531 | A00646 | 165 | A00531 | A00648 | 185 |
| A00531 | A00649 | 238 | A00531 | A00651 | 625 |
| A00531 | A00653 | 550 | A00531 | A00677 | 241 |
| A00531 | A00687 | 452 | A00531 | A00691 | 526 |
| A00531 | A00707 | 424 | A00531 | A00716 | 535 |
| A00531 | A00719 | 285 | A00531 | A00725 | 480 |
| A00531 | A00735 | 396 | A00531 | A00741 | 373 |
| A00531 | A00757 | 488 | A00531 | A00766 | 188 |
| A00531 | A00769 | 208 | A00531 | A00775 | 160 |
| A00531 | A00781 | 167 | A00531 | A00783 | 475 |

|        |        |     |        |        |     |
|--------|--------|-----|--------|--------|-----|
| A00531 | A00784 | 328 | A00531 | A00787 | 278 |
| A00531 | A00790 | 217 | A00531 | A00802 | 467 |
| A00531 | A00813 | 391 | A00531 | A00822 | 477 |
| A00531 | A00829 | 202 | A00531 | A00835 | 347 |
| A00531 | A00839 | 466 | A00531 | A00841 | 751 |
| A00531 | A00849 | 352 | A00531 | A00856 | 241 |
| A00531 | A00863 | 182 | A00531 | A00864 | 620 |
| A00531 | A00867 | 156 | A00531 | A00868 | 491 |
| A00531 | A00871 | 602 | A00531 | A00878 | 547 |
| A00531 | A00879 | 184 | A00531 | A00883 | 409 |
| A00531 | A00905 | 542 | A00531 | A00909 | 549 |
| A00531 | A00915 | 491 | A00531 | A00916 | 533 |
| A00531 | A00919 | 337 | A00531 | A00926 | 465 |
| A00531 | A00950 | 208 | A00531 | A00966 | 219 |
| A00531 | A00975 | 356 | A00531 | A00983 | 334 |
| A00531 | A00985 | 483 | A00531 | A00987 | 260 |
| A00531 | A01011 | 613 | A00531 | A01012 | 486 |
| A00531 | A01017 | 269 | A00531 | A01024 | 245 |
| A00531 | A01027 | 483 | A00531 | A01029 | 392 |
| A00531 | A01038 | 578 | A00531 | A01046 | 352 |
| A00531 | A01053 | 485 | A00531 | A01054 | 443 |
| A00531 | A01066 | 223 | A00531 | A01070 | 899 |
| A00531 | A01075 | 491 | A00531 | A01077 | 490 |
| A00531 | A01082 | 433 | A00531 | A01084 | 451 |
| A00531 | A01086 | 281 | A00531 | A01087 | 469 |
| A00531 | A01093 | 395 | A00531 | A01099 | 386 |
| A00531 | A01100 | 440 | A00531 | A01112 | 446 |
| A00531 | A01114 | 263 | A00531 | A01136 | 541 |
| A00531 | A01139 | 962 | A00531 | A01144 | 340 |
| A00531 | A01150 | 477 | A00531 | A01151 | 541 |
| A00531 | A01156 | 572 | A00531 | A01161 | 491 |
| A00531 | A01168 | 279 | A00531 | A01187 | 419 |
| A00531 | A01192 | 288 | A00531 | A01206 | 432 |
| A00531 | A01210 | 281 | A00531 | A01214 | 436 |
| A00531 | A01215 | 491 | A00531 | A01217 | 367 |
| A00531 | A01231 | 416 | A00531 | A01232 | 312 |
| A00531 | A01234 | 584 | A00531 | A01239 | 254 |
| A00531 | A01264 | 229 | A00531 | A01266 | 514 |
| A00531 | A01268 | 526 | A00531 | A01275 | 480 |
| A00531 | A01278 | 488 | A00531 | A01287 | 180 |
| A00531 | A01291 | 420 | A00531 | A01294 | 380 |
| A00531 | A01295 | 156 | A00531 | A01296 | 265 |
| A00531 | A01311 | 651 | A00531 | A01320 | 552 |
| A00531 | A01322 | 449 | A00531 | A01326 | 180 |
| A00531 | A01327 | 340 | A00531 | A01334 | 440 |
| A00531 | A01338 | 480 | A00531 | A01353 | 491 |

|        |        |     |        |        |     |
|--------|--------|-----|--------|--------|-----|
| A00531 | A01354 | 491 | A00531 | A01359 | 962 |
| A00531 | A01366 | 196 | A00531 | A01372 | 383 |
| A00531 | A01380 | 409 | A00531 | A01385 | 481 |
| A00531 | A01391 | 156 | A00531 | A01399 | 236 |
| A00531 | A01404 | 470 | A00531 | A01406 | 480 |
| A00531 | A01410 | 488 | A00531 | A01413 | 159 |
| A00531 | A01425 | 335 | A00531 | A01434 | 156 |
| A00531 | A01436 | 165 | A00531 | A01446 | 323 |
| A00531 | A01454 | 475 | A00531 | A01468 | 324 |
| A00531 | A01470 | 452 | A00531 | A01479 | 479 |
| A00531 | A01492 | 655 | A00531 | A01496 | 491 |
| A00531 | A01497 | 277 | A00531 | A01524 | 899 |
| A00531 | A01527 | 899 | A00531 | A01540 | 491 |
| A00531 | A01557 | 452 | A00531 | A01558 | 405 |
| A00531 | A01569 | 375 | A00531 | A01572 | 578 |
| A00531 | A01579 | 425 | A00531 | A01582 | 491 |
| A00531 | A01591 | 188 | A00531 | A01595 | 351 |
| A00531 | A01598 | 491 | A00531 | A01601 | 285 |
| A00531 | A01612 | 531 | A00531 | A01615 | 271 |
| A00531 | A01627 | 272 | A00531 | A01630 | 445 |
| A00531 | A01648 | 363 | A00531 | A01649 | 485 |
| A00531 | A01655 | 465 | A00531 | A01687 | 270 |
| A00531 | A01705 | 205 | A00531 | A01707 | 430 |
| A00531 | A01741 | 429 | A00531 | A01808 | 199 |
| A00531 | A01826 | 308 | A00531 | A01989 | 265 |
| A00531 | A02138 | 258 | A00531 | A02164 | 391 |
| A00531 | A02165 | 307 | A00531 | A02203 | 182 |
| A00531 | A02219 | 182 | A00531 | A02221 | 162 |
| A00531 | A02265 | 374 | A00531 | A02275 | 184 |
| A00531 | A02454 | 217 | A00531 | A02518 | 265 |
| A00531 | A02671 | 491 | A00531 | A02959 | 396 |
| A00531 | A02978 | 491 | A00531 | A03007 | 159 |
| A00531 | A03057 | 450 | A00531 | A03298 | 491 |
| A00531 | A03313 | 163 | A00531 | A03438 | 491 |
| A00531 | A03446 | 469 | A00531 | A03494 | 694 |
| A00531 | A03567 | 154 | A00531 | A03569 | 559 |
| A00531 | A03628 | 63  | A00531 | A03637 | 246 |
| A00531 | A03676 | 382 | A00531 | A03740 | 355 |
| A00531 | A03858 | 272 | A00531 | A03859 | 405 |
| A00531 | A03902 | 488 | A00531 | A03931 | 245 |
| A00531 | A03981 | 558 | A00531 | A04337 | 408 |
| A00531 | A04345 | 223 | A00531 | A04666 | 327 |
| A00531 | A04856 | 327 | A00531 | A04971 | 385 |
| A00531 | A05015 | 407 | A00531 | A05095 | 187 |
| A00531 | A06046 | 154 | A00531 | A06082 | 568 |
| A00531 | A06267 | 434 | A00531 | A06379 | 344 |

|        |        |     |        |        |     |
|--------|--------|-----|--------|--------|-----|
| A00531 | A06390 | 199 | A00531 | A06591 | 341 |
| A00531 | A06600 | 205 | A00531 | A06624 | 297 |
| A00531 | A06713 | 199 | A00531 | A06733 | 230 |
| A00531 | A06814 | 208 | A00531 | A06825 | 491 |
| A00531 | A07014 | 196 | A00531 | A07183 | 419 |
| A00531 | A07442 | 176 | A00531 | A07604 | 313 |
| A00531 | A07706 | 491 | A00531 | A07810 | 162 |
| A00531 | A07898 | 156 | A00531 | A08137 | 530 |
| A00531 | A08192 | 340 | A00531 | A08201 | 156 |
| A00531 | A08212 | 269 | A00531 | A08280 | 263 |
| A00531 | A08327 | 156 | A00531 | A08335 | 254 |
| A00531 | A08431 | 174 | A00531 | A08437 | 274 |
| A00531 | A08524 | 383 | A00531 | A08542 | 156 |
| A00531 | A08548 | 226 | A00531 | A08558 | 256 |
| A00531 | A08571 | 528 | A00531 | A08686 | 330 |
| A00531 | A08756 | 235 | A00531 | A08773 | 213 |
| A00531 | A08811 | 199 | A00531 | A08818 | 63  |
| A00531 | A08859 | 491 | A00531 | A08885 | 168 |
| A00531 | A08928 | 85  | A00531 | A09044 | 375 |
| A00531 | A09195 | 501 | A00531 | A09258 | 945 |
| A00531 | A09319 | 899 | A00531 | A09377 | 433 |
| A00531 | A09451 | 491 | A00531 | A09491 | 383 |
| A00531 | A09515 | 490 | A00531 | A09526 | 180 |
| A00531 | A09538 | 491 | A00531 | A09686 | 88  |
| A00531 | A09732 | 489 | A00531 | A09733 | 489 |
| A00531 | A09992 | 455 | A00531 | A10001 | 199 |
| A00531 | A10174 | 899 | A00531 | A10205 | 252 |
| A00531 | A10228 | 945 | A00531 | A10250 | 774 |
| A00531 | A10333 | 199 | A00531 | A10340 | 936 |
| A00531 | A10527 | 385 | A00531 | A10532 | 534 |
| A00531 | A10537 | 199 | A00531 | A10561 | 235 |
| A00531 | A10615 | 477 | A00531 | A10616 | 333 |
| A00531 | A10624 | 205 | A00531 | A10760 | 321 |
| A00531 | A10853 | 491 | A00531 | A10887 | 297 |
| A00531 | A10957 | 140 | A00531 | A11099 | 274 |
| A00531 | A11139 | 693 | A00531 | A11291 | 485 |
| A00531 | A11346 | 439 | A00531 | A11415 | 417 |
| A00531 | A11454 | 380 | A00531 | A11486 | 491 |
| A00531 | A11492 | 251 | A00531 | A11496 | 156 |
| A00531 | A11497 | 156 | A00531 | A11928 | 334 |
| A00531 | A11938 | 201 | A00531 | A12045 | 434 |
| A00531 | A12046 | 399 | A00531 | A12757 | 156 |
| A00531 | A12759 | 294 | A00531 | A12824 | 484 |
| A00531 | A12861 | 193 | A00531 | A12906 | 199 |
| A00531 | A13052 | 160 | A00531 | A13063 | 265 |
| A00531 | A13310 | 288 | A00531 | A13311 | 488 |

|        |        |     |        |        |     |
|--------|--------|-----|--------|--------|-----|
| A00531 | A13369 | 260 | A00531 | A13805 | 494 |
| A00531 | A13928 | 571 | A00531 | A13989 | 530 |
| A00531 | A14000 | 489 | A00531 | A14006 | 490 |
| A00531 | A14007 | 344 | A00531 | A14064 | 162 |
| A00531 | A14073 | 490 | A00531 | A14122 | 281 |
| A00531 | A14178 | 156 | A00531 | A14209 | 304 |
| A00531 | A14216 | 582 | A00531 | A14220 | 547 |
| A00531 | A14257 | 374 | A00531 | A14272 | 274 |
| A00531 | A14279 | 549 | A00531 | A14449 | 484 |
| A00531 | A14476 | 485 | A00531 | A14511 | 465 |
| A00531 | A14566 | 363 | A00531 | A14594 | 254 |
| A00531 | A14614 | 375 | A00531 | A14622 | 254 |
| A00531 | A14674 | 327 | A00531 | A14699 | 348 |
| A00531 | A14755 | 162 | A00531 | A14809 | 199 |
| A00531 | A14843 | 208 | A00531 | A15232 | 199 |
| A00531 | A15292 | 356 | A00531 | A15293 | 899 |
| A00531 | A15294 | 899 | A00531 | A15366 | 317 |
| A00531 | A15504 | 227 | A00531 | A15624 | 491 |
| A00531 | A15649 | 270 | A00531 | A15660 | 208 |
| A00531 | A15665 | 330 | A00531 | A15684 | 518 |
| A00531 | A15711 | 565 | A00531 | A15773 | 466 |
| A00531 | A15932 | 490 | A00531 | A15933 | 255 |
| A00531 | A16088 | 463 | A00531 | A16095 | 396 |
| A00531 | A16149 | 461 | A00531 | A16328 | 443 |
| A00531 | A16400 | 208 | A00531 | A16568 | 88  |
| A00531 | A16690 | 383 | A00531 | A16699 | 156 |
| A00531 | A16738 | 327 | A00531 | A16866 | 383 |
| A00531 | A16912 | 435 | A00531 | A17063 | 318 |
| A00531 | A17213 | 899 | A00532 | A00537 | 484 |
| A00532 | A00552 | 436 | A00532 | A00553 | 268 |
| A00532 | A00554 | 425 | A00532 | A00560 | 469 |
| A00532 | A00565 | 556 | A00532 | A00566 | 445 |
| A00532 | A00570 | 474 | A00532 | A00571 | 491 |
| A00532 | A00575 | 481 | A00532 | A00589 | 251 |
| A00532 | A00603 | 293 | A00532 | A00605 | 490 |
| A00532 | A00608 | 290 | A00532 | A00629 | 481 |
| A00532 | A00643 | 172 | A00532 | A00648 | 401 |
| A00532 | A00653 | 170 | A00532 | A00655 | 491 |
| A00532 | A00658 | 458 | A00532 | A00677 | 477 |
| A00532 | A00687 | 484 | A00532 | A00691 | 491 |
| A00532 | A00693 | 491 | A00532 | A00697 | 379 |
| A00532 | A00708 | 232 | A00532 | A00718 | 301 |
| A00532 | A00724 | 334 | A00532 | A00733 | 341 |
| A00532 | A00734 | 172 | A00532 | A00757 | 212 |
| A00532 | A00760 | 682 | A00532 | A00762 | 491 |
| A00532 | A00767 | 489 | A00532 | A00772 | 416 |



|        |        |     |        |        |     |
|--------|--------|-----|--------|--------|-----|
| A00532 | A00774 | 223 | A00532 | A00781 | 174 |
| A00532 | A00805 | 479 | A00532 | A00809 | 198 |
| A00532 | A00822 | 491 | A00532 | A00831 | 443 |
| A00532 | A00835 | 490 | A00532 | A00837 | 247 |
| A00532 | A00839 | 188 | A00532 | A00841 | 484 |
| A00532 | A00843 | 191 | A00532 | A00848 | 486 |
| A00532 | A00856 | 491 | A00532 | A00858 | 490 |
| A00532 | A00868 | 207 | A00532 | A00871 | 491 |
| A00532 | A00876 | 65  | A00532 | A00878 | 486 |
| A00532 | A00879 | 475 | A00532 | A00881 | 416 |
| A00532 | A00883 | 491 | A00532 | A00905 | 491 |
| A00532 | A00909 | 296 | A00532 | A00916 | 604 |
| A00532 | A00919 | 491 | A00532 | A00923 | 479 |
| A00532 | A00928 | 351 | A00532 | A00934 | 474 |
| A00532 | A00935 | 213 | A00532 | A00947 | 491 |
| A00532 | A00954 | 182 | A00532 | A00964 | 396 |
| A00532 | A00985 | 296 | A00532 | A00992 | 344 |
| A00532 | A00994 | 293 | A00532 | A01002 | 401 |
| A00532 | A01020 | 491 | A00532 | A01022 | 234 |
| A00532 | A01024 | 491 | A00532 | A01027 | 474 |
| A00532 | A01029 | 362 | A00532 | A01032 | 409 |
| A00532 | A01036 | 489 | A00532 | A01052 | 258 |
| A00532 | A01057 | 288 | A00532 | A01069 | 358 |
| A00532 | A01075 | 695 | A00532 | A01077 | 443 |
| A00532 | A01079 | 481 | A00532 | A01082 | 491 |
| A00532 | A01084 | 491 | A00532 | A01087 | 491 |
| A00532 | A01088 | 491 | A00532 | A01091 | 477 |
| A00532 | A01100 | 302 | A00532 | A01116 | 374 |
| A00532 | A01119 | 353 | A00532 | A01136 | 491 |
| A00532 | A01150 | 486 | A00532 | A01161 | 573 |
| A00532 | A01166 | 486 | A00532 | A01173 | 340 |
| A00532 | A01181 | 361 | A00532 | A01184 | 489 |
| A00532 | A01194 | 352 | A00532 | A01201 | 468 |
| A00532 | A01206 | 491 | A00532 | A01209 | 486 |
| A00532 | A01211 | 205 | A00532 | A01212 | 491 |
| A00532 | A01214 | 491 | A00532 | A01215 | 490 |
| A00532 | A01221 | 404 | A00532 | A01226 | 491 |
| A00532 | A01234 | 553 | A00532 | A01243 | 489 |
| A00532 | A01244 | 270 | A00532 | A01291 | 488 |
| A00532 | A01304 | 491 | A00532 | A01326 | 458 |
| A00532 | A01329 | 400 | A00532 | A01338 | 483 |
| A00532 | A01351 | 235 | A00532 | A01352 | 395 |
| A00532 | A01353 | 483 | A00532 | A01354 | 491 |
| A00532 | A01365 | 435 | A00532 | A01384 | 313 |
| A00532 | A01385 | 626 | A00532 | A01391 | 172 |
| A00532 | A01399 | 247 | A00532 | A01406 | 491 |

|        |        |     |        |        |     |
|--------|--------|-----|--------|--------|-----|
| A00532 | A01419 | 212 | A00532 | A01433 | 63  |
| A00532 | A01468 | 491 | A00532 | A01470 | 491 |
| A00532 | A01471 | 154 | A00532 | A01492 | 491 |
| A00532 | A01495 | 196 | A00532 | A01500 | 420 |
| A00532 | A01503 | 432 | A00532 | A01540 | 364 |
| A00532 | A01541 | 441 | A00532 | A01555 | 305 |
| A00532 | A01558 | 490 | A00532 | A01568 | 491 |
| A00532 | A01573 | 212 | A00532 | A01598 | 553 |
| A00532 | A01612 | 491 | A00532 | A01614 | 489 |
| A00532 | A01647 | 660 | A00532 | A01649 | 490 |
| A00532 | A01660 | 184 | A00532 | A01665 | 171 |
| A00532 | A01689 | 285 | A00532 | A01700 | 271 |
| A00532 | A01707 | 491 | A00532 | A01763 | 484 |
| A00532 | A01959 | 424 | A00532 | A02050 | 190 |
| A00532 | A02064 | 491 | A00532 | A02180 | 358 |
| A00532 | A02227 | 307 | A00532 | A02364 | 329 |
| A00532 | A02452 | 400 | A00532 | A02635 | 489 |
| A00532 | A02671 | 348 | A00532 | A02978 | 462 |
| A00532 | A03057 | 485 | A00532 | A03328 | 335 |
| A00532 | A03446 | 388 | A00532 | A03473 | 439 |
| A00532 | A03494 | 477 | A00532 | A03567 | 489 |
| A00532 | A03569 | 583 | A00532 | A03601 | 491 |
| A00532 | A03720 | 472 | A00532 | A03728 | 63  |
| A00532 | A03734 | 205 | A00532 | A03817 | 479 |
| A00532 | A03859 | 172 | A00532 | A03880 | 436 |
| A00532 | A03918 | 388 | A00532 | A03944 | 299 |
| A00532 | A04447 | 362 | A00532 | A04507 | 163 |
| A00532 | A04668 | 570 | A00532 | A05155 | 249 |
| A00532 | A05230 | 210 | A00532 | A05234 | 329 |
| A00532 | A05301 | 491 | A00532 | A05356 | 173 |
| A00532 | A05501 | 477 | A00532 | A05633 | 352 |
| A00532 | A06273 | 296 | A00532 | A06275 | 168 |
| A00532 | A06277 | 486 | A00532 | A06531 | 416 |
| A00532 | A06591 | 212 | A00532 | A06662 | 154 |
| A00532 | A06861 | 308 | A00532 | A06907 | 489 |
| A00532 | A07054 | 491 | A00532 | A07103 | 163 |
| A00532 | A07207 | 202 | A00532 | A07225 | 201 |
| A00532 | A07242 | 547 | A00532 | A07244 | 324 |
| A00532 | A07347 | 374 | A00532 | A07349 | 443 |
| A00532 | A07414 | 469 | A00532 | A07474 | 205 |
| A00532 | A07483 | 586 | A00532 | A07487 | 439 |
| A00532 | A07495 | 491 | A00532 | A07524 | 281 |
| A00532 | A07604 | 486 | A00532 | A07695 | 465 |
| A00532 | A07700 | 483 | A00532 | A07706 | 491 |
| A00532 | A07726 | 294 | A00532 | A07893 | 485 |
| A00532 | A07898 | 185 | A00532 | A07954 | 488 |

|        |        |     |        |        |     |
|--------|--------|-----|--------|--------|-----|
| A00532 | A08022 | 491 | A00532 | A08118 | 489 |
| A00532 | A08137 | 491 | A00532 | A08144 | 344 |
| A00532 | A08280 | 243 | A00532 | A08281 | 221 |
| A00532 | A08304 | 465 | A00532 | A08337 | 435 |
| A00532 | A08356 | 223 | A00532 | A08381 | 221 |
| A00532 | A08402 | 318 | A00532 | A08439 | 196 |
| A00532 | A08491 | 375 | A00532 | A08524 | 293 |
| A00532 | A08527 | 491 | A00532 | A08531 | 160 |
| A00532 | A08537 | 257 | A00532 | A08567 | 455 |
| A00532 | A08571 | 679 | A00532 | A08982 | 226 |
| A00532 | A09059 | 208 | A00532 | A09131 | 207 |
| A00532 | A09307 | 462 | A00532 | A09339 | 472 |
| A00532 | A09352 | 63  | A00532 | A09621 | 467 |
| A00532 | A09717 | 391 | A00532 | A09737 | 156 |
| A00532 | A09745 | 170 | A00532 | A09761 | 393 |
| A00532 | A09825 | 490 | A00532 | A10250 | 151 |
| A00532 | A10538 | 470 | A00532 | A10875 | 162 |
| A00532 | A11068 | 301 | A00532 | A11277 | 235 |
| A00532 | A11288 | 276 | A00532 | A11291 | 491 |
| A00532 | A11346 | 425 | A00532 | A11401 | 446 |
| A00532 | A11406 | 475 | A00532 | A11452 | 473 |
| A00532 | A11472 | 329 | A00532 | A11487 | 391 |
| A00532 | A11532 | 163 | A00532 | A11674 | 435 |
| A00532 | A11685 | 201 | A00532 | A11699 | 419 |
| A00532 | A11930 | 481 | A00532 | A12139 | 151 |
| A00532 | A12254 | 168 | A00532 | A12722 | 358 |
| A00532 | A12988 | 152 | A00532 | A13340 | 425 |
| A00532 | A13870 | 486 | A00532 | A13963 | 452 |
| A00532 | A13989 | 491 | A00532 | A14006 | 491 |
| A00532 | A14074 | 195 | A00532 | A14080 | 412 |
| A00532 | A14122 | 330 | A00532 | A14169 | 316 |
| A00532 | A14178 | 293 | A00532 | A14196 | 488 |
| A00532 | A14213 | 398 | A00532 | A14220 | 491 |
| A00532 | A14221 | 236 | A00532 | A14257 | 380 |
| A00532 | A14266 | 467 | A00532 | A14272 | 490 |
| A00532 | A14281 | 419 | A00532 | A14303 | 199 |
| A00532 | A14481 | 401 | A00532 | A14566 | 491 |
| A00532 | A14570 | 378 | A00532 | A14594 | 491 |
| A00532 | A14655 | 594 | A00532 | A14661 | 480 |
| A00532 | A14701 | 180 | A00532 | A14956 | 63  |
| A00532 | A15041 | 201 | A00532 | A15046 | 201 |
| A00532 | A15128 | 201 | A00532 | A15292 | 213 |
| A00532 | A15297 | 489 | A00532 | A15315 | 229 |
| A00532 | A15322 | 536 | A00532 | A15324 | 461 |
| A00532 | A15338 | 411 | A00532 | A15345 | 188 |
| A00532 | A15353 | 479 | A00532 | A15366 | 488 |

|        |        |     |        |        |     |
|--------|--------|-----|--------|--------|-----|
| A00532 | A15384 | 329 | A00532 | A15418 | 174 |
| A00532 | A15499 | 185 | A00532 | A15501 | 491 |
| A00532 | A15502 | 491 | A00532 | A15559 | 490 |
| A00532 | A15660 | 335 | A00532 | A15666 | 417 |
| A00532 | A15729 | 201 | A00532 | A15733 | 488 |
| A00532 | A15763 | 154 | A00532 | A15851 | 162 |
| A00532 | A15932 | 350 | A00532 | A15935 | 412 |
| A00532 | A15949 | 172 | A00532 | A16060 | 477 |
| A00532 | A16088 | 234 | A00532 | A16117 | 267 |
| A00532 | A16144 | 491 | A00532 | A16320 | 485 |
| A00532 | A16328 | 434 | A00532 | A16366 | 201 |
| A00532 | A16410 | 193 | A00532 | A16525 | 163 |
| A00532 | A16690 | 391 | A00532 | A17063 | 491 |
| A00532 | A17142 | 185 | A00532 | A17168 | 388 |
| A00532 | A17198 | 168 | A00533 | A00748 | 291 |
| A00533 | A00801 | 190 | A00533 | A00820 | 303 |
| A00533 | A00901 | 174 | A00533 | A00905 | 196 |
| A00533 | A00943 | 183 | A00533 | A01162 | 312 |
| A00533 | A01451 | 491 | A00533 | A01558 | 452 |
| A00533 | A01588 | 296 | A00533 | A01615 | 474 |
| A00533 | A01636 | 477 | A00533 | A01640 | 438 |
| A00533 | A01665 | 201 | A00533 | A01712 | 486 |
| A00533 | A01844 | 205 | A00533 | A02531 | 163 |
| A00533 | A03186 | 266 | A00533 | A03502 | 218 |
| A00533 | A03821 | 151 | A00533 | A03878 | 229 |
| A00533 | A04207 | 208 | A00533 | A04751 | 486 |
| A00533 | A04784 | 238 | A00533 | A04937 | 190 |
| A00533 | A05216 | 302 | A00533 | A05699 | 238 |
| A00533 | A06597 | 483 | A00533 | A06819 | 490 |
| A00533 | A06834 | 160 | A00533 | A07528 | 296 |
| A00533 | A07834 | 433 | A00533 | A08571 | 480 |
| A00533 | A09319 | 121 | A00533 | A10894 | 469 |
| A00533 | A13844 | 234 | A00533 | A13991 | 162 |
| A00533 | A14006 | 330 | A00533 | A14193 | 162 |
| A00533 | A14221 | 202 | A00533 | A15315 | 418 |
| A00533 | A15347 | 297 | A00534 | A00885 | 481 |
| A00534 | A00886 | 221 | A00534 | A00889 | 491 |
| A00534 | A00893 | 152 | A00534 | A00895 | 337 |
| A00534 | A00898 | 491 | A00534 | A00986 | 156 |
| A00534 | A01303 | 151 | A00534 | A01927 | 193 |
| A00534 | A03151 | 441 | A00534 | A06673 | 469 |
| A00534 | A06992 | 283 | A00534 | A08435 | 473 |
| A00534 | A08891 | 486 | A00534 | A14174 | 491 |
| A00534 | A14463 | 324 | A00535 | A00560 | 278 |
| A00535 | A00566 | 475 | A00535 | A00760 | 316 |
| A00535 | A00805 | 676 | A00535 | A00856 | 481 |

|        |        |     |        |        |     |
|--------|--------|-----|--------|--------|-----|
| A00535 | A00858 | 491 | A00535 | A00883 | 165 |
| A00535 | A00903 | 688 | A00535 | A00954 | 688 |
| A00535 | A00964 | 394 | A00535 | A01075 | 185 |
| A00535 | A01143 | 473 | A00535 | A01185 | 435 |
| A00535 | A01401 | 152 | A00535 | A01431 | 182 |
| A00535 | A01451 | 377 | A00535 | A01457 | 230 |
| A00535 | A01458 | 173 | A00535 | A01483 | 154 |
| A00535 | A01500 | 826 | A00535 | A01503 | 762 |
| A00535 | A01572 | 190 | A00535 | A01573 | 366 |
| A00535 | A01574 | 174 | A00535 | A01598 | 205 |
| A00535 | A02202 | 152 | A00535 | A03435 | 263 |
| A00535 | A05424 | 302 | A00535 | A07004 | 402 |
| A00535 | A08022 | 490 | A00535 | A08382 | 447 |
| A00535 | A08439 | 187 | A00535 | A08527 | 168 |
| A00535 | A08553 | 688 | A00535 | A08564 | 670 |
| A00535 | A08565 | 626 | A00535 | A09010 | 688 |
| A00535 | A10420 | 249 | A00535 | A11301 | 363 |
| A00535 | A11395 | 486 | A00535 | A11439 | 201 |
| A00535 | A12365 | 477 | A00535 | A12660 | 305 |
| A00535 | A13398 | 191 | A00535 | A13989 | 451 |
| A00535 | A14085 | 185 | A00535 | A14147 | 283 |
| A00535 | A14214 | 378 | A00535 | A14462 | 171 |
| A00535 | A15366 | 221 | A00535 | A15373 | 676 |
| A00535 | A15626 | 378 | A00535 | A15666 | 307 |
| A00535 | A15749 | 491 | A00535 | A15852 | 159 |
| A00535 | A15943 | 457 | A00535 | A15946 | 483 |
| A00535 | A16109 | 429 | A00535 | A16144 | 400 |
| A00535 | A16212 | 291 | A00536 | A00651 | 306 |
| A00536 | A00994 | 193 | A00536 | A01150 | 241 |
| A00536 | A01585 | 218 | A00536 | A01743 | 208 |
| A00536 | A02859 | 424 | A00536 | A02983 | 338 |
| A00536 | A03259 | 408 | A00536 | A03614 | 274 |
| A00536 | A03794 | 489 | A00536 | A03959 | 185 |
| A00536 | A04217 | 160 | A00536 | A04232 | 210 |
| A00536 | A05449 | 747 | A00536 | A07050 | 491 |
| A00536 | A07585 | 456 | A00536 | A08137 | 165 |
| A00536 | A11297 | 486 | A00536 | A11331 | 160 |
| A00536 | A11357 | 368 | A00536 | A11358 | 238 |
| A00536 | A11981 | 180 | A00536 | A12927 | 162 |
| A00536 | A14071 | 205 | A00536 | A14216 | 210 |
| A00536 | A15019 | 308 | A00536 | A15188 | 475 |
| A00536 | A15498 | 394 | A00536 | A15507 | 680 |
| A00536 | A15522 | 262 | A00536 | A15547 | 704 |
| A00536 | A15624 | 229 | A00536 | A15657 | 481 |
| A00536 | A15676 | 196 | A00536 | A15684 | 423 |
| A00536 | A15769 | 460 | A00536 | A15773 | 193 |

|        |        |     |        |        |     |
|--------|--------|-----|--------|--------|-----|
| A00536 | A15794 | 491 | A00536 | A16822 | 345 |
| A00537 | A00538 | 491 | A00537 | A00555 | 252 |
| A00537 | A00561 | 417 | A00537 | A00564 | 348 |
| A00537 | A00566 | 183 | A00537 | A00571 | 486 |
| A00537 | A00572 | 480 | A00537 | A00590 | 470 |
| A00537 | A00598 | 491 | A00537 | A00600 | 450 |
| A00537 | A00601 | 491 | A00537 | A00603 | 480 |
| A00537 | A00604 | 491 | A00537 | A00605 | 486 |
| A00537 | A00629 | 240 | A00537 | A00648 | 489 |
| A00537 | A00649 | 366 | A00537 | A00653 | 573 |
| A00537 | A00687 | 229 | A00537 | A00693 | 407 |
| A00537 | A00697 | 785 | A00537 | A00698 | 199 |
| A00537 | A00703 | 224 | A00537 | A00741 | 491 |
| A00537 | A00742 | 380 | A00537 | A00758 | 491 |
| A00537 | A00760 | 152 | A00537 | A00766 | 240 |
| A00537 | A00782 | 329 | A00537 | A00783 | 167 |
| A00537 | A00787 | 491 | A00537 | A00809 | 730 |
| A00537 | A00813 | 490 | A00537 | A00821 | 317 |
| A00537 | A00839 | 491 | A00537 | A00849 | 241 |
| A00537 | A00865 | 291 | A00537 | A00868 | 491 |
| A00537 | A00871 | 489 | A00537 | A00878 | 491 |
| A00537 | A00890 | 348 | A00537 | A00892 | 484 |
| A00537 | A00911 | 498 | A00537 | A00915 | 460 |
| A00537 | A00922 | 407 | A00537 | A00926 | 488 |
| A00537 | A00935 | 653 | A00537 | A00953 | 490 |
| A00537 | A00965 | 341 | A00537 | A00975 | 446 |
| A00537 | A00980 | 177 | A00537 | A00985 | 601 |
| A00537 | A00987 | 390 | A00537 | A00994 | 174 |
| A00537 | A00998 | 174 | A00537 | A01020 | 475 |
| A00537 | A01024 | 606 | A00537 | A01025 | 445 |
| A00537 | A01027 | 481 | A00537 | A01034 | 452 |
| A00537 | A01037 | 193 | A00537 | A01046 | 345 |
| A00537 | A01050 | 263 | A00537 | A01067 | 377 |
| A00537 | A01071 | 157 | A00537 | A01075 | 283 |
| A00537 | A01082 | 466 | A00537 | A01086 | 447 |
| A00537 | A01095 | 458 | A00537 | A01099 | 380 |
| A00537 | A01100 | 369 | A00537 | A01108 | 486 |
| A00537 | A01139 | 361 | A00537 | A01149 | 226 |
| A00537 | A01150 | 649 | A00537 | A01152 | 321 |
| A00537 | A01153 | 226 | A00537 | A01154 | 221 |
| A00537 | A01155 | 340 | A00537 | A01161 | 708 |
| A00537 | A01169 | 461 | A00537 | A01192 | 390 |
| A00537 | A01210 | 491 | A00537 | A01214 | 472 |
| A00537 | A01220 | 156 | A00537 | A01221 | 198 |
| A00537 | A01234 | 489 | A00537 | A01247 | 483 |
| A00537 | A01261 | 345 | A00537 | A01263 | 491 |

|        |        |     |        |        |     |
|--------|--------|-----|--------|--------|-----|
| A00537 | A01287 | 247 | A00537 | A01291 | 517 |
| A00537 | A01320 | 185 | A00537 | A01322 | 491 |
| A00537 | A01327 | 254 | A00537 | A01329 | 254 |
| A00537 | A01335 | 241 | A00537 | A01336 | 489 |
| A00537 | A01347 | 273 | A00537 | A01352 | 433 |
| A00537 | A01365 | 472 | A00537 | A01369 | 377 |
| A00537 | A01379 | 358 | A00537 | A01392 | 475 |
| A00537 | A01399 | 446 | A00537 | A01404 | 490 |
| A00537 | A01411 | 430 | A00537 | A01413 | 491 |
| A00537 | A01415 | 484 | A00537 | A01416 | 283 |
| A00537 | A01433 | 474 | A00537 | A01435 | 491 |
| A00537 | A01436 | 424 | A00537 | A01447 | 491 |
| A00537 | A01449 | 180 | A00537 | A01515 | 401 |
| A00537 | A01539 | 283 | A00537 | A01540 | 491 |
| A00537 | A01542 | 163 | A00537 | A01573 | 489 |
| A00537 | A01578 | 252 | A00537 | A01596 | 483 |
| A00537 | A01601 | 403 | A00537 | A01707 | 481 |
| A00537 | A01711 | 168 | A00537 | A01741 | 486 |
| A00537 | A01815 | 283 | A00537 | A01827 | 489 |
| A00537 | A01850 | 385 | A00537 | A01926 | 465 |
| A00537 | A01988 | 170 | A00537 | A02040 | 299 |
| A00537 | A02086 | 274 | A00537 | A02097 | 193 |
| A00537 | A02225 | 451 | A00537 | A02227 | 196 |
| A00537 | A02524 | 398 | A00537 | A02607 | 491 |
| A00537 | A02978 | 180 | A00537 | A02994 | 488 |
| A00537 | A03223 | 227 | A00537 | A03259 | 278 |
| A00537 | A03298 | 223 | A00537 | A03401 | 204 |
| A00537 | A03490 | 63  | A00537 | A03494 | 475 |
| A00537 | A03651 | 581 | A00537 | A03676 | 486 |
| A00537 | A03740 | 480 | A00537 | A03752 | 443 |
| A00537 | A03770 | 243 | A00537 | A03798 | 382 |
| A00537 | A03959 | 488 | A00537 | A03981 | 216 |
| A00537 | A04397 | 273 | A00537 | A04642 | 255 |
| A00537 | A04668 | 490 | A00537 | A04686 | 333 |
| A00537 | A04782 | 462 | A00537 | A04838 | 455 |
| A00537 | A05146 | 167 | A00537 | A05417 | 491 |
| A00537 | A05419 | 454 | A00537 | A05501 | 299 |
| A00537 | A05557 | 265 | A00537 | A05812 | 637 |
| A00537 | A06014 | 469 | A00537 | A06046 | 221 |
| A00537 | A06158 | 243 | A00537 | A06297 | 317 |
| A00537 | A06466 | 480 | A00537 | A06478 | 180 |
| A00537 | A06545 | 449 | A00537 | A06546 | 486 |
| A00537 | A06733 | 290 | A00537 | A06754 | 238 |
| A00537 | A06783 | 396 | A00537 | A07360 | 470 |
| A00537 | A07394 | 491 | A00537 | A07686 | 273 |
| A00537 | A07695 | 371 | A00537 | A07697 | 489 |

|        |        |     |        |        |     |
|--------|--------|-----|--------|--------|-----|
| A00537 | A07706 | 390 | A00537 | A07767 | 335 |
| A00537 | A07902 | 338 | A00537 | A08011 | 481 |
| A00537 | A08131 | 390 | A00537 | A08222 | 441 |
| A00537 | A08319 | 473 | A00537 | A08519 | 489 |
| A00537 | A08543 | 422 | A00537 | A08550 | 205 |
| A00537 | A08556 | 422 | A00537 | A08567 | 311 |
| A00537 | A08745 | 188 | A00537 | A08773 | 488 |
| A00537 | A08812 | 290 | A00537 | A08831 | 198 |
| A00537 | A08967 | 163 | A00537 | A08975 | 562 |
| A00537 | A09054 | 480 | A00537 | A09581 | 486 |
| A00537 | A09595 | 238 | A00537 | A09709 | 391 |
| A00537 | A09735 | 446 | A00537 | A10373 | 468 |
| A00537 | A10527 | 486 | A00537 | A10535 | 401 |
| A00537 | A10537 | 238 | A00537 | A10598 | 279 |
| A00537 | A10853 | 372 | A00537 | A11041 | 201 |
| A00537 | A11242 | 283 | A00537 | A11307 | 255 |
| A00537 | A11313 | 671 | A00537 | A11526 | 491 |
| A00537 | A11597 | 196 | A00537 | A11688 | 172 |
| A00537 | A11728 | 271 | A00537 | A11833 | 481 |
| A00537 | A11860 | 260 | A00537 | A12027 | 201 |
| A00537 | A12140 | 486 | A00537 | A12170 | 391 |
| A00537 | A12326 | 486 | A00537 | A12480 | 238 |
| A00537 | A12507 | 444 | A00537 | A12824 | 491 |
| A00537 | A12997 | 152 | A00537 | A13116 | 294 |
| A00537 | A13340 | 379 | A00537 | A13398 | 310 |
| A00537 | A13446 | 201 | A00537 | A13524 | 163 |
| A00537 | A13809 | 474 | A00537 | A13963 | 396 |
| A00537 | A14073 | 470 | A00537 | A14077 | 172 |
| A00537 | A14084 | 603 | A00537 | A14089 | 201 |
| A00537 | A14167 | 271 | A00537 | A14178 | 409 |
| A00537 | A14216 | 352 | A00537 | A14230 | 246 |
| A00537 | A14272 | 361 | A00537 | A14478 | 177 |
| A00537 | A14479 | 324 | A00537 | A14482 | 470 |
| A00537 | A14502 | 419 | A00537 | A14507 | 374 |
| A00537 | A14547 | 283 | A00537 | A14566 | 481 |
| A00537 | A14568 | 198 | A00537 | A14642 | 201 |
| A00537 | A14655 | 488 | A00537 | A14701 | 435 |
| A00537 | A14845 | 449 | A00537 | A15161 | 238 |
| A00537 | A15500 | 172 | A00537 | A15524 | 224 |
| A00537 | A15531 | 260 | A00537 | A15617 | 165 |
| A00537 | A15624 | 450 | A00537 | A15653 | 491 |
| A00537 | A15661 | 367 | A00537 | A15666 | 491 |
| A00537 | A15765 | 491 | A00537 | A15771 | 283 |
| A00537 | A15932 | 441 | A00537 | A15988 | 165 |
| A00537 | A15992 | 401 | A00537 | A16060 | 243 |
| A00537 | A16157 | 491 | A00537 | A16162 | 394 |



|        |        |     |        |        |     |
|--------|--------|-----|--------|--------|-----|
| A00537 | A16318 | 193 | A00537 | A16403 | 339 |
| A00537 | A16430 | 230 | A00537 | A16437 | 249 |
| A00537 | A16662 | 152 | A00537 | A16676 | 185 |
| A00537 | A16683 | 283 | A00537 | A16813 | 180 |
| A00538 | A00604 | 454 | A00538 | A00649 | 274 |
| A00538 | A00697 | 491 | A00538 | A00741 | 484 |
| A00538 | A00758 | 460 | A00538 | A00809 | 411 |
| A00538 | A00935 | 491 | A00538 | A00985 | 374 |
| A00538 | A01095 | 235 | A00538 | A01153 | 165 |
| A00538 | A01161 | 491 | A00538 | A01210 | 491 |
| A00538 | A01336 | 162 | A00538 | A01435 | 451 |
| A00538 | A01436 | 245 | A00538 | A01447 | 473 |
| A00538 | A01741 | 475 | A00538 | A02225 | 445 |
| A00538 | A02333 | 357 | A00538 | A02607 | 491 |
| A00538 | A02996 | 312 | A00538 | A03401 | 198 |
| A00538 | A05417 | 454 | A00538 | A05445 | 198 |
| A00538 | A05812 | 374 | A00538 | A06014 | 404 |
| A00538 | A06158 | 353 | A00538 | A06424 | 351 |
| A00538 | A06545 | 274 | A00538 | A06546 | 486 |
| A00538 | A07196 | 291 | A00538 | A07394 | 489 |
| A00538 | A07605 | 154 | A00538 | A08319 | 249 |
| A00538 | A08519 | 165 | A00538 | A08938 | 306 |
| A00538 | A09581 | 474 | A00538 | A09709 | 232 |
| A00538 | A10598 | 193 | A00538 | A11101 | 202 |
| A00538 | A11307 | 180 | A00538 | A11313 | 362 |
| A00538 | A11526 | 485 | A00538 | A11712 | 338 |
| A00538 | A12140 | 391 | A00538 | A12326 | 440 |
| A00538 | A12454 | 371 | A00538 | A12480 | 371 |
| A00538 | A13809 | 286 | A00538 | A15052 | 245 |
| A00538 | A15653 | 380 | A00538 | A15666 | 187 |
| A00538 | A15765 | 308 | A00538 | A16157 | 165 |
| A00538 | A16430 | 218 | A00539 | A00550 | 246 |
| A00539 | A00599 | 255 | A00539 | A00667 | 210 |
| A00539 | A00687 | 489 | A00539 | A00712 | 334 |
| A00539 | A00829 | 246 | A00539 | A00839 | 486 |
| A00539 | A00859 | 223 | A00539 | A00876 | 479 |
| A00539 | A00911 | 249 | A00539 | A00922 | 335 |
| A00539 | A00930 | 224 | A00539 | A00943 | 205 |
| A00539 | A00947 | 196 | A00539 | A00994 | 334 |
| A00539 | A01110 | 334 | A00539 | A01119 | 121 |
| A00539 | A01154 | 245 | A00539 | A01189 | 180 |
| A00539 | A01215 | 224 | A00539 | A01385 | 271 |
| A00539 | A01411 | 283 | A00539 | A01420 | 238 |
| A00539 | A01720 | 307 | A00539 | A01822 | 441 |
| A00539 | A01824 | 491 | A00539 | A01831 | 334 |
| A00539 | A02304 | 152 | A00539 | A02353 | 210 |

|        |        |     |        |        |     |
|--------|--------|-----|--------|--------|-----|
| A00539 | A02602 | 334 | A00539 | A03453 | 183 |
| A00539 | A03490 | 480 | A00539 | A03601 | 307 |
| A00539 | A03752 | 179 | A00539 | A03881 | 435 |
| A00539 | A04495 | 232 | A00539 | A04622 | 152 |
| A00539 | A04666 | 171 | A00539 | A05017 | 334 |
| A00539 | A05417 | 227 | A00539 | A06000 | 188 |
| A00539 | A06273 | 152 | A00539 | A06365 | 307 |
| A00539 | A06425 | 520 | A00539 | A06466 | 470 |
| A00539 | A06827 | 506 | A00539 | A06975 | 328 |
| A00539 | A07206 | 217 | A00539 | A07311 | 400 |
| A00539 | A07531 | 498 | A00539 | A07581 | 224 |
| A00539 | A08201 | 334 | A00539 | A08301 | 485 |
| A00539 | A08408 | 353 | A00539 | A08419 | 302 |
| A00539 | A09297 | 218 | A00539 | A09587 | 391 |
| A00539 | A11344 | 201 | A00539 | A11688 | 213 |
| A00539 | A12328 | 234 | A00539 | A12329 | 238 |
| A00539 | A13340 | 454 | A00539 | A13375 | 468 |
| A00539 | A14132 | 294 | A00539 | A14594 | 154 |
| A00539 | A15624 | 485 | A00539 | A15651 | 334 |
| A00539 | A15750 | 334 | A00539 | A15917 | 399 |
| A00539 | A15932 | 638 | A00539 | A15933 | 375 |
| A00539 | A15937 | 334 | A00539 | A15951 | 313 |
| A00540 | A00557 | 223 | A00540 | A00563 | 276 |
| A00540 | A00570 | 472 | A00540 | A00594 | 313 |
| A00540 | A00687 | 468 | A00540 | A00689 | 294 |
| A00540 | A00703 | 263 | A00540 | A00709 | 486 |
| A00540 | A00735 | 307 | A00540 | A00829 | 160 |
| A00540 | A00854 | 329 | A00540 | A00865 | 165 |
| A00540 | A00913 | 241 | A00540 | A00972 | 213 |
| A00540 | A01053 | 277 | A00540 | A01102 | 310 |
| A00540 | A01154 | 159 | A00540 | A01159 | 435 |
| A00540 | A01278 | 201 | A00540 | A01323 | 227 |
| A00540 | A01352 | 157 | A00540 | A01418 | 436 |
| A00540 | A01598 | 204 | A00540 | A01704 | 334 |
| A00540 | A01826 | 340 | A00540 | A01976 | 283 |
| A00540 | A02164 | 474 | A00540 | A02203 | 418 |
| A00540 | A02252 | 276 | A00540 | A02268 | 215 |
| A00540 | A02454 | 213 | A00540 | A02812 | 168 |
| A00540 | A02847 | 154 | A00540 | A03438 | 238 |
| A00540 | A03901 | 226 | A00540 | A03907 | 416 |
| A00540 | A04308 | 338 | A00540 | A05646 | 321 |
| A00540 | A06017 | 338 | A00540 | A06122 | 405 |
| A00540 | A06369 | 379 | A00540 | A06825 | 383 |
| A00540 | A06832 | 450 | A00540 | A07309 | 180 |
| A00540 | A07312 | 259 | A00540 | A07677 | 223 |
| A00540 | A14594 | 193 | A00540 | A15649 | 156 |

|        |        |     |        |        |     |
|--------|--------|-----|--------|--------|-----|
| A00540 | A15651 | 224 | A00540 | A15918 | 204 |
| A00540 | A15932 | 414 | A00541 | A00565 | 223 |
| A00541 | A00573 | 380 | A00541 | A00574 | 491 |
| A00541 | A00614 | 242 | A00541 | A00628 | 463 |
| A00541 | A00633 | 228 | A00541 | A00654 | 491 |
| A00541 | A00662 | 340 | A00541 | A00666 | 489 |
| A00541 | A00670 | 223 | A00541 | A00681 | 490 |
| A00541 | A00695 | 452 | A00541 | A00696 | 461 |
| A00541 | A00738 | 454 | A00541 | A00739 | 486 |
| A00541 | A00770 | 418 | A00541 | A00771 | 430 |
| A00541 | A00773 | 384 | A00541 | A00825 | 460 |
| A00541 | A00962 | 491 | A00541 | A00968 | 223 |
| A00541 | A00980 | 355 | A00541 | A00995 | 477 |
| A00541 | A01005 | 210 | A00541 | A01008 | 491 |
| A00541 | A01018 | 481 | A00541 | A01074 | 223 |
| A00541 | A01109 | 378 | A00541 | A01174 | 490 |
| A00541 | A01175 | 171 | A00541 | A01189 | 223 |
| A00541 | A01222 | 177 | A00541 | A01223 | 427 |
| A00541 | A01227 | 332 | A00541 | A01230 | 238 |
| A00541 | A01233 | 491 | A00541 | A01256 | 334 |
| A00541 | A01297 | 479 | A00541 | A01360 | 411 |
| A00541 | A01397 | 238 | A00541 | A01409 | 462 |
| A00541 | A01481 | 283 | A00541 | A01508 | 319 |
| A00541 | A01511 | 177 | A00541 | A01635 | 491 |
| A00541 | A01730 | 252 | A00541 | A01741 | 452 |
| A00541 | A01743 | 413 | A00541 | A01972 | 217 |
| A00541 | A02026 | 157 | A00541 | A02053 | 195 |
| A00541 | A02071 | 341 | A00541 | A02082 | 196 |
| A00541 | A02114 | 185 | A00541 | A02148 | 475 |
| A00541 | A02254 | 221 | A00541 | A02330 | 160 |
| A00541 | A02335 | 523 | A00541 | A02432 | 221 |
| A00541 | A02439 | 171 | A00541 | A02476 | 283 |
| A00541 | A02789 | 223 | A00541 | A02927 | 441 |
| A00541 | A02992 | 182 | A00541 | A03004 | 484 |
| A00541 | A03050 | 162 | A00541 | A03095 | 238 |
| A00541 | A03115 | 168 | A00541 | A03167 | 461 |
| A00541 | A03168 | 346 | A00541 | A03186 | 190 |
| A00541 | A03188 | 154 | A00541 | A03259 | 276 |
| A00541 | A03477 | 474 | A00541 | A03484 | 357 |
| A00541 | A03487 | 458 | A00541 | A03513 | 483 |
| A00541 | A03591 | 201 | A00541 | A03609 | 157 |
| A00541 | A03719 | 223 | A00541 | A03728 | 223 |
| A00541 | A03752 | 223 | A00541 | A03804 | 228 |
| A00541 | A03858 | 173 | A00541 | A03968 | 165 |
| A00541 | A04087 | 322 | A00541 | A04307 | 491 |
| A00541 | A04556 | 185 | A00541 | A04570 | 210 |

|        |        |     |        |        |     |
|--------|--------|-----|--------|--------|-----|
| A00541 | A04674 | 270 | A00541 | A04779 | 157 |
| A00541 | A04791 | 446 | A00541 | A04834 | 301 |
| A00541 | A04880 | 157 | A00541 | A04937 | 196 |
| A00541 | A04995 | 472 | A00541 | A05006 | 407 |
| A00541 | A05007 | 463 | A00541 | A05045 | 347 |
| A00541 | A05050 | 217 | A00541 | A05088 | 235 |
| A00541 | A05103 | 235 | A00541 | A05138 | 475 |
| A00541 | A05277 | 491 | A00541 | A05310 | 395 |
| A00541 | A05358 | 302 | A00541 | A05416 | 401 |
| A00541 | A05418 | 258 | A00541 | A05424 | 263 |
| A00541 | A05451 | 228 | A00541 | A05463 | 429 |
| A00541 | A05471 | 474 | A00541 | A05472 | 491 |
| A00541 | A05517 | 174 | A00541 | A05548 | 324 |
| A00541 | A05550 | 249 | A00541 | A05555 | 279 |
| A00541 | A05573 | 473 | A00541 | A05660 | 256 |
| A00541 | A05713 | 343 | A00541 | A05753 | 288 |
| A00541 | A05754 | 391 | A00541 | A05759 | 372 |
| A00541 | A05767 | 469 | A00541 | A05768 | 490 |
| A00541 | A05771 | 375 | A00541 | A05774 | 337 |
| A00541 | A05789 | 217 | A00541 | A05792 | 318 |
| A00541 | A06018 | 318 | A00541 | A06091 | 445 |
| A00541 | A06282 | 249 | A00541 | A06358 | 218 |
| A00541 | A06359 | 417 | A00541 | A06360 | 240 |
| A00541 | A06397 | 249 | A00541 | A06405 | 375 |
| A00541 | A06420 | 288 | A00541 | A06439 | 457 |
| A00541 | A06523 | 484 | A00541 | A06629 | 380 |
| A00541 | A06632 | 469 | A00541 | A06633 | 160 |
| A00541 | A06635 | 353 | A00541 | A06640 | 281 |
| A00541 | A06641 | 290 | A00541 | A06689 | 577 |
| A00541 | A06692 | 352 | A00541 | A06700 | 486 |
| A00541 | A06716 | 343 | A00541 | A06819 | 223 |
| A00541 | A06847 | 182 | A00541 | A06860 | 394 |
| A00541 | A06912 | 491 | A00541 | A06916 | 491 |
| A00541 | A06970 | 443 | A00541 | A06979 | 286 |
| A00541 | A06981 | 185 | A00541 | A07027 | 152 |
| A00541 | A07059 | 308 | A00541 | A07061 | 491 |
| A00541 | A07077 | 343 | A00541 | A07080 | 226 |
| A00541 | A07088 | 324 | A00541 | A07109 | 491 |
| A00541 | A07122 | 481 | A00541 | A07222 | 223 |
| A00541 | A07238 | 491 | A00541 | A07239 | 435 |
| A00541 | A07256 | 221 | A00541 | A07267 | 443 |
| A00541 | A07287 | 318 | A00541 | A07304 | 157 |
| A00541 | A07322 | 191 | A00541 | A07333 | 223 |
| A00541 | A07376 | 191 | A00541 | A07381 | 418 |
| A00541 | A07424 | 466 | A00541 | A07477 | 450 |
| A00541 | A07520 | 446 | A00541 | A07530 | 182 |

|        |        |     |        |        |     |
|--------|--------|-----|--------|--------|-----|
| A00541 | A07553 | 356 | A00541 | A07558 | 375 |
| A00541 | A07590 | 470 | A00541 | A07710 | 213 |
| A00541 | A07718 | 208 | A00541 | A07736 | 452 |
| A00541 | A07800 | 249 | A00541 | A07848 | 489 |
| A00541 | A07894 | 162 | A00541 | A07933 | 443 |
| A00541 | A08023 | 475 | A00541 | A08083 | 195 |
| A00541 | A08127 | 481 | A00541 | A08155 | 208 |
| A00541 | A08379 | 417 | A00541 | A08474 | 343 |
| A00541 | A08667 | 177 | A00541 | A08751 | 221 |
| A00541 | A08905 | 154 | A00541 | A09211 | 160 |
| A00541 | A09879 | 205 | A00541 | A10020 | 301 |
| A00541 | A10326 | 343 | A00541 | A10420 | 451 |
| A00541 | A10443 | 329 | A00541 | A10444 | 279 |
| A00541 | A10456 | 473 | A00541 | A10475 | 205 |
| A00541 | A10550 | 208 | A00541 | A10656 | 355 |
| A00541 | A10658 | 195 | A00541 | A10659 | 235 |
| A00541 | A10677 | 332 | A00541 | A10681 | 182 |
| A00541 | A10694 | 461 | A00541 | A10703 | 288 |
| A00541 | A10715 | 180 | A00541 | A10883 | 318 |
| A00541 | A10904 | 279 | A00541 | A11309 | 277 |
| A00541 | A13471 | 343 | A00541 | A13731 | 318 |
| A00541 | A13822 | 223 | A00541 | A14525 | 223 |
| A00541 | A14652 | 151 | A00541 | A14803 | 396 |
| A00541 | A14804 | 223 | A00541 | A14827 | 152 |
| A00541 | A14828 | 263 | A00541 | A15372 | 223 |
| A00541 | A15497 | 174 | A00541 | A15874 | 491 |
| A00541 | A15905 | 446 | A00541 | A15970 | 310 |
| A00541 | A16026 | 276 | A00541 | A16027 | 480 |
| A00541 | A16219 | 223 | A00541 | A16355 | 419 |
| A00541 | A16419 | 322 | A00541 | A16529 | 307 |
| A00541 | A16531 | 223 | A00541 | A16739 | 488 |
| A00541 | A16741 | 491 | A00541 | A16744 | 490 |
| A00541 | A16959 | 398 | A00541 | A17078 | 167 |
| A00542 | A00545 | 450 | A00542 | A00625 | 485 |
| A00542 | A00786 | 491 | A00542 | A01191 | 218 |
| A00542 | A01282 | 343 | A00542 | A01345 | 477 |
| A00542 | A01366 | 441 | A00542 | A01454 | 491 |
| A00542 | A01478 | 281 | A00542 | A01484 | 160 |
| A00542 | A01568 | 488 | A00542 | A01645 | 165 |
| A00542 | A01681 | 281 | A00542 | A01687 | 485 |
| A00542 | A03321 | 172 | A00542 | A04845 | 193 |
| A00542 | A04903 | 184 | A00542 | A05075 | 326 |
| A00542 | A05944 | 380 | A00542 | A06100 | 217 |
| A00542 | A06162 | 168 | A00542 | A06661 | 391 |
| A00542 | A07054 | 475 | A00542 | A07242 | 491 |
| A00542 | A07495 | 438 | A00542 | A07709 | 488 |

|        |        |     |        |        |     |
|--------|--------|-----|--------|--------|-----|
| A00542 | A07816 | 400 | A00542 | A07934 | 269 |
| A00542 | A08094 | 241 | A00542 | A08418 | 151 |
| A00542 | A08986 | 254 | A00542 | A09342 | 245 |
| A00542 | A09666 | 425 | A00542 | A09774 | 283 |
| A00542 | A11150 | 259 | A00542 | A11473 | 241 |
| A00542 | A11513 | 163 | A00542 | A11684 | 263 |
| A00542 | A11986 | 210 | A00542 | A12047 | 232 |
| A00542 | A12324 | 350 | A00542 | A12722 | 491 |
| A00542 | A14281 | 219 | A00542 | A14484 | 176 |
| A00542 | A14783 | 157 | A00542 | A16261 | 322 |
| A00543 | A01042 | 168 | A00543 | A01192 | 232 |
| A00543 | A13255 | 400 | A00543 | A13992 | 265 |
| A00543 | A14073 | 174 | A00544 | A00564 | 391 |
| A00544 | A00569 | 429 | A00544 | A00576 | 576 |
| A00544 | A00581 | 171 | A00544 | A00604 | 306 |
| A00544 | A00640 | 152 | A00544 | A00649 | 207 |
| A00544 | A00653 | 577 | A00544 | A00726 | 299 |
| A00544 | A00758 | 232 | A00544 | A00810 | 152 |
| A00544 | A00833 | 299 | A00544 | A00915 | 311 |
| A00544 | A00953 | 306 | A00544 | A00974 | 299 |
| A00544 | A00984 | 299 | A00544 | A00985 | 234 |
| A00544 | A00987 | 619 | A00544 | A00994 | 374 |
| A00544 | A01001 | 595 | A00544 | A01038 | 208 |
| A00544 | A01102 | 567 | A00544 | A01108 | 358 |
| A00544 | A01156 | 156 | A00544 | A01311 | 152 |
| A00544 | A01379 | 453 | A00544 | A01387 | 299 |
| A00544 | A01439 | 299 | A00544 | A01446 | 404 |
| A00544 | A01448 | 391 | A00544 | A01577 | 152 |
| A00544 | A01627 | 468 | A00544 | A01644 | 414 |
| A00544 | A02601 | 299 | A00544 | A03676 | 411 |
| A00544 | A03677 | 187 | A00544 | A03697 | 152 |
| A00544 | A03981 | 271 | A00544 | A04495 | 299 |
| A00544 | A04497 | 266 | A00544 | A04931 | 205 |
| A00544 | A05323 | 473 | A00544 | A05570 | 351 |
| A00544 | A06046 | 238 | A00544 | A06173 | 367 |
| A00544 | A06287 | 152 | A00544 | A07360 | 241 |
| A00544 | A07531 | 373 | A00544 | A07744 | 152 |
| A00544 | A07773 | 156 | A00544 | A08061 | 152 |
| A00544 | A08098 | 152 | A00544 | A08178 | 152 |
| A00544 | A08763 | 152 | A00544 | A08947 | 299 |
| A00544 | A09004 | 299 | A00544 | A10199 | 286 |
| A00544 | A10842 | 152 | A00544 | A14216 | 249 |
| A00544 | A14525 | 152 | A00544 | A14527 | 154 |
| A00544 | A15375 | 152 | A00544 | A15379 | 168 |
| A00544 | A15546 | 152 | A00544 | A15624 | 399 |
| A00544 | A15651 | 461 | A00544 | A15661 | 441 |

|        |        |     |        |        |     |
|--------|--------|-----|--------|--------|-----|
| A00544 | A15684 | 229 | A00544 | A15932 | 151 |
| A00544 | A15992 | 167 | A00545 | A00691 | 160 |
| A00545 | A00786 | 491 | A00545 | A01282 | 243 |
| A00545 | A01345 | 491 | A00545 | A01454 | 486 |
| A00545 | A01479 | 224 | A00545 | A02846 | 162 |
| A00545 | A02895 | 184 | A00545 | A05568 | 160 |
| A00545 | A05894 | 490 | A00545 | A06100 | 216 |
| A00545 | A07242 | 299 | A00545 | A07709 | 417 |
| A00545 | A08986 | 374 | A00545 | A09662 | 374 |
| A00545 | A09666 | 157 | A00545 | A11283 | 221 |
| A00545 | A11986 | 340 | A00545 | A12099 | 319 |
| A00545 | A12225 | 319 | A00545 | A12226 | 340 |
| A00545 | A12722 | 416 | A00545 | A14661 | 308 |
| A00545 | A15533 | 184 | A00546 | A00562 | 491 |
| A00546 | A00625 | 491 | A00546 | A00643 | 477 |
| A00546 | A00652 | 486 | A00546 | A00668 | 213 |
| A00546 | A00732 | 420 | A00546 | A00733 | 321 |
| A00546 | A00786 | 491 | A00546 | A00864 | 490 |
| A00546 | A00877 | 491 | A00546 | A00951 | 491 |
| A00546 | A00971 | 491 | A00546 | A00981 | 290 |
| A00546 | A01003 | 257 | A00546 | A01011 | 408 |
| A00546 | A01036 | 489 | A00546 | A01216 | 491 |
| A00546 | A01286 | 382 | A00546 | A01290 | 491 |
| A00546 | A01345 | 200 | A00546 | A01348 | 491 |
| A00546 | A01366 | 491 | A00546 | A01451 | 477 |
| A00546 | A01454 | 491 | A00546 | A01459 | 396 |
| A00546 | A01478 | 319 | A00546 | A01479 | 438 |
| A00546 | A01514 | 491 | A00546 | A01568 | 491 |
| A00546 | A01580 | 281 | A00546 | A01687 | 491 |
| A00546 | A01698 | 160 | A00546 | A01723 | 462 |
| A00546 | A01790 | 462 | A00546 | A01912 | 290 |
| A00546 | A02020 | 450 | A00546 | A02698 | 196 |
| A00546 | A03018 | 74  | A00546 | A03304 | 170 |
| A00546 | A03451 | 466 | A00546 | A03478 | 267 |
| A00546 | A03512 | 340 | A00546 | A03819 | 215 |
| A00546 | A03880 | 343 | A00546 | A03922 | 217 |
| A00546 | A04034 | 190 | A00546 | A04111 | 177 |
| A00546 | A04449 | 449 | A00546 | A04533 | 246 |
| A00546 | A04715 | 491 | A00546 | A04790 | 457 |
| A00546 | A04845 | 152 | A00546 | A04905 | 393 |
| A00546 | A05301 | 344 | A00546 | A05438 | 490 |
| A00546 | A05918 | 473 | A00546 | A06021 | 277 |
| A00546 | A06277 | 491 | A00546 | A06591 | 480 |
| A00546 | A06752 | 490 | A00546 | A06778 | 490 |
| A00546 | A07004 | 488 | A00546 | A07054 | 481 |
| A00546 | A07083 | 167 | A00546 | A07231 | 152 |

|        |        |     |        |        |     |
|--------|--------|-----|--------|--------|-----|
| A00546 | A07242 | 491 | A00546 | A07444 | 183 |
| A00546 | A07483 | 466 | A00546 | A07495 | 491 |
| A00546 | A07665 | 486 | A00546 | A07696 | 491 |
| A00546 | A07709 | 491 | A00546 | A07732 | 466 |
| A00546 | A07816 | 485 | A00546 | A07893 | 347 |
| A00546 | A07897 | 344 | A00546 | A07903 | 160 |
| A00546 | A07934 | 491 | A00546 | A07944 | 160 |
| A00546 | A08409 | 474 | A00546 | A08464 | 190 |
| A00546 | A08507 | 251 | A00546 | A08531 | 443 |
| A00546 | A08536 | 238 | A00546 | A08551 | 457 |
| A00546 | A08878 | 490 | A00546 | A08917 | 170 |
| A00546 | A09311 | 491 | A00546 | A09666 | 347 |
| A00546 | A09671 | 451 | A00546 | A09859 | 208 |
| A00546 | A09995 | 491 | A00546 | A10264 | 208 |
| A00546 | A10315 | 235 | A00546 | A10358 | 165 |
| A00546 | A10540 | 177 | A00546 | A11034 | 288 |
| A00546 | A11057 | 375 | A00546 | A11155 | 256 |
| A00546 | A11160 | 252 | A00546 | A11161 | 208 |
| A00546 | A11183 | 183 | A00546 | A11187 | 446 |
| A00546 | A11201 | 447 | A00546 | A11209 | 488 |
| A00546 | A11281 | 406 | A00546 | A11292 | 489 |
| A00546 | A11346 | 483 | A00546 | A11576 | 332 |
| A00546 | A11689 | 323 | A00546 | A11725 | 223 |
| A00546 | A11727 | 288 | A00546 | A11983 | 490 |
| A00546 | A12024 | 208 | A00546 | A12047 | 491 |
| A00546 | A12333 | 288 | A00546 | A12511 | 288 |
| A00546 | A12584 | 375 | A00546 | A13479 | 235 |
| A00546 | A13513 | 424 | A00546 | A13917 | 274 |
| A00546 | A13942 | 152 | A00546 | A14266 | 491 |
| A00546 | A14270 | 179 | A00546 | A14278 | 235 |
| A00546 | A14281 | 491 | A00546 | A14358 | 190 |
| A00546 | A14474 | 305 | A00546 | A14484 | 451 |
| A00546 | A14633 | 489 | A00546 | A14661 | 491 |
| A00546 | A15004 | 290 | A00546 | A15010 | 183 |
| A00546 | A15187 | 407 | A00546 | A15282 | 489 |
| A00546 | A15367 | 398 | A00546 | A15626 | 480 |
| A00546 | A16423 | 199 | A00546 | A16611 | 176 |
| A00546 | A16626 | 243 | A00546 | A16664 | 187 |
| A00546 | A16824 | 152 | A00547 | A00571 | 451 |
| A00547 | A00603 | 104 | A00547 | A00608 | 245 |
| A00547 | A00648 | 76  | A00547 | A00653 | 388 |
| A00547 | A00698 | 196 | A00547 | A00750 | 296 |
| A00547 | A00782 | 260 | A00547 | A00839 | 395 |
| A00547 | A00878 | 420 | A00547 | A00949 | 265 |
| A00547 | A00955 | 199 | A00547 | A01121 | 386 |
| A00547 | A01153 | 436 | A00547 | A01154 | 371 |



|        |        |     |        |        |     |
|--------|--------|-----|--------|--------|-----|
| A00547 | A01186 | 382 | A00547 | A01306 | 229 |
| A00547 | A01335 | 469 | A00547 | A01337 | 271 |
| A00547 | A01365 | 347 | A00547 | A01408 | 240 |
| A00547 | A01449 | 247 | A00547 | A03490 | 255 |
| A00547 | A03493 | 259 | A00547 | A03770 | 440 |
| A00547 | A05499 | 274 | A00547 | A05501 | 439 |
| A00547 | A08358 | 218 | A00547 | A09735 | 330 |
| A00547 | A11616 | 274 | A00547 | A12011 | 323 |
| A00547 | A12821 | 263 | A00547 | A14479 | 224 |
| A00547 | A14482 | 160 | A00547 | A14568 | 351 |
| A00547 | A14813 | 330 | A00547 | A15500 | 299 |
| A00547 | A15771 | 230 | A00548 | A00688 | 241 |
| A00548 | A00751 | 483 | A00548 | A00761 | 249 |
| A00548 | A00766 | 429 | A00548 | A00769 | 170 |
| A00548 | A00781 | 172 | A00548 | A00791 | 479 |
| A00548 | A00816 | 151 | A00548 | A00841 | 190 |
| A00548 | A00868 | 488 | A00548 | A00883 | 491 |
| A00548 | A00884 | 481 | A00548 | A00909 | 272 |
| A00548 | A00922 | 168 | A00548 | A00926 | 491 |
| A00548 | A00975 | 446 | A00548 | A00983 | 386 |
| A00548 | A01004 | 241 | A00548 | A01077 | 429 |
| A00548 | A01106 | 152 | A00548 | A01122 | 386 |
| A00548 | A01169 | 486 | A00548 | A01232 | 165 |
| A00548 | A01339 | 467 | A00548 | A01340 | 240 |
| A00548 | A01370 | 481 | A00548 | A01417 | 241 |
| A00548 | A01458 | 227 | A00548 | A01613 | 441 |
| A00548 | A01661 | 241 | A00548 | A02049 | 154 |
| A00548 | A02416 | 241 | A00548 | A05258 | 159 |
| A00548 | A05276 | 226 | A00548 | A06411 | 335 |
| A00548 | A06750 | 409 | A00548 | A07101 | 297 |
| A00548 | A07226 | 272 | A00548 | A07360 | 188 |
| A00548 | A07457 | 156 | A00548 | A07642 | 165 |
| A00548 | A07708 | 484 | A00548 | A07756 | 463 |
| A00548 | A08490 | 338 | A00548 | A08861 | 241 |
| A00548 | A09242 | 245 | A00548 | A09331 | 355 |
| A00548 | A10576 | 210 | A00548 | A12255 | 191 |
| A00548 | A12824 | 490 | A00548 | A12863 | 240 |
| A00548 | A14299 | 241 | A00548 | A14699 | 296 |
| A00548 | A15297 | 485 | A00548 | A15323 | 168 |
| A00548 | A15498 | 468 | A00548 | A15662 | 224 |
| A00548 | A15937 | 460 | A00548 | A16671 | 286 |
| A00549 | A00966 | 379 | A00549 | A02350 | 215 |
| A00549 | A02737 | 267 | A00549 | A02825 | 327 |
| A00549 | A03720 | 296 | A00549 | A05838 | 313 |
| A00549 | A08867 | 360 | A00550 | A00554 | 461 |
| A00550 | A00555 | 232 | A00550 | A00605 | 385 |

|        |        |     |        |        |     |
|--------|--------|-----|--------|--------|-----|
| A00550 | A00690 | 481 | A00550 | A00742 | 246 |
| A00550 | A00831 | 392 | A00550 | A00911 | 224 |
| A00550 | A00916 | 490 | A00550 | A00930 | 232 |
| A00550 | A00934 | 473 | A00550 | A00944 | 210 |
| A00550 | A01020 | 636 | A00550 | A01040 | 370 |
| A00550 | A01079 | 243 | A00550 | A01112 | 334 |
| A00550 | A01116 | 631 | A00550 | A01177 | 228 |
| A00550 | A01184 | 491 | A00550 | A01201 | 435 |
| A00550 | A01206 | 345 | A00550 | A01234 | 491 |
| A00550 | A01304 | 633 | A00550 | A01351 | 152 |
| A00550 | A01385 | 283 | A00550 | A01470 | 412 |
| A00550 | A01492 | 465 | A00550 | A01495 | 334 |
| A00550 | A01503 | 174 | A00550 | A01539 | 486 |
| A00550 | A01598 | 281 | A00550 | A06340 | 165 |
| A00550 | A07223 | 637 | A00550 | A07347 | 491 |
| A00550 | A07533 | 276 | A00550 | A07584 | 457 |
| A00550 | A07661 | 368 | A00550 | A07700 | 635 |
| A00550 | A07706 | 190 | A00550 | A07725 | 636 |
| A00550 | A07850 | 160 | A00550 | A08491 | 433 |
| A00550 | A09664 | 174 | A00550 | A09705 | 447 |
| A00550 | A12419 | 205 | A00550 | A13989 | 469 |
| A00550 | A14936 | 180 | A00550 | A15354 | 154 |
| A00550 | A15735 | 469 | A00550 | A15739 | 399 |
| A00551 | A00554 | 490 | A00551 | A00589 | 156 |
| A00551 | A00708 | 676 | A00551 | A00760 | 170 |
| A00551 | A00856 | 362 | A00551 | A00858 | 422 |
| A00551 | A00903 | 152 | A00551 | A00916 | 632 |
| A00551 | A00934 | 694 | A00551 | A00954 | 473 |
| A00551 | A01020 | 747 | A00551 | A01075 | 402 |
| A00551 | A01184 | 483 | A00551 | A01206 | 687 |
| A00551 | A01213 | 462 | A00551 | A01226 | 172 |
| A00551 | A01234 | 491 | A00551 | A01304 | 477 |
| A00551 | A01349 | 438 | A00551 | A01429 | 514 |
| A00551 | A01434 | 283 | A00551 | A01500 | 446 |
| A00551 | A01503 | 170 | A00551 | A01598 | 341 |
| A00551 | A02049 | 375 | A00551 | A02925 | 311 |
| A00551 | A04033 | 266 | A00551 | A06273 | 180 |
| A00551 | A06881 | 221 | A00551 | A07347 | 424 |
| A00551 | A07348 | 438 | A00551 | A07524 | 652 |
| A00551 | A07584 | 199 | A00551 | A07700 | 274 |
| A00551 | A07706 | 204 | A00551 | A08022 | 240 |
| A00551 | A08024 | 146 | A00551 | A08211 | 695 |
| A00551 | A08481 | 245 | A00551 | A08491 | 165 |
| A00551 | A08553 | 286 | A00551 | A08807 | 601 |
| A00551 | A09010 | 335 | A00551 | A09619 | 491 |
| A00551 | A09664 | 174 | A00551 | A09880 | 384 |

|        |        |     |        |        |     |
|--------|--------|-----|--------|--------|-----|
| A00551 | A10456 | 475 | A00551 | A11291 | 160 |
| A00551 | A11395 | 179 | A00551 | A12138 | 438 |
| A00551 | A13989 | 603 | A00551 | A14505 | 185 |
| A00551 | A14635 | 384 | A00551 | A14655 | 489 |
| A00551 | A14826 | 364 | A00551 | A15580 | 296 |
| A00551 | A15733 | 162 | A00551 | A15764 | 160 |
| A00551 | A15946 | 152 | A00551 | A16209 | 180 |
| A00552 | A00571 | 190 | A00552 | A00573 | 347 |
| A00552 | A00588 | 486 | A00552 | A00669 | 307 |
| A00552 | A00680 | 445 | A00552 | A00696 | 491 |
| A00552 | A00718 | 329 | A00552 | A00719 | 383 |
| A00552 | A00725 | 210 | A00552 | A00757 | 480 |
| A00552 | A00825 | 383 | A00552 | A00887 | 256 |
| A00552 | A00981 | 425 | A00552 | A01052 | 491 |
| A00552 | A01064 | 335 | A00552 | A01070 | 350 |
| A00552 | A01075 | 281 | A00552 | A01093 | 483 |
| A00552 | A01099 | 411 | A00552 | A01173 | 183 |
| A00552 | A01235 | 176 | A00552 | A01406 | 343 |
| A00552 | A01426 | 383 | A00552 | A01468 | 402 |
| A00552 | A01524 | 188 | A00552 | A01527 | 213 |
| A00552 | A01558 | 484 | A00552 | A01559 | 480 |
| A00552 | A01572 | 488 | A00552 | A01660 | 443 |
| A00552 | A01707 | 262 | A00552 | A01730 | 466 |
| A00552 | A01790 | 230 | A00552 | A01995 | 664 |
| A00552 | A02117 | 384 | A00552 | A02152 | 173 |
| A00552 | A02156 | 187 | A00552 | A02482 | 480 |
| A00552 | A02715 | 199 | A00552 | A03292 | 480 |
| A00552 | A03436 | 486 | A00552 | A03611 | 273 |
| A00552 | A03749 | 271 | A00552 | A03968 | 383 |
| A00552 | A03990 | 491 | A00552 | A04012 | 165 |
| A00552 | A04157 | 170 | A00552 | A04663 | 395 |
| A00552 | A04668 | 347 | A00552 | A05150 | 256 |
| A00552 | A05288 | 183 | A00552 | A05315 | 273 |
| A00552 | A05560 | 172 | A00552 | A06010 | 274 |
| A00552 | A06197 | 177 | A00552 | A06660 | 427 |
| A00552 | A07011 | 179 | A00552 | A07311 | 430 |
| A00552 | A07339 | 491 | A00552 | A07538 | 201 |
| A00552 | A08210 | 177 | A00552 | A08212 | 262 |
| A00552 | A08221 | 296 | A00552 | A08355 | 204 |
| A00552 | A08516 | 274 | A00552 | A08571 | 414 |
| A00552 | A09078 | 485 | A00552 | A09543 | 246 |
| A00552 | A09598 | 263 | A00552 | A09791 | 383 |
| A00552 | A09837 | 201 | A00552 | A10072 | 348 |
| A00552 | A10514 | 184 | A00552 | A11291 | 489 |
| A00552 | A11324 | 172 | A00552 | A11487 | 451 |
| A00552 | A11624 | 324 | A00552 | A13250 | 900 |

|        |        |     |        |        |     |
|--------|--------|-----|--------|--------|-----|
| A00552 | A13824 | 224 | A00552 | A14006 | 488 |
| A00552 | A14009 | 180 | A00552 | A14147 | 200 |
| A00552 | A14198 | 213 | A00552 | A14220 | 491 |
| A00552 | A14399 | 270 | A00552 | A15293 | 187 |
| A00552 | A15294 | 183 | A00552 | A15504 | 477 |
| A00552 | A15505 | 167 | A00552 | A15850 | 230 |
| A00552 | A15935 | 152 | A00552 | A16410 | 227 |
| A00552 | A16994 | 159 | A00552 | A17136 | 245 |
| A00553 | A00652 | 458 | A00553 | A00674 | 160 |
| A00553 | A00714 | 481 | A00553 | A00744 | 418 |
| A00553 | A00751 | 719 | A00553 | A00761 | 160 |
| A00553 | A00766 | 160 | A00553 | A00786 | 278 |
| A00553 | A00791 | 537 | A00553 | A00809 | 463 |
| A00553 | A00838 | 205 | A00553 | A00868 | 665 |
| A00553 | A00883 | 545 | A00553 | A00884 | 160 |
| A00553 | A00926 | 533 | A00553 | A00927 | 533 |
| A00553 | A00936 | 330 | A00553 | A00941 | 347 |
| A00553 | A00942 | 247 | A00553 | A00956 | 251 |
| A00553 | A00957 | 271 | A00553 | A00975 | 160 |
| A00553 | A01039 | 184 | A00553 | A01058 | 714 |
| A00553 | A01077 | 160 | A00553 | A01080 | 545 |
| A00553 | A01097 | 746 | A00553 | A01100 | 479 |
| A00553 | A01169 | 177 | A00553 | A01252 | 215 |
| A00553 | A01261 | 477 | A00553 | A01263 | 319 |
| A00553 | A01267 | 861 | A00553 | A01302 | 272 |
| A00553 | A01325 | 489 | A00553 | A01326 | 575 |
| A00553 | A01339 | 160 | A00553 | A01348 | 335 |
| A00553 | A01358 | 479 | A00553 | A01385 | 379 |
| A00553 | A01451 | 542 | A00553 | A01571 | 191 |
| A00553 | A01578 | 313 | A00553 | A01660 | 199 |
| A00553 | A01787 | 185 | A00553 | A02131 | 156 |
| A00553 | A02212 | 160 | A00553 | A02389 | 462 |
| A00553 | A02635 | 335 | A00553 | A03014 | 424 |
| A00553 | A03129 | 168 | A00553 | A03665 | 515 |
| A00553 | A04750 | 196 | A00553 | A05439 | 199 |
| A00553 | A05591 | 191 | A00553 | A06554 | 462 |
| A00553 | A06599 | 428 | A00553 | A06739 | 152 |
| A00553 | A06907 | 352 | A00553 | A06997 | 162 |
| A00553 | A07096 | 160 | A00553 | A07209 | 200 |
| A00553 | A07226 | 160 | A00553 | A07360 | 363 |
| A00553 | A07483 | 171 | A00553 | A07848 | 178 |
| A00553 | A08262 | 184 | A00553 | A08461 | 267 |
| A00553 | A08506 | 474 | A00553 | A08517 | 443 |
| A00553 | A08536 | 458 | A00553 | A08550 | 368 |
| A00553 | A08551 | 477 | A00553 | A08569 | 460 |
| A00553 | A08834 | 160 | A00553 | A09062 | 156 |

|        |        |     |        |        |     |
|--------|--------|-----|--------|--------|-----|
| A00553 | A09239 | 202 | A00553 | A09627 | 160 |
| A00553 | A09672 | 369 | A00553 | A09723 | 160 |
| A00553 | A10159 | 247 | A00553 | A10315 | 321 |
| A00553 | A10372 | 160 | A00553 | A10383 | 215 |
| A00553 | A10532 | 216 | A00553 | A11365 | 160 |
| A00553 | A11497 | 162 | A00553 | A11598 | 435 |
| A00553 | A11648 | 219 | A00553 | A11649 | 463 |
| A00553 | A11735 | 722 | A00553 | A11737 | 721 |
| A00553 | A11914 | 722 | A00553 | A11917 | 446 |
| A00553 | A12253 | 160 | A00553 | A12255 | 414 |
| A00553 | A12325 | 174 | A00553 | A12658 | 722 |
| A00553 | A12824 | 545 | A00553 | A12834 | 177 |
| A00553 | A12858 | 157 | A00553 | A12873 | 177 |
| A00553 | A13313 | 427 | A00553 | A13587 | 246 |
| A00553 | A13915 | 184 | A00553 | A14007 | 160 |
| A00553 | A14084 | 195 | A00553 | A14196 | 562 |
| A00553 | A14202 | 268 | A00553 | A14212 | 174 |
| A00553 | A14286 | 218 | A00553 | A14570 | 462 |
| A00553 | A14650 | 402 | A00553 | A14661 | 393 |
| A00553 | A15189 | 269 | A00553 | A15237 | 419 |
| A00553 | A15257 | 544 | A00553 | A15297 | 577 |
| A00553 | A15309 | 162 | A00553 | A15431 | 213 |
| A00553 | A15558 | 477 | A00553 | A15559 | 627 |
| A00553 | A15651 | 154 | A00553 | A15666 | 427 |
| A00553 | A15680 | 294 | A00553 | A15700 | 172 |
| A00553 | A16157 | 374 | A00553 | A16611 | 190 |
| A00553 | A16720 | 177 | A00553 | A16860 | 473 |
| A00553 | A16874 | 226 | A00553 | A16901 | 355 |
| A00553 | A17044 | 205 | A00553 | A17133 | 319 |
| A00554 | A00575 | 473 | A00554 | A00595 | 295 |
| A00554 | A00605 | 286 | A00554 | A00651 | 170 |
| A00554 | A00691 | 276 | A00554 | A00708 | 226 |
| A00554 | A00713 | 170 | A00554 | A00749 | 170 |
| A00554 | A00767 | 207 | A00554 | A00772 | 182 |
| A00554 | A00858 | 160 | A00554 | A00861 | 170 |
| A00554 | A00872 | 170 | A00554 | A00916 | 546 |
| A00554 | A00918 | 170 | A00554 | A00923 | 251 |
| A00554 | A00934 | 549 | A00554 | A00970 | 159 |
| A00554 | A00992 | 170 | A00554 | A01020 | 708 |
| A00554 | A01028 | 170 | A00554 | A01075 | 398 |
| A00554 | A01088 | 243 | A00554 | A01116 | 485 |
| A00554 | A01120 | 170 | A00554 | A01129 | 170 |
| A00554 | A01160 | 170 | A00554 | A01168 | 170 |
| A00554 | A01184 | 491 | A00554 | A01201 | 357 |
| A00554 | A01206 | 210 | A00554 | A01226 | 63  |
| A00554 | A01234 | 491 | A00554 | A01304 | 477 |

|        |        |     |        |        |     |
|--------|--------|-----|--------|--------|-----|
| A00554 | A01351 | 488 | A00554 | A01356 | 170 |
| A00554 | A01425 | 170 | A00554 | A01429 | 353 |
| A00554 | A01487 | 267 | A00554 | A01492 | 189 |
| A00554 | A01538 | 170 | A00554 | A01555 | 259 |
| A00554 | A01576 | 424 | A00554 | A01598 | 170 |
| A00554 | A01614 | 253 | A00554 | A02265 | 170 |
| A00554 | A03112 | 172 | A00554 | A03438 | 170 |
| A00554 | A03652 | 170 | A00554 | A03981 | 170 |
| A00554 | A04638 | 307 | A00554 | A06356 | 170 |
| A00554 | A06974 | 193 | A00554 | A07223 | 329 |
| A00554 | A07244 | 170 | A00554 | A07347 | 439 |
| A00554 | A07524 | 170 | A00554 | A07533 | 358 |
| A00554 | A07625 | 274 | A00554 | A07700 | 486 |
| A00554 | A07706 | 234 | A00554 | A07924 | 170 |
| A00554 | A08024 | 472 | A00554 | A08211 | 488 |
| A00554 | A08491 | 651 | A00554 | A08528 | 180 |
| A00554 | A08674 | 162 | A00554 | A09307 | 475 |
| A00554 | A09619 | 687 | A00554 | A09664 | 467 |
| A00554 | A09697 | 170 | A00554 | A11831 | 213 |
| A00554 | A13052 | 170 | A00554 | A13989 | 244 |
| A00554 | A15129 | 363 | A00554 | A16994 | 157 |
| A00555 | A00570 | 573 | A00555 | A00590 | 201 |
| A00555 | A00629 | 494 | A00555 | A00687 | 572 |
| A00555 | A00717 | 491 | A00555 | A00721 | 557 |
| A00555 | A00727 | 491 | A00555 | A00772 | 695 |
| A00555 | A00809 | 265 | A00555 | A00865 | 491 |
| A00555 | A00928 | 574 | A00555 | A00952 | 695 |
| A00555 | A00972 | 512 | A00555 | A00997 | 217 |
| A00555 | A01068 | 238 | A00555 | A01101 | 201 |
| A00555 | A01107 | 572 | A00555 | A01159 | 247 |
| A00555 | A01181 | 208 | A00555 | A01189 | 462 |
| A00555 | A01221 | 495 | A00555 | A01243 | 570 |
| A00555 | A01313 | 268 | A00555 | A01314 | 236 |
| A00555 | A01352 | 695 | A00555 | A01385 | 249 |
| A00555 | A01418 | 319 | A00555 | A01440 | 205 |
| A00555 | A01442 | 427 | A00555 | A01459 | 246 |
| A00555 | A01741 | 243 | A00555 | A01809 | 218 |
| A00555 | A01977 | 173 | A00555 | A01988 | 219 |
| A00555 | A02164 | 486 | A00555 | A03460 | 255 |
| A00555 | A03556 | 217 | A00555 | A03617 | 217 |
| A00555 | A05605 | 217 | A00555 | A06122 | 462 |
| A00555 | A06204 | 414 | A00555 | A06347 | 433 |
| A00555 | A06369 | 480 | A00555 | A06832 | 561 |
| A00555 | A07083 | 171 | A00555 | A07312 | 483 |
| A00555 | A08183 | 395 | A00555 | A08272 | 202 |
| A00555 | A08450 | 157 | A00555 | A08558 | 154 |

|        |        |     |        |        |     |
|--------|--------|-----|--------|--------|-----|
| A00555 | A08627 | 394 | A00555 | A08984 | 694 |
| A00555 | A09345 | 247 | A00555 | A09485 | 170 |
| A00555 | A09673 | 217 | A00555 | A09713 | 196 |
| A00555 | A10317 | 404 | A00555 | A10373 | 201 |
| A00555 | A11277 | 458 | A00555 | A11933 | 328 |
| A00555 | A12052 | 271 | A00555 | A12140 | 223 |
| A00555 | A12252 | 151 | A00555 | A13117 | 461 |
| A00555 | A13231 | 196 | A00555 | A13356 | 180 |
| A00555 | A13788 | 162 | A00555 | A14084 | 245 |
| A00555 | A14087 | 266 | A00555 | A14088 | 492 |
| A00555 | A14167 | 184 | A00555 | A14186 | 475 |
| A00555 | A14246 | 452 | A00555 | A14358 | 255 |
| A00555 | A14462 | 302 | A00555 | A14482 | 374 |
| A00555 | A14701 | 443 | A00555 | A14819 | 254 |
| A00555 | A15270 | 215 | A00555 | A15323 | 374 |
| A00555 | A15324 | 457 | A00555 | A15370 | 473 |
| A00555 | A15373 | 182 | A00555 | A15374 | 486 |
| A00555 | A15377 | 684 | A00555 | A15543 | 217 |
| A00555 | A15677 | 159 | A00555 | A15724 | 323 |
| A00555 | A16463 | 241 | A00555 | A16611 | 213 |
| A00555 | A16664 | 235 | A00555 | A16682 | 171 |
| A00555 | A16824 | 218 | A00555 | A17133 | 290 |
| A00556 | A00557 | 458 | A00556 | A00558 | 491 |
| A00556 | A00568 | 473 | A00556 | A00640 | 63  |
| A00556 | A00647 | 176 | A00556 | A00658 | 196 |
| A00556 | A00659 | 162 | A00556 | A00736 | 481 |
| A00556 | A00747 | 152 | A00556 | A00847 | 311 |
| A00556 | A00914 | 463 | A00556 | A01064 | 441 |
| A00556 | A01137 | 157 | A00556 | A01188 | 172 |
| A00556 | A01257 | 283 | A00556 | A01404 | 223 |
| A00556 | A01450 | 378 | A00556 | A01462 | 159 |
| A00556 | A01554 | 159 | A00556 | A01563 | 360 |
| A00556 | A01602 | 435 | A00556 | A01626 | 475 |
| A00556 | A01650 | 488 | A00556 | A01668 | 485 |
| A00556 | A01676 | 313 | A00556 | A01694 | 395 |
| A00556 | A01704 | 484 | A00556 | A01741 | 477 |
| A00556 | A01743 | 326 | A00556 | A01770 | 462 |
| A00556 | A01812 | 172 | A00556 | A01844 | 273 |
| A00556 | A01926 | 159 | A00556 | A01951 | 205 |
| A00556 | A01959 | 473 | A00556 | A02018 | 288 |
| A00556 | A02083 | 201 | A00556 | A02086 | 363 |
| A00556 | A02111 | 200 | A00556 | A02117 | 174 |
| A00556 | A02152 | 210 | A00556 | A02223 | 165 |
| A00556 | A02226 | 191 | A00556 | A02304 | 176 |
| A00556 | A02306 | 159 | A00556 | A02564 | 168 |
| A00556 | A02668 | 168 | A00556 | A02698 | 162 |

|        |        |     |        |        |     |
|--------|--------|-----|--------|--------|-----|
| A00556 | A02722 | 408 | A00556 | A02811 | 201 |
| A00556 | A02834 | 314 | A00556 | A02874 | 479 |
| A00556 | A02877 | 63  | A00556 | A02895 | 146 |
| A00556 | A02896 | 490 | A00556 | A02910 | 63  |
| A00556 | A02930 | 488 | A00556 | A02939 | 277 |
| A00556 | A02944 | 371 | A00556 | A02963 | 391 |
| A00556 | A02967 | 353 | A00556 | A02972 | 177 |
| A00556 | A02976 | 217 | A00556 | A02995 | 151 |
| A00556 | A03019 | 258 | A00556 | A03043 | 191 |
| A00556 | A03076 | 341 | A00556 | A03099 | 232 |
| A00556 | A03118 | 241 | A00556 | A03150 | 162 |
| A00556 | A03212 | 279 | A00556 | A03223 | 491 |
| A00556 | A03224 | 262 | A00556 | A03275 | 281 |
| A00556 | A03288 | 408 | A00556 | A03321 | 167 |
| A00556 | A03451 | 156 | A00556 | A03523 | 319 |
| A00556 | A03568 | 243 | A00556 | A03576 | 172 |
| A00556 | A03604 | 323 | A00556 | A03839 | 235 |
| A00556 | A03893 | 363 | A00556 | A03914 | 252 |
| A00556 | A03952 | 247 | A00556 | A04010 | 395 |
| A00556 | A04061 | 303 | A00556 | A04092 | 162 |
| A00556 | A04164 | 196 | A00556 | A04721 | 172 |
| A00556 | A04779 | 168 | A00556 | A04873 | 177 |
| A00556 | A04879 | 191 | A00556 | A05112 | 491 |
| A00556 | A05176 | 241 | A00556 | A05315 | 207 |
| A00556 | A05349 | 238 | A00556 | A05369 | 241 |
| A00556 | A05380 | 168 | A00556 | A05417 | 263 |
| A00556 | A05476 | 215 | A00556 | A05508 | 475 |
| A00556 | A05709 | 251 | A00556 | A05721 | 200 |
| A00556 | A05767 | 310 | A00556 | A05878 | 208 |
| A00556 | A05879 | 201 | A00556 | A06286 | 226 |
| A00556 | A06581 | 218 | A00556 | A06610 | 160 |
| A00556 | A06623 | 154 | A00556 | A06642 | 486 |
| A00556 | A06644 | 179 | A00556 | A06949 | 201 |
| A00556 | A07123 | 489 | A00556 | A07140 | 404 |
| A00556 | A07141 | 279 | A00556 | A07170 | 301 |
| A00556 | A07190 | 151 | A00556 | A07218 | 429 |
| A00556 | A07552 | 172 | A00556 | A07723 | 246 |
| A00556 | A08065 | 294 | A00556 | A08279 | 152 |
| A00556 | A08572 | 172 | A00556 | A08673 | 227 |
| A00556 | A08805 | 183 | A00556 | A08851 | 391 |
| A00556 | A09033 | 343 | A00556 | A09087 | 241 |
| A00556 | A09540 | 488 | A00556 | A09932 | 165 |
| A00556 | A09977 | 157 | A00556 | A10022 | 196 |
| A00556 | A10081 | 168 | A00556 | A10174 | 377 |
| A00556 | A10267 | 168 | A00556 | A10296 | 215 |
| A00556 | A10353 | 162 | A00556 | A10394 | 241 |



|        |        |     |        |        |     |
|--------|--------|-----|--------|--------|-----|
| A00556 | A10601 | 63  | A00556 | A10625 | 486 |
| A00556 | A10737 | 215 | A00556 | A10866 | 270 |
| A00556 | A10942 | 196 | A00556 | A12972 | 190 |
| A00556 | A13632 | 215 | A00556 | A13829 | 485 |
| A00556 | A14430 | 368 | A00556 | A14957 | 162 |
| A00556 | A15099 | 247 | A00556 | A16751 | 172 |
| A00556 | A16829 | 332 | A00557 | A00697 | 63  |
| A00557 | A00736 | 490 | A00557 | A00847 | 180 |
| A00557 | A00939 | 144 | A00557 | A01307 | 475 |
| A00557 | A01524 | 919 | A00557 | A01527 | 370 |
| A00557 | A01848 | 254 | A00557 | A01870 | 163 |
| A00557 | A02578 | 235 | A00557 | A02668 | 177 |
| A00557 | A02753 | 184 | A00557 | A02847 | 317 |
| A00557 | A02852 | 251 | A00557 | A02883 | 132 |
| A00557 | A02889 | 251 | A00557 | A02896 | 179 |
| A00557 | A02916 | 95  | A00557 | A02920 | 240 |
| A00557 | A02922 | 270 | A00557 | A02931 | 102 |
| A00557 | A02944 | 486 | A00557 | A02951 | 190 |
| A00557 | A02953 | 318 | A00557 | A02961 | 488 |
| A00557 | A02962 | 409 | A00557 | A02971 | 265 |
| A00557 | A02972 | 491 | A00557 | A02976 | 491 |
| A00557 | A03223 | 404 | A00557 | A03279 | 226 |
| A00557 | A03288 | 272 | A00557 | A03982 | 316 |
| A00557 | A03998 | 417 | A00557 | A04050 | 440 |
| A00557 | A04051 | 491 | A00557 | A04052 | 246 |
| A00557 | A04110 | 182 | A00557 | A04117 | 202 |
| A00557 | A04278 | 290 | A00557 | A04608 | 243 |
| A00557 | A04609 | 172 | A00557 | A04611 | 446 |
| A00557 | A04612 | 413 | A00557 | A04613 | 380 |
| A00557 | A04614 | 180 | A00557 | A04616 | 486 |
| A00557 | A04618 | 236 | A00557 | A04659 | 601 |
| A00557 | A04693 | 305 | A00557 | A05169 | 271 |
| A00557 | A05242 | 439 | A00557 | A05273 | 190 |
| A00557 | A05349 | 358 | A00557 | A05539 | 205 |
| A00557 | A05747 | 369 | A00557 | A05760 | 159 |
| A00557 | A06149 | 201 | A00557 | A06312 | 256 |
| A00557 | A06333 | 256 | A00557 | A06385 | 274 |
| A00557 | A06589 | 218 | A00557 | A06627 | 176 |
| A00557 | A06631 | 312 | A00557 | A06644 | 184 |
| A00557 | A06735 | 199 | A00557 | A07135 | 201 |
| A00557 | A07149 | 167 | A00557 | A07157 | 88  |
| A00557 | A07167 | 162 | A00557 | A07168 | 296 |
| A00557 | A07955 | 347 | A00557 | A08654 | 369 |
| A00557 | A10178 | 347 | A00557 | A10573 | 347 |
| A00557 | A10601 | 77  | A00557 | A10930 | 324 |
| A00557 | A13131 | 262 | A00557 | A14199 | 260 |

|        |        |     |        |        |     |
|--------|--------|-----|--------|--------|-----|
| A00557 | A14201 | 328 | A00557 | A14208 | 458 |
| A00557 | A14443 | 989 | A00557 | A14502 | 182 |
| A00557 | A14707 | 217 | A00557 | A15613 | 190 |
| A00557 | A15639 | 446 | A00557 | A15674 | 347 |
| A00557 | A15960 | 393 | A00557 | A15974 | 184 |
| A00557 | A15996 | 291 | A00557 | A16216 | 208 |
| A00557 | A16485 | 372 | A00558 | A00647 | 445 |
| A00558 | A00820 | 475 | A00558 | A01280 | 369 |
| A00558 | A01404 | 488 | A00558 | A01450 | 360 |
| A00558 | A01602 | 417 | A00558 | A01650 | 491 |
| A00558 | A01660 | 213 | A00558 | A01668 | 369 |
| A00558 | A01704 | 205 | A00558 | A01712 | 163 |
| A00558 | A01830 | 168 | A00558 | A01903 | 414 |
| A00558 | A01921 | 190 | A00558 | A02018 | 350 |
| A00558 | A02049 | 458 | A00558 | A02138 | 204 |
| A00558 | A02149 | 157 | A00558 | A02162 | 216 |
| A00558 | A02208 | 353 | A00558 | A02268 | 226 |
| A00558 | A02698 | 308 | A00558 | A02722 | 246 |
| A00558 | A02896 | 340 | A00558 | A02930 | 246 |
| A00558 | A03047 | 201 | A00558 | A03212 | 245 |
| A00558 | A03223 | 485 | A00558 | A03247 | 160 |
| A00558 | A03742 | 419 | A00558 | A04608 | 160 |
| A00558 | A05016 | 277 | A00558 | A05112 | 434 |
| A00558 | A05467 | 160 | A00558 | A05476 | 265 |
| A00558 | A05709 | 177 | A00558 | A06608 | 475 |
| A00558 | A06727 | 162 | A00558 | A07016 | 190 |
| A00558 | A07123 | 480 | A00558 | A07170 | 221 |
| A00558 | A07218 | 291 | A00558 | A07341 | 193 |
| A00558 | A08673 | 276 | A00558 | A09033 | 171 |
| A00558 | A09380 | 171 | A00558 | A09540 | 196 |
| A00558 | A10986 | 228 | A00558 | A11576 | 168 |
| A00558 | A11931 | 228 | A00558 | A12472 | 163 |
| A00558 | A12962 | 306 | A00558 | A13054 | 154 |
| A00558 | A13597 | 212 | A00558 | A13829 | 455 |
| A00559 | A00691 | 245 | A00559 | A00905 | 408 |
| A00559 | A01054 | 152 | A00559 | A01085 | 174 |
| A00559 | A01139 | 456 | A00559 | A01206 | 157 |
| A00559 | A01231 | 193 | A00559 | A01266 | 286 |
| A00559 | A01268 | 446 | A00559 | A01359 | 258 |
| A00559 | A01558 | 216 | A00559 | A01588 | 207 |
| A00559 | A01612 | 419 | A00559 | A01707 | 184 |
| A00559 | A02165 | 190 | A00559 | A03298 | 486 |
| A00559 | A03902 | 278 | A00559 | A07604 | 168 |
| A00559 | A08137 | 259 | A00559 | A08571 | 491 |
| A00559 | A08818 | 247 | A00559 | A09665 | 343 |
| A00559 | A09686 | 339 | A00559 | A10250 | 324 |

|        |        |     |        |        |     |
|--------|--------|-----|--------|--------|-----|
| A00559 | A10624 | 241 | A00559 | A10853 | 180 |
| A00559 | A11105 | 408 | A00559 | A11139 | 396 |
| A00559 | A11338 | 191 | A00559 | A11920 | 341 |
| A00559 | A11928 | 480 | A00559 | A12251 | 286 |
| A00559 | A13310 | 468 | A00559 | A13311 | 479 |
| A00559 | A14476 | 483 | A00559 | A14728 | 271 |
| A00559 | A14899 | 347 | A00559 | A15711 | 252 |
| A00559 | A15769 | 151 | A00559 | A16491 | 316 |
| A00559 | A16912 | 343 | A00560 | A00655 | 488 |
| A00560 | A00781 | 462 | A00560 | A00812 | 193 |
| A00560 | A00822 | 491 | A00560 | A00835 | 491 |
| A00560 | A00836 | 176 | A00560 | A00837 | 413 |
| A00560 | A00883 | 435 | A00560 | A00905 | 436 |
| A00560 | A00916 | 432 | A00560 | A00923 | 241 |
| A00560 | A00940 | 488 | A00560 | A00954 | 451 |
| A00560 | A00957 | 491 | A00560 | A00958 | 358 |
| A00560 | A01052 | 217 | A00560 | A01075 | 486 |
| A00560 | A01077 | 335 | A00560 | A01082 | 271 |
| A00560 | A01087 | 213 | A00560 | A01091 | 157 |
| A00560 | A01143 | 491 | A00560 | A01194 | 245 |
| A00560 | A01206 | 473 | A00560 | A01237 | 486 |
| A00560 | A01266 | 260 | A00560 | A01268 | 201 |
| A00560 | A01280 | 491 | A00560 | A01284 | 165 |
| A00560 | A01291 | 207 | A00560 | A01378 | 402 |
| A00560 | A01406 | 200 | A00560 | A01552 | 366 |
| A00560 | A01560 | 177 | A00560 | A01598 | 489 |
| A00560 | A01612 | 446 | A00560 | A01614 | 152 |
| A00560 | A01647 | 223 | A00560 | A01660 | 470 |
| A00560 | A01995 | 154 | A00560 | A01997 | 400 |
| A00560 | A02452 | 290 | A00560 | A02592 | 165 |
| A00560 | A03057 | 447 | A00560 | A03070 | 484 |
| A00560 | A03390 | 157 | A00560 | A03435 | 474 |
| A00560 | A03446 | 154 | A00560 | A03569 | 445 |
| A00560 | A04020 | 301 | A00560 | A04050 | 152 |
| A00560 | A04449 | 296 | A00560 | A05029 | 162 |
| A00560 | A06466 | 472 | A00560 | A06907 | 491 |
| A00560 | A07311 | 486 | A00560 | A07427 | 168 |
| A00560 | A07604 | 491 | A00560 | A07616 | 162 |
| A00560 | A07785 | 485 | A00560 | A08137 | 491 |
| A00560 | A08300 | 157 | A00560 | A08571 | 490 |
| A00560 | A09591 | 177 | A00560 | A09737 | 243 |
| A00560 | A11227 | 195 | A00560 | A11291 | 491 |
| A00560 | A11323 | 223 | A00560 | A11324 | 337 |
| A00560 | A11405 | 462 | A00560 | A11422 | 369 |
| A00560 | A11920 | 267 | A00560 | A11928 | 180 |
| A00560 | A11952 | 461 | A00560 | A12020 | 180 |

|        |        |     |        |        |     |
|--------|--------|-----|--------|--------|-----|
| A00560 | A12069 | 418 | A00560 | A12138 | 199 |
| A00560 | A12329 | 467 | A00560 | A12365 | 172 |
| A00560 | A12416 | 180 | A00560 | A12458 | 232 |
| A00560 | A12543 | 489 | A00560 | A12660 | 468 |
| A00560 | A13287 | 224 | A00560 | A13310 | 187 |
| A00560 | A13340 | 355 | A00560 | A13466 | 488 |
| A00560 | A13889 | 348 | A00560 | A13928 | 491 |
| A00560 | A13989 | 229 | A00560 | A14017 | 297 |
| A00560 | A14073 | 193 | A00560 | A14147 | 263 |
| A00560 | A14148 | 160 | A00560 | A14196 | 475 |
| A00560 | A14220 | 491 | A00560 | A14221 | 491 |
| A00560 | A14257 | 491 | A00560 | A14265 | 296 |
| A00560 | A14303 | 277 | A00560 | A14451 | 212 |
| A00560 | A14476 | 268 | A00560 | A14497 | 187 |
| A00560 | A14596 | 368 | A00560 | A14738 | 324 |
| A00560 | A14875 | 217 | A00560 | A14931 | 428 |
| A00560 | A15116 | 251 | A00560 | A15291 | 461 |
| A00560 | A15309 | 402 | A00560 | A15366 | 491 |
| A00560 | A15376 | 201 | A00560 | A15431 | 198 |
| A00560 | A15492 | 491 | A00560 | A15503 | 357 |
| A00560 | A15535 | 238 | A00560 | A15660 | 399 |
| A00560 | A15684 | 356 | A00560 | A15695 | 286 |
| A00560 | A15741 | 296 | A00560 | A15749 | 252 |
| A00560 | A15752 | 486 | A00560 | A15760 | 168 |
| A00560 | A15773 | 483 | A00560 | A15804 | 170 |
| A00560 | A15851 | 249 | A00560 | A15852 | 221 |
| A00560 | A16218 | 249 | A00560 | A16301 | 241 |
| A00560 | A16328 | 310 | A00560 | A16724 | 272 |
| A00560 | A16768 | 210 | A00560 | A17013 | 151 |
| A00560 | A17063 | 188 | A00560 | A17134 | 208 |
| A00561 | A00571 | 434 | A00561 | A00590 | 168 |
| A00561 | A00605 | 358 | A00561 | A00651 | 419 |
| A00561 | A00653 | 697 | A00561 | A00687 | 227 |
| A00561 | A00694 | 462 | A00561 | A00700 | 270 |
| A00561 | A00705 | 236 | A00561 | A00718 | 489 |
| A00561 | A00724 | 157 | A00561 | A00736 | 458 |
| A00561 | A00769 | 314 | A00561 | A00783 | 313 |
| A00561 | A00790 | 477 | A00561 | A00804 | 176 |
| A00561 | A00821 | 461 | A00561 | A00839 | 489 |
| A00561 | A00841 | 486 | A00561 | A00849 | 480 |
| A00561 | A00865 | 491 | A00561 | A00887 | 263 |
| A00561 | A00909 | 408 | A00561 | A00922 | 491 |
| A00561 | A00953 | 344 | A00561 | A00983 | 483 |
| A00561 | A00987 | 377 | A00561 | A01000 | 367 |
| A00561 | A01006 | 326 | A00561 | A01013 | 319 |
| A00561 | A01027 | 489 | A00561 | A01062 | 177 |

|        |        |     |        |        |     |
|--------|--------|-----|--------|--------|-----|
| A00561 | A01090 | 266 | A00561 | A01112 | 319 |
| A00561 | A01127 | 245 | A00561 | A01136 | 200 |
| A00561 | A01140 | 283 | A00561 | A01150 | 791 |
| A00561 | A01161 | 655 | A00561 | A01172 | 440 |
| A00561 | A01206 | 283 | A00561 | A01212 | 267 |
| A00561 | A01215 | 173 | A00561 | A01221 | 475 |
| A00561 | A01232 | 307 | A00561 | A01244 | 484 |
| A00561 | A01287 | 480 | A00561 | A01291 | 486 |
| A00561 | A01335 | 238 | A00561 | A01346 | 185 |
| A00561 | A01360 | 485 | A00561 | A01399 | 369 |
| A00561 | A01403 | 475 | A00561 | A01431 | 491 |
| A00561 | A01439 | 477 | A00561 | A01446 | 274 |
| A00561 | A01468 | 307 | A00561 | A01496 | 408 |
| A00561 | A01527 | 933 | A00561 | A01548 | 302 |
| A00561 | A01567 | 234 | A00561 | A01579 | 480 |
| A00561 | A01615 | 899 | A00561 | A01626 | 435 |
| A00561 | A01647 | 485 | A00561 | A01649 | 306 |
| A00561 | A01668 | 477 | A00561 | A01699 | 311 |
| A00561 | A01705 | 80  | A00561 | A01711 | 465 |
| A00561 | A01751 | 369 | A00561 | A01775 | 177 |
| A00561 | A01782 | 390 | A00561 | A01787 | 491 |
| A00561 | A01793 | 63  | A00561 | A01796 | 491 |
| A00561 | A01798 | 462 | A00561 | A01807 | 176 |
| A00561 | A01893 | 63  | A00561 | A01894 | 491 |
| A00561 | A01895 | 281 | A00561 | A01909 | 63  |
| A00561 | A01914 | 490 | A00561 | A02278 | 423 |
| A00561 | A02350 | 372 | A00561 | A02407 | 422 |
| A00561 | A02630 | 219 | A00561 | A02637 | 247 |
| A00561 | A02687 | 491 | A00561 | A02854 | 165 |
| A00561 | A02917 | 162 | A00561 | A02985 | 399 |
| A00561 | A02988 | 491 | A00561 | A03435 | 154 |
| A00561 | A03456 | 276 | A00561 | A03611 | 156 |
| A00561 | A03643 | 156 | A00561 | A03713 | 443 |
| A00561 | A03872 | 363 | A00561 | A03875 | 310 |
| A00561 | A04053 | 323 | A00561 | A04213 | 154 |
| A00561 | A04302 | 160 | A00561 | A04304 | 432 |
| A00561 | A04371 | 204 | A00561 | A04452 | 246 |
| A00561 | A04623 | 204 | A00561 | A04878 | 259 |
| A00561 | A04879 | 428 | A00561 | A04933 | 457 |
| A00561 | A05094 | 190 | A00561 | A05258 | 355 |
| A00561 | A05285 | 173 | A00561 | A05443 | 183 |
| A00561 | A05579 | 340 | A00561 | A05752 | 310 |
| A00561 | A05797 | 224 | A00561 | A05866 | 407 |
| A00561 | A05940 | 363 | A00561 | A06025 | 279 |
| A00561 | A06095 | 156 | A00561 | A06607 | 470 |
| A00561 | A06637 | 265 | A00561 | A06664 | 366 |

|        |        |     |        |        |     |
|--------|--------|-----|--------|--------|-----|
| A00561 | A06926 | 377 | A00561 | A06970 | 185 |
| A00561 | A07160 | 489 | A00561 | A07200 | 302 |
| A00561 | A08275 | 310 | A00561 | A08359 | 408 |
| A00561 | A08389 | 322 | A00561 | A08408 | 257 |
| A00561 | A08452 | 302 | A00561 | A08547 | 156 |
| A00561 | A08627 | 462 | A00561 | A08684 | 184 |
| A00561 | A09223 | 310 | A00561 | A09262 | 180 |
| A00561 | A09366 | 310 | A00561 | A09696 | 180 |
| A00561 | A09826 | 489 | A00561 | A09901 | 204 |
| A00561 | A09964 | 204 | A00561 | A10146 | 193 |
| A00561 | A10386 | 302 | A00561 | A10616 | 167 |
| A00561 | A11372 | 190 | A00561 | A11411 | 271 |
| A00561 | A11606 | 193 | A00561 | A12259 | 218 |
| A00561 | A13333 | 170 | A00561 | A13340 | 152 |
| A00561 | A13866 | 259 | A00561 | A13989 | 377 |
| A00561 | A14016 | 485 | A00561 | A14216 | 347 |
| A00561 | A14699 | 425 | A00561 | A14839 | 210 |
| A00561 | A15232 | 310 | A00561 | A15379 | 420 |
| A00561 | A15660 | 263 | A00561 | A15684 | 457 |
| A00561 | A16281 | 416 | A00561 | A16397 | 160 |
| A00561 | A16438 | 446 | A00561 | A17132 | 154 |
| A00562 | A00565 | 208 | A00562 | A00625 | 491 |
| A00562 | A00638 | 384 | A00562 | A00703 | 269 |
| A00562 | A00709 | 234 | A00562 | A00719 | 294 |
| A00562 | A00733 | 457 | A00562 | A00786 | 490 |
| A00562 | A00862 | 433 | A00562 | A00864 | 463 |
| A00562 | A00877 | 299 | A00562 | A00881 | 243 |
| A00562 | A00951 | 446 | A00562 | A00971 | 491 |
| A00562 | A01011 | 323 | A00562 | A01036 | 490 |
| A00562 | A01064 | 279 | A00562 | A01208 | 279 |
| A00562 | A01216 | 491 | A00562 | A01244 | 266 |
| A00562 | A01290 | 428 | A00562 | A01358 | 430 |
| A00562 | A01366 | 484 | A00562 | A01454 | 490 |
| A00562 | A01459 | 491 | A00562 | A01484 | 229 |
| A00562 | A01507 | 465 | A00562 | A01514 | 491 |
| A00562 | A01568 | 491 | A00562 | A01633 | 227 |
| A00562 | A01647 | 485 | A00562 | A01657 | 215 |
| A00562 | A01681 | 294 | A00562 | A01687 | 485 |
| A00562 | A01931 | 201 | A00562 | A01988 | 490 |
| A00562 | A02154 | 241 | A00562 | A02836 | 213 |
| A00562 | A03042 | 171 | A00562 | A03044 | 263 |
| A00562 | A03111 | 252 | A00562 | A03116 | 272 |
| A00562 | A03117 | 238 | A00562 | A03321 | 401 |
| A00562 | A03518 | 271 | A00562 | A03529 | 208 |
| A00562 | A03769 | 278 | A00562 | A04081 | 394 |
| A00562 | A04715 | 221 | A00562 | A04790 | 156 |

|        |        |     |        |        |     |
|--------|--------|-----|--------|--------|-----|
| A00562 | A04877 | 184 | A00562 | A05015 | 260 |
| A00562 | A05094 | 279 | A00562 | A06176 | 491 |
| A00562 | A06237 | 226 | A00562 | A06277 | 475 |
| A00562 | A06379 | 216 | A00562 | A06502 | 297 |
| A00562 | A06564 | 286 | A00562 | A06591 | 173 |
| A00562 | A06680 | 491 | A00562 | A06752 | 420 |
| A00562 | A06819 | 443 | A00562 | A06966 | 333 |
| A00562 | A07054 | 396 | A00562 | A07083 | 486 |
| A00562 | A07111 | 228 | A00562 | A07242 | 491 |
| A00562 | A07404 | 491 | A00562 | A07483 | 188 |
| A00562 | A07495 | 491 | A00562 | A07665 | 407 |
| A00562 | A07893 | 458 | A00562 | A07944 | 179 |
| A00562 | A07954 | 191 | A00562 | A08492 | 302 |
| A00562 | A08675 | 302 | A00562 | A08834 | 278 |
| A00562 | A08917 | 486 | A00562 | A09256 | 485 |
| A00562 | A09311 | 229 | A00562 | A09760 | 154 |
| A00562 | A10174 | 899 | A00562 | A10250 | 467 |
| A00562 | A10909 | 238 | A00562 | A11023 | 446 |
| A00562 | A11281 | 272 | A00562 | A11346 | 260 |
| A00562 | A12047 | 491 | A00562 | A12313 | 327 |
| A00562 | A12561 | 272 | A00562 | A13744 | 302 |
| A00562 | A13784 | 384 | A00562 | A13938 | 195 |
| A00562 | A14209 | 246 | A00562 | A14266 | 404 |
| A00562 | A14281 | 491 | A00562 | A14406 | 361 |
| A00562 | A14407 | 238 | A00562 | A14474 | 491 |
| A00562 | A14484 | 468 | A00562 | A14633 | 385 |
| A00562 | A15281 | 160 | A00562 | A15380 | 480 |
| A00562 | A15396 | 281 | A00562 | A16004 | 303 |
| A00562 | A16048 | 486 | A00562 | A16423 | 346 |
| A00562 | A16649 | 385 | A00563 | A00570 | 481 |
| A00563 | A00629 | 172 | A00563 | A00648 | 228 |
| A00563 | A00687 | 473 | A00563 | A00689 | 363 |
| A00563 | A00709 | 335 | A00563 | A00854 | 279 |
| A00563 | A00865 | 484 | A00563 | A00878 | 236 |
| A00563 | A00972 | 463 | A00563 | A01016 | 255 |
| A00563 | A01068 | 235 | A00563 | A01102 | 235 |
| A00563 | A01154 | 213 | A00563 | A01161 | 452 |
| A00563 | A01168 | 152 | A00563 | A01189 | 424 |
| A00563 | A01220 | 229 | A00563 | A01221 | 472 |
| A00563 | A01243 | 424 | A00563 | A01352 | 210 |
| A00563 | A01393 | 205 | A00563 | A01412 | 317 |
| A00563 | A01416 | 151 | A00563 | A01418 | 344 |
| A00563 | A01582 | 152 | A00563 | A01702 | 307 |
| A00563 | A01976 | 488 | A00563 | A01977 | 391 |
| A00563 | A02542 | 167 | A00563 | A03272 | 252 |
| A00563 | A03322 | 245 | A00563 | A03460 | 425 |

|        |        |     |        |        |     |
|--------|--------|-----|--------|--------|-----|
| A00563 | A03652 | 469 | A00563 | A03901 | 294 |
| A00563 | A06017 | 291 | A00563 | A06351 | 172 |
| A00563 | A06369 | 199 | A00563 | A06832 | 467 |
| A00563 | A07449 | 266 | A00563 | A09485 | 389 |
| A00563 | A11277 | 162 | A00563 | A11288 | 299 |
| A00563 | A13874 | 154 | A00563 | A13992 | 249 |
| A00563 | A14335 | 249 | A00563 | A14566 | 91  |
| A00563 | A14594 | 259 | A00563 | A16401 | 294 |
| A00563 | A17150 | 329 | A00564 | A00569 | 382 |
| A00564 | A00576 | 350 | A00564 | A00577 | 236 |
| A00564 | A00640 | 152 | A00564 | A00653 | 421 |
| A00564 | A00726 | 299 | A00564 | A00810 | 152 |
| A00564 | A00833 | 299 | A00564 | A00849 | 283 |
| A00564 | A00915 | 196 | A00564 | A00974 | 299 |
| A00564 | A00975 | 221 | A00564 | A00984 | 524 |
| A00564 | A00987 | 381 | A00564 | A01001 | 402 |
| A00564 | A01102 | 500 | A00564 | A01169 | 221 |
| A00564 | A01311 | 152 | A00564 | A01379 | 299 |
| A00564 | A01387 | 559 | A00564 | A01439 | 299 |
| A00564 | A01577 | 152 | A00564 | A01627 | 383 |
| A00564 | A01722 | 388 | A00564 | A02601 | 299 |
| A00564 | A02616 | 474 | A00564 | A03697 | 152 |
| A00564 | A04495 | 299 | A00564 | A06272 | 221 |
| A00564 | A06287 | 152 | A00564 | A06742 | 461 |
| A00564 | A07744 | 152 | A00564 | A08061 | 152 |
| A00564 | A08098 | 152 | A00564 | A08178 | 152 |
| A00564 | A08763 | 152 | A00564 | A08947 | 299 |
| A00564 | A09004 | 299 | A00564 | A09548 | 318 |
| A00564 | A09602 | 391 | A00564 | A10321 | 215 |
| A00564 | A10699 | 199 | A00564 | A10842 | 152 |
| A00564 | A11242 | 430 | A00564 | A14525 | 152 |
| A00564 | A15375 | 152 | A00564 | A15546 | 152 |
| A00564 | A15917 | 252 | A00565 | A00567 | 462 |
| A00565 | A00570 | 486 | A00565 | A00571 | 490 |
| A00565 | A00597 | 358 | A00565 | A00614 | 223 |
| A00565 | A00625 | 153 | A00565 | A00629 | 446 |
| A00565 | A00638 | 491 | A00565 | A00643 | 531 |
| A00565 | A00648 | 465 | A00565 | A00653 | 255 |
| A00565 | A00670 | 502 | A00565 | A00805 | 489 |
| A00565 | A00856 | 279 | A00565 | A00862 | 642 |
| A00565 | A00868 | 230 | A00565 | A00871 | 185 |
| A00565 | A00878 | 302 | A00565 | A00883 | 479 |
| A00565 | A00888 | 677 | A00565 | A00928 | 255 |
| A00565 | A00941 | 213 | A00565 | A00968 | 223 |
| A00565 | A00977 | 430 | A00565 | A00985 | 452 |
| A00565 | A01013 | 254 | A00565 | A01017 | 378 |



|        |        |     |        |        |     |
|--------|--------|-----|--------|--------|-----|
| A00565 | A01021 | 485 | A00565 | A01052 | 375 |
| A00565 | A01074 | 472 | A00565 | A01100 | 506 |
| A00565 | A01122 | 238 | A00565 | A01149 | 434 |
| A00565 | A01169 | 458 | A00565 | A01172 | 265 |
| A00565 | A01189 | 302 | A00565 | A01209 | 703 |
| A00565 | A01214 | 200 | A00565 | A01221 | 454 |
| A00565 | A01244 | 491 | A00565 | A01324 | 196 |
| A00565 | A01325 | 388 | A00565 | A01365 | 311 |
| A00565 | A01373 | 369 | A00565 | A01385 | 185 |
| A00565 | A01406 | 316 | A00565 | A01409 | 279 |
| A00565 | A01452 | 200 | A00565 | A01459 | 516 |
| A00565 | A01483 | 378 | A00565 | A01507 | 491 |
| A00565 | A01514 | 382 | A00565 | A01516 | 272 |
| A00565 | A01559 | 515 | A00565 | A01622 | 464 |
| A00565 | A01647 | 491 | A00565 | A01660 | 491 |
| A00565 | A01730 | 491 | A00565 | A01796 | 475 |
| A00565 | A01976 | 186 | A00565 | A01988 | 420 |
| A00565 | A02032 | 165 | A00565 | A02051 | 355 |
| A00565 | A02158 | 221 | A00565 | A02180 | 491 |
| A00565 | A02219 | 475 | A00565 | A02335 | 223 |
| A00565 | A02452 | 303 | A00565 | A02568 | 223 |
| A00565 | A02687 | 157 | A00565 | A02789 | 223 |
| A00565 | A02876 | 229 | A00565 | A03050 | 221 |
| A00565 | A03297 | 63  | A00565 | A03321 | 317 |
| A00565 | A03327 | 475 | A00565 | A03328 | 762 |
| A00565 | A03401 | 469 | A00565 | A03651 | 254 |
| A00565 | A03652 | 465 | A00565 | A03719 | 223 |
| A00565 | A03728 | 694 | A00565 | A03752 | 223 |
| A00565 | A03764 | 361 | A00565 | A04079 | 319 |
| A00565 | A04174 | 481 | A00565 | A04178 | 265 |
| A00565 | A04187 | 490 | A00565 | A04316 | 171 |
| A00565 | A04405 | 262 | A00565 | A05359 | 154 |
| A00565 | A05378 | 165 | A00565 | A05427 | 254 |
| A00565 | A05621 | 160 | A00565 | A05690 | 491 |
| A00565 | A06016 | 165 | A00565 | A06017 | 154 |
| A00565 | A06085 | 664 | A00565 | A06122 | 172 |
| A00565 | A06264 | 485 | A00565 | A06351 | 172 |
| A00565 | A06423 | 310 | A00565 | A06493 | 255 |
| A00565 | A06671 | 484 | A00565 | A06689 | 270 |
| A00565 | A06819 | 563 | A00565 | A06924 | 438 |
| A00565 | A06982 | 443 | A00565 | A07054 | 348 |
| A00565 | A07222 | 223 | A00565 | A07249 | 352 |
| A00565 | A07261 | 187 | A00565 | A07333 | 502 |
| A00565 | A07339 | 519 | A00565 | A07349 | 286 |
| A00565 | A07572 | 490 | A00565 | A07756 | 196 |
| A00565 | A07793 | 174 | A00565 | A07869 | 204 |

|        |        |     |        |        |     |
|--------|--------|-----|--------|--------|-----|
| A00565 | A08259 | 235 | A00565 | A08463 | 384 |
| A00565 | A08524 | 506 | A00565 | A08863 | 229 |
| A00565 | A08884 | 491 | A00565 | A08939 | 438 |
| A00565 | A09067 | 434 | A00565 | A09269 | 491 |
| A00565 | A09276 | 165 | A00565 | A09316 | 491 |
| A00565 | A09340 | 491 | A00565 | A09442 | 182 |
| A00565 | A09607 | 221 | A00565 | A09659 | 182 |
| A00565 | A09761 | 491 | A00565 | A09826 | 180 |
| A00565 | A09873 | 491 | A00565 | A10076 | 201 |
| A00565 | A10258 | 430 | A00565 | A10289 | 445 |
| A00565 | A10314 | 458 | A00565 | A10421 | 188 |
| A00565 | A10508 | 281 | A00565 | A10575 | 438 |
| A00565 | A10870 | 162 | A00565 | A10978 | 224 |
| A00565 | A11107 | 165 | A00565 | A11165 | 267 |
| A00565 | A11487 | 217 | A00565 | A11828 | 326 |
| A00565 | A11858 | 491 | A00565 | A11983 | 215 |
| A00565 | A12047 | 525 | A00565 | A12249 | 165 |
| A00565 | A12824 | 227 | A00565 | A12865 | 224 |
| A00565 | A12875 | 385 | A00565 | A12912 | 196 |
| A00565 | A13050 | 334 | A00565 | A13287 | 468 |
| A00565 | A13519 | 224 | A00565 | A13771 | 187 |
| A00565 | A13822 | 229 | A00565 | A13986 | 484 |
| A00565 | A14025 | 283 | A00565 | A14074 | 901 |
| A00565 | A14230 | 477 | A00565 | A14481 | 277 |
| A00565 | A14525 | 223 | A00565 | A14540 | 163 |
| A00565 | A14665 | 191 | A00565 | A14804 | 223 |
| A00565 | A14827 | 277 | A00565 | A14976 | 255 |
| A00565 | A15292 | 344 | A00565 | A15297 | 191 |
| A00565 | A15367 | 438 | A00565 | A15372 | 293 |
| A00565 | A15557 | 173 | A00565 | A15818 | 160 |
| A00565 | A16035 | 201 | A00565 | A16219 | 223 |
| A00565 | A16223 | 165 | A00565 | A16401 | 258 |
| A00565 | A16404 | 452 | A00565 | A16410 | 491 |
| A00565 | A16440 | 491 | A00565 | A16531 | 223 |
| A00565 | A16572 | 224 | A00565 | A16690 | 378 |
| A00565 | A16769 | 196 | A00565 | A17059 | 162 |
| A00566 | A00572 | 484 | A00566 | A00575 | 715 |
| A00566 | A00605 | 452 | A00566 | A00622 | 712 |
| A00566 | A00626 | 518 | A00566 | A00655 | 485 |
| A00566 | A00665 | 377 | A00566 | A00708 | 470 |
| A00566 | A00733 | 542 | A00566 | A00744 | 236 |
| A00566 | A00760 | 246 | A00566 | A00805 | 667 |
| A00566 | A00831 | 450 | A00566 | A00856 | 491 |
| A00566 | A00858 | 917 | A00566 | A00860 | 714 |
| A00566 | A00866 | 156 | A00566 | A00868 | 180 |
| A00566 | A00881 | 542 | A00566 | A00883 | 420 |

|        |        |     |        |        |     |
|--------|--------|-----|--------|--------|-----|
| A00566 | A00903 | 465 | A00566 | A00923 | 188 |
| A00566 | A00934 | 486 | A00566 | A00954 | 597 |
| A00566 | A00978 | 523 | A00566 | A01007 | 713 |
| A00566 | A01019 | 541 | A00566 | A01020 | 489 |
| A00566 | A01024 | 271 | A00566 | A01032 | 443 |
| A00566 | A01075 | 489 | A00566 | A01087 | 419 |
| A00566 | A01116 | 439 | A00566 | A01147 | 395 |
| A00566 | A01184 | 484 | A00566 | A01195 | 534 |
| A00566 | A01200 | 714 | A00566 | A01206 | 491 |
| A00566 | A01212 | 472 | A00566 | A01214 | 252 |
| A00566 | A01215 | 408 | A00566 | A01234 | 490 |
| A00566 | A01325 | 450 | A00566 | A01349 | 434 |
| A00566 | A01383 | 296 | A00566 | A01398 | 541 |
| A00566 | A01401 | 715 | A00566 | A01412 | 408 |
| A00566 | A01429 | 226 | A00566 | A01468 | 488 |
| A00566 | A01492 | 202 | A00566 | A01500 | 617 |
| A00566 | A01503 | 787 | A00566 | A01555 | 386 |
| A00566 | A01576 | 486 | A00566 | A01598 | 152 |
| A00566 | A01720 | 299 | A00566 | A01761 | 346 |
| A00566 | A02855 | 408 | A00566 | A03191 | 347 |
| A00566 | A03306 | 271 | A00566 | A04106 | 190 |
| A00566 | A04548 | 151 | A00566 | A04648 | 539 |
| A00566 | A04687 | 156 | A00566 | A05027 | 152 |
| A00566 | A06062 | 227 | A00566 | A06543 | 428 |
| A00566 | A06793 | 246 | A00566 | A06803 | 536 |
| A00566 | A06972 | 152 | A00566 | A07348 | 460 |
| A00566 | A07520 | 346 | A00566 | A07670 | 503 |
| A00566 | A07700 | 340 | A00566 | A07706 | 401 |
| A00566 | A07850 | 436 | A00566 | A07887 | 533 |
| A00566 | A07920 | 343 | A00566 | A08022 | 491 |
| A00566 | A08383 | 445 | A00566 | A08495 | 279 |
| A00566 | A08553 | 485 | A00566 | A08818 | 156 |
| A00566 | A09010 | 480 | A00566 | A09502 | 156 |
| A00566 | A09708 | 205 | A00566 | A09712 | 480 |
| A00566 | A10684 | 188 | A00566 | A11344 | 156 |
| A00566 | A11395 | 486 | A00566 | A11674 | 156 |
| A00566 | A11804 | 419 | A00566 | A13078 | 152 |
| A00566 | A13620 | 308 | A00566 | A13831 | 160 |
| A00566 | A13980 | 308 | A00566 | A14006 | 292 |
| A00566 | A14359 | 267 | A00566 | A14655 | 455 |
| A00566 | A14899 | 314 | A00566 | A15034 | 328 |
| A00566 | A15315 | 663 | A00566 | A15347 | 556 |
| A00566 | A15373 | 435 | A00566 | A15733 | 210 |
| A00566 | A15945 | 493 | A00566 | A15946 | 329 |
| A00566 | A16067 | 260 | A00566 | A16144 | 326 |
| A00566 | A16212 | 466 | A00566 | A16228 | 497 |

|        |        |     |        |        |     |
|--------|--------|-----|--------|--------|-----|
| A00567 | A00568 | 314 | A00567 | A00597 | 449 |
| A00567 | A00611 | 475 | A00567 | A00718 | 221 |
| A00567 | A00743 | 218 | A00567 | A00888 | 326 |
| A00567 | A01198 | 255 | A00567 | A01716 | 340 |
| A00567 | A02018 | 216 | A00567 | A02306 | 210 |
| A00567 | A03498 | 366 | A00567 | A03961 | 157 |
| A00567 | A06253 | 351 | A00567 | A06629 | 296 |
| A00567 | A08377 | 219 | A00567 | A09442 | 286 |
| A00567 | A10477 | 226 | A00568 | A00597 | 187 |
| A00568 | A00611 | 404 | A00568 | A00616 | 210 |
| A00568 | A00664 | 317 | A00568 | A00820 | 182 |
| A00568 | A00846 | 152 | A00568 | A00850 | 196 |
| A00568 | A00855 | 438 | A00568 | A00914 | 441 |
| A00568 | A01074 | 317 | A00568 | A01105 | 438 |
| A00568 | A01137 | 435 | A00568 | A01343 | 213 |
| A00568 | A01404 | 469 | A00568 | A01590 | 227 |
| A00568 | A01602 | 185 | A00568 | A01622 | 438 |
| A00568 | A01679 | 317 | A00568 | A01937 | 399 |
| A00568 | A02083 | 137 | A00568 | A02111 | 180 |
| A00568 | A02156 | 260 | A00568 | A02219 | 154 |
| A00568 | A02251 | 195 | A00568 | A02260 | 260 |
| A00568 | A02262 | 279 | A00568 | A02275 | 196 |
| A00568 | A02524 | 340 | A00568 | A02698 | 382 |
| A00568 | A02772 | 281 | A00568 | A03086 | 461 |
| A00568 | A03091 | 213 | A00568 | A03099 | 238 |
| A00568 | A03173 | 363 | A00568 | A03238 | 168 |
| A00568 | A03498 | 380 | A00568 | A03584 | 204 |
| A00568 | A03710 | 438 | A00568 | A03919 | 272 |
| A00568 | A04163 | 355 | A00568 | A05143 | 286 |
| A00568 | A05208 | 272 | A00568 | A05332 | 317 |
| A00568 | A05459 | 318 | A00568 | A05609 | 317 |
| A00568 | A05679 | 291 | A00568 | A06253 | 367 |
| A00568 | A06446 | 374 | A00568 | A06471 | 321 |
| A00568 | A06607 | 226 | A00568 | A07019 | 235 |
| A00568 | A07140 | 438 | A00568 | A07222 | 317 |
| A00568 | A07333 | 438 | A00568 | A07559 | 218 |
| A00568 | A07571 | 317 | A00568 | A07655 | 380 |
| A00568 | A07803 | 162 | A00568 | A07974 | 317 |
| A00568 | A08097 | 438 | A00568 | A08660 | 355 |
| A00568 | A08688 | 263 | A00568 | A08724 | 223 |
| A00568 | A08850 | 156 | A00568 | A09135 | 255 |
| A00568 | A09236 | 390 | A00568 | A09340 | 438 |
| A00568 | A09429 | 441 | A00568 | A14128 | 162 |
| A00568 | A14438 | 279 | A00568 | A16099 | 249 |
| A00569 | A00576 | 401 | A00569 | A00577 | 293 |
| A00569 | A00653 | 188 | A00569 | A00984 | 408 |

|        |        |     |        |        |     |
|--------|--------|-----|--------|--------|-----|
| A00569 | A01001 | 460 | A00569 | A01102 | 303 |
| A00569 | A01379 | 221 | A00569 | A01387 | 267 |
| A00569 | A01627 | 238 | A00569 | A01650 | 457 |
| A00569 | A02814 | 251 | A00569 | A03676 | 156 |
| A00569 | A05323 | 422 | A00569 | A10321 | 274 |
| A00569 | A15498 | 174 | A00570 | A00571 | 279 |
| A00570 | A00572 | 163 | A00570 | A00599 | 210 |
| A00570 | A00605 | 305 | A00570 | A00606 | 296 |
| A00570 | A00629 | 688 | A00570 | A00648 | 191 |
| A00570 | A00653 | 235 | A00570 | A00658 | 267 |
| A00570 | A00687 | 575 | A00570 | A00689 | 218 |
| A00570 | A00693 | 79  | A00570 | A00703 | 223 |
| A00570 | A00709 | 480 | A00570 | A00717 | 424 |
| A00570 | A00718 | 154 | A00570 | A00721 | 568 |
| A00570 | A00727 | 488 | A00570 | A00772 | 561 |
| A00570 | A00829 | 477 | A00570 | A00839 | 226 |
| A00570 | A00848 | 434 | A00570 | A00854 | 276 |
| A00570 | A00865 | 688 | A00570 | A00868 | 474 |
| A00570 | A00871 | 156 | A00570 | A00878 | 458 |
| A00570 | A00883 | 491 | A00570 | A00915 | 170 |
| A00570 | A00916 | 391 | A00570 | A00923 | 346 |
| A00570 | A00928 | 688 | A00570 | A00952 | 688 |
| A00570 | A00972 | 450 | A00570 | A00975 | 268 |
| A00570 | A00983 | 312 | A00570 | A00997 | 283 |
| A00570 | A01025 | 183 | A00570 | A01040 | 223 |
| A00570 | A01053 | 484 | A00570 | A01065 | 451 |
| A00570 | A01075 | 363 | A00570 | A01091 | 429 |
| A00570 | A01101 | 425 | A00570 | A01102 | 343 |
| A00570 | A01107 | 556 | A00570 | A01120 | 221 |
| A00570 | A01150 | 432 | A00570 | A01159 | 688 |
| A00570 | A01166 | 443 | A00570 | A01169 | 219 |
| A00570 | A01184 | 217 | A00570 | A01201 | 156 |
| A00570 | A01206 | 383 | A00570 | A01221 | 688 |
| A00570 | A01234 | 491 | A00570 | A01243 | 575 |
| A00570 | A01244 | 240 | A00570 | A01251 | 358 |
| A00570 | A01278 | 378 | A00570 | A01291 | 490 |
| A00570 | A01352 | 491 | A00570 | A01356 | 446 |
| A00570 | A01368 | 163 | A00570 | A01384 | 414 |
| A00570 | A01412 | 588 | A00570 | A01418 | 574 |
| A00570 | A01448 | 152 | A00570 | A01451 | 460 |
| A00570 | A01458 | 208 | A00570 | A01459 | 321 |
| A00570 | A01468 | 396 | A00570 | A01470 | 486 |
| A00570 | A01492 | 396 | A00570 | A01569 | 227 |
| A00570 | A01598 | 490 | A00570 | A01649 | 396 |
| A00570 | A01702 | 389 | A00570 | A01741 | 394 |
| A00570 | A01846 | 276 | A00570 | A01847 | 457 |

|        |        |     |        |        |     |
|--------|--------|-----|--------|--------|-----|
| A00570 | A01941 | 219 | A00570 | A01976 | 417 |
| A00570 | A02024 | 188 | A00570 | A02064 | 330 |
| A00570 | A02164 | 491 | A00570 | A02195 | 187 |
| A00570 | A02203 | 417 | A00570 | A02212 | 435 |
| A00570 | A02227 | 152 | A00570 | A02268 | 346 |
| A00570 | A02454 | 344 | A00570 | A03019 | 352 |
| A00570 | A03438 | 485 | A00570 | A03494 | 274 |
| A00570 | A03556 | 227 | A00570 | A03567 | 491 |
| A00570 | A03597 | 374 | A00570 | A03617 | 217 |
| A00570 | A03788 | 259 | A00570 | A03797 | 199 |
| A00570 | A04099 | 234 | A00570 | A04100 | 160 |
| A00570 | A04932 | 157 | A00570 | A05095 | 208 |
| A00570 | A05323 | 157 | A00570 | A05605 | 217 |
| A00570 | A05646 | 357 | A00570 | A05690 | 286 |
| A00570 | A06017 | 291 | A00570 | A06049 | 204 |
| A00570 | A06122 | 486 | A00570 | A06204 | 201 |
| A00570 | A06369 | 675 | A00570 | A06436 | 394 |
| A00570 | A06602 | 428 | A00570 | A06664 | 152 |
| A00570 | A06825 | 491 | A00570 | A06832 | 688 |
| A00570 | A07309 | 419 | A00570 | A07312 | 490 |
| A00570 | A07473 | 172 | A00570 | A07583 | 475 |
| A00570 | A07706 | 182 | A00570 | A08183 | 519 |
| A00570 | A08596 | 338 | A00570 | A08982 | 424 |
| A00570 | A08984 | 205 | A00570 | A08989 | 152 |
| A00570 | A09289 | 246 | A00570 | A09317 | 195 |
| A00570 | A09327 | 107 | A00570 | A09673 | 217 |
| A00570 | A10402 | 204 | A00570 | A10549 | 278 |
| A00570 | A10662 | 163 | A00570 | A11277 | 490 |
| A00570 | A11411 | 152 | A00570 | A11532 | 288 |
| A00570 | A11842 | 232 | A00570 | A11933 | 188 |
| A00570 | A12252 | 347 | A00570 | A13989 | 477 |
| A00570 | A14087 | 230 | A00570 | A14088 | 264 |
| A00570 | A14188 | 491 | A00570 | A14196 | 187 |
| A00570 | A14216 | 224 | A00570 | A14482 | 332 |
| A00570 | A14594 | 157 | A00570 | A14596 | 675 |
| A00570 | A14597 | 491 | A00570 | A14701 | 491 |
| A00570 | A15297 | 213 | A00570 | A15353 | 368 |
| A00570 | A15364 | 208 | A00570 | A15377 | 488 |
| A00570 | A15543 | 546 | A00570 | A15550 | 350 |
| A00570 | A15564 | 167 | A00570 | A15624 | 480 |
| A00570 | A15649 | 484 | A00570 | A15660 | 472 |
| A00570 | A15684 | 450 | A00570 | A15724 | 217 |
| A00570 | A15932 | 491 | A00570 | A16118 | 215 |
| A00570 | A16401 | 162 | A00570 | A16664 | 217 |
| A00570 | A16810 | 204 | A00571 | A00590 | 221 |
| A00571 | A00593 | 373 | A00571 | A00597 | 263 |

|        |        |     |        |        |     |
|--------|--------|-----|--------|--------|-----|
| A00571 | A00603 | 621 | A00571 | A00604 | 283 |
| A00571 | A00605 | 490 | A00571 | A00606 | 236 |
| A00571 | A00608 | 152 | A00571 | A00610 | 157 |
| A00571 | A00629 | 581 | A00571 | A00648 | 603 |
| A00571 | A00651 | 491 | A00571 | A00653 | 710 |
| A00571 | A00658 | 491 | A00571 | A00673 | 188 |
| A00571 | A00687 | 557 | A00571 | A00693 | 196 |
| A00571 | A00694 | 307 | A00571 | A00697 | 467 |
| A00571 | A00700 | 490 | A00571 | A00705 | 556 |
| A00571 | A00709 | 188 | A00571 | A00711 | 558 |
| A00571 | A00718 | 258 | A00571 | A00740 | 450 |
| A00571 | A00741 | 299 | A00571 | A00750 | 268 |
| A00571 | A00762 | 299 | A00571 | A00763 | 210 |
| A00571 | A00781 | 159 | A00571 | A00782 | 491 |
| A00571 | A00785 | 184 | A00571 | A00787 | 466 |
| A00571 | A00788 | 469 | A00571 | A00789 | 204 |
| A00571 | A00790 | 277 | A00571 | A00793 | 565 |
| A00571 | A00805 | 235 | A00571 | A00821 | 285 |
| A00571 | A00826 | 371 | A00571 | A00831 | 411 |
| A00571 | A00835 | 167 | A00571 | A00839 | 693 |
| A00571 | A00843 | 249 | A00571 | A00848 | 408 |
| A00571 | A00849 | 477 | A00571 | A00854 | 317 |
| A00571 | A00856 | 279 | A00571 | A00865 | 485 |
| A00571 | A00870 | 312 | A00571 | A00871 | 486 |
| A00571 | A00878 | 491 | A00571 | A00883 | 466 |
| A00571 | A00902 | 486 | A00571 | A00922 | 428 |
| A00571 | A00923 | 430 | A00571 | A00953 | 549 |
| A00571 | A00955 | 491 | A00571 | A00965 | 584 |
| A00571 | A00968 | 249 | A00571 | A00970 | 424 |
| A00571 | A00972 | 202 | A00571 | A00974 | 260 |
| A00571 | A00977 | 334 | A00571 | A00981 | 365 |
| A00571 | A00983 | 491 | A00571 | A00984 | 450 |
| A00571 | A00987 | 688 | A00571 | A00990 | 481 |
| A00571 | A00991 | 489 | A00571 | A00994 | 380 |
| A00571 | A01000 | 470 | A00571 | A01004 | 475 |
| A00571 | A01012 | 401 | A00571 | A01016 | 358 |
| A00571 | A01017 | 560 | A00571 | A01023 | 308 |
| A00571 | A01025 | 491 | A00571 | A01052 | 207 |
| A00571 | A01056 | 154 | A00571 | A01065 | 221 |
| A00571 | A01072 | 450 | A00571 | A01074 | 388 |
| A00571 | A01075 | 419 | A00571 | A01086 | 721 |
| A00571 | A01090 | 375 | A00571 | A01091 | 168 |
| A00571 | A01098 | 571 | A00571 | A01101 | 325 |
| A00571 | A01108 | 414 | A00571 | A01112 | 452 |
| A00571 | A01115 | 383 | A00571 | A01120 | 481 |
| A00571 | A01121 | 489 | A00571 | A01127 | 411 |

|        |        |     |        |        |     |
|--------|--------|-----|--------|--------|-----|
| A00571 | A01136 | 324 | A00571 | A01140 | 460 |
| A00571 | A01150 | 491 | A00571 | A01152 | 475 |
| A00571 | A01153 | 485 | A00571 | A01154 | 657 |
| A00571 | A01160 | 204 | A00571 | A01161 | 491 |
| A00571 | A01166 | 612 | A00571 | A01169 | 480 |
| A00571 | A01186 | 449 | A00571 | A01196 | 461 |
| A00571 | A01206 | 490 | A00571 | A01209 | 428 |
| A00571 | A01211 | 432 | A00571 | A01214 | 311 |
| A00571 | A01215 | 490 | A00571 | A01217 | 704 |
| A00571 | A01218 | 446 | A00571 | A01220 | 560 |
| A00571 | A01221 | 491 | A00571 | A01230 | 339 |
| A00571 | A01234 | 491 | A00571 | A01238 | 577 |
| A00571 | A01243 | 485 | A00571 | A01247 | 491 |
| A00571 | A01249 | 296 | A00571 | A01252 | 243 |
| A00571 | A01263 | 491 | A00571 | A01287 | 484 |
| A00571 | A01291 | 582 | A00571 | A01306 | 684 |
| A00571 | A01325 | 279 | A00571 | A01335 | 491 |
| A00571 | A01337 | 484 | A00571 | A01352 | 402 |
| A00571 | A01353 | 491 | A00571 | A01362 | 517 |
| A00571 | A01365 | 682 | A00571 | A01369 | 480 |
| A00571 | A01380 | 159 | A00571 | A01384 | 439 |
| A00571 | A01392 | 388 | A00571 | A01406 | 700 |
| A00571 | A01407 | 489 | A00571 | A01408 | 560 |
| A00571 | A01411 | 488 | A00571 | A01412 | 592 |
| A00571 | A01413 | 241 | A00571 | A01414 | 210 |
| A00571 | A01416 | 632 | A00571 | A01418 | 380 |
| A00571 | A01425 | 478 | A00571 | A01436 | 412 |
| A00571 | A01439 | 184 | A00571 | A01449 | 491 |
| A00571 | A01451 | 188 | A00571 | A01464 | 491 |
| A00571 | A01468 | 491 | A00571 | A01470 | 491 |
| A00571 | A01487 | 255 | A00571 | A01492 | 484 |
| A00571 | A01495 | 457 | A00571 | A01496 | 491 |
| A00571 | A01539 | 167 | A00571 | A01540 | 477 |
| A00571 | A01569 | 488 | A00571 | A01579 | 491 |
| A00571 | A01582 | 454 | A00571 | A01586 | 486 |
| A00571 | A01597 | 347 | A00571 | A01601 | 580 |
| A00571 | A01611 | 488 | A00571 | A01612 | 441 |
| A00571 | A01613 | 486 | A00571 | A01618 | 435 |
| A00571 | A01647 | 460 | A00571 | A01649 | 491 |
| A00571 | A01652 | 238 | A00571 | A01711 | 375 |
| A00571 | A01822 | 461 | A00571 | A01825 | 419 |
| A00571 | A01976 | 188 | A00571 | A01988 | 188 |
| A00571 | A01993 | 361 | A00571 | A01998 | 152 |
| A00571 | A01999 | 238 | A00571 | A02051 | 281 |
| A00571 | A02068 | 159 | A00571 | A02117 | 274 |
| A00571 | A02211 | 339 | A00571 | A02214 | 207 |



|        |        |     |        |        |     |
|--------|--------|-----|--------|--------|-----|
| A00571 | A02216 | 157 | A00571 | A02225 | 191 |
| A00571 | A02227 | 491 | A00571 | A02364 | 152 |
| A00571 | A02452 | 438 | A00571 | A02924 | 256 |
| A00571 | A02978 | 272 | A00571 | A03095 | 491 |
| A00571 | A03187 | 352 | A00571 | A03401 | 235 |
| A00571 | A03438 | 232 | A00571 | A03453 | 486 |
| A00571 | A03461 | 254 | A00571 | A03472 | 357 |
| A00571 | A03490 | 246 | A00571 | A03493 | 490 |
| A00571 | A03567 | 580 | A00571 | A03568 | 488 |
| A00571 | A03600 | 98  | A00571 | A03601 | 640 |
| A00571 | A03652 | 394 | A00571 | A03671 | 434 |
| A00571 | A03676 | 235 | A00571 | A03705 | 428 |
| A00571 | A03720 | 255 | A00571 | A03859 | 483 |
| A00571 | A03901 | 482 | A00571 | A03981 | 490 |
| A00571 | A03990 | 204 | A00571 | A04072 | 224 |
| A00571 | A04230 | 213 | A00571 | A04563 | 160 |
| A00571 | A04688 | 474 | A00571 | A04689 | 247 |
| A00571 | A04844 | 445 | A00571 | A05025 | 162 |
| A00571 | A05198 | 160 | A00571 | A05199 | 226 |
| A00571 | A05210 | 235 | A00571 | A05258 | 337 |
| A00571 | A05318 | 440 | A00571 | A05327 | 234 |
| A00571 | A05375 | 591 | A00571 | A05450 | 378 |
| A00571 | A05499 | 489 | A00571 | A05501 | 595 |
| A00571 | A05502 | 405 | A00571 | A05510 | 283 |
| A00571 | A05512 | 491 | A00571 | A05557 | 409 |
| A00571 | A05702 | 188 | A00571 | A05804 | 386 |
| A00571 | A06025 | 188 | A00571 | A06105 | 352 |
| A00571 | A06114 | 227 | A00571 | A06115 | 322 |
| A00571 | A06279 | 419 | A00571 | A06308 | 177 |
| A00571 | A06351 | 457 | A00571 | A06388 | 205 |
| A00571 | A06564 | 491 | A00571 | A06589 | 480 |
| A00571 | A06785 | 304 | A00571 | A06861 | 499 |
| A00571 | A06965 | 364 | A00571 | A06973 | 157 |
| A00571 | A07028 | 167 | A00571 | A07075 | 270 |
| A00571 | A07160 | 293 | A00571 | A07201 | 200 |
| A00571 | A07248 | 201 | A00571 | A07305 | 152 |
| A00571 | A07323 | 434 | A00571 | A07349 | 486 |
| A00571 | A07447 | 188 | A00571 | A07473 | 174 |
| A00571 | A07581 | 477 | A00571 | A07706 | 463 |
| A00571 | A07730 | 173 | A00571 | A07773 | 401 |
| A00571 | A07965 | 199 | A00571 | A08011 | 168 |
| A00571 | A08128 | 227 | A00571 | A08154 | 489 |
| A00571 | A08301 | 266 | A00571 | A08335 | 63  |
| A00571 | A08357 | 232 | A00571 | A08358 | 489 |
| A00571 | A08359 | 458 | A00571 | A08408 | 312 |
| A00571 | A08419 | 467 | A00571 | A08501 | 486 |

|        |        |     |        |        |     |
|--------|--------|-----|--------|--------|-----|
| A00571 | A08543 | 474 | A00571 | A08556 | 491 |
| A00571 | A08559 | 424 | A00571 | A08760 | 124 |
| A00571 | A08761 | 456 | A00571 | A08900 | 154 |
| A00571 | A08901 | 485 | A00571 | A08929 | 266 |
| A00571 | A08979 | 230 | A00571 | A09232 | 319 |
| A00571 | A09285 | 326 | A00571 | A09289 | 270 |
| A00571 | A09322 | 228 | A00571 | A09520 | 491 |
| A00571 | A09530 | 227 | A00571 | A09563 | 227 |
| A00571 | A09613 | 152 | A00571 | A09622 | 177 |
| A00571 | A09664 | 364 | A00571 | A09726 | 329 |
| A00571 | A09735 | 491 | A00571 | A09852 | 414 |
| A00571 | A10117 | 385 | A00571 | A10137 | 227 |
| A00571 | A10338 | 227 | A00571 | A10339 | 152 |
| A00571 | A10480 | 227 | A00571 | A10498 | 195 |
| A00571 | A10586 | 154 | A00571 | A10607 | 326 |
| A00571 | A10909 | 152 | A00571 | A11277 | 469 |
| A00571 | A11364 | 205 | A00571 | A11380 | 210 |
| A00571 | A11383 | 323 | A00571 | A11480 | 188 |
| A00571 | A11593 | 277 | A00571 | A11597 | 167 |
| A00571 | A11616 | 423 | A00571 | A11780 | 167 |
| A00571 | A11882 | 455 | A00571 | A12011 | 323 |
| A00571 | A12059 | 167 | A00571 | A12160 | 259 |
| A00571 | A12477 | 296 | A00571 | A12523 | 167 |
| A00571 | A12598 | 152 | A00571 | A12821 | 408 |
| A00571 | A12923 | 160 | A00571 | A12924 | 195 |
| A00571 | A12966 | 270 | A00571 | A13144 | 322 |
| A00571 | A13497 | 188 | A00571 | A13527 | 215 |
| A00571 | A13583 | 188 | A00571 | A13769 | 227 |
| A00571 | A13782 | 152 | A00571 | A13905 | 249 |
| A00571 | A13989 | 491 | A00571 | A13992 | 167 |
| A00571 | A14006 | 390 | A00571 | A14026 | 232 |
| A00571 | A14073 | 436 | A00571 | A14216 | 418 |
| A00571 | A14443 | 171 | A00571 | A14449 | 276 |
| A00571 | A14478 | 468 | A00571 | A14479 | 491 |
| A00571 | A14482 | 488 | A00571 | A14508 | 361 |
| A00571 | A14566 | 313 | A00571 | A14568 | 491 |
| A00571 | A14594 | 190 | A00571 | A14648 | 205 |
| A00571 | A14699 | 480 | A00571 | A14813 | 356 |
| A00571 | A15499 | 374 | A00571 | A15500 | 491 |
| A00571 | A15624 | 440 | A00571 | A15657 | 276 |
| A00571 | A15659 | 424 | A00571 | A15660 | 467 |
| A00571 | A15684 | 491 | A00571 | A15751 | 188 |
| A00571 | A15771 | 489 | A00571 | A15920 | 174 |
| A00571 | A15932 | 177 | A00571 | A15988 | 340 |
| A00571 | A16035 | 308 | A00571 | A16053 | 167 |
| A00571 | A16118 | 338 | A00571 | A16324 | 350 |

|        |        |     |        |        |     |
|--------|--------|-----|--------|--------|-----|
| A00571 | A16410 | 240 | A00571 | A16680 | 188 |
| A00571 | A17063 | 338 | A00571 | A17152 | 463 |
| A00572 | A00575 | 221 | A00572 | A00600 | 475 |
| A00572 | A00622 | 205 | A00572 | A00655 | 467 |
| A00572 | A00694 | 475 | A00572 | A00805 | 364 |
| A00572 | A00817 | 491 | A00572 | A00818 | 474 |
| A00572 | A00819 | 491 | A00572 | A00822 | 491 |
| A00572 | A00858 | 462 | A00572 | A00860 | 420 |
| A00572 | A00863 | 156 | A00572 | A00881 | 291 |
| A00572 | A01156 | 163 | A00572 | A01169 | 417 |
| A00572 | A01195 | 419 | A00572 | A01200 | 411 |
| A00572 | A01325 | 438 | A00572 | A01383 | 491 |
| A00572 | A01385 | 491 | A00572 | A01401 | 430 |
| A00572 | A01474 | 449 | A00572 | A01612 | 227 |
| A00572 | A03525 | 490 | A00572 | A03526 | 474 |
| A00572 | A04141 | 380 | A00572 | A04265 | 159 |
| A00572 | A04570 | 190 | A00572 | A04648 | 193 |
| A00572 | A05915 | 302 | A00572 | A06803 | 419 |
| A00572 | A07004 | 467 | A00572 | A07290 | 279 |
| A00572 | A07885 | 201 | A00572 | A08591 | 361 |
| A00572 | A09093 | 361 | A00572 | A09672 | 187 |
| A00572 | A09675 | 302 | A00572 | A09712 | 452 |
| A00572 | A10642 | 486 | A00572 | A12296 | 441 |
| A00572 | A15295 | 219 | A00572 | A15660 | 450 |
| A00572 | A15876 | 187 | A00572 | A16964 | 243 |
| A00573 | A00574 | 423 | A00573 | A00633 | 168 |
| A00573 | A00669 | 187 | A00573 | A00696 | 328 |
| A00573 | A00930 | 334 | A00573 | A01008 | 303 |
| A00573 | A01175 | 210 | A00573 | A01227 | 185 |
| A00573 | A01233 | 266 | A00573 | A01297 | 157 |
| A00573 | A01360 | 435 | A00573 | A01409 | 262 |
| A00573 | A01572 | 450 | A00573 | A01625 | 462 |
| A00573 | A01635 | 414 | A00573 | A01726 | 334 |
| A00573 | A02290 | 347 | A00573 | A02301 | 152 |
| A00573 | A02311 | 165 | A00573 | A02316 | 232 |
| A00573 | A02525 | 291 | A00573 | A02758 | 488 |
| A00573 | A03016 | 308 | A00573 | A03027 | 187 |
| A00573 | A03164 | 369 | A00573 | A03167 | 369 |
| A00573 | A03234 | 313 | A00573 | A03484 | 160 |
| A00573 | A03513 | 469 | A00573 | A03917 | 215 |
| A00573 | A04229 | 391 | A00573 | A04231 | 447 |
| A00573 | A04556 | 213 | A00573 | A04781 | 234 |
| A00573 | A04791 | 469 | A00573 | A04832 | 165 |
| A00573 | A04927 | 358 | A00573 | A05007 | 441 |
| A00573 | A05034 | 334 | A00573 | A05050 | 245 |
| A00573 | A05103 | 262 | A00573 | A05140 | 238 |

|        |        |     |        |        |     |
|--------|--------|-----|--------|--------|-----|
| A00573 | A05289 | 334 | A00573 | A05337 | 177 |
| A00573 | A05358 | 330 | A00573 | A05416 | 396 |
| A00573 | A05448 | 224 | A00573 | A05451 | 255 |
| A00573 | A05452 | 271 | A00573 | A05463 | 193 |
| A00573 | A05472 | 357 | A00573 | A05548 | 221 |
| A00573 | A05615 | 234 | A00573 | A05841 | 348 |
| A00573 | A05883 | 334 | A00573 | A06315 | 267 |
| A00573 | A06385 | 393 | A00573 | A06598 | 334 |
| A00573 | A06629 | 491 | A00573 | A06640 | 177 |
| A00573 | A06641 | 319 | A00573 | A06689 | 238 |
| A00573 | A06734 | 356 | A00573 | A06914 | 352 |
| A00573 | A06970 | 418 | A00573 | A06994 | 236 |
| A00573 | A07002 | 281 | A00573 | A07238 | 215 |
| A00573 | A07256 | 457 | A00573 | A07264 | 301 |
| A00573 | A07384 | 184 | A00573 | A07477 | 408 |
| A00573 | A07508 | 337 | A00573 | A07520 | 188 |
| A00573 | A07690 | 188 | A00573 | A07711 | 232 |
| A00573 | A07728 | 334 | A00573 | A07736 | 311 |
| A00573 | A07763 | 177 | A00573 | A07973 | 443 |
| A00573 | A08135 | 201 | A00573 | A08199 | 210 |
| A00573 | A08707 | 334 | A00573 | A09182 | 334 |
| A00573 | A10141 | 302 | A00573 | A10694 | 223 |
| A00573 | A11189 | 319 | A00573 | A12705 | 236 |
| A00573 | A14252 | 334 | A00573 | A15356 | 359 |
| A00573 | A15498 | 195 | A00573 | A16741 | 229 |
| A00574 | A00614 | 490 | A00574 | A00628 | 491 |
| A00574 | A00633 | 469 | A00574 | A00654 | 757 |
| A00574 | A00660 | 463 | A00574 | A00662 | 490 |
| A00574 | A00663 | 480 | A00574 | A00666 | 491 |
| A00574 | A00681 | 491 | A00574 | A00695 | 486 |
| A00574 | A00696 | 469 | A00574 | A00738 | 491 |
| A00574 | A00739 | 484 | A00574 | A00770 | 491 |
| A00574 | A00771 | 488 | A00574 | A00773 | 491 |
| A00574 | A00825 | 473 | A00574 | A00843 | 333 |
| A00574 | A00962 | 491 | A00574 | A00970 | 334 |
| A00574 | A00995 | 491 | A00574 | A01005 | 479 |
| A00574 | A01008 | 491 | A00574 | A01018 | 491 |
| A00574 | A01046 | 475 | A00574 | A01063 | 405 |
| A00574 | A01115 | 313 | A00574 | A01165 | 299 |
| A00574 | A01174 | 490 | A00574 | A01175 | 485 |
| A00574 | A01225 | 160 | A00574 | A01229 | 462 |
| A00574 | A01230 | 429 | A00574 | A01233 | 491 |
| A00574 | A01242 | 319 | A00574 | A01256 | 491 |
| A00574 | A01272 | 474 | A00574 | A01277 | 267 |
| A00574 | A01297 | 489 | A00574 | A01347 | 491 |
| A00574 | A01351 | 190 | A00574 | A01360 | 462 |

|        |        |     |        |        |     |
|--------|--------|-----|--------|--------|-----|
| A00574 | A01367 | 371 | A00574 | A01397 | 396 |
| A00574 | A01409 | 490 | A00574 | A01481 | 490 |
| A00574 | A01496 | 324 | A00574 | A01508 | 479 |
| A00574 | A01511 | 243 | A00574 | A01548 | 360 |
| A00574 | A01569 | 369 | A00574 | A01576 | 160 |
| A00574 | A01635 | 491 | A00574 | A01713 | 441 |
| A00574 | A01735 | 340 | A00574 | A01741 | 456 |
| A00574 | A01743 | 433 | A00574 | A01747 | 393 |
| A00574 | A01841 | 412 | A00574 | A01855 | 380 |
| A00574 | A01857 | 401 | A00574 | A01899 | 152 |
| A00574 | A01926 | 419 | A00574 | A01937 | 274 |
| A00574 | A01972 | 441 | A00574 | A02097 | 199 |
| A00574 | A02148 | 224 | A00574 | A02156 | 391 |
| A00574 | A02168 | 278 | A00574 | A02252 | 160 |
| A00574 | A02254 | 443 | A00574 | A02316 | 361 |
| A00574 | A02330 | 252 | A00574 | A02353 | 782 |
| A00574 | A02432 | 384 | A00574 | A02521 | 463 |
| A00574 | A02695 | 470 | A00574 | A02718 | 724 |
| A00574 | A02847 | 466 | A00574 | A02859 | 396 |
| A00574 | A02922 | 229 | A00574 | A02992 | 489 |
| A00574 | A03003 | 401 | A00574 | A03004 | 230 |
| A00574 | A03005 | 306 | A00574 | A03008 | 270 |
| A00574 | A03016 | 486 | A00574 | A03050 | 475 |
| A00574 | A03059 | 371 | A00574 | A03167 | 486 |
| A00574 | A03168 | 463 | A00574 | A03259 | 366 |
| A00574 | A03311 | 302 | A00574 | A03370 | 281 |
| A00574 | A03429 | 344 | A00574 | A03441 | 465 |
| A00574 | A03442 | 235 | A00574 | A03443 | 238 |
| A00574 | A03477 | 791 | A00574 | A03484 | 288 |
| A00574 | A03501 | 312 | A00574 | A03508 | 199 |
| A00574 | A03513 | 474 | A00574 | A03545 | 205 |
| A00574 | A03586 | 238 | A00574 | A03783 | 267 |
| A00574 | A03858 | 182 | A00574 | A04211 | 432 |
| A00574 | A04229 | 430 | A00574 | A04369 | 229 |
| A00574 | A04674 | 213 | A00574 | A04701 | 173 |
| A00574 | A04778 | 396 | A00574 | A04779 | 486 |
| A00574 | A04791 | 374 | A00574 | A04834 | 479 |
| A00574 | A04839 | 303 | A00574 | A04850 | 238 |
| A00574 | A04880 | 160 | A00574 | A04883 | 243 |
| A00574 | A04927 | 332 | A00574 | A04936 | 301 |
| A00574 | A04937 | 361 | A00574 | A04995 | 486 |
| A00574 | A04998 | 319 | A00574 | A05006 | 465 |
| A00574 | A05007 | 491 | A00574 | A05020 | 790 |
| A00574 | A05045 | 274 | A00574 | A05088 | 177 |
| A00574 | A05098 | 185 | A00574 | A05102 | 486 |
| A00574 | A05310 | 484 | A00574 | A05311 | 173 |

|        |        |     |        |        |     |
|--------|--------|-----|--------|--------|-----|
| A00574 | A05337 | 207 | A00574 | A05376 | 172 |
| A00574 | A05390 | 205 | A00574 | A05393 | 174 |
| A00574 | A05416 | 491 | A00574 | A05418 | 223 |
| A00574 | A05459 | 177 | A00574 | A05472 | 445 |
| A00574 | A05516 | 469 | A00574 | A05532 | 224 |
| A00574 | A05573 | 327 | A00574 | A05600 | 258 |
| A00574 | A05659 | 347 | A00574 | A05713 | 301 |
| A00574 | A05754 | 224 | A00574 | A05755 | 301 |
| A00574 | A05757 | 293 | A00574 | A05759 | 380 |
| A00574 | A05771 | 199 | A00574 | A05772 | 157 |
| A00574 | A05774 | 447 | A00574 | A05789 | 157 |
| A00574 | A05820 | 235 | A00574 | A05974 | 152 |
| A00574 | A06086 | 451 | A00574 | A06088 | 288 |
| A00574 | A06089 | 213 | A00574 | A06091 | 296 |
| A00574 | A06252 | 477 | A00574 | A06301 | 251 |
| A00574 | A06358 | 491 | A00574 | A06359 | 791 |
| A00574 | A06360 | 314 | A00574 | A06386 | 235 |
| A00574 | A06405 | 462 | A00574 | A06439 | 460 |
| A00574 | A06473 | 491 | A00574 | A06474 | 182 |
| A00574 | A06523 | 173 | A00574 | A06555 | 251 |
| A00574 | A06592 | 348 | A00574 | A06597 | 170 |
| A00574 | A06633 | 324 | A00574 | A06641 | 319 |
| A00574 | A06689 | 489 | A00574 | A06692 | 297 |
| A00574 | A06699 | 154 | A00574 | A06700 | 486 |
| A00574 | A06756 | 491 | A00574 | A06831 | 177 |
| A00574 | A06912 | 232 | A00574 | A06914 | 160 |
| A00574 | A06934 | 364 | A00574 | A06970 | 451 |
| A00574 | A06979 | 477 | A00574 | A07002 | 199 |
| A00574 | A07059 | 371 | A00574 | A07080 | 479 |
| A00574 | A07088 | 477 | A00574 | A07109 | 486 |
| A00574 | A07122 | 491 | A00574 | A07238 | 477 |
| A00574 | A07256 | 480 | A00574 | A07267 | 489 |
| A00574 | A07271 | 224 | A00574 | A07304 | 450 |
| A00574 | A07376 | 260 | A00574 | A07381 | 218 |
| A00574 | A07385 | 352 | A00574 | A07413 | 491 |
| A00574 | A07459 | 337 | A00574 | A07477 | 490 |
| A00574 | A07503 | 152 | A00574 | A07507 | 187 |
| A00574 | A07520 | 430 | A00574 | A07530 | 457 |
| A00574 | A07553 | 466 | A00574 | A07554 | 291 |
| A00574 | A07558 | 481 | A00574 | A07590 | 489 |
| A00574 | A07627 | 414 | A00574 | A07674 | 491 |
| A00574 | A07688 | 491 | A00574 | A07721 | 372 |
| A00574 | A07736 | 489 | A00574 | A07737 | 245 |
| A00574 | A07746 | 424 | A00574 | A07757 | 296 |
| A00574 | A07800 | 491 | A00574 | A07844 | 188 |
| A00574 | A07847 | 180 | A00574 | A07848 | 420 |

|        |        |     |        |        |     |
|--------|--------|-----|--------|--------|-----|
| A00574 | A07933 | 490 | A00574 | A07973 | 490 |
| A00574 | A07976 | 218 | A00574 | A08099 | 456 |
| A00574 | A08108 | 306 | A00574 | A08135 | 338 |
| A00574 | A08252 | 276 | A00574 | A08318 | 157 |
| A00574 | A08687 | 152 | A00574 | A08751 | 294 |
| A00574 | A08817 | 378 | A00574 | A09043 | 160 |
| A00574 | A09612 | 386 | A00574 | A09711 | 251 |
| A00574 | A09837 | 168 | A00574 | A09876 | 389 |
| A00574 | A10027 | 301 | A00574 | A10121 | 199 |
| A00574 | A10147 | 301 | A00574 | A10229 | 301 |
| A00574 | A10420 | 329 | A00574 | A10424 | 160 |
| A00574 | A10427 | 294 | A00574 | A10437 | 168 |
| A00574 | A10443 | 267 | A00574 | A10444 | 446 |
| A00574 | A10452 | 405 | A00574 | A10455 | 177 |
| A00574 | A10456 | 491 | A00574 | A10532 | 402 |
| A00574 | A10656 | 467 | A00574 | A10659 | 177 |
| A00574 | A10677 | 481 | A00574 | A10681 | 347 |
| A00574 | A10686 | 358 | A00574 | A10693 | 202 |
| A00574 | A10694 | 265 | A00574 | A10702 | 483 |
| A00574 | A10703 | 449 | A00574 | A10708 | 157 |
| A00574 | A10710 | 188 | A00574 | A10712 | 419 |
| A00574 | A10714 | 468 | A00574 | A10763 | 301 |
| A00574 | A10885 | 238 | A00574 | A11309 | 491 |
| A00574 | A11325 | 361 | A00574 | A11381 | 480 |
| A00574 | A11431 | 466 | A00574 | A12055 | 324 |
| A00574 | A13326 | 160 | A00574 | A13330 | 210 |
| A00574 | A13362 | 302 | A00574 | A13609 | 367 |
| A00574 | A13677 | 301 | A00574 | A13735 | 229 |
| A00574 | A13871 | 162 | A00574 | A13915 | 193 |
| A00574 | A14196 | 263 | A00574 | A14803 | 335 |
| A00574 | A14827 | 185 | A00574 | A14856 | 446 |
| A00574 | A15282 | 196 | A00574 | A15497 | 465 |
| A00574 | A15637 | 290 | A00574 | A15874 | 490 |
| A00574 | A15905 | 454 | A00574 | A16002 | 411 |
| A00574 | A16026 | 475 | A00574 | A16027 | 490 |
| A00574 | A16033 | 484 | A00574 | A16048 | 277 |
| A00574 | A16262 | 480 | A00574 | A16286 | 423 |
| A00574 | A16309 | 270 | A00574 | A16344 | 334 |
| A00574 | A16355 | 302 | A00574 | A16419 | 258 |
| A00574 | A16528 | 193 | A00574 | A16529 | 491 |
| A00574 | A16636 | 157 | A00574 | A16741 | 467 |
| A00574 | A16836 | 213 | A00574 | A16959 | 490 |
| A00574 | A17006 | 258 | A00574 | A17007 | 219 |
| A00574 | A17078 | 489 | A00574 | A17194 | 251 |
| A00575 | A00605 | 489 | A00575 | A00622 | 699 |
| A00575 | A00626 | 383 | A00575 | A00665 | 433 |

|        |        |     |        |        |     |
|--------|--------|-----|--------|--------|-----|
| A00575 | A00708 | 491 | A00575 | A00733 | 538 |
| A00575 | A00744 | 253 | A00575 | A00760 | 294 |
| A00575 | A00805 | 541 | A00575 | A00819 | 279 |
| A00575 | A00831 | 188 | A00575 | A00856 | 488 |
| A00575 | A00858 | 715 | A00575 | A00860 | 713 |
| A00575 | A00866 | 156 | A00575 | A00881 | 541 |
| A00575 | A00903 | 176 | A00575 | A00934 | 445 |
| A00575 | A00954 | 290 | A00575 | A00978 | 528 |
| A00575 | A01007 | 629 | A00575 | A01019 | 538 |
| A00575 | A01020 | 491 | A00575 | A01032 | 456 |
| A00575 | A01075 | 474 | A00575 | A01087 | 414 |
| A00575 | A01116 | 491 | A00575 | A01184 | 447 |
| A00575 | A01195 | 534 | A00575 | A01200 | 712 |
| A00575 | A01206 | 445 | A00575 | A01212 | 450 |
| A00575 | A01234 | 486 | A00575 | A01325 | 406 |
| A00575 | A01383 | 385 | A00575 | A01385 | 156 |
| A00575 | A01398 | 541 | A00575 | A01401 | 714 |
| A00575 | A01429 | 208 | A00575 | A01468 | 489 |
| A00575 | A01500 | 541 | A00575 | A01503 | 479 |
| A00575 | A01555 | 316 | A00575 | A01576 | 473 |
| A00575 | A01720 | 466 | A00575 | A01741 | 152 |
| A00575 | A03068 | 170 | A00575 | A03207 | 213 |
| A00575 | A03526 | 407 | A00575 | A03629 | 205 |
| A00575 | A04068 | 213 | A00575 | A04648 | 534 |
| A00575 | A04687 | 156 | A00575 | A05027 | 274 |
| A00575 | A05419 | 268 | A00575 | A06803 | 540 |
| A00575 | A07223 | 172 | A00575 | A07290 | 162 |
| A00575 | A07670 | 508 | A00575 | A07700 | 451 |
| A00575 | A07850 | 398 | A00575 | A07887 | 487 |
| A00575 | A08022 | 486 | A00575 | A08024 | 323 |
| A00575 | A08199 | 173 | A00575 | A08362 | 281 |
| A00575 | A08382 | 278 | A00575 | A08383 | 271 |
| A00575 | A08430 | 305 | A00575 | A08518 | 195 |
| A00575 | A08553 | 452 | A00575 | A08818 | 156 |
| A00575 | A08952 | 191 | A00575 | A09502 | 156 |
| A00575 | A09712 | 480 | A00575 | A10642 | 328 |
| A00575 | A11344 | 156 | A00575 | A11674 | 156 |
| A00575 | A13413 | 249 | A00575 | A15733 | 391 |
| A00575 | A15945 | 310 | A00575 | A15946 | 204 |
| A00575 | A16144 | 380 | A00575 | A16228 | 505 |
| A00576 | A00577 | 491 | A00576 | A00609 | 430 |
| A00576 | A00636 | 477 | A00576 | A00640 | 152 |
| A00576 | A00653 | 476 | A00576 | A00694 | 419 |
| A00576 | A00719 | 162 | A00576 | A00726 | 299 |
| A00576 | A00737 | 196 | A00576 | A00751 | 173 |
| A00576 | A00799 | 477 | A00576 | A00802 | 489 |



|        |        |     |        |        |     |
|--------|--------|-----|--------|--------|-----|
| A00576 | A00810 | 152 | A00576 | A00821 | 168 |
| A00576 | A00822 | 286 | A00576 | A00833 | 299 |
| A00576 | A00841 | 283 | A00576 | A00849 | 160 |
| A00576 | A00863 | 329 | A00576 | A00868 | 205 |
| A00576 | A00871 | 200 | A00576 | A00904 | 176 |
| A00576 | A00911 | 472 | A00576 | A00939 | 480 |
| A00576 | A00974 | 299 | A00576 | A00984 | 458 |
| A00576 | A00985 | 491 | A00576 | A00987 | 365 |
| A00576 | A01001 | 580 | A00576 | A01004 | 281 |
| A00576 | A01027 | 491 | A00576 | A01067 | 157 |
| A00576 | A01075 | 486 | A00576 | A01077 | 223 |
| A00576 | A01100 | 467 | A00576 | A01102 | 484 |
| A00576 | A01139 | 301 | A00576 | A01156 | 491 |
| A00576 | A01161 | 301 | A00576 | A01276 | 190 |
| A00576 | A01311 | 152 | A00576 | A01313 | 167 |
| A00576 | A01326 | 490 | A00576 | A01329 | 236 |
| A00576 | A01352 | 278 | A00576 | A01379 | 320 |
| A00576 | A01385 | 491 | A00576 | A01387 | 299 |
| A00576 | A01413 | 278 | A00576 | A01439 | 299 |
| A00576 | A01551 | 212 | A00576 | A01577 | 152 |
| A00576 | A01582 | 272 | A00576 | A01585 | 491 |
| A00576 | A01599 | 268 | A00576 | A01627 | 618 |
| A00576 | A01632 | 470 | A00576 | A01728 | 151 |
| A00576 | A01738 | 154 | A00576 | A01741 | 375 |
| A00576 | A01758 | 160 | A00576 | A01787 | 257 |
| A00576 | A01819 | 215 | A00576 | A01826 | 221 |
| A00576 | A01983 | 167 | A00576 | A02040 | 176 |
| A00576 | A02324 | 385 | A00576 | A02477 | 270 |
| A00576 | A02491 | 218 | A00576 | A02601 | 299 |
| A00576 | A02620 | 238 | A00576 | A02691 | 254 |
| A00576 | A03241 | 162 | A00576 | A03259 | 152 |
| A00576 | A03304 | 491 | A00576 | A03473 | 363 |
| A00576 | A03562 | 218 | A00576 | A03598 | 241 |
| A00576 | A03697 | 152 | A00576 | A03902 | 191 |
| A00576 | A03945 | 162 | A00576 | A03955 | 177 |
| A00576 | A03959 | 389 | A00576 | A03992 | 210 |
| A00576 | A04124 | 185 | A00576 | A04275 | 441 |
| A00576 | A04337 | 485 | A00576 | A04495 | 299 |
| A00576 | A04668 | 167 | A00576 | A04947 | 229 |
| A00576 | A04987 | 247 | A00576 | A05087 | 196 |
| A00576 | A05323 | 465 | A00576 | A05601 | 185 |
| A00576 | A06225 | 188 | A00576 | A06287 | 152 |
| A00576 | A06293 | 205 | A00576 | A06328 | 251 |
| A00576 | A06580 | 306 | A00576 | A06686 | 162 |
| A00576 | A06868 | 152 | A00576 | A07197 | 174 |
| A00576 | A07237 | 176 | A00576 | A07442 | 477 |

|        |        |     |        |        |     |
|--------|--------|-----|--------|--------|-----|
| A00576 | A07483 | 310 | A00576 | A07744 | 152 |
| A00576 | A07894 | 183 | A00576 | A08061 | 152 |
| A00576 | A08098 | 152 | A00576 | A08178 | 152 |
| A00576 | A08517 | 180 | A00576 | A08567 | 173 |
| A00576 | A08763 | 152 | A00576 | A08947 | 299 |
| A00576 | A09004 | 299 | A00576 | A09351 | 182 |
| A00576 | A09939 | 232 | A00576 | A10321 | 484 |
| A00576 | A10532 | 246 | A00576 | A10742 | 238 |
| A00576 | A10842 | 152 | A00576 | A11348 | 174 |
| A00576 | A11558 | 216 | A00576 | A11565 | 185 |
| A00576 | A11714 | 238 | A00576 | A12789 | 288 |
| A00576 | A12824 | 152 | A00576 | A13124 | 193 |
| A00576 | A13369 | 160 | A00576 | A13885 | 198 |
| A00576 | A14112 | 218 | A00576 | A14202 | 159 |
| A00576 | A14272 | 485 | A00576 | A14405 | 335 |
| A00576 | A14525 | 152 | A00576 | A14589 | 205 |
| A00576 | A14648 | 185 | A00576 | A14838 | 389 |
| A00576 | A15375 | 152 | A00576 | A15422 | 461 |
| A00576 | A15546 | 152 | A00576 | A15598 | 167 |
| A00576 | A15809 | 160 | A00576 | A15824 | 167 |
| A00576 | A15858 | 167 | A00576 | A15917 | 152 |
| A00576 | A15932 | 491 | A00576 | A15933 | 390 |
| A00576 | A15949 | 154 | A00576 | A16064 | 243 |
| A00576 | A16613 | 490 | A00576 | A16750 | 306 |
| A00577 | A00636 | 446 | A00577 | A00694 | 347 |
| A00577 | A00799 | 279 | A00577 | A00802 | 217 |
| A00577 | A00863 | 446 | A00577 | A00985 | 160 |
| A00577 | A01027 | 363 | A00577 | A01156 | 391 |
| A00577 | A01326 | 182 | A00577 | A01385 | 159 |
| A00577 | A01434 | 208 | A00577 | A01599 | 246 |
| A00577 | A01627 | 338 | A00577 | A01741 | 219 |
| A00577 | A02745 | 224 | A00577 | A03241 | 269 |
| A00577 | A03304 | 458 | A00577 | A03959 | 156 |
| A00577 | A04275 | 188 | A00577 | A05812 | 229 |
| A00577 | A10321 | 368 | A00577 | A13124 | 188 |
| A00577 | A14405 | 218 | A00577 | A14838 | 154 |
| A00577 | A15422 | 427 | A00577 | A15434 | 202 |
| A00577 | A15498 | 314 | A00577 | A15596 | 167 |
| A00577 | A15932 | 427 | A00577 | A15933 | 452 |
| A00577 | A16613 | 490 | A00578 | A00829 | 218 |
| A00578 | A02830 | 363 | A00578 | A03115 | 283 |
| A00578 | A03763 | 389 | A00578 | A05309 | 208 |
| A00578 | A07483 | 212 | A00579 | A00628 | 177 |
| A00579 | A00695 | 294 | A00579 | A01256 | 299 |
| A00579 | A01397 | 302 | A00579 | A01508 | 191 |
| A00579 | A01695 | 449 | A00579 | A01696 | 475 |

|        |        |     |        |        |     |
|--------|--------|-----|--------|--------|-----|
| A00579 | A01748 | 299 | A00579 | A02026 | 249 |
| A00579 | A02114 | 205 | A00579 | A02290 | 353 |
| A00579 | A02366 | 451 | A00579 | A03167 | 247 |
| A00579 | A03168 | 308 | A00579 | A03661 | 218 |
| A00579 | A04211 | 480 | A00579 | A05363 | 332 |
| A00579 | A05466 | 414 | A00579 | A06236 | 414 |
| A00579 | A06633 | 335 | A00579 | A06970 | 208 |
| A00579 | A07770 | 424 | A00579 | A09985 | 368 |
| A00579 | A11309 | 262 | A00579 | A13343 | 424 |
| A00579 | A14176 | 294 | A00579 | A16027 | 263 |
| A00579 | A16028 | 344 | A00579 | A16966 | 424 |
| A00580 | A01041 | 473 | A00580 | A01309 | 405 |
| A00580 | A01687 | 152 | A00580 | A02061 | 294 |
| A00580 | A02499 | 267 | A00580 | A07054 | 195 |
| A00580 | A07483 | 246 | A00580 | A07944 | 466 |
| A00580 | A08352 | 288 | A00580 | A08535 | 321 |
| A00580 | A08536 | 409 | A00580 | A08550 | 179 |
| A00580 | A08552 | 311 | A00580 | A08561 | 201 |
| A00580 | A11456 | 296 | A00580 | A11472 | 235 |
| A00580 | A11675 | 262 | A00580 | A11706 | 326 |
| A00580 | A12506 | 290 | A00580 | A12507 | 152 |
| A00580 | A12508 | 274 | A00580 | A12658 | 270 |
| A00580 | A12858 | 235 | A00580 | A13116 | 314 |
| A00580 | A13785 | 363 | A00580 | A13786 | 293 |
| A00580 | A13787 | 374 | A00580 | A13969 | 252 |
| A00580 | A14286 | 326 | A00580 | A14569 | 281 |
| A00580 | A14838 | 202 | A00580 | A15189 | 249 |
| A00580 | A15855 | 163 | A00580 | A16157 | 184 |
| A00580 | A16552 | 167 | A00580 | A16664 | 258 |
| A00580 | A16776 | 340 | A00580 | A17144 | 318 |
| A00581 | A00597 | 318 | A00581 | A00609 | 486 |
| A00581 | A00617 | 288 | A00581 | A00642 | 335 |
| A00581 | A00718 | 466 | A00581 | A00778 | 486 |
| A00581 | A00826 | 419 | A00581 | A00840 | 241 |
| A00581 | A00888 | 201 | A00581 | A00907 | 215 |
| A00581 | A00947 | 224 | A00581 | A01002 | 310 |
| A00581 | A01016 | 245 | A00581 | A01026 | 466 |
| A00581 | A01074 | 232 | A00581 | A01166 | 401 |
| A00581 | A01209 | 256 | A00581 | A01217 | 232 |
| A00581 | A01306 | 319 | A00581 | A01313 | 229 |
| A00581 | A01352 | 235 | A00581 | A01365 | 286 |
| A00581 | A01377 | 395 | A00581 | A01386 | 423 |
| A00581 | A01406 | 227 | A00581 | A01416 | 229 |
| A00581 | A01689 | 390 | A00581 | A02572 | 375 |
| A00581 | A02925 | 179 | A00581 | A03601 | 260 |
| A00581 | A05337 | 232 | A00581 | A06046 | 241 |

|        |        |     |        |        |     |
|--------|--------|-----|--------|--------|-----|
| A00581 | A07693 | 491 | A00581 | A08113 | 246 |
| A00581 | A08263 | 420 | A00581 | A08346 | 491 |
| A00581 | A08402 | 491 | A00581 | A08502 | 163 |
| A00581 | A09164 | 268 | A00581 | A09648 | 348 |
| A00581 | A11184 | 156 | A00581 | A14077 | 486 |
| A00581 | A14209 | 168 | A00581 | A14272 | 473 |
| A00581 | A14288 | 313 | A00581 | A14707 | 251 |
| A00581 | A15452 | 274 | A00581 | A15877 | 414 |
| A00581 | A16611 | 240 | A00581 | A16692 | 235 |
| A00582 | A00587 | 191 | A00582 | A00600 | 439 |
| A00582 | A00765 | 465 | A00582 | A00813 | 272 |
| A00582 | A00883 | 281 | A00582 | A01097 | 401 |
| A00582 | A01143 | 439 | A00582 | A01185 | 491 |
| A00582 | A01361 | 491 | A00582 | A01419 | 491 |
| A00582 | A01438 | 491 | A00582 | A01926 | 294 |
| A00582 | A01994 | 202 | A00582 | A03822 | 200 |
| A00582 | A04449 | 457 | A00582 | A04962 | 477 |
| A00582 | A06907 | 208 | A00582 | A07697 | 412 |
| A00582 | A07835 | 154 | A00582 | A10159 | 491 |
| A00582 | A11487 | 190 | A00582 | A12183 | 363 |
| A00582 | A13587 | 201 | A00582 | A13647 | 456 |
| A00582 | A13928 | 388 | A00582 | A14192 | 162 |
| A00582 | A14193 | 425 | A00582 | A14253 | 466 |
| A00582 | A14454 | 491 | A00582 | A15224 | 447 |
| A00582 | A15237 | 297 | A00582 | A15297 | 168 |
| A00582 | A15710 | 330 | A00582 | A16623 | 479 |
| A00582 | A16709 | 198 | A00582 | A16724 | 200 |
| A00582 | A16802 | 451 | A00583 | A00646 | 238 |
| A00583 | A00691 | 533 | A00583 | A00716 | 156 |
| A00583 | A00867 | 156 | A00583 | A00879 | 553 |
| A00583 | A00905 | 305 | A00583 | A00916 | 157 |
| A00583 | A00981 | 217 | A00583 | A01024 | 156 |
| A00583 | A01029 | 743 | A00583 | A01061 | 429 |
| A00583 | A01088 | 213 | A00583 | A01100 | 154 |
| A00583 | A01136 | 159 | A00583 | A01151 | 541 |
| A00583 | A01213 | 432 | A00583 | A01266 | 160 |
| A00583 | A01268 | 530 | A00583 | A01295 | 172 |
| A00583 | A01334 | 156 | A00583 | A01372 | 599 |
| A00583 | A01390 | 217 | A00583 | A01391 | 265 |
| A00583 | A01434 | 279 | A00583 | A01576 | 252 |
| A00583 | A01588 | 458 | A00583 | A01612 | 481 |
| A00583 | A03494 | 156 | A00583 | A03569 | 260 |
| A00583 | A03873 | 262 | A00583 | A07004 | 424 |
| A00583 | A07898 | 156 | A00583 | A07956 | 262 |
| A00583 | A08137 | 457 | A00583 | A08201 | 156 |
| A00583 | A08248 | 262 | A00583 | A08327 | 531 |

|        |        |     |        |        |     |
|--------|--------|-----|--------|--------|-----|
| A00583 | A08431 | 156 | A00583 | A08524 | 491 |
| A00583 | A08542 | 156 | A00583 | A08571 | 350 |
| A00583 | A08977 | 362 | A00583 | A08982 | 262 |
| A00583 | A10208 | 369 | A00583 | A11324 | 386 |
| A00583 | A11496 | 156 | A00583 | A11497 | 156 |
| A00583 | A11544 | 262 | A00583 | A11649 | 262 |
| A00583 | A12757 | 156 | A00583 | A13783 | 185 |
| A00583 | A13892 | 262 | A00583 | A13928 | 156 |
| A00583 | A14178 | 156 | A00583 | A14257 | 229 |
| A00583 | A14362 | 262 | A00583 | A14454 | 162 |
| A00583 | A15321 | 217 | A00583 | A15338 | 535 |
| A00583 | A15478 | 263 | A00583 | A15544 | 223 |
| A00583 | A15559 | 405 | A00583 | A15561 | 446 |
| A00583 | A15564 | 400 | A00583 | A15729 | 207 |
| A00583 | A16465 | 168 | A00583 | A16614 | 262 |
| A00583 | A16690 | 345 | A00583 | A16699 | 156 |
| A00583 | A16831 | 238 | A00583 | A16866 | 229 |
| A00584 | A00595 | 551 | A00584 | A00749 | 174 |
| A00584 | A00767 | 457 | A00584 | A00908 | 174 |
| A00584 | A00916 | 314 | A00584 | A00918 | 450 |
| A00584 | A00960 | 548 | A00584 | A00992 | 174 |
| A00584 | A01131 | 185 | A00584 | A01193 | 174 |
| A00584 | A01234 | 276 | A00584 | A01279 | 210 |
| A00584 | A01351 | 538 | A00584 | A01424 | 494 |
| A00584 | A01492 | 174 | A00584 | A01542 | 218 |
| A00584 | A01879 | 183 | A00584 | A04715 | 157 |
| A00584 | A06698 | 174 | A00584 | A06797 | 249 |
| A00584 | A07244 | 233 | A00584 | A07432 | 174 |
| A00584 | A07524 | 174 | A00584 | A07533 | 348 |
| A00584 | A07537 | 286 | A00584 | A07584 | 332 |
| A00584 | A07625 | 174 | A00584 | A07924 | 174 |
| A00584 | A09664 | 249 | A00584 | A09707 | 205 |
| A00584 | A11462 | 332 | A00584 | A11544 | 174 |
| A00584 | A11831 | 174 | A00584 | A11832 | 174 |
| A00584 | A12097 | 318 | A00584 | A13792 | 361 |
| A00585 | A14594 | 63  | A00586 | A00588 | 491 |
| A00586 | A00725 | 491 | A00586 | A00759 | 293 |
| A00586 | A00761 | 283 | A00586 | A00775 | 430 |
| A00586 | A00784 | 489 | A00586 | A00814 | 294 |
| A00586 | A00950 | 470 | A00586 | A01014 | 255 |
| A00586 | A01064 | 491 | A00586 | A01093 | 491 |
| A00586 | A01099 | 491 | A00586 | A01114 | 491 |
| A00586 | A01187 | 491 | A00586 | A01197 | 480 |
| A00586 | A01212 | 196 | A00586 | A01322 | 344 |
| A00586 | A01331 | 212 | A00586 | A01341 | 187 |
| A00586 | A01415 | 475 | A00586 | A01686 | 449 |

|        |        |     |        |        |     |
|--------|--------|-----|--------|--------|-----|
| A00586 | A02180 | 407 | A00586 | A06242 | 369 |
| A00586 | A06864 | 440 | A00586 | A06982 | 217 |
| A00586 | A07319 | 288 | A00586 | A07346 | 429 |
| A00586 | A07534 | 152 | A00586 | A07603 | 303 |
| A00586 | A07996 | 195 | A00586 | A08117 | 249 |
| A00586 | A08141 | 232 | A00586 | A08208 | 398 |
| A00586 | A08212 | 490 | A00586 | A08516 | 408 |
| A00586 | A08526 | 455 | A00586 | A08769 | 210 |
| A00586 | A09598 | 454 | A00586 | A11236 | 329 |
| A00586 | A11724 | 247 | A00586 | A13913 | 488 |
| A00586 | A13949 | 480 | A00586 | A14079 | 196 |
| A00586 | A14138 | 216 | A00586 | A14282 | 212 |
| A00586 | A16127 | 208 | A00586 | A16226 | 414 |
| A00586 | A16437 | 201 | A00586 | A16613 | 196 |
| A00586 | A16616 | 183 | A00586 | A16626 | 483 |
| A00587 | A00588 | 156 | A00587 | A00600 | 491 |
| A00587 | A00601 | 491 | A00587 | A00609 | 173 |
| A00587 | A00660 | 246 | A00587 | A00697 | 191 |
| A00587 | A00743 | 362 | A00587 | A00765 | 491 |
| A00587 | A00813 | 491 | A00587 | A00939 | 468 |
| A00587 | A01161 | 489 | A00587 | A01213 | 288 |
| A00587 | A01298 | 255 | A00587 | A01343 | 449 |
| A00587 | A01419 | 604 | A00587 | A01438 | 719 |
| A00587 | A01451 | 417 | A00587 | A01522 | 193 |
| A00587 | A01542 | 213 | A00587 | A01576 | 567 |
| A00587 | A01595 | 251 | A00587 | A02574 | 358 |
| A00587 | A02611 | 252 | A00587 | A02768 | 163 |
| A00587 | A03034 | 480 | A00587 | A03104 | 408 |
| A00587 | A03523 | 401 | A00587 | A03524 | 484 |
| A00587 | A04275 | 312 | A00587 | A04454 | 252 |
| A00587 | A05234 | 389 | A00587 | A05356 | 177 |
| A00587 | A05678 | 179 | A00587 | A06092 | 491 |
| A00587 | A06520 | 383 | A00587 | A07069 | 467 |
| A00587 | A07107 | 167 | A00587 | A07276 | 422 |
| A00587 | A07697 | 491 | A00587 | A07756 | 201 |
| A00587 | A08097 | 372 | A00587 | A08251 | 266 |
| A00587 | A08293 | 418 | A00587 | A08345 | 319 |
| A00587 | A08356 | 477 | A00587 | A08362 | 358 |
| A00587 | A08831 | 443 | A00587 | A08956 | 171 |
| A00587 | A09323 | 447 | A00587 | A09461 | 204 |
| A00587 | A09659 | 369 | A00587 | A10619 | 160 |
| A00587 | A10987 | 407 | A00587 | A11559 | 152 |
| A00587 | A11591 | 210 | A00587 | A14212 | 434 |
| A00587 | A14253 | 229 | A00587 | A15224 | 212 |
| A00587 | A15295 | 160 | A00587 | A15314 | 352 |
| A00587 | A15336 | 366 | A00587 | A15612 | 366 |

|        |        |     |        |        |     |
|--------|--------|-----|--------|--------|-----|
| A00587 | A15917 | 167 | A00587 | A16623 | 196 |
| A00588 | A00725 | 491 | A00588 | A00759 | 468 |
| A00588 | A00761 | 488 | A00588 | A00775 | 491 |
| A00588 | A00778 | 484 | A00588 | A00784 | 491 |
| A00588 | A00814 | 491 | A00588 | A00824 | 241 |
| A00588 | A00868 | 165 | A00588 | A00911 | 491 |
| A00588 | A00950 | 491 | A00588 | A00989 | 385 |
| A00588 | A00993 | 151 | A00588 | A01004 | 480 |
| A00588 | A01021 | 491 | A00588 | A01059 | 424 |
| A00588 | A01064 | 491 | A00588 | A01093 | 491 |
| A00588 | A01099 | 491 | A00588 | A01106 | 246 |
| A00588 | A01114 | 491 | A00588 | A01124 | 249 |
| A00588 | A01151 | 213 | A00588 | A01187 | 491 |
| A00588 | A01189 | 486 | A00588 | A01197 | 462 |
| A00588 | A01212 | 419 | A00588 | A01296 | 484 |
| A00588 | A01320 | 419 | A00588 | A01321 | 254 |
| A00588 | A01322 | 491 | A00588 | A01325 | 443 |
| A00588 | A01331 | 486 | A00588 | A01341 | 491 |
| A00588 | A01375 | 307 | A00588 | A01388 | 491 |
| A00588 | A01404 | 425 | A00588 | A01415 | 491 |
| A00588 | A01468 | 472 | A00588 | A01536 | 491 |
| A00588 | A01559 | 491 | A00588 | A01589 | 491 |
| A00588 | A01594 | 491 | A00588 | A01616 | 491 |
| A00588 | A01625 | 489 | A00588 | A01659 | 491 |
| A00588 | A01680 | 474 | A00588 | A01686 | 491 |
| A00588 | A01690 | 360 | A00588 | A01741 | 463 |
| A00588 | A02058 | 404 | A00588 | A02180 | 486 |
| A00588 | A02216 | 215 | A00588 | A02731 | 479 |
| A00588 | A02806 | 491 | A00588 | A02847 | 489 |
| A00588 | A02887 | 475 | A00588 | A03057 | 489 |
| A00588 | A03301 | 468 | A00588 | A04667 | 204 |
| A00588 | A04668 | 491 | A00588 | A05218 | 398 |
| A00588 | A05334 | 491 | A00588 | A06242 | 491 |
| A00588 | A06297 | 457 | A00588 | A06606 | 271 |
| A00588 | A06851 | 398 | A00588 | A06864 | 491 |
| A00588 | A06924 | 183 | A00588 | A06982 | 491 |
| A00588 | A07079 | 249 | A00588 | A07319 | 491 |
| A00588 | A07332 | 172 | A00588 | A07346 | 491 |
| A00588 | A07466 | 362 | A00588 | A07480 | 491 |
| A00588 | A07534 | 491 | A00588 | A07603 | 491 |
| A00588 | A07647 | 469 | A00588 | A07902 | 449 |
| A00588 | A07996 | 491 | A00588 | A08000 | 475 |
| A00588 | A08029 | 424 | A00588 | A08030 | 491 |
| A00588 | A08117 | 486 | A00588 | A08141 | 477 |
| A00588 | A08208 | 491 | A00588 | A08212 | 491 |
| A00588 | A08402 | 217 | A00588 | A08516 | 491 |

|        |        |     |        |        |     |
|--------|--------|-----|--------|--------|-----|
| A00588 | A08526 | 491 | A00588 | A08669 | 491 |
| A00588 | A08694 | 358 | A00588 | A08769 | 491 |
| A00588 | A08820 | 489 | A00588 | A08912 | 240 |
| A00588 | A08919 | 369 | A00588 | A08964 | 390 |
| A00588 | A08995 | 491 | A00588 | A09000 | 491 |
| A00588 | A09001 | 469 | A00588 | A09135 | 190 |
| A00588 | A09288 | 489 | A00588 | A09301 | 162 |
| A00588 | A09434 | 162 | A00588 | A09598 | 491 |
| A00588 | A09653 | 260 | A00588 | A09654 | 180 |
| A00588 | A09706 | 474 | A00588 | A09762 | 491 |
| A00588 | A09765 | 294 | A00588 | A10083 | 195 |
| A00588 | A10250 | 232 | A00588 | A10373 | 491 |
| A00588 | A10565 | 219 | A00588 | A11236 | 491 |
| A00588 | A11540 | 486 | A00588 | A11703 | 490 |
| A00588 | A11829 | 490 | A00588 | A11880 | 466 |
| A00588 | A11916 | 491 | A00588 | A12064 | 183 |
| A00588 | A12190 | 294 | A00588 | A12556 | 491 |
| A00588 | A12625 | 489 | A00588 | A12749 | 419 |
| A00588 | A12760 | 219 | A00588 | A13103 | 294 |
| A00588 | A13332 | 285 | A00588 | A13486 | 183 |
| A00588 | A13913 | 490 | A00588 | A13949 | 491 |
| A00588 | A14076 | 491 | A00588 | A14079 | 491 |
| A00588 | A14094 | 491 | A00588 | A14223 | 490 |
| A00588 | A14230 | 491 | A00588 | A14273 | 488 |
| A00588 | A14282 | 491 | A00588 | A14297 | 332 |
| A00588 | A14460 | 491 | A00588 | A14477 | 357 |
| A00588 | A14609 | 174 | A00588 | A14674 | 474 |
| A00588 | A14694 | 491 | A00588 | A14706 | 490 |
| A00588 | A15367 | 434 | A00588 | A15369 | 491 |
| A00588 | A15371 | 477 | A00588 | A15524 | 456 |
| A00588 | A15531 | 218 | A00588 | A15539 | 323 |
| A00588 | A15654 | 458 | A00588 | A15714 | 313 |
| A00588 | A15837 | 491 | A00588 | A15876 | 165 |
| A00588 | A15939 | 443 | A00588 | A15941 | 491 |
| A00588 | A16073 | 288 | A00588 | A16127 | 491 |
| A00588 | A16128 | 491 | A00588 | A16129 | 491 |
| A00588 | A16132 | 193 | A00588 | A16134 | 465 |
| A00588 | A16226 | 491 | A00588 | A16294 | 488 |
| A00588 | A16299 | 455 | A00588 | A16378 | 489 |
| A00588 | A16606 | 491 | A00588 | A16613 | 491 |
| A00588 | A16616 | 489 | A00588 | A16626 | 491 |
| A00588 | A16646 | 469 | A00588 | A16754 | 486 |
| A00588 | A16760 | 208 | A00588 | A16762 | 491 |
| A00589 | A00605 | 572 | A00589 | A00609 | 193 |
| A00589 | A00648 | 297 | A00589 | A00749 | 210 |
| A00589 | A00832 | 413 | A00589 | A00839 | 235 |



|        |        |     |        |        |     |
|--------|--------|-----|--------|--------|-----|
| A00589 | A00866 | 176 | A00589 | A00870 | 252 |
| A00589 | A00872 | 502 | A00589 | A00876 | 172 |
| A00589 | A00883 | 217 | A00589 | A00916 | 488 |
| A00589 | A00945 | 449 | A00589 | A01028 | 502 |
| A00589 | A01056 | 479 | A00589 | A01065 | 714 |
| A00589 | A01072 | 172 | A00589 | A01075 | 489 |
| A00589 | A01077 | 341 | A00589 | A01087 | 172 |
| A00589 | A01092 | 210 | A00589 | A01098 | 210 |
| A00589 | A01120 | 714 | A00589 | A01140 | 424 |
| A00589 | A01150 | 438 | A00589 | A01166 | 490 |
| A00589 | A01179 | 491 | A00589 | A01206 | 491 |
| A00589 | A01234 | 488 | A00589 | A01291 | 461 |
| A00589 | A01356 | 534 | A00589 | A01379 | 249 |
| A00589 | A01384 | 461 | A00589 | A01425 | 409 |
| A00589 | A01429 | 185 | A00589 | A01430 | 452 |
| A00589 | A01439 | 563 | A00589 | A01440 | 475 |
| A00589 | A01457 | 191 | A00589 | A01468 | 185 |
| A00589 | A01470 | 488 | A00589 | A01492 | 570 |
| A00589 | A01495 | 219 | A00589 | A01538 | 502 |
| A00589 | A01597 | 235 | A00589 | A01598 | 730 |
| A00589 | A01614 | 729 | A00589 | A01649 | 491 |
| A00589 | A01684 | 191 | A00589 | A02164 | 475 |
| A00589 | A02265 | 475 | A00589 | A02978 | 502 |
| A00589 | A05230 | 570 | A00589 | A05501 | 190 |
| A00589 | A06584 | 461 | A00589 | A06814 | 177 |
| A00589 | A06825 | 443 | A00589 | A06897 | 462 |
| A00589 | A07076 | 210 | A00589 | A07228 | 368 |
| A00589 | A07700 | 151 | A00589 | A07706 | 191 |
| A00589 | A07759 | 255 | A00589 | A08022 | 168 |
| A00589 | A08137 | 362 | A00589 | A08357 | 491 |
| A00589 | A08359 | 167 | A00589 | A08559 | 249 |
| A00589 | A09292 | 568 | A00589 | A09352 | 299 |
| A00589 | A09622 | 191 | A00589 | A09707 | 488 |
| A00589 | A10156 | 152 | A00589 | A10321 | 162 |
| A00589 | A10518 | 152 | A00589 | A11462 | 488 |
| A00589 | A11942 | 353 | A00589 | A13052 | 475 |
| A00589 | A13126 | 413 | A00589 | A13527 | 213 |
| A00589 | A13989 | 572 | A00589 | A14006 | 324 |
| A00589 | A14216 | 255 | A00589 | A14816 | 210 |
| A00589 | A15215 | 491 | A00589 | A15235 | 154 |
| A00589 | A15309 | 229 | A00589 | A15764 | 165 |
| A00590 | A00603 | 659 | A00590 | A00605 | 473 |
| A00590 | A00629 | 462 | A00590 | A00648 | 491 |
| A00590 | A00651 | 429 | A00590 | A00653 | 486 |
| A00590 | A00697 | 177 | A00590 | A00700 | 277 |
| A00590 | A00701 | 491 | A00590 | A00706 | 363 |

|        |        |     |        |        |     |
|--------|--------|-----|--------|--------|-----|
| A00590 | A00713 | 475 | A00590 | A00763 | 657 |
| A00590 | A00787 | 665 | A00590 | A00809 | 324 |
| A00590 | A00839 | 491 | A00590 | A00870 | 443 |
| A00590 | A00878 | 491 | A00590 | A00923 | 491 |
| A00590 | A00935 | 416 | A00590 | A00953 | 297 |
| A00590 | A00955 | 561 | A00590 | A00965 | 665 |
| A00590 | A00966 | 488 | A00590 | A00980 | 216 |
| A00590 | A00985 | 481 | A00590 | A00988 | 347 |
| A00590 | A00994 | 152 | A00590 | A01000 | 491 |
| A00590 | A01012 | 469 | A00590 | A01020 | 226 |
| A00590 | A01025 | 665 | A00590 | A01034 | 491 |
| A00590 | A01037 | 491 | A00590 | A01047 | 468 |
| A00590 | A01056 | 486 | A00590 | A01067 | 663 |
| A00590 | A01068 | 227 | A00590 | A01072 | 452 |
| A00590 | A01085 | 491 | A00590 | A01090 | 490 |
| A00590 | A01091 | 229 | A00590 | A01095 | 491 |
| A00590 | A01100 | 297 | A00590 | A01101 | 477 |
| A00590 | A01112 | 391 | A00590 | A01127 | 491 |
| A00590 | A01140 | 486 | A00590 | A01154 | 246 |
| A00590 | A01184 | 479 | A00590 | A01186 | 386 |
| A00590 | A01206 | 489 | A00590 | A01238 | 436 |
| A00590 | A01247 | 484 | A00590 | A01249 | 652 |
| A00590 | A01263 | 491 | A00590 | A01291 | 667 |
| A00590 | A01306 | 468 | A00590 | A01335 | 597 |
| A00590 | A01338 | 433 | A00590 | A01365 | 474 |
| A00590 | A01392 | 664 | A00590 | A01416 | 489 |
| A00590 | A01433 | 665 | A00590 | A01436 | 664 |
| A00590 | A01437 | 491 | A00590 | A01446 | 165 |
| A00590 | A01448 | 180 | A00590 | A01457 | 486 |
| A00590 | A01458 | 358 | A00590 | A01464 | 436 |
| A00590 | A01468 | 458 | A00590 | A01496 | 424 |
| A00590 | A01579 | 458 | A00590 | A01586 | 251 |
| A00590 | A01596 | 198 | A00590 | A01649 | 276 |
| A00590 | A01718 | 383 | A00590 | A01741 | 395 |
| A00590 | A01787 | 191 | A00590 | A02270 | 162 |
| A00590 | A02874 | 182 | A00590 | A02966 | 210 |
| A00590 | A03048 | 297 | A00590 | A03069 | 440 |
| A00590 | A03490 | 374 | A00590 | A03567 | 474 |
| A00590 | A03676 | 185 | A00590 | A04507 | 265 |
| A00590 | A04760 | 200 | A00590 | A05323 | 257 |
| A00590 | A05411 | 410 | A00590 | A05443 | 382 |
| A00590 | A05501 | 340 | A00590 | A06351 | 472 |
| A00590 | A06805 | 218 | A00590 | A06812 | 326 |
| A00590 | A06814 | 462 | A00590 | A06861 | 159 |
| A00590 | A06897 | 235 | A00590 | A06965 | 488 |
| A00590 | A07201 | 496 | A00590 | A07360 | 333 |

|        |        |     |        |        |     |
|--------|--------|-----|--------|--------|-----|
| A00590 | A07412 | 204 | A00590 | A07451 | 488 |
| A00590 | A07584 | 198 | A00590 | A08011 | 665 |
| A00590 | A08055 | 658 | A00590 | A08357 | 386 |
| A00590 | A08359 | 405 | A00590 | A08377 | 456 |
| A00590 | A08398 | 419 | A00590 | A08452 | 485 |
| A00590 | A08457 | 151 | A00590 | A08501 | 173 |
| A00590 | A08543 | 467 | A00590 | A08550 | 658 |
| A00590 | A08556 | 455 | A00590 | A08559 | 350 |
| A00590 | A08773 | 659 | A00590 | A08972 | 235 |
| A00590 | A08973 | 491 | A00590 | A09322 | 324 |
| A00590 | A09332 | 488 | A00590 | A09376 | 229 |
| A00590 | A09735 | 454 | A00590 | A09788 | 398 |
| A00590 | A09852 | 152 | A00590 | A11254 | 291 |
| A00590 | A11334 | 475 | A00590 | A11390 | 445 |
| A00590 | A11438 | 404 | A00590 | A11480 | 399 |
| A00590 | A11518 | 218 | A00590 | A11728 | 252 |
| A00590 | A11945 | 335 | A00590 | A11992 | 486 |
| A00590 | A12052 | 218 | A00590 | A12433 | 491 |
| A00590 | A12525 | 200 | A00590 | A12918 | 176 |
| A00590 | A13055 | 319 | A00590 | A13249 | 650 |
| A00590 | A13340 | 273 | A00590 | A13525 | 411 |
| A00590 | A13626 | 367 | A00590 | A13989 | 491 |
| A00590 | A13992 | 477 | A00590 | A14167 | 255 |
| A00590 | A14216 | 491 | A00590 | A14447 | 357 |
| A00590 | A14449 | 462 | A00590 | A14479 | 417 |
| A00590 | A14482 | 488 | A00590 | A14505 | 185 |
| A00590 | A15029 | 339 | A00590 | A15218 | 252 |
| A00590 | A15221 | 400 | A00590 | A15235 | 445 |
| A00590 | A15500 | 383 | A00590 | A15666 | 389 |
| A00590 | A15715 | 185 | A00590 | A15771 | 343 |
| A00590 | A15932 | 303 | A00590 | A15988 | 658 |
| A00590 | A16053 | 245 | A00590 | A16157 | 281 |
| A00590 | A16159 | 208 | A00590 | A16631 | 396 |
| A00590 | A16793 | 274 | A00590 | A16805 | 193 |
| A00591 | A01004 | 468 | A00591 | A01183 | 358 |
| A00591 | A01661 | 477 | A00591 | A01870 | 177 |
| A00591 | A02240 | 249 | A00591 | A02416 | 180 |
| A00591 | A02458 | 246 | A00591 | A03079 | 461 |
| A00591 | A03724 | 479 | A00591 | A03732 | 270 |
| A00591 | A03899 | 429 | A00591 | A03945 | 299 |
| A00591 | A04337 | 290 | A00591 | A05439 | 204 |
| A00591 | A06415 | 290 | A00591 | A07152 | 221 |
| A00591 | A08097 | 216 | A00591 | A09204 | 270 |
| A00591 | A09205 | 485 | A00591 | A09307 | 257 |
| A00591 | A09734 | 357 | A00591 | A09743 | 249 |
| A00591 | A09745 | 257 | A00591 | A13987 | 301 |

|        |        |     |        |        |     |
|--------|--------|-----|--------|--------|-----|
| A00591 | A14391 | 201 | A00591 | A14611 | 446 |
| A00591 | A15313 | 154 | A00591 | A15352 | 266 |
| A00591 | A15422 | 198 | A00591 | A15431 | 176 |
| A00591 | A15433 | 293 | A00591 | A15461 | 243 |
| A00591 | A15886 | 369 | A00591 | A16117 | 445 |
| A00592 | A11917 | 469 | A00592 | A13313 | 443 |
| A00592 | A15665 | 235 | A00593 | A00653 | 276 |
| A00593 | A00673 | 188 | A00593 | A00687 | 188 |
| A00593 | A00705 | 557 | A00593 | A00709 | 188 |
| A00593 | A00711 | 205 | A00593 | A00782 | 368 |
| A00593 | A00839 | 556 | A00593 | A00953 | 188 |
| A00593 | A00972 | 188 | A00593 | A01017 | 559 |
| A00593 | A01090 | 303 | A00593 | A01101 | 188 |
| A00593 | A01112 | 396 | A00593 | A01206 | 299 |
| A00593 | A01217 | 239 | A00593 | A01220 | 188 |
| A00593 | A01306 | 462 | A00593 | A01335 | 489 |
| A00593 | A01337 | 484 | A00593 | A01362 | 425 |
| A00593 | A01365 | 179 | A00593 | A01369 | 474 |
| A00593 | A01406 | 188 | A00593 | A01408 | 188 |
| A00593 | A01414 | 188 | A00593 | A01451 | 188 |
| A00593 | A01579 | 486 | A00593 | A01976 | 188 |
| A00593 | A01988 | 188 | A00593 | A02925 | 200 |
| A00593 | A03567 | 235 | A00593 | A03901 | 188 |
| A00593 | A05501 | 179 | A00593 | A05702 | 188 |
| A00593 | A06564 | 328 | A00593 | A06785 | 531 |
| A00593 | A07047 | 204 | A00593 | A07581 | 406 |
| A00593 | A07925 | 394 | A00593 | A07965 | 538 |
| A00593 | A08131 | 461 | A00593 | A08154 | 246 |
| A00593 | A08358 | 162 | A00593 | A08359 | 450 |
| A00593 | A09726 | 286 | A00593 | A11338 | 182 |
| A00593 | A11480 | 188 | A00593 | A12821 | 474 |
| A00593 | A13734 | 159 | A00593 | A14479 | 170 |
| A00593 | A14508 | 407 | A00593 | A14813 | 188 |
| A00593 | A15500 | 434 | A00593 | A15657 | 188 |
| A00593 | A15771 | 177 | A00593 | A16035 | 414 |
| A00593 | A16680 | 188 | A00594 | A00658 | 154 |
| A00594 | A00687 | 272 | A00594 | A00689 | 281 |
| A00594 | A00846 | 224 | A00594 | A00854 | 318 |
| A00594 | A00972 | 196 | A00594 | A01065 | 212 |
| A00594 | A01098 | 226 | A00594 | A01221 | 238 |
| A00594 | A01234 | 340 | A00594 | A01418 | 301 |
| A00594 | A01468 | 190 | A00594 | A01535 | 170 |
| A00594 | A01536 | 396 | A00594 | A03051 | 228 |
| A00594 | A03227 | 260 | A00594 | A03567 | 201 |
| A00594 | A05275 | 322 | A00594 | A06551 | 364 |
| A00594 | A06832 | 208 | A00594 | A07583 | 424 |

|        |        |     |        |        |     |
|--------|--------|-----|--------|--------|-----|
| A00594 | A11493 | 213 | A00594 | A13594 | 216 |
| A00594 | A14597 | 165 | A00594 | A14701 | 404 |
| A00594 | A16128 | 167 | A00595 | A00603 | 221 |
| A00595 | A00605 | 475 | A00595 | A00648 | 489 |
| A00595 | A00651 | 190 | A00595 | A00713 | 531 |
| A00595 | A00749 | 174 | A00595 | A00767 | 552 |
| A00595 | A00774 | 205 | A00595 | A00861 | 170 |
| A00595 | A00872 | 170 | A00595 | A00878 | 402 |
| A00595 | A00905 | 259 | A00595 | A00908 | 174 |
| A00595 | A00916 | 634 | A00595 | A00918 | 546 |
| A00595 | A00934 | 192 | A00595 | A00960 | 551 |
| A00595 | A00965 | 347 | A00595 | A00992 | 628 |
| A00595 | A01020 | 488 | A00595 | A01025 | 278 |
| A00595 | A01028 | 170 | A00595 | A01115 | 216 |
| A00595 | A01116 | 207 | A00595 | A01120 | 170 |
| A00595 | A01129 | 170 | A00595 | A01160 | 170 |
| A00595 | A01166 | 185 | A00595 | A01168 | 170 |
| A00595 | A01184 | 307 | A00595 | A01193 | 391 |
| A00595 | A01201 | 402 | A00595 | A01206 | 470 |
| A00595 | A01234 | 491 | A00595 | A01249 | 402 |
| A00595 | A01279 | 543 | A00595 | A01291 | 445 |
| A00595 | A01294 | 232 | A00595 | A01304 | 196 |
| A00595 | A01351 | 552 | A00595 | A01356 | 170 |
| A00595 | A01424 | 547 | A00595 | A01425 | 170 |
| A00595 | A01439 | 201 | A00595 | A01451 | 339 |
| A00595 | A01457 | 168 | A00595 | A01468 | 294 |
| A00595 | A01488 | 417 | A00595 | A01492 | 534 |
| A00595 | A01538 | 170 | A00595 | A01542 | 168 |
| A00595 | A01583 | 312 | A00595 | A01584 | 173 |
| A00595 | A01598 | 489 | A00595 | A01612 | 400 |
| A00595 | A01614 | 340 | A00595 | A01649 | 460 |
| A00595 | A01715 | 283 | A00595 | A01741 | 443 |
| A00595 | A02265 | 170 | A00595 | A03438 | 209 |
| A00595 | A03494 | 191 | A00595 | A03569 | 371 |
| A00595 | A03626 | 462 | A00595 | A03652 | 170 |
| A00595 | A03890 | 156 | A00595 | A03981 | 170 |
| A00595 | A04622 | 167 | A00595 | A04893 | 358 |
| A00595 | A05201 | 188 | A00595 | A05318 | 182 |
| A00595 | A05531 | 318 | A00595 | A06275 | 294 |
| A00595 | A06356 | 170 | A00595 | A06659 | 451 |
| A00595 | A06675 | 404 | A00595 | A06698 | 413 |
| A00595 | A06797 | 227 | A00595 | A06860 | 195 |
| A00595 | A06965 | 205 | A00595 | A07244 | 608 |
| A00595 | A07347 | 328 | A00595 | A07432 | 250 |
| A00595 | A07524 | 545 | A00595 | A07533 | 188 |
| A00595 | A07537 | 369 | A00595 | A07584 | 462 |

|        |        |     |        |        |     |
|--------|--------|-----|--------|--------|-----|
| A00595 | A07625 | 486 | A00595 | A07700 | 441 |
| A00595 | A07908 | 299 | A00595 | A07924 | 541 |
| A00595 | A08055 | 322 | A00595 | A08137 | 326 |
| A00595 | A08211 | 201 | A00595 | A08357 | 293 |
| A00595 | A09050 | 267 | A00595 | A09664 | 430 |
| A00595 | A09697 | 170 | A00595 | A10465 | 171 |
| A00595 | A10616 | 357 | A00595 | A11544 | 174 |
| A00595 | A11831 | 448 | A00595 | A11832 | 235 |
| A00595 | A12097 | 439 | A00595 | A12821 | 198 |
| A00595 | A13052 | 170 | A00595 | A13792 | 472 |
| A00595 | A13989 | 546 | A00595 | A13992 | 249 |
| A00595 | A14693 | 307 | A00595 | A14953 | 267 |
| A00595 | A15215 | 326 | A00595 | A15764 | 213 |
| A00595 | A15988 | 384 | A00595 | A16302 | 445 |
| A00596 | A00600 | 467 | A00596 | A00601 | 401 |
| A00596 | A00765 | 366 | A00596 | A00813 | 277 |
| A00596 | A01073 | 310 | A00596 | A01213 | 427 |
| A00596 | A01298 | 435 | A00596 | A01438 | 188 |
| A00596 | A01576 | 477 | A00596 | A03195 | 294 |
| A00596 | A03432 | 297 | A00596 | A06092 | 241 |
| A00596 | A06195 | 229 | A00596 | A06769 | 243 |
| A00596 | A07107 | 301 | A00596 | A07276 | 346 |
| A00596 | A07380 | 374 | A00596 | A07697 | 468 |
| A00596 | A07814 | 374 | A00596 | A08293 | 241 |
| A00596 | A08356 | 215 | A00596 | A08362 | 407 |
| A00596 | A08831 | 271 | A00596 | A11991 | 380 |
| A00596 | A14212 | 168 | A00596 | A14213 | 215 |
| A00596 | A15345 | 151 | A00596 | A16109 | 257 |
| A00596 | A16831 | 278 | A00597 | A00609 | 270 |
| A00597 | A00611 | 396 | A00597 | A00643 | 398 |
| A00597 | A00667 | 221 | A00597 | A00694 | 302 |
| A00597 | A00736 | 252 | A00597 | A00747 | 358 |
| A00597 | A00762 | 340 | A00597 | A00791 | 561 |
| A00597 | A00793 | 251 | A00597 | A00813 | 402 |
| A00597 | A00826 | 367 | A00597 | A00850 | 177 |
| A00597 | A00868 | 408 | A00597 | A00883 | 378 |
| A00597 | A00887 | 352 | A00597 | A00888 | 490 |
| A00597 | A00965 | 224 | A00597 | A00977 | 345 |
| A00597 | A00981 | 288 | A00597 | A01074 | 397 |
| A00597 | A01154 | 260 | A00597 | A01166 | 358 |
| A00597 | A01209 | 268 | A00597 | A01217 | 290 |
| A00597 | A01306 | 281 | A00597 | A01308 | 358 |
| A00597 | A01352 | 396 | A00597 | A01365 | 329 |
| A00597 | A01367 | 154 | A00597 | A01386 | 380 |
| A00597 | A01406 | 299 | A00597 | A01416 | 243 |
| A00597 | A01461 | 227 | A00597 | A01527 | 297 |

|        |        |     |        |        |     |
|--------|--------|-----|--------|--------|-----|
| A00597 | A01537 | 450 | A00597 | A01576 | 160 |
| A00597 | A01716 | 477 | A00597 | A01727 | 299 |
| A00597 | A01739 | 219 | A00597 | A01741 | 340 |
| A00597 | A01766 | 241 | A00597 | A01784 | 170 |
| A00597 | A01993 | 216 | A00597 | A02001 | 430 |
| A00597 | A02006 | 213 | A00597 | A02105 | 356 |
| A00597 | A02180 | 467 | A00597 | A02202 | 230 |
| A00597 | A02219 | 168 | A00597 | A02220 | 232 |
| A00597 | A02411 | 428 | A00597 | A02471 | 185 |
| A00597 | A02663 | 188 | A00597 | A02728 | 322 |
| A00597 | A02744 | 224 | A00597 | A02841 | 163 |
| A00597 | A02877 | 265 | A00597 | A03057 | 479 |
| A00597 | A03070 | 183 | A00597 | A03535 | 226 |
| A00597 | A03598 | 188 | A00597 | A03601 | 402 |
| A00597 | A03728 | 183 | A00597 | A03834 | 180 |
| A00597 | A03872 | 154 | A00597 | A04001 | 188 |
| A00597 | A04002 | 196 | A00597 | A04264 | 270 |
| A00597 | A04509 | 205 | A00597 | A04555 | 193 |
| A00597 | A04623 | 327 | A00597 | A04647 | 159 |
| A00597 | A04743 | 196 | A00597 | A04874 | 152 |
| A00597 | A05009 | 484 | A00597 | A05327 | 229 |
| A00597 | A05375 | 271 | A00597 | A05539 | 278 |
| A00597 | A05619 | 177 | A00597 | A06085 | 241 |
| A00597 | A06130 | 398 | A00597 | A06264 | 411 |
| A00597 | A06606 | 491 | A00597 | A06607 | 293 |
| A00597 | A06621 | 299 | A00597 | A06849 | 262 |
| A00597 | A07013 | 322 | A00597 | A07242 | 154 |
| A00597 | A07339 | 276 | A00597 | A07519 | 215 |
| A00597 | A07768 | 454 | A00597 | A09025 | 322 |
| A00597 | A09370 | 177 | A00597 | A09548 | 205 |
| A00597 | A09620 | 223 | A00597 | A09840 | 163 |
| A00597 | A10781 | 159 | A00597 | A11475 | 399 |
| A00597 | A11759 | 193 | A00597 | A11792 | 167 |
| A00597 | A11998 | 274 | A00597 | A12824 | 497 |
| A00597 | A14173 | 247 | A00597 | A14180 | 440 |
| A00597 | A14247 | 179 | A00597 | A14713 | 205 |
| A00597 | A15141 | 185 | A00597 | A15372 | 219 |
| A00597 | A15575 | 229 | A00597 | A15837 | 405 |
| A00597 | A16298 | 260 | A00598 | A00604 | 491 |
| A00598 | A00608 | 435 | A00598 | A00610 | 224 |
| A00598 | A00649 | 489 | A00598 | A00653 | 491 |
| A00598 | A00697 | 491 | A00598 | A00731 | 414 |
| A00598 | A00737 | 202 | A00598 | A00741 | 490 |
| A00598 | A00745 | 207 | A00598 | A00758 | 483 |
| A00598 | A00780 | 346 | A00598 | A00783 | 479 |
| A00598 | A00785 | 490 | A00598 | A00790 | 486 |

|        |        |     |        |        |     |
|--------|--------|-----|--------|--------|-----|
| A00598 | A00809 | 484 | A00598 | A00935 | 491 |
| A00598 | A00953 | 491 | A00598 | A00974 | 452 |
| A00598 | A00987 | 162 | A00598 | A01025 | 160 |
| A00598 | A01027 | 489 | A00598 | A01042 | 229 |
| A00598 | A01081 | 224 | A00598 | A01086 | 491 |
| A00598 | A01090 | 423 | A00598 | A01108 | 491 |
| A00598 | A01161 | 491 | A00598 | A01204 | 483 |
| A00598 | A01210 | 470 | A00598 | A01246 | 418 |
| A00598 | A01336 | 414 | A00598 | A01346 | 488 |
| A00598 | A01399 | 490 | A00598 | A01435 | 491 |
| A00598 | A01443 | 321 | A00598 | A01446 | 350 |
| A00598 | A01447 | 486 | A00598 | A01448 | 340 |
| A00598 | A01540 | 485 | A00598 | A01711 | 160 |
| A00598 | A01741 | 361 | A00598 | A01827 | 286 |
| A00598 | A02040 | 182 | A00598 | A02607 | 477 |
| A00598 | A03713 | 338 | A00598 | A03740 | 174 |
| A00598 | A04895 | 485 | A00598 | A05417 | 339 |
| A00598 | A05473 | 154 | A00598 | A05801 | 293 |
| A00598 | A05839 | 201 | A00598 | A06746 | 310 |
| A00598 | A06959 | 405 | A00598 | A07086 | 346 |
| A00598 | A07115 | 436 | A00598 | A07237 | 436 |
| A00598 | A07350 | 335 | A00598 | A07362 | 208 |
| A00598 | A07394 | 488 | A00598 | A07412 | 180 |
| A00598 | A07569 | 401 | A00598 | A07597 | 154 |
| A00598 | A08055 | 374 | A00598 | A08222 | 235 |
| A00598 | A08315 | 162 | A00598 | A08653 | 204 |
| A00598 | A08835 | 294 | A00598 | A08987 | 276 |
| A00598 | A09616 | 364 | A00598 | A09709 | 208 |
| A00598 | A09720 | 270 | A00598 | A10199 | 364 |
| A00598 | A10535 | 491 | A00598 | A10553 | 322 |
| A00598 | A11015 | 281 | A00598 | A11322 | 218 |
| A00598 | A11374 | 240 | A00598 | A11419 | 411 |
| A00598 | A11427 | 341 | A00598 | A11677 | 190 |
| A00598 | A13809 | 258 | A00598 | A14566 | 188 |
| A00598 | A14845 | 372 | A00598 | A15653 | 486 |
| A00598 | A15666 | 490 | A00598 | A15765 | 488 |
| A00598 | A15933 | 160 | A00598 | A16403 | 270 |
| A00599 | A00687 | 411 | A00599 | A01159 | 223 |
| A00599 | A01461 | 469 | A00599 | A01574 | 454 |
| A00599 | A01585 | 198 | A00599 | A01824 | 249 |
| A00599 | A01831 | 337 | A00599 | A02108 | 179 |
| A00599 | A02170 | 260 | A00599 | A02364 | 210 |
| A00599 | A03228 | 241 | A00599 | A03881 | 356 |
| A00599 | A04589 | 193 | A00599 | A05446 | 227 |
| A00599 | A06122 | 263 | A00599 | A06369 | 216 |
| A00599 | A06425 | 321 | A00599 | A06436 | 321 |



|        |        |     |        |        |     |
|--------|--------|-----|--------|--------|-----|
| A00599 | A10590 | 285 | A00599 | A14156 | 311 |
| A00599 | A14527 | 329 | A00599 | A15750 | 262 |
| A00599 | A15951 | 308 | A00600 | A00601 | 607 |
| A00600 | A00691 | 452 | A00600 | A00697 | 257 |
| A00600 | A00765 | 491 | A00600 | A00813 | 491 |
| A00600 | A00862 | 361 | A00600 | A00868 | 384 |
| A00600 | A00911 | 327 | A00600 | A00939 | 491 |
| A00600 | A00973 | 74  | A00600 | A01022 | 302 |
| A00600 | A01073 | 474 | A00600 | A01156 | 294 |
| A00600 | A01161 | 491 | A00600 | A01185 | 375 |
| A00600 | A01211 | 252 | A00600 | A01213 | 606 |
| A00600 | A01215 | 177 | A00600 | A01241 | 456 |
| A00600 | A01298 | 450 | A00600 | A01329 | 475 |
| A00600 | A01343 | 329 | A00600 | A01360 | 160 |
| A00600 | A01361 | 207 | A00600 | A01385 | 358 |
| A00600 | A01419 | 473 | A00600 | A01438 | 607 |
| A00600 | A01451 | 480 | A00600 | A01519 | 151 |
| A00600 | A01520 | 477 | A00600 | A01522 | 452 |
| A00600 | A01524 | 207 | A00600 | A01527 | 423 |
| A00600 | A01542 | 177 | A00600 | A01572 | 207 |
| A00600 | A01573 | 302 | A00600 | A01576 | 491 |
| A00600 | A01582 | 160 | A00600 | A01695 | 319 |
| A00600 | A01860 | 174 | A00600 | A01908 | 427 |
| A00600 | A02144 | 160 | A00600 | A02148 | 193 |
| A00600 | A02257 | 63  | A00600 | A02278 | 160 |
| A00600 | A02284 | 473 | A00600 | A02333 | 216 |
| A00600 | A02443 | 173 | A00600 | A02499 | 484 |
| A00600 | A02574 | 310 | A00600 | A02601 | 63  |
| A00600 | A02619 | 162 | A00600 | A02664 | 168 |
| A00600 | A02719 | 157 | A00600 | A02935 | 195 |
| A00600 | A02965 | 450 | A00600 | A03009 | 179 |
| A00600 | A03034 | 491 | A00600 | A03036 | 179 |
| A00600 | A03104 | 477 | A00600 | A03195 | 396 |
| A00600 | A03205 | 490 | A00600 | A03293 | 378 |
| A00600 | A03335 | 329 | A00600 | A03417 | 218 |
| A00600 | A03523 | 489 | A00600 | A03524 | 486 |
| A00600 | A03625 | 246 | A00600 | A03628 | 173 |
| A00600 | A03686 | 259 | A00600 | A04012 | 277 |
| A00600 | A04195 | 185 | A00600 | A04275 | 307 |
| A00600 | A04276 | 218 | A00600 | A04337 | 374 |
| A00600 | A04731 | 413 | A00600 | A04990 | 162 |
| A00600 | A05234 | 469 | A00600 | A05405 | 168 |
| A00600 | A05407 | 152 | A00600 | A05602 | 258 |
| A00600 | A05633 | 230 | A00600 | A06037 | 218 |
| A00600 | A06042 | 258 | A00600 | A06092 | 491 |
| A00600 | A06195 | 479 | A00600 | A06480 | 185 |

|        |        |     |        |        |     |
|--------|--------|-----|--------|--------|-----|
| A00600 | A06520 | 491 | A00600 | A06701 | 263 |
| A00600 | A06708 | 168 | A00600 | A06769 | 252 |
| A00600 | A06846 | 193 | A00600 | A07069 | 490 |
| A00600 | A07106 | 461 | A00600 | A07107 | 170 |
| A00600 | A07209 | 286 | A00600 | A07276 | 480 |
| A00600 | A07310 | 238 | A00600 | A07380 | 312 |
| A00600 | A07389 | 193 | A00600 | A07447 | 258 |
| A00600 | A07605 | 436 | A00600 | A07697 | 491 |
| A00600 | A07826 | 488 | A00600 | A07940 | 168 |
| A00600 | A08091 | 472 | A00600 | A08097 | 290 |
| A00600 | A08235 | 360 | A00600 | A08243 | 291 |
| A00600 | A08251 | 382 | A00600 | A08293 | 602 |
| A00600 | A08356 | 561 | A00600 | A08362 | 527 |
| A00600 | A08426 | 210 | A00600 | A08473 | 223 |
| A00600 | A08608 | 452 | A00600 | A08758 | 162 |
| A00600 | A08821 | 515 | A00600 | A08831 | 595 |
| A00600 | A08956 | 605 | A00600 | A09287 | 291 |
| A00600 | A09291 | 152 | A00600 | A09315 | 457 |
| A00600 | A09323 | 467 | A00600 | A09335 | 193 |
| A00600 | A09514 | 201 | A00600 | A09560 | 201 |
| A00600 | A09659 | 446 | A00600 | A09743 | 276 |
| A00600 | A09878 | 297 | A00600 | A09996 | 276 |
| A00600 | A10156 | 229 | A00600 | A10159 | 386 |
| A00600 | A10214 | 285 | A00600 | A10226 | 159 |
| A00600 | A10288 | 210 | A00600 | A10437 | 154 |
| A00600 | A10846 | 210 | A00600 | A10987 | 263 |
| A00600 | A11101 | 486 | A00600 | A11377 | 333 |
| A00600 | A11862 | 213 | A00600 | A11929 | 283 |
| A00600 | A11991 | 324 | A00600 | A12260 | 223 |
| A00600 | A12464 | 351 | A00600 | A12523 | 238 |
| A00600 | A12606 | 276 | A00600 | A12633 | 296 |
| A00600 | A12931 | 382 | A00600 | A13043 | 258 |
| A00600 | A13088 | 291 | A00600 | A13301 | 291 |
| A00600 | A13361 | 435 | A00600 | A13362 | 154 |
| A00600 | A13824 | 460 | A00600 | A13983 | 441 |
| A00600 | A14196 | 418 | A00600 | A14208 | 463 |
| A00600 | A14212 | 276 | A00600 | A14213 | 320 |
| A00600 | A14214 | 276 | A00600 | A14253 | 252 |
| A00600 | A14362 | 168 | A00600 | A14381 | 484 |
| A00600 | A14594 | 170 | A00600 | A14635 | 165 |
| A00600 | A14648 | 151 | A00600 | A14936 | 172 |
| A00600 | A14990 | 152 | A00600 | A15295 | 488 |
| A00600 | A15314 | 422 | A00600 | A15323 | 520 |
| A00600 | A15386 | 383 | A00600 | A15498 | 457 |
| A00600 | A15596 | 750 | A00600 | A16005 | 291 |
| A00600 | A16024 | 201 | A00600 | A16316 | 393 |

|        |        |     |        |        |     |
|--------|--------|-----|--------|--------|-----|
| A00600 | A16363 | 221 | A00600 | A16449 | 306 |
| A00600 | A16459 | 210 | A00600 | A16702 | 276 |
| A00600 | A16719 | 173 | A00601 | A00653 | 252 |
| A00601 | A00674 | 238 | A00601 | A00697 | 288 |
| A00601 | A00761 | 198 | A00601 | A00765 | 486 |
| A00601 | A00766 | 477 | A00601 | A00787 | 283 |
| A00601 | A00813 | 491 | A00601 | A00868 | 491 |
| A00601 | A00883 | 288 | A00601 | A00889 | 218 |
| A00601 | A00890 | 435 | A00601 | A00892 | 435 |
| A00601 | A00915 | 432 | A00601 | A00926 | 491 |
| A00601 | A00939 | 488 | A00601 | A00949 | 243 |
| A00601 | A00975 | 467 | A00601 | A01020 | 168 |
| A00601 | A01073 | 154 | A00601 | A01095 | 177 |
| A00601 | A01099 | 413 | A00601 | A01108 | 255 |
| A00601 | A01137 | 299 | A00601 | A01161 | 486 |
| A00601 | A01162 | 247 | A00601 | A01169 | 208 |
| A00601 | A01212 | 224 | A00601 | A01213 | 350 |
| A00601 | A01215 | 157 | A00601 | A01222 | 185 |
| A00601 | A01234 | 270 | A00601 | A01298 | 230 |
| A00601 | A01322 | 469 | A00601 | A01370 | 183 |
| A00601 | A01404 | 483 | A00601 | A01415 | 208 |
| A00601 | A01438 | 606 | A00601 | A01451 | 288 |
| A00601 | A01515 | 458 | A00601 | A01522 | 258 |
| A00601 | A01573 | 154 | A00601 | A01576 | 488 |
| A00601 | A01677 | 263 | A00601 | A01796 | 198 |
| A00601 | A01914 | 383 | A00601 | A01926 | 419 |
| A00601 | A02054 | 435 | A00601 | A02108 | 176 |
| A00601 | A02112 | 472 | A00601 | A02148 | 281 |
| A00601 | A02254 | 112 | A00601 | A02257 | 227 |
| A00601 | A02284 | 205 | A00601 | A02499 | 428 |
| A00601 | A02574 | 234 | A00601 | A02611 | 323 |
| A00601 | A02802 | 157 | A00601 | A02965 | 224 |
| A00601 | A02977 | 269 | A00601 | A03034 | 490 |
| A00601 | A03084 | 184 | A00601 | A03086 | 316 |
| A00601 | A03087 | 235 | A00601 | A03104 | 176 |
| A00601 | A03164 | 205 | A00601 | A03195 | 358 |
| A00601 | A03225 | 162 | A00601 | A03238 | 191 |
| A00601 | A03408 | 196 | A00601 | A03415 | 162 |
| A00601 | A03498 | 176 | A00601 | A03520 | 290 |
| A00601 | A03523 | 466 | A00601 | A03524 | 394 |
| A00601 | A03593 | 307 | A00601 | A03594 | 224 |
| A00601 | A03672 | 252 | A00601 | A03676 | 177 |
| A00601 | A04031 | 216 | A00601 | A04194 | 458 |
| A00601 | A04288 | 152 | A00601 | A04402 | 263 |
| A00601 | A04421 | 389 | A00601 | A04731 | 157 |
| A00601 | A04870 | 165 | A00601 | A04990 | 366 |

|        |        |     |        |        |     |
|--------|--------|-----|--------|--------|-----|
| A00601 | A05208 | 319 | A00601 | A05234 | 366 |
| A00601 | A05466 | 323 | A00601 | A05533 | 340 |
| A00601 | A05539 | 152 | A00601 | A06037 | 208 |
| A00601 | A06042 | 323 | A00601 | A06046 | 168 |
| A00601 | A06092 | 491 | A00601 | A06195 | 483 |
| A00601 | A06298 | 246 | A00601 | A06520 | 491 |
| A00601 | A06769 | 368 | A00601 | A07027 | 160 |
| A00601 | A07069 | 417 | A00601 | A07237 | 162 |
| A00601 | A07276 | 411 | A00601 | A07419 | 243 |
| A00601 | A07435 | 228 | A00601 | A07447 | 323 |
| A00601 | A07697 | 491 | A00601 | A07756 | 272 |
| A00601 | A07814 | 257 | A00601 | A07826 | 485 |
| A00601 | A07940 | 246 | A00601 | A07961 | 199 |
| A00601 | A08091 | 416 | A00601 | A08199 | 188 |
| A00601 | A08235 | 346 | A00601 | A08293 | 405 |
| A00601 | A08356 | 276 | A00601 | A08362 | 276 |
| A00601 | A08572 | 291 | A00601 | A08821 | 276 |
| A00601 | A08831 | 601 | A00601 | A08956 | 602 |
| A00601 | A09315 | 443 | A00601 | A09323 | 193 |
| A00601 | A09335 | 270 | A00601 | A09743 | 276 |
| A00601 | A09821 | 230 | A00601 | A09996 | 276 |
| A00601 | A10214 | 151 | A00601 | A10226 | 238 |
| A00601 | A10527 | 223 | A00601 | A10986 | 162 |
| A00601 | A11559 | 256 | A00601 | A11663 | 243 |
| A00601 | A12606 | 276 | A00601 | A12824 | 491 |
| A00601 | A12931 | 366 | A00601 | A13362 | 235 |
| A00601 | A13368 | 235 | A00601 | A13387 | 217 |
| A00601 | A13666 | 347 | A00601 | A13983 | 154 |
| A00601 | A14196 | 377 | A00601 | A14208 | 424 |
| A00601 | A14212 | 276 | A00601 | A14213 | 276 |
| A00601 | A14214 | 276 | A00601 | A14253 | 188 |
| A00601 | A14332 | 208 | A00601 | A14381 | 302 |
| A00601 | A14605 | 152 | A00601 | A15295 | 351 |
| A00601 | A15314 | 235 | A00601 | A15498 | 488 |
| A00601 | A16392 | 196 | A00601 | A16449 | 276 |
| A00601 | A16702 | 276 | A00602 | A03223 | 154 |
| A00602 | A15524 | 193 | A00603 | A00604 | 472 |
| A00603 | A00605 | 486 | A00603 | A00629 | 586 |
| A00603 | A00648 | 796 | A00603 | A00651 | 461 |
| A00603 | A00653 | 490 | A00603 | A00687 | 291 |
| A00603 | A00697 | 422 | A00603 | A00700 | 443 |
| A00603 | A00701 | 490 | A00603 | A00718 | 234 |
| A00603 | A00762 | 258 | A00603 | A00763 | 658 |
| A00603 | A00782 | 545 | A00603 | A00787 | 775 |
| A00603 | A00793 | 247 | A00603 | A00826 | 294 |
| A00603 | A00839 | 491 | A00603 | A00854 | 241 |

|        |        |     |        |        |     |
|--------|--------|-----|--------|--------|-----|
| A00603 | A00870 | 486 | A00603 | A00878 | 785 |
| A00603 | A00902 | 279 | A00603 | A00906 | 430 |
| A00603 | A00923 | 441 | A00603 | A00935 | 171 |
| A00603 | A00949 | 638 | A00603 | A00953 | 240 |
| A00603 | A00965 | 597 | A00603 | A00966 | 466 |
| A00603 | A00977 | 269 | A00603 | A00981 | 286 |
| A00603 | A00985 | 265 | A00603 | A01000 | 469 |
| A00603 | A01012 | 260 | A00603 | A01025 | 491 |
| A00603 | A01031 | 337 | A00603 | A01034 | 643 |
| A00603 | A01037 | 491 | A00603 | A01038 | 151 |
| A00603 | A01047 | 312 | A00603 | A01056 | 490 |
| A00603 | A01067 | 475 | A00603 | A01072 | 486 |
| A00603 | A01074 | 352 | A00603 | A01085 | 486 |
| A00603 | A01090 | 491 | A00603 | A01095 | 474 |
| A00603 | A01111 | 188 | A00603 | A01112 | 385 |
| A00603 | A01115 | 339 | A00603 | A01127 | 490 |
| A00603 | A01140 | 489 | A00603 | A01144 | 160 |
| A00603 | A01152 | 434 | A00603 | A01153 | 249 |
| A00603 | A01154 | 357 | A00603 | A01166 | 579 |
| A00603 | A01184 | 299 | A00603 | A01186 | 243 |
| A00603 | A01189 | 319 | A00603 | A01206 | 338 |
| A00603 | A01209 | 249 | A00603 | A01212 | 204 |
| A00603 | A01217 | 306 | A00603 | A01220 | 454 |
| A00603 | A01221 | 394 | A00603 | A01234 | 333 |
| A00603 | A01238 | 729 | A00603 | A01247 | 419 |
| A00603 | A01249 | 486 | A00603 | A01252 | 265 |
| A00603 | A01263 | 484 | A00603 | A01291 | 667 |
| A00603 | A01292 | 293 | A00603 | A01306 | 340 |
| A00603 | A01335 | 446 | A00603 | A01352 | 319 |
| A00603 | A01365 | 683 | A00603 | A01392 | 658 |
| A00603 | A01406 | 386 | A00603 | A01412 | 349 |
| A00603 | A01416 | 722 | A00603 | A01425 | 408 |
| A00603 | A01433 | 658 | A00603 | A01436 | 490 |
| A00603 | A01437 | 335 | A00603 | A01457 | 314 |
| A00603 | A01458 | 452 | A00603 | A01464 | 291 |
| A00603 | A01468 | 488 | A00603 | A01496 | 384 |
| A00603 | A01518 | 436 | A00603 | A01553 | 899 |
| A00603 | A01569 | 374 | A00603 | A01579 | 475 |
| A00603 | A01586 | 362 | A00603 | A01628 | 899 |
| A00603 | A01649 | 390 | A00603 | A01718 | 470 |
| A00603 | A01741 | 402 | A00603 | A02227 | 420 |
| A00603 | A02859 | 240 | A00603 | A03069 | 301 |
| A00603 | A03112 | 171 | A00603 | A03275 | 157 |
| A00603 | A03490 | 629 | A00603 | A03567 | 490 |
| A00603 | A03570 | 172 | A00603 | A03601 | 290 |
| A00603 | A03652 | 456 | A00603 | A03676 | 247 |

|        |        |     |        |        |     |
|--------|--------|-----|--------|--------|-----|
| A00603 | A03770 | 160 | A00603 | A03981 | 156 |
| A00603 | A04622 | 196 | A00603 | A05375 | 272 |
| A00603 | A05411 | 470 | A00603 | A05419 | 486 |
| A00603 | A05443 | 213 | A00603 | A05501 | 483 |
| A00603 | A05502 | 173 | A00603 | A06279 | 238 |
| A00603 | A06351 | 643 | A00603 | A06814 | 317 |
| A00603 | A06861 | 261 | A00603 | A06965 | 489 |
| A00603 | A07157 | 378 | A00603 | A07243 | 159 |
| A00603 | A07360 | 279 | A00603 | A07412 | 305 |
| A00603 | A07449 | 427 | A00603 | A07451 | 333 |
| A00603 | A07464 | 157 | A00603 | A08011 | 659 |
| A00603 | A08052 | 379 | A00603 | A08055 | 654 |
| A00603 | A08088 | 191 | A00603 | A08154 | 294 |
| A00603 | A08452 | 446 | A00603 | A08543 | 277 |
| A00603 | A08550 | 639 | A00603 | A08556 | 270 |
| A00603 | A08752 | 168 | A00603 | A08760 | 223 |
| A00603 | A08773 | 659 | A00603 | A08958 | 243 |
| A00603 | A08973 | 484 | A00603 | A09308 | 188 |
| A00603 | A09332 | 638 | A00603 | A09697 | 188 |
| A00603 | A09735 | 469 | A00603 | A09978 | 322 |
| A00603 | A10732 | 173 | A00603 | A10924 | 184 |
| A00603 | A11288 | 165 | A00603 | A11438 | 205 |
| A00603 | A11518 | 216 | A00603 | A11815 | 343 |
| A00603 | A11992 | 369 | A00603 | A12433 | 461 |
| A00603 | A12525 | 490 | A00603 | A12923 | 260 |
| A00603 | A13024 | 205 | A00603 | A13249 | 643 |
| A00603 | A13549 | 216 | A00603 | A13905 | 221 |
| A00603 | A13989 | 491 | A00603 | A13992 | 452 |
| A00603 | A14216 | 288 | A00603 | A14449 | 395 |
| A00603 | A14479 | 257 | A00603 | A14482 | 643 |
| A00603 | A14573 | 228 | A00603 | A14729 | 216 |
| A00603 | A15500 | 380 | A00603 | A15660 | 446 |
| A00603 | A15684 | 474 | A00603 | A15771 | 340 |
| A00603 | A15931 | 324 | A00603 | A15932 | 182 |
| A00603 | A15988 | 659 | A00603 | A16118 | 411 |
| A00603 | A16306 | 255 | A00603 | A16351 | 205 |
| A00603 | A16805 | 191 | A00603 | A16885 | 243 |
| A00604 | A00605 | 477 | A00604 | A00608 | 306 |
| A00604 | A00610 | 265 | A00604 | A00629 | 340 |
| A00604 | A00648 | 157 | A00604 | A00649 | 591 |
| A00604 | A00653 | 765 | A00604 | A00663 | 265 |
| A00604 | A00687 | 379 | A00604 | A00691 | 273 |
| A00604 | A00697 | 837 | A00604 | A00731 | 584 |
| A00604 | A00741 | 491 | A00604 | A00745 | 121 |
| A00604 | A00750 | 307 | A00604 | A00758 | 474 |
| A00604 | A00780 | 408 | A00604 | A00782 | 273 |

|        |        |     |        |        |     |
|--------|--------|-----|--------|--------|-----|
| A00604 | A00783 | 592 | A00604 | A00785 | 592 |
| A00604 | A00787 | 483 | A00604 | A00790 | 591 |
| A00604 | A00796 | 191 | A00604 | A00809 | 491 |
| A00604 | A00839 | 489 | A00604 | A00842 | 324 |
| A00604 | A00849 | 247 | A00604 | A00870 | 485 |
| A00604 | A00871 | 184 | A00604 | A00878 | 462 |
| A00604 | A00910 | 276 | A00604 | A00935 | 491 |
| A00604 | A00953 | 592 | A00604 | A00974 | 590 |
| A00604 | A00985 | 202 | A00604 | A00987 | 307 |
| A00604 | A01012 | 235 | A00604 | A01023 | 171 |
| A00604 | A01027 | 591 | A00604 | A01037 | 462 |
| A00604 | A01042 | 491 | A00604 | A01054 | 483 |
| A00604 | A01081 | 470 | A00604 | A01086 | 592 |
| A00604 | A01087 | 160 | A00604 | A01108 | 592 |
| A00604 | A01150 | 588 | A00604 | A01155 | 241 |
| A00604 | A01161 | 652 | A00604 | A01186 | 152 |
| A00604 | A01192 | 681 | A00604 | A01204 | 583 |
| A00604 | A01210 | 664 | A00604 | A01234 | 441 |
| A00604 | A01246 | 260 | A00604 | A01247 | 303 |
| A00604 | A01249 | 236 | A00604 | A01263 | 430 |
| A00604 | A01265 | 474 | A00604 | A01270 | 358 |
| A00604 | A01287 | 426 | A00604 | A01291 | 489 |
| A00604 | A01336 | 425 | A00604 | A01346 | 590 |
| A00604 | A01369 | 460 | A00604 | A01382 | 165 |
| A00604 | A01392 | 303 | A00604 | A01399 | 591 |
| A00604 | A01411 | 485 | A00604 | A01413 | 490 |
| A00604 | A01433 | 441 | A00604 | A01435 | 491 |
| A00604 | A01443 | 247 | A00604 | A01446 | 491 |
| A00604 | A01447 | 490 | A00604 | A01448 | 485 |
| A00604 | A01449 | 224 | A00604 | A01471 | 160 |
| A00604 | A01539 | 286 | A00604 | A01540 | 491 |
| A00604 | A01579 | 257 | A00604 | A01586 | 430 |
| A00604 | A01601 | 603 | A00604 | A01741 | 441 |
| A00604 | A01822 | 168 | A00604 | A01824 | 285 |
| A00604 | A01827 | 473 | A00604 | A01850 | 180 |
| A00604 | A02040 | 213 | A00604 | A02300 | 251 |
| A00604 | A02607 | 486 | A00604 | A02814 | 411 |
| A00604 | A02961 | 380 | A00604 | A02994 | 309 |
| A00604 | A03070 | 483 | A00604 | A03259 | 296 |
| A00604 | A03298 | 363 | A00604 | A03494 | 200 |
| A00604 | A03567 | 313 | A00604 | A03676 | 265 |
| A00604 | A03740 | 491 | A00604 | A03752 | 294 |
| A00604 | A03776 | 277 | A00604 | A03860 | 152 |
| A00604 | A03959 | 544 | A00604 | A04030 | 213 |
| A00604 | A04895 | 435 | A00604 | A05387 | 299 |
| A00604 | A05417 | 472 | A00604 | A05501 | 385 |

|        |        |     |        |        |     |
|--------|--------|-----|--------|--------|-----|
| A00604 | A05839 | 236 | A00604 | A06466 | 307 |
| A00604 | A06814 | 337 | A00604 | A06959 | 466 |
| A00604 | A06973 | 247 | A00604 | A07237 | 213 |
| A00604 | A07350 | 269 | A00604 | A07362 | 246 |
| A00604 | A07394 | 489 | A00604 | A07398 | 335 |
| A00604 | A07569 | 393 | A00604 | A07597 | 279 |
| A00604 | A07767 | 341 | A00604 | A07773 | 355 |
| A00604 | A07792 | 119 | A00604 | A07961 | 199 |
| A00604 | A08011 | 473 | A00604 | A08052 | 445 |
| A00604 | A08423 | 249 | A00604 | A08519 | 259 |
| A00604 | A08556 | 286 | A00604 | A08760 | 232 |
| A00604 | A08773 | 480 | A00604 | A08835 | 480 |
| A00604 | A08987 | 462 | A00604 | A09054 | 235 |
| A00604 | A09285 | 185 | A00604 | A09449 | 356 |
| A00604 | A09595 | 185 | A00604 | A09616 | 286 |
| A00604 | A09709 | 246 | A00604 | A09720 | 185 |
| A00604 | A10199 | 424 | A00604 | A10535 | 422 |
| A00604 | A10798 | 157 | A00604 | A11015 | 196 |
| A00604 | A11296 | 159 | A00604 | A11302 | 348 |
| A00604 | A11322 | 486 | A00604 | A11331 | 157 |
| A00604 | A11337 | 236 | A00604 | A11338 | 486 |
| A00604 | A11374 | 486 | A00604 | A11419 | 485 |
| A00604 | A11427 | 489 | A00604 | A11677 | 458 |
| A00604 | A11724 | 337 | A00604 | A11728 | 430 |
| A00604 | A12241 | 335 | A00604 | A12433 | 314 |
| A00604 | A12746 | 269 | A00604 | A13261 | 191 |
| A00604 | A13340 | 329 | A00604 | A13992 | 402 |
| A00604 | A14073 | 463 | A00604 | A14482 | 217 |
| A00604 | A14507 | 154 | A00604 | A14566 | 429 |
| A00604 | A14699 | 426 | A00604 | A14778 | 362 |
| A00604 | A14825 | 157 | A00604 | A14845 | 272 |
| A00604 | A15624 | 428 | A00604 | A15652 | 249 |
| A00604 | A15653 | 491 | A00604 | A15661 | 474 |
| A00604 | A15666 | 489 | A00604 | A15684 | 224 |
| A00604 | A15765 | 352 | A00604 | A16118 | 333 |
| A00604 | A16157 | 458 | A00604 | A16418 | 310 |
| A00604 | A16587 | 247 | A00604 | A17128 | 436 |
| A00605 | A00629 | 491 | A00605 | A00648 | 491 |
| A00605 | A00651 | 491 | A00605 | A00653 | 491 |
| A00605 | A00655 | 488 | A00605 | A00687 | 283 |
| A00605 | A00694 | 465 | A00605 | A00697 | 230 |
| A00605 | A00700 | 491 | A00605 | A00701 | 196 |
| A00605 | A00705 | 481 | A00605 | A00708 | 435 |
| A00605 | A00711 | 424 | A00605 | A00713 | 491 |
| A00605 | A00749 | 225 | A00605 | A00763 | 488 |
| A00605 | A00769 | 491 | A00605 | A00782 | 452 |



|        |        |     |        |        |     |
|--------|--------|-----|--------|--------|-----|
| A00605 | A00783 | 461 | A00605 | A00787 | 486 |
| A00605 | A00805 | 446 | A00605 | A00809 | 490 |
| A00605 | A00822 | 364 | A00605 | A00831 | 638 |
| A00605 | A00839 | 491 | A00605 | A00841 | 374 |
| A00605 | A00843 | 466 | A00605 | A00848 | 491 |
| A00605 | A00849 | 176 | A00605 | A00856 | 491 |
| A00605 | A00858 | 490 | A00605 | A00870 | 396 |
| A00605 | A00871 | 491 | A00605 | A00872 | 210 |
| A00605 | A00878 | 491 | A00605 | A00881 | 386 |
| A00605 | A00883 | 483 | A00605 | A00905 | 486 |
| A00605 | A00909 | 479 | A00605 | A00916 | 491 |
| A00605 | A00922 | 623 | A00605 | A00923 | 491 |
| A00605 | A00926 | 252 | A00605 | A00934 | 491 |
| A00605 | A00945 | 491 | A00605 | A00953 | 152 |
| A00605 | A00965 | 428 | A00605 | A00970 | 489 |
| A00605 | A00983 | 486 | A00605 | A00986 | 439 |
| A00605 | A00992 | 165 | A00605 | A00994 | 491 |
| A00605 | A01000 | 347 | A00605 | A01001 | 247 |
| A00605 | A01010 | 165 | A00605 | A01012 | 488 |
| A00605 | A01017 | 481 | A00605 | A01020 | 638 |
| A00605 | A01025 | 491 | A00605 | A01027 | 491 |
| A00605 | A01028 | 550 | A00605 | A01032 | 491 |
| A00605 | A01034 | 439 | A00605 | A01040 | 636 |
| A00605 | A01042 | 480 | A00605 | A01047 | 263 |
| A00605 | A01054 | 213 | A00605 | A01056 | 488 |
| A00605 | A01065 | 572 | A00605 | A01068 | 379 |
| A00605 | A01069 | 491 | A00605 | A01072 | 462 |
| A00605 | A01075 | 491 | A00605 | A01082 | 173 |
| A00605 | A01085 | 470 | A00605 | A01086 | 171 |
| A00605 | A01087 | 436 | A00605 | A01088 | 457 |
| A00605 | A01090 | 460 | A00605 | A01092 | 265 |
| A00605 | A01098 | 536 | A00605 | A01101 | 458 |
| A00605 | A01112 | 638 | A00605 | A01115 | 693 |
| A00605 | A01116 | 457 | A00605 | A01119 | 447 |
| A00605 | A01120 | 572 | A00605 | A01121 | 207 |
| A00605 | A01127 | 486 | A00605 | A01136 | 355 |
| A00605 | A01140 | 490 | A00605 | A01144 | 201 |
| A00605 | A01150 | 491 | A00605 | A01166 | 491 |
| A00605 | A01179 | 491 | A00605 | A01184 | 486 |
| A00605 | A01192 | 477 | A00605 | A01194 | 445 |
| A00605 | A01196 | 470 | A00605 | A01201 | 347 |
| A00605 | A01206 | 491 | A00605 | A01215 | 152 |
| A00605 | A01232 | 490 | A00605 | A01234 | 582 |
| A00605 | A01238 | 374 | A00605 | A01242 | 479 |
| A00605 | A01243 | 452 | A00605 | A01249 | 491 |
| A00605 | A01263 | 281 | A00605 | A01291 | 541 |

|        |        |     |        |        |     |
|--------|--------|-----|--------|--------|-----|
| A00605 | A01292 | 195 | A00605 | A01293 | 469 |
| A00605 | A01304 | 614 | A00605 | A01306 | 491 |
| A00605 | A01335 | 491 | A00605 | A01338 | 160 |
| A00605 | A01349 | 483 | A00605 | A01351 | 484 |
| A00605 | A01353 | 434 | A00605 | A01354 | 435 |
| A00605 | A01356 | 351 | A00605 | A01365 | 232 |
| A00605 | A01379 | 682 | A00605 | A01384 | 491 |
| A00605 | A01392 | 481 | A00605 | A01398 | 163 |
| A00605 | A01418 | 374 | A00605 | A01425 | 491 |
| A00605 | A01429 | 491 | A00605 | A01430 | 480 |
| A00605 | A01431 | 491 | A00605 | A01433 | 457 |
| A00605 | A01436 | 230 | A00605 | A01437 | 221 |
| A00605 | A01439 | 682 | A00605 | A01440 | 439 |
| A00605 | A01454 | 157 | A00605 | A01457 | 483 |
| A00605 | A01458 | 486 | A00605 | A01464 | 232 |
| A00605 | A01468 | 491 | A00605 | A01470 | 491 |
| A00605 | A01488 | 486 | A00605 | A01492 | 572 |
| A00605 | A01495 | 606 | A00605 | A01496 | 491 |
| A00605 | A01500 | 270 | A00605 | A01503 | 167 |
| A00605 | A01506 | 394 | A00605 | A01538 | 386 |
| A00605 | A01539 | 463 | A00605 | A01540 | 446 |
| A00605 | A01569 | 491 | A00605 | A01579 | 491 |
| A00605 | A01586 | 409 | A00605 | A01597 | 491 |
| A00605 | A01598 | 572 | A00605 | A01601 | 623 |
| A00605 | A01612 | 491 | A00605 | A01614 | 572 |
| A00605 | A01640 | 162 | A00605 | A01649 | 491 |
| A00605 | A01684 | 469 | A00605 | A01707 | 373 |
| A00605 | A01787 | 188 | A00605 | A01822 | 283 |
| A00605 | A02216 | 151 | A00605 | A02265 | 210 |
| A00605 | A02350 | 182 | A00605 | A02353 | 270 |
| A00605 | A02978 | 485 | A00605 | A03035 | 316 |
| A00605 | A03069 | 306 | A00605 | A03296 | 443 |
| A00605 | A03298 | 479 | A00605 | A03304 | 371 |
| A00605 | A03438 | 481 | A00605 | A03446 | 452 |
| A00605 | A03452 | 485 | A00605 | A03454 | 232 |
| A00605 | A03567 | 491 | A00605 | A03569 | 404 |
| A00605 | A03676 | 224 | A00605 | A03734 | 490 |
| A00605 | A03740 | 485 | A00605 | A03859 | 473 |
| A00605 | A03863 | 151 | A00605 | A03959 | 394 |
| A00605 | A04507 | 185 | A00605 | A04846 | 440 |
| A00605 | A05230 | 567 | A00605 | A05370 | 160 |
| A00605 | A05501 | 491 | A00605 | A05845 | 230 |
| A00605 | A06275 | 458 | A00605 | A06279 | 457 |
| A00605 | A06351 | 445 | A00605 | A06466 | 374 |
| A00605 | A06543 | 368 | A00605 | A06584 | 411 |
| A00605 | A06661 | 180 | A00605 | A06825 | 234 |

|        |        |     |        |        |     |
|--------|--------|-----|--------|--------|-----|
| A00605 | A06826 | 216 | A00605 | A06861 | 486 |
| A00605 | A06897 | 479 | A00605 | A06965 | 490 |
| A00605 | A06973 | 477 | A00605 | A07047 | 243 |
| A00605 | A07076 | 682 | A00605 | A07203 | 229 |
| A00605 | A07223 | 334 | A00605 | A07306 | 163 |
| A00605 | A07323 | 491 | A00605 | A07347 | 484 |
| A00605 | A07348 | 486 | A00605 | A07360 | 485 |
| A00605 | A07378 | 157 | A00605 | A07398 | 451 |
| A00605 | A07451 | 462 | A00605 | A07481 | 182 |
| A00605 | A07487 | 489 | A00605 | A07524 | 485 |
| A00605 | A07581 | 160 | A00605 | A07677 | 414 |
| A00605 | A07700 | 569 | A00605 | A07706 | 484 |
| A00605 | A07725 | 334 | A00605 | A07744 | 425 |
| A00605 | A07759 | 486 | A00605 | A07881 | 491 |
| A00605 | A07924 | 468 | A00605 | A08011 | 260 |
| A00605 | A08022 | 490 | A00605 | A08131 | 484 |
| A00605 | A08137 | 491 | A00605 | A08228 | 461 |
| A00605 | A08258 | 224 | A00605 | A08357 | 724 |
| A00605 | A08359 | 489 | A00605 | A08377 | 480 |
| A00605 | A08398 | 385 | A00605 | A08408 | 240 |
| A00605 | A08452 | 483 | A00605 | A08491 | 434 |
| A00605 | A08521 | 167 | A00605 | A08548 | 277 |
| A00605 | A08571 | 488 | A00605 | A08679 | 180 |
| A00605 | A08756 | 170 | A00605 | A08835 | 216 |
| A00605 | A08952 | 486 | A00605 | A08973 | 408 |
| A00605 | A09292 | 572 | A00605 | A09293 | 151 |
| A00605 | A09307 | 152 | A00605 | A09322 | 215 |
| A00605 | A09327 | 489 | A00605 | A09328 | 201 |
| A00605 | A09655 | 152 | A00605 | A09707 | 491 |
| A00605 | A09735 | 163 | A00605 | A09736 | 159 |
| A00605 | A10466 | 472 | A00605 | A10518 | 445 |
| A00605 | A10532 | 569 | A00605 | A10616 | 457 |
| A00605 | A10624 | 157 | A00605 | A10755 | 485 |
| A00605 | A10853 | 443 | A00605 | A11297 | 420 |
| A00605 | A11312 | 245 | A00605 | A11322 | 176 |
| A00605 | A11427 | 221 | A00605 | A11438 | 378 |
| A00605 | A11462 | 491 | A00605 | A11562 | 358 |
| A00605 | A11608 | 157 | A00605 | A11942 | 489 |
| A00605 | A11957 | 170 | A00605 | A12138 | 177 |
| A00605 | A12329 | 458 | A00605 | A12821 | 185 |
| A00605 | A13052 | 210 | A00605 | A13066 | 361 |
| A00605 | A13126 | 491 | A00605 | A13164 | 163 |
| A00605 | A13207 | 205 | A00605 | A13298 | 491 |
| A00605 | A13340 | 480 | A00605 | A13699 | 163 |
| A00605 | A13764 | 224 | A00605 | A13875 | 484 |
| A00605 | A13989 | 624 | A00605 | A13992 | 488 |

|        |        |     |        |        |     |
|--------|--------|-----|--------|--------|-----|
| A00605 | A14073 | 430 | A00605 | A14172 | 339 |
| A00605 | A14176 | 176 | A00605 | A14216 | 491 |
| A00605 | A14479 | 163 | A00605 | A14482 | 414 |
| A00605 | A14566 | 390 | A00605 | A14596 | 428 |
| A00605 | A14597 | 475 | A00605 | A14699 | 352 |
| A00605 | A14778 | 347 | A00605 | A14816 | 370 |
| A00605 | A14817 | 182 | A00605 | A15204 | 163 |
| A00605 | A15208 | 185 | A00605 | A15210 | 163 |
| A00605 | A15215 | 491 | A00605 | A15256 | 408 |
| A00605 | A15297 | 311 | A00605 | A15338 | 419 |
| A00605 | A15416 | 441 | A00605 | A15500 | 447 |
| A00605 | A15624 | 162 | A00605 | A15652 | 467 |
| A00605 | A15659 | 201 | A00605 | A15660 | 491 |
| A00605 | A15661 | 324 | A00605 | A15684 | 491 |
| A00605 | A15746 | 162 | A00605 | A15918 | 208 |
| A00605 | A15931 | 491 | A00605 | A15937 | 199 |
| A00605 | A15988 | 454 | A00605 | A16088 | 491 |
| A00605 | A16096 | 353 | A00605 | A16118 | 332 |
| A00605 | A16218 | 236 | A00605 | A16272 | 345 |
| A00605 | A17140 | 165 | A00606 | A00652 | 311 |
| A00606 | A00687 | 428 | A00606 | A00689 | 241 |
| A00606 | A00712 | 297 | A00606 | A00762 | 223 |
| A00606 | A00854 | 281 | A00606 | A00878 | 232 |
| A00606 | A00965 | 238 | A00606 | A00977 | 232 |
| A00606 | A01004 | 163 | A00606 | A01016 | 234 |
| A00606 | A01018 | 218 | A00606 | A01074 | 306 |
| A00606 | A01102 | 118 | A00606 | A01154 | 258 |
| A00606 | A01220 | 226 | A00606 | A01238 | 286 |
| A00606 | A01306 | 274 | A00606 | A01352 | 281 |
| A00606 | A01356 | 229 | A00606 | A01365 | 307 |
| A00606 | A01406 | 265 | A00606 | A01416 | 283 |
| A00606 | A01709 | 154 | A00606 | A01824 | 236 |
| A00606 | A02051 | 228 | A00606 | A02164 | 151 |
| A00606 | A03601 | 274 | A00606 | A03918 | 182 |
| A00606 | A05987 | 160 | A00606 | A06369 | 201 |
| A00606 | A06832 | 162 | A00606 | A07458 | 380 |
| A00606 | A08910 | 218 | A00606 | A08974 | 389 |
| A00606 | A10065 | 251 | A00606 | A14395 | 196 |
| A00606 | A14456 | 236 | A00606 | A14484 | 182 |
| A00606 | A14546 | 246 | A00606 | A15291 | 408 |
| A00606 | A15367 | 218 | A00606 | A15614 | 495 |
| A00606 | A15932 | 188 | A00607 | A00848 | 154 |
| A00607 | A00923 | 171 | A00607 | A00926 | 201 |
| A00607 | A01372 | 475 | A00607 | A03503 | 340 |
| A00607 | A08524 | 63  | A00607 | A08839 | 291 |
| A00607 | A12288 | 427 | A00607 | A14303 | 257 |

|        |        |     |        |        |     |
|--------|--------|-----|--------|--------|-----|
| A00607 | A15495 | 238 | A00608 | A00610 | 385 |
| A00608 | A00653 | 477 | A00608 | A00731 | 321 |
| A00608 | A00745 | 257 | A00608 | A00750 | 486 |
| A00608 | A00780 | 265 | A00608 | A00785 | 451 |
| A00608 | A00790 | 303 | A00608 | A00953 | 369 |
| A00608 | A00974 | 154 | A00608 | A01027 | 343 |
| A00608 | A01081 | 272 | A00608 | A01086 | 439 |
| A00608 | A01108 | 358 | A00608 | A01121 | 199 |
| A00608 | A01186 | 188 | A00608 | A01204 | 391 |
| A00608 | A01246 | 193 | A00608 | A01346 | 205 |
| A00608 | A01382 | 405 | A00608 | A01399 | 452 |
| A00608 | A01446 | 173 | A00608 | A03776 | 205 |
| A00608 | A04895 | 385 | A00608 | A05839 | 251 |
| A00608 | A07237 | 358 | A00608 | A07325 | 183 |
| A00608 | A07362 | 258 | A00608 | A07569 | 243 |
| A00608 | A08521 | 177 | A00608 | A08987 | 196 |
| A00608 | A09616 | 286 | A00608 | A11338 | 157 |
| A00608 | A11419 | 316 | A00608 | A11427 | 302 |
| A00608 | A16144 | 457 | A00608 | A16935 | 286 |
| A00609 | A00617 | 468 | A00609 | A00647 | 302 |
| A00609 | A00718 | 783 | A00609 | A00753 | 373 |
| A00609 | A00778 | 722 | A00609 | A00779 | 491 |
| A00609 | A00781 | 419 | A00609 | A00797 | 480 |
| A00609 | A00807 | 240 | A00609 | A00822 | 490 |
| A00609 | A00826 | 312 | A00609 | A00840 | 483 |
| A00609 | A00883 | 490 | A00609 | A00907 | 491 |
| A00609 | A00920 | 638 | A00609 | A00948 | 414 |
| A00609 | A00975 | 321 | A00609 | A00977 | 235 |
| A00609 | A01021 | 483 | A00609 | A01022 | 485 |
| A00609 | A01026 | 722 | A00609 | A01074 | 285 |
| A00609 | A01075 | 441 | A00609 | A01077 | 270 |
| A00609 | A01087 | 419 | A00609 | A01091 | 470 |
| A00609 | A01096 | 160 | A00609 | A01161 | 490 |
| A00609 | A01166 | 293 | A00609 | A01171 | 285 |
| A00609 | A01211 | 484 | A00609 | A01280 | 249 |
| A00609 | A01306 | 232 | A00609 | A01313 | 490 |
| A00609 | A01326 | 457 | A00609 | A01329 | 288 |
| A00609 | A01343 | 291 | A00609 | A01354 | 488 |
| A00609 | A01360 | 350 | A00609 | A01365 | 313 |
| A00609 | A01375 | 411 | A00609 | A01377 | 721 |
| A00609 | A01386 | 491 | A00609 | A01428 | 171 |
| A00609 | A01451 | 470 | A00609 | A01571 | 159 |
| A00609 | A01573 | 185 | A00609 | A01598 | 266 |
| A00609 | A01686 | 229 | A00609 | A01716 | 383 |
| A00609 | A01900 | 202 | A00609 | A02389 | 154 |
| A00609 | A02452 | 286 | A00609 | A02477 | 168 |

|        |        |     |        |        |     |
|--------|--------|-----|--------|--------|-----|
| A00609 | A02494 | 353 | A00609 | A02629 | 230 |
| A00609 | A02704 | 463 | A00609 | A02774 | 217 |
| A00609 | A02852 | 163 | A00609 | A02878 | 430 |
| A00609 | A03057 | 423 | A00609 | A03181 | 157 |
| A00609 | A03237 | 174 | A00609 | A03293 | 314 |
| A00609 | A03417 | 163 | A00609 | A03597 | 270 |
| A00609 | A03601 | 273 | A00609 | A04145 | 337 |
| A00609 | A04263 | 157 | A00609 | A04275 | 201 |
| A00609 | A04337 | 483 | A00609 | A04463 | 374 |
| A00609 | A04668 | 373 | A00609 | A04737 | 205 |
| A00609 | A05052 | 348 | A00609 | A05234 | 364 |
| A00609 | A05353 | 152 | A00609 | A05525 | 330 |
| A00609 | A05539 | 173 | A00609 | A05556 | 193 |
| A00609 | A06312 | 168 | A00609 | A06390 | 313 |
| A00609 | A06472 | 369 | A00609 | A07069 | 208 |
| A00609 | A07106 | 165 | A00609 | A07245 | 190 |
| A00609 | A07391 | 182 | A00609 | A07442 | 216 |
| A00609 | A07558 | 385 | A00609 | A07605 | 270 |
| A00609 | A07621 | 319 | A00609 | A07693 | 488 |
| A00609 | A07736 | 205 | A00609 | A07976 | 435 |
| A00609 | A08113 | 586 | A00609 | A08137 | 423 |
| A00609 | A08263 | 484 | A00609 | A08346 | 483 |
| A00609 | A08400 | 199 | A00609 | A08402 | 491 |
| A00609 | A08656 | 230 | A00609 | A08694 | 240 |
| A00609 | A08975 | 358 | A00609 | A09135 | 436 |
| A00609 | A09136 | 216 | A00609 | A09271 | 240 |
| A00609 | A09648 | 717 | A00609 | A09857 | 260 |
| A00609 | A10156 | 435 | A00609 | A10289 | 190 |
| A00609 | A10321 | 491 | A00609 | A10420 | 224 |
| A00609 | A10424 | 177 | A00609 | A10664 | 188 |
| A00609 | A11297 | 235 | A00609 | A11324 | 469 |
| A00609 | A11965 | 165 | A00609 | A12863 | 152 |
| A00609 | A13785 | 458 | A00609 | A13873 | 475 |
| A00609 | A13905 | 321 | A00609 | A13963 | 205 |
| A00609 | A14077 | 491 | A00609 | A14092 | 491 |
| A00609 | A14191 | 490 | A00609 | A14196 | 490 |
| A00609 | A14220 | 450 | A00609 | A14272 | 722 |
| A00609 | A14288 | 333 | A00609 | A14381 | 316 |
| A00609 | A14707 | 458 | A00609 | A14840 | 327 |
| A00609 | A15256 | 174 | A00609 | A15367 | 491 |
| A00609 | A15383 | 480 | A00609 | A15419 | 347 |
| A00609 | A15431 | 195 | A00609 | A15559 | 243 |
| A00609 | A15596 | 249 | A00609 | A15752 | 160 |
| A00609 | A15763 | 204 | A00609 | A15877 | 489 |
| A00609 | A16037 | 252 | A00609 | A16406 | 160 |
| A00610 | A00649 | 329 | A00610 | A00653 | 440 |

|        |        |     |        |        |     |
|--------|--------|-----|--------|--------|-----|
| A00610 | A00731 | 396 | A00610 | A00780 | 461 |
| A00610 | A00785 | 356 | A00610 | A00790 | 326 |
| A00610 | A00842 | 445 | A00610 | A00953 | 266 |
| A00610 | A00974 | 434 | A00610 | A01023 | 440 |
| A00610 | A01027 | 193 | A00610 | A01081 | 430 |
| A00610 | A01086 | 457 | A00610 | A01108 | 391 |
| A00610 | A01184 | 269 | A00610 | A01204 | 391 |
| A00610 | A01246 | 294 | A00610 | A01346 | 196 |
| A00610 | A01399 | 168 | A00610 | A01446 | 172 |
| A00610 | A01448 | 341 | A00610 | A02814 | 273 |
| A00610 | A04895 | 386 | A00610 | A05839 | 424 |
| A00610 | A07237 | 324 | A00610 | A07362 | 340 |
| A00610 | A07569 | 330 | A00610 | A09616 | 361 |
| A00610 | A10799 | 283 | A00610 | A16591 | 396 |
| A00611 | A01716 | 322 | A00611 | A02018 | 326 |
| A00611 | A02180 | 154 | A00611 | A02191 | 317 |
| A00611 | A03070 | 196 | A00611 | A03498 | 428 |
| A00611 | A04874 | 432 | A00611 | A06253 | 420 |
| A00611 | A06607 | 207 | A00611 | A07803 | 296 |
| A00611 | A14128 | 296 | A00612 | A04065 | 411 |
| A00613 | A00968 | 310 | A00613 | A01074 | 235 |
| A00613 | A01365 | 246 | A00613 | A01647 | 477 |
| A00613 | A02548 | 338 | A00613 | A03880 | 324 |
| A00613 | A05016 | 221 | A00613 | A05301 | 156 |
| A00613 | A05563 | 246 | A00613 | A05998 | 871 |
| A00613 | A07981 | 375 | A00613 | A08050 | 812 |
| A00613 | A08069 | 825 | A00613 | A08297 | 63  |
| A00613 | A08351 | 258 | A00613 | A08411 | 104 |
| A00613 | A09054 | 208 | A00613 | A10377 | 740 |
| A00613 | A10378 | 929 | A00613 | A11202 | 358 |
| A00613 | A13415 | 430 | A00613 | A13920 | 433 |
| A00614 | A00628 | 458 | A00614 | A00654 | 491 |
| A00614 | A00660 | 154 | A00614 | A00666 | 470 |
| A00614 | A00670 | 223 | A00614 | A00681 | 279 |
| A00614 | A00695 | 170 | A00614 | A00738 | 469 |
| A00614 | A00739 | 391 | A00614 | A00770 | 477 |
| A00614 | A00773 | 232 | A00614 | A00962 | 489 |
| A00614 | A00968 | 224 | A00614 | A00995 | 224 |
| A00614 | A01005 | 422 | A00614 | A01008 | 474 |
| A00614 | A01018 | 213 | A00614 | A01063 | 191 |
| A00614 | A01074 | 223 | A00614 | A01109 | 352 |
| A00614 | A01174 | 424 | A00614 | A01175 | 259 |
| A00614 | A01189 | 223 | A00614 | A01233 | 215 |
| A00614 | A01256 | 414 | A00614 | A01272 | 333 |
| A00614 | A01360 | 314 | A00614 | A01408 | 151 |
| A00614 | A01481 | 419 | A00614 | A01508 | 483 |

|        |        |     |        |        |     |
|--------|--------|-----|--------|--------|-----|
| A00614 | A01511 | 243 | A00614 | A01635 | 456 |
| A00614 | A01794 | 221 | A00614 | A01857 | 469 |
| A00614 | A01866 | 252 | A00614 | A01867 | 210 |
| A00614 | A01995 | 221 | A00614 | A02138 | 262 |
| A00614 | A02154 | 241 | A00614 | A02227 | 251 |
| A00614 | A02319 | 329 | A00614 | A02335 | 223 |
| A00614 | A02353 | 313 | A00614 | A02363 | 438 |
| A00614 | A02541 | 238 | A00614 | A02546 | 291 |
| A00614 | A02574 | 171 | A00614 | A02593 | 330 |
| A00614 | A02642 | 154 | A00614 | A02718 | 238 |
| A00614 | A02789 | 223 | A00614 | A03003 | 438 |
| A00614 | A03004 | 234 | A00614 | A03005 | 291 |
| A00614 | A03016 | 213 | A00614 | A03224 | 191 |
| A00614 | A03243 | 152 | A00614 | A03264 | 245 |
| A00614 | A03441 | 483 | A00614 | A03443 | 424 |
| A00614 | A03468 | 232 | A00614 | A03477 | 484 |
| A00614 | A03500 | 477 | A00614 | A03501 | 414 |
| A00614 | A03719 | 223 | A00614 | A03728 | 223 |
| A00614 | A03752 | 223 | A00614 | A04372 | 312 |
| A00614 | A04620 | 270 | A00614 | A04779 | 346 |
| A00614 | A04834 | 452 | A00614 | A04995 | 408 |
| A00614 | A05007 | 302 | A00614 | A05013 | 318 |
| A00614 | A05020 | 201 | A00614 | A05102 | 188 |
| A00614 | A05262 | 483 | A00614 | A05416 | 260 |
| A00614 | A05463 | 232 | A00614 | A05472 | 305 |
| A00614 | A05516 | 210 | A00614 | A05550 | 191 |
| A00614 | A05573 | 168 | A00614 | A05772 | 279 |
| A00614 | A05774 | 270 | A00614 | A05859 | 288 |
| A00614 | A06101 | 230 | A00614 | A06211 | 279 |
| A00614 | A06252 | 374 | A00614 | A06309 | 183 |
| A00614 | A06358 | 165 | A00614 | A06558 | 338 |
| A00614 | A06689 | 223 | A00614 | A06700 | 154 |
| A00614 | A06756 | 458 | A00614 | A06819 | 420 |
| A00614 | A06979 | 490 | A00614 | A07080 | 388 |
| A00614 | A07109 | 450 | A00614 | A07122 | 457 |
| A00614 | A07222 | 223 | A00614 | A07267 | 333 |
| A00614 | A07333 | 223 | A00614 | A07413 | 374 |
| A00614 | A07710 | 313 | A00614 | A07746 | 198 |
| A00614 | A07800 | 434 | A00614 | A07931 | 167 |
| A00614 | A08193 | 489 | A00614 | A09711 | 347 |
| A00614 | A10701 | 168 | A00614 | A11309 | 262 |
| A00614 | A13822 | 223 | A00614 | A13906 | 270 |
| A00614 | A14525 | 278 | A00614 | A14685 | 318 |
| A00614 | A14804 | 223 | A00614 | A15372 | 223 |
| A00614 | A15497 | 262 | A00614 | A15637 | 462 |
| A00614 | A15874 | 255 | A00614 | A15905 | 157 |



|        |        |     |        |        |     |
|--------|--------|-----|--------|--------|-----|
| A00614 | A16026 | 413 | A00614 | A16028 | 425 |
| A00614 | A16219 | 223 | A00614 | A16419 | 254 |
| A00614 | A16531 | 223 | A00614 | A16753 | 184 |
| A00614 | A17155 | 256 | A00615 | A00981 | 227 |
| A00615 | A01143 | 411 | A00615 | A03141 | 177 |
| A00615 | A15274 | 335 | A00615 | A15321 | 469 |
| A00615 | A15944 | 311 | A00615 | A16724 | 224 |
| A00616 | A00736 | 294 | A00616 | A00752 | 327 |
| A00616 | A00799 | 388 | A00616 | A00815 | 407 |
| A00616 | A00900 | 243 | A00616 | A01137 | 491 |
| A00616 | A01138 | 216 | A00616 | A01161 | 172 |
| A00616 | A01163 | 179 | A00616 | A01257 | 490 |
| A00616 | A01277 | 224 | A00616 | A01425 | 63  |
| A00616 | A01477 | 251 | A00616 | A01485 | 238 |
| A00616 | A01527 | 899 | A00616 | A01590 | 488 |
| A00616 | A01604 | 167 | A00616 | A01605 | 940 |
| A00616 | A01626 | 179 | A00616 | A01639 | 899 |
| A00616 | A01654 | 180 | A00616 | A01668 | 345 |
| A00616 | A01722 | 168 | A00616 | A01888 | 251 |
| A00616 | A01908 | 252 | A00616 | A01926 | 63  |
| A00616 | A01983 | 491 | A00616 | A02021 | 154 |
| A00616 | A02074 | 196 | A00616 | A02083 | 408 |
| A00616 | A02107 | 201 | A00616 | A02111 | 408 |
| A00616 | A02132 | 258 | A00616 | A02136 | 385 |
| A00616 | A02138 | 208 | A00616 | A02142 | 475 |
| A00616 | A02143 | 119 | A00616 | A02148 | 460 |
| A00616 | A02176 | 162 | A00616 | A02213 | 179 |
| A00616 | A02237 | 204 | A00616 | A02240 | 180 |
| A00616 | A02245 | 472 | A00616 | A02246 | 278 |
| A00616 | A02298 | 462 | A00616 | A02305 | 385 |
| A00616 | A02306 | 485 | A00616 | A02309 | 486 |
| A00616 | A02313 | 452 | A00616 | A02326 | 467 |
| A00616 | A02333 | 174 | A00616 | A02346 | 227 |
| A00616 | A02367 | 334 | A00616 | A02393 | 291 |
| A00616 | A02396 | 334 | A00616 | A02397 | 257 |
| A00616 | A02405 | 462 | A00616 | A02412 | 160 |
| A00616 | A02419 | 234 | A00616 | A02423 | 466 |
| A00616 | A02425 | 457 | A00616 | A02434 | 159 |
| A00616 | A02444 | 190 | A00616 | A02451 | 430 |
| A00616 | A02461 | 399 | A00616 | A02464 | 465 |
| A00616 | A02465 | 469 | A00616 | A02468 | 218 |
| A00616 | A02490 | 480 | A00616 | A02491 | 416 |
| A00616 | A02501 | 216 | A00616 | A02508 | 190 |
| A00616 | A02587 | 204 | A00616 | A02608 | 183 |
| A00616 | A02618 | 162 | A00616 | A02620 | 204 |
| A00616 | A02624 | 278 | A00616 | A02644 | 486 |

|        |        |     |        |        |     |
|--------|--------|-----|--------|--------|-----|
| A00616 | A02667 | 456 | A00616 | A02668 | 466 |
| A00616 | A02670 | 307 | A00616 | A02756 | 462 |
| A00616 | A02759 | 452 | A00616 | A02764 | 198 |
| A00616 | A02772 | 477 | A00616 | A02785 | 364 |
| A00616 | A02803 | 432 | A00616 | A02807 | 213 |
| A00616 | A02854 | 210 | A00616 | A02917 | 208 |
| A00616 | A02935 | 271 | A00616 | A02945 | 285 |
| A00616 | A02952 | 171 | A00616 | A03049 | 191 |
| A00616 | A03053 | 154 | A00616 | A03056 | 238 |
| A00616 | A03062 | 195 | A00616 | A03063 | 251 |
| A00616 | A03099 | 441 | A00616 | A03110 | 347 |
| A00616 | A03129 | 223 | A00616 | A03165 | 173 |
| A00616 | A03184 | 174 | A00616 | A03186 | 475 |
| A00616 | A03219 | 87  | A00616 | A03238 | 430 |
| A00616 | A03239 | 185 | A00616 | A03259 | 207 |
| A00616 | A03271 | 395 | A00616 | A03304 | 208 |
| A00616 | A03310 | 321 | A00616 | A03314 | 490 |
| A00616 | A03315 | 159 | A00616 | A03436 | 163 |
| A00616 | A03470 | 288 | A00616 | A03540 | 218 |
| A00616 | A03584 | 99  | A00616 | A03610 | 347 |
| A00616 | A03633 | 188 | A00616 | A03639 | 945 |
| A00616 | A03771 | 296 | A00616 | A03788 | 212 |
| A00616 | A03800 | 339 | A00616 | A03817 | 439 |
| A00616 | A03818 | 435 | A00616 | A03915 | 238 |
| A00616 | A03919 | 429 | A00616 | A03942 | 163 |
| A00616 | A03961 | 358 | A00616 | A03975 | 183 |
| A00616 | A04040 | 170 | A00616 | A04086 | 265 |
| A00616 | A04092 | 474 | A00616 | A04101 | 174 |
| A00616 | A04163 | 456 | A00616 | A04202 | 218 |
| A00616 | A04248 | 218 | A00616 | A04254 | 278 |
| A00616 | A04255 | 390 | A00616 | A04256 | 226 |
| A00616 | A04276 | 157 | A00616 | A04423 | 173 |
| A00616 | A04437 | 156 | A00616 | A04457 | 278 |
| A00616 | A04472 | 238 | A00616 | A04482 | 351 |
| A00616 | A04484 | 227 | A00616 | A04504 | 243 |
| A00616 | A04516 | 183 | A00616 | A04536 | 299 |
| A00616 | A04578 | 210 | A00616 | A04679 | 483 |
| A00616 | A04682 | 413 | A00616 | A04734 | 201 |
| A00616 | A04746 | 154 | A00616 | A04748 | 238 |
| A00616 | A04813 | 157 | A00616 | A04974 | 232 |
| A00616 | A04976 | 340 | A00616 | A05078 | 210 |
| A00616 | A05111 | 232 | A00616 | A05117 | 201 |
| A00616 | A05143 | 183 | A00616 | A05208 | 297 |
| A00616 | A05288 | 193 | A00616 | A05311 | 449 |
| A00616 | A05459 | 351 | A00616 | A05533 | 384 |
| A00616 | A05653 | 207 | A00616 | A05679 | 152 |

|        |        |     |        |        |     |
|--------|--------|-----|--------|--------|-----|
| A00616 | A05869 | 174 | A00616 | A05923 | 160 |
| A00616 | A05934 | 251 | A00616 | A05944 | 367 |
| A00616 | A05985 | 490 | A00616 | A06054 | 335 |
| A00616 | A06055 | 329 | A00616 | A06263 | 246 |
| A00616 | A06404 | 193 | A00616 | A06588 | 252 |
| A00616 | A06747 | 224 | A00616 | A06818 | 174 |
| A00616 | A06831 | 223 | A00616 | A07140 | 188 |
| A00616 | A07143 | 491 | A00616 | A07173 | 168 |
| A00616 | A07209 | 241 | A00616 | A07422 | 899 |
| A00616 | A08264 | 278 | A00616 | A08714 | 235 |
| A00616 | A08728 | 267 | A00616 | A08751 | 207 |
| A00616 | A08817 | 373 | A00616 | A09074 | 223 |
| A00616 | A09217 | 278 | A00616 | A09218 | 465 |
| A00616 | A09480 | 333 | A00616 | A09513 | 258 |
| A00616 | A09559 | 238 | A00616 | A09797 | 160 |
| A00616 | A10018 | 364 | A00616 | A10044 | 267 |
| A00616 | A10045 | 267 | A00616 | A10046 | 390 |
| A00616 | A10357 | 195 | A00616 | A10650 | 278 |
| A00616 | A10665 | 207 | A00616 | A10806 | 267 |
| A00616 | A11014 | 170 | A00616 | A11064 | 204 |
| A00616 | A11123 | 198 | A00616 | A11485 | 210 |
| A00616 | A11556 | 188 | A00616 | A11950 | 255 |
| A00616 | A12412 | 210 | A00616 | A13391 | 179 |
| A00616 | A13872 | 243 | A00616 | A13978 | 903 |
| A00616 | A14003 | 162 | A00616 | A14125 | 469 |
| A00616 | A14194 | 408 | A00616 | A14198 | 390 |
| A00616 | A14210 | 172 | A00616 | A14370 | 152 |
| A00616 | A14443 | 924 | A00616 | A14554 | 180 |
| A00616 | A14604 | 170 | A00616 | A15230 | 323 |
| A00616 | A15290 | 316 | A00616 | A15466 | 238 |
| A00616 | A15498 | 443 | A00616 | A15674 | 159 |
| A00616 | A15966 | 238 | A00616 | A16636 | 469 |
| A00617 | A00718 | 451 | A00617 | A00778 | 215 |
| A00617 | A00779 | 151 | A00617 | A00907 | 452 |
| A00617 | A01026 | 424 | A00617 | A01035 | 221 |
| A00617 | A01091 | 291 | A00617 | A01211 | 202 |
| A00617 | A01313 | 480 | A00617 | A01377 | 466 |
| A00617 | A03055 | 363 | A00617 | A08113 | 458 |
| A00617 | A08263 | 456 | A00617 | A08402 | 338 |
| A00617 | A14092 | 324 | A00617 | A14272 | 333 |
| A00617 | A14840 | 379 | A00617 | A15339 | 204 |
| A00617 | A15498 | 228 | A00617 | A15788 | 196 |
| A00617 | A15877 | 452 | A00618 | A14502 | 63  |
| A00619 | A00697 | 179 | A00619 | A00734 | 252 |
| A00619 | A00918 | 457 | A00619 | A00969 | 210 |
| A00619 | A01020 | 172 | A00619 | A01061 | 358 |

|        |        |     |        |        |     |
|--------|--------|-----|--------|--------|-----|
| A00619 | A01066 | 307 | A00619 | A01082 | 204 |
| A00619 | A01136 | 454 | A00619 | A01151 | 201 |
| A00619 | A01234 | 190 | A00619 | A01264 | 286 |
| A00619 | A01338 | 329 | A00619 | A01384 | 210 |
| A00619 | A01412 | 165 | A00619 | A01471 | 201 |
| A00619 | A02050 | 317 | A00619 | A02499 | 312 |
| A00619 | A02978 | 279 | A00619 | A03009 | 486 |
| A00619 | A03289 | 201 | A00619 | A03494 | 200 |
| A00619 | A03567 | 205 | A00619 | A03776 | 210 |
| A00619 | A03859 | 168 | A00619 | A04398 | 170 |
| A00619 | A04861 | 168 | A00619 | A05301 | 247 |
| A00619 | A06861 | 418 | A00619 | A07226 | 313 |
| A00619 | A07378 | 252 | A00619 | A08558 | 274 |
| A00619 | A09529 | 247 | A00619 | A11248 | 386 |
| A00619 | A14566 | 477 | A00619 | A14594 | 399 |
| A00619 | A16664 | 168 | A00620 | A01042 | 474 |
| A00620 | A01461 | 286 | A00620 | A01673 | 173 |
| A00620 | A03326 | 160 | A00620 | A03876 | 276 |
| A00620 | A06290 | 414 | A00620 | A06593 | 301 |
| A00620 | A07989 | 184 | A00620 | A09375 | 273 |
| A00620 | A09583 | 306 | A00620 | A10578 | 201 |
| A00620 | A11285 | 165 | A00620 | A11742 | 296 |
| A00620 | A14247 | 465 | A00620 | A14661 | 263 |
| A00620 | A14710 | 383 | A00620 | A14799 | 65  |
| A00620 | A15770 | 515 | A00621 | A00624 | 343 |
| A00621 | A00652 | 101 | A00621 | A01373 | 235 |
| A00621 | A01507 | 63  | A00621 | A01553 | 480 |
| A00621 | A01562 | 414 | A00621 | A01610 | 210 |
| A00621 | A01628 | 475 | A00621 | A01631 | 491 |
| A00621 | A01639 | 486 | A00621 | A01640 | 430 |
| A00621 | A01660 | 265 | A00621 | A01692 | 179 |
| A00621 | A01708 | 396 | A00621 | A01709 | 74  |
| A00621 | A01908 | 432 | A00621 | A03419 | 180 |
| A00621 | A03444 | 218 | A00621 | A03959 | 190 |
| A00621 | A04699 | 168 | A00621 | A05009 | 218 |
| A00621 | A05953 | 265 | A00621 | A06000 | 455 |
| A00621 | A06254 | 188 | A00621 | A06289 | 93  |
| A00621 | A06423 | 281 | A00621 | A06466 | 63  |
| A00621 | A06701 | 477 | A00621 | A06821 | 212 |
| A00621 | A07422 | 479 | A00621 | A08571 | 383 |
| A00621 | A09162 | 281 | A00621 | A09643 | 144 |
| A00621 | A09767 | 213 | A00621 | A10014 | 303 |
| A00621 | A10392 | 357 | A00621 | A10514 | 149 |
| A00621 | A10534 | 434 | A00621 | A10623 | 259 |
| A00621 | A10844 | 224 | A00621 | A11027 | 247 |
| A00621 | A11258 | 160 | A00621 | A11379 | 438 |

|        |        |     |        |        |     |
|--------|--------|-----|--------|--------|-----|
| A00621 | A12383 | 371 | A00621 | A14008 | 367 |
| A00621 | A14009 | 217 | A00621 | A14073 | 288 |
| A00621 | A14747 | 371 | A00621 | A16782 | 327 |
| A00622 | A00626 | 428 | A00622 | A00655 | 156 |
| A00622 | A00665 | 347 | A00622 | A00733 | 171 |
| A00622 | A00744 | 156 | A00622 | A00805 | 508 |
| A00622 | A00831 | 457 | A00622 | A00856 | 221 |
| A00622 | A00858 | 713 | A00622 | A00860 | 689 |
| A00622 | A00866 | 156 | A00622 | A00881 | 483 |
| A00622 | A00978 | 521 | A00622 | A01007 | 564 |
| A00622 | A01019 | 511 | A00622 | A01116 | 490 |
| A00622 | A01195 | 484 | A00622 | A01200 | 704 |
| A00622 | A01212 | 418 | A00622 | A01318 | 157 |
| A00622 | A01323 | 293 | A00622 | A01383 | 205 |
| A00622 | A01398 | 197 | A00622 | A01401 | 683 |
| A00622 | A01500 | 293 | A00622 | A01720 | 380 |
| A00622 | A01901 | 170 | A00622 | A03057 | 247 |
| A00622 | A03207 | 308 | A00622 | A03329 | 165 |
| A00622 | A03525 | 154 | A00622 | A03526 | 232 |
| A00622 | A04648 | 515 | A00622 | A04687 | 156 |
| A00622 | A05027 | 171 | A00622 | A05386 | 208 |
| A00622 | A05419 | 167 | A00622 | A06803 | 517 |
| A00622 | A07290 | 267 | A00622 | A07348 | 173 |
| A00622 | A07670 | 376 | A00622 | A07850 | 156 |
| A00622 | A07887 | 445 | A00622 | A08383 | 266 |
| A00622 | A08398 | 170 | A00622 | A08818 | 156 |
| A00622 | A09195 | 436 | A00622 | A09502 | 156 |
| A00622 | A09597 | 317 | A00622 | A09676 | 308 |
| A00622 | A09712 | 462 | A00622 | A10642 | 213 |
| A00622 | A11344 | 156 | A00622 | A11674 | 156 |
| A00622 | A14153 | 249 | A00622 | A16228 | 490 |
| A00623 | A00667 | 430 | A00623 | A00709 | 307 |
| A00623 | A00740 | 247 | A00623 | A00791 | 388 |
| A00623 | A00824 | 247 | A00623 | A00854 | 254 |
| A00623 | A00861 | 516 | A00623 | A00996 | 247 |
| A00623 | A01012 | 63  | A00623 | A01040 | 363 |
| A00623 | A01069 | 190 | A00623 | A01102 | 247 |
| A00623 | A01119 | 247 | A00623 | A01159 | 177 |
| A00623 | A01194 | 247 | A00623 | A01218 | 340 |
| A00623 | A01228 | 435 | A00623 | A01313 | 219 |
| A00623 | A01411 | 247 | A00623 | A01420 | 708 |
| A00623 | A01455 | 462 | A00623 | A01492 | 462 |
| A00623 | A01539 | 457 | A00623 | A01581 | 247 |
| A00623 | A01598 | 707 | A00623 | A01649 | 495 |
| A00623 | A01826 | 247 | A00623 | A02705 | 162 |
| A00623 | A03453 | 247 | A00623 | A03863 | 263 |

|        |        |     |        |        |     |
|--------|--------|-----|--------|--------|-----|
| A00623 | A07347 | 195 | A00623 | A07725 | 165 |
| A00623 | A09717 | 247 | A00623 | A10624 | 294 |
| A00623 | A12862 | 322 | A00623 | A14074 | 247 |
| A00623 | A17035 | 200 | A00624 | A00747 | 98  |
| A00624 | A00933 | 271 | A00624 | A01104 | 259 |
| A00624 | A01262 | 184 | A00624 | A01571 | 185 |
| A00624 | A01631 | 368 | A00624 | A01646 | 210 |
| A00624 | A01730 | 299 | A00624 | A01877 | 299 |
| A00624 | A01908 | 162 | A00624 | A02026 | 205 |
| A00624 | A02500 | 378 | A00624 | A02786 | 481 |
| A00624 | A02787 | 193 | A00624 | A02816 | 201 |
| A00624 | A02860 | 279 | A00624 | A02874 | 322 |
| A00624 | A02877 | 212 | A00624 | A02878 | 157 |
| A00624 | A02895 | 263 | A00624 | A02983 | 156 |
| A00624 | A03100 | 366 | A00624 | A03157 | 157 |
| A00624 | A03171 | 163 | A00624 | A03419 | 388 |
| A00624 | A03740 | 254 | A00624 | A03767 | 302 |
| A00624 | A03936 | 305 | A00624 | A05473 | 276 |
| A00624 | A05910 | 369 | A00624 | A06000 | 344 |
| A00624 | A06466 | 180 | A00624 | A06622 | 262 |
| A00624 | A06654 | 296 | A00624 | A07163 | 121 |
| A00624 | A07798 | 215 | A00624 | A08527 | 180 |
| A00624 | A08738 | 151 | A00624 | A08885 | 170 |
| A00624 | A09464 | 401 | A00624 | A11286 | 151 |
| A00624 | A11296 | 205 | A00624 | A11694 | 241 |
| A00624 | A11908 | 348 | A00624 | A14073 | 191 |
| A00624 | A14738 | 188 | A00625 | A00638 | 488 |
| A00625 | A00643 | 346 | A00625 | A00681 | 270 |
| A00625 | A00732 | 436 | A00625 | A00786 | 491 |
| A00625 | A00812 | 347 | A00625 | A00814 | 366 |
| A00625 | A00827 | 234 | A00625 | A00862 | 489 |
| A00625 | A00864 | 491 | A00625 | A00877 | 491 |
| A00625 | A00941 | 489 | A00625 | A00951 | 491 |
| A00625 | A00971 | 491 | A00625 | A00979 | 324 |
| A00625 | A01002 | 182 | A00625 | A01011 | 484 |
| A00625 | A01017 | 486 | A00625 | A01036 | 491 |
| A00625 | A01088 | 213 | A00625 | A01101 | 491 |
| A00625 | A01161 | 447 | A00625 | A01169 | 381 |
| A00625 | A01216 | 645 | A00625 | A01217 | 435 |
| A00625 | A01275 | 475 | A00625 | A01276 | 267 |
| A00625 | A01282 | 423 | A00625 | A01290 | 491 |
| A00625 | A01345 | 491 | A00625 | A01348 | 171 |
| A00625 | A01358 | 491 | A00625 | A01366 | 752 |
| A00625 | A01373 | 327 | A00625 | A01451 | 491 |
| A00625 | A01453 | 490 | A00625 | A01454 | 538 |
| A00625 | A01459 | 628 | A00625 | A01484 | 417 |

|        |        |     |        |        |     |
|--------|--------|-----|--------|--------|-----|
| A00625 | A01507 | 491 | A00625 | A01514 | 626 |
| A00625 | A01524 | 899 | A00625 | A01543 | 299 |
| A00625 | A01549 | 449 | A00625 | A01557 | 460 |
| A00625 | A01568 | 491 | A00625 | A01578 | 597 |
| A00625 | A01580 | 491 | A00625 | A01584 | 334 |
| A00625 | A01595 | 195 | A00625 | A01600 | 408 |
| A00625 | A01630 | 480 | A00625 | A01632 | 486 |
| A00625 | A01647 | 490 | A00625 | A01657 | 363 |
| A00625 | A01668 | 319 | A00625 | A01681 | 486 |
| A00625 | A01687 | 491 | A00625 | A01694 | 480 |
| A00625 | A01706 | 450 | A00625 | A01768 | 205 |
| A00625 | A01811 | 167 | A00625 | A01988 | 590 |
| A00625 | A02116 | 490 | A00625 | A02120 | 252 |
| A00625 | A02188 | 377 | A00625 | A02228 | 283 |
| A00625 | A02303 | 157 | A00625 | A02535 | 383 |
| A00625 | A02698 | 491 | A00625 | A02786 | 252 |
| A00625 | A03197 | 311 | A00625 | A03407 | 486 |
| A00625 | A03434 | 204 | A00625 | A03518 | 491 |
| A00625 | A03597 | 177 | A00625 | A03742 | 296 |
| A00625 | A03769 | 272 | A00625 | A03817 | 196 |
| A00625 | A03837 | 240 | A00625 | A03880 | 477 |
| A00625 | A03893 | 383 | A00625 | A04115 | 283 |
| A00625 | A04139 | 337 | A00625 | A04256 | 234 |
| A00625 | A04292 | 361 | A00625 | A04410 | 477 |
| A00625 | A04449 | 152 | A00625 | A04520 | 489 |
| A00625 | A04710 | 385 | A00625 | A04715 | 488 |
| A00625 | A04790 | 443 | A00625 | A04944 | 279 |
| A00625 | A05016 | 326 | A00625 | A05150 | 177 |
| A00625 | A05155 | 240 | A00625 | A05243 | 177 |
| A00625 | A05301 | 485 | A00625 | A05431 | 383 |
| A00625 | A05638 | 334 | A00625 | A05894 | 490 |
| A00625 | A05987 | 213 | A00625 | A06100 | 241 |
| A00625 | A06176 | 491 | A00625 | A06177 | 229 |
| A00625 | A06213 | 174 | A00625 | A06277 | 423 |
| A00625 | A06661 | 205 | A00625 | A06752 | 488 |
| A00625 | A06819 | 491 | A00625 | A06889 | 180 |
| A00625 | A06941 | 396 | A00625 | A07054 | 491 |
| A00625 | A07073 | 408 | A00625 | A07083 | 486 |
| A00625 | A07180 | 213 | A00625 | A07227 | 491 |
| A00625 | A07242 | 545 | A00625 | A07253 | 458 |
| A00625 | A07282 | 465 | A00625 | A07364 | 245 |
| A00625 | A07404 | 472 | A00625 | A07444 | 272 |
| A00625 | A07483 | 491 | A00625 | A07495 | 491 |
| A00625 | A07665 | 491 | A00625 | A07696 | 491 |
| A00625 | A07709 | 491 | A00625 | A07732 | 424 |
| A00625 | A07802 | 363 | A00625 | A07803 | 383 |

|        |        |     |        |        |     |
|--------|--------|-----|--------|--------|-----|
| A00625 | A07816 | 491 | A00625 | A07893 | 491 |
| A00625 | A07897 | 170 | A00625 | A07934 | 480 |
| A00625 | A07954 | 491 | A00625 | A07965 | 389 |
| A00625 | A08056 | 491 | A00625 | A08094 | 286 |
| A00625 | A08293 | 204 | A00625 | A08402 | 240 |
| A00625 | A08484 | 215 | A00625 | A08531 | 491 |
| A00625 | A08536 | 483 | A00625 | A08551 | 475 |
| A00625 | A08569 | 488 | A00625 | A08594 | 350 |
| A00625 | A08917 | 486 | A00625 | A08934 | 491 |
| A00625 | A08961 | 177 | A00625 | A08962 | 414 |
| A00625 | A09112 | 283 | A00625 | A09256 | 400 |
| A00625 | A09283 | 160 | A00625 | A09298 | 391 |
| A00625 | A09311 | 274 | A00625 | A09527 | 174 |
| A00625 | A09567 | 238 | A00625 | A09594 | 174 |
| A00625 | A09624 | 463 | A00625 | A09666 | 491 |
| A00625 | A09727 | 204 | A00625 | A10008 | 441 |
| A00625 | A10100 | 174 | A00625 | A10250 | 281 |
| A00625 | A10345 | 241 | A00625 | A10369 | 171 |
| A00625 | A10375 | 266 | A00625 | A10657 | 383 |
| A00625 | A11022 | 307 | A00625 | A11023 | 491 |
| A00625 | A11149 | 491 | A00625 | A11150 | 477 |
| A00625 | A11152 | 174 | A00625 | A11180 | 425 |
| A00625 | A11185 | 238 | A00625 | A11281 | 491 |
| A00625 | A11284 | 488 | A00625 | A11301 | 265 |
| A00625 | A11346 | 491 | A00625 | A11547 | 443 |
| A00625 | A11675 | 269 | A00625 | A11684 | 170 |
| A00625 | A11690 | 160 | A00625 | A11716 | 446 |
| A00625 | A11863 | 238 | A00625 | A11902 | 488 |
| A00625 | A11915 | 228 | A00625 | A12047 | 550 |
| A00625 | A12051 | 419 | A00625 | A12083 | 254 |
| A00625 | A12091 | 322 | A00625 | A12161 | 322 |
| A00625 | A12313 | 263 | A00625 | A12337 | 417 |
| A00625 | A12365 | 283 | A00625 | A12397 | 272 |
| A00625 | A12511 | 174 | A00625 | A12722 | 436 |
| A00625 | A12843 | 174 | A00625 | A12897 | 383 |
| A00625 | A12911 | 174 | A00625 | A13146 | 490 |
| A00625 | A13239 | 152 | A00625 | A13369 | 594 |
| A00625 | A13489 | 174 | A00625 | A13784 | 671 |
| A00625 | A13831 | 374 | A00625 | A13866 | 384 |
| A00625 | A13894 | 483 | A00625 | A13895 | 311 |
| A00625 | A13927 | 364 | A00625 | A13936 | 414 |
| A00625 | A13949 | 162 | A00625 | A14163 | 477 |
| A00625 | A14208 | 162 | A00625 | A14209 | 491 |
| A00625 | A14222 | 484 | A00625 | A14266 | 491 |
| A00625 | A14281 | 752 | A00625 | A14464 | 317 |
| A00625 | A14471 | 386 | A00625 | A14474 | 645 |



|        |        |     |        |        |     |
|--------|--------|-----|--------|--------|-----|
| A00625 | A14484 | 491 | A00625 | A14621 | 490 |
| A00625 | A14633 | 491 | A00625 | A14661 | 491 |
| A00625 | A14665 | 195 | A00625 | A14711 | 399 |
| A00625 | A14744 | 174 | A00625 | A14783 | 353 |
| A00625 | A14854 | 174 | A00625 | A15004 | 232 |
| A00625 | A15035 | 486 | A00625 | A15122 | 174 |
| A00625 | A15232 | 174 | A00625 | A15277 | 152 |
| A00625 | A15367 | 406 | A00625 | A15380 | 491 |
| A00625 | A15386 | 383 | A00625 | A15626 | 456 |
| A00625 | A15693 | 174 | A00625 | A15895 | 174 |
| A00625 | A15930 | 458 | A00625 | A16048 | 491 |
| A00625 | A16216 | 259 | A00625 | A16423 | 368 |
| A00625 | A16680 | 439 | A00625 | A16727 | 117 |
| A00625 | A16728 | 238 | A00625 | A17211 | 216 |
| A00626 | A00655 | 480 | A00626 | A00665 | 152 |
| A00626 | A00733 | 255 | A00626 | A00744 | 196 |
| A00626 | A00805 | 188 | A00626 | A00833 | 491 |
| A00626 | A00858 | 513 | A00626 | A00860 | 428 |
| A00626 | A00866 | 156 | A00626 | A00881 | 381 |
| A00626 | A00932 | 436 | A00626 | A00978 | 451 |
| A00626 | A01007 | 156 | A00626 | A01019 | 405 |
| A00626 | A01083 | 182 | A00626 | A01195 | 385 |
| A00626 | A01200 | 467 | A00626 | A01300 | 207 |
| A00626 | A01398 | 389 | A00626 | A01401 | 490 |
| A00626 | A01500 | 156 | A00626 | A01572 | 218 |
| A00626 | A02178 | 254 | A00626 | A02671 | 396 |
| A00626 | A03207 | 252 | A00626 | A03526 | 165 |
| A00626 | A03740 | 313 | A00626 | A03752 | 621 |
| A00626 | A03959 | 167 | A00626 | A04648 | 421 |
| A00626 | A04687 | 156 | A00626 | A05154 | 157 |
| A00626 | A06466 | 613 | A00626 | A06803 | 427 |
| A00626 | A07290 | 202 | A00626 | A07311 | 620 |
| A00626 | A07670 | 200 | A00626 | A07798 | 763 |
| A00626 | A07850 | 156 | A00626 | A07887 | 296 |
| A00626 | A08280 | 226 | A00626 | A08383 | 156 |
| A00626 | A08818 | 156 | A00626 | A09471 | 249 |
| A00626 | A09502 | 156 | A00626 | A09712 | 414 |
| A00626 | A10875 | 193 | A00626 | A11344 | 156 |
| A00626 | A11674 | 156 | A00626 | A11731 | 207 |
| A00626 | A12042 | 475 | A00626 | A12328 | 483 |
| A00626 | A12503 | 490 | A00626 | A12990 | 162 |
| A00626 | A13320 | 369 | A00626 | A13335 | 290 |
| A00626 | A13340 | 486 | A00626 | A14073 | 402 |
| A00626 | A14216 | 234 | A00626 | A14220 | 257 |
| A00626 | A14738 | 180 | A00626 | A14845 | 156 |
| A00626 | A14848 | 226 | A00626 | A15244 | 486 |

|        |        |     |        |        |     |
|--------|--------|-----|--------|--------|-----|
| A00626 | A15546 | 472 | A00626 | A15734 | 310 |
| A00626 | A15741 | 154 | A00626 | A16228 | 497 |
| A00626 | A16291 | 293 | A00627 | A01069 | 157 |
| A00627 | A01114 | 251 | A00627 | A01189 | 165 |
| A00627 | A01218 | 411 | A00627 | A01411 | 245 |
| A00627 | A01824 | 332 | A00627 | A02188 | 263 |
| A00627 | A04174 | 308 | A00627 | A05596 | 374 |
| A00628 | A00654 | 491 | A00628 | A00662 | 269 |
| A00628 | A00663 | 406 | A00628 | A00666 | 469 |
| A00628 | A00681 | 491 | A00628 | A00738 | 457 |
| A00628 | A00770 | 486 | A00628 | A00771 | 491 |
| A00628 | A00773 | 486 | A00628 | A00825 | 402 |
| A00628 | A00962 | 491 | A00628 | A00995 | 486 |
| A00628 | A01004 | 163 | A00628 | A01005 | 432 |
| A00628 | A01008 | 481 | A00628 | A01018 | 374 |
| A00628 | A01052 | 199 | A00628 | A01063 | 210 |
| A00628 | A01165 | 490 | A00628 | A01174 | 263 |
| A00628 | A01186 | 191 | A00628 | A01223 | 278 |
| A00628 | A01233 | 491 | A00628 | A01256 | 491 |
| A00628 | A01272 | 429 | A00628 | A01297 | 188 |
| A00628 | A01347 | 480 | A00628 | A01409 | 281 |
| A00628 | A01481 | 491 | A00628 | A01508 | 457 |
| A00628 | A01552 | 168 | A00628 | A01558 | 199 |
| A00628 | A01635 | 488 | A00628 | A01713 | 180 |
| A00628 | A01741 | 228 | A00628 | A01748 | 327 |
| A00628 | A02047 | 185 | A00628 | A02330 | 213 |
| A00628 | A02545 | 167 | A00628 | A02584 | 174 |
| A00628 | A02655 | 152 | A00628 | A02718 | 199 |
| A00628 | A02847 | 424 | A00628 | A02859 | 451 |
| A00628 | A02992 | 477 | A00628 | A03003 | 378 |
| A00628 | A03016 | 339 | A00628 | A03167 | 291 |
| A00628 | A03401 | 199 | A00628 | A03487 | 152 |
| A00628 | A03899 | 154 | A00628 | A04211 | 491 |
| A00628 | A04266 | 232 | A00628 | A04778 | 268 |
| A00628 | A04839 | 193 | A00628 | A04937 | 165 |
| A00628 | A05007 | 358 | A00628 | A05102 | 205 |
| A00628 | A05363 | 249 | A00628 | A05393 | 219 |
| A00628 | A05416 | 396 | A00628 | A05617 | 167 |
| A00628 | A05715 | 274 | A00628 | A05738 | 174 |
| A00628 | A05759 | 343 | A00628 | A05783 | 249 |
| A00628 | A05859 | 208 | A00628 | A05961 | 162 |
| A00628 | A06039 | 208 | A00628 | A06086 | 491 |
| A00628 | A06358 | 176 | A00628 | A06405 | 260 |
| A00628 | A06592 | 491 | A00628 | A06689 | 418 |
| A00628 | A06700 | 160 | A00628 | A06756 | 486 |
| A00628 | A06773 | 380 | A00628 | A06979 | 249 |

|        |        |     |        |        |     |
|--------|--------|-----|--------|--------|-----|
| A00628 | A07088 | 179 | A00628 | A07109 | 260 |
| A00628 | A07122 | 489 | A00628 | A07234 | 379 |
| A00628 | A07238 | 416 | A00628 | A07267 | 473 |
| A00628 | A07413 | 486 | A00628 | A07459 | 232 |
| A00628 | A07477 | 356 | A00628 | A07495 | 199 |
| A00628 | A07520 | 286 | A00628 | A07525 | 439 |
| A00628 | A07553 | 465 | A00628 | A07590 | 451 |
| A00628 | A07627 | 241 | A00628 | A07659 | 486 |
| A00628 | A07660 | 457 | A00628 | A07674 | 288 |
| A00628 | A07688 | 489 | A00628 | A07753 | 473 |
| A00628 | A07770 | 322 | A00628 | A07800 | 491 |
| A00628 | A07848 | 430 | A00628 | A07933 | 215 |
| A00628 | A07970 | 241 | A00628 | A07973 | 182 |
| A00628 | A07976 | 339 | A00628 | A08099 | 491 |
| A00628 | A08133 | 211 | A00628 | A08155 | 391 |
| A00628 | A08193 | 485 | A00628 | A08205 | 473 |
| A00628 | A08318 | 185 | A00628 | A08332 | 293 |
| A00628 | A08687 | 179 | A00628 | A08751 | 188 |
| A00628 | A09043 | 188 | A00628 | A09612 | 440 |
| A00628 | A09879 | 174 | A00628 | A09985 | 185 |
| A00628 | A10151 | 191 | A00628 | A10370 | 241 |
| A00628 | A10420 | 245 | A00628 | A10424 | 188 |
| A00628 | A10443 | 165 | A00628 | A10444 | 340 |
| A00628 | A10452 | 210 | A00628 | A10455 | 204 |
| A00628 | A10456 | 474 | A00628 | A10550 | 177 |
| A00628 | A10656 | 218 | A00628 | A10673 | 246 |
| A00628 | A10677 | 188 | A00628 | A10681 | 449 |
| A00628 | A10693 | 238 | A00628 | A10694 | 162 |
| A00628 | A10702 | 330 | A00628 | A10712 | 358 |
| A00628 | A10714 | 458 | A00628 | A10904 | 249 |
| A00628 | A11309 | 491 | A00628 | A11325 | 425 |
| A00628 | A11381 | 434 | A00628 | A13343 | 322 |
| A00628 | A13677 | 322 | A00628 | A13694 | 208 |
| A00628 | A13695 | 191 | A00628 | A13768 | 288 |
| A00628 | A14209 | 185 | A00628 | A14221 | 468 |
| A00628 | A14628 | 177 | A00628 | A14856 | 238 |
| A00628 | A14862 | 188 | A00628 | A15190 | 171 |
| A00628 | A15497 | 491 | A00628 | A15637 | 390 |
| A00628 | A15752 | 445 | A00628 | A15874 | 488 |
| A00628 | A15974 | 247 | A00628 | A16002 | 162 |
| A00628 | A16027 | 491 | A00628 | A16028 | 273 |
| A00628 | A16033 | 443 | A00628 | A16262 | 360 |
| A00628 | A16263 | 171 | A00628 | A16286 | 344 |
| A00628 | A16368 | 467 | A00628 | A16419 | 288 |
| A00628 | A16488 | 167 | A00628 | A16529 | 491 |
| A00628 | A16741 | 345 | A00628 | A16767 | 165 |

|        |        |     |        |        |     |
|--------|--------|-----|--------|--------|-----|
| A00628 | A16959 | 491 | A00628 | A17006 | 157 |
| A00628 | A17040 | 339 | A00628 | A17078 | 432 |
| A00629 | A00648 | 489 | A00629 | A00651 | 480 |
| A00629 | A00653 | 480 | A00629 | A00683 | 407 |
| A00629 | A00687 | 574 | A00629 | A00689 | 419 |
| A00629 | A00697 | 462 | A00629 | A00700 | 477 |
| A00629 | A00701 | 489 | A00629 | A00705 | 168 |
| A00629 | A00709 | 157 | A00629 | A00721 | 242 |
| A00629 | A00727 | 346 | A00629 | A00763 | 491 |
| A00629 | A00772 | 233 | A00629 | A00780 | 270 |
| A00629 | A00782 | 386 | A00629 | A00787 | 491 |
| A00629 | A00790 | 176 | A00629 | A00831 | 208 |
| A00629 | A00839 | 491 | A00629 | A00848 | 473 |
| A00629 | A00854 | 262 | A00629 | A00865 | 682 |
| A00629 | A00868 | 356 | A00629 | A00870 | 310 |
| A00629 | A00878 | 490 | A00629 | A00883 | 491 |
| A00629 | A00906 | 234 | A00629 | A00916 | 383 |
| A00629 | A00923 | 491 | A00629 | A00928 | 687 |
| A00629 | A00952 | 668 | A00629 | A00955 | 160 |
| A00629 | A00965 | 240 | A00629 | A00970 | 260 |
| A00629 | A00972 | 528 | A00629 | A00990 | 474 |
| A00629 | A00997 | 217 | A00629 | A01000 | 491 |
| A00629 | A01017 | 485 | A00629 | A01022 | 475 |
| A00629 | A01025 | 491 | A00629 | A01034 | 238 |
| A00629 | A01035 | 452 | A00629 | A01037 | 235 |
| A00629 | A01042 | 307 | A00629 | A01047 | 486 |
| A00629 | A01056 | 236 | A00629 | A01072 | 201 |
| A00629 | A01085 | 281 | A00629 | A01086 | 344 |
| A00629 | A01090 | 321 | A00629 | A01091 | 201 |
| A00629 | A01098 | 574 | A00629 | A01101 | 682 |
| A00629 | A01107 | 511 | A00629 | A01108 | 213 |
| A00629 | A01112 | 439 | A00629 | A01115 | 338 |
| A00629 | A01127 | 491 | A00629 | A01140 | 488 |
| A00629 | A01150 | 461 | A00629 | A01151 | 294 |
| A00629 | A01159 | 597 | A00629 | A01166 | 491 |
| A00629 | A01169 | 293 | A00629 | A01182 | 308 |
| A00629 | A01184 | 452 | A00629 | A01186 | 433 |
| A00629 | A01189 | 327 | A00629 | A01196 | 328 |
| A00629 | A01206 | 491 | A00629 | A01217 | 334 |
| A00629 | A01221 | 687 | A00629 | A01234 | 636 |
| A00629 | A01238 | 63  | A00629 | A01240 | 274 |
| A00629 | A01243 | 575 | A00629 | A01249 | 491 |
| A00629 | A01291 | 648 | A00629 | A01306 | 581 |
| A00629 | A01335 | 467 | A00629 | A01338 | 418 |
| A00629 | A01352 | 486 | A00629 | A01365 | 535 |
| A00629 | A01379 | 191 | A00629 | A01384 | 317 |

|        |        |     |        |        |     |
|--------|--------|-----|--------|--------|-----|
| A00629 | A01392 | 477 | A00629 | A01393 | 259 |
| A00629 | A01406 | 285 | A00629 | A01412 | 526 |
| A00629 | A01418 | 554 | A00629 | A01425 | 305 |
| A00629 | A01436 | 204 | A00629 | A01437 | 179 |
| A00629 | A01451 | 490 | A00629 | A01457 | 307 |
| A00629 | A01458 | 489 | A00629 | A01464 | 486 |
| A00629 | A01468 | 491 | A00629 | A01470 | 491 |
| A00629 | A01492 | 440 | A00629 | A01495 | 389 |
| A00629 | A01496 | 469 | A00629 | A01539 | 182 |
| A00629 | A01569 | 480 | A00629 | A01579 | 491 |
| A00629 | A01597 | 202 | A00629 | A01598 | 232 |
| A00629 | A01601 | 511 | A00629 | A01617 | 256 |
| A00629 | A01618 | 362 | A00629 | A01649 | 491 |
| A00629 | A01718 | 472 | A00629 | A01917 | 174 |
| A00629 | A02003 | 313 | A00629 | A02195 | 174 |
| A00629 | A02212 | 483 | A00629 | A02221 | 223 |
| A00629 | A02227 | 232 | A00629 | A02452 | 382 |
| A00629 | A02978 | 363 | A00629 | A03069 | 414 |
| A00629 | A03304 | 187 | A00629 | A03451 | 438 |
| A00629 | A03494 | 183 | A00629 | A03556 | 221 |
| A00629 | A03567 | 582 | A00629 | A03617 | 217 |
| A00629 | A03705 | 479 | A00629 | A03740 | 430 |
| A00629 | A03754 | 414 | A00629 | A03859 | 435 |
| A00629 | A04292 | 473 | A00629 | A04846 | 262 |
| A00629 | A04922 | 232 | A00629 | A05025 | 205 |
| A00629 | A05199 | 351 | A00629 | A05409 | 246 |
| A00629 | A05449 | 345 | A00629 | A05501 | 491 |
| A00629 | A05605 | 217 | A00629 | A06011 | 154 |
| A00629 | A06064 | 191 | A00629 | A06122 | 472 |
| A00629 | A06275 | 326 | A00629 | A06279 | 466 |
| A00629 | A06369 | 591 | A00629 | A06435 | 157 |
| A00629 | A06436 | 168 | A00629 | A06664 | 272 |
| A00629 | A06832 | 677 | A00629 | A06843 | 174 |
| A00629 | A06861 | 582 | A00629 | A06909 | 217 |
| A00629 | A06965 | 491 | A00629 | A06973 | 468 |
| A00629 | A07203 | 443 | A00629 | A07323 | 324 |
| A00629 | A07349 | 326 | A00629 | A07398 | 254 |
| A00629 | A07430 | 308 | A00629 | A07449 | 490 |
| A00629 | A07451 | 485 | A00629 | A07581 | 251 |
| A00629 | A07706 | 274 | A00629 | A08011 | 406 |
| A00629 | A08055 | 188 | A00629 | A08131 | 328 |
| A00629 | A08183 | 217 | A00629 | A08343 | 187 |
| A00629 | A08357 | 477 | A00629 | A08369 | 193 |
| A00629 | A08398 | 210 | A00629 | A08452 | 358 |
| A00629 | A08578 | 268 | A00629 | A08773 | 417 |
| A00629 | A08972 | 353 | A00629 | A08982 | 337 |

|        |        |     |        |        |     |
|--------|--------|-----|--------|--------|-----|
| A00629 | A09289 | 234 | A00629 | A09314 | 396 |
| A00629 | A09322 | 578 | A00629 | A09673 | 217 |
| A00629 | A10503 | 234 | A00629 | A10518 | 163 |
| A00629 | A10616 | 435 | A00629 | A11277 | 489 |
| A00629 | A11338 | 223 | A00629 | A11427 | 241 |
| A00629 | A11438 | 485 | A00629 | A11480 | 228 |
| A00629 | A11704 | 151 | A00629 | A12053 | 260 |
| A00629 | A12363 | 174 | A00629 | A12480 | 308 |
| A00629 | A12605 | 467 | A00629 | A12824 | 219 |
| A00629 | A12889 | 486 | A00629 | A12918 | 191 |
| A00629 | A13249 | 425 | A00629 | A13272 | 234 |
| A00629 | A13441 | 360 | A00629 | A13989 | 491 |
| A00629 | A13992 | 490 | A00629 | A14088 | 217 |
| A00629 | A14115 | 154 | A00629 | A14140 | 308 |
| A00629 | A14169 | 326 | A00629 | A14196 | 205 |
| A00629 | A14272 | 215 | A00629 | A14482 | 454 |
| A00629 | A14566 | 364 | A00629 | A14594 | 394 |
| A00629 | A14596 | 614 | A00629 | A14597 | 447 |
| A00629 | A14701 | 361 | A00629 | A14875 | 208 |
| A00629 | A14938 | 308 | A00629 | A15235 | 168 |
| A00629 | A15324 | 201 | A00629 | A15377 | 217 |
| A00629 | A15465 | 208 | A00629 | A15498 | 337 |
| A00629 | A15500 | 322 | A00629 | A15543 | 375 |
| A00629 | A15660 | 491 | A00629 | A15684 | 486 |
| A00629 | A15724 | 217 | A00629 | A15743 | 238 |
| A00629 | A15772 | 202 | A00629 | A15776 | 263 |
| A00629 | A15971 | 217 | A00629 | A15988 | 441 |
| A00629 | A16118 | 491 | A00629 | A16463 | 190 |
| A00629 | A16664 | 217 | A00629 | A16686 | 168 |
| A00630 | A00631 | 470 | A00630 | A00643 | 322 |
| A00630 | A00679 | 183 | A00630 | A00820 | 335 |
| A00630 | A00826 | 485 | A00630 | A00839 | 283 |
| A00630 | A00875 | 452 | A00630 | A00887 | 436 |
| A00630 | A00980 | 452 | A00630 | A00981 | 347 |
| A00630 | A01052 | 469 | A00630 | A01125 | 399 |
| A00630 | A01291 | 164 | A00630 | A01299 | 156 |
| A00630 | A01309 | 485 | A00630 | A01461 | 154 |
| A00630 | A01487 | 213 | A00630 | A01507 | 193 |
| A00630 | A01512 | 407 | A00630 | A01551 | 374 |
| A00630 | A01553 | 228 | A00630 | A01561 | 528 |
| A00630 | A01574 | 174 | A00630 | A01585 | 152 |
| A00630 | A01606 | 682 | A00630 | A01683 | 346 |
| A00630 | A01688 | 441 | A00630 | A01698 | 165 |
| A00630 | A01724 | 424 | A00630 | A01730 | 163 |
| A00630 | A01740 | 205 | A00630 | A01920 | 594 |
| A00630 | A01995 | 343 | A00630 | A02110 | 452 |

|        |        |     |        |        |     |
|--------|--------|-----|--------|--------|-----|
| A00630 | A02703 | 208 | A00630 | A02715 | 229 |
| A00630 | A02766 | 306 | A00630 | A02822 | 174 |
| A00630 | A02873 | 191 | A00630 | A03041 | 167 |
| A00630 | A03321 | 229 | A00630 | A03336 | 235 |
| A00630 | A03451 | 245 | A00630 | A03591 | 274 |
| A00630 | A03611 | 362 | A00630 | A03892 | 219 |
| A00630 | A04020 | 441 | A00630 | A04316 | 266 |
| A00630 | A04449 | 447 | A00630 | A05176 | 324 |
| A00630 | A05414 | 469 | A00630 | A05416 | 297 |
| A00630 | A05418 | 288 | A00630 | A05438 | 180 |
| A00630 | A06143 | 281 | A00630 | A06277 | 440 |
| A00630 | A06466 | 227 | A00630 | A07220 | 257 |
| A00630 | A07311 | 359 | A00630 | A07848 | 188 |
| A00630 | A08815 | 270 | A00630 | A08878 | 480 |
| A00630 | A09162 | 443 | A00630 | A09303 | 152 |
| A00630 | A09562 | 168 | A00630 | A10247 | 321 |
| A00630 | A10430 | 534 | A00630 | A10655 | 452 |
| A00630 | A11061 | 218 | A00630 | A11158 | 245 |
| A00630 | A11293 | 274 | A00630 | A11487 | 408 |
| A00630 | A11793 | 337 | A00630 | A11937 | 480 |
| A00630 | A11983 | 603 | A00630 | A12062 | 168 |
| A00630 | A13213 | 218 | A00630 | A13392 | 205 |
| A00630 | A13902 | 452 | A00630 | A14002 | 306 |
| A00630 | A14206 | 170 | A00630 | A14211 | 230 |
| A00630 | A15336 | 391 | A00630 | A15506 | 254 |
| A00630 | A15665 | 201 | A00630 | A15682 | 329 |
| A00630 | A16478 | 168 | A00630 | A16847 | 534 |
| A00630 | A16926 | 311 | A00631 | A01366 | 327 |
| A00631 | A01512 | 199 | A00631 | A01606 | 486 |
| A00631 | A01724 | 191 | A00631 | A02846 | 228 |
| A00631 | A03336 | 432 | A00631 | A07746 | 152 |
| A00631 | A11293 | 208 | A00632 | A00765 | 172 |
| A00632 | A01041 | 288 | A00632 | A01309 | 353 |
| A00632 | A01338 | 162 | A00632 | A01568 | 283 |
| A00632 | A01647 | 182 | A00632 | A01683 | 172 |
| A00632 | A02278 | 151 | A00632 | A03271 | 196 |
| A00632 | A03496 | 291 | A00632 | A03880 | 200 |
| A00632 | A05301 | 165 | A00632 | A06039 | 177 |
| A00632 | A07483 | 286 | A00632 | A08255 | 278 |
| A00632 | A08362 | 154 | A00632 | A08501 | 267 |
| A00632 | A08502 | 281 | A00632 | A08503 | 208 |
| A00632 | A08543 | 187 | A00632 | A08550 | 207 |
| A00632 | A08552 | 337 | A00632 | A08556 | 208 |
| A00632 | A08561 | 229 | A00632 | A08814 | 254 |
| A00632 | A08845 | 238 | A00632 | A08996 | 306 |
| A00632 | A09333 | 258 | A00632 | A09622 | 329 |

|        |        |     |        |        |     |
|--------|--------|-----|--------|--------|-----|
| A00632 | A11301 | 190 | A00632 | A11376 | 281 |
| A00632 | A11430 | 218 | A00632 | A11472 | 260 |
| A00632 | A11497 | 223 | A00632 | A11597 | 266 |
| A00632 | A11675 | 286 | A00632 | A11820 | 351 |
| A00632 | A11917 | 154 | A00632 | A11940 | 355 |
| A00632 | A12254 | 267 | A00632 | A12433 | 221 |
| A00632 | A12501 | 305 | A00632 | A12507 | 180 |
| A00632 | A12606 | 338 | A00632 | A12725 | 219 |
| A00632 | A12825 | 324 | A00632 | A13309 | 407 |
| A00632 | A13313 | 174 | A00632 | A13399 | 268 |
| A00632 | A13706 | 277 | A00632 | A13708 | 356 |
| A00632 | A13737 | 241 | A00632 | A13781 | 313 |
| A00632 | A13784 | 205 | A00632 | A13804 | 366 |
| A00632 | A13912 | 380 | A00632 | A14084 | 205 |
| A00632 | A14214 | 200 | A00632 | A14222 | 157 |
| A00632 | A14288 | 344 | A00632 | A14706 | 224 |
| A00632 | A14708 | 265 | A00632 | A14903 | 351 |
| A00632 | A15105 | 345 | A00632 | A15189 | 274 |
| A00632 | A15245 | 416 | A00632 | A15262 | 259 |
| A00632 | A15357 | 185 | A00632 | A15402 | 160 |
| A00632 | A15680 | 218 | A00632 | A15683 | 219 |
| A00632 | A16157 | 210 | A00632 | A16552 | 327 |
| A00632 | A16597 | 395 | A00632 | A16611 | 362 |
| A00632 | A16675 | 374 | A00632 | A16680 | 272 |
| A00632 | A16703 | 323 | A00632 | A16709 | 340 |
| A00632 | A16764 | 288 | A00632 | A16776 | 356 |
| A00632 | A16829 | 348 | A00632 | A16866 | 296 |
| A00632 | A16905 | 313 | A00632 | A16913 | 371 |
| A00632 | A17018 | 352 | A00632 | A17030 | 356 |
| A00632 | A17190 | 347 | A00633 | A00654 | 462 |
| A00633 | A00660 | 235 | A00633 | A00662 | 411 |
| A00633 | A00870 | 217 | A00633 | A01005 | 386 |
| A00633 | A01008 | 154 | A00633 | A01018 | 255 |
| A00633 | A01207 | 210 | A00633 | A01229 | 271 |
| A00633 | A01297 | 232 | A00633 | A01409 | 324 |
| A00633 | A01490 | 210 | A00633 | A01635 | 372 |
| A00633 | A01739 | 154 | A00633 | A01832 | 259 |
| A00633 | A01972 | 469 | A00633 | A02023 | 277 |
| A00633 | A03050 | 439 | A00633 | A03174 | 240 |
| A00633 | A03442 | 307 | A00633 | A03729 | 168 |
| A00633 | A04791 | 165 | A00633 | A05050 | 240 |
| A00633 | A05337 | 172 | A00633 | A05358 | 193 |
| A00633 | A05390 | 388 | A00633 | A05416 | 457 |
| A00633 | A05451 | 249 | A00633 | A05532 | 401 |
| A00633 | A05548 | 216 | A00633 | A05549 | 319 |
| A00633 | A05610 | 277 | A00633 | A06439 | 321 |



|        |        |     |        |        |     |
|--------|--------|-----|--------|--------|-----|
| A00633 | A06641 | 180 | A00633 | A06855 | 234 |
| A00633 | A06994 | 230 | A00633 | A07376 | 213 |
| A00633 | A07477 | 247 | A00633 | A07590 | 339 |
| A00633 | A07674 | 286 | A00633 | A07736 | 200 |
| A00633 | A10686 | 218 | A00633 | A11519 | 319 |
| A00633 | A11767 | 205 | A00633 | A12121 | 290 |
| A00633 | A14081 | 208 | A00633 | A15811 | 212 |
| A00633 | A17078 | 205 | A00634 | A01299 | 246 |
| A00634 | A01907 | 195 | A00634 | A03397 | 313 |
| A00634 | A03591 | 347 | A00634 | A03636 | 291 |
| A00634 | A03964 | 297 | A00634 | A05288 | 477 |
| A00634 | A09494 | 345 | A00634 | A09555 | 377 |
| A00634 | A10506 | 168 | A00634 | A11190 | 238 |
| A00634 | A12047 | 391 | A00634 | A15854 | 195 |
| A00635 | A00736 | 347 | A00635 | A01143 | 168 |
| A00635 | A01668 | 302 | A00635 | A01743 | 162 |
| A00635 | A02005 | 350 | A00635 | A02010 | 480 |
| A00635 | A02983 | 302 | A00635 | A03701 | 334 |
| A00635 | A11951 | 486 | A00635 | A12959 | 469 |
| A00635 | A12960 | 366 | A00635 | A12976 | 486 |
| A00635 | A12983 | 466 | A00635 | A13826 | 254 |
| A00635 | A14178 | 201 | A00635 | A14295 | 334 |
| A00635 | A14490 | 226 | A00635 | A15318 | 340 |
| A00635 | A15346 | 180 | A00635 | A15366 | 344 |
| A00635 | A15376 | 177 | A00635 | A15851 | 252 |
| A00635 | A15852 | 185 | A00636 | A00722 | 670 |
| A00636 | A00921 | 439 | A00636 | A00981 | 168 |
| A00636 | A01036 | 326 | A00636 | A01125 | 305 |
| A00636 | A01162 | 432 | A00636 | A01248 | 254 |
| A00636 | A01417 | 479 | A00636 | A01473 | 393 |
| A00636 | A01578 | 210 | A00636 | A01712 | 479 |
| A00636 | A01723 | 168 | A00636 | A01956 | 486 |
| A00636 | A01961 | 348 | A00636 | A01963 | 361 |
| A00636 | A01967 | 391 | A00636 | A02000 | 273 |
| A00636 | A02007 | 474 | A00636 | A02010 | 491 |
| A00636 | A02157 | 348 | A00636 | A02466 | 213 |
| A00636 | A02993 | 393 | A00636 | A03025 | 481 |
| A00636 | A03080 | 399 | A00636 | A03134 | 416 |
| A00636 | A03135 | 319 | A00636 | A03137 | 319 |
| A00636 | A03141 | 180 | A00636 | A03344 | 256 |
| A00636 | A03345 | 258 | A00636 | A03384 | 249 |
| A00636 | A03686 | 393 | A00636 | A03692 | 313 |
| A00636 | A03694 | 215 | A00636 | A03701 | 377 |
| A00636 | A03703 | 490 | A00636 | A03712 | 276 |
| A00636 | A03721 | 486 | A00636 | A03722 | 490 |
| A00636 | A03728 | 393 | A00636 | A03894 | 469 |

|        |        |     |        |        |     |
|--------|--------|-----|--------|--------|-----|
| A00636 | A04076 | 165 | A00636 | A04333 | 167 |
| A00636 | A04340 | 414 | A00636 | A04477 | 283 |
| A00636 | A04932 | 159 | A00636 | A05243 | 224 |
| A00636 | A05313 | 188 | A00636 | A05361 | 290 |
| A00636 | A05887 | 364 | A00636 | A06771 | 171 |
| A00636 | A06862 | 330 | A00636 | A06964 | 420 |
| A00636 | A07181 | 344 | A00636 | A07242 | 446 |
| A00636 | A07413 | 154 | A00636 | A07954 | 163 |
| A00636 | A08111 | 380 | A00636 | A08161 | 176 |
| A00636 | A08268 | 361 | A00636 | A09235 | 162 |
| A00636 | A09253 | 182 | A00636 | A09421 | 260 |
| A00636 | A09804 | 188 | A00636 | A09824 | 378 |
| A00636 | A09890 | 276 | A00636 | A09900 | 335 |
| A00636 | A10579 | 259 | A00636 | A11601 | 269 |
| A00636 | A12016 | 330 | A00636 | A12648 | 348 |
| A00636 | A12835 | 393 | A00636 | A13410 | 296 |
| A00636 | A14470 | 484 | A00636 | A14789 | 247 |
| A00636 | A15277 | 313 | A00636 | A15627 | 319 |
| A00636 | A17076 | 317 | A00637 | A00652 | 334 |
| A00637 | A00853 | 617 | A00637 | A00886 | 162 |
| A00637 | A01093 | 308 | A00637 | A01149 | 456 |
| A00637 | A01595 | 383 | A00637 | A01705 | 195 |
| A00637 | A02311 | 152 | A00637 | A03237 | 347 |
| A00637 | A03336 | 266 | A00637 | A03435 | 243 |
| A00637 | A04268 | 232 | A00637 | A05004 | 188 |
| A00637 | A05958 | 475 | A00637 | A07054 | 379 |
| A00637 | A07232 | 334 | A00637 | A07378 | 160 |
| A00637 | A07732 | 334 | A00637 | A08863 | 276 |
| A00637 | A09078 | 334 | A00637 | A10001 | 201 |
| A00637 | A11376 | 276 | A00637 | A11843 | 276 |
| A00637 | A11851 | 276 | A00637 | A12251 | 195 |
| A00637 | A12252 | 174 | A00637 | A13356 | 276 |
| A00637 | A14009 | 334 | A00637 | A14288 | 334 |
| A00637 | A15480 | 276 | A00637 | A16417 | 168 |
| A00637 | A16635 | 334 | A00638 | A00652 | 240 |
| A00638 | A00791 | 398 | A00638 | A00805 | 171 |
| A00638 | A00856 | 455 | A00638 | A00862 | 489 |
| A00638 | A00883 | 281 | A00638 | A00911 | 557 |
| A00638 | A00985 | 469 | A00638 | A01086 | 352 |
| A00638 | A01099 | 488 | A00638 | A01124 | 371 |
| A00638 | A01149 | 491 | A00638 | A01151 | 241 |
| A00638 | A01156 | 305 | A00638 | A01209 | 491 |
| A00638 | A01214 | 436 | A00638 | A01244 | 624 |
| A00638 | A01296 | 675 | A00638 | A01311 | 270 |
| A00638 | A01317 | 358 | A00638 | A01318 | 272 |
| A00638 | A01319 | 471 | A00638 | A01320 | 653 |

|        |        |     |        |        |     |
|--------|--------|-----|--------|--------|-----|
| A00638 | A01322 | 491 | A00638 | A01323 | 477 |
| A00638 | A01325 | 486 | A00638 | A01327 | 708 |
| A00638 | A01328 | 305 | A00638 | A01331 | 182 |
| A00638 | A01333 | 412 | A00638 | A01358 | 705 |
| A00638 | A01415 | 624 | A00638 | A01459 | 490 |
| A00638 | A01507 | 258 | A00638 | A01514 | 491 |
| A00638 | A01524 | 313 | A00638 | A01580 | 170 |
| A00638 | A01596 | 385 | A00638 | A01647 | 491 |
| A00638 | A01680 | 182 | A00638 | A01828 | 707 |
| A00638 | A01928 | 267 | A00638 | A01988 | 473 |
| A00638 | A02212 | 345 | A00638 | A02228 | 348 |
| A00638 | A02319 | 193 | A00638 | A02473 | 252 |
| A00638 | A02504 | 221 | A00638 | A02523 | 302 |
| A00638 | A02539 | 374 | A00638 | A02541 | 416 |
| A00638 | A03216 | 183 | A00638 | A03217 | 113 |
| A00638 | A03237 | 422 | A00638 | A03264 | 204 |
| A00638 | A03304 | 174 | A00638 | A03327 | 210 |
| A00638 | A03328 | 623 | A00638 | A03929 | 307 |
| A00638 | A04140 | 491 | A00638 | A04359 | 193 |
| A00638 | A04372 | 168 | A00638 | A04498 | 205 |
| A00638 | A04668 | 385 | A00638 | A04772 | 174 |
| A00638 | A04776 | 152 | A00638 | A04922 | 177 |
| A00638 | A05556 | 188 | A00638 | A05690 | 491 |
| A00638 | A05707 | 276 | A00638 | A06002 | 276 |
| A00638 | A06318 | 396 | A00638 | A06493 | 317 |
| A00638 | A06517 | 193 | A00638 | A06558 | 205 |
| A00638 | A06572 | 159 | A00638 | A06588 | 236 |
| A00638 | A06602 | 307 | A00638 | A06819 | 172 |
| A00638 | A06941 | 213 | A00638 | A06982 | 479 |
| A00638 | A07205 | 463 | A00638 | A07386 | 241 |
| A00638 | A07433 | 406 | A00638 | A07564 | 221 |
| A00638 | A07572 | 162 | A00638 | A07687 | 307 |
| A00638 | A07695 | 238 | A00638 | A07833 | 266 |
| A00638 | A08195 | 276 | A00638 | A08196 | 363 |
| A00638 | A08212 | 337 | A00638 | A08252 | 259 |
| A00638 | A08352 | 422 | A00638 | A08516 | 252 |
| A00638 | A08552 | 307 | A00638 | A08884 | 489 |
| A00638 | A09304 | 602 | A00638 | A09316 | 218 |
| A00638 | A09340 | 196 | A00638 | A09342 | 483 |
| A00638 | A09680 | 193 | A00638 | A10250 | 290 |
| A00638 | A10257 | 276 | A00638 | A10373 | 484 |
| A00638 | A10456 | 327 | A00638 | A10761 | 183 |
| A00638 | A10839 | 234 | A00638 | A11283 | 307 |
| A00638 | A11332 | 307 | A00638 | A11467 | 168 |
| A00638 | A11676 | 218 | A00638 | A11828 | 579 |
| A00638 | A11834 | 344 | A00638 | A11840 | 307 |

|        |        |     |        |        |     |
|--------|--------|-----|--------|--------|-----|
| A00638 | A11854 | 491 | A00638 | A11858 | 198 |
| A00638 | A12013 | 501 | A00638 | A12047 | 623 |
| A00638 | A12824 | 168 | A00638 | A13949 | 491 |
| A00638 | A14209 | 395 | A00638 | A14221 | 162 |
| A00638 | A14230 | 281 | A00638 | A14272 | 363 |
| A00638 | A14449 | 369 | A00638 | A14477 | 491 |
| A00638 | A14674 | 491 | A00638 | A14685 | 174 |
| A00638 | A14703 | 463 | A00638 | A14909 | 193 |
| A00638 | A14976 | 317 | A00638 | A15233 | 196 |
| A00638 | A15380 | 472 | A00638 | A15556 | 462 |
| A00638 | A15557 | 483 | A00638 | A15644 | 443 |
| A00638 | A16440 | 345 | A00638 | A16738 | 447 |
| A00638 | A16763 | 552 | A00638 | A17172 | 348 |
| A00639 | A02671 | 162 | A00639 | A11277 | 301 |
| A00640 | A00647 | 420 | A00640 | A00653 | 152 |
| A00640 | A00689 | 236 | A00640 | A00711 | 224 |
| A00640 | A00726 | 152 | A00640 | A00740 | 256 |
| A00640 | A00810 | 610 | A00640 | A00833 | 152 |
| A00640 | A00843 | 396 | A00640 | A00848 | 491 |
| A00640 | A00970 | 491 | A00640 | A00974 | 152 |
| A00640 | A00980 | 63  | A00640 | A00984 | 152 |
| A00640 | A00987 | 152 | A00640 | A01001 | 152 |
| A00640 | A01069 | 490 | A00640 | A01102 | 152 |
| A00640 | A01115 | 400 | A00640 | A01189 | 180 |
| A00640 | A01211 | 202 | A00640 | A01215 | 465 |
| A00640 | A01311 | 730 | A00640 | A01353 | 224 |
| A00640 | A01354 | 489 | A00640 | A01379 | 152 |
| A00640 | A01387 | 152 | A00640 | A01439 | 152 |
| A00640 | A01506 | 439 | A00640 | A01539 | 419 |
| A00640 | A01541 | 168 | A00640 | A01548 | 272 |
| A00640 | A01569 | 488 | A00640 | A01577 | 629 |
| A00640 | A01588 | 899 | A00640 | A01627 | 152 |
| A00640 | A01684 | 391 | A00640 | A01747 | 199 |
| A00640 | A01770 | 489 | A00640 | A01917 | 411 |
| A00640 | A02051 | 228 | A00640 | A02601 | 152 |
| A00640 | A02719 | 364 | A00640 | A02877 | 63  |
| A00640 | A02892 | 291 | A00640 | A03282 | 157 |
| A00640 | A03325 | 405 | A00640 | A03446 | 335 |
| A00640 | A03448 | 313 | A00640 | A03476 | 458 |
| A00640 | A03669 | 251 | A00640 | A03697 | 502 |
| A00640 | A03738 | 475 | A00640 | A04013 | 408 |
| A00640 | A04495 | 152 | A00640 | A04537 | 236 |
| A00640 | A04697 | 195 | A00640 | A04957 | 198 |
| A00640 | A05417 | 411 | A00640 | A05508 | 202 |
| A00640 | A05712 | 267 | A00640 | A05760 | 899 |
| A00640 | A06178 | 313 | A00640 | A06287 | 360 |

|        |        |     |        |        |     |
|--------|--------|-----|--------|--------|-----|
| A00640 | A06365 | 208 | A00640 | A06543 | 462 |
| A00640 | A06677 | 423 | A00640 | A07247 | 449 |
| A00640 | A07744 | 545 | A00640 | A08061 | 317 |
| A00640 | A08098 | 389 | A00640 | A08178 | 343 |
| A00640 | A08763 | 317 | A00640 | A08947 | 152 |
| A00640 | A09004 | 152 | A00640 | A09033 | 202 |
| A00640 | A09395 | 184 | A00640 | A09423 | 154 |
| A00640 | A09603 | 271 | A00640 | A09819 | 353 |
| A00640 | A10238 | 399 | A00640 | A10532 | 491 |
| A00640 | A10574 | 177 | A00640 | A10842 | 152 |
| A00640 | A11403 | 385 | A00640 | A12839 | 152 |
| A00640 | A13465 | 291 | A00640 | A13609 | 276 |
| A00640 | A14525 | 514 | A00640 | A14728 | 177 |
| A00640 | A15375 | 317 | A00640 | A15546 | 502 |
| A00640 | A16026 | 160 | A00641 | A00696 | 366 |
| A00641 | A00697 | 63  | A00641 | A00782 | 491 |
| A00641 | A00788 | 485 | A00641 | A00789 | 488 |
| A00641 | A00799 | 151 | A00641 | A00839 | 479 |
| A00641 | A00939 | 491 | A00641 | A01154 | 369 |
| A00641 | A01164 | 393 | A00641 | A01247 | 193 |
| A00641 | A01254 | 151 | A00641 | A01286 | 443 |
| A00641 | A01307 | 491 | A00641 | A01428 | 84  |
| A00641 | A01602 | 363 | A00641 | A01604 | 217 |
| A00641 | A02425 | 296 | A00641 | A02604 | 213 |
| A00641 | A02611 | 76  | A00641 | A02651 | 130 |
| A00641 | A02659 | 346 | A00641 | A02681 | 305 |
| A00641 | A02803 | 469 | A00641 | A02847 | 249 |
| A00641 | A02851 | 377 | A00641 | A02853 | 364 |
| A00641 | A02887 | 490 | A00641 | A02917 | 82  |
| A00641 | A02920 | 162 | A00641 | A02925 | 353 |
| A00641 | A02931 | 489 | A00641 | A02935 | 124 |
| A00641 | A02944 | 435 | A00641 | A02945 | 427 |
| A00641 | A02950 | 486 | A00641 | A02953 | 110 |
| A00641 | A02961 | 408 | A00641 | A02962 | 129 |
| A00641 | A02969 | 112 | A00641 | A02972 | 107 |
| A00641 | A02975 | 82  | A00641 | A03019 | 68  |
| A00641 | A03195 | 99  | A00641 | A03271 | 491 |
| A00641 | A03275 | 358 | A00641 | A03282 | 112 |
| A00641 | A03524 | 79  | A00641 | A03565 | 480 |
| A00641 | A03625 | 65  | A00641 | A03626 | 413 |
| A00641 | A03686 | 63  | A00641 | A03830 | 393 |
| A00641 | A03834 | 358 | A00641 | A03835 | 324 |
| A00641 | A03838 | 171 | A00641 | A03984 | 441 |
| A00641 | A03985 | 243 | A00641 | A04005 | 204 |
| A00641 | A04050 | 491 | A00641 | A04085 | 191 |
| A00641 | A04251 | 274 | A00641 | A04494 | 174 |

|        |        |     |        |        |     |
|--------|--------|-----|--------|--------|-----|
| A00641 | A04657 | 369 | A00641 | A04685 | 302 |
| A00641 | A04862 | 249 | A00641 | A05037 | 333 |
| A00641 | A05211 | 449 | A00641 | A05212 | 322 |
| A00641 | A05213 | 249 | A00641 | A05220 | 435 |
| A00641 | A05349 | 367 | A00641 | A05508 | 154 |
| A00641 | A05633 | 366 | A00641 | A05902 | 185 |
| A00641 | A06111 | 322 | A00641 | A06289 | 63  |
| A00641 | A06819 | 338 | A00641 | A07141 | 185 |
| A00641 | A07148 | 151 | A00641 | A07157 | 262 |
| A00641 | A07161 | 377 | A00641 | A07166 | 151 |
| A00641 | A07168 | 226 | A00641 | A07173 | 243 |
| A00641 | A07188 | 213 | A00641 | A07218 | 477 |
| A00641 | A07602 | 256 | A00641 | A08277 | 490 |
| A00641 | A08335 | 179 | A00641 | A08672 | 249 |
| A00641 | A08761 | 243 | A00641 | A08762 | 385 |
| A00641 | A08840 | 63  | A00641 | A09395 | 414 |
| A00641 | A10060 | 274 | A00641 | A10214 | 235 |
| A00641 | A10609 | 299 | A00641 | A10739 | 157 |
| A00641 | A11085 | 274 | A00641 | A11129 | 302 |
| A00641 | A11604 | 151 | A00641 | A11688 | 396 |
| A00641 | A11906 | 179 | A00641 | A12364 | 293 |
| A00641 | A12792 | 383 | A00641 | A12824 | 899 |
| A00641 | A13199 | 200 | A00641 | A13302 | 196 |
| A00641 | A13400 | 241 | A00641 | A13824 | 152 |
| A00641 | A13829 | 445 | A00641 | A13846 | 201 |
| A00641 | A14208 | 491 | A00641 | A14430 | 202 |
| A00641 | A14431 | 68  | A00641 | A14647 | 246 |
| A00641 | A14830 | 457 | A00641 | A15314 | 488 |
| A00641 | A15347 | 187 | A00641 | A15361 | 352 |
| A00641 | A15386 | 104 | A00641 | A15425 | 190 |
| A00641 | A15500 | 454 | A00641 | A15505 | 160 |
| A00641 | A15578 | 63  | A00641 | A15613 | 256 |
| A00641 | A15639 | 172 | A00641 | A15771 | 420 |
| A00641 | A15780 | 440 | A00641 | A15781 | 293 |
| A00641 | A15782 | 260 | A00641 | A15976 | 174 |
| A00641 | A16225 | 151 | A00641 | A16377 | 188 |
| A00641 | A16583 | 388 | A00641 | A16594 | 328 |
| A00641 | A16971 | 260 | A00642 | A00643 | 491 |
| A00642 | A00864 | 154 | A00642 | A00875 | 283 |
| A00642 | A00931 | 185 | A00642 | A01546 | 363 |
| A00642 | A03049 | 486 | A00642 | A03213 | 201 |
| A00642 | A06269 | 425 | A00642 | A07158 | 263 |
| A00642 | A07568 | 457 | A00642 | A09556 | 273 |
| A00642 | A09624 | 344 | A00642 | A10440 | 351 |
| A00642 | A11827 | 420 | A00642 | A12246 | 246 |
| A00642 | A13726 | 180 | A00642 | A13785 | 246 |

|        |        |     |        |        |     |
|--------|--------|-----|--------|--------|-----|
| A00642 | A14289 | 152 | A00642 | A14720 | 480 |
| A00642 | A15498 | 172 | A00642 | A16764 | 230 |
| A00643 | A00669 | 420 | A00643 | A00671 | 491 |
| A00643 | A00679 | 252 | A00643 | A00747 | 467 |
| A00643 | A00799 | 265 | A00643 | A00815 | 366 |
| A00643 | A00826 | 374 | A00643 | A00839 | 171 |
| A00643 | A00852 | 438 | A00643 | A00864 | 475 |
| A00643 | A00875 | 404 | A00643 | A00883 | 469 |
| A00643 | A00947 | 258 | A00643 | A00980 | 322 |
| A00643 | A00981 | 480 | A00643 | A01022 | 299 |
| A00643 | A01075 | 248 | A00643 | A01091 | 443 |
| A00643 | A01112 | 433 | A00643 | A01125 | 449 |
| A00643 | A01148 | 400 | A00643 | A01161 | 281 |
| A00643 | A01211 | 430 | A00643 | A01213 | 427 |
| A00643 | A01216 | 358 | A00643 | A01235 | 462 |
| A00643 | A01299 | 460 | A00643 | A01305 | 362 |
| A00643 | A01309 | 358 | A00643 | A01310 | 484 |
| A00643 | A01378 | 375 | A00643 | A01405 | 332 |
| A00643 | A01409 | 322 | A00643 | A01452 | 236 |
| A00643 | A01474 | 241 | A00643 | A01507 | 465 |
| A00643 | A01514 | 165 | A00643 | A01546 | 489 |
| A00643 | A01561 | 159 | A00643 | A01602 | 484 |
| A00643 | A01606 | 224 | A00643 | A01660 | 449 |
| A00643 | A01698 | 367 | A00643 | A01723 | 491 |
| A00643 | A01747 | 436 | A00643 | A01763 | 480 |
| A00643 | A01781 | 477 | A00643 | A01790 | 491 |
| A00643 | A01887 | 168 | A00643 | A01931 | 475 |
| A00643 | A01995 | 440 | A00643 | A02018 | 226 |
| A00643 | A02020 | 398 | A00643 | A02110 | 322 |
| A00643 | A02143 | 247 | A00643 | A02502 | 384 |
| A00643 | A02698 | 168 | A00643 | A02709 | 188 |
| A00643 | A02839 | 452 | A00643 | A02902 | 460 |
| A00643 | A03014 | 267 | A00643 | A03049 | 424 |
| A00643 | A03050 | 269 | A00643 | A03104 | 473 |
| A00643 | A03188 | 477 | A00643 | A03213 | 665 |
| A00643 | A03304 | 486 | A00643 | A03434 | 424 |
| A00643 | A03435 | 244 | A00643 | A03436 | 174 |
| A00643 | A03451 | 227 | A00643 | A03591 | 165 |
| A00643 | A03723 | 228 | A00643 | A03739 | 469 |
| A00643 | A03893 | 484 | A00643 | A03961 | 283 |
| A00643 | A04033 | 491 | A00643 | A04139 | 234 |
| A00643 | A04449 | 571 | A00643 | A04638 | 174 |
| A00643 | A04759 | 483 | A00643 | A04873 | 368 |
| A00643 | A05158 | 436 | A00643 | A05416 | 182 |
| A00643 | A05418 | 490 | A00643 | A05810 | 439 |
| A00643 | A05920 | 156 | A00643 | A06190 | 196 |

|        |        |     |        |        |     |
|--------|--------|-----|--------|--------|-----|
| A00643 | A06196 | 174 | A00643 | A06277 | 486 |
| A00643 | A06588 | 488 | A00643 | A06705 | 307 |
| A00643 | A07209 | 491 | A00643 | A07229 | 265 |
| A00643 | A07242 | 445 | A00643 | A07339 | 463 |
| A00643 | A07568 | 490 | A00643 | A07693 | 232 |
| A00643 | A07726 | 352 | A00643 | A07803 | 491 |
| A00643 | A08205 | 358 | A00643 | A08875 | 463 |
| A00643 | A08878 | 469 | A00643 | A09072 | 326 |
| A00643 | A09078 | 187 | A00643 | A09449 | 259 |
| A00643 | A09624 | 466 | A00643 | A09791 | 461 |
| A00643 | A10114 | 188 | A00643 | A10203 | 224 |
| A00643 | A10264 | 174 | A00643 | A10430 | 420 |
| A00643 | A10439 | 356 | A00643 | A10440 | 447 |
| A00643 | A10449 | 281 | A00643 | A10761 | 163 |
| A00643 | A11020 | 174 | A00643 | A11104 | 162 |
| A00643 | A11300 | 210 | A00643 | A11335 | 168 |
| A00643 | A11433 | 240 | A00643 | A11487 | 283 |
| A00643 | A11560 | 159 | A00643 | A11827 | 224 |
| A00643 | A11983 | 491 | A00643 | A12246 | 343 |
| A00643 | A12365 | 484 | A00643 | A12513 | 334 |
| A00643 | A12897 | 486 | A00643 | A13299 | 174 |
| A00643 | A13388 | 151 | A00643 | A13784 | 426 |
| A00643 | A14055 | 361 | A00643 | A14062 | 420 |
| A00643 | A14063 | 420 | A00643 | A14196 | 396 |
| A00643 | A14198 | 260 | A00643 | A14279 | 201 |
| A00643 | A14292 | 269 | A00643 | A14410 | 486 |
| A00643 | A14511 | 193 | A00643 | A14540 | 195 |
| A00643 | A14635 | 491 | A00643 | A14636 | 491 |
| A00643 | A14643 | 491 | A00643 | A14650 | 265 |
| A00643 | A14653 | 227 | A00643 | A14714 | 339 |
| A00643 | A14720 | 451 | A00643 | A14943 | 277 |
| A00643 | A15282 | 486 | A00643 | A15292 | 386 |
| A00643 | A15296 | 480 | A00643 | A15318 | 199 |
| A00643 | A15349 | 310 | A00643 | A15606 | 260 |
| A00643 | A15665 | 228 | A00643 | A15682 | 205 |
| A00643 | A15879 | 163 | A00643 | A16764 | 424 |
| A00643 | A16847 | 430 | A00644 | A05449 | 63  |
| A00645 | A00888 | 362 | A00645 | A01021 | 162 |
| A00645 | A01725 | 293 | A00645 | A02289 | 390 |
| A00645 | A06607 | 171 | A00645 | A07800 | 241 |
| A00645 | A08104 | 63  | A00645 | A14502 | 371 |
| A00646 | A00691 | 156 | A00646 | A00716 | 156 |
| A00646 | A00867 | 156 | A00646 | A00879 | 431 |
| A00646 | A00905 | 522 | A00646 | A00916 | 191 |
| A00646 | A01029 | 521 | A00646 | A01058 | 196 |
| A00646 | A01136 | 156 | A00646 | A01151 | 519 |



|        |        |     |        |        |     |
|--------|--------|-----|--------|--------|-----|
| A00646 | A01231 | 219 | A00646 | A01266 | 538 |
| A00646 | A01268 | 541 | A00646 | A01295 | 156 |
| A00646 | A01334 | 156 | A00646 | A01391 | 156 |
| A00646 | A01434 | 156 | A00646 | A01612 | 477 |
| A00646 | A02487 | 246 | A00646 | A03494 | 261 |
| A00646 | A03569 | 296 | A00646 | A07898 | 156 |
| A00646 | A08137 | 458 | A00646 | A08201 | 156 |
| A00646 | A08327 | 156 | A00646 | A08431 | 156 |
| A00646 | A08542 | 156 | A00646 | A08571 | 377 |
| A00646 | A11496 | 156 | A00646 | A11497 | 156 |
| A00646 | A12082 | 408 | A00646 | A12189 | 372 |
| A00646 | A12202 | 329 | A00646 | A12757 | 515 |
| A00646 | A13510 | 313 | A00646 | A13928 | 156 |
| A00646 | A14178 | 451 | A00646 | A14255 | 229 |
| A00646 | A14257 | 243 | A00646 | A14284 | 302 |
| A00646 | A14728 | 466 | A00646 | A14882 | 308 |
| A00646 | A15629 | 408 | A00646 | A16699 | 156 |
| A00647 | A00655 | 198 | A00647 | A00662 | 180 |
| A00647 | A00663 | 152 | A00647 | A00736 | 319 |
| A00647 | A00764 | 195 | A00647 | A00822 | 438 |
| A00647 | A00853 | 170 | A00647 | A01354 | 439 |
| A00647 | A01385 | 281 | A00647 | A01564 | 188 |
| A00647 | A01923 | 470 | A00647 | A02059 | 195 |
| A00647 | A02180 | 447 | A00647 | A02187 | 196 |
| A00647 | A02215 | 324 | A00647 | A02545 | 486 |
| A00647 | A03565 | 394 | A00647 | A03725 | 491 |
| A00647 | A03839 | 196 | A00647 | A04661 | 154 |
| A00647 | A04916 | 302 | A00647 | A05112 | 213 |
| A00647 | A05135 | 313 | A00647 | A05153 | 491 |
| A00647 | A05299 | 184 | A00647 | A05315 | 227 |
| A00647 | A05356 | 318 | A00647 | A05926 | 477 |
| A00647 | A06162 | 238 | A00647 | A06180 | 353 |
| A00647 | A06288 | 240 | A00647 | A07016 | 221 |
| A00647 | A07123 | 157 | A00647 | A07452 | 241 |
| A00647 | A07468 | 488 | A00647 | A07469 | 439 |
| A00647 | A07617 | 347 | A00647 | A07728 | 218 |
| A00647 | A07958 | 424 | A00647 | A08063 | 302 |
| A00647 | A08494 | 221 | A00647 | A08785 | 335 |
| A00647 | A10321 | 262 | A00647 | A10967 | 491 |
| A00647 | A10986 | 174 | A00647 | A11324 | 330 |
| A00647 | A11471 | 157 | A00647 | A12588 | 353 |
| A00647 | A12793 | 485 | A00647 | A13879 | 238 |
| A00647 | A15503 | 190 | A00647 | A15850 | 271 |
| A00647 | A17108 | 383 | A00648 | A00651 | 813 |
| A00648 | A00653 | 491 | A00648 | A00658 | 227 |
| A00648 | A00670 | 159 | A00648 | A00687 | 340 |

|        |        |     |        |        |     |
|--------|--------|-----|--------|--------|-----|
| A00648 | A00697 | 313 | A00648 | A00700 | 491 |
| A00648 | A00701 | 489 | A00648 | A00705 | 443 |
| A00648 | A00713 | 491 | A00648 | A00763 | 485 |
| A00648 | A00782 | 475 | A00648 | A00787 | 740 |
| A00648 | A00790 | 294 | A00648 | A00809 | 414 |
| A00648 | A00812 | 384 | A00648 | A00826 | 243 |
| A00648 | A00831 | 491 | A00648 | A00839 | 603 |
| A00648 | A00843 | 272 | A00648 | A00848 | 355 |
| A00648 | A00854 | 240 | A00648 | A00861 | 218 |
| A00648 | A00870 | 491 | A00648 | A00871 | 451 |
| A00648 | A00878 | 838 | A00648 | A00902 | 477 |
| A00648 | A00906 | 353 | A00648 | A00916 | 491 |
| A00648 | A00922 | 326 | A00648 | A00923 | 490 |
| A00648 | A00935 | 379 | A00648 | A00949 | 643 |
| A00648 | A00953 | 296 | A00648 | A00955 | 201 |
| A00648 | A00965 | 727 | A00648 | A00966 | 628 |
| A00648 | A00970 | 281 | A00648 | A00985 | 434 |
| A00648 | A00986 | 414 | A00648 | A00988 | 177 |
| A00648 | A00994 | 477 | A00648 | A01000 | 474 |
| A00648 | A01012 | 657 | A00648 | A01016 | 317 |
| A00648 | A01020 | 329 | A00648 | A01025 | 491 |
| A00648 | A01031 | 193 | A00648 | A01034 | 640 |
| A00648 | A01037 | 491 | A00648 | A01042 | 170 |
| A00648 | A01047 | 391 | A00648 | A01054 | 195 |
| A00648 | A01056 | 491 | A00648 | A01067 | 480 |
| A00648 | A01072 | 491 | A00648 | A01085 | 491 |
| A00648 | A01090 | 491 | A00648 | A01095 | 489 |
| A00648 | A01098 | 174 | A00648 | A01101 | 350 |
| A00648 | A01112 | 491 | A00648 | A01115 | 467 |
| A00648 | A01120 | 486 | A00648 | A01127 | 491 |
| A00648 | A01140 | 491 | A00648 | A01144 | 534 |
| A00648 | A01150 | 474 | A00648 | A01153 | 274 |
| A00648 | A01154 | 599 | A00648 | A01161 | 413 |
| A00648 | A01166 | 491 | A00648 | A01179 | 324 |
| A00648 | A01184 | 396 | A00648 | A01186 | 180 |
| A00648 | A01189 | 396 | A00648 | A01192 | 177 |
| A00648 | A01196 | 409 | A00648 | A01201 | 229 |
| A00648 | A01206 | 491 | A00648 | A01211 | 419 |
| A00648 | A01217 | 258 | A00648 | A01220 | 483 |
| A00648 | A01221 | 463 | A00648 | A01234 | 491 |
| A00648 | A01238 | 724 | A00648 | A01243 | 450 |
| A00648 | A01249 | 480 | A00648 | A01263 | 408 |
| A00648 | A01268 | 470 | A00648 | A01291 | 697 |
| A00648 | A01292 | 249 | A00648 | A01294 | 385 |
| A00648 | A01304 | 195 | A00648 | A01306 | 580 |
| A00648 | A01335 | 491 | A00648 | A01365 | 491 |

|        |        |     |        |        |     |
|--------|--------|-----|--------|--------|-----|
| A00648 | A01392 | 491 | A00648 | A01406 | 586 |
| A00648 | A01416 | 736 | A00648 | A01425 | 629 |
| A00648 | A01431 | 388 | A00648 | A01433 | 491 |
| A00648 | A01436 | 628 | A00648 | A01437 | 452 |
| A00648 | A01439 | 152 | A00648 | A01457 | 491 |
| A00648 | A01458 | 157 | A00648 | A01464 | 159 |
| A00648 | A01468 | 629 | A00648 | A01470 | 491 |
| A00648 | A01488 | 291 | A00648 | A01492 | 561 |
| A00648 | A01496 | 491 | A00648 | A01538 | 486 |
| A00648 | A01539 | 213 | A00648 | A01540 | 241 |
| A00648 | A01569 | 358 | A00648 | A01579 | 491 |
| A00648 | A01586 | 626 | A00648 | A01597 | 486 |
| A00648 | A01598 | 489 | A00648 | A01601 | 538 |
| A00648 | A01612 | 414 | A00648 | A01614 | 490 |
| A00648 | A01628 | 899 | A00648 | A01649 | 491 |
| A00648 | A01652 | 190 | A00648 | A01707 | 409 |
| A00648 | A01718 | 296 | A00648 | A01722 | 198 |
| A00648 | A01741 | 213 | A00648 | A01822 | 412 |
| A00648 | A02051 | 261 | A00648 | A02227 | 288 |
| A00648 | A03069 | 396 | A00648 | A03290 | 177 |
| A00648 | A03296 | 151 | A00648 | A03461 | 483 |
| A00648 | A03490 | 633 | A00648 | A03567 | 488 |
| A00648 | A03652 | 271 | A00648 | A03770 | 460 |
| A00648 | A03963 | 350 | A00648 | A03981 | 604 |
| A00648 | A04846 | 188 | A00648 | A05267 | 262 |
| A00648 | A05443 | 301 | A00648 | A05501 | 489 |
| A00648 | A05654 | 205 | A00648 | A06102 | 205 |
| A00648 | A06275 | 445 | A00648 | A06279 | 353 |
| A00648 | A06340 | 468 | A00648 | A06351 | 643 |
| A00648 | A06466 | 313 | A00648 | A06517 | 177 |
| A00648 | A06543 | 272 | A00648 | A06690 | 160 |
| A00648 | A06812 | 374 | A00648 | A06814 | 424 |
| A00648 | A06861 | 291 | A00648 | A06965 | 483 |
| A00648 | A07157 | 417 | A00648 | A07312 | 152 |
| A00648 | A07323 | 472 | A00648 | A07360 | 396 |
| A00648 | A07394 | 71  | A00648 | A07398 | 208 |
| A00648 | A07412 | 424 | A00648 | A07447 | 227 |
| A00648 | A07449 | 350 | A00648 | A07451 | 491 |
| A00648 | A07536 | 210 | A00648 | A07584 | 210 |
| A00648 | A07597 | 462 | A00648 | A07726 | 484 |
| A00648 | A07924 | 346 | A00648 | A08011 | 738 |
| A00648 | A08052 | 171 | A00648 | A08055 | 486 |
| A00648 | A08137 | 371 | A00648 | A08301 | 334 |
| A00648 | A08357 | 491 | A00648 | A08359 | 483 |
| A00648 | A08377 | 627 | A00648 | A08398 | 408 |
| A00648 | A08452 | 433 | A00648 | A08533 | 196 |

|        |        |     |        |        |     |
|--------|--------|-----|--------|--------|-----|
| A00648 | A08543 | 167 | A00648 | A08550 | 620 |
| A00648 | A08773 | 738 | A00648 | A08966 | 190 |
| A00648 | A08973 | 808 | A00648 | A08983 | 168 |
| A00648 | A09148 | 177 | A00648 | A09293 | 308 |
| A00648 | A09332 | 632 | A00648 | A09352 | 399 |
| A00648 | A09530 | 262 | A00648 | A09620 | 219 |
| A00648 | A09697 | 441 | A00648 | A09735 | 462 |
| A00648 | A09811 | 227 | A00648 | A09978 | 480 |
| A00648 | A10532 | 433 | A00648 | A10616 | 455 |
| A00648 | A10910 | 96  | A00648 | A10924 | 277 |
| A00648 | A11254 | 402 | A00648 | A11263 | 332 |
| A00648 | A11334 | 425 | A00648 | A11390 | 268 |
| A00648 | A11392 | 316 | A00648 | A11453 | 491 |
| A00648 | A11462 | 452 | A00648 | A11518 | 177 |
| A00648 | A11535 | 154 | A00648 | A11815 | 643 |
| A00648 | A11945 | 187 | A00648 | A11992 | 369 |
| A00648 | A12052 | 177 | A00648 | A12168 | 291 |
| A00648 | A12252 | 157 | A00648 | A12433 | 419 |
| A00648 | A12881 | 489 | A00648 | A12923 | 383 |
| A00648 | A13024 | 168 | A00648 | A13126 | 466 |
| A00648 | A13171 | 205 | A00648 | A13249 | 419 |
| A00648 | A13340 | 467 | A00648 | A13549 | 177 |
| A00648 | A13989 | 649 | A00648 | A13992 | 328 |
| A00648 | A14006 | 486 | A00648 | A14172 | 574 |
| A00648 | A14188 | 299 | A00648 | A14216 | 812 |
| A00648 | A14447 | 323 | A00648 | A14449 | 489 |
| A00648 | A14479 | 405 | A00648 | A14482 | 643 |
| A00648 | A14508 | 160 | A00648 | A14530 | 193 |
| A00648 | A14551 | 160 | A00648 | A14729 | 177 |
| A00648 | A14816 | 205 | A00648 | A14875 | 152 |
| A00648 | A14889 | 177 | A00648 | A15215 | 210 |
| A00648 | A15500 | 347 | A00648 | A15660 | 481 |
| A00648 | A15684 | 570 | A00648 | A15756 | 168 |
| A00648 | A15917 | 168 | A00648 | A15931 | 319 |
| A00648 | A15932 | 439 | A00648 | A15988 | 491 |
| A00648 | A16029 | 262 | A00648 | A16053 | 205 |
| A00648 | A16157 | 296 | A00648 | A16306 | 308 |
| A00648 | A16351 | 168 | A00648 | A16462 | 324 |
| A00648 | A16467 | 154 | A00648 | A16793 | 210 |
| A00648 | A16858 | 168 | A00648 | A16886 | 162 |
| A00648 | A17095 | 152 | A00649 | A00651 | 419 |
| A00649 | A00653 | 592 | A00649 | A00662 | 635 |
| A00649 | A00687 | 321 | A00649 | A00694 | 188 |
| A00649 | A00697 | 162 | A00649 | A00731 | 516 |
| A00649 | A00741 | 174 | A00649 | A00780 | 323 |
| A00649 | A00783 | 589 | A00649 | A00785 | 592 |

|        |        |     |        |        |     |
|--------|--------|-----|--------|--------|-----|
| A00649 | A00787 | 151 | A00649 | A00790 | 588 |
| A00649 | A00849 | 301 | A00649 | A00863 | 177 |
| A00649 | A00953 | 592 | A00649 | A00974 | 590 |
| A00649 | A00985 | 465 | A00649 | A00987 | 271 |
| A00649 | A00994 | 380 | A00649 | A01027 | 590 |
| A00649 | A01081 | 198 | A00649 | A01086 | 591 |
| A00649 | A01100 | 319 | A00649 | A01108 | 592 |
| A00649 | A01150 | 467 | A00649 | A01161 | 581 |
| A00649 | A01204 | 591 | A00649 | A01234 | 241 |
| A00649 | A01246 | 340 | A00649 | A01271 | 352 |
| A00649 | A01287 | 384 | A00649 | A01346 | 592 |
| A00649 | A01399 | 590 | A00649 | A01403 | 165 |
| A00649 | A01433 | 191 | A00649 | A01443 | 427 |
| A00649 | A01446 | 473 | A00649 | A01448 | 462 |
| A00649 | A01540 | 419 | A00649 | A01560 | 252 |
| A00649 | A01622 | 443 | A00649 | A01668 | 355 |
| A00649 | A01711 | 436 | A00649 | A01741 | 454 |
| A00649 | A01743 | 445 | A00649 | A02814 | 313 |
| A00649 | A02994 | 247 | A00649 | A03259 | 223 |
| A00649 | A03959 | 298 | A00649 | A03981 | 313 |
| A00649 | A03990 | 633 | A00649 | A04771 | 413 |
| A00649 | A04895 | 485 | A00649 | A05054 | 271 |
| A00649 | A05323 | 196 | A00649 | A05449 | 380 |
| A00649 | A05839 | 488 | A00649 | A05840 | 344 |
| A00649 | A05982 | 260 | A00649 | A06258 | 647 |
| A00649 | A06825 | 171 | A00649 | A06959 | 489 |
| A00649 | A07157 | 230 | A00649 | A07164 | 278 |
| A00649 | A07237 | 489 | A00649 | A07311 | 281 |
| A00649 | A07339 | 485 | A00649 | A07350 | 319 |
| A00649 | A07362 | 316 | A00649 | A07412 | 154 |
| A00649 | A07442 | 294 | A00649 | A07551 | 257 |
| A00649 | A07569 | 430 | A00649 | A07597 | 352 |
| A00649 | A07599 | 414 | A00649 | A07623 | 290 |
| A00649 | A07773 | 193 | A00649 | A07792 | 490 |
| A00649 | A08653 | 177 | A00649 | A08760 | 171 |
| A00649 | A08773 | 180 | A00649 | A09616 | 345 |
| A00649 | A09696 | 356 | A00649 | A09720 | 246 |
| A00649 | A09978 | 168 | A00649 | A10199 | 447 |
| A00649 | A10535 | 465 | A00649 | A11015 | 257 |
| A00649 | A11427 | 210 | A00649 | A11453 | 174 |
| A00649 | A11628 | 180 | A00649 | A11677 | 247 |
| A00649 | A11992 | 218 | A00649 | A12600 | 344 |
| A00649 | A13678 | 414 | A00649 | A14216 | 307 |
| A00649 | A14699 | 345 | A00649 | A14778 | 247 |
| A00649 | A15233 | 174 | A00649 | A15293 | 249 |
| A00649 | A15498 | 468 | A00649 | A15624 | 462 |

|        |        |     |        |        |     |
|--------|--------|-----|--------|--------|-----|
| A00649 | A15651 | 165 | A00649 | A15684 | 396 |
| A00649 | A16088 | 177 | A00649 | A16095 | 358 |
| A00649 | A16587 | 247 | A00650 | A00926 | 208 |
| A00650 | A01488 | 163 | A00650 | A02284 | 218 |
| A00650 | A02675 | 168 | A00650 | A03570 | 205 |
| A00650 | A03948 | 152 | A00650 | A04773 | 229 |
| A00650 | A05209 | 479 | A00650 | A05577 | 260 |
| A00650 | A05796 | 255 | A00650 | A06279 | 193 |
| A00650 | A07143 | 245 | A00650 | A07961 | 344 |
| A00650 | A10234 | 377 | A00650 | A11435 | 483 |
| A00650 | A12111 | 191 | A00650 | A14374 | 167 |
| A00650 | A14596 | 491 | A00650 | A14659 | 424 |
| A00650 | A15507 | 201 | A00650 | A15612 | 208 |
| A00650 | A15722 | 279 | A00650 | A16230 | 269 |
| A00650 | A16627 | 235 | A00651 | A00653 | 491 |
| A00651 | A00687 | 208 | A00651 | A00694 | 316 |
| A00651 | A00697 | 428 | A00651 | A00700 | 491 |
| A00651 | A00701 | 491 | A00651 | A00702 | 104 |
| A00651 | A00713 | 519 | A00651 | A00749 | 170 |
| A00651 | A00756 | 477 | A00651 | A00763 | 491 |
| A00651 | A00767 | 170 | A00651 | A00769 | 279 |
| A00651 | A00782 | 488 | A00651 | A00785 | 285 |
| A00651 | A00787 | 585 | A00651 | A00806 | 174 |
| A00651 | A00831 | 210 | A00651 | A00839 | 570 |
| A00651 | A00849 | 490 | A00651 | A00861 | 550 |
| A00651 | A00870 | 406 | A00651 | A00872 | 500 |
| A00651 | A00878 | 629 | A00651 | A00902 | 414 |
| A00651 | A00916 | 242 | A00651 | A00918 | 170 |
| A00651 | A00919 | 428 | A00651 | A00922 | 490 |
| A00651 | A00923 | 461 | A00651 | A00934 | 170 |
| A00651 | A00945 | 98  | A00651 | A00965 | 317 |
| A00651 | A00966 | 688 | A00651 | A00970 | 389 |
| A00651 | A00974 | 173 | A00651 | A00980 | 230 |
| A00651 | A00983 | 630 | A00651 | A00986 | 329 |
| A00651 | A00987 | 477 | A00651 | A00990 | 491 |
| A00651 | A00992 | 170 | A00651 | A00994 | 491 |
| A00651 | A01012 | 766 | A00651 | A01017 | 407 |
| A00651 | A01025 | 475 | A00651 | A01028 | 170 |
| A00651 | A01038 | 491 | A00651 | A01042 | 475 |
| A00651 | A01047 | 408 | A00651 | A01053 | 457 |
| A00651 | A01054 | 439 | A00651 | A01056 | 484 |
| A00651 | A01072 | 486 | A00651 | A01085 | 477 |
| A00651 | A01086 | 243 | A00651 | A01090 | 688 |
| A00651 | A01092 | 65  | A00651 | A01098 | 420 |
| A00651 | A01101 | 386 | A00651 | A01108 | 474 |
| A00651 | A01112 | 826 | A00651 | A01115 | 488 |

|        |        |     |        |        |     |
|--------|--------|-----|--------|--------|-----|
| A00651 | A01120 | 170 | A00651 | A01127 | 491 |
| A00651 | A01129 | 549 | A00651 | A01139 | 436 |
| A00651 | A01140 | 491 | A00651 | A01144 | 607 |
| A00651 | A01150 | 491 | A00651 | A01160 | 548 |
| A00651 | A01161 | 477 | A00651 | A01166 | 490 |
| A00651 | A01168 | 549 | A00651 | A01192 | 296 |
| A00651 | A01196 | 479 | A00651 | A01206 | 480 |
| A00651 | A01211 | 380 | A00651 | A01234 | 489 |
| A00651 | A01238 | 376 | A00651 | A01240 | 404 |
| A00651 | A01247 | 160 | A00651 | A01249 | 481 |
| A00651 | A01251 | 115 | A00651 | A01263 | 484 |
| A00651 | A01275 | 486 | A00651 | A01287 | 480 |
| A00651 | A01288 | 167 | A00651 | A01291 | 566 |
| A00651 | A01294 | 267 | A00651 | A01306 | 491 |
| A00651 | A01335 | 491 | A00651 | A01351 | 170 |
| A00651 | A01356 | 170 | A00651 | A01359 | 428 |
| A00651 | A01365 | 467 | A00651 | A01380 | 391 |
| A00651 | A01392 | 213 | A00651 | A01393 | 232 |
| A00651 | A01414 | 230 | A00651 | A01416 | 317 |
| A00651 | A01425 | 712 | A00651 | A01431 | 462 |
| A00651 | A01436 | 579 | A00651 | A01437 | 335 |
| A00651 | A01446 | 165 | A00651 | A01448 | 310 |
| A00651 | A01457 | 490 | A00651 | A01464 | 489 |
| A00651 | A01468 | 629 | A00651 | A01470 | 486 |
| A00651 | A01492 | 321 | A00651 | A01496 | 688 |
| A00651 | A01527 | 899 | A00651 | A01538 | 384 |
| A00651 | A01539 | 432 | A00651 | A01540 | 491 |
| A00651 | A01546 | 146 | A00651 | A01569 | 488 |
| A00651 | A01579 | 491 | A00651 | A01586 | 628 |
| A00651 | A01597 | 400 | A00651 | A01598 | 170 |
| A00651 | A01601 | 673 | A00651 | A01605 | 73  |
| A00651 | A01614 | 471 | A00651 | A01618 | 378 |
| A00651 | A01649 | 488 | A00651 | A01707 | 174 |
| A00651 | A01711 | 479 | A00651 | A01787 | 452 |
| A00651 | A01822 | 558 | A00651 | A01989 | 188 |
| A00651 | A01995 | 218 | A00651 | A02064 | 491 |
| A00651 | A02151 | 63  | A00651 | A02164 | 490 |
| A00651 | A02165 | 490 | A00651 | A02179 | 205 |
| A00651 | A02236 | 160 | A00651 | A02248 | 82  |
| A00651 | A02249 | 63  | A00651 | A02265 | 255 |
| A00651 | A02350 | 474 | A00651 | A02414 | 481 |
| A00651 | A02494 | 420 | A00651 | A02527 | 460 |
| A00651 | A02590 | 491 | A00651 | A02605 | 63  |
| A00651 | A02814 | 208 | A00651 | A03048 | 374 |
| A00651 | A03069 | 63  | A00651 | A03083 | 167 |
| A00651 | A03093 | 176 | A00651 | A03112 | 162 |

|        |        |     |        |        |     |
|--------|--------|-----|--------|--------|-----|
| A00651 | A03437 | 377 | A00651 | A03438 | 550 |
| A00651 | A03461 | 405 | A00651 | A03490 | 338 |
| A00651 | A03502 | 82  | A00651 | A03567 | 486 |
| A00651 | A03571 | 182 | A00651 | A03601 | 219 |
| A00651 | A03602 | 154 | A00651 | A03609 | 486 |
| A00651 | A03644 | 490 | A00651 | A03645 | 430 |
| A00651 | A03652 | 528 | A00651 | A03671 | 445 |
| A00651 | A03676 | 465 | A00651 | A03677 | 313 |
| A00651 | A03740 | 382 | A00651 | A03752 | 540 |
| A00651 | A03809 | 484 | A00651 | A03858 | 366 |
| A00651 | A03888 | 446 | A00651 | A03906 | 156 |
| A00651 | A03981 | 758 | A00651 | A04197 | 218 |
| A00651 | A04230 | 380 | A00651 | A04309 | 156 |
| A00651 | A04666 | 428 | A00651 | A04689 | 236 |
| A00651 | A04697 | 217 | A00651 | A04764 | 159 |
| A00651 | A04846 | 369 | A00651 | A05086 | 299 |
| A00651 | A05153 | 208 | A00651 | A05191 | 417 |
| A00651 | A05255 | 252 | A00651 | A05411 | 455 |
| A00651 | A05418 | 224 | A00651 | A05443 | 256 |
| A00651 | A05449 | 491 | A00651 | A05477 | 286 |
| A00651 | A05501 | 491 | A00651 | A05557 | 450 |
| A00651 | A05566 | 486 | A00651 | A05654 | 344 |
| A00651 | A06084 | 480 | A00651 | A06286 | 366 |
| A00651 | A06351 | 491 | A00651 | A06356 | 533 |
| A00651 | A06466 | 490 | A00651 | A06495 | 350 |
| A00651 | A06525 | 180 | A00651 | A06564 | 377 |
| A00651 | A06682 | 159 | A00651 | A06807 | 475 |
| A00651 | A06814 | 636 | A00651 | A06815 | 435 |
| A00651 | A06825 | 491 | A00651 | A06901 | 291 |
| A00651 | A06955 | 408 | A00651 | A06965 | 484 |
| A00651 | A06973 | 469 | A00651 | A07047 | 159 |
| A00651 | A07105 | 219 | A00651 | A07116 | 416 |
| A00651 | A07138 | 132 | A00651 | A07201 | 490 |
| A00651 | A07243 | 491 | A00651 | A07244 | 170 |
| A00651 | A07251 | 85  | A00651 | A07258 | 177 |
| A00651 | A07307 | 490 | A00651 | A07311 | 576 |
| A00651 | A07323 | 469 | A00651 | A07360 | 230 |
| A00651 | A07398 | 408 | A00651 | A07399 | 208 |
| A00651 | A07412 | 174 | A00651 | A07447 | 180 |
| A00651 | A07449 | 427 | A00651 | A07451 | 488 |
| A00651 | A07506 | 491 | A00651 | A07524 | 364 |
| A00651 | A07581 | 288 | A00651 | A07726 | 480 |
| A00651 | A07773 | 245 | A00651 | A07874 | 180 |
| A00651 | A07921 | 218 | A00651 | A07924 | 170 |
| A00651 | A08011 | 684 | A00651 | A08052 | 165 |
| A00651 | A08072 | 218 | A00651 | A08131 | 385 |



|        |        |     |        |        |     |
|--------|--------|-----|--------|--------|-----|
| A00651 | A08211 | 170 | A00651 | A08301 | 246 |
| A00651 | A08321 | 452 | A00651 | A08357 | 371 |
| A00651 | A08358 | 260 | A00651 | A08359 | 491 |
| A00651 | A08377 | 628 | A00651 | A08408 | 388 |
| A00651 | A08457 | 259 | A00651 | A08476 | 230 |
| A00651 | A08543 | 430 | A00651 | A08546 | 221 |
| A00651 | A08550 | 425 | A00651 | A08559 | 457 |
| A00651 | A08653 | 488 | A00651 | A08664 | 451 |
| A00651 | A08682 | 491 | A00651 | A08752 | 199 |
| A00651 | A08768 | 126 | A00651 | A08773 | 558 |
| A00651 | A08914 | 313 | A00651 | A08970 | 180 |
| A00651 | A08973 | 596 | A00651 | A09044 | 470 |
| A00651 | A09618 | 218 | A00651 | A09656 | 485 |
| A00651 | A09657 | 205 | A00651 | A09697 | 170 |
| A00651 | A09852 | 466 | A00651 | A10001 | 441 |
| A00651 | A10034 | 466 | A00651 | A10417 | 489 |
| A00651 | A10532 | 722 | A00651 | A10564 | 443 |
| A00651 | A10569 | 260 | A00651 | A10814 | 159 |
| A00651 | A10901 | 384 | A00651 | A10928 | 159 |
| A00651 | A10983 | 63  | A00651 | A11263 | 170 |
| A00651 | A11264 | 433 | A00651 | A11331 | 491 |
| A00651 | A11334 | 327 | A00651 | A11344 | 345 |
| A00651 | A11355 | 291 | A00651 | A11359 | 180 |
| A00651 | A11392 | 152 | A00651 | A11420 | 358 |
| A00651 | A11438 | 267 | A00651 | A11440 | 174 |
| A00651 | A11618 | 218 | A00651 | A11619 | 218 |
| A00651 | A11697 | 156 | A00651 | A11926 | 407 |
| A00651 | A11945 | 185 | A00651 | A11981 | 491 |
| A00651 | A11983 | 195 | A00651 | A12259 | 236 |
| A00651 | A12270 | 416 | A00651 | A12329 | 303 |
| A00651 | A12404 | 228 | A00651 | A12589 | 159 |
| A00651 | A12687 | 488 | A00651 | A13052 | 548 |
| A00651 | A13063 | 589 | A00651 | A13126 | 135 |
| A00651 | A13340 | 491 | A00651 | A13344 | 159 |
| A00651 | A13425 | 213 | A00651 | A13581 | 488 |
| A00651 | A13626 | 491 | A00651 | A13712 | 218 |
| A00651 | A13752 | 436 | A00651 | A13989 | 643 |
| A00651 | A13992 | 396 | A00651 | A14073 | 597 |
| A00651 | A14090 | 91  | A00651 | A14172 | 372 |
| A00651 | A14176 | 238 | A00651 | A14188 | 227 |
| A00651 | A14216 | 855 | A00651 | A14272 | 366 |
| A00651 | A14479 | 215 | A00651 | A14482 | 185 |
| A00651 | A14508 | 154 | A00651 | A14606 | 366 |
| A00651 | A14674 | 428 | A00651 | A14738 | 247 |
| A00651 | A14754 | 180 | A00651 | A14816 | 327 |
| A00651 | A14817 | 173 | A00651 | A14937 | 257 |

|        |        |     |        |        |     |
|--------|--------|-----|--------|--------|-----|
| A00651 | A14959 | 218 | A00651 | A15063 | 313 |
| A00651 | A15075 | 218 | A00651 | A15076 | 218 |
| A00651 | A15225 | 162 | A00651 | A15235 | 249 |
| A00651 | A15244 | 356 | A00651 | A15268 | 157 |
| A00651 | A15323 | 191 | A00651 | A15381 | 188 |
| A00651 | A15500 | 490 | A00651 | A15614 | 151 |
| A00651 | A15624 | 491 | A00651 | A15649 | 440 |
| A00651 | A15651 | 190 | A00651 | A15659 | 390 |
| A00651 | A15660 | 491 | A00651 | A15661 | 263 |
| A00651 | A15684 | 621 | A00651 | A15707 | 236 |
| A00651 | A15732 | 346 | A00651 | A15743 | 190 |
| A00651 | A15773 | 232 | A00651 | A15917 | 219 |
| A00651 | A15918 | 249 | A00651 | A15931 | 483 |
| A00651 | A15933 | 218 | A00651 | A15988 | 355 |
| A00651 | A16088 | 491 | A00651 | A16095 | 490 |
| A00651 | A16118 | 417 | A00651 | A16149 | 394 |
| A00651 | A16272 | 377 | A00651 | A16274 | 210 |
| A00651 | A16575 | 335 | A00651 | A16633 | 156 |
| A00651 | A16686 | 318 | A00651 | A16738 | 428 |
| A00651 | A16778 | 193 | A00651 | A16790 | 188 |
| A00651 | A17035 | 462 | A00651 | A17134 | 319 |
| A00651 | A17193 | 269 | A00652 | A00847 | 201 |
| A00652 | A00852 | 337 | A00652 | A00853 | 339 |
| A00652 | A00868 | 174 | A00652 | A00876 | 191 |
| A00652 | A00882 | 286 | A00652 | A01045 | 475 |
| A00652 | A01149 | 638 | A00652 | A01178 | 188 |
| A00652 | A01209 | 157 | A00652 | A01244 | 247 |
| A00652 | A01451 | 232 | A00652 | A01478 | 395 |
| A00652 | A01522 | 396 | A00652 | A01528 | 260 |
| A00652 | A01550 | 396 | A00652 | A01562 | 221 |
| A00652 | A01566 | 435 | A00652 | A01575 | 314 |
| A00652 | A01578 | 327 | A00652 | A01595 | 190 |
| A00652 | A01660 | 491 | A00652 | A01671 | 157 |
| A00652 | A01692 | 491 | A00652 | A01708 | 63  |
| A00652 | A02325 | 470 | A00652 | A02544 | 396 |
| A00652 | A02703 | 213 | A00652 | A02786 | 465 |
| A00652 | A02911 | 183 | A00652 | A02912 | 249 |
| A00652 | A03104 | 213 | A00652 | A03237 | 477 |
| A00652 | A03488 | 375 | A00652 | A03517 | 212 |
| A00652 | A03974 | 457 | A00652 | A04275 | 339 |
| A00652 | A04342 | 151 | A00652 | A04449 | 156 |
| A00652 | A04715 | 485 | A00652 | A04897 | 156 |
| A00652 | A04985 | 396 | A00652 | A05453 | 243 |
| A00652 | A05556 | 260 | A00652 | A05601 | 380 |
| A00652 | A05986 | 191 | A00652 | A06100 | 386 |
| A00652 | A06466 | 243 | A00652 | A06530 | 324 |

|        |        |     |        |        |     |
|--------|--------|-----|--------|--------|-----|
| A00652 | A07232 | 447 | A00652 | A07422 | 324 |
| A00652 | A07709 | 176 | A00652 | A07732 | 334 |
| A00652 | A07848 | 274 | A00652 | A08097 | 489 |
| A00652 | A08352 | 172 | A00652 | A08461 | 433 |
| A00652 | A08532 | 363 | A00652 | A08859 | 255 |
| A00652 | A08899 | 463 | A00652 | A09078 | 334 |
| A00652 | A09402 | 241 | A00652 | A09434 | 460 |
| A00652 | A09736 | 200 | A00652 | A09842 | 162 |
| A00652 | A09857 | 243 | A00652 | A09995 | 377 |
| A00652 | A10603 | 198 | A00652 | A11187 | 229 |
| A00652 | A11687 | 160 | A00652 | A11901 | 274 |
| A00652 | A12199 | 241 | A00652 | A12282 | 363 |
| A00652 | A13949 | 341 | A00652 | A13977 | 380 |
| A00652 | A14009 | 334 | A00652 | A14016 | 288 |
| A00652 | A14193 | 574 | A00652 | A14253 | 416 |
| A00652 | A14288 | 334 | A00652 | A14395 | 596 |
| A00652 | A14570 | 398 | A00652 | A14648 | 321 |
| A00652 | A14661 | 440 | A00652 | A15297 | 362 |
| A00652 | A15322 | 373 | A00652 | A15366 | 372 |
| A00652 | A15483 | 219 | A00652 | A15557 | 372 |
| A00652 | A15632 | 241 | A00652 | A15680 | 486 |
| A00652 | A16022 | 420 | A00652 | A16635 | 637 |
| A00652 | A16979 | 152 | A00653 | A00673 | 188 |
| A00653 | A00677 | 154 | A00653 | A00687 | 559 |
| A00653 | A00691 | 391 | A00653 | A00693 | 238 |
| A00653 | A00697 | 547 | A00653 | A00698 | 460 |
| A00653 | A00700 | 417 | A00653 | A00705 | 188 |
| A00653 | A00707 | 294 | A00653 | A00709 | 188 |
| A00653 | A00711 | 659 | A00653 | A00718 | 477 |
| A00653 | A00724 | 615 | A00653 | A00726 | 313 |
| A00653 | A00731 | 590 | A00653 | A00736 | 291 |
| A00653 | A00741 | 491 | A00653 | A00745 | 477 |
| A00653 | A00750 | 484 | A00653 | A00758 | 484 |
| A00653 | A00763 | 363 | A00653 | A00769 | 665 |
| A00653 | A00780 | 484 | A00653 | A00782 | 457 |
| A00653 | A00783 | 592 | A00653 | A00785 | 592 |
| A00653 | A00787 | 491 | A00653 | A00790 | 592 |
| A00653 | A00795 | 247 | A00653 | A00796 | 380 |
| A00653 | A00802 | 177 | A00653 | A00805 | 418 |
| A00653 | A00809 | 486 | A00653 | A00810 | 155 |
| A00653 | A00811 | 435 | A00653 | A00821 | 391 |
| A00653 | A00824 | 622 | A00653 | A00833 | 436 |
| A00653 | A00839 | 560 | A00653 | A00841 | 615 |
| A00653 | A00849 | 591 | A00653 | A00856 | 316 |
| A00653 | A00865 | 486 | A00653 | A00868 | 563 |
| A00653 | A00870 | 385 | A00653 | A00871 | 491 |

|        |        |     |        |        |     |
|--------|--------|-----|--------|--------|-----|
| A00653 | A00876 | 258 | A00653 | A00878 | 491 |
| A00653 | A00892 | 281 | A00653 | A00909 | 615 |
| A00653 | A00910 | 479 | A00653 | A00911 | 469 |
| A00653 | A00922 | 665 | A00653 | A00926 | 362 |
| A00653 | A00934 | 213 | A00653 | A00935 | 486 |
| A00653 | A00953 | 592 | A00653 | A00965 | 462 |
| A00653 | A00970 | 423 | A00653 | A00972 | 211 |
| A00653 | A00973 | 267 | A00653 | A00974 | 620 |
| A00653 | A00983 | 659 | A00653 | A00984 | 613 |
| A00653 | A00985 | 483 | A00653 | A00987 | 702 |
| A00653 | A00990 | 417 | A00653 | A00994 | 490 |
| A00653 | A01001 | 611 | A00653 | A01006 | 575 |
| A00653 | A01012 | 485 | A00653 | A01013 | 296 |
| A00653 | A01017 | 556 | A00653 | A01020 | 256 |
| A00653 | A01023 | 361 | A00653 | A01025 | 489 |
| A00653 | A01027 | 665 | A00653 | A01037 | 227 |
| A00653 | A01042 | 491 | A00653 | A01047 | 278 |
| A00653 | A01054 | 491 | A00653 | A01055 | 180 |
| A00653 | A01056 | 183 | A00653 | A01069 | 202 |
| A00653 | A01072 | 157 | A00653 | A01075 | 438 |
| A00653 | A01081 | 440 | A00653 | A01082 | 357 |
| A00653 | A01083 | 219 | A00653 | A01086 | 716 |
| A00653 | A01087 | 249 | A00653 | A01088 | 215 |
| A00653 | A01090 | 393 | A00653 | A01094 | 174 |
| A00653 | A01095 | 172 | A00653 | A01100 | 484 |
| A00653 | A01101 | 558 | A00653 | A01102 | 564 |
| A00653 | A01108 | 592 | A00653 | A01115 | 461 |
| A00653 | A01116 | 307 | A00653 | A01121 | 251 |
| A00653 | A01127 | 467 | A00653 | A01135 | 241 |
| A00653 | A01140 | 270 | A00653 | A01150 | 797 |
| A00653 | A01154 | 462 | A00653 | A01155 | 213 |
| A00653 | A01156 | 310 | A00653 | A01161 | 707 |
| A00653 | A01169 | 469 | A00653 | A01192 | 663 |
| A00653 | A01204 | 591 | A00653 | A01206 | 329 |
| A00653 | A01210 | 489 | A00653 | A01215 | 324 |
| A00653 | A01217 | 421 | A00653 | A01218 | 475 |
| A00653 | A01219 | 165 | A00653 | A01220 | 446 |
| A00653 | A01221 | 491 | A00653 | A01232 | 665 |
| A00653 | A01234 | 562 | A00653 | A01242 | 490 |
| A00653 | A01244 | 411 | A00653 | A01246 | 484 |
| A00653 | A01249 | 353 | A00653 | A01260 | 398 |
| A00653 | A01265 | 491 | A00653 | A01287 | 658 |
| A00653 | A01289 | 201 | A00653 | A01291 | 532 |
| A00653 | A01293 | 320 | A00653 | A01300 | 193 |
| A00653 | A01306 | 180 | A00653 | A01311 | 539 |
| A00653 | A01326 | 316 | A00653 | A01331 | 395 |

|        |        |     |        |        |     |
|--------|--------|-----|--------|--------|-----|
| A00653 | A01335 | 485 | A00653 | A01336 | 297 |
| A00653 | A01346 | 592 | A00653 | A01352 | 187 |
| A00653 | A01360 | 441 | A00653 | A01362 | 374 |
| A00653 | A01365 | 490 | A00653 | A01369 | 465 |
| A00653 | A01379 | 618 | A00653 | A01382 | 486 |
| A00653 | A01385 | 455 | A00653 | A01387 | 563 |
| A00653 | A01392 | 361 | A00653 | A01399 | 659 |
| A00653 | A01403 | 333 | A00653 | A01406 | 518 |
| A00653 | A01407 | 221 | A00653 | A01408 | 227 |
| A00653 | A01411 | 485 | A00653 | A01412 | 406 |
| A00653 | A01413 | 491 | A00653 | A01414 | 188 |
| A00653 | A01416 | 347 | A00653 | A01418 | 334 |
| A00653 | A01431 | 654 | A00653 | A01433 | 399 |
| A00653 | A01435 | 488 | A00653 | A01436 | 411 |
| A00653 | A01437 | 213 | A00653 | A01439 | 619 |
| A00653 | A01443 | 577 | A00653 | A01446 | 491 |
| A00653 | A01447 | 394 | A00653 | A01448 | 491 |
| A00653 | A01451 | 188 | A00653 | A01457 | 489 |
| A00653 | A01468 | 475 | A00653 | A01470 | 419 |
| A00653 | A01496 | 491 | A00653 | A01539 | 491 |
| A00653 | A01540 | 491 | A00653 | A01548 | 297 |
| A00653 | A01569 | 491 | A00653 | A01577 | 420 |
| A00653 | A01579 | 489 | A00653 | A01582 | 378 |
| A00653 | A01613 | 489 | A00653 | A01627 | 299 |
| A00653 | A01647 | 159 | A00653 | A01649 | 490 |
| A00653 | A01711 | 491 | A00653 | A01741 | 420 |
| A00653 | A01747 | 450 | A00653 | A01822 | 489 |
| A00653 | A01824 | 276 | A00653 | A01827 | 268 |
| A00653 | A01837 | 416 | A00653 | A01841 | 455 |
| A00653 | A01850 | 400 | A00653 | A01894 | 291 |
| A00653 | A01976 | 188 | A00653 | A01988 | 188 |
| A00653 | A02040 | 162 | A00653 | A02165 | 278 |
| A00653 | A02227 | 373 | A00653 | A02350 | 324 |
| A00653 | A02353 | 491 | A00653 | A02601 | 299 |
| A00653 | A02607 | 475 | A00653 | A02718 | 417 |
| A00653 | A02994 | 498 | A00653 | A03070 | 462 |
| A00653 | A03298 | 467 | A00653 | A03421 | 405 |
| A00653 | A03453 | 489 | A00653 | A03454 | 385 |
| A00653 | A03494 | 485 | A00653 | A03516 | 266 |
| A00653 | A03567 | 341 | A00653 | A03651 | 210 |
| A00653 | A03676 | 477 | A00653 | A03697 | 152 |
| A00653 | A03740 | 491 | A00653 | A03752 | 491 |
| A00653 | A03776 | 472 | A00653 | A03809 | 664 |
| A00653 | A03901 | 282 | A00653 | A03959 | 590 |
| A00653 | A03981 | 488 | A00653 | A04495 | 299 |
| A00653 | A04642 | 380 | A00653 | A04771 | 446 |

|        |        |     |        |        |     |
|--------|--------|-----|--------|--------|-----|
| A00653 | A04782 | 337 | A00653 | A04895 | 491 |
| A00653 | A05054 | 434 | A00653 | A05086 | 489 |
| A00653 | A05227 | 664 | A00653 | A05258 | 480 |
| A00653 | A05323 | 227 | A00653 | A05387 | 208 |
| A00653 | A05417 | 440 | A00653 | A05449 | 486 |
| A00653 | A05501 | 460 | A00653 | A05542 | 208 |
| A00653 | A05562 | 224 | A00653 | A05702 | 517 |
| A00653 | A05839 | 457 | A00653 | A05840 | 208 |
| A00653 | A05859 | 389 | A00653 | A06000 | 238 |
| A00653 | A06049 | 193 | A00653 | A06084 | 188 |
| A00653 | A06287 | 403 | A00653 | A06356 | 165 |
| A00653 | A06466 | 491 | A00653 | A06543 | 372 |
| A00653 | A06637 | 486 | A00653 | A06750 | 443 |
| A00653 | A06785 | 188 | A00653 | A06794 | 208 |
| A00653 | A06959 | 483 | A00653 | A06965 | 307 |
| A00653 | A07046 | 168 | A00653 | A07160 | 489 |
| A00653 | A07208 | 485 | A00653 | A07237 | 490 |
| A00653 | A07311 | 204 | A00653 | A07331 | 215 |
| A00653 | A07350 | 171 | A00653 | A07360 | 423 |
| A00653 | A07362 | 485 | A00653 | A07394 | 281 |
| A00653 | A07442 | 306 | A00653 | A07502 | 208 |
| A00653 | A07523 | 74  | A00653 | A07527 | 215 |
| A00653 | A07551 | 385 | A00653 | A07569 | 475 |
| A00653 | A07597 | 486 | A00653 | A07599 | 305 |
| A00653 | A07686 | 335 | A00653 | A07706 | 156 |
| A00653 | A07731 | 160 | A00653 | A07744 | 538 |
| A00653 | A07746 | 330 | A00653 | A07773 | 491 |
| A00653 | A07792 | 474 | A00653 | A07799 | 157 |
| A00653 | A07819 | 207 | A00653 | A07881 | 627 |
| A00653 | A07911 | 291 | A00653 | A07965 | 188 |
| A00653 | A08011 | 463 | A00653 | A08053 | 201 |
| A00653 | A08054 | 313 | A00653 | A08055 | 263 |
| A00653 | A08061 | 152 | A00653 | A08098 | 524 |
| A00653 | A08178 | 234 | A00653 | A08228 | 658 |
| A00653 | A08319 | 319 | A00653 | A08357 | 385 |
| A00653 | A08358 | 173 | A00653 | A08371 | 310 |
| A00653 | A08398 | 484 | A00653 | A08452 | 491 |
| A00653 | A08488 | 446 | A00653 | A08521 | 490 |
| A00653 | A08547 | 241 | A00653 | A08548 | 383 |
| A00653 | A08571 | 200 | A00653 | A08763 | 152 |
| A00653 | A08773 | 414 | A00653 | A08835 | 698 |
| A00653 | A08843 | 71  | A00653 | A08922 | 208 |
| A00653 | A08947 | 299 | A00653 | A08968 | 281 |
| A00653 | A08987 | 491 | A00653 | A09004 | 299 |
| A00653 | A09285 | 199 | A00653 | A09297 | 184 |
| A00653 | A09298 | 238 | A00653 | A09303 | 258 |

|        |        |     |        |        |     |
|--------|--------|-----|--------|--------|-----|
| A00653 | A09332 | 217 | A00653 | A09476 | 358 |
| A00653 | A09587 | 411 | A00653 | A09616 | 394 |
| A00653 | A09655 | 205 | A00653 | A09702 | 375 |
| A00653 | A09717 | 427 | A00653 | A09720 | 419 |
| A00653 | A09735 | 474 | A00653 | A10199 | 394 |
| A00653 | A10487 | 208 | A00653 | A10518 | 344 |
| A00653 | A10527 | 399 | A00653 | A10532 | 364 |
| A00653 | A10535 | 477 | A00653 | A10797 | 401 |
| A00653 | A10798 | 490 | A00653 | A10842 | 152 |
| A00653 | A10853 | 430 | A00653 | A10935 | 302 |
| A00653 | A11015 | 102 | A00653 | A11296 | 490 |
| A00653 | A11302 | 468 | A00653 | A11316 | 252 |
| A00653 | A11322 | 491 | A00653 | A11337 | 406 |
| A00653 | A11338 | 491 | A00653 | A11372 | 435 |
| A00653 | A11374 | 491 | A00653 | A11380 | 185 |
| A00653 | A11419 | 491 | A00653 | A11427 | 491 |
| A00653 | A11480 | 539 | A00653 | A11521 | 201 |
| A00653 | A11677 | 591 | A00653 | A11724 | 395 |
| A00653 | A11823 | 171 | A00653 | A11860 | 475 |
| A00653 | A11974 | 413 | A00653 | A11975 | 454 |
| A00653 | A12056 | 208 | A00653 | A12059 | 281 |
| A00653 | A12241 | 457 | A00653 | A12400 | 171 |
| A00653 | A12418 | 208 | A00653 | A12824 | 333 |
| A00653 | A13069 | 249 | A00653 | A13116 | 157 |
| A00653 | A13261 | 207 | A00653 | A13328 | 343 |
| A00653 | A13340 | 491 | A00653 | A13497 | 171 |
| A00653 | A13525 | 375 | A00653 | A13707 | 224 |
| A00653 | A13754 | 208 | A00653 | A13769 | 208 |
| A00653 | A13787 | 207 | A00653 | A13989 | 456 |
| A00653 | A13992 | 212 | A00653 | A14073 | 491 |
| A00653 | A14077 | 180 | A00653 | A14080 | 446 |
| A00653 | A14152 | 369 | A00653 | A14216 | 491 |
| A00653 | A14272 | 286 | A00653 | A14479 | 429 |
| A00653 | A14482 | 488 | A00653 | A14516 | 226 |
| A00653 | A14525 | 152 | A00653 | A14566 | 458 |
| A00653 | A14569 | 156 | A00653 | A14594 | 238 |
| A00653 | A14642 | 443 | A00653 | A14655 | 454 |
| A00653 | A14699 | 665 | A00653 | A14701 | 369 |
| A00653 | A14738 | 316 | A00653 | A14778 | 662 |
| A00653 | A14813 | 188 | A00653 | A14819 | 281 |
| A00653 | A14825 | 430 | A00653 | A14845 | 489 |
| A00653 | A14888 | 468 | A00653 | A15081 | 208 |
| A00653 | A15121 | 302 | A00653 | A15133 | 391 |
| A00653 | A15219 | 227 | A00653 | A15375 | 152 |
| A00653 | A15379 | 183 | A00653 | A15416 | 424 |
| A00653 | A15498 | 257 | A00653 | A15499 | 198 |

|        |        |     |        |        |     |
|--------|--------|-----|--------|--------|-----|
| A00653 | A15500 | 398 | A00653 | A15546 | 152 |
| A00653 | A15624 | 491 | A00653 | A15651 | 367 |
| A00653 | A15652 | 201 | A00653 | A15653 | 475 |
| A00653 | A15657 | 246 | A00653 | A15660 | 491 |
| A00653 | A15661 | 308 | A00653 | A15662 | 478 |
| A00653 | A15666 | 394 | A00653 | A15684 | 491 |
| A00653 | A15699 | 310 | A00653 | A15715 | 207 |
| A00653 | A15746 | 454 | A00653 | A15765 | 184 |
| A00653 | A15917 | 240 | A00653 | A15931 | 439 |
| A00653 | A15932 | 457 | A00653 | A15933 | 363 |
| A00653 | A15937 | 479 | A00653 | A15988 | 286 |
| A00653 | A15992 | 180 | A00653 | A16088 | 473 |
| A00653 | A16118 | 238 | A00653 | A16272 | 436 |
| A00653 | A16371 | 276 | A00653 | A16437 | 329 |
| A00653 | A16587 | 247 | A00653 | A16627 | 205 |
| A00653 | A16680 | 188 | A00653 | A16683 | 346 |
| A00653 | A16793 | 332 | A00653 | A16840 | 171 |
| A00653 | A16886 | 332 | A00653 | A17128 | 491 |
| A00654 | A00660 | 224 | A00654 | A00662 | 480 |
| A00654 | A00663 | 213 | A00654 | A00666 | 491 |
| A00654 | A00681 | 491 | A00654 | A00695 | 488 |
| A00654 | A00696 | 398 | A00654 | A00738 | 491 |
| A00654 | A00739 | 479 | A00654 | A00770 | 491 |
| A00654 | A00773 | 472 | A00654 | A00825 | 321 |
| A00654 | A00853 | 174 | A00654 | A00962 | 491 |
| A00654 | A00995 | 486 | A00654 | A01005 | 467 |
| A00654 | A01008 | 491 | A00654 | A01018 | 488 |
| A00654 | A01046 | 344 | A00654 | A01063 | 357 |
| A00654 | A01174 | 480 | A00654 | A01175 | 486 |
| A00654 | A01222 | 247 | A00654 | A01223 | 240 |
| A00654 | A01227 | 238 | A00654 | A01229 | 348 |
| A00654 | A01230 | 345 | A00654 | A01233 | 491 |
| A00654 | A01256 | 490 | A00654 | A01272 | 367 |
| A00654 | A01297 | 488 | A00654 | A01347 | 343 |
| A00654 | A01397 | 163 | A00654 | A01409 | 485 |
| A00654 | A01452 | 207 | A00654 | A01478 | 199 |
| A00654 | A01481 | 472 | A00654 | A01508 | 481 |
| A00654 | A01511 | 246 | A00654 | A01572 | 199 |
| A00654 | A01596 | 199 | A00654 | A01635 | 491 |
| A00654 | A01642 | 160 | A00654 | A01714 | 152 |
| A00654 | A01730 | 199 | A00654 | A01741 | 388 |
| A00654 | A01743 | 335 | A00654 | A01857 | 343 |
| A00654 | A01972 | 419 | A00654 | A02156 | 217 |
| A00654 | A02254 | 329 | A00654 | A02268 | 157 |
| A00654 | A02319 | 226 | A00654 | A02353 | 646 |
| A00654 | A02363 | 465 | A00654 | A02432 | 329 |



|        |        |     |        |        |     |
|--------|--------|-----|--------|--------|-----|
| A00654 | A02521 | 414 | A00654 | A02546 | 174 |
| A00654 | A02593 | 187 | A00654 | A02695 | 390 |
| A00654 | A02718 | 560 | A00654 | A02719 | 281 |
| A00654 | A02859 | 401 | A00654 | A02992 | 477 |
| A00654 | A03003 | 401 | A00654 | A03004 | 396 |
| A00654 | A03005 | 174 | A00654 | A03008 | 272 |
| A00654 | A03016 | 380 | A00654 | A03050 | 274 |
| A00654 | A03059 | 283 | A00654 | A03167 | 486 |
| A00654 | A03168 | 405 | A00654 | A03259 | 179 |
| A00654 | A03429 | 346 | A00654 | A03430 | 217 |
| A00654 | A03441 | 466 | A00654 | A03477 | 756 |
| A00654 | A03484 | 366 | A00654 | A03500 | 188 |
| A00654 | A03508 | 201 | A00654 | A03513 | 168 |
| A00654 | A03545 | 286 | A00654 | A04211 | 212 |
| A00654 | A04372 | 201 | A00654 | A04660 | 399 |
| A00654 | A04674 | 346 | A00654 | A04702 | 238 |
| A00654 | A04779 | 479 | A00654 | A04784 | 188 |
| A00654 | A04791 | 377 | A00654 | A04834 | 474 |
| A00654 | A04850 | 241 | A00654 | A04880 | 165 |
| A00654 | A04891 | 272 | A00654 | A04927 | 252 |
| A00654 | A04995 | 483 | A00654 | A05006 | 358 |
| A00654 | A05007 | 491 | A00654 | A05013 | 208 |
| A00654 | A05020 | 756 | A00654 | A05041 | 195 |
| A00654 | A05045 | 277 | A00654 | A05051 | 435 |
| A00654 | A05098 | 188 | A00654 | A05102 | 452 |
| A00654 | A05310 | 479 | A00654 | A05311 | 174 |
| A00654 | A05416 | 480 | A00654 | A05459 | 179 |
| A00654 | A05472 | 249 | A00654 | A05515 | 249 |
| A00654 | A05516 | 488 | A00654 | A05532 | 226 |
| A00654 | A05573 | 468 | A00654 | A05600 | 260 |
| A00654 | A05659 | 271 | A00654 | A05699 | 322 |
| A00654 | A05714 | 226 | A00654 | A05759 | 485 |
| A00654 | A05772 | 380 | A00654 | A05774 | 473 |
| A00654 | A05783 | 353 | A00654 | A06063 | 402 |
| A00654 | A06086 | 348 | A00654 | A06088 | 425 |
| A00654 | A06089 | 346 | A00654 | A06091 | 443 |
| A00654 | A06098 | 208 | A00654 | A06195 | 199 |
| A00654 | A06211 | 160 | A00654 | A06252 | 480 |
| A00654 | A06358 | 491 | A00654 | A06359 | 756 |
| A00654 | A06402 | 373 | A00654 | A06405 | 435 |
| A00654 | A06439 | 469 | A00654 | A06473 | 486 |
| A00654 | A06523 | 174 | A00654 | A06555 | 252 |
| A00654 | A06558 | 238 | A00654 | A06562 | 208 |
| A00654 | A06597 | 279 | A00654 | A06630 | 229 |
| A00654 | A06633 | 224 | A00654 | A06638 | 226 |
| A00654 | A06689 | 441 | A00654 | A06692 | 299 |

|        |        |     |        |        |     |
|--------|--------|-----|--------|--------|-----|
| A00654 | A06699 | 157 | A00654 | A06700 | 454 |
| A00654 | A06756 | 486 | A00654 | A06831 | 179 |
| A00654 | A06847 | 252 | A00654 | A06934 | 274 |
| A00654 | A06970 | 306 | A00654 | A06979 | 319 |
| A00654 | A07002 | 333 | A00654 | A07027 | 425 |
| A00654 | A07080 | 389 | A00654 | A07088 | 329 |
| A00654 | A07109 | 475 | A00654 | A07122 | 491 |
| A00654 | A07238 | 346 | A00654 | A07239 | 163 |
| A00654 | A07256 | 480 | A00654 | A07267 | 414 |
| A00654 | A07271 | 226 | A00654 | A07288 | 174 |
| A00654 | A07304 | 412 | A00654 | A07322 | 413 |
| A00654 | A07336 | 152 | A00654 | A07339 | 384 |
| A00654 | A07376 | 263 | A00654 | A07381 | 223 |
| A00654 | A07413 | 491 | A00654 | A07477 | 477 |
| A00654 | A07503 | 286 | A00654 | A07520 | 369 |
| A00654 | A07530 | 252 | A00654 | A07553 | 274 |
| A00654 | A07554 | 160 | A00654 | A07590 | 477 |
| A00654 | A07627 | 414 | A00654 | A07674 | 449 |
| A00654 | A07688 | 432 | A00654 | A07736 | 455 |
| A00654 | A07737 | 457 | A00654 | A07739 | 201 |
| A00654 | A07757 | 417 | A00654 | A07800 | 488 |
| A00654 | A07933 | 356 | A00654 | A08099 | 243 |
| A00654 | A08133 | 299 | A00654 | A08135 | 241 |
| A00654 | A08280 | 199 | A00654 | A08596 | 213 |
| A00654 | A08751 | 383 | A00654 | A09195 | 199 |
| A00654 | A09425 | 272 | A00654 | A09632 | 402 |
| A00654 | A09711 | 252 | A00654 | A09917 | 195 |
| A00654 | A09924 | 424 | A00654 | A10020 | 252 |
| A00654 | A10027 | 302 | A00654 | A10147 | 302 |
| A00654 | A10456 | 486 | A00654 | A10550 | 283 |
| A00654 | A10582 | 238 | A00654 | A10656 | 185 |
| A00654 | A10659 | 393 | A00654 | A10686 | 267 |
| A00654 | A10702 | 207 | A00654 | A10703 | 218 |
| A00654 | A11309 | 423 | A00654 | A11346 | 263 |
| A00654 | A11381 | 172 | A00654 | A11431 | 490 |
| A00654 | A11432 | 208 | A00654 | A11611 | 363 |
| A00654 | A12055 | 195 | A00654 | A12990 | 195 |
| A00654 | A13481 | 302 | A00654 | A13677 | 302 |
| A00654 | A14196 | 180 | A00654 | A14299 | 199 |
| A00654 | A14313 | 208 | A00654 | A14443 | 207 |
| A00654 | A14678 | 184 | A00654 | A14685 | 208 |
| A00654 | A14827 | 317 | A00654 | A14857 | 329 |
| A00654 | A14862 | 163 | A00654 | A15135 | 160 |
| A00654 | A15190 | 278 | A00654 | A15497 | 443 |
| A00654 | A15637 | 441 | A00654 | A15874 | 334 |
| A00654 | A15892 | 184 | A00654 | A15905 | 483 |

|        |        |     |        |        |     |
|--------|--------|-----|--------|--------|-----|
| A00654 | A16026 | 461 | A00654 | A16027 | 424 |
| A00654 | A16028 | 340 | A00654 | A16033 | 489 |
| A00654 | A16262 | 167 | A00654 | A16335 | 245 |
| A00654 | A16344 | 337 | A00654 | A16346 | 252 |
| A00654 | A16507 | 238 | A00654 | A16529 | 462 |
| A00654 | A16741 | 297 | A00654 | A16959 | 469 |
| A00654 | A17078 | 481 | A00655 | A00757 | 385 |
| A00655 | A00805 | 479 | A00655 | A00817 | 463 |
| A00655 | A00818 | 353 | A00655 | A00819 | 491 |
| A00655 | A00822 | 795 | A00655 | A00831 | 236 |
| A00655 | A00833 | 235 | A00655 | A00856 | 491 |
| A00655 | A00858 | 443 | A00655 | A00860 | 156 |
| A00655 | A00905 | 480 | A00655 | A00916 | 452 |
| A00655 | A00918 | 294 | A00655 | A00934 | 483 |
| A00655 | A00940 | 199 | A00655 | A00978 | 199 |
| A00655 | A01032 | 491 | A00655 | A01033 | 477 |
| A00655 | A01075 | 491 | A00655 | A01082 | 271 |
| A00655 | A01087 | 480 | A00655 | A01088 | 447 |
| A00655 | A01136 | 466 | A00655 | A01206 | 477 |
| A00655 | A01234 | 466 | A00655 | A01325 | 374 |
| A00655 | A01354 | 486 | A00655 | A01378 | 277 |
| A00655 | A01384 | 232 | A00655 | A01385 | 836 |
| A00655 | A01401 | 358 | A00655 | A01429 | 281 |
| A00655 | A01468 | 258 | A00655 | A01470 | 488 |
| A00655 | A01474 | 352 | A00655 | A01492 | 532 |
| A00655 | A01506 | 258 | A00655 | A01553 | 226 |
| A00655 | A01558 | 547 | A00655 | A01588 | 797 |
| A00655 | A01598 | 350 | A00655 | A01612 | 219 |
| A00655 | A01628 | 377 | A00655 | A01649 | 221 |
| A00655 | A01995 | 441 | A00655 | A02050 | 188 |
| A00655 | A02869 | 414 | A00655 | A02980 | 414 |
| A00655 | A03014 | 270 | A00655 | A03399 | 393 |
| A00655 | A03473 | 273 | A00655 | A03734 | 479 |
| A00655 | A04790 | 185 | A00655 | A05357 | 193 |
| A00655 | A06543 | 230 | A00655 | A06545 | 170 |
| A00655 | A06735 | 414 | A00655 | A06803 | 154 |
| A00655 | A06907 | 364 | A00655 | A07004 | 477 |
| A00655 | A07244 | 240 | A00655 | A07290 | 235 |
| A00655 | A07311 | 481 | A00655 | A07339 | 234 |
| A00655 | A07487 | 243 | A00655 | A07706 | 236 |
| A00655 | A07835 | 480 | A00655 | A08022 | 424 |
| A00655 | A08118 | 490 | A00655 | A08137 | 474 |
| A00655 | A08193 | 254 | A00655 | A08357 | 399 |
| A00655 | A08571 | 490 | A00655 | A09004 | 452 |
| A00655 | A09007 | 318 | A00655 | A09279 | 204 |
| A00655 | A09327 | 299 | A00655 | A09471 | 160 |

|        |        |     |        |        |     |
|--------|--------|-----|--------|--------|-----|
| A00655 | A09568 | 314 | A00655 | A09644 | 152 |
| A00655 | A09707 | 489 | A00655 | A09712 | 252 |
| A00655 | A10070 | 188 | A00655 | A10642 | 263 |
| A00655 | A11324 | 313 | A00655 | A11487 | 455 |
| A00655 | A11820 | 417 | A00655 | A12660 | 257 |
| A00655 | A13889 | 257 | A00655 | A13928 | 329 |
| A00655 | A13989 | 474 | A00655 | A14006 | 362 |
| A00655 | A14220 | 472 | A00655 | A14566 | 240 |
| A00655 | A14931 | 486 | A00655 | A15256 | 427 |
| A00655 | A15291 | 154 | A00655 | A15492 | 191 |
| A00655 | A16228 | 227 | A00655 | A16994 | 182 |
| A00656 | A01157 | 172 | A00656 | A01526 | 216 |
| A00656 | A01527 | 899 | A00656 | A01556 | 313 |
| A00656 | A01741 | 308 | A00656 | A01877 | 193 |
| A00656 | A01947 | 168 | A00656 | A01982 | 394 |
| A00656 | A02021 | 205 | A00656 | A02036 | 467 |
| A00656 | A02037 | 257 | A00656 | A02048 | 491 |
| A00656 | A02049 | 491 | A00656 | A02087 | 283 |
| A00656 | A02088 | 165 | A00656 | A02146 | 395 |
| A00656 | A02156 | 491 | A00656 | A02180 | 152 |
| A00656 | A02186 | 374 | A00656 | A02190 | 271 |
| A00656 | A02215 | 489 | A00656 | A02226 | 235 |
| A00656 | A02238 | 185 | A00656 | A02309 | 188 |
| A00656 | A02390 | 240 | A00656 | A02505 | 267 |
| A00656 | A02776 | 191 | A00656 | A02859 | 305 |
| A00656 | A02951 | 177 | A00656 | A02977 | 168 |
| A00656 | A03074 | 396 | A00656 | A03080 | 490 |
| A00656 | A03095 | 477 | A00656 | A03195 | 163 |
| A00656 | A03218 | 198 | A00656 | A03312 | 257 |
| A00656 | A03353 | 154 | A00656 | A03356 | 185 |
| A00656 | A03363 | 245 | A00656 | A03367 | 408 |
| A00656 | A03370 | 490 | A00656 | A03378 | 356 |
| A00656 | A03379 | 462 | A00656 | A03390 | 355 |
| A00656 | A03392 | 294 | A00656 | A03396 | 446 |
| A00656 | A03397 | 243 | A00656 | A03401 | 463 |
| A00656 | A03402 | 419 | A00656 | A03403 | 364 |
| A00656 | A03408 | 329 | A00656 | A03541 | 195 |
| A00656 | A03729 | 396 | A00656 | A03733 | 210 |
| A00656 | A03744 | 469 | A00656 | A03921 | 208 |
| A00656 | A03989 | 430 | A00656 | A04051 | 475 |
| A00656 | A04089 | 254 | A00656 | A04278 | 420 |
| A00656 | A04293 | 241 | A00656 | A04407 | 254 |
| A00656 | A04433 | 254 | A00656 | A04488 | 274 |
| A00656 | A04608 | 479 | A00656 | A04614 | 171 |
| A00656 | A04639 | 180 | A00656 | A04775 | 271 |
| A00656 | A04830 | 335 | A00656 | A04922 | 196 |

|        |        |     |        |        |     |
|--------|--------|-----|--------|--------|-----|
| A00656 | A04923 | 329 | A00656 | A05136 | 294 |
| A00656 | A05377 | 322 | A00656 | A05427 | 286 |
| A00656 | A05460 | 318 | A00656 | A05731 | 229 |
| A00656 | A05901 | 288 | A00656 | A06088 | 251 |
| A00656 | A06387 | 247 | A00656 | A06838 | 271 |
| A00656 | A07187 | 167 | A00656 | A07218 | 490 |
| A00656 | A09131 | 276 | A00656 | A12674 | 294 |
| A00656 | A13661 | 267 | A00656 | A13683 | 288 |
| A00656 | A13734 | 154 | A00656 | A14444 | 326 |
| A00656 | A15809 | 183 | A00656 | A16595 | 396 |
| A00657 | A01400 | 485 | A00657 | A01551 | 419 |
| A00657 | A01618 | 183 | A00657 | A01637 | 191 |
| A00657 | A01651 | 176 | A00657 | A01668 | 469 |
| A00657 | A01675 | 201 | A00657 | A01705 | 434 |
| A00657 | A01725 | 458 | A00657 | A01728 | 268 |
| A00657 | A01729 | 316 | A00657 | A01731 | 245 |
| A00657 | A01732 | 490 | A00657 | A01737 | 177 |
| A00657 | A01739 | 241 | A00657 | A01743 | 491 |
| A00657 | A01744 | 384 | A00657 | A01745 | 469 |
| A00657 | A01751 | 399 | A00657 | A01754 | 263 |
| A00657 | A01757 | 260 | A00657 | A01766 | 184 |
| A00657 | A01798 | 193 | A00657 | A01872 | 310 |
| A00657 | A01873 | 357 | A00657 | A01883 | 363 |
| A00657 | A01893 | 305 | A00657 | A01909 | 200 |
| A00657 | A02300 | 167 | A00657 | A02305 | 221 |
| A00657 | A02335 | 159 | A00657 | A02338 | 257 |
| A00657 | A02362 | 254 | A00657 | A02687 | 191 |
| A00657 | A02691 | 488 | A00657 | A02700 | 299 |
| A00657 | A02744 | 174 | A00657 | A02810 | 299 |
| A00657 | A02811 | 263 | A00657 | A02857 | 202 |
| A00657 | A02858 | 408 | A00657 | A02893 | 347 |
| A00657 | A02906 | 301 | A00657 | A02977 | 241 |
| A00657 | A03268 | 317 | A00657 | A03585 | 303 |
| A00657 | A03845 | 288 | A00657 | A03849 | 382 |
| A00657 | A03964 | 288 | A00657 | A04005 | 328 |
| A00657 | A04105 | 177 | A00657 | A04122 | 288 |
| A00657 | A04139 | 371 | A00657 | A04709 | 252 |
| A00657 | A04797 | 382 | A00657 | A04960 | 185 |
| A00657 | A05390 | 258 | A00657 | A05911 | 411 |
| A00657 | A06298 | 224 | A00657 | A06635 | 308 |
| A00657 | A07200 | 443 | A00657 | A08617 | 341 |
| A00657 | A08741 | 235 | A00657 | A08806 | 207 |
| A00657 | A08844 | 257 | A00657 | A09275 | 363 |
| A00657 | A11400 | 196 | A00657 | A12122 | 441 |
| A00657 | A13632 | 357 | A00657 | A14320 | 372 |
| A00657 | A14389 | 328 | A00657 | A14405 | 333 |

|        |        |     |        |        |     |
|--------|--------|-----|--------|--------|-----|
| A00657 | A14440 | 182 | A00657 | A15795 | 205 |
| A00657 | A16636 | 171 | A00658 | A00687 | 273 |
| A00658 | A00715 | 418 | A00658 | A00757 | 374 |
| A00658 | A00871 | 578 | A00658 | A00878 | 412 |
| A00658 | A00911 | 332 | A00658 | A00986 | 577 |
| A00658 | A01052 | 176 | A00658 | A01065 | 259 |
| A00658 | A01111 | 223 | A00658 | A01118 | 451 |
| A00658 | A01126 | 385 | A00658 | A01143 | 259 |
| A00658 | A01150 | 168 | A00658 | A01202 | 223 |
| A00658 | A01208 | 574 | A00658 | A01211 | 162 |
| A00658 | A01214 | 445 | A00658 | A01215 | 578 |
| A00658 | A01228 | 435 | A00658 | A01234 | 481 |
| A00658 | A01287 | 218 | A00658 | A01311 | 724 |
| A00658 | A01353 | 578 | A00658 | A01406 | 490 |
| A00658 | A01558 | 157 | A00658 | A01647 | 401 |
| A00658 | A01707 | 394 | A00658 | A01736 | 225 |
| A00658 | A01790 | 210 | A00658 | A01995 | 252 |
| A00658 | A02041 | 446 | A00658 | A02051 | 339 |
| A00658 | A02092 | 191 | A00658 | A02180 | 283 |
| A00658 | A02270 | 219 | A00658 | A02274 | 272 |
| A00658 | A02385 | 180 | A00658 | A02452 | 424 |
| A00658 | A02454 | 236 | A00658 | A02565 | 200 |
| A00658 | A02695 | 601 | A00658 | A03169 | 542 |
| A00658 | A03279 | 172 | A00658 | A03568 | 179 |
| A00658 | A03569 | 268 | A00658 | A03601 | 380 |
| A00658 | A03792 | 363 | A00658 | A03895 | 219 |
| A00658 | A03952 | 396 | A00658 | A03958 | 473 |
| A00658 | A03972 | 272 | A00658 | A03982 | 272 |
| A00658 | A04447 | 471 | A00658 | A04477 | 213 |
| A00658 | A04833 | 389 | A00658 | A05058 | 312 |
| A00658 | A05216 | 718 | A00658 | A05411 | 196 |
| A00658 | A05467 | 167 | A00658 | A06907 | 193 |
| A00658 | A07265 | 393 | A00658 | A07447 | 312 |
| A00658 | A07588 | 499 | A00658 | A07644 | 172 |
| A00658 | A07706 | 230 | A00658 | A08925 | 157 |
| A00658 | A08942 | 353 | A00658 | A08955 | 223 |
| A00658 | A08971 | 223 | A00658 | A09281 | 177 |
| A00658 | A09641 | 281 | A00658 | A09756 | 174 |
| A00658 | A09977 | 154 | A00658 | A10006 | 174 |
| A00658 | A10755 | 223 | A00658 | A10871 | 219 |
| A00658 | A11202 | 223 | A00658 | A11254 | 216 |
| A00658 | A11277 | 152 | A00658 | A11451 | 263 |
| A00658 | A12661 | 170 | A00658 | A13132 | 312 |
| A00658 | A13298 | 327 | A00658 | A14006 | 243 |
| A00658 | A14196 | 288 | A00658 | A14216 | 538 |
| A00658 | A15875 | 191 | A00658 | A16465 | 154 |

|        |        |     |        |        |     |
|--------|--------|-----|--------|--------|-----|
| A00658 | A17063 | 157 | A00659 | A00662 | 165 |
| A00659 | A00688 | 256 | A00659 | A00794 | 434 |
| A00659 | A00813 | 443 | A00659 | A01005 | 438 |
| A00659 | A01046 | 430 | A00659 | A01073 | 157 |
| A00659 | A01235 | 63  | A00659 | A01396 | 208 |
| A00659 | A01438 | 462 | A00659 | A01461 | 389 |
| A00659 | A01515 | 184 | A00659 | A01573 | 424 |
| A00659 | A01575 | 163 | A00659 | A01583 | 212 |
| A00659 | A01585 | 467 | A00659 | A01726 | 221 |
| A00659 | A01737 | 489 | A00659 | A01741 | 377 |
| A00659 | A01750 | 159 | A00659 | A01845 | 221 |
| A00659 | A01846 | 460 | A00659 | A01847 | 407 |
| A00659 | A01848 | 414 | A00659 | A01856 | 252 |
| A00659 | A01864 | 168 | A00659 | A01867 | 152 |
| A00659 | A01878 | 185 | A00659 | A01926 | 491 |
| A00659 | A01941 | 212 | A00659 | A01990 | 236 |
| A00659 | A02008 | 491 | A00659 | A02009 | 435 |
| A00659 | A02011 | 491 | A00659 | A02012 | 491 |
| A00659 | A02013 | 324 | A00659 | A02014 | 490 |
| A00659 | A02015 | 456 | A00659 | A02028 | 93  |
| A00659 | A02031 | 396 | A00659 | A02034 | 339 |
| A00659 | A02093 | 229 | A00659 | A02114 | 491 |
| A00659 | A02147 | 218 | A00659 | A02152 | 221 |
| A00659 | A02262 | 198 | A00659 | A02268 | 345 |
| A00659 | A02275 | 433 | A00659 | A02287 | 198 |
| A00659 | A02336 | 200 | A00659 | A02371 | 324 |
| A00659 | A02377 | 213 | A00659 | A02405 | 238 |
| A00659 | A02454 | 263 | A00659 | A02468 | 249 |
| A00659 | A02574 | 490 | A00659 | A02606 | 185 |
| A00659 | A02611 | 324 | A00659 | A02635 | 201 |
| A00659 | A02649 | 334 | A00659 | A02695 | 456 |
| A00659 | A02802 | 466 | A00659 | A02806 | 489 |
| A00659 | A02816 | 165 | A00659 | A02859 | 420 |
| A00659 | A02992 | 416 | A00659 | A03016 | 156 |
| A00659 | A03034 | 491 | A00659 | A03035 | 191 |
| A00659 | A03036 | 491 | A00659 | A03043 | 157 |
| A00659 | A03045 | 335 | A00659 | A03058 | 347 |
| A00659 | A03091 | 408 | A00659 | A03099 | 367 |
| A00659 | A03107 | 268 | A00659 | A03144 | 491 |
| A00659 | A03146 | 491 | A00659 | A03147 | 382 |
| A00659 | A03148 | 486 | A00659 | A03156 | 491 |
| A00659 | A03157 | 283 | A00659 | A03196 | 265 |
| A00659 | A03224 | 357 | A00659 | A03238 | 443 |
| A00659 | A03247 | 185 | A00659 | A03251 | 347 |
| A00659 | A03254 | 278 | A00659 | A03259 | 302 |
| A00659 | A03275 | 162 | A00659 | A03278 | 172 |

|        |        |     |        |        |     |
|--------|--------|-----|--------|--------|-----|
| A00659 | A03279 | 188 | A00659 | A03305 | 152 |
| A00659 | A03513 | 472 | A00659 | A03638 | 205 |
| A00659 | A03950 | 200 | A00659 | A03957 | 347 |
| A00659 | A04010 | 310 | A00659 | A04051 | 252 |
| A00659 | A04076 | 227 | A00659 | A04212 | 472 |
| A00659 | A04229 | 224 | A00659 | A04286 | 151 |
| A00659 | A04318 | 358 | A00659 | A04341 | 324 |
| A00659 | A04349 | 327 | A00659 | A04400 | 286 |
| A00659 | A04450 | 241 | A00659 | A04487 | 286 |
| A00659 | A04506 | 296 | A00659 | A04615 | 183 |
| A00659 | A04839 | 157 | A00659 | A04881 | 159 |
| A00659 | A04886 | 286 | A00659 | A04956 | 249 |
| A00659 | A05145 | 241 | A00659 | A05203 | 368 |
| A00659 | A05330 | 297 | A00659 | A05376 | 412 |
| A00659 | A05393 | 180 | A00659 | A05437 | 278 |
| A00659 | A05459 | 245 | A00659 | A05463 | 174 |
| A00659 | A05467 | 185 | A00659 | A05506 | 210 |
| A00659 | A05570 | 286 | A00659 | A05597 | 165 |
| A00659 | A05682 | 177 | A00659 | A06053 | 378 |
| A00659 | A06195 | 491 | A00659 | A06414 | 188 |
| A00659 | A06642 | 163 | A00659 | A06643 | 286 |
| A00659 | A06650 | 241 | A00659 | A06798 | 210 |
| A00659 | A06827 | 198 | A00659 | A06831 | 245 |
| A00659 | A07006 | 278 | A00659 | A07059 | 321 |
| A00659 | A07130 | 288 | A00659 | A07168 | 382 |
| A00659 | A07175 | 191 | A00659 | A07184 | 188 |
| A00659 | A07191 | 362 | A00659 | A07342 | 491 |
| A00659 | A07373 | 458 | A00659 | A07407 | 379 |
| A00659 | A07477 | 395 | A00659 | A07659 | 205 |
| A00659 | A07736 | 484 | A00659 | A08093 | 274 |
| A00659 | A08250 | 218 | A00659 | A08667 | 185 |
| A00659 | A09036 | 213 | A00659 | A09110 | 229 |
| A00659 | A09267 | 296 | A00659 | A09277 | 301 |
| A00659 | A09411 | 229 | A00659 | A09991 | 485 |
| A00659 | A10091 | 204 | A00659 | A10214 | 152 |
| A00659 | A10226 | 364 | A00659 | A10816 | 356 |
| A00659 | A11076 | 347 | A00659 | A12927 | 291 |
| A00659 | A13826 | 339 | A00659 | A13832 | 227 |
| A00659 | A13871 | 252 | A00659 | A14146 | 165 |
| A00659 | A14247 | 357 | A00659 | A14344 | 490 |
| A00659 | A14419 | 296 | A00659 | A15308 | 162 |
| A00659 | A15346 | 215 | A00659 | A15366 | 176 |
| A00659 | A15411 | 299 | A00659 | A15462 | 358 |
| A00659 | A15498 | 213 | A00659 | A15518 | 345 |
| A00659 | A15874 | 179 | A00659 | A16008 | 218 |
| A00659 | A16037 | 296 | A00659 | A16063 | 347 |



|        |        |     |        |        |     |
|--------|--------|-----|--------|--------|-----|
| A00659 | A16337 | 324 | A00659 | A16636 | 258 |
| A00660 | A00681 | 294 | A00660 | A00696 | 334 |
| A00660 | A00825 | 458 | A00660 | A01018 | 484 |
| A00660 | A01176 | 157 | A00660 | A01225 | 324 |
| A00660 | A01297 | 467 | A00660 | A01397 | 472 |
| A00660 | A01409 | 475 | A00660 | A01463 | 311 |
| A00660 | A01466 | 324 | A00660 | A01490 | 434 |
| A00660 | A01511 | 252 | A00660 | A01635 | 333 |
| A00660 | A01726 | 281 | A00660 | A01832 | 229 |
| A00660 | A01972 | 176 | A00660 | A02020 | 323 |
| A00660 | A02054 | 388 | A00660 | A02114 | 445 |
| A00660 | A02115 | 366 | A00660 | A02254 | 491 |
| A00660 | A02257 | 457 | A00660 | A02284 | 480 |
| A00660 | A02330 | 263 | A00660 | A02363 | 281 |
| A00660 | A02532 | 273 | A00660 | A02719 | 202 |
| A00660 | A03054 | 204 | A00660 | A03087 | 484 |
| A00660 | A03099 | 213 | A00660 | A03164 | 159 |
| A00660 | A03174 | 465 | A00660 | A03484 | 210 |
| A00660 | A03498 | 246 | A00660 | A03513 | 356 |
| A00660 | A03520 | 379 | A00660 | A03968 | 267 |
| A00660 | A04781 | 279 | A00660 | A04791 | 221 |
| A00660 | A04927 | 183 | A00660 | A05007 | 179 |
| A00660 | A05102 | 198 | A00660 | A05208 | 374 |
| A00660 | A05224 | 408 | A00660 | A05277 | 273 |
| A00660 | A05330 | 234 | A00660 | A05331 | 481 |
| A00660 | A05337 | 227 | A00660 | A05338 | 465 |
| A00660 | A05416 | 274 | A00660 | A05418 | 362 |
| A00660 | A05424 | 490 | A00660 | A05462 | 238 |
| A00660 | A05463 | 241 | A00660 | A05550 | 201 |
| A00660 | A05573 | 180 | A00660 | A05610 | 414 |
| A00660 | A05614 | 345 | A00660 | A05988 | 490 |
| A00660 | A06086 | 195 | A00660 | A06405 | 296 |
| A00660 | A06439 | 154 | A00660 | A06473 | 185 |
| A00660 | A06629 | 167 | A00660 | A06632 | 311 |
| A00660 | A06668 | 299 | A00660 | A06700 | 165 |
| A00660 | A06769 | 279 | A00660 | A07007 | 168 |
| A00660 | A07027 | 230 | A00660 | A07059 | 430 |
| A00660 | A07080 | 182 | A00660 | A07088 | 477 |
| A00660 | A07520 | 350 | A00660 | A07674 | 441 |
| A00660 | A07684 | 362 | A00660 | A07690 | 238 |
| A00660 | A07711 | 390 | A00660 | A07763 | 226 |
| A00660 | A07771 | 303 | A00660 | A07779 | 384 |
| A00660 | A07847 | 446 | A00660 | A07851 | 467 |
| A00660 | A07933 | 377 | A00660 | A08083 | 269 |
| A00660 | A08114 | 223 | A00660 | A08135 | 429 |
| A00660 | A08190 | 449 | A00660 | A08197 | 258 |

|        |        |     |        |        |     |
|--------|--------|-----|--------|--------|-----|
| A00660 | A08279 | 399 | A00660 | A08280 | 305 |
| A00660 | A08372 | 323 | A00660 | A08385 | 351 |
| A00660 | A08707 | 269 | A00660 | A09846 | 372 |
| A00660 | A10422 | 391 | A00660 | A10446 | 236 |
| A00660 | A10456 | 389 | A00660 | A10679 | 433 |
| A00660 | A10687 | 294 | A00660 | A10691 | 417 |
| A00660 | A10698 | 428 | A00660 | A10700 | 311 |
| A00660 | A10715 | 375 | A00660 | A10781 | 266 |
| A00660 | A12723 | 301 | A00660 | A13155 | 337 |
| A00660 | A13362 | 401 | A00660 | A14803 | 185 |
| A00660 | A15356 | 333 | A00660 | A15628 | 311 |
| A00660 | A16288 | 348 | A00661 | A00696 | 283 |
| A00661 | A00825 | 176 | A00661 | A01022 | 468 |
| A00661 | A01161 | 157 | A00661 | A01174 | 187 |
| A00661 | A01225 | 213 | A00661 | A01397 | 213 |
| A00661 | A01409 | 288 | A00661 | A01462 | 469 |
| A00661 | A01635 | 358 | A00661 | A01878 | 271 |
| A00661 | A02075 | 180 | A00661 | A02187 | 274 |
| A00661 | A02215 | 201 | A00661 | A02329 | 358 |
| A00661 | A02359 | 357 | A00661 | A02450 | 270 |
| A00661 | A02495 | 449 | A00661 | A02669 | 283 |
| A00661 | A02854 | 205 | A00661 | A02928 | 428 |
| A00661 | A03028 | 326 | A00661 | A03234 | 296 |
| A00661 | A03304 | 257 | A00661 | A03819 | 330 |
| A00661 | A03968 | 291 | A00661 | A04325 | 375 |
| A00661 | A04458 | 366 | A00661 | A04589 | 172 |
| A00661 | A04710 | 185 | A00661 | A04910 | 366 |
| A00661 | A05330 | 479 | A00661 | A05331 | 465 |
| A00661 | A05659 | 217 | A00661 | A05963 | 393 |
| A00661 | A05964 | 466 | A00661 | A06405 | 185 |
| A00661 | A06934 | 293 | A00661 | A07007 | 190 |
| A00661 | A07408 | 307 | A00661 | A07690 | 258 |
| A00661 | A07847 | 356 | A00661 | A08199 | 277 |
| A00661 | A09880 | 474 | A00661 | A10687 | 311 |
| A00661 | A14371 | 205 | A00661 | A14386 | 283 |
| A00661 | A14498 | 351 | A00661 | A14589 | 337 |
| A00661 | A14665 | 489 | A00662 | A00663 | 491 |
| A00662 | A00681 | 399 | A00662 | A00738 | 423 |
| A00662 | A00794 | 489 | A00662 | A00882 | 259 |
| A00662 | A00962 | 486 | A00662 | A00981 | 212 |
| A00662 | A01005 | 491 | A00662 | A01008 | 430 |
| A00662 | A01018 | 321 | A00662 | A01035 | 491 |
| A00662 | A01138 | 281 | A00662 | A01229 | 154 |
| A00662 | A01233 | 324 | A00662 | A01256 | 294 |
| A00662 | A01297 | 165 | A00662 | A01397 | 151 |
| A00662 | A01409 | 430 | A00662 | A01461 | 485 |

|        |        |     |        |        |     |
|--------|--------|-----|--------|--------|-----|
| A00662 | A01560 | 305 | A00662 | A01575 | 489 |
| A00662 | A01583 | 435 | A00662 | A01585 | 475 |
| A00662 | A01590 | 409 | A00662 | A01669 | 433 |
| A00662 | A01705 | 436 | A00662 | A01713 | 491 |
| A00662 | A01726 | 486 | A00662 | A01741 | 191 |
| A00662 | A01743 | 405 | A00662 | A01926 | 477 |
| A00662 | A01928 | 452 | A00662 | A01934 | 276 |
| A00662 | A01947 | 172 | A00662 | A01972 | 454 |
| A00662 | A01978 | 486 | A00662 | A01995 | 212 |
| A00662 | A02012 | 191 | A00662 | A02022 | 283 |
| A00662 | A02077 | 205 | A00662 | A02168 | 472 |
| A00662 | A02215 | 491 | A00662 | A02319 | 217 |
| A00662 | A02402 | 364 | A00662 | A02413 | 168 |
| A00662 | A02521 | 156 | A00662 | A02530 | 160 |
| A00662 | A02538 | 409 | A00662 | A02541 | 430 |
| A00662 | A02542 | 91  | A00662 | A02545 | 371 |
| A00662 | A02546 | 297 | A00662 | A02574 | 234 |
| A00662 | A02575 | 180 | A00662 | A02601 | 484 |
| A00662 | A02785 | 265 | A00662 | A02859 | 484 |
| A00662 | A02992 | 491 | A00662 | A03027 | 208 |
| A00662 | A03034 | 310 | A00662 | A03050 | 491 |
| A00662 | A03167 | 302 | A00662 | A03238 | 180 |
| A00662 | A03402 | 299 | A00662 | A03487 | 243 |
| A00662 | A03513 | 485 | A00662 | A03523 | 184 |
| A00662 | A03545 | 475 | A00662 | A03618 | 273 |
| A00662 | A03858 | 170 | A00662 | A03892 | 432 |
| A00662 | A03990 | 583 | A00662 | A04023 | 190 |
| A00662 | A04214 | 229 | A00662 | A04369 | 486 |
| A00662 | A04372 | 191 | A00662 | A04674 | 207 |
| A00662 | A04839 | 491 | A00662 | A04883 | 377 |
| A00662 | A05009 | 236 | A00662 | A05146 | 168 |
| A00662 | A05153 | 483 | A00662 | A05356 | 491 |
| A00662 | A05390 | 417 | A00662 | A05393 | 162 |
| A00662 | A05407 | 157 | A00662 | A05416 | 288 |
| A00662 | A05487 | 473 | A00662 | A05573 | 230 |
| A00662 | A05775 | 406 | A00662 | A05776 | 481 |
| A00662 | A05858 | 243 | A00662 | A05926 | 480 |
| A00662 | A05945 | 347 | A00662 | A06009 | 218 |
| A00662 | A06013 | 356 | A00662 | A06019 | 191 |
| A00662 | A06086 | 255 | A00662 | A06211 | 151 |
| A00662 | A06258 | 802 | A00662 | A06379 | 420 |
| A00662 | A06397 | 185 | A00662 | A06527 | 484 |
| A00662 | A06558 | 229 | A00662 | A06607 | 480 |
| A00662 | A06659 | 400 | A00662 | A06709 | 229 |
| A00662 | A06875 | 307 | A00662 | A06908 | 208 |
| A00662 | A06979 | 205 | A00662 | A07122 | 379 |

|        |        |     |        |        |     |
|--------|--------|-----|--------|--------|-----|
| A00662 | A07292 | 168 | A00662 | A07300 | 440 |
| A00662 | A07311 | 180 | A00662 | A07330 | 185 |
| A00662 | A07339 | 420 | A00662 | A07389 | 199 |
| A00662 | A07407 | 480 | A00662 | A07413 | 205 |
| A00662 | A07452 | 489 | A00662 | A07468 | 327 |
| A00662 | A07471 | 413 | A00662 | A07472 | 347 |
| A00662 | A07475 | 473 | A00662 | A07477 | 472 |
| A00662 | A07491 | 335 | A00662 | A07530 | 240 |
| A00662 | A07541 | 491 | A00662 | A07542 | 491 |
| A00662 | A07543 | 491 | A00662 | A07544 | 401 |
| A00662 | A07561 | 483 | A00662 | A07563 | 217 |
| A00662 | A07590 | 215 | A00662 | A07610 | 480 |
| A00662 | A07630 | 373 | A00662 | A07631 | 217 |
| A00662 | A07633 | 185 | A00662 | A07634 | 491 |
| A00662 | A07635 | 416 | A00662 | A07688 | 152 |
| A00662 | A07736 | 491 | A00662 | A07754 | 391 |
| A00662 | A07800 | 210 | A00662 | A07847 | 171 |
| A00662 | A07912 | 179 | A00662 | A07958 | 481 |
| A00662 | A07973 | 417 | A00662 | A08063 | 229 |
| A00662 | A08404 | 486 | A00662 | A08693 | 260 |
| A00662 | A08785 | 481 | A00662 | A08798 | 263 |
| A00662 | A09837 | 160 | A00662 | A09932 | 360 |
| A00662 | A10056 | 419 | A00662 | A10655 | 319 |
| A00662 | A10967 | 490 | A00662 | A11370 | 263 |
| A00662 | A11450 | 168 | A00662 | A12793 | 465 |
| A00662 | A13327 | 185 | A00662 | A13602 | 296 |
| A00662 | A13871 | 491 | A00662 | A13879 | 224 |
| A00662 | A14247 | 470 | A00662 | A14444 | 235 |
| A00662 | A14685 | 199 | A00662 | A15293 | 380 |
| A00662 | A15462 | 318 | A00662 | A15506 | 778 |
| A00662 | A15608 | 477 | A00662 | A15992 | 210 |
| A00662 | A16877 | 204 | A00662 | A17078 | 491 |
| A00662 | A17108 | 372 | A00663 | A00666 | 232 |
| A00663 | A00688 | 63  | A00663 | A00738 | 183 |
| A00663 | A00962 | 480 | A00663 | A01005 | 491 |
| A00663 | A01018 | 152 | A00663 | A01035 | 491 |
| A00663 | A01161 | 491 | A00663 | A01166 | 207 |
| A00663 | A01233 | 156 | A00663 | A01256 | 477 |
| A00663 | A01409 | 196 | A00663 | A01461 | 475 |
| A00663 | A01493 | 180 | A00663 | A01556 | 363 |
| A00663 | A01585 | 334 | A00663 | A01705 | 366 |
| A00663 | A01713 | 491 | A00663 | A01722 | 375 |
| A00663 | A01726 | 170 | A00663 | A01741 | 191 |
| A00663 | A01743 | 385 | A00663 | A01926 | 483 |
| A00663 | A01928 | 322 | A00663 | A01947 | 208 |
| A00663 | A01972 | 430 | A00663 | A01978 | 489 |

|        |        |     |        |        |     |
|--------|--------|-----|--------|--------|-----|
| A00663 | A02022 | 177 | A00663 | A02075 | 241 |
| A00663 | A02078 | 172 | A00663 | A02092 | 160 |
| A00663 | A02107 | 174 | A00663 | A02156 | 165 |
| A00663 | A02168 | 468 | A00663 | A02170 | 224 |
| A00663 | A02215 | 491 | A00663 | A02317 | 361 |
| A00663 | A02402 | 321 | A00663 | A02530 | 188 |
| A00663 | A02538 | 360 | A00663 | A02542 | 121 |
| A00663 | A02545 | 154 | A00663 | A02601 | 391 |
| A00663 | A02785 | 260 | A00663 | A02859 | 477 |
| A00663 | A02992 | 491 | A00663 | A03027 | 245 |
| A00663 | A03050 | 491 | A00663 | A03056 | 187 |
| A00663 | A03080 | 356 | A00663 | A03099 | 218 |
| A00663 | A03167 | 191 | A00663 | A03168 | 196 |
| A00663 | A03238 | 226 | A00663 | A03293 | 159 |
| A00663 | A03370 | 371 | A00663 | A03402 | 424 |
| A00663 | A03523 | 154 | A00663 | A03545 | 245 |
| A00663 | A03858 | 302 | A00663 | A03917 | 279 |
| A00663 | A04369 | 462 | A00663 | A04633 | 412 |
| A00663 | A04839 | 491 | A00663 | A04883 | 171 |
| A00663 | A04975 | 185 | A00663 | A05153 | 428 |
| A00663 | A05237 | 255 | A00663 | A05356 | 489 |
| A00663 | A05389 | 167 | A00663 | A05390 | 433 |
| A00663 | A05393 | 360 | A00663 | A05407 | 185 |
| A00663 | A05487 | 452 | A00663 | A05687 | 269 |
| A00663 | A05775 | 316 | A00663 | A05776 | 469 |
| A00663 | A05801 | 234 | A00663 | A05858 | 269 |
| A00663 | A05926 | 317 | A00663 | A06009 | 252 |
| A00663 | A06092 | 221 | A00663 | A06148 | 162 |
| A00663 | A06527 | 486 | A00663 | A06607 | 470 |
| A00663 | A06874 | 180 | A00663 | A06908 | 341 |
| A00663 | A07088 | 170 | A00663 | A07122 | 274 |
| A00663 | A07134 | 269 | A00663 | A07209 | 337 |
| A00663 | A07218 | 319 | A00663 | A07300 | 449 |
| A00663 | A07330 | 213 | A00663 | A07407 | 454 |
| A00663 | A07419 | 196 | A00663 | A07452 | 483 |
| A00663 | A07471 | 251 | A00663 | A07472 | 201 |
| A00663 | A07475 | 174 | A00663 | A07477 | 165 |
| A00663 | A07541 | 491 | A00663 | A07542 | 486 |
| A00663 | A07543 | 480 | A00663 | A07544 | 347 |
| A00663 | A07561 | 462 | A00663 | A07605 | 172 |
| A00663 | A07610 | 447 | A00663 | A07630 | 177 |
| A00663 | A07632 | 168 | A00663 | A07633 | 213 |
| A00663 | A07634 | 488 | A00663 | A07635 | 330 |
| A00663 | A07721 | 249 | A00663 | A07736 | 475 |
| A00663 | A07800 | 472 | A00663 | A07890 | 316 |
| A00663 | A07958 | 485 | A00663 | A07970 | 234 |

|        |        |     |        |        |     |
|--------|--------|-----|--------|--------|-----|
| A00663 | A07973 | 172 | A00663 | A08079 | 174 |
| A00663 | A08089 | 160 | A00663 | A08210 | 163 |
| A00663 | A08404 | 338 | A00663 | A08693 | 299 |
| A00663 | A08785 | 246 | A00663 | A09174 | 154 |
| A00663 | A09932 | 224 | A00663 | A10052 | 380 |
| A00663 | A10056 | 469 | A00663 | A10967 | 480 |
| A00663 | A11309 | 216 | A00663 | A11329 | 172 |
| A00663 | A11370 | 286 | A00663 | A12793 | 350 |
| A00663 | A13327 | 213 | A00663 | A13602 | 316 |
| A00663 | A13871 | 491 | A00663 | A13992 | 223 |
| A00663 | A14247 | 477 | A00663 | A15992 | 152 |
| A00663 | A16118 | 363 | A00663 | A17078 | 491 |
| A00664 | A00846 | 474 | A00664 | A00855 | 317 |
| A00664 | A01074 | 724 | A00664 | A01105 | 317 |
| A00664 | A01137 | 268 | A00664 | A01549 | 228 |
| A00664 | A01622 | 317 | A00664 | A01679 | 317 |
| A00664 | A01699 | 180 | A00664 | A01716 | 177 |
| A00664 | A01779 | 188 | A00664 | A01899 | 281 |
| A00664 | A01926 | 63  | A00664 | A01978 | 355 |
| A00664 | A02168 | 369 | A00664 | A02170 | 184 |
| A00664 | A02513 | 221 | A00664 | A02524 | 156 |
| A00664 | A02530 | 267 | A00664 | A02538 | 406 |
| A00664 | A02539 | 485 | A00664 | A02541 | 213 |
| A00664 | A02542 | 229 | A00664 | A02572 | 202 |
| A00664 | A02616 | 221 | A00664 | A02761 | 151 |
| A00664 | A02832 | 193 | A00664 | A03086 | 217 |
| A00664 | A03155 | 183 | A00664 | A03710 | 317 |
| A00664 | A04487 | 185 | A00664 | A05060 | 227 |
| A00664 | A05150 | 196 | A00664 | A05154 | 165 |
| A00664 | A05157 | 201 | A00664 | A05208 | 219 |
| A00664 | A05222 | 151 | A00664 | A05313 | 160 |
| A00664 | A05315 | 259 | A00664 | A05332 | 317 |
| A00664 | A05407 | 263 | A00664 | A05435 | 457 |
| A00664 | A05609 | 317 | A00664 | A05691 | 195 |
| A00664 | A05775 | 457 | A00664 | A06454 | 491 |
| A00664 | A06471 | 278 | A00664 | A06650 | 217 |
| A00664 | A07222 | 317 | A00664 | A07333 | 317 |
| A00664 | A07571 | 317 | A00664 | A07655 | 340 |
| A00664 | A07796 | 243 | A00664 | A07974 | 317 |
| A00664 | A08097 | 317 | A00664 | A08688 | 210 |
| A00664 | A09340 | 317 | A00664 | A10109 | 260 |
| A00664 | A10394 | 332 | A00664 | A10483 | 366 |
| A00664 | A10693 | 188 | A00664 | A11841 | 217 |
| A00664 | A13195 | 283 | A00664 | A13614 | 488 |
| A00664 | A14195 | 228 | A00664 | A14986 | 483 |
| A00664 | A15097 | 213 | A00664 | A16219 | 184 |

|        |        |     |        |        |     |
|--------|--------|-----|--------|--------|-----|
| A00665 | A00680 | 180 | A00665 | A00733 | 291 |
| A00665 | A00744 | 714 | A00665 | A00766 | 163 |
| A00665 | A00805 | 329 | A00665 | A00858 | 475 |
| A00665 | A00860 | 449 | A00665 | A00881 | 330 |
| A00665 | A00961 | 179 | A00665 | A00978 | 249 |
| A00665 | A01007 | 232 | A00665 | A01019 | 440 |
| A00665 | A01074 | 165 | A00665 | A01195 | 305 |
| A00665 | A01200 | 202 | A00665 | A01212 | 333 |
| A00665 | A01325 | 486 | A00665 | A01335 | 380 |
| A00665 | A01336 | 218 | A00665 | A01401 | 319 |
| A00665 | A01442 | 168 | A00665 | A01447 | 458 |
| A00665 | A01564 | 277 | A00665 | A01571 | 484 |
| A00665 | A01720 | 385 | A00665 | A02389 | 552 |
| A00665 | A02872 | 296 | A00665 | A03014 | 484 |
| A00665 | A03207 | 314 | A00665 | A03759 | 191 |
| A00665 | A04100 | 296 | A00665 | A04648 | 210 |
| A00665 | A05027 | 180 | A00665 | A05981 | 713 |
| A00665 | A06803 | 216 | A00665 | A07347 | 335 |
| A00665 | A07670 | 183 | A00665 | A07695 | 229 |
| A00665 | A07708 | 171 | A00665 | A07887 | 307 |
| A00665 | A09432 | 326 | A00665 | A09712 | 286 |
| A00665 | A09806 | 473 | A00665 | A11735 | 385 |
| A00665 | A11737 | 170 | A00665 | A13788 | 484 |
| A00665 | A15666 | 477 | A00665 | A16228 | 268 |
| A00666 | A00676 | 162 | A00666 | A00681 | 491 |
| A00666 | A00695 | 458 | A00666 | A00738 | 470 |
| A00666 | A00739 | 306 | A00666 | A00770 | 491 |
| A00666 | A00771 | 228 | A00666 | A00773 | 358 |
| A00666 | A00962 | 491 | A00666 | A00968 | 358 |
| A00666 | A00995 | 489 | A00666 | A01005 | 173 |
| A00666 | A01008 | 491 | A00666 | A01011 | 358 |
| A00666 | A01018 | 268 | A00666 | A01063 | 490 |
| A00666 | A01115 | 224 | A00666 | A01165 | 245 |
| A00666 | A01174 | 454 | A00666 | A01175 | 384 |
| A00666 | A01189 | 344 | A00666 | A01222 | 377 |
| A00666 | A01225 | 210 | A00666 | A01233 | 491 |
| A00666 | A01256 | 479 | A00666 | A01272 | 467 |
| A00666 | A01277 | 213 | A00666 | A01297 | 212 |
| A00666 | A01347 | 294 | A00666 | A01360 | 466 |
| A00666 | A01397 | 210 | A00666 | A01409 | 163 |
| A00666 | A01481 | 238 | A00666 | A01483 | 347 |
| A00666 | A01508 | 491 | A00666 | A01511 | 154 |
| A00666 | A01548 | 489 | A00666 | A01569 | 481 |
| A00666 | A01630 | 162 | A00666 | A01635 | 491 |
| A00666 | A01725 | 160 | A00666 | A01741 | 373 |
| A00666 | A01747 | 419 | A00666 | A01841 | 374 |

|        |        |     |        |        |     |
|--------|--------|-----|--------|--------|-----|
| A00666 | A01855 | 473 | A00666 | A01857 | 374 |
| A00666 | A01859 | 221 | A00666 | A01870 | 238 |
| A00666 | A01895 | 434 | A00666 | A02020 | 174 |
| A00666 | A02167 | 162 | A00666 | A02240 | 401 |
| A00666 | A02254 | 193 | A00666 | A02290 | 168 |
| A00666 | A02353 | 480 | A00666 | A02363 | 187 |
| A00666 | A02541 | 371 | A00666 | A02718 | 477 |
| A00666 | A02719 | 224 | A00666 | A02826 | 193 |
| A00666 | A02834 | 271 | A00666 | A02940 | 441 |
| A00666 | A02992 | 335 | A00666 | A03002 | 173 |
| A00666 | A03005 | 210 | A00666 | A03008 | 301 |
| A00666 | A03059 | 187 | A00666 | A03167 | 463 |
| A00666 | A03168 | 323 | A00666 | A03184 | 167 |
| A00666 | A03259 | 154 | A00666 | A03311 | 408 |
| A00666 | A03430 | 251 | A00666 | A03431 | 154 |
| A00666 | A03441 | 361 | A00666 | A03468 | 274 |
| A00666 | A03477 | 491 | A00666 | A03484 | 335 |
| A00666 | A03501 | 409 | A00666 | A03586 | 441 |
| A00666 | A03861 | 457 | A00666 | A03863 | 441 |
| A00666 | A04095 | 314 | A00666 | A04175 | 187 |
| A00666 | A04211 | 165 | A00666 | A04274 | 224 |
| A00666 | A04372 | 235 | A00666 | A04465 | 235 |
| A00666 | A04517 | 152 | A00666 | A04602 | 329 |
| A00666 | A04660 | 420 | A00666 | A04674 | 372 |
| A00666 | A04779 | 198 | A00666 | A04784 | 352 |
| A00666 | A04791 | 346 | A00666 | A04834 | 368 |
| A00666 | A04850 | 490 | A00666 | A04880 | 224 |
| A00666 | A04937 | 390 | A00666 | A04995 | 340 |
| A00666 | A05006 | 451 | A00666 | A05007 | 481 |
| A00666 | A05020 | 434 | A00666 | A05026 | 330 |
| A00666 | A05050 | 196 | A00666 | A05051 | 283 |
| A00666 | A05088 | 213 | A00666 | A05102 | 490 |
| A00666 | A05155 | 446 | A00666 | A05310 | 483 |
| A00666 | A05330 | 263 | A00666 | A05348 | 157 |
| A00666 | A05416 | 408 | A00666 | A05472 | 417 |
| A00666 | A05515 | 291 | A00666 | A05516 | 469 |
| A00666 | A05600 | 385 | A00666 | A05659 | 385 |
| A00666 | A05673 | 313 | A00666 | A05679 | 241 |
| A00666 | A05699 | 224 | A00666 | A05757 | 238 |
| A00666 | A05759 | 353 | A00666 | A05768 | 269 |
| A00666 | A05771 | 235 | A00666 | A05772 | 441 |
| A00666 | A05774 | 436 | A00666 | A05789 | 196 |
| A00666 | A05937 | 184 | A00666 | A06024 | 441 |
| A00666 | A06088 | 193 | A00666 | A06089 | 251 |
| A00666 | A06091 | 401 | A00666 | A06098 | 243 |
| A00666 | A06165 | 251 | A00666 | A06252 | 167 |



|        |        |     |        |        |     |
|--------|--------|-----|--------|--------|-----|
| A00666 | A06344 | 167 | A00666 | A06358 | 488 |
| A00666 | A06359 | 486 | A00666 | A06360 | 416 |
| A00666 | A06389 | 182 | A00666 | A06415 | 274 |
| A00666 | A06517 | 260 | A00666 | A06555 | 283 |
| A00666 | A06592 | 385 | A00666 | A06630 | 364 |
| A00666 | A06633 | 445 | A00666 | A06635 | 243 |
| A00666 | A06641 | 265 | A00666 | A06692 | 407 |
| A00666 | A06700 | 278 | A00666 | A06756 | 386 |
| A00666 | A06773 | 171 | A00666 | A06819 | 432 |
| A00666 | A06934 | 313 | A00666 | A06970 | 152 |
| A00666 | A07002 | 361 | A00666 | A07080 | 417 |
| A00666 | A07109 | 274 | A00666 | A07122 | 491 |
| A00666 | A07134 | 283 | A00666 | A07185 | 465 |
| A00666 | A07222 | 212 | A00666 | A07238 | 330 |
| A00666 | A07239 | 313 | A00666 | A07246 | 329 |
| A00666 | A07267 | 335 | A00666 | A07288 | 340 |
| A00666 | A07341 | 187 | A00666 | A07413 | 477 |
| A00666 | A07477 | 293 | A00666 | A07530 | 293 |
| A00666 | A07554 | 196 | A00666 | A07558 | 172 |
| A00666 | A07627 | 251 | A00666 | A07688 | 384 |
| A00666 | A07739 | 235 | A00666 | A07746 | 434 |
| A00666 | A07757 | 241 | A00666 | A07780 | 270 |
| A00666 | A07800 | 481 | A00666 | A07931 | 190 |
| A00666 | A07973 | 196 | A00666 | A08099 | 257 |
| A00666 | A08223 | 455 | A00666 | A08265 | 441 |
| A00666 | A08616 | 329 | A00666 | A08751 | 405 |
| A00666 | A08817 | 185 | A00666 | A08847 | 191 |
| A00666 | A08978 | 400 | A00666 | A09024 | 204 |
| A00666 | A09169 | 157 | A00666 | A09381 | 151 |
| A00666 | A09632 | 424 | A00666 | A10027 | 329 |
| A00666 | A10240 | 235 | A00666 | A10370 | 372 |
| A00666 | A10420 | 177 | A00666 | A10444 | 252 |
| A00666 | A10456 | 156 | A00666 | A10488 | 378 |
| A00666 | A10550 | 319 | A00666 | A10614 | 167 |
| A00666 | A10659 | 213 | A00666 | A10738 | 301 |
| A00666 | A11304 | 252 | A00666 | A11402 | 435 |
| A00666 | A13033 | 283 | A00666 | A13478 | 329 |
| A00666 | A13746 | 329 | A00666 | A13821 | 193 |
| A00666 | A14125 | 185 | A00666 | A14313 | 243 |
| A00666 | A14337 | 352 | A00666 | A14366 | 249 |
| A00666 | A14372 | 157 | A00666 | A14419 | 270 |
| A00666 | A14525 | 419 | A00666 | A14613 | 218 |
| A00666 | A14827 | 485 | A00666 | A14858 | 260 |
| A00666 | A15079 | 329 | A00666 | A15372 | 418 |
| A00666 | A15637 | 485 | A00666 | A15874 | 477 |
| A00666 | A15905 | 489 | A00666 | A16026 | 475 |

|        |        |     |        |        |     |
|--------|--------|-----|--------|--------|-----|
| A00666 | A16027 | 490 | A00666 | A16028 | 474 |
| A00666 | A16283 | 438 | A00666 | A16284 | 398 |
| A00666 | A16328 | 184 | A00666 | A16346 | 394 |
| A00666 | A16529 | 185 | A00666 | A16741 | 445 |
| A00666 | A17078 | 286 | A00667 | A00706 | 154 |
| A00667 | A00709 | 480 | A00667 | A00710 | 395 |
| A00667 | A00740 | 376 | A00667 | A00762 | 223 |
| A00667 | A00774 | 321 | A00667 | A00789 | 188 |
| A00667 | A00824 | 508 | A00667 | A00843 | 363 |
| A00667 | A00848 | 356 | A00667 | A00913 | 216 |
| A00667 | A00965 | 221 | A00667 | A00969 | 405 |
| A00667 | A00970 | 310 | A00667 | A00982 | 205 |
| A00667 | A00996 | 320 | A00667 | A01016 | 254 |
| A00667 | A01017 | 154 | A00667 | A01102 | 356 |
| A00667 | A01115 | 486 | A00667 | A01119 | 583 |
| A00667 | A01136 | 241 | A00667 | A01190 | 301 |
| A00667 | A01192 | 165 | A00667 | A01194 | 592 |
| A00667 | A01218 | 447 | A00667 | A01411 | 589 |
| A00667 | A01420 | 299 | A00667 | A01455 | 512 |
| A00667 | A01539 | 467 | A00667 | A01569 | 430 |
| A00667 | A01581 | 247 | A00667 | A01608 | 296 |
| A00667 | A01824 | 205 | A00667 | A01826 | 247 |
| A00667 | A02705 | 163 | A00667 | A03051 | 151 |
| A00667 | A03180 | 312 | A00667 | A03446 | 401 |
| A00667 | A03453 | 247 | A00667 | A03601 | 228 |
| A00667 | A03785 | 202 | A00667 | A03885 | 204 |
| A00667 | A04932 | 163 | A00667 | A06531 | 303 |
| A00667 | A07196 | 307 | A00667 | A08447 | 191 |
| A00667 | A08550 | 188 | A00667 | A08896 | 273 |
| A00667 | A09073 | 193 | A00667 | A09587 | 230 |
| A00667 | A09717 | 374 | A00667 | A10490 | 439 |
| A00667 | A11372 | 260 | A00667 | A11409 | 491 |
| A00667 | A11614 | 200 | A00667 | A11704 | 170 |
| A00667 | A12433 | 208 | A00667 | A12508 | 177 |
| A00667 | A12607 | 328 | A00667 | A12665 | 154 |
| A00667 | A12825 | 213 | A00667 | A13310 | 190 |
| A00667 | A13609 | 279 | A00667 | A13788 | 243 |
| A00667 | A14074 | 247 | A00667 | A14358 | 322 |
| A00667 | A14375 | 162 | A00667 | A14462 | 165 |
| A00667 | A14622 | 174 | A00667 | A15660 | 157 |
| A00667 | A15804 | 279 | A00667 | A16187 | 200 |
| A00667 | A16597 | 160 | A00667 | A16664 | 157 |
| A00667 | A16682 | 252 | A00667 | A16807 | 184 |
| A00667 | A16824 | 294 | A00668 | A00864 | 489 |
| A00668 | A01908 | 170 | A00668 | A02839 | 221 |
| A00668 | A03570 | 227 | A00668 | A04282 | 404 |

|        |        |     |        |        |     |
|--------|--------|-----|--------|--------|-----|
| A00668 | A06715 | 223 | A00668 | A07073 | 219 |
| A00668 | A08196 | 367 | A00668 | A09263 | 224 |
| A00668 | A09624 | 196 | A00668 | A11475 | 247 |
| A00668 | A11675 | 246 | A00668 | A14084 | 160 |
| A00668 | A14266 | 286 | A00669 | A00719 | 184 |
| A00669 | A00838 | 243 | A00669 | A00875 | 534 |
| A00669 | A00887 | 489 | A00669 | A00997 | 491 |
| A00669 | A01052 | 491 | A00669 | A01172 | 486 |
| A00669 | A01524 | 475 | A00669 | A01527 | 944 |
| A00669 | A01548 | 469 | A00669 | A01558 | 899 |
| A00669 | A01560 | 942 | A00669 | A01561 | 899 |
| A00669 | A01572 | 324 | A00669 | A01588 | 901 |
| A00669 | A01591 | 157 | A00669 | A01592 | 177 |
| A00669 | A01602 | 899 | A00669 | A01615 | 899 |
| A00669 | A01645 | 172 | A00669 | A01650 | 188 |
| A00669 | A01688 | 489 | A00669 | A01694 | 391 |
| A00669 | A01839 | 491 | A00669 | A02178 | 151 |
| A00669 | A02436 | 369 | A00669 | A02452 | 446 |
| A00669 | A02517 | 252 | A00669 | A02586 | 202 |
| A00669 | A02640 | 461 | A00669 | A02749 | 446 |
| A00669 | A02752 | 205 | A00669 | A02792 | 245 |
| A00669 | A03070 | 185 | A00669 | A03226 | 160 |
| A00669 | A03435 | 462 | A00669 | A03451 | 369 |
| A00669 | A03477 | 286 | A00669 | A03479 | 179 |
| A00669 | A03611 | 490 | A00669 | A03741 | 156 |
| A00669 | A03854 | 491 | A00669 | A03878 | 205 |
| A00669 | A03949 | 232 | A00669 | A03990 | 454 |
| A00669 | A04062 | 485 | A00669 | A04442 | 202 |
| A00669 | A04468 | 201 | A00669 | A04494 | 310 |
| A00669 | A04790 | 407 | A00669 | A04807 | 396 |
| A00669 | A04879 | 265 | A00669 | A05082 | 491 |
| A00669 | A05120 | 163 | A00669 | A05415 | 430 |
| A00669 | A05701 | 491 | A00669 | A05797 | 252 |
| A00669 | A06118 | 173 | A00669 | A06268 | 408 |
| A00669 | A06379 | 450 | A00669 | A06597 | 319 |
| A00669 | A06610 | 455 | A00669 | A06660 | 424 |
| A00669 | A06897 | 363 | A00669 | A07011 | 332 |
| A00669 | A07091 | 319 | A00669 | A07158 | 185 |
| A00669 | A07206 | 167 | A00669 | A07311 | 924 |
| A00669 | A07375 | 443 | A00669 | A07834 | 235 |
| A00669 | A08571 | 241 | A00669 | A08851 | 198 |
| A00669 | A09092 | 160 | A00669 | A09124 | 491 |
| A00669 | A09566 | 179 | A00669 | A09727 | 252 |
| A00669 | A09826 | 168 | A00669 | A10006 | 152 |
| A00669 | A10111 | 228 | A00669 | A10189 | 294 |
| A00669 | A10386 | 187 | A00669 | A10551 | 305 |

|        |        |     |        |        |     |
|--------|--------|-----|--------|--------|-----|
| A00669 | A11348 | 457 | A00669 | A11369 | 216 |
| A00669 | A12383 | 299 | A00669 | A12886 | 152 |
| A00669 | A13824 | 899 | A00669 | A14188 | 899 |
| A00669 | A14198 | 915 | A00669 | A14577 | 286 |
| A00669 | A15071 | 323 | A00669 | A15545 | 398 |
| A00669 | A15893 | 157 | A00669 | A16719 | 216 |
| A00669 | A17064 | 263 | A00670 | A00850 | 179 |
| A00670 | A00854 | 151 | A00670 | A00883 | 490 |
| A00670 | A00943 | 460 | A00670 | A00968 | 577 |
| A00670 | A01074 | 475 | A00670 | A01091 | 480 |
| A00670 | A01105 | 210 | A00670 | A01189 | 568 |
| A00670 | A01205 | 457 | A00670 | A01243 | 368 |
| A00670 | A01269 | 302 | A00670 | A01360 | 486 |
| A00670 | A01385 | 232 | A00670 | A01483 | 422 |
| A00670 | A01508 | 486 | A00670 | A01622 | 391 |
| A00670 | A02212 | 610 | A00670 | A02335 | 223 |
| A00670 | A02601 | 165 | A00670 | A02789 | 223 |
| A00670 | A03242 | 249 | A00670 | A03501 | 404 |
| A00670 | A03567 | 347 | A00670 | A03597 | 240 |
| A00670 | A03719 | 223 | A00670 | A03728 | 223 |
| A00670 | A03752 | 223 | A00670 | A04734 | 184 |
| A00670 | A05332 | 390 | A00670 | A06290 | 252 |
| A00670 | A06689 | 223 | A00670 | A06819 | 577 |
| A00670 | A07107 | 226 | A00670 | A07222 | 247 |
| A00670 | A07232 | 180 | A00670 | A07333 | 709 |
| A00670 | A07413 | 160 | A00670 | A07756 | 450 |
| A00670 | A07931 | 177 | A00670 | A07956 | 414 |
| A00670 | A07974 | 249 | A00670 | A08289 | 198 |
| A00670 | A08517 | 414 | A00670 | A08960 | 184 |
| A00670 | A09276 | 391 | A00670 | A09317 | 201 |
| A00670 | A09627 | 414 | A00670 | A12924 | 485 |
| A00670 | A13822 | 343 | A00670 | A14196 | 488 |
| A00670 | A14525 | 562 | A00670 | A14803 | 294 |
| A00670 | A14804 | 223 | A00670 | A14858 | 252 |
| A00670 | A15323 | 475 | A00670 | A15324 | 486 |
| A00670 | A15339 | 281 | A00670 | A15353 | 281 |
| A00670 | A15372 | 354 | A00670 | A15564 | 335 |
| A00670 | A16219 | 223 | A00670 | A16463 | 438 |
| A00670 | A16531 | 524 | A00670 | A16753 | 201 |
| A00670 | A16761 | 216 | A00670 | A16769 | 441 |
| A00671 | A00679 | 452 | A00671 | A00703 | 234 |
| A00671 | A00747 | 474 | A00671 | A00759 | 240 |
| A00671 | A00791 | 288 | A00671 | A00856 | 263 |
| A00671 | A00942 | 302 | A00671 | A01068 | 283 |
| A00671 | A01124 | 196 | A00671 | A01148 | 378 |
| A00671 | A01202 | 263 | A00671 | A01291 | 268 |

|        |        |     |        |        |     |
|--------|--------|-----|--------|--------|-----|
| A00671 | A01374 | 353 | A00671 | A01405 | 187 |
| A00671 | A01418 | 224 | A00671 | A01474 | 193 |
| A00671 | A01507 | 440 | A00671 | A01602 | 491 |
| A00671 | A01633 | 303 | A00671 | A01665 | 157 |
| A00671 | A01724 | 353 | A00671 | A01790 | 260 |
| A00671 | A01917 | 240 | A00671 | A01931 | 308 |
| A00671 | A02121 | 218 | A00671 | A02253 | 353 |
| A00671 | A02344 | 263 | A00671 | A02902 | 486 |
| A00671 | A03021 | 218 | A00671 | A03104 | 171 |
| A00671 | A03213 | 491 | A00671 | A03273 | 104 |
| A00671 | A03304 | 458 | A00671 | A03465 | 475 |
| A00671 | A03663 | 212 | A00671 | A03738 | 266 |
| A00671 | A03843 | 262 | A00671 | A03954 | 270 |
| A00671 | A04020 | 245 | A00671 | A04033 | 201 |
| A00671 | A04449 | 172 | A00671 | A04638 | 243 |
| A00671 | A04687 | 263 | A00671 | A05017 | 226 |
| A00671 | A05112 | 238 | A00671 | A05158 | 389 |
| A00671 | A05418 | 335 | A00671 | A05454 | 321 |
| A00671 | A06011 | 226 | A00671 | A06200 | 411 |
| A00671 | A06813 | 151 | A00671 | A07203 | 234 |
| A00671 | A07209 | 290 | A00671 | A07572 | 223 |
| A00671 | A07677 | 262 | A00671 | A07695 | 293 |
| A00671 | A07803 | 232 | A00671 | A08022 | 313 |
| A00671 | A08538 | 384 | A00671 | A08621 | 151 |
| A00671 | A08734 | 255 | A00671 | A08836 | 130 |
| A00671 | A08860 | 210 | A00671 | A09042 | 389 |
| A00671 | A09072 | 281 | A00671 | A09171 | 286 |
| A00671 | A09320 | 266 | A00671 | A09487 | 483 |
| A00671 | A09566 | 302 | A00671 | A09624 | 63  |
| A00671 | A09789 | 367 | A00671 | A09874 | 154 |
| A00671 | A10159 | 223 | A00671 | A10255 | 384 |
| A00671 | A10440 | 163 | A00671 | A11403 | 218 |
| A00671 | A11543 | 154 | A00671 | A11983 | 262 |
| A00671 | A12246 | 188 | A00671 | A12513 | 269 |
| A00671 | A12897 | 279 | A00671 | A14211 | 191 |
| A00671 | A14410 | 154 | A00671 | A14635 | 191 |
| A00671 | A14643 | 296 | A00671 | A14660 | 171 |
| A00671 | A14711 | 165 | A00671 | A14928 | 290 |
| A00671 | A16304 | 177 | A00671 | A16610 | 154 |
| A00672 | A00996 | 229 | A00672 | A14247 | 63  |
| A00672 | A14504 | 63  | A00673 | A00687 | 363 |
| A00673 | A00705 | 344 | A00673 | A00709 | 188 |
| A00673 | A00711 | 234 | A00673 | A00727 | 252 |
| A00673 | A00740 | 257 | A00673 | A00751 | 235 |
| A00673 | A00839 | 188 | A00673 | A00953 | 188 |
| A00673 | A00972 | 188 | A00673 | A00988 | 241 |

|        |        |     |        |        |     |
|--------|--------|-----|--------|--------|-----|
| A00673 | A01017 | 188 | A00673 | A01101 | 315 |
| A00673 | A01207 | 146 | A00673 | A01217 | 275 |
| A00673 | A01218 | 430 | A00673 | A01220 | 188 |
| A00673 | A01362 | 188 | A00673 | A01369 | 226 |
| A00673 | A01406 | 188 | A00673 | A01408 | 188 |
| A00673 | A01411 | 303 | A00673 | A01414 | 188 |
| A00673 | A01451 | 188 | A00673 | A01579 | 226 |
| A00673 | A01841 | 201 | A00673 | A01976 | 249 |
| A00673 | A01988 | 188 | A00673 | A03453 | 202 |
| A00673 | A03901 | 313 | A00673 | A04687 | 329 |
| A00673 | A05127 | 185 | A00673 | A05702 | 188 |
| A00673 | A06785 | 188 | A00673 | A07746 | 162 |
| A00673 | A07965 | 188 | A00673 | A09587 | 296 |
| A00673 | A11480 | 188 | A00673 | A14566 | 257 |
| A00673 | A14594 | 307 | A00673 | A14813 | 188 |
| A00673 | A15657 | 188 | A00673 | A16680 | 188 |
| A00674 | A00697 | 396 | A00674 | A00709 | 272 |
| A00674 | A00714 | 160 | A00674 | A00735 | 173 |
| A00674 | A00736 | 369 | A00674 | A00751 | 175 |
| A00674 | A00759 | 394 | A00674 | A00761 | 486 |
| A00674 | A00766 | 539 | A00674 | A00781 | 486 |
| A00674 | A00791 | 543 | A00674 | A00805 | 279 |
| A00674 | A00816 | 351 | A00674 | A00868 | 544 |
| A00674 | A00883 | 544 | A00674 | A00884 | 407 |
| A00674 | A00926 | 544 | A00674 | A00927 | 272 |
| A00674 | A00975 | 544 | A00674 | A01014 | 335 |
| A00674 | A01039 | 160 | A00674 | A01058 | 160 |
| A00674 | A01077 | 511 | A00674 | A01080 | 160 |
| A00674 | A01106 | 255 | A00674 | A01122 | 461 |
| A00674 | A01169 | 484 | A00674 | A01197 | 168 |
| A00674 | A01212 | 321 | A00674 | A01267 | 160 |
| A00674 | A01278 | 160 | A00674 | A01329 | 238 |
| A00674 | A01339 | 518 | A00674 | A01340 | 217 |
| A00674 | A01370 | 419 | A00674 | A01826 | 223 |
| A00674 | A01985 | 177 | A00674 | A02126 | 265 |
| A00674 | A02212 | 286 | A00674 | A02254 | 249 |
| A00674 | A03043 | 168 | A00674 | A03061 | 288 |
| A00674 | A03271 | 198 | A00674 | A03498 | 324 |
| A00674 | A03676 | 429 | A00674 | A03885 | 152 |
| A00674 | A03902 | 191 | A00674 | A04579 | 204 |
| A00674 | A04793 | 207 | A00674 | A05377 | 173 |
| A00674 | A05383 | 170 | A00674 | A05570 | 299 |
| A00674 | A06032 | 170 | A00674 | A06750 | 452 |
| A00674 | A06773 | 213 | A00674 | A06938 | 380 |
| A00674 | A07096 | 160 | A00674 | A07226 | 212 |
| A00674 | A07266 | 312 | A00674 | A07389 | 281 |

|        |        |     |        |        |     |
|--------|--------|-----|--------|--------|-----|
| A00674 | A07403 | 385 | A00674 | A07756 | 468 |
| A00674 | A07822 | 271 | A00674 | A07986 | 276 |
| A00674 | A08834 | 160 | A00674 | A08882 | 451 |
| A00674 | A09627 | 160 | A00674 | A09740 | 212 |
| A00674 | A10372 | 338 | A00674 | A11365 | 160 |
| A00674 | A11724 | 196 | A00674 | A11735 | 160 |
| A00674 | A11737 | 160 | A00674 | A11914 | 160 |
| A00674 | A12658 | 160 | A00674 | A12824 | 545 |
| A00674 | A12887 | 270 | A00674 | A14007 | 160 |
| A00674 | A14138 | 162 | A00674 | A15257 | 160 |
| A00674 | A15498 | 491 | A00674 | A15624 | 486 |
| A00675 | A00882 | 491 | A00675 | A01332 | 468 |
| A00675 | A01461 | 393 | A00675 | A01575 | 343 |
| A00675 | A01723 | 187 | A00675 | A01916 | 241 |
| A00675 | A01983 | 255 | A00675 | A03104 | 196 |
| A00675 | A03753 | 463 | A00675 | A04337 | 191 |
| A00675 | A04848 | 177 | A00675 | A05356 | 356 |
| A00675 | A05601 | 446 | A00675 | A06611 | 291 |
| A00675 | A07754 | 163 | A00675 | A08093 | 204 |
| A00675 | A09469 | 428 | A00675 | A09742 | 322 |
| A00675 | A11279 | 256 | A00675 | A11552 | 265 |
| A00675 | A12540 | 351 | A00675 | A13313 | 165 |
| A00675 | A13369 | 399 | A00675 | A13945 | 474 |
| A00675 | A13987 | 205 | A00675 | A14052 | 228 |
| A00675 | A14202 | 353 | A00675 | A14247 | 480 |
| A00675 | A14381 | 297 | A00675 | A14570 | 445 |
| A00675 | A14661 | 151 | A00675 | A15366 | 293 |
| A00675 | A15922 | 171 | A00675 | A16132 | 386 |
| A00676 | A00914 | 199 | A00676 | A01364 | 294 |
| A00676 | A01402 | 302 | A00676 | A01556 | 171 |
| A00676 | A01841 | 357 | A00676 | A01859 | 290 |
| A00676 | A02011 | 241 | A00676 | A02192 | 319 |
| A00676 | A02353 | 462 | A00676 | A02481 | 165 |
| A00676 | A02506 | 265 | A00676 | A02718 | 488 |
| A00676 | A02951 | 205 | A00676 | A02984 | 230 |
| A00676 | A03126 | 278 | A00676 | A03832 | 157 |
| A00676 | A03841 | 311 | A00676 | A03983 | 374 |
| A00676 | A04712 | 486 | A00676 | A04728 | 176 |
| A00676 | A04783 | 484 | A00676 | A05264 | 316 |
| A00676 | A05284 | 286 | A00676 | A06422 | 311 |
| A00676 | A07191 | 235 | A00676 | A07746 | 191 |
| A00676 | A08817 | 268 | A00676 | A09169 | 333 |
| A00676 | A10689 | 334 | A00676 | A12927 | 185 |
| A00676 | A13426 | 330 | A00677 | A00691 | 491 |
| A00677 | A00790 | 152 | A00677 | A00867 | 163 |
| A00677 | A00905 | 249 | A00677 | A00947 | 490 |

|        |        |     |        |        |     |
|--------|--------|-----|--------|--------|-----|
| A00677 | A00957 | 335 | A00677 | A01075 | 470 |
| A00677 | A01088 | 321 | A00677 | A01136 | 486 |
| A00677 | A01231 | 251 | A00677 | A01252 | 285 |
| A00677 | A01309 | 314 | A00677 | A01391 | 335 |
| A00677 | A01471 | 491 | A00677 | A01478 | 452 |
| A00677 | A01541 | 205 | A00677 | A01558 | 357 |
| A00677 | A01569 | 177 | A00677 | A01591 | 491 |
| A00677 | A01610 | 199 | A00677 | A01612 | 168 |
| A00677 | A01650 | 401 | A00677 | A01685 | 474 |
| A00677 | A02003 | 318 | A00677 | A02064 | 290 |
| A00677 | A03298 | 473 | A00677 | A03299 | 345 |
| A00677 | A03494 | 208 | A00677 | A03601 | 207 |
| A00677 | A04355 | 283 | A00677 | A05008 | 396 |
| A00677 | A05015 | 443 | A00677 | A05219 | 291 |
| A00677 | A05633 | 390 | A00677 | A06009 | 208 |
| A00677 | A06143 | 246 | A00677 | A06273 | 177 |
| A00677 | A06275 | 310 | A00677 | A06572 | 257 |
| A00677 | A06761 | 318 | A00677 | A07313 | 162 |
| A00677 | A07433 | 182 | A00677 | A07706 | 483 |
| A00677 | A07898 | 219 | A00677 | A08118 | 229 |
| A00677 | A08554 | 490 | A00677 | A08571 | 491 |
| A00677 | A08756 | 251 | A00677 | A08885 | 491 |
| A00677 | A09221 | 188 | A00677 | A09256 | 457 |
| A00677 | A09649 | 288 | A00677 | A10853 | 235 |
| A00677 | A11139 | 435 | A00677 | A12240 | 333 |
| A00677 | A13978 | 279 | A00677 | A14184 | 183 |
| A00677 | A14196 | 160 | A00677 | A15312 | 240 |
| A00677 | A15313 | 249 | A00678 | A01667 | 176 |
| A00679 | A00694 | 196 | A00679 | A01052 | 270 |
| A00679 | A01148 | 441 | A00679 | A01172 | 167 |
| A00679 | A01363 | 234 | A00679 | A01378 | 413 |
| A00679 | A01405 | 258 | A00679 | A01507 | 491 |
| A00679 | A01562 | 899 | A00679 | A01602 | 490 |
| A00679 | A01606 | 483 | A00679 | A01688 | 369 |
| A00679 | A01698 | 456 | A00679 | A01724 | 491 |
| A00679 | A01756 | 228 | A00679 | A01850 | 123 |
| A00679 | A01907 | 191 | A00679 | A02189 | 184 |
| A00679 | A02343 | 388 | A00679 | A02699 | 369 |
| A00679 | A02822 | 460 | A00679 | A03213 | 172 |
| A00679 | A03304 | 483 | A00679 | A03336 | 350 |
| A00679 | A03451 | 154 | A00679 | A03465 | 491 |
| A00679 | A03726 | 226 | A00679 | A03778 | 491 |
| A00679 | A03832 | 152 | A00679 | A04007 | 450 |
| A00679 | A04449 | 484 | A00679 | A04868 | 293 |
| A00679 | A05168 | 312 | A00679 | A05169 | 232 |
| A00679 | A05564 | 346 | A00679 | A05944 | 212 |



|        |        |     |        |        |     |
|--------|--------|-----|--------|--------|-----|
| A00679 | A06354 | 346 | A00679 | A07957 | 346 |
| A00679 | A08485 | 346 | A00679 | A08493 | 346 |
| A00679 | A08621 | 402 | A00679 | A08692 | 151 |
| A00679 | A09273 | 267 | A00679 | A09937 | 162 |
| A00679 | A10006 | 188 | A00679 | A10014 | 350 |
| A00679 | A10015 | 267 | A00679 | A10195 | 466 |
| A00679 | A11007 | 267 | A00679 | A11345 | 466 |
| A00679 | A11659 | 388 | A00679 | A11983 | 327 |
| A00679 | A13111 | 291 | A00679 | A13388 | 294 |
| A00679 | A13400 | 274 | A00679 | A14055 | 243 |
| A00679 | A14293 | 346 | A00679 | A14653 | 491 |
| A00679 | A14777 | 176 | A00679 | A14913 | 283 |
| A00679 | A15111 | 274 | A00679 | A15186 | 321 |
| A00679 | A15282 | 254 | A00679 | A15293 | 321 |
| A00679 | A15622 | 245 | A00679 | A15752 | 167 |
| A00680 | A00697 | 425 | A00680 | A00741 | 463 |
| A00680 | A00808 | 156 | A00680 | A00811 | 172 |
| A00680 | A00963 | 196 | A00680 | A00967 | 378 |
| A00680 | A00985 | 316 | A00680 | A01139 | 348 |
| A00680 | A01161 | 447 | A00680 | A01359 | 296 |
| A00680 | A01413 | 491 | A00680 | A01551 | 245 |
| A00680 | A01558 | 249 | A00680 | A01640 | 416 |
| A00680 | A01730 | 488 | A00680 | A02477 | 223 |
| A00680 | A02860 | 195 | A00680 | A02994 | 162 |
| A00680 | A02999 | 259 | A00680 | A03144 | 271 |
| A00680 | A03526 | 196 | A00680 | A03886 | 221 |
| A00680 | A03911 | 345 | A00680 | A03990 | 306 |
| A00680 | A04025 | 246 | A00680 | A04072 | 391 |
| A00680 | A04540 | 286 | A00680 | A05240 | 183 |
| A00680 | A05812 | 296 | A00680 | A05981 | 165 |
| A00680 | A06546 | 207 | A00680 | A09581 | 168 |
| A00680 | A10553 | 345 | A00680 | A10598 | 337 |
| A00680 | A11662 | 294 | A00680 | A14006 | 208 |
| A00680 | A14410 | 208 | A00680 | A14894 | 299 |
| A00681 | A00695 | 470 | A00681 | A00696 | 368 |
| A00681 | A00738 | 490 | A00681 | A00739 | 427 |
| A00681 | A00770 | 491 | A00681 | A00771 | 419 |
| A00681 | A00773 | 438 | A00681 | A00825 | 401 |
| A00681 | A00962 | 491 | A00681 | A00971 | 477 |
| A00681 | A00995 | 491 | A00681 | A01005 | 279 |
| A00681 | A01008 | 491 | A00681 | A01018 | 201 |
| A00681 | A01063 | 238 | A00681 | A01109 | 481 |
| A00681 | A01174 | 481 | A00681 | A01175 | 489 |
| A00681 | A01222 | 168 | A00681 | A01223 | 202 |
| A00681 | A01230 | 326 | A00681 | A01233 | 480 |
| A00681 | A01256 | 486 | A00681 | A01272 | 406 |

|        |        |     |        |        |     |
|--------|--------|-----|--------|--------|-----|
| A00681 | A01297 | 439 | A00681 | A01360 | 313 |
| A00681 | A01366 | 251 | A00681 | A01367 | 188 |
| A00681 | A01397 | 327 | A00681 | A01409 | 326 |
| A00681 | A01481 | 430 | A00681 | A01482 | 361 |
| A00681 | A01508 | 491 | A00681 | A01635 | 491 |
| A00681 | A01713 | 302 | A00681 | A01735 | 263 |
| A00681 | A01741 | 236 | A00681 | A01743 | 396 |
| A00681 | A01747 | 380 | A00681 | A01857 | 384 |
| A00681 | A01859 | 235 | A00681 | A01866 | 176 |
| A00681 | A02053 | 184 | A00681 | A02066 | 335 |
| A00681 | A02083 | 221 | A00681 | A02168 | 196 |
| A00681 | A02254 | 208 | A00681 | A02432 | 208 |
| A00681 | A02521 | 205 | A00681 | A02735 | 247 |
| A00681 | A02847 | 293 | A00681 | A02859 | 226 |
| A00681 | A02919 | 291 | A00681 | A02992 | 477 |
| A00681 | A03003 | 232 | A00681 | A03004 | 157 |
| A00681 | A03008 | 310 | A00681 | A03016 | 266 |
| A00681 | A03050 | 210 | A00681 | A03059 | 329 |
| A00681 | A03167 | 443 | A00681 | A03168 | 235 |
| A00681 | A03259 | 296 | A00681 | A03311 | 347 |
| A00681 | A03369 | 173 | A00681 | A03431 | 165 |
| A00681 | A03441 | 417 | A00681 | A03443 | 162 |
| A00681 | A03477 | 327 | A00681 | A03487 | 174 |
| A00681 | A03500 | 235 | A00681 | A03508 | 246 |
| A00681 | A03513 | 443 | A00681 | A03586 | 205 |
| A00681 | A03861 | 375 | A00681 | A04660 | 466 |
| A00681 | A04674 | 260 | A00681 | A04778 | 291 |
| A00681 | A04779 | 486 | A00681 | A04784 | 235 |
| A00681 | A04834 | 377 | A00681 | A04850 | 446 |
| A00681 | A04883 | 382 | A00681 | A04927 | 317 |
| A00681 | A04937 | 185 | A00681 | A04949 | 212 |
| A00681 | A04995 | 353 | A00681 | A05007 | 491 |
| A00681 | A05026 | 210 | A00681 | A05102 | 491 |
| A00681 | A05122 | 168 | A00681 | A05310 | 319 |
| A00681 | A05416 | 440 | A00681 | A05451 | 217 |
| A00681 | A05472 | 477 | A00681 | A05516 | 489 |
| A00681 | A05600 | 177 | A00681 | A05610 | 246 |
| A00681 | A05659 | 229 | A00681 | A05738 | 405 |
| A00681 | A05752 | 335 | A00681 | A05758 | 232 |
| A00681 | A05759 | 462 | A00681 | A05768 | 281 |
| A00681 | A05771 | 369 | A00681 | A05772 | 207 |
| A00681 | A05774 | 461 | A00681 | A05820 | 279 |
| A00681 | A05937 | 196 | A00681 | A06010 | 159 |
| A00681 | A06088 | 443 | A00681 | A06089 | 379 |
| A00681 | A06252 | 177 | A00681 | A06358 | 461 |
| A00681 | A06405 | 457 | A00681 | A06439 | 278 |

|        |        |     |        |        |     |
|--------|--------|-----|--------|--------|-----|
| A00681 | A06597 | 341 | A00681 | A06630 | 485 |
| A00681 | A06633 | 449 | A00681 | A06641 | 447 |
| A00681 | A06668 | 350 | A00681 | A06689 | 486 |
| A00681 | A06700 | 368 | A00681 | A06744 | 297 |
| A00681 | A06756 | 481 | A00681 | A06847 | 305 |
| A00681 | A06912 | 291 | A00681 | A06934 | 324 |
| A00681 | A06970 | 479 | A00681 | A06979 | 446 |
| A00681 | A07002 | 246 | A00681 | A07037 | 193 |
| A00681 | A07080 | 314 | A00681 | A07109 | 366 |
| A00681 | A07122 | 491 | A00681 | A07185 | 226 |
| A00681 | A07238 | 490 | A00681 | A07256 | 210 |
| A00681 | A07267 | 469 | A00681 | A07283 | 213 |
| A00681 | A07304 | 243 | A00681 | A07364 | 177 |
| A00681 | A07413 | 489 | A00681 | A07459 | 374 |
| A00681 | A07477 | 378 | A00681 | A07520 | 319 |
| A00681 | A07530 | 171 | A00681 | A07553 | 160 |
| A00681 | A07554 | 207 | A00681 | A07558 | 291 |
| A00681 | A07590 | 469 | A00681 | A07627 | 260 |
| A00681 | A07674 | 321 | A00681 | A07688 | 477 |
| A00681 | A07736 | 427 | A00681 | A07739 | 246 |
| A00681 | A07796 | 326 | A00681 | A07800 | 490 |
| A00681 | A07849 | 293 | A00681 | A07926 | 270 |
| A00681 | A07933 | 380 | A00681 | A07973 | 210 |
| A00681 | A07976 | 305 | A00681 | A08099 | 385 |
| A00681 | A08238 | 177 | A00681 | A08330 | 241 |
| A00681 | A08396 | 279 | A00681 | A08751 | 340 |
| A00681 | A08961 | 399 | A00681 | A09249 | 246 |
| A00681 | A09632 | 429 | A00681 | A09816 | 252 |
| A00681 | A09876 | 305 | A00681 | A09879 | 328 |
| A00681 | A10020 | 293 | A00681 | A10027 | 335 |
| A00681 | A10097 | 335 | A00681 | A10437 | 217 |
| A00681 | A10441 | 184 | A00681 | A10444 | 267 |
| A00681 | A10456 | 483 | A00681 | A10656 | 438 |
| A00681 | A10659 | 226 | A00681 | A10676 | 221 |
| A00681 | A10677 | 218 | A00681 | A10679 | 173 |
| A00681 | A10686 | 184 | A00681 | A10688 | 198 |
| A00681 | A10694 | 317 | A00681 | A10712 | 311 |
| A00681 | A10714 | 278 | A00681 | A10715 | 168 |
| A00681 | A10738 | 310 | A00681 | A10763 | 335 |
| A00681 | A10860 | 399 | A00681 | A10866 | 329 |
| A00681 | A11023 | 167 | A00681 | A11033 | 412 |
| A00681 | A11038 | 446 | A00681 | A11309 | 449 |
| A00681 | A11381 | 330 | A00681 | A11434 | 270 |
| A00681 | A11915 | 168 | A00681 | A12730 | 159 |
| A00681 | A12837 | 241 | A00681 | A13033 | 293 |
| A00681 | A13057 | 335 | A00681 | A13314 | 326 |

|        |        |     |        |        |     |
|--------|--------|-----|--------|--------|-----|
| A00681 | A13326 | 411 | A00681 | A13362 | 217 |
| A00681 | A13607 | 252 | A00681 | A14525 | 256 |
| A00681 | A14637 | 223 | A00681 | A14640 | 347 |
| A00681 | A14671 | 310 | A00681 | A14803 | 386 |
| A00681 | A14827 | 475 | A00681 | A14871 | 260 |
| A00681 | A15135 | 207 | A00681 | A15372 | 252 |
| A00681 | A15497 | 262 | A00681 | A15637 | 480 |
| A00681 | A15874 | 475 | A00681 | A15905 | 481 |
| A00681 | A15970 | 299 | A00681 | A16026 | 443 |
| A00681 | A16027 | 491 | A00681 | A16028 | 296 |
| A00681 | A16033 | 154 | A00681 | A16262 | 385 |
| A00681 | A16292 | 182 | A00681 | A16529 | 485 |
| A00681 | A16728 | 293 | A00681 | A16741 | 165 |
| A00681 | A16959 | 451 | A00681 | A17006 | 177 |
| A00681 | A17078 | 480 | A00682 | A01904 | 362 |
| A00682 | A04307 | 417 | A00682 | A04444 | 341 |
| A00682 | A14190 | 235 | A00682 | A14430 | 371 |
| A00683 | A00700 | 249 | A00683 | A00861 | 369 |
| A00683 | A00906 | 246 | A00683 | A00917 | 419 |
| A00683 | A01000 | 168 | A00683 | A01127 | 337 |
| A00683 | A01220 | 167 | A00683 | A01221 | 252 |
| A00683 | A01291 | 184 | A00683 | A01338 | 247 |
| A00683 | A01352 | 152 | A00683 | A01362 | 260 |
| A00683 | A01369 | 213 | A00683 | A01384 | 168 |
| A00683 | A01408 | 368 | A00683 | A01412 | 366 |
| A00683 | A01425 | 302 | A00683 | A01440 | 259 |
| A00683 | A01518 | 179 | A00683 | A02227 | 311 |
| A00683 | A02980 | 212 | A00683 | A03567 | 319 |
| A00683 | A06064 | 362 | A00683 | A06122 | 299 |
| A00683 | A06204 | 170 | A00683 | A06279 | 347 |
| A00683 | A06965 | 160 | A00683 | A14566 | 446 |
| A00683 | A16118 | 224 | A00684 | A00686 | 360 |
| A00684 | A00888 | 204 | A00684 | A00943 | 162 |
| A00684 | A00968 | 270 | A00684 | A01021 | 491 |
| A00684 | A01269 | 491 | A00684 | A01296 | 154 |
| A00684 | A01320 | 407 | A00684 | A01375 | 489 |
| A00684 | A01699 | 223 | A00684 | A01741 | 424 |
| A00684 | A01743 | 213 | A00684 | A02468 | 198 |
| A00684 | A02859 | 438 | A00684 | A03259 | 441 |
| A00684 | A04622 | 184 | A00684 | A04743 | 405 |
| A00684 | A05332 | 216 | A00684 | A05419 | 152 |
| A00684 | A05832 | 163 | A00684 | A05873 | 358 |
| A00684 | A06085 | 232 | A00684 | A06472 | 463 |
| A00684 | A06829 | 491 | A00684 | A06924 | 489 |
| A00684 | A07232 | 246 | A00684 | A07889 | 393 |
| A00684 | A08820 | 408 | A00684 | A09276 | 285 |

|        |        |     |        |        |     |
|--------|--------|-----|--------|--------|-----|
| A00684 | A09714 | 455 | A00684 | A11830 | 486 |
| A00684 | A13969 | 429 | A00684 | A14336 | 489 |
| A00684 | A14803 | 193 | A00684 | A14810 | 483 |
| A00684 | A15837 | 414 | A00684 | A16659 | 341 |
| A00684 | A16748 | 399 | A00684 | A16753 | 201 |
| A00685 | A00707 | 263 | A00685 | A01069 | 157 |
| A00685 | A01380 | 278 | A00685 | A02872 | 273 |
| A00686 | A01089 | 480 | A00686 | A01244 | 191 |
| A00686 | A01296 | 343 | A00686 | A01317 | 452 |
| A00686 | A01320 | 249 | A00686 | A06026 | 407 |
| A00686 | A06318 | 416 | A00686 | A06561 | 356 |
| A00686 | A07007 | 343 | A00686 | A09340 | 343 |
| A00686 | A13969 | 484 | A00686 | A15837 | 443 |
| A00686 | A15935 | 631 | A00686 | A16068 | 168 |
| A00687 | A00689 | 456 | A00687 | A00697 | 262 |
| A00687 | A00700 | 217 | A00687 | A00705 | 430 |
| A00687 | A00709 | 558 | A00687 | A00711 | 540 |
| A00687 | A00712 | 489 | A00687 | A00715 | 241 |
| A00687 | A00717 | 429 | A00687 | A00721 | 511 |
| A00687 | A00727 | 465 | A00687 | A00729 | 243 |
| A00687 | A00768 | 159 | A00687 | A00772 | 570 |
| A00687 | A00787 | 462 | A00687 | A00790 | 193 |
| A00687 | A00822 | 337 | A00687 | A00829 | 475 |
| A00687 | A00839 | 558 | A00687 | A00848 | 485 |
| A00687 | A00849 | 379 | A00687 | A00854 | 443 |
| A00687 | A00865 | 491 | A00687 | A00868 | 470 |
| A00687 | A00871 | 574 | A00687 | A00878 | 485 |
| A00687 | A00883 | 491 | A00687 | A00916 | 456 |
| A00687 | A00923 | 479 | A00687 | A00928 | 573 |
| A00687 | A00952 | 573 | A00687 | A00953 | 557 |
| A00687 | A00957 | 269 | A00687 | A00972 | 452 |
| A00687 | A00983 | 445 | A00687 | A00986 | 225 |
| A00687 | A00987 | 441 | A00687 | A00994 | 273 |
| A00687 | A00997 | 397 | A00687 | A01000 | 193 |
| A00687 | A01017 | 559 | A00687 | A01025 | 235 |
| A00687 | A01027 | 288 | A00687 | A01053 | 458 |
| A00687 | A01065 | 257 | A00687 | A01068 | 350 |
| A00687 | A01069 | 176 | A00687 | A01075 | 212 |
| A00687 | A01086 | 218 | A00687 | A01091 | 306 |
| A00687 | A01095 | 180 | A00687 | A01101 | 551 |
| A00687 | A01102 | 489 | A00687 | A01107 | 567 |
| A00687 | A01108 | 313 | A00687 | A01110 | 373 |
| A00687 | A01111 | 223 | A00687 | A01118 | 223 |
| A00687 | A01136 | 475 | A00687 | A01150 | 489 |
| A00687 | A01154 | 430 | A00687 | A01159 | 486 |
| A00687 | A01161 | 162 | A00687 | A01166 | 475 |

|        |        |     |        |        |     |
|--------|--------|-----|--------|--------|-----|
| A00687 | A01189 | 424 | A00687 | A01202 | 223 |
| A00687 | A01206 | 456 | A00687 | A01208 | 223 |
| A00687 | A01215 | 488 | A00687 | A01217 | 524 |
| A00687 | A01220 | 245 | A00687 | A01221 | 575 |
| A00687 | A01228 | 223 | A00687 | A01234 | 491 |
| A00687 | A01243 | 575 | A00687 | A01251 | 182 |
| A00687 | A01287 | 369 | A00687 | A01291 | 491 |
| A00687 | A01346 | 393 | A00687 | A01351 | 157 |
| A00687 | A01352 | 491 | A00687 | A01353 | 246 |
| A00687 | A01354 | 447 | A00687 | A01359 | 157 |
| A00687 | A01362 | 421 | A00687 | A01365 | 286 |
| A00687 | A01384 | 311 | A00687 | A01399 | 338 |
| A00687 | A01406 | 226 | A00687 | A01408 | 202 |
| A00687 | A01411 | 347 | A00687 | A01412 | 396 |
| A00687 | A01414 | 337 | A00687 | A01418 | 575 |
| A00687 | A01425 | 198 | A00687 | A01431 | 329 |
| A00687 | A01446 | 251 | A00687 | A01448 | 241 |
| A00687 | A01451 | 559 | A00687 | A01468 | 414 |
| A00687 | A01470 | 491 | A00687 | A01487 | 265 |
| A00687 | A01492 | 479 | A00687 | A01495 | 311 |
| A00687 | A01496 | 321 | A00687 | A01514 | 302 |
| A00687 | A01540 | 151 | A00687 | A01569 | 460 |
| A00687 | A01579 | 272 | A00687 | A01582 | 218 |
| A00687 | A01598 | 474 | A00687 | A01612 | 160 |
| A00687 | A01649 | 463 | A00687 | A01702 | 301 |
| A00687 | A01711 | 491 | A00687 | A01736 | 223 |
| A00687 | A01741 | 319 | A00687 | A01822 | 323 |
| A00687 | A01824 | 489 | A00687 | A01826 | 390 |
| A00687 | A01831 | 446 | A00687 | A01976 | 483 |
| A00687 | A01988 | 538 | A00687 | A02041 | 223 |
| A00687 | A02051 | 265 | A00687 | A02164 | 472 |
| A00687 | A02170 | 457 | A00687 | A02195 | 251 |
| A00687 | A02203 | 457 | A00687 | A02227 | 312 |
| A00687 | A02454 | 224 | A00687 | A02542 | 190 |
| A00687 | A02602 | 425 | A00687 | A02802 | 152 |
| A00687 | A03112 | 185 | A00687 | A03169 | 223 |
| A00687 | A03307 | 173 | A00687 | A03438 | 488 |
| A00687 | A03453 | 172 | A00687 | A03480 | 200 |
| A00687 | A03494 | 462 | A00687 | A03556 | 240 |
| A00687 | A03567 | 491 | A00687 | A03617 | 217 |
| A00687 | A03676 | 456 | A00687 | A03768 | 266 |
| A00687 | A03881 | 390 | A00687 | A03896 | 260 |
| A00687 | A03901 | 558 | A00687 | A03902 | 438 |
| A00687 | A03907 | 267 | A00687 | A03931 | 172 |
| A00687 | A03986 | 152 | A00687 | A04447 | 286 |
| A00687 | A04485 | 391 | A00687 | A04507 | 232 |

|        |        |     |        |        |     |
|--------|--------|-----|--------|--------|-----|
| A00687 | A04540 | 157 | A00687 | A05017 | 449 |
| A00687 | A05199 | 413 | A00687 | A05501 | 185 |
| A00687 | A05605 | 217 | A00687 | A05646 | 180 |
| A00687 | A05702 | 188 | A00687 | A06122 | 468 |
| A00687 | A06194 | 210 | A00687 | A06276 | 196 |
| A00687 | A06350 | 297 | A00687 | A06351 | 200 |
| A00687 | A06369 | 508 | A00687 | A06407 | 232 |
| A00687 | A06412 | 152 | A00687 | A06425 | 341 |
| A00687 | A06435 | 394 | A00687 | A06436 | 243 |
| A00687 | A06466 | 353 | A00687 | A06602 | 368 |
| A00687 | A06785 | 188 | A00687 | A06825 | 333 |
| A00687 | A06827 | 486 | A00687 | A06832 | 574 |
| A00687 | A06861 | 249 | A00687 | A06870 | 267 |
| A00687 | A06909 | 165 | A00687 | A06965 | 230 |
| A00687 | A06975 | 468 | A00687 | A07072 | 475 |
| A00687 | A07265 | 223 | A00687 | A07309 | 474 |
| A00687 | A07312 | 469 | A00687 | A07360 | 227 |
| A00687 | A07411 | 267 | A00687 | A07458 | 232 |
| A00687 | A07483 | 470 | A00687 | A07531 | 486 |
| A00687 | A07583 | 485 | A00687 | A07588 | 223 |
| A00687 | A07706 | 401 | A00687 | A07965 | 188 |
| A00687 | A08011 | 172 | A00687 | A08183 | 251 |
| A00687 | A08228 | 199 | A00687 | A08301 | 422 |
| A00687 | A08357 | 152 | A00687 | A08773 | 212 |
| A00687 | A08918 | 188 | A00687 | A08932 | 329 |
| A00687 | A08933 | 360 | A00687 | A08955 | 223 |
| A00687 | A08971 | 223 | A00687 | A08974 | 491 |
| A00687 | A08982 | 335 | A00687 | A08989 | 208 |
| A00687 | A08993 | 490 | A00687 | A09289 | 183 |
| A00687 | A09327 | 238 | A00687 | A09514 | 307 |
| A00687 | A09544 | 165 | A00687 | A09588 | 402 |
| A00687 | A09599 | 317 | A00687 | A09673 | 217 |
| A00687 | A09972 | 232 | A00687 | A10074 | 232 |
| A00687 | A10339 | 196 | A00687 | A10549 | 198 |
| A00687 | A10755 | 223 | A00687 | A10889 | 210 |
| A00687 | A11017 | 196 | A00687 | A11202 | 223 |
| A00687 | A11210 | 430 | A00687 | A11277 | 491 |
| A00687 | A11290 | 240 | A00687 | A11316 | 296 |
| A00687 | A11372 | 251 | A00687 | A11480 | 188 |
| A00687 | A11772 | 477 | A00687 | A11864 | 196 |
| A00687 | A11944 | 238 | A00687 | A12015 | 173 |
| A00687 | A12101 | 152 | A00687 | A12329 | 200 |
| A00687 | A12369 | 210 | A00687 | A12647 | 183 |
| A00687 | A13047 | 267 | A00687 | A13200 | 232 |
| A00687 | A13264 | 402 | A00687 | A13272 | 183 |
| A00687 | A13298 | 223 | A00687 | A13477 | 267 |

|        |        |     |        |        |     |
|--------|--------|-----|--------|--------|-----|
| A00687 | A13480 | 267 | A00687 | A13490 | 232 |
| A00687 | A13656 | 267 | A00687 | A13807 | 267 |
| A00687 | A13808 | 267 | A00687 | A13989 | 469 |
| A00687 | A14088 | 217 | A00687 | A14216 | 526 |
| A00687 | A14482 | 475 | A00687 | A14594 | 356 |
| A00687 | A14596 | 491 | A00687 | A14597 | 491 |
| A00687 | A14701 | 491 | A00687 | A14813 | 188 |
| A00687 | A14816 | 213 | A00687 | A15324 | 371 |
| A00687 | A15353 | 205 | A00687 | A15377 | 229 |
| A00687 | A15379 | 240 | A00687 | A15543 | 486 |
| A00687 | A15550 | 157 | A00687 | A15624 | 491 |
| A00687 | A15649 | 490 | A00687 | A15651 | 484 |
| A00687 | A15652 | 335 | A00687 | A15657 | 188 |
| A00687 | A15660 | 491 | A00687 | A15661 | 422 |
| A00687 | A15684 | 491 | A00687 | A15708 | 423 |
| A00687 | A15709 | 152 | A00687 | A15724 | 217 |
| A00687 | A15730 | 335 | A00687 | A15746 | 167 |
| A00687 | A15750 | 474 | A00687 | A15917 | 308 |
| A00687 | A15918 | 272 | A00687 | A15920 | 272 |
| A00687 | A15932 | 491 | A00687 | A15933 | 490 |
| A00687 | A15937 | 341 | A00687 | A15951 | 428 |
| A00687 | A16075 | 238 | A00687 | A16097 | 183 |
| A00687 | A16105 | 384 | A00687 | A16118 | 430 |
| A00687 | A16191 | 311 | A00687 | A16205 | 183 |
| A00687 | A16218 | 449 | A00687 | A16244 | 210 |
| A00687 | A16246 | 267 | A00687 | A16249 | 267 |
| A00687 | A16250 | 267 | A00687 | A16401 | 218 |
| A00687 | A16664 | 217 | A00687 | A16680 | 194 |
| A00687 | A16768 | 326 | A00687 | A16841 | 232 |
| A00687 | A17042 | 462 | A00687 | A17230 | 152 |
| A00688 | A00731 | 378 | A00688 | A00736 | 433 |
| A00688 | A00765 | 467 | A00688 | A00842 | 229 |
| A00688 | A00914 | 383 | A00688 | A00926 | 490 |
| A00688 | A01004 | 241 | A00688 | A01005 | 174 |
| A00688 | A01046 | 251 | A00688 | A01081 | 174 |
| A00688 | A01086 | 438 | A00688 | A01117 | 491 |
| A00688 | A01125 | 205 | A00688 | A01138 | 202 |
| A00688 | A01260 | 491 | A00688 | A01339 | 251 |
| A00688 | A01370 | 443 | A00688 | A01396 | 168 |
| A00688 | A01399 | 260 | A00688 | A01404 | 191 |
| A00688 | A01417 | 241 | A00688 | A01661 | 241 |
| A00688 | A01668 | 380 | A00688 | A01710 | 238 |
| A00688 | A01741 | 469 | A00688 | A01743 | 419 |
| A00688 | A01748 | 228 | A00688 | A01775 | 238 |
| A00688 | A01791 | 307 | A00688 | A01799 | 279 |
| A00688 | A01818 | 230 | A00688 | A01846 | 160 |



|        |        |     |        |        |     |
|--------|--------|-----|--------|--------|-----|
| A00688 | A01889 | 174 | A00688 | A01926 | 484 |
| A00688 | A01929 | 180 | A00688 | A02008 | 369 |
| A00688 | A02010 | 470 | A00688 | A02011 | 330 |
| A00688 | A02014 | 301 | A00688 | A02029 | 243 |
| A00688 | A02048 | 346 | A00688 | A02157 | 314 |
| A00688 | A02158 | 491 | A00688 | A02166 | 251 |
| A00688 | A02167 | 467 | A00688 | A02170 | 491 |
| A00688 | A02171 | 162 | A00688 | A02186 | 213 |
| A00688 | A02192 | 271 | A00688 | A02215 | 419 |
| A00688 | A02226 | 218 | A00688 | A02237 | 329 |
| A00688 | A02249 | 245 | A00688 | A02272 | 160 |
| A00688 | A02278 | 388 | A00688 | A02349 | 260 |
| A00688 | A02385 | 167 | A00688 | A02402 | 63  |
| A00688 | A02412 | 68  | A00688 | A02415 | 299 |
| A00688 | A02416 | 587 | A00688 | A02466 | 251 |
| A00688 | A02468 | 382 | A00688 | A02471 | 196 |
| A00688 | A02474 | 302 | A00688 | A02501 | 205 |
| A00688 | A02502 | 187 | A00688 | A02542 | 458 |
| A00688 | A02545 | 185 | A00688 | A02550 | 210 |
| A00688 | A02574 | 301 | A00688 | A02614 | 243 |
| A00688 | A02632 | 173 | A00688 | A02783 | 200 |
| A00688 | A02785 | 296 | A00688 | A02789 | 368 |
| A00688 | A02837 | 301 | A00688 | A02859 | 291 |
| A00688 | A02869 | 274 | A00688 | A02874 | 177 |
| A00688 | A02886 | 281 | A00688 | A02910 | 260 |
| A00688 | A02969 | 457 | A00688 | A02992 | 154 |
| A00688 | A03022 | 260 | A00688 | A03029 | 144 |
| A00688 | A03043 | 351 | A00688 | A03044 | 301 |
| A00688 | A03045 | 173 | A00688 | A03046 | 407 |
| A00688 | A03068 | 254 | A00688 | A03080 | 434 |
| A00688 | A03090 | 308 | A00688 | A03095 | 363 |
| A00688 | A03099 | 167 | A00688 | A03112 | 343 |
| A00688 | A03144 | 162 | A00688 | A03146 | 305 |
| A00688 | A03148 | 271 | A00688 | A03152 | 480 |
| A00688 | A03153 | 462 | A00688 | A03154 | 477 |
| A00688 | A03155 | 489 | A00688 | A03181 | 412 |
| A00688 | A03182 | 462 | A00688 | A03218 | 363 |
| A00688 | A03238 | 337 | A00688 | A03259 | 156 |
| A00688 | A03275 | 328 | A00688 | A03278 | 272 |
| A00688 | A03403 | 182 | A00688 | A03520 | 368 |
| A00688 | A03576 | 348 | A00688 | A03594 | 196 |
| A00688 | A03636 | 288 | A00688 | A03744 | 480 |
| A00688 | A03757 | 196 | A00688 | A03776 | 226 |
| A00688 | A03813 | 477 | A00688 | A03882 | 332 |
| A00688 | A03909 | 182 | A00688 | A03940 | 367 |
| A00688 | A04020 | 343 | A00688 | A04049 | 316 |

|        |        |     |        |        |     |
|--------|--------|-----|--------|--------|-----|
| A00688 | A04125 | 190 | A00688 | A04138 | 152 |
| A00688 | A04144 | 224 | A00688 | A04169 | 170 |
| A00688 | A04176 | 159 | A00688 | A04257 | 196 |
| A00688 | A04318 | 202 | A00688 | A04327 | 198 |
| A00688 | A04331 | 219 | A00688 | A04334 | 165 |
| A00688 | A04342 | 154 | A00688 | A04367 | 251 |
| A00688 | A04397 | 251 | A00688 | A04433 | 196 |
| A00688 | A04477 | 200 | A00688 | A04734 | 193 |
| A00688 | A04762 | 302 | A00688 | A04763 | 173 |
| A00688 | A04771 | 323 | A00688 | A04815 | 329 |
| A00688 | A04855 | 260 | A00688 | A04927 | 303 |
| A00688 | A04961 | 177 | A00688 | A05002 | 449 |
| A00688 | A05044 | 274 | A00688 | A05050 | 196 |
| A00688 | A05057 | 251 | A00688 | A05142 | 353 |
| A00688 | A05143 | 489 | A00688 | A05376 | 391 |
| A00688 | A05396 | 249 | A00688 | A05409 | 271 |
| A00688 | A05568 | 327 | A00688 | A05832 | 163 |
| A00688 | A05856 | 283 | A00688 | A05918 | 202 |
| A00688 | A05920 | 243 | A00688 | A06046 | 363 |
| A00688 | A06053 | 229 | A00688 | A06137 | 486 |
| A00688 | A06167 | 200 | A00688 | A06248 | 302 |
| A00688 | A06402 | 188 | A00688 | A06405 | 173 |
| A00688 | A06415 | 199 | A00688 | A07059 | 281 |
| A00688 | A07062 | 457 | A00688 | A07163 | 152 |
| A00688 | A07165 | 154 | A00688 | A07179 | 251 |
| A00688 | A07184 | 157 | A00688 | A07211 | 329 |
| A00688 | A07218 | 276 | A00688 | A07339 | 382 |
| A00688 | A07407 | 353 | A00688 | A07503 | 400 |
| A00688 | A07736 | 240 | A00688 | A07773 | 162 |
| A00688 | A07793 | 323 | A00688 | A08103 | 329 |
| A00688 | A08209 | 328 | A00688 | A08234 | 302 |
| A00688 | A08235 | 321 | A00688 | A08399 | 229 |
| A00688 | A08445 | 302 | A00688 | A08598 | 219 |
| A00688 | A08677 | 156 | A00688 | A08738 | 441 |
| A00688 | A08831 | 369 | A00688 | A08861 | 241 |
| A00688 | A09036 | 182 | A00688 | A09080 | 379 |
| A00688 | A09195 | 272 | A00688 | A09208 | 229 |
| A00688 | A09310 | 251 | A00688 | A09373 | 434 |
| A00688 | A09374 | 477 | A00688 | A09375 | 408 |
| A00688 | A09434 | 193 | A00688 | A09485 | 157 |
| A00688 | A09491 | 283 | A00688 | A09652 | 474 |
| A00688 | A09837 | 207 | A00688 | A09891 | 385 |
| A00688 | A09917 | 229 | A00688 | A09968 | 283 |
| A00688 | A10053 | 329 | A00688 | A10074 | 302 |
| A00688 | A10197 | 188 | A00688 | A10320 | 157 |
| A00688 | A10339 | 462 | A00688 | A10426 | 302 |

|        |        |     |        |        |     |
|--------|--------|-----|--------|--------|-----|
| A00688 | A10470 | 229 | A00688 | A10473 | 283 |
| A00688 | A10527 | 185 | A00688 | A10557 | 443 |
| A00688 | A10671 | 340 | A00688 | A10937 | 385 |
| A00688 | A11017 | 271 | A00688 | A11485 | 198 |
| A00688 | A11867 | 251 | A00688 | A12371 | 159 |
| A00688 | A12824 | 382 | A00688 | A12897 | 473 |
| A00688 | A13515 | 302 | A00688 | A13535 | 283 |
| A00688 | A14299 | 241 | A00688 | A14316 | 177 |
| A00688 | A14343 | 367 | A00688 | A14376 | 165 |
| A00688 | A14399 | 216 | A00688 | A14489 | 236 |
| A00688 | A14532 | 386 | A00688 | A14642 | 205 |
| A00688 | A14679 | 302 | A00688 | A15441 | 409 |
| A00688 | A15896 | 457 | A00688 | A15902 | 182 |
| A00688 | A16038 | 260 | A00688 | A16256 | 260 |
| A00688 | A16300 | 339 | A00688 | A16738 | 193 |
| A00689 | A00709 | 227 | A00689 | A00711 | 241 |
| A00689 | A00824 | 236 | A00689 | A00854 | 467 |
| A00689 | A00972 | 305 | A00689 | A01013 | 210 |
| A00689 | A01061 | 249 | A00689 | A01102 | 358 |
| A00689 | A01107 | 208 | A00689 | A01221 | 420 |
| A00689 | A01243 | 361 | A00689 | A01317 | 224 |
| A00689 | A01412 | 338 | A00689 | A01826 | 313 |
| A00689 | A01945 | 165 | A00689 | A02116 | 152 |
| A00689 | A02203 | 294 | A00689 | A02414 | 246 |
| A00689 | A02542 | 323 | A00689 | A03453 | 182 |
| A00689 | A03907 | 401 | A00689 | A06122 | 269 |
| A00689 | A06531 | 221 | A00689 | A06825 | 249 |
| A00689 | A06832 | 458 | A00689 | A06878 | 223 |
| A00689 | A09644 | 172 | A00689 | A09713 | 317 |
| A00690 | A01053 | 210 | A00690 | A01356 | 232 |
| A00690 | A01470 | 212 | A00690 | A01492 | 491 |
| A00690 | A01539 | 491 | A00690 | A01734 | 480 |
| A00690 | A01792 | 386 | A00690 | A03301 | 230 |
| A00690 | A03597 | 154 | A00690 | A03617 | 321 |
| A00690 | A03863 | 474 | A00690 | A07223 | 385 |
| A00690 | A07347 | 491 | A00690 | A07524 | 232 |
| A00690 | A07725 | 490 | A00690 | A11562 | 196 |
| A00690 | A14842 | 324 | A00690 | A15735 | 480 |
| A00690 | A15739 | 455 | A00691 | A00693 | 252 |
| A00691 | A00716 | 156 | A00691 | A00734 | 399 |
| A00691 | A00760 | 302 | A00691 | A00762 | 201 |
| A00691 | A00786 | 483 | A00691 | A00791 | 154 |
| A00691 | A00831 | 296 | A00691 | A00856 | 391 |
| A00691 | A00862 | 190 | A00691 | A00867 | 174 |
| A00691 | A00868 | 188 | A00691 | A00879 | 449 |
| A00691 | A00883 | 606 | A00691 | A00905 | 541 |

|        |        |     |        |        |     |
|--------|--------|-----|--------|--------|-----|
| A00691 | A00916 | 443 | A00691 | A00918 | 195 |
| A00691 | A00919 | 185 | A00691 | A00947 | 491 |
| A00691 | A01020 | 462 | A00691 | A01029 | 511 |
| A00691 | A01057 | 190 | A00691 | A01075 | 491 |
| A00691 | A01077 | 281 | A00691 | A01084 | 436 |
| A00691 | A01088 | 675 | A00691 | A01116 | 294 |
| A00691 | A01136 | 542 | A00691 | A01151 | 537 |
| A00691 | A01173 | 160 | A00691 | A01184 | 378 |
| A00691 | A01213 | 558 | A00691 | A01231 | 353 |
| A00691 | A01234 | 491 | A00691 | A01266 | 534 |
| A00691 | A01268 | 539 | A00691 | A01295 | 329 |
| A00691 | A01329 | 491 | A00691 | A01334 | 156 |
| A00691 | A01372 | 491 | A00691 | A01391 | 535 |
| A00691 | A01434 | 156 | A00691 | A01459 | 611 |
| A00691 | A01470 | 452 | A00691 | A01471 | 491 |
| A00691 | A01478 | 489 | A00691 | A01479 | 319 |
| A00691 | A01558 | 488 | A00691 | A01580 | 394 |
| A00691 | A01588 | 490 | A00691 | A01591 | 491 |
| A00691 | A01596 | 171 | A00691 | A01610 | 445 |
| A00691 | A01612 | 486 | A00691 | A01615 | 489 |
| A00691 | A01650 | 390 | A00691 | A01685 | 454 |
| A00691 | A01851 | 417 | A00691 | A02064 | 491 |
| A00691 | A02499 | 185 | A00691 | A02855 | 269 |
| A00691 | A02980 | 288 | A00691 | A03012 | 452 |
| A00691 | A03298 | 491 | A00691 | A03299 | 324 |
| A00691 | A03492 | 245 | A00691 | A03494 | 542 |
| A00691 | A03503 | 467 | A00691 | A03601 | 480 |
| A00691 | A03944 | 273 | A00691 | A04687 | 454 |
| A00691 | A05008 | 768 | A00691 | A05009 | 263 |
| A00691 | A05015 | 796 | A00691 | A05082 | 154 |
| A00691 | A05147 | 152 | A00691 | A05428 | 545 |
| A00691 | A06143 | 226 | A00691 | A06273 | 480 |
| A00691 | A06374 | 180 | A00691 | A06572 | 390 |
| A00691 | A06715 | 321 | A00691 | A06741 | 265 |
| A00691 | A06761 | 490 | A00691 | A06881 | 491 |
| A00691 | A07378 | 201 | A00691 | A07380 | 247 |
| A00691 | A07487 | 340 | A00691 | A07524 | 491 |
| A00691 | A07700 | 348 | A00691 | A07706 | 591 |
| A00691 | A07730 | 281 | A00691 | A07762 | 379 |
| A00691 | A07898 | 399 | A00691 | A07956 | 427 |
| A00691 | A08118 | 489 | A00691 | A08137 | 179 |
| A00691 | A08201 | 156 | A00691 | A08213 | 234 |
| A00691 | A08281 | 322 | A00691 | A08327 | 380 |
| A00691 | A08431 | 377 | A00691 | A08450 | 451 |
| A00691 | A08524 | 491 | A00691 | A08527 | 332 |
| A00691 | A08542 | 156 | A00691 | A08554 | 486 |

|        |        |     |        |        |     |
|--------|--------|-----|--------|--------|-----|
| A00691 | A08571 | 563 | A00691 | A08756 | 191 |
| A00691 | A08885 | 491 | A00691 | A09256 | 486 |
| A00691 | A09315 | 173 | A00691 | A09725 | 180 |
| A00691 | A10538 | 238 | A00691 | A10624 | 157 |
| A00691 | A10853 | 489 | A00691 | A11105 | 296 |
| A00691 | A11139 | 477 | A00691 | A11496 | 156 |
| A00691 | A11497 | 156 | A00691 | A11957 | 457 |
| A00691 | A12047 | 183 | A00691 | A12082 | 156 |
| A00691 | A12240 | 180 | A00691 | A12254 | 269 |
| A00691 | A12757 | 156 | A00691 | A13019 | 247 |
| A00691 | A13310 | 307 | A00691 | A13311 | 310 |
| A00691 | A13454 | 180 | A00691 | A13805 | 413 |
| A00691 | A13917 | 420 | A00691 | A13928 | 156 |
| A00691 | A13978 | 208 | A00691 | A13989 | 199 |
| A00691 | A14169 | 491 | A00691 | A14178 | 530 |
| A00691 | A14196 | 446 | A00691 | A14278 | 260 |
| A00691 | A14476 | 481 | A00691 | A14540 | 314 |
| A00691 | A14709 | 414 | A00691 | A14728 | 224 |
| A00691 | A15131 | 202 | A00691 | A15136 | 165 |
| A00691 | A15147 | 180 | A00691 | A15321 | 235 |
| A00691 | A15338 | 477 | A00691 | A15559 | 491 |
| A00691 | A15729 | 343 | A00691 | A16690 | 290 |
| A00691 | A16699 | 156 | A00691 | A16774 | 378 |
| A00691 | A16866 | 201 | A00692 | A01767 | 232 |
| A00692 | A04739 | 440 | A00692 | A16300 | 152 |
| A00693 | A00822 | 171 | A00693 | A00871 | 491 |
| A00693 | A00878 | 419 | A00693 | A00916 | 469 |
| A00693 | A01020 | 466 | A00693 | A01024 | 491 |
| A00693 | A01028 | 407 | A00693 | A01050 | 480 |
| A00693 | A01075 | 235 | A00693 | A01116 | 324 |
| A00693 | A01159 | 177 | A00693 | A01181 | 491 |
| A00693 | A01184 | 401 | A00693 | A01201 | 389 |
| A00693 | A01209 | 393 | A00693 | A01214 | 491 |
| A00693 | A01224 | 187 | A00693 | A01226 | 491 |
| A00693 | A01234 | 491 | A00693 | A01304 | 491 |
| A00693 | A01668 | 216 | A00693 | A02064 | 168 |
| A00693 | A04668 | 234 | A00693 | A06440 | 229 |
| A00693 | A06770 | 229 | A00693 | A07203 | 447 |
| A00693 | A07312 | 74  | A00693 | A07414 | 490 |
| A00693 | A07467 | 271 | A00693 | A07695 | 491 |
| A00693 | A07700 | 195 | A00693 | A07706 | 483 |
| A00693 | A08118 | 171 | A00693 | A08144 | 491 |
| A00693 | A08363 | 170 | A00693 | A08494 | 480 |
| A00693 | A08537 | 443 | A00693 | A08892 | 490 |
| A00693 | A08971 | 489 | A00693 | A09059 | 416 |
| A00693 | A09280 | 216 | A00693 | A09621 | 463 |

|        |        |     |        |        |     |
|--------|--------|-----|--------|--------|-----|
| A00693 | A09701 | 221 | A00693 | A10373 | 334 |
| A00693 | A10608 | 475 | A00693 | A10923 | 200 |
| A00693 | A11394 | 188 | A00693 | A11401 | 479 |
| A00693 | A11407 | 490 | A00693 | A12447 | 465 |
| A00693 | A13870 | 475 | A00693 | A14006 | 462 |
| A00693 | A14074 | 477 | A00693 | A14080 | 154 |
| A00693 | A14449 | 400 | A00693 | A14481 | 256 |
| A00693 | A14655 | 491 | A00693 | A15058 | 151 |
| A00693 | A15531 | 162 | A00693 | A16320 | 151 |
| A00694 | A00700 | 486 | A00694 | A00743 | 378 |
| A00694 | A00762 | 267 | A00694 | A00769 | 491 |
| A00694 | A00799 | 491 | A00694 | A00802 | 183 |
| A00694 | A00806 | 411 | A00694 | A00839 | 232 |
| A00694 | A00849 | 212 | A00694 | A00882 | 156 |
| A00694 | A00887 | 274 | A00694 | A00977 | 314 |
| A00694 | A00981 | 380 | A00694 | A00994 | 474 |
| A00694 | A01012 | 162 | A00694 | A01021 | 472 |
| A00694 | A01022 | 277 | A00694 | A01038 | 317 |
| A00694 | A01052 | 286 | A00694 | A01088 | 644 |
| A00694 | A01101 | 425 | A00694 | A01119 | 266 |
| A00694 | A01122 | 236 | A00694 | A01127 | 433 |
| A00694 | A01140 | 401 | A00694 | A01161 | 488 |
| A00694 | A01166 | 399 | A00694 | A01211 | 454 |
| A00694 | A01235 | 229 | A00694 | A01265 | 205 |
| A00694 | A01280 | 276 | A00694 | A01291 | 443 |
| A00694 | A01326 | 204 | A00694 | A01352 | 271 |
| A00694 | A01367 | 491 | A00694 | A01383 | 213 |
| A00694 | A01385 | 205 | A00694 | A01468 | 473 |
| A00694 | A01507 | 334 | A00694 | A01524 | 452 |
| A00694 | A01527 | 486 | A00694 | A01530 | 188 |
| A00694 | A01543 | 452 | A00694 | A01579 | 339 |
| A00694 | A01582 | 330 | A00694 | A01601 | 458 |
| A00694 | A01632 | 446 | A00694 | A01746 | 491 |
| A00694 | A01891 | 326 | A00694 | A01916 | 467 |
| A00694 | A02211 | 177 | A00694 | A02289 | 215 |
| A00694 | A02373 | 355 | A00694 | A02439 | 299 |
| A00694 | A02477 | 367 | A00694 | A02691 | 460 |
| A00694 | A02698 | 356 | A00694 | A02709 | 439 |
| A00694 | A02739 | 424 | A00694 | A02830 | 472 |
| A00694 | A03095 | 488 | A00694 | A03104 | 475 |
| A00694 | A03304 | 491 | A00694 | A03332 | 446 |
| A00694 | A03601 | 291 | A00694 | A03611 | 491 |
| A00694 | A03806 | 390 | A00694 | A03901 | 353 |
| A00694 | A04275 | 217 | A00694 | A04337 | 391 |
| A00694 | A04449 | 369 | A00694 | A04492 | 419 |
| A00694 | A04530 | 177 | A00694 | A04718 | 491 |

|        |        |     |        |        |     |
|--------|--------|-----|--------|--------|-----|
| A00694 | A04791 | 402 | A00694 | A04796 | 283 |
| A00694 | A04797 | 251 | A00694 | A04879 | 165 |
| A00694 | A04985 | 307 | A00694 | A05103 | 288 |
| A00694 | A05119 | 171 | A00694 | A05308 | 283 |
| A00694 | A05419 | 232 | A00694 | A05463 | 374 |
| A00694 | A05501 | 299 | A00694 | A05529 | 297 |
| A00694 | A05573 | 360 | A00694 | A05654 | 246 |
| A00694 | A05851 | 357 | A00694 | A06100 | 152 |
| A00694 | A06151 | 210 | A00694 | A06153 | 229 |
| A00694 | A06214 | 283 | A00694 | A06227 | 193 |
| A00694 | A06357 | 160 | A00694 | A06415 | 201 |
| A00694 | A06535 | 154 | A00694 | A06704 | 283 |
| A00694 | A06720 | 193 | A00694 | A07042 | 283 |
| A00694 | A07160 | 228 | A00694 | A07209 | 458 |
| A00694 | A07227 | 367 | A00694 | A07323 | 472 |
| A00694 | A07626 | 311 | A00694 | A07665 | 195 |
| A00694 | A07773 | 326 | A00694 | A07902 | 440 |
| A00694 | A07903 | 152 | A00694 | A08000 | 152 |
| A00694 | A08030 | 488 | A00694 | A08117 | 490 |
| A00694 | A08591 | 177 | A00694 | A09078 | 363 |
| A00694 | A09112 | 318 | A00694 | A09149 | 205 |
| A00694 | A09302 | 215 | A00694 | A09592 | 752 |
| A00694 | A09603 | 177 | A00694 | A09693 | 311 |
| A00694 | A09744 | 277 | A00694 | A09876 | 491 |
| A00694 | A09936 | 215 | A00694 | A10090 | 184 |
| A00694 | A10156 | 408 | A00694 | A10626 | 252 |
| A00694 | A10768 | 184 | A00694 | A11023 | 369 |
| A00694 | A11025 | 251 | A00694 | A11300 | 497 |
| A00694 | A11348 | 183 | A00694 | A11431 | 585 |
| A00694 | A11714 | 488 | A00694 | A11983 | 286 |
| A00694 | A12296 | 229 | A00694 | A13002 | 274 |
| A00694 | A13494 | 202 | A00694 | A13681 | 215 |
| A00694 | A13905 | 260 | A00694 | A13989 | 484 |
| A00694 | A14172 | 229 | A00694 | A14193 | 162 |
| A00694 | A14204 | 193 | A00694 | A14216 | 580 |
| A00694 | A14246 | 366 | A00694 | A14272 | 269 |
| A00694 | A14273 | 468 | A00694 | A14381 | 165 |
| A00694 | A14393 | 354 | A00694 | A14595 | 151 |
| A00694 | A14602 | 283 | A00694 | A14634 | 151 |
| A00694 | A14669 | 251 | A00694 | A14782 | 483 |
| A00694 | A14796 | 283 | A00694 | A14937 | 180 |
| A00694 | A15029 | 326 | A00694 | A15282 | 465 |
| A00694 | A15292 | 389 | A00694 | A15553 | 160 |
| A00694 | A15554 | 202 | A00694 | A15622 | 293 |
| A00694 | A15666 | 486 | A00694 | A15684 | 296 |
| A00694 | A15869 | 184 | A00694 | A15931 | 491 |

|        |        |     |        |        |     |
|--------|--------|-----|--------|--------|-----|
| A00694 | A16613 | 303 | A00694 | A16695 | 165 |
| A00694 | A16707 | 215 | A00694 | A16723 | 235 |
| A00694 | A16754 | 435 | A00695 | A00738 | 462 |
| A00695 | A00739 | 333 | A00695 | A00770 | 486 |
| A00695 | A00962 | 475 | A00695 | A00995 | 257 |
| A00695 | A01008 | 480 | A00695 | A01018 | 404 |
| A00695 | A01115 | 270 | A00695 | A01174 | 491 |
| A00695 | A01175 | 288 | A00695 | A01222 | 384 |
| A00695 | A01225 | 207 | A00695 | A01347 | 212 |
| A00695 | A01397 | 208 | A00695 | A01409 | 356 |
| A00695 | A01508 | 305 | A00695 | A01548 | 245 |
| A00695 | A01635 | 273 | A00695 | A01865 | 241 |
| A00695 | A02214 | 255 | A00695 | A02254 | 193 |
| A00695 | A02290 | 279 | A00695 | A02366 | 340 |
| A00695 | A02523 | 208 | A00695 | A02924 | 167 |
| A00695 | A02992 | 296 | A00695 | A03003 | 212 |
| A00695 | A03004 | 377 | A00695 | A03027 | 249 |
| A00695 | A03059 | 445 | A00695 | A03095 | 445 |
| A00695 | A03167 | 366 | A00695 | A03168 | 344 |
| A00695 | A03311 | 408 | A00695 | A03429 | 425 |
| A00695 | A03430 | 340 | A00695 | A03441 | 185 |
| A00695 | A03783 | 283 | A00695 | A03861 | 188 |
| A00695 | A03863 | 154 | A00695 | A03968 | 152 |
| A00695 | A04211 | 173 | A00695 | A04660 | 434 |
| A00695 | A04779 | 302 | A00695 | A04781 | 291 |
| A00695 | A04791 | 361 | A00695 | A04834 | 377 |
| A00695 | A04883 | 195 | A00695 | A04937 | 394 |
| A00695 | A04995 | 486 | A00695 | A05007 | 461 |
| A00695 | A05098 | 226 | A00695 | A05102 | 343 |
| A00695 | A05150 | 246 | A00695 | A05230 | 236 |
| A00695 | A05310 | 201 | A00695 | A05337 | 241 |
| A00695 | A05348 | 268 | A00695 | A05393 | 152 |
| A00695 | A05416 | 441 | A00695 | A05472 | 196 |
| A00695 | A05516 | 361 | A00695 | A05548 | 279 |
| A00695 | A05573 | 195 | A00695 | A05713 | 390 |
| A00695 | A05714 | 475 | A00695 | A05751 | 238 |
| A00695 | A05754 | 346 | A00695 | A05757 | 228 |
| A00695 | A05759 | 241 | A00695 | A05774 | 291 |
| A00695 | A06063 | 386 | A00695 | A06088 | 297 |
| A00695 | A06252 | 277 | A00695 | A06358 | 440 |
| A00695 | A06402 | 294 | A00695 | A06405 | 312 |
| A00695 | A06439 | 168 | A00695 | A06633 | 430 |
| A00695 | A06635 | 157 | A00695 | A06700 | 484 |
| A00695 | A06756 | 412 | A00695 | A06934 | 465 |
| A00695 | A07080 | 196 | A00695 | A07088 | 193 |
| A00695 | A07109 | 435 | A00695 | A07122 | 472 |



|        |        |     |        |        |     |
|--------|--------|-----|--------|--------|-----|
| A00695 | A07132 | 268 | A00695 | A07256 | 302 |
| A00695 | A07264 | 230 | A00695 | A07267 | 226 |
| A00695 | A07304 | 277 | A00695 | A07322 | 391 |
| A00695 | A07413 | 312 | A00695 | A07424 | 404 |
| A00695 | A07508 | 373 | A00695 | A07530 | 271 |
| A00695 | A07554 | 404 | A00695 | A07674 | 272 |
| A00695 | A07684 | 251 | A00695 | A07688 | 340 |
| A00695 | A08155 | 294 | A00695 | A08197 | 271 |
| A00695 | A08688 | 259 | A00695 | A08751 | 302 |
| A00695 | A09381 | 263 | A00695 | A10121 | 329 |
| A00695 | A10657 | 230 | A00695 | A10686 | 281 |
| A00695 | A10880 | 441 | A00695 | A12055 | 326 |
| A00695 | A13609 | 469 | A00695 | A15874 | 152 |
| A00695 | A15905 | 317 | A00695 | A16026 | 236 |
| A00695 | A16027 | 293 | A00695 | A16028 | 263 |
| A00695 | A16529 | 249 | A00695 | A16741 | 388 |
| A00695 | A17006 | 277 | A00696 | A00757 | 430 |
| A00696 | A00786 | 183 | A00696 | A00825 | 490 |
| A00696 | A00930 | 219 | A00696 | A01008 | 294 |
| A00696 | A01018 | 488 | A00696 | A01125 | 405 |
| A00696 | A01141 | 170 | A00696 | A01209 | 472 |
| A00696 | A01222 | 416 | A00696 | A01223 | 486 |
| A00696 | A01227 | 484 | A00696 | A01230 | 363 |
| A00696 | A01233 | 238 | A00696 | A01297 | 491 |
| A00696 | A01322 | 159 | A00696 | A01344 | 486 |
| A00696 | A01404 | 152 | A00696 | A01409 | 423 |
| A00696 | A01524 | 475 | A00696 | A01559 | 413 |
| A00696 | A01572 | 306 | A00696 | A01635 | 466 |
| A00696 | A01636 | 195 | A00696 | A01643 | 491 |
| A00696 | A01660 | 286 | A00696 | A01727 | 283 |
| A00696 | A01730 | 202 | A00696 | A01741 | 228 |
| A00696 | A01743 | 323 | A00696 | A01793 | 283 |
| A00696 | A01914 | 283 | A00696 | A01972 | 266 |
| A00696 | A01995 | 157 | A00696 | A02020 | 299 |
| A00696 | A02023 | 218 | A00696 | A02074 | 160 |
| A00696 | A02114 | 380 | A00696 | A02117 | 165 |
| A00696 | A02129 | 224 | A00696 | A02168 | 165 |
| A00696 | A02254 | 477 | A00696 | A02284 | 241 |
| A00696 | A02311 | 319 | A00696 | A02316 | 491 |
| A00696 | A02321 | 205 | A00696 | A02402 | 486 |
| A00696 | A02482 | 398 | A00696 | A02521 | 490 |
| A00696 | A02529 | 475 | A00696 | A02545 | 366 |
| A00696 | A02557 | 268 | A00696 | A02673 | 246 |
| A00696 | A02698 | 427 | A00696 | A02992 | 412 |
| A00696 | A03016 | 329 | A00696 | A03050 | 204 |
| A00696 | A03168 | 196 | A00696 | A03174 | 311 |

|        |        |     |        |        |     |
|--------|--------|-----|--------|--------|-----|
| A00696 | A03175 | 456 | A00696 | A03203 | 385 |
| A00696 | A03211 | 193 | A00696 | A03226 | 484 |
| A00696 | A03234 | 490 | A00696 | A03259 | 196 |
| A00696 | A03292 | 401 | A00696 | A03436 | 485 |
| A00696 | A03442 | 254 | A00696 | A03484 | 489 |
| A00696 | A03485 | 243 | A00696 | A03513 | 491 |
| A00696 | A03694 | 452 | A00696 | A03803 | 418 |
| A00696 | A03968 | 357 | A00696 | A03990 | 352 |
| A00696 | A04006 | 163 | A00696 | A04095 | 490 |
| A00696 | A04162 | 252 | A00696 | A04220 | 212 |
| A00696 | A04227 | 396 | A00696 | A04305 | 180 |
| A00696 | A04316 | 473 | A00696 | A04366 | 441 |
| A00696 | A04556 | 276 | A00696 | A04558 | 491 |
| A00696 | A04702 | 254 | A00696 | A04746 | 408 |
| A00696 | A04778 | 258 | A00696 | A04781 | 165 |
| A00696 | A04791 | 326 | A00696 | A04883 | 490 |
| A00696 | A04927 | 488 | A00696 | A05014 | 268 |
| A00696 | A05045 | 373 | A00696 | A05064 | 180 |
| A00696 | A05098 | 489 | A00696 | A05140 | 171 |
| A00696 | A05224 | 201 | A00696 | A05288 | 207 |
| A00696 | A05330 | 468 | A00696 | A05331 | 483 |
| A00696 | A05337 | 396 | A00696 | A05358 | 490 |
| A00696 | A05398 | 236 | A00696 | A05416 | 449 |
| A00696 | A05418 | 491 | A00696 | A05433 | 374 |
| A00696 | A05451 | 477 | A00696 | A05452 | 462 |
| A00696 | A05463 | 252 | A00696 | A05472 | 172 |
| A00696 | A05538 | 358 | A00696 | A05548 | 374 |
| A00696 | A05549 | 268 | A00696 | A05550 | 491 |
| A00696 | A05573 | 433 | A00696 | A05610 | 218 |
| A00696 | A05622 | 477 | A00696 | A05883 | 486 |
| A00696 | A05912 | 436 | A00696 | A06019 | 484 |
| A00696 | A06074 | 160 | A00696 | A06090 | 224 |
| A00696 | A06245 | 341 | A00696 | A06402 | 385 |
| A00696 | A06405 | 491 | A00696 | A06439 | 488 |
| A00696 | A06629 | 252 | A00696 | A06641 | 340 |
| A00696 | A06689 | 429 | A00696 | A06733 | 165 |
| A00696 | A06734 | 467 | A00696 | A06800 | 384 |
| A00696 | A06847 | 272 | A00696 | A06860 | 491 |
| A00696 | A06970 | 276 | A00696 | A06979 | 238 |
| A00696 | A06994 | 385 | A00696 | A07002 | 218 |
| A00696 | A07007 | 461 | A00696 | A07027 | 455 |
| A00696 | A07037 | 483 | A00696 | A07059 | 475 |
| A00696 | A07078 | 469 | A00696 | A07088 | 463 |
| A00696 | A07205 | 193 | A00696 | A07239 | 185 |
| A00696 | A07264 | 321 | A00696 | A07281 | 212 |
| A00696 | A07336 | 168 | A00696 | A07366 | 469 |

|        |        |     |        |        |     |
|--------|--------|-----|--------|--------|-----|
| A00696 | A07408 | 313 | A00696 | A07477 | 347 |
| A00696 | A07501 | 216 | A00696 | A07503 | 388 |
| A00696 | A07520 | 491 | A00696 | A07553 | 216 |
| A00696 | A07558 | 247 | A00696 | A07590 | 393 |
| A00696 | A07619 | 218 | A00696 | A07674 | 423 |
| A00696 | A07690 | 345 | A00696 | A07711 | 296 |
| A00696 | A07717 | 268 | A00696 | A07718 | 154 |
| A00696 | A07736 | 450 | A00696 | A07757 | 486 |
| A00696 | A07763 | 396 | A00696 | A07771 | 157 |
| A00696 | A07849 | 268 | A00696 | A07851 | 252 |
| A00696 | A07973 | 452 | A00696 | A08250 | 168 |
| A00696 | A08385 | 328 | A00696 | A08667 | 361 |
| A00696 | A09078 | 165 | A00696 | A09235 | 159 |
| A00696 | A09401 | 268 | A00696 | A09880 | 414 |
| A00696 | A09917 | 212 | A00696 | A10072 | 485 |
| A00696 | A10103 | 256 | A00696 | A10420 | 229 |
| A00696 | A10456 | 312 | A00696 | A10537 | 316 |
| A00696 | A10635 | 491 | A00696 | A10675 | 412 |
| A00696 | A10690 | 430 | A00696 | A10694 | 286 |
| A00696 | A10884 | 224 | A00696 | A10926 | 224 |
| A00696 | A11124 | 428 | A00696 | A13980 | 346 |
| A00696 | A14032 | 589 | A00696 | A14133 | 154 |
| A00696 | A14245 | 177 | A00696 | A14306 | 427 |
| A00696 | A14337 | 205 | A00696 | A14856 | 223 |
| A00696 | A14943 | 263 | A00696 | A15293 | 160 |
| A00696 | A15357 | 213 | A00696 | A15390 | 307 |
| A00696 | A15874 | 205 | A00696 | A15970 | 361 |
| A00696 | A16741 | 330 | A00696 | A16767 | 156 |
| A00696 | A17078 | 174 | A00697 | A00698 | 408 |
| A00697 | A00741 | 491 | A00697 | A00758 | 491 |
| A00697 | A00766 | 160 | A00697 | A00783 | 461 |
| A00697 | A00787 | 490 | A00697 | A00808 | 443 |
| A00697 | A00809 | 730 | A00697 | A00811 | 486 |
| A00697 | A00813 | 546 | A00697 | A00833 | 262 |
| A00697 | A00839 | 539 | A00697 | A00864 | 450 |
| A00697 | A00868 | 466 | A00697 | A00878 | 477 |
| A00697 | A00911 | 428 | A00697 | A00922 | 249 |
| A00697 | A00926 | 221 | A00697 | A00935 | 491 |
| A00697 | A00953 | 491 | A00697 | A00985 | 224 |
| A00697 | A00987 | 279 | A00697 | A00998 | 167 |
| A00697 | A01012 | 420 | A00697 | A01017 | 160 |
| A00697 | A01020 | 258 | A00697 | A01022 | 212 |
| A00697 | A01024 | 171 | A00697 | A01027 | 485 |
| A00697 | A01034 | 180 | A00697 | A01041 | 489 |
| A00697 | A01042 | 491 | A00697 | A01054 | 243 |
| A00697 | A01066 | 357 | A00697 | A01082 | 457 |

|        |        |     |        |        |     |
|--------|--------|-----|--------|--------|-----|
| A00697 | A01083 | 405 | A00697 | A01086 | 483 |
| A00697 | A01150 | 477 | A00697 | A01155 | 268 |
| A00697 | A01161 | 570 | A00697 | A01169 | 348 |
| A00697 | A01192 | 725 | A00697 | A01210 | 593 |
| A00697 | A01212 | 469 | A00697 | A01218 | 196 |
| A00697 | A01232 | 374 | A00697 | A01234 | 460 |
| A00697 | A01247 | 491 | A00697 | A01261 | 395 |
| A00697 | A01263 | 491 | A00697 | A01264 | 191 |
| A00697 | A01283 | 360 | A00697 | A01291 | 514 |
| A00697 | A01309 | 748 | A00697 | A01310 | 63  |
| A00697 | A01335 | 174 | A00697 | A01336 | 488 |
| A00697 | A01338 | 485 | A00697 | A01358 | 400 |
| A00697 | A01386 | 246 | A00697 | A01392 | 402 |
| A00697 | A01411 | 307 | A00697 | A01413 | 491 |
| A00697 | A01428 | 63  | A00697 | A01433 | 477 |
| A00697 | A01435 | 593 | A00697 | A01447 | 491 |
| A00697 | A01520 | 63  | A00697 | A01539 | 411 |
| A00697 | A01540 | 491 | A00697 | A01543 | 423 |
| A00697 | A01560 | 439 | A00697 | A01568 | 162 |
| A00697 | A01573 | 179 | A00697 | A01593 | 247 |
| A00697 | A01596 | 491 | A00697 | A01601 | 205 |
| A00697 | A01623 | 177 | A00697 | A01632 | 162 |
| A00697 | A01692 | 182 | A00697 | A01707 | 208 |
| A00697 | A01792 | 329 | A00697 | A01827 | 488 |
| A00697 | A01850 | 475 | A00697 | A02020 | 313 |
| A00697 | A02039 | 329 | A00697 | A02040 | 357 |
| A00697 | A02084 | 339 | A00697 | A02350 | 90  |
| A00697 | A02419 | 235 | A00697 | A02511 | 395 |
| A00697 | A02607 | 491 | A00697 | A02610 | 174 |
| A00697 | A02611 | 313 | A00697 | A02661 | 273 |
| A00697 | A02740 | 196 | A00697 | A02803 | 452 |
| A00697 | A02854 | 68  | A00697 | A02867 | 159 |
| A00697 | A02887 | 63  | A00697 | A02931 | 63  |
| A00697 | A02978 | 447 | A00697 | A02994 | 374 |
| A00697 | A03195 | 480 | A00697 | A03211 | 461 |
| A00697 | A03271 | 395 | A00697 | A03320 | 118 |
| A00697 | A03335 | 221 | A00697 | A03494 | 481 |
| A00697 | A03496 | 493 | A00697 | A03516 | 154 |
| A00697 | A03567 | 439 | A00697 | A03591 | 352 |
| A00697 | A03625 | 63  | A00697 | A03651 | 454 |
| A00697 | A03676 | 374 | A00697 | A03740 | 491 |
| A00697 | A03752 | 469 | A00697 | A03790 | 193 |
| A00697 | A03809 | 571 | A00697 | A03859 | 479 |
| A00697 | A03959 | 386 | A00697 | A04012 | 490 |
| A00697 | A04017 | 396 | A00697 | A04449 | 188 |
| A00697 | A04493 | 489 | A00697 | A04540 | 310 |

|        |        |     |        |        |     |
|--------|--------|-----|--------|--------|-----|
| A00697 | A04838 | 276 | A00697 | A04867 | 385 |
| A00697 | A04944 | 430 | A00697 | A04947 | 183 |
| A00697 | A04964 | 443 | A00697 | A05029 | 252 |
| A00697 | A05086 | 408 | A00697 | A05417 | 491 |
| A00697 | A05501 | 374 | A00697 | A05617 | 550 |
| A00697 | A05904 | 390 | A00697 | A05910 | 353 |
| A00697 | A05946 | 390 | A00697 | A06028 | 232 |
| A00697 | A06155 | 232 | A00697 | A06158 | 480 |
| A00697 | A06224 | 346 | A00697 | A06306 | 173 |
| A00697 | A06466 | 475 | A00697 | A06530 | 251 |
| A00697 | A06546 | 185 | A00697 | A06581 | 172 |
| A00697 | A06686 | 388 | A00697 | A06754 | 232 |
| A00697 | A06783 | 313 | A00697 | A06814 | 208 |
| A00697 | A06861 | 454 | A00697 | A06893 | 159 |
| A00697 | A07086 | 156 | A00697 | A07135 | 313 |
| A00697 | A07146 | 65  | A00697 | A07158 | 63  |
| A00697 | A07160 | 308 | A00697 | A07208 | 63  |
| A00697 | A07310 | 307 | A00697 | A07311 | 524 |
| A00697 | A07360 | 177 | A00697 | A07394 | 491 |
| A00697 | A07398 | 151 | A00697 | A07479 | 156 |
| A00697 | A07527 | 346 | A00697 | A07686 | 267 |
| A00697 | A07767 | 476 | A00697 | A07773 | 446 |
| A00697 | A08011 | 316 | A00697 | A08315 | 256 |
| A00697 | A08375 | 232 | A00697 | A08438 | 313 |
| A00697 | A08519 | 463 | A00697 | A08543 | 490 |
| A00697 | A08550 | 240 | A00697 | A08556 | 486 |
| A00697 | A08558 | 409 | A00697 | A08608 | 466 |
| A00697 | A08773 | 439 | A00697 | A08967 | 291 |
| A00697 | A08968 | 174 | A00697 | A08975 | 217 |
| A00697 | A09054 | 490 | A00697 | A09332 | 160 |
| A00697 | A09339 | 286 | A00697 | A09449 | 219 |
| A00697 | A09502 | 241 | A00697 | A09549 | 447 |
| A00697 | A09581 | 491 | A00697 | A09586 | 183 |
| A00697 | A09595 | 232 | A00697 | A09654 | 208 |
| A00697 | A09706 | 469 | A00697 | A09709 | 246 |
| A00697 | A09902 | 207 | A00697 | A10248 | 232 |
| A00697 | A10535 | 283 | A00697 | A10797 | 63  |
| A00697 | A10798 | 210 | A00697 | A10853 | 191 |
| A00697 | A10935 | 112 | A00697 | A11041 | 329 |
| A00697 | A11296 | 63  | A00697 | A11307 | 491 |
| A00697 | A11322 | 267 | A00697 | A11372 | 232 |
| A00697 | A11433 | 307 | A00697 | A11526 | 439 |
| A00697 | A11597 | 184 | A00697 | A11662 | 481 |
| A00697 | A11820 | 252 | A00697 | A11833 | 486 |
| A00697 | A11835 | 364 | A00697 | A11910 | 232 |
| A00697 | A12400 | 196 | A00697 | A12625 | 191 |

|        |        |     |        |        |     |
|--------|--------|-----|--------|--------|-----|
| A00697 | A12692 | 414 | A00697 | A12722 | 429 |
| A00697 | A12824 | 452 | A00697 | A12953 | 196 |
| A00697 | A12968 | 177 | A00697 | A12988 | 293 |
| A00697 | A13037 | 232 | A00697 | A13116 | 428 |
| A00697 | A13146 | 208 | A00697 | A13232 | 427 |
| A00697 | A13308 | 240 | A00697 | A13340 | 391 |
| A00697 | A13345 | 329 | A00697 | A13398 | 302 |
| A00697 | A13446 | 196 | A00697 | A13555 | 163 |
| A00697 | A13711 | 232 | A00697 | A13754 | 232 |
| A00697 | A13809 | 486 | A00697 | A13840 | 232 |
| A00697 | A14073 | 560 | A00697 | A14076 | 391 |
| A00697 | A14080 | 167 | A00697 | A14089 | 196 |
| A00697 | A14192 | 570 | A00697 | A14193 | 460 |
| A00697 | A14215 | 63  | A00697 | A14263 | 419 |
| A00697 | A14400 | 159 | A00697 | A14507 | 191 |
| A00697 | A14566 | 490 | A00697 | A14642 | 408 |
| A00697 | A14655 | 200 | A00697 | A14845 | 401 |
| A00697 | A14914 | 174 | A00697 | A14958 | 232 |
| A00697 | A15252 | 204 | A00697 | A15498 | 490 |
| A00697 | A15653 | 609 | A00697 | A15660 | 226 |
| A00697 | A15661 | 224 | A00697 | A15666 | 491 |
| A00697 | A15765 | 490 | A00697 | A15771 | 205 |
| A00697 | A15932 | 208 | A00697 | A16157 | 491 |
| A00697 | A16272 | 311 | A00697 | A16403 | 333 |
| A00697 | A16418 | 162 | A00697 | A16430 | 491 |
| A00697 | A16437 | 240 | A00697 | A16676 | 480 |
| A00697 | A16683 | 278 | A00697 | A16709 | 301 |
| A00698 | A00741 | 436 | A00698 | A00783 | 271 |
| A00698 | A00809 | 160 | A00698 | A00833 | 160 |
| A00698 | A00839 | 375 | A00698 | A00876 | 404 |
| A00698 | A00922 | 535 | A00698 | A00932 | 544 |
| A00698 | A00933 | 240 | A00698 | A00970 | 234 |
| A00698 | A00980 | 198 | A00698 | A01001 | 262 |
| A00698 | A01027 | 446 | A00698 | A01042 | 489 |
| A00698 | A01054 | 407 | A00698 | A01055 | 196 |
| A00698 | A01150 | 246 | A00698 | A01161 | 397 |
| A00698 | A01261 | 165 | A00698 | A01413 | 291 |
| A00698 | A01431 | 479 | A00698 | A01539 | 411 |
| A00698 | A01540 | 445 | A00698 | A01560 | 489 |
| A00698 | A01579 | 152 | A00698 | A01684 | 171 |
| A00698 | A01822 | 539 | A00698 | A01850 | 256 |
| A00698 | A02872 | 419 | A00698 | A02877 | 202 |
| A00698 | A03446 | 201 | A00698 | A03516 | 373 |
| A00698 | A03677 | 160 | A00698 | A03740 | 489 |
| A00698 | A03752 | 491 | A00698 | A05515 | 210 |
| A00698 | A05772 | 246 | A00698 | A06000 | 382 |

|        |        |     |        |        |     |
|--------|--------|-----|--------|--------|-----|
| A00698 | A06466 | 491 | A00698 | A06950 | 286 |
| A00698 | A07311 | 491 | A00698 | A07527 | 283 |
| A00698 | A07726 | 173 | A00698 | A07798 | 491 |
| A00698 | A08315 | 165 | A00698 | A08533 | 160 |
| A00698 | A08748 | 329 | A00698 | A08835 | 433 |
| A00698 | A09297 | 496 | A00698 | A09577 | 306 |
| A00698 | A09902 | 539 | A00698 | A10506 | 291 |
| A00698 | A10728 | 454 | A00698 | A10853 | 217 |
| A00698 | A11302 | 321 | A00698 | A11322 | 429 |
| A00698 | A11374 | 341 | A00698 | A12043 | 160 |
| A00698 | A12084 | 288 | A00698 | A12227 | 373 |
| A00698 | A12328 | 491 | A00698 | A12473 | 241 |
| A00698 | A12990 | 428 | A00698 | A13149 | 462 |
| A00698 | A13335 | 182 | A00698 | A13340 | 545 |
| A00698 | A13812 | 180 | A00698 | A14073 | 486 |
| A00698 | A14188 | 408 | A00698 | A14571 | 293 |
| A00698 | A14738 | 160 | A00698 | A15106 | 277 |
| A00698 | A15126 | 243 | A00698 | A15244 | 543 |
| A00698 | A15246 | 208 | A00698 | A15335 | 154 |
| A00698 | A15684 | 281 | A00698 | A15932 | 399 |
| A00698 | A15933 | 342 | A00698 | A16272 | 524 |
| A00698 | A16318 | 453 | A00698 | A16437 | 244 |
| A00698 | A16446 | 160 | A00698 | A16585 | 160 |
| A00698 | A16618 | 294 | A00699 | A03752 | 235 |
| A00699 | A06466 | 212 | A00699 | A07798 | 296 |
| A00700 | A00701 | 486 | A00700 | A00705 | 468 |
| A00700 | A00711 | 154 | A00700 | A00713 | 484 |
| A00700 | A00763 | 432 | A00700 | A00782 | 430 |
| A00700 | A00787 | 483 | A00700 | A00806 | 484 |
| A00700 | A00811 | 268 | A00700 | A00831 | 351 |
| A00700 | A00839 | 491 | A00700 | A00843 | 450 |
| A00700 | A00848 | 396 | A00700 | A00861 | 229 |
| A00700 | A00878 | 489 | A00700 | A00902 | 176 |
| A00700 | A00906 | 232 | A00700 | A00922 | 218 |
| A00700 | A00923 | 348 | A00700 | A00945 | 157 |
| A00700 | A00965 | 302 | A00700 | A00966 | 424 |
| A00700 | A00970 | 413 | A00700 | A00972 | 165 |
| A00700 | A01000 | 399 | A00700 | A01010 | 98  |
| A00700 | A01012 | 475 | A00700 | A01017 | 235 |
| A00700 | A01025 | 400 | A00700 | A01042 | 434 |
| A00700 | A01056 | 481 | A00700 | A01072 | 486 |
| A00700 | A01090 | 491 | A00700 | A01092 | 177 |
| A00700 | A01098 | 424 | A00700 | A01112 | 491 |
| A00700 | A01115 | 424 | A00700 | A01121 | 283 |
| A00700 | A01127 | 491 | A00700 | A01140 | 491 |
| A00700 | A01150 | 418 | A00700 | A01154 | 283 |

|        |        |     |        |        |     |
|--------|--------|-----|--------|--------|-----|
| A00700 | A01161 | 167 | A00700 | A01166 | 491 |
| A00700 | A01196 | 475 | A00700 | A01206 | 491 |
| A00700 | A01212 | 484 | A00700 | A01216 | 322 |
| A00700 | A01221 | 269 | A00700 | A01234 | 491 |
| A00700 | A01238 | 281 | A00700 | A01243 | 218 |
| A00700 | A01249 | 446 | A00700 | A01291 | 491 |
| A00700 | A01306 | 491 | A00700 | A01335 | 491 |
| A00700 | A01360 | 219 | A00700 | A01365 | 371 |
| A00700 | A01384 | 424 | A00700 | A01393 | 154 |
| A00700 | A01411 | 208 | A00700 | A01425 | 489 |
| A00700 | A01431 | 461 | A00700 | A01435 | 171 |
| A00700 | A01457 | 441 | A00700 | A01461 | 378 |
| A00700 | A01464 | 338 | A00700 | A01468 | 491 |
| A00700 | A01470 | 491 | A00700 | A01492 | 489 |
| A00700 | A01496 | 491 | A00700 | A01538 | 367 |
| A00700 | A01539 | 385 | A00700 | A01540 | 380 |
| A00700 | A01569 | 485 | A00700 | A01579 | 491 |
| A00700 | A01586 | 490 | A00700 | A01597 | 480 |
| A00700 | A01598 | 396 | A00700 | A01601 | 945 |
| A00700 | A01605 | 936 | A00700 | A01614 | 252 |
| A00700 | A01649 | 491 | A00700 | A01787 | 396 |
| A00700 | A01822 | 230 | A00700 | A02350 | 491 |
| A00700 | A02601 | 321 | A00700 | A03272 | 219 |
| A00700 | A03304 | 491 | A00700 | A03438 | 330 |
| A00700 | A03461 | 446 | A00700 | A03567 | 491 |
| A00700 | A03740 | 396 | A00700 | A03752 | 221 |
| A00700 | A03770 | 184 | A00700 | A03809 | 380 |
| A00700 | A03963 | 256 | A00700 | A03981 | 491 |
| A00700 | A04099 | 217 | A00700 | A04230 | 408 |
| A00700 | A04846 | 460 | A00700 | A05076 | 299 |
| A00700 | A05149 | 160 | A00700 | A05443 | 469 |
| A00700 | A05501 | 491 | A00700 | A05654 | 366 |
| A00700 | A05660 | 208 | A00700 | A06279 | 456 |
| A00700 | A06351 | 291 | A00700 | A06534 | 457 |
| A00700 | A06814 | 473 | A00700 | A06825 | 93  |
| A00700 | A06897 | 385 | A00700 | A06965 | 486 |
| A00700 | A06973 | 467 | A00700 | A07047 | 256 |
| A00700 | A07243 | 82  | A00700 | A07306 | 259 |
| A00700 | A07307 | 118 | A00700 | A07311 | 167 |
| A00700 | A07323 | 491 | A00700 | A07349 | 238 |
| A00700 | A07398 | 481 | A00700 | A07451 | 475 |
| A00700 | A07581 | 249 | A00700 | A07726 | 163 |
| A00700 | A08131 | 452 | A00700 | A08357 | 490 |
| A00700 | A08358 | 345 | A00700 | A08359 | 491 |
| A00700 | A08408 | 469 | A00700 | A08476 | 378 |
| A00700 | A08682 | 65  | A00700 | A08869 | 63  |



|        |        |     |        |        |     |
|--------|--------|-----|--------|--------|-----|
| A00700 | A08931 | 160 | A00700 | A09285 | 196 |
| A00700 | A09308 | 212 | A00700 | A09313 | 170 |
| A00700 | A09539 | 95  | A00700 | A09852 | 172 |
| A00700 | A10599 | 80  | A00700 | A10814 | 156 |
| A00700 | A10949 | 228 | A00700 | A11263 | 429 |
| A00700 | A11392 | 96  | A00700 | A11420 | 429 |
| A00700 | A11670 | 157 | A00700 | A11728 | 208 |
| A00700 | A11924 | 208 | A00700 | A12068 | 201 |
| A00700 | A12109 | 278 | A00700 | A12821 | 163 |
| A00700 | A13002 | 307 | A00700 | A13052 | 82  |
| A00700 | A13126 | 63  | A00700 | A13340 | 446 |
| A00700 | A13752 | 303 | A00700 | A13830 | 461 |
| A00700 | A13989 | 491 | A00700 | A13992 | 200 |
| A00700 | A14025 | 236 | A00700 | A14090 | 450 |
| A00700 | A14172 | 480 | A00700 | A14216 | 480 |
| A00700 | A14247 | 269 | A00700 | A14508 | 151 |
| A00700 | A14530 | 470 | A00700 | A14642 | 240 |
| A00700 | A14782 | 156 | A00700 | A14908 | 167 |
| A00700 | A15500 | 443 | A00700 | A15659 | 193 |
| A00700 | A15660 | 491 | A00700 | A15684 | 491 |
| A00700 | A15988 | 391 | A00700 | A16060 | 227 |
| A00700 | A16118 | 445 | A00700 | A16272 | 383 |
| A00700 | A16318 | 212 | A00700 | A16686 | 401 |
| A00700 | A17095 | 208 | A00701 | A00702 | 255 |
| A00701 | A00713 | 489 | A00701 | A00763 | 491 |
| A00701 | A00783 | 283 | A00701 | A00787 | 491 |
| A00701 | A00839 | 483 | A00701 | A00861 | 207 |
| A00701 | A00875 | 162 | A00701 | A00878 | 486 |
| A00701 | A00923 | 490 | A00701 | A00966 | 379 |
| A00701 | A01000 | 485 | A00701 | A01012 | 190 |
| A00701 | A01025 | 485 | A00701 | A01047 | 401 |
| A00701 | A01056 | 456 | A00701 | A01068 | 157 |
| A00701 | A01072 | 213 | A00701 | A01085 | 406 |
| A00701 | A01101 | 391 | A00701 | A01112 | 489 |
| A00701 | A01127 | 491 | A00701 | A01140 | 484 |
| A00701 | A01166 | 265 | A00701 | A01168 | 160 |
| A00701 | A01184 | 463 | A00701 | A01192 | 241 |
| A00701 | A01206 | 468 | A00701 | A01238 | 177 |
| A00701 | A01249 | 491 | A00701 | A01282 | 157 |
| A00701 | A01291 | 491 | A00701 | A01306 | 481 |
| A00701 | A01335 | 324 | A00701 | A01392 | 159 |
| A00701 | A01425 | 68  | A00701 | A01431 | 249 |
| A00701 | A01433 | 276 | A00701 | A01437 | 396 |
| A00701 | A01457 | 470 | A00701 | A01468 | 490 |
| A00701 | A01496 | 489 | A00701 | A01538 | 65  |
| A00701 | A01546 | 105 | A00701 | A01569 | 229 |

|        |        |     |        |        |     |
|--------|--------|-----|--------|--------|-----|
| A00701 | A01579 | 486 | A00701 | A01586 | 306 |
| A00701 | A01601 | 307 | A00701 | A01617 | 182 |
| A00701 | A01649 | 337 | A00701 | A01660 | 162 |
| A00701 | A01718 | 475 | A00701 | A01822 | 188 |
| A00701 | A02165 | 196 | A00701 | A02605 | 152 |
| A00701 | A02671 | 490 | A00701 | A03048 | 474 |
| A00701 | A03069 | 297 | A00701 | A03085 | 293 |
| A00701 | A03246 | 224 | A00701 | A03437 | 286 |
| A00701 | A03438 | 63  | A00701 | A03567 | 491 |
| A00701 | A03645 | 379 | A00701 | A03652 | 191 |
| A00701 | A03705 | 263 | A00701 | A03754 | 205 |
| A00701 | A03981 | 491 | A00701 | A04818 | 151 |
| A00701 | A04991 | 152 | A00701 | A05411 | 449 |
| A00701 | A05443 | 468 | A00701 | A05501 | 461 |
| A00701 | A06279 | 401 | A00701 | A06351 | 412 |
| A00701 | A06814 | 263 | A00701 | A06965 | 491 |
| A00701 | A06973 | 361 | A00701 | A07243 | 127 |
| A00701 | A07307 | 306 | A00701 | A07323 | 314 |
| A00701 | A07449 | 305 | A00701 | A07451 | 491 |
| A00701 | A07506 | 146 | A00701 | A08011 | 490 |
| A00701 | A08055 | 355 | A00701 | A08357 | 350 |
| A00701 | A08358 | 278 | A00701 | A08398 | 367 |
| A00701 | A08452 | 477 | A00701 | A08550 | 185 |
| A00701 | A08559 | 302 | A00701 | A08748 | 172 |
| A00701 | A08773 | 374 | A00701 | A09322 | 406 |
| A00701 | A09444 | 346 | A00701 | A09674 | 323 |
| A00701 | A09788 | 255 | A00701 | A10881 | 293 |
| A00701 | A10949 | 160 | A00701 | A11263 | 218 |
| A00701 | A11331 | 243 | A00701 | A11344 | 193 |
| A00701 | A11438 | 480 | A00701 | A11480 | 202 |
| A00701 | A11496 | 229 | A00701 | A11588 | 201 |
| A00701 | A11981 | 269 | A00701 | A12011 | 188 |
| A00701 | A12687 | 322 | A00701 | A13340 | 198 |
| A00701 | A13989 | 491 | A00701 | A13992 | 469 |
| A00701 | A14216 | 480 | A00701 | A14505 | 276 |
| A00701 | A15219 | 200 | A00701 | A15225 | 151 |
| A00701 | A15660 | 312 | A00701 | A15743 | 168 |
| A00701 | A15932 | 210 | A00701 | A15988 | 490 |
| A00701 | A16053 | 305 | A00701 | A16118 | 480 |
| A00701 | A16127 | 163 | A00701 | A16679 | 226 |
| A00702 | A01291 | 185 | A00702 | A01597 | 299 |
| A00702 | A06279 | 291 | A00702 | A13741 | 332 |
| A00703 | A00831 | 227 | A00703 | A00848 | 218 |
| A00703 | A00883 | 488 | A00703 | A00902 | 249 |
| A00703 | A00913 | 271 | A00703 | A00927 | 235 |
| A00703 | A00942 | 262 | A00703 | A01024 | 241 |

|        |        |     |        |        |     |
|--------|--------|-----|--------|--------|-----|
| A00703 | A01068 | 260 | A00703 | A01098 | 252 |
| A00703 | A01172 | 469 | A00703 | A01234 | 185 |
| A00703 | A01243 | 395 | A00703 | A01374 | 265 |
| A00703 | A01414 | 245 | A00703 | A01470 | 348 |
| A00703 | A01548 | 180 | A00703 | A01633 | 334 |
| A00703 | A03567 | 285 | A00703 | A03570 | 291 |
| A00703 | A05144 | 179 | A00703 | A05797 | 201 |
| A00703 | A05998 | 243 | A00703 | A06351 | 191 |
| A00703 | A06564 | 257 | A00703 | A06642 | 162 |
| A00703 | A07353 | 323 | A00703 | A08022 | 491 |
| A00703 | A08522 | 406 | A00703 | A08834 | 252 |
| A00703 | A08860 | 243 | A00703 | A08928 | 252 |
| A00703 | A09644 | 260 | A00703 | A09708 | 434 |
| A00703 | A09727 | 491 | A00703 | A10449 | 263 |
| A00703 | A10934 | 272 | A00703 | A11290 | 168 |
| A00703 | A11312 | 266 | A00703 | A11316 | 470 |
| A00703 | A11368 | 308 | A00703 | A11386 | 491 |
| A00703 | A11476 | 454 | A00703 | A11670 | 335 |
| A00703 | A11857 | 185 | A00703 | A11866 | 258 |
| A00703 | A12175 | 408 | A00703 | A12256 | 369 |
| A00703 | A14009 | 477 | A00703 | A14150 | 422 |
| A00703 | A14200 | 491 | A00703 | A14283 | 385 |
| A00703 | A14596 | 491 | A00703 | A14659 | 215 |
| A00703 | A15211 | 324 | A00703 | A15353 | 395 |
| A00703 | A15359 | 279 | A00703 | A15660 | 491 |
| A00703 | A15684 | 483 | A00703 | A15708 | 213 |
| A00703 | A15720 | 170 | A00703 | A15721 | 185 |
| A00703 | A15931 | 182 | A00703 | A16092 | 218 |
| A00703 | A16093 | 402 | A00703 | A16096 | 299 |
| A00703 | A16145 | 340 | A00703 | A16218 | 389 |
| A00703 | A16463 | 263 | A00703 | A17123 | 243 |
| A00703 | A17127 | 174 | A00703 | A17140 | 427 |
| A00704 | A00722 | 324 | A00704 | A00837 | 324 |
| A00704 | A00905 | 260 | A00704 | A01308 | 324 |
| A00704 | A01489 | 184 | A00704 | A01552 | 294 |
| A00704 | A01587 | 391 | A00704 | A01591 | 270 |
| A00704 | A01616 | 447 | A00704 | A01660 | 491 |
| A00704 | A02350 | 228 | A00704 | A03584 | 156 |
| A00704 | A03637 | 273 | A00704 | A03728 | 324 |
| A00704 | A04175 | 296 | A00704 | A06651 | 256 |
| A00704 | A09021 | 258 | A00704 | A09182 | 469 |
| A00704 | A09448 | 180 | A00704 | A09511 | 236 |
| A00704 | A09551 | 310 | A00704 | A09646 | 246 |
| A00704 | A09860 | 356 | A00704 | A10205 | 458 |
| A00704 | A10911 | 238 | A00704 | A11258 | 291 |
| A00704 | A11917 | 324 | A00704 | A12665 | 324 |

|        |        |     |        |        |     |
|--------|--------|-----|--------|--------|-----|
| A00704 | A12952 | 626 | A00704 | A13313 | 324 |
| A00704 | A13708 | 324 | A00704 | A13781 | 324 |
| A00704 | A13906 | 252 | A00704 | A13928 | 358 |
| A00704 | A14009 | 488 | A00704 | A14221 | 479 |
| A00704 | A14279 | 446 | A00704 | A15105 | 324 |
| A00704 | A15366 | 324 | A00704 | A15726 | 157 |
| A00704 | A15773 | 324 | A00704 | A15851 | 267 |
| A00704 | A15854 | 324 | A00704 | A17063 | 486 |
| A00705 | A00709 | 188 | A00705 | A00711 | 551 |
| A00705 | A00782 | 480 | A00705 | A00827 | 191 |
| A00705 | A00831 | 290 | A00705 | A00839 | 560 |
| A00705 | A00848 | 479 | A00705 | A00883 | 240 |
| A00705 | A00916 | 398 | A00705 | A00923 | 481 |
| A00705 | A00936 | 219 | A00705 | A00953 | 188 |
| A00705 | A00955 | 176 | A00705 | A00972 | 188 |
| A00705 | A01000 | 332 | A00705 | A01017 | 560 |
| A00705 | A01069 | 398 | A00705 | A01090 | 490 |
| A00705 | A01100 | 470 | A00705 | A01101 | 557 |
| A00705 | A01112 | 474 | A00705 | A01150 | 378 |
| A00705 | A01166 | 484 | A00705 | A01186 | 438 |
| A00705 | A01194 | 383 | A00705 | A01196 | 466 |
| A00705 | A01206 | 491 | A00705 | A01217 | 515 |
| A00705 | A01219 | 170 | A00705 | A01220 | 188 |
| A00705 | A01221 | 296 | A00705 | A01234 | 491 |
| A00705 | A01243 | 188 | A00705 | A01244 | 226 |
| A00705 | A01249 | 281 | A00705 | A01250 | 469 |
| A00705 | A01263 | 173 | A00705 | A01270 | 267 |
| A00705 | A01291 | 490 | A00705 | A01306 | 491 |
| A00705 | A01335 | 491 | A00705 | A01337 | 188 |
| A00705 | A01338 | 288 | A00705 | A01362 | 369 |
| A00705 | A01384 | 412 | A00705 | A01406 | 188 |
| A00705 | A01408 | 191 | A00705 | A01414 | 411 |
| A00705 | A01439 | 234 | A00705 | A01451 | 320 |
| A00705 | A01457 | 288 | A00705 | A01458 | 216 |
| A00705 | A01468 | 368 | A00705 | A01470 | 491 |
| A00705 | A01492 | 473 | A00705 | A01503 | 434 |
| A00705 | A01555 | 179 | A00705 | A01569 | 271 |
| A00705 | A01574 | 385 | A00705 | A01579 | 491 |
| A00705 | A01598 | 434 | A00705 | A01601 | 491 |
| A00705 | A01612 | 219 | A00705 | A01614 | 154 |
| A00705 | A01649 | 491 | A00705 | A01684 | 162 |
| A00705 | A01787 | 241 | A00705 | A01976 | 188 |
| A00705 | A01988 | 316 | A00705 | A02207 | 268 |
| A00705 | A02978 | 213 | A00705 | A03567 | 477 |
| A00705 | A03859 | 402 | A00705 | A03901 | 234 |
| A00705 | A04668 | 479 | A00705 | A05501 | 491 |

|        |        |     |        |        |     |
|--------|--------|-----|--------|--------|-----|
| A00705 | A05702 | 188 | A00705 | A06343 | 243 |
| A00705 | A06564 | 427 | A00705 | A06785 | 539 |
| A00705 | A06965 | 427 | A00705 | A06973 | 454 |
| A00705 | A07047 | 477 | A00705 | A07203 | 232 |
| A00705 | A07323 | 152 | A00705 | A07347 | 176 |
| A00705 | A07370 | 173 | A00705 | A07398 | 406 |
| A00705 | A07581 | 462 | A00705 | A07965 | 540 |
| A00705 | A07976 | 255 | A00705 | A08131 | 489 |
| A00705 | A08357 | 472 | A00705 | A08358 | 207 |
| A00705 | A08359 | 491 | A00705 | A08408 | 432 |
| A00705 | A08457 | 411 | A00705 | A08462 | 201 |
| A00705 | A08466 | 177 | A00705 | A09322 | 208 |
| A00705 | A09579 | 212 | A00705 | A09593 | 286 |
| A00705 | A09665 | 218 | A00705 | A09862 | 180 |
| A00705 | A11480 | 416 | A00705 | A11550 | 202 |
| A00705 | A11562 | 167 | A00705 | A11704 | 162 |
| A00705 | A11728 | 445 | A00705 | A11729 | 396 |
| A00705 | A12080 | 205 | A00705 | A12821 | 358 |
| A00705 | A13058 | 224 | A00705 | A13330 | 399 |
| A00705 | A13473 | 257 | A00705 | A13710 | 337 |
| A00705 | A13830 | 388 | A00705 | A13989 | 491 |
| A00705 | A14176 | 172 | A00705 | A14188 | 409 |
| A00705 | A14272 | 294 | A00705 | A14508 | 489 |
| A00705 | A14566 | 380 | A00705 | A14594 | 473 |
| A00705 | A14701 | 475 | A00705 | A14813 | 188 |
| A00705 | A14923 | 234 | A00705 | A15218 | 151 |
| A00705 | A15236 | 243 | A00705 | A15499 | 361 |
| A00705 | A15500 | 488 | A00705 | A15657 | 432 |
| A00705 | A15660 | 486 | A00705 | A15751 | 286 |
| A00705 | A15931 | 176 | A00705 | A16053 | 268 |
| A00705 | A16680 | 188 | A00705 | A16686 | 285 |
| A00705 | A16705 | 218 | A00705 | A16927 | 177 |
| A00706 | A00787 | 151 | A00706 | A00809 | 201 |
| A00706 | A00839 | 281 | A00706 | A00970 | 485 |
| A00706 | A00973 | 334 | A00706 | A00980 | 491 |
| A00706 | A01012 | 430 | A00706 | A01034 | 193 |
| A00706 | A01038 | 352 | A00706 | A01069 | 345 |
| A00706 | A01082 | 290 | A00706 | A01113 | 347 |
| A00706 | A01119 | 366 | A00706 | A01192 | 631 |
| A00706 | A01218 | 180 | A00706 | A01231 | 249 |
| A00706 | A01247 | 472 | A00706 | A01263 | 485 |
| A00706 | A01311 | 185 | A00706 | A01433 | 314 |
| A00706 | A01496 | 188 | A00706 | A01508 | 489 |
| A00706 | A01569 | 491 | A00706 | A01648 | 334 |
| A00706 | A02877 | 432 | A00706 | A03560 | 638 |
| A00706 | A05029 | 415 | A00706 | A05712 | 202 |

|        |        |     |        |        |     |
|--------|--------|-----|--------|--------|-----|
| A00706 | A06466 | 451 | A00706 | A06814 | 463 |
| A00706 | A07247 | 335 | A00706 | A07311 | 435 |
| A00706 | A07378 | 360 | A00706 | A08011 | 241 |
| A00706 | A08377 | 371 | A00706 | A08543 | 296 |
| A00706 | A08546 | 218 | A00706 | A08550 | 274 |
| A00706 | A08773 | 432 | A00706 | A08978 | 451 |
| A00706 | A09299 | 162 | A00706 | A09591 | 495 |
| A00706 | A09995 | 344 | A00706 | A10490 | 196 |
| A00706 | A10532 | 477 | A00706 | A11705 | 347 |
| A00706 | A11725 | 446 | A00706 | A12433 | 303 |
| A00706 | A13340 | 198 | A00706 | A13388 | 249 |
| A00706 | A13424 | 345 | A00706 | A14178 | 334 |
| A00706 | A14351 | 449 | A00706 | A14705 | 177 |
| A00706 | A14745 | 207 | A00706 | A15141 | 184 |
| A00706 | A15932 | 63  | A00706 | A16090 | 317 |
| A00706 | A16462 | 236 | A00706 | A16816 | 207 |
| A00706 | A16824 | 193 | A00706 | A17088 | 524 |
| A00707 | A00841 | 391 | A00707 | A00849 | 271 |
| A00707 | A00983 | 465 | A00707 | A01012 | 180 |
| A00707 | A01150 | 408 | A00707 | A01238 | 218 |
| A00707 | A01293 | 163 | A00707 | A01380 | 425 |
| A00707 | A01439 | 483 | A00707 | A01540 | 152 |
| A00707 | A01567 | 245 | A00707 | A01569 | 232 |
| A00707 | A01613 | 174 | A00707 | A01649 | 435 |
| A00707 | A03467 | 389 | A00707 | A03494 | 481 |
| A00707 | A03518 | 152 | A00707 | A05562 | 227 |
| A00707 | A07258 | 254 | A00707 | A07370 | 479 |
| A00707 | A08228 | 266 | A00707 | A10250 | 212 |
| A00707 | A14073 | 322 | A00707 | A14699 | 402 |
| A00707 | A15660 | 441 | A00707 | A15684 | 408 |
| A00707 | A15746 | 263 | A00707 | A15937 | 232 |
| A00708 | A00760 | 210 | A00708 | A00856 | 283 |
| A00708 | A00858 | 481 | A00708 | A00881 | 151 |
| A00708 | A00919 | 227 | A00708 | A00923 | 266 |
| A00708 | A00934 | 677 | A00708 | A00954 | 417 |
| A00708 | A00964 | 283 | A00708 | A01020 | 466 |
| A00708 | A01062 | 465 | A00708 | A01075 | 483 |
| A00708 | A01087 | 339 | A00708 | A01166 | 486 |
| A00708 | A01206 | 695 | A00708 | A01234 | 477 |
| A00708 | A01295 | 425 | A00708 | A01349 | 695 |
| A00708 | A01429 | 689 | A00708 | A01430 | 475 |
| A00708 | A01470 | 475 | A00708 | A01492 | 433 |
| A00708 | A01575 | 324 | A00708 | A01576 | 491 |
| A00708 | A01598 | 490 | A00708 | A01614 | 340 |
| A00708 | A01649 | 489 | A00708 | A04584 | 232 |
| A00708 | A07348 | 693 | A00708 | A07700 | 157 |

|        |        |     |        |        |     |
|--------|--------|-----|--------|--------|-----|
| A00708 | A08022 | 361 | A00708 | A08211 | 438 |
| A00708 | A08362 | 272 | A00708 | A08382 | 270 |
| A00708 | A08461 | 491 | A00708 | A08518 | 188 |
| A00708 | A08553 | 339 | A00708 | A09664 | 243 |
| A00708 | A10931 | 399 | A00708 | A11223 | 163 |
| A00708 | A11431 | 157 | A00708 | A11496 | 353 |
| A00708 | A11497 | 420 | A00708 | A11841 | 162 |
| A00708 | A12138 | 695 | A00708 | A12243 | 201 |
| A00708 | A13126 | 293 | A00708 | A13989 | 490 |
| A00708 | A16109 | 182 | A00708 | A16704 | 260 |
| A00709 | A00711 | 188 | A00709 | A00725 | 307 |
| A00709 | A00789 | 205 | A00709 | A00805 | 243 |
| A00709 | A00829 | 199 | A00709 | A00839 | 188 |
| A00709 | A00854 | 269 | A00709 | A00865 | 380 |
| A00709 | A00881 | 249 | A00709 | A00953 | 189 |
| A00709 | A00972 | 253 | A00709 | A00982 | 226 |
| A00709 | A00994 | 213 | A00709 | A00997 | 358 |
| A00709 | A01017 | 368 | A00709 | A01064 | 321 |
| A00709 | A01071 | 385 | A00709 | A01101 | 188 |
| A00709 | A01102 | 428 | A00709 | A01109 | 246 |
| A00709 | A01111 | 297 | A00709 | A01114 | 227 |
| A00709 | A01159 | 472 | A00709 | A01161 | 210 |
| A00709 | A01186 | 201 | A00709 | A01210 | 256 |
| A00709 | A01214 | 232 | A00709 | A01217 | 188 |
| A00709 | A01220 | 188 | A00709 | A01221 | 428 |
| A00709 | A01238 | 154 | A00709 | A01243 | 416 |
| A00709 | A01244 | 369 | A00709 | A01251 | 260 |
| A00709 | A01313 | 236 | A00709 | A01352 | 372 |
| A00709 | A01359 | 258 | A00709 | A01362 | 188 |
| A00709 | A01369 | 319 | A00709 | A01406 | 188 |
| A00709 | A01408 | 188 | A00709 | A01414 | 331 |
| A00709 | A01418 | 452 | A00709 | A01443 | 162 |
| A00709 | A01446 | 293 | A00709 | A01448 | 241 |
| A00709 | A01451 | 188 | A00709 | A01457 | 236 |
| A00709 | A01704 | 252 | A00709 | A01826 | 395 |
| A00709 | A01976 | 452 | A00709 | A01988 | 188 |
| A00709 | A02068 | 226 | A00709 | A02164 | 227 |
| A00709 | A02195 | 305 | A00709 | A02203 | 382 |
| A00709 | A02275 | 190 | A00709 | A02542 | 154 |
| A00709 | A03044 | 241 | A00709 | A03438 | 319 |
| A00709 | A03512 | 267 | A00709 | A03901 | 456 |
| A00709 | A03907 | 389 | A00709 | A04739 | 185 |
| A00709 | A05393 | 283 | A00709 | A05646 | 378 |
| A00709 | A05702 | 188 | A00709 | A06122 | 361 |
| A00709 | A06366 | 299 | A00709 | A06369 | 187 |
| A00709 | A06531 | 187 | A00709 | A06564 | 283 |

|        |        |     |        |        |     |
|--------|--------|-----|--------|--------|-----|
| A00709 | A06785 | 188 | A00709 | A06832 | 371 |
| A00709 | A07312 | 318 | A00709 | A07384 | 245 |
| A00709 | A07473 | 291 | A00709 | A07655 | 226 |
| A00709 | A07965 | 188 | A00709 | A08426 | 345 |
| A00709 | A08760 | 259 | A00709 | A09672 | 229 |
| A00709 | A11394 | 305 | A00709 | A11480 | 188 |
| A00709 | A13091 | 486 | A00709 | A14813 | 188 |
| A00709 | A15498 | 251 | A00709 | A15624 | 369 |
| A00709 | A15657 | 188 | A00709 | A15905 | 182 |
| A00709 | A15932 | 463 | A00709 | A16095 | 157 |
| A00709 | A16680 | 188 | A00710 | A00887 | 163 |
| A00710 | A00913 | 329 | A00710 | A00915 | 297 |
| A00710 | A00986 | 199 | A00710 | A01098 | 230 |
| A00710 | A01194 | 283 | A00710 | A01220 | 212 |
| A00710 | A01353 | 172 | A00710 | A01411 | 230 |
| A00710 | A01455 | 302 | A00710 | A01504 | 389 |
| A00710 | A01582 | 286 | A00710 | A03453 | 260 |
| A00710 | A03494 | 362 | A00710 | A11409 | 357 |
| A00710 | A14674 | 412 | A00711 | A00724 | 491 |
| A00711 | A00736 | 151 | A00711 | A00769 | 659 |
| A00711 | A00782 | 436 | A00711 | A00785 | 489 |
| A00711 | A00824 | 567 | A00711 | A00839 | 559 |
| A00711 | A00841 | 491 | A00711 | A00865 | 441 |
| A00711 | A00871 | 369 | A00711 | A00878 | 246 |
| A00711 | A00909 | 490 | A00711 | A00922 | 491 |
| A00711 | A00953 | 539 | A00711 | A00955 | 168 |
| A00711 | A00972 | 188 | A00711 | A00983 | 658 |
| A00711 | A00986 | 296 | A00711 | A00994 | 198 |
| A00711 | A01006 | 456 | A00711 | A01017 | 560 |
| A00711 | A01027 | 658 | A00711 | A01069 | 361 |
| A00711 | A01086 | 461 | A00711 | A01101 | 560 |
| A00711 | A01150 | 656 | A00711 | A01154 | 472 |
| A00711 | A01166 | 378 | A00711 | A01167 | 184 |
| A00711 | A01186 | 279 | A00711 | A01217 | 558 |
| A00711 | A01218 | 168 | A00711 | A01220 | 188 |
| A00711 | A01221 | 490 | A00711 | A01232 | 491 |
| A00711 | A01234 | 475 | A00711 | A01247 | 232 |
| A00711 | A01263 | 314 | A00711 | A01287 | 372 |
| A00711 | A01291 | 414 | A00711 | A01293 | 380 |
| A00711 | A01306 | 254 | A00711 | A01311 | 491 |
| A00711 | A01335 | 404 | A00711 | A01337 | 288 |
| A00711 | A01362 | 364 | A00711 | A01365 | 479 |
| A00711 | A01374 | 274 | A00711 | A01399 | 372 |
| A00711 | A01406 | 349 | A00711 | A01407 | 273 |
| A00711 | A01408 | 341 | A00711 | A01412 | 485 |
| A00711 | A01414 | 221 | A00711 | A01439 | 375 |



|        |        |     |        |        |     |
|--------|--------|-----|--------|--------|-----|
| A00711 | A01451 | 555 | A00711 | A01468 | 171 |
| A00711 | A01470 | 469 | A00711 | A01492 | 384 |
| A00711 | A01569 | 258 | A00711 | A01577 | 374 |
| A00711 | A01579 | 326 | A00711 | A01613 | 152 |
| A00711 | A01976 | 427 | A00711 | A01988 | 303 |
| A00711 | A03187 | 294 | A00711 | A03438 | 301 |
| A00711 | A03454 | 451 | A00711 | A03543 | 202 |
| A00711 | A03809 | 435 | A00711 | A03901 | 555 |
| A00711 | A03959 | 227 | A00711 | A05227 | 353 |
| A00711 | A05258 | 179 | A00711 | A05501 | 473 |
| A00711 | A05502 | 420 | A00711 | A05702 | 223 |
| A00711 | A06543 | 372 | A00711 | A06637 | 274 |
| A00711 | A06785 | 234 | A00711 | A07046 | 182 |
| A00711 | A07360 | 406 | A00711 | A07581 | 157 |
| A00711 | A07658 | 180 | A00711 | A07744 | 491 |
| A00711 | A07881 | 650 | A00711 | A07911 | 226 |
| A00711 | A07965 | 493 | A00711 | A08098 | 475 |
| A00711 | A08178 | 313 | A00711 | A08228 | 491 |
| A00711 | A08501 | 432 | A00711 | A08548 | 171 |
| A00711 | A08556 | 428 | A00711 | A08652 | 390 |
| A00711 | A08773 | 152 | A00711 | A08860 | 223 |
| A00711 | A08929 | 316 | A00711 | A09059 | 278 |
| A00711 | A09209 | 177 | A00711 | A09684 | 313 |
| A00711 | A10498 | 180 | A00711 | A10607 | 202 |
| A00711 | A11480 | 188 | A00711 | A11926 | 182 |
| A00711 | A13989 | 473 | A00711 | A14478 | 380 |
| A00711 | A14479 | 297 | A00711 | A14699 | 491 |
| A00711 | A14778 | 468 | A00711 | A14813 | 188 |
| A00711 | A15657 | 195 | A00711 | A15660 | 470 |
| A00711 | A15662 | 372 | A00711 | A15684 | 491 |
| A00711 | A15730 | 168 | A00711 | A15746 | 455 |
| A00711 | A15771 | 436 | A00711 | A15937 | 366 |
| A00711 | A16680 | 452 | A00712 | A00829 | 184 |
| A00712 | A00966 | 223 | A00712 | A00994 | 334 |
| A00712 | A01110 | 334 | A00712 | A01121 | 301 |
| A00712 | A01189 | 263 | A00712 | A01831 | 334 |
| A00712 | A02216 | 278 | A00712 | A02602 | 334 |
| A00712 | A05017 | 334 | A00712 | A06425 | 334 |
| A00712 | A06827 | 334 | A00712 | A07458 | 412 |
| A00712 | A07531 | 334 | A00712 | A08201 | 334 |
| A00712 | A08974 | 491 | A00712 | A11772 | 435 |
| A00712 | A15624 | 540 | A00712 | A15651 | 334 |
| A00712 | A15750 | 334 | A00712 | A15917 | 334 |
| A00712 | A15932 | 334 | A00712 | A15937 | 334 |
| A00713 | A00749 | 170 | A00713 | A00767 | 170 |
| A00713 | A00787 | 472 | A00713 | A00806 | 208 |

|        |        |     |        |        |     |
|--------|--------|-----|--------|--------|-----|
| A00713 | A00831 | 168 | A00713 | A00839 | 446 |
| A00713 | A00861 | 170 | A00713 | A00872 | 170 |
| A00713 | A00878 | 240 | A00713 | A00916 | 402 |
| A00713 | A00918 | 170 | A00713 | A00923 | 332 |
| A00713 | A00934 | 170 | A00713 | A00966 | 251 |
| A00713 | A00992 | 170 | A00713 | A01000 | 208 |
| A00713 | A01025 | 355 | A00713 | A01028 | 170 |
| A00713 | A01056 | 286 | A00713 | A01085 | 414 |
| A00713 | A01090 | 326 | A00713 | A01112 | 491 |
| A00713 | A01120 | 170 | A00713 | A01127 | 490 |
| A00713 | A01129 | 170 | A00713 | A01140 | 296 |
| A00713 | A01160 | 170 | A00713 | A01166 | 343 |
| A00713 | A01168 | 170 | A00713 | A01184 | 272 |
| A00713 | A01206 | 491 | A00713 | A01234 | 460 |
| A00713 | A01249 | 452 | A00713 | A01275 | 241 |
| A00713 | A01291 | 491 | A00713 | A01335 | 344 |
| A00713 | A01351 | 170 | A00713 | A01356 | 170 |
| A00713 | A01425 | 354 | A00713 | A01457 | 252 |
| A00713 | A01468 | 472 | A00713 | A01470 | 395 |
| A00713 | A01492 | 224 | A00713 | A01495 | 82  |
| A00713 | A01496 | 451 | A00713 | A01538 | 170 |
| A00713 | A01579 | 451 | A00713 | A01598 | 410 |
| A00713 | A01601 | 454 | A00713 | A01614 | 361 |
| A00713 | A01649 | 490 | A00713 | A01822 | 218 |
| A00713 | A02265 | 170 | A00713 | A02818 | 174 |
| A00713 | A03048 | 160 | A00713 | A03438 | 170 |
| A00713 | A03652 | 170 | A00713 | A03740 | 271 |
| A00713 | A03752 | 154 | A00713 | A03981 | 527 |
| A00713 | A05076 | 232 | A00713 | A06356 | 170 |
| A00713 | A06466 | 191 | A00713 | A06814 | 486 |
| A00713 | A06965 | 425 | A00713 | A07244 | 170 |
| A00713 | A07307 | 183 | A00713 | A07323 | 328 |
| A00713 | A07398 | 246 | A00713 | A07451 | 490 |
| A00713 | A07524 | 170 | A00713 | A07726 | 307 |
| A00713 | A07924 | 170 | A00713 | A08061 | 441 |
| A00713 | A08211 | 170 | A00713 | A08357 | 489 |
| A00713 | A08358 | 188 | A00713 | A08973 | 154 |
| A00713 | A09313 | 235 | A00713 | A09581 | 247 |
| A00713 | A09697 | 170 | A00713 | A10616 | 167 |
| A00713 | A11392 | 156 | A00713 | A11462 | 215 |
| A00713 | A12839 | 152 | A00713 | A13002 | 238 |
| A00713 | A13052 | 170 | A00713 | A13340 | 226 |
| A00713 | A13525 | 212 | A00713 | A13989 | 550 |
| A00713 | A14172 | 195 | A00713 | A14530 | 201 |
| A00713 | A15219 | 210 | A00713 | A15500 | 215 |
| A00713 | A15660 | 460 | A00713 | A15988 | 485 |

|        |        |     |        |        |     |
|--------|--------|-----|--------|--------|-----|
| A00713 | A16053 | 313 | A00713 | A16119 | 180 |
| A00714 | A00751 | 393 | A00714 | A00761 | 160 |
| A00714 | A00766 | 160 | A00714 | A00781 | 162 |
| A00714 | A00791 | 495 | A00714 | A00868 | 531 |
| A00714 | A00883 | 541 | A00714 | A00884 | 160 |
| A00714 | A00915 | 245 | A00714 | A00926 | 452 |
| A00714 | A00927 | 223 | A00714 | A00967 | 171 |
| A00714 | A00975 | 238 | A00714 | A01039 | 160 |
| A00714 | A01058 | 160 | A00714 | A01077 | 243 |
| A00714 | A01080 | 500 | A00714 | A01097 | 491 |
| A00714 | A01267 | 412 | A00714 | A01274 | 234 |
| A00714 | A01339 | 160 | A00714 | A02112 | 202 |
| A00714 | A02202 | 162 | A00714 | A02212 | 160 |
| A00714 | A03570 | 213 | A00714 | A07096 | 160 |
| A00714 | A07226 | 160 | A00714 | A08834 | 160 |
| A00714 | A09627 | 160 | A00714 | A10372 | 160 |
| A00714 | A11365 | 160 | A00714 | A11476 | 246 |
| A00714 | A11598 | 486 | A00714 | A11649 | 364 |
| A00714 | A11735 | 289 | A00714 | A11737 | 160 |
| A00714 | A11914 | 288 | A00714 | A12111 | 200 |
| A00714 | A12325 | 215 | A00714 | A12658 | 160 |
| A00714 | A12824 | 427 | A00714 | A12853 | 293 |
| A00714 | A14007 | 160 | A00714 | A14196 | 480 |
| A00714 | A14202 | 185 | A00714 | A15257 | 474 |
| A00714 | A15297 | 435 | A00714 | A15559 | 174 |
| A00714 | A15596 | 183 | A00714 | A15763 | 207 |
| A00714 | A15867 | 232 | A00714 | A16860 | 372 |
| A00715 | A00871 | 404 | A00715 | A00873 | 419 |
| A00715 | A00966 | 196 | A00715 | A00986 | 223 |
| A00715 | A01050 | 229 | A00715 | A01111 | 223 |
| A00715 | A01118 | 223 | A00715 | A01202 | 223 |
| A00715 | A01208 | 308 | A00715 | A01215 | 240 |
| A00715 | A01228 | 391 | A00715 | A01238 | 227 |
| A00715 | A01353 | 278 | A00715 | A01387 | 270 |
| A00715 | A01736 | 223 | A00715 | A02041 | 223 |
| A00715 | A02051 | 223 | A00715 | A03169 | 223 |
| A00715 | A03954 | 301 | A00715 | A04447 | 223 |
| A00715 | A07265 | 223 | A00715 | A07588 | 223 |
| A00715 | A08955 | 223 | A00715 | A08971 | 223 |
| A00715 | A09565 | 337 | A00715 | A10755 | 223 |
| A00715 | A11202 | 223 | A00715 | A13298 | 284 |
| A00715 | A14216 | 300 | A00715 | A15988 | 191 |
| A00716 | A00747 | 433 | A00716 | A00767 | 267 |
| A00716 | A00829 | 188 | A00716 | A00867 | 156 |
| A00716 | A00879 | 156 | A00716 | A00905 | 249 |
| A00716 | A00929 | 157 | A00716 | A01029 | 156 |

|        |        |     |        |        |     |
|--------|--------|-----|--------|--------|-----|
| A00716 | A01136 | 255 | A00716 | A01139 | 144 |
| A00716 | A01151 | 415 | A00716 | A01212 | 294 |
| A00716 | A01239 | 491 | A00716 | A01266 | 156 |
| A00716 | A01268 | 156 | A00716 | A01295 | 156 |
| A00716 | A01334 | 156 | A00716 | A01359 | 477 |
| A00716 | A01391 | 156 | A00716 | A01396 | 165 |
| A00716 | A01407 | 188 | A00716 | A01434 | 156 |
| A00716 | A01847 | 198 | A00716 | A02925 | 179 |
| A00716 | A03115 | 276 | A00716 | A03494 | 538 |
| A00716 | A03902 | 457 | A00716 | A04096 | 171 |
| A00716 | A04698 | 172 | A00716 | A06827 | 268 |
| A00716 | A06937 | 303 | A00716 | A07898 | 156 |
| A00716 | A08201 | 428 | A00716 | A08327 | 156 |
| A00716 | A08408 | 182 | A00716 | A08431 | 156 |
| A00716 | A08542 | 156 | A00716 | A09427 | 273 |
| A00716 | A09538 | 457 | A00716 | A09658 | 347 |
| A00716 | A10250 | 467 | A00716 | A11496 | 156 |
| A00716 | A11497 | 156 | A00716 | A12757 | 156 |
| A00716 | A13928 | 156 | A00716 | A14178 | 156 |
| A00716 | A15379 | 172 | A00716 | A16699 | 156 |
| A00717 | A00721 | 212 | A00717 | A00727 | 484 |
| A00717 | A00772 | 491 | A00717 | A00839 | 63  |
| A00717 | A00865 | 467 | A00717 | A00928 | 465 |
| A00717 | A00952 | 491 | A00717 | A00964 | 157 |
| A00717 | A00991 | 168 | A00717 | A01066 | 165 |
| A00717 | A01107 | 427 | A00717 | A01243 | 294 |
| A00717 | A01352 | 491 | A00717 | A02877 | 288 |
| A00717 | A03065 | 229 | A00717 | A06204 | 198 |
| A00717 | A06832 | 357 | A00717 | A07312 | 432 |
| A00717 | A08467 | 195 | A00717 | A08984 | 490 |
| A00717 | A11707 | 215 | A00717 | A12035 | 207 |
| A00717 | A12816 | 319 | A00717 | A14196 | 401 |
| A00717 | A14272 | 445 | A00717 | A14462 | 168 |
| A00717 | A15323 | 413 | A00717 | A15324 | 193 |
| A00717 | A15373 | 156 | A00717 | A15374 | 162 |
| A00717 | A15377 | 159 | A00717 | A16840 | 193 |
| A00717 | A17133 | 241 | A00718 | A00753 | 405 |
| A00718 | A00762 | 285 | A00718 | A00778 | 721 |
| A00718 | A00779 | 491 | A00718 | A00781 | 228 |
| A00718 | A00797 | 217 | A00718 | A00807 | 291 |
| A00718 | A00826 | 363 | A00718 | A00854 | 246 |
| A00718 | A00883 | 400 | A00718 | A00907 | 579 |
| A00718 | A00920 | 488 | A00718 | A00977 | 319 |
| A00718 | A01021 | 274 | A00718 | A01026 | 722 |
| A00718 | A01074 | 299 | A00718 | A01075 | 457 |
| A00718 | A01082 | 230 | A00718 | A01087 | 278 |

|        |        |     |        |        |     |
|--------|--------|-----|--------|--------|-----|
| A00718 | A01091 | 469 | A00718 | A01154 | 240 |
| A00718 | A01166 | 316 | A00718 | A01209 | 226 |
| A00718 | A01211 | 447 | A00718 | A01217 | 255 |
| A00718 | A01244 | 488 | A00718 | A01306 | 252 |
| A00718 | A01313 | 491 | A00718 | A01352 | 311 |
| A00718 | A01360 | 491 | A00718 | A01365 | 296 |
| A00718 | A01377 | 721 | A00718 | A01386 | 460 |
| A00718 | A01406 | 303 | A00718 | A01426 | 168 |
| A00718 | A01634 | 201 | A00718 | A01647 | 480 |
| A00718 | A01716 | 151 | A00718 | A01809 | 335 |
| A00718 | A02361 | 293 | A00718 | A02452 | 374 |
| A00718 | A02774 | 154 | A00718 | A03057 | 204 |
| A00718 | A03601 | 305 | A00718 | A04145 | 434 |
| A00718 | A04813 | 187 | A00718 | A05375 | 260 |
| A00718 | A05501 | 234 | A00718 | A06472 | 267 |
| A00718 | A07130 | 296 | A00718 | A07558 | 390 |
| A00718 | A07693 | 466 | A00718 | A07976 | 260 |
| A00718 | A08113 | 457 | A00718 | A08263 | 485 |
| A00718 | A08346 | 344 | A00718 | A08402 | 491 |
| A00718 | A08975 | 445 | A00718 | A09004 | 177 |
| A00718 | A09118 | 329 | A00718 | A09164 | 204 |
| A00718 | A09528 | 160 | A00718 | A09648 | 613 |
| A00718 | A10420 | 324 | A00718 | A10625 | 215 |
| A00718 | A11233 | 201 | A00718 | A11291 | 488 |
| A00718 | A11471 | 157 | A00718 | A12174 | 329 |
| A00718 | A12952 | 221 | A00718 | A13866 | 241 |
| A00718 | A13873 | 361 | A00718 | A13905 | 243 |
| A00718 | A13948 | 217 | A00718 | A14055 | 177 |
| A00718 | A14077 | 480 | A00718 | A14092 | 474 |
| A00718 | A14191 | 451 | A00718 | A14196 | 440 |
| A00718 | A14220 | 491 | A00718 | A14272 | 722 |
| A00718 | A14473 | 165 | A00718 | A14840 | 372 |
| A00718 | A15237 | 165 | A00718 | A15367 | 491 |
| A00718 | A15383 | 469 | A00718 | A15877 | 490 |
| A00719 | A00802 | 485 | A00719 | A00825 | 383 |
| A00719 | A00853 | 391 | A00719 | A00855 | 329 |
| A00719 | A00882 | 71  | A00719 | A01022 | 435 |
| A00719 | A01026 | 296 | A00719 | A01036 | 670 |
| A00719 | A01064 | 355 | A00719 | A01114 | 462 |
| A00719 | A01156 | 258 | A00719 | A01161 | 425 |
| A00719 | A01280 | 180 | A00719 | A01309 | 291 |
| A00719 | A01326 | 191 | A00719 | A01426 | 383 |
| A00719 | A01454 | 208 | A00719 | A01481 | 329 |
| A00719 | A01568 | 270 | A00719 | A01571 | 167 |
| A00719 | A01578 | 467 | A00719 | A01730 | 245 |
| A00719 | A01995 | 383 | A00719 | A02049 | 372 |

|        |        |     |        |        |     |
|--------|--------|-----|--------|--------|-----|
| A00719 | A02117 | 383 | A00719 | A02219 | 395 |
| A00719 | A03070 | 204 | A00719 | A03297 | 157 |
| A00719 | A03304 | 218 | A00719 | A03391 | 176 |
| A00719 | A03401 | 313 | A00719 | A03417 | 408 |
| A00719 | A03880 | 450 | A00719 | A03910 | 165 |
| A00719 | A03968 | 383 | A00719 | A04182 | 313 |
| A00719 | A04337 | 491 | A00719 | A04411 | 205 |
| A00719 | A04422 | 157 | A00719 | A04633 | 198 |
| A00719 | A04832 | 163 | A00719 | A04993 | 286 |
| A00719 | A05327 | 266 | A00719 | A05356 | 407 |
| A00719 | A05967 | 196 | A00719 | A05979 | 193 |
| A00719 | A06267 | 299 | A00719 | A06319 | 246 |
| A00719 | A06502 | 296 | A00719 | A06591 | 489 |
| A00719 | A07054 | 479 | A00719 | A07061 | 236 |
| A00719 | A07091 | 154 | A00719 | A07218 | 281 |
| A00719 | A07242 | 490 | A00719 | A07442 | 249 |
| A00719 | A07471 | 271 | A00719 | A07495 | 490 |
| A00719 | A07687 | 171 | A00719 | A07942 | 485 |
| A00719 | A08309 | 210 | A00719 | A08531 | 160 |
| A00719 | A08753 | 281 | A00719 | A08785 | 165 |
| A00719 | A08910 | 198 | A00719 | A09324 | 486 |
| A00719 | A09341 | 165 | A00719 | A09538 | 246 |
| A00719 | A09624 | 171 | A00719 | A09671 | 160 |
| A00719 | A09771 | 491 | A00719 | A09791 | 383 |
| A00719 | A10155 | 423 | A00719 | A10313 | 221 |
| A00719 | A10314 | 294 | A00719 | A10358 | 159 |
| A00719 | A10651 | 491 | A00719 | A10658 | 221 |
| A00719 | A10909 | 310 | A00719 | A11046 | 358 |
| A00719 | A11074 | 358 | A00719 | A11121 | 472 |
| A00719 | A11346 | 371 | A00719 | A11385 | 221 |
| A00719 | A11411 | 215 | A00719 | A11414 | 399 |
| A00719 | A11433 | 371 | A00719 | A11722 | 454 |
| A00719 | A11998 | 321 | A00719 | A12064 | 335 |
| A00719 | A12722 | 234 | A00719 | A12787 | 343 |
| A00719 | A13323 | 256 | A00719 | A13874 | 191 |
| A00719 | A13916 | 236 | A00719 | A13942 | 281 |
| A00719 | A14266 | 488 | A00719 | A14272 | 424 |
| A00719 | A14278 | 205 | A00719 | A14381 | 391 |
| A00719 | A14633 | 207 | A00719 | A14838 | 156 |
| A00719 | A15273 | 168 | A00719 | A15282 | 291 |
| A00719 | A15366 | 221 | A00719 | A15422 | 266 |
| A00719 | A15498 | 190 | A00719 | A15685 | 390 |
| A00719 | A15768 | 165 | A00719 | A15880 | 249 |
| A00719 | A16786 | 180 | A00719 | A17152 | 229 |
| A00720 | A00921 | 187 | A00720 | A01125 | 488 |
| A00720 | A01543 | 326 | A00720 | A01553 | 177 |

|        |        |     |        |        |     |
|--------|--------|-----|--------|--------|-----|
| A00720 | A01574 | 63  | A00720 | A01585 | 63  |
| A00720 | A01628 | 198 | A00720 | A02030 | 151 |
| A00720 | A02951 | 162 | A00720 | A03413 | 262 |
| A00720 | A03471 | 246 | A00720 | A04608 | 204 |
| A00720 | A09022 | 272 | A00720 | A13708 | 157 |
| A00720 | A13822 | 252 | A00720 | A14525 | 193 |
| A00720 | A14570 | 160 | A00720 | A15348 | 171 |
| A00720 | A15452 | 156 | A00721 | A00727 | 422 |
| A00721 | A00751 | 170 | A00721 | A00772 | 411 |
| A00721 | A00873 | 301 | A00721 | A00927 | 235 |
| A00721 | A00928 | 573 | A00721 | A00952 | 512 |
| A00721 | A00972 | 217 | A00721 | A00997 | 217 |
| A00721 | A01065 | 185 | A00721 | A01106 | 230 |
| A00721 | A01107 | 507 | A00721 | A01159 | 516 |
| A00721 | A01221 | 243 | A00721 | A01228 | 229 |
| A00721 | A01243 | 530 | A00721 | A01352 | 435 |
| A00721 | A01418 | 217 | A00721 | A01420 | 177 |
| A00721 | A01483 | 456 | A00721 | A02116 | 283 |
| A00721 | A03556 | 217 | A00721 | A03617 | 217 |
| A00721 | A05605 | 217 | A00721 | A06369 | 217 |
| A00721 | A06832 | 495 | A00721 | A08183 | 514 |
| A00721 | A08467 | 243 | A00721 | A09673 | 365 |
| A00721 | A14088 | 217 | A00721 | A15377 | 552 |
| A00721 | A15543 | 307 | A00721 | A15724 | 217 |
| A00721 | A16664 | 217 | A00721 | A16857 | 321 |
| A00722 | A00837 | 324 | A00722 | A00921 | 345 |
| A00722 | A00931 | 160 | A00722 | A01036 | 187 |
| A00722 | A01143 | 170 | A00722 | A01145 | 290 |
| A00722 | A01248 | 399 | A00722 | A01308 | 324 |
| A00722 | A01473 | 393 | A00722 | A01524 | 899 |
| A00722 | A01668 | 226 | A00722 | A01712 | 477 |
| A00722 | A01741 | 423 | A00722 | A01807 | 224 |
| A00722 | A01956 | 274 | A00722 | A01961 | 152 |
| A00722 | A01962 | 124 | A00722 | A02007 | 338 |
| A00722 | A02010 | 491 | A00722 | A02052 | 218 |
| A00722 | A02055 | 241 | A00722 | A02157 | 475 |
| A00722 | A02158 | 363 | A00722 | A02211 | 258 |
| A00722 | A02288 | 221 | A00722 | A02993 | 393 |
| A00722 | A03025 | 241 | A00722 | A03032 | 159 |
| A00722 | A03079 | 329 | A00722 | A03134 | 465 |
| A00722 | A03141 | 177 | A00722 | A03259 | 456 |
| A00722 | A03686 | 393 | A00722 | A03692 | 433 |
| A00722 | A03693 | 477 | A00722 | A03694 | 463 |
| A00722 | A03695 | 263 | A00722 | A03701 | 440 |
| A00722 | A03703 | 491 | A00722 | A03719 | 281 |
| A00722 | A03721 | 491 | A00722 | A03722 | 491 |

|        |        |     |        |        |     |
|--------|--------|-----|--------|--------|-----|
| A00722 | A03724 | 218 | A00722 | A03728 | 393 |
| A00722 | A03887 | 375 | A00722 | A03894 | 491 |
| A00722 | A03899 | 199 | A00722 | A04076 | 216 |
| A00722 | A04337 | 159 | A00722 | A04340 | 263 |
| A00722 | A04449 | 165 | A00722 | A05220 | 221 |
| A00722 | A05704 | 232 | A00722 | A05887 | 174 |
| A00722 | A06001 | 303 | A00722 | A06022 | 302 |
| A00722 | A06344 | 190 | A00722 | A06862 | 279 |
| A00722 | A07199 | 334 | A00722 | A07801 | 271 |
| A00722 | A08842 | 473 | A00722 | A08870 | 157 |
| A00722 | A09482 | 319 | A00722 | A09734 | 174 |
| A00722 | A09740 | 456 | A00722 | A09824 | 477 |
| A00722 | A09834 | 190 | A00722 | A10063 | 151 |
| A00722 | A10579 | 461 | A00722 | A10723 | 159 |
| A00722 | A11558 | 190 | A00722 | A11601 | 335 |
| A00722 | A11703 | 163 | A00722 | A11917 | 324 |
| A00722 | A12016 | 279 | A00722 | A12497 | 344 |
| A00722 | A12665 | 324 | A00722 | A12835 | 393 |
| A00722 | A12933 | 290 | A00722 | A12950 | 319 |
| A00722 | A12952 | 324 | A00722 | A13313 | 324 |
| A00722 | A13410 | 236 | A00722 | A13411 | 344 |
| A00722 | A13708 | 324 | A00722 | A13781 | 324 |
| A00722 | A13826 | 324 | A00722 | A13899 | 260 |
| A00722 | A13926 | 177 | A00722 | A13928 | 324 |
| A00722 | A13951 | 489 | A00722 | A13987 | 334 |
| A00722 | A14116 | 279 | A00722 | A14122 | 319 |
| A00722 | A14190 | 313 | A00722 | A14202 | 486 |
| A00722 | A14399 | 432 | A00722 | A14457 | 276 |
| A00722 | A14470 | 472 | A00722 | A14570 | 385 |
| A00722 | A15105 | 324 | A00722 | A15292 | 477 |
| A00722 | A15312 | 440 | A00722 | A15313 | 238 |
| A00722 | A15317 | 263 | A00722 | A15333 | 346 |
| A00722 | A15348 | 238 | A00722 | A15349 | 317 |
| A00722 | A15352 | 414 | A00722 | A15366 | 433 |
| A00722 | A15376 | 485 | A00722 | A15404 | 198 |
| A00722 | A15412 | 350 | A00722 | A15417 | 196 |
| A00722 | A15431 | 473 | A00722 | A15436 | 198 |
| A00722 | A15447 | 154 | A00722 | A15451 | 180 |
| A00722 | A15461 | 414 | A00722 | A15464 | 479 |
| A00722 | A15467 | 177 | A00722 | A15511 | 152 |
| A00722 | A15523 | 290 | A00722 | A15638 | 162 |
| A00722 | A15773 | 324 | A00722 | A15797 | 271 |
| A00722 | A15804 | 213 | A00722 | A15810 | 258 |
| A00722 | A15854 | 324 | A00722 | A16058 | 279 |
| A00722 | A16224 | 208 | A00722 | A16555 | 232 |
| A00722 | A17004 | 210 | A00722 | A17058 | 216 |



|        |        |     |        |        |     |
|--------|--------|-----|--------|--------|-----|
| A00722 | A17076 | 483 | A00723 | A00728 | 466 |
| A00723 | A00776 | 319 | A00723 | A00849 | 154 |
| A00723 | A00956 | 246 | A00723 | A00975 | 318 |
| A00723 | A01169 | 435 | A00723 | A01371 | 308 |
| A00723 | A01582 | 480 | A00723 | A03570 | 247 |
| A00723 | A04666 | 353 | A00723 | A11160 | 297 |
| A00723 | A15684 | 226 | A00723 | A15920 | 249 |
| A00724 | A00736 | 707 | A00724 | A00769 | 616 |
| A00724 | A00785 | 473 | A00724 | A00824 | 474 |
| A00724 | A00841 | 708 | A00724 | A00871 | 486 |
| A00724 | A00909 | 708 | A00724 | A00922 | 616 |
| A00724 | A00934 | 291 | A00724 | A00983 | 484 |
| A00724 | A01006 | 708 | A00724 | A01027 | 615 |
| A00724 | A01069 | 475 | A00724 | A01088 | 385 |
| A00724 | A01126 | 213 | A00724 | A01150 | 490 |
| A00724 | A01161 | 469 | A00724 | A01215 | 188 |
| A00724 | A01221 | 213 | A00724 | A01232 | 616 |
| A00724 | A01293 | 708 | A00724 | A01311 | 491 |
| A00724 | A01346 | 279 | A00724 | A01431 | 328 |
| A00724 | A01458 | 419 | A00724 | A01492 | 490 |
| A00724 | A01551 | 162 | A00724 | A01577 | 156 |
| A00724 | A01582 | 277 | A00724 | A01598 | 385 |
| A00724 | A01668 | 491 | A00724 | A01692 | 356 |
| A00724 | A01704 | 191 | A00724 | A01748 | 480 |
| A00724 | A01778 | 185 | A00724 | A01779 | 408 |
| A00724 | A01797 | 368 | A00724 | A01800 | 204 |
| A00724 | A01802 | 314 | A00724 | A01894 | 558 |
| A00724 | A02477 | 274 | A00724 | A02896 | 358 |
| A00724 | A02944 | 241 | A00724 | A02961 | 156 |
| A00724 | A02971 | 151 | A00724 | A03275 | 152 |
| A00724 | A03435 | 398 | A00724 | A03440 | 213 |
| A00724 | A03454 | 327 | A00724 | A03466 | 196 |
| A00724 | A03516 | 425 | A00724 | A03547 | 293 |
| A00724 | A03557 | 450 | A00724 | A03577 | 165 |
| A00724 | A03591 | 374 | A00724 | A03598 | 151 |
| A00724 | A03608 | 491 | A00724 | A03809 | 291 |
| A00724 | A04306 | 204 | A00724 | A04788 | 204 |
| A00724 | A04895 | 205 | A00724 | A05216 | 491 |
| A00724 | A05227 | 542 | A00724 | A05742 | 340 |
| A00724 | A05827 | 151 | A00724 | A06543 | 438 |
| A00724 | A06637 | 486 | A00724 | A06709 | 226 |
| A00724 | A06961 | 213 | A00724 | A07360 | 157 |
| A00724 | A07524 | 174 | A00724 | A07706 | 432 |
| A00724 | A07744 | 491 | A00724 | A07881 | 613 |
| A00724 | A07911 | 708 | A00724 | A08098 | 491 |
| A00724 | A08178 | 341 | A00724 | A08228 | 615 |

|        |        |     |        |        |     |
|--------|--------|-----|--------|--------|-----|
| A00724 | A08491 | 154 | A00724 | A08548 | 291 |
| A00724 | A11296 | 301 | A00724 | A11326 | 401 |
| A00724 | A12739 | 151 | A00724 | A13989 | 469 |
| A00724 | A14073 | 254 | A00724 | A14083 | 416 |
| A00724 | A14699 | 616 | A00724 | A14778 | 614 |
| A00724 | A15338 | 205 | A00724 | A15375 | 414 |
| A00724 | A15660 | 345 | A00724 | A15684 | 485 |
| A00724 | A15746 | 393 | A00724 | A15937 | 191 |
| A00724 | A16048 | 247 | A00725 | A00759 | 490 |
| A00725 | A00761 | 491 | A00725 | A00775 | 491 |
| A00725 | A00784 | 491 | A00725 | A00791 | 329 |
| A00725 | A00792 | 179 | A00725 | A00802 | 191 |
| A00725 | A00814 | 491 | A00725 | A00881 | 224 |
| A00725 | A00926 | 345 | A00725 | A00950 | 491 |
| A00725 | A00956 | 263 | A00725 | A00975 | 163 |
| A00725 | A00982 | 224 | A00725 | A01014 | 173 |
| A00725 | A01021 | 199 | A00725 | A01059 | 450 |
| A00725 | A01064 | 599 | A00725 | A01093 | 491 |
| A00725 | A01099 | 491 | A00725 | A01114 | 491 |
| A00725 | A01187 | 491 | A00725 | A01189 | 452 |
| A00725 | A01197 | 481 | A00725 | A01203 | 358 |
| A00725 | A01212 | 361 | A00725 | A01244 | 230 |
| A00725 | A01255 | 162 | A00725 | A01322 | 457 |
| A00725 | A01341 | 490 | A00725 | A01388 | 491 |
| A00725 | A01415 | 486 | A00725 | A01536 | 221 |
| A00725 | A01559 | 488 | A00725 | A01616 | 488 |
| A00725 | A01659 | 443 | A00725 | A01686 | 489 |
| A00725 | A01741 | 290 | A00725 | A01743 | 188 |
| A00725 | A02060 | 224 | A00725 | A02180 | 465 |
| A00725 | A02731 | 377 | A00725 | A02806 | 314 |
| A00725 | A03044 | 236 | A00725 | A03494 | 383 |
| A00725 | A04668 | 489 | A00725 | A05334 | 373 |
| A00725 | A06242 | 345 | A00725 | A06564 | 235 |
| A00725 | A06606 | 384 | A00725 | A06864 | 419 |
| A00725 | A06924 | 246 | A00725 | A06982 | 480 |
| A00725 | A07319 | 423 | A00725 | A07346 | 484 |
| A00725 | A07480 | 485 | A00725 | A07534 | 433 |
| A00725 | A07595 | 224 | A00725 | A07603 | 486 |
| A00725 | A07996 | 470 | A00725 | A08030 | 463 |
| A00725 | A08117 | 446 | A00725 | A08208 | 418 |
| A00725 | A08212 | 491 | A00725 | A08335 | 210 |
| A00725 | A08516 | 491 | A00725 | A08526 | 469 |
| A00725 | A08669 | 484 | A00725 | A08769 | 490 |
| A00725 | A08964 | 366 | A00725 | A08995 | 433 |
| A00725 | A09000 | 486 | A00725 | A09001 | 402 |
| A00725 | A09085 | 329 | A00725 | A09451 | 429 |

|        |        |     |        |        |     |
|--------|--------|-----|--------|--------|-----|
| A00725 | A09515 | 472 | A00725 | A09538 | 480 |
| A00725 | A09598 | 490 | A00725 | A09762 | 489 |
| A00725 | A10228 | 177 | A00725 | A10250 | 355 |
| A00725 | A10373 | 263 | A00725 | A11236 | 480 |
| A00725 | A11703 | 374 | A00725 | A11724 | 165 |
| A00725 | A11829 | 491 | A00725 | A11880 | 343 |
| A00725 | A12556 | 491 | A00725 | A12760 | 338 |
| A00725 | A12897 | 200 | A00725 | A13634 | 249 |
| A00725 | A13913 | 489 | A00725 | A13949 | 488 |
| A00725 | A14079 | 257 | A00725 | A14282 | 441 |
| A00725 | A14381 | 177 | A00725 | A14614 | 329 |
| A00725 | A14694 | 353 | A00725 | A14701 | 190 |
| A00725 | A15369 | 383 | A00725 | A15941 | 246 |
| A00725 | A16127 | 443 | A00725 | A16128 | 458 |
| A00725 | A16226 | 461 | A00725 | A16606 | 425 |
| A00725 | A16616 | 322 | A00725 | A16626 | 234 |
| A00725 | A16762 | 251 | A00726 | A00810 | 152 |
| A00726 | A00833 | 299 | A00726 | A00839 | 63  |
| A00726 | A00871 | 151 | A00726 | A00956 | 201 |
| A00726 | A00974 | 299 | A00726 | A00984 | 299 |
| A00726 | A00987 | 299 | A00726 | A01001 | 299 |
| A00726 | A01102 | 299 | A00726 | A01311 | 152 |
| A00726 | A01379 | 555 | A00726 | A01387 | 618 |
| A00726 | A01439 | 299 | A00726 | A01447 | 154 |
| A00726 | A01577 | 152 | A00726 | A01627 | 299 |
| A00726 | A02249 | 274 | A00726 | A02601 | 299 |
| A00726 | A03068 | 208 | A00726 | A03069 | 154 |
| A00726 | A03697 | 152 | A00726 | A03773 | 218 |
| A00726 | A04495 | 299 | A00726 | A06287 | 152 |
| A00726 | A06463 | 302 | A00726 | A07744 | 152 |
| A00726 | A08061 | 152 | A00726 | A08098 | 152 |
| A00726 | A08178 | 152 | A00726 | A08763 | 152 |
| A00726 | A08947 | 299 | A00726 | A09004 | 299 |
| A00726 | A09644 | 183 | A00726 | A10842 | 152 |
| A00726 | A11284 | 180 | A00726 | A12245 | 393 |
| A00726 | A12418 | 406 | A00726 | A13523 | 477 |
| A00726 | A14525 | 152 | A00726 | A15375 | 152 |
| A00726 | A15546 | 152 | A00727 | A00772 | 477 |
| A00727 | A00782 | 180 | A00727 | A00865 | 213 |
| A00727 | A00923 | 205 | A00727 | A00928 | 491 |
| A00727 | A00952 | 479 | A00727 | A01025 | 350 |
| A00727 | A01098 | 486 | A00727 | A01107 | 488 |
| A00727 | A01221 | 163 | A00727 | A01243 | 382 |
| A00727 | A01291 | 224 | A00727 | A01352 | 490 |
| A00727 | A01425 | 288 | A00727 | A01442 | 288 |
| A00727 | A01470 | 347 | A00727 | A04212 | 182 |

|        |        |     |        |        |     |
|--------|--------|-----|--------|--------|-----|
| A00727 | A06832 | 152 | A00727 | A07312 | 400 |
| A00727 | A08467 | 215 | A00727 | A08984 | 351 |
| A00727 | A11277 | 154 | A00727 | A11928 | 207 |
| A00727 | A11933 | 411 | A00727 | A12251 | 272 |
| A00727 | A13117 | 399 | A00727 | A14255 | 187 |
| A00727 | A15257 | 162 | A00727 | A15324 | 313 |
| A00727 | A15377 | 490 | A00727 | A15543 | 272 |
| A00727 | A16912 | 221 | A00728 | A00761 | 318 |
| A00728 | A00868 | 414 | A00728 | A00883 | 490 |
| A00728 | A00925 | 217 | A00728 | A00926 | 170 |
| A00728 | A00936 | 210 | A00728 | A00975 | 335 |
| A00728 | A01014 | 283 | A00728 | A01100 | 474 |
| A00728 | A01169 | 457 | A00728 | A01231 | 188 |
| A00728 | A01271 | 235 | A00728 | A01321 | 188 |
| A00728 | A01371 | 485 | A00728 | A01376 | 299 |
| A00728 | A01422 | 318 | A00728 | A01483 | 157 |
| A00728 | A01495 | 163 | A00728 | A01582 | 480 |
| A00728 | A01606 | 489 | A00728 | A02705 | 330 |
| A00728 | A03570 | 174 | A00728 | A04666 | 465 |
| A00728 | A05276 | 393 | A00728 | A06750 | 191 |
| A00728 | A07101 | 353 | A00728 | A07497 | 340 |
| A00728 | A09580 | 326 | A00728 | A09687 | 333 |
| A00728 | A10484 | 480 | A00728 | A11352 | 362 |
| A00728 | A11673 | 412 | A00728 | A13166 | 441 |
| A00728 | A13245 | 396 | A00728 | A14701 | 296 |
| A00728 | A14819 | 165 | A00728 | A15297 | 398 |
| A00728 | A15535 | 188 | A00728 | A15537 | 326 |
| A00728 | A15920 | 310 | A00728 | A17079 | 462 |
| A00729 | A00829 | 414 | A00729 | A01189 | 283 |
| A00729 | A03728 | 200 | A00729 | A04449 | 414 |
| A00729 | A08340 | 414 | A00729 | A08918 | 414 |
| A00729 | A10590 | 414 | A00729 | A15932 | 177 |
| A00730 | A00887 | 395 | A00730 | A00907 | 154 |
| A00730 | A01052 | 201 | A00730 | A01137 | 236 |
| A00730 | A01163 | 414 | A00730 | A01557 | 165 |
| A00730 | A01572 | 419 | A00730 | A01813 | 167 |
| A00730 | A01959 | 424 | A00730 | A02208 | 263 |
| A00730 | A02224 | 185 | A00730 | A02226 | 491 |
| A00730 | A02518 | 157 | A00730 | A03257 | 281 |
| A00730 | A03730 | 477 | A00730 | A03766 | 296 |
| A00730 | A03990 | 366 | A00730 | A04079 | 299 |
| A00730 | A04343 | 252 | A00730 | A04668 | 361 |
| A00730 | A04696 | 223 | A00730 | A04865 | 174 |
| A00730 | A05016 | 334 | A00730 | A05044 | 187 |
| A00730 | A05259 | 210 | A00730 | A05264 | 177 |
| A00730 | A05621 | 491 | A00730 | A05641 | 228 |

|        |        |     |        |        |     |
|--------|--------|-----|--------|--------|-----|
| A00730 | A05767 | 168 | A00730 | A05958 | 263 |
| A00730 | A06269 | 245 | A00730 | A06834 | 322 |
| A00730 | A08630 | 162 | A00730 | A08905 | 177 |
| A00730 | A09243 | 337 | A00730 | A10353 | 481 |
| A00730 | A10765 | 347 | A00730 | A12697 | 306 |
| A00730 | A12897 | 375 | A00730 | A13638 | 296 |
| A00730 | A14006 | 401 | A00730 | A14300 | 243 |
| A00730 | A14644 | 296 | A00730 | A15601 | 188 |
| A00730 | A15603 | 173 | A00730 | A15809 | 265 |
| A00730 | A16951 | 238 | A00730 | A17063 | 154 |
| A00731 | A00745 | 274 | A00731 | A00750 | 369 |
| A00731 | A00780 | 393 | A00731 | A00783 | 306 |
| A00731 | A00785 | 585 | A00731 | A00790 | 590 |
| A00731 | A00842 | 419 | A00731 | A00849 | 247 |
| A00731 | A00851 | 174 | A00731 | A00953 | 578 |
| A00731 | A00974 | 573 | A00731 | A01023 | 316 |
| A00731 | A01027 | 453 | A00731 | A01081 | 288 |
| A00731 | A01086 | 591 | A00731 | A01108 | 587 |
| A00731 | A01150 | 278 | A00731 | A01161 | 272 |
| A00731 | A01204 | 576 | A00731 | A01246 | 465 |
| A00731 | A01260 | 462 | A00731 | A01287 | 247 |
| A00731 | A01346 | 561 | A00731 | A01382 | 347 |
| A00731 | A01387 | 208 | A00731 | A01399 | 591 |
| A00731 | A01443 | 544 | A00731 | A01446 | 374 |
| A00731 | A01448 | 407 | A00731 | A01468 | 176 |
| A00731 | A01540 | 443 | A00731 | A01741 | 232 |
| A00731 | A01797 | 152 | A00731 | A02073 | 188 |
| A00731 | A02814 | 188 | A00731 | A02991 | 218 |
| A00731 | A02994 | 247 | A00731 | A03259 | 246 |
| A00731 | A03959 | 247 | A00731 | A04622 | 207 |
| A00731 | A04895 | 321 | A00731 | A05027 | 171 |
| A00731 | A06959 | 383 | A00731 | A07574 | 229 |
| A00731 | A07597 | 451 | A00731 | A09734 | 162 |
| A00731 | A10199 | 405 | A00731 | A10535 | 369 |
| A00731 | A10799 | 201 | A00731 | A11015 | 334 |
| A00731 | A11677 | 247 | A00731 | A11992 | 196 |
| A00731 | A13707 | 207 | A00731 | A14479 | 165 |
| A00731 | A14569 | 208 | A00731 | A14699 | 247 |
| A00731 | A14778 | 247 | A00731 | A15943 | 208 |
| A00731 | A16095 | 165 | A00731 | A16587 | 247 |
| A00731 | A16591 | 357 | A00732 | A00877 | 255 |
| A00732 | A00951 | 207 | A00732 | A01021 | 351 |
| A00732 | A01366 | 238 | A00732 | A03119 | 256 |
| A00732 | A03486 | 213 | A00732 | A03518 | 190 |
| A00732 | A03922 | 491 | A00732 | A04375 | 212 |
| A00732 | A05094 | 196 | A00732 | A06277 | 483 |

|        |        |     |        |        |     |
|--------|--------|-----|--------|--------|-----|
| A00732 | A06472 | 324 | A00732 | A06752 | 491 |
| A00732 | A06753 | 491 | A00732 | A07232 | 394 |
| A00732 | A09901 | 207 | A00732 | A10753 | 226 |
| A00732 | A10777 | 380 | A00732 | A11149 | 302 |
| A00732 | A11160 | 479 | A00732 | A11684 | 263 |
| A00732 | A12007 | 291 | A00732 | A12136 | 485 |
| A00732 | A12236 | 311 | A00732 | A12867 | 350 |
| A00732 | A13954 | 489 | A00732 | A14281 | 465 |
| A00732 | A15035 | 276 | A00732 | A15282 | 173 |
| A00732 | A16423 | 326 | A00732 | A16485 | 480 |
| A00733 | A00744 | 156 | A00733 | A00746 | 160 |
| A00733 | A00759 | 241 | A00733 | A00781 | 286 |
| A00733 | A00805 | 542 | A00733 | A00814 | 308 |
| A00733 | A00858 | 541 | A00733 | A00860 | 351 |
| A00733 | A00866 | 479 | A00733 | A00881 | 459 |
| A00733 | A00883 | 483 | A00733 | A00884 | 254 |
| A00733 | A00887 | 215 | A00733 | A00975 | 256 |
| A00733 | A00978 | 296 | A00733 | A00981 | 404 |
| A00733 | A01007 | 156 | A00733 | A01019 | 529 |
| A00733 | A01052 | 488 | A00733 | A01077 | 332 |
| A00733 | A01088 | 385 | A00733 | A01091 | 154 |
| A00733 | A01122 | 322 | A00733 | A01161 | 443 |
| A00733 | A01162 | 165 | A00733 | A01166 | 246 |
| A00733 | A01169 | 260 | A00733 | A01173 | 223 |
| A00733 | A01195 | 539 | A00733 | A01200 | 522 |
| A00733 | A01212 | 490 | A00733 | A01329 | 286 |
| A00733 | A01363 | 274 | A00733 | A01398 | 540 |
| A00733 | A01401 | 509 | A00733 | A01500 | 538 |
| A00733 | A01503 | 208 | A00733 | A01594 | 488 |
| A00733 | A01655 | 404 | A00733 | A01729 | 378 |
| A00733 | A01790 | 190 | A00733 | A01931 | 491 |
| A00733 | A02092 | 156 | A00733 | A02148 | 324 |
| A00733 | A02333 | 341 | A00733 | A02443 | 491 |
| A00733 | A02447 | 160 | A00733 | A02450 | 168 |
| A00733 | A02476 | 490 | A00733 | A02477 | 167 |
| A00733 | A02698 | 294 | A00733 | A03207 | 312 |
| A00733 | A03304 | 265 | A00733 | A03451 | 196 |
| A00733 | A03494 | 308 | A00733 | A04275 | 200 |
| A00733 | A04449 | 451 | A00733 | A04522 | 208 |
| A00733 | A04648 | 531 | A00733 | A04687 | 156 |
| A00733 | A04879 | 369 | A00733 | A05027 | 221 |
| A00733 | A05082 | 218 | A00733 | A05128 | 462 |
| A00733 | A05489 | 257 | A00733 | A05556 | 193 |
| A00733 | A05741 | 157 | A00733 | A06037 | 385 |
| A00733 | A06277 | 491 | A00733 | A06298 | 481 |
| A00733 | A06660 | 170 | A00733 | A06803 | 419 |

|        |        |     |        |        |     |
|--------|--------|-----|--------|--------|-----|
| A00733 | A07242 | 452 | A00733 | A07471 | 160 |
| A00733 | A07665 | 182 | A00733 | A07670 | 534 |
| A00733 | A07850 | 530 | A00733 | A07887 | 489 |
| A00733 | A07920 | 485 | A00733 | A08097 | 271 |
| A00733 | A08383 | 156 | A00733 | A08571 | 324 |
| A00733 | A08818 | 156 | A00733 | A08831 | 74  |
| A00733 | A08882 | 380 | A00733 | A09502 | 156 |
| A00733 | A10001 | 219 | A00733 | A10174 | 901 |
| A00733 | A10618 | 208 | A00733 | A10621 | 167 |
| A00733 | A11068 | 338 | A00733 | A11299 | 241 |
| A00733 | A11300 | 218 | A00733 | A11344 | 156 |
| A00733 | A11674 | 156 | A00733 | A11727 | 393 |
| A00733 | A11983 | 945 | A00733 | A12026 | 266 |
| A00733 | A12033 | 230 | A00733 | A12107 | 162 |
| A00733 | A13248 | 382 | A00733 | A13905 | 366 |
| A00733 | A13917 | 260 | A00733 | A14006 | 491 |
| A00733 | A14080 | 279 | A00733 | A14281 | 441 |
| A00733 | A14377 | 486 | A00733 | A14399 | 341 |
| A00733 | A14813 | 152 | A00733 | A14860 | 152 |
| A00733 | A15281 | 307 | A00733 | A15282 | 477 |
| A00733 | A15292 | 332 | A00733 | A15317 | 191 |
| A00733 | A15324 | 276 | A00733 | A15349 | 151 |
| A00733 | A15395 | 230 | A00733 | A15502 | 252 |
| A00733 | A15505 | 329 | A00733 | A15605 | 188 |
| A00733 | A15606 | 396 | A00733 | A15608 | 204 |
| A00733 | A15649 | 227 | A00733 | A16143 | 165 |
| A00733 | A16228 | 463 | A00733 | A17168 | 294 |
| A00734 | A00888 | 273 | A00734 | A00915 | 256 |
| A00734 | A00916 | 235 | A00734 | A00918 | 196 |
| A00734 | A00969 | 279 | A00734 | A01061 | 207 |
| A00734 | A01116 | 157 | A00734 | A01136 | 490 |
| A00734 | A01224 | 202 | A00734 | A01384 | 165 |
| A00734 | A01851 | 199 | A00734 | A02050 | 436 |
| A00734 | A02499 | 249 | A00734 | A02855 | 200 |
| A00734 | A03070 | 151 | A00734 | A03289 | 270 |
| A00734 | A03571 | 268 | A00734 | A05845 | 323 |
| A00734 | A06190 | 174 | A00734 | A07226 | 252 |
| A00734 | A08144 | 213 | A00734 | A14594 | 185 |
| A00734 | A14622 | 377 | A00735 | A00766 | 196 |
| A00735 | A00829 | 263 | A00735 | A00868 | 412 |
| A00735 | A00915 | 240 | A00735 | A00926 | 213 |
| A00735 | A00975 | 367 | A00735 | A01046 | 246 |
| A00735 | A01053 | 254 | A00735 | A01102 | 283 |
| A00735 | A01156 | 435 | A00735 | A01278 | 477 |
| A00735 | A01281 | 126 | A00735 | A01359 | 157 |
| A00735 | A01818 | 267 | A00735 | A02454 | 321 |

|        |        |     |        |        |     |
|--------|--------|-----|--------|--------|-----|
| A00735 | A02491 | 172 | A00735 | A03749 | 229 |
| A00735 | A03931 | 296 | A00735 | A04211 | 221 |
| A00735 | A04687 | 191 | A00735 | A05095 | 432 |
| A00735 | A06100 | 168 | A00735 | A07368 | 408 |
| A00735 | A09323 | 313 | A00735 | A14502 | 273 |
| A00735 | A16068 | 168 | A00735 | A17072 | 394 |
| A00736 | A00769 | 291 | A00736 | A00829 | 317 |
| A00736 | A00841 | 708 | A00736 | A00847 | 483 |
| A00736 | A00849 | 481 | A00736 | A00874 | 473 |
| A00736 | A00909 | 706 | A00736 | A00914 | 490 |
| A00736 | A00922 | 609 | A00736 | A01003 | 204 |
| A00736 | A01006 | 707 | A00736 | A01027 | 291 |
| A00736 | A01088 | 491 | A00736 | A01125 | 221 |
| A00736 | A01150 | 491 | A00736 | A01161 | 524 |
| A00736 | A01232 | 291 | A00736 | A01257 | 160 |
| A00736 | A01278 | 485 | A00736 | A01293 | 695 |
| A00736 | A01307 | 457 | A00736 | A01325 | 226 |
| A00736 | A01404 | 486 | A00736 | A01431 | 614 |
| A00736 | A01439 | 310 | A00736 | A01457 | 491 |
| A00736 | A01460 | 472 | A00736 | A01461 | 473 |
| A00736 | A01513 | 201 | A00736 | A01515 | 486 |
| A00736 | A01522 | 324 | A00736 | A01573 | 427 |
| A00736 | A01576 | 672 | A00736 | A01577 | 160 |
| A00736 | A01585 | 238 | A00736 | A01593 | 268 |
| A00736 | A01603 | 162 | A00736 | A01604 | 263 |
| A00736 | A01612 | 199 | A00736 | A01626 | 362 |
| A00736 | A01634 | 234 | A00736 | A01650 | 199 |
| A00736 | A01663 | 172 | A00736 | A01668 | 491 |
| A00736 | A01676 | 428 | A00736 | A01677 | 208 |
| A00736 | A01678 | 167 | A00736 | A01683 | 157 |
| A00736 | A01710 | 457 | A00736 | A01726 | 488 |
| A00736 | A01729 | 475 | A00736 | A01733 | 350 |
| A00736 | A01736 | 424 | A00736 | A01737 | 419 |
| A00736 | A01739 | 334 | A00736 | A01741 | 491 |
| A00736 | A01743 | 491 | A00736 | A01747 | 481 |
| A00736 | A01748 | 491 | A00736 | A01749 | 377 |
| A00736 | A01754 | 157 | A00736 | A01769 | 85  |
| A00736 | A01770 | 213 | A00736 | A01775 | 491 |
| A00736 | A01781 | 374 | A00736 | A01782 | 319 |
| A00736 | A01785 | 433 | A00736 | A01789 | 378 |
| A00736 | A01796 | 467 | A00736 | A01797 | 469 |
| A00736 | A01802 | 279 | A00736 | A01817 | 235 |
| A00736 | A01844 | 429 | A00736 | A01869 | 168 |
| A00736 | A01879 | 63  | A00736 | A01888 | 369 |
| A00736 | A01894 | 542 | A00736 | A01900 | 281 |
| A00736 | A01902 | 63  | A00736 | A01909 | 174 |



|        |        |     |        |        |     |
|--------|--------|-----|--------|--------|-----|
| A00736 | A01923 | 400 | A00736 | A01926 | 445 |
| A00736 | A01928 | 172 | A00736 | A01950 | 278 |
| A00736 | A02006 | 414 | A00736 | A02010 | 251 |
| A00736 | A02077 | 243 | A00736 | A02078 | 151 |
| A00736 | A02083 | 318 | A00736 | A02117 | 461 |
| A00736 | A02158 | 215 | A00736 | A02215 | 490 |
| A00736 | A02278 | 188 | A00736 | A02331 | 157 |
| A00736 | A02349 | 84  | A00736 | A02416 | 281 |
| A00736 | A02452 | 195 | A00736 | A02488 | 443 |
| A00736 | A02490 | 302 | A00736 | A02491 | 246 |
| A00736 | A02495 | 302 | A00736 | A02513 | 286 |
| A00736 | A02542 | 294 | A00736 | A02545 | 491 |
| A00736 | A02555 | 207 | A00736 | A02564 | 263 |
| A00736 | A02575 | 257 | A00736 | A02579 | 490 |
| A00736 | A02582 | 201 | A00736 | A02587 | 340 |
| A00736 | A02639 | 491 | A00736 | A02667 | 165 |
| A00736 | A02686 | 63  | A00736 | A02687 | 440 |
| A00736 | A02689 | 163 | A00736 | A02693 | 177 |
| A00736 | A02695 | 303 | A00736 | A02697 | 356 |
| A00736 | A02709 | 452 | A00736 | A02713 | 398 |
| A00736 | A02735 | 65  | A00736 | A02736 | 172 |
| A00736 | A02739 | 188 | A00736 | A02745 | 472 |
| A00736 | A02749 | 469 | A00736 | A02753 | 356 |
| A00736 | A02785 | 311 | A00736 | A02801 | 207 |
| A00736 | A02812 | 489 | A00736 | A02814 | 180 |
| A00736 | A02828 | 477 | A00736 | A02832 | 311 |
| A00736 | A02833 | 491 | A00736 | A02836 | 407 |
| A00736 | A02837 | 491 | A00736 | A02842 | 327 |
| A00736 | A02859 | 491 | A00736 | A02869 | 479 |
| A00736 | A02872 | 210 | A00736 | A02874 | 486 |
| A00736 | A02875 | 247 | A00736 | A02876 | 257 |
| A00736 | A02877 | 414 | A00736 | A02878 | 419 |
| A00736 | A02882 | 183 | A00736 | A02883 | 232 |
| A00736 | A02888 | 219 | A00736 | A02893 | 221 |
| A00736 | A02896 | 162 | A00736 | A02905 | 475 |
| A00736 | A02906 | 414 | A00736 | A02908 | 489 |
| A00736 | A02918 | 364 | A00736 | A02919 | 270 |
| A00736 | A02921 | 196 | A00736 | A02925 | 260 |
| A00736 | A02929 | 468 | A00736 | A02942 | 466 |
| A00736 | A02951 | 190 | A00736 | A02961 | 396 |
| A00736 | A02962 | 167 | A00736 | A02964 | 154 |
| A00736 | A02966 | 162 | A00736 | A02968 | 475 |
| A00736 | A02976 | 363 | A00736 | A02982 | 183 |
| A00736 | A02983 | 491 | A00736 | A02988 | 208 |
| A00736 | A03001 | 283 | A00736 | A03011 | 80  |
| A00736 | A03080 | 260 | A00736 | A03081 | 266 |

|        |        |     |        |        |     |
|--------|--------|-----|--------|--------|-----|
| A00736 | A03095 | 407 | A00736 | A03099 | 363 |
| A00736 | A03110 | 382 | A00736 | A03112 | 480 |
| A00736 | A03183 | 279 | A00736 | A03216 | 232 |
| A00736 | A03223 | 424 | A00736 | A03224 | 180 |
| A00736 | A03259 | 491 | A00736 | A03275 | 472 |
| A00736 | A03281 | 480 | A00736 | A03287 | 417 |
| A00736 | A03293 | 441 | A00736 | A03322 | 219 |
| A00736 | A03326 | 344 | A00736 | A03378 | 188 |
| A00736 | A03402 | 423 | A00736 | A03408 | 154 |
| A00736 | A03419 | 457 | A00736 | A03427 | 486 |
| A00736 | A03516 | 477 | A00736 | A03520 | 489 |
| A00736 | A03541 | 162 | A00736 | A03608 | 484 |
| A00736 | A03609 | 353 | A00736 | A03623 | 168 |
| A00736 | A03625 | 263 | A00736 | A03626 | 413 |
| A00736 | A03650 | 246 | A00736 | A03661 | 338 |
| A00736 | A03695 | 221 | A00736 | A03701 | 408 |
| A00736 | A03725 | 221 | A00736 | A03742 | 425 |
| A00736 | A03748 | 329 | A00736 | A03760 | 167 |
| A00736 | A03782 | 314 | A00736 | A03809 | 291 |
| A00736 | A03813 | 391 | A00736 | A03821 | 152 |
| A00736 | A03839 | 200 | A00736 | A03848 | 162 |
| A00736 | A03892 | 205 | A00736 | A03894 | 210 |
| A00736 | A03910 | 368 | A00736 | A03922 | 305 |
| A00736 | A03942 | 259 | A00736 | A03965 | 285 |
| A00736 | A03992 | 218 | A00736 | A04008 | 333 |
| A00736 | A04010 | 303 | A00736 | A04012 | 199 |
| A00736 | A04030 | 232 | A00736 | A04035 | 413 |
| A00736 | A04080 | 221 | A00736 | A04087 | 213 |
| A00736 | A04105 | 185 | A00736 | A04112 | 167 |
| A00736 | A04114 | 468 | A00736 | A04117 | 489 |
| A00736 | A04134 | 190 | A00736 | A04140 | 182 |
| A00736 | A04169 | 369 | A00736 | A04183 | 162 |
| A00736 | A04267 | 168 | A00736 | A04288 | 296 |
| A00736 | A04300 | 207 | A00736 | A04306 | 232 |
| A00736 | A04334 | 361 | A00736 | A04336 | 154 |
| A00736 | A04477 | 162 | A00736 | A04486 | 301 |
| A00736 | A04487 | 221 | A00736 | A04540 | 391 |
| A00736 | A04568 | 373 | A00736 | A04570 | 151 |
| A00736 | A04585 | 207 | A00736 | A04588 | 168 |
| A00736 | A04589 | 201 | A00736 | A04593 | 168 |
| A00736 | A04622 | 486 | A00736 | A04652 | 491 |
| A00736 | A04662 | 224 | A00736 | A04681 | 345 |
| A00736 | A04697 | 446 | A00736 | A04735 | 316 |
| A00736 | A04885 | 393 | A00736 | A05032 | 343 |
| A00736 | A05082 | 485 | A00736 | A05116 | 207 |
| A00736 | A05122 | 199 | A00736 | A05153 | 486 |

|        |        |     |        |        |     |
|--------|--------|-----|--------|--------|-----|
| A00736 | A05184 | 174 | A00736 | A05212 | 271 |
| A00736 | A05216 | 260 | A00736 | A05227 | 291 |
| A00736 | A05272 | 207 | A00736 | A05309 | 491 |
| A00736 | A05344 | 334 | A00736 | A05345 | 168 |
| A00736 | A05349 | 302 | A00736 | A05366 | 260 |
| A00736 | A05380 | 184 | A00736 | A05393 | 490 |
| A00736 | A05394 | 213 | A00736 | A05418 | 235 |
| A00736 | A05446 | 286 | A00736 | A05449 | 227 |
| A00736 | A05485 | 417 | A00736 | A05509 | 168 |
| A00736 | A05517 | 190 | A00736 | A05519 | 279 |
| A00736 | A05520 | 302 | A00736 | A05568 | 317 |
| A00736 | A05570 | 424 | A00736 | A05577 | 337 |
| A00736 | A05591 | 279 | A00736 | A05669 | 168 |
| A00736 | A05675 | 168 | A00736 | A05687 | 369 |
| A00736 | A05707 | 207 | A00736 | A05760 | 390 |
| A00736 | A05761 | 232 | A00736 | A05806 | 207 |
| A00736 | A05878 | 413 | A00736 | A05879 | 449 |
| A00736 | A05957 | 213 | A00736 | A06002 | 207 |
| A00736 | A06169 | 168 | A00736 | A06190 | 193 |
| A00736 | A06255 | 177 | A00736 | A06312 | 151 |
| A00736 | A06332 | 207 | A00736 | A06394 | 207 |
| A00736 | A06415 | 180 | A00736 | A06438 | 207 |
| A00736 | A06500 | 207 | A00736 | A06505 | 386 |
| A00736 | A06526 | 307 | A00736 | A06581 | 423 |
| A00736 | A06595 | 208 | A00736 | A06597 | 420 |
| A00736 | A06606 | 338 | A00736 | A06607 | 281 |
| A00736 | A06610 | 380 | A00736 | A06642 | 486 |
| A00736 | A06644 | 208 | A00736 | A06709 | 260 |
| A00736 | A06797 | 490 | A00736 | A06855 | 151 |
| A00736 | A06890 | 205 | A00736 | A06942 | 207 |
| A00736 | A06949 | 491 | A00736 | A06976 | 207 |
| A00736 | A07063 | 172 | A00736 | A07121 | 207 |
| A00736 | A07123 | 213 | A00736 | A07135 | 424 |
| A00736 | A07140 | 243 | A00736 | A07141 | 219 |
| A00736 | A07145 | 299 | A00736 | A07157 | 200 |
| A00736 | A07165 | 489 | A00736 | A07191 | 230 |
| A00736 | A07199 | 235 | A00736 | A07218 | 422 |
| A00736 | A07233 | 168 | A00736 | A07292 | 184 |
| A00736 | A07311 | 199 | A00736 | A07339 | 185 |
| A00736 | A07386 | 168 | A00736 | A07455 | 412 |
| A00736 | A07468 | 485 | A00736 | A07469 | 443 |
| A00736 | A07486 | 491 | A00736 | A07510 | 184 |
| A00736 | A07539 | 207 | A00736 | A07541 | 154 |
| A00736 | A07547 | 207 | A00736 | A07576 | 207 |
| A00736 | A07617 | 235 | A00736 | A07711 | 323 |
| A00736 | A07871 | 168 | A00736 | A07881 | 291 |

|        |        |     |        |        |     |
|--------|--------|-----|--------|--------|-----|
| A00736 | A07890 | 207 | A00736 | A07911 | 553 |
| A00736 | A07958 | 297 | A00736 | A07969 | 168 |
| A00736 | A07972 | 168 | A00736 | A08070 | 303 |
| A00736 | A08228 | 291 | A00736 | A08240 | 207 |
| A00736 | A08242 | 260 | A00736 | A08263 | 358 |
| A00736 | A08391 | 488 | A00736 | A08548 | 291 |
| A00736 | A08571 | 199 | A00736 | A08572 | 347 |
| A00736 | A08592 | 168 | A00736 | A08627 | 486 |
| A00736 | A08742 | 213 | A00736 | A08881 | 373 |
| A00736 | A08904 | 199 | A00736 | A09015 | 207 |
| A00736 | A09054 | 174 | A00736 | A09121 | 230 |
| A00736 | A09127 | 172 | A00736 | A09159 | 207 |
| A00736 | A09201 | 364 | A00736 | A09340 | 402 |
| A00736 | A09408 | 168 | A00736 | A09416 | 294 |
| A00736 | A09418 | 221 | A00736 | A09481 | 168 |
| A00736 | A09509 | 283 | A00736 | A09559 | 204 |
| A00736 | A09743 | 293 | A00736 | A09785 | 486 |
| A00736 | A09790 | 480 | A00736 | A09807 | 168 |
| A00736 | A09908 | 207 | A00736 | A09930 | 168 |
| A00736 | A09985 | 157 | A00736 | A10021 | 154 |
| A00736 | A10026 | 168 | A00736 | A10061 | 301 |
| A00736 | A10070 | 196 | A00736 | A10088 | 168 |
| A00736 | A10252 | 168 | A00736 | A10257 | 207 |
| A00736 | A10382 | 490 | A00736 | A10400 | 207 |
| A00736 | A10418 | 489 | A00736 | A10422 | 243 |
| A00736 | A10447 | 207 | A00736 | A10451 | 207 |
| A00736 | A10459 | 293 | A00736 | A10460 | 243 |
| A00736 | A10462 | 168 | A00736 | A10530 | 132 |
| A00736 | A10551 | 235 | A00736 | A10594 | 151 |
| A00736 | A10597 | 168 | A00736 | A10609 | 316 |
| A00736 | A10734 | 154 | A00736 | A10749 | 168 |
| A00736 | A10757 | 184 | A00736 | A10831 | 207 |
| A00736 | A10843 | 302 | A00736 | A10851 | 279 |
| A00736 | A10886 | 207 | A00736 | A10967 | 489 |
| A00736 | A10986 | 299 | A00736 | A11326 | 449 |
| A00736 | A11346 | 199 | A00736 | A11366 | 205 |
| A00736 | A11424 | 184 | A00736 | A11474 | 486 |
| A00736 | A11498 | 260 | A00736 | A11537 | 180 |
| A00736 | A11698 | 221 | A00736 | A11889 | 207 |
| A00736 | A11908 | 172 | A00736 | A11910 | 207 |
| A00736 | A11951 | 451 | A00736 | A12110 | 207 |
| A00736 | A12181 | 207 | A00736 | A12228 | 390 |
| A00736 | A12229 | 334 | A00736 | A12323 | 168 |
| A00736 | A12425 | 207 | A00736 | A12458 | 232 |
| A00736 | A12497 | 207 | A00736 | A12514 | 168 |
| A00736 | A12515 | 207 | A00736 | A12516 | 207 |

|        |        |     |        |        |     |
|--------|--------|-----|--------|--------|-----|
| A00736 | A12517 | 207 | A00736 | A12520 | 207 |
| A00736 | A12529 | 260 | A00736 | A12535 | 168 |
| A00736 | A12587 | 207 | A00736 | A12778 | 207 |
| A00736 | A12793 | 402 | A00736 | A12887 | 204 |
| A00736 | A12959 | 433 | A00736 | A12976 | 363 |
| A00736 | A12983 | 204 | A00736 | A13138 | 207 |
| A00736 | A13140 | 232 | A00736 | A13161 | 207 |
| A00736 | A13191 | 294 | A00736 | A13195 | 196 |
| A00736 | A13202 | 207 | A00736 | A13224 | 168 |
| A00736 | A13319 | 260 | A00736 | A13342 | 219 |
| A00736 | A13748 | 302 | A00736 | A13755 | 168 |
| A00736 | A13772 | 385 | A00736 | A13800 | 168 |
| A00736 | A13824 | 332 | A00736 | A13826 | 475 |
| A00736 | A13829 | 489 | A00736 | A13865 | 168 |
| A00736 | A13926 | 281 | A00736 | A13931 | 168 |
| A00736 | A13982 | 257 | A00736 | A13987 | 311 |
| A00736 | A14010 | 291 | A00736 | A14127 | 199 |
| A00736 | A14137 | 184 | A00736 | A14188 | 241 |
| A00736 | A14190 | 215 | A00736 | A14196 | 489 |
| A00736 | A14208 | 488 | A00736 | A14210 | 474 |
| A00736 | A14299 | 243 | A00736 | A14313 | 221 |
| A00736 | A14371 | 366 | A00736 | A14374 | 391 |
| A00736 | A14399 | 369 | A00736 | A14420 | 207 |
| A00736 | A14511 | 367 | A00736 | A14582 | 196 |
| A00736 | A14604 | 477 | A00736 | A14647 | 311 |
| A00736 | A14696 | 168 | A00736 | A14699 | 613 |
| A00736 | A14710 | 157 | A00736 | A14778 | 291 |
| A00736 | A14841 | 168 | A00736 | A14896 | 168 |
| A00736 | A14936 | 281 | A00736 | A14961 | 168 |
| A00736 | A15162 | 184 | A00736 | A15194 | 207 |
| A00736 | A15228 | 356 | A00736 | A15291 | 172 |
| A00736 | A15292 | 480 | A00736 | A15295 | 172 |
| A00736 | A15301 | 232 | A00736 | A15312 | 455 |
| A00736 | A15313 | 462 | A00736 | A15314 | 455 |
| A00736 | A15316 | 247 | A00736 | A15323 | 461 |
| A00736 | A15327 | 355 | A00736 | A15333 | 443 |
| A00736 | A15339 | 377 | A00736 | A15346 | 385 |
| A00736 | A15352 | 450 | A00736 | A15417 | 310 |
| A00736 | A15432 | 291 | A00736 | A15436 | 337 |
| A00736 | A15440 | 232 | A00736 | A15447 | 301 |
| A00736 | A15450 | 246 | A00736 | A15451 | 285 |
| A00736 | A15452 | 311 | A00736 | A15459 | 302 |
| A00736 | A15460 | 180 | A00736 | A15498 | 635 |
| A00736 | A15507 | 394 | A00736 | A15547 | 483 |
| A00736 | A15630 | 357 | A00736 | A15639 | 193 |
| A00736 | A15649 | 177 | A00736 | A15726 | 208 |

|        |        |     |        |        |     |
|--------|--------|-----|--------|--------|-----|
| A00736 | A15788 | 202 | A00736 | A15802 | 218 |
| A00736 | A15826 | 172 | A00736 | A15828 | 174 |
| A00736 | A15836 | 168 | A00736 | A15843 | 190 |
| A00736 | A15925 | 343 | A00736 | A16094 | 207 |
| A00736 | A16112 | 276 | A00736 | A16216 | 404 |
| A00736 | A16224 | 246 | A00736 | A16253 | 207 |
| A00736 | A16300 | 212 | A00736 | A16420 | 172 |
| A00736 | A16460 | 207 | A00736 | A16478 | 281 |
| A00736 | A16508 | 207 | A00736 | A16571 | 207 |
| A00736 | A16636 | 475 | A00736 | A16691 | 172 |
| A00736 | A16901 | 485 | A00736 | A16969 | 207 |
| A00736 | A16986 | 157 | A00736 | A16987 | 401 |
| A00736 | A17108 | 445 | A00736 | A17145 | 260 |
| A00736 | A17191 | 207 | A00736 | A17194 | 279 |
| A00737 | A00790 | 172 | A00737 | A00821 | 445 |
| A00737 | A00829 | 159 | A00737 | A00849 | 267 |
| A00737 | A00985 | 196 | A00737 | A00987 | 260 |
| A00737 | A00998 | 338 | A00737 | A01001 | 265 |
| A00737 | A01013 | 457 | A00737 | A01108 | 154 |
| A00737 | A01210 | 167 | A00737 | A01245 | 469 |
| A00737 | A01287 | 333 | A00737 | A01329 | 183 |
| A00737 | A01346 | 174 | A00737 | A01502 | 301 |
| A00737 | A01504 | 238 | A00737 | A01711 | 441 |
| A00737 | A01787 | 196 | A00737 | A01815 | 384 |
| A00737 | A01819 | 335 | A00737 | A01820 | 395 |
| A00737 | A01825 | 303 | A00737 | A01827 | 286 |
| A00737 | A01830 | 329 | A00737 | A01832 | 441 |
| A00737 | A01833 | 384 | A00737 | A01837 | 208 |
| A00737 | A02040 | 308 | A00737 | A02477 | 205 |
| A00737 | A02994 | 263 | A00737 | A03456 | 423 |
| A00737 | A03856 | 413 | A00737 | A03959 | 191 |
| A00737 | A04056 | 363 | A00737 | A04131 | 456 |
| A00737 | A05130 | 414 | A00737 | A05617 | 193 |
| A00737 | A05741 | 340 | A00737 | A07237 | 308 |
| A00737 | A07756 | 218 | A00737 | A09124 | 174 |
| A00737 | A09321 | 375 | A00737 | A09396 | 335 |
| A00737 | A09857 | 260 | A00737 | A09936 | 389 |
| A00737 | A14377 | 235 | A00737 | A15317 | 218 |
| A00737 | A15379 | 430 | A00737 | A15668 | 339 |
| A00737 | A15917 | 326 | A00738 | A00739 | 340 |
| A00738 | A00770 | 489 | A00738 | A00825 | 179 |
| A00738 | A00962 | 491 | A00738 | A00995 | 414 |
| A00738 | A01005 | 249 | A00738 | A01008 | 490 |
| A00738 | A01035 | 249 | A00738 | A01174 | 470 |
| A00738 | A01175 | 483 | A00738 | A01223 | 199 |
| A00738 | A01229 | 416 | A00738 | A01233 | 259 |

|        |        |     |        |        |     |
|--------|--------|-----|--------|--------|-----|
| A00738 | A01256 | 358 | A00738 | A01397 | 216 |
| A00738 | A01409 | 291 | A00738 | A01496 | 176 |
| A00738 | A01635 | 456 | A00738 | A01713 | 268 |
| A00738 | A01714 | 404 | A00738 | A01735 | 168 |
| A00738 | A01741 | 238 | A00738 | A01857 | 462 |
| A00738 | A01866 | 283 | A00738 | A02363 | 404 |
| A00738 | A02568 | 229 | A00738 | A02859 | 313 |
| A00738 | A02992 | 475 | A00738 | A03002 | 288 |
| A00738 | A03003 | 221 | A00738 | A03008 | 377 |
| A00738 | A03016 | 369 | A00738 | A03167 | 152 |
| A00738 | A03168 | 351 | A00738 | A03259 | 251 |
| A00738 | A03311 | 314 | A00738 | A03441 | 441 |
| A00738 | A03442 | 358 | A00738 | A03443 | 271 |
| A00738 | A03477 | 187 | A00738 | A03513 | 154 |
| A00738 | A03861 | 198 | A00738 | A03917 | 283 |
| A00738 | A04307 | 193 | A00738 | A04660 | 268 |
| A00738 | A04778 | 268 | A00738 | A04779 | 462 |
| A00738 | A04791 | 427 | A00738 | A04834 | 486 |
| A00738 | A04880 | 154 | A00738 | A04949 | 307 |
| A00738 | A04995 | 454 | A00738 | A05007 | 490 |
| A00738 | A05013 | 340 | A00738 | A05102 | 417 |
| A00738 | A05289 | 241 | A00738 | A05310 | 340 |
| A00738 | A05416 | 204 | A00738 | A05472 | 205 |
| A00738 | A05516 | 485 | A00738 | A05600 | 283 |
| A00738 | A05659 | 218 | A00738 | A05699 | 328 |
| A00738 | A05738 | 263 | A00738 | A05755 | 393 |
| A00738 | A05759 | 457 | A00738 | A05774 | 477 |
| A00738 | A05937 | 299 | A00738 | A06063 | 312 |
| A00738 | A06088 | 407 | A00738 | A06089 | 429 |
| A00738 | A06252 | 486 | A00738 | A06358 | 473 |
| A00738 | A06405 | 187 | A00738 | A06439 | 311 |
| A00738 | A06633 | 260 | A00738 | A06744 | 210 |
| A00738 | A06756 | 486 | A00738 | A06912 | 383 |
| A00738 | A06916 | 296 | A00738 | A06970 | 335 |
| A00738 | A06979 | 374 | A00738 | A07080 | 337 |
| A00738 | A07109 | 398 | A00738 | A07122 | 491 |
| A00738 | A07238 | 302 | A00738 | A07256 | 310 |
| A00738 | A07267 | 469 | A00738 | A07288 | 318 |
| A00738 | A07304 | 286 | A00738 | A07322 | 286 |
| A00738 | A07413 | 477 | A00738 | A07468 | 165 |
| A00738 | A07477 | 406 | A00738 | A07530 | 278 |
| A00738 | A07553 | 167 | A00738 | A07558 | 187 |
| A00738 | A07688 | 449 | A00738 | A07800 | 462 |
| A00738 | A07847 | 230 | A00738 | A07933 | 234 |
| A00738 | A08099 | 198 | A00738 | A08751 | 310 |
| A00738 | A08817 | 196 | A00738 | A09059 | 200 |

|        |        |     |        |        |     |
|--------|--------|-----|--------|--------|-----|
| A00738 | A09711 | 367 | A00738 | A10027 | 393 |
| A00738 | A10424 | 310 | A00738 | A10444 | 247 |
| A00738 | A10527 | 196 | A00738 | A10703 | 256 |
| A00738 | A10714 | 177 | A00738 | A11309 | 167 |
| A00738 | A11381 | 157 | A00738 | A12055 | 332 |
| A00738 | A13871 | 217 | A00738 | A14827 | 310 |
| A00738 | A15497 | 299 | A00738 | A15637 | 234 |
| A00738 | A15874 | 380 | A00738 | A15905 | 324 |
| A00738 | A16026 | 246 | A00738 | A16027 | 385 |
| A00738 | A16286 | 251 | A00738 | A16529 | 260 |
| A00738 | A17078 | 472 | A00739 | A00770 | 414 |
| A00739 | A00793 | 208 | A00739 | A00962 | 465 |
| A00739 | A01008 | 296 | A00739 | A01174 | 438 |
| A00739 | A01175 | 294 | A00739 | A01508 | 208 |
| A00739 | A01725 | 435 | A00739 | A01798 | 435 |
| A00739 | A01883 | 355 | A00739 | A02335 | 369 |
| A00739 | A02691 | 255 | A00739 | A02699 | 363 |
| A00739 | A03004 | 435 | A00739 | A03311 | 313 |
| A00739 | A03441 | 191 | A00739 | A03508 | 334 |
| A00739 | A03513 | 152 | A00739 | A03962 | 188 |
| A00739 | A04108 | 364 | A00739 | A04307 | 191 |
| A00739 | A04779 | 308 | A00739 | A04834 | 380 |
| A00739 | A04995 | 454 | A00739 | A05007 | 406 |
| A00739 | A05102 | 218 | A00739 | A05310 | 205 |
| A00739 | A05759 | 429 | A00739 | A05774 | 401 |
| A00739 | A05789 | 305 | A00739 | A06358 | 485 |
| A00739 | A06597 | 257 | A00739 | A06635 | 490 |
| A00739 | A06700 | 438 | A00739 | A06756 | 347 |
| A00739 | A07059 | 321 | A00739 | A07080 | 201 |
| A00739 | A07109 | 491 | A00739 | A07122 | 473 |
| A00739 | A07267 | 232 | A00739 | A07304 | 423 |
| A00739 | A07413 | 317 | A00739 | A07477 | 404 |
| A00739 | A07688 | 215 | A00739 | A07690 | 257 |
| A00739 | A07710 | 347 | A00739 | A07933 | 229 |
| A00739 | A08751 | 307 | A00739 | A10652 | 269 |
| A00739 | A10701 | 424 | A00739 | A10707 | 400 |
| A00739 | A10776 | 173 | A00739 | A11580 | 391 |
| A00739 | A13731 | 375 | A00739 | A15637 | 358 |
| A00739 | A15905 | 322 | A00739 | A16027 | 165 |
| A00739 | A16355 | 451 | A00739 | A16739 | 369 |
| A00739 | A16741 | 491 | A00739 | A16744 | 375 |
| A00740 | A00782 | 366 | A00740 | A00789 | 217 |
| A00740 | A00824 | 383 | A00740 | A00839 | 247 |
| A00740 | A00878 | 151 | A00740 | A00955 | 274 |
| A00740 | A00965 | 266 | A00740 | A00970 | 165 |
| A00740 | A00996 | 247 | A00740 | A01016 | 432 |



|        |        |     |        |        |     |
|--------|--------|-----|--------|--------|-----|
| A00740 | A01069 | 235 | A00740 | A01102 | 466 |
| A00740 | A01119 | 247 | A00740 | A01152 | 193 |
| A00740 | A01153 | 216 | A00740 | A01154 | 212 |
| A00740 | A01172 | 154 | A00740 | A01194 | 395 |
| A00740 | A01214 | 254 | A00740 | A01217 | 341 |
| A00740 | A01218 | 582 | A00740 | A01220 | 109 |
| A00740 | A01221 | 489 | A00740 | A01365 | 454 |
| A00740 | A01406 | 308 | A00740 | A01408 | 185 |
| A00740 | A01411 | 590 | A00740 | A01412 | 477 |
| A00740 | A01420 | 247 | A00740 | A01455 | 247 |
| A00740 | A01547 | 249 | A00740 | A01548 | 157 |
| A00740 | A01569 | 489 | A00740 | A01581 | 247 |
| A00740 | A01611 | 223 | A00740 | A01635 | 285 |
| A00740 | A01824 | 232 | A00740 | A01826 | 247 |
| A00740 | A01841 | 156 | A00740 | A02227 | 475 |
| A00740 | A03453 | 323 | A00740 | A03477 | 366 |
| A00740 | A03493 | 205 | A00740 | A03863 | 162 |
| A00740 | A03901 | 160 | A00740 | A05007 | 201 |
| A00740 | A05112 | 180 | A00740 | A05310 | 411 |
| A00740 | A05701 | 187 | A00740 | A05712 | 450 |
| A00740 | A06360 | 324 | A00740 | A06564 | 326 |
| A00740 | A08901 | 457 | A00740 | A09131 | 208 |
| A00740 | A09587 | 257 | A00740 | A09717 | 247 |
| A00740 | A09735 | 462 | A00740 | A10006 | 391 |
| A00740 | A10032 | 358 | A00740 | A10338 | 393 |
| A00740 | A11288 | 165 | A00740 | A11622 | 377 |
| A00740 | A14074 | 247 | A00740 | A14479 | 168 |
| A00740 | A14568 | 301 | A00740 | A15673 | 423 |
| A00740 | A16109 | 185 | A00740 | A17152 | 296 |
| A00741 | A00742 | 452 | A00741 | A00758 | 491 |
| A00741 | A00808 | 198 | A00741 | A00809 | 491 |
| A00741 | A00811 | 218 | A00741 | A00821 | 310 |
| A00741 | A00839 | 299 | A00741 | A00878 | 317 |
| A00741 | A00922 | 328 | A00741 | A00935 | 491 |
| A00741 | A00953 | 375 | A00741 | A00974 | 174 |
| A00741 | A00985 | 485 | A00741 | A00998 | 185 |
| A00741 | A01027 | 340 | A00741 | A01042 | 319 |
| A00741 | A01050 | 160 | A00741 | A01054 | 307 |
| A00741 | A01075 | 311 | A00741 | A01082 | 384 |
| A00741 | A01086 | 466 | A00741 | A01150 | 477 |
| A00741 | A01155 | 447 | A00741 | A01161 | 491 |
| A00741 | A01192 | 440 | A00741 | A01210 | 491 |
| A00741 | A01214 | 205 | A00741 | A01261 | 271 |
| A00741 | A01287 | 215 | A00741 | A01336 | 490 |
| A00741 | A01413 | 491 | A00741 | A01435 | 491 |
| A00741 | A01447 | 491 | A00741 | A01539 | 184 |

|        |        |     |        |        |     |
|--------|--------|-----|--------|--------|-----|
| A00741 | A01540 | 491 | A00741 | A01741 | 432 |
| A00741 | A01815 | 270 | A00741 | A01827 | 491 |
| A00741 | A01850 | 346 | A00741 | A02040 | 488 |
| A00741 | A02225 | 276 | A00741 | A02350 | 439 |
| A00741 | A02510 | 218 | A00741 | A02527 | 160 |
| A00741 | A02607 | 491 | A00741 | A02743 | 262 |
| A00741 | A02872 | 479 | A00741 | A02994 | 483 |
| A00741 | A02996 | 260 | A00741 | A02999 | 188 |
| A00741 | A03494 | 380 | A00741 | A03676 | 229 |
| A00741 | A03691 | 316 | A00741 | A03740 | 485 |
| A00741 | A03752 | 451 | A00741 | A03798 | 311 |
| A00741 | A03809 | 484 | A00741 | A03905 | 173 |
| A00741 | A04031 | 198 | A00741 | A04209 | 452 |
| A00741 | A04838 | 324 | A00741 | A05417 | 491 |
| A00741 | A05449 | 263 | A00741 | A05812 | 311 |
| A00741 | A06158 | 163 | A00741 | A06466 | 405 |
| A00741 | A06545 | 218 | A00741 | A06546 | 461 |
| A00741 | A07311 | 285 | A00741 | A07394 | 491 |
| A00741 | A07527 | 369 | A00741 | A07686 | 260 |
| A00741 | A07706 | 168 | A00741 | A07742 | 270 |
| A00741 | A07798 | 195 | A00741 | A08519 | 327 |
| A00741 | A08527 | 483 | A00741 | A08835 | 301 |
| A00741 | A08967 | 279 | A00741 | A09054 | 491 |
| A00741 | A09093 | 246 | A00741 | A09581 | 385 |
| A00741 | A09595 | 235 | A00741 | A09709 | 469 |
| A00741 | A09792 | 469 | A00741 | A09902 | 219 |
| A00741 | A10598 | 443 | A00741 | A10853 | 163 |
| A00741 | A10935 | 235 | A00741 | A10982 | 195 |
| A00741 | A11307 | 343 | A00741 | A11322 | 351 |
| A00741 | A11338 | 177 | A00741 | A11372 | 446 |
| A00741 | A11526 | 256 | A00741 | A11833 | 375 |
| A00741 | A12167 | 363 | A00741 | A12170 | 170 |
| A00741 | A12408 | 188 | A00741 | A13037 | 335 |
| A00741 | A13340 | 157 | A00741 | A13398 | 210 |
| A00741 | A13555 | 184 | A00741 | A13576 | 310 |
| A00741 | A13809 | 210 | A00741 | A14073 | 481 |
| A00741 | A14507 | 204 | A00741 | A14547 | 270 |
| A00741 | A14566 | 451 | A00741 | A14655 | 208 |
| A00741 | A15121 | 235 | A00741 | A15653 | 491 |
| A00741 | A15666 | 491 | A00741 | A15760 | 198 |
| A00741 | A15765 | 337 | A00741 | A15932 | 254 |
| A00741 | A16157 | 252 | A00741 | A16243 | 167 |
| A00741 | A16274 | 159 | A00741 | A16403 | 235 |
| A00741 | A16430 | 377 | A00741 | A16676 | 196 |
| A00741 | A16683 | 385 | A00742 | A00766 | 290 |
| A00742 | A00821 | 333 | A00742 | A00876 | 228 |

|        |        |     |        |        |     |
|--------|--------|-----|--------|--------|-----|
| A00742 | A00923 | 252 | A00742 | A00967 | 185 |
| A00742 | A00973 | 322 | A00742 | A00985 | 481 |
| A00742 | A00998 | 334 | A00742 | A01013 | 243 |
| A00742 | A01155 | 260 | A00742 | A01161 | 423 |
| A00742 | A01177 | 285 | A00742 | A01196 | 278 |
| A00742 | A01210 | 485 | A00742 | A01287 | 195 |
| A00742 | A01313 | 235 | A00742 | A01320 | 221 |
| A00742 | A01327 | 243 | A00742 | A01358 | 249 |
| A00742 | A01385 | 271 | A00742 | A01413 | 335 |
| A00742 | A01420 | 232 | A00742 | A01440 | 311 |
| A00742 | A01470 | 232 | A00742 | A01627 | 227 |
| A00742 | A01667 | 174 | A00742 | A01711 | 188 |
| A00742 | A01741 | 190 | A00742 | A01827 | 441 |
| A00742 | A02009 | 369 | A00742 | A02040 | 468 |
| A00742 | A02564 | 183 | A00742 | A02743 | 294 |
| A00742 | A02994 | 433 | A00742 | A02996 | 377 |
| A00742 | A03259 | 159 | A00742 | A03651 | 384 |
| A00742 | A05812 | 259 | A00742 | A09506 | 274 |
| A00742 | A10598 | 400 | A00742 | A11279 | 232 |
| A00742 | A11313 | 245 | A00742 | A13180 | 234 |
| A00742 | A15379 | 247 | A00743 | A00804 | 167 |
| A00743 | A00882 | 451 | A00743 | A00887 | 176 |
| A00743 | A01091 | 240 | A00743 | A01161 | 466 |
| A00743 | A01235 | 484 | A00743 | A01343 | 350 |
| A00743 | A01503 | 258 | A00743 | A01541 | 199 |
| A00743 | A01741 | 174 | A00743 | A02096 | 167 |
| A00743 | A02156 | 217 | A00743 | A02215 | 272 |
| A00743 | A02286 | 455 | A00743 | A02313 | 172 |
| A00743 | A02320 | 235 | A00743 | A02889 | 422 |
| A00743 | A02923 | 217 | A00743 | A02991 | 170 |
| A00743 | A03018 | 367 | A00743 | A03071 | 235 |
| A00743 | A03104 | 491 | A00743 | A03167 | 162 |
| A00743 | A03191 | 160 | A00743 | A03300 | 68  |
| A00743 | A04091 | 160 | A00743 | A04205 | 273 |
| A00743 | A04252 | 424 | A00743 | A04275 | 417 |
| A00743 | A05152 | 217 | A00743 | A05155 | 483 |
| A00743 | A05157 | 326 | A00743 | A05229 | 208 |
| A00743 | A05234 | 190 | A00743 | A05285 | 162 |
| A00743 | A05289 | 199 | A00743 | A05356 | 176 |
| A00743 | A05439 | 355 | A00743 | A05653 | 162 |
| A00743 | A06100 | 450 | A00743 | A06255 | 174 |
| A00743 | A06654 | 212 | A00743 | A06708 | 457 |
| A00743 | A06728 | 217 | A00743 | A07209 | 491 |
| A00743 | A07311 | 199 | A00743 | A07329 | 272 |
| A00743 | A07558 | 307 | A00743 | A07641 | 232 |
| A00743 | A07803 | 427 | A00743 | A07836 | 167 |

|        |        |     |        |        |     |
|--------|--------|-----|--------|--------|-----|
| A00743 | A07922 | 369 | A00743 | A08097 | 486 |
| A00743 | A08277 | 217 | A00743 | A08495 | 174 |
| A00743 | A08630 | 199 | A00743 | A08751 | 162 |
| A00743 | A09362 | 256 | A00743 | A09509 | 232 |
| A00743 | A09742 | 160 | A00743 | A10069 | 217 |
| A00743 | A10528 | 276 | A00743 | A10594 | 486 |
| A00743 | A11454 | 299 | A00743 | A11548 | 167 |
| A00743 | A11597 | 185 | A00743 | A11673 | 162 |
| A00743 | A12055 | 195 | A00743 | A13213 | 171 |
| A00743 | A13369 | 485 | A00743 | A13441 | 226 |
| A00743 | A13832 | 467 | A00743 | A13933 | 302 |
| A00743 | A14635 | 274 | A00743 | A14788 | 307 |
| A00743 | A15366 | 296 | A00743 | A15463 | 413 |
| A00743 | A15498 | 345 | A00743 | A16061 | 157 |
| A00743 | A16157 | 234 | A00743 | A17123 | 215 |
| A00744 | A00805 | 401 | A00744 | A00858 | 360 |
| A00744 | A00860 | 156 | A00744 | A00866 | 156 |
| A00744 | A00881 | 167 | A00744 | A00961 | 412 |
| A00744 | A00978 | 282 | A00744 | A01007 | 156 |
| A00744 | A01019 | 156 | A00744 | A01195 | 212 |
| A00744 | A01200 | 156 | A00744 | A01212 | 172 |
| A00744 | A01228 | 165 | A00744 | A01325 | 491 |
| A00744 | A01335 | 449 | A00744 | A01336 | 172 |
| A00744 | A01398 | 171 | A00744 | A01401 | 225 |
| A00744 | A01447 | 457 | A00744 | A01500 | 156 |
| A00744 | A01571 | 486 | A00744 | A02389 | 525 |
| A00744 | A02394 | 290 | A00744 | A02872 | 340 |
| A00744 | A03014 | 489 | A00744 | A03207 | 277 |
| A00744 | A03486 | 204 | A00744 | A03591 | 254 |
| A00744 | A03662 | 157 | A00744 | A03886 | 219 |
| A00744 | A03990 | 218 | A00744 | A04002 | 174 |
| A00744 | A04316 | 205 | A00744 | A04648 | 156 |
| A00744 | A04687 | 156 | A00744 | A04879 | 316 |
| A00744 | A05353 | 254 | A00744 | A05981 | 714 |
| A00744 | A06429 | 232 | A00744 | A06803 | 251 |
| A00744 | A07670 | 156 | A00744 | A07850 | 156 |
| A00744 | A07887 | 156 | A00744 | A08383 | 156 |
| A00744 | A08818 | 156 | A00744 | A09502 | 156 |
| A00744 | A09806 | 447 | A00744 | A11344 | 156 |
| A00744 | A11674 | 156 | A00744 | A11735 | 405 |
| A00744 | A13788 | 485 | A00744 | A14006 | 477 |
| A00744 | A14827 | 152 | A00744 | A15545 | 201 |
| A00744 | A15666 | 488 | A00744 | A15986 | 172 |
| A00744 | A16228 | 156 | A00745 | A00750 | 307 |
| A00745 | A00780 | 335 | A00745 | A00785 | 240 |
| A00745 | A00953 | 344 | A00745 | A00974 | 245 |

|        |        |     |        |        |     |
|--------|--------|-----|--------|--------|-----|
| A00745 | A01068 | 218 | A00745 | A01086 | 382 |
| A00745 | A01094 | 435 | A00745 | A01108 | 160 |
| A00745 | A01204 | 263 | A00745 | A01399 | 152 |
| A00745 | A01448 | 195 | A00745 | A07569 | 319 |
| A00745 | A11427 | 259 | A00745 | A12325 | 238 |
| A00745 | A14479 | 235 | A00746 | A00848 | 322 |
| A00746 | A01011 | 321 | A00746 | A01578 | 162 |
| A00746 | A01757 | 238 | A00746 | A02541 | 257 |
| A00746 | A02642 | 174 | A00746 | A04372 | 327 |
| A00746 | A04790 | 205 | A00746 | A05673 | 283 |
| A00746 | A06428 | 152 | A00746 | A06868 | 219 |
| A00746 | A07129 | 216 | A00746 | A07483 | 414 |
| A00746 | A07810 | 371 | A00746 | A08444 | 401 |
| A00746 | A09334 | 405 | A00746 | A09869 | 195 |
| A00746 | A11917 | 428 | A00746 | A13313 | 462 |
| A00746 | A13536 | 371 | A00746 | A14633 | 316 |
| A00746 | A15297 | 241 | A00746 | A15366 | 515 |
| A00746 | A16274 | 152 | A00747 | A00820 | 477 |
| A00747 | A00887 | 306 | A00747 | A00914 | 185 |
| A00747 | A01046 | 414 | A00747 | A01104 | 489 |
| A00747 | A01172 | 486 | A00747 | A01178 | 151 |
| A00747 | A01189 | 490 | A00747 | A01239 | 350 |
| A00747 | A01364 | 165 | A00747 | A01367 | 234 |
| A00747 | A01405 | 490 | A00747 | A01507 | 162 |
| A00747 | A01524 | 899 | A00747 | A01527 | 899 |
| A00747 | A01548 | 180 | A00747 | A01550 | 418 |
| A00747 | A01554 | 899 | A00747 | A01558 | 899 |
| A00747 | A01562 | 171 | A00747 | A01588 | 917 |
| A00747 | A01602 | 491 | A00747 | A01606 | 272 |
| A00747 | A01626 | 154 | A00747 | A01665 | 210 |
| A00747 | A01726 | 440 | A00747 | A01730 | 418 |
| A00747 | A01740 | 316 | A00747 | A01741 | 457 |
| A00747 | A01743 | 350 | A00747 | A01755 | 213 |
| A00747 | A01769 | 173 | A00747 | A01774 | 79  |
| A00747 | A01838 | 353 | A00747 | A01844 | 219 |
| A00747 | A01850 | 391 | A00747 | A01886 | 491 |
| A00747 | A01896 | 183 | A00747 | A01897 | 63  |
| A00747 | A01927 | 172 | A00747 | A02028 | 184 |
| A00747 | A02080 | 218 | A00747 | A02143 | 433 |
| A00747 | A02148 | 199 | A00747 | A02195 | 154 |
| A00747 | A02215 | 223 | A00747 | A02233 | 240 |
| A00747 | A02294 | 195 | A00747 | A02304 | 474 |
| A00747 | A02321 | 176 | A00747 | A02325 | 243 |
| A00747 | A02339 | 240 | A00747 | A02345 | 480 |
| A00747 | A02416 | 221 | A00747 | A02460 | 440 |
| A00747 | A02497 | 182 | A00747 | A02535 | 440 |

|        |        |     |        |        |     |
|--------|--------|-----|--------|--------|-----|
| A00747 | A02561 | 339 | A00747 | A02563 | 343 |
| A00747 | A02564 | 395 | A00747 | A02673 | 388 |
| A00747 | A02687 | 229 | A00747 | A02689 | 447 |
| A00747 | A02695 | 327 | A00747 | A02703 | 428 |
| A00747 | A02704 | 160 | A00747 | A02706 | 156 |
| A00747 | A02744 | 63  | A00747 | A02752 | 441 |
| A00747 | A02753 | 173 | A00747 | A02773 | 182 |
| A00747 | A02815 | 195 | A00747 | A02816 | 353 |
| A00747 | A02823 | 353 | A00747 | A02827 | 171 |
| A00747 | A02830 | 457 | A00747 | A02837 | 270 |
| A00747 | A02842 | 477 | A00747 | A02860 | 168 |
| A00747 | A02868 | 475 | A00747 | A02877 | 257 |
| A00747 | A02878 | 323 | A00747 | A02894 | 171 |
| A00747 | A02902 | 491 | A00747 | A02903 | 422 |
| A00747 | A02904 | 238 | A00747 | A02913 | 204 |
| A00747 | A02965 | 475 | A00747 | A03057 | 358 |
| A00747 | A03112 | 462 | A00747 | A03213 | 475 |
| A00747 | A03229 | 290 | A00747 | A03267 | 213 |
| A00747 | A03273 | 350 | A00747 | A03286 | 224 |
| A00747 | A03304 | 371 | A00747 | A03305 | 185 |
| A00747 | A03307 | 204 | A00747 | A03314 | 188 |
| A00747 | A03321 | 443 | A00747 | A03338 | 269 |
| A00747 | A03401 | 445 | A00747 | A03415 | 353 |
| A00747 | A03416 | 154 | A00747 | A03432 | 168 |
| A00747 | A03449 | 154 | A00747 | A03451 | 469 |
| A00747 | A03465 | 235 | A00747 | A03494 | 491 |
| A00747 | A03575 | 899 | A00747 | A03611 | 491 |
| A00747 | A03656 | 151 | A00747 | A03725 | 310 |
| A00747 | A03740 | 180 | A00747 | A03803 | 162 |
| A00747 | A03906 | 221 | A00747 | A03990 | 367 |
| A00747 | A04001 | 151 | A00747 | A04080 | 308 |
| A00747 | A04202 | 201 | A00747 | A04212 | 252 |
| A00747 | A04236 | 188 | A00747 | A04342 | 477 |
| A00747 | A04422 | 350 | A00747 | A04496 | 293 |
| A00747 | A04597 | 171 | A00747 | A04828 | 224 |
| A00747 | A04847 | 343 | A00747 | A04867 | 246 |
| A00747 | A05006 | 159 | A00747 | A05075 | 204 |
| A00747 | A05122 | 262 | A00747 | A05142 | 176 |
| A00747 | A05158 | 473 | A00747 | A05185 | 384 |
| A00747 | A05216 | 210 | A00747 | A05291 | 157 |
| A00747 | A05355 | 290 | A00747 | A05364 | 240 |
| A00747 | A05415 | 394 | A00747 | A05576 | 182 |
| A00747 | A05623 | 224 | A00747 | A05684 | 335 |
| A00747 | A05797 | 422 | A00747 | A05802 | 224 |
| A00747 | A05902 | 369 | A00747 | A05958 | 151 |
| A00747 | A05983 | 260 | A00747 | A06078 | 232 |

|        |        |     |        |        |     |
|--------|--------|-----|--------|--------|-----|
| A00747 | A06107 | 171 | A00747 | A06138 | 436 |
| A00747 | A06200 | 389 | A00747 | A06376 | 260 |
| A00747 | A06388 | 162 | A00747 | A06581 | 262 |
| A00747 | A06588 | 152 | A00747 | A06595 | 338 |
| A00747 | A06610 | 191 | A00747 | A06623 | 234 |
| A00747 | A06683 | 204 | A00747 | A06877 | 241 |
| A00747 | A06897 | 302 | A00747 | A06937 | 162 |
| A00747 | A06949 | 274 | A00747 | A06950 | 160 |
| A00747 | A07071 | 260 | A00747 | A07089 | 188 |
| A00747 | A07158 | 195 | A00747 | A07311 | 899 |
| A00747 | A07568 | 446 | A00747 | A08200 | 224 |
| A00747 | A08571 | 185 | A00747 | A08576 | 351 |
| A00747 | A08581 | 399 | A00747 | A08627 | 234 |
| A00747 | A08836 | 174 | A00747 | A08837 | 441 |
| A00747 | A08858 | 899 | A00747 | A09020 | 427 |
| A00747 | A09025 | 293 | A00747 | A09136 | 188 |
| A00747 | A09242 | 384 | A00747 | A09271 | 213 |
| A00747 | A09385 | 195 | A00747 | A09561 | 173 |
| A00747 | A09771 | 236 | A00747 | A09789 | 399 |
| A00747 | A09923 | 260 | A00747 | A09955 | 162 |
| A00747 | A10015 | 195 | A00747 | A10081 | 165 |
| A00747 | A10148 | 398 | A00747 | A10155 | 379 |
| A00747 | A10247 | 195 | A00747 | A10491 | 240 |
| A00747 | A10506 | 213 | A00747 | A10580 | 899 |
| A00747 | A11142 | 204 | A00747 | A11574 | 165 |
| A00747 | A11900 | 154 | A00747 | A13236 | 451 |
| A00747 | A13419 | 224 | A00747 | A13487 | 379 |
| A00747 | A13629 | 151 | A00747 | A13683 | 188 |
| A00747 | A13684 | 213 | A00747 | A13829 | 299 |
| A00747 | A14023 | 204 | A00747 | A14297 | 399 |
| A00747 | A14643 | 343 | A00747 | A14965 | 379 |
| A00747 | A14966 | 379 | A00747 | A16014 | 224 |
| A00747 | A16300 | 274 | A00747 | A16304 | 249 |
| A00748 | A00880 | 472 | A00748 | A00901 | 249 |
| A00748 | A01252 | 609 | A00748 | A01302 | 611 |
| A00748 | A01459 | 297 | A00748 | A01560 | 243 |
| A00748 | A05216 | 481 | A00748 | A05454 | 574 |
| A00748 | A06596 | 157 | A00748 | A06597 | 479 |
| A00748 | A06687 | 611 | A00748 | A08091 | 185 |
| A00748 | A08555 | 611 | A00748 | A09298 | 611 |
| A00748 | A11725 | 151 | A00748 | A12200 | 238 |
| A00748 | A12246 | 201 | A00748 | A13604 | 419 |
| A00748 | A13783 | 152 | A00748 | A13912 | 210 |
| A00748 | A13983 | 486 | A00748 | A14199 | 223 |
| A00748 | A14247 | 468 | A00748 | A14661 | 283 |
| A00748 | A14711 | 283 | A00748 | A14921 | 226 |

|        |        |     |        |        |     |
|--------|--------|-----|--------|--------|-----|
| A00748 | A15315 | 611 | A00748 | A15345 | 234 |
| A00748 | A15347 | 611 | A00748 | A15528 | 416 |
| A00748 | A15617 | 591 | A00748 | A16304 | 491 |
| A00748 | A16364 | 308 | A00748 | A16806 | 219 |
| A00748 | A16824 | 201 | A00749 | A00767 | 178 |
| A00749 | A00861 | 170 | A00749 | A00872 | 322 |
| A00749 | A00908 | 321 | A00749 | A00916 | 174 |
| A00749 | A00918 | 218 | A00749 | A00934 | 170 |
| A00749 | A00945 | 176 | A00749 | A00960 | 174 |
| A00749 | A00992 | 416 | A00749 | A01028 | 559 |
| A00749 | A01065 | 210 | A00749 | A01092 | 560 |
| A00749 | A01098 | 296 | A00749 | A01120 | 210 |
| A00749 | A01129 | 275 | A00749 | A01160 | 170 |
| A00749 | A01168 | 170 | A00749 | A01193 | 174 |
| A00749 | A01234 | 156 | A00749 | A01279 | 174 |
| A00749 | A01351 | 174 | A00749 | A01356 | 170 |
| A00749 | A01379 | 210 | A00749 | A01424 | 174 |
| A00749 | A01425 | 397 | A00749 | A01439 | 210 |
| A00749 | A01440 | 171 | A00749 | A01488 | 104 |
| A00749 | A01492 | 328 | A00749 | A01538 | 253 |
| A00749 | A01598 | 361 | A00749 | A01614 | 210 |
| A00749 | A02249 | 213 | A00749 | A02265 | 278 |
| A00749 | A02978 | 210 | A00749 | A03438 | 544 |
| A00749 | A03652 | 170 | A00749 | A03859 | 491 |
| A00749 | A03981 | 170 | A00749 | A05230 | 210 |
| A00749 | A06356 | 170 | A00749 | A06698 | 174 |
| A00749 | A07076 | 210 | A00749 | A07203 | 388 |
| A00749 | A07244 | 198 | A00749 | A07432 | 174 |
| A00749 | A07481 | 224 | A00749 | A07524 | 544 |
| A00749 | A07625 | 174 | A00749 | A07924 | 574 |
| A00749 | A08211 | 170 | A00749 | A09292 | 210 |
| A00749 | A09665 | 316 | A00749 | A09686 | 312 |
| A00749 | A09697 | 539 | A00749 | A11263 | 281 |
| A00749 | A11544 | 174 | A00749 | A11831 | 174 |
| A00749 | A11832 | 174 | A00749 | A13052 | 210 |
| A00749 | A13989 | 478 | A00749 | A14699 | 210 |
| A00749 | A14816 | 210 | A00750 | A00780 | 313 |
| A00750 | A00783 | 367 | A00750 | A00785 | 443 |
| A00750 | A00839 | 162 | A00750 | A00842 | 355 |
| A00750 | A00878 | 299 | A00750 | A00953 | 379 |
| A00750 | A01027 | 227 | A00750 | A01054 | 177 |
| A00750 | A01086 | 460 | A00750 | A01121 | 256 |
| A00750 | A01186 | 247 | A00750 | A01246 | 373 |
| A00750 | A01335 | 177 | A00750 | A01365 | 226 |
| A00750 | A01382 | 375 | A00750 | A01399 | 438 |
| A00750 | A01448 | 162 | A00750 | A03776 | 262 |



|        |        |     |        |        |     |
|--------|--------|-----|--------|--------|-----|
| A00750 | A05501 | 226 | A00750 | A08011 | 288 |
| A00750 | A08521 | 362 | A00750 | A08773 | 216 |
| A00750 | A08982 | 156 | A00750 | A08987 | 374 |
| A00750 | A09735 | 180 | A00750 | A10535 | 283 |
| A00750 | A11338 | 217 | A00750 | A11419 | 241 |
| A00750 | A11427 | 229 | A00751 | A00759 | 243 |
| A00751 | A00761 | 403 | A00751 | A00766 | 444 |
| A00751 | A00781 | 257 | A00751 | A00791 | 541 |
| A00751 | A00868 | 544 | A00751 | A00873 | 218 |
| A00751 | A00883 | 544 | A00751 | A00884 | 469 |
| A00751 | A00926 | 544 | A00751 | A00927 | 506 |
| A00751 | A00956 | 450 | A00751 | A00975 | 499 |
| A00751 | A01039 | 495 | A00751 | A01058 | 721 |
| A00751 | A01077 | 162 | A00751 | A01080 | 540 |
| A00751 | A01097 | 468 | A00751 | A01106 | 486 |
| A00751 | A01169 | 377 | A00751 | A01267 | 714 |
| A00751 | A01339 | 305 | A00751 | A01340 | 228 |
| A00751 | A01370 | 450 | A00751 | A01371 | 173 |
| A00751 | A01444 | 460 | A00751 | A01502 | 179 |
| A00751 | A01557 | 185 | A00751 | A02151 | 204 |
| A00751 | A02212 | 160 | A00751 | A02414 | 288 |
| A00751 | A04015 | 274 | A00751 | A04990 | 267 |
| A00751 | A05570 | 177 | A00751 | A06750 | 241 |
| A00751 | A07096 | 160 | A00751 | A07226 | 220 |
| A00751 | A07307 | 201 | A00751 | A07434 | 174 |
| A00751 | A07457 | 274 | A00751 | A07649 | 314 |
| A00751 | A07708 | 318 | A00751 | A07756 | 204 |
| A00751 | A07985 | 216 | A00751 | A08490 | 193 |
| A00751 | A08834 | 160 | A00751 | A08882 | 165 |
| A00751 | A09627 | 160 | A00751 | A09672 | 355 |
| A00751 | A10127 | 199 | A00751 | A10372 | 160 |
| A00751 | A11234 | 252 | A00751 | A11365 | 160 |
| A00751 | A11526 | 172 | A00751 | A11598 | 386 |
| A00751 | A11735 | 569 | A00751 | A11737 | 488 |
| A00751 | A11914 | 698 | A00751 | A12255 | 179 |
| A00751 | A12658 | 594 | A00751 | A12824 | 545 |
| A00751 | A13495 | 362 | A00751 | A13861 | 314 |
| A00751 | A14007 | 160 | A00751 | A14196 | 313 |
| A00751 | A14488 | 425 | A00751 | A14510 | 425 |
| A00751 | A15257 | 302 | A00751 | A15297 | 483 |
| A00751 | A15559 | 205 | A00751 | A15698 | 160 |
| A00751 | A15774 | 180 | A00751 | A16704 | 177 |
| A00751 | A16799 | 241 | A00751 | A16858 | 299 |
| A00751 | A17099 | 455 | A00751 | A17100 | 425 |
| A00751 | A17101 | 362 | A00752 | A00887 | 485 |
| A00752 | A01009 | 766 | A00752 | A01043 | 480 |

|        |        |     |        |        |     |
|--------|--------|-----|--------|--------|-----|
| A00752 | A01046 | 152 | A00752 | A01098 | 238 |
| A00752 | A01137 | 466 | A00752 | A01257 | 306 |
| A00752 | A01276 | 491 | A00752 | A01367 | 152 |
| A00752 | A01461 | 177 | A00752 | A01520 | 512 |
| A00752 | A01565 | 747 | A00752 | A01575 | 162 |
| A00752 | A01578 | 157 | A00752 | A01585 | 174 |
| A00752 | A01593 | 393 | A00752 | A01604 | 488 |
| A00752 | A01654 | 362 | A00752 | A01766 | 489 |
| A00752 | A01867 | 234 | A00752 | A01870 | 491 |
| A00752 | A01941 | 449 | A00752 | A01953 | 224 |
| A00752 | A01983 | 183 | A00752 | A02007 | 173 |
| A00752 | A02011 | 229 | A00752 | A02052 | 184 |
| A00752 | A02132 | 240 | A00752 | A02138 | 491 |
| A00752 | A02148 | 205 | A00752 | A02154 | 363 |
| A00752 | A02174 | 340 | A00752 | A02222 | 400 |
| A00752 | A02236 | 235 | A00752 | A02240 | 491 |
| A00752 | A02242 | 491 | A00752 | A02243 | 174 |
| A00752 | A02245 | 488 | A00752 | A02251 | 355 |
| A00752 | A02262 | 154 | A00752 | A02278 | 420 |
| A00752 | A02282 | 174 | A00752 | A02283 | 321 |
| A00752 | A02285 | 177 | A00752 | A02370 | 290 |
| A00752 | A02371 | 269 | A00752 | A02382 | 414 |
| A00752 | A02439 | 475 | A00752 | A02458 | 424 |
| A00752 | A02459 | 213 | A00752 | A02460 | 458 |
| A00752 | A02468 | 193 | A00752 | A02547 | 353 |
| A00752 | A02578 | 288 | A00752 | A02597 | 202 |
| A00752 | A02608 | 296 | A00752 | A02624 | 441 |
| A00752 | A02637 | 472 | A00752 | A02644 | 218 |
| A00752 | A02654 | 490 | A00752 | A02655 | 475 |
| A00752 | A02657 | 202 | A00752 | A02659 | 246 |
| A00752 | A02673 | 373 | A00752 | A02681 | 170 |
| A00752 | A02698 | 565 | A00752 | A02727 | 489 |
| A00752 | A02769 | 291 | A00752 | A02800 | 154 |
| A00752 | A02843 | 180 | A00752 | A02859 | 151 |
| A00752 | A02876 | 168 | A00752 | A02884 | 180 |
| A00752 | A02885 | 240 | A00752 | A02896 | 154 |
| A00752 | A03019 | 414 | A00752 | A03045 | 428 |
| A00752 | A03049 | 399 | A00752 | A03093 | 405 |
| A00752 | A03104 | 465 | A00752 | A03109 | 260 |
| A00752 | A03110 | 477 | A00752 | A03157 | 281 |
| A00752 | A03183 | 466 | A00752 | A03223 | 357 |
| A00752 | A03224 | 446 | A00752 | A03239 | 491 |
| A00752 | A03259 | 221 | A00752 | A03310 | 168 |
| A00752 | A03316 | 180 | A00752 | A03318 | 321 |
| A00752 | A03413 | 218 | A00752 | A03447 | 486 |
| A00752 | A03489 | 515 | A00752 | A03718 | 515 |

|        |        |     |        |        |     |
|--------|--------|-----|--------|--------|-----|
| A00752 | A03735 | 357 | A00752 | A03746 | 481 |
| A00752 | A03757 | 184 | A00752 | A03761 | 246 |
| A00752 | A03788 | 491 | A00752 | A03799 | 221 |
| A00752 | A03804 | 327 | A00752 | A03851 | 212 |
| A00752 | A03892 | 259 | A00752 | A03900 | 446 |
| A00752 | A03923 | 352 | A00752 | A03935 | 208 |
| A00752 | A03942 | 380 | A00752 | A03948 | 449 |
| A00752 | A03979 | 218 | A00752 | A04033 | 310 |
| A00752 | A04039 | 274 | A00752 | A04040 | 372 |
| A00752 | A04075 | 232 | A00752 | A04076 | 274 |
| A00752 | A04130 | 475 | A00752 | A04248 | 294 |
| A00752 | A04257 | 184 | A00752 | A04275 | 435 |
| A00752 | A04305 | 190 | A00752 | A04423 | 154 |
| A00752 | A04450 | 330 | A00752 | A04478 | 262 |
| A00752 | A04589 | 238 | A00752 | A04679 | 312 |
| A00752 | A04748 | 218 | A00752 | A04756 | 405 |
| A00752 | A04780 | 173 | A00752 | A04870 | 407 |
| A00752 | A04902 | 188 | A00752 | A05155 | 297 |
| A00752 | A05252 | 249 | A00752 | A05355 | 195 |
| A00752 | A05439 | 180 | A00752 | A05449 | 462 |
| A00752 | A05483 | 274 | A00752 | A05517 | 417 |
| A00752 | A05556 | 574 | A00752 | A05577 | 697 |
| A00752 | A05613 | 202 | A00752 | A05653 | 188 |
| A00752 | A05679 | 491 | A00752 | A05815 | 483 |
| A00752 | A05891 | 152 | A00752 | A05931 | 249 |
| A00752 | A05944 | 263 | A00752 | A06054 | 447 |
| A00752 | A06118 | 170 | A00752 | A06293 | 423 |
| A00752 | A06344 | 154 | A00752 | A06415 | 490 |
| A00752 | A06452 | 291 | A00752 | A06588 | 462 |
| A00752 | A06604 | 318 | A00752 | A06747 | 302 |
| A00752 | A06899 | 162 | A00752 | A07006 | 240 |
| A00752 | A07010 | 249 | A00752 | A07126 | 435 |
| A00752 | A07133 | 379 | A00752 | A07143 | 457 |
| A00752 | A07145 | 396 | A00752 | A07152 | 296 |
| A00752 | A07157 | 330 | A00752 | A07161 | 303 |
| A00752 | A07166 | 389 | A00752 | A07209 | 486 |
| A00752 | A07372 | 195 | A00752 | A07390 | 273 |
| A00752 | A07529 | 321 | A00752 | A07558 | 157 |
| A00752 | A07764 | 385 | A00752 | A07946 | 291 |
| A00752 | A08580 | 274 | A00752 | A08642 | 321 |
| A00752 | A08834 | 404 | A00752 | A08850 | 609 |
| A00752 | A08908 | 259 | A00752 | A09150 | 162 |
| A00752 | A09219 | 486 | A00752 | A09245 | 441 |
| A00752 | A09552 | 483 | A00752 | A09572 | 308 |
| A00752 | A09652 | 199 | A00752 | A10172 | 260 |
| A00752 | A10287 | 291 | A00752 | A10319 | 157 |

|        |        |     |        |        |     |
|--------|--------|-----|--------|--------|-----|
| A00752 | A10487 | 321 | A00752 | A10571 | 249 |
| A00752 | A10586 | 218 | A00752 | A10640 | 363 |
| A00752 | A10744 | 318 | A00752 | A10943 | 218 |
| A00752 | A11216 | 180 | A00752 | A11488 | 274 |
| A00752 | A11601 | 170 | A00752 | A11953 | 226 |
| A00752 | A12295 | 177 | A00752 | A12542 | 291 |
| A00752 | A12936 | 249 | A00752 | A13369 | 163 |
| A00752 | A13485 | 249 | A00752 | A13987 | 273 |
| A00752 | A13988 | 246 | A00752 | A14071 | 273 |
| A00752 | A14125 | 402 | A00752 | A14135 | 372 |
| A00752 | A14190 | 462 | A00752 | A14199 | 208 |
| A00752 | A14202 | 223 | A00752 | A14210 | 490 |
| A00752 | A14236 | 561 | A00752 | A14366 | 747 |
| A00752 | A14368 | 256 | A00752 | A14371 | 174 |
| A00752 | A14372 | 491 | A00752 | A14374 | 491 |
| A00752 | A14380 | 480 | A00752 | A14381 | 479 |
| A00752 | A14391 | 491 | A00752 | A14392 | 210 |
| A00752 | A14394 | 486 | A00752 | A14417 | 232 |
| A00752 | A14418 | 199 | A00752 | A14430 | 277 |
| A00752 | A14439 | 445 | A00752 | A14511 | 484 |
| A00752 | A14554 | 491 | A00752 | A14570 | 489 |
| A00752 | A14596 | 662 | A00752 | A14599 | 451 |
| A00752 | A14603 | 416 | A00752 | A14604 | 489 |
| A00752 | A14616 | 249 | A00752 | A14621 | 343 |
| A00752 | A14635 | 380 | A00752 | A14659 | 714 |
| A00752 | A15081 | 321 | A00752 | A15285 | 430 |
| A00752 | A15292 | 386 | A00752 | A15312 | 279 |
| A00752 | A15322 | 398 | A00752 | A15394 | 279 |
| A00752 | A15395 | 246 | A00752 | A15420 | 256 |
| A00752 | A15425 | 490 | A00752 | A15427 | 224 |
| A00752 | A15475 | 340 | A00752 | A15477 | 232 |
| A00752 | A15480 | 467 | A00752 | A15495 | 455 |
| A00752 | A15498 | 429 | A00752 | A15516 | 443 |
| A00752 | A15518 | 433 | A00752 | A15606 | 515 |
| A00752 | A15607 | 281 | A00752 | A15608 | 217 |
| A00752 | A15609 | 232 | A00752 | A15610 | 321 |
| A00752 | A15642 | 185 | A00752 | A15790 | 429 |
| A00752 | A15795 | 491 | A00752 | A15808 | 232 |
| A00752 | A15884 | 375 | A00752 | A15904 | 224 |
| A00752 | A15969 | 232 | A00752 | A16001 | 321 |
| A00752 | A16008 | 174 | A00752 | A16014 | 260 |
| A00752 | A16031 | 240 | A00752 | A16037 | 260 |
| A00752 | A16267 | 260 | A00753 | A01026 | 363 |
| A00754 | A00809 | 208 | A00754 | A00812 | 491 |
| A00754 | A01000 | 262 | A00754 | A01146 | 491 |
| A00754 | A01262 | 218 | A00754 | A01443 | 176 |

|        |        |     |        |        |     |
|--------|--------|-----|--------|--------|-----|
| A00754 | A01537 | 281 | A00754 | A01689 | 445 |
| A00754 | A03461 | 360 | A00754 | A04164 | 259 |
| A00754 | A04492 | 162 | A00754 | A04681 | 168 |
| A00754 | A04693 | 345 | A00754 | A05880 | 279 |
| A00754 | A06348 | 443 | A00754 | A06572 | 335 |
| A00754 | A06584 | 201 | A00754 | A06607 | 290 |
| A00754 | A07433 | 232 | A00754 | A07593 | 475 |
| A00754 | A08184 | 277 | A00754 | A08185 | 328 |
| A00754 | A08196 | 355 | A00754 | A08201 | 156 |
| A00754 | A08285 | 317 | A00754 | A08463 | 299 |
| A00754 | A08503 | 489 | A00754 | A08525 | 491 |
| A00754 | A08549 | 491 | A00754 | A08557 | 362 |
| A00754 | A08560 | 481 | A00754 | A08561 | 450 |
| A00754 | A08729 | 358 | A00754 | A08814 | 475 |
| A00754 | A08847 | 299 | A00754 | A09256 | 249 |
| A00754 | A09828 | 345 | A00754 | A10789 | 182 |
| A00754 | A11390 | 229 | A00754 | A11954 | 308 |
| A00754 | A12725 | 467 | A00754 | A14084 | 168 |
| A00754 | A14227 | 489 | A00754 | A14285 | 229 |
| A00754 | A14286 | 162 | A00754 | A14289 | 409 |
| A00754 | A15533 | 481 | A00754 | A15743 | 157 |
| A00754 | A17125 | 188 | A00754 | A17144 | 152 |
| A00756 | A00861 | 288 | A00756 | A01129 | 307 |
| A00756 | A01156 | 396 | A00756 | A01160 | 285 |
| A00756 | A01313 | 254 | A00756 | A02064 | 367 |
| A00756 | A02164 | 152 | A00756 | A03438 | 290 |
| A00756 | A03601 | 374 | A00756 | A03644 | 435 |
| A00756 | A03981 | 486 | A00756 | A06084 | 430 |
| A00756 | A06356 | 443 | A00756 | A06814 | 302 |
| A00756 | A06815 | 452 | A00756 | A06825 | 208 |
| A00756 | A06955 | 411 | A00756 | A07307 | 347 |
| A00756 | A07506 | 472 | A00756 | A08653 | 432 |
| A00756 | A08768 | 355 | A00756 | A09656 | 443 |
| A00756 | A11981 | 326 | A00756 | A13052 | 317 |
| A00756 | A13626 | 262 | A00757 | A00822 | 411 |
| A00757 | A00981 | 167 | A00757 | A01052 | 467 |
| A00757 | A01074 | 154 | A00757 | A01125 | 236 |
| A00757 | A01173 | 424 | A00757 | A01354 | 454 |
| A00757 | A01385 | 404 | A00757 | A01406 | 232 |
| A00757 | A01426 | 277 | A00757 | A01527 | 173 |
| A00757 | A01558 | 210 | A00757 | A01572 | 405 |
| A00757 | A01610 | 409 | A00757 | A01707 | 306 |
| A00757 | A01730 | 234 | A00757 | A01770 | 199 |
| A00757 | A01790 | 445 | A00757 | A01995 | 491 |
| A00757 | A02152 | 199 | A00757 | A02482 | 252 |
| A00757 | A02736 | 221 | A00757 | A03247 | 170 |

|        |        |     |        |        |     |
|--------|--------|-----|--------|--------|-----|
| A00757 | A03292 | 475 | A00757 | A03475 | 229 |
| A00757 | A03771 | 200 | A00757 | A03990 | 491 |
| A00757 | A04012 | 218 | A00757 | A04104 | 157 |
| A00757 | A04304 | 210 | A00757 | A04316 | 268 |
| A00757 | A04449 | 368 | A00757 | A04663 | 201 |
| A00757 | A05633 | 154 | A00757 | A06010 | 162 |
| A00757 | A06660 | 314 | A00757 | A07311 | 489 |
| A00757 | A07339 | 466 | A00757 | A07553 | 347 |
| A00757 | A07619 | 430 | A00757 | A08160 | 174 |
| A00757 | A08514 | 152 | A00757 | A08571 | 177 |
| A00757 | A09004 | 288 | A00757 | A09038 | 210 |
| A00757 | A09504 | 160 | A00757 | A09606 | 190 |
| A00757 | A09937 | 151 | A00757 | A09993 | 413 |
| A00757 | A10151 | 217 | A00757 | A11068 | 377 |
| A00757 | A11369 | 273 | A00757 | A11487 | 429 |
| A00757 | A11711 | 283 | A00757 | A12383 | 205 |
| A00757 | A13824 | 154 | A00757 | A13997 | 226 |
| A00757 | A14006 | 489 | A00757 | A14208 | 168 |
| A00757 | A14220 | 491 | A00757 | A14406 | 187 |
| A00757 | A14644 | 434 | A00757 | A14943 | 167 |
| A00757 | A15492 | 428 | A00757 | A15503 | 167 |
| A00757 | A15504 | 329 | A00757 | A16004 | 221 |
| A00757 | A16285 | 179 | A00757 | A16410 | 454 |
| A00757 | A17063 | 285 | A00758 | A00809 | 491 |
| A00758 | A00922 | 285 | A00758 | A00935 | 491 |
| A00758 | A00987 | 235 | A00758 | A01086 | 198 |
| A00758 | A01150 | 165 | A00758 | A01161 | 491 |
| A00758 | A01210 | 491 | A00758 | A01336 | 260 |
| A00758 | A01413 | 279 | A00758 | A01435 | 491 |
| A00758 | A01447 | 491 | A00758 | A01540 | 461 |
| A00758 | A01573 | 185 | A00758 | A01644 | 159 |
| A00758 | A01741 | 378 | A00758 | A01827 | 371 |
| A00758 | A02353 | 151 | A00758 | A02607 | 490 |
| A00758 | A02698 | 267 | A00758 | A02743 | 165 |
| A00758 | A02996 | 288 | A00758 | A03740 | 286 |
| A00758 | A03752 | 286 | A00758 | A04017 | 460 |
| A00758 | A05417 | 486 | A00758 | A05812 | 249 |
| A00758 | A06158 | 196 | A00758 | A06173 | 188 |
| A00758 | A06466 | 489 | A00758 | A07311 | 468 |
| A00758 | A07371 | 379 | A00758 | A07394 | 491 |
| A00758 | A08517 | 182 | A00758 | A08519 | 490 |
| A00758 | A09054 | 228 | A00758 | A09709 | 202 |
| A00758 | A10533 | 356 | A00758 | A11149 | 246 |
| A00758 | A11526 | 427 | A00758 | A11833 | 485 |
| A00758 | A12042 | 213 | A00758 | A12170 | 333 |
| A00758 | A12227 | 291 | A00758 | A13116 | 390 |

|        |        |     |        |        |     |
|--------|--------|-----|--------|--------|-----|
| A00758 | A13340 | 350 | A00758 | A13524 | 306 |
| A00758 | A13739 | 480 | A00758 | A13809 | 483 |
| A00758 | A14073 | 467 | A00758 | A14566 | 335 |
| A00758 | A14825 | 238 | A00758 | A14845 | 472 |
| A00758 | A15653 | 491 | A00758 | A15666 | 491 |
| A00758 | A15765 | 491 | A00758 | A15932 | 157 |
| A00758 | A16157 | 490 | A00758 | A16243 | 330 |
| A00758 | A16403 | 265 | A00758 | A16676 | 475 |
| A00758 | A17176 | 468 | A00759 | A00761 | 491 |
| A00759 | A00775 | 391 | A00759 | A00791 | 475 |
| A00759 | A00868 | 408 | A00759 | A00883 | 428 |
| A00759 | A00884 | 430 | A00759 | A00915 | 174 |
| A00759 | A00926 | 452 | A00759 | A00950 | 380 |
| A00759 | A00956 | 268 | A00759 | A00975 | 368 |
| A00759 | A01014 | 254 | A00759 | A01042 | 322 |
| A00759 | A01064 | 329 | A00759 | A01093 | 490 |
| A00759 | A01099 | 484 | A00759 | A01169 | 388 |
| A00759 | A01187 | 352 | A00759 | A01197 | 350 |
| A00759 | A01203 | 216 | A00759 | A01321 | 154 |
| A00759 | A01341 | 185 | A00759 | A01388 | 369 |
| A00759 | A01444 | 228 | A00759 | A01844 | 159 |
| A00759 | A02215 | 245 | A00759 | A03043 | 221 |
| A00759 | A03149 | 196 | A00759 | A03570 | 364 |
| A00759 | A03682 | 196 | A00759 | A06750 | 157 |
| A00759 | A07406 | 432 | A00759 | A07434 | 215 |
| A00759 | A08516 | 283 | A00759 | A08769 | 210 |
| A00759 | A08844 | 221 | A00759 | A08995 | 193 |
| A00759 | A09000 | 400 | A00759 | A09085 | 389 |
| A00759 | A09320 | 266 | A00759 | A09654 | 184 |
| A00759 | A09828 | 199 | A00759 | A09979 | 352 |
| A00759 | A11068 | 301 | A00759 | A11604 | 212 |
| A00759 | A11724 | 246 | A00759 | A11851 | 201 |
| A00759 | A11940 | 259 | A00759 | A11965 | 278 |
| A00759 | A12556 | 443 | A00759 | A12658 | 170 |
| A00759 | A12665 | 154 | A00759 | A12824 | 438 |
| A00759 | A13356 | 154 | A00759 | A13809 | 177 |
| A00759 | A14026 | 167 | A00759 | A14073 | 173 |
| A00759 | A14138 | 215 | A00759 | A14903 | 252 |
| A00759 | A15505 | 160 | A00759 | A16322 | 157 |
| A00759 | A16409 | 313 | A00759 | A16587 | 235 |
| A00759 | A16962 | 305 | A00760 | A00762 | 190 |
| A00760 | A00777 | 356 | A00760 | A00856 | 490 |
| A00760 | A00858 | 491 | A00760 | A00903 | 404 |
| A00760 | A00919 | 491 | A00760 | A00923 | 238 |
| A00760 | A00954 | 481 | A00760 | A00964 | 470 |
| A00760 | A01020 | 491 | A00760 | A01022 | 490 |

|        |        |     |        |        |     |
|--------|--------|-----|--------|--------|-----|
| A00760 | A01027 | 455 | A00760 | A01032 | 467 |
| A00760 | A01075 | 719 | A00760 | A01079 | 486 |
| A00760 | A01082 | 491 | A00760 | A01084 | 491 |
| A00760 | A01087 | 491 | A00760 | A01088 | 257 |
| A00760 | A01161 | 356 | A00760 | A01206 | 457 |
| A00760 | A01234 | 400 | A00760 | A01352 | 412 |
| A00760 | A01399 | 404 | A00760 | A01406 | 430 |
| A00760 | A01419 | 468 | A00760 | A01451 | 274 |
| A00760 | A01458 | 254 | A00760 | A01503 | 481 |
| A00760 | A01573 | 462 | A00760 | A01574 | 256 |
| A00760 | A01585 | 224 | A00760 | A01598 | 279 |
| A00760 | A02086 | 374 | A00760 | A02364 | 561 |
| A00760 | A03279 | 157 | A00760 | A03601 | 462 |
| A00760 | A03880 | 561 | A00760 | A03944 | 170 |
| A00760 | A04668 | 534 | A00760 | A05155 | 497 |
| A00760 | A05234 | 561 | A00760 | A06881 | 151 |
| A00760 | A07533 | 191 | A00760 | A07706 | 491 |
| A00760 | A08022 | 475 | A00760 | A08293 | 377 |
| A00760 | A08356 | 232 | A00760 | A08402 | 265 |
| A00760 | A08518 | 435 | A00760 | A08527 | 455 |
| A00760 | A08553 | 445 | A00760 | A08567 | 313 |
| A00760 | A08976 | 486 | A00760 | A08996 | 208 |
| A00760 | A08998 | 201 | A00760 | A09339 | 130 |
| A00760 | A10538 | 146 | A00760 | A11496 | 183 |
| A00760 | A11674 | 384 | A00760 | A11930 | 335 |
| A00760 | A13045 | 241 | A00760 | A13532 | 385 |
| A00760 | A13987 | 218 | A00760 | A13989 | 490 |
| A00760 | A14006 | 180 | A00760 | A14122 | 281 |
| A00760 | A14209 | 174 | A00760 | A14272 | 402 |
| A00760 | A14566 | 177 | A00760 | A14594 | 180 |
| A00760 | A14614 | 183 | A00760 | A14655 | 474 |
| A00760 | A15266 | 205 | A00760 | A15322 | 420 |
| A00760 | A15345 | 435 | A00760 | A15347 | 238 |
| A00760 | A15384 | 561 | A00760 | A15520 | 417 |
| A00760 | A15531 | 180 | A00760 | A15733 | 490 |
| A00760 | A15946 | 490 | A00760 | A16394 | 156 |
| A00761 | A00766 | 513 | A00761 | A00775 | 213 |
| A00761 | A00781 | 302 | A00761 | A00791 | 538 |
| A00761 | A00816 | 170 | A00761 | A00868 | 542 |
| A00761 | A00883 | 543 | A00761 | A00884 | 246 |
| A00761 | A00925 | 174 | A00761 | A00926 | 542 |
| A00761 | A00927 | 160 | A00761 | A00950 | 372 |
| A00761 | A00955 | 330 | A00761 | A00956 | 258 |
| A00761 | A00975 | 535 | A00761 | A01014 | 246 |
| A00761 | A01039 | 160 | A00761 | A01042 | 151 |
| A00761 | A01045 | 171 | A00761 | A01058 | 415 |



|        |        |     |        |        |     |
|--------|--------|-----|--------|--------|-----|
| A00761 | A01064 | 432 | A00761 | A01077 | 272 |
| A00761 | A01080 | 166 | A00761 | A01093 | 490 |
| A00761 | A01099 | 486 | A00761 | A01106 | 171 |
| A00761 | A01114 | 215 | A00761 | A01122 | 173 |
| A00761 | A01169 | 480 | A00761 | A01187 | 344 |
| A00761 | A01197 | 344 | A00761 | A01203 | 208 |
| A00761 | A01267 | 160 | A00761 | A01339 | 225 |
| A00761 | A01340 | 258 | A00761 | A01370 | 411 |
| A00761 | A01388 | 416 | A00761 | A02212 | 160 |
| A00761 | A02215 | 427 | A00761 | A02629 | 216 |
| A00761 | A02746 | 247 | A00761 | A03498 | 234 |
| A00761 | A03570 | 357 | A00761 | A04990 | 294 |
| A00761 | A05570 | 210 | A00761 | A06750 | 371 |
| A00761 | A07096 | 160 | A00761 | A07101 | 184 |
| A00761 | A07175 | 246 | A00761 | A07226 | 248 |
| A00761 | A07439 | 185 | A00761 | A07725 | 157 |
| A00761 | A07756 | 438 | A00761 | A08212 | 344 |
| A00761 | A08516 | 168 | A00761 | A08745 | 205 |
| A00761 | A08769 | 198 | A00761 | A08834 | 160 |
| A00761 | A08882 | 329 | A00761 | A09000 | 180 |
| A00761 | A09085 | 269 | A00761 | A09627 | 160 |
| A00761 | A10372 | 160 | A00761 | A11365 | 160 |
| A00761 | A11724 | 238 | A00761 | A11735 | 160 |
| A00761 | A11737 | 160 | A00761 | A11914 | 160 |
| A00761 | A12556 | 263 | A00761 | A12658 | 160 |
| A00761 | A12824 | 542 | A00761 | A13049 | 316 |
| A00761 | A14007 | 160 | A00761 | A14073 | 159 |
| A00761 | A14138 | 207 | A00761 | A15257 | 160 |
| A00761 | A16358 | 269 | A00761 | A16391 | 256 |
| A00761 | A16437 | 191 | A00762 | A00793 | 279 |
| A00762 | A00826 | 314 | A00762 | A00854 | 238 |
| A00762 | A00916 | 154 | A00762 | A00947 | 160 |
| A00762 | A00965 | 296 | A00762 | A00977 | 326 |
| A00762 | A00981 | 224 | A00762 | A01016 | 258 |
| A00762 | A01074 | 407 | A00762 | A01075 | 491 |
| A00762 | A01082 | 363 | A00762 | A01084 | 383 |
| A00762 | A01107 | 174 | A00762 | A01116 | 308 |
| A00762 | A01154 | 304 | A00762 | A01166 | 323 |
| A00762 | A01182 | 303 | A00762 | A01217 | 247 |
| A00762 | A01238 | 252 | A00762 | A01280 | 241 |
| A00762 | A01300 | 262 | A00762 | A01352 | 359 |
| A00762 | A01365 | 540 | A00762 | A01406 | 595 |
| A00762 | A01416 | 246 | A00762 | A01471 | 205 |
| A00762 | A02325 | 202 | A00762 | A02464 | 205 |
| A00762 | A03601 | 694 | A00762 | A05327 | 258 |
| A00762 | A05375 | 243 | A00762 | A05501 | 543 |

|        |        |     |        |        |     |
|--------|--------|-----|--------|--------|-----|
| A00762 | A06531 | 438 | A00762 | A07706 | 491 |
| A00762 | A09339 | 241 | A00762 | A09608 | 361 |
| A00762 | A10538 | 258 | A00762 | A11291 | 467 |
| A00762 | A12477 | 254 | A00762 | A14220 | 446 |
| A00762 | A14566 | 474 | A00762 | A14594 | 490 |
| A00762 | A14622 | 191 | A00762 | A15275 | 438 |
| A00762 | A16767 | 281 | A00763 | A00787 | 729 |
| A00763 | A00822 | 268 | A00763 | A00839 | 489 |
| A00763 | A00861 | 180 | A00763 | A00878 | 488 |
| A00763 | A00923 | 490 | A00763 | A00966 | 491 |
| A00763 | A00990 | 278 | A00763 | A01000 | 486 |
| A00763 | A01012 | 480 | A00763 | A01025 | 485 |
| A00763 | A01040 | 152 | A00763 | A01047 | 490 |
| A00763 | A01054 | 318 | A00763 | A01056 | 428 |
| A00763 | A01085 | 357 | A00763 | A01090 | 344 |
| A00763 | A01101 | 389 | A00763 | A01112 | 385 |
| A00763 | A01127 | 491 | A00763 | A01140 | 463 |
| A00763 | A01144 | 272 | A00763 | A01160 | 481 |
| A00763 | A01166 | 227 | A00763 | A01168 | 491 |
| A00763 | A01184 | 435 | A00763 | A01196 | 196 |
| A00763 | A01249 | 491 | A00763 | A01275 | 208 |
| A00763 | A01291 | 652 | A00763 | A01294 | 490 |
| A00763 | A01306 | 418 | A00763 | A01335 | 401 |
| A00763 | A01385 | 256 | A00763 | A01392 | 628 |
| A00763 | A01419 | 276 | A00763 | A01433 | 372 |
| A00763 | A01437 | 417 | A00763 | A01457 | 493 |
| A00763 | A01458 | 541 | A00763 | A01464 | 252 |
| A00763 | A01468 | 484 | A00763 | A01496 | 491 |
| A00763 | A01579 | 481 | A00763 | A01601 | 162 |
| A00763 | A01649 | 425 | A00763 | A01683 | 249 |
| A00763 | A01718 | 452 | A00763 | A01976 | 152 |
| A00763 | A02064 | 456 | A00763 | A02165 | 491 |
| A00763 | A02527 | 380 | A00763 | A03438 | 473 |
| A00763 | A03567 | 491 | A00763 | A03644 | 113 |
| A00763 | A03645 | 177 | A00763 | A03652 | 488 |
| A00763 | A03752 | 174 | A00763 | A03759 | 391 |
| A00763 | A03981 | 490 | A00763 | A04632 | 152 |
| A00763 | A05288 | 241 | A00763 | A05411 | 659 |
| A00763 | A05443 | 358 | A00763 | A05501 | 423 |
| A00763 | A05566 | 490 | A00763 | A06084 | 312 |
| A00763 | A06279 | 288 | A00763 | A06356 | 363 |
| A00763 | A06689 | 156 | A00763 | A06812 | 177 |
| A00763 | A06814 | 63  | A00763 | A06825 | 488 |
| A00763 | A06861 | 350 | A00763 | A06965 | 491 |
| A00763 | A07201 | 338 | A00763 | A07240 | 285 |
| A00763 | A07307 | 204 | A00763 | A07349 | 393 |

|        |        |     |        |        |     |
|--------|--------|-----|--------|--------|-----|
| A00763 | A07398 | 172 | A00763 | A07447 | 252 |
| A00763 | A07449 | 469 | A00763 | A07451 | 491 |
| A00763 | A07506 | 76  | A00763 | A07867 | 252 |
| A00763 | A08011 | 656 | A00763 | A08055 | 637 |
| A00763 | A08131 | 252 | A00763 | A08321 | 213 |
| A00763 | A08357 | 154 | A00763 | A08452 | 484 |
| A00763 | A08550 | 372 | A00763 | A08559 | 414 |
| A00763 | A08653 | 216 | A00763 | A08664 | 213 |
| A00763 | A08682 | 425 | A00763 | A08773 | 654 |
| A00763 | A08973 | 170 | A00763 | A09044 | 491 |
| A00763 | A09322 | 297 | A00763 | A09656 | 363 |
| A00763 | A09702 | 190 | A00763 | A10417 | 216 |
| A00763 | A10745 | 252 | A00763 | A10881 | 216 |
| A00763 | A11331 | 228 | A00763 | A11390 | 224 |
| A00763 | A11400 | 182 | A00763 | A11438 | 491 |
| A00763 | A11981 | 260 | A00763 | A12105 | 213 |
| A00763 | A12157 | 285 | A00763 | A12177 | 216 |
| A00763 | A13249 | 633 | A00763 | A13296 | 285 |
| A00763 | A13617 | 180 | A00763 | A13626 | 208 |
| A00763 | A13989 | 488 | A00763 | A13992 | 489 |
| A00763 | A14152 | 326 | A00763 | A14192 | 171 |
| A00763 | A14216 | 490 | A00763 | A14482 | 172 |
| A00763 | A14843 | 483 | A00763 | A14856 | 391 |
| A00763 | A15062 | 252 | A00763 | A15221 | 246 |
| A00763 | A15235 | 369 | A00763 | A15559 | 221 |
| A00763 | A15660 | 406 | A00763 | A15684 | 379 |
| A00763 | A15743 | 196 | A00763 | A15931 | 318 |
| A00763 | A15988 | 631 | A00763 | A16118 | 479 |
| A00763 | A16823 | 160 | A00763 | A17193 | 260 |
| A00764 | A00939 | 199 | A00764 | A01098 | 199 |
| A00764 | A01227 | 199 | A00764 | A01291 | 199 |
| A00764 | A01425 | 199 | A00764 | A01520 | 165 |
| A00764 | A01590 | 177 | A00764 | A01655 | 198 |
| A00764 | A01934 | 291 | A00764 | A01950 | 362 |
| A00764 | A01972 | 263 | A00764 | A02048 | 163 |
| A00764 | A02074 | 262 | A00764 | A02083 | 208 |
| A00764 | A02709 | 182 | A00764 | A03051 | 245 |
| A00764 | A03079 | 362 | A00764 | A04072 | 208 |
| A00764 | A04258 | 305 | A00764 | A04974 | 368 |
| A00764 | A05237 | 390 | A00764 | A05390 | 306 |
| A00764 | A06263 | 294 | A00764 | A06701 | 151 |
| A00764 | A07207 | 362 | A00764 | A07311 | 199 |
| A00764 | A07808 | 404 | A00764 | A08133 | 199 |
| A00764 | A09584 | 362 | A00764 | A14026 | 362 |
| A00764 | A14120 | 362 | A00764 | A14210 | 362 |
| A00764 | A16407 | 362 | A00764 | A16847 | 362 |

|        |        |     |        |        |     |
|--------|--------|-----|--------|--------|-----|
| A00765 | A00813 | 491 | A00765 | A00868 | 172 |
| A00765 | A00926 | 469 | A00765 | A00954 | 472 |
| A00765 | A01117 | 404 | A00765 | A01185 | 489 |
| A00765 | A01213 | 488 | A00765 | A01361 | 446 |
| A00765 | A01370 | 432 | A00765 | A01419 | 484 |
| A00765 | A01438 | 491 | A00765 | A01520 | 363 |
| A00765 | A01521 | 177 | A00765 | A01576 | 582 |
| A00765 | A01634 | 235 | A00765 | A02170 | 221 |
| A00765 | A02364 | 151 | A00765 | A02965 | 157 |
| A00765 | A03475 | 183 | A00765 | A03837 | 408 |
| A00765 | A05237 | 252 | A00765 | A05508 | 276 |
| A00765 | A06137 | 335 | A00765 | A06520 | 380 |
| A00765 | A06569 | 210 | A00765 | A07004 | 385 |
| A00765 | A07069 | 380 | A00765 | A07106 | 167 |
| A00765 | A07276 | 159 | A00765 | A07697 | 491 |
| A00765 | A07826 | 419 | A00765 | A08013 | 163 |
| A00765 | A08235 | 167 | A00765 | A08251 | 193 |
| A00765 | A08293 | 666 | A00765 | A08356 | 491 |
| A00765 | A08362 | 491 | A00765 | A08831 | 491 |
| A00765 | A08956 | 462 | A00765 | A09007 | 187 |
| A00765 | A09294 | 455 | A00765 | A09323 | 366 |
| A00765 | A09652 | 323 | A00765 | A09659 | 174 |
| A00765 | A10156 | 173 | A00765 | A10159 | 491 |
| A00765 | A10315 | 358 | A00765 | A10784 | 281 |
| A00765 | A11101 | 232 | A00765 | A11469 | 290 |
| A00765 | A11559 | 294 | A00765 | A12284 | 168 |
| A00765 | A12295 | 302 | A00765 | A12606 | 491 |
| A00765 | A12662 | 294 | A00765 | A13198 | 185 |
| A00765 | A13219 | 445 | A00765 | A13647 | 299 |
| A00765 | A13824 | 235 | A00765 | A14167 | 151 |
| A00765 | A14208 | 443 | A00765 | A14212 | 490 |
| A00765 | A14213 | 469 | A00765 | A14214 | 484 |
| A00765 | A14235 | 424 | A00765 | A14843 | 373 |
| A00765 | A15224 | 268 | A00765 | A15237 | 262 |
| A00765 | A15295 | 288 | A00765 | A15328 | 232 |
| A00765 | A15345 | 265 | A00765 | A15498 | 356 |
| A00765 | A15596 | 375 | A00765 | A15701 | 377 |
| A00765 | A16364 | 229 | A00765 | A16611 | 157 |
| A00765 | A16623 | 346 | A00765 | A16802 | 441 |
| A00765 | A16831 | 174 | A00765 | A16898 | 313 |
| A00766 | A00781 | 452 | A00766 | A00791 | 544 |
| A00766 | A00813 | 428 | A00766 | A00868 | 545 |
| A00766 | A00883 | 544 | A00766 | A00884 | 539 |
| A00766 | A00915 | 419 | A00766 | A00925 | 154 |
| A00766 | A00926 | 545 | A00766 | A00927 | 160 |
| A00766 | A00973 | 281 | A00766 | A00975 | 543 |

|        |        |     |        |        |     |
|--------|--------|-----|--------|--------|-----|
| A00766 | A01014 | 353 | A00766 | A01039 | 160 |
| A00766 | A01046 | 213 | A00766 | A01058 | 200 |
| A00766 | A01072 | 243 | A00766 | A01077 | 459 |
| A00766 | A01080 | 160 | A00766 | A01106 | 151 |
| A00766 | A01122 | 422 | A00766 | A01156 | 204 |
| A00766 | A01169 | 491 | A00766 | A01197 | 193 |
| A00766 | A01203 | 187 | A00766 | A01212 | 302 |
| A00766 | A01222 | 224 | A00766 | A01230 | 159 |
| A00766 | A01267 | 160 | A00766 | A01278 | 191 |
| A00766 | A01329 | 353 | A00766 | A01339 | 538 |
| A00766 | A01340 | 238 | A00766 | A01370 | 474 |
| A00766 | A01371 | 184 | A00766 | A01404 | 224 |
| A00766 | A01440 | 240 | A00766 | A01507 | 321 |
| A00766 | A01516 | 199 | A00766 | A01741 | 279 |
| A00766 | A01917 | 328 | A00766 | A02056 | 221 |
| A00766 | A02138 | 227 | A00766 | A02151 | 215 |
| A00766 | A02212 | 160 | A00766 | A02414 | 167 |
| A00766 | A03104 | 63  | A00766 | A03676 | 474 |
| A00766 | A03885 | 176 | A00766 | A04015 | 375 |
| A00766 | A04666 | 205 | A00766 | A04922 | 202 |
| A00766 | A04927 | 151 | A00766 | A04990 | 277 |
| A00766 | A05276 | 224 | A00766 | A05570 | 322 |
| A00766 | A06137 | 199 | A00766 | A06938 | 436 |
| A00766 | A07096 | 160 | A00766 | A07101 | 429 |
| A00766 | A07226 | 160 | A00766 | A07237 | 200 |
| A00766 | A07266 | 201 | A00766 | A07307 | 213 |
| A00766 | A07403 | 398 | A00766 | A07457 | 375 |
| A00766 | A07684 | 204 | A00766 | A07697 | 238 |
| A00766 | A07756 | 472 | A00766 | A07826 | 232 |
| A00766 | A07986 | 294 | A00766 | A08197 | 227 |
| A00766 | A08834 | 160 | A00766 | A08882 | 310 |
| A00766 | A09145 | 201 | A00766 | A09290 | 430 |
| A00766 | A09331 | 227 | A00766 | A09506 | 229 |
| A00766 | A09627 | 160 | A00766 | A09798 | 368 |
| A00766 | A10174 | 281 | A00766 | A10372 | 160 |
| A00766 | A10679 | 228 | A00766 | A10766 | 255 |
| A00766 | A11365 | 160 | A00766 | A11724 | 218 |
| A00766 | A11735 | 160 | A00766 | A11737 | 160 |
| A00766 | A11914 | 160 | A00766 | A12658 | 160 |
| A00766 | A12824 | 545 | A00766 | A12863 | 363 |
| A00766 | A14007 | 160 | A00766 | A14138 | 185 |
| A00766 | A14475 | 229 | A00766 | A14502 | 394 |
| A00766 | A15257 | 160 | A00766 | A15498 | 232 |
| A00766 | A15624 | 226 | A00766 | A15947 | 179 |
| A00767 | A00861 | 170 | A00767 | A00872 | 170 |
| A00767 | A00883 | 426 | A00767 | A00905 | 230 |

|        |        |     |        |        |     |
|--------|--------|-----|--------|--------|-----|
| A00767 | A00908 | 652 | A00767 | A00916 | 552 |
| A00767 | A00918 | 685 | A00767 | A00928 | 399 |
| A00767 | A00934 | 183 | A00767 | A00960 | 424 |
| A00767 | A00992 | 694 | A00767 | A01020 | 489 |
| A00767 | A01028 | 170 | A00767 | A01029 | 165 |
| A00767 | A01075 | 425 | A00767 | A01120 | 242 |
| A00767 | A01129 | 170 | A00767 | A01160 | 170 |
| A00767 | A01166 | 364 | A00767 | A01168 | 170 |
| A00767 | A01184 | 467 | A00767 | A01193 | 622 |
| A00767 | A01201 | 473 | A00767 | A01234 | 491 |
| A00767 | A01239 | 215 | A00767 | A01257 | 163 |
| A00767 | A01268 | 339 | A00767 | A01279 | 694 |
| A00767 | A01351 | 695 | A00767 | A01356 | 170 |
| A00767 | A01424 | 538 | A00767 | A01425 | 170 |
| A00767 | A01470 | 391 | A00767 | A01488 | 408 |
| A00767 | A01492 | 550 | A00767 | A01538 | 170 |
| A00767 | A01598 | 523 | A00767 | A01612 | 385 |
| A00767 | A01614 | 170 | A00767 | A01649 | 266 |
| A00767 | A02265 | 170 | A00767 | A02535 | 490 |
| A00767 | A03438 | 486 | A00767 | A03494 | 488 |
| A00767 | A03569 | 311 | A00767 | A03597 | 229 |
| A00767 | A03628 | 235 | A00767 | A03652 | 170 |
| A00767 | A03981 | 170 | A00767 | A06204 | 438 |
| A00767 | A06340 | 202 | A00767 | A06347 | 213 |
| A00767 | A06356 | 170 | A00767 | A06698 | 545 |
| A00767 | A07244 | 694 | A00767 | A07432 | 562 |
| A00767 | A07524 | 537 | A00767 | A07537 | 477 |
| A00767 | A07625 | 536 | A00767 | A07700 | 198 |
| A00767 | A07924 | 546 | A00767 | A08137 | 458 |
| A00767 | A08211 | 170 | A00767 | A09324 | 168 |
| A00767 | A09697 | 170 | A00767 | A10317 | 235 |
| A00767 | A10465 | 467 | A00767 | A11476 | 177 |
| A00767 | A11544 | 174 | A00767 | A11831 | 174 |
| A00767 | A11832 | 174 | A00767 | A11913 | 74  |
| A00767 | A12097 | 180 | A00767 | A12202 | 177 |
| A00767 | A12849 | 408 | A00767 | A12998 | 273 |
| A00767 | A13052 | 170 | A00767 | A13989 | 547 |
| A00767 | A14803 | 185 | A00767 | A15297 | 229 |
| A00767 | A15370 | 263 | A00767 | A15590 | 259 |
| A00767 | A15764 | 377 | A00767 | A16302 | 352 |
| A00767 | A16661 | 238 | A00768 | A01309 | 165 |
| A00768 | A06204 | 151 | A00768 | A07313 | 260 |
| A00768 | A08450 | 205 | A00768 | A08517 | 193 |
| A00768 | A08518 | 232 | A00768 | A08560 | 176 |
| A00768 | A09054 | 156 | A00768 | A09309 | 296 |
| A00768 | A10710 | 167 | A00768 | A11497 | 162 |

|        |        |     |        |        |     |
|--------|--------|-----|--------|--------|-----|
| A00768 | A11551 | 247 | A00768 | A11914 | 202 |
| A00768 | A11940 | 316 | A00768 | A11954 | 311 |
| A00768 | A12284 | 184 | A00768 | A12433 | 162 |
| A00768 | A12665 | 224 | A00768 | A12725 | 160 |
| A00768 | A12858 | 204 | A00768 | A12873 | 215 |
| A00768 | A13708 | 168 | A00768 | A13805 | 297 |
| A00768 | A14260 | 313 | A00768 | A14596 | 207 |
| A00768 | A15189 | 218 | A00768 | A16597 | 230 |
| A00768 | A16611 | 176 | A00768 | A16664 | 227 |
| A00768 | A16675 | 195 | A00768 | A16703 | 276 |
| A00768 | A16905 | 263 | A00769 | A00783 | 490 |
| A00769 | A00785 | 491 | A00769 | A00792 | 259 |
| A00769 | A00805 | 241 | A00769 | A00809 | 474 |
| A00769 | A00824 | 654 | A00769 | A00839 | 446 |
| A00769 | A00841 | 744 | A00769 | A00859 | 218 |
| A00769 | A00865 | 183 | A00769 | A00871 | 645 |
| A00769 | A00879 | 159 | A00769 | A00883 | 254 |
| A00769 | A00909 | 787 | A00769 | A00922 | 665 |
| A00769 | A00926 | 457 | A00769 | A00927 | 491 |
| A00769 | A00934 | 460 | A00769 | A00953 | 483 |
| A00769 | A00983 | 659 | A00769 | A00986 | 491 |
| A00769 | A00994 | 754 | A00769 | A01006 | 561 |
| A00769 | A01017 | 443 | A00769 | A01027 | 665 |
| A00769 | A01029 | 360 | A00769 | A01069 | 491 |
| A00769 | A01075 | 174 | A00769 | A01086 | 401 |
| A00769 | A01088 | 491 | A00769 | A01101 | 486 |
| A00769 | A01119 | 489 | A00769 | A01150 | 658 |
| A00769 | A01208 | 706 | A00769 | A01215 | 174 |
| A00769 | A01217 | 184 | A00769 | A01221 | 469 |
| A00769 | A01232 | 815 | A00769 | A01237 | 156 |
| A00769 | A01242 | 160 | A00769 | A01287 | 372 |
| A00769 | A01293 | 616 | A00769 | A01311 | 662 |
| A00769 | A01346 | 321 | A00769 | A01353 | 324 |
| A00769 | A01399 | 372 | A00769 | A01429 | 167 |
| A00769 | A01431 | 400 | A00769 | A01439 | 483 |
| A00769 | A01458 | 488 | A00769 | A01492 | 491 |
| A00769 | A01538 | 306 | A00769 | A01577 | 446 |
| A00769 | A01598 | 480 | A00769 | A01612 | 373 |
| A00769 | A01613 | 369 | A00769 | A01894 | 291 |
| A00769 | A02592 | 193 | A00769 | A02814 | 364 |
| A00769 | A02877 | 475 | A00769 | A03169 | 434 |
| A00769 | A03187 | 183 | A00769 | A03291 | 281 |
| A00769 | A03438 | 491 | A00769 | A03454 | 581 |
| A00769 | A03513 | 165 | A00769 | A03558 | 162 |
| A00769 | A03619 | 353 | A00769 | A03676 | 575 |
| A00769 | A03677 | 410 | A00769 | A03809 | 418 |

|        |        |     |        |        |     |
|--------|--------|-----|--------|--------|-----|
| A00769 | A03855 | 245 | A00769 | A04447 | 291 |
| A00769 | A04485 | 466 | A00769 | A04846 | 151 |
| A00769 | A04895 | 246 | A00769 | A04931 | 485 |
| A00769 | A04932 | 256 | A00769 | A05227 | 638 |
| A00769 | A05255 | 294 | A00769 | A05258 | 491 |
| A00769 | A05318 | 472 | A00769 | A05702 | 185 |
| A00769 | A06287 | 485 | A00769 | A06320 | 277 |
| A00769 | A06543 | 541 | A00769 | A06637 | 491 |
| A00769 | A06709 | 162 | A00769 | A06826 | 157 |
| A00769 | A07046 | 559 | A00769 | A07360 | 581 |
| A00769 | A07524 | 479 | A00769 | A07588 | 393 |
| A00769 | A07706 | 454 | A00769 | A07744 | 491 |
| A00769 | A07822 | 260 | A00769 | A07881 | 665 |
| A00769 | A07911 | 615 | A00769 | A08098 | 491 |
| A00769 | A08118 | 259 | A00769 | A08131 | 236 |
| A00769 | A08178 | 490 | A00769 | A08228 | 665 |
| A00769 | A08327 | 247 | A00769 | A08491 | 490 |
| A00769 | A08530 | 465 | A00769 | A08534 | 162 |
| A00769 | A08539 | 299 | A00769 | A08548 | 665 |
| A00769 | A08662 | 485 | A00769 | A08674 | 769 |
| A00769 | A08763 | 489 | A00769 | A08929 | 63  |
| A00769 | A10755 | 491 | A00769 | A11290 | 359 |
| A00769 | A11296 | 286 | A00769 | A11344 | 408 |
| A00769 | A11381 | 296 | A00769 | A11555 | 435 |
| A00769 | A11608 | 174 | A00769 | A11647 | 463 |
| A00769 | A11737 | 247 | A00769 | A11918 | 538 |
| A00769 | A11935 | 440 | A00769 | A12080 | 235 |
| A00769 | A12329 | 701 | A00769 | A13029 | 363 |
| A00769 | A13271 | 235 | A00769 | A13298 | 491 |
| A00769 | A13989 | 489 | A00769 | A14083 | 491 |
| A00769 | A14216 | 319 | A00769 | A14594 | 462 |
| A00769 | A14699 | 833 | A00769 | A14778 | 664 |
| A00769 | A14955 | 294 | A00769 | A15297 | 190 |
| A00769 | A15338 | 425 | A00769 | A15375 | 428 |
| A00769 | A15624 | 581 | A00769 | A15649 | 166 |
| A00769 | A15651 | 580 | A00769 | A15652 | 581 |
| A00769 | A15658 | 443 | A00769 | A15659 | 490 |
| A00769 | A15660 | 669 | A00769 | A15661 | 581 |
| A00769 | A15662 | 657 | A00769 | A15684 | 659 |
| A00769 | A15708 | 489 | A00769 | A15720 | 194 |
| A00769 | A15721 | 166 | A00769 | A15746 | 581 |
| A00769 | A15843 | 229 | A00769 | A15917 | 233 |
| A00769 | A15918 | 579 | A00769 | A15920 | 484 |
| A00769 | A15923 | 229 | A00769 | A15931 | 491 |
| A00769 | A15932 | 219 | A00769 | A15933 | 416 |
| A00769 | A15937 | 581 | A00769 | A16048 | 486 |



|        |        |     |        |        |     |
|--------|--------|-----|--------|--------|-----|
| A00769 | A16088 | 727 | A00769 | A16092 | 400 |
| A00769 | A16095 | 321 | A00769 | A16096 | 406 |
| A00769 | A16104 | 199 | A00769 | A16145 | 228 |
| A00769 | A16191 | 162 | A00769 | A16201 | 191 |
| A00769 | A16218 | 699 | A00769 | A16307 | 156 |
| A00769 | A16464 | 480 | A00769 | A16700 | 279 |
| A00769 | A16768 | 418 | A00770 | A00771 | 274 |
| A00770 | A00773 | 408 | A00770 | A00962 | 491 |
| A00770 | A00995 | 465 | A00770 | A01005 | 154 |
| A00770 | A01008 | 491 | A00770 | A01063 | 474 |
| A00770 | A01109 | 438 | A00770 | A01174 | 479 |
| A00770 | A01175 | 380 | A00770 | A01186 | 268 |
| A00770 | A01230 | 446 | A00770 | A01233 | 491 |
| A00770 | A01256 | 491 | A00770 | A01272 | 452 |
| A00770 | A01297 | 369 | A00770 | A01347 | 491 |
| A00770 | A01360 | 249 | A00770 | A01409 | 332 |
| A00770 | A01481 | 463 | A00770 | A01508 | 484 |
| A00770 | A01511 | 408 | A00770 | A01635 | 378 |
| A00770 | A01642 | 367 | A00770 | A01695 | 281 |
| A00770 | A01714 | 235 | A00770 | A01741 | 324 |
| A00770 | A01743 | 162 | A00770 | A01855 | 201 |
| A00770 | A02252 | 272 | A00770 | A02363 | 361 |
| A00770 | A02521 | 191 | A00770 | A02859 | 219 |
| A00770 | A02992 | 321 | A00770 | A03003 | 278 |
| A00770 | A03004 | 328 | A00770 | A03005 | 377 |
| A00770 | A03008 | 337 | A00770 | A03016 | 307 |
| A00770 | A03019 | 168 | A00770 | A03059 | 361 |
| A00770 | A03095 | 480 | A00770 | A03119 | 215 |
| A00770 | A03167 | 191 | A00770 | A03217 | 229 |
| A00770 | A03221 | 302 | A00770 | A03223 | 199 |
| A00770 | A03259 | 235 | A00770 | A03311 | 374 |
| A00770 | A03430 | 445 | A00770 | A03441 | 457 |
| A00770 | A03443 | 332 | A00770 | A03477 | 383 |
| A00770 | A03501 | 393 | A00770 | A03586 | 408 |
| A00770 | A04010 | 152 | A00770 | A04609 | 152 |
| A00770 | A04660 | 198 | A00770 | A04674 | 294 |
| A00770 | A04779 | 460 | A00770 | A04791 | 171 |
| A00770 | A04834 | 461 | A00770 | A04936 | 358 |
| A00770 | A04937 | 224 | A00770 | A04995 | 468 |
| A00770 | A05007 | 490 | A00770 | A05013 | 286 |
| A00770 | A05051 | 406 | A00770 | A05088 | 262 |
| A00770 | A05098 | 162 | A00770 | A05102 | 463 |
| A00770 | A05262 | 215 | A00770 | A05289 | 168 |
| A00770 | A05310 | 414 | A00770 | A05358 | 198 |
| A00770 | A05416 | 283 | A00770 | A05471 | 319 |
| A00770 | A05472 | 412 | A00770 | A05515 | 339 |

|        |        |     |        |        |     |
|--------|--------|-----|--------|--------|-----|
| A00770 | A05516 | 490 | A00770 | A05600 | 216 |
| A00770 | A05615 | 232 | A00770 | A05699 | 271 |
| A00770 | A05714 | 302 | A00770 | A05738 | 351 |
| A00770 | A05751 | 174 | A00770 | A05759 | 469 |
| A00770 | A05772 | 427 | A00770 | A05774 | 452 |
| A00770 | A05905 | 441 | A00770 | A06088 | 491 |
| A00770 | A06089 | 475 | A00770 | A06091 | 468 |
| A00770 | A06098 | 286 | A00770 | A06252 | 475 |
| A00770 | A06358 | 485 | A00770 | A06474 | 489 |
| A00770 | A06475 | 469 | A00770 | A06555 | 416 |
| A00770 | A06630 | 191 | A00770 | A06633 | 321 |
| A00770 | A06641 | 185 | A00770 | A06654 | 179 |
| A00770 | A06692 | 251 | A00770 | A06700 | 240 |
| A00770 | A06756 | 479 | A00770 | A06791 | 454 |
| A00770 | A06934 | 452 | A00770 | A06979 | 183 |
| A00770 | A07002 | 281 | A00770 | A07027 | 180 |
| A00770 | A07080 | 412 | A00770 | A07109 | 474 |
| A00770 | A07122 | 491 | A00770 | A07204 | 210 |
| A00770 | A07238 | 213 | A00770 | A07256 | 369 |
| A00770 | A07267 | 294 | A00770 | A07288 | 258 |
| A00770 | A07304 | 443 | A00770 | A07322 | 347 |
| A00770 | A07333 | 168 | A00770 | A07413 | 486 |
| A00770 | A07424 | 243 | A00770 | A07508 | 337 |
| A00770 | A07530 | 340 | A00770 | A07553 | 384 |
| A00770 | A07554 | 243 | A00770 | A07590 | 246 |
| A00770 | A07736 | 310 | A00770 | A07800 | 491 |
| A00770 | A07809 | 445 | A00770 | A07847 | 157 |
| A00770 | A07933 | 234 | A00770 | A08108 | 174 |
| A00770 | A08238 | 216 | A00770 | A09161 | 358 |
| A00770 | A09879 | 232 | A00770 | A10027 | 358 |
| A00770 | A10437 | 254 | A00770 | A10444 | 174 |
| A00770 | A10452 | 152 | A00770 | A10456 | 168 |
| A00770 | A10523 | 286 | A00770 | A10652 | 201 |
| A00770 | A10656 | 159 | A00770 | A10658 | 351 |
| A00770 | A10688 | 235 | A00770 | A10692 | 281 |
| A00770 | A10693 | 174 | A00770 | A10702 | 393 |
| A00770 | A11309 | 424 | A00770 | A12055 | 274 |
| A00770 | A12730 | 198 | A00770 | A13175 | 454 |
| A00770 | A13176 | 358 | A00770 | A13544 | 358 |
| A00770 | A14313 | 286 | A00770 | A14827 | 428 |
| A00770 | A14856 | 152 | A00770 | A14857 | 190 |
| A00770 | A14861 | 322 | A00770 | A15497 | 383 |
| A00770 | A15637 | 452 | A00770 | A15655 | 208 |
| A00770 | A15811 | 216 | A00770 | A15874 | 202 |
| A00770 | A15905 | 457 | A00770 | A16002 | 449 |
| A00770 | A16026 | 456 | A00770 | A16027 | 424 |

|        |        |     |        |        |     |
|--------|--------|-----|--------|--------|-----|
| A00770 | A16028 | 201 | A00770 | A16286 | 179 |
| A00770 | A16346 | 322 | A00770 | A16529 | 462 |
| A00770 | A17006 | 216 | A00771 | A00773 | 283 |
| A00771 | A00962 | 451 | A00771 | A00995 | 270 |
| A00771 | A01005 | 167 | A00771 | A01008 | 246 |
| A00771 | A01063 | 160 | A00771 | A01165 | 488 |
| A00771 | A01174 | 357 | A00771 | A01229 | 151 |
| A00771 | A01233 | 255 | A00771 | A01256 | 491 |
| A00771 | A01272 | 276 | A00771 | A01405 | 561 |
| A00771 | A01481 | 452 | A00771 | A01507 | 428 |
| A00771 | A01635 | 424 | A00771 | A02992 | 463 |
| A00771 | A03003 | 255 | A00771 | A04211 | 491 |
| A00771 | A05393 | 157 | A00771 | A05466 | 262 |
| A00771 | A05715 | 241 | A00771 | A05768 | 208 |
| A00771 | A06086 | 469 | A00771 | A06592 | 486 |
| A00771 | A06756 | 391 | A00771 | A06773 | 347 |
| A00771 | A07077 | 294 | A00771 | A07234 | 226 |
| A00771 | A07256 | 152 | A00771 | A07459 | 196 |
| A00771 | A07525 | 425 | A00771 | A07553 | 168 |
| A00771 | A07554 | 279 | A00771 | A07659 | 408 |
| A00771 | A07688 | 424 | A00771 | A07739 | 188 |
| A00771 | A07753 | 454 | A00771 | A07800 | 491 |
| A00771 | A07823 | 196 | A00771 | A07848 | 246 |
| A00771 | A08099 | 491 | A00771 | A08193 | 480 |
| A00771 | A08205 | 473 | A00771 | A09612 | 307 |
| A00771 | A10253 | 180 | A00771 | A10456 | 238 |
| A00771 | A10673 | 199 | A00771 | A10681 | 235 |
| A00771 | A10695 | 212 | A00771 | A11309 | 491 |
| A00771 | A13313 | 379 | A00771 | A13945 | 235 |
| A00771 | A14219 | 262 | A00771 | A15497 | 490 |
| A00771 | A15637 | 353 | A00771 | A15874 | 432 |
| A00771 | A16027 | 452 | A00771 | A16033 | 215 |
| A00771 | A16112 | 159 | A00771 | A16368 | 400 |
| A00771 | A16419 | 245 | A00771 | A16529 | 486 |
| A00771 | A16959 | 486 | A00771 | A17078 | 182 |
| A00772 | A00865 | 479 | A00772 | A00868 | 63  |
| A00772 | A00928 | 560 | A00772 | A00952 | 695 |
| A00772 | A00972 | 217 | A00772 | A00994 | 146 |
| A00772 | A00997 | 217 | A00772 | A01027 | 380 |
| A00772 | A01067 | 165 | A00772 | A01071 | 296 |
| A00772 | A01100 | 202 | A00772 | A01107 | 543 |
| A00772 | A01159 | 274 | A00772 | A01212 | 330 |
| A00772 | A01221 | 471 | A00772 | A01243 | 486 |
| A00772 | A01352 | 695 | A00772 | A01418 | 217 |
| A00772 | A01433 | 159 | A00772 | A01442 | 307 |
| A00772 | A01741 | 360 | A00772 | A01977 | 208 |

|        |        |     |        |        |     |
|--------|--------|-----|--------|--------|-----|
| A00772 | A02164 | 477 | A00772 | A02927 | 154 |
| A00772 | A03556 | 217 | A00772 | A03617 | 217 |
| A00772 | A03858 | 561 | A00772 | A04622 | 351 |
| A00772 | A04668 | 241 | A00772 | A04750 | 286 |
| A00772 | A05375 | 294 | A00772 | A05605 | 217 |
| A00772 | A05646 | 196 | A00772 | A06369 | 217 |
| A00772 | A06832 | 241 | A00772 | A07312 | 345 |
| A00772 | A08011 | 185 | A00772 | A08113 | 191 |
| A00772 | A08183 | 372 | A00772 | A08356 | 157 |
| A00772 | A08402 | 377 | A00772 | A08517 | 188 |
| A00772 | A08551 | 213 | A00772 | A08567 | 183 |
| A00772 | A08857 | 238 | A00772 | A08984 | 694 |
| A00772 | A09307 | 436 | A00772 | A09351 | 188 |
| A00772 | A09621 | 534 | A00772 | A09673 | 217 |
| A00772 | A10317 | 219 | A00772 | A10789 | 234 |
| A00772 | A11729 | 247 | A00772 | A12254 | 210 |
| A00772 | A13117 | 357 | A00772 | A13348 | 190 |
| A00772 | A13963 | 396 | A00772 | A14087 | 306 |
| A00772 | A14088 | 420 | A00772 | A14122 | 170 |
| A00772 | A14186 | 351 | A00772 | A14272 | 441 |
| A00772 | A14394 | 182 | A00772 | A14655 | 479 |
| A00772 | A14701 | 279 | A00772 | A15212 | 210 |
| A00772 | A15352 | 167 | A00772 | A15370 | 202 |
| A00772 | A15374 | 472 | A00772 | A15377 | 692 |
| A00772 | A15543 | 217 | A00772 | A15724 | 220 |
| A00772 | A15949 | 412 | A00772 | A16117 | 294 |
| A00772 | A16664 | 217 | A00773 | A00962 | 480 |
| A00773 | A00995 | 177 | A00773 | A01005 | 159 |
| A00773 | A01018 | 400 | A00773 | A01042 | 306 |
| A00773 | A01046 | 346 | A00773 | A01063 | 156 |
| A00773 | A01165 | 173 | A00773 | A01233 | 477 |
| A00773 | A01256 | 490 | A00773 | A01272 | 165 |
| A00773 | A01409 | 268 | A00773 | A01481 | 486 |
| A00773 | A01572 | 271 | A00773 | A01635 | 481 |
| A00773 | A02020 | 160 | A00773 | A02847 | 207 |
| A00773 | A02922 | 252 | A00773 | A02992 | 224 |
| A00773 | A03003 | 423 | A00773 | A03004 | 199 |
| A00773 | A03005 | 434 | A00773 | A03168 | 154 |
| A00773 | A03484 | 163 | A00773 | A03513 | 201 |
| A00773 | A03584 | 269 | A00773 | A03740 | 252 |
| A00773 | A04568 | 188 | A00773 | A04995 | 171 |
| A00773 | A05416 | 202 | A00773 | A05757 | 168 |
| A00773 | A05771 | 283 | A00773 | A06024 | 247 |
| A00773 | A06358 | 355 | A00773 | A06359 | 338 |
| A00773 | A07027 | 185 | A00773 | A07109 | 243 |
| A00773 | A07122 | 457 | A00773 | A07154 | 196 |

|        |        |     |        |        |     |
|--------|--------|-----|--------|--------|-----|
| A00773 | A07238 | 322 | A00773 | A07267 | 299 |
| A00773 | A07311 | 452 | A00773 | A07381 | 180 |
| A00773 | A07459 | 290 | A00773 | A07553 | 472 |
| A00773 | A07674 | 195 | A00773 | A07684 | 191 |
| A00773 | A07688 | 279 | A00773 | A07692 | 379 |
| A00773 | A07736 | 314 | A00773 | A07757 | 171 |
| A00773 | A07800 | 490 | A00773 | A07973 | 265 |
| A00773 | A07976 | 180 | A00773 | A08108 | 311 |
| A00773 | A08197 | 213 | A00773 | A09040 | 152 |
| A00773 | A09461 | 202 | A00773 | A09879 | 236 |
| A00773 | A10151 | 374 | A00773 | A10424 | 372 |
| A00773 | A10452 | 156 | A00773 | A10456 | 491 |
| A00773 | A10475 | 362 | A00773 | A10550 | 363 |
| A00773 | A10652 | 205 | A00773 | A10656 | 296 |
| A00773 | A10681 | 213 | A00773 | A10693 | 311 |
| A00773 | A10694 | 226 | A00773 | A10702 | 396 |
| A00773 | A10703 | 399 | A00773 | A10712 | 412 |
| A00773 | A10714 | 486 | A00773 | A10715 | 212 |
| A00773 | A11309 | 488 | A00773 | A11325 | 160 |
| A00773 | A11381 | 486 | A00773 | A12357 | 160 |
| A00773 | A12945 | 290 | A00773 | A13314 | 235 |
| A00773 | A13903 | 154 | A00773 | A14073 | 177 |
| A00773 | A14857 | 472 | A00773 | A14862 | 372 |
| A00773 | A15223 | 165 | A00773 | A15282 | 301 |
| A00773 | A15497 | 386 | A00773 | A15637 | 165 |
| A00773 | A15699 | 224 | A00773 | A15874 | 312 |
| A00773 | A15877 | 165 | A00773 | A16002 | 485 |
| A00773 | A16262 | 488 | A00773 | A16286 | 183 |
| A00773 | A16419 | 221 | A00773 | A16529 | 433 |
| A00773 | A17036 | 466 | A00773 | A17040 | 435 |
| A00774 | A00878 | 460 | A00774 | A00996 | 183 |
| A00774 | A01062 | 219 | A00774 | A01075 | 356 |
| A00774 | A01119 | 491 | A00774 | A01136 | 469 |
| A00774 | A01349 | 262 | A00774 | A01421 | 419 |
| A00774 | A01818 | 422 | A00774 | A02249 | 243 |
| A00774 | A03910 | 184 | A00774 | A06531 | 489 |
| A00774 | A08245 | 394 | A00774 | A08896 | 299 |
| A00774 | A11811 | 323 | A00774 | A12138 | 338 |
| A00774 | A12349 | 440 | A00774 | A14699 | 183 |
| A00774 | A15203 | 379 | A00774 | A15667 | 268 |
| A00775 | A00784 | 419 | A00775 | A00814 | 486 |
| A00775 | A00950 | 491 | A00775 | A01014 | 201 |
| A00775 | A01021 | 228 | A00775 | A01059 | 180 |
| A00775 | A01064 | 491 | A00775 | A01093 | 491 |
| A00775 | A01099 | 491 | A00775 | A01114 | 446 |
| A00775 | A01187 | 486 | A00775 | A01189 | 185 |

|        |        |     |        |        |     |
|--------|--------|-----|--------|--------|-----|
| A00775 | A01197 | 167 | A00775 | A01212 | 425 |
| A00775 | A01255 | 191 | A00775 | A01320 | 176 |
| A00775 | A01322 | 307 | A00775 | A01341 | 488 |
| A00775 | A01388 | 491 | A00775 | A01415 | 456 |
| A00775 | A01444 | 173 | A00775 | A01536 | 235 |
| A00775 | A01559 | 414 | A00775 | A01616 | 490 |
| A00775 | A01659 | 486 | A00775 | A01686 | 467 |
| A00775 | A02180 | 199 | A00775 | A02806 | 202 |
| A00775 | A03812 | 334 | A00775 | A04004 | 177 |
| A00775 | A04668 | 473 | A00775 | A05334 | 313 |
| A00775 | A06606 | 243 | A00775 | A06982 | 430 |
| A00775 | A07178 | 171 | A00775 | A07319 | 257 |
| A00775 | A07346 | 477 | A00775 | A07480 | 401 |
| A00775 | A07534 | 246 | A00775 | A07603 | 458 |
| A00775 | A07902 | 313 | A00775 | A07996 | 424 |
| A00775 | A08030 | 428 | A00775 | A08208 | 383 |
| A00775 | A08212 | 491 | A00775 | A08516 | 491 |
| A00775 | A08526 | 238 | A00775 | A08669 | 322 |
| A00775 | A08769 | 490 | A00775 | A08919 | 291 |
| A00775 | A08995 | 445 | A00775 | A09000 | 486 |
| A00775 | A09001 | 368 | A00775 | A09598 | 477 |
| A00775 | A09762 | 489 | A00775 | A10373 | 272 |
| A00775 | A11236 | 430 | A00775 | A11703 | 314 |
| A00775 | A11724 | 193 | A00775 | A11829 | 406 |
| A00775 | A11880 | 363 | A00775 | A12061 | 160 |
| A00775 | A12556 | 491 | A00775 | A13913 | 418 |
| A00775 | A13949 | 480 | A00775 | A14079 | 317 |
| A00775 | A14138 | 160 | A00775 | A14230 | 160 |
| A00775 | A14273 | 340 | A00775 | A14282 | 466 |
| A00775 | A14614 | 224 | A00775 | A14694 | 389 |
| A00775 | A15369 | 460 | A00775 | A15371 | 216 |
| A00775 | A15524 | 171 | A00775 | A15654 | 238 |
| A00775 | A15939 | 380 | A00775 | A15941 | 449 |
| A00775 | A15942 | 204 | A00775 | A16127 | 433 |
| A00775 | A16128 | 480 | A00775 | A16129 | 324 |
| A00775 | A16226 | 441 | A00775 | A16294 | 173 |
| A00775 | A16613 | 408 | A00775 | A16646 | 372 |
| A00775 | A16762 | 187 | A00776 | A00781 | 293 |
| A00776 | A00816 | 486 | A00776 | A00868 | 227 |
| A00776 | A00883 | 366 | A00776 | A00956 | 207 |
| A00776 | A01077 | 152 | A00776 | A01125 | 221 |
| A00776 | A01369 | 193 | A00776 | A01370 | 207 |
| A00776 | A02006 | 199 | A00776 | A03676 | 361 |
| A00776 | A06785 | 293 | A00776 | A07317 | 313 |
| A00776 | A07954 | 260 | A00776 | A09296 | 419 |
| A00776 | A15649 | 357 | A00777 | A00781 | 257 |

|        |        |     |        |        |     |
|--------|--------|-----|--------|--------|-----|
| A00777 | A00883 | 162 | A00777 | A01075 | 310 |
| A00777 | A01394 | 399 | A00777 | A03809 | 177 |
| A00777 | A06864 | 201 | A00777 | A14272 | 281 |
| A00778 | A00779 | 491 | A00778 | A00782 | 263 |
| A00778 | A00786 | 297 | A00778 | A00807 | 168 |
| A00778 | A00812 | 447 | A00778 | A00847 | 414 |
| A00778 | A00907 | 469 | A00778 | A00920 | 719 |
| A00778 | A01021 | 435 | A00778 | A01026 | 722 |
| A00778 | A01027 | 428 | A00778 | A01071 | 228 |
| A00778 | A01099 | 224 | A00778 | A01100 | 258 |
| A00778 | A01149 | 472 | A00778 | A01296 | 277 |
| A00778 | A01313 | 373 | A00778 | A01322 | 407 |
| A00778 | A01326 | 329 | A00778 | A01377 | 720 |
| A00778 | A01385 | 401 | A00778 | A01399 | 193 |
| A00778 | A01415 | 324 | A00778 | A01458 | 200 |
| A00778 | A01557 | 399 | A00778 | A01573 | 402 |
| A00778 | A01574 | 201 | A00778 | A02704 | 477 |
| A00778 | A02878 | 262 | A00778 | A03293 | 358 |
| A00778 | A03420 | 212 | A00778 | A03534 | 180 |
| A00778 | A04463 | 196 | A00778 | A04668 | 262 |
| A00778 | A05218 | 152 | A00778 | A05767 | 466 |
| A00778 | A06970 | 417 | A00778 | A07232 | 162 |
| A00778 | A07433 | 457 | A00778 | A07558 | 384 |
| A00778 | A07603 | 255 | A00778 | A07693 | 485 |
| A00778 | A07976 | 170 | A00778 | A07996 | 247 |
| A00778 | A08113 | 425 | A00778 | A08161 | 160 |
| A00778 | A08196 | 299 | A00778 | A08263 | 413 |
| A00778 | A08346 | 491 | A00778 | A08356 | 167 |
| A00778 | A08402 | 709 | A00778 | A08567 | 281 |
| A00778 | A08975 | 235 | A00778 | A09118 | 218 |
| A00778 | A09556 | 466 | A00778 | A09648 | 722 |
| A00778 | A09653 | 490 | A00778 | A09787 | 168 |
| A00778 | A09849 | 329 | A00778 | A10373 | 481 |
| A00778 | A10421 | 63  | A00778 | A11173 | 274 |
| A00778 | A12492 | 489 | A00778 | A12556 | 199 |
| A00778 | A12952 | 288 | A00778 | A13169 | 491 |
| A00778 | A13516 | 212 | A00778 | A13873 | 877 |
| A00778 | A13949 | 472 | A00778 | A13963 | 414 |
| A00778 | A14077 | 491 | A00778 | A14092 | 481 |
| A00778 | A14191 | 644 | A00778 | A14209 | 481 |
| A00778 | A14222 | 317 | A00778 | A14230 | 379 |
| A00778 | A14272 | 866 | A00778 | A14288 | 491 |
| A00778 | A14707 | 262 | A00778 | A15367 | 731 |
| A00778 | A15383 | 408 | A00778 | A15510 | 157 |
| A00778 | A15877 | 401 | A00778 | A15949 | 193 |
| A00778 | A16128 | 180 | A00778 | A16129 | 355 |

|        |        |     |        |        |     |
|--------|--------|-----|--------|--------|-----|
| A00778 | A16553 | 218 | A00778 | A16694 | 489 |
| A00779 | A00786 | 760 | A00779 | A00812 | 490 |
| A00779 | A00814 | 173 | A00779 | A00824 | 256 |
| A00779 | A00898 | 236 | A00779 | A00907 | 286 |
| A00779 | A00920 | 216 | A00779 | A01026 | 491 |
| A00779 | A01091 | 277 | A00779 | A01149 | 208 |
| A00779 | A01296 | 190 | A00779 | A01313 | 201 |
| A00779 | A01360 | 256 | A00779 | A01377 | 480 |
| A00779 | A01386 | 344 | A00779 | A01479 | 293 |
| A00779 | A01592 | 594 | A00779 | A01650 | 587 |
| A00779 | A01703 | 151 | A00779 | A03492 | 750 |
| A00779 | A05383 | 205 | A00779 | A05625 | 578 |
| A00779 | A06606 | 163 | A00779 | A07242 | 470 |
| A00779 | A08062 | 249 | A00779 | A08113 | 328 |
| A00779 | A08263 | 306 | A00779 | A08346 | 484 |
| A00779 | A08402 | 491 | A00779 | A08569 | 172 |
| A00779 | A08694 | 223 | A00779 | A08885 | 515 |
| A00779 | A09195 | 296 | A00779 | A09383 | 168 |
| A00779 | A09443 | 249 | A00779 | A09556 | 445 |
| A00779 | A09648 | 491 | A00779 | A09653 | 469 |
| A00779 | A09849 | 160 | A00779 | A09884 | 198 |
| A00779 | A10525 | 374 | A00779 | A12492 | 427 |
| A00779 | A13169 | 480 | A00779 | A14077 | 485 |
| A00779 | A14092 | 441 | A00779 | A14191 | 486 |
| A00779 | A14272 | 491 | A00779 | A14288 | 491 |
| A00779 | A15367 | 491 | A00779 | A15383 | 486 |
| A00779 | A15877 | 288 | A00779 | A16088 | 230 |
| A00779 | A16694 | 395 | A00780 | A00785 | 347 |
| A00780 | A00790 | 458 | A00780 | A00906 | 262 |
| A00780 | A00953 | 352 | A00780 | A00974 | 457 |
| A00780 | A00990 | 405 | A00780 | A01023 | 366 |
| A00780 | A01081 | 480 | A00780 | A01086 | 456 |
| A00780 | A01108 | 430 | A00780 | A01186 | 283 |
| A00780 | A01204 | 438 | A00780 | A01246 | 286 |
| A00780 | A01346 | 188 | A00780 | A01399 | 380 |
| A00780 | A01407 | 279 | A00780 | A01448 | 202 |
| A00780 | A03740 | 187 | A00780 | A04895 | 382 |
| A00780 | A05839 | 330 | A00780 | A06279 | 360 |
| A00780 | A07350 | 408 | A00780 | A07569 | 326 |
| A00780 | A08572 | 245 | A00780 | A10199 | 356 |
| A00780 | A10535 | 314 | A00780 | A11015 | 378 |
| A00780 | A11427 | 266 | A00780 | A13497 | 408 |
| A00781 | A00791 | 489 | A00781 | A00822 | 454 |
| A00781 | A00866 | 481 | A00781 | A00868 | 491 |
| A00781 | A00883 | 491 | A00781 | A00891 | 165 |
| A00781 | A00926 | 486 | A00781 | A00927 | 162 |



|        |        |     |        |        |     |
|--------|--------|-----|--------|--------|-----|
| A00781 | A00975 | 491 | A00781 | A00981 | 201 |
| A00781 | A01014 | 400 | A00781 | A01057 | 490 |
| A00781 | A01075 | 468 | A00781 | A01077 | 491 |
| A00781 | A01080 | 369 | A00781 | A01097 | 154 |
| A00781 | A01122 | 484 | A00781 | A01162 | 423 |
| A00781 | A01169 | 491 | A00781 | A01173 | 165 |
| A00781 | A01208 | 232 | A00781 | A01212 | 152 |
| A00781 | A01261 | 479 | A00781 | A01278 | 324 |
| A00781 | A01339 | 188 | A00781 | A01340 | 201 |
| A00781 | A01354 | 430 | A00781 | A01370 | 182 |
| A00781 | A01371 | 277 | A00781 | A01524 | 899 |
| A00781 | A01582 | 396 | A00781 | A01671 | 154 |
| A00781 | A01698 | 291 | A00781 | A01741 | 303 |
| A00781 | A01975 | 191 | A00781 | A02000 | 195 |
| A00781 | A02452 | 213 | A00781 | A02916 | 252 |
| A00781 | A03495 | 469 | A00781 | A03498 | 176 |
| A00781 | A03682 | 285 | A00781 | A03733 | 180 |
| A00781 | A03892 | 902 | A00781 | A04229 | 221 |
| A00781 | A04423 | 193 | A00781 | A04491 | 168 |
| A00781 | A04666 | 154 | A00781 | A04774 | 323 |
| A00781 | A05383 | 156 | A00781 | A05539 | 152 |
| A00781 | A05570 | 152 | A00781 | A06032 | 156 |
| A00781 | A06188 | 228 | A00781 | A06750 | 446 |
| A00781 | A06905 | 294 | A00781 | A06974 | 165 |
| A00781 | A07101 | 408 | A00781 | A07355 | 339 |
| A00781 | A07403 | 257 | A00781 | A07434 | 490 |
| A00781 | A08403 | 188 | A00781 | A08527 | 229 |
| A00781 | A08578 | 193 | A00781 | A08834 | 235 |
| A00781 | A08882 | 416 | A00781 | A08913 | 224 |
| A00781 | A09131 | 238 | A00781 | A09296 | 213 |
| A00781 | A09687 | 252 | A00781 | A09857 | 224 |
| A00781 | A11291 | 314 | A00781 | A11540 | 171 |
| A00781 | A11741 | 204 | A00781 | A11893 | 277 |
| A00781 | A12107 | 213 | A00781 | A12824 | 490 |
| A00781 | A13317 | 269 | A00781 | A13867 | 193 |
| A00781 | A14159 | 165 | A00781 | A14180 | 163 |
| A00781 | A14196 | 469 | A00781 | A14201 | 156 |
| A00781 | A14220 | 486 | A00781 | A14352 | 205 |
| A00781 | A15185 | 188 | A00781 | A15292 | 188 |
| A00781 | A15297 | 475 | A00781 | A15317 | 168 |
| A00781 | A15419 | 168 | A00781 | A16358 | 213 |
| A00782 | A00788 | 491 | A00782 | A00789 | 490 |
| A00782 | A00790 | 277 | A00782 | A00793 | 440 |
| A00782 | A00839 | 491 | A00782 | A00878 | 486 |
| A00782 | A00916 | 326 | A00782 | A00923 | 347 |
| A00782 | A00955 | 490 | A00782 | A00965 | 329 |

|        |        |     |        |        |     |
|--------|--------|-----|--------|--------|-----|
| A00782 | A00991 | 475 | A00782 | A01000 | 338 |
| A00782 | A01012 | 312 | A00782 | A01017 | 491 |
| A00782 | A01025 | 435 | A00782 | A01042 | 191 |
| A00782 | A01072 | 301 | A00782 | A01090 | 414 |
| A00782 | A01091 | 393 | A00782 | A01098 | 230 |
| A00782 | A01108 | 307 | A00782 | A01112 | 445 |
| A00782 | A01115 | 190 | A00782 | A01121 | 198 |
| A00782 | A01152 | 480 | A00782 | A01153 | 481 |
| A00782 | A01154 | 491 | A00782 | A01166 | 321 |
| A00782 | A01186 | 364 | A00782 | A01189 | 311 |
| A00782 | A01196 | 191 | A00782 | A01206 | 327 |
| A00782 | A01217 | 652 | A00782 | A01218 | 177 |
| A00782 | A01220 | 489 | A00782 | A01221 | 490 |
| A00782 | A01234 | 474 | A00782 | A01243 | 259 |
| A00782 | A01247 | 489 | A00782 | A01263 | 491 |
| A00782 | A01291 | 483 | A00782 | A01306 | 491 |
| A00782 | A01335 | 491 | A00782 | A01337 | 416 |
| A00782 | A01365 | 659 | A00782 | A01369 | 458 |
| A00782 | A01381 | 346 | A00782 | A01406 | 671 |
| A00782 | A01407 | 485 | A00782 | A01408 | 491 |
| A00782 | A01411 | 473 | A00782 | A01412 | 386 |
| A00782 | A01416 | 193 | A00782 | A01419 | 319 |
| A00782 | A01449 | 475 | A00782 | A01468 | 475 |
| A00782 | A01470 | 466 | A00782 | A01488 | 313 |
| A00782 | A01496 | 425 | A00782 | A01569 | 173 |
| A00782 | A01579 | 491 | A00782 | A01586 | 307 |
| A00782 | A01597 | 310 | A00782 | A01601 | 432 |
| A00782 | A01611 | 375 | A00782 | A01612 | 454 |
| A00782 | A01613 | 249 | A00782 | A01649 | 259 |
| A00782 | A01822 | 199 | A00782 | A01998 | 377 |
| A00782 | A01999 | 278 | A00782 | A02227 | 491 |
| A00782 | A02887 | 488 | A00782 | A03095 | 477 |
| A00782 | A03490 | 171 | A00782 | A03493 | 454 |
| A00782 | A03567 | 335 | A00782 | A03982 | 246 |
| A00782 | A04688 | 386 | A00782 | A04846 | 419 |
| A00782 | A05198 | 322 | A00782 | A05199 | 269 |
| A00782 | A05258 | 188 | A00782 | A05318 | 167 |
| A00782 | A05450 | 226 | A00782 | A05499 | 374 |
| A00782 | A05501 | 491 | A00782 | A05502 | 462 |
| A00782 | A05646 | 358 | A00782 | A05804 | 423 |
| A00782 | A06564 | 491 | A00782 | A06897 | 201 |
| A00782 | A06970 | 208 | A00782 | A06973 | 443 |
| A00782 | A07047 | 276 | A00782 | A07248 | 347 |
| A00782 | A07349 | 475 | A00782 | A07463 | 319 |
| A00782 | A07473 | 172 | A00782 | A07536 | 162 |
| A00782 | A07581 | 401 | A00782 | A07819 | 215 |

|        |        |     |        |        |     |
|--------|--------|-----|--------|--------|-----|
| A00782 | A08131 | 390 | A00782 | A08154 | 474 |
| A00782 | A08277 | 475 | A00782 | A08301 | 183 |
| A00782 | A08346 | 281 | A00782 | A08358 | 406 |
| A00782 | A08359 | 470 | A00782 | A08408 | 352 |
| A00782 | A08419 | 420 | A00782 | A08501 | 452 |
| A00782 | A08543 | 414 | A00782 | A08556 | 481 |
| A00782 | A08559 | 243 | A00782 | A08760 | 134 |
| A00782 | A08761 | 486 | A00782 | A08762 | 165 |
| A00782 | A08773 | 235 | A00782 | A08929 | 326 |
| A00782 | A08973 | 170 | A00782 | A09285 | 210 |
| A00782 | A09520 | 312 | A00782 | A09530 | 319 |
| A00782 | A09610 | 229 | A00782 | A09735 | 490 |
| A00782 | A09852 | 414 | A00782 | A10159 | 278 |
| A00782 | A10338 | 319 | A00782 | A10498 | 188 |
| A00782 | A10553 | 271 | A00782 | A11277 | 159 |
| A00782 | A11279 | 238 | A00782 | A11364 | 196 |
| A00782 | A11616 | 201 | A00782 | A11657 | 170 |
| A00782 | A11688 | 393 | A00782 | A12011 | 278 |
| A00782 | A12080 | 210 | A00782 | A12477 | 353 |
| A00782 | A13989 | 472 | A00782 | A14216 | 191 |
| A00782 | A14479 | 472 | A00782 | A14482 | 379 |
| A00782 | A14508 | 463 | A00782 | A14568 | 491 |
| A00782 | A14813 | 157 | A00782 | A15225 | 232 |
| A00782 | A15499 | 363 | A00782 | A15500 | 491 |
| A00782 | A15510 | 324 | A00782 | A15660 | 251 |
| A00782 | A15771 | 486 | A00782 | A16007 | 160 |
| A00782 | A16035 | 196 | A00782 | A16272 | 344 |
| A00782 | A16318 | 230 | A00782 | A16583 | 167 |
| A00782 | A16686 | 185 | A00782 | A17152 | 385 |
| A00783 | A00785 | 592 | A00783 | A00790 | 592 |
| A00783 | A00833 | 281 | A00783 | A00839 | 475 |
| A00783 | A00841 | 277 | A00783 | A00849 | 430 |
| A00783 | A00909 | 457 | A00783 | A00910 | 327 |
| A00783 | A00911 | 353 | A00783 | A00922 | 469 |
| A00783 | A00923 | 279 | A00783 | A00953 | 592 |
| A00783 | A00974 | 532 | A00783 | A00983 | 329 |
| A00783 | A00987 | 391 | A00783 | A01027 | 592 |
| A00783 | A01042 | 491 | A00783 | A01047 | 228 |
| A00783 | A01054 | 491 | A00783 | A01081 | 251 |
| A00783 | A01086 | 588 | A00783 | A01094 | 154 |
| A00783 | A01101 | 446 | A00783 | A01108 | 590 |
| A00783 | A01127 | 390 | A00783 | A01150 | 592 |
| A00783 | A01161 | 584 | A00783 | A01204 | 438 |
| A00783 | A01206 | 314 | A00783 | A01232 | 489 |
| A00783 | A01246 | 443 | A00783 | A01260 | 226 |
| A00783 | A01265 | 491 | A00783 | A01275 | 235 |

|        |        |     |        |        |     |
|--------|--------|-----|--------|--------|-----|
| A00783 | A01287 | 247 | A00783 | A01291 | 486 |
| A00783 | A01346 | 416 | A00783 | A01379 | 308 |
| A00783 | A01399 | 592 | A00783 | A01431 | 171 |
| A00783 | A01435 | 294 | A00783 | A01437 | 401 |
| A00783 | A01439 | 204 | A00783 | A01443 | 583 |
| A00783 | A01446 | 491 | A00783 | A01448 | 491 |
| A00783 | A01457 | 183 | A00783 | A01540 | 491 |
| A00783 | A01569 | 435 | A00783 | A01572 | 276 |
| A00783 | A01579 | 313 | A00783 | A01649 | 486 |
| A00783 | A01850 | 350 | A00783 | A02350 | 269 |
| A00783 | A02791 | 218 | A00783 | A02864 | 314 |
| A00783 | A02994 | 247 | A00783 | A03070 | 379 |
| A00783 | A03298 | 340 | A00783 | A03421 | 286 |
| A00783 | A03494 | 398 | A00783 | A03740 | 491 |
| A00783 | A03776 | 394 | A00783 | A03809 | 457 |
| A00783 | A03959 | 247 | A00783 | A04161 | 681 |
| A00783 | A04542 | 193 | A00783 | A04686 | 249 |
| A00783 | A04895 | 474 | A00783 | A05153 | 238 |
| A00783 | A05387 | 291 | A00783 | A06466 | 462 |
| A00783 | A06690 | 193 | A00783 | A06959 | 388 |
| A00783 | A06965 | 302 | A00783 | A07086 | 241 |
| A00783 | A07208 | 465 | A00783 | A07237 | 458 |
| A00783 | A07451 | 205 | A00783 | A07569 | 383 |
| A00783 | A07597 | 341 | A00783 | A07744 | 272 |
| A00783 | A07773 | 182 | A00783 | A07792 | 329 |
| A00783 | A07881 | 241 | A00783 | A08055 | 157 |
| A00783 | A08228 | 475 | A00783 | A08357 | 401 |
| A00783 | A08398 | 255 | A00783 | A08452 | 401 |
| A00783 | A08488 | 414 | A00783 | A08571 | 355 |
| A00783 | A08835 | 491 | A00783 | A08922 | 291 |
| A00783 | A08967 | 223 | A00783 | A08968 | 238 |
| A00783 | A08987 | 490 | A00783 | A09702 | 199 |
| A00783 | A09720 | 307 | A00783 | A10535 | 190 |
| A00783 | A10797 | 386 | A00783 | A10798 | 481 |
| A00783 | A10853 | 249 | A00783 | A11296 | 463 |
| A00783 | A11302 | 326 | A00783 | A11322 | 491 |
| A00783 | A11337 | 454 | A00783 | A11338 | 491 |
| A00783 | A11372 | 428 | A00783 | A11374 | 491 |
| A00783 | A11400 | 348 | A00783 | A11419 | 491 |
| A00783 | A11427 | 491 | A00783 | A11612 | 238 |
| A00783 | A11677 | 579 | A00783 | A11724 | 324 |
| A00783 | A11975 | 483 | A00783 | A12059 | 424 |
| A00783 | A12142 | 238 | A00783 | A12241 | 322 |
| A00783 | A12835 | 201 | A00783 | A13069 | 265 |
| A00783 | A13261 | 312 | A00783 | A13340 | 430 |
| A00783 | A13787 | 179 | A00783 | A13989 | 163 |

|        |        |     |        |        |     |
|--------|--------|-----|--------|--------|-----|
| A00783 | A14073 | 438 | A00783 | A14152 | 384 |
| A00783 | A14471 | 183 | A00783 | A14699 | 556 |
| A00783 | A14778 | 247 | A00783 | A14825 | 446 |
| A00783 | A14845 | 486 | A00783 | A14888 | 262 |
| A00783 | A15219 | 247 | A00783 | A15312 | 240 |
| A00783 | A15416 | 213 | A00783 | A15432 | 344 |
| A00783 | A15660 | 491 | A00783 | A15684 | 489 |
| A00783 | A15742 | 151 | A00783 | A15758 | 258 |
| A00783 | A15931 | 457 | A00783 | A15937 | 418 |
| A00783 | A15988 | 170 | A00783 | A16118 | 238 |
| A00783 | A16371 | 165 | A00783 | A16575 | 254 |
| A00783 | A16587 | 446 | A00783 | A16965 | 173 |
| A00783 | A17000 | 377 | A00783 | A17128 | 490 |
| A00784 | A00814 | 475 | A00784 | A00816 | 294 |
| A00784 | A00866 | 229 | A00784 | A00950 | 490 |
| A00784 | A00993 | 272 | A00784 | A00999 | 317 |
| A00784 | A01059 | 217 | A00784 | A01064 | 491 |
| A00784 | A01093 | 491 | A00784 | A01099 | 629 |
| A00784 | A01114 | 629 | A00784 | A01187 | 628 |
| A00784 | A01189 | 380 | A00784 | A01197 | 620 |
| A00784 | A01212 | 250 | A00784 | A01296 | 462 |
| A00784 | A01297 | 204 | A00784 | A01315 | 317 |
| A00784 | A01317 | 293 | A00784 | A01319 | 317 |
| A00784 | A01320 | 236 | A00784 | A01322 | 486 |
| A00784 | A01329 | 229 | A00784 | A01341 | 344 |
| A00784 | A01398 | 170 | A00784 | A01404 | 243 |
| A00784 | A01415 | 628 | A00784 | A01508 | 254 |
| A00784 | A01559 | 488 | A00784 | A01589 | 413 |
| A00784 | A01594 | 424 | A00784 | A01627 | 229 |
| A00784 | A01635 | 216 | A00784 | A01680 | 317 |
| A00784 | A01682 | 229 | A00784 | A01686 | 486 |
| A00784 | A01741 | 480 | A00784 | A01743 | 157 |
| A00784 | A02156 | 208 | A00784 | A02216 | 420 |
| A00784 | A02377 | 182 | A00784 | A02838 | 157 |
| A00784 | A02859 | 288 | A00784 | A03057 | 452 |
| A00784 | A03259 | 235 | A00784 | A03327 | 317 |
| A00784 | A04668 | 485 | A00784 | A04927 | 380 |
| A00784 | A05334 | 470 | A00784 | A05525 | 290 |
| A00784 | A05630 | 270 | A00784 | A05690 | 317 |
| A00784 | A06130 | 317 | A00784 | A06309 | 172 |
| A00784 | A06381 | 317 | A00784 | A06750 | 229 |
| A00784 | A06775 | 236 | A00784 | A07078 | 311 |
| A00784 | A07205 | 310 | A00784 | A07346 | 446 |
| A00784 | A07353 | 317 | A00784 | A07520 | 226 |
| A00784 | A07603 | 267 | A00784 | A07670 | 229 |
| A00784 | A08212 | 489 | A00784 | A08516 | 475 |

|        |        |     |        |        |     |
|--------|--------|-----|--------|--------|-----|
| A00784 | A08526 | 491 | A00784 | A08694 | 454 |
| A00784 | A08820 | 483 | A00784 | A08995 | 174 |
| A00784 | A09000 | 172 | A00784 | A09126 | 328 |
| A00784 | A09301 | 378 | A00784 | A09598 | 491 |
| A00784 | A09762 | 121 | A00784 | A10635 | 290 |
| A00784 | A10989 | 159 | A00784 | A11236 | 121 |
| A00784 | A11540 | 485 | A00784 | A12556 | 318 |
| A00784 | A13913 | 477 | A00784 | A13949 | 196 |
| A00784 | A14153 | 208 | A00784 | A15190 | 377 |
| A00784 | A15497 | 247 | A00784 | A15549 | 308 |
| A00784 | A15714 | 238 | A00784 | A15837 | 580 |
| A00784 | A16626 | 560 | A00784 | A16643 | 317 |
| A00785 | A00790 | 592 | A00785 | A00796 | 319 |
| A00785 | A00839 | 423 | A00785 | A00841 | 458 |
| A00785 | A00842 | 319 | A00785 | A00849 | 247 |
| A00785 | A00909 | 486 | A00785 | A00910 | 456 |
| A00785 | A00922 | 491 | A00785 | A00923 | 344 |
| A00785 | A00953 | 592 | A00785 | A00965 | 202 |
| A00785 | A00974 | 590 | A00785 | A00983 | 470 |
| A00785 | A00994 | 424 | A00785 | A01023 | 167 |
| A00785 | A01025 | 236 | A00785 | A01027 | 592 |
| A00785 | A01042 | 491 | A00785 | A01054 | 480 |
| A00785 | A01081 | 470 | A00785 | A01086 | 592 |
| A00785 | A01108 | 592 | A00785 | A01150 | 592 |
| A00785 | A01161 | 584 | A00785 | A01204 | 590 |
| A00785 | A01221 | 435 | A00785 | A01232 | 486 |
| A00785 | A01246 | 479 | A00785 | A01265 | 491 |
| A00785 | A01287 | 359 | A00785 | A01306 | 341 |
| A00785 | A01311 | 423 | A00785 | A01346 | 591 |
| A00785 | A01382 | 450 | A00785 | A01399 | 592 |
| A00785 | A01403 | 218 | A00785 | A01408 | 357 |
| A00785 | A01443 | 535 | A00785 | A01446 | 491 |
| A00785 | A01448 | 491 | A00785 | A01540 | 491 |
| A00785 | A01711 | 374 | A00785 | A01741 | 333 |
| A00785 | A02731 | 334 | A00785 | A02814 | 408 |
| A00785 | A02994 | 247 | A00785 | A03070 | 249 |
| A00785 | A03150 | 167 | A00785 | A03205 | 196 |
| A00785 | A03259 | 191 | A00785 | A03293 | 294 |
| A00785 | A03454 | 463 | A00785 | A03740 | 491 |
| A00785 | A03752 | 367 | A00785 | A03776 | 489 |
| A00785 | A03809 | 491 | A00785 | A03959 | 523 |
| A00785 | A03981 | 254 | A00785 | A04895 | 491 |
| A00785 | A05044 | 219 | A00785 | A05227 | 176 |
| A00785 | A05387 | 296 | A00785 | A06466 | 176 |
| A00785 | A06637 | 294 | A00785 | A06959 | 465 |
| A00785 | A07208 | 486 | A00785 | A07237 | 446 |

|        |        |     |        |        |     |
|--------|--------|-----|--------|--------|-----|
| A00785 | A07331 | 193 | A00785 | A07350 | 265 |
| A00785 | A07362 | 401 | A00785 | A07569 | 463 |
| A00785 | A07597 | 351 | A00785 | A07744 | 475 |
| A00785 | A07773 | 350 | A00785 | A07792 | 338 |
| A00785 | A07881 | 416 | A00785 | A08098 | 366 |
| A00785 | A08228 | 472 | A00785 | A08327 | 205 |
| A00785 | A08452 | 193 | A00785 | A08760 | 227 |
| A00785 | A08835 | 491 | A00785 | A08967 | 229 |
| A00785 | A08987 | 428 | A00785 | A09616 | 281 |
| A00785 | A09720 | 314 | A00785 | A09735 | 290 |
| A00785 | A09740 | 184 | A00785 | A09792 | 187 |
| A00785 | A09894 | 200 | A00785 | A10199 | 449 |
| A00785 | A10535 | 375 | A00785 | A10633 | 174 |
| A00785 | A10797 | 480 | A00785 | A10798 | 479 |
| A00785 | A11015 | 193 | A00785 | A11244 | 185 |
| A00785 | A11296 | 491 | A00785 | A11302 | 457 |
| A00785 | A11322 | 491 | A00785 | A11331 | 252 |
| A00785 | A11337 | 303 | A00785 | A11338 | 491 |
| A00785 | A11374 | 490 | A00785 | A11419 | 486 |
| A00785 | A11427 | 491 | A00785 | A11677 | 280 |
| A00785 | A11724 | 454 | A00785 | A12125 | 485 |
| A00785 | A12159 | 245 | A00785 | A12902 | 218 |
| A00785 | A13038 | 229 | A00785 | A13609 | 477 |
| A00785 | A13829 | 312 | A00785 | A14073 | 422 |
| A00785 | A14216 | 422 | A00785 | A14471 | 201 |
| A00785 | A14699 | 591 | A00785 | A14778 | 247 |
| A00785 | A14825 | 152 | A00785 | A14845 | 462 |
| A00785 | A14888 | 272 | A00785 | A15416 | 360 |
| A00785 | A15624 | 308 | A00785 | A15660 | 347 |
| A00785 | A15684 | 468 | A00785 | A15746 | 313 |
| A00785 | A15758 | 382 | A00785 | A15938 | 176 |
| A00785 | A16088 | 396 | A00785 | A16371 | 454 |
| A00785 | A16587 | 371 | A00785 | A16591 | 229 |
| A00785 | A16662 | 218 | A00785 | A16965 | 180 |
| A00785 | A17128 | 435 | A00786 | A00864 | 549 |
| A00786 | A00877 | 491 | A00786 | A00929 | 249 |
| A00786 | A00941 | 470 | A00786 | A00942 | 198 |
| A00786 | A00951 | 486 | A00786 | A00971 | 486 |
| A00786 | A01002 | 401 | A00786 | A01017 | 371 |
| A00786 | A01035 | 272 | A00786 | A01036 | 491 |
| A00786 | A01101 | 368 | A00786 | A01104 | 176 |
| A00786 | A01216 | 479 | A00786 | A01217 | 207 |
| A00786 | A01282 | 481 | A00786 | A01290 | 491 |
| A00786 | A01309 | 187 | A00786 | A01345 | 491 |
| A00786 | A01366 | 491 | A00786 | A01386 | 173 |
| A00786 | A01454 | 539 | A00786 | A01478 | 545 |

|        |        |     |        |        |     |
|--------|--------|-----|--------|--------|-----|
| A00786 | A01479 | 491 | A00786 | A01486 | 681 |
| A00786 | A01514 | 491 | A00786 | A01515 | 168 |
| A00786 | A01532 | 383 | A00786 | A01533 | 429 |
| A00786 | A01537 | 449 | A00786 | A01568 | 491 |
| A00786 | A01572 | 201 | A00786 | A01580 | 491 |
| A00786 | A01591 | 963 | A00786 | A01592 | 970 |
| A00786 | A01595 | 428 | A00786 | A01596 | 559 |
| A00786 | A01638 | 251 | A00786 | A01647 | 414 |
| A00786 | A01650 | 772 | A00786 | A01651 | 238 |
| A00786 | A01681 | 223 | A00786 | A01685 | 187 |
| A00786 | A01687 | 695 | A00786 | A01689 | 481 |
| A00786 | A01703 | 306 | A00786 | A01706 | 458 |
| A00786 | A02653 | 171 | A00786 | A02847 | 345 |
| A00786 | A03014 | 249 | A00786 | A03300 | 165 |
| A00786 | A03321 | 165 | A00786 | A03422 | 663 |
| A00786 | A03492 | 972 | A00786 | A03496 | 499 |
| A00786 | A03528 | 484 | A00786 | A03575 | 566 |
| A00786 | A03720 | 265 | A00786 | A03817 | 353 |
| A00786 | A03880 | 372 | A00786 | A04831 | 216 |
| A00786 | A04971 | 241 | A00786 | A05008 | 562 |
| A00786 | A05009 | 694 | A00786 | A05024 | 185 |
| A00786 | A05155 | 249 | A00786 | A05301 | 490 |
| A00786 | A05356 | 173 | A00786 | A05383 | 490 |
| A00786 | A05625 | 723 | A00786 | A05894 | 491 |
| A00786 | A06144 | 171 | A00786 | A06591 | 660 |
| A00786 | A06602 | 167 | A00786 | A06606 | 484 |
| A00786 | A06661 | 441 | A00786 | A06752 | 163 |
| A00786 | A06819 | 491 | A00786 | A06991 | 252 |
| A00786 | A07004 | 490 | A00786 | A07054 | 491 |
| A00786 | A07073 | 481 | A00786 | A07242 | 673 |
| A00786 | A07253 | 218 | A00786 | A07404 | 480 |
| A00786 | A07433 | 238 | A00786 | A07444 | 346 |
| A00786 | A07483 | 491 | A00786 | A07495 | 546 |
| A00786 | A07665 | 463 | A00786 | A07687 | 560 |
| A00786 | A07709 | 491 | A00786 | A07732 | 167 |
| A00786 | A07762 | 491 | A00786 | A07816 | 491 |
| A00786 | A07872 | 168 | A00786 | A07893 | 491 |
| A00786 | A07903 | 348 | A00786 | A07934 | 251 |
| A00786 | A07944 | 157 | A00786 | A07961 | 432 |
| A00786 | A08050 | 152 | A00786 | A08056 | 491 |
| A00786 | A08192 | 191 | A00786 | A08351 | 458 |
| A00786 | A08360 | 491 | A00786 | A08379 | 477 |
| A00786 | A08409 | 432 | A00786 | A08463 | 491 |
| A00786 | A08531 | 488 | A00786 | A08536 | 618 |
| A00786 | A08551 | 608 | A00786 | A08552 | 577 |
| A00786 | A08569 | 491 | A00786 | A08715 | 163 |



|        |        |     |        |        |     |
|--------|--------|-----|--------|--------|-----|
| A00786 | A08839 | 581 | A00786 | A08858 | 588 |
| A00786 | A08885 | 506 | A00786 | A08986 | 491 |
| A00786 | A08997 | 428 | A00786 | A09052 | 160 |
| A00786 | A09195 | 480 | A00786 | A09342 | 474 |
| A00786 | A09370 | 408 | A00786 | A09443 | 456 |
| A00786 | A09449 | 476 | A00786 | A09491 | 63  |
| A00786 | A09567 | 333 | A00786 | A09624 | 439 |
| A00786 | A09662 | 424 | A00786 | A09666 | 247 |
| A00786 | A09757 | 364 | A00786 | A09793 | 205 |
| A00786 | A09884 | 412 | A00786 | A09995 | 386 |
| A00786 | A10175 | 344 | A00786 | A10250 | 234 |
| A00786 | A10580 | 486 | A00786 | A11006 | 129 |
| A00786 | A11183 | 291 | A00786 | A11281 | 182 |
| A00786 | A11283 | 496 | A00786 | A11292 | 152 |
| A00786 | A11346 | 288 | A00786 | A11676 | 182 |
| A00786 | A11835 | 394 | A00786 | A11917 | 467 |
| A00786 | A11920 | 154 | A00786 | A11986 | 443 |
| A00786 | A11995 | 291 | A00786 | A12030 | 311 |
| A00786 | A12047 | 627 | A00786 | A12099 | 458 |
| A00786 | A12225 | 417 | A00786 | A12226 | 335 |
| A00786 | A12506 | 204 | A00786 | A12508 | 290 |
| A00786 | A12665 | 286 | A00786 | A12722 | 488 |
| A00786 | A12727 | 216 | A00786 | A12858 | 274 |
| A00786 | A13313 | 484 | A00786 | A13369 | 268 |
| A00786 | A13708 | 329 | A00786 | A13781 | 319 |
| A00786 | A13788 | 152 | A00786 | A13866 | 283 |
| A00786 | A13894 | 447 | A00786 | A13917 | 168 |
| A00786 | A13924 | 160 | A00786 | A13986 | 202 |
| A00786 | A14006 | 159 | A00786 | A14156 | 162 |
| A00786 | A14163 | 294 | A00786 | A14220 | 168 |
| A00786 | A14227 | 416 | A00786 | A14266 | 486 |
| A00786 | A14278 | 329 | A00786 | A14281 | 491 |
| A00786 | A14310 | 424 | A00786 | A14443 | 899 |
| A00786 | A14444 | 899 | A00786 | A14471 | 363 |
| A00786 | A14484 | 491 | A00786 | A14485 | 63  |
| A00786 | A14509 | 474 | A00786 | A14633 | 561 |
| A00786 | A14661 | 491 | A00786 | A14711 | 358 |
| A00786 | A15533 | 484 | A00786 | A15557 | 340 |
| A00786 | A15626 | 473 | A00786 | A15693 | 187 |
| A00786 | A15855 | 160 | A00786 | A15895 | 187 |
| A00786 | A16261 | 268 | A00786 | A16387 | 210 |
| A00786 | A16418 | 221 | A00786 | A16468 | 187 |
| A00786 | A16532 | 274 | A00787 | A00809 | 439 |
| A00787 | A00813 | 230 | A00787 | A00839 | 491 |
| A00787 | A00868 | 423 | A00787 | A00870 | 491 |
| A00787 | A00878 | 607 | A00787 | A00902 | 380 |

|        |        |     |        |        |     |
|--------|--------|-----|--------|--------|-----|
| A00787 | A00923 | 491 | A00787 | A00935 | 490 |
| A00787 | A00949 | 477 | A00787 | A00952 | 159 |
| A00787 | A00953 | 373 | A00787 | A00965 | 665 |
| A00787 | A00966 | 489 | A00787 | A00980 | 215 |
| A00787 | A00985 | 267 | A00787 | A00988 | 162 |
| A00787 | A00994 | 340 | A00787 | A01000 | 490 |
| A00787 | A01012 | 611 | A00787 | A01020 | 63  |
| A00787 | A01025 | 665 | A00787 | A01034 | 491 |
| A00787 | A01037 | 491 | A00787 | A01038 | 430 |
| A00787 | A01047 | 490 | A00787 | A01056 | 490 |
| A00787 | A01067 | 665 | A00787 | A01072 | 479 |
| A00787 | A01085 | 491 | A00787 | A01090 | 491 |
| A00787 | A01093 | 305 | A00787 | A01095 | 491 |
| A00787 | A01101 | 490 | A00787 | A01108 | 339 |
| A00787 | A01112 | 474 | A00787 | A01127 | 491 |
| A00787 | A01130 | 168 | A00787 | A01140 | 491 |
| A00787 | A01144 | 165 | A00787 | A01152 | 384 |
| A00787 | A01154 | 257 | A00787 | A01166 | 218 |
| A00787 | A01168 | 489 | A00787 | A01184 | 490 |
| A00787 | A01206 | 445 | A00787 | A01220 | 261 |
| A00787 | A01234 | 479 | A00787 | A01238 | 486 |
| A00787 | A01242 | 303 | A00787 | A01247 | 489 |
| A00787 | A01249 | 664 | A00787 | A01261 | 165 |
| A00787 | A01263 | 491 | A00787 | A01268 | 252 |
| A00787 | A01291 | 860 | A00787 | A01294 | 490 |
| A00787 | A01295 | 267 | A00787 | A01306 | 472 |
| A00787 | A01322 | 478 | A00787 | A01326 | 258 |
| A00787 | A01335 | 659 | A00787 | A01338 | 441 |
| A00787 | A01352 | 297 | A00787 | A01365 | 475 |
| A00787 | A01392 | 665 | A00787 | A01399 | 224 |
| A00787 | A01404 | 285 | A00787 | A01415 | 316 |
| A00787 | A01416 | 489 | A00787 | A01433 | 665 |
| A00787 | A01436 | 663 | A00787 | A01437 | 491 |
| A00787 | A01457 | 491 | A00787 | A01468 | 489 |
| A00787 | A01496 | 489 | A00787 | A01514 | 165 |
| A00787 | A01579 | 477 | A00787 | A01586 | 344 |
| A00787 | A01601 | 154 | A00787 | A01618 | 162 |
| A00787 | A01649 | 477 | A00787 | A01718 | 661 |
| A00787 | A01741 | 433 | A00787 | A01822 | 157 |
| A00787 | A02165 | 424 | A00787 | A02524 | 160 |
| A00787 | A02607 | 205 | A00787 | A03048 | 301 |
| A00787 | A03069 | 475 | A00787 | A03086 | 159 |
| A00787 | A03438 | 388 | A00787 | A03488 | 154 |
| A00787 | A03490 | 217 | A00787 | A03567 | 491 |
| A00787 | A03575 | 190 | A00787 | A03705 | 187 |
| A00787 | A03981 | 461 | A00787 | A04607 | 472 |

|        |        |     |        |        |     |
|--------|--------|-----|--------|--------|-----|
| A00787 | A04764 | 190 | A00787 | A05121 | 276 |
| A00787 | A05411 | 655 | A00787 | A05443 | 307 |
| A00787 | A05501 | 486 | A00787 | A05735 | 318 |
| A00787 | A06279 | 200 | A00787 | A06351 | 490 |
| A00787 | A06746 | 174 | A00787 | A06814 | 486 |
| A00787 | A06825 | 358 | A00787 | A06861 | 201 |
| A00787 | A06965 | 491 | A00787 | A07201 | 224 |
| A00787 | A07360 | 434 | A00787 | A07449 | 329 |
| A00787 | A07451 | 491 | A00787 | A07726 | 228 |
| A00787 | A08011 | 801 | A00787 | A08052 | 228 |
| A00787 | A08055 | 656 | A00787 | A08357 | 435 |
| A00787 | A08359 | 430 | A00787 | A08377 | 480 |
| A00787 | A08398 | 473 | A00787 | A08403 | 271 |
| A00787 | A08452 | 477 | A00787 | A08543 | 486 |
| A00787 | A08550 | 658 | A00787 | A08556 | 399 |
| A00787 | A08558 | 205 | A00787 | A08559 | 463 |
| A00787 | A08653 | 344 | A00787 | A08760 | 152 |
| A00787 | A08773 | 797 | A00787 | A08973 | 698 |
| A00787 | A09044 | 491 | A00787 | A09322 | 377 |
| A00787 | A09332 | 491 | A00787 | A09376 | 174 |
| A00787 | A09592 | 168 | A00787 | A09609 | 219 |
| A00787 | A09657 | 344 | A00787 | A09674 | 274 |
| A00787 | A09735 | 291 | A00787 | A09852 | 162 |
| A00787 | A10316 | 263 | A00787 | A10518 | 232 |
| A00787 | A10532 | 297 | A00787 | A10569 | 162 |
| A00787 | A10797 | 424 | A00787 | A10798 | 484 |
| A00787 | A11316 | 180 | A00787 | A11334 | 195 |
| A00787 | A11390 | 480 | A00787 | A11438 | 488 |
| A00787 | A11480 | 405 | A00787 | A11496 | 196 |
| A00787 | A11497 | 286 | A00787 | A11588 | 188 |
| A00787 | A11597 | 286 | A00787 | A11688 | 269 |
| A00787 | A11704 | 212 | A00787 | A11832 | 318 |
| A00787 | A11914 | 205 | A00787 | A11945 | 162 |
| A00787 | A11981 | 193 | A00787 | A11992 | 485 |
| A00787 | A12052 | 162 | A00787 | A12168 | 274 |
| A00787 | A12241 | 339 | A00787 | A12252 | 235 |
| A00787 | A12296 | 190 | A00787 | A12433 | 491 |
| A00787 | A12525 | 465 | A00787 | A12687 | 170 |
| A00787 | A12821 | 152 | A00787 | A12824 | 417 |
| A00787 | A12968 | 290 | A00787 | A13249 | 620 |
| A00787 | A13328 | 230 | A00787 | A13340 | 316 |
| A00787 | A13375 | 174 | A00787 | A13525 | 188 |
| A00787 | A13617 | 157 | A00787 | A13949 | 358 |
| A00787 | A13963 | 157 | A00787 | A13989 | 541 |
| A00787 | A13992 | 489 | A00787 | A14074 | 439 |
| A00787 | A14172 | 366 | A00787 | A14216 | 681 |

|        |        |     |        |        |     |
|--------|--------|-----|--------|--------|-----|
| A00787 | A14272 | 414 | A00787 | A14279 | 205 |
| A00787 | A14449 | 401 | A00787 | A14479 | 152 |
| A00787 | A14482 | 491 | A00787 | A14505 | 357 |
| A00787 | A14569 | 366 | A00787 | A14843 | 419 |
| A00787 | A14903 | 165 | A00787 | A15029 | 285 |
| A00787 | A15221 | 419 | A00787 | A15235 | 430 |
| A00787 | A15376 | 386 | A00787 | A15500 | 441 |
| A00787 | A15624 | 176 | A00787 | A15660 | 457 |
| A00787 | A15666 | 469 | A00787 | A15684 | 509 |
| A00787 | A15778 | 156 | A00787 | A15931 | 473 |
| A00787 | A15932 | 488 | A00787 | A15933 | 193 |
| A00787 | A15988 | 659 | A00787 | A16053 | 190 |
| A00787 | A16118 | 486 | A00787 | A16157 | 302 |
| A00787 | A16159 | 152 | A00787 | A16306 | 288 |
| A00787 | A16462 | 302 | A00787 | A16631 | 172 |
| A00787 | A16679 | 322 | A00787 | A16793 | 185 |
| A00787 | A16797 | 247 | A00787 | A16882 | 162 |
| A00787 | A16886 | 383 | A00788 | A00789 | 491 |
| A00788 | A00793 | 474 | A00788 | A00839 | 488 |
| A00788 | A00878 | 475 | A00788 | A01102 | 160 |
| A00788 | A01154 | 63  | A00788 | A01186 | 154 |
| A00788 | A01218 | 372 | A00788 | A01263 | 263 |
| A00788 | A01335 | 285 | A00788 | A01411 | 177 |
| A00788 | A01579 | 255 | A00788 | A02227 | 477 |
| A00788 | A02887 | 457 | A00788 | A03095 | 168 |
| A00788 | A05499 | 165 | A00788 | A05501 | 393 |
| A00788 | A07349 | 461 | A00788 | A07463 | 368 |
| A00788 | A07602 | 485 | A00788 | A08277 | 491 |
| A00788 | A08761 | 195 | A00788 | A08762 | 245 |
| A00788 | A15500 | 462 | A00788 | A15771 | 343 |
| A00788 | A16583 | 369 | A00788 | A17152 | 246 |
| A00789 | A00793 | 346 | A00789 | A00839 | 319 |
| A00789 | A01154 | 102 | A00789 | A01218 | 340 |
| A00789 | A01306 | 160 | A00789 | A01365 | 361 |
| A00789 | A01406 | 313 | A00789 | A01411 | 257 |
| A00789 | A02227 | 480 | A00789 | A02887 | 472 |
| A00789 | A02950 | 168 | A00789 | A07602 | 473 |
| A00789 | A08277 | 399 | A00789 | A08408 | 204 |
| A00789 | A08556 | 232 | A00789 | A08761 | 457 |
| A00789 | A08762 | 401 | A00789 | A12477 | 267 |
| A00789 | A16583 | 299 | A00790 | A00796 | 246 |
| A00790 | A00810 | 154 | A00790 | A00821 | 417 |
| A00790 | A00839 | 435 | A00790 | A00849 | 416 |
| A00790 | A00863 | 173 | A00790 | A00910 | 176 |
| A00790 | A00953 | 591 | A00790 | A00974 | 590 |
| A00790 | A00987 | 446 | A00790 | A01012 | 234 |

|        |        |     |        |        |     |
|--------|--------|-----|--------|--------|-----|
| A00790 | A01013 | 297 | A00790 | A01027 | 591 |
| A00790 | A01042 | 491 | A00790 | A01054 | 486 |
| A00790 | A01081 | 441 | A00790 | A01083 | 455 |
| A00790 | A01086 | 592 | A00790 | A01094 | 224 |
| A00790 | A01108 | 592 | A00790 | A01150 | 591 |
| A00790 | A01154 | 152 | A00790 | A01161 | 582 |
| A00790 | A01204 | 588 | A00790 | A01246 | 491 |
| A00790 | A01265 | 152 | A00790 | A01287 | 588 |
| A00790 | A01346 | 592 | A00790 | A01365 | 324 |
| A00790 | A01399 | 592 | A00790 | A01406 | 174 |
| A00790 | A01408 | 193 | A00790 | A01443 | 561 |
| A00790 | A01446 | 491 | A00790 | A01448 | 491 |
| A00790 | A01471 | 398 | A00790 | A01540 | 486 |
| A00790 | A01711 | 479 | A00790 | A01741 | 263 |
| A00790 | A01819 | 191 | A00790 | A02040 | 151 |
| A00790 | A02165 | 184 | A00790 | A02227 | 385 |
| A00790 | A02994 | 279 | A00790 | A03740 | 491 |
| A00790 | A03959 | 293 | A00790 | A04771 | 208 |
| A00790 | A04846 | 177 | A00790 | A04895 | 491 |
| A00790 | A05044 | 160 | A00790 | A05387 | 340 |
| A00790 | A05839 | 386 | A00790 | A06084 | 167 |
| A00790 | A06356 | 217 | A00790 | A06959 | 491 |
| A00790 | A07208 | 335 | A00790 | A07237 | 450 |
| A00790 | A07311 | 188 | A00790 | A07350 | 314 |
| A00790 | A07362 | 457 | A00790 | A07551 | 252 |
| A00790 | A07569 | 382 | A00790 | A07682 | 259 |
| A00790 | A08053 | 390 | A00790 | A08054 | 307 |
| A00790 | A08835 | 458 | A00790 | A08885 | 196 |
| A00790 | A09616 | 340 | A00790 | A09696 | 224 |
| A00790 | A10199 | 210 | A00790 | A10535 | 278 |
| A00790 | A11015 | 252 | A00790 | A11244 | 265 |
| A00790 | A11296 | 252 | A00790 | A11302 | 441 |
| A00790 | A11322 | 480 | A00790 | A11338 | 440 |
| A00790 | A11372 | 159 | A00790 | A11374 | 460 |
| A00790 | A11419 | 463 | A00790 | A11427 | 480 |
| A00790 | A11677 | 247 | A00790 | A11724 | 170 |
| A00790 | A12241 | 168 | A00790 | A13261 | 246 |
| A00790 | A13340 | 235 | A00790 | A13707 | 226 |
| A00790 | A14073 | 430 | A00790 | A14479 | 274 |
| A00790 | A14482 | 172 | A00790 | A14569 | 227 |
| A00790 | A14699 | 256 | A00790 | A14778 | 247 |
| A00790 | A14825 | 213 | A00790 | A15244 | 191 |
| A00790 | A16587 | 247 | A00791 | A00792 | 463 |
| A00791 | A00813 | 346 | A00791 | A00868 | 800 |
| A00791 | A00883 | 787 | A00791 | A00884 | 537 |
| A00791 | A00914 | 205 | A00791 | A00925 | 182 |

|        |        |     |        |        |     |
|--------|--------|-----|--------|--------|-----|
| A00791 | A00926 | 545 | A00791 | A00927 | 527 |
| A00791 | A00975 | 544 | A00791 | A01014 | 274 |
| A00791 | A01039 | 206 | A00791 | A01057 | 168 |
| A00791 | A01058 | 490 | A00791 | A01068 | 266 |
| A00791 | A01077 | 508 | A00791 | A01080 | 539 |
| A00791 | A01091 | 483 | A00791 | A01097 | 488 |
| A00791 | A01106 | 177 | A00791 | A01122 | 371 |
| A00791 | A01132 | 171 | A00791 | A01169 | 491 |
| A00791 | A01202 | 232 | A00791 | A01203 | 393 |
| A00791 | A01228 | 279 | A00791 | A01267 | 518 |
| A00791 | A01308 | 296 | A00791 | A01327 | 296 |
| A00791 | A01329 | 296 | A00791 | A01339 | 543 |
| A00791 | A01340 | 157 | A00791 | A01352 | 420 |
| A00791 | A01370 | 486 | A00791 | A01374 | 283 |
| A00791 | A01451 | 475 | A00791 | A01459 | 477 |
| A00791 | A01461 | 177 | A00791 | A01501 | 484 |
| A00791 | A01507 | 323 | A00791 | A01527 | 238 |
| A00791 | A01560 | 191 | A00791 | A01598 | 353 |
| A00791 | A01633 | 249 | A00791 | A01741 | 281 |
| A00791 | A01941 | 218 | A00791 | A02212 | 434 |
| A00791 | A02411 | 366 | A00791 | A02452 | 221 |
| A00791 | A02847 | 393 | A00791 | A03480 | 168 |
| A00791 | A03617 | 341 | A00791 | A04990 | 199 |
| A00791 | A06458 | 318 | A00791 | A06466 | 260 |
| A00791 | A06750 | 388 | A00791 | A06968 | 162 |
| A00791 | A07096 | 160 | A00791 | A07101 | 299 |
| A00791 | A07226 | 170 | A00791 | A07439 | 196 |
| A00791 | A07457 | 456 | A00791 | A07708 | 213 |
| A00791 | A07756 | 488 | A00791 | A07876 | 405 |
| A00791 | A07956 | 413 | A00791 | A07961 | 236 |
| A00791 | A08281 | 217 | A00791 | A08715 | 204 |
| A00791 | A08834 | 160 | A00791 | A08882 | 316 |
| A00791 | A08982 | 355 | A00791 | A09085 | 168 |
| A00791 | A09290 | 388 | A00791 | A09302 | 256 |
| A00791 | A09320 | 235 | A00791 | A09627 | 160 |
| A00791 | A09672 | 269 | A00791 | A09798 | 318 |
| A00791 | A09876 | 485 | A00791 | A09898 | 270 |
| A00791 | A10372 | 328 | A00791 | A11365 | 160 |
| A00791 | A11598 | 388 | A00791 | A11649 | 268 |
| A00791 | A11706 | 491 | A00791 | A11735 | 370 |
| A00791 | A11737 | 160 | A00791 | A11914 | 209 |
| A00791 | A12253 | 323 | A00791 | A12325 | 226 |
| A00791 | A12658 | 160 | A00791 | A12824 | 833 |
| A00791 | A12863 | 157 | A00791 | A12887 | 213 |
| A00791 | A13098 | 235 | A00791 | A13340 | 428 |
| A00791 | A14007 | 193 | A00791 | A14196 | 491 |

|        |        |     |        |        |     |
|--------|--------|-----|--------|--------|-----|
| A00791 | A14220 | 346 | A00791 | A15237 | 270 |
| A00791 | A15256 | 180 | A00791 | A15257 | 379 |
| A00791 | A15297 | 491 | A00791 | A15323 | 454 |
| A00791 | A15338 | 165 | A00791 | A15353 | 367 |
| A00791 | A15419 | 288 | A00791 | A15431 | 205 |
| A00791 | A15498 | 243 | A00791 | A15559 | 473 |
| A00791 | A15564 | 324 | A00791 | A15624 | 402 |
| A00791 | A15779 | 162 | A00791 | A15962 | 266 |
| A00791 | A16463 | 307 | A00791 | A16700 | 383 |
| A00791 | A16947 | 157 | A00792 | A01017 | 210 |
| A00792 | A01232 | 479 | A00792 | A01293 | 314 |
| A00792 | A07744 | 252 | A00792 | A07881 | 151 |
| A00792 | A11381 | 232 | A00792 | A11737 | 236 |
| A00792 | A12329 | 163 | A00793 | A00826 | 294 |
| A00793 | A00839 | 485 | A00793 | A00947 | 388 |
| A00793 | A00965 | 296 | A00793 | A00977 | 263 |
| A00793 | A01016 | 294 | A00793 | A01074 | 324 |
| A00793 | A01075 | 157 | A00793 | A01082 | 229 |
| A00793 | A01087 | 344 | A00793 | A01154 | 408 |
| A00793 | A01186 | 412 | A00793 | A01217 | 260 |
| A00793 | A01238 | 308 | A00793 | A01252 | 251 |
| A00793 | A01263 | 205 | A00793 | A01306 | 322 |
| A00793 | A01335 | 224 | A00793 | A01352 | 302 |
| A00793 | A01365 | 546 | A00793 | A01369 | 151 |
| A00793 | A01406 | 331 | A00793 | A01407 | 338 |
| A00793 | A01408 | 184 | A00793 | A01416 | 322 |
| A00793 | A01449 | 193 | A00793 | A02051 | 232 |
| A00793 | A03493 | 205 | A00793 | A03601 | 390 |
| A00793 | A05499 | 221 | A00793 | A05501 | 585 |
| A00793 | A06105 | 279 | A00793 | A07349 | 489 |
| A00793 | A07602 | 259 | A00793 | A07706 | 311 |
| A00793 | A08277 | 184 | A00793 | A08301 | 208 |
| A00793 | A08403 | 278 | A00793 | A08408 | 200 |
| A00793 | A08501 | 165 | A00793 | A08527 | 256 |
| A00793 | A08533 | 221 | A00793 | A08556 | 227 |
| A00793 | A08761 | 249 | A00793 | A08762 | 400 |
| A00793 | A08886 | 425 | A00793 | A09009 | 243 |
| A00793 | A09690 | 328 | A00793 | A11452 | 238 |
| A00793 | A11535 | 196 | A00793 | A11597 | 165 |
| A00793 | A11699 | 299 | A00793 | A11930 | 235 |
| A00793 | A14566 | 373 | A00793 | A14594 | 257 |
| A00793 | A14943 | 271 | A00793 | A16583 | 296 |
| A00794 | A00942 | 433 | A00794 | A01005 | 384 |
| A00794 | A01035 | 269 | A00794 | A01060 | 450 |
| A00794 | A01078 | 688 | A00794 | A01185 | 307 |
| A00794 | A01451 | 644 | A00794 | A01453 | 491 |

|        |        |     |        |        |     |
|--------|--------|-----|--------|--------|-----|
| A00794 | A01457 | 375 | A00794 | A01458 | 576 |
| A00794 | A01459 | 269 | A00794 | A01461 | 491 |
| A00794 | A01492 | 224 | A00794 | A01500 | 491 |
| A00794 | A01503 | 213 | A00794 | A01514 | 462 |
| A00794 | A01520 | 347 | A00794 | A01522 | 646 |
| A00794 | A01561 | 291 | A00794 | A01573 | 483 |
| A00794 | A01574 | 582 | A00794 | A01575 | 648 |
| A00794 | A01583 | 599 | A00794 | A01585 | 662 |
| A00794 | A01634 | 646 | A00794 | A01646 | 385 |
| A00794 | A01660 | 347 | A00794 | A01683 | 544 |
| A00794 | A01706 | 510 | A00794 | A01779 | 399 |
| A00794 | A01822 | 283 | A00794 | A01926 | 466 |
| A00794 | A02275 | 151 | A00794 | A03034 | 185 |
| A00794 | A03238 | 205 | A00794 | A03293 | 180 |
| A00794 | A03452 | 687 | A00794 | A03489 | 455 |
| A00794 | A03513 | 489 | A00794 | A03565 | 229 |
| A00794 | A03618 | 688 | A00794 | A03626 | 460 |
| A00794 | A03890 | 441 | A00794 | A03891 | 450 |
| A00794 | A03892 | 725 | A00794 | A04145 | 249 |
| A00794 | A04160 | 213 | A00794 | A04292 | 599 |
| A00794 | A04686 | 670 | A00794 | A04839 | 160 |
| A00794 | A04893 | 324 | A00794 | A04897 | 484 |
| A00794 | A05024 | 766 | A00794 | A05061 | 185 |
| A00794 | A05376 | 182 | A00794 | A05401 | 326 |
| A00794 | A05538 | 221 | A00794 | A05638 | 269 |
| A00794 | A06011 | 337 | A00794 | A06037 | 277 |
| A00794 | A06088 | 162 | A00794 | A06089 | 221 |
| A00794 | A06240 | 390 | A00794 | A06659 | 480 |
| A00794 | A06675 | 375 | A00794 | A06890 | 154 |
| A00794 | A06941 | 324 | A00794 | A07122 | 399 |
| A00794 | A07203 | 547 | A00794 | A07477 | 479 |
| A00794 | A07521 | 205 | A00794 | A07736 | 688 |
| A00794 | A07973 | 257 | A00794 | A08250 | 157 |
| A00794 | A08400 | 490 | A00794 | A08461 | 491 |
| A00794 | A08484 | 574 | A00794 | A09050 | 226 |
| A00794 | A09326 | 269 | A00794 | A09333 | 386 |
| A00794 | A09876 | 341 | A00794 | A10584 | 213 |
| A00794 | A10655 | 688 | A00794 | A10663 | 157 |
| A00794 | A10803 | 561 | A00794 | A11279 | 601 |
| A00794 | A11287 | 167 | A00794 | A11303 | 480 |
| A00794 | A11570 | 556 | A00794 | A12922 | 338 |
| A00794 | A13830 | 480 | A00794 | A13831 | 314 |
| A00794 | A13837 | 201 | A00794 | A13882 | 388 |
| A00794 | A13894 | 485 | A00794 | A13895 | 582 |
| A00794 | A13902 | 472 | A00794 | A14056 | 451 |
| A00794 | A14182 | 461 | A00794 | A14247 | 623 |



|        |        |     |        |        |     |
|--------|--------|-----|--------|--------|-----|
| A00794 | A14272 | 490 | A00794 | A14570 | 366 |
| A00794 | A14661 | 602 | A00794 | A14711 | 332 |
| A00794 | A14783 | 399 | A00794 | A14825 | 165 |
| A00794 | A15553 | 188 | A00794 | A15647 | 686 |
| A00794 | A16004 | 176 | A00794 | A17121 | 160 |
| A00794 | A17133 | 238 | A00794 | A17144 | 393 |
| A00795 | A00842 | 412 | A00795 | A00990 | 286 |
| A00795 | A01086 | 263 | A00795 | A01540 | 184 |
| A00795 | A03981 | 162 | A00795 | A14073 | 200 |
| A00795 | A14699 | 174 | A00796 | A01081 | 379 |
| A00796 | A01086 | 423 | A00796 | A01094 | 393 |
| A00796 | A01204 | 416 | A00796 | A01540 | 285 |
| A00796 | A14073 | 301 | A00796 | A14479 | 299 |
| A00797 | A00907 | 409 | A00797 | A01026 | 276 |
| A00797 | A01313 | 416 | A00797 | A01377 | 285 |
| A00797 | A08346 | 288 | A00797 | A08688 | 335 |
| A00797 | A08975 | 319 | A00797 | A14092 | 317 |
| A00797 | A14272 | 450 | A00797 | A15877 | 311 |
| A00798 | A01238 | 247 | A00798 | A01352 | 251 |
| A00798 | A01406 | 238 | A00799 | A00802 | 425 |
| A00799 | A00911 | 377 | A00799 | A00914 | 441 |
| A00799 | A01004 | 369 | A00799 | A01022 | 452 |
| A00799 | A01102 | 204 | A00799 | A01161 | 486 |
| A00799 | A01211 | 191 | A00799 | A01326 | 463 |
| A00799 | A01520 | 185 | A00799 | A01524 | 440 |
| A00799 | A01527 | 945 | A00799 | A01582 | 363 |
| A00799 | A01585 | 362 | A00799 | A01615 | 903 |
| A00799 | A01632 | 489 | A00799 | A01634 | 183 |
| A00799 | A01666 | 149 | A00799 | A01775 | 357 |
| A00799 | A01788 | 308 | A00799 | A01887 | 286 |
| A00799 | A01891 | 278 | A00799 | A01983 | 151 |
| A00799 | A02396 | 347 | A00799 | A02397 | 152 |
| A00799 | A02447 | 213 | A00799 | A02477 | 252 |
| A00799 | A02572 | 170 | A00799 | A02644 | 271 |
| A00799 | A02698 | 357 | A00799 | A02709 | 433 |
| A00799 | A02772 | 200 | A00799 | A02828 | 371 |
| A00799 | A02831 | 218 | A00799 | A02856 | 351 |
| A00799 | A02864 | 441 | A00799 | A02888 | 152 |
| A00799 | A02908 | 484 | A00799 | A02912 | 185 |
| A00799 | A02918 | 475 | A00799 | A03035 | 191 |
| A00799 | A03188 | 255 | A00799 | A03211 | 398 |
| A00799 | A03271 | 262 | A00799 | A03293 | 215 |
| A00799 | A03304 | 488 | A00799 | A03314 | 308 |
| A00799 | A03332 | 224 | A00799 | A03406 | 291 |
| A00799 | A03473 | 257 | A00799 | A03562 | 205 |
| A00799 | A03611 | 491 | A00799 | A03639 | 201 |

|        |        |     |        |        |     |
|--------|--------|-----|--------|--------|-----|
| A00799 | A03780 | 319 | A00799 | A03809 | 291 |
| A00799 | A03819 | 396 | A00799 | A03919 | 187 |
| A00799 | A04017 | 254 | A00799 | A04275 | 466 |
| A00799 | A04337 | 380 | A00799 | A04449 | 435 |
| A00799 | A04453 | 333 | A00799 | A04504 | 265 |
| A00799 | A04540 | 463 | A00799 | A04568 | 165 |
| A00799 | A04960 | 199 | A00799 | A04969 | 249 |
| A00799 | A05305 | 165 | A00799 | A05348 | 321 |
| A00799 | A05459 | 243 | A00799 | A05503 | 395 |
| A00799 | A05504 | 278 | A00799 | A05517 | 183 |
| A00799 | A06214 | 347 | A00799 | A06293 | 193 |
| A00799 | A06773 | 201 | A00799 | A06831 | 243 |
| A00799 | A07298 | 219 | A00799 | A07803 | 414 |
| A00799 | A07900 | 368 | A00799 | A09188 | 408 |
| A00799 | A09263 | 185 | A00799 | A09496 | 235 |
| A00799 | A10044 | 395 | A00799 | A10045 | 395 |
| A00799 | A10046 | 446 | A00799 | A10214 | 423 |
| A00799 | A10626 | 215 | A00799 | A10997 | 417 |
| A00799 | A11318 | 322 | A00799 | A11413 | 235 |
| A00799 | A11590 | 219 | A00799 | A11684 | 462 |
| A00799 | A12140 | 240 | A00799 | A12326 | 240 |
| A00799 | A13433 | 408 | A00799 | A13720 | 307 |
| A00799 | A13841 | 417 | A00799 | A14193 | 399 |
| A00799 | A14204 | 461 | A00799 | A14208 | 274 |
| A00799 | A14231 | 337 | A00799 | A14272 | 402 |
| A00799 | A14387 | 210 | A00799 | A14391 | 329 |
| A00799 | A14410 | 456 | A00799 | A14498 | 260 |
| A00799 | A14646 | 281 | A00799 | A14813 | 204 |
| A00799 | A15224 | 188 | A00799 | A15282 | 176 |
| A00799 | A15303 | 252 | A00799 | A15586 | 235 |
| A00799 | A15670 | 226 | A00799 | A15671 | 210 |
| A00799 | A16289 | 324 | A00799 | A16429 | 167 |
| A00799 | A16907 | 167 | A00799 | A16910 | 401 |
| A00800 | A02535 | 218 | A00800 | A04622 | 170 |
| A00800 | A04709 | 355 | A00800 | A15370 | 191 |
| A00801 | A00884 | 234 | A00801 | A01009 | 170 |
| A00801 | A03043 | 319 | A00801 | A03112 | 152 |
| A00801 | A03749 | 271 | A00801 | A04751 | 380 |
| A00801 | A04820 | 393 | A00801 | A06648 | 263 |
| A00801 | A07655 | 235 | A00802 | A00863 | 373 |
| A00802 | A00911 | 277 | A00802 | A00939 | 195 |
| A00802 | A00941 | 179 | A00802 | A00985 | 466 |
| A00802 | A01004 | 452 | A00802 | A01022 | 294 |
| A00802 | A01024 | 168 | A00802 | A01027 | 414 |
| A00802 | A01056 | 190 | A00802 | A01095 | 267 |
| A00802 | A01100 | 473 | A00802 | A01102 | 445 |

|        |        |     |        |        |     |
|--------|--------|-----|--------|--------|-----|
| A00802 | A01139 | 363 | A00802 | A01152 | 168 |
| A00802 | A01156 | 491 | A00802 | A01161 | 465 |
| A00802 | A01326 | 491 | A00802 | A01329 | 213 |
| A00802 | A01352 | 279 | A00802 | A01359 | 99  |
| A00802 | A01372 | 385 | A00802 | A01385 | 486 |
| A00802 | A01449 | 168 | A00802 | A01451 | 246 |
| A00802 | A01518 | 210 | A00802 | A01556 | 184 |
| A00802 | A01571 | 234 | A00802 | A01585 | 484 |
| A00802 | A01648 | 180 | A00802 | A01788 | 241 |
| A00802 | A02222 | 168 | A00802 | A02240 | 160 |
| A00802 | A02644 | 208 | A00802 | A03095 | 307 |
| A00802 | A03293 | 188 | A00802 | A03304 | 491 |
| A00802 | A03332 | 172 | A00802 | A03562 | 270 |
| A00802 | A03734 | 243 | A00802 | A04275 | 360 |
| A00802 | A04337 | 491 | A00802 | A04361 | 163 |
| A00802 | A04668 | 364 | A00802 | A04671 | 221 |
| A00802 | A04718 | 276 | A00802 | A04883 | 179 |
| A00802 | A04927 | 183 | A00802 | A05020 | 210 |
| A00802 | A05087 | 251 | A00802 | A05294 | 195 |
| A00802 | A05356 | 339 | A00802 | A06405 | 162 |
| A00802 | A06696 | 238 | A00802 | A07204 | 258 |
| A00802 | A07266 | 232 | A00802 | A07438 | 263 |
| A00802 | A07442 | 216 | A00802 | A07506 | 217 |
| A00802 | A07658 | 294 | A00802 | A07670 | 374 |
| A00802 | A07673 | 198 | A00802 | A08309 | 185 |
| A00802 | A08418 | 157 | A00802 | A08517 | 254 |
| A00802 | A08602 | 296 | A00802 | A08686 | 467 |
| A00802 | A08753 | 201 | A00802 | A08949 | 190 |
| A00802 | A09054 | 205 | A00802 | A09416 | 363 |
| A00802 | A09515 | 185 | A00802 | A09538 | 171 |
| A00802 | A10250 | 278 | A00802 | A10504 | 174 |
| A00802 | A11282 | 358 | A00802 | A11307 | 205 |
| A00802 | A11315 | 335 | A00802 | A11529 | 398 |
| A00802 | A11558 | 152 | A00802 | A11608 | 272 |
| A00802 | A11688 | 163 | A00802 | A11714 | 396 |
| A00802 | A12661 | 254 | A00802 | A12824 | 176 |
| A00802 | A12951 | 432 | A00802 | A13369 | 182 |
| A00802 | A13485 | 337 | A00802 | A13581 | 254 |
| A00802 | A13617 | 389 | A00802 | A13720 | 353 |
| A00802 | A13874 | 257 | A00802 | A14074 | 152 |
| A00802 | A14202 | 269 | A00802 | A14272 | 491 |
| A00802 | A14304 | 212 | A00802 | A14381 | 479 |
| A00802 | A14614 | 390 | A00802 | A14689 | 227 |
| A00802 | A14838 | 452 | A00802 | A15287 | 255 |
| A00802 | A15292 | 418 | A00802 | A15422 | 230 |
| A00802 | A15432 | 249 | A00802 | A15436 | 159 |

|        |        |     |        |        |     |
|--------|--------|-----|--------|--------|-----|
| A00802 | A15451 | 254 | A00802 | A15670 | 288 |
| A00802 | A15671 | 274 | A00802 | A15698 | 202 |
| A00802 | A15770 | 172 | A00802 | A15932 | 488 |
| A00802 | A15933 | 226 | A00802 | A16117 | 212 |
| A00802 | A16587 | 238 | A00802 | A16718 | 260 |
| A00802 | A16811 | 324 | A00802 | A16862 | 329 |
| A00802 | A17091 | 243 | A00803 | A00886 | 229 |
| A00803 | A01177 | 228 | A00803 | A15837 | 330 |
| A00804 | A00849 | 185 | A00804 | A01140 | 179 |
| A00804 | A01454 | 191 | A00804 | A01676 | 156 |
| A00804 | A01729 | 196 | A00804 | A01768 | 430 |
| A00804 | A02507 | 363 | A00804 | A02586 | 260 |
| A00804 | A02838 | 305 | A00804 | A03273 | 172 |
| A00804 | A03321 | 273 | A00804 | A03420 | 241 |
| A00804 | A03654 | 308 | A00804 | A04020 | 179 |
| A00804 | A04565 | 458 | A00804 | A04845 | 321 |
| A00804 | A06078 | 357 | A00804 | A07153 | 246 |
| A00804 | A09814 | 374 | A00804 | A10289 | 383 |
| A00804 | A10311 | 402 | A00804 | A14643 | 154 |
| A00805 | A00814 | 430 | A00805 | A00819 | 329 |
| A00805 | A00822 | 446 | A00805 | A00856 | 612 |
| A00805 | A00858 | 631 | A00805 | A00860 | 538 |
| A00805 | A00862 | 481 | A00805 | A00866 | 517 |
| A00805 | A00868 | 458 | A00805 | A00881 | 541 |
| A00805 | A00883 | 698 | A00805 | A00905 | 188 |
| A00805 | A00906 | 232 | A00805 | A00916 | 446 |
| A00805 | A00926 | 346 | A00805 | A00934 | 414 |
| A00805 | A00954 | 576 | A00805 | A00975 | 443 |
| A00805 | A00978 | 525 | A00805 | A01007 | 346 |
| A00805 | A01009 | 486 | A00805 | A01013 | 234 |
| A00805 | A01019 | 541 | A00805 | A01020 | 483 |
| A00805 | A01029 | 205 | A00805 | A01032 | 489 |
| A00805 | A01042 | 391 | A00805 | A01052 | 450 |
| A00805 | A01057 | 490 | A00805 | A01075 | 485 |
| A00805 | A01077 | 489 | A00805 | A01088 | 424 |
| A00805 | A01150 | 369 | A00805 | A01169 | 486 |
| A00805 | A01173 | 479 | A00805 | A01195 | 542 |
| A00805 | A01200 | 538 | A00805 | A01206 | 436 |
| A00805 | A01212 | 584 | A00805 | A01214 | 375 |
| A00805 | A01234 | 491 | A00805 | A01244 | 243 |
| A00805 | A01277 | 326 | A00805 | A01322 | 236 |
| A00805 | A01325 | 341 | A00805 | A01329 | 425 |
| A00805 | A01331 | 324 | A00805 | A01351 | 228 |
| A00805 | A01354 | 438 | A00805 | A01358 | 435 |
| A00805 | A01383 | 302 | A00805 | A01385 | 429 |
| A00805 | A01390 | 227 | A00805 | A01398 | 542 |

|        |        |     |        |        |     |
|--------|--------|-----|--------|--------|-----|
| A00805 | A01401 | 541 | A00805 | A01406 | 201 |
| A00805 | A01446 | 246 | A00805 | A01451 | 444 |
| A00805 | A01458 | 227 | A00805 | A01459 | 375 |
| A00805 | A01468 | 413 | A00805 | A01469 | 311 |
| A00805 | A01492 | 230 | A00805 | A01500 | 816 |
| A00805 | A01503 | 828 | A00805 | A01514 | 489 |
| A00805 | A01555 | 588 | A00805 | A01573 | 183 |
| A00805 | A01594 | 302 | A00805 | A01595 | 159 |
| A00805 | A01612 | 364 | A00805 | A01646 | 552 |
| A00805 | A01720 | 467 | A00805 | A01761 | 293 |
| A00805 | A01988 | 325 | A00805 | A02064 | 462 |
| A00805 | A02518 | 167 | A00805 | A02715 | 477 |
| A00805 | A02855 | 363 | A00805 | A02955 | 457 |
| A00805 | A03044 | 235 | A00805 | A03207 | 176 |
| A00805 | A03434 | 183 | A00805 | A03479 | 364 |
| A00805 | A03494 | 462 | A00805 | A03526 | 395 |
| A00805 | A03569 | 473 | A00805 | A03734 | 480 |
| A00805 | A03740 | 450 | A00805 | A03893 | 356 |
| A00805 | A04648 | 539 | A00805 | A04687 | 201 |
| A00805 | A05027 | 374 | A00805 | A05981 | 229 |
| A00805 | A06062 | 157 | A00805 | A06543 | 356 |
| A00805 | A06750 | 252 | A00805 | A06803 | 540 |
| A00805 | A07203 | 467 | A00805 | A07524 | 440 |
| A00805 | A07584 | 245 | A00805 | A07670 | 534 |
| A00805 | A07700 | 177 | A00805 | A07706 | 319 |
| A00805 | A07708 | 199 | A00805 | A07850 | 541 |
| A00805 | A07887 | 542 | A00805 | A07920 | 490 |
| A00805 | A08022 | 491 | A00805 | A08137 | 401 |
| A00805 | A08183 | 285 | A00805 | A08362 | 163 |
| A00805 | A08383 | 513 | A00805 | A08402 | 216 |
| A00805 | A08439 | 245 | A00805 | A08495 | 414 |
| A00805 | A08818 | 510 | A00805 | A08882 | 455 |
| A00805 | A09038 | 151 | A00805 | A09432 | 196 |
| A00805 | A09502 | 156 | A00805 | A09712 | 463 |
| A00805 | A10070 | 480 | A00805 | A10642 | 179 |
| A00805 | A10798 | 152 | A00805 | A11286 | 212 |
| A00805 | A11344 | 156 | A00805 | A11674 | 156 |
| A00805 | A11702 | 393 | A00805 | A12026 | 290 |
| A00805 | A12081 | 180 | A00805 | A12107 | 258 |
| A00805 | A12659 | 409 | A00805 | A12824 | 353 |
| A00805 | A12897 | 356 | A00805 | A13078 | 196 |
| A00805 | A13248 | 157 | A00805 | A14006 | 550 |
| A00805 | A14007 | 458 | A00805 | A14056 | 224 |
| A00805 | A14080 | 313 | A00805 | A14399 | 490 |
| A00805 | A14474 | 293 | A00805 | A14655 | 491 |
| A00805 | A14701 | 251 | A00805 | A14845 | 460 |

|        |        |     |        |        |     |
|--------|--------|-----|--------|--------|-----|
| A00805 | A14967 | 216 | A00805 | A15297 | 566 |
| A00805 | A15338 | 229 | A00805 | A15416 | 202 |
| A00805 | A15498 | 380 | A00805 | A15511 | 254 |
| A00805 | A15545 | 308 | A00805 | A15559 | 267 |
| A00805 | A15626 | 191 | A00805 | A15945 | 454 |
| A00805 | A15946 | 480 | A00805 | A15963 | 216 |
| A00805 | A16067 | 413 | A00805 | A16212 | 160 |
| A00805 | A16228 | 524 | A00805 | A16487 | 157 |
| A00805 | A17111 | 216 | A00805 | A17123 | 416 |
| A00806 | A00839 | 165 | A00806 | A00931 | 345 |
| A00806 | A01092 | 185 | A00806 | A01140 | 372 |
| A00806 | A01142 | 382 | A00806 | A01157 | 210 |
| A00806 | A01166 | 374 | A00806 | A01234 | 195 |
| A00806 | A01291 | 441 | A00806 | A01468 | 433 |
| A00806 | A01579 | 162 | A00806 | A01586 | 205 |
| A00806 | A01601 | 480 | A00806 | A01605 | 229 |
| A00806 | A01916 | 221 | A00806 | A02003 | 207 |
| A00806 | A03304 | 430 | A00806 | A03332 | 160 |
| A00806 | A03654 | 173 | A00806 | A03722 | 154 |
| A00806 | A03782 | 362 | A00806 | A03790 | 215 |
| A00806 | A04099 | 213 | A00806 | A04230 | 185 |
| A00806 | A05443 | 187 | A00806 | A05501 | 413 |
| A00806 | A05546 | 468 | A00806 | A05654 | 191 |
| A00806 | A07315 | 407 | A00806 | A07323 | 451 |
| A00806 | A07398 | 246 | A00806 | A07766 | 488 |
| A00806 | A07794 | 486 | A00806 | A08457 | 179 |
| A00806 | A09824 | 257 | A00806 | A10612 | 347 |
| A00806 | A10616 | 234 | A00806 | A11760 | 430 |
| A00806 | A11936 | 291 | A00806 | A12314 | 378 |
| A00806 | A12819 | 378 | A00806 | A13276 | 435 |
| A00806 | A13369 | 163 | A00806 | A13494 | 472 |
| A00806 | A13989 | 491 | A00806 | A14025 | 154 |
| A00806 | A14090 | 215 | A00806 | A14097 | 188 |
| A00806 | A14128 | 366 | A00806 | A14530 | 249 |
| A00806 | A14870 | 323 | A00806 | A14872 | 216 |
| A00806 | A15365 | 193 | A00806 | A15430 | 481 |
| A00806 | A15467 | 364 | A00806 | A15669 | 165 |
| A00806 | A15925 | 174 | A00806 | A16963 | 218 |
| A00807 | A01360 | 240 | A00807 | A01735 | 416 |
| A00807 | A03420 | 294 | A00807 | A07721 | 383 |
| A00807 | A07844 | 235 | A00807 | A07976 | 447 |
| A00807 | A08027 | 440 | A00807 | A08127 | 407 |
| A00807 | A08379 | 272 | A00807 | A09059 | 374 |
| A00807 | A09612 | 375 | A00807 | A09876 | 210 |
| A00807 | A10253 | 435 | A00807 | A10420 | 465 |
| A00807 | A10421 | 463 | A00807 | A10424 | 455 |

|        |        |     |        |        |     |
|--------|--------|-----|--------|--------|-----|
| A00807 | A10427 | 405 | A00807 | A10429 | 420 |
| A00807 | A10441 | 391 | A00807 | A10443 | 393 |
| A00807 | A10456 | 241 | A00807 | A10677 | 350 |
| A00807 | A10703 | 374 | A00807 | A10712 | 345 |
| A00807 | A11381 | 314 | A00807 | A13735 | 380 |
| A00807 | A14272 | 180 | A00807 | A14856 | 288 |
| A00807 | A15673 | 311 | A00807 | A16103 | 386 |
| A00807 | A16286 | 373 | A00807 | A16418 | 350 |
| A00807 | A16767 | 393 | A00807 | A17041 | 379 |
| A00807 | A17089 | 246 | A00808 | A00811 | 489 |
| A00808 | A00910 | 154 | A00808 | A00911 | 414 |
| A00808 | A01042 | 455 | A00808 | A01413 | 257 |
| A00808 | A01435 | 486 | A00808 | A01524 | 899 |
| A00808 | A01527 | 899 | A00808 | A01540 | 163 |
| A00808 | A01553 | 205 | A00808 | A01560 | 379 |
| A00808 | A01561 | 277 | A00808 | A01579 | 199 |
| A00808 | A01692 | 474 | A00808 | A01850 | 226 |
| A00808 | A02791 | 184 | A00808 | A03591 | 205 |
| A00808 | A03740 | 355 | A00808 | A03752 | 180 |
| A00808 | A04484 | 899 | A00808 | A06129 | 224 |
| A00808 | A07311 | 945 | A00808 | A07366 | 171 |
| A00808 | A07527 | 324 | A00808 | A08277 | 167 |
| A00808 | A09502 | 260 | A00808 | A09902 | 193 |
| A00808 | A10853 | 152 | A00808 | A10982 | 174 |
| A00808 | A11302 | 210 | A00808 | A11550 | 210 |
| A00808 | A11707 | 351 | A00808 | A12664 | 259 |
| A00808 | A13390 | 335 | A00808 | A13984 | 356 |
| A00808 | A14045 | 434 | A00808 | A15096 | 168 |
| A00808 | A15296 | 188 | A00808 | A16076 | 212 |
| A00808 | A17188 | 899 | A00809 | A00822 | 152 |
| A00809 | A00833 | 160 | A00809 | A00839 | 217 |
| A00809 | A00841 | 332 | A00809 | A00868 | 399 |
| A00809 | A00870 | 271 | A00809 | A00871 | 491 |
| A00809 | A00876 | 160 | A00809 | A00878 | 271 |
| A00809 | A00883 | 215 | A00809 | A00922 | 543 |
| A00809 | A00927 | 288 | A00809 | A00932 | 160 |
| A00809 | A00933 | 160 | A00809 | A00935 | 491 |
| A00809 | A00952 | 156 | A00809 | A00953 | 399 |
| A00809 | A00980 | 584 | A00809 | A00994 | 228 |
| A00809 | A01024 | 488 | A00809 | A01034 | 461 |
| A00809 | A01037 | 193 | A00809 | A01038 | 291 |
| A00809 | A01066 | 296 | A00809 | A01067 | 377 |
| A00809 | A01082 | 329 | A00809 | A01083 | 202 |
| A00809 | A01101 | 279 | A00809 | A01102 | 241 |
| A00809 | A01161 | 545 | A00809 | A01192 | 160 |
| A00809 | A01196 | 241 | A00809 | A01210 | 491 |

|        |        |     |        |        |     |
|--------|--------|-----|--------|--------|-----|
| A00809 | A01218 | 241 | A00809 | A01234 | 357 |
| A00809 | A01247 | 400 | A00809 | A01261 | 528 |
| A00809 | A01263 | 322 | A00809 | A01264 | 333 |
| A00809 | A01267 | 353 | A00809 | A01270 | 577 |
| A00809 | A01291 | 545 | A00809 | A01295 | 180 |
| A00809 | A01311 | 332 | A00809 | A01338 | 430 |
| A00809 | A01369 | 217 | A00809 | A01379 | 486 |
| A00809 | A01392 | 288 | A00809 | A01411 | 241 |
| A00809 | A01433 | 491 | A00809 | A01435 | 491 |
| A00809 | A01447 | 491 | A00809 | A01520 | 63  |
| A00809 | A01521 | 63  | A00809 | A01540 | 455 |
| A00809 | A01579 | 241 | A00809 | A01601 | 569 |
| A00809 | A01628 | 245 | A00809 | A01719 | 307 |
| A00809 | A01741 | 224 | A00809 | A01822 | 160 |
| A00809 | A02607 | 490 | A00809 | A02737 | 217 |
| A00809 | A02978 | 276 | A00809 | A03148 | 213 |
| A00809 | A03677 | 160 | A00809 | A03740 | 193 |
| A00809 | A03809 | 200 | A00809 | A03859 | 201 |
| A00809 | A03959 | 319 | A00809 | A04017 | 393 |
| A00809 | A04682 | 193 | A00809 | A05417 | 477 |
| A00809 | A05501 | 262 | A00809 | A06289 | 63  |
| A00809 | A06306 | 470 | A00809 | A06466 | 356 |
| A00809 | A06534 | 241 | A00809 | A06660 | 345 |
| A00809 | A06814 | 241 | A00809 | A06973 | 241 |
| A00809 | A07047 | 241 | A00809 | A07311 | 489 |
| A00809 | A07360 | 491 | A00809 | A07371 | 307 |
| A00809 | A07394 | 491 | A00809 | A07398 | 357 |
| A00809 | A08011 | 479 | A00809 | A08110 | 294 |
| A00809 | A08131 | 286 | A00809 | A08369 | 674 |
| A00809 | A08408 | 241 | A00809 | A08476 | 241 |
| A00809 | A08519 | 486 | A00809 | A08533 | 160 |
| A00809 | A08550 | 491 | A00809 | A08558 | 243 |
| A00809 | A08773 | 358 | A00809 | A09073 | 157 |
| A00809 | A09297 | 160 | A00809 | A09308 | 241 |
| A00809 | A09322 | 241 | A00809 | A09577 | 258 |
| A00809 | A09581 | 140 | A00809 | A09620 | 241 |
| A00809 | A09902 | 160 | A00809 | A10576 | 63  |
| A00809 | A10875 | 276 | A00809 | A11433 | 157 |
| A00809 | A11526 | 182 | A00809 | A11728 | 573 |
| A00809 | A11833 | 484 | A00809 | A11914 | 243 |
| A00809 | A11992 | 308 | A00809 | A12043 | 160 |
| A00809 | A12227 | 241 | A00809 | A12692 | 207 |
| A00809 | A12824 | 341 | A00809 | A13116 | 375 |
| A00809 | A13298 | 190 | A00809 | A13340 | 261 |
| A00809 | A13345 | 263 | A00809 | A13360 | 294 |
| A00809 | A13398 | 374 | A00809 | A13524 | 228 |



|        |        |     |        |        |     |
|--------|--------|-----|--------|--------|-----|
| A00809 | A13809 | 486 | A00809 | A13840 | 294 |
| A00809 | A13989 | 448 | A00809 | A14167 | 252 |
| A00809 | A14216 | 184 | A00809 | A14566 | 422 |
| A00809 | A14596 | 490 | A00809 | A14738 | 160 |
| A00809 | A14845 | 344 | A00809 | A15156 | 329 |
| A00809 | A15244 | 160 | A00809 | A15268 | 241 |
| A00809 | A15381 | 241 | A00809 | A15624 | 374 |
| A00809 | A15651 | 157 | A00809 | A15652 | 235 |
| A00809 | A15653 | 491 | A00809 | A15657 | 306 |
| A00809 | A15661 | 491 | A00809 | A15666 | 491 |
| A00809 | A15684 | 491 | A00809 | A15694 | 168 |
| A00809 | A15765 | 486 | A00809 | A15769 | 278 |
| A00809 | A15931 | 238 | A00809 | A15932 | 486 |
| A00809 | A15933 | 160 | A00809 | A16157 | 738 |
| A00809 | A16243 | 334 | A00809 | A16272 | 160 |
| A00809 | A16318 | 160 | A00809 | A16403 | 313 |
| A00809 | A16437 | 171 | A00809 | A16446 | 160 |
| A00809 | A16585 | 160 | A00809 | A16671 | 179 |
| A00809 | A16676 | 462 | A00809 | A16680 | 441 |
| A00809 | A16683 | 216 | A00809 | A16720 | 179 |
| A00809 | A16838 | 196 | A00809 | A16858 | 207 |
| A00809 | A16973 | 154 | A00809 | A17133 | 218 |
| A00810 | A00833 | 152 | A00810 | A00841 | 408 |
| A00810 | A00848 | 593 | A00810 | A00853 | 343 |
| A00810 | A00970 | 366 | A00810 | A00974 | 152 |
| A00810 | A00983 | 340 | A00810 | A00984 | 180 |
| A00810 | A00987 | 190 | A00810 | A01001 | 152 |
| A00810 | A01102 | 152 | A00810 | A01150 | 490 |
| A00810 | A01194 | 152 | A00810 | A01311 | 617 |
| A00810 | A01379 | 152 | A00810 | A01387 | 152 |
| A00810 | A01431 | 491 | A00810 | A01439 | 152 |
| A00810 | A01506 | 343 | A00810 | A01569 | 255 |
| A00810 | A01577 | 675 | A00810 | A01627 | 152 |
| A00810 | A01684 | 504 | A00810 | A01830 | 228 |
| A00810 | A01917 | 410 | A00810 | A02051 | 254 |
| A00810 | A02601 | 152 | A00810 | A02896 | 343 |
| A00810 | A02968 | 899 | A00810 | A03697 | 317 |
| A00810 | A03740 | 213 | A00810 | A04178 | 258 |
| A00810 | A04495 | 152 | A00810 | A05417 | 210 |
| A00810 | A05760 | 899 | A00810 | A05941 | 260 |
| A00810 | A06287 | 414 | A00810 | A06320 | 188 |
| A00810 | A06543 | 343 | A00810 | A06637 | 162 |
| A00810 | A07311 | 246 | A00810 | A07744 | 414 |
| A00810 | A08061 | 317 | A00810 | A08098 | 414 |
| A00810 | A08102 | 174 | A00810 | A08178 | 452 |
| A00810 | A08763 | 352 | A00810 | A08947 | 152 |

|        |        |     |        |        |     |
|--------|--------|-----|--------|--------|-----|
| A00810 | A09004 | 152 | A00810 | A09024 | 154 |
| A00810 | A10842 | 152 | A00810 | A11302 | 157 |
| A00810 | A11435 | 305 | A00810 | A13135 | 273 |
| A00810 | A14073 | 201 | A00810 | A14525 | 317 |
| A00810 | A14596 | 443 | A00810 | A14699 | 449 |
| A00810 | A15375 | 496 | A00810 | A15546 | 317 |
| A00810 | A15660 | 348 | A00810 | A15684 | 256 |
| A00810 | A15927 | 333 | A00810 | A17068 | 288 |
| A00811 | A00839 | 308 | A00811 | A00911 | 323 |
| A00811 | A01042 | 489 | A00811 | A01083 | 361 |
| A00811 | A01435 | 491 | A00811 | A01468 | 176 |
| A00811 | A01540 | 467 | A00811 | A01579 | 427 |
| A00811 | A01623 | 461 | A00811 | A01850 | 438 |
| A00811 | A02350 | 302 | A00811 | A02791 | 200 |
| A00811 | A03271 | 98  | A00811 | A03740 | 490 |
| A00811 | A03809 | 232 | A00811 | A07311 | 303 |
| A00811 | A07527 | 457 | A00811 | A08315 | 234 |
| A00811 | A09502 | 474 | A00811 | A09581 | 408 |
| A00811 | A11438 | 185 | A00811 | A11724 | 385 |
| A00811 | A13802 | 393 | A00811 | A13992 | 245 |
| A00811 | A14029 | 163 | A00811 | A14073 | 302 |
| A00811 | A14479 | 165 | A00811 | A14642 | 270 |
| A00811 | A15296 | 208 | A00811 | A15938 | 323 |
| A00812 | A00941 | 267 | A00812 | A01037 | 335 |
| A00812 | A01098 | 226 | A00812 | A01146 | 491 |
| A00812 | A01149 | 303 | A00812 | A01212 | 396 |
| A00812 | A01262 | 396 | A00812 | A01425 | 152 |
| A00812 | A01459 | 473 | A00812 | A01478 | 488 |
| A00812 | A01483 | 390 | A00812 | A01492 | 363 |
| A00812 | A01514 | 395 | A00812 | A01537 | 477 |
| A00812 | A01649 | 174 | A00812 | A01689 | 485 |
| A00812 | A01988 | 457 | A00812 | A02381 | 490 |
| A00812 | A03057 | 452 | A00812 | A03858 | 263 |
| A00812 | A03913 | 391 | A00812 | A05474 | 182 |
| A00812 | A05880 | 407 | A00812 | A06143 | 212 |
| A00812 | A06348 | 490 | A00812 | A06466 | 462 |
| A00812 | A06572 | 455 | A00812 | A06814 | 208 |
| A00812 | A06905 | 327 | A00812 | A07311 | 491 |
| A00812 | A07412 | 258 | A00812 | A07425 | 369 |
| A00812 | A07433 | 491 | A00812 | A07593 | 486 |
| A00812 | A07798 | 423 | A00812 | A08184 | 425 |
| A00812 | A08185 | 483 | A00812 | A08196 | 475 |
| A00812 | A08402 | 312 | A00812 | A08503 | 480 |
| A00812 | A08525 | 491 | A00812 | A08549 | 485 |
| A00812 | A08557 | 177 | A00812 | A08679 | 281 |
| A00812 | A08814 | 491 | A00812 | A08853 | 467 |

|        |        |     |        |        |     |
|--------|--------|-----|--------|--------|-----|
| A00812 | A09052 | 213 | A00812 | A09256 | 477 |
| A00812 | A10372 | 420 | A00812 | A10525 | 371 |
| A00812 | A10607 | 368 | A00812 | A11286 | 491 |
| A00812 | A11884 | 479 | A00812 | A12328 | 241 |
| A00812 | A12595 | 182 | A00812 | A12725 | 152 |
| A00812 | A13320 | 350 | A00812 | A13335 | 491 |
| A00812 | A13949 | 418 | A00812 | A13989 | 491 |
| A00812 | A14159 | 486 | A00812 | A14167 | 208 |
| A00812 | A14203 | 276 | A00812 | A14209 | 483 |
| A00812 | A14220 | 157 | A00812 | A14222 | 438 |
| A00812 | A14227 | 491 | A00812 | A14289 | 491 |
| A00812 | A14309 | 334 | A00812 | A14474 | 258 |
| A00812 | A14738 | 491 | A00812 | A15367 | 229 |
| A00812 | A15380 | 488 | A00812 | A15533 | 486 |
| A00812 | A15547 | 246 | A00812 | A15697 | 283 |
| A00812 | A15741 | 491 | A00812 | A15760 | 330 |
| A00812 | A16266 | 462 | A00812 | A16291 | 491 |
| A00812 | A16602 | 210 | A00812 | A16605 | 182 |
| A00812 | A16619 | 232 | A00812 | A16630 | 210 |
| A00812 | A17023 | 195 | A00813 | A00858 | 276 |
| A00813 | A00864 | 587 | A00813 | A00868 | 569 |
| A00813 | A00883 | 172 | A00813 | A00884 | 157 |
| A00813 | A00915 | 271 | A00813 | A00926 | 490 |
| A00813 | A00975 | 374 | A00813 | A01020 | 271 |
| A00813 | A01099 | 172 | A00813 | A01185 | 452 |
| A00813 | A01210 | 185 | A00813 | A01213 | 488 |
| A00813 | A01298 | 319 | A00813 | A01308 | 154 |
| A00813 | A01309 | 340 | A00813 | A01322 | 484 |
| A00813 | A01327 | 353 | A00813 | A01361 | 345 |
| A00813 | A01386 | 540 | A00813 | A01404 | 483 |
| A00813 | A01415 | 450 | A00813 | A01419 | 361 |
| A00813 | A01438 | 491 | A00813 | A01515 | 412 |
| A00813 | A01572 | 459 | A00813 | A01573 | 372 |
| A00813 | A01576 | 527 | A00813 | A01591 | 200 |
| A00813 | A02257 | 165 | A00813 | A02411 | 191 |
| A00813 | A02524 | 291 | A00813 | A02574 | 173 |
| A00813 | A02803 | 191 | A00813 | A02965 | 263 |
| A00813 | A03007 | 337 | A00813 | A03034 | 281 |
| A00813 | A03098 | 565 | A00813 | A03205 | 324 |
| A00813 | A04086 | 565 | A00813 | A04668 | 299 |
| A00813 | A04990 | 196 | A00813 | A05617 | 640 |
| A00813 | A06046 | 247 | A00813 | A06520 | 210 |
| A00813 | A06764 | 207 | A00813 | A07276 | 162 |
| A00813 | A07380 | 213 | A00813 | A07480 | 340 |
| A00813 | A07603 | 402 | A00813 | A07697 | 491 |
| A00813 | A07835 | 371 | A00813 | A08235 | 302 |

|        |        |     |        |        |     |
|--------|--------|-----|--------|--------|-----|
| A00813 | A08251 | 196 | A00813 | A08293 | 491 |
| A00813 | A08356 | 491 | A00813 | A08362 | 491 |
| A00813 | A08402 | 424 | A00813 | A08473 | 255 |
| A00813 | A08813 | 162 | A00813 | A08831 | 483 |
| A00813 | A08956 | 322 | A00813 | A09007 | 477 |
| A00813 | A09291 | 185 | A00813 | A09335 | 226 |
| A00813 | A09514 | 234 | A00813 | A09637 | 182 |
| A00813 | A10083 | 230 | A00813 | A10159 | 483 |
| A00813 | A10288 | 243 | A00813 | A10373 | 281 |
| A00813 | A10497 | 317 | A00813 | A11675 | 152 |
| A00813 | A12067 | 367 | A00813 | A12606 | 480 |
| A00813 | A12722 | 682 | A00813 | A12824 | 612 |
| A00813 | A13889 | 212 | A00813 | A13963 | 399 |
| A00813 | A14167 | 154 | A00813 | A14192 | 455 |
| A00813 | A14212 | 489 | A00813 | A14213 | 491 |
| A00813 | A14214 | 474 | A00813 | A14230 | 269 |
| A00813 | A14253 | 260 | A00813 | A14655 | 254 |
| A00813 | A14706 | 226 | A00813 | A15328 | 357 |
| A00813 | A15498 | 488 | A00813 | A15502 | 259 |
| A00813 | A15701 | 322 | A00813 | A16802 | 195 |
| A00814 | A00868 | 201 | A00814 | A00916 | 297 |
| A00814 | A00925 | 151 | A00814 | A00938 | 350 |
| A00814 | A00950 | 469 | A00814 | A00961 | 445 |
| A00814 | A01021 | 491 | A00814 | A01059 | 462 |
| A00814 | A01064 | 491 | A00814 | A01093 | 491 |
| A00814 | A01099 | 491 | A00814 | A01114 | 477 |
| A00814 | A01178 | 412 | A00814 | A01187 | 486 |
| A00814 | A01197 | 229 | A00814 | A01296 | 489 |
| A00814 | A01317 | 430 | A00814 | A01318 | 162 |
| A00814 | A01320 | 559 | A00814 | A01321 | 281 |
| A00814 | A01322 | 491 | A00814 | A01325 | 490 |
| A00814 | A01328 | 456 | A00814 | A01331 | 491 |
| A00814 | A01341 | 466 | A00814 | A01375 | 162 |
| A00814 | A01388 | 477 | A00814 | A01415 | 491 |
| A00814 | A01469 | 491 | A00814 | A01535 | 429 |
| A00814 | A01536 | 491 | A00814 | A01559 | 693 |
| A00814 | A01589 | 491 | A00814 | A01594 | 721 |
| A00814 | A01616 | 491 | A00814 | A01625 | 491 |
| A00814 | A01659 | 491 | A00814 | A01660 | 200 |
| A00814 | A01668 | 374 | A00814 | A01680 | 274 |
| A00814 | A01686 | 491 | A00814 | A01690 | 319 |
| A00814 | A01737 | 317 | A00814 | A01805 | 215 |
| A00814 | A01910 | 196 | A00814 | A01941 | 360 |
| A00814 | A02030 | 296 | A00814 | A02054 | 337 |
| A00814 | A02058 | 272 | A00814 | A02152 | 183 |
| A00814 | A02183 | 424 | A00814 | A02535 | 435 |

|        |        |     |        |        |     |
|--------|--------|-----|--------|--------|-----|
| A00814 | A02718 | 291 | A00814 | A02806 | 489 |
| A00814 | A02847 | 488 | A00814 | A02887 | 484 |
| A00814 | A03057 | 633 | A00814 | A03301 | 491 |
| A00814 | A03597 | 334 | A00814 | A03728 | 200 |
| A00814 | A03886 | 165 | A00814 | A04012 | 380 |
| A00814 | A04033 | 380 | A00814 | A04375 | 215 |
| A00814 | A04668 | 566 | A00814 | A04701 | 177 |
| A00814 | A05016 | 374 | A00814 | A05218 | 383 |
| A00814 | A05334 | 491 | A00814 | A06130 | 353 |
| A00814 | A06242 | 491 | A00814 | A06297 | 491 |
| A00814 | A06851 | 429 | A00814 | A06864 | 491 |
| A00814 | A06982 | 566 | A00814 | A07017 | 246 |
| A00814 | A07079 | 486 | A00814 | A07096 | 277 |
| A00814 | A07314 | 485 | A00814 | A07319 | 491 |
| A00814 | A07346 | 491 | A00814 | A07466 | 566 |
| A00814 | A07480 | 673 | A00814 | A07524 | 291 |
| A00814 | A07534 | 491 | A00814 | A07603 | 491 |
| A00814 | A07647 | 491 | A00814 | A07902 | 490 |
| A00814 | A07996 | 491 | A00814 | A08000 | 490 |
| A00814 | A08029 | 435 | A00814 | A08030 | 491 |
| A00814 | A08117 | 491 | A00814 | A08141 | 255 |
| A00814 | A08208 | 484 | A00814 | A08212 | 491 |
| A00814 | A08516 | 468 | A00814 | A08526 | 439 |
| A00814 | A08571 | 185 | A00814 | A08669 | 566 |
| A00814 | A08700 | 285 | A00814 | A08769 | 481 |
| A00814 | A08820 | 566 | A00814 | A08888 | 363 |
| A00814 | A08919 | 391 | A00814 | A09135 | 435 |
| A00814 | A09288 | 491 | A00814 | A09598 | 491 |
| A00814 | A09617 | 168 | A00814 | A09623 | 232 |
| A00814 | A09653 | 157 | A00814 | A09663 | 245 |
| A00814 | A09706 | 210 | A00814 | A09751 | 443 |
| A00814 | A09752 | 474 | A00814 | A09753 | 491 |
| A00814 | A09754 | 479 | A00814 | A09755 | 456 |
| A00814 | A09762 | 174 | A00814 | A09764 | 461 |
| A00814 | A09836 | 171 | A00814 | A10373 | 562 |
| A00814 | A10380 | 337 | A00814 | A10657 | 435 |
| A00814 | A11236 | 485 | A00814 | A11279 | 247 |
| A00814 | A11540 | 491 | A00814 | A11829 | 288 |
| A00814 | A11841 | 347 | A00814 | A11916 | 491 |
| A00814 | A11983 | 308 | A00814 | A12165 | 190 |
| A00814 | A12365 | 200 | A00814 | A12556 | 491 |
| A00814 | A12625 | 391 | A00814 | A13257 | 490 |
| A00814 | A13429 | 485 | A00814 | A13511 | 374 |
| A00814 | A13550 | 301 | A00814 | A13889 | 200 |
| A00814 | A13913 | 368 | A00814 | A13949 | 491 |
| A00814 | A14007 | 229 | A00814 | A14009 | 200 |

|        |        |     |        |        |     |
|--------|--------|-----|--------|--------|-----|
| A00814 | A14076 | 491 | A00814 | A14079 | 491 |
| A00814 | A14091 | 200 | A00814 | A14094 | 565 |
| A00814 | A14154 | 454 | A00814 | A14177 | 564 |
| A00814 | A14192 | 200 | A00814 | A14223 | 565 |
| A00814 | A14230 | 491 | A00814 | A14268 | 470 |
| A00814 | A14273 | 491 | A00814 | A14443 | 185 |
| A00814 | A14460 | 491 | A00814 | A14570 | 218 |
| A00814 | A14631 | 207 | A00814 | A14655 | 356 |
| A00814 | A14694 | 566 | A00814 | A14706 | 398 |
| A00814 | A14764 | 207 | A00814 | A15356 | 361 |
| A00814 | A15367 | 488 | A00814 | A15369 | 491 |
| A00814 | A15420 | 369 | A00814 | A15524 | 330 |
| A00814 | A15539 | 63  | A00814 | A15617 | 188 |
| A00814 | A15714 | 449 | A00814 | A15837 | 491 |
| A00814 | A15939 | 259 | A00814 | A15941 | 483 |
| A00814 | A16068 | 408 | A00814 | A16073 | 438 |
| A00814 | A16127 | 491 | A00814 | A16128 | 491 |
| A00814 | A16129 | 491 | A00814 | A16134 | 479 |
| A00814 | A16225 | 334 | A00814 | A16226 | 491 |
| A00814 | A16274 | 200 | A00814 | A16299 | 450 |
| A00814 | A16332 | 302 | A00814 | A16378 | 486 |
| A00814 | A16606 | 491 | A00814 | A16613 | 491 |
| A00814 | A16616 | 489 | A00814 | A16626 | 491 |
| A00814 | A16754 | 490 | A00814 | A16762 | 272 |
| A00814 | A16802 | 337 | A00814 | A17075 | 323 |
| A00815 | A00931 | 152 | A00815 | A00989 | 480 |
| A00815 | A01009 | 135 | A00815 | A01124 | 195 |
| A00815 | A01131 | 167 | A00815 | A01253 | 185 |
| A00815 | A01257 | 296 | A00815 | A01277 | 235 |
| A00815 | A01278 | 369 | A00815 | A01524 | 899 |
| A00815 | A01527 | 899 | A00815 | A01635 | 263 |
| A00815 | A01722 | 177 | A00815 | A01741 | 391 |
| A00815 | A01797 | 457 | A00815 | A01975 | 177 |
| A00815 | A01985 | 149 | A00815 | A02044 | 123 |
| A00815 | A02064 | 249 | A00815 | A02126 | 424 |
| A00815 | A02143 | 63  | A00815 | A02148 | 329 |
| A00815 | A02214 | 157 | A00815 | A02223 | 124 |
| A00815 | A02238 | 141 | A00815 | A02313 | 339 |
| A00815 | A02324 | 245 | A00815 | A02326 | 456 |
| A00815 | A02356 | 176 | A00815 | A02361 | 262 |
| A00815 | A02425 | 945 | A00815 | A02429 | 367 |
| A00815 | A02431 | 102 | A00815 | A02470 | 406 |
| A00815 | A02481 | 63  | A00815 | A02508 | 198 |
| A00815 | A02772 | 438 | A00815 | A02816 | 385 |
| A00815 | A03053 | 160 | A00815 | A03054 | 121 |
| A00815 | A03082 | 288 | A00815 | A03110 | 486 |

|        |        |     |        |        |     |
|--------|--------|-----|--------|--------|-----|
| A00815 | A03119 | 180 | A00815 | A03188 | 358 |
| A00815 | A03219 | 303 | A00815 | A03458 | 432 |
| A00815 | A03498 | 452 | A00815 | A03599 | 245 |
| A00815 | A03639 | 182 | A00815 | A03712 | 205 |
| A00815 | A03749 | 469 | A00815 | A03750 | 491 |
| A00815 | A03760 | 347 | A00815 | A03915 | 245 |
| A00815 | A03942 | 454 | A00815 | A03961 | 441 |
| A00815 | A04033 | 249 | A00815 | A04180 | 328 |
| A00815 | A04184 | 402 | A00815 | A04194 | 171 |
| A00815 | A04329 | 179 | A00815 | A04332 | 240 |
| A00815 | A04380 | 229 | A00815 | A04676 | 176 |
| A00815 | A04749 | 208 | A00815 | A04843 | 274 |
| A00815 | A04914 | 480 | A00815 | A04949 | 355 |
| A00815 | A05229 | 258 | A00815 | A05457 | 265 |
| A00815 | A05491 | 240 | A00815 | A05596 | 406 |
| A00815 | A06070 | 221 | A00815 | A06508 | 240 |
| A00815 | A07575 | 156 | A00815 | A07723 | 183 |
| A00815 | A07726 | 265 | A00815 | A08032 | 218 |
| A00815 | A08633 | 193 | A00815 | A08722 | 313 |
| A00815 | A09020 | 162 | A00815 | A09062 | 218 |
| A00815 | A09078 | 151 | A00815 | A09202 | 489 |
| A00815 | A09387 | 202 | A00815 | A09447 | 406 |
| A00815 | A09480 | 208 | A00815 | A09541 | 251 |
| A00815 | A09570 | 341 | A00815 | A09732 | 356 |
| A00815 | A09971 | 274 | A00815 | A10021 | 483 |
| A00815 | A10040 | 212 | A00815 | A10232 | 339 |
| A00815 | A10539 | 296 | A00815 | A10550 | 202 |
| A00815 | A10558 | 235 | A00815 | A10766 | 205 |
| A00815 | A10850 | 221 | A00815 | A11060 | 313 |
| A00815 | A11184 | 177 | A00815 | A11392 | 263 |
| A00815 | A11983 | 371 | A00815 | A12041 | 191 |
| A00815 | A12055 | 245 | A00815 | A13370 | 229 |
| A00815 | A13944 | 157 | A00815 | A14027 | 265 |
| A00815 | A14072 | 246 | A00815 | A14190 | 299 |
| A00815 | A14198 | 401 | A00815 | A14210 | 490 |
| A00815 | A14369 | 263 | A00815 | A14370 | 427 |
| A00815 | A14371 | 486 | A00815 | A14379 | 467 |
| A00815 | A14410 | 405 | A00815 | A14438 | 180 |
| A00815 | A14443 | 362 | A00815 | A14511 | 474 |
| A00815 | A14583 | 391 | A00815 | A14722 | 283 |
| A00815 | A14930 | 177 | A00815 | A15292 | 267 |
| A00815 | A15352 | 188 | A00815 | A15498 | 288 |
| A00815 | A16042 | 390 | A00815 | A16520 | 191 |
| A00816 | A00868 | 229 | A00816 | A00883 | 263 |
| A00816 | A00975 | 319 | A00816 | A01122 | 210 |
| A00816 | A01398 | 389 | A00816 | A02006 | 151 |

|        |        |     |        |        |     |
|--------|--------|-----|--------|--------|-----|
| A00816 | A02291 | 157 | A00816 | A03163 | 199 |
| A00816 | A03676 | 205 | A00816 | A05337 | 243 |
| A00816 | A06750 | 177 | A00816 | A07046 | 210 |
| A00816 | A07101 | 213 | A00816 | A07226 | 190 |
| A00816 | A07317 | 274 | A00816 | A08932 | 293 |
| A00816 | A09296 | 445 | A00816 | A09305 | 319 |
| A00816 | A15624 | 312 | A00816 | A15641 | 235 |
| A00817 | A00818 | 491 | A00817 | A00819 | 491 |
| A00817 | A00822 | 491 | A00817 | A00863 | 314 |
| A00817 | A00881 | 480 | A00817 | A01080 | 152 |
| A00817 | A01100 | 252 | A00817 | A01177 | 223 |
| A00817 | A01185 | 490 | A00817 | A01188 | 245 |
| A00817 | A01361 | 406 | A00817 | A01383 | 454 |
| A00817 | A01385 | 491 | A00817 | A01419 | 389 |
| A00817 | A01474 | 481 | A00817 | A01576 | 270 |
| A00817 | A01588 | 271 | A00817 | A01628 | 172 |
| A00817 | A01741 | 296 | A00817 | A03076 | 247 |
| A00817 | A03279 | 185 | A00817 | A03525 | 432 |
| A00817 | A03526 | 268 | A00817 | A05218 | 170 |
| A00817 | A05313 | 407 | A00817 | A07004 | 489 |
| A00817 | A07290 | 457 | A00817 | A07835 | 347 |
| A00817 | A07885 | 469 | A00817 | A08118 | 412 |
| A00817 | A08190 | 491 | A00817 | A08430 | 185 |
| A00817 | A08775 | 179 | A00817 | A08937 | 393 |
| A00817 | A09004 | 167 | A00817 | A09007 | 490 |
| A00817 | A09307 | 216 | A00817 | A09351 | 165 |
| A00817 | A09675 | 321 | A00817 | A09712 | 188 |
| A00817 | A10159 | 481 | A00817 | A10642 | 489 |
| A00817 | A11395 | 475 | A00817 | A11735 | 173 |
| A00817 | A12254 | 180 | A00817 | A13929 | 154 |
| A00817 | A14167 | 196 | A00817 | A14183 | 396 |
| A00817 | A14290 | 201 | A00817 | A15559 | 218 |
| A00817 | A16228 | 167 | A00818 | A00819 | 491 |
| A00818 | A00822 | 491 | A00818 | A00863 | 204 |
| A00818 | A01185 | 491 | A00818 | A01361 | 477 |
| A00818 | A01383 | 356 | A00818 | A01385 | 489 |
| A00818 | A01419 | 451 | A00818 | A01474 | 196 |
| A00818 | A01558 | 318 | A00818 | A01576 | 196 |
| A00818 | A01741 | 321 | A00818 | A02678 | 165 |
| A00818 | A03822 | 187 | A00818 | A04622 | 157 |
| A00818 | A05756 | 273 | A00818 | A07004 | 310 |
| A00818 | A07290 | 404 | A00818 | A07835 | 488 |
| A00818 | A07885 | 488 | A00818 | A08118 | 290 |
| A00818 | A08356 | 157 | A00818 | A09004 | 400 |
| A00818 | A09007 | 491 | A00818 | A09644 | 409 |
| A00818 | A09675 | 335 | A00818 | A10159 | 491 |



|        |        |     |        |        |     |
|--------|--------|-----|--------|--------|-----|
| A00818 | A10642 | 417 | A00818 | A11487 | 171 |
| A00818 | A11496 | 160 | A00818 | A11614 | 152 |
| A00818 | A12825 | 165 | A00818 | A13788 | 198 |
| A00818 | A14086 | 470 | A00818 | A14183 | 353 |
| A00818 | A14358 | 286 | A00818 | A15262 | 458 |
| A00818 | A15667 | 193 | A00818 | A15774 | 172 |
| A00818 | A16597 | 238 | A00818 | A16682 | 207 |
| A00818 | A16701 | 228 | A00818 | A16704 | 171 |
| A00818 | A16824 | 252 | A00818 | A17015 | 156 |
| A00818 | A17125 | 218 | A00818 | A17168 | 152 |
| A00819 | A00822 | 491 | A00819 | A00858 | 388 |
| A00819 | A00860 | 457 | A00819 | A00863 | 319 |
| A00819 | A00881 | 391 | A00819 | A00884 | 324 |
| A00819 | A00958 | 182 | A00819 | A00978 | 152 |
| A00819 | A01033 | 168 | A00819 | A01075 | 208 |
| A00819 | A01185 | 486 | A00819 | A01195 | 411 |
| A00819 | A01200 | 430 | A00819 | A01320 | 232 |
| A00819 | A01321 | 205 | A00819 | A01325 | 462 |
| A00819 | A01354 | 434 | A00819 | A01358 | 276 |
| A00819 | A01361 | 162 | A00819 | A01383 | 491 |
| A00819 | A01385 | 491 | A00819 | A01401 | 446 |
| A00819 | A01419 | 294 | A00819 | A01470 | 262 |
| A00819 | A01741 | 379 | A00819 | A02040 | 249 |
| A00819 | A03525 | 473 | A00819 | A03526 | 477 |
| A00819 | A03809 | 154 | A00819 | A04908 | 165 |
| A00819 | A06803 | 436 | A00819 | A07290 | 484 |
| A00819 | A07835 | 486 | A00819 | A07885 | 463 |
| A00819 | A08547 | 213 | A00819 | A08641 | 168 |
| A00819 | A09007 | 489 | A00819 | A09712 | 472 |
| A00819 | A09937 | 168 | A00819 | A09999 | 199 |
| A00819 | A10159 | 479 | A00819 | A10642 | 491 |
| A00819 | A11273 | 188 | A00819 | A11279 | 240 |
| A00819 | A11486 | 152 | A00819 | A12329 | 168 |
| A00819 | A12886 | 193 | A00819 | A14086 | 240 |
| A00819 | A14212 | 177 | A00819 | A14352 | 208 |
| A00819 | A15262 | 484 | A00819 | A15824 | 157 |
| A00819 | A16228 | 172 | A00819 | A16302 | 172 |
| A00819 | A17015 | 269 | A00820 | A00887 | 152 |
| A00820 | A00914 | 937 | A00820 | A00999 | 428 |
| A00820 | A01163 | 249 | A00820 | A01178 | 486 |
| A00820 | A01450 | 210 | A00820 | A01560 | 216 |
| A00820 | A01572 | 491 | A00820 | A01602 | 382 |
| A00820 | A01605 | 246 | A00820 | A01606 | 213 |
| A00820 | A01647 | 408 | A00820 | A01694 | 210 |
| A00820 | A01726 | 236 | A00820 | A01733 | 432 |
| A00820 | A01741 | 899 | A00820 | A01764 | 353 |

|        |        |     |        |        |     |
|--------|--------|-----|--------|--------|-----|
| A00820 | A01769 | 416 | A00820 | A01775 | 224 |
| A00820 | A01802 | 251 | A00820 | A01838 | 279 |
| A00820 | A01844 | 394 | A00820 | A01875 | 276 |
| A00820 | A01880 | 63  | A00820 | A01888 | 63  |
| A00820 | A01903 | 491 | A00820 | A01941 | 163 |
| A00820 | A02086 | 281 | A00820 | A02117 | 488 |
| A00820 | A02199 | 486 | A00820 | A02208 | 491 |
| A00820 | A02228 | 326 | A00820 | A02304 | 285 |
| A00820 | A02325 | 193 | A00820 | A02377 | 337 |
| A00820 | A02381 | 380 | A00820 | A02639 | 165 |
| A00820 | A02673 | 419 | A00820 | A02687 | 377 |
| A00820 | A02689 | 367 | A00820 | A02698 | 491 |
| A00820 | A02703 | 188 | A00820 | A02704 | 157 |
| A00820 | A02706 | 430 | A00820 | A02711 | 490 |
| A00820 | A02752 | 185 | A00820 | A02761 | 326 |
| A00820 | A02776 | 481 | A00820 | A02777 | 452 |
| A00820 | A02800 | 327 | A00820 | A02836 | 235 |
| A00820 | A02841 | 63  | A00820 | A02846 | 152 |
| A00820 | A02863 | 63  | A00820 | A02982 | 302 |
| A00820 | A03012 | 452 | A00820 | A03019 | 462 |
| A00820 | A03076 | 221 | A00820 | A03212 | 238 |
| A00820 | A03223 | 185 | A00820 | A03255 | 450 |
| A00820 | A03271 | 63  | A00820 | A03321 | 488 |
| A00820 | A03436 | 319 | A00820 | A03451 | 296 |
| A00820 | A03611 | 491 | A00820 | A03687 | 227 |
| A00820 | A03846 | 323 | A00820 | A04020 | 368 |
| A00820 | A04073 | 238 | A00820 | A04117 | 436 |
| A00820 | A04202 | 219 | A00820 | A04209 | 318 |
| A00820 | A04553 | 488 | A00820 | A04595 | 160 |
| A00820 | A04867 | 393 | A00820 | A04902 | 490 |
| A00820 | A04942 | 327 | A00820 | A04973 | 245 |
| A00820 | A05406 | 187 | A00820 | A05415 | 475 |
| A00820 | A05584 | 480 | A00820 | A05598 | 474 |
| A00820 | A05958 | 434 | A00820 | A06446 | 187 |
| A00820 | A06471 | 213 | A00820 | A06588 | 424 |
| A00820 | A06607 | 480 | A00820 | A06610 | 260 |
| A00820 | A06688 | 355 | A00820 | A06707 | 339 |
| A00820 | A06897 | 196 | A00820 | A07339 | 402 |
| A00820 | A07436 | 396 | A00820 | A07711 | 162 |
| A00820 | A08688 | 210 | A00820 | A09160 | 221 |
| A00820 | A09242 | 306 | A00820 | A09797 | 306 |
| A00820 | A09900 | 154 | A00820 | A10035 | 213 |
| A00820 | A10247 | 463 | A00820 | A10365 | 353 |
| A00820 | A10813 | 260 | A00820 | A11095 | 224 |
| A00820 | A11535 | 157 | A00820 | A11683 | 165 |
| A00820 | A11710 | 162 | A00820 | A12000 | 165 |

|        |        |     |        |        |     |
|--------|--------|-----|--------|--------|-----|
| A00820 | A12868 | 165 | A00820 | A14035 | 121 |
| A00820 | A14120 | 491 | A00820 | A14127 | 486 |
| A00820 | A14236 | 428 | A00820 | A14483 | 160 |
| A00820 | A14652 | 483 | A00820 | A15241 | 180 |
| A00820 | A15598 | 174 | A00820 | A16369 | 224 |
| A00820 | A16518 | 187 | A00821 | A00849 | 385 |
| A00821 | A00878 | 156 | A00821 | A00985 | 452 |
| A00821 | A00987 | 489 | A00821 | A00994 | 154 |
| A00821 | A00998 | 227 | A00821 | A01012 | 63  |
| A00821 | A01013 | 491 | A00821 | A01086 | 363 |
| A00821 | A01108 | 208 | A00821 | A01150 | 481 |
| A00821 | A01155 | 134 | A00821 | A01156 | 179 |
| A00821 | A01161 | 491 | A00821 | A01169 | 185 |
| A00821 | A01210 | 472 | A00821 | A01214 | 218 |
| A00821 | A01245 | 458 | A00821 | A01287 | 488 |
| A00821 | A01310 | 449 | A00821 | A01346 | 240 |
| A00821 | A01358 | 221 | A00821 | A01380 | 208 |
| A00821 | A01468 | 205 | A00821 | A01502 | 457 |
| A00821 | A01668 | 212 | A00821 | A01711 | 491 |
| A00821 | A01815 | 303 | A00821 | A01819 | 224 |
| A00821 | A01820 | 324 | A00821 | A01825 | 313 |
| A00821 | A01827 | 378 | A00821 | A01832 | 432 |
| A00821 | A01833 | 303 | A00821 | A01922 | 201 |
| A00821 | A02009 | 283 | A00821 | A02040 | 398 |
| A00821 | A02289 | 409 | A00821 | A02994 | 411 |
| A00821 | A03526 | 163 | A00821 | A03676 | 408 |
| A00821 | A03856 | 196 | A00821 | A03931 | 193 |
| A00821 | A04056 | 268 | A00821 | A04661 | 168 |
| A00821 | A04782 | 162 | A00821 | A05579 | 283 |
| A00821 | A05678 | 177 | A00821 | A06498 | 417 |
| A00821 | A06546 | 307 | A00821 | A06740 | 361 |
| A00821 | A06938 | 168 | A00821 | A07081 | 198 |
| A00821 | A07157 | 173 | A00821 | A07237 | 185 |
| A00821 | A07471 | 277 | A00821 | A07541 | 154 |
| A00821 | A07894 | 193 | A00821 | A08794 | 296 |
| A00821 | A09321 | 288 | A00821 | A09546 | 440 |
| A00821 | A10593 | 224 | A00821 | A10598 | 389 |
| A00821 | A11407 | 257 | A00821 | A11897 | 162 |
| A00821 | A13027 | 324 | A00821 | A13031 | 475 |
| A00821 | A13174 | 361 | A00821 | A13205 | 361 |
| A00821 | A13217 | 361 | A00821 | A13637 | 361 |
| A00821 | A13903 | 152 | A00821 | A14077 | 307 |
| A00821 | A14699 | 193 | A00821 | A14970 | 424 |
| A00821 | A15379 | 486 | A00821 | A15624 | 484 |
| A00821 | A15668 | 229 | A00821 | A15891 | 217 |
| A00822 | A00831 | 483 | A00822 | A00835 | 308 |

|        |        |     |        |        |     |
|--------|--------|-----|--------|--------|-----|
| A00822 | A00848 | 293 | A00822 | A00858 | 446 |
| A00822 | A00860 | 378 | A00822 | A00863 | 172 |
| A00822 | A00866 | 358 | A00822 | A00881 | 380 |
| A00822 | A00883 | 491 | A00822 | A00905 | 490 |
| A00822 | A00916 | 491 | A00822 | A00918 | 241 |
| A00822 | A00958 | 483 | A00822 | A00975 | 314 |
| A00822 | A01024 | 257 | A00822 | A01026 | 420 |
| A00822 | A01029 | 382 | A00822 | A01032 | 491 |
| A00822 | A01033 | 489 | A00822 | A01057 | 491 |
| A00822 | A01075 | 491 | A00822 | A01077 | 488 |
| A00822 | A01082 | 314 | A00822 | A01087 | 460 |
| A00822 | A01088 | 490 | A00822 | A01096 | 311 |
| A00822 | A01136 | 460 | A00822 | A01143 | 226 |
| A00822 | A01150 | 467 | A00822 | A01185 | 491 |
| A00822 | A01195 | 353 | A00822 | A01200 | 299 |
| A00822 | A01206 | 466 | A00822 | A01211 | 352 |
| A00822 | A01215 | 360 | A00822 | A01234 | 491 |
| A00822 | A01243 | 288 | A00822 | A01268 | 439 |
| A00822 | A01291 | 215 | A00822 | A01295 | 338 |
| A00822 | A01299 | 486 | A00822 | A01300 | 168 |
| A00822 | A01325 | 461 | A00822 | A01326 | 278 |
| A00822 | A01354 | 491 | A00822 | A01361 | 475 |
| A00822 | A01378 | 152 | A00822 | A01383 | 491 |
| A00822 | A01385 | 851 | A00822 | A01401 | 377 |
| A00822 | A01406 | 216 | A00822 | A01419 | 620 |
| A00822 | A01439 | 273 | A00822 | A01441 | 218 |
| A00822 | A01470 | 490 | A00822 | A01474 | 491 |
| A00822 | A01541 | 472 | A00822 | A01558 | 677 |
| A00822 | A01576 | 428 | A00822 | A01588 | 666 |
| A00822 | A01593 | 360 | A00822 | A01598 | 491 |
| A00822 | A01612 | 488 | A00822 | A01614 | 475 |
| A00822 | A01628 | 229 | A00822 | A01638 | 246 |
| A00822 | A01649 | 486 | A00822 | A01655 | 223 |
| A00822 | A01976 | 318 | A00822 | A01995 | 394 |
| A00822 | A02715 | 254 | A00822 | A02869 | 462 |
| A00822 | A03298 | 286 | A00822 | A03399 | 484 |
| A00822 | A03435 | 484 | A00822 | A03479 | 341 |
| A00822 | A03494 | 227 | A00822 | A03525 | 488 |
| A00822 | A03526 | 469 | A00822 | A03569 | 425 |
| A00822 | A04181 | 435 | A00822 | A05288 | 272 |
| A00822 | A05775 | 294 | A00822 | A06803 | 322 |
| A00822 | A06907 | 249 | A00822 | A07004 | 491 |
| A00822 | A07290 | 490 | A00822 | A07487 | 430 |
| A00822 | A07518 | 316 | A00822 | A07604 | 446 |
| A00822 | A07700 | 151 | A00822 | A07706 | 553 |
| A00822 | A07835 | 491 | A00822 | A07885 | 489 |

|        |        |     |        |        |     |
|--------|--------|-----|--------|--------|-----|
| A00822 | A08118 | 491 | A00822 | A08137 | 491 |
| A00822 | A08357 | 347 | A00822 | A08362 | 373 |
| A00822 | A08383 | 438 | A00822 | A08527 | 151 |
| A00822 | A08528 | 490 | A00822 | A08571 | 491 |
| A00822 | A08679 | 183 | A00822 | A08937 | 303 |
| A00822 | A08993 | 210 | A00822 | A09004 | 491 |
| A00822 | A09007 | 491 | A00822 | A09327 | 218 |
| A00822 | A09446 | 294 | A00822 | A09621 | 306 |
| A00822 | A09644 | 321 | A00822 | A09675 | 219 |
| A00822 | A09707 | 388 | A00822 | A09712 | 438 |
| A00822 | A09768 | 228 | A00822 | A09857 | 445 |
| A00822 | A10159 | 491 | A00822 | A10162 | 171 |
| A00822 | A10321 | 484 | A00822 | A10353 | 193 |
| A00822 | A10547 | 404 | A00822 | A10624 | 357 |
| A00822 | A10642 | 491 | A00822 | A10982 | 479 |
| A00822 | A11139 | 402 | A00822 | A11291 | 254 |
| A00822 | A11297 | 238 | A00822 | A11301 | 436 |
| A00822 | A11324 | 480 | A00822 | A11452 | 364 |
| A00822 | A11487 | 465 | A00822 | A11496 | 154 |
| A00822 | A11554 | 174 | A00822 | A11920 | 363 |
| A00822 | A11928 | 452 | A00822 | A11965 | 425 |
| A00822 | A11983 | 484 | A00822 | A12052 | 171 |
| A00822 | A12232 | 465 | A00822 | A12329 | 353 |
| A00822 | A12416 | 395 | A00822 | A12660 | 221 |
| A00822 | A13231 | 210 | A00822 | A13310 | 179 |
| A00822 | A13325 | 486 | A00822 | A13664 | 198 |
| A00822 | A13788 | 165 | A00822 | A13824 | 212 |
| A00822 | A13928 | 312 | A00822 | A13929 | 319 |
| A00822 | A13989 | 491 | A00822 | A14006 | 491 |
| A00822 | A14086 | 408 | A00822 | A14147 | 188 |
| A00822 | A14183 | 483 | A00822 | A14196 | 461 |
| A00822 | A14220 | 489 | A00822 | A14221 | 154 |
| A00822 | A14238 | 279 | A00822 | A14257 | 483 |
| A00822 | A14272 | 296 | A00822 | A14358 | 152 |
| A00822 | A14399 | 232 | A00822 | A14476 | 461 |
| A00822 | A14596 | 490 | A00822 | A14635 | 480 |
| A00822 | A14655 | 327 | A00822 | A14659 | 443 |
| A00822 | A14661 | 187 | A00822 | A14701 | 177 |
| A00822 | A14785 | 245 | A00822 | A14826 | 446 |
| A00822 | A14931 | 490 | A00822 | A15188 | 172 |
| A00822 | A15257 | 168 | A00822 | A15262 | 475 |
| A00822 | A15353 | 162 | A00822 | A15366 | 468 |
| A00822 | A15502 | 434 | A00822 | A15507 | 340 |
| A00822 | A15545 | 409 | A00822 | A15559 | 486 |
| A00822 | A15596 | 241 | A00822 | A15660 | 486 |
| A00822 | A15682 | 446 | A00822 | A15684 | 435 |

|        |        |     |        |        |     |
|--------|--------|-----|--------|--------|-----|
| A00822 | A15729 | 474 | A00822 | A15766 | 219 |
| A00822 | A15867 | 208 | A00822 | A16668 | 219 |
| A00822 | A16873 | 285 | A00822 | A16936 | 160 |
| A00822 | A16967 | 171 | A00822 | A17015 | 468 |
| A00822 | A17028 | 335 | A00822 | A17135 | 224 |
| A00823 | A01325 | 180 | A00823 | A05914 | 293 |
| A00823 | A06982 | 188 | A00824 | A00829 | 184 |
| A00824 | A00841 | 489 | A00824 | A00865 | 235 |
| A00824 | A00871 | 384 | A00824 | A00898 | 238 |
| A00824 | A00909 | 489 | A00824 | A00913 | 154 |
| A00824 | A00922 | 483 | A00824 | A00934 | 226 |
| A00824 | A00982 | 146 | A00824 | A00983 | 603 |
| A00824 | A00996 | 247 | A00824 | A01017 | 393 |
| A00824 | A01020 | 182 | A00824 | A01027 | 656 |
| A00824 | A01061 | 273 | A00824 | A01069 | 491 |
| A00824 | A01102 | 247 | A00824 | A01106 | 260 |
| A00824 | A01119 | 277 | A00824 | A01123 | 406 |
| A00824 | A01145 | 230 | A00824 | A01150 | 372 |
| A00824 | A01194 | 337 | A00824 | A01218 | 247 |
| A00824 | A01232 | 488 | A00824 | A01242 | 419 |
| A00824 | A01287 | 372 | A00824 | A01293 | 314 |
| A00824 | A01311 | 491 | A00824 | A01317 | 236 |
| A00824 | A01374 | 249 | A00824 | A01399 | 372 |
| A00824 | A01411 | 307 | A00824 | A01420 | 247 |
| A00824 | A01429 | 278 | A00824 | A01439 | 484 |
| A00824 | A01455 | 247 | A00824 | A01569 | 184 |
| A00824 | A01581 | 247 | A00824 | A01613 | 445 |
| A00824 | A01826 | 247 | A00824 | A03438 | 369 |
| A00824 | A03453 | 247 | A00824 | A03809 | 372 |
| A00824 | A04055 | 337 | A00824 | A04662 | 159 |
| A00824 | A05017 | 258 | A00824 | A05865 | 180 |
| A00824 | A06287 | 243 | A00824 | A06543 | 438 |
| A00824 | A06878 | 224 | A00824 | A07677 | 291 |
| A00824 | A07695 | 238 | A00824 | A07744 | 490 |
| A00824 | A07881 | 432 | A00824 | A08098 | 477 |
| A00824 | A08228 | 481 | A00824 | A08491 | 310 |
| A00824 | A08548 | 465 | A00824 | A08574 | 258 |
| A00824 | A08763 | 191 | A00824 | A08807 | 230 |
| A00824 | A08860 | 228 | A00824 | A09717 | 247 |
| A00824 | A10490 | 257 | A00824 | A11725 | 191 |
| A00824 | A12825 | 152 | A00824 | A12858 | 184 |
| A00824 | A13550 | 221 | A00824 | A13783 | 191 |
| A00824 | A14074 | 247 | A00824 | A14083 | 473 |
| A00824 | A14255 | 226 | A00824 | A14270 | 157 |
| A00824 | A14674 | 245 | A00824 | A14699 | 491 |
| A00824 | A14778 | 249 | A00824 | A14889 | 290 |

|        |        |     |        |        |     |
|--------|--------|-----|--------|--------|-----|
| A00824 | A14903 | 193 | A00824 | A14917 | 182 |
| A00824 | A15662 | 450 | A00824 | A15684 | 374 |
| A00824 | A15711 | 154 | A00824 | A15714 | 224 |
| A00824 | A15746 | 230 | A00824 | A15937 | 446 |
| A00824 | A16585 | 230 | A00824 | A16587 | 176 |
| A00824 | A16695 | 258 | A00824 | A16703 | 371 |
| A00824 | A16790 | 174 | A00824 | A16806 | 258 |
| A00824 | A16824 | 241 | A00825 | A00933 | 193 |
| A00825 | A00962 | 472 | A00825 | A00995 | 319 |
| A00825 | A01008 | 333 | A00825 | A01018 | 484 |
| A00825 | A01176 | 491 | A00825 | A01223 | 160 |
| A00825 | A01297 | 165 | A00825 | A01409 | 420 |
| A00825 | A01426 | 383 | A00825 | A01554 | 899 |
| A00825 | A01558 | 899 | A00825 | A01588 | 899 |
| A00825 | A01635 | 465 | A00825 | A01755 | 490 |
| A00825 | A01793 | 347 | A00825 | A01995 | 383 |
| A00825 | A02020 | 443 | A00825 | A02117 | 383 |
| A00825 | A02254 | 269 | A00825 | A02284 | 380 |
| A00825 | A02407 | 317 | A00825 | A02966 | 241 |
| A00825 | A03126 | 358 | A00825 | A03167 | 274 |
| A00825 | A03209 | 994 | A00825 | A03235 | 152 |
| A00825 | A03513 | 445 | A00825 | A03531 | 201 |
| A00825 | A03595 | 193 | A00825 | A03604 | 346 |
| A00825 | A03968 | 415 | A00825 | A04095 | 160 |
| A00825 | A04622 | 232 | A00825 | A04791 | 221 |
| A00825 | A04927 | 274 | A00825 | A05014 | 266 |
| A00825 | A05034 | 207 | A00825 | A05064 | 491 |
| A00825 | A05140 | 168 | A00825 | A05284 | 293 |
| A00825 | A05330 | 238 | A00825 | A05331 | 322 |
| A00825 | A05338 | 427 | A00825 | A05416 | 286 |
| A00825 | A05418 | 488 | A00825 | A05424 | 350 |
| A00825 | A05433 | 252 | A00825 | A05451 | 185 |
| A00825 | A05462 | 243 | A00825 | A05550 | 443 |
| A00825 | A05684 | 358 | A00825 | A05912 | 382 |
| A00825 | A05961 | 283 | A00825 | A05966 | 174 |
| A00825 | A06037 | 240 | A00825 | A06286 | 268 |
| A00825 | A06402 | 165 | A00825 | A06405 | 474 |
| A00825 | A06597 | 481 | A00825 | A06641 | 435 |
| A00825 | A06724 | 330 | A00825 | A06847 | 270 |
| A00825 | A06860 | 173 | A00825 | A06934 | 159 |
| A00825 | A06994 | 299 | A00825 | A07007 | 390 |
| A00825 | A07027 | 454 | A00825 | A07059 | 481 |
| A00825 | A07239 | 184 | A00825 | A07320 | 266 |
| A00825 | A07325 | 162 | A00825 | A07399 | 486 |
| A00825 | A07408 | 312 | A00825 | A07459 | 223 |
| A00825 | A07501 | 213 | A00825 | A07503 | 168 |

|        |        |     |        |        |     |
|--------|--------|-----|--------|--------|-----|
| A00825 | A07520 | 472 | A00825 | A07619 | 216 |
| A00825 | A07643 | 491 | A00825 | A07658 | 182 |
| A00825 | A07674 | 441 | A00825 | A07684 | 241 |
| A00825 | A07690 | 436 | A00825 | A07736 | 205 |
| A00825 | A07757 | 385 | A00825 | A07798 | 489 |
| A00825 | A07851 | 451 | A00825 | A07933 | 270 |
| A00825 | A07976 | 165 | A00825 | A08109 | 199 |
| A00825 | A08114 | 424 | A00825 | A08155 | 299 |
| A00825 | A08190 | 310 | A00825 | A08249 | 151 |
| A00825 | A08278 | 198 | A00825 | A08279 | 435 |
| A00825 | A08280 | 258 | A00825 | A08365 | 210 |
| A00825 | A08667 | 358 | A00825 | A08687 | 168 |
| A00825 | A09791 | 383 | A00825 | A09845 | 218 |
| A00825 | A09846 | 356 | A00825 | A09880 | 334 |
| A00825 | A10241 | 395 | A00825 | A10391 | 285 |
| A00825 | A10423 | 279 | A00825 | A10444 | 227 |
| A00825 | A10452 | 299 | A00825 | A10456 | 391 |
| A00825 | A10506 | 266 | A00825 | A10685 | 327 |
| A00825 | A10687 | 182 | A00825 | A10690 | 299 |
| A00825 | A10691 | 221 | A00825 | A10709 | 441 |
| A00825 | A10715 | 414 | A00825 | A11708 | 230 |
| A00825 | A13228 | 199 | A00825 | A13326 | 179 |
| A00825 | A13717 | 216 | A00825 | A13733 | 285 |
| A00825 | A14803 | 174 | A00825 | A14859 | 266 |
| A00825 | A15874 | 201 | A00825 | A16529 | 235 |
| A00825 | A16767 | 154 | A00825 | A17006 | 278 |
| A00825 | A17024 | 266 | A00825 | A17055 | 266 |
| A00826 | A00839 | 319 | A00826 | A00854 | 241 |
| A00826 | A00883 | 307 | A00826 | A00965 | 299 |
| A00826 | A00968 | 260 | A00826 | A00977 | 305 |
| A00826 | A00980 | 485 | A00826 | A01002 | 249 |
| A00826 | A01016 | 322 | A00826 | A01026 | 226 |
| A00826 | A01074 | 512 | A00826 | A01091 | 490 |
| A00826 | A01125 | 428 | A00826 | A01136 | 259 |
| A00826 | A01154 | 369 | A00826 | A01166 | 372 |
| A00826 | A01211 | 205 | A00826 | A01217 | 321 |
| A00826 | A01238 | 306 | A00826 | A01244 | 249 |
| A00826 | A01291 | 180 | A00826 | A01306 | 372 |
| A00826 | A01309 | 624 | A00826 | A01352 | 396 |
| A00826 | A01365 | 389 | A00826 | A01406 | 482 |
| A00826 | A01416 | 353 | A00826 | A01503 | 213 |
| A00826 | A01524 | 228 | A00826 | A01553 | 259 |
| A00826 | A01561 | 185 | A00826 | A01568 | 179 |
| A00826 | A01573 | 363 | A00826 | A01574 | 465 |
| A00826 | A01575 | 454 | A00826 | A01583 | 305 |
| A00826 | A01585 | 490 | A00826 | A01706 | 658 |



|        |        |     |        |        |     |
|--------|--------|-----|--------|--------|-----|
| A00826 | A01995 | 374 | A00826 | A02051 | 283 |
| A00826 | A02110 | 485 | A00826 | A02212 | 232 |
| A00826 | A02228 | 157 | A00826 | A02342 | 450 |
| A00826 | A02347 | 160 | A00826 | A02452 | 366 |
| A00826 | A02649 | 162 | A00826 | A02729 | 257 |
| A00826 | A03104 | 267 | A00826 | A03293 | 185 |
| A00826 | A03489 | 332 | A00826 | A03583 | 195 |
| A00826 | A03591 | 311 | A00826 | A03601 | 439 |
| A00826 | A03618 | 583 | A00826 | A03719 | 179 |
| A00826 | A03720 | 179 | A00826 | A03757 | 188 |
| A00826 | A03880 | 179 | A00826 | A04166 | 235 |
| A00826 | A04280 | 457 | A00826 | A04449 | 337 |
| A00826 | A04687 | 361 | A00826 | A04696 | 172 |
| A00826 | A05375 | 265 | A00826 | A05416 | 335 |
| A00826 | A05501 | 229 | A00826 | A05573 | 475 |
| A00826 | A05597 | 179 | A00826 | A06466 | 260 |
| A00826 | A06491 | 179 | A00826 | A06591 | 179 |
| A00826 | A06640 | 246 | A00826 | A06861 | 232 |
| A00826 | A06917 | 324 | A00826 | A06941 | 199 |
| A00826 | A06991 | 157 | A00826 | A07209 | 316 |
| A00826 | A07421 | 179 | A00826 | A07437 | 489 |
| A00826 | A07495 | 179 | A00826 | A07732 | 670 |
| A00826 | A07785 | 179 | A00826 | A07816 | 179 |
| A00826 | A07820 | 228 | A00826 | A07848 | 218 |
| A00826 | A08259 | 179 | A00826 | A08400 | 185 |
| A00826 | A08551 | 179 | A00826 | A08772 | 245 |
| A00826 | A08834 | 179 | A00826 | A08840 | 179 |
| A00826 | A08852 | 154 | A00826 | A08961 | 168 |
| A00826 | A09121 | 168 | A00826 | A09286 | 252 |
| A00826 | A09326 | 479 | A00826 | A09402 | 263 |
| A00826 | A09609 | 191 | A00826 | A09825 | 179 |
| A00826 | A10038 | 159 | A00826 | A10430 | 561 |
| A00826 | A10514 | 541 | A00826 | A11209 | 154 |
| A00826 | A11234 | 191 | A00826 | A11436 | 505 |
| A00826 | A11487 | 449 | A00826 | A11496 | 172 |
| A00826 | A11558 | 179 | A00826 | A11675 | 165 |
| A00826 | A11937 | 278 | A00826 | A13568 | 277 |
| A00826 | A13781 | 156 | A00826 | A13819 | 179 |
| A00826 | A13845 | 262 | A00826 | A13866 | 179 |
| A00826 | A13905 | 243 | A00826 | A13942 | 179 |
| A00826 | A14202 | 179 | A00826 | A14220 | 195 |
| A00826 | A14366 | 179 | A00826 | A14371 | 475 |
| A00826 | A14569 | 193 | A00826 | A14693 | 215 |
| A00826 | A15036 | 296 | A00826 | A15292 | 443 |
| A00826 | A15314 | 296 | A00826 | A15358 | 179 |
| A00826 | A15376 | 224 | A00826 | A15419 | 366 |

|        |        |     |        |        |     |
|--------|--------|-----|--------|--------|-----|
| A00826 | A15452 | 247 | A00826 | A15470 | 179 |
| A00826 | A15484 | 179 | A00826 | A15665 | 250 |
| A00826 | A15682 | 366 | A00826 | A16059 | 324 |
| A00826 | A16122 | 491 | A00826 | A16597 | 163 |
| A00826 | A16664 | 159 | A00826 | A16709 | 260 |
| A00826 | A16790 | 260 | A00826 | A16847 | 561 |
| A00826 | A16944 | 167 | A00826 | A17013 | 401 |
| A00826 | A17043 | 212 | A00827 | A00923 | 311 |
| A00827 | A01000 | 435 | A00827 | A01017 | 479 |
| A00827 | A01025 | 184 | A00827 | A01047 | 163 |
| A00827 | A01065 | 168 | A00827 | A01101 | 491 |
| A00827 | A01184 | 167 | A00827 | A01189 | 156 |
| A00827 | A01217 | 457 | A00827 | A01249 | 438 |
| A00827 | A01270 | 152 | A00827 | A01291 | 489 |
| A00827 | A01306 | 266 | A00827 | A01335 | 235 |
| A00827 | A01414 | 243 | A00827 | A01451 | 278 |
| A00827 | A01470 | 152 | A00827 | A01579 | 246 |
| A00827 | A01671 | 152 | A00827 | A02216 | 200 |
| A00827 | A03480 | 274 | A00827 | A03567 | 327 |
| A00827 | A04681 | 174 | A00827 | A05499 | 229 |
| A00827 | A06965 | 394 | A00827 | A07967 | 152 |
| A00827 | A10773 | 307 | A00827 | A11480 | 488 |
| A00827 | A12509 | 329 | A00827 | A13356 | 187 |
| A00827 | A13992 | 256 | A00827 | A14819 | 165 |
| A00827 | A15373 | 188 | A00827 | A15377 | 191 |
| A00827 | A16680 | 393 | A00827 | A17133 | 271 |
| A00828 | A00963 | 255 | A00828 | A01278 | 156 |
| A00828 | A01604 | 260 | A00828 | A01870 | 262 |
| A00828 | A02202 | 269 | A00828 | A02291 | 185 |
| A00828 | A02851 | 404 | A00828 | A02896 | 274 |
| A00828 | A03080 | 177 | A00828 | A03280 | 384 |
| A00828 | A03414 | 490 | A00828 | A03932 | 474 |
| A00828 | A04048 | 230 | A00828 | A04275 | 180 |
| A00828 | A04517 | 288 | A00828 | A04698 | 212 |
| A00828 | A06797 | 251 | A00828 | A07229 | 462 |
| A00828 | A08097 | 171 | A00828 | A09509 | 165 |
| A00828 | A10585 | 279 | A00828 | A11257 | 340 |
| A00828 | A11472 | 180 | A00828 | A11485 | 157 |
| A00828 | A11983 | 165 | A00828 | A13899 | 174 |
| A00828 | A14119 | 312 | A00828 | A14392 | 310 |
| A00828 | A14667 | 223 | A00828 | A15331 | 216 |
| A00828 | A15642 | 228 | A00828 | A16450 | 414 |
| A00829 | A00841 | 490 | A00829 | A00898 | 221 |
| A00829 | A00909 | 313 | A00829 | A00922 | 491 |
| A00829 | A00984 | 435 | A00829 | A00998 | 180 |
| A00829 | A01001 | 460 | A00829 | A01021 | 470 |

|        |        |     |        |        |     |
|--------|--------|-----|--------|--------|-----|
| A00829 | A01159 | 202 | A00829 | A01212 | 234 |
| A00829 | A01439 | 491 | A00829 | A01553 | 172 |
| A00829 | A01558 | 199 | A00829 | A01589 | 238 |
| A00829 | A01613 | 490 | A00829 | A01815 | 263 |
| A00829 | A01819 | 177 | A00829 | A01833 | 263 |
| A00829 | A01915 | 151 | A00829 | A01974 | 165 |
| A00829 | A02164 | 480 | A00829 | A02268 | 454 |
| A00829 | A02425 | 235 | A00829 | A02454 | 436 |
| A00829 | A02601 | 82  | A00829 | A02602 | 180 |
| A00829 | A02954 | 224 | A00829 | A03301 | 200 |
| A00829 | A03435 | 170 | A00829 | A03438 | 313 |
| A00829 | A03926 | 154 | A00829 | A03956 | 204 |
| A00829 | A04056 | 224 | A00829 | A04104 | 245 |
| A00829 | A04443 | 180 | A00829 | A04449 | 414 |
| A00829 | A05095 | 356 | A00829 | A05944 | 183 |
| A00829 | A06064 | 224 | A00829 | A06368 | 170 |
| A00829 | A06783 | 405 | A00829 | A06825 | 465 |
| A00829 | A06827 | 305 | A00829 | A07061 | 283 |
| A00829 | A07319 | 241 | A00829 | A07524 | 312 |
| A00829 | A07902 | 413 | A00829 | A08030 | 472 |
| A00829 | A08117 | 396 | A00829 | A08340 | 414 |
| A00829 | A08918 | 414 | A00829 | A09321 | 246 |
| A00829 | A09427 | 177 | A00829 | A09698 | 151 |
| A00829 | A10532 | 187 | A00829 | A10590 | 414 |
| A00829 | A10829 | 274 | A00829 | A11983 | 222 |
| A00829 | A13012 | 485 | A00829 | A13889 | 293 |
| A00829 | A14056 | 183 | A00829 | A14079 | 480 |
| A00829 | A14096 | 216 | A00829 | A14333 | 333 |
| A00829 | A14699 | 463 | A00829 | A14778 | 490 |
| A00829 | A15624 | 380 | A00829 | A15668 | 182 |
| A00829 | A15932 | 486 | A00829 | A15933 | 346 |
| A00829 | A15937 | 427 | A00829 | A15939 | 341 |
| A00829 | A16099 | 268 | A00829 | A16128 | 430 |
| A00829 | A16129 | 428 | A00829 | A16226 | 457 |
| A00829 | A16613 | 240 | A00829 | A16616 | 208 |
| A00830 | A01374 | 224 | A00830 | A01633 | 229 |
| A00831 | A00839 | 294 | A00831 | A00843 | 475 |
| A00831 | A00848 | 491 | A00831 | A00856 | 491 |
| A00831 | A00858 | 486 | A00831 | A00871 | 450 |
| A00831 | A00878 | 446 | A00831 | A00883 | 491 |
| A00831 | A00902 | 272 | A00831 | A00916 | 618 |
| A00831 | A00923 | 469 | A00831 | A00934 | 400 |
| A00831 | A00970 | 489 | A00831 | A01000 | 267 |
| A00831 | A01007 | 156 | A00831 | A01017 | 208 |
| A00831 | A01020 | 565 | A00831 | A01021 | 462 |
| A00831 | A01022 | 428 | A00831 | A01025 | 160 |

|        |        |     |        |        |     |
|--------|--------|-----|--------|--------|-----|
| A00831 | A01032 | 475 | A00831 | A01040 | 609 |
| A00831 | A01065 | 154 | A00831 | A01069 | 486 |
| A00831 | A01072 | 348 | A00831 | A01075 | 489 |
| A00831 | A01085 | 314 | A00831 | A01088 | 332 |
| A00831 | A01112 | 638 | A00831 | A01116 | 584 |
| A00831 | A01120 | 414 | A00831 | A01127 | 174 |
| A00831 | A01136 | 462 | A00831 | A01140 | 324 |
| A00831 | A01150 | 479 | A00831 | A01166 | 491 |
| A00831 | A01201 | 398 | A00831 | A01206 | 491 |
| A00831 | A01208 | 190 | A00831 | A01215 | 441 |
| A00831 | A01224 | 283 | A00831 | A01234 | 636 |
| A00831 | A01243 | 489 | A00831 | A01291 | 491 |
| A00831 | A01304 | 357 | A00831 | A01331 | 227 |
| A00831 | A01335 | 210 | A00831 | A01351 | 154 |
| A00831 | A01353 | 160 | A00831 | A01354 | 477 |
| A00831 | A01384 | 454 | A00831 | A01418 | 290 |
| A00831 | A01425 | 688 | A00831 | A01431 | 490 |
| A00831 | A01439 | 314 | A00831 | A01464 | 228 |
| A00831 | A01468 | 491 | A00831 | A01470 | 491 |
| A00831 | A01487 | 373 | A00831 | A01488 | 171 |
| A00831 | A01492 | 705 | A00831 | A01495 | 451 |
| A00831 | A01496 | 461 | A00831 | A01506 | 466 |
| A00831 | A01538 | 434 | A00831 | A01539 | 465 |
| A00831 | A01546 | 198 | A00831 | A01555 | 162 |
| A00831 | A01558 | 490 | A00831 | A01569 | 491 |
| A00831 | A01572 | 196 | A00831 | A01577 | 306 |
| A00831 | A01597 | 412 | A00831 | A01598 | 491 |
| A00831 | A01606 | 162 | A00831 | A01614 | 491 |
| A00831 | A01644 | 174 | A00831 | A01649 | 491 |
| A00831 | A01684 | 429 | A00831 | A01720 | 212 |
| A00831 | A01917 | 385 | A00831 | A02003 | 283 |
| A00831 | A03057 | 311 | A00831 | A03298 | 168 |
| A00831 | A03494 | 165 | A00831 | A03567 | 489 |
| A00831 | A03669 | 165 | A00831 | A03734 | 414 |
| A00831 | A03859 | 443 | A00831 | A04042 | 212 |
| A00831 | A04124 | 212 | A00831 | A04161 | 485 |
| A00831 | A04697 | 474 | A00831 | A06025 | 260 |
| A00831 | A07223 | 334 | A00831 | A07323 | 288 |
| A00831 | A07347 | 469 | A00831 | A07677 | 479 |
| A00831 | A07700 | 547 | A00831 | A07725 | 334 |
| A00831 | A08022 | 456 | A00831 | A08118 | 578 |
| A00831 | A08178 | 183 | A00831 | A08357 | 466 |
| A00831 | A08571 | 484 | A00831 | A08679 | 384 |
| A00831 | A09327 | 358 | A00831 | A09621 | 485 |
| A00831 | A09638 | 165 | A00831 | A10165 | 334 |
| A00831 | A10532 | 618 | A00831 | A10624 | 491 |

|        |        |     |        |        |     |
|--------|--------|-----|--------|--------|-----|
| A00831 | A11254 | 152 | A00831 | A11301 | 216 |
| A00831 | A11312 | 394 | A00831 | A11316 | 420 |
| A00831 | A11476 | 485 | A00831 | A11535 | 299 |
| A00831 | A11704 | 301 | A00831 | A12251 | 232 |
| A00831 | A12507 | 414 | A00831 | A12878 | 212 |
| A00831 | A12937 | 212 | A00831 | A13058 | 193 |
| A00831 | A13097 | 224 | A00831 | A13126 | 202 |
| A00831 | A13511 | 515 | A00831 | A13989 | 595 |
| A00831 | A14006 | 368 | A00831 | A14216 | 490 |
| A00831 | A14596 | 491 | A00831 | A14597 | 380 |
| A00831 | A14659 | 345 | A00831 | A15660 | 491 |
| A00831 | A15684 | 346 | A00831 | A17127 | 385 |
| A00831 | A17142 | 368 | A00832 | A00887 | 234 |
| A00832 | A01172 | 208 | A00832 | A01214 | 899 |
| A00832 | A01450 | 491 | A00832 | A01480 | 215 |
| A00832 | A01492 | 899 | A00832 | A01512 | 314 |
| A00832 | A01527 | 899 | A00832 | A01548 | 157 |
| A00832 | A01558 | 989 | A00832 | A01560 | 460 |
| A00832 | A01562 | 921 | A00832 | A01572 | 258 |
| A00832 | A01588 | 990 | A00832 | A01591 | 207 |
| A00832 | A01649 | 219 | A00832 | A01668 | 267 |
| A00832 | A01688 | 355 | A00832 | A01692 | 912 |
| A00832 | A01707 | 378 | A00832 | A01730 | 374 |
| A00832 | A01770 | 905 | A00832 | A01796 | 196 |
| A00832 | A01797 | 272 | A00832 | A01844 | 401 |
| A00832 | A02239 | 170 | A00832 | A02470 | 204 |
| A00832 | A03213 | 274 | A00832 | A03223 | 187 |
| A00832 | A03451 | 329 | A00832 | A03591 | 943 |
| A00832 | A03611 | 182 | A00832 | A03843 | 301 |
| A00832 | A03854 | 278 | A00832 | A04283 | 475 |
| A00832 | A05082 | 374 | A00832 | A05414 | 899 |
| A00832 | A05701 | 303 | A00832 | A05902 | 159 |
| A00832 | A06608 | 380 | A00832 | A06610 | 474 |
| A00832 | A07228 | 302 | A00832 | A07422 | 213 |
| A00832 | A07726 | 899 | A00832 | A08133 | 199 |
| A00832 | A08357 | 438 | A00832 | A08851 | 477 |
| A00832 | A08878 | 201 | A00832 | A09011 | 177 |
| A00832 | A09040 | 274 | A00832 | A09124 | 301 |
| A00832 | A09292 | 157 | A00832 | A09977 | 330 |
| A00832 | A09999 | 259 | A00832 | A10575 | 899 |
| A00832 | A11621 | 222 | A00832 | A11679 | 183 |
| A00832 | A11791 | 188 | A00832 | A11892 | 251 |
| A00832 | A13373 | 162 | A00832 | A13390 | 215 |
| A00832 | A13989 | 899 | A00832 | A13997 | 297 |
| A00832 | A14236 | 899 | A00832 | A14643 | 462 |
| A00832 | A16911 | 152 | A00832 | A17136 | 183 |

|        |        |     |        |        |     |
|--------|--------|-----|--------|--------|-----|
| A00833 | A00834 | 393 | A00833 | A00839 | 314 |
| A00833 | A00876 | 247 | A00833 | A00922 | 392 |
| A00833 | A00932 | 446 | A00833 | A00933 | 160 |
| A00833 | A00970 | 160 | A00833 | A00974 | 299 |
| A00833 | A00980 | 487 | A00833 | A00984 | 299 |
| A00833 | A00987 | 299 | A00833 | A01001 | 299 |
| A00833 | A01083 | 185 | A00833 | A01102 | 299 |
| A00833 | A01161 | 160 | A00833 | A01261 | 457 |
| A00833 | A01311 | 152 | A00833 | A01379 | 299 |
| A00833 | A01382 | 156 | A00833 | A01387 | 299 |
| A00833 | A01439 | 299 | A00833 | A01540 | 414 |
| A00833 | A01560 | 391 | A00833 | A01577 | 161 |
| A00833 | A01627 | 299 | A00833 | A01822 | 190 |
| A00833 | A02178 | 340 | A00833 | A02601 | 299 |
| A00833 | A03677 | 160 | A00833 | A03697 | 152 |
| A00833 | A03740 | 363 | A00833 | A03752 | 491 |
| A00833 | A04495 | 299 | A00833 | A06287 | 152 |
| A00833 | A06466 | 491 | A00833 | A07311 | 491 |
| A00833 | A07744 | 152 | A00833 | A07798 | 353 |
| A00833 | A08061 | 152 | A00833 | A08098 | 152 |
| A00833 | A08178 | 152 | A00833 | A08533 | 243 |
| A00833 | A08559 | 338 | A00833 | A08763 | 152 |
| A00833 | A08947 | 299 | A00833 | A09004 | 299 |
| A00833 | A09297 | 160 | A00833 | A09902 | 160 |
| A00833 | A10842 | 152 | A00833 | A11286 | 374 |
| A00833 | A12042 | 489 | A00833 | A12043 | 160 |
| A00833 | A12227 | 452 | A00833 | A12328 | 485 |
| A00833 | A12503 | 318 | A00833 | A13116 | 477 |
| A00833 | A13320 | 281 | A00833 | A13335 | 188 |
| A00833 | A13340 | 545 | A00833 | A14073 | 323 |
| A00833 | A14188 | 452 | A00833 | A14457 | 218 |
| A00833 | A14466 | 452 | A00833 | A14525 | 152 |
| A00833 | A14738 | 361 | A00833 | A15244 | 540 |
| A00833 | A15375 | 152 | A00833 | A15546 | 533 |
| A00833 | A15677 | 202 | A00833 | A15684 | 174 |
| A00833 | A15741 | 156 | A00833 | A15932 | 160 |
| A00833 | A15933 | 160 | A00833 | A16272 | 535 |
| A00833 | A16318 | 160 | A00833 | A16437 | 534 |
| A00833 | A16446 | 160 | A00833 | A16585 | 160 |
| A00833 | A16618 | 299 | A00833 | A16793 | 163 |
| A00834 | A01478 | 176 | A00834 | A03752 | 243 |
| A00834 | A12042 | 377 | A00834 | A14009 | 170 |
| A00835 | A00836 | 288 | A00835 | A00837 | 469 |
| A00835 | A00883 | 490 | A00835 | A00905 | 490 |
| A00835 | A00916 | 486 | A00835 | A00940 | 467 |
| A00835 | A00957 | 154 | A00835 | A01023 | 171 |

|        |        |     |        |        |     |
|--------|--------|-----|--------|--------|-----|
| A00835 | A01057 | 210 | A00835 | A01075 | 490 |
| A00835 | A01087 | 219 | A00835 | A01091 | 477 |
| A00835 | A01143 | 486 | A00835 | A01173 | 435 |
| A00835 | A01189 | 486 | A00835 | A01206 | 363 |
| A00835 | A01234 | 416 | A00835 | A01243 | 296 |
| A00835 | A01259 | 322 | A00835 | A01266 | 223 |
| A00835 | A01284 | 419 | A00835 | A01291 | 396 |
| A00835 | A01325 | 472 | A00835 | A01354 | 277 |
| A00835 | A01406 | 491 | A00835 | A01451 | 440 |
| A00835 | A01528 | 247 | A00835 | A01598 | 466 |
| A00835 | A01612 | 491 | A00835 | A01614 | 163 |
| A00835 | A01647 | 288 | A00835 | A01649 | 163 |
| A00835 | A01660 | 491 | A00835 | A02052 | 157 |
| A00835 | A02452 | 480 | A00835 | A02671 | 347 |
| A00835 | A02794 | 185 | A00835 | A03057 | 489 |
| A00835 | A03070 | 488 | A00835 | A03171 | 235 |
| A00835 | A03272 | 475 | A00835 | A03446 | 180 |
| A00835 | A03569 | 491 | A00835 | A04050 | 434 |
| A00835 | A04831 | 369 | A00835 | A05219 | 485 |
| A00835 | A05403 | 167 | A00835 | A05633 | 378 |
| A00835 | A06466 | 457 | A00835 | A06907 | 491 |
| A00835 | A07309 | 357 | A00835 | A07311 | 379 |
| A00835 | A07604 | 491 | A00835 | A07706 | 445 |
| A00835 | A07756 | 162 | A00835 | A07798 | 399 |
| A00835 | A08137 | 491 | A00835 | A08289 | 475 |
| A00835 | A08318 | 157 | A00835 | A08571 | 479 |
| A00835 | A09021 | 283 | A00835 | A09737 | 321 |
| A00835 | A09758 | 187 | A00835 | A10165 | 162 |
| A00835 | A10563 | 484 | A00835 | A10601 | 398 |
| A00835 | A10624 | 218 | A00835 | A11291 | 411 |
| A00835 | A11323 | 373 | A00835 | A11405 | 483 |
| A00835 | A11406 | 435 | A00835 | A11948 | 157 |
| A00835 | A12232 | 157 | A00835 | A12247 | 180 |
| A00835 | A12353 | 288 | A00835 | A12543 | 488 |
| A00835 | A12557 | 213 | A00835 | A12943 | 329 |
| A00835 | A13767 | 154 | A00835 | A13928 | 489 |
| A00835 | A13989 | 462 | A00835 | A14006 | 391 |
| A00835 | A14148 | 479 | A00835 | A14184 | 191 |
| A00835 | A14188 | 241 | A00835 | A14193 | 296 |
| A00835 | A14196 | 491 | A00835 | A14220 | 486 |
| A00835 | A14221 | 491 | A00835 | A14257 | 491 |
| A00835 | A14265 | 486 | A00835 | A14303 | 490 |
| A00835 | A14566 | 232 | A00835 | A14875 | 198 |
| A00835 | A14906 | 223 | A00835 | A15291 | 491 |
| A00835 | A15292 | 369 | A00835 | A15297 | 486 |
| A00835 | A15309 | 174 | A00835 | A15315 | 356 |

|        |        |     |        |        |     |
|--------|--------|-----|--------|--------|-----|
| A00835 | A15323 | 451 | A00835 | A15338 | 163 |
| A00835 | A15366 | 491 | A00835 | A15492 | 260 |
| A00835 | A15545 | 193 | A00835 | A15752 | 489 |
| A00835 | A15773 | 474 | A00835 | A15851 | 408 |
| A00835 | A15852 | 182 | A00835 | A16328 | 335 |
| A00835 | A16722 | 341 | A00835 | A16994 | 316 |
| A00835 | A17063 | 491 | A00835 | A17198 | 491 |
| A00836 | A02049 | 212 | A00836 | A02381 | 193 |
| A00836 | A03070 | 200 | A00836 | A06907 | 198 |
| A00836 | A11405 | 224 | A00836 | A12543 | 274 |
| A00836 | A14148 | 165 | A00836 | A16328 | 235 |
| A00836 | A16827 | 347 | A00837 | A00957 | 288 |
| A00837 | A01075 | 408 | A00837 | A01082 | 404 |
| A00837 | A01111 | 303 | A00837 | A01143 | 432 |
| A00837 | A01295 | 252 | A00837 | A01308 | 329 |
| A00837 | A01598 | 470 | A00837 | A03070 | 293 |
| A00837 | A03136 | 185 | A00837 | A03488 | 479 |
| A00837 | A05121 | 466 | A00837 | A07604 | 347 |
| A00837 | A07706 | 369 | A00837 | A08118 | 204 |
| A00837 | A08356 | 297 | A00837 | A09221 | 389 |
| A00837 | A09319 | 899 | A00837 | A10165 | 236 |
| A00837 | A10624 | 310 | A00837 | A11301 | 195 |
| A00837 | A11406 | 333 | A00837 | A11917 | 324 |
| A00837 | A12069 | 423 | A00837 | A12111 | 195 |
| A00837 | A12247 | 266 | A00837 | A12365 | 213 |
| A00837 | A12665 | 324 | A00837 | A12952 | 324 |
| A00837 | A13313 | 324 | A00837 | A13708 | 324 |
| A00837 | A13781 | 324 | A00837 | A13928 | 587 |
| A00837 | A13983 | 193 | A00837 | A14147 | 180 |
| A00837 | A14257 | 182 | A00837 | A15105 | 324 |
| A00837 | A15116 | 491 | A00837 | A15138 | 338 |
| A00837 | A15366 | 619 | A00837 | A15492 | 337 |
| A00837 | A15564 | 452 | A00837 | A15729 | 163 |
| A00837 | A15752 | 401 | A00837 | A15773 | 399 |
| A00837 | A15854 | 324 | A00837 | A16798 | 152 |
| A00838 | A01325 | 159 | A00838 | A02711 | 260 |
| A00838 | A02779 | 316 | A00838 | A04879 | 290 |
| A00838 | A05701 | 329 | A00838 | A06588 | 205 |
| A00838 | A06688 | 269 | A00838 | A09723 | 401 |
| A00838 | A10103 | 375 | A00839 | A00841 | 229 |
| A00839 | A00848 | 477 | A00839 | A00849 | 362 |
| A00839 | A00851 | 167 | A00839 | A00861 | 254 |
| A00839 | A00865 | 363 | A00839 | A00870 | 418 |
| A00839 | A00876 | 490 | A00839 | A00878 | 491 |
| A00839 | A00902 | 288 | A00839 | A00906 | 188 |
| A00839 | A00913 | 234 | A00839 | A00916 | 507 |



|        |        |     |        |        |     |
|--------|--------|-----|--------|--------|-----|
| A00839 | A00922 | 491 | A00839 | A00923 | 491 |
| A00839 | A00935 | 195 | A00839 | A00953 | 559 |
| A00839 | A00955 | 491 | A00839 | A00965 | 479 |
| A00839 | A00966 | 451 | A00839 | A00970 | 491 |
| A00839 | A00972 | 188 | A00839 | A00980 | 665 |
| A00839 | A00983 | 334 | A00839 | A00987 | 386 |
| A00839 | A00990 | 457 | A00839 | A00991 | 488 |
| A00839 | A00994 | 238 | A00839 | A00999 | 383 |
| A00839 | A01000 | 491 | A00839 | A01001 | 229 |
| A00839 | A01012 | 491 | A00839 | A01016 | 268 |
| A00839 | A01017 | 560 | A00839 | A01020 | 259 |
| A00839 | A01025 | 491 | A00839 | A01027 | 460 |
| A00839 | A01034 | 439 | A00839 | A01037 | 207 |
| A00839 | A01038 | 258 | A00839 | A01042 | 491 |
| A00839 | A01047 | 466 | A00839 | A01054 | 339 |
| A00839 | A01056 | 477 | A00839 | A01067 | 276 |
| A00839 | A01072 | 486 | A00839 | A01082 | 319 |
| A00839 | A01085 | 413 | A00839 | A01086 | 462 |
| A00839 | A01090 | 491 | A00839 | A01095 | 251 |
| A00839 | A01098 | 319 | A00839 | A01101 | 558 |
| A00839 | A01102 | 252 | A00839 | A01108 | 390 |
| A00839 | A01112 | 491 | A00839 | A01115 | 491 |
| A00839 | A01121 | 485 | A00839 | A01125 | 224 |
| A00839 | A01127 | 491 | A00839 | A01140 | 491 |
| A00839 | A01150 | 491 | A00839 | A01152 | 490 |
| A00839 | A01153 | 477 | A00839 | A01154 | 678 |
| A00839 | A01156 | 232 | A00839 | A01161 | 481 |
| A00839 | A01166 | 491 | A00839 | A01184 | 479 |
| A00839 | A01186 | 490 | A00839 | A01189 | 321 |
| A00839 | A01192 | 378 | A00839 | A01196 | 575 |
| A00839 | A01206 | 491 | A00839 | A01212 | 418 |
| A00839 | A01217 | 557 | A00839 | A01218 | 359 |
| A00839 | A01219 | 419 | A00839 | A01220 | 556 |
| A00839 | A01221 | 491 | A00839 | A01226 | 326 |
| A00839 | A01234 | 550 | A00839 | A01238 | 313 |
| A00839 | A01243 | 486 | A00839 | A01247 | 491 |
| A00839 | A01249 | 491 | A00839 | A01263 | 819 |
| A00839 | A01270 | 424 | A00839 | A01291 | 657 |
| A00839 | A01304 | 236 | A00839 | A01306 | 491 |
| A00839 | A01309 | 319 | A00839 | A01335 | 491 |
| A00839 | A01337 | 491 | A00839 | A01352 | 435 |
| A00839 | A01362 | 266 | A00839 | A01365 | 678 |
| A00839 | A01369 | 574 | A00839 | A01384 | 406 |
| A00839 | A01387 | 63  | A00839 | A01392 | 486 |
| A00839 | A01406 | 560 | A00839 | A01407 | 491 |
| A00839 | A01408 | 531 | A00839 | A01411 | 574 |

|        |        |     |        |        |     |
|--------|--------|-----|--------|--------|-----|
| A00839 | A01413 | 207 | A00839 | A01414 | 201 |
| A00839 | A01416 | 362 | A00839 | A01425 | 454 |
| A00839 | A01431 | 475 | A00839 | A01433 | 428 |
| A00839 | A01435 | 268 | A00839 | A01436 | 419 |
| A00839 | A01437 | 483 | A00839 | A01449 | 491 |
| A00839 | A01451 | 227 | A00839 | A01457 | 419 |
| A00839 | A01464 | 475 | A00839 | A01468 | 645 |
| A00839 | A01470 | 491 | A00839 | A01492 | 256 |
| A00839 | A01496 | 491 | A00839 | A01539 | 491 |
| A00839 | A01540 | 489 | A00839 | A01569 | 491 |
| A00839 | A01579 | 575 | A00839 | A01586 | 644 |
| A00839 | A01597 | 480 | A00839 | A01598 | 363 |
| A00839 | A01601 | 611 | A00839 | A01606 | 224 |
| A00839 | A01611 | 269 | A00839 | A01612 | 445 |
| A00839 | A01614 | 291 | A00839 | A01618 | 405 |
| A00839 | A01649 | 491 | A00839 | A01684 | 324 |
| A00839 | A01707 | 199 | A00839 | A01737 | 452 |
| A00839 | A01740 | 156 | A00839 | A01781 | 193 |
| A00839 | A01787 | 473 | A00839 | A01822 | 491 |
| A00839 | A01824 | 391 | A00839 | A01976 | 188 |
| A00839 | A01988 | 188 | A00839 | A01995 | 182 |
| A00839 | A01999 | 306 | A00839 | A02110 | 283 |
| A00839 | A02179 | 246 | A00839 | A02216 | 371 |
| A00839 | A02227 | 491 | A00839 | A02350 | 491 |
| A00839 | A02607 | 401 | A00839 | A02737 | 217 |
| A00839 | A02877 | 486 | A00839 | A03069 | 486 |
| A00839 | A03191 | 156 | A00839 | A03304 | 236 |
| A00839 | A03446 | 160 | A00839 | A03453 | 440 |
| A00839 | A03461 | 307 | A00839 | A03490 | 412 |
| A00839 | A03493 | 480 | A00839 | A03567 | 491 |
| A00839 | A03591 | 283 | A00839 | A03601 | 152 |
| A00839 | A03705 | 208 | A00839 | A03740 | 491 |
| A00839 | A03752 | 543 | A00839 | A03809 | 424 |
| A00839 | A03859 | 446 | A00839 | A03901 | 188 |
| A00839 | A03959 | 470 | A00839 | A03981 | 584 |
| A00839 | A04230 | 191 | A00839 | A04449 | 152 |
| A00839 | A04688 | 423 | A00839 | A04689 | 232 |
| A00839 | A04846 | 480 | A00839 | A04858 | 218 |
| A00839 | A05086 | 435 | A00839 | A05198 | 296 |
| A00839 | A05258 | 425 | A00839 | A05318 | 477 |
| A00839 | A05411 | 266 | A00839 | A05416 | 156 |
| A00839 | A05443 | 290 | A00839 | A05449 | 573 |
| A00839 | A05450 | 363 | A00839 | A05499 | 488 |
| A00839 | A05501 | 575 | A00839 | A05502 | 486 |
| A00839 | A05512 | 223 | A00839 | A05557 | 491 |
| A00839 | A05702 | 188 | A00839 | A06115 | 177 |

|        |        |     |        |        |     |
|--------|--------|-----|--------|--------|-----|
| A00839 | A06275 | 267 | A00839 | A06279 | 341 |
| A00839 | A06351 | 451 | A00839 | A06466 | 592 |
| A00839 | A06534 | 334 | A00839 | A06564 | 491 |
| A00839 | A06589 | 201 | A00839 | A06666 | 216 |
| A00839 | A06779 | 383 | A00839 | A06785 | 188 |
| A00839 | A06814 | 554 | A00839 | A06843 | 179 |
| A00839 | A06861 | 481 | A00839 | A06897 | 400 |
| A00839 | A06965 | 491 | A00839 | A06973 | 574 |
| A00839 | A07028 | 156 | A00839 | A07047 | 574 |
| A00839 | A07075 | 256 | A00839 | A07135 | 383 |
| A00839 | A07201 | 549 | A00839 | A07248 | 180 |
| A00839 | A07307 | 193 | A00839 | A07311 | 551 |
| A00839 | A07323 | 491 | A00839 | A07349 | 490 |
| A00839 | A07398 | 572 | A00839 | A07449 | 191 |
| A00839 | A07451 | 481 | A00839 | A07473 | 157 |
| A00839 | A07517 | 177 | A00839 | A07524 | 240 |
| A00839 | A07533 | 224 | A00839 | A07581 | 491 |
| A00839 | A07658 | 486 | A00839 | A07726 | 477 |
| A00839 | A07731 | 273 | A00839 | A07773 | 469 |
| A00839 | A07798 | 290 | A00839 | A07811 | 383 |
| A00839 | A07965 | 422 | A00839 | A08011 | 486 |
| A00839 | A08055 | 201 | A00839 | A08131 | 491 |
| A00839 | A08137 | 160 | A00839 | A08144 | 326 |
| A00839 | A08154 | 490 | A00839 | A08277 | 491 |
| A00839 | A08301 | 491 | A00839 | A08321 | 157 |
| A00839 | A08350 | 177 | A00839 | A08357 | 491 |
| A00839 | A08358 | 491 | A00839 | A08359 | 491 |
| A00839 | A08369 | 264 | A00839 | A08398 | 466 |
| A00839 | A08408 | 574 | A00839 | A08419 | 480 |
| A00839 | A08438 | 383 | A00839 | A08452 | 489 |
| A00839 | A08457 | 486 | A00839 | A08476 | 557 |
| A00839 | A08501 | 491 | A00839 | A08533 | 466 |
| A00839 | A08543 | 491 | A00839 | A08546 | 350 |
| A00839 | A08547 | 151 | A00839 | A08556 | 491 |
| A00839 | A08559 | 491 | A00839 | A08664 | 207 |
| A00839 | A08682 | 330 | A00839 | A08748 | 395 |
| A00839 | A08760 | 427 | A00839 | A08761 | 477 |
| A00839 | A08762 | 330 | A00839 | A08773 | 488 |
| A00839 | A08860 | 171 | A00839 | A08929 | 411 |
| A00839 | A08970 | 177 | A00839 | A08973 | 283 |
| A00839 | A08975 | 241 | A00839 | A09045 | 188 |
| A00839 | A09059 | 274 | A00839 | A09282 | 372 |
| A00839 | A09285 | 423 | A00839 | A09289 | 353 |
| A00839 | A09297 | 200 | A00839 | A09308 | 217 |
| A00839 | A09322 | 564 | A00839 | A09577 | 485 |
| A00839 | A09610 | 334 | A00839 | A09613 | 363 |

|        |        |     |        |        |     |
|--------|--------|-----|--------|--------|-----|
| A00839 | A09620 | 217 | A00839 | A09621 | 188 |
| A00839 | A09622 | 486 | A00839 | A09655 | 463 |
| A00839 | A09726 | 414 | A00839 | A09735 | 491 |
| A00839 | A09808 | 156 | A00839 | A09852 | 491 |
| A00839 | A09862 | 311 | A00839 | A09902 | 170 |
| A00839 | A09999 | 228 | A00839 | A10338 | 215 |
| A00839 | A10417 | 391 | A00839 | A10430 | 383 |
| A00839 | A10480 | 215 | A00839 | A10490 | 369 |
| A00839 | A10498 | 455 | A00839 | A10532 | 488 |
| A00839 | A10616 | 205 | A00839 | A10745 | 177 |
| A00839 | A10961 | 156 | A00839 | A11120 | 224 |
| A00839 | A11334 | 262 | A00839 | A11337 | 276 |
| A00839 | A11420 | 488 | A00839 | A11438 | 483 |
| A00839 | A11440 | 675 | A00839 | A11462 | 243 |
| A00839 | A11480 | 494 | A00839 | A11487 | 249 |
| A00839 | A11550 | 452 | A00839 | A11562 | 344 |
| A00839 | A11572 | 208 | A00839 | A11588 | 383 |
| A00839 | A11593 | 428 | A00839 | A11597 | 486 |
| A00839 | A11616 | 486 | A00839 | A11688 | 491 |
| A00839 | A11728 | 535 | A00839 | A11857 | 361 |
| A00839 | A11922 | 283 | A00839 | A11931 | 283 |
| A00839 | A11937 | 240 | A00839 | A12011 | 463 |
| A00839 | A12053 | 156 | A00839 | A12079 | 232 |
| A00839 | A12084 | 232 | A00839 | A12160 | 343 |
| A00839 | A12193 | 156 | A00839 | A12227 | 228 |
| A00839 | A12270 | 475 | A00839 | A12329 | 462 |
| A00839 | A12404 | 391 | A00839 | A12477 | 276 |
| A00839 | A12821 | 491 | A00839 | A12968 | 488 |
| A00839 | A13024 | 343 | A00839 | A13126 | 196 |
| A00839 | A13311 | 450 | A00839 | A13340 | 595 |
| A00839 | A13375 | 224 | A00839 | A13497 | 177 |
| A00839 | A13527 | 350 | A00839 | A13596 | 256 |
| A00839 | A13649 | 215 | A00839 | A13710 | 491 |
| A00839 | A13812 | 251 | A00839 | A13830 | 355 |
| A00839 | A13989 | 491 | A00839 | A13992 | 662 |
| A00839 | A14073 | 451 | A00839 | A14090 | 319 |
| A00839 | A14152 | 201 | A00839 | A14169 | 466 |
| A00839 | A14176 | 472 | A00839 | A14188 | 485 |
| A00839 | A14216 | 647 | A00839 | A14265 | 298 |
| A00839 | A14449 | 254 | A00839 | A14478 | 441 |
| A00839 | A14479 | 490 | A00839 | A14482 | 468 |
| A00839 | A14508 | 491 | A00839 | A14530 | 308 |
| A00839 | A14566 | 435 | A00839 | A14568 | 491 |
| A00839 | A14738 | 290 | A00839 | A14813 | 543 |
| A00839 | A14849 | 156 | A00839 | A14911 | 177 |
| A00839 | A14937 | 412 | A00839 | A15062 | 177 |

|        |        |     |        |        |     |
|--------|--------|-----|--------|--------|-----|
| A00839 | A15146 | 156 | A00839 | A15225 | 477 |
| A00839 | A15235 | 452 | A00839 | A15244 | 165 |
| A00839 | A15268 | 394 | A00839 | A15381 | 217 |
| A00839 | A15498 | 204 | A00839 | A15499 | 432 |
| A00839 | A15500 | 491 | A00839 | A15624 | 349 |
| A00839 | A15657 | 207 | A00839 | A15659 | 318 |
| A00839 | A15660 | 491 | A00839 | A15665 | 185 |
| A00839 | A15682 | 176 | A00839 | A15684 | 592 |
| A00839 | A15711 | 305 | A00839 | A15732 | 486 |
| A00839 | A15743 | 456 | A00839 | A15751 | 177 |
| A00839 | A15759 | 216 | A00839 | A15769 | 241 |
| A00839 | A15771 | 491 | A00839 | A15776 | 306 |
| A00839 | A15918 | 291 | A00839 | A15920 | 271 |
| A00839 | A15931 | 484 | A00839 | A15932 | 625 |
| A00839 | A15933 | 480 | A00839 | A15938 | 305 |
| A00839 | A15988 | 475 | A00839 | A16053 | 156 |
| A00839 | A16118 | 491 | A00839 | A16272 | 462 |
| A00839 | A16318 | 154 | A00839 | A16351 | 243 |
| A00839 | A16400 | 259 | A00839 | A16412 | 156 |
| A00839 | A16437 | 340 | A00839 | A16457 | 352 |
| A00839 | A16462 | 480 | A00839 | A16631 | 191 |
| A00839 | A16658 | 417 | A00839 | A16680 | 188 |
| A00839 | A16682 | 481 | A00839 | A16686 | 490 |
| A00839 | A16756 | 157 | A00839 | A16839 | 188 |
| A00839 | A16847 | 383 | A00839 | A16937 | 380 |
| A00839 | A17152 | 252 | A00840 | A01026 | 473 |
| A00840 | A01386 | 480 | A00840 | A02852 | 333 |
| A00840 | A03412 | 355 | A00840 | A07693 | 243 |
| A00840 | A14077 | 393 | A00840 | A15877 | 390 |
| A00841 | A00848 | 335 | A00841 | A00849 | 281 |
| A00841 | A00871 | 619 | A00841 | A00909 | 887 |
| A00841 | A00916 | 452 | A00841 | A00922 | 616 |
| A00841 | A00927 | 170 | A00841 | A00932 | 467 |
| A00841 | A00934 | 419 | A00841 | A00970 | 165 |
| A00841 | A00983 | 491 | A00841 | A01006 | 708 |
| A00841 | A01027 | 616 | A00841 | A01042 | 414 |
| A00841 | A01069 | 491 | A00841 | A01075 | 323 |
| A00841 | A01088 | 362 | A00841 | A01090 | 400 |
| A00841 | A01101 | 176 | A00841 | A01116 | 344 |
| A00841 | A01140 | 286 | A00841 | A01150 | 491 |
| A00841 | A01161 | 491 | A00841 | A01201 | 405 |
| A00841 | A01208 | 185 | A00841 | A01209 | 322 |
| A00841 | A01214 | 232 | A00841 | A01215 | 461 |
| A00841 | A01221 | 306 | A00841 | A01232 | 769 |
| A00841 | A01234 | 490 | A00841 | A01261 | 238 |
| A00841 | A01293 | 708 | A00841 | A01304 | 177 |

|        |        |     |        |        |     |
|--------|--------|-----|--------|--------|-----|
| A00841 | A01311 | 754 | A00841 | A01353 | 411 |
| A00841 | A01431 | 614 | A00841 | A01439 | 491 |
| A00841 | A01458 | 465 | A00841 | A01492 | 491 |
| A00841 | A01506 | 191 | A00841 | A01524 | 899 |
| A00841 | A01538 | 200 | A00841 | A01551 | 484 |
| A00841 | A01558 | 369 | A00841 | A01569 | 254 |
| A00841 | A01577 | 477 | A00841 | A01598 | 491 |
| A00841 | A01612 | 152 | A00841 | A01613 | 491 |
| A00841 | A01614 | 238 | A00841 | A01668 | 491 |
| A00841 | A01704 | 188 | A00841 | A01705 | 322 |
| A00841 | A01748 | 491 | A00841 | A01779 | 338 |
| A00841 | A01788 | 491 | A00841 | A01797 | 491 |
| A00841 | A01800 | 124 | A00841 | A01802 | 63  |
| A00841 | A01803 | 123 | A00841 | A01805 | 319 |
| A00841 | A01894 | 695 | A00841 | A01985 | 179 |
| A00841 | A02671 | 154 | A00841 | A02812 | 180 |
| A00841 | A02896 | 455 | A00841 | A02916 | 480 |
| A00841 | A02944 | 358 | A00841 | A02961 | 198 |
| A00841 | A02971 | 179 | A00841 | A02988 | 245 |
| A00841 | A03304 | 258 | A00841 | A03435 | 255 |
| A00841 | A03454 | 452 | A00841 | A03473 | 490 |
| A00841 | A03494 | 457 | A00841 | A03516 | 377 |
| A00841 | A03547 | 218 | A00841 | A03549 | 238 |
| A00841 | A03550 | 63  | A00841 | A03557 | 477 |
| A00841 | A03562 | 489 | A00841 | A03577 | 200 |
| A00841 | A03608 | 491 | A00841 | A03609 | 241 |
| A00841 | A03734 | 353 | A00841 | A03740 | 483 |
| A00841 | A03752 | 234 | A00841 | A03809 | 303 |
| A00841 | A04286 | 157 | A00841 | A04788 | 457 |
| A00841 | A04885 | 362 | A00841 | A05216 | 483 |
| A00841 | A05227 | 610 | A00841 | A05318 | 345 |
| A00841 | A05348 | 303 | A00841 | A05742 | 429 |
| A00841 | A05827 | 360 | A00841 | A06287 | 477 |
| A00841 | A06320 | 246 | A00841 | A06390 | 218 |
| A00841 | A06466 | 490 | A00841 | A06543 | 491 |
| A00841 | A06555 | 160 | A00841 | A06589 | 208 |
| A00841 | A06606 | 171 | A00841 | A06637 | 491 |
| A00841 | A07311 | 486 | A00841 | A07317 | 226 |
| A00841 | A07451 | 205 | A00841 | A07524 | 446 |
| A00841 | A07539 | 218 | A00841 | A07670 | 446 |
| A00841 | A07706 | 439 | A00841 | A07708 | 205 |
| A00841 | A07744 | 491 | A00841 | A07798 | 168 |
| A00841 | A07881 | 613 | A00841 | A07911 | 708 |
| A00841 | A08098 | 491 | A00841 | A08178 | 481 |
| A00841 | A08228 | 615 | A00841 | A08357 | 394 |
| A00841 | A08491 | 185 | A00841 | A08539 | 339 |

|        |        |     |        |        |     |
|--------|--------|-----|--------|--------|-----|
| A00841 | A08542 | 303 | A00841 | A08548 | 318 |
| A00841 | A08602 | 945 | A00841 | A08675 | 218 |
| A00841 | A08763 | 420 | A00841 | A09178 | 218 |
| A00841 | A09292 | 171 | A00841 | A09297 | 276 |
| A00841 | A09436 | 115 | A00841 | A09952 | 427 |
| A00841 | A11296 | 458 | A00841 | A11326 | 388 |
| A00841 | A11381 | 306 | A00841 | A11555 | 302 |
| A00841 | A12040 | 160 | A00841 | A12329 | 306 |
| A00841 | A12990 | 154 | A00841 | A13340 | 480 |
| A00841 | A13989 | 491 | A00841 | A14073 | 301 |
| A00841 | A14083 | 479 | A00841 | A14220 | 235 |
| A00841 | A14410 | 223 | A00841 | A14516 | 308 |
| A00841 | A14596 | 152 | A00841 | A14699 | 791 |
| A00841 | A14778 | 616 | A00841 | A15235 | 251 |
| A00841 | A15375 | 414 | A00841 | A15422 | 232 |
| A00841 | A15660 | 491 | A00841 | A15662 | 351 |
| A00841 | A15684 | 491 | A00841 | A15746 | 419 |
| A00841 | A15937 | 480 | A00841 | A16048 | 480 |
| A00841 | A16104 | 180 | A00841 | A16218 | 265 |
| A00841 | A16259 | 238 | A00841 | A17156 | 159 |
| A00842 | A00953 | 191 | A00842 | A01081 | 379 |
| A00842 | A01086 | 423 | A00842 | A01399 | 353 |
| A00842 | A01448 | 263 | A00842 | A14073 | 168 |
| A00842 | A14479 | 299 | A00843 | A00848 | 491 |
| A00843 | A00878 | 313 | A00843 | A00970 | 491 |
| A00843 | A00971 | 235 | A00843 | A01042 | 262 |
| A00843 | A01069 | 491 | A00843 | A01090 | 201 |
| A00843 | A01112 | 469 | A00843 | A01113 | 382 |
| A00843 | A01115 | 491 | A00843 | A01150 | 249 |
| A00843 | A01166 | 467 | A00843 | A01192 | 388 |
| A00843 | A01194 | 491 | A00843 | A01206 | 391 |
| A00843 | A01215 | 400 | A00843 | A01234 | 475 |
| A00843 | A01243 | 260 | A00843 | A01291 | 450 |
| A00843 | A01311 | 251 | A00843 | A01354 | 465 |
| A00843 | A01384 | 165 | A00843 | A01451 | 224 |
| A00843 | A01468 | 484 | A00843 | A01470 | 469 |
| A00843 | A01506 | 458 | A00843 | A01539 | 424 |
| A00843 | A01541 | 374 | A00843 | A01548 | 334 |
| A00843 | A01569 | 491 | A00843 | A01577 | 485 |
| A00843 | A01579 | 210 | A00843 | A01637 | 358 |
| A00843 | A01649 | 455 | A00843 | A01650 | 182 |
| A00843 | A01684 | 208 | A00843 | A01707 | 389 |
| A00843 | A01917 | 429 | A00843 | A02202 | 180 |
| A00843 | A02215 | 193 | A00843 | A02232 | 334 |
| A00843 | A02353 | 167 | A00843 | A02639 | 296 |
| A00843 | A02737 | 490 | A00843 | A02877 | 358 |

|        |        |     |        |        |     |
|--------|--------|-----|--------|--------|-----|
| A00843 | A03321 | 440 | A00843 | A03446 | 390 |
| A00843 | A03477 | 406 | A00843 | A03567 | 462 |
| A00843 | A03586 | 420 | A00843 | A03740 | 249 |
| A00843 | A03863 | 252 | A00843 | A03886 | 279 |
| A00843 | A04697 | 167 | A00843 | A04905 | 168 |
| A00843 | A05029 | 486 | A00843 | A05508 | 174 |
| A00843 | A05645 | 291 | A00843 | A06279 | 458 |
| A00843 | A06398 | 316 | A00843 | A06489 | 400 |
| A00843 | A06690 | 252 | A00843 | A06892 | 260 |
| A00843 | A07163 | 170 | A00843 | A07247 | 216 |
| A00843 | A07594 | 445 | A00843 | A08061 | 490 |
| A00843 | A08261 | 369 | A00843 | A08357 | 369 |
| A00843 | A08390 | 171 | A00843 | A08991 | 312 |
| A00843 | A09101 | 291 | A00843 | A09593 | 308 |
| A00843 | A09641 | 441 | A00843 | A10238 | 486 |
| A00843 | A10532 | 486 | A00843 | A10847 | 346 |
| A00843 | A11372 | 424 | A00843 | A11409 | 457 |
| A00843 | A11657 | 327 | A00843 | A13210 | 335 |
| A00843 | A13465 | 461 | A00843 | A13609 | 356 |
| A00843 | A13989 | 480 | A00843 | A14006 | 462 |
| A00843 | A14073 | 215 | A00843 | A14525 | 152 |
| A00843 | A15660 | 483 | A00843 | A15684 | 472 |
| A00843 | A16531 | 177 | A00844 | A01468 | 180 |
| A00845 | A00945 | 219 | A00845 | A01028 | 177 |
| A00845 | A01178 | 221 | A00845 | A01423 | 313 |
| A00845 | A01615 | 299 | A00845 | A02895 | 229 |
| A00845 | A03763 | 171 | A00845 | A06297 | 152 |
| A00845 | A06785 | 270 | A00845 | A07190 | 172 |
| A00845 | A09427 | 301 | A00845 | A09581 | 223 |
| A00845 | A09665 | 345 | A00845 | A09686 | 340 |
| A00845 | A14594 | 367 | A00845 | A17059 | 307 |
| A00846 | A01074 | 260 | A00846 | A01404 | 480 |
| A00846 | A01431 | 447 | A00846 | A01612 | 296 |
| A00846 | A01679 | 216 | A00846 | A02061 | 177 |
| A00846 | A02083 | 299 | A00846 | A02214 | 228 |
| A00846 | A02320 | 152 | A00846 | A02524 | 345 |
| A00846 | A03086 | 119 | A00846 | A03581 | 196 |
| A00846 | A04281 | 151 | A00846 | A04331 | 183 |
| A00846 | A04548 | 185 | A00846 | A04574 | 193 |
| A00846 | A04823 | 201 | A00846 | A05210 | 251 |
| A00846 | A05332 | 456 | A00846 | A05435 | 430 |
| A00846 | A05609 | 302 | A00846 | A05689 | 226 |
| A00846 | A05786 | 188 | A00846 | A06517 | 226 |
| A00846 | A06650 | 447 | A00846 | A06772 | 339 |
| A00846 | A06810 | 188 | A00846 | A07124 | 154 |
| A00846 | A07222 | 267 | A00846 | A07311 | 899 |



|        |        |     |        |        |     |
|--------|--------|-----|--------|--------|-----|
| A00846 | A07571 | 396 | A00846 | A07624 | 302 |
| A00846 | A10061 | 188 | A00846 | A10394 | 252 |
| A00846 | A10483 | 302 | A00846 | A13102 | 294 |
| A00846 | A15655 | 249 | A00846 | A17134 | 561 |
| A00847 | A01149 | 491 | A00847 | A01578 | 163 |
| A00847 | A02833 | 162 | A00847 | A03237 | 398 |
| A00847 | A03742 | 491 | A00847 | A04004 | 171 |
| A00847 | A04174 | 235 | A00847 | A04715 | 414 |
| A00847 | A05029 | 465 | A00847 | A05425 | 200 |
| A00847 | A07026 | 188 | A00847 | A07232 | 334 |
| A00847 | A07880 | 375 | A00847 | A08365 | 272 |
| A00847 | A08391 | 491 | A00847 | A08402 | 246 |
| A00847 | A09135 | 174 | A00847 | A09311 | 312 |
| A00847 | A09340 | 235 | A00847 | A09977 | 286 |
| A00847 | A12248 | 419 | A00847 | A12492 | 172 |
| A00847 | A12501 | 491 | A00847 | A14272 | 408 |
| A00847 | A15367 | 491 | A00847 | A16261 | 356 |
| A00847 | A16497 | 488 | A00847 | A16635 | 430 |
| A00847 | A16969 | 351 | A00848 | A00853 | 343 |
| A00848 | A00856 | 490 | A00848 | A00871 | 491 |
| A00848 | A00883 | 491 | A00848 | A00916 | 491 |
| A00848 | A00922 | 156 | A00848 | A00923 | 485 |
| A00848 | A00932 | 356 | A00848 | A00954 | 405 |
| A00848 | A00970 | 722 | A00848 | A00980 | 63  |
| A00848 | A00996 | 348 | A00848 | A01000 | 428 |
| A00848 | A01017 | 435 | A00848 | A01020 | 235 |
| A00848 | A01040 | 265 | A00848 | A01042 | 466 |
| A00848 | A01069 | 491 | A00848 | A01075 | 490 |
| A00848 | A01088 | 198 | A00848 | A01091 | 251 |
| A00848 | A01101 | 488 | A00848 | A01111 | 240 |
| A00848 | A01112 | 489 | A00848 | A01115 | 491 |
| A00848 | A01120 | 152 | A00848 | A01127 | 311 |
| A00848 | A01136 | 324 | A00848 | A01150 | 491 |
| A00848 | A01159 | 260 | A00848 | A01166 | 491 |
| A00848 | A01184 | 229 | A00848 | A01194 | 491 |
| A00848 | A01201 | 396 | A00848 | A01206 | 491 |
| A00848 | A01215 | 489 | A00848 | A01219 | 268 |
| A00848 | A01221 | 215 | A00848 | A01224 | 283 |
| A00848 | A01234 | 491 | A00848 | A01243 | 491 |
| A00848 | A01249 | 201 | A00848 | A01291 | 491 |
| A00848 | A01304 | 395 | A00848 | A01311 | 470 |
| A00848 | A01335 | 463 | A00848 | A01349 | 246 |
| A00848 | A01354 | 491 | A00848 | A01384 | 452 |
| A00848 | A01418 | 420 | A00848 | A01420 | 436 |
| A00848 | A01425 | 489 | A00848 | A01431 | 491 |
| A00848 | A01439 | 162 | A00848 | A01455 | 262 |

|        |        |     |        |        |     |
|--------|--------|-----|--------|--------|-----|
| A00848 | A01464 | 218 | A00848 | A01468 | 491 |
| A00848 | A01470 | 491 | A00848 | A01492 | 491 |
| A00848 | A01495 | 452 | A00848 | A01506 | 721 |
| A00848 | A01539 | 491 | A00848 | A01555 | 447 |
| A00848 | A01558 | 273 | A00848 | A01569 | 491 |
| A00848 | A01577 | 643 | A00848 | A01579 | 414 |
| A00848 | A01597 | 188 | A00848 | A01598 | 491 |
| A00848 | A01614 | 480 | A00848 | A01649 | 491 |
| A00848 | A01684 | 721 | A00848 | A01707 | 484 |
| A00848 | A01770 | 490 | A00848 | A01871 | 491 |
| A00848 | A01917 | 721 | A00848 | A02121 | 317 |
| A00848 | A02564 | 229 | A00848 | A02877 | 63  |
| A00848 | A02896 | 343 | A00848 | A03439 | 251 |
| A00848 | A03446 | 491 | A00848 | A03453 | 307 |
| A00848 | A03456 | 380 | A00848 | A03472 | 690 |
| A00848 | A03476 | 357 | A00848 | A03477 | 151 |
| A00848 | A03494 | 229 | A00848 | A03567 | 491 |
| A00848 | A03572 | 443 | A00848 | A03586 | 167 |
| A00848 | A03738 | 491 | A00848 | A03740 | 491 |
| A00848 | A03859 | 468 | A00848 | A03863 | 177 |
| A00848 | A03958 | 224 | A00848 | A04013 | 299 |
| A00848 | A04021 | 224 | A00848 | A05025 | 659 |
| A00848 | A05154 | 208 | A00848 | A05417 | 218 |
| A00848 | A05645 | 177 | A00848 | A05712 | 290 |
| A00848 | A06025 | 357 | A00848 | A06543 | 721 |
| A00848 | A06677 | 339 | A00848 | A06965 | 328 |
| A00848 | A07160 | 184 | A00848 | A07247 | 491 |
| A00848 | A07311 | 408 | A00848 | A07347 | 477 |
| A00848 | A07524 | 191 | A00848 | A07533 | 170 |
| A00848 | A07706 | 232 | A00848 | A07744 | 343 |
| A00848 | A08022 | 473 | A00848 | A08054 | 154 |
| A00848 | A08098 | 343 | A00848 | A08178 | 348 |
| A00848 | A08357 | 466 | A00848 | A08489 | 227 |
| A00848 | A08565 | 208 | A00848 | A08571 | 188 |
| A00848 | A08896 | 463 | A00848 | A08933 | 263 |
| A00848 | A09197 | 193 | A00848 | A09334 | 441 |
| A00848 | A09685 | 208 | A00848 | A09869 | 489 |
| A00848 | A10006 | 193 | A00848 | A10165 | 199 |
| A00848 | A10266 | 193 | A00848 | A10331 | 265 |
| A00848 | A10532 | 491 | A00848 | A10624 | 485 |
| A00848 | A11277 | 235 | A00848 | A11297 | 456 |
| A00848 | A11302 | 411 | A00848 | A11312 | 293 |
| A00848 | A11316 | 470 | A00848 | A11403 | 154 |
| A00848 | A11409 | 489 | A00848 | A11476 | 452 |
| A00848 | A11480 | 353 | A00848 | A11704 | 246 |
| A00848 | A12328 | 179 | A00848 | A12839 | 486 |

|        |        |     |        |        |     |
|--------|--------|-----|--------|--------|-----|
| A00848 | A12937 | 180 | A00848 | A13465 | 313 |
| A00848 | A13609 | 452 | A00848 | A13674 | 208 |
| A00848 | A13805 | 167 | A00848 | A13829 | 299 |
| A00848 | A13870 | 319 | A00848 | A13989 | 491 |
| A00848 | A14006 | 481 | A00848 | A14073 | 480 |
| A00848 | A14152 | 335 | A00848 | A14216 | 477 |
| A00848 | A14596 | 491 | A00848 | A14597 | 418 |
| A00848 | A14659 | 369 | A00848 | A15156 | 283 |
| A00848 | A15188 | 330 | A00848 | A15297 | 246 |
| A00848 | A15660 | 491 | A00848 | A15684 | 490 |
| A00848 | A15696 | 435 | A00848 | A15717 | 229 |
| A00848 | A15747 | 176 | A00848 | A15840 | 183 |
| A00848 | A16096 | 200 | A00848 | A16105 | 296 |
| A00848 | A16118 | 319 | A00848 | A16218 | 163 |
| A00848 | A16293 | 238 | A00848 | A16822 | 339 |
| A00848 | A17138 | 290 | A00849 | A00878 | 346 |
| A00849 | A00915 | 272 | A00849 | A00916 | 180 |
| A00849 | A00922 | 347 | A00849 | A00928 | 306 |
| A00849 | A00953 | 313 | A00849 | A00967 | 364 |
| A00849 | A00974 | 247 | A00849 | A00983 | 202 |
| A00849 | A00984 | 180 | A00849 | A00985 | 469 |
| A00849 | A00987 | 449 | A00849 | A00990 | 224 |
| A00849 | A00998 | 427 | A00849 | A01013 | 388 |
| A00849 | A01022 | 462 | A00849 | A01027 | 247 |
| A00849 | A01075 | 185 | A00849 | A01086 | 447 |
| A00849 | A01102 | 204 | A00849 | A01108 | 247 |
| A00849 | A01115 | 313 | A00849 | A01150 | 591 |
| A00849 | A01156 | 462 | A00849 | A01161 | 592 |
| A00849 | A01169 | 393 | A00849 | A01204 | 247 |
| A00849 | A01211 | 486 | A00849 | A01215 | 467 |
| A00849 | A01234 | 473 | A00849 | A01245 | 340 |
| A00849 | A01287 | 590 | A00849 | A01291 | 373 |
| A00849 | A01346 | 252 | A00849 | A01352 | 305 |
| A00849 | A01353 | 180 | A00849 | A01380 | 212 |
| A00849 | A01385 | 465 | A00849 | A01387 | 182 |
| A00849 | A01393 | 172 | A00849 | A01394 | 208 |
| A00849 | A01399 | 269 | A00849 | A01431 | 422 |
| A00849 | A01443 | 247 | A00849 | A01468 | 485 |
| A00849 | A01496 | 227 | A00849 | A01502 | 486 |
| A00849 | A01540 | 491 | A00849 | A01551 | 479 |
| A00849 | A01569 | 277 | A00849 | A01572 | 199 |
| A00849 | A01577 | 188 | A00849 | A01579 | 345 |
| A00849 | A01582 | 491 | A00849 | A01585 | 343 |
| A00849 | A01586 | 230 | A00849 | A01627 | 491 |
| A00849 | A01629 | 268 | A00849 | A01649 | 204 |
| A00849 | A01654 | 488 | A00849 | A01667 | 480 |

|        |        |     |        |        |     |
|--------|--------|-----|--------|--------|-----|
| A00849 | A01704 | 168 | A00849 | A01711 | 480 |
| A00849 | A01746 | 368 | A00849 | A01815 | 245 |
| A00849 | A01819 | 466 | A00849 | A01825 | 396 |
| A00849 | A01832 | 159 | A00849 | A01833 | 245 |
| A00849 | A01870 | 347 | A00849 | A02215 | 179 |
| A00849 | A02340 | 188 | A00849 | A02380 | 168 |
| A00849 | A02477 | 489 | A00849 | A02565 | 262 |
| A00849 | A02769 | 154 | A00849 | A02800 | 151 |
| A00849 | A02843 | 176 | A00849 | A02863 | 168 |
| A00849 | A02945 | 249 | A00849 | A02994 | 585 |
| A00849 | A02996 | 235 | A00849 | A03024 | 185 |
| A00849 | A03244 | 217 | A00849 | A03280 | 335 |
| A00849 | A03290 | 245 | A00849 | A03304 | 152 |
| A00849 | A03440 | 160 | A00849 | A03669 | 198 |
| A00849 | A03740 | 308 | A00849 | A03799 | 213 |
| A00849 | A03807 | 198 | A00849 | A03856 | 408 |
| A00849 | A03959 | 321 | A00849 | A03981 | 279 |
| A00849 | A04023 | 229 | A00849 | A04056 | 408 |
| A00849 | A04072 | 174 | A00849 | A04337 | 358 |
| A00849 | A04519 | 195 | A00849 | A04563 | 160 |
| A00849 | A04717 | 245 | A00849 | A04782 | 470 |
| A00849 | A04838 | 382 | A00849 | A05227 | 445 |
| A00849 | A05305 | 245 | A00849 | A05437 | 235 |
| A00849 | A05862 | 151 | A00849 | A06091 | 221 |
| A00849 | A06637 | 285 | A00849 | A06652 | 227 |
| A00849 | A07166 | 295 | A00849 | A07403 | 213 |
| A00849 | A07442 | 479 | A00849 | A07773 | 238 |
| A00849 | A07799 | 176 | A00849 | A07894 | 348 |
| A00849 | A08222 | 303 | A00849 | A08319 | 160 |
| A00849 | A08460 | 317 | A00849 | A08623 | 288 |
| A00849 | A08954 | 190 | A00849 | A09005 | 219 |
| A00849 | A09307 | 159 | A00849 | A09321 | 227 |
| A00849 | A09447 | 168 | A00849 | A09507 | 364 |
| A00849 | A09617 | 249 | A00849 | A10359 | 171 |
| A00849 | A10796 | 168 | A00849 | A11513 | 462 |
| A00849 | A11677 | 247 | A00849 | A12027 | 288 |
| A00849 | A12179 | 235 | A00849 | A12285 | 208 |
| A00849 | A12940 | 288 | A00849 | A13117 | 165 |
| A00849 | A13521 | 213 | A00849 | A13728 | 270 |
| A00849 | A13782 | 256 | A00849 | A13989 | 151 |
| A00849 | A14073 | 440 | A00849 | A14080 | 344 |
| A00849 | A14236 | 409 | A00849 | A14374 | 160 |
| A00849 | A14416 | 468 | A00849 | A14432 | 159 |
| A00849 | A14442 | 401 | A00849 | A14536 | 183 |
| A00849 | A14699 | 591 | A00849 | A14778 | 527 |
| A00849 | A14779 | 152 | A00849 | A14848 | 154 |

|        |        |     |        |        |     |
|--------|--------|-----|--------|--------|-----|
| A00849 | A15075 | 317 | A00849 | A15076 | 317 |
| A00849 | A15121 | 208 | A00849 | A15266 | 185 |
| A00849 | A15295 | 308 | A00849 | A15365 | 207 |
| A00849 | A15394 | 352 | A00849 | A15395 | 486 |
| A00849 | A15538 | 235 | A00849 | A15601 | 353 |
| A00849 | A15606 | 221 | A00849 | A15624 | 401 |
| A00849 | A15668 | 160 | A00849 | A15684 | 449 |
| A00849 | A15806 | 285 | A00849 | A15917 | 491 |
| A00849 | A15974 | 199 | A00849 | A15981 | 446 |
| A00849 | A16269 | 193 | A00849 | A16495 | 198 |
| A00849 | A16587 | 247 | A00849 | A17066 | 229 |
| A00849 | A17078 | 177 | A00849 | A17079 | 245 |
| A00850 | A00888 | 339 | A00850 | A00968 | 173 |
| A00850 | A01189 | 313 | A00850 | A01257 | 291 |
| A00850 | A01360 | 162 | A00850 | A02156 | 252 |
| A00850 | A02309 | 238 | A00850 | A02364 | 179 |
| A00850 | A02673 | 200 | A00850 | A02772 | 276 |
| A00850 | A03157 | 213 | A00850 | A03799 | 373 |
| A00850 | A03818 | 168 | A00850 | A03903 | 328 |
| A00850 | A03963 | 323 | A00850 | A04169 | 174 |
| A00850 | A05205 | 372 | A00850 | A05210 | 268 |
| A00850 | A05435 | 360 | A00850 | A06264 | 327 |
| A00850 | A07145 | 177 | A00850 | A07200 | 463 |
| A00850 | A08823 | 344 | A00850 | A09078 | 196 |
| A00850 | A10394 | 360 | A00850 | A13459 | 319 |
| A00850 | A13822 | 412 | A00850 | A14372 | 162 |
| A00850 | A14430 | 210 | A00850 | A14496 | 232 |
| A00850 | A14525 | 151 | A00850 | A14925 | 168 |
| A00850 | A15372 | 281 | A00850 | A16219 | 232 |
| A00850 | A16555 | 308 | A00851 | A00876 | 201 |
| A00851 | A00923 | 154 | A00851 | A01140 | 491 |
| A00851 | A01178 | 256 | A00851 | A01243 | 443 |
| A00851 | A01289 | 180 | A00851 | A01291 | 402 |
| A00851 | A01569 | 223 | A00851 | A01702 | 488 |
| A00851 | A01822 | 288 | A00851 | A02494 | 269 |
| A00851 | A03981 | 245 | A00851 | A04715 | 173 |
| A00851 | A06601 | 157 | A00851 | A06602 | 489 |
| A00851 | A07422 | 899 | A00851 | A07583 | 286 |
| A00851 | A09423 | 204 | A00851 | A09622 | 212 |
| A00851 | A10319 | 283 | A00851 | A10328 | 165 |
| A00851 | A11277 | 402 | A00851 | A11593 | 271 |
| A00851 | A13989 | 212 | A00851 | A14246 | 154 |
| A00851 | A14597 | 296 | A00851 | A15225 | 212 |
| A00851 | A16592 | 477 | A00852 | A00905 | 414 |
| A00852 | A01283 | 218 | A00852 | A01309 | 414 |
| A00852 | A01310 | 368 | A00852 | A01451 | 484 |

|        |        |     |        |        |     |
|--------|--------|-----|--------|--------|-----|
| A00852 | A01546 | 202 | A00852 | A01568 | 391 |
| A00852 | A01578 | 288 | A00852 | A01587 | 281 |
| A00852 | A01595 | 193 | A00852 | A01596 | 488 |
| A00852 | A01612 | 279 | A00852 | A01660 | 462 |
| A00852 | A01676 | 474 | A00852 | A01687 | 301 |
| A00852 | A01692 | 344 | A00852 | A01693 | 252 |
| A00852 | A01717 | 224 | A00852 | A01835 | 240 |
| A00852 | A01901 | 301 | A00852 | A01936 | 172 |
| A00852 | A01985 | 168 | A00852 | A02228 | 486 |
| A00852 | A02502 | 167 | A00852 | A02642 | 218 |
| A00852 | A02734 | 165 | A00852 | A02874 | 488 |
| A00852 | A03055 | 218 | A00852 | A03434 | 369 |
| A00852 | A03496 | 196 | A00852 | A03569 | 279 |
| A00852 | A04182 | 165 | A00852 | A05691 | 165 |
| A00852 | A06907 | 451 | A00852 | A07153 | 330 |
| A00852 | A07201 | 191 | A00852 | A09433 | 240 |
| A00852 | A09984 | 443 | A00852 | A10401 | 384 |
| A00852 | A11099 | 152 | A00852 | A11346 | 352 |
| A00852 | A13146 | 358 | A00852 | A14006 | 318 |
| A00852 | A14009 | 212 | A00852 | A14192 | 277 |
| A00852 | A14193 | 491 | A00852 | A14253 | 196 |
| A00852 | A14278 | 187 | A00852 | A14279 | 216 |
| A00852 | A14303 | 363 | A00853 | A00970 | 343 |
| A00853 | A00981 | 402 | A00853 | A01093 | 435 |
| A00853 | A01149 | 394 | A00853 | A01506 | 343 |
| A00853 | A01559 | 193 | A00853 | A01577 | 343 |
| A00853 | A01684 | 343 | A00853 | A01705 | 172 |
| A00853 | A01822 | 277 | A00853 | A01917 | 343 |
| A00853 | A01995 | 299 | A00853 | A02178 | 236 |
| A00853 | A02209 | 396 | A00853 | A02219 | 945 |
| A00853 | A02352 | 193 | A00853 | A02810 | 168 |
| A00853 | A02877 | 324 | A00853 | A02896 | 343 |
| A00853 | A03390 | 488 | A00853 | A03401 | 490 |
| A00853 | A03472 | 177 | A00853 | A03710 | 156 |
| A00853 | A04190 | 265 | A00853 | A04318 | 196 |
| A00853 | A04334 | 366 | A00853 | A04534 | 229 |
| A00853 | A05418 | 229 | A00853 | A05621 | 362 |
| A00853 | A05967 | 446 | A00853 | A06001 | 160 |
| A00853 | A06223 | 313 | A00853 | A06288 | 196 |
| A00853 | A06502 | 333 | A00853 | A06543 | 343 |
| A00853 | A07054 | 488 | A00853 | A07232 | 334 |
| A00853 | A07242 | 383 | A00853 | A07339 | 479 |
| A00853 | A07732 | 334 | A00853 | A07744 | 343 |
| A00853 | A08064 | 185 | A00853 | A08098 | 343 |
| A00853 | A08131 | 400 | A00853 | A08178 | 343 |
| A00853 | A09078 | 334 | A00853 | A09227 | 294 |

|        |        |     |        |        |     |
|--------|--------|-----|--------|--------|-----|
| A00853 | A09739 | 200 | A00853 | A09840 | 168 |
| A00853 | A09997 | 254 | A00853 | A10549 | 154 |
| A00853 | A11367 | 243 | A00853 | A11611 | 435 |
| A00853 | A11882 | 229 | A00853 | A12018 | 243 |
| A00853 | A12111 | 490 | A00853 | A12365 | 196 |
| A00853 | A12550 | 265 | A00853 | A14009 | 334 |
| A00853 | A14288 | 334 | A00853 | A14678 | 465 |
| A00853 | A14714 | 328 | A00853 | A15685 | 249 |
| A00853 | A15926 | 152 | A00853 | A16635 | 368 |
| A00854 | A00865 | 468 | A00854 | A00964 | 252 |
| A00854 | A00972 | 447 | A00854 | A00977 | 296 |
| A00854 | A01006 | 154 | A00854 | A01016 | 270 |
| A00854 | A01074 | 293 | A00854 | A01102 | 180 |
| A00854 | A01107 | 374 | A00854 | A01154 | 461 |
| A00854 | A01217 | 296 | A00854 | A01220 | 224 |
| A00854 | A01221 | 461 | A00854 | A01238 | 274 |
| A00854 | A01243 | 401 | A00854 | A01252 | 228 |
| A00854 | A01306 | 232 | A00854 | A01313 | 307 |
| A00854 | A01352 | 355 | A00854 | A01362 | 385 |
| A00854 | A01365 | 283 | A00854 | A01406 | 312 |
| A00854 | A01411 | 235 | A00854 | A01412 | 430 |
| A00854 | A01416 | 273 | A00854 | A01418 | 321 |
| A00854 | A01755 | 263 | A00854 | A02051 | 224 |
| A00854 | A03601 | 409 | A00854 | A06064 | 367 |
| A00854 | A06832 | 468 | A00854 | A06861 | 269 |
| A00854 | A07312 | 263 | A00854 | A09221 | 407 |
| A00854 | A09644 | 217 | A00854 | A09735 | 213 |
| A00854 | A11688 | 257 | A00854 | A12821 | 276 |
| A00854 | A14471 | 172 | A00854 | A14566 | 152 |
| A00854 | A14597 | 185 | A00854 | A15498 | 188 |
| A00854 | A15543 | 217 | A00855 | A00864 | 157 |
| A00855 | A01011 | 439 | A00855 | A01074 | 317 |
| A00855 | A01105 | 695 | A00855 | A01166 | 358 |
| A00855 | A01205 | 490 | A00855 | A01216 | 247 |
| A00855 | A01366 | 205 | A00855 | A01454 | 152 |
| A00855 | A01484 | 272 | A00855 | A01508 | 479 |
| A00855 | A01557 | 213 | A00855 | A01622 | 694 |
| A00855 | A01630 | 406 | A00855 | A01657 | 204 |
| A00855 | A01679 | 317 | A00855 | A01689 | 438 |
| A00855 | A01826 | 251 | A00855 | A02017 | 235 |
| A00855 | A02352 | 159 | A00855 | A03095 | 177 |
| A00855 | A03178 | 257 | A00855 | A03297 | 316 |
| A00855 | A03333 | 199 | A00855 | A03406 | 456 |
| A00855 | A03518 | 168 | A00855 | A03710 | 695 |
| A00855 | A03769 | 252 | A00855 | A03861 | 278 |
| A00855 | A03909 | 252 | A00855 | A04424 | 332 |

|        |        |     |        |        |     |
|--------|--------|-----|--------|--------|-----|
| A00855 | A05332 | 317 | A00855 | A05609 | 317 |
| A00855 | A06264 | 288 | A00855 | A06293 | 423 |
| A00855 | A06385 | 176 | A00855 | A06819 | 193 |
| A00855 | A07222 | 317 | A00855 | A07274 | 465 |
| A00855 | A07333 | 640 | A00855 | A07571 | 317 |
| A00855 | A07824 | 469 | A00855 | A07825 | 371 |
| A00855 | A07974 | 317 | A00855 | A08097 | 532 |
| A00855 | A08136 | 281 | A00855 | A08289 | 163 |
| A00855 | A09340 | 438 | A00855 | A09677 | 327 |
| A00855 | A09713 | 255 | A00855 | A09781 | 371 |
| A00855 | A10593 | 243 | A00855 | A12415 | 371 |
| A00855 | A14918 | 330 | A00855 | A15221 | 174 |
| A00855 | A15232 | 371 | A00855 | A15258 | 228 |
| A00855 | A15260 | 327 | A00855 | A15277 | 294 |
| A00855 | A15313 | 263 | A00856 | A00858 | 491 |
| A00856 | A00870 | 481 | A00856 | A00879 | 465 |
| A00856 | A00881 | 339 | A00856 | A00883 | 475 |
| A00856 | A00902 | 308 | A00856 | A00911 | 713 |
| A00856 | A00916 | 488 | A00856 | A00918 | 249 |
| A00856 | A00919 | 477 | A00856 | A00934 | 491 |
| A00856 | A00942 | 271 | A00856 | A00954 | 491 |
| A00856 | A00964 | 463 | A00856 | A01010 | 168 |
| A00856 | A01019 | 263 | A00856 | A01020 | 491 |
| A00856 | A01029 | 462 | A00856 | A01032 | 491 |
| A00856 | A01050 | 362 | A00856 | A01061 | 274 |
| A00856 | A01068 | 247 | A00856 | A01072 | 208 |
| A00856 | A01075 | 491 | A00856 | A01079 | 319 |
| A00856 | A01082 | 191 | A00856 | A01084 | 384 |
| A00856 | A01086 | 457 | A00856 | A01087 | 485 |
| A00856 | A01088 | 491 | A00856 | A01098 | 249 |
| A00856 | A01106 | 232 | A00856 | A01116 | 486 |
| A00856 | A01136 | 473 | A00856 | A01166 | 480 |
| A00856 | A01179 | 180 | A00856 | A01184 | 477 |
| A00856 | A01202 | 235 | A00856 | A01206 | 491 |
| A00856 | A01214 | 785 | A00856 | A01234 | 491 |
| A00856 | A01289 | 474 | A00856 | A01291 | 224 |
| A00856 | A01296 | 673 | A00856 | A01311 | 384 |
| A00856 | A01320 | 777 | A00856 | A01327 | 587 |
| A00856 | A01349 | 232 | A00856 | A01374 | 224 |
| A00856 | A01381 | 490 | A00856 | A01384 | 416 |
| A00856 | A01398 | 177 | A00856 | A01401 | 327 |
| A00856 | A01425 | 285 | A00856 | A01429 | 353 |
| A00856 | A01434 | 170 | A00856 | A01468 | 491 |
| A00856 | A01470 | 491 | A00856 | A01492 | 563 |
| A00856 | A01500 | 488 | A00856 | A01503 | 488 |
| A00856 | A01506 | 477 | A00856 | A01507 | 479 |



|        |        |     |        |        |     |
|--------|--------|-----|--------|--------|-----|
| A00856 | A01514 | 274 | A00856 | A01538 | 367 |
| A00856 | A01555 | 485 | A00856 | A01572 | 190 |
| A00856 | A01598 | 488 | A00856 | A01614 | 385 |
| A00856 | A01646 | 218 | A00856 | A01649 | 395 |
| A00856 | A01652 | 224 | A00856 | A01684 | 477 |
| A00856 | A01988 | 378 | A00856 | A02050 | 165 |
| A00856 | A02064 | 491 | A00856 | A02494 | 210 |
| A00856 | A02502 | 452 | A00856 | A02698 | 472 |
| A00856 | A02709 | 196 | A00856 | A03065 | 481 |
| A00856 | A03398 | 484 | A00856 | A03421 | 434 |
| A00856 | A03451 | 491 | A00856 | A03496 | 353 |
| A00856 | A03601 | 193 | A00856 | A03625 | 240 |
| A00856 | A03734 | 491 | A00856 | A03954 | 227 |
| A00856 | A03959 | 154 | A00856 | A04520 | 204 |
| A00856 | A04687 | 586 | A00856 | A04759 | 165 |
| A00856 | A04808 | 165 | A00856 | A06543 | 324 |
| A00856 | A06689 | 229 | A00856 | A06752 | 313 |
| A00856 | A06881 | 252 | A00856 | A07004 | 174 |
| A00856 | A07145 | 185 | A00856 | A07347 | 401 |
| A00856 | A07348 | 162 | A00856 | A07524 | 302 |
| A00856 | A07655 | 243 | A00856 | A07695 | 260 |
| A00856 | A07700 | 445 | A00856 | A07706 | 485 |
| A00856 | A07884 | 447 | A00856 | A07924 | 416 |
| A00856 | A08022 | 491 | A00856 | A08327 | 249 |
| A00856 | A08382 | 443 | A00856 | A08409 | 177 |
| A00856 | A08418 | 258 | A00856 | A08439 | 469 |
| A00856 | A08491 | 372 | A00856 | A08553 | 346 |
| A00856 | A08976 | 390 | A00856 | A08996 | 313 |
| A00856 | A09133 | 335 | A00856 | A09590 | 230 |
| A00856 | A09705 | 361 | A00856 | A10250 | 398 |
| A00856 | A10538 | 310 | A00856 | A11160 | 422 |
| A00856 | A11301 | 307 | A00856 | A11395 | 486 |
| A00856 | A12217 | 185 | A00856 | A12247 | 160 |
| A00856 | A12365 | 460 | A00856 | A12579 | 230 |
| A00856 | A12971 | 174 | A00856 | A13617 | 263 |
| A00856 | A13989 | 491 | A00856 | A14263 | 180 |
| A00856 | A14449 | 520 | A00856 | A14594 | 228 |
| A00856 | A14634 | 152 | A00856 | A14655 | 491 |
| A00856 | A14827 | 274 | A00856 | A14879 | 283 |
| A00856 | A15241 | 154 | A00856 | A15266 | 311 |
| A00856 | A15297 | 210 | A00856 | A15559 | 353 |
| A00856 | A15606 | 216 | A00856 | A15772 | 171 |
| A00856 | A15943 | 221 | A00856 | A15946 | 423 |
| A00856 | A16067 | 329 | A00856 | A16109 | 265 |
| A00856 | A16343 | 160 | A00856 | A16624 | 274 |
| A00856 | A16626 | 172 | A00856 | A16664 | 179 |

|        |        |     |        |        |     |
|--------|--------|-----|--------|--------|-----|
| A00856 | A16695 | 165 | A00856 | A16703 | 160 |
| A00856 | A16707 | 215 | A00856 | A16772 | 489 |
| A00857 | A01306 | 163 | A00857 | A01741 | 173 |
| A00857 | A01969 | 386 | A00857 | A02179 | 236 |
| A00857 | A03070 | 207 | A00857 | A06001 | 475 |
| A00857 | A06280 | 473 | A00857 | A11817 | 366 |
| A00857 | A14449 | 234 | A00857 | A14570 | 470 |
| A00858 | A00860 | 714 | A00858 | A00866 | 156 |
| A00858 | A00868 | 491 | A00858 | A00881 | 542 |
| A00858 | A00883 | 567 | A00858 | A00903 | 491 |
| A00858 | A00919 | 490 | A00858 | A00923 | 374 |
| A00858 | A00934 | 486 | A00858 | A00954 | 491 |
| A00858 | A00964 | 458 | A00858 | A00975 | 199 |
| A00858 | A00978 | 481 | A00858 | A01007 | 706 |
| A00858 | A01019 | 540 | A00858 | A01020 | 491 |
| A00858 | A01032 | 477 | A00858 | A01057 | 281 |
| A00858 | A01075 | 491 | A00858 | A01079 | 218 |
| A00858 | A01084 | 200 | A00858 | A01087 | 491 |
| A00858 | A01116 | 491 | A00858 | A01147 | 388 |
| A00858 | A01179 | 346 | A00858 | A01184 | 490 |
| A00858 | A01195 | 541 | A00858 | A01200 | 709 |
| A00858 | A01206 | 491 | A00858 | A01212 | 483 |
| A00858 | A01234 | 491 | A00858 | A01304 | 457 |
| A00858 | A01309 | 182 | A00858 | A01325 | 434 |
| A00858 | A01329 | 172 | A00858 | A01349 | 267 |
| A00858 | A01383 | 394 | A00858 | A01385 | 430 |
| A00858 | A01398 | 542 | A00858 | A01401 | 714 |
| A00858 | A01429 | 201 | A00858 | A01468 | 491 |
| A00858 | A01500 | 542 | A00858 | A01503 | 558 |
| A00858 | A01544 | 262 | A00858 | A01555 | 420 |
| A00858 | A01576 | 490 | A00858 | A01612 | 171 |
| A00858 | A01644 | 443 | A00858 | A01720 | 474 |
| A00858 | A01741 | 475 | A00858 | A01832 | 468 |
| A00858 | A02003 | 249 | A00858 | A03175 | 272 |
| A00858 | A03191 | 475 | A00858 | A03207 | 351 |
| A00858 | A03306 | 258 | A00858 | A03307 | 179 |
| A00858 | A03526 | 418 | A00858 | A03725 | 232 |
| A00858 | A03734 | 480 | A00858 | A04106 | 179 |
| A00858 | A04622 | 270 | A00858 | A04648 | 539 |
| A00858 | A04687 | 156 | A00858 | A04753 | 238 |
| A00858 | A05027 | 441 | A00858 | A05528 | 439 |
| A00858 | A06597 | 188 | A00858 | A06803 | 540 |
| A00858 | A07076 | 469 | A00858 | A07311 | 899 |
| A00858 | A07347 | 491 | A00858 | A07348 | 294 |
| A00858 | A07497 | 163 | A00858 | A07520 | 443 |
| A00858 | A07670 | 541 | A00858 | A07677 | 307 |

|        |        |     |        |        |     |
|--------|--------|-----|--------|--------|-----|
| A00858 | A07697 | 177 | A00858 | A07700 | 486 |
| A00858 | A07706 | 490 | A00858 | A07850 | 527 |
| A00858 | A07887 | 533 | A00858 | A07920 | 468 |
| A00858 | A08022 | 491 | A00858 | A08362 | 152 |
| A00858 | A08381 | 490 | A00858 | A08382 | 491 |
| A00858 | A08383 | 532 | A00858 | A08430 | 201 |
| A00858 | A08439 | 491 | A00858 | A08518 | 488 |
| A00858 | A08552 | 256 | A00858 | A08553 | 491 |
| A00858 | A08818 | 156 | A00858 | A08976 | 266 |
| A00858 | A08996 | 291 | A00858 | A09010 | 491 |
| A00858 | A09292 | 441 | A00858 | A09502 | 156 |
| A00858 | A09619 | 480 | A00858 | A09708 | 274 |
| A00858 | A09712 | 485 | A00858 | A10235 | 217 |
| A00858 | A10642 | 291 | A00858 | A10829 | 201 |
| A00858 | A11301 | 154 | A00858 | A11344 | 156 |
| A00858 | A11395 | 491 | A00858 | A11439 | 294 |
| A00858 | A11496 | 323 | A00858 | A11497 | 350 |
| A00858 | A11674 | 156 | A00858 | A11702 | 191 |
| A00858 | A11735 | 191 | A00858 | A11940 | 210 |
| A00858 | A12026 | 217 | A00858 | A12052 | 188 |
| A00858 | A12215 | 235 | A00858 | A12254 | 204 |
| A00858 | A12255 | 154 | A00858 | A12433 | 173 |
| A00858 | A12508 | 274 | A00858 | A12606 | 389 |
| A00858 | A12658 | 176 | A00858 | A12824 | 319 |
| A00858 | A12858 | 267 | A00858 | A13078 | 446 |
| A00858 | A13989 | 243 | A00858 | A14006 | 246 |
| A00858 | A14167 | 218 | A00858 | A14214 | 341 |
| A00858 | A14288 | 152 | A00858 | A14359 | 351 |
| A00858 | A14462 | 436 | A00858 | A14655 | 483 |
| A00858 | A14899 | 303 | A00858 | A15034 | 240 |
| A00858 | A15187 | 152 | A00858 | A15315 | 495 |
| A00858 | A15347 | 273 | A00858 | A15373 | 488 |
| A00858 | A15733 | 485 | A00858 | A15762 | 480 |
| A00858 | A15791 | 217 | A00858 | A15850 | 163 |
| A00858 | A15943 | 477 | A00858 | A15944 | 340 |
| A00858 | A15945 | 491 | A00858 | A15946 | 491 |
| A00858 | A16067 | 491 | A00858 | A16144 | 485 |
| A00858 | A16212 | 491 | A00858 | A16228 | 465 |
| A00858 | A16343 | 278 | A00858 | A16565 | 317 |
| A00858 | A16587 | 177 | A00858 | A16597 | 319 |
| A00858 | A16611 | 274 | A00858 | A16664 | 154 |
| A00858 | A16684 | 238 | A00858 | A16692 | 165 |
| A00858 | A16725 | 152 | A00858 | A16764 | 165 |
| A00858 | A16806 | 152 | A00858 | A16824 | 263 |
| A00858 | A16858 | 179 | A00858 | A16859 | 217 |
| A00858 | A16874 | 191 | A00858 | A16913 | 249 |

|        |        |     |        |        |     |
|--------|--------|-----|--------|--------|-----|
| A00858 | A16954 | 279 | A00858 | A17211 | 193 |
| A00859 | A01720 | 224 | A00859 | A01969 | 390 |
| A00859 | A07989 | 224 | A00859 | A14132 | 249 |
| A00859 | A15624 | 159 | A00859 | A15661 | 480 |
| A00859 | A15684 | 296 | A00859 | A16095 | 283 |
| A00859 | A16149 | 352 | A00860 | A00866 | 156 |
| A00860 | A00881 | 538 | A00860 | A00978 | 428 |
| A00860 | A01007 | 564 | A00860 | A01019 | 537 |
| A00860 | A01195 | 531 | A00860 | A01200 | 709 |
| A00860 | A01212 | 321 | A00860 | A01325 | 411 |
| A00860 | A01383 | 473 | A00860 | A01385 | 407 |
| A00860 | A01398 | 395 | A00860 | A01401 | 714 |
| A00860 | A01468 | 177 | A00860 | A01500 | 428 |
| A00860 | A01720 | 460 | A00860 | A01729 | 196 |
| A00860 | A02086 | 296 | A00860 | A02512 | 183 |
| A00860 | A03525 | 154 | A00860 | A03526 | 477 |
| A00860 | A04648 | 515 | A00860 | A04687 | 156 |
| A00860 | A05027 | 171 | A00860 | A05914 | 238 |
| A00860 | A06803 | 531 | A00860 | A07290 | 267 |
| A00860 | A07311 | 899 | A00860 | A07670 | 156 |
| A00860 | A07850 | 156 | A00860 | A07887 | 156 |
| A00860 | A08383 | 156 | A00860 | A08818 | 156 |
| A00860 | A09502 | 156 | A00860 | A09712 | 486 |
| A00860 | A10642 | 446 | A00860 | A11344 | 156 |
| A00860 | A11674 | 156 | A00860 | A13078 | 319 |
| A00860 | A15367 | 267 | A00860 | A16228 | 439 |
| A00861 | A00870 | 88  | A00861 | A00872 | 288 |
| A00861 | A00902 | 198 | A00861 | A00906 | 160 |
| A00861 | A00913 | 217 | A00861 | A00916 | 170 |
| A00861 | A00918 | 170 | A00861 | A00934 | 170 |
| A00861 | A00945 | 177 | A00861 | A00992 | 170 |
| A00861 | A01028 | 235 | A00861 | A01056 | 187 |
| A00861 | A01072 | 212 | A00861 | A01112 | 99  |
| A00861 | A01120 | 170 | A00861 | A01129 | 549 |
| A00861 | A01160 | 369 | A00861 | A01168 | 170 |
| A00861 | A01291 | 240 | A00861 | A01337 | 191 |
| A00861 | A01351 | 170 | A00861 | A01356 | 170 |
| A00861 | A01420 | 689 | A00861 | A01425 | 540 |
| A00861 | A01455 | 462 | A00861 | A01464 | 213 |
| A00861 | A01492 | 462 | A00861 | A01496 | 490 |
| A00861 | A01538 | 325 | A00861 | A01546 | 88  |
| A00861 | A01579 | 319 | A00861 | A01598 | 704 |
| A00861 | A01614 | 170 | A00861 | A01649 | 464 |
| A00861 | A02068 | 210 | A00861 | A02164 | 63  |
| A00861 | A02265 | 170 | A00861 | A02350 | 165 |
| A00861 | A02414 | 196 | A00861 | A02590 | 449 |

|        |        |     |        |        |     |
|--------|--------|-----|--------|--------|-----|
| A00861 | A02605 | 221 | A00861 | A03438 | 496 |
| A00861 | A03644 | 263 | A00861 | A03652 | 170 |
| A00861 | A03671 | 210 | A00861 | A03981 | 548 |
| A00861 | A04230 | 402 | A00861 | A04415 | 246 |
| A00861 | A04697 | 252 | A00861 | A04760 | 323 |
| A00861 | A05566 | 195 | A00861 | A05654 | 406 |
| A00861 | A06351 | 276 | A00861 | A06356 | 170 |
| A00861 | A06807 | 305 | A00861 | A06814 | 313 |
| A00861 | A06825 | 456 | A00861 | A07201 | 185 |
| A00861 | A07243 | 486 | A00861 | A07244 | 170 |
| A00861 | A07524 | 170 | A00861 | A07924 | 170 |
| A00861 | A08211 | 170 | A00861 | A08653 | 249 |
| A00861 | A08682 | 168 | A00861 | A09248 | 235 |
| A00861 | A09697 | 170 | A00861 | A10034 | 210 |
| A00861 | A10564 | 404 | A00861 | A10901 | 308 |
| A00861 | A11263 | 283 | A00861 | A11264 | 283 |
| A00861 | A11334 | 296 | A00861 | A11981 | 208 |
| A00861 | A12270 | 227 | A00861 | A12687 | 375 |
| A00861 | A13052 | 404 | A00861 | A13741 | 187 |
| A00861 | A13989 | 474 | A00861 | A14216 | 483 |
| A00861 | A14381 | 152 | A00861 | A14817 | 227 |
| A00861 | A15365 | 202 | A00861 | A15532 | 432 |
| A00861 | A15732 | 201 | A00862 | A00883 | 251 |
| A00862 | A00941 | 490 | A00862 | A00989 | 180 |
| A00862 | A01209 | 475 | A00862 | A01327 | 314 |
| A00862 | A01329 | 432 | A00862 | A01358 | 457 |
| A00862 | A01435 | 224 | A00862 | A01459 | 480 |
| A00862 | A01507 | 491 | A00862 | A01514 | 491 |
| A00862 | A01647 | 401 | A00862 | A01988 | 458 |
| A00862 | A02051 | 184 | A00862 | A04187 | 372 |
| A00862 | A06016 | 279 | A00862 | A08196 | 174 |
| A00862 | A08700 | 151 | A00862 | A09269 | 486 |
| A00862 | A09659 | 323 | A00862 | A12047 | 491 |
| A00862 | A12824 | 168 | A00862 | A14393 | 232 |
| A00862 | A15380 | 430 | A00862 | A15398 | 191 |
| A00862 | A15557 | 519 | A00862 | A15712 | 185 |
| A00863 | A00936 | 151 | A00863 | A00967 | 191 |
| A00863 | A00985 | 405 | A00863 | A01027 | 401 |
| A00863 | A01100 | 413 | A00863 | A01139 | 419 |
| A00863 | A01156 | 472 | A00863 | A01209 | 337 |
| A00863 | A01326 | 480 | A00863 | A01329 | 185 |
| A00863 | A01359 | 184 | A00863 | A01361 | 151 |
| A00863 | A01385 | 491 | A00863 | A01582 | 238 |
| A00863 | A01699 | 296 | A00863 | A02239 | 281 |
| A00863 | A02983 | 171 | A00863 | A03676 | 162 |
| A00863 | A03682 | 174 | A00863 | A04337 | 157 |

|        |        |     |        |        |     |
|--------|--------|-----|--------|--------|-----|
| A00863 | A07290 | 321 | A00863 | A07442 | 187 |
| A00863 | A09007 | 217 | A00863 | A09304 | 301 |
| A00863 | A10250 | 156 | A00863 | A10642 | 276 |
| A00863 | A13124 | 226 | A00863 | A14266 | 160 |
| A00863 | A14272 | 187 | A00863 | A15262 | 223 |
| A00863 | A15376 | 177 | A00863 | A15422 | 329 |
| A00863 | A15932 | 443 | A00863 | A15933 | 481 |
| A00863 | A17015 | 288 | A00864 | A00877 | 165 |
| A00864 | A00937 | 210 | A00864 | A00951 | 481 |
| A00864 | A00971 | 477 | A00864 | A01011 | 930 |
| A00864 | A01036 | 380 | A00864 | A01064 | 467 |
| A00864 | A01071 | 191 | A00864 | A01191 | 491 |
| A00864 | A01216 | 485 | A00864 | A01289 | 63  |
| A00864 | A01290 | 256 | A00864 | A01308 | 491 |
| A00864 | A01309 | 332 | A00864 | A01358 | 221 |
| A00864 | A01366 | 462 | A00864 | A01386 | 468 |
| A00864 | A01409 | 168 | A00864 | A01454 | 767 |
| A00864 | A01459 | 241 | A00864 | A01478 | 537 |
| A00864 | A01479 | 491 | A00864 | A01514 | 457 |
| A00864 | A01537 | 385 | A00864 | A01557 | 489 |
| A00864 | A01560 | 232 | A00864 | A01568 | 491 |
| A00864 | A01573 | 177 | A00864 | A01580 | 481 |
| A00864 | A01591 | 373 | A00864 | A01595 | 581 |
| A00864 | A01612 | 199 | A00864 | A01630 | 470 |
| A00864 | A01632 | 396 | A00864 | A01637 | 272 |
| A00864 | A01647 | 480 | A00864 | A01650 | 294 |
| A00864 | A01660 | 491 | A00864 | A01681 | 268 |
| A00864 | A01687 | 491 | A00864 | A01705 | 187 |
| A00864 | A01717 | 254 | A00864 | A01729 | 199 |
| A00864 | A01927 | 208 | A00864 | A02950 | 228 |
| A00864 | A03496 | 554 | A00864 | A03512 | 196 |
| A00864 | A03575 | 348 | A00864 | A03728 | 177 |
| A00864 | A04077 | 171 | A00864 | A04139 | 207 |
| A00864 | A04239 | 462 | A00864 | A04282 | 379 |
| A00864 | A04305 | 168 | A00864 | A04435 | 274 |
| A00864 | A04533 | 515 | A00864 | A04540 | 293 |
| A00864 | A04715 | 479 | A00864 | A04719 | 171 |
| A00864 | A05008 | 491 | A00864 | A05009 | 408 |
| A00864 | A05015 | 490 | A00864 | A05243 | 485 |
| A00864 | A05428 | 475 | A00864 | A05607 | 259 |
| A00864 | A05617 | 585 | A00864 | A05829 | 160 |
| A00864 | A05880 | 489 | A00864 | A06092 | 311 |
| A00864 | A06176 | 418 | A00864 | A06191 | 347 |
| A00864 | A06348 | 423 | A00864 | A06428 | 420 |
| A00864 | A06572 | 367 | A00864 | A06591 | 491 |
| A00864 | A06597 | 199 | A00864 | A06707 | 515 |

|        |        |     |        |        |     |
|--------|--------|-----|--------|--------|-----|
| A00864 | A06715 | 485 | A00864 | A06841 | 152 |
| A00864 | A06970 | 285 | A00864 | A07007 | 291 |
| A00864 | A07054 | 489 | A00864 | A07073 | 388 |
| A00864 | A07200 | 348 | A00864 | A07242 | 491 |
| A00864 | A07433 | 488 | A00864 | A07483 | 413 |
| A00864 | A07495 | 491 | A00864 | A07762 | 405 |
| A00864 | A07816 | 318 | A00864 | A08196 | 491 |
| A00864 | A08221 | 191 | A00864 | A08293 | 234 |
| A00864 | A08370 | 390 | A00864 | A08400 | 198 |
| A00864 | A08503 | 272 | A00864 | A08517 | 474 |
| A00864 | A08531 | 409 | A00864 | A08536 | 445 |
| A00864 | A08549 | 400 | A00864 | A08560 | 227 |
| A00864 | A08643 | 286 | A00864 | A08698 | 218 |
| A00864 | A08812 | 271 | A00864 | A08813 | 168 |
| A00864 | A08839 | 455 | A00864 | A08858 | 321 |
| A00864 | A09195 | 201 | A00864 | A09214 | 171 |
| A00864 | A09323 | 183 | A00864 | A09630 | 347 |
| A00864 | A09666 | 346 | A00864 | A10296 | 171 |
| A00864 | A10445 | 223 | A00864 | A10593 | 299 |
| A00864 | A10645 | 319 | A00864 | A10909 | 316 |
| A00864 | A11028 | 219 | A00864 | A11099 | 218 |
| A00864 | A11189 | 329 | A00864 | A11281 | 165 |
| A00864 | A11340 | 199 | A00864 | A12047 | 491 |
| A00864 | A12365 | 252 | A00864 | A12384 | 256 |
| A00864 | A12392 | 199 | A00864 | A12722 | 614 |
| A00864 | A12952 | 238 | A00864 | A12965 | 199 |
| A00864 | A13109 | 256 | A00864 | A13785 | 340 |
| A00864 | A13866 | 152 | A00864 | A14009 | 479 |
| A00864 | A14048 | 419 | A00864 | A14084 | 465 |
| A00864 | A14192 | 546 | A00864 | A14193 | 229 |
| A00864 | A14202 | 220 | A00864 | A14263 | 580 |
| A00864 | A14266 | 455 | A00864 | A14278 | 160 |
| A00864 | A14279 | 732 | A00864 | A14281 | 488 |
| A00864 | A14410 | 348 | A00864 | A14455 | 180 |
| A00864 | A14464 | 245 | A00864 | A14474 | 477 |
| A00864 | A14484 | 490 | A00864 | A14633 | 490 |
| A00864 | A14643 | 312 | A00864 | A15232 | 256 |
| A00864 | A15626 | 401 | A00864 | A15644 | 232 |
| A00864 | A15665 | 530 | A00864 | A15871 | 285 |
| A00864 | A15949 | 414 | A00864 | A16062 | 277 |
| A00864 | A16163 | 199 | A00864 | A16579 | 199 |
| A00864 | A16732 | 435 | A00864 | A16738 | 722 |
| A00864 | A16764 | 350 | A00864 | A17171 | 199 |
| A00865 | A00871 | 271 | A00865 | A00878 | 382 |
| A00865 | A00928 | 628 | A00865 | A00952 | 686 |
| A00865 | A00953 | 405 | A00865 | A00972 | 375 |

|        |        |     |        |        |     |
|--------|--------|-----|--------|--------|-----|
| A00865 | A00983 | 491 | A00865 | A00987 | 462 |
| A00865 | A00996 | 227 | A00865 | A01027 | 484 |
| A00865 | A01037 | 63  | A00865 | A01101 | 425 |
| A00865 | A01102 | 436 | A00865 | A01106 | 252 |
| A00865 | A01107 | 286 | A00865 | A01123 | 434 |
| A00865 | A01154 | 443 | A00865 | A01159 | 425 |
| A00865 | A01189 | 460 | A00865 | A01193 | 326 |
| A00865 | A01217 | 180 | A00865 | A01220 | 245 |
| A00865 | A01221 | 688 | A00865 | A01232 | 385 |
| A00865 | A01243 | 452 | A00865 | A01287 | 462 |
| A00865 | A01352 | 490 | A00865 | A01362 | 205 |
| A00865 | A01365 | 360 | A00865 | A01403 | 152 |
| A00865 | A01412 | 655 | A00865 | A01418 | 465 |
| A00865 | A01448 | 195 | A00865 | A01459 | 234 |
| A00865 | A01540 | 291 | A00865 | A01787 | 401 |
| A00865 | A01976 | 130 | A00865 | A01977 | 432 |
| A00865 | A02203 | 454 | A00865 | A02542 | 157 |
| A00865 | A03051 | 174 | A00865 | A03142 | 191 |
| A00865 | A03438 | 479 | A00865 | A03453 | 329 |
| A00865 | A03456 | 313 | A00865 | A03460 | 373 |
| A00865 | A03490 | 204 | A00865 | A03494 | 162 |
| A00865 | A03676 | 302 | A00865 | A03881 | 260 |
| A00865 | A03931 | 152 | A00865 | A05199 | 296 |
| A00865 | A05375 | 249 | A00865 | A05734 | 313 |
| A00865 | A06048 | 335 | A00865 | A06049 | 356 |
| A00865 | A06122 | 413 | A00865 | A06369 | 443 |
| A00865 | A06436 | 205 | A00865 | A06637 | 174 |
| A00865 | A06664 | 480 | A00865 | A06832 | 684 |
| A00865 | A06975 | 208 | A00865 | A07103 | 308 |
| A00865 | A07160 | 157 | A00865 | A07312 | 373 |
| A00865 | A07598 | 427 | A00865 | A07773 | 174 |
| A00865 | A07881 | 185 | A00865 | A08098 | 193 |
| A00865 | A08228 | 177 | A00865 | A08773 | 154 |
| A00865 | A08984 | 400 | A00865 | A09485 | 299 |
| A00865 | A09735 | 223 | A00865 | A10607 | 360 |
| A00865 | A10927 | 154 | A00865 | A14482 | 477 |
| A00865 | A14566 | 201 | A00865 | A14594 | 353 |
| A00865 | A14596 | 425 | A00865 | A14701 | 379 |
| A00865 | A15500 | 168 | A00865 | A15624 | 303 |
| A00865 | A15684 | 348 | A00866 | A00881 | 210 |
| A00866 | A00883 | 372 | A00866 | A00978 | 156 |
| A00866 | A00999 | 229 | A00866 | A01007 | 156 |
| A00866 | A01019 | 156 | A00866 | A01057 | 451 |
| A00866 | A01075 | 337 | A00866 | A01077 | 491 |
| A00866 | A01087 | 188 | A00866 | A01099 | 229 |
| A00866 | A01114 | 229 | A00866 | A01187 | 229 |



|        |        |     |        |        |     |
|--------|--------|-----|--------|--------|-----|
| A00866 | A01195 | 156 | A00866 | A01197 | 229 |
| A00866 | A01200 | 156 | A00866 | A01203 | 372 |
| A00866 | A01212 | 445 | A00866 | A01315 | 229 |
| A00866 | A01319 | 229 | A00866 | A01329 | 438 |
| A00866 | A01398 | 156 | A00866 | A01401 | 156 |
| A00866 | A01415 | 229 | A00866 | A01500 | 156 |
| A00866 | A01627 | 438 | A00866 | A01647 | 372 |
| A00866 | A01680 | 229 | A00866 | A01682 | 438 |
| A00866 | A02152 | 213 | A00866 | A02518 | 152 |
| A00866 | A02715 | 163 | A00866 | A03175 | 388 |
| A00866 | A03327 | 229 | A00866 | A03479 | 375 |
| A00866 | A03495 | 329 | A00866 | A03858 | 185 |
| A00866 | A04648 | 300 | A00866 | A04687 | 156 |
| A00866 | A05690 | 229 | A00866 | A06130 | 229 |
| A00866 | A06381 | 229 | A00866 | A06750 | 438 |
| A00866 | A06803 | 305 | A00866 | A07353 | 229 |
| A00866 | A07670 | 438 | A00866 | A07850 | 313 |
| A00866 | A07887 | 156 | A00866 | A07920 | 377 |
| A00866 | A08137 | 277 | A00866 | A08383 | 156 |
| A00866 | A08818 | 156 | A00866 | A09502 | 156 |
| A00866 | A10386 | 322 | A00866 | A11344 | 156 |
| A00866 | A11674 | 156 | A00866 | A12284 | 372 |
| A00866 | A12824 | 372 | A00866 | A14399 | 375 |
| A00866 | A14661 | 395 | A00866 | A15545 | 379 |
| A00866 | A15837 | 229 | A00866 | A16228 | 156 |
| A00866 | A16626 | 229 | A00866 | A16643 | 229 |
| A00867 | A00875 | 160 | A00867 | A00879 | 156 |
| A00867 | A00883 | 302 | A00867 | A00905 | 291 |
| A00867 | A00928 | 463 | A00867 | A01029 | 156 |
| A00867 | A01107 | 461 | A00867 | A01136 | 211 |
| A00867 | A01151 | 317 | A00867 | A01231 | 440 |
| A00867 | A01255 | 390 | A00867 | A01266 | 156 |
| A00867 | A01268 | 375 | A00867 | A01295 | 156 |
| A00867 | A01334 | 156 | A00867 | A01391 | 156 |
| A00867 | A01434 | 156 | A00867 | A01612 | 416 |
| A00867 | A02212 | 307 | A00867 | A02275 | 210 |
| A00867 | A03494 | 315 | A00867 | A03569 | 160 |
| A00867 | A04144 | 334 | A00867 | A07380 | 337 |
| A00867 | A07439 | 357 | A00867 | A07898 | 156 |
| A00867 | A08201 | 156 | A00867 | A08327 | 156 |
| A00867 | A08431 | 156 | A00867 | A08467 | 229 |
| A00867 | A08542 | 156 | A00867 | A11406 | 279 |
| A00867 | A11496 | 156 | A00867 | A11497 | 156 |
| A00867 | A12242 | 288 | A00867 | A12757 | 156 |
| A00867 | A13289 | 396 | A00867 | A13928 | 156 |
| A00867 | A14178 | 231 | A00867 | A14184 | 247 |

|        |        |     |        |        |     |
|--------|--------|-----|--------|--------|-----|
| A00867 | A14221 | 217 | A00867 | A14255 | 201 |
| A00867 | A14257 | 205 | A00867 | A15324 | 333 |
| A00867 | A15353 | 443 | A00867 | A15377 | 326 |
| A00867 | A15543 | 483 | A00867 | A15559 | 447 |
| A00867 | A15684 | 204 | A00867 | A16333 | 283 |
| A00867 | A16699 | 156 | A00868 | A00883 | 825 |
| A00868 | A00884 | 540 | A00868 | A00892 | 469 |
| A00868 | A00914 | 406 | A00868 | A00915 | 480 |
| A00868 | A00925 | 152 | A00868 | A00926 | 545 |
| A00868 | A00927 | 544 | A00868 | A00935 | 173 |
| A00868 | A00952 | 394 | A00868 | A00956 | 383 |
| A00868 | A00975 | 545 | A00868 | A00983 | 165 |
| A00868 | A00993 | 191 | A00868 | A01014 | 401 |
| A00868 | A01017 | 294 | A00868 | A01020 | 469 |
| A00868 | A01039 | 160 | A00868 | A01046 | 374 |
| A00868 | A01058 | 544 | A00868 | A01066 | 273 |
| A00868 | A01077 | 540 | A00868 | A01080 | 544 |
| A00868 | A01091 | 491 | A00868 | A01097 | 690 |
| A00868 | A01099 | 380 | A00868 | A01106 | 481 |
| A00868 | A01122 | 488 | A00868 | A01139 | 213 |
| A00868 | A01151 | 456 | A00868 | A01156 | 579 |
| A00868 | A01161 | 155 | A00868 | A01169 | 491 |
| A00868 | A01203 | 404 | A00868 | A01212 | 268 |
| A00868 | A01234 | 552 | A00868 | A01235 | 199 |
| A00868 | A01264 | 157 | A00868 | A01267 | 723 |
| A00868 | A01278 | 367 | A00868 | A01281 | 177 |
| A00868 | A01322 | 491 | A00868 | A01326 | 420 |
| A00868 | A01327 | 286 | A00868 | A01329 | 419 |
| A00868 | A01338 | 477 | A00868 | A01339 | 543 |
| A00868 | A01352 | 299 | A00868 | A01370 | 491 |
| A00868 | A01371 | 357 | A00868 | A01385 | 385 |
| A00868 | A01404 | 491 | A00868 | A01415 | 483 |
| A00868 | A01444 | 229 | A00868 | A01451 | 532 |
| A00868 | A01459 | 401 | A00868 | A01507 | 455 |
| A00868 | A01515 | 467 | A00868 | A01573 | 474 |
| A00868 | A01582 | 452 | A00868 | A01722 | 168 |
| A00868 | A01741 | 460 | A00868 | A01743 | 307 |
| A00868 | A01847 | 249 | A00868 | A01913 | 279 |
| A00868 | A01926 | 477 | A00868 | A01941 | 465 |
| A00868 | A01988 | 477 | A00868 | A02054 | 316 |
| A00868 | A02086 | 457 | A00868 | A02097 | 210 |
| A00868 | A02151 | 68  | A00868 | A02156 | 152 |
| A00868 | A02164 | 438 | A00868 | A02212 | 532 |
| A00868 | A02226 | 230 | A00868 | A02230 | 212 |
| A00868 | A02252 | 319 | A00868 | A02377 | 160 |
| A00868 | A02411 | 195 | A00868 | A02452 | 332 |

|        |        |     |        |        |     |
|--------|--------|-----|--------|--------|-----|
| A00868 | A02454 | 243 | A00868 | A02966 | 417 |
| A00868 | A02978 | 168 | A00868 | A03019 | 163 |
| A00868 | A03029 | 65  | A00868 | A03086 | 262 |
| A00868 | A03091 | 167 | A00868 | A03104 | 159 |
| A00868 | A03254 | 152 | A00868 | A03454 | 228 |
| A00868 | A03570 | 386 | A00868 | A03593 | 191 |
| A00868 | A03594 | 216 | A00868 | A03676 | 486 |
| A00868 | A03750 | 193 | A00868 | A03859 | 201 |
| A00868 | A04010 | 440 | A00868 | A04015 | 313 |
| A00868 | A04449 | 238 | A00868 | A04666 | 446 |
| A00868 | A04668 | 373 | A00868 | A04902 | 154 |
| A00868 | A04990 | 241 | A00868 | A05146 | 185 |
| A00868 | A05276 | 483 | A00868 | A05570 | 299 |
| A00868 | A05577 | 380 | A00868 | A05876 | 154 |
| A00868 | A06032 | 219 | A00868 | A06046 | 238 |
| A00868 | A06261 | 191 | A00868 | A06272 | 385 |
| A00868 | A06631 | 191 | A00868 | A06750 | 486 |
| A00868 | A06764 | 252 | A00868 | A06825 | 322 |
| A00868 | A06907 | 235 | A00868 | A06974 | 322 |
| A00868 | A07096 | 160 | A00868 | A07101 | 462 |
| A00868 | A07207 | 157 | A00868 | A07226 | 453 |
| A00868 | A07236 | 173 | A00868 | A07266 | 440 |
| A00868 | A07311 | 260 | A00868 | A07360 | 488 |
| A00868 | A07403 | 260 | A00868 | A07434 | 294 |
| A00868 | A07439 | 172 | A00868 | A07457 | 483 |
| A00868 | A07520 | 358 | A00868 | A07575 | 324 |
| A00868 | A07587 | 241 | A00868 | A07670 | 243 |
| A00868 | A07697 | 491 | A00868 | A07750 | 249 |
| A00868 | A07756 | 491 | A00868 | A07876 | 401 |
| A00868 | A07956 | 373 | A00868 | A07961 | 172 |
| A00868 | A07986 | 414 | A00868 | A08011 | 170 |
| A00868 | A08097 | 418 | A00868 | A08119 | 162 |
| A00868 | A08213 | 246 | A00868 | A08281 | 432 |
| A00868 | A08343 | 241 | A00868 | A08517 | 185 |
| A00868 | A08558 | 443 | A00868 | A08773 | 182 |
| A00868 | A08834 | 160 | A00868 | A08882 | 394 |
| A00868 | A08954 | 229 | A00868 | A08982 | 286 |
| A00868 | A09077 | 246 | A00868 | A09098 | 162 |
| A00868 | A09239 | 160 | A00868 | A09290 | 469 |
| A00868 | A09302 | 307 | A00868 | A09331 | 168 |
| A00868 | A09334 | 154 | A00868 | A09627 | 160 |
| A00868 | A09672 | 440 | A00868 | A09687 | 252 |
| A00868 | A09798 | 249 | A00868 | A09876 | 308 |
| A00868 | A10047 | 188 | A00868 | A10372 | 291 |
| A00868 | A10527 | 486 | A00868 | A10553 | 191 |
| A00868 | A10576 | 246 | A00868 | A10718 | 296 |

|        |        |     |        |        |     |
|--------|--------|-----|--------|--------|-----|
| A00868 | A10973 | 212 | A00868 | A11352 | 174 |
| A00868 | A11365 | 160 | A00868 | A11598 | 353 |
| A00868 | A11623 | 212 | A00868 | A11735 | 542 |
| A00868 | A11737 | 355 | A00868 | A11914 | 538 |
| A00868 | A12116 | 212 | A00868 | A12118 | 191 |
| A00868 | A12201 | 249 | A00868 | A12282 | 290 |
| A00868 | A12325 | 157 | A00868 | A12658 | 541 |
| A00868 | A12823 | 343 | A00868 | A12824 | 760 |
| A00868 | A12863 | 185 | A00868 | A13008 | 391 |
| A00868 | A13166 | 191 | A00868 | A13340 | 249 |
| A00868 | A13511 | 346 | A00868 | A13982 | 258 |
| A00868 | A14007 | 160 | A00868 | A14167 | 183 |
| A00868 | A14196 | 643 | A00868 | A14216 | 215 |
| A00868 | A14218 | 162 | A00868 | A14220 | 188 |
| A00868 | A14230 | 302 | A00868 | A14246 | 408 |
| A00868 | A14489 | 281 | A00868 | A14502 | 352 |
| A00868 | A14566 | 221 | A00868 | A14570 | 394 |
| A00868 | A14574 | 162 | A00868 | A14636 | 184 |
| A00868 | A14701 | 473 | A00868 | A14761 | 249 |
| A00868 | A15034 | 162 | A00868 | A15185 | 350 |
| A00868 | A15237 | 385 | A00868 | A15257 | 527 |
| A00868 | A15264 | 252 | A00868 | A15297 | 595 |
| A00868 | A15323 | 462 | A00868 | A15324 | 430 |
| A00868 | A15338 | 466 | A00868 | A15339 | 184 |
| A00868 | A15353 | 234 | A00868 | A15379 | 199 |
| A00868 | A15419 | 475 | A00868 | A15431 | 408 |
| A00868 | A15498 | 457 | A00868 | A15502 | 286 |
| A00868 | A15507 | 344 | A00868 | A15558 | 484 |
| A00868 | A15559 | 574 | A00868 | A15564 | 436 |
| A00868 | A15624 | 491 | A00868 | A15649 | 249 |
| A00868 | A15651 | 485 | A00868 | A15661 | 484 |
| A00868 | A15680 | 327 | A00868 | A15684 | 480 |
| A00868 | A15710 | 353 | A00868 | A15729 | 216 |
| A00868 | A15763 | 279 | A00868 | A15779 | 204 |
| A00868 | A15788 | 425 | A00868 | A15992 | 435 |
| A00868 | A16157 | 305 | A00868 | A16358 | 305 |
| A00868 | A16463 | 182 | A00868 | A16734 | 152 |
| A00868 | A16797 | 249 | A00868 | A16833 | 152 |
| A00868 | A16860 | 232 | A00868 | A16882 | 162 |
| A00869 | A00969 | 162 | A00869 | A02191 | 165 |
| A00869 | A02585 | 162 | A00869 | A02746 | 221 |
| A00869 | A03330 | 154 | A00869 | A03826 | 245 |
| A00869 | A03871 | 318 | A00869 | A04874 | 221 |
| A00869 | A05332 | 168 | A00869 | A06631 | 168 |
| A00869 | A06877 | 224 | A00869 | A07079 | 208 |
| A00869 | A07222 | 152 | A00869 | A07821 | 343 |

|        |        |     |        |        |     |
|--------|--------|-----|--------|--------|-----|
| A00869 | A08546 | 170 | A00869 | A08551 | 235 |
| A00869 | A08797 | 329 | A00869 | A09000 | 152 |
| A00869 | A09964 | 283 | A00869 | A10664 | 154 |
| A00869 | A10925 | 343 | A00869 | A11533 | 252 |
| A00869 | A13926 | 213 | A00869 | A13988 | 191 |
| A00869 | A15489 | 185 | A00869 | A15608 | 168 |
| A00869 | A15824 | 184 | A00869 | A15882 | 283 |
| A00869 | A16188 | 318 | A00870 | A00872 | 118 |
| A00870 | A00878 | 491 | A00870 | A00902 | 602 |
| A00870 | A00906 | 602 | A00870 | A00911 | 463 |
| A00870 | A00965 | 451 | A00870 | A00972 | 380 |
| A00870 | A00983 | 462 | A00870 | A01012 | 162 |
| A00870 | A01025 | 469 | A00870 | A01037 | 602 |
| A00870 | A01047 | 391 | A00870 | A01056 | 602 |
| A00870 | A01067 | 302 | A00870 | A01072 | 600 |
| A00870 | A01085 | 160 | A00870 | A01086 | 152 |
| A00870 | A01090 | 286 | A00870 | A01127 | 412 |
| A00870 | A01140 | 601 | A00870 | A01234 | 283 |
| A00870 | A01238 | 450 | A00870 | A01249 | 269 |
| A00870 | A01289 | 479 | A00870 | A01291 | 491 |
| A00870 | A01320 | 213 | A00870 | A01365 | 179 |
| A00870 | A01392 | 485 | A00870 | A01416 | 419 |
| A00870 | A01425 | 491 | A00870 | A01433 | 486 |
| A00870 | A01468 | 285 | A00870 | A01496 | 68  |
| A00870 | A01546 | 469 | A00870 | A01586 | 353 |
| A00870 | A01601 | 219 | A00870 | A01607 | 457 |
| A00870 | A01617 | 170 | A00870 | A01652 | 435 |
| A00870 | A01718 | 152 | A00870 | A02185 | 391 |
| A00870 | A02490 | 210 | A00870 | A02494 | 446 |
| A00870 | A02502 | 454 | A00870 | A02704 | 195 |
| A00870 | A03048 | 363 | A00870 | A03437 | 273 |
| A00870 | A03451 | 491 | A00870 | A03567 | 308 |
| A00870 | A03581 | 280 | A00870 | A03981 | 63  |
| A00870 | A04101 | 457 | A00870 | A04230 | 400 |
| A00870 | A04697 | 172 | A00870 | A04760 | 257 |
| A00870 | A05065 | 223 | A00870 | A05942 | 210 |
| A00870 | A06117 | 313 | A00870 | A06279 | 152 |
| A00870 | A06324 | 329 | A00870 | A06351 | 472 |
| A00870 | A06807 | 234 | A00870 | A06814 | 602 |
| A00870 | A06825 | 85  | A00870 | A07243 | 240 |
| A00870 | A07398 | 385 | A00870 | A07412 | 436 |
| A00870 | A08011 | 485 | A00870 | A08052 | 602 |
| A00870 | A08273 | 461 | A00870 | A08315 | 321 |
| A00870 | A08357 | 377 | A00870 | A08578 | 180 |
| A00870 | A08635 | 172 | A00870 | A08773 | 486 |
| A00870 | A09332 | 152 | A00870 | A09351 | 154 |

|        |        |     |        |        |     |
|--------|--------|-----|--------|--------|-----|
| A00870 | A09428 | 312 | A00870 | A09494 | 243 |
| A00870 | A09620 | 418 | A00870 | A09697 | 269 |
| A00870 | A09707 | 296 | A00870 | A09722 | 283 |
| A00870 | A09788 | 243 | A00870 | A11438 | 193 |
| A00870 | A11462 | 185 | A00870 | A12155 | 401 |
| A00870 | A12252 | 152 | A00870 | A13581 | 269 |
| A00870 | A13989 | 486 | A00870 | A13992 | 196 |
| A00870 | A15212 | 177 | A00870 | A15837 | 269 |
| A00870 | A16027 | 269 | A00870 | A16053 | 296 |
| A00870 | A16157 | 174 | A00870 | A16773 | 411 |
| A00870 | A17152 | 196 | A00871 | A00878 | 480 |
| A00871 | A00883 | 258 | A00871 | A00909 | 677 |
| A00871 | A00916 | 550 | A00871 | A00922 | 608 |
| A00871 | A00926 | 438 | A00871 | A00927 | 475 |
| A00871 | A00932 | 196 | A00871 | A00934 | 257 |
| A00871 | A00935 | 328 | A00871 | A00947 | 63  |
| A00871 | A00983 | 491 | A00871 | A00986 | 578 |
| A00871 | A00988 | 406 | A00871 | A01017 | 566 |
| A00871 | A01020 | 486 | A00871 | A01024 | 634 |
| A00871 | A01027 | 491 | A00871 | A01042 | 450 |
| A00871 | A01047 | 63  | A00871 | A01050 | 472 |
| A00871 | A01051 | 180 | A00871 | A01065 | 235 |
| A00871 | A01069 | 419 | A00871 | A01075 | 486 |
| A00871 | A01085 | 404 | A00871 | A01088 | 486 |
| A00871 | A01111 | 235 | A00871 | A01116 | 311 |
| A00871 | A01118 | 571 | A00871 | A01120 | 369 |
| A00871 | A01136 | 458 | A00871 | A01150 | 491 |
| A00871 | A01161 | 486 | A00871 | A01166 | 439 |
| A00871 | A01181 | 443 | A00871 | A01184 | 474 |
| A00871 | A01201 | 469 | A00871 | A01202 | 340 |
| A00871 | A01208 | 578 | A00871 | A01209 | 290 |
| A00871 | A01211 | 193 | A00871 | A01214 | 729 |
| A00871 | A01215 | 578 | A00871 | A01221 | 374 |
| A00871 | A01226 | 491 | A00871 | A01228 | 556 |
| A00871 | A01232 | 678 | A00871 | A01234 | 570 |
| A00871 | A01243 | 389 | A00871 | A01293 | 491 |
| A00871 | A01304 | 491 | A00871 | A01311 | 618 |
| A00871 | A01338 | 165 | A00871 | A01353 | 578 |
| A00871 | A01354 | 485 | A00871 | A01379 | 234 |
| A00871 | A01384 | 340 | A00871 | A01387 | 417 |
| A00871 | A01406 | 218 | A00871 | A01413 | 188 |
| A00871 | A01431 | 490 | A00871 | A01439 | 490 |
| A00871 | A01440 | 204 | A00871 | A01470 | 489 |
| A00871 | A01492 | 545 | A00871 | A01506 | 281 |
| A00871 | A01518 | 428 | A00871 | A01538 | 226 |
| A00871 | A01540 | 201 | A00871 | A01565 | 416 |

|        |        |     |        |        |     |
|--------|--------|-----|--------|--------|-----|
| A00871 | A01568 | 270 | A00871 | A01569 | 382 |
| A00871 | A01582 | 307 | A00871 | A01588 | 174 |
| A00871 | A01598 | 486 | A00871 | A01613 | 418 |
| A00871 | A01647 | 222 | A00871 | A01672 | 154 |
| A00871 | A01707 | 480 | A00871 | A01736 | 537 |
| A00871 | A01809 | 380 | A00871 | A01988 | 460 |
| A00871 | A02041 | 378 | A00871 | A02051 | 450 |
| A00871 | A02072 | 481 | A00871 | A02270 | 477 |
| A00871 | A02303 | 358 | A00871 | A02454 | 479 |
| A00871 | A03057 | 182 | A00871 | A03169 | 578 |
| A00871 | A03321 | 204 | A00871 | A03438 | 490 |
| A00871 | A03480 | 160 | A00871 | A03572 | 187 |
| A00871 | A03597 | 419 | A00871 | A03601 | 377 |
| A00871 | A03728 | 319 | A00871 | A03740 | 296 |
| A00871 | A03792 | 200 | A00871 | A03859 | 324 |
| A00871 | A03901 | 173 | A00871 | A03952 | 411 |
| A00871 | A03954 | 363 | A00871 | A03958 | 445 |
| A00871 | A03959 | 363 | A00871 | A04447 | 577 |
| A00871 | A04449 | 195 | A00871 | A04485 | 243 |
| A00871 | A05058 | 479 | A00871 | A05205 | 172 |
| A00871 | A05561 | 208 | A00871 | A05577 | 506 |
| A00871 | A05695 | 208 | A00871 | A06275 | 473 |
| A00871 | A06600 | 491 | A00871 | A06637 | 185 |
| A00871 | A07054 | 319 | A00871 | A07126 | 443 |
| A00871 | A07160 | 185 | A00871 | A07180 | 438 |
| A00871 | A07225 | 208 | A00871 | A07265 | 578 |
| A00871 | A07347 | 324 | A00871 | A07360 | 491 |
| A00871 | A07414 | 488 | A00871 | A07524 | 157 |
| A00871 | A07588 | 578 | A00871 | A07644 | 205 |
| A00871 | A07695 | 491 | A00871 | A07706 | 490 |
| A00871 | A07744 | 491 | A00871 | A07854 | 208 |
| A00871 | A07881 | 490 | A00871 | A07959 | 63  |
| A00871 | A08098 | 461 | A00871 | A08118 | 399 |
| A00871 | A08144 | 488 | A00871 | A08228 | 491 |
| A00871 | A08349 | 208 | A00871 | A08491 | 483 |
| A00871 | A08537 | 217 | A00871 | A08548 | 483 |
| A00871 | A08550 | 245 | A00871 | A08763 | 185 |
| A00871 | A08850 | 383 | A00871 | A08860 | 204 |
| A00871 | A08892 | 428 | A00871 | A08955 | 518 |
| A00871 | A08971 | 460 | A00871 | A09059 | 160 |
| A00871 | A09280 | 446 | A00871 | A09526 | 283 |
| A00871 | A09621 | 227 | A00871 | A09910 | 281 |
| A00871 | A10362 | 369 | A00871 | A10463 | 208 |
| A00871 | A10755 | 576 | A00871 | A11202 | 223 |
| A00871 | A11254 | 274 | A00871 | A11368 | 162 |
| A00871 | A11401 | 394 | A00871 | A11407 | 176 |

|        |        |     |        |        |     |
|--------|--------|-----|--------|--------|-----|
| A00871 | A11452 | 440 | A00871 | A11608 | 235 |
| A00871 | A11638 | 172 | A00871 | A12291 | 172 |
| A00871 | A12305 | 172 | A00871 | A12376 | 172 |
| A00871 | A12447 | 208 | A00871 | A13126 | 310 |
| A00871 | A13298 | 578 | A00871 | A13653 | 208 |
| A00871 | A13870 | 489 | A00871 | A13945 | 162 |
| A00871 | A13989 | 469 | A00871 | A14006 | 488 |
| A00871 | A14073 | 165 | A00871 | A14074 | 439 |
| A00871 | A14083 | 484 | A00871 | A14216 | 578 |
| A00871 | A14394 | 443 | A00871 | A14469 | 176 |
| A00871 | A14481 | 204 | A00871 | A14502 | 63  |
| A00871 | A14540 | 213 | A00871 | A14566 | 279 |
| A00871 | A14596 | 595 | A00871 | A14655 | 489 |
| A00871 | A14659 | 463 | A00871 | A14665 | 249 |
| A00871 | A14699 | 709 | A00871 | A14778 | 475 |
| A00871 | A15422 | 252 | A00871 | A15507 | 204 |
| A00871 | A15624 | 474 | A00871 | A15660 | 479 |
| A00871 | A15661 | 440 | A00871 | A15684 | 491 |
| A00871 | A15746 | 312 | A00871 | A15856 | 205 |
| A00871 | A15932 | 219 | A00871 | A15937 | 472 |
| A00871 | A16060 | 154 | A00871 | A16157 | 489 |
| A00871 | A16400 | 319 | A00871 | A17168 | 170 |
| A00872 | A00916 | 170 | A00872 | A00918 | 170 |
| A00872 | A00934 | 170 | A00872 | A00992 | 170 |
| A00872 | A01028 | 502 | A00872 | A01065 | 210 |
| A00872 | A01092 | 210 | A00872 | A01098 | 210 |
| A00872 | A01111 | 374 | A00872 | A01120 | 210 |
| A00872 | A01129 | 170 | A00872 | A01140 | 188 |
| A00872 | A01160 | 284 | A00872 | A01168 | 547 |
| A00872 | A01351 | 170 | A00872 | A01356 | 170 |
| A00872 | A01379 | 210 | A00872 | A01425 | 445 |
| A00872 | A01439 | 210 | A00872 | A01468 | 384 |
| A00872 | A01492 | 275 | A00872 | A01496 | 395 |
| A00872 | A01538 | 666 | A00872 | A01546 | 118 |
| A00872 | A01598 | 608 | A00872 | A01614 | 617 |
| A00872 | A01740 | 270 | A00872 | A02164 | 157 |
| A00872 | A02165 | 188 | A00872 | A02265 | 210 |
| A00872 | A02978 | 502 | A00872 | A03438 | 545 |
| A00872 | A03609 | 165 | A00872 | A03652 | 170 |
| A00872 | A03981 | 343 | A00872 | A04697 | 283 |
| A00872 | A05230 | 210 | A00872 | A05563 | 162 |
| A00872 | A06356 | 170 | A00872 | A06814 | 82  |
| A00872 | A06825 | 232 | A00872 | A07076 | 210 |
| A00872 | A07244 | 224 | A00872 | A07307 | 388 |
| A00872 | A07524 | 170 | A00872 | A07558 | 196 |
| A00872 | A07924 | 170 | A00872 | A08211 | 170 |



|        |        |     |        |        |     |
|--------|--------|-----|--------|--------|-----|
| A00872 | A09292 | 210 | A00872 | A09697 | 170 |
| A00872 | A10381 | 485 | A00872 | A11263 | 313 |
| A00872 | A13052 | 210 | A00872 | A13989 | 261 |
| A00872 | A14816 | 210 | A00873 | A00969 | 399 |
| A00873 | A01106 | 276 | A00873 | A01120 | 191 |
| A00873 | A01228 | 276 | A00873 | A01420 | 226 |
| A00873 | A01437 | 182 | A00873 | A06687 | 157 |
| A00873 | A09010 | 180 | A00873 | A14212 | 168 |
| A00873 | A15346 | 191 | A00873 | A15779 | 205 |
| A00874 | A01088 | 414 | A00874 | A02381 | 283 |
| A00874 | A02859 | 157 | A00874 | A02944 | 224 |
| A00874 | A02969 | 296 | A00874 | A02976 | 377 |
| A00874 | A03302 | 296 | A00874 | A03609 | 218 |
| A00874 | A03834 | 263 | A00874 | A05242 | 358 |
| A00874 | A05345 | 402 | A00874 | A09785 | 479 |
| A00874 | A13826 | 351 | A00874 | A15346 | 180 |
| A00874 | A15615 | 380 | A00874 | A15639 | 259 |
| A00875 | A00973 | 212 | A00875 | A00981 | 506 |
| A00875 | A01031 | 337 | A00875 | A01070 | 299 |
| A00875 | A01113 | 446 | A00875 | A01125 | 475 |
| A00875 | A01192 | 367 | A00875 | A01231 | 405 |
| A00875 | A01461 | 154 | A00875 | A01561 | 166 |
| A00875 | A01569 | 399 | A00875 | A01574 | 174 |
| A00875 | A01585 | 152 | A00875 | A01683 | 346 |
| A00875 | A01995 | 168 | A00875 | A02934 | 366 |
| A00875 | A03279 | 221 | A00875 | A03435 | 589 |
| A00875 | A03515 | 180 | A00875 | A03634 | 188 |
| A00875 | A03681 | 152 | A00875 | A03725 | 258 |
| A00875 | A03752 | 221 | A00875 | A03892 | 219 |
| A00875 | A04449 | 300 | A00875 | A04770 | 182 |
| A00875 | A05443 | 152 | A00875 | A06466 | 157 |
| A00875 | A06597 | 387 | A00875 | A06814 | 329 |
| A00875 | A06915 | 236 | A00875 | A07311 | 410 |
| A00875 | A07378 | 297 | A00875 | A07798 | 229 |
| A00875 | A07803 | 260 | A00875 | A08261 | 199 |
| A00875 | A08978 | 177 | A00875 | A08991 | 452 |
| A00875 | A09235 | 358 | A00875 | A09337 | 224 |
| A00875 | A09363 | 159 | A00875 | A09508 | 266 |
| A00875 | A09620 | 174 | A00875 | A09901 | 176 |
| A00875 | A10655 | 452 | A00875 | A11937 | 243 |
| A00875 | A11983 | 217 | A00875 | A12242 | 419 |
| A00875 | A13522 | 286 | A00875 | A13902 | 452 |
| A00875 | A14178 | 479 | A00875 | A14351 | 171 |
| A00875 | A15174 | 330 | A00875 | A15282 | 374 |
| A00875 | A15294 | 457 | A00875 | A15329 | 205 |
| A00875 | A15336 | 391 | A00875 | A15506 | 610 |

|        |        |     |        |        |     |
|--------|--------|-----|--------|--------|-----|
| A00875 | A15820 | 212 | A00875 | A16082 | 226 |
| A00876 | A00918 | 149 | A00876 | A00922 | 541 |
| A00876 | A00932 | 452 | A00876 | A00933 | 160 |
| A00876 | A00980 | 542 | A00876 | A01042 | 313 |
| A00876 | A01061 | 266 | A00876 | A01071 | 479 |
| A00876 | A01112 | 198 | A00876 | A01136 | 179 |
| A00876 | A01150 | 279 | A00876 | A01161 | 160 |
| A00876 | A01177 | 240 | A00876 | A01218 | 238 |
| A00876 | A01261 | 297 | A00876 | A01291 | 168 |
| A00876 | A01407 | 339 | A00876 | A01540 | 443 |
| A00876 | A01680 | 446 | A00876 | A01822 | 542 |
| A00876 | A01824 | 446 | A00876 | A02245 | 165 |
| A00876 | A02787 | 152 | A00876 | A02877 | 461 |
| A00876 | A02902 | 391 | A00876 | A03490 | 452 |
| A00876 | A03601 | 160 | A00876 | A03677 | 160 |
| A00876 | A03740 | 307 | A00876 | A03752 | 486 |
| A00876 | A03859 | 230 | A00876 | A03981 | 170 |
| A00876 | A05301 | 276 | A00876 | A05875 | 307 |
| A00876 | A06000 | 286 | A00876 | A06466 | 491 |
| A00876 | A07208 | 352 | A00876 | A07245 | 240 |
| A00876 | A07311 | 491 | A00876 | A07378 | 152 |
| A00876 | A07798 | 305 | A00876 | A08301 | 468 |
| A00876 | A08408 | 230 | A00876 | A08419 | 193 |
| A00876 | A08519 | 347 | A00876 | A08533 | 545 |
| A00876 | A08539 | 165 | A00876 | A08748 | 310 |
| A00876 | A09009 | 152 | A00876 | A09297 | 544 |
| A00876 | A09577 | 490 | A00876 | A09592 | 258 |
| A00876 | A09902 | 160 | A00876 | A10491 | 307 |
| A00876 | A10534 | 223 | A00876 | A11296 | 168 |
| A00876 | A11322 | 195 | A00876 | A11337 | 347 |
| A00876 | A11688 | 215 | A00876 | A12042 | 201 |
| A00876 | A12043 | 160 | A00876 | A12170 | 188 |
| A00876 | A12227 | 532 | A00876 | A12328 | 490 |
| A00876 | A12427 | 235 | A00876 | A13340 | 545 |
| A00876 | A13375 | 196 | A00876 | A13812 | 490 |
| A00876 | A14073 | 473 | A00876 | A14159 | 168 |
| A00876 | A14178 | 247 | A00876 | A14188 | 485 |
| A00876 | A14566 | 157 | A00876 | A14594 | 232 |
| A00876 | A14596 | 193 | A00876 | A14738 | 237 |
| A00876 | A15133 | 348 | A00876 | A15244 | 295 |
| A00876 | A15684 | 458 | A00876 | A15932 | 543 |
| A00876 | A15933 | 532 | A00876 | A16272 | 520 |
| A00876 | A16318 | 241 | A00876 | A16394 | 187 |
| A00876 | A16437 | 475 | A00876 | A16446 | 309 |
| A00876 | A16462 | 156 | A00876 | A16585 | 160 |
| A00876 | A16618 | 390 | A00876 | A16630 | 307 |

|        |        |     |        |        |     |
|--------|--------|-----|--------|--------|-----|
| A00876 | A16671 | 252 | A00876 | A17146 | 358 |
| A00877 | A00951 | 441 | A00877 | A00971 | 475 |
| A00877 | A01017 | 291 | A00877 | A01036 | 491 |
| A00877 | A01101 | 382 | A00877 | A01216 | 489 |
| A00877 | A01290 | 255 | A00877 | A01308 | 438 |
| A00877 | A01345 | 224 | A00877 | A01348 | 294 |
| A00877 | A01366 | 490 | A00877 | A01451 | 490 |
| A00877 | A01454 | 491 | A00877 | A01459 | 486 |
| A00877 | A01514 | 468 | A00877 | A01568 | 491 |
| A00877 | A01580 | 486 | A00877 | A01657 | 283 |
| A00877 | A01687 | 491 | A00877 | A01742 | 171 |
| A00877 | A01758 | 235 | A00877 | A01988 | 327 |
| A00877 | A02698 | 491 | A00877 | A02804 | 445 |
| A00877 | A02847 | 430 | A00877 | A03126 | 201 |
| A00877 | A03518 | 375 | A00877 | A03769 | 246 |
| A00877 | A03817 | 477 | A00877 | A03880 | 272 |
| A00877 | A04256 | 316 | A00877 | A04296 | 200 |
| A00877 | A04449 | 443 | A00877 | A04905 | 319 |
| A00877 | A05301 | 465 | A00877 | A06213 | 281 |
| A00877 | A06277 | 162 | A00877 | A06889 | 184 |
| A00877 | A07054 | 468 | A00877 | A07167 | 373 |
| A00877 | A07227 | 185 | A00877 | A07242 | 491 |
| A00877 | A07483 | 491 | A00877 | A07495 | 491 |
| A00877 | A07665 | 466 | A00877 | A07696 | 474 |
| A00877 | A07709 | 466 | A00877 | A07788 | 162 |
| A00877 | A07816 | 491 | A00877 | A07893 | 491 |
| A00877 | A07934 | 230 | A00877 | A07954 | 411 |
| A00877 | A07965 | 322 | A00877 | A08531 | 490 |
| A00877 | A08536 | 491 | A00877 | A08551 | 490 |
| A00877 | A08552 | 224 | A00877 | A08569 | 162 |
| A00877 | A08594 | 491 | A00877 | A08917 | 313 |
| A00877 | A08934 | 491 | A00877 | A08962 | 323 |
| A00877 | A08985 | 319 | A00877 | A09624 | 360 |
| A00877 | A09666 | 385 | A00877 | A09952 | 174 |
| A00877 | A10260 | 430 | A00877 | A11023 | 489 |
| A00877 | A11149 | 398 | A00877 | A11150 | 490 |
| A00877 | A11180 | 491 | A00877 | A11185 | 228 |
| A00877 | A11281 | 481 | A00877 | A11346 | 489 |
| A00877 | A11472 | 490 | A00877 | A11547 | 491 |
| A00877 | A11665 | 491 | A00877 | A11716 | 296 |
| A00877 | A11902 | 362 | A00877 | A11915 | 484 |
| A00877 | A12047 | 491 | A00877 | A12048 | 446 |
| A00877 | A12051 | 200 | A00877 | A12102 | 412 |
| A00877 | A12722 | 307 | A00877 | A13313 | 200 |
| A00877 | A13927 | 491 | A00877 | A14266 | 490 |
| A00877 | A14281 | 491 | A00877 | A14484 | 312 |

|        |        |     |        |        |     |
|--------|--------|-----|--------|--------|-----|
| A00877 | A14633 | 177 | A00877 | A14661 | 350 |
| A00877 | A14783 | 177 | A00877 | A15035 | 252 |
| A00877 | A15626 | 458 | A00877 | A15930 | 269 |
| A00877 | A16680 | 404 | A00877 | A16787 | 400 |
| A00878 | A00902 | 491 | A00878 | A00906 | 483 |
| A00878 | A00916 | 452 | A00878 | A00923 | 491 |
| A00878 | A00935 | 374 | A00878 | A00949 | 643 |
| A00878 | A00953 | 334 | A00878 | A00955 | 441 |
| A00878 | A00965 | 629 | A00878 | A00966 | 585 |
| A00878 | A00970 | 205 | A00878 | A00983 | 224 |
| A00878 | A00985 | 462 | A00878 | A00987 | 480 |
| A00878 | A00994 | 263 | A00878 | A01000 | 467 |
| A00878 | A01012 | 491 | A00878 | A01024 | 215 |
| A00878 | A01025 | 491 | A00878 | A01031 | 388 |
| A00878 | A01034 | 643 | A00878 | A01037 | 491 |
| A00878 | A01042 | 507 | A00878 | A01046 | 332 |
| A00878 | A01047 | 396 | A00878 | A01054 | 422 |
| A00878 | A01056 | 490 | A00878 | A01067 | 491 |
| A00878 | A01069 | 156 | A00878 | A01072 | 491 |
| A00878 | A01075 | 314 | A00878 | A01085 | 490 |
| A00878 | A01086 | 443 | A00878 | A01090 | 491 |
| A00878 | A01095 | 473 | A00878 | A01101 | 411 |
| A00878 | A01108 | 412 | A00878 | A01112 | 473 |
| A00878 | A01115 | 484 | A00878 | A01119 | 488 |
| A00878 | A01121 | 323 | A00878 | A01127 | 491 |
| A00878 | A01140 | 491 | A00878 | A01144 | 361 |
| A00878 | A01150 | 484 | A00878 | A01152 | 480 |
| A00878 | A01153 | 313 | A00878 | A01154 | 579 |
| A00878 | A01156 | 341 | A00878 | A01160 | 313 |
| A00878 | A01161 | 485 | A00878 | A01166 | 488 |
| A00878 | A01169 | 322 | A00878 | A01184 | 229 |
| A00878 | A01189 | 232 | A00878 | A01192 | 455 |
| A00878 | A01196 | 171 | A00878 | A01206 | 491 |
| A00878 | A01211 | 411 | A00878 | A01213 | 352 |
| A00878 | A01214 | 401 | A00878 | A01215 | 163 |
| A00878 | A01217 | 497 | A00878 | A01218 | 296 |
| A00878 | A01220 | 490 | A00878 | A01221 | 491 |
| A00878 | A01234 | 582 | A00878 | A01238 | 714 |
| A00878 | A01243 | 463 | A00878 | A01247 | 380 |
| A00878 | A01249 | 485 | A00878 | A01263 | 447 |
| A00878 | A01268 | 436 | A00878 | A01291 | 541 |
| A00878 | A01292 | 430 | A00878 | A01300 | 254 |
| A00878 | A01306 | 561 | A00878 | A01335 | 491 |
| A00878 | A01353 | 468 | A00878 | A01365 | 589 |
| A00878 | A01382 | 165 | A00878 | A01392 | 491 |
| A00878 | A01406 | 596 | A00878 | A01407 | 396 |

|        |        |     |        |        |     |
|--------|--------|-----|--------|--------|-----|
| A00878 | A01408 | 179 | A00878 | A01411 | 469 |
| A00878 | A01412 | 247 | A00878 | A01416 | 719 |
| A00878 | A01418 | 319 | A00878 | A01425 | 628 |
| A00878 | A01433 | 491 | A00878 | A01436 | 629 |
| A00878 | A01437 | 446 | A00878 | A01449 | 271 |
| A00878 | A01457 | 484 | A00878 | A01464 | 433 |
| A00878 | A01468 | 629 | A00878 | A01470 | 452 |
| A00878 | A01496 | 491 | A00878 | A01540 | 479 |
| A00878 | A01542 | 154 | A00878 | A01569 | 486 |
| A00878 | A01579 | 491 | A00878 | A01582 | 288 |
| A00878 | A01586 | 628 | A00878 | A01598 | 263 |
| A00878 | A01601 | 458 | A00878 | A01612 | 344 |
| A00878 | A01618 | 154 | A00878 | A01627 | 414 |
| A00878 | A01628 | 899 | A00878 | A01649 | 491 |
| A00878 | A01707 | 218 | A00878 | A01711 | 347 |
| A00878 | A01718 | 436 | A00878 | A01741 | 373 |
| A00878 | A01822 | 238 | A00878 | A02068 | 191 |
| A00878 | A02216 | 333 | A00878 | A02227 | 486 |
| A00878 | A02374 | 187 | A00878 | A02859 | 157 |
| A00878 | A02924 | 299 | A00878 | A03069 | 363 |
| A00878 | A03290 | 159 | A00878 | A03438 | 353 |
| A00878 | A03453 | 396 | A00878 | A03461 | 429 |
| A00878 | A03490 | 641 | A00878 | A03567 | 480 |
| A00878 | A03568 | 402 | A00878 | A03600 | 201 |
| A00878 | A03601 | 234 | A00878 | A03652 | 460 |
| A00878 | A03671 | 279 | A00878 | A03676 | 419 |
| A00878 | A03723 | 202 | A00878 | A03770 | 489 |
| A00878 | A03965 | 472 | A00878 | A03981 | 626 |
| A00878 | A04507 | 208 | A00878 | A04622 | 307 |
| A00878 | A04844 | 224 | A00878 | A05255 | 174 |
| A00878 | A05356 | 241 | A00878 | A05419 | 340 |
| A00878 | A05443 | 297 | A00878 | A05499 | 324 |
| A00878 | A05501 | 479 | A00878 | A05562 | 177 |
| A00878 | A06000 | 273 | A00878 | A06102 | 187 |
| A00878 | A06351 | 643 | A00878 | A06466 | 236 |
| A00878 | A06517 | 159 | A00878 | A06531 | 341 |
| A00878 | A06814 | 423 | A00878 | A06825 | 210 |
| A00878 | A06861 | 282 | A00878 | A06965 | 483 |
| A00878 | A07004 | 157 | A00878 | A07046 | 157 |
| A00878 | A07157 | 358 | A00878 | A07323 | 190 |
| A00878 | A07412 | 369 | A00878 | A07414 | 260 |
| A00878 | A07449 | 480 | A00878 | A07451 | 434 |
| A00878 | A07464 | 219 | A00878 | A07505 | 193 |
| A00878 | A07597 | 384 | A00878 | A07706 | 353 |
| A00878 | A07773 | 307 | A00878 | A07781 | 208 |
| A00878 | A08011 | 491 | A00878 | A08052 | 481 |

|        |        |     |        |        |     |
|--------|--------|-----|--------|--------|-----|
| A00878 | A08055 | 486 | A00878 | A08137 | 223 |
| A00878 | A08144 | 255 | A00878 | A08154 | 294 |
| A00878 | A08273 | 268 | A00878 | A08357 | 416 |
| A00878 | A08359 | 485 | A00878 | A08377 | 580 |
| A00878 | A08398 | 385 | A00878 | A08452 | 475 |
| A00878 | A08521 | 210 | A00878 | A08550 | 606 |
| A00878 | A08556 | 283 | A00878 | A08773 | 491 |
| A00878 | A08901 | 212 | A00878 | A08929 | 241 |
| A00878 | A08958 | 187 | A00878 | A08966 | 388 |
| A00878 | A08972 | 258 | A00878 | A08973 | 628 |
| A00878 | A09148 | 159 | A00878 | A09293 | 486 |
| A00878 | A09332 | 641 | A00878 | A09520 | 335 |
| A00878 | A09722 | 171 | A00878 | A09735 | 489 |
| A00878 | A09939 | 202 | A00878 | A09978 | 491 |
| A00878 | A10006 | 165 | A00878 | A10518 | 224 |
| A00878 | A10532 | 230 | A00878 | A10601 | 345 |
| A00878 | A10616 | 163 | A00878 | A10798 | 373 |
| A00878 | A10909 | 171 | A00878 | A10910 | 484 |
| A00878 | A11390 | 151 | A00878 | A11400 | 182 |
| A00878 | A11453 | 491 | A00878 | A11480 | 443 |
| A00878 | A11518 | 159 | A00878 | A11815 | 643 |
| A00878 | A11882 | 358 | A00878 | A11974 | 171 |
| A00878 | A11992 | 281 | A00878 | A12059 | 187 |
| A00878 | A12157 | 245 | A00878 | A12159 | 187 |
| A00878 | A12241 | 151 | A00878 | A12293 | 245 |
| A00878 | A12310 | 208 | A00878 | A12433 | 393 |
| A00878 | A12881 | 486 | A00878 | A12905 | 159 |
| A00878 | A12923 | 474 | A00878 | A12925 | 247 |
| A00878 | A13042 | 171 | A00878 | A13249 | 402 |
| A00878 | A13333 | 210 | A00878 | A13340 | 461 |
| A00878 | A13369 | 352 | A00878 | A13556 | 303 |
| A00878 | A13747 | 171 | A00878 | A13919 | 417 |
| A00878 | A13983 | 290 | A00878 | A13989 | 554 |
| A00878 | A13992 | 456 | A00878 | A14006 | 483 |
| A00878 | A14073 | 424 | A00878 | A14209 | 200 |
| A00878 | A14216 | 634 | A00878 | A14272 | 190 |
| A00878 | A14449 | 488 | A00878 | A14478 | 344 |
| A00878 | A14479 | 489 | A00878 | A14482 | 643 |
| A00878 | A14498 | 380 | A00878 | A14530 | 168 |
| A00878 | A14568 | 379 | A00878 | A14570 | 254 |
| A00878 | A14589 | 423 | A00878 | A14594 | 246 |
| A00878 | A14701 | 187 | A00878 | A14816 | 180 |
| A00878 | A15082 | 245 | A00878 | A15174 | 187 |
| A00878 | A15219 | 180 | A00878 | A15275 | 170 |
| A00878 | A15291 | 196 | A00878 | A15322 | 247 |
| A00878 | A15376 | 450 | A00878 | A15416 | 174 |

|        |        |     |        |        |     |
|--------|--------|-----|--------|--------|-----|
| A00878 | A15450 | 159 | A00878 | A15498 | 168 |
| A00878 | A15500 | 343 | A00878 | A15624 | 201 |
| A00878 | A15660 | 466 | A00878 | A15684 | 489 |
| A00878 | A15932 | 439 | A00878 | A15988 | 491 |
| A00878 | A16029 | 245 | A00878 | A16272 | 196 |
| A00878 | A16306 | 361 | A00878 | A16457 | 210 |
| A00878 | A16631 | 324 | A00878 | A16655 | 187 |
| A00878 | A17152 | 296 | A00879 | A00905 | 539 |
| A00879 | A00909 | 350 | A00879 | A00916 | 490 |
| A00879 | A01029 | 745 | A00879 | A01075 | 338 |
| A00879 | A01088 | 440 | A00879 | A01136 | 494 |
| A00879 | A01150 | 188 | A00879 | A01151 | 379 |
| A00879 | A01184 | 299 | A00879 | A01193 | 481 |
| A00879 | A01206 | 163 | A00879 | A01234 | 469 |
| A00879 | A01266 | 510 | A00879 | A01268 | 540 |
| A00879 | A01285 | 243 | A00879 | A01295 | 163 |
| A00879 | A01334 | 541 | A00879 | A01351 | 279 |
| A00879 | A01391 | 170 | A00879 | A01434 | 541 |
| A00879 | A01468 | 154 | A00879 | A01470 | 167 |
| A00879 | A01492 | 477 | A00879 | A01598 | 443 |
| A00879 | A01612 | 491 | A00879 | A02064 | 190 |
| A00879 | A02733 | 273 | A00879 | A03494 | 324 |
| A00879 | A07111 | 224 | A00879 | A07524 | 491 |
| A00879 | A07706 | 341 | A00879 | A07898 | 156 |
| A00879 | A07924 | 475 | A00879 | A08022 | 268 |
| A00879 | A08137 | 467 | A00879 | A08201 | 156 |
| A00879 | A08327 | 745 | A00879 | A08431 | 539 |
| A00879 | A08491 | 196 | A00879 | A08542 | 377 |
| A00879 | A08571 | 417 | A00879 | A08756 | 205 |
| A00879 | A09004 | 160 | A00879 | A09699 | 424 |
| A00879 | A11496 | 156 | A00879 | A11497 | 156 |
| A00879 | A11930 | 260 | A00879 | A11938 | 472 |
| A00879 | A12082 | 179 | A00879 | A12146 | 268 |
| A00879 | A12757 | 156 | A00879 | A12829 | 247 |
| A00879 | A12853 | 152 | A00879 | A13228 | 238 |
| A00879 | A13510 | 380 | A00879 | A13928 | 156 |
| A00879 | A13989 | 483 | A00879 | A14006 | 480 |
| A00879 | A14178 | 305 | A00879 | A14184 | 414 |
| A00879 | A14257 | 347 | A00879 | A14655 | 479 |
| A00879 | A14728 | 466 | A00879 | A14826 | 358 |
| A00879 | A14986 | 245 | A00879 | A15311 | 404 |
| A00879 | A15312 | 311 | A00879 | A15313 | 263 |
| A00879 | A15338 | 368 | A00879 | A15416 | 246 |
| A00879 | A15432 | 332 | A00879 | A15629 | 313 |
| A00879 | A16048 | 340 | A00879 | A16335 | 218 |
| A00879 | A16699 | 156 | A00880 | A01144 | 356 |

|        |        |     |        |        |     |
|--------|--------|-----|--------|--------|-----|
| A00880 | A01302 | 438 | A00880 | A06687 | 319 |
| A00880 | A08484 | 171 | A00880 | A08555 | 276 |
| A00880 | A09298 | 379 | A00880 | A11734 | 260 |
| A00880 | A12200 | 488 | A00880 | A12858 | 174 |
| A00880 | A13983 | 475 | A00880 | A14199 | 249 |
| A00880 | A15528 | 272 | A00881 | A00903 | 258 |
| A00881 | A00954 | 435 | A00881 | A00978 | 419 |
| A00881 | A00992 | 246 | A00881 | A01007 | 202 |
| A00881 | A01019 | 538 | A00881 | A01020 | 185 |
| A00881 | A01064 | 269 | A00881 | A01075 | 343 |
| A00881 | A01079 | 170 | A00881 | A01184 | 337 |
| A00881 | A01195 | 533 | A00881 | A01200 | 521 |
| A00881 | A01206 | 394 | A00881 | A01208 | 247 |
| A00881 | A01244 | 228 | A00881 | A01304 | 157 |
| A00881 | A01325 | 468 | A00881 | A01383 | 424 |
| A00881 | A01398 | 526 | A00881 | A01401 | 540 |
| A00881 | A01411 | 232 | A00881 | A01468 | 221 |
| A00881 | A01500 | 536 | A00881 | A01576 | 434 |
| A00881 | A01720 | 374 | A00881 | A01741 | 235 |
| A00881 | A03044 | 235 | A00881 | A03207 | 210 |
| A00881 | A03526 | 439 | A00881 | A03775 | 451 |
| A00881 | A04648 | 531 | A00881 | A04687 | 156 |
| A00881 | A05027 | 271 | A00881 | A06501 | 324 |
| A00881 | A06564 | 238 | A00881 | A06803 | 539 |
| A00881 | A07290 | 159 | A00881 | A07325 | 486 |
| A00881 | A07670 | 490 | A00881 | A07850 | 507 |
| A00881 | A07853 | 210 | A00881 | A07887 | 536 |
| A00881 | A07920 | 256 | A00881 | A08022 | 484 |
| A00881 | A08190 | 491 | A00881 | A08383 | 530 |
| A00881 | A08553 | 341 | A00881 | A08678 | 160 |
| A00881 | A08818 | 156 | A00881 | A09427 | 184 |
| A00881 | A09502 | 156 | A00881 | A09621 | 219 |
| A00881 | A09712 | 480 | A00881 | A10642 | 391 |
| A00881 | A11344 | 156 | A00881 | A11395 | 491 |
| A00881 | A11674 | 156 | A00881 | A11737 | 154 |
| A00881 | A13472 | 293 | A00881 | A13989 | 436 |
| A00881 | A15559 | 297 | A00881 | A15943 | 484 |
| A00881 | A15946 | 198 | A00881 | A16228 | 504 |
| A00881 | A17084 | 63  | A00882 | A00900 | 371 |
| A00882 | A01004 | 276 | A00882 | A01023 | 249 |
| A00882 | A01161 | 367 | A00882 | A01332 | 489 |
| A00882 | A01461 | 490 | A00882 | A01515 | 435 |
| A00882 | A01522 | 286 | A00882 | A01565 | 435 |
| A00882 | A01575 | 157 | A00882 | A01578 | 480 |
| A00882 | A01632 | 404 | A00882 | A01718 | 377 |
| A00882 | A01916 | 173 | A00882 | A01983 | 490 |



|        |        |     |        |        |     |
|--------|--------|-----|--------|--------|-----|
| A00882 | A02049 | 63  | A00882 | A02068 | 286 |
| A00882 | A02333 | 228 | A00882 | A02586 | 174 |
| A00882 | A02818 | 176 | A00882 | A02935 | 172 |
| A00882 | A03104 | 480 | A00882 | A03211 | 434 |
| A00882 | A03753 | 486 | A00882 | A03829 | 224 |
| A00882 | A03910 | 364 | A00882 | A03913 | 436 |
| A00882 | A03974 | 466 | A00882 | A04175 | 151 |
| A00882 | A04252 | 468 | A00882 | A04275 | 484 |
| A00882 | A04276 | 188 | A00882 | A04337 | 343 |
| A00882 | A04410 | 190 | A00882 | A04415 | 324 |
| A00882 | A04449 | 361 | A00882 | A04715 | 439 |
| A00882 | A04754 | 252 | A00882 | A04944 | 190 |
| A00882 | A04964 | 290 | A00882 | A05155 | 452 |
| A00882 | A05356 | 465 | A00882 | A05601 | 491 |
| A00882 | A05865 | 185 | A00882 | A06415 | 187 |
| A00882 | A06868 | 281 | A00882 | A07159 | 177 |
| A00882 | A07209 | 424 | A00882 | A07479 | 274 |
| A00882 | A08093 | 480 | A00882 | A08097 | 489 |
| A00882 | A08309 | 458 | A00882 | A08458 | 273 |
| A00882 | A08461 | 168 | A00882 | A08525 | 229 |
| A00882 | A08859 | 443 | A00882 | A09469 | 477 |
| A00882 | A10024 | 227 | A00882 | A10169 | 302 |
| A00882 | A10594 | 157 | A00882 | A10603 | 154 |
| A00882 | A10631 | 467 | A00882 | A11280 | 356 |
| A00882 | A11299 | 324 | A00882 | A11454 | 377 |
| A00882 | A11982 | 249 | A00882 | A12212 | 279 |
| A00882 | A12282 | 213 | A00882 | A12493 | 314 |
| A00882 | A12950 | 329 | A00882 | A13369 | 491 |
| A00882 | A13871 | 262 | A00882 | A13874 | 180 |
| A00882 | A13945 | 490 | A00882 | A13987 | 205 |
| A00882 | A14052 | 291 | A00882 | A14071 | 347 |
| A00882 | A14135 | 260 | A00882 | A14202 | 475 |
| A00882 | A14229 | 419 | A00882 | A14247 | 491 |
| A00882 | A14303 | 221 | A00882 | A14381 | 317 |
| A00882 | A14570 | 489 | A00882 | A14611 | 157 |
| A00882 | A14661 | 481 | A00882 | A14893 | 402 |
| A00882 | A15286 | 205 | A00882 | A15292 | 439 |
| A00882 | A15301 | 168 | A00882 | A15302 | 187 |
| A00882 | A15312 | 159 | A00882 | A15366 | 479 |
| A00882 | A15384 | 168 | A00882 | A15432 | 276 |
| A00882 | A15457 | 221 | A00882 | A15462 | 190 |
| A00882 | A15495 | 443 | A00882 | A15557 | 170 |
| A00882 | A15641 | 157 | A00882 | A15680 | 313 |
| A00882 | A16132 | 451 | A00882 | A16143 | 227 |
| A00882 | A16792 | 187 | A00882 | A16901 | 217 |
| A00883 | A00884 | 542 | A00883 | A00887 | 327 |

|        |        |     |        |        |     |
|--------|--------|-----|--------|--------|-----|
| A00883 | A00904 | 180 | A00883 | A00905 | 491 |
| A00883 | A00915 | 249 | A00883 | A00916 | 491 |
| A00883 | A00918 | 607 | A00883 | A00923 | 491 |
| A00883 | A00926 | 545 | A00883 | A00927 | 542 |
| A00883 | A00928 | 469 | A00883 | A00936 | 430 |
| A00883 | A00954 | 491 | A00883 | A00956 | 460 |
| A00883 | A00958 | 486 | A00883 | A00975 | 545 |
| A00883 | A00983 | 165 | A00883 | A00989 | 425 |
| A00883 | A00992 | 425 | A00883 | A01000 | 469 |
| A00883 | A01014 | 467 | A00883 | A01022 | 488 |
| A00883 | A01026 | 462 | A00883 | A01039 | 498 |
| A00883 | A01052 | 545 | A00883 | A01057 | 490 |
| A00883 | A01058 | 544 | A00883 | A01075 | 688 |
| A00883 | A01077 | 543 | A00883 | A01080 | 951 |
| A00883 | A01087 | 375 | A00883 | A01088 | 587 |
| A00883 | A01091 | 491 | A00883 | A01097 | 491 |
| A00883 | A01100 | 491 | A00883 | A01106 | 483 |
| A00883 | A01112 | 369 | A00883 | A01118 | 180 |
| A00883 | A01122 | 491 | A00883 | A01125 | 185 |
| A00883 | A01127 | 249 | A00883 | A01132 | 195 |
| A00883 | A01136 | 491 | A00883 | A01143 | 462 |
| A00883 | A01150 | 491 | A00883 | A01151 | 477 |
| A00883 | A01156 | 588 | A00883 | A01162 | 154 |
| A00883 | A01166 | 491 | A00883 | A01169 | 945 |
| A00883 | A01173 | 475 | A00883 | A01194 | 481 |
| A00883 | A01195 | 245 | A00883 | A01203 | 654 |
| A00883 | A01206 | 491 | A00883 | A01211 | 491 |
| A00883 | A01212 | 801 | A00883 | A01213 | 254 |
| A00883 | A01217 | 240 | A00883 | A01221 | 477 |
| A00883 | A01234 | 491 | A00883 | A01235 | 256 |
| A00883 | A01243 | 491 | A00883 | A01254 | 475 |
| A00883 | A01259 | 485 | A00883 | A01266 | 371 |
| A00883 | A01267 | 545 | A00883 | A01268 | 477 |
| A00883 | A01271 | 259 | A00883 | A01278 | 399 |
| A00883 | A01291 | 491 | A00883 | A01299 | 463 |
| A00883 | A01326 | 372 | A00883 | A01327 | 379 |
| A00883 | A01329 | 658 | A00883 | A01338 | 475 |
| A00883 | A01339 | 544 | A00883 | A01351 | 639 |
| A00883 | A01353 | 402 | A00883 | A01354 | 491 |
| A00883 | A01370 | 491 | A00883 | A01371 | 433 |
| A00883 | A01376 | 269 | A00883 | A01384 | 390 |
| A00883 | A01391 | 208 | A00883 | A01398 | 385 |
| A00883 | A01406 | 489 | A00883 | A01418 | 479 |
| A00883 | A01419 | 245 | A00883 | A01431 | 490 |
| A00883 | A01444 | 484 | A00883 | A01451 | 491 |
| A00883 | A01457 | 483 | A00883 | A01458 | 530 |

|        |        |     |        |        |     |
|--------|--------|-----|--------|--------|-----|
| A00883 | A01459 | 491 | A00883 | A01468 | 486 |
| A00883 | A01470 | 491 | A00883 | A01478 | 457 |
| A00883 | A01492 | 532 | A00883 | A01500 | 454 |
| A00883 | A01501 | 252 | A00883 | A01503 | 622 |
| A00883 | A01506 | 405 | A00883 | A01507 | 490 |
| A00883 | A01516 | 367 | A00883 | A01524 | 899 |
| A00883 | A01555 | 436 | A00883 | A01558 | 489 |
| A00883 | A01574 | 486 | A00883 | A01582 | 489 |
| A00883 | A01588 | 488 | A00883 | A01598 | 491 |
| A00883 | A01606 | 489 | A00883 | A01612 | 536 |
| A00883 | A01614 | 491 | A00883 | A01627 | 372 |
| A00883 | A01638 | 468 | A00883 | A01647 | 656 |
| A00883 | A01649 | 491 | A00883 | A01660 | 491 |
| A00883 | A01671 | 273 | A00883 | A01682 | 372 |
| A00883 | A01712 | 378 | A00883 | A01722 | 363 |
| A00883 | A01724 | 268 | A00883 | A01741 | 899 |
| A00883 | A01761 | 188 | A00883 | A01790 | 283 |
| A00883 | A01931 | 202 | A00883 | A01941 | 246 |
| A00883 | A01988 | 465 | A00883 | A02086 | 312 |
| A00883 | A02116 | 243 | A00883 | A02157 | 218 |
| A00883 | A02212 | 545 | A00883 | A02238 | 165 |
| A00883 | A02252 | 160 | A00883 | A02411 | 173 |
| A00883 | A02436 | 260 | A00883 | A02452 | 491 |
| A00883 | A03057 | 323 | A00883 | A03104 | 480 |
| A00883 | A03259 | 180 | A00883 | A03298 | 479 |
| A00883 | A03304 | 171 | A00883 | A03334 | 299 |
| A00883 | A03434 | 286 | A00883 | A03446 | 170 |
| A00883 | A03480 | 319 | A00883 | A03494 | 488 |
| A00883 | A03567 | 491 | A00883 | A03568 | 243 |
| A00883 | A03569 | 491 | A00883 | A03570 | 490 |
| A00883 | A03597 | 477 | A00883 | A03617 | 167 |
| A00883 | A03676 | 249 | A00883 | A03682 | 369 |
| A00883 | A03703 | 414 | A00883 | A03835 | 223 |
| A00883 | A03893 | 406 | A00883 | A03910 | 162 |
| A00883 | A04033 | 475 | A00883 | A04050 | 904 |
| A00883 | A04062 | 263 | A00883 | A04337 | 395 |
| A00883 | A04449 | 285 | A00883 | A04562 | 151 |
| A00883 | A04666 | 475 | A00883 | A04887 | 174 |
| A00883 | A05196 | 258 | A00883 | A05276 | 229 |
| A00883 | A05288 | 489 | A00883 | A05427 | 277 |
| A00883 | A05539 | 266 | A00883 | A05568 | 154 |
| A00883 | A05570 | 232 | A00883 | A05765 | 414 |
| A00883 | A05775 | 208 | A00883 | A06272 | 466 |
| A00883 | A06508 | 154 | A00883 | A06510 | 162 |
| A00883 | A06640 | 243 | A00883 | A06750 | 658 |
| A00883 | A06819 | 489 | A00883 | A06832 | 319 |

|        |        |     |        |        |     |
|--------|--------|-----|--------|--------|-----|
| A00883 | A06861 | 224 | A00883 | A06881 | 322 |
| A00883 | A06898 | 389 | A00883 | A06907 | 490 |
| A00883 | A06968 | 232 | A00883 | A06974 | 374 |
| A00883 | A07004 | 462 | A00883 | A07043 | 174 |
| A00883 | A07054 | 254 | A00883 | A07081 | 436 |
| A00883 | A07096 | 160 | A00883 | A07101 | 474 |
| A00883 | A07203 | 196 | A00883 | A07209 | 470 |
| A00883 | A07226 | 529 | A00883 | A07244 | 649 |
| A00883 | A07266 | 470 | A00883 | A07317 | 236 |
| A00883 | A07347 | 408 | A00883 | A07355 | 486 |
| A00883 | A07402 | 162 | A00883 | A07403 | 398 |
| A00883 | A07434 | 346 | A00883 | A07439 | 241 |
| A00883 | A07457 | 486 | A00883 | A07497 | 171 |
| A00883 | A07520 | 314 | A00883 | A07583 | 319 |
| A00883 | A07587 | 324 | A00883 | A07604 | 480 |
| A00883 | A07670 | 372 | A00883 | A07675 | 168 |
| A00883 | A07706 | 488 | A00883 | A07708 | 291 |
| A00883 | A07715 | 420 | A00883 | A07750 | 174 |
| A00883 | A07756 | 491 | A00883 | A07853 | 302 |
| A00883 | A07956 | 489 | A00883 | A07961 | 454 |
| A00883 | A07986 | 402 | A00883 | A08022 | 491 |
| A00883 | A08028 | 191 | A00883 | A08118 | 267 |
| A00883 | A08119 | 307 | A00883 | A08123 | 268 |
| A00883 | A08137 | 491 | A00883 | A08150 | 154 |
| A00883 | A08161 | 63  | A00883 | A08180 | 268 |
| A00883 | A08248 | 488 | A00883 | A08281 | 491 |
| A00883 | A08343 | 419 | A00883 | A08353 | 268 |
| A00883 | A08357 | 362 | A00883 | A08362 | 187 |
| A00883 | A08383 | 475 | A00883 | A08413 | 174 |
| A00883 | A08512 | 171 | A00883 | A08517 | 491 |
| A00883 | A08571 | 491 | A00883 | A08679 | 430 |
| A00883 | A08718 | 187 | A00883 | A08834 | 160 |
| A00883 | A08882 | 473 | A00883 | A08957 | 213 |
| A00883 | A08960 | 479 | A00883 | A08977 | 378 |
| A00883 | A08982 | 491 | A00883 | A08989 | 411 |
| A00883 | A08990 | 469 | A00883 | A09078 | 160 |
| A00883 | A09302 | 221 | A00883 | A09306 | 268 |
| A00883 | A09314 | 319 | A00883 | A09319 | 899 |
| A00883 | A09331 | 232 | A00883 | A09343 | 183 |
| A00883 | A09627 | 160 | A00883 | A09659 | 296 |
| A00883 | A09669 | 340 | A00883 | A09670 | 438 |
| A00883 | A09672 | 481 | A00883 | A09687 | 338 |
| A00883 | A09702 | 63  | A00883 | A09718 | 229 |
| A00883 | A09727 | 417 | A00883 | A09754 | 235 |
| A00883 | A09857 | 474 | A00883 | A09876 | 279 |
| A00883 | A10156 | 457 | A00883 | A10200 | 269 |

|        |        |     |        |        |     |
|--------|--------|-----|--------|--------|-----|
| A00883 | A10250 | 347 | A00883 | A10372 | 160 |
| A00883 | A10616 | 177 | A00883 | A10624 | 475 |
| A00883 | A10797 | 293 | A00883 | A11137 | 174 |
| A00883 | A11141 | 174 | A00883 | A11170 | 191 |
| A00883 | A11186 | 234 | A00883 | A11277 | 491 |
| A00883 | A11291 | 472 | A00883 | A11297 | 449 |
| A00883 | A11301 | 474 | A00883 | A11312 | 449 |
| A00883 | A11316 | 484 | A00883 | A11327 | 156 |
| A00883 | A11365 | 160 | A00883 | A11368 | 457 |
| A00883 | A11376 | 252 | A00883 | A11397 | 402 |
| A00883 | A11474 | 290 | A00883 | A11476 | 468 |
| A00883 | A11598 | 485 | A00883 | A11649 | 180 |
| A00883 | A11670 | 313 | A00883 | A11673 | 366 |
| A00883 | A11735 | 426 | A00883 | A11737 | 362 |
| A00883 | A11741 | 260 | A00883 | A11842 | 235 |
| A00883 | A11914 | 485 | A00883 | A11933 | 377 |
| A00883 | A11983 | 353 | A00883 | A12020 | 215 |
| A00883 | A12101 | 345 | A00883 | A12201 | 174 |
| A00883 | A12241 | 350 | A00883 | A12255 | 438 |
| A00883 | A12284 | 372 | A00883 | A12325 | 486 |
| A00883 | A12350 | 241 | A00883 | A12365 | 259 |
| A00883 | A12658 | 319 | A00883 | A12810 | 434 |
| A00883 | A12824 | 865 | A00883 | A12853 | 369 |
| A00883 | A12866 | 268 | A00883 | A12887 | 470 |
| A00883 | A13039 | 174 | A00883 | A13040 | 174 |
| A00883 | A13098 | 191 | A00883 | A13105 | 340 |
| A00883 | A13340 | 221 | A00883 | A13452 | 174 |
| A00883 | A13620 | 279 | A00883 | A13715 | 174 |
| A00883 | A13917 | 176 | A00883 | A13928 | 251 |
| A00883 | A13989 | 491 | A00883 | A14006 | 491 |
| A00883 | A14007 | 160 | A00883 | A14147 | 481 |
| A00883 | A14148 | 477 | A00883 | A14170 | 156 |
| A00883 | A14196 | 559 | A00883 | A14200 | 490 |
| A00883 | A14202 | 243 | A00883 | A14208 | 477 |
| A00883 | A14218 | 491 | A00883 | A14220 | 542 |
| A00883 | A14246 | 582 | A00883 | A14253 | 210 |
| A00883 | A14257 | 477 | A00883 | A14266 | 314 |
| A00883 | A14272 | 435 | A00883 | A14352 | 179 |
| A00883 | A14431 | 255 | A00883 | A14454 | 366 |
| A00883 | A14461 | 246 | A00883 | A14470 | 383 |
| A00883 | A14511 | 477 | A00883 | A14552 | 174 |
| A00883 | A14566 | 339 | A00883 | A14596 | 491 |
| A00883 | A14597 | 490 | A00883 | A14621 | 190 |
| A00883 | A14635 | 435 | A00883 | A14636 | 425 |
| A00883 | A14659 | 486 | A00883 | A14701 | 491 |
| A00883 | A14836 | 347 | A00883 | A14875 | 171 |

|        |        |     |        |        |     |
|--------|--------|-----|--------|--------|-----|
| A00883 | A14898 | 174 | A00883 | A15034 | 288 |
| A00883 | A15057 | 174 | A00883 | A15185 | 457 |
| A00883 | A15188 | 423 | A00883 | A15237 | 491 |
| A00883 | A15257 | 545 | A00883 | A15282 | 201 |
| A00883 | A15292 | 486 | A00883 | A15297 | 829 |
| A00883 | A15309 | 491 | A00883 | A15314 | 491 |
| A00883 | A15315 | 226 | A00883 | A15317 | 418 |
| A00883 | A15323 | 491 | A00883 | A15324 | 568 |
| A00883 | A15330 | 489 | A00883 | A15338 | 491 |
| A00883 | A15339 | 491 | A00883 | A15349 | 270 |
| A00883 | A15353 | 491 | A00883 | A15354 | 329 |
| A00883 | A15355 | 420 | A00883 | A15359 | 407 |
| A00883 | A15360 | 374 | A00883 | A15363 | 488 |
| A00883 | A15366 | 490 | A00883 | A15379 | 162 |
| A00883 | A15419 | 491 | A00883 | A15431 | 491 |
| A00883 | A15502 | 491 | A00883 | A15505 | 389 |
| A00883 | A15507 | 477 | A00883 | A15519 | 374 |
| A00883 | A15530 | 477 | A00883 | A15534 | 258 |
| A00883 | A15535 | 402 | A00883 | A15537 | 324 |
| A00883 | A15540 | 475 | A00883 | A15543 | 182 |
| A00883 | A15558 | 491 | A00883 | A15559 | 563 |
| A00883 | A15561 | 429 | A00883 | A15564 | 491 |
| A00883 | A15565 | 401 | A00883 | A15596 | 491 |
| A00883 | A15624 | 278 | A00883 | A15660 | 491 |
| A00883 | A15684 | 488 | A00883 | A15702 | 388 |
| A00883 | A15710 | 486 | A00883 | A15717 | 283 |
| A00883 | A15722 | 165 | A00883 | A15725 | 413 |
| A00883 | A15729 | 491 | A00883 | A15738 | 234 |
| A00883 | A15747 | 491 | A00883 | A15749 | 465 |
| A00883 | A15763 | 491 | A00883 | A15779 | 489 |
| A00883 | A15788 | 491 | A00883 | A15820 | 288 |
| A00883 | A15867 | 490 | A00883 | A15871 | 311 |
| A00883 | A15946 | 299 | A00883 | A15947 | 455 |
| A00883 | A16093 | 278 | A00883 | A16293 | 369 |
| A00883 | A16311 | 490 | A00883 | A16312 | 174 |
| A00883 | A16358 | 346 | A00883 | A16359 | 180 |
| A00883 | A16458 | 434 | A00883 | A16463 | 491 |
| A00883 | A16495 | 241 | A00883 | A16496 | 361 |
| A00883 | A16510 | 274 | A00883 | A16627 | 347 |
| A00883 | A16860 | 489 | A00883 | A16890 | 268 |
| A00883 | A16949 | 269 | A00883 | A17063 | 491 |
| A00883 | A17127 | 340 | A00883 | A17141 | 241 |
| A00884 | A00926 | 544 | A00884 | A00927 | 177 |
| A00884 | A00942 | 281 | A00884 | A00975 | 160 |
| A00884 | A01001 | 229 | A00884 | A01039 | 160 |
| A00884 | A01058 | 160 | A00884 | A01077 | 192 |

|        |        |     |        |        |     |
|--------|--------|-----|--------|--------|-----|
| A00884 | A01080 | 160 | A00884 | A01097 | 172 |
| A00884 | A01106 | 336 | A00884 | A01122 | 195 |
| A00884 | A01169 | 195 | A00884 | A01212 | 208 |
| A00884 | A01261 | 232 | A00884 | A01267 | 160 |
| A00884 | A01339 | 538 | A00884 | A01370 | 447 |
| A00884 | A01401 | 223 | A00884 | A02151 | 251 |
| A00884 | A02212 | 160 | A00884 | A02254 | 183 |
| A00884 | A02257 | 313 | A00884 | A03149 | 204 |
| A00884 | A04015 | 324 | A00884 | A04990 | 307 |
| A00884 | A05017 | 224 | A00884 | A06750 | 165 |
| A00884 | A06968 | 308 | A00884 | A07096 | 160 |
| A00884 | A07101 | 200 | A00884 | A07205 | 201 |
| A00884 | A07226 | 160 | A00884 | A07457 | 191 |
| A00884 | A07655 | 240 | A00884 | A07756 | 443 |
| A00884 | A08834 | 160 | A00884 | A09331 | 260 |
| A00884 | A09627 | 160 | A00884 | A10372 | 160 |
| A00884 | A11068 | 308 | A00884 | A11365 | 160 |
| A00884 | A11735 | 160 | A00884 | A11737 | 160 |
| A00884 | A11914 | 160 | A00884 | A12658 | 160 |
| A00884 | A12824 | 541 | A00884 | A12863 | 273 |
| A00884 | A13824 | 180 | A00884 | A14007 | 160 |
| A00884 | A14026 | 174 | A00884 | A15257 | 160 |
| A00884 | A15505 | 168 | A00884 | A16076 | 210 |
| A00884 | A16192 | 301 | A00884 | A16711 | 228 |
| A00885 | A00886 | 156 | A00885 | A00889 | 469 |
| A00885 | A00890 | 418 | A00885 | A00891 | 165 |
| A00885 | A00892 | 173 | A00885 | A00893 | 339 |
| A00885 | A00895 | 489 | A00885 | A00898 | 485 |
| A00885 | A02024 | 356 | A00885 | A02112 | 171 |
| A00885 | A03151 | 316 | A00885 | A04170 | 279 |
| A00885 | A04782 | 245 | A00885 | A06673 | 291 |
| A00885 | A06992 | 470 | A00885 | A08891 | 488 |
| A00885 | A09423 | 373 | A00885 | A12891 | 269 |
| A00885 | A14174 | 455 | A00885 | A16046 | 305 |
| A00886 | A00889 | 491 | A00886 | A00890 | 491 |
| A00886 | A00892 | 491 | A00886 | A00894 | 491 |
| A00886 | A00897 | 481 | A00886 | A00898 | 491 |
| A00886 | A00899 | 213 | A00886 | A01004 | 238 |
| A00886 | A01572 | 423 | A00886 | A03663 | 163 |
| A00886 | A04449 | 307 | A00886 | A08435 | 490 |
| A00886 | A08891 | 491 | A00886 | A09008 | 439 |
| A00886 | A11475 | 345 | A00886 | A13087 | 361 |
| A00886 | A13423 | 319 | A00886 | A14174 | 446 |
| A00887 | A00981 | 271 | A00887 | A01009 | 534 |
| A00887 | A01052 | 945 | A00887 | A01172 | 491 |
| A00887 | A01173 | 267 | A00887 | A01178 | 363 |

|        |        |     |        |        |     |
|--------|--------|-----|--------|--------|-----|
| A00887 | A01307 | 374 | A00887 | A01404 | 899 |
| A00887 | A01450 | 281 | A00887 | A01507 | 173 |
| A00887 | A01512 | 945 | A00887 | A01524 | 936 |
| A00887 | A01527 | 939 | A00887 | A01529 | 174 |
| A00887 | A01530 | 159 | A00887 | A01548 | 490 |
| A00887 | A01558 | 899 | A00887 | A01561 | 899 |
| A00887 | A01565 | 540 | A00887 | A01572 | 163 |
| A00887 | A01588 | 943 | A00887 | A01602 | 303 |
| A00887 | A01606 | 454 | A00887 | A01631 | 63  |
| A00887 | A01638 | 899 | A00887 | A01660 | 249 |
| A00887 | A01665 | 899 | A00887 | A01675 | 477 |
| A00887 | A01688 | 491 | A00887 | A01691 | 408 |
| A00887 | A01694 | 180 | A00887 | A01709 | 899 |
| A00887 | A01729 | 313 | A00887 | A01730 | 427 |
| A00887 | A01790 | 326 | A00887 | A01798 | 154 |
| A00887 | A01844 | 912 | A00887 | A01897 | 132 |
| A00887 | A01899 | 160 | A00887 | A01913 | 63  |
| A00887 | A02056 | 251 | A00887 | A02163 | 223 |
| A00887 | A02343 | 326 | A00887 | A02411 | 350 |
| A00887 | A02436 | 272 | A00887 | A02492 | 419 |
| A00887 | A02687 | 489 | A00887 | A02698 | 544 |
| A00887 | A02733 | 210 | A00887 | A02752 | 252 |
| A00887 | A02939 | 160 | A00887 | A03007 | 456 |
| A00887 | A03018 | 416 | A00887 | A03223 | 310 |
| A00887 | A03268 | 168 | A00887 | A03436 | 246 |
| A00887 | A03451 | 418 | A00887 | A03477 | 232 |
| A00887 | A03778 | 451 | A00887 | A03854 | 288 |
| A00887 | A03948 | 361 | A00887 | A03990 | 210 |
| A00887 | A04020 | 491 | A00887 | A04062 | 245 |
| A00887 | A04070 | 229 | A00887 | A04074 | 466 |
| A00887 | A04125 | 157 | A00887 | A04249 | 163 |
| A00887 | A04297 | 193 | A00887 | A04310 | 183 |
| A00887 | A04342 | 217 | A00887 | A04442 | 172 |
| A00887 | A04699 | 899 | A00887 | A04772 | 212 |
| A00887 | A04879 | 456 | A00887 | A04991 | 384 |
| A00887 | A05032 | 160 | A00887 | A05082 | 480 |
| A00887 | A05216 | 430 | A00887 | A05367 | 179 |
| A00887 | A05414 | 458 | A00887 | A05449 | 428 |
| A00887 | A05556 | 534 | A00887 | A05577 | 391 |
| A00887 | A05621 | 281 | A00887 | A05701 | 312 |
| A00887 | A05797 | 364 | A00887 | A05809 | 205 |
| A00887 | A05854 | 488 | A00887 | A05925 | 229 |
| A00887 | A05997 | 163 | A00887 | A06057 | 221 |
| A00887 | A06257 | 171 | A00887 | A06588 | 433 |
| A00887 | A06608 | 899 | A00887 | A06609 | 899 |
| A00887 | A06610 | 490 | A00887 | A06640 | 216 |



|        |        |     |        |        |     |
|--------|--------|-----|--------|--------|-----|
| A00887 | A06660 | 236 | A00887 | A06821 | 332 |
| A00887 | A07218 | 226 | A00887 | A07311 | 899 |
| A00887 | A07339 | 462 | A00887 | A08280 | 168 |
| A00887 | A08850 | 485 | A00887 | A08878 | 483 |
| A00887 | A09018 | 420 | A00887 | A09124 | 441 |
| A00887 | A09149 | 469 | A00887 | A09273 | 212 |
| A00887 | A09438 | 335 | A00887 | A09504 | 467 |
| A00887 | A09727 | 369 | A00887 | A09826 | 490 |
| A00887 | A10615 | 162 | A00887 | A10765 | 367 |
| A00887 | A11125 | 907 | A00887 | A11321 | 193 |
| A00887 | A11487 | 457 | A00887 | A11604 | 411 |
| A00887 | A11983 | 945 | A00887 | A13234 | 152 |
| A00887 | A13829 | 288 | A00887 | A13985 | 899 |
| A00887 | A13995 | 899 | A00887 | A13997 | 467 |
| A00887 | A14002 | 353 | A00887 | A14006 | 457 |
| A00887 | A14016 | 485 | A00887 | A14027 | 221 |
| A00887 | A14055 | 265 | A00887 | A14200 | 170 |
| A00887 | A14236 | 547 | A00887 | A14248 | 160 |
| A00887 | A14366 | 491 | A00887 | A14443 | 907 |
| A00887 | A14444 | 236 | A00887 | A14596 | 329 |
| A00887 | A14659 | 485 | A00887 | A14960 | 183 |
| A00887 | A15282 | 279 | A00887 | A15510 | 423 |
| A00887 | A15606 | 498 | A00887 | A15902 | 151 |
| A00888 | A00968 | 199 | A00888 | A01021 | 488 |
| A00888 | A01074 | 299 | A00888 | A01269 | 223 |
| A00888 | A01312 | 226 | A00888 | A01386 | 177 |
| A00888 | A01622 | 438 | A00888 | A02001 | 297 |
| A00888 | A02112 | 165 | A00888 | A03728 | 678 |
| A00888 | A04061 | 260 | A00888 | A04178 | 302 |
| A00888 | A06085 | 674 | A00888 | A06264 | 343 |
| A00888 | A06924 | 438 | A00888 | A07889 | 302 |
| A00888 | A08939 | 438 | A00888 | A13949 | 205 |
| A00888 | A13969 | 187 | A00888 | A15367 | 438 |
| A00888 | A15372 | 168 | A00888 | A15837 | 221 |
| A00889 | A00890 | 491 | A00889 | A00892 | 491 |
| A00889 | A00893 | 480 | A00889 | A00894 | 491 |
| A00889 | A00895 | 396 | A00889 | A00897 | 491 |
| A00889 | A00898 | 491 | A00889 | A00899 | 491 |
| A00889 | A01572 | 485 | A00889 | A01602 | 258 |
| A00889 | A02455 | 281 | A00889 | A03151 | 491 |
| A00889 | A04115 | 232 | A00889 | A06992 | 399 |
| A00889 | A07695 | 235 | A00889 | A08435 | 491 |
| A00889 | A08891 | 491 | A00889 | A09008 | 488 |
| A00889 | A11475 | 154 | A00889 | A13339 | 177 |
| A00889 | A14174 | 491 | A00890 | A00892 | 491 |
| A00890 | A00893 | 190 | A00890 | A00894 | 477 |

|        |        |     |        |        |     |
|--------|--------|-----|--------|--------|-----|
| A00890 | A00895 | 151 | A00890 | A00897 | 445 |
| A00890 | A00898 | 486 | A00890 | A00899 | 389 |
| A00890 | A02254 | 199 | A00890 | A03086 | 270 |
| A00890 | A08435 | 362 | A00890 | A08891 | 491 |
| A00890 | A09008 | 430 | A00890 | A10527 | 191 |
| A00891 | A00895 | 470 | A00891 | A01162 | 296 |
| A00891 | A01234 | 221 | A00891 | A01494 | 455 |
| A00891 | A01542 | 491 | A00891 | A02358 | 488 |
| A00891 | A03175 | 196 | A00891 | A03258 | 312 |
| A00891 | A04090 | 312 | A00891 | A04170 | 446 |
| A00891 | A05465 | 345 | A00891 | A05903 | 386 |
| A00891 | A06653 | 200 | A00891 | A06878 | 470 |
| A00891 | A07111 | 174 | A00891 | A07446 | 414 |
| A00891 | A07611 | 477 | A00891 | A08882 | 173 |
| A00891 | A08903 | 375 | A00891 | A10810 | 416 |
| A00891 | A11363 | 263 | A00891 | A11856 | 303 |
| A00891 | A12218 | 345 | A00891 | A12891 | 198 |
| A00891 | A14475 | 491 | A00891 | A14589 | 489 |
| A00891 | A15295 | 294 | A00891 | A15498 | 466 |
| A00892 | A00893 | 141 | A00892 | A00894 | 491 |
| A00892 | A00895 | 221 | A00892 | A00897 | 489 |
| A00892 | A00898 | 491 | A00892 | A00899 | 357 |
| A00892 | A00987 | 196 | A00892 | A01046 | 302 |
| A00892 | A01322 | 470 | A00892 | A01404 | 229 |
| A00892 | A01515 | 379 | A00892 | A01573 | 424 |
| A00892 | A01722 | 247 | A00892 | A01947 | 312 |
| A00892 | A02524 | 160 | A00892 | A03007 | 361 |
| A00892 | A03086 | 223 | A00892 | A03151 | 452 |
| A00892 | A03250 | 369 | A00892 | A05258 | 160 |
| A00892 | A05917 | 173 | A00892 | A06650 | 429 |
| A00892 | A06992 | 272 | A00892 | A08435 | 460 |
| A00892 | A08891 | 491 | A00892 | A09008 | 445 |
| A00892 | A10428 | 335 | A00892 | A10527 | 462 |
| A00892 | A11443 | 377 | A00892 | A12824 | 452 |
| A00892 | A13087 | 369 | A00892 | A13423 | 202 |
| A00892 | A14174 | 417 | A00892 | A15992 | 360 |
| A00892 | A16028 | 221 | A00893 | A00895 | 470 |
| A00893 | A00898 | 435 | A00893 | A03098 | 232 |
| A00893 | A03151 | 472 | A00893 | A04642 | 212 |
| A00893 | A06361 | 184 | A00893 | A06673 | 380 |
| A00893 | A08435 | 221 | A00893 | A08891 | 486 |
| A00893 | A14174 | 441 | A00894 | A00897 | 321 |
| A00894 | A00898 | 491 | A00894 | A03151 | 462 |
| A00894 | A04260 | 152 | A00894 | A05258 | 191 |
| A00894 | A08818 | 216 | A00894 | A08891 | 491 |
| A00894 | A11443 | 399 | A00894 | A14174 | 490 |

|        |        |     |        |        |     |
|--------|--------|-----|--------|--------|-----|
| A00895 | A00896 | 427 | A00895 | A00898 | 190 |
| A00895 | A01188 | 279 | A00895 | A01212 | 398 |
| A00895 | A01600 | 196 | A00895 | A01632 | 229 |
| A00895 | A01682 | 185 | A00895 | A02024 | 378 |
| A00895 | A03151 | 210 | A00895 | A03770 | 299 |
| A00895 | A04050 | 899 | A00895 | A04170 | 343 |
| A00895 | A04256 | 160 | A00895 | A07229 | 402 |
| A00895 | A07446 | 480 | A00895 | A07611 | 252 |
| A00895 | A08125 | 346 | A00895 | A11692 | 439 |
| A00895 | A12891 | 473 | A00895 | A13824 | 447 |
| A00895 | A14006 | 157 | A00895 | A14174 | 379 |
| A00895 | A14463 | 313 | A00895 | A15295 | 449 |
| A00895 | A16046 | 243 | A00896 | A02494 | 184 |
| A00896 | A07446 | 488 | A00896 | A11692 | 374 |
| A00896 | A12891 | 472 | A00897 | A00898 | 488 |
| A00897 | A00899 | 390 | A00897 | A03151 | 294 |
| A00897 | A08435 | 238 | A00897 | A08891 | 491 |
| A00897 | A09008 | 255 | A00897 | A15561 | 184 |
| A00898 | A00899 | 207 | A00898 | A01091 | 252 |
| A00898 | A01429 | 240 | A00898 | A03151 | 490 |
| A00898 | A06025 | 334 | A00898 | A06673 | 338 |
| A00898 | A06992 | 430 | A00898 | A07695 | 224 |
| A00898 | A08125 | 334 | A00898 | A08435 | 429 |
| A00898 | A08891 | 491 | A00898 | A08896 | 227 |
| A00898 | A09008 | 395 | A00898 | A11443 | 357 |
| A00898 | A13087 | 357 | A00898 | A14174 | 491 |
| A00898 | A15212 | 207 | A00899 | A03151 | 152 |
| A00899 | A08891 | 457 | A00899 | A09008 | 317 |
| A00900 | A00932 | 377 | A00900 | A01291 | 141 |
| A00900 | A01531 | 177 | A00900 | A01533 | 182 |
| A00900 | A01718 | 486 | A00900 | A01983 | 480 |
| A00900 | A02028 | 198 | A00900 | A02054 | 364 |
| A00900 | A02112 | 177 | A00900 | A02199 | 171 |
| A00900 | A02293 | 296 | A00900 | A03084 | 398 |
| A00900 | A03126 | 490 | A00900 | A03171 | 489 |
| A00900 | A03209 | 176 | A00900 | A03331 | 400 |
| A00900 | A03338 | 249 | A00900 | A03771 | 213 |
| A00900 | A03913 | 433 | A00900 | A04194 | 291 |
| A00900 | A04639 | 260 | A00900 | A04754 | 335 |
| A00900 | A05996 | 252 | A00900 | A06371 | 310 |
| A00900 | A06897 | 174 | A00900 | A07803 | 195 |
| A00900 | A08853 | 210 | A00900 | A09469 | 440 |
| A00900 | A09809 | 389 | A00900 | A11400 | 205 |
| A00900 | A12383 | 221 | A00900 | A12651 | 249 |
| A00900 | A12887 | 344 | A00900 | A13992 | 272 |
| A00900 | A14048 | 272 | A00900 | A14475 | 263 |

|        |        |     |        |        |     |
|--------|--------|-----|--------|--------|-----|
| A00900 | A14495 | 352 | A00900 | A15641 | 259 |
| A00900 | A16042 | 293 | A00900 | A17195 | 322 |
| A00901 | A01052 | 199 | A00901 | A01173 | 154 |
| A00901 | A01461 | 420 | A00901 | A01515 | 246 |
| A00901 | A03910 | 224 | A00901 | A05216 | 278 |
| A00901 | A07311 | 199 | A00901 | A09515 | 171 |
| A00901 | A09538 | 157 | A00901 | A09742 | 491 |
| A00901 | A11329 | 270 | A00901 | A13987 | 171 |
| A00901 | A14247 | 489 | A00901 | A14661 | 340 |
| A00901 | A15292 | 254 | A00901 | A15301 | 228 |
| A00901 | A15302 | 121 | A00901 | A15312 | 135 |
| A00901 | A15347 | 473 | A00901 | A15352 | 226 |
| A00901 | A15366 | 358 | A00901 | A15413 | 126 |
| A00901 | A15432 | 230 | A00901 | A15462 | 247 |
| A00901 | A15463 | 367 | A00901 | A15961 | 377 |
| A00901 | A16026 | 207 | A00901 | A16903 | 377 |
| A00902 | A00906 | 599 | A00902 | A00911 | 491 |
| A00902 | A00965 | 258 | A00902 | A00972 | 458 |
| A00902 | A00987 | 265 | A00902 | A01025 | 472 |
| A00902 | A01037 | 560 | A00902 | A01056 | 600 |
| A00902 | A01072 | 602 | A00902 | A01127 | 450 |
| A00902 | A01140 | 602 | A00902 | A01154 | 241 |
| A00902 | A01161 | 373 | A00902 | A01166 | 447 |
| A00902 | A01211 | 380 | A00902 | A01216 | 281 |
| A00902 | A01220 | 263 | A00902 | A01288 | 369 |
| A00902 | A01289 | 418 | A00902 | A01291 | 491 |
| A00902 | A01425 | 472 | A00902 | A01436 | 405 |
| A00902 | A01464 | 348 | A00902 | A01468 | 491 |
| A00902 | A01470 | 323 | A00902 | A01492 | 461 |
| A00902 | A01495 | 340 | A00902 | A01496 | 172 |
| A00902 | A01531 | 262 | A00902 | A01540 | 201 |
| A00902 | A01544 | 417 | A00902 | A01546 | 480 |
| A00902 | A01566 | 208 | A00902 | A01586 | 450 |
| A00902 | A01601 | 435 | A00902 | A01617 | 308 |
| A00902 | A01618 | 360 | A00902 | A01652 | 435 |
| A00902 | A01733 | 347 | A00902 | A02003 | 269 |
| A00902 | A02185 | 269 | A00902 | A02249 | 268 |
| A00902 | A02494 | 316 | A00902 | A02502 | 443 |
| A00902 | A03066 | 243 | A00902 | A03143 | 154 |
| A00902 | A03188 | 152 | A00902 | A03437 | 369 |
| A00902 | A03438 | 344 | A00902 | A03451 | 490 |
| A00902 | A03453 | 429 | A00902 | A03456 | 191 |
| A00902 | A03469 | 243 | A00902 | A03490 | 217 |
| A00902 | A03536 | 162 | A00902 | A03567 | 422 |
| A00902 | A03581 | 269 | A00902 | A03705 | 408 |
| A00902 | A03931 | 162 | A00902 | A03963 | 188 |

|        |        |     |        |        |     |
|--------|--------|-----|--------|--------|-----|
| A00902 | A04006 | 215 | A00902 | A04072 | 235 |
| A00902 | A04101 | 187 | A00902 | A04553 | 303 |
| A00902 | A04563 | 196 | A00902 | A04697 | 176 |
| A00902 | A04805 | 168 | A00902 | A04808 | 243 |
| A00902 | A04844 | 152 | A00902 | A05065 | 452 |
| A00902 | A05085 | 286 | A00902 | A05385 | 204 |
| A00902 | A05574 | 269 | A00902 | A05942 | 216 |
| A00902 | A06007 | 417 | A00902 | A06324 | 334 |
| A00902 | A06340 | 404 | A00902 | A06351 | 281 |
| A00902 | A06814 | 581 | A00902 | A07171 | 286 |
| A00902 | A07317 | 180 | A00902 | A07412 | 269 |
| A00902 | A07670 | 184 | A00902 | A07807 | 255 |
| A00902 | A08052 | 394 | A00902 | A08273 | 361 |
| A00902 | A08315 | 269 | A00902 | A08578 | 185 |
| A00902 | A09047 | 299 | A00902 | A09293 | 324 |
| A00902 | A09560 | 269 | A00902 | A09620 | 269 |
| A00902 | A09647 | 121 | A00902 | A09676 | 218 |
| A00902 | A09697 | 269 | A00902 | A09827 | 341 |
| A00902 | A09868 | 260 | A00902 | A10023 | 286 |
| A00902 | A10816 | 218 | A00902 | A11181 | 341 |
| A00902 | A13494 | 277 | A00902 | A13581 | 269 |
| A00902 | A13919 | 260 | A00902 | A13989 | 490 |
| A00902 | A14216 | 383 | A00902 | A14482 | 332 |
| A00902 | A15837 | 269 | A00902 | A16027 | 269 |
| A00903 | A00952 | 198 | A00903 | A00954 | 688 |
| A00903 | A00964 | 373 | A00903 | A01075 | 173 |
| A00903 | A01185 | 249 | A00903 | A01267 | 208 |
| A00903 | A01302 | 182 | A00903 | A01500 | 414 |
| A00903 | A01503 | 477 | A00903 | A01741 | 319 |
| A00903 | A07802 | 208 | A00903 | A08022 | 484 |
| A00903 | A08356 | 344 | A00903 | A08362 | 234 |
| A00903 | A08382 | 449 | A00903 | A08518 | 310 |
| A00903 | A08524 | 452 | A00903 | A08553 | 688 |
| A00903 | A08564 | 679 | A00903 | A08565 | 634 |
| A00903 | A08603 | 188 | A00903 | A09010 | 688 |
| A00903 | A10159 | 271 | A00903 | A10420 | 213 |
| A00903 | A11301 | 232 | A00903 | A11395 | 477 |
| A00903 | A12111 | 159 | A00903 | A12365 | 167 |
| A00903 | A12606 | 263 | A00903 | A14084 | 174 |
| A00903 | A14214 | 324 | A00903 | A14462 | 313 |
| A00903 | A15262 | 162 | A00903 | A15373 | 676 |
| A00903 | A15667 | 167 | A00903 | A15749 | 488 |
| A00903 | A15943 | 333 | A00903 | A15946 | 489 |
| A00903 | A16109 | 199 | A00903 | A16144 | 333 |
| A00903 | A16212 | 490 | A00903 | A16675 | 154 |
| A00903 | A17125 | 193 | A00903 | A17133 | 299 |

|        |        |     |        |        |     |
|--------|--------|-----|--------|--------|-----|
| A00904 | A00905 | 430 | A00904 | A01194 | 205 |
| A00904 | A01266 | 185 | A00904 | A01268 | 405 |
| A00904 | A01612 | 260 | A00904 | A03423 | 198 |
| A00904 | A03569 | 305 | A00904 | A06688 | 152 |
| A00904 | A09558 | 229 | A00904 | A14178 | 180 |
| A00904 | A14188 | 481 | A00904 | A14257 | 249 |
| A00904 | A15611 | 229 | A00905 | A00916 | 491 |
| A00905 | A00923 | 180 | A00905 | A00958 | 485 |
| A00905 | A01000 | 318 | A00905 | A01025 | 296 |
| A00905 | A01029 | 542 | A00905 | A01057 | 474 |
| A00905 | A01075 | 489 | A00905 | A01087 | 306 |
| A00905 | A01091 | 224 | A00905 | A01098 | 474 |
| A00905 | A01115 | 375 | A00905 | A01136 | 542 |
| A00905 | A01139 | 377 | A00905 | A01143 | 251 |
| A00905 | A01151 | 532 | A00905 | A01173 | 413 |
| A00905 | A01206 | 486 | A00905 | A01212 | 445 |
| A00905 | A01231 | 229 | A00905 | A01234 | 491 |
| A00905 | A01243 | 269 | A00905 | A01266 | 542 |
| A00905 | A01268 | 542 | A00905 | A01291 | 486 |
| A00905 | A01295 | 513 | A00905 | A01299 | 425 |
| A00905 | A01306 | 408 | A00905 | A01334 | 418 |
| A00905 | A01351 | 373 | A00905 | A01354 | 485 |
| A00905 | A01359 | 479 | A00905 | A01385 | 622 |
| A00905 | A01391 | 212 | A00905 | A01406 | 491 |
| A00905 | A01419 | 380 | A00905 | A01434 | 168 |
| A00905 | A01441 | 329 | A00905 | A01451 | 560 |
| A00905 | A01457 | 234 | A00905 | A01458 | 206 |
| A00905 | A01461 | 419 | A00905 | A01470 | 489 |
| A00905 | A01488 | 486 | A00905 | A01492 | 491 |
| A00905 | A01542 | 335 | A00905 | A01574 | 486 |
| A00905 | A01582 | 445 | A00905 | A01585 | 175 |
| A00905 | A01598 | 489 | A00905 | A01612 | 658 |
| A00905 | A01614 | 419 | A00905 | A01615 | 491 |
| A00905 | A01649 | 488 | A00905 | A01660 | 491 |
| A00905 | A01707 | 385 | A00905 | A01770 | 245 |
| A00905 | A01779 | 205 | A00905 | A02219 | 157 |
| A00905 | A02535 | 424 | A00905 | A02715 | 224 |
| A00905 | A03112 | 196 | A00905 | A03171 | 152 |
| A00905 | A03293 | 393 | A00905 | A03298 | 491 |
| A00905 | A03494 | 535 | A00905 | A03569 | 491 |
| A00905 | A03902 | 185 | A00905 | A04282 | 157 |
| A00905 | A04761 | 151 | A00905 | A04767 | 302 |
| A00905 | A04819 | 154 | A00905 | A05015 | 196 |
| A00905 | A06143 | 355 | A00905 | A06168 | 270 |
| A00905 | A06907 | 491 | A00905 | A07004 | 230 |
| A00905 | A07583 | 241 | A00905 | A07604 | 488 |

|        |        |     |        |        |     |
|--------|--------|-----|--------|--------|-----|
| A00905 | A07625 | 193 | A00905 | A07706 | 434 |
| A00905 | A07898 | 179 | A00905 | A07924 | 171 |
| A00905 | A08137 | 670 | A00905 | A08201 | 169 |
| A00905 | A08280 | 362 | A00905 | A08327 | 535 |
| A00905 | A08359 | 428 | A00905 | A08400 | 256 |
| A00905 | A08431 | 346 | A00905 | A08542 | 156 |
| A00905 | A08571 | 549 | A00905 | A08756 | 474 |
| A00905 | A08885 | 168 | A00905 | A08963 | 177 |
| A00905 | A09258 | 74  | A00905 | A09699 | 274 |
| A00905 | A09857 | 259 | A00905 | A10159 | 238 |
| A00905 | A10250 | 491 | A00905 | A10616 | 389 |
| A00905 | A10853 | 486 | A00905 | A11105 | 235 |
| A00905 | A11139 | 286 | A00905 | A11168 | 440 |
| A00905 | A11258 | 196 | A00905 | A11286 | 297 |
| A00905 | A11291 | 254 | A00905 | A11373 | 168 |
| A00905 | A11487 | 402 | A00905 | A11496 | 273 |
| A00905 | A11497 | 158 | A00905 | A11575 | 232 |
| A00905 | A11704 | 173 | A00905 | A11928 | 196 |
| A00905 | A11965 | 399 | A00905 | A12095 | 215 |
| A00905 | A12146 | 177 | A00905 | A12189 | 187 |
| A00905 | A12202 | 455 | A00905 | A12294 | 177 |
| A00905 | A12543 | 285 | A00905 | A12757 | 391 |
| A00905 | A12933 | 199 | A00905 | A13510 | 484 |
| A00905 | A13928 | 287 | A00905 | A13989 | 491 |
| A00905 | A14006 | 490 | A00905 | A14148 | 227 |
| A00905 | A14178 | 538 | A00905 | A14184 | 243 |
| A00905 | A14193 | 420 | A00905 | A14196 | 479 |
| A00905 | A14220 | 486 | A00905 | A14221 | 491 |
| A00905 | A14246 | 440 | A00905 | A14257 | 491 |
| A00905 | A14303 | 466 | A00905 | A14304 | 63  |
| A00905 | A14426 | 268 | A00905 | A14476 | 232 |
| A00905 | A14603 | 154 | A00905 | A14728 | 355 |
| A00905 | A14986 | 438 | A00905 | A15019 | 177 |
| A00905 | A15297 | 491 | A00905 | A15315 | 235 |
| A00905 | A15324 | 191 | A00905 | A15338 | 491 |
| A00905 | A15366 | 489 | A00905 | A15505 | 157 |
| A00905 | A15559 | 490 | A00905 | A15629 | 202 |
| A00905 | A15660 | 316 | A00905 | A15710 | 346 |
| A00905 | A15729 | 454 | A00905 | A15738 | 168 |
| A00905 | A15752 | 481 | A00905 | A15779 | 452 |
| A00905 | A15851 | 317 | A00905 | A16699 | 156 |
| A00905 | A16798 | 307 | A00905 | A17063 | 491 |
| A00905 | A17192 | 177 | A00906 | A00962 | 279 |
| A00906 | A00965 | 190 | A00906 | A00996 | 224 |
| A00906 | A01025 | 443 | A00906 | A01037 | 505 |
| A00906 | A01056 | 563 | A00906 | A01072 | 595 |

|        |        |     |        |        |     |
|--------|--------|-----|--------|--------|-----|
| A00906 | A01090 | 163 | A00906 | A01106 | 229 |
| A00906 | A01140 | 472 | A00906 | A01208 | 221 |
| A00906 | A01211 | 190 | A00906 | A01288 | 224 |
| A00906 | A01291 | 445 | A00906 | A01392 | 433 |
| A00906 | A01416 | 407 | A00906 | A01425 | 252 |
| A00906 | A01468 | 265 | A00906 | A01652 | 375 |
| A00906 | A01971 | 193 | A00906 | A02185 | 269 |
| A00906 | A03044 | 227 | A00906 | A03451 | 235 |
| A00906 | A03469 | 310 | A00906 | A03477 | 152 |
| A00906 | A03493 | 179 | A00906 | A03524 | 174 |
| A00906 | A03581 | 269 | A00906 | A03738 | 227 |
| A00906 | A04101 | 434 | A00906 | A04737 | 207 |
| A00906 | A04879 | 454 | A00906 | A05234 | 274 |
| A00906 | A05499 | 196 | A00906 | A06308 | 281 |
| A00906 | A06324 | 274 | A00906 | A06388 | 299 |
| A00906 | A06621 | 188 | A00906 | A06814 | 399 |
| A00906 | A07248 | 235 | A00906 | A07398 | 159 |
| A00906 | A07412 | 398 | A00906 | A08052 | 360 |
| A00906 | A08273 | 420 | A00906 | A08315 | 269 |
| A00906 | A08578 | 260 | A00906 | A08834 | 226 |
| A00906 | A09293 | 267 | A00906 | A09560 | 329 |
| A00906 | A09620 | 269 | A00906 | A09697 | 269 |
| A00906 | A09978 | 241 | A00906 | A11535 | 170 |
| A00906 | A12310 | 364 | A00906 | A13126 | 165 |
| A00906 | A13581 | 269 | A00906 | A13965 | 450 |
| A00906 | A14478 | 210 | A00906 | A14479 | 273 |
| A00906 | A15641 | 216 | A00906 | A15837 | 269 |
| A00906 | A15988 | 326 | A00906 | A16027 | 269 |
| A00906 | A17152 | 274 | A00907 | A00920 | 274 |
| A00907 | A00968 | 217 | A00907 | A01021 | 259 |
| A00907 | A01026 | 491 | A00907 | A01078 | 210 |
| A00907 | A01313 | 484 | A00907 | A01360 | 205 |
| A00907 | A01375 | 259 | A00907 | A01377 | 491 |
| A00907 | A01386 | 191 | A00907 | A01716 | 256 |
| A00907 | A01813 | 160 | A00907 | A03601 | 232 |
| A00907 | A04145 | 302 | A00907 | A05539 | 165 |
| A00907 | A06472 | 366 | A00907 | A07111 | 278 |
| A00907 | A07693 | 218 | A00907 | A08113 | 463 |
| A00907 | A08263 | 461 | A00907 | A08346 | 226 |
| A00907 | A08402 | 440 | A00907 | A08694 | 363 |
| A00907 | A08905 | 274 | A00907 | A08975 | 243 |
| A00907 | A10655 | 182 | A00907 | A10664 | 486 |
| A00907 | A11926 | 236 | A00907 | A13902 | 177 |
| A00907 | A14077 | 414 | A00907 | A14092 | 483 |
| A00907 | A14272 | 490 | A00907 | A14840 | 423 |
| A00907 | A15367 | 152 | A00907 | A15877 | 488 |



|        |        |     |        |        |     |
|--------|--------|-----|--------|--------|-----|
| A00908 | A00916 | 550 | A00908 | A00918 | 174 |
| A00908 | A00960 | 174 | A00908 | A00992 | 694 |
| A00908 | A01193 | 438 | A00908 | A01279 | 459 |
| A00908 | A01351 | 685 | A00908 | A01424 | 174 |
| A00908 | A01492 | 486 | A00908 | A01495 | 168 |
| A00908 | A01567 | 196 | A00908 | A01598 | 408 |
| A00908 | A02195 | 414 | A00908 | A03438 | 165 |
| A00908 | A03494 | 443 | A00908 | A06698 | 174 |
| A00908 | A07244 | 438 | A00908 | A07332 | 185 |
| A00908 | A07432 | 438 | A00908 | A07524 | 298 |
| A00908 | A07537 | 279 | A00908 | A07625 | 174 |
| A00908 | A07924 | 174 | A00908 | A11544 | 174 |
| A00908 | A11831 | 174 | A00908 | A11832 | 174 |
| A00908 | A11913 | 207 | A00909 | A00922 | 616 |
| A00909 | A00927 | 241 | A00909 | A00934 | 469 |
| A00909 | A00983 | 479 | A00909 | A00986 | 435 |
| A00909 | A01006 | 708 | A00909 | A01027 | 616 |
| A00909 | A01029 | 190 | A00909 | A01069 | 488 |
| A00909 | A01075 | 245 | A00909 | A01088 | 466 |
| A00909 | A01101 | 443 | A00909 | A01150 | 491 |
| A00909 | A01161 | 462 | A00909 | A01232 | 808 |
| A00909 | A01293 | 708 | A00909 | A01311 | 694 |
| A00909 | A01431 | 585 | A00909 | A01439 | 491 |
| A00909 | A01492 | 491 | A00909 | A01538 | 162 |
| A00909 | A01558 | 160 | A00909 | A01598 | 491 |
| A00909 | A01612 | 236 | A00909 | A01613 | 491 |
| A00909 | A01668 | 483 | A00909 | A01748 | 472 |
| A00909 | A01782 | 462 | A00909 | A01788 | 389 |
| A00909 | A01797 | 200 | A00909 | A01800 | 154 |
| A00909 | A01802 | 229 | A00909 | A01805 | 179 |
| A00909 | A01894 | 471 | A00909 | A02896 | 427 |
| A00909 | A02971 | 221 | A00909 | A03435 | 445 |
| A00909 | A03438 | 435 | A00909 | A03454 | 467 |
| A00909 | A03473 | 174 | A00909 | A03516 | 461 |
| A00909 | A03547 | 249 | A00909 | A03557 | 488 |
| A00909 | A03562 | 414 | A00909 | A03577 | 241 |
| A00909 | A03608 | 491 | A00909 | A03740 | 343 |
| A00909 | A03809 | 291 | A00909 | A04306 | 286 |
| A00909 | A04709 | 212 | A00909 | A04788 | 154 |
| A00909 | A05216 | 489 | A00909 | A05227 | 291 |
| A00909 | A05258 | 319 | A00909 | A06287 | 446 |
| A00909 | A06466 | 477 | A00909 | A06543 | 481 |
| A00909 | A06606 | 188 | A00909 | A06637 | 321 |
| A00909 | A06709 | 310 | A00909 | A06961 | 163 |
| A00909 | A07311 | 406 | A00909 | A07360 | 294 |
| A00909 | A07524 | 475 | A00909 | A07706 | 395 |

|        |        |     |        |        |     |
|--------|--------|-----|--------|--------|-----|
| A00909 | A07744 | 491 | A00909 | A07881 | 615 |
| A00909 | A07911 | 708 | A00909 | A08098 | 491 |
| A00909 | A08178 | 455 | A00909 | A08228 | 616 |
| A00909 | A08327 | 224 | A00909 | A08491 | 486 |
| A00909 | A08548 | 615 | A00909 | A08571 | 475 |
| A00909 | A08674 | 187 | A00909 | A08763 | 485 |
| A00909 | A09952 | 232 | A00909 | A11296 | 319 |
| A00909 | A11326 | 479 | A00909 | A11926 | 435 |
| A00909 | A13298 | 360 | A00909 | A13340 | 262 |
| A00909 | A13989 | 480 | A00909 | A14083 | 491 |
| A00909 | A14220 | 346 | A00909 | A14699 | 826 |
| A00909 | A14778 | 616 | A00909 | A15338 | 451 |
| A00909 | A15375 | 411 | A00909 | A15660 | 191 |
| A00909 | A15662 | 443 | A00909 | A15684 | 491 |
| A00909 | A15746 | 241 | A00909 | A15937 | 491 |
| A00909 | A16048 | 481 | A00909 | A16671 | 408 |
| A00910 | A00912 | 489 | A00910 | A01027 | 170 |
| A00910 | A01042 | 695 | A00910 | A01083 | 490 |
| A00910 | A01150 | 451 | A00910 | A01300 | 234 |
| A00910 | A01446 | 549 | A00910 | A01623 | 154 |
| A00910 | A02703 | 208 | A00910 | A02791 | 294 |
| A00910 | A03740 | 491 | A00910 | A03752 | 204 |
| A00910 | A05086 | 438 | A00910 | A06965 | 165 |
| A00910 | A07220 | 199 | A00910 | A07311 | 430 |
| A00910 | A08053 | 363 | A00910 | A08054 | 483 |
| A00910 | A09476 | 308 | A00910 | A09502 | 238 |
| A00910 | A11302 | 477 | A00910 | A11322 | 260 |
| A00910 | A11372 | 485 | A00910 | A11724 | 360 |
| A00910 | A12167 | 341 | A00910 | A12988 | 174 |
| A00910 | A14073 | 467 | A00910 | A14138 | 333 |
| A00910 | A14569 | 170 | A00910 | A14596 | 272 |
| A00910 | A15699 | 430 | A00910 | A15988 | 204 |
| A00910 | A16230 | 196 | A00911 | A00950 | 191 |
| A00911 | A00985 | 286 | A00911 | A00997 | 151 |
| A00911 | A01021 | 288 | A00911 | A01022 | 188 |
| A00911 | A01050 | 283 | A00911 | A01054 | 412 |
| A00911 | A01072 | 204 | A00911 | A01086 | 235 |
| A00911 | A01093 | 162 | A00911 | A01099 | 491 |
| A00911 | A01124 | 755 | A00911 | A01139 | 899 |
| A00911 | A01161 | 536 | A00911 | A01169 | 190 |
| A00911 | A01177 | 240 | A00911 | A01210 | 409 |
| A00911 | A01211 | 195 | A00911 | A01214 | 560 |
| A00911 | A01289 | 480 | A00911 | A01296 | 520 |
| A00911 | A01310 | 281 | A00911 | A01311 | 353 |
| A00911 | A01320 | 798 | A00911 | A01322 | 434 |
| A00911 | A01326 | 249 | A00911 | A01327 | 415 |

|        |        |     |        |        |     |
|--------|--------|-----|--------|--------|-----|
| A00911 | A01331 | 254 | A00911 | A01336 | 185 |
| A00911 | A01341 | 406 | A00911 | A01404 | 744 |
| A00911 | A01415 | 462 | A00911 | A01459 | 454 |
| A00911 | A01507 | 334 | A00911 | A01527 | 335 |
| A00911 | A01540 | 485 | A00911 | A01544 | 491 |
| A00911 | A01547 | 334 | A00911 | A01559 | 478 |
| A00911 | A01578 | 196 | A00911 | A01594 | 491 |
| A00911 | A01607 | 235 | A00911 | A01615 | 899 |
| A00911 | A01623 | 472 | A00911 | A01629 | 351 |
| A00911 | A01632 | 454 | A00911 | A01680 | 643 |
| A00911 | A01850 | 480 | A00911 | A02125 | 162 |
| A00911 | A02143 | 310 | A00911 | A02388 | 160 |
| A00911 | A02424 | 490 | A00911 | A02443 | 243 |
| A00911 | A02473 | 208 | A00911 | A02502 | 486 |
| A00911 | A02629 | 334 | A00911 | A02695 | 332 |
| A00911 | A02749 | 157 | A00911 | A02784 | 63  |
| A00911 | A02903 | 184 | A00911 | A02924 | 305 |
| A00911 | A03076 | 273 | A00911 | A03211 | 212 |
| A00911 | A03242 | 270 | A00911 | A03420 | 179 |
| A00911 | A03451 | 491 | A00911 | A03611 | 427 |
| A00911 | A03651 | 222 | A00911 | A03676 | 170 |
| A00911 | A03734 | 273 | A00911 | A03740 | 463 |
| A00911 | A03893 | 361 | A00911 | A03971 | 180 |
| A00911 | A03993 | 234 | A00911 | A04020 | 265 |
| A00911 | A04071 | 338 | A00911 | A04082 | 484 |
| A00911 | A04102 | 296 | A00911 | A04105 | 162 |
| A00911 | A04133 | 217 | A00911 | A04216 | 252 |
| A00911 | A04221 | 218 | A00911 | A04275 | 418 |
| A00911 | A04337 | 249 | A00911 | A04417 | 489 |
| A00911 | A04443 | 152 | A00911 | A04534 | 234 |
| A00911 | A04668 | 291 | A00911 | A04759 | 159 |
| A00911 | A04776 | 483 | A00911 | A04909 | 217 |
| A00911 | A04982 | 451 | A00911 | A05065 | 491 |
| A00911 | A05139 | 162 | A00911 | A05216 | 167 |
| A00911 | A05234 | 288 | A00911 | A05240 | 469 |
| A00911 | A05343 | 477 | A00911 | A05415 | 240 |
| A00911 | A05779 | 385 | A00911 | A05812 | 332 |
| A00911 | A05938 | 221 | A00911 | A05959 | 379 |
| A00911 | A06050 | 185 | A00911 | A06317 | 385 |
| A00911 | A06588 | 257 | A00911 | A06623 | 490 |
| A00911 | A06653 | 424 | A00911 | A06719 | 322 |
| A00911 | A06906 | 279 | A00911 | A07181 | 168 |
| A00911 | A07192 | 162 | A00911 | A07275 | 270 |
| A00911 | A07339 | 363 | A00911 | A07505 | 218 |
| A00911 | A07524 | 196 | A00911 | A07600 | 221 |
| A00911 | A07603 | 491 | A00911 | A07936 | 279 |

|        |        |     |        |        |     |
|--------|--------|-----|--------|--------|-----|
| A00911 | A08025 | 221 | A00911 | A08516 | 641 |
| A00911 | A08833 | 483 | A00911 | A08835 | 162 |
| A00911 | A08987 | 414 | A00911 | A09000 | 343 |
| A00911 | A09085 | 267 | A00911 | A09121 | 338 |
| A00911 | A09124 | 313 | A00911 | A09127 | 394 |
| A00911 | A09647 | 945 | A00911 | A09765 | 162 |
| A00911 | A09803 | 491 | A00911 | A09815 | 185 |
| A00911 | A09900 | 457 | A00911 | A10093 | 369 |
| A00911 | A10183 | 221 | A00911 | A10235 | 296 |
| A00911 | A10247 | 296 | A00911 | A10250 | 194 |
| A00911 | A10278 | 899 | A00911 | A10373 | 491 |
| A00911 | A10380 | 235 | A00911 | A10524 | 221 |
| A00911 | A11117 | 185 | A00911 | A11236 | 491 |
| A00911 | A11313 | 332 | A00911 | A11338 | 314 |
| A00911 | A11377 | 252 | A00911 | A11486 | 933 |
| A00911 | A11677 | 285 | A00911 | A11854 | 157 |
| A00911 | A11891 | 162 | A00911 | A12555 | 221 |
| A00911 | A12556 | 490 | A00911 | A12965 | 162 |
| A00911 | A13382 | 899 | A00911 | A13923 | 185 |
| A00911 | A13949 | 252 | A00911 | A14073 | 456 |
| A00911 | A14094 | 406 | A00911 | A14381 | 185 |
| A00911 | A14443 | 243 | A00911 | A14449 | 430 |
| A00911 | A14477 | 643 | A00911 | A14483 | 157 |
| A00911 | A14498 | 343 | A00911 | A14614 | 163 |
| A00911 | A14642 | 490 | A00911 | A14652 | 340 |
| A00911 | A14674 | 752 | A00911 | A14702 | 605 |
| A00911 | A14703 | 327 | A00911 | A14819 | 265 |
| A00911 | A14970 | 185 | A00911 | A15510 | 544 |
| A00911 | A16019 | 243 | A00911 | A16123 | 302 |
| A00911 | A16299 | 488 | A00911 | A16469 | 417 |
| A00911 | A16601 | 234 | A00911 | A16644 | 435 |
| A00911 | A16660 | 205 | A00911 | A16726 | 221 |
| A00911 | A16738 | 643 | A00911 | A16748 | 176 |
| A00911 | A16802 | 235 | A00912 | A01042 | 475 |
| A00912 | A01083 | 485 | A00912 | A01299 | 160 |
| A00912 | A01435 | 265 | A00912 | A01553 | 217 |
| A00912 | A01699 | 293 | A00912 | A01908 | 172 |
| A00912 | A02877 | 452 | A00912 | A03244 | 227 |
| A00912 | A03740 | 451 | A00912 | A04622 | 199 |
| A00912 | A05898 | 378 | A00912 | A07220 | 293 |
| A00912 | A09476 | 274 | A00912 | A10506 | 208 |
| A00912 | A12383 | 273 | A00912 | A12988 | 273 |
| A00912 | A14073 | 205 | A00912 | A16840 | 276 |
| A00913 | A00983 | 74  | A00913 | A00994 | 63  |
| A00913 | A00996 | 340 | A00913 | A01123 | 307 |
| A00913 | A01217 | 279 | A00913 | A01339 | 201 |

|        |        |     |        |        |     |
|--------|--------|-----|--------|--------|-----|
| A00913 | A01383 | 235 | A00913 | A01406 | 452 |
| A00913 | A01411 | 288 | A00913 | A01414 | 266 |
| A00913 | A01455 | 235 | A00913 | A01633 | 268 |
| A00913 | A01729 | 339 | A00913 | A02212 | 196 |
| A00913 | A04055 | 311 | A00913 | A04932 | 221 |
| A00913 | A06122 | 274 | A00913 | A06825 | 257 |
| A00913 | A07397 | 306 | A00913 | A08281 | 196 |
| A00913 | A08907 | 391 | A00913 | A09517 | 255 |
| A00913 | A11409 | 154 | A00913 | A12292 | 358 |
| A00913 | A14622 | 232 | A00913 | A16118 | 193 |
| A00913 | A16673 | 374 | A00914 | A00926 | 424 |
| A00914 | A00927 | 249 | A00914 | A00939 | 899 |
| A00914 | A01125 | 157 | A00914 | A01257 | 191 |
| A00914 | A01307 | 249 | A00914 | A01359 | 154 |
| A00914 | A01404 | 457 | A00914 | A01461 | 227 |
| A00914 | A01486 | 218 | A00914 | A01515 | 408 |
| A00914 | A01520 | 520 | A00914 | A01524 | 993 |
| A00914 | A01527 | 944 | A00914 | A01551 | 475 |
| A00914 | A01558 | 989 | A00914 | A01562 | 899 |
| A00914 | A01567 | 79  | A00914 | A01572 | 899 |
| A00914 | A01574 | 899 | A00914 | A01575 | 207 |
| A00914 | A01588 | 899 | A00914 | A01604 | 391 |
| A00914 | A01615 | 899 | A00914 | A01632 | 240 |
| A00914 | A01639 | 899 | A00914 | A01640 | 899 |
| A00914 | A01668 | 491 | A00914 | A01676 | 491 |
| A00914 | A01692 | 899 | A00914 | A01704 | 491 |
| A00914 | A01705 | 184 | A00914 | A01708 | 899 |
| A00914 | A01718 | 899 | A00914 | A01733 | 486 |
| A00914 | A01735 | 191 | A00914 | A01741 | 491 |
| A00914 | A01743 | 491 | A00914 | A01746 | 204 |
| A00914 | A01749 | 63  | A00914 | A01752 | 121 |
| A00914 | A01767 | 340 | A00914 | A01769 | 302 |
| A00914 | A01775 | 491 | A00914 | A01785 | 411 |
| A00914 | A01789 | 486 | A00914 | A01790 | 63  |
| A00914 | A01791 | 212 | A00914 | A01796 | 407 |
| A00914 | A01797 | 486 | A00914 | A01799 | 151 |
| A00914 | A01836 | 173 | A00914 | A01844 | 941 |
| A00914 | A01850 | 899 | A00914 | A01876 | 351 |
| A00914 | A01877 | 260 | A00914 | A01879 | 491 |
| A00914 | A01880 | 177 | A00914 | A01882 | 163 |
| A00914 | A01885 | 210 | A00914 | A01887 | 491 |
| A00914 | A01888 | 491 | A00914 | A01894 | 174 |
| A00914 | A01900 | 195 | A00914 | A01902 | 326 |
| A00914 | A01903 | 396 | A00914 | A01908 | 262 |
| A00914 | A01941 | 352 | A00914 | A01982 | 195 |
| A00914 | A02071 | 201 | A00914 | A02086 | 319 |

|        |        |     |        |        |     |
|--------|--------|-----|--------|--------|-----|
| A00914 | A02156 | 196 | A00914 | A02166 | 173 |
| A00914 | A02170 | 326 | A00914 | A02219 | 899 |
| A00914 | A02248 | 321 | A00914 | A02298 | 265 |
| A00914 | A02300 | 246 | A00914 | A02314 | 173 |
| A00914 | A02331 | 277 | A00914 | A02338 | 249 |
| A00914 | A02340 | 283 | A00914 | A02341 | 226 |
| A00914 | A02353 | 232 | A00914 | A02371 | 159 |
| A00914 | A02382 | 180 | A00914 | A02412 | 272 |
| A00914 | A02414 | 294 | A00914 | A02415 | 490 |
| A00914 | A02416 | 491 | A00914 | A02469 | 216 |
| A00914 | A02490 | 475 | A00914 | A02491 | 243 |
| A00914 | A02497 | 151 | A00914 | A02505 | 328 |
| A00914 | A02517 | 899 | A00914 | A02564 | 382 |
| A00914 | A02582 | 170 | A00914 | A02591 | 210 |
| A00914 | A02595 | 210 | A00914 | A02612 | 182 |
| A00914 | A02634 | 156 | A00914 | A02645 | 195 |
| A00914 | A02668 | 165 | A00914 | A02695 | 430 |
| A00914 | A02697 | 326 | A00914 | A02698 | 247 |
| A00914 | A02703 | 185 | A00914 | A02705 | 84  |
| A00914 | A02709 | 436 | A00914 | A02717 | 199 |
| A00914 | A02718 | 202 | A00914 | A02729 | 162 |
| A00914 | A02730 | 480 | A00914 | A02731 | 80  |
| A00914 | A02735 | 412 | A00914 | A02739 | 329 |
| A00914 | A02741 | 329 | A00914 | A02742 | 294 |
| A00914 | A02745 | 374 | A00914 | A02746 | 417 |
| A00914 | A02747 | 241 | A00914 | A02749 | 151 |
| A00914 | A02756 | 374 | A00914 | A02763 | 177 |
| A00914 | A02770 | 229 | A00914 | A02785 | 236 |
| A00914 | A02787 | 489 | A00914 | A02788 | 439 |
| A00914 | A02808 | 346 | A00914 | A02812 | 488 |
| A00914 | A02814 | 406 | A00914 | A02828 | 418 |
| A00914 | A02830 | 436 | A00914 | A02837 | 491 |
| A00914 | A02839 | 256 | A00914 | A02841 | 176 |
| A00914 | A02847 | 451 | A00914 | A02854 | 183 |
| A00914 | A02859 | 945 | A00914 | A02864 | 185 |
| A00914 | A02869 | 302 | A00914 | A02872 | 241 |
| A00914 | A02874 | 490 | A00914 | A02875 | 316 |
| A00914 | A02886 | 361 | A00914 | A02896 | 483 |
| A00914 | A02897 | 272 | A00914 | A02900 | 266 |
| A00914 | A02904 | 177 | A00914 | A02908 | 922 |
| A00914 | A02916 | 213 | A00914 | A02918 | 210 |
| A00914 | A02923 | 173 | A00914 | A02925 | 249 |
| A00914 | A02942 | 899 | A00914 | A02944 | 368 |
| A00914 | A02961 | 367 | A00914 | A02968 | 904 |
| A00914 | A02969 | 238 | A00914 | A02982 | 411 |
| A00914 | A02987 | 163 | A00914 | A03001 | 76  |

|        |        |     |        |        |     |
|--------|--------|-----|--------|--------|-----|
| A00914 | A03009 | 151 | A00914 | A03010 | 928 |
| A00914 | A03019 | 216 | A00914 | A03039 | 151 |
| A00914 | A03068 | 201 | A00914 | A03112 | 490 |
| A00914 | A03126 | 491 | A00914 | A03127 | 217 |
| A00914 | A03131 | 227 | A00914 | A03189 | 173 |
| A00914 | A03204 | 329 | A00914 | A03211 | 307 |
| A00914 | A03220 | 151 | A00914 | A03223 | 419 |
| A00914 | A03259 | 491 | A00914 | A03263 | 238 |
| A00914 | A03275 | 491 | A00914 | A03281 | 314 |
| A00914 | A03282 | 238 | A00914 | A03292 | 63  |
| A00914 | A03415 | 229 | A00914 | A03436 | 196 |
| A00914 | A03438 | 165 | A00914 | A03534 | 327 |
| A00914 | A03585 | 107 | A00914 | A03596 | 238 |
| A00914 | A03614 | 132 | A00914 | A03661 | 162 |
| A00914 | A03666 | 363 | A00914 | A03780 | 188 |
| A00914 | A03821 | 452 | A00914 | A03843 | 210 |
| A00914 | A03892 | 899 | A00914 | A03973 | 182 |
| A00914 | A04010 | 488 | A00914 | A04015 | 188 |
| A00914 | A04027 | 151 | A00914 | A04040 | 373 |
| A00914 | A04050 | 909 | A00914 | A04069 | 157 |
| A00914 | A04117 | 328 | A00914 | A04138 | 286 |
| A00914 | A04164 | 383 | A00914 | A04206 | 424 |
| A00914 | A04207 | 337 | A00914 | A04222 | 199 |
| A00914 | A04247 | 151 | A00914 | A04248 | 190 |
| A00914 | A04263 | 462 | A00914 | A04264 | 473 |
| A00914 | A04286 | 240 | A00914 | A04294 | 173 |
| A00914 | A04296 | 182 | A00914 | A04306 | 173 |
| A00914 | A04322 | 306 | A00914 | A04327 | 385 |
| A00914 | A04334 | 330 | A00914 | A04493 | 288 |
| A00914 | A04518 | 328 | A00914 | A04546 | 255 |
| A00914 | A04567 | 485 | A00914 | A04600 | 925 |
| A00914 | A04605 | 157 | A00914 | A04622 | 491 |
| A00914 | A04681 | 267 | A00914 | A04798 | 151 |
| A00914 | A04860 | 173 | A00914 | A04862 | 182 |
| A00914 | A04908 | 390 | A00914 | A04912 | 173 |
| A00914 | A04939 | 473 | A00914 | A05032 | 185 |
| A00914 | A05039 | 173 | A00914 | A05054 | 173 |
| A00914 | A05120 | 212 | A00914 | A05122 | 202 |
| A00914 | A05170 | 358 | A00914 | A05171 | 266 |
| A00914 | A05221 | 306 | A00914 | A05229 | 163 |
| A00914 | A05279 | 210 | A00914 | A05289 | 238 |
| A00914 | A05309 | 489 | A00914 | A05346 | 173 |
| A00914 | A05401 | 497 | A00914 | A05466 | 232 |
| A00914 | A05470 | 210 | A00914 | A05506 | 219 |
| A00914 | A05568 | 374 | A00914 | A05577 | 414 |
| A00914 | A05728 | 232 | A00914 | A05741 | 219 |

|        |        |     |        |        |     |
|--------|--------|-----|--------|--------|-----|
| A00914 | A05759 | 152 | A00914 | A05847 | 185 |
| A00914 | A05889 | 208 | A00914 | A05929 | 266 |
| A00914 | A06015 | 255 | A00914 | A06107 | 270 |
| A00914 | A06149 | 462 | A00914 | A06156 | 195 |
| A00914 | A06328 | 899 | A00914 | A06334 | 173 |
| A00914 | A06415 | 312 | A00914 | A06422 | 491 |
| A00914 | A06509 | 173 | A00914 | A06510 | 373 |
| A00914 | A06580 | 899 | A00914 | A06588 | 195 |
| A00914 | A06607 | 235 | A00914 | A06610 | 479 |
| A00914 | A06642 | 341 | A00914 | A06805 | 182 |
| A00914 | A06825 | 167 | A00914 | A06845 | 157 |
| A00914 | A06863 | 152 | A00914 | A06964 | 182 |
| A00914 | A07091 | 899 | A00914 | A07135 | 470 |
| A00914 | A07143 | 899 | A00914 | A07147 | 302 |
| A00914 | A07153 | 260 | A00914 | A07154 | 170 |
| A00914 | A07157 | 491 | A00914 | A07158 | 270 |
| A00914 | A07164 | 327 | A00914 | A07165 | 491 |
| A00914 | A07193 | 232 | A00914 | A07200 | 435 |
| A00914 | A07209 | 310 | A00914 | A07234 | 195 |
| A00914 | A07311 | 899 | A00914 | A07363 | 266 |
| A00914 | A07509 | 196 | A00914 | A07566 | 232 |
| A00914 | A07746 | 329 | A00914 | A07805 | 266 |
| A00914 | A08238 | 420 | A00914 | A08313 | 317 |
| A00914 | A08368 | 327 | A00914 | A08571 | 240 |
| A00914 | A08627 | 63  | A00914 | A08657 | 232 |
| A00914 | A08687 | 334 | A00914 | A08732 | 899 |
| A00914 | A08827 | 180 | A00914 | A08829 | 232 |
| A00914 | A08851 | 475 | A00914 | A09054 | 899 |
| A00914 | A09101 | 210 | A00914 | A09112 | 163 |
| A00914 | A09237 | 173 | A00914 | A09304 | 243 |
| A00914 | A09381 | 182 | A00914 | A09396 | 212 |
| A00914 | A09419 | 435 | A00914 | A09538 | 246 |
| A00914 | A09727 | 899 | A00914 | A09756 | 193 |
| A00914 | A09799 | 182 | A00914 | A09804 | 899 |
| A00914 | A10009 | 104 | A00914 | A10060 | 210 |
| A00914 | A10174 | 899 | A00914 | A10175 | 899 |
| A00914 | A10211 | 232 | A00914 | A10332 | 174 |
| A00914 | A10369 | 207 | A00914 | A10413 | 266 |
| A00914 | A10420 | 238 | A00914 | A10456 | 899 |
| A00914 | A10550 | 330 | A00914 | A10625 | 419 |
| A00914 | A10818 | 182 | A00914 | A10820 | 195 |
| A00914 | A10823 | 296 | A00914 | A10901 | 276 |
| A00914 | A11009 | 195 | A00914 | A11124 | 899 |
| A00914 | A11131 | 173 | A00914 | A11474 | 899 |
| A00914 | A11667 | 195 | A00914 | A12449 | 195 |
| A00914 | A12581 | 210 | A00914 | A12635 | 266 |



|        |        |     |        |        |     |
|--------|--------|-----|--------|--------|-----|
| A00914 | A12710 | 195 | A00914 | A12719 | 296 |
| A00914 | A12868 | 210 | A00914 | A12927 | 446 |
| A00914 | A13031 | 173 | A00914 | A13371 | 173 |
| A00914 | A13535 | 340 | A00914 | A13824 | 899 |
| A00914 | A13851 | 151 | A00914 | A14029 | 63  |
| A00914 | A14193 | 193 | A00914 | A14195 | 899 |
| A00914 | A14208 | 912 | A00914 | A14237 | 899 |
| A00914 | A14429 | 182 | A00914 | A14443 | 899 |
| A00914 | A14444 | 899 | A00914 | A14449 | 378 |
| A00914 | A14561 | 195 | A00914 | A14650 | 249 |
| A00914 | A14729 | 316 | A00914 | A14745 | 363 |
| A00914 | A15328 | 441 | A00914 | A15345 | 162 |
| A00914 | A15580 | 266 | A00914 | A15624 | 393 |
| A00914 | A15639 | 249 | A00914 | A15673 | 160 |
| A00914 | A15887 | 163 | A00914 | A15952 | 232 |
| A00914 | A16120 | 338 | A00914 | A16229 | 266 |
| A00914 | A16369 | 266 | A00914 | A16417 | 395 |
| A00914 | A16418 | 341 | A00914 | A16429 | 162 |
| A00914 | A16636 | 486 | A00914 | A16966 | 266 |
| A00915 | A00926 | 468 | A00915 | A00975 | 447 |
| A00915 | A01046 | 358 | A00915 | A01076 | 333 |
| A00915 | A01122 | 379 | A00915 | A01156 | 472 |
| A00915 | A01161 | 207 | A00915 | A01169 | 461 |
| A00915 | A01245 | 366 | A00915 | A01253 | 389 |
| A00915 | A01278 | 249 | A00915 | A01322 | 297 |
| A00915 | A01404 | 291 | A00915 | A01504 | 296 |
| A00915 | A01515 | 227 | A00915 | A01534 | 306 |
| A00915 | A01582 | 491 | A00915 | A01712 | 219 |
| A00915 | A01741 | 278 | A00915 | A02138 | 368 |
| A00915 | A02623 | 286 | A00915 | A02746 | 269 |
| A00915 | A02802 | 238 | A00915 | A02914 | 257 |
| A00915 | A03126 | 401 | A00915 | A03454 | 157 |
| A00915 | A03749 | 177 | A00915 | A03885 | 449 |
| A00915 | A03931 | 430 | A00915 | A04925 | 360 |
| A00915 | A05095 | 319 | A00915 | A05401 | 183 |
| A00915 | A05570 | 358 | A00915 | A05781 | 328 |
| A00915 | A06644 | 227 | A00915 | A07154 | 252 |
| A00915 | A07226 | 318 | A00915 | A07675 | 390 |
| A00915 | A08191 | 319 | A00915 | A09766 | 326 |
| A00915 | A11242 | 344 | A00915 | A11352 | 432 |
| A00915 | A12204 | 179 | A00915 | A12295 | 293 |
| A00915 | A12824 | 427 | A00915 | A13162 | 184 |
| A00915 | A13432 | 344 | A00915 | A13618 | 328 |
| A00915 | A14502 | 418 | A00915 | A14605 | 232 |
| A00915 | A15624 | 435 | A00916 | A00918 | 542 |
| A00916 | A00923 | 446 | A00916 | A00928 | 434 |

|        |        |     |        |        |     |
|--------|--------|-----|--------|--------|-----|
| A00916 | A00930 | 196 | A00916 | A00934 | 549 |
| A00916 | A00944 | 227 | A00916 | A00945 | 483 |
| A00916 | A00954 | 407 | A00916 | A00958 | 428 |
| A00916 | A00960 | 459 | A00916 | A00992 | 654 |
| A00916 | A01000 | 285 | A00916 | A01020 | 590 |
| A00916 | A01022 | 193 | A00916 | A01024 | 285 |
| A00916 | A01025 | 379 | A00916 | A01028 | 183 |
| A00916 | A01029 | 491 | A00916 | A01040 | 419 |
| A00916 | A01053 | 63  | A00916 | A01057 | 484 |
| A00916 | A01065 | 427 | A00916 | A01069 | 281 |
| A00916 | A01072 | 168 | A00916 | A01075 | 491 |
| A00916 | A01084 | 422 | A00916 | A01087 | 475 |
| A00916 | A01088 | 491 | A00916 | A01091 | 263 |
| A00916 | A01092 | 198 | A00916 | A01098 | 450 |
| A00916 | A01112 | 491 | A00916 | A01115 | 612 |
| A00916 | A01116 | 490 | A00916 | A01120 | 547 |
| A00916 | A01129 | 170 | A00916 | A01136 | 491 |
| A00916 | A01140 | 208 | A00916 | A01150 | 491 |
| A00916 | A01160 | 170 | A00916 | A01166 | 491 |
| A00916 | A01168 | 170 | A00916 | A01181 | 152 |
| A00916 | A01184 | 491 | A00916 | A01193 | 488 |
| A00916 | A01194 | 486 | A00916 | A01201 | 491 |
| A00916 | A01206 | 491 | A00916 | A01214 | 511 |
| A00916 | A01215 | 440 | A00916 | A01224 | 446 |
| A00916 | A01226 | 402 | A00916 | A01234 | 589 |
| A00916 | A01243 | 491 | A00916 | A01251 | 63  |
| A00916 | A01266 | 491 | A00916 | A01268 | 491 |
| A00916 | A01279 | 550 | A00916 | A01285 | 271 |
| A00916 | A01291 | 491 | A00916 | A01299 | 452 |
| A00916 | A01304 | 491 | A00916 | A01306 | 447 |
| A00916 | A01334 | 449 | A00916 | A01335 | 396 |
| A00916 | A01351 | 552 | A00916 | A01354 | 491 |
| A00916 | A01356 | 170 | A00916 | A01384 | 488 |
| A00916 | A01385 | 232 | A00916 | A01391 | 294 |
| A00916 | A01406 | 486 | A00916 | A01424 | 510 |
| A00916 | A01425 | 550 | A00916 | A01429 | 369 |
| A00916 | A01430 | 218 | A00916 | A01431 | 470 |
| A00916 | A01434 | 277 | A00916 | A01439 | 455 |
| A00916 | A01451 | 527 | A00916 | A01457 | 480 |
| A00916 | A01468 | 491 | A00916 | A01470 | 491 |
| A00916 | A01474 | 154 | A00916 | A01487 | 491 |
| A00916 | A01488 | 491 | A00916 | A01492 | 703 |
| A00916 | A01495 | 480 | A00916 | A01506 | 308 |
| A00916 | A01531 | 404 | A00916 | A01538 | 531 |
| A00916 | A01539 | 568 | A00916 | A01542 | 489 |
| A00916 | A01555 | 483 | A00916 | A01558 | 485 |

|        |        |     |        |        |     |
|--------|--------|-----|--------|--------|-----|
| A00916 | A01569 | 461 | A00916 | A01579 | 462 |
| A00916 | A01597 | 475 | A00916 | A01598 | 550 |
| A00916 | A01612 | 746 | A00916 | A01614 | 550 |
| A00916 | A01615 | 490 | A00916 | A01640 | 466 |
| A00916 | A01646 | 283 | A00916 | A01647 | 443 |
| A00916 | A01649 | 491 | A00916 | A01660 | 490 |
| A00916 | A01684 | 443 | A00916 | A01707 | 355 |
| A00916 | A01721 | 460 | A00916 | A01917 | 256 |
| A00916 | A02054 | 235 | A00916 | A02064 | 402 |
| A00916 | A02164 | 167 | A00916 | A02212 | 286 |
| A00916 | A02265 | 488 | A00916 | A02437 | 208 |
| A00916 | A02456 | 290 | A00916 | A02671 | 252 |
| A00916 | A02715 | 305 | A00916 | A02855 | 430 |
| A00916 | A02978 | 414 | A00916 | A03083 | 63  |
| A00916 | A03171 | 340 | A00916 | A03296 | 200 |
| A00916 | A03298 | 491 | A00916 | A03438 | 548 |
| A00916 | A03446 | 446 | A00916 | A03494 | 491 |
| A00916 | A03567 | 491 | A00916 | A03569 | 491 |
| A00916 | A03601 | 467 | A00916 | A03652 | 170 |
| A00916 | A03734 | 154 | A00916 | A03859 | 486 |
| A00916 | A03963 | 265 | A00916 | A03981 | 170 |
| A00916 | A04553 | 481 | A00916 | A04761 | 174 |
| A00916 | A04966 | 257 | A00916 | A05216 | 477 |
| A00916 | A05230 | 483 | A00916 | A05501 | 413 |
| A00916 | A05654 | 213 | A00916 | A05845 | 168 |
| A00916 | A06275 | 491 | A00916 | A06340 | 489 |
| A00916 | A06351 | 193 | A00916 | A06356 | 170 |
| A00916 | A06504 | 316 | A00916 | A06543 | 212 |
| A00916 | A06584 | 191 | A00916 | A06698 | 387 |
| A00916 | A06761 | 174 | A00916 | A06907 | 490 |
| A00916 | A07004 | 531 | A00916 | A07223 | 479 |
| A00916 | A07244 | 548 | A00916 | A07323 | 188 |
| A00916 | A07347 | 491 | A00916 | A07403 | 177 |
| A00916 | A07432 | 536 | A00916 | A07481 | 272 |
| A00916 | A07487 | 402 | A00916 | A07524 | 800 |
| A00916 | A07533 | 402 | A00916 | A07537 | 473 |
| A00916 | A07583 | 427 | A00916 | A07584 | 367 |
| A00916 | A07604 | 488 | A00916 | A07625 | 552 |
| A00916 | A07661 | 185 | A00916 | A07700 | 650 |
| A00916 | A07706 | 531 | A00916 | A07725 | 198 |
| A00916 | A07919 | 168 | A00916 | A07924 | 552 |
| A00916 | A07968 | 218 | A00916 | A08022 | 488 |
| A00916 | A08024 | 481 | A00916 | A08118 | 642 |
| A00916 | A08137 | 762 | A00916 | A08211 | 514 |
| A00916 | A08326 | 382 | A00916 | A08327 | 288 |
| A00916 | A08357 | 489 | A00916 | A08359 | 312 |

|        |        |     |        |        |     |
|--------|--------|-----|--------|--------|-----|
| A00916 | A08431 | 347 | A00916 | A08437 | 251 |
| A00916 | A08491 | 485 | A00916 | A08571 | 566 |
| A00916 | A08707 | 332 | A00916 | A08756 | 406 |
| A00916 | A08768 | 63  | A00916 | A08807 | 528 |
| A00916 | A08859 | 332 | A00916 | A08890 | 224 |
| A00916 | A08929 | 159 | A00916 | A08933 | 156 |
| A00916 | A09004 | 217 | A00916 | A09059 | 314 |
| A00916 | A09312 | 185 | A00916 | A09324 | 205 |
| A00916 | A09352 | 462 | A00916 | A09619 | 290 |
| A00916 | A09621 | 551 | A00916 | A09627 | 156 |
| A00916 | A09664 | 224 | A00916 | A09697 | 170 |
| A00916 | A09699 | 162 | A00916 | A09705 | 404 |
| A00916 | A10165 | 180 | A00916 | A10250 | 460 |
| A00916 | A10321 | 193 | A00916 | A10380 | 303 |
| A00916 | A10465 | 473 | A00916 | A10616 | 491 |
| A00916 | A10624 | 273 | A00916 | A10633 | 63  |
| A00916 | A10853 | 446 | A00916 | A10923 | 257 |
| A00916 | A11277 | 401 | A00916 | A11291 | 168 |
| A00916 | A11397 | 329 | A00916 | A11405 | 162 |
| A00916 | A11406 | 156 | A00916 | A11409 | 488 |
| A00916 | A11462 | 368 | A00916 | A11487 | 526 |
| A00916 | A11544 | 330 | A00916 | A11562 | 401 |
| A00916 | A11575 | 404 | A00916 | A11831 | 539 |
| A00916 | A11832 | 550 | A00916 | A11913 | 63  |
| A00916 | A11928 | 416 | A00916 | A11930 | 234 |
| A00916 | A11938 | 176 | A00916 | A11965 | 299 |
| A00916 | A11983 | 196 | A00916 | A12181 | 185 |
| A00916 | A12202 | 218 | A00916 | A12507 | 174 |
| A00916 | A12543 | 196 | A00916 | A12757 | 165 |
| A00916 | A12829 | 358 | A00916 | A12849 | 265 |
| A00916 | A13052 | 170 | A00916 | A13126 | 443 |
| A00916 | A13294 | 353 | A00916 | A13386 | 185 |
| A00916 | A13510 | 208 | A00916 | A13511 | 270 |
| A00916 | A13609 | 480 | A00916 | A13775 | 185 |
| A00916 | A13870 | 316 | A00916 | A13874 | 243 |
| A00916 | A13875 | 475 | A00916 | A13928 | 493 |
| A00916 | A13989 | 763 | A00916 | A14006 | 491 |
| A00916 | A14151 | 460 | A00916 | A14169 | 367 |
| A00916 | A14172 | 63  | A00916 | A14184 | 486 |
| A00916 | A14196 | 524 | A00916 | A14216 | 513 |
| A00916 | A14220 | 486 | A00916 | A14221 | 488 |
| A00916 | A14246 | 210 | A00916 | A14257 | 491 |
| A00916 | A14475 | 297 | A00916 | A14476 | 474 |
| A00916 | A14505 | 398 | A00916 | A14596 | 187 |
| A00916 | A14597 | 481 | A00916 | A14635 | 278 |
| A00916 | A14826 | 313 | A00916 | A15085 | 185 |

|        |        |     |        |        |     |
|--------|--------|-----|--------|--------|-----|
| A00916 | A15129 | 185 | A00916 | A15215 | 219 |
| A00916 | A15297 | 491 | A00916 | A15324 | 441 |
| A00916 | A15338 | 590 | A00916 | A15353 | 401 |
| A00916 | A15366 | 168 | A00916 | A15500 | 173 |
| A00916 | A15559 | 491 | A00916 | A15561 | 294 |
| A00916 | A15629 | 257 | A00916 | A15729 | 474 |
| A00916 | A15752 | 467 | A00916 | A15764 | 491 |
| A00916 | A15773 | 451 | A00916 | A16302 | 488 |
| A00916 | A16320 | 477 | A00916 | A16328 | 425 |
| A00916 | A16802 | 235 | A00916 | A16904 | 270 |
| A00916 | A17063 | 486 | A00917 | A01221 | 139 |
| A00917 | A01362 | 274 | A00917 | A01408 | 258 |
| A00917 | A01412 | 256 | A00917 | A05199 | 330 |
| A00917 | A06064 | 369 | A00917 | A06425 | 357 |
| A00917 | A07016 | 350 | A00918 | A00934 | 170 |
| A00918 | A00960 | 468 | A00918 | A00969 | 152 |
| A00918 | A00992 | 672 | A00918 | A01020 | 281 |
| A00918 | A01028 | 170 | A00918 | A01075 | 432 |
| A00918 | A01120 | 170 | A00918 | A01129 | 170 |
| A00918 | A01136 | 457 | A00918 | A01151 | 177 |
| A00918 | A01160 | 170 | A00918 | A01166 | 173 |
| A00918 | A01168 | 170 | A00918 | A01193 | 174 |
| A00918 | A01206 | 191 | A00918 | A01234 | 450 |
| A00918 | A01279 | 281 | A00918 | A01351 | 681 |
| A00918 | A01356 | 170 | A00918 | A01384 | 374 |
| A00918 | A01424 | 368 | A00918 | A01425 | 170 |
| A00918 | A01470 | 412 | A00918 | A01492 | 382 |
| A00918 | A01538 | 184 | A00918 | A01598 | 404 |
| A00918 | A01614 | 183 | A00918 | A01774 | 162 |
| A00918 | A02050 | 270 | A00918 | A02265 | 170 |
| A00918 | A03158 | 207 | A00918 | A03438 | 170 |
| A00918 | A03652 | 170 | A00918 | A03767 | 185 |
| A00918 | A03981 | 170 | A00918 | A06356 | 170 |
| A00918 | A06698 | 174 | A00918 | A07244 | 688 |
| A00918 | A07432 | 174 | A00918 | A07524 | 185 |
| A00918 | A07537 | 200 | A00918 | A07583 | 238 |
| A00918 | A07625 | 174 | A00918 | A07924 | 196 |
| A00918 | A08211 | 170 | A00918 | A08528 | 174 |
| A00918 | A09664 | 157 | A00918 | A09697 | 170 |
| A00918 | A11544 | 174 | A00918 | A11831 | 174 |
| A00918 | A11832 | 174 | A00918 | A13052 | 170 |
| A00918 | A13989 | 511 | A00918 | A15729 | 247 |
| A00918 | A15947 | 160 | A00918 | A17088 | 168 |
| A00919 | A00934 | 170 | A00919 | A00947 | 263 |
| A00919 | A00964 | 358 | A00919 | A00983 | 601 |
| A00919 | A01020 | 480 | A00919 | A01075 | 491 |

|        |        |     |        |        |     |
|--------|--------|-----|--------|--------|-----|
| A00919 | A01079 | 451 | A00919 | A01082 | 491 |
| A00919 | A01084 | 490 | A00919 | A01087 | 491 |
| A00919 | A01088 | 193 | A00919 | A01139 | 601 |
| A00919 | A01184 | 462 | A00919 | A01206 | 425 |
| A00919 | A01234 | 469 | A00919 | A01503 | 238 |
| A00919 | A01576 | 457 | A00919 | A01598 | 228 |
| A00919 | A01601 | 276 | A00919 | A01707 | 151 |
| A00919 | A03171 | 324 | A00919 | A03734 | 367 |
| A00919 | A03817 | 362 | A00919 | A03858 | 561 |
| A00919 | A04124 | 151 | A00919 | A07706 | 491 |
| A00919 | A08022 | 467 | A00919 | A08024 | 470 |
| A00919 | A08304 | 291 | A00919 | A08437 | 165 |
| A00919 | A08518 | 187 | A00919 | A08527 | 446 |
| A00919 | A08682 | 191 | A00919 | A08976 | 196 |
| A00919 | A09339 | 268 | A00919 | A11395 | 469 |
| A00919 | A11930 | 246 | A00919 | A13063 | 561 |
| A00919 | A13989 | 462 | A00919 | A14216 | 469 |
| A00919 | A14220 | 339 | A00919 | A14355 | 257 |
| A00919 | A14566 | 473 | A00919 | A14594 | 350 |
| A00919 | A14655 | 337 | A00919 | A15297 | 301 |
| A00919 | A15520 | 207 | A00919 | A15559 | 419 |
| A00919 | A15733 | 490 | A00919 | A15762 | 490 |
| A00919 | A15931 | 305 | A00919 | A15946 | 377 |
| A00919 | A17142 | 199 | A00920 | A01026 | 511 |
| A00920 | A01313 | 286 | A00920 | A01377 | 587 |
| A00920 | A02731 | 283 | A00920 | A08113 | 302 |
| A00920 | A08346 | 249 | A00920 | A08402 | 491 |
| A00920 | A08694 | 375 | A00920 | A09648 | 488 |
| A00920 | A14092 | 281 | A00920 | A14272 | 596 |
| A00920 | A14707 | 306 | A00920 | A15367 | 458 |
| A00920 | A15562 | 375 | A00920 | A15877 | 276 |
| A00921 | A00981 | 490 | A00921 | A01070 | 200 |
| A00921 | A01125 | 481 | A00921 | A01209 | 243 |
| A00921 | A01244 | 302 | A00921 | A01599 | 162 |
| A00921 | A01668 | 307 | A00921 | A01712 | 160 |
| A00921 | A01956 | 398 | A00921 | A01995 | 252 |
| A00921 | A02000 | 436 | A00921 | A02007 | 249 |
| A00921 | A02010 | 343 | A00921 | A02020 | 177 |
| A00921 | A02484 | 221 | A00921 | A03025 | 281 |
| A00921 | A03033 | 317 | A00921 | A03134 | 196 |
| A00921 | A03141 | 491 | A00921 | A03183 | 279 |
| A00921 | A03330 | 162 | A00921 | A03688 | 490 |
| A00921 | A03703 | 215 | A00921 | A03709 | 190 |
| A00921 | A03719 | 491 | A00921 | A03745 | 243 |
| A00921 | A03906 | 446 | A00921 | A04065 | 277 |
| A00921 | A04086 | 193 | A00921 | A04152 | 210 |

|        |        |     |        |        |     |
|--------|--------|-----|--------|--------|-----|
| A00921 | A04162 | 262 | A00921 | A04244 | 219 |
| A00921 | A05048 | 417 | A00921 | A05335 | 427 |
| A00921 | A05418 | 394 | A00921 | A05627 | 273 |
| A00921 | A05887 | 217 | A00921 | A06277 | 151 |
| A00921 | A06309 | 160 | A00921 | A06823 | 391 |
| A00921 | A08111 | 368 | A00921 | A08268 | 347 |
| A00921 | A08352 | 162 | A00921 | A09235 | 484 |
| A00921 | A09236 | 229 | A00921 | A09241 | 177 |
| A00921 | A09363 | 296 | A00921 | A09508 | 270 |
| A00921 | A09812 | 260 | A00921 | A10470 | 290 |
| A00921 | A10681 | 226 | A00921 | A11300 | 174 |
| A00921 | A11678 | 245 | A00921 | A12648 | 334 |
| A00921 | A13539 | 255 | A00921 | A13716 | 235 |
| A00921 | A14048 | 199 | A00921 | A14209 | 346 |
| A00921 | A14646 | 185 | A00921 | A14789 | 224 |
| A00921 | A14848 | 236 | A00921 | A15293 | 316 |
| A00921 | A15294 | 191 | A00921 | A15495 | 232 |
| A00921 | A15560 | 151 | A00921 | A15813 | 215 |
| A00921 | A16123 | 177 | A00922 | A00926 | 340 |
| A00922 | A00927 | 236 | A00922 | A00932 | 543 |
| A00922 | A00933 | 178 | A00922 | A00935 | 364 |
| A00922 | A00953 | 480 | A00922 | A00980 | 544 |
| A00922 | A00983 | 491 | A00922 | A00990 | 249 |
| A00922 | A00994 | 480 | A00922 | A01006 | 614 |
| A00922 | A01024 | 274 | A00922 | A01027 | 665 |
| A00922 | A01042 | 456 | A00922 | A01055 | 226 |
| A00922 | A01069 | 452 | A00922 | A01082 | 205 |
| A00922 | A01086 | 401 | A00922 | A01101 | 229 |
| A00922 | A01115 | 400 | A00922 | A01122 | 281 |
| A00922 | A01150 | 491 | A00922 | A01161 | 529 |
| A00922 | A01208 | 335 | A00922 | A01215 | 170 |
| A00922 | A01220 | 373 | A00922 | A01221 | 472 |
| A00922 | A01232 | 665 | A00922 | A01234 | 429 |
| A00922 | A01249 | 170 | A00922 | A01261 | 503 |
| A00922 | A01287 | 179 | A00922 | A01293 | 615 |
| A00922 | A01294 | 63  | A00922 | A01311 | 491 |
| A00922 | A01335 | 224 | A00922 | A01353 | 241 |
| A00922 | A01369 | 154 | A00922 | A01384 | 462 |
| A00922 | A01412 | 154 | A00922 | A01420 | 221 |
| A00922 | A01431 | 665 | A00922 | A01439 | 491 |
| A00922 | A01448 | 208 | A00922 | A01464 | 327 |
| A00922 | A01470 | 454 | A00922 | A01492 | 536 |
| A00922 | A01496 | 441 | A00922 | A01539 | 445 |
| A00922 | A01540 | 466 | A00922 | A01560 | 263 |
| A00922 | A01569 | 475 | A00922 | A01577 | 218 |
| A00922 | A01579 | 458 | A00922 | A01613 | 491 |

|        |        |     |        |        |     |
|--------|--------|-----|--------|--------|-----|
| A00922 | A01618 | 204 | A00922 | A01649 | 490 |
| A00922 | A01680 | 314 | A00922 | A01748 | 165 |
| A00922 | A01782 | 485 | A00922 | A01822 | 545 |
| A00922 | A01824 | 252 | A00922 | A01894 | 291 |
| A00922 | A02353 | 152 | A00922 | A02788 | 291 |
| A00922 | A02877 | 172 | A00922 | A03438 | 240 |
| A00922 | A03454 | 484 | A00922 | A03494 | 230 |
| A00922 | A03608 | 249 | A00922 | A03644 | 263 |
| A00922 | A03677 | 221 | A00922 | A03740 | 484 |
| A00922 | A03752 | 490 | A00922 | A03809 | 665 |
| A00922 | A03888 | 447 | A00922 | A03981 | 491 |
| A00922 | A04449 | 202 | A00922 | A04507 | 199 |
| A00922 | A05227 | 664 | A00922 | A05258 | 455 |
| A00922 | A05318 | 486 | A00922 | A05449 | 307 |
| A00922 | A05562 | 480 | A00922 | A06320 | 466 |
| A00922 | A06466 | 640 | A00922 | A06589 | 380 |
| A00922 | A06637 | 491 | A00922 | A06709 | 160 |
| A00922 | A06826 | 156 | A00922 | A07201 | 449 |
| A00922 | A07208 | 226 | A00922 | A07251 | 212 |
| A00922 | A07311 | 530 | A00922 | A07360 | 491 |
| A00922 | A07744 | 491 | A00922 | A07798 | 490 |
| A00922 | A07881 | 664 | A00922 | A07911 | 598 |
| A00922 | A08098 | 480 | A00922 | A08178 | 218 |
| A00922 | A08228 | 664 | A00922 | A08301 | 208 |
| A00922 | A08359 | 224 | A00922 | A08519 | 219 |
| A00922 | A08530 | 324 | A00922 | A08533 | 160 |
| A00922 | A08548 | 664 | A00922 | A08674 | 434 |
| A00922 | A08684 | 491 | A00922 | A08748 | 313 |
| A00922 | A09045 | 386 | A00922 | A09297 | 536 |
| A00922 | A09577 | 462 | A00922 | A09655 | 490 |
| A00922 | A09902 | 361 | A00922 | A10522 | 160 |
| A00922 | A10532 | 170 | A00922 | A10689 | 271 |
| A00922 | A10728 | 185 | A00922 | A10755 | 307 |
| A00922 | A11113 | 102 | A00922 | A11157 | 151 |
| A00922 | A11296 | 491 | A00922 | A11822 | 281 |
| A00922 | A11823 | 199 | A00922 | A11926 | 491 |
| A00922 | A11981 | 258 | A00922 | A12043 | 160 |
| A00922 | A12105 | 277 | A00922 | A12227 | 262 |
| A00922 | A12328 | 488 | A00922 | A12329 | 447 |
| A00922 | A13149 | 212 | A00922 | A13248 | 177 |
| A00922 | A13298 | 486 | A00922 | A13340 | 545 |
| A00922 | A13989 | 419 | A00922 | A14073 | 609 |
| A00922 | A14083 | 470 | A00922 | A14188 | 480 |
| A00922 | A14216 | 490 | A00922 | A14596 | 382 |
| A00922 | A14699 | 665 | A00922 | A14738 | 372 |
| A00922 | A14778 | 664 | A00922 | A15244 | 535 |



|        |        |     |        |        |     |
|--------|--------|-----|--------|--------|-----|
| A00922 | A15624 | 462 | A00922 | A15652 | 373 |
| A00922 | A15659 | 372 | A00922 | A15660 | 491 |
| A00922 | A15661 | 408 | A00922 | A15662 | 383 |
| A00922 | A15684 | 491 | A00922 | A15746 | 473 |
| A00922 | A15918 | 299 | A00922 | A15923 | 157 |
| A00922 | A15931 | 477 | A00922 | A15932 | 699 |
| A00922 | A15933 | 544 | A00922 | A15937 | 491 |
| A00922 | A16048 | 235 | A00922 | A16088 | 273 |
| A00922 | A16157 | 262 | A00922 | A16238 | 160 |
| A00922 | A16272 | 501 | A00922 | A16318 | 273 |
| A00922 | A16437 | 388 | A00922 | A16446 | 188 |
| A00922 | A16552 | 391 | A00922 | A16585 | 160 |
| A00922 | A16630 | 177 | A00922 | A16912 | 151 |
| A00922 | A17023 | 160 | A00922 | A17193 | 190 |
| A00923 | A00928 | 185 | A00923 | A00934 | 335 |
| A00923 | A00947 | 227 | A00923 | A00955 | 310 |
| A00923 | A00965 | 400 | A00923 | A00970 | 454 |
| A00923 | A00988 | 196 | A00923 | A00990 | 193 |
| A00923 | A01000 | 491 | A00923 | A01017 | 491 |
| A00923 | A01020 | 479 | A00923 | A01025 | 491 |
| A00923 | A01031 | 361 | A00923 | A01042 | 165 |
| A00923 | A01047 | 491 | A00923 | A01056 | 449 |
| A00923 | A01061 | 446 | A00923 | A01066 | 463 |
| A00923 | A01075 | 490 | A00923 | A01085 | 210 |
| A00923 | A01087 | 335 | A00923 | A01090 | 395 |
| A00923 | A01091 | 151 | A00923 | A01101 | 491 |
| A00923 | A01112 | 488 | A00923 | A01120 | 361 |
| A00923 | A01127 | 491 | A00923 | A01140 | 489 |
| A00923 | A01150 | 439 | A00923 | A01166 | 486 |
| A00923 | A01184 | 491 | A00923 | A01186 | 485 |
| A00923 | A01189 | 486 | A00923 | A01194 | 301 |
| A00923 | A01206 | 491 | A00923 | A01234 | 491 |
| A00923 | A01243 | 491 | A00923 | A01249 | 491 |
| A00923 | A01263 | 490 | A00923 | A01264 | 299 |
| A00923 | A01282 | 486 | A00923 | A01291 | 597 |
| A00923 | A01306 | 491 | A00923 | A01335 | 491 |
| A00923 | A01338 | 491 | A00923 | A01349 | 380 |
| A00923 | A01365 | 327 | A00923 | A01392 | 483 |
| A00923 | A01401 | 157 | A00923 | A01425 | 299 |
| A00923 | A01429 | 488 | A00923 | A01431 | 469 |
| A00923 | A01437 | 491 | A00923 | A01457 | 466 |
| A00923 | A01464 | 491 | A00923 | A01468 | 491 |
| A00923 | A01470 | 491 | A00923 | A01490 | 219 |
| A00923 | A01492 | 480 | A00923 | A01496 | 204 |
| A00923 | A01503 | 384 | A00923 | A01555 | 327 |
| A00923 | A01579 | 486 | A00923 | A01586 | 489 |

|        |        |     |        |        |     |
|--------|--------|-----|--------|--------|-----|
| A00923 | A01588 | 473 | A00923 | A01598 | 491 |
| A00923 | A01612 | 452 | A00923 | A01614 | 477 |
| A00923 | A01617 | 207 | A00923 | A01618 | 427 |
| A00923 | A01649 | 491 | A00923 | A01700 | 162 |
| A00923 | A01740 | 213 | A00923 | A01822 | 400 |
| A00923 | A02216 | 441 | A00923 | A02738 | 466 |
| A00923 | A02877 | 333 | A00923 | A02978 | 484 |
| A00923 | A02980 | 262 | A00923 | A03069 | 491 |
| A00923 | A03272 | 171 | A00923 | A03437 | 272 |
| A00923 | A03567 | 491 | A00923 | A03705 | 243 |
| A00923 | A03734 | 360 | A00923 | A03740 | 460 |
| A00923 | A03752 | 327 | A00923 | A03754 | 477 |
| A00923 | A03859 | 489 | A00923 | A04116 | 159 |
| A00923 | A04760 | 177 | A00923 | A05331 | 401 |
| A00923 | A05385 | 457 | A00923 | A05411 | 385 |
| A00923 | A05443 | 455 | A00923 | A05501 | 391 |
| A00923 | A05502 | 246 | A00923 | A06279 | 200 |
| A00923 | A06351 | 358 | A00923 | A06466 | 400 |
| A00923 | A06861 | 491 | A00923 | A06897 | 411 |
| A00923 | A06909 | 312 | A00923 | A06965 | 491 |
| A00923 | A06973 | 480 | A00923 | A07201 | 489 |
| A00923 | A07311 | 446 | A00923 | A07348 | 363 |
| A00923 | A07451 | 491 | A00923 | A07533 | 283 |
| A00923 | A07581 | 443 | A00923 | A07584 | 162 |
| A00923 | A07706 | 484 | A00923 | A07798 | 205 |
| A00923 | A08011 | 490 | A00923 | A08022 | 232 |
| A00923 | A08055 | 380 | A00923 | A08131 | 335 |
| A00923 | A08137 | 484 | A00923 | A08154 | 267 |
| A00923 | A08248 | 344 | A00923 | A08281 | 441 |
| A00923 | A08357 | 491 | A00923 | A08358 | 418 |
| A00923 | A08359 | 411 | A00923 | A08398 | 485 |
| A00923 | A08403 | 213 | A00923 | A08452 | 491 |
| A00923 | A08501 | 218 | A00923 | A08556 | 157 |
| A00923 | A08558 | 474 | A00923 | A08559 | 491 |
| A00923 | A08664 | 480 | A00923 | A08752 | 371 |
| A00923 | A08773 | 306 | A00923 | A08810 | 467 |
| A00923 | A08920 | 245 | A00923 | A08972 | 422 |
| A00923 | A09044 | 172 | A00923 | A09322 | 491 |
| A00923 | A09327 | 259 | A00923 | A09332 | 335 |
| A00923 | A09337 | 318 | A00923 | A09471 | 259 |
| A00923 | A09542 | 180 | A00923 | A09610 | 177 |
| A00923 | A09614 | 245 | A00923 | A09674 | 480 |
| A00923 | A09702 | 438 | A00923 | A09764 | 398 |
| A00923 | A09852 | 368 | A00923 | A10417 | 486 |
| A00923 | A10439 | 154 | A00923 | A10518 | 293 |
| A00923 | A10529 | 286 | A00923 | A10616 | 401 |

|        |        |     |        |        |     |
|--------|--------|-----|--------|--------|-----|
| A00923 | A11277 | 414 | A00923 | A11316 | 183 |
| A00923 | A11368 | 162 | A00923 | A11390 | 490 |
| A00923 | A11420 | 469 | A00923 | A11438 | 491 |
| A00923 | A11440 | 154 | A00923 | A11480 | 490 |
| A00923 | A11612 | 302 | A00923 | A11704 | 490 |
| A00923 | A11945 | 475 | A00923 | A12233 | 475 |
| A00923 | A12270 | 277 | A00923 | A12329 | 177 |
| A00923 | A12821 | 432 | A00923 | A12849 | 154 |
| A00923 | A13340 | 358 | A00923 | A13457 | 291 |
| A00923 | A13830 | 333 | A00923 | A13989 | 491 |
| A00923 | A13992 | 490 | A00923 | A14070 | 208 |
| A00923 | A14073 | 234 | A00923 | A14169 | 469 |
| A00923 | A14188 | 486 | A00923 | A14196 | 182 |
| A00923 | A14216 | 490 | A00923 | A14505 | 447 |
| A00923 | A14508 | 347 | A00923 | A14566 | 221 |
| A00923 | A14596 | 477 | A00923 | A14923 | 187 |
| A00923 | A15062 | 245 | A00923 | A15086 | 279 |
| A00923 | A15218 | 490 | A00923 | A15219 | 330 |
| A00923 | A15221 | 490 | A00923 | A15235 | 490 |
| A00923 | A15500 | 346 | A00923 | A15559 | 340 |
| A00923 | A15564 | 154 | A00923 | A15660 | 489 |
| A00923 | A15684 | 432 | A00923 | A15727 | 463 |
| A00923 | A15732 | 238 | A00923 | A15743 | 474 |
| A00923 | A15776 | 385 | A00923 | A15947 | 460 |
| A00923 | A15988 | 488 | A00923 | A16053 | 224 |
| A00923 | A16118 | 491 | A00923 | A16376 | 171 |
| A00923 | A16523 | 383 | A00923 | A16631 | 477 |
| A00923 | A16763 | 173 | A00923 | A16823 | 154 |
| A00923 | A17193 | 252 | A00924 | A14272 | 63  |
| A00925 | A00926 | 156 | A00925 | A01064 | 212 |
| A00925 | A01122 | 319 | A00925 | A01169 | 486 |
| A00925 | A01329 | 241 | A00925 | A01339 | 167 |
| A00925 | A01340 | 286 | A00925 | A01370 | 162 |
| A00925 | A01559 | 154 | A00925 | A01594 | 254 |
| A00925 | A01686 | 162 | A00925 | A03734 | 363 |
| A00925 | A04608 | 170 | A00925 | A05276 | 274 |
| A00925 | A05570 | 366 | A00925 | A05781 | 334 |
| A00925 | A07132 | 273 | A00925 | A07457 | 339 |
| A00925 | A08913 | 449 | A00925 | A11352 | 357 |
| A00925 | A11828 | 208 | A00925 | A13250 | 171 |
| A00925 | A13765 | 350 | A00925 | A14912 | 430 |
| A00926 | A00927 | 542 | A00926 | A00950 | 177 |
| A00926 | A00956 | 443 | A00926 | A00975 | 545 |
| A00926 | A00983 | 299 | A00926 | A00993 | 229 |
| A00926 | A01014 | 440 | A00926 | A01017 | 162 |
| A00926 | A01020 | 458 | A00926 | A01039 | 160 |

|        |        |     |        |        |     |
|--------|--------|-----|--------|--------|-----|
| A00926 | A01046 | 168 | A00926 | A01057 | 218 |
| A00926 | A01058 | 511 | A00926 | A01068 | 317 |
| A00926 | A01077 | 542 | A00926 | A01080 | 543 |
| A00926 | A01091 | 241 | A00926 | A01097 | 446 |
| A00926 | A01099 | 313 | A00926 | A01106 | 391 |
| A00926 | A01108 | 366 | A00926 | A01117 | 456 |
| A00926 | A01122 | 485 | A00926 | A01156 | 281 |
| A00926 | A01169 | 491 | A00926 | A01203 | 460 |
| A00926 | A01212 | 481 | A00926 | A01234 | 460 |
| A00926 | A01243 | 201 | A00926 | A01267 | 498 |
| A00926 | A01278 | 215 | A00926 | A01314 | 188 |
| A00926 | A01317 | 187 | A00926 | A01322 | 389 |
| A00926 | A01329 | 183 | A00926 | A01339 | 544 |
| A00926 | A01370 | 491 | A00926 | A01404 | 458 |
| A00926 | A01415 | 172 | A00926 | A01444 | 217 |
| A00926 | A01582 | 151 | A00926 | A01722 | 288 |
| A00926 | A01741 | 486 | A00926 | A01844 | 221 |
| A00926 | A01900 | 469 | A00926 | A01941 | 469 |
| A00926 | A02086 | 187 | A00926 | A02212 | 196 |
| A00926 | A02252 | 162 | A00926 | A02268 | 316 |
| A00926 | A02278 | 151 | A00926 | A02324 | 195 |
| A00926 | A02364 | 228 | A00926 | A02377 | 252 |
| A00926 | A02404 | 217 | A00926 | A02435 | 196 |
| A00926 | A02454 | 313 | A00926 | A02847 | 191 |
| A00926 | A02966 | 221 | A00926 | A03019 | 418 |
| A00926 | A03068 | 283 | A00926 | A03091 | 270 |
| A00926 | A03112 | 200 | A00926 | A03254 | 217 |
| A00926 | A03567 | 226 | A00926 | A03614 | 174 |
| A00926 | A03676 | 207 | A00926 | A03742 | 201 |
| A00926 | A03885 | 364 | A00926 | A04015 | 340 |
| A00926 | A04666 | 364 | A00926 | A04908 | 160 |
| A00926 | A04990 | 180 | A00926 | A05001 | 163 |
| A00926 | A05570 | 307 | A00926 | A05577 | 443 |
| A00926 | A05630 | 160 | A00926 | A06137 | 386 |
| A00926 | A06272 | 177 | A00926 | A06510 | 328 |
| A00926 | A06572 | 163 | A00926 | A06750 | 488 |
| A00926 | A06764 | 188 | A00926 | A06974 | 224 |
| A00926 | A06989 | 252 | A00926 | A07096 | 160 |
| A00926 | A07101 | 401 | A00926 | A07226 | 160 |
| A00926 | A07317 | 254 | A00926 | A07360 | 454 |
| A00926 | A07434 | 200 | A00926 | A07439 | 172 |
| A00926 | A07457 | 486 | A00926 | A07697 | 481 |
| A00926 | A07708 | 456 | A00926 | A07715 | 274 |
| A00926 | A07756 | 486 | A00926 | A07876 | 180 |
| A00926 | A07881 | 224 | A00926 | A07961 | 205 |
| A00926 | A08343 | 180 | A00926 | A08490 | 224 |

|        |        |     |        |        |     |
|--------|--------|-----|--------|--------|-----|
| A00926 | A08745 | 199 | A00926 | A08831 | 328 |
| A00926 | A08834 | 160 | A00926 | A08882 | 187 |
| A00926 | A08982 | 259 | A00926 | A09290 | 465 |
| A00926 | A09302 | 363 | A00926 | A09310 | 217 |
| A00926 | A09328 | 452 | A00926 | A09331 | 252 |
| A00926 | A09627 | 160 | A00926 | A09652 | 391 |
| A00926 | A09672 | 457 | A00926 | A10050 | 217 |
| A00926 | A10372 | 224 | A00926 | A10766 | 154 |
| A00926 | A11365 | 160 | A00926 | A11532 | 273 |
| A00926 | A11735 | 263 | A00926 | A11737 | 479 |
| A00926 | A11914 | 262 | A00926 | A12253 | 171 |
| A00926 | A12658 | 161 | A00926 | A12824 | 545 |
| A00926 | A12863 | 268 | A00926 | A13298 | 330 |
| A00926 | A13406 | 184 | A00926 | A13413 | 201 |
| A00926 | A13618 | 201 | A00926 | A14007 | 160 |
| A00926 | A14196 | 461 | A00926 | A14208 | 190 |
| A00926 | A14343 | 480 | A00926 | A14352 | 418 |
| A00926 | A14488 | 273 | A00926 | A14489 | 491 |
| A00926 | A14502 | 369 | A00926 | A14510 | 273 |
| A00926 | A14679 | 386 | A00926 | A14701 | 339 |
| A00926 | A15185 | 252 | A00926 | A15257 | 273 |
| A00926 | A15297 | 486 | A00926 | A15323 | 322 |
| A00926 | A15498 | 475 | A00926 | A15624 | 467 |
| A00926 | A15661 | 409 | A00926 | A15662 | 173 |
| A00926 | A15684 | 485 | A00926 | A15746 | 190 |
| A00926 | A15931 | 227 | A00926 | A15937 | 288 |
| A00926 | A16463 | 179 | A00927 | A00952 | 157 |
| A00927 | A00975 | 300 | A00927 | A00983 | 491 |
| A00927 | A00986 | 196 | A00927 | A01017 | 269 |
| A00927 | A01027 | 454 | A00927 | A01039 | 160 |
| A00927 | A01058 | 222 | A00927 | A01077 | 160 |
| A00927 | A01080 | 434 | A00927 | A01097 | 455 |
| A00927 | A01101 | 380 | A00927 | A01106 | 417 |
| A00927 | A01217 | 408 | A00927 | A01232 | 489 |
| A00927 | A01267 | 495 | A00927 | A01293 | 323 |
| A00927 | A01338 | 324 | A00927 | A01339 | 236 |
| A00927 | A01451 | 428 | A00927 | A01501 | 383 |
| A00927 | A01844 | 445 | A00927 | A01988 | 221 |
| A00927 | A02212 | 161 | A00927 | A02942 | 159 |
| A00927 | A03480 | 191 | A00927 | A03570 | 243 |
| A00927 | A03617 | 177 | A00927 | A03676 | 202 |
| A00927 | A03859 | 165 | A00927 | A06786 | 258 |
| A00927 | A06938 | 238 | A00927 | A07096 | 160 |
| A00927 | A07226 | 160 | A00927 | A07360 | 485 |
| A00927 | A07744 | 386 | A00927 | A08087 | 241 |
| A00927 | A08088 | 234 | A00927 | A08098 | 358 |

|        |        |     |        |        |     |
|--------|--------|-----|--------|--------|-----|
| A00927 | A08228 | 449 | A00927 | A08548 | 217 |
| A00927 | A08834 | 160 | A00927 | A09045 | 208 |
| A00927 | A09328 | 424 | A00927 | A09627 | 160 |
| A00927 | A09672 | 184 | A00927 | A10372 | 545 |
| A00927 | A10421 | 368 | A00927 | A10755 | 200 |
| A00927 | A11365 | 160 | A00927 | A11735 | 512 |
| A00927 | A11737 | 542 | A00927 | A11855 | 152 |
| A00927 | A11914 | 310 | A00927 | A12589 | 281 |
| A00927 | A12655 | 480 | A00927 | A12658 | 160 |
| A00927 | A12824 | 536 | A00927 | A13298 | 467 |
| A00927 | A14007 | 160 | A00927 | A14071 | 201 |
| A00927 | A14083 | 281 | A00927 | A14596 | 191 |
| A00927 | A14699 | 278 | A00927 | A15257 | 322 |
| A00927 | A15297 | 477 | A00927 | A15377 | 165 |
| A00927 | A15624 | 477 | A00927 | A15651 | 414 |
| A00927 | A15652 | 319 | A00927 | A15660 | 408 |
| A00927 | A15661 | 389 | A00927 | A15684 | 491 |
| A00927 | A15746 | 254 | A00927 | A15757 | 165 |
| A00927 | A15937 | 351 | A00928 | A00952 | 687 |
| A00928 | A00972 | 267 | A00928 | A00997 | 217 |
| A00928 | A01022 | 173 | A00928 | A01075 | 187 |
| A00928 | A01091 | 428 | A00928 | A01101 | 425 |
| A00928 | A01107 | 575 | A00928 | A01159 | 674 |
| A00928 | A01221 | 682 | A00928 | A01243 | 574 |
| A00928 | A01255 | 450 | A00928 | A01291 | 414 |
| A00928 | A01351 | 385 | A00928 | A01352 | 491 |
| A00928 | A01371 | 245 | A00928 | A01412 | 433 |
| A00928 | A01418 | 240 | A00928 | A01451 | 366 |
| A00928 | A01459 | 477 | A00928 | A01514 | 159 |
| A00928 | A02212 | 330 | A00928 | A02452 | 170 |
| A00928 | A02828 | 187 | A00928 | A03065 | 413 |
| A00928 | A03279 | 160 | A00928 | A03494 | 469 |
| A00928 | A03556 | 217 | A00928 | A03567 | 439 |
| A00928 | A03617 | 217 | A00928 | A03720 | 159 |
| A00928 | A04212 | 246 | A00928 | A05605 | 276 |
| A00928 | A05955 | 238 | A00928 | A06017 | 177 |
| A00928 | A06122 | 458 | A00928 | A06204 | 430 |
| A00928 | A06347 | 172 | A00928 | A06369 | 503 |
| A00928 | A06436 | 329 | A00928 | A06832 | 688 |
| A00928 | A06861 | 457 | A00928 | A07244 | 157 |
| A00928 | A07312 | 412 | A00928 | A07349 | 180 |
| A00928 | A07439 | 221 | A00928 | A08183 | 568 |
| A00928 | A08248 | 188 | A00928 | A08467 | 388 |
| A00928 | A08982 | 479 | A00928 | A08984 | 394 |
| A00928 | A08990 | 270 | A00928 | A09317 | 343 |
| A00928 | A09324 | 184 | A00928 | A09345 | 238 |

|        |        |     |        |        |     |
|--------|--------|-----|--------|--------|-----|
| A00928 | A09673 | 486 | A00928 | A09713 | 187 |
| A00928 | A09860 | 293 | A00928 | A11277 | 491 |
| A00928 | A11855 | 156 | A00928 | A13117 | 470 |
| A00928 | A14088 | 217 | A00928 | A14167 | 173 |
| A00928 | A14196 | 185 | A00928 | A14198 | 232 |
| A00928 | A14246 | 375 | A00928 | A14482 | 400 |
| A00928 | A14596 | 544 | A00928 | A14597 | 162 |
| A00928 | A14662 | 188 | A00928 | A14701 | 416 |
| A00928 | A15212 | 163 | A00928 | A15323 | 427 |
| A00928 | A15324 | 477 | A00928 | A15353 | 468 |
| A00928 | A15370 | 174 | A00928 | A15374 | 323 |
| A00928 | A15377 | 574 | A00928 | A15543 | 574 |
| A00928 | A15564 | 196 | A00928 | A15620 | 173 |
| A00928 | A15724 | 217 | A00928 | A15747 | 200 |
| A00928 | A16401 | 179 | A00928 | A16495 | 346 |
| A00928 | A16664 | 217 | A00928 | A17063 | 191 |
| A00929 | A00980 | 226 | A00929 | A01004 | 548 |
| A00929 | A01268 | 319 | A00929 | A01317 | 243 |
| A00929 | A01661 | 430 | A00929 | A01809 | 485 |
| A00929 | A01970 | 491 | A00929 | A02050 | 205 |
| A00929 | A03066 | 205 | A00929 | A03724 | 265 |
| A00929 | A03757 | 177 | A00929 | A03763 | 196 |
| A00929 | A07180 | 485 | A00929 | A07695 | 235 |
| A00929 | A08463 | 414 | A00929 | A09069 | 205 |
| A00929 | A10014 | 195 | A00929 | A10253 | 449 |
| A00929 | A12137 | 224 | A00929 | A13971 | 212 |
| A00929 | A15543 | 472 | A00929 | A15557 | 329 |
| A00930 | A01320 | 232 | A00930 | A01385 | 252 |
| A00930 | A01466 | 190 | A00930 | A01539 | 332 |
| A00930 | A01572 | 491 | A00930 | A01593 | 899 |
| A00930 | A01615 | 380 | A00930 | A01643 | 472 |
| A00930 | A01660 | 465 | A00930 | A01726 | 638 |
| A00930 | A02053 | 243 | A00930 | A02054 | 491 |
| A00930 | A02112 | 465 | A00930 | A02115 | 256 |
| A00930 | A02551 | 480 | A00930 | A03126 | 473 |
| A00930 | A03164 | 588 | A00930 | A03171 | 491 |
| A00930 | A03672 | 170 | A00930 | A03986 | 176 |
| A00930 | A04232 | 204 | A00930 | A04829 | 235 |
| A00930 | A04866 | 156 | A00930 | A05034 | 334 |
| A00930 | A05289 | 345 | A00930 | A05301 | 299 |
| A00930 | A05706 | 419 | A00930 | A06188 | 481 |
| A00930 | A06385 | 334 | A00930 | A06508 | 170 |
| A00930 | A06598 | 638 | A00930 | A06693 | 168 |
| A00930 | A06914 | 636 | A00930 | A07257 | 491 |
| A00930 | A07366 | 191 | A00930 | A07771 | 491 |
| A00930 | A08571 | 472 | A00930 | A08707 | 813 |

|        |        |     |        |        |     |
|--------|--------|-----|--------|--------|-----|
| A00930 | A08859 | 497 | A00930 | A09090 | 190 |
| A00930 | A09182 | 560 | A00930 | A10720 | 343 |
| A00930 | A10869 | 490 | A00930 | A11156 | 243 |
| A00930 | A11158 | 157 | A00930 | A12393 | 473 |
| A00930 | A12952 | 205 | A00930 | A13983 | 177 |
| A00930 | A13989 | 162 | A00930 | A14252 | 638 |
| A00930 | A14489 | 163 | A00930 | A15318 | 198 |
| A00930 | A15356 | 638 | A00930 | A15480 | 198 |
| A00930 | A15483 | 198 | A00930 | A15587 | 198 |
| A00930 | A15649 | 213 | A00930 | A15684 | 190 |
| A00930 | A16422 | 256 | A00930 | A16489 | 219 |
| A00930 | A16503 | 160 | A00930 | A16719 | 170 |
| A00930 | A16904 | 443 | A00930 | A17096 | 288 |
| A00931 | A01142 | 455 | A00931 | A01257 | 308 |
| A00931 | A01281 | 306 | A00931 | A01367 | 173 |
| A00931 | A01546 | 154 | A00931 | A01601 | 436 |
| A00931 | A01605 | 483 | A00931 | A01674 | 204 |
| A00931 | A02322 | 257 | A00931 | A02621 | 157 |
| A00931 | A02983 | 152 | A00931 | A03049 | 477 |
| A00931 | A03053 | 212 | A00931 | A03167 | 213 |
| A00931 | A03201 | 176 | A00931 | A03259 | 208 |
| A00931 | A03304 | 168 | A00931 | A03305 | 188 |
| A00931 | A03314 | 457 | A00931 | A03758 | 423 |
| A00931 | A03963 | 343 | A00931 | A04079 | 180 |
| A00931 | A04183 | 263 | A00931 | A04492 | 340 |
| A00931 | A04860 | 307 | A00931 | A05155 | 475 |
| A00931 | A05252 | 313 | A00931 | A05443 | 260 |
| A00931 | A05603 | 201 | A00931 | A06140 | 313 |
| A00931 | A06269 | 266 | A00931 | A06295 | 180 |
| A00931 | A06479 | 347 | A00931 | A06665 | 201 |
| A00931 | A06777 | 323 | A00931 | A07126 | 193 |
| A00931 | A07167 | 160 | A00931 | A07801 | 307 |
| A00931 | A07815 | 430 | A00931 | A08672 | 313 |
| A00931 | A08905 | 200 | A00931 | A09247 | 199 |
| A00931 | A09469 | 205 | A00931 | A09784 | 232 |
| A00931 | A09824 | 236 | A00931 | A09875 | 176 |
| A00931 | A09971 | 313 | A00931 | A10060 | 333 |
| A00931 | A10332 | 212 | A00931 | A10577 | 281 |
| A00931 | A10612 | 324 | A00931 | A10730 | 294 |
| A00931 | A10887 | 290 | A00931 | A10899 | 171 |
| A00931 | A11738 | 193 | A00931 | A13369 | 438 |
| A00931 | A13373 | 159 | A00931 | A13951 | 269 |
| A00931 | A13994 | 465 | A00931 | A14048 | 490 |
| A00931 | A14072 | 491 | A00931 | A14077 | 330 |
| A00931 | A14097 | 385 | A00931 | A14128 | 441 |
| A00931 | A14137 | 277 | A00931 | A14202 | 283 |



|        |        |     |        |        |     |
|--------|--------|-----|--------|--------|-----|
| A00931 | A14371 | 229 | A00931 | A14394 | 205 |
| A00931 | A14496 | 434 | A00931 | A14654 | 179 |
| A00931 | A14716 | 373 | A00931 | A14803 | 285 |
| A00931 | A15292 | 902 | A00931 | A15430 | 306 |
| A00931 | A15431 | 159 | A00931 | A15463 | 188 |
| A00931 | A15464 | 283 | A00931 | A15489 | 191 |
| A00931 | A15671 | 245 | A00931 | A15816 | 307 |
| A00931 | A15827 | 373 | A00931 | A16555 | 273 |
| A00931 | A17081 | 290 | A00932 | A00933 | 367 |
| A00932 | A00970 | 481 | A00932 | A00980 | 222 |
| A00932 | A01042 | 491 | A00932 | A01083 | 434 |
| A00932 | A01113 | 347 | A00932 | A01150 | 302 |
| A00932 | A01161 | 160 | A00932 | A01206 | 210 |
| A00932 | A01212 | 486 | A00932 | A01261 | 219 |
| A00932 | A01291 | 486 | A00932 | A01431 | 491 |
| A00932 | A01496 | 201 | A00932 | A01512 | 435 |
| A00932 | A01540 | 429 | A00932 | A01553 | 151 |
| A00932 | A01554 | 402 | A00932 | A01560 | 491 |
| A00932 | A01561 | 238 | A00932 | A01577 | 171 |
| A00932 | A01598 | 213 | A00932 | A01628 | 191 |
| A00932 | A01640 | 216 | A00932 | A01680 | 318 |
| A00932 | A01684 | 152 | A00932 | A01707 | 423 |
| A00932 | A01718 | 648 | A00932 | A01787 | 232 |
| A00932 | A01822 | 401 | A00932 | A01974 | 412 |
| A00932 | A02178 | 436 | A00932 | A02180 | 461 |
| A00932 | A02239 | 481 | A00932 | A03142 | 159 |
| A00932 | A03560 | 223 | A00932 | A03606 | 372 |
| A00932 | A03677 | 160 | A00932 | A03740 | 491 |
| A00932 | A03752 | 491 | A00932 | A04347 | 355 |
| A00932 | A04858 | 466 | A00932 | A06409 | 249 |
| A00932 | A06466 | 491 | A00932 | A06543 | 168 |
| A00932 | A06950 | 297 | A00932 | A07247 | 450 |
| A00932 | A07311 | 945 | A00932 | A07726 | 303 |
| A00932 | A07798 | 491 | A00932 | A08054 | 249 |
| A00932 | A08137 | 212 | A00932 | A08533 | 365 |
| A00932 | A08539 | 235 | A00932 | A08571 | 404 |
| A00932 | A09145 | 235 | A00932 | A09297 | 503 |
| A00932 | A09393 | 238 | A00932 | A09577 | 490 |
| A00932 | A09804 | 411 | A00932 | A09809 | 339 |
| A00932 | A09902 | 535 | A00932 | A09906 | 417 |
| A00932 | A10365 | 454 | A00932 | A10475 | 160 |
| A00932 | A10532 | 452 | A00932 | A10624 | 252 |
| A00932 | A10728 | 489 | A00932 | A11286 | 477 |
| A00932 | A11302 | 490 | A00932 | A11737 | 200 |
| A00932 | A12043 | 160 | A00932 | A12084 | 348 |
| A00932 | A12167 | 229 | A00932 | A12227 | 384 |

|        |        |     |        |        |     |
|--------|--------|-----|--------|--------|-----|
| A00932 | A12328 | 491 | A00932 | A12990 | 491 |
| A00932 | A13149 | 491 | A00932 | A13320 | 180 |
| A00932 | A13335 | 475 | A00932 | A13340 | 545 |
| A00932 | A14073 | 491 | A00932 | A14188 | 452 |
| A00932 | A14429 | 238 | A00932 | A14433 | 154 |
| A00932 | A14466 | 152 | A00932 | A14472 | 210 |
| A00932 | A14495 | 219 | A00932 | A14571 | 176 |
| A00932 | A14738 | 181 | A00932 | A15133 | 165 |
| A00932 | A15146 | 263 | A00932 | A15244 | 545 |
| A00932 | A15546 | 472 | A00932 | A15551 | 488 |
| A00932 | A15660 | 165 | A00932 | A15720 | 274 |
| A00932 | A15741 | 291 | A00932 | A15753 | 156 |
| A00932 | A15754 | 191 | A00932 | A15932 | 474 |
| A00932 | A15933 | 374 | A00932 | A16272 | 328 |
| A00932 | A16318 | 160 | A00932 | A16437 | 185 |
| A00932 | A16446 | 160 | A00932 | A16585 | 259 |
| A00933 | A00980 | 160 | A00933 | A01161 | 160 |
| A00933 | A01176 | 95  | A00933 | A01261 | 160 |
| A00933 | A01554 | 185 | A00933 | A01560 | 944 |
| A00933 | A01822 | 160 | A00933 | A03677 | 160 |
| A00933 | A03740 | 274 | A00933 | A03752 | 480 |
| A00933 | A06466 | 488 | A00933 | A06597 | 167 |
| A00933 | A07311 | 945 | A00933 | A07798 | 490 |
| A00933 | A08533 | 160 | A00933 | A09263 | 177 |
| A00933 | A09297 | 160 | A00933 | A09319 | 366 |
| A00933 | A09577 | 334 | A00933 | A09804 | 230 |
| A00933 | A09902 | 417 | A00933 | A09995 | 201 |
| A00933 | A10208 | 185 | A00933 | A10506 | 291 |
| A00933 | A10728 | 281 | A00933 | A11286 | 490 |
| A00933 | A11292 | 319 | A00933 | A11296 | 163 |
| A00933 | A12043 | 160 | A00933 | A12227 | 160 |
| A00933 | A12328 | 462 | A00933 | A12990 | 266 |
| A00933 | A13320 | 480 | A00933 | A13335 | 465 |
| A00933 | A13340 | 360 | A00933 | A13511 | 193 |
| A00933 | A13522 | 339 | A00933 | A14073 | 321 |
| A00933 | A14159 | 268 | A00933 | A14188 | 913 |
| A00933 | A14198 | 900 | A00933 | A14228 | 63  |
| A00933 | A14571 | 491 | A00933 | A14738 | 238 |
| A00933 | A15244 | 418 | A00933 | A15932 | 160 |
| A00933 | A15933 | 160 | A00933 | A16272 | 160 |
| A00933 | A16291 | 238 | A00933 | A16318 | 160 |
| A00933 | A16437 | 160 | A00933 | A16446 | 389 |
| A00933 | A16585 | 160 | A00933 | A16793 | 240 |
| A00934 | A00992 | 170 | A00934 | A01017 | 160 |
| A00934 | A01020 | 491 | A00934 | A01028 | 170 |
| A00934 | A01032 | 435 | A00934 | A01040 | 408 |

|        |        |     |        |        |     |
|--------|--------|-----|--------|--------|-----|
| A00934 | A01075 | 491 | A00934 | A01088 | 486 |
| A00934 | A01116 | 491 | A00934 | A01120 | 370 |
| A00934 | A01129 | 170 | A00934 | A01147 | 224 |
| A00934 | A01160 | 170 | A00934 | A01166 | 488 |
| A00934 | A01168 | 170 | A00934 | A01184 | 491 |
| A00934 | A01201 | 488 | A00934 | A01206 | 695 |
| A00934 | A01214 | 257 | A00934 | A01232 | 165 |
| A00934 | A01234 | 491 | A00934 | A01278 | 246 |
| A00934 | A01304 | 489 | A00934 | A01311 | 385 |
| A00934 | A01349 | 491 | A00934 | A01351 | 184 |
| A00934 | A01356 | 170 | A00934 | A01384 | 268 |
| A00934 | A01425 | 170 | A00934 | A01429 | 690 |
| A00934 | A01468 | 266 | A00934 | A01470 | 491 |
| A00934 | A01487 | 170 | A00934 | A01488 | 232 |
| A00934 | A01492 | 548 | A00934 | A01503 | 458 |
| A00934 | A01538 | 170 | A00934 | A01546 | 375 |
| A00934 | A01597 | 408 | A00934 | A01598 | 549 |
| A00934 | A01614 | 405 | A00934 | A01649 | 456 |
| A00934 | A02003 | 219 | A00934 | A02265 | 170 |
| A00934 | A03438 | 170 | A00934 | A03652 | 170 |
| A00934 | A03734 | 475 | A00934 | A03981 | 170 |
| A00934 | A06275 | 386 | A00934 | A06356 | 170 |
| A00934 | A06543 | 176 | A00934 | A07116 | 472 |
| A00934 | A07223 | 224 | A00934 | A07244 | 170 |
| A00934 | A07347 | 491 | A00934 | A07348 | 536 |
| A00934 | A07524 | 170 | A00934 | A07533 | 452 |
| A00934 | A07547 | 314 | A00934 | A07584 | 380 |
| A00934 | A07700 | 491 | A00934 | A07706 | 449 |
| A00934 | A07725 | 257 | A00934 | A07744 | 312 |
| A00934 | A07924 | 170 | A00934 | A08022 | 486 |
| A00934 | A08024 | 281 | A00934 | A08211 | 690 |
| A00934 | A08491 | 491 | A00934 | A09307 | 154 |
| A00934 | A09619 | 462 | A00934 | A09697 | 170 |
| A00934 | A09705 | 433 | A00934 | A10923 | 195 |
| A00934 | A12138 | 473 | A00934 | A12998 | 267 |
| A00934 | A13052 | 170 | A00934 | A13989 | 549 |
| A00934 | A14216 | 441 | A00934 | A14699 | 435 |
| A00935 | A00953 | 436 | A00935 | A00980 | 439 |
| A00935 | A01024 | 441 | A00935 | A01034 | 401 |
| A00935 | A01038 | 389 | A00935 | A01086 | 185 |
| A00935 | A01161 | 627 | A00935 | A01180 | 174 |
| A00935 | A01192 | 293 | A00935 | A01210 | 491 |
| A00935 | A01247 | 491 | A00935 | A01261 | 489 |
| A00935 | A01263 | 490 | A00935 | A01291 | 439 |
| A00935 | A01336 | 388 | A00935 | A01338 | 278 |
| A00935 | A01379 | 251 | A00935 | A01392 | 168 |

|        |        |     |        |        |     |
|--------|--------|-----|--------|--------|-----|
| A00935 | A01413 | 296 | A00935 | A01433 | 485 |
| A00935 | A01435 | 491 | A00935 | A01447 | 491 |
| A00935 | A01466 | 201 | A00935 | A01540 | 474 |
| A00935 | A01560 | 402 | A00935 | A01593 | 279 |
| A00935 | A01596 | 157 | A00935 | A01707 | 475 |
| A00935 | A01741 | 460 | A00935 | A01822 | 246 |
| A00935 | A01827 | 434 | A00935 | A01976 | 165 |
| A00935 | A02607 | 491 | A00935 | A03752 | 311 |
| A00935 | A04017 | 314 | A00935 | A05417 | 491 |
| A00935 | A06466 | 480 | A00935 | A06545 | 162 |
| A00935 | A07311 | 491 | A00935 | A07360 | 436 |
| A00935 | A07371 | 310 | A00935 | A07394 | 491 |
| A00935 | A08011 | 462 | A00935 | A08339 | 296 |
| A00935 | A08519 | 490 | A00935 | A08533 | 160 |
| A00935 | A08543 | 486 | A00935 | A08550 | 274 |
| A00935 | A08556 | 469 | A00935 | A08773 | 274 |
| A00935 | A09009 | 191 | A00935 | A09054 | 347 |
| A00935 | A11313 | 296 | A00935 | A11526 | 481 |
| A00935 | A11728 | 254 | A00935 | A11833 | 490 |
| A00935 | A12215 | 446 | A00935 | A12433 | 241 |
| A00935 | A13116 | 307 | A00935 | A13340 | 479 |
| A00935 | A13398 | 451 | A00935 | A13524 | 230 |
| A00935 | A13660 | 230 | A00935 | A13809 | 486 |
| A00935 | A14468 | 180 | A00935 | A14566 | 441 |
| A00935 | A14845 | 462 | A00935 | A15498 | 443 |
| A00935 | A15653 | 491 | A00935 | A15666 | 491 |
| A00935 | A15765 | 491 | A00935 | A15932 | 350 |
| A00935 | A16060 | 468 | A00935 | A16157 | 491 |
| A00935 | A16243 | 335 | A00935 | A16272 | 218 |
| A00935 | A16403 | 180 | A00935 | A16676 | 446 |
| A00935 | A16683 | 218 | A00935 | A16720 | 180 |
| A00935 | A16813 | 245 | A00935 | A17142 | 314 |
| A00936 | A00985 | 182 | A00936 | A01017 | 260 |
| A00936 | A01021 | 491 | A00936 | A01100 | 491 |
| A00936 | A01135 | 491 | A00936 | A01194 | 157 |
| A00936 | A01250 | 491 | A00936 | A01254 | 469 |
| A00936 | A01375 | 479 | A00936 | A01445 | 423 |
| A00936 | A01483 | 491 | A00936 | A01660 | 313 |
| A00936 | A01741 | 254 | A00936 | A01847 | 205 |
| A00936 | A03243 | 163 | A00936 | A07346 | 491 |
| A00936 | A08430 | 154 | A00936 | A08524 | 213 |
| A00936 | A08957 | 466 | A00936 | A10373 | 491 |
| A00936 | A12052 | 255 | A00936 | A12556 | 202 |
| A00936 | A12824 | 288 | A00936 | A13231 | 179 |
| A00936 | A14167 | 299 | A00936 | A14209 | 297 |
| A00936 | A14230 | 441 | A00936 | A14272 | 238 |

|        |        |     |        |        |     |
|--------|--------|-----|--------|--------|-----|
| A00936 | A14462 | 278 | A00936 | A14655 | 299 |
| A00936 | A14701 | 491 | A00936 | A14819 | 413 |
| A00936 | A15519 | 330 | A00936 | A15534 | 460 |
| A00936 | A15535 | 159 | A00936 | A15540 | 218 |
| A00936 | A15558 | 475 | A00937 | A00981 | 441 |
| A00937 | A01071 | 343 | A00937 | A01125 | 230 |
| A00937 | A01157 | 391 | A00937 | A03141 | 486 |
| A00937 | A03314 | 156 | A00937 | A03553 | 177 |
| A00937 | A03688 | 207 | A00937 | A03906 | 491 |
| A00937 | A04449 | 162 | A00937 | A05285 | 291 |
| A00937 | A05880 | 343 | A00937 | A06572 | 343 |
| A00937 | A06591 | 489 | A00937 | A07232 | 434 |
| A00937 | A07242 | 154 | A00937 | A07433 | 343 |
| A00937 | A08097 | 343 | A00937 | A08196 | 343 |
| A00937 | A08503 | 343 | A00937 | A08531 | 385 |
| A00937 | A08549 | 343 | A00937 | A08551 | 157 |
| A00937 | A08560 | 343 | A00937 | A08812 | 343 |
| A00937 | A08838 | 163 | A00937 | A08844 | 343 |
| A00937 | A08910 | 355 | A00937 | A09149 | 177 |
| A00937 | A09539 | 216 | A00937 | A09653 | 188 |
| A00937 | A09757 | 172 | A00937 | A10392 | 159 |
| A00937 | A10619 | 205 | A00937 | A11233 | 260 |
| A00937 | A11456 | 204 | A00937 | A12665 | 157 |
| A00937 | A13321 | 196 | A00937 | A13388 | 232 |
| A00937 | A13804 | 278 | A00937 | A13926 | 252 |
| A00937 | A14084 | 343 | A00937 | A14255 | 168 |
| A00937 | A14266 | 180 | A00937 | A14279 | 384 |
| A00937 | A14285 | 343 | A00937 | A14347 | 383 |
| A00937 | A14372 | 151 | A00937 | A14903 | 255 |
| A00937 | A14917 | 243 | A00937 | A15273 | 347 |
| A00937 | A15673 | 255 | A00937 | A16565 | 162 |
| A00937 | A16587 | 238 | A00937 | A16635 | 469 |
| A00937 | A16703 | 213 | A00937 | A16704 | 221 |
| A00937 | A16905 | 199 | A00937 | A16911 | 184 |
| A00937 | A16944 | 270 | A00938 | A01177 | 291 |
| A00938 | A01589 | 375 | A00938 | A01686 | 176 |
| A00938 | A06242 | 455 | A00938 | A06864 | 173 |
| A00938 | A06982 | 241 | A00938 | A07319 | 154 |
| A00938 | A07480 | 355 | A00938 | A07534 | 439 |
| A00938 | A07603 | 406 | A00938 | A07647 | 238 |
| A00938 | A07989 | 327 | A00938 | A07996 | 152 |
| A00938 | A08117 | 486 | A00938 | A08669 | 188 |
| A00938 | A14079 | 424 | A00938 | A14273 | 407 |
| A00938 | A16127 | 293 | A00938 | A16134 | 379 |
| A00938 | A16225 | 288 | A00939 | A00957 | 465 |
| A00939 | A01011 | 227 | A00939 | A01022 | 433 |

|        |        |     |        |        |     |
|--------|--------|-----|--------|--------|-----|
| A00939 | A01037 | 201 | A00939 | A01098 | 199 |
| A00939 | A01161 | 480 | A00939 | A01205 | 337 |
| A00939 | A01211 | 307 | A00939 | A01254 | 270 |
| A00939 | A01286 | 174 | A00939 | A01291 | 922 |
| A00939 | A01307 | 491 | A00939 | A01326 | 293 |
| A00939 | A01425 | 199 | A00939 | A01428 | 311 |
| A00939 | A01438 | 408 | A00939 | A01492 | 899 |
| A00939 | A01524 | 899 | A00939 | A01527 | 989 |
| A00939 | A01553 | 207 | A00939 | A01558 | 899 |
| A00939 | A01561 | 222 | A00939 | A01562 | 899 |
| A00939 | A01576 | 477 | A00939 | A01582 | 488 |
| A00939 | A01585 | 473 | A00939 | A01588 | 899 |
| A00939 | A01593 | 899 | A00939 | A01632 | 245 |
| A00939 | A01646 | 152 | A00939 | A01692 | 899 |
| A00939 | A01705 | 179 | A00939 | A01748 | 219 |
| A00939 | A01775 | 199 | A00939 | A01785 | 344 |
| A00939 | A01849 | 217 | A00939 | A01945 | 63  |
| A00939 | A01958 | 306 | A00939 | A02043 | 200 |
| A00939 | A02302 | 200 | A00939 | A02425 | 470 |
| A00939 | A02477 | 267 | A00939 | A02574 | 221 |
| A00939 | A02604 | 172 | A00939 | A02611 | 63  |
| A00939 | A02631 | 162 | A00939 | A02646 | 121 |
| A00939 | A02651 | 95  | A00939 | A02659 | 88  |
| A00939 | A02803 | 926 | A00939 | A02847 | 215 |
| A00939 | A02851 | 117 | A00939 | A02853 | 200 |
| A00939 | A02854 | 63  | A00939 | A02859 | 375 |
| A00939 | A02887 | 232 | A00939 | A02912 | 107 |
| A00939 | A02916 | 63  | A00939 | A02917 | 63  |
| A00939 | A02920 | 480 | A00939 | A02925 | 210 |
| A00939 | A02931 | 441 | A00939 | A02939 | 271 |
| A00939 | A02944 | 428 | A00939 | A02945 | 104 |
| A00939 | A02950 | 480 | A00939 | A02951 | 424 |
| A00939 | A02961 | 484 | A00939 | A02962 | 445 |
| A00939 | A02972 | 170 | A00939 | A02975 | 369 |
| A00939 | A02976 | 117 | A00939 | A02984 | 226 |
| A00939 | A03019 | 63  | A00939 | A03034 | 462 |
| A00939 | A03036 | 177 | A00939 | A03086 | 221 |
| A00939 | A03223 | 394 | A00939 | A03271 | 945 |
| A00939 | A03273 | 199 | A00939 | A03274 | 191 |
| A00939 | A03275 | 915 | A00939 | A03285 | 290 |
| A00939 | A03523 | 396 | A00939 | A03524 | 213 |
| A00939 | A03625 | 63  | A00939 | A03626 | 389 |
| A00939 | A03736 | 154 | A00939 | A03817 | 329 |
| A00939 | A03830 | 188 | A00939 | A03834 | 435 |
| A00939 | A03835 | 469 | A00939 | A03837 | 330 |
| A00939 | A03984 | 165 | A00939 | A03985 | 468 |

|        |        |     |        |        |     |
|--------|--------|-----|--------|--------|-----|
| A00939 | A04050 | 955 | A00939 | A04051 | 396 |
| A00939 | A04096 | 283 | A00939 | A04097 | 337 |
| A00939 | A04115 | 174 | A00939 | A04175 | 337 |
| A00939 | A04337 | 373 | A00939 | A04450 | 157 |
| A00939 | A04614 | 165 | A00939 | A04657 | 394 |
| A00939 | A04685 | 255 | A00939 | A04731 | 486 |
| A00939 | A04873 | 170 | A00939 | A05037 | 942 |
| A00939 | A05112 | 455 | A00939 | A05211 | 435 |
| A00939 | A05212 | 488 | A00939 | A05213 | 208 |
| A00939 | A05234 | 160 | A00939 | A05349 | 903 |
| A00939 | A05409 | 221 | A00939 | A05418 | 199 |
| A00939 | A05446 | 465 | A00939 | A05467 | 221 |
| A00939 | A05633 | 229 | A00939 | A05760 | 899 |
| A00939 | A05775 | 167 | A00939 | A06092 | 450 |
| A00939 | A06135 | 162 | A00939 | A06161 | 385 |
| A00939 | A06195 | 356 | A00939 | A06289 | 199 |
| A00939 | A06370 | 154 | A00939 | A06520 | 163 |
| A00939 | A06631 | 347 | A00939 | A07006 | 200 |
| A00939 | A07069 | 432 | A00939 | A07106 | 461 |
| A00939 | A07141 | 191 | A00939 | A07152 | 356 |
| A00939 | A07163 | 343 | A00939 | A07218 | 469 |
| A00939 | A07311 | 253 | A00939 | A07380 | 177 |
| A00939 | A07442 | 479 | A00939 | A07684 | 201 |
| A00939 | A07697 | 232 | A00939 | A07807 | 184 |
| A00939 | A08133 | 199 | A00939 | A08280 | 199 |
| A00939 | A08421 | 157 | A00939 | A08463 | 337 |
| A00939 | A08571 | 256 | A00939 | A08715 | 299 |
| A00939 | A08840 | 63  | A00939 | A09152 | 110 |
| A00939 | A09220 | 435 | A00939 | A09222 | 119 |
| A00939 | A09441 | 144 | A00939 | A10061 | 172 |
| A00939 | A10159 | 899 | A00939 | A10214 | 945 |
| A00939 | A10226 | 157 | A00939 | A10586 | 74  |
| A00939 | A10721 | 63  | A00939 | A11101 | 190 |
| A00939 | A11304 | 375 | A00939 | A11474 | 899 |
| A00939 | A11559 | 249 | A00939 | A11663 | 294 |
| A00939 | A11906 | 267 | A00939 | A11964 | 162 |
| A00939 | A12000 | 204 | A00939 | A12067 | 208 |
| A00939 | A12364 | 375 | A00939 | A12365 | 248 |
| A00939 | A12507 | 187 | A00939 | A12875 | 337 |
| A00939 | A13229 | 177 | A00939 | A13824 | 272 |
| A00939 | A13829 | 63  | A00939 | A13899 | 63  |
| A00939 | A13928 | 413 | A00939 | A13982 | 323 |
| A00939 | A13989 | 904 | A00939 | A14196 | 544 |
| A00939 | A14208 | 994 | A00939 | A14218 | 520 |
| A00939 | A14225 | 290 | A00939 | A14279 | 199 |
| A00939 | A14367 | 414 | A00939 | A14381 | 177 |

|        |        |     |        |        |     |
|--------|--------|-----|--------|--------|-----|
| A00939 | A14410 | 358 | A00939 | A14431 | 63  |
| A00939 | A14650 | 398 | A00939 | A14662 | 899 |
| A00939 | A14801 | 209 | A00939 | A14830 | 196 |
| A00939 | A15116 | 208 | A00939 | A15291 | 307 |
| A00939 | A15297 | 899 | A00939 | A15314 | 491 |
| A00939 | A15323 | 902 | A00939 | A15324 | 899 |
| A00939 | A15328 | 283 | A00939 | A15332 | 127 |
| A00939 | A15338 | 224 | A00939 | A15353 | 899 |
| A00939 | A15359 | 901 | A00939 | A15361 | 475 |
| A00939 | A15369 | 199 | A00939 | A15386 | 380 |
| A00939 | A15388 | 279 | A00939 | A15400 | 168 |
| A00939 | A15452 | 418 | A00939 | A15505 | 477 |
| A00939 | A15510 | 673 | A00939 | A15566 | 144 |
| A00939 | A15572 | 257 | A00939 | A15573 | 299 |
| A00939 | A15575 | 277 | A00939 | A15576 | 130 |
| A00939 | A15578 | 375 | A00939 | A15596 | 558 |
| A00939 | A15630 | 221 | A00939 | A15726 | 207 |
| A00939 | A15783 | 167 | A00939 | A15917 | 241 |
| A00939 | A16037 | 221 | A00939 | A16216 | 339 |
| A00940 | A01075 | 267 | A00940 | A01143 | 456 |
| A00940 | A01259 | 162 | A00940 | A01354 | 326 |
| A00940 | A01563 | 152 | A00940 | A03079 | 301 |
| A00940 | A03171 | 290 | A00940 | A03749 | 283 |
| A00940 | A06466 | 330 | A00940 | A06907 | 443 |
| A00940 | A07311 | 353 | A00940 | A07604 | 191 |
| A00940 | A08137 | 457 | A00940 | A08289 | 177 |
| A00940 | A11323 | 205 | A00940 | A11421 | 198 |
| A00940 | A11572 | 299 | A00940 | A12825 | 201 |
| A00940 | A13889 | 156 | A00940 | A13928 | 484 |
| A00940 | A14194 | 204 | A00940 | A14220 | 322 |
| A00940 | A14221 | 455 | A00940 | A14257 | 467 |
| A00940 | A14295 | 252 | A00940 | A14368 | 224 |
| A00940 | A14490 | 457 | A00940 | A15366 | 491 |
| A00940 | A15413 | 458 | A00940 | A15463 | 491 |
| A00940 | A15492 | 305 | A00940 | A15752 | 263 |
| A00940 | A15773 | 213 | A00940 | A15851 | 488 |
| A00940 | A15852 | 460 | A00940 | A15878 | 288 |
| A00940 | A15911 | 191 | A00941 | A01267 | 171 |
| A00941 | A01358 | 281 | A00941 | A01459 | 470 |
| A00941 | A01507 | 283 | A00941 | A01514 | 452 |
| A00941 | A01591 | 629 | A00941 | A01592 | 405 |
| A00941 | A01898 | 305 | A00941 | A01988 | 188 |
| A00941 | A02428 | 285 | A00941 | A03745 | 180 |
| A00941 | A04065 | 218 | A00941 | A08517 | 226 |
| A00941 | A08525 | 490 | A00941 | A10359 | 191 |
| A00941 | A10677 | 208 | A00941 | A11284 | 462 |



|        |        |     |        |        |     |
|--------|--------|-----|--------|--------|-----|
| A00941 | A11430 | 378 | A00941 | A12047 | 491 |
| A00941 | A12264 | 306 | A00941 | A12627 | 274 |
| A00941 | A12665 | 274 | A00941 | A12825 | 345 |
| A00941 | A13587 | 183 | A00941 | A13708 | 185 |
| A00941 | A14209 | 491 | A00941 | A14222 | 488 |
| A00941 | A14289 | 240 | A00941 | A14577 | 485 |
| A00941 | A15102 | 156 | A00941 | A15189 | 162 |
| A00941 | A15373 | 168 | A00941 | A15380 | 491 |
| A00941 | A15649 | 385 | A00941 | A15665 | 491 |
| A00941 | A16495 | 218 | A00941 | A16552 | 205 |
| A00941 | A16597 | 283 | A00941 | A16611 | 196 |
| A00941 | A17133 | 279 | A00942 | A01016 | 224 |
| A00942 | A01041 | 187 | A00942 | A01068 | 307 |
| A00942 | A01098 | 255 | A00942 | A01252 | 484 |
| A00942 | A01267 | 177 | A00942 | A01291 | 260 |
| A00942 | A01302 | 241 | A00942 | A01374 | 260 |
| A00942 | A01418 | 259 | A00942 | A01457 | 312 |
| A00942 | A01458 | 303 | A00942 | A01461 | 639 |
| A00942 | A01499 | 267 | A00942 | A01503 | 236 |
| A00942 | A01506 | 229 | A00942 | A01515 | 488 |
| A00942 | A01522 | 193 | A00942 | A01574 | 506 |
| A00942 | A01575 | 620 | A00942 | A01585 | 636 |
| A00942 | A01633 | 307 | A00942 | A01634 | 490 |
| A00942 | A01706 | 632 | A00942 | A03625 | 260 |
| A00942 | A03892 | 471 | A00942 | A04145 | 722 |
| A00942 | A04292 | 491 | A00942 | A04318 | 210 |
| A00942 | A04687 | 305 | A00942 | A05017 | 240 |
| A00942 | A05061 | 221 | A00942 | A06011 | 485 |
| A00942 | A06597 | 224 | A00942 | A07483 | 424 |
| A00942 | A07572 | 229 | A00942 | A07655 | 243 |
| A00942 | A07893 | 162 | A00942 | A08369 | 485 |
| A00942 | A08379 | 151 | A00942 | A08454 | 430 |
| A00942 | A08461 | 408 | A00942 | A08484 | 721 |
| A00942 | A08506 | 722 | A00942 | A08544 | 721 |
| A00942 | A08569 | 433 | A00942 | A08860 | 229 |
| A00942 | A09298 | 486 | A00942 | A09734 | 152 |
| A00942 | A11279 | 491 | A00942 | A11497 | 180 |
| A00942 | A11644 | 249 | A00942 | A11917 | 267 |
| A00942 | A12858 | 246 | A00942 | A13313 | 173 |
| A00942 | A13708 | 485 | A00942 | A13788 | 156 |
| A00942 | A13830 | 218 | A00942 | A13867 | 172 |
| A00942 | A13963 | 490 | A00942 | A14247 | 599 |
| A00942 | A14358 | 249 | A00942 | A14661 | 491 |
| A00942 | A14711 | 484 | A00942 | A14844 | 352 |
| A00942 | A14877 | 185 | A00942 | A15297 | 210 |
| A00942 | A15347 | 332 | A00942 | A15552 | 193 |

|        |        |     |        |        |     |
|--------|--------|-----|--------|--------|-----|
| A00942 | A15714 | 238 | A00942 | A15856 | 165 |
| A00942 | A15949 | 485 | A00942 | A16552 | 288 |
| A00942 | A16669 | 266 | A00942 | A16675 | 232 |
| A00942 | A16682 | 165 | A00942 | A16824 | 213 |
| A00942 | A16900 | 182 | A00943 | A00968 | 468 |
| A00943 | A01074 | 350 | A00943 | A01189 | 424 |
| A00943 | A01205 | 188 | A00943 | A01269 | 395 |
| A00943 | A01360 | 483 | A00943 | A01483 | 281 |
| A00943 | A01508 | 401 | A00943 | A01563 | 157 |
| A00943 | A01622 | 229 | A00943 | A02518 | 321 |
| A00943 | A03173 | 347 | A00943 | A03242 | 221 |
| A00943 | A03822 | 241 | A00943 | A04495 | 173 |
| A00943 | A05332 | 443 | A00943 | A05609 | 411 |
| A00943 | A06134 | 221 | A00943 | A06819 | 491 |
| A00943 | A07091 | 328 | A00943 | A07222 | 317 |
| A00943 | A07232 | 326 | A00943 | A07834 | 266 |
| A00943 | A07931 | 299 | A00943 | A08194 | 171 |
| A00943 | A08571 | 195 | A00943 | A09276 | 438 |
| A00943 | A10894 | 377 | A00943 | A12292 | 318 |
| A00943 | A14006 | 157 | A00943 | A14525 | 477 |
| A00943 | A14803 | 434 | A00943 | A14804 | 160 |
| A00943 | A15372 | 255 | A00943 | A16753 | 396 |
| A00944 | A01020 | 362 | A00944 | A01116 | 424 |
| A00944 | A01184 | 333 | A00944 | A01201 | 364 |
| A00944 | A01224 | 334 | A00944 | A01234 | 469 |
| A00944 | A01304 | 456 | A00944 | A01315 | 165 |
| A00944 | A01374 | 413 | A00944 | A01581 | 364 |
| A00944 | A01721 | 283 | A00944 | A03936 | 450 |
| A00944 | A05845 | 322 | A00944 | A06275 | 202 |
| A00944 | A07223 | 229 | A00944 | A07347 | 385 |
| A00944 | A07533 | 256 | A00944 | A07584 | 236 |
| A00944 | A07700 | 293 | A00944 | A07725 | 369 |
| A00944 | A07961 | 232 | A00944 | A09664 | 281 |
| A00944 | A10616 | 201 | A00944 | A15498 | 168 |
| A00945 | A00992 | 259 | A00945 | A01010 | 235 |
| A00945 | A01065 | 286 | A00945 | A01092 | 343 |
| A00945 | A01098 | 369 | A00945 | A01112 | 68  |
| A00945 | A01120 | 335 | A00945 | A01166 | 405 |
| A00945 | A01206 | 490 | A00945 | A01215 | 177 |
| A00945 | A01234 | 458 | A00945 | A01291 | 165 |
| A00945 | A01304 | 340 | A00945 | A01425 | 396 |
| A00945 | A01431 | 207 | A00945 | A01468 | 165 |
| A00945 | A01470 | 488 | A00945 | A01488 | 246 |
| A00945 | A01492 | 490 | A00945 | A01496 | 88  |
| A00945 | A01538 | 357 | A00945 | A01597 | 467 |
| A00945 | A01598 | 489 | A00945 | A01614 | 481 |

|        |        |     |        |        |     |
|--------|--------|-----|--------|--------|-----|
| A00945 | A01649 | 491 | A00945 | A02265 | 163 |
| A00945 | A02437 | 291 | A00945 | A02895 | 207 |
| A00945 | A03859 | 180 | A00945 | A05654 | 491 |
| A00945 | A07076 | 205 | A00945 | A07160 | 157 |
| A00945 | A07323 | 182 | A00945 | A07348 | 167 |
| A00945 | A07378 | 461 | A00945 | A07398 | 286 |
| A00945 | A08357 | 435 | A00945 | A09292 | 472 |
| A00945 | A09707 | 394 | A00945 | A11562 | 193 |
| A00945 | A13126 | 396 | A00945 | A13311 | 177 |
| A00945 | A13875 | 196 | A00945 | A13989 | 491 |
| A00945 | A15215 | 350 | A00946 | A01185 | 160 |
| A00946 | A01361 | 443 | A00946 | A01419 | 477 |
| A00946 | A05942 | 303 | A00946 | A06868 | 357 |
| A00946 | A10159 | 375 | A00946 | A10315 | 475 |
| A00946 | A13322 | 268 | A00946 | A14193 | 469 |
| A00946 | A14247 | 157 | A00946 | A14253 | 477 |
| A00946 | A14317 | 391 | A00946 | A15690 | 479 |
| A00946 | A16432 | 255 | A00946 | A16459 | 348 |
| A00946 | A16546 | 343 | A00946 | A16915 | 260 |
| A00947 | A00991 | 152 | A00947 | A01075 | 491 |
| A00947 | A01082 | 469 | A00947 | A01084 | 274 |
| A00947 | A01087 | 396 | A00947 | A01088 | 417 |
| A00947 | A01136 | 350 | A00947 | A01189 | 440 |
| A00947 | A01226 | 151 | A00947 | A01234 | 283 |
| A00947 | A01252 | 232 | A00947 | A01291 | 219 |
| A00947 | A01352 | 154 | A00947 | A01471 | 469 |
| A00947 | A01591 | 435 | A00947 | A01824 | 191 |
| A00947 | A03299 | 230 | A00947 | A03490 | 159 |
| A00947 | A03567 | 163 | A00947 | A03601 | 486 |
| A00947 | A03881 | 318 | A00947 | A04875 | 286 |
| A00947 | A06369 | 156 | A00947 | A06531 | 156 |
| A00947 | A06975 | 276 | A00947 | A07349 | 372 |
| A00947 | A07581 | 156 | A00947 | A07706 | 491 |
| A00947 | A08301 | 168 | A00947 | A08403 | 364 |
| A00947 | A08501 | 252 | A00947 | A08554 | 467 |
| A00947 | A08571 | 489 | A00947 | A08806 | 156 |
| A00947 | A08885 | 488 | A00947 | A09009 | 202 |
| A00947 | A09256 | 165 | A00947 | A10538 | 229 |
| A00947 | A11452 | 404 | A00947 | A11930 | 327 |
| A00947 | A14169 | 296 | A00947 | A14566 | 491 |
| A00947 | A14594 | 489 | A00947 | A16060 | 314 |
| A00948 | A01026 | 201 | A00948 | A01386 | 306 |
| A00948 | A02494 | 240 | A00948 | A02704 | 265 |
| A00948 | A02878 | 372 | A00948 | A08346 | 472 |
| A00948 | A08402 | 160 | A00948 | A14191 | 204 |
| A00948 | A14272 | 377 | A00948 | A14707 | 369 |

|        |        |     |        |        |     |
|--------|--------|-----|--------|--------|-----|
| A00949 | A00965 | 490 | A00949 | A00975 | 224 |
| A00949 | A01025 | 488 | A00949 | A01031 | 172 |
| A00949 | A01034 | 343 | A00949 | A01037 | 322 |
| A00949 | A01067 | 262 | A00949 | A01090 | 373 |
| A00949 | A01095 | 294 | A00949 | A01238 | 343 |
| A00949 | A01291 | 451 | A00949 | A01292 | 412 |
| A00949 | A01392 | 483 | A00949 | A01416 | 495 |
| A00949 | A01433 | 173 | A00949 | A01436 | 480 |
| A00949 | A01640 | 235 | A00949 | A01722 | 390 |
| A00949 | A02785 | 221 | A00949 | A03490 | 439 |
| A00949 | A03676 | 317 | A00949 | A04106 | 345 |
| A00949 | A06351 | 343 | A00949 | A08011 | 473 |
| A00949 | A08773 | 347 | A00949 | A08966 | 358 |
| A00949 | A08973 | 265 | A00949 | A09332 | 343 |
| A00949 | A09978 | 265 | A00949 | A11815 | 551 |
| A00949 | A12052 | 351 | A00949 | A12881 | 312 |
| A00949 | A13249 | 245 | A00949 | A13989 | 369 |
| A00949 | A14482 | 528 | A00949 | A14729 | 351 |
| A00949 | A17126 | 201 | A00950 | A01004 | 455 |
| A00950 | A01059 | 454 | A00950 | A01064 | 491 |
| A00950 | A01093 | 491 | A00950 | A01099 | 491 |
| A00950 | A01114 | 489 | A00950 | A01187 | 491 |
| A00950 | A01189 | 418 | A00950 | A01197 | 374 |
| A00950 | A01255 | 177 | A00950 | A01322 | 375 |
| A00950 | A01341 | 491 | A00950 | A01388 | 491 |
| A00950 | A01415 | 360 | A00950 | A01444 | 159 |
| A00950 | A01536 | 199 | A00950 | A01540 | 561 |
| A00950 | A01559 | 329 | A00950 | A01616 | 486 |
| A00950 | A01659 | 438 | A00950 | A01686 | 374 |
| A00950 | A01741 | 368 | A00950 | A02180 | 171 |
| A00950 | A02211 | 260 | A00950 | A02216 | 319 |
| A00950 | A02806 | 337 | A00950 | A04079 | 267 |
| A00950 | A04668 | 470 | A00950 | A05334 | 213 |
| A00950 | A06606 | 351 | A00950 | A06795 | 408 |
| A00950 | A06982 | 198 | A00950 | A07319 | 435 |
| A00950 | A07346 | 470 | A00950 | A07466 | 207 |
| A00950 | A07480 | 235 | A00950 | A07534 | 294 |
| A00950 | A07595 | 236 | A00950 | A08029 | 165 |
| A00950 | A08208 | 477 | A00950 | A08212 | 491 |
| A00950 | A08516 | 491 | A00950 | A08526 | 484 |
| A00950 | A08694 | 441 | A00950 | A08769 | 490 |
| A00950 | A08995 | 440 | A00950 | A09000 | 485 |
| A00950 | A09001 | 460 | A00950 | A09073 | 252 |
| A00950 | A09434 | 394 | A00950 | A09451 | 240 |
| A00950 | A09538 | 219 | A00950 | A09598 | 491 |
| A00950 | A09762 | 491 | A00950 | A10228 | 190 |

|        |        |     |        |        |     |
|--------|--------|-----|--------|--------|-----|
| A00950 | A10250 | 162 | A00950 | A10373 | 238 |
| A00950 | A11236 | 491 | A00950 | A11703 | 486 |
| A00950 | A11841 | 180 | A00950 | A11880 | 226 |
| A00950 | A12190 | 306 | A00950 | A12556 | 491 |
| A00950 | A12826 | 322 | A00950 | A12897 | 445 |
| A00950 | A13949 | 475 | A00950 | A14230 | 201 |
| A00950 | A14282 | 472 | A00950 | A14614 | 210 |
| A00950 | A14921 | 255 | A00950 | A15369 | 441 |
| A00950 | A15531 | 218 | A00950 | A15828 | 170 |
| A00950 | A15941 | 184 | A00950 | A15942 | 190 |
| A00950 | A16127 | 461 | A00950 | A16128 | 422 |
| A00950 | A16294 | 256 | A00950 | A16378 | 200 |
| A00950 | A16612 | 303 | A00950 | A16754 | 263 |
| A00950 | A16762 | 168 | A00950 | A16790 | 167 |
| A00951 | A00971 | 491 | A00951 | A01036 | 443 |
| A00951 | A01044 | 263 | A00951 | A01161 | 259 |
| A00951 | A01216 | 491 | A00951 | A01290 | 489 |
| A00951 | A01348 | 491 | A00951 | A01366 | 348 |
| A00951 | A01402 | 278 | A00951 | A01454 | 456 |
| A00951 | A01459 | 266 | A00951 | A01514 | 491 |
| A00951 | A01568 | 491 | A00951 | A01657 | 162 |
| A00951 | A01687 | 483 | A00951 | A01736 | 269 |
| A00951 | A02786 | 180 | A00951 | A02835 | 199 |
| A00951 | A03197 | 335 | A00951 | A03314 | 205 |
| A00951 | A04715 | 475 | A00951 | A04790 | 177 |
| A00951 | A04905 | 188 | A00951 | A05438 | 472 |
| A00951 | A05918 | 477 | A00951 | A06021 | 229 |
| A00951 | A06379 | 273 | A00951 | A06591 | 221 |
| A00951 | A06752 | 490 | A00951 | A06778 | 463 |
| A00951 | A07004 | 412 | A00951 | A07054 | 273 |
| A00951 | A07232 | 243 | A00951 | A07242 | 491 |
| A00951 | A07404 | 396 | A00951 | A07495 | 491 |
| A00951 | A07665 | 162 | A00951 | A07709 | 461 |
| A00951 | A07732 | 177 | A00951 | A07816 | 490 |
| A00951 | A07897 | 202 | A00951 | A07954 | 168 |
| A00951 | A08409 | 290 | A00951 | A08531 | 286 |
| A00951 | A09311 | 173 | A00951 | A09671 | 274 |
| A00951 | A09995 | 488 | A00951 | A11057 | 324 |
| A00951 | A11155 | 324 | A00951 | A11160 | 357 |
| A00951 | A11201 | 475 | A00951 | A11292 | 417 |
| A00951 | A11576 | 200 | A00951 | A11689 | 385 |
| A00951 | A11725 | 185 | A00951 | A12047 | 491 |
| A00951 | A12665 | 310 | A00951 | A13309 | 246 |
| A00951 | A13788 | 180 | A00951 | A14266 | 484 |
| A00951 | A14281 | 489 | A00951 | A14358 | 270 |
| A00951 | A14633 | 484 | A00951 | A15189 | 196 |

|        |        |     |        |        |     |
|--------|--------|-----|--------|--------|-----|
| A00951 | A15367 | 407 | A00951 | A15626 | 386 |
| A00951 | A16682 | 188 | A00951 | A16824 | 235 |
| A00952 | A00972 | 293 | A00952 | A00997 | 217 |
| A00952 | A01100 | 213 | A00952 | A01101 | 529 |
| A00952 | A01107 | 549 | A00952 | A01159 | 629 |
| A00952 | A01221 | 619 | A00952 | A01243 | 548 |
| A00952 | A01352 | 695 | A00952 | A01412 | 444 |
| A00952 | A01418 | 262 | A00952 | A01442 | 452 |
| A00952 | A01459 | 152 | A00952 | A01741 | 366 |
| A00952 | A01809 | 400 | A00952 | A02164 | 491 |
| A00952 | A02212 | 179 | A00952 | A02877 | 224 |
| A00952 | A03065 | 157 | A00952 | A03556 | 217 |
| A00952 | A03617 | 217 | A00952 | A04668 | 268 |
| A00952 | A04750 | 267 | A00952 | A05605 | 217 |
| A00952 | A05646 | 174 | A00952 | A06017 | 201 |
| A00952 | A06122 | 489 | A00952 | A06204 | 473 |
| A00952 | A06347 | 423 | A00952 | A06369 | 649 |
| A00952 | A06825 | 176 | A00952 | A06832 | 685 |
| A00952 | A06861 | 272 | A00952 | A07312 | 450 |
| A00952 | A08183 | 341 | A00952 | A08402 | 157 |
| A00952 | A08627 | 301 | A00952 | A08984 | 694 |
| A00952 | A09309 | 165 | A00952 | A09673 | 217 |
| A00952 | A09713 | 210 | A00952 | A10317 | 468 |
| A00952 | A10373 | 170 | A00952 | A11277 | 401 |
| A00952 | A12292 | 267 | A00952 | A14084 | 183 |
| A00952 | A14087 | 449 | A00952 | A14088 | 552 |
| A00952 | A14186 | 483 | A00952 | A14246 | 311 |
| A00952 | A14272 | 481 | A00952 | A14596 | 425 |
| A00952 | A14701 | 441 | A00952 | A14819 | 273 |
| A00952 | A15324 | 337 | A00952 | A15370 | 483 |
| A00952 | A15373 | 199 | A00952 | A15374 | 491 |
| A00952 | A15377 | 685 | A00952 | A15543 | 217 |
| A00952 | A15624 | 338 | A00952 | A15724 | 527 |
| A00952 | A16401 | 202 | A00952 | A16664 | 243 |
| A00952 | A16692 | 159 | A00952 | A16702 | 156 |
| A00952 | A16838 | 152 | A00952 | A16973 | 224 |
| A00952 | A17133 | 303 | A00953 | A00972 | 188 |
| A00953 | A00974 | 589 | A00953 | A00980 | 229 |
| A00953 | A00983 | 391 | A00953 | A00987 | 430 |
| A00953 | A01001 | 243 | A00953 | A01017 | 559 |
| A00953 | A01027 | 592 | A00953 | A01042 | 446 |
| A00953 | A01054 | 488 | A00953 | A01067 | 204 |
| A00953 | A01081 | 360 | A00953 | A01086 | 592 |
| A00953 | A01101 | 555 | A00953 | A01108 | 592 |
| A00953 | A01150 | 591 | A00953 | A01154 | 191 |
| A00953 | A01161 | 591 | A00953 | A01167 | 162 |

|        |        |     |        |        |     |
|--------|--------|-----|--------|--------|-----|
| A00953 | A01204 | 590 | A00953 | A01217 | 535 |
| A00953 | A01220 | 188 | A00953 | A01221 | 451 |
| A00953 | A01232 | 491 | A00953 | A01246 | 449 |
| A00953 | A01247 | 452 | A00953 | A01263 | 417 |
| A00953 | A01265 | 434 | A00953 | A01287 | 475 |
| A00953 | A01291 | 452 | A00953 | A01311 | 254 |
| A00953 | A01346 | 592 | A00953 | A01362 | 189 |
| A00953 | A01369 | 430 | A00953 | A01382 | 165 |
| A00953 | A01392 | 177 | A00953 | A01399 | 592 |
| A00953 | A01406 | 188 | A00953 | A01408 | 188 |
| A00953 | A01412 | 207 | A00953 | A01414 | 188 |
| A00953 | A01433 | 302 | A00953 | A01435 | 449 |
| A00953 | A01443 | 582 | A00953 | A01446 | 491 |
| A00953 | A01448 | 491 | A00953 | A01451 | 555 |
| A00953 | A01540 | 485 | A00953 | A01596 | 252 |
| A00953 | A01711 | 334 | A00953 | A01741 | 156 |
| A00953 | A01743 | 199 | A00953 | A01976 | 188 |
| A00953 | A01988 | 215 | A00953 | A02185 | 208 |
| A00953 | A02994 | 248 | A00953 | A03809 | 319 |
| A00953 | A03901 | 188 | A00953 | A03959 | 413 |
| A00953 | A04771 | 151 | A00953 | A04895 | 491 |
| A00953 | A05228 | 213 | A00953 | A05499 | 167 |
| A00953 | A05702 | 188 | A00953 | A05719 | 154 |
| A00953 | A05839 | 486 | A00953 | A05856 | 249 |
| A00953 | A06356 | 160 | A00953 | A06785 | 222 |
| A00953 | A06832 | 252 | A00953 | A06938 | 190 |
| A00953 | A06959 | 486 | A00953 | A07086 | 256 |
| A00953 | A07160 | 465 | A00953 | A07208 | 160 |
| A00953 | A07237 | 447 | A00953 | A07350 | 269 |
| A00953 | A07362 | 457 | A00953 | A07394 | 281 |
| A00953 | A07464 | 163 | A00953 | A07523 | 160 |
| A00953 | A07569 | 329 | A00953 | A07597 | 279 |
| A00953 | A07599 | 385 | A00953 | A07744 | 440 |
| A00953 | A07773 | 288 | A00953 | A07793 | 151 |
| A00953 | A07881 | 450 | A00953 | A07965 | 369 |
| A00953 | A08011 | 457 | A00953 | A08055 | 276 |
| A00953 | A08098 | 157 | A00953 | A08228 | 391 |
| A00953 | A08371 | 401 | A00953 | A08452 | 340 |
| A00953 | A08521 | 238 | A00953 | A08543 | 409 |
| A00953 | A08556 | 382 | A00953 | A08760 | 333 |
| A00953 | A08773 | 372 | A00953 | A08835 | 319 |
| A00953 | A08984 | 278 | A00953 | A08987 | 346 |
| A00953 | A09616 | 286 | A00953 | A09735 | 223 |
| A00953 | A10199 | 286 | A00953 | A10535 | 310 |
| A00953 | A10607 | 319 | A00953 | A10700 | 185 |
| A00953 | A10837 | 198 | A00953 | A11015 | 198 |

|        |        |     |        |        |     |
|--------|--------|-----|--------|--------|-----|
| A00953 | A11322 | 424 | A00953 | A11338 | 430 |
| A00953 | A11419 | 477 | A00953 | A11427 | 483 |
| A00953 | A11480 | 236 | A00953 | A11677 | 458 |
| A00953 | A12059 | 249 | A00953 | A12433 | 176 |
| A00953 | A13678 | 269 | A00953 | A13707 | 251 |
| A00953 | A13809 | 326 | A00953 | A13890 | 299 |
| A00953 | A14216 | 168 | A00953 | A14482 | 217 |
| A00953 | A14568 | 182 | A00953 | A14699 | 586 |
| A00953 | A14778 | 247 | A00953 | A14813 | 188 |
| A00953 | A14818 | 223 | A00953 | A14825 | 288 |
| A00953 | A15029 | 213 | A00953 | A15498 | 490 |
| A00953 | A15624 | 388 | A00953 | A15652 | 364 |
| A00953 | A15653 | 447 | A00953 | A15657 | 250 |
| A00953 | A15661 | 274 | A00953 | A15666 | 396 |
| A00953 | A15684 | 489 | A00953 | A15932 | 391 |
| A00953 | A16157 | 458 | A00953 | A16587 | 282 |
| A00953 | A16680 | 299 | A00953 | A16688 | 213 |
| A00954 | A00957 | 247 | A00954 | A00966 | 472 |
| A00954 | A01020 | 195 | A00954 | A01032 | 346 |
| A00954 | A01075 | 488 | A00954 | A01087 | 358 |
| A00954 | A01143 | 486 | A00954 | A01150 | 352 |
| A00954 | A01206 | 490 | A00954 | A01212 | 174 |
| A00954 | A01234 | 520 | A00954 | A01308 | 195 |
| A00954 | A01326 | 160 | A00954 | A01349 | 180 |
| A00954 | A01431 | 462 | A00954 | A01470 | 216 |
| A00954 | A01492 | 286 | A00954 | A01500 | 490 |
| A00954 | A01503 | 618 | A00954 | A01506 | 243 |
| A00954 | A01514 | 207 | A00954 | A01555 | 684 |
| A00954 | A01595 | 254 | A00954 | A01598 | 581 |
| A00954 | A01614 | 408 | A00954 | A01684 | 188 |
| A00954 | A01761 | 414 | A00954 | A02855 | 472 |
| A00954 | A03136 | 223 | A00954 | A03653 | 472 |
| A00954 | A03948 | 262 | A00954 | A05425 | 414 |
| A00954 | A06543 | 485 | A00954 | A06907 | 290 |
| A00954 | A07004 | 479 | A00954 | A07670 | 341 |
| A00954 | A08022 | 491 | A00954 | A08137 | 195 |
| A00954 | A08356 | 480 | A00954 | A08362 | 374 |
| A00954 | A08382 | 490 | A00954 | A08439 | 401 |
| A00954 | A08518 | 363 | A00954 | A08553 | 688 |
| A00954 | A08564 | 667 | A00954 | A08565 | 595 |
| A00954 | A08976 | 179 | A00954 | A09007 | 228 |
| A00954 | A09010 | 688 | A00954 | A09054 | 420 |
| A00954 | A09078 | 207 | A00954 | A09708 | 259 |
| A00954 | A10159 | 257 | A00954 | A10420 | 491 |
| A00954 | A11291 | 443 | A00954 | A11301 | 477 |
| A00954 | A11395 | 491 | A00954 | A11397 | 291 |



|        |        |     |        |        |     |
|--------|--------|-----|--------|--------|-----|
| A00954 | A11439 | 425 | A00954 | A11443 | 456 |
| A00954 | A11621 | 249 | A00954 | A12052 | 180 |
| A00954 | A12081 | 247 | A00954 | A12111 | 302 |
| A00954 | A12365 | 483 | A00954 | A12606 | 174 |
| A00954 | A12660 | 308 | A00954 | A12873 | 198 |
| A00954 | A13321 | 288 | A00954 | A13989 | 553 |
| A00954 | A14006 | 513 | A00954 | A14147 | 477 |
| A00954 | A14167 | 207 | A00954 | A14200 | 210 |
| A00954 | A14212 | 314 | A00954 | A14214 | 216 |
| A00954 | A14220 | 260 | A00954 | A14443 | 217 |
| A00954 | A14462 | 406 | A00954 | A14843 | 180 |
| A00954 | A15297 | 163 | A00954 | A15366 | 318 |
| A00954 | A15373 | 676 | A00954 | A15380 | 357 |
| A00954 | A15559 | 452 | A00954 | A15596 | 198 |
| A00954 | A15729 | 232 | A00954 | A15749 | 491 |
| A00954 | A15763 | 252 | A00954 | A15852 | 337 |
| A00954 | A15943 | 456 | A00954 | A15945 | 654 |
| A00954 | A15946 | 491 | A00954 | A16020 | 212 |
| A00954 | A16067 | 480 | A00954 | A16089 | 269 |
| A00954 | A16093 | 272 | A00954 | A16109 | 456 |
| A00954 | A16144 | 484 | A00954 | A16212 | 490 |
| A00954 | A16330 | 154 | A00954 | A16802 | 378 |
| A00955 | A00965 | 228 | A00955 | A00991 | 407 |
| A00955 | A01002 | 154 | A00955 | A01017 | 435 |
| A00955 | A01025 | 462 | A00955 | A01036 | 428 |
| A00955 | A01121 | 151 | A00955 | A01154 | 406 |
| A00955 | A01186 | 418 | A00955 | A01217 | 333 |
| A00955 | A01221 | 246 | A00955 | A01247 | 475 |
| A00955 | A01263 | 490 | A00955 | A01291 | 587 |
| A00955 | A01306 | 424 | A00955 | A01335 | 486 |
| A00955 | A01365 | 491 | A00955 | A01392 | 202 |
| A00955 | A01406 | 475 | A00955 | A01411 | 160 |
| A00955 | A01416 | 193 | A00955 | A01449 | 406 |
| A00955 | A01579 | 440 | A00955 | A01580 | 224 |
| A00955 | A01672 | 182 | A00955 | A01741 | 238 |
| A00955 | A02041 | 238 | A00955 | A02227 | 319 |
| A00955 | A02629 | 182 | A00955 | A03112 | 377 |
| A00955 | A03388 | 208 | A00955 | A03400 | 313 |
| A00955 | A03567 | 268 | A00955 | A03704 | 154 |
| A00955 | A04688 | 299 | A00955 | A04846 | 213 |
| A00955 | A05450 | 456 | A00955 | A05499 | 489 |
| A00955 | A05501 | 452 | A00955 | A05557 | 216 |
| A00955 | A06361 | 262 | A00955 | A06388 | 260 |
| A00955 | A06564 | 491 | A00955 | A06861 | 308 |
| A00955 | A07201 | 550 | A00955 | A07349 | 247 |
| A00955 | A07412 | 184 | A00955 | A07473 | 238 |

|        |        |     |        |        |     |
|--------|--------|-----|--------|--------|-----|
| A00955 | A07996 | 199 | A00955 | A08154 | 480 |
| A00955 | A08358 | 423 | A00955 | A08419 | 414 |
| A00955 | A08476 | 168 | A00955 | A08501 | 319 |
| A00955 | A08525 | 168 | A00955 | A08543 | 196 |
| A00955 | A08556 | 317 | A00955 | A08559 | 232 |
| A00955 | A08760 | 201 | A00955 | A09528 | 176 |
| A00955 | A09735 | 439 | A00955 | A09852 | 368 |
| A00955 | A10338 | 361 | A00955 | A10498 | 254 |
| A00955 | A10949 | 187 | A00955 | A11364 | 260 |
| A00955 | A11462 | 235 | A00955 | A11550 | 157 |
| A00955 | A11597 | 215 | A00955 | A12477 | 196 |
| A00955 | A12738 | 157 | A00955 | A13786 | 154 |
| A00955 | A14003 | 207 | A00955 | A14482 | 375 |
| A00955 | A14568 | 491 | A00955 | A14594 | 268 |
| A00955 | A14938 | 361 | A00955 | A15218 | 221 |
| A00955 | A15500 | 419 | A00955 | A15771 | 393 |
| A00956 | A00975 | 265 | A00956 | A01039 | 202 |
| A00956 | A01097 | 317 | A00956 | A01106 | 291 |
| A00956 | A01203 | 404 | A00956 | A01371 | 193 |
| A00956 | A01444 | 480 | A00956 | A01576 | 489 |
| A00956 | A01637 | 263 | A00956 | A03100 | 276 |
| A00956 | A03419 | 185 | A00956 | A08995 | 173 |
| A00956 | A09000 | 170 | A00956 | A13105 | 424 |
| A00956 | A15295 | 396 | A00956 | A15297 | 279 |
| A00956 | A15323 | 184 | A00956 | A15359 | 399 |
| A00956 | A15519 | 321 | A00956 | A15530 | 278 |
| A00956 | A16465 | 217 | A00957 | A01097 | 474 |
| A00957 | A01143 | 491 | A00957 | A01308 | 468 |
| A00957 | A01332 | 201 | A00957 | A01426 | 269 |
| A00957 | A01441 | 249 | A00957 | A01451 | 193 |
| A00957 | A01461 | 377 | A00957 | A01528 | 405 |
| A00957 | A01595 | 199 | A00957 | A01598 | 180 |
| A00957 | A01612 | 270 | A00957 | A01660 | 491 |
| A00957 | A01763 | 152 | A00957 | A01995 | 151 |
| A00957 | A02806 | 190 | A00957 | A03136 | 491 |
| A00957 | A03569 | 294 | A00957 | A04449 | 480 |
| A00957 | A05439 | 383 | A00957 | A06491 | 456 |
| A00957 | A06591 | 290 | A00957 | A06907 | 435 |
| A00957 | A07004 | 196 | A00957 | A07229 | 245 |
| A00957 | A07242 | 446 | A00957 | A07311 | 354 |
| A00957 | A07483 | 416 | A00957 | A07495 | 455 |
| A00957 | A07604 | 333 | A00957 | A08137 | 486 |
| A00957 | A08845 | 380 | A00957 | A08859 | 266 |
| A00957 | A08883 | 311 | A00957 | A09054 | 224 |
| A00957 | A09319 | 899 | A00957 | A09606 | 224 |
| A00957 | A09745 | 255 | A00957 | A10159 | 294 |

|        |        |     |        |        |     |
|--------|--------|-----|--------|--------|-----|
| A00957 | A10870 | 249 | A00957 | A11079 | 152 |
| A00957 | A11279 | 485 | A00957 | A11291 | 491 |
| A00957 | A11297 | 152 | A00957 | A11405 | 174 |
| A00957 | A11487 | 408 | A00957 | A11572 | 152 |
| A00957 | A11767 | 207 | A00957 | A11917 | 457 |
| A00957 | A12069 | 412 | A00957 | A12858 | 269 |
| A00957 | A12952 | 468 | A00957 | A13225 | 899 |
| A00957 | A13587 | 491 | A00957 | A13889 | 462 |
| A00957 | A13928 | 582 | A00957 | A14016 | 369 |
| A00957 | A14148 | 428 | A00957 | A14192 | 281 |
| A00957 | A14193 | 371 | A00957 | A14196 | 407 |
| A00957 | A14202 | 337 | A00957 | A14220 | 490 |
| A00957 | A14221 | 477 | A00957 | A14247 | 262 |
| A00957 | A14257 | 490 | A00957 | A14258 | 228 |
| A00957 | A14490 | 481 | A00957 | A14570 | 455 |
| A00957 | A14661 | 160 | A00957 | A14931 | 251 |
| A00957 | A15074 | 218 | A00957 | A15188 | 210 |
| A00957 | A15252 | 401 | A00957 | A15254 | 157 |
| A00957 | A15292 | 446 | A00957 | A15309 | 273 |
| A00957 | A15312 | 177 | A00957 | A15313 | 252 |
| A00957 | A15366 | 491 | A00957 | A15492 | 490 |
| A00957 | A15503 | 297 | A00957 | A15614 | 472 |
| A00957 | A15665 | 491 | A00957 | A15682 | 467 |
| A00957 | A15749 | 218 | A00957 | A15752 | 232 |
| A00957 | A15773 | 455 | A00957 | A15852 | 491 |
| A00957 | A15867 | 160 | A00957 | A15870 | 479 |
| A00957 | A16077 | 190 | A00957 | A16410 | 219 |
| A00957 | A16552 | 283 | A00957 | A16604 | 191 |
| A00957 | A16608 | 319 | A00957 | A16689 | 394 |
| A00957 | A16724 | 491 | A00957 | A16822 | 221 |
| A00957 | A16847 | 167 | A00957 | A16851 | 326 |
| A00957 | A16860 | 195 | A00957 | A16861 | 201 |
| A00957 | A16875 | 486 | A00957 | A16895 | 369 |
| A00957 | A16897 | 475 | A00957 | A17039 | 411 |
| A00957 | A17071 | 357 | A00957 | A17150 | 152 |
| A00958 | A01075 | 173 | A00958 | A01077 | 167 |
| A00958 | A01088 | 406 | A00958 | A01125 | 188 |
| A00958 | A01299 | 484 | A00958 | A01305 | 240 |
| A00958 | A01354 | 353 | A00958 | A01406 | 294 |
| A00958 | A01441 | 324 | A00958 | A01598 | 467 |
| A00958 | A01612 | 443 | A00958 | A01688 | 234 |
| A00958 | A02830 | 277 | A00958 | A03141 | 156 |
| A00958 | A03304 | 455 | A00958 | A04773 | 274 |
| A00958 | A05288 | 307 | A00958 | A08118 | 243 |
| A00958 | A08137 | 374 | A00958 | A08571 | 324 |
| A00958 | A08981 | 154 | A00958 | A09768 | 329 |

|        |        |     |        |        |     |
|--------|--------|-----|--------|--------|-----|
| A00958 | A11139 | 347 | A00958 | A11285 | 163 |
| A00958 | A11300 | 184 | A00958 | A11443 | 160 |
| A00958 | A12227 | 188 | A00958 | A13989 | 230 |
| A00958 | A14148 | 190 | A00958 | A14211 | 168 |
| A00958 | A14220 | 450 | A00958 | A14476 | 217 |
| A00958 | A15244 | 174 | A00958 | A15366 | 281 |
| A00958 | A15559 | 193 | A00958 | A17063 | 213 |
| A00959 | A01464 | 63  | A00960 | A00992 | 174 |
| A00960 | A01193 | 174 | A00960 | A01279 | 231 |
| A00960 | A01351 | 544 | A00960 | A01424 | 541 |
| A00960 | A01492 | 174 | A00960 | A01519 | 207 |
| A00960 | A01741 | 168 | A00960 | A02416 | 162 |
| A00960 | A05201 | 337 | A00960 | A06675 | 193 |
| A00960 | A06698 | 174 | A00960 | A06797 | 274 |
| A00960 | A07139 | 375 | A00960 | A07244 | 374 |
| A00960 | A07432 | 174 | A00960 | A07524 | 174 |
| A00960 | A07533 | 246 | A00960 | A07537 | 307 |
| A00960 | A07584 | 227 | A00960 | A07625 | 174 |
| A00960 | A07924 | 174 | A00960 | A08335 | 246 |
| A00960 | A09664 | 274 | A00960 | A11544 | 174 |
| A00960 | A11831 | 174 | A00960 | A11832 | 174 |
| A00960 | A13792 | 479 | A00960 | A14197 | 165 |
| A00960 | A14485 | 171 | A00960 | A15920 | 215 |
| A00961 | A01225 | 174 | A00961 | A01289 | 173 |
| A00961 | A01296 | 215 | A00961 | A01325 | 488 |
| A00961 | A01328 | 188 | A00961 | A01571 | 212 |
| A00961 | A01616 | 258 | A00961 | A02389 | 374 |
| A00961 | A02394 | 396 | A00961 | A02777 | 252 |
| A00961 | A03014 | 463 | A00961 | A03057 | 423 |
| A00961 | A03116 | 356 | A00961 | A03232 | 238 |
| A00961 | A03663 | 326 | A00961 | A04557 | 229 |
| A00961 | A06242 | 196 | A00961 | A07367 | 174 |
| A00961 | A09753 | 210 | A00961 | A09806 | 302 |
| A00961 | A10508 | 271 | A00961 | A11735 | 246 |
| A00961 | A13429 | 193 | A00961 | A14223 | 396 |
| A00961 | A16068 | 469 | A00962 | A00995 | 490 |
| A00962 | A01005 | 483 | A00962 | A01008 | 491 |
| A00962 | A01018 | 462 | A00962 | A01046 | 429 |
| A00962 | A01063 | 491 | A00962 | A01109 | 196 |
| A00962 | A01165 | 435 | A00962 | A01174 | 483 |
| A00962 | A01175 | 486 | A00962 | A01186 | 232 |
| A00962 | A01227 | 340 | A00962 | A01230 | 238 |
| A00962 | A01233 | 491 | A00962 | A01256 | 491 |
| A00962 | A01272 | 430 | A00962 | A01297 | 383 |
| A00962 | A01347 | 491 | A00962 | A01360 | 156 |
| A00962 | A01409 | 438 | A00962 | A01481 | 491 |

|        |        |     |        |        |     |
|--------|--------|-----|--------|--------|-----|
| A00962 | A01508 | 491 | A00962 | A01569 | 382 |
| A00962 | A01574 | 174 | A00962 | A01635 | 491 |
| A00962 | A01642 | 274 | A00962 | A01695 | 184 |
| A00962 | A01698 | 246 | A00962 | A01713 | 372 |
| A00962 | A01735 | 243 | A00962 | A01741 | 358 |
| A00962 | A01743 | 302 | A00962 | A01747 | 172 |
| A00962 | A01818 | 262 | A00962 | A01832 | 245 |
| A00962 | A01855 | 457 | A00962 | A01857 | 390 |
| A00962 | A01866 | 335 | A00962 | A01986 | 208 |
| A00962 | A01988 | 188 | A00962 | A02008 | 210 |
| A00962 | A02014 | 238 | A00962 | A02020 | 157 |
| A00962 | A02164 | 366 | A00962 | A02240 | 276 |
| A00962 | A02363 | 358 | A00962 | A02432 | 217 |
| A00962 | A02476 | 191 | A00962 | A02695 | 424 |
| A00962 | A02859 | 425 | A00962 | A02992 | 485 |
| A00962 | A03003 | 486 | A00962 | A03004 | 313 |
| A00962 | A03008 | 257 | A00962 | A03016 | 409 |
| A00962 | A03050 | 409 | A00962 | A03099 | 218 |
| A00962 | A03146 | 243 | A00962 | A03148 | 202 |
| A00962 | A03167 | 477 | A00962 | A03168 | 251 |
| A00962 | A03254 | 199 | A00962 | A03311 | 286 |
| A00962 | A03323 | 406 | A00962 | A03324 | 491 |
| A00962 | A03430 | 330 | A00962 | A03431 | 224 |
| A00962 | A03441 | 469 | A00962 | A03443 | 319 |
| A00962 | A03477 | 489 | A00962 | A03508 | 184 |
| A00962 | A03513 | 294 | A00962 | A03783 | 249 |
| A00962 | A03861 | 361 | A00962 | A04087 | 238 |
| A00962 | A04211 | 456 | A00962 | A04660 | 449 |
| A00962 | A04674 | 199 | A00962 | A04779 | 477 |
| A00962 | A04784 | 432 | A00962 | A04791 | 179 |
| A00962 | A04834 | 470 | A00962 | A04839 | 274 |
| A00962 | A04850 | 434 | A00962 | A04879 | 319 |
| A00962 | A04880 | 469 | A00962 | A04883 | 306 |
| A00962 | A04937 | 406 | A00962 | A04995 | 465 |
| A00962 | A05006 | 255 | A00962 | A05007 | 491 |
| A00962 | A05013 | 191 | A00962 | A05020 | 165 |
| A00962 | A05083 | 172 | A00962 | A05088 | 162 |
| A00962 | A05102 | 475 | A00962 | A05138 | 208 |
| A00962 | A05310 | 491 | A00962 | A05376 | 152 |
| A00962 | A05416 | 447 | A00962 | A05418 | 457 |
| A00962 | A05472 | 221 | A00962 | A05515 | 329 |
| A00962 | A05516 | 490 | A00962 | A05555 | 208 |
| A00962 | A05573 | 305 | A00962 | A05600 | 338 |
| A00962 | A05660 | 184 | A00962 | A05699 | 456 |
| A00962 | A05729 | 350 | A00962 | A05759 | 490 |
| A00962 | A05768 | 201 | A00962 | A05771 | 184 |

|        |        |     |        |        |     |
|--------|--------|-----|--------|--------|-----|
| A00962 | A05772 | 418 | A00962 | A05774 | 486 |
| A00962 | A05782 | 196 | A00962 | A05859 | 190 |
| A00962 | A06024 | 418 | A00962 | A06063 | 177 |
| A00962 | A06086 | 243 | A00962 | A06088 | 270 |
| A00962 | A06089 | 330 | A00962 | A06091 | 274 |
| A00962 | A06098 | 324 | A00962 | A06252 | 455 |
| A00962 | A06358 | 491 | A00962 | A06359 | 477 |
| A00962 | A06405 | 347 | A00962 | A06439 | 262 |
| A00962 | A06473 | 228 | A00962 | A06523 | 157 |
| A00962 | A06592 | 246 | A00962 | A06597 | 173 |
| A00962 | A06630 | 422 | A00962 | A06633 | 460 |
| A00962 | A06634 | 278 | A00962 | A06668 | 290 |
| A00962 | A06689 | 424 | A00962 | A06692 | 372 |
| A00962 | A06700 | 281 | A00962 | A06724 | 165 |
| A00962 | A06756 | 481 | A00962 | A06912 | 213 |
| A00962 | A06934 | 254 | A00962 | A06970 | 424 |
| A00962 | A06979 | 372 | A00962 | A07002 | 396 |
| A00962 | A07059 | 198 | A00962 | A07080 | 371 |
| A00962 | A07088 | 218 | A00962 | A07109 | 467 |
| A00962 | A07122 | 491 | A00962 | A07135 | 167 |
| A00962 | A07148 | 333 | A00962 | A07221 | 480 |
| A00962 | A07238 | 434 | A00962 | A07256 | 278 |
| A00962 | A07267 | 400 | A00962 | A07288 | 157 |
| A00962 | A07304 | 293 | A00962 | A07326 | 288 |
| A00962 | A07381 | 374 | A00962 | A07407 | 188 |
| A00962 | A07413 | 491 | A00962 | A07459 | 191 |
| A00962 | A07477 | 433 | A00962 | A07520 | 208 |
| A00962 | A07530 | 466 | A00962 | A07553 | 474 |
| A00962 | A07558 | 394 | A00962 | A07590 | 356 |
| A00962 | A07627 | 330 | A00962 | A07674 | 346 |
| A00962 | A07688 | 480 | A00962 | A07736 | 446 |
| A00962 | A07739 | 184 | A00962 | A07753 | 430 |
| A00962 | A07789 | 288 | A00962 | A07796 | 257 |
| A00962 | A07800 | 491 | A00962 | A07823 | 191 |
| A00962 | A07933 | 324 | A00962 | A07976 | 188 |
| A00962 | A08099 | 198 | A00962 | A08368 | 221 |
| A00962 | A08751 | 278 | A00962 | A08860 | 321 |
| A00962 | A09612 | 374 | A00962 | A09632 | 221 |
| A00962 | A09876 | 174 | A00962 | A10020 | 235 |
| A00962 | A10027 | 288 | A00962 | A10353 | 338 |
| A00962 | A10442 | 172 | A00962 | A10443 | 249 |
| A00962 | A10444 | 288 | A00962 | A10452 | 254 |
| A00962 | A10456 | 417 | A00962 | A10536 | 288 |
| A00962 | A10550 | 263 | A00962 | A10614 | 490 |
| A00962 | A10656 | 162 | A00962 | A10658 | 246 |
| A00962 | A10659 | 294 | A00962 | A10676 | 157 |

|        |        |     |        |        |     |
|--------|--------|-----|--------|--------|-----|
| A00962 | A10677 | 229 | A00962 | A10693 | 182 |
| A00962 | A10702 | 385 | A00962 | A10703 | 196 |
| A00962 | A10712 | 217 | A00962 | A10714 | 176 |
| A00962 | A10817 | 241 | A00962 | A11309 | 490 |
| A00962 | A11432 | 191 | A00962 | A11708 | 199 |
| A00962 | A12055 | 391 | A00962 | A13033 | 235 |
| A00962 | A13158 | 288 | A00962 | A13582 | 235 |
| A00962 | A13607 | 191 | A00962 | A13735 | 313 |
| A00962 | A13871 | 324 | A00962 | A13965 | 176 |
| A00962 | A14313 | 191 | A00962 | A14827 | 399 |
| A00962 | A14856 | 154 | A00962 | A14857 | 307 |
| A00962 | A14871 | 199 | A00962 | A14928 | 489 |
| A00962 | A14935 | 288 | A00962 | A15223 | 167 |
| A00962 | A15282 | 160 | A00962 | A15435 | 490 |
| A00962 | A15497 | 483 | A00962 | A15637 | 480 |
| A00962 | A15874 | 486 | A00962 | A15905 | 485 |
| A00962 | A16002 | 393 | A00962 | A16026 | 486 |
| A00962 | A16027 | 489 | A00962 | A16028 | 219 |
| A00962 | A16033 | 380 | A00962 | A16283 | 263 |
| A00962 | A16346 | 235 | A00962 | A16529 | 491 |
| A00962 | A16741 | 467 | A00962 | A16959 | 234 |
| A00962 | A17078 | 489 | A00963 | A01161 | 283 |
| A00963 | A01413 | 168 | A00963 | A01507 | 238 |
| A00963 | A01551 | 477 | A00963 | A01582 | 286 |
| A00963 | A01628 | 187 | A00963 | A01632 | 356 |
| A00963 | A01647 | 371 | A00963 | A01788 | 285 |
| A00963 | A01907 | 462 | A00963 | A02116 | 151 |
| A00963 | A02477 | 296 | A00963 | A03562 | 308 |
| A00963 | A03778 | 351 | A00963 | A03945 | 263 |
| A00963 | A03964 | 299 | A00963 | A05841 | 154 |
| A00963 | A07442 | 274 | A00963 | A08541 | 324 |
| A00963 | A11485 | 160 | A00963 | A14381 | 201 |
| A00963 | A15498 | 221 | A00964 | A01066 | 160 |
| A00964 | A01075 | 489 | A00964 | A01079 | 485 |
| A00964 | A01082 | 419 | A00964 | A01084 | 481 |
| A00964 | A01087 | 480 | A00964 | A01107 | 154 |
| A00964 | A02922 | 165 | A00964 | A04662 | 218 |
| A00964 | A07706 | 443 | A00964 | A07802 | 162 |
| A00964 | A08382 | 208 | A00964 | A08553 | 262 |
| A00964 | A08818 | 208 | A00964 | A08976 | 486 |
| A00964 | A08984 | 198 | A00964 | A08996 | 396 |
| A00964 | A10316 | 156 | A00964 | A11234 | 286 |
| A00964 | A11456 | 199 | A00964 | A11674 | 481 |
| A00964 | A11725 | 247 | A00964 | A11992 | 168 |
| A00964 | A12499 | 232 | A00964 | A12501 | 183 |
| A00964 | A12665 | 285 | A00964 | A12821 | 180 |

|        |        |     |        |        |     |
|--------|--------|-----|--------|--------|-----|
| A00964 | A13708 | 217 | A00964 | A13783 | 249 |
| A00964 | A14255 | 162 | A00964 | A14375 | 160 |
| A00964 | A14462 | 163 | A00964 | A14566 | 157 |
| A00964 | A15187 | 215 | A00964 | A15217 | 249 |
| A00964 | A15373 | 152 | A00964 | A15520 | 457 |
| A00964 | A15698 | 198 | A00964 | A15711 | 212 |
| A00964 | A15733 | 258 | A00964 | A15943 | 491 |
| A00964 | A15946 | 156 | A00964 | A16109 | 288 |
| A00964 | A16187 | 198 | A00964 | A16261 | 191 |
| A00964 | A16394 | 249 | A00964 | A16565 | 157 |
| A00964 | A16690 | 247 | A00964 | A16703 | 208 |
| A00964 | A16704 | 216 | A00964 | A16764 | 162 |
| A00964 | A16790 | 232 | A00964 | A16806 | 307 |
| A00964 | A16824 | 291 | A00964 | A16866 | 172 |
| A00964 | A16905 | 193 | A00964 | A17133 | 236 |
| A00965 | A00966 | 358 | A00965 | A00976 | 208 |
| A00965 | A00985 | 212 | A00965 | A00988 | 271 |
| A00965 | A01000 | 312 | A00965 | A01016 | 416 |
| A00965 | A01025 | 665 | A00965 | A01031 | 171 |
| A00965 | A01034 | 474 | A00965 | A01037 | 491 |
| A00965 | A01047 | 151 | A00965 | A01056 | 371 |
| A00965 | A01067 | 580 | A00965 | A01072 | 457 |
| A00965 | A01074 | 313 | A00965 | A01085 | 428 |
| A00965 | A01090 | 491 | A00965 | A01095 | 469 |
| A00965 | A01101 | 454 | A00965 | A01115 | 252 |
| A00965 | A01127 | 338 | A00965 | A01140 | 469 |
| A00965 | A01152 | 374 | A00965 | A01154 | 481 |
| A00965 | A01166 | 230 | A00965 | A01186 | 223 |
| A00965 | A01204 | 205 | A00965 | A01206 | 340 |
| A00965 | A01217 | 235 | A00965 | A01220 | 165 |
| A00965 | A01221 | 241 | A00965 | A01234 | 152 |
| A00965 | A01238 | 729 | A00965 | A01249 | 383 |
| A00965 | A01291 | 491 | A00965 | A01292 | 449 |
| A00965 | A01306 | 247 | A00965 | A01335 | 494 |
| A00965 | A01352 | 257 | A00965 | A01365 | 547 |
| A00965 | A01392 | 665 | A00965 | A01416 | 728 |
| A00965 | A01425 | 317 | A00965 | A01433 | 662 |
| A00965 | A01436 | 665 | A00965 | A01449 | 302 |
| A00965 | A01468 | 606 | A00965 | A01579 | 358 |
| A00965 | A01586 | 351 | A00965 | A01649 | 457 |
| A00965 | A01718 | 403 | A00965 | A01741 | 243 |
| A00965 | A02051 | 232 | A00965 | A03490 | 548 |
| A00965 | A03601 | 307 | A00965 | A03981 | 362 |
| A00965 | A04694 | 271 | A00965 | A05419 | 399 |
| A00965 | A05499 | 335 | A00965 | A05501 | 285 |
| A00965 | A06105 | 294 | A00965 | A06275 | 235 |



|        |        |     |        |        |     |
|--------|--------|-----|--------|--------|-----|
| A00965 | A06351 | 491 | A00965 | A06775 | 173 |
| A00965 | A06814 | 160 | A00965 | A06861 | 224 |
| A00965 | A06987 | 208 | A00965 | A07157 | 215 |
| A00965 | A07164 | 160 | A00965 | A07449 | 290 |
| A00965 | A08011 | 664 | A00965 | A08052 | 425 |
| A00965 | A08055 | 488 | A00965 | A08357 | 374 |
| A00965 | A08377 | 417 | A00965 | A08452 | 297 |
| A00965 | A08550 | 389 | A00965 | A08773 | 490 |
| A00965 | A08973 | 620 | A00965 | A09293 | 319 |
| A00965 | A09332 | 460 | A00965 | A09735 | 414 |
| A00965 | A09978 | 291 | A00965 | A10616 | 232 |
| A00965 | A10732 | 358 | A00965 | A10910 | 188 |
| A00965 | A11453 | 165 | A00965 | A11588 | 188 |
| A00965 | A11992 | 420 | A00965 | A12052 | 271 |
| A00965 | A12885 | 152 | A00965 | A13989 | 491 |
| A00965 | A14172 | 162 | A00965 | A14216 | 335 |
| A00965 | A14241 | 202 | A00965 | A14479 | 430 |
| A00965 | A14482 | 491 | A00965 | A14568 | 266 |
| A00965 | A14729 | 271 | A00965 | A14816 | 185 |
| A00965 | A15376 | 177 | A00965 | A15500 | 416 |
| A00965 | A15771 | 174 | A00965 | A15988 | 491 |
| A00965 | A16053 | 400 | A00965 | A16306 | 438 |
| A00965 | A16655 | 294 | A00966 | A01012 | 688 |
| A00966 | A01056 | 208 | A00966 | A01085 | 485 |
| A00966 | A01090 | 688 | A00966 | A01112 | 483 |
| A00966 | A01140 | 477 | A00966 | A01160 | 486 |
| A00966 | A01168 | 491 | A00966 | A01189 | 432 |
| A00966 | A01206 | 176 | A00966 | A01238 | 338 |
| A00966 | A01249 | 374 | A00966 | A01288 | 170 |
| A00966 | A01291 | 491 | A00966 | A01294 | 472 |
| A00966 | A01306 | 477 | A00966 | A01335 | 162 |
| A00966 | A01357 | 168 | A00966 | A01416 | 317 |
| A00966 | A01425 | 518 | A00966 | A01436 | 341 |
| A00966 | A01468 | 574 | A00966 | A01496 | 688 |
| A00966 | A01514 | 374 | A00966 | A01575 | 207 |
| A00966 | A01579 | 445 | A00966 | A01586 | 553 |
| A00966 | A01595 | 428 | A00966 | A01601 | 163 |
| A00966 | A01711 | 152 | A00966 | A01822 | 375 |
| A00966 | A02068 | 157 | A00966 | A02165 | 491 |
| A00966 | A02270 | 249 | A00966 | A02527 | 191 |
| A00966 | A03438 | 477 | A00966 | A03461 | 162 |
| A00966 | A03490 | 317 | A00966 | A03567 | 247 |
| A00966 | A03652 | 447 | A00966 | A03653 | 601 |
| A00966 | A03671 | 157 | A00966 | A03981 | 684 |
| A00966 | A04230 | 418 | A00966 | A04988 | 171 |
| A00966 | A05149 | 452 | A00966 | A05501 | 404 |

|        |        |     |        |        |     |
|--------|--------|-----|--------|--------|-----|
| A00966 | A05566 | 273 | A00966 | A06084 | 326 |
| A00966 | A06351 | 312 | A00966 | A06356 | 425 |
| A00966 | A06814 | 483 | A00966 | A06825 | 479 |
| A00966 | A06965 | 293 | A00966 | A07237 | 177 |
| A00966 | A07451 | 182 | A00966 | A07726 | 491 |
| A00966 | A08011 | 455 | A00966 | A08131 | 272 |
| A00966 | A08359 | 345 | A00966 | A08377 | 380 |
| A00966 | A08476 | 159 | A00966 | A08550 | 425 |
| A00966 | A08653 | 443 | A00966 | A08682 | 339 |
| A00966 | A08773 | 355 | A00966 | A08872 | 266 |
| A00966 | A08973 | 324 | A00966 | A09044 | 465 |
| A00966 | A09308 | 299 | A00966 | A10001 | 210 |
| A00966 | A10362 | 212 | A00966 | A11254 | 368 |
| A00966 | A11263 | 361 | A00966 | A11334 | 491 |
| A00966 | A11550 | 279 | A00966 | A11992 | 243 |
| A00966 | A13581 | 200 | A00966 | A13989 | 491 |
| A00966 | A14090 | 170 | A00966 | A14216 | 688 |
| A00966 | A14443 | 386 | A00966 | A14447 | 407 |
| A00966 | A14843 | 452 | A00966 | A15499 | 199 |
| A00966 | A15500 | 412 | A00966 | A15988 | 252 |
| A00966 | A16802 | 534 | A00967 | A01151 | 334 |
| A00967 | A01161 | 449 | A00967 | A01413 | 401 |
| A00967 | A01547 | 165 | A00967 | A01689 | 172 |
| A00967 | A01926 | 334 | A00967 | A02312 | 184 |
| A00967 | A02401 | 276 | A00967 | A02427 | 151 |
| A00967 | A02481 | 334 | A00967 | A03139 | 232 |
| A00967 | A03435 | 170 | A00967 | A03820 | 310 |
| A00967 | A03873 | 334 | A00967 | A03945 | 157 |
| A00967 | A04025 | 200 | A00967 | A04033 | 427 |
| A00967 | A04145 | 452 | A00967 | A04449 | 334 |
| A00967 | A04662 | 160 | A00967 | A04911 | 196 |
| A00967 | A05289 | 156 | A00967 | A05825 | 249 |
| A00967 | A06891 | 200 | A00967 | A06915 | 212 |
| A00967 | A08517 | 355 | A00967 | A08550 | 290 |
| A00967 | A08552 | 200 | A00967 | A08560 | 249 |
| A00967 | A08561 | 240 | A00967 | A08814 | 357 |
| A00967 | A08850 | 334 | A00967 | A08869 | 283 |
| A00967 | A09447 | 221 | A00967 | A09451 | 252 |
| A00967 | A09512 | 394 | A00967 | A09538 | 333 |
| A00967 | A09609 | 361 | A00967 | A09828 | 271 |
| A00967 | A11209 | 199 | A00967 | A11234 | 235 |
| A00967 | A11301 | 260 | A00967 | A11496 | 329 |
| A00967 | A11497 | 229 | A00967 | A11559 | 334 |
| A00967 | A11735 | 290 | A00967 | A11737 | 188 |
| A00967 | A11914 | 185 | A00967 | A12111 | 408 |
| A00967 | A12254 | 299 | A00967 | A12365 | 191 |

|        |        |     |        |        |     |
|--------|--------|-----|--------|--------|-----|
| A00967 | A12373 | 334 | A00967 | A12433 | 228 |
| A00967 | A12606 | 201 | A00967 | A12665 | 215 |
| A00967 | A12725 | 224 | A00967 | A12825 | 286 |
| A00967 | A12858 | 364 | A00967 | A13116 | 167 |
| A00967 | A13313 | 232 | A00967 | A13783 | 193 |
| A00967 | A14074 | 312 | A00967 | A14210 | 334 |
| A00967 | A14212 | 187 | A00967 | A14214 | 278 |
| A00967 | A14270 | 159 | A00967 | A14371 | 334 |
| A00967 | A14569 | 348 | A00967 | A14635 | 294 |
| A00967 | A14636 | 334 | A00967 | A14799 | 182 |
| A00967 | A14903 | 328 | A00967 | A14917 | 317 |
| A00967 | A15116 | 180 | A00967 | A15138 | 223 |
| A00967 | A15189 | 205 | A00967 | A15487 | 160 |
| A00967 | A15498 | 163 | A00967 | A15564 | 424 |
| A00967 | A15606 | 468 | A00967 | A15709 | 168 |
| A00967 | A15711 | 154 | A00967 | A15726 | 151 |
| A00967 | A16157 | 210 | A00967 | A16565 | 221 |
| A00967 | A16585 | 232 | A00967 | A16587 | 391 |
| A00967 | A16611 | 251 | A00967 | A16664 | 321 |
| A00967 | A16690 | 174 | A00967 | A16692 | 168 |
| A00967 | A16695 | 378 | A00967 | A16707 | 301 |
| A00967 | A16790 | 176 | A00968 | A01021 | 488 |
| A00968 | A01074 | 686 | A00968 | A01105 | 447 |
| A00968 | A01166 | 296 | A00968 | A01169 | 398 |
| A00968 | A01189 | 562 | A00968 | A01205 | 491 |
| A00968 | A01269 | 193 | A00968 | A01352 | 286 |
| A00968 | A01360 | 491 | A00968 | A01365 | 294 |
| A00968 | A01375 | 452 | A00968 | A01377 | 173 |
| A00968 | A01406 | 257 | A00968 | A01409 | 307 |
| A00968 | A01483 | 491 | A00968 | A01508 | 490 |
| A00968 | A01568 | 307 | A00968 | A01622 | 419 |
| A00968 | A01647 | 571 | A00968 | A01978 | 276 |
| A00968 | A02335 | 223 | A00968 | A02789 | 223 |
| A00968 | A02859 | 193 | A00968 | A03095 | 285 |
| A00968 | A03142 | 168 | A00968 | A03259 | 265 |
| A00968 | A03277 | 263 | A00968 | A03501 | 435 |
| A00968 | A03601 | 224 | A00968 | A03719 | 223 |
| A00968 | A03728 | 223 | A00968 | A03752 | 223 |
| A00968 | A03880 | 344 | A00968 | A04429 | 168 |
| A00968 | A04769 | 183 | A00968 | A05060 | 281 |
| A00968 | A05222 | 185 | A00968 | A05262 | 152 |
| A00968 | A05332 | 425 | A00968 | A05375 | 235 |
| A00968 | A05609 | 329 | A00968 | A06085 | 238 |
| A00968 | A06101 | 257 | A00968 | A06134 | 243 |
| A00968 | A06203 | 238 | A00968 | A06264 | 283 |
| A00968 | A06472 | 201 | A00968 | A06689 | 530 |

|        |        |     |        |        |     |
|--------|--------|-----|--------|--------|-----|
| A00968 | A06718 | 358 | A00968 | A06819 | 578 |
| A00968 | A06924 | 288 | A00968 | A06970 | 358 |
| A00968 | A06990 | 489 | A00968 | A07007 | 307 |
| A00968 | A07222 | 551 | A00968 | A07277 | 273 |
| A00968 | A07333 | 556 | A00968 | A07508 | 291 |
| A00968 | A07816 | 307 | A00968 | A07880 | 417 |
| A00968 | A07931 | 452 | A00968 | A07974 | 436 |
| A00968 | A07981 | 307 | A00968 | A08939 | 229 |
| A00968 | A09054 | 307 | A00968 | A09276 | 475 |
| A00968 | A09667 | 337 | A00968 | A12872 | 156 |
| A00968 | A12924 | 322 | A00968 | A13277 | 247 |
| A00968 | A13819 | 307 | A00968 | A13822 | 223 |
| A00968 | A13866 | 319 | A00968 | A13905 | 235 |
| A00968 | A14239 | 307 | A00968 | A14525 | 577 |
| A00968 | A14614 | 171 | A00968 | A14803 | 288 |
| A00968 | A14804 | 223 | A00968 | A14858 | 247 |
| A00968 | A15313 | 236 | A00968 | A15372 | 578 |
| A00968 | A15837 | 314 | A00968 | A16219 | 262 |
| A00968 | A16531 | 293 | A00968 | A16753 | 486 |
| A00968 | A16761 | 210 | A00968 | A16769 | 326 |
| A00968 | A16807 | 307 | A00969 | A00984 | 157 |
| A00969 | A01061 | 163 | A00969 | A01136 | 227 |
| A00969 | A01335 | 329 | A00969 | A01977 | 290 |
| A00969 | A02050 | 337 | A00969 | A02236 | 483 |
| A00969 | A02499 | 208 | A00969 | A02855 | 157 |
| A00969 | A03112 | 297 | A00969 | A03289 | 229 |
| A00969 | A03644 | 401 | A00969 | A04666 | 159 |
| A00969 | A04676 | 398 | A00969 | A06785 | 269 |
| A00969 | A06805 | 475 | A00969 | A07226 | 210 |
| A00969 | A07243 | 235 | A00969 | A09634 | 353 |
| A00969 | A10578 | 262 | A00969 | A11597 | 180 |
| A00969 | A11811 | 330 | A00969 | A14377 | 185 |
| A00969 | A14594 | 273 | A00969 | A14622 | 346 |
| A00969 | A14745 | 334 | A00970 | A00980 | 180 |
| A00970 | A01000 | 358 | A00970 | A01042 | 460 |
| A00970 | A01069 | 491 | A00970 | A01090 | 393 |
| A00970 | A01101 | 319 | A00970 | A01112 | 486 |
| A00970 | A01113 | 154 | A00970 | A01115 | 491 |
| A00970 | A01127 | 333 | A00970 | A01150 | 480 |
| A00970 | A01166 | 490 | A00970 | A01192 | 364 |
| A00970 | A01194 | 491 | A00970 | A01206 | 489 |
| A00970 | A01215 | 205 | A00970 | A01218 | 257 |
| A00970 | A01234 | 490 | A00970 | A01242 | 374 |
| A00970 | A01243 | 389 | A00970 | A01291 | 491 |
| A00970 | A01306 | 227 | A00970 | A01335 | 409 |
| A00970 | A01354 | 474 | A00970 | A01411 | 339 |

|        |        |     |        |        |     |
|--------|--------|-----|--------|--------|-----|
| A00970 | A01425 | 294 | A00970 | A01431 | 486 |
| A00970 | A01457 | 249 | A00970 | A01468 | 489 |
| A00970 | A01470 | 491 | A00970 | A01492 | 408 |
| A00970 | A01496 | 266 | A00970 | A01506 | 718 |
| A00970 | A01539 | 491 | A00970 | A01548 | 457 |
| A00970 | A01569 | 491 | A00970 | A01577 | 643 |
| A00970 | A01579 | 470 | A00970 | A01614 | 299 |
| A00970 | A01637 | 305 | A00970 | A01649 | 488 |
| A00970 | A01650 | 168 | A00970 | A01684 | 721 |
| A00970 | A01707 | 193 | A00970 | A01770 | 461 |
| A00970 | A01787 | 216 | A00970 | A01822 | 218 |
| A00970 | A01824 | 191 | A00970 | A01917 | 721 |
| A00970 | A02353 | 480 | A00970 | A02718 | 160 |
| A00970 | A02896 | 343 | A00970 | A03446 | 491 |
| A00970 | A03453 | 335 | A00970 | A03472 | 489 |
| A00970 | A03476 | 241 | A00970 | A03560 | 486 |
| A00970 | A03567 | 491 | A00970 | A03570 | 196 |
| A00970 | A03669 | 317 | A00970 | A03738 | 491 |
| A00970 | A03740 | 491 | A00970 | A03752 | 461 |
| A00970 | A03958 | 152 | A00970 | A03981 | 339 |
| A00970 | A04966 | 183 | A00970 | A05025 | 488 |
| A00970 | A05029 | 428 | A00970 | A05302 | 152 |
| A00970 | A05501 | 272 | A00970 | A05712 | 358 |
| A00970 | A05995 | 474 | A00970 | A06025 | 389 |
| A00970 | A06279 | 419 | A00970 | A06466 | 489 |
| A00970 | A06534 | 185 | A00970 | A06543 | 720 |
| A00970 | A06819 | 406 | A00970 | A06965 | 413 |
| A00970 | A07247 | 491 | A00970 | A07311 | 491 |
| A00970 | A07451 | 188 | A00970 | A07744 | 343 |
| A00970 | A07759 | 157 | A00970 | A07798 | 208 |
| A00970 | A08061 | 188 | A00970 | A08098 | 343 |
| A00970 | A08178 | 383 | A00970 | A08357 | 452 |
| A00970 | A08359 | 374 | A00970 | A08748 | 238 |
| A00970 | A08896 | 151 | A00970 | A09425 | 277 |
| A00970 | A09587 | 226 | A00970 | A09591 | 396 |
| A00970 | A09641 | 241 | A00970 | A10006 | 259 |
| A00970 | A10266 | 241 | A00970 | A10456 | 156 |
| A00970 | A10490 | 274 | A00970 | A10532 | 491 |
| A00970 | A10624 | 162 | A00970 | A10633 | 195 |
| A00970 | A10830 | 276 | A00970 | A11240 | 247 |
| A00970 | A11297 | 363 | A00970 | A11409 | 461 |
| A00970 | A11705 | 486 | A00970 | A11814 | 256 |
| A00970 | A12328 | 419 | A00970 | A12813 | 212 |
| A00970 | A12831 | 263 | A00970 | A12839 | 490 |
| A00970 | A13000 | 306 | A00970 | A13340 | 488 |
| A00970 | A13533 | 174 | A00970 | A13674 | 256 |

|        |        |     |        |        |     |
|--------|--------|-----|--------|--------|-----|
| A00970 | A13989 | 491 | A00970 | A14073 | 486 |
| A00970 | A14216 | 458 | A00970 | A14220 | 162 |
| A00970 | A14525 | 391 | A00970 | A14551 | 212 |
| A00970 | A14591 | 152 | A00970 | A14596 | 165 |
| A00970 | A14908 | 454 | A00970 | A14939 | 306 |
| A00970 | A14982 | 156 | A00970 | A15141 | 429 |
| A00970 | A15146 | 256 | A00970 | A15156 | 486 |
| A00970 | A15244 | 372 | A00970 | A15503 | 246 |
| A00970 | A15660 | 491 | A00970 | A15684 | 490 |
| A00970 | A15696 | 486 | A00970 | A15698 | 474 |
| A00970 | A15931 | 441 | A00970 | A15932 | 373 |
| A00970 | A16824 | 174 | A00970 | A17134 | 184 |
| A00970 | A17140 | 167 | A00971 | A01011 | 491 |
| A00971 | A01036 | 358 | A00971 | A01216 | 491 |
| A00971 | A01217 | 278 | A00971 | A01290 | 411 |
| A00971 | A01366 | 490 | A00971 | A01402 | 463 |
| A00971 | A01431 | 384 | A00971 | A01445 | 462 |
| A00971 | A01454 | 555 | A00971 | A01459 | 489 |
| A00971 | A01478 | 385 | A00971 | A01483 | 249 |
| A00971 | A01484 | 480 | A00971 | A01514 | 491 |
| A00971 | A01557 | 642 | A00971 | A01568 | 491 |
| A00971 | A01606 | 199 | A00971 | A01630 | 688 |
| A00971 | A01647 | 273 | A00971 | A01657 | 481 |
| A00971 | A01661 | 477 | A00971 | A01681 | 463 |
| A00971 | A01687 | 490 | A00971 | A01730 | 536 |
| A00971 | A01839 | 407 | A00971 | A01976 | 157 |
| A00971 | A02278 | 374 | A00971 | A02357 | 234 |
| A00971 | A02564 | 154 | A00971 | A02641 | 386 |
| A00971 | A02698 | 291 | A00971 | A02736 | 450 |
| A00971 | A02778 | 374 | A00971 | A02830 | 63  |
| A00971 | A02836 | 391 | A00971 | A03042 | 152 |
| A00971 | A03073 | 156 | A00971 | A03111 | 234 |
| A00971 | A03112 | 63  | A00971 | A03116 | 255 |
| A00971 | A03117 | 218 | A00971 | A03197 | 303 |
| A00971 | A03220 | 434 | A00971 | A03297 | 396 |
| A00971 | A03321 | 475 | A00971 | A03401 | 380 |
| A00971 | A03455 | 174 | A00971 | A03518 | 485 |
| A00971 | A03529 | 188 | A00971 | A03769 | 352 |
| A00971 | A03832 | 491 | A00971 | A03983 | 391 |
| A00971 | A04081 | 204 | A00971 | A04139 | 465 |
| A00971 | A04715 | 416 | A00971 | A04728 | 241 |
| A00971 | A04904 | 165 | A00971 | A04905 | 391 |
| A00971 | A05094 | 252 | A00971 | A05301 | 462 |
| A00971 | A05967 | 314 | A00971 | A05989 | 207 |
| A00971 | A06106 | 234 | A00971 | A06162 | 479 |
| A00971 | A06277 | 463 | A00971 | A06428 | 236 |

|        |        |     |        |        |     |
|--------|--------|-----|--------|--------|-----|
| A00971 | A06591 | 381 | A00971 | A06595 | 171 |
| A00971 | A06680 | 343 | A00971 | A06752 | 208 |
| A00971 | A06966 | 182 | A00971 | A07054 | 465 |
| A00971 | A07231 | 283 | A00971 | A07241 | 255 |
| A00971 | A07242 | 491 | A00971 | A07404 | 299 |
| A00971 | A07495 | 490 | A00971 | A07589 | 218 |
| A00971 | A07665 | 469 | A00971 | A07709 | 267 |
| A00971 | A07816 | 270 | A00971 | A07897 | 456 |
| A00971 | A08061 | 363 | A00971 | A08576 | 246 |
| A00971 | A08620 | 188 | A00971 | A08917 | 480 |
| A00971 | A09478 | 218 | A00971 | A09671 | 267 |
| A00971 | A09963 | 427 | A00971 | A09995 | 425 |
| A00971 | A10284 | 152 | A00971 | A10315 | 457 |
| A00971 | A10361 | 255 | A00971 | A10470 | 174 |
| A00971 | A10525 | 353 | A00971 | A10751 | 174 |
| A00971 | A10847 | 283 | A00971 | A10956 | 288 |
| A00971 | A11023 | 485 | A00971 | A11160 | 251 |
| A00971 | A11187 | 207 | A00971 | A11281 | 446 |
| A00971 | A11576 | 173 | A00971 | A11623 | 374 |
| A00971 | A11727 | 182 | A00971 | A11882 | 182 |
| A00971 | A11902 | 307 | A00971 | A12047 | 491 |
| A00971 | A12087 | 288 | A00971 | A12161 | 218 |
| A00971 | A12313 | 434 | A00971 | A12509 | 165 |
| A00971 | A12561 | 255 | A00971 | A12598 | 218 |
| A00971 | A13244 | 207 | A00971 | A13479 | 234 |
| A00971 | A13528 | 165 | A00971 | A13744 | 288 |
| A00971 | A13772 | 246 | A00971 | A13831 | 452 |
| A00971 | A13866 | 407 | A00971 | A13894 | 489 |
| A00971 | A13895 | 486 | A00971 | A14266 | 223 |
| A00971 | A14281 | 688 | A00971 | A14484 | 477 |
| A00971 | A15232 | 288 | A00971 | A16147 | 234 |
| A00972 | A00997 | 217 | A00972 | A01017 | 275 |
| A00972 | A01037 | 230 | A00972 | A01056 | 456 |
| A00972 | A01091 | 246 | A00972 | A01092 | 154 |
| A00972 | A01101 | 200 | A00972 | A01107 | 451 |
| A00972 | A01140 | 439 | A00972 | A01144 | 157 |
| A00972 | A01159 | 217 | A00972 | A01189 | 218 |
| A00972 | A01217 | 269 | A00972 | A01220 | 188 |
| A00972 | A01221 | 551 | A00972 | A01243 | 460 |
| A00972 | A01291 | 491 | A00972 | A01343 | 285 |
| A00972 | A01362 | 253 | A00972 | A01406 | 188 |
| A00972 | A01408 | 188 | A00972 | A01414 | 284 |
| A00972 | A01418 | 295 | A00972 | A01425 | 455 |
| A00972 | A01451 | 202 | A00972 | A01468 | 363 |
| A00972 | A01540 | 293 | A00972 | A01564 | 208 |
| A00972 | A01586 | 165 | A00972 | A01601 | 263 |

|        |        |     |        |        |     |
|--------|--------|-----|--------|--------|-----|
| A00972 | A01720 | 274 | A00972 | A01976 | 507 |
| A00972 | A01977 | 347 | A00972 | A01988 | 188 |
| A00972 | A02494 | 221 | A00972 | A02542 | 219 |
| A00972 | A02860 | 167 | A00972 | A03508 | 286 |
| A00972 | A03556 | 217 | A00972 | A03567 | 277 |
| A00972 | A03571 | 369 | A00972 | A03617 | 217 |
| A00972 | A03705 | 165 | A00972 | A03901 | 556 |
| A00972 | A04230 | 156 | A00972 | A05323 | 229 |
| A00972 | A05605 | 217 | A00972 | A05702 | 188 |
| A00972 | A06007 | 258 | A00972 | A06098 | 293 |
| A00972 | A06369 | 217 | A00972 | A06644 | 173 |
| A00972 | A06699 | 249 | A00972 | A06785 | 188 |
| A00972 | A06814 | 451 | A00972 | A06832 | 426 |
| A00972 | A07726 | 183 | A00972 | A07965 | 188 |
| A00972 | A08183 | 298 | A00972 | A08982 | 340 |
| A00972 | A08990 | 240 | A00972 | A09352 | 157 |
| A00972 | A09673 | 217 | A00972 | A11277 | 156 |
| A00972 | A11392 | 176 | A00972 | A11480 | 188 |
| A00972 | A11532 | 341 | A00972 | A13125 | 234 |
| A00972 | A13222 | 179 | A00972 | A13989 | 488 |
| A00972 | A14088 | 217 | A00972 | A14566 | 112 |
| A00972 | A14594 | 77  | A00972 | A14813 | 188 |
| A00972 | A14836 | 177 | A00972 | A15237 | 193 |
| A00972 | A15377 | 217 | A00972 | A15543 | 217 |
| A00972 | A15657 | 188 | A00972 | A15724 | 217 |
| A00972 | A15988 | 171 | A00972 | A16437 | 162 |
| A00972 | A16664 | 217 | A00972 | A16680 | 188 |
| A00973 | A00974 | 243 | A00973 | A01061 | 423 |
| A00973 | A01072 | 232 | A00973 | A01113 | 392 |
| A00973 | A01129 | 152 | A00973 | A01133 | 339 |
| A00973 | A01144 | 165 | A00973 | A01177 | 273 |
| A00973 | A01192 | 638 | A00973 | A01288 | 191 |
| A00973 | A01313 | 227 | A00973 | A01440 | 234 |
| A00973 | A01540 | 241 | A00973 | A01569 | 251 |
| A00973 | A01648 | 392 | A00973 | A02719 | 168 |
| A00973 | A02737 | 490 | A00973 | A03336 | 162 |
| A00973 | A03560 | 334 | A00973 | A03859 | 401 |
| A00973 | A04293 | 245 | A00973 | A04615 | 217 |
| A00973 | A05029 | 633 | A00973 | A05101 | 491 |
| A00973 | A06769 | 485 | A00973 | A07107 | 177 |
| A00973 | A07353 | 224 | A00973 | A07378 | 633 |
| A00973 | A07773 | 405 | A00973 | A07814 | 288 |
| A00973 | A08261 | 333 | A00973 | A08546 | 174 |
| A00973 | A08978 | 179 | A00973 | A08991 | 232 |
| A00973 | A09586 | 371 | A00973 | A09591 | 334 |
| A00973 | A09653 | 286 | A00973 | A09657 | 279 |



|        |        |     |        |        |     |
|--------|--------|-----|--------|--------|-----|
| A00973 | A10490 | 157 | A00973 | A11489 | 271 |
| A00973 | A12473 | 457 | A00973 | A13342 | 185 |
| A00973 | A13424 | 196 | A00973 | A14178 | 626 |
| A00973 | A14351 | 173 | A00973 | A14478 | 176 |
| A00973 | A14594 | 283 | A00973 | A17088 | 420 |
| A00974 | A00984 | 299 | A00974 | A00987 | 421 |
| A00974 | A00991 | 159 | A00974 | A01001 | 299 |
| A00974 | A01023 | 291 | A00974 | A01027 | 581 |
| A00974 | A01042 | 232 | A00974 | A01081 | 434 |
| A00974 | A01086 | 591 | A00974 | A01102 | 299 |
| A00974 | A01108 | 591 | A00974 | A01150 | 430 |
| A00974 | A01153 | 180 | A00974 | A01161 | 493 |
| A00974 | A01186 | 176 | A00974 | A01204 | 582 |
| A00974 | A01223 | 162 | A00974 | A01246 | 394 |
| A00974 | A01287 | 281 | A00974 | A01311 | 152 |
| A00974 | A01346 | 577 | A00974 | A01379 | 299 |
| A00974 | A01382 | 319 | A00974 | A01387 | 383 |
| A00974 | A01399 | 578 | A00974 | A01407 | 171 |
| A00974 | A01439 | 299 | A00974 | A01443 | 247 |
| A00974 | A01455 | 170 | A00974 | A01502 | 210 |
| A00974 | A01540 | 213 | A00974 | A01577 | 152 |
| A00974 | A01627 | 299 | A00974 | A02601 | 299 |
| A00974 | A02745 | 162 | A00974 | A02814 | 156 |
| A00974 | A02994 | 247 | A00974 | A03697 | 152 |
| A00974 | A03959 | 247 | A00974 | A04278 | 176 |
| A00974 | A04386 | 159 | A00974 | A04495 | 299 |
| A00974 | A04688 | 200 | A00974 | A04782 | 196 |
| A00974 | A04895 | 375 | A00974 | A05839 | 238 |
| A00974 | A06287 | 152 | A00974 | A06405 | 151 |
| A00974 | A06959 | 424 | A00974 | A06975 | 281 |
| A00974 | A07237 | 417 | A00974 | A07350 | 358 |
| A00974 | A07362 | 246 | A00974 | A07502 | 378 |
| A00974 | A07569 | 422 | A00974 | A07597 | 191 |
| A00974 | A07610 | 198 | A00974 | A07744 | 152 |
| A00974 | A07773 | 367 | A00974 | A07792 | 243 |
| A00974 | A08061 | 152 | A00974 | A08098 | 152 |
| A00974 | A08178 | 152 | A00974 | A08763 | 152 |
| A00974 | A08947 | 299 | A00974 | A09004 | 299 |
| A00974 | A09595 | 302 | A00974 | A09616 | 389 |
| A00974 | A09653 | 177 | A00974 | A10535 | 216 |
| A00974 | A10799 | 168 | A00974 | A10842 | 152 |
| A00974 | A11677 | 247 | A00974 | A11836 | 380 |
| A00974 | A13497 | 358 | A00974 | A14252 | 224 |
| A00974 | A14478 | 199 | A00974 | A14482 | 179 |
| A00974 | A14525 | 152 | A00974 | A14699 | 247 |
| A00974 | A14778 | 247 | A00974 | A15375 | 152 |

|        |        |     |        |        |     |
|--------|--------|-----|--------|--------|-----|
| A00974 | A15546 | 152 | A00974 | A16587 | 247 |
| A00974 | A16591 | 337 | A00975 | A01014 | 434 |
| A00975 | A01032 | 224 | A00975 | A01039 | 231 |
| A00975 | A01057 | 490 | A00975 | A01058 | 242 |
| A00975 | A01066 | 299 | A00975 | A01077 | 544 |
| A00975 | A01080 | 480 | A00975 | A01093 | 191 |
| A00975 | A01122 | 488 | A00975 | A01156 | 378 |
| A00975 | A01169 | 491 | A00975 | A01234 | 345 |
| A00975 | A01264 | 168 | A00975 | A01267 | 277 |
| A00975 | A01274 | 195 | A00975 | A01278 | 303 |
| A00975 | A01322 | 306 | A00975 | A01338 | 165 |
| A00975 | A01339 | 418 | A00975 | A01340 | 319 |
| A00975 | A01370 | 265 | A00975 | A01390 | 419 |
| A00975 | A01404 | 441 | A00975 | A01415 | 228 |
| A00975 | A01507 | 196 | A00975 | A01582 | 486 |
| A00975 | A01677 | 232 | A00975 | A01741 | 362 |
| A00975 | A01926 | 200 | A00975 | A02212 | 250 |
| A00975 | A02237 | 210 | A00975 | A02507 | 185 |
| A00975 | A02564 | 199 | A00975 | A02666 | 168 |
| A00975 | A02904 | 156 | A00975 | A03259 | 198 |
| A00975 | A03498 | 160 | A00975 | A03570 | 269 |
| A00975 | A03676 | 480 | A00975 | A03726 | 207 |
| A00975 | A03885 | 249 | A00975 | A04063 | 157 |
| A00975 | A04180 | 193 | A00975 | A04216 | 188 |
| A00975 | A04229 | 427 | A00975 | A04666 | 378 |
| A00975 | A04668 | 271 | A00975 | A05095 | 238 |
| A00975 | A05276 | 173 | A00975 | A05765 | 385 |
| A00975 | A06451 | 232 | A00975 | A06750 | 367 |
| A00975 | A06941 | 469 | A00975 | A06974 | 152 |
| A00975 | A07086 | 180 | A00975 | A07096 | 160 |
| A00975 | A07226 | 160 | A00975 | A07236 | 177 |
| A00975 | A07317 | 176 | A00975 | A07439 | 337 |
| A00975 | A07457 | 224 | A00975 | A07497 | 249 |
| A00975 | A07675 | 318 | A00975 | A07697 | 152 |
| A00975 | A07756 | 424 | A00975 | A07986 | 249 |
| A00975 | A08159 | 263 | A00975 | A08343 | 229 |
| A00975 | A08679 | 279 | A00975 | A08718 | 283 |
| A00975 | A08732 | 334 | A00975 | A08831 | 210 |
| A00975 | A08834 | 160 | A00975 | A08877 | 188 |
| A00975 | A08882 | 469 | A00975 | A08903 | 228 |
| A00975 | A08913 | 210 | A00975 | A09627 | 160 |
| A00975 | A09719 | 213 | A00975 | A09985 | 210 |
| A00975 | A10200 | 193 | A00975 | A10372 | 160 |
| A00975 | A11365 | 160 | A00975 | A11724 | 167 |
| A00975 | A11735 | 160 | A00975 | A11737 | 160 |
| A00975 | A11909 | 338 | A00975 | A11913 | 307 |

|        |        |     |        |        |     |
|--------|--------|-----|--------|--------|-----|
| A00975 | A11914 | 243 | A00975 | A12107 | 199 |
| A00975 | A12658 | 160 | A00975 | A12824 | 545 |
| A00975 | A13105 | 296 | A00975 | A13167 | 263 |
| A00975 | A13262 | 338 | A00975 | A14007 | 160 |
| A00975 | A14196 | 469 | A00975 | A14352 | 472 |
| A00975 | A14502 | 352 | A00975 | A14845 | 435 |
| A00975 | A15052 | 187 | A00975 | A15053 | 296 |
| A00975 | A15257 | 160 | A00975 | A15297 | 472 |
| A00975 | A15338 | 386 | A00975 | A15498 | 168 |
| A00975 | A15624 | 188 | A00975 | A15763 | 341 |
| A00975 | A16082 | 177 | A00975 | A16585 | 210 |
| A00975 | A17017 | 154 | A00976 | A00990 | 227 |
| A00976 | A01127 | 157 | A00976 | A01192 | 193 |
| A00976 | A01648 | 404 | A00976 | A02737 | 368 |
| A00976 | A03314 | 281 | A00976 | A03461 | 329 |
| A00976 | A07481 | 424 | A00976 | A07811 | 196 |
| A00976 | A08576 | 362 | A00976 | A14029 | 269 |
| A00977 | A00981 | 337 | A00977 | A01074 | 391 |
| A00977 | A01154 | 307 | A00977 | A01166 | 418 |
| A00977 | A01209 | 329 | A00977 | A01217 | 330 |
| A00977 | A01238 | 308 | A00977 | A01244 | 457 |
| A00977 | A01252 | 326 | A00977 | A01280 | 277 |
| A00977 | A01306 | 306 | A00977 | A01326 | 288 |
| A00977 | A01352 | 466 | A00977 | A01365 | 419 |
| A00977 | A01406 | 396 | A00977 | A01412 | 227 |
| A00977 | A01416 | 270 | A00977 | A02180 | 191 |
| A00977 | A03601 | 432 | A00977 | A05327 | 260 |
| A00977 | A05375 | 288 | A00977 | A05501 | 286 |
| A00977 | A05690 | 351 | A00977 | A10258 | 474 |
| A00977 | A13905 | 235 | A00977 | A14274 | 63  |
| A00978 | A01007 | 328 | A00978 | A01019 | 502 |
| A00978 | A01075 | 395 | A00978 | A01087 | 201 |
| A00978 | A01184 | 199 | A00978 | A01195 | 462 |
| A00978 | A01200 | 476 | A00978 | A01212 | 180 |
| A00978 | A01383 | 235 | A00978 | A01398 | 156 |
| A00978 | A01401 | 405 | A00978 | A01500 | 246 |
| A00978 | A01503 | 333 | A00978 | A01720 | 290 |
| A00978 | A03207 | 330 | A00978 | A03525 | 187 |
| A00978 | A03526 | 262 | A00978 | A03965 | 238 |
| A00978 | A04648 | 507 | A00978 | A04687 | 156 |
| A00978 | A05027 | 204 | A00978 | A05227 | 154 |
| A00978 | A06803 | 508 | A00978 | A07290 | 294 |
| A00978 | A07545 | 157 | A00978 | A07670 | 285 |
| A00978 | A07850 | 156 | A00978 | A07887 | 277 |
| A00978 | A08383 | 156 | A00978 | A08818 | 156 |
| A00978 | A08952 | 316 | A00978 | A09502 | 156 |

|        |        |     |        |        |     |
|--------|--------|-----|--------|--------|-----|
| A00978 | A09712 | 449 | A00978 | A10642 | 243 |
| A00978 | A11344 | 156 | A00978 | A11674 | 156 |
| A00978 | A13614 | 243 | A00978 | A14783 | 218 |
| A00978 | A16067 | 177 | A00978 | A16228 | 499 |
| A00978 | A17088 | 270 | A00979 | A01366 | 454 |
| A00979 | A01568 | 329 | A00979 | A02753 | 252 |
| A00979 | A05242 | 316 | A00979 | A07054 | 177 |
| A00979 | A09229 | 435 | A00979 | A10345 | 281 |
| A00979 | A10909 | 357 | A00979 | A11690 | 329 |
| A00979 | A12930 | 391 | A00979 | A12978 | 326 |
| A00979 | A14163 | 297 | A00979 | A14281 | 390 |
| A00980 | A01012 | 224 | A00980 | A01038 | 301 |
| A00980 | A01082 | 467 | A00980 | A01102 | 241 |
| A00980 | A01125 | 391 | A00980 | A01161 | 160 |
| A00980 | A01192 | 399 | A00980 | A01196 | 281 |
| A00980 | A01218 | 486 | A00980 | A01231 | 154 |
| A00980 | A01247 | 199 | A00980 | A01261 | 522 |
| A00980 | A01262 | 417 | A00980 | A01270 | 241 |
| A00980 | A01291 | 472 | A00980 | A01309 | 485 |
| A00980 | A01369 | 217 | A00980 | A01411 | 390 |
| A00980 | A01540 | 332 | A00980 | A01553 | 219 |
| A00980 | A01561 | 154 | A00980 | A01579 | 461 |
| A00980 | A01601 | 567 | A00980 | A01680 | 302 |
| A00980 | A01822 | 543 | A00980 | A01917 | 93  |
| A00980 | A01995 | 343 | A00980 | A02110 | 452 |
| A00980 | A02353 | 200 | A00980 | A02737 | 217 |
| A00980 | A02786 | 63  | A00980 | A03211 | 213 |
| A00980 | A03560 | 491 | A00980 | A03591 | 399 |
| A00980 | A03677 | 276 | A00980 | A03752 | 395 |
| A00980 | A04449 | 301 | A00980 | A05416 | 297 |
| A00980 | A05501 | 217 | A00980 | A06466 | 793 |
| A00980 | A06534 | 241 | A00980 | A06814 | 561 |
| A00980 | A06916 | 173 | A00980 | A06973 | 241 |
| A00980 | A07047 | 241 | A00980 | A07311 | 679 |
| A00980 | A07378 | 276 | A00980 | A07398 | 241 |
| A00980 | A07399 | 168 | A00980 | A07436 | 469 |
| A00980 | A07630 | 187 | A00980 | A07848 | 188 |
| A00980 | A08369 | 241 | A00980 | A08408 | 241 |
| A00980 | A08476 | 241 | A00980 | A08519 | 374 |
| A00980 | A08533 | 538 | A00980 | A08543 | 165 |
| A00980 | A09297 | 463 | A00980 | A09308 | 574 |
| A00980 | A09322 | 241 | A00980 | A09577 | 725 |
| A00980 | A09592 | 458 | A00980 | A09606 | 165 |
| A00980 | A09620 | 241 | A00980 | A09902 | 160 |
| A00980 | A10188 | 252 | A00980 | A10365 | 157 |
| A00980 | A10430 | 540 | A00980 | A11487 | 408 |

|        |        |     |        |        |     |
|--------|--------|-----|--------|--------|-----|
| A00980 | A11728 | 261 | A00980 | A11937 | 243 |
| A00980 | A12011 | 152 | A00980 | A12043 | 160 |
| A00980 | A12126 | 154 | A00980 | A12215 | 308 |
| A00980 | A12227 | 457 | A00980 | A12328 | 452 |
| A00980 | A12433 | 366 | A00980 | A12503 | 245 |
| A00980 | A12834 | 216 | A00980 | A13340 | 817 |
| A00980 | A13375 | 288 | A00980 | A13424 | 457 |
| A00980 | A13812 | 405 | A00980 | A14073 | 281 |
| A00980 | A14188 | 488 | A00980 | A14216 | 396 |
| A00980 | A14265 | 318 | A00980 | A14738 | 409 |
| A00980 | A14937 | 246 | A00980 | A15037 | 243 |
| A00980 | A15133 | 395 | A00980 | A15218 | 160 |
| A00980 | A15244 | 463 | A00980 | A15268 | 241 |
| A00980 | A15381 | 241 | A00980 | A15429 | 157 |
| A00980 | A15665 | 201 | A00980 | A15666 | 306 |
| A00980 | A15682 | 329 | A00980 | A15684 | 477 |
| A00980 | A15696 | 270 | A00980 | A15932 | 543 |
| A00980 | A15933 | 495 | A00980 | A16157 | 215 |
| A00980 | A16272 | 540 | A00980 | A16318 | 462 |
| A00980 | A16437 | 531 | A00980 | A16446 | 275 |
| A00980 | A16585 | 160 | A00980 | A16618 | 243 |
| A00980 | A16671 | 216 | A00980 | A16756 | 179 |
| A00980 | A16793 | 427 | A00980 | A16847 | 534 |
| A00980 | A17088 | 235 | A00981 | A01011 | 196 |
| A00981 | A01022 | 274 | A00981 | A01052 | 441 |
| A00981 | A01070 | 491 | A00981 | A01074 | 311 |
| A00981 | A01122 | 333 | A00981 | A01125 | 739 |
| A00981 | A01154 | 232 | A00981 | A01157 | 288 |
| A00981 | A01158 | 232 | A00981 | A01161 | 438 |
| A00981 | A01166 | 427 | A00981 | A01209 | 588 |
| A00981 | A01211 | 454 | A00981 | A01221 | 177 |
| A00981 | A01238 | 224 | A00981 | A01280 | 530 |
| A00981 | A01306 | 224 | A00981 | A01332 | 229 |
| A00981 | A01352 | 411 | A00981 | A01365 | 419 |
| A00981 | A01372 | 217 | A00981 | A01390 | 502 |
| A00981 | A01406 | 245 | A00981 | A01416 | 256 |
| A00981 | A01454 | 443 | A00981 | A01524 | 945 |
| A00981 | A01527 | 944 | A00981 | A01551 | 230 |
| A00981 | A01557 | 358 | A00981 | A01562 | 413 |
| A00981 | A01582 | 185 | A00981 | A01600 | 481 |
| A00981 | A01683 | 232 | A00981 | A01692 | 446 |
| A00981 | A01723 | 288 | A00981 | A01790 | 491 |
| A00981 | A01876 | 491 | A00981 | A01931 | 490 |
| A00981 | A01994 | 200 | A00981 | A01995 | 594 |
| A00981 | A02000 | 489 | A00981 | A02010 | 446 |
| A00981 | A02020 | 484 | A00981 | A02074 | 396 |

|        |        |     |        |        |     |
|--------|--------|-----|--------|--------|-----|
| A00981 | A02148 | 172 | A00981 | A02183 | 483 |
| A00981 | A02208 | 269 | A00981 | A02313 | 238 |
| A00981 | A02437 | 269 | A00981 | A02479 | 160 |
| A00981 | A02482 | 344 | A00981 | A02709 | 260 |
| A00981 | A02812 | 162 | A00981 | A02981 | 299 |
| A00981 | A03033 | 265 | A00981 | A03104 | 366 |
| A00981 | A03111 | 229 | A00981 | A03141 | 491 |
| A00981 | A03209 | 207 | A00981 | A03292 | 647 |
| A00981 | A03304 | 202 | A00981 | A03434 | 602 |
| A00981 | A03436 | 491 | A00981 | A03451 | 491 |
| A00981 | A03601 | 355 | A00981 | A03688 | 460 |
| A00981 | A03719 | 491 | A00981 | A03723 | 945 |
| A00981 | A03739 | 251 | A00981 | A03819 | 430 |
| A00981 | A03873 | 217 | A00981 | A03893 | 436 |
| A00981 | A03906 | 469 | A00981 | A03910 | 441 |
| A00981 | A03926 | 310 | A00981 | A04033 | 391 |
| A00981 | A04079 | 326 | A00981 | A04086 | 466 |
| A00981 | A04152 | 374 | A00981 | A04155 | 170 |
| A00981 | A04162 | 420 | A00981 | A04266 | 184 |
| A00981 | A04361 | 180 | A00981 | A04449 | 490 |
| A00981 | A04488 | 159 | A00981 | A04492 | 374 |
| A00981 | A04747 | 167 | A00981 | A04770 | 165 |
| A00981 | A04773 | 394 | A00981 | A04996 | 288 |
| A00981 | A05037 | 168 | A00981 | A05221 | 428 |
| A00981 | A05288 | 363 | A00981 | A05299 | 201 |
| A00981 | A05327 | 396 | A00981 | A05356 | 418 |
| A00981 | A05375 | 319 | A00981 | A05418 | 491 |
| A00981 | A05439 | 172 | A00981 | A05560 | 489 |
| A00981 | A05627 | 281 | A00981 | A05680 | 201 |
| A00981 | A05697 | 229 | A00981 | A05765 | 269 |
| A00981 | A05780 | 176 | A00981 | A05887 | 446 |
| A00981 | A06038 | 232 | A00981 | A06258 | 224 |
| A00981 | A06277 | 490 | A00981 | A06578 | 441 |
| A00981 | A06610 | 165 | A00981 | A06813 | 474 |
| A00981 | A06823 | 159 | A00981 | A07054 | 290 |
| A00981 | A07209 | 414 | A00981 | A07242 | 551 |
| A00981 | A07311 | 160 | A00981 | A07339 | 180 |
| A00981 | A07453 | 191 | A00981 | A07495 | 312 |
| A00981 | A07565 | 191 | A00981 | A07803 | 460 |
| A00981 | A07893 | 459 | A00981 | A07934 | 446 |
| A00981 | A07956 | 217 | A00981 | A08125 | 249 |
| A00981 | A08248 | 217 | A00981 | A08292 | 196 |
| A00981 | A08402 | 539 | A00981 | A08878 | 480 |
| A00981 | A08944 | 176 | A00981 | A08981 | 479 |
| A00981 | A08982 | 217 | A00981 | A09149 | 401 |
| A00981 | A09235 | 491 | A00981 | A09236 | 391 |

|        |        |     |        |        |     |
|--------|--------|-----|--------|--------|-----|
| A00981 | A09241 | 257 | A00981 | A09363 | 490 |
| A00981 | A09508 | 419 | A00981 | A09603 | 310 |
| A00981 | A09778 | 335 | A00981 | A09812 | 265 |
| A00981 | A09978 | 445 | A00981 | A10072 | 180 |
| A00981 | A10090 | 184 | A00981 | A10272 | 283 |
| A00981 | A10283 | 249 | A00981 | A10286 | 269 |
| A00981 | A10332 | 201 | A00981 | A10470 | 170 |
| A00981 | A10525 | 694 | A00981 | A10655 | 337 |
| A00981 | A10666 | 251 | A00981 | A11100 | 213 |
| A00981 | A11394 | 273 | A00981 | A11469 | 377 |
| A00981 | A11544 | 217 | A00981 | A11548 | 435 |
| A00981 | A11649 | 217 | A00981 | A11834 | 201 |
| A00981 | A11937 | 165 | A00981 | A11983 | 491 |
| A00981 | A12111 | 205 | A00981 | A12212 | 184 |
| A00981 | A12365 | 216 | A00981 | A12561 | 249 |
| A00981 | A12618 | 205 | A00981 | A13168 | 249 |
| A00981 | A13892 | 217 | A00981 | A13902 | 337 |
| A00981 | A13905 | 307 | A00981 | A13917 | 185 |
| A00981 | A13937 | 283 | A00981 | A13975 | 419 |
| A00981 | A14055 | 307 | A00981 | A14127 | 291 |
| A00981 | A14198 | 491 | A00981 | A14299 | 555 |
| A00981 | A14362 | 217 | A00981 | A14411 | 283 |
| A00981 | A14443 | 942 | A00981 | A14548 | 205 |
| A00981 | A14577 | 358 | A00981 | A14714 | 273 |
| A00981 | A14814 | 176 | A00981 | A14906 | 201 |
| A00981 | A15282 | 477 | A00981 | A15292 | 593 |
| A00981 | A15293 | 520 | A00981 | A15294 | 542 |
| A00981 | A15308 | 330 | A00981 | A15317 | 281 |
| A00981 | A15320 | 351 | A00981 | A15321 | 831 |
| A00981 | A15336 | 274 | A00981 | A15338 | 217 |
| A00981 | A15349 | 355 | A00981 | A15421 | 163 |
| A00981 | A15452 | 263 | A00981 | A15506 | 645 |
| A00981 | A15555 | 602 | A00981 | A15564 | 217 |
| A00981 | A15575 | 162 | A00981 | A15606 | 311 |
| A00981 | A15691 | 328 | A00981 | A15726 | 491 |
| A00981 | A16068 | 224 | A00981 | A16255 | 269 |
| A00981 | A16261 | 441 | A00981 | A16614 | 217 |
| A00981 | A16626 | 428 | A00981 | A16635 | 187 |
| A00982 | A01069 | 165 | A00982 | A01190 | 335 |
| A00982 | A01224 | 234 | A00982 | A01369 | 241 |
| A00982 | A01455 | 227 | A00982 | A01608 | 333 |
| A00982 | A02452 | 270 | A00982 | A03180 | 345 |
| A00982 | A03568 | 299 | A00982 | A03596 | 212 |
| A00982 | A03885 | 252 | A00982 | A05917 | 246 |
| A00982 | A06610 | 165 | A00982 | A08900 | 306 |
| A00983 | A00987 | 371 | A00983 | A00994 | 581 |

|        |        |     |        |        |     |
|--------|--------|-----|--------|--------|-----|
| A00983 | A01006 | 402 | A00983 | A01017 | 486 |
| A00983 | A01027 | 659 | A00983 | A01037 | 330 |
| A00983 | A01055 | 196 | A00983 | A01056 | 154 |
| A00983 | A01068 | 458 | A00983 | A01069 | 360 |
| A00983 | A01101 | 221 | A00983 | A01108 | 193 |
| A00983 | A01127 | 367 | A00983 | A01139 | 601 |
| A00983 | A01140 | 334 | A00983 | A01150 | 658 |
| A00983 | A01161 | 234 | A00983 | A01169 | 221 |
| A00983 | A01208 | 483 | A00983 | A01211 | 63  |
| A00983 | A01214 | 232 | A00983 | A01215 | 263 |
| A00983 | A01217 | 363 | A00983 | A01220 | 489 |
| A00983 | A01221 | 491 | A00983 | A01232 | 491 |
| A00983 | A01237 | 156 | A00983 | A01287 | 624 |
| A00983 | A01291 | 386 | A00983 | A01293 | 163 |
| A00983 | A01311 | 488 | A00983 | A01353 | 236 |
| A00983 | A01399 | 372 | A00983 | A01408 | 329 |
| A00983 | A01412 | 378 | A00983 | A01429 | 152 |
| A00983 | A01439 | 279 | A00983 | A01492 | 458 |
| A00983 | A01496 | 218 | A00983 | A01540 | 227 |
| A00983 | A01569 | 430 | A00983 | A01582 | 408 |
| A00983 | A01601 | 276 | A00983 | A01613 | 486 |
| A00983 | A01787 | 227 | A00983 | A01822 | 324 |
| A00983 | A01823 | 157 | A00983 | A02227 | 160 |
| A00983 | A02725 | 182 | A00983 | A02877 | 396 |
| A00983 | A02910 | 157 | A00983 | A02997 | 212 |
| A00983 | A03180 | 301 | A00983 | A03291 | 490 |
| A00983 | A03438 | 357 | A00983 | A03454 | 578 |
| A00983 | A03619 | 467 | A00983 | A03673 | 215 |
| A00983 | A03676 | 581 | A00983 | A03677 | 537 |
| A00983 | A03809 | 372 | A00983 | A03855 | 441 |
| A00983 | A03858 | 561 | A00983 | A03859 | 215 |
| A00983 | A03885 | 333 | A00983 | A03901 | 288 |
| A00983 | A03959 | 340 | A00983 | A04808 | 162 |
| A00983 | A04898 | 221 | A00983 | A04931 | 443 |
| A00983 | A04932 | 497 | A00983 | A05147 | 200 |
| A00983 | A05227 | 208 | A00983 | A05255 | 436 |
| A00983 | A05910 | 182 | A00983 | A05982 | 389 |
| A00983 | A06049 | 485 | A00983 | A06194 | 227 |
| A00983 | A06382 | 446 | A00983 | A06411 | 84  |
| A00983 | A06543 | 372 | A00983 | A06637 | 310 |
| A00983 | A06664 | 394 | A00983 | A06709 | 212 |
| A00983 | A06814 | 269 | A00983 | A07046 | 569 |
| A00983 | A07360 | 581 | A00983 | A07397 | 324 |
| A00983 | A07588 | 218 | A00983 | A07744 | 450 |
| A00983 | A07822 | 580 | A00983 | A07881 | 659 |
| A00983 | A08098 | 416 | A00983 | A08228 | 581 |



|        |        |     |        |        |     |
|--------|--------|-----|--------|--------|-----|
| A00983 | A08548 | 539 | A00983 | A08605 | 281 |
| A00983 | A08637 | 281 | A00983 | A08674 | 158 |
| A00983 | A08681 | 260 | A00983 | A08724 | 65  |
| A00983 | A08726 | 212 | A00983 | A08901 | 404 |
| A00983 | A09634 | 190 | A00983 | A09735 | 463 |
| A00983 | A10372 | 486 | A00983 | A10522 | 212 |
| A00983 | A11290 | 156 | A00983 | A11811 | 152 |
| A00983 | A11918 | 183 | A00983 | A12195 | 160 |
| A00983 | A12329 | 247 | A00983 | A13063 | 561 |
| A00983 | A13630 | 247 | A00983 | A13633 | 168 |
| A00983 | A14073 | 200 | A00983 | A14216 | 328 |
| A00983 | A14699 | 491 | A00983 | A14778 | 391 |
| A00983 | A15297 | 301 | A00983 | A15624 | 581 |
| A00983 | A15649 | 515 | A00983 | A15651 | 496 |
| A00983 | A15652 | 581 | A00983 | A15659 | 491 |
| A00983 | A15660 | 491 | A00983 | A15661 | 580 |
| A00983 | A15662 | 657 | A00983 | A15684 | 581 |
| A00983 | A15720 | 160 | A00983 | A15721 | 168 |
| A00983 | A15746 | 581 | A00983 | A15843 | 507 |
| A00983 | A15917 | 516 | A00983 | A15918 | 581 |
| A00983 | A15919 | 252 | A00983 | A15920 | 491 |
| A00983 | A15923 | 317 | A00983 | A15931 | 485 |
| A00983 | A15932 | 475 | A00983 | A15933 | 480 |
| A00983 | A15937 | 581 | A00983 | A15953 | 162 |
| A00983 | A16071 | 182 | A00983 | A16088 | 580 |
| A00983 | A16095 | 302 | A00983 | A16096 | 430 |
| A00983 | A16145 | 156 | A00983 | A16151 | 243 |
| A00983 | A16191 | 229 | A00983 | A16307 | 156 |
| A00983 | A16650 | 188 | A00983 | A16811 | 182 |
| A00984 | A00987 | 444 | A00984 | A01001 | 597 |
| A00984 | A01068 | 372 | A00984 | A01102 | 299 |
| A00984 | A01161 | 334 | A00984 | A01234 | 63  |
| A00984 | A01278 | 279 | A00984 | A01311 | 180 |
| A00984 | A01331 | 235 | A00984 | A01379 | 410 |
| A00984 | A01382 | 152 | A00984 | A01387 | 605 |
| A00984 | A01411 | 162 | A00984 | A01413 | 294 |
| A00984 | A01423 | 243 | A00984 | A01439 | 299 |
| A00984 | A01540 | 340 | A00984 | A01577 | 409 |
| A00984 | A01611 | 154 | A00984 | A01627 | 502 |
| A00984 | A01711 | 168 | A00984 | A01733 | 190 |
| A00984 | A01824 | 163 | A00984 | A01837 | 185 |
| A00984 | A02065 | 151 | A00984 | A02068 | 168 |
| A00984 | A02601 | 344 | A00984 | A03000 | 297 |
| A00984 | A03453 | 205 | A00984 | A03456 | 353 |
| A00984 | A03669 | 266 | A00984 | A03697 | 152 |
| A00984 | A03956 | 457 | A00984 | A03980 | 305 |

|        |        |     |        |        |     |
|--------|--------|-----|--------|--------|-----|
| A00984 | A04268 | 255 | A00984 | A04495 | 299 |
| A00984 | A04647 | 223 | A00984 | A05239 | 313 |
| A00984 | A05323 | 227 | A00984 | A05375 | 168 |
| A00984 | A05733 | 340 | A00984 | A06048 | 362 |
| A00984 | A06287 | 152 | A00984 | A07160 | 216 |
| A00984 | A07744 | 152 | A00984 | A07894 | 195 |
| A00984 | A08061 | 152 | A00984 | A08098 | 152 |
| A00984 | A08178 | 152 | A00984 | A08763 | 152 |
| A00984 | A08808 | 297 | A00984 | A08947 | 299 |
| A00984 | A09004 | 299 | A00984 | A09300 | 167 |
| A00984 | A09674 | 218 | A00984 | A10616 | 87  |
| A00984 | A10842 | 152 | A00984 | A11380 | 382 |
| A00984 | A11583 | 221 | A00984 | A12053 | 324 |
| A00984 | A14073 | 469 | A00984 | A14525 | 152 |
| A00984 | A15375 | 152 | A00984 | A15546 | 152 |
| A00984 | A15624 | 201 | A00984 | A15650 | 177 |
| A00984 | A15659 | 254 | A00984 | A15684 | 329 |
| A00984 | A15819 | 154 | A00984 | A16761 | 274 |
| A00985 | A00991 | 240 | A00985 | A01013 | 228 |
| A00985 | A01020 | 327 | A00985 | A01022 | 191 |
| A00985 | A01027 | 470 | A00985 | A01037 | 294 |
| A00985 | A01075 | 579 | A00985 | A01095 | 196 |
| A00985 | A01100 | 801 | A00985 | A01139 | 443 |
| A00985 | A01155 | 407 | A00985 | A01156 | 654 |
| A00985 | A01161 | 694 | A00985 | A01210 | 490 |
| A00985 | A01214 | 349 | A00985 | A01234 | 433 |
| A00985 | A01287 | 162 | A00985 | A01310 | 201 |
| A00985 | A01326 | 490 | A00985 | A01329 | 323 |
| A00985 | A01336 | 357 | A00985 | A01346 | 226 |
| A00985 | A01352 | 193 | A00985 | A01365 | 152 |
| A00985 | A01385 | 634 | A00985 | A01399 | 180 |
| A00985 | A01413 | 473 | A00985 | A01416 | 283 |
| A00985 | A01483 | 497 | A00985 | A01540 | 193 |
| A00985 | A01578 | 362 | A00985 | A01582 | 199 |
| A00985 | A01585 | 229 | A00985 | A01711 | 255 |
| A00985 | A01739 | 152 | A00985 | A01741 | 154 |
| A00985 | A01787 | 157 | A00985 | A01827 | 490 |
| A00985 | A02009 | 276 | A00985 | A02040 | 469 |
| A00985 | A02527 | 191 | A00985 | A02743 | 165 |
| A00985 | A02994 | 480 | A00985 | A03304 | 285 |
| A00985 | A03328 | 810 | A00985 | A03651 | 792 |
| A00985 | A03676 | 201 | A00985 | A03856 | 187 |
| A00985 | A04031 | 229 | A00985 | A04337 | 457 |
| A00985 | A04668 | 360 | A00985 | A04947 | 229 |
| A00985 | A05417 | 173 | A00985 | A05734 | 213 |
| A00985 | A05812 | 720 | A00985 | A06517 | 296 |

|        |        |     |        |        |     |
|--------|--------|-----|--------|--------|-----|
| A00985 | A06546 | 299 | A00985 | A06686 | 163 |
| A00985 | A07237 | 310 | A00985 | A07248 | 182 |
| A00985 | A07361 | 184 | A00985 | A07670 | 216 |
| A00985 | A07792 | 200 | A00985 | A08011 | 249 |
| A00985 | A08144 | 477 | A00985 | A08524 | 621 |
| A00985 | A08760 | 191 | A00985 | A08773 | 221 |
| A00985 | A09229 | 191 | A00985 | A09351 | 183 |
| A00985 | A09692 | 256 | A00985 | A09709 | 335 |
| A00985 | A09735 | 172 | A00985 | A10598 | 491 |
| A00985 | A10829 | 306 | A00985 | A11313 | 707 |
| A00985 | A11486 | 165 | A00985 | A11565 | 396 |
| A00985 | A11815 | 377 | A00985 | A11830 | 223 |
| A00985 | A13885 | 199 | A00985 | A14272 | 466 |
| A00985 | A14410 | 255 | A00985 | A14449 | 667 |
| A00985 | A14838 | 251 | A00985 | A14936 | 497 |
| A00985 | A15422 | 259 | A00985 | A15624 | 462 |
| A00985 | A15651 | 497 | A00985 | A15652 | 497 |
| A00985 | A15661 | 497 | A00985 | A15662 | 497 |
| A00985 | A15684 | 190 | A00985 | A15824 | 168 |
| A00985 | A15932 | 690 | A00985 | A15933 | 486 |
| A00985 | A16690 | 497 | A00986 | A01012 | 398 |
| A00986 | A01027 | 477 | A00986 | A01111 | 223 |
| A00986 | A01118 | 495 | A00986 | A01144 | 378 |
| A00986 | A01150 | 266 | A00986 | A01161 | 261 |
| A00986 | A01202 | 305 | A00986 | A01208 | 578 |
| A00986 | A01215 | 577 | A00986 | A01228 | 338 |
| A00986 | A01232 | 480 | A00986 | A01291 | 313 |
| A00986 | A01293 | 483 | A00986 | A01353 | 578 |
| A00986 | A01492 | 491 | A00986 | A01601 | 190 |
| A00986 | A01736 | 223 | A00986 | A02041 | 223 |
| A00986 | A02051 | 223 | A00986 | A02270 | 210 |
| A00986 | A02454 | 306 | A00986 | A03169 | 577 |
| A00986 | A03454 | 152 | A00986 | A03792 | 228 |
| A00986 | A03972 | 263 | A00986 | A04447 | 223 |
| A00986 | A04468 | 213 | A00986 | A04704 | 241 |
| A00986 | A05356 | 314 | A00986 | A06600 | 385 |
| A00986 | A06851 | 174 | A00986 | A07265 | 577 |
| A00986 | A07588 | 578 | A00986 | A07744 | 484 |
| A00986 | A07881 | 173 | A00986 | A08106 | 167 |
| A00986 | A08228 | 302 | A00986 | A08955 | 223 |
| A00986 | A08971 | 223 | A00986 | A09328 | 218 |
| A00986 | A09910 | 286 | A00986 | A10532 | 455 |
| A00986 | A10755 | 528 | A00986 | A11202 | 223 |
| A00986 | A11608 | 180 | A00986 | A13126 | 474 |
| A00986 | A13298 | 578 | A00986 | A13730 | 263 |
| A00986 | A13989 | 195 | A00986 | A14216 | 494 |

|        |        |     |        |        |     |
|--------|--------|-----|--------|--------|-----|
| A00986 | A14449 | 408 | A00986 | A14699 | 468 |
| A00986 | A14778 | 446 | A00986 | A14805 | 330 |
| A00986 | A15322 | 322 | A00986 | A15422 | 534 |
| A00986 | A15684 | 180 | A00986 | A15937 | 302 |
| A00986 | A17207 | 230 | A00987 | A00998 | 152 |
| A00987 | A01001 | 308 | A00987 | A01013 | 467 |
| A00987 | A01086 | 656 | A00987 | A01102 | 300 |
| A00987 | A01108 | 414 | A00987 | A01150 | 491 |
| A00987 | A01161 | 491 | A00987 | A01210 | 314 |
| A00987 | A01217 | 205 | A00987 | A01220 | 475 |
| A00987 | A01221 | 160 | A00987 | A01245 | 232 |
| A00987 | A01287 | 477 | A00987 | A01311 | 152 |
| A00987 | A01365 | 294 | A00987 | A01379 | 299 |
| A00987 | A01380 | 288 | A00987 | A01387 | 311 |
| A00987 | A01399 | 333 | A00987 | A01407 | 168 |
| A00987 | A01412 | 234 | A00987 | A01413 | 260 |
| A00987 | A01439 | 299 | A00987 | A01446 | 215 |
| A00987 | A01448 | 424 | A00987 | A01464 | 191 |
| A00987 | A01468 | 414 | A00987 | A01496 | 457 |
| A00987 | A01502 | 221 | A00987 | A01540 | 473 |
| A00987 | A01577 | 152 | A00987 | A01582 | 184 |
| A00987 | A01627 | 423 | A00987 | A01644 | 383 |
| A00987 | A01711 | 490 | A00987 | A01815 | 238 |
| A00987 | A01819 | 151 | A00987 | A01825 | 226 |
| A00987 | A01832 | 401 | A00987 | A01833 | 238 |
| A00987 | A01851 | 324 | A00987 | A01854 | 399 |
| A00987 | A01922 | 475 | A00987 | A02227 | 246 |
| A00987 | A02277 | 221 | A00987 | A02601 | 299 |
| A00987 | A02994 | 263 | A00987 | A03007 | 246 |
| A00987 | A03453 | 490 | A00987 | A03527 | 173 |
| A00987 | A03676 | 393 | A00987 | A03697 | 152 |
| A00987 | A03798 | 265 | A00987 | A03856 | 246 |
| A00987 | A03981 | 160 | A00987 | A04056 | 196 |
| A00987 | A04495 | 299 | A00987 | A04642 | 469 |
| A00987 | A04782 | 419 | A00987 | A05028 | 427 |
| A00987 | A05086 | 266 | A00987 | A05239 | 249 |
| A00987 | A05733 | 283 | A00987 | A06173 | 439 |
| A00987 | A06179 | 443 | A00987 | A06287 | 152 |
| A00987 | A06367 | 249 | A00987 | A06746 | 430 |
| A00987 | A07046 | 182 | A00987 | A07160 | 294 |
| A00987 | A07744 | 152 | A00987 | A07773 | 414 |
| A00987 | A07851 | 162 | A00987 | A07895 | 229 |
| A00987 | A08061 | 152 | A00987 | A08098 | 152 |
| A00987 | A08178 | 152 | A00987 | A08205 | 232 |
| A00987 | A08452 | 152 | A00987 | A08763 | 152 |
| A00987 | A08947 | 299 | A00987 | A08967 | 249 |

|        |        |     |        |        |     |
|--------|--------|-----|--------|--------|-----|
| A00987 | A08968 | 263 | A00987 | A09004 | 299 |
| A00987 | A09285 | 201 | A00987 | A09321 | 221 |
| A00987 | A09396 | 151 | A00987 | A09595 | 201 |
| A00987 | A09634 | 229 | A00987 | A09679 | 249 |
| A00987 | A10199 | 170 | A00987 | A10842 | 152 |
| A00987 | A11202 | 157 | A00987 | A11427 | 389 |
| A00987 | A11811 | 191 | A00987 | A11860 | 472 |
| A00987 | A12647 | 238 | A00987 | A13069 | 165 |
| A00987 | A13497 | 283 | A00987 | A14073 | 291 |
| A00987 | A14200 | 439 | A00987 | A14478 | 207 |
| A00987 | A14525 | 152 | A00987 | A14749 | 229 |
| A00987 | A14977 | 221 | A00987 | A15375 | 152 |
| A00987 | A15379 | 330 | A00987 | A15546 | 152 |
| A00987 | A15624 | 445 | A00987 | A15668 | 154 |
| A00987 | A15684 | 435 | A00987 | A15891 | 273 |
| A00987 | A15917 | 228 | A00988 | A01215 | 183 |
| A00988 | A03169 | 318 | A00988 | A03954 | 371 |
| A00988 | A05690 | 241 | A00988 | A09674 | 388 |
| A00988 | A11438 | 337 | A00988 | A14216 | 218 |
| A00988 | A15218 | 390 | A00988 | A15988 | 293 |
| A00989 | A00993 | 418 | A00989 | A01009 | 63  |
| A00989 | A01021 | 491 | A00989 | A01091 | 299 |
| A00989 | A01124 | 491 | A00989 | A01254 | 299 |
| A00989 | A01277 | 76  | A00989 | A01278 | 137 |
| A00989 | A01327 | 491 | A00989 | A01358 | 210 |
| A00989 | A01458 | 412 | A00989 | A01459 | 490 |
| A00989 | A01472 | 202 | A00989 | A01485 | 255 |
| A00989 | A01514 | 490 | A00989 | A01534 | 172 |
| A00989 | A01847 | 347 | A00989 | A01941 | 477 |
| A00989 | A01948 | 227 | A00989 | A01985 | 104 |
| A00989 | A01988 | 395 | A00989 | A02091 | 227 |
| A00989 | A02126 | 440 | A00989 | A02143 | 76  |
| A00989 | A02304 | 277 | A00989 | A02424 | 130 |
| A00989 | A02436 | 484 | A00989 | A02560 | 218 |
| A00989 | A02773 | 196 | A00989 | A02802 | 314 |
| A00989 | A03019 | 252 | A00989 | A03115 | 269 |
| A00989 | A03458 | 123 | A00989 | A03498 | 236 |
| A00989 | A03597 | 335 | A00989 | A03599 | 196 |
| A00989 | A03972 | 227 | A00989 | A04062 | 483 |
| A00989 | A04098 | 303 | A00989 | A04224 | 254 |
| A00989 | A04853 | 204 | A00989 | A05183 | 176 |
| A00989 | A05569 | 154 | A00989 | A05898 | 218 |
| A00989 | A06347 | 462 | A00989 | A06408 | 152 |
| A00989 | A06588 | 457 | A00989 | A06924 | 377 |
| A00989 | A07136 | 180 | A00989 | A07159 | 224 |
| A00989 | A07207 | 345 | A00989 | A08479 | 190 |

|        |        |     |        |        |     |
|--------|--------|-----|--------|--------|-----|
| A00989 | A08517 | 246 | A00989 | A08957 | 193 |
| A00989 | A09078 | 63  | A00989 | A09470 | 176 |
| A00989 | A09644 | 156 | A00989 | A10237 | 196 |
| A00989 | A12047 | 490 | A00989 | A12864 | 152 |
| A00989 | A12968 | 418 | A00989 | A14196 | 388 |
| A00989 | A14209 | 414 | A00989 | A14484 | 491 |
| A00989 | A14633 | 317 | A00989 | A15297 | 362 |
| A00989 | A15323 | 486 | A00989 | A15324 | 180 |
| A00989 | A15339 | 347 | A00989 | A15370 | 491 |
| A00989 | A15380 | 227 | A00989 | A16311 | 177 |
| A00990 | A00994 | 162 | A00990 | A01047 | 213 |
| A00990 | A01066 | 200 | A00990 | A01081 | 205 |
| A00990 | A01086 | 177 | A00990 | A01112 | 95  |
| A00990 | A01127 | 369 | A00990 | A01129 | 245 |
| A00990 | A01150 | 324 | A00990 | A01168 | 165 |
| A00990 | A01211 | 279 | A00990 | A01240 | 670 |
| A00990 | A01249 | 515 | A00990 | A01264 | 200 |
| A00990 | A01291 | 565 | A00990 | A01338 | 200 |
| A00990 | A01425 | 257 | A00990 | A01429 | 200 |
| A00990 | A01464 | 670 | A00990 | A01496 | 489 |
| A00990 | A01497 | 191 | A00990 | A01531 | 279 |
| A00990 | A01540 | 230 | A00990 | A01569 | 174 |
| A00990 | A01579 | 434 | A00990 | A01614 | 63  |
| A00990 | A01618 | 669 | A00990 | A01620 | 234 |
| A00990 | A01822 | 662 | A00990 | A01999 | 193 |
| A00990 | A02179 | 228 | A00990 | A02978 | 218 |
| A00990 | A03030 | 254 | A00990 | A03048 | 288 |
| A00990 | A03083 | 490 | A00990 | A03438 | 247 |
| A00990 | A03456 | 201 | A00990 | A03461 | 151 |
| A00990 | A03567 | 470 | A00990 | A03609 | 274 |
| A00990 | A03671 | 278 | A00990 | A03705 | 462 |
| A00990 | A03746 | 180 | A00990 | A03754 | 651 |
| A00990 | A03856 | 174 | A00990 | A03862 | 327 |
| A00990 | A03888 | 670 | A00990 | A03981 | 477 |
| A00990 | A04116 | 254 | A00990 | A05019 | 196 |
| A00990 | A05375 | 276 | A00990 | A05449 | 607 |
| A00990 | A05545 | 227 | A00990 | A05562 | 201 |
| A00990 | A06279 | 174 | A00990 | A06411 | 167 |
| A00990 | A06861 | 176 | A00990 | A06965 | 341 |
| A00990 | A06973 | 548 | A00990 | A07104 | 254 |
| A00990 | A07105 | 378 | A00990 | A07201 | 491 |
| A00990 | A07243 | 582 | A00990 | A07251 | 236 |
| A00990 | A07449 | 176 | A00990 | A08398 | 200 |
| A00990 | A08452 | 200 | A00990 | A08521 | 200 |
| A00990 | A08558 | 200 | A00990 | A08662 | 205 |
| A00990 | A08664 | 609 | A00990 | A08682 | 391 |

|        |        |     |        |        |     |
|--------|--------|-----|--------|--------|-----|
| A00990 | A08748 | 177 | A00990 | A08752 | 245 |
| A00990 | A08991 | 200 | A00990 | A09044 | 200 |
| A00990 | A09221 | 154 | A00990 | A09248 | 303 |
| A00990 | A09702 | 200 | A00990 | A09893 | 396 |
| A00990 | A10080 | 296 | A00990 | A10417 | 670 |
| A00990 | A10569 | 286 | A00990 | A11331 | 347 |
| A00990 | A11438 | 233 | A00990 | A11729 | 200 |
| A00990 | A11822 | 286 | A00990 | A12105 | 400 |
| A00990 | A13333 | 200 | A00990 | A13540 | 408 |
| A00990 | A13581 | 188 | A00990 | A13626 | 172 |
| A00990 | A13989 | 221 | A00990 | A13992 | 223 |
| A00990 | A14073 | 441 | A00990 | A14114 | 271 |
| A00990 | A14216 | 475 | A00990 | A14362 | 274 |
| A00990 | A14479 | 188 | A00990 | A14983 | 348 |
| A00990 | A15659 | 408 | A00990 | A15684 | 384 |
| A00990 | A15743 | 172 | A00990 | A15746 | 224 |
| A00990 | A15920 | 190 | A00990 | A15936 | 353 |
| A00990 | A15937 | 191 | A00990 | A15951 | 210 |
| A00990 | A16118 | 439 | A00990 | A17193 | 417 |
| A00990 | A17208 | 193 | A00991 | A01017 | 171 |
| A00991 | A01086 | 190 | A00991 | A01152 | 308 |
| A00991 | A01153 | 198 | A00991 | A01154 | 85  |
| A00991 | A01217 | 104 | A00991 | A01220 | 307 |
| A00991 | A01247 | 151 | A00991 | A01263 | 262 |
| A00991 | A01306 | 313 | A00991 | A01352 | 185 |
| A00991 | A01365 | 491 | A00991 | A01406 | 63  |
| A00991 | A01407 | 188 | A00991 | A01408 | 299 |
| A00991 | A01412 | 163 | A00991 | A01449 | 307 |
| A00991 | A02227 | 488 | A00991 | A02390 | 294 |
| A00991 | A02830 | 216 | A00991 | A02877 | 301 |
| A00991 | A03095 | 488 | A00991 | A04688 | 218 |
| A00991 | A04782 | 215 | A00991 | A05450 | 224 |
| A00991 | A05501 | 252 | A00991 | A06369 | 179 |
| A00991 | A06564 | 308 | A00991 | A07248 | 491 |
| A00991 | A07349 | 174 | A00991 | A07473 | 490 |
| A00991 | A08154 | 467 | A00991 | A08301 | 191 |
| A00991 | A08419 | 382 | A00991 | A08556 | 307 |
| A00991 | A08559 | 162 | A00991 | A09520 | 210 |
| A00991 | A09595 | 314 | A00991 | A09852 | 329 |
| A00991 | A14478 | 347 | A00991 | A14566 | 174 |
| A00991 | A14568 | 463 | A00991 | A15500 | 313 |
| A00991 | A15771 | 157 | A00991 | A15932 | 157 |
| A00992 | A01020 | 463 | A00992 | A01028 | 170 |
| A00992 | A01075 | 425 | A00992 | A01092 | 117 |
| A00992 | A01098 | 63  | A00992 | A01112 | 63  |
| A00992 | A01116 | 247 | A00992 | A01120 | 170 |

|        |        |     |        |        |     |
|--------|--------|-----|--------|--------|-----|
| A00992 | A01129 | 210 | A00992 | A01136 | 398 |
| A00992 | A01160 | 170 | A00992 | A01166 | 351 |
| A00992 | A01168 | 173 | A00992 | A01184 | 417 |
| A00992 | A01193 | 684 | A00992 | A01201 | 443 |
| A00992 | A01234 | 491 | A00992 | A01255 | 167 |
| A00992 | A01257 | 398 | A00992 | A01279 | 652 |
| A00992 | A01351 | 695 | A00992 | A01356 | 222 |
| A00992 | A01424 | 336 | A00992 | A01425 | 364 |
| A00992 | A01468 | 294 | A00992 | A01470 | 408 |
| A00992 | A01488 | 210 | A00992 | A01492 | 551 |
| A00992 | A01538 | 170 | A00992 | A01598 | 540 |
| A00992 | A01614 | 170 | A00992 | A02164 | 63  |
| A00992 | A02165 | 84  | A00992 | A02265 | 184 |
| A00992 | A02535 | 486 | A00992 | A03438 | 537 |
| A00992 | A03494 | 486 | A00992 | A03652 | 185 |
| A00992 | A03981 | 170 | A00992 | A04875 | 228 |
| A00992 | A06340 | 243 | A00992 | A06356 | 170 |
| A00992 | A06698 | 542 | A00992 | A06807 | 235 |
| A00992 | A06827 | 396 | A00992 | A06901 | 297 |
| A00992 | A07244 | 740 | A00992 | A07432 | 583 |
| A00992 | A07524 | 546 | A00992 | A07537 | 430 |
| A00992 | A07625 | 407 | A00992 | A07700 | 380 |
| A00992 | A07924 | 493 | A00992 | A08072 | 340 |
| A00992 | A08078 | 180 | A00992 | A08211 | 170 |
| A00992 | A08890 | 162 | A00992 | A09324 | 200 |
| A00992 | A09565 | 193 | A00992 | A09589 | 193 |
| A00992 | A09618 | 340 | A00992 | A09697 | 170 |
| A00992 | A10218 | 180 | A00992 | A10317 | 179 |
| A00992 | A10465 | 324 | A00992 | A11271 | 168 |
| A00992 | A11544 | 174 | A00992 | A11618 | 340 |
| A00992 | A11808 | 200 | A00992 | A11831 | 271 |
| A00992 | A11832 | 174 | A00992 | A12998 | 297 |
| A00992 | A13052 | 170 | A00992 | A13989 | 537 |
| A00992 | A14614 | 201 | A00992 | A14959 | 340 |
| A00992 | A15012 | 286 | A00993 | A01071 | 156 |
| A00993 | A01079 | 177 | A00993 | A01114 | 215 |
| A00993 | A01137 | 191 | A00993 | A01159 | 218 |
| A00993 | A01223 | 210 | A00993 | A01230 | 332 |
| A00993 | A01360 | 184 | A00993 | A01606 | 497 |
| A00993 | A01640 | 193 | A00993 | A01643 | 157 |
| A00993 | A01668 | 486 | A00993 | A01726 | 254 |
| A00993 | A01733 | 343 | A00993 | A01741 | 491 |
| A00993 | A01786 | 291 | A00993 | A01797 | 91  |
| A00993 | A01847 | 334 | A00993 | A01849 | 165 |
| A00993 | A01898 | 255 | A00993 | A01900 | 491 |
| A00993 | A01908 | 63  | A00993 | A01913 | 480 |



|        |        |     |        |        |     |
|--------|--------|-----|--------|--------|-----|
| A00993 | A01926 | 329 | A00993 | A01936 | 154 |
| A00993 | A01941 | 491 | A00993 | A01942 | 313 |
| A00993 | A01957 | 174 | A00993 | A02011 | 168 |
| A00993 | A02086 | 472 | A00993 | A02272 | 176 |
| A00993 | A02332 | 353 | A00993 | A02345 | 462 |
| A00993 | A02371 | 486 | A00993 | A02376 | 435 |
| A00993 | A02377 | 491 | A00993 | A02481 | 232 |
| A00993 | A02491 | 489 | A00993 | A02492 | 491 |
| A00993 | A02506 | 486 | A00993 | A02521 | 422 |
| A00993 | A02571 | 167 | A00993 | A02630 | 143 |
| A00993 | A02635 | 265 | A00993 | A02689 | 341 |
| A00993 | A02695 | 219 | A00993 | A02697 | 182 |
| A00993 | A02698 | 63  | A00993 | A02704 | 196 |
| A00993 | A02706 | 174 | A00993 | A02737 | 229 |
| A00993 | A02739 | 278 | A00993 | A02753 | 208 |
| A00993 | A02778 | 278 | A00993 | A02781 | 474 |
| A00993 | A02798 | 484 | A00993 | A02799 | 201 |
| A00993 | A02837 | 279 | A00993 | A02842 | 157 |
| A00993 | A02846 | 419 | A00993 | A02942 | 191 |
| A00993 | A02961 | 429 | A00993 | A03013 | 293 |
| A00993 | A03019 | 462 | A00993 | A03228 | 243 |
| A00993 | A03240 | 246 | A00993 | A03243 | 489 |
| A00993 | A03256 | 480 | A00993 | A03265 | 418 |
| A00993 | A03438 | 338 | A00993 | A03502 | 218 |
| A00993 | A03513 | 152 | A00993 | A03611 | 324 |
| A00993 | A03803 | 229 | A00993 | A03862 | 435 |
| A00993 | A03921 | 165 | A00993 | A03927 | 176 |
| A00993 | A04010 | 286 | A00993 | A04088 | 172 |
| A00993 | A04111 | 246 | A00993 | A04213 | 329 |
| A00993 | A04446 | 366 | A00993 | A04510 | 172 |
| A00993 | A04553 | 212 | A00993 | A04793 | 394 |
| A00993 | A04813 | 165 | A00993 | A04853 | 362 |
| A00993 | A04861 | 369 | A00993 | A04883 | 386 |
| A00993 | A04888 | 165 | A00993 | A04902 | 491 |
| A00993 | A04938 | 314 | A00993 | A05050 | 212 |
| A00993 | A05051 | 167 | A00993 | A05055 | 235 |
| A00993 | A05138 | 160 | A00993 | A05278 | 472 |
| A00993 | A05407 | 218 | A00993 | A05478 | 313 |
| A00993 | A05543 | 296 | A00993 | A05568 | 489 |
| A00993 | A05569 | 338 | A00993 | A05584 | 257 |
| A00993 | A05588 | 285 | A00993 | A05589 | 357 |
| A00993 | A05597 | 151 | A00993 | A05630 | 343 |
| A00993 | A05685 | 201 | A00993 | A05691 | 369 |
| A00993 | A05693 | 187 | A00993 | A05719 | 340 |
| A00993 | A05790 | 439 | A00993 | A05791 | 338 |
| A00993 | A05832 | 490 | A00993 | A05949 | 489 |

|        |        |     |        |        |     |
|--------|--------|-----|--------|--------|-----|
| A00993 | A06004 | 428 | A00993 | A06111 | 216 |
| A00993 | A06122 | 271 | A00993 | A06144 | 240 |
| A00993 | A06217 | 223 | A00993 | A06234 | 252 |
| A00993 | A06377 | 296 | A00993 | A06405 | 195 |
| A00993 | A06595 | 180 | A00993 | A06769 | 276 |
| A00993 | A06825 | 160 | A00993 | A07079 | 152 |
| A00993 | A07312 | 308 | A00993 | A07321 | 170 |
| A00993 | A07347 | 266 | A00993 | A07503 | 205 |
| A00993 | A07926 | 274 | A00993 | A08238 | 183 |
| A00993 | A08250 | 204 | A00993 | A08583 | 470 |
| A00993 | A09126 | 263 | A00993 | A09145 | 152 |
| A00993 | A09429 | 187 | A00993 | A09535 | 416 |
| A00993 | A09598 | 305 | A00993 | A09741 | 228 |
| A00993 | A09851 | 156 | A00993 | A09883 | 274 |
| A00993 | A10247 | 170 | A00993 | A10418 | 152 |
| A00993 | A10437 | 223 | A00993 | A10552 | 240 |
| A00993 | A10592 | 180 | A00993 | A10625 | 480 |
| A00993 | A10672 | 199 | A00993 | A13392 | 208 |
| A00994 | A01027 | 414 | A00994 | A01071 | 469 |
| A00994 | A01108 | 463 | A00994 | A01110 | 334 |
| A00994 | A01150 | 446 | A00994 | A01161 | 473 |
| A00994 | A01237 | 156 | A00994 | A01240 | 152 |
| A00994 | A01287 | 362 | A00994 | A01365 | 195 |
| A00994 | A01412 | 424 | A00994 | A01439 | 224 |
| A00994 | A01446 | 170 | A00994 | A01448 | 236 |
| A00994 | A01496 | 462 | A00994 | A01500 | 314 |
| A00994 | A01537 | 490 | A00994 | A01613 | 412 |
| A00994 | A01647 | 314 | A00994 | A01711 | 480 |
| A00994 | A01822 | 486 | A00994 | A01831 | 334 |
| A00994 | A02038 | 303 | A00994 | A02064 | 329 |
| A00994 | A02602 | 334 | A00994 | A02661 | 185 |
| A00994 | A02814 | 193 | A00994 | A03140 | 208 |
| A00994 | A03291 | 361 | A00994 | A03438 | 202 |
| A00994 | A03454 | 544 | A00994 | A03570 | 216 |
| A00994 | A03619 | 362 | A00994 | A03668 | 435 |
| A00994 | A03673 | 263 | A00994 | A03674 | 488 |
| A00994 | A03676 | 581 | A00994 | A03677 | 541 |
| A00994 | A03855 | 581 | A00994 | A03981 | 490 |
| A00994 | A04898 | 463 | A00994 | A04931 | 475 |
| A00994 | A04932 | 468 | A00994 | A05017 | 334 |
| A00994 | A05255 | 491 | A00994 | A05449 | 486 |
| A00994 | A05905 | 491 | A00994 | A05982 | 420 |
| A00994 | A06049 | 241 | A00994 | A06382 | 391 |
| A00994 | A06411 | 491 | A00994 | A06425 | 334 |
| A00994 | A06466 | 396 | A00994 | A06589 | 151 |
| A00994 | A06827 | 334 | A00994 | A06938 | 483 |

|        |        |     |        |        |     |
|--------|--------|-----|--------|--------|-----|
| A00994 | A07046 | 512 | A00994 | A07076 | 489 |
| A00994 | A07163 | 151 | A00994 | A07242 | 246 |
| A00994 | A07360 | 581 | A00994 | A07397 | 167 |
| A00994 | A07483 | 378 | A00994 | A07531 | 334 |
| A00994 | A07822 | 270 | A00994 | A07881 | 576 |
| A00994 | A08201 | 334 | A00994 | A08228 | 515 |
| A00994 | A08548 | 156 | A00994 | A08567 | 391 |
| A00994 | A08674 | 612 | A00994 | A08743 | 379 |
| A00994 | A08773 | 363 | A00994 | A08812 | 463 |
| A00994 | A08813 | 389 | A00994 | A09059 | 345 |
| A00994 | A09376 | 171 | A00994 | A09592 | 160 |
| A00994 | A10034 | 193 | A00994 | A10532 | 484 |
| A00994 | A11290 | 156 | A00994 | A11331 | 236 |
| A00994 | A11472 | 485 | A00994 | A11647 | 191 |
| A00994 | A11918 | 158 | A00994 | A11981 | 274 |
| A00994 | A12031 | 185 | A00994 | A12227 | 193 |
| A00994 | A12329 | 710 | A00994 | A12507 | 185 |
| A00994 | A13626 | 252 | A00994 | A13691 | 339 |
| A00994 | A13963 | 479 | A00994 | A14216 | 584 |
| A00994 | A14272 | 152 | A00994 | A14445 | 491 |
| A00994 | A14482 | 228 | A00994 | A14655 | 378 |
| A00994 | A15112 | 245 | A00994 | A15382 | 485 |
| A00994 | A15624 | 638 | A00994 | A15649 | 540 |
| A00994 | A15651 | 637 | A00994 | A15652 | 581 |
| A00994 | A15659 | 491 | A00994 | A15660 | 682 |
| A00994 | A15661 | 581 | A00994 | A15662 | 578 |
| A00994 | A15684 | 668 | A00994 | A15708 | 317 |
| A00994 | A15720 | 156 | A00994 | A15721 | 156 |
| A00994 | A15746 | 578 | A00994 | A15750 | 496 |
| A00994 | A15843 | 533 | A00994 | A15917 | 610 |
| A00994 | A15918 | 581 | A00994 | A15919 | 302 |
| A00994 | A15920 | 465 | A00994 | A15923 | 437 |
| A00994 | A15928 | 195 | A00994 | A15931 | 491 |
| A00994 | A15932 | 631 | A00994 | A15933 | 486 |
| A00994 | A15937 | 633 | A00994 | A15949 | 390 |
| A00994 | A15951 | 293 | A00994 | A16088 | 876 |
| A00994 | A16095 | 491 | A00994 | A16096 | 450 |
| A00994 | A16145 | 156 | A00994 | A16149 | 441 |
| A00994 | A16191 | 174 | A00994 | A16218 | 612 |
| A00994 | A16307 | 156 | A00994 | A16976 | 174 |
| A00995 | A01008 | 481 | A00995 | A01063 | 281 |
| A00995 | A01068 | 185 | A00995 | A01109 | 469 |
| A00995 | A01172 | 210 | A00995 | A01174 | 337 |
| A00995 | A01256 | 461 | A00995 | A01272 | 379 |
| A00995 | A01360 | 372 | A00995 | A01481 | 257 |
| A00995 | A01508 | 461 | A00995 | A01635 | 411 |

|        |        |     |        |        |     |
|--------|--------|-----|--------|--------|-----|
| A00995 | A01741 | 319 | A00995 | A01743 | 157 |
| A00995 | A01747 | 352 | A00995 | A01841 | 372 |
| A00995 | A02256 | 171 | A00995 | A02992 | 216 |
| A00995 | A03003 | 276 | A00995 | A03004 | 193 |
| A00995 | A03016 | 172 | A00995 | A03167 | 188 |
| A00995 | A03168 | 279 | A00995 | A03259 | 462 |
| A00995 | A03311 | 252 | A00995 | A03322 | 168 |
| A00995 | A03443 | 405 | A00995 | A03477 | 475 |
| A00995 | A03508 | 279 | A00995 | A03513 | 193 |
| A00995 | A03543 | 269 | A00995 | A03586 | 407 |
| A00995 | A04660 | 328 | A00995 | A04778 | 328 |
| A00995 | A04839 | 179 | A00995 | A04849 | 196 |
| A00995 | A04937 | 221 | A00995 | A04995 | 163 |
| A00995 | A05006 | 281 | A00995 | A05007 | 408 |
| A00995 | A05020 | 159 | A00995 | A05098 | 159 |
| A00995 | A05102 | 491 | A00995 | A05138 | 191 |
| A00995 | A05289 | 167 | A00995 | A05310 | 358 |
| A00995 | A05416 | 467 | A00995 | A05451 | 252 |
| A00995 | A05472 | 409 | A00995 | A05759 | 176 |
| A00995 | A05768 | 319 | A00995 | A05883 | 200 |
| A00995 | A05961 | 219 | A00995 | A06358 | 407 |
| A00995 | A06359 | 330 | A00995 | A06633 | 319 |
| A00995 | A06668 | 256 | A00995 | A06689 | 232 |
| A00995 | A06756 | 276 | A00995 | A06934 | 227 |
| A00995 | A06979 | 180 | A00995 | A07109 | 454 |
| A00995 | A07122 | 313 | A00995 | A07238 | 424 |
| A00995 | A07267 | 452 | A00995 | A07288 | 256 |
| A00995 | A07304 | 369 | A00995 | A07413 | 434 |
| A00995 | A07445 | 321 | A00995 | A07459 | 285 |
| A00995 | A07477 | 347 | A00995 | A07501 | 162 |
| A00995 | A07530 | 409 | A00995 | A07554 | 241 |
| A00995 | A07558 | 454 | A00995 | A07627 | 291 |
| A00995 | A07688 | 484 | A00995 | A07736 | 202 |
| A00995 | A07763 | 174 | A00995 | A07800 | 475 |
| A00995 | A07849 | 321 | A00995 | A07856 | 263 |
| A00995 | A07933 | 229 | A00995 | A08099 | 185 |
| A00995 | A08108 | 171 | A00995 | A08238 | 213 |
| A00995 | A08368 | 308 | A00995 | A08687 | 236 |
| A00995 | A08751 | 368 | A00995 | A10444 | 173 |
| A00995 | A10456 | 469 | A00995 | A10550 | 234 |
| A00995 | A10681 | 338 | A00995 | A10880 | 335 |
| A00995 | A10885 | 198 | A00995 | A12730 | 196 |
| A00995 | A13257 | 152 | A00995 | A13855 | 332 |
| A00995 | A14337 | 436 | A00995 | A14637 | 279 |
| A00995 | A14640 | 373 | A00995 | A14821 | 245 |
| A00995 | A14827 | 283 | A00995 | A14862 | 245 |

|        |        |     |        |        |     |
|--------|--------|-----|--------|--------|-----|
| A00995 | A15282 | 204 | A00995 | A15637 | 159 |
| A00995 | A15874 | 469 | A00995 | A15893 | 213 |
| A00995 | A15905 | 468 | A00995 | A16026 | 388 |
| A00995 | A16027 | 486 | A00995 | A16028 | 200 |
| A00995 | A16033 | 191 | A00995 | A16262 | 191 |
| A00995 | A16286 | 177 | A00995 | A16419 | 447 |
| A00995 | A16433 | 229 | A00995 | A16529 | 263 |
| A00995 | A16741 | 472 | A00995 | A16959 | 361 |
| A00996 | A01016 | 249 | A00996 | A01102 | 247 |
| A00996 | A01106 | 224 | A00996 | A01119 | 332 |
| A00996 | A01194 | 247 | A00996 | A01195 | 235 |
| A00996 | A01218 | 247 | A00996 | A01354 | 198 |
| A00996 | A01411 | 247 | A00996 | A01420 | 247 |
| A00996 | A01455 | 510 | A00996 | A01495 | 348 |
| A00996 | A01534 | 290 | A00996 | A01581 | 247 |
| A00996 | A01633 | 480 | A00996 | A01826 | 247 |
| A00996 | A02226 | 80  | A00996 | A03044 | 240 |
| A00996 | A03090 | 179 | A00996 | A03181 | 296 |
| A00996 | A03453 | 247 | A00996 | A03472 | 165 |
| A00996 | A03476 | 238 | A00996 | A03657 | 301 |
| A00996 | A04055 | 260 | A00996 | A04795 | 183 |
| A00996 | A09033 | 254 | A00996 | A09717 | 247 |
| A00996 | A10574 | 229 | A00996 | A14074 | 247 |
| A00996 | A15714 | 245 | A00997 | A01052 | 440 |
| A00997 | A01107 | 217 | A00997 | A01159 | 403 |
| A00997 | A01161 | 360 | A00997 | A01178 | 165 |
| A00997 | A01221 | 217 | A00997 | A01243 | 567 |
| A00997 | A01368 | 168 | A00997 | A01418 | 553 |
| A00997 | A01438 | 358 | A00997 | A01475 | 255 |
| A00997 | A01523 | 182 | A00997 | A01524 | 263 |
| A00997 | A01527 | 288 | A00997 | A01560 | 420 |
| A00997 | A01675 | 266 | A00997 | A01688 | 307 |
| A00997 | A01702 | 462 | A00997 | A01848 | 176 |
| A00997 | A02195 | 481 | A00997 | A02567 | 165 |
| A00997 | A02640 | 486 | A00997 | A02675 | 491 |
| A00997 | A03307 | 241 | A00997 | A03544 | 200 |
| A00997 | A03556 | 217 | A00997 | A03566 | 163 |
| A00997 | A03611 | 196 | A00997 | A03617 | 217 |
| A00997 | A03768 | 473 | A00997 | A03854 | 413 |
| A00997 | A03878 | 204 | A00997 | A03921 | 361 |
| A00997 | A03982 | 249 | A00997 | A04072 | 184 |
| A00997 | A04361 | 159 | A00997 | A04372 | 226 |
| A00997 | A05082 | 313 | A00997 | A05182 | 160 |
| A00997 | A05605 | 217 | A00997 | A05673 | 168 |
| A00997 | A05701 | 259 | A00997 | A05986 | 273 |
| A00997 | A06268 | 281 | A00997 | A06369 | 229 |

|        |        |     |        |        |     |
|--------|--------|-----|--------|--------|-----|
| A00997 | A06379 | 379 | A00997 | A06615 | 347 |
| A00997 | A06832 | 217 | A00997 | A07190 | 452 |
| A00997 | A07312 | 168 | A00997 | A07339 | 274 |
| A00997 | A07384 | 249 | A00997 | A07440 | 168 |
| A00997 | A07995 | 218 | A00997 | A08183 | 217 |
| A00997 | A08426 | 371 | A00997 | A08872 | 491 |
| A00997 | A09124 | 419 | A00997 | A09319 | 329 |
| A00997 | A09323 | 152 | A00997 | A09490 | 241 |
| A00997 | A09566 | 176 | A00997 | A09673 | 217 |
| A00997 | A10015 | 358 | A00997 | A10111 | 226 |
| A00997 | A11190 | 201 | A00997 | A11394 | 191 |
| A00997 | A11411 | 288 | A00997 | A11792 | 165 |
| A00997 | A13391 | 160 | A00997 | A13987 | 452 |
| A00997 | A14088 | 217 | A00997 | A15377 | 217 |
| A00997 | A15543 | 217 | A00997 | A15724 | 217 |
| A00997 | A16664 | 217 | A00997 | A16862 | 241 |
| A00998 | A01013 | 268 | A00998 | A01086 | 180 |
| A00998 | A01150 | 419 | A00998 | A01155 | 283 |
| A00998 | A01161 | 485 | A00998 | A01210 | 460 |
| A00998 | A01245 | 323 | A00998 | A01287 | 450 |
| A00998 | A01336 | 290 | A00998 | A01413 | 422 |
| A00998 | A01435 | 160 | A00998 | A01447 | 204 |
| A00998 | A01502 | 452 | A00998 | A01504 | 258 |
| A00998 | A01711 | 215 | A00998 | A01815 | 393 |
| A00998 | A01819 | 430 | A00998 | A01825 | 319 |
| A00998 | A01832 | 216 | A00998 | A01833 | 393 |
| A00998 | A02040 | 324 | A00998 | A02994 | 486 |
| A00998 | A03520 | 329 | A00998 | A03798 | 281 |
| A00998 | A03856 | 330 | A00998 | A03959 | 343 |
| A00998 | A04056 | 374 | A00998 | A05417 | 165 |
| A00998 | A09321 | 385 | A00998 | A09709 | 340 |
| A00998 | A14699 | 307 | A00998 | A14778 | 219 |
| A00998 | A15668 | 352 | A00999 | A01099 | 317 |
| A00999 | A01114 | 349 | A00999 | A01149 | 307 |
| A00999 | A01187 | 317 | A00999 | A01197 | 317 |
| A00999 | A01212 | 229 | A00999 | A01315 | 317 |
| A00999 | A01319 | 317 | A00999 | A01329 | 229 |
| A00999 | A01330 | 229 | A00999 | A01415 | 338 |
| A00999 | A01458 | 254 | A00999 | A01576 | 160 |
| A00999 | A01606 | 490 | A00999 | A01627 | 229 |
| A00999 | A01629 | 191 | A00999 | A01680 | 317 |
| A00999 | A01682 | 229 | A00999 | A01763 | 378 |
| A00999 | A01946 | 159 | A00999 | A01957 | 162 |
| A00999 | A02021 | 151 | A00999 | A02121 | 246 |
| A00999 | A02199 | 227 | A00999 | A02208 | 490 |
| A00999 | A02672 | 238 | A00999 | A02676 | 326 |

|        |        |     |        |        |     |
|--------|--------|-----|--------|--------|-----|
| A00999 | A02790 | 215 | A00999 | A02795 | 154 |
| A00999 | A02810 | 177 | A00999 | A02876 | 188 |
| A00999 | A02877 | 172 | A00999 | A02901 | 183 |
| A00999 | A02965 | 190 | A00999 | A03127 | 180 |
| A00999 | A03130 | 274 | A00999 | A03180 | 232 |
| A00999 | A03327 | 317 | A00999 | A03415 | 465 |
| A00999 | A03472 | 441 | A00999 | A03632 | 174 |
| A00999 | A03766 | 238 | A00999 | A03832 | 191 |
| A00999 | A04080 | 441 | A00999 | A04305 | 210 |
| A00999 | A04308 | 177 | A00999 | A04432 | 274 |
| A00999 | A04473 | 172 | A00999 | A04579 | 162 |
| A00999 | A05016 | 457 | A00999 | A05030 | 196 |
| A00999 | A05132 | 228 | A00999 | A05185 | 277 |
| A00999 | A05400 | 303 | A00999 | A05449 | 515 |
| A00999 | A05536 | 183 | A00999 | A05571 | 303 |
| A00999 | A05690 | 317 | A00999 | A06130 | 317 |
| A00999 | A06138 | 303 | A00999 | A06381 | 624 |
| A00999 | A06750 | 229 | A00999 | A07158 | 205 |
| A00999 | A07182 | 246 | A00999 | A07212 | 224 |
| A00999 | A07353 | 317 | A00999 | A07670 | 229 |
| A00999 | A08402 | 462 | A00999 | A08717 | 213 |
| A00999 | A08815 | 427 | A00999 | A08816 | 330 |
| A00999 | A08860 | 402 | A00999 | A09026 | 180 |
| A00999 | A09098 | 263 | A00999 | A09485 | 160 |
| A00999 | A09838 | 228 | A00999 | A10221 | 228 |
| A00999 | A10644 | 254 | A00999 | A11931 | 534 |
| A00999 | A13949 | 445 | A00999 | A14127 | 491 |
| A00999 | A14247 | 179 | A00999 | A14642 | 296 |
| A00999 | A14652 | 463 | A00999 | A15054 | 238 |
| A00999 | A15367 | 451 | A00999 | A15628 | 228 |
| A00999 | A15837 | 317 | A00999 | A16400 | 542 |
| A00999 | A16626 | 424 | A00999 | A16643 | 317 |
| A01000 | A01016 | 269 | A01000 | A01017 | 480 |
| A01000 | A01025 | 491 | A01000 | A01047 | 491 |
| A01000 | A01056 | 377 | A01000 | A01066 | 445 |
| A01000 | A01096 | 200 | A01000 | A01101 | 491 |
| A01000 | A01112 | 424 | A01000 | A01115 | 263 |
| A01000 | A01120 | 458 | A01000 | A01127 | 491 |
| A01000 | A01130 | 177 | A01000 | A01140 | 489 |
| A01000 | A01150 | 184 | A01000 | A01154 | 243 |
| A01000 | A01166 | 414 | A01000 | A01184 | 491 |
| A01000 | A01186 | 329 | A01000 | A01189 | 278 |
| A01000 | A01206 | 491 | A01000 | A01234 | 491 |
| A01000 | A01243 | 445 | A01000 | A01249 | 491 |
| A01000 | A01263 | 450 | A01000 | A01264 | 355 |
| A01000 | A01282 | 329 | A01000 | A01291 | 491 |

|        |        |     |        |        |     |
|--------|--------|-----|--------|--------|-----|
| A01000 | A01292 | 224 | A01000 | A01306 | 491 |
| A01000 | A01325 | 318 | A01000 | A01335 | 484 |
| A01000 | A01338 | 491 | A01000 | A01354 | 165 |
| A01000 | A01365 | 260 | A01000 | A01425 | 157 |
| A01000 | A01429 | 302 | A01000 | A01430 | 263 |
| A01000 | A01431 | 385 | A01000 | A01437 | 491 |
| A01000 | A01464 | 491 | A01000 | A01468 | 457 |
| A01000 | A01470 | 491 | A01000 | A01490 | 183 |
| A01000 | A01496 | 435 | A01000 | A01569 | 205 |
| A01000 | A01579 | 396 | A01000 | A01588 | 302 |
| A01000 | A01597 | 171 | A01000 | A01598 | 312 |
| A01000 | A01612 | 469 | A01000 | A01614 | 305 |
| A01000 | A01617 | 389 | A01000 | A01618 | 407 |
| A01000 | A01649 | 491 | A01000 | A01700 | 190 |
| A01000 | A01740 | 213 | A01000 | A01787 | 303 |
| A01000 | A01997 | 151 | A01000 | A02019 | 173 |
| A01000 | A02216 | 307 | A01000 | A02738 | 358 |
| A01000 | A02978 | 486 | A01000 | A02980 | 247 |
| A01000 | A03069 | 491 | A01000 | A03461 | 267 |
| A01000 | A03567 | 491 | A01000 | A03731 | 208 |
| A01000 | A03740 | 157 | A01000 | A03754 | 486 |
| A01000 | A03767 | 154 | A01000 | A03859 | 484 |
| A01000 | A03888 | 162 | A01000 | A04430 | 246 |
| A01000 | A05121 | 254 | A01000 | A05385 | 201 |
| A01000 | A05411 | 377 | A01000 | A05443 | 386 |
| A01000 | A05501 | 483 | A01000 | A06564 | 204 |
| A01000 | A06861 | 489 | A01000 | A06897 | 391 |
| A01000 | A06965 | 491 | A01000 | A06973 | 489 |
| A01000 | A07311 | 224 | A01000 | A07397 | 180 |
| A01000 | A07449 | 294 | A01000 | A07451 | 486 |
| A01000 | A08011 | 479 | A01000 | A08055 | 457 |
| A01000 | A08137 | 490 | A01000 | A08248 | 210 |
| A01000 | A08281 | 401 | A01000 | A08357 | 489 |
| A01000 | A08358 | 162 | A01000 | A08398 | 465 |
| A01000 | A08419 | 180 | A01000 | A08452 | 491 |
| A01000 | A08550 | 171 | A01000 | A08558 | 429 |
| A01000 | A08559 | 291 | A01000 | A08571 | 157 |
| A01000 | A08748 | 296 | A01000 | A08972 | 433 |
| A01000 | A09044 | 236 | A01000 | A09322 | 491 |
| A01000 | A09674 | 395 | A01000 | A09702 | 474 |
| A01000 | A10006 | 179 | A01000 | A10529 | 424 |
| A01000 | A10616 | 467 | A01000 | A11364 | 228 |
| A01000 | A11390 | 491 | A01000 | A11400 | 195 |
| A01000 | A11438 | 490 | A01000 | A11480 | 457 |
| A01000 | A11704 | 489 | A01000 | A11945 | 490 |
| A01000 | A12233 | 489 | A01000 | A12243 | 210 |



|        |        |     |        |        |     |
|--------|--------|-----|--------|--------|-----|
| A01000 | A12477 | 160 | A01000 | A13125 | 195 |
| A01000 | A13340 | 291 | A01000 | A13989 | 491 |
| A01000 | A13992 | 399 | A01000 | A14029 | 271 |
| A01000 | A14169 | 401 | A01000 | A14216 | 481 |
| A01000 | A14505 | 461 | A01000 | A14508 | 213 |
| A01000 | A15218 | 438 | A01000 | A15219 | 191 |
| A01000 | A15221 | 483 | A01000 | A15500 | 269 |
| A01000 | A15660 | 400 | A01000 | A15677 | 162 |
| A01000 | A15727 | 468 | A01000 | A15776 | 435 |
| A01000 | A15777 | 452 | A01000 | A15988 | 406 |
| A01000 | A16053 | 297 | A01000 | A16118 | 491 |
| A01000 | A16631 | 468 | A01000 | A17127 | 162 |
| A01000 | A17152 | 200 | A01001 | A01017 | 187 |
| A01001 | A01102 | 495 | A01001 | A01150 | 294 |
| A01001 | A01311 | 152 | A01001 | A01379 | 465 |
| A01001 | A01387 | 299 | A01001 | A01439 | 306 |
| A01001 | A01577 | 152 | A01001 | A01627 | 379 |
| A01001 | A02601 | 299 | A01001 | A03697 | 152 |
| A01001 | A03723 | 235 | A01001 | A03956 | 447 |
| A01001 | A04495 | 299 | A01001 | A04931 | 218 |
| A01001 | A05323 | 475 | A01001 | A05501 | 268 |
| A01001 | A06287 | 152 | A01001 | A06431 | 221 |
| A01001 | A07581 | 188 | A01001 | A07744 | 152 |
| A01001 | A08061 | 152 | A01001 | A08098 | 152 |
| A01001 | A08178 | 152 | A01001 | A08408 | 191 |
| A01001 | A08763 | 152 | A01001 | A08947 | 299 |
| A01001 | A09004 | 299 | A01001 | A09297 | 183 |
| A01001 | A09396 | 281 | A01001 | A10842 | 152 |
| A01001 | A14525 | 152 | A01001 | A15133 | 296 |
| A01001 | A15375 | 152 | A01001 | A15546 | 152 |
| A01001 | A15684 | 273 | A01001 | A16437 | 218 |
| A01001 | A16750 | 353 | A01002 | A01166 | 266 |
| A01002 | A01212 | 157 | A01002 | A01244 | 422 |
| A01002 | A01512 | 899 | A01002 | A01524 | 899 |
| A01002 | A01527 | 899 | A01002 | A01554 | 899 |
| A01002 | A01558 | 899 | A01002 | A01561 | 238 |
| A01002 | A01568 | 353 | A01002 | A01580 | 307 |
| A01002 | A01588 | 899 | A01002 | A01596 | 485 |
| A01002 | A01687 | 234 | A01002 | A01689 | 418 |
| A01002 | A02572 | 401 | A01002 | A03575 | 901 |
| A01002 | A05553 | 172 | A01002 | A05563 | 299 |
| A01002 | A06277 | 899 | A01002 | A06602 | 649 |
| A01002 | A06991 | 413 | A01002 | A07005 | 366 |
| A01002 | A07311 | 918 | A01002 | A07687 | 234 |
| A01002 | A08351 | 567 | A01002 | A08858 | 899 |
| A01002 | A09760 | 63  | A01002 | A09793 | 540 |

|        |        |     |        |        |     |
|--------|--------|-----|--------|--------|-----|
| A01002 | A10580 | 917 | A01002 | A11332 | 226 |
| A01002 | A11983 | 899 | A01002 | A12047 | 491 |
| A01002 | A12938 | 236 | A01002 | A13964 | 299 |
| A01003 | A01011 | 446 | A01003 | A01289 | 358 |
| A01003 | A01348 | 472 | A01003 | A01529 | 183 |
| A01003 | A01537 | 276 | A01003 | A01591 | 236 |
| A01003 | A01630 | 235 | A01003 | A01636 | 172 |
| A01003 | A01645 | 291 | A01003 | A01650 | 479 |
| A01003 | A01668 | 241 | A01003 | A01730 | 160 |
| A01003 | A01740 | 210 | A01003 | A01747 | 429 |
| A01003 | A01839 | 165 | A01003 | A01897 | 151 |
| A01003 | A02502 | 151 | A01003 | A02504 | 183 |
| A01003 | A02749 | 160 | A01003 | A02814 | 154 |
| A01003 | A02827 | 296 | A01003 | A02830 | 190 |
| A01003 | A02905 | 232 | A01003 | A02983 | 80  |
| A01003 | A03181 | 159 | A01003 | A03451 | 390 |
| A01003 | A03457 | 238 | A01003 | A03486 | 207 |
| A01003 | A03520 | 185 | A01003 | A04006 | 162 |
| A01003 | A04133 | 236 | A01003 | A04175 | 316 |
| A01003 | A04239 | 199 | A01003 | A04282 | 446 |
| A01003 | A04358 | 305 | A01003 | A04489 | 358 |
| A01003 | A04534 | 310 | A01003 | A04548 | 196 |
| A01003 | A04739 | 157 | A01003 | A04790 | 195 |
| A01003 | A04904 | 296 | A01003 | A05065 | 306 |
| A01003 | A05779 | 252 | A01003 | A06653 | 223 |
| A01003 | A06830 | 257 | A01003 | A06890 | 165 |
| A01003 | A07159 | 351 | A01003 | A07375 | 308 |
| A01003 | A08445 | 252 | A01003 | A09112 | 314 |
| A01003 | A09123 | 230 | A01003 | A09871 | 269 |
| A01003 | A09900 | 199 | A01003 | A09937 | 221 |
| A01003 | A11149 | 162 | A01003 | A11262 | 382 |
| A01003 | A11779 | 201 | A01003 | A12965 | 346 |
| A01003 | A13686 | 174 | A01003 | A14062 | 180 |
| A01003 | A14521 | 182 | A01003 | A15215 | 191 |
| A01003 | A15337 | 167 | A01003 | A15624 | 383 |
| A01003 | A15649 | 157 | A01003 | A15651 | 457 |
| A01003 | A15652 | 417 | A01003 | A15661 | 402 |
| A01003 | A15662 | 438 | A01003 | A15718 | 207 |
| A01003 | A15840 | 173 | A01003 | A16095 | 441 |
| A01003 | A16732 | 286 | A01003 | A16764 | 154 |
| A01003 | A16793 | 191 | A01004 | A01011 | 430 |
| A01004 | A01022 | 343 | A01004 | A01064 | 241 |
| A01004 | A01099 | 399 | A01004 | A01117 | 267 |
| A01004 | A01161 | 234 | A01004 | A01183 | 456 |
| A01004 | A01211 | 340 | A01004 | A01220 | 152 |
| A01004 | A01317 | 230 | A01004 | A01326 | 434 |

|        |        |     |        |        |     |
|--------|--------|-----|--------|--------|-----|
| A01004 | A01341 | 491 | A01004 | A01388 | 199 |
| A01004 | A01417 | 588 | A01004 | A01454 | 637 |
| A01004 | A01478 | 418 | A01004 | A01481 | 470 |
| A01004 | A01557 | 439 | A01004 | A01630 | 216 |
| A01004 | A01661 | 588 | A01004 | A01694 | 232 |
| A01004 | A01970 | 394 | A01004 | A01993 | 360 |
| A01004 | A01997 | 319 | A01004 | A02211 | 200 |
| A01004 | A02214 | 393 | A01004 | A02416 | 241 |
| A01004 | A02736 | 168 | A01004 | A02935 | 213 |
| A01004 | A03046 | 201 | A01004 | A03080 | 427 |
| A01004 | A03170 | 406 | A01004 | A03304 | 276 |
| A01004 | A03401 | 385 | A01004 | A03712 | 152 |
| A01004 | A03714 | 200 | A01004 | A03724 | 491 |
| A01004 | A03731 | 285 | A01004 | A03732 | 469 |
| A01004 | A03879 | 311 | A01004 | A03899 | 491 |
| A01004 | A03945 | 460 | A01004 | A04139 | 628 |
| A01004 | A04337 | 479 | A01004 | A04622 | 177 |
| A01004 | A04736 | 188 | A01004 | A04985 | 187 |
| A01004 | A05075 | 215 | A01004 | A05150 | 216 |
| A01004 | A05210 | 249 | A01004 | A05396 | 200 |
| A01004 | A05689 | 224 | A01004 | A05778 | 302 |
| A01004 | A06137 | 213 | A01004 | A06223 | 351 |
| A01004 | A06828 | 409 | A01004 | A07062 | 305 |
| A01004 | A08093 | 408 | A01004 | A08209 | 406 |
| A01004 | A08306 | 162 | A01004 | A08407 | 271 |
| A01004 | A08516 | 443 | A01004 | A08639 | 481 |
| A01004 | A08683 | 489 | A01004 | A08746 | 491 |
| A01004 | A08769 | 402 | A01004 | A08861 | 294 |
| A01004 | A08866 | 488 | A01004 | A09205 | 491 |
| A01004 | A09206 | 474 | A01004 | A09563 | 302 |
| A01004 | A09762 | 180 | A01004 | A10084 | 215 |
| A01004 | A10158 | 156 | A01004 | A10321 | 165 |
| A01004 | A11236 | 486 | A01004 | A11383 | 491 |
| A01004 | A11398 | 412 | A01004 | A11422 | 256 |
| A01004 | A11703 | 391 | A01004 | A12137 | 445 |
| A01004 | A12556 | 279 | A01004 | A12897 | 488 |
| A01004 | A13369 | 302 | A01004 | A13935 | 447 |
| A01004 | A14272 | 274 | A01004 | A14299 | 241 |
| A01004 | A14381 | 204 | A01004 | A14611 | 195 |
| A01004 | A14621 | 154 | A01004 | A14633 | 310 |
| A01004 | A15300 | 413 | A01004 | A15312 | 154 |
| A01004 | A15318 | 446 | A01004 | A15329 | 110 |
| A01004 | A15349 | 172 | A01004 | A15419 | 324 |
| A01004 | A15422 | 484 | A01004 | A15556 | 414 |
| A01004 | A15644 | 165 | A01004 | A15886 | 193 |
| A01004 | A15896 | 324 | A01004 | A16117 | 291 |

|        |        |     |        |        |     |
|--------|--------|-----|--------|--------|-----|
| A01004 | A16473 | 168 | A01005 | A01008 | 369 |
| A01005 | A01018 | 322 | A01005 | A01035 | 455 |
| A01005 | A01117 | 85  | A01005 | A01161 | 351 |
| A01005 | A01165 | 152 | A01005 | A01222 | 190 |
| A01005 | A01223 | 232 | A01005 | A01256 | 353 |
| A01005 | A01297 | 346 | A01005 | A01409 | 428 |
| A01005 | A01460 | 263 | A01005 | A01461 | 491 |
| A01005 | A01476 | 207 | A01005 | A01481 | 306 |
| A01005 | A01508 | 419 | A01005 | A01511 | 188 |
| A01005 | A01515 | 468 | A01005 | A01525 | 274 |
| A01005 | A01573 | 485 | A01005 | A01574 | 469 |
| A01005 | A01575 | 434 | A01005 | A01583 | 217 |
| A01005 | A01585 | 485 | A01005 | A01634 | 191 |
| A01005 | A01635 | 396 | A01005 | A01695 | 267 |
| A01005 | A01705 | 263 | A01005 | A01713 | 491 |
| A01005 | A01714 | 348 | A01005 | A01743 | 246 |
| A01005 | A01857 | 187 | A01005 | A01916 | 167 |
| A01005 | A01926 | 491 | A01005 | A01937 | 414 |
| A01005 | A01972 | 334 | A01005 | A01978 | 199 |
| A01005 | A02008 | 313 | A01005 | A02011 | 191 |
| A01005 | A02014 | 333 | A01005 | A02168 | 449 |
| A01005 | A02215 | 256 | A01005 | A02254 | 238 |
| A01005 | A02285 | 223 | A01005 | A02326 | 188 |
| A01005 | A02336 | 202 | A01005 | A02405 | 241 |
| A01005 | A02468 | 252 | A01005 | A02538 | 281 |
| A01005 | A02574 | 240 | A01005 | A02785 | 396 |
| A01005 | A02859 | 294 | A01005 | A02964 | 226 |
| A01005 | A02992 | 485 | A01005 | A03016 | 425 |
| A01005 | A03050 | 490 | A01005 | A03087 | 241 |
| A01005 | A03146 | 335 | A01005 | A03148 | 307 |
| A01005 | A03167 | 352 | A01005 | A03238 | 483 |
| A01005 | A03293 | 343 | A01005 | A03303 | 311 |
| A01005 | A03441 | 226 | A01005 | A03892 | 319 |
| A01005 | A03917 | 199 | A01005 | A04053 | 380 |
| A01005 | A04259 | 288 | A01005 | A04369 | 393 |
| A01005 | A04633 | 183 | A01005 | A04791 | 154 |
| A01005 | A04839 | 491 | A01005 | A05007 | 236 |
| A01005 | A05131 | 274 | A01005 | A05342 | 207 |
| A01005 | A05356 | 411 | A01005 | A05376 | 358 |
| A01005 | A05390 | 380 | A01005 | A05393 | 409 |
| A01005 | A05416 | 255 | A01005 | A05759 | 162 |
| A01005 | A06617 | 299 | A01005 | A06633 | 172 |
| A01005 | A06908 | 168 | A01005 | A06970 | 404 |
| A01005 | A06979 | 167 | A01005 | A07027 | 165 |
| A01005 | A07029 | 350 | A01005 | A07059 | 324 |
| A01005 | A07122 | 475 | A01005 | A07204 | 195 |

|        |        |     |        |        |     |
|--------|--------|-----|--------|--------|-----|
| A01005 | A07322 | 202 | A01005 | A07373 | 188 |
| A01005 | A07407 | 382 | A01005 | A07413 | 319 |
| A01005 | A07477 | 232 | A01005 | A07520 | 167 |
| A01005 | A07590 | 224 | A01005 | A07736 | 489 |
| A01005 | A07800 | 200 | A01005 | A07856 | 252 |
| A01005 | A07973 | 340 | A01005 | A09036 | 216 |
| A01005 | A09161 | 350 | A01005 | A09742 | 187 |
| A01005 | A10052 | 491 | A01005 | A10091 | 207 |
| A01005 | A10301 | 350 | A01005 | A10424 | 232 |
| A01005 | A10598 | 154 | A01005 | A10655 | 182 |
| A01005 | A10686 | 207 | A01005 | A11279 | 484 |
| A01005 | A11329 | 223 | A01005 | A13544 | 350 |
| A01005 | A13830 | 217 | A01005 | A13871 | 486 |
| A01005 | A13987 | 350 | A01005 | A14247 | 491 |
| A01005 | A14258 | 384 | A01005 | A14344 | 395 |
| A01005 | A14473 | 162 | A01005 | A14661 | 418 |
| A01005 | A14670 | 256 | A01005 | A14693 | 176 |
| A01005 | A15301 | 160 | A01005 | A15366 | 490 |
| A01005 | A15430 | 249 | A01005 | A15462 | 477 |
| A01005 | A15498 | 156 | A01005 | A15637 | 419 |
| A01005 | A15874 | 286 | A01005 | A16028 | 319 |
| A01005 | A16284 | 417 | A01005 | A16741 | 202 |
| A01005 | A17020 | 226 | A01005 | A17061 | 272 |
| A01005 | A17078 | 491 | A01006 | A01027 | 291 |
| A01006 | A01150 | 490 | A01006 | A01161 | 475 |
| A01006 | A01232 | 291 | A01006 | A01293 | 707 |
| A01006 | A01431 | 517 | A01006 | A01439 | 462 |
| A01006 | A01567 | 163 | A01006 | A01613 | 465 |
| A01006 | A01668 | 491 | A01006 | A01704 | 274 |
| A01006 | A01748 | 484 | A01006 | A01782 | 283 |
| A01006 | A01802 | 190 | A01006 | A01805 | 162 |
| A01006 | A01894 | 661 | A01006 | A02477 | 281 |
| A01006 | A02812 | 210 | A01006 | A02896 | 251 |
| A01006 | A02944 | 228 | A01006 | A02971 | 327 |
| A01006 | A02972 | 232 | A01006 | A03275 | 177 |
| A01006 | A03473 | 99  | A01006 | A03516 | 366 |
| A01006 | A03547 | 324 | A01006 | A03608 | 491 |
| A01006 | A03809 | 291 | A01006 | A04613 | 191 |
| A01006 | A04885 | 420 | A01006 | A05216 | 491 |
| A01006 | A05227 | 555 | A01006 | A05258 | 201 |
| A01006 | A05318 | 283 | A01006 | A05348 | 152 |
| A01006 | A05827 | 193 | A01006 | A06606 | 205 |
| A01006 | A06637 | 428 | A01006 | A07881 | 291 |
| A01006 | A07911 | 660 | A01006 | A08228 | 310 |
| A01006 | A08548 | 291 | A01006 | A11199 | 185 |
| A01006 | A11853 | 185 | A01006 | A11936 | 205 |

|        |        |     |        |        |     |
|--------|--------|-----|--------|--------|-----|
| A01006 | A14699 | 604 | A01006 | A14778 | 448 |
| A01006 | A15662 | 223 | A01007 | A01019 | 463 |
| A01007 | A01140 | 486 | A01007 | A01147 | 430 |
| A01007 | A01195 | 156 | A01007 | A01200 | 556 |
| A01007 | A01349 | 446 | A01007 | A01398 | 510 |
| A01007 | A01401 | 621 | A01007 | A01500 | 225 |
| A01007 | A01503 | 157 | A01007 | A01720 | 274 |
| A01007 | A01726 | 452 | A01007 | A02473 | 200 |
| A01007 | A03143 | 473 | A01007 | A04648 | 292 |
| A01007 | A04687 | 156 | A01007 | A06803 | 156 |
| A01007 | A07409 | 369 | A01007 | A07670 | 156 |
| A01007 | A07850 | 156 | A01007 | A07887 | 156 |
| A01007 | A08383 | 156 | A01007 | A08818 | 156 |
| A01007 | A09502 | 156 | A01007 | A11344 | 156 |
| A01007 | A11674 | 156 | A01007 | A16228 | 156 |
| A01008 | A01174 | 479 | A01008 | A01175 | 391 |
| A01008 | A01223 | 394 | A01008 | A01227 | 180 |
| A01008 | A01230 | 462 | A01008 | A01233 | 380 |
| A01008 | A01256 | 475 | A01008 | A01272 | 249 |
| A01008 | A01297 | 483 | A01008 | A01360 | 285 |
| A01008 | A01409 | 424 | A01008 | A01481 | 406 |
| A01008 | A01508 | 484 | A01008 | A01635 | 491 |
| A01008 | A01713 | 232 | A01008 | A01986 | 196 |
| A01008 | A02276 | 279 | A01008 | A02290 | 224 |
| A01008 | A02363 | 346 | A01008 | A02366 | 187 |
| A01008 | A02521 | 281 | A01008 | A02847 | 241 |
| A01008 | A02992 | 303 | A01008 | A03004 | 193 |
| A01008 | A03016 | 432 | A01008 | A03050 | 232 |
| A01008 | A03167 | 446 | A01008 | A03168 | 230 |
| A01008 | A03429 | 319 | A01008 | A03441 | 388 |
| A01008 | A03477 | 491 | A01008 | A03484 | 247 |
| A01008 | A03508 | 171 | A01008 | A03513 | 195 |
| A01008 | A03961 | 251 | A01008 | A04229 | 324 |
| A01008 | A04427 | 279 | A01008 | A04660 | 418 |
| A01008 | A04779 | 452 | A01008 | A04784 | 159 |
| A01008 | A04791 | 162 | A01008 | A04834 | 469 |
| A01008 | A04850 | 424 | A01008 | A04937 | 232 |
| A01008 | A04995 | 447 | A01008 | A05006 | 491 |
| A01008 | A05007 | 491 | A01008 | A05013 | 177 |
| A01008 | A05020 | 249 | A01008 | A05102 | 465 |
| A01008 | A05333 | 171 | A01008 | A05416 | 450 |
| A01008 | A05462 | 288 | A01008 | A05516 | 483 |
| A01008 | A05573 | 398 | A01008 | A05600 | 324 |
| A01008 | A05751 | 432 | A01008 | A05759 | 353 |
| A01008 | A05772 | 259 | A01008 | A05774 | 468 |
| A01008 | A06098 | 177 | A01008 | A06252 | 429 |

|        |        |     |        |        |     |
|--------|--------|-----|--------|--------|-----|
| A01008 | A06358 | 486 | A01008 | A06359 | 435 |
| A01008 | A06405 | 257 | A01008 | A06439 | 312 |
| A01008 | A06473 | 294 | A01008 | A06597 | 324 |
| A01008 | A06630 | 294 | A01008 | A06632 | 159 |
| A01008 | A06633 | 467 | A01008 | A06689 | 352 |
| A01008 | A06700 | 439 | A01008 | A06756 | 480 |
| A01008 | A06934 | 339 | A01008 | A06970 | 430 |
| A01008 | A06979 | 177 | A01008 | A07088 | 196 |
| A01008 | A07109 | 328 | A01008 | A07122 | 491 |
| A01008 | A07238 | 355 | A01008 | A07256 | 461 |
| A01008 | A07264 | 156 | A01008 | A07267 | 486 |
| A01008 | A07381 | 236 | A01008 | A07413 | 380 |
| A01008 | A07477 | 394 | A01008 | A07520 | 258 |
| A01008 | A07554 | 259 | A01008 | A07558 | 171 |
| A01008 | A07674 | 185 | A01008 | A07688 | 470 |
| A01008 | A07707 | 245 | A01008 | A07718 | 179 |
| A01008 | A07736 | 346 | A01008 | A07800 | 302 |
| A01008 | A07831 | 279 | A01008 | A07832 | 279 |
| A01008 | A07849 | 224 | A01008 | A07973 | 429 |
| A01008 | A08099 | 224 | A01008 | A08385 | 165 |
| A01008 | A08396 | 208 | A01008 | A08656 | 187 |
| A01008 | A08721 | 245 | A01008 | A08751 | 263 |
| A01008 | A09637 | 263 | A01008 | A09881 | 198 |
| A01008 | A10020 | 224 | A01008 | A10121 | 171 |
| A01008 | A10420 | 273 | A01008 | A10523 | 177 |
| A01008 | A10550 | 405 | A01008 | A10880 | 245 |
| A01008 | A11309 | 422 | A01008 | A11381 | 338 |
| A01008 | A12055 | 297 | A01008 | A13137 | 435 |
| A01008 | A13154 | 462 | A01008 | A14337 | 159 |
| A01008 | A14827 | 451 | A01008 | A14871 | 187 |
| A01008 | A14921 | 165 | A01008 | A15230 | 303 |
| A01008 | A15637 | 332 | A01008 | A15874 | 477 |
| A01008 | A15905 | 470 | A01008 | A16026 | 267 |
| A01008 | A16027 | 490 | A01008 | A16283 | 247 |
| A01008 | A16335 | 196 | A01008 | A16346 | 224 |
| A01008 | A16529 | 411 | A01008 | A16741 | 162 |
| A01008 | A17040 | 168 | A01008 | A17078 | 489 |
| A01009 | A01124 | 63  | A01009 | A01235 | 63  |
| A01009 | A01277 | 380 | A01009 | A01278 | 185 |
| A01009 | A01363 | 193 | A01009 | A01565 | 677 |
| A01009 | A01572 | 345 | A01009 | A01604 | 475 |
| A01009 | A01654 | 243 | A01009 | A01784 | 174 |
| A01009 | A01870 | 491 | A01009 | A01876 | 187 |
| A01009 | A02011 | 63  | A01009 | A02028 | 154 |
| A01009 | A02062 | 255 | A01009 | A02074 | 408 |
| A01009 | A02111 | 486 | A01009 | A02138 | 457 |

|        |        |     |        |        |     |
|--------|--------|-----|--------|--------|-----|
| A01009 | A02143 | 473 | A01009 | A02240 | 266 |
| A01009 | A02242 | 185 | A01009 | A02251 | 488 |
| A01009 | A02260 | 139 | A01009 | A02454 | 63  |
| A01009 | A02472 | 63  | A01009 | A02547 | 230 |
| A01009 | A02698 | 615 | A01009 | A02884 | 188 |
| A01009 | A02896 | 435 | A01009 | A02931 | 469 |
| A01009 | A02945 | 470 | A01009 | A03043 | 123 |
| A01009 | A03045 | 168 | A01009 | A03046 | 121 |
| A01009 | A03047 | 472 | A01009 | A03053 | 141 |
| A01009 | A03055 | 179 | A01009 | A03110 | 63  |
| A01009 | A03128 | 255 | A01009 | A03177 | 419 |
| A01009 | A03224 | 449 | A01009 | A03228 | 318 |
| A01009 | A03239 | 168 | A01009 | A03280 | 249 |
| A01009 | A03458 | 151 | A01009 | A03498 | 141 |
| A01009 | A03610 | 434 | A01009 | A03750 | 401 |
| A01009 | A03948 | 435 | A01009 | A04051 | 180 |
| A01009 | A04075 | 420 | A01009 | A04169 | 299 |
| A01009 | A04180 | 174 | A01009 | A04216 | 170 |
| A01009 | A04217 | 202 | A01009 | A04244 | 281 |
| A01009 | A04257 | 191 | A01009 | A04379 | 160 |
| A01009 | A04551 | 246 | A01009 | A04614 | 329 |
| A01009 | A04783 | 457 | A01009 | A04820 | 255 |
| A01009 | A04867 | 257 | A01009 | A04950 | 266 |
| A01009 | A05449 | 601 | A01009 | A05497 | 266 |
| A01009 | A05556 | 601 | A01009 | A05577 | 778 |
| A01009 | A05677 | 340 | A01009 | A05773 | 201 |
| A01009 | A05985 | 380 | A01009 | A06037 | 210 |
| A01009 | A06414 | 450 | A01009 | A06415 | 446 |
| A01009 | A06588 | 515 | A01009 | A06650 | 488 |
| A01009 | A06877 | 160 | A01009 | A07142 | 205 |
| A01009 | A07145 | 168 | A01009 | A07152 | 307 |
| A01009 | A07173 | 460 | A01009 | A07422 | 165 |
| A01009 | A08438 | 419 | A01009 | A08612 | 424 |
| A01009 | A08642 | 324 | A01009 | A08840 | 285 |
| A01009 | A08850 | 576 | A01009 | A09219 | 182 |
| A01009 | A09744 | 452 | A01009 | A10611 | 270 |
| A01009 | A11060 | 297 | A01009 | A13131 | 191 |
| A01009 | A13212 | 246 | A01009 | A13307 | 274 |
| A01009 | A13872 | 227 | A01009 | A13899 | 217 |
| A01009 | A14146 | 355 | A01009 | A14236 | 601 |
| A01009 | A14366 | 746 | A01009 | A14368 | 263 |
| A01009 | A14372 | 424 | A01009 | A14374 | 455 |
| A01009 | A14417 | 238 | A01009 | A14554 | 346 |
| A01009 | A14596 | 535 | A01009 | A14599 | 229 |
| A01009 | A14604 | 152 | A01009 | A14621 | 353 |
| A01009 | A14659 | 561 | A01009 | A14799 | 263 |



|        |        |     |        |        |     |
|--------|--------|-----|--------|--------|-----|
| A01009 | A15284 | 152 | A01009 | A15356 | 168 |
| A01009 | A15394 | 490 | A01009 | A15395 | 469 |
| A01009 | A15425 | 480 | A01009 | A15427 | 481 |
| A01009 | A15451 | 152 | A01009 | A15452 | 252 |
| A01009 | A15606 | 561 | A01009 | A15642 | 297 |
| A01009 | A15806 | 429 | A01009 | A15865 | 238 |
| A01009 | A15964 | 489 | A01009 | A16010 | 324 |
| A01009 | A16308 | 246 | A01010 | A01156 | 227 |
| A01010 | A01234 | 236 | A01010 | A01277 | 247 |
| A01010 | A01425 | 71  | A01010 | A01500 | 163 |
| A01010 | A01601 | 363 | A01010 | A01623 | 226 |
| A01010 | A02413 | 257 | A01010 | A02585 | 255 |
| A01010 | A02816 | 180 | A01010 | A06007 | 334 |
| A01010 | A06371 | 318 | A01010 | A06534 | 257 |
| A01010 | A07323 | 221 | A01010 | A07398 | 112 |
| A01010 | A11522 | 188 | A01010 | A13549 | 368 |
| A01010 | A13875 | 234 | A01010 | A13992 | 152 |
| A01010 | A15988 | 159 | A01011 | A01064 | 412 |
| A01011 | A01216 | 462 | A01011 | A01240 | 157 |
| A01011 | A01276 | 435 | A01011 | A01348 | 413 |
| A01011 | A01366 | 314 | A01011 | A01431 | 193 |
| A01011 | A01454 | 727 | A01011 | A01478 | 530 |
| A01011 | A01479 | 179 | A01011 | A01484 | 454 |
| A01011 | A01530 | 401 | A01011 | A01543 | 395 |
| A01011 | A01551 | 162 | A01011 | A01557 | 491 |
| A01011 | A01560 | 232 | A01011 | A01566 | 265 |
| A01011 | A01572 | 361 | A01011 | A01578 | 485 |
| A01011 | A01595 | 481 | A01011 | A01630 | 491 |
| A01011 | A01632 | 491 | A01011 | A01645 | 483 |
| A01011 | A01681 | 204 | A01011 | A01687 | 477 |
| A01011 | A01689 | 238 | A01011 | A01705 | 270 |
| A01011 | A01729 | 572 | A01011 | A01768 | 333 |
| A01011 | A01769 | 270 | A01011 | A01781 | 303 |
| A01011 | A01790 | 451 | A01011 | A01839 | 491 |
| A01011 | A01915 | 432 | A01011 | A01930 | 154 |
| A01011 | A02129 | 337 | A01011 | A02188 | 230 |
| A01011 | A02221 | 201 | A01011 | A02228 | 441 |
| A01011 | A02322 | 154 | A01011 | A02333 | 424 |
| A01011 | A02345 | 171 | A01011 | A02687 | 199 |
| A01011 | A02691 | 200 | A01011 | A02736 | 168 |
| A01011 | A03111 | 249 | A01011 | A03138 | 236 |
| A01011 | A03167 | 157 | A01011 | A03178 | 291 |
| A01011 | A03211 | 227 | A01011 | A03297 | 467 |
| A01011 | A03323 | 213 | A01011 | A03324 | 216 |
| A01011 | A03337 | 196 | A01011 | A03488 | 196 |
| A01011 | A03861 | 417 | A01011 | A03899 | 297 |

|        |        |     |        |        |     |
|--------|--------|-----|--------|--------|-----|
| A01011 | A04139 | 480 | A01011 | A04175 | 672 |
| A01011 | A04239 | 187 | A01011 | A04257 | 157 |
| A01011 | A04305 | 154 | A01011 | A04361 | 303 |
| A01011 | A04372 | 199 | A01011 | A04410 | 485 |
| A01011 | A04425 | 165 | A01011 | A04435 | 351 |
| A01011 | A04710 | 435 | A01011 | A04715 | 491 |
| A01011 | A04790 | 491 | A01011 | A04832 | 296 |
| A01011 | A04879 | 470 | A01011 | A04880 | 470 |
| A01011 | A04903 | 395 | A01011 | A04949 | 475 |
| A01011 | A04964 | 168 | A01011 | A05075 | 213 |
| A01011 | A05114 | 419 | A01011 | A05274 | 180 |
| A01011 | A05307 | 199 | A01011 | A05418 | 374 |
| A01011 | A05421 | 301 | A01011 | A05422 | 330 |
| A01011 | A05666 | 286 | A01011 | A05829 | 213 |
| A01011 | A05854 | 235 | A01011 | A05899 | 213 |
| A01011 | A06021 | 160 | A01011 | A06106 | 249 |
| A01011 | A06162 | 319 | A01011 | A06346 | 288 |
| A01011 | A06379 | 210 | A01011 | A06385 | 424 |
| A01011 | A06428 | 490 | A01011 | A06533 | 262 |
| A01011 | A06591 | 560 | A01011 | A06601 | 413 |
| A01011 | A06608 | 454 | A01011 | A06887 | 191 |
| A01011 | A06970 | 419 | A01011 | A06971 | 269 |
| A01011 | A07054 | 258 | A01011 | A07157 | 274 |
| A01011 | A07163 | 374 | A01011 | A07218 | 152 |
| A01011 | A07221 | 272 | A01011 | A07242 | 353 |
| A01011 | A07383 | 301 | A01011 | A07384 | 424 |
| A01011 | A07396 | 235 | A01011 | A07495 | 528 |
| A01011 | A07704 | 277 | A01011 | A07810 | 270 |
| A01011 | A07938 | 301 | A01011 | A07939 | 301 |
| A01011 | A08002 | 205 | A01011 | A08136 | 177 |
| A01011 | A08256 | 160 | A01011 | A08280 | 533 |
| A01011 | A08400 | 218 | A01011 | A08444 | 157 |
| A01011 | A08643 | 311 | A01011 | A08850 | 172 |
| A01011 | A09147 | 180 | A01011 | A09311 | 227 |
| A01011 | A09646 | 363 | A01011 | A09671 | 291 |
| A01011 | A09953 | 344 | A01011 | A10051 | 401 |
| A01011 | A10205 | 201 | A01011 | A10214 | 470 |
| A01011 | A10276 | 301 | A01011 | A10291 | 165 |
| A01011 | A10354 | 152 | A01011 | A10386 | 157 |
| A01011 | A10445 | 647 | A01011 | A10502 | 224 |
| A01011 | A10602 | 160 | A01011 | A10604 | 162 |
| A01011 | A10619 | 408 | A01011 | A11172 | 224 |
| A01011 | A11281 | 180 | A01011 | A11300 | 478 |
| A01011 | A11339 | 199 | A01011 | A11424 | 177 |
| A01011 | A11819 | 270 | A01011 | A11983 | 505 |
| A01011 | A12212 | 337 | A01011 | A12365 | 274 |

|        |        |     |        |        |     |
|--------|--------|-----|--------|--------|-----|
| A01011 | A12561 | 270 | A01011 | A12649 | 249 |
| A01011 | A13369 | 490 | A01011 | A13695 | 165 |
| A01011 | A13860 | 417 | A01011 | A14202 | 232 |
| A01011 | A14208 | 210 | A01011 | A14231 | 540 |
| A01011 | A14279 | 443 | A01011 | A14281 | 351 |
| A01011 | A14410 | 374 | A01011 | A14633 | 488 |
| A01011 | A14643 | 180 | A01011 | A15196 | 160 |
| A01011 | A15323 | 199 | A01011 | A15326 | 177 |
| A01011 | A15336 | 407 | A01011 | A15638 | 324 |
| A01011 | A16147 | 249 | A01011 | A16274 | 338 |
| A01011 | A16350 | 157 | A01011 | A17203 | 213 |
| A01012 | A01038 | 491 | A01012 | A01085 | 486 |
| A01012 | A01090 | 688 | A01012 | A01112 | 446 |
| A01012 | A01140 | 235 | A01012 | A01144 | 642 |
| A01012 | A01160 | 485 | A01012 | A01168 | 432 |
| A01012 | A01192 | 296 | A01012 | A01196 | 326 |
| A01012 | A01238 | 423 | A01012 | A01249 | 182 |
| A01012 | A01263 | 484 | A01012 | A01287 | 302 |
| A01012 | A01291 | 542 | A01012 | A01306 | 596 |
| A01012 | A01322 | 485 | A01012 | A01335 | 258 |
| A01012 | A01346 | 177 | A01012 | A01365 | 418 |
| A01012 | A01380 | 290 | A01012 | A01392 | 243 |
| A01012 | A01399 | 438 | A01012 | A01415 | 366 |
| A01012 | A01433 | 285 | A01012 | A01436 | 226 |
| A01012 | A01452 | 302 | A01012 | A01468 | 489 |
| A01012 | A01496 | 688 | A01012 | A01569 | 417 |
| A01012 | A01579 | 701 | A01012 | A01586 | 207 |
| A01012 | A01601 | 540 | A01012 | A01612 | 160 |
| A01012 | A01649 | 226 | A01012 | A01822 | 496 |
| A01012 | A01976 | 185 | A01012 | A02064 | 227 |
| A01012 | A02165 | 433 | A01012 | A02350 | 236 |
| A01012 | A02527 | 201 | A01012 | A02737 | 168 |
| A01012 | A02877 | 430 | A01012 | A03438 | 462 |
| A01012 | A03467 | 159 | A01012 | A03575 | 249 |
| A01012 | A03671 | 481 | A01012 | A03809 | 358 |
| A01012 | A03981 | 777 | A01012 | A04230 | 317 |
| A01012 | A04689 | 180 | A01012 | A05149 | 408 |
| A01012 | A05191 | 327 | A01012 | A05501 | 369 |
| A01012 | A05621 | 191 | A01012 | A06084 | 202 |
| A01012 | A06356 | 266 | A01012 | A06746 | 210 |
| A01012 | A06814 | 462 | A01012 | A07398 | 160 |
| A01012 | A08011 | 461 | A01012 | A08359 | 395 |
| A01012 | A08377 | 491 | A01012 | A08543 | 334 |
| A01012 | A08550 | 425 | A01012 | A08551 | 346 |
| A01012 | A08653 | 210 | A01012 | A08682 | 343 |
| A01012 | A08773 | 438 | A01012 | A08973 | 160 |

|        |        |     |        |        |     |
|--------|--------|-----|--------|--------|-----|
| A01012 | A10532 | 423 | A01012 | A10745 | 246 |
| A01012 | A11254 | 270 | A01012 | A11334 | 481 |
| A01012 | A12259 | 180 | A01012 | A12270 | 177 |
| A01012 | A13576 | 246 | A01012 | A13709 | 199 |
| A01012 | A13949 | 428 | A01012 | A13989 | 491 |
| A01012 | A14216 | 782 | A01012 | A14279 | 268 |
| A01012 | A14447 | 210 | A01012 | A15383 | 428 |
| A01012 | A15500 | 351 | A01012 | A15617 | 234 |
| A01012 | A15624 | 241 | A01012 | A15666 | 154 |
| A01012 | A15732 | 243 | A01012 | A15988 | 218 |
| A01012 | A16686 | 217 | A01012 | A16790 | 294 |
| A01012 | A16984 | 63  | A01012 | A17035 | 457 |
| A01013 | A01086 | 436 | A01013 | A01108 | 173 |
| A01013 | A01150 | 480 | A01013 | A01161 | 469 |
| A01013 | A01210 | 366 | A01013 | A01245 | 355 |
| A01013 | A01287 | 479 | A01013 | A01399 | 346 |
| A01013 | A01451 | 170 | A01013 | A01458 | 314 |
| A01013 | A01494 | 477 | A01013 | A01502 | 218 |
| A01013 | A01627 | 152 | A01013 | A01711 | 489 |
| A01013 | A01815 | 335 | A01013 | A01819 | 266 |
| A01013 | A01825 | 223 | A01013 | A01827 | 201 |
| A01013 | A01832 | 224 | A01013 | A01833 | 335 |
| A01013 | A02040 | 229 | A01013 | A02994 | 174 |
| A01013 | A03676 | 283 | A01013 | A03856 | 238 |
| A01013 | A04056 | 305 | A01013 | A07237 | 229 |
| A01013 | A09001 | 366 | A01013 | A09321 | 323 |
| A01013 | A14155 | 188 | A01013 | A15379 | 480 |
| A01013 | A15668 | 270 | A01014 | A01114 | 201 |
| A01014 | A01122 | 303 | A01014 | A01169 | 391 |
| A01014 | A01187 | 224 | A01014 | A01197 | 307 |
| A01014 | A01278 | 205 | A01014 | A01339 | 240 |
| A01014 | A01371 | 301 | A01014 | A01507 | 201 |
| A01014 | A02227 | 104 | A01014 | A04265 | 330 |
| A01014 | A04666 | 216 | A01014 | A06750 | 252 |
| A01014 | A07101 | 394 | A01014 | A07756 | 353 |
| A01014 | A09517 | 290 | A01014 | A09687 | 466 |
| A01014 | A11724 | 327 | A01014 | A14138 | 302 |
| A01014 | A15843 | 240 | A01015 | A01313 | 249 |
| A01016 | A01068 | 251 | A01016 | A01070 | 899 |
| A01016 | A01074 | 318 | A01016 | A01102 | 324 |
| A01016 | A01154 | 412 | A01016 | A01217 | 317 |
| A01016 | A01218 | 386 | A01016 | A01220 | 176 |
| A01016 | A01238 | 353 | A01016 | A01288 | 307 |
| A01016 | A01306 | 224 | A01016 | A01352 | 276 |
| A01016 | A01365 | 299 | A01016 | A01406 | 267 |
| A01016 | A01411 | 402 | A01016 | A01416 | 334 |

|        |        |     |        |        |     |
|--------|--------|-----|--------|--------|-----|
| A01016 | A01457 | 260 | A01016 | A01826 | 344 |
| A01016 | A01908 | 182 | A01016 | A02051 | 294 |
| A01016 | A02163 | 899 | A01016 | A03601 | 305 |
| A01016 | A04698 | 259 | A01016 | A06105 | 329 |
| A01016 | A06861 | 281 | A01016 | A06939 | 417 |
| A01016 | A12223 | 379 | A01016 | A14449 | 191 |
| A01016 | A14479 | 424 | A01016 | A14568 | 424 |
| A01016 | A15293 | 899 | A01016 | A15294 | 899 |
| A01016 | A15500 | 180 | A01016 | A15771 | 245 |
| A01016 | A16444 | 417 | A01017 | A01020 | 312 |
| A01017 | A01025 | 454 | A01017 | A01027 | 430 |
| A01017 | A01066 | 247 | A01017 | A01069 | 486 |
| A01017 | A01090 | 348 | A01017 | A01098 | 356 |
| A01017 | A01100 | 474 | A01017 | A01101 | 560 |
| A01017 | A01102 | 217 | A01017 | A01112 | 224 |
| A01017 | A01154 | 473 | A01017 | A01164 | 260 |
| A01017 | A01166 | 460 | A01017 | A01184 | 159 |
| A01017 | A01186 | 200 | A01017 | A01194 | 452 |
| A01017 | A01196 | 167 | A01017 | A01206 | 452 |
| A01017 | A01209 | 485 | A01017 | A01214 | 456 |
| A01017 | A01217 | 560 | A01017 | A01220 | 188 |
| A01017 | A01221 | 489 | A01017 | A01232 | 489 |
| A01017 | A01234 | 491 | A01017 | A01249 | 486 |
| A01017 | A01263 | 167 | A01017 | A01264 | 285 |
| A01017 | A01291 | 491 | A01017 | A01306 | 491 |
| A01017 | A01335 | 491 | A01017 | A01337 | 491 |
| A01017 | A01338 | 491 | A01017 | A01346 | 154 |
| A01017 | A01362 | 555 | A01017 | A01365 | 491 |
| A01017 | A01369 | 491 | A01017 | A01384 | 324 |
| A01017 | A01406 | 211 | A01017 | A01408 | 206 |
| A01017 | A01414 | 344 | A01017 | A01451 | 560 |
| A01017 | A01457 | 306 | A01017 | A01458 | 490 |
| A01017 | A01461 | 424 | A01017 | A01468 | 439 |
| A01017 | A01470 | 488 | A01017 | A01492 | 176 |
| A01017 | A01496 | 281 | A01017 | A01503 | 491 |
| A01017 | A01569 | 152 | A01017 | A01579 | 491 |
| A01017 | A01601 | 490 | A01017 | A01646 | 165 |
| A01017 | A01649 | 485 | A01017 | A01976 | 364 |
| A01017 | A01988 | 558 | A01017 | A02978 | 490 |
| A01017 | A03057 | 374 | A01017 | A03230 | 152 |
| A01017 | A03438 | 188 | A01017 | A03477 | 230 |
| A01017 | A03480 | 212 | A01017 | A03567 | 491 |
| A01017 | A03859 | 488 | A01017 | A03901 | 552 |
| A01017 | A04161 | 450 | A01017 | A04507 | 238 |
| A01017 | A04668 | 491 | A01017 | A04846 | 445 |
| A01017 | A04932 | 324 | A01017 | A05450 | 249 |

|        |        |     |        |        |     |
|--------|--------|-----|--------|--------|-----|
| A01017 | A05499 | 216 | A01017 | A05501 | 491 |
| A01017 | A05638 | 201 | A01017 | A05702 | 422 |
| A01017 | A06543 | 229 | A01017 | A06564 | 485 |
| A01017 | A06785 | 547 | A01017 | A06787 | 201 |
| A01017 | A06832 | 187 | A01017 | A06861 | 457 |
| A01017 | A06965 | 483 | A01017 | A06973 | 486 |
| A01017 | A07075 | 188 | A01017 | A07242 | 378 |
| A01017 | A07305 | 201 | A01017 | A07323 | 162 |
| A01017 | A07360 | 416 | A01017 | A07495 | 168 |
| A01017 | A07581 | 333 | A01017 | A07816 | 274 |
| A01017 | A07893 | 319 | A01017 | A07965 | 559 |
| A01017 | A08056 | 435 | A01017 | A08131 | 466 |
| A01017 | A08154 | 255 | A01017 | A08358 | 378 |
| A01017 | A08359 | 490 | A01017 | A08408 | 337 |
| A01017 | A08476 | 327 | A01017 | A08558 | 374 |
| A01017 | A08927 | 201 | A01017 | A09013 | 272 |
| A01017 | A09285 | 283 | A01017 | A09322 | 332 |
| A01017 | A09330 | 409 | A01017 | A09590 | 216 |
| A01017 | A09593 | 363 | A01017 | A09613 | 333 |
| A01017 | A09726 | 447 | A01017 | A09735 | 227 |
| A01017 | A11480 | 559 | A01017 | A11550 | 454 |
| A01017 | A11704 | 454 | A01017 | A11729 | 469 |
| A01017 | A11857 | 301 | A01017 | A12080 | 152 |
| A01017 | A12607 | 179 | A01017 | A12821 | 196 |
| A01017 | A12824 | 399 | A01017 | A13989 | 481 |
| A01017 | A14358 | 171 | A01017 | A14508 | 441 |
| A01017 | A14566 | 255 | A01017 | A14582 | 152 |
| A01017 | A14655 | 219 | A01017 | A14665 | 452 |
| A01017 | A14699 | 322 | A01017 | A14701 | 491 |
| A01017 | A14813 | 188 | A01017 | A14819 | 263 |
| A01017 | A15500 | 490 | A01017 | A15624 | 386 |
| A01017 | A15652 | 171 | A01017 | A15657 | 549 |
| A01017 | A15660 | 481 | A01017 | A15684 | 489 |
| A01017 | A15937 | 256 | A01017 | A16680 | 498 |
| A01017 | A16686 | 460 | A01017 | A16705 | 162 |
| A01018 | A01139 | 191 | A01018 | A01222 | 402 |
| A01018 | A01223 | 455 | A01018 | A01225 | 491 |
| A01018 | A01227 | 452 | A01018 | A01230 | 441 |
| A01018 | A01297 | 491 | A01018 | A01344 | 382 |
| A01018 | A01397 | 412 | A01018 | A01409 | 491 |
| A01018 | A01554 | 187 | A01018 | A01635 | 457 |
| A01018 | A01643 | 413 | A01018 | A01709 | 366 |
| A01018 | A01713 | 157 | A01018 | A01743 | 199 |
| A01018 | A01829 | 185 | A01018 | A01899 | 490 |
| A01018 | A01931 | 277 | A01018 | A01958 | 245 |
| A01018 | A01982 | 201 | A01018 | A02020 | 238 |

|        |        |     |        |        |     |
|--------|--------|-----|--------|--------|-----|
| A01018 | A02083 | 162 | A01018 | A02114 | 434 |
| A01018 | A02192 | 312 | A01018 | A02254 | 468 |
| A01018 | A02284 | 218 | A01018 | A02310 | 167 |
| A01018 | A02316 | 319 | A01018 | A02450 | 162 |
| A01018 | A02521 | 490 | A01018 | A02545 | 246 |
| A01018 | A02777 | 196 | A01018 | A02992 | 307 |
| A01018 | A03016 | 163 | A01018 | A03050 | 334 |
| A01018 | A03087 | 405 | A01018 | A03121 | 185 |
| A01018 | A03167 | 358 | A01018 | A03234 | 297 |
| A01018 | A03311 | 243 | A01018 | A03423 | 283 |
| A01018 | A03484 | 422 | A01018 | A03513 | 474 |
| A01018 | A03795 | 491 | A01018 | A04172 | 285 |
| A01018 | A04179 | 480 | A01018 | A04228 | 491 |
| A01018 | A04366 | 185 | A01018 | A04423 | 204 |
| A01018 | A04556 | 201 | A01018 | A04713 | 355 |
| A01018 | A04791 | 380 | A01018 | A04839 | 271 |
| A01018 | A04883 | 468 | A01018 | A05014 | 195 |
| A01018 | A05045 | 490 | A01018 | A05138 | 182 |
| A01018 | A05331 | 207 | A01018 | A05337 | 299 |
| A01018 | A05390 | 165 | A01018 | A05393 | 294 |
| A01018 | A05416 | 484 | A01018 | A05463 | 314 |
| A01018 | A05548 | 210 | A01018 | A05550 | 472 |
| A01018 | A05573 | 475 | A01018 | A05757 | 285 |
| A01018 | A05789 | 360 | A01018 | A05883 | 324 |
| A01018 | A06405 | 490 | A01018 | A06439 | 491 |
| A01018 | A06626 | 260 | A01018 | A06847 | 330 |
| A01018 | A06855 | 467 | A01018 | A06860 | 469 |
| A01018 | A06912 | 185 | A01018 | A07027 | 302 |
| A01018 | A07037 | 219 | A01018 | A07059 | 491 |
| A01018 | A07067 | 353 | A01018 | A07088 | 491 |
| A01018 | A07091 | 428 | A01018 | A07239 | 491 |
| A01018 | A07264 | 156 | A01018 | A07281 | 480 |
| A01018 | A07366 | 393 | A01018 | A07413 | 224 |
| A01018 | A07490 | 252 | A01018 | A07507 | 260 |
| A01018 | A07520 | 485 | A01018 | A07553 | 302 |
| A01018 | A07590 | 232 | A01018 | A07613 | 457 |
| A01018 | A07674 | 491 | A01018 | A07688 | 262 |
| A01018 | A07690 | 311 | A01018 | A07692 | 247 |
| A01018 | A07711 | 219 | A01018 | A07739 | 474 |
| A01018 | A07757 | 156 | A01018 | A07779 | 353 |
| A01018 | A07847 | 419 | A01018 | A07848 | 188 |
| A01018 | A07851 | 260 | A01018 | A07856 | 256 |
| A01018 | A07933 | 366 | A01018 | A07973 | 246 |
| A01018 | A07976 | 160 | A01018 | A08155 | 467 |
| A01018 | A08249 | 247 | A01018 | A08366 | 168 |
| A01018 | A08368 | 302 | A01018 | A08372 | 238 |

|        |        |     |        |        |     |
|--------|--------|-----|--------|--------|-----|
| A01018 | A08385 | 380 | A01018 | A08636 | 302 |
| A01018 | A08663 | 196 | A01018 | A08690 | 430 |
| A01018 | A09878 | 170 | A01018 | A10126 | 272 |
| A01018 | A10420 | 241 | A01018 | A10424 | 362 |
| A01018 | A10444 | 163 | A01018 | A10446 | 310 |
| A01018 | A10458 | 236 | A01018 | A10635 | 343 |
| A01018 | A10652 | 472 | A01018 | A10683 | 170 |
| A01018 | A10686 | 412 | A01018 | A10687 | 364 |
| A01018 | A10690 | 353 | A01018 | A10692 | 272 |
| A01018 | A10696 | 485 | A01018 | A10700 | 260 |
| A01018 | A10708 | 234 | A01018 | A10778 | 213 |
| A01018 | A10882 | 266 | A01018 | A11021 | 461 |
| A01018 | A11189 | 307 | A01018 | A11425 | 170 |
| A01018 | A12033 | 285 | A01018 | A13065 | 419 |
| A01018 | A13362 | 367 | A01018 | A14190 | 182 |
| A01018 | A14828 | 278 | A01018 | A15970 | 193 |
| A01018 | A16288 | 159 | A01018 | A16741 | 362 |
| A01018 | A16744 | 310 | A01018 | A17006 | 491 |
| A01018 | A17078 | 350 | A01019 | A01195 | 499 |
| A01019 | A01200 | 446 | A01019 | A01212 | 279 |
| A01019 | A01383 | 177 | A01019 | A01398 | 527 |
| A01019 | A01401 | 503 | A01019 | A01500 | 537 |
| A01019 | A01503 | 258 | A01019 | A01720 | 481 |
| A01019 | A01723 | 172 | A01019 | A02030 | 208 |
| A01019 | A03207 | 286 | A01019 | A03526 | 205 |
| A01019 | A04648 | 509 | A01019 | A04687 | 156 |
| A01019 | A06803 | 454 | A01019 | A07210 | 221 |
| A01019 | A07290 | 241 | A01019 | A07670 | 232 |
| A01019 | A07850 | 156 | A01019 | A07887 | 473 |
| A01019 | A07920 | 212 | A01019 | A08022 | 160 |
| A01019 | A08024 | 182 | A01019 | A08383 | 242 |
| A01019 | A08818 | 156 | A01019 | A09502 | 156 |
| A01019 | A09712 | 430 | A01019 | A10642 | 185 |
| A01019 | A11344 | 156 | A01019 | A11674 | 156 |
| A01019 | A11737 | 413 | A01019 | A16228 | 480 |
| A01020 | A01024 | 451 | A01020 | A01027 | 241 |
| A01020 | A01032 | 323 | A01020 | A01040 | 334 |
| A01020 | A01066 | 373 | A01020 | A01075 | 491 |
| A01020 | A01087 | 346 | A01020 | A01088 | 489 |
| A01020 | A01108 | 219 | A01020 | A01112 | 334 |
| A01020 | A01116 | 638 | A01020 | A01135 | 226 |
| A01020 | A01150 | 215 | A01020 | A01154 | 520 |
| A01020 | A01156 | 459 | A01020 | A01166 | 483 |
| A01020 | A01184 | 491 | A01020 | A01201 | 491 |
| A01020 | A01206 | 491 | A01020 | A01214 | 446 |
| A01020 | A01224 | 159 | A01020 | A01226 | 717 |



|        |        |     |        |        |     |
|--------|--------|-----|--------|--------|-----|
| A01020 | A01234 | 605 | A01020 | A01263 | 433 |
| A01020 | A01264 | 281 | A01020 | A01304 | 638 |
| A01020 | A01322 | 229 | A01020 | A01327 | 232 |
| A01020 | A01329 | 168 | A01020 | A01338 | 408 |
| A01020 | A01349 | 321 | A01020 | A01351 | 491 |
| A01020 | A01365 | 519 | A01020 | A01429 | 323 |
| A01020 | A01436 | 63  | A01020 | A01468 | 332 |
| A01020 | A01470 | 491 | A01020 | A01488 | 479 |
| A01020 | A01492 | 491 | A01020 | A01495 | 334 |
| A01020 | A01500 | 456 | A01020 | A01503 | 418 |
| A01020 | A01597 | 279 | A01020 | A01598 | 486 |
| A01020 | A01649 | 488 | A01020 | A01741 | 384 |
| A01020 | A01743 | 228 | A01020 | A01941 | 172 |
| A01020 | A02064 | 456 | A01020 | A02226 | 187 |
| A01020 | A02265 | 285 | A01020 | A02364 | 162 |
| A01020 | A02802 | 340 | A01020 | A02978 | 423 |
| A01020 | A03112 | 199 | A01020 | A03438 | 281 |
| A01020 | A03567 | 316 | A01020 | A03734 | 344 |
| A01020 | A03859 | 454 | A01020 | A04948 | 215 |
| A01020 | A06046 | 173 | A01020 | A06273 | 185 |
| A01020 | A06275 | 491 | A01020 | A06861 | 405 |
| A01020 | A07223 | 587 | A01020 | A07244 | 152 |
| A01020 | A07347 | 491 | A01020 | A07360 | 241 |
| A01020 | A07524 | 677 | A01020 | A07533 | 441 |
| A01020 | A07584 | 490 | A01020 | A07625 | 488 |
| A01020 | A07695 | 235 | A01020 | A07697 | 234 |
| A01020 | A07700 | 638 | A01020 | A07706 | 491 |
| A01020 | A07725 | 582 | A01020 | A07924 | 491 |
| A01020 | A07968 | 188 | A01020 | A08011 | 352 |
| A01020 | A08022 | 491 | A01020 | A08024 | 486 |
| A01020 | A08112 | 188 | A01020 | A08144 | 587 |
| A01020 | A08211 | 491 | A01020 | A08356 | 363 |
| A01020 | A08357 | 386 | A01020 | A08382 | 411 |
| A01020 | A08439 | 216 | A01020 | A08491 | 703 |
| A01020 | A08518 | 162 | A01020 | A08524 | 323 |
| A01020 | A08553 | 306 | A01020 | A08558 | 373 |
| A01020 | A08767 | 469 | A01020 | A08807 | 515 |
| A01020 | A09004 | 176 | A01020 | A09307 | 412 |
| A01020 | A09619 | 707 | A01020 | A09664 | 375 |
| A01020 | A10456 | 491 | A01020 | A10616 | 486 |
| A01020 | A10923 | 141 | A01020 | A11395 | 367 |
| A01020 | A11565 | 491 | A01020 | A12254 | 384 |
| A01020 | A12569 | 162 | A01020 | A12696 | 236 |
| A01020 | A12824 | 469 | A01020 | A13045 | 475 |
| A01020 | A13055 | 377 | A01020 | A13076 | 215 |
| A01020 | A13294 | 109 | A01020 | A13532 | 316 |

|        |        |     |        |        |     |
|--------|--------|-----|--------|--------|-----|
| A01020 | A13989 | 664 | A01020 | A13992 | 174 |
| A01020 | A14449 | 670 | A01020 | A14505 | 422 |
| A01020 | A14566 | 486 | A01020 | A14655 | 489 |
| A01020 | A14701 | 479 | A01020 | A15215 | 227 |
| A01020 | A15498 | 340 | A01020 | A15624 | 530 |
| A01020 | A15666 | 351 | A01020 | A15684 | 205 |
| A01020 | A15764 | 434 | A01020 | A15932 | 689 |
| A01020 | A15933 | 191 | A01020 | A15946 | 486 |
| A01020 | A16302 | 406 | A01020 | A16487 | 215 |
| A01021 | A01022 | 366 | A01021 | A01026 | 481 |
| A01021 | A01064 | 490 | A01021 | A01074 | 303 |
| A01021 | A01080 | 460 | A01021 | A01093 | 462 |
| A01021 | A01099 | 491 | A01021 | A01100 | 491 |
| A01021 | A01135 | 486 | A01021 | A01149 | 477 |
| A01021 | A01177 | 165 | A01021 | A01187 | 232 |
| A01021 | A01205 | 221 | A01021 | A01244 | 371 |
| A01021 | A01250 | 466 | A01021 | A01269 | 491 |
| A01021 | A01296 | 360 | A01021 | A01308 | 236 |
| A01021 | A01315 | 457 | A01021 | A01320 | 230 |
| A01021 | A01322 | 489 | A01021 | A01341 | 477 |
| A01021 | A01360 | 364 | A01021 | A01375 | 491 |
| A01021 | A01388 | 281 | A01021 | A01415 | 490 |
| A01021 | A01425 | 340 | A01021 | A01459 | 154 |
| A01021 | A01469 | 180 | A01021 | A01483 | 423 |
| A01021 | A01492 | 174 | A01021 | A01514 | 384 |
| A01021 | A01535 | 347 | A01021 | A01536 | 491 |
| A01021 | A01559 | 491 | A01021 | A01589 | 491 |
| A01021 | A01594 | 484 | A01021 | A01622 | 489 |
| A01021 | A01625 | 423 | A01021 | A01659 | 393 |
| A01021 | A01680 | 162 | A01021 | A01686 | 491 |
| A01021 | A02058 | 445 | A01021 | A02278 | 210 |
| A01021 | A02479 | 266 | A01021 | A02731 | 379 |
| A01021 | A03057 | 608 | A01021 | A03119 | 260 |
| A01021 | A03232 | 388 | A01021 | A03728 | 491 |
| A01021 | A03922 | 452 | A01021 | A04161 | 684 |
| A01021 | A04178 | 438 | A01021 | A04205 | 235 |
| A01021 | A04364 | 198 | A01021 | A04375 | 460 |
| A01021 | A04449 | 268 | A01021 | A04606 | 201 |
| A01021 | A04668 | 491 | A01021 | A04743 | 385 |
| A01021 | A05016 | 218 | A01021 | A05124 | 216 |
| A01021 | A05218 | 313 | A01021 | A05332 | 171 |
| A01021 | A05334 | 429 | A01021 | A05503 | 151 |
| A01021 | A05575 | 219 | A01021 | A05872 | 333 |
| A01021 | A05873 | 312 | A01021 | A05959 | 224 |
| A01021 | A06085 | 490 | A01021 | A06128 | 312 |
| A01021 | A06146 | 162 | A01021 | A06242 | 486 |

|        |        |     |        |        |     |
|--------|--------|-----|--------|--------|-----|
| A01021 | A06262 | 201 | A01021 | A06264 | 489 |
| A01021 | A06297 | 443 | A01021 | A06472 | 491 |
| A01021 | A06752 | 491 | A01021 | A06753 | 362 |
| A01021 | A06775 | 152 | A01021 | A06829 | 480 |
| A01021 | A06851 | 347 | A01021 | A06864 | 485 |
| A01021 | A06924 | 491 | A01021 | A06982 | 491 |
| A01021 | A07232 | 481 | A01021 | A07319 | 491 |
| A01021 | A07332 | 430 | A01021 | A07346 | 491 |
| A01021 | A07480 | 491 | A01021 | A07534 | 491 |
| A01021 | A07603 | 488 | A01021 | A07647 | 470 |
| A01021 | A07880 | 491 | A01021 | A07889 | 486 |
| A01021 | A07902 | 480 | A01021 | A07996 | 491 |
| A01021 | A08000 | 417 | A01021 | A08030 | 491 |
| A01021 | A08117 | 491 | A01021 | A08141 | 343 |
| A01021 | A08208 | 473 | A01021 | A08212 | 475 |
| A01021 | A08215 | 401 | A01021 | A08221 | 163 |
| A01021 | A08516 | 468 | A01021 | A08669 | 480 |
| A01021 | A08769 | 490 | A01021 | A08820 | 490 |
| A01021 | A08957 | 179 | A01021 | A09135 | 218 |
| A01021 | A09153 | 272 | A01021 | A09276 | 288 |
| A01021 | A09300 | 479 | A01021 | A09450 | 452 |
| A01021 | A09598 | 303 | A01021 | A09714 | 440 |
| A01021 | A09765 | 179 | A01021 | A09959 | 162 |
| A01021 | A10246 | 312 | A01021 | A10373 | 491 |
| A01021 | A10525 | 182 | A01021 | A10532 | 216 |
| A01021 | A10870 | 63  | A01021 | A10872 | 236 |
| A01021 | A10929 | 236 | A01021 | A11236 | 491 |
| A01021 | A11703 | 412 | A01021 | A11778 | 236 |
| A01021 | A11803 | 236 | A01021 | A11830 | 491 |
| A01021 | A11916 | 491 | A01021 | A12060 | 179 |
| A01021 | A12174 | 333 | A01021 | A12188 | 382 |
| A01021 | A12190 | 179 | A01021 | A12413 | 201 |
| A01021 | A12556 | 491 | A01021 | A12625 | 479 |
| A01021 | A12800 | 312 | A01021 | A12835 | 252 |
| A01021 | A12888 | 296 | A01021 | A13095 | 236 |
| A01021 | A13100 | 333 | A01021 | A13101 | 333 |
| A01021 | A13112 | 236 | A01021 | A13113 | 236 |
| A01021 | A13114 | 236 | A01021 | A13511 | 462 |
| A01021 | A13913 | 157 | A01021 | A13949 | 491 |
| A01021 | A14076 | 491 | A01021 | A14077 | 254 |
| A01021 | A14079 | 491 | A01021 | A14094 | 479 |
| A01021 | A14154 | 271 | A01021 | A14209 | 154 |
| A01021 | A14230 | 491 | A01021 | A14272 | 469 |
| A01021 | A14273 | 475 | A01021 | A14282 | 385 |
| A01021 | A14336 | 457 | A01021 | A14460 | 491 |
| A01021 | A14484 | 490 | A01021 | A14502 | 263 |

|        |        |     |        |        |     |
|--------|--------|-----|--------|--------|-----|
| A01021 | A14614 | 185 | A01021 | A14642 | 198 |
| A01021 | A14694 | 489 | A01021 | A14701 | 491 |
| A01021 | A14810 | 472 | A01021 | A14819 | 243 |
| A01021 | A15260 | 162 | A01021 | A15367 | 341 |
| A01021 | A15369 | 491 | A01021 | A15370 | 450 |
| A01021 | A15372 | 247 | A01021 | A15524 | 374 |
| A01021 | A15557 | 274 | A01021 | A15622 | 332 |
| A01021 | A15633 | 236 | A01021 | A15714 | 154 |
| A01021 | A15837 | 491 | A01021 | A15858 | 196 |
| A01021 | A15941 | 371 | A01021 | A16068 | 480 |
| A01021 | A16127 | 491 | A01021 | A16128 | 491 |
| A01021 | A16129 | 486 | A01021 | A16225 | 229 |
| A01021 | A16226 | 489 | A01021 | A16299 | 274 |
| A01021 | A16378 | 484 | A01021 | A16408 | 412 |
| A01021 | A16423 | 272 | A01021 | A16606 | 310 |
| A01021 | A16611 | 238 | A01021 | A16613 | 491 |
| A01021 | A16626 | 491 | A01021 | A16635 | 436 |
| A01021 | A16707 | 162 | A01021 | A16725 | 238 |
| A01021 | A16738 | 199 | A01021 | A16754 | 286 |
| A01021 | A17120 | 201 | A01022 | A01026 | 469 |
| A01022 | A01035 | 491 | A01022 | A01075 | 302 |
| A01022 | A01091 | 484 | A01022 | A01102 | 218 |
| A01022 | A01140 | 172 | A01022 | A01161 | 581 |
| A01022 | A01211 | 491 | A01022 | A01234 | 339 |
| A01022 | A01235 | 373 | A01022 | A01326 | 306 |
| A01022 | A01397 | 151 | A01022 | A01419 | 302 |
| A01022 | A01425 | 302 | A01022 | A01451 | 555 |
| A01022 | A01452 | 162 | A01022 | A01457 | 568 |
| A01022 | A01458 | 706 | A01022 | A01459 | 230 |
| A01022 | A01460 | 374 | A01022 | A01461 | 310 |
| A01022 | A01481 | 491 | A01022 | A01492 | 484 |
| A01022 | A01500 | 604 | A01022 | A01503 | 552 |
| A01022 | A01513 | 612 | A01022 | A01515 | 368 |
| A01022 | A01522 | 486 | A01022 | A01524 | 535 |
| A01022 | A01542 | 202 | A01022 | A01551 | 219 |
| A01022 | A01573 | 361 | A01022 | A01574 | 611 |
| A01022 | A01575 | 308 | A01022 | A01578 | 379 |
| A01022 | A01582 | 489 | A01022 | A01585 | 753 |
| A01022 | A01612 | 160 | A01022 | A01627 | 278 |
| A01022 | A01632 | 316 | A01022 | A01634 | 488 |
| A01022 | A01646 | 491 | A01022 | A01683 | 424 |
| A01022 | A01693 | 174 | A01022 | A01723 | 413 |
| A01022 | A01772 | 171 | A01022 | A01788 | 389 |
| A01022 | A01794 | 204 | A01022 | A01895 | 258 |
| A01022 | A01931 | 306 | A01022 | A01995 | 217 |
| A01022 | A02148 | 208 | A01022 | A02212 | 170 |

|        |        |     |        |        |     |
|--------|--------|-----|--------|--------|-----|
| A01022 | A02215 | 357 | A01022 | A02222 | 364 |
| A01022 | A02224 | 462 | A01022 | A02290 | 251 |
| A01022 | A02301 | 163 | A01022 | A02333 | 296 |
| A01022 | A02364 | 428 | A01022 | A02476 | 201 |
| A01022 | A02477 | 452 | A01022 | A02485 | 263 |
| A01022 | A02491 | 152 | A01022 | A02565 | 217 |
| A01022 | A02837 | 229 | A01022 | A02924 | 490 |
| A01022 | A03057 | 218 | A01022 | A03095 | 302 |
| A01022 | A03104 | 457 | A01022 | A03120 | 199 |
| A01022 | A03293 | 491 | A01022 | A03304 | 449 |
| A01022 | A03417 | 313 | A01022 | A03536 | 63  |
| A01022 | A03562 | 258 | A01022 | A03618 | 157 |
| A01022 | A03682 | 546 | A01022 | A03819 | 313 |
| A01022 | A03854 | 260 | A01022 | A03880 | 428 |
| A01022 | A03910 | 299 | A01022 | A03993 | 191 |
| A01022 | A04161 | 391 | A01022 | A04231 | 217 |
| A01022 | A04304 | 151 | A01022 | A04337 | 491 |
| A01022 | A04410 | 245 | A01022 | A04412 | 199 |
| A01022 | A04424 | 196 | A01022 | A04449 | 217 |
| A01022 | A04488 | 390 | A01022 | A04520 | 235 |
| A01022 | A04620 | 270 | A01022 | A04652 | 168 |
| A01022 | A04668 | 392 | A01022 | A04710 | 205 |
| A01022 | A04835 | 413 | A01022 | A05027 | 182 |
| A01022 | A05155 | 360 | A01022 | A05234 | 689 |
| A01022 | A05240 | 159 | A01022 | A05245 | 420 |
| A01022 | A05253 | 168 | A01022 | A05356 | 180 |
| A01022 | A05426 | 229 | A01022 | A05587 | 151 |
| A01022 | A05594 | 356 | A01022 | A05640 | 243 |
| A01022 | A05689 | 217 | A01022 | A05710 | 185 |
| A01022 | A05726 | 324 | A01022 | A05891 | 474 |
| A01022 | A06038 | 251 | A01022 | A06086 | 154 |
| A01022 | A06168 | 378 | A01022 | A06171 | 243 |
| A01022 | A06316 | 243 | A01022 | A06320 | 190 |
| A01022 | A06334 | 207 | A01022 | A06347 | 260 |
| A01022 | A06478 | 243 | A01022 | A06617 | 229 |
| A01022 | A06689 | 180 | A01022 | A06815 | 199 |
| A01022 | A06999 | 380 | A01022 | A07071 | 263 |
| A01022 | A07190 | 154 | A01022 | A07203 | 252 |
| A01022 | A07209 | 345 | A01022 | A07433 | 223 |
| A01022 | A07442 | 491 | A01022 | A07605 | 232 |
| A01022 | A07815 | 318 | A01022 | A07958 | 193 |
| A01022 | A07985 | 324 | A01022 | A07997 | 335 |
| A01022 | A08369 | 157 | A01022 | A08400 | 490 |
| A01022 | A08461 | 324 | A01022 | A08777 | 485 |
| A01022 | A09210 | 228 | A01022 | A09416 | 326 |
| A01022 | A09431 | 160 | A01022 | A09504 | 223 |

|        |        |     |        |        |     |
|--------|--------|-----|--------|--------|-----|
| A01022 | A09507 | 238 | A01022 | A10156 | 467 |
| A01022 | A10237 | 185 | A01022 | A10340 | 168 |
| A01022 | A10532 | 203 | A01022 | A10620 | 185 |
| A01022 | A10651 | 357 | A01022 | A10667 | 460 |
| A01022 | A10742 | 151 | A01022 | A10778 | 258 |
| A01022 | A11130 | 217 | A01022 | A11220 | 296 |
| A01022 | A11264 | 279 | A01022 | A11308 | 420 |
| A01022 | A11394 | 157 | A01022 | A11403 | 191 |
| A01022 | A11411 | 346 | A01022 | A11428 | 165 |
| A01022 | A11698 | 199 | A01022 | A11982 | 165 |
| A01022 | A11983 | 256 | A01022 | A12022 | 229 |
| A01022 | A12119 | 217 | A01022 | A12214 | 318 |
| A01022 | A12241 | 394 | A01022 | A12265 | 217 |
| A01022 | A12412 | 157 | A01022 | A12605 | 207 |
| A01022 | A12787 | 246 | A01022 | A12789 | 207 |
| A01022 | A12883 | 414 | A01022 | A13369 | 274 |
| A01022 | A13511 | 428 | A01022 | A13617 | 312 |
| A01022 | A13798 | 243 | A01022 | A13831 | 558 |
| A01022 | A14056 | 658 | A01022 | A14192 | 198 |
| A01022 | A14196 | 480 | A01022 | A14272 | 491 |
| A01022 | A14381 | 488 | A01022 | A14410 | 371 |
| A01022 | A14461 | 489 | A01022 | A14498 | 265 |
| A01022 | A14589 | 486 | A01022 | A14643 | 213 |
| A01022 | A15282 | 474 | A01022 | A15315 | 174 |
| A01022 | A15317 | 430 | A01022 | A15322 | 260 |
| A01022 | A15345 | 274 | A01022 | A15347 | 245 |
| A01022 | A15384 | 428 | A01022 | A15419 | 152 |
| A01022 | A15422 | 375 | A01022 | A15588 | 338 |
| A01022 | A15617 | 265 | A01022 | A15646 | 283 |
| A01022 | A15867 | 205 | A01022 | A15917 | 475 |
| A01022 | A17057 | 168 | A01022 | A17078 | 313 |
| A01023 | A01081 | 369 | A01023 | A01086 | 216 |
| A01023 | A01108 | 212 | A01023 | A01204 | 307 |
| A01023 | A01246 | 319 | A01023 | A01346 | 232 |
| A01023 | A01399 | 205 | A01023 | A02814 | 302 |
| A01023 | A07597 | 329 | A01023 | A08293 | 162 |
| A01023 | A08356 | 274 | A01023 | A08362 | 305 |
| A01023 | A10535 | 344 | A01023 | A14212 | 345 |
| A01023 | A14213 | 378 | A01023 | A15286 | 364 |
| A01024 | A01050 | 418 | A01024 | A01116 | 279 |
| A01024 | A01166 | 63  | A01024 | A01178 | 366 |
| A01024 | A01181 | 467 | A01024 | A01201 | 177 |
| A01024 | A01209 | 163 | A01024 | A01214 | 645 |
| A01024 | A01226 | 491 | A01024 | A01234 | 594 |
| A01024 | A01261 | 241 | A01024 | A01304 | 491 |
| A01024 | A01492 | 171 | A01024 | A01588 | 221 |

|        |        |     |        |        |     |
|--------|--------|-----|--------|--------|-----|
| A01024 | A02336 | 163 | A01024 | A02745 | 180 |
| A01024 | A04163 | 227 | A01024 | A07348 | 249 |
| A01024 | A07360 | 402 | A01024 | A07414 | 488 |
| A01024 | A07467 | 151 | A01024 | A07658 | 329 |
| A01024 | A07695 | 491 | A01024 | A07706 | 455 |
| A01024 | A07882 | 255 | A01024 | A08118 | 266 |
| A01024 | A08144 | 491 | A01024 | A08269 | 307 |
| A01024 | A08363 | 180 | A01024 | A08494 | 394 |
| A01024 | A08537 | 152 | A01024 | A08860 | 259 |
| A01024 | A08892 | 470 | A01024 | A08971 | 447 |
| A01024 | A09280 | 224 | A01024 | A09451 | 374 |
| A01024 | A09515 | 373 | A01024 | A09526 | 346 |
| A01024 | A09538 | 281 | A01024 | A09621 | 467 |
| A01024 | A10608 | 307 | A01024 | A10875 | 197 |
| A01024 | A11401 | 419 | A01024 | A11927 | 154 |
| A01024 | A12447 | 353 | A01024 | A13251 | 255 |
| A01024 | A13870 | 364 | A01024 | A13965 | 154 |
| A01024 | A14006 | 207 | A01024 | A14074 | 254 |
| A01024 | A14449 | 374 | A01024 | A14540 | 270 |
| A01024 | A14596 | 419 | A01024 | A14614 | 180 |
| A01024 | A14655 | 395 | A01024 | A15661 | 205 |
| A01024 | A15684 | 196 | A01024 | A15932 | 218 |
| A01024 | A16157 | 470 | A01024 | A16243 | 151 |
| A01024 | A16320 | 266 | A01024 | A16400 | 383 |
| A01025 | A01031 | 435 | A01025 | A01034 | 491 |
| A01025 | A01037 | 491 | A01025 | A01047 | 491 |
| A01025 | A01056 | 441 | A01025 | A01067 | 635 |
| A01025 | A01072 | 483 | A01025 | A01085 | 460 |
| A01025 | A01090 | 491 | A01025 | A01095 | 428 |
| A01025 | A01098 | 489 | A01025 | A01101 | 483 |
| A01025 | A01106 | 236 | A01025 | A01112 | 470 |
| A01025 | A01115 | 345 | A01025 | A01121 | 185 |
| A01025 | A01127 | 491 | A01025 | A01140 | 490 |
| A01025 | A01150 | 301 | A01025 | A01154 | 227 |
| A01025 | A01161 | 307 | A01025 | A01166 | 480 |
| A01025 | A01184 | 490 | A01025 | A01186 | 435 |
| A01025 | A01189 | 465 | A01025 | A01204 | 156 |
| A01025 | A01206 | 491 | A01025 | A01218 | 165 |
| A01025 | A01221 | 374 | A01025 | A01234 | 491 |
| A01025 | A01238 | 477 | A01025 | A01243 | 477 |
| A01025 | A01247 | 290 | A01025 | A01249 | 664 |
| A01025 | A01263 | 447 | A01025 | A01268 | 259 |
| A01025 | A01282 | 263 | A01025 | A01291 | 491 |
| A01025 | A01292 | 477 | A01025 | A01294 | 193 |
| A01025 | A01306 | 491 | A01025 | A01335 | 663 |
| A01025 | A01338 | 470 | A01025 | A01365 | 475 |

|        |        |     |        |        |     |
|--------|--------|-----|--------|--------|-----|
| A01025 | A01384 | 324 | A01025 | A01392 | 665 |
| A01025 | A01411 | 293 | A01025 | A01416 | 491 |
| A01025 | A01425 | 469 | A01025 | A01433 | 662 |
| A01025 | A01436 | 665 | A01025 | A01437 | 430 |
| A01025 | A01449 | 388 | A01025 | A01457 | 294 |
| A01025 | A01464 | 480 | A01025 | A01468 | 485 |
| A01025 | A01470 | 490 | A01025 | A01496 | 450 |
| A01025 | A01569 | 374 | A01025 | A01579 | 489 |
| A01025 | A01586 | 291 | A01025 | A01597 | 486 |
| A01025 | A01598 | 350 | A01025 | A01612 | 337 |
| A01025 | A01614 | 267 | A01025 | A01617 | 356 |
| A01025 | A01649 | 491 | A01025 | A01718 | 487 |
| A01025 | A02068 | 207 | A01025 | A02216 | 249 |
| A01025 | A02738 | 435 | A01025 | A02978 | 201 |
| A01025 | A03069 | 469 | A01025 | A03446 | 216 |
| A01025 | A03490 | 341 | A01025 | A03567 | 491 |
| A01025 | A03705 | 374 | A01025 | A03740 | 188 |
| A01025 | A03754 | 380 | A01025 | A03859 | 362 |
| A01025 | A03980 | 238 | A01025 | A03981 | 205 |
| A01025 | A04846 | 266 | A01025 | A05121 | 201 |
| A01025 | A05385 | 160 | A01025 | A05443 | 188 |
| A01025 | A05499 | 291 | A01025 | A05501 | 454 |
| A01025 | A05502 | 202 | A01025 | A05891 | 234 |
| A01025 | A06279 | 279 | A01025 | A06351 | 491 |
| A01025 | A06388 | 187 | A01025 | A06814 | 274 |
| A01025 | A06861 | 491 | A01025 | A06909 | 348 |
| A01025 | A06965 | 491 | A01025 | A06973 | 436 |
| A01025 | A06987 | 306 | A01025 | A07312 | 152 |
| A01025 | A07398 | 195 | A01025 | A07412 | 332 |
| A01025 | A07449 | 488 | A01025 | A07451 | 477 |
| A01025 | A07481 | 229 | A01025 | A07581 | 338 |
| A01025 | A07597 | 373 | A01025 | A08011 | 664 |
| A01025 | A08052 | 269 | A01025 | A08055 | 481 |
| A01025 | A08088 | 213 | A01025 | A08137 | 154 |
| A01025 | A08154 | 322 | A01025 | A08357 | 490 |
| A01025 | A08359 | 462 | A01025 | A08398 | 302 |
| A01025 | A08427 | 172 | A01025 | A08452 | 477 |
| A01025 | A08457 | 177 | A01025 | A08550 | 176 |
| A01025 | A08559 | 477 | A01025 | A08664 | 259 |
| A01025 | A08773 | 490 | A01025 | A08972 | 260 |
| A01025 | A08973 | 484 | A01025 | A09285 | 201 |
| A01025 | A09293 | 422 | A01025 | A09322 | 491 |
| A01025 | A09332 | 457 | A01025 | A09674 | 462 |
| A01025 | A09713 | 160 | A01025 | A09735 | 324 |
| A01025 | A09978 | 347 | A01025 | A10417 | 270 |
| A01025 | A10529 | 196 | A01025 | A10616 | 380 |



|        |        |     |        |        |     |
|--------|--------|-----|--------|--------|-----|
| A01025 | A10910 | 152 | A01025 | A11364 | 187 |
| A01025 | A11390 | 278 | A01025 | A11438 | 491 |
| A01025 | A11480 | 378 | A01025 | A11704 | 393 |
| A01025 | A11992 | 393 | A01025 | A12157 | 312 |
| A01025 | A12310 | 283 | A01025 | A12653 | 160 |
| A01025 | A13249 | 389 | A01025 | A13340 | 260 |
| A01025 | A13855 | 347 | A01025 | A13989 | 491 |
| A01025 | A13992 | 484 | A01025 | A14188 | 402 |
| A01025 | A14216 | 441 | A01025 | A14449 | 286 |
| A01025 | A14479 | 208 | A01025 | A14482 | 491 |
| A01025 | A14508 | 157 | A01025 | A14568 | 208 |
| A01025 | A14597 | 198 | A01025 | A15218 | 419 |
| A01025 | A15235 | 353 | A01025 | A15500 | 472 |
| A01025 | A15660 | 446 | A01025 | A15684 | 305 |
| A01025 | A15988 | 491 | A01025 | A16118 | 491 |
| A01025 | A16306 | 281 | A01025 | A16631 | 188 |
| A01025 | A17095 | 213 | A01025 | A17152 | 157 |
| A01026 | A01027 | 182 | A01026 | A01075 | 204 |
| A01026 | A01087 | 173 | A01026 | A01091 | 243 |
| A01026 | A01093 | 185 | A01026 | A01161 | 367 |
| A01026 | A01186 | 343 | A01026 | A01211 | 466 |
| A01026 | A01250 | 216 | A01026 | A01313 | 491 |
| A01026 | A01326 | 377 | A01026 | A01352 | 323 |
| A01026 | A01354 | 333 | A01026 | A01360 | 394 |
| A01026 | A01377 | 722 | A01026 | A01385 | 196 |
| A01026 | A01386 | 491 | A01026 | A01406 | 262 |
| A01026 | A01428 | 152 | A01026 | A01501 | 188 |
| A01026 | A01524 | 899 | A01026 | A01529 | 171 |
| A01026 | A01530 | 154 | A01026 | A01559 | 243 |
| A01026 | A01634 | 180 | A01026 | A01900 | 162 |
| A01026 | A02278 | 267 | A01026 | A02361 | 268 |
| A01026 | A02704 | 446 | A01026 | A02774 | 302 |
| A01026 | A03057 | 314 | A01026 | A03237 | 310 |
| A01026 | A03573 | 168 | A01026 | A03591 | 330 |
| A01026 | A03859 | 163 | A01026 | A04145 | 449 |
| A01026 | A04337 | 475 | A01026 | A04579 | 350 |
| A01026 | A04668 | 371 | A01026 | A05052 | 332 |
| A01026 | A05720 | 303 | A01026 | A05775 | 369 |
| A01026 | A06357 | 185 | A01026 | A06390 | 303 |
| A01026 | A07069 | 190 | A01026 | A07345 | 196 |
| A01026 | A07558 | 470 | A01026 | A07693 | 477 |
| A01026 | A07976 | 398 | A01026 | A08113 | 489 |
| A01026 | A08260 | 303 | A01026 | A08263 | 488 |
| A01026 | A08293 | 301 | A01026 | A08346 | 446 |
| A01026 | A08402 | 491 | A01026 | A08484 | 329 |
| A01026 | A08656 | 218 | A01026 | A08975 | 477 |

|        |        |     |        |        |     |
|--------|--------|-----|--------|--------|-----|
| A01026 | A09118 | 273 | A01026 | A09135 | 452 |
| A01026 | A09648 | 719 | A01026 | A09876 | 179 |
| A01026 | A10160 | 185 | A01026 | A10420 | 198 |
| A01026 | A10607 | 323 | A01026 | A11291 | 247 |
| A01026 | A12952 | 174 | A01026 | A13551 | 254 |
| A01026 | A13873 | 945 | A01026 | A14077 | 491 |
| A01026 | A14092 | 490 | A01026 | A14191 | 491 |
| A01026 | A14196 | 485 | A01026 | A14220 | 435 |
| A01026 | A14272 | 722 | A01026 | A14288 | 168 |
| A01026 | A14594 | 204 | A01026 | A14707 | 338 |
| A01026 | A14840 | 313 | A01026 | A15034 | 319 |
| A01026 | A15367 | 491 | A01026 | A15383 | 489 |
| A01026 | A15510 | 288 | A01026 | A15562 | 227 |
| A01026 | A15596 | 424 | A01026 | A15673 | 163 |
| A01026 | A15867 | 472 | A01026 | A15877 | 490 |
| A01026 | A16919 | 208 | A01027 | A01042 | 486 |
| A01027 | A01054 | 488 | A01027 | A01067 | 219 |
| A01027 | A01069 | 446 | A01027 | A01075 | 488 |
| A01027 | A01086 | 592 | A01027 | A01088 | 463 |
| A01027 | A01100 | 486 | A01027 | A01101 | 479 |
| A01027 | A01108 | 591 | A01027 | A01139 | 224 |
| A01027 | A01150 | 659 | A01027 | A01156 | 490 |
| A01027 | A01161 | 591 | A01027 | A01204 | 515 |
| A01027 | A01208 | 424 | A01027 | A01221 | 489 |
| A01027 | A01232 | 665 | A01027 | A01242 | 385 |
| A01027 | A01246 | 380 | A01027 | A01265 | 455 |
| A01027 | A01287 | 399 | A01027 | A01293 | 616 |
| A01027 | A01311 | 491 | A01027 | A01326 | 441 |
| A01027 | A01346 | 591 | A01027 | A01352 | 484 |
| A01027 | A01379 | 341 | A01027 | A01382 | 180 |
| A01027 | A01385 | 491 | A01027 | A01399 | 659 |
| A01027 | A01412 | 447 | A01027 | A01413 | 185 |
| A01027 | A01431 | 383 | A01027 | A01439 | 486 |
| A01027 | A01443 | 561 | A01027 | A01446 | 491 |
| A01027 | A01448 | 489 | A01027 | A01458 | 350 |
| A01027 | A01492 | 484 | A01027 | A01540 | 479 |
| A01027 | A01569 | 368 | A01027 | A01585 | 475 |
| A01027 | A01613 | 477 | A01027 | A01711 | 208 |
| A01027 | A01741 | 279 | A01027 | A01894 | 291 |
| A01027 | A02353 | 452 | A01027 | A02718 | 201 |
| A01027 | A02814 | 346 | A01027 | A02994 | 247 |
| A01027 | A03438 | 441 | A01027 | A03454 | 488 |
| A01027 | A03494 | 353 | A01027 | A03677 | 160 |
| A01027 | A03740 | 490 | A01027 | A03809 | 383 |
| A01027 | A03901 | 218 | A01027 | A03959 | 453 |
| A01027 | A04337 | 353 | A01027 | A04668 | 491 |

|        |        |     |        |        |     |
|--------|--------|-----|--------|--------|-----|
| A01027 | A04895 | 489 | A01027 | A05227 | 383 |
| A01027 | A05234 | 235 | A01027 | A05258 | 491 |
| A01027 | A05387 | 252 | A01027 | A05839 | 163 |
| A01027 | A06466 | 377 | A01027 | A06543 | 372 |
| A01027 | A06637 | 165 | A01027 | A06959 | 462 |
| A01027 | A07160 | 296 | A01027 | A07208 | 443 |
| A01027 | A07237 | 418 | A01027 | A07350 | 217 |
| A01027 | A07360 | 467 | A01027 | A07524 | 441 |
| A01027 | A07569 | 255 | A01027 | A07597 | 278 |
| A01027 | A07706 | 391 | A01027 | A07744 | 491 |
| A01027 | A07881 | 665 | A01027 | A07911 | 611 |
| A01027 | A07983 | 252 | A01027 | A08098 | 491 |
| A01027 | A08178 | 258 | A01027 | A08228 | 665 |
| A01027 | A08327 | 167 | A01027 | A08356 | 313 |
| A01027 | A08398 | 243 | A01027 | A08402 | 484 |
| A01027 | A08491 | 377 | A01027 | A08527 | 321 |
| A01027 | A08548 | 665 | A01027 | A08567 | 483 |
| A01027 | A08763 | 450 | A01027 | A08835 | 358 |
| A01027 | A08987 | 439 | A01027 | A09616 | 218 |
| A01027 | A09735 | 469 | A01027 | A10373 | 412 |
| A01027 | A10498 | 230 | A01027 | A10798 | 455 |
| A01027 | A11296 | 327 | A01027 | A11322 | 484 |
| A01027 | A11338 | 480 | A01027 | A11374 | 204 |
| A01027 | A11381 | 377 | A01027 | A11419 | 490 |
| A01027 | A11427 | 462 | A01027 | A11677 | 463 |
| A01027 | A11975 | 457 | A01027 | A13298 | 441 |
| A01027 | A13963 | 466 | A01027 | A14083 | 488 |
| A01027 | A14209 | 180 | A01027 | A14272 | 491 |
| A01027 | A14449 | 249 | A01027 | A14655 | 443 |
| A01027 | A14699 | 665 | A01027 | A14701 | 335 |
| A01027 | A14778 | 663 | A01027 | A14888 | 207 |
| A01027 | A15422 | 329 | A01027 | A15498 | 221 |
| A01027 | A15624 | 413 | A01027 | A15652 | 241 |
| A01027 | A15653 | 401 | A01027 | A15660 | 490 |
| A01027 | A15662 | 516 | A01027 | A15684 | 491 |
| A01027 | A15746 | 484 | A01027 | A15931 | 269 |
| A01027 | A15932 | 491 | A01027 | A15933 | 457 |
| A01027 | A15937 | 491 | A01027 | A15949 | 360 |
| A01027 | A16117 | 204 | A01027 | A16587 | 247 |
| A01027 | A16655 | 195 | A01027 | A16680 | 245 |
| A01028 | A01065 | 210 | A01028 | A01092 | 521 |
| A01028 | A01098 | 210 | A01028 | A01120 | 226 |
| A01028 | A01129 | 170 | A01028 | A01160 | 170 |
| A01028 | A01168 | 207 | A01028 | A01242 | 243 |
| A01028 | A01291 | 334 | A01028 | A01295 | 224 |
| A01028 | A01349 | 193 | A01028 | A01351 | 170 |

|        |        |     |        |        |     |
|--------|--------|-----|--------|--------|-----|
| A01028 | A01356 | 170 | A01028 | A01379 | 210 |
| A01028 | A01425 | 170 | A01028 | A01439 | 210 |
| A01028 | A01471 | 299 | A01028 | A01492 | 210 |
| A01028 | A01538 | 502 | A01028 | A01598 | 536 |
| A01028 | A01602 | 534 | A01028 | A01614 | 522 |
| A01028 | A01649 | 290 | A01028 | A02208 | 472 |
| A01028 | A02265 | 261 | A01028 | A02737 | 311 |
| A01028 | A02978 | 502 | A01028 | A03161 | 345 |
| A01028 | A03438 | 530 | A01028 | A03652 | 170 |
| A01028 | A03859 | 470 | A01028 | A03981 | 170 |
| A01028 | A04012 | 273 | A01028 | A05221 | 485 |
| A01028 | A05230 | 210 | A01028 | A06356 | 170 |
| A01028 | A06825 | 391 | A01028 | A07076 | 210 |
| A01028 | A07203 | 738 | A01028 | A07244 | 170 |
| A01028 | A07524 | 170 | A01028 | A07924 | 170 |
| A01028 | A08211 | 170 | A01028 | A08773 | 188 |
| A01028 | A08892 | 172 | A01028 | A09292 | 210 |
| A01028 | A09697 | 522 | A01028 | A09715 | 483 |
| A01028 | A13052 | 210 | A01028 | A13837 | 322 |
| A01028 | A13989 | 554 | A01028 | A14172 | 340 |
| A01028 | A14816 | 210 | A01028 | A16281 | 386 |
| A01029 | A01075 | 383 | A01029 | A01088 | 486 |
| A01029 | A01136 | 539 | A01029 | A01150 | 198 |
| A01029 | A01151 | 332 | A01029 | A01193 | 380 |
| A01029 | A01206 | 198 | A01029 | A01234 | 477 |
| A01029 | A01266 | 541 | A01029 | A01268 | 542 |
| A01029 | A01285 | 462 | A01029 | A01295 | 537 |
| A01029 | A01299 | 346 | A01029 | A01334 | 541 |
| A01029 | A01391 | 158 | A01029 | A01434 | 536 |
| A01029 | A01468 | 390 | A01029 | A01470 | 152 |
| A01029 | A01483 | 167 | A01029 | A01492 | 484 |
| A01029 | A01598 | 480 | A01029 | A01612 | 491 |
| A01029 | A01615 | 373 | A01029 | A02671 | 348 |
| A01029 | A03494 | 419 | A01029 | A03569 | 473 |
| A01029 | A04899 | 228 | A01029 | A05120 | 171 |
| A01029 | A06584 | 278 | A01029 | A07524 | 491 |
| A01029 | A07706 | 279 | A01029 | A07898 | 156 |
| A01029 | A07924 | 369 | A01029 | A08022 | 290 |
| A01029 | A08137 | 491 | A01029 | A08201 | 156 |
| A01029 | A08327 | 745 | A01029 | A08431 | 540 |
| A01029 | A08542 | 518 | A01029 | A08571 | 486 |
| A01029 | A08756 | 185 | A01029 | A08903 | 205 |
| A01029 | A09699 | 414 | A01029 | A11496 | 262 |
| A01029 | A11497 | 179 | A01029 | A11555 | 296 |
| A01029 | A11938 | 490 | A01029 | A11965 | 396 |
| A01029 | A12082 | 291 | A01029 | A12146 | 429 |

|        |        |     |        |        |     |
|--------|--------|-----|--------|--------|-----|
| A01029 | A12202 | 321 | A01029 | A12757 | 490 |
| A01029 | A13510 | 489 | A01029 | A13928 | 156 |
| A01029 | A13989 | 489 | A01029 | A14006 | 474 |
| A01029 | A14178 | 538 | A01029 | A14184 | 241 |
| A01029 | A14220 | 159 | A01029 | A14257 | 360 |
| A01029 | A14408 | 165 | A01029 | A14655 | 485 |
| A01029 | A14728 | 491 | A01029 | A14826 | 491 |
| A01029 | A14986 | 362 | A01029 | A15131 | 299 |
| A01029 | A15266 | 480 | A01029 | A15334 | 291 |
| A01029 | A15366 | 241 | A01029 | A15504 | 180 |
| A01029 | A15559 | 401 | A01029 | A15629 | 485 |
| A01029 | A15729 | 411 | A01029 | A15890 | 327 |
| A01029 | A16048 | 160 | A01029 | A16209 | 221 |
| A01029 | A16699 | 156 | A01029 | A16798 | 221 |
| A01029 | A17123 | 191 | A01030 | A01730 | 184 |
| A01030 | A02687 | 223 | A01030 | A03070 | 369 |
| A01031 | A01037 | 168 | A01031 | A01047 | 243 |
| A01031 | A01090 | 385 | A01031 | A01113 | 165 |
| A01031 | A01115 | 369 | A01031 | A01291 | 384 |
| A01031 | A01392 | 151 | A01031 | A01454 | 184 |
| A01031 | A01569 | 391 | A01031 | A03421 | 479 |
| A01031 | A03860 | 187 | A01031 | A07464 | 281 |
| A01031 | A08055 | 398 | A01031 | A08133 | 199 |
| A01031 | A08255 | 383 | A01031 | A08273 | 243 |
| A01031 | A08664 | 236 | A01031 | A08991 | 251 |
| A01031 | A09722 | 334 | A01031 | A09902 | 171 |
| A01031 | A09978 | 229 | A01031 | A10490 | 177 |
| A01031 | A13149 | 172 | A01031 | A13587 | 199 |
| A01031 | A13663 | 334 | A01031 | A13900 | 283 |
| A01031 | A14351 | 191 | A01031 | A17066 | 463 |
| A01032 | A01033 | 491 | A01032 | A01075 | 489 |
| A01032 | A01084 | 398 | A01032 | A01087 | 461 |
| A01032 | A01088 | 477 | A01032 | A01136 | 283 |
| A01032 | A01206 | 491 | A01032 | A01234 | 491 |
| A01032 | A01354 | 452 | A01032 | A01425 | 468 |
| A01032 | A01461 | 227 | A01032 | A01468 | 374 |
| A01032 | A01470 | 306 | A01032 | A01500 | 454 |
| A01032 | A01503 | 425 | A01032 | A01515 | 414 |
| A01032 | A01522 | 548 | A01032 | A01575 | 438 |
| A01032 | A01585 | 281 | A01032 | A01684 | 193 |
| A01032 | A02064 | 366 | A01032 | A02148 | 541 |
| A01032 | A02853 | 251 | A01032 | A02877 | 165 |
| A01032 | A02925 | 187 | A01032 | A03422 | 218 |
| A01032 | A03618 | 332 | A01032 | A03726 | 183 |
| A01032 | A03734 | 469 | A01032 | A03892 | 324 |
| A01032 | A05350 | 243 | A01032 | A05838 | 188 |

|        |        |     |        |        |     |
|--------|--------|-----|--------|--------|-----|
| A01032 | A07076 | 208 | A01032 | A07677 | 160 |
| A01032 | A07700 | 424 | A01032 | A08022 | 491 |
| A01032 | A08118 | 468 | A01032 | A08439 | 201 |
| A01032 | A08461 | 491 | A01032 | A08528 | 252 |
| A01032 | A08857 | 356 | A01032 | A09277 | 157 |
| A01032 | A10321 | 215 | A01032 | A10642 | 424 |
| A01032 | A11913 | 363 | A01032 | A13989 | 592 |
| A01032 | A14112 | 174 | A01032 | A14193 | 185 |
| A01032 | A15629 | 162 | A01033 | A01057 | 184 |
| A01033 | A01261 | 165 | A01033 | A01354 | 424 |
| A01033 | A01385 | 185 | A01033 | A01438 | 163 |
| A01033 | A04858 | 180 | A01033 | A08118 | 477 |
| A01033 | A08137 | 254 | A01033 | A08863 | 193 |
| A01033 | A13989 | 283 | A01033 | A14006 | 170 |
| A01033 | A16623 | 302 | A01034 | A01037 | 489 |
| A01034 | A01038 | 418 | A01034 | A01054 | 221 |
| A01034 | A01067 | 491 | A01034 | A01085 | 258 |
| A01034 | A01095 | 469 | A01034 | A01101 | 369 |
| A01034 | A01152 | 196 | A01034 | A01184 | 217 |
| A01034 | A01202 | 170 | A01034 | A01206 | 196 |
| A01034 | A01238 | 349 | A01034 | A01247 | 489 |
| A01034 | A01263 | 486 | A01034 | A01291 | 491 |
| A01034 | A01365 | 399 | A01034 | A01379 | 154 |
| A01034 | A01392 | 491 | A01034 | A01416 | 633 |
| A01034 | A01433 | 491 | A01034 | A01436 | 451 |
| A01034 | A01437 | 327 | A01034 | A01443 | 168 |
| A01034 | A01446 | 454 | A01034 | A01447 | 273 |
| A01034 | A01448 | 198 | A01034 | A01449 | 196 |
| A01034 | A01518 | 184 | A01034 | A02966 | 279 |
| A01034 | A03490 | 366 | A01034 | A03981 | 229 |
| A01034 | A05501 | 173 | A01034 | A06351 | 343 |
| A01034 | A07360 | 307 | A01034 | A07394 | 160 |
| A01034 | A08011 | 491 | A01034 | A08357 | 324 |
| A01034 | A08377 | 199 | A01034 | A08543 | 462 |
| A01034 | A08550 | 491 | A01034 | A08556 | 321 |
| A01034 | A08773 | 491 | A01034 | A08973 | 491 |
| A01034 | A09332 | 626 | A01034 | A10316 | 366 |
| A01034 | A10793 | 170 | A01034 | A11597 | 160 |
| A01034 | A11728 | 351 | A01034 | A11815 | 343 |
| A01034 | A11992 | 475 | A01034 | A12433 | 491 |
| A01034 | A13707 | 388 | A01034 | A13989 | 491 |
| A01034 | A14167 | 183 | A01034 | A14479 | 265 |
| A01034 | A14482 | 638 | A01034 | A14569 | 322 |
| A01034 | A15500 | 173 | A01034 | A15666 | 386 |
| A01034 | A15771 | 173 | A01034 | A15917 | 202 |
| A01034 | A16583 | 193 | A01034 | A17133 | 156 |

|        |        |     |        |        |     |
|--------|--------|-----|--------|--------|-----|
| A01035 | A01060 | 269 | A01035 | A01451 | 595 |
| A01035 | A01457 | 382 | A01035 | A01458 | 491 |
| A01035 | A01459 | 269 | A01035 | A01500 | 202 |
| A01035 | A01503 | 449 | A01035 | A01514 | 269 |
| A01035 | A01522 | 267 | A01035 | A01568 | 221 |
| A01035 | A01575 | 213 | A01035 | A01583 | 269 |
| A01035 | A01585 | 208 | A01035 | A01634 | 249 |
| A01035 | A01646 | 452 | A01035 | A01706 | 269 |
| A01035 | A01713 | 491 | A01035 | A01714 | 218 |
| A01035 | A01926 | 167 | A01035 | A01978 | 441 |
| A01035 | A02132 | 279 | A01035 | A02168 | 217 |
| A01035 | A02215 | 311 | A01035 | A02992 | 299 |
| A01035 | A03050 | 490 | A01035 | A03206 | 272 |
| A01035 | A03293 | 382 | A01035 | A03513 | 173 |
| A01035 | A03673 | 191 | A01035 | A04292 | 269 |
| A01035 | A04314 | 168 | A01035 | A04686 | 274 |
| A01035 | A04778 | 180 | A01035 | A04839 | 491 |
| A01035 | A05024 | 269 | A01035 | A05390 | 379 |
| A01035 | A05516 | 154 | A01035 | A05638 | 269 |
| A01035 | A05776 | 228 | A01035 | A06011 | 269 |
| A01035 | A06252 | 199 | A01035 | A06320 | 154 |
| A01035 | A06527 | 350 | A01035 | A06847 | 191 |
| A01035 | A06908 | 168 | A01035 | A07004 | 207 |
| A01035 | A07242 | 477 | A01035 | A07300 | 266 |
| A01035 | A07407 | 160 | A01035 | A07495 | 486 |
| A01035 | A07519 | 488 | A01035 | A07542 | 260 |
| A01035 | A07561 | 229 | A01035 | A07610 | 274 |
| A01035 | A07629 | 199 | A01035 | A08079 | 224 |
| A01035 | A08089 | 210 | A01035 | A08484 | 269 |
| A01035 | A09326 | 269 | A01035 | A10444 | 157 |
| A01035 | A11032 | 401 | A01035 | A11279 | 269 |
| A01035 | A12163 | 418 | A01035 | A12214 | 260 |
| A01035 | A13130 | 241 | A01035 | A13871 | 491 |
| A01035 | A13895 | 269 | A01035 | A14056 | 229 |
| A01035 | A14090 | 291 | A01035 | A14182 | 269 |
| A01035 | A14272 | 489 | A01035 | A14440 | 195 |
| A01035 | A14461 | 481 | A01035 | A14661 | 269 |
| A01035 | A14711 | 269 | A01035 | A14783 | 269 |
| A01035 | A16286 | 162 | A01035 | A17020 | 224 |
| A01035 | A17078 | 490 | A01036 | A01114 | 157 |
| A01036 | A01206 | 398 | A01036 | A01216 | 455 |
| A01036 | A01308 | 430 | A01036 | A01358 | 357 |
| A01036 | A01366 | 490 | A01036 | A01402 | 162 |
| A01036 | A01451 | 489 | A01036 | A01454 | 491 |
| A01036 | A01458 | 254 | A01036 | A01459 | 491 |
| A01036 | A01514 | 491 | A01036 | A01568 | 491 |

|        |        |     |        |        |     |
|--------|--------|-----|--------|--------|-----|
| A01036 | A01575 | 475 | A01036 | A01580 | 491 |
| A01036 | A01647 | 358 | A01036 | A01687 | 491 |
| A01036 | A01955 | 283 | A01036 | A01988 | 486 |
| A01036 | A02010 | 491 | A01036 | A02573 | 491 |
| A01036 | A02635 | 353 | A01036 | A02866 | 163 |
| A01036 | A03025 | 159 | A01036 | A03032 | 367 |
| A01036 | A03080 | 475 | A01036 | A03496 | 263 |
| A01036 | A03710 | 170 | A01036 | A03880 | 151 |
| A01036 | A04845 | 664 | A01036 | A05301 | 490 |
| A01036 | A05327 | 154 | A01036 | A05638 | 230 |
| A01036 | A05894 | 420 | A01036 | A06176 | 491 |
| A01036 | A06591 | 491 | A01036 | A06715 | 357 |
| A01036 | A07054 | 747 | A01036 | A07083 | 468 |
| A01036 | A07242 | 657 | A01036 | A07274 | 163 |
| A01036 | A07404 | 489 | A01036 | A07483 | 491 |
| A01036 | A07495 | 491 | A01036 | A07665 | 269 |
| A01036 | A07696 | 469 | A01036 | A07709 | 358 |
| A01036 | A07816 | 491 | A01036 | A07893 | 491 |
| A01036 | A07934 | 477 | A01036 | A07937 | 177 |
| A01036 | A07942 | 479 | A01036 | A07954 | 491 |
| A01036 | A08056 | 489 | A01036 | A08151 | 163 |
| A01036 | A08192 | 374 | A01036 | A08360 | 449 |
| A01036 | A08531 | 771 | A01036 | A08535 | 191 |
| A01036 | A08536 | 480 | A01036 | A08551 | 486 |
| A01036 | A08910 | 480 | A01036 | A08917 | 477 |
| A01036 | A09256 | 157 | A01036 | A09309 | 193 |
| A01036 | A09624 | 485 | A01036 | A09662 | 486 |
| A01036 | A09666 | 182 | A01036 | A09668 | 254 |
| A01036 | A09757 | 666 | A01036 | A10250 | 257 |
| A01036 | A10607 | 163 | A01036 | A10909 | 213 |
| A01036 | A11281 | 226 | A01036 | A11346 | 485 |
| A01036 | A11408 | 296 | A01036 | A11661 | 420 |
| A01036 | A11675 | 183 | A01036 | A11917 | 430 |
| A01036 | A12004 | 176 | A01036 | A12047 | 491 |
| A01036 | A12234 | 613 | A01036 | A12258 | 408 |
| A01036 | A12337 | 377 | A01036 | A12538 | 758 |
| A01036 | A12678 | 800 | A01036 | A12722 | 491 |
| A01036 | A12834 | 825 | A01036 | A12858 | 216 |
| A01036 | A12873 | 154 | A01036 | A13313 | 311 |
| A01036 | A13804 | 251 | A01036 | A13894 | 398 |
| A01036 | A13895 | 491 | A01036 | A13942 | 326 |
| A01036 | A14163 | 302 | A01036 | A14167 | 234 |
| A01036 | A14266 | 491 | A01036 | A14271 | 208 |
| A01036 | A14278 | 396 | A01036 | A14281 | 491 |
| A01036 | A14286 | 305 | A01036 | A14474 | 491 |
| A01036 | A14484 | 486 | A01036 | A14633 | 491 |



|        |        |     |        |        |     |
|--------|--------|-----|--------|--------|-----|
| A01036 | A14661 | 474 | A01036 | A15102 | 210 |
| A01036 | A15273 | 463 | A01036 | A15501 | 481 |
| A01036 | A15502 | 174 | A01036 | A15685 | 246 |
| A01036 | A15857 | 213 | A01036 | A16048 | 319 |
| A01036 | A16565 | 385 | A01036 | A16611 | 162 |
| A01036 | A16664 | 176 | A01036 | A16675 | 198 |
| A01036 | A16804 | 154 | A01036 | A16850 | 489 |
| A01036 | A17034 | 229 | A01037 | A01056 | 602 |
| A01037 | A01067 | 481 | A01037 | A01072 | 565 |
| A01037 | A01090 | 340 | A01037 | A01095 | 391 |
| A01037 | A01100 | 173 | A01037 | A01140 | 595 |
| A01037 | A01152 | 195 | A01037 | A01211 | 157 |
| A01037 | A01263 | 196 | A01037 | A01264 | 163 |
| A01037 | A01291 | 547 | A01037 | A01338 | 350 |
| A01037 | A01365 | 171 | A01037 | A01392 | 490 |
| A01037 | A01416 | 483 | A01037 | A01425 | 491 |
| A01037 | A01433 | 491 | A01037 | A01436 | 490 |
| A01037 | A01448 | 196 | A01037 | A01449 | 299 |
| A01037 | A01451 | 165 | A01037 | A01457 | 195 |
| A01037 | A01458 | 153 | A01037 | A01503 | 154 |
| A01037 | A01601 | 202 | A01037 | A01646 | 291 |
| A01037 | A01649 | 187 | A01037 | A01690 | 177 |
| A01037 | A02185 | 269 | A01037 | A02878 | 434 |
| A01037 | A03438 | 201 | A01037 | A03461 | 355 |
| A01037 | A03581 | 269 | A01037 | A06324 | 193 |
| A01037 | A06351 | 268 | A01037 | A06814 | 602 |
| A01037 | A07243 | 235 | A01037 | A07412 | 602 |
| A01037 | A08011 | 491 | A01037 | A08052 | 603 |
| A01037 | A08055 | 238 | A01037 | A08273 | 601 |
| A01037 | A08315 | 269 | A01037 | A08550 | 160 |
| A01037 | A08558 | 334 | A01037 | A08773 | 491 |
| A01037 | A08973 | 488 | A01037 | A09073 | 232 |
| A01037 | A09293 | 458 | A01037 | A09332 | 479 |
| A01037 | A09620 | 599 | A01037 | A09697 | 269 |
| A01037 | A09722 | 391 | A01037 | A09735 | 224 |
| A01037 | A11724 | 162 | A01037 | A11992 | 201 |
| A01037 | A12433 | 185 | A01037 | A12923 | 399 |
| A01037 | A12925 | 235 | A01037 | A13107 | 460 |
| A01037 | A13512 | 310 | A01037 | A13581 | 269 |
| A01037 | A13989 | 560 | A01037 | A14216 | 179 |
| A01037 | A14449 | 345 | A01037 | A14482 | 480 |
| A01037 | A15174 | 293 | A01037 | A15219 | 184 |
| A01037 | A15771 | 171 | A01037 | A15837 | 269 |
| A01037 | A15932 | 367 | A01037 | A16027 | 269 |
| A01037 | A16157 | 167 | A01038 | A01101 | 154 |
| A01038 | A01144 | 484 | A01038 | A01206 | 416 |

|        |        |     |        |        |     |
|--------|--------|-----|--------|--------|-----|
| A01038 | A01238 | 174 | A01038 | A01247 | 380 |
| A01038 | A01263 | 291 | A01038 | A01291 | 566 |
| A01038 | A01425 | 199 | A01038 | A01433 | 460 |
| A01038 | A01446 | 152 | A01038 | A01496 | 491 |
| A01038 | A01601 | 423 | A01038 | A01649 | 167 |
| A01038 | A03513 | 162 | A01038 | A03809 | 490 |
| A01038 | A03981 | 485 | A01038 | A06746 | 291 |
| A01038 | A06814 | 183 | A01038 | A07311 | 297 |
| A01038 | A08011 | 374 | A01038 | A08377 | 475 |
| A01038 | A08501 | 177 | A01038 | A08543 | 428 |
| A01038 | A08550 | 182 | A01038 | A08653 | 179 |
| A01038 | A08773 | 183 | A01038 | A10001 | 199 |
| A01038 | A10328 | 221 | A01038 | A11728 | 435 |
| A01038 | A12105 | 229 | A01038 | A13424 | 156 |
| A01038 | A13707 | 234 | A01038 | A13989 | 417 |
| A01038 | A14167 | 195 | A01038 | A14216 | 669 |
| A01038 | A14816 | 483 | A01038 | A14878 | 252 |
| A01038 | A14937 | 154 | A01038 | A15030 | 193 |
| A01038 | A15651 | 165 | A01038 | A15666 | 470 |
| A01038 | A15743 | 165 | A01038 | A16587 | 165 |
| A01038 | A16790 | 490 | A01038 | A17133 | 168 |
| A01039 | A01058 | 160 | A01039 | A01077 | 160 |
| A01039 | A01080 | 326 | A01039 | A01097 | 457 |
| A01039 | A01209 | 200 | A01039 | A01267 | 160 |
| A01039 | A01282 | 185 | A01039 | A01339 | 160 |
| A01039 | A01444 | 465 | A01039 | A02054 | 291 |
| A01039 | A02063 | 291 | A01039 | A02212 | 160 |
| A01039 | A03115 | 200 | A01039 | A03570 | 408 |
| A01039 | A03837 | 213 | A01039 | A04714 | 286 |
| A01039 | A07096 | 160 | A01039 | A07226 | 160 |
| A01039 | A08834 | 160 | A01039 | A09627 | 160 |
| A01039 | A10372 | 160 | A01039 | A11365 | 160 |
| A01039 | A11735 | 160 | A01039 | A11737 | 160 |
| A01039 | A11914 | 160 | A01039 | A12658 | 160 |
| A01039 | A12824 | 160 | A01039 | A12853 | 396 |
| A01039 | A14007 | 160 | A01039 | A14457 | 201 |
| A01039 | A15257 | 288 | A01039 | A15710 | 208 |
| A01039 | A15725 | 274 | A01040 | A01061 | 228 |
| A01040 | A01065 | 341 | A01040 | A01092 | 176 |
| A01040 | A01112 | 334 | A01040 | A01116 | 334 |
| A01040 | A01120 | 440 | A01040 | A01122 | 263 |
| A01040 | A01136 | 462 | A01040 | A01166 | 429 |
| A01040 | A01206 | 489 | A01040 | A01234 | 481 |
| A01040 | A01243 | 174 | A01040 | A01304 | 334 |
| A01040 | A01384 | 483 | A01040 | A01420 | 474 |
| A01040 | A01439 | 357 | A01040 | A01468 | 154 |

|        |        |     |        |        |     |
|--------|--------|-----|--------|--------|-----|
| A01040 | A01470 | 491 | A01040 | A01492 | 457 |
| A01040 | A01495 | 370 | A01040 | A01496 | 469 |
| A01040 | A01538 | 318 | A01040 | A01539 | 689 |
| A01040 | A01569 | 577 | A01040 | A01597 | 488 |
| A01040 | A01598 | 491 | A01040 | A01614 | 490 |
| A01040 | A01649 | 491 | A01040 | A02003 | 198 |
| A01040 | A02978 | 235 | A01040 | A03082 | 218 |
| A01040 | A03296 | 210 | A01040 | A03567 | 159 |
| A01040 | A03863 | 502 | A01040 | A05654 | 183 |
| A01040 | A05708 | 323 | A01040 | A06020 | 330 |
| A01040 | A07016 | 260 | A01040 | A07135 | 219 |
| A01040 | A07223 | 334 | A01040 | A07347 | 324 |
| A01040 | A07348 | 355 | A01040 | A07700 | 334 |
| A01040 | A07725 | 395 | A01040 | A08258 | 374 |
| A01040 | A08357 | 411 | A01040 | A10917 | 286 |
| A01040 | A10993 | 266 | A01040 | A13989 | 490 |
| A01040 | A14817 | 208 | A01040 | A15338 | 335 |
| A01040 | A15498 | 259 | A01040 | A15567 | 299 |
| A01040 | A16228 | 219 | A01041 | A01283 | 463 |
| A01041 | A01308 | 291 | A01041 | A01309 | 491 |
| A01041 | A02106 | 385 | A01041 | A02499 | 172 |
| A01041 | A03496 | 466 | A01041 | A03553 | 180 |
| A01041 | A04867 | 227 | A01041 | A07242 | 278 |
| A01041 | A08255 | 290 | A01041 | A08377 | 227 |
| A01041 | A08502 | 160 | A01041 | A08543 | 273 |
| A01041 | A08550 | 301 | A01041 | A08552 | 372 |
| A01041 | A08556 | 198 | A01041 | A08995 | 198 |
| A01041 | A08996 | 193 | A01041 | A09010 | 200 |
| A01041 | A09298 | 157 | A01041 | A09333 | 265 |
| A01041 | A09609 | 293 | A01041 | A09622 | 224 |
| A01041 | A09828 | 205 | A01041 | A11156 | 198 |
| A01041 | A11301 | 174 | A01041 | A11471 | 221 |
| A01041 | A11472 | 362 | A01041 | A11496 | 230 |
| A01041 | A11497 | 321 | A01041 | A11551 | 185 |
| A01041 | A11616 | 201 | A01041 | A11675 | 301 |
| A01041 | A11917 | 369 | A01041 | A11940 | 435 |
| A01041 | A11953 | 217 | A01041 | A11992 | 176 |
| A01041 | A12254 | 277 | A01041 | A12255 | 353 |
| A01041 | A12433 | 319 | A01041 | A12501 | 191 |
| A01041 | A12508 | 182 | A01041 | A12606 | 196 |
| A01041 | A12658 | 391 | A01041 | A12665 | 294 |
| A01041 | A12825 | 218 | A01041 | A12858 | 269 |
| A01041 | A13309 | 191 | A01041 | A13313 | 391 |
| A01041 | A13665 | 207 | A01041 | A13706 | 157 |
| A01041 | A13707 | 188 | A01041 | A13708 | 328 |
| A01041 | A13734 | 372 | A01041 | A13737 | 243 |

|        |        |     |        |        |     |
|--------|--------|-----|--------|--------|-----|
| A01041 | A13781 | 263 | A01041 | A13784 | 196 |
| A01041 | A13787 | 317 | A01041 | A13788 | 249 |
| A01041 | A13804 | 281 | A01041 | A13912 | 305 |
| A01041 | A14192 | 491 | A01041 | A14214 | 291 |
| A01041 | A14263 | 419 | A01041 | A14270 | 224 |
| A01041 | A14288 | 308 | A01041 | A14569 | 188 |
| A01041 | A14570 | 177 | A01041 | A14719 | 224 |
| A01041 | A14799 | 180 | A01041 | A14917 | 246 |
| A01041 | A15187 | 223 | A01041 | A15189 | 154 |
| A01041 | A15870 | 152 | A01041 | A15940 | 247 |
| A01041 | A16157 | 306 | A01041 | A16187 | 337 |
| A01041 | A16343 | 308 | A01041 | A16552 | 283 |
| A01041 | A16565 | 299 | A01041 | A16566 | 260 |
| A01041 | A16567 | 283 | A01041 | A16597 | 385 |
| A01041 | A16608 | 262 | A01041 | A16611 | 335 |
| A01041 | A16664 | 162 | A01041 | A16675 | 355 |
| A01041 | A16680 | 283 | A01041 | A16701 | 277 |
| A01041 | A16703 | 216 | A01041 | A16709 | 469 |
| A01041 | A16776 | 382 | A01041 | A16824 | 299 |
| A01041 | A16829 | 255 | A01041 | A16874 | 251 |
| A01041 | A16905 | 201 | A01041 | A16913 | 398 |
| A01041 | A16954 | 364 | A01041 | A17018 | 378 |
| A01041 | A17030 | 382 | A01041 | A17033 | 374 |
| A01041 | A17035 | 205 | A01041 | A17190 | 254 |
| A01041 | A17211 | 252 | A01042 | A01054 | 475 |
| A01042 | A01075 | 350 | A01042 | A01083 | 491 |
| A01042 | A01086 | 249 | A01042 | A01090 | 321 |
| A01042 | A01108 | 377 | A01042 | A01112 | 486 |
| A01042 | A01115 | 477 | A01042 | A01127 | 404 |
| A01042 | A01150 | 491 | A01042 | A01161 | 486 |
| A01042 | A01194 | 390 | A01042 | A01206 | 224 |
| A01042 | A01216 | 195 | A01042 | A01218 | 199 |
| A01042 | A01232 | 396 | A01042 | A01234 | 317 |
| A01042 | A01249 | 296 | A01042 | A01265 | 489 |
| A01042 | A01287 | 291 | A01042 | A01289 | 371 |
| A01042 | A01291 | 491 | A01042 | A01300 | 374 |
| A01042 | A01306 | 420 | A01042 | A01335 | 380 |
| A01042 | A01399 | 416 | A01042 | A01413 | 246 |
| A01042 | A01431 | 491 | A01042 | A01435 | 491 |
| A01042 | A01446 | 765 | A01042 | A01448 | 401 |
| A01042 | A01470 | 475 | A01042 | A01496 | 364 |
| A01042 | A01539 | 462 | A01042 | A01540 | 491 |
| A01042 | A01569 | 470 | A01042 | A01574 | 462 |
| A01042 | A01579 | 491 | A01042 | A01598 | 215 |
| A01042 | A01601 | 228 | A01042 | A01646 | 279 |
| A01042 | A01649 | 386 | A01042 | A01684 | 286 |

|        |        |     |        |        |     |
|--------|--------|-----|--------|--------|-----|
| A01042 | A01707 | 477 | A01042 | A01822 | 188 |
| A01042 | A01850 | 483 | A01042 | A02350 | 434 |
| A01042 | A02715 | 167 | A01042 | A02791 | 279 |
| A01042 | A03293 | 294 | A01042 | A03446 | 400 |
| A01042 | A03516 | 479 | A01042 | A03536 | 274 |
| A01042 | A03567 | 427 | A01042 | A03691 | 224 |
| A01042 | A03740 | 491 | A01042 | A03752 | 491 |
| A01042 | A03809 | 486 | A01042 | A03959 | 477 |
| A01042 | A04686 | 232 | A01042 | A05043 | 338 |
| A01042 | A05086 | 637 | A01042 | A05501 | 274 |
| A01042 | A06037 | 473 | A01042 | A06466 | 491 |
| A01042 | A06965 | 391 | A01042 | A07086 | 218 |
| A01042 | A07208 | 483 | A01042 | A07220 | 152 |
| A01042 | A07262 | 184 | A01042 | A07311 | 491 |
| A01042 | A07451 | 394 | A01042 | A07505 | 174 |
| A01042 | A07527 | 385 | A01042 | A07773 | 312 |
| A01042 | A07798 | 480 | A01042 | A08053 | 480 |
| A01042 | A08054 | 491 | A01042 | A08301 | 204 |
| A01042 | A08359 | 484 | A01042 | A08461 | 205 |
| A01042 | A08676 | 208 | A01042 | A08835 | 441 |
| A01042 | A09263 | 212 | A01042 | A09285 | 157 |
| A01042 | A09297 | 174 | A01042 | A09476 | 486 |
| A01042 | A09502 | 475 | A01042 | A09581 | 355 |
| A01042 | A09648 | 458 | A01042 | A09792 | 162 |
| A01042 | A09902 | 358 | A01042 | A10532 | 205 |
| A01042 | A10728 | 389 | A01042 | A10797 | 484 |
| A01042 | A10798 | 491 | A01042 | A10935 | 157 |
| A01042 | A11244 | 337 | A01042 | A11296 | 490 |
| A01042 | A11297 | 218 | A01042 | A11302 | 491 |
| A01042 | A11322 | 490 | A01042 | A11337 | 465 |
| A01042 | A11338 | 468 | A01042 | A11372 | 491 |
| A01042 | A11374 | 328 | A01042 | A11419 | 196 |
| A01042 | A11427 | 485 | A01042 | A11438 | 168 |
| A01042 | A11644 | 176 | A01042 | A11724 | 480 |
| A01042 | A11974 | 205 | A01042 | A12241 | 443 |
| A01042 | A12328 | 486 | A01042 | A12329 | 372 |
| A01042 | A12990 | 368 | A01042 | A13261 | 162 |
| A01042 | A13340 | 491 | A01042 | A13521 | 162 |
| A01042 | A13655 | 205 | A01042 | A13889 | 401 |
| A01042 | A13989 | 490 | A01042 | A14041 | 184 |
| A01042 | A14073 | 491 | A01042 | A14138 | 257 |
| A01042 | A14188 | 435 | A01042 | A14216 | 279 |
| A01042 | A14461 | 344 | A01042 | A14596 | 213 |
| A01042 | A14642 | 439 | A01042 | A14699 | 157 |
| A01042 | A14845 | 228 | A01042 | A14923 | 184 |
| A01042 | A15244 | 488 | A01042 | A15500 | 340 |

|        |        |     |        |        |     |
|--------|--------|-----|--------|--------|-----|
| A01042 | A15660 | 491 | A01042 | A15684 | 491 |
| A01042 | A15699 | 489 | A01042 | A15923 | 160 |
| A01042 | A15931 | 429 | A01042 | A15938 | 283 |
| A01042 | A16092 | 174 | A01042 | A16118 | 207 |
| A01042 | A16371 | 241 | A01042 | A16437 | 234 |
| A01042 | A16540 | 196 | A01042 | A17128 | 241 |
| A01043 | A01276 | 491 | A01043 | A01481 | 213 |
| A01043 | A01953 | 348 | A01043 | A02052 | 322 |
| A01043 | A02240 | 490 | A01043 | A02288 | 324 |
| A01043 | A02439 | 185 | A01043 | A02457 | 263 |
| A01043 | A02458 | 462 | A01043 | A02460 | 385 |
| A01043 | A02654 | 340 | A01043 | A02945 | 205 |
| A01043 | A03093 | 385 | A01043 | A03177 | 232 |
| A01043 | A03224 | 243 | A01043 | A03239 | 486 |
| A01043 | A03413 | 252 | A01043 | A03447 | 441 |
| A01043 | A03610 | 257 | A01043 | A03724 | 347 |
| A01043 | A03735 | 490 | A01043 | A03746 | 491 |
| A01043 | A03788 | 159 | A01043 | A03900 | 489 |
| A01043 | A03948 | 414 | A01043 | A04050 | 294 |
| A01043 | A04130 | 446 | A01043 | A04217 | 452 |
| A01043 | A04389 | 318 | A01043 | A04609 | 246 |
| A01043 | A05517 | 288 | A01043 | A05597 | 274 |
| A01043 | A05679 | 185 | A01043 | A06293 | 297 |
| A01043 | A06415 | 455 | A01043 | A06747 | 238 |
| A01043 | A06956 | 316 | A01043 | A07010 | 363 |
| A01043 | A07152 | 311 | A01043 | A07381 | 160 |
| A01043 | A07529 | 324 | A01043 | A07764 | 310 |
| A01043 | A07960 | 443 | A01043 | A08651 | 353 |
| A01043 | A09259 | 406 | A01043 | A09482 | 385 |
| A01043 | A09933 | 210 | A01043 | A10319 | 208 |
| A01043 | A10681 | 294 | A01043 | A13035 | 401 |
| A01043 | A13369 | 154 | A01043 | A13821 | 319 |
| A01043 | A13988 | 272 | A01043 | A14071 | 162 |
| A01043 | A14125 | 414 | A01043 | A14362 | 374 |
| A01043 | A14372 | 486 | A01043 | A14374 | 152 |
| A01043 | A14380 | 340 | A01043 | A14381 | 462 |
| A01043 | A14391 | 157 | A01043 | A14392 | 177 |
| A01043 | A14394 | 165 | A01043 | A14439 | 240 |
| A01043 | A14554 | 408 | A01043 | A15425 | 429 |
| A01043 | A15427 | 257 | A01043 | A15475 | 384 |
| A01043 | A15642 | 228 | A01043 | A15790 | 363 |
| A01043 | A15812 | 385 | A01043 | A15819 | 366 |
| A01043 | A16034 | 274 | A01044 | A02786 | 243 |
| A01044 | A03611 | 188 | A01044 | A06379 | 246 |
| A01044 | A13826 | 208 | A01044 | A15867 | 414 |
| A01044 | A16224 | 321 | A01045 | A01550 | 335 |

|        |        |     |        |        |     |
|--------|--------|-----|--------|--------|-----|
| A01045 | A01595 | 273 | A01045 | A01651 | 160 |
| A01045 | A01660 | 369 | A01045 | A01692 | 419 |
| A01045 | A01699 | 232 | A01045 | A02695 | 246 |
| A01045 | A03472 | 191 | A01045 | A04008 | 176 |
| A01045 | A08532 | 490 | A01045 | A08815 | 165 |
| A01045 | A11921 | 229 | A01046 | A01096 | 306 |
| A01046 | A01117 | 465 | A01046 | A01230 | 196 |
| A01046 | A01242 | 491 | A01046 | A01256 | 454 |
| A01046 | A01305 | 313 | A01046 | A01322 | 299 |
| A01046 | A01404 | 462 | A01046 | A01405 | 446 |
| A01046 | A01548 | 290 | A01046 | A01550 | 188 |
| A01046 | A01576 | 199 | A01046 | A01595 | 199 |
| A01046 | A01612 | 171 | A01046 | A01630 | 199 |
| A01046 | A01635 | 330 | A01046 | A01870 | 463 |
| A01046 | A01926 | 205 | A01046 | A01947 | 218 |
| A01046 | A02026 | 63  | A01046 | A02118 | 241 |
| A01046 | A02138 | 312 | A01046 | A02242 | 180 |
| A01046 | A02252 | 196 | A01046 | A02279 | 174 |
| A01046 | A02287 | 488 | A01046 | A02353 | 423 |
| A01046 | A02423 | 446 | A01046 | A02456 | 469 |
| A01046 | A02459 | 216 | A01046 | A02460 | 352 |
| A01046 | A02480 | 152 | A01046 | A02636 | 191 |
| A01046 | A02654 | 346 | A01046 | A02655 | 491 |
| A01046 | A02657 | 205 | A01046 | A02681 | 172 |
| A01046 | A02695 | 475 | A01046 | A02794 | 215 |
| A01046 | A02830 | 358 | A01046 | A02840 | 234 |
| A01046 | A02852 | 174 | A01046 | A02853 | 241 |
| A01046 | A02877 | 474 | A01046 | A02902 | 491 |
| A01046 | A02903 | 188 | A01046 | A02904 | 219 |
| A01046 | A02922 | 170 | A01046 | A02931 | 489 |
| A01046 | A02935 | 439 | A01046 | A02965 | 274 |
| A01046 | A02970 | 160 | A01046 | A03007 | 430 |
| A01046 | A03044 | 157 | A01046 | A03112 | 322 |
| A01046 | A03144 | 490 | A01046 | A03194 | 294 |
| A01046 | A03229 | 196 | A01046 | A03239 | 263 |
| A01046 | A03316 | 183 | A01046 | A03484 | 221 |
| A01046 | A03788 | 269 | A01046 | A03832 | 163 |
| A01046 | A03950 | 452 | A01046 | A04076 | 173 |
| A01046 | A04192 | 234 | A01046 | A04211 | 152 |
| A01046 | A04346 | 221 | A01046 | A04701 | 201 |
| A01046 | A04734 | 183 | A01046 | A04908 | 204 |
| A01046 | A04927 | 185 | A01046 | A05310 | 188 |
| A01046 | A05350 | 234 | A01046 | A05462 | 353 |
| A01046 | A05670 | 486 | A01046 | A05794 | 262 |
| A01046 | A05828 | 170 | A01046 | A05985 | 414 |
| A01046 | A06015 | 483 | A01046 | A06046 | 257 |

|        |        |     |        |        |     |
|--------|--------|-----|--------|--------|-----|
| A01046 | A06086 | 375 | A01046 | A06359 | 446 |
| A01046 | A06402 | 311 | A01046 | A06405 | 341 |
| A01046 | A06415 | 456 | A01046 | A06466 | 199 |
| A01046 | A06592 | 202 | A01046 | A06643 | 251 |
| A01046 | A06650 | 152 | A01046 | A06689 | 503 |
| A01046 | A06733 | 174 | A01046 | A06764 | 215 |
| A01046 | A06773 | 380 | A01046 | A07145 | 162 |
| A01046 | A07184 | 369 | A01046 | A07343 | 322 |
| A01046 | A07503 | 180 | A01046 | A07800 | 177 |
| A01046 | A07961 | 458 | A01046 | A08133 | 196 |
| A01046 | A08325 | 400 | A01046 | A08711 | 219 |
| A01046 | A08757 | 294 | A01046 | A08904 | 199 |
| A01046 | A09471 | 185 | A01046 | A09789 | 152 |
| A01046 | A09917 | 219 | A01046 | A10030 | 400 |
| A01046 | A10031 | 457 | A01046 | A10078 | 246 |
| A01046 | A10537 | 322 | A01046 | A10556 | 491 |
| A01046 | A10605 | 279 | A01046 | A10709 | 255 |
| A01046 | A10796 | 469 | A01046 | A11387 | 394 |
| A01046 | A11649 | 277 | A01046 | A11994 | 491 |
| A01046 | A12055 | 219 | A01046 | A12378 | 276 |
| A01046 | A12824 | 159 | A01046 | A13034 | 486 |
| A01046 | A13071 | 294 | A01046 | A13821 | 183 |
| A01046 | A14374 | 436 | A01046 | A14376 | 154 |
| A01046 | A14424 | 262 | A01046 | A14502 | 391 |
| A01046 | A14600 | 234 | A01046 | A15518 | 174 |
| A01046 | A15560 | 185 | A01046 | A15795 | 171 |
| A01046 | A15806 | 159 | A01046 | A15968 | 251 |
| A01047 | A01054 | 200 | A01047 | A01066 | 200 |
| A01047 | A01072 | 174 | A01047 | A01101 | 480 |
| A01047 | A01127 | 475 | A01047 | A01129 | 156 |
| A01047 | A01184 | 489 | A01047 | A01189 | 491 |
| A01047 | A01206 | 413 | A01047 | A01234 | 473 |
| A01047 | A01249 | 566 | A01047 | A01264 | 200 |
| A01047 | A01275 | 228 | A01047 | A01291 | 566 |
| A01047 | A01306 | 491 | A01047 | A01338 | 523 |
| A01047 | A01392 | 414 | A01047 | A01414 | 317 |
| A01047 | A01429 | 200 | A01047 | A01437 | 475 |
| A01047 | A01464 | 556 | A01047 | A01470 | 243 |
| A01047 | A01617 | 223 | A01047 | A01618 | 200 |
| A01047 | A01649 | 474 | A01047 | A01700 | 255 |
| A01047 | A01787 | 188 | A01047 | A02178 | 274 |
| A01047 | A02216 | 477 | A01047 | A02392 | 291 |
| A01047 | A02738 | 483 | A01047 | A02978 | 200 |
| A01047 | A03069 | 489 | A01047 | A03272 | 329 |
| A01047 | A03567 | 491 | A01047 | A03644 | 361 |
| A01047 | A03705 | 174 | A01047 | A03740 | 218 |



|        |        |     |        |        |     |
|--------|--------|-----|--------|--------|-----|
| A01047 | A03754 | 441 | A01047 | A03859 | 296 |
| A01047 | A05121 | 177 | A01047 | A05411 | 443 |
| A01047 | A06861 | 481 | A01047 | A06965 | 491 |
| A01047 | A06973 | 490 | A01047 | A07201 | 329 |
| A01047 | A07243 | 301 | A01047 | A07398 | 213 |
| A01047 | A07451 | 454 | A01047 | A07584 | 351 |
| A01047 | A08011 | 224 | A01047 | A08052 | 151 |
| A01047 | A08055 | 305 | A01047 | A08137 | 221 |
| A01047 | A08301 | 154 | A01047 | A08357 | 461 |
| A01047 | A08359 | 328 | A01047 | A08398 | 564 |
| A01047 | A08452 | 566 | A01047 | A08521 | 270 |
| A01047 | A08558 | 200 | A01047 | A08559 | 407 |
| A01047 | A08664 | 502 | A01047 | A09044 | 321 |
| A01047 | A09322 | 491 | A01047 | A09332 | 221 |
| A01047 | A09674 | 230 | A01047 | A09702 | 494 |
| A01047 | A10034 | 490 | A01047 | A10417 | 530 |
| A01047 | A10518 | 450 | A01047 | A10564 | 278 |
| A01047 | A10616 | 311 | A01047 | A10797 | 251 |
| A01047 | A11331 | 291 | A01047 | A11390 | 452 |
| A01047 | A11400 | 443 | A01047 | A11420 | 151 |
| A01047 | A11438 | 565 | A01047 | A11480 | 352 |
| A01047 | A11729 | 200 | A01047 | A11945 | 427 |
| A01047 | A11981 | 180 | A01047 | A12241 | 218 |
| A01047 | A12687 | 356 | A01047 | A12821 | 154 |
| A01047 | A13333 | 200 | A01047 | A13388 | 202 |
| A01047 | A13425 | 223 | A01047 | A13992 | 465 |
| A01047 | A14188 | 391 | A01047 | A14216 | 260 |
| A01047 | A14505 | 319 | A01047 | A15218 | 361 |
| A01047 | A15221 | 303 | A01047 | A15235 | 288 |
| A01047 | A15743 | 340 | A01047 | A15776 | 356 |
| A01047 | A16118 | 452 | A01047 | A17193 | 256 |
| A01048 | A01406 | 371 | A01048 | A09253 | 378 |
| A01049 | A01161 | 466 | A01049 | A02221 | 372 |
| A01049 | A04337 | 343 | A01049 | A08936 | 399 |
| A01049 | A10731 | 316 | A01050 | A01159 | 159 |
| A01050 | A01161 | 302 | A01050 | A01210 | 263 |
| A01050 | A01214 | 491 | A01050 | A01226 | 243 |
| A01050 | A01228 | 160 | A01050 | A01234 | 384 |
| A01050 | A01304 | 396 | A01050 | A01320 | 319 |
| A01050 | A01327 | 184 | A01050 | A01373 | 241 |
| A01050 | A01398 | 168 | A01050 | A01827 | 182 |
| A01050 | A06488 | 162 | A01050 | A06492 | 157 |
| A01050 | A06600 | 241 | A01050 | A07695 | 324 |
| A01050 | A08144 | 333 | A01050 | A08414 | 340 |
| A01050 | A08477 | 213 | A01050 | A08537 | 260 |
| A01050 | A08892 | 176 | A01050 | A10608 | 302 |

|        |        |     |        |        |     |
|--------|--------|-----|--------|--------|-----|
| A01050 | A11223 | 232 | A01050 | A11897 | 185 |
| A01050 | A12272 | 373 | A01050 | A13475 | 432 |
| A01050 | A13598 | 272 | A01050 | A14655 | 329 |
| A01050 | A14701 | 196 | A01051 | A01707 | 241 |
| A01051 | A01830 | 322 | A01051 | A02470 | 151 |
| A01051 | A03408 | 162 | A01051 | A03820 | 171 |
| A01051 | A05701 | 241 | A01051 | A07206 | 368 |
| A01051 | A07486 | 273 | A01051 | A09124 | 475 |
| A01051 | A09438 | 307 | A01051 | A13832 | 251 |
| A01051 | A14686 | 347 | A01051 | A15635 | 322 |
| A01051 | A15651 | 213 | A01051 | A15843 | 224 |
| A01051 | A15898 | 400 | A01051 | A16075 | 290 |
| A01052 | A01070 | 899 | A01052 | A01091 | 424 |
| A01052 | A01100 | 443 | A01052 | A01115 | 162 |
| A01052 | A01125 | 305 | A01052 | A01172 | 491 |
| A01052 | A01173 | 477 | A01052 | A01194 | 458 |
| A01052 | A01212 | 543 | A01052 | A01234 | 438 |
| A01052 | A01263 | 279 | A01052 | A01306 | 180 |
| A01052 | A01307 | 367 | A01052 | A01354 | 339 |
| A01052 | A01406 | 486 | A01052 | A01512 | 484 |
| A01052 | A01524 | 945 | A01052 | A01527 | 945 |
| A01052 | A01548 | 491 | A01052 | A01553 | 451 |
| A01052 | A01554 | 918 | A01052 | A01558 | 953 |
| A01052 | A01560 | 899 | A01052 | A01562 | 936 |
| A01052 | A01572 | 491 | A01052 | A01588 | 944 |
| A01052 | A01602 | 945 | A01052 | A01605 | 906 |
| A01052 | A01606 | 484 | A01052 | A01610 | 477 |
| A01052 | A01612 | 347 | A01052 | A01628 | 950 |
| A01052 | A01631 | 434 | A01052 | A01638 | 922 |
| A01052 | A01639 | 512 | A01052 | A01640 | 963 |
| A01052 | A01647 | 550 | A01052 | A01651 | 899 |
| A01052 | A01660 | 191 | A01052 | A01665 | 906 |
| A01052 | A01688 | 491 | A01052 | A01691 | 171 |
| A01052 | A01692 | 919 | A01052 | A01694 | 480 |
| A01052 | A01702 | 227 | A01052 | A01708 | 283 |
| A01052 | A01709 | 899 | A01052 | A01712 | 378 |
| A01052 | A01719 | 487 | A01052 | A01730 | 205 |
| A01052 | A01790 | 486 | A01052 | A01796 | 308 |
| A01052 | A01844 | 935 | A01052 | A01931 | 470 |
| A01052 | A01994 | 243 | A01052 | A01995 | 481 |
| A01052 | A02163 | 207 | A01052 | A02343 | 205 |
| A01052 | A02436 | 334 | A01052 | A02452 | 484 |
| A01052 | A02502 | 911 | A01052 | A02517 | 160 |
| A01052 | A02586 | 352 | A01052 | A02687 | 483 |
| A01052 | A02718 | 199 | A01052 | A02753 | 185 |
| A01052 | A03002 | 183 | A01052 | A03007 | 332 |

|        |        |     |        |        |     |
|--------|--------|-----|--------|--------|-----|
| A01052 | A03164 | 177 | A01052 | A03191 | 152 |
| A01052 | A03298 | 200 | A01052 | A03304 | 238 |
| A01052 | A03401 | 208 | A01052 | A03436 | 251 |
| A01052 | A03451 | 491 | A01052 | A03575 | 313 |
| A01052 | A03611 | 362 | A01052 | A03643 | 195 |
| A01052 | A03778 | 489 | A01052 | A03817 | 162 |
| A01052 | A03854 | 454 | A01052 | A03990 | 491 |
| A01052 | A04012 | 288 | A01052 | A04020 | 491 |
| A01052 | A04062 | 937 | A01052 | A04074 | 484 |
| A01052 | A04350 | 246 | A01052 | A04442 | 246 |
| A01052 | A04449 | 456 | A01052 | A04484 | 899 |
| A01052 | A04494 | 198 | A01052 | A04696 | 191 |
| A01052 | A04699 | 899 | A01052 | A04807 | 185 |
| A01052 | A04879 | 267 | A01052 | A04991 | 486 |
| A01052 | A05082 | 491 | A01052 | A05150 | 227 |
| A01052 | A05168 | 154 | A01052 | A05216 | 486 |
| A01052 | A05428 | 154 | A01052 | A05515 | 162 |
| A01052 | A05701 | 479 | A01052 | A05797 | 246 |
| A01052 | A05809 | 265 | A01052 | A05854 | 491 |
| A01052 | A05958 | 226 | A01052 | A05966 | 199 |
| A01052 | A05997 | 316 | A01052 | A06039 | 156 |
| A01052 | A06257 | 221 | A01052 | A06277 | 443 |
| A01052 | A06420 | 389 | A01052 | A06610 | 491 |
| A01052 | A06642 | 385 | A01052 | A06660 | 491 |
| A01052 | A06715 | 335 | A01052 | A06779 | 378 |
| A01052 | A06819 | 401 | A01052 | A06897 | 395 |
| A01052 | A06907 | 229 | A01052 | A06919 | 396 |
| A01052 | A07054 | 267 | A01052 | A07091 | 899 |
| A01052 | A07173 | 165 | A01052 | A07311 | 958 |
| A01052 | A07339 | 491 | A01052 | A07422 | 907 |
| A01052 | A07495 | 280 | A01052 | A08112 | 160 |
| A01052 | A08137 | 486 | A01052 | A08215 | 199 |
| A01052 | A08280 | 424 | A01052 | A08571 | 491 |
| A01052 | A08855 | 490 | A01052 | A08878 | 491 |
| A01052 | A08885 | 328 | A01052 | A09018 | 371 |
| A01052 | A09124 | 480 | A01052 | A09149 | 486 |
| A01052 | A09162 | 328 | A01052 | A09235 | 204 |
| A01052 | A09319 | 899 | A01052 | A09362 | 170 |
| A01052 | A09504 | 445 | A01052 | A09542 | 934 |
| A01052 | A09660 | 160 | A01052 | A09727 | 428 |
| A01052 | A09791 | 174 | A01052 | A09826 | 481 |
| A01052 | A09890 | 205 | A01052 | A10014 | 255 |
| A01052 | A10051 | 159 | A01052 | A10115 | 210 |
| A01052 | A10218 | 170 | A01052 | A10392 | 180 |
| A01052 | A10395 | 344 | A01052 | A10459 | 168 |
| A01052 | A10615 | 412 | A01052 | A10623 | 176 |

|        |        |     |        |        |     |
|--------|--------|-----|--------|--------|-----|
| A01052 | A10754 | 152 | A01052 | A10808 | 204 |
| A01052 | A10825 | 173 | A01052 | A10894 | 267 |
| A01052 | A10972 | 246 | A01052 | A11068 | 278 |
| A01052 | A11125 | 899 | A01052 | A11285 | 313 |
| A01052 | A11300 | 449 | A01052 | A11387 | 259 |
| A01052 | A11432 | 273 | A01052 | A11487 | 450 |
| A01052 | A11673 | 319 | A01052 | A11767 | 168 |
| A01052 | A11983 | 955 | A01052 | A12014 | 160 |
| A01052 | A12242 | 170 | A01052 | A12365 | 312 |
| A01052 | A12550 | 173 | A01052 | A12705 | 903 |
| A01052 | A13555 | 183 | A01052 | A13609 | 477 |
| A01052 | A13824 | 477 | A01052 | A13829 | 229 |
| A01052 | A13917 | 167 | A01052 | A13975 | 505 |
| A01052 | A13977 | 899 | A01052 | A13985 | 899 |
| A01052 | A13989 | 199 | A01052 | A13997 | 491 |
| A01052 | A14006 | 491 | A01052 | A14009 | 344 |
| A01052 | A14016 | 472 | A01052 | A14032 | 899 |
| A01052 | A14055 | 283 | A01052 | A14148 | 174 |
| A01052 | A14188 | 899 | A01052 | A14196 | 425 |
| A01052 | A14198 | 183 | A01052 | A14200 | 470 |
| A01052 | A14208 | 299 | A01052 | A14211 | 451 |
| A01052 | A14221 | 430 | A01052 | A14231 | 899 |
| A01052 | A14253 | 218 | A01052 | A14266 | 314 |
| A01052 | A14279 | 491 | A01052 | A14399 | 380 |
| A01052 | A14444 | 899 | A01052 | A14584 | 249 |
| A01052 | A15114 | 190 | A01052 | A15237 | 167 |
| A01052 | A15282 | 486 | A01052 | A15291 | 652 |
| A01052 | A15292 | 296 | A01052 | A15293 | 899 |
| A01052 | A15294 | 899 | A01052 | A15324 | 230 |
| A01052 | A15338 | 229 | A01052 | A15366 | 338 |
| A01052 | A15503 | 154 | A01052 | A15510 | 201 |
| A01052 | A15548 | 316 | A01052 | A15606 | 291 |
| A01052 | A15612 | 597 | A01052 | A15614 | 392 |
| A01052 | A15695 | 210 | A01052 | A15752 | 486 |
| A01052 | A15875 | 188 | A01052 | A16148 | 173 |
| A01052 | A16328 | 191 | A01052 | A16410 | 491 |
| A01052 | A16840 | 414 | A01052 | A17140 | 188 |
| A01052 | A17142 | 212 | A01052 | A17188 | 899 |
| A01053 | A01168 | 154 | A01053 | A01598 | 63  |
| A01053 | A01741 | 398 | A01053 | A01797 | 160 |
| A01053 | A02164 | 491 | A01053 | A02165 | 314 |
| A01053 | A02265 | 307 | A01053 | A02814 | 195 |
| A01053 | A02927 | 230 | A01053 | A03109 | 267 |
| A01053 | A03112 | 180 | A01053 | A03438 | 491 |
| A01053 | A03502 | 314 | A01053 | A03601 | 151 |
| A01053 | A03609 | 290 | A01053 | A03718 | 159 |

|        |        |     |        |        |     |
|--------|--------|-----|--------|--------|-----|
| A01053 | A03976 | 163 | A01053 | A03981 | 486 |
| A01053 | A04229 | 252 | A01053 | A04622 | 217 |
| A01053 | A05309 | 204 | A01053 | A05477 | 314 |
| A01053 | A05850 | 395 | A01053 | A06356 | 312 |
| A01053 | A06659 | 188 | A01053 | A06814 | 77  |
| A01053 | A06815 | 343 | A01053 | A06825 | 491 |
| A01053 | A06890 | 205 | A01053 | A06901 | 368 |
| A01053 | A07243 | 226 | A01053 | A07399 | 196 |
| A01053 | A08131 | 380 | A01053 | A08653 | 277 |
| A01053 | A08682 | 441 | A01053 | A09656 | 312 |
| A01053 | A11264 | 307 | A01053 | A11331 | 218 |
| A01053 | A13052 | 491 | A01053 | A15649 | 486 |
| A01053 | A15843 | 173 | A01053 | A16095 | 171 |
| A01053 | A16149 | 382 | A01054 | A01086 | 405 |
| A01054 | A01150 | 483 | A01054 | A01160 | 450 |
| A01054 | A01161 | 361 | A01054 | A01168 | 450 |
| A01054 | A01246 | 366 | A01054 | A01265 | 491 |
| A01054 | A01275 | 193 | A01054 | A01291 | 441 |
| A01054 | A01294 | 450 | A01054 | A01399 | 347 |
| A01054 | A01446 | 446 | A01054 | A01448 | 395 |
| A01054 | A01496 | 358 | A01054 | A01540 | 653 |
| A01054 | A01649 | 486 | A01054 | A01785 | 157 |
| A01054 | A01787 | 165 | A01054 | A01837 | 180 |
| A01054 | A01850 | 152 | A01054 | A01862 | 174 |
| A01054 | A02165 | 450 | A01054 | A03615 | 404 |
| A01054 | A03740 | 650 | A01054 | A03752 | 429 |
| A01054 | A03782 | 450 | A01054 | A05043 | 232 |
| A01054 | A05757 | 163 | A01054 | A05859 | 229 |
| A01054 | A06466 | 395 | A01054 | A06524 | 174 |
| A01054 | A07505 | 344 | A01054 | A07597 | 375 |
| A01054 | A08357 | 174 | A01054 | A08398 | 218 |
| A01054 | A08452 | 401 | A01054 | A08835 | 491 |
| A01054 | A08987 | 463 | A01054 | A09720 | 271 |
| A01054 | A10441 | 223 | A01054 | A10798 | 380 |
| A01054 | A11244 | 168 | A01054 | A11322 | 491 |
| A01054 | A11338 | 491 | A01054 | A11372 | 362 |
| A01054 | A11374 | 491 | A01054 | A11400 | 238 |
| A01054 | A11419 | 470 | A01054 | A11427 | 480 |
| A01054 | A11724 | 362 | A01054 | A12167 | 362 |
| A01054 | A12252 | 188 | A01054 | A12259 | 288 |
| A01054 | A13052 | 450 | A01054 | A13340 | 191 |
| A01054 | A13989 | 193 | A01054 | A14073 | 310 |
| A01054 | A14152 | 362 | A01054 | A14816 | 223 |
| A01054 | A14825 | 368 | A01054 | A14843 | 404 |
| A01054 | A14845 | 151 | A01054 | A15666 | 404 |
| A01054 | A15717 | 165 | A01054 | A16681 | 404 |

|        |        |     |        |        |     |
|--------|--------|-----|--------|--------|-----|
| A01054 | A16886 | 191 | A01054 | A17128 | 159 |
| A01055 | A01540 | 435 | A01055 | A01560 | 281 |
| A01055 | A01850 | 177 | A01055 | A02675 | 188 |
| A01055 | A02803 | 160 | A01055 | A03740 | 475 |
| A01055 | A03752 | 472 | A01055 | A06466 | 422 |
| A01055 | A07311 | 218 | A01055 | A07798 | 428 |
| A01055 | A09476 | 268 | A01055 | A09577 | 154 |
| A01055 | A10728 | 326 | A01055 | A11302 | 163 |
| A01055 | A11322 | 355 | A01055 | A13149 | 380 |
| A01055 | A14073 | 196 | A01055 | A14375 | 245 |
| A01055 | A14642 | 196 | A01056 | A01065 | 255 |
| A01056 | A01072 | 601 | A01056 | A01085 | 156 |
| A01056 | A01090 | 489 | A01056 | A01095 | 154 |
| A01056 | A01112 | 484 | A01056 | A01127 | 789 |
| A01056 | A01130 | 171 | A01056 | A01140 | 603 |
| A01056 | A01179 | 371 | A01056 | A01211 | 433 |
| A01056 | A01212 | 251 | A01056 | A01234 | 185 |
| A01056 | A01238 | 340 | A01056 | A01249 | 176 |
| A01056 | A01288 | 489 | A01056 | A01289 | 491 |
| A01056 | A01291 | 597 | A01056 | A01379 | 154 |
| A01056 | A01425 | 491 | A01056 | A01436 | 162 |
| A01056 | A01457 | 193 | A01056 | A01468 | 486 |
| A01056 | A01496 | 452 | A01056 | A01527 | 899 |
| A01056 | A01546 | 375 | A01056 | A01579 | 316 |
| A01056 | A01586 | 458 | A01056 | A01597 | 162 |
| A01056 | A01601 | 490 | A01056 | A01617 | 167 |
| A01056 | A01649 | 480 | A01056 | A01652 | 173 |
| A01056 | A01718 | 395 | A01056 | A01730 | 226 |
| A01056 | A01888 | 172 | A01056 | A02185 | 314 |
| A01056 | A02494 | 491 | A01056 | A02601 | 88  |
| A01056 | A02860 | 405 | A01056 | A02895 | 224 |
| A01056 | A02914 | 160 | A01056 | A02924 | 274 |
| A01056 | A03048 | 461 | A01056 | A03069 | 273 |
| A01056 | A03160 | 157 | A01056 | A03332 | 200 |
| A01056 | A03437 | 268 | A01056 | A03445 | 293 |
| A01056 | A03461 | 411 | A01056 | A03567 | 174 |
| A01056 | A03571 | 490 | A01056 | A03581 | 269 |
| A01056 | A03963 | 260 | A01056 | A03977 | 313 |
| A01056 | A03981 | 430 | A01056 | A04230 | 334 |
| A01056 | A04761 | 184 | A01056 | A04813 | 160 |
| A01056 | A05443 | 452 | A01056 | A05996 | 251 |
| A01056 | A06121 | 201 | A01056 | A06324 | 485 |
| A01056 | A06581 | 160 | A01056 | A06666 | 241 |
| A01056 | A06814 | 603 | A01056 | A06897 | 385 |
| A01056 | A06965 | 235 | A01056 | A07228 | 335 |
| A01056 | A07398 | 473 | A01056 | A07412 | 592 |

|        |        |     |        |        |     |
|--------|--------|-----|--------|--------|-----|
| A01056 | A07451 | 388 | A01056 | A07506 | 353 |
| A01056 | A07726 | 486 | A01056 | A07731 | 207 |
| A01056 | A08011 | 457 | A01056 | A08052 | 602 |
| A01056 | A08055 | 401 | A01056 | A08273 | 599 |
| A01056 | A08301 | 319 | A01056 | A08315 | 537 |
| A01056 | A08357 | 483 | A01056 | A08359 | 446 |
| A01056 | A08452 | 208 | A01056 | A08635 | 385 |
| A01056 | A08773 | 389 | A01056 | A08835 | 358 |
| A01056 | A08878 | 201 | A01056 | A09620 | 602 |
| A01056 | A09674 | 307 | A01056 | A09697 | 324 |
| A01056 | A09707 | 441 | A01056 | A09722 | 391 |
| A01056 | A10711 | 350 | A01056 | A10748 | 152 |
| A01056 | A11262 | 193 | A01056 | A11322 | 168 |
| A01056 | A11462 | 455 | A01056 | A12168 | 254 |
| A01056 | A12215 | 196 | A01056 | A12618 | 380 |
| A01056 | A12924 | 213 | A01056 | A13063 | 154 |
| A01056 | A13107 | 324 | A01056 | A13417 | 210 |
| A01056 | A13512 | 310 | A01056 | A13581 | 269 |
| A01056 | A13862 | 374 | A01056 | A13989 | 626 |
| A01056 | A13992 | 483 | A01056 | A14038 | 170 |
| A01056 | A14216 | 455 | A01056 | A14247 | 179 |
| A01056 | A14443 | 899 | A01056 | A14996 | 299 |
| A01056 | A15218 | 180 | A01056 | A15229 | 330 |
| A01056 | A15268 | 165 | A01056 | A15381 | 332 |
| A01056 | A15416 | 380 | A01056 | A15837 | 269 |
| A01056 | A15988 | 474 | A01056 | A16027 | 269 |
| A01056 | A16107 | 408 | A01056 | A16631 | 234 |
| A01056 | A16778 | 350 | A01057 | A01075 | 380 |
| A01057 | A01077 | 491 | A01057 | A01195 | 379 |
| A01057 | A01234 | 162 | A01057 | A01243 | 200 |
| A01057 | A01351 | 198 | A01057 | A01354 | 457 |
| A01057 | A01406 | 168 | A01057 | A01470 | 188 |
| A01057 | A01610 | 413 | A01057 | A01612 | 489 |
| A01057 | A01770 | 151 | A01057 | A02152 | 241 |
| A01057 | A02470 | 207 | A01057 | A02518 | 160 |
| A01057 | A02715 | 177 | A01057 | A03207 | 245 |
| A01057 | A03406 | 208 | A01057 | A03479 | 480 |
| A01057 | A03495 | 428 | A01057 | A03569 | 432 |
| A01057 | A04229 | 469 | A01057 | A04388 | 358 |
| A01057 | A05082 | 249 | A01057 | A06149 | 179 |
| A01057 | A06907 | 238 | A01057 | A07236 | 210 |
| A01057 | A07311 | 157 | A01057 | A07434 | 165 |
| A01057 | A07586 | 199 | A01057 | A07732 | 303 |
| A01057 | A08137 | 491 | A01057 | A08150 | 268 |
| A01057 | A08571 | 443 | A01057 | A08718 | 183 |
| A01057 | A08953 | 335 | A01057 | A09341 | 162 |

|        |        |     |        |        |     |
|--------|--------|-----|--------|--------|-----|
| A01057 | A09374 | 221 | A01057 | A09943 | 424 |
| A01057 | A09985 | 241 | A01057 | A10174 | 257 |
| A01057 | A10321 | 273 | A01057 | A10870 | 165 |
| A01057 | A11544 | 162 | A01057 | A11628 | 205 |
| A01057 | A12824 | 160 | A01057 | A14006 | 486 |
| A01057 | A14196 | 418 | A01057 | A14220 | 474 |
| A01057 | A14257 | 418 | A01057 | A14352 | 467 |
| A01057 | A14367 | 218 | A01057 | A14399 | 486 |
| A01057 | A15052 | 219 | A01057 | A15183 | 259 |
| A01057 | A15297 | 433 | A01057 | A15366 | 279 |
| A01057 | A15545 | 454 | A01057 | A16491 | 241 |
| A01057 | A17141 | 174 | A01058 | A01077 | 160 |
| A01058 | A01080 | 531 | A01058 | A01097 | 307 |
| A01058 | A01106 | 485 | A01058 | A01267 | 718 |
| A01058 | A01339 | 160 | A01058 | A01370 | 235 |
| A01058 | A01444 | 201 | A01058 | A01888 | 162 |
| A01058 | A02131 | 268 | A01058 | A02212 | 315 |
| A01058 | A02428 | 193 | A01058 | A03366 | 236 |
| A01058 | A03415 | 216 | A01058 | A04878 | 224 |
| A01058 | A07096 | 160 | A01058 | A07226 | 160 |
| A01058 | A07266 | 491 | A01058 | A07756 | 221 |
| A01058 | A08834 | 160 | A01058 | A08927 | 227 |
| A01058 | A09627 | 160 | A01058 | A09672 | 419 |
| A01058 | A10372 | 160 | A01058 | A11365 | 160 |
| A01058 | A11598 | 183 | A01058 | A11735 | 513 |
| A01058 | A11737 | 488 | A01058 | A11914 | 488 |
| A01058 | A12658 | 488 | A01058 | A12824 | 545 |
| A01058 | A12897 | 188 | A01058 | A14007 | 160 |
| A01058 | A14196 | 273 | A01058 | A15257 | 208 |
| A01058 | A15297 | 377 | A01058 | A15558 | 432 |
| A01058 | A15559 | 243 | A01059 | A01093 | 461 |
| A01059 | A01099 | 485 | A01059 | A01341 | 149 |
| A01059 | A01342 | 208 | A01059 | A01388 | 450 |
| A01059 | A01616 | 479 | A01059 | A01686 | 418 |
| A01059 | A02278 | 216 | A01059 | A04668 | 486 |
| A01059 | A06864 | 396 | A01059 | A06982 | 486 |
| A01059 | A08208 | 356 | A01059 | A08502 | 230 |
| A01059 | A08516 | 463 | A01059 | A08769 | 168 |
| A01059 | A08995 | 266 | A01059 | A09000 | 263 |
| A01059 | A09762 | 343 | A01059 | A10247 | 152 |
| A01059 | A11236 | 121 | A01059 | A12556 | 306 |
| A01059 | A14154 | 218 | A01059 | A14694 | 445 |
| A01059 | A15557 | 306 | A01059 | A16612 | 420 |
| A01059 | A16634 | 285 | A01059 | A16692 | 296 |
| A01060 | A01252 | 604 | A01060 | A01406 | 159 |
| A01060 | A01451 | 269 | A01060 | A01457 | 185 |



|        |        |     |        |        |     |
|--------|--------|-----|--------|--------|-----|
| A01060 | A01458 | 247 | A01060 | A01459 | 269 |
| A01060 | A01460 | 486 | A01060 | A01461 | 491 |
| A01060 | A01464 | 195 | A01060 | A01514 | 269 |
| A01060 | A01515 | 477 | A01060 | A01572 | 375 |
| A01060 | A01573 | 416 | A01060 | A01574 | 489 |
| A01060 | A01575 | 389 | A01060 | A01578 | 200 |
| A01060 | A01583 | 269 | A01060 | A01585 | 480 |
| A01060 | A01660 | 185 | A01060 | A01673 | 631 |
| A01060 | A01677 | 205 | A01060 | A01706 | 334 |
| A01060 | A01710 | 185 | A01060 | A01731 | 329 |
| A01060 | A01860 | 266 | A01060 | A03293 | 165 |
| A01060 | A03452 | 180 | A01060 | A03528 | 179 |
| A01060 | A03618 | 210 | A01060 | A03634 | 210 |
| A01060 | A03891 | 229 | A01060 | A03892 | 465 |
| A01060 | A04292 | 269 | A01060 | A05024 | 269 |
| A01060 | A05493 | 271 | A01060 | A05638 | 269 |
| A01060 | A06011 | 269 | A01060 | A06168 | 165 |
| A01060 | A06319 | 157 | A01060 | A06502 | 201 |
| A01060 | A06661 | 170 | A01060 | A06941 | 324 |
| A01060 | A07521 | 263 | A01060 | A07687 | 208 |
| A01060 | A07899 | 377 | A01060 | A08001 | 299 |
| A01060 | A08177 | 435 | A01060 | A08484 | 324 |
| A01060 | A08785 | 324 | A01060 | A09326 | 269 |
| A01060 | A09375 | 281 | A01060 | A10909 | 335 |
| A01060 | A10989 | 165 | A01060 | A11279 | 543 |
| A01060 | A11287 | 624 | A01060 | A11303 | 182 |
| A01060 | A11366 | 246 | A01060 | A11602 | 210 |
| A01060 | A11742 | 477 | A01060 | A12820 | 321 |
| A01060 | A13222 | 324 | A01060 | A13732 | 328 |
| A01060 | A13830 | 469 | A01060 | A13832 | 159 |
| A01060 | A13895 | 269 | A01060 | A14052 | 204 |
| A01060 | A14182 | 307 | A01060 | A14247 | 491 |
| A01060 | A14258 | 631 | A01060 | A14481 | 223 |
| A01060 | A14661 | 634 | A01060 | A14710 | 440 |
| A01060 | A14711 | 337 | A01060 | A14783 | 269 |
| A01060 | A14799 | 157 | A01060 | A14844 | 428 |
| A01060 | A14877 | 324 | A01060 | A15462 | 249 |
| A01060 | A15909 | 243 | A01060 | A15911 | 191 |
| A01060 | A17061 | 418 | A01061 | A01136 | 462 |
| A01061 | A01151 | 491 | A01061 | A01166 | 196 |
| A01061 | A01192 | 475 | A01061 | A01291 | 488 |
| A01061 | A01471 | 154 | A01061 | A02050 | 279 |
| A01061 | A02499 | 356 | A01061 | A03289 | 154 |
| A01061 | A03628 | 398 | A01061 | A03859 | 352 |
| A01061 | A05101 | 466 | A01061 | A05301 | 329 |
| A01061 | A06273 | 171 | A01061 | A07378 | 475 |

|        |        |     |        |        |     |
|--------|--------|-----|--------|--------|-----|
| A01061 | A09600 | 210 | A01061 | A13207 | 162 |
| A01061 | A13992 | 451 | A01061 | A14147 | 196 |
| A01061 | A14178 | 291 | A01061 | A14198 | 353 |
| A01061 | A14566 | 469 | A01061 | A14594 | 477 |
| A01061 | A15338 | 345 | A01061 | A15559 | 160 |
| A01061 | A15729 | 182 | A01061 | A16333 | 217 |
| A01061 | A17088 | 394 | A01062 | A01075 | 167 |
| A01062 | A01206 | 490 | A01062 | A01234 | 63  |
| A01062 | A01349 | 461 | A01062 | A01429 | 477 |
| A01062 | A01430 | 384 | A01062 | A01598 | 455 |
| A01062 | A01649 | 380 | A01062 | A02216 | 329 |
| A01062 | A02763 | 165 | A01062 | A04681 | 172 |
| A01062 | A06254 | 243 | A01062 | A07348 | 179 |
| A01062 | A12138 | 491 | A01062 | A13989 | 263 |
| A01062 | A15774 | 483 | A01063 | A01109 | 268 |
| A01063 | A01229 | 230 | A01063 | A01256 | 480 |
| A01063 | A01272 | 428 | A01063 | A01347 | 435 |
| A01063 | A01481 | 420 | A01063 | A01508 | 486 |
| A01063 | A01635 | 374 | A01063 | A02240 | 479 |
| A01063 | A02789 | 162 | A01063 | A03008 | 383 |
| A01063 | A03167 | 163 | A01063 | A03441 | 205 |
| A01063 | A03443 | 281 | A01063 | A04108 | 157 |
| A01063 | A04791 | 256 | A01063 | A04850 | 446 |
| A01063 | A04861 | 198 | A01063 | A05007 | 345 |
| A01063 | A05289 | 252 | A01063 | A05516 | 256 |
| A01063 | A05573 | 216 | A01063 | A05738 | 279 |
| A01063 | A06024 | 483 | A01063 | A06129 | 254 |
| A01063 | A06344 | 400 | A01063 | A06359 | 196 |
| A01063 | A06360 | 333 | A01063 | A06635 | 177 |
| A01063 | A06692 | 321 | A01063 | A07122 | 346 |
| A01063 | A07185 | 329 | A01063 | A07222 | 229 |
| A01063 | A07304 | 167 | A01063 | A07553 | 313 |
| A01063 | A07688 | 229 | A01063 | A07753 | 395 |
| A01063 | A07800 | 182 | A01063 | A07976 | 152 |
| A01063 | A10444 | 259 | A01063 | A10452 | 236 |
| A01063 | A10456 | 198 | A01063 | A10714 | 190 |
| A01063 | A11309 | 313 | A01063 | A11325 | 241 |
| A01063 | A11381 | 170 | A01063 | A13735 | 276 |
| A01063 | A15223 | 246 | A01063 | A15874 | 389 |
| A01063 | A15905 | 335 | A01063 | A16028 | 283 |
| A01063 | A16335 | 215 | A01063 | A16346 | 373 |
| A01063 | A16763 | 201 | A01063 | A16959 | 224 |
| A01064 | A01093 | 491 | A01064 | A01099 | 579 |
| A01064 | A01111 | 243 | A01064 | A01114 | 491 |
| A01064 | A01187 | 491 | A01064 | A01189 | 213 |
| A01064 | A01197 | 491 | A01064 | A01244 | 229 |

|        |        |     |        |        |     |
|--------|--------|-----|--------|--------|-----|
| A01064 | A01296 | 484 | A01064 | A01317 | 369 |
| A01064 | A01318 | 283 | A01064 | A01320 | 333 |
| A01064 | A01321 | 462 | A01064 | A01322 | 491 |
| A01064 | A01324 | 221 | A01064 | A01325 | 489 |
| A01064 | A01328 | 363 | A01064 | A01330 | 238 |
| A01064 | A01331 | 491 | A01064 | A01341 | 484 |
| A01064 | A01369 | 268 | A01064 | A01375 | 299 |
| A01064 | A01388 | 486 | A01064 | A01411 | 224 |
| A01064 | A01415 | 491 | A01064 | A01454 | 491 |
| A01064 | A01469 | 480 | A01064 | A01473 | 227 |
| A01064 | A01479 | 162 | A01064 | A01536 | 490 |
| A01064 | A01559 | 491 | A01064 | A01589 | 491 |
| A01064 | A01594 | 491 | A01064 | A01604 | 302 |
| A01064 | A01616 | 488 | A01064 | A01625 | 467 |
| A01064 | A01630 | 308 | A01064 | A01659 | 479 |
| A01064 | A01660 | 246 | A01064 | A01680 | 374 |
| A01064 | A01686 | 491 | A01064 | A02180 | 463 |
| A01064 | A03057 | 491 | A01064 | A03223 | 254 |
| A01064 | A04364 | 480 | A01064 | A04375 | 205 |
| A01064 | A04561 | 307 | A01064 | A04668 | 491 |
| A01064 | A05218 | 193 | A01064 | A05334 | 491 |
| A01064 | A06130 | 346 | A01064 | A06242 | 491 |
| A01064 | A06564 | 255 | A01064 | A06591 | 404 |
| A01064 | A06607 | 324 | A01064 | A06851 | 196 |
| A01064 | A06864 | 491 | A01064 | A06982 | 491 |
| A01064 | A07319 | 489 | A01064 | A07346 | 491 |
| A01064 | A07466 | 360 | A01064 | A07480 | 491 |
| A01064 | A07495 | 302 | A01064 | A07534 | 474 |
| A01064 | A07595 | 463 | A01064 | A07603 | 491 |
| A01064 | A07647 | 484 | A01064 | A07996 | 488 |
| A01064 | A08030 | 477 | A01064 | A08117 | 480 |
| A01064 | A08141 | 297 | A01064 | A08208 | 484 |
| A01064 | A08212 | 491 | A01064 | A08516 | 491 |
| A01064 | A08526 | 488 | A01064 | A08669 | 470 |
| A01064 | A08679 | 154 | A01064 | A08769 | 486 |
| A01064 | A08820 | 490 | A01064 | A08912 | 180 |
| A01064 | A08939 | 180 | A01064 | A08964 | 385 |
| A01064 | A08995 | 229 | A01064 | A09000 | 310 |
| A01064 | A09127 | 314 | A01064 | A09598 | 491 |
| A01064 | A09667 | 156 | A01064 | A09762 | 422 |
| A01064 | A09889 | 210 | A01064 | A10374 | 279 |
| A01064 | A11121 | 151 | A01064 | A11236 | 483 |
| A01064 | A11540 | 474 | A01064 | A11624 | 279 |
| A01064 | A11644 | 180 | A01064 | A11829 | 449 |
| A01064 | A11880 | 265 | A01064 | A12064 | 369 |
| A01064 | A12556 | 491 | A01064 | A12897 | 159 |

|        |        |     |        |        |     |
|--------|--------|-----|--------|--------|-----|
| A01064 | A13429 | 334 | A01064 | A13634 | 173 |
| A01064 | A13913 | 490 | A01064 | A13949 | 491 |
| A01064 | A14009 | 330 | A01064 | A14019 | 254 |
| A01064 | A14076 | 258 | A01064 | A14077 | 257 |
| A01064 | A14079 | 491 | A01064 | A14177 | 184 |
| A01064 | A14230 | 489 | A01064 | A14266 | 456 |
| A01064 | A14273 | 441 | A01064 | A14279 | 414 |
| A01064 | A14282 | 156 | A01064 | A14460 | 441 |
| A01064 | A14560 | 157 | A01064 | A14609 | 430 |
| A01064 | A14694 | 345 | A01064 | A15273 | 346 |
| A01064 | A15367 | 441 | A01064 | A15369 | 491 |
| A01064 | A15420 | 293 | A01064 | A15549 | 180 |
| A01064 | A15714 | 388 | A01064 | A15837 | 491 |
| A01064 | A15844 | 226 | A01064 | A15858 | 168 |
| A01064 | A15941 | 485 | A01064 | A16052 | 226 |
| A01064 | A16068 | 217 | A01064 | A16073 | 191 |
| A01064 | A16127 | 491 | A01064 | A16128 | 491 |
| A01064 | A16129 | 272 | A01064 | A16226 | 491 |
| A01064 | A16299 | 201 | A01064 | A16396 | 156 |
| A01064 | A16606 | 485 | A01064 | A16613 | 462 |
| A01064 | A16626 | 491 | A01064 | A16760 | 156 |
| A01064 | A16762 | 340 | A01065 | A01092 | 300 |
| A01065 | A01098 | 556 | A01065 | A01120 | 715 |
| A01065 | A01129 | 160 | A01065 | A01159 | 424 |
| A01065 | A01166 | 395 | A01065 | A01179 | 423 |
| A01065 | A01206 | 491 | A01065 | A01234 | 434 |
| A01065 | A01353 | 199 | A01065 | A01356 | 714 |
| A01065 | A01368 | 249 | A01065 | A01379 | 354 |
| A01065 | A01384 | 491 | A01065 | A01439 | 515 |
| A01065 | A01440 | 713 | A01065 | A01468 | 201 |
| A01065 | A01470 | 491 | A01065 | A01492 | 568 |
| A01065 | A01538 | 210 | A01065 | A01579 | 201 |
| A01065 | A01597 | 401 | A01065 | A01598 | 714 |
| A01065 | A01614 | 570 | A01065 | A01649 | 491 |
| A01065 | A02164 | 475 | A01065 | A02265 | 633 |
| A01065 | A02325 | 162 | A01065 | A02454 | 216 |
| A01065 | A02978 | 210 | A01065 | A03091 | 167 |
| A01065 | A03101 | 210 | A01065 | A03438 | 378 |
| A01065 | A03952 | 240 | A01065 | A05230 | 210 |
| A01065 | A06584 | 271 | A01065 | A06825 | 151 |
| A01065 | A07076 | 407 | A01065 | A07228 | 371 |
| A01065 | A07487 | 283 | A01065 | A07759 | 433 |
| A01065 | A08357 | 488 | A01065 | A08952 | 369 |
| A01065 | A09033 | 236 | A01065 | A09292 | 429 |
| A01065 | A09707 | 445 | A01065 | A09960 | 327 |
| A01065 | A11462 | 411 | A01065 | A13052 | 475 |

|        |        |     |        |        |     |
|--------|--------|-----|--------|--------|-----|
| A01065 | A13126 | 270 | A01065 | A13875 | 285 |
| A01065 | A13989 | 570 | A01065 | A14216 | 165 |
| A01065 | A14597 | 172 | A01065 | A14816 | 210 |
| A01065 | A15204 | 337 | A01065 | A15205 | 327 |
| A01065 | A15206 | 327 | A01065 | A15207 | 327 |
| A01065 | A15210 | 337 | A01065 | A15215 | 393 |
| A01065 | A15353 | 210 | A01066 | A01217 | 316 |
| A01066 | A01234 | 232 | A01066 | A01249 | 200 |
| A01066 | A01264 | 566 | A01066 | A01267 | 156 |
| A01066 | A01291 | 655 | A01066 | A01295 | 188 |
| A01066 | A01338 | 760 | A01066 | A01429 | 200 |
| A01066 | A01437 | 306 | A01066 | A01464 | 200 |
| A01066 | A01618 | 200 | A01066 | A01740 | 229 |
| A01066 | A01976 | 172 | A01066 | A02978 | 561 |
| A01066 | A03149 | 201 | A01066 | A03567 | 281 |
| A01066 | A03754 | 162 | A01066 | A03859 | 490 |
| A01066 | A06973 | 329 | A01066 | A07083 | 281 |
| A01066 | A07398 | 162 | A01066 | A07802 | 168 |
| A01066 | A08398 | 200 | A01066 | A08452 | 200 |
| A01066 | A08463 | 174 | A01066 | A08521 | 200 |
| A01066 | A08558 | 760 | A01066 | A08664 | 200 |
| A01066 | A08984 | 205 | A01066 | A09044 | 200 |
| A01066 | A09622 | 224 | A01066 | A09702 | 200 |
| A01066 | A10417 | 200 | A01066 | A11301 | 173 |
| A01066 | A11390 | 190 | A01066 | A11438 | 200 |
| A01066 | A11675 | 167 | A01066 | A11728 | 223 |
| A01066 | A11729 | 200 | A01066 | A11851 | 205 |
| A01066 | A11945 | 326 | A01066 | A12011 | 260 |
| A01066 | A12233 | 457 | A01066 | A12243 | 286 |
| A01066 | A12507 | 160 | A01066 | A12606 | 195 |
| A01066 | A12658 | 174 | A01066 | A12824 | 335 |
| A01066 | A12834 | 312 | A01066 | A13333 | 200 |
| A01066 | A13457 | 312 | A01066 | A13786 | 202 |
| A01066 | A14084 | 193 | A01066 | A14167 | 268 |
| A01066 | A14183 | 182 | A01066 | A14216 | 293 |
| A01066 | A14255 | 170 | A01066 | A14270 | 223 |
| A01066 | A14462 | 171 | A01066 | A14566 | 350 |
| A01066 | A15221 | 473 | A01066 | A15373 | 157 |
| A01066 | A15653 | 176 | A01066 | A15666 | 317 |
| A01066 | A15711 | 218 | A01066 | A15727 | 449 |
| A01066 | A15854 | 152 | A01066 | A16157 | 305 |
| A01066 | A16565 | 165 | A01066 | A16611 | 335 |
| A01066 | A16675 | 258 | A01066 | A17133 | 367 |
| A01067 | A01085 | 199 | A01067 | A01095 | 469 |
| A01067 | A01247 | 308 | A01067 | A01249 | 492 |
| A01067 | A01263 | 335 | A01067 | A01291 | 491 |

|        |        |     |        |        |     |
|--------|--------|-----|--------|--------|-----|
| A01067 | A01335 | 383 | A01067 | A01352 | 347 |
| A01067 | A01392 | 665 | A01067 | A01399 | 465 |
| A01067 | A01416 | 180 | A01067 | A01419 | 159 |
| A01067 | A01433 | 665 | A01067 | A01436 | 404 |
| A01067 | A01443 | 210 | A01067 | A01446 | 341 |
| A01067 | A01448 | 249 | A01067 | A01718 | 383 |
| A01067 | A02216 | 475 | A01067 | A02758 | 173 |
| A01067 | A03032 | 180 | A01067 | A03272 | 172 |
| A01067 | A07670 | 217 | A01067 | A08011 | 665 |
| A01067 | A08356 | 412 | A01067 | A08362 | 205 |
| A01067 | A08398 | 210 | A01067 | A08402 | 267 |
| A01067 | A08419 | 207 | A01067 | A08517 | 183 |
| A01067 | A08527 | 254 | A01067 | A08550 | 364 |
| A01067 | A08556 | 217 | A01067 | A08567 | 174 |
| A01067 | A08773 | 491 | A01067 | A08973 | 486 |
| A01067 | A09332 | 190 | A01067 | A09351 | 184 |
| A01067 | A09442 | 238 | A01067 | A10598 | 165 |
| A01067 | A11688 | 232 | A01067 | A12252 | 180 |
| A01067 | A13069 | 230 | A01067 | A13249 | 167 |
| A01067 | A13398 | 241 | A01067 | A13707 | 259 |
| A01067 | A13963 | 347 | A01067 | A13989 | 486 |
| A01067 | A14213 | 168 | A01067 | A14272 | 360 |
| A01067 | A14569 | 260 | A01067 | A15666 | 294 |
| A01067 | A15717 | 159 | A01067 | A15932 | 317 |
| A01067 | A15949 | 407 | A01067 | A16750 | 307 |
| A01068 | A01098 | 226 | A01068 | A01102 | 479 |
| A01068 | A01111 | 182 | A01068 | A01127 | 154 |
| A01068 | A01202 | 228 | A01068 | A01248 | 224 |
| A01068 | A01291 | 280 | A01068 | A01313 | 185 |
| A01068 | A01374 | 281 | A01068 | A01412 | 245 |
| A01068 | A01418 | 268 | A01068 | A01633 | 247 |
| A01068 | A01707 | 255 | A01068 | A01985 | 326 |
| A01068 | A02170 | 180 | A01068 | A02227 | 193 |
| A01068 | A03670 | 279 | A01068 | A03676 | 374 |
| A01068 | A05276 | 218 | A01068 | A05540 | 441 |
| A01068 | A06080 | 401 | A01068 | A07046 | 424 |
| A01068 | A07360 | 481 | A01068 | A08548 | 180 |
| A01068 | A08760 | 208 | A01068 | A09328 | 375 |
| A01068 | A09655 | 172 | A01068 | A09735 | 416 |
| A01068 | A10490 | 154 | A01068 | A11386 | 152 |
| A01068 | A12195 | 177 | A01068 | A14154 | 229 |
| A01068 | A15624 | 440 | A01068 | A15659 | 160 |
| A01068 | A15660 | 290 | A01068 | A15662 | 213 |
| A01068 | A15684 | 491 | A01068 | A15746 | 165 |
| A01068 | A16075 | 177 | A01069 | A01101 | 305 |
| A01069 | A01112 | 274 | A01069 | A01115 | 491 |

|        |        |     |        |        |     |
|--------|--------|-----|--------|--------|-----|
| A01069 | A01140 | 154 | A01069 | A01150 | 454 |
| A01069 | A01166 | 428 | A01069 | A01194 | 490 |
| A01069 | A01206 | 405 | A01069 | A01215 | 391 |
| A01069 | A01232 | 483 | A01069 | A01234 | 489 |
| A01069 | A01242 | 688 | A01069 | A01243 | 256 |
| A01069 | A01291 | 420 | A01069 | A01293 | 446 |
| A01069 | A01311 | 491 | A01069 | A01354 | 474 |
| A01069 | A01425 | 268 | A01069 | A01431 | 434 |
| A01069 | A01455 | 454 | A01069 | A01468 | 200 |
| A01069 | A01470 | 489 | A01069 | A01492 | 484 |
| A01069 | A01539 | 491 | A01069 | A01541 | 462 |
| A01069 | A01548 | 489 | A01069 | A01564 | 104 |
| A01069 | A01569 | 491 | A01069 | A01577 | 701 |
| A01069 | A01635 | 63  | A01069 | A01649 | 477 |
| A01069 | A01684 | 319 | A01069 | A01747 | 174 |
| A01069 | A01917 | 383 | A01069 | A02353 | 430 |
| A01069 | A02426 | 411 | A01069 | A02626 | 184 |
| A01069 | A02719 | 469 | A01069 | A02819 | 243 |
| A01069 | A03005 | 157 | A01069 | A03325 | 221 |
| A01069 | A03438 | 380 | A01069 | A03446 | 663 |
| A01069 | A03476 | 385 | A01069 | A03477 | 465 |
| A01069 | A03560 | 673 | A01069 | A03567 | 314 |
| A01069 | A03738 | 193 | A01069 | A03783 | 404 |
| A01069 | A03785 | 263 | A01069 | A03859 | 380 |
| A01069 | A03863 | 664 | A01069 | A04124 | 312 |
| A01069 | A04495 | 226 | A01069 | A04785 | 278 |
| A01069 | A05025 | 404 | A01069 | A05302 | 460 |
| A01069 | A05695 | 177 | A01069 | A05712 | 469 |
| A01069 | A06030 | 301 | A01069 | A06182 | 213 |
| A01069 | A06287 | 413 | A01069 | A06382 | 154 |
| A01069 | A06543 | 199 | A01069 | A06698 | 171 |
| A01069 | A06812 | 184 | A01069 | A06909 | 191 |
| A01069 | A07247 | 457 | A01069 | A07277 | 236 |
| A01069 | A07518 | 221 | A01069 | A07706 | 204 |
| A01069 | A07744 | 491 | A01069 | A07822 | 196 |
| A01069 | A07881 | 424 | A01069 | A08098 | 491 |
| A01069 | A08178 | 491 | A01069 | A08228 | 329 |
| A01069 | A08261 | 200 | A01069 | A08357 | 232 |
| A01069 | A08359 | 172 | A01069 | A08546 | 404 |
| A01069 | A08669 | 180 | A01069 | A08730 | 210 |
| A01069 | A08763 | 477 | A01069 | A08888 | 162 |
| A01069 | A08906 | 191 | A01069 | A08978 | 353 |
| A01069 | A08991 | 404 | A01069 | A09024 | 485 |
| A01069 | A09194 | 162 | A01069 | A09197 | 221 |
| A01069 | A09252 | 236 | A01069 | A09584 | 184 |
| A01069 | A09603 | 184 | A01069 | A09819 | 290 |

|        |        |     |        |        |     |
|--------|--------|-----|--------|--------|-----|
| A01069 | A10006 | 334 | A01069 | A10238 | 386 |
| A01069 | A10282 | 236 | A01069 | A10399 | 447 |
| A01069 | A10490 | 420 | A01069 | A10493 | 191 |
| A01069 | A10532 | 491 | A01069 | A10586 | 165 |
| A01069 | A10755 | 193 | A01069 | A11409 | 419 |
| A01069 | A11529 | 369 | A01069 | A11670 | 223 |
| A01069 | A11729 | 208 | A01069 | A13135 | 291 |
| A01069 | A13298 | 232 | A01069 | A13354 | 221 |
| A01069 | A13989 | 488 | A01069 | A14029 | 159 |
| A01069 | A14083 | 491 | A01069 | A14551 | 191 |
| A01069 | A14596 | 152 | A01069 | A14699 | 491 |
| A01069 | A14701 | 188 | A01069 | A14819 | 303 |
| A01069 | A15375 | 457 | A01069 | A15660 | 636 |
| A01069 | A15684 | 491 | A01069 | A15744 | 290 |
| A01069 | A16026 | 182 | A01069 | A16912 | 366 |
| A01070 | A01125 | 480 | A01070 | A01524 | 899 |
| A01070 | A01527 | 899 | A01070 | A01553 | 899 |
| A01070 | A01558 | 899 | A01070 | A01576 | 255 |
| A01070 | A01588 | 899 | A01070 | A01602 | 899 |
| A01070 | A01615 | 899 | A01070 | A01676 | 899 |
| A01070 | A01680 | 899 | A01070 | A01876 | 486 |
| A01070 | A01931 | 210 | A01070 | A01995 | 491 |
| A01070 | A02163 | 899 | A01070 | A02245 | 187 |
| A01070 | A02407 | 167 | A01070 | A02812 | 224 |
| A01070 | A03141 | 224 | A01070 | A03149 | 283 |
| A01070 | A03436 | 418 | A01070 | A03893 | 188 |
| A01070 | A03990 | 375 | A01070 | A04010 | 154 |
| A01070 | A04110 | 165 | A01070 | A04229 | 154 |
| A01070 | A05082 | 900 | A01070 | A05221 | 486 |
| A01070 | A05315 | 929 | A01070 | A05854 | 899 |
| A01070 | A06295 | 899 | A01070 | A06578 | 402 |
| A01070 | A06609 | 899 | A01070 | A07165 | 899 |
| A01070 | A07201 | 899 | A01070 | A08293 | 202 |
| A01070 | A09235 | 469 | A01070 | A09363 | 486 |
| A01070 | A09508 | 256 | A01070 | A09843 | 288 |
| A01070 | A10228 | 899 | A01070 | A10801 | 899 |
| A01070 | A10833 | 899 | A01070 | A10899 | 157 |
| A01070 | A11435 | 288 | A01070 | A11846 | 357 |
| A01070 | A13975 | 241 | A01070 | A13983 | 555 |
| A01070 | A14198 | 937 | A01070 | A14199 | 439 |
| A01070 | A14443 | 989 | A01070 | A14444 | 907 |
| A01070 | A14596 | 899 | A01070 | A15293 | 945 |
| A01070 | A15294 | 945 | A01070 | A15320 | 491 |
| A01070 | A15321 | 468 | A01070 | A15506 | 945 |
| A01070 | A15555 | 380 | A01070 | A15642 | 266 |
| A01070 | A15691 | 346 | A01070 | A16115 | 176 |



|        |        |     |        |        |     |
|--------|--------|-----|--------|--------|-----|
| A01070 | A16363 | 335 | A01070 | A16806 | 272 |
| A01070 | A16904 | 270 | A01070 | A16916 | 469 |
| A01071 | A01146 | 279 | A01071 | A01308 | 195 |
| A01071 | A01309 | 191 | A01071 | A01399 | 177 |
| A01071 | A01478 | 379 | A01071 | A01689 | 159 |
| A01071 | A01741 | 452 | A01071 | A01819 | 267 |
| A01071 | A01860 | 452 | A01071 | A02086 | 491 |
| A01071 | A02178 | 456 | A01071 | A02332 | 307 |
| A01071 | A02377 | 174 | A01071 | A02781 | 157 |
| A01071 | A04446 | 207 | A01071 | A04902 | 475 |
| A01071 | A05735 | 160 | A01071 | A05880 | 643 |
| A01071 | A05925 | 226 | A01071 | A06411 | 322 |
| A01071 | A06466 | 221 | A01071 | A06572 | 643 |
| A01071 | A06892 | 216 | A01071 | A07433 | 643 |
| A01071 | A08097 | 343 | A01071 | A08196 | 643 |
| A01071 | A08255 | 310 | A01071 | A08356 | 180 |
| A01071 | A08503 | 543 | A01071 | A08525 | 184 |
| A01071 | A08549 | 643 | A01071 | A08560 | 541 |
| A01071 | A08561 | 491 | A01071 | A08566 | 184 |
| A01071 | A08567 | 557 | A01071 | A08812 | 643 |
| A01071 | A08813 | 557 | A01071 | A08819 | 154 |
| A01071 | A08840 | 184 | A01071 | A08844 | 643 |
| A01071 | A08845 | 496 | A01071 | A09100 | 252 |
| A01071 | A09609 | 162 | A01071 | A09727 | 184 |
| A01071 | A09759 | 205 | A01071 | A10165 | 168 |
| A01071 | A10266 | 238 | A01071 | A10789 | 557 |
| A01071 | A11668 | 252 | A01071 | A11954 | 347 |
| A01071 | A12084 | 208 | A01071 | A12507 | 557 |
| A01071 | A12665 | 212 | A01071 | A12725 | 367 |
| A01071 | A13091 | 393 | A01071 | A13399 | 491 |
| A01071 | A13737 | 554 | A01071 | A13912 | 179 |
| A01071 | A13963 | 557 | A01071 | A14084 | 643 |
| A01071 | A14193 | 424 | A01071 | A14198 | 373 |
| A01071 | A14204 | 180 | A01071 | A14226 | 160 |
| A01071 | A14270 | 210 | A01071 | A14285 | 643 |
| A01071 | A14393 | 201 | A01071 | A14445 | 226 |
| A01071 | A14549 | 188 | A01071 | A14643 | 374 |
| A01071 | A14708 | 456 | A01071 | A14785 | 174 |
| A01071 | A14825 | 160 | A01071 | A15105 | 168 |
| A01071 | A15755 | 216 | A01071 | A15846 | 317 |
| A01071 | A15949 | 557 | A01071 | A16099 | 184 |
| A01071 | A16133 | 201 | A01071 | A16552 | 195 |
| A01071 | A16608 | 251 | A01071 | A16630 | 252 |
| A01071 | A16875 | 216 | A01071 | A17025 | 385 |
| A01071 | A17039 | 167 | A01071 | A17071 | 326 |
| A01071 | A17145 | 238 | A01072 | A01090 | 432 |

|        |        |     |        |        |     |
|--------|--------|-----|--------|--------|-----|
| A01072 | A01098 | 247 | A01072 | A01112 | 481 |
| A01072 | A01115 | 213 | A01072 | A01121 | 257 |
| A01072 | A01127 | 486 | A01072 | A01140 | 602 |
| A01072 | A01166 | 485 | A01072 | A01234 | 472 |
| A01072 | A01249 | 360 | A01072 | A01288 | 290 |
| A01072 | A01291 | 491 | A01072 | A01306 | 317 |
| A01072 | A01335 | 274 | A01072 | A01365 | 389 |
| A01072 | A01392 | 323 | A01072 | A01416 | 162 |
| A01072 | A01425 | 483 | A01072 | A01436 | 481 |
| A01072 | A01464 | 318 | A01072 | A01468 | 491 |
| A01072 | A01470 | 451 | A01072 | A01492 | 288 |
| A01072 | A01496 | 479 | A01072 | A01546 | 474 |
| A01072 | A01579 | 477 | A01072 | A01586 | 454 |
| A01072 | A01597 | 188 | A01072 | A01601 | 491 |
| A01072 | A01617 | 185 | A01072 | A01649 | 245 |
| A01072 | A01652 | 401 | A01072 | A01718 | 438 |
| A01072 | A01917 | 226 | A01072 | A02185 | 269 |
| A01072 | A02494 | 262 | A01072 | A02502 | 246 |
| A01072 | A02816 | 163 | A01072 | A03048 | 154 |
| A01072 | A03304 | 371 | A01072 | A03437 | 290 |
| A01072 | A03451 | 454 | A01072 | A03490 | 230 |
| A01072 | A03567 | 465 | A01072 | A03581 | 269 |
| A01072 | A03671 | 277 | A01072 | A03981 | 170 |
| A01072 | A04230 | 257 | A01072 | A04563 | 208 |
| A01072 | A04697 | 319 | A01072 | A04808 | 252 |
| A01072 | A04846 | 400 | A01072 | A05298 | 296 |
| A01072 | A05354 | 243 | A01072 | A05385 | 215 |
| A01072 | A05501 | 462 | A01072 | A06081 | 347 |
| A01072 | A06279 | 435 | A01072 | A06324 | 413 |
| A01072 | A06351 | 457 | A01072 | A06814 | 594 |
| A01072 | A06965 | 184 | A01072 | A07323 | 217 |
| A01072 | A07398 | 152 | A01072 | A07412 | 517 |
| A01072 | A07451 | 160 | A01072 | A08011 | 288 |
| A01072 | A08052 | 310 | A01072 | A08055 | 413 |
| A01072 | A08154 | 154 | A01072 | A08156 | 417 |
| A01072 | A08273 | 369 | A01072 | A08315 | 269 |
| A01072 | A08578 | 196 | A01072 | A09293 | 443 |
| A01072 | A09560 | 278 | A01072 | A09595 | 252 |
| A01072 | A09620 | 269 | A01072 | A09697 | 338 |
| A01072 | A10910 | 205 | A01072 | A10986 | 163 |
| A01072 | A11438 | 215 | A01072 | A11734 | 157 |
| A01072 | A13126 | 319 | A01072 | A13249 | 154 |
| A01072 | A13581 | 269 | A01072 | A13989 | 491 |
| A01072 | A13992 | 452 | A01072 | A14006 | 160 |
| A01072 | A14172 | 290 | A01072 | A14216 | 260 |
| A01072 | A14478 | 273 | A01072 | A14482 | 193 |

|        |        |     |        |        |     |
|--------|--------|-----|--------|--------|-----|
| A01072 | A14530 | 193 | A01072 | A15215 | 267 |
| A01072 | A15837 | 269 | A01072 | A15891 | 196 |
| A01072 | A15988 | 318 | A01072 | A16027 | 269 |
| A01072 | A16118 | 182 | A01072 | A16306 | 202 |
| A01073 | A01213 | 347 | A01073 | A01298 | 337 |
| A01073 | A01576 | 489 | A01073 | A02499 | 357 |
| A01073 | A03001 | 218 | A01073 | A07380 | 353 |
| A01073 | A08362 | 378 | A01073 | A16831 | 367 |
| A01074 | A01105 | 583 | A01074 | A01154 | 358 |
| A01074 | A01166 | 430 | A01074 | A01189 | 552 |
| A01074 | A01205 | 491 | A01074 | A01209 | 291 |
| A01074 | A01217 | 352 | A01074 | A01225 | 160 |
| A01074 | A01238 | 324 | A01074 | A01252 | 241 |
| A01074 | A01269 | 380 | A01074 | A01306 | 363 |
| A01074 | A01352 | 477 | A01074 | A01360 | 474 |
| A01074 | A01365 | 502 | A01074 | A01406 | 402 |
| A01074 | A01416 | 358 | A01074 | A01508 | 419 |
| A01074 | A01547 | 198 | A01074 | A01622 | 596 |
| A01074 | A01679 | 317 | A01074 | A02051 | 285 |
| A01074 | A02061 | 389 | A01074 | A02098 | 470 |
| A01074 | A02335 | 223 | A01074 | A02789 | 223 |
| A01074 | A02968 | 286 | A01074 | A03123 | 445 |
| A01074 | A03183 | 152 | A01074 | A03498 | 216 |
| A01074 | A03601 | 477 | A01074 | A03710 | 317 |
| A01074 | A03719 | 223 | A01074 | A03728 | 287 |
| A01074 | A03752 | 223 | A01074 | A03990 | 195 |
| A01074 | A04178 | 249 | A01074 | A04574 | 185 |
| A01074 | A05060 | 481 | A01074 | A05222 | 491 |
| A01074 | A05223 | 218 | A01074 | A05327 | 396 |
| A01074 | A05330 | 204 | A01074 | A05332 | 604 |
| A01074 | A05375 | 323 | A01074 | A05434 | 308 |
| A01074 | A05501 | 335 | A01074 | A05609 | 606 |
| A01074 | A06085 | 196 | A01074 | A06101 | 212 |
| A01074 | A06105 | 235 | A01074 | A06134 | 201 |
| A01074 | A06264 | 152 | A01074 | A06689 | 256 |
| A01074 | A06718 | 480 | A01074 | A06819 | 441 |
| A01074 | A06855 | 257 | A01074 | A06861 | 228 |
| A01074 | A07222 | 549 | A01074 | A07232 | 301 |
| A01074 | A07239 | 162 | A01074 | A07333 | 317 |
| A01074 | A07571 | 317 | A01074 | A07737 | 226 |
| A01074 | A07931 | 369 | A01074 | A07974 | 317 |
| A01074 | A08097 | 317 | A01074 | A08105 | 455 |
| A01074 | A08588 | 182 | A01074 | A09276 | 457 |
| A01074 | A09340 | 317 | A01074 | A09350 | 279 |
| A01074 | A13822 | 310 | A01074 | A13905 | 302 |
| A01074 | A14525 | 363 | A01074 | A14803 | 377 |

|        |        |     |        |        |     |
|--------|--------|-----|--------|--------|-----|
| A01074 | A14804 | 223 | A01074 | A14810 | 276 |
| A01074 | A14821 | 266 | A01074 | A14833 | 413 |
| A01074 | A15372 | 563 | A01074 | A15655 | 228 |
| A01074 | A16219 | 223 | A01074 | A16531 | 223 |
| A01074 | A16753 | 296 | A01075 | A01077 | 491 |
| A01075 | A01079 | 491 | A01075 | A01082 | 491 |
| A01075 | A01084 | 491 | A01075 | A01087 | 491 |
| A01075 | A01088 | 491 | A01075 | A01091 | 475 |
| A01075 | A01116 | 391 | A01075 | A01119 | 235 |
| A01075 | A01136 | 491 | A01075 | A01143 | 440 |
| A01075 | A01150 | 485 | A01075 | A01151 | 229 |
| A01075 | A01156 | 620 | A01075 | A01161 | 186 |
| A01075 | A01166 | 588 | A01075 | A01179 | 361 |
| A01075 | A01184 | 468 | A01075 | A01194 | 311 |
| A01075 | A01206 | 491 | A01075 | A01209 | 391 |
| A01075 | A01213 | 405 | A01075 | A01214 | 436 |
| A01075 | A01215 | 475 | A01075 | A01226 | 177 |
| A01075 | A01234 | 578 | A01075 | A01243 | 479 |
| A01075 | A01268 | 377 | A01075 | A01291 | 491 |
| A01075 | A01299 | 369 | A01075 | A01304 | 196 |
| A01075 | A01326 | 428 | A01075 | A01349 | 291 |
| A01075 | A01351 | 620 | A01075 | A01352 | 369 |
| A01075 | A01353 | 436 | A01075 | A01354 | 491 |
| A01075 | A01372 | 276 | A01075 | A01384 | 256 |
| A01075 | A01385 | 490 | A01075 | A01391 | 190 |
| A01075 | A01398 | 157 | A01075 | A01399 | 394 |
| A01075 | A01401 | 371 | A01075 | A01406 | 491 |
| A01075 | A01419 | 300 | A01075 | A01429 | 481 |
| A01075 | A01430 | 484 | A01075 | A01439 | 316 |
| A01075 | A01468 | 422 | A01075 | A01470 | 491 |
| A01075 | A01492 | 489 | A01075 | A01500 | 254 |
| A01075 | A01503 | 491 | A01075 | A01506 | 162 |
| A01075 | A01540 | 305 | A01075 | A01541 | 485 |
| A01075 | A01546 | 156 | A01075 | A01555 | 362 |
| A01075 | A01558 | 462 | A01075 | A01573 | 286 |
| A01075 | A01585 | 345 | A01075 | A01598 | 491 |
| A01075 | A01612 | 490 | A01075 | A01614 | 491 |
| A01075 | A01649 | 491 | A01075 | A01707 | 491 |
| A01075 | A01758 | 151 | A01075 | A01763 | 439 |
| A01075 | A02064 | 491 | A01075 | A02086 | 288 |
| A01075 | A02219 | 273 | A01075 | A02364 | 402 |
| A01075 | A02452 | 391 | A01075 | A02671 | 411 |
| A01075 | A02978 | 307 | A01075 | A02980 | 347 |
| A01075 | A03057 | 490 | A01075 | A03171 | 486 |
| A01075 | A03213 | 402 | A01075 | A03298 | 196 |
| A01075 | A03446 | 470 | A01075 | A03494 | 396 |

|        |        |     |        |        |     |
|--------|--------|-----|--------|--------|-----|
| A01075 | A03567 | 462 | A01075 | A03569 | 486 |
| A01075 | A03601 | 491 | A01075 | A03734 | 460 |
| A01075 | A03740 | 480 | A01075 | A03752 | 440 |
| A01075 | A03757 | 160 | A01075 | A03817 | 491 |
| A01075 | A03859 | 163 | A01075 | A03880 | 402 |
| A01075 | A03881 | 235 | A01075 | A03944 | 371 |
| A01075 | A03965 | 462 | A01075 | A04151 | 229 |
| A01075 | A04337 | 446 | A01075 | A04668 | 572 |
| A01075 | A04687 | 484 | A01075 | A05155 | 319 |
| A01075 | A05230 | 424 | A01075 | A05234 | 409 |
| A01075 | A05501 | 463 | A01075 | A06273 | 406 |
| A01075 | A06390 | 208 | A01075 | A06466 | 490 |
| A01075 | A06531 | 461 | A01075 | A06592 | 313 |
| A01075 | A06662 | 323 | A01075 | A06881 | 468 |
| A01075 | A06907 | 489 | A01075 | A07244 | 686 |
| A01075 | A07311 | 467 | A01075 | A07347 | 185 |
| A01075 | A07349 | 356 | A01075 | A07378 | 277 |
| A01075 | A07442 | 258 | A01075 | A07604 | 491 |
| A01075 | A07700 | 452 | A01075 | A07706 | 491 |
| A01075 | A07798 | 279 | A01075 | A08022 | 491 |
| A01075 | A08118 | 491 | A01075 | A08137 | 491 |
| A01075 | A08144 | 414 | A01075 | A08280 | 343 |
| A01075 | A08293 | 285 | A01075 | A08304 | 473 |
| A01075 | A08356 | 425 | A01075 | A08357 | 265 |
| A01075 | A08362 | 258 | A01075 | A08383 | 412 |
| A01075 | A08403 | 358 | A01075 | A08437 | 429 |
| A01075 | A08439 | 440 | A01075 | A08491 | 333 |
| A01075 | A08518 | 355 | A01075 | A08527 | 491 |
| A01075 | A08553 | 154 | A01075 | A08571 | 490 |
| A01075 | A08907 | 170 | A01075 | A08949 | 162 |
| A01075 | A08976 | 485 | A01075 | A08996 | 452 |
| A01075 | A08998 | 351 | A01075 | A09307 | 313 |
| A01075 | A09339 | 490 | A01075 | A09591 | 346 |
| A01075 | A09619 | 385 | A01075 | A09717 | 228 |
| A01075 | A09825 | 443 | A01075 | A10532 | 201 |
| A01075 | A10538 | 490 | A01075 | A10601 | 319 |
| A01075 | A10615 | 188 | A01075 | A10624 | 481 |
| A01075 | A10625 | 458 | A01075 | A10798 | 364 |
| A01075 | A11286 | 425 | A01075 | A11291 | 491 |
| A01075 | A11316 | 302 | A01075 | A11395 | 438 |
| A01075 | A11452 | 439 | A01075 | A11476 | 463 |
| A01075 | A11672 | 374 | A01075 | A11674 | 491 |
| A01075 | A11685 | 208 | A01075 | A11699 | 332 |
| A01075 | A11930 | 490 | A01075 | A11965 | 332 |
| A01075 | A12138 | 457 | A01075 | A12209 | 413 |
| A01075 | A12232 | 262 | A01075 | A12328 | 485 |

|        |        |     |        |        |     |
|--------|--------|-----|--------|--------|-----|
| A01075 | A12329 | 173 | A01075 | A12535 | 170 |
| A01075 | A12871 | 223 | A01075 | A13099 | 351 |
| A01075 | A13325 | 229 | A01075 | A13335 | 174 |
| A01075 | A13340 | 490 | A01075 | A13842 | 174 |
| A01075 | A13870 | 185 | A01075 | A13928 | 305 |
| A01075 | A13983 | 278 | A01075 | A13989 | 491 |
| A01075 | A14006 | 491 | A01075 | A14074 | 212 |
| A01075 | A14147 | 416 | A01075 | A14165 | 79  |
| A01075 | A14169 | 486 | A01075 | A14178 | 267 |
| A01075 | A14188 | 317 | A01075 | A14196 | 483 |
| A01075 | A14209 | 338 | A01075 | A14212 | 409 |
| A01075 | A14213 | 168 | A01075 | A14220 | 491 |
| A01075 | A14221 | 204 | A01075 | A14257 | 474 |
| A01075 | A14272 | 489 | A01075 | A14449 | 611 |
| A01075 | A14451 | 205 | A01075 | A14481 | 235 |
| A01075 | A14566 | 491 | A01075 | A14570 | 243 |
| A01075 | A14594 | 491 | A01075 | A14596 | 484 |
| A01075 | A14655 | 491 | A01075 | A14659 | 439 |
| A01075 | A14701 | 323 | A01075 | A14838 | 462 |
| A01075 | A14879 | 208 | A01075 | A14936 | 470 |
| A01075 | A15128 | 208 | A01075 | A15215 | 433 |
| A01075 | A15244 | 436 | A01075 | A15291 | 188 |
| A01075 | A15292 | 229 | A01075 | A15297 | 452 |
| A01075 | A15311 | 390 | A01075 | A15312 | 364 |
| A01075 | A15313 | 379 | A01075 | A15315 | 337 |
| A01075 | A15322 | 236 | A01075 | A15324 | 350 |
| A01075 | A15338 | 185 | A01075 | A15345 | 251 |
| A01075 | A15352 | 232 | A01075 | A15353 | 474 |
| A01075 | A15366 | 488 | A01075 | A15384 | 402 |
| A01075 | A15432 | 374 | A01075 | A15520 | 491 |
| A01075 | A15559 | 491 | A01075 | A15564 | 151 |
| A01075 | A15624 | 402 | A01075 | A15651 | 467 |
| A01075 | A15652 | 462 | A01075 | A15660 | 224 |
| A01075 | A15661 | 462 | A01075 | A15662 | 462 |
| A01075 | A15684 | 160 | A01075 | A15729 | 430 |
| A01075 | A15733 | 491 | A01075 | A15747 | 216 |
| A01075 | A15773 | 373 | A01075 | A15932 | 638 |
| A01075 | A15945 | 221 | A01075 | A15946 | 223 |
| A01075 | A16060 | 446 | A01075 | A16109 | 167 |
| A01075 | A16117 | 205 | A01075 | A16144 | 190 |
| A01075 | A16320 | 443 | A01075 | A16328 | 391 |
| A01075 | A16394 | 468 | A01075 | A16491 | 160 |
| A01075 | A16499 | 185 | A01075 | A16525 | 170 |
| A01075 | A16619 | 170 | A01075 | A16668 | 170 |
| A01075 | A16873 | 224 | A01075 | A17063 | 490 |
| A01075 | A17088 | 218 | A01075 | A17127 | 179 |

|        |        |     |        |        |     |
|--------|--------|-----|--------|--------|-----|
| A01075 | A17142 | 491 | A01076 | A01253 | 383 |
| A01076 | A01582 | 201 | A01076 | A02502 | 238 |
| A01076 | A03321 | 184 | A01076 | A03651 | 260 |
| A01076 | A03885 | 352 | A01077 | A01080 | 526 |
| A01077 | A01097 | 424 | A01077 | A01122 | 462 |
| A01077 | A01169 | 485 | A01077 | A01173 | 402 |
| A01077 | A01212 | 205 | A01077 | A01267 | 160 |
| A01077 | A01339 | 176 | A01077 | A01340 | 326 |
| A01077 | A01354 | 646 | A01077 | A01370 | 353 |
| A01077 | A01387 | 332 | A01077 | A01524 | 899 |
| A01077 | A01558 | 232 | A01077 | A01560 | 395 |
| A01077 | A01572 | 182 | A01077 | A01781 | 427 |
| A01077 | A02212 | 160 | A01077 | A02358 | 170 |
| A01077 | A02518 | 221 | A01077 | A02715 | 467 |
| A01077 | A03479 | 483 | A01077 | A03495 | 491 |
| A01077 | A03682 | 184 | A01077 | A04181 | 353 |
| A01077 | A04807 | 199 | A01077 | A05082 | 294 |
| A01077 | A05254 | 341 | A01077 | A06149 | 152 |
| A01077 | A06750 | 373 | A01077 | A07063 | 227 |
| A01077 | A07096 | 160 | A01077 | A07226 | 295 |
| A01077 | A07311 | 461 | A01077 | A07317 | 182 |
| A01077 | A07412 | 152 | A01077 | A07604 | 227 |
| A01077 | A07715 | 200 | A01077 | A07920 | 268 |
| A01077 | A08137 | 430 | A01077 | A08150 | 481 |
| A01077 | A08834 | 160 | A01077 | A09296 | 205 |
| A01077 | A09328 | 241 | A01077 | A09627 | 160 |
| A01077 | A09857 | 213 | A01077 | A10050 | 269 |
| A01077 | A10200 | 200 | A01077 | A10372 | 160 |
| A01077 | A10386 | 216 | A01077 | A10875 | 167 |
| A01077 | A11324 | 310 | A01077 | A11365 | 160 |
| A01077 | A11598 | 358 | A01077 | A11735 | 160 |
| A01077 | A11737 | 160 | A01077 | A11914 | 160 |
| A01077 | A12658 | 195 | A01077 | A12824 | 541 |
| A01077 | A14006 | 375 | A01077 | A14007 | 160 |
| A01077 | A14073 | 302 | A01077 | A14112 | 196 |
| A01077 | A14196 | 285 | A01077 | A14220 | 486 |
| A01077 | A14352 | 198 | A01077 | A14399 | 430 |
| A01077 | A14426 | 154 | A01077 | A14614 | 205 |
| A01077 | A14661 | 594 | A01077 | A15257 | 353 |
| A01077 | A15297 | 165 | A01077 | A15545 | 472 |
| A01077 | A16050 | 262 | A01077 | A16298 | 160 |
| A01077 | A16358 | 335 | A01078 | A01080 | 168 |
| A01078 | A01211 | 193 | A01078 | A01377 | 177 |
| A01078 | A01461 | 430 | A01078 | A01500 | 179 |
| A01078 | A01516 | 230 | A01078 | A01520 | 188 |
| A01078 | A01522 | 291 | A01078 | A01573 | 306 |

|        |        |     |        |        |     |
|--------|--------|-----|--------|--------|-----|
| A01078 | A01574 | 356 | A01078 | A01575 | 491 |
| A01078 | A01585 | 491 | A01078 | A01634 | 202 |
| A01078 | A02865 | 283 | A01078 | A03452 | 425 |
| A01078 | A03618 | 688 | A01078 | A03651 | 302 |
| A01078 | A03892 | 489 | A01078 | A04292 | 190 |
| A01078 | A04487 | 221 | A01078 | A04686 | 182 |
| A01078 | A04893 | 171 | A01078 | A04897 | 183 |
| A01078 | A05233 | 193 | A01078 | A06011 | 177 |
| A01078 | A06086 | 195 | A01078 | A07135 | 152 |
| A01078 | A07736 | 425 | A01078 | A08400 | 238 |
| A01078 | A09204 | 184 | A01078 | A10655 | 685 |
| A01078 | A11570 | 425 | A01078 | A13882 | 434 |
| A01078 | A13902 | 443 | A01078 | A13928 | 154 |
| A01078 | A14182 | 425 | A01078 | A14247 | 290 |
| A01078 | A14272 | 232 | A01078 | A15647 | 611 |
| A01078 | A15817 | 172 | A01078 | A17061 | 207 |
| A01078 | A17133 | 243 | A01079 | A01082 | 483 |
| A01079 | A01084 | 484 | A01079 | A01087 | 491 |
| A01079 | A01398 | 179 | A01079 | A01446 | 152 |
| A01079 | A02377 | 191 | A01079 | A02492 | 346 |
| A01079 | A02506 | 156 | A01079 | A03228 | 185 |
| A01079 | A07706 | 489 | A01079 | A07718 | 154 |
| A01079 | A08022 | 378 | A01079 | A08527 | 208 |
| A01079 | A08996 | 177 | A01079 | A09485 | 241 |
| A01079 | A09705 | 384 | A01079 | A10538 | 358 |
| A01079 | A11674 | 484 | A01079 | A12158 | 291 |
| A01079 | A13989 | 154 | A01079 | A14566 | 386 |
| A01079 | A15520 | 475 | A01079 | A15733 | 123 |
| A01079 | A16394 | 364 | A01079 | A17142 | 162 |
| A01080 | A01082 | 490 | A01080 | A01087 | 182 |
| A01080 | A01097 | 491 | A01080 | A01267 | 544 |
| A01080 | A01274 | 168 | A01080 | A01325 | 193 |
| A01080 | A01327 | 157 | A01080 | A01339 | 162 |
| A01080 | A01379 | 228 | A01080 | A01396 | 160 |
| A01080 | A01512 | 199 | A01080 | A01557 | 226 |
| A01080 | A01741 | 900 | A01080 | A02030 | 243 |
| A01080 | A02131 | 196 | A01080 | A02212 | 160 |
| A01080 | A03279 | 152 | A01080 | A03806 | 465 |
| A01080 | A04666 | 201 | A01080 | A05276 | 152 |
| A01080 | A06100 | 172 | A01080 | A06472 | 213 |
| A01080 | A06588 | 423 | A01080 | A07096 | 160 |
| A01080 | A07226 | 160 | A01080 | A07317 | 156 |
| A01080 | A07439 | 313 | A01080 | A07731 | 190 |
| A01080 | A07756 | 218 | A01080 | A08133 | 199 |
| A01080 | A08430 | 152 | A01080 | A08517 | 210 |
| A01080 | A08834 | 160 | A01080 | A08927 | 152 |



|        |        |     |        |        |     |
|--------|--------|-----|--------|--------|-----|
| A01080 | A08990 | 157 | A01080 | A09627 | 160 |
| A01080 | A09672 | 408 | A01080 | A10026 | 296 |
| A01080 | A10372 | 160 | A01080 | A10560 | 187 |
| A01080 | A11365 | 160 | A01080 | A11598 | 486 |
| A01080 | A11735 | 496 | A01080 | A11737 | 497 |
| A01080 | A11914 | 511 | A01080 | A12253 | 333 |
| A01080 | A12325 | 384 | A01080 | A12412 | 196 |
| A01080 | A12658 | 264 | A01080 | A12824 | 545 |
| A01080 | A12853 | 256 | A01080 | A14007 | 160 |
| A01080 | A14167 | 165 | A01080 | A14196 | 490 |
| A01080 | A14200 | 229 | A01080 | A14566 | 170 |
| A01080 | A14570 | 208 | A01080 | A14591 | 187 |
| A01080 | A14825 | 190 | A01080 | A15257 | 540 |
| A01080 | A15264 | 218 | A01080 | A15297 | 491 |
| A01080 | A15323 | 179 | A01080 | A15507 | 167 |
| A01080 | A15547 | 215 | A01080 | A15559 | 372 |
| A01080 | A15564 | 184 | A01080 | A16860 | 371 |
| A01080 | A16907 | 355 | A01080 | A16964 | 238 |
| A01080 | A17142 | 182 | A01081 | A01086 | 489 |
| A01081 | A01108 | 434 | A01081 | A01204 | 440 |
| A01081 | A01346 | 196 | A01081 | A01399 | 386 |
| A01081 | A04895 | 386 | A01081 | A07350 | 409 |
| A01081 | A07451 | 170 | A01081 | A07569 | 330 |
| A01081 | A07682 | 385 | A01081 | A07880 | 375 |
| A01081 | A08452 | 218 | A01081 | A08572 | 252 |
| A01081 | A11338 | 380 | A01081 | A11427 | 273 |
| A01082 | A01084 | 491 | A01082 | A01087 | 491 |
| A01082 | A01092 | 241 | A01082 | A01136 | 475 |
| A01082 | A01192 | 199 | A01082 | A01206 | 353 |
| A01082 | A01234 | 399 | A01082 | A01261 | 335 |
| A01082 | A01291 | 480 | A01082 | A01338 | 184 |
| A01082 | A01339 | 159 | A01082 | A01354 | 465 |
| A01082 | A01406 | 422 | A01082 | A01540 | 479 |
| A01082 | A01707 | 472 | A01082 | A02739 | 276 |
| A01082 | A03171 | 323 | A01082 | A03435 | 274 |
| A01082 | A03601 | 477 | A01082 | A03740 | 313 |
| A01082 | A03752 | 455 | A01082 | A03817 | 491 |
| A01082 | A04059 | 240 | A01082 | A04211 | 177 |
| A01082 | A05501 | 352 | A01082 | A06466 | 490 |
| A01082 | A06814 | 182 | A01082 | A06861 | 396 |
| A01082 | A07311 | 489 | A01082 | A07349 | 281 |
| A01082 | A07378 | 407 | A01082 | A07706 | 491 |
| A01082 | A07881 | 435 | A01082 | A08137 | 419 |
| A01082 | A08261 | 195 | A01082 | A08304 | 216 |
| A01082 | A08437 | 107 | A01082 | A08452 | 168 |
| A01082 | A08518 | 63  | A01082 | A08527 | 488 |

|        |        |     |        |        |     |
|--------|--------|-----|--------|--------|-----|
| A01082 | A08533 | 327 | A01082 | A08976 | 394 |
| A01082 | A08996 | 232 | A01082 | A08998 | 473 |
| A01082 | A09009 | 278 | A01082 | A09297 | 281 |
| A01082 | A09339 | 85  | A01082 | A09529 | 202 |
| A01082 | A10532 | 312 | A01082 | A10538 | 486 |
| A01082 | A11199 | 263 | A01082 | A11286 | 294 |
| A01082 | A11291 | 472 | A01082 | A11452 | 432 |
| A01082 | A11674 | 382 | A01082 | A11865 | 177 |
| A01082 | A11930 | 450 | A01082 | A12083 | 168 |
| A01082 | A12328 | 386 | A01082 | A12543 | 162 |
| A01082 | A12746 | 254 | A01082 | A12871 | 401 |
| A01082 | A13340 | 491 | A01082 | A13989 | 467 |
| A01082 | A14178 | 180 | A01082 | A14216 | 281 |
| A01082 | A14220 | 491 | A01082 | A14257 | 240 |
| A01082 | A14566 | 491 | A01082 | A14594 | 483 |
| A01082 | A14630 | 234 | A01082 | A14960 | 159 |
| A01082 | A15128 | 286 | A01082 | A15520 | 452 |
| A01082 | A15559 | 260 | A01082 | A15564 | 174 |
| A01082 | A15660 | 449 | A01082 | A15684 | 462 |
| A01082 | A15733 | 396 | A01082 | A15932 | 156 |
| A01082 | A16050 | 188 | A01082 | A16394 | 105 |
| A01082 | A16619 | 254 | A01082 | A17063 | 221 |
| A01082 | A17088 | 172 | A01082 | A17142 | 490 |
| A01083 | A01150 | 419 | A01083 | A01261 | 246 |
| A01083 | A01335 | 249 | A01083 | A01431 | 356 |
| A01083 | A01435 | 470 | A01083 | A01540 | 455 |
| A01083 | A01560 | 447 | A01083 | A01641 | 301 |
| A01083 | A01692 | 63  | A01083 | A01707 | 458 |
| A01083 | A01850 | 424 | A01083 | A02170 | 170 |
| A01083 | A02429 | 177 | A01083 | A02791 | 256 |
| A01083 | A02877 | 382 | A01083 | A03667 | 281 |
| A01083 | A03740 | 491 | A01083 | A03752 | 452 |
| A01083 | A03785 | 290 | A01083 | A04012 | 302 |
| A01083 | A04092 | 152 | A01083 | A05128 | 215 |
| A01083 | A06466 | 443 | A01083 | A07311 | 489 |
| A01083 | A07798 | 279 | A01083 | A08053 | 445 |
| A01083 | A08054 | 457 | A01083 | A09476 | 490 |
| A01083 | A10332 | 195 | A01083 | A10365 | 152 |
| A01083 | A10728 | 174 | A01083 | A11302 | 477 |
| A01083 | A11322 | 428 | A01083 | A11372 | 485 |
| A01083 | A12383 | 443 | A01083 | A12791 | 358 |
| A01083 | A13521 | 439 | A01083 | A14006 | 428 |
| A01083 | A14073 | 485 | A01083 | A14369 | 167 |
| A01083 | A14429 | 301 | A01083 | A14963 | 238 |
| A01083 | A15219 | 221 | A01083 | A15244 | 327 |
| A01083 | A15765 | 151 | A01083 | A15938 | 266 |

|        |        |     |        |        |     |
|--------|--------|-----|--------|--------|-----|
| A01083 | A16060 | 168 | A01083 | A16676 | 232 |
| A01084 | A01087 | 491 | A01084 | A01088 | 454 |
| A01084 | A01206 | 305 | A01084 | A01234 | 467 |
| A01084 | A01291 | 279 | A01084 | A01354 | 430 |
| A01084 | A01492 | 200 | A01084 | A01503 | 454 |
| A01084 | A01598 | 258 | A01084 | A01614 | 232 |
| A01084 | A02064 | 306 | A01084 | A03478 | 183 |
| A01084 | A03601 | 441 | A01084 | A03817 | 332 |
| A01084 | A07706 | 491 | A01084 | A08022 | 341 |
| A01084 | A08304 | 167 | A01084 | A08437 | 173 |
| A01084 | A08518 | 91  | A01084 | A08519 | 229 |
| A01084 | A08527 | 358 | A01084 | A08976 | 118 |
| A01084 | A08996 | 110 | A01084 | A09010 | 170 |
| A01084 | A10538 | 467 | A01084 | A11674 | 479 |
| A01084 | A11930 | 352 | A01084 | A12543 | 172 |
| A01084 | A13099 | 468 | A01084 | A13126 | 301 |
| A01084 | A13231 | 199 | A01084 | A13989 | 485 |
| A01084 | A14006 | 361 | A01084 | A14165 | 221 |
| A01084 | A14220 | 210 | A01084 | A14566 | 474 |
| A01084 | A14594 | 207 | A01084 | A14655 | 273 |
| A01084 | A14835 | 272 | A01084 | A15520 | 319 |
| A01084 | A15733 | 479 | A01084 | A16394 | 305 |
| A01085 | A01090 | 491 | A01085 | A01095 | 115 |
| A01085 | A01112 | 436 | A01085 | A01140 | 201 |
| A01085 | A01196 | 322 | A01085 | A01206 | 489 |
| A01085 | A01215 | 183 | A01085 | A01234 | 346 |
| A01085 | A01238 | 456 | A01085 | A01249 | 353 |
| A01085 | A01291 | 491 | A01085 | A01294 | 353 |
| A01085 | A01363 | 157 | A01085 | A01392 | 418 |
| A01085 | A01425 | 417 | A01085 | A01433 | 468 |
| A01085 | A01436 | 245 | A01085 | A01437 | 165 |
| A01085 | A01439 | 350 | A01085 | A01449 | 366 |
| A01085 | A01468 | 319 | A01085 | A01496 | 481 |
| A01085 | A01538 | 208 | A01085 | A01598 | 247 |
| A01085 | A01614 | 390 | A01085 | A01649 | 434 |
| A01085 | A01684 | 375 | A01085 | A01822 | 188 |
| A01085 | A02270 | 276 | A01085 | A02527 | 221 |
| A01085 | A02877 | 162 | A01085 | A03218 | 212 |
| A01085 | A03261 | 191 | A01085 | A03490 | 151 |
| A01085 | A03638 | 246 | A01085 | A03654 | 159 |
| A01085 | A04230 | 172 | A01085 | A04764 | 338 |
| A01085 | A05501 | 356 | A01085 | A06084 | 223 |
| A01085 | A06340 | 173 | A01085 | A06351 | 405 |
| A01085 | A06356 | 269 | A01085 | A06400 | 182 |
| A01085 | A06812 | 301 | A01085 | A06965 | 255 |
| A01085 | A07047 | 152 | A01085 | A07449 | 218 |

|        |        |     |        |        |     |
|--------|--------|-----|--------|--------|-----|
| A01085 | A07726 | 405 | A01085 | A08011 | 490 |
| A01085 | A08055 | 310 | A01085 | A08154 | 196 |
| A01085 | A08301 | 160 | A01085 | A08357 | 481 |
| A01085 | A08359 | 335 | A01085 | A08377 | 475 |
| A01085 | A08550 | 429 | A01085 | A08556 | 160 |
| A01085 | A08682 | 276 | A01085 | A08748 | 218 |
| A01085 | A08773 | 424 | A01085 | A08973 | 445 |
| A01085 | A10362 | 241 | A01085 | A10518 | 159 |
| A01085 | A11254 | 272 | A01085 | A11334 | 486 |
| A01085 | A11419 | 154 | A01085 | A11420 | 157 |
| A01085 | A11550 | 179 | A01085 | A11815 | 319 |
| A01085 | A12195 | 191 | A01085 | A12687 | 235 |
| A01085 | A13340 | 171 | A01085 | A13989 | 491 |
| A01085 | A14216 | 491 | A01085 | A14447 | 328 |
| A01085 | A14482 | 160 | A01085 | A15215 | 180 |
| A01085 | A15500 | 401 | A01085 | A15684 | 324 |
| A01085 | A15988 | 457 | A01086 | A01108 | 592 |
| A01086 | A01150 | 558 | A01086 | A01155 | 201 |
| A01086 | A01161 | 590 | A01086 | A01204 | 589 |
| A01086 | A01210 | 428 | A01086 | A01214 | 379 |
| A01086 | A01221 | 152 | A01086 | A01232 | 306 |
| A01086 | A01246 | 472 | A01086 | A01260 | 483 |
| A01086 | A01287 | 573 | A01086 | A01296 | 485 |
| A01086 | A01311 | 393 | A01086 | A01320 | 504 |
| A01086 | A01327 | 545 | A01086 | A01336 | 213 |
| A01086 | A01346 | 592 | A01086 | A01365 | 232 |
| A01086 | A01382 | 391 | A01086 | A01387 | 210 |
| A01086 | A01399 | 592 | A01086 | A01407 | 205 |
| A01086 | A01412 | 353 | A01086 | A01413 | 307 |
| A01086 | A01435 | 313 | A01086 | A01443 | 541 |
| A01086 | A01446 | 484 | A01086 | A01447 | 417 |
| A01086 | A01448 | 491 | A01086 | A01540 | 477 |
| A01086 | A01711 | 486 | A01086 | A01741 | 386 |
| A01086 | A01743 | 270 | A01086 | A01819 | 177 |
| A01086 | A01825 | 356 | A01086 | A02814 | 290 |
| A01086 | A02994 | 271 | A01086 | A03259 | 278 |
| A01086 | A03713 | 162 | A01086 | A03723 | 254 |
| A01086 | A03740 | 330 | A01086 | A03926 | 154 |
| A01086 | A03959 | 419 | A01086 | A03981 | 260 |
| A01086 | A04541 | 348 | A01086 | A04542 | 247 |
| A01086 | A04771 | 328 | A01086 | A04895 | 490 |
| A01086 | A05258 | 425 | A01086 | A05368 | 460 |
| A01086 | A05839 | 157 | A01086 | A06813 | 174 |
| A01086 | A06959 | 375 | A01086 | A07046 | 218 |
| A01086 | A07237 | 362 | A01086 | A07350 | 306 |
| A01086 | A07362 | 297 | A01086 | A07551 | 364 |

|        |        |     |        |        |     |
|--------|--------|-----|--------|--------|-----|
| A01086 | A07569 | 372 | A01086 | A07597 | 234 |
| A01086 | A07773 | 477 | A01086 | A07880 | 449 |
| A01086 | A08794 | 256 | A01086 | A09293 | 177 |
| A01086 | A09595 | 229 | A01086 | A09616 | 329 |
| A01086 | A09709 | 165 | A01086 | A10199 | 490 |
| A01086 | A10250 | 391 | A01086 | A10498 | 208 |
| A01086 | A10535 | 413 | A01086 | A11015 | 485 |
| A01086 | A11297 | 230 | A01086 | A11338 | 170 |
| A01086 | A11419 | 202 | A01086 | A11427 | 457 |
| A01086 | A11677 | 247 | A01086 | A13497 | 306 |
| A01086 | A14073 | 263 | A01086 | A14387 | 185 |
| A01086 | A14449 | 421 | A01086 | A14478 | 243 |
| A01086 | A14479 | 425 | A01086 | A14482 | 307 |
| A01086 | A14699 | 573 | A01086 | A14778 | 247 |
| A01086 | A14801 | 205 | A01086 | A14882 | 165 |
| A01086 | A14888 | 190 | A01086 | A15624 | 408 |
| A01086 | A15684 | 296 | A01086 | A15891 | 170 |
| A01086 | A16587 | 247 | A01086 | A16591 | 274 |
| A01086 | A17152 | 187 | A01087 | A01088 | 278 |
| A01087 | A01116 | 411 | A01087 | A01136 | 173 |
| A01087 | A01150 | 369 | A01087 | A01166 | 266 |
| A01087 | A01206 | 489 | A01087 | A01234 | 489 |
| A01087 | A01291 | 374 | A01087 | A01299 | 218 |
| A01087 | A01306 | 219 | A01087 | A01354 | 477 |
| A01087 | A01385 | 418 | A01087 | A01406 | 477 |
| A01087 | A01429 | 419 | A01087 | A01430 | 455 |
| A01087 | A01468 | 232 | A01087 | A01470 | 418 |
| A01087 | A01503 | 488 | A01087 | A01541 | 156 |
| A01087 | A01598 | 414 | A01087 | A01612 | 385 |
| A01087 | A01614 | 238 | A01087 | A01646 | 191 |
| A01087 | A01649 | 399 | A01087 | A01707 | 490 |
| A01087 | A03446 | 191 | A01087 | A03569 | 307 |
| A01087 | A03601 | 474 | A01087 | A03734 | 457 |
| A01087 | A03740 | 326 | A01087 | A03752 | 347 |
| A01087 | A03817 | 488 | A01087 | A05501 | 204 |
| A01087 | A06466 | 399 | A01087 | A06592 | 171 |
| A01087 | A07311 | 172 | A01087 | A07604 | 272 |
| A01087 | A07700 | 156 | A01087 | A07706 | 491 |
| A01087 | A07850 | 351 | A01087 | A08022 | 490 |
| A01087 | A08118 | 201 | A01087 | A08137 | 480 |
| A01087 | A08304 | 343 | A01087 | A08381 | 267 |
| A01087 | A08383 | 224 | A01087 | A08437 | 348 |
| A01087 | A08439 | 443 | A01087 | A08518 | 229 |
| A01087 | A08527 | 385 | A01087 | A08528 | 208 |
| A01087 | A08976 | 484 | A01087 | A08996 | 430 |
| A01087 | A09194 | 180 | A01087 | A09339 | 102 |

|        |        |     |        |        |     |
|--------|--------|-----|--------|--------|-----|
| A01087 | A09608 | 254 | A01087 | A10321 | 168 |
| A01087 | A10538 | 475 | A01087 | A10624 | 157 |
| A01087 | A11395 | 424 | A01087 | A11452 | 299 |
| A01087 | A11674 | 463 | A01087 | A11845 | 363 |
| A01087 | A11930 | 488 | A01087 | A12328 | 249 |
| A01087 | A13287 | 210 | A01087 | A13340 | 398 |
| A01087 | A13785 | 172 | A01087 | A13989 | 491 |
| A01087 | A14006 | 463 | A01087 | A14165 | 172 |
| A01087 | A14220 | 491 | A01087 | A14257 | 170 |
| A01087 | A14272 | 191 | A01087 | A14303 | 172 |
| A01087 | A14566 | 491 | A01087 | A14594 | 480 |
| A01087 | A14655 | 341 | A01087 | A15128 | 303 |
| A01087 | A15373 | 479 | A01087 | A15520 | 460 |
| A01087 | A15613 | 210 | A01087 | A15733 | 490 |
| A01087 | A15747 | 152 | A01087 | A15762 | 262 |
| A01087 | A15945 | 228 | A01087 | A15946 | 413 |
| A01087 | A16144 | 157 | A01087 | A16394 | 347 |
| A01087 | A17063 | 398 | A01087 | A17142 | 485 |
| A01088 | A01096 | 271 | A01088 | A01116 | 252 |
| A01088 | A01119 | 458 | A01088 | A01136 | 491 |
| A01088 | A01150 | 470 | A01088 | A01166 | 481 |
| A01088 | A01201 | 245 | A01088 | A01206 | 486 |
| A01088 | A01213 | 358 | A01088 | A01234 | 491 |
| A01088 | A01291 | 451 | A01088 | A01293 | 428 |
| A01088 | A01295 | 485 | A01088 | A01299 | 491 |
| A01088 | A01305 | 477 | A01088 | A01338 | 461 |
| A01088 | A01354 | 168 | A01088 | A01363 | 263 |
| A01088 | A01384 | 234 | A01088 | A01391 | 446 |
| A01088 | A01425 | 290 | A01088 | A01429 | 407 |
| A01088 | A01470 | 491 | A01088 | A01492 | 489 |
| A01088 | A01524 | 899 | A01088 | A01558 | 281 |
| A01088 | A01588 | 399 | A01088 | A01598 | 582 |
| A01088 | A01614 | 489 | A01088 | A01737 | 193 |
| A01088 | A01851 | 491 | A01088 | A02034 | 462 |
| A01088 | A02064 | 491 | A01088 | A02114 | 390 |
| A01088 | A02830 | 344 | A01088 | A02855 | 490 |
| A01088 | A02892 | 271 | A01088 | A02931 | 262 |
| A01088 | A02978 | 399 | A01088 | A02980 | 430 |
| A01088 | A03001 | 374 | A01088 | A03056 | 479 |
| A01088 | A03107 | 475 | A01088 | A03121 | 451 |
| A01088 | A03438 | 385 | A01088 | A03494 | 477 |
| A01088 | A03591 | 252 | A01088 | A03601 | 467 |
| A01088 | A03709 | 177 | A01088 | A03734 | 465 |
| A01088 | A03837 | 332 | A01088 | A03859 | 362 |
| A01088 | A04115 | 378 | A01088 | A04229 | 229 |
| A01088 | A04233 | 249 | A01088 | A04349 | 238 |

|        |        |     |        |        |     |
|--------|--------|-----|--------|--------|-----|
| A01088 | A04449 | 491 | A01088 | A04525 | 945 |
| A01088 | A04527 | 945 | A01088 | A04687 | 490 |
| A01088 | A05288 | 614 | A01088 | A05295 | 484 |
| A01088 | A05795 | 330 | A01088 | A05888 | 294 |
| A01088 | A06273 | 184 | A01088 | A06470 | 271 |
| A01088 | A06543 | 488 | A01088 | A06608 | 899 |
| A01088 | A06631 | 238 | A01088 | A06859 | 191 |
| A01088 | A06881 | 491 | A01088 | A07004 | 182 |
| A01088 | A07311 | 152 | A01088 | A07347 | 335 |
| A01088 | A07487 | 317 | A01088 | A07518 | 152 |
| A01088 | A07524 | 491 | A01088 | A07700 | 454 |
| A01088 | A07706 | 491 | A01088 | A07730 | 260 |
| A01088 | A07744 | 391 | A01088 | A07803 | 472 |
| A01088 | A07812 | 491 | A01088 | A08022 | 489 |
| A01088 | A08118 | 491 | A01088 | A08137 | 290 |
| A01088 | A08293 | 290 | A01088 | A08327 | 366 |
| A01088 | A08450 | 454 | A01088 | A08491 | 483 |
| A01088 | A08527 | 247 | A01088 | A08571 | 489 |
| A01088 | A08745 | 255 | A01088 | A08771 | 460 |
| A01088 | A09391 | 940 | A01088 | A09619 | 163 |
| A01088 | A09705 | 489 | A01088 | A09715 | 486 |
| A01088 | A09750 | 177 | A01088 | A09785 | 374 |
| A01088 | A10218 | 945 | A01088 | A10808 | 236 |
| A01088 | A10828 | 228 | A01088 | A11240 | 346 |
| A01088 | A11300 | 484 | A01088 | A11387 | 281 |
| A01088 | A11507 | 228 | A01088 | A11621 | 283 |
| A01088 | A11649 | 360 | A01088 | A12152 | 399 |
| A01088 | A12209 | 152 | A01088 | A12365 | 245 |
| A01088 | A12373 | 332 | A01088 | A13227 | 450 |
| A01088 | A13376 | 279 | A01088 | A13989 | 491 |
| A01088 | A14169 | 491 | A01088 | A14196 | 188 |
| A01088 | A14208 | 259 | A01088 | A14216 | 151 |
| A01088 | A14315 | 168 | A01088 | A14596 | 167 |
| A01088 | A14622 | 177 | A01088 | A14690 | 290 |
| A01088 | A14699 | 333 | A01088 | A14830 | 283 |
| A01088 | A15263 | 190 | A01088 | A15338 | 491 |
| A01088 | A15386 | 472 | A01088 | A15477 | 249 |
| A01088 | A15547 | 470 | A01088 | A15559 | 491 |
| A01088 | A15561 | 285 | A01088 | A15613 | 458 |
| A01088 | A15684 | 205 | A01088 | A15729 | 330 |
| A01088 | A15747 | 324 | A01088 | A16048 | 430 |
| A01088 | A16216 | 622 | A01088 | A16394 | 318 |
| A01088 | A16590 | 321 | A01088 | A16732 | 201 |
| A01088 | A16798 | 226 | A01088 | A17063 | 479 |
| A01088 | A17123 | 390 | A01089 | A01317 | 216 |
| A01089 | A01629 | 286 | A01089 | A01743 | 204 |

|        |        |     |        |        |     |
|--------|--------|-----|--------|--------|-----|
| A01089 | A02049 | 200 | A01089 | A02427 | 317 |
| A01089 | A03056 | 198 | A01089 | A03107 | 245 |
| A01089 | A03259 | 207 | A01089 | A04460 | 372 |
| A01089 | A04677 | 406 | A01089 | A05260 | 293 |
| A01089 | A05363 | 329 | A01089 | A13969 | 271 |
| A01089 | A15524 | 176 | A01089 | A15837 | 188 |
| A01089 | A16068 | 223 | A01090 | A01112 | 491 |
| A01090 | A01115 | 443 | A01090 | A01127 | 477 |
| A01090 | A01140 | 491 | A01090 | A01160 | 157 |
| A01090 | A01189 | 154 | A01090 | A01196 | 486 |
| A01090 | A01206 | 473 | A01090 | A01211 | 208 |
| A01090 | A01215 | 238 | A01090 | A01234 | 241 |
| A01090 | A01238 | 377 | A01090 | A01249 | 427 |
| A01090 | A01291 | 491 | A01090 | A01294 | 400 |
| A01090 | A01306 | 462 | A01090 | A01335 | 491 |
| A01090 | A01365 | 273 | A01090 | A01392 | 490 |
| A01090 | A01416 | 402 | A01090 | A01425 | 462 |
| A01090 | A01431 | 236 | A01090 | A01436 | 491 |
| A01090 | A01468 | 491 | A01090 | A01470 | 405 |
| A01090 | A01496 | 688 | A01090 | A01569 | 306 |
| A01090 | A01579 | 491 | A01090 | A01586 | 451 |
| A01090 | A01601 | 491 | A01090 | A01649 | 473 |
| A01090 | A01707 | 363 | A01090 | A01822 | 465 |
| A01090 | A02179 | 451 | A01090 | A02270 | 200 |
| A01090 | A02350 | 424 | A01090 | A03567 | 353 |
| A01090 | A03671 | 332 | A01090 | A03981 | 686 |
| A01090 | A04230 | 210 | A01090 | A04764 | 278 |
| A01090 | A05149 | 458 | A01090 | A05499 | 313 |
| A01090 | A05501 | 485 | A01090 | A06121 | 317 |
| A01090 | A06351 | 490 | A01090 | A06466 | 401 |
| A01090 | A06814 | 489 | A01090 | A06897 | 215 |
| A01090 | A06965 | 383 | A01090 | A06973 | 312 |
| A01090 | A06987 | 322 | A01090 | A07047 | 184 |
| A01090 | A07153 | 268 | A01090 | A07311 | 279 |
| A01090 | A07323 | 168 | A01090 | A07398 | 473 |
| A01090 | A07449 | 268 | A01090 | A07451 | 474 |
| A01090 | A07551 | 229 | A01090 | A07726 | 491 |
| A01090 | A07797 | 324 | A01090 | A08011 | 455 |
| A01090 | A08055 | 480 | A01090 | A08131 | 425 |
| A01090 | A08301 | 193 | A01090 | A08357 | 341 |
| A01090 | A08359 | 491 | A01090 | A08377 | 378 |
| A01090 | A08408 | 286 | A01090 | A08433 | 324 |
| A01090 | A08476 | 333 | A01090 | A08550 | 430 |
| A01090 | A08682 | 405 | A01090 | A08773 | 438 |
| A01090 | A08973 | 340 | A01090 | A09293 | 385 |
| A01090 | A09308 | 340 | A01090 | A09332 | 303 |



|        |        |     |        |        |     |
|--------|--------|-----|--------|--------|-----|
| A01090 | A09674 | 157 | A01090 | A09697 | 240 |
| A01090 | A09722 | 265 | A01090 | A09978 | 363 |
| A01090 | A10490 | 204 | A01090 | A10532 | 389 |
| A01090 | A10633 | 63  | A01090 | A10686 | 165 |
| A01090 | A10732 | 474 | A01090 | A11254 | 329 |
| A01090 | A11334 | 490 | A01090 | A11374 | 165 |
| A01090 | A11550 | 218 | A01090 | A12305 | 296 |
| A01090 | A13340 | 457 | A01090 | A13403 | 278 |
| A01090 | A13989 | 491 | A01090 | A13992 | 408 |
| A01090 | A14006 | 446 | A01090 | A14025 | 168 |
| A01090 | A14188 | 263 | A01090 | A14216 | 688 |
| A01090 | A14425 | 324 | A01090 | A14447 | 382 |
| A01090 | A14482 | 489 | A01090 | A14508 | 408 |
| A01090 | A14568 | 235 | A01090 | A15229 | 313 |
| A01090 | A15244 | 151 | A01090 | A15268 | 324 |
| A01090 | A15381 | 219 | A01090 | A15500 | 481 |
| A01090 | A15988 | 491 | A01090 | A16060 | 269 |
| A01090 | A16107 | 229 | A01090 | A16306 | 385 |
| A01090 | A17095 | 229 | A01090 | A17208 | 154 |
| A01091 | A01097 | 470 | A01091 | A01107 | 226 |
| A01091 | A01143 | 366 | A01091 | A01211 | 486 |
| A01091 | A01234 | 379 | A01091 | A01235 | 491 |
| A01091 | A01243 | 491 | A01091 | A01259 | 486 |
| A01091 | A01291 | 409 | A01091 | A01325 | 226 |
| A01091 | A01327 | 378 | A01091 | A01354 | 172 |
| A01091 | A01406 | 488 | A01091 | A01419 | 380 |
| A01091 | A01451 | 491 | A01091 | A01470 | 424 |
| A01091 | A01478 | 227 | A01091 | A01481 | 234 |
| A01091 | A01574 | 187 | A01091 | A01582 | 235 |
| A01091 | A01598 | 465 | A01091 | A01612 | 466 |
| A01091 | A01660 | 446 | A01091 | A01671 | 243 |
| A01091 | A01790 | 396 | A01091 | A01931 | 281 |
| A01091 | A02096 | 433 | A01091 | A02099 | 157 |
| A01091 | A02148 | 241 | A01091 | A02212 | 491 |
| A01091 | A02228 | 353 | A01091 | A02452 | 491 |
| A01091 | A02482 | 265 | A01091 | A02889 | 286 |
| A01091 | A02911 | 184 | A01091 | A03057 | 200 |
| A01091 | A03104 | 491 | A01091 | A03136 | 249 |
| A01091 | A03434 | 302 | A01091 | A03567 | 462 |
| A01091 | A03569 | 378 | A01091 | A03576 | 188 |
| A01091 | A03757 | 299 | A01091 | A03835 | 402 |
| A01091 | A03893 | 419 | A01091 | A04050 | 302 |
| A01091 | A04150 | 165 | A01091 | A04166 | 213 |
| A01091 | A04275 | 185 | A01091 | A04316 | 210 |
| A01091 | A04449 | 485 | A01091 | A04488 | 188 |
| A01091 | A04922 | 329 | A01091 | A05157 | 396 |

|        |        |     |        |        |     |
|--------|--------|-----|--------|--------|-----|
| A01091 | A05229 | 465 | A01091 | A05439 | 457 |
| A01091 | A05556 | 177 | A01091 | A05765 | 246 |
| A01091 | A05766 | 257 | A01091 | A05885 | 243 |
| A01091 | A05891 | 223 | A01091 | A06277 | 208 |
| A01091 | A06290 | 230 | A01091 | A06588 | 151 |
| A01091 | A06731 | 288 | A01091 | A06907 | 473 |
| A01091 | A07209 | 491 | A01091 | A07422 | 899 |
| A01091 | A07604 | 396 | A01091 | A07756 | 491 |
| A01091 | A07803 | 462 | A01091 | A07956 | 490 |
| A01091 | A08137 | 425 | A01091 | A08248 | 245 |
| A01091 | A08281 | 424 | A01091 | A08517 | 480 |
| A01091 | A08600 | 257 | A01091 | A08630 | 422 |
| A01091 | A08658 | 184 | A01091 | A08841 | 212 |
| A01091 | A08960 | 382 | A01091 | A08982 | 479 |
| A01091 | A08990 | 306 | A01091 | A09054 | 63  |
| A01091 | A09078 | 378 | A01091 | A09219 | 157 |
| A01091 | A09559 | 200 | A01091 | A09627 | 458 |
| A01091 | A09630 | 184 | A01091 | A09669 | 257 |
| A01091 | A09737 | 330 | A01091 | A09743 | 228 |
| A01091 | A09838 | 327 | A01091 | A10156 | 160 |
| A01091 | A10159 | 353 | A01091 | A10437 | 176 |
| A01091 | A10594 | 227 | A01091 | A10842 | 180 |
| A01091 | A11072 | 458 | A01091 | A11277 | 344 |
| A01091 | A11279 | 288 | A01091 | A11291 | 438 |
| A01091 | A11706 | 340 | A01091 | A11983 | 205 |
| A01091 | A12253 | 176 | A01091 | A12292 | 213 |
| A01091 | A12464 | 243 | A01091 | A12633 | 184 |
| A01091 | A12824 | 156 | A01091 | A13098 | 221 |
| A01091 | A13874 | 63  | A01091 | A13876 | 288 |
| A01091 | A13917 | 243 | A01091 | A13928 | 162 |
| A01091 | A13989 | 409 | A01091 | A14006 | 160 |
| A01091 | A14148 | 445 | A01091 | A14196 | 491 |
| A01091 | A14202 | 274 | A01091 | A14208 | 460 |
| A01091 | A14218 | 475 | A01091 | A14220 | 462 |
| A01091 | A14221 | 180 | A01091 | A14246 | 439 |
| A01091 | A14272 | 429 | A01091 | A14367 | 296 |
| A01091 | A14498 | 286 | A01091 | A14511 | 491 |
| A01091 | A14570 | 477 | A01091 | A14596 | 332 |
| A01091 | A14643 | 204 | A01091 | A14659 | 266 |
| A01091 | A14836 | 208 | A01091 | A15237 | 491 |
| A01091 | A15257 | 351 | A01091 | A15292 | 491 |
| A01091 | A15297 | 491 | A01091 | A15309 | 480 |
| A01091 | A15314 | 491 | A01091 | A15323 | 491 |
| A01091 | A15324 | 491 | A01091 | A15330 | 450 |
| A01091 | A15338 | 401 | A01091 | A15339 | 491 |
| A01091 | A15341 | 351 | A01091 | A15352 | 224 |

|        |        |     |        |        |     |
|--------|--------|-----|--------|--------|-----|
| A01091 | A15353 | 491 | A01091 | A15355 | 481 |
| A01091 | A15356 | 306 | A01091 | A15359 | 270 |
| A01091 | A15360 | 341 | A01091 | A15366 | 399 |
| A01091 | A15396 | 185 | A01091 | A15419 | 491 |
| A01091 | A15431 | 491 | A01091 | A15452 | 340 |
| A01091 | A15458 | 200 | A01091 | A15478 | 170 |
| A01091 | A15480 | 318 | A01091 | A15502 | 364 |
| A01091 | A15559 | 489 | A01091 | A15564 | 357 |
| A01091 | A15566 | 299 | A01091 | A15578 | 170 |
| A01091 | A15581 | 229 | A01091 | A15587 | 221 |
| A01091 | A15596 | 362 | A01091 | A15729 | 278 |
| A01091 | A15747 | 340 | A01091 | A15788 | 491 |
| A01091 | A15833 | 188 | A01091 | A15867 | 316 |
| A01091 | A16188 | 243 | A01091 | A16311 | 286 |
| A01091 | A16418 | 162 | A01091 | A16458 | 337 |
| A01091 | A16463 | 481 | A01091 | A16511 | 159 |
| A01091 | A16861 | 243 | A01091 | A17063 | 491 |
| A01091 | A17198 | 291 | A01092 | A01098 | 571 |
| A01092 | A01112 | 80  | A01092 | A01116 | 229 |
| A01092 | A01120 | 370 | A01092 | A01140 | 185 |
| A01092 | A01234 | 251 | A01092 | A01351 | 71  |
| A01092 | A01379 | 210 | A01092 | A01425 | 436 |
| A01092 | A01439 | 210 | A01092 | A01470 | 235 |
| A01092 | A01487 | 212 | A01092 | A01488 | 135 |
| A01092 | A01492 | 483 | A01092 | A01495 | 163 |
| A01092 | A01506 | 165 | A01092 | A01538 | 392 |
| A01092 | A01598 | 564 | A01092 | A01614 | 210 |
| A01092 | A01649 | 334 | A01092 | A02164 | 154 |
| A01092 | A02265 | 569 | A01092 | A02825 | 224 |
| A01092 | A02978 | 238 | A01092 | A03438 | 462 |
| A01092 | A03859 | 374 | A01092 | A04230 | 484 |
| A01092 | A05230 | 210 | A01092 | A05654 | 234 |
| A01092 | A06564 | 201 | A01092 | A06825 | 329 |
| A01092 | A07076 | 210 | A01092 | A07695 | 154 |
| A01092 | A07725 | 201 | A01092 | A08682 | 201 |
| A01092 | A09292 | 210 | A01092 | A09697 | 457 |
| A01092 | A10633 | 174 | A01092 | A11263 | 310 |
| A01092 | A11689 | 345 | A01092 | A13052 | 210 |
| A01092 | A13126 | 198 | A01092 | A13989 | 568 |
| A01092 | A14090 | 255 | A01092 | A14508 | 207 |
| A01092 | A14816 | 210 | A01092 | A15673 | 159 |
| A01092 | A16076 | 236 | A01092 | A16228 | 268 |
| A01093 | A01095 | 473 | A01093 | A01099 | 491 |
| A01093 | A01114 | 491 | A01093 | A01177 | 250 |
| A01093 | A01187 | 491 | A01093 | A01189 | 489 |
| A01093 | A01197 | 479 | A01093 | A01203 | 180 |

|        |        |     |        |        |     |
|--------|--------|-----|--------|--------|-----|
| A01093 | A01212 | 334 | A01093 | A01255 | 219 |
| A01093 | A01296 | 416 | A01093 | A01317 | 390 |
| A01093 | A01318 | 307 | A01093 | A01319 | 177 |
| A01093 | A01320 | 465 | A01093 | A01322 | 491 |
| A01093 | A01325 | 419 | A01093 | A01331 | 294 |
| A01093 | A01341 | 491 | A01093 | A01375 | 329 |
| A01093 | A01388 | 491 | A01093 | A01415 | 491 |
| A01093 | A01468 | 462 | A01093 | A01469 | 435 |
| A01093 | A01536 | 481 | A01093 | A01559 | 491 |
| A01093 | A01589 | 491 | A01093 | A01594 | 491 |
| A01093 | A01616 | 491 | A01093 | A01625 | 279 |
| A01093 | A01659 | 488 | A01093 | A01686 | 491 |
| A01093 | A01741 | 483 | A01093 | A02180 | 488 |
| A01093 | A02216 | 207 | A01093 | A02524 | 243 |
| A01093 | A02731 | 321 | A01093 | A02806 | 470 |
| A01093 | A02847 | 374 | A01093 | A03057 | 480 |
| A01093 | A04562 | 179 | A01093 | A04667 | 199 |
| A01093 | A04668 | 491 | A01093 | A05334 | 490 |
| A01093 | A05620 | 160 | A01093 | A06242 | 489 |
| A01093 | A06606 | 407 | A01093 | A06838 | 165 |
| A01093 | A06851 | 435 | A01093 | A06864 | 491 |
| A01093 | A06982 | 490 | A01093 | A07079 | 227 |
| A01093 | A07319 | 490 | A01093 | A07346 | 491 |
| A01093 | A07466 | 383 | A01093 | A07480 | 491 |
| A01093 | A07534 | 486 | A01093 | A07603 | 491 |
| A01093 | A07647 | 358 | A01093 | A07902 | 218 |
| A01093 | A07996 | 491 | A01093 | A08000 | 246 |
| A01093 | A08030 | 485 | A01093 | A08117 | 489 |
| A01093 | A08141 | 185 | A01093 | A08208 | 491 |
| A01093 | A08212 | 491 | A01093 | A08516 | 491 |
| A01093 | A08526 | 491 | A01093 | A08669 | 490 |
| A01093 | A08694 | 413 | A01093 | A08769 | 491 |
| A01093 | A08820 | 470 | A01093 | A08910 | 283 |
| A01093 | A08964 | 313 | A01093 | A08995 | 424 |
| A01093 | A09000 | 484 | A01093 | A09001 | 396 |
| A01093 | A09085 | 263 | A01093 | A09106 | 202 |
| A01093 | A09127 | 340 | A01093 | A09288 | 407 |
| A01093 | A09515 | 235 | A01093 | A09598 | 491 |
| A01093 | A09706 | 267 | A01093 | A09762 | 490 |
| A01093 | A09765 | 238 | A01093 | A10250 | 159 |
| A01093 | A10366 | 475 | A01093 | A10373 | 457 |
| A01093 | A11236 | 491 | A01093 | A11540 | 361 |
| A01093 | A11829 | 484 | A01093 | A11880 | 281 |
| A01093 | A11916 | 299 | A01093 | A12064 | 260 |
| A01093 | A12556 | 491 | A01093 | A12760 | 291 |
| A01093 | A12897 | 213 | A01093 | A13049 | 193 |

|        |        |     |        |        |     |
|--------|--------|-----|--------|--------|-----|
| A01093 | A13092 | 202 | A01093 | A13634 | 319 |
| A01093 | A13913 | 491 | A01093 | A13949 | 491 |
| A01093 | A14076 | 457 | A01093 | A14079 | 491 |
| A01093 | A14223 | 171 | A01093 | A14230 | 477 |
| A01093 | A14273 | 401 | A01093 | A14282 | 405 |
| A01093 | A14460 | 461 | A01093 | A14694 | 475 |
| A01093 | A15367 | 221 | A01093 | A15369 | 491 |
| A01093 | A15524 | 199 | A01093 | A15531 | 210 |
| A01093 | A15549 | 193 | A01093 | A15714 | 235 |
| A01093 | A15837 | 489 | A01093 | A15939 | 173 |
| A01093 | A15941 | 486 | A01093 | A16127 | 491 |
| A01093 | A16128 | 491 | A01093 | A16129 | 308 |
| A01093 | A16173 | 378 | A01093 | A16226 | 491 |
| A01093 | A16606 | 468 | A01093 | A16612 | 187 |
| A01093 | A16613 | 485 | A01093 | A16616 | 441 |
| A01093 | A16626 | 491 | A01093 | A16646 | 241 |
| A01093 | A16754 | 470 | A01093 | A16762 | 428 |
| A01094 | A01246 | 490 | A01094 | A01346 | 228 |
| A01094 | A01399 | 201 | A01094 | A06960 | 429 |
| A01094 | A07569 | 351 | A01094 | A08402 | 259 |
| A01094 | A11427 | 299 | A01095 | A01186 | 160 |
| A01095 | A01222 | 228 | A01095 | A01230 | 163 |
| A01095 | A01238 | 238 | A01095 | A01263 | 198 |
| A01095 | A01291 | 491 | A01095 | A01326 | 223 |
| A01095 | A01392 | 466 | A01095 | A01416 | 427 |
| A01095 | A01433 | 491 | A01095 | A01436 | 436 |
| A01095 | A01741 | 480 | A01095 | A02814 | 271 |
| A01095 | A02831 | 257 | A01095 | A02966 | 208 |
| A01095 | A03112 | 286 | A01095 | A03545 | 196 |
| A01095 | A04337 | 240 | A01095 | A04883 | 152 |
| A01095 | A04927 | 156 | A01095 | A05477 | 271 |
| A01095 | A05502 | 182 | A01095 | A05735 | 382 |
| A01095 | A06351 | 246 | A01095 | A07157 | 199 |
| A01095 | A07243 | 172 | A01095 | A07412 | 202 |
| A01095 | A07706 | 205 | A01095 | A08011 | 491 |
| A01095 | A08377 | 85  | A01095 | A08550 | 157 |
| A01095 | A08760 | 219 | A01095 | A08773 | 491 |
| A01095 | A08973 | 469 | A01095 | A09308 | 193 |
| A01095 | A09332 | 329 | A01095 | A09515 | 159 |
| A01095 | A10569 | 318 | A01095 | A10598 | 193 |
| A01095 | A10798 | 348 | A01095 | A10799 | 152 |
| A01095 | A11688 | 267 | A01095 | A11815 | 184 |
| A01095 | A11992 | 485 | A01095 | A12195 | 190 |
| A01095 | A13249 | 195 | A01095 | A13516 | 257 |
| A01095 | A14272 | 455 | A01095 | A14449 | 466 |
| A01095 | A14482 | 462 | A01095 | A15932 | 430 |

|        |        |     |        |        |     |
|--------|--------|-----|--------|--------|-----|
| A01095 | A15988 | 190 | A01095 | A17126 | 151 |
| A01096 | A01299 | 324 | A01096 | A01305 | 256 |
| A01096 | A01431 | 184 | A01096 | A01598 | 247 |
| A01096 | A02931 | 243 | A01096 | A03406 | 258 |
| A01096 | A04773 | 281 | A01096 | A05709 | 352 |
| A01096 | A11300 | 215 | A01096 | A14257 | 171 |
| A01096 | A14660 | 288 | A01096 | A15244 | 208 |
| A01096 | A15419 | 246 | A01096 | A15851 | 277 |
| A01096 | A16798 | 307 | A01097 | A01106 | 294 |
| A01097 | A01143 | 491 | A01097 | A01267 | 789 |
| A01097 | A01274 | 269 | A01097 | A01305 | 232 |
| A01097 | A01325 | 430 | A01097 | A01419 | 213 |
| A01097 | A01444 | 408 | A01097 | A01451 | 620 |
| A01097 | A01457 | 367 | A01097 | A01461 | 234 |
| A01097 | A01585 | 224 | A01097 | A01598 | 357 |
| A01097 | A01660 | 634 | A01097 | A03014 | 408 |
| A01097 | A03136 | 393 | A01097 | A03569 | 195 |
| A01097 | A04449 | 167 | A01097 | A04900 | 249 |
| A01097 | A05288 | 443 | A01097 | A06491 | 183 |
| A01097 | A06907 | 708 | A01097 | A08093 | 204 |
| A01097 | A08137 | 409 | A01097 | A08982 | 154 |
| A01097 | A11297 | 202 | A01097 | A11598 | 491 |
| A01097 | A11647 | 395 | A01097 | A11649 | 358 |
| A01097 | A11695 | 157 | A01097 | A12325 | 491 |
| A01097 | A12365 | 380 | A01097 | A12824 | 435 |
| A01097 | A12853 | 480 | A01097 | A13587 | 480 |
| A01097 | A14196 | 615 | A01097 | A14202 | 480 |
| A01097 | A14246 | 424 | A01097 | A14247 | 194 |
| A01097 | A14257 | 451 | A01097 | A14454 | 360 |
| A01097 | A14527 | 151 | A01097 | A14596 | 221 |
| A01097 | A14659 | 152 | A01097 | A15185 | 152 |
| A01097 | A15237 | 352 | A01097 | A15257 | 491 |
| A01097 | A15297 | 635 | A01097 | A15309 | 485 |
| A01097 | A15363 | 184 | A01097 | A15366 | 173 |
| A01097 | A15419 | 302 | A01097 | A15431 | 356 |
| A01097 | A15461 | 252 | A01097 | A15507 | 290 |
| A01097 | A15559 | 693 | A01097 | A15564 | 180 |
| A01097 | A15596 | 187 | A01097 | A15614 | 165 |
| A01097 | A15702 | 343 | A01097 | A15710 | 486 |
| A01097 | A15725 | 234 | A01097 | A15729 | 330 |
| A01097 | A15763 | 472 | A01097 | A15779 | 475 |
| A01097 | A15852 | 160 | A01097 | A16293 | 353 |
| A01097 | A16844 | 262 | A01097 | A16860 | 479 |
| A01097 | A16947 | 165 | A01097 | A16979 | 177 |
| A01098 | A01112 | 286 | A01098 | A01120 | 210 |
| A01098 | A01130 | 157 | A01098 | A01140 | 463 |

|        |        |     |        |        |     |
|--------|--------|-----|--------|--------|-----|
| A01098 | A01166 | 347 | A01098 | A01178 | 179 |
| A01098 | A01234 | 481 | A01098 | A01253 | 235 |
| A01098 | A01261 | 252 | A01098 | A01268 | 247 |
| A01098 | A01289 | 353 | A01098 | A01291 | 631 |
| A01098 | A01306 | 425 | A01098 | A01351 | 63  |
| A01098 | A01379 | 210 | A01098 | A01384 | 357 |
| A01098 | A01425 | 716 | A01098 | A01439 | 210 |
| A01098 | A01468 | 488 | A01098 | A01470 | 491 |
| A01098 | A01487 | 369 | A01098 | A01488 | 262 |
| A01098 | A01492 | 636 | A01098 | A01496 | 317 |
| A01098 | A01506 | 285 | A01098 | A01538 | 453 |
| A01098 | A01572 | 448 | A01098 | A01579 | 218 |
| A01098 | A01598 | 539 | A01098 | A01601 | 537 |
| A01098 | A01605 | 218 | A01098 | A01612 | 491 |
| A01098 | A01614 | 374 | A01098 | A01649 | 489 |
| A01098 | A01791 | 168 | A01098 | A02068 | 433 |
| A01098 | A02164 | 99  | A01098 | A02265 | 572 |
| A01098 | A02494 | 473 | A01098 | A02592 | 85  |
| A01098 | A02895 | 205 | A01098 | A02978 | 210 |
| A01098 | A03083 | 193 | A01098 | A03438 | 234 |
| A01098 | A03567 | 292 | A01098 | A03569 | 208 |
| A01098 | A03571 | 204 | A01098 | A03582 | 480 |
| A01098 | A03652 | 151 | A01098 | A03754 | 165 |
| A01098 | A03981 | 63  | A01098 | A04079 | 267 |
| A01098 | A04230 | 472 | A01098 | A05230 | 210 |
| A01098 | A05385 | 180 | A01098 | A05411 | 173 |
| A01098 | A05418 | 319 | A01098 | A05654 | 323 |
| A01098 | A06486 | 227 | A01098 | A06812 | 232 |
| A01098 | A06825 | 127 | A01098 | A06861 | 199 |
| A01098 | A07076 | 210 | A01098 | A07133 | 268 |
| A01098 | A07311 | 575 | A01098 | A07323 | 172 |
| A01098 | A07440 | 176 | A01098 | A07536 | 174 |
| A01098 | A07655 | 245 | A01098 | A08137 | 488 |
| A01098 | A08357 | 154 | A01098 | A08571 | 199 |
| A01098 | A08717 | 207 | A01098 | A09248 | 477 |
| A01098 | A09292 | 210 | A01098 | A09322 | 199 |
| A01098 | A10001 | 247 | A01098 | A10469 | 240 |
| A01098 | A11190 | 486 | A01098 | A11263 | 188 |
| A01098 | A11808 | 435 | A01098 | A12881 | 199 |
| A01098 | A13052 | 210 | A01098 | A13126 | 276 |
| A01098 | A13989 | 717 | A01098 | A14038 | 286 |
| A01098 | A14090 | 124 | A01098 | A14172 | 63  |
| A01098 | A14216 | 257 | A01098 | A14257 | 167 |
| A01098 | A14374 | 180 | A01098 | A14561 | 268 |
| A01098 | A14816 | 210 | A01098 | A15034 | 199 |
| A01098 | A15483 | 247 | A01098 | A15500 | 427 |

|        |        |     |        |        |     |
|--------|--------|-----|--------|--------|-----|
| A01098 | A15795 | 179 | A01098 | A15806 | 165 |
| A01098 | A15974 | 260 | A01098 | A16002 | 260 |
| A01098 | A16073 | 316 | A01098 | A16575 | 329 |
| A01099 | A01114 | 628 | A01099 | A01124 | 470 |
| A01099 | A01187 | 629 | A01099 | A01189 | 452 |
| A01099 | A01197 | 613 | A01099 | A01203 | 152 |
| A01099 | A01212 | 480 | A01099 | A01296 | 260 |
| A01099 | A01315 | 317 | A01099 | A01317 | 246 |
| A01099 | A01319 | 317 | A01099 | A01320 | 263 |
| A01099 | A01322 | 491 | A01099 | A01329 | 229 |
| A01099 | A01331 | 243 | A01099 | A01341 | 491 |
| A01099 | A01369 | 232 | A01099 | A01388 | 491 |
| A01099 | A01404 | 216 | A01099 | A01415 | 629 |
| A01099 | A01536 | 491 | A01099 | A01559 | 491 |
| A01099 | A01589 | 489 | A01099 | A01594 | 491 |
| A01099 | A01616 | 491 | A01099 | A01625 | 472 |
| A01099 | A01627 | 229 | A01099 | A01659 | 491 |
| A01099 | A01680 | 627 | A01099 | A01682 | 229 |
| A01099 | A01686 | 491 | A01099 | A01737 | 454 |
| A01099 | A01741 | 344 | A01099 | A02180 | 339 |
| A01099 | A02216 | 170 | A01099 | A02731 | 363 |
| A01099 | A02806 | 477 | A01099 | A02847 | 491 |
| A01099 | A03057 | 353 | A01099 | A03327 | 317 |
| A01099 | A03812 | 168 | A01099 | A04071 | 344 |
| A01099 | A04668 | 491 | A01099 | A05334 | 489 |
| A01099 | A05690 | 317 | A01099 | A06130 | 317 |
| A01099 | A06242 | 486 | A01099 | A06297 | 288 |
| A01099 | A06381 | 317 | A01099 | A06606 | 268 |
| A01099 | A06750 | 229 | A01099 | A06851 | 446 |
| A01099 | A06864 | 490 | A01099 | A06924 | 319 |
| A01099 | A06982 | 491 | A01099 | A07319 | 491 |
| A01099 | A07332 | 221 | A01099 | A07346 | 491 |
| A01099 | A07353 | 317 | A01099 | A07466 | 409 |
| A01099 | A07480 | 491 | A01099 | A07534 | 486 |
| A01099 | A07603 | 491 | A01099 | A07647 | 396 |
| A01099 | A07670 | 229 | A01099 | A07697 | 241 |
| A01099 | A07822 | 238 | A01099 | A07902 | 489 |
| A01099 | A07996 | 491 | A01099 | A08000 | 489 |
| A01099 | A08029 | 177 | A01099 | A08030 | 491 |
| A01099 | A08117 | 488 | A01099 | A08141 | 378 |
| A01099 | A08208 | 491 | A01099 | A08212 | 491 |
| A01099 | A08516 | 491 | A01099 | A08526 | 489 |
| A01099 | A08669 | 491 | A01099 | A08694 | 400 |
| A01099 | A08769 | 491 | A01099 | A08820 | 485 |
| A01099 | A08919 | 249 | A01099 | A08964 | 379 |
| A01099 | A08995 | 470 | A01099 | A09000 | 491 |



|        |        |     |        |        |     |
|--------|--------|-----|--------|--------|-----|
| A01099 | A09001 | 486 | A01099 | A09209 | 256 |
| A01099 | A09288 | 491 | A01099 | A09434 | 185 |
| A01099 | A09451 | 201 | A01099 | A09515 | 286 |
| A01099 | A09538 | 333 | A01099 | A09598 | 491 |
| A01099 | A09706 | 425 | A01099 | A09762 | 491 |
| A01099 | A09765 | 218 | A01099 | A10373 | 491 |
| A01099 | A11236 | 491 | A01099 | A11540 | 262 |
| A01099 | A11703 | 486 | A01099 | A11829 | 483 |
| A01099 | A11880 | 352 | A01099 | A11916 | 485 |
| A01099 | A12190 | 218 | A01099 | A12556 | 491 |
| A01099 | A12760 | 274 | A01099 | A13103 | 347 |
| A01099 | A13913 | 486 | A01099 | A13949 | 491 |
| A01099 | A14076 | 491 | A01099 | A14079 | 491 |
| A01099 | A14094 | 413 | A01099 | A14223 | 341 |
| A01099 | A14230 | 491 | A01099 | A14273 | 433 |
| A01099 | A14282 | 491 | A01099 | A14460 | 477 |
| A01099 | A14477 | 480 | A01099 | A14674 | 491 |
| A01099 | A14694 | 491 | A01099 | A14701 | 346 |
| A01099 | A14706 | 391 | A01099 | A15356 | 400 |
| A01099 | A15369 | 491 | A01099 | A15524 | 489 |
| A01099 | A15531 | 174 | A01099 | A15539 | 474 |
| A01099 | A15837 | 543 | A01099 | A15941 | 491 |
| A01099 | A16071 | 172 | A01099 | A16127 | 491 |
| A01099 | A16128 | 491 | A01099 | A16129 | 489 |
| A01099 | A16132 | 240 | A01099 | A16134 | 247 |
| A01099 | A16226 | 491 | A01099 | A16294 | 452 |
| A01099 | A16299 | 424 | A01099 | A16378 | 452 |
| A01099 | A16452 | 154 | A01099 | A16470 | 172 |
| A01099 | A16606 | 475 | A01099 | A16612 | 446 |
| A01099 | A16613 | 490 | A01099 | A16616 | 490 |
| A01099 | A16626 | 627 | A01099 | A16643 | 317 |
| A01099 | A16646 | 473 | A01099 | A16738 | 160 |
| A01099 | A16754 | 490 | A01099 | A16762 | 491 |
| A01100 | A01120 | 157 | A01100 | A01135 | 491 |
| A01100 | A01139 | 184 | A01100 | A01156 | 456 |
| A01100 | A01161 | 332 | A01100 | A01177 | 272 |
| A01100 | A01194 | 490 | A01100 | A01219 | 273 |
| A01100 | A01250 | 491 | A01100 | A01254 | 441 |
| A01100 | A01267 | 423 | A01100 | A01326 | 489 |
| A01100 | A01360 | 288 | A01100 | A01375 | 491 |
| A01100 | A01385 | 711 | A01100 | A01418 | 154 |
| A01100 | A01422 | 251 | A01100 | A01445 | 486 |
| A01100 | A01483 | 757 | A01100 | A01582 | 481 |
| A01100 | A01606 | 369 | A01100 | A01741 | 262 |
| A01100 | A02323 | 171 | A01100 | A02529 | 404 |
| A01100 | A02626 | 221 | A01100 | A02731 | 428 |

|        |        |     |        |        |     |
|--------|--------|-----|--------|--------|-----|
| A01100 | A03095 | 407 | A01100 | A03328 | 684 |
| A01100 | A03569 | 425 | A01100 | A03651 | 428 |
| A01100 | A03990 | 328 | A01100 | A04337 | 411 |
| A01100 | A04430 | 151 | A01100 | A04622 | 156 |
| A01100 | A04668 | 465 | A01100 | A05016 | 303 |
| A01100 | A05356 | 367 | A01100 | A06775 | 195 |
| A01100 | A06924 | 238 | A01100 | A07346 | 491 |
| A01100 | A07442 | 228 | A01100 | A08221 | 207 |
| A01100 | A08361 | 183 | A01100 | A08458 | 157 |
| A01100 | A08489 | 160 | A01100 | A08524 | 816 |
| A01100 | A08571 | 162 | A01100 | A08957 | 317 |
| A01100 | A09307 | 159 | A01100 | A09567 | 200 |
| A01100 | A10373 | 491 | A01100 | A10535 | 152 |
| A01100 | A11170 | 173 | A01100 | A11673 | 483 |
| A01100 | A11882 | 290 | A01100 | A12052 | 183 |
| A01100 | A12125 | 283 | A01100 | A12433 | 157 |
| A01100 | A12507 | 271 | A01100 | A12658 | 251 |
| A01100 | A12824 | 296 | A01100 | A12951 | 210 |
| A01100 | A13963 | 446 | A01100 | A14006 | 475 |
| A01100 | A14167 | 313 | A01100 | A14230 | 477 |
| A01100 | A14272 | 490 | A01100 | A14449 | 229 |
| A01100 | A14596 | 308 | A01100 | A14655 | 427 |
| A01100 | A14701 | 491 | A01100 | A14819 | 490 |
| A01100 | A14840 | 443 | A01100 | A15257 | 268 |
| A01100 | A15297 | 452 | A01100 | A15519 | 313 |
| A01100 | A15534 | 396 | A01100 | A15535 | 296 |
| A01100 | A15540 | 364 | A01100 | A15558 | 491 |
| A01100 | A15565 | 238 | A01100 | A15738 | 461 |
| A01100 | A15837 | 443 | A01100 | A15932 | 489 |
| A01100 | A15933 | 355 | A01100 | A16410 | 416 |
| A01100 | A16655 | 210 | A01100 | A16666 | 183 |
| A01100 | A16690 | 598 | A01100 | A16811 | 165 |
| A01101 | A01127 | 484 | A01101 | A01140 | 235 |
| A01101 | A01154 | 434 | A01101 | A01159 | 425 |
| A01101 | A01184 | 484 | A01101 | A01206 | 409 |
| A01101 | A01217 | 559 | A01101 | A01220 | 188 |
| A01101 | A01221 | 686 | A01101 | A01232 | 491 |
| A01101 | A01234 | 399 | A01101 | A01243 | 391 |
| A01101 | A01247 | 291 | A01101 | A01249 | 488 |
| A01101 | A01263 | 408 | A01101 | A01275 | 208 |
| A01101 | A01291 | 491 | A01101 | A01293 | 385 |
| A01101 | A01306 | 486 | A01101 | A01335 | 425 |
| A01101 | A01338 | 490 | A01101 | A01346 | 290 |
| A01101 | A01362 | 251 | A01101 | A01406 | 188 |
| A01101 | A01408 | 188 | A01101 | A01412 | 425 |
| A01101 | A01414 | 292 | A01101 | A01431 | 208 |

|        |        |     |        |        |     |
|--------|--------|-----|--------|--------|-----|
| A01101 | A01437 | 485 | A01101 | A01451 | 560 |
| A01101 | A01470 | 207 | A01101 | A01483 | 232 |
| A01101 | A01496 | 337 | A01101 | A01579 | 462 |
| A01101 | A01649 | 475 | A01101 | A01976 | 527 |
| A01101 | A01988 | 472 | A01101 | A03069 | 440 |
| A01101 | A03089 | 208 | A01101 | A03480 | 201 |
| A01101 | A03567 | 491 | A01101 | A03740 | 324 |
| A01101 | A03901 | 555 | A01101 | A03981 | 165 |
| A01101 | A04584 | 180 | A01101 | A05449 | 249 |
| A01101 | A05702 | 208 | A01101 | A06369 | 425 |
| A01101 | A06785 | 550 | A01101 | A06832 | 485 |
| A01101 | A06861 | 243 | A01101 | A06965 | 490 |
| A01101 | A06973 | 163 | A01101 | A07242 | 472 |
| A01101 | A07360 | 457 | A01101 | A07451 | 427 |
| A01101 | A07744 | 400 | A01101 | A07893 | 484 |
| A01101 | A07911 | 386 | A01101 | A07965 | 549 |
| A01101 | A08011 | 474 | A01101 | A08056 | 433 |
| A01101 | A08098 | 419 | A01101 | A08131 | 291 |
| A01101 | A08228 | 383 | A01101 | A08357 | 445 |
| A01101 | A08358 | 165 | A01101 | A08398 | 481 |
| A01101 | A08403 | 401 | A01101 | A08452 | 490 |
| A01101 | A08543 | 221 | A01101 | A08547 | 268 |
| A01101 | A08548 | 241 | A01101 | A08559 | 350 |
| A01101 | A08773 | 322 | A01101 | A08823 | 218 |
| A01101 | A08972 | 235 | A01101 | A09044 | 290 |
| A01101 | A09322 | 488 | A01101 | A09332 | 313 |
| A01101 | A09592 | 469 | A01101 | A09707 | 208 |
| A01101 | A09805 | 180 | A01101 | A09852 | 152 |
| A01101 | A10249 | 208 | A01101 | A10532 | 338 |
| A01101 | A11386 | 152 | A01101 | A11438 | 450 |
| A01101 | A11480 | 560 | A01101 | A11588 | 355 |
| A01101 | A11704 | 491 | A01101 | A11945 | 152 |
| A01101 | A12007 | 162 | A01101 | A12080 | 180 |
| A01101 | A12083 | 180 | A01101 | A12221 | 379 |
| A01101 | A12509 | 308 | A01101 | A13810 | 391 |
| A01101 | A13992 | 170 | A01101 | A14083 | 363 |
| A01101 | A14152 | 351 | A01101 | A14216 | 486 |
| A01101 | A14596 | 672 | A01101 | A14659 | 163 |
| A01101 | A14699 | 438 | A01101 | A14701 | 221 |
| A01101 | A14813 | 188 | A01101 | A15139 | 296 |
| A01101 | A15221 | 269 | A01101 | A15652 | 165 |
| A01101 | A15657 | 188 | A01101 | A15660 | 486 |
| A01101 | A15661 | 195 | A01101 | A15666 | 452 |
| A01101 | A15684 | 491 | A01101 | A15717 | 183 |
| A01101 | A15743 | 217 | A01101 | A15756 | 208 |
| A01101 | A15776 | 243 | A01101 | A15931 | 485 |

|        |        |     |        |        |     |
|--------|--------|-----|--------|--------|-----|
| A01101 | A15988 | 185 | A01101 | A16060 | 198 |
| A01101 | A16118 | 326 | A01101 | A16624 | 159 |
| A01101 | A16631 | 429 | A01101 | A16680 | 559 |
| A01101 | A17127 | 221 | A01101 | A17133 | 221 |
| A01102 | A01119 | 247 | A01102 | A01154 | 159 |
| A01102 | A01161 | 481 | A01102 | A01188 | 240 |
| A01102 | A01190 | 361 | A01102 | A01194 | 247 |
| A01102 | A01196 | 245 | A01102 | A01211 | 332 |
| A01102 | A01218 | 542 | A01102 | A01221 | 184 |
| A01102 | A01248 | 185 | A01102 | A01270 | 241 |
| A01102 | A01311 | 152 | A01102 | A01326 | 480 |
| A01102 | A01352 | 156 | A01102 | A01369 | 222 |
| A01102 | A01379 | 453 | A01102 | A01387 | 299 |
| A01102 | A01411 | 574 | A01102 | A01420 | 247 |
| A01102 | A01439 | 299 | A01102 | A01451 | 393 |
| A01102 | A01455 | 284 | A01102 | A01468 | 306 |
| A01102 | A01569 | 400 | A01102 | A01577 | 152 |
| A01102 | A01579 | 241 | A01102 | A01581 | 247 |
| A01102 | A01601 | 456 | A01102 | A01608 | 230 |
| A01102 | A01627 | 299 | A01102 | A01756 | 224 |
| A01102 | A01788 | 165 | A01102 | A01826 | 464 |
| A01102 | A01894 | 230 | A01102 | A02203 | 434 |
| A01102 | A02542 | 276 | A01102 | A02601 | 299 |
| A01102 | A02660 | 162 | A01102 | A02737 | 217 |
| A01102 | A02998 | 196 | A01102 | A03127 | 198 |
| A01102 | A03180 | 249 | A01102 | A03304 | 356 |
| A01102 | A03453 | 256 | A01102 | A03562 | 196 |
| A01102 | A03676 | 321 | A01102 | A03697 | 152 |
| A01102 | A03821 | 159 | A01102 | A03907 | 343 |
| A01102 | A04055 | 191 | A01102 | A04275 | 165 |
| A01102 | A04337 | 406 | A01102 | A04495 | 299 |
| A01102 | A04536 | 319 | A01102 | A04898 | 184 |
| A01102 | A04969 | 240 | A01102 | A05199 | 174 |
| A01102 | A05288 | 245 | A01102 | A05323 | 402 |
| A01102 | A05501 | 217 | A01102 | A06051 | 191 |
| A01102 | A06287 | 152 | A01102 | A06531 | 215 |
| A01102 | A06534 | 241 | A01102 | A06597 | 479 |
| A01102 | A06607 | 469 | A01102 | A06814 | 241 |
| A01102 | A06832 | 398 | A01102 | A06973 | 241 |
| A01102 | A07047 | 241 | A01102 | A07106 | 208 |
| A01102 | A07398 | 241 | A01102 | A07411 | 343 |
| A01102 | A07744 | 152 | A01102 | A08061 | 152 |
| A01102 | A08098 | 152 | A01102 | A08178 | 152 |
| A01102 | A08249 | 463 | A01102 | A08369 | 241 |
| A01102 | A08408 | 241 | A01102 | A08476 | 241 |
| A01102 | A08751 | 219 | A01102 | A08763 | 152 |

|        |        |     |        |        |     |
|--------|--------|-----|--------|--------|-----|
| A01102 | A08947 | 299 | A01102 | A09004 | 299 |
| A01102 | A09245 | 232 | A01102 | A09308 | 306 |
| A01102 | A09322 | 241 | A01102 | A09620 | 241 |
| A01102 | A09717 | 247 | A01102 | A10598 | 273 |
| A01102 | A10842 | 152 | A01102 | A11394 | 224 |
| A01102 | A11529 | 219 | A01102 | A11728 | 241 |
| A01102 | A12227 | 241 | A01102 | A12499 | 294 |
| A01102 | A12951 | 301 | A01102 | A14074 | 247 |
| A01102 | A14272 | 432 | A01102 | A14440 | 180 |
| A01102 | A14525 | 152 | A01102 | A15268 | 241 |
| A01102 | A15375 | 152 | A01102 | A15381 | 241 |
| A01102 | A15546 | 152 | A01102 | A15932 | 199 |
| A01102 | A16358 | 205 | A01102 | A16675 | 255 |
| A01103 | A01387 | 260 | A01103 | A01950 | 340 |
| A01103 | A02209 | 235 | A01103 | A04557 | 310 |
| A01103 | A04782 | 279 | A01103 | A06435 | 335 |
| A01103 | A10109 | 428 | A01103 | A15837 | 274 |
| A01103 | A15933 | 180 | A01104 | A01189 | 241 |
| A01104 | A01580 | 193 | A01104 | A01755 | 191 |
| A01104 | A01886 | 456 | A01104 | A01927 | 230 |
| A01104 | A02304 | 251 | A01104 | A02316 | 179 |
| A01104 | A02321 | 326 | A01104 | A02568 | 224 |
| A01104 | A02592 | 198 | A01104 | A02874 | 329 |
| A01104 | A02877 | 140 | A01104 | A02902 | 217 |
| A01104 | A03100 | 188 | A01104 | A03304 | 154 |
| A01104 | A03305 | 241 | A01104 | A03416 | 310 |
| A01104 | A03417 | 198 | A01104 | A04268 | 191 |
| A01104 | A04636 | 391 | A01104 | A04637 | 296 |
| A01104 | A04847 | 350 | A01104 | A05684 | 344 |
| A01104 | A05838 | 195 | A01104 | A06247 | 226 |
| A01104 | A07191 | 160 | A01104 | A08551 | 193 |
| A01104 | A08576 | 288 | A01104 | A08655 | 274 |
| A01104 | A09020 | 263 | A01104 | A09147 | 322 |
| A01104 | A10081 | 319 | A01104 | A10416 | 375 |
| A01104 | A11283 | 256 | A01104 | A15674 | 268 |
| A01105 | A01205 | 491 | A01105 | A01508 | 490 |
| A01105 | A01622 | 694 | A01105 | A01679 | 317 |
| A01105 | A02733 | 188 | A01105 | A03705 | 172 |
| A01105 | A03710 | 694 | A01105 | A05332 | 317 |
| A01105 | A05609 | 317 | A01105 | A06819 | 176 |
| A01105 | A07222 | 317 | A01105 | A07333 | 637 |
| A01105 | A07571 | 317 | A01105 | A07824 | 411 |
| A01105 | A07974 | 317 | A01105 | A08097 | 653 |
| A01105 | A09340 | 448 | A01105 | A09677 | 321 |
| A01105 | A15221 | 167 | A01105 | A15372 | 324 |
| A01105 | A15858 | 188 | A01106 | A01169 | 367 |

|        |        |     |        |        |     |
|--------|--------|-----|--------|--------|-----|
| A01106 | A01179 | 229 | A01106 | A01228 | 200 |
| A01106 | A01267 | 179 | A01106 | A01374 | 235 |
| A01106 | A01444 | 429 | A01106 | A02925 | 191 |
| A01106 | A03044 | 240 | A01106 | A03279 | 272 |
| A01106 | A05812 | 329 | A01106 | A06750 | 177 |
| A01106 | A06974 | 374 | A01106 | A07593 | 162 |
| A01106 | A07822 | 183 | A01106 | A10208 | 168 |
| A01106 | A11540 | 235 | A01106 | A12824 | 481 |
| A01106 | A14589 | 230 | A01106 | A14674 | 236 |
| A01106 | A16049 | 165 | A01107 | A01159 | 217 |
| A01107 | A01221 | 479 | A01107 | A01243 | 560 |
| A01107 | A01255 | 456 | A01107 | A01291 | 318 |
| A01107 | A01352 | 491 | A01107 | A01418 | 217 |
| A01107 | A01627 | 151 | A01107 | A01629 | 170 |
| A01107 | A01977 | 254 | A01107 | A02542 | 362 |
| A01107 | A03460 | 322 | A01107 | A03494 | 180 |
| A01107 | A03556 | 217 | A01107 | A03617 | 217 |
| A01107 | A04706 | 179 | A01107 | A05605 | 217 |
| A01107 | A06122 | 218 | A01107 | A06369 | 217 |
| A01107 | A06832 | 562 | A01107 | A07349 | 163 |
| A01107 | A07583 | 160 | A01107 | A08183 | 339 |
| A01107 | A08467 | 401 | A01107 | A08984 | 200 |
| A01107 | A08990 | 152 | A01107 | A09485 | 251 |
| A01107 | A09673 | 217 | A01107 | A11277 | 435 |
| A01107 | A12052 | 334 | A01107 | A12821 | 182 |
| A01107 | A13231 | 274 | A01107 | A13279 | 351 |
| A01107 | A13321 | 193 | A01107 | A13356 | 152 |
| A01107 | A14088 | 217 | A01107 | A14167 | 263 |
| A01107 | A14246 | 162 | A01107 | A14462 | 165 |
| A01107 | A14471 | 290 | A01107 | A14566 | 343 |
| A01107 | A14594 | 324 | A01107 | A15324 | 467 |
| A01107 | A15353 | 329 | A01107 | A15374 | 160 |
| A01107 | A15377 | 405 | A01107 | A15543 | 572 |
| A01107 | A15724 | 217 | A01107 | A15932 | 243 |
| A01107 | A16296 | 243 | A01107 | A16664 | 217 |
| A01107 | A17063 | 327 | A01108 | A01150 | 509 |
| A01108 | A01161 | 591 | A01108 | A01168 | 221 |
| A01108 | A01204 | 591 | A01108 | A01210 | 224 |
| A01108 | A01234 | 286 | A01108 | A01238 | 328 |
| A01108 | A01246 | 385 | A01108 | A01278 | 196 |
| A01108 | A01287 | 516 | A01108 | A01346 | 592 |
| A01108 | A01382 | 323 | A01108 | A01399 | 591 |
| A01108 | A01438 | 322 | A01108 | A01443 | 540 |
| A01108 | A01446 | 486 | A01108 | A01448 | 486 |
| A01108 | A01496 | 177 | A01108 | A01518 | 165 |
| A01108 | A01540 | 461 | A01108 | A01573 | 201 |

|        |        |     |        |        |     |
|--------|--------|-----|--------|--------|-----|
| A01108 | A01582 | 246 | A01108 | A01678 | 238 |
| A01108 | A01711 | 466 | A01108 | A01741 | 469 |
| A01108 | A01743 | 435 | A01108 | A01795 | 177 |
| A01108 | A01827 | 229 | A01108 | A02148 | 230 |
| A01108 | A02222 | 183 | A01108 | A02240 | 353 |
| A01108 | A02355 | 170 | A01108 | A02468 | 210 |
| A01108 | A02814 | 361 | A01108 | A02926 | 238 |
| A01108 | A02994 | 353 | A01108 | A03259 | 213 |
| A01108 | A03740 | 168 | A01108 | A03959 | 414 |
| A01108 | A03981 | 371 | A01108 | A04771 | 324 |
| A01108 | A04895 | 489 | A01108 | A05054 | 252 |
| A01108 | A05191 | 168 | A01108 | A05449 | 375 |
| A01108 | A05839 | 374 | A01108 | A05840 | 329 |
| A01108 | A06014 | 238 | A01108 | A06084 | 283 |
| A01108 | A06356 | 201 | A01108 | A06959 | 489 |
| A01108 | A07237 | 489 | A01108 | A07350 | 302 |
| A01108 | A07362 | 428 | A01108 | A07523 | 443 |
| A01108 | A07551 | 238 | A01108 | A07569 | 481 |
| A01108 | A07597 | 329 | A01108 | A07599 | 302 |
| A01108 | A07773 | 163 | A01108 | A07792 | 475 |
| A01108 | A07880 | 257 | A01108 | A08011 | 154 |
| A01108 | A08273 | 162 | A01108 | A08760 | 372 |
| A01108 | A08791 | 329 | A01108 | A09284 | 272 |
| A01108 | A09332 | 230 | A01108 | A09616 | 327 |
| A01108 | A09726 | 168 | A01108 | A10199 | 472 |
| A01108 | A10535 | 355 | A01108 | A11331 | 210 |
| A01108 | A11419 | 199 | A01108 | A11427 | 361 |
| A01108 | A11453 | 154 | A01108 | A11628 | 160 |
| A01108 | A11677 | 247 | A01108 | A12159 | 285 |
| A01108 | A12824 | 188 | A01108 | A13275 | 272 |
| A01108 | A13286 | 285 | A01108 | A13497 | 302 |
| A01108 | A13678 | 405 | A01108 | A13707 | 204 |
| A01108 | A14073 | 254 | A01108 | A14216 | 469 |
| A01108 | A14568 | 247 | A01108 | A14569 | 205 |
| A01108 | A14699 | 247 | A01108 | A14778 | 247 |
| A01108 | A14818 | 379 | A01108 | A15498 | 491 |
| A01108 | A15624 | 481 | A01108 | A15684 | 485 |
| A01108 | A16088 | 375 | A01108 | A16587 | 247 |
| A01108 | A17152 | 183 | A01109 | A01233 | 308 |
| A01109 | A01256 | 238 | A01109 | A01272 | 462 |
| A01109 | A01508 | 417 | A01109 | A01540 | 163 |
| A01109 | A01635 | 241 | A01109 | A01741 | 168 |
| A01109 | A01747 | 389 | A01109 | A01857 | 310 |
| A01109 | A02020 | 168 | A01109 | A03004 | 303 |
| A01109 | A03477 | 457 | A01109 | A04850 | 245 |
| A01109 | A04937 | 324 | A01109 | A05006 | 268 |

|        |        |     |        |        |     |
|--------|--------|-----|--------|--------|-----|
| A01109 | A05007 | 369 | A01109 | A05102 | 460 |
| A01109 | A05310 | 374 | A01109 | A06630 | 477 |
| A01109 | A06633 | 297 | A01109 | A06634 | 425 |
| A01109 | A06668 | 347 | A01109 | A06931 | 449 |
| A01109 | A07109 | 452 | A01109 | A07238 | 344 |
| A01109 | A07267 | 389 | A01109 | A07304 | 332 |
| A01109 | A07553 | 213 | A01109 | A07554 | 339 |
| A01109 | A07688 | 260 | A01109 | A08751 | 340 |
| A01109 | A10456 | 401 | A01109 | A11309 | 343 |
| A01109 | A14337 | 462 | A01109 | A15874 | 338 |
| A01109 | A15905 | 469 | A01109 | A16026 | 286 |
| A01109 | A16027 | 447 | A01109 | A16766 | 157 |
| A01110 | A01119 | 232 | A01110 | A01831 | 334 |
| A01110 | A02268 | 283 | A01110 | A02454 | 283 |
| A01110 | A02602 | 334 | A01110 | A02830 | 254 |
| A01110 | A05017 | 334 | A01110 | A06425 | 334 |
| A01110 | A06827 | 555 | A01110 | A07157 | 272 |
| A01110 | A07531 | 551 | A01110 | A08201 | 334 |
| A01110 | A09764 | 210 | A01110 | A13047 | 434 |
| A01110 | A15624 | 416 | A01110 | A15651 | 334 |
| A01110 | A15750 | 334 | A01110 | A15917 | 334 |
| A01110 | A15932 | 334 | A01110 | A15937 | 334 |
| A01111 | A01118 | 223 | A01111 | A01136 | 256 |
| A01111 | A01166 | 170 | A01111 | A01168 | 316 |
| A01111 | A01202 | 223 | A01111 | A01208 | 223 |
| A01111 | A01215 | 441 | A01111 | A01228 | 223 |
| A01111 | A01244 | 270 | A01111 | A01353 | 223 |
| A01111 | A01736 | 223 | A01111 | A02041 | 223 |
| A01111 | A02051 | 223 | A01111 | A03169 | 223 |
| A01111 | A04447 | 223 | A01111 | A07265 | 223 |
| A01111 | A07588 | 223 | A01111 | A08955 | 223 |
| A01111 | A08971 | 223 | A01111 | A10317 | 205 |
| A01111 | A10755 | 223 | A01111 | A11202 | 223 |
| A01111 | A13298 | 223 | A01111 | A14216 | 223 |
| A01112 | A01115 | 469 | A01112 | A01116 | 334 |
| A01112 | A01120 | 449 | A01112 | A01125 | 177 |
| A01112 | A01127 | 491 | A01112 | A01129 | 63  |
| A01112 | A01140 | 491 | A01112 | A01150 | 457 |
| A01112 | A01166 | 491 | A01112 | A01184 | 152 |
| A01112 | A01196 | 475 | A01112 | A01201 | 358 |
| A01112 | A01206 | 491 | A01112 | A01234 | 491 |
| A01112 | A01238 | 438 | A01112 | A01243 | 450 |
| A01112 | A01249 | 285 | A01112 | A01261 | 247 |
| A01112 | A01270 | 483 | A01112 | A01291 | 491 |
| A01112 | A01304 | 567 | A01112 | A01306 | 491 |
| A01112 | A01335 | 491 | A01112 | A01351 | 63  |



|        |        |     |        |        |     |
|--------|--------|-----|--------|--------|-----|
| A01112 | A01384 | 384 | A01112 | A01393 | 200 |
| A01112 | A01411 | 154 | A01112 | A01425 | 491 |
| A01112 | A01431 | 491 | A01112 | A01437 | 271 |
| A01112 | A01439 | 347 | A01112 | A01457 | 491 |
| A01112 | A01468 | 491 | A01112 | A01470 | 491 |
| A01112 | A01478 | 213 | A01112 | A01488 | 160 |
| A01112 | A01492 | 491 | A01112 | A01495 | 334 |
| A01112 | A01496 | 491 | A01112 | A01506 | 241 |
| A01112 | A01538 | 412 | A01112 | A01539 | 278 |
| A01112 | A01540 | 193 | A01112 | A01569 | 346 |
| A01112 | A01579 | 491 | A01112 | A01586 | 443 |
| A01112 | A01597 | 452 | A01112 | A01598 | 490 |
| A01112 | A01601 | 658 | A01112 | A01612 | 443 |
| A01112 | A01614 | 490 | A01112 | A01647 | 205 |
| A01112 | A01649 | 491 | A01112 | A01684 | 470 |
| A01112 | A01707 | 228 | A01112 | A01822 | 440 |
| A01112 | A01995 | 637 | A01112 | A02179 | 152 |
| A01112 | A02265 | 63  | A01112 | A02350 | 475 |
| A01112 | A02397 | 104 | A01112 | A03028 | 470 |
| A01112 | A03069 | 195 | A01112 | A03083 | 207 |
| A01112 | A03164 | 232 | A01112 | A03304 | 346 |
| A01112 | A03438 | 168 | A01112 | A03567 | 491 |
| A01112 | A03571 | 221 | A01112 | A03740 | 486 |
| A01112 | A03752 | 592 | A01112 | A03981 | 491 |
| A01112 | A04449 | 279 | A01112 | A04846 | 335 |
| A01112 | A05298 | 162 | A01112 | A05418 | 331 |
| A01112 | A05443 | 221 | A01112 | A05501 | 491 |
| A01112 | A06277 | 185 | A01112 | A06279 | 491 |
| A01112 | A06286 | 462 | A01112 | A06340 | 367 |
| A01112 | A06343 | 151 | A01112 | A06351 | 205 |
| A01112 | A06466 | 491 | A01112 | A06534 | 474 |
| A01112 | A06814 | 489 | A01112 | A06897 | 380 |
| A01112 | A06965 | 451 | A01112 | A06973 | 486 |
| A01112 | A07047 | 468 | A01112 | A07093 | 321 |
| A01112 | A07223 | 334 | A01112 | A07311 | 580 |
| A01112 | A07323 | 469 | A01112 | A07347 | 375 |
| A01112 | A07398 | 491 | A01112 | A07451 | 491 |
| A01112 | A07581 | 328 | A01112 | A07700 | 363 |
| A01112 | A07725 | 334 | A01112 | A07726 | 491 |
| A01112 | A08055 | 160 | A01112 | A08061 | 361 |
| A01112 | A08131 | 491 | A01112 | A08333 | 201 |
| A01112 | A08357 | 491 | A01112 | A08358 | 183 |
| A01112 | A08359 | 491 | A01112 | A08369 | 294 |
| A01112 | A08408 | 467 | A01112 | A08457 | 223 |
| A01112 | A08476 | 475 | A01112 | A08559 | 154 |
| A01112 | A08571 | 486 | A01112 | A08756 | 188 |

|        |        |     |        |        |     |
|--------|--------|-----|--------|--------|-----|
| A01112 | A08768 | 151 | A01112 | A08983 | 272 |
| A01112 | A09078 | 268 | A01112 | A09590 | 179 |
| A01112 | A09620 | 174 | A01112 | A09707 | 168 |
| A01112 | A09722 | 162 | A01112 | A10417 | 130 |
| A01112 | A10532 | 486 | A01112 | A10564 | 107 |
| A01112 | A10599 | 63  | A01112 | A10616 | 323 |
| A01112 | A10624 | 401 | A01112 | A11096 | 176 |
| A01112 | A11263 | 196 | A01112 | A11277 | 351 |
| A01112 | A11392 | 480 | A01112 | A11487 | 191 |
| A01112 | A11535 | 490 | A01112 | A11550 | 374 |
| A01112 | A11728 | 389 | A01112 | A11857 | 246 |
| A01112 | A11861 | 401 | A01112 | A11935 | 265 |
| A01112 | A11983 | 327 | A01112 | A12028 | 162 |
| A01112 | A12042 | 167 | A01112 | A12221 | 210 |
| A01112 | A12269 | 358 | A01112 | A12270 | 205 |
| A01112 | A12305 | 201 | A01112 | A13063 | 519 |
| A01112 | A13126 | 313 | A01112 | A13251 | 151 |
| A01112 | A13311 | 486 | A01112 | A13335 | 262 |
| A01112 | A13340 | 491 | A01112 | A13609 | 271 |
| A01112 | A13710 | 294 | A01112 | A13989 | 570 |
| A01112 | A13992 | 382 | A01112 | A14006 | 469 |
| A01112 | A14188 | 317 | A01112 | A14216 | 491 |
| A01112 | A14508 | 378 | A01112 | A14530 | 394 |
| A01112 | A14596 | 491 | A01112 | A14597 | 180 |
| A01112 | A14633 | 290 | A01112 | A14738 | 467 |
| A01112 | A15215 | 375 | A01112 | A15381 | 241 |
| A01112 | A15499 | 246 | A01112 | A15500 | 488 |
| A01112 | A15606 | 162 | A01112 | A15660 | 490 |
| A01112 | A15684 | 489 | A01112 | A15711 | 457 |
| A01112 | A15891 | 341 | A01112 | A15988 | 162 |
| A01112 | A16107 | 179 | A01112 | A16437 | 162 |
| A01112 | A16627 | 195 | A01112 | A16658 | 479 |
| A01112 | A16686 | 293 | A01112 | A16822 | 213 |
| A01112 | A16839 | 322 | A01112 | A16947 | 170 |
| A01112 | A17140 | 438 | A01113 | A01115 | 271 |
| A01113 | A01192 | 638 | A01113 | A01569 | 273 |
| A01113 | A01648 | 334 | A01113 | A01680 | 252 |
| A01113 | A01741 | 286 | A01113 | A02411 | 213 |
| A01113 | A02961 | 152 | A01113 | A03560 | 334 |
| A01113 | A04446 | 251 | A01113 | A04571 | 319 |
| A01113 | A05029 | 334 | A01113 | A05101 | 297 |
| A01113 | A06466 | 223 | A01113 | A06814 | 156 |
| A01113 | A07378 | 334 | A01113 | A08261 | 490 |
| A01113 | A08390 | 273 | A01113 | A08978 | 229 |
| A01113 | A08991 | 279 | A01113 | A08994 | 238 |
| A01113 | A08999 | 362 | A01113 | A09339 | 243 |

|        |        |     |        |        |     |
|--------|--------|-----|--------|--------|-----|
| A01113 | A09577 | 208 | A01113 | A09591 | 625 |
| A01113 | A09691 | 433 | A01113 | A11697 | 290 |
| A01113 | A12167 | 367 | A01113 | A12710 | 353 |
| A01113 | A13320 | 208 | A01113 | A14178 | 472 |
| A01113 | A15146 | 362 | A01113 | A15653 | 195 |
| A01113 | A17088 | 334 | A01114 | A01187 | 629 |
| A01114 | A01197 | 628 | A01114 | A01212 | 229 |
| A01114 | A01296 | 428 | A01114 | A01315 | 317 |
| A01114 | A01317 | 477 | A01114 | A01318 | 191 |
| A01114 | A01319 | 317 | A01114 | A01322 | 477 |
| A01114 | A01324 | 263 | A01114 | A01329 | 229 |
| A01114 | A01341 | 115 | A01114 | A01415 | 628 |
| A01114 | A01451 | 274 | A01114 | A01536 | 384 |
| A01114 | A01559 | 488 | A01114 | A01589 | 257 |
| A01114 | A01594 | 452 | A01114 | A01625 | 234 |
| A01114 | A01627 | 229 | A01114 | A01680 | 317 |
| A01114 | A01682 | 229 | A01114 | A01686 | 486 |
| A01114 | A01741 | 483 | A01114 | A01743 | 207 |
| A01114 | A02180 | 414 | A01114 | A02859 | 357 |
| A01114 | A03057 | 276 | A01114 | A03259 | 328 |
| A01114 | A03327 | 317 | A01114 | A04668 | 457 |
| A01114 | A05185 | 184 | A01114 | A05334 | 314 |
| A01114 | A05596 | 226 | A01114 | A05630 | 236 |
| A01114 | A05690 | 317 | A01114 | A06130 | 549 |
| A01114 | A06242 | 388 | A01114 | A06381 | 317 |
| A01114 | A06591 | 172 | A01114 | A06750 | 229 |
| A01114 | A06777 | 305 | A01114 | A06851 | 236 |
| A01114 | A06864 | 219 | A01114 | A07096 | 154 |
| A01114 | A07319 | 322 | A01114 | A07346 | 454 |
| A01114 | A07353 | 317 | A01114 | A07466 | 230 |
| A01114 | A07480 | 328 | A01114 | A07495 | 285 |
| A01114 | A07595 | 430 | A01114 | A07603 | 418 |
| A01114 | A07670 | 229 | A01114 | A07996 | 176 |
| A01114 | A08212 | 491 | A01114 | A08516 | 460 |
| A01114 | A08526 | 491 | A01114 | A08820 | 405 |
| A01114 | A08877 | 217 | A01114 | A08912 | 279 |
| A01114 | A09126 | 379 | A01114 | A09413 | 196 |
| A01114 | A09598 | 491 | A01114 | A09664 | 151 |
| A01114 | A09764 | 154 | A01114 | A09771 | 202 |
| A01114 | A09901 | 154 | A01114 | A11121 | 255 |
| A01114 | A11540 | 488 | A01114 | A11724 | 193 |
| A01114 | A11829 | 200 | A01114 | A11880 | 240 |
| A01114 | A12064 | 332 | A01114 | A13913 | 486 |
| A01114 | A13949 | 396 | A01114 | A14079 | 402 |
| A01114 | A14138 | 160 | A01114 | A14266 | 458 |
| A01114 | A14282 | 157 | A01114 | A15273 | 296 |

|        |        |     |        |        |     |
|--------|--------|-----|--------|--------|-----|
| A01114 | A15315 | 318 | A01114 | A15347 | 238 |
| A01114 | A15549 | 279 | A01114 | A15686 | 202 |
| A01114 | A15714 | 335 | A01114 | A15768 | 160 |
| A01114 | A15837 | 611 | A01114 | A16052 | 316 |
| A01114 | A16396 | 259 | A01114 | A16626 | 621 |
| A01114 | A16643 | 317 | A01114 | A16760 | 259 |
| A01115 | A01127 | 414 | A01115 | A01140 | 477 |
| A01115 | A01150 | 407 | A01115 | A01166 | 405 |
| A01115 | A01192 | 218 | A01115 | A01194 | 491 |
| A01115 | A01196 | 268 | A01115 | A01206 | 218 |
| A01115 | A01212 | 281 | A01115 | A01221 | 162 |
| A01115 | A01234 | 483 | A01115 | A01249 | 383 |
| A01115 | A01291 | 490 | A01115 | A01335 | 450 |
| A01115 | A01354 | 396 | A01115 | A01365 | 172 |
| A01115 | A01393 | 491 | A01115 | A01406 | 195 |
| A01115 | A01411 | 486 | A01115 | A01431 | 310 |
| A01115 | A01436 | 434 | A01115 | A01439 | 160 |
| A01115 | A01455 | 272 | A01115 | A01468 | 491 |
| A01115 | A01470 | 223 | A01115 | A01492 | 306 |
| A01115 | A01496 | 452 | A01115 | A01539 | 722 |
| A01115 | A01540 | 466 | A01115 | A01541 | 177 |
| A01115 | A01548 | 480 | A01115 | A01569 | 491 |
| A01115 | A01577 | 469 | A01115 | A01579 | 491 |
| A01115 | A01586 | 480 | A01115 | A01597 | 213 |
| A01115 | A01601 | 449 | A01115 | A01612 | 486 |
| A01115 | A01649 | 490 | A01115 | A01707 | 283 |
| A01115 | A01727 | 279 | A01115 | A01770 | 353 |
| A01115 | A01917 | 409 | A01115 | A02353 | 462 |
| A01115 | A03188 | 293 | A01115 | A03298 | 301 |
| A01115 | A03321 | 404 | A01115 | A03446 | 722 |
| A01115 | A03453 | 350 | A01115 | A03476 | 255 |
| A01115 | A03560 | 156 | A01115 | A03567 | 319 |
| A01115 | A03572 | 193 | A01115 | A03738 | 436 |
| A01115 | A03740 | 411 | A01115 | A03752 | 210 |
| A01115 | A03785 | 469 | A01115 | A03812 | 151 |
| A01115 | A03863 | 202 | A01115 | A04021 | 452 |
| A01115 | A04106 | 230 | A01115 | A04446 | 310 |
| A01115 | A04681 | 213 | A01115 | A04905 | 361 |
| A01115 | A05437 | 230 | A01115 | A05449 | 170 |
| A01115 | A05501 | 384 | A01115 | A05712 | 294 |
| A01115 | A05930 | 285 | A01115 | A06077 | 208 |
| A01115 | A06109 | 447 | A01115 | A06275 | 335 |
| A01115 | A06351 | 218 | A01115 | A06365 | 281 |
| A01115 | A06466 | 401 | A01115 | A07163 | 385 |
| A01115 | A07247 | 462 | A01115 | A07311 | 323 |
| A01115 | A07412 | 234 | A01115 | A07449 | 347 |

|        |        |     |        |        |     |
|--------|--------|-----|--------|--------|-----|
| A01115 | A07822 | 246 | A01115 | A07840 | 266 |
| A01115 | A08055 | 196 | A01115 | A08061 | 479 |
| A01115 | A08137 | 484 | A01115 | A08359 | 480 |
| A01115 | A08390 | 490 | A01115 | A08446 | 313 |
| A01115 | A08546 | 705 | A01115 | A08571 | 385 |
| A01115 | A08896 | 452 | A01115 | A08991 | 279 |
| A01115 | A09243 | 151 | A01115 | A09285 | 202 |
| A01115 | A09691 | 251 | A01115 | A09705 | 165 |
| A01115 | A09722 | 251 | A01115 | A10006 | 271 |
| A01115 | A10390 | 251 | A01115 | A10490 | 491 |
| A01115 | A10532 | 745 | A01115 | A10616 | 176 |
| A01115 | A10878 | 230 | A01115 | A11240 | 372 |
| A01115 | A11409 | 491 | A01115 | A11945 | 438 |
| A01115 | A12293 | 313 | A01115 | A12839 | 314 |
| A01115 | A13218 | 485 | A01115 | A13310 | 185 |
| A01115 | A13478 | 313 | A01115 | A13525 | 154 |
| A01115 | A13609 | 491 | A01115 | A13723 | 313 |
| A01115 | A13989 | 491 | A01115 | A13992 | 454 |
| A01115 | A14073 | 419 | A01115 | A14410 | 232 |
| A01115 | A14508 | 344 | A01115 | A14758 | 198 |
| A01115 | A14816 | 152 | A01115 | A15174 | 266 |
| A01115 | A15500 | 193 | A01115 | A15660 | 475 |
| A01115 | A15684 | 489 | A01115 | A15698 | 372 |
| A01115 | A15769 | 165 | A01115 | A16756 | 384 |
| A01115 | A17131 | 160 | A01116 | A01166 | 283 |
| A01116 | A01184 | 491 | A01116 | A01201 | 491 |
| A01116 | A01206 | 451 | A01116 | A01214 | 201 |
| A01116 | A01224 | 374 | A01116 | A01226 | 213 |
| A01116 | A01234 | 491 | A01116 | A01304 | 638 |
| A01116 | A01351 | 363 | A01116 | A01398 | 247 |
| A01116 | A01468 | 218 | A01116 | A01470 | 488 |
| A01116 | A01487 | 382 | A01116 | A01492 | 486 |
| A01116 | A01495 | 334 | A01116 | A01503 | 165 |
| A01116 | A01597 | 71  | A01116 | A01721 | 404 |
| A01116 | A01741 | 398 | A01116 | A01755 | 196 |
| A01116 | A02265 | 165 | A01116 | A02288 | 208 |
| A01116 | A02364 | 191 | A01116 | A03338 | 243 |
| A01116 | A03567 | 171 | A01116 | A03629 | 202 |
| A01116 | A03734 | 475 | A01116 | A03760 | 212 |
| A01116 | A05419 | 263 | A01116 | A05845 | 432 |
| A01116 | A06275 | 490 | A01116 | A07223 | 635 |
| A01116 | A07347 | 491 | A01116 | A07533 | 380 |
| A01116 | A07584 | 466 | A01116 | A07625 | 216 |
| A01116 | A07700 | 638 | A01116 | A07725 | 553 |
| A01116 | A07924 | 238 | A01116 | A08022 | 185 |
| A01116 | A08024 | 449 | A01116 | A08211 | 227 |

|        |        |     |        |        |     |
|--------|--------|-----|--------|--------|-----|
| A01116 | A08491 | 338 | A01116 | A08890 | 286 |
| A01116 | A09307 | 458 | A01116 | A09664 | 436 |
| A01116 | A10616 | 374 | A01116 | A10923 | 224 |
| A01116 | A12025 | 335 | A01116 | A13220 | 234 |
| A01116 | A13386 | 335 | A01116 | A13989 | 462 |
| A01116 | A14505 | 256 | A01116 | A16302 | 283 |
| A01117 | A01330 | 177 | A01117 | A01370 | 401 |
| A01117 | A01404 | 480 | A01117 | A01461 | 159 |
| A01117 | A01741 | 185 | A01117 | A01926 | 480 |
| A01117 | A01947 | 183 | A01117 | A01993 | 180 |
| A01117 | A02097 | 196 | A01117 | A02156 | 307 |
| A01117 | A02170 | 461 | A01117 | A02268 | 451 |
| A01117 | A02272 | 360 | A01117 | A02275 | 374 |
| A01117 | A02330 | 332 | A01117 | A02454 | 427 |
| A01117 | A02524 | 385 | A01117 | A02798 | 223 |
| A01117 | A02837 | 170 | A01117 | A02998 | 247 |
| A01117 | A03043 | 201 | A01117 | A03044 | 491 |
| A01117 | A03045 | 246 | A01117 | A03046 | 490 |
| A01117 | A03086 | 355 | A01117 | A03090 | 162 |
| A01117 | A03091 | 432 | A01117 | A03099 | 285 |
| A01117 | A03152 | 490 | A01117 | A03153 | 419 |
| A01117 | A03154 | 483 | A01117 | A03155 | 491 |
| A01117 | A03193 | 273 | A01117 | A03310 | 373 |
| A01117 | A03998 | 228 | A01117 | A04095 | 255 |
| A01117 | A04477 | 270 | A01117 | A04770 | 193 |
| A01117 | A04927 | 157 | A01117 | A05044 | 486 |
| A01117 | A05143 | 477 | A01117 | A05150 | 208 |
| A01117 | A05278 | 205 | A01117 | A05396 | 196 |
| A01117 | A05580 | 339 | A01117 | A05643 | 273 |
| A01117 | A05685 | 257 | A01117 | A05825 | 394 |
| A01117 | A05949 | 201 | A01117 | A06046 | 213 |
| A01117 | A06137 | 491 | A01117 | A06494 | 319 |
| A01117 | A07062 | 491 | A01117 | A07209 | 241 |
| A01117 | A07477 | 151 | A01117 | A07660 | 262 |
| A01117 | A07952 | 419 | A01117 | A08209 | 491 |
| A01117 | A08647 | 236 | A01117 | A09107 | 246 |
| A01117 | A09357 | 207 | A01117 | A09652 | 484 |
| A01117 | A09891 | 329 | A01117 | A10091 | 246 |
| A01117 | A10339 | 329 | A01117 | A10410 | 339 |
| A01117 | A10527 | 369 | A01117 | A10671 | 441 |
| A01117 | A10762 | 270 | A01117 | A11279 | 200 |
| A01117 | A11994 | 346 | A01117 | A12485 | 352 |
| A01117 | A14190 | 443 | A01117 | A14202 | 223 |
| A01117 | A14376 | 238 | A01117 | A14516 | 188 |
| A01117 | A15498 | 176 | A01117 | A15896 | 491 |
| A01117 | A15992 | 272 | A01118 | A01177 | 266 |

|        |        |     |        |        |     |
|--------|--------|-----|--------|--------|-----|
| A01118 | A01202 | 223 | A01118 | A01208 | 267 |
| A01118 | A01215 | 470 | A01118 | A01228 | 577 |
| A01118 | A01353 | 577 | A01118 | A01420 | 296 |
| A01118 | A01567 | 404 | A01118 | A01598 | 265 |
| A01118 | A01736 | 223 | A01118 | A02041 | 223 |
| A01118 | A02051 | 223 | A01118 | A02275 | 212 |
| A01118 | A03169 | 223 | A01118 | A04447 | 223 |
| A01118 | A04630 | 234 | A01118 | A05621 | 425 |
| A01118 | A06102 | 372 | A01118 | A07223 | 184 |
| A01118 | A07265 | 223 | A01118 | A07588 | 315 |
| A01118 | A08335 | 213 | A01118 | A08955 | 223 |
| A01118 | A08971 | 223 | A01118 | A09705 | 213 |
| A01118 | A09977 | 171 | A01118 | A10755 | 223 |
| A01118 | A11202 | 223 | A01118 | A11312 | 162 |
| A01118 | A11316 | 160 | A01118 | A11368 | 193 |
| A01118 | A12204 | 201 | A01118 | A13298 | 223 |
| A01118 | A14216 | 342 | A01119 | A01136 | 173 |
| A01119 | A01194 | 587 | A01119 | A01218 | 359 |
| A01119 | A01349 | 191 | A01119 | A01411 | 534 |
| A01119 | A01420 | 303 | A01119 | A01421 | 491 |
| A01119 | A01424 | 394 | A01119 | A01455 | 272 |
| A01119 | A01461 | 460 | A01119 | A01499 | 260 |
| A01119 | A01515 | 316 | A01119 | A01539 | 221 |
| A01119 | A01569 | 167 | A01119 | A01573 | 441 |
| A01119 | A01581 | 247 | A01119 | A01608 | 213 |
| A01119 | A01728 | 343 | A01119 | A01824 | 115 |
| A01119 | A01826 | 247 | A01119 | A02027 | 187 |
| A01119 | A02739 | 254 | A01119 | A02847 | 277 |
| A01119 | A02881 | 193 | A01119 | A03046 | 254 |
| A01119 | A03279 | 294 | A01119 | A03453 | 247 |
| A01119 | A03883 | 330 | A01119 | A04525 | 270 |
| A01119 | A06531 | 491 | A01119 | A06825 | 294 |
| A01119 | A07961 | 346 | A01119 | A08245 | 330 |
| A01119 | A08377 | 184 | A01119 | A08430 | 160 |
| A01119 | A08466 | 405 | A01119 | A08550 | 400 |
| A01119 | A08775 | 154 | A01119 | A08896 | 185 |
| A01119 | A09005 | 363 | A01119 | A09717 | 247 |
| A01119 | A10532 | 491 | A01119 | A11075 | 427 |
| A01119 | A11409 | 338 | A01119 | A11496 | 345 |
| A01119 | A11497 | 382 | A01119 | A11705 | 268 |
| A01119 | A11728 | 180 | A01119 | A11735 | 240 |
| A01119 | A12138 | 316 | A01119 | A12232 | 199 |
| A01119 | A12349 | 395 | A01119 | A12433 | 258 |
| A01119 | A12658 | 294 | A01119 | A12723 | 361 |
| A01119 | A12739 | 334 | A01119 | A12792 | 177 |
| A01119 | A12858 | 240 | A01119 | A13169 | 151 |

|        |        |     |        |        |     |
|--------|--------|-----|--------|--------|-----|
| A01119 | A13609 | 346 | A01119 | A13809 | 199 |
| A01119 | A14074 | 256 | A01119 | A14167 | 490 |
| A01119 | A14214 | 215 | A01119 | A14247 | 364 |
| A01119 | A14288 | 157 | A01119 | A14462 | 185 |
| A01119 | A14569 | 311 | A01119 | A14596 | 305 |
| A01119 | A14706 | 177 | A01119 | A14739 | 246 |
| A01119 | A15652 | 171 | A01119 | A15667 | 490 |
| A01119 | A15711 | 247 | A01119 | A15943 | 207 |
| A01119 | A16109 | 174 | A01119 | A16157 | 236 |
| A01119 | A16243 | 157 | A01119 | A16587 | 274 |
| A01119 | A16617 | 346 | A01119 | A16621 | 451 |
| A01119 | A16652 | 156 | A01119 | A16664 | 173 |
| A01119 | A16680 | 157 | A01119 | A16691 | 208 |
| A01119 | A16704 | 458 | A01119 | A16788 | 286 |
| A01119 | A16815 | 218 | A01120 | A01129 | 170 |
| A01120 | A01136 | 302 | A01120 | A01150 | 274 |
| A01120 | A01159 | 234 | A01120 | A01160 | 170 |
| A01120 | A01166 | 486 | A01120 | A01168 | 170 |
| A01120 | A01179 | 475 | A01120 | A01206 | 491 |
| A01120 | A01234 | 490 | A01120 | A01243 | 303 |
| A01120 | A01266 | 252 | A01120 | A01291 | 454 |
| A01120 | A01306 | 443 | A01120 | A01338 | 193 |
| A01120 | A01351 | 257 | A01120 | A01353 | 205 |
| A01120 | A01356 | 709 | A01120 | A01379 | 550 |
| A01120 | A01384 | 489 | A01120 | A01425 | 388 |
| A01120 | A01430 | 491 | A01120 | A01439 | 565 |
| A01120 | A01440 | 714 | A01120 | A01468 | 363 |
| A01120 | A01470 | 491 | A01120 | A01488 | 314 |
| A01120 | A01492 | 572 | A01120 | A01538 | 214 |
| A01120 | A01597 | 457 | A01120 | A01598 | 715 |
| A01120 | A01612 | 330 | A01120 | A01614 | 572 |
| A01120 | A01649 | 491 | A01120 | A02164 | 636 |
| A01120 | A02265 | 475 | A01120 | A02978 | 227 |
| A01120 | A03296 | 294 | A01120 | A03438 | 387 |
| A01120 | A03567 | 430 | A01120 | A03652 | 170 |
| A01120 | A03767 | 165 | A01120 | A03967 | 204 |
| A01120 | A03981 | 170 | A01120 | A04016 | 277 |
| A01120 | A04282 | 157 | A01120 | A04563 | 205 |
| A01120 | A05230 | 549 | A01120 | A05512 | 191 |
| A01120 | A06275 | 157 | A01120 | A06356 | 170 |
| A01120 | A06825 | 419 | A01120 | A06965 | 268 |
| A01120 | A07076 | 260 | A01120 | A07244 | 170 |
| A01120 | A07348 | 372 | A01120 | A07487 | 230 |
| A01120 | A07524 | 170 | A01120 | A07759 | 347 |
| A01120 | A07924 | 261 | A01120 | A08106 | 191 |
| A01120 | A08137 | 450 | A01120 | A08211 | 170 |



|        |        |     |        |        |     |
|--------|--------|-----|--------|--------|-----|
| A01120 | A08357 | 491 | A01120 | A08437 | 187 |
| A01120 | A08952 | 337 | A01120 | A09292 | 493 |
| A01120 | A09322 | 177 | A01120 | A09327 | 369 |
| A01120 | A09697 | 170 | A01120 | A09707 | 470 |
| A01120 | A10518 | 238 | A01120 | A10616 | 156 |
| A01120 | A10625 | 273 | A01120 | A11312 | 162 |
| A01120 | A11462 | 489 | A01120 | A11704 | 224 |
| A01120 | A11942 | 439 | A01120 | A12138 | 447 |
| A01120 | A12233 | 396 | A01120 | A13052 | 475 |
| A01120 | A13126 | 449 | A01120 | A13875 | 466 |
| A01120 | A13989 | 572 | A01120 | A14087 | 152 |
| A01120 | A14088 | 177 | A01120 | A14147 | 154 |
| A01120 | A14186 | 247 | A01120 | A14216 | 486 |
| A01120 | A14816 | 210 | A01120 | A15215 | 265 |
| A01120 | A15256 | 353 | A01120 | A15370 | 236 |
| A01120 | A15660 | 232 | A01120 | A15684 | 174 |
| A01121 | A01153 | 224 | A01121 | A01154 | 390 |
| A01121 | A01166 | 236 | A01121 | A01186 | 449 |
| A01121 | A01196 | 290 | A01121 | A01238 | 173 |
| A01121 | A01306 | 165 | A01121 | A01335 | 418 |
| A01121 | A01337 | 419 | A01121 | A01365 | 468 |
| A01121 | A01369 | 380 | A01121 | A01406 | 235 |
| A01121 | A01436 | 177 | A01121 | A01449 | 407 |
| A01121 | A01468 | 473 | A01121 | A01496 | 188 |
| A01121 | A01579 | 411 | A01121 | A01586 | 460 |
| A01121 | A02737 | 279 | A01121 | A03601 | 156 |
| A01121 | A03981 | 170 | A01121 | A04230 | 229 |
| A01121 | A05318 | 205 | A01121 | A05501 | 366 |
| A01121 | A06351 | 179 | A01121 | A06564 | 201 |
| A01121 | A06664 | 399 | A01121 | A07323 | 199 |
| A01121 | A07349 | 200 | A01121 | A07581 | 205 |
| A01121 | A09296 | 305 | A01121 | A09735 | 423 |
| A01121 | A11364 | 324 | A01121 | A11616 | 232 |
| A01121 | A12011 | 286 | A01121 | A12477 | 271 |
| A01121 | A12821 | 347 | A01121 | A13989 | 411 |
| A01121 | A14568 | 308 | A01121 | A14741 | 157 |
| A01121 | A14813 | 296 | A01121 | A14817 | 260 |
| A01121 | A16686 | 219 | A01122 | A01151 | 229 |
| A01122 | A01156 | 323 | A01122 | A01166 | 313 |
| A01122 | A01169 | 491 | A01122 | A01212 | 247 |
| A01122 | A01278 | 432 | A01122 | A01280 | 235 |
| A01122 | A01329 | 420 | A01122 | A01340 | 477 |
| A01122 | A01352 | 360 | A01122 | A01370 | 259 |
| A01122 | A01418 | 488 | A01122 | A01458 | 201 |
| A01122 | A01459 | 441 | A01122 | A01517 | 200 |
| A01122 | A01559 | 223 | A01122 | A01582 | 441 |

|        |        |     |        |        |     |
|--------|--------|-----|--------|--------|-----|
| A01122 | A01866 | 174 | A01122 | A02212 | 71  |
| A01122 | A02219 | 446 | A01122 | A02291 | 157 |
| A01122 | A02358 | 160 | A01122 | A02623 | 191 |
| A01122 | A04529 | 173 | A01122 | A04595 | 190 |
| A01122 | A04666 | 227 | A01122 | A04850 | 202 |
| A01122 | A05276 | 168 | A01122 | A05419 | 263 |
| A01122 | A05570 | 357 | A01122 | A05761 | 260 |
| A01122 | A05998 | 173 | A01122 | A06032 | 445 |
| A01122 | A06090 | 252 | A01122 | A06750 | 409 |
| A01122 | A07251 | 216 | A01122 | A07402 | 363 |
| A01122 | A07439 | 332 | A01122 | A07457 | 321 |
| A01122 | A07715 | 323 | A01122 | A08918 | 463 |
| A01122 | A09870 | 219 | A01122 | A09901 | 251 |
| A01122 | A10200 | 190 | A01122 | A10440 | 191 |
| A01122 | A10611 | 154 | A01122 | A11113 | 219 |
| A01122 | A11352 | 279 | A01122 | A11663 | 224 |
| A01122 | A11691 | 229 | A01122 | A11795 | 490 |
| A01122 | A11884 | 163 | A01122 | A11926 | 327 |
| A01122 | A12523 | 291 | A01122 | A12824 | 488 |
| A01122 | A13190 | 408 | A01122 | A13229 | 240 |
| A01122 | A13835 | 234 | A01122 | A13905 | 428 |
| A01122 | A14949 | 335 | A01122 | A15485 | 160 |
| A01122 | A15498 | 273 | A01122 | A16228 | 283 |
| A01122 | A16269 | 417 | A01122 | A16358 | 195 |
| A01122 | A16554 | 335 | A01122 | A16981 | 252 |
| A01122 | A17166 | 234 | A01123 | A01218 | 277 |
| A01123 | A01393 | 274 | A01123 | A01411 | 332 |
| A01123 | A04055 | 341 | A01123 | A05865 | 326 |
| A01123 | A07681 | 364 | A01124 | A01212 | 405 |
| A01124 | A01214 | 267 | A01124 | A01278 | 63  |
| A01124 | A01320 | 749 | A01124 | A01325 | 901 |
| A01124 | A01327 | 465 | A01124 | A01503 | 428 |
| A01124 | A01544 | 475 | A01124 | A01582 | 201 |
| A01124 | A01594 | 479 | A01124 | A01596 | 261 |
| A01124 | A01629 | 74  | A01124 | A01680 | 642 |
| A01124 | A01985 | 119 | A01124 | A02221 | 160 |
| A01124 | A02445 | 270 | A01124 | A02481 | 63  |
| A01124 | A02858 | 171 | A01124 | A02903 | 183 |
| A01124 | A02999 | 160 | A01124 | A03334 | 229 |
| A01124 | A03404 | 245 | A01124 | A03498 | 132 |
| A01124 | A04098 | 318 | A01124 | A04180 | 163 |
| A01124 | A04256 | 489 | A01124 | A04853 | 228 |
| A01124 | A05062 | 532 | A01124 | A06435 | 168 |
| A01124 | A07603 | 420 | A01124 | A08516 | 423 |
| A01124 | A08877 | 159 | A01124 | A08893 | 256 |
| A01124 | A09000 | 343 | A01124 | A10109 | 183 |

|        |        |     |        |        |     |
|--------|--------|-----|--------|--------|-----|
| A01124 | A10278 | 899 | A01124 | A11236 | 191 |
| A01124 | A11923 | 532 | A01124 | A12556 | 337 |
| A01124 | A13382 | 899 | A01124 | A14443 | 899 |
| A01124 | A14477 | 493 | A01124 | A14498 | 343 |
| A01124 | A14652 | 191 | A01124 | A14674 | 643 |
| A01124 | A14702 | 343 | A01124 | A16738 | 642 |
| A01125 | A01137 | 489 | A01125 | A01209 | 434 |
| A01125 | A01257 | 479 | A01125 | A01276 | 180 |
| A01125 | A01309 | 428 | A01125 | A01475 | 310 |
| A01125 | A01485 | 263 | A01125 | A01524 | 435 |
| A01125 | A01527 | 334 | A01125 | A01547 | 321 |
| A01125 | A01553 | 172 | A01125 | A01556 | 221 |
| A01125 | A01599 | 174 | A01125 | A01600 | 494 |
| A01125 | A01668 | 184 | A01125 | A01676 | 152 |
| A01125 | A01741 | 473 | A01125 | A01775 | 167 |
| A01125 | A01889 | 134 | A01125 | A01937 | 152 |
| A01125 | A01995 | 422 | A01125 | A02000 | 486 |
| A01125 | A02006 | 470 | A01125 | A02007 | 154 |
| A01125 | A02010 | 486 | A01125 | A02074 | 422 |
| A01125 | A02083 | 152 | A01125 | A02110 | 391 |
| A01125 | A02111 | 228 | A01125 | A02215 | 366 |
| A01125 | A02229 | 477 | A01125 | A02306 | 378 |
| A01125 | A02313 | 360 | A01125 | A02415 | 255 |
| A01125 | A02416 | 326 | A01125 | A02482 | 335 |
| A01125 | A02495 | 255 | A01125 | A02505 | 334 |
| A01125 | A02531 | 243 | A01125 | A02559 | 462 |
| A01125 | A02618 | 350 | A01125 | A02635 | 174 |
| A01125 | A02660 | 467 | A01125 | A02667 | 228 |
| A01125 | A02673 | 288 | A01125 | A02785 | 232 |
| A01125 | A02951 | 218 | A01125 | A03022 | 232 |
| A01125 | A03033 | 307 | A01125 | A03051 | 491 |
| A01125 | A03080 | 223 | A01125 | A03099 | 411 |
| A01125 | A03104 | 411 | A01125 | A03112 | 213 |
| A01125 | A03134 | 219 | A01125 | A03135 | 213 |
| A01125 | A03141 | 491 | A01125 | A03203 | 451 |
| A01125 | A03219 | 238 | A01125 | A03259 | 154 |
| A01125 | A03292 | 184 | A01125 | A03300 | 157 |
| A01125 | A03314 | 369 | A01125 | A03315 | 438 |
| A01125 | A03391 | 218 | A01125 | A03402 | 168 |
| A01125 | A03415 | 255 | A01125 | A03436 | 313 |
| A01125 | A03511 | 176 | A01125 | A03571 | 168 |
| A01125 | A03576 | 188 | A01125 | A03584 | 263 |
| A01125 | A03591 | 218 | A01125 | A03639 | 215 |
| A01125 | A03653 | 165 | A01125 | A03719 | 399 |
| A01125 | A03761 | 302 | A01125 | A03802 | 157 |
| A01125 | A03906 | 479 | A01125 | A03910 | 490 |

|        |        |     |        |        |     |
|--------|--------|-----|--------|--------|-----|
| A01125 | A03916 | 358 | A01125 | A03961 | 491 |
| A01125 | A04049 | 152 | A01125 | A04081 | 235 |
| A01125 | A04085 | 172 | A01125 | A04086 | 490 |
| A01125 | A04152 | 337 | A01125 | A04162 | 319 |
| A01125 | A04202 | 491 | A01125 | A04266 | 213 |
| A01125 | A04271 | 379 | A01125 | A04327 | 258 |
| A01125 | A04383 | 152 | A01125 | A04441 | 435 |
| A01125 | A04449 | 512 | A01125 | A04482 | 185 |
| A01125 | A04626 | 258 | A01125 | A04746 | 401 |
| A01125 | A04749 | 296 | A01125 | A04770 | 422 |
| A01125 | A04795 | 274 | A01125 | A05008 | 224 |
| A01125 | A05043 | 152 | A01125 | A05140 | 160 |
| A01125 | A05168 | 249 | A01125 | A05288 | 188 |
| A01125 | A05344 | 160 | A01125 | A05355 | 176 |
| A01125 | A05356 | 475 | A01125 | A05366 | 243 |
| A01125 | A05377 | 472 | A01125 | A05416 | 238 |
| A01125 | A05418 | 429 | A01125 | A05439 | 363 |
| A01125 | A05494 | 260 | A01125 | A05533 | 450 |
| A01125 | A05560 | 369 | A01125 | A05627 | 180 |
| A01125 | A05639 | 207 | A01125 | A05655 | 277 |
| A01125 | A05697 | 258 | A01125 | A05716 | 172 |
| A01125 | A05816 | 306 | A01125 | A05860 | 232 |
| A01125 | A05886 | 290 | A01125 | A05887 | 469 |
| A01125 | A06038 | 362 | A01125 | A06424 | 277 |
| A01125 | A06466 | 177 | A01125 | A06521 | 213 |
| A01125 | A06578 | 232 | A01125 | A06650 | 245 |
| A01125 | A06769 | 460 | A01125 | A07165 | 221 |
| A01125 | A07209 | 305 | A01125 | A07210 | 216 |
| A01125 | A07211 | 307 | A01125 | A07242 | 375 |
| A01125 | A07297 | 213 | A01125 | A07339 | 302 |
| A01125 | A07893 | 485 | A01125 | A07934 | 485 |
| A01125 | A08512 | 207 | A01125 | A08786 | 232 |
| A01125 | A08878 | 326 | A01125 | A09003 | 157 |
| A01125 | A09028 | 213 | A01125 | A09073 | 281 |
| A01125 | A09209 | 302 | A01125 | A09235 | 491 |
| A01125 | A09236 | 461 | A01125 | A09241 | 488 |
| A01125 | A09246 | 174 | A01125 | A09363 | 488 |
| A01125 | A09442 | 165 | A01125 | A09453 | 232 |
| A01125 | A09480 | 162 | A01125 | A09496 | 176 |
| A01125 | A09508 | 310 | A01125 | A09729 | 329 |
| A01125 | A09850 | 165 | A01125 | A10084 | 350 |
| A01125 | A10134 | 277 | A01125 | A10264 | 232 |
| A01125 | A10329 | 277 | A01125 | A10430 | 485 |
| A01125 | A10525 | 505 | A01125 | A10540 | 332 |
| A01125 | A11190 | 176 | A01125 | A11233 | 262 |
| A01125 | A11313 | 473 | A01125 | A11327 | 262 |

|        |        |     |        |        |     |
|--------|--------|-----|--------|--------|-----|
| A01125 | A11485 | 229 | A01125 | A11487 | 346 |
| A01125 | A11527 | 152 | A01125 | A11537 | 183 |
| A01125 | A11548 | 562 | A01125 | A11614 | 428 |
| A01125 | A11882 | 207 | A01125 | A11932 | 168 |
| A01125 | A11937 | 191 | A01125 | A11970 | 307 |
| A01125 | A11983 | 416 | A01125 | A12298 | 221 |
| A01125 | A12354 | 277 | A01125 | A12412 | 172 |
| A01125 | A12421 | 185 | A01125 | A12459 | 221 |
| A01125 | A12636 | 307 | A01125 | A12650 | 441 |
| A01125 | A12654 | 474 | A01125 | A12897 | 488 |
| A01125 | A13183 | 207 | A01125 | A13346 | 215 |
| A01125 | A13965 | 301 | A01125 | A13994 | 159 |
| A01125 | A14060 | 454 | A01125 | A14072 | 171 |
| A01125 | A14118 | 180 | A01125 | A14188 | 435 |
| A01125 | A14198 | 204 | A01125 | A14247 | 168 |
| A01125 | A14390 | 262 | A01125 | A14443 | 277 |
| A01125 | A14444 | 899 | A01125 | A14511 | 418 |
| A01125 | A14710 | 165 | A01125 | A15230 | 452 |
| A01125 | A15281 | 165 | A01125 | A15282 | 281 |
| A01125 | A15292 | 445 | A01125 | A15293 | 490 |
| A01125 | A15294 | 479 | A01125 | A15321 | 553 |
| A01125 | A15333 | 179 | A01125 | A15452 | 279 |
| A01125 | A15496 | 221 | A01125 | A15506 | 581 |
| A01125 | A15598 | 472 | A01125 | A15642 | 263 |
| A01125 | A15665 | 157 | A01125 | A15682 | 735 |
| A01125 | A15909 | 258 | A01125 | A15913 | 489 |
| A01125 | A16016 | 307 | A01125 | A16261 | 406 |
| A01125 | A16608 | 730 | A01125 | A16731 | 213 |
| A01125 | A16738 | 201 | A01125 | A16806 | 193 |
| A01125 | A16847 | 485 | A01125 | A16932 | 193 |
| A01125 | A16934 | 207 | A01125 | A17118 | 185 |
| A01126 | A01215 | 316 | A01126 | A01353 | 363 |
| A01126 | A03602 | 324 | A01126 | A05034 | 227 |
| A01126 | A05628 | 440 | A01127 | A01128 | 429 |
| A01127 | A01140 | 491 | A01127 | A01150 | 479 |
| A01127 | A01166 | 491 | A01127 | A01168 | 63  |
| A01127 | A01184 | 490 | A01127 | A01196 | 235 |
| A01127 | A01206 | 491 | A01127 | A01212 | 480 |
| A01127 | A01234 | 490 | A01127 | A01238 | 179 |
| A01127 | A01243 | 375 | A01127 | A01249 | 491 |
| A01127 | A01291 | 597 | A01127 | A01294 | 63  |
| A01127 | A01306 | 488 | A01127 | A01335 | 489 |
| A01127 | A01392 | 246 | A01127 | A01431 | 483 |
| A01127 | A01437 | 490 | A01127 | A01457 | 486 |
| A01127 | A01464 | 474 | A01127 | A01468 | 491 |
| A01127 | A01470 | 489 | A01127 | A01496 | 488 |

|        |        |     |        |        |     |
|--------|--------|-----|--------|--------|-----|
| A01127 | A01539 | 290 | A01127 | A01540 | 454 |
| A01127 | A01569 | 479 | A01127 | A01579 | 491 |
| A01127 | A01583 | 170 | A01127 | A01585 | 167 |
| A01127 | A01586 | 483 | A01127 | A01597 | 185 |
| A01127 | A01601 | 491 | A01127 | A01605 | 88  |
| A01127 | A01617 | 243 | A01127 | A01618 | 279 |
| A01127 | A01640 | 474 | A01127 | A01649 | 491 |
| A01127 | A01718 | 491 | A01127 | A01787 | 414 |
| A01127 | A02003 | 196 | A01127 | A02350 | 241 |
| A01127 | A02601 | 481 | A01127 | A03069 | 480 |
| A01127 | A03304 | 445 | A01127 | A03437 | 205 |
| A01127 | A03461 | 417 | A01127 | A03567 | 491 |
| A01127 | A03645 | 199 | A01127 | A03705 | 436 |
| A01127 | A03740 | 440 | A01127 | A03754 | 363 |
| A01127 | A03888 | 176 | A01127 | A03981 | 428 |
| A01127 | A04099 | 307 | A01127 | A04230 | 168 |
| A01127 | A04846 | 347 | A01127 | A04917 | 213 |
| A01127 | A05407 | 297 | A01127 | A05411 | 472 |
| A01127 | A05443 | 490 | A01127 | A05501 | 491 |
| A01127 | A05581 | 177 | A01127 | A05953 | 157 |
| A01127 | A06279 | 491 | A01127 | A06351 | 393 |
| A01127 | A06769 | 345 | A01127 | A06814 | 234 |
| A01127 | A06861 | 469 | A01127 | A06965 | 491 |
| A01127 | A07201 | 208 | A01127 | A07243 | 170 |
| A01127 | A07323 | 484 | A01127 | A07398 | 461 |
| A01127 | A07449 | 430 | A01127 | A07451 | 491 |
| A01127 | A07533 | 241 | A01127 | A08011 | 475 |
| A01127 | A08055 | 435 | A01127 | A08350 | 270 |
| A01127 | A08357 | 485 | A01127 | A08358 | 174 |
| A01127 | A08398 | 457 | A01127 | A08452 | 490 |
| A01127 | A08521 | 238 | A01127 | A08559 | 461 |
| A01127 | A08682 | 132 | A01127 | A08752 | 177 |
| A01127 | A08773 | 234 | A01127 | A08931 | 152 |
| A01127 | A08973 | 347 | A01127 | A09044 | 301 |
| A01127 | A09322 | 417 | A01127 | A09332 | 165 |
| A01127 | A09385 | 205 | A01127 | A09539 | 88  |
| A01127 | A09674 | 252 | A01127 | A09702 | 217 |
| A01127 | A09722 | 235 | A01127 | A09852 | 343 |
| A01127 | A10417 | 249 | A01127 | A10616 | 229 |
| A01127 | A10949 | 385 | A01127 | A11254 | 165 |
| A01127 | A11331 | 260 | A01127 | A11355 | 302 |
| A01127 | A11390 | 156 | A01127 | A11400 | 302 |
| A01127 | A11420 | 246 | A01127 | A11438 | 452 |
| A01127 | A11480 | 450 | A01127 | A11588 | 470 |
| A01127 | A11704 | 319 | A01127 | A12126 | 252 |
| A01127 | A12918 | 180 | A01127 | A13249 | 201 |

|        |        |     |        |        |     |
|--------|--------|-----|--------|--------|-----|
| A01127 | A13626 | 163 | A01127 | A13752 | 160 |
| A01127 | A13830 | 435 | A01127 | A13989 | 626 |
| A01127 | A13992 | 491 | A01127 | A14029 | 485 |
| A01127 | A14081 | 252 | A01127 | A14090 | 96  |
| A01127 | A14172 | 101 | A01127 | A14246 | 241 |
| A01127 | A14247 | 179 | A01127 | A14505 | 297 |
| A01127 | A14529 | 104 | A01127 | A14597 | 243 |
| A01127 | A15062 | 270 | A01127 | A15219 | 358 |
| A01127 | A15235 | 391 | A01127 | A15338 | 294 |
| A01127 | A15500 | 299 | A01127 | A15660 | 491 |
| A01127 | A15684 | 491 | A01127 | A15971 | 205 |
| A01127 | A15988 | 490 | A01127 | A16053 | 249 |
| A01127 | A16118 | 491 | A01128 | A01315 | 187 |
| A01128 | A01486 | 234 | A01128 | A01559 | 329 |
| A01128 | A01605 | 414 | A01128 | A01640 | 472 |
| A01128 | A01660 | 310 | A01128 | A01717 | 201 |
| A01128 | A01718 | 154 | A01128 | A02213 | 257 |
| A01128 | A02381 | 157 | A01128 | A02415 | 168 |
| A01128 | A03531 | 441 | A01128 | A03812 | 290 |
| A01128 | A04827 | 307 | A01128 | A05005 | 240 |
| A01128 | A05530 | 179 | A01128 | A05953 | 391 |
| A01128 | A06289 | 286 | A01128 | A06606 | 353 |
| A01128 | A06665 | 223 | A01128 | A06701 | 469 |
| A01128 | A06882 | 401 | A01128 | A08869 | 174 |
| A01128 | A09546 | 160 | A01128 | A09644 | 236 |
| A01128 | A09871 | 385 | A01128 | A10581 | 419 |
| A01128 | A10593 | 259 | A01128 | A10599 | 185 |
| A01128 | A10725 | 221 | A01128 | A10949 | 351 |
| A01128 | A11134 | 338 | A01128 | A12651 | 329 |
| A01128 | A14009 | 490 | A01128 | A14190 | 160 |
| A01128 | A14527 | 143 | A01128 | A14529 | 488 |
| A01128 | A15894 | 216 | A01129 | A01153 | 213 |
| A01129 | A01160 | 170 | A01129 | A01168 | 170 |
| A01129 | A01211 | 221 | A01129 | A01251 | 267 |
| A01129 | A01351 | 170 | A01129 | A01356 | 170 |
| A01129 | A01396 | 180 | A01129 | A01425 | 170 |
| A01129 | A01492 | 177 | A01129 | A01496 | 63  |
| A01129 | A01538 | 170 | A01129 | A01598 | 170 |
| A01129 | A01614 | 170 | A01129 | A01741 | 299 |
| A01129 | A02164 | 63  | A01129 | A02165 | 176 |
| A01129 | A02265 | 535 | A01129 | A02414 | 350 |
| A01129 | A02590 | 243 | A01129 | A03432 | 230 |
| A01129 | A03438 | 529 | A01129 | A03644 | 283 |
| A01129 | A03652 | 170 | A01129 | A03981 | 550 |
| A01129 | A06351 | 168 | A01129 | A06356 | 170 |
| A01129 | A06814 | 266 | A01129 | A06825 | 462 |

|        |        |     |        |        |     |
|--------|--------|-----|--------|--------|-----|
| A01129 | A06955 | 216 | A01129 | A07105 | 420 |
| A01129 | A07243 | 450 | A01129 | A07244 | 170 |
| A01129 | A07524 | 170 | A01129 | A07924 | 170 |
| A01129 | A08211 | 170 | A01129 | A08664 | 385 |
| A01129 | A08752 | 319 | A01129 | A09697 | 170 |
| A01129 | A09960 | 357 | A01129 | A10034 | 235 |
| A01129 | A10417 | 335 | A01129 | A10564 | 479 |
| A01129 | A11264 | 302 | A01129 | A11331 | 413 |
| A01129 | A11926 | 213 | A01129 | A11981 | 358 |
| A01129 | A12687 | 278 | A01129 | A13052 | 309 |
| A01129 | A13626 | 152 | A01129 | A13989 | 170 |
| A01129 | A15498 | 335 | A01129 | A15651 | 156 |
| A01129 | A16095 | 299 | A01130 | A01249 | 184 |
| A01130 | A01291 | 205 | A01130 | A01425 | 462 |
| A01130 | A02494 | 297 | A01130 | A02597 | 363 |
| A01130 | A02739 | 187 | A01130 | A03083 | 462 |
| A01130 | A03567 | 228 | A01130 | A05385 | 347 |
| A01130 | A09960 | 391 | A01130 | A10092 | 417 |
| A01130 | A13862 | 379 | A01130 | A13989 | 208 |
| A01130 | A14038 | 330 | A01130 | A16118 | 232 |
| A01131 | A01156 | 307 | A01131 | A01249 | 177 |
| A01131 | A01289 | 167 | A01131 | A01632 | 326 |
| A01131 | A02119 | 162 | A01131 | A02470 | 154 |
| A01131 | A02504 | 174 | A01131 | A03304 | 185 |
| A01131 | A04006 | 491 | A01131 | A06848 | 286 |
| A01131 | A07394 | 162 | A01131 | A11477 | 455 |
| A01131 | A12518 | 314 | A01132 | A01143 | 213 |
| A01132 | A01259 | 291 | A01132 | A01688 | 184 |
| A01132 | A02452 | 346 | A01132 | A03136 | 177 |
| A01132 | A06466 | 154 | A01132 | A11291 | 395 |
| A01132 | A14196 | 350 | A01132 | A15237 | 241 |
| A01132 | A15297 | 297 | A01132 | A15309 | 483 |
| A01133 | A01165 | 202 | A01133 | A01172 | 424 |
| A01133 | A01438 | 293 | A01133 | A01660 | 63  |
| A01133 | A03274 | 411 | A01133 | A05449 | 475 |
| A01133 | A05747 | 375 | A01133 | A06903 | 488 |
| A01133 | A09411 | 462 | A01133 | A09857 | 291 |
| A01133 | A10798 | 182 | A01133 | A11297 | 490 |
| A01133 | A11906 | 270 | A01133 | A12730 | 230 |
| A01133 | A14196 | 469 | A01133 | A14454 | 335 |
| A01133 | A14591 | 483 | A01133 | A14596 | 406 |
| A01133 | A14659 | 441 | A01133 | A15188 | 491 |
| A01133 | A15224 | 469 | A01133 | A15237 | 329 |
| A01133 | A15254 | 409 | A01133 | A15309 | 249 |
| A01133 | A15464 | 168 | A01133 | A15507 | 491 |
| A01133 | A15547 | 491 | A01133 | A15611 | 479 |



|        |        |     |        |        |     |
|--------|--------|-----|--------|--------|-----|
| A01133 | A15612 | 491 | A01133 | A15657 | 157 |
| A01133 | A15716 | 294 | A01133 | A15722 | 446 |
| A01133 | A15769 | 463 | A01133 | A16293 | 479 |
| A01133 | A16580 | 366 | A01133 | A16627 | 452 |
| A01133 | A16632 | 283 | A01133 | A16696 | 213 |
| A01133 | A16822 | 477 | A01133 | A16879 | 363 |
| A01133 | A16947 | 255 | A01134 | A01331 | 177 |
| A01134 | A01920 | 707 | A01134 | A04012 | 321 |
| A01134 | A04558 | 485 | A01134 | A07961 | 235 |
| A01134 | A12204 | 457 | A01134 | A14196 | 263 |
| A01134 | A15322 | 154 | A01135 | A01250 | 491 |
| A01135 | A01267 | 216 | A01135 | A01375 | 446 |
| A01135 | A01445 | 188 | A01135 | A01483 | 491 |
| A01135 | A01741 | 294 | A01135 | A01941 | 326 |
| A01135 | A02338 | 152 | A01135 | A03095 | 363 |
| A01135 | A04622 | 245 | A01135 | A07346 | 491 |
| A01135 | A08430 | 184 | A01135 | A08524 | 456 |
| A01135 | A08775 | 177 | A01135 | A10373 | 491 |
| A01135 | A12052 | 283 | A01135 | A13231 | 210 |
| A01135 | A14167 | 329 | A01135 | A14230 | 401 |
| A01135 | A14462 | 216 | A01135 | A14655 | 439 |
| A01135 | A14701 | 491 | A01135 | A14819 | 434 |
| A01135 | A15558 | 450 | A01135 | A16776 | 326 |
| A01136 | A01150 | 475 | A01136 | A01151 | 504 |
| A01136 | A01166 | 480 | A01136 | A01169 | 232 |
| A01136 | A01184 | 165 | A01136 | A01206 | 486 |
| A01136 | A01215 | 384 | A01136 | A01234 | 491 |
| A01136 | A01237 | 429 | A01136 | A01243 | 435 |
| A01136 | A01266 | 539 | A01136 | A01268 | 539 |
| A01136 | A01280 | 162 | A01136 | A01291 | 489 |
| A01136 | A01295 | 539 | A01136 | A01299 | 488 |
| A01136 | A01334 | 203 | A01136 | A01351 | 232 |
| A01136 | A01353 | 154 | A01136 | A01354 | 210 |
| A01136 | A01359 | 241 | A01136 | A01384 | 458 |
| A01136 | A01391 | 410 | A01136 | A01392 | 324 |
| A01136 | A01394 | 152 | A01136 | A01406 | 411 |
| A01136 | A01434 | 156 | A01136 | A01468 | 351 |
| A01136 | A01470 | 491 | A01136 | A01471 | 469 |
| A01136 | A01492 | 490 | A01136 | A01495 | 260 |
| A01136 | A01538 | 435 | A01136 | A01558 | 422 |
| A01136 | A01567 | 159 | A01136 | A01579 | 171 |
| A01136 | A01588 | 210 | A01136 | A01598 | 491 |
| A01136 | A01612 | 491 | A01136 | A01614 | 447 |
| A01136 | A01615 | 463 | A01136 | A01638 | 171 |
| A01136 | A01649 | 435 | A01136 | A01818 | 234 |
| A01136 | A01851 | 228 | A01136 | A02050 | 374 |

|        |        |     |        |        |     |
|--------|--------|-----|--------|--------|-----|
| A01136 | A02064 | 356 | A01136 | A02179 | 188 |
| A01136 | A02243 | 241 | A01136 | A02499 | 259 |
| A01136 | A02855 | 297 | A01136 | A02905 | 188 |
| A01136 | A03070 | 489 | A01136 | A03150 | 484 |
| A01136 | A03298 | 402 | A01136 | A03453 | 374 |
| A01136 | A03494 | 541 | A01136 | A03567 | 405 |
| A01136 | A03569 | 491 | A01136 | A03601 | 396 |
| A01136 | A03628 | 456 | A01136 | A03757 | 252 |
| A01136 | A03859 | 339 | A01136 | A04066 | 425 |
| A01136 | A04148 | 299 | A01136 | A04447 | 151 |
| A01136 | A04495 | 486 | A01136 | A04687 | 177 |
| A01136 | A04844 | 433 | A01136 | A05132 | 152 |
| A01136 | A05248 | 202 | A01136 | A05301 | 469 |
| A01136 | A05805 | 240 | A01136 | A06274 | 240 |
| A01136 | A06761 | 335 | A01136 | A07181 | 157 |
| A01136 | A07370 | 294 | A01136 | A07378 | 435 |
| A01136 | A07427 | 241 | A01136 | A07583 | 163 |
| A01136 | A07706 | 491 | A01136 | A07730 | 154 |
| A01136 | A07898 | 499 | A01136 | A08118 | 465 |
| A01136 | A08137 | 489 | A01136 | A08168 | 240 |
| A01136 | A08201 | 156 | A01136 | A08327 | 445 |
| A01136 | A08431 | 508 | A01136 | A08482 | 274 |
| A01136 | A08528 | 159 | A01136 | A08542 | 183 |
| A01136 | A08571 | 491 | A01136 | A08885 | 433 |
| A01136 | A08915 | 240 | A01136 | A09034 | 159 |
| A01136 | A09600 | 296 | A01136 | A09708 | 190 |
| A01136 | A09717 | 259 | A01136 | A09775 | 468 |
| A01136 | A10111 | 165 | A01136 | A10250 | 368 |
| A01136 | A10390 | 202 | A01136 | A10759 | 159 |
| A01136 | A10853 | 347 | A01136 | A10918 | 180 |
| A01136 | A11496 | 281 | A01136 | A11497 | 319 |
| A01136 | A11544 | 329 | A01136 | A11672 | 286 |
| A01136 | A11818 | 202 | A01136 | A11938 | 152 |
| A01136 | A11957 | 241 | A01136 | A12082 | 205 |
| A01136 | A12138 | 157 | A01136 | A12757 | 158 |
| A01136 | A13013 | 240 | A01136 | A13162 | 384 |
| A01136 | A13207 | 388 | A01136 | A13421 | 172 |
| A01136 | A13466 | 281 | A01136 | A13510 | 232 |
| A01136 | A13928 | 156 | A01136 | A13957 | 202 |
| A01136 | A13989 | 491 | A01136 | A14073 | 330 |
| A01136 | A14178 | 518 | A01136 | A14196 | 374 |
| A01136 | A14345 | 240 | A01136 | A14408 | 157 |
| A01136 | A14566 | 480 | A01136 | A14594 | 490 |
| A01136 | A14597 | 380 | A01136 | A14622 | 489 |
| A01136 | A14728 | 408 | A01136 | A14770 | 159 |
| A01136 | A14830 | 171 | A01136 | A14927 | 172 |

|        |        |     |        |        |     |
|--------|--------|-----|--------|--------|-----|
| A01136 | A14986 | 168 | A01136 | A15203 | 240 |
| A01136 | A15297 | 252 | A01136 | A15338 | 491 |
| A01136 | A15559 | 475 | A01136 | A15564 | 281 |
| A01136 | A15567 | 159 | A01136 | A15624 | 491 |
| A01136 | A15684 | 489 | A01136 | A15747 | 191 |
| A01136 | A15750 | 156 | A01136 | A15843 | 491 |
| A01136 | A16086 | 457 | A01136 | A16088 | 413 |
| A01136 | A16095 | 462 | A01136 | A16149 | 486 |
| A01136 | A16320 | 371 | A01136 | A16699 | 156 |
| A01136 | A16967 | 191 | A01136 | A17063 | 247 |
| A01136 | A17135 | 154 | A01137 | A01138 | 66  |
| A01137 | A01163 | 443 | A01137 | A01257 | 372 |
| A01137 | A01462 | 234 | A01137 | A01466 | 269 |
| A01137 | A01476 | 201 | A01137 | A01485 | 270 |
| A01137 | A01590 | 491 | A01137 | A01625 | 283 |
| A01137 | A01722 | 458 | A01137 | A01766 | 296 |
| A01137 | A01775 | 395 | A01137 | A01817 | 208 |
| A01137 | A01914 | 438 | A01137 | A01959 | 323 |
| A01137 | A02071 | 126 | A01137 | A02074 | 489 |
| A01137 | A02083 | 491 | A01137 | A02104 | 230 |
| A01137 | A02109 | 152 | A01137 | A02111 | 485 |
| A01137 | A02122 | 154 | A01137 | A02138 | 162 |
| A01137 | A02141 | 205 | A01137 | A02142 | 187 |
| A01137 | A02148 | 279 | A01137 | A02168 | 213 |
| A01137 | A02222 | 321 | A01137 | A02254 | 332 |
| A01137 | A02299 | 241 | A01137 | A02301 | 260 |
| A01137 | A02306 | 491 | A01137 | A02309 | 157 |
| A01137 | A02314 | 276 | A01137 | A02317 | 477 |
| A01137 | A02326 | 184 | A01137 | A02330 | 489 |
| A01137 | A02425 | 168 | A01137 | A02461 | 208 |
| A01137 | A02462 | 246 | A01137 | A02464 | 249 |
| A01137 | A02469 | 263 | A01137 | A02490 | 235 |
| A01137 | A02491 | 252 | A01137 | A02522 | 202 |
| A01137 | A02582 | 228 | A01137 | A02616 | 187 |
| A01137 | A02644 | 269 | A01137 | A02667 | 480 |
| A01137 | A02671 | 63  | A01137 | A02749 | 170 |
| A01137 | A02758 | 157 | A01137 | A02759 | 491 |
| A01137 | A02774 | 277 | A01137 | A02785 | 488 |
| A01137 | A02788 | 212 | A01137 | A02966 | 165 |
| A01137 | A03050 | 63  | A01137 | A03087 | 335 |
| A01137 | A03099 | 491 | A01137 | A03127 | 337 |
| A01137 | A03184 | 195 | A01137 | A03186 | 400 |
| A01137 | A03238 | 191 | A01137 | A03310 | 208 |
| A01137 | A03314 | 483 | A01137 | A03402 | 160 |
| A01137 | A03487 | 191 | A01137 | A03578 | 213 |
| A01137 | A03584 | 483 | A01137 | A03633 | 208 |

|        |        |     |        |        |     |
|--------|--------|-----|--------|--------|-----|
| A01137 | A03639 | 199 | A01137 | A03685 | 180 |
| A01137 | A03935 | 246 | A01137 | A03961 | 380 |
| A01137 | A03992 | 196 | A01137 | A04002 | 404 |
| A01137 | A04010 | 306 | A01137 | A04092 | 260 |
| A01137 | A04157 | 202 | A01137 | A04162 | 480 |
| A01137 | A04163 | 362 | A01137 | A04218 | 201 |
| A01137 | A04256 | 457 | A01137 | A04258 | 474 |
| A01137 | A04288 | 151 | A01137 | A04326 | 262 |
| A01137 | A04371 | 375 | A01137 | A04421 | 276 |
| A01137 | A04437 | 176 | A01137 | A04471 | 221 |
| A01137 | A04504 | 262 | A01137 | A04626 | 307 |
| A01137 | A04633 | 177 | A01137 | A04635 | 238 |
| A01137 | A04637 | 343 | A01137 | A04674 | 276 |
| A01137 | A04679 | 218 | A01137 | A04746 | 307 |
| A01137 | A04813 | 393 | A01137 | A04917 | 276 |
| A01137 | A04974 | 251 | A01137 | A04975 | 468 |
| A01137 | A04981 | 408 | A01137 | A05143 | 202 |
| A01137 | A05208 | 481 | A01137 | A05297 | 157 |
| A01137 | A05311 | 238 | A01137 | A05366 | 294 |
| A01137 | A05459 | 241 | A01137 | A05467 | 182 |
| A01137 | A05471 | 165 | A01137 | A05494 | 235 |
| A01137 | A05533 | 491 | A01137 | A05696 | 283 |
| A01137 | A05736 | 202 | A01137 | A05786 | 251 |
| A01137 | A06149 | 160 | A01137 | A06263 | 472 |
| A01137 | A06397 | 257 | A01137 | A06460 | 347 |
| A01137 | A06607 | 488 | A01137 | A06650 | 454 |
| A01137 | A06757 | 347 | A01137 | A06762 | 374 |
| A01137 | A06769 | 491 | A01137 | A06874 | 419 |
| A01137 | A06922 | 283 | A01137 | A06979 | 162 |
| A01137 | A07039 | 294 | A01137 | A07143 | 238 |
| A01137 | A07438 | 328 | A01137 | A07509 | 190 |
| A01137 | A08746 | 468 | A01137 | A09028 | 152 |
| A01137 | A09072 | 238 | A01137 | A09390 | 190 |
| A01137 | A09540 | 218 | A01137 | A10891 | 234 |
| A01137 | A12931 | 241 | A01137 | A13734 | 176 |
| A01137 | A14188 | 198 | A01137 | A14198 | 294 |
| A01137 | A14578 | 347 | A01137 | A15576 | 210 |
| A01137 | A15905 | 217 | A01137 | A15913 | 200 |
| A01137 | A16744 | 165 | A01137 | A17174 | 347 |
| A01137 | A17183 | 347 | A01138 | A01161 | 171 |
| A01138 | A01438 | 245 | A01138 | A01527 | 899 |
| A01138 | A01551 | 480 | A01138 | A01595 | 180 |
| A01138 | A01668 | 489 | A01138 | A01705 | 485 |
| A01138 | A01728 | 162 | A01138 | A01737 | 165 |
| A01138 | A01743 | 468 | A01138 | A01751 | 329 |
| A01138 | A01753 | 216 | A01138 | A01757 | 180 |

|        |        |     |        |        |     |
|--------|--------|-----|--------|--------|-----|
| A01138 | A01758 | 352 | A01138 | A01794 | 183 |
| A01138 | A01867 | 469 | A01138 | A01872 | 240 |
| A01138 | A01883 | 425 | A01138 | A01888 | 380 |
| A01138 | A01893 | 380 | A01138 | A01894 | 483 |
| A01138 | A01909 | 456 | A01138 | A02011 | 215 |
| A01138 | A02071 | 488 | A01138 | A02075 | 334 |
| A01138 | A02083 | 358 | A01138 | A02109 | 176 |
| A01138 | A02111 | 238 | A01138 | A02144 | 157 |
| A01138 | A02147 | 236 | A01138 | A02154 | 202 |
| A01138 | A02175 | 179 | A01138 | A02177 | 324 |
| A01138 | A02215 | 388 | A01138 | A02298 | 489 |
| A01138 | A02300 | 491 | A01138 | A02301 | 154 |
| A01138 | A02306 | 149 | A01138 | A02307 | 363 |
| A01138 | A02317 | 337 | A01138 | A02319 | 302 |
| A01138 | A02321 | 272 | A01138 | A02326 | 205 |
| A01138 | A02329 | 489 | A01138 | A02330 | 303 |
| A01138 | A02335 | 190 | A01138 | A02336 | 218 |
| A01138 | A02338 | 176 | A01138 | A02346 | 267 |
| A01138 | A02372 | 173 | A01138 | A02385 | 347 |
| A01138 | A02427 | 165 | A01138 | A02444 | 232 |
| A01138 | A02468 | 272 | A01138 | A02469 | 156 |
| A01138 | A02490 | 491 | A01138 | A02491 | 489 |
| A01138 | A02493 | 228 | A01138 | A02541 | 200 |
| A01138 | A02546 | 259 | A01138 | A02574 | 260 |
| A01138 | A02601 | 243 | A01138 | A02663 | 249 |
| A01138 | A02668 | 469 | A01138 | A02669 | 218 |
| A01138 | A02671 | 63  | A01138 | A02691 | 399 |
| A01138 | A02697 | 249 | A01138 | A02698 | 281 |
| A01138 | A02701 | 151 | A01138 | A02706 | 159 |
| A01138 | A02713 | 208 | A01138 | A02714 | 152 |
| A01138 | A02751 | 182 | A01138 | A02756 | 407 |
| A01138 | A02759 | 149 | A01138 | A02771 | 332 |
| A01138 | A02774 | 430 | A01138 | A02785 | 491 |
| A01138 | A02799 | 235 | A01138 | A02807 | 255 |
| A01138 | A02810 | 224 | A01138 | A02859 | 404 |
| A01138 | A02874 | 347 | A01138 | A02919 | 199 |
| A01138 | A02951 | 269 | A01138 | A03034 | 445 |
| A01138 | A03050 | 480 | A01138 | A03099 | 249 |
| A01138 | A03123 | 276 | A01138 | A03195 | 156 |
| A01138 | A03224 | 152 | A01138 | A03234 | 210 |
| A01138 | A03264 | 208 | A01138 | A03486 | 171 |
| A01138 | A03540 | 259 | A01138 | A03545 | 168 |
| A01138 | A03550 | 212 | A01138 | A03573 | 252 |
| A01138 | A03917 | 216 | A01138 | A03923 | 188 |
| A01138 | A04005 | 263 | A01138 | A04010 | 446 |
| A01138 | A04023 | 491 | A01138 | A04162 | 401 |

|        |        |     |        |        |     |
|--------|--------|-----|--------|--------|-----|
| A01138 | A04260 | 223 | A01138 | A04286 | 171 |
| A01138 | A04366 | 329 | A01138 | A04369 | 483 |
| A01138 | A04372 | 281 | A01138 | A04391 | 243 |
| A01138 | A04433 | 245 | A01138 | A04441 | 259 |
| A01138 | A04556 | 213 | A01138 | A04620 | 235 |
| A01138 | A04633 | 406 | A01138 | A04635 | 433 |
| A01138 | A04974 | 272 | A01138 | A04975 | 252 |
| A01138 | A05113 | 265 | A01138 | A05153 | 157 |
| A01138 | A05309 | 395 | A01138 | A05349 | 152 |
| A01138 | A05356 | 346 | A01138 | A05494 | 263 |
| A01138 | A05550 | 152 | A01138 | A05932 | 360 |
| A01138 | A05992 | 185 | A01138 | A06211 | 245 |
| A01138 | A06415 | 358 | A01138 | A06558 | 312 |
| A01138 | A06607 | 466 | A01138 | A06635 | 314 |
| A01138 | A06696 | 190 | A01138 | A06874 | 249 |
| A01138 | A06961 | 302 | A01138 | A07069 | 162 |
| A01138 | A07156 | 338 | A01138 | A07177 | 361 |
| A01138 | A07200 | 490 | A01138 | A07297 | 288 |
| A01138 | A07442 | 152 | A01138 | A07496 | 272 |
| A01138 | A08444 | 245 | A01138 | A11273 | 208 |
| A01138 | A13163 | 252 | A01138 | A13906 | 235 |
| A01138 | A14071 | 477 | A01138 | A14405 | 402 |
| A01138 | A14423 | 491 | A01138 | A14440 | 218 |
| A01138 | A14637 | 360 | A01138 | A14685 | 288 |
| A01138 | A15241 | 345 | A01138 | A15368 | 263 |
| A01138 | A16028 | 202 | A01138 | A16636 | 490 |
| A01138 | A17155 | 218 | A01139 | A01151 | 77  |
| A01139 | A01156 | 451 | A01139 | A01239 | 182 |
| A01139 | A01322 | 306 | A01139 | A01359 | 491 |
| A01139 | A01385 | 348 | A01139 | A01404 | 235 |
| A01139 | A01413 | 385 | A01139 | A01524 | 899 |
| A01139 | A01527 | 899 | A01139 | A01601 | 276 |
| A01139 | A01926 | 247 | A01139 | A03438 | 171 |
| A01139 | A03494 | 77  | A01139 | A03858 | 561 |
| A01139 | A03902 | 475 | A01139 | A04038 | 193 |
| A01139 | A04337 | 327 | A01139 | A04345 | 312 |
| A01139 | A04384 | 286 | A01139 | A04440 | 224 |
| A01139 | A04627 | 260 | A01139 | A05812 | 152 |
| A01139 | A06379 | 393 | A01139 | A07442 | 183 |
| A01139 | A07650 | 279 | A01139 | A08542 | 229 |
| A01139 | A08571 | 385 | A01139 | A08831 | 152 |
| A01139 | A08949 | 165 | A01139 | A09258 | 945 |
| A01139 | A09377 | 940 | A01139 | A09451 | 491 |
| A01139 | A09515 | 480 | A01139 | A09538 | 488 |
| A01139 | A09647 | 899 | A01139 | A09992 | 396 |
| A01139 | A10228 | 491 | A01139 | A10250 | 491 |

|        |        |     |        |        |     |
|--------|--------|-----|--------|--------|-----|
| A01139 | A10278 | 899 | A01139 | A10340 | 393 |
| A01139 | A10532 | 343 | A01139 | A10853 | 246 |
| A01139 | A11139 | 124 | A01139 | A11435 | 179 |
| A01139 | A11486 | 945 | A01139 | A11565 | 216 |
| A01139 | A13063 | 561 | A01139 | A13124 | 235 |
| A01139 | A13382 | 899 | A01139 | A14498 | 174 |
| A01139 | A15297 | 301 | A01139 | A15624 | 238 |
| A01139 | A15932 | 296 | A01139 | A15933 | 296 |
| A01140 | A01150 | 301 | A01140 | A01161 | 385 |
| A01140 | A01166 | 486 | A01140 | A01184 | 196 |
| A01140 | A01206 | 486 | A01140 | A01211 | 174 |
| A01140 | A01212 | 491 | A01140 | A01234 | 485 |
| A01140 | A01242 | 154 | A01140 | A01249 | 486 |
| A01140 | A01288 | 430 | A01140 | A01289 | 491 |
| A01140 | A01291 | 491 | A01140 | A01306 | 477 |
| A01140 | A01335 | 436 | A01140 | A01338 | 369 |
| A01140 | A01392 | 408 | A01140 | A01425 | 491 |
| A01140 | A01431 | 215 | A01140 | A01436 | 450 |
| A01140 | A01437 | 185 | A01140 | A01457 | 483 |
| A01140 | A01464 | 305 | A01140 | A01468 | 491 |
| A01140 | A01470 | 486 | A01140 | A01492 | 488 |
| A01140 | A01496 | 491 | A01140 | A01538 | 162 |
| A01140 | A01540 | 363 | A01140 | A01546 | 470 |
| A01140 | A01569 | 445 | A01140 | A01575 | 207 |
| A01140 | A01579 | 491 | A01140 | A01586 | 351 |
| A01140 | A01597 | 404 | A01140 | A01598 | 288 |
| A01140 | A01601 | 491 | A01140 | A01605 | 297 |
| A01140 | A01614 | 205 | A01140 | A01617 | 260 |
| A01140 | A01618 | 217 | A01140 | A01647 | 246 |
| A01140 | A01649 | 489 | A01140 | A01702 | 279 |
| A01140 | A01707 | 451 | A01140 | A01718 | 491 |
| A01140 | A01730 | 296 | A01140 | A02185 | 536 |
| A01140 | A02243 | 163 | A01140 | A02350 | 486 |
| A01140 | A02494 | 491 | A01140 | A02698 | 172 |
| A01140 | A02710 | 199 | A01140 | A02860 | 202 |
| A01140 | A03048 | 324 | A01140 | A03069 | 343 |
| A01140 | A03143 | 235 | A01140 | A03304 | 356 |
| A01140 | A03332 | 391 | A01140 | A03421 | 177 |
| A01140 | A03437 | 224 | A01140 | A03451 | 441 |
| A01140 | A03461 | 477 | A01140 | A03567 | 491 |
| A01140 | A03571 | 454 | A01140 | A03581 | 269 |
| A01140 | A03652 | 218 | A01140 | A03754 | 236 |
| A01140 | A03913 | 271 | A01140 | A03963 | 479 |
| A01140 | A03981 | 475 | A01140 | A04006 | 157 |
| A01140 | A04099 | 326 | A01140 | A04230 | 474 |
| A01140 | A04529 | 484 | A01140 | A04761 | 441 |

|        |        |     |        |        |     |
|--------|--------|-----|--------|--------|-----|
| A01140 | A04843 | 238 | A01140 | A04988 | 328 |
| A01140 | A05076 | 306 | A01140 | A05351 | 291 |
| A01140 | A05360 | 207 | A01140 | A05443 | 491 |
| A01140 | A05501 | 462 | A01140 | A05660 | 213 |
| A01140 | A05996 | 379 | A01140 | A06279 | 394 |
| A01140 | A06324 | 483 | A01140 | A06340 | 491 |
| A01140 | A06351 | 484 | A01140 | A06506 | 238 |
| A01140 | A06602 | 385 | A01140 | A06814 | 603 |
| A01140 | A06861 | 193 | A01140 | A06965 | 485 |
| A01140 | A06973 | 436 | A01140 | A06987 | 172 |
| A01140 | A07171 | 249 | A01140 | A07228 | 312 |
| A01140 | A07323 | 488 | A01140 | A07398 | 488 |
| A01140 | A07412 | 478 | A01140 | A07449 | 405 |
| A01140 | A07451 | 490 | A01140 | A07517 | 283 |
| A01140 | A07726 | 491 | A01140 | A07807 | 213 |
| A01140 | A08011 | 411 | A01140 | A08052 | 581 |
| A01140 | A08055 | 297 | A01140 | A08071 | 312 |
| A01140 | A08273 | 428 | A01140 | A08315 | 269 |
| A01140 | A08357 | 484 | A01140 | A08717 | 187 |
| A01140 | A08835 | 229 | A01140 | A08931 | 165 |
| A01140 | A08973 | 313 | A01140 | A09292 | 180 |
| A01140 | A09322 | 200 | A01140 | A09423 | 210 |
| A01140 | A09620 | 567 | A01140 | A09697 | 570 |
| A01140 | A09722 | 249 | A01140 | A09788 | 207 |
| A01140 | A10626 | 160 | A01140 | A10839 | 288 |
| A01140 | A10910 | 152 | A01140 | A11392 | 213 |
| A01140 | A11400 | 238 | A01140 | A11438 | 443 |
| A01140 | A11574 | 191 | A01140 | A11593 | 163 |
| A01140 | A11704 | 393 | A01140 | A12618 | 469 |
| A01140 | A13125 | 154 | A01140 | A13126 | 329 |
| A01140 | A13340 | 160 | A01140 | A13549 | 238 |
| A01140 | A13581 | 425 | A01140 | A13830 | 344 |
| A01140 | A13862 | 219 | A01140 | A13989 | 491 |
| A01140 | A13992 | 488 | A01140 | A14006 | 198 |
| A01140 | A14172 | 402 | A01140 | A14216 | 491 |
| A01140 | A14247 | 179 | A01140 | A15229 | 296 |
| A01140 | A15268 | 475 | A01140 | A15416 | 266 |
| A01140 | A15500 | 190 | A01140 | A15660 | 385 |
| A01140 | A15684 | 414 | A01140 | A15837 | 269 |
| A01140 | A15988 | 425 | A01140 | A16027 | 269 |
| A01140 | A16107 | 312 | A01140 | A16118 | 447 |
| A01140 | A16592 | 201 | A01140 | A16686 | 174 |
| A01140 | A16778 | 187 | A01141 | A01223 | 254 |
| A01141 | A01793 | 196 | A01141 | A02020 | 154 |
| A01141 | A02301 | 152 | A01141 | A02311 | 165 |
| A01141 | A02525 | 159 | A01141 | A03513 | 301 |



|        |        |     |        |        |     |
|--------|--------|-----|--------|--------|-----|
| A01141 | A04095 | 232 | A01141 | A04791 | 172 |
| A01141 | A04927 | 263 | A01141 | A05014 | 338 |
| A01141 | A05140 | 238 | A01141 | A05330 | 318 |
| A01141 | A05337 | 177 | A01141 | A05433 | 311 |
| A01141 | A05451 | 255 | A01141 | A05550 | 283 |
| A01141 | A05912 | 416 | A01141 | A06641 | 319 |
| A01141 | A06847 | 340 | A01141 | A06994 | 362 |
| A01141 | A07027 | 314 | A01141 | A07059 | 243 |
| A01141 | A07408 | 369 | A01141 | A07501 | 297 |
| A01141 | A07545 | 160 | A01141 | A07619 | 281 |
| A01141 | A07674 | 190 | A01141 | A07723 | 217 |
| A01141 | A08553 | 279 | A01141 | A09010 | 313 |
| A01141 | A11207 | 286 | A01141 | A13099 | 205 |
| A01141 | A14902 | 358 | A01141 | A15072 | 302 |
| A01142 | A01360 | 224 | A01142 | A01463 | 409 |
| A01142 | A01668 | 165 | A01142 | A01674 | 462 |
| A01142 | A01741 | 412 | A01142 | A02059 | 193 |
| A01142 | A02197 | 270 | A01142 | A02313 | 360 |
| A01142 | A02425 | 180 | A01142 | A02666 | 191 |
| A01142 | A02699 | 157 | A01142 | A02859 | 185 |
| A01142 | A03147 | 168 | A01142 | A03259 | 488 |
| A01142 | A03695 | 276 | A01142 | A03782 | 204 |
| A01142 | A03809 | 165 | A01142 | A04086 | 165 |
| A01142 | A04147 | 481 | A01142 | A04212 | 157 |
| A01142 | A04696 | 216 | A01142 | A04778 | 185 |
| A01142 | A05155 | 491 | A01142 | A05603 | 162 |
| A01142 | A06022 | 313 | A01142 | A06253 | 163 |
| A01142 | A06665 | 171 | A01142 | A06882 | 249 |
| A01142 | A07379 | 291 | A01142 | A07766 | 490 |
| A01142 | A07794 | 393 | A01142 | A07801 | 283 |
| A01142 | A09566 | 224 | A01142 | A09570 | 452 |
| A01142 | A09768 | 160 | A01142 | A09829 | 170 |
| A01142 | A09865 | 160 | A01142 | A10444 | 162 |
| A01142 | A10612 | 491 | A01142 | A11280 | 172 |
| A01142 | A11380 | 249 | A01142 | A11444 | 157 |
| A01142 | A13369 | 491 | A01142 | A13370 | 483 |
| A01142 | A13860 | 477 | A01142 | A14077 | 486 |
| A01142 | A14097 | 477 | A01142 | A14128 | 491 |
| A01142 | A14191 | 279 | A01142 | A14222 | 486 |
| A01142 | A14430 | 357 | A01142 | A14654 | 281 |
| A01142 | A14789 | 441 | A01142 | A14807 | 270 |
| A01142 | A14812 | 455 | A01142 | A14870 | 362 |
| A01142 | A14872 | 384 | A01142 | A15430 | 491 |
| A01142 | A15627 | 276 | A01142 | A15669 | 340 |
| A01142 | A15925 | 347 | A01142 | A15934 | 281 |
| A01142 | A16139 | 301 | A01143 | A01305 | 162 |

|        |        |     |        |        |     |
|--------|--------|-----|--------|--------|-----|
| A01143 | A01332 | 423 | A01143 | A01419 | 683 |
| A01143 | A01438 | 238 | A01143 | A01451 | 438 |
| A01143 | A01461 | 480 | A01143 | A01473 | 226 |
| A01143 | A01478 | 465 | A01143 | A01595 | 462 |
| A01143 | A01598 | 473 | A01143 | A01612 | 477 |
| A01143 | A01660 | 491 | A01143 | A01995 | 369 |
| A01143 | A03057 | 454 | A01143 | A03136 | 491 |
| A01143 | A03569 | 489 | A01143 | A03879 | 229 |
| A01143 | A03910 | 249 | A01143 | A04449 | 491 |
| A01143 | A04767 | 151 | A01143 | A04773 | 294 |
| A01143 | A05439 | 238 | A01143 | A06039 | 199 |
| A01143 | A06277 | 187 | A01143 | A06466 | 266 |
| A01143 | A06491 | 446 | A01143 | A06907 | 491 |
| A01143 | A07483 | 380 | A01143 | A07604 | 484 |
| A01143 | A08023 | 168 | A01143 | A08137 | 491 |
| A01143 | A08293 | 308 | A01143 | A08359 | 183 |
| A01143 | A08571 | 347 | A01143 | A08842 | 165 |
| A01143 | A08845 | 167 | A01143 | A08859 | 445 |
| A01143 | A08903 | 414 | A01143 | A08934 | 152 |
| A01143 | A09204 | 63  | A01143 | A09606 | 196 |
| A01143 | A09740 | 401 | A01143 | A09745 | 74  |
| A01143 | A09826 | 274 | A01143 | A10159 | 466 |
| A01143 | A11279 | 491 | A01143 | A11291 | 491 |
| A01143 | A11297 | 383 | A01143 | A11300 | 258 |
| A01143 | A11405 | 441 | A01143 | A11406 | 167 |
| A01143 | A11487 | 167 | A01143 | A11644 | 151 |
| A01143 | A11767 | 179 | A01143 | A11917 | 369 |
| A01143 | A12069 | 477 | A01143 | A12242 | 182 |
| A01143 | A12365 | 185 | A01143 | A12543 | 174 |
| A01143 | A12660 | 340 | A01143 | A12952 | 450 |
| A01143 | A13340 | 226 | A01143 | A13587 | 491 |
| A01143 | A13762 | 351 | A01143 | A13889 | 491 |
| A01143 | A13928 | 491 | A01143 | A14016 | 466 |
| A01143 | A14147 | 312 | A01143 | A14148 | 258 |
| A01143 | A14192 | 251 | A01143 | A14193 | 288 |
| A01143 | A14196 | 491 | A01143 | A14202 | 446 |
| A01143 | A14220 | 488 | A01143 | A14221 | 625 |
| A01143 | A14247 | 477 | A01143 | A14257 | 491 |
| A01143 | A14258 | 321 | A01143 | A14284 | 165 |
| A01143 | A14454 | 326 | A01143 | A14457 | 159 |
| A01143 | A14490 | 479 | A01143 | A14570 | 490 |
| A01143 | A14660 | 405 | A01143 | A14661 | 339 |
| A01143 | A14906 | 168 | A01143 | A14931 | 368 |
| A01143 | A15188 | 243 | A01143 | A15236 | 168 |
| A01143 | A15237 | 313 | A01143 | A15257 | 238 |
| A01143 | A15288 | 272 | A01143 | A15291 | 452 |

|        |        |     |        |        |     |
|--------|--------|-----|--------|--------|-----|
| A01143 | A15292 | 187 | A01143 | A15297 | 484 |
| A01143 | A15309 | 491 | A01143 | A15312 | 479 |
| A01143 | A15313 | 110 | A01143 | A15352 | 107 |
| A01143 | A15366 | 491 | A01143 | A15431 | 469 |
| A01143 | A15432 | 63  | A01143 | A15435 | 63  |
| A01143 | A15452 | 63  | A01143 | A15461 | 115 |
| A01143 | A15463 | 454 | A01143 | A15492 | 491 |
| A01143 | A15502 | 176 | A01143 | A15547 | 208 |
| A01143 | A15614 | 488 | A01143 | A15618 | 213 |
| A01143 | A15665 | 491 | A01143 | A15682 | 355 |
| A01143 | A15749 | 485 | A01143 | A15752 | 441 |
| A01143 | A15773 | 491 | A01143 | A15824 | 63  |
| A01143 | A15852 | 491 | A01143 | A15870 | 489 |
| A01143 | A15948 | 218 | A01143 | A16293 | 216 |
| A01143 | A16689 | 490 | A01143 | A16724 | 491 |
| A01143 | A16853 | 160 | A01143 | A16860 | 160 |
| A01143 | A16861 | 314 | A01143 | A16994 | 249 |
| A01143 | A17031 | 168 | A01143 | A17138 | 191 |
| A01144 | A01160 | 307 | A01144 | A01168 | 263 |
| A01144 | A01192 | 160 | A01144 | A01238 | 285 |
| A01144 | A01291 | 164 | A01144 | A01436 | 185 |
| A01144 | A01496 | 491 | A01144 | A01668 | 193 |
| A01144 | A02165 | 199 | A01144 | A02361 | 177 |
| A01144 | A03520 | 201 | A01144 | A03963 | 201 |
| A01144 | A03981 | 435 | A01144 | A04689 | 269 |
| A01144 | A05191 | 328 | A01144 | A06084 | 177 |
| A01144 | A06356 | 228 | A01144 | A06610 | 286 |
| A01144 | A06811 | 347 | A01144 | A07237 | 162 |
| A01144 | A08377 | 227 | A01144 | A08902 | 337 |
| A01144 | A09337 | 190 | A01144 | A09657 | 369 |
| A01144 | A10376 | 480 | A01144 | A10829 | 294 |
| A01144 | A11995 | 263 | A01144 | A13560 | 269 |
| A01144 | A13576 | 323 | A01144 | A13589 | 440 |
| A01144 | A13593 | 441 | A01144 | A13597 | 234 |
| A01144 | A13975 | 205 | A01144 | A14100 | 241 |
| A01144 | A14145 | 180 | A01144 | A14216 | 203 |
| A01144 | A14996 | 450 | A01144 | A15096 | 483 |
| A01144 | A15423 | 246 | A01145 | A02010 | 247 |
| A01145 | A03080 | 232 | A01145 | A07584 | 63  |
| A01145 | A11652 | 412 | A01145 | A13055 | 63  |
| A01145 | A16300 | 247 | A01146 | A01262 | 207 |
| A01146 | A01478 | 400 | A01146 | A01537 | 472 |
| A01146 | A01689 | 474 | A01146 | A02381 | 458 |
| A01146 | A04492 | 224 | A01146 | A04693 | 396 |
| A01146 | A05008 | 218 | A01146 | A05880 | 314 |
| A01146 | A05892 | 157 | A01146 | A06348 | 479 |

|        |        |     |        |        |     |
|--------|--------|-----|--------|--------|-----|
| A01146 | A06572 | 357 | A01146 | A07313 | 177 |
| A01146 | A07433 | 283 | A01146 | A07593 | 400 |
| A01146 | A08083 | 252 | A01146 | A08184 | 411 |
| A01146 | A08185 | 301 | A01146 | A08196 | 328 |
| A01146 | A08463 | 386 | A01146 | A08503 | 488 |
| A01146 | A08525 | 491 | A01146 | A08549 | 490 |
| A01146 | A08557 | 201 | A01146 | A08560 | 422 |
| A01146 | A08561 | 302 | A01146 | A08729 | 396 |
| A01146 | A08813 | 151 | A01146 | A08814 | 334 |
| A01146 | A08844 | 205 | A01146 | A08847 | 246 |
| A01146 | A08853 | 369 | A01146 | A08875 | 252 |
| A01146 | A09052 | 358 | A01146 | A09100 | 241 |
| A01146 | A09256 | 475 | A01146 | A09828 | 184 |
| A01146 | A10673 | 446 | A01146 | A10789 | 177 |
| A01146 | A11884 | 358 | A01146 | A12725 | 412 |
| A01146 | A12875 | 162 | A01146 | A14084 | 400 |
| A01146 | A14222 | 395 | A01146 | A14227 | 491 |
| A01146 | A14285 | 334 | A01146 | A14289 | 324 |
| A01146 | A15123 | 374 | A01146 | A15533 | 489 |
| A01146 | A16602 | 341 | A01147 | A01184 | 208 |
| A01147 | A01221 | 217 | A01147 | A01234 | 187 |
| A01147 | A01401 | 318 | A01147 | A04548 | 353 |
| A01147 | A06615 | 174 | A01147 | A09705 | 335 |
| A01147 | A10538 | 373 | A01147 | A12897 | 172 |
| A01148 | A01310 | 180 | A01148 | A01373 | 177 |
| A01148 | A01378 | 274 | A01148 | A01507 | 488 |
| A01148 | A01512 | 173 | A01148 | A01562 | 899 |
| A01148 | A01698 | 317 | A01148 | A01708 | 123 |
| A01148 | A01709 | 126 | A01148 | A01724 | 171 |
| A01148 | A01797 | 176 | A01148 | A01974 | 191 |
| A01148 | A02143 | 152 | A01148 | A02343 | 210 |
| A01148 | A02789 | 163 | A01148 | A03213 | 281 |
| A01148 | A03304 | 358 | A01148 | A03465 | 414 |
| A01148 | A03632 | 200 | A01148 | A03822 | 297 |
| A01148 | A03846 | 174 | A01148 | A04133 | 285 |
| A01148 | A04449 | 369 | A01148 | A04536 | 154 |
| A01148 | A04922 | 271 | A01148 | A05165 | 243 |
| A01148 | A05398 | 266 | A01148 | A05797 | 193 |
| A01148 | A06466 | 63  | A01148 | A06832 | 174 |
| A01148 | A06859 | 321 | A01148 | A08692 | 379 |
| A01148 | A09873 | 210 | A01148 | A10560 | 316 |
| A01148 | A10623 | 196 | A01148 | A10808 | 210 |
| A01148 | A10811 | 364 | A01148 | A11125 | 291 |
| A01148 | A11290 | 168 | A01148 | A11379 | 251 |
| A01148 | A11902 | 221 | A01148 | A12824 | 240 |
| A01148 | A13997 | 288 | A01148 | A14642 | 288 |

|        |        |     |        |        |     |
|--------|--------|-----|--------|--------|-----|
| A01148 | A14643 | 162 | A01149 | A01209 | 484 |
| A01149 | A01244 | 491 | A01149 | A01296 | 457 |
| A01149 | A01322 | 491 | A01149 | A01406 | 151 |
| A01149 | A01415 | 491 | A01149 | A01580 | 388 |
| A01149 | A01720 | 302 | A01149 | A01781 | 154 |
| A01149 | A02257 | 165 | A01149 | A02325 | 185 |
| A01149 | A02715 | 455 | A01149 | A02838 | 172 |
| A01149 | A03237 | 491 | A01149 | A03728 | 168 |
| A01149 | A04174 | 168 | A01149 | A04206 | 157 |
| A01149 | A04595 | 162 | A01149 | A04932 | 157 |
| A01149 | A05425 | 374 | A01149 | A05690 | 411 |
| A01149 | A06011 | 168 | A01149 | A06064 | 202 |
| A01149 | A06309 | 414 | A01149 | A06318 | 160 |
| A01149 | A06502 | 218 | A01149 | A06572 | 414 |
| A01149 | A06982 | 484 | A01149 | A07232 | 610 |
| A01149 | A07433 | 490 | A01149 | A07480 | 228 |
| A01149 | A07732 | 334 | A01149 | A08106 | 447 |
| A01149 | A08196 | 475 | A01149 | A08352 | 369 |
| A01149 | A08402 | 384 | A01149 | A08741 | 201 |
| A01149 | A08884 | 367 | A01149 | A09059 | 344 |
| A01149 | A09078 | 334 | A01149 | A09135 | 346 |
| A01149 | A09739 | 190 | A01149 | A09840 | 154 |
| A01149 | A10373 | 283 | A01149 | A12035 | 490 |
| A01149 | A12124 | 241 | A01149 | A13949 | 491 |
| A01149 | A13977 | 157 | A01149 | A14009 | 334 |
| A01149 | A14132 | 243 | A01149 | A14230 | 154 |
| A01149 | A14272 | 486 | A01149 | A14288 | 334 |
| A01149 | A14753 | 288 | A01149 | A14846 | 157 |
| A01149 | A15179 | 213 | A01149 | A15367 | 491 |
| A01149 | A15622 | 202 | A01149 | A15704 | 182 |
| A01149 | A16599 | 317 | A01149 | A16635 | 634 |
| A01149 | A17152 | 165 | A01150 | A01161 | 727 |
| A01150 | A01166 | 491 | A01150 | A01184 | 271 |
| A01150 | A01201 | 396 | A01150 | A01204 | 247 |
| A01150 | A01206 | 491 | A01150 | A01210 | 340 |
| A01150 | A01211 | 449 | A01150 | A01215 | 488 |
| A01150 | A01218 | 299 | A01150 | A01220 | 224 |
| A01150 | A01221 | 462 | A01150 | A01232 | 491 |
| A01150 | A01234 | 491 | A01150 | A01243 | 452 |
| A01150 | A01246 | 319 | A01150 | A01249 | 205 |
| A01150 | A01265 | 491 | A01150 | A01275 | 316 |
| A01150 | A01287 | 659 | A01150 | A01291 | 491 |
| A01150 | A01304 | 454 | A01150 | A01311 | 439 |
| A01150 | A01335 | 455 | A01150 | A01338 | 195 |
| A01150 | A01346 | 357 | A01150 | A01353 | 184 |
| A01150 | A01380 | 307 | A01150 | A01384 | 187 |

|        |        |     |        |        |     |
|--------|--------|-----|--------|--------|-----|
| A01150 | A01393 | 291 | A01150 | A01399 | 658 |
| A01150 | A01408 | 183 | A01150 | A01413 | 409 |
| A01150 | A01418 | 351 | A01150 | A01425 | 401 |
| A01150 | A01430 | 348 | A01150 | A01431 | 491 |
| A01150 | A01439 | 491 | A01150 | A01443 | 372 |
| A01150 | A01446 | 489 | A01150 | A01448 | 418 |
| A01150 | A01457 | 488 | A01150 | A01464 | 322 |
| A01150 | A01468 | 491 | A01150 | A01470 | 491 |
| A01150 | A01487 | 156 | A01150 | A01488 | 204 |
| A01150 | A01492 | 491 | A01150 | A01496 | 491 |
| A01150 | A01502 | 460 | A01150 | A01504 | 425 |
| A01150 | A01506 | 378 | A01150 | A01539 | 479 |
| A01150 | A01540 | 491 | A01150 | A01558 | 240 |
| A01150 | A01565 | 462 | A01150 | A01567 | 185 |
| A01150 | A01569 | 489 | A01150 | A01577 | 385 |
| A01150 | A01579 | 490 | A01150 | A01582 | 480 |
| A01150 | A01586 | 334 | A01150 | A01597 | 465 |
| A01150 | A01598 | 491 | A01150 | A01613 | 483 |
| A01150 | A01614 | 485 | A01150 | A01627 | 484 |
| A01150 | A01649 | 491 | A01150 | A01667 | 490 |
| A01150 | A01684 | 485 | A01150 | A01707 | 236 |
| A01150 | A01711 | 489 | A01150 | A01775 | 363 |
| A01150 | A01782 | 488 | A01150 | A01787 | 162 |
| A01150 | A01815 | 352 | A01150 | A01816 | 119 |
| A01150 | A01819 | 418 | A01150 | A01822 | 491 |
| A01150 | A01825 | 483 | A01150 | A01832 | 159 |
| A01150 | A01833 | 129 | A01150 | A01950 | 245 |
| A01150 | A02064 | 190 | A01150 | A02292 | 160 |
| A01150 | A02353 | 333 | A01150 | A02477 | 374 |
| A01150 | A02813 | 180 | A01150 | A02857 | 270 |
| A01150 | A02896 | 190 | A01150 | A02988 | 288 |
| A01150 | A02994 | 585 | A01150 | A02997 | 270 |
| A01150 | A03188 | 422 | A01150 | A03290 | 129 |
| A01150 | A03298 | 226 | A01150 | A03435 | 446 |
| A01150 | A03453 | 238 | A01150 | A03494 | 438 |
| A01150 | A03567 | 490 | A01150 | A03608 | 269 |
| A01150 | A03654 | 163 | A01150 | A03676 | 351 |
| A01150 | A03740 | 491 | A01150 | A03752 | 491 |
| A01150 | A03783 | 241 | A01150 | A03809 | 626 |
| A01150 | A03856 | 423 | A01150 | A03859 | 347 |
| A01150 | A03959 | 589 | A01150 | A03981 | 486 |
| A01150 | A04039 | 154 | A01150 | A04056 | 305 |
| A01150 | A05109 | 154 | A01150 | A05227 | 291 |
| A01150 | A05258 | 486 | A01150 | A05318 | 337 |
| A01150 | A05449 | 488 | A01150 | A05501 | 455 |
| A01150 | A05742 | 212 | A01150 | A05981 | 226 |

|        |        |     |        |        |     |
|--------|--------|-----|--------|--------|-----|
| A01150 | A06048 | 215 | A01150 | A06275 | 316 |
| A01150 | A06320 | 154 | A01150 | A06466 | 491 |
| A01150 | A06543 | 563 | A01150 | A06589 | 288 |
| A01150 | A06637 | 490 | A01150 | A06794 | 215 |
| A01150 | A06804 | 215 | A01150 | A06965 | 154 |
| A01150 | A07041 | 215 | A01150 | A07102 | 177 |
| A01150 | A07160 | 391 | A01150 | A07208 | 491 |
| A01150 | A07247 | 291 | A01150 | A07311 | 491 |
| A01150 | A07323 | 263 | A01150 | A07370 | 401 |
| A01150 | A07398 | 162 | A01150 | A07451 | 232 |
| A01150 | A07524 | 449 | A01150 | A07700 | 221 |
| A01150 | A07706 | 470 | A01150 | A07759 | 160 |
| A01150 | A07798 | 404 | A01150 | A07881 | 372 |
| A01150 | A07924 | 396 | A01150 | A08022 | 488 |
| A01150 | A08054 | 371 | A01150 | A08118 | 263 |
| A01150 | A08222 | 157 | A01150 | A08357 | 489 |
| A01150 | A08477 | 177 | A01150 | A08488 | 157 |
| A01150 | A08571 | 491 | A01150 | A08679 | 224 |
| A01150 | A08684 | 432 | A01150 | A08835 | 345 |
| A01150 | A08968 | 154 | A01150 | A08982 | 174 |
| A01150 | A09292 | 468 | A01150 | A09297 | 199 |
| A01150 | A09313 | 355 | A01150 | A09337 | 368 |
| A01150 | A09412 | 215 | A01150 | A09505 | 215 |
| A01150 | A09725 | 154 | A01150 | A09727 | 160 |
| A01150 | A09754 | 188 | A01150 | A09952 | 191 |
| A01150 | A10227 | 215 | A01150 | A10362 | 230 |
| A01150 | A10508 | 165 | A01150 | A10532 | 485 |
| A01150 | A10616 | 352 | A01150 | A10728 | 371 |
| A01150 | A10797 | 477 | A01150 | A10798 | 483 |
| A01150 | A10928 | 154 | A01150 | A10935 | 208 |
| A01150 | A11269 | 215 | A01150 | A11277 | 243 |
| A01150 | A11296 | 491 | A01150 | A11302 | 486 |
| A01150 | A11312 | 363 | A01150 | A11322 | 489 |
| A01150 | A11337 | 414 | A01150 | A11338 | 469 |
| A01150 | A11372 | 380 | A01150 | A11374 | 363 |
| A01150 | A11419 | 450 | A01150 | A11427 | 486 |
| A01150 | A11487 | 257 | A01150 | A11677 | 414 |
| A01150 | A11724 | 291 | A01150 | A11823 | 177 |
| A01150 | A11887 | 215 | A01150 | A11934 | 258 |
| A01150 | A11944 | 165 | A01150 | A11957 | 157 |
| A01150 | A11974 | 270 | A01150 | A12053 | 154 |
| A01150 | A12056 | 215 | A01150 | A12059 | 288 |
| A01150 | A12143 | 215 | A01150 | A12186 | 154 |
| A01150 | A12232 | 168 | A01150 | A12291 | 177 |
| A01150 | A12328 | 425 | A01150 | A12329 | 357 |
| A01150 | A12427 | 183 | A01150 | A12673 | 215 |

|        |        |     |        |        |     |
|--------|--------|-----|--------|--------|-----|
| A01150 | A12903 | 205 | A01150 | A13248 | 154 |
| A01150 | A13340 | 490 | A01150 | A13376 | 340 |
| A01150 | A13403 | 154 | A01150 | A13547 | 215 |
| A01150 | A13620 | 337 | A01150 | A13674 | 154 |
| A01150 | A13830 | 452 | A01150 | A13870 | 260 |
| A01150 | A13989 | 491 | A01150 | A14006 | 477 |
| A01150 | A14073 | 491 | A01150 | A14178 | 235 |
| A01150 | A14216 | 490 | A01150 | A14365 | 215 |
| A01150 | A14471 | 302 | A01150 | A14478 | 293 |
| A01150 | A14487 | 107 | A01150 | A14566 | 407 |
| A01150 | A14596 | 490 | A01150 | A14597 | 343 |
| A01150 | A14655 | 177 | A01150 | A14659 | 171 |
| A01150 | A14699 | 592 | A01150 | A14778 | 589 |
| A01150 | A14823 | 215 | A01150 | A14825 | 351 |
| A01150 | A14835 | 246 | A01150 | A14845 | 490 |
| A01150 | A14914 | 154 | A01150 | A14972 | 215 |
| A01150 | A15109 | 363 | A01150 | A15117 | 215 |
| A01150 | A15215 | 281 | A01150 | A15221 | 199 |
| A01150 | A15244 | 163 | A01150 | A15379 | 424 |
| A01150 | A15624 | 460 | A01150 | A15659 | 405 |
| A01150 | A15660 | 491 | A01150 | A15662 | 449 |
| A01150 | A15668 | 243 | A01150 | A15684 | 491 |
| A01150 | A15699 | 417 | A01150 | A15873 | 215 |
| A01150 | A15917 | 379 | A01150 | A15918 | 418 |
| A01150 | A15920 | 270 | A01150 | A15931 | 475 |
| A01150 | A15932 | 321 | A01150 | A15933 | 446 |
| A01150 | A15937 | 369 | A01150 | A16048 | 473 |
| A01150 | A16118 | 195 | A01150 | A16368 | 224 |
| A01150 | A16371 | 390 | A01150 | A16384 | 215 |
| A01150 | A16587 | 247 | A01150 | A16840 | 112 |
| A01150 | A16912 | 180 | A01150 | A17000 | 311 |
| A01151 | A01192 | 468 | A01151 | A01231 | 491 |
| A01151 | A01241 | 173 | A01151 | A01266 | 156 |
| A01151 | A01268 | 540 | A01151 | A01295 | 226 |
| A01151 | A01334 | 156 | A01151 | A01358 | 491 |
| A01151 | A01359 | 485 | A01151 | A01366 | 205 |
| A01151 | A01372 | 465 | A01151 | A01391 | 174 |
| A01151 | A01434 | 156 | A01151 | A01451 | 490 |
| A01151 | A01459 | 469 | A01151 | A01514 | 384 |
| A01151 | A01612 | 469 | A01151 | A01647 | 391 |
| A01151 | A01926 | 334 | A01151 | A01988 | 434 |
| A01151 | A02050 | 167 | A01151 | A02481 | 334 |
| A01151 | A03494 | 528 | A01151 | A03569 | 489 |
| A01151 | A03628 | 477 | A01151 | A03873 | 334 |
| A01151 | A04033 | 450 | A01151 | A04449 | 478 |
| A01151 | A05015 | 469 | A01151 | A05101 | 160 |



|        |        |     |        |        |     |
|--------|--------|-----|--------|--------|-----|
| A01151 | A05221 | 475 | A01151 | A06027 | 187 |
| A01151 | A07378 | 445 | A01151 | A07898 | 156 |
| A01151 | A08137 | 371 | A01151 | A08201 | 156 |
| A01151 | A08327 | 196 | A01151 | A08431 | 156 |
| A01151 | A08542 | 156 | A01151 | A08571 | 477 |
| A01151 | A08850 | 334 | A01151 | A09529 | 460 |
| A01151 | A09681 | 179 | A01151 | A10250 | 491 |
| A01151 | A11139 | 63  | A01151 | A11496 | 156 |
| A01151 | A11497 | 156 | A01151 | A11559 | 334 |
| A01151 | A11984 | 173 | A01151 | A12047 | 283 |
| A01151 | A12369 | 232 | A01151 | A12373 | 334 |
| A01151 | A12757 | 165 | A01151 | A13928 | 156 |
| A01151 | A14178 | 537 | A01151 | A14209 | 279 |
| A01151 | A14210 | 334 | A01151 | A14304 | 489 |
| A01151 | A14371 | 334 | A01151 | A14566 | 408 |
| A01151 | A14594 | 451 | A01151 | A14636 | 334 |
| A01151 | A15297 | 281 | A01151 | A15338 | 474 |
| A01151 | A15559 | 481 | A01151 | A15567 | 173 |
| A01151 | A15729 | 408 | A01151 | A16280 | 217 |
| A01151 | A16699 | 156 | A01151 | A17088 | 402 |
| A01152 | A01153 | 329 | A01152 | A01154 | 479 |
| A01152 | A01186 | 191 | A01152 | A01189 | 407 |
| A01152 | A01217 | 450 | A01152 | A01220 | 490 |
| A01152 | A01221 | 385 | A01152 | A01247 | 249 |
| A01152 | A01263 | 469 | A01152 | A01335 | 347 |
| A01152 | A01362 | 183 | A01152 | A01365 | 490 |
| A01152 | A01406 | 393 | A01152 | A01407 | 188 |
| A01152 | A01408 | 165 | A01152 | A01412 | 162 |
| A01152 | A01416 | 258 | A01152 | A01449 | 456 |
| A01152 | A01611 | 202 | A01152 | A02227 | 491 |
| A01152 | A03490 | 313 | A01152 | A03493 | 438 |
| A01152 | A04337 | 183 | A01152 | A04688 | 346 |
| A01152 | A05501 | 334 | A01152 | A05502 | 213 |
| A01152 | A05702 | 224 | A01152 | A07248 | 364 |
| A01152 | A08501 | 420 | A01152 | A08773 | 382 |
| A01152 | A09735 | 486 | A01152 | A10228 | 263 |
| A01152 | A11992 | 177 | A01152 | A12525 | 162 |
| A01152 | A12657 | 488 | A01152 | A12905 | 480 |
| A01152 | A14479 | 371 | A01152 | A14482 | 375 |
| A01152 | A14827 | 180 | A01152 | A15500 | 477 |
| A01152 | A15771 | 424 | A01152 | A17152 | 279 |
| A01153 | A01154 | 477 | A01153 | A01186 | 215 |
| A01153 | A01217 | 438 | A01153 | A01220 | 112 |
| A01153 | A01221 | 406 | A01153 | A01247 | 283 |
| A01153 | A01263 | 210 | A01153 | A01335 | 439 |
| A01153 | A01337 | 221 | A01153 | A01362 | 205 |

|        |        |     |        |        |     |
|--------|--------|-----|--------|--------|-----|
| A01153 | A01365 | 486 | A01153 | A01406 | 414 |
| A01153 | A01408 | 188 | A01153 | A01412 | 438 |
| A01153 | A01449 | 404 | A01153 | A01611 | 224 |
| A01153 | A02227 | 486 | A01153 | A02924 | 177 |
| A01153 | A03493 | 463 | A01153 | A03981 | 160 |
| A01153 | A04688 | 363 | A01153 | A04782 | 235 |
| A01153 | A05499 | 224 | A01153 | A05501 | 408 |
| A01153 | A05804 | 286 | A01153 | A07773 | 182 |
| A01153 | A08760 | 438 | A01153 | A08761 | 252 |
| A01153 | A09332 | 159 | A01153 | A09595 | 329 |
| A01153 | A09735 | 463 | A01153 | A09978 | 268 |
| A01153 | A11453 | 274 | A01153 | A11521 | 176 |
| A01153 | A11616 | 226 | A01153 | A11815 | 362 |
| A01153 | A12011 | 281 | A01153 | A12821 | 213 |
| A01153 | A14478 | 236 | A01153 | A14568 | 432 |
| A01153 | A14813 | 399 | A01153 | A15500 | 238 |
| A01153 | A15771 | 177 | A01153 | A17152 | 299 |
| A01154 | A01156 | 491 | A01154 | A01166 | 249 |
| A01154 | A01186 | 383 | A01154 | A01217 | 652 |
| A01154 | A01220 | 489 | A01154 | A01221 | 490 |
| A01154 | A01226 | 640 | A01154 | A01234 | 366 |
| A01154 | A01238 | 544 | A01154 | A01247 | 490 |
| A01154 | A01252 | 273 | A01154 | A01263 | 756 |
| A01154 | A01291 | 347 | A01154 | A01306 | 586 |
| A01154 | A01335 | 488 | A01154 | A01337 | 218 |
| A01154 | A01352 | 373 | A01154 | A01362 | 374 |
| A01154 | A01365 | 856 | A01154 | A01393 | 199 |
| A01154 | A01406 | 650 | A01154 | A01407 | 480 |
| A01154 | A01408 | 490 | A01154 | A01411 | 420 |
| A01154 | A01412 | 463 | A01154 | A01414 | 245 |
| A01154 | A01416 | 355 | A01154 | A01436 | 152 |
| A01154 | A01449 | 481 | A01154 | A01461 | 294 |
| A01154 | A01468 | 433 | A01154 | A01578 | 351 |
| A01154 | A01579 | 477 | A01154 | A01586 | 268 |
| A01154 | A01611 | 430 | A01154 | A01826 | 183 |
| A01154 | A01976 | 334 | A01154 | A01998 | 386 |
| A01154 | A01999 | 297 | A01154 | A02051 | 294 |
| A01154 | A02227 | 491 | A01154 | A02887 | 291 |
| A01154 | A02994 | 196 | A01154 | A03095 | 452 |
| A01154 | A03453 | 380 | A01154 | A03456 | 307 |
| A01154 | A03490 | 417 | A01154 | A03493 | 375 |
| A01154 | A03600 | 293 | A01154 | A03601 | 420 |
| A01154 | A03881 | 254 | A01154 | A03901 | 443 |
| A01154 | A04080 | 184 | A01154 | A04101 | 171 |
| A01154 | A04688 | 340 | A01154 | A04689 | 246 |
| A01154 | A04846 | 163 | A01154 | A05210 | 163 |

|        |        |     |        |        |     |
|--------|--------|-----|--------|--------|-----|
| A01154 | A05258 | 213 | A01154 | A05499 | 224 |
| A01154 | A05501 | 486 | A01154 | A05804 | 455 |
| A01154 | A05930 | 303 | A01154 | A06048 | 330 |
| A01154 | A06064 | 223 | A01154 | A06081 | 330 |
| A01154 | A06105 | 296 | A01154 | A06564 | 364 |
| A01154 | A06589 | 286 | A01154 | A06861 | 266 |
| A01154 | A06975 | 202 | A01154 | A07349 | 286 |
| A01154 | A07473 | 191 | A01154 | A07581 | 191 |
| A01154 | A08011 | 157 | A01154 | A08131 | 271 |
| A01154 | A08144 | 577 | A01154 | A08277 | 174 |
| A01154 | A08419 | 167 | A01154 | A08501 | 334 |
| A01154 | A08543 | 475 | A01154 | A08556 | 490 |
| A01154 | A08761 | 260 | A01154 | A08762 | 469 |
| A01154 | A08932 | 188 | A01154 | A09735 | 490 |
| A01154 | A09862 | 424 | A01154 | A10116 | 205 |
| A01154 | A10322 | 443 | A01154 | A10498 | 205 |
| A01154 | A11593 | 401 | A01154 | A11688 | 179 |
| A01154 | A12011 | 297 | A01154 | A12477 | 278 |
| A01154 | A12821 | 208 | A01154 | A12912 | 210 |
| A01154 | A13472 | 286 | A01154 | A13830 | 449 |
| A01154 | A14449 | 656 | A01154 | A14479 | 486 |
| A01154 | A14482 | 401 | A01154 | A14568 | 486 |
| A01154 | A14813 | 310 | A01154 | A15498 | 468 |
| A01154 | A15500 | 486 | A01154 | A15624 | 568 |
| A01154 | A15684 | 341 | A01154 | A15771 | 491 |
| A01154 | A15932 | 600 | A01154 | A16029 | 330 |
| A01154 | A16035 | 213 | A01154 | A17152 | 185 |
| A01155 | A01161 | 457 | A01155 | A01210 | 384 |
| A01155 | A01336 | 202 | A01155 | A01413 | 445 |
| A01155 | A01435 | 428 | A01155 | A01540 | 385 |
| A01155 | A01639 | 366 | A01155 | A01643 | 373 |
| A01155 | A02028 | 168 | A01155 | A02040 | 369 |
| A01155 | A02150 | 335 | A01155 | A03798 | 193 |
| A01155 | A03981 | 63  | A01155 | A05468 | 307 |
| A01155 | A09353 | 425 | A01155 | A09709 | 462 |
| A01155 | A10598 | 235 | A01155 | A11313 | 179 |
| A01155 | A11384 | 279 | A01155 | A11519 | 362 |
| A01156 | A01161 | 580 | A01156 | A01169 | 489 |
| A01156 | A01211 | 329 | A01156 | A01214 | 431 |
| A01156 | A01215 | 208 | A01156 | A01226 | 435 |
| A01156 | A01234 | 722 | A01156 | A01245 | 401 |
| A01156 | A01263 | 391 | A01156 | A01278 | 490 |
| A01156 | A01326 | 485 | A01156 | A01329 | 223 |
| A01156 | A01352 | 167 | A01156 | A01359 | 424 |
| A01156 | A01365 | 490 | A01156 | A01385 | 491 |
| A01156 | A01485 | 201 | A01156 | A01497 | 462 |

|        |        |     |        |        |     |
|--------|--------|-----|--------|--------|-----|
| A01156 | A01502 | 332 | A01156 | A01582 | 491 |
| A01156 | A01585 | 486 | A01156 | A01627 | 428 |
| A01156 | A01632 | 249 | A01156 | A01640 | 177 |
| A01156 | A01711 | 369 | A01156 | A01741 | 467 |
| A01156 | A01820 | 271 | A01156 | A01832 | 245 |
| A01156 | A01910 | 208 | A01156 | A02188 | 341 |
| A01156 | A02203 | 270 | A01156 | A02221 | 434 |
| A01156 | A02485 | 163 | A01156 | A02511 | 157 |
| A01156 | A02549 | 177 | A01156 | A02594 | 257 |
| A01156 | A02598 | 319 | A01156 | A03010 | 274 |
| A01156 | A03233 | 235 | A01156 | A03259 | 157 |
| A01156 | A03304 | 401 | A01156 | A03313 | 130 |
| A01156 | A03334 | 491 | A01156 | A03562 | 160 |
| A01156 | A03676 | 366 | A01156 | A03734 | 179 |
| A01156 | A03769 | 299 | A01156 | A03931 | 408 |
| A01156 | A03938 | 318 | A01156 | A03992 | 474 |
| A01156 | A04177 | 375 | A01156 | A04337 | 491 |
| A01156 | A04410 | 210 | A01156 | A04491 | 252 |
| A01156 | A04520 | 221 | A01156 | A04647 | 154 |
| A01156 | A04668 | 271 | A01156 | A04710 | 152 |
| A01156 | A04824 | 172 | A01156 | A04987 | 191 |
| A01156 | A04999 | 191 | A01156 | A05095 | 463 |
| A01156 | A05266 | 235 | A01156 | A05356 | 265 |
| A01156 | A05487 | 176 | A01156 | A05491 | 208 |
| A01156 | A05697 | 271 | A01156 | A05763 | 271 |
| A01156 | A05772 | 180 | A01156 | A05777 | 232 |
| A01156 | A06038 | 154 | A01156 | A06100 | 368 |
| A01156 | A06400 | 212 | A01156 | A06556 | 318 |
| A01156 | A06574 | 313 | A01156 | A06624 | 157 |
| A01156 | A06625 | 180 | A01156 | A06731 | 226 |
| A01156 | A06871 | 385 | A01156 | A06872 | 318 |
| A01156 | A07014 | 491 | A01156 | A07046 | 294 |
| A01156 | A07276 | 163 | A01156 | A07282 | 332 |
| A01156 | A07442 | 481 | A01156 | A07799 | 177 |
| A01156 | A08012 | 208 | A01156 | A08064 | 457 |
| A01156 | A08144 | 732 | A01156 | A08172 | 154 |
| A01156 | A08309 | 180 | A01156 | A08685 | 235 |
| A01156 | A08686 | 174 | A01156 | A09580 | 199 |
| A01156 | A10186 | 458 | A01156 | A10250 | 165 |
| A01156 | A10668 | 330 | A01156 | A11230 | 318 |
| A01156 | A11352 | 257 | A01156 | A11378 | 479 |
| A01156 | A11467 | 475 | A01156 | A11573 | 177 |
| A01156 | A11761 | 288 | A01156 | A11830 | 163 |
| A01156 | A11983 | 282 | A01156 | A12453 | 318 |
| A01156 | A12462 | 288 | A01156 | A12824 | 440 |
| A01156 | A12908 | 187 | A01156 | A13369 | 449 |

|        |        |     |        |        |     |
|--------|--------|-----|--------|--------|-----|
| A01156 | A13618 | 221 | A01156 | A13760 | 318 |
| A01156 | A14272 | 483 | A01156 | A14381 | 419 |
| A01156 | A14418 | 195 | A01156 | A14449 | 747 |
| A01156 | A14838 | 154 | A01156 | A14936 | 485 |
| A01156 | A15297 | 163 | A01156 | A15322 | 260 |
| A01156 | A15422 | 321 | A01156 | A15498 | 459 |
| A01156 | A15624 | 808 | A01156 | A15651 | 500 |
| A01156 | A15652 | 485 | A01156 | A15661 | 485 |
| A01156 | A15662 | 485 | A01156 | A15684 | 365 |
| A01156 | A15917 | 157 | A01156 | A15932 | 795 |
| A01156 | A15933 | 369 | A01156 | A16055 | 154 |
| A01156 | A16203 | 246 | A01156 | A16862 | 235 |
| A01157 | A01531 | 288 | A01157 | A01668 | 224 |
| A01157 | A01730 | 221 | A01157 | A01822 | 346 |
| A01157 | A02039 | 152 | A01157 | A02049 | 207 |
| A01157 | A02121 | 154 | A01157 | A02178 | 477 |
| A01157 | A02180 | 268 | A01157 | A02187 | 196 |
| A01157 | A02192 | 177 | A01157 | A02225 | 171 |
| A01157 | A02227 | 413 | A01157 | A02304 | 474 |
| A01157 | A02322 | 229 | A01157 | A02441 | 232 |
| A01157 | A02482 | 286 | A01157 | A02502 | 489 |
| A01157 | A02531 | 185 | A01157 | A02532 | 345 |
| A01157 | A02673 | 279 | A01157 | A02676 | 227 |
| A01157 | A02761 | 348 | A01157 | A02981 | 247 |
| A01157 | A03072 | 271 | A01157 | A03080 | 430 |
| A01157 | A03190 | 313 | A01157 | A03203 | 224 |
| A01157 | A03209 | 361 | A01157 | A03226 | 221 |
| A01157 | A03377 | 419 | A01157 | A03390 | 433 |
| A01157 | A03391 | 299 | A01157 | A03401 | 480 |
| A01157 | A03402 | 173 | A01157 | A03403 | 348 |
| A01157 | A03434 | 374 | A01157 | A03436 | 490 |
| A01157 | A03466 | 277 | A01157 | A03587 | 172 |
| A01157 | A03777 | 219 | A01157 | A03960 | 229 |
| A01157 | A04079 | 391 | A01157 | A04080 | 240 |
| A01157 | A04202 | 396 | A01157 | A04314 | 173 |
| A01157 | A04423 | 202 | A01157 | A04424 | 165 |
| A01157 | A04449 | 403 | A01157 | A04818 | 162 |
| A01157 | A04886 | 291 | A01157 | A04905 | 196 |
| A01157 | A04949 | 601 | A01157 | A05018 | 313 |
| A01157 | A05052 | 475 | A01157 | A05418 | 564 |
| A01157 | A05546 | 468 | A01157 | A05596 | 221 |
| A01157 | A05716 | 240 | A01157 | A06220 | 352 |
| A01157 | A06554 | 561 | A01157 | A06599 | 534 |
| A01157 | A06607 | 243 | A01157 | A07311 | 176 |
| A01157 | A07315 | 283 | A01157 | A07706 | 318 |
| A01157 | A08944 | 429 | A01157 | A09026 | 215 |

|        |        |     |        |        |     |
|--------|--------|-----|--------|--------|-----|
| A01157 | A09073 | 443 | A01157 | A09131 | 439 |
| A01157 | A09141 | 195 | A01157 | A09733 | 346 |
| A01157 | A09997 | 480 | A01157 | A10041 | 419 |
| A01157 | A10042 | 352 | A01157 | A10072 | 454 |
| A01157 | A10081 | 251 | A01157 | A10332 | 396 |
| A01157 | A10960 | 491 | A01157 | A11394 | 363 |
| A01157 | A11531 | 405 | A01157 | A11757 | 475 |
| A01157 | A11760 | 489 | A01157 | A12164 | 329 |
| A01157 | A12385 | 352 | A01157 | A12425 | 352 |
| A01157 | A12444 | 329 | A01157 | A12466 | 352 |
| A01157 | A12488 | 352 | A01157 | A12490 | 352 |
| A01157 | A12654 | 224 | A01157 | A12880 | 277 |
| A01157 | A12934 | 260 | A01157 | A13414 | 302 |
| A01157 | A13983 | 171 | A01157 | A14032 | 224 |
| A01157 | A14247 | 179 | A01157 | A14402 | 171 |
| A01157 | A14494 | 224 | A01157 | A14644 | 288 |
| A01157 | A14969 | 198 | A01157 | A15149 | 352 |
| A01157 | A15292 | 210 | A01157 | A15325 | 193 |
| A01157 | A15522 | 232 | A01157 | A16911 | 406 |
| A01158 | A01169 | 368 | A01158 | A01340 | 251 |
| A01158 | A01602 | 184 | A01158 | A01971 | 391 |
| A01158 | A02234 | 266 | A01158 | A02397 | 201 |
| A01158 | A03219 | 184 | A01158 | A03719 | 184 |
| A01158 | A03914 | 174 | A01158 | A04351 | 360 |
| A01158 | A05023 | 183 | A01158 | A05048 | 332 |
| A01158 | A05153 | 196 | A01158 | A05570 | 201 |
| A01158 | A06067 | 276 | A01158 | A06578 | 184 |
| A01158 | A07598 | 184 | A01158 | A09351 | 534 |
| A01158 | A09557 | 355 | A01158 | A09560 | 317 |
| A01158 | A09633 | 163 | A01158 | A11558 | 184 |
| A01158 | A11851 | 184 | A01158 | A11914 | 241 |
| A01158 | A13356 | 184 | A01158 | A14210 | 184 |
| A01158 | A15321 | 684 | A01158 | A16152 | 184 |
| A01159 | A01221 | 663 | A01159 | A01243 | 573 |
| A01159 | A01278 | 255 | A01159 | A01352 | 374 |
| A01159 | A01356 | 218 | A01159 | A01368 | 396 |
| A01159 | A01412 | 425 | A01159 | A01418 | 443 |
| A01159 | A01598 | 291 | A01159 | A01702 | 296 |
| A01159 | A01976 | 191 | A01159 | A02164 | 317 |
| A01159 | A02195 | 307 | A01159 | A02203 | 267 |
| A01159 | A02454 | 270 | A01159 | A02601 | 182 |
| A01159 | A03228 | 216 | A01159 | A03556 | 217 |
| A01159 | A03617 | 217 | A01159 | A05605 | 217 |
| A01159 | A05646 | 434 | A01159 | A06122 | 424 |
| A01159 | A06369 | 656 | A01159 | A06436 | 301 |
| A01159 | A06825 | 483 | A01159 | A06832 | 560 |

|        |        |     |        |        |     |
|--------|--------|-----|--------|--------|-----|
| A01159 | A07312 | 439 | A01159 | A07349 | 317 |
| A01159 | A07583 | 180 | A01159 | A08183 | 260 |
| A01159 | A09673 | 217 | A01159 | A11394 | 307 |
| A01159 | A14087 | 238 | A01159 | A14088 | 217 |
| A01159 | A14188 | 470 | A01159 | A14596 | 425 |
| A01159 | A14701 | 472 | A01159 | A15377 | 527 |
| A01159 | A15437 | 283 | A01159 | A15543 | 217 |
| A01159 | A15624 | 224 | A01159 | A15724 | 217 |
| A01159 | A15932 | 274 | A01159 | A16149 | 256 |
| A01159 | A16664 | 217 | A01160 | A01168 | 697 |
| A01160 | A01294 | 450 | A01160 | A01351 | 170 |
| A01160 | A01356 | 170 | A01160 | A01407 | 176 |
| A01160 | A01412 | 151 | A01160 | A01425 | 170 |
| A01160 | A01492 | 170 | A01160 | A01496 | 486 |
| A01160 | A01538 | 170 | A01160 | A01598 | 170 |
| A01160 | A01614 | 170 | A01160 | A01711 | 321 |
| A01160 | A01904 | 353 | A01160 | A02164 | 63  |
| A01160 | A02165 | 700 | A01160 | A02265 | 170 |
| A01160 | A02527 | 363 | A01160 | A02725 | 319 |
| A01160 | A02814 | 160 | A01160 | A03438 | 521 |
| A01160 | A03447 | 236 | A01160 | A03461 | 210 |
| A01160 | A03527 | 281 | A01160 | A03609 | 249 |
| A01160 | A03615 | 404 | A01160 | A03652 | 542 |
| A01160 | A03671 | 409 | A01160 | A03676 | 174 |
| A01160 | A03782 | 450 | A01160 | A03981 | 518 |
| A01160 | A04688 | 205 | A01160 | A05566 | 324 |
| A01160 | A06084 | 425 | A01160 | A06356 | 464 |
| A01160 | A06825 | 466 | A01160 | A07237 | 224 |
| A01160 | A07244 | 170 | A01160 | A07245 | 294 |
| A01160 | A07524 | 170 | A01160 | A07924 | 170 |
| A01160 | A08211 | 170 | A01160 | A09697 | 170 |
| A01160 | A10034 | 207 | A01160 | A11427 | 160 |
| A01160 | A11438 | 157 | A01160 | A13052 | 525 |
| A01160 | A13752 | 285 | A01160 | A13989 | 170 |
| A01160 | A14216 | 283 | A01160 | A14843 | 404 |
| A01160 | A15666 | 404 | A01160 | A16681 | 404 |
| A01161 | A01162 | 451 | A01161 | A01168 | 310 |
| A01161 | A01169 | 486 | A01161 | A01188 | 193 |
| A01161 | A01192 | 330 | A01161 | A01204 | 260 |
| A01161 | A01209 | 207 | A01161 | A01210 | 609 |
| A01161 | A01211 | 491 | A01161 | A01212 | 343 |
| A01161 | A01214 | 451 | A01161 | A01215 | 218 |
| A01161 | A01218 | 341 | A01161 | A01221 | 456 |
| A01161 | A01232 | 432 | A01161 | A01234 | 419 |
| A01161 | A01235 | 246 | A01161 | A01245 | 319 |
| A01161 | A01260 | 286 | A01161 | A01261 | 160 |

|        |        |     |        |        |     |
|--------|--------|-----|--------|--------|-----|
| A01161 | A01275 | 486 | A01161 | A01276 | 473 |
| A01161 | A01278 | 601 | A01161 | A01287 | 592 |
| A01161 | A01310 | 428 | A01161 | A01317 | 213 |
| A01161 | A01320 | 243 | A01161 | A01326 | 461 |
| A01161 | A01329 | 205 | A01161 | A01331 | 157 |
| A01161 | A01336 | 486 | A01161 | A01343 | 660 |
| A01161 | A01346 | 340 | A01161 | A01359 | 338 |
| A01161 | A01365 | 388 | A01161 | A01380 | 469 |
| A01161 | A01385 | 545 | A01161 | A01399 | 516 |
| A01161 | A01400 | 154 | A01161 | A01412 | 163 |
| A01161 | A01413 | 491 | A01161 | A01419 | 188 |
| A01161 | A01431 | 380 | A01161 | A01435 | 609 |
| A01161 | A01438 | 489 | A01161 | A01443 | 247 |
| A01161 | A01447 | 491 | A01161 | A01448 | 230 |
| A01161 | A01451 | 531 | A01161 | A01468 | 157 |
| A01161 | A01481 | 491 | A01161 | A01485 | 391 |
| A01161 | A01496 | 452 | A01161 | A01500 | 538 |
| A01161 | A01502 | 489 | A01161 | A01504 | 457 |
| A01161 | A01510 | 185 | A01161 | A01515 | 235 |
| A01161 | A01520 | 224 | A01161 | A01524 | 576 |
| A01161 | A01526 | 288 | A01161 | A01530 | 400 |
| A01161 | A01539 | 388 | A01161 | A01540 | 491 |
| A01161 | A01542 | 353 | A01161 | A01543 | 491 |
| A01161 | A01551 | 491 | A01161 | A01556 | 491 |
| A01161 | A01559 | 485 | A01161 | A01566 | 227 |
| A01161 | A01567 | 172 | A01161 | A01573 | 568 |
| A01161 | A01578 | 582 | A01161 | A01582 | 491 |
| A01161 | A01585 | 528 | A01161 | A01591 | 193 |
| A01161 | A01593 | 547 | A01161 | A01595 | 170 |
| A01161 | A01600 | 490 | A01161 | A01627 | 624 |
| A01161 | A01632 | 491 | A01161 | A01634 | 490 |
| A01161 | A01660 | 437 | A01161 | A01664 | 401 |
| A01161 | A01667 | 491 | A01161 | A01668 | 491 |
| A01161 | A01670 | 198 | A01161 | A01677 | 224 |
| A01161 | A01710 | 227 | A01161 | A01711 | 490 |
| A01161 | A01741 | 333 | A01161 | A01746 | 479 |
| A01161 | A01757 | 369 | A01161 | A01758 | 475 |
| A01161 | A01763 | 490 | A01161 | A01772 | 335 |
| A01161 | A01788 | 455 | A01161 | A01790 | 208 |
| A01161 | A01813 | 168 | A01161 | A01815 | 406 |
| A01161 | A01816 | 115 | A01161 | A01819 | 414 |
| A01161 | A01822 | 209 | A01161 | A01825 | 481 |
| A01161 | A01827 | 490 | A01161 | A01832 | 296 |
| A01161 | A01850 | 311 | A01161 | A01855 | 369 |
| A01161 | A01893 | 337 | A01161 | A01894 | 255 |
| A01161 | A01909 | 249 | A01161 | A01914 | 160 |



|        |        |     |        |        |     |
|--------|--------|-----|--------|--------|-----|
| A01161 | A01922 | 190 | A01161 | A01931 | 490 |
| A01161 | A01935 | 172 | A01161 | A01950 | 285 |
| A01161 | A01958 | 281 | A01161 | A01983 | 227 |
| A01161 | A02021 | 185 | A01161 | A02039 | 286 |
| A01161 | A02040 | 461 | A01161 | A02075 | 229 |
| A01161 | A02148 | 490 | A01161 | A02156 | 313 |
| A01161 | A02182 | 236 | A01161 | A02188 | 401 |
| A01161 | A02215 | 491 | A01161 | A02221 | 417 |
| A01161 | A02222 | 491 | A01161 | A02250 | 263 |
| A01161 | A02283 | 348 | A01161 | A02289 | 446 |
| A01161 | A02305 | 157 | A01161 | A02320 | 188 |
| A01161 | A02329 | 208 | A01161 | A02333 | 484 |
| A01161 | A02335 | 307 | A01161 | A02338 | 232 |
| A01161 | A02364 | 286 | A01161 | A02443 | 485 |
| A01161 | A02476 | 407 | A01161 | A02477 | 491 |
| A01161 | A02485 | 419 | A01161 | A02489 | 305 |
| A01161 | A02491 | 423 | A01161 | A02501 | 232 |
| A01161 | A02523 | 361 | A01161 | A02527 | 188 |
| A01161 | A02539 | 240 | A01161 | A02565 | 259 |
| A01161 | A02607 | 491 | A01161 | A02611 | 191 |
| A01161 | A02667 | 299 | A01161 | A02679 | 208 |
| A01161 | A02686 | 221 | A01161 | A02691 | 443 |
| A01161 | A02695 | 318 | A01161 | A02706 | 424 |
| A01161 | A02709 | 360 | A01161 | A02738 | 395 |
| A01161 | A02785 | 190 | A01161 | A02837 | 157 |
| A01161 | A02841 | 183 | A01161 | A02905 | 185 |
| A01161 | A02924 | 491 | A01161 | A02935 | 160 |
| A01161 | A02988 | 414 | A01161 | A02994 | 592 |
| A01161 | A02996 | 115 | A01161 | A03020 | 208 |
| A01161 | A03034 | 486 | A01161 | A03050 | 488 |
| A01161 | A03065 | 159 | A01161 | A03071 | 272 |
| A01161 | A03079 | 637 | A01161 | A03095 | 335 |
| A01161 | A03104 | 491 | A01161 | A03178 | 157 |
| A01161 | A03186 | 227 | A01161 | A03211 | 475 |
| A01161 | A03259 | 413 | A01161 | A03293 | 491 |
| A01161 | A03304 | 489 | A01161 | A03324 | 163 |
| A01161 | A03328 | 296 | A01161 | A03334 | 228 |
| A01161 | A03351 | 446 | A01161 | A03358 | 294 |
| A01161 | A03379 | 208 | A01161 | A03384 | 207 |
| A01161 | A03413 | 278 | A01161 | A03417 | 455 |
| A01161 | A03438 | 449 | A01161 | A03440 | 491 |
| A01161 | A03473 | 179 | A01161 | A03474 | 266 |
| A01161 | A03477 | 462 | A01161 | A03488 | 357 |
| A01161 | A03491 | 172 | A01161 | A03494 | 485 |
| A01161 | A03512 | 249 | A01161 | A03516 | 152 |
| A01161 | A03518 | 249 | A01161 | A03527 | 162 |

|        |        |     |        |        |     |
|--------|--------|-----|--------|--------|-----|
| A01161 | A03559 | 235 | A01161 | A03562 | 473 |
| A01161 | A03569 | 179 | A01161 | A03592 | 172 |
| A01161 | A03608 | 395 | A01161 | A03618 | 440 |
| A01161 | A03625 | 477 | A01161 | A03650 | 249 |
| A01161 | A03651 | 583 | A01161 | A03652 | 322 |
| A01161 | A03676 | 472 | A01161 | A03677 | 160 |
| A01161 | A03708 | 485 | A01161 | A03740 | 491 |
| A01161 | A03752 | 443 | A01161 | A03790 | 152 |
| A01161 | A03798 | 334 | A01161 | A03809 | 259 |
| A01161 | A03819 | 485 | A01161 | A03855 | 182 |
| A01161 | A03856 | 455 | A01161 | A03880 | 286 |
| A01161 | A03885 | 274 | A01161 | A03910 | 256 |
| A01161 | A03930 | 172 | A01161 | A03945 | 470 |
| A01161 | A03959 | 540 | A01161 | A03981 | 466 |
| A01161 | A04006 | 204 | A01161 | A04023 | 227 |
| A01161 | A04033 | 310 | A01161 | A04056 | 296 |
| A01161 | A04072 | 479 | A01161 | A04209 | 274 |
| A01161 | A04255 | 263 | A01161 | A04263 | 324 |
| A01161 | A04269 | 172 | A01161 | A04275 | 484 |
| A01161 | A04276 | 190 | A01161 | A04304 | 345 |
| A01161 | A04337 | 491 | A01161 | A04349 | 196 |
| A01161 | A04389 | 255 | A01161 | A04410 | 473 |
| A01161 | A04418 | 479 | A01161 | A04423 | 216 |
| A01161 | A04424 | 405 | A01161 | A04449 | 407 |
| A01161 | A04491 | 416 | A01161 | A04493 | 425 |
| A01161 | A04508 | 172 | A01161 | A04518 | 386 |
| A01161 | A04520 | 491 | A01161 | A04529 | 299 |
| A01161 | A04532 | 236 | A01161 | A04560 | 171 |
| A01161 | A04567 | 424 | A01161 | A04579 | 207 |
| A01161 | A04620 | 246 | A01161 | A04630 | 405 |
| A01161 | A04668 | 557 | A01161 | A04715 | 382 |
| A01161 | A04777 | 337 | A01161 | A04782 | 491 |
| A01161 | A04783 | 212 | A01161 | A04790 | 417 |
| A01161 | A04944 | 422 | A01161 | A04964 | 328 |
| A01161 | A04985 | 191 | A01161 | A04987 | 176 |
| A01161 | A05022 | 235 | A01161 | A05065 | 156 |
| A01161 | A05106 | 195 | A01161 | A05155 | 581 |
| A01161 | A05164 | 303 | A01161 | A05234 | 627 |
| A01161 | A05245 | 408 | A01161 | A05254 | 208 |
| A01161 | A05255 | 229 | A01161 | A05272 | 208 |
| A01161 | A05294 | 174 | A01161 | A05356 | 630 |
| A01161 | A05416 | 457 | A01161 | A05417 | 491 |
| A01161 | A05439 | 221 | A01161 | A05449 | 416 |
| A01161 | A05487 | 283 | A01161 | A05494 | 433 |
| A01161 | A05577 | 215 | A01161 | A05587 | 462 |
| A01161 | A05601 | 213 | A01161 | A05608 | 235 |

|        |        |     |        |        |     |
|--------|--------|-----|--------|--------|-----|
| A01161 | A05637 | 172 | A01161 | A05644 | 235 |
| A01161 | A05657 | 337 | A01161 | A05678 | 401 |
| A01161 | A05765 | 216 | A01161 | A05777 | 428 |
| A01161 | A05812 | 652 | A01161 | A05887 | 191 |
| A01161 | A05891 | 491 | A01161 | A05968 | 187 |
| A01161 | A06038 | 221 | A01161 | A06048 | 208 |
| A01161 | A06092 | 491 | A01161 | A06100 | 412 |
| A01161 | A06148 | 238 | A01161 | A06172 | 193 |
| A01161 | A06195 | 219 | A01161 | A06277 | 483 |
| A01161 | A06298 | 394 | A01161 | A06346 | 382 |
| A01161 | A06430 | 172 | A01161 | A06466 | 188 |
| A01161 | A06480 | 216 | A01161 | A06545 | 176 |
| A01161 | A06546 | 491 | A01161 | A06569 | 184 |
| A01161 | A06577 | 172 | A01161 | A06686 | 357 |
| A01161 | A06701 | 474 | A01161 | A06708 | 388 |
| A01161 | A06719 | 366 | A01161 | A06729 | 477 |
| A01161 | A06731 | 414 | A01161 | A06752 | 228 |
| A01161 | A06753 | 247 | A01161 | A06765 | 154 |
| A01161 | A06794 | 208 | A01161 | A06804 | 208 |
| A01161 | A06875 | 193 | A01161 | A06910 | 226 |
| A01161 | A06913 | 172 | A01161 | A06953 | 375 |
| A01161 | A06954 | 216 | A01161 | A06991 | 216 |
| A01161 | A06999 | 172 | A01161 | A07009 | 208 |
| A01161 | A07069 | 469 | A01161 | A07071 | 172 |
| A01161 | A07102 | 172 | A01161 | A07125 | 172 |
| A01161 | A07160 | 488 | A01161 | A07190 | 162 |
| A01161 | A07197 | 159 | A01161 | A07209 | 491 |
| A01161 | A07227 | 165 | A01161 | A07237 | 162 |
| A01161 | A07310 | 281 | A01161 | A07371 | 416 |
| A01161 | A07384 | 409 | A01161 | A07391 | 171 |
| A01161 | A07394 | 491 | A01161 | A07407 | 238 |
| A01161 | A07442 | 491 | A01161 | A07446 | 199 |
| A01161 | A07450 | 208 | A01161 | A07452 | 208 |
| A01161 | A07470 | 193 | A01161 | A07471 | 490 |
| A01161 | A07472 | 466 | A01161 | A07475 | 411 |
| A01161 | A07479 | 267 | A01161 | A07515 | 187 |
| A01161 | A07527 | 319 | A01161 | A07541 | 490 |
| A01161 | A07561 | 473 | A01161 | A07605 | 457 |
| A01161 | A07630 | 162 | A01161 | A07635 | 232 |
| A01161 | A07636 | 255 | A01161 | A07670 | 368 |
| A01161 | A07686 | 235 | A01161 | A07698 | 208 |
| A01161 | A07731 | 162 | A01161 | A07773 | 440 |
| A01161 | A07815 | 486 | A01161 | A07857 | 172 |
| A01161 | A07894 | 479 | A01161 | A07903 | 383 |
| A01161 | A07958 | 486 | A01161 | A07985 | 241 |
| A01161 | A07990 | 200 | A01161 | A07997 | 355 |

|        |        |     |        |        |     |
|--------|--------|-----|--------|--------|-----|
| A01161 | A08073 | 263 | A01161 | A08093 | 317 |
| A01161 | A08097 | 486 | A01161 | A08256 | 165 |
| A01161 | A08309 | 368 | A01161 | A08319 | 235 |
| A01161 | A08405 | 208 | A01161 | A08409 | 152 |
| A01161 | A08426 | 347 | A01161 | A08519 | 452 |
| A01161 | A08524 | 252 | A01161 | A08533 | 160 |
| A01161 | A08551 | 210 | A01161 | A08686 | 358 |
| A01161 | A08693 | 254 | A01161 | A08738 | 272 |
| A01161 | A08785 | 446 | A01161 | A08825 | 208 |
| A01161 | A08828 | 208 | A01161 | A08835 | 246 |
| A01161 | A08915 | 172 | A01161 | A08936 | 226 |
| A01161 | A09054 | 473 | A01161 | A09072 | 291 |
| A01161 | A09204 | 223 | A01161 | A09210 | 191 |
| A01161 | A09246 | 246 | A01161 | A09297 | 160 |
| A01161 | A09302 | 263 | A01161 | A09303 | 173 |
| A01161 | A09321 | 327 | A01161 | A09380 | 216 |
| A01161 | A09416 | 486 | A01161 | A09474 | 172 |
| A01161 | A09475 | 172 | A01161 | A09476 | 243 |
| A01161 | A09507 | 401 | A01161 | A09581 | 223 |
| A01161 | A09595 | 93  | A01161 | A09647 | 371 |
| A01161 | A09679 | 263 | A01161 | A09709 | 479 |
| A01161 | A09735 | 332 | A01161 | A09800 | 208 |
| A01161 | A09902 | 246 | A01161 | A10095 | 157 |
| A01161 | A10156 | 479 | A01161 | A10159 | 187 |
| A01161 | A10227 | 208 | A01161 | A10250 | 185 |
| A01161 | A10264 | 249 | A01161 | A10340 | 187 |
| A01161 | A10385 | 208 | A01161 | A10405 | 208 |
| A01161 | A10487 | 208 | A01161 | A10535 | 238 |
| A01161 | A10547 | 334 | A01161 | A10598 | 484 |
| A01161 | A10620 | 208 | A01161 | A10649 | 172 |
| A01161 | A10651 | 436 | A01161 | A10667 | 425 |
| A01161 | A10731 | 228 | A01161 | A10742 | 345 |
| A01161 | A10853 | 195 | A01161 | A11023 | 201 |
| A01161 | A11101 | 240 | A01161 | A11143 | 172 |
| A01161 | A11149 | 329 | A01161 | A11154 | 172 |
| A01161 | A11230 | 208 | A01161 | A11264 | 340 |
| A01161 | A11282 | 411 | A01161 | A11296 | 412 |
| A01161 | A11307 | 468 | A01161 | A11308 | 340 |
| A01161 | A11310 | 216 | A01161 | A11311 | 165 |
| A01161 | A11313 | 652 | A01161 | A11328 | 224 |
| A01161 | A11338 | 335 | A01161 | A11374 | 353 |
| A01161 | A11375 | 200 | A01161 | A11377 | 235 |
| A01161 | A11396 | 200 | A01161 | A11411 | 475 |
| A01161 | A11414 | 235 | A01161 | A11424 | 187 |
| A01161 | A11427 | 394 | A01161 | A11428 | 285 |
| A01161 | A11433 | 274 | A01161 | A11448 | 172 |

|        |        |     |        |        |     |
|--------|--------|-----|--------|--------|-----|
| A01161 | A11449 | 340 | A01161 | A11513 | 489 |
| A01161 | A11523 | 165 | A01161 | A11526 | 462 |
| A01161 | A11553 | 382 | A01161 | A11573 | 260 |
| A01161 | A11590 | 391 | A01161 | A11619 | 208 |
| A01161 | A11664 | 208 | A01161 | A11677 | 247 |
| A01161 | A11687 | 157 | A01161 | A11798 | 263 |
| A01161 | A11824 | 172 | A01161 | A11860 | 213 |
| A01161 | A11898 | 208 | A01161 | A11983 | 625 |
| A01161 | A12027 | 172 | A01161 | A12043 | 160 |
| A01161 | A12056 | 208 | A01161 | A12099 | 226 |
| A01161 | A12143 | 208 | A01161 | A12227 | 223 |
| A01161 | A12332 | 208 | A01161 | A12430 | 208 |
| A01161 | A12443 | 208 | A01161 | A12528 | 172 |
| A01161 | A12567 | 208 | A01161 | A12599 | 172 |
| A01161 | A12614 | 305 | A01161 | A12676 | 208 |
| A01161 | A12721 | 172 | A01161 | A12786 | 172 |
| A01161 | A12787 | 216 | A01161 | A12789 | 337 |
| A01161 | A13009 | 172 | A01161 | A13015 | 208 |
| A01161 | A13037 | 208 | A01161 | A13073 | 208 |
| A01161 | A13088 | 208 | A01161 | A13153 | 172 |
| A01161 | A13243 | 172 | A01161 | A13331 | 249 |
| A01161 | A13340 | 494 | A01161 | A13361 | 480 |
| A01161 | A13369 | 491 | A01161 | A13389 | 208 |
| A01161 | A13555 | 313 | A01161 | A13617 | 477 |
| A01161 | A13653 | 208 | A01161 | A13668 | 208 |
| A01161 | A13678 | 172 | A01161 | A13754 | 208 |
| A01161 | A13824 | 465 | A01161 | A13841 | 172 |
| A01161 | A13874 | 266 | A01161 | A14063 | 226 |
| A01161 | A14071 | 329 | A01161 | A14073 | 490 |
| A01161 | A14077 | 465 | A01161 | A14080 | 472 |
| A01161 | A14125 | 401 | A01161 | A14216 | 456 |
| A01161 | A14221 | 152 | A01161 | A14266 | 286 |
| A01161 | A14272 | 486 | A01161 | A14311 | 172 |
| A01161 | A14340 | 172 | A01161 | A14377 | 260 |
| A01161 | A14381 | 491 | A01161 | A14399 | 185 |
| A01161 | A14405 | 358 | A01161 | A14410 | 190 |
| A01161 | A14449 | 235 | A01161 | A14471 | 190 |
| A01161 | A14475 | 369 | A01161 | A14479 | 191 |
| A01161 | A14482 | 246 | A01161 | A14498 | 466 |
| A01161 | A14548 | 466 | A01161 | A14566 | 373 |
| A01161 | A14589 | 480 | A01161 | A14635 | 305 |
| A01161 | A14637 | 232 | A01161 | A14648 | 485 |
| A01161 | A14655 | 479 | A01161 | A14673 | 208 |
| A01161 | A14699 | 591 | A01161 | A14735 | 311 |
| A01161 | A14738 | 160 | A01161 | A14778 | 556 |
| A01161 | A14845 | 323 | A01161 | A14918 | 152 |

|        |        |     |        |        |     |
|--------|--------|-----|--------|--------|-----|
| A01161 | A14936 | 286 | A01161 | A14986 | 193 |
| A01161 | A15081 | 208 | A01161 | A15117 | 208 |
| A01161 | A15232 | 208 | A01161 | A15244 | 160 |
| A01161 | A15282 | 491 | A01161 | A15295 | 847 |
| A01161 | A15317 | 216 | A01161 | A15321 | 389 |
| A01161 | A15322 | 609 | A01161 | A15345 | 168 |
| A01161 | A15358 | 163 | A01161 | A15379 | 358 |
| A01161 | A15384 | 286 | A01161 | A15422 | 656 |
| A01161 | A15498 | 570 | A01161 | A15617 | 188 |
| A01161 | A15624 | 489 | A01161 | A15626 | 195 |
| A01161 | A15638 | 364 | A01161 | A15653 | 491 |
| A01161 | A15666 | 491 | A01161 | A15680 | 348 |
| A01161 | A15684 | 534 | A01161 | A15707 | 327 |
| A01161 | A15726 | 198 | A01161 | A15765 | 483 |
| A01161 | A15917 | 491 | A01161 | A15932 | 443 |
| A01161 | A15933 | 188 | A01161 | A16005 | 208 |
| A01161 | A16143 | 251 | A01161 | A16157 | 369 |
| A01161 | A16272 | 215 | A01161 | A16318 | 160 |
| A01161 | A16340 | 172 | A01161 | A16403 | 200 |
| A01161 | A16420 | 176 | A01161 | A16430 | 268 |
| A01161 | A16437 | 209 | A01161 | A16446 | 160 |
| A01161 | A16522 | 208 | A01161 | A16585 | 160 |
| A01161 | A16587 | 247 | A01161 | A16683 | 347 |
| A01161 | A16690 | 348 | A01161 | A16876 | 319 |
| A01161 | A17078 | 491 | A01161 | A17156 | 235 |
| A01161 | A17198 | 196 | A01162 | A01164 | 477 |
| A01162 | A01173 | 200 | A01162 | A01460 | 232 |
| A01162 | A01485 | 475 | A01162 | A01515 | 344 |
| A01162 | A01520 | 302 | A01162 | A01582 | 286 |
| A01162 | A01585 | 260 | A01162 | A01591 | 152 |
| A01162 | A01812 | 318 | A01162 | A01813 | 174 |
| A01162 | A02010 | 316 | A01162 | A02065 | 146 |
| A01162 | A02084 | 276 | A01162 | A02148 | 489 |
| A01162 | A02222 | 246 | A01162 | A02228 | 269 |
| A01162 | A02329 | 162 | A01162 | A02443 | 324 |
| A01162 | A02542 | 313 | A01162 | A02993 | 368 |
| A01162 | A02995 | 198 | A01162 | A03029 | 193 |
| A01162 | A03077 | 247 | A01162 | A03097 | 411 |
| A01162 | A03104 | 210 | A01162 | A03165 | 215 |
| A01162 | A03186 | 236 | A01162 | A03207 | 247 |
| A01162 | A03313 | 193 | A01162 | A03703 | 441 |
| A01162 | A03882 | 462 | A01162 | A03893 | 406 |
| A01162 | A04161 | 414 | A01162 | A04379 | 215 |
| A01162 | A04487 | 172 | A01162 | A04633 | 199 |
| A01162 | A04751 | 229 | A01162 | A05621 | 351 |
| A01162 | A05887 | 201 | A01162 | A06137 | 182 |

|        |        |     |        |        |     |
|--------|--------|-----|--------|--------|-----|
| A01162 | A06535 | 262 | A01162 | A06729 | 401 |
| A01162 | A06953 | 318 | A01162 | A06964 | 447 |
| A01162 | A07181 | 456 | A01162 | A07920 | 167 |
| A01162 | A08792 | 294 | A01162 | A08905 | 316 |
| A01162 | A09126 | 385 | A01162 | A09356 | 429 |
| A01162 | A09362 | 413 | A01162 | A09370 | 235 |
| A01162 | A09470 | 151 | A01162 | A10171 | 302 |
| A01162 | A10790 | 235 | A01162 | A11750 | 185 |
| A01162 | A13387 | 243 | A01162 | A14431 | 334 |
| A01162 | A14705 | 238 | A01162 | A15295 | 419 |
| A01162 | A15301 | 183 | A01162 | A15422 | 165 |
| A01162 | A15498 | 491 | A01162 | A15620 | 219 |
| A01162 | A15940 | 198 | A01163 | A01208 | 185 |
| A01163 | A01257 | 168 | A01163 | A01903 | 196 |
| A01163 | A02185 | 217 | A01163 | A02272 | 339 |
| A01163 | A02304 | 208 | A01163 | A02382 | 185 |
| A01163 | A02390 | 258 | A01163 | A03115 | 367 |
| A01163 | A03186 | 193 | A01163 | A03906 | 390 |
| A01163 | A04080 | 207 | A01163 | A05158 | 308 |
| A01163 | A05706 | 260 | A01163 | A07833 | 273 |
| A01163 | A09236 | 340 | A01163 | A09241 | 305 |
| A01163 | A10018 | 267 | A01163 | A13860 | 201 |
| A01163 | A15809 | 217 | A01164 | A01212 | 491 |
| A01164 | A01324 | 202 | A01164 | A01325 | 193 |
| A01164 | A01331 | 157 | A01164 | A01461 | 491 |
| A01164 | A01473 | 165 | A01164 | A01536 | 273 |
| A01164 | A01572 | 191 | A01164 | A01574 | 208 |
| A01164 | A01812 | 490 | A01164 | A01813 | 480 |
| A01164 | A02017 | 157 | A01164 | A02233 | 279 |
| A01164 | A02995 | 491 | A01164 | A03079 | 190 |
| A01164 | A03097 | 154 | A01164 | A03115 | 316 |
| A01164 | A03207 | 193 | A01164 | A03582 | 160 |
| A01164 | A03745 | 172 | A01164 | A03750 | 165 |
| A01164 | A03882 | 240 | A01164 | A03892 | 205 |
| A01164 | A03893 | 311 | A01164 | A04079 | 452 |
| A01164 | A04379 | 160 | A01164 | A04780 | 179 |
| A01164 | A05621 | 185 | A01164 | A05958 | 247 |
| A01164 | A06599 | 267 | A01164 | A06750 | 160 |
| A01164 | A07212 | 212 | A01164 | A07401 | 296 |
| A01164 | A07521 | 245 | A01164 | A08400 | 191 |
| A01164 | A08489 | 210 | A01164 | A08715 | 344 |
| A01164 | A08905 | 484 | A01164 | A09243 | 274 |
| A01164 | A09597 | 205 | A01164 | A09668 | 182 |
| A01164 | A09821 | 462 | A01164 | A10072 | 251 |
| A01164 | A10171 | 255 | A01164 | A11007 | 238 |
| A01164 | A11144 | 187 | A01164 | A11287 | 294 |

|        |        |     |        |        |     |
|--------|--------|-----|--------|--------|-----|
| A01164 | A11433 | 329 | A01164 | A11729 | 358 |
| A01164 | A11730 | 279 | A01164 | A11831 | 151 |
| A01164 | A12077 | 296 | A01164 | A12952 | 232 |
| A01164 | A13829 | 223 | A01164 | A14006 | 160 |
| A01164 | A14247 | 490 | A01164 | A14258 | 408 |
| A01164 | A14661 | 449 | A01164 | A15282 | 193 |
| A01164 | A15295 | 170 | A01164 | A15620 | 165 |
| A01164 | A15831 | 193 | A01164 | A15884 | 160 |
| A01164 | A16323 | 160 | A01164 | A16324 | 277 |
| A01164 | A17134 | 152 | A01165 | A01233 | 293 |
| A01165 | A01256 | 491 | A01165 | A01272 | 262 |
| A01165 | A01481 | 477 | A01165 | A01635 | 463 |
| A01165 | A02545 | 159 | A01165 | A04211 | 491 |
| A01165 | A04267 | 217 | A01165 | A04939 | 180 |
| A01165 | A05617 | 159 | A01165 | A06086 | 369 |
| A01165 | A06592 | 490 | A01165 | A06773 | 409 |
| A01165 | A07027 | 279 | A01165 | A07059 | 219 |
| A01165 | A07234 | 374 | A01165 | A07238 | 198 |
| A01165 | A07525 | 380 | A01165 | A07553 | 196 |
| A01165 | A07659 | 477 | A01165 | A07660 | 324 |
| A01165 | A07674 | 180 | A01165 | A07753 | 446 |
| A01165 | A07800 | 489 | A01165 | A08099 | 399 |
| A01165 | A08193 | 428 | A01165 | A08205 | 318 |
| A01165 | A09059 | 238 | A01165 | A09612 | 283 |
| A01165 | A09985 | 329 | A01165 | A10370 | 436 |
| A01165 | A10702 | 208 | A01165 | A11287 | 179 |
| A01165 | A11309 | 490 | A01165 | A12730 | 293 |
| A01165 | A14502 | 263 | A01165 | A14989 | 368 |
| A01165 | A15497 | 196 | A01165 | A16002 | 156 |
| A01165 | A16368 | 433 | A01165 | A16529 | 427 |
| A01165 | A16596 | 374 | A01165 | A16959 | 455 |
| A01166 | A01179 | 319 | A01166 | A01184 | 480 |
| A01166 | A01186 | 221 | A01166 | A01196 | 411 |
| A01166 | A01201 | 490 | A01166 | A01206 | 491 |
| A01166 | A01209 | 267 | A01166 | A01215 | 274 |
| A01166 | A01221 | 368 | A01166 | A01224 | 457 |
| A01166 | A01234 | 491 | A01166 | A01238 | 438 |
| A01166 | A01243 | 491 | A01166 | A01249 | 438 |
| A01166 | A01252 | 269 | A01166 | A01280 | 363 |
| A01166 | A01291 | 491 | A01166 | A01304 | 490 |
| A01166 | A01306 | 626 | A01166 | A01309 | 235 |
| A01166 | A01335 | 491 | A01166 | A01349 | 475 |
| A01166 | A01351 | 470 | A01166 | A01352 | 360 |
| A01166 | A01354 | 229 | A01166 | A01365 | 643 |
| A01166 | A01384 | 491 | A01166 | A01392 | 252 |
| A01166 | A01406 | 475 | A01166 | A01416 | 266 |



|        |        |     |        |        |     |
|--------|--------|-----|--------|--------|-----|
| A01166 | A01418 | 491 | A01166 | A01425 | 491 |
| A01166 | A01430 | 486 | A01166 | A01431 | 463 |
| A01166 | A01439 | 454 | A01166 | A01457 | 447 |
| A01166 | A01464 | 296 | A01166 | A01468 | 491 |
| A01166 | A01470 | 491 | A01166 | A01487 | 490 |
| A01166 | A01488 | 480 | A01166 | A01492 | 491 |
| A01166 | A01495 | 491 | A01166 | A01496 | 486 |
| A01166 | A01506 | 391 | A01166 | A01538 | 475 |
| A01166 | A01539 | 443 | A01166 | A01555 | 343 |
| A01166 | A01558 | 296 | A01166 | A01569 | 489 |
| A01166 | A01577 | 224 | A01166 | A01579 | 491 |
| A01166 | A01586 | 409 | A01166 | A01597 | 491 |
| A01166 | A01598 | 491 | A01166 | A01601 | 475 |
| A01166 | A01612 | 488 | A01166 | A01614 | 491 |
| A01166 | A01649 | 491 | A01166 | A01652 | 324 |
| A01166 | A01684 | 485 | A01166 | A01689 | 245 |
| A01166 | A01721 | 393 | A01166 | A01917 | 313 |
| A01166 | A01988 | 195 | A01166 | A02003 | 167 |
| A01166 | A02265 | 154 | A01166 | A02572 | 328 |
| A01166 | A02978 | 474 | A01166 | A03164 | 174 |
| A01166 | A03296 | 479 | A01166 | A03298 | 208 |
| A01166 | A03304 | 490 | A01166 | A03438 | 457 |
| A01166 | A03494 | 452 | A01166 | A03567 | 491 |
| A01166 | A03568 | 329 | A01166 | A03569 | 424 |
| A01166 | A03601 | 487 | A01166 | A03705 | 424 |
| A01166 | A03734 | 180 | A01166 | A03740 | 483 |
| A01166 | A03774 | 171 | A01166 | A03859 | 490 |
| A01166 | A03963 | 187 | A01166 | A03981 | 215 |
| A01166 | A04093 | 171 | A01166 | A04697 | 217 |
| A01166 | A04846 | 486 | A01166 | A05230 | 452 |
| A01166 | A05327 | 229 | A01166 | A05375 | 281 |
| A01166 | A05499 | 238 | A01166 | A05501 | 491 |
| A01166 | A05617 | 450 | A01166 | A06275 | 483 |
| A01166 | A06279 | 286 | A01166 | A06340 | 467 |
| A01166 | A06351 | 367 | A01166 | A06543 | 184 |
| A01166 | A06584 | 188 | A01166 | A06807 | 160 |
| A01166 | A06861 | 213 | A01166 | A06897 | 417 |
| A01166 | A06901 | 229 | A01166 | A06965 | 491 |
| A01166 | A07262 | 193 | A01166 | A07323 | 491 |
| A01166 | A07347 | 481 | A01166 | A07348 | 433 |
| A01166 | A07349 | 274 | A01166 | A07378 | 252 |
| A01166 | A07398 | 369 | A01166 | A07449 | 303 |
| A01166 | A07451 | 184 | A01166 | A07524 | 443 |
| A01166 | A07581 | 446 | A01166 | A07583 | 183 |
| A01166 | A07700 | 296 | A01166 | A07706 | 347 |
| A01166 | A07747 | 229 | A01166 | A08022 | 443 |

|        |        |     |        |        |     |
|--------|--------|-----|--------|--------|-----|
| A01166 | A08072 | 283 | A01166 | A08357 | 491 |
| A01166 | A08571 | 468 | A01166 | A09285 | 165 |
| A01166 | A09327 | 165 | A01166 | A09352 | 383 |
| A01166 | A09618 | 283 | A01166 | A09707 | 182 |
| A01166 | A10532 | 475 | A01166 | A10616 | 486 |
| A01166 | A10624 | 296 | A01166 | A10625 | 329 |
| A01166 | A10917 | 154 | A01166 | A10923 | 154 |
| A01166 | A10950 | 283 | A01166 | A11316 | 195 |
| A01166 | A11462 | 380 | A01166 | A11562 | 449 |
| A01166 | A11857 | 215 | A01166 | A12053 | 229 |
| A01166 | A12138 | 311 | A01166 | A13126 | 391 |
| A01166 | A13218 | 151 | A01166 | A13404 | 283 |
| A01166 | A13830 | 401 | A01166 | A13875 | 296 |
| A01166 | A13905 | 532 | A01166 | A13989 | 491 |
| A01166 | A13992 | 375 | A01166 | A14006 | 457 |
| A01166 | A14090 | 473 | A01166 | A14169 | 470 |
| A01166 | A14172 | 427 | A01166 | A14216 | 491 |
| A01166 | A14530 | 224 | A01166 | A14596 | 355 |
| A01166 | A14597 | 439 | A01166 | A14699 | 154 |
| A01166 | A14959 | 283 | A01166 | A15215 | 469 |
| A01166 | A15292 | 265 | A01166 | A15297 | 475 |
| A01166 | A15311 | 272 | A01166 | A15312 | 361 |
| A01166 | A15313 | 390 | A01166 | A15324 | 152 |
| A01166 | A15338 | 469 | A01166 | A15432 | 346 |
| A01166 | A15452 | 246 | A01166 | A15500 | 466 |
| A01166 | A15559 | 267 | A01166 | A15660 | 491 |
| A01166 | A15684 | 489 | A01166 | A15920 | 234 |
| A01166 | A15988 | 293 | A01166 | A16053 | 229 |
| A01166 | A16118 | 475 | A01167 | A03956 | 313 |
| A01167 | A07138 | 286 | A01167 | A13012 | 173 |
| A01167 | A14000 | 207 | A01167 | A14699 | 187 |
| A01168 | A01251 | 210 | A01168 | A01291 | 491 |
| A01168 | A01294 | 701 | A01168 | A01351 | 170 |
| A01168 | A01356 | 170 | A01168 | A01397 | 154 |
| A01168 | A01425 | 170 | A01168 | A01447 | 430 |
| A01168 | A01492 | 170 | A01168 | A01496 | 488 |
| A01168 | A01527 | 899 | A01168 | A01538 | 192 |
| A01168 | A01598 | 170 | A01168 | A01614 | 170 |
| A01168 | A01904 | 195 | A01168 | A02164 | 465 |
| A01168 | A02165 | 701 | A01168 | A02265 | 170 |
| A01168 | A02414 | 294 | A01168 | A02527 | 446 |
| A01168 | A02978 | 294 | A01168 | A03438 | 549 |
| A01168 | A03567 | 283 | A01168 | A03609 | 447 |
| A01168 | A03615 | 404 | A01168 | A03652 | 549 |
| A01168 | A03782 | 450 | A01168 | A03981 | 548 |
| A01168 | A05146 | 167 | A01168 | A05191 | 228 |

|        |        |     |        |        |     |
|--------|--------|-----|--------|--------|-----|
| A01168 | A05313 | 159 | A01168 | A05411 | 441 |
| A01168 | A05566 | 483 | A01168 | A05782 | 195 |
| A01168 | A06084 | 340 | A01168 | A06356 | 497 |
| A01168 | A06797 | 170 | A01168 | A06814 | 63  |
| A01168 | A06825 | 491 | A01168 | A07130 | 187 |
| A01168 | A07237 | 193 | A01168 | A07243 | 160 |
| A01168 | A07244 | 170 | A01168 | A07307 | 338 |
| A01168 | A07471 | 185 | A01168 | A07524 | 170 |
| A01168 | A07924 | 170 | A01168 | A08211 | 170 |
| A01168 | A08653 | 216 | A01168 | A08682 | 412 |
| A01168 | A08773 | 327 | A01168 | A09044 | 491 |
| A01168 | A09284 | 319 | A01168 | A09656 | 377 |
| A01168 | A09697 | 170 | A01168 | A09828 | 163 |
| A01168 | A10381 | 485 | A01168 | A11297 | 267 |
| A01168 | A11331 | 374 | A01168 | A11411 | 228 |
| A01168 | A11616 | 162 | A01168 | A11926 | 154 |
| A01168 | A11981 | 307 | A01168 | A12687 | 223 |
| A01168 | A13052 | 450 | A01168 | A13581 | 218 |
| A01168 | A13805 | 201 | A01168 | A13912 | 272 |
| A01168 | A13989 | 425 | A01168 | A13992 | 269 |
| A01168 | A14216 | 483 | A01168 | A14843 | 676 |
| A01168 | A15063 | 344 | A01168 | A15666 | 666 |
| A01168 | A15725 | 179 | A01168 | A15931 | 252 |
| A01168 | A16681 | 482 | A01168 | A16790 | 201 |
| A01168 | A16838 | 188 | A01168 | A16905 | 162 |
| A01168 | A16954 | 201 | A01168 | A17012 | 339 |
| A01168 | A17033 | 216 | A01169 | A01212 | 652 |
| A01169 | A01241 | 172 | A01169 | A01243 | 363 |
| A01169 | A01253 | 489 | A01169 | A01278 | 477 |
| A01169 | A01296 | 457 | A01169 | A01317 | 430 |
| A01169 | A01321 | 260 | A01169 | A01322 | 249 |
| A01169 | A01326 | 462 | A01169 | A01329 | 737 |
| A01169 | A01331 | 333 | A01169 | A01339 | 477 |
| A01169 | A01340 | 489 | A01169 | A01360 | 465 |
| A01169 | A01370 | 446 | A01169 | A01371 | 432 |
| A01169 | A01376 | 249 | A01169 | A01385 | 488 |
| A01169 | A01415 | 363 | A01169 | A01418 | 491 |
| A01169 | A01451 | 486 | A01169 | A01452 | 185 |
| A01169 | A01453 | 317 | A01169 | A01458 | 481 |
| A01169 | A01459 | 489 | A01169 | A01468 | 375 |
| A01169 | A01481 | 162 | A01169 | A01483 | 486 |
| A01169 | A01507 | 488 | A01169 | A01514 | 586 |
| A01169 | A01516 | 187 | A01169 | A01524 | 899 |
| A01169 | A01559 | 466 | A01169 | A01560 | 199 |
| A01169 | A01582 | 491 | A01169 | A01613 | 357 |
| A01169 | A01647 | 457 | A01169 | A01650 | 188 |

|        |        |     |        |        |     |
|--------|--------|-----|--------|--------|-----|
| A01169 | A01671 | 191 | A01169 | A01741 | 213 |
| A01169 | A02116 | 156 | A01169 | A02211 | 179 |
| A01169 | A02212 | 401 | A01169 | A02607 | 208 |
| A01169 | A02859 | 226 | A01169 | A03095 | 486 |
| A01169 | A03163 | 216 | A01169 | A03421 | 199 |
| A01169 | A03488 | 497 | A01169 | A03498 | 207 |
| A01169 | A03526 | 159 | A01169 | A03567 | 152 |
| A01169 | A03570 | 484 | A01169 | A03597 | 408 |
| A01169 | A03676 | 451 | A01169 | A03773 | 176 |
| A01169 | A03809 | 362 | A01169 | A03885 | 393 |
| A01169 | A03903 | 179 | A01169 | A04050 | 899 |
| A01169 | A04449 | 249 | A01169 | A04512 | 217 |
| A01169 | A04666 | 479 | A01169 | A05034 | 199 |
| A01169 | A05095 | 167 | A01169 | A05155 | 362 |
| A01169 | A05216 | 319 | A01169 | A05276 | 451 |
| A01169 | A05431 | 497 | A01169 | A05531 | 243 |
| A01169 | A05570 | 489 | A01169 | A05690 | 182 |
| A01169 | A05781 | 393 | A01169 | A06032 | 408 |
| A01169 | A06039 | 199 | A01169 | A06272 | 330 |
| A01169 | A06393 | 179 | A01169 | A06750 | 491 |
| A01169 | A06819 | 480 | A01169 | A06948 | 217 |
| A01169 | A06968 | 198 | A01169 | A06972 | 290 |
| A01169 | A06974 | 371 | A01169 | A07004 | 176 |
| A01169 | A07081 | 308 | A01169 | A07101 | 480 |
| A01169 | A07132 | 219 | A01169 | A07226 | 399 |
| A01169 | A07242 | 205 | A01169 | A07311 | 199 |
| A01169 | A07317 | 226 | A01169 | A07355 | 406 |
| A01169 | A07402 | 173 | A01169 | A07403 | 433 |
| A01169 | A07422 | 240 | A01169 | A07434 | 170 |
| A01169 | A07439 | 484 | A01169 | A07457 | 413 |
| A01169 | A07495 | 201 | A01169 | A07497 | 179 |
| A01169 | A07587 | 157 | A01169 | A07675 | 238 |
| A01169 | A07681 | 152 | A01169 | A07708 | 491 |
| A01169 | A07756 | 486 | A01169 | A07876 | 157 |
| A01169 | A08046 | 232 | A01169 | A08159 | 402 |
| A01169 | A08191 | 167 | A01169 | A08353 | 252 |
| A01169 | A08508 | 286 | A01169 | A08509 | 286 |
| A01169 | A08578 | 332 | A01169 | A08882 | 462 |
| A01169 | A08913 | 462 | A01169 | A08927 | 221 |
| A01169 | A08954 | 422 | A01169 | A09300 | 160 |
| A01169 | A09306 | 252 | A01169 | A09345 | 179 |
| A01169 | A09672 | 290 | A01169 | A09687 | 167 |
| A01169 | A09718 | 351 | A01169 | A10070 | 167 |
| A01169 | A10093 | 217 | A01169 | A10200 | 469 |
| A01169 | A10275 | 232 | A01169 | A10359 | 258 |
| A01169 | A10849 | 252 | A01169 | A11102 | 195 |

|        |        |     |        |        |     |
|--------|--------|-----|--------|--------|-----|
| A01169 | A11186 | 285 | A01169 | A11352 | 346 |
| A01169 | A11620 | 252 | A01169 | A11758 | 217 |
| A01169 | A11795 | 490 | A01169 | A11812 | 286 |
| A01169 | A11813 | 286 | A01169 | A12116 | 252 |
| A01169 | A12159 | 232 | A01169 | A12201 | 286 |
| A01169 | A12248 | 252 | A01169 | A12350 | 232 |
| A01169 | A12365 | 408 | A01169 | A12524 | 252 |
| A01169 | A12526 | 232 | A01169 | A12810 | 179 |
| A01169 | A12824 | 491 | A01169 | A12900 | 358 |
| A01169 | A13028 | 286 | A01169 | A13079 | 373 |
| A01169 | A13080 | 373 | A01169 | A13166 | 232 |
| A01169 | A13190 | 373 | A01169 | A13369 | 391 |
| A01169 | A13418 | 286 | A01169 | A13432 | 491 |
| A01169 | A13617 | 241 | A01169 | A13831 | 467 |
| A01169 | A14077 | 411 | A01169 | A14080 | 408 |
| A01169 | A14196 | 486 | A01169 | A14202 | 362 |
| A01169 | A14216 | 168 | A01169 | A14525 | 224 |
| A01169 | A14589 | 154 | A01169 | A14634 | 152 |
| A01169 | A14758 | 199 | A01169 | A14912 | 205 |
| A01169 | A15295 | 218 | A01169 | A15297 | 484 |
| A01169 | A15338 | 311 | A01169 | A15372 | 396 |
| A01169 | A15465 | 179 | A01169 | A15529 | 276 |
| A01169 | A15615 | 195 | A01169 | A15624 | 263 |
| A01169 | A15665 | 168 | A01169 | A15718 | 435 |
| A01169 | A15937 | 170 | A01169 | A16358 | 458 |
| A01169 | A16890 | 252 | A01169 | A17079 | 335 |
| A01169 | A17118 | 157 | A01170 | A01598 | 63  |
| A01170 | A02703 | 236 | A01171 | A01386 | 356 |
| A01171 | A15526 | 405 | A01172 | A01307 | 278 |
| A01172 | A01548 | 491 | A01172 | A01554 | 195 |
| A01172 | A01558 | 899 | A01172 | A01560 | 152 |
| A01172 | A01569 | 447 | A01172 | A01572 | 460 |
| A01172 | A01588 | 899 | A01172 | A01602 | 491 |
| A01172 | A01603 | 469 | A01172 | A01660 | 404 |
| A01172 | A01688 | 456 | A01172 | A01728 | 330 |
| A01172 | A01796 | 238 | A01172 | A01844 | 480 |
| A01172 | A01855 | 469 | A01172 | A01907 | 457 |
| A01172 | A02343 | 414 | A01172 | A02452 | 441 |
| A01172 | A02470 | 452 | A01172 | A02517 | 350 |
| A01172 | A02520 | 358 | A01172 | A02598 | 162 |
| A01172 | A02637 | 226 | A01172 | A02687 | 491 |
| A01172 | A02695 | 307 | A01172 | A03196 | 196 |
| A01172 | A03211 | 151 | A01172 | A03223 | 366 |
| A01172 | A03271 | 258 | A01172 | A03477 | 490 |
| A01172 | A03586 | 477 | A01172 | A03643 | 364 |
| A01172 | A03807 | 174 | A01172 | A03984 | 274 |

|        |        |     |        |        |     |
|--------|--------|-----|--------|--------|-----|
| A01172 | A04104 | 171 | A01172 | A04124 | 391 |
| A01172 | A04310 | 174 | A01172 | A04497 | 257 |
| A01172 | A04519 | 162 | A01172 | A04691 | 299 |
| A01172 | A04879 | 474 | A01172 | A04880 | 449 |
| A01172 | A05082 | 180 | A01172 | A05165 | 174 |
| A01172 | A05216 | 491 | A01172 | A05449 | 263 |
| A01172 | A05660 | 196 | A01172 | A05797 | 491 |
| A01172 | A05918 | 162 | A01172 | A06298 | 258 |
| A01172 | A06315 | 179 | A01172 | A06516 | 221 |
| A01172 | A06610 | 491 | A01172 | A06640 | 307 |
| A01172 | A06642 | 385 | A01172 | A06778 | 188 |
| A01172 | A06852 | 212 | A01172 | A06868 | 182 |
| A01172 | A07080 | 243 | A01172 | A07256 | 159 |
| A01172 | A08022 | 174 | A01172 | A08280 | 308 |
| A01172 | A08627 | 490 | A01172 | A09006 | 204 |
| A01172 | A09124 | 458 | A01172 | A09169 | 402 |
| A01172 | A09273 | 204 | A01172 | A09504 | 330 |
| A01172 | A09566 | 420 | A01172 | A09727 | 491 |
| A01172 | A09826 | 491 | A01172 | A10488 | 221 |
| A01172 | A10754 | 335 | A01172 | A10934 | 362 |
| A01172 | A11297 | 477 | A01172 | A11304 | 391 |
| A01172 | A11474 | 398 | A01172 | A11922 | 162 |
| A01172 | A13295 | 196 | A01172 | A13400 | 212 |
| A01172 | A13447 | 179 | A01172 | A13902 | 322 |
| A01172 | A13997 | 463 | A01172 | A14009 | 413 |
| A01172 | A14016 | 491 | A01172 | A14196 | 475 |
| A01172 | A14200 | 491 | A01172 | A14221 | 249 |
| A01172 | A14496 | 176 | A01172 | A14591 | 241 |
| A01172 | A14659 | 398 | A01172 | A15188 | 340 |
| A01172 | A15309 | 382 | A01172 | A15507 | 491 |
| A01172 | A15547 | 432 | A01172 | A15716 | 313 |
| A01172 | A15892 | 179 | A01172 | A16216 | 324 |
| A01172 | A16293 | 412 | A01172 | A16627 | 457 |
| A01172 | A16879 | 240 | A01173 | A01212 | 373 |
| A01173 | A01406 | 193 | A01173 | A01473 | 417 |
| A01173 | A01572 | 321 | A01173 | A01605 | 63  |
| A01173 | A01610 | 491 | A01173 | A01643 | 232 |
| A01173 | A01694 | 366 | A01173 | A01897 | 173 |
| A01173 | A02030 | 252 | A01173 | A02219 | 460 |
| A01173 | A02344 | 283 | A01173 | A02896 | 174 |
| A01173 | A03165 | 165 | A01173 | A03451 | 205 |
| A01173 | A03458 | 154 | A01173 | A03479 | 467 |
| A01173 | A03748 | 323 | A01173 | A03800 | 473 |
| A01173 | A03910 | 458 | A01173 | A04012 | 294 |
| A01173 | A04169 | 469 | A01173 | A04305 | 461 |
| A01173 | A04316 | 406 | A01173 | A04809 | 243 |

|        |        |     |        |        |     |
|--------|--------|-----|--------|--------|-----|
| A01173 | A04861 | 168 | A01173 | A05082 | 258 |
| A01173 | A05229 | 241 | A01173 | A05349 | 256 |
| A01173 | A05944 | 475 | A01173 | A05974 | 188 |
| A01173 | A05986 | 299 | A01173 | A07051 | 272 |
| A01173 | A07708 | 475 | A01173 | A07793 | 188 |
| A01173 | A07920 | 241 | A01173 | A08137 | 389 |
| A01173 | A08840 | 475 | A01173 | A08864 | 159 |
| A01173 | A09202 | 91  | A01173 | A09204 | 199 |
| A01173 | A09239 | 201 | A01173 | A09447 | 184 |
| A01173 | A09732 | 458 | A01173 | A09734 | 457 |
| A01173 | A10164 | 168 | A01173 | A10528 | 104 |
| A01173 | A10735 | 157 | A01173 | A11097 | 270 |
| A01173 | A11324 | 281 | A01173 | A11329 | 188 |
| A01173 | A11345 | 258 | A01173 | A11369 | 477 |
| A01173 | A11406 | 152 | A01173 | A11412 | 361 |
| A01173 | A11487 | 489 | A01173 | A11929 | 173 |
| A01173 | A12393 | 184 | A01173 | A12478 | 259 |
| A01173 | A13987 | 490 | A01173 | A14006 | 491 |
| A01173 | A14010 | 477 | A01173 | A14055 | 724 |
| A01173 | A14072 | 219 | A01173 | A14122 | 458 |
| A01173 | A14196 | 208 | A01173 | A14208 | 368 |
| A01173 | A14257 | 173 | A01173 | A14371 | 380 |
| A01173 | A14378 | 481 | A01173 | A14399 | 469 |
| A01173 | A14406 | 172 | A01173 | A14408 | 351 |
| A01173 | A14426 | 443 | A01173 | A14452 | 379 |
| A01173 | A14511 | 279 | A01173 | A14543 | 413 |
| A01173 | A14597 | 243 | A01173 | A14643 | 490 |
| A01173 | A14943 | 152 | A01173 | A15291 | 174 |
| A01173 | A15292 | 491 | A01173 | A15297 | 479 |
| A01173 | A15301 | 475 | A01173 | A15312 | 484 |
| A01173 | A15313 | 472 | A01173 | A15338 | 477 |
| A01173 | A15348 | 428 | A01173 | A15349 | 480 |
| A01173 | A15352 | 485 | A01173 | A15366 | 479 |
| A01173 | A15396 | 391 | A01173 | A15431 | 475 |
| A01173 | A15432 | 479 | A01173 | A15433 | 235 |
| A01173 | A15434 | 154 | A01173 | A15435 | 449 |
| A01173 | A15436 | 348 | A01173 | A15437 | 174 |
| A01173 | A15447 | 435 | A01173 | A15451 | 156 |
| A01173 | A15452 | 475 | A01173 | A15462 | 319 |
| A01173 | A15463 | 409 | A01173 | A15464 | 200 |
| A01173 | A15545 | 245 | A01173 | A15553 | 347 |
| A01173 | A15554 | 259 | A01173 | A15612 | 152 |
| A01173 | A15671 | 179 | A01173 | A15804 | 322 |
| A01173 | A15915 | 283 | A01173 | A16082 | 162 |
| A01173 | A16414 | 195 | A01173 | A16627 | 190 |
| A01173 | A16879 | 154 | A01173 | A16947 | 172 |

|        |        |     |        |        |     |
|--------|--------|-----|--------|--------|-----|
| A01173 | A16994 | 491 | A01173 | A17136 | 168 |
| A01173 | A17198 | 185 | A01174 | A01175 | 417 |
| A01174 | A01225 | 191 | A01174 | A01229 | 195 |
| A01174 | A01397 | 191 | A01174 | A01409 | 391 |
| A01174 | A01508 | 285 | A01174 | A01635 | 460 |
| A01174 | A01714 | 281 | A01174 | A01865 | 227 |
| A01174 | A01902 | 174 | A01174 | A02053 | 269 |
| A01174 | A02363 | 281 | A01174 | A02924 | 283 |
| A01174 | A03004 | 427 | A01174 | A03027 | 235 |
| A01174 | A03050 | 219 | A01174 | A03095 | 452 |
| A01174 | A03311 | 296 | A01174 | A03413 | 208 |
| A01174 | A03429 | 420 | A01174 | A03431 | 430 |
| A01174 | A03441 | 170 | A01174 | A03442 | 344 |
| A01174 | A03487 | 378 | A01174 | A03508 | 319 |
| A01174 | A03513 | 260 | A01174 | A03791 | 383 |
| A01174 | A04660 | 456 | A01174 | A04779 | 358 |
| A01174 | A04781 | 279 | A01174 | A04834 | 456 |
| A01174 | A04995 | 490 | A01174 | A05006 | 334 |
| A01174 | A05007 | 457 | A01174 | A05310 | 396 |
| A01174 | A05472 | 180 | A01174 | A05516 | 221 |
| A01174 | A05713 | 383 | A01174 | A05753 | 474 |
| A01174 | A05754 | 480 | A01174 | A05755 | 383 |
| A01174 | A05757 | 343 | A01174 | A05759 | 355 |
| A01174 | A05774 | 391 | A01174 | A05789 | 288 |
| A01174 | A05937 | 279 | A01174 | A06063 | 424 |
| A01174 | A06358 | 457 | A01174 | A06359 | 159 |
| A01174 | A06597 | 379 | A01174 | A06633 | 236 |
| A01174 | A06635 | 272 | A01174 | A06700 | 490 |
| A01174 | A06756 | 462 | A01174 | A06847 | 257 |
| A01174 | A06912 | 245 | A01174 | A06916 | 277 |
| A01174 | A07059 | 299 | A01174 | A07080 | 180 |
| A01174 | A07109 | 382 | A01174 | A07122 | 460 |
| A01174 | A07239 | 440 | A01174 | A07256 | 398 |
| A01174 | A07264 | 216 | A01174 | A07267 | 412 |
| A01174 | A07304 | 259 | A01174 | A07413 | 429 |
| A01174 | A07424 | 396 | A01174 | A07477 | 174 |
| A01174 | A07520 | 252 | A01174 | A07530 | 375 |
| A01174 | A07554 | 288 | A01174 | A07688 | 326 |
| A01174 | A07847 | 207 | A01174 | A07848 | 255 |
| A01174 | A08199 | 257 | A01174 | A08751 | 291 |
| A01174 | A10020 | 462 | A01174 | A10121 | 319 |
| A01174 | A10420 | 221 | A01174 | A10657 | 216 |
| A01174 | A10701 | 183 | A01174 | A10875 | 185 |
| A01174 | A10880 | 366 | A01174 | A12055 | 314 |
| A01174 | A14498 | 333 | A01174 | A14589 | 219 |
| A01174 | A14827 | 356 | A01174 | A15628 | 311 |



|        |        |     |        |        |     |
|--------|--------|-----|--------|--------|-----|
| A01174 | A15637 | 210 | A01174 | A15874 | 267 |
| A01174 | A15905 | 385 | A01174 | A16027 | 473 |
| A01174 | A16741 | 486 | A01174 | A17078 | 290 |
| A01175 | A01315 | 168 | A01175 | A01347 | 159 |
| A01175 | A01508 | 249 | A01175 | A01599 | 303 |
| A01175 | A01635 | 479 | A01175 | A01735 | 344 |
| A01175 | A01743 | 151 | A01175 | A01866 | 363 |
| A01175 | A01902 | 151 | A01175 | A02053 | 246 |
| A01175 | A02254 | 154 | A01175 | A02432 | 154 |
| A01175 | A02992 | 407 | A01175 | A03003 | 172 |
| A01175 | A03008 | 352 | A01175 | A03016 | 332 |
| A01175 | A03167 | 430 | A01175 | A03431 | 229 |
| A01175 | A03441 | 277 | A01175 | A03443 | 226 |
| A01175 | A03513 | 229 | A01175 | A04229 | 187 |
| A01175 | A04646 | 339 | A01175 | A04660 | 223 |
| A01175 | A04778 | 418 | A01175 | A04779 | 485 |
| A01175 | A04834 | 449 | A01175 | A04851 | 274 |
| A01175 | A04995 | 440 | A01175 | A05007 | 483 |
| A01175 | A05098 | 187 | A01175 | A05102 | 307 |
| A01175 | A05289 | 193 | A01175 | A05310 | 160 |
| A01175 | A05472 | 157 | A01175 | A05573 | 154 |
| A01175 | A05600 | 241 | A01175 | A05738 | 202 |
| A01175 | A05759 | 462 | A01175 | A05770 | 277 |
| A01175 | A05774 | 433 | A01175 | A06088 | 265 |
| A01175 | A06089 | 313 | A01175 | A06252 | 241 |
| A01175 | A06358 | 474 | A01175 | A06641 | 210 |
| A01175 | A06668 | 391 | A01175 | A06689 | 196 |
| A01175 | A06744 | 246 | A01175 | A06756 | 433 |
| A01175 | A06847 | 235 | A01175 | A06957 | 160 |
| A01175 | A06979 | 339 | A01175 | A06981 | 238 |
| A01175 | A07027 | 338 | A01175 | A07035 | 372 |
| A01175 | A07122 | 472 | A01175 | A07238 | 345 |
| A01175 | A07256 | 438 | A01175 | A07264 | 191 |
| A01175 | A07267 | 398 | A01175 | A07271 | 321 |
| A01175 | A07413 | 363 | A01175 | A07477 | 450 |
| A01175 | A07553 | 404 | A01175 | A07574 | 184 |
| A01175 | A07590 | 419 | A01175 | A07688 | 302 |
| A01175 | A07736 | 339 | A01175 | A07933 | 170 |
| A01175 | A07973 | 157 | A01175 | A08108 | 199 |
| A01175 | A08238 | 241 | A01175 | A08252 | 218 |
| A01175 | A08330 | 180 | A01175 | A08690 | 283 |
| A01175 | A08751 | 271 | A01175 | A09879 | 257 |
| A01175 | A10020 | 339 | A01175 | A10027 | 372 |
| A01175 | A10437 | 277 | A01175 | A10444 | 201 |
| A01175 | A10452 | 311 | A01175 | A10652 | 227 |
| A01175 | A10656 | 318 | A01175 | A10677 | 162 |

|        |        |     |        |        |     |
|--------|--------|-----|--------|--------|-----|
| A01175 | A10688 | 260 | A01175 | A10693 | 199 |
| A01175 | A10707 | 255 | A01175 | A10712 | 286 |
| A01175 | A11325 | 183 | A01175 | A11381 | 232 |
| A01175 | A13735 | 218 | A01175 | A14827 | 326 |
| A01175 | A14856 | 185 | A01175 | A14871 | 313 |
| A01175 | A15905 | 367 | A01175 | A16286 | 335 |
| A01176 | A01281 | 230 | A01176 | A01457 | 254 |
| A01176 | A01498 | 247 | A01176 | A01524 | 899 |
| A01176 | A01558 | 899 | A01176 | A01560 | 899 |
| A01176 | A01561 | 899 | A01176 | A01588 | 899 |
| A01176 | A01594 | 468 | A01176 | A01639 | 899 |
| A01176 | A02254 | 176 | A01176 | A02676 | 176 |
| A01176 | A02775 | 273 | A01176 | A03131 | 171 |
| A01176 | A03513 | 205 | A01176 | A04699 | 899 |
| A01176 | A05064 | 490 | A01176 | A05338 | 243 |
| A01176 | A05453 | 393 | A01176 | A05684 | 238 |
| A01176 | A05706 | 445 | A01176 | A06641 | 249 |
| A01176 | A07059 | 260 | A01176 | A07311 | 928 |
| A01176 | A07320 | 273 | A01176 | A07399 | 162 |
| A01176 | A07643 | 393 | A01176 | A07690 | 252 |
| A01176 | A07771 | 267 | A01176 | A08155 | 174 |
| A01176 | A08205 | 314 | A01176 | A08279 | 185 |
| A01176 | A08280 | 152 | A01176 | A08707 | 294 |
| A01176 | A10365 | 899 | A01176 | A10391 | 398 |
| A01176 | A10506 | 191 | A01176 | A10542 | 223 |
| A01176 | A10691 | 230 | A01176 | A13050 | 160 |
| A01176 | A13335 | 63  | A01176 | A15507 | 340 |
| A01177 | A01312 | 583 | A01177 | A01317 | 362 |
| A01177 | A01318 | 308 | A01177 | A01320 | 323 |
| A01177 | A01323 | 177 | A01177 | A01328 | 358 |
| A01177 | A01375 | 223 | A01177 | A01385 | 266 |
| A01177 | A01420 | 224 | A01177 | A01470 | 252 |
| A01177 | A01559 | 193 | A01177 | A01974 | 193 |
| A01177 | A03057 | 445 | A01177 | A11745 | 288 |
| A01177 | A14153 | 266 | A01177 | A15837 | 232 |
| A01178 | A01291 | 436 | A01178 | A01425 | 456 |
| A01178 | A01435 | 228 | A01178 | A01554 | 269 |
| A01178 | A01560 | 486 | A01178 | A01594 | 263 |
| A01178 | A01688 | 180 | A01178 | A01692 | 446 |
| A01178 | A01730 | 380 | A01178 | A01740 | 177 |
| A01178 | A01741 | 491 | A01178 | A01742 | 477 |
| A01178 | A01776 | 408 | A01178 | A01791 | 168 |
| A01178 | A01796 | 405 | A01178 | A01850 | 490 |
| A01178 | A01903 | 430 | A01178 | A02001 | 173 |
| A01178 | A02020 | 483 | A01178 | A02028 | 154 |
| A01178 | A02065 | 383 | A01178 | A02143 | 63  |

|        |        |     |        |        |     |
|--------|--------|-----|--------|--------|-----|
| A01178 | A02208 | 219 | A01178 | A02298 | 63  |
| A01178 | A02307 | 91  | A01178 | A02361 | 473 |
| A01178 | A02418 | 85  | A01178 | A02421 | 246 |
| A01178 | A02481 | 63  | A01178 | A02500 | 256 |
| A01178 | A02586 | 462 | A01178 | A02698 | 404 |
| A01178 | A02700 | 171 | A01178 | A02703 | 180 |
| A01178 | A02711 | 208 | A01178 | A02810 | 171 |
| A01178 | A02837 | 454 | A01178 | A02859 | 174 |
| A01178 | A02866 | 219 | A01178 | A03053 | 141 |
| A01178 | A03071 | 143 | A01178 | A03112 | 210 |
| A01178 | A03144 | 70  | A01178 | A03259 | 246 |
| A01178 | A03286 | 267 | A01178 | A03591 | 417 |
| A01178 | A03739 | 489 | A01178 | A03754 | 266 |
| A01178 | A03869 | 256 | A01178 | A03934 | 226 |
| A01178 | A04054 | 183 | A01178 | A04062 | 452 |
| A01178 | A04095 | 177 | A01178 | A04342 | 446 |
| A01178 | A04392 | 279 | A01178 | A04449 | 490 |
| A01178 | A04571 | 215 | A01178 | A04583 | 256 |
| A01178 | A05247 | 257 | A01178 | A05281 | 226 |
| A01178 | A05436 | 353 | A01178 | A05451 | 201 |
| A01178 | A05452 | 219 | A01178 | A05472 | 191 |
| A01178 | A05541 | 246 | A01178 | A05550 | 217 |
| A01178 | A06588 | 219 | A01178 | A06660 | 285 |
| A01178 | A06717 | 238 | A01178 | A06825 | 204 |
| A01178 | A06994 | 183 | A01178 | A07037 | 177 |
| A01178 | A07311 | 486 | A01178 | A07399 | 488 |
| A01178 | A07426 | 232 | A01178 | A07440 | 391 |
| A01178 | A07466 | 458 | A01178 | A07480 | 461 |
| A01178 | A07603 | 294 | A01178 | A08669 | 418 |
| A01178 | A08878 | 165 | A01178 | A09018 | 228 |
| A01178 | A09319 | 182 | A01178 | A09423 | 335 |
| A01178 | A09545 | 210 | A01178 | A09577 | 341 |
| A01178 | A09643 | 177 | A01178 | A09644 | 205 |
| A01178 | A09753 | 350 | A01178 | A09755 | 210 |
| A01178 | A09849 | 195 | A01178 | A10365 | 249 |
| A01178 | A10501 | 215 | A01178 | A10560 | 188 |
| A01178 | A10601 | 483 | A01178 | A10637 | 297 |
| A01178 | A10728 | 193 | A01178 | A10902 | 180 |
| A01178 | A11621 | 475 | A01178 | A11850 | 302 |
| A01178 | A11983 | 348 | A01178 | A12343 | 238 |
| A01178 | A12664 | 151 | A01178 | A13108 | 256 |
| A01178 | A13426 | 151 | A01178 | A13663 | 267 |
| A01178 | A14000 | 185 | A01178 | A14456 | 329 |
| A01178 | A14520 | 251 | A01178 | A14831 | 215 |
| A01178 | A15241 | 174 | A01178 | A15291 | 475 |
| A01178 | A15429 | 160 | A01178 | A15614 | 238 |

|        |        |     |        |        |     |
|--------|--------|-----|--------|--------|-----|
| A01178 | A16739 | 350 | A01178 | A16741 | 221 |
| A01178 | A16744 | 262 | A01179 | A01206 | 489 |
| A01179 | A01356 | 286 | A01179 | A01379 | 380 |
| A01179 | A01384 | 319 | A01179 | A01429 | 432 |
| A01179 | A01470 | 391 | A01179 | A01492 | 469 |
| A01179 | A01539 | 218 | A01179 | A01598 | 398 |
| A01179 | A01649 | 491 | A01179 | A06584 | 438 |
| A01179 | A06897 | 374 | A01179 | A08022 | 312 |
| A01179 | A08357 | 491 | A01179 | A08684 | 151 |
| A01179 | A09292 | 491 | A01179 | A09352 | 285 |
| A01179 | A09707 | 491 | A01179 | A11462 | 491 |
| A01179 | A11942 | 465 | A01179 | A13126 | 468 |
| A01179 | A13989 | 491 | A01179 | A15215 | 291 |
| A01179 | A15256 | 246 | A01179 | A15373 | 232 |
| A01179 | A15416 | 369 | A01179 | A15946 | 188 |
| A01180 | A01191 | 266 | A01180 | A01372 | 307 |
| A01180 | A01391 | 188 | A01180 | A01588 | 218 |
| A01180 | A02976 | 216 | A01180 | A08248 | 216 |
| A01180 | A08281 | 184 | A01180 | A08524 | 322 |
| A01180 | A12186 | 375 | A01180 | A14196 | 468 |
| A01180 | A15419 | 174 | A01180 | A15559 | 475 |
| A01180 | A15564 | 374 | A01180 | A15729 | 204 |
| A01180 | A15763 | 314 | A01180 | A15947 | 430 |
| A01180 | A16690 | 170 | A01180 | A16866 | 221 |
| A01181 | A01209 | 416 | A01181 | A01214 | 456 |
| A01181 | A01226 | 457 | A01181 | A07695 | 567 |
| A01181 | A08144 | 530 | A01181 | A08892 | 340 |
| A01181 | A11401 | 201 | A01182 | A01243 | 157 |
| A01182 | A01352 | 204 | A01182 | A01365 | 241 |
| A01182 | A06832 | 268 | A01182 | A07449 | 348 |
| A01182 | A08773 | 172 | A01183 | A01661 | 424 |
| A01183 | A03724 | 450 | A01183 | A03899 | 446 |
| A01183 | A04622 | 274 | A01183 | A08866 | 368 |
| A01183 | A09205 | 485 | A01183 | A14928 | 338 |
| A01183 | A15318 | 263 | A01184 | A01189 | 195 |
| A01184 | A01201 | 491 | A01184 | A01206 | 491 |
| A01184 | A01214 | 265 | A01184 | A01224 | 308 |
| A01184 | A01234 | 491 | A01184 | A01243 | 254 |
| A01184 | A01249 | 485 | A01184 | A01291 | 491 |
| A01184 | A01292 | 170 | A01184 | A01304 | 491 |
| A01184 | A01306 | 491 | A01184 | A01334 | 160 |
| A01184 | A01335 | 401 | A01184 | A01338 | 424 |
| A01184 | A01351 | 484 | A01184 | A01401 | 294 |
| A01184 | A01430 | 176 | A01184 | A01433 | 430 |
| A01184 | A01437 | 491 | A01184 | A01468 | 483 |
| A01184 | A01470 | 491 | A01184 | A01487 | 484 |

|        |        |     |        |        |     |
|--------|--------|-----|--------|--------|-----|
| A01184 | A01488 | 413 | A01184 | A01492 | 491 |
| A01184 | A01503 | 286 | A01184 | A01569 | 157 |
| A01184 | A01576 | 302 | A01184 | A01579 | 369 |
| A01184 | A01598 | 477 | A01184 | A01612 | 486 |
| A01184 | A01614 | 372 | A01184 | A01649 | 491 |
| A01184 | A01721 | 474 | A01184 | A02064 | 469 |
| A01184 | A02978 | 172 | A01184 | A03069 | 484 |
| A01184 | A03438 | 205 | A01184 | A03567 | 491 |
| A01184 | A03754 | 216 | A01184 | A03859 | 224 |
| A01184 | A03912 | 160 | A01184 | A04430 | 193 |
| A01184 | A04607 | 296 | A01184 | A04648 | 491 |
| A01184 | A05121 | 288 | A01184 | A05501 | 198 |
| A01184 | A05845 | 439 | A01184 | A06275 | 491 |
| A01184 | A06861 | 380 | A01184 | A06897 | 375 |
| A01184 | A06965 | 491 | A01184 | A07223 | 486 |
| A01184 | A07306 | 252 | A01184 | A07347 | 491 |
| A01184 | A07451 | 434 | A01184 | A07533 | 477 |
| A01184 | A07570 | 151 | A01184 | A07581 | 236 |
| A01184 | A07584 | 490 | A01184 | A07625 | 338 |
| A01184 | A07661 | 302 | A01184 | A07700 | 491 |
| A01184 | A07706 | 428 | A01184 | A07725 | 316 |
| A01184 | A07924 | 477 | A01184 | A07968 | 226 |
| A01184 | A08011 | 490 | A01184 | A08022 | 343 |
| A01184 | A08024 | 491 | A01184 | A08112 | 226 |
| A01184 | A08137 | 461 | A01184 | A08154 | 202 |
| A01184 | A08211 | 347 | A01184 | A08326 | 385 |
| A01184 | A08357 | 477 | A01184 | A08398 | 458 |
| A01184 | A08403 | 251 | A01184 | A08452 | 491 |
| A01184 | A08521 | 326 | A01184 | A08664 | 243 |
| A01184 | A08972 | 245 | A01184 | A09307 | 414 |
| A01184 | A09312 | 302 | A01184 | A09322 | 486 |
| A01184 | A09327 | 196 | A01184 | A09585 | 216 |
| A01184 | A09619 | 424 | A01184 | A09664 | 363 |
| A01184 | A09702 | 450 | A01184 | A10439 | 183 |
| A01184 | A10465 | 445 | A01184 | A10518 | 152 |
| A01184 | A10529 | 183 | A01184 | A10616 | 489 |
| A01184 | A10923 | 393 | A01184 | A11390 | 260 |
| A01184 | A11438 | 436 | A01184 | A11480 | 299 |
| A01184 | A11575 | 369 | A01184 | A11704 | 418 |
| A01184 | A11831 | 246 | A01184 | A11832 | 322 |
| A01184 | A11945 | 345 | A01184 | A12237 | 200 |
| A01184 | A12259 | 208 | A01184 | A12419 | 430 |
| A01184 | A12821 | 154 | A01184 | A12998 | 252 |
| A01184 | A13055 | 402 | A01184 | A13220 | 188 |
| A01184 | A13870 | 172 | A01184 | A13989 | 491 |
| A01184 | A13992 | 260 | A01184 | A14006 | 165 |

|        |        |     |        |        |     |
|--------|--------|-----|--------|--------|-----|
| A01184 | A14355 | 216 | A01184 | A14505 | 490 |
| A01184 | A14655 | 362 | A01184 | A15660 | 273 |
| A01184 | A15762 | 258 | A01184 | A15764 | 274 |
| A01184 | A15776 | 252 | A01184 | A15988 | 276 |
| A01184 | A16118 | 337 | A01184 | A16302 | 226 |
| A01184 | A16320 | 217 | A01184 | A16631 | 274 |
| A01185 | A01267 | 429 | A01185 | A01294 | 367 |
| A01185 | A01361 | 792 | A01185 | A01383 | 157 |
| A01185 | A01419 | 655 | A01185 | A01438 | 465 |
| A01185 | A01572 | 171 | A01185 | A01575 | 168 |
| A01185 | A01576 | 485 | A01185 | A01741 | 199 |
| A01185 | A03321 | 278 | A01185 | A03822 | 462 |
| A01185 | A05756 | 399 | A01185 | A07004 | 475 |
| A01185 | A07290 | 241 | A01185 | A07697 | 486 |
| A01185 | A07835 | 356 | A01185 | A07885 | 489 |
| A01185 | A07967 | 319 | A01185 | A08190 | 205 |
| A01185 | A08356 | 460 | A01185 | A08553 | 255 |
| A01185 | A08562 | 193 | A01185 | A08831 | 249 |
| A01185 | A08934 | 389 | A01185 | A09007 | 491 |
| A01185 | A09010 | 480 | A01185 | A09675 | 276 |
| A01185 | A09968 | 256 | A01185 | A10159 | 491 |
| A01185 | A10642 | 270 | A01185 | A11297 | 208 |
| A01185 | A11487 | 356 | A01185 | A11496 | 213 |
| A01185 | A12662 | 281 | A01185 | A13204 | 276 |
| A01185 | A13231 | 424 | A01185 | A13647 | 424 |
| A01185 | A14086 | 428 | A01185 | A14183 | 489 |
| A01185 | A14221 | 224 | A01185 | A14235 | 419 |
| A01185 | A14358 | 212 | A01185 | A14454 | 491 |
| A01185 | A14843 | 439 | A01185 | A15262 | 491 |
| A01185 | A15359 | 182 | A01185 | A15373 | 218 |
| A01185 | A15665 | 192 | A01185 | A15946 | 307 |
| A01185 | A16623 | 398 | A01185 | A16701 | 279 |
| A01185 | A16802 | 358 | A01185 | A16824 | 174 |
| A01185 | A16936 | 435 | A01185 | A16979 | 152 |
| A01185 | A17015 | 441 | A01185 | A17028 | 486 |
| A01185 | A17043 | 188 | A01186 | A01233 | 258 |
| A01186 | A01247 | 278 | A01186 | A01249 | 337 |
| A01186 | A01250 | 413 | A01186 | A01256 | 281 |
| A01186 | A01263 | 469 | A01186 | A01291 | 484 |
| A01186 | A01306 | 469 | A01186 | A01335 | 371 |
| A01186 | A01337 | 347 | A01186 | A01347 | 221 |
| A01186 | A01365 | 465 | A01186 | A01369 | 281 |
| A01186 | A01392 | 202 | A01186 | A01407 | 474 |
| A01186 | A01416 | 279 | A01186 | A01436 | 168 |
| A01186 | A01449 | 440 | A01186 | A01481 | 457 |
| A01186 | A01495 | 156 | A01186 | A02154 | 271 |

|        |        |     |        |        |     |
|--------|--------|-----|--------|--------|-----|
| A01186 | A02325 | 213 | A01186 | A02814 | 191 |
| A01186 | A03167 | 151 | A01186 | A03338 | 229 |
| A01186 | A03410 | 283 | A01186 | A03454 | 302 |
| A01186 | A03490 | 332 | A01186 | A03567 | 466 |
| A01186 | A03754 | 184 | A01186 | A03763 | 154 |
| A01186 | A04211 | 313 | A01186 | A04372 | 335 |
| A01186 | A04475 | 330 | A01186 | A04846 | 390 |
| A01186 | A04945 | 291 | A01186 | A05258 | 413 |
| A01186 | A05318 | 329 | A01186 | A05499 | 221 |
| A01186 | A05501 | 480 | A01186 | A05502 | 358 |
| A01186 | A06564 | 324 | A01186 | A06965 | 321 |
| A01186 | A07331 | 335 | A01186 | A07413 | 185 |
| A01186 | A07451 | 302 | A01186 | A07800 | 267 |
| A01186 | A07976 | 416 | A01186 | A08358 | 160 |
| A01186 | A08402 | 281 | A01186 | A08419 | 281 |
| A01186 | A08501 | 165 | A01186 | A08556 | 226 |
| A01186 | A08973 | 265 | A01186 | A09245 | 210 |
| A01186 | A09322 | 294 | A01186 | A09735 | 364 |
| A01186 | A10417 | 205 | A01186 | A10702 | 177 |
| A01186 | A10924 | 330 | A01186 | A11309 | 165 |
| A01186 | A11364 | 317 | A01186 | A11597 | 299 |
| A01186 | A11616 | 223 | A01186 | A11992 | 196 |
| A01186 | A12011 | 279 | A01186 | A12270 | 251 |
| A01186 | A12477 | 263 | A01186 | A12821 | 340 |
| A01186 | A13497 | 377 | A01186 | A13596 | 430 |
| A01186 | A13992 | 345 | A01186 | A14176 | 205 |
| A01186 | A14272 | 274 | A01186 | A14479 | 167 |
| A01186 | A14482 | 327 | A01186 | A14568 | 165 |
| A01186 | A14579 | 196 | A01186 | A14588 | 213 |
| A01186 | A14594 | 408 | A01186 | A14813 | 288 |
| A01186 | A14849 | 439 | A01186 | A15235 | 210 |
| A01186 | A15497 | 165 | A01186 | A15500 | 334 |
| A01186 | A15771 | 434 | A01186 | A16118 | 452 |
| A01187 | A01189 | 446 | A01187 | A01197 | 628 |
| A01187 | A01212 | 229 | A01187 | A01255 | 215 |
| A01187 | A01315 | 317 | A01187 | A01319 | 317 |
| A01187 | A01322 | 475 | A01187 | A01329 | 239 |
| A01187 | A01331 | 168 | A01187 | A01341 | 328 |
| A01187 | A01388 | 468 | A01187 | A01415 | 606 |
| A01187 | A01559 | 443 | A01187 | A01589 | 303 |
| A01187 | A01594 | 457 | A01187 | A01627 | 229 |
| A01187 | A01659 | 238 | A01187 | A01680 | 317 |
| A01187 | A01682 | 229 | A01187 | A01686 | 488 |
| A01187 | A02060 | 272 | A01187 | A02180 | 319 |
| A01187 | A02216 | 358 | A01187 | A03327 | 317 |
| A01187 | A04668 | 291 | A01187 | A05690 | 317 |

|        |        |     |        |        |     |
|--------|--------|-----|--------|--------|-----|
| A01187 | A06130 | 317 | A01187 | A06242 | 378 |
| A01187 | A06381 | 317 | A01187 | A06750 | 229 |
| A01187 | A06864 | 418 | A01187 | A06924 | 215 |
| A01187 | A06982 | 293 | A01187 | A07319 | 445 |
| A01187 | A07346 | 466 | A01187 | A07353 | 317 |
| A01187 | A07480 | 445 | A01187 | A07534 | 355 |
| A01187 | A07595 | 385 | A01187 | A07603 | 481 |
| A01187 | A07647 | 177 | A01187 | A07670 | 229 |
| A01187 | A07902 | 399 | A01187 | A07996 | 470 |
| A01187 | A08000 | 361 | A01187 | A08029 | 204 |
| A01187 | A08030 | 423 | A01187 | A08117 | 351 |
| A01187 | A08208 | 364 | A01187 | A08212 | 491 |
| A01187 | A08516 | 477 | A01187 | A08526 | 462 |
| A01187 | A08694 | 452 | A01187 | A08964 | 288 |
| A01187 | A08995 | 162 | A01187 | A09000 | 159 |
| A01187 | A09451 | 154 | A01187 | A09515 | 152 |
| A01187 | A09598 | 486 | A01187 | A10228 | 228 |
| A01187 | A10250 | 313 | A01187 | A11724 | 218 |
| A01187 | A12556 | 296 | A01187 | A13913 | 486 |
| A01187 | A13949 | 480 | A01187 | A14079 | 425 |
| A01187 | A14138 | 185 | A01187 | A14273 | 224 |
| A01187 | A14460 | 390 | A01187 | A14614 | 249 |
| A01187 | A14694 | 224 | A01187 | A15369 | 246 |
| A01187 | A15837 | 317 | A01187 | A16127 | 432 |
| A01187 | A16128 | 306 | A01187 | A16134 | 210 |
| A01187 | A16226 | 384 | A01187 | A16606 | 173 |
| A01187 | A16613 | 461 | A01187 | A16616 | 283 |
| A01187 | A16626 | 625 | A01187 | A16643 | 317 |
| A01187 | A16754 | 384 | A01188 | A01190 | 391 |
| A01188 | A01291 | 238 | A01188 | A01365 | 196 |
| A01188 | A01379 | 285 | A01188 | A01500 | 157 |
| A01188 | A01613 | 260 | A01188 | A01655 | 259 |
| A01188 | A01826 | 375 | A01188 | A02542 | 288 |
| A01188 | A02998 | 374 | A01188 | A04055 | 372 |
| A01188 | A05154 | 333 | A01188 | A07655 | 235 |
| A01188 | A07885 | 221 | A01188 | A09042 | 341 |
| A01188 | A10159 | 167 | A01188 | A14589 | 226 |
| A01189 | A01191 | 417 | A01189 | A01196 | 297 |
| A01189 | A01205 | 268 | A01189 | A01206 | 477 |
| A01189 | A01249 | 479 | A01189 | A01269 | 251 |
| A01189 | A01291 | 491 | A01189 | A01295 | 425 |
| A01189 | A01306 | 472 | A01189 | A01325 | 373 |
| A01189 | A01338 | 157 | A01189 | A01352 | 172 |
| A01189 | A01354 | 63  | A01189 | A01360 | 477 |
| A01189 | A01371 | 183 | A01189 | A01388 | 185 |
| A01189 | A01392 | 379 | A01189 | A01406 | 224 |



|        |        |     |        |        |     |
|--------|--------|-----|--------|--------|-----|
| A01189 | A01437 | 379 | A01189 | A01483 | 490 |
| A01189 | A01508 | 434 | A01189 | A01540 | 366 |
| A01189 | A01545 | 217 | A01189 | A01569 | 176 |
| A01189 | A01577 | 273 | A01189 | A01599 | 154 |
| A01189 | A01620 | 157 | A01189 | A01649 | 424 |
| A01189 | A01690 | 388 | A01189 | A01700 | 283 |
| A01189 | A01755 | 218 | A01189 | A01824 | 173 |
| A01189 | A01976 | 160 | A01189 | A02117 | 246 |
| A01189 | A02178 | 160 | A01189 | A02179 | 174 |
| A01189 | A02180 | 468 | A01189 | A02216 | 489 |
| A01189 | A02227 | 491 | A01189 | A02335 | 223 |
| A01189 | A02392 | 185 | A01189 | A02433 | 154 |
| A01189 | A02542 | 327 | A01189 | A02562 | 63  |
| A01189 | A02589 | 465 | A01189 | A02641 | 330 |
| A01189 | A02675 | 191 | A01189 | A02676 | 462 |
| A01189 | A02738 | 419 | A01189 | A02784 | 456 |
| A01189 | A02789 | 223 | A01189 | A02790 | 151 |
| A01189 | A02792 | 374 | A01189 | A02830 | 294 |
| A01189 | A02842 | 63  | A01189 | A02868 | 95  |
| A01189 | A02877 | 491 | A01189 | A02878 | 491 |
| A01189 | A02902 | 76  | A01189 | A02910 | 187 |
| A01189 | A02965 | 219 | A01189 | A02993 | 151 |
| A01189 | A03069 | 468 | A01189 | A03070 | 305 |
| A01189 | A03112 | 117 | A01189 | A03229 | 294 |
| A01189 | A03241 | 468 | A01189 | A03272 | 443 |
| A01189 | A03277 | 324 | A01189 | A03321 | 85  |
| A01189 | A03406 | 172 | A01189 | A03415 | 466 |
| A01189 | A03422 | 263 | A01189 | A03490 | 227 |
| A01189 | A03501 | 374 | A01189 | A03534 | 229 |
| A01189 | A03567 | 430 | A01189 | A03644 | 251 |
| A01189 | A03645 | 191 | A01189 | A03719 | 223 |
| A01189 | A03728 | 223 | A01189 | A03740 | 152 |
| A01189 | A03752 | 223 | A01189 | A03775 | 176 |
| A01189 | A03812 | 213 | A01189 | A04080 | 316 |
| A01189 | A04085 | 157 | A01189 | A04283 | 154 |
| A01189 | A04346 | 355 | A01189 | A04405 | 263 |
| A01189 | A04507 | 263 | A01189 | A04678 | 157 |
| A01189 | A05011 | 243 | A01189 | A05106 | 218 |
| A01189 | A05332 | 355 | A01189 | A05609 | 185 |
| A01189 | A05902 | 283 | A01189 | A06101 | 425 |
| A01189 | A06135 | 170 | A01189 | A06199 | 243 |
| A01189 | A06273 | 469 | A01189 | A06364 | 486 |
| A01189 | A06383 | 170 | A01189 | A06388 | 165 |
| A01189 | A06443 | 191 | A01189 | A06606 | 401 |
| A01189 | A06689 | 223 | A01189 | A06819 | 574 |
| A01189 | A06845 | 191 | A01189 | A06965 | 451 |

|        |        |     |        |        |     |
|--------|--------|-----|--------|--------|-----|
| A01189 | A07103 | 263 | A01189 | A07163 | 490 |
| A01189 | A07222 | 227 | A01189 | A07243 | 160 |
| A01189 | A07245 | 165 | A01189 | A07333 | 324 |
| A01189 | A07341 | 446 | A01189 | A07370 | 283 |
| A01189 | A07531 | 333 | A01189 | A07706 | 238 |
| A01189 | A07931 | 227 | A01189 | A07974 | 204 |
| A01189 | A08212 | 236 | A01189 | A08289 | 486 |
| A01189 | A08301 | 241 | A01189 | A08357 | 191 |
| A01189 | A08361 | 217 | A01189 | A08398 | 385 |
| A01189 | A08403 | 475 | A01189 | A08450 | 477 |
| A01189 | A08452 | 466 | A01189 | A08516 | 358 |
| A01189 | A08526 | 221 | A01189 | A08554 | 216 |
| A01189 | A08694 | 414 | A01189 | A08836 | 99  |
| A01189 | A09000 | 152 | A01189 | A09021 | 419 |
| A01189 | A09096 | 307 | A01189 | A09119 | 296 |
| A01189 | A09127 | 212 | A01189 | A09133 | 217 |
| A01189 | A09221 | 490 | A01189 | A09276 | 446 |
| A01189 | A09322 | 321 | A01189 | A09471 | 151 |
| A01189 | A09485 | 467 | A01189 | A09548 | 170 |
| A01189 | A09598 | 446 | A01189 | A09610 | 199 |
| A01189 | A09702 | 208 | A01189 | A09808 | 243 |
| A01189 | A09832 | 243 | A01189 | A09836 | 385 |
| A01189 | A09915 | 296 | A01189 | A10034 | 477 |
| A01189 | A10200 | 263 | A01189 | A10221 | 179 |
| A01189 | A10251 | 243 | A01189 | A10289 | 165 |
| A01189 | A10389 | 160 | A01189 | A10399 | 168 |
| A01189 | A10439 | 174 | A01189 | A10509 | 243 |
| A01189 | A10518 | 477 | A01189 | A10529 | 174 |
| A01189 | A10564 | 170 | A01189 | A10917 | 302 |
| A01189 | A10924 | 318 | A01189 | A10997 | 380 |
| A01189 | A11334 | 432 | A01189 | A11438 | 479 |
| A01189 | A11496 | 185 | A01189 | A11529 | 154 |
| A01189 | A11647 | 179 | A01189 | A11745 | 396 |
| A01189 | A11750 | 208 | A01189 | A11935 | 408 |
| A01189 | A11981 | 177 | A01189 | A12006 | 263 |
| A01189 | A12427 | 160 | A01189 | A12687 | 241 |
| A01189 | A12924 | 157 | A01189 | A12968 | 183 |
| A01189 | A13070 | 191 | A01189 | A13088 | 296 |
| A01189 | A13246 | 279 | A01189 | A13459 | 179 |
| A01189 | A13578 | 296 | A01189 | A13822 | 499 |
| A01189 | A13864 | 151 | A01189 | A13992 | 168 |
| A01189 | A14094 | 361 | A01189 | A14216 | 417 |
| A01189 | A14272 | 243 | A01189 | A14505 | 184 |
| A01189 | A14525 | 576 | A01189 | A14566 | 486 |
| A01189 | A14594 | 457 | A01189 | A14643 | 213 |
| A01189 | A14672 | 232 | A01189 | A14803 | 384 |

|        |        |     |        |        |     |
|--------|--------|-----|--------|--------|-----|
| A01189 | A14804 | 223 | A01189 | A14858 | 217 |
| A01189 | A14876 | 297 | A01189 | A14944 | 174 |
| A01189 | A15215 | 168 | A01189 | A15262 | 240 |
| A01189 | A15372 | 563 | A01189 | A15498 | 229 |
| A01189 | A15499 | 234 | A01189 | A15500 | 380 |
| A01189 | A16118 | 165 | A01189 | A16219 | 326 |
| A01189 | A16328 | 324 | A01189 | A16449 | 326 |
| A01189 | A16531 | 261 | A01189 | A16753 | 461 |
| A01189 | A17219 | 296 | A01190 | A01455 | 316 |
| A01190 | A01608 | 388 | A01190 | A01826 | 374 |
| A01190 | A02542 | 285 | A01190 | A02998 | 372 |
| A01190 | A03180 | 396 | A01190 | A03885 | 334 |
| A01190 | A04055 | 369 | A01190 | A05154 | 329 |
| A01190 | A09042 | 339 | A01192 | A01210 | 290 |
| A01192 | A01231 | 162 | A01192 | A01435 | 230 |
| A01192 | A01436 | 243 | A01192 | A01447 | 162 |
| A01192 | A01496 | 318 | A01192 | A01540 | 463 |
| A01192 | A01569 | 486 | A01192 | A01579 | 219 |
| A01192 | A01648 | 614 | A01192 | A01660 | 172 |
| A01192 | A01837 | 201 | A01192 | A02737 | 396 |
| A01192 | A03560 | 596 | A01192 | A03628 | 252 |
| A01192 | A03740 | 347 | A01192 | A03809 | 486 |
| A01192 | A03859 | 485 | A01192 | A03959 | 384 |
| A01192 | A04446 | 489 | A01192 | A04449 | 329 |
| A01192 | A04495 | 195 | A01192 | A05029 | 628 |
| A01192 | A05086 | 490 | A01192 | A05101 | 491 |
| A01192 | A05301 | 481 | A01192 | A06814 | 265 |
| A01192 | A06936 | 281 | A01192 | A07163 | 409 |
| A01192 | A07311 | 928 | A01192 | A07378 | 637 |
| A01192 | A07481 | 255 | A01192 | A07527 | 232 |
| A01192 | A07767 | 665 | A01192 | A07773 | 480 |
| A01192 | A07793 | 319 | A01192 | A07798 | 227 |
| A01192 | A08261 | 491 | A01192 | A08315 | 113 |
| A01192 | A08390 | 159 | A01192 | A08991 | 430 |
| A01192 | A08999 | 391 | A01192 | A09009 | 243 |
| A01192 | A09586 | 436 | A01192 | A09591 | 633 |
| A01192 | A09600 | 369 | A01192 | A09653 | 204 |
| A01192 | A09657 | 216 | A01192 | A09691 | 384 |
| A01192 | A10490 | 208 | A01192 | A11521 | 469 |
| A01192 | A11578 | 245 | A01192 | A11855 | 151 |
| A01192 | A11860 | 293 | A01192 | A12268 | 327 |
| A01192 | A12473 | 481 | A01192 | A12503 | 348 |
| A01192 | A12607 | 247 | A01192 | A12710 | 268 |
| A01192 | A12923 | 174 | A01192 | A12997 | 257 |
| A01192 | A13162 | 283 | A01192 | A13207 | 246 |
| A01192 | A13342 | 491 | A01192 | A13992 | 251 |

|        |        |     |        |        |     |
|--------|--------|-----|--------|--------|-----|
| A01192 | A14073 | 604 | A01192 | A14178 | 638 |
| A01192 | A14351 | 465 | A01192 | A14478 | 232 |
| A01192 | A14566 | 314 | A01192 | A14594 | 475 |
| A01192 | A15653 | 745 | A01192 | A15684 | 210 |
| A01192 | A17088 | 531 | A01193 | A01206 | 425 |
| A01193 | A01279 | 582 | A01193 | A01334 | 217 |
| A01193 | A01351 | 687 | A01193 | A01424 | 321 |
| A01193 | A01492 | 188 | A01193 | A03438 | 154 |
| A01193 | A06698 | 174 | A01193 | A07244 | 438 |
| A01193 | A07432 | 565 | A01193 | A07524 | 541 |
| A01193 | A07537 | 273 | A01193 | A07625 | 174 |
| A01193 | A07924 | 549 | A01193 | A10317 | 177 |
| A01193 | A11544 | 174 | A01193 | A11831 | 174 |
| A01193 | A11832 | 174 | A01193 | A11913 | 199 |
| A01193 | A14655 | 235 | A01193 | A15215 | 358 |
| A01194 | A01206 | 483 | A01194 | A01218 | 308 |
| A01194 | A01219 | 385 | A01194 | A01234 | 462 |
| A01194 | A01242 | 474 | A01194 | A01243 | 226 |
| A01194 | A01291 | 561 | A01194 | A01335 | 278 |
| A01194 | A01354 | 420 | A01194 | A01406 | 174 |
| A01194 | A01411 | 590 | A01194 | A01416 | 443 |
| A01194 | A01420 | 591 | A01194 | A01431 | 245 |
| A01194 | A01455 | 455 | A01194 | A01468 | 363 |
| A01194 | A01470 | 457 | A01194 | A01539 | 491 |
| A01194 | A01548 | 377 | A01194 | A01569 | 491 |
| A01194 | A01577 | 274 | A01194 | A01581 | 247 |
| A01194 | A01598 | 411 | A01194 | A01606 | 176 |
| A01194 | A01612 | 483 | A01194 | A01626 | 162 |
| A01194 | A01649 | 475 | A01194 | A01684 | 332 |
| A01194 | A01725 | 157 | A01194 | A01728 | 257 |
| A01194 | A01824 | 277 | A01194 | A01826 | 247 |
| A01194 | A02219 | 306 | A01194 | A02877 | 488 |
| A01194 | A03446 | 491 | A01194 | A03453 | 448 |
| A01194 | A03477 | 258 | A01194 | A03690 | 185 |
| A01194 | A03738 | 283 | A01194 | A03740 | 480 |
| A01194 | A03752 | 185 | A01194 | A03783 | 441 |
| A01194 | A03785 | 486 | A01194 | A04563 | 412 |
| A01194 | A05025 | 180 | A01194 | A05712 | 159 |
| A01194 | A06030 | 174 | A01194 | A06064 | 174 |
| A01194 | A06365 | 440 | A01194 | A06466 | 202 |
| A01194 | A06543 | 348 | A01194 | A06897 | 307 |
| A01194 | A07247 | 204 | A01194 | A07311 | 311 |
| A01194 | A07516 | 296 | A01194 | A07604 | 290 |
| A01194 | A08061 | 452 | A01194 | A08137 | 486 |
| A01194 | A08357 | 385 | A01194 | A08359 | 193 |
| A01194 | A08390 | 401 | A01194 | A08546 | 356 |

|        |        |     |        |        |     |
|--------|--------|-----|--------|--------|-----|
| A01194 | A08896 | 445 | A01194 | A08991 | 251 |
| A01194 | A09042 | 286 | A01194 | A09222 | 252 |
| A01194 | A09318 | 290 | A01194 | A09587 | 423 |
| A01194 | A09717 | 352 | A01194 | A10111 | 191 |
| A01194 | A10490 | 486 | A01194 | A10532 | 491 |
| A01194 | A11266 | 199 | A01194 | A11291 | 333 |
| A01194 | A11372 | 371 | A01194 | A11409 | 491 |
| A01194 | A11833 | 221 | A01194 | A13609 | 491 |
| A01194 | A13989 | 488 | A01194 | A14074 | 247 |
| A01194 | A14220 | 401 | A01194 | A14351 | 172 |
| A01194 | A14482 | 328 | A01194 | A14551 | 199 |
| A01194 | A14701 | 491 | A01194 | A14819 | 317 |
| A01194 | A15199 | 296 | A01194 | A15297 | 457 |
| A01194 | A15529 | 294 | A01194 | A15537 | 170 |
| A01194 | A15558 | 358 | A01194 | A15660 | 474 |
| A01194 | A15738 | 435 | A01194 | A16705 | 324 |
| A01194 | A17131 | 414 | A01195 | A01200 | 530 |
| A01195 | A01212 | 484 | A01195 | A01325 | 350 |
| A01195 | A01329 | 180 | A01195 | A01374 | 224 |
| A01195 | A01383 | 452 | A01195 | A01385 | 351 |
| A01195 | A01398 | 537 | A01195 | A01401 | 537 |
| A01195 | A01500 | 497 | A01195 | A01503 | 201 |
| A01195 | A01741 | 185 | A01195 | A03207 | 385 |
| A01195 | A03526 | 458 | A01195 | A04379 | 238 |
| A01195 | A04648 | 481 | A01195 | A04687 | 156 |
| A01195 | A05550 | 176 | A01195 | A05981 | 154 |
| A01195 | A06037 | 291 | A01195 | A06803 | 539 |
| A01195 | A07290 | 223 | A01195 | A07584 | 443 |
| A01195 | A07670 | 496 | A01195 | A07850 | 509 |
| A01195 | A07853 | 436 | A01195 | A07887 | 538 |
| A01195 | A07920 | 481 | A01195 | A08137 | 341 |
| A01195 | A08383 | 224 | A01195 | A08818 | 156 |
| A01195 | A08882 | 185 | A01195 | A09502 | 156 |
| A01195 | A09712 | 485 | A01195 | A10174 | 157 |
| A01195 | A10642 | 430 | A01195 | A11344 | 156 |
| A01195 | A11674 | 156 | A01195 | A12107 | 257 |
| A01195 | A14006 | 489 | A01195 | A14399 | 353 |
| A01195 | A15297 | 168 | A01195 | A15545 | 193 |
| A01195 | A15946 | 480 | A01195 | A16228 | 518 |
| A01196 | A01212 | 288 | A01196 | A01218 | 305 |
| A01196 | A01234 | 257 | A01196 | A01238 | 221 |
| A01196 | A01249 | 425 | A01196 | A01270 | 582 |
| A01196 | A01291 | 361 | A01196 | A01306 | 458 |
| A01196 | A01335 | 485 | A01196 | A01337 | 154 |
| A01196 | A01369 | 217 | A01196 | A01385 | 224 |
| A01196 | A01407 | 274 | A01196 | A01411 | 251 |

|        |        |     |        |        |     |
|--------|--------|-----|--------|--------|-----|
| A01196 | A01425 | 177 | A01196 | A01468 | 462 |
| A01196 | A01470 | 221 | A01196 | A01496 | 490 |
| A01196 | A01539 | 162 | A01196 | A01579 | 588 |
| A01196 | A01586 | 167 | A01196 | A01601 | 588 |
| A01196 | A01856 | 154 | A01196 | A02350 | 404 |
| A01196 | A02527 | 207 | A01196 | A02737 | 217 |
| A01196 | A03069 | 160 | A01196 | A03859 | 312 |
| A01196 | A04230 | 157 | A01196 | A04662 | 183 |
| A01196 | A04846 | 218 | A01196 | A05499 | 291 |
| A01196 | A05501 | 574 | A01196 | A06084 | 208 |
| A01196 | A06273 | 168 | A01196 | A06274 | 343 |
| A01196 | A06279 | 314 | A01196 | A06356 | 256 |
| A01196 | A06534 | 322 | A01196 | A06814 | 494 |
| A01196 | A06965 | 261 | A01196 | A06973 | 581 |
| A01196 | A06987 | 252 | A01196 | A07047 | 302 |
| A01196 | A07103 | 343 | A01196 | A07307 | 205 |
| A01196 | A07323 | 351 | A01196 | A07398 | 421 |
| A01196 | A07581 | 358 | A01196 | A08131 | 551 |
| A01196 | A08359 | 538 | A01196 | A08369 | 536 |
| A01196 | A08408 | 405 | A01196 | A08457 | 530 |
| A01196 | A08462 | 274 | A01196 | A08466 | 200 |
| A01196 | A08476 | 241 | A01196 | A09285 | 279 |
| A01196 | A09296 | 243 | A01196 | A09308 | 241 |
| A01196 | A09322 | 241 | A01196 | A09620 | 241 |
| A01196 | A09862 | 463 | A01196 | A10924 | 394 |
| A01196 | A11550 | 163 | A01196 | A11562 | 374 |
| A01196 | A11572 | 279 | A01196 | A11728 | 579 |
| A01196 | A11857 | 344 | A01196 | A11861 | 200 |
| A01196 | A12227 | 241 | A01196 | A12270 | 323 |
| A01196 | A13116 | 190 | A01196 | A13333 | 200 |
| A01196 | A13989 | 483 | A01196 | A13992 | 163 |
| A01196 | A14167 | 229 | A01196 | A14169 | 258 |
| A01196 | A14176 | 364 | A01196 | A14530 | 221 |
| A01196 | A14817 | 190 | A01196 | A14937 | 188 |
| A01196 | A15202 | 200 | A01196 | A15225 | 183 |
| A01196 | A15250 | 301 | A01196 | A15268 | 509 |
| A01196 | A15381 | 445 | A01196 | A15567 | 283 |
| A01196 | A15660 | 179 | A01196 | A15711 | 177 |
| A01196 | A16682 | 217 | A01196 | A16686 | 485 |
| A01197 | A01212 | 229 | A01197 | A01241 | 216 |
| A01197 | A01315 | 317 | A01197 | A01317 | 157 |
| A01197 | A01319 | 317 | A01197 | A01321 | 217 |
| A01197 | A01329 | 229 | A01197 | A01331 | 156 |
| A01197 | A01371 | 273 | A01197 | A01415 | 318 |
| A01197 | A01627 | 229 | A01197 | A01680 | 317 |
| A01197 | A01682 | 229 | A01197 | A01741 | 152 |

|        |        |     |        |        |     |
|--------|--------|-----|--------|--------|-----|
| A01197 | A02060 | 341 | A01197 | A03327 | 317 |
| A01197 | A03793 | 317 | A01197 | A04520 | 154 |
| A01197 | A05690 | 317 | A01197 | A06130 | 317 |
| A01197 | A06381 | 317 | A01197 | A06750 | 229 |
| A01197 | A06851 | 157 | A01197 | A06864 | 216 |
| A01197 | A07086 | 313 | A01197 | A07319 | 191 |
| A01197 | A07353 | 317 | A01197 | A07480 | 159 |
| A01197 | A07670 | 229 | A01197 | A08212 | 255 |
| A01197 | A08526 | 232 | A01197 | A08769 | 154 |
| A01197 | A08820 | 191 | A01197 | A09598 | 408 |
| A01197 | A09762 | 332 | A01197 | A11724 | 302 |
| A01197 | A12942 | 406 | A01197 | A14079 | 188 |
| A01197 | A14138 | 274 | A01197 | A14594 | 165 |
| A01197 | A15837 | 459 | A01197 | A15843 | 205 |
| A01197 | A16626 | 317 | A01197 | A16643 | 317 |
| A01197 | A16764 | 227 | A01198 | A01527 | 899 |
| A01198 | A01558 | 899 | A01198 | A01604 | 435 |
| A01198 | A01640 | 232 | A01198 | A02578 | 335 |
| A01198 | A02908 | 899 | A01198 | A02919 | 899 |
| A01198 | A02939 | 352 | A01198 | A02942 | 913 |
| A01198 | A02968 | 899 | A01198 | A03209 | 226 |
| A01198 | A04510 | 329 | A01198 | A05315 | 258 |
| A01198 | A05760 | 923 | A01198 | A07140 | 378 |
| A01198 | A08131 | 290 | A01198 | A08732 | 899 |
| A01198 | A09559 | 372 | A01198 | A10174 | 899 |
| A01198 | A14444 | 899 | A01198 | A16121 | 310 |
| A01200 | A01206 | 489 | A01200 | A01234 | 185 |
| A01200 | A01325 | 218 | A01200 | A01383 | 460 |
| A01200 | A01385 | 344 | A01200 | A01398 | 156 |
| A01200 | A01401 | 711 | A01200 | A01468 | 380 |
| A01200 | A01500 | 193 | A01200 | A03207 | 296 |
| A01200 | A03526 | 466 | A01200 | A04105 | 283 |
| A01200 | A04648 | 493 | A01200 | A04687 | 156 |
| A01200 | A05027 | 156 | A01200 | A05386 | 193 |
| A01200 | A06803 | 533 | A01200 | A07290 | 252 |
| A01200 | A07670 | 242 | A01200 | A07850 | 156 |
| A01200 | A07887 | 234 | A01200 | A08383 | 252 |
| A01200 | A08818 | 156 | A01200 | A09502 | 156 |
| A01200 | A09712 | 486 | A01200 | A10642 | 441 |
| A01200 | A11344 | 156 | A01200 | A11674 | 156 |
| A01200 | A16228 | 484 | A01201 | A01206 | 479 |
| A01201 | A01214 | 455 | A01201 | A01215 | 296 |
| A01201 | A01224 | 484 | A01201 | A01234 | 669 |
| A01201 | A01304 | 491 | A01201 | A01351 | 488 |
| A01201 | A01354 | 159 | A01201 | A01374 | 326 |
| A01201 | A01384 | 396 | A01201 | A01425 | 367 |

|        |        |     |        |        |     |
|--------|--------|-----|--------|--------|-----|
| A01201 | A01468 | 486 | A01201 | A01470 | 491 |
| A01201 | A01487 | 475 | A01201 | A01488 | 486 |
| A01201 | A01492 | 491 | A01201 | A01495 | 452 |
| A01201 | A01597 | 324 | A01201 | A01598 | 486 |
| A01201 | A01612 | 465 | A01201 | A01614 | 419 |
| A01201 | A01649 | 475 | A01201 | A01721 | 477 |
| A01201 | A01861 | 173 | A01201 | A01917 | 205 |
| A01201 | A02003 | 240 | A01201 | A02978 | 171 |
| A01201 | A03205 | 157 | A01201 | A03567 | 469 |
| A01201 | A05845 | 424 | A01201 | A06275 | 491 |
| A01201 | A06543 | 201 | A01201 | A07223 | 490 |
| A01201 | A07244 | 361 | A01201 | A07347 | 491 |
| A01201 | A07348 | 151 | A01201 | A07524 | 480 |
| A01201 | A07537 | 278 | A01201 | A07581 | 180 |
| A01201 | A07584 | 469 | A01201 | A07625 | 491 |
| A01201 | A07644 | 154 | A01201 | A07695 | 208 |
| A01201 | A07700 | 422 | A01201 | A07730 | 243 |
| A01201 | A07919 | 416 | A01201 | A07924 | 488 |
| A01201 | A07968 | 256 | A01201 | A08024 | 198 |
| A01201 | A08112 | 256 | A01201 | A08211 | 312 |
| A01201 | A08326 | 405 | A01201 | A08890 | 446 |
| A01201 | A08952 | 173 | A01201 | A09307 | 406 |
| A01201 | A09664 | 227 | A01201 | A10465 | 475 |
| A01201 | A10616 | 490 | A01201 | A10917 | 210 |
| A01201 | A10923 | 446 | A01201 | A11544 | 235 |
| A01201 | A11831 | 152 | A01201 | A11832 | 260 |
| A01201 | A12419 | 265 | A01201 | A13055 | 226 |
| A01201 | A13220 | 219 | A01201 | A13386 | 326 |
| A01201 | A13870 | 310 | A01201 | A13875 | 190 |
| A01201 | A13989 | 491 | A01201 | A13992 | 163 |
| A01201 | A14572 | 326 | A01201 | A14597 | 152 |
| A01202 | A01208 | 313 | A01202 | A01211 | 171 |
| A01202 | A01215 | 330 | A01202 | A01228 | 223 |
| A01202 | A01321 | 224 | A01202 | A01353 | 283 |
| A01202 | A01374 | 305 | A01202 | A01452 | 412 |
| A01202 | A01458 | 183 | A01202 | A01736 | 223 |
| A01202 | A01814 | 416 | A01202 | A01917 | 389 |
| A01202 | A02041 | 223 | A01202 | A02051 | 223 |
| A01202 | A02331 | 165 | A01202 | A02994 | 267 |
| A01202 | A03169 | 223 | A01202 | A03954 | 274 |
| A01202 | A04447 | 223 | A01202 | A05577 | 383 |
| A01202 | A07225 | 416 | A01202 | A07265 | 367 |
| A01202 | A07588 | 363 | A01202 | A07695 | 238 |
| A01202 | A08955 | 223 | A01202 | A08971 | 223 |
| A01202 | A10755 | 223 | A01202 | A11202 | 223 |
| A01202 | A13298 | 223 | A01202 | A14216 | 223 |



|        |        |     |        |        |     |
|--------|--------|-----|--------|--------|-----|
| A01202 | A15543 | 215 | A01203 | A01212 | 384 |
| A01203 | A01329 | 372 | A01203 | A01339 | 201 |
| A01203 | A01370 | 196 | A01203 | A01371 | 268 |
| A01203 | A01388 | 205 | A01203 | A01420 | 396 |
| A01203 | A01444 | 480 | A01203 | A01567 | 346 |
| A01203 | A01627 | 372 | A01203 | A01640 | 179 |
| A01203 | A01647 | 372 | A01203 | A01682 | 372 |
| A01203 | A02011 | 199 | A01203 | A02739 | 279 |
| A01203 | A03480 | 167 | A01203 | A03617 | 351 |
| A01203 | A04922 | 283 | A01203 | A06750 | 372 |
| A01203 | A07670 | 372 | A01203 | A07756 | 185 |
| A01203 | A09145 | 283 | A01203 | A09290 | 323 |
| A01203 | A12284 | 372 | A01203 | A12824 | 438 |
| A01203 | A14196 | 291 | A01203 | A15297 | 312 |
| A01203 | A15498 | 456 | A01203 | A16754 | 182 |
| A01204 | A01246 | 407 | A01204 | A01287 | 247 |
| A01204 | A01346 | 589 | A01204 | A01382 | 207 |
| A01204 | A01399 | 588 | A01204 | A01401 | 165 |
| A01204 | A01436 | 154 | A01204 | A01443 | 247 |
| A01204 | A01446 | 183 | A01204 | A01448 | 335 |
| A01204 | A01504 | 160 | A01204 | A01741 | 328 |
| A01204 | A02814 | 177 | A01204 | A02994 | 247 |
| A01204 | A03082 | 246 | A01204 | A03959 | 247 |
| A01204 | A04895 | 434 | A01204 | A05499 | 207 |
| A01204 | A05839 | 259 | A01204 | A06959 | 375 |
| A01204 | A07046 | 201 | A01204 | A07164 | 151 |
| A01204 | A07237 | 485 | A01204 | A07350 | 369 |
| A01204 | A07362 | 266 | A01204 | A07551 | 326 |
| A01204 | A07569 | 477 | A01204 | A07597 | 344 |
| A01204 | A07792 | 473 | A01204 | A08572 | 154 |
| A01204 | A09284 | 430 | A01204 | A09616 | 400 |
| A01204 | A09978 | 252 | A01204 | A10199 | 400 |
| A01204 | A10535 | 362 | A01204 | A11015 | 418 |
| A01204 | A11322 | 291 | A01204 | A11374 | 307 |
| A01204 | A11677 | 247 | A01204 | A12125 | 322 |
| A01204 | A13678 | 369 | A01204 | A14699 | 247 |
| A01204 | A14778 | 247 | A01204 | A16587 | 247 |
| A01205 | A01360 | 463 | A01205 | A01451 | 207 |
| A01205 | A01452 | 443 | A01205 | A01459 | 378 |
| A01205 | A01483 | 481 | A01205 | A01508 | 491 |
| A01205 | A01622 | 490 | A01205 | A01679 | 475 |
| A01205 | A01787 | 259 | A01205 | A02774 | 180 |
| A01205 | A03070 | 347 | A01205 | A03710 | 485 |
| A01205 | A05054 | 205 | A01205 | A05060 | 401 |
| A01205 | A05222 | 382 | A01205 | A05332 | 433 |
| A01205 | A05609 | 286 | A01205 | A06101 | 213 |

|        |        |     |        |        |     |
|--------|--------|-----|--------|--------|-----|
| A01205 | A06718 | 491 | A01205 | A06819 | 479 |
| A01205 | A06990 | 316 | A01205 | A07222 | 332 |
| A01205 | A07333 | 467 | A01205 | A07571 | 218 |
| A01205 | A07880 | 334 | A01205 | A07931 | 308 |
| A01205 | A07974 | 419 | A01205 | A08097 | 465 |
| A01205 | A09276 | 361 | A01205 | A09316 | 172 |
| A01205 | A09340 | 491 | A01205 | A09416 | 165 |
| A01205 | A12507 | 472 | A01205 | A14525 | 484 |
| A01205 | A14590 | 241 | A01205 | A14858 | 344 |
| A01205 | A14905 | 262 | A01205 | A15347 | 238 |
| A01205 | A15372 | 490 | A01205 | A15598 | 191 |
| A01205 | A15655 | 398 | A01205 | A16350 | 279 |
| A01205 | A16531 | 424 | A01205 | A16753 | 490 |
| A01206 | A01215 | 152 | A01206 | A01216 | 152 |
| A01206 | A01234 | 491 | A01206 | A01243 | 491 |
| A01206 | A01247 | 208 | A01206 | A01249 | 480 |
| A01206 | A01263 | 399 | A01206 | A01268 | 210 |
| A01206 | A01291 | 491 | A01206 | A01304 | 486 |
| A01206 | A01306 | 491 | A01206 | A01335 | 491 |
| A01206 | A01338 | 424 | A01206 | A01349 | 695 |
| A01206 | A01351 | 479 | A01206 | A01354 | 470 |
| A01206 | A01365 | 334 | A01206 | A01379 | 477 |
| A01206 | A01384 | 491 | A01206 | A01392 | 294 |
| A01206 | A01411 | 213 | A01206 | A01418 | 422 |
| A01206 | A01425 | 491 | A01206 | A01429 | 695 |
| A01206 | A01430 | 491 | A01206 | A01431 | 491 |
| A01206 | A01437 | 489 | A01206 | A01439 | 491 |
| A01206 | A01440 | 193 | A01206 | A01457 | 486 |
| A01206 | A01468 | 491 | A01206 | A01470 | 491 |
| A01206 | A01488 | 489 | A01206 | A01492 | 491 |
| A01206 | A01495 | 486 | A01206 | A01496 | 486 |
| A01206 | A01503 | 314 | A01206 | A01506 | 485 |
| A01206 | A01538 | 388 | A01206 | A01539 | 246 |
| A01206 | A01555 | 423 | A01206 | A01558 | 486 |
| A01206 | A01569 | 479 | A01206 | A01579 | 491 |
| A01206 | A01597 | 491 | A01206 | A01598 | 491 |
| A01206 | A01612 | 491 | A01206 | A01614 | 491 |
| A01206 | A01640 | 441 | A01206 | A01649 | 491 |
| A01206 | A01684 | 484 | A01206 | A02003 | 188 |
| A01206 | A02064 | 484 | A01206 | A02067 | 163 |
| A01206 | A02179 | 154 | A01206 | A02216 | 369 |
| A01206 | A02763 | 249 | A01206 | A02978 | 443 |
| A01206 | A03035 | 254 | A01206 | A03069 | 463 |
| A01206 | A03228 | 157 | A01206 | A03296 | 475 |
| A01206 | A03298 | 221 | A01206 | A03304 | 279 |
| A01206 | A03438 | 291 | A01206 | A03446 | 368 |

|        |        |     |        |        |     |
|--------|--------|-----|--------|--------|-----|
| A01206 | A03567 | 491 | A01206 | A03569 | 477 |
| A01206 | A03697 | 323 | A01206 | A03734 | 488 |
| A01206 | A03740 | 483 | A01206 | A03859 | 489 |
| A01206 | A03981 | 229 | A01206 | A04687 | 162 |
| A01206 | A04846 | 254 | A01206 | A05230 | 491 |
| A01206 | A05238 | 163 | A01206 | A05501 | 489 |
| A01206 | A06037 | 388 | A01206 | A06275 | 400 |
| A01206 | A06351 | 274 | A01206 | A06466 | 362 |
| A01206 | A06584 | 251 | A01206 | A06825 | 391 |
| A01206 | A06861 | 446 | A01206 | A06897 | 232 |
| A01206 | A06907 | 452 | A01206 | A06965 | 491 |
| A01206 | A07004 | 446 | A01206 | A07076 | 297 |
| A01206 | A07306 | 179 | A01206 | A07323 | 443 |
| A01206 | A07347 | 491 | A01206 | A07348 | 695 |
| A01206 | A07378 | 446 | A01206 | A07451 | 435 |
| A01206 | A07524 | 488 | A01206 | A07533 | 274 |
| A01206 | A07581 | 329 | A01206 | A07584 | 157 |
| A01206 | A07604 | 485 | A01206 | A07625 | 391 |
| A01206 | A07677 | 391 | A01206 | A07700 | 490 |
| A01206 | A07706 | 491 | A01206 | A07759 | 193 |
| A01206 | A07924 | 428 | A01206 | A08022 | 491 |
| A01206 | A08118 | 165 | A01206 | A08131 | 329 |
| A01206 | A08137 | 491 | A01206 | A08154 | 281 |
| A01206 | A08211 | 448 | A01206 | A08350 | 201 |
| A01206 | A08357 | 491 | A01206 | A08358 | 391 |
| A01206 | A08359 | 489 | A01206 | A08377 | 159 |
| A01206 | A08383 | 168 | A01206 | A08398 | 406 |
| A01206 | A08408 | 196 | A01206 | A08437 | 151 |
| A01206 | A08452 | 489 | A01206 | A08461 | 171 |
| A01206 | A08501 | 400 | A01206 | A08559 | 472 |
| A01206 | A08571 | 486 | A01206 | A08810 | 368 |
| A01206 | A08920 | 201 | A01206 | A08960 | 196 |
| A01206 | A08973 | 346 | A01206 | A09189 | 179 |
| A01206 | A09285 | 238 | A01206 | A09292 | 489 |
| A01206 | A09322 | 477 | A01206 | A09327 | 480 |
| A01206 | A09613 | 163 | A01206 | A09614 | 201 |
| A01206 | A09697 | 191 | A01206 | A09702 | 364 |
| A01206 | A09705 | 477 | A01206 | A09707 | 441 |
| A01206 | A09825 | 173 | A01206 | A09852 | 358 |
| A01206 | A10492 | 163 | A01206 | A10518 | 210 |
| A01206 | A10532 | 457 | A01206 | A10616 | 469 |
| A01206 | A10624 | 491 | A01206 | A10625 | 491 |
| A01206 | A10879 | 163 | A01206 | A10889 | 179 |
| A01206 | A11223 | 329 | A01206 | A11291 | 422 |
| A01206 | A11301 | 196 | A01206 | A11390 | 353 |
| A01206 | A11409 | 270 | A01206 | A11420 | 343 |

|        |        |     |        |        |     |
|--------|--------|-----|--------|--------|-----|
| A01206 | A11462 | 491 | A01206 | A11480 | 299 |
| A01206 | A11518 | 152 | A01206 | A11562 | 481 |
| A01206 | A11612 | 465 | A01206 | A11704 | 265 |
| A01206 | A11790 | 201 | A01206 | A11942 | 335 |
| A01206 | A12053 | 179 | A01206 | A12089 | 238 |
| A01206 | A12109 | 201 | A01206 | A12138 | 695 |
| A01206 | A12305 | 201 | A01206 | A12320 | 163 |
| A01206 | A12687 | 154 | A01206 | A12821 | 391 |
| A01206 | A13066 | 283 | A01206 | A13097 | 163 |
| A01206 | A13126 | 490 | A01206 | A13340 | 473 |
| A01206 | A13494 | 152 | A01206 | A13527 | 378 |
| A01206 | A13609 | 480 | A01206 | A13830 | 281 |
| A01206 | A13875 | 490 | A01206 | A13989 | 491 |
| A01206 | A13992 | 308 | A01206 | A14006 | 479 |
| A01206 | A14073 | 407 | A01206 | A14169 | 416 |
| A01206 | A14188 | 281 | A01206 | A14216 | 491 |
| A01206 | A14220 | 327 | A01206 | A14257 | 215 |
| A01206 | A14479 | 199 | A01206 | A14508 | 332 |
| A01206 | A14566 | 180 | A01206 | A14596 | 480 |
| A01206 | A14597 | 369 | A01206 | A14655 | 396 |
| A01206 | A14816 | 402 | A01206 | A15204 | 393 |
| A01206 | A15205 | 429 | A01206 | A15206 | 429 |
| A01206 | A15207 | 429 | A01206 | A15208 | 333 |
| A01206 | A15209 | 238 | A01206 | A15210 | 393 |
| A01206 | A15215 | 491 | A01206 | A15221 | 318 |
| A01206 | A15247 | 219 | A01206 | A15255 | 441 |
| A01206 | A15297 | 238 | A01206 | A15500 | 452 |
| A01206 | A15559 | 451 | A01206 | A15660 | 491 |
| A01206 | A15684 | 480 | A01206 | A15732 | 411 |
| A01206 | A15764 | 238 | A01206 | A15774 | 351 |
| A01206 | A15988 | 163 | A01206 | A16053 | 179 |
| A01206 | A16060 | 241 | A01206 | A16118 | 460 |
| A01206 | A16272 | 256 | A01206 | A16302 | 436 |
| A01206 | A16318 | 193 | A01206 | A16523 | 246 |
| A01206 | A16949 | 179 | A01207 | A01218 | 212 |
| A01207 | A01411 | 348 | A01207 | A02558 | 162 |
| A01207 | A03050 | 278 | A01207 | A03735 | 154 |
| A01207 | A06099 | 159 | A01207 | A06650 | 356 |
| A01207 | A06959 | 160 | A01207 | A07705 | 224 |
| A01207 | A08292 | 152 | A01207 | A10784 | 321 |
| A01207 | A12945 | 252 | A01207 | A13314 | 193 |
| A01207 | A16640 | 171 | A01208 | A01214 | 212 |
| A01208 | A01215 | 577 | A01208 | A01228 | 491 |
| A01208 | A01251 | 163 | A01208 | A01353 | 578 |
| A01208 | A01414 | 235 | A01208 | A01492 | 491 |
| A01208 | A01633 | 232 | A01208 | A01736 | 373 |

|        |        |     |        |        |     |
|--------|--------|-----|--------|--------|-----|
| A01208 | A01803 | 168 | A01208 | A02041 | 337 |
| A01208 | A02051 | 339 | A01208 | A02270 | 219 |
| A01208 | A02303 | 477 | A01208 | A02454 | 236 |
| A01208 | A02672 | 154 | A01208 | A03169 | 570 |
| A01208 | A03279 | 172 | A01208 | A03792 | 238 |
| A01208 | A03952 | 183 | A01208 | A03958 | 198 |
| A01208 | A03972 | 272 | A01208 | A04447 | 239 |
| A01208 | A04468 | 224 | A01208 | A05826 | 243 |
| A01208 | A07111 | 232 | A01208 | A07265 | 577 |
| A01208 | A07360 | 171 | A01208 | A07588 | 577 |
| A01208 | A08377 | 201 | A01208 | A08550 | 165 |
| A01208 | A08552 | 162 | A01208 | A08834 | 271 |
| A01208 | A08955 | 223 | A01208 | A08971 | 223 |
| A01208 | A09609 | 343 | A01208 | A10032 | 283 |
| A01208 | A10755 | 279 | A01208 | A11202 | 223 |
| A01208 | A11209 | 176 | A01208 | A11254 | 217 |
| A01208 | A11497 | 191 | A01208 | A11608 | 191 |
| A01208 | A11675 | 193 | A01208 | A11914 | 338 |
| A01208 | A12254 | 165 | A01208 | A12433 | 190 |
| A01208 | A12726 | 196 | A01208 | A12850 | 217 |
| A01208 | A13126 | 299 | A01208 | A13298 | 576 |
| A01208 | A13711 | 338 | A01208 | A13787 | 243 |
| A01208 | A13788 | 163 | A01208 | A13804 | 198 |
| A01208 | A13809 | 213 | A01208 | A14216 | 474 |
| A01208 | A14699 | 416 | A01208 | A14917 | 160 |
| A01208 | A16157 | 172 | A01208 | A16565 | 296 |
| A01208 | A16566 | 176 | A01208 | A16567 | 201 |
| A01208 | A16587 | 154 | A01208 | A16675 | 243 |
| A01208 | A16701 | 193 | A01208 | A16790 | 154 |
| A01208 | A16874 | 165 | A01209 | A01211 | 205 |
| A01209 | A01226 | 474 | A01209 | A01244 | 491 |
| A01209 | A01280 | 299 | A01209 | A01296 | 241 |
| A01209 | A01306 | 224 | A01209 | A01322 | 201 |
| A01209 | A01326 | 238 | A01209 | A01352 | 344 |
| A01209 | A01365 | 371 | A01209 | A01406 | 278 |
| A01209 | A01415 | 481 | A01209 | A01500 | 254 |
| A01209 | A01524 | 274 | A01209 | A01741 | 210 |
| A01209 | A01790 | 296 | A01209 | A01975 | 246 |
| A01209 | A02000 | 491 | A01209 | A02020 | 486 |
| A01209 | A02032 | 246 | A01209 | A02160 | 486 |
| A01209 | A02178 | 241 | A01209 | A02180 | 491 |
| A01209 | A02482 | 159 | A01209 | A02660 | 218 |
| A01209 | A02981 | 384 | A01209 | A02993 | 154 |
| A01209 | A03057 | 218 | A01209 | A03141 | 272 |
| A01209 | A03292 | 163 | A01209 | A03328 | 480 |
| A01209 | A03391 | 202 | A01209 | A03401 | 176 |

|        |        |     |        |        |     |
|--------|--------|-----|--------|--------|-----|
| A01209 | A03570 | 440 | A01209 | A03688 | 174 |
| A01209 | A03764 | 488 | A01209 | A03881 | 210 |
| A01209 | A04033 | 436 | A01209 | A04158 | 210 |
| A01209 | A04162 | 213 | A01209 | A04174 | 491 |
| A01209 | A04187 | 474 | A01209 | A04360 | 177 |
| A01209 | A04396 | 232 | A01209 | A04399 | 193 |
| A01209 | A04441 | 168 | A01209 | A04539 | 188 |
| A01209 | A04566 | 232 | A01209 | A04770 | 190 |
| A01209 | A04924 | 193 | A01209 | A05007 | 235 |
| A01209 | A05283 | 182 | A01209 | A05327 | 281 |
| A01209 | A05375 | 268 | A01209 | A05418 | 491 |
| A01209 | A05422 | 193 | A01209 | A05603 | 291 |
| A01209 | A05690 | 491 | A01209 | A05697 | 246 |
| A01209 | A06016 | 246 | A01209 | A06277 | 281 |
| A01209 | A06303 | 297 | A01209 | A06309 | 156 |
| A01209 | A06318 | 265 | A01209 | A06423 | 306 |
| A01209 | A06493 | 210 | A01209 | A06578 | 363 |
| A01209 | A06813 | 254 | A01209 | A06975 | 157 |
| A01209 | A06982 | 491 | A01209 | A07232 | 202 |
| A01209 | A07572 | 302 | A01209 | A07706 | 430 |
| A01209 | A07723 | 440 | A01209 | A08151 | 182 |
| A01209 | A08527 | 263 | A01209 | A08884 | 490 |
| A01209 | A08892 | 162 | A01209 | A08998 | 160 |
| A01209 | A09009 | 191 | A01209 | A09067 | 327 |
| A01209 | A09073 | 162 | A01209 | A09269 | 477 |
| A01209 | A09316 | 481 | A01209 | A09340 | 475 |
| A01209 | A09346 | 477 | A01209 | A10258 | 188 |
| A01209 | A10276 | 297 | A01209 | A10608 | 154 |
| A01209 | A10991 | 297 | A01209 | A11401 | 152 |
| A01209 | A11858 | 490 | A01209 | A11893 | 411 |
| A01209 | A11983 | 465 | A01209 | A12120 | 297 |
| A01209 | A12527 | 297 | A01209 | A12897 | 243 |
| A01209 | A12912 | 296 | A01209 | A12982 | 302 |
| A01209 | A13123 | 452 | A01209 | A13265 | 193 |
| A01209 | A13870 | 160 | A01209 | A13949 | 472 |
| A01209 | A14165 | 163 | A01209 | A14230 | 332 |
| A01209 | A14272 | 335 | A01209 | A14319 | 180 |
| A01209 | A14655 | 232 | A01209 | A14665 | 293 |
| A01209 | A14812 | 163 | A01209 | A15282 | 312 |
| A01209 | A15295 | 172 | A01209 | A15598 | 198 |
| A01209 | A15726 | 329 | A01209 | A16404 | 276 |
| A01209 | A16440 | 416 | A01209 | A16626 | 326 |
| A01209 | A16635 | 396 | A01209 | A16769 | 163 |
| A01210 | A01214 | 277 | A01210 | A01218 | 215 |
| A01210 | A01234 | 488 | A01210 | A01287 | 452 |
| A01210 | A01322 | 241 | A01210 | A01336 | 463 |

|        |        |     |        |        |     |
|--------|--------|-----|--------|--------|-----|
| A01210 | A01369 | 229 | A01210 | A01413 | 486 |
| A01210 | A01415 | 163 | A01210 | A01435 | 491 |
| A01210 | A01447 | 490 | A01210 | A01540 | 460 |
| A01210 | A01543 | 400 | A01210 | A01559 | 188 |
| A01210 | A01596 | 450 | A01210 | A01601 | 267 |
| A01210 | A01667 | 340 | A01210 | A01711 | 401 |
| A01210 | A01741 | 452 | A01210 | A01815 | 438 |
| A01210 | A01816 | 263 | A01210 | A01825 | 363 |
| A01210 | A01827 | 491 | A01210 | A02009 | 247 |
| A01210 | A02040 | 488 | A01210 | A02225 | 278 |
| A01210 | A02527 | 160 | A01210 | A02607 | 491 |
| A01210 | A02743 | 263 | A01210 | A02994 | 491 |
| A01210 | A02996 | 263 | A01210 | A02999 | 190 |
| A01210 | A03007 | 193 | A01210 | A03259 | 378 |
| A01210 | A03651 | 462 | A01210 | A03676 | 307 |
| A01210 | A03798 | 210 | A01210 | A03856 | 156 |
| A01210 | A04031 | 200 | A01210 | A04777 | 380 |
| A01210 | A05417 | 491 | A01210 | A05812 | 382 |
| A01210 | A06046 | 152 | A01210 | A06158 | 165 |
| A01210 | A06498 | 294 | A01210 | A06545 | 218 |
| A01210 | A06546 | 491 | A01210 | A07199 | 191 |
| A01210 | A07371 | 232 | A01210 | A07394 | 491 |
| A01210 | A08572 | 165 | A01210 | A09054 | 177 |
| A01210 | A09709 | 469 | A01210 | A10598 | 470 |
| A01210 | A13809 | 314 | A01210 | A14566 | 207 |
| A01210 | A15379 | 195 | A01210 | A15653 | 491 |
| A01210 | A15666 | 491 | A01210 | A15765 | 435 |
| A01210 | A16157 | 379 | A01210 | A16430 | 157 |
| A01211 | A01217 | 224 | A01211 | A01326 | 474 |
| A01211 | A01352 | 260 | A01211 | A01353 | 455 |
| A01211 | A01354 | 388 | A01211 | A01400 | 177 |
| A01211 | A01451 | 418 | A01211 | A01481 | 491 |
| A01211 | A01482 | 362 | A01211 | A01483 | 271 |
| A01211 | A01502 | 266 | A01211 | A01510 | 196 |
| A01211 | A01524 | 302 | A01211 | A01551 | 435 |
| A01211 | A01582 | 486 | A01211 | A01598 | 294 |
| A01211 | A01618 | 171 | A01211 | A01627 | 408 |
| A01211 | A01629 | 204 | A01211 | A01632 | 399 |
| A01211 | A01652 | 174 | A01211 | A01668 | 190 |
| A01211 | A01670 | 202 | A01211 | A01723 | 311 |
| A01211 | A01746 | 188 | A01211 | A01758 | 364 |
| A01211 | A01763 | 391 | A01211 | A01766 | 173 |
| A01211 | A01794 | 277 | A01211 | A01855 | 152 |
| A01211 | A01893 | 156 | A01211 | A01983 | 224 |
| A01211 | A02051 | 408 | A01211 | A02064 | 176 |
| A01211 | A02075 | 183 | A01211 | A02186 | 230 |

|        |        |     |        |        |     |
|--------|--------|-----|--------|--------|-----|
| A01211 | A02212 | 162 | A01211 | A02215 | 434 |
| A01211 | A02222 | 198 | A01211 | A02224 | 375 |
| A01211 | A02274 | 271 | A01211 | A02333 | 184 |
| A01211 | A02336 | 182 | A01211 | A02338 | 269 |
| A01211 | A02444 | 195 | A01211 | A02452 | 188 |
| A01211 | A02477 | 454 | A01211 | A02485 | 441 |
| A01211 | A02542 | 162 | A01211 | A02565 | 199 |
| A01211 | A02606 | 167 | A01211 | A02633 | 263 |
| A01211 | A02706 | 441 | A01211 | A02709 | 180 |
| A01211 | A02803 | 165 | A01211 | A02820 | 193 |
| A01211 | A02886 | 162 | A01211 | A02924 | 489 |
| A01211 | A03029 | 156 | A01211 | A03062 | 200 |
| A01211 | A03095 | 219 | A01211 | A03104 | 363 |
| A01211 | A03120 | 255 | A01211 | A03211 | 168 |
| A01211 | A03218 | 152 | A01211 | A03293 | 413 |
| A01211 | A03304 | 412 | A01211 | A03417 | 423 |
| A01211 | A03440 | 201 | A01211 | A03477 | 191 |
| A01211 | A03534 | 281 | A01211 | A03587 | 279 |
| A01211 | A03676 | 307 | A01211 | A03819 | 208 |
| A01211 | A03855 | 399 | A01211 | A03941 | 247 |
| A01211 | A03958 | 198 | A01211 | A03964 | 176 |
| A01211 | A03975 | 188 | A01211 | A03981 | 286 |
| A01211 | A03992 | 182 | A01211 | A04072 | 310 |
| A01211 | A04125 | 202 | A01211 | A04150 | 208 |
| A01211 | A04185 | 247 | A01211 | A04198 | 241 |
| A01211 | A04231 | 271 | A01211 | A04244 | 167 |
| A01211 | A04266 | 255 | A01211 | A04275 | 154 |
| A01211 | A04337 | 491 | A01211 | A04361 | 294 |
| A01211 | A04399 | 247 | A01211 | A04429 | 195 |
| A01211 | A04443 | 188 | A01211 | A04449 | 413 |
| A01211 | A04488 | 232 | A01211 | A04520 | 343 |
| A01211 | A04563 | 190 | A01211 | A04576 | 247 |
| A01211 | A04620 | 329 | A01211 | A04630 | 238 |
| A01211 | A04747 | 262 | A01211 | A04773 | 199 |
| A01211 | A04787 | 195 | A01211 | A04808 | 236 |
| A01211 | A04835 | 193 | A01211 | A04944 | 154 |
| A01211 | A04964 | 252 | A01211 | A04985 | 165 |
| A01211 | A05058 | 177 | A01211 | A05149 | 335 |
| A01211 | A05184 | 156 | A01211 | A05199 | 167 |
| A01211 | A05234 | 268 | A01211 | A05254 | 337 |
| A01211 | A05255 | 288 | A01211 | A05291 | 218 |
| A01211 | A05299 | 159 | A01211 | A05351 | 195 |
| A01211 | A05394 | 180 | A01211 | A05449 | 208 |
| A01211 | A05512 | 310 | A01211 | A05515 | 171 |
| A01211 | A05517 | 165 | A01211 | A05587 | 208 |
| A01211 | A05600 | 180 | A01211 | A05772 | 208 |



|        |        |     |        |        |     |
|--------|--------|-----|--------|--------|-----|
| A01211 | A05780 | 247 | A01211 | A05891 | 479 |
| A01211 | A05982 | 249 | A01211 | A06038 | 182 |
| A01211 | A06088 | 205 | A01211 | A06225 | 160 |
| A01211 | A06228 | 271 | A01211 | A06255 | 223 |
| A01211 | A06478 | 294 | A01211 | A06501 | 195 |
| A01211 | A06546 | 265 | A01211 | A06680 | 185 |
| A01211 | A06712 | 281 | A01211 | A06752 | 396 |
| A01211 | A06753 | 278 | A01211 | A06773 | 184 |
| A01211 | A06814 | 419 | A01211 | A06815 | 255 |
| A01211 | A06830 | 185 | A01211 | A06910 | 255 |
| A01211 | A07071 | 312 | A01211 | A07106 | 200 |
| A01211 | A07134 | 294 | A01211 | A07209 | 419 |
| A01211 | A07232 | 367 | A01211 | A07307 | 159 |
| A01211 | A07330 | 241 | A01211 | A07339 | 236 |
| A01211 | A07442 | 445 | A01211 | A07506 | 260 |
| A01211 | A07605 | 213 | A01211 | A07660 | 202 |
| A01211 | A07670 | 176 | A01211 | A07685 | 294 |
| A01211 | A07711 | 195 | A01211 | A07726 | 185 |
| A01211 | A08052 | 215 | A01211 | A08222 | 200 |
| A01211 | A08358 | 156 | A01211 | A08398 | 273 |
| A01211 | A08452 | 210 | A01211 | A08738 | 156 |
| A01211 | A08929 | 180 | A01211 | A09004 | 154 |
| A01211 | A09036 | 195 | A01211 | A09072 | 218 |
| A01211 | A09123 | 159 | A01211 | A09210 | 163 |
| A01211 | A09390 | 174 | A01211 | A09421 | 319 |
| A01211 | A09431 | 218 | A01211 | A09485 | 170 |
| A01211 | A09696 | 218 | A01211 | A09976 | 241 |
| A01211 | A09978 | 291 | A01211 | A10156 | 218 |
| A01211 | A10518 | 427 | A01211 | A10620 | 241 |
| A01211 | A10832 | 294 | A01211 | A10954 | 374 |
| A01211 | A11211 | 236 | A01211 | A11220 | 337 |
| A01211 | A11233 | 176 | A01211 | A11264 | 445 |
| A01211 | A11288 | 262 | A01211 | A11317 | 177 |
| A01211 | A11394 | 216 | A01211 | A11404 | 314 |
| A01211 | A11411 | 486 | A01211 | A11432 | 255 |
| A01211 | A11513 | 303 | A01211 | A11983 | 329 |
| A01211 | A12265 | 271 | A01211 | A12412 | 216 |
| A01211 | A12605 | 263 | A01211 | A12673 | 337 |
| A01211 | A12787 | 177 | A01211 | A12883 | 271 |
| A01211 | A13227 | 358 | A01211 | A13369 | 163 |
| A01211 | A13668 | 337 | A01211 | A13951 | 218 |
| A01211 | A14026 | 199 | A01211 | A14196 | 491 |
| A01211 | A14216 | 302 | A01211 | A14272 | 480 |
| A01211 | A14381 | 436 | A01211 | A14404 | 160 |
| A01211 | A14410 | 293 | A01211 | A14444 | 165 |
| A01211 | A14449 | 347 | A01211 | A14498 | 455 |

|        |        |     |        |        |     |
|--------|--------|-----|--------|--------|-----|
| A01211 | A14540 | 213 | A01211 | A14589 | 484 |
| A01211 | A14594 | 205 | A01211 | A14735 | 184 |
| A01211 | A14832 | 337 | A01211 | A15052 | 185 |
| A01211 | A15282 | 486 | A01211 | A15419 | 332 |
| A01211 | A15422 | 296 | A01211 | A15431 | 260 |
| A01211 | A15498 | 165 | A01211 | A15553 | 232 |
| A01211 | A15554 | 271 | A01211 | A15559 | 265 |
| A01211 | A15596 | 221 | A01211 | A15672 | 205 |
| A01211 | A15707 | 374 | A01211 | A15788 | 235 |
| A01211 | A15867 | 414 | A01211 | A15909 | 173 |
| A01211 | A15917 | 479 | A01211 | A15932 | 183 |
| A01211 | A16004 | 218 | A01211 | A16423 | 435 |
| A01211 | A16674 | 168 | A01211 | A16723 | 184 |
| A01211 | A16732 | 347 | A01211 | A16778 | 223 |
| A01211 | A17063 | 154 | A01211 | A17078 | 404 |
| A01212 | A01214 | 167 | A01212 | A01291 | 491 |
| A01212 | A01315 | 229 | A01212 | A01317 | 229 |
| A01212 | A01319 | 229 | A01212 | A01322 | 424 |
| A01212 | A01323 | 154 | A01212 | A01325 | 168 |
| A01212 | A01329 | 838 | A01212 | A01354 | 490 |
| A01212 | A01365 | 219 | A01212 | A01398 | 441 |
| A01212 | A01401 | 420 | A01212 | A01415 | 509 |
| A01212 | A01468 | 385 | A01212 | A01469 | 480 |
| A01212 | A01535 | 491 | A01212 | A01536 | 491 |
| A01212 | A01568 | 391 | A01212 | A01589 | 396 |
| A01212 | A01596 | 473 | A01212 | A01601 | 183 |
| A01212 | A01610 | 474 | A01212 | A01612 | 430 |
| A01212 | A01625 | 395 | A01212 | A01627 | 460 |
| A01212 | A01647 | 644 | A01212 | A01680 | 229 |
| A01212 | A01682 | 449 | A01212 | A01686 | 491 |
| A01212 | A01712 | 485 | A01212 | A01718 | 230 |
| A01212 | A01720 | 212 | A01212 | A01812 | 167 |
| A01212 | A01813 | 488 | A01212 | A01910 | 174 |
| A01212 | A01920 | 316 | A01212 | A02030 | 228 |
| A01212 | A02058 | 394 | A01212 | A02075 | 423 |
| A01212 | A02715 | 461 | A01212 | A02931 | 219 |
| A01212 | A02995 | 360 | A01212 | A03207 | 422 |
| A01212 | A03301 | 323 | A01212 | A03327 | 229 |
| A01212 | A03750 | 398 | A01212 | A03784 | 374 |
| A01212 | A03809 | 370 | A01212 | A03886 | 486 |
| A01212 | A03947 | 156 | A01212 | A04012 | 235 |
| A01212 | A04372 | 187 | A01212 | A04449 | 361 |
| A01212 | A04507 | 259 | A01212 | A04648 | 221 |
| A01212 | A04686 | 205 | A01212 | A05082 | 234 |
| A01212 | A05193 | 212 | A01212 | A05216 | 302 |
| A01212 | A05275 | 409 | A01212 | A05334 | 491 |

|        |        |     |        |        |     |
|--------|--------|-----|--------|--------|-----|
| A01212 | A05443 | 480 | A01212 | A05501 | 324 |
| A01212 | A05621 | 486 | A01212 | A05641 | 263 |
| A01212 | A05690 | 250 | A01212 | A06029 | 389 |
| A01212 | A06130 | 229 | A01212 | A06242 | 240 |
| A01212 | A06277 | 467 | A01212 | A06381 | 229 |
| A01212 | A06431 | 399 | A01212 | A06593 | 187 |
| A01212 | A06750 | 515 | A01212 | A06803 | 318 |
| A01212 | A06851 | 348 | A01212 | A06864 | 465 |
| A01212 | A07054 | 599 | A01212 | A07242 | 203 |
| A01212 | A07319 | 481 | A01212 | A07331 | 187 |
| A01212 | A07332 | 486 | A01212 | A07346 | 491 |
| A01212 | A07353 | 229 | A01212 | A07398 | 195 |
| A01212 | A07433 | 489 | A01212 | A07449 | 213 |
| A01212 | A07495 | 197 | A01212 | A07534 | 380 |
| A01212 | A07641 | 213 | A01212 | A07647 | 462 |
| A01212 | A07670 | 692 | A01212 | A07756 | 224 |
| A01212 | A07850 | 386 | A01212 | A07887 | 435 |
| A01212 | A07920 | 477 | A01212 | A07989 | 167 |
| A01212 | A07996 | 288 | A01212 | A08030 | 160 |
| A01212 | A08117 | 235 | A01212 | A08141 | 407 |
| A01212 | A08208 | 361 | A01212 | A08495 | 293 |
| A01212 | A08503 | 366 | A01212 | A08525 | 491 |
| A01212 | A08818 | 174 | A01212 | A08847 | 329 |
| A01212 | A08878 | 160 | A01212 | A08902 | 204 |
| A01212 | A09038 | 368 | A01212 | A09272 | 350 |
| A01212 | A09597 | 160 | A01212 | A09626 | 185 |
| A01212 | A09629 | 162 | A01212 | A09654 | 322 |
| A01212 | A09762 | 241 | A01212 | A09920 | 259 |
| A01212 | A10171 | 341 | A01212 | A10237 | 313 |
| A01212 | A10294 | 179 | A01212 | A10620 | 180 |
| A01212 | A11068 | 450 | A01212 | A11193 | 334 |
| A01212 | A11236 | 168 | A01212 | A11318 | 230 |
| A01212 | A11345 | 372 | A01212 | A11369 | 263 |
| A01212 | A11886 | 259 | A01212 | A11983 | 360 |
| A01212 | A12047 | 588 | A01212 | A12207 | 334 |
| A01212 | A12284 | 585 | A01212 | A12499 | 310 |
| A01212 | A12771 | 212 | A01212 | A12824 | 642 |
| A01212 | A12887 | 394 | A01212 | A12990 | 462 |
| A01212 | A13248 | 238 | A01212 | A13348 | 470 |
| A01212 | A13824 | 473 | A01212 | A13892 | 216 |
| A01212 | A13913 | 339 | A01212 | A13917 | 485 |
| A01212 | A13949 | 281 | A01212 | A13963 | 290 |
| A01212 | A13989 | 356 | A01212 | A13992 | 157 |
| A01212 | A14006 | 491 | A01212 | A14079 | 489 |
| A01212 | A14080 | 268 | A01212 | A14093 | 443 |
| A01212 | A14128 | 458 | A01212 | A14253 | 314 |

|        |        |     |        |        |     |
|--------|--------|-----|--------|--------|-----|
| A01212 | A14266 | 437 | A01212 | A14272 | 176 |
| A01212 | A14273 | 330 | A01212 | A14299 | 307 |
| A01212 | A14399 | 481 | A01212 | A14460 | 193 |
| A01212 | A14484 | 312 | A01212 | A14655 | 486 |
| A01212 | A14701 | 452 | A01212 | A14819 | 151 |
| A01212 | A14824 | 259 | A01212 | A15295 | 302 |
| A01212 | A15324 | 592 | A01212 | A15366 | 273 |
| A01212 | A15369 | 355 | A01212 | A15498 | 491 |
| A01212 | A15501 | 407 | A01212 | A15502 | 491 |
| A01212 | A15505 | 460 | A01212 | A15546 | 177 |
| A01212 | A15822 | 201 | A01212 | A15837 | 229 |
| A01212 | A15939 | 258 | A01212 | A15941 | 254 |
| A01212 | A16004 | 156 | A01212 | A16127 | 450 |
| A01212 | A16128 | 486 | A01212 | A16294 | 418 |
| A01212 | A16378 | 276 | A01212 | A16438 | 402 |
| A01212 | A16592 | 174 | A01212 | A16613 | 369 |
| A01212 | A16626 | 229 | A01212 | A16643 | 229 |
| A01212 | A16678 | 156 | A01212 | A16725 | 174 |
| A01212 | A16780 | 187 | A01212 | A17118 | 165 |
| A01213 | A01235 | 266 | A01213 | A01298 | 199 |
| A01213 | A01391 | 243 | A01213 | A01438 | 276 |
| A01213 | A01474 | 291 | A01213 | A01576 | 711 |
| A01213 | A01587 | 419 | A01213 | A01596 | 311 |
| A01213 | A01723 | 185 | A01213 | A01790 | 170 |
| A01213 | A01860 | 151 | A01213 | A02086 | 286 |
| A01213 | A02861 | 154 | A01213 | A02965 | 180 |
| A01213 | A03057 | 339 | A01213 | A03205 | 341 |
| A01213 | A03582 | 160 | A01213 | A03625 | 224 |
| A01213 | A03757 | 191 | A01213 | A03965 | 515 |
| A01213 | A04012 | 168 | A01213 | A04033 | 484 |
| A01213 | A04449 | 458 | A01213 | A05221 | 466 |
| A01213 | A05817 | 226 | A01213 | A06520 | 329 |
| A01213 | A06915 | 171 | A01213 | A07004 | 479 |
| A01213 | A07149 | 213 | A01213 | A07209 | 491 |
| A01213 | A07210 | 347 | A01213 | A07242 | 433 |
| A01213 | A07276 | 176 | A01213 | A07380 | 226 |
| A01213 | A07697 | 486 | A01213 | A07706 | 173 |
| A01213 | A07803 | 489 | A01213 | A07826 | 162 |
| A01213 | A08293 | 605 | A01213 | A08335 | 291 |
| A01213 | A08356 | 757 | A01213 | A08362 | 721 |
| A01213 | A08430 | 154 | A01213 | A08821 | 373 |
| A01213 | A08831 | 276 | A01213 | A08956 | 411 |
| A01213 | A09323 | 160 | A01213 | A09624 | 193 |
| A01213 | A09743 | 285 | A01213 | A09996 | 276 |
| A01213 | A10156 | 299 | A01213 | A10596 | 279 |
| A01213 | A10601 | 383 | A01213 | A10798 | 402 |

|        |        |     |        |        |     |
|--------|--------|-----|--------|--------|-----|
| A01213 | A11132 | 170 | A01213 | A11862 | 364 |
| A01213 | A11983 | 177 | A01213 | A11991 | 240 |
| A01213 | A12606 | 276 | A01213 | A13301 | 326 |
| A01213 | A13783 | 489 | A01213 | A13983 | 350 |
| A01213 | A14167 | 167 | A01213 | A14212 | 772 |
| A01213 | A14213 | 379 | A01213 | A14214 | 276 |
| A01213 | A14229 | 193 | A01213 | A14292 | 274 |
| A01213 | A14570 | 310 | A01213 | A14635 | 491 |
| A01213 | A15291 | 240 | A01213 | A15314 | 417 |
| A01213 | A15322 | 469 | A01213 | A15506 | 357 |
| A01213 | A15606 | 436 | A01213 | A15617 | 268 |
| A01213 | A15630 | 221 | A01213 | A15701 | 259 |
| A01213 | A16005 | 326 | A01213 | A16449 | 276 |
| A01213 | A16702 | 276 | A01213 | A16831 | 373 |
| A01213 | A16916 | 363 | A01214 | A01215 | 718 |
| A01214 | A01226 | 491 | A01214 | A01234 | 677 |
| A01214 | A01238 | 174 | A01214 | A01296 | 410 |
| A01214 | A01304 | 491 | A01214 | A01311 | 484 |
| A01214 | A01320 | 664 | A01214 | A01327 | 584 |
| A01214 | A01337 | 160 | A01214 | A01353 | 467 |
| A01214 | A01354 | 480 | A01214 | A01412 | 462 |
| A01214 | A01492 | 330 | A01214 | A01507 | 424 |
| A01214 | A01514 | 205 | A01214 | A01569 | 361 |
| A01214 | A01588 | 188 | A01214 | A01711 | 193 |
| A01214 | A01770 | 899 | A01214 | A01988 | 290 |
| A01214 | A02041 | 369 | A01214 | A02270 | 299 |
| A01214 | A02736 | 165 | A01214 | A03112 | 246 |
| A01214 | A03169 | 168 | A01214 | A03334 | 198 |
| A01214 | A03494 | 196 | A01214 | A03496 | 361 |
| A01214 | A03601 | 303 | A01214 | A03958 | 367 |
| A01214 | A03982 | 221 | A01214 | A04447 | 447 |
| A01214 | A05712 | 165 | A01214 | A05748 | 202 |
| A01214 | A06418 | 184 | A01214 | A06600 | 171 |
| A01214 | A06689 | 162 | A01214 | A07347 | 170 |
| A01214 | A07414 | 485 | A01214 | A07467 | 238 |
| A01214 | A07695 | 491 | A01214 | A07706 | 474 |
| A01214 | A07726 | 907 | A01214 | A07888 | 299 |
| A01214 | A08144 | 687 | A01214 | A08269 | 416 |
| A01214 | A08363 | 274 | A01214 | A08477 | 101 |
| A01214 | A08491 | 361 | A01214 | A08537 | 488 |
| A01214 | A08571 | 296 | A01214 | A08860 | 219 |
| A01214 | A08892 | 451 | A01214 | A09280 | 190 |
| A01214 | A09526 | 302 | A01214 | A09621 | 463 |
| A01214 | A09965 | 196 | A01214 | A10250 | 302 |
| A01214 | A10608 | 339 | A01214 | A11394 | 162 |
| A01214 | A11401 | 461 | A01214 | A11407 | 165 |

|        |        |     |        |        |     |
|--------|--------|-----|--------|--------|-----|
| A01214 | A12272 | 299 | A01214 | A13475 | 384 |
| A01214 | A13598 | 159 | A01214 | A13617 | 188 |
| A01214 | A13657 | 221 | A01214 | A13831 | 200 |
| A01214 | A13870 | 486 | A01214 | A14006 | 466 |
| A01214 | A14074 | 480 | A01214 | A14449 | 652 |
| A01214 | A14469 | 165 | A01214 | A14540 | 230 |
| A01214 | A14634 | 170 | A01214 | A14655 | 491 |
| A01214 | A14701 | 446 | A01214 | A14827 | 196 |
| A01214 | A14936 | 462 | A01214 | A15624 | 411 |
| A01214 | A15651 | 462 | A01214 | A15652 | 462 |
| A01214 | A15661 | 462 | A01214 | A15662 | 462 |
| A01214 | A15684 | 160 | A01214 | A15932 | 372 |
| A01214 | A16400 | 340 | A01214 | A16410 | 156 |
| A01214 | A16626 | 396 | A01214 | A17168 | 321 |
| A01215 | A01221 | 223 | A01215 | A01228 | 450 |
| A01215 | A01234 | 490 | A01215 | A01243 | 436 |
| A01215 | A01304 | 213 | A01215 | A01311 | 465 |
| A01215 | A01320 | 183 | A01215 | A01353 | 578 |
| A01215 | A01354 | 491 | A01215 | A01384 | 255 |
| A01215 | A01406 | 371 | A01215 | A01412 | 621 |
| A01215 | A01431 | 490 | A01215 | A01468 | 208 |
| A01215 | A01470 | 470 | A01215 | A01492 | 490 |
| A01215 | A01496 | 371 | A01215 | A01506 | 400 |
| A01215 | A01535 | 491 | A01215 | A01536 | 491 |
| A01215 | A01569 | 458 | A01215 | A01577 | 445 |
| A01215 | A01597 | 332 | A01215 | A01598 | 154 |
| A01215 | A01604 | 360 | A01215 | A01647 | 212 |
| A01215 | A01649 | 405 | A01215 | A01707 | 443 |
| A01215 | A01711 | 182 | A01215 | A01736 | 365 |
| A01215 | A01917 | 283 | A01215 | A02041 | 563 |
| A01215 | A02051 | 223 | A01215 | A02086 | 202 |
| A01215 | A02268 | 93  | A01215 | A02270 | 488 |
| A01215 | A02274 | 183 | A01215 | A02454 | 291 |
| A01215 | A02487 | 490 | A01215 | A02499 | 160 |
| A01215 | A02671 | 450 | A01215 | A03029 | 173 |
| A01215 | A03169 | 577 | A01215 | A03180 | 151 |
| A01215 | A03227 | 443 | A01215 | A03438 | 262 |
| A01215 | A03456 | 382 | A01215 | A03586 | 256 |
| A01215 | A03742 | 184 | A01215 | A03792 | 277 |
| A01215 | A03952 | 470 | A01215 | A03953 | 267 |
| A01215 | A03954 | 332 | A01215 | A03958 | 477 |
| A01215 | A03972 | 183 | A01215 | A03982 | 183 |
| A01215 | A04083 | 232 | A01215 | A04447 | 577 |
| A01215 | A04468 | 260 | A01215 | A04917 | 173 |
| A01215 | A05058 | 201 | A01215 | A05227 | 168 |
| A01215 | A05275 | 204 | A01215 | A05628 | 267 |

|        |        |     |        |        |     |
|--------|--------|-----|--------|--------|-----|
| A01215 | A05695 | 151 | A01215 | A05748 | 383 |
| A01215 | A06025 | 232 | A01215 | A06275 | 458 |
| A01215 | A06431 | 452 | A01215 | A07160 | 327 |
| A01215 | A07225 | 267 | A01215 | A07265 | 529 |
| A01215 | A07447 | 232 | A01215 | A07588 | 577 |
| A01215 | A07706 | 435 | A01215 | A08118 | 356 |
| A01215 | A08149 | 210 | A01215 | A08682 | 160 |
| A01215 | A08955 | 223 | A01215 | A08971 | 223 |
| A01215 | A09061 | 173 | A01215 | A09281 | 200 |
| A01215 | A09910 | 210 | A01215 | A10175 | 356 |
| A01215 | A10362 | 422 | A01215 | A10532 | 411 |
| A01215 | A10616 | 341 | A01215 | A10755 | 223 |
| A01215 | A10846 | 174 | A01215 | A11202 | 223 |
| A01215 | A11254 | 347 | A01215 | A12001 | 232 |
| A01215 | A12305 | 232 | A01215 | A12998 | 210 |
| A01215 | A13126 | 154 | A01215 | A13156 | 389 |
| A01215 | A13298 | 424 | A01215 | A13633 | 151 |
| A01215 | A13831 | 484 | A01215 | A13870 | 324 |
| A01215 | A13989 | 479 | A01215 | A14006 | 469 |
| A01215 | A14073 | 474 | A01215 | A14216 | 578 |
| A01215 | A14220 | 159 | A01215 | A14449 | 163 |
| A01215 | A14469 | 255 | A01215 | A14543 | 160 |
| A01215 | A14699 | 435 | A01215 | A14999 | 267 |
| A01215 | A15011 | 210 | A01215 | A15040 | 267 |
| A01215 | A15660 | 163 | A01215 | A15684 | 375 |
| A01215 | A16060 | 366 | A01215 | A16149 | 171 |
| A01215 | A16332 | 232 | A01216 | A01289 | 329 |
| A01216 | A01290 | 440 | A01216 | A01291 | 469 |
| A01216 | A01335 | 174 | A01216 | A01348 | 491 |
| A01216 | A01356 | 229 | A01216 | A01366 | 481 |
| A01216 | A01402 | 182 | A01216 | A01431 | 201 |
| A01216 | A01451 | 369 | A01216 | A01454 | 599 |
| A01216 | A01457 | 472 | A01216 | A01458 | 200 |
| A01216 | A01459 | 491 | A01216 | A01461 | 570 |
| A01216 | A01484 | 363 | A01216 | A01503 | 213 |
| A01216 | A01514 | 640 | A01216 | A01542 | 292 |
| A01216 | A01543 | 302 | A01216 | A01557 | 193 |
| A01216 | A01566 | 400 | A01216 | A01568 | 491 |
| A01216 | A01574 | 491 | A01216 | A01575 | 541 |
| A01216 | A01578 | 352 | A01216 | A01585 | 568 |
| A01216 | A01601 | 218 | A01216 | A01607 | 491 |
| A01216 | A01630 | 255 | A01216 | A01632 | 449 |
| A01216 | A01652 | 241 | A01216 | A01681 | 445 |
| A01216 | A01687 | 489 | A01216 | A01707 | 157 |
| A01216 | A01729 | 281 | A01216 | A01889 | 401 |
| A01216 | A01933 | 270 | A01216 | A01988 | 386 |

|        |        |     |        |        |     |
|--------|--------|-----|--------|--------|-----|
| A01216 | A02494 | 179 | A01216 | A02518 | 188 |
| A01216 | A02857 | 215 | A01216 | A02899 | 202 |
| A01216 | A03197 | 473 | A01216 | A03451 | 480 |
| A01216 | A03866 | 160 | A01216 | A03880 | 312 |
| A01216 | A03892 | 201 | A01216 | A04139 | 401 |
| A01216 | A04171 | 160 | A01216 | A04175 | 326 |
| A01216 | A04347 | 230 | A01216 | A04520 | 160 |
| A01216 | A04686 | 374 | A01216 | A04715 | 469 |
| A01216 | A04790 | 475 | A01216 | A04904 | 174 |
| A01216 | A05301 | 468 | A01216 | A05449 | 362 |
| A01216 | A05574 | 207 | A01216 | A05914 | 485 |
| A01216 | A06037 | 491 | A01216 | A06039 | 355 |
| A01216 | A06466 | 200 | A01216 | A06752 | 168 |
| A01216 | A06778 | 285 | A01216 | A06889 | 205 |
| A01216 | A06947 | 198 | A01216 | A07004 | 268 |
| A01216 | A07054 | 346 | A01216 | A07242 | 491 |
| A01216 | A07311 | 405 | A01216 | A07404 | 228 |
| A01216 | A07495 | 491 | A01216 | A07499 | 243 |
| A01216 | A07709 | 484 | A01216 | A07791 | 433 |
| A01216 | A07816 | 483 | A01216 | A07893 | 452 |
| A01216 | A07897 | 255 | A01216 | A07934 | 481 |
| A01216 | A08018 | 355 | A01216 | A09168 | 294 |
| A01216 | A09311 | 218 | A01216 | A09474 | 380 |
| A01216 | A09666 | 461 | A01216 | A09953 | 207 |
| A01216 | A10521 | 191 | A01216 | A11346 | 232 |
| A01216 | A11350 | 185 | A01216 | A11690 | 185 |
| A01216 | A12047 | 491 | A01216 | A12670 | 243 |
| A01216 | A13213 | 160 | A01216 | A13830 | 491 |
| A01216 | A13866 | 374 | A01216 | A13989 | 491 |
| A01216 | A14247 | 551 | A01216 | A14251 | 165 |
| A01216 | A14266 | 480 | A01216 | A14281 | 490 |
| A01216 | A14484 | 475 | A01216 | A14633 | 466 |
| A01216 | A15004 | 297 | A01216 | A15039 | 217 |
| A01216 | A15232 | 294 | A01216 | A15347 | 187 |
| A01216 | A15507 | 350 | A01216 | A15626 | 458 |
| A01216 | A15660 | 447 | A01216 | A15930 | 413 |
| A01216 | A16048 | 388 | A01216 | A16782 | 228 |
| A01216 | A17061 | 352 | A01216 | A17208 | 241 |
| A01217 | A01220 | 556 | A01217 | A01221 | 491 |
| A01217 | A01238 | 291 | A01217 | A01247 | 278 |
| A01217 | A01290 | 252 | A01217 | A01291 | 215 |
| A01217 | A01306 | 404 | A01217 | A01335 | 200 |
| A01217 | A01337 | 249 | A01217 | A01338 | 467 |
| A01217 | A01352 | 414 | A01217 | A01362 | 420 |
| A01217 | A01365 | 731 | A01217 | A01406 | 768 |
| A01217 | A01407 | 335 | A01217 | A01408 | 546 |



|        |        |     |        |        |     |
|--------|--------|-----|--------|--------|-----|
| A01217 | A01412 | 445 | A01217 | A01414 | 543 |
| A01217 | A01416 | 339 | A01217 | A01451 | 555 |
| A01217 | A01468 | 326 | A01217 | A01547 | 156 |
| A01217 | A01579 | 317 | A01217 | A01611 | 408 |
| A01217 | A01976 | 343 | A01217 | A01988 | 190 |
| A01217 | A02227 | 491 | A01217 | A03095 | 317 |
| A01217 | A03453 | 168 | A01217 | A03456 | 198 |
| A01217 | A03493 | 479 | A01217 | A03601 | 313 |
| A01217 | A03901 | 375 | A01217 | A04688 | 477 |
| A01217 | A04932 | 385 | A01217 | A05199 | 314 |
| A01217 | A05375 | 235 | A01217 | A05449 | 477 |
| A01217 | A05501 | 494 | A01217 | A05702 | 262 |
| A01217 | A05804 | 193 | A01217 | A06064 | 246 |
| A01217 | A06589 | 312 | A01217 | A06785 | 465 |
| A01217 | A06861 | 344 | A01217 | A07165 | 899 |
| A01217 | A07242 | 436 | A01217 | A07248 | 165 |
| A01217 | A07495 | 185 | A01217 | A07965 | 440 |
| A01217 | A08154 | 151 | A01217 | A08419 | 191 |
| A01217 | A08543 | 152 | A01217 | A08556 | 188 |
| A01217 | A08760 | 176 | A01217 | A08761 | 156 |
| A01217 | A08901 | 374 | A01217 | A09520 | 134 |
| A01217 | A09735 | 489 | A01217 | A10338 | 346 |
| A01217 | A10575 | 152 | A01217 | A10607 | 372 |
| A01217 | A11480 | 311 | A01217 | A12657 | 251 |
| A01217 | A14479 | 286 | A01217 | A14568 | 182 |
| A01217 | A14813 | 188 | A01217 | A15499 | 183 |
| A01217 | A15500 | 398 | A01217 | A15657 | 557 |
| A01217 | A15661 | 180 | A01217 | A15684 | 246 |
| A01217 | A15771 | 193 | A01217 | A16680 | 298 |
| A01217 | A17152 | 208 | A01218 | A01221 | 265 |
| A01218 | A01242 | 306 | A01218 | A01270 | 241 |
| A01218 | A01369 | 217 | A01218 | A01411 | 591 |
| A01218 | A01420 | 314 | A01218 | A01433 | 74  |
| A01218 | A01455 | 247 | A01218 | A01569 | 443 |
| A01218 | A01579 | 241 | A01218 | A01581 | 247 |
| A01218 | A01601 | 317 | A01218 | A01822 | 63  |
| A01218 | A01824 | 467 | A01218 | A01826 | 247 |
| A01218 | A01827 | 221 | A01218 | A01976 | 297 |
| A01218 | A02227 | 210 | A01218 | A02353 | 489 |
| A01218 | A02705 | 185 | A01218 | A02737 | 217 |
| A01218 | A03453 | 577 | A01218 | A05501 | 217 |
| A01218 | A06466 | 154 | A01218 | A06534 | 241 |
| A01218 | A06814 | 241 | A01218 | A06973 | 241 |
| A01218 | A07047 | 241 | A01218 | A07360 | 74  |
| A01218 | A07398 | 241 | A01218 | A07602 | 252 |
| A01218 | A08369 | 241 | A01218 | A08408 | 241 |

|        |        |     |        |        |     |
|--------|--------|-----|--------|--------|-----|
| A01218 | A08476 | 241 | A01218 | A09308 | 241 |
| A01218 | A09322 | 241 | A01218 | A09587 | 470 |
| A01218 | A09620 | 241 | A01218 | A09717 | 247 |
| A01218 | A09735 | 266 | A01218 | A11409 | 343 |
| A01218 | A11728 | 241 | A01218 | A12227 | 241 |
| A01218 | A13713 | 391 | A01218 | A14074 | 247 |
| A01218 | A15268 | 241 | A01218 | A15381 | 241 |
| A01218 | A16272 | 187 | A01219 | A01335 | 176 |
| A01219 | A01431 | 196 | A01219 | A01579 | 458 |
| A01219 | A02248 | 167 | A01219 | A05196 | 221 |
| A01219 | A06701 | 190 | A01219 | A08489 | 491 |
| A01219 | A08505 | 489 | A01219 | A11290 | 195 |
| A01219 | A13929 | 177 | A01219 | A14152 | 488 |
| A01219 | A14701 | 213 | A01219 | A14725 | 286 |
| A01219 | A15535 | 230 | A01219 | A15660 | 485 |
| A01219 | A15684 | 489 | A01219 | A15738 | 249 |
| A01219 | A16705 | 281 | A01219 | A16834 | 201 |
| A01220 | A01221 | 491 | A01220 | A01238 | 505 |
| A01220 | A01252 | 238 | A01220 | A01263 | 449 |
| A01220 | A01335 | 299 | A01220 | A01362 | 408 |
| A01220 | A01365 | 578 | A01220 | A01406 | 640 |
| A01220 | A01407 | 219 | A01220 | A01408 | 559 |
| A01220 | A01412 | 488 | A01220 | A01414 | 188 |
| A01220 | A01416 | 443 | A01220 | A01439 | 399 |
| A01220 | A01451 | 188 | A01220 | A01579 | 230 |
| A01220 | A01597 | 168 | A01220 | A01611 | 401 |
| A01220 | A01613 | 475 | A01220 | A01652 | 177 |
| A01220 | A01976 | 188 | A01220 | A01988 | 188 |
| A01220 | A02227 | 491 | A01220 | A03095 | 484 |
| A01220 | A03403 | 198 | A01220 | A03453 | 154 |
| A01220 | A03456 | 187 | A01220 | A03487 | 179 |
| A01220 | A03490 | 210 | A01220 | A03493 | 217 |
| A01220 | A03568 | 180 | A01220 | A03676 | 154 |
| A01220 | A03901 | 188 | A01220 | A04563 | 193 |
| A01220 | A04688 | 409 | A01220 | A04808 | 240 |
| A01220 | A04846 | 176 | A01220 | A05127 | 226 |
| A01220 | A05199 | 302 | A01220 | A05255 | 187 |
| A01220 | A05471 | 152 | A01220 | A05501 | 428 |
| A01220 | A05702 | 188 | A01220 | A05804 | 396 |
| A01220 | A05916 | 258 | A01220 | A06564 | 201 |
| A01220 | A06589 | 475 | A01220 | A06775 | 176 |
| A01220 | A06785 | 188 | A01220 | A07160 | 267 |
| A01220 | A07248 | 374 | A01220 | A07851 | 224 |
| A01220 | A07965 | 188 | A01220 | A08154 | 363 |
| A01220 | A08358 | 159 | A01220 | A08501 | 400 |
| A01220 | A08556 | 170 | A01220 | A08773 | 240 |

|        |        |     |        |        |     |
|--------|--------|-----|--------|--------|-----|
| A01220 | A08901 | 364 | A01220 | A09520 | 346 |
| A01220 | A09735 | 490 | A01220 | A10018 | 196 |
| A01220 | A10332 | 160 | A01220 | A11288 | 162 |
| A01220 | A11480 | 188 | A01220 | A12923 | 193 |
| A01220 | A14479 | 486 | A01220 | A14482 | 378 |
| A01220 | A14813 | 188 | A01220 | A14977 | 258 |
| A01220 | A15500 | 335 | A01220 | A15657 | 188 |
| A01220 | A15771 | 177 | A01220 | A16323 | 183 |
| A01220 | A16680 | 188 | A01221 | A01230 | 174 |
| A01221 | A01232 | 267 | A01221 | A01234 | 488 |
| A01221 | A01235 | 297 | A01221 | A01243 | 575 |
| A01221 | A01287 | 364 | A01221 | A01291 | 462 |
| A01221 | A01292 | 180 | A01221 | A01311 | 417 |
| A01221 | A01335 | 433 | A01221 | A01337 | 177 |
| A01221 | A01352 | 480 | A01221 | A01353 | 157 |
| A01221 | A01362 | 462 | A01221 | A01365 | 583 |
| A01221 | A01403 | 340 | A01221 | A01406 | 491 |
| A01221 | A01408 | 489 | A01221 | A01411 | 440 |
| A01221 | A01412 | 688 | A01221 | A01414 | 310 |
| A01221 | A01416 | 259 | A01221 | A01418 | 572 |
| A01221 | A01446 | 205 | A01221 | A01451 | 485 |
| A01221 | A01464 | 180 | A01221 | A01468 | 455 |
| A01221 | A01470 | 470 | A01221 | A01492 | 377 |
| A01221 | A01496 | 436 | A01221 | A01551 | 438 |
| A01221 | A01569 | 414 | A01221 | A01579 | 344 |
| A01221 | A01582 | 337 | A01221 | A01611 | 363 |
| A01221 | A01613 | 144 | A01221 | A01668 | 160 |
| A01221 | A01702 | 272 | A01221 | A01723 | 447 |
| A01221 | A01790 | 235 | A01221 | A01976 | 427 |
| A01221 | A01993 | 371 | A01221 | A01998 | 246 |
| A01221 | A01999 | 135 | A01221 | A02003 | 210 |
| A01221 | A02211 | 210 | A01221 | A02212 | 288 |
| A01221 | A02227 | 491 | A01221 | A03095 | 429 |
| A01221 | A03438 | 422 | A01221 | A03453 | 185 |
| A01221 | A03454 | 449 | A01221 | A03493 | 344 |
| A01221 | A03556 | 222 | A01221 | A03567 | 484 |
| A01221 | A03568 | 269 | A01221 | A03617 | 217 |
| A01221 | A03676 | 227 | A01221 | A03705 | 299 |
| A01221 | A03856 | 241 | A01221 | A03859 | 183 |
| A01221 | A03896 | 184 | A01221 | A03901 | 488 |
| A01221 | A03982 | 235 | A01221 | A04033 | 316 |
| A01221 | A04099 | 219 | A01221 | A05025 | 205 |
| A01221 | A05199 | 352 | A01221 | A05210 | 263 |
| A01221 | A05501 | 475 | A01221 | A05510 | 456 |
| A01221 | A05512 | 267 | A01221 | A05605 | 217 |
| A01221 | A05639 | 210 | A01221 | A05804 | 363 |

|        |        |     |        |        |     |
|--------|--------|-----|--------|--------|-----|
| A01221 | A05982 | 198 | A01221 | A06064 | 441 |
| A01221 | A06114 | 310 | A01221 | A06115 | 279 |
| A01221 | A06122 | 386 | A01221 | A06369 | 541 |
| A01221 | A06408 | 160 | A01221 | A06435 | 291 |
| A01221 | A06436 | 302 | A01221 | A06564 | 385 |
| A01221 | A06589 | 348 | A01221 | A06832 | 687 |
| A01221 | A06861 | 274 | A01221 | A06965 | 234 |
| A01221 | A07095 | 310 | A01221 | A07160 | 200 |
| A01221 | A07262 | 224 | A01221 | A07309 | 329 |
| A01221 | A07312 | 423 | A01221 | A07360 | 152 |
| A01221 | A07473 | 160 | A01221 | A07581 | 151 |
| A01221 | A07583 | 441 | A01221 | A07744 | 177 |
| A01221 | A07965 | 185 | A01221 | A08064 | 165 |
| A01221 | A08183 | 217 | A01221 | A08521 | 156 |
| A01221 | A08901 | 486 | A01221 | A08962 | 224 |
| A01221 | A09232 | 326 | A01221 | A09285 | 198 |
| A01221 | A09520 | 457 | A01221 | A09563 | 310 |
| A01221 | A09575 | 235 | A01221 | A09673 | 217 |
| A01221 | A09735 | 490 | A01221 | A10109 | 173 |
| A01221 | A10338 | 310 | A01221 | A10480 | 310 |
| A01221 | A10498 | 176 | A01221 | A10522 | 246 |
| A01221 | A10553 | 260 | A01221 | A10607 | 329 |
| A01221 | A10923 | 188 | A01221 | A11277 | 430 |
| A01221 | A11882 | 210 | A01221 | A12080 | 198 |
| A01221 | A12923 | 151 | A01221 | A12924 | 310 |
| A01221 | A13272 | 235 | A01221 | A13989 | 299 |
| A01221 | A14088 | 217 | A01221 | A14479 | 430 |
| A01221 | A14482 | 424 | A01221 | A14568 | 202 |
| A01221 | A14594 | 219 | A01221 | A14596 | 425 |
| A01221 | A14597 | 486 | A01221 | A14699 | 481 |
| A01221 | A14701 | 486 | A01221 | A14875 | 210 |
| A01221 | A15377 | 217 | A01221 | A15500 | 183 |
| A01221 | A15543 | 217 | A01221 | A15550 | 210 |
| A01221 | A15624 | 441 | A01221 | A15660 | 260 |
| A01221 | A15673 | 263 | A01221 | A15684 | 483 |
| A01221 | A15724 | 217 | A01221 | A15746 | 386 |
| A01221 | A16401 | 151 | A01221 | A16468 | 210 |
| A01221 | A16664 | 217 | A01221 | A17152 | 375 |
| A01222 | A01223 | 486 | A01222 | A01225 | 278 |
| A01222 | A01227 | 215 | A01222 | A01230 | 486 |
| A01222 | A01297 | 486 | A01222 | A01344 | 303 |
| A01222 | A01397 | 278 | A01222 | A01409 | 272 |
| A01222 | A01643 | 227 | A01222 | A02020 | 324 |
| A01222 | A02083 | 208 | A01222 | A02168 | 345 |
| A01222 | A02316 | 247 | A01222 | A02521 | 485 |
| A01222 | A02779 | 235 | A01222 | A02992 | 238 |

|        |        |     |        |        |     |
|--------|--------|-----|--------|--------|-----|
| A01222 | A03016 | 305 | A01222 | A03099 | 185 |
| A01222 | A03107 | 218 | A01222 | A03423 | 417 |
| A01222 | A03484 | 445 | A01222 | A03513 | 417 |
| A01222 | A03858 | 232 | A01222 | A04349 | 260 |
| A01222 | A04702 | 390 | A01222 | A04791 | 405 |
| A01222 | A04883 | 484 | A01222 | A04927 | 480 |
| A01222 | A04995 | 402 | A01222 | A05045 | 285 |
| A01222 | A05050 | 352 | A01222 | A05051 | 479 |
| A01222 | A05297 | 408 | A01222 | A05462 | 314 |
| A01222 | A05472 | 269 | A01222 | A05573 | 435 |
| A01222 | A05757 | 296 | A01222 | A05789 | 352 |
| A01222 | A06402 | 347 | A01222 | A06405 | 373 |
| A01222 | A06439 | 455 | A01222 | A06607 | 159 |
| A01222 | A06650 | 241 | A01222 | A06700 | 374 |
| A01222 | A06860 | 271 | A01222 | A07059 | 256 |
| A01222 | A07088 | 473 | A01222 | A07132 | 328 |
| A01222 | A07230 | 396 | A01222 | A07239 | 278 |
| A01222 | A07327 | 416 | A01222 | A07503 | 461 |
| A01222 | A07520 | 216 | A01222 | A07643 | 180 |
| A01222 | A07697 | 162 | A01222 | A07736 | 229 |
| A01222 | A07757 | 446 | A01222 | A07973 | 268 |
| A01222 | A08484 | 224 | A01222 | A08688 | 321 |
| A01222 | A10614 | 334 | A01222 | A16741 | 174 |
| A01222 | A16744 | 313 | A01222 | A17078 | 165 |
| A01223 | A01225 | 407 | A01223 | A01227 | 413 |
| A01223 | A01230 | 491 | A01223 | A01297 | 491 |
| A01223 | A01344 | 232 | A01223 | A01397 | 201 |
| A01223 | A01409 | 472 | A01223 | A01635 | 430 |
| A01223 | A01643 | 369 | A01223 | A01735 | 154 |
| A01223 | A01741 | 205 | A01223 | A01755 | 182 |
| A01223 | A01793 | 272 | A01223 | A01829 | 255 |
| A01223 | A02020 | 334 | A01223 | A02168 | 286 |
| A01223 | A02316 | 168 | A01223 | A02363 | 290 |
| A01223 | A02377 | 324 | A01223 | A02432 | 188 |
| A01223 | A02521 | 491 | A01223 | A02525 | 218 |
| A01223 | A02777 | 374 | A01223 | A02779 | 424 |
| A01223 | A02859 | 213 | A01223 | A02924 | 160 |
| A01223 | A02992 | 159 | A01223 | A03016 | 234 |
| A01223 | A03238 | 159 | A01223 | A03363 | 290 |
| A01223 | A03370 | 205 | A01223 | A03423 | 490 |
| A01223 | A03484 | 348 | A01223 | A03513 | 486 |
| A01223 | A03795 | 268 | A01223 | A04095 | 395 |
| A01223 | A04286 | 229 | A01223 | A04702 | 430 |
| A01223 | A04791 | 357 | A01223 | A04883 | 491 |
| A01223 | A04891 | 441 | A01223 | A04927 | 491 |
| A01223 | A05006 | 212 | A01223 | A05007 | 322 |

|        |        |     |        |        |     |
|--------|--------|-----|--------|--------|-----|
| A01223 | A05014 | 380 | A01223 | A05045 | 446 |
| A01223 | A05050 | 477 | A01223 | A05051 | 483 |
| A01223 | A05140 | 291 | A01223 | A05297 | 363 |
| A01223 | A05330 | 427 | A01223 | A05337 | 424 |
| A01223 | A05358 | 375 | A01223 | A05416 | 185 |
| A01223 | A05418 | 322 | A01223 | A05420 | 351 |
| A01223 | A05426 | 351 | A01223 | A05433 | 351 |
| A01223 | A05451 | 305 | A01223 | A05463 | 251 |
| A01223 | A05472 | 191 | A01223 | A05516 | 230 |
| A01223 | A05550 | 480 | A01223 | A05573 | 477 |
| A01223 | A05759 | 236 | A01223 | A05883 | 260 |
| A01223 | A05912 | 435 | A01223 | A06150 | 388 |
| A01223 | A06252 | 273 | A01223 | A06405 | 491 |
| A01223 | A06439 | 489 | A01223 | A06553 | 358 |
| A01223 | A06629 | 177 | A01223 | A06638 | 343 |
| A01223 | A06639 | 371 | A01223 | A06641 | 367 |
| A01223 | A06700 | 174 | A01223 | A06756 | 207 |
| A01223 | A06847 | 435 | A01223 | A06860 | 441 |
| A01223 | A06994 | 443 | A01223 | A07027 | 363 |
| A01223 | A07059 | 480 | A01223 | A07061 | 174 |
| A01223 | A07088 | 491 | A01223 | A07109 | 173 |
| A01223 | A07122 | 213 | A01223 | A07230 | 435 |
| A01223 | A07238 | 154 | A01223 | A07322 | 274 |
| A01223 | A07325 | 195 | A01223 | A07366 | 308 |
| A01223 | A07408 | 402 | A01223 | A07424 | 296 |
| A01223 | A07477 | 185 | A01223 | A07501 | 352 |
| A01223 | A07503 | 466 | A01223 | A07520 | 461 |
| A01223 | A07610 | 219 | A01223 | A07619 | 327 |
| A01223 | A07674 | 445 | A01223 | A07697 | 196 |
| A01223 | A07723 | 273 | A01223 | A07757 | 419 |
| A01223 | A07933 | 319 | A01223 | A08190 | 160 |
| A01223 | A08238 | 273 | A01223 | A08385 | 232 |
| A01223 | A10156 | 195 | A01223 | A10420 | 235 |
| A01223 | A10550 | 290 | A01223 | A10614 | 273 |
| A01223 | A10635 | 439 | A01223 | A10669 | 188 |
| A01223 | A10694 | 278 | A01223 | A10926 | 332 |
| A01223 | A13717 | 327 | A01223 | A14405 | 177 |
| A01223 | A17006 | 273 | A01224 | A01234 | 491 |
| A01224 | A01243 | 353 | A01224 | A01304 | 485 |
| A01224 | A01369 | 224 | A01224 | A01468 | 414 |
| A01224 | A01470 | 486 | A01224 | A01487 | 489 |
| A01224 | A01492 | 474 | A01224 | A01569 | 160 |
| A01224 | A01598 | 63  | A01224 | A01721 | 454 |
| A01224 | A01917 | 232 | A01224 | A03112 | 259 |
| A01224 | A03301 | 266 | A01224 | A03438 | 63  |
| A01224 | A03567 | 337 | A01224 | A03705 | 163 |

|        |        |     |        |        |     |
|--------|--------|-----|--------|--------|-----|
| A01224 | A03896 | 263 | A01224 | A04055 | 227 |
| A01224 | A05463 | 200 | A01224 | A05712 | 154 |
| A01224 | A05845 | 346 | A01224 | A06275 | 372 |
| A01224 | A07307 | 201 | A01224 | A08524 | 165 |
| A01224 | A08701 | 601 | A01224 | A08768 | 215 |
| A01224 | A09664 | 165 | A01224 | A10083 | 157 |
| A01224 | A11565 | 198 | A01224 | A13989 | 475 |
| A01224 | A14216 | 168 | A01225 | A01227 | 479 |
| A01225 | A01230 | 414 | A01225 | A01297 | 406 |
| A01225 | A01344 | 247 | A01225 | A01409 | 368 |
| A01225 | A01508 | 216 | A01225 | A01635 | 288 |
| A01225 | A01643 | 162 | A01225 | A01755 | 198 |
| A01225 | A01829 | 269 | A01225 | A01932 | 378 |
| A01225 | A02191 | 230 | A01225 | A02254 | 205 |
| A01225 | A02316 | 185 | A01225 | A02529 | 324 |
| A01225 | A02584 | 299 | A01225 | A03028 | 198 |
| A01225 | A03087 | 208 | A01225 | A03095 | 345 |
| A01225 | A03167 | 286 | A01225 | A03232 | 278 |
| A01225 | A03234 | 301 | A01225 | A03484 | 235 |
| A01225 | A03513 | 474 | A01225 | A03795 | 393 |
| A01225 | A03858 | 168 | A01225 | A03962 | 193 |
| A01225 | A03968 | 296 | A01225 | A04228 | 491 |
| A01225 | A04307 | 196 | A01225 | A04449 | 475 |
| A01225 | A04485 | 297 | A01225 | A04791 | 246 |
| A01225 | A04816 | 432 | A01225 | A05007 | 205 |
| A01225 | A05014 | 390 | A01225 | A05139 | 368 |
| A01225 | A05140 | 305 | A01225 | A05222 | 213 |
| A01225 | A05330 | 258 | A01225 | A05337 | 252 |
| A01225 | A05463 | 266 | A01225 | A05472 | 208 |
| A01225 | A05538 | 347 | A01225 | A05548 | 288 |
| A01225 | A05549 | 368 | A01225 | A05573 | 408 |
| A01225 | A05751 | 247 | A01225 | A05752 | 394 |
| A01225 | A05757 | 238 | A01225 | A05789 | 308 |
| A01225 | A05883 | 388 | A01225 | A06358 | 201 |
| A01225 | A06405 | 400 | A01225 | A06607 | 430 |
| A01225 | A06629 | 401 | A01225 | A06641 | 259 |
| A01225 | A06847 | 279 | A01225 | A06970 | 238 |
| A01225 | A07059 | 401 | A01225 | A07067 | 394 |
| A01225 | A07088 | 205 | A01225 | A07096 | 236 |
| A01225 | A07122 | 235 | A01225 | A07239 | 488 |
| A01225 | A07520 | 152 | A01225 | A07674 | 374 |
| A01225 | A07690 | 379 | A01225 | A07711 | 297 |
| A01225 | A07739 | 424 | A01225 | A07779 | 394 |
| A01225 | A07847 | 232 | A01225 | A07933 | 399 |
| A01225 | A07976 | 272 | A01225 | A08155 | 477 |
| A01225 | A08190 | 176 | A01225 | A10422 | 299 |

|        |        |     |        |        |     |
|--------|--------|-----|--------|--------|-----|
| A01225 | A10458 | 312 | A01225 | A10652 | 388 |
| A01225 | A10658 | 291 | A01225 | A10696 | 412 |
| A01225 | A10702 | 180 | A01225 | A11021 | 333 |
| A01225 | A11201 | 312 | A01225 | A13065 | 378 |
| A01225 | A14549 | 329 | A01225 | A15498 | 187 |
| A01225 | A16744 | 260 | A01226 | A01234 | 635 |
| A01226 | A01263 | 491 | A01226 | A01304 | 491 |
| A01226 | A01314 | 224 | A01226 | A01352 | 335 |
| A01226 | A01365 | 679 | A01226 | A02831 | 187 |
| A01226 | A03338 | 230 | A01226 | A07414 | 477 |
| A01226 | A07467 | 154 | A01226 | A07695 | 490 |
| A01226 | A07700 | 299 | A01226 | A07706 | 485 |
| A01226 | A08144 | 746 | A01226 | A08269 | 179 |
| A01226 | A08293 | 163 | A01226 | A08363 | 184 |
| A01226 | A08491 | 165 | A01226 | A08494 | 184 |
| A01226 | A08537 | 490 | A01226 | A08571 | 196 |
| A01226 | A08892 | 427 | A01226 | A08971 | 465 |
| A01226 | A09280 | 229 | A01226 | A09621 | 486 |
| A01226 | A09965 | 361 | A01226 | A10608 | 470 |
| A01226 | A10938 | 302 | A01226 | A11280 | 303 |
| A01226 | A13470 | 251 | A01226 | A13706 | 429 |
| A01226 | A13870 | 449 | A01226 | A14074 | 341 |
| A01226 | A14449 | 707 | A01226 | A14655 | 491 |
| A01226 | A15498 | 615 | A01226 | A15624 | 641 |
| A01226 | A15684 | 268 | A01226 | A15932 | 655 |
| A01226 | A16096 | 154 | A01227 | A01230 | 372 |
| A01227 | A01297 | 414 | A01227 | A01344 | 314 |
| A01227 | A01409 | 443 | A01227 | A01635 | 441 |
| A01227 | A01643 | 384 | A01227 | A02061 | 160 |
| A01227 | A02083 | 187 | A01227 | A02119 | 199 |
| A01227 | A02187 | 216 | A01227 | A02191 | 162 |
| A01227 | A02301 | 293 | A01227 | A02311 | 307 |
| A01227 | A02316 | 491 | A01227 | A02521 | 291 |
| A01227 | A02529 | 251 | A01227 | A02584 | 241 |
| A01227 | A02669 | 226 | A01227 | A02759 | 157 |
| A01227 | A03164 | 243 | A01227 | A03174 | 252 |
| A01227 | A03234 | 389 | A01227 | A03259 | 188 |
| A01227 | A03513 | 490 | A01227 | A03992 | 226 |
| A01227 | A04095 | 469 | A01227 | A04307 | 257 |
| A01227 | A04366 | 445 | A01227 | A04485 | 238 |
| A01227 | A04556 | 221 | A01227 | A04781 | 241 |
| A01227 | A04791 | 313 | A01227 | A05006 | 160 |
| A01227 | A05014 | 215 | A01227 | A05045 | 291 |
| A01227 | A05139 | 328 | A01227 | A05140 | 246 |
| A01227 | A05208 | 215 | A01227 | A05358 | 205 |
| A01227 | A05426 | 413 | A01227 | A05452 | 278 |



|        |        |     |        |        |     |
|--------|--------|-----|--------|--------|-----|
| A01227 | A05538 | 404 | A01227 | A05549 | 328 |
| A01227 | A05550 | 427 | A01227 | A05573 | 489 |
| A01227 | A05615 | 364 | A01227 | A05659 | 154 |
| A01227 | A05883 | 210 | A01227 | A06245 | 283 |
| A01227 | A06402 | 243 | A01227 | A06405 | 247 |
| A01227 | A06439 | 398 | A01227 | A06629 | 252 |
| A01227 | A06756 | 154 | A01227 | A06847 | 218 |
| A01227 | A07002 | 288 | A01227 | A07027 | 188 |
| A01227 | A07059 | 350 | A01227 | A07088 | 267 |
| A01227 | A07239 | 151 | A01227 | A07477 | 263 |
| A01227 | A07590 | 256 | A01227 | A07692 | 265 |
| A01227 | A07711 | 238 | A01227 | A07736 | 217 |
| A01227 | A07847 | 165 | A01227 | A07856 | 273 |
| A01227 | A07926 | 408 | A01227 | A07951 | 341 |
| A01227 | A08133 | 199 | A01227 | A08250 | 243 |
| A01227 | A08372 | 399 | A01227 | A08385 | 314 |
| A01227 | A10421 | 152 | A01227 | A10441 | 357 |
| A01227 | A10442 | 278 | A01227 | A10454 | 363 |
| A01227 | A10475 | 425 | A01227 | A10635 | 267 |
| A01227 | A10652 | 210 | A01227 | A10658 | 229 |
| A01227 | A10691 | 480 | A01227 | A10693 | 182 |
| A01227 | A10694 | 229 | A01227 | A10696 | 258 |
| A01227 | A10699 | 267 | A01227 | A10702 | 338 |
| A01227 | A10708 | 252 | A01227 | A10761 | 481 |
| A01227 | A11230 | 363 | A01227 | A13341 | 460 |
| A01227 | A13734 | 151 | A01227 | A13871 | 151 |
| A01227 | A15874 | 317 | A01227 | A16277 | 314 |
| A01227 | A16286 | 319 | A01227 | A16419 | 352 |
| A01227 | A16529 | 174 | A01228 | A01353 | 577 |
| A01228 | A01420 | 488 | A01228 | A01567 | 313 |
| A01228 | A01598 | 414 | A01228 | A01736 | 223 |
| A01228 | A02041 | 223 | A01228 | A02051 | 223 |
| A01228 | A02275 | 193 | A01228 | A03169 | 299 |
| A01228 | A03792 | 323 | A01228 | A03952 | 279 |
| A01228 | A04447 | 315 | A01228 | A04630 | 217 |
| A01228 | A05621 | 408 | A01228 | A05981 | 196 |
| A01228 | A07265 | 223 | A01228 | A07583 | 182 |
| A01228 | A07588 | 300 | A01228 | A07725 | 187 |
| A01228 | A08955 | 223 | A01228 | A08971 | 223 |
| A01228 | A09281 | 276 | A01228 | A09977 | 152 |
| A01228 | A10402 | 319 | A01228 | A10755 | 223 |
| A01228 | A11202 | 223 | A01228 | A11254 | 307 |
| A01228 | A13298 | 223 | A01228 | A14216 | 526 |
| A01228 | A14817 | 368 | A01229 | A01256 | 185 |
| A01229 | A01272 | 240 | A01229 | A01297 | 179 |
| A01229 | A01409 | 193 | A01229 | A01481 | 416 |

|        |        |     |        |        |     |
|--------|--------|-----|--------|--------|-----|
| A01229 | A01635 | 293 | A01229 | A01725 | 247 |
| A01229 | A01933 | 234 | A01229 | A01972 | 205 |
| A01229 | A02411 | 396 | A01229 | A02573 | 278 |
| A01229 | A02847 | 215 | A01229 | A02992 | 486 |
| A01229 | A03003 | 226 | A01229 | A03167 | 290 |
| A01229 | A03968 | 165 | A01229 | A04229 | 256 |
| A01229 | A04791 | 371 | A01229 | A05007 | 208 |
| A01229 | A05330 | 260 | A01229 | A05416 | 313 |
| A01229 | A05573 | 208 | A01229 | A05682 | 385 |
| A01229 | A06397 | 335 | A01229 | A06635 | 171 |
| A01229 | A06700 | 195 | A01229 | A06756 | 226 |
| A01229 | A06979 | 434 | A01229 | A07322 | 291 |
| A01229 | A07346 | 160 | A01229 | A07376 | 291 |
| A01229 | A07413 | 193 | A01229 | A07553 | 173 |
| A01229 | A07590 | 199 | A01229 | A07674 | 288 |
| A01229 | A07688 | 223 | A01229 | A07718 | 196 |
| A01229 | A07736 | 168 | A01229 | A07933 | 241 |
| A01229 | A07973 | 210 | A01229 | A08099 | 422 |
| A01229 | A08197 | 283 | A01229 | A08820 | 152 |
| A01229 | A09879 | 405 | A01229 | A10424 | 313 |
| A01229 | A10441 | 400 | A01229 | A10443 | 401 |
| A01229 | A10703 | 486 | A01229 | A10714 | 436 |
| A01229 | A11309 | 172 | A01229 | A11381 | 382 |
| A01229 | A13314 | 404 | A01229 | A13326 | 313 |
| A01229 | A14862 | 412 | A01229 | A14871 | 348 |
| A01229 | A15497 | 173 | A01229 | A15874 | 165 |
| A01229 | A16262 | 160 | A01229 | A16335 | 208 |
| A01229 | A16419 | 396 | A01229 | A16529 | 266 |
| A01229 | A16767 | 446 | A01229 | A17089 | 299 |
| A01230 | A01297 | 491 | A01230 | A01409 | 414 |
| A01230 | A01635 | 184 | A01230 | A01643 | 162 |
| A01230 | A01668 | 190 | A01230 | A01735 | 170 |
| A01230 | A01741 | 168 | A01230 | A01755 | 329 |
| A01230 | A01899 | 341 | A01230 | A02074 | 199 |
| A01230 | A02168 | 299 | A01230 | A02252 | 347 |
| A01230 | A02284 | 318 | A01230 | A02309 | 252 |
| A01230 | A02316 | 185 | A01230 | A02317 | 276 |
| A01230 | A02330 | 159 | A01230 | A02363 | 302 |
| A01230 | A02377 | 436 | A01230 | A02491 | 217 |
| A01230 | A02521 | 491 | A01230 | A02777 | 486 |
| A01230 | A02779 | 432 | A01230 | A02992 | 174 |
| A01230 | A03016 | 249 | A01230 | A03223 | 329 |
| A01230 | A03423 | 489 | A01230 | A03453 | 160 |
| A01230 | A03484 | 361 | A01230 | A03513 | 474 |
| A01230 | A03795 | 281 | A01230 | A04145 | 151 |
| A01230 | A04702 | 435 | A01230 | A04791 | 369 |

|        |        |     |        |        |     |
|--------|--------|-----|--------|--------|-----|
| A01230 | A04844 | 257 | A01230 | A04883 | 491 |
| A01230 | A04891 | 443 | A01230 | A04927 | 491 |
| A01230 | A05007 | 205 | A01230 | A05045 | 488 |
| A01230 | A05050 | 308 | A01230 | A05051 | 480 |
| A01230 | A05297 | 252 | A01230 | A05337 | 252 |
| A01230 | A05358 | 385 | A01230 | A05420 | 360 |
| A01230 | A05516 | 246 | A01230 | A05550 | 227 |
| A01230 | A05573 | 474 | A01230 | A05774 | 299 |
| A01230 | A05883 | 274 | A01230 | A05966 | 210 |
| A01230 | A06252 | 286 | A01230 | A06405 | 491 |
| A01230 | A06439 | 491 | A01230 | A06553 | 368 |
| A01230 | A06607 | 156 | A01230 | A06638 | 353 |
| A01230 | A06689 | 276 | A01230 | A06733 | 299 |
| A01230 | A06847 | 279 | A01230 | A06860 | 340 |
| A01230 | A07027 | 255 | A01230 | A07037 | 446 |
| A01230 | A07088 | 491 | A01230 | A07230 | 368 |
| A01230 | A07238 | 171 | A01230 | A07366 | 191 |
| A01230 | A07503 | 449 | A01230 | A07520 | 373 |
| A01230 | A07674 | 285 | A01230 | A07690 | 262 |
| A01230 | A07730 | 246 | A01230 | A07757 | 425 |
| A01230 | A10537 | 394 | A01230 | A10614 | 286 |
| A01230 | A10635 | 335 | A01230 | A12507 | 414 |
| A01230 | A14431 | 185 | A01230 | A17006 | 286 |
| A01231 | A01359 | 204 | A01231 | A01508 | 172 |
| A01231 | A01612 | 407 | A01231 | A03298 | 274 |
| A01231 | A03300 | 174 | A01231 | A03569 | 307 |
| A01231 | A07311 | 469 | A01231 | A07378 | 334 |
| A01231 | A08571 | 491 | A01231 | A08885 | 461 |
| A01231 | A09508 | 291 | A01231 | A09529 | 360 |
| A01231 | A09606 | 265 | A01231 | A09766 | 174 |
| A01231 | A10250 | 463 | A01231 | A11139 | 143 |
| A01231 | A11475 | 160 | A01231 | A11705 | 228 |
| A01231 | A11928 | 182 | A01231 | A12104 | 380 |
| A01231 | A13525 | 265 | A01231 | A14304 | 205 |
| A01231 | A14816 | 263 | A01231 | A15684 | 202 |
| A01231 | A15696 | 240 | A01231 | A15698 | 196 |
| A01231 | A16333 | 247 | A01232 | A01265 | 224 |
| A01232 | A01274 | 306 | A01232 | A01293 | 616 |
| A01232 | A01311 | 694 | A01232 | A01346 | 439 |
| A01232 | A01426 | 63  | A01232 | A01431 | 383 |
| A01232 | A01439 | 488 | A01232 | A01492 | 417 |
| A01232 | A01598 | 452 | A01232 | A01612 | 236 |
| A01232 | A01613 | 491 | A01232 | A01894 | 291 |
| A01232 | A02102 | 174 | A01232 | A02107 | 369 |
| A01232 | A02132 | 139 | A01232 | A02138 | 423 |
| A01232 | A02326 | 65  | A01232 | A02461 | 174 |

|        |        |     |        |        |     |
|--------|--------|-----|--------|--------|-----|
| A01232 | A02670 | 154 | A01232 | A03104 | 79  |
| A01232 | A03438 | 490 | A01232 | A03454 | 483 |
| A01232 | A03740 | 488 | A01232 | A03809 | 383 |
| A01232 | A03901 | 446 | A01232 | A03959 | 268 |
| A01232 | A04163 | 412 | A01232 | A04457 | 293 |
| A01232 | A04566 | 160 | A01232 | A05227 | 435 |
| A01232 | A05258 | 216 | A01232 | A05580 | 308 |
| A01232 | A05846 | 427 | A01232 | A06637 | 469 |
| A01232 | A07208 | 486 | A01232 | A07210 | 396 |
| A01232 | A07360 | 468 | A01232 | A07744 | 491 |
| A01232 | A07881 | 665 | A01232 | A07911 | 616 |
| A01232 | A08098 | 491 | A01232 | A08118 | 201 |
| A01232 | A08178 | 430 | A01232 | A08228 | 665 |
| A01232 | A08491 | 488 | A01232 | A08548 | 665 |
| A01232 | A08763 | 491 | A01232 | A09125 | 174 |
| A01232 | A09526 | 63  | A01232 | A11296 | 491 |
| A01232 | A11381 | 455 | A01232 | A11555 | 434 |
| A01232 | A13298 | 490 | A01232 | A14073 | 271 |
| A01232 | A14083 | 491 | A01232 | A14699 | 849 |
| A01232 | A14778 | 664 | A01232 | A14845 | 402 |
| A01232 | A15275 | 70  | A01232 | A15375 | 396 |
| A01232 | A15653 | 643 | A01232 | A15684 | 491 |
| A01232 | A15746 | 302 | A01232 | A15905 | 424 |
| A01232 | A15937 | 475 | A01232 | A16048 | 184 |
| A01232 | A16912 | 374 | A01233 | A01256 | 491 |
| A01233 | A01272 | 423 | A01233 | A01347 | 491 |
| A01233 | A01481 | 488 | A01233 | A01508 | 279 |
| A01233 | A01569 | 440 | A01233 | A01635 | 491 |
| A01233 | A01642 | 361 | A01233 | A01730 | 294 |
| A01233 | A01741 | 196 | A01233 | A02082 | 215 |
| A01233 | A02148 | 363 | A01233 | A02156 | 159 |
| A01233 | A02432 | 246 | A01233 | A02522 | 215 |
| A01233 | A02525 | 281 | A01233 | A02964 | 232 |
| A01233 | A03003 | 268 | A01233 | A03095 | 202 |
| A01233 | A03115 | 193 | A01233 | A03167 | 360 |
| A01233 | A03168 | 363 | A01233 | A03477 | 461 |
| A01233 | A03487 | 473 | A01233 | A03513 | 288 |
| A01233 | A04211 | 472 | A01233 | A04307 | 479 |
| A01233 | A04570 | 229 | A01233 | A04674 | 395 |
| A01233 | A04791 | 162 | A01233 | A04883 | 246 |
| A01233 | A04937 | 215 | A01233 | A05007 | 475 |
| A01233 | A05088 | 374 | A01233 | A05102 | 362 |
| A01233 | A05138 | 458 | A01233 | A05277 | 347 |
| A01233 | A05310 | 254 | A01233 | A05320 | 330 |
| A01233 | A05358 | 188 | A01233 | A05437 | 395 |
| A01233 | A05463 | 184 | A01233 | A05471 | 457 |

|        |        |     |        |        |     |
|--------|--------|-----|--------|--------|-----|
| A01233 | A05472 | 491 | A01233 | A05516 | 467 |
| A01233 | A05597 | 174 | A01233 | A05615 | 224 |
| A01233 | A05660 | 386 | A01233 | A05767 | 477 |
| A01233 | A05768 | 486 | A01233 | A05771 | 386 |
| A01233 | A05782 | 174 | A01233 | A05947 | 353 |
| A01233 | A06018 | 330 | A01233 | A06086 | 265 |
| A01233 | A06091 | 485 | A01233 | A06358 | 436 |
| A01233 | A06359 | 221 | A01233 | A06397 | 267 |
| A01233 | A06523 | 429 | A01233 | A06592 | 414 |
| A01233 | A06629 | 452 | A01233 | A06632 | 472 |
| A01233 | A06633 | 179 | A01233 | A06640 | 301 |
| A01233 | A06641 | 391 | A01233 | A06689 | 463 |
| A01233 | A06692 | 425 | A01233 | A06716 | 353 |
| A01233 | A06853 | 353 | A01233 | A06912 | 439 |
| A01233 | A06916 | 221 | A01233 | A06970 | 219 |
| A01233 | A06978 | 215 | A01233 | A06979 | 174 |
| A01233 | A07027 | 172 | A01233 | A07061 | 491 |
| A01233 | A07109 | 226 | A01233 | A07122 | 491 |
| A01233 | A07238 | 486 | A01233 | A07267 | 285 |
| A01233 | A07376 | 208 | A01233 | A07381 | 265 |
| A01233 | A07413 | 489 | A01233 | A07530 | 200 |
| A01233 | A07646 | 353 | A01233 | A07800 | 491 |
| A01233 | A07848 | 371 | A01233 | A08127 | 252 |
| A01233 | A08379 | 207 | A01233 | A08748 | 185 |
| A01233 | A09612 | 308 | A01233 | A09632 | 193 |
| A01233 | A10326 | 353 | A01233 | A10456 | 430 |
| A01233 | A10652 | 193 | A01233 | A10693 | 163 |
| A01233 | A10703 | 174 | A01233 | A10714 | 213 |
| A01233 | A11309 | 486 | A01233 | A13471 | 353 |
| A01233 | A13609 | 193 | A01233 | A14857 | 180 |
| A01233 | A15497 | 475 | A01233 | A15637 | 152 |
| A01233 | A15874 | 491 | A01233 | A16002 | 385 |
| A01233 | A16026 | 163 | A01233 | A16033 | 396 |
| A01233 | A16034 | 176 | A01233 | A16283 | 227 |
| A01233 | A16284 | 227 | A01233 | A16529 | 486 |
| A01233 | A16739 | 486 | A01233 | A16741 | 491 |
| A01233 | A16744 | 484 | A01233 | A17078 | 286 |
| A01234 | A01238 | 310 | A01234 | A01243 | 491 |
| A01234 | A01249 | 480 | A01234 | A01259 | 485 |
| A01234 | A01263 | 268 | A01234 | A01264 | 227 |
| A01234 | A01266 | 383 | A01234 | A01268 | 456 |
| A01234 | A01279 | 479 | A01234 | A01285 | 257 |
| A01234 | A01291 | 543 | A01234 | A01304 | 491 |
| A01234 | A01306 | 491 | A01234 | A01311 | 322 |
| A01234 | A01322 | 201 | A01234 | A01334 | 296 |
| A01234 | A01335 | 491 | A01234 | A01338 | 488 |

|        |        |     |        |        |     |
|--------|--------|-----|--------|--------|-----|
| A01234 | A01349 | 477 | A01234 | A01351 | 491 |
| A01234 | A01353 | 483 | A01234 | A01354 | 491 |
| A01234 | A01365 | 662 | A01234 | A01374 | 180 |
| A01234 | A01381 | 196 | A01234 | A01384 | 491 |
| A01234 | A01385 | 428 | A01234 | A01391 | 389 |
| A01234 | A01398 | 255 | A01234 | A01406 | 462 |
| A01234 | A01411 | 254 | A01234 | A01418 | 490 |
| A01234 | A01425 | 491 | A01234 | A01429 | 457 |
| A01234 | A01430 | 474 | A01234 | A01431 | 491 |
| A01234 | A01439 | 468 | A01234 | A01457 | 490 |
| A01234 | A01458 | 434 | A01234 | A01464 | 156 |
| A01234 | A01468 | 491 | A01234 | A01470 | 491 |
| A01234 | A01487 | 491 | A01234 | A01488 | 491 |
| A01234 | A01492 | 563 | A01234 | A01494 | 238 |
| A01234 | A01495 | 491 | A01234 | A01496 | 443 |
| A01234 | A01500 | 462 | A01234 | A01503 | 528 |
| A01234 | A01506 | 490 | A01234 | A01531 | 188 |
| A01234 | A01538 | 443 | A01234 | A01539 | 469 |
| A01234 | A01540 | 207 | A01234 | A01542 | 490 |
| A01234 | A01555 | 173 | A01234 | A01558 | 472 |
| A01234 | A01569 | 491 | A01234 | A01577 | 373 |
| A01234 | A01579 | 491 | A01234 | A01588 | 162 |
| A01234 | A01597 | 490 | A01234 | A01598 | 546 |
| A01234 | A01601 | 556 | A01234 | A01612 | 491 |
| A01234 | A01614 | 491 | A01234 | A01615 | 423 |
| A01234 | A01627 | 302 | A01234 | A01640 | 427 |
| A01234 | A01649 | 491 | A01234 | A01684 | 490 |
| A01234 | A01700 | 152 | A01234 | A01707 | 414 |
| A01234 | A01721 | 490 | A01234 | A01864 | 274 |
| A01234 | A01917 | 241 | A01234 | A02003 | 391 |
| A01234 | A02064 | 491 | A01234 | A02179 | 162 |
| A01234 | A02212 | 313 | A01234 | A02265 | 329 |
| A01234 | A02267 | 180 | A01234 | A02452 | 226 |
| A01234 | A02715 | 283 | A01234 | A02978 | 490 |
| A01234 | A03069 | 369 | A01234 | A03084 | 363 |
| A01234 | A03112 | 329 | A01234 | A03296 | 263 |
| A01234 | A03298 | 358 | A01234 | A03300 | 213 |
| A01234 | A03304 | 424 | A01234 | A03438 | 490 |
| A01234 | A03446 | 196 | A01234 | A03494 | 491 |
| A01234 | A03567 | 491 | A01234 | A03569 | 491 |
| A01234 | A03601 | 337 | A01234 | A03676 | 386 |
| A01234 | A03686 | 183 | A01234 | A03734 | 490 |
| A01234 | A03740 | 484 | A01234 | A03859 | 491 |
| A01234 | A03948 | 170 | A01234 | A04447 | 353 |
| A01234 | A04687 | 350 | A01234 | A04846 | 432 |
| A01234 | A05025 | 414 | A01234 | A05230 | 441 |

|        |        |     |        |        |     |
|--------|--------|-----|--------|--------|-----|
| A01234 | A05239 | 227 | A01234 | A05356 | 157 |
| A01234 | A05501 | 491 | A01234 | A05845 | 460 |
| A01234 | A05933 | 180 | A01234 | A06197 | 195 |
| A01234 | A06273 | 388 | A01234 | A06275 | 491 |
| A01234 | A06279 | 329 | A01234 | A06287 | 152 |
| A01234 | A06340 | 438 | A01234 | A06351 | 283 |
| A01234 | A06543 | 466 | A01234 | A06584 | 174 |
| A01234 | A06642 | 327 | A01234 | A06661 | 156 |
| A01234 | A06832 | 291 | A01234 | A06861 | 490 |
| A01234 | A06881 | 489 | A01234 | A06957 | 159 |
| A01234 | A06965 | 491 | A01234 | A06973 | 180 |
| A01234 | A07111 | 490 | A01234 | A07203 | 243 |
| A01234 | A07223 | 491 | A01234 | A07244 | 468 |
| A01234 | A07323 | 486 | A01234 | A07347 | 491 |
| A01234 | A07348 | 446 | A01234 | A07414 | 458 |
| A01234 | A07451 | 346 | A01234 | A07481 | 479 |
| A01234 | A07487 | 474 | A01234 | A07524 | 491 |
| A01234 | A07533 | 491 | A01234 | A07570 | 489 |
| A01234 | A07581 | 412 | A01234 | A07583 | 475 |
| A01234 | A07584 | 491 | A01234 | A07604 | 174 |
| A01234 | A07625 | 489 | A01234 | A07644 | 490 |
| A01234 | A07695 | 338 | A01234 | A07700 | 669 |
| A01234 | A07706 | 491 | A01234 | A07725 | 297 |
| A01234 | A07730 | 358 | A01234 | A07919 | 263 |
| A01234 | A07924 | 491 | A01234 | A07968 | 210 |
| A01234 | A08022 | 618 | A01234 | A08024 | 490 |
| A01234 | A08072 | 180 | A01234 | A08118 | 656 |
| A01234 | A08137 | 491 | A01234 | A08144 | 746 |
| A01234 | A08211 | 481 | A01234 | A08326 | 414 |
| A01234 | A08357 | 491 | A01234 | A08359 | 347 |
| A01234 | A08439 | 430 | A01234 | A08452 | 452 |
| A01234 | A08491 | 490 | A01234 | A08558 | 452 |
| A01234 | A08571 | 530 | A01234 | A08756 | 356 |
| A01234 | A08890 | 486 | A01234 | A08989 | 259 |
| A01234 | A09307 | 491 | A01234 | A09312 | 180 |
| A01234 | A09322 | 477 | A01234 | A09327 | 390 |
| A01234 | A09526 | 212 | A01234 | A09618 | 180 |
| A01234 | A09619 | 485 | A01234 | A09621 | 346 |
| A01234 | A09664 | 477 | A01234 | A09705 | 490 |
| A01234 | A09715 | 406 | A01234 | A09952 | 277 |
| A01234 | A10417 | 217 | A01234 | A10465 | 441 |
| A01234 | A10466 | 366 | A01234 | A10532 | 489 |
| A01234 | A10616 | 491 | A01234 | A10624 | 393 |
| A01234 | A10625 | 391 | A01234 | A10917 | 388 |
| A01234 | A10923 | 423 | A01234 | A10965 | 180 |
| A01234 | A11277 | 188 | A01234 | A11291 | 477 |

|        |        |     |        |        |     |
|--------|--------|-----|--------|--------|-----|
| A01234 | A11316 | 341 | A01234 | A11401 | 346 |
| A01234 | A11409 | 361 | A01234 | A11429 | 229 |
| A01234 | A11438 | 168 | A01234 | A11462 | 411 |
| A01234 | A11544 | 347 | A01234 | A11555 | 208 |
| A01234 | A11562 | 416 | A01234 | A11831 | 366 |
| A01234 | A11832 | 485 | A01234 | A12101 | 168 |
| A01234 | A12108 | 443 | A01234 | A12329 | 198 |
| A01234 | A12419 | 385 | A01234 | A12507 | 200 |
| A01234 | A12744 | 180 | A01234 | A12824 | 452 |
| A01234 | A12849 | 255 | A01234 | A13055 | 76  |
| A01234 | A13066 | 210 | A01234 | A13126 | 465 |
| A01234 | A13220 | 344 | A01234 | A13294 | 105 |
| A01234 | A13369 | 243 | A01234 | A13386 | 180 |
| A01234 | A13404 | 180 | A01234 | A13870 | 486 |
| A01234 | A13875 | 271 | A01234 | A13983 | 191 |
| A01234 | A13989 | 533 | A01234 | A13992 | 281 |
| A01234 | A14006 | 491 | A01234 | A14074 | 438 |
| A01234 | A14080 | 208 | A01234 | A14090 | 177 |
| A01234 | A14151 | 230 | A01234 | A14169 | 470 |
| A01234 | A14172 | 271 | A01234 | A14184 | 232 |
| A01234 | A14196 | 449 | A01234 | A14199 | 268 |
| A01234 | A14200 | 357 | A01234 | A14216 | 491 |
| A01234 | A14220 | 185 | A01234 | A14246 | 215 |
| A01234 | A14257 | 445 | A01234 | A14449 | 606 |
| A01234 | A14475 | 488 | A01234 | A14482 | 316 |
| A01234 | A14505 | 390 | A01234 | A14540 | 157 |
| A01234 | A14566 | 491 | A01234 | A14589 | 704 |
| A01234 | A14596 | 491 | A01234 | A14597 | 491 |
| A01234 | A14655 | 686 | A01234 | A14699 | 163 |
| A01234 | A14701 | 469 | A01234 | A14842 | 73  |
| A01234 | A14936 | 366 | A01234 | A14959 | 180 |
| A01234 | A15050 | 180 | A01234 | A15172 | 180 |
| A01234 | A15215 | 329 | A01234 | A15266 | 232 |
| A01234 | A15291 | 413 | A01234 | A15297 | 491 |
| A01234 | A15322 | 160 | A01234 | A15324 | 229 |
| A01234 | A15338 | 491 | A01234 | A15353 | 424 |
| A01234 | A15498 | 218 | A01234 | A15500 | 457 |
| A01234 | A15559 | 483 | A01234 | A15612 | 590 |
| A01234 | A15614 | 224 | A01234 | A15624 | 589 |
| A01234 | A15626 | 200 | A01234 | A15651 | 366 |
| A01234 | A15652 | 366 | A01234 | A15660 | 491 |
| A01234 | A15661 | 366 | A01234 | A15662 | 366 |
| A01234 | A15666 | 477 | A01234 | A15684 | 580 |
| A01234 | A15764 | 490 | A01234 | A15890 | 180 |
| A01234 | A15932 | 519 | A01234 | A16067 | 391 |
| A01234 | A16118 | 467 | A01234 | A16302 | 486 |



|        |        |     |        |        |     |
|--------|--------|-----|--------|--------|-----|
| A01234 | A16320 | 363 | A01234 | A16400 | 243 |
| A01234 | A17063 | 329 | A01234 | A17168 | 419 |
| A01235 | A01257 | 180 | A01235 | A01360 | 232 |
| A01235 | A01376 | 219 | A01235 | A01417 | 223 |
| A01235 | A01481 | 160 | A01235 | A01530 | 171 |
| A01235 | A01547 | 168 | A01235 | A01582 | 193 |
| A01235 | A01606 | 266 | A01235 | A01632 | 321 |
| A01235 | A01654 | 319 | A01235 | A01704 | 159 |
| A01235 | A01716 | 154 | A01235 | A01723 | 402 |
| A01235 | A01726 | 430 | A01235 | A01790 | 269 |
| A01235 | A01794 | 173 | A01235 | A01867 | 162 |
| A01235 | A01919 | 353 | A01235 | A01931 | 279 |
| A01235 | A01995 | 193 | A01235 | A02092 | 218 |
| A01235 | A02096 | 425 | A01235 | A02099 | 355 |
| A01235 | A02120 | 210 | A01235 | A02148 | 434 |
| A01235 | A02154 | 193 | A01235 | A02212 | 302 |
| A01235 | A02213 | 210 | A01235 | A02268 | 176 |
| A01235 | A02275 | 243 | A01235 | A02312 | 187 |
| A01235 | A02319 | 294 | A01235 | A02431 | 457 |
| A01235 | A02443 | 210 | A01235 | A02454 | 355 |
| A01235 | A02541 | 190 | A01235 | A02546 | 249 |
| A01235 | A02673 | 427 | A01235 | A02889 | 467 |
| A01235 | A02897 | 180 | A01235 | A03014 | 152 |
| A01235 | A03091 | 137 | A01235 | A03104 | 491 |
| A01235 | A03224 | 273 | A01235 | A03264 | 196 |
| A01235 | A03304 | 204 | A01235 | A03413 | 151 |
| A01235 | A03415 | 281 | A01235 | A03639 | 215 |
| A01235 | A03749 | 430 | A01235 | A03893 | 241 |
| A01235 | A03910 | 152 | A01235 | A04033 | 394 |
| A01235 | A04256 | 267 | A01235 | A04372 | 273 |
| A01235 | A04449 | 363 | A01235 | A04520 | 232 |
| A01235 | A04620 | 224 | A01235 | A04881 | 302 |
| A01235 | A05093 | 279 | A01235 | A05114 | 163 |
| A01235 | A05157 | 490 | A01235 | A05221 | 347 |
| A01235 | A05229 | 441 | A01235 | A05418 | 179 |
| A01235 | A05439 | 491 | A01235 | A05603 | 168 |
| A01235 | A05653 | 363 | A01235 | A05721 | 172 |
| A01235 | A05944 | 230 | A01235 | A05956 | 210 |
| A01235 | A06074 | 219 | A01235 | A06100 | 247 |
| A01235 | A06211 | 235 | A01235 | A06277 | 258 |
| A01235 | A06280 | 163 | A01235 | A06428 | 198 |
| A01235 | A06471 | 258 | A01235 | A06558 | 303 |
| A01235 | A06578 | 229 | A01235 | A06588 | 183 |
| A01235 | A06617 | 303 | A01235 | A06708 | 374 |
| A01235 | A07209 | 491 | A01235 | A07355 | 219 |
| A01235 | A07655 | 187 | A01235 | A07803 | 490 |

|        |        |     |        |        |     |
|--------|--------|-----|--------|--------|-----|
| A01235 | A08097 | 177 | A01235 | A08172 | 228 |
| A01235 | A08182 | 232 | A01235 | A08292 | 183 |
| A01235 | A08630 | 491 | A01235 | A08686 | 345 |
| A01235 | A08688 | 187 | A01235 | A08859 | 402 |
| A01235 | A09028 | 165 | A01235 | A09078 | 489 |
| A01235 | A09732 | 419 | A01235 | A09733 | 270 |
| A01235 | A10336 | 360 | A01235 | A10603 | 288 |
| A01235 | A10858 | 303 | A01235 | A11431 | 200 |
| A01235 | A11983 | 217 | A01235 | A12015 | 286 |
| A01235 | A12365 | 199 | A01235 | A12897 | 454 |
| A01235 | A13342 | 162 | A01235 | A13546 | 190 |
| A01235 | A13906 | 224 | A01235 | A14010 | 196 |
| A01235 | A14111 | 266 | A01235 | A14196 | 443 |
| A01235 | A14202 | 228 | A01235 | A14210 | 430 |
| A01235 | A14369 | 157 | A01235 | A14371 | 188 |
| A01235 | A14394 | 170 | A01235 | A14410 | 333 |
| A01235 | A14430 | 450 | A01235 | A14511 | 481 |
| A01235 | A14570 | 446 | A01235 | A14635 | 463 |
| A01235 | A14685 | 279 | A01235 | A15140 | 235 |
| A01235 | A15258 | 196 | A01235 | A15260 | 303 |
| A01235 | A15281 | 235 | A01235 | A15292 | 477 |
| A01235 | A15313 | 270 | A01235 | A15314 | 454 |
| A01235 | A15349 | 391 | A01235 | A15419 | 439 |
| A01235 | A15435 | 226 | A01235 | A15456 | 165 |
| A01235 | A15480 | 171 | A01235 | A15495 | 477 |
| A01235 | A15606 | 345 | A01235 | A15718 | 162 |
| A01235 | A15833 | 258 | A01235 | A16260 | 279 |
| A01235 | A17155 | 208 | A01236 | A03151 | 385 |
| A01236 | A08891 | 344 | A01236 | A14174 | 180 |
| A01237 | A01280 | 491 | A01237 | A02065 | 218 |
| A01237 | A03070 | 491 | A01237 | A03150 | 317 |
| A01237 | A03454 | 156 | A01237 | A03676 | 156 |
| A01237 | A03677 | 156 | A01237 | A03689 | 466 |
| A01237 | A03691 | 286 | A01237 | A03696 | 452 |
| A01237 | A03732 | 207 | A01237 | A03740 | 252 |
| A01237 | A03855 | 156 | A01237 | A04148 | 335 |
| A01237 | A04932 | 156 | A01237 | A05552 | 345 |
| A01237 | A06001 | 436 | A01237 | A06280 | 456 |
| A01237 | A06319 | 193 | A01237 | A06488 | 208 |
| A01237 | A06755 | 301 | A01237 | A07040 | 319 |
| A01237 | A07046 | 156 | A01237 | A07360 | 156 |
| A01237 | A07427 | 299 | A01237 | A07822 | 156 |
| A01237 | A07881 | 156 | A01237 | A08228 | 156 |
| A01237 | A08548 | 156 | A01237 | A08674 | 156 |
| A01237 | A09740 | 171 | A01237 | A09741 | 474 |
| A01237 | A09775 | 489 | A01237 | A11223 | 438 |

|        |        |     |        |        |     |
|--------|--------|-----|--------|--------|-----|
| A01237 | A11224 | 452 | A01237 | A11290 | 156 |
| A01237 | A11680 | 409 | A01237 | A11787 | 377 |
| A01237 | A11794 | 377 | A01237 | A11818 | 357 |
| A01237 | A11918 | 156 | A01237 | A11952 | 490 |
| A01237 | A12669 | 463 | A01237 | A12904 | 438 |
| A01237 | A13417 | 308 | A01237 | A13461 | 452 |
| A01237 | A13466 | 489 | A01237 | A13575 | 327 |
| A01237 | A14196 | 151 | A01237 | A15624 | 156 |
| A01237 | A15649 | 185 | A01237 | A15651 | 156 |
| A01237 | A15652 | 156 | A01237 | A15661 | 156 |
| A01237 | A15662 | 156 | A01237 | A15684 | 156 |
| A01237 | A15720 | 156 | A01237 | A15721 | 156 |
| A01237 | A15746 | 156 | A01237 | A15843 | 302 |
| A01237 | A15917 | 156 | A01237 | A15918 | 156 |
| A01237 | A15923 | 156 | A01237 | A15937 | 156 |
| A01237 | A16086 | 234 | A01237 | A16088 | 156 |
| A01237 | A16145 | 156 | A01237 | A16307 | 156 |
| A01238 | A01252 | 294 | A01238 | A01291 | 486 |
| A01238 | A01306 | 249 | A01238 | A01352 | 366 |
| A01238 | A01365 | 377 | A01238 | A01387 | 162 |
| A01238 | A01392 | 441 | A01238 | A01406 | 342 |
| A01238 | A01412 | 288 | A01238 | A01416 | 753 |
| A01238 | A01424 | 177 | A01238 | A01425 | 424 |
| A01238 | A01433 | 400 | A01238 | A01436 | 612 |
| A01238 | A01468 | 588 | A01238 | A01496 | 307 |
| A01238 | A01538 | 382 | A01238 | A01586 | 408 |
| A01238 | A02051 | 291 | A01238 | A02859 | 379 |
| A01238 | A03291 | 200 | A01238 | A03490 | 595 |
| A01238 | A03493 | 157 | A01238 | A03601 | 319 |
| A01238 | A03609 | 229 | A01238 | A03770 | 177 |
| A01238 | A03889 | 467 | A01238 | A03981 | 317 |
| A01238 | A04846 | 235 | A01238 | A05086 | 154 |
| A01238 | A05198 | 188 | A01238 | A05258 | 165 |
| A01238 | A05501 | 291 | A01238 | A05502 | 185 |
| A01238 | A06105 | 294 | A01238 | A06324 | 255 |
| A01238 | A06351 | 632 | A01238 | A06382 | 277 |
| A01238 | A06814 | 193 | A01238 | A06861 | 236 |
| A01238 | A07157 | 378 | A01238 | A07323 | 364 |
| A01238 | A07451 | 234 | A01238 | A07473 | 260 |
| A01238 | A08154 | 198 | A01238 | A08357 | 215 |
| A01238 | A08377 | 317 | A01238 | A08550 | 317 |
| A01238 | A08773 | 424 | A01238 | A08973 | 495 |
| A01238 | A09332 | 343 | A01238 | A11453 | 227 |
| A01238 | A11815 | 343 | A01238 | A12657 | 291 |
| A01238 | A13905 | 241 | A01238 | A13989 | 490 |
| A01238 | A14479 | 246 | A01238 | A14482 | 643 |

|        |        |     |        |        |     |
|--------|--------|-----|--------|--------|-----|
| A01238 | A14568 | 245 | A01238 | A15624 | 157 |
| A01238 | A15988 | 372 | A01239 | A01351 | 172 |
| A01239 | A01359 | 361 | A01239 | A01900 | 154 |
| A01239 | A02882 | 212 | A01239 | A02975 | 223 |
| A01239 | A03115 | 182 | A01239 | A03494 | 393 |
| A01239 | A03902 | 285 | A01239 | A04902 | 302 |
| A01239 | A09427 | 303 | A01239 | A09538 | 345 |
| A01239 | A10250 | 433 | A01239 | A12421 | 334 |
| A01240 | A01291 | 469 | A01240 | A01437 | 232 |
| A01240 | A01464 | 668 | A01240 | A01617 | 274 |
| A01240 | A01618 | 665 | A01240 | A01619 | 314 |
| A01240 | A01718 | 63  | A01240 | A01822 | 401 |
| A01240 | A02575 | 173 | A01240 | A02809 | 310 |
| A01240 | A02814 | 193 | A01240 | A03083 | 207 |
| A01240 | A03567 | 318 | A01240 | A03753 | 224 |
| A01240 | A03754 | 667 | A01240 | A03888 | 670 |
| A01240 | A05449 | 543 | A01240 | A06965 | 219 |
| A01240 | A07012 | 394 | A01240 | A07201 | 477 |
| A01240 | A07243 | 393 | A01240 | A08358 | 162 |
| A01240 | A08559 | 180 | A01240 | A08664 | 393 |
| A01240 | A08682 | 328 | A01240 | A09322 | 162 |
| A01240 | A10417 | 617 | A01240 | A11535 | 196 |
| A01240 | A12105 | 338 | A01240 | A12237 | 335 |
| A01240 | A13052 | 223 | A01240 | A13626 | 288 |
| A01240 | A14216 | 182 | A01240 | A15498 | 184 |
| A01240 | A15624 | 238 | A01240 | A15651 | 159 |
| A01240 | A15743 | 262 | A01240 | A17193 | 302 |
| A01241 | A01371 | 207 | A01241 | A01576 | 441 |
| A01241 | A02499 | 160 | A01241 | A03628 | 272 |
| A01241 | A07061 | 154 | A01241 | A07481 | 221 |
| A01241 | A07894 | 230 | A01241 | A07898 | 456 |
| A01241 | A09291 | 286 | A01241 | A11837 | 364 |
| A01241 | A12112 | 379 | A01241 | A13172 | 339 |
| A01241 | A13592 | 391 | A01241 | A14594 | 318 |
| A01242 | A01311 | 463 | A01242 | A01411 | 484 |
| A01242 | A01457 | 211 | A01242 | A01458 | 176 |
| A01242 | A01459 | 443 | A01242 | A01492 | 174 |
| A01242 | A01514 | 593 | A01242 | A01541 | 481 |
| A01242 | A01548 | 475 | A01242 | A01569 | 491 |
| A01242 | A01574 | 157 | A01242 | A01577 | 301 |
| A01242 | A01601 | 367 | A01242 | A01635 | 235 |
| A01242 | A01741 | 157 | A01242 | A01747 | 485 |
| A01242 | A01824 | 434 | A01242 | A01841 | 489 |
| A01242 | A02353 | 491 | A01242 | A02423 | 224 |
| A01242 | A02426 | 263 | A01242 | A02499 | 185 |
| A01242 | A02718 | 491 | A01242 | A03438 | 357 |

|        |        |     |        |        |     |
|--------|--------|-----|--------|--------|-----|
| A01242 | A03453 | 489 | A01242 | A03477 | 484 |
| A01242 | A03543 | 227 | A01242 | A03832 | 375 |
| A01242 | A03863 | 243 | A01242 | A04223 | 188 |
| A01242 | A04584 | 227 | A01242 | A04995 | 246 |
| A01242 | A05302 | 321 | A01242 | A06287 | 202 |
| A01242 | A06359 | 402 | A01242 | A06773 | 174 |
| A01242 | A07706 | 203 | A01242 | A07744 | 472 |
| A01242 | A07746 | 489 | A01242 | A08098 | 319 |
| A01242 | A08178 | 165 | A01242 | A08578 | 168 |
| A01242 | A08817 | 414 | A01242 | A08978 | 343 |
| A01242 | A09587 | 445 | A01242 | A10589 | 273 |
| A01242 | A13989 | 176 | A01242 | A14074 | 515 |
| A01242 | A15701 | 432 | A01242 | A15840 | 311 |
| A01242 | A16325 | 221 | A01242 | A16741 | 152 |
| A01242 | A16912 | 366 | A01243 | A01249 | 152 |
| A01243 | A01268 | 363 | A01243 | A01291 | 491 |
| A01243 | A01306 | 435 | A01243 | A01335 | 408 |
| A01243 | A01351 | 324 | A01243 | A01352 | 491 |
| A01243 | A01354 | 463 | A01243 | A01368 | 265 |
| A01243 | A01384 | 281 | A01243 | A01412 | 198 |
| A01243 | A01418 | 574 | A01243 | A01425 | 201 |
| A01243 | A01431 | 286 | A01243 | A01442 | 321 |
| A01243 | A01451 | 484 | A01243 | A01457 | 404 |
| A01243 | A01464 | 401 | A01243 | A01468 | 486 |
| A01243 | A01470 | 491 | A01243 | A01492 | 481 |
| A01243 | A01495 | 430 | A01243 | A01506 | 369 |
| A01243 | A01554 | 281 | A01243 | A01569 | 475 |
| A01243 | A01577 | 223 | A01243 | A01579 | 311 |
| A01243 | A01582 | 180 | A01243 | A01586 | 174 |
| A01243 | A01597 | 260 | A01243 | A01598 | 489 |
| A01243 | A01604 | 383 | A01243 | A01612 | 490 |
| A01243 | A01614 | 313 | A01243 | A01649 | 490 |
| A01243 | A01702 | 485 | A01243 | A01740 | 430 |
| A01243 | A01976 | 162 | A01243 | A02116 | 182 |
| A01243 | A02195 | 452 | A01243 | A02203 | 398 |
| A01243 | A02212 | 488 | A01243 | A02227 | 276 |
| A01243 | A02452 | 238 | A01243 | A03307 | 208 |
| A01243 | A03446 | 168 | A01243 | A03494 | 463 |
| A01243 | A03556 | 217 | A01243 | A03567 | 491 |
| A01243 | A03569 | 260 | A01243 | A03617 | 217 |
| A01243 | A03705 | 274 | A01243 | A03754 | 202 |
| A01243 | A03768 | 170 | A01243 | A03896 | 165 |
| A01243 | A03901 | 162 | A01243 | A04075 | 177 |
| A01243 | A05154 | 165 | A01243 | A05199 | 333 |
| A01243 | A05477 | 157 | A01243 | A05501 | 293 |
| A01243 | A05605 | 217 | A01243 | A05646 | 391 |

|        |        |     |        |        |     |
|--------|--------|-----|--------|--------|-----|
| A01243 | A05656 | 296 | A01243 | A06122 | 193 |
| A01243 | A06351 | 180 | A01243 | A06369 | 350 |
| A01243 | A06435 | 271 | A01243 | A06602 | 469 |
| A01243 | A06825 | 439 | A01243 | A06832 | 571 |
| A01243 | A06861 | 316 | A01243 | A06965 | 439 |
| A01243 | A07309 | 486 | A01243 | A07312 | 490 |
| A01243 | A07447 | 265 | A01243 | A07449 | 323 |
| A01243 | A07583 | 491 | A01243 | A07604 | 184 |
| A01243 | A07706 | 200 | A01243 | A08022 | 389 |
| A01243 | A08137 | 465 | A01243 | A08183 | 248 |
| A01243 | A08281 | 327 | A01243 | A08357 | 254 |
| A01243 | A08358 | 163 | A01243 | A08383 | 358 |
| A01243 | A08501 | 173 | A01243 | A08517 | 457 |
| A01243 | A08571 | 469 | A01243 | A08982 | 491 |
| A01243 | A08984 | 168 | A01243 | A08990 | 351 |
| A01243 | A09322 | 375 | A01243 | A09345 | 324 |
| A01243 | A09423 | 456 | A01243 | A09630 | 170 |
| A01243 | A09673 | 217 | A01243 | A09852 | 152 |
| A01243 | A10402 | 174 | A01243 | A10532 | 217 |
| A01243 | A10877 | 265 | A01243 | A10917 | 170 |
| A01243 | A11277 | 491 | A01243 | A11291 | 404 |
| A01243 | A11312 | 400 | A01243 | A11316 | 443 |
| A01243 | A11368 | 398 | A01243 | A11394 | 157 |
| A01243 | A11429 | 183 | A01243 | A11584 | 283 |
| A01243 | A11670 | 235 | A01243 | A11864 | 229 |
| A01243 | A11920 | 228 | A01243 | A11933 | 252 |
| A01243 | A12053 | 243 | A01243 | A12101 | 185 |
| A01243 | A12253 | 162 | A01243 | A12816 | 191 |
| A01243 | A12988 | 152 | A01243 | A13066 | 218 |
| A01243 | A13193 | 174 | A01243 | A13272 | 218 |
| A01243 | A13609 | 307 | A01243 | A13917 | 291 |
| A01243 | A13989 | 491 | A01243 | A14088 | 217 |
| A01243 | A14188 | 281 | A01243 | A14196 | 490 |
| A01243 | A14200 | 434 | A01243 | A14216 | 226 |
| A01243 | A14220 | 202 | A01243 | A14246 | 375 |
| A01243 | A14257 | 208 | A01243 | A14482 | 404 |
| A01243 | A14596 | 491 | A01243 | A14597 | 491 |
| A01243 | A14659 | 162 | A01243 | A14701 | 491 |
| A01243 | A14875 | 191 | A01243 | A14894 | 180 |
| A01243 | A14925 | 350 | A01243 | A15237 | 475 |
| A01243 | A15270 | 291 | A01243 | A15297 | 488 |
| A01243 | A15323 | 452 | A01243 | A15324 | 491 |
| A01243 | A15338 | 475 | A01243 | A15353 | 491 |
| A01243 | A15377 | 405 | A01243 | A15502 | 418 |
| A01243 | A15543 | 348 | A01243 | A15559 | 327 |
| A01243 | A15564 | 434 | A01243 | A15624 | 258 |

|        |        |     |        |        |     |
|--------|--------|-----|--------|--------|-----|
| A01243 | A15660 | 490 | A01243 | A15684 | 486 |
| A01243 | A15702 | 308 | A01243 | A15717 | 286 |
| A01243 | A15718 | 368 | A01243 | A15724 | 217 |
| A01243 | A15725 | 185 | A01243 | A15871 | 243 |
| A01243 | A16053 | 243 | A01243 | A16118 | 167 |
| A01243 | A16463 | 463 | A01243 | A16495 | 303 |
| A01243 | A16664 | 217 | A01243 | A17152 | 268 |
| A01243 | A17192 | 208 | A01244 | A01296 | 491 |
| A01244 | A01317 | 417 | A01244 | A01319 | 384 |
| A01244 | A01320 | 463 | A01244 | A01322 | 491 |
| A01244 | A01323 | 238 | A01244 | A01324 | 443 |
| A01244 | A01325 | 491 | A01244 | A01326 | 221 |
| A01244 | A01328 | 221 | A01244 | A01331 | 224 |
| A01244 | A01360 | 484 | A01244 | A01411 | 224 |
| A01244 | A01415 | 624 | A01244 | A01457 | 234 |
| A01244 | A01524 | 899 | A01244 | A01527 | 899 |
| A01244 | A01554 | 899 | A01244 | A01558 | 899 |
| A01244 | A01580 | 491 | A01244 | A01588 | 899 |
| A01244 | A01596 | 491 | A01244 | A01647 | 395 |
| A01244 | A01689 | 374 | A01244 | A01828 | 375 |
| A01244 | A02180 | 226 | A01244 | A02219 | 238 |
| A01244 | A02311 | 174 | A01244 | A02521 | 363 |
| A01244 | A02572 | 312 | A01244 | A03123 | 180 |
| A01244 | A03228 | 154 | A01244 | A03237 | 340 |
| A01244 | A03302 | 176 | A01244 | A03327 | 491 |
| A01244 | A03328 | 624 | A01244 | A03575 | 917 |
| A01244 | A03764 | 347 | A01244 | A03929 | 307 |
| A01244 | A04140 | 480 | A01244 | A04174 | 218 |
| A01244 | A04187 | 234 | A01244 | A04488 | 168 |
| A01244 | A05690 | 491 | A01244 | A06318 | 480 |
| A01244 | A06423 | 163 | A01244 | A06440 | 193 |
| A01244 | A06493 | 407 | A01244 | A06564 | 291 |
| A01244 | A06602 | 592 | A01244 | A06982 | 491 |
| A01244 | A06991 | 238 | A01244 | A07096 | 168 |
| A01244 | A07249 | 334 | A01244 | A07311 | 899 |
| A01244 | A07433 | 313 | A01244 | A07572 | 291 |
| A01244 | A07687 | 307 | A01244 | A07869 | 485 |
| A01244 | A08352 | 621 | A01244 | A08552 | 307 |
| A01244 | A08834 | 267 | A01244 | A08858 | 989 |
| A01244 | A08884 | 491 | A01244 | A08887 | 205 |
| A01244 | A09067 | 185 | A01244 | A09073 | 252 |
| A01244 | A09269 | 466 | A01244 | A09304 | 395 |
| A01244 | A09316 | 491 | A01244 | A09340 | 491 |
| A01244 | A09342 | 391 | A01244 | A09350 | 163 |
| A01244 | A09680 | 341 | A01244 | A09773 | 291 |
| A01244 | A09854 | 156 | A01244 | A10174 | 899 |

|        |        |     |        |        |     |
|--------|--------|-----|--------|--------|-----|
| A01244 | A10183 | 291 | A01244 | A10258 | 394 |
| A01244 | A10373 | 428 | A01244 | A10477 | 193 |
| A01244 | A10575 | 291 | A01244 | A10580 | 941 |
| A01244 | A10836 | 291 | A01244 | A11107 | 424 |
| A01244 | A11283 | 341 | A01244 | A11332 | 365 |
| A01244 | A11769 | 201 | A01244 | A11828 | 624 |
| A01244 | A11840 | 307 | A01244 | A11858 | 472 |
| A01244 | A12047 | 624 | A01244 | A12307 | 259 |
| A01244 | A12325 | 168 | A01244 | A12912 | 288 |
| A01244 | A13519 | 291 | A01244 | A13949 | 491 |
| A01244 | A14154 | 168 | A01244 | A14230 | 490 |
| A01244 | A14810 | 160 | A01244 | A14976 | 334 |
| A01244 | A15419 | 232 | A01244 | A16404 | 266 |
| A01244 | A16440 | 486 | A01245 | A01287 | 179 |
| A01245 | A01502 | 283 | A01245 | A01504 | 218 |
| A01245 | A01540 | 262 | A01245 | A01711 | 433 |
| A01245 | A01749 | 167 | A01245 | A01815 | 374 |
| A01245 | A01819 | 322 | A01245 | A01820 | 386 |
| A01245 | A01825 | 286 | A01245 | A01832 | 389 |
| A01245 | A01833 | 374 | A01245 | A02994 | 243 |
| A01245 | A03856 | 299 | A01245 | A03959 | 170 |
| A01245 | A04056 | 352 | A01245 | A09321 | 364 |
| A01245 | A13728 | 447 | A01245 | A15075 | 408 |
| A01245 | A15076 | 408 | A01245 | A15121 | 433 |
| A01245 | A15668 | 324 | A01246 | A01260 | 277 |
| A01246 | A01346 | 483 | A01246 | A01399 | 491 |
| A01246 | A01443 | 308 | A01246 | A01446 | 477 |
| A01246 | A01448 | 469 | A01246 | A02814 | 195 |
| A01246 | A03776 | 452 | A01246 | A04895 | 402 |
| A01246 | A05839 | 274 | A01246 | A06959 | 385 |
| A01246 | A06960 | 395 | A01246 | A07164 | 168 |
| A01246 | A07237 | 472 | A01246 | A07362 | 281 |
| A01246 | A07569 | 268 | A01246 | A07597 | 230 |
| A01246 | A08773 | 171 | A01246 | A08835 | 386 |
| A01246 | A09307 | 196 | A01246 | A09351 | 263 |
| A01246 | A09616 | 307 | A01246 | A10199 | 307 |
| A01246 | A10535 | 430 | A01246 | A11015 | 338 |
| A01246 | A11322 | 176 | A01246 | A11338 | 316 |
| A01246 | A11374 | 191 | A01246 | A11427 | 402 |
| A01246 | A12254 | 171 | A01246 | A13707 | 213 |
| A01246 | A14479 | 171 | A01246 | A14569 | 213 |
| A01247 | A01263 | 491 | A01247 | A01270 | 257 |
| A01247 | A01291 | 491 | A01247 | A01335 | 475 |
| A01247 | A01337 | 286 | A01247 | A01365 | 490 |
| A01247 | A01392 | 446 | A01247 | A01406 | 339 |
| A01247 | A01416 | 177 | A01247 | A01433 | 490 |



|        |        |     |        |        |     |
|--------|--------|-----|--------|--------|-----|
| A01247 | A01446 | 279 | A01247 | A01447 | 343 |
| A01247 | A01449 | 491 | A01247 | A01579 | 236 |
| A01247 | A01601 | 475 | A01247 | A01822 | 294 |
| A01247 | A02814 | 247 | A01247 | A03560 | 151 |
| A01247 | A03581 | 216 | A01247 | A05450 | 385 |
| A01247 | A05499 | 490 | A01247 | A05501 | 485 |
| A01247 | A05557 | 490 | A01247 | A06564 | 332 |
| A01247 | A07394 | 424 | A01247 | A08011 | 480 |
| A01247 | A08154 | 428 | A01247 | A08277 | 321 |
| A01247 | A08358 | 483 | A01247 | A08359 | 310 |
| A01247 | A08377 | 221 | A01247 | A08419 | 363 |
| A01247 | A08501 | 491 | A01247 | A08543 | 491 |
| A01247 | A08550 | 251 | A01247 | A08556 | 491 |
| A01247 | A08559 | 455 | A01247 | A08773 | 483 |
| A01247 | A08973 | 313 | A01247 | A09592 | 327 |
| A01247 | A09622 | 486 | A01247 | A09735 | 324 |
| A01247 | A09852 | 466 | A01247 | A11440 | 224 |
| A01247 | A11572 | 201 | A01247 | A11597 | 491 |
| A01247 | A11616 | 486 | A01247 | A11728 | 394 |
| A01247 | A11992 | 393 | A01247 | A12011 | 416 |
| A01247 | A12052 | 238 | A01247 | A12433 | 281 |
| A01247 | A12525 | 232 | A01247 | A12821 | 402 |
| A01247 | A12834 | 201 | A01247 | A12968 | 447 |
| A01247 | A13231 | 160 | A01247 | A13707 | 274 |
| A01247 | A13710 | 452 | A01247 | A14167 | 279 |
| A01247 | A14176 | 165 | A01247 | A14265 | 219 |
| A01247 | A14482 | 401 | A01247 | A14569 | 276 |
| A01247 | A14819 | 281 | A01247 | A14937 | 329 |
| A01247 | A15500 | 408 | A01247 | A15653 | 217 |
| A01247 | A15666 | 477 | A01247 | A15711 | 317 |
| A01247 | A15732 | 373 | A01247 | A15771 | 470 |
| A01247 | A15931 | 267 | A01247 | A16157 | 406 |
| A01247 | A16583 | 157 | A01247 | A16682 | 263 |
| A01247 | A17133 | 246 | A01247 | A17152 | 157 |
| A01248 | A01712 | 481 | A01248 | A01813 | 215 |
| A01248 | A01954 | 369 | A01248 | A01956 | 408 |
| A01248 | A02007 | 350 | A01248 | A02010 | 363 |
| A01248 | A02908 | 899 | A01248 | A03344 | 340 |
| A01248 | A03345 | 340 | A01248 | A03379 | 195 |
| A01248 | A03654 | 279 | A01248 | A03703 | 228 |
| A01248 | A04337 | 167 | A01248 | A06286 | 274 |
| A01248 | A06825 | 174 | A01248 | A09054 | 188 |
| A01248 | A14190 | 165 | A01248 | A15376 | 188 |
| A01249 | A01263 | 165 | A01249 | A01264 | 200 |
| A01249 | A01291 | 566 | A01249 | A01292 | 229 |
| A01249 | A01306 | 491 | A01249 | A01317 | 224 |

|        |        |     |        |        |     |
|--------|--------|-----|--------|--------|-----|
| A01249 | A01335 | 644 | A01249 | A01337 | 343 |
| A01249 | A01338 | 462 | A01249 | A01369 | 258 |
| A01249 | A01384 | 188 | A01249 | A01392 | 655 |
| A01249 | A01411 | 216 | A01249 | A01429 | 200 |
| A01249 | A01433 | 383 | A01249 | A01436 | 383 |
| A01249 | A01457 | 486 | A01249 | A01464 | 565 |
| A01249 | A01468 | 466 | A01249 | A01470 | 396 |
| A01249 | A01490 | 188 | A01249 | A01496 | 486 |
| A01249 | A01540 | 273 | A01249 | A01569 | 374 |
| A01249 | A01579 | 491 | A01249 | A01597 | 408 |
| A01249 | A01614 | 401 | A01249 | A01618 | 535 |
| A01249 | A01619 | 229 | A01249 | A01649 | 488 |
| A01249 | A01718 | 661 | A01249 | A01822 | 286 |
| A01249 | A01985 | 157 | A01249 | A02180 | 461 |
| A01249 | A02216 | 314 | A01249 | A02350 | 232 |
| A01249 | A02738 | 467 | A01249 | A02928 | 174 |
| A01249 | A02978 | 402 | A01249 | A02980 | 393 |
| A01249 | A03069 | 489 | A01249 | A03272 | 152 |
| A01249 | A03536 | 167 | A01249 | A03567 | 491 |
| A01249 | A03705 | 260 | A01249 | A03740 | 234 |
| A01249 | A03754 | 486 | A01249 | A03981 | 152 |
| A01249 | A04846 | 396 | A01249 | A05385 | 208 |
| A01249 | A05411 | 477 | A01249 | A05443 | 278 |
| A01249 | A05501 | 412 | A01249 | A05562 | 195 |
| A01249 | A05646 | 172 | A01249 | A06275 | 252 |
| A01249 | A06279 | 451 | A01249 | A06351 | 409 |
| A01249 | A06861 | 491 | A01249 | A06897 | 160 |
| A01249 | A06965 | 491 | A01249 | A06973 | 562 |
| A01249 | A06987 | 218 | A01249 | A07126 | 151 |
| A01249 | A07201 | 454 | A01249 | A07312 | 215 |
| A01249 | A07398 | 465 | A01249 | A07449 | 455 |
| A01249 | A07451 | 491 | A01249 | A08011 | 622 |
| A01249 | A08055 | 255 | A01249 | A08131 | 308 |
| A01249 | A08154 | 278 | A01249 | A08357 | 477 |
| A01249 | A08359 | 243 | A01249 | A08398 | 544 |
| A01249 | A08419 | 187 | A01249 | A08452 | 565 |
| A01249 | A08501 | 177 | A01249 | A08521 | 200 |
| A01249 | A08558 | 200 | A01249 | A08559 | 416 |
| A01249 | A08664 | 411 | A01249 | A08773 | 257 |
| A01249 | A08972 | 179 | A01249 | A09044 | 270 |
| A01249 | A09322 | 486 | A01249 | A09330 | 226 |
| A01249 | A09674 | 187 | A01249 | A09702 | 395 |
| A01249 | A10417 | 550 | A01249 | A10518 | 232 |
| A01249 | A10616 | 424 | A01249 | A11338 | 193 |
| A01249 | A11400 | 202 | A01249 | A11438 | 566 |
| A01249 | A11480 | 480 | A01249 | A11729 | 200 |

|        |        |     |        |        |     |
|--------|--------|-----|--------|--------|-----|
| A01249 | A11945 | 241 | A01249 | A12177 | 291 |
| A01249 | A12329 | 156 | A01249 | A12923 | 201 |
| A01249 | A13249 | 420 | A01249 | A13333 | 200 |
| A01249 | A13425 | 179 | A01249 | A13830 | 319 |
| A01249 | A13989 | 490 | A01249 | A13992 | 491 |
| A01249 | A13993 | 393 | A01249 | A14169 | 393 |
| A01249 | A14188 | 327 | A01249 | A14216 | 446 |
| A01249 | A14449 | 393 | A01249 | A14482 | 268 |
| A01249 | A14898 | 344 | A01249 | A15215 | 258 |
| A01249 | A15218 | 193 | A01249 | A15235 | 235 |
| A01249 | A15297 | 393 | A01249 | A15416 | 154 |
| A01249 | A15500 | 191 | A01249 | A15558 | 393 |
| A01249 | A15560 | 393 | A01249 | A15660 | 439 |
| A01249 | A15684 | 425 | A01249 | A15743 | 383 |
| A01249 | A15988 | 480 | A01249 | A16118 | 491 |
| A01249 | A16306 | 196 | A01249 | A16523 | 373 |
| A01249 | A16686 | 236 | A01249 | A16823 | 241 |
| A01249 | A17193 | 344 | A01250 | A01254 | 327 |
| A01250 | A01267 | 168 | A01250 | A01302 | 307 |
| A01250 | A01375 | 312 | A01250 | A01483 | 480 |
| A01250 | A01741 | 157 | A01250 | A02323 | 187 |
| A01250 | A03095 | 213 | A01250 | A07346 | 491 |
| A01250 | A07802 | 238 | A01250 | A07976 | 351 |
| A01250 | A08430 | 204 | A01250 | A08524 | 281 |
| A01250 | A08560 | 160 | A01250 | A08561 | 152 |
| A01250 | A08775 | 198 | A01250 | A09009 | 165 |
| A01250 | A09622 | 168 | A01250 | A10373 | 490 |
| A01250 | A11497 | 243 | A01250 | A12011 | 207 |
| A01250 | A12052 | 297 | A01250 | A12255 | 168 |
| A01250 | A12507 | 172 | A01250 | A12556 | 319 |
| A01250 | A12606 | 215 | A01250 | A12658 | 245 |
| A01250 | A12834 | 267 | A01250 | A12873 | 213 |
| A01250 | A13231 | 229 | A01250 | A14084 | 213 |
| A01250 | A14167 | 346 | A01250 | A14209 | 394 |
| A01250 | A14255 | 238 | A01250 | A14272 | 363 |
| A01250 | A14462 | 241 | A01250 | A14594 | 338 |
| A01250 | A14655 | 308 | A01250 | A14701 | 486 |
| A01250 | A15380 | 215 | A01250 | A15519 | 452 |
| A01250 | A15534 | 179 | A01250 | A15535 | 224 |
| A01250 | A15837 | 199 | A01250 | A17133 | 190 |
| A01251 | A01496 | 168 | A01251 | A01538 | 200 |
| A01251 | A01598 | 63  | A01251 | A02164 | 107 |
| A01251 | A02806 | 160 | A01251 | A03051 | 238 |
| A01251 | A03438 | 489 | A01251 | A03502 | 63  |
| A01251 | A03981 | 68  | A01251 | A05191 | 329 |
| A01251 | A06825 | 291 | A01251 | A08768 | 417 |

|        |        |     |        |        |     |
|--------|--------|-----|--------|--------|-----|
| A01251 | A10549 | 418 | A01251 | A11544 | 291 |
| A01251 | A15661 | 160 | A01252 | A01302 | 754 |
| A01252 | A01352 | 335 | A01252 | A01365 | 266 |
| A01252 | A01406 | 235 | A01252 | A01416 | 243 |
| A01252 | A01419 | 163 | A01252 | A01457 | 185 |
| A01252 | A01461 | 852 | A01252 | A01499 | 414 |
| A01252 | A01503 | 154 | A01252 | A01515 | 390 |
| A01252 | A01522 | 319 | A01252 | A01524 | 899 |
| A01252 | A01561 | 199 | A01252 | A01573 | 485 |
| A01252 | A01574 | 628 | A01252 | A01575 | 441 |
| A01252 | A01576 | 530 | A01252 | A01578 | 340 |
| A01252 | A01585 | 393 | A01252 | A01593 | 899 |
| A01252 | A01673 | 410 | A01252 | A01706 | 634 |
| A01252 | A01926 | 322 | A01252 | A03398 | 165 |
| A01252 | A03399 | 204 | A01252 | A03493 | 245 |
| A01252 | A03601 | 277 | A01252 | A03889 | 384 |
| A01252 | A03892 | 379 | A01252 | A04145 | 326 |
| A01252 | A04202 | 157 | A01252 | A04815 | 168 |
| A01252 | A05216 | 291 | A01252 | A05356 | 495 |
| A01252 | A05427 | 383 | A01252 | A05454 | 283 |
| A01252 | A06039 | 199 | A01252 | A06687 | 383 |
| A01252 | A06941 | 324 | A01252 | A07214 | 208 |
| A01252 | A08137 | 369 | A01252 | A08177 | 451 |
| A01252 | A08356 | 259 | A01252 | A08400 | 384 |
| A01252 | A08461 | 313 | A01252 | A08484 | 324 |
| A01252 | A08506 | 486 | A01252 | A08555 | 610 |
| A01252 | A08785 | 324 | A01252 | A09007 | 260 |
| A01252 | A09277 | 475 | A01252 | A09298 | 607 |
| A01252 | A10532 | 899 | A01252 | A10798 | 180 |
| A01252 | A11265 | 348 | A01252 | A11279 | 634 |
| A01252 | A11287 | 630 | A01252 | A11640 | 171 |
| A01252 | A11950 | 382 | A01252 | A12052 | 234 |
| A01252 | A12606 | 165 | A01252 | A12738 | 491 |
| A01252 | A12818 | 899 | A01252 | A12834 | 196 |
| A01252 | A13222 | 324 | A01252 | A13225 | 899 |
| A01252 | A13231 | 157 | A01252 | A13344 | 899 |
| A01252 | A13397 | 899 | A01252 | A13589 | 475 |
| A01252 | A13593 | 424 | A01252 | A13786 | 491 |
| A01252 | A13830 | 180 | A01252 | A13905 | 263 |
| A01252 | A14167 | 274 | A01252 | A14182 | 624 |
| A01252 | A14204 | 152 | A01252 | A14247 | 720 |
| A01252 | A14258 | 768 | A01252 | A14557 | 899 |
| A01252 | A14661 | 838 | A01252 | A14711 | 745 |
| A01252 | A14844 | 633 | A01252 | A14877 | 389 |
| A01252 | A14917 | 490 | A01252 | A15315 | 439 |
| A01252 | A15336 | 587 | A01252 | A15347 | 655 |

|        |        |     |        |        |     |
|--------|--------|-----|--------|--------|-----|
| A01252 | A15366 | 490 | A01252 | A15462 | 188 |
| A01252 | A15463 | 369 | A01252 | A15498 | 249 |
| A01252 | A15528 | 634 | A01252 | A15617 | 437 |
| A01252 | A15680 | 447 | A01252 | A16117 | 200 |
| A01252 | A16364 | 283 | A01252 | A16812 | 899 |
| A01252 | A17061 | 546 | A01252 | A17133 | 241 |
| A01252 | A17214 | 899 | A01253 | A01582 | 469 |
| A01253 | A02502 | 163 | A01253 | A03126 | 152 |
| A01253 | A03458 | 335 | A01253 | A03625 | 252 |
| A01253 | A03651 | 187 | A01253 | A03885 | 467 |
| A01253 | A05570 | 312 | A01253 | A06032 | 314 |
| A01253 | A07655 | 221 | A01253 | A08191 | 374 |
| A01253 | A11352 | 395 | A01253 | A13432 | 296 |
| A01254 | A01561 | 167 | A01254 | A03304 | 462 |
| A01254 | A03893 | 419 | A01254 | A04033 | 257 |
| A01254 | A05724 | 182 | A01254 | A06688 | 191 |
| A01254 | A07346 | 246 | A01254 | A08957 | 463 |
| A01254 | A09766 | 174 | A01254 | A11376 | 283 |
| A01254 | A14148 | 221 | A01254 | A15297 | 219 |
| A01254 | A15529 | 213 | A01254 | A15535 | 449 |
| A01254 | A15558 | 350 | A01254 | A15738 | 296 |
| A01255 | A01317 | 469 | A01255 | A01318 | 218 |
| A01255 | A01329 | 179 | A01255 | A01352 | 151 |
| A01255 | A01388 | 235 | A01255 | A01415 | 174 |
| A01255 | A01436 | 228 | A01255 | A02239 | 440 |
| A01255 | A03676 | 156 | A01255 | A03889 | 180 |
| A01255 | A07414 | 218 | A01255 | A07700 | 163 |
| A01255 | A08212 | 151 | A01255 | A08467 | 462 |
| A01255 | A14614 | 340 | A01255 | A15531 | 252 |
| A01255 | A15543 | 480 | A01255 | A15564 | 195 |
| A01255 | A16396 | 361 | A01256 | A01272 | 477 |
| A01256 | A01297 | 162 | A01256 | A01347 | 490 |
| A01256 | A01481 | 491 | A01256 | A01508 | 438 |
| A01256 | A01635 | 484 | A01256 | A01695 | 215 |
| A01256 | A01707 | 402 | A01256 | A01741 | 412 |
| A01256 | A01743 | 177 | A01256 | A01748 | 388 |
| A01256 | A01818 | 306 | A01256 | A02047 | 174 |
| A01256 | A02242 | 168 | A01256 | A02719 | 196 |
| A01256 | A02859 | 479 | A01256 | A02992 | 409 |
| A01256 | A03003 | 188 | A01256 | A03050 | 196 |
| A01256 | A03167 | 185 | A01256 | A03168 | 191 |
| A01256 | A03259 | 281 | A01256 | A04211 | 491 |
| A01256 | A04779 | 347 | A01256 | A04995 | 215 |
| A01256 | A05007 | 163 | A01256 | A05088 | 193 |
| A01256 | A05102 | 190 | A01256 | A05363 | 399 |
| A01256 | A05386 | 174 | A01256 | A05516 | 221 |

|        |        |     |        |        |     |
|--------|--------|-----|--------|--------|-----|
| A01256 | A05617 | 446 | A01256 | A05759 | 229 |
| A01256 | A05771 | 215 | A01256 | A05783 | 240 |
| A01256 | A05859 | 262 | A01256 | A05947 | 313 |
| A01256 | A06015 | 318 | A01256 | A06070 | 185 |
| A01256 | A06086 | 491 | A01256 | A06088 | 171 |
| A01256 | A06339 | 252 | A01256 | A06358 | 430 |
| A01256 | A06523 | 188 | A01256 | A06592 | 491 |
| A01256 | A06692 | 180 | A01256 | A06756 | 468 |
| A01256 | A06773 | 485 | A01256 | A06855 | 168 |
| A01256 | A06979 | 335 | A01256 | A06981 | 446 |
| A01256 | A07002 | 215 | A01256 | A07122 | 491 |
| A01256 | A07234 | 457 | A01256 | A07238 | 363 |
| A01256 | A07256 | 177 | A01256 | A07267 | 462 |
| A01256 | A07271 | 240 | A01256 | A07363 | 313 |
| A01256 | A07413 | 488 | A01256 | A07477 | 160 |
| A01256 | A07525 | 265 | A01256 | A07553 | 479 |
| A01256 | A07590 | 252 | A01256 | A07659 | 488 |
| A01256 | A07660 | 455 | A01256 | A07688 | 479 |
| A01256 | A07711 | 160 | A01256 | A07736 | 204 |
| A01256 | A07753 | 486 | A01256 | A07770 | 313 |
| A01256 | A07789 | 313 | A01256 | A07800 | 491 |
| A01256 | A07823 | 221 | A01256 | A07848 | 419 |
| A01256 | A07983 | 313 | A01256 | A08099 | 491 |
| A01256 | A08104 | 313 | A01256 | A08193 | 490 |
| A01256 | A08205 | 483 | A01256 | A08666 | 313 |
| A01256 | A09612 | 486 | A01256 | A09632 | 357 |
| A01256 | A09877 | 215 | A01256 | A09879 | 162 |
| A01256 | A09985 | 434 | A01256 | A10441 | 152 |
| A01256 | A10456 | 486 | A01256 | A10475 | 162 |
| A01256 | A10550 | 165 | A01256 | A10673 | 334 |
| A01256 | A10693 | 224 | A01256 | A10694 | 152 |
| A01256 | A10702 | 466 | A01256 | A10712 | 163 |
| A01256 | A10714 | 455 | A01256 | A10796 | 162 |
| A01256 | A10860 | 265 | A01256 | A11309 | 491 |
| A01256 | A11325 | 306 | A01256 | A11381 | 474 |
| A01256 | A11994 | 345 | A01256 | A13343 | 313 |
| A01256 | A13870 | 278 | A01256 | A14313 | 221 |
| A01256 | A14628 | 165 | A01256 | A14814 | 215 |
| A01256 | A14866 | 265 | A01256 | A15190 | 160 |
| A01256 | A15497 | 491 | A01256 | A15637 | 422 |
| A01256 | A15874 | 483 | A01256 | A15974 | 457 |
| A01256 | A16002 | 475 | A01256 | A16027 | 475 |
| A01256 | A16033 | 405 | A01256 | A16112 | 185 |
| A01256 | A16262 | 424 | A01256 | A16263 | 160 |
| A01256 | A16368 | 465 | A01256 | A16419 | 447 |
| A01256 | A16528 | 446 | A01256 | A16529 | 491 |

|        |        |     |        |        |     |
|--------|--------|-----|--------|--------|-----|
| A01256 | A16596 | 372 | A01256 | A16741 | 187 |
| A01256 | A16959 | 491 | A01257 | A01258 | 358 |
| A01257 | A01277 | 210 | A01257 | A01351 | 406 |
| A01257 | A01485 | 307 | A01257 | A01527 | 899 |
| A01257 | A01547 | 252 | A01257 | A01590 | 303 |
| A01257 | A01668 | 455 | A01257 | A01741 | 177 |
| A01257 | A01830 | 159 | A01257 | A02028 | 259 |
| A01257 | A02074 | 82  | A01257 | A02111 | 167 |
| A01257 | A02117 | 382 | A01257 | A02143 | 193 |
| A01257 | A02148 | 443 | A01257 | A02174 | 110 |
| A01257 | A02190 | 212 | A01257 | A02213 | 168 |
| A01257 | A02304 | 384 | A01257 | A02306 | 450 |
| A01257 | A02309 | 127 | A01257 | A02312 | 367 |
| A01257 | A02313 | 318 | A01257 | A02336 | 165 |
| A01257 | A02381 | 184 | A01257 | A02397 | 243 |
| A01257 | A02425 | 436 | A01257 | A02429 | 408 |
| A01257 | A02431 | 294 | A01257 | A02450 | 200 |
| A01257 | A02463 | 272 | A01257 | A02546 | 208 |
| A01257 | A02574 | 191 | A01257 | A02584 | 182 |
| A01257 | A02588 | 247 | A01257 | A02618 | 152 |
| A01257 | A02621 | 205 | A01257 | A02667 | 76  |
| A01257 | A02673 | 488 | A01257 | A02759 | 386 |
| A01257 | A02761 | 460 | A01257 | A02772 | 165 |
| A01257 | A02789 | 363 | A01257 | A02791 | 188 |
| A01257 | A02797 | 193 | A01257 | A02959 | 266 |
| A01257 | A03097 | 157 | A01257 | A03099 | 162 |
| A01257 | A03104 | 201 | A01257 | A03110 | 439 |
| A01257 | A03157 | 456 | A01257 | A03158 | 156 |
| A01257 | A03186 | 401 | A01257 | A03192 | 227 |
| A01257 | A03264 | 154 | A01257 | A03314 | 396 |
| A01257 | A03315 | 279 | A01257 | A03319 | 329 |
| A01257 | A03458 | 450 | A01257 | A03577 | 212 |
| A01257 | A03588 | 247 | A01257 | A03639 | 481 |
| A01257 | A03771 | 358 | A01257 | A03773 | 263 |
| A01257 | A03794 | 455 | A01257 | A03818 | 491 |
| A01257 | A03866 | 204 | A01257 | A03893 | 202 |
| A01257 | A03927 | 157 | A01257 | A03961 | 945 |
| A01257 | A03978 | 257 | A01257 | A04075 | 246 |
| A01257 | A04092 | 390 | A01257 | A04135 | 170 |
| A01257 | A04157 | 172 | A01257 | A04162 | 172 |
| A01257 | A04196 | 212 | A01257 | A04229 | 168 |
| A01257 | A04256 | 462 | A01257 | A04331 | 217 |
| A01257 | A04365 | 423 | A01257 | A04368 | 193 |
| A01257 | A04424 | 252 | A01257 | A04482 | 212 |
| A01257 | A04553 | 180 | A01257 | A04933 | 200 |
| A01257 | A04976 | 406 | A01257 | A05118 | 257 |

|        |        |     |        |        |     |
|--------|--------|-----|--------|--------|-----|
| A01257 | A05247 | 259 | A01257 | A05546 | 188 |
| A01257 | A05653 | 404 | A01257 | A05709 | 168 |
| A01257 | A06607 | 224 | A01257 | A06719 | 162 |
| A01257 | A06969 | 257 | A01257 | A07096 | 232 |
| A01257 | A07124 | 187 | A01257 | A07191 | 235 |
| A01257 | A07315 | 235 | A01257 | A07342 | 347 |
| A01257 | A07478 | 234 | A01257 | A08136 | 212 |
| A01257 | A08583 | 163 | A01257 | A08859 | 154 |
| A01257 | A08941 | 240 | A01257 | A09075 | 281 |
| A01257 | A09108 | 327 | A01257 | A09235 | 180 |
| A01257 | A09394 | 154 | A01257 | A09404 | 221 |
| A01257 | A09467 | 268 | A01257 | A09480 | 190 |
| A01257 | A09732 | 260 | A01257 | A09733 | 201 |
| A01257 | A10164 | 299 | A01257 | A10318 | 281 |
| A01257 | A11039 | 165 | A01257 | A11050 | 327 |
| A01257 | A11144 | 190 | A01257 | A11170 | 247 |
| A01257 | A11765 | 165 | A01257 | A11950 | 340 |
| A01257 | A12108 | 247 | A01257 | A12697 | 268 |
| A01257 | A12898 | 281 | A01257 | A13367 | 204 |
| A01257 | A14127 | 440 | A01257 | A14202 | 383 |
| A01257 | A14210 | 290 | A01257 | A14544 | 268 |
| A01257 | A14554 | 165 | A01257 | A14634 | 208 |
| A01257 | A14635 | 419 | A01257 | A15217 | 154 |
| A01257 | A15286 | 162 | A01257 | A15292 | 380 |
| A01257 | A15352 | 152 | A01257 | A15430 | 179 |
| A01257 | A15437 | 172 | A01257 | A15457 | 179 |
| A01257 | A15498 | 234 | A01257 | A15682 | 378 |
| A01257 | A15795 | 180 | A01257 | A16257 | 216 |
| A01257 | A16608 | 369 | A01257 | A16875 | 258 |
| A01257 | A17150 | 221 | A01258 | A01548 | 199 |
| A01258 | A02278 | 195 | A01258 | A03477 | 221 |
| A01258 | A04490 | 346 | A01258 | A04728 | 247 |
| A01258 | A07135 | 218 | A01258 | A14198 | 188 |
| A01259 | A01307 | 156 | A01259 | A01431 | 274 |
| A01259 | A01665 | 180 | A01259 | A02452 | 481 |
| A01259 | A03057 | 399 | A01259 | A03835 | 160 |
| A01259 | A03858 | 154 | A01259 | A04020 | 159 |
| A01259 | A04844 | 243 | A01259 | A06907 | 466 |
| A01259 | A07349 | 313 | A01259 | A07956 | 202 |
| A01259 | A09737 | 246 | A01259 | A10039 | 283 |
| A01259 | A11286 | 204 | A01259 | A11291 | 474 |
| A01259 | A11297 | 159 | A01259 | A12543 | 160 |
| A01259 | A13340 | 160 | A01259 | A13928 | 329 |
| A01259 | A13975 | 221 | A01259 | A13989 | 371 |
| A01259 | A14148 | 151 | A01259 | A14196 | 491 |
| A01259 | A14208 | 174 | A01259 | A14220 | 307 |



|        |        |     |        |        |     |
|--------|--------|-----|--------|--------|-----|
| A01259 | A14246 | 184 | A01259 | A14659 | 228 |
| A01259 | A14843 | 314 | A01259 | A15297 | 436 |
| A01259 | A15309 | 465 | A01259 | A15366 | 423 |
| A01259 | A15431 | 218 | A01259 | A15547 | 483 |
| A01259 | A15559 | 433 | A01259 | A15596 | 254 |
| A01259 | A15747 | 193 | A01259 | A15788 | 303 |
| A01259 | A15851 | 177 | A01259 | A15867 | 176 |
| A01260 | A01399 | 463 | A01260 | A01446 | 152 |
| A01260 | A01448 | 191 | A01260 | A04895 | 255 |
| A01260 | A08738 | 480 | A01260 | A09302 | 390 |
| A01260 | A11427 | 256 | A01260 | A14479 | 232 |
| A01260 | A16840 | 279 | A01261 | A01270 | 154 |
| A01261 | A01354 | 255 | A01261 | A01379 | 176 |
| A01261 | A01415 | 229 | A01261 | A01560 | 324 |
| A01261 | A01561 | 185 | A01261 | A01601 | 420 |
| A01261 | A01707 | 433 | A01261 | A01822 | 160 |
| A01261 | A02292 | 472 | A01261 | A03625 | 232 |
| A01261 | A03665 | 561 | A01261 | A03677 | 160 |
| A01261 | A03740 | 302 | A01261 | A03752 | 456 |
| A01261 | A06466 | 489 | A01261 | A06554 | 576 |
| A01261 | A06599 | 485 | A01261 | A07311 | 550 |
| A01261 | A07655 | 240 | A01261 | A08450 | 283 |
| A01261 | A08533 | 219 | A01261 | A08860 | 362 |
| A01261 | A09009 | 281 | A01261 | A09297 | 298 |
| A01261 | A09902 | 160 | A01261 | A10321 | 440 |
| A01261 | A10532 | 273 | A01261 | A11291 | 156 |
| A01261 | A11728 | 224 | A01261 | A12043 | 160 |
| A01261 | A12126 | 324 | A01261 | A12227 | 160 |
| A01261 | A12328 | 157 | A01261 | A13116 | 291 |
| A01261 | A13340 | 541 | A01261 | A13812 | 157 |
| A01261 | A14159 | 165 | A01261 | A14188 | 274 |
| A01261 | A14196 | 215 | A01261 | A14738 | 235 |
| A01261 | A15133 | 218 | A01261 | A15244 | 160 |
| A01261 | A15734 | 281 | A01261 | A15932 | 417 |
| A01261 | A15933 | 160 | A01261 | A16272 | 197 |
| A01261 | A16318 | 160 | A01261 | A16437 | 224 |
| A01261 | A16446 | 160 | A01261 | A16585 | 160 |
| A01261 | A16618 | 276 | A01262 | A01537 | 334 |
| A01262 | A01689 | 438 | A01262 | A01730 | 353 |
| A01262 | A02605 | 168 | A01262 | A02877 | 187 |
| A01262 | A06348 | 456 | A01262 | A06514 | 346 |
| A01262 | A07163 | 235 | A01262 | A07433 | 307 |
| A01262 | A07593 | 491 | A01262 | A08525 | 152 |
| A01262 | A08557 | 491 | A01262 | A08560 | 157 |
| A01262 | A08844 | 168 | A01262 | A08847 | 491 |
| A01262 | A10789 | 224 | A01262 | A12208 | 486 |

|        |        |     |        |        |     |
|--------|--------|-----|--------|--------|-----|
| A01262 | A12285 | 265 | A01262 | A14010 | 200 |
| A01262 | A14227 | 207 | A01262 | A14260 | 205 |
| A01262 | A14289 | 154 | A01262 | A16827 | 191 |
| A01263 | A01267 | 238 | A01263 | A01291 | 559 |
| A01263 | A01306 | 475 | A01263 | A01335 | 491 |
| A01263 | A01337 | 434 | A01263 | A01338 | 293 |
| A01263 | A01365 | 757 | A01263 | A01369 | 463 |
| A01263 | A01392 | 446 | A01263 | A01406 | 439 |
| A01263 | A01407 | 196 | A01263 | A01411 | 318 |
| A01263 | A01416 | 247 | A01263 | A01430 | 272 |
| A01263 | A01433 | 486 | A01263 | A01437 | 332 |
| A01263 | A01447 | 305 | A01263 | A01449 | 491 |
| A01263 | A01496 | 356 | A01263 | A01579 | 477 |
| A01263 | A01596 | 171 | A01263 | A01601 | 288 |
| A01263 | A01822 | 470 | A01263 | A02227 | 369 |
| A01263 | A02372 | 157 | A01263 | A03191 | 297 |
| A01263 | A03560 | 373 | A01263 | A03981 | 305 |
| A01263 | A05450 | 152 | A01263 | A05499 | 452 |
| A01263 | A05501 | 491 | A01263 | A05557 | 491 |
| A01263 | A06466 | 360 | A01263 | A06564 | 438 |
| A01263 | A06779 | 534 | A01263 | A06897 | 184 |
| A01263 | A06965 | 386 | A01263 | A06973 | 176 |
| A01263 | A07201 | 256 | A01263 | A07394 | 263 |
| A01263 | A08011 | 491 | A01263 | A08131 | 159 |
| A01263 | A08144 | 491 | A01263 | A08154 | 480 |
| A01263 | A08277 | 477 | A01263 | A08357 | 232 |
| A01263 | A08358 | 491 | A01263 | A08359 | 401 |
| A01263 | A08369 | 172 | A01263 | A08377 | 468 |
| A01263 | A08419 | 470 | A01263 | A08501 | 491 |
| A01263 | A08543 | 491 | A01263 | A08550 | 394 |
| A01263 | A08556 | 491 | A01263 | A08559 | 491 |
| A01263 | A08760 | 294 | A01263 | A08761 | 165 |
| A01263 | A08773 | 491 | A01263 | A08973 | 380 |
| A01263 | A08975 | 188 | A01263 | A09059 | 154 |
| A01263 | A09282 | 274 | A01263 | A09322 | 435 |
| A01263 | A09577 | 255 | A01263 | A09610 | 173 |
| A01263 | A09622 | 489 | A01263 | A09674 | 210 |
| A01263 | A09735 | 490 | A01263 | A09852 | 490 |
| A01263 | A11420 | 281 | A01263 | A11440 | 427 |
| A01263 | A11572 | 154 | A01263 | A11597 | 491 |
| A01263 | A11616 | 490 | A01263 | A11688 | 165 |
| A01263 | A11704 | 180 | A01263 | A12011 | 423 |
| A01263 | A12079 | 173 | A01263 | A12433 | 389 |
| A01263 | A12503 | 163 | A01263 | A12525 | 447 |
| A01263 | A12821 | 485 | A01263 | A12968 | 481 |
| A01263 | A13340 | 406 | A01263 | A13698 | 205 |

|        |        |     |        |        |     |
|--------|--------|-----|--------|--------|-----|
| A01263 | A13710 | 488 | A01263 | A14216 | 450 |
| A01263 | A14265 | 419 | A01263 | A14358 | 173 |
| A01263 | A14449 | 414 | A01263 | A14479 | 210 |
| A01263 | A14482 | 268 | A01263 | A14568 | 345 |
| A01263 | A14937 | 269 | A01263 | A15034 | 283 |
| A01263 | A15235 | 201 | A01263 | A15498 | 366 |
| A01263 | A15500 | 489 | A01263 | A15624 | 502 |
| A01263 | A15666 | 485 | A01263 | A15684 | 440 |
| A01263 | A15732 | 316 | A01263 | A15743 | 180 |
| A01263 | A15759 | 160 | A01263 | A15771 | 491 |
| A01263 | A15776 | 312 | A01263 | A15778 | 195 |
| A01263 | A15932 | 593 | A01263 | A16157 | 152 |
| A01263 | A16159 | 182 | A01263 | A16583 | 398 |
| A01263 | A16631 | 221 | A01263 | A16682 | 461 |
| A01263 | A16750 | 204 | A01263 | A16818 | 173 |
| A01264 | A01267 | 226 | A01264 | A01291 | 565 |
| A01264 | A01338 | 566 | A01264 | A01429 | 200 |
| A01264 | A01464 | 200 | A01264 | A01618 | 200 |
| A01264 | A01740 | 306 | A01264 | A02978 | 562 |
| A01264 | A03567 | 160 | A01264 | A03859 | 486 |
| A01264 | A06973 | 219 | A01264 | A08398 | 200 |
| A01264 | A08452 | 200 | A01264 | A08521 | 200 |
| A01264 | A08558 | 566 | A01264 | A08627 | 191 |
| A01264 | A08664 | 200 | A01264 | A08765 | 165 |
| A01264 | A09044 | 200 | A01264 | A09702 | 200 |
| A01264 | A10417 | 200 | A01264 | A11390 | 168 |
| A01264 | A11438 | 200 | A01264 | A11675 | 278 |
| A01264 | A11728 | 196 | A01264 | A11729 | 200 |
| A01264 | A11851 | 185 | A01264 | A12126 | 243 |
| A01264 | A12233 | 423 | A01264 | A12243 | 270 |
| A01264 | A12499 | 219 | A01264 | A12508 | 160 |
| A01264 | A12606 | 168 | A01264 | A12858 | 243 |
| A01264 | A13333 | 200 | A01264 | A13398 | 274 |
| A01264 | A13805 | 221 | A01264 | A14167 | 371 |
| A01264 | A14270 | 202 | A01264 | A14566 | 238 |
| A01264 | A15221 | 396 | A01264 | A15651 | 241 |
| A01264 | A15666 | 285 | A01264 | A15711 | 199 |
| A01264 | A15727 | 396 | A01264 | A16157 | 174 |
| A01264 | A16552 | 152 | A01264 | A16790 | 219 |
| A01265 | A01275 | 424 | A01265 | A01300 | 217 |
| A01265 | A01399 | 303 | A01265 | A01446 | 490 |
| A01265 | A01540 | 486 | A01265 | A01572 | 185 |
| A01265 | A01785 | 173 | A01265 | A01850 | 173 |
| A01265 | A02350 | 218 | A01265 | A02864 | 185 |
| A01265 | A02988 | 217 | A01265 | A03740 | 484 |
| A01265 | A03776 | 168 | A01265 | A03809 | 355 |

|        |        |     |        |        |     |
|--------|--------|-----|--------|--------|-----|
| A01265 | A05045 | 165 | A01265 | A05153 | 281 |
| A01265 | A06466 | 163 | A01265 | A06959 | 215 |
| A01265 | A07208 | 318 | A01265 | A07597 | 170 |
| A01265 | A08438 | 296 | A01265 | A08835 | 488 |
| A01265 | A08987 | 380 | A01265 | A10797 | 247 |
| A01265 | A10798 | 428 | A01265 | A11296 | 215 |
| A01265 | A11302 | 156 | A01265 | A11322 | 491 |
| A01265 | A11338 | 490 | A01265 | A11372 | 221 |
| A01265 | A11374 | 490 | A01265 | A11419 | 491 |
| A01265 | A11427 | 477 | A01265 | A11677 | 205 |
| A01265 | A11724 | 217 | A01265 | A11928 | 154 |
| A01265 | A13340 | 293 | A01265 | A14073 | 200 |
| A01265 | A14648 | 224 | A01265 | A14845 | 430 |
| A01265 | A15215 | 171 | A01265 | A15660 | 196 |
| A01265 | A15931 | 185 | A01265 | A15988 | 180 |
| A01265 | A16688 | 306 | A01266 | A01268 | 542 |
| A01266 | A01291 | 198 | A01266 | A01295 | 156 |
| A01266 | A01299 | 223 | A01266 | A01334 | 429 |
| A01266 | A01391 | 156 | A01266 | A01434 | 201 |
| A01266 | A01441 | 172 | A01266 | A01470 | 267 |
| A01266 | A01488 | 163 | A01266 | A01492 | 191 |
| A01266 | A01598 | 243 | A01266 | A01612 | 491 |
| A01266 | A01614 | 308 | A01266 | A01615 | 207 |
| A01266 | A01649 | 243 | A01266 | A01660 | 151 |
| A01266 | A03298 | 484 | A01266 | A03299 | 202 |
| A01266 | A03494 | 464 | A01266 | A03569 | 491 |
| A01266 | A03902 | 201 | A01266 | A04282 | 180 |
| A01266 | A05502 | 162 | A01266 | A06190 | 335 |
| A01266 | A06907 | 413 | A01266 | A07898 | 156 |
| A01266 | A08137 | 491 | A01266 | A08201 | 156 |
| A01266 | A08327 | 422 | A01266 | A08431 | 524 |
| A01266 | A08542 | 156 | A01266 | A08571 | 491 |
| A01266 | A08756 | 454 | A01266 | A10250 | 402 |
| A01266 | A10853 | 218 | A01266 | A11379 | 168 |
| A01266 | A11496 | 156 | A01266 | A11497 | 156 |
| A01266 | A11928 | 418 | A01266 | A12082 | 213 |
| A01266 | A12189 | 449 | A01266 | A12757 | 509 |
| A01266 | A13171 | 324 | A01266 | A13510 | 479 |
| A01266 | A13928 | 156 | A01266 | A13989 | 475 |
| A01266 | A14090 | 180 | A01266 | A14148 | 407 |
| A01266 | A14178 | 465 | A01266 | A14196 | 165 |
| A01266 | A14220 | 185 | A01266 | A14221 | 156 |
| A01266 | A14241 | 241 | A01266 | A14255 | 249 |
| A01266 | A14257 | 443 | A01266 | A14476 | 368 |
| A01266 | A14728 | 441 | A01266 | A14986 | 441 |
| A01266 | A15297 | 472 | A01266 | A15334 | 215 |

|        |        |     |        |        |     |
|--------|--------|-----|--------|--------|-----|
| A01266 | A15338 | 485 | A01266 | A15433 | 165 |
| A01266 | A15486 | 198 | A01266 | A15561 | 241 |
| A01266 | A15629 | 414 | A01266 | A15764 | 152 |
| A01266 | A16699 | 156 | A01266 | A16798 | 156 |
| A01266 | A17063 | 313 | A01267 | A01274 | 156 |
| A01267 | A01295 | 219 | A01267 | A01302 | 274 |
| A01267 | A01325 | 213 | A01267 | A01339 | 160 |
| A01267 | A01379 | 433 | A01267 | A01451 | 456 |
| A01267 | A01461 | 227 | A01267 | A01540 | 213 |
| A01267 | A01585 | 224 | A01267 | A01660 | 313 |
| A01267 | A01669 | 157 | A01267 | A02131 | 187 |
| A01267 | A02212 | 160 | A01267 | A03560 | 307 |
| A01267 | A05288 | 302 | A01267 | A05439 | 174 |
| A01267 | A06211 | 180 | A01267 | A06907 | 472 |
| A01267 | A07096 | 160 | A01267 | A07226 | 160 |
| A01267 | A07360 | 388 | A01267 | A07802 | 159 |
| A01267 | A08356 | 191 | A01267 | A08377 | 236 |
| A01267 | A08461 | 216 | A01267 | A08543 | 345 |
| A01267 | A08550 | 330 | A01267 | A08553 | 224 |
| A01267 | A08561 | 312 | A01267 | A08834 | 160 |
| A01267 | A08934 | 362 | A01267 | A08984 | 205 |
| A01267 | A09062 | 187 | A01267 | A09239 | 263 |
| A01267 | A09299 | 160 | A01267 | A09627 | 160 |
| A01267 | A10159 | 375 | A01267 | A10372 | 160 |
| A01267 | A10602 | 184 | A01267 | A11301 | 299 |
| A01267 | A11365 | 160 | A01267 | A11496 | 160 |
| A01267 | A11497 | 358 | A01267 | A11649 | 269 |
| A01267 | A11735 | 722 | A01267 | A11737 | 721 |
| A01267 | A11914 | 722 | A01267 | A11917 | 212 |
| A01267 | A12126 | 279 | A01267 | A12167 | 339 |
| A01267 | A12215 | 168 | A01267 | A12254 | 221 |
| A01267 | A12255 | 432 | A01267 | A12433 | 297 |
| A01267 | A12508 | 174 | A01267 | A12606 | 409 |
| A01267 | A12658 | 721 | A01267 | A12824 | 545 |
| A01267 | A12834 | 208 | A01267 | A12837 | 215 |
| A01267 | A12858 | 297 | A01267 | A12971 | 232 |
| A01267 | A13786 | 307 | A01267 | A13915 | 215 |
| A01267 | A14007 | 345 | A01267 | A14084 | 329 |
| A01267 | A14167 | 156 | A01267 | A14196 | 606 |
| A01267 | A14202 | 154 | A01267 | A14214 | 318 |
| A01267 | A14247 | 179 | A01267 | A14255 | 159 |
| A01267 | A14358 | 228 | A01267 | A14375 | 157 |
| A01267 | A14462 | 263 | A01267 | A14739 | 228 |
| A01267 | A14761 | 318 | A01267 | A14839 | 221 |
| A01267 | A15257 | 544 | A01267 | A15297 | 633 |
| A01267 | A15541 | 236 | A01267 | A15558 | 475 |

|        |        |     |        |        |     |
|--------|--------|-----|--------|--------|-----|
| A01267 | A15559 | 693 | A01267 | A15661 | 465 |
| A01267 | A15684 | 419 | A01267 | A15729 | 255 |
| A01267 | A15813 | 262 | A01267 | A16157 | 384 |
| A01267 | A16565 | 254 | A01267 | A16587 | 252 |
| A01267 | A16597 | 154 | A01267 | A16611 | 435 |
| A01267 | A16680 | 229 | A01267 | A16691 | 191 |
| A01267 | A16707 | 257 | A01267 | A16788 | 385 |
| A01267 | A16815 | 200 | A01267 | A16824 | 191 |
| A01267 | A16833 | 235 | A01267 | A16860 | 283 |
| A01267 | A16942 | 180 | A01267 | A17133 | 353 |
| A01268 | A01279 | 458 | A01268 | A01291 | 291 |
| A01268 | A01295 | 528 | A01268 | A01299 | 267 |
| A01268 | A01334 | 179 | A01268 | A01391 | 156 |
| A01268 | A01434 | 322 | A01268 | A01451 | 483 |
| A01268 | A01468 | 218 | A01268 | A01488 | 162 |
| A01268 | A01598 | 434 | A01268 | A01612 | 491 |
| A01268 | A01615 | 449 | A01268 | A01649 | 270 |
| A01268 | A01660 | 210 | A01268 | A02388 | 170 |
| A01268 | A02487 | 185 | A01268 | A03298 | 402 |
| A01268 | A03398 | 188 | A01268 | A03494 | 517 |
| A01268 | A03569 | 491 | A01268 | A03817 | 208 |
| A01268 | A04446 | 168 | A01268 | A04790 | 168 |
| A01268 | A06698 | 224 | A01268 | A06907 | 247 |
| A01268 | A07604 | 277 | A01268 | A07898 | 156 |
| A01268 | A08137 | 491 | A01268 | A08201 | 156 |
| A01268 | A08327 | 523 | A01268 | A08400 | 173 |
| A01268 | A08431 | 538 | A01268 | A08517 | 286 |
| A01268 | A08542 | 156 | A01268 | A08571 | 491 |
| A01268 | A08756 | 391 | A01268 | A09591 | 366 |
| A01268 | A10250 | 454 | A01268 | A10529 | 208 |
| A01268 | A10853 | 440 | A01268 | A11496 | 324 |
| A01268 | A11497 | 156 | A01268 | A11648 | 171 |
| A01268 | A11704 | 171 | A01268 | A11965 | 391 |
| A01268 | A12005 | 274 | A01268 | A12070 | 249 |
| A01268 | A12082 | 490 | A01268 | A12189 | 429 |
| A01268 | A12202 | 488 | A01268 | A12757 | 760 |
| A01268 | A13171 | 274 | A01268 | A13311 | 156 |
| A01268 | A13510 | 491 | A01268 | A13928 | 252 |
| A01268 | A13989 | 484 | A01268 | A14148 | 433 |
| A01268 | A14178 | 541 | A01268 | A14184 | 228 |
| A01268 | A14220 | 182 | A01268 | A14221 | 399 |
| A01268 | A14241 | 480 | A01268 | A14255 | 489 |
| A01268 | A14257 | 491 | A01268 | A14408 | 154 |
| A01268 | A14476 | 425 | A01268 | A14728 | 491 |
| A01268 | A14986 | 490 | A01268 | A15034 | 259 |
| A01268 | A15266 | 191 | A01268 | A15297 | 490 |

|        |        |     |        |        |     |
|--------|--------|-----|--------|--------|-----|
| A01268 | A15323 | 215 | A01268 | A15324 | 185 |
| A01268 | A15338 | 402 | A01268 | A15353 | 374 |
| A01268 | A15366 | 208 | A01268 | A15559 | 428 |
| A01268 | A15629 | 489 | A01268 | A15710 | 380 |
| A01268 | A15729 | 322 | A01268 | A15752 | 318 |
| A01268 | A15764 | 204 | A01268 | A15779 | 168 |
| A01268 | A16137 | 218 | A01268 | A16320 | 338 |
| A01268 | A16632 | 195 | A01268 | A16685 | 409 |
| A01268 | A16699 | 156 | A01268 | A16774 | 184 |
| A01268 | A16844 | 256 | A01269 | A01296 | 179 |
| A01269 | A01375 | 479 | A01269 | A01508 | 319 |
| A01269 | A01622 | 367 | A01269 | A01699 | 241 |
| A01269 | A01741 | 396 | A01269 | A02468 | 217 |
| A01269 | A02859 | 408 | A01269 | A02961 | 163 |
| A01269 | A03119 | 285 | A01269 | A03259 | 452 |
| A01269 | A03922 | 213 | A01269 | A05332 | 423 |
| A01269 | A05334 | 185 | A01269 | A05832 | 183 |
| A01269 | A05873 | 368 | A01269 | A06289 | 157 |
| A01269 | A06472 | 419 | A01269 | A06752 | 313 |
| A01269 | A06819 | 205 | A01269 | A06829 | 490 |
| A01269 | A06924 | 485 | A01269 | A07232 | 445 |
| A01269 | A07889 | 446 | A01269 | A08820 | 247 |
| A01269 | A09135 | 262 | A01269 | A09257 | 338 |
| A01269 | A09276 | 447 | A01269 | A09714 | 424 |
| A01269 | A11411 | 286 | A01269 | A11830 | 486 |
| A01269 | A13969 | 182 | A01269 | A14336 | 484 |
| A01269 | A14803 | 413 | A01269 | A14810 | 483 |
| A01269 | A15837 | 385 | A01269 | A16068 | 356 |
| A01269 | A16626 | 352 | A01269 | A16635 | 281 |
| A01269 | A16748 | 307 | A01269 | A16753 | 348 |
| A01270 | A01335 | 263 | A01270 | A01369 | 217 |
| A01270 | A01411 | 249 | A01270 | A01579 | 586 |
| A01270 | A01601 | 588 | A01270 | A01671 | 191 |
| A01270 | A02737 | 217 | A01270 | A03859 | 200 |
| A01270 | A05501 | 217 | A01270 | A06534 | 241 |
| A01270 | A06814 | 586 | A01270 | A06965 | 200 |
| A01270 | A06973 | 587 | A01270 | A07016 | 238 |
| A01270 | A07047 | 241 | A01270 | A07398 | 550 |
| A01270 | A07726 | 180 | A01270 | A08131 | 566 |
| A01270 | A08359 | 511 | A01270 | A08369 | 588 |
| A01270 | A08408 | 402 | A01270 | A08457 | 271 |
| A01270 | A08466 | 463 | A01270 | A08476 | 328 |
| A01270 | A08501 | 219 | A01270 | A08543 | 353 |
| A01270 | A09308 | 241 | A01270 | A09322 | 241 |
| A01270 | A09620 | 326 | A01270 | A11562 | 539 |
| A01270 | A11572 | 276 | A01270 | A11728 | 588 |

|        |        |     |        |        |     |
|--------|--------|-----|--------|--------|-----|
| A01270 | A11861 | 200 | A01270 | A12011 | 217 |
| A01270 | A12227 | 241 | A01270 | A12270 | 438 |
| A01270 | A13063 | 199 | A01270 | A13333 | 200 |
| A01270 | A13357 | 256 | A01270 | A13375 | 221 |
| A01270 | A13710 | 319 | A01270 | A14167 | 226 |
| A01270 | A14176 | 462 | A01270 | A15202 | 283 |
| A01270 | A15225 | 180 | A01270 | A15268 | 577 |
| A01270 | A15377 | 243 | A01270 | A15381 | 586 |
| A01270 | A15661 | 227 | A01270 | A15711 | 174 |
| A01270 | A15732 | 160 | A01270 | A17133 | 200 |
| A01271 | A01413 | 162 | A01271 | A01422 | 323 |
| A01271 | A01606 | 171 | A01271 | A02877 | 267 |
| A01271 | A08335 | 218 | A01271 | A08738 | 240 |
| A01271 | A11973 | 355 | A01271 | A14597 | 383 |
| A01271 | A14701 | 664 | A01271 | A14819 | 544 |
| A01271 | A15519 | 383 | A01271 | A15535 | 196 |
| A01272 | A01277 | 424 | A01272 | A01347 | 348 |
| A01272 | A01481 | 491 | A01272 | A01482 | 460 |
| A01272 | A01508 | 456 | A01272 | A02432 | 224 |
| A01272 | A02718 | 316 | A01272 | A02821 | 390 |
| A01272 | A02940 | 377 | A01272 | A03004 | 285 |
| A01272 | A03027 | 277 | A01272 | A03156 | 238 |
| A01272 | A03477 | 385 | A01272 | A03586 | 221 |
| A01272 | A03843 | 163 | A01272 | A03858 | 188 |
| A01272 | A03863 | 184 | A01272 | A04108 | 165 |
| A01272 | A04211 | 202 | A01272 | A04307 | 216 |
| A01272 | A04628 | 386 | A01272 | A04791 | 263 |
| A01272 | A04880 | 174 | A01272 | A05007 | 224 |
| A01272 | A05020 | 374 | A01272 | A05289 | 262 |
| A01272 | A05310 | 230 | A01272 | A05472 | 419 |
| A01272 | A05516 | 380 | A01272 | A05573 | 224 |
| A01272 | A05738 | 156 | A01272 | A06359 | 462 |
| A01272 | A06360 | 339 | A01272 | A06630 | 281 |
| A01272 | A06635 | 188 | A01272 | A06700 | 210 |
| A01272 | A06914 | 174 | A01272 | A06979 | 274 |
| A01272 | A07109 | 446 | A01272 | A07122 | 355 |
| A01272 | A07304 | 308 | A01272 | A07322 | 302 |
| A01272 | A07520 | 171 | A01272 | A07554 | 323 |
| A01272 | A07688 | 469 | A01272 | A07736 | 185 |
| A01272 | A07771 | 414 | A01272 | A07800 | 371 |
| A01272 | A07849 | 443 | A01272 | A09632 | 291 |
| A01272 | A09878 | 272 | A01272 | A09879 | 314 |
| A01272 | A10441 | 306 | A01272 | A10443 | 307 |
| A01272 | A10456 | 313 | A01272 | A10703 | 274 |
| A01272 | A10712 | 224 | A01272 | A10714 | 330 |
| A01272 | A10866 | 317 | A01272 | A10885 | 288 |



|        |        |     |        |        |     |
|--------|--------|-----|--------|--------|-----|
| A01272 | A11309 | 460 | A01272 | A11325 | 251 |
| A01272 | A11381 | 394 | A01272 | A13314 | 411 |
| A01272 | A13326 | 324 | A01272 | A13979 | 190 |
| A01272 | A15282 | 475 | A01272 | A15507 | 286 |
| A01272 | A15611 | 339 | A01272 | A15637 | 255 |
| A01272 | A15874 | 316 | A01272 | A16028 | 290 |
| A01272 | A16419 | 405 | A01272 | A16529 | 285 |
| A01272 | A16767 | 408 | A01272 | A16959 | 234 |
| A01272 | A17040 | 207 | A01272 | A17163 | 386 |
| A01273 | A01274 | 316 | A01273 | A01691 | 338 |
| A01273 | A03611 | 180 | A01273 | A05865 | 364 |
| A01273 | A06864 | 201 | A01273 | A10156 | 329 |
| A01273 | A14496 | 259 | A01274 | A01451 | 377 |
| A01274 | A02120 | 268 | A01274 | A02734 | 229 |
| A01274 | A02749 | 180 | A01274 | A03246 | 176 |
| A01274 | A04074 | 168 | A01274 | A04442 | 195 |
| A01274 | A04449 | 165 | A01274 | A04900 | 491 |
| A01274 | A05009 | 160 | A01274 | A05288 | 485 |
| A01274 | A06648 | 157 | A01274 | A06859 | 291 |
| A01274 | A08679 | 152 | A01274 | A10156 | 185 |
| A01274 | A10854 | 154 | A01274 | A10894 | 165 |
| A01274 | A11920 | 177 | A01274 | A12111 | 260 |
| A01274 | A12365 | 290 | A01274 | A14408 | 294 |
| A01274 | A14485 | 223 | A01274 | A14643 | 357 |
| A01274 | A15257 | 276 | A01274 | A15696 | 246 |
| A01274 | A15905 | 302 | A01274 | A16847 | 168 |
| A01275 | A01291 | 256 | A01275 | A01315 | 63  |
| A01275 | A01414 | 277 | A01275 | A01457 | 438 |
| A01275 | A01473 | 489 | A01275 | A01496 | 446 |
| A01275 | A01570 | 450 | A01275 | A01571 | 323 |
| A01275 | A01572 | 972 | A01275 | A01699 | 278 |
| A01275 | A01718 | 227 | A01275 | A01822 | 317 |
| A01275 | A02026 | 456 | A01275 | A02093 | 479 |
| A01275 | A02156 | 407 | A01275 | A02188 | 205 |
| A01275 | A02346 | 302 | A01275 | A02400 | 179 |
| A01275 | A02518 | 853 | A01275 | A02786 | 432 |
| A01275 | A03104 | 430 | A01275 | A03188 | 486 |
| A01275 | A03313 | 813 | A01275 | A03331 | 945 |
| A01275 | A03625 | 180 | A01275 | A04084 | 291 |
| A01275 | A04540 | 204 | A01275 | A04715 | 486 |
| A01275 | A04931 | 159 | A01275 | A05095 | 173 |
| A01275 | A05220 | 193 | A01275 | A05328 | 258 |
| A01275 | A05501 | 159 | A01275 | A06082 | 490 |
| A01275 | A06092 | 323 | A01275 | A06100 | 490 |
| A01275 | A06314 | 338 | A01275 | A06466 | 200 |
| A01275 | A06828 | 193 | A01275 | A06958 | 193 |

|        |        |     |        |        |     |
|--------|--------|-----|--------|--------|-----|
| A01275 | A07051 | 491 | A01275 | A07183 | 484 |
| A01275 | A07209 | 428 | A01275 | A07282 | 491 |
| A01275 | A07311 | 439 | A01275 | A07490 | 163 |
| A01275 | A07641 | 212 | A01275 | A07836 | 152 |
| A01275 | A08452 | 177 | A01275 | A09414 | 443 |
| A01275 | A09633 | 783 | A01275 | A09644 | 480 |
| A01275 | A09702 | 303 | A01275 | A09852 | 326 |
| A01275 | A10502 | 412 | A01275 | A10532 | 480 |
| A01275 | A10834 | 163 | A01275 | A11420 | 312 |
| A01275 | A11662 | 168 | A01275 | A12383 | 355 |
| A01275 | A12723 | 201 | A01275 | A13002 | 283 |
| A01275 | A13146 | 286 | A01275 | A13369 | 204 |
| A01275 | A14216 | 491 | A01275 | A14251 | 159 |
| A01275 | A14300 | 212 | A01275 | A14430 | 485 |
| A01275 | A15401 | 352 | A01275 | A15658 | 168 |
| A01275 | A15660 | 486 | A01275 | A15684 | 491 |
| A01275 | A15839 | 226 | A01275 | A15927 | 238 |
| A01275 | A15931 | 486 | A01275 | A16218 | 352 |
| A01275 | A16437 | 159 | A01275 | A16768 | 157 |
| A01275 | A17147 | 154 | A01275 | A17198 | 364 |
| A01276 | A01280 | 207 | A01276 | A01431 | 414 |
| A01276 | A01481 | 430 | A01276 | A01526 | 227 |
| A01276 | A01543 | 201 | A01276 | A01551 | 406 |
| A01276 | A01557 | 461 | A01276 | A01566 | 180 |
| A01276 | A01578 | 420 | A01276 | A01630 | 291 |
| A01276 | A01632 | 430 | A01276 | A01768 | 414 |
| A01276 | A01772 | 176 | A01276 | A01870 | 265 |
| A01276 | A01916 | 201 | A01276 | A01953 | 296 |
| A01276 | A02188 | 446 | A01276 | A02215 | 188 |
| A01276 | A02221 | 413 | A01276 | A02228 | 299 |
| A01276 | A02240 | 491 | A01276 | A02282 | 252 |
| A01276 | A02283 | 486 | A01276 | A02303 | 468 |
| A01276 | A02333 | 168 | A01276 | A02458 | 252 |
| A01276 | A02526 | 347 | A01276 | A02624 | 205 |
| A01276 | A02642 | 412 | A01276 | A02686 | 188 |
| A01276 | A02706 | 187 | A01276 | A02776 | 199 |
| A01276 | A03056 | 152 | A01276 | A03068 | 241 |
| A01276 | A03080 | 319 | A01276 | A03093 | 473 |
| A01276 | A03107 | 317 | A01276 | A03121 | 326 |
| A01276 | A03177 | 157 | A01276 | A03210 | 324 |
| A01276 | A03224 | 302 | A01276 | A03239 | 491 |
| A01276 | A03351 | 308 | A01276 | A03384 | 227 |
| A01276 | A03413 | 477 | A01276 | A03447 | 488 |
| A01276 | A03689 | 246 | A01276 | A03721 | 263 |
| A01276 | A03735 | 465 | A01276 | A03742 | 191 |
| A01276 | A03746 | 488 | A01276 | A03766 | 391 |

|        |        |     |        |        |     |
|--------|--------|-----|--------|--------|-----|
| A01276 | A03785 | 308 | A01276 | A03900 | 475 |
| A01276 | A03935 | 281 | A01276 | A03948 | 351 |
| A01276 | A03984 | 241 | A01276 | A04130 | 358 |
| A01276 | A04195 | 296 | A01276 | A04202 | 306 |
| A01276 | A04217 | 160 | A01276 | A04279 | 162 |
| A01276 | A04305 | 156 | A01276 | A04349 | 363 |
| A01276 | A04543 | 210 | A01276 | A04609 | 171 |
| A01276 | A04671 | 191 | A01276 | A04710 | 470 |
| A01276 | A04715 | 294 | A01276 | A04832 | 184 |
| A01276 | A04870 | 202 | A01276 | A04903 | 159 |
| A01276 | A04944 | 329 | A01276 | A05418 | 167 |
| A01276 | A05438 | 234 | A01276 | A05603 | 204 |
| A01276 | A05795 | 374 | A01276 | A05891 | 256 |
| A01276 | A05927 | 347 | A01276 | A06293 | 491 |
| A01276 | A06415 | 318 | A01276 | A06480 | 296 |
| A01276 | A06488 | 154 | A01276 | A06571 | 347 |
| A01276 | A06701 | 369 | A01276 | A06708 | 180 |
| A01276 | A06739 | 162 | A01276 | A06747 | 162 |
| A01276 | A06956 | 252 | A01276 | A07010 | 412 |
| A01276 | A07101 | 163 | A01276 | A07218 | 258 |
| A01276 | A07384 | 201 | A01276 | A07529 | 486 |
| A01276 | A07764 | 477 | A01276 | A07765 | 334 |
| A01276 | A07969 | 347 | A01276 | A08002 | 302 |
| A01276 | A08453 | 324 | A01276 | A08458 | 296 |
| A01276 | A09065 | 369 | A01276 | A09072 | 152 |
| A01276 | A09245 | 377 | A01276 | A09354 | 347 |
| A01276 | A09380 | 232 | A01276 | A09552 | 481 |
| A01276 | A09768 | 191 | A01276 | A10236 | 369 |
| A01276 | A10585 | 207 | A01276 | A10651 | 179 |
| A01276 | A10742 | 260 | A01276 | A10943 | 398 |
| A01276 | A11216 | 458 | A01276 | A11291 | 307 |
| A01276 | A11477 | 234 | A01276 | A11950 | 187 |
| A01276 | A12455 | 347 | A01276 | A12524 | 347 |
| A01276 | A12526 | 334 | A01276 | A12542 | 430 |
| A01276 | A12936 | 452 | A01276 | A13369 | 419 |
| A01276 | A13453 | 369 | A01276 | A13903 | 168 |
| A01276 | A14125 | 462 | A01276 | A14190 | 229 |
| A01276 | A14247 | 160 | A01276 | A14362 | 394 |
| A01276 | A14366 | 402 | A01276 | A14372 | 491 |
| A01276 | A14380 | 286 | A01276 | A14381 | 491 |
| A01276 | A14384 | 241 | A01276 | A14394 | 422 |
| A01276 | A14418 | 274 | A01276 | A14554 | 477 |
| A01276 | A14600 | 302 | A01276 | A14602 | 369 |
| A01276 | A14643 | 473 | A01276 | A14648 | 374 |
| A01276 | A14654 | 180 | A01276 | A14767 | 369 |
| A01276 | A15258 | 223 | A01276 | A15277 | 157 |

|        |        |     |        |        |     |
|--------|--------|-----|--------|--------|-----|
| A01276 | A15287 | 226 | A01276 | A15292 | 218 |
| A01276 | A15358 | 159 | A01276 | A15425 | 307 |
| A01276 | A15466 | 291 | A01276 | A15470 | 279 |
| A01276 | A15475 | 483 | A01276 | A15498 | 235 |
| A01276 | A15642 | 285 | A01276 | A15790 | 412 |
| A01276 | A15795 | 271 | A01276 | A15819 | 168 |
| A01276 | A15827 | 252 | A01276 | A16074 | 160 |
| A01276 | A16267 | 417 | A01276 | A16417 | 200 |
| A01276 | A16562 | 369 | A01276 | A17052 | 369 |
| A01277 | A01279 | 446 | A01277 | A01351 | 154 |
| A01277 | A01485 | 160 | A01277 | A01508 | 221 |
| A01277 | A01548 | 267 | A01277 | A01629 | 204 |
| A01277 | A01690 | 246 | A01277 | A01722 | 180 |
| A01277 | A01855 | 491 | A01277 | A01879 | 171 |
| A01277 | A02111 | 191 | A01277 | A02142 | 281 |
| A01277 | A02143 | 486 | A01277 | A02305 | 217 |
| A01277 | A02313 | 228 | A01277 | A02415 | 340 |
| A01277 | A02423 | 229 | A01277 | A02424 | 195 |
| A01277 | A02429 | 256 | A01277 | A02454 | 152 |
| A01277 | A02465 | 201 | A01277 | A02575 | 177 |
| A01277 | A02897 | 383 | A01277 | A03107 | 157 |
| A01277 | A03209 | 162 | A01277 | A03310 | 299 |
| A01277 | A03314 | 187 | A01277 | A03458 | 279 |
| A01277 | A03477 | 372 | A01277 | A03578 | 196 |
| A01277 | A03586 | 408 | A01277 | A03639 | 184 |
| A01277 | A03656 | 313 | A01277 | A03749 | 461 |
| A01277 | A03750 | 441 | A01277 | A03818 | 185 |
| A01277 | A03861 | 202 | A01277 | A03873 | 215 |
| A01277 | A04092 | 232 | A01277 | A04163 | 238 |
| A01277 | A04218 | 294 | A01277 | A04223 | 302 |
| A01277 | A04291 | 396 | A01277 | A04307 | 200 |
| A01277 | A04423 | 288 | A01277 | A04562 | 246 |
| A01277 | A04600 | 230 | A01277 | A04605 | 340 |
| A01277 | A05007 | 208 | A01277 | A05310 | 345 |
| A01277 | A06359 | 439 | A01277 | A06648 | 185 |
| A01277 | A06735 | 257 | A01277 | A06914 | 157 |
| A01277 | A07138 | 286 | A01277 | A07553 | 173 |
| A01277 | A07688 | 418 | A01277 | A08447 | 352 |
| A01277 | A09241 | 240 | A01277 | A09480 | 308 |
| A01277 | A09878 | 258 | A01277 | A10673 | 433 |
| A01277 | A10681 | 283 | A01277 | A11063 | 361 |
| A01277 | A11304 | 391 | A01277 | A12854 | 213 |
| A01277 | A14007 | 491 | A01277 | A14072 | 157 |
| A01277 | A14190 | 213 | A01277 | A14368 | 266 |
| A01277 | A15230 | 221 | A01277 | A15394 | 207 |
| A01277 | A15498 | 191 | A01277 | A16027 | 174 |

|        |        |     |        |        |     |
|--------|--------|-----|--------|--------|-----|
| A01278 | A01287 | 165 | A01278 | A01291 | 229 |
| A01278 | A01466 | 283 | A01278 | A01476 | 218 |
| A01278 | A01530 | 177 | A01278 | A01582 | 384 |
| A01278 | A01593 | 446 | A01278 | A01598 | 165 |
| A01278 | A01829 | 191 | A01278 | A01985 | 179 |
| A01278 | A02061 | 371 | A01278 | A02098 | 229 |
| A01278 | A02126 | 267 | A01278 | A02143 | 270 |
| A01278 | A02148 | 411 | A01278 | A02203 | 333 |
| A01278 | A02229 | 174 | A01278 | A02268 | 182 |
| A01278 | A02425 | 88  | A01278 | A02454 | 361 |
| A01278 | A02865 | 235 | A01278 | A03041 | 199 |
| A01278 | A03043 | 388 | A01278 | A03047 | 241 |
| A01278 | A03054 | 422 | A01278 | A03055 | 229 |
| A01278 | A03084 | 201 | A01278 | A03163 | 256 |
| A01278 | A03186 | 375 | A01278 | A03296 | 177 |
| A01278 | A03477 | 168 | A01278 | A03726 | 256 |
| A01278 | A03750 | 334 | A01278 | A03767 | 183 |
| A01278 | A03885 | 154 | A01278 | A03932 | 184 |
| A01278 | A04133 | 198 | A01278 | A04180 | 224 |
| A01278 | A04337 | 196 | A01278 | A04487 | 168 |
| A01278 | A04647 | 344 | A01278 | A04666 | 281 |
| A01278 | A05095 | 383 | A01278 | A05210 | 205 |
| A01278 | A05222 | 262 | A01278 | A05249 | 224 |
| A01278 | A05476 | 402 | A01278 | A05497 | 408 |
| A01278 | A05570 | 168 | A01278 | A05577 | 485 |
| A01278 | A05646 | 193 | A01278 | A05887 | 196 |
| A01278 | A06032 | 306 | A01278 | A06122 | 170 |
| A01278 | A06250 | 297 | A01278 | A06644 | 160 |
| A01278 | A06825 | 208 | A01278 | A08358 | 199 |
| A01278 | A08932 | 229 | A01278 | A09078 | 286 |
| A01278 | A09202 | 130 | A01278 | A09305 | 262 |
| A01278 | A09552 | 212 | A01278 | A09603 | 277 |
| A01278 | A09764 | 160 | A01278 | A09801 | 489 |
| A01278 | A11309 | 205 | A01278 | A11440 | 219 |
| A01278 | A12395 | 357 | A01278 | A12824 | 157 |
| A01278 | A12998 | 319 | A01278 | A13690 | 357 |
| A01278 | A14119 | 227 | A01278 | A15282 | 288 |
| A01278 | A15295 | 320 | A01278 | A15498 | 718 |
| A01278 | A15624 | 405 | A01278 | A15641 | 163 |
| A01278 | A15911 | 152 | A01278 | A16358 | 229 |
| A01279 | A01295 | 546 | A01279 | A01304 | 394 |
| A01279 | A01351 | 695 | A01279 | A01424 | 538 |
| A01279 | A01442 | 463 | A01279 | A01451 | 183 |
| A01279 | A01492 | 186 | A01279 | A01612 | 364 |
| A01279 | A01615 | 168 | A01279 | A01802 | 185 |
| A01279 | A02535 | 491 | A01279 | A02731 | 439 |

|        |        |     |        |        |     |
|--------|--------|-----|--------|--------|-----|
| A01279 | A03656 | 191 | A01279 | A04212 | 152 |
| A01279 | A04848 | 165 | A01279 | A05331 | 486 |
| A01279 | A06204 | 491 | A01279 | A06347 | 490 |
| A01279 | A06698 | 215 | A01279 | A07180 | 162 |
| A01279 | A07244 | 445 | A01279 | A07432 | 566 |
| A01279 | A07524 | 174 | A01279 | A07625 | 196 |
| A01279 | A07718 | 167 | A01279 | A07924 | 174 |
| A01279 | A08183 | 447 | A01279 | A08447 | 491 |
| A01279 | A08807 | 460 | A01279 | A09664 | 221 |
| A01279 | A10317 | 243 | A01279 | A10465 | 299 |
| A01279 | A11544 | 174 | A01279 | A11831 | 174 |
| A01279 | A11832 | 174 | A01279 | A11913 | 353 |
| A01279 | A12849 | 210 | A01279 | A13357 | 193 |
| A01279 | A14088 | 223 | A01279 | A14186 | 491 |
| A01279 | A14255 | 350 | A01279 | A15323 | 171 |
| A01279 | A15370 | 491 | A01279 | A15374 | 491 |
| A01279 | A15724 | 491 | A01279 | A16664 | 340 |
| A01279 | A16703 | 490 | A01280 | A01332 | 171 |
| A01280 | A01365 | 307 | A01280 | A01404 | 475 |
| A01280 | A01425 | 171 | A01280 | A01565 | 480 |
| A01280 | A01655 | 274 | A01280 | A01661 | 193 |
| A01280 | A01707 | 162 | A01280 | A02065 | 152 |
| A01280 | A02138 | 294 | A01280 | A02494 | 218 |
| A01280 | A03070 | 491 | A01280 | A03224 | 290 |
| A01280 | A03387 | 228 | A01280 | A03388 | 412 |
| A01280 | A03390 | 352 | A01280 | A03421 | 196 |
| A01280 | A03601 | 276 | A01280 | A03690 | 174 |
| A01280 | A03697 | 160 | A01280 | A03704 | 157 |
| A01280 | A03721 | 249 | A01280 | A03728 | 367 |
| A01280 | A04079 | 162 | A01280 | A04147 | 157 |
| A01280 | A05327 | 291 | A01280 | A05375 | 260 |
| A01280 | A06001 | 401 | A01280 | A06280 | 393 |
| A01280 | A06502 | 456 | A01280 | A07096 | 168 |
| A01280 | A07229 | 157 | A01280 | A07427 | 241 |
| A01280 | A07785 | 483 | A01280 | A09227 | 224 |
| A01280 | A09556 | 190 | A01280 | A09775 | 366 |
| A01280 | A10618 | 385 | A01280 | A11227 | 267 |
| A01280 | A11477 | 221 | A01280 | A11544 | 171 |
| A01280 | A11952 | 491 | A01280 | A12472 | 213 |
| A01280 | A12897 | 162 | A01280 | A12904 | 326 |
| A01280 | A13207 | 156 | A01280 | A13466 | 491 |
| A01280 | A13905 | 266 | A01280 | A14006 | 243 |
| A01280 | A14017 | 363 | A01280 | A14018 | 441 |
| A01280 | A14038 | 213 | A01280 | A14041 | 299 |
| A01280 | A14049 | 418 | A01280 | A14050 | 299 |
| A01280 | A14080 | 201 | A01280 | A15309 | 215 |

|        |        |     |        |        |     |
|--------|--------|-----|--------|--------|-----|
| A01280 | A15312 | 251 | A01280 | A15396 | 159 |
| A01280 | A15470 | 266 | A01280 | A15475 | 317 |
| A01280 | A15624 | 385 | A01280 | A15684 | 423 |
| A01280 | A15843 | 451 | A01280 | A16075 | 456 |
| A01280 | A16086 | 168 | A01280 | A16114 | 196 |
| A01281 | A01328 | 156 | A01281 | A01668 | 335 |
| A01281 | A02859 | 435 | A01281 | A02951 | 180 |
| A01281 | A03043 | 123 | A01281 | A03170 | 230 |
| A01281 | A03794 | 165 | A01281 | A03874 | 198 |
| A01281 | A04052 | 174 | A01281 | A04236 | 230 |
| A01281 | A04461 | 224 | A01281 | A04759 | 337 |
| A01281 | A05249 | 456 | A01281 | A05627 | 205 |
| A01281 | A07053 | 266 | A01281 | A07794 | 274 |
| A01281 | A08954 | 201 | A01281 | A09111 | 210 |
| A01281 | A10612 | 308 | A01281 | A11144 | 188 |
| A01281 | A11445 | 210 | A01281 | A11789 | 324 |
| A01281 | A12041 | 170 | A01281 | A12824 | 372 |
| A01281 | A14009 | 241 | A01281 | A14014 | 185 |
| A01281 | A14245 | 399 | A01281 | A15322 | 491 |
| A01281 | A15334 | 157 | A01281 | A15342 | 232 |
| A01281 | A15357 | 361 | A01281 | A15398 | 279 |
| A01281 | A15401 | 168 | A01281 | A15402 | 188 |
| A01281 | A15430 | 313 | A01281 | A15608 | 224 |
| A01281 | A15840 | 373 | A01281 | A16051 | 201 |
| A01282 | A01291 | 488 | A01282 | A01306 | 364 |
| A01282 | A01345 | 226 | A01282 | A01437 | 423 |
| A01282 | A01478 | 278 | A01282 | A01479 | 170 |
| A01282 | A02059 | 216 | A01282 | A03413 | 170 |
| A01282 | A03492 | 384 | A01282 | A03518 | 424 |
| A01282 | A03567 | 281 | A01282 | A03688 | 468 |
| A01282 | A03775 | 229 | A01282 | A04440 | 210 |
| A01282 | A04831 | 246 | A01282 | A05094 | 162 |
| A01282 | A05800 | 251 | A01282 | A05894 | 256 |
| A01282 | A05914 | 157 | A01282 | A06223 | 157 |
| A01282 | A06620 | 176 | A01282 | A06761 | 179 |
| A01282 | A06909 | 294 | A01282 | A07242 | 386 |
| A01282 | A07454 | 329 | A01282 | A07897 | 358 |
| A01282 | A08192 | 152 | A01282 | A08559 | 485 |
| A01282 | A08683 | 247 | A01282 | A08894 | 188 |
| A01282 | A09022 | 180 | A01282 | A09322 | 388 |
| A01282 | A09674 | 223 | A01282 | A09780 | 235 |
| A01282 | A11390 | 281 | A01282 | A11438 | 252 |
| A01282 | A11986 | 177 | A01282 | A12099 | 294 |
| A01282 | A12210 | 343 | A01282 | A12225 | 294 |
| A01282 | A12226 | 318 | A01282 | A12233 | 345 |
| A01282 | A12270 | 190 | A01282 | A12401 | 263 |

|        |        |     |        |        |     |
|--------|--------|-----|--------|--------|-----|
| A01282 | A12722 | 152 | A01282 | A12853 | 193 |
| A01282 | A13115 | 427 | A01282 | A13207 | 162 |
| A01282 | A13753 | 202 | A01282 | A13857 | 185 |
| A01282 | A13905 | 152 | A01282 | A13932 | 451 |
| A01282 | A14133 | 358 | A01282 | A14188 | 329 |
| A01282 | A14471 | 473 | A01282 | A15157 | 427 |
| A01282 | A15218 | 419 | A01282 | A15221 | 162 |
| A01282 | A15235 | 485 | A01282 | A15725 | 177 |
| A01282 | A15743 | 333 | A01282 | A15926 | 218 |
| A01282 | A16153 | 274 | A01282 | A16300 | 260 |
| A01282 | A16363 | 212 | A01282 | A16631 | 291 |
| A01282 | A16961 | 363 | A01283 | A01309 | 449 |
| A01283 | A04867 | 221 | A01283 | A11346 | 162 |
| A01283 | A14192 | 285 | A01283 | A17013 | 279 |
| A01283 | A17033 | 344 | A01284 | A01595 | 179 |
| A01284 | A01639 | 162 | A01284 | A01798 | 163 |
| A01284 | A02535 | 167 | A01284 | A03070 | 188 |
| A01284 | A05646 | 340 | A01284 | A06347 | 171 |
| A01284 | A06907 | 286 | A01284 | A10392 | 274 |
| A01284 | A13977 | 281 | A01284 | A14257 | 174 |
| A01284 | A14265 | 185 | A01284 | A15376 | 207 |
| A01284 | A15851 | 279 | A01284 | A17198 | 226 |
| A01285 | A01334 | 224 | A01285 | A01406 | 382 |
| A01285 | A01434 | 323 | A01285 | A01707 | 466 |
| A01285 | A06584 | 443 | A01285 | A07524 | 400 |
| A01285 | A08137 | 319 | A01285 | A08971 | 279 |
| A01285 | A09485 | 283 | A01285 | A11452 | 369 |
| A01285 | A11930 | 245 | A01285 | A11938 | 373 |
| A01285 | A12660 | 168 | A01285 | A13484 | 218 |
| A01285 | A13870 | 252 | A01285 | A14006 | 465 |
| A01285 | A14835 | 258 | A01286 | A01307 | 191 |
| A01286 | A01310 | 130 | A01286 | A01428 | 170 |
| A01286 | A01520 | 77  | A01286 | A01521 | 112 |
| A01286 | A01733 | 420 | A01286 | A01737 | 173 |
| A01286 | A01832 | 483 | A01286 | A01846 | 246 |
| A01286 | A01847 | 180 | A01286 | A01849 | 235 |
| A01286 | A02008 | 232 | A01286 | A02015 | 293 |
| A01286 | A02121 | 202 | A01286 | A02470 | 167 |
| A01286 | A02481 | 263 | A01286 | A02574 | 168 |
| A01286 | A02579 | 165 | A01286 | A02605 | 213 |
| A01286 | A02697 | 224 | A01286 | A02802 | 213 |
| A01286 | A02864 | 317 | A01286 | A02883 | 281 |
| A01286 | A02961 | 126 | A01286 | A02975 | 167 |
| A01286 | A03019 | 85  | A01286 | A03271 | 266 |
| A01286 | A03335 | 182 | A01286 | A03749 | 152 |
| A01286 | A03784 | 221 | A01286 | A03830 | 489 |



|        |        |     |        |        |     |
|--------|--------|-----|--------|--------|-----|
| A01286 | A03831 | 316 | A01286 | A04600 | 188 |
| A01286 | A04614 | 198 | A01286 | A04731 | 447 |
| A01286 | A04822 | 243 | A01286 | A05102 | 185 |
| A01286 | A05203 | 293 | A01286 | A05297 | 216 |
| A01286 | A05349 | 201 | A01286 | A05400 | 358 |
| A01286 | A05917 | 190 | A01286 | A07130 | 413 |
| A01286 | A07186 | 263 | A01286 | A07697 | 534 |
| A01286 | A08732 | 182 | A01286 | A09026 | 379 |
| A01286 | A09988 | 452 | A01286 | A10085 | 157 |
| A01286 | A10510 | 290 | A01286 | A11129 | 380 |
| A01286 | A13216 | 249 | A01286 | A13980 | 243 |
| A01286 | A14198 | 339 | A01286 | A14364 | 157 |
| A01286 | A14402 | 219 | A01286 | A14431 | 463 |
| A01286 | A14438 | 249 | A01286 | A14647 | 217 |
| A01286 | A15314 | 82  | A01286 | A15386 | 395 |
| A01286 | A15639 | 160 | A01286 | A15846 | 296 |
| A01286 | A16547 | 249 | A01286 | A16594 | 396 |
| A01287 | A01346 | 383 | A01287 | A01399 | 612 |
| A01287 | A01403 | 188 | A01287 | A01443 | 247 |
| A01287 | A01496 | 477 | A01287 | A01502 | 475 |
| A01287 | A01504 | 484 | A01287 | A01618 | 216 |
| A01287 | A01644 | 162 | A01287 | A01667 | 483 |
| A01287 | A01668 | 196 | A01287 | A01704 | 167 |
| A01287 | A01711 | 491 | A01287 | A01785 | 154 |
| A01287 | A01815 | 299 | A01287 | A01819 | 486 |
| A01287 | A01822 | 408 | A01287 | A01825 | 486 |
| A01287 | A01827 | 285 | A01287 | A01832 | 160 |
| A01287 | A01833 | 299 | A01287 | A01853 | 308 |
| A01287 | A02151 | 195 | A01287 | A02526 | 335 |
| A01287 | A02994 | 589 | A01287 | A02996 | 399 |
| A01287 | A02997 | 408 | A01287 | A03440 | 436 |
| A01287 | A03671 | 162 | A01287 | A03676 | 402 |
| A01287 | A03716 | 279 | A01287 | A03740 | 235 |
| A01287 | A03809 | 372 | A01287 | A03856 | 477 |
| A01287 | A03902 | 195 | A01287 | A03959 | 403 |
| A01287 | A03981 | 438 | A01287 | A04056 | 263 |
| A01287 | A04898 | 210 | A01287 | A05445 | 172 |
| A01287 | A05449 | 151 | A01287 | A05982 | 156 |
| A01287 | A06173 | 191 | A01287 | A06424 | 335 |
| A01287 | A06543 | 372 | A01287 | A06546 | 168 |
| A01287 | A06938 | 162 | A01287 | A07041 | 358 |
| A01287 | A07102 | 335 | A01287 | A07113 | 63  |
| A01287 | A07187 | 154 | A01287 | A07196 | 268 |
| A01287 | A07321 | 201 | A01287 | A07881 | 372 |
| A01287 | A08572 | 210 | A01287 | A08794 | 291 |
| A01287 | A08938 | 285 | A01287 | A08968 | 319 |

|        |        |     |        |        |     |
|--------|--------|-----|--------|--------|-----|
| A01287 | A09321 | 285 | A01287 | A09353 | 291 |
| A01287 | A10598 | 301 | A01287 | A11677 | 247 |
| A01287 | A11712 | 319 | A01287 | A12454 | 358 |
| A01287 | A14216 | 383 | A01287 | A14479 | 208 |
| A01287 | A14482 | 219 | A01287 | A14699 | 590 |
| A01287 | A14778 | 589 | A01287 | A15379 | 435 |
| A01287 | A15624 | 479 | A01287 | A15662 | 372 |
| A01287 | A15668 | 224 | A01287 | A15684 | 457 |
| A01287 | A15933 | 157 | A01287 | A15951 | 226 |
| A01287 | A16371 | 156 | A01287 | A16587 | 247 |
| A01287 | A16976 | 151 | A01288 | A01289 | 274 |
| A01288 | A01291 | 348 | A01288 | A01425 | 269 |
| A01288 | A01496 | 139 | A01288 | A01601 | 461 |
| A01288 | A01718 | 167 | A01288 | A02494 | 260 |
| A01288 | A03571 | 249 | A01288 | A03581 | 208 |
| A01288 | A03596 | 228 | A01288 | A03981 | 63  |
| A01288 | A06814 | 491 | A01288 | A07412 | 286 |
| A01288 | A08052 | 241 | A01288 | A08273 | 310 |
| A01288 | A13992 | 157 | A01288 | A14202 | 176 |
| A01288 | A15673 | 188 | A01289 | A01291 | 475 |
| A01289 | A01425 | 491 | A01289 | A01527 | 177 |
| A01289 | A01540 | 252 | A01289 | A01544 | 168 |
| A01289 | A01607 | 241 | A01289 | A01623 | 205 |
| A01289 | A01632 | 201 | A01289 | A01652 | 177 |
| A01289 | A01730 | 491 | A01289 | A01850 | 353 |
| A01289 | A02288 | 215 | A01289 | A02304 | 358 |
| A01289 | A02361 | 160 | A01289 | A02494 | 491 |
| A01289 | A02502 | 488 | A01289 | A02508 | 198 |
| A01289 | A02609 | 245 | A01289 | A02698 | 485 |
| A01289 | A02702 | 477 | A01289 | A02704 | 491 |
| A01289 | A02819 | 270 | A01289 | A02827 | 235 |
| A01289 | A02844 | 368 | A01289 | A02860 | 351 |
| A01289 | A02914 | 163 | A01289 | A02962 | 154 |
| A01289 | A03032 | 152 | A01289 | A03160 | 162 |
| A01289 | A03264 | 173 | A01289 | A03304 | 347 |
| A01289 | A03337 | 177 | A01289 | A03451 | 490 |
| A01289 | A03571 | 430 | A01289 | A03581 | 405 |
| A01289 | A03611 | 265 | A01289 | A03740 | 461 |
| A01289 | A03971 | 212 | A01289 | A04006 | 462 |
| A01289 | A04033 | 335 | A01289 | A04078 | 486 |
| A01289 | A04101 | 316 | A01289 | A04133 | 475 |
| A01289 | A04257 | 212 | A01289 | A04375 | 485 |
| A01289 | A04417 | 468 | A01289 | A04529 | 179 |
| A01289 | A04710 | 297 | A01289 | A04747 | 266 |
| A01289 | A04787 | 198 | A01289 | A04849 | 163 |
| A01289 | A04901 | 176 | A01289 | A05030 | 208 |

|        |        |     |        |        |     |
|--------|--------|-----|--------|--------|-----|
| A01289 | A05575 | 226 | A01289 | A05811 | 173 |
| A01289 | A06147 | 258 | A01289 | A06324 | 198 |
| A01289 | A06501 | 198 | A01289 | A06595 | 408 |
| A01289 | A06596 | 177 | A01289 | A06623 | 447 |
| A01289 | A06719 | 180 | A01289 | A06814 | 491 |
| A01289 | A07004 | 419 | A01289 | A07192 | 314 |
| A01289 | A07311 | 899 | A01289 | A07641 | 160 |
| A01289 | A08578 | 180 | A01289 | A08635 | 389 |
| A01289 | A09047 | 296 | A01289 | A09092 | 185 |
| A01289 | A09105 | 339 | A01289 | A09510 | 283 |
| A01289 | A09544 | 258 | A01289 | A09620 | 353 |
| A01289 | A09817 | 283 | A01289 | A09900 | 458 |
| A01289 | A10133 | 274 | A01289 | A10201 | 208 |
| A01289 | A10307 | 265 | A01289 | A10645 | 274 |
| A01289 | A10899 | 247 | A01289 | A11149 | 383 |
| A01289 | A11262 | 198 | A01289 | A11543 | 302 |
| A01289 | A11932 | 432 | A01289 | A13232 | 463 |
| A01289 | A13927 | 177 | A01289 | A14033 | 274 |
| A01289 | A14038 | 174 | A01289 | A14073 | 230 |
| A01289 | A14125 | 311 | A01289 | A14642 | 491 |
| A01289 | A14643 | 401 | A01289 | A14771 | 313 |
| A01289 | A15035 | 335 | A01289 | A15241 | 450 |
| A01289 | A15606 | 232 | A01289 | A15837 | 232 |
| A01289 | A16054 | 188 | A01289 | A16068 | 489 |
| A01289 | A16099 | 489 | A01289 | A16158 | 296 |
| A01289 | A16723 | 187 | A01289 | A16738 | 299 |
| A01289 | A16835 | 240 | A01289 | A16887 | 258 |
| A01290 | A01345 | 393 | A01290 | A01454 | 491 |
| A01290 | A01479 | 434 | A01290 | A01514 | 190 |
| A01290 | A01568 | 491 | A01290 | A01580 | 460 |
| A01290 | A01657 | 185 | A01290 | A01687 | 462 |
| A01290 | A04081 | 196 | A01290 | A04111 | 279 |
| A01290 | A04715 | 269 | A01290 | A04905 | 213 |
| A01290 | A05024 | 276 | A01290 | A05438 | 350 |
| A01290 | A05918 | 374 | A01290 | A06752 | 294 |
| A01290 | A06778 | 475 | A01290 | A06819 | 475 |
| A01290 | A06889 | 188 | A01290 | A07004 | 486 |
| A01290 | A07073 | 462 | A01290 | A07232 | 177 |
| A01290 | A07242 | 491 | A01290 | A07444 | 285 |
| A01290 | A07495 | 361 | A01290 | A07687 | 469 |
| A01290 | A07709 | 485 | A01290 | A07762 | 302 |
| A01290 | A07897 | 227 | A01290 | A08409 | 314 |
| A01290 | A09001 | 159 | A01290 | A09311 | 462 |
| A01290 | A09666 | 468 | A01290 | A09671 | 167 |
| A01290 | A09995 | 346 | A01290 | A11057 | 425 |
| A01290 | A11167 | 255 | A01290 | A11292 | 329 |

|        |        |     |        |        |     |
|--------|--------|-----|--------|--------|-----|
| A01290 | A11851 | 159 | A01290 | A12047 | 486 |
| A01290 | A12584 | 425 | A01290 | A12825 | 171 |
| A01290 | A13513 | 455 | A01290 | A13894 | 283 |
| A01290 | A14222 | 151 | A01290 | A14266 | 217 |
| A01290 | A14270 | 177 | A01290 | A14281 | 490 |
| A01290 | A14903 | 213 | A01290 | A14917 | 201 |
| A01290 | A15626 | 369 | A01290 | A16187 | 157 |
| A01290 | A16423 | 297 | A01290 | A16585 | 249 |
| A01290 | A16587 | 195 | A01290 | A16695 | 274 |
| A01291 | A01292 | 228 | A01291 | A01294 | 491 |
| A01291 | A01295 | 154 | A01291 | A01299 | 177 |
| A01291 | A01306 | 582 | A01291 | A01309 | 180 |
| A01291 | A01317 | 232 | A01291 | A01335 | 491 |
| A01291 | A01337 | 154 | A01291 | A01338 | 715 |
| A01291 | A01354 | 491 | A01291 | A01365 | 462 |
| A01291 | A01369 | 245 | A01291 | A01374 | 324 |
| A01291 | A01384 | 435 | A01291 | A01392 | 491 |
| A01291 | A01393 | 259 | A01291 | A01406 | 293 |
| A01291 | A01415 | 292 | A01291 | A01416 | 480 |
| A01291 | A01418 | 471 | A01291 | A01425 | 620 |
| A01291 | A01429 | 562 | A01291 | A01430 | 414 |
| A01291 | A01431 | 491 | A01291 | A01433 | 491 |
| A01291 | A01436 | 488 | A01291 | A01437 | 491 |
| A01291 | A01445 | 229 | A01291 | A01446 | 297 |
| A01291 | A01447 | 262 | A01291 | A01448 | 307 |
| A01291 | A01449 | 480 | A01291 | A01457 | 533 |
| A01291 | A01458 | 527 | A01291 | A01464 | 566 |
| A01291 | A01468 | 572 | A01291 | A01470 | 491 |
| A01291 | A01487 | 263 | A01291 | A01488 | 443 |
| A01291 | A01490 | 283 | A01291 | A01492 | 969 |
| A01291 | A01495 | 472 | A01291 | A01496 | 491 |
| A01291 | A01506 | 303 | A01291 | A01512 | 899 |
| A01291 | A01527 | 899 | A01291 | A01538 | 258 |
| A01291 | A01539 | 483 | A01291 | A01540 | 475 |
| A01291 | A01541 | 219 | A01291 | A01546 | 235 |
| A01291 | A01555 | 400 | A01291 | A01558 | 946 |
| A01291 | A01560 | 481 | A01291 | A01562 | 899 |
| A01291 | A01569 | 491 | A01291 | A01572 | 199 |
| A01291 | A01577 | 271 | A01291 | A01579 | 572 |
| A01291 | A01586 | 572 | A01291 | A01588 | 951 |
| A01291 | A01593 | 904 | A01291 | A01597 | 475 |
| A01291 | A01598 | 529 | A01291 | A01601 | 871 |
| A01291 | A01605 | 435 | A01291 | A01612 | 614 |
| A01291 | A01614 | 491 | A01291 | A01617 | 472 |
| A01291 | A01618 | 565 | A01291 | A01620 | 424 |
| A01291 | A01638 | 933 | A01291 | A01640 | 257 |

|        |        |     |        |        |     |
|--------|--------|-----|--------|--------|-----|
| A01291 | A01649 | 491 | A01291 | A01668 | 180 |
| A01291 | A01684 | 462 | A01291 | A01692 | 899 |
| A01291 | A01700 | 224 | A01291 | A01707 | 485 |
| A01291 | A01718 | 945 | A01291 | A01740 | 446 |
| A01291 | A01770 | 899 | A01291 | A01787 | 486 |
| A01291 | A01822 | 440 | A01291 | A01837 | 201 |
| A01291 | A02003 | 398 | A01291 | A02068 | 477 |
| A01291 | A02110 | 156 | A01291 | A02116 | 314 |
| A01291 | A02165 | 384 | A01291 | A02179 | 162 |
| A01291 | A02212 | 279 | A01291 | A02216 | 488 |
| A01291 | A02265 | 434 | A01291 | A02350 | 438 |
| A01291 | A02494 | 597 | A01291 | A02601 | 367 |
| A01291 | A02671 | 355 | A01291 | A02738 | 465 |
| A01291 | A02788 | 229 | A01291 | A02803 | 899 |
| A01291 | A02818 | 213 | A01291 | A02877 | 468 |
| A01291 | A02928 | 311 | A01291 | A02978 | 566 |
| A01291 | A02980 | 243 | A01291 | A03048 | 451 |
| A01291 | A03069 | 491 | A01291 | A03271 | 899 |
| A01291 | A03298 | 306 | A01291 | A03304 | 199 |
| A01291 | A03331 | 172 | A01291 | A03332 | 945 |
| A01291 | A03437 | 484 | A01291 | A03438 | 238 |
| A01291 | A03446 | 489 | A01291 | A03461 | 475 |
| A01291 | A03464 | 127 | A01291 | A03488 | 440 |
| A01291 | A03494 | 270 | A01291 | A03531 | 63  |
| A01291 | A03560 | 165 | A01291 | A03567 | 582 |
| A01291 | A03569 | 516 | A01291 | A03570 | 288 |
| A01291 | A03571 | 486 | A01291 | A03601 | 185 |
| A01291 | A03625 | 899 | A01291 | A03645 | 351 |
| A01291 | A03652 | 395 | A01291 | A03686 | 899 |
| A01291 | A03705 | 491 | A01291 | A03726 | 899 |
| A01291 | A03740 | 491 | A01291 | A03752 | 491 |
| A01291 | A03754 | 597 | A01291 | A03759 | 180 |
| A01291 | A03775 | 257 | A01291 | A03809 | 170 |
| A01291 | A03859 | 491 | A01291 | A03888 | 479 |
| A01291 | A03913 | 291 | A01291 | A03939 | 236 |
| A01291 | A03981 | 538 | A01291 | A04230 | 473 |
| A01291 | A04607 | 216 | A01291 | A04754 | 408 |
| A01291 | A04760 | 360 | A01291 | A04761 | 491 |
| A01291 | A04846 | 272 | A01291 | A05037 | 899 |
| A01291 | A05044 | 230 | A01291 | A05076 | 386 |
| A01291 | A05086 | 257 | A01291 | A05121 | 486 |
| A01291 | A05385 | 479 | A01291 | A05411 | 491 |
| A01291 | A05443 | 597 | A01291 | A05449 | 470 |
| A01291 | A05501 | 491 | A01291 | A05557 | 374 |
| A01291 | A05566 | 385 | A01291 | A05654 | 418 |
| A01291 | A05996 | 489 | A01291 | A06037 | 456 |

|        |        |     |        |        |     |
|--------|--------|-----|--------|--------|-----|
| A01291 | A06275 | 356 | A01291 | A06279 | 491 |
| A01291 | A06324 | 368 | A01291 | A06351 | 491 |
| A01291 | A06428 | 229 | A01291 | A06466 | 527 |
| A01291 | A06564 | 173 | A01291 | A06779 | 229 |
| A01291 | A06812 | 446 | A01291 | A06814 | 623 |
| A01291 | A06825 | 168 | A01291 | A06832 | 245 |
| A01291 | A06843 | 296 | A01291 | A06861 | 582 |
| A01291 | A06897 | 488 | A01291 | A06907 | 296 |
| A01291 | A06909 | 404 | A01291 | A06965 | 491 |
| A01291 | A06973 | 566 | A01291 | A07201 | 640 |
| A01291 | A07203 | 246 | A01291 | A07243 | 479 |
| A01291 | A07245 | 152 | A01291 | A07247 | 252 |
| A01291 | A07311 | 700 | A01291 | A07323 | 438 |
| A01291 | A07360 | 491 | A01291 | A07398 | 667 |
| A01291 | A07412 | 314 | A01291 | A07422 | 899 |
| A01291 | A07449 | 486 | A01291 | A07451 | 491 |
| A01291 | A07505 | 306 | A01291 | A07533 | 480 |
| A01291 | A07581 | 484 | A01291 | A07583 | 249 |
| A01291 | A07584 | 393 | A01291 | A07597 | 419 |
| A01291 | A07604 | 486 | A01291 | A07677 | 243 |
| A01291 | A07695 | 271 | A01291 | A07706 | 480 |
| A01291 | A07726 | 951 | A01291 | A07798 | 461 |
| A01291 | A08011 | 597 | A01291 | A08052 | 489 |
| A01291 | A08055 | 491 | A01291 | A08061 | 462 |
| A01291 | A08131 | 470 | A01291 | A08137 | 533 |
| A01291 | A08154 | 377 | A01291 | A08248 | 454 |
| A01291 | A08273 | 428 | A01291 | A08281 | 445 |
| A01291 | A08301 | 439 | A01291 | A08315 | 317 |
| A01291 | A08357 | 491 | A01291 | A08358 | 465 |
| A01291 | A08359 | 491 | A01291 | A08377 | 475 |
| A01291 | A08398 | 566 | A01291 | A08403 | 427 |
| A01291 | A08419 | 408 | A01291 | A08452 | 566 |
| A01291 | A08501 | 472 | A01291 | A08521 | 565 |
| A01291 | A08543 | 491 | A01291 | A08547 | 456 |
| A01291 | A08550 | 491 | A01291 | A08556 | 491 |
| A01291 | A08558 | 565 | A01291 | A08559 | 491 |
| A01291 | A08571 | 955 | A01291 | A08664 | 544 |
| A01291 | A08682 | 273 | A01291 | A08752 | 243 |
| A01291 | A08760 | 352 | A01291 | A08773 | 597 |
| A01291 | A08810 | 216 | A01291 | A08835 | 467 |
| A01291 | A08972 | 485 | A01291 | A08973 | 597 |
| A01291 | A08982 | 386 | A01291 | A09044 | 656 |
| A01291 | A09078 | 157 | A01291 | A09144 | 205 |
| A01291 | A09293 | 234 | A01291 | A09308 | 375 |
| A01291 | A09313 | 288 | A01291 | A09322 | 582 |
| A01291 | A09327 | 163 | A01291 | A09332 | 491 |

|        |        |     |        |        |     |
|--------|--------|-----|--------|--------|-----|
| A01291 | A09345 | 196 | A01291 | A09591 | 180 |
| A01291 | A09592 | 246 | A01291 | A09610 | 208 |
| A01291 | A09620 | 263 | A01291 | A09622 | 466 |
| A01291 | A09657 | 252 | A01291 | A09674 | 489 |
| A01291 | A09702 | 561 | A01291 | A09707 | 152 |
| A01291 | A09722 | 257 | A01291 | A09735 | 238 |
| A01291 | A09737 | 216 | A01291 | A09758 | 207 |
| A01291 | A09788 | 272 | A01291 | A09852 | 490 |
| A01291 | A09860 | 201 | A01291 | A09862 | 188 |
| A01291 | A10001 | 361 | A01291 | A10034 | 213 |
| A01291 | A10080 | 257 | A01291 | A10159 | 920 |
| A01291 | A10316 | 489 | A01291 | A10417 | 564 |
| A01291 | A10430 | 229 | A01291 | A10439 | 324 |
| A01291 | A10518 | 491 | A01291 | A10529 | 377 |
| A01291 | A10532 | 669 | A01291 | A10616 | 596 |
| A01291 | A10624 | 405 | A01291 | A10633 | 245 |
| A01291 | A10728 | 345 | A01291 | A10798 | 466 |
| A01291 | A10924 | 272 | A01291 | A10949 | 363 |
| A01291 | A11190 | 424 | A01291 | A11254 | 221 |
| A01291 | A11277 | 491 | A01291 | A11291 | 157 |
| A01291 | A11297 | 477 | A01291 | A11316 | 272 |
| A01291 | A11331 | 452 | A01291 | A11334 | 486 |
| A01291 | A11344 | 193 | A01291 | A11355 | 302 |
| A01291 | A11390 | 491 | A01291 | A11400 | 488 |
| A01291 | A11420 | 435 | A01291 | A11438 | 566 |
| A01291 | A11440 | 244 | A01291 | A11462 | 427 |
| A01291 | A11480 | 491 | A01291 | A11485 | 462 |
| A01291 | A11535 | 353 | A01291 | A11567 | 199 |
| A01291 | A11588 | 486 | A01291 | A11597 | 394 |
| A01291 | A11612 | 489 | A01291 | A11616 | 489 |
| A01291 | A11688 | 201 | A01291 | A11704 | 491 |
| A01291 | A11728 | 353 | A01291 | A11729 | 546 |
| A01291 | A11731 | 254 | A01291 | A11832 | 210 |
| A01291 | A11937 | 256 | A01291 | A11945 | 491 |
| A01291 | A11981 | 452 | A01291 | A11992 | 490 |
| A01291 | A12013 | 348 | A01291 | A12077 | 205 |
| A01291 | A12079 | 294 | A01291 | A12126 | 213 |
| A01291 | A12168 | 432 | A01291 | A12177 | 154 |
| A01291 | A12195 | 223 | A01291 | A12221 | 443 |
| A01291 | A12233 | 490 | A01291 | A12237 | 196 |
| A01291 | A12241 | 184 | A01291 | A12243 | 201 |
| A01291 | A12270 | 313 | A01291 | A12310 | 205 |
| A01291 | A12328 | 326 | A01291 | A12329 | 356 |
| A01291 | A12433 | 491 | A01291 | A12509 | 167 |
| A01291 | A12525 | 490 | A01291 | A12643 | 452 |
| A01291 | A12653 | 184 | A01291 | A12661 | 265 |

|        |        |     |        |        |     |
|--------|--------|-----|--------|--------|-----|
| A01291 | A12687 | 455 | A01291 | A12821 | 475 |
| A01291 | A12849 | 252 | A01291 | A12889 | 176 |
| A01291 | A12918 | 413 | A01291 | A12990 | 481 |
| A01291 | A13048 | 176 | A01291 | A13107 | 313 |
| A01291 | A13125 | 477 | A01291 | A13207 | 162 |
| A01291 | A13249 | 491 | A01291 | A13328 | 353 |
| A01291 | A13333 | 503 | A01291 | A13340 | 491 |
| A01291 | A13375 | 283 | A01291 | A13424 | 263 |
| A01291 | A13457 | 176 | A01291 | A13525 | 480 |
| A01291 | A13527 | 474 | A01291 | A13549 | 140 |
| A01291 | A13626 | 417 | A01291 | A13663 | 154 |
| A01291 | A13710 | 480 | A01291 | A13810 | 167 |
| A01291 | A13824 | 899 | A01291 | A13829 | 899 |
| A01291 | A13830 | 486 | A01291 | A13889 | 271 |
| A01291 | A13989 | 988 | A01291 | A13992 | 957 |
| A01291 | A14006 | 384 | A01291 | A14029 | 483 |
| A01291 | A14070 | 338 | A01291 | A14073 | 489 |
| A01291 | A14148 | 899 | A01291 | A14150 | 452 |
| A01291 | A14152 | 458 | A01291 | A14169 | 490 |
| A01291 | A14172 | 396 | A01291 | A14176 | 434 |
| A01291 | A14188 | 491 | A01291 | A14196 | 535 |
| A01291 | A14208 | 899 | A01291 | A14216 | 844 |
| A01291 | A14220 | 182 | A01291 | A14246 | 939 |
| A01291 | A14265 | 341 | A01291 | A14303 | 199 |
| A01291 | A14443 | 899 | A01291 | A14449 | 246 |
| A01291 | A14471 | 198 | A01291 | A14482 | 490 |
| A01291 | A14495 | 63  | A01291 | A14505 | 491 |
| A01291 | A14508 | 439 | A01291 | A14566 | 469 |
| A01291 | A14589 | 266 | A01291 | A14594 | 188 |
| A01291 | A14596 | 491 | A01291 | A14597 | 489 |
| A01291 | A14609 | 281 | A01291 | A14662 | 899 |
| A01291 | A14843 | 429 | A01291 | A15029 | 369 |
| A01291 | A15034 | 259 | A01291 | A15215 | 188 |
| A01291 | A15218 | 488 | A01291 | A15219 | 486 |
| A01291 | A15221 | 491 | A01291 | A15235 | 491 |
| A01291 | A15244 | 207 | A01291 | A15297 | 945 |
| A01291 | A15323 | 899 | A01291 | A15324 | 944 |
| A01291 | A15338 | 491 | A01291 | A15353 | 945 |
| A01291 | A15359 | 899 | A01291 | A15361 | 180 |
| A01291 | A15376 | 480 | A01291 | A15416 | 366 |
| A01291 | A15500 | 579 | A01291 | A15507 | 307 |
| A01291 | A15547 | 899 | A01291 | A15559 | 950 |
| A01291 | A15611 | 353 | A01291 | A15614 | 899 |
| A01291 | A15660 | 491 | A01291 | A15666 | 324 |
| A01291 | A15684 | 527 | A01291 | A15725 | 223 |
| A01291 | A15727 | 468 | A01291 | A15729 | 205 |



|        |        |     |        |        |     |
|--------|--------|-----|--------|--------|-----|
| A01291 | A15732 | 293 | A01291 | A15743 | 489 |
| A01291 | A15747 | 348 | A01291 | A15763 | 179 |
| A01291 | A15764 | 221 | A01291 | A15769 | 288 |
| A01291 | A15776 | 474 | A01291 | A15777 | 449 |
| A01291 | A15778 | 488 | A01291 | A15918 | 173 |
| A01291 | A15931 | 489 | A01291 | A15932 | 486 |
| A01291 | A15933 | 226 | A01291 | A15947 | 460 |
| A01291 | A15971 | 294 | A01291 | A15988 | 491 |
| A01291 | A16053 | 176 | A01291 | A16060 | 408 |
| A01291 | A16118 | 491 | A01291 | A16119 | 388 |
| A01291 | A16157 | 489 | A01291 | A16159 | 411 |
| A01291 | A16233 | 196 | A01291 | A16234 | 154 |
| A01291 | A16274 | 152 | A01291 | A16306 | 353 |
| A01291 | A16418 | 371 | A01291 | A16523 | 443 |
| A01291 | A16631 | 491 | A01291 | A16679 | 462 |
| A01291 | A16680 | 490 | A01291 | A16682 | 477 |
| A01291 | A16686 | 391 | A01291 | A16805 | 283 |
| A01291 | A16823 | 377 | A01291 | A16847 | 229 |
| A01291 | A17063 | 486 | A01291 | A17140 | 208 |
| A01291 | A17171 | 199 | A01291 | A17193 | 271 |
| A01292 | A01392 | 204 | A01292 | A01393 | 307 |
| A01292 | A01416 | 263 | A01292 | A01468 | 293 |
| A01292 | A08011 | 152 | A01292 | A11704 | 303 |
| A01292 | A13989 | 306 | A01292 | A14188 | 313 |
| A01293 | A01311 | 490 | A01293 | A01431 | 291 |
| A01293 | A01439 | 337 | A01293 | A01492 | 481 |
| A01293 | A01598 | 249 | A01293 | A01800 | 180 |
| A01293 | A01894 | 462 | A01293 | A02833 | 477 |
| A01293 | A03435 | 216 | A01293 | A03438 | 479 |
| A01293 | A03547 | 273 | A01293 | A03608 | 91  |
| A01293 | A03809 | 291 | A01293 | A04306 | 394 |
| A01293 | A04788 | 180 | A01293 | A04939 | 475 |
| A01293 | A05216 | 491 | A01293 | A05227 | 291 |
| A01293 | A06543 | 160 | A01293 | A07360 | 373 |
| A01293 | A07456 | 180 | A01293 | A07524 | 243 |
| A01293 | A07744 | 491 | A01293 | A07881 | 612 |
| A01293 | A07911 | 708 | A01293 | A08098 | 486 |
| A01293 | A08228 | 614 | A01293 | A08491 | 348 |
| A01293 | A08548 | 616 | A01293 | A08763 | 481 |
| A01293 | A11326 | 491 | A01293 | A11555 | 477 |
| A01293 | A13298 | 486 | A01293 | A13643 | 202 |
| A01293 | A14083 | 491 | A01293 | A14699 | 616 |
| A01293 | A14778 | 615 | A01293 | A15338 | 232 |
| A01293 | A15937 | 358 | A01293 | A16048 | 235 |
| A01294 | A01295 | 260 | A01294 | A01361 | 307 |
| A01294 | A01433 | 193 | A01294 | A01447 | 449 |

|        |        |     |        |        |     |
|--------|--------|-----|--------|--------|-----|
| A01294 | A01496 | 379 | A01294 | A02165 | 699 |
| A01294 | A03438 | 486 | A01294 | A03615 | 404 |
| A01294 | A03782 | 450 | A01294 | A03981 | 151 |
| A01294 | A05566 | 346 | A01294 | A06825 | 452 |
| A01294 | A06965 | 258 | A01294 | A07885 | 319 |
| A01294 | A08011 | 204 | A01294 | A08359 | 168 |
| A01294 | A08550 | 267 | A01294 | A08653 | 457 |
| A01294 | A08773 | 404 | A01294 | A08973 | 441 |
| A01294 | A09007 | 393 | A01294 | A09044 | 491 |
| A01294 | A10159 | 406 | A01294 | A11297 | 491 |
| A01294 | A11462 | 373 | A01294 | A12606 | 335 |
| A01294 | A13052 | 450 | A01294 | A13989 | 491 |
| A01294 | A14705 | 213 | A01294 | A14819 | 400 |
| A01294 | A14843 | 676 | A01294 | A15262 | 163 |
| A01294 | A15666 | 674 | A01294 | A15988 | 436 |
| A01294 | A16681 | 458 | A01294 | A16713 | 319 |
| A01294 | A17012 | 170 | A01295 | A01334 | 156 |
| A01295 | A01391 | 156 | A01295 | A01392 | 257 |
| A01295 | A01434 | 156 | A01295 | A01441 | 168 |
| A01295 | A01470 | 485 | A01295 | A01579 | 491 |
| A01295 | A01585 | 480 | A01295 | A01598 | 472 |
| A01295 | A01649 | 468 | A01295 | A01741 | 356 |
| A01295 | A03488 | 450 | A01295 | A03494 | 156 |
| A01295 | A03981 | 184 | A01295 | A04622 | 152 |
| A01295 | A05417 | 450 | A01295 | A07083 | 160 |
| A01295 | A07898 | 156 | A01295 | A08011 | 338 |
| A01295 | A08201 | 156 | A01295 | A08289 | 440 |
| A01295 | A08327 | 258 | A01295 | A08356 | 385 |
| A01295 | A08431 | 156 | A01295 | A08461 | 291 |
| A01295 | A08542 | 156 | A01295 | A08567 | 339 |
| A01295 | A08773 | 230 | A01295 | A08812 | 160 |
| A01295 | A08874 | 160 | A01295 | A10221 | 385 |
| A01295 | A11301 | 491 | A01295 | A11387 | 268 |
| A01295 | A11496 | 878 | A01295 | A11497 | 878 |
| A01295 | A11937 | 243 | A01295 | A12138 | 460 |
| A01295 | A12757 | 246 | A01295 | A13225 | 899 |
| A01295 | A13928 | 156 | A01295 | A13963 | 449 |
| A01295 | A14167 | 236 | A01295 | A14178 | 382 |
| A01295 | A14358 | 185 | A01295 | A14462 | 195 |
| A01295 | A15338 | 491 | A01295 | A15544 | 268 |
| A01295 | A15559 | 491 | A01295 | A15561 | 488 |
| A01295 | A15729 | 491 | A01295 | A15817 | 199 |
| A01295 | A16157 | 249 | A01295 | A16611 | 167 |
| A01295 | A16663 | 491 | A01295 | A16699 | 735 |
| A01295 | A16798 | 484 | A01295 | A16858 | 193 |
| A01295 | A17133 | 202 | A01296 | A01311 | 414 |

|        |        |     |        |        |     |
|--------|--------|-----|--------|--------|-----|
| A01296 | A01312 | 183 | A01296 | A01314 | 333 |
| A01296 | A01315 | 488 | A01296 | A01316 | 201 |
| A01296 | A01317 | 491 | A01296 | A01318 | 491 |
| A01296 | A01319 | 488 | A01296 | A01320 | 827 |
| A01296 | A01321 | 491 | A01296 | A01322 | 491 |
| A01296 | A01323 | 491 | A01296 | A01324 | 491 |
| A01296 | A01325 | 491 | A01296 | A01326 | 456 |
| A01296 | A01327 | 771 | A01296 | A01328 | 491 |
| A01296 | A01330 | 457 | A01296 | A01331 | 491 |
| A01296 | A01385 | 177 | A01296 | A01415 | 491 |
| A01296 | A01453 | 191 | A01296 | A01469 | 272 |
| A01296 | A01536 | 483 | A01296 | A01559 | 491 |
| A01296 | A01580 | 490 | A01296 | A01589 | 481 |
| A01296 | A01594 | 486 | A01296 | A01596 | 462 |
| A01296 | A01625 | 294 | A01296 | A01680 | 263 |
| A01296 | A01686 | 491 | A01296 | A01741 | 480 |
| A01296 | A02058 | 329 | A01296 | A02797 | 348 |
| A01296 | A03017 | 343 | A01296 | A03057 | 469 |
| A01296 | A03116 | 283 | A01296 | A03117 | 249 |
| A01296 | A03237 | 414 | A01296 | A03259 | 177 |
| A01296 | A03328 | 408 | A01296 | A03422 | 398 |
| A01296 | A04058 | 294 | A01296 | A04488 | 196 |
| A01296 | A04668 | 489 | A01296 | A04693 | 193 |
| A01296 | A04776 | 477 | A01296 | A04900 | 394 |
| A01296 | A05021 | 207 | A01296 | A05183 | 187 |
| A01296 | A05247 | 232 | A01296 | A05275 | 160 |
| A01296 | A05334 | 474 | A01296 | A05690 | 490 |
| A01296 | A06242 | 462 | A01296 | A06318 | 286 |
| A01296 | A06423 | 191 | A01296 | A06843 | 179 |
| A01296 | A06851 | 208 | A01296 | A06864 | 329 |
| A01296 | A06982 | 491 | A01296 | A07007 | 343 |
| A01296 | A07079 | 276 | A01296 | A07346 | 458 |
| A01296 | A07437 | 152 | A01296 | A07603 | 388 |
| A01296 | A07708 | 201 | A01296 | A07835 | 185 |
| A01296 | A08352 | 363 | A01296 | A08402 | 193 |
| A01296 | A08820 | 447 | A01296 | A08877 | 152 |
| A01296 | A08884 | 224 | A01296 | A08887 | 491 |
| A01296 | A09225 | 249 | A01296 | A09264 | 187 |
| A01296 | A09278 | 398 | A01296 | A09301 | 160 |
| A01296 | A09304 | 218 | A01296 | A09340 | 351 |
| A01296 | A09342 | 259 | A01296 | A09348 | 328 |
| A01296 | A09598 | 489 | A01296 | A10039 | 154 |
| A01296 | A10250 | 428 | A01296 | A10373 | 348 |
| A01296 | A10580 | 151 | A01296 | A10947 | 296 |
| A01296 | A11107 | 263 | A01296 | A11242 | 238 |
| A01296 | A11540 | 278 | A01296 | A13744 | 312 |

|        |        |     |        |        |     |
|--------|--------|-----|--------|--------|-----|
| A01296 | A13949 | 490 | A01296 | A14077 | 205 |
| A01296 | A14230 | 463 | A01296 | A14272 | 278 |
| A01296 | A14449 | 443 | A01296 | A14930 | 307 |
| A01296 | A15367 | 279 | A01296 | A15837 | 386 |
| A01296 | A15935 | 343 | A01296 | A15949 | 173 |
| A01296 | A16626 | 485 | A01296 | A16748 | 168 |
| A01296 | A17152 | 157 | A01297 | A01344 | 450 |
| A01297 | A01397 | 279 | A01297 | A01409 | 488 |
| A01297 | A01635 | 486 | A01297 | A01643 | 473 |
| A01297 | A01741 | 266 | A01297 | A01743 | 334 |
| A01297 | A01755 | 249 | A01297 | A01899 | 401 |
| A01297 | A01926 | 221 | A01297 | A02008 | 245 |
| A01297 | A02014 | 271 | A01297 | A02020 | 286 |
| A01297 | A02023 | 210 | A01297 | A02083 | 159 |
| A01297 | A02168 | 157 | A01297 | A02252 | 174 |
| A01297 | A02254 | 428 | A01297 | A02316 | 229 |
| A01297 | A02335 | 174 | A01297 | A02432 | 157 |
| A01297 | A02468 | 174 | A01297 | A02521 | 491 |
| A01297 | A02574 | 160 | A01297 | A02777 | 490 |
| A01297 | A02779 | 480 | A01297 | A02992 | 212 |
| A01297 | A03016 | 218 | A01297 | A03050 | 346 |
| A01297 | A03087 | 162 | A01297 | A03146 | 276 |
| A01297 | A03148 | 238 | A01297 | A03167 | 385 |
| A01297 | A03174 | 170 | A01297 | A03311 | 180 |
| A01297 | A03423 | 491 | A01297 | A03442 | 246 |
| A01297 | A03484 | 486 | A01297 | A03513 | 490 |
| A01297 | A04095 | 288 | A01297 | A04228 | 291 |
| A01297 | A04316 | 217 | A01297 | A04366 | 246 |
| A01297 | A04702 | 369 | A01297 | A04781 | 157 |
| A01297 | A04791 | 477 | A01297 | A04883 | 491 |
| A01297 | A04891 | 391 | A01297 | A04927 | 491 |
| A01297 | A05007 | 157 | A01297 | A05045 | 491 |
| A01297 | A05050 | 432 | A01297 | A05051 | 475 |
| A01297 | A05098 | 201 | A01297 | A05140 | 296 |
| A01297 | A05297 | 327 | A01297 | A05331 | 172 |
| A01297 | A05337 | 390 | A01297 | A05358 | 249 |
| A01297 | A05376 | 187 | A01297 | A05393 | 281 |
| A01297 | A05416 | 374 | A01297 | A05418 | 165 |
| A01297 | A05420 | 246 | A01297 | A05424 | 185 |
| A01297 | A05433 | 246 | A01297 | A05451 | 180 |
| A01297 | A05463 | 241 | A01297 | A05472 | 345 |
| A01297 | A05549 | 260 | A01297 | A05550 | 367 |
| A01297 | A05573 | 486 | A01297 | A05610 | 340 |
| A01297 | A05615 | 157 | A01297 | A05757 | 205 |
| A01297 | A05771 | 210 | A01297 | A05774 | 157 |
| A01297 | A05789 | 170 | A01297 | A05883 | 408 |

|        |        |     |        |        |     |
|--------|--------|-----|--------|--------|-----|
| A01297 | A05912 | 260 | A01297 | A05966 | 348 |
| A01297 | A05986 | 299 | A01297 | A06014 | 210 |
| A01297 | A06402 | 294 | A01297 | A06405 | 491 |
| A01297 | A06439 | 491 | A01297 | A06626 | 198 |
| A01297 | A06638 | 235 | A01297 | A06639 | 279 |
| A01297 | A06641 | 333 | A01297 | A06689 | 366 |
| A01297 | A06733 | 157 | A01297 | A06847 | 263 |
| A01297 | A06860 | 470 | A01297 | A06970 | 324 |
| A01297 | A06994 | 380 | A01297 | A07004 | 199 |
| A01297 | A07027 | 393 | A01297 | A07037 | 466 |
| A01297 | A07059 | 486 | A01297 | A07078 | 185 |
| A01297 | A07088 | 491 | A01297 | A07109 | 235 |
| A01297 | A07122 | 321 | A01297 | A07205 | 184 |
| A01297 | A07230 | 260 | A01297 | A07239 | 357 |
| A01297 | A07264 | 208 | A01297 | A07271 | 235 |
| A01297 | A07366 | 419 | A01297 | A07407 | 224 |
| A01297 | A07408 | 173 | A01297 | A07477 | 255 |
| A01297 | A07503 | 488 | A01297 | A07520 | 489 |
| A01297 | A07553 | 204 | A01297 | A07590 | 246 |
| A01297 | A07619 | 210 | A01297 | A07674 | 470 |
| A01297 | A07690 | 236 | A01297 | A07711 | 156 |
| A01297 | A07718 | 243 | A01297 | A07736 | 196 |
| A01297 | A07757 | 488 | A01297 | A07779 | 310 |
| A01297 | A07800 | 360 | A01297 | A07851 | 154 |
| A01297 | A07856 | 193 | A01297 | A07875 | 260 |
| A01297 | A07933 | 405 | A01297 | A08155 | 160 |
| A01297 | A08385 | 217 | A01297 | A08975 | 157 |
| A01297 | A09837 | 180 | A01297 | A09917 | 204 |
| A01297 | A10537 | 310 | A01297 | A10635 | 449 |
| A01297 | A10687 | 176 | A01297 | A10690 | 294 |
| A01297 | A10926 | 218 | A01297 | A12507 | 183 |
| A01297 | A14794 | 260 | A01297 | A14803 | 168 |
| A01297 | A14907 | 279 | A01297 | A16027 | 293 |
| A01297 | A16741 | 366 | A01297 | A17006 | 271 |
| A01297 | A17078 | 467 | A01298 | A02574 | 306 |
| A01298 | A03034 | 386 | A01298 | A03104 | 208 |
| A01298 | A03523 | 241 | A01298 | A03524 | 302 |
| A01298 | A03821 | 266 | A01298 | A06092 | 278 |
| A01298 | A06708 | 329 | A01298 | A07380 | 391 |
| A01298 | A07697 | 208 | A01299 | A01305 | 650 |
| A01299 | A01354 | 382 | A01299 | A01598 | 489 |
| A01299 | A01605 | 247 | A01299 | A01612 | 420 |
| A01299 | A01995 | 241 | A01299 | A02064 | 648 |
| A01299 | A02618 | 165 | A01299 | A02703 | 202 |
| A01299 | A02809 | 208 | A01299 | A02830 | 479 |
| A01299 | A02902 | 423 | A01299 | A02931 | 441 |

|        |        |     |        |        |     |
|--------|--------|-----|--------|--------|-----|
| A01299 | A03304 | 279 | A01299 | A03406 | 159 |
| A01299 | A03591 | 241 | A01299 | A03854 | 201 |
| A01299 | A03893 | 296 | A01299 | A04449 | 462 |
| A01299 | A05288 | 490 | A01299 | A05361 | 216 |
| A01299 | A06001 | 182 | A01299 | A06277 | 256 |
| A01299 | A06466 | 401 | A01299 | A06859 | 208 |
| A01299 | A06881 | 616 | A01299 | A07311 | 276 |
| A01299 | A07726 | 177 | A01299 | A07803 | 350 |
| A01299 | A08118 | 395 | A01299 | A08137 | 439 |
| A01299 | A08571 | 224 | A01299 | A08679 | 273 |
| A01299 | A08855 | 279 | A01299 | A08869 | 480 |
| A01299 | A08875 | 159 | A01299 | A08960 | 202 |
| A01299 | A09246 | 329 | A01299 | A09361 | 208 |
| A01299 | A10218 | 173 | A01299 | A10811 | 238 |
| A01299 | A11300 | 653 | A01299 | A11387 | 629 |
| A01299 | A11447 | 362 | A01299 | A11983 | 447 |
| A01299 | A12365 | 305 | A01299 | A12373 | 469 |
| A01299 | A13227 | 229 | A01299 | A13287 | 252 |
| A01299 | A13376 | 196 | A01299 | A13377 | 269 |
| A01299 | A13989 | 405 | A01299 | A14132 | 162 |
| A01299 | A14148 | 154 | A01299 | A14196 | 360 |
| A01299 | A14315 | 191 | A01299 | A14660 | 312 |
| A01299 | A15323 | 226 | A01299 | A15338 | 455 |
| A01299 | A15559 | 461 | A01299 | A15606 | 286 |
| A01299 | A15729 | 454 | A01299 | A16330 | 362 |
| A01299 | A16916 | 201 | A01299 | A17063 | 273 |
| A01300 | A01565 | 199 | A01300 | A02350 | 279 |
| A01300 | A02698 | 199 | A01300 | A02703 | 477 |
| A01300 | A03601 | 210 | A01300 | A03740 | 452 |
| A01300 | A03809 | 221 | A01300 | A05577 | 199 |
| A01300 | A07201 | 162 | A01300 | A08358 | 224 |
| A01300 | A08559 | 241 | A01300 | A08850 | 199 |
| A01300 | A09622 | 299 | A01300 | A09852 | 274 |
| A01300 | A11372 | 480 | A01300 | A12167 | 305 |
| A01300 | A13023 | 199 | A01300 | A14216 | 240 |
| A01300 | A14366 | 199 | A01300 | A14596 | 199 |
| A01300 | A15244 | 179 | A01300 | A15275 | 472 |
| A01300 | A15694 | 360 | A01301 | A01459 | 259 |
| A01301 | A01568 | 398 | A01301 | A02675 | 313 |
| A01301 | A06591 | 479 | A01301 | A07054 | 260 |
| A01301 | A07073 | 486 | A01301 | A07242 | 446 |
| A01301 | A07495 | 483 | A01301 | A08239 | 307 |
| A01301 | A08531 | 563 | A01301 | A08551 | 628 |
| A01301 | A09624 | 458 | A01301 | A11205 | 328 |
| A01301 | A11394 | 530 | A01301 | A11615 | 330 |
| A01301 | A12722 | 293 | A01301 | A14357 | 382 |

|        |        |     |        |        |     |
|--------|--------|-----|--------|--------|-----|
| A01301 | A14502 | 279 | A01301 | A15273 | 696 |
| A01301 | A15415 | 297 | A01302 | A01451 | 170 |
| A01302 | A01563 | 200 | A01302 | A01706 | 413 |
| A01302 | A05216 | 391 | A01302 | A05454 | 283 |
| A01302 | A06597 | 212 | A01302 | A06687 | 611 |
| A01302 | A07802 | 305 | A01302 | A08430 | 174 |
| A01302 | A08550 | 170 | A01302 | A08553 | 217 |
| A01302 | A08555 | 611 | A01302 | A08775 | 168 |
| A01302 | A09010 | 174 | A01302 | A09298 | 611 |
| A01302 | A09299 | 191 | A01302 | A11496 | 213 |
| A01302 | A11497 | 351 | A01302 | A11735 | 160 |
| A01302 | A12011 | 177 | A01302 | A12138 | 268 |
| A01302 | A12200 | 461 | A01302 | A12433 | 195 |
| A01302 | A12606 | 254 | A01302 | A12658 | 208 |
| A01302 | A12738 | 249 | A01302 | A12834 | 241 |
| A01302 | A13786 | 245 | A01302 | A13983 | 490 |
| A01302 | A14084 | 252 | A01302 | A14167 | 188 |
| A01302 | A14182 | 352 | A01302 | A14199 | 263 |
| A01302 | A14214 | 241 | A01302 | A14247 | 537 |
| A01302 | A14255 | 201 | A01302 | A14661 | 283 |
| A01302 | A14711 | 283 | A01302 | A15297 | 191 |
| A01302 | A15315 | 650 | A01302 | A15347 | 787 |
| A01302 | A15528 | 736 | A01302 | A15555 | 263 |
| A01302 | A15617 | 684 | A01302 | A15667 | 162 |
| A01302 | A16157 | 177 | A01302 | A16304 | 319 |
| A01302 | A16364 | 283 | A01302 | A16611 | 218 |
| A01302 | A16704 | 270 | A01302 | A16801 | 218 |
| A01302 | A17125 | 188 | A01302 | A17133 | 294 |
| A01303 | A02953 | 218 | A01303 | A02989 | 322 |
| A01303 | A03068 | 152 | A01303 | A03199 | 260 |
| A01303 | A03223 | 63  | A01303 | A06642 | 477 |
| A01303 | A10477 | 232 | A01303 | A14019 | 215 |
| A01303 | A15187 | 224 | A01303 | A15941 | 196 |
| A01304 | A01351 | 157 | A01304 | A01352 | 375 |
| A01304 | A01374 | 307 | A01304 | A01384 | 313 |
| A01304 | A01431 | 277 | A01304 | A01468 | 413 |
| A01304 | A01470 | 491 | A01304 | A01487 | 469 |
| A01304 | A01488 | 212 | A01304 | A01492 | 489 |
| A01304 | A01495 | 334 | A01304 | A01597 | 428 |
| A01304 | A01598 | 475 | A01304 | A01612 | 208 |
| A01304 | A01614 | 475 | A01304 | A01649 | 469 |
| A01304 | A01721 | 486 | A01304 | A01741 | 369 |
| A01304 | A02064 | 462 | A01304 | A03567 | 296 |
| A01304 | A04948 | 258 | A01304 | A05501 | 152 |
| A01304 | A05845 | 259 | A01304 | A06275 | 491 |
| A01304 | A07223 | 498 | A01304 | A07347 | 491 |

|        |        |     |        |        |     |
|--------|--------|-----|--------|--------|-----|
| A01304 | A07414 | 420 | A01304 | A07533 | 337 |
| A01304 | A07581 | 247 | A01304 | A07584 | 307 |
| A01304 | A07625 | 163 | A01304 | A07644 | 257 |
| A01304 | A07695 | 462 | A01304 | A07700 | 638 |
| A01304 | A07706 | 486 | A01304 | A07725 | 520 |
| A01304 | A07924 | 260 | A01304 | A08024 | 163 |
| A01304 | A08118 | 335 | A01304 | A08144 | 486 |
| A01304 | A08214 | 157 | A01304 | A08477 | 490 |
| A01304 | A08491 | 467 | A01304 | A08494 | 154 |
| A01304 | A08537 | 491 | A01304 | A08571 | 262 |
| A01304 | A08807 | 167 | A01304 | A08892 | 455 |
| A01304 | A09059 | 480 | A01304 | A09621 | 491 |
| A01304 | A09664 | 296 | A01304 | A09674 | 263 |
| A01304 | A10608 | 353 | A01304 | A10616 | 486 |
| A01304 | A10710 | 343 | A01304 | A11236 | 160 |
| A01304 | A11280 | 413 | A01304 | A11288 | 348 |
| A01304 | A11685 | 307 | A01304 | A11857 | 254 |
| A01304 | A12998 | 258 | A01304 | A13294 | 372 |
| A01304 | A13706 | 484 | A01304 | A13870 | 187 |
| A01304 | A13989 | 491 | A01304 | A14074 | 364 |
| A01304 | A14655 | 491 | A01304 | A14835 | 462 |
| A01304 | A16060 | 301 | A01304 | A16209 | 195 |
| A01305 | A01598 | 193 | A01305 | A02064 | 423 |
| A01305 | A02830 | 466 | A01305 | A02878 | 165 |
| A01305 | A02902 | 624 | A01305 | A02927 | 180 |
| A01305 | A02931 | 490 | A01305 | A03406 | 246 |
| A01305 | A04449 | 458 | A01305 | A05288 | 475 |
| A01305 | A05979 | 221 | A01305 | A06141 | 235 |
| A01305 | A06277 | 167 | A01305 | A06588 | 324 |
| A01305 | A06881 | 372 | A01305 | A07339 | 262 |
| A01305 | A08137 | 299 | A01305 | A08309 | 256 |
| A01305 | A08869 | 428 | A01305 | A08982 | 183 |
| A01305 | A09361 | 271 | A01305 | A09857 | 151 |
| A01305 | A11300 | 652 | A01305 | A11387 | 652 |
| A01305 | A11447 | 362 | A01305 | A11598 | 323 |
| A01305 | A11649 | 151 | A01305 | A12111 | 230 |
| A01305 | A12365 | 391 | A01305 | A12373 | 382 |
| A01305 | A13376 | 472 | A01305 | A13917 | 218 |
| A01305 | A14660 | 451 | A01305 | A16330 | 362 |
| A01305 | A16798 | 179 | A01306 | A01335 | 491 |
| A01306 | A01337 | 263 | A01306 | A01338 | 491 |
| A01306 | A01352 | 332 | A01306 | A01365 | 670 |
| A01306 | A01369 | 430 | A01306 | A01392 | 434 |
| A01306 | A01406 | 625 | A01306 | A01407 | 458 |
| A01306 | A01408 | 210 | A01306 | A01411 | 187 |
| A01306 | A01412 | 234 | A01306 | A01416 | 297 |



|        |        |     |        |        |     |
|--------|--------|-----|--------|--------|-----|
| A01306 | A01425 | 435 | A01306 | A01429 | 383 |
| A01306 | A01430 | 491 | A01306 | A01437 | 489 |
| A01306 | A01449 | 472 | A01306 | A01457 | 235 |
| A01306 | A01464 | 491 | A01306 | A01468 | 491 |
| A01306 | A01470 | 491 | A01306 | A01488 | 193 |
| A01306 | A01492 | 371 | A01306 | A01495 | 249 |
| A01306 | A01496 | 490 | A01306 | A01539 | 191 |
| A01306 | A01569 | 247 | A01306 | A01579 | 771 |
| A01306 | A01586 | 324 | A01306 | A01598 | 400 |
| A01306 | A01601 | 580 | A01306 | A01612 | 485 |
| A01306 | A01614 | 473 | A01306 | A01617 | 340 |
| A01306 | A01649 | 491 | A01306 | A01700 | 208 |
| A01306 | A01822 | 406 | A01306 | A02179 | 187 |
| A01306 | A02216 | 438 | A01306 | A02227 | 191 |
| A01306 | A02350 | 456 | A01306 | A02572 | 235 |
| A01306 | A02978 | 341 | A01306 | A02980 | 238 |
| A01306 | A03069 | 491 | A01306 | A03164 | 475 |
| A01306 | A03493 | 243 | A01306 | A03567 | 582 |
| A01306 | A03571 | 156 | A01306 | A03601 | 317 |
| A01306 | A03740 | 307 | A01306 | A03752 | 486 |
| A01306 | A03754 | 481 | A01306 | A03859 | 401 |
| A01306 | A03981 | 675 | A01306 | A04430 | 191 |
| A01306 | A04475 | 191 | A01306 | A04846 | 438 |
| A01306 | A05076 | 157 | A01306 | A05121 | 180 |
| A01306 | A05230 | 302 | A01306 | A05375 | 224 |
| A01306 | A05385 | 419 | A01306 | A05450 | 193 |
| A01306 | A05499 | 167 | A01306 | A05501 | 491 |
| A01306 | A05502 | 467 | A01306 | A06279 | 251 |
| A01306 | A06351 | 344 | A01306 | A06466 | 443 |
| A01306 | A06564 | 488 | A01306 | A06861 | 665 |
| A01306 | A06897 | 461 | A01306 | A06909 | 205 |
| A01306 | A06965 | 491 | A01306 | A06973 | 486 |
| A01306 | A07047 | 491 | A01306 | A07075 | 223 |
| A01306 | A07201 | 330 | A01306 | A07311 | 227 |
| A01306 | A07323 | 452 | A01306 | A07348 | 195 |
| A01306 | A07349 | 308 | A01306 | A07398 | 285 |
| A01306 | A07449 | 430 | A01306 | A07451 | 483 |
| A01306 | A07533 | 240 | A01306 | A07581 | 491 |
| A01306 | A07658 | 163 | A01306 | A08011 | 316 |
| A01306 | A08131 | 491 | A01306 | A08137 | 491 |
| A01306 | A08154 | 419 | A01306 | A08277 | 297 |
| A01306 | A08301 | 251 | A01306 | A08357 | 488 |
| A01306 | A08358 | 469 | A01306 | A08359 | 491 |
| A01306 | A08398 | 473 | A01306 | A08408 | 441 |
| A01306 | A08452 | 491 | A01306 | A08457 | 259 |
| A01306 | A08521 | 380 | A01306 | A08559 | 290 |

|        |        |     |        |        |     |
|--------|--------|-----|--------|--------|-----|
| A01306 | A09282 | 176 | A01306 | A09285 | 185 |
| A01306 | A09322 | 582 | A01306 | A09702 | 216 |
| A01306 | A09735 | 396 | A01306 | A09852 | 159 |
| A01306 | A10154 | 180 | A01306 | A10417 | 445 |
| A01306 | A10439 | 180 | A01306 | A10490 | 160 |
| A01306 | A10498 | 163 | A01306 | A10529 | 180 |
| A01306 | A10616 | 302 | A01306 | A10625 | 177 |
| A01306 | A10633 | 182 | A01306 | A11254 | 163 |
| A01306 | A11263 | 286 | A01306 | A11390 | 154 |
| A01306 | A11420 | 385 | A01306 | A11438 | 488 |
| A01306 | A11440 | 428 | A01306 | A11480 | 360 |
| A01306 | A11550 | 279 | A01306 | A11562 | 419 |
| A01306 | A11588 | 266 | A01306 | A11593 | 279 |
| A01306 | A11688 | 367 | A01306 | A11704 | 466 |
| A01306 | A11728 | 263 | A01306 | A11838 | 229 |
| A01306 | A11857 | 241 | A01306 | A11924 | 198 |
| A01306 | A11936 | 171 | A01306 | A11945 | 395 |
| A01306 | A12079 | 205 | A01306 | A12138 | 232 |
| A01306 | A12160 | 213 | A01306 | A12233 | 456 |
| A01306 | A12243 | 154 | A01306 | A12270 | 312 |
| A01306 | A12473 | 151 | A01306 | A12657 | 185 |
| A01306 | A12821 | 486 | A01306 | A12905 | 223 |
| A01306 | A13125 | 268 | A01306 | A13218 | 171 |
| A01306 | A13333 | 157 | A01306 | A13340 | 201 |
| A01306 | A13357 | 163 | A01306 | A13609 | 479 |
| A01306 | A13622 | 269 | A01306 | A13710 | 210 |
| A01306 | A13830 | 252 | A01306 | A13874 | 157 |
| A01306 | A13905 | 223 | A01306 | A13989 | 491 |
| A01306 | A13992 | 443 | A01306 | A14073 | 286 |
| A01306 | A14169 | 296 | A01306 | A14188 | 341 |
| A01306 | A14216 | 623 | A01306 | A14479 | 388 |
| A01306 | A14505 | 468 | A01306 | A14508 | 488 |
| A01306 | A14568 | 419 | A01306 | A14813 | 263 |
| A01306 | A15218 | 477 | A01306 | A15225 | 201 |
| A01306 | A15235 | 152 | A01306 | A15499 | 401 |
| A01306 | A15500 | 491 | A01306 | A15660 | 480 |
| A01306 | A15677 | 229 | A01306 | A15684 | 443 |
| A01306 | A15732 | 454 | A01306 | A15771 | 195 |
| A01306 | A15776 | 249 | A01306 | A15923 | 404 |
| A01306 | A15988 | 333 | A01306 | A16118 | 490 |
| A01306 | A16272 | 224 | A01306 | A16318 | 199 |
| A01306 | A16462 | 201 | A01306 | A16523 | 191 |
| A01306 | A16658 | 385 | A01306 | A16686 | 461 |
| A01306 | A17152 | 366 | A01307 | A01419 | 165 |
| A01307 | A01428 | 90  | A01307 | A01473 | 213 |
| A01307 | A01524 | 899 | A01307 | A01527 | 899 |

|        |        |     |        |        |     |
|--------|--------|-----|--------|--------|-----|
| A01307 | A01572 | 489 | A01307 | A01576 | 554 |
| A01307 | A01603 | 185 | A01307 | A01668 | 422 |
| A01307 | A01748 | 345 | A01307 | A01798 | 263 |
| A01307 | A01844 | 176 | A01307 | A01847 | 182 |
| A01307 | A01900 | 243 | A01307 | A01941 | 396 |
| A01307 | A01945 | 63  | A01307 | A01973 | 163 |
| A01307 | A02019 | 407 | A01307 | A02076 | 63  |
| A01307 | A02086 | 486 | A01307 | A02302 | 163 |
| A01307 | A02564 | 367 | A01307 | A02604 | 137 |
| A01307 | A02650 | 259 | A01307 | A02651 | 469 |
| A01307 | A02766 | 183 | A01307 | A02802 | 63  |
| A01307 | A02803 | 455 | A01307 | A02847 | 63  |
| A01307 | A02848 | 174 | A01307 | A02851 | 88  |
| A01307 | A02859 | 465 | A01307 | A02887 | 138 |
| A01307 | A02912 | 279 | A01307 | A02916 | 63  |
| A01307 | A02920 | 303 | A01307 | A02931 | 380 |
| A01307 | A02944 | 63  | A01307 | A02945 | 63  |
| A01307 | A02950 | 245 | A01307 | A02953 | 63  |
| A01307 | A02954 | 132 | A01307 | A02956 | 185 |
| A01307 | A02961 | 160 | A01307 | A02969 | 477 |
| A01307 | A02972 | 124 | A01307 | A02974 | 119 |
| A01307 | A02975 | 491 | A01307 | A02976 | 490 |
| A01307 | A02977 | 208 | A01307 | A03019 | 176 |
| A01307 | A03195 | 63  | A01307 | A03223 | 432 |
| A01307 | A03271 | 486 | A01307 | A03282 | 63  |
| A01307 | A03524 | 82  | A01307 | A03625 | 99  |
| A01307 | A03686 | 127 | A01307 | A03742 | 254 |
| A01307 | A03830 | 283 | A01307 | A03834 | 490 |
| A01307 | A03835 | 491 | A01307 | A03836 | 333 |
| A01307 | A03837 | 488 | A01307 | A03838 | 314 |
| A01307 | A03851 | 423 | A01307 | A03985 | 323 |
| A01307 | A04020 | 462 | A01307 | A04050 | 945 |
| A01307 | A04051 | 168 | A01307 | A04053 | 380 |
| A01307 | A04096 | 490 | A01307 | A04097 | 480 |
| A01307 | A04115 | 491 | A01307 | A04278 | 260 |
| A01307 | A04609 | 199 | A01307 | A04613 | 229 |
| A01307 | A04614 | 363 | A01307 | A04616 | 180 |
| A01307 | A04657 | 285 | A01307 | A04658 | 307 |
| A01307 | A04659 | 195 | A01307 | A04667 | 475 |
| A01307 | A04668 | 446 | A01307 | A04685 | 446 |
| A01307 | A04693 | 198 | A01307 | A04890 | 223 |
| A01307 | A05001 | 235 | A01307 | A05037 | 484 |
| A01307 | A05212 | 208 | A01307 | A05213 | 174 |
| A01307 | A05349 | 363 | A01307 | A05446 | 327 |
| A01307 | A05633 | 229 | A01307 | A06289 | 73  |
| A01307 | A06312 | 324 | A01307 | A06370 | 243 |

|        |        |     |        |        |     |
|--------|--------|-----|--------|--------|-----|
| A01307 | A06608 | 251 | A01307 | A06610 | 491 |
| A01307 | A06615 | 263 | A01307 | A06631 | 479 |
| A01307 | A06642 | 165 | A01307 | A06644 | 475 |
| A01307 | A06737 | 223 | A01307 | A07175 | 439 |
| A01307 | A07207 | 63  | A01307 | A07209 | 188 |
| A01307 | A07218 | 314 | A01307 | A08223 | 156 |
| A01307 | A08745 | 480 | A01307 | A08759 | 185 |
| A01307 | A08840 | 74  | A01307 | A08877 | 378 |
| A01307 | A09222 | 91  | A01307 | A09410 | 117 |
| A01307 | A09411 | 113 | A01307 | A09449 | 216 |
| A01307 | A09764 | 165 | A01307 | A09785 | 174 |
| A01307 | A09818 | 185 | A01307 | A09977 | 390 |
| A01307 | A10214 | 63  | A01307 | A10601 | 475 |
| A01307 | A11605 | 249 | A01307 | A11759 | 417 |
| A01307 | A11765 | 195 | A01307 | A11850 | 937 |
| A01307 | A11906 | 223 | A01307 | A11912 | 259 |
| A01307 | A12116 | 223 | A01307 | A12364 | 351 |
| A01307 | A12733 | 259 | A01307 | A12900 | 201 |
| A01307 | A13310 | 899 | A01307 | A13824 | 409 |
| A01307 | A13826 | 486 | A01307 | A13829 | 424 |
| A01307 | A13899 | 218 | A01307 | A13975 | 380 |
| A01307 | A13983 | 63  | A01307 | A14177 | 443 |
| A01307 | A14191 | 395 | A01307 | A14196 | 491 |
| A01307 | A14198 | 199 | A01307 | A14204 | 461 |
| A01307 | A14207 | 928 | A01307 | A14208 | 979 |
| A01307 | A14218 | 945 | A01307 | A14279 | 63  |
| A01307 | A14339 | 266 | A01307 | A14367 | 945 |
| A01307 | A14377 | 199 | A01307 | A14395 | 200 |
| A01307 | A14431 | 469 | A01307 | A14647 | 243 |
| A01307 | A14650 | 429 | A01307 | A14741 | 443 |
| A01307 | A14749 | 163 | A01307 | A15192 | 259 |
| A01307 | A15291 | 945 | A01307 | A15314 | 642 |
| A01307 | A15328 | 480 | A01307 | A15330 | 944 |
| A01307 | A15332 | 382 | A01307 | A15339 | 157 |
| A01307 | A15346 | 443 | A01307 | A15360 | 945 |
| A01307 | A15361 | 945 | A01307 | A15385 | 195 |
| A01307 | A15386 | 480 | A01307 | A15388 | 490 |
| A01307 | A15402 | 219 | A01307 | A15506 | 294 |
| A01307 | A15510 | 411 | A01307 | A15566 | 110 |
| A01307 | A15575 | 411 | A01307 | A15576 | 99  |
| A01307 | A15578 | 491 | A01307 | A15579 | 82  |
| A01307 | A15580 | 259 | A01307 | A15611 | 286 |
| A01307 | A15613 | 380 | A01307 | A15630 | 413 |
| A01307 | A15639 | 429 | A01307 | A15726 | 228 |
| A01307 | A15783 | 132 | A01307 | A15834 | 414 |
| A01307 | A15912 | 174 | A01307 | A15914 | 259 |

|        |        |     |        |        |     |
|--------|--------|-----|--------|--------|-----|
| A01307 | A15976 | 367 | A01307 | A16007 | 299 |
| A01307 | A16148 | 185 | A01307 | A16216 | 485 |
| A01307 | A16217 | 939 | A01307 | A16815 | 254 |
| A01307 | A17068 | 273 | A01308 | A01309 | 489 |
| A01308 | A01348 | 440 | A01308 | A01358 | 467 |
| A01308 | A01452 | 194 | A01308 | A01522 | 291 |
| A01308 | A01558 | 260 | A01308 | A01568 | 479 |
| A01308 | A01687 | 491 | A01308 | A01729 | 195 |
| A01308 | A01781 | 447 | A01308 | A02010 | 358 |
| A01308 | A02411 | 160 | A01308 | A02797 | 408 |
| A01308 | A03496 | 294 | A01308 | A03704 | 279 |
| A01308 | A03809 | 217 | A01308 | A03974 | 219 |
| A01308 | A04050 | 899 | A01308 | A05425 | 296 |
| A01308 | A06176 | 477 | A01308 | A06613 | 358 |
| A01308 | A07054 | 283 | A01308 | A07083 | 255 |
| A01308 | A07242 | 535 | A01308 | A07483 | 475 |
| A01308 | A07495 | 455 | A01308 | A07802 | 353 |
| A01308 | A07954 | 465 | A01308 | A08280 | 205 |
| A01308 | A08377 | 477 | A01308 | A08398 | 254 |
| A01308 | A08450 | 419 | A01308 | A08517 | 274 |
| A01308 | A08518 | 393 | A01308 | A08531 | 198 |
| A01308 | A08536 | 466 | A01308 | A08543 | 489 |
| A01308 | A08550 | 490 | A01308 | A08551 | 475 |
| A01308 | A08552 | 490 | A01308 | A08553 | 204 |
| A01308 | A08556 | 319 | A01308 | A08560 | 483 |
| A01308 | A08561 | 486 | A01308 | A08569 | 218 |
| A01308 | A08814 | 463 | A01308 | A08844 | 232 |
| A01308 | A08845 | 456 | A01308 | A08996 | 262 |
| A01308 | A09010 | 274 | A01308 | A09298 | 486 |
| A01308 | A09309 | 254 | A01308 | A09333 | 288 |
| A01308 | A09443 | 165 | A01308 | A09609 | 479 |
| A01308 | A09624 | 177 | A01308 | A09648 | 467 |
| A01308 | A09828 | 446 | A01308 | A10159 | 173 |
| A01308 | A10315 | 235 | A01308 | A10316 | 205 |
| A01308 | A10789 | 463 | A01308 | A11209 | 182 |
| A01308 | A11234 | 333 | A01308 | A11279 | 357 |
| A01308 | A11281 | 165 | A01308 | A11301 | 490 |
| A01308 | A11430 | 382 | A01308 | A11436 | 208 |
| A01308 | A11471 | 307 | A01308 | A11472 | 490 |
| A01308 | A11496 | 486 | A01308 | A11497 | 490 |
| A01308 | A11551 | 319 | A01308 | A11555 | 314 |
| A01308 | A11597 | 167 | A01308 | A11616 | 346 |
| A01308 | A11675 | 486 | A01308 | A11735 | 486 |
| A01308 | A11737 | 460 | A01308 | A11833 | 302 |
| A01308 | A11851 | 352 | A01308 | A11914 | 486 |
| A01308 | A11915 | 358 | A01308 | A11917 | 634 |

|        |        |     |        |        |     |
|--------|--------|-----|--------|--------|-----|
| A01308 | A11940 | 366 | A01308 | A11954 | 281 |
| A01308 | A11992 | 230 | A01308 | A12052 | 172 |
| A01308 | A12215 | 384 | A01308 | A12238 | 202 |
| A01308 | A12254 | 480 | A01308 | A12255 | 228 |
| A01308 | A12284 | 391 | A01308 | A12433 | 486 |
| A01308 | A12499 | 254 | A01308 | A12501 | 414 |
| A01308 | A12506 | 423 | A01308 | A12507 | 475 |
| A01308 | A12508 | 489 | A01308 | A12606 | 490 |
| A01308 | A12625 | 460 | A01308 | A12658 | 480 |
| A01308 | A12659 | 272 | A01308 | A12665 | 633 |
| A01308 | A12725 | 480 | A01308 | A12726 | 208 |
| A01308 | A12727 | 216 | A01308 | A12738 | 285 |
| A01308 | A12824 | 218 | A01308 | A12825 | 475 |
| A01308 | A12858 | 491 | A01308 | A12873 | 443 |
| A01308 | A12885 | 152 | A01308 | A12952 | 493 |
| A01308 | A13116 | 382 | A01308 | A13169 | 310 |
| A01308 | A13231 | 213 | A01308 | A13309 | 380 |
| A01308 | A13313 | 634 | A01308 | A13321 | 391 |
| A01308 | A13356 | 196 | A01308 | A13399 | 361 |
| A01308 | A13527 | 162 | A01308 | A13587 | 452 |
| A01308 | A13706 | 377 | A01308 | A13707 | 452 |
| A01308 | A13708 | 632 | A01308 | A13711 | 257 |
| A01308 | A13737 | 389 | A01308 | A13781 | 634 |
| A01308 | A13782 | 184 | A01308 | A13783 | 357 |
| A01308 | A13784 | 484 | A01308 | A13786 | 395 |
| A01308 | A13787 | 270 | A01308 | A13788 | 400 |
| A01308 | A13804 | 384 | A01308 | A13805 | 427 |
| A01308 | A13809 | 477 | A01308 | A13811 | 249 |
| A01308 | A13912 | 480 | A01308 | A13928 | 430 |
| A01308 | A14074 | 265 | A01308 | A14084 | 313 |
| A01308 | A14167 | 195 | A01308 | A14193 | 290 |
| A01308 | A14214 | 490 | A01308 | A14222 | 469 |
| A01308 | A14239 | 472 | A01308 | A14255 | 294 |
| A01308 | A14263 | 486 | A01308 | A14270 | 465 |
| A01308 | A14286 | 160 | A01308 | A14288 | 457 |
| A01308 | A14289 | 208 | A01308 | A14358 | 154 |
| A01308 | A14375 | 291 | A01308 | A14443 | 899 |
| A01308 | A14455 | 491 | A01308 | A14462 | 356 |
| A01308 | A14474 | 363 | A01308 | A14569 | 488 |
| A01308 | A14706 | 446 | A01308 | A14708 | 394 |
| A01308 | A14718 | 255 | A01308 | A14739 | 154 |
| A01308 | A14799 | 469 | A01308 | A14903 | 466 |
| A01308 | A14917 | 398 | A01308 | A14921 | 417 |
| A01308 | A15105 | 722 | A01308 | A15187 | 454 |
| A01308 | A15189 | 488 | A01308 | A15214 | 257 |
| A01308 | A15262 | 343 | A01308 | A15366 | 324 |

|        |        |     |        |        |     |
|--------|--------|-----|--------|--------|-----|
| A01308 | A15492 | 319 | A01308 | A15501 | 411 |
| A01308 | A15524 | 494 | A01308 | A15541 | 466 |
| A01308 | A15653 | 273 | A01308 | A15665 | 489 |
| A01308 | A15680 | 347 | A01308 | A15682 | 288 |
| A01308 | A15683 | 428 | A01308 | A15709 | 473 |
| A01308 | A15711 | 307 | A01308 | A15773 | 324 |
| A01308 | A15850 | 419 | A01308 | A15852 | 456 |
| A01308 | A15853 | 491 | A01308 | A15854 | 626 |
| A01308 | A15855 | 491 | A01308 | A16157 | 491 |
| A01308 | A16187 | 283 | A01308 | A16243 | 174 |
| A01308 | A16261 | 184 | A01308 | A16281 | 269 |
| A01308 | A16343 | 257 | A01308 | A16552 | 491 |
| A01308 | A16565 | 486 | A01308 | A16566 | 409 |
| A01308 | A16567 | 216 | A01308 | A16587 | 481 |
| A01308 | A16597 | 491 | A01308 | A16608 | 489 |
| A01308 | A16611 | 490 | A01308 | A16664 | 489 |
| A01308 | A16675 | 489 | A01308 | A16680 | 475 |
| A01308 | A16682 | 177 | A01308 | A16684 | 221 |
| A01308 | A16689 | 409 | A01308 | A16690 | 462 |
| A01308 | A16691 | 340 | A01308 | A16693 | 257 |
| A01308 | A16695 | 413 | A01308 | A16697 | 174 |
| A01308 | A16703 | 406 | A01308 | A16704 | 413 |
| A01308 | A16707 | 396 | A01308 | A16709 | 335 |
| A01308 | A16724 | 271 | A01308 | A16764 | 422 |
| A01308 | A16774 | 329 | A01308 | A16776 | 368 |
| A01308 | A16788 | 330 | A01308 | A16790 | 425 |
| A01308 | A16797 | 257 | A01308 | A16806 | 263 |
| A01308 | A16807 | 170 | A01308 | A16815 | 348 |
| A01308 | A16824 | 241 | A01308 | A16827 | 163 |
| A01308 | A16829 | 485 | A01308 | A16838 | 417 |
| A01308 | A16858 | 162 | A01308 | A16859 | 199 |
| A01308 | A16866 | 311 | A01308 | A16874 | 433 |
| A01308 | A16882 | 172 | A01308 | A16900 | 200 |
| A01308 | A16905 | 443 | A01308 | A16913 | 329 |
| A01308 | A16944 | 200 | A01308 | A16954 | 254 |
| A01308 | A17013 | 350 | A01308 | A17018 | 180 |
| A01308 | A17030 | 368 | A01308 | A17033 | 174 |
| A01308 | A17190 | 274 | A01308 | A17211 | 170 |
| A01309 | A01386 | 352 | A01309 | A01522 | 208 |
| A01309 | A01553 | 252 | A01309 | A01561 | 196 |
| A01309 | A01568 | 171 | A01309 | A01687 | 191 |
| A01309 | A01689 | 271 | A01309 | A01995 | 374 |
| A01309 | A02110 | 485 | A01309 | A02151 | 182 |
| A01309 | A02553 | 443 | A01309 | A03265 | 238 |
| A01309 | A03496 | 488 | A01309 | A03591 | 319 |
| A01309 | A03809 | 159 | A01309 | A04449 | 550 |

|        |        |     |        |        |     |
|--------|--------|-----|--------|--------|-----|
| A01309 | A04786 | 373 | A01309 | A04867 | 466 |
| A01309 | A05416 | 335 | A01309 | A06466 | 260 |
| A01309 | A07242 | 408 | A01309 | A07483 | 477 |
| A01309 | A07495 | 207 | A01309 | A07848 | 218 |
| A01309 | A07954 | 174 | A01309 | A08013 | 218 |
| A01309 | A08074 | 252 | A01309 | A08255 | 311 |
| A01309 | A08377 | 441 | A01309 | A08450 | 185 |
| A01309 | A08503 | 201 | A01309 | A08518 | 463 |
| A01309 | A08535 | 172 | A01309 | A08543 | 477 |
| A01309 | A08550 | 483 | A01309 | A08552 | 488 |
| A01309 | A08553 | 374 | A01309 | A08556 | 353 |
| A01309 | A08560 | 474 | A01309 | A08561 | 477 |
| A01309 | A08569 | 201 | A01309 | A08707 | 162 |
| A01309 | A08807 | 229 | A01309 | A08814 | 353 |
| A01309 | A08818 | 371 | A01309 | A08845 | 424 |
| A01309 | A08996 | 252 | A01309 | A09010 | 355 |
| A01309 | A09298 | 401 | A01309 | A09309 | 307 |
| A01309 | A09326 | 212 | A01309 | A09609 | 422 |
| A01309 | A09622 | 378 | A01309 | A09648 | 283 |
| A01309 | A09828 | 361 | A01309 | A10315 | 467 |
| A01309 | A10430 | 561 | A01309 | A10789 | 361 |
| A01309 | A11156 | 259 | A01309 | A11180 | 165 |
| A01309 | A11209 | 195 | A01309 | A11234 | 358 |
| A01309 | A11279 | 419 | A01309 | A11301 | 483 |
| A01309 | A11376 | 210 | A01309 | A11471 | 152 |
| A01309 | A11472 | 285 | A01309 | A11487 | 449 |
| A01309 | A11496 | 457 | A01309 | A11497 | 484 |
| A01309 | A11551 | 341 | A01309 | A11555 | 238 |
| A01309 | A11597 | 414 | A01309 | A11616 | 413 |
| A01309 | A11675 | 480 | A01309 | A11735 | 182 |
| A01309 | A11737 | 288 | A01309 | A11820 | 191 |
| A01309 | A11833 | 330 | A01309 | A11914 | 408 |
| A01309 | A11915 | 324 | A01309 | A11917 | 488 |
| A01309 | A11937 | 278 | A01309 | A11940 | 443 |
| A01309 | A11954 | 191 | A01309 | A11992 | 333 |
| A01309 | A12167 | 162 | A01309 | A12215 | 218 |
| A01309 | A12234 | 210 | A01309 | A12238 | 210 |
| A01309 | A12254 | 468 | A01309 | A12255 | 290 |
| A01309 | A12284 | 394 | A01309 | A12433 | 463 |
| A01309 | A12499 | 456 | A01309 | A12501 | 407 |
| A01309 | A12507 | 458 | A01309 | A12606 | 486 |
| A01309 | A12655 | 171 | A01309 | A12658 | 432 |
| A01309 | A12665 | 447 | A01309 | A12722 | 485 |
| A01309 | A12725 | 470 | A01309 | A12727 | 348 |
| A01309 | A12738 | 363 | A01309 | A12858 | 481 |
| A01309 | A12873 | 418 | A01309 | A12952 | 215 |



|        |        |     |        |        |     |
|--------|--------|-----|--------|--------|-----|
| A01309 | A13069 | 221 | A01309 | A13116 | 296 |
| A01309 | A13231 | 218 | A01309 | A13309 | 439 |
| A01309 | A13313 | 484 | A01309 | A13399 | 457 |
| A01309 | A13587 | 270 | A01309 | A13706 | 422 |
| A01309 | A13708 | 473 | A01309 | A13737 | 425 |
| A01309 | A13781 | 491 | A01309 | A13783 | 324 |
| A01309 | A13784 | 486 | A01309 | A13787 | 262 |
| A01309 | A13788 | 183 | A01309 | A13804 | 347 |
| A01309 | A13805 | 456 | A01309 | A13809 | 435 |
| A01309 | A13912 | 456 | A01309 | A14074 | 204 |
| A01309 | A14084 | 281 | A01309 | A14087 | 290 |
| A01309 | A14094 | 279 | A01309 | A14192 | 818 |
| A01309 | A14214 | 486 | A01309 | A14222 | 480 |
| A01309 | A14239 | 379 | A01309 | A14255 | 224 |
| A01309 | A14260 | 195 | A01309 | A14263 | 486 |
| A01309 | A14270 | 288 | A01309 | A14286 | 179 |
| A01309 | A14288 | 432 | A01309 | A14455 | 393 |
| A01309 | A14569 | 469 | A01309 | A14706 | 228 |
| A01309 | A14708 | 366 | A01309 | A14718 | 405 |
| A01309 | A14719 | 290 | A01309 | A14799 | 418 |
| A01309 | A14903 | 324 | A01309 | A14917 | 313 |
| A01309 | A14921 | 379 | A01309 | A15105 | 485 |
| A01309 | A15187 | 474 | A01309 | A15189 | 480 |
| A01309 | A15262 | 358 | A01309 | A15536 | 207 |
| A01309 | A15541 | 307 | A01309 | A15665 | 466 |
| A01309 | A15680 | 305 | A01309 | A15682 | 396 |
| A01309 | A15683 | 306 | A01309 | A15711 | 283 |
| A01309 | A15850 | 383 | A01309 | A16157 | 485 |
| A01309 | A16261 | 355 | A01309 | A16343 | 373 |
| A01309 | A16552 | 488 | A01309 | A16565 | 477 |
| A01309 | A16587 | 307 | A01309 | A16597 | 488 |
| A01309 | A16608 | 435 | A01309 | A16611 | 479 |
| A01309 | A16664 | 477 | A01309 | A16675 | 480 |
| A01309 | A16680 | 302 | A01309 | A16684 | 326 |
| A01309 | A16690 | 433 | A01309 | A16692 | 299 |
| A01309 | A16697 | 188 | A01309 | A16699 | 154 |
| A01309 | A16702 | 162 | A01309 | A16703 | 463 |
| A01309 | A16704 | 377 | A01309 | A16709 | 489 |
| A01309 | A16715 | 326 | A01309 | A16764 | 391 |
| A01309 | A16774 | 229 | A01309 | A16776 | 201 |
| A01309 | A16790 | 456 | A01309 | A16806 | 375 |
| A01309 | A16815 | 246 | A01309 | A16824 | 238 |
| A01309 | A16829 | 400 | A01309 | A16838 | 452 |
| A01309 | A16847 | 561 | A01309 | A16858 | 281 |
| A01309 | A16859 | 311 | A01309 | A16866 | 399 |
| A01309 | A16874 | 396 | A01309 | A16875 | 165 |

|        |        |     |        |        |     |
|--------|--------|-----|--------|--------|-----|
| A01309 | A16900 | 208 | A01309 | A16905 | 477 |
| A01309 | A16913 | 452 | A01309 | A16944 | 411 |
| A01309 | A16954 | 390 | A01309 | A17012 | 180 |
| A01309 | A17013 | 324 | A01309 | A17018 | 326 |
| A01309 | A17030 | 333 | A01309 | A17033 | 439 |
| A01309 | A17035 | 268 | A01309 | A17043 | 252 |
| A01309 | A17190 | 321 | A01309 | A17211 | 398 |
| A01310 | A01521 | 104 | A01310 | A01546 | 270 |
| A01310 | A01660 | 160 | A01310 | A01747 | 185 |
| A01310 | A01763 | 380 | A01310 | A01914 | 613 |
| A01310 | A03225 | 210 | A01310 | A03470 | 450 |
| A01310 | A03591 | 470 | A01310 | A03937 | 191 |
| A01310 | A04630 | 177 | A01310 | A04790 | 222 |
| A01310 | A05494 | 160 | A01310 | A06502 | 191 |
| A01310 | A09121 | 252 | A01310 | A10510 | 281 |
| A01310 | A11129 | 254 | A01310 | A11614 | 717 |
| A01310 | A11707 | 193 | A01310 | A12886 | 236 |
| A01310 | A13216 | 241 | A01310 | A13376 | 260 |
| A01310 | A14198 | 249 | A01310 | A15294 | 319 |
| A01310 | A16547 | 241 | A01311 | A01320 | 378 |
| A01311 | A01327 | 472 | A01311 | A01379 | 152 |
| A01311 | A01387 | 195 | A01311 | A01439 | 152 |
| A01311 | A01492 | 457 | A01311 | A01506 | 188 |
| A01311 | A01538 | 152 | A01311 | A01569 | 475 |
| A01311 | A01577 | 629 | A01311 | A01612 | 152 |
| A01311 | A01627 | 152 | A01311 | A02454 | 165 |
| A01311 | A02601 | 152 | A01311 | A02695 | 472 |
| A01311 | A03169 | 270 | A01311 | A03438 | 329 |
| A01311 | A03697 | 502 | A01311 | A03863 | 460 |
| A01311 | A04495 | 152 | A01311 | A05216 | 587 |
| A01311 | A05227 | 488 | A01311 | A05695 | 157 |
| A01311 | A05712 | 470 | A01311 | A05760 | 899 |
| A01311 | A06178 | 218 | A01311 | A06198 | 273 |
| A01311 | A06287 | 621 | A01311 | A06530 | 439 |
| A01311 | A06543 | 418 | A01311 | A06637 | 489 |
| A01311 | A07744 | 629 | A01311 | A07881 | 470 |
| A01311 | A07911 | 479 | A01311 | A08061 | 317 |
| A01311 | A08067 | 465 | A01311 | A08098 | 629 |
| A01311 | A08178 | 627 | A01311 | A08228 | 491 |
| A01311 | A08491 | 489 | A01311 | A08548 | 486 |
| A01311 | A08763 | 626 | A01311 | A08947 | 152 |
| A01311 | A09004 | 152 | A01311 | A10006 | 461 |
| A01311 | A10238 | 294 | A01311 | A10250 | 314 |
| A01311 | A10586 | 380 | A01311 | A10842 | 152 |
| A01311 | A11381 | 187 | A01311 | A12903 | 196 |
| A01311 | A13132 | 238 | A01311 | A13353 | 273 |

|        |        |     |        |        |     |
|--------|--------|-----|--------|--------|-----|
| A01311 | A13354 | 334 | A01311 | A14083 | 491 |
| A01311 | A14449 | 332 | A01311 | A14525 | 502 |
| A01311 | A14699 | 724 | A01311 | A14778 | 491 |
| A01311 | A15375 | 627 | A01311 | A15546 | 502 |
| A01311 | A15684 | 407 | A01311 | A15746 | 391 |
| A01311 | A15937 | 357 | A01311 | A16048 | 234 |
| A01311 | A17021 | 172 | A01312 | A01317 | 255 |
| A01312 | A01318 | 384 | A01312 | A01323 | 167 |
| A01312 | A01325 | 384 | A01312 | A01328 | 439 |
| A01312 | A01596 | 490 | A01312 | A06092 | 174 |
| A01312 | A09038 | 205 | A01313 | A01377 | 477 |
| A01313 | A01385 | 229 | A01313 | A01411 | 160 |
| A01313 | A01440 | 226 | A01313 | A02704 | 156 |
| A01313 | A03846 | 195 | A01313 | A07693 | 358 |
| A01313 | A08113 | 486 | A01313 | A08263 | 462 |
| A01313 | A08346 | 240 | A01313 | A08402 | 391 |
| A01313 | A08694 | 371 | A01313 | A11926 | 251 |
| A01313 | A14092 | 480 | A01313 | A14272 | 481 |
| A01313 | A14840 | 344 | A01313 | A15877 | 484 |
| A01314 | A01315 | 469 | A01314 | A01317 | 430 |
| A01314 | A01318 | 288 | A01314 | A01320 | 347 |
| A01314 | A01321 | 305 | A01314 | A01322 | 302 |
| A01314 | A01323 | 396 | A01314 | A01324 | 329 |
| A01314 | A01325 | 443 | A01314 | A01327 | 373 |
| A01314 | A01328 | 457 | A01314 | A01331 | 457 |
| A01314 | A01518 | 251 | A01314 | A02086 | 159 |
| A01314 | A02895 | 329 | A01314 | A03157 | 241 |
| A01314 | A05690 | 217 | A01314 | A07238 | 294 |
| A01314 | A07477 | 319 | A01314 | A08133 | 182 |
| A01314 | A08366 | 353 | A01314 | A08910 | 224 |
| A01314 | A09598 | 226 | A01314 | A10444 | 351 |
| A01315 | A01317 | 460 | A01315 | A01318 | 490 |
| A01315 | A01319 | 535 | A01315 | A01320 | 489 |
| A01315 | A01321 | 414 | A01315 | A01322 | 483 |
| A01315 | A01323 | 430 | A01315 | A01324 | 474 |
| A01315 | A01325 | 491 | A01315 | A01327 | 460 |
| A01315 | A01328 | 489 | A01315 | A01329 | 229 |
| A01315 | A01331 | 286 | A01315 | A01342 | 345 |
| A01315 | A01415 | 489 | A01315 | A01459 | 226 |
| A01315 | A01501 | 353 | A01315 | A01559 | 167 |
| A01315 | A01627 | 229 | A01315 | A01680 | 317 |
| A01315 | A01682 | 229 | A01315 | A02203 | 174 |
| A01315 | A02278 | 479 | A01315 | A02632 | 193 |
| A01315 | A03327 | 317 | A01315 | A05247 | 152 |
| A01315 | A05690 | 558 | A01315 | A06130 | 317 |
| A01315 | A06381 | 317 | A01315 | A06750 | 229 |

|        |        |     |        |        |     |
|--------|--------|-----|--------|--------|-----|
| A01315 | A06982 | 404 | A01315 | A07096 | 260 |
| A01315 | A07124 | 208 | A01315 | A07353 | 317 |
| A01315 | A07670 | 229 | A01315 | A08502 | 369 |
| A01315 | A13054 | 168 | A01315 | A14697 | 226 |
| A01315 | A15837 | 317 | A01315 | A16626 | 317 |
| A01315 | A16643 | 317 | A01316 | A01325 | 477 |
| A01316 | A01331 | 470 | A01317 | A01318 | 491 |
| A01317 | A01319 | 490 | A01317 | A01320 | 491 |
| A01317 | A01321 | 490 | A01317 | A01322 | 491 |
| A01317 | A01323 | 491 | A01317 | A01324 | 491 |
| A01317 | A01325 | 491 | A01317 | A01326 | 486 |
| A01317 | A01327 | 491 | A01317 | A01328 | 491 |
| A01317 | A01330 | 484 | A01317 | A01331 | 489 |
| A01317 | A01374 | 260 | A01317 | A01385 | 401 |
| A01317 | A01415 | 491 | A01317 | A01418 | 217 |
| A01317 | A01469 | 159 | A01317 | A01536 | 457 |
| A01317 | A01559 | 475 | A01317 | A01567 | 213 |
| A01317 | A01589 | 160 | A01317 | A01594 | 488 |
| A01317 | A01680 | 190 | A01317 | A01686 | 490 |
| A01317 | A01741 | 435 | A01317 | A01743 | 296 |
| A01317 | A02589 | 227 | A01317 | A02859 | 232 |
| A01317 | A03057 | 383 | A01317 | A03115 | 182 |
| A01317 | A03142 | 213 | A01317 | A03259 | 187 |
| A01317 | A03327 | 467 | A01317 | A03422 | 188 |
| A01317 | A03520 | 205 | A01317 | A04668 | 473 |
| A01317 | A04776 | 449 | A01317 | A04900 | 374 |
| A01317 | A05021 | 378 | A01317 | A05334 | 470 |
| A01317 | A05690 | 490 | A01317 | A05915 | 324 |
| A01317 | A06093 | 236 | A01317 | A06318 | 446 |
| A01317 | A06829 | 173 | A01317 | A06878 | 243 |
| A01317 | A07319 | 235 | A01317 | A07346 | 328 |
| A01317 | A07399 | 221 | A01317 | A07695 | 246 |
| A01317 | A07815 | 488 | A01317 | A07894 | 172 |
| A01317 | A08820 | 452 | A01317 | A09301 | 346 |
| A01317 | A09598 | 481 | A01317 | A10359 | 218 |
| A01317 | A10683 | 162 | A01317 | A11540 | 473 |
| A01317 | A13726 | 172 | A01317 | A13969 | 307 |
| A01317 | A14674 | 427 | A01317 | A15295 | 481 |
| A01317 | A15386 | 394 | A01317 | A15498 | 438 |
| A01317 | A15837 | 384 | A01317 | A15935 | 434 |
| A01317 | A16052 | 308 | A01317 | A16396 | 249 |
| A01317 | A16731 | 272 | A01318 | A01319 | 488 |
| A01318 | A01320 | 491 | A01318 | A01321 | 491 |
| A01318 | A01322 | 491 | A01318 | A01323 | 491 |
| A01318 | A01324 | 491 | A01318 | A01325 | 491 |
| A01318 | A01326 | 221 | A01318 | A01327 | 491 |

|        |        |     |        |        |     |
|--------|--------|-----|--------|--------|-----|
| A01318 | A01328 | 491 | A01318 | A01330 | 475 |
| A01318 | A01331 | 488 | A01318 | A01415 | 491 |
| A01318 | A01559 | 469 | A01318 | A01668 | 316 |
| A01318 | A01686 | 377 | A01318 | A01741 | 485 |
| A01318 | A01743 | 277 | A01318 | A02377 | 170 |
| A01318 | A02473 | 263 | A01318 | A02797 | 152 |
| A01318 | A02830 | 168 | A01318 | A02859 | 327 |
| A01318 | A02895 | 162 | A01318 | A03115 | 232 |
| A01318 | A03142 | 249 | A01318 | A03259 | 216 |
| A01318 | A03422 | 424 | A01318 | A03770 | 171 |
| A01318 | A03902 | 218 | A01318 | A04058 | 252 |
| A01318 | A04256 | 165 | A01318 | A04445 | 224 |
| A01318 | A04668 | 246 | A01318 | A04776 | 477 |
| A01318 | A04900 | 456 | A01318 | A05247 | 202 |
| A01318 | A05690 | 481 | A01318 | A06318 | 246 |
| A01318 | A06621 | 160 | A01318 | A06851 | 357 |
| A01318 | A07187 | 177 | A01318 | A07205 | 168 |
| A01318 | A07399 | 269 | A01318 | A08352 | 165 |
| A01318 | A08820 | 238 | A01318 | A09126 | 187 |
| A01318 | A09201 | 168 | A01318 | A09225 | 324 |
| A01318 | A09278 | 276 | A01318 | A09304 | 324 |
| A01318 | A09348 | 441 | A01318 | A09597 | 462 |
| A01318 | A09598 | 441 | A01318 | A10039 | 246 |
| A01318 | A10947 | 255 | A01318 | A14153 | 199 |
| A01318 | A15837 | 238 | A01318 | A16052 | 335 |
| A01318 | A16068 | 291 | A01318 | A16396 | 283 |
| A01319 | A01320 | 488 | A01319 | A01321 | 446 |
| A01319 | A01322 | 489 | A01319 | A01323 | 485 |
| A01319 | A01324 | 484 | A01319 | A01325 | 490 |
| A01319 | A01326 | 340 | A01319 | A01327 | 469 |
| A01319 | A01328 | 458 | A01319 | A01329 | 229 |
| A01319 | A01330 | 322 | A01319 | A01331 | 417 |
| A01319 | A01358 | 462 | A01319 | A01415 | 548 |
| A01319 | A01627 | 229 | A01319 | A01680 | 317 |
| A01319 | A01682 | 229 | A01319 | A01828 | 552 |
| A01319 | A02930 | 200 | A01319 | A03327 | 475 |
| A01319 | A03422 | 172 | A01319 | A04776 | 443 |
| A01319 | A05690 | 511 | A01319 | A06130 | 317 |
| A01319 | A06381 | 317 | A01319 | A06750 | 229 |
| A01319 | A07353 | 317 | A01319 | A07399 | 154 |
| A01319 | A07670 | 229 | A01319 | A09348 | 401 |
| A01319 | A09598 | 260 | A01319 | A11854 | 462 |
| A01319 | A12013 | 462 | A01319 | A14697 | 286 |
| A01319 | A14703 | 252 | A01319 | A15837 | 317 |
| A01319 | A16626 | 357 | A01319 | A16643 | 317 |
| A01320 | A01321 | 491 | A01320 | A01322 | 491 |

|        |        |     |        |        |     |
|--------|--------|-----|--------|--------|-----|
| A01320 | A01323 | 491 | A01320 | A01324 | 491 |
| A01320 | A01325 | 491 | A01320 | A01326 | 451 |
| A01320 | A01327 | 757 | A01320 | A01328 | 491 |
| A01320 | A01329 | 157 | A01320 | A01330 | 449 |
| A01320 | A01331 | 486 | A01320 | A01415 | 491 |
| A01320 | A01440 | 272 | A01320 | A01535 | 460 |
| A01320 | A01536 | 480 | A01320 | A01559 | 491 |
| A01320 | A01567 | 265 | A01320 | A01582 | 288 |
| A01320 | A01589 | 210 | A01320 | A01594 | 152 |
| A01320 | A01596 | 171 | A01320 | A01625 | 276 |
| A01320 | A01668 | 362 | A01320 | A01686 | 490 |
| A01320 | A01741 | 488 | A01320 | A01743 | 425 |
| A01320 | A02188 | 201 | A01320 | A02221 | 475 |
| A01320 | A02228 | 301 | A01320 | A02231 | 273 |
| A01320 | A02377 | 235 | A01320 | A02389 | 174 |
| A01320 | A02473 | 165 | A01320 | A02859 | 420 |
| A01320 | A03057 | 475 | A01320 | A03232 | 151 |
| A01320 | A03259 | 188 | A01320 | A03422 | 343 |
| A01320 | A03451 | 420 | A01320 | A03520 | 425 |
| A01320 | A03734 | 195 | A01320 | A04011 | 157 |
| A01320 | A04058 | 435 | A01320 | A04140 | 216 |
| A01320 | A04375 | 165 | A01320 | A04622 | 324 |
| A01320 | A04668 | 489 | A01320 | A04776 | 467 |
| A01320 | A04900 | 490 | A01320 | A05021 | 418 |
| A01320 | A05065 | 195 | A01320 | A05334 | 285 |
| A01320 | A05690 | 486 | A01320 | A06141 | 154 |
| A01320 | A06318 | 305 | A01320 | A06357 | 213 |
| A01320 | A06659 | 162 | A01320 | A06829 | 266 |
| A01320 | A06851 | 316 | A01320 | A06982 | 218 |
| A01320 | A07079 | 218 | A01320 | A07136 | 208 |
| A01320 | A07346 | 343 | A01320 | A07505 | 171 |
| A01320 | A08352 | 207 | A01320 | A08479 | 218 |
| A01320 | A08686 | 188 | A01320 | A08820 | 483 |
| A01320 | A09278 | 204 | A01320 | A09301 | 177 |
| A01320 | A09348 | 413 | A01320 | A09598 | 489 |
| A01320 | A09668 | 180 | A01320 | A10109 | 193 |
| A01320 | A10250 | 537 | A01320 | A10278 | 407 |
| A01320 | A10373 | 208 | A01320 | A10947 | 435 |
| A01320 | A11279 | 252 | A01320 | A11315 | 218 |
| A01320 | A11483 | 224 | A01320 | A11486 | 340 |
| A01320 | A11540 | 306 | A01320 | A11576 | 152 |
| A01320 | A13969 | 256 | A01320 | A14449 | 640 |
| A01320 | A14697 | 332 | A01320 | A15498 | 224 |
| A01320 | A15837 | 483 | A01320 | A15917 | 259 |
| A01320 | A15935 | 234 | A01320 | A16068 | 259 |
| A01320 | A16626 | 188 | A01320 | A16731 | 236 |

|        |        |     |        |        |     |
|--------|--------|-----|--------|--------|-----|
| A01320 | A16740 | 224 | A01320 | A16772 | 196 |
| A01321 | A01322 | 491 | A01321 | A01323 | 490 |
| A01321 | A01324 | 488 | A01321 | A01325 | 491 |
| A01321 | A01326 | 346 | A01321 | A01327 | 490 |
| A01321 | A01328 | 491 | A01321 | A01330 | 193 |
| A01321 | A01331 | 486 | A01321 | A01336 | 180 |
| A01321 | A01385 | 247 | A01321 | A01415 | 746 |
| A01321 | A01559 | 424 | A01321 | A01567 | 154 |
| A01321 | A01594 | 335 | A01321 | A01686 | 469 |
| A01321 | A01704 | 226 | A01321 | A01917 | 232 |
| A01321 | A02273 | 224 | A01321 | A02895 | 183 |
| A01321 | A02998 | 263 | A01321 | A03057 | 188 |
| A01321 | A03115 | 355 | A01321 | A03506 | 154 |
| A01321 | A03985 | 347 | A01321 | A04668 | 176 |
| A01321 | A04776 | 474 | A01321 | A05247 | 352 |
| A01321 | A05276 | 247 | A01321 | A05690 | 461 |
| A01321 | A06129 | 210 | A01321 | A06130 | 212 |
| A01321 | A06242 | 210 | A01321 | A07101 | 188 |
| A01321 | A07181 | 213 | A01321 | A07835 | 188 |
| A01321 | A13949 | 355 | A01321 | A15876 | 274 |
| A01321 | A16068 | 216 | A01321 | A16626 | 481 |
| A01322 | A01323 | 491 | A01322 | A01324 | 491 |
| A01322 | A01325 | 491 | A01322 | A01326 | 454 |
| A01322 | A01327 | 491 | A01322 | A01328 | 491 |
| A01322 | A01330 | 446 | A01322 | A01331 | 491 |
| A01322 | A01341 | 412 | A01322 | A01385 | 400 |
| A01322 | A01388 | 168 | A01322 | A01404 | 484 |
| A01322 | A01415 | 747 | A01322 | A01459 | 269 |
| A01322 | A01469 | 252 | A01322 | A01515 | 441 |
| A01322 | A01536 | 491 | A01322 | A01559 | 491 |
| A01322 | A01573 | 450 | A01322 | A01580 | 348 |
| A01322 | A01589 | 491 | A01322 | A01594 | 491 |
| A01322 | A01596 | 600 | A01322 | A01616 | 489 |
| A01322 | A01625 | 355 | A01322 | A01659 | 489 |
| A01322 | A01680 | 363 | A01322 | A01686 | 491 |
| A01322 | A01722 | 168 | A01322 | A01741 | 473 |
| A01322 | A01822 | 346 | A01322 | A01926 | 288 |
| A01322 | A01976 | 327 | A01322 | A02254 | 301 |
| A01322 | A02257 | 296 | A01322 | A02294 | 188 |
| A01322 | A02524 | 235 | A01322 | A02814 | 196 |
| A01322 | A02930 | 165 | A01322 | A03007 | 281 |
| A01322 | A03057 | 490 | A01322 | A03115 | 446 |
| A01322 | A03237 | 449 | A01322 | A03301 | 363 |
| A01322 | A03327 | 416 | A01322 | A03328 | 321 |
| A01322 | A03575 | 408 | A01322 | A03676 | 160 |
| A01322 | A04012 | 273 | A01322 | A04058 | 353 |

|        |        |     |        |        |     |
|--------|--------|-----|--------|--------|-----|
| A01322 | A04668 | 491 | A01322 | A04776 | 486 |
| A01322 | A04900 | 450 | A01322 | A05247 | 191 |
| A01322 | A05334 | 491 | A01322 | A05403 | 152 |
| A01322 | A05690 | 491 | A01322 | A06014 | 314 |
| A01322 | A06242 | 489 | A01322 | A06318 | 406 |
| A01322 | A06381 | 173 | A01322 | A06405 | 188 |
| A01322 | A06439 | 258 | A01322 | A06650 | 306 |
| A01322 | A06733 | 258 | A01322 | A06764 | 170 |
| A01322 | A06775 | 227 | A01322 | A06851 | 457 |
| A01322 | A06864 | 491 | A01322 | A06982 | 491 |
| A01322 | A07319 | 491 | A01322 | A07332 | 413 |
| A01322 | A07346 | 491 | A01322 | A07433 | 324 |
| A01322 | A07466 | 208 | A01322 | A07480 | 491 |
| A01322 | A07534 | 488 | A01322 | A07595 | 156 |
| A01322 | A07603 | 491 | A01322 | A07628 | 288 |
| A01322 | A07647 | 417 | A01322 | A07697 | 441 |
| A01322 | A07902 | 274 | A01322 | A07996 | 491 |
| A01322 | A08000 | 301 | A01322 | A08030 | 477 |
| A01322 | A08117 | 417 | A01322 | A08141 | 364 |
| A01322 | A08208 | 491 | A01322 | A08212 | 470 |
| A01322 | A08317 | 322 | A01322 | A08352 | 419 |
| A01322 | A08402 | 394 | A01322 | A08516 | 288 |
| A01322 | A08590 | 188 | A01322 | A08669 | 479 |
| A01322 | A08769 | 281 | A01322 | A08820 | 491 |
| A01322 | A08831 | 212 | A01322 | A08832 | 252 |
| A01322 | A08833 | 232 | A01322 | A08877 | 490 |
| A01322 | A08884 | 438 | A01322 | A08887 | 443 |
| A01322 | A09278 | 288 | A01322 | A09288 | 230 |
| A01322 | A09301 | 353 | A01322 | A09304 | 279 |
| A01322 | A09342 | 321 | A01322 | A09598 | 491 |
| A01322 | A09626 | 180 | A01322 | A09654 | 229 |
| A01322 | A09680 | 207 | A01322 | A09706 | 380 |
| A01322 | A09762 | 232 | A01322 | A10373 | 491 |
| A01322 | A10527 | 430 | A01322 | A10537 | 288 |
| A01322 | A11236 | 430 | A01322 | A11242 | 207 |
| A01322 | A11540 | 489 | A01322 | A11866 | 174 |
| A01322 | A11916 | 226 | A01322 | A12010 | 489 |
| A01322 | A12047 | 385 | A01322 | A12556 | 491 |
| A01322 | A12824 | 488 | A01322 | A13949 | 771 |
| A01322 | A14076 | 483 | A01322 | A14079 | 491 |
| A01322 | A14094 | 472 | A01322 | A14230 | 491 |
| A01322 | A14247 | 179 | A01322 | A14272 | 324 |
| A01322 | A14273 | 477 | A01322 | A14279 | 428 |
| A01322 | A14460 | 391 | A01322 | A14694 | 485 |
| A01322 | A14697 | 152 | A01322 | A14701 | 308 |
| A01322 | A15054 | 182 | A01322 | A15367 | 393 |



|        |        |     |        |        |     |
|--------|--------|-----|--------|--------|-----|
| A01322 | A15369 | 491 | A01322 | A15371 | 332 |
| A01322 | A15524 | 185 | A01322 | A15654 | 430 |
| A01322 | A15714 | 329 | A01322 | A15837 | 490 |
| A01322 | A15941 | 480 | A01322 | A15992 | 348 |
| A01322 | A16127 | 491 | A01322 | A16128 | 491 |
| A01322 | A16129 | 440 | A01322 | A16226 | 490 |
| A01322 | A16294 | 337 | A01322 | A16378 | 198 |
| A01322 | A16606 | 221 | A01322 | A16613 | 256 |
| A01322 | A16626 | 491 | A01322 | A16646 | 362 |
| A01322 | A16754 | 285 | A01322 | A16762 | 395 |
| A01323 | A01324 | 488 | A01323 | A01325 | 491 |
| A01323 | A01326 | 429 | A01323 | A01327 | 491 |
| A01323 | A01328 | 491 | A01323 | A01330 | 391 |
| A01323 | A01331 | 484 | A01323 | A01415 | 486 |
| A01323 | A01559 | 232 | A01323 | A01686 | 346 |
| A01323 | A02273 | 205 | A01323 | A02895 | 163 |
| A01323 | A03327 | 340 | A01323 | A04776 | 400 |
| A01323 | A05690 | 465 | A01323 | A09597 | 440 |
| A01323 | A10132 | 351 | A01323 | A14477 | 152 |
| A01323 | A14697 | 439 | A01323 | A14702 | 170 |
| A01323 | A14703 | 240 | A01324 | A01325 | 491 |
| A01324 | A01326 | 377 | A01324 | A01327 | 489 |
| A01324 | A01328 | 491 | A01324 | A01330 | 356 |
| A01324 | A01331 | 483 | A01324 | A01415 | 472 |
| A01324 | A01559 | 238 | A01324 | A01567 | 188 |
| A01324 | A01668 | 267 | A01324 | A01741 | 474 |
| A01324 | A02273 | 257 | A01324 | A02859 | 160 |
| A01324 | A02895 | 218 | A01324 | A03259 | 170 |
| A01324 | A03327 | 395 | A01324 | A04776 | 241 |
| A01324 | A05690 | 469 | A01324 | A06093 | 317 |
| A01324 | A07595 | 319 | A01324 | A08884 | 132 |
| A01324 | A09327 | 243 | A01324 | A09598 | 316 |
| A01324 | A10477 | 254 | A01324 | A11540 | 160 |
| A01324 | A13969 | 182 | A01324 | A15837 | 449 |
| A01324 | A16052 | 368 | A01324 | A16068 | 260 |
| A01324 | A16396 | 326 | A01325 | A01326 | 477 |
| A01325 | A01327 | 491 | A01325 | A01328 | 491 |
| A01325 | A01330 | 490 | A01325 | A01331 | 491 |
| A01325 | A01338 | 208 | A01325 | A01383 | 407 |
| A01325 | A01385 | 488 | A01325 | A01401 | 326 |
| A01325 | A01406 | 490 | A01325 | A01415 | 491 |
| A01325 | A01447 | 481 | A01325 | A01536 | 319 |
| A01325 | A01547 | 317 | A01325 | A01559 | 491 |
| A01325 | A01571 | 491 | A01325 | A01580 | 174 |
| A01325 | A01582 | 159 | A01325 | A01589 | 407 |
| A01325 | A01594 | 491 | A01325 | A01596 | 486 |

|        |        |     |        |        |     |
|--------|--------|-----|--------|--------|-----|
| A01325 | A01659 | 283 | A01325 | A01669 | 419 |
| A01325 | A01686 | 491 | A01325 | A01699 | 469 |
| A01325 | A01741 | 454 | A01325 | A01932 | 218 |
| A01325 | A02017 | 82  | A01325 | A02094 | 99  |
| A01325 | A02180 | 472 | A01325 | A02185 | 454 |
| A01325 | A02194 | 196 | A01325 | A02214 | 152 |
| A01325 | A02233 | 196 | A01325 | A02294 | 151 |
| A01325 | A02389 | 491 | A01325 | A02394 | 480 |
| A01325 | A02584 | 208 | A01325 | A02797 | 156 |
| A01325 | A02836 | 218 | A01325 | A02877 | 367 |
| A01325 | A03014 | 491 | A01325 | A03057 | 485 |
| A01325 | A03070 | 490 | A01325 | A03115 | 486 |
| A01325 | A03116 | 347 | A01325 | A03117 | 313 |
| A01325 | A03178 | 187 | A01325 | A03207 | 329 |
| A01325 | A03245 | 196 | A01325 | A03327 | 485 |
| A01325 | A03422 | 193 | A01325 | A03474 | 174 |
| A01325 | A03475 | 491 | A01325 | A03523 | 477 |
| A01325 | A03524 | 399 | A01325 | A03525 | 474 |
| A01325 | A03526 | 401 | A01325 | A03553 | 428 |
| A01325 | A03554 | 488 | A01325 | A03611 | 173 |
| A01325 | A03950 | 413 | A01325 | A03969 | 347 |
| A01325 | A04058 | 380 | A01325 | A04306 | 159 |
| A01325 | A04342 | 408 | A01325 | A04668 | 488 |
| A01325 | A04750 | 151 | A01325 | A04776 | 490 |
| A01325 | A04825 | 180 | A01325 | A04879 | 484 |
| A01325 | A04900 | 358 | A01325 | A05021 | 267 |
| A01325 | A05139 | 196 | A01325 | A05210 | 176 |
| A01325 | A05247 | 474 | A01325 | A05288 | 457 |
| A01325 | A05325 | 159 | A01325 | A05334 | 486 |
| A01325 | A05571 | 218 | A01325 | A05689 | 168 |
| A01325 | A05690 | 491 | A01325 | A05966 | 408 |
| A01325 | A05981 | 488 | A01325 | A06093 | 399 |
| A01325 | A06242 | 488 | A01325 | A06318 | 199 |
| A01325 | A06455 | 302 | A01325 | A06493 | 159 |
| A01325 | A06588 | 341 | A01325 | A06622 | 462 |
| A01325 | A06803 | 372 | A01325 | A06864 | 162 |
| A01325 | A06982 | 369 | A01325 | A07163 | 446 |
| A01325 | A07290 | 343 | A01325 | A07346 | 480 |
| A01325 | A07480 | 262 | A01325 | A07603 | 391 |
| A01325 | A07850 | 262 | A01325 | A08208 | 333 |
| A01325 | A08317 | 151 | A01325 | A08820 | 180 |
| A01325 | A08832 | 445 | A01325 | A08833 | 438 |
| A01325 | A08877 | 373 | A01325 | A08884 | 449 |
| A01325 | A09057 | 159 | A01325 | A09093 | 144 |
| A01325 | A09114 | 254 | A01325 | A09125 | 196 |
| A01325 | A09151 | 277 | A01325 | A09152 | 176 |

|        |        |     |        |        |     |
|--------|--------|-----|--------|--------|-----|
| A01325 | A09174 | 484 | A01325 | A09225 | 313 |
| A01325 | A09286 | 168 | A01325 | A09301 | 208 |
| A01325 | A09485 | 172 | A01325 | A09597 | 401 |
| A01325 | A09598 | 473 | A01325 | A09712 | 407 |
| A01325 | A09723 | 337 | A01325 | A09761 | 413 |
| A01325 | A09806 | 445 | A01325 | A09819 | 254 |
| A01325 | A09889 | 180 | A01325 | A09917 | 267 |
| A01325 | A09920 | 218 | A01325 | A09932 | 491 |
| A01325 | A10017 | 160 | A01325 | A10148 | 384 |
| A01325 | A10151 | 433 | A01325 | A10278 | 899 |
| A01325 | A10359 | 447 | A01325 | A10373 | 334 |
| A01325 | A10642 | 328 | A01325 | A10708 | 391 |
| A01325 | A10881 | 180 | A01325 | A10947 | 212 |
| A01325 | A11242 | 168 | A01325 | A11540 | 213 |
| A01325 | A11735 | 480 | A01325 | A11737 | 486 |
| A01325 | A11744 | 329 | A01325 | A11753 | 366 |
| A01325 | A11755 | 218 | A01325 | A11775 | 218 |
| A01325 | A11804 | 196 | A01325 | A11809 | 347 |
| A01325 | A12010 | 399 | A01325 | A12079 | 151 |
| A01325 | A12627 | 180 | A01325 | A13382 | 899 |
| A01325 | A13589 | 151 | A01325 | A13593 | 152 |
| A01325 | A13744 | 254 | A01325 | A13788 | 480 |
| A01325 | A13949 | 491 | A01325 | A14047 | 180 |
| A01325 | A14230 | 172 | A01325 | A14257 | 475 |
| A01325 | A14359 | 228 | A01325 | A14592 | 254 |
| A01325 | A14643 | 364 | A01325 | A14903 | 174 |
| A01325 | A14964 | 319 | A01325 | A15369 | 457 |
| A01325 | A15378 | 306 | A01325 | A15666 | 469 |
| A01325 | A15776 | 407 | A01325 | A15777 | 247 |
| A01325 | A15779 | 332 | A01325 | A15837 | 441 |
| A01325 | A15857 | 180 | A01325 | A15861 | 254 |
| A01325 | A16226 | 205 | A01325 | A16332 | 218 |
| A01325 | A16626 | 485 | A01325 | A16882 | 168 |
| A01326 | A01327 | 270 | A01326 | A01329 | 348 |
| A01326 | A01330 | 167 | A01326 | A01331 | 350 |
| A01326 | A01359 | 165 | A01326 | A01372 | 457 |
| A01326 | A01385 | 709 | A01326 | A01415 | 154 |
| A01326 | A01585 | 480 | A01326 | A01788 | 208 |
| A01326 | A02239 | 162 | A01326 | A02438 | 204 |
| A01326 | A03095 | 163 | A01326 | A03304 | 491 |
| A01326 | A03562 | 238 | A01326 | A03676 | 234 |
| A01326 | A04187 | 151 | A01326 | A04337 | 491 |
| A01326 | A04493 | 160 | A01326 | A04579 | 224 |
| A01326 | A04668 | 469 | A01326 | A04671 | 187 |
| A01326 | A04776 | 180 | A01326 | A05690 | 417 |
| A01326 | A06293 | 227 | A01326 | A06559 | 299 |

|        |        |     |        |        |     |
|--------|--------|-----|--------|--------|-----|
| A01326 | A07442 | 273 | A01326 | A07483 | 263 |
| A01326 | A07554 | 258 | A01326 | A07597 | 168 |
| A01326 | A07658 | 263 | A01326 | A07670 | 401 |
| A01326 | A07887 | 432 | A01326 | A08337 | 313 |
| A01326 | A08602 | 267 | A01326 | A08773 | 174 |
| A01326 | A09151 | 221 | A01326 | A09421 | 235 |
| A01326 | A09461 | 213 | A01326 | A09857 | 269 |
| A01326 | A10131 | 202 | A01326 | A10170 | 332 |
| A01326 | A10598 | 185 | A01326 | A11307 | 305 |
| A01326 | A11509 | 313 | A01326 | A11529 | 260 |
| A01326 | A11608 | 240 | A01326 | A11628 | 351 |
| A01326 | A11714 | 258 | A01326 | A12125 | 288 |
| A01326 | A12654 | 249 | A01326 | A12661 | 221 |
| A01326 | A12824 | 270 | A01326 | A12951 | 332 |
| A01326 | A13617 | 173 | A01326 | A13720 | 332 |
| A01326 | A13920 | 263 | A01326 | A13963 | 165 |
| A01326 | A13988 | 196 | A01326 | A14196 | 301 |
| A01326 | A14212 | 317 | A01326 | A14272 | 491 |
| A01326 | A14381 | 343 | A01326 | A14827 | 310 |
| A01326 | A14838 | 477 | A01326 | A15052 | 235 |
| A01326 | A15230 | 156 | A01326 | A15287 | 221 |
| A01326 | A15292 | 443 | A01326 | A15374 | 212 |
| A01326 | A15422 | 185 | A01326 | A15432 | 205 |
| A01326 | A15451 | 221 | A01326 | A15498 | 227 |
| A01326 | A15553 | 279 | A01326 | A15554 | 313 |
| A01326 | A15559 | 286 | A01326 | A15763 | 224 |
| A01326 | A15765 | 165 | A01326 | A15867 | 353 |
| A01326 | A15932 | 488 | A01326 | A15933 | 408 |
| A01326 | A16004 | 267 | A01326 | A16117 | 177 |
| A01326 | A16674 | 218 | A01326 | A16811 | 299 |
| A01326 | A17091 | 210 | A01326 | A17118 | 274 |
| A01326 | A17141 | 191 | A01327 | A01328 | 491 |
| A01327 | A01330 | 356 | A01327 | A01331 | 475 |
| A01327 | A01333 | 306 | A01327 | A01415 | 469 |
| A01327 | A01459 | 345 | A01327 | A01507 | 236 |
| A01327 | A02473 | 213 | A01327 | A02666 | 183 |
| A01327 | A03115 | 180 | A01327 | A04776 | 278 |
| A01327 | A05021 | 258 | A01327 | A05690 | 405 |
| A01327 | A06588 | 353 | A01327 | A07399 | 218 |
| A01327 | A07697 | 334 | A01327 | A07756 | 168 |
| A01327 | A08479 | 485 | A01327 | A08877 | 204 |
| A01327 | A09225 | 446 | A01327 | A09659 | 224 |
| A01327 | A10250 | 485 | A01327 | A10373 | 177 |
| A01327 | A12824 | 319 | A01327 | A14449 | 514 |
| A01327 | A14484 | 375 | A01327 | A15061 | 347 |
| A01327 | A15088 | 221 | A01327 | A15323 | 154 |

|        |        |     |        |        |     |
|--------|--------|-----|--------|--------|-----|
| A01328 | A01330 | 355 | A01328 | A01331 | 488 |
| A01328 | A01333 | 171 | A01328 | A01415 | 489 |
| A01328 | A01536 | 391 | A01328 | A01559 | 490 |
| A01328 | A01567 | 208 | A01328 | A01589 | 227 |
| A01328 | A01594 | 462 | A01328 | A01596 | 235 |
| A01328 | A01625 | 207 | A01328 | A01686 | 475 |
| A01328 | A01741 | 430 | A01328 | A01743 | 172 |
| A01328 | A02086 | 312 | A01328 | A02149 | 179 |
| A01328 | A02273 | 162 | A01328 | A02318 | 195 |
| A01328 | A02321 | 372 | A01328 | A02463 | 173 |
| A01328 | A02773 | 257 | A01328 | A03057 | 405 |
| A01328 | A03115 | 177 | A01328 | A03257 | 269 |
| A01328 | A03520 | 201 | A01328 | A04001 | 227 |
| A01328 | A04058 | 213 | A01328 | A04236 | 262 |
| A01328 | A04445 | 183 | A01328 | A04571 | 428 |
| A01328 | A04622 | 183 | A01328 | A04668 | 436 |
| A01328 | A04776 | 462 | A01328 | A04900 | 412 |
| A01328 | A04911 | 188 | A01328 | A05021 | 375 |
| A01328 | A05142 | 251 | A01328 | A05247 | 380 |
| A01328 | A05334 | 350 | A01328 | A05432 | 168 |
| A01328 | A05690 | 481 | A01328 | A06242 | 321 |
| A01328 | A06318 | 205 | A01328 | A07062 | 151 |
| A01328 | A07124 | 218 | A01328 | A07399 | 217 |
| A01328 | A08366 | 157 | A01328 | A08820 | 450 |
| A01328 | A08865 | 202 | A01328 | A09225 | 400 |
| A01328 | A09598 | 435 | A01328 | A09841 | 347 |
| A01328 | A10183 | 347 | A01328 | A10444 | 154 |
| A01328 | A11540 | 170 | A01328 | A14153 | 157 |
| A01328 | A14430 | 188 | A01328 | A14697 | 234 |
| A01328 | A15837 | 475 | A01328 | A16068 | 229 |
| A01328 | A16626 | 375 | A01329 | A01359 | 215 |
| A01329 | A01370 | 183 | A01329 | A01372 | 490 |
| A01329 | A01385 | 398 | A01329 | A01415 | 229 |
| A01329 | A01516 | 162 | A01329 | A01531 | 173 |
| A01329 | A01547 | 157 | A01329 | A01582 | 361 |
| A01329 | A01627 | 520 | A01329 | A01647 | 624 |
| A01329 | A01680 | 229 | A01329 | A01682 | 490 |
| A01329 | A02040 | 162 | A01329 | A02814 | 321 |
| A01329 | A03043 | 154 | A01329 | A03207 | 228 |
| A01329 | A03327 | 229 | A01329 | A03601 | 159 |
| A01329 | A03676 | 177 | A01329 | A03809 | 497 |
| A01329 | A03885 | 268 | A01329 | A04011 | 193 |
| A01329 | A04033 | 195 | A01329 | A04281 | 216 |
| A01329 | A04337 | 256 | A01329 | A04379 | 195 |
| A01329 | A04411 | 188 | A01329 | A04666 | 257 |
| A01329 | A04996 | 296 | A01329 | A05216 | 462 |

|        |        |     |        |        |     |
|--------|--------|-----|--------|--------|-----|
| A01329 | A05218 | 173 | A01329 | A05276 | 188 |
| A01329 | A05419 | 187 | A01329 | A05570 | 152 |
| A01329 | A05690 | 229 | A01329 | A05781 | 380 |
| A01329 | A05979 | 174 | A01329 | A06032 | 156 |
| A01329 | A06130 | 229 | A01329 | A06381 | 229 |
| A01329 | A06750 | 438 | A01329 | A07132 | 185 |
| A01329 | A07204 | 191 | A01329 | A07237 | 162 |
| A01329 | A07353 | 229 | A01329 | A07457 | 341 |
| A01329 | A07670 | 624 | A01329 | A07887 | 185 |
| A01329 | A08281 | 286 | A01329 | A08913 | 224 |
| A01329 | A09712 | 191 | A01329 | A10123 | 323 |
| A01329 | A11352 | 294 | A01329 | A11411 | 196 |
| A01329 | A12047 | 172 | A01329 | A12284 | 372 |
| A01329 | A12824 | 638 | A01329 | A13111 | 162 |
| A01329 | A13892 | 391 | A01329 | A14055 | 163 |
| A01329 | A14196 | 472 | A01329 | A14614 | 213 |
| A01329 | A14824 | 323 | A01329 | A14912 | 285 |
| A01329 | A15338 | 357 | A01329 | A15502 | 424 |
| A01329 | A15524 | 152 | A01329 | A15559 | 475 |
| A01329 | A15837 | 229 | A01329 | A16228 | 170 |
| A01329 | A16626 | 229 | A01329 | A16643 | 229 |
| A01330 | A01331 | 477 | A01330 | A01385 | 238 |
| A01330 | A01415 | 204 | A01330 | A01559 | 260 |
| A01330 | A01686 | 271 | A01330 | A03178 | 193 |
| A01330 | A03327 | 243 | A01330 | A03525 | 168 |
| A01330 | A05027 | 185 | A01330 | A06093 | 324 |
| A01330 | A07164 | 179 | A01330 | A07165 | 196 |
| A01330 | A07166 | 193 | A01330 | A07572 | 259 |
| A01330 | A09597 | 327 | A01331 | A01333 | 173 |
| A01331 | A01385 | 193 | A01331 | A01415 | 491 |
| A01331 | A01469 | 240 | A01331 | A01536 | 484 |
| A01331 | A01559 | 491 | A01331 | A01589 | 491 |
| A01331 | A01594 | 491 | A01331 | A01625 | 419 |
| A01331 | A01627 | 232 | A01331 | A01659 | 168 |
| A01331 | A01686 | 491 | A01331 | A01741 | 160 |
| A01331 | A01861 | 207 | A01331 | A02058 | 314 |
| A01331 | A02715 | 154 | A01331 | A02904 | 279 |
| A01331 | A03057 | 477 | A01331 | A03115 | 283 |
| A01331 | A03301 | 324 | A01331 | A03494 | 230 |
| A01331 | A03750 | 213 | A01331 | A03902 | 177 |
| A01331 | A04140 | 357 | A01331 | A04668 | 491 |
| A01331 | A04776 | 481 | A01331 | A05334 | 480 |
| A01331 | A05690 | 430 | A01331 | A06242 | 479 |
| A01331 | A06864 | 380 | A01331 | A06982 | 435 |
| A01331 | A07079 | 273 | A01331 | A07319 | 299 |
| A01331 | A07346 | 491 | A01331 | A07480 | 350 |

|        |        |     |        |        |     |
|--------|--------|-----|--------|--------|-----|
| A01331 | A07534 | 224 | A01331 | A07603 | 472 |
| A01331 | A07996 | 224 | A01331 | A08030 | 208 |
| A01331 | A08117 | 294 | A01331 | A08208 | 486 |
| A01331 | A08366 | 159 | A01331 | A08820 | 391 |
| A01331 | A08877 | 335 | A01331 | A09598 | 414 |
| A01331 | A09764 | 291 | A01331 | A10070 | 252 |
| A01331 | A10373 | 352 | A01331 | A10444 | 156 |
| A01331 | A11279 | 221 | A01331 | A11540 | 353 |
| A01331 | A12204 | 217 | A01331 | A12667 | 157 |
| A01331 | A13949 | 491 | A01331 | A14077 | 188 |
| A01331 | A14079 | 467 | A01331 | A14080 | 157 |
| A01331 | A14177 | 469 | A01331 | A14230 | 274 |
| A01331 | A14273 | 165 | A01331 | A14460 | 347 |
| A01331 | A14697 | 235 | A01331 | A15295 | 486 |
| A01331 | A15369 | 485 | A01331 | A15371 | 201 |
| A01331 | A15654 | 224 | A01331 | A15714 | 191 |
| A01331 | A15837 | 416 | A01331 | A15941 | 443 |
| A01331 | A16127 | 360 | A01331 | A16128 | 472 |
| A01331 | A16226 | 193 | A01331 | A16294 | 395 |
| A01331 | A16626 | 490 | A01332 | A01526 | 191 |
| A01332 | A01565 | 480 | A01332 | A01790 | 270 |
| A01332 | A02727 | 190 | A01332 | A03090 | 409 |
| A01332 | A03104 | 350 | A01332 | A03111 | 316 |
| A01332 | A03136 | 329 | A01332 | A03211 | 215 |
| A01332 | A03828 | 420 | A01332 | A03829 | 480 |
| A01332 | A03974 | 234 | A01332 | A04252 | 229 |
| A01332 | A04273 | 279 | A01332 | A04275 | 191 |
| A01332 | A04449 | 491 | A01332 | A05155 | 328 |
| A01332 | A05439 | 491 | A01332 | A05489 | 399 |
| A01332 | A05517 | 193 | A01332 | A05556 | 411 |
| A01332 | A05601 | 491 | A01332 | A05767 | 491 |
| A01332 | A06277 | 323 | A01332 | A06719 | 205 |
| A01332 | A08093 | 205 | A01332 | A08097 | 488 |
| A01332 | A08596 | 170 | A01332 | A08685 | 212 |
| A01332 | A08850 | 191 | A01332 | A08855 | 427 |
| A01332 | A08859 | 470 | A01332 | A09246 | 484 |
| A01332 | A09309 | 180 | A01332 | A10169 | 406 |
| A01332 | A10173 | 491 | A01332 | A10367 | 355 |
| A01332 | A10631 | 224 | A01332 | A11454 | 157 |
| A01332 | A11645 | 254 | A01332 | A11727 | 167 |
| A01332 | A11983 | 274 | A01332 | A12561 | 330 |
| A01332 | A12599 | 330 | A01332 | A12786 | 330 |
| A01332 | A13587 | 378 | A01332 | A13889 | 185 |
| A01332 | A14072 | 180 | A01332 | A14202 | 475 |
| A01332 | A14229 | 215 | A01332 | A14366 | 318 |
| A01332 | A14375 | 332 | A01332 | A14570 | 488 |

|        |        |     |        |        |     |
|--------|--------|-----|--------|--------|-----|
| A01332 | A14893 | 404 | A01332 | A14936 | 377 |
| A01332 | A15281 | 235 | A01332 | A15282 | 279 |
| A01332 | A15292 | 440 | A01332 | A15366 | 263 |
| A01332 | A15432 | 174 | A01332 | A15478 | 179 |
| A01332 | A15606 | 208 | A01332 | A15680 | 229 |
| A01332 | A16036 | 303 | A01332 | A16349 | 254 |
| A01332 | A16702 | 170 | A01332 | A16703 | 154 |
| A01332 | A16838 | 168 | A01333 | A13617 | 177 |
| A01334 | A01391 | 156 | A01334 | A01434 | 455 |
| A01334 | A01483 | 334 | A01334 | A01612 | 475 |
| A01334 | A02671 | 425 | A01334 | A03079 | 207 |
| A01334 | A03494 | 156 | A01334 | A05845 | 279 |
| A01334 | A07242 | 159 | A01334 | A07487 | 204 |
| A01334 | A07524 | 391 | A01334 | A07584 | 183 |
| A01334 | A07898 | 156 | A01334 | A07924 | 375 |
| A01334 | A08137 | 439 | A01334 | A08201 | 156 |
| A01334 | A08304 | 273 | A01334 | A08327 | 538 |
| A01334 | A08431 | 334 | A01334 | A08542 | 348 |
| A01334 | A09146 | 303 | A01334 | A09699 | 324 |
| A01334 | A11496 | 156 | A01334 | A11497 | 156 |
| A01334 | A11938 | 456 | A01334 | A12757 | 156 |
| A01334 | A12829 | 422 | A01334 | A13928 | 156 |
| A01334 | A14006 | 394 | A01334 | A14178 | 156 |
| A01334 | A14184 | 241 | A01334 | A14381 | 180 |
| A01334 | A15266 | 213 | A01334 | A16320 | 187 |
| A01334 | A16699 | 156 | A01335 | A01337 | 491 |
| A01335 | A01365 | 491 | A01335 | A01369 | 491 |
| A01335 | A01382 | 238 | A01335 | A01384 | 179 |
| A01335 | A01392 | 428 | A01335 | A01406 | 479 |
| A01335 | A01407 | 302 | A01335 | A01411 | 382 |
| A01335 | A01416 | 196 | A01335 | A01425 | 355 |
| A01335 | A01431 | 208 | A01335 | A01433 | 383 |
| A01335 | A01436 | 544 | A01335 | A01437 | 416 |
| A01335 | A01439 | 235 | A01335 | A01449 | 473 |
| A01335 | A01457 | 188 | A01335 | A01461 | 433 |
| A01335 | A01464 | 249 | A01335 | A01468 | 491 |
| A01335 | A01470 | 491 | A01335 | A01496 | 491 |
| A01335 | A01539 | 404 | A01335 | A01569 | 480 |
| A01335 | A01571 | 358 | A01335 | A01574 | 348 |
| A01335 | A01579 | 491 | A01335 | A01585 | 329 |
| A01335 | A01586 | 339 | A01335 | A01597 | 363 |
| A01335 | A01598 | 358 | A01335 | A01601 | 491 |
| A01335 | A01612 | 456 | A01335 | A01614 | 218 |
| A01335 | A01649 | 491 | A01335 | A01684 | 165 |
| A01335 | A01718 | 383 | A01335 | A01822 | 310 |
| A01335 | A02227 | 451 | A01335 | A02350 | 408 |



|        |        |     |        |        |     |
|--------|--------|-----|--------|--------|-----|
| A01335 | A03069 | 329 | A01335 | A03446 | 195 |
| A01335 | A03493 | 297 | A01335 | A03567 | 491 |
| A01335 | A03740 | 481 | A01335 | A03752 | 411 |
| A01335 | A03859 | 418 | A01335 | A03981 | 490 |
| A01335 | A04099 | 176 | A01335 | A04846 | 390 |
| A01335 | A04988 | 177 | A01335 | A05086 | 294 |
| A01335 | A05450 | 167 | A01335 | A05499 | 457 |
| A01335 | A05501 | 491 | A01335 | A05502 | 338 |
| A01335 | A05557 | 305 | A01335 | A05981 | 361 |
| A01335 | A06343 | 202 | A01335 | A06351 | 238 |
| A01335 | A06466 | 477 | A01335 | A06564 | 489 |
| A01335 | A06814 | 226 | A01335 | A06897 | 486 |
| A01335 | A06965 | 491 | A01335 | A06973 | 491 |
| A01335 | A07047 | 488 | A01335 | A07075 | 202 |
| A01335 | A07262 | 193 | A01335 | A07311 | 483 |
| A01335 | A07323 | 187 | A01335 | A07349 | 188 |
| A01335 | A07398 | 420 | A01335 | A07451 | 347 |
| A01335 | A07581 | 490 | A01335 | A07775 | 165 |
| A01335 | A07965 | 443 | A01335 | A08011 | 561 |
| A01335 | A08131 | 491 | A01335 | A08137 | 473 |
| A01335 | A08154 | 472 | A01335 | A08301 | 435 |
| A01335 | A08321 | 212 | A01335 | A08357 | 490 |
| A01335 | A08358 | 491 | A01335 | A08359 | 491 |
| A01335 | A08369 | 198 | A01335 | A08408 | 485 |
| A01335 | A08419 | 328 | A01335 | A08452 | 162 |
| A01335 | A08457 | 455 | A01335 | A08462 | 160 |
| A01335 | A08476 | 480 | A01335 | A08501 | 305 |
| A01335 | A08543 | 440 | A01335 | A08556 | 412 |
| A01335 | A08559 | 170 | A01335 | A08761 | 466 |
| A01335 | A08773 | 279 | A01335 | A08929 | 413 |
| A01335 | A09285 | 430 | A01335 | A09322 | 355 |
| A01335 | A09613 | 345 | A01335 | A09622 | 174 |
| A01335 | A09726 | 332 | A01335 | A09735 | 485 |
| A01335 | A09852 | 439 | A01335 | A09999 | 230 |
| A01335 | A10338 | 283 | A01335 | A10532 | 356 |
| A01335 | A10616 | 188 | A01335 | A10633 | 306 |
| A01335 | A10853 | 152 | A01335 | A11420 | 406 |
| A01335 | A11440 | 63  | A01335 | A11480 | 174 |
| A01335 | A11550 | 479 | A01335 | A11562 | 358 |
| A01335 | A11593 | 256 | A01335 | A11616 | 241 |
| A01335 | A11728 | 457 | A01335 | A11857 | 480 |
| A01335 | A12011 | 224 | A01335 | A12080 | 165 |
| A01335 | A12270 | 182 | A01335 | A12328 | 452 |
| A01335 | A12813 | 185 | A01335 | A12821 | 475 |
| A01335 | A12968 | 163 | A01335 | A13340 | 484 |
| A01335 | A13357 | 274 | A01335 | A13375 | 329 |

|        |        |     |        |        |     |
|--------|--------|-----|--------|--------|-----|
| A01335 | A13710 | 183 | A01335 | A13788 | 423 |
| A01335 | A13989 | 491 | A01335 | A13992 | 210 |
| A01335 | A14151 | 213 | A01335 | A14152 | 324 |
| A01335 | A14169 | 238 | A01335 | A14176 | 212 |
| A01335 | A14188 | 396 | A01335 | A14216 | 491 |
| A01335 | A14257 | 168 | A01335 | A14479 | 307 |
| A01335 | A14502 | 160 | A01335 | A14508 | 490 |
| A01335 | A14566 | 179 | A01335 | A14568 | 446 |
| A01335 | A14594 | 227 | A01335 | A14597 | 262 |
| A01335 | A14813 | 238 | A01335 | A14923 | 193 |
| A01335 | A15062 | 251 | A01335 | A15202 | 249 |
| A01335 | A15244 | 196 | A01335 | A15499 | 215 |
| A01335 | A15500 | 491 | A01335 | A15660 | 491 |
| A01335 | A15666 | 219 | A01335 | A15684 | 486 |
| A01335 | A15732 | 446 | A01335 | A15771 | 477 |
| A01335 | A15931 | 276 | A01335 | A16118 | 470 |
| A01335 | A16462 | 356 | A01335 | A16686 | 483 |
| A01335 | A16818 | 185 | A01335 | A17123 | 168 |
| A01336 | A01413 | 368 | A01336 | A01435 | 185 |
| A01336 | A01447 | 402 | A01336 | A01559 | 230 |
| A01336 | A01827 | 467 | A01336 | A02040 | 254 |
| A01336 | A02527 | 267 | A01336 | A02994 | 333 |
| A01336 | A03506 | 185 | A01336 | A03676 | 213 |
| A01336 | A03798 | 201 | A01336 | A04782 | 230 |
| A01336 | A05812 | 201 | A01336 | A07394 | 391 |
| A01336 | A09709 | 462 | A01336 | A11526 | 238 |
| A01336 | A11737 | 294 | A01336 | A15653 | 379 |
| A01336 | A15666 | 266 | A01337 | A01365 | 488 |
| A01337 | A01369 | 491 | A01337 | A01449 | 441 |
| A01337 | A01579 | 488 | A01337 | A01649 | 174 |
| A01337 | A03493 | 340 | A01337 | A05258 | 347 |
| A01337 | A05501 | 456 | A01337 | A06564 | 199 |
| A01337 | A07262 | 348 | A01337 | A07412 | 258 |
| A01337 | A07581 | 202 | A01337 | A07965 | 452 |
| A01337 | A08358 | 167 | A01337 | A08359 | 165 |
| A01337 | A08501 | 306 | A01337 | A09285 | 420 |
| A01337 | A09332 | 162 | A01337 | A09726 | 288 |
| A01337 | A09735 | 463 | A01337 | A09808 | 369 |
| A01337 | A11338 | 185 | A01337 | A11616 | 229 |
| A01337 | A12011 | 283 | A01337 | A12821 | 480 |
| A01337 | A14508 | 462 | A01337 | A14813 | 293 |
| A01337 | A15500 | 401 | A01337 | A16686 | 217 |
| A01338 | A01429 | 200 | A01338 | A01437 | 484 |
| A01338 | A01464 | 433 | A01338 | A01598 | 424 |
| A01338 | A01612 | 404 | A01338 | A01614 | 190 |
| A01338 | A01617 | 127 | A01338 | A01618 | 200 |

|        |        |     |        |        |     |
|--------|--------|-----|--------|--------|-----|
| A01338 | A01649 | 489 | A01338 | A01740 | 350 |
| A01338 | A02738 | 294 | A01338 | A02978 | 566 |
| A01338 | A02980 | 328 | A01338 | A03069 | 434 |
| A01338 | A03149 | 182 | A01338 | A03567 | 491 |
| A01338 | A03754 | 313 | A01338 | A03785 | 191 |
| A01338 | A03859 | 491 | A01338 | A04858 | 219 |
| A01338 | A05385 | 288 | A01338 | A06861 | 480 |
| A01338 | A06965 | 491 | A01338 | A06973 | 528 |
| A01338 | A08011 | 462 | A01338 | A08137 | 488 |
| A01338 | A08357 | 293 | A01338 | A08398 | 200 |
| A01338 | A08452 | 484 | A01338 | A08521 | 200 |
| A01338 | A08558 | 760 | A01338 | A08664 | 200 |
| A01338 | A08773 | 356 | A01338 | A08972 | 254 |
| A01338 | A09044 | 281 | A01338 | A09322 | 491 |
| A01338 | A09702 | 532 | A01338 | A10417 | 200 |
| A01338 | A10439 | 323 | A01338 | A10529 | 440 |
| A01338 | A11301 | 324 | A01338 | A11390 | 491 |
| A01338 | A11438 | 417 | A01338 | A11443 | 165 |
| A01338 | A11480 | 224 | A01338 | A11704 | 468 |
| A01338 | A11729 | 200 | A01338 | A11945 | 491 |
| A01338 | A12052 | 232 | A01338 | A12233 | 486 |
| A01338 | A12243 | 489 | A01338 | A12606 | 162 |
| A01338 | A12728 | 479 | A01338 | A12824 | 491 |
| A01338 | A13231 | 154 | A01338 | A13333 | 200 |
| A01338 | A13457 | 481 | A01338 | A13793 | 278 |
| A01338 | A13989 | 188 | A01338 | A14167 | 272 |
| A01338 | A14169 | 268 | A01338 | A14505 | 205 |
| A01338 | A14566 | 488 | A01338 | A14595 | 314 |
| A01338 | A14596 | 485 | A01338 | A14982 | 157 |
| A01338 | A15218 | 363 | A01338 | A15219 | 419 |
| A01338 | A15221 | 491 | A01338 | A15666 | 486 |
| A01338 | A15723 | 390 | A01338 | A15727 | 485 |
| A01338 | A15937 | 438 | A01338 | A16118 | 279 |
| A01338 | A16157 | 247 | A01338 | A16523 | 201 |
| A01338 | A16631 | 283 | A01338 | A16675 | 173 |
| A01338 | A16697 | 458 | A01338 | A16823 | 190 |
| A01339 | A01370 | 489 | A01339 | A01372 | 216 |
| A01339 | A02041 | 265 | A01339 | A02151 | 228 |
| A01339 | A02212 | 216 | A01339 | A02414 | 180 |
| A01339 | A03570 | 408 | A01339 | A03676 | 428 |
| A01339 | A04990 | 288 | A01339 | A05107 | 243 |
| A01339 | A05502 | 191 | A01339 | A06122 | 205 |
| A01339 | A06761 | 200 | A01339 | A06989 | 341 |
| A01339 | A07081 | 226 | A01339 | A07096 | 160 |
| A01339 | A07101 | 310 | A01339 | A07226 | 160 |
| A01339 | A07439 | 179 | A01339 | A07457 | 302 |

|        |        |     |        |        |     |
|--------|--------|-----|--------|--------|-----|
| A01339 | A07670 | 443 | A01339 | A07725 | 151 |
| A01339 | A07756 | 337 | A01339 | A08183 | 191 |
| A01339 | A08248 | 286 | A01339 | A08281 | 347 |
| A01339 | A08834 | 160 | A01339 | A08927 | 363 |
| A01339 | A08990 | 268 | A01339 | A09331 | 240 |
| A01339 | A09627 | 160 | A01339 | A09898 | 341 |
| A01339 | A10372 | 160 | A01339 | A11365 | 160 |
| A01339 | A11735 | 160 | A01339 | A11737 | 160 |
| A01339 | A11914 | 160 | A01339 | A12292 | 311 |
| A01339 | A12658 | 160 | A01339 | A12810 | 306 |
| A01339 | A12824 | 542 | A01339 | A12863 | 252 |
| A01339 | A12897 | 212 | A01339 | A14007 | 160 |
| A01339 | A14196 | 468 | A01339 | A14566 | 382 |
| A01339 | A15257 | 160 | A01339 | A15297 | 372 |
| A01339 | A15338 | 216 | A01339 | A15498 | 187 |
| A01339 | A15559 | 327 | A01339 | A15624 | 451 |
| A01339 | A15649 | 152 | A01339 | A15947 | 193 |
| A01339 | A16862 | 317 | A01340 | A01370 | 247 |
| A01340 | A01418 | 473 | A01340 | A02494 | 177 |
| A01340 | A05570 | 314 | A01340 | A07111 | 226 |
| A01340 | A11795 | 432 | A01340 | A12824 | 232 |
| A01340 | A13190 | 457 | A01341 | A01388 | 491 |
| A01341 | A01415 | 363 | A01341 | A01468 | 270 |
| A01341 | A01536 | 467 | A01341 | A01559 | 480 |
| A01341 | A01616 | 490 | A01341 | A01659 | 369 |
| A01341 | A01686 | 480 | A01341 | A01690 | 385 |
| A01341 | A01741 | 190 | A01341 | A03051 | 176 |
| A01341 | A04668 | 491 | A01341 | A05218 | 286 |
| A01341 | A06982 | 491 | A01341 | A07319 | 395 |
| A01341 | A07346 | 491 | A01341 | A07480 | 412 |
| A01341 | A07534 | 374 | A01341 | A07603 | 488 |
| A01341 | A07996 | 477 | A01341 | A08212 | 483 |
| A01341 | A08516 | 491 | A01341 | A08526 | 200 |
| A01341 | A08769 | 491 | A01341 | A08995 | 486 |
| A01341 | A09000 | 488 | A01341 | A09001 | 435 |
| A01341 | A09598 | 455 | A01341 | A09706 | 355 |
| A01341 | A09762 | 491 | A01341 | A09765 | 293 |
| A01341 | A10373 | 491 | A01341 | A11236 | 491 |
| A01341 | A11703 | 152 | A01341 | A11880 | 210 |
| A01341 | A11916 | 466 | A01341 | A12556 | 491 |
| A01341 | A12625 | 413 | A01341 | A13949 | 484 |
| A01341 | A14076 | 491 | A01341 | A14094 | 491 |
| A01341 | A14230 | 491 | A01341 | A14282 | 483 |
| A01341 | A14674 | 246 | A01341 | A14706 | 489 |
| A01341 | A15369 | 490 | A01341 | A15371 | 357 |
| A01341 | A15563 | 157 | A01341 | A15941 | 369 |

|        |        |     |        |        |     |
|--------|--------|-----|--------|--------|-----|
| A01341 | A16127 | 462 | A01341 | A16128 | 491 |
| A01341 | A16129 | 491 | A01341 | A16226 | 156 |
| A01341 | A16294 | 416 | A01341 | A16299 | 427 |
| A01341 | A16470 | 252 | A01341 | A16646 | 447 |
| A01341 | A16656 | 217 | A01341 | A16762 | 491 |
| A01341 | A17133 | 156 | A01342 | A01417 | 451 |
| A01342 | A01546 | 159 | A01342 | A01661 | 355 |
| A01342 | A02044 | 308 | A01342 | A02203 | 224 |
| A01342 | A02278 | 469 | A01342 | A03095 | 260 |
| A01342 | A03556 | 477 | A01342 | A03880 | 462 |
| A01342 | A04668 | 303 | A01342 | A06982 | 439 |
| A01342 | A07294 | 319 | A01342 | A08148 | 270 |
| A01342 | A08463 | 455 | A01342 | A08502 | 491 |
| A01342 | A10315 | 466 | A01342 | A12047 | 458 |
| A01342 | A13322 | 351 | A01342 | A14088 | 396 |
| A01342 | A14193 | 708 | A01342 | A14204 | 446 |
| A01342 | A14209 | 288 | A01342 | A14253 | 337 |
| A01342 | A14393 | 450 | A01342 | A15347 | 305 |
| A01342 | A15556 | 692 | A01342 | A15557 | 490 |
| A01342 | A15644 | 707 | A01342 | A15683 | 491 |
| A01342 | A15712 | 281 | A01342 | A16113 | 294 |
| A01342 | A16292 | 240 | A01342 | A16459 | 317 |
| A01342 | A16466 | 177 | A01342 | A16546 | 408 |
| A01342 | A16611 | 417 | A01342 | A16665 | 258 |
| A01343 | A01438 | 249 | A01343 | A01451 | 215 |
| A01343 | A01500 | 229 | A01343 | A01522 | 616 |
| A01343 | A01543 | 414 | A01343 | A01551 | 259 |
| A01343 | A01585 | 165 | A01343 | A01595 | 221 |
| A01343 | A01627 | 632 | A01343 | A02215 | 302 |
| A01343 | A03079 | 601 | A01343 | A03104 | 391 |
| A01343 | A03293 | 382 | A01343 | A03625 | 432 |
| A01343 | A04151 | 296 | A01343 | A04194 | 279 |
| A01343 | A04275 | 385 | A01343 | A05234 | 477 |
| A01343 | A05356 | 383 | A01343 | A05891 | 190 |
| A01343 | A06293 | 286 | A01343 | A08097 | 474 |
| A01343 | A09939 | 307 | A01343 | A11573 | 310 |
| A01343 | A11904 | 362 | A01343 | A14193 | 914 |
| A01343 | A14216 | 300 | A01343 | A14221 | 299 |
| A01343 | A14340 | 380 | A01343 | A14381 | 184 |
| A01343 | A14936 | 243 | A01343 | A15295 | 321 |
| A01343 | A15347 | 238 | A01343 | A15626 | 472 |
| A01343 | A17061 | 235 | A01344 | A01643 | 402 |
| A01344 | A02316 | 217 | A01344 | A02344 | 299 |
| A01344 | A02521 | 243 | A01344 | A02529 | 224 |
| A01344 | A03234 | 199 | A01344 | A03484 | 382 |
| A01344 | A03513 | 460 | A01344 | A03860 | 279 |

|        |        |     |        |        |     |
|--------|--------|-----|--------|--------|-----|
| A01344 | A04095 | 322 | A01344 | A04228 | 257 |
| A01344 | A04883 | 477 | A01344 | A05358 | 296 |
| A01344 | A05418 | 328 | A01344 | A05424 | 324 |
| A01344 | A05452 | 430 | A01344 | A05550 | 433 |
| A01344 | A05883 | 299 | A01344 | A06090 | 361 |
| A01344 | A06439 | 412 | A01344 | A06629 | 224 |
| A01344 | A06734 | 321 | A01344 | A06860 | 241 |
| A01344 | A06970 | 368 | A01344 | A07007 | 226 |
| A01344 | A07037 | 322 | A01344 | A07059 | 451 |
| A01344 | A07088 | 236 | A01344 | A07520 | 184 |
| A01344 | A07553 | 201 | A01344 | A07757 | 480 |
| A01344 | A07771 | 229 | A01344 | A07851 | 389 |
| A01344 | A07855 | 308 | A01344 | A08365 | 207 |
| A01344 | A10072 | 281 | A01344 | A10989 | 238 |
| A01344 | A14701 | 520 | A01345 | A01366 | 299 |
| A01345 | A01454 | 491 | A01345 | A01478 | 245 |
| A01345 | A01479 | 434 | A01345 | A01486 | 218 |
| A01345 | A01553 | 199 | A01345 | A01561 | 199 |
| A01345 | A01568 | 456 | A01345 | A01580 | 491 |
| A01345 | A01591 | 63  | A01345 | A01593 | 63  |
| A01345 | A01653 | 157 | A01345 | A01687 | 479 |
| A01345 | A01689 | 79  | A01345 | A01703 | 278 |
| A01345 | A02116 | 183 | A01345 | A02151 | 226 |
| A01345 | A02350 | 228 | A01345 | A02718 | 310 |
| A01345 | A02875 | 379 | A01345 | A03492 | 314 |
| A01345 | A03575 | 63  | A01345 | A03809 | 152 |
| A01345 | A05009 | 207 | A01345 | A05894 | 491 |
| A01345 | A06100 | 184 | A01345 | A06819 | 445 |
| A01345 | A06840 | 200 | A01345 | A07242 | 491 |
| A01345 | A07309 | 157 | A01345 | A07483 | 491 |
| A01345 | A07495 | 408 | A01345 | A07687 | 193 |
| A01345 | A07709 | 490 | A01345 | A07816 | 238 |
| A01345 | A07893 | 433 | A01345 | A08536 | 473 |
| A01345 | A08551 | 491 | A01345 | A08569 | 491 |
| A01345 | A08571 | 199 | A01345 | A08951 | 193 |
| A01345 | A08986 | 486 | A01345 | A08997 | 218 |
| A01345 | A09508 | 162 | A01345 | A09662 | 291 |
| A01345 | A09727 | 171 | A01345 | A09774 | 152 |
| A01345 | A10571 | 218 | A01345 | A10578 | 199 |
| A01345 | A10604 | 70  | A01345 | A10909 | 229 |
| A01345 | A11112 | 265 | A01345 | A11283 | 409 |
| A01345 | A11551 | 240 | A01345 | A11835 | 215 |
| A01345 | A11917 | 247 | A01345 | A11986 | 479 |
| A01345 | A11995 | 326 | A01345 | A12047 | 486 |
| A01345 | A12099 | 200 | A01345 | A12225 | 332 |
| A01345 | A12226 | 357 | A01345 | A12722 | 291 |

|        |        |     |        |        |     |
|--------|--------|-----|--------|--------|-----|
| A01345 | A13163 | 159 | A01345 | A14227 | 129 |
| A01345 | A14484 | 188 | A01345 | A14509 | 162 |
| A01345 | A14661 | 488 | A01345 | A15533 | 390 |
| A01345 | A16077 | 218 | A01346 | A01392 | 151 |
| A01346 | A01399 | 592 | A01346 | A01403 | 163 |
| A01346 | A01412 | 372 | A01346 | A01443 | 587 |
| A01346 | A01446 | 490 | A01346 | A01448 | 491 |
| A01346 | A01711 | 435 | A01346 | A01741 | 319 |
| A01346 | A01743 | 213 | A01346 | A01795 | 196 |
| A01346 | A02040 | 154 | A01346 | A02260 | 165 |
| A01346 | A02814 | 208 | A01346 | A02994 | 281 |
| A01346 | A03068 | 182 | A01346 | A03676 | 249 |
| A01346 | A03809 | 204 | A01346 | A03959 | 579 |
| A01346 | A04327 | 226 | A01346 | A04771 | 212 |
| A01346 | A04895 | 491 | A01346 | A05054 | 270 |
| A01346 | A05839 | 390 | A01346 | A06084 | 171 |
| A01346 | A06217 | 228 | A01346 | A06356 | 221 |
| A01346 | A06959 | 490 | A01346 | A07237 | 483 |
| A01346 | A07321 | 174 | A01346 | A07350 | 318 |
| A01346 | A07362 | 395 | A01346 | A07551 | 256 |
| A01346 | A07569 | 484 | A01346 | A07597 | 351 |
| A01346 | A07744 | 230 | A01346 | A07792 | 179 |
| A01346 | A08228 | 338 | A01346 | A08547 | 204 |
| A01346 | A09616 | 344 | A01346 | A09978 | 167 |
| A01346 | A10199 | 414 | A01346 | A10535 | 281 |
| A01346 | A11086 | 218 | A01346 | A11427 | 311 |
| A01346 | A11453 | 174 | A01346 | A11628 | 180 |
| A01346 | A11677 | 247 | A01346 | A13678 | 318 |
| A01346 | A13707 | 230 | A01346 | A14482 | 385 |
| A01346 | A14569 | 232 | A01346 | A14699 | 391 |
| A01346 | A14701 | 212 | A01346 | A14778 | 247 |
| A01346 | A14816 | 195 | A01346 | A14818 | 279 |
| A01346 | A15035 | 208 | A01346 | A15498 | 429 |
| A01346 | A15624 | 273 | A01346 | A15649 | 156 |
| A01346 | A15684 | 393 | A01346 | A16088 | 430 |
| A01346 | A16587 | 247 | A01347 | A01433 | 171 |
| A01347 | A01481 | 446 | A01347 | A01635 | 428 |
| A01347 | A03059 | 200 | A01347 | A04781 | 196 |
| A01347 | A04834 | 157 | A01347 | A04995 | 258 |
| A01347 | A05007 | 313 | A01347 | A05088 | 227 |
| A01347 | A05516 | 263 | A01347 | A05714 | 271 |
| A01347 | A05868 | 154 | A01347 | A06088 | 205 |
| A01347 | A06252 | 180 | A01347 | A06358 | 483 |
| A01347 | A07088 | 210 | A01347 | A07122 | 491 |
| A01347 | A07256 | 212 | A01347 | A07413 | 486 |
| A01347 | A07553 | 480 | A01347 | A07659 | 188 |

|        |        |     |        |        |     |
|--------|--------|-----|--------|--------|-----|
| A01347 | A07706 | 195 | A01347 | A07800 | 491 |
| A01347 | A07823 | 255 | A01347 | A07848 | 263 |
| A01347 | A10121 | 247 | A01347 | A10536 | 337 |
| A01347 | A10702 | 477 | A01347 | A10880 | 311 |
| A01347 | A10885 | 162 | A01347 | A11309 | 345 |
| A01347 | A11358 | 183 | A01347 | A12055 | 241 |
| A01347 | A14221 | 232 | A01347 | A15315 | 201 |
| A01347 | A15322 | 296 | A01347 | A15497 | 430 |
| A01347 | A15743 | 154 | A01347 | A15811 | 180 |
| A01347 | A16002 | 490 | A01347 | A16027 | 347 |
| A01347 | A16529 | 430 | A01348 | A01358 | 489 |
| A01348 | A01483 | 343 | A01348 | A01524 | 273 |
| A01348 | A01568 | 489 | A01348 | A01705 | 625 |
| A01348 | A04175 | 477 | A01348 | A04715 | 409 |
| A01348 | A05918 | 180 | A01348 | A06478 | 265 |
| A01348 | A06591 | 271 | A01348 | A07004 | 301 |
| A01348 | A07242 | 461 | A01348 | A07483 | 456 |
| A01348 | A07495 | 484 | A01348 | A07709 | 484 |
| A01348 | A08464 | 221 | A01348 | A08531 | 489 |
| A01348 | A08536 | 358 | A01348 | A08551 | 491 |
| A01348 | A08569 | 329 | A01348 | A09671 | 490 |
| A01348 | A09995 | 330 | A01348 | A10284 | 184 |
| A01348 | A10773 | 168 | A01348 | A11201 | 177 |
| A01348 | A11292 | 491 | A01348 | A11472 | 285 |
| A01348 | A11576 | 490 | A01348 | A11648 | 340 |
| A01348 | A11917 | 462 | A01348 | A12047 | 327 |
| A01348 | A12508 | 165 | A01348 | A12665 | 441 |
| A01348 | A13116 | 230 | A01348 | A13309 | 435 |
| A01348 | A13313 | 711 | A01348 | A13781 | 683 |
| A01348 | A14270 | 221 | A01348 | A14281 | 363 |
| A01348 | A14358 | 221 | A01348 | A14633 | 246 |
| A01348 | A14661 | 165 | A01348 | A14846 | 285 |
| A01348 | A15004 | 321 | A01348 | A15034 | 319 |
| A01348 | A15187 | 322 | A01348 | A15189 | 412 |
| A01348 | A15855 | 447 | A01348 | A16225 | 378 |
| A01348 | A16552 | 414 | A01348 | A16675 | 271 |
| A01348 | A16824 | 184 | A01348 | A16905 | 191 |
| A01349 | A01429 | 668 | A01349 | A01430 | 479 |
| A01349 | A01470 | 477 | A01349 | A01492 | 221 |
| A01349 | A01575 | 385 | A01349 | A01576 | 413 |
| A01349 | A01597 | 201 | A01349 | A01598 | 491 |
| A01349 | A01614 | 286 | A01349 | A01649 | 491 |
| A01349 | A02278 | 193 | A01349 | A02763 | 191 |
| A01349 | A03892 | 374 | A01349 | A04584 | 263 |
| A01349 | A07348 | 692 | A01349 | A07677 | 201 |
| A01349 | A08022 | 330 | A01349 | A08211 | 438 |



|        |        |     |        |        |     |
|--------|--------|-----|--------|--------|-----|
| A01349 | A08357 | 241 | A01349 | A08461 | 491 |
| A01349 | A08810 | 177 | A01349 | A11462 | 219 |
| A01349 | A11496 | 251 | A01349 | A11497 | 321 |
| A01349 | A12138 | 695 | A01349 | A13989 | 486 |
| A01349 | A15774 | 297 | A01349 | A16699 | 162 |
| A01351 | A01356 | 170 | A01351 | A01424 | 544 |
| A01351 | A01425 | 207 | A01351 | A01430 | 160 |
| A01351 | A01451 | 230 | A01351 | A01459 | 299 |
| A01351 | A01470 | 491 | A01351 | A01488 | 445 |
| A01351 | A01492 | 552 | A01351 | A01538 | 170 |
| A01351 | A01598 | 549 | A01351 | A01610 | 191 |
| A01351 | A01612 | 491 | A01351 | A01614 | 530 |
| A01351 | A01649 | 452 | A01351 | A02164 | 63  |
| A01351 | A02265 | 201 | A01351 | A02535 | 491 |
| A01351 | A03438 | 540 | A01351 | A03494 | 491 |
| A01351 | A03569 | 485 | A01351 | A03582 | 121 |
| A01351 | A03597 | 425 | A01351 | A03652 | 170 |
| A01351 | A03981 | 170 | A01351 | A06177 | 229 |
| A01351 | A06204 | 279 | A01351 | A06275 | 294 |
| A01351 | A06347 | 199 | A01351 | A06356 | 170 |
| A01351 | A06698 | 542 | A01351 | A06825 | 63  |
| A01351 | A06907 | 400 | A01351 | A07244 | 694 |
| A01351 | A07347 | 423 | A01351 | A07432 | 599 |
| A01351 | A07524 | 552 | A01351 | A07537 | 452 |
| A01351 | A07625 | 406 | A01351 | A07700 | 462 |
| A01351 | A07924 | 551 | A01351 | A08137 | 491 |
| A01351 | A08211 | 170 | A01351 | A08447 | 256 |
| A01351 | A08571 | 195 | A01351 | A09156 | 165 |
| A01351 | A09248 | 99  | A01351 | A09697 | 170 |
| A01351 | A10250 | 168 | A01351 | A10465 | 353 |
| A01351 | A10616 | 216 | A01351 | A10710 | 249 |
| A01351 | A11277 | 200 | A01351 | A11544 | 174 |
| A01351 | A11831 | 174 | A01351 | A11832 | 203 |
| A01351 | A11913 | 63  | A01351 | A12097 | 369 |
| A01351 | A12369 | 243 | A01351 | A13052 | 170 |
| A01351 | A13076 | 243 | A01351 | A13164 | 243 |
| A01351 | A13165 | 296 | A01351 | A13792 | 346 |
| A01351 | A13875 | 232 | A01351 | A13989 | 549 |
| A01351 | A14006 | 465 | A01351 | A14257 | 363 |
| A01351 | A15338 | 333 | A01351 | A15370 | 491 |
| A01351 | A15764 | 341 | A01351 | A16302 | 215 |
| A01352 | A01365 | 663 | A01352 | A01385 | 249 |
| A01352 | A01399 | 485 | A01352 | A01406 | 429 |
| A01352 | A01411 | 63  | A01352 | A01412 | 271 |
| A01352 | A01416 | 366 | A01352 | A01418 | 324 |
| A01352 | A01419 | 159 | A01352 | A01440 | 191 |

|        |        |     |        |        |     |
|--------|--------|-----|--------|--------|-----|
| A01352 | A01442 | 324 | A01352 | A01518 | 165 |
| A01352 | A01598 | 202 | A01352 | A01615 | 255 |
| A01352 | A02164 | 473 | A01352 | A02203 | 157 |
| A01352 | A03601 | 458 | A01352 | A04337 | 278 |
| A01352 | A04668 | 490 | A01352 | A05327 | 358 |
| A01352 | A05375 | 640 | A01352 | A05501 | 493 |
| A01352 | A05646 | 281 | A01352 | A06105 | 235 |
| A01352 | A06122 | 490 | A01352 | A06204 | 364 |
| A01352 | A06347 | 454 | A01352 | A06369 | 367 |
| A01352 | A06436 | 196 | A01352 | A06531 | 457 |
| A01352 | A06832 | 491 | A01352 | A07309 | 319 |
| A01352 | A07312 | 481 | A01352 | A08183 | 452 |
| A01352 | A08293 | 380 | A01352 | A08383 | 278 |
| A01352 | A08402 | 488 | A01352 | A08501 | 445 |
| A01352 | A08517 | 411 | A01352 | A08527 | 272 |
| A01352 | A08537 | 162 | A01352 | A08567 | 470 |
| A01352 | A08627 | 382 | A01352 | A08760 | 281 |
| A01352 | A08813 | 382 | A01352 | A08984 | 694 |
| A01352 | A09059 | 446 | A01352 | A09609 | 201 |
| A01352 | A09621 | 486 | A01352 | A09882 | 151 |
| A01352 | A10317 | 428 | A01352 | A10373 | 449 |
| A01352 | A10789 | 156 | A01352 | A11277 | 475 |
| A01352 | A11316 | 218 | A01352 | A11675 | 177 |
| A01352 | A12255 | 252 | A01352 | A12658 | 188 |
| A01352 | A13117 | 436 | A01352 | A13787 | 358 |
| A01352 | A13788 | 151 | A01352 | A13804 | 319 |
| A01352 | A13905 | 267 | A01352 | A13963 | 461 |
| A01352 | A13987 | 223 | A01352 | A14122 | 199 |
| A01352 | A14186 | 449 | A01352 | A14230 | 361 |
| A01352 | A14246 | 430 | A01352 | A14270 | 251 |
| A01352 | A14272 | 491 | A01352 | A14478 | 238 |
| A01352 | A14482 | 358 | A01352 | A14566 | 184 |
| A01352 | A14594 | 185 | A01352 | A14596 | 255 |
| A01352 | A14614 | 185 | A01352 | A14655 | 176 |
| A01352 | A14701 | 483 | A01352 | A14917 | 279 |
| A01352 | A15324 | 477 | A01352 | A15353 | 302 |
| A01352 | A15370 | 474 | A01352 | A15377 | 660 |
| A01352 | A15531 | 185 | A01352 | A15539 | 276 |
| A01352 | A15550 | 362 | A01352 | A15724 | 172 |
| A01352 | A15932 | 418 | A01352 | A15949 | 351 |
| A01352 | A16463 | 228 | A01352 | A16495 | 216 |
| A01352 | A16566 | 162 | A01352 | A16567 | 188 |
| A01352 | A16701 | 180 | A01352 | A16774 | 196 |
| A01352 | A16815 | 216 | A01352 | A16874 | 152 |
| A01352 | A17152 | 183 | A01353 | A01406 | 446 |
| A01353 | A01492 | 491 | A01353 | A01598 | 477 |

|        |        |     |        |        |     |
|--------|--------|-----|--------|--------|-----|
| A01353 | A01612 | 283 | A01353 | A01647 | 323 |
| A01353 | A01707 | 470 | A01353 | A01736 | 223 |
| A01353 | A01822 | 163 | A01353 | A02041 | 558 |
| A01353 | A02051 | 419 | A01353 | A02270 | 436 |
| A01353 | A02452 | 417 | A01353 | A02454 | 174 |
| A01353 | A02455 | 184 | A01353 | A02487 | 170 |
| A01353 | A02843 | 168 | A01353 | A03150 | 187 |
| A01353 | A03169 | 576 | A01353 | A03279 | 263 |
| A01353 | A03361 | 180 | A01353 | A03435 | 363 |
| A01353 | A03438 | 440 | A01353 | A03568 | 272 |
| A01353 | A03601 | 174 | A01353 | A03792 | 333 |
| A01353 | A03952 | 447 | A01353 | A03954 | 390 |
| A01353 | A03958 | 480 | A01353 | A03972 | 238 |
| A01353 | A03982 | 363 | A01353 | A04439 | 219 |
| A01353 | A04447 | 548 | A01353 | A04468 | 187 |
| A01353 | A04477 | 176 | A01353 | A05058 | 364 |
| A01353 | A05748 | 416 | A01353 | A06074 | 156 |
| A01353 | A06275 | 174 | A01353 | A06390 | 312 |
| A01353 | A07265 | 506 | A01353 | A07588 | 577 |
| A01353 | A07706 | 328 | A01353 | A08955 | 483 |
| A01353 | A08971 | 223 | A01353 | A09207 | 172 |
| A01353 | A09281 | 140 | A01353 | A09651 | 249 |
| A01353 | A09910 | 263 | A01353 | A10755 | 223 |
| A01353 | A10887 | 207 | A01353 | A11202 | 223 |
| A01353 | A11254 | 435 | A01353 | A13298 | 561 |
| A01353 | A13870 | 274 | A01353 | A14006 | 463 |
| A01353 | A14196 | 232 | A01353 | A14216 | 578 |
| A01353 | A14220 | 436 | A01353 | A14594 | 226 |
| A01353 | A14699 | 369 | A01353 | A14739 | 219 |
| A01353 | A15338 | 184 | A01353 | A15684 | 388 |
| A01353 | A15773 | 151 | A01353 | A15935 | 274 |
| A01353 | A16060 | 154 | A01353 | A16243 | 260 |
| A01353 | A16691 | 183 | A01353 | A16788 | 263 |
| A01353 | A16815 | 191 | A01354 | A01384 | 226 |
| A01354 | A01385 | 491 | A01354 | A01402 | 63  |
| A01354 | A01406 | 267 | A01354 | A01469 | 455 |
| A01354 | A01470 | 490 | A01354 | A01506 | 293 |
| A01354 | A01536 | 373 | A01354 | A01541 | 730 |
| A01354 | A01558 | 480 | A01354 | A01561 | 899 |
| A01354 | A01569 | 310 | A01354 | A01572 | 488 |
| A01354 | A01577 | 485 | A01354 | A01588 | 899 |
| A01354 | A01592 | 899 | A01354 | A01598 | 491 |
| A01354 | A01612 | 486 | A01354 | A01614 | 449 |
| A01354 | A01640 | 268 | A01354 | A01649 | 486 |
| A01354 | A01655 | 288 | A01354 | A01692 | 899 |
| A01354 | A01707 | 490 | A01354 | A01730 | 268 |

|        |        |     |        |        |     |
|--------|--------|-----|--------|--------|-----|
| A01354 | A01740 | 63  | A01354 | A01755 | 63  |
| A01354 | A01763 | 472 | A01354 | A01770 | 491 |
| A01354 | A01781 | 424 | A01354 | A01822 | 338 |
| A01354 | A01917 | 180 | A01354 | A01978 | 188 |
| A01354 | A02075 | 277 | A01354 | A02219 | 475 |
| A01354 | A02467 | 341 | A01354 | A02470 | 481 |
| A01354 | A02564 | 63  | A01354 | A02671 | 224 |
| A01354 | A02715 | 460 | A01354 | A02736 | 118 |
| A01354 | A02737 | 63  | A01354 | A02830 | 79  |
| A01354 | A02904 | 63  | A01354 | A03112 | 391 |
| A01354 | A03171 | 377 | A01354 | A03276 | 77  |
| A01354 | A03298 | 184 | A01354 | A03325 | 185 |
| A01354 | A03415 | 139 | A01354 | A03446 | 491 |
| A01354 | A03456 | 373 | A01354 | A03476 | 165 |
| A01354 | A03494 | 193 | A01354 | A03569 | 470 |
| A01354 | A03572 | 252 | A01354 | A03638 | 305 |
| A01354 | A03654 | 413 | A01354 | A03740 | 484 |
| A01354 | A03752 | 269 | A01354 | A03817 | 337 |
| A01354 | A03820 | 481 | A01354 | A03881 | 162 |
| A01354 | A03886 | 490 | A01354 | A03887 | 168 |
| A01354 | A04012 | 457 | A01354 | A04013 | 215 |
| A01354 | A04122 | 184 | A01354 | A04169 | 328 |
| A01354 | A04366 | 163 | A01354 | A04502 | 200 |
| A01354 | A04507 | 221 | A01354 | A04686 | 226 |
| A01354 | A04740 | 218 | A01354 | A05417 | 245 |
| A01354 | A05418 | 234 | A01354 | A06025 | 221 |
| A01354 | A06048 | 258 | A01354 | A06182 | 163 |
| A01354 | A06198 | 258 | A01354 | A06466 | 486 |
| A01354 | A06907 | 294 | A01354 | A06975 | 232 |
| A01354 | A07054 | 179 | A01354 | A07160 | 307 |
| A01354 | A07247 | 180 | A01354 | A07311 | 475 |
| A01354 | A07356 | 221 | A01354 | A07596 | 258 |
| A01354 | A07604 | 462 | A01354 | A07706 | 490 |
| A01354 | A07726 | 490 | A01354 | A07798 | 329 |
| A01354 | A07803 | 491 | A01354 | A07975 | 221 |
| A01354 | A08053 | 177 | A01354 | A08065 | 258 |
| A01354 | A08118 | 486 | A01354 | A08137 | 491 |
| A01354 | A08280 | 234 | A01354 | A08357 | 380 |
| A01354 | A08571 | 489 | A01354 | A08572 | 174 |
| A01354 | A09004 | 258 | A01354 | A09033 | 441 |
| A01354 | A09239 | 184 | A01354 | A09464 | 63  |
| A01354 | A09621 | 502 | A01354 | A09655 | 212 |
| A01354 | A09732 | 440 | A01354 | A09825 | 229 |
| A01354 | A09857 | 363 | A01354 | A10238 | 350 |
| A01354 | A10249 | 162 | A01354 | A10321 | 389 |
| A01354 | A10399 | 165 | A01354 | A10476 | 200 |

|        |        |     |        |        |     |
|--------|--------|-----|--------|--------|-----|
| A01354 | A10532 | 481 | A01354 | A10547 | 483 |
| A01354 | A10624 | 445 | A01354 | A10642 | 463 |
| A01354 | A10875 | 319 | A01354 | A11214 | 200 |
| A01354 | A11286 | 350 | A01354 | A11302 | 286 |
| A01354 | A11324 | 727 | A01354 | A11362 | 200 |
| A01354 | A11476 | 317 | A01354 | A11537 | 193 |
| A01354 | A11553 | 422 | A01354 | A11590 | 323 |
| A01354 | A11833 | 229 | A01354 | A11965 | 319 |
| A01354 | A12328 | 404 | A01354 | A12393 | 401 |
| A01354 | A12712 | 221 | A01354 | A12988 | 337 |
| A01354 | A13221 | 258 | A01354 | A13548 | 221 |
| A01354 | A13569 | 200 | A01354 | A13987 | 151 |
| A01354 | A13989 | 491 | A01354 | A14006 | 491 |
| A01354 | A14073 | 468 | A01354 | A14105 | 165 |
| A01354 | A14112 | 201 | A01354 | A14128 | 412 |
| A01354 | A14196 | 447 | A01354 | A14202 | 386 |
| A01354 | A14210 | 432 | A01354 | A14220 | 488 |
| A01354 | A14221 | 163 | A01354 | A14257 | 243 |
| A01354 | A14355 | 162 | A01354 | A14371 | 430 |
| A01354 | A14399 | 436 | A01354 | A14467 | 447 |
| A01354 | A14511 | 455 | A01354 | A14596 | 477 |
| A01354 | A14659 | 193 | A01354 | A14925 | 335 |
| A01354 | A14930 | 407 | A01354 | A15244 | 188 |
| A01354 | A15261 | 475 | A01354 | A15292 | 480 |
| A01354 | A15313 | 322 | A01354 | A15317 | 286 |
| A01354 | A15322 | 394 | A01354 | A15349 | 470 |
| A01354 | A15352 | 460 | A01354 | A15366 | 355 |
| A01354 | A15452 | 366 | A01354 | A15463 | 195 |
| A01354 | A15480 | 400 | A01354 | A15495 | 367 |
| A01354 | A15498 | 250 | A01354 | A15507 | 396 |
| A01354 | A15559 | 418 | A01354 | A15596 | 180 |
| A01354 | A15660 | 208 | A01354 | A15729 | 254 |
| A01354 | A15797 | 162 | A01354 | A16060 | 297 |
| A01354 | A16228 | 156 | A01354 | A16320 | 208 |
| A01354 | A16487 | 200 | A01354 | A16764 | 294 |
| A01354 | A17063 | 286 | A01354 | A17142 | 152 |
| A01355 | A09741 | 63  | A01356 | A01384 | 438 |
| A01356 | A01420 | 165 | A01356 | A01425 | 170 |
| A01356 | A01440 | 690 | A01356 | A01470 | 319 |
| A01356 | A01492 | 244 | A01356 | A01501 | 179 |
| A01356 | A01538 | 170 | A01356 | A01598 | 652 |
| A01356 | A01614 | 186 | A01356 | A02164 | 480 |
| A01356 | A02265 | 475 | A01356 | A02268 | 162 |
| A01356 | A03438 | 181 | A01356 | A03617 | 337 |
| A01356 | A03652 | 170 | A01356 | A03981 | 170 |
| A01356 | A05810 | 256 | A01356 | A06356 | 170 |

|        |        |     |        |        |     |
|--------|--------|-----|--------|--------|-----|
| A01356 | A06369 | 210 | A01356 | A07244 | 170 |
| A01356 | A07524 | 170 | A01356 | A07880 | 185 |
| A01356 | A07924 | 170 | A01356 | A08211 | 170 |
| A01356 | A09033 | 294 | A01356 | A09697 | 170 |
| A01356 | A13052 | 475 | A01356 | A13875 | 217 |
| A01356 | A13989 | 170 | A01356 | A15651 | 172 |
| A01356 | A16095 | 180 | A01357 | A01560 | 408 |
| A01357 | A01692 | 146 | A01357 | A01697 | 167 |
| A01357 | A02180 | 375 | A01357 | A02575 | 207 |
| A01357 | A04668 | 159 | A01357 | A05144 | 297 |
| A01357 | A05161 | 461 | A01357 | A06466 | 82  |
| A01357 | A07001 | 251 | A01357 | A07311 | 469 |
| A01357 | A07798 | 296 | A01357 | A09804 | 252 |
| A01357 | A09871 | 326 | A01357 | A10365 | 474 |
| A01357 | A10560 | 329 | A01357 | A10728 | 173 |
| A01357 | A12257 | 353 | A01357 | A14520 | 208 |
| A01357 | A15321 | 324 | A01358 | A01390 | 340 |
| A01358 | A01451 | 541 | A01358 | A01459 | 481 |
| A01358 | A01514 | 491 | A01358 | A01568 | 490 |
| A01358 | A01598 | 165 | A01358 | A01647 | 481 |
| A01358 | A01687 | 213 | A01358 | A01828 | 469 |
| A01358 | A01988 | 258 | A01358 | A02026 | 491 |
| A01358 | A02110 | 329 | A01358 | A02182 | 302 |
| A01358 | A03496 | 400 | A01358 | A04292 | 382 |
| A01358 | A06011 | 385 | A01358 | A06176 | 345 |
| A01358 | A06941 | 337 | A01358 | A07120 | 271 |
| A01358 | A07242 | 491 | A01358 | A07483 | 439 |
| A01358 | A07495 | 337 | A01358 | A07731 | 485 |
| A01358 | A08505 | 63  | A01358 | A08531 | 419 |
| A01358 | A08536 | 406 | A01358 | A08551 | 483 |
| A01358 | A08569 | 406 | A01358 | A08860 | 191 |
| A01358 | A08917 | 348 | A01358 | A09054 | 218 |
| A01358 | A09056 | 366 | A01358 | A09228 | 276 |
| A01358 | A09298 | 465 | A01358 | A09546 | 486 |
| A01358 | A10022 | 475 | A01358 | A10121 | 162 |
| A01358 | A10630 | 486 | A01358 | A10737 | 398 |
| A01358 | A10751 | 466 | A01358 | A11088 | 345 |
| A01358 | A11158 | 456 | A01358 | A11266 | 168 |
| A01358 | A11648 | 452 | A01358 | A11675 | 159 |
| A01358 | A11689 | 168 | A01358 | A11854 | 462 |
| A01358 | A11917 | 245 | A01358 | A12013 | 462 |
| A01358 | A12047 | 489 | A01358 | A12303 | 271 |
| A01358 | A12312 | 271 | A01358 | A12327 | 271 |
| A01358 | A12501 | 198 | A01358 | A12665 | 428 |
| A01358 | A12858 | 446 | A01358 | A12873 | 286 |
| A01358 | A12894 | 271 | A01358 | A12957 | 271 |

|        |        |     |        |        |     |
|--------|--------|-----|--------|--------|-----|
| A01358 | A13309 | 198 | A01358 | A13781 | 416 |
| A01358 | A13784 | 491 | A01358 | A13895 | 329 |
| A01358 | A14209 | 445 | A01358 | A14263 | 418 |
| A01358 | A14281 | 491 | A01358 | A14286 | 408 |
| A01358 | A14474 | 452 | A01358 | A14484 | 391 |
| A01358 | A14915 | 271 | A01358 | A15189 | 217 |
| A01358 | A15237 | 228 | A01358 | A15345 | 218 |
| A01358 | A15380 | 477 | A01358 | A15557 | 540 |
| A01358 | A15854 | 679 | A01358 | A15855 | 633 |
| A01358 | A16450 | 329 | A01358 | A16675 | 360 |
| A01358 | A16905 | 302 | A01358 | A17033 | 299 |
| A01359 | A01413 | 340 | A01359 | A01425 | 467 |
| A01359 | A01492 | 289 | A01359 | A01524 | 899 |
| A01359 | A01527 | 900 | A01359 | A01582 | 168 |
| A01359 | A01612 | 383 | A01359 | A01668 | 193 |
| A01359 | A01741 | 372 | A01359 | A03101 | 165 |
| A01359 | A03438 | 168 | A01359 | A03494 | 137 |
| A01359 | A03902 | 488 | A01359 | A03981 | 473 |
| A01359 | A04337 | 255 | A01359 | A04345 | 389 |
| A01359 | A04384 | 246 | A01359 | A04666 | 601 |
| A01359 | A04971 | 180 | A01359 | A05095 | 252 |
| A01359 | A05588 | 294 | A01359 | A06379 | 340 |
| A01359 | A06597 | 319 | A01359 | A06814 | 515 |
| A01359 | A06827 | 196 | A01359 | A07422 | 308 |
| A01359 | A08201 | 167 | A01359 | A08571 | 483 |
| A01359 | A08756 | 216 | A01359 | A08859 | 348 |
| A01359 | A09258 | 945 | A01359 | A09377 | 945 |
| A01359 | A09427 | 201 | A01359 | A09451 | 489 |
| A01359 | A09491 | 180 | A01359 | A09515 | 489 |
| A01359 | A09538 | 491 | A01359 | A09732 | 477 |
| A01359 | A09733 | 424 | A01359 | A09735 | 152 |
| A01359 | A09992 | 456 | A01359 | A10205 | 199 |
| A01359 | A10228 | 491 | A01359 | A10250 | 491 |
| A01359 | A10340 | 945 | A01359 | A10342 | 252 |
| A01359 | A10532 | 342 | A01359 | A10853 | 366 |
| A01359 | A11099 | 369 | A01359 | A11139 | 88  |
| A01359 | A11412 | 256 | A01359 | A11415 | 351 |
| A01359 | A11492 | 400 | A01359 | A14000 | 432 |
| A01359 | A14272 | 567 | A01359 | A14661 | 322 |
| A01359 | A14674 | 601 | A01359 | A14733 | 183 |
| A01359 | A15308 | 159 | A01359 | A15650 | 152 |
| A01359 | A16738 | 601 | A01360 | A01377 | 162 |
| A01360 | A01468 | 255 | A01360 | A01481 | 188 |
| A01360 | A01483 | 491 | A01360 | A01496 | 472 |
| A01360 | A01508 | 483 | A01360 | A01514 | 218 |
| A01360 | A01540 | 191 | A01360 | A01586 | 491 |

|        |        |     |        |        |     |
|--------|--------|-----|--------|--------|-----|
| A01360 | A01622 | 377 | A01360 | A01635 | 447 |
| A01360 | A01647 | 486 | A01360 | A01735 | 212 |
| A01360 | A01741 | 252 | A01360 | A01743 | 312 |
| A01360 | A02053 | 151 | A01360 | A02148 | 185 |
| A01360 | A02156 | 491 | A01360 | A02227 | 484 |
| A01360 | A02432 | 266 | A01360 | A02518 | 152 |
| A01360 | A03167 | 422 | A01360 | A03212 | 210 |
| A01360 | A03259 | 483 | A01360 | A03468 | 405 |
| A01360 | A03501 | 474 | A01360 | A03513 | 191 |
| A01360 | A03891 | 332 | A01360 | A03892 | 151 |
| A01360 | A04019 | 283 | A01360 | A04171 | 185 |
| A01360 | A04178 | 160 | A01360 | A04229 | 441 |
| A01360 | A04429 | 293 | A01360 | A04430 | 208 |
| A01360 | A04736 | 334 | A01360 | A04769 | 307 |
| A01360 | A04778 | 254 | A01360 | A04883 | 165 |
| A01360 | A04977 | 469 | A01360 | A05007 | 462 |
| A01360 | A05102 | 368 | A01360 | A05262 | 462 |
| A01360 | A05289 | 217 | A01360 | A05332 | 307 |
| A01360 | A05416 | 380 | A01360 | A05472 | 463 |
| A01360 | A05974 | 168 | A01360 | A06101 | 404 |
| A01360 | A06111 | 488 | A01360 | A06134 | 232 |
| A01360 | A06202 | 188 | A01360 | A06203 | 229 |
| A01360 | A06277 | 173 | A01360 | A06402 | 165 |
| A01360 | A06405 | 243 | A01360 | A06472 | 191 |
| A01360 | A06629 | 330 | A01360 | A06654 | 229 |
| A01360 | A06689 | 491 | A01360 | A06819 | 491 |
| A01360 | A06882 | 193 | A01360 | A06912 | 350 |
| A01360 | A06970 | 491 | A01360 | A06990 | 345 |
| A01360 | A07209 | 162 | A01360 | A07222 | 409 |
| A01360 | A07256 | 435 | A01360 | A07277 | 265 |
| A01360 | A07283 | 168 | A01360 | A07427 | 297 |
| A01360 | A07477 | 475 | A01360 | A07503 | 168 |
| A01360 | A07508 | 283 | A01360 | A07530 | 268 |
| A01360 | A07558 | 491 | A01360 | A07571 | 251 |
| A01360 | A07590 | 424 | A01360 | A07721 | 165 |
| A01360 | A07736 | 356 | A01360 | A07931 | 462 |
| A01360 | A07933 | 268 | A01360 | A07973 | 401 |
| A01360 | A07974 | 335 | A01360 | A07976 | 321 |
| A01360 | A08155 | 165 | A01360 | A08252 | 188 |
| A01360 | A08656 | 229 | A01360 | A08725 | 265 |
| A01360 | A09096 | 329 | A01360 | A09566 | 165 |
| A01360 | A09876 | 455 | A01360 | A09879 | 162 |
| A01360 | A09917 | 208 | A01360 | A09925 | 160 |
| A01360 | A10110 | 313 | A01360 | A10420 | 396 |
| A01360 | A10427 | 163 | A01360 | A10441 | 151 |
| A01360 | A10443 | 152 | A01360 | A10444 | 327 |



|        |        |     |        |        |     |
|--------|--------|-----|--------|--------|-----|
| A01360 | A10452 | 297 | A01360 | A10456 | 245 |
| A01360 | A10656 | 420 | A01360 | A10658 | 450 |
| A01360 | A10659 | 326 | A01360 | A10675 | 208 |
| A01360 | A10686 | 151 | A01360 | A10702 | 314 |
| A01360 | A10710 | 221 | A01360 | A10904 | 240 |
| A01360 | A11224 | 193 | A01360 | A12055 | 208 |
| A01360 | A13206 | 265 | A01360 | A13459 | 202 |
| A01360 | A13597 | 185 | A01360 | A13866 | 162 |
| A01360 | A14077 | 469 | A01360 | A14272 | 326 |
| A01360 | A14337 | 202 | A01360 | A14525 | 486 |
| A01360 | A14614 | 162 | A01360 | A14803 | 486 |
| A01360 | A14856 | 351 | A01360 | A14858 | 240 |
| A01360 | A15372 | 490 | A01360 | A15498 | 171 |
| A01360 | A15874 | 353 | A01360 | A16103 | 268 |
| A01360 | A16739 | 229 | A01360 | A16741 | 324 |
| A01360 | A16744 | 241 | A01360 | A16753 | 486 |
| A01361 | A01419 | 645 | A01361 | A01438 | 477 |
| A01361 | A01451 | 279 | A01361 | A01457 | 194 |
| A01361 | A01503 | 154 | A01361 | A01572 | 157 |
| A01361 | A01575 | 357 | A01361 | A01576 | 532 |
| A01361 | A01669 | 274 | A01361 | A03321 | 259 |
| A01361 | A03412 | 157 | A01361 | A03651 | 221 |
| A01361 | A03822 | 405 | A01361 | A04100 | 171 |
| A01361 | A04209 | 347 | A01361 | A04962 | 260 |
| A01361 | A07004 | 346 | A01361 | A07697 | 382 |
| A01361 | A07835 | 462 | A01361 | A07885 | 481 |
| A01361 | A07967 | 299 | A01361 | A08831 | 185 |
| A01361 | A09007 | 434 | A01361 | A09383 | 201 |
| A01361 | A09546 | 358 | A01361 | A09675 | 297 |
| A01361 | A10159 | 769 | A01361 | A10315 | 232 |
| A01361 | A11487 | 427 | A01361 | A12183 | 326 |
| A01361 | A12662 | 484 | A01361 | A12729 | 279 |
| A01361 | A13204 | 297 | A01361 | A13231 | 531 |
| A01361 | A13647 | 489 | A01361 | A14086 | 193 |
| A01361 | A14183 | 369 | A01361 | A14193 | 314 |
| A01361 | A14246 | 376 | A01361 | A14406 | 168 |
| A01361 | A14454 | 491 | A01361 | A14579 | 466 |
| A01361 | A14843 | 352 | A01361 | A15262 | 480 |
| A01361 | A15293 | 263 | A01361 | A15314 | 374 |
| A01361 | A15665 | 168 | A01361 | A15682 | 208 |
| A01361 | A15701 | 156 | A01361 | A15946 | 168 |
| A01361 | A16701 | 308 | A01361 | A16802 | 213 |
| A01361 | A16898 | 326 | A01361 | A17015 | 486 |
| A01361 | A17028 | 443 | A01362 | A01365 | 265 |
| A01362 | A01406 | 311 | A01362 | A01408 | 401 |
| A01362 | A01412 | 305 | A01362 | A01414 | 331 |

|        |        |     |        |        |     |
|--------|--------|-----|--------|--------|-----|
| A01362 | A01451 | 333 | A01362 | A01597 | 157 |
| A01362 | A01976 | 188 | A01362 | A01988 | 249 |
| A01362 | A02227 | 485 | A01362 | A02978 | 183 |
| A01362 | A03493 | 327 | A01362 | A03901 | 378 |
| A01362 | A04688 | 224 | A01362 | A05501 | 265 |
| A01362 | A05702 | 188 | A01362 | A06064 | 317 |
| A01362 | A06564 | 183 | A01362 | A06785 | 348 |
| A01362 | A07309 | 391 | A01362 | A07965 | 188 |
| A01362 | A08901 | 238 | A01362 | A09073 | 210 |
| A01362 | A09221 | 235 | A01362 | A09735 | 132 |
| A01362 | A10498 | 305 | A01362 | A11440 | 167 |
| A01362 | A11480 | 188 | A01362 | A14188 | 157 |
| A01362 | A14479 | 290 | A01362 | A14566 | 184 |
| A01362 | A14594 | 243 | A01362 | A14813 | 188 |
| A01362 | A15657 | 188 | A01362 | A16680 | 188 |
| A01363 | A01507 | 191 | A01363 | A01698 | 383 |
| A01363 | A01850 | 341 | A01363 | A02189 | 273 |
| A01363 | A02212 | 160 | A01363 | A02343 | 191 |
| A01363 | A02443 | 168 | A01363 | A02505 | 196 |
| A01363 | A02674 | 321 | A01363 | A02789 | 367 |
| A01363 | A02821 | 254 | A01363 | A03074 | 422 |
| A01363 | A03095 | 152 | A01363 | A03101 | 254 |
| A01363 | A03112 | 168 | A01363 | A03336 | 217 |
| A01363 | A03846 | 154 | A01363 | A04449 | 436 |
| A01363 | A04525 | 252 | A01363 | A04914 | 224 |
| A01363 | A05038 | 313 | A01363 | A05165 | 224 |
| A01363 | A06261 | 363 | A01363 | A06286 | 196 |
| A01363 | A06357 | 321 | A01363 | A08692 | 241 |
| A01363 | A09242 | 168 | A01363 | A10621 | 199 |
| A01363 | A11184 | 170 | A01363 | A12508 | 199 |
| A01363 | A14646 | 235 | A01363 | A14925 | 174 |
| A01363 | A16115 | 455 | A01364 | A01402 | 255 |
| A01364 | A01552 | 279 | A01364 | A01698 | 185 |
| A01364 | A01838 | 337 | A01364 | A01841 | 174 |
| A01364 | A02343 | 213 | A01364 | A02353 | 302 |
| A01364 | A02498 | 265 | A01364 | A02718 | 380 |
| A01364 | A02871 | 400 | A01364 | A02908 | 157 |
| A01364 | A02909 | 294 | A01364 | A02929 | 232 |
| A01364 | A03007 | 208 | A01364 | A03095 | 477 |
| A01364 | A03312 | 322 | A01364 | A03541 | 272 |
| A01364 | A03679 | 385 | A01364 | A03832 | 491 |
| A01364 | A03841 | 265 | A01364 | A03846 | 177 |
| A01364 | A03983 | 343 | A01364 | A03989 | 318 |
| A01364 | A04908 | 168 | A01364 | A06877 | 467 |
| A01364 | A07167 | 423 | A01364 | A07187 | 369 |
| A01364 | A07746 | 263 | A01364 | A09388 | 388 |

|        |        |     |        |        |     |
|--------|--------|-----|--------|--------|-----|
| A01364 | A10506 | 165 | A01364 | A10939 | 385 |
| A01364 | A13426 | 288 | A01364 | A13997 | 157 |
| A01364 | A14520 | 191 | A01364 | A14588 | 232 |
| A01364 | A14643 | 165 | A01365 | A01369 | 484 |
| A01365 | A01392 | 380 | A01365 | A01406 | 751 |
| A01365 | A01407 | 477 | A01365 | A01408 | 489 |
| A01365 | A01411 | 479 | A01365 | A01412 | 603 |
| A01365 | A01416 | 601 | A01365 | A01449 | 490 |
| A01365 | A01468 | 208 | A01365 | A01470 | 390 |
| A01365 | A01496 | 457 | A01365 | A01540 | 241 |
| A01365 | A01569 | 202 | A01365 | A01579 | 491 |
| A01365 | A01597 | 296 | A01365 | A01611 | 294 |
| A01365 | A01613 | 80  | A01365 | A01811 | 221 |
| A01365 | A01864 | 240 | A01365 | A01906 | 288 |
| A01365 | A02227 | 491 | A01365 | A02877 | 229 |
| A01365 | A03095 | 490 | A01365 | A03490 | 343 |
| A01365 | A03493 | 462 | A01365 | A03567 | 314 |
| A01365 | A03601 | 633 | A01365 | A03676 | 391 |
| A01365 | A03677 | 172 | A01365 | A04688 | 446 |
| A01365 | A04689 | 350 | A01365 | A04846 | 361 |
| A01365 | A05127 | 162 | A01365 | A05198 | 382 |
| A01365 | A05199 | 260 | A01365 | A05327 | 372 |
| A01365 | A05375 | 328 | A01365 | A05450 | 425 |
| A01365 | A05499 | 479 | A01365 | A05501 | 606 |
| A01365 | A05502 | 307 | A01365 | A05557 | 360 |
| A01365 | A05804 | 367 | A01365 | A06105 | 467 |
| A01365 | A06115 | 283 | A01365 | A06435 | 162 |
| A01365 | A06564 | 491 | A01365 | A06589 | 256 |
| A01365 | A06861 | 357 | A01365 | A06965 | 307 |
| A01365 | A07075 | 238 | A01365 | A07248 | 491 |
| A01365 | A07262 | 356 | A01365 | A07349 | 332 |
| A01365 | A07473 | 429 | A01365 | A07581 | 258 |
| A01365 | A07706 | 201 | A01365 | A07771 | 469 |
| A01365 | A08011 | 443 | A01365 | A08144 | 561 |
| A01365 | A08154 | 489 | A01365 | A08358 | 488 |
| A01365 | A08359 | 259 | A01365 | A08408 | 160 |
| A01365 | A08419 | 481 | A01365 | A08501 | 490 |
| A01365 | A08543 | 428 | A01365 | A08556 | 490 |
| A01365 | A08760 | 252 | A01365 | A08761 | 394 |
| A01365 | A08773 | 438 | A01365 | A08901 | 326 |
| A01365 | A08916 | 313 | A01365 | A09059 | 406 |
| A01365 | A09285 | 462 | A01365 | A09402 | 249 |
| A01365 | A09520 | 302 | A01365 | A09610 | 221 |
| A01365 | A09613 | 249 | A01365 | A09726 | 274 |
| A01365 | A09735 | 491 | A01365 | A09852 | 283 |
| A01365 | A10109 | 176 | A01365 | A10338 | 313 |

|        |        |     |        |        |     |
|--------|--------|-----|--------|--------|-----|
| A01365 | A10480 | 313 | A01365 | A10498 | 180 |
| A01365 | A10917 | 191 | A01365 | A11420 | 168 |
| A01365 | A11616 | 294 | A01365 | A11815 | 310 |
| A01365 | A11992 | 157 | A01365 | A12433 | 208 |
| A01365 | A12657 | 201 | A01365 | A12821 | 353 |
| A01365 | A13497 | 283 | A01365 | A13609 | 297 |
| A01365 | A13905 | 232 | A01365 | A14449 | 594 |
| A01365 | A14478 | 475 | A01365 | A14479 | 488 |
| A01365 | A14482 | 475 | A01365 | A14508 | 341 |
| A01365 | A14566 | 205 | A01365 | A14568 | 491 |
| A01365 | A14661 | 162 | A01365 | A15292 | 228 |
| A01365 | A15498 | 468 | A01365 | A15499 | 357 |
| A01365 | A15500 | 490 | A01365 | A15624 | 647 |
| A01365 | A15673 | 183 | A01365 | A15684 | 361 |
| A01365 | A15751 | 283 | A01365 | A15771 | 486 |
| A01365 | A15932 | 638 | A01365 | A15988 | 302 |
| A01365 | A16029 | 313 | A01365 | A17152 | 427 |
| A01366 | A01454 | 491 | A01366 | A01479 | 224 |
| A01366 | A01484 | 424 | A01366 | A01505 | 378 |
| A01366 | A01514 | 360 | A01366 | A01568 | 491 |
| A01366 | A01595 | 243 | A01366 | A01645 | 156 |
| A01366 | A01687 | 491 | A01366 | A01811 | 310 |
| A01366 | A01988 | 291 | A01366 | A02906 | 157 |
| A01366 | A03321 | 486 | A01366 | A03769 | 160 |
| A01366 | A03861 | 159 | A01366 | A04054 | 468 |
| A01366 | A04229 | 219 | A01366 | A04710 | 245 |
| A01366 | A05034 | 435 | A01366 | A05075 | 230 |
| A01366 | A05445 | 490 | A01366 | A06656 | 313 |
| A01366 | A07054 | 424 | A01366 | A07242 | 491 |
| A01366 | A07253 | 374 | A01366 | A07282 | 384 |
| A01366 | A07404 | 163 | A01366 | A07483 | 485 |
| A01366 | A07495 | 491 | A01366 | A07665 | 456 |
| A01366 | A07696 | 251 | A01366 | A07709 | 274 |
| A01366 | A07816 | 152 | A01366 | A07893 | 489 |
| A01366 | A07934 | 435 | A01366 | A08056 | 350 |
| A01366 | A08531 | 463 | A01366 | A08573 | 226 |
| A01366 | A08620 | 223 | A01366 | A08961 | 466 |
| A01366 | A09229 | 408 | A01366 | A09721 | 216 |
| A01366 | A10023 | 373 | A01366 | A10250 | 154 |
| A01366 | A11023 | 307 | A01366 | A11033 | 484 |
| A01366 | A11038 | 182 | A01366 | A11112 | 285 |
| A01366 | A11149 | 483 | A01366 | A11205 | 288 |
| A01366 | A11229 | 223 | A01366 | A11346 | 347 |
| A01366 | A11350 | 210 | A01366 | A11357 | 288 |
| A01366 | A11358 | 151 | A01366 | A11434 | 241 |
| A01366 | A11524 | 204 | A01366 | A11902 | 452 |

|        |        |     |        |        |     |
|--------|--------|-----|--------|--------|-----|
| A01366 | A12047 | 491 | A01366 | A12930 | 313 |
| A01366 | A12978 | 335 | A01366 | A13607 | 223 |
| A01366 | A13720 | 266 | A01366 | A13819 | 251 |
| A01366 | A14209 | 188 | A01366 | A14266 | 439 |
| A01366 | A14281 | 752 | A01366 | A14313 | 223 |
| A01366 | A14474 | 491 | A01366 | A14484 | 470 |
| A01366 | A14661 | 215 | A01366 | A15035 | 385 |
| A01366 | A15232 | 313 | A01366 | A15260 | 252 |
| A01366 | A16048 | 191 | A01367 | A01632 | 238 |
| A01367 | A01635 | 463 | A01367 | A01746 | 299 |
| A01367 | A01916 | 486 | A01367 | A01972 | 332 |
| A01367 | A02028 | 202 | A01367 | A02083 | 152 |
| A01367 | A02268 | 163 | A01367 | A02290 | 333 |
| A01367 | A02373 | 490 | A01367 | A02537 | 391 |
| A01367 | A02673 | 489 | A01367 | A02711 | 276 |
| A01367 | A02741 | 151 | A01367 | A02830 | 213 |
| A01367 | A02846 | 223 | A01367 | A02992 | 196 |
| A01367 | A03051 | 204 | A01367 | A03057 | 443 |
| A01367 | A03098 | 294 | A01367 | A03167 | 490 |
| A01367 | A03304 | 889 | A01367 | A03369 | 201 |
| A01367 | A03513 | 276 | A01367 | A03685 | 184 |
| A01367 | A03927 | 191 | A01367 | A03962 | 218 |
| A01367 | A04075 | 369 | A01367 | A04258 | 157 |
| A01367 | A04674 | 279 | A01367 | A04778 | 313 |
| A01367 | A04791 | 286 | A01367 | A05103 | 368 |
| A01367 | A05289 | 151 | A01367 | A05308 | 348 |
| A01367 | A05416 | 167 | A01367 | A05463 | 174 |
| A01367 | A05532 | 286 | A01367 | A05752 | 348 |
| A01367 | A05789 | 227 | A01367 | A05961 | 205 |
| A01367 | A06083 | 296 | A01367 | A06277 | 238 |
| A01367 | A06295 | 466 | A01367 | A06689 | 451 |
| A01367 | A06855 | 221 | A01367 | A06970 | 469 |
| A01367 | A06994 | 218 | A01367 | A07198 | 152 |
| A01367 | A07238 | 294 | A01367 | A07558 | 425 |
| A01367 | A07590 | 223 | A01367 | A07856 | 249 |
| A01367 | A07875 | 308 | A01367 | A08108 | 288 |
| A01367 | A08135 | 183 | A01367 | A08667 | 187 |
| A01367 | A08875 | 318 | A01367 | A09098 | 286 |
| A01367 | A09612 | 167 | A01367 | A09753 | 160 |
| A01367 | A09770 | 786 | A01367 | A10420 | 229 |
| A01367 | A10612 | 176 | A01367 | A10676 | 241 |
| A01367 | A10681 | 191 | A01367 | A10694 | 205 |
| A01367 | A10703 | 165 | A01367 | A10718 | 286 |
| A01367 | A10885 | 183 | A01367 | A10983 | 201 |
| A01367 | A13137 | 272 | A01367 | A14097 | 262 |
| A01367 | A14366 | 368 | A01367 | A14521 | 256 |

|        |        |     |        |        |     |
|--------|--------|-----|--------|--------|-----|
| A01367 | A14554 | 212 | A01367 | A14637 | 393 |
| A01367 | A14640 | 238 | A01367 | A14698 | 480 |
| A01367 | A14782 | 490 | A01367 | A14803 | 457 |
| A01367 | A14856 | 224 | A01367 | A14862 | 230 |
| A01367 | A15795 | 226 | A01367 | A16286 | 160 |
| A01367 | A16355 | 238 | A01367 | A17007 | 302 |
| A01367 | A17041 | 307 | A01368 | A01418 | 339 |
| A01368 | A03201 | 310 | A01368 | A03990 | 157 |
| A01369 | A01411 | 542 | A01369 | A01579 | 567 |
| A01369 | A01586 | 274 | A01369 | A01597 | 229 |
| A01369 | A01601 | 558 | A01369 | A02737 | 324 |
| A01369 | A02830 | 157 | A01369 | A03301 | 232 |
| A01369 | A03477 | 283 | A01369 | A03493 | 367 |
| A01369 | A03567 | 210 | A01369 | A03885 | 170 |
| A01369 | A03959 | 435 | A01369 | A04846 | 350 |
| A01369 | A05450 | 180 | A01369 | A05501 | 565 |
| A01369 | A05690 | 229 | A01369 | A06534 | 217 |
| A01369 | A06564 | 260 | A01369 | A06814 | 242 |
| A01369 | A06973 | 385 | A01369 | A07047 | 282 |
| A01369 | A07160 | 226 | A01369 | A07398 | 259 |
| A01369 | A07581 | 266 | A01369 | A07822 | 240 |
| A01369 | A07965 | 382 | A01369 | A08358 | 389 |
| A01369 | A08359 | 371 | A01369 | A08369 | 217 |
| A01369 | A08408 | 217 | A01369 | A08457 | 152 |
| A01369 | A08476 | 217 | A01369 | A08543 | 296 |
| A01369 | A08547 | 243 | A01369 | A08556 | 329 |
| A01369 | A08576 | 235 | A01369 | A09285 | 391 |
| A01369 | A09308 | 217 | A01369 | A09322 | 217 |
| A01369 | A09613 | 319 | A01369 | A09620 | 217 |
| A01369 | A09726 | 228 | A01369 | A09735 | 196 |
| A01369 | A09999 | 228 | A01369 | A10490 | 156 |
| A01369 | A11616 | 162 | A01369 | A11728 | 217 |
| A01369 | A11857 | 217 | A01369 | A11927 | 219 |
| A01369 | A12227 | 217 | A01369 | A12813 | 296 |
| A01369 | A12821 | 279 | A01369 | A14508 | 445 |
| A01369 | A14594 | 177 | A01369 | A15268 | 217 |
| A01369 | A15381 | 217 | A01369 | A15500 | 446 |
| A01370 | A01444 | 339 | A01370 | A01451 | 170 |
| A01370 | A01516 | 208 | A01370 | A02252 | 168 |
| A01370 | A02257 | 152 | A01370 | A02414 | 176 |
| A01370 | A02981 | 160 | A01370 | A03104 | 152 |
| A01370 | A03899 | 266 | A01370 | A04548 | 185 |
| A01370 | A05210 | 235 | A01370 | A05570 | 199 |
| A01370 | A06137 | 208 | A01370 | A06272 | 312 |
| A01370 | A06361 | 288 | A01370 | A06750 | 267 |
| A01370 | A07101 | 389 | A01370 | A07307 | 221 |

|        |        |     |        |        |     |
|--------|--------|-----|--------|--------|-----|
| A01370 | A07355 | 254 | A01370 | A07457 | 429 |
| A01370 | A07756 | 479 | A01370 | A08882 | 185 |
| A01370 | A09290 | 379 | A01370 | A09672 | 283 |
| A01370 | A12255 | 199 | A01370 | A12824 | 491 |
| A01370 | A12897 | 279 | A01370 | A15297 | 443 |
| A01370 | A15559 | 201 | A01370 | A15642 | 160 |
| A01370 | A16358 | 258 | A01371 | A01376 | 316 |
| A01371 | A01449 | 219 | A01371 | A01582 | 366 |
| A01371 | A03186 | 269 | A01371 | A03570 | 328 |
| A01371 | A04666 | 389 | A01371 | A06443 | 353 |
| A01371 | A06750 | 212 | A01371 | A07101 | 246 |
| A01371 | A08159 | 435 | A01371 | A09317 | 337 |
| A01371 | A09580 | 424 | A01371 | A09687 | 346 |
| A01371 | A10484 | 341 | A01371 | A11277 | 196 |
| A01371 | A12095 | 380 | A01371 | A13166 | 445 |
| A01371 | A14594 | 156 | A01371 | A15297 | 306 |
| A01371 | A15543 | 174 | A01371 | A15920 | 196 |
| A01371 | A16311 | 251 | A01371 | A17079 | 366 |
| A01372 | A01390 | 217 | A01372 | A01391 | 479 |
| A01372 | A01492 | 213 | A01372 | A01588 | 491 |
| A01372 | A02381 | 217 | A01372 | A02719 | 299 |
| A01372 | A03012 | 327 | A01372 | A03494 | 383 |
| A01372 | A03503 | 440 | A01372 | A03873 | 262 |
| A01372 | A03948 | 341 | A01372 | A07554 | 174 |
| A01372 | A07670 | 413 | A01372 | A07706 | 205 |
| A01372 | A07956 | 436 | A01372 | A08118 | 157 |
| A01372 | A08248 | 480 | A01372 | A08281 | 360 |
| A01372 | A08524 | 865 | A01372 | A08571 | 396 |
| A01372 | A08773 | 152 | A01372 | A08977 | 439 |
| A01372 | A08982 | 316 | A01372 | A09343 | 157 |
| A01372 | A09725 | 265 | A01372 | A10372 | 154 |
| A01372 | A11139 | 383 | A01372 | A11544 | 262 |
| A01372 | A11649 | 268 | A01372 | A11962 | 215 |
| A01372 | A12288 | 394 | A01372 | A13183 | 215 |
| A01372 | A13447 | 198 | A01372 | A13720 | 265 |
| A01372 | A13805 | 421 | A01372 | A13892 | 262 |
| A01372 | A13912 | 193 | A01372 | A13915 | 208 |
| A01372 | A14196 | 489 | A01372 | A14212 | 160 |
| A01372 | A14272 | 361 | A01372 | A14362 | 262 |
| A01372 | A14614 | 162 | A01372 | A14887 | 162 |
| A01372 | A15136 | 251 | A01372 | A15321 | 482 |
| A01372 | A15338 | 588 | A01372 | A15544 | 174 |
| A01372 | A15559 | 486 | A01372 | A15561 | 384 |
| A01372 | A15564 | 552 | A01372 | A15631 | 417 |
| A01372 | A15665 | 347 | A01372 | A15711 | 383 |
| A01372 | A15729 | 385 | A01372 | A16255 | 311 |

|        |        |     |        |        |     |
|--------|--------|-----|--------|--------|-----|
| A01372 | A16311 | 195 | A01372 | A16465 | 245 |
| A01372 | A16614 | 262 | A01372 | A16690 | 744 |
| A01372 | A16831 | 276 | A01372 | A16862 | 229 |
| A01372 | A16866 | 740 | A01373 | A01622 | 208 |
| A01373 | A01636 | 427 | A01373 | A01657 | 204 |
| A01373 | A01705 | 177 | A01373 | A02037 | 269 |
| A01373 | A02048 | 475 | A01373 | A02158 | 185 |
| A01373 | A03366 | 364 | A01373 | A03370 | 154 |
| A01373 | A03401 | 446 | A01373 | A03407 | 243 |
| A01373 | A03744 | 481 | A01373 | A03769 | 252 |
| A01373 | A03843 | 208 | A01373 | A03958 | 255 |
| A01373 | A04495 | 438 | A01373 | A05589 | 281 |
| A01373 | A06721 | 185 | A01373 | A06819 | 472 |
| A01373 | A07375 | 162 | A01373 | A07560 | 438 |
| A01373 | A07642 | 673 | A01373 | A07687 | 196 |
| A01373 | A08463 | 438 | A01373 | A08889 | 514 |
| A01373 | A11158 | 179 | A01373 | A11385 | 245 |
| A01373 | A11574 | 281 | A01373 | A11958 | 371 |
| A01373 | A12129 | 286 | A01373 | A12208 | 198 |
| A01373 | A13056 | 371 | A01373 | A13093 | 371 |
| A01373 | A13219 | 230 | A01373 | A13507 | 371 |
| A01373 | A14170 | 235 | A01373 | A16782 | 327 |
| A01374 | A01390 | 232 | A01374 | A01633 | 274 |
| A01374 | A01917 | 260 | A01374 | A03689 | 235 |
| A01374 | A04687 | 257 | A01374 | A06878 | 249 |
| A01374 | A07203 | 263 | A01374 | A07347 | 293 |
| A01374 | A07677 | 294 | A01374 | A07695 | 297 |
| A01374 | A08860 | 224 | A01374 | A09320 | 268 |
| A01374 | A13230 | 230 | A01375 | A01377 | 217 |
| A01375 | A01415 | 299 | A01375 | A01432 | 515 |
| A01375 | A01536 | 378 | A01375 | A01559 | 450 |
| A01375 | A01589 | 276 | A01375 | A01622 | 321 |
| A01375 | A01686 | 477 | A01375 | A01741 | 377 |
| A01375 | A02058 | 221 | A01375 | A02731 | 177 |
| A01375 | A03232 | 177 | A01375 | A03259 | 215 |
| A01375 | A03728 | 369 | A01375 | A04071 | 173 |
| A01375 | A04375 | 404 | A01375 | A04507 | 317 |
| A01375 | A04668 | 479 | A01375 | A04743 | 353 |
| A01375 | A05247 | 152 | A01375 | A05419 | 174 |
| A01375 | A06085 | 463 | A01375 | A06101 | 162 |
| A01375 | A06264 | 326 | A01375 | A06472 | 736 |
| A01375 | A06829 | 380 | A01375 | A06924 | 737 |
| A01375 | A06982 | 490 | A01375 | A07026 | 307 |
| A01375 | A07111 | 210 | A01375 | A07232 | 228 |
| A01375 | A07332 | 183 | A01375 | A07346 | 491 |
| A01375 | A07771 | 208 | A01375 | A07880 | 480 |



|        |        |     |        |        |     |
|--------|--------|-----|--------|--------|-----|
| A01375 | A07889 | 473 | A01375 | A07996 | 326 |
| A01375 | A08117 | 337 | A01375 | A08669 | 283 |
| A01375 | A08939 | 260 | A01375 | A09227 | 188 |
| A01375 | A09667 | 238 | A01375 | A09714 | 432 |
| A01375 | A10373 | 491 | A01375 | A11687 | 213 |
| A01375 | A11830 | 406 | A01375 | A12052 | 277 |
| A01375 | A12556 | 198 | A01375 | A13231 | 204 |
| A01375 | A13949 | 201 | A01375 | A14079 | 462 |
| A01375 | A14093 | 191 | A01375 | A14167 | 191 |
| A01375 | A14230 | 418 | A01375 | A14336 | 429 |
| A01375 | A14701 | 322 | A01375 | A14810 | 468 |
| A01375 | A15372 | 163 | A01375 | A15667 | 165 |
| A01375 | A15837 | 736 | A01375 | A15858 | 276 |
| A01375 | A16068 | 216 | A01375 | A16353 | 515 |
| A01375 | A16408 | 260 | A01375 | A16635 | 243 |
| A01375 | A16692 | 152 | A01375 | A16748 | 213 |
| A01376 | A02148 | 196 | A01376 | A04033 | 156 |
| A01376 | A04666 | 235 | A01376 | A06578 | 274 |
| A01376 | A09300 | 312 | A01376 | A10484 | 375 |
| A01376 | A12116 | 412 | A01376 | A15419 | 245 |
| A01377 | A01386 | 159 | A01377 | A01686 | 216 |
| A01377 | A01691 | 210 | A01377 | A02774 | 452 |
| A01377 | A04145 | 266 | A01377 | A06472 | 340 |
| A01377 | A07111 | 238 | A01377 | A07558 | 174 |
| A01377 | A07693 | 438 | A01377 | A08113 | 470 |
| A01377 | A08263 | 454 | A01377 | A08346 | 441 |
| A01377 | A08402 | 489 | A01377 | A08694 | 344 |
| A01377 | A08975 | 305 | A01377 | A09164 | 274 |
| A01377 | A09648 | 488 | A01377 | A12952 | 224 |
| A01377 | A14077 | 468 | A01377 | A14092 | 475 |
| A01377 | A14272 | 721 | A01377 | A14840 | 411 |
| A01377 | A15367 | 469 | A01377 | A15498 | 162 |
| A01377 | A15877 | 486 | A01378 | A01405 | 174 |
| A01378 | A01507 | 491 | A01378 | A01512 | 268 |
| A01378 | A01531 | 185 | A01378 | A01606 | 485 |
| A01378 | A01692 | 179 | A01378 | A01698 | 475 |
| A01378 | A01776 | 247 | A01378 | A01850 | 236 |
| A01378 | A02343 | 235 | A01378 | A02345 | 188 |
| A01378 | A02411 | 63  | A01378 | A02677 | 314 |
| A01378 | A02822 | 201 | A01378 | A02898 | 165 |
| A01378 | A03451 | 252 | A01378 | A03893 | 238 |
| A01378 | A04007 | 165 | A01378 | A04202 | 163 |
| A01378 | A04449 | 491 | A01378 | A05032 | 408 |
| A01378 | A05101 | 308 | A01378 | A05168 | 191 |
| A01378 | A05556 | 183 | A01378 | A06701 | 259 |
| A01378 | A06858 | 160 | A01378 | A07220 | 288 |

|        |        |     |        |        |     |
|--------|--------|-----|--------|--------|-----|
| A01378 | A07355 | 218 | A01378 | A08022 | 489 |
| A01378 | A08340 | 353 | A01378 | A08621 | 208 |
| A01378 | A08692 | 475 | A01378 | A09003 | 226 |
| A01378 | A09162 | 416 | A01378 | A10114 | 202 |
| A01378 | A10590 | 399 | A01378 | A11345 | 170 |
| A01378 | A11452 | 154 | A01378 | A11983 | 430 |
| A01378 | A12304 | 226 | A01378 | A13928 | 184 |
| A01378 | A14636 | 383 | A01378 | A14653 | 363 |
| A01378 | A14749 | 285 | A01378 | A14925 | 385 |
| A01379 | A01387 | 571 | A01379 | A01431 | 187 |
| A01379 | A01439 | 414 | A01379 | A01470 | 185 |
| A01379 | A01492 | 210 | A01379 | A01538 | 210 |
| A01379 | A01577 | 152 | A01379 | A01597 | 340 |
| A01379 | A01598 | 477 | A01379 | A01614 | 443 |
| A01379 | A01627 | 299 | A01379 | A01649 | 490 |
| A01379 | A02265 | 210 | A01379 | A02601 | 299 |
| A01379 | A02978 | 210 | A01379 | A03697 | 152 |
| A01379 | A04495 | 299 | A01379 | A05230 | 321 |
| A01379 | A05323 | 367 | A01379 | A06279 | 229 |
| A01379 | A06287 | 152 | A01379 | A07076 | 477 |
| A01379 | A07362 | 230 | A01379 | A07394 | 257 |
| A01379 | A07744 | 152 | A01379 | A08061 | 152 |
| A01379 | A08098 | 152 | A01379 | A08178 | 152 |
| A01379 | A08357 | 479 | A01379 | A08674 | 177 |
| A01379 | A08763 | 152 | A01379 | A08947 | 299 |
| A01379 | A09004 | 299 | A01379 | A09292 | 210 |
| A01379 | A09707 | 360 | A01379 | A10842 | 152 |
| A01379 | A11734 | 199 | A01379 | A12508 | 152 |
| A01379 | A13052 | 210 | A01379 | A13398 | 268 |
| A01379 | A13989 | 542 | A01379 | A14167 | 241 |
| A01379 | A14525 | 152 | A01379 | A14614 | 255 |
| A01379 | A14816 | 210 | A01379 | A14838 | 188 |
| A01379 | A15375 | 152 | A01379 | A15546 | 152 |
| A01379 | A15660 | 362 | A01379 | A15666 | 340 |
| A01379 | A15684 | 420 | A01379 | A15932 | 205 |
| A01379 | A16157 | 162 | A01380 | A01540 | 632 |
| A01380 | A01543 | 361 | A01380 | A01582 | 327 |
| A01380 | A01830 | 234 | A01380 | A01850 | 324 |
| A01380 | A01922 | 221 | A01380 | A02003 | 191 |
| A01380 | A02243 | 258 | A01380 | A02252 | 165 |
| A01380 | A02353 | 324 | A01380 | A02813 | 167 |
| A01380 | A02830 | 173 | A01380 | A02994 | 151 |
| A01380 | A03143 | 207 | A01380 | A03398 | 160 |
| A01380 | A03438 | 168 | A01380 | A03467 | 400 |
| A01380 | A03494 | 224 | A01380 | A03516 | 324 |
| A01380 | A03671 | 188 | A01380 | A03705 | 180 |

|        |        |     |        |        |     |
|--------|--------|-----|--------|--------|-----|
| A01380 | A03740 | 324 | A01380 | A03840 | 168 |
| A01380 | A04265 | 230 | A01380 | A04305 | 160 |
| A01380 | A04399 | 402 | A01380 | A04543 | 216 |
| A01380 | A05086 | 324 | A01380 | A05240 | 172 |
| A01380 | A05515 | 230 | A01380 | A05732 | 241 |
| A01380 | A06795 | 288 | A01380 | A07102 | 324 |
| A01380 | A07187 | 324 | A01380 | A07483 | 226 |
| A01380 | A07894 | 213 | A01380 | A09073 | 171 |
| A01380 | A10162 | 414 | A01380 | A10507 | 371 |
| A01380 | A10814 | 255 | A01380 | A11374 | 324 |
| A01380 | A11694 | 324 | A01380 | A13240 | 157 |
| A01380 | A13432 | 174 | A01380 | A14073 | 531 |
| A01380 | A14642 | 324 | A01380 | A15295 | 361 |
| A01380 | A15365 | 179 | A01380 | A15652 | 177 |
| A01380 | A15684 | 281 | A01380 | A15843 | 324 |
| A01380 | A15917 | 369 | A01380 | A15918 | 204 |
| A01381 | A02064 | 196 | A01381 | A03398 | 255 |
| A01381 | A03734 | 439 | A01381 | A04520 | 165 |
| A01382 | A01540 | 208 | A01382 | A03776 | 235 |
| A01382 | A05086 | 341 | A01382 | A06623 | 167 |
| A01382 | A07773 | 188 | A01382 | A08521 | 340 |
| A01382 | A08979 | 424 | A01382 | A08987 | 228 |
| A01382 | A09546 | 204 | A01382 | A09615 | 480 |
| A01382 | A09717 | 254 | A01382 | A10616 | 154 |
| A01382 | A11427 | 333 | A01382 | A11724 | 279 |
| A01382 | A11731 | 279 | A01382 | A12923 | 299 |
| A01382 | A13261 | 337 | A01382 | A15416 | 159 |
| A01383 | A01385 | 491 | A01383 | A01401 | 469 |
| A01383 | A01414 | 232 | A01383 | A01419 | 173 |
| A01383 | A01502 | 240 | A01383 | A01699 | 232 |
| A01383 | A02511 | 318 | A01383 | A03525 | 465 |
| A01383 | A03526 | 486 | A01383 | A04648 | 196 |
| A01383 | A04964 | 152 | A01383 | A04972 | 463 |
| A01383 | A06803 | 462 | A01383 | A07046 | 210 |
| A01383 | A07290 | 435 | A01383 | A07835 | 213 |
| A01383 | A07885 | 306 | A01383 | A08907 | 374 |
| A01383 | A09517 | 219 | A01383 | A09675 | 374 |
| A01383 | A09712 | 480 | A01383 | A10642 | 483 |
| A01383 | A11487 | 212 | A01383 | A13813 | 347 |
| A01383 | A14086 | 201 | A01383 | A14183 | 199 |
| A01383 | A16228 | 256 | A01384 | A01418 | 195 |
| A01384 | A01425 | 425 | A01384 | A01439 | 491 |
| A01384 | A01440 | 317 | A01384 | A01468 | 486 |
| A01384 | A01470 | 491 | A01384 | A01492 | 490 |
| A01384 | A01495 | 488 | A01384 | A01569 | 208 |
| A01384 | A01579 | 183 | A01384 | A01597 | 491 |

|        |        |     |        |        |     |
|--------|--------|-----|--------|--------|-----|
| A01384 | A01598 | 489 | A01384 | A01614 | 473 |
| A01384 | A01649 | 491 | A01384 | A02050 | 241 |
| A01384 | A02328 | 168 | A01384 | A02499 | 310 |
| A01384 | A02978 | 463 | A01384 | A03101 | 156 |
| A01384 | A03296 | 488 | A01384 | A03438 | 219 |
| A01384 | A03567 | 460 | A01384 | A03859 | 386 |
| A01384 | A04016 | 268 | A01384 | A04846 | 177 |
| A01384 | A05011 | 299 | A01384 | A05318 | 314 |
| A01384 | A05501 | 262 | A01384 | A06017 | 193 |
| A01384 | A06279 | 157 | A01384 | A06584 | 306 |
| A01384 | A07076 | 232 | A01384 | A07258 | 218 |
| A01384 | A07306 | 299 | A01384 | A07487 | 217 |
| A01384 | A07524 | 245 | A01384 | A08357 | 486 |
| A01384 | A08674 | 252 | A01384 | A09060 | 177 |
| A01384 | A09285 | 241 | A01384 | A09292 | 249 |
| A01384 | A09327 | 266 | A01384 | A09707 | 198 |
| A01384 | A10156 | 224 | A01384 | A10917 | 232 |
| A01384 | A11462 | 190 | A01384 | A11593 | 205 |
| A01384 | A12477 | 162 | A01384 | A13989 | 491 |
| A01384 | A14169 | 179 | A01384 | A14216 | 290 |
| A01384 | A14597 | 467 | A01384 | A15204 | 446 |
| A01384 | A15205 | 465 | A01384 | A15206 | 465 |
| A01384 | A15207 | 465 | A01384 | A15208 | 412 |
| A01384 | A15209 | 340 | A01384 | A15210 | 446 |
| A01384 | A15215 | 252 | A01384 | A15338 | 480 |
| A01384 | A15559 | 424 | A01384 | A15660 | 443 |
| A01384 | A15684 | 445 | A01384 | A15917 | 213 |
| A01384 | A15931 | 154 | A01384 | A15937 | 256 |
| A01384 | A16372 | 218 | A01385 | A01401 | 372 |
| A01385 | A01419 | 426 | A01385 | A01420 | 297 |
| A01385 | A01470 | 391 | A01385 | A01474 | 490 |
| A01385 | A01492 | 494 | A01385 | A01502 | 165 |
| A01385 | A01558 | 494 | A01385 | A01582 | 224 |
| A01385 | A01585 | 488 | A01385 | A01588 | 787 |
| A01385 | A01612 | 523 | A01385 | A01628 | 472 |
| A01385 | A01699 | 259 | A01385 | A01720 | 286 |
| A01385 | A01741 | 199 | A01385 | A02715 | 249 |
| A01385 | A02869 | 443 | A01385 | A03304 | 458 |
| A01385 | A03328 | 393 | A01385 | A03494 | 163 |
| A01385 | A03525 | 491 | A01385 | A03526 | 484 |
| A01385 | A03569 | 400 | A01385 | A03945 | 162 |
| A01385 | A04141 | 427 | A01385 | A04337 | 477 |
| A01385 | A05288 | 232 | A01385 | A05812 | 286 |
| A01385 | A06644 | 156 | A01385 | A06750 | 327 |
| A01385 | A06803 | 362 | A01385 | A07004 | 490 |
| A01385 | A07081 | 196 | A01385 | A07290 | 486 |

|        |        |     |        |        |     |
|--------|--------|-----|--------|--------|-----|
| A01385 | A07339 | 165 | A01385 | A07442 | 424 |
| A01385 | A07483 | 182 | A01385 | A07487 | 286 |
| A01385 | A07670 | 313 | A01385 | A07706 | 217 |
| A01385 | A07835 | 491 | A01385 | A07885 | 191 |
| A01385 | A07887 | 424 | A01385 | A07940 | 156 |
| A01385 | A08118 | 191 | A01385 | A08137 | 537 |
| A01385 | A08357 | 196 | A01385 | A08524 | 346 |
| A01385 | A08528 | 272 | A01385 | A08571 | 451 |
| A01385 | A08937 | 329 | A01385 | A09007 | 479 |
| A01385 | A09093 | 173 | A01385 | A09327 | 429 |
| A01385 | A09446 | 188 | A01385 | A09675 | 246 |
| A01385 | A09707 | 454 | A01385 | A09712 | 450 |
| A01385 | A09984 | 198 | A01385 | A10070 | 160 |
| A01385 | A10642 | 490 | A01385 | A11369 | 165 |
| A01385 | A11487 | 408 | A01385 | A11509 | 329 |
| A01385 | A11558 | 241 | A01385 | A12296 | 226 |
| A01385 | A12824 | 235 | A01385 | A13045 | 180 |
| A01385 | A13124 | 208 | A01385 | A13485 | 198 |
| A01385 | A14006 | 461 | A01385 | A14077 | 202 |
| A01385 | A14080 | 170 | A01385 | A14212 | 259 |
| A01385 | A14220 | 345 | A01385 | A14272 | 490 |
| A01385 | A14381 | 159 | A01385 | A14449 | 441 |
| A01385 | A14838 | 279 | A01385 | A15053 | 226 |
| A01385 | A15431 | 240 | A01385 | A15449 | 294 |
| A01385 | A15932 | 491 | A01385 | A15933 | 430 |
| A01385 | A15949 | 187 | A01385 | A16690 | 443 |
| A01385 | A16934 | 173 | A01385 | A16994 | 366 |
| A01385 | A17230 | 165 | A01386 | A01428 | 467 |
| A01386 | A01716 | 327 | A01386 | A02494 | 258 |
| A01386 | A02704 | 414 | A01386 | A02878 | 171 |
| A01386 | A03098 | 352 | A01386 | A03186 | 179 |
| A01386 | A04086 | 352 | A01386 | A05539 | 324 |
| A01386 | A05617 | 270 | A01386 | A07480 | 352 |
| A01386 | A07603 | 414 | A01386 | A07693 | 424 |
| A01386 | A08346 | 382 | A01386 | A08402 | 281 |
| A01386 | A09073 | 179 | A01386 | A09164 | 428 |
| A01386 | A09205 | 208 | A01386 | A09532 | 374 |
| A01386 | A10083 | 241 | A01386 | A10664 | 177 |
| A01386 | A11346 | 154 | A01386 | A12722 | 675 |
| A01386 | A13889 | 221 | A01386 | A14077 | 490 |
| A01386 | A14173 | 212 | A01386 | A14191 | 398 |
| A01386 | A14192 | 468 | A01386 | A14272 | 467 |
| A01386 | A14707 | 356 | A01386 | A15367 | 241 |
| A01386 | A15391 | 201 | A01386 | A15526 | 363 |
| A01386 | A15877 | 324 | A01387 | A01439 | 299 |
| A01387 | A01577 | 152 | A01387 | A01627 | 299 |

|        |        |     |        |        |     |
|--------|--------|-----|--------|--------|-----|
| A01387 | A02249 | 238 | A01387 | A02601 | 393 |
| A01387 | A03439 | 247 | A01387 | A03628 | 172 |
| A01387 | A03697 | 152 | A01387 | A04495 | 299 |
| A01387 | A04782 | 229 | A01387 | A04818 | 367 |
| A01387 | A06287 | 152 | A01387 | A06435 | 296 |
| A01387 | A07744 | 152 | A01387 | A08061 | 152 |
| A01387 | A08098 | 152 | A01387 | A08178 | 152 |
| A01387 | A08763 | 152 | A01387 | A08947 | 299 |
| A01387 | A09004 | 299 | A01387 | A10109 | 307 |
| A01387 | A10156 | 205 | A01387 | A10842 | 152 |
| A01387 | A12418 | 393 | A01387 | A13523 | 430 |
| A01387 | A14525 | 152 | A01387 | A14801 | 263 |
| A01387 | A14954 | 393 | A01387 | A15375 | 152 |
| A01387 | A15546 | 152 | A01388 | A01444 | 218 |
| A01388 | A01536 | 270 | A01388 | A01559 | 323 |
| A01388 | A01616 | 490 | A01388 | A01626 | 458 |
| A01388 | A01686 | 477 | A01388 | A01737 | 441 |
| A01388 | A02847 | 484 | A01388 | A03812 | 154 |
| A01388 | A04668 | 479 | A01388 | A05334 | 229 |
| A01388 | A06982 | 467 | A01388 | A07346 | 352 |
| A01388 | A07603 | 462 | A01388 | A07902 | 294 |
| A01388 | A07996 | 486 | A01388 | A08000 | 446 |
| A01388 | A08030 | 411 | A01388 | A08117 | 375 |
| A01388 | A08208 | 330 | A01388 | A08212 | 475 |
| A01388 | A08516 | 491 | A01388 | A08769 | 485 |
| A01388 | A08995 | 484 | A01388 | A09000 | 490 |
| A01388 | A09001 | 477 | A01388 | A09288 | 469 |
| A01388 | A09538 | 157 | A01388 | A09654 | 174 |
| A01388 | A09706 | 462 | A01388 | A09762 | 489 |
| A01388 | A10373 | 485 | A01388 | A11236 | 480 |
| A01388 | A11703 | 419 | A01388 | A11880 | 279 |
| A01388 | A11916 | 268 | A01388 | A12061 | 205 |
| A01388 | A12556 | 491 | A01388 | A13103 | 346 |
| A01388 | A13257 | 191 | A01388 | A13913 | 187 |
| A01388 | A14076 | 469 | A01388 | A14079 | 177 |
| A01388 | A14230 | 409 | A01388 | A14282 | 473 |
| A01388 | A14614 | 267 | A01388 | A14694 | 257 |
| A01388 | A15356 | 404 | A01388 | A15524 | 245 |
| A01388 | A15531 | 290 | A01388 | A15539 | 369 |
| A01388 | A15941 | 435 | A01388 | A15942 | 247 |
| A01388 | A16226 | 296 | A01388 | A16612 | 274 |
| A01388 | A16616 | 475 | A01388 | A16646 | 440 |
| A01388 | A16754 | 435 | A01388 | A16762 | 344 |
| A01389 | A07360 | 310 | A01389 | A08774 | 63  |
| A01389 | A15684 | 160 | A01390 | A01435 | 63  |
| A01390 | A01562 | 290 | A01390 | A01575 | 278 |

|        |        |     |        |        |     |
|--------|--------|-----|--------|--------|-----|
| A01390 | A01585 | 152 | A01390 | A01598 | 268 |
| A01390 | A01633 | 267 | A01390 | A01677 | 249 |
| A01390 | A02208 | 269 | A01390 | A02419 | 101 |
| A01390 | A02437 | 269 | A01390 | A02874 | 160 |
| A01390 | A03163 | 188 | A01390 | A03271 | 446 |
| A01390 | A03873 | 217 | A01390 | A04957 | 465 |
| A01390 | A05765 | 576 | A01390 | A06289 | 63  |
| A01390 | A06675 | 660 | A01390 | A06941 | 815 |
| A01390 | A07956 | 217 | A01390 | A08248 | 217 |
| A01390 | A08982 | 217 | A01390 | A09056 | 485 |
| A01390 | A09826 | 329 | A01390 | A10286 | 269 |
| A01390 | A11544 | 217 | A01390 | A11649 | 217 |
| A01390 | A13604 | 223 | A01390 | A13892 | 217 |
| A01390 | A14362 | 217 | A01390 | A15321 | 686 |
| A01390 | A15338 | 217 | A01390 | A15529 | 240 |
| A01390 | A15544 | 188 | A01390 | A15555 | 269 |
| A01390 | A15564 | 217 | A01390 | A15684 | 227 |
| A01390 | A16255 | 269 | A01390 | A16614 | 217 |
| A01391 | A01434 | 156 | A01391 | A02064 | 157 |
| A01391 | A02173 | 193 | A01391 | A03494 | 237 |
| A01391 | A04033 | 286 | A01391 | A06890 | 159 |
| A01391 | A07706 | 343 | A01391 | A07898 | 156 |
| A01391 | A08201 | 156 | A01391 | A08248 | 374 |
| A01391 | A08327 | 156 | A01391 | A08431 | 156 |
| A01391 | A08542 | 156 | A01391 | A09766 | 160 |
| A01391 | A11496 | 156 | A01391 | A11497 | 156 |
| A01391 | A12757 | 156 | A01391 | A13870 | 182 |
| A01391 | A13928 | 158 | A01391 | A14178 | 156 |
| A01391 | A14196 | 446 | A01391 | A15543 | 326 |
| A01391 | A15559 | 485 | A01391 | A15729 | 299 |
| A01391 | A15947 | 324 | A01391 | A16699 | 156 |
| A01391 | A16831 | 165 | A01392 | A01399 | 255 |
| A01392 | A01416 | 489 | A01392 | A01433 | 664 |
| A01392 | A01436 | 664 | A01392 | A01437 | 229 |
| A01392 | A01443 | 446 | A01392 | A01446 | 485 |
| A01392 | A01448 | 332 | A01392 | A01449 | 177 |
| A01392 | A01468 | 367 | A01392 | A01470 | 252 |
| A01392 | A01575 | 207 | A01392 | A01579 | 273 |
| A01392 | A01601 | 196 | A01392 | A01649 | 470 |
| A01392 | A01718 | 390 | A01392 | A02216 | 407 |
| A01392 | A02814 | 176 | A01392 | A03069 | 163 |
| A01392 | A03279 | 156 | A01392 | A03296 | 259 |
| A01392 | A03460 | 241 | A01392 | A03490 | 188 |
| A01392 | A03567 | 394 | A01392 | A03958 | 182 |
| A01392 | A04507 | 299 | A01392 | A04846 | 157 |
| A01392 | A05411 | 382 | A01392 | A05499 | 216 |

|        |        |     |        |        |     |
|--------|--------|-----|--------|--------|-----|
| A01392 | A05501 | 216 | A01392 | A05502 | 230 |
| A01392 | A06351 | 488 | A01392 | A06861 | 374 |
| A01392 | A06965 | 469 | A01392 | A06987 | 327 |
| A01392 | A07449 | 462 | A01392 | A08011 | 664 |
| A01392 | A08055 | 478 | A01392 | A08357 | 229 |
| A01392 | A08452 | 272 | A01392 | A08521 | 188 |
| A01392 | A08543 | 177 | A01392 | A08550 | 613 |
| A01392 | A08559 | 160 | A01392 | A08773 | 658 |
| A01392 | A08973 | 473 | A01392 | A09227 | 167 |
| A01392 | A09293 | 432 | A01392 | A09322 | 319 |
| A01392 | A10316 | 271 | A01392 | A10389 | 204 |
| A01392 | A10878 | 249 | A01392 | A11438 | 353 |
| A01392 | A11992 | 363 | A01392 | A12923 | 174 |
| A01392 | A13069 | 185 | A01392 | A13249 | 412 |
| A01392 | A13375 | 162 | A01392 | A13707 | 460 |
| A01392 | A13989 | 489 | A01392 | A13992 | 252 |
| A01392 | A14482 | 491 | A01392 | A14568 | 420 |
| A01392 | A14569 | 460 | A01392 | A15235 | 201 |
| A01392 | A15988 | 656 | A01392 | A16306 | 303 |
| A01392 | A16750 | 269 | A01393 | A01468 | 438 |
| A01393 | A01539 | 180 | A01393 | A01540 | 454 |
| A01393 | A01569 | 184 | A01393 | A01586 | 435 |
| A01393 | A01601 | 224 | A01393 | A01721 | 223 |
| A01393 | A03272 | 241 | A01393 | A03570 | 159 |
| A01393 | A03752 | 196 | A01393 | A04265 | 269 |
| A01393 | A05109 | 361 | A01393 | A05191 | 276 |
| A01393 | A06077 | 418 | A01393 | A07081 | 257 |
| A01393 | A07449 | 375 | A01393 | A07583 | 179 |
| A01393 | A08390 | 271 | A01393 | A08980 | 334 |
| A01393 | A09308 | 235 | A01393 | A10328 | 191 |
| A01393 | A11802 | 389 | A01393 | A13989 | 265 |
| A01393 | A14073 | 356 | A01393 | A14172 | 157 |
| A01393 | A14362 | 224 | A01393 | A15891 | 274 |
| A01394 | A01582 | 183 | A01394 | A01627 | 302 |
| A01394 | A01941 | 167 | A01394 | A02477 | 272 |
| A01394 | A05301 | 196 | A01394 | A15324 | 173 |
| A01395 | A13905 | 224 | A01395 | A14193 | 63  |
| A01395 | A14253 | 63  | A01395 | A15557 | 63  |
| A01396 | A01548 | 212 | A01396 | A01569 | 151 |
| A01396 | A01603 | 490 | A01396 | A01845 | 279 |
| A01396 | A01846 | 430 | A01396 | A01847 | 485 |
| A01396 | A01848 | 440 | A01396 | A01902 | 455 |
| A01396 | A01941 | 470 | A01396 | A02011 | 362 |
| A01396 | A02251 | 170 | A01396 | A02260 | 361 |
| A01396 | A02331 | 79  | A01396 | A02415 | 307 |
| A01396 | A02416 | 202 | A01396 | A02631 | 299 |



|        |        |     |        |        |     |
|--------|--------|-----|--------|--------|-----|
| A01396 | A02637 | 297 | A01396 | A02657 | 299 |
| A01396 | A02678 | 210 | A01396 | A02699 | 213 |
| A01396 | A02783 | 177 | A01396 | A02802 | 350 |
| A01396 | A02834 | 234 | A01396 | A02843 | 281 |
| A01396 | A02847 | 270 | A01396 | A02925 | 430 |
| A01396 | A02972 | 208 | A01396 | A03022 | 333 |
| A01396 | A03177 | 183 | A01396 | A03206 | 321 |
| A01396 | A03215 | 472 | A01396 | A03224 | 195 |
| A01396 | A03259 | 193 | A01396 | A03275 | 162 |
| A01396 | A03279 | 251 | A01396 | A03280 | 221 |
| A01396 | A03553 | 172 | A01396 | A03984 | 477 |
| A01396 | A03985 | 221 | A01396 | A04096 | 160 |
| A01396 | A04278 | 182 | A01396 | A04446 | 224 |
| A01396 | A04519 | 472 | A01396 | A04865 | 224 |
| A01396 | A04879 | 477 | A01396 | A04880 | 348 |
| A01396 | A04908 | 346 | A01396 | A05577 | 174 |
| A01396 | A06631 | 204 | A01396 | A07135 | 327 |
| A01396 | A07147 | 255 | A01396 | A07166 | 152 |
| A01396 | A07175 | 252 | A01396 | A07211 | 380 |
| A01396 | A07335 | 458 | A01396 | A08635 | 249 |
| A01396 | A08732 | 322 | A01396 | A08860 | 154 |
| A01396 | A09395 | 238 | A01396 | A09672 | 302 |
| A01396 | A11931 | 182 | A01396 | A12361 | 160 |
| A01396 | A14391 | 229 | A01396 | A14487 | 238 |
| A01396 | A14570 | 165 | A01396 | A15297 | 456 |
| A01396 | A15613 | 224 | A01396 | A16216 | 445 |
| A01397 | A01409 | 489 | A01397 | A01508 | 319 |
| A01397 | A01714 | 302 | A01397 | A01793 | 159 |
| A01397 | A01855 | 162 | A01397 | A01907 | 177 |
| A01397 | A02020 | 255 | A01397 | A02026 | 157 |
| A01397 | A02254 | 337 | A01397 | A02284 | 185 |
| A01397 | A02290 | 486 | A01397 | A02366 | 347 |
| A01397 | A02701 | 226 | A01397 | A02859 | 319 |
| A01397 | A03016 | 249 | A01397 | A03087 | 208 |
| A01397 | A03167 | 375 | A01397 | A03168 | 226 |
| A01397 | A03174 | 310 | A01397 | A03234 | 168 |
| A01397 | A03441 | 196 | A01397 | A03962 | 193 |
| A01397 | A04095 | 299 | A01397 | A04211 | 185 |
| A01397 | A04315 | 294 | A01397 | A04410 | 163 |
| A01397 | A04778 | 271 | A01397 | A04791 | 477 |
| A01397 | A04834 | 269 | A01397 | A04883 | 207 |
| A01397 | A04927 | 340 | A01397 | A05026 | 312 |
| A01397 | A05050 | 310 | A01397 | A05098 | 424 |
| A01397 | A05103 | 454 | A01397 | A05140 | 305 |
| A01397 | A05330 | 259 | A01397 | A05331 | 452 |
| A01397 | A05333 | 338 | A01397 | A05337 | 373 |

|        |        |     |        |        |     |
|--------|--------|-----|--------|--------|-----|
| A01397 | A05424 | 160 | A01397 | A05431 | 319 |
| A01397 | A05463 | 435 | A01397 | A05546 | 205 |
| A01397 | A05573 | 408 | A01397 | A05659 | 221 |
| A01397 | A05820 | 360 | A01397 | A05937 | 301 |
| A01397 | A06063 | 182 | A01397 | A06358 | 202 |
| A01397 | A06633 | 263 | A01397 | A06970 | 339 |
| A01397 | A07059 | 327 | A01397 | A07088 | 205 |
| A01397 | A07190 | 160 | A01397 | A07283 | 210 |
| A01397 | A07381 | 274 | A01397 | A07408 | 411 |
| A01397 | A07520 | 152 | A01397 | A07530 | 281 |
| A01397 | A07674 | 154 | A01397 | A07684 | 379 |
| A01397 | A07723 | 286 | A01397 | A07763 | 373 |
| A01397 | A07847 | 477 | A01397 | A10422 | 404 |
| A01397 | A10687 | 314 | A01397 | A14803 | 213 |
| A01397 | A15135 | 310 | A01397 | A15905 | 196 |
| A01397 | A16027 | 306 | A01397 | A16028 | 274 |
| A01397 | A17078 | 221 | A01398 | A01401 | 530 |
| A01398 | A01415 | 293 | A01398 | A01500 | 695 |
| A01398 | A01503 | 695 | A01398 | A01513 | 179 |
| A01398 | A01524 | 899 | A01398 | A01555 | 184 |
| A01398 | A01596 | 190 | A01398 | A01720 | 160 |
| A01398 | A02336 | 185 | A01398 | A03175 | 283 |
| A01398 | A03432 | 255 | A01398 | A03734 | 319 |
| A01398 | A03793 | 190 | A01398 | A04485 | 199 |
| A01398 | A04648 | 503 | A01398 | A04687 | 159 |
| A01398 | A05027 | 407 | A01398 | A05107 | 160 |
| A01398 | A05419 | 171 | A01398 | A06103 | 177 |
| A01398 | A06580 | 285 | A01398 | A06803 | 533 |
| A01398 | A06975 | 216 | A01398 | A07670 | 355 |
| A01398 | A07850 | 311 | A01398 | A07887 | 461 |
| A01398 | A07916 | 190 | A01398 | A07920 | 263 |
| A01398 | A08383 | 156 | A01398 | A08818 | 156 |
| A01398 | A09296 | 201 | A01398 | A09307 | 446 |
| A01398 | A09502 | 156 | A01398 | A09712 | 490 |
| A01398 | A10553 | 297 | A01398 | A11344 | 156 |
| A01398 | A11674 | 156 | A01398 | A11737 | 162 |
| A01398 | A12026 | 401 | A01398 | A13078 | 489 |
| A01398 | A13981 | 899 | A01398 | A14006 | 391 |
| A01398 | A14655 | 430 | A01398 | A15297 | 252 |
| A01398 | A15949 | 265 | A01398 | A16228 | 440 |
| A01398 | A17168 | 202 | A01399 | A01443 | 591 |
| A01399 | A01446 | 491 | A01399 | A01448 | 491 |
| A01399 | A01496 | 380 | A01399 | A01540 | 477 |
| A01399 | A01711 | 417 | A01399 | A01741 | 165 |
| A01399 | A02814 | 274 | A01399 | A02994 | 247 |
| A01399 | A03740 | 252 | A01399 | A03776 | 450 |

|        |        |     |        |        |     |
|--------|--------|-----|--------|--------|-----|
| A01399 | A03809 | 465 | A01399 | A03959 | 272 |
| A01399 | A04542 | 363 | A01399 | A04668 | 427 |
| A01399 | A04686 | 179 | A01399 | A04895 | 491 |
| A01399 | A06356 | 193 | A01399 | A06543 | 372 |
| A01399 | A06959 | 481 | A01399 | A07208 | 462 |
| A01399 | A07237 | 441 | A01399 | A07350 | 296 |
| A01399 | A07362 | 451 | A01399 | A07551 | 230 |
| A01399 | A07569 | 269 | A01399 | A07597 | 450 |
| A01399 | A07706 | 218 | A01399 | A07793 | 184 |
| A01399 | A07881 | 372 | A01399 | A08293 | 276 |
| A01399 | A08402 | 469 | A01399 | A08521 | 363 |
| A01399 | A08554 | 266 | A01399 | A08567 | 439 |
| A01399 | A08813 | 260 | A01399 | A08982 | 241 |
| A01399 | A08987 | 311 | A01399 | A08988 | 324 |
| A01399 | A09616 | 187 | A01399 | A09735 | 196 |
| A01399 | A10199 | 319 | A01399 | A10373 | 266 |
| A01399 | A10535 | 347 | A01399 | A10797 | 154 |
| A01399 | A10798 | 398 | A01399 | A11015 | 230 |
| A01399 | A11322 | 246 | A01399 | A11337 | 210 |
| A01399 | A11338 | 427 | A01399 | A11374 | 452 |
| A01399 | A11419 | 490 | A01399 | A11427 | 488 |
| A01399 | A11677 | 553 | A01399 | A11975 | 384 |
| A01399 | A12371 | 152 | A01399 | A13525 | 168 |
| A01399 | A13707 | 372 | A01399 | A13963 | 457 |
| A01399 | A14122 | 187 | A01399 | A14272 | 488 |
| A01399 | A14569 | 196 | A01399 | A14699 | 247 |
| A01399 | A14778 | 247 | A01399 | A14825 | 323 |
| A01399 | A14878 | 224 | A01399 | A14888 | 312 |
| A01399 | A15531 | 174 | A01399 | A15539 | 162 |
| A01399 | A15550 | 230 | A01399 | A15624 | 204 |
| A01399 | A15652 | 157 | A01399 | A15662 | 372 |
| A01399 | A15666 | 187 | A01399 | A16587 | 306 |
| A01400 | A01478 | 491 | A01400 | A01551 | 486 |
| A01400 | A01668 | 491 | A01400 | A01670 | 162 |
| A01400 | A01675 | 424 | A01400 | A01705 | 447 |
| A01400 | A01725 | 196 | A01400 | A01729 | 152 |
| A01400 | A01731 | 201 | A01400 | A01732 | 428 |
| A01400 | A01743 | 475 | A01400 | A01745 | 193 |
| A01400 | A01751 | 491 | A01400 | A01758 | 389 |
| A01400 | A01765 | 171 | A01400 | A01766 | 477 |
| A01400 | A01772 | 441 | A01400 | A01780 | 193 |
| A01400 | A01796 | 434 | A01400 | A01798 | 230 |
| A01400 | A01867 | 210 | A01400 | A01883 | 196 |
| A01400 | A01893 | 351 | A01400 | A01894 | 286 |
| A01400 | A01909 | 375 | A01400 | A01914 | 452 |
| A01400 | A02072 | 196 | A01400 | A02147 | 272 |

|        |        |     |        |        |     |
|--------|--------|-----|--------|--------|-----|
| A01400 | A02167 | 249 | A01400 | A02298 | 223 |
| A01400 | A02362 | 210 | A01400 | A02468 | 180 |
| A01400 | A02488 | 168 | A01400 | A02490 | 390 |
| A01400 | A02493 | 274 | A01400 | A02539 | 152 |
| A01400 | A02541 | 236 | A01400 | A02613 | 347 |
| A01400 | A02668 | 205 | A01400 | A02691 | 215 |
| A01400 | A02692 | 193 | A01400 | A02785 | 281 |
| A01400 | A02858 | 385 | A01400 | A02906 | 263 |
| A01400 | A02985 | 294 | A01400 | A03042 | 288 |
| A01400 | A03107 | 241 | A01400 | A03224 | 190 |
| A01400 | A03531 | 193 | A01400 | A03608 | 157 |
| A01400 | A03667 | 451 | A01400 | A03841 | 216 |
| A01400 | A03849 | 360 | A01400 | A03862 | 249 |
| A01400 | A04031 | 272 | A01400 | A04053 | 213 |
| A01400 | A04122 | 470 | A01400 | A04267 | 152 |
| A01400 | A04302 | 272 | A01400 | A04437 | 454 |
| A01400 | A04584 | 302 | A01400 | A04623 | 486 |
| A01400 | A04877 | 299 | A01400 | A05106 | 160 |
| A01400 | A05309 | 255 | A01400 | A05673 | 265 |
| A01400 | A05866 | 424 | A01400 | A05940 | 470 |
| A01400 | A06607 | 489 | A01400 | A06635 | 260 |
| A01400 | A06650 | 377 | A01400 | A06688 | 187 |
| A01400 | A07031 | 152 | A01400 | A07177 | 491 |
| A01400 | A07200 | 480 | A01400 | A08389 | 294 |
| A01400 | A08643 | 218 | A01400 | A08675 | 379 |
| A01400 | A09262 | 288 | A01400 | A09274 | 347 |
| A01400 | A09359 | 419 | A01400 | A09935 | 312 |
| A01400 | A10085 | 159 | A01400 | A10103 | 235 |
| A01400 | A11539 | 307 | A01400 | A11606 | 299 |
| A01400 | A12122 | 429 | A01400 | A13092 | 323 |
| A01400 | A13152 | 317 | A01400 | A13632 | 329 |
| A01400 | A14332 | 265 | A01400 | A14342 | 347 |
| A01400 | A14349 | 424 | A01400 | A14366 | 199 |
| A01400 | A14405 | 424 | A01400 | A14440 | 361 |
| A01400 | A14956 | 235 | A01400 | A15238 | 236 |
| A01400 | A15282 | 165 | A01400 | A15368 | 294 |
| A01400 | A16281 | 469 | A01401 | A01500 | 521 |
| A01401 | A01555 | 229 | A01401 | A02774 | 208 |
| A01401 | A03526 | 473 | A01401 | A04548 | 200 |
| A01401 | A04648 | 487 | A01401 | A04687 | 156 |
| A01401 | A05386 | 177 | A01401 | A05998 | 224 |
| A01401 | A06803 | 537 | A01401 | A07290 | 236 |
| A01401 | A07655 | 235 | A01401 | A07670 | 228 |
| A01401 | A07850 | 156 | A01401 | A07887 | 421 |
| A01401 | A07920 | 409 | A01401 | A08022 | 458 |
| A01401 | A08383 | 356 | A01401 | A08495 | 466 |

|        |        |     |        |        |     |
|--------|--------|-----|--------|--------|-----|
| A01401 | A08553 | 256 | A01401 | A08571 | 247 |
| A01401 | A08818 | 537 | A01401 | A08996 | 180 |
| A01401 | A09502 | 156 | A01401 | A09703 | 207 |
| A01401 | A09712 | 485 | A01401 | A10497 | 379 |
| A01401 | A10642 | 435 | A01401 | A11344 | 156 |
| A01401 | A11674 | 156 | A01401 | A16067 | 238 |
| A01401 | A16109 | 152 | A01401 | A16228 | 420 |
| A01402 | A01841 | 183 | A01402 | A02564 | 283 |
| A01402 | A02641 | 400 | A01402 | A02791 | 228 |
| A01402 | A02908 | 165 | A01402 | A03209 | 183 |
| A01402 | A03220 | 430 | A01402 | A03832 | 335 |
| A01402 | A03841 | 274 | A01402 | A03983 | 430 |
| A01402 | A07885 | 245 | A01402 | A11521 | 199 |
| A01402 | A13426 | 296 | A01402 | A14484 | 269 |
| A01403 | A01412 | 234 | A01403 | A01448 | 177 |
| A01403 | A01502 | 291 | A01403 | A01711 | 182 |
| A01403 | A03007 | 241 | A01403 | A03931 | 306 |
| A01403 | A03959 | 180 | A01403 | A08521 | 252 |
| A01403 | A14778 | 187 | A01403 | A15379 | 243 |
| A01404 | A01415 | 461 | A01404 | A01461 | 277 |
| A01404 | A01515 | 486 | A01404 | A01524 | 899 |
| A01404 | A01527 | 990 | A01404 | A01559 | 402 |
| A01404 | A01573 | 340 | A01404 | A01590 | 303 |
| A01404 | A01616 | 481 | A01404 | A01643 | 229 |
| A01404 | A01650 | 385 | A01404 | A01716 | 335 |
| A01404 | A01847 | 208 | A01404 | A01899 | 199 |
| A01404 | A01923 | 260 | A01404 | A01926 | 491 |
| A01404 | A01937 | 179 | A01404 | A01947 | 229 |
| A01404 | A02083 | 428 | A01404 | A02097 | 245 |
| A01404 | A02138 | 407 | A01404 | A02156 | 483 |
| A01404 | A02262 | 163 | A01404 | A02268 | 469 |
| A01404 | A02272 | 452 | A01404 | A02275 | 468 |
| A01404 | A02306 | 374 | A01404 | A02330 | 226 |
| A01404 | A02454 | 462 | A01404 | A02524 | 491 |
| A01404 | A02545 | 455 | A01404 | A02698 | 491 |
| A01404 | A02712 | 490 | A01404 | A02749 | 196 |
| A01404 | A02759 | 217 | A01404 | A03007 | 277 |
| A01404 | A03019 | 241 | A01404 | A03034 | 396 |
| A01404 | A03044 | 163 | A01404 | A03086 | 485 |
| A01404 | A03091 | 424 | A01404 | A03099 | 488 |
| A01404 | A03155 | 241 | A01404 | A03173 | 281 |
| A01404 | A03183 | 193 | A01404 | A03223 | 488 |
| A01404 | A03238 | 424 | A01404 | A03402 | 213 |
| A01404 | A03545 | 185 | A01404 | A04095 | 179 |
| A01404 | A04162 | 172 | A01404 | A04668 | 356 |
| A01404 | A05165 | 224 | A01404 | A05208 | 154 |

|        |        |     |        |        |     |
|--------|--------|-----|--------|--------|-----|
| A01404 | A05210 | 157 | A01404 | A05216 | 491 |
| A01404 | A05369 | 393 | A01404 | A05376 | 218 |
| A01404 | A05419 | 477 | A01404 | A05577 | 201 |
| A01404 | A05767 | 162 | A01404 | A06159 | 346 |
| A01404 | A06405 | 168 | A01404 | A06439 | 156 |
| A01404 | A06471 | 346 | A01404 | A06607 | 436 |
| A01404 | A06729 | 172 | A01404 | A06733 | 182 |
| A01404 | A06764 | 221 | A01404 | A06874 | 329 |
| A01404 | A07140 | 277 | A01404 | A07184 | 154 |
| A01404 | A07509 | 427 | A01404 | A07520 | 212 |
| A01404 | A07534 | 160 | A01404 | A07548 | 281 |
| A01404 | A07650 | 483 | A01404 | A07655 | 367 |
| A01404 | A07878 | 302 | A01404 | A08688 | 276 |
| A01404 | A08859 | 156 | A01404 | A09881 | 260 |
| A01404 | A10018 | 172 | A01404 | A10061 | 221 |
| A01404 | A10394 | 281 | A01404 | A10527 | 484 |
| A01404 | A10537 | 327 | A01404 | A10688 | 185 |
| A01404 | A10806 | 257 | A01404 | A10967 | 188 |
| A01404 | A11424 | 480 | A01404 | A12472 | 424 |
| A01404 | A12824 | 490 | A01404 | A12909 | 327 |
| A01404 | A13140 | 477 | A01404 | A13280 | 461 |
| A01404 | A14180 | 262 | A01404 | A14188 | 490 |
| A01404 | A14223 | 461 | A01404 | A14430 | 218 |
| A01404 | A14502 | 398 | A01404 | A14674 | 550 |
| A01404 | A14694 | 263 | A01404 | A15510 | 745 |
| A01404 | A15992 | 435 | A01404 | A16843 | 441 |
| A01405 | A01507 | 731 | A01405 | A01602 | 350 |
| A01405 | A01724 | 210 | A01405 | A01886 | 184 |
| A01405 | A02028 | 238 | A01405 | A02039 | 174 |
| A01405 | A02293 | 221 | A01405 | A02467 | 156 |
| A01405 | A02537 | 205 | A01405 | A02561 | 223 |
| A01405 | A02564 | 167 | A01405 | A02629 | 188 |
| A01405 | A02813 | 286 | A01405 | A02842 | 102 |
| A01405 | A02868 | 193 | A01405 | A02902 | 491 |
| A01405 | A02903 | 257 | A01405 | A02929 | 151 |
| A01405 | A02958 | 241 | A01405 | A02965 | 491 |
| A01405 | A03112 | 177 | A01405 | A03213 | 154 |
| A01405 | A03229 | 263 | A01405 | A03304 | 460 |
| A01405 | A03321 | 332 | A01405 | A04004 | 196 |
| A01405 | A04249 | 254 | A01405 | A04346 | 168 |
| A01405 | A04729 | 196 | A01405 | A04737 | 168 |
| A01405 | A05828 | 363 | A01405 | A06138 | 484 |
| A01405 | A07004 | 246 | A01405 | A08416 | 157 |
| A01405 | A08815 | 473 | A01405 | A08836 | 230 |
| A01405 | A08837 | 235 | A01405 | A09487 | 406 |
| A01405 | A09659 | 254 | A01405 | A10061 | 279 |

|        |        |     |        |        |     |
|--------|--------|-----|--------|--------|-----|
| A01405 | A10148 | 406 | A01405 | A11190 | 156 |
| A01405 | A11345 | 190 | A01405 | A12365 | 314 |
| A01405 | A13581 | 216 | A01405 | A14653 | 384 |
| A01405 | A16131 | 243 | A01406 | A01407 | 479 |
| A01406 | A01408 | 559 | A01406 | A01411 | 339 |
| A01406 | A01412 | 571 | A01406 | A01414 | 188 |
| A01406 | A01416 | 414 | A01406 | A01449 | 190 |
| A01406 | A01451 | 188 | A01406 | A01468 | 434 |
| A01406 | A01470 | 457 | A01406 | A01558 | 188 |
| A01406 | A01568 | 373 | A01406 | A01579 | 473 |
| A01406 | A01598 | 273 | A01406 | A01611 | 140 |
| A01406 | A01612 | 491 | A01406 | A01613 | 63  |
| A01406 | A01647 | 489 | A01406 | A01660 | 468 |
| A01406 | A01665 | 346 | A01406 | A01707 | 469 |
| A01406 | A01790 | 363 | A01406 | A01976 | 188 |
| A01406 | A01988 | 188 | A01406 | A01995 | 157 |
| A01406 | A01999 | 221 | A01406 | A02148 | 173 |
| A01406 | A02152 | 276 | A01406 | A02207 | 229 |
| A01406 | A02225 | 185 | A01406 | A02227 | 491 |
| A01406 | A02452 | 477 | A01406 | A02671 | 413 |
| A01406 | A02839 | 218 | A01406 | A03057 | 443 |
| A01406 | A03095 | 467 | A01406 | A03453 | 285 |
| A01406 | A03490 | 201 | A01406 | A03493 | 486 |
| A01406 | A03568 | 227 | A01406 | A03569 | 491 |
| A01406 | A03600 | 350 | A01406 | A03601 | 658 |
| A01406 | A03901 | 198 | A01406 | A04507 | 249 |
| A01406 | A04597 | 427 | A01406 | A04688 | 394 |
| A01406 | A04689 | 317 | A01406 | A04833 | 208 |
| A01406 | A05375 | 246 | A01406 | A05501 | 606 |
| A01406 | A05502 | 154 | A01406 | A05702 | 188 |
| A01406 | A05804 | 395 | A01406 | A06308 | 353 |
| A01406 | A06564 | 488 | A01406 | A06785 | 188 |
| A01406 | A06861 | 271 | A01406 | A06907 | 490 |
| A01406 | A07054 | 400 | A01406 | A07209 | 154 |
| A01406 | A07242 | 486 | A01406 | A07349 | 486 |
| A01406 | A07414 | 210 | A01406 | A07604 | 451 |
| A01406 | A07706 | 491 | A01406 | A07773 | 252 |
| A01406 | A07883 | 332 | A01406 | A07902 | 439 |
| A01406 | A07965 | 188 | A01406 | A08137 | 491 |
| A01406 | A08318 | 265 | A01406 | A08419 | 224 |
| A01406 | A08556 | 235 | A01406 | A08571 | 475 |
| A01406 | A08695 | 283 | A01406 | A08760 | 205 |
| A01406 | A08761 | 358 | A01406 | A08901 | 174 |
| A01406 | A08929 | 252 | A01406 | A09282 | 154 |
| A01406 | A09520 | 489 | A01406 | A09530 | 283 |
| A01406 | A09735 | 488 | A01406 | A09826 | 224 |

|        |        |     |        |        |     |
|--------|--------|-----|--------|--------|-----|
| A01406 | A10090 | 184 | A01406 | A10296 | 201 |
| A01406 | A10338 | 283 | A01406 | A11277 | 491 |
| A01406 | A11288 | 224 | A01406 | A11401 | 224 |
| A01406 | A11480 | 188 | A01406 | A11688 | 182 |
| A01406 | A11737 | 219 | A01406 | A11930 | 157 |
| A01406 | A12598 | 213 | A01406 | A12657 | 163 |
| A01406 | A12923 | 241 | A01406 | A12924 | 273 |
| A01406 | A13989 | 427 | A01406 | A14006 | 491 |
| A01406 | A14148 | 360 | A01406 | A14196 | 490 |
| A01406 | A14220 | 488 | A01406 | A14221 | 488 |
| A01406 | A14257 | 227 | A01406 | A14271 | 208 |
| A01406 | A14303 | 254 | A01406 | A14478 | 258 |
| A01406 | A14479 | 446 | A01406 | A14482 | 408 |
| A01406 | A14566 | 488 | A01406 | A14568 | 491 |
| A01406 | A14594 | 466 | A01406 | A14661 | 480 |
| A01406 | A14813 | 188 | A01406 | A14875 | 176 |
| A01406 | A15291 | 430 | A01406 | A15292 | 379 |
| A01406 | A15297 | 475 | A01406 | A15323 | 177 |
| A01406 | A15338 | 224 | A01406 | A15360 | 213 |
| A01406 | A15366 | 358 | A01406 | A15500 | 480 |
| A01406 | A15559 | 401 | A01406 | A15657 | 188 |
| A01406 | A15752 | 417 | A01406 | A15771 | 450 |
| A01406 | A15773 | 461 | A01406 | A15935 | 193 |
| A01406 | A16680 | 188 | A01406 | A17063 | 491 |
| A01406 | A17152 | 457 | A01407 | A01408 | 179 |
| A01407 | A01449 | 187 | A01407 | A01468 | 170 |
| A01407 | A01579 | 456 | A01407 | A01597 | 162 |
| A01407 | A01611 | 217 | A01407 | A01860 | 168 |
| A01407 | A02108 | 154 | A01407 | A02227 | 363 |
| A01407 | A03493 | 473 | A01407 | A03754 | 313 |
| A01407 | A04688 | 229 | A01407 | A05258 | 446 |
| A01407 | A05318 | 193 | A01407 | A05501 | 433 |
| A01407 | A05502 | 228 | A01407 | A05557 | 160 |
| A01407 | A06564 | 188 | A01407 | A07283 | 201 |
| A01407 | A07323 | 185 | A01407 | A07347 | 232 |
| A01407 | A07349 | 185 | A01407 | A07581 | 191 |
| A01407 | A07730 | 238 | A01407 | A08154 | 240 |
| A01407 | A08408 | 328 | A01407 | A08419 | 277 |
| A01407 | A08501 | 160 | A01407 | A08533 | 345 |
| A01407 | A08761 | 368 | A01407 | A08929 | 433 |
| A01407 | A09735 | 361 | A01407 | A10695 | 257 |
| A01407 | A11688 | 316 | A01407 | A13497 | 374 |
| A01407 | A13596 | 430 | A01407 | A14191 | 156 |
| A01407 | A14479 | 294 | A01407 | A14568 | 294 |
| A01407 | A14849 | 438 | A01407 | A15500 | 329 |
| A01407 | A15771 | 170 | A01408 | A01412 | 483 |



|        |        |     |        |        |     |
|--------|--------|-----|--------|--------|-----|
| A01408 | A01414 | 317 | A01408 | A01416 | 247 |
| A01408 | A01449 | 165 | A01408 | A01451 | 188 |
| A01408 | A01484 | 163 | A01408 | A01547 | 224 |
| A01408 | A01611 | 461 | A01408 | A01613 | 473 |
| A01408 | A01976 | 366 | A01408 | A01988 | 188 |
| A01408 | A01998 | 427 | A01408 | A01999 | 374 |
| A01408 | A02211 | 317 | A01408 | A02227 | 491 |
| A01408 | A02786 | 180 | A01408 | A03095 | 302 |
| A01408 | A03568 | 258 | A01408 | A03705 | 202 |
| A01408 | A03856 | 238 | A01408 | A03901 | 361 |
| A01408 | A05198 | 208 | A01408 | A05199 | 247 |
| A01408 | A05318 | 303 | A01408 | A05499 | 193 |
| A01408 | A05501 | 419 | A01408 | A05702 | 188 |
| A01408 | A05804 | 378 | A01408 | A06064 | 303 |
| A01408 | A06564 | 299 | A01408 | A06589 | 245 |
| A01408 | A06785 | 188 | A01408 | A07046 | 188 |
| A01408 | A07349 | 163 | A01408 | A07965 | 188 |
| A01408 | A08154 | 218 | A01408 | A09520 | 201 |
| A01408 | A09664 | 204 | A01408 | A09735 | 435 |
| A01408 | A10038 | 260 | A01408 | A11480 | 188 |
| A01408 | A11703 | 235 | A01408 | A14478 | 207 |
| A01408 | A14479 | 462 | A01408 | A14813 | 188 |
| A01408 | A15500 | 374 | A01408 | A15657 | 188 |
| A01408 | A16680 | 188 | A01409 | A01452 | 372 |
| A01409 | A01568 | 307 | A01409 | A01635 | 422 |
| A01409 | A01647 | 498 | A01409 | A01714 | 172 |
| A01409 | A01899 | 182 | A01409 | A01972 | 350 |
| A01409 | A01978 | 276 | A01409 | A02008 | 259 |
| A01409 | A02014 | 283 | A01409 | A02168 | 168 |
| A01409 | A02173 | 218 | A01409 | A02254 | 276 |
| A01409 | A02335 | 279 | A01409 | A02336 | 154 |
| A01409 | A02432 | 353 | A01409 | A02468 | 188 |
| A01409 | A02574 | 174 | A01409 | A02669 | 154 |
| A01409 | A02992 | 455 | A01409 | A03016 | 334 |
| A01409 | A03050 | 662 | A01409 | A03146 | 288 |
| A01409 | A03148 | 252 | A01409 | A03167 | 446 |
| A01409 | A03168 | 200 | A01409 | A03174 | 313 |
| A01409 | A03203 | 172 | A01409 | A03346 | 154 |
| A01409 | A03484 | 215 | A01409 | A03513 | 474 |
| A01409 | A03880 | 307 | A01409 | A04095 | 167 |
| A01409 | A04493 | 196 | A01409 | A04620 | 168 |
| A01409 | A04781 | 168 | A01409 | A04791 | 430 |
| A01409 | A04839 | 184 | A01409 | A04866 | 195 |
| A01409 | A04883 | 405 | A01409 | A04927 | 408 |
| A01409 | A05007 | 172 | A01409 | A05014 | 364 |
| A01409 | A05045 | 305 | A01409 | A05140 | 174 |

|        |        |     |        |        |     |
|--------|--------|-----|--------|--------|-----|
| A01409 | A05330 | 245 | A01409 | A05331 | 480 |
| A01409 | A05333 | 221 | A01409 | A05337 | 236 |
| A01409 | A05376 | 201 | A01409 | A05393 | 433 |
| A01409 | A05416 | 467 | A01409 | A05418 | 302 |
| A01409 | A05433 | 257 | A01409 | A05451 | 191 |
| A01409 | A05550 | 445 | A01409 | A05573 | 477 |
| A01409 | A05714 | 246 | A01409 | A05757 | 321 |
| A01409 | A05789 | 180 | A01409 | A05912 | 271 |
| A01409 | A05937 | 168 | A01409 | A06039 | 199 |
| A01409 | A06245 | 447 | A01409 | A06358 | 272 |
| A01409 | A06385 | 219 | A01409 | A06405 | 424 |
| A01409 | A06439 | 441 | A01409 | A06629 | 157 |
| A01409 | A06847 | 276 | A01409 | A06855 | 174 |
| A01409 | A06860 | 408 | A01409 | A06970 | 414 |
| A01409 | A06994 | 172 | A01409 | A07007 | 622 |
| A01409 | A07027 | 401 | A01409 | A07037 | 167 |
| A01409 | A07059 | 486 | A01409 | A07088 | 435 |
| A01409 | A07109 | 152 | A01409 | A07122 | 340 |
| A01409 | A07239 | 191 | A01409 | A07264 | 391 |
| A01409 | A07334 | 452 | A01409 | A07335 | 154 |
| A01409 | A07366 | 338 | A01409 | A07376 | 154 |
| A01409 | A07407 | 238 | A01409 | A07408 | 458 |
| A01409 | A07477 | 168 | A01409 | A07490 | 332 |
| A01409 | A07507 | 463 | A01409 | A07508 | 288 |
| A01409 | A07520 | 473 | A01409 | A07619 | 221 |
| A01409 | A07674 | 491 | A01409 | A07684 | 406 |
| A01409 | A07688 | 193 | A01409 | A07690 | 249 |
| A01409 | A07718 | 260 | A01409 | A07736 | 364 |
| A01409 | A07757 | 223 | A01409 | A07763 | 335 |
| A01409 | A07800 | 230 | A01409 | A07816 | 307 |
| A01409 | A07847 | 488 | A01409 | A07856 | 204 |
| A01409 | A07933 | 205 | A01409 | A07981 | 307 |
| A01409 | A08114 | 152 | A01409 | A08133 | 207 |
| A01409 | A08155 | 305 | A01409 | A08199 | 276 |
| A01409 | A08280 | 207 | A01409 | A08368 | 257 |
| A01409 | A08678 | 63  | A01409 | A08751 | 184 |
| A01409 | A09054 | 307 | A01409 | A09879 | 168 |
| A01409 | A10420 | 152 | A01409 | A10422 | 302 |
| A01409 | A10424 | 184 | A01409 | A10444 | 234 |
| A01409 | A10656 | 213 | A01409 | A10658 | 157 |
| A01409 | A10672 | 167 | A01409 | A10687 | 187 |
| A01409 | A10690 | 305 | A01409 | A11189 | 486 |
| A01409 | A13819 | 307 | A01409 | A13866 | 307 |
| A01409 | A13989 | 199 | A01409 | A14239 | 307 |
| A01409 | A14481 | 199 | A01409 | A14540 | 314 |
| A01409 | A14827 | 274 | A01409 | A15874 | 210 |

|        |        |     |        |        |     |
|--------|--------|-----|--------|--------|-----|
| A01409 | A16741 | 274 | A01409 | A16807 | 307 |
| A01409 | A17006 | 152 | A01409 | A17007 | 249 |
| A01409 | A17078 | 445 | A01410 | A01572 | 270 |
| A01410 | A02052 | 290 | A01410 | A02252 | 193 |
| A01410 | A02723 | 281 | A01410 | A03053 | 246 |
| A01410 | A03560 | 180 | A01410 | A03785 | 208 |
| A01410 | A04082 | 246 | A01410 | A04288 | 224 |
| A01410 | A05162 | 326 | A01410 | A05588 | 346 |
| A01410 | A06120 | 313 | A01410 | A06584 | 168 |
| A01410 | A07192 | 179 | A01410 | A09218 | 243 |
| A01410 | A09778 | 269 | A01410 | A10639 | 413 |
| A01410 | A10735 | 154 | A01410 | A11601 | 391 |
| A01410 | A12383 | 901 | A01410 | A12791 | 384 |
| A01410 | A13511 | 160 | A01410 | A13605 | 230 |
| A01410 | A14187 | 221 | A01410 | A14433 | 308 |
| A01410 | A14511 | 443 | A01410 | A14667 | 180 |
| A01410 | A14925 | 159 | A01410 | A15313 | 176 |
| A01410 | A15515 | 168 | A01410 | A17170 | 355 |
| A01411 | A01414 | 151 | A01411 | A01420 | 260 |
| A01411 | A01455 | 471 | A01411 | A01461 | 154 |
| A01411 | A01468 | 154 | A01411 | A01539 | 469 |
| A01411 | A01569 | 486 | A01411 | A01579 | 492 |
| A01411 | A01581 | 247 | A01411 | A01586 | 378 |
| A01411 | A01601 | 737 | A01411 | A01822 | 63  |
| A01411 | A01824 | 473 | A01411 | A01826 | 247 |
| A01411 | A01841 | 436 | A01411 | A02353 | 490 |
| A01411 | A02718 | 306 | A01411 | A02737 | 217 |
| A01411 | A02877 | 245 | A01411 | A03102 | 188 |
| A01411 | A03446 | 383 | A01411 | A03453 | 591 |
| A01411 | A03901 | 185 | A01411 | A04055 | 205 |
| A01411 | A05138 | 177 | A01411 | A05501 | 517 |
| A01411 | A05660 | 269 | A01411 | A05782 | 170 |
| A01411 | A05930 | 327 | A01411 | A06091 | 152 |
| A01411 | A06179 | 258 | A01411 | A06534 | 304 |
| A01411 | A06564 | 359 | A01411 | A06814 | 417 |
| A01411 | A06861 | 244 | A01411 | A06973 | 371 |
| A01411 | A07047 | 241 | A01411 | A07398 | 579 |
| A01411 | A07531 | 188 | A01411 | A07746 | 369 |
| A01411 | A08131 | 329 | A01411 | A08369 | 241 |
| A01411 | A08408 | 241 | A01411 | A08476 | 241 |
| A01411 | A08546 | 277 | A01411 | A08739 | 185 |
| A01411 | A08760 | 184 | A01411 | A08761 | 296 |
| A01411 | A08834 | 230 | A01411 | A08901 | 160 |
| A01411 | A09308 | 241 | A01411 | A09322 | 241 |
| A01411 | A09495 | 312 | A01411 | A09587 | 486 |
| A01411 | A09620 | 241 | A01411 | A09717 | 247 |

|        |        |     |        |        |     |
|--------|--------|-----|--------|--------|-----|
| A01411 | A09726 | 201 | A01411 | A10390 | 299 |
| A01411 | A10490 | 441 | A01411 | A10798 | 428 |
| A01411 | A11409 | 483 | A01411 | A11588 | 340 |
| A01411 | A11728 | 241 | A01411 | A11780 | 312 |
| A01411 | A12227 | 241 | A01411 | A13340 | 157 |
| A01411 | A13609 | 340 | A01411 | A13692 | 63  |
| A01411 | A13693 | 63  | A01411 | A14074 | 247 |
| A01411 | A14172 | 296 | A01411 | A14568 | 296 |
| A01411 | A14813 | 339 | A01411 | A14816 | 208 |
| A01411 | A15225 | 159 | A01411 | A15268 | 241 |
| A01411 | A15381 | 256 | A01411 | A16149 | 177 |
| A01411 | A16756 | 221 | A01411 | A17152 | 217 |
| A01412 | A01414 | 208 | A01412 | A01416 | 245 |
| A01412 | A01418 | 204 | A01412 | A01446 | 162 |
| A01412 | A01540 | 224 | A01412 | A01611 | 191 |
| A01412 | A01787 | 221 | A01412 | A01825 | 218 |
| A01412 | A02227 | 491 | A01412 | A03095 | 363 |
| A01412 | A03487 | 254 | A01412 | A03490 | 170 |
| A01412 | A03493 | 390 | A01412 | A03600 | 165 |
| A01412 | A03671 | 208 | A01412 | A03676 | 174 |
| A01412 | A04688 | 205 | A01412 | A04782 | 201 |
| A01412 | A05127 | 232 | A01412 | A05199 | 368 |
| A01412 | A05471 | 229 | A01412 | A05646 | 240 |
| A01412 | A05702 | 213 | A01412 | A05839 | 243 |
| A01412 | A06064 | 447 | A01412 | A06122 | 217 |
| A01412 | A06369 | 489 | A01412 | A06431 | 200 |
| A01412 | A06589 | 427 | A01412 | A06832 | 544 |
| A01412 | A08760 | 425 | A01412 | A08761 | 221 |
| A01412 | A09595 | 306 | A01412 | A09696 | 291 |
| A01412 | A09735 | 486 | A01412 | A13361 | 171 |
| A01412 | A13831 | 378 | A01412 | A14478 | 205 |
| A01412 | A14482 | 185 | A01412 | A14596 | 425 |
| A01412 | A14699 | 281 | A01412 | A15673 | 405 |
| A01412 | A16026 | 216 | A01413 | A01435 | 185 |
| A01413 | A01447 | 259 | A01413 | A01497 | 217 |
| A01413 | A01539 | 296 | A01413 | A01540 | 491 |
| A01413 | A01551 | 307 | A01413 | A01582 | 357 |
| A01413 | A01611 | 156 | A01413 | A01827 | 452 |
| A01413 | A01837 | 190 | A01413 | A01850 | 344 |
| A01413 | A02040 | 477 | A01413 | A02477 | 364 |
| A01413 | A02527 | 205 | A01413 | A02607 | 258 |
| A01413 | A02994 | 414 | A01413 | A02999 | 490 |
| A01413 | A03456 | 355 | A01413 | A03494 | 191 |
| A01413 | A03651 | 443 | A01413 | A03691 | 355 |
| A01413 | A03740 | 363 | A01413 | A03752 | 205 |
| A01413 | A03798 | 358 | A01413 | A03809 | 340 |

|        |        |     |        |        |     |
|--------|--------|-----|--------|--------|-----|
| A01413 | A03911 | 419 | A01413 | A04072 | 412 |
| A01413 | A04642 | 383 | A01413 | A04647 | 224 |
| A01413 | A04782 | 454 | A01413 | A05375 | 170 |
| A01413 | A05417 | 396 | A01413 | A05449 | 245 |
| A01413 | A05812 | 265 | A01413 | A06048 | 363 |
| A01413 | A06546 | 179 | A01413 | A07081 | 334 |
| A01413 | A07160 | 218 | A01413 | A07686 | 299 |
| A01413 | A09595 | 389 | A01413 | A09709 | 217 |
| A01413 | A10553 | 327 | A01413 | A10598 | 311 |
| A01413 | A10853 | 224 | A01413 | A11380 | 268 |
| A01413 | A11860 | 416 | A01413 | A12167 | 185 |
| A01413 | A12673 | 363 | A01413 | A13653 | 363 |
| A01413 | A13822 | 156 | A01413 | A14073 | 258 |
| A01413 | A14410 | 274 | A01413 | A14779 | 224 |
| A01413 | A14894 | 277 | A01413 | A15557 | 202 |
| A01413 | A15659 | 156 | A01413 | A16437 | 160 |
| A01413 | A16458 | 286 | A01414 | A01451 | 188 |
| A01414 | A01579 | 425 | A01414 | A01601 | 223 |
| A01414 | A01633 | 278 | A01414 | A01976 | 528 |
| A01414 | A01988 | 188 | A01414 | A02814 | 218 |
| A01414 | A03453 | 183 | A01414 | A03705 | 255 |
| A01414 | A03901 | 478 | A01414 | A03959 | 154 |
| A01414 | A05702 | 188 | A01414 | A06534 | 252 |
| A01414 | A06785 | 188 | A01414 | A07965 | 188 |
| A01414 | A08834 | 241 | A01414 | A08907 | 389 |
| A01414 | A09322 | 188 | A01414 | A09517 | 251 |
| A01414 | A10575 | 271 | A01414 | A11480 | 188 |
| A01414 | A14813 | 188 | A01414 | A15657 | 188 |
| A01414 | A16680 | 188 | A01415 | A01459 | 276 |
| A01415 | A01469 | 465 | A01415 | A01478 | 465 |
| A01415 | A01492 | 174 | A01415 | A01524 | 993 |
| A01415 | A01527 | 899 | A01415 | A01535 | 326 |
| A01415 | A01536 | 491 | A01415 | A01554 | 899 |
| A01415 | A01558 | 899 | A01415 | A01559 | 491 |
| A01415 | A01580 | 644 | A01415 | A01588 | 899 |
| A01415 | A01589 | 491 | A01415 | A01594 | 491 |
| A01415 | A01596 | 640 | A01415 | A01601 | 171 |
| A01415 | A01616 | 491 | A01415 | A01625 | 380 |
| A01415 | A01627 | 229 | A01415 | A01659 | 491 |
| A01415 | A01680 | 546 | A01415 | A01682 | 229 |
| A01415 | A01686 | 491 | A01415 | A01741 | 152 |
| A01415 | A01822 | 224 | A01415 | A01976 | 214 |
| A01415 | A02058 | 388 | A01415 | A02257 | 317 |
| A01415 | A02731 | 232 | A01415 | A02797 | 171 |
| A01415 | A02887 | 353 | A01415 | A03057 | 491 |
| A01415 | A03080 | 283 | A01415 | A03237 | 455 |

|        |        |     |        |        |     |
|--------|--------|-----|--------|--------|-----|
| A01415 | A03300 | 170 | A01415 | A03301 | 355 |
| A01415 | A03327 | 628 | A01415 | A03328 | 615 |
| A01415 | A03422 | 394 | A01415 | A03575 | 955 |
| A01415 | A03620 | 190 | A01415 | A03625 | 226 |
| A01415 | A03886 | 157 | A01415 | A03929 | 307 |
| A01415 | A04012 | 168 | A01415 | A04058 | 219 |
| A01415 | A04668 | 491 | A01415 | A04776 | 491 |
| A01415 | A04927 | 172 | A01415 | A05124 | 180 |
| A01415 | A05218 | 165 | A01415 | A05334 | 491 |
| A01415 | A05369 | 205 | A01415 | A05690 | 628 |
| A01415 | A06130 | 441 | A01415 | A06242 | 491 |
| A01415 | A06297 | 316 | A01415 | A06318 | 480 |
| A01415 | A06381 | 603 | A01415 | A06493 | 168 |
| A01415 | A06602 | 429 | A01415 | A06750 | 229 |
| A01415 | A06851 | 273 | A01415 | A06864 | 491 |
| A01415 | A06982 | 491 | A01415 | A07079 | 157 |
| A01415 | A07224 | 227 | A01415 | A07311 | 899 |
| A01415 | A07319 | 491 | A01415 | A07332 | 449 |
| A01415 | A07346 | 491 | A01415 | A07353 | 317 |
| A01415 | A07433 | 321 | A01415 | A07466 | 433 |
| A01415 | A07480 | 491 | A01415 | A07534 | 490 |
| A01415 | A07603 | 491 | A01415 | A07647 | 472 |
| A01415 | A07670 | 229 | A01415 | A07687 | 307 |
| A01415 | A07697 | 311 | A01415 | A07869 | 477 |
| A01415 | A07996 | 491 | A01415 | A08030 | 486 |
| A01415 | A08117 | 468 | A01415 | A08141 | 417 |
| A01415 | A08208 | 491 | A01415 | A08212 | 488 |
| A01415 | A08317 | 159 | A01415 | A08351 | 205 |
| A01415 | A08352 | 623 | A01415 | A08402 | 395 |
| A01415 | A08516 | 313 | A01415 | A08526 | 238 |
| A01415 | A08549 | 184 | A01415 | A08552 | 342 |
| A01415 | A08561 | 229 | A01415 | A08590 | 159 |
| A01415 | A08669 | 490 | A01415 | A08769 | 363 |
| A01415 | A08820 | 491 | A01415 | A08832 | 477 |
| A01415 | A08833 | 490 | A01415 | A08858 | 902 |
| A01415 | A08877 | 477 | A01415 | A08884 | 429 |
| A01415 | A08887 | 486 | A01415 | A08912 | 159 |
| A01415 | A08995 | 193 | A01415 | A09135 | 396 |
| A01415 | A09278 | 458 | A01415 | A09288 | 172 |
| A01415 | A09301 | 477 | A01415 | A09304 | 624 |
| A01415 | A09342 | 436 | A01415 | A09523 | 227 |
| A01415 | A09598 | 491 | A01415 | A09609 | 238 |
| A01415 | A09626 | 238 | A01415 | A09654 | 180 |
| A01415 | A09680 | 177 | A01415 | A09706 | 338 |
| A01415 | A09762 | 249 | A01415 | A10082 | 152 |
| A01415 | A10373 | 491 | A01415 | A10394 | 205 |

|        |        |     |        |        |     |
|--------|--------|-----|--------|--------|-----|
| A01415 | A10553 | 205 | A01415 | A10580 | 960 |
| A01415 | A10846 | 270 | A01415 | A10896 | 262 |
| A01415 | A11107 | 205 | A01415 | A11236 | 462 |
| A01415 | A11242 | 311 | A01415 | A11283 | 307 |
| A01415 | A11332 | 307 | A01415 | A11540 | 491 |
| A01415 | A11828 | 545 | A01415 | A11840 | 307 |
| A01415 | A11858 | 172 | A01415 | A11914 | 165 |
| A01415 | A11916 | 460 | A01415 | A12047 | 708 |
| A01415 | A12396 | 159 | A01415 | A12556 | 491 |
| A01415 | A12658 | 241 | A01415 | A12824 | 451 |
| A01415 | A13913 | 288 | A01415 | A13949 | 719 |
| A01415 | A13989 | 176 | A01415 | A14076 | 486 |
| A01415 | A14079 | 491 | A01415 | A14094 | 484 |
| A01415 | A14223 | 465 | A01415 | A14230 | 491 |
| A01415 | A14272 | 297 | A01415 | A14273 | 477 |
| A01415 | A14279 | 302 | A01415 | A14460 | 474 |
| A01415 | A14543 | 255 | A01415 | A14569 | 179 |
| A01415 | A14694 | 491 | A01415 | A14701 | 291 |
| A01415 | A14706 | 152 | A01415 | A14739 | 159 |
| A01415 | A15054 | 152 | A01415 | A15238 | 174 |
| A01415 | A15367 | 488 | A01415 | A15369 | 491 |
| A01415 | A15371 | 204 | A01415 | A15524 | 382 |
| A01415 | A15549 | 159 | A01415 | A15654 | 238 |
| A01415 | A15714 | 368 | A01415 | A15837 | 629 |
| A01415 | A15940 | 172 | A01415 | A15941 | 484 |
| A01415 | A16073 | 204 | A01415 | A16110 | 230 |
| A01415 | A16127 | 491 | A01415 | A16128 | 491 |
| A01415 | A16129 | 483 | A01415 | A16187 | 205 |
| A01415 | A16226 | 491 | A01415 | A16294 | 334 |
| A01415 | A16299 | 310 | A01415 | A16378 | 188 |
| A01415 | A16587 | 162 | A01415 | A16606 | 486 |
| A01415 | A16613 | 377 | A01415 | A16616 | 262 |
| A01415 | A16626 | 629 | A01415 | A16643 | 317 |
| A01415 | A16646 | 312 | A01415 | A16762 | 301 |
| A01415 | A16788 | 205 | A01415 | A16815 | 259 |
| A01416 | A01424 | 162 | A01416 | A01425 | 317 |
| A01416 | A01433 | 454 | A01416 | A01436 | 600 |
| A01416 | A01448 | 353 | A01416 | A01468 | 323 |
| A01416 | A01586 | 317 | A01416 | A01741 | 451 |
| A01416 | A02051 | 294 | A01416 | A02529 | 254 |
| A01416 | A03490 | 622 | A01416 | A03601 | 296 |
| A01416 | A03652 | 235 | A01416 | A03770 | 428 |
| A01416 | A03981 | 317 | A01416 | A04622 | 180 |
| A01416 | A05146 | 165 | A01416 | A05327 | 249 |
| A01416 | A05351 | 241 | A01416 | A05375 | 252 |
| A01416 | A05499 | 159 | A01416 | A05501 | 226 |

|        |        |     |        |        |     |
|--------|--------|-----|--------|--------|-----|
| A01416 | A05502 | 170 | A01416 | A06105 | 230 |
| A01416 | A06351 | 625 | A01416 | A06775 | 219 |
| A01416 | A06861 | 252 | A01416 | A07412 | 191 |
| A01416 | A08011 | 477 | A01416 | A08154 | 183 |
| A01416 | A08377 | 317 | A01416 | A08550 | 317 |
| A01416 | A08760 | 208 | A01416 | A08773 | 475 |
| A01416 | A08973 | 603 | A01416 | A09332 | 368 |
| A01416 | A09735 | 371 | A01416 | A11453 | 212 |
| A01416 | A11815 | 343 | A01416 | A11992 | 263 |
| A01416 | A12433 | 263 | A01416 | A12881 | 260 |
| A01416 | A13905 | 257 | A01416 | A13989 | 441 |
| A01416 | A14188 | 173 | A01416 | A14479 | 393 |
| A01416 | A14482 | 643 | A01416 | A14701 | 393 |
| A01416 | A15500 | 334 | A01416 | A15771 | 335 |
| A01416 | A15988 | 356 | A01416 | A16654 | 229 |
| A01417 | A01454 | 183 | A01417 | A01478 | 223 |
| A01417 | A01661 | 588 | A01417 | A02157 | 462 |
| A01417 | A02309 | 151 | A01417 | A02416 | 241 |
| A01417 | A02513 | 180 | A01417 | A02711 | 174 |
| A01417 | A03704 | 252 | A01417 | A03712 | 343 |
| A01417 | A03724 | 217 | A01417 | A03899 | 488 |
| A01417 | A04037 | 241 | A01417 | A04881 | 151 |
| A01417 | A05157 | 160 | A01417 | A05210 | 183 |
| A01417 | A05539 | 458 | A01417 | A06174 | 319 |
| A01417 | A06886 | 398 | A01417 | A07294 | 425 |
| A01417 | A08148 | 224 | A01417 | A08296 | 483 |
| A01417 | A08639 | 463 | A01417 | A08683 | 446 |
| A01417 | A08746 | 455 | A01417 | A08861 | 241 |
| A01417 | A08866 | 193 | A01417 | A09205 | 149 |
| A01417 | A09469 | 160 | A01417 | A09729 | 378 |
| A01417 | A09809 | 160 | A01417 | A09834 | 190 |
| A01417 | A10603 | 268 | A01417 | A11383 | 470 |
| A01417 | A11398 | 191 | A01417 | A11470 | 396 |
| A01417 | A12038 | 343 | A01417 | A12047 | 465 |
| A01417 | A12648 | 405 | A01417 | A12897 | 337 |
| A01417 | A12949 | 271 | A01417 | A14037 | 180 |
| A01417 | A14118 | 358 | A01417 | A14171 | 198 |
| A01417 | A14193 | 283 | A01417 | A14198 | 481 |
| A01417 | A14299 | 241 | A01417 | A14323 | 290 |
| A01417 | A14375 | 489 | A01417 | A15315 | 479 |
| A01417 | A15323 | 200 | A01417 | A15347 | 486 |
| A01417 | A15556 | 485 | A01417 | A15644 | 489 |
| A01417 | A15683 | 491 | A01417 | A15712 | 326 |
| A01417 | A15788 | 167 | A01417 | A16017 | 290 |
| A01417 | A16113 | 238 | A01417 | A16292 | 193 |
| A01417 | A16322 | 374 | A01417 | A16376 | 257 |



|        |        |     |        |        |     |
|--------|--------|-----|--------|--------|-----|
| A01417 | A16432 | 293 | A01417 | A16466 | 353 |
| A01417 | A16665 | 213 | A01418 | A01425 | 182 |
| A01418 | A01470 | 489 | A01418 | A01495 | 351 |
| A01418 | A01496 | 388 | A01418 | A01540 | 223 |
| A01418 | A01598 | 307 | A01418 | A01649 | 424 |
| A01418 | A01976 | 408 | A01418 | A02195 | 480 |
| A01418 | A02203 | 317 | A01418 | A02868 | 160 |
| A01418 | A03035 | 188 | A01418 | A03227 | 401 |
| A01418 | A03307 | 276 | A01418 | A03556 | 254 |
| A01418 | A03567 | 469 | A01418 | A03568 | 193 |
| A01418 | A03572 | 241 | A01418 | A03617 | 217 |
| A01418 | A03676 | 260 | A01418 | A03768 | 241 |
| A01418 | A03952 | 196 | A01418 | A04697 | 185 |
| A01418 | A04769 | 224 | A01418 | A05019 | 193 |
| A01418 | A05199 | 182 | A01418 | A05605 | 217 |
| A01418 | A05646 | 176 | A01418 | A06122 | 152 |
| A01418 | A06369 | 252 | A01418 | A06412 | 375 |
| A01418 | A06832 | 501 | A01418 | A07250 | 269 |
| A01418 | A07309 | 205 | A01418 | A07473 | 215 |
| A01418 | A07583 | 384 | A01418 | A07677 | 241 |
| A01418 | A07708 | 408 | A01418 | A08183 | 217 |
| A01418 | A08989 | 196 | A01418 | A09673 | 217 |
| A01418 | A10632 | 480 | A01418 | A11277 | 445 |
| A01418 | A11795 | 339 | A01418 | A13989 | 488 |
| A01418 | A14088 | 231 | A01418 | A14170 | 191 |
| A01418 | A14216 | 291 | A01418 | A14597 | 485 |
| A01418 | A14662 | 215 | A01418 | A14701 | 454 |
| A01418 | A15297 | 241 | A01418 | A15377 | 217 |
| A01418 | A15543 | 217 | A01418 | A15660 | 452 |
| A01418 | A15684 | 466 | A01418 | A15724 | 217 |
| A01418 | A15746 | 305 | A01418 | A16088 | 469 |
| A01418 | A16495 | 241 | A01418 | A16664 | 217 |
| A01418 | A16844 | 168 | A01419 | A01438 | 688 |
| A01419 | A01451 | 603 | A01419 | A01457 | 157 |
| A01419 | A01458 | 235 | A01419 | A01461 | 200 |
| A01419 | A01557 | 346 | A01419 | A01573 | 286 |
| A01419 | A01574 | 238 | A01419 | A01575 | 423 |
| A01419 | A01576 | 443 | A01419 | A01585 | 207 |
| A01419 | A01634 | 268 | A01419 | A01683 | 292 |
| A01419 | A01976 | 157 | A01419 | A02089 | 196 |
| A01419 | A02364 | 402 | A01419 | A03822 | 466 |
| A01419 | A03880 | 402 | A01419 | A03892 | 164 |
| A01419 | A04100 | 156 | A01419 | A04239 | 212 |
| A01419 | A04449 | 458 | A01419 | A04668 | 302 |
| A01419 | A04686 | 264 | A01419 | A04749 | 173 |
| A01419 | A04962 | 457 | A01419 | A05092 | 286 |

|        |        |     |        |        |     |
|--------|--------|-----|--------|--------|-----|
| A01419 | A05097 | 286 | A01419 | A05155 | 319 |
| A01419 | A05234 | 402 | A01419 | A05288 | 259 |
| A01419 | A06689 | 162 | A01419 | A07004 | 432 |
| A01419 | A07697 | 488 | A01419 | A07706 | 152 |
| A01419 | A07771 | 157 | A01419 | A07835 | 369 |
| A01419 | A07885 | 491 | A01419 | A08137 | 154 |
| A01419 | A08356 | 332 | A01419 | A08362 | 358 |
| A01419 | A08517 | 344 | A01419 | A08562 | 205 |
| A01419 | A08643 | 402 | A01419 | A08831 | 268 |
| A01419 | A09007 | 488 | A01419 | A09010 | 190 |
| A01419 | A09044 | 174 | A01419 | A09675 | 286 |
| A01419 | A10159 | 810 | A01419 | A10383 | 241 |
| A01419 | A11132 | 149 | A01419 | A11279 | 345 |
| A01419 | A11301 | 290 | A01419 | A11487 | 469 |
| A01419 | A11496 | 152 | A01419 | A11735 | 204 |
| A01419 | A12052 | 241 | A01419 | A12662 | 162 |
| A01419 | A12729 | 383 | A01419 | A12858 | 204 |
| A01419 | A13204 | 286 | A01419 | A13231 | 569 |
| A01419 | A13278 | 328 | A01419 | A13323 | 191 |
| A01419 | A13647 | 385 | A01419 | A13831 | 200 |
| A01419 | A13928 | 302 | A01419 | A14086 | 452 |
| A01419 | A14167 | 283 | A01419 | A14183 | 171 |
| A01419 | A14193 | 487 | A01419 | A14196 | 162 |
| A01419 | A14208 | 390 | A01419 | A14212 | 238 |
| A01419 | A14213 | 257 | A01419 | A14214 | 171 |
| A01419 | A14221 | 184 | A01419 | A14235 | 156 |
| A01419 | A14246 | 286 | A01419 | A14253 | 483 |
| A01419 | A14272 | 291 | A01419 | A14454 | 491 |
| A01419 | A14462 | 257 | A01419 | A14633 | 230 |
| A01419 | A14825 | 177 | A01419 | A14843 | 466 |
| A01419 | A15224 | 269 | A01419 | A15268 | 219 |
| A01419 | A15293 | 224 | A01419 | A15314 | 605 |
| A01419 | A15322 | 236 | A01419 | A15336 | 302 |
| A01419 | A15345 | 251 | A01419 | A15366 | 251 |
| A01419 | A15384 | 402 | A01419 | A15498 | 425 |
| A01419 | A15502 | 170 | A01419 | A15578 | 366 |
| A01419 | A15612 | 302 | A01419 | A15682 | 240 |
| A01419 | A15690 | 270 | A01419 | A15827 | 168 |
| A01419 | A15946 | 374 | A01419 | A16387 | 165 |
| A01419 | A16585 | 177 | A01419 | A16623 | 347 |
| A01419 | A16695 | 205 | A01419 | A16908 | 224 |
| A01420 | A01455 | 462 | A01420 | A01492 | 462 |
| A01420 | A01539 | 490 | A01420 | A01567 | 252 |
| A01420 | A01569 | 455 | A01420 | A01581 | 247 |
| A01420 | A01598 | 708 | A01420 | A01626 | 165 |
| A01420 | A01649 | 462 | A01420 | A01770 | 353 |

|        |        |     |        |        |     |
|--------|--------|-----|--------|--------|-----|
| A01420 | A01826 | 247 | A01420 | A02573 | 217 |
| A01420 | A03446 | 435 | A01420 | A03453 | 247 |
| A01420 | A03723 | 184 | A01420 | A03785 | 388 |
| A01420 | A03937 | 179 | A01420 | A08771 | 174 |
| A01420 | A09717 | 247 | A01420 | A11409 | 483 |
| A01420 | A14074 | 247 | A01420 | A14817 | 489 |
| A01420 | A15711 | 182 | A01420 | A15905 | 260 |
| A01420 | A16332 | 345 | A01421 | A07756 | 299 |
| A01421 | A10986 | 160 | A01421 | A15667 | 490 |
| A01422 | A01626 | 230 | A01422 | A02877 | 154 |
| A01422 | A03414 | 281 | A01422 | A08301 | 310 |
| A01422 | A08957 | 329 | A01422 | A12361 | 401 |
| A01422 | A14701 | 255 | A01422 | A15529 | 457 |
| A01422 | A15535 | 475 | A01422 | A15540 | 454 |
| A01423 | A01440 | 399 | A01423 | A01598 | 157 |
| A01423 | A01668 | 170 | A01423 | A01730 | 258 |
| A01423 | A01740 | 356 | A01423 | A01877 | 422 |
| A01423 | A01888 | 210 | A01423 | A02414 | 311 |
| A01423 | A02558 | 428 | A01423 | A02610 | 408 |
| A01423 | A02703 | 357 | A01423 | A02740 | 461 |
| A01423 | A02803 | 337 | A01423 | A02816 | 371 |
| A01423 | A02854 | 299 | A01423 | A02860 | 414 |
| A01423 | A02887 | 329 | A01423 | A02895 | 406 |
| A01423 | A02914 | 427 | A01423 | A02924 | 272 |
| A01423 | A03195 | 313 | A01423 | A03271 | 327 |
| A01423 | A03437 | 329 | A01423 | A03817 | 278 |
| A01423 | A04042 | 398 | A01423 | A04587 | 454 |
| A01423 | A04682 | 419 | A01423 | A04730 | 480 |
| A01423 | A06224 | 449 | A01423 | A06654 | 420 |
| A01423 | A07307 | 341 | A01423 | A13126 | 285 |
| A01423 | A15935 | 216 | A01424 | A01492 | 174 |
| A01424 | A01598 | 63  | A01424 | A06698 | 174 |
| A01424 | A07244 | 230 | A01424 | A07432 | 174 |
| A01424 | A07524 | 174 | A01424 | A07584 | 328 |
| A01424 | A07625 | 174 | A01424 | A07924 | 174 |
| A01424 | A09357 | 152 | A01424 | A11544 | 174 |
| A01424 | A11831 | 174 | A01424 | A11832 | 174 |
| A01424 | A13792 | 435 | A01424 | A14186 | 223 |
| A01425 | A01431 | 461 | A01425 | A01436 | 325 |
| A01425 | A01439 | 468 | A01425 | A01464 | 221 |
| A01425 | A01468 | 629 | A01425 | A01470 | 605 |
| A01425 | A01487 | 468 | A01425 | A01488 | 273 |
| A01425 | A01492 | 742 | A01425 | A01495 | 269 |
| A01425 | A01496 | 485 | A01425 | A01506 | 273 |
| A01425 | A01515 | 224 | A01425 | A01522 | 207 |
| A01425 | A01538 | 543 | A01425 | A01539 | 256 |

|        |        |     |        |        |     |
|--------|--------|-----|--------|--------|-----|
| A01425 | A01546 | 373 | A01425 | A01558 | 174 |
| A01425 | A01569 | 443 | A01425 | A01572 | 207 |
| A01425 | A01579 | 330 | A01425 | A01586 | 591 |
| A01425 | A01597 | 216 | A01425 | A01598 | 550 |
| A01425 | A01601 | 581 | A01425 | A01604 | 167 |
| A01425 | A01605 | 945 | A01425 | A01612 | 268 |
| A01425 | A01614 | 549 | A01425 | A01617 | 204 |
| A01425 | A01618 | 301 | A01425 | A01640 | 458 |
| A01425 | A01649 | 491 | A01425 | A01684 | 219 |
| A01425 | A01690 | 176 | A01425 | A01692 | 151 |
| A01425 | A01707 | 343 | A01425 | A01718 | 293 |
| A01425 | A01730 | 486 | A01425 | A01740 | 480 |
| A01425 | A01877 | 356 | A01425 | A02068 | 249 |
| A01425 | A02138 | 63  | A01425 | A02148 | 363 |
| A01425 | A02164 | 191 | A01425 | A02265 | 549 |
| A01425 | A02325 | 363 | A01425 | A02382 | 899 |
| A01425 | A02397 | 71  | A01425 | A02412 | 63  |
| A01425 | A02414 | 132 | A01425 | A02490 | 63  |
| A01425 | A02494 | 491 | A01425 | A02592 | 63  |
| A01425 | A02703 | 213 | A01425 | A02816 | 428 |
| A01425 | A02860 | 243 | A01425 | A02895 | 407 |
| A01425 | A02978 | 213 | A01425 | A03057 | 196 |
| A01425 | A03083 | 446 | A01425 | A03110 | 201 |
| A01425 | A03286 | 207 | A01425 | A03437 | 165 |
| A01425 | A03438 | 549 | A01425 | A03446 | 172 |
| A01425 | A03451 | 205 | A01425 | A03461 | 469 |
| A01425 | A03490 | 317 | A01425 | A03567 | 567 |
| A01425 | A03571 | 479 | A01425 | A03582 | 486 |
| A01425 | A03604 | 168 | A01425 | A03639 | 63  |
| A01425 | A03652 | 382 | A01425 | A03671 | 251 |
| A01425 | A03754 | 163 | A01425 | A03799 | 281 |
| A01425 | A03800 | 238 | A01425 | A03818 | 156 |
| A01425 | A03859 | 255 | A01425 | A03977 | 221 |
| A01425 | A03981 | 647 | A01425 | A04161 | 366 |
| A01425 | A04230 | 491 | A01425 | A04307 | 265 |
| A01425 | A04342 | 484 | A01425 | A04415 | 302 |
| A01425 | A04490 | 236 | A01425 | A04666 | 462 |
| A01425 | A04697 | 310 | A01425 | A04829 | 221 |
| A01425 | A05230 | 263 | A01425 | A05267 | 277 |
| A01425 | A05370 | 154 | A01425 | A05501 | 223 |
| A01425 | A05654 | 456 | A01425 | A06117 | 243 |
| A01425 | A06239 | 277 | A01425 | A06275 | 174 |
| A01425 | A06279 | 196 | A01425 | A06324 | 238 |
| A01425 | A06340 | 312 | A01425 | A06349 | 277 |
| A01425 | A06351 | 296 | A01425 | A06356 | 170 |
| A01425 | A06486 | 296 | A01425 | A06543 | 241 |

|        |        |     |        |        |     |
|--------|--------|-----|--------|--------|-----|
| A01425 | A06597 | 159 | A01425 | A06798 | 335 |
| A01425 | A06807 | 152 | A01425 | A06812 | 385 |
| A01425 | A06814 | 655 | A01425 | A06825 | 433 |
| A01425 | A06861 | 210 | A01425 | A06901 | 221 |
| A01425 | A06987 | 256 | A01425 | A07143 | 357 |
| A01425 | A07203 | 271 | A01425 | A07244 | 170 |
| A01425 | A07307 | 88  | A01425 | A07311 | 921 |
| A01425 | A07323 | 173 | A01425 | A07398 | 353 |
| A01425 | A07412 | 477 | A01425 | A07506 | 154 |
| A01425 | A07524 | 170 | A01425 | A07700 | 328 |
| A01425 | A07726 | 290 | A01425 | A07768 | 281 |
| A01425 | A07924 | 215 | A01425 | A08052 | 491 |
| A01425 | A08055 | 232 | A01425 | A08072 | 277 |
| A01425 | A08137 | 221 | A01425 | A08211 | 170 |
| A01425 | A08273 | 462 | A01425 | A08315 | 249 |
| A01425 | A08357 | 399 | A01425 | A08377 | 317 |
| A01425 | A08458 | 168 | A01425 | A08550 | 317 |
| A01425 | A08571 | 420 | A01425 | A08682 | 63  |
| A01425 | A08768 | 96  | A01425 | A08965 | 243 |
| A01425 | A08973 | 381 | A01425 | A09248 | 486 |
| A01425 | A09322 | 282 | A01425 | A09327 | 255 |
| A01425 | A09539 | 335 | A01425 | A09550 | 139 |
| A01425 | A09562 | 204 | A01425 | A09618 | 277 |
| A01425 | A09697 | 345 | A01425 | A09839 | 168 |
| A01425 | A09960 | 207 | A01425 | A10001 | 361 |
| A01425 | A10092 | 277 | A01425 | A10249 | 185 |
| A01425 | A10262 | 277 | A01425 | A10336 | 63  |
| A01425 | A10469 | 310 | A01425 | A10529 | 283 |
| A01425 | A10532 | 654 | A01425 | A10599 | 63  |
| A01425 | A10624 | 329 | A01425 | A10645 | 167 |
| A01425 | A11190 | 480 | A01425 | A11263 | 408 |
| A01425 | A11334 | 171 | A01425 | A11454 | 152 |
| A01425 | A11618 | 277 | A01425 | A11765 | 390 |
| A01425 | A11808 | 479 | A01425 | A11857 | 204 |
| A01425 | A11932 | 407 | A01425 | A12310 | 243 |
| A01425 | A12715 | 441 | A01425 | A13042 | 207 |
| A01425 | A13052 | 170 | A01425 | A13107 | 235 |
| A01425 | A13126 | 452 | A01425 | A13352 | 425 |
| A01425 | A13466 | 286 | A01425 | A13511 | 402 |
| A01425 | A13944 | 185 | A01425 | A13989 | 743 |
| A01425 | A13992 | 258 | A01425 | A14006 | 456 |
| A01425 | A14038 | 942 | A01425 | A14172 | 213 |
| A01425 | A14216 | 582 | A01425 | A14272 | 402 |
| A01425 | A14371 | 341 | A01425 | A14443 | 899 |
| A01425 | A14597 | 241 | A01425 | A14661 | 160 |
| A01425 | A14674 | 462 | A01425 | A14959 | 277 |

|        |        |     |        |        |     |
|--------|--------|-----|--------|--------|-----|
| A01425 | A15034 | 199 | A01425 | A15174 | 221 |
| A01425 | A15215 | 322 | A01425 | A15365 | 238 |
| A01425 | A15483 | 185 | A01425 | A15500 | 367 |
| A01425 | A15538 | 185 | A01425 | A15935 | 177 |
| A01425 | A16738 | 462 | A01426 | A01995 | 383 |
| A01426 | A02061 | 265 | A01426 | A02116 | 168 |
| A01426 | A02117 | 431 | A01426 | A03968 | 383 |
| A01426 | A05150 | 291 | A01426 | A07732 | 202 |
| A01426 | A08359 | 317 | A01426 | A09791 | 383 |
| A01426 | A11291 | 408 | A01426 | A11405 | 160 |
| A01426 | A13928 | 341 | A01426 | A14220 | 443 |
| A01426 | A14490 | 204 | A01426 | A14636 | 165 |
| A01426 | A15275 | 314 | A01426 | A15366 | 439 |
| A01426 | A15492 | 165 | A01427 | A01459 | 210 |
| A01427 | A03019 | 281 | A01427 | A15338 | 243 |
| A01428 | A01585 | 63  | A01428 | A01850 | 241 |
| A01428 | A02419 | 218 | A01428 | A02920 | 283 |
| A01428 | A02931 | 369 | A01428 | A02950 | 489 |
| A01428 | A02952 | 389 | A01428 | A03044 | 279 |
| A01428 | A03198 | 288 | A01428 | A03271 | 95  |
| A01428 | A04260 | 168 | A01428 | A04822 | 270 |
| A01428 | A04906 | 385 | A01428 | A04913 | 337 |
| A01428 | A05606 | 305 | A01428 | A07106 | 401 |
| A01428 | A07220 | 232 | A01428 | A09870 | 313 |
| A01428 | A10247 | 218 | A01428 | A10557 | 251 |
| A01428 | A11835 | 255 | A01428 | A13829 | 79  |
| A01428 | A14072 | 277 | A01428 | A14207 | 168 |
| A01428 | A14367 | 168 | A01428 | A14400 | 281 |
| A01428 | A15314 | 121 | A01428 | A15330 | 118 |
| A01428 | A15386 | 138 | A01428 | A15578 | 80  |
| A01429 | A01430 | 481 | A01429 | A01464 | 200 |
| A01429 | A01470 | 474 | A01429 | A01492 | 405 |
| A01429 | A01598 | 472 | A01429 | A01614 | 288 |
| A01429 | A01618 | 200 | A01429 | A01649 | 486 |
| A01429 | A02064 | 168 | A01429 | A02216 | 398 |
| A01429 | A02978 | 200 | A01429 | A03734 | 477 |
| A01429 | A03767 | 179 | A01429 | A04430 | 269 |
| A01429 | A06973 | 200 | A01429 | A07348 | 677 |
| A01429 | A08022 | 447 | A01429 | A08211 | 438 |
| A01429 | A08398 | 229 | A01429 | A08452 | 481 |
| A01429 | A08491 | 234 | A01429 | A08521 | 200 |
| A01429 | A08558 | 200 | A01429 | A08664 | 200 |
| A01429 | A09044 | 200 | A01429 | A09292 | 360 |
| A01429 | A09322 | 195 | A01429 | A09702 | 297 |
| A01429 | A10417 | 200 | A01429 | A11438 | 200 |
| A01429 | A11729 | 200 | A01429 | A12138 | 662 |

|        |        |     |        |        |     |
|--------|--------|-----|--------|--------|-----|
| A01429 | A13333 | 200 | A01429 | A13989 | 486 |
| A01429 | A14153 | 171 | A01429 | A17088 | 160 |
| A01430 | A01470 | 491 | A01430 | A01492 | 481 |
| A01430 | A01555 | 199 | A01430 | A01598 | 491 |
| A01430 | A01614 | 491 | A01430 | A01649 | 491 |
| A01430 | A03069 | 281 | A01430 | A03767 | 208 |
| A01430 | A04430 | 294 | A01430 | A05230 | 401 |
| A01430 | A06340 | 171 | A01430 | A06965 | 151 |
| A01430 | A07347 | 154 | A01430 | A07348 | 486 |
| A01430 | A08357 | 450 | A01430 | A08452 | 299 |
| A01430 | A09702 | 207 | A01430 | A10625 | 491 |
| A01430 | A12138 | 491 | A01430 | A13989 | 491 |
| A01430 | A14216 | 271 | A01430 | A14505 | 188 |
| A01430 | A14817 | 201 | A01430 | A15215 | 177 |
| A01430 | A16302 | 212 | A01431 | A01437 | 323 |
| A01431 | A01439 | 489 | A01431 | A01457 | 168 |
| A01431 | A01468 | 480 | A01431 | A01470 | 491 |
| A01431 | A01484 | 180 | A01431 | A01492 | 491 |
| A01431 | A01496 | 235 | A01431 | A01504 | 432 |
| A01431 | A01506 | 484 | A01431 | A01538 | 313 |
| A01431 | A01539 | 402 | A01431 | A01540 | 378 |
| A01431 | A01543 | 191 | A01431 | A01555 | 368 |
| A01431 | A01557 | 475 | A01431 | A01565 | 362 |
| A01431 | A01566 | 217 | A01431 | A01567 | 168 |
| A01431 | A01569 | 490 | A01431 | A01577 | 434 |
| A01431 | A01578 | 486 | A01431 | A01579 | 446 |
| A01431 | A01597 | 441 | A01431 | A01598 | 491 |
| A01431 | A01614 | 363 | A01431 | A01630 | 291 |
| A01431 | A01631 | 176 | A01431 | A01632 | 441 |
| A01431 | A01647 | 168 | A01431 | A01649 | 490 |
| A01431 | A01684 | 481 | A01431 | A01692 | 452 |
| A01431 | A01707 | 191 | A01431 | A01721 | 174 |
| A01431 | A01737 | 430 | A01431 | A01763 | 363 |
| A01431 | A01782 | 467 | A01431 | A01787 | 424 |
| A01431 | A01850 | 266 | A01431 | A01894 | 291 |
| A01431 | A01900 | 481 | A01431 | A01967 | 202 |
| A01431 | A02039 | 183 | A01431 | A02351 | 105 |
| A01431 | A02518 | 236 | A01431 | A02548 | 319 |
| A01431 | A02763 | 252 | A01431 | A02798 | 441 |
| A01431 | A02857 | 184 | A01431 | A02864 | 235 |
| A01431 | A02877 | 152 | A01431 | A02906 | 177 |
| A01431 | A03188 | 473 | A01431 | A03278 | 226 |
| A01431 | A03336 | 157 | A01431 | A03446 | 340 |
| A01431 | A03477 | 157 | A01431 | A03567 | 480 |
| A01431 | A03740 | 491 | A01431 | A03742 | 409 |
| A01431 | A03752 | 491 | A01431 | A03803 | 162 |

|        |        |     |        |        |     |
|--------|--------|-----|--------|--------|-----|
| A01431 | A03809 | 452 | A01431 | A04212 | 162 |
| A01431 | A04239 | 491 | A01431 | A04266 | 414 |
| A01431 | A04296 | 152 | A01431 | A04307 | 486 |
| A01431 | A04435 | 157 | A01431 | A04571 | 234 |
| A01431 | A04578 | 212 | A01431 | A04715 | 270 |
| A01431 | A04720 | 180 | A01431 | A04790 | 188 |
| A01431 | A04793 | 160 | A01431 | A04867 | 434 |
| A01431 | A05227 | 383 | A01431 | A05258 | 465 |
| A01431 | A05278 | 477 | A01431 | A05409 | 165 |
| A01431 | A05501 | 263 | A01431 | A05523 | 202 |
| A01431 | A05542 | 238 | A01431 | A05582 | 165 |
| A01431 | A05645 | 383 | A01431 | A05763 | 180 |
| A01431 | A06037 | 305 | A01431 | A06178 | 180 |
| A01431 | A06275 | 218 | A01431 | A06325 | 394 |
| A01431 | A06466 | 491 | A01431 | A06637 | 455 |
| A01431 | A06868 | 491 | A01431 | A06896 | 180 |
| A01431 | A06965 | 191 | A01431 | A07004 | 226 |
| A01431 | A07160 | 440 | A01431 | A07209 | 485 |
| A01431 | A07247 | 258 | A01431 | A07311 | 666 |
| A01431 | A07347 | 299 | A01431 | A07451 | 447 |
| A01431 | A07798 | 467 | A01431 | A07881 | 383 |
| A01431 | A07911 | 291 | A01431 | A08080 | 165 |
| A01431 | A08228 | 383 | A01431 | A08357 | 465 |
| A01431 | A08359 | 283 | A01431 | A08390 | 157 |
| A01431 | A08548 | 383 | A01431 | A08754 | 202 |
| A01431 | A09065 | 238 | A01431 | A09655 | 265 |
| A01431 | A09710 | 152 | A01431 | A09901 | 63  |
| A01431 | A09902 | 455 | A01431 | A10362 | 167 |
| A01431 | A10532 | 474 | A01431 | A10624 | 210 |
| A01431 | A10728 | 490 | A01431 | A11001 | 165 |
| A01431 | A11290 | 235 | A01431 | A11296 | 462 |
| A01431 | A11297 | 364 | A01431 | A11302 | 489 |
| A01431 | A11312 | 377 | A01431 | A11316 | 452 |
| A01431 | A11338 | 157 | A01431 | A11368 | 391 |
| A01431 | A11372 | 435 | A01431 | A11380 | 329 |
| A01431 | A11450 | 481 | A01431 | A11462 | 160 |
| A01431 | A11476 | 462 | A01431 | A11478 | 361 |
| A01431 | A11480 | 355 | A01431 | A11554 | 301 |
| A01431 | A11670 | 344 | A01431 | A11833 | 375 |
| A01431 | A12216 | 180 | A01431 | A12305 | 202 |
| A01431 | A12325 | 276 | A01431 | A12328 | 486 |
| A01431 | A12329 | 208 | A01431 | A12418 | 238 |
| A01431 | A12524 | 202 | A01431 | A12526 | 180 |
| A01431 | A12990 | 472 | A01431 | A12998 | 180 |
| A01431 | A13126 | 443 | A01431 | A13149 | 296 |
| A01431 | A13325 | 174 | A01431 | A13340 | 491 |



|        |        |     |        |        |     |
|--------|--------|-----|--------|--------|-----|
| A01431 | A13369 | 402 | A01431 | A13391 | 523 |
| A01431 | A13541 | 180 | A01431 | A13558 | 152 |
| A01431 | A13564 | 238 | A01431 | A13674 | 180 |
| A01431 | A13989 | 491 | A01431 | A14073 | 489 |
| A01431 | A14152 | 436 | A01431 | A14496 | 507 |
| A01431 | A14596 | 491 | A01431 | A14597 | 435 |
| A01431 | A14609 | 488 | A01431 | A14659 | 424 |
| A01431 | A14699 | 600 | A01431 | A14778 | 393 |
| A01431 | A15203 | 202 | A01431 | A15215 | 168 |
| A01431 | A15232 | 238 | A01431 | A15244 | 475 |
| A01431 | A15257 | 327 | A01431 | A15297 | 407 |
| A01431 | A15338 | 229 | A01431 | A15507 | 268 |
| A01431 | A15519 | 179 | A01431 | A15660 | 491 |
| A01431 | A15684 | 491 | A01431 | A15720 | 173 |
| A01431 | A15721 | 324 | A01431 | A15723 | 334 |
| A01431 | A15749 | 193 | A01431 | A16099 | 213 |
| A01431 | A16234 | 165 | A01431 | A16293 | 183 |
| A01431 | A16580 | 154 | A01431 | A17176 | 165 |
| A01432 | A03090 | 191 | A01432 | A03138 | 252 |
| A01432 | A03818 | 160 | A01432 | A03894 | 438 |
| A01432 | A03979 | 452 | A01432 | A04164 | 327 |
| A01432 | A06472 | 515 | A01432 | A06557 | 347 |
| A01432 | A06924 | 515 | A01432 | A08834 | 223 |
| A01432 | A09199 | 486 | A01432 | A09824 | 270 |
| A01432 | A09831 | 452 | A01432 | A10944 | 456 |
| A01432 | A11144 | 288 | A01432 | A12347 | 327 |
| A01432 | A13179 | 356 | A01432 | A14111 | 199 |
| A01432 | A15431 | 207 | A01432 | A15803 | 456 |
| A01432 | A15825 | 457 | A01432 | A15837 | 515 |
| A01432 | A15896 | 180 | A01432 | A16057 | 347 |
| A01432 | A16194 | 333 | A01432 | A16353 | 515 |
| A01433 | A01436 | 651 | A01433 | A01437 | 470 |
| A01433 | A01446 | 335 | A01433 | A01448 | 218 |
| A01433 | A01718 | 383 | A01433 | A01741 | 238 |
| A01433 | A02787 | 249 | A01433 | A03069 | 205 |
| A01433 | A03148 | 240 | A01433 | A03560 | 221 |
| A01433 | A04607 | 372 | A01433 | A04622 | 273 |
| A01433 | A05411 | 372 | A01433 | A07360 | 489 |
| A01433 | A07394 | 173 | A01433 | A08011 | 665 |
| A01433 | A08052 | 165 | A01433 | A08055 | 389 |
| A01433 | A08301 | 170 | A01433 | A08357 | 177 |
| A01433 | A08377 | 479 | A01433 | A08543 | 473 |
| A01433 | A08550 | 659 | A01433 | A08556 | 252 |
| A01433 | A08773 | 659 | A01433 | A08973 | 491 |
| A01433 | A09061 | 451 | A01433 | A09299 | 151 |
| A01433 | A09332 | 466 | A01433 | A09351 | 240 |

|        |        |     |        |        |     |
|--------|--------|-----|--------|--------|-----|
| A01433 | A09735 | 165 | A01433 | A10316 | 485 |
| A01433 | A11597 | 205 | A01433 | A11728 | 393 |
| A01433 | A11735 | 196 | A01433 | A11992 | 491 |
| A01433 | A12252 | 238 | A01433 | A12433 | 491 |
| A01433 | A13249 | 399 | A01433 | A13375 | 271 |
| A01433 | A13809 | 162 | A01433 | A13989 | 491 |
| A01433 | A13992 | 210 | A01433 | A14182 | 388 |
| A01433 | A14482 | 455 | A01433 | A15653 | 283 |
| A01433 | A15661 | 395 | A01433 | A15666 | 474 |
| A01433 | A15673 | 180 | A01433 | A15932 | 385 |
| A01433 | A15988 | 372 | A01433 | A16157 | 491 |
| A01433 | A16203 | 236 | A01433 | A16611 | 151 |
| A01433 | A16621 | 200 | A01434 | A01612 | 345 |
| A01434 | A03494 | 156 | A01434 | A06689 | 263 |
| A01434 | A07187 | 462 | A01434 | A07524 | 210 |
| A01434 | A07898 | 156 | A01434 | A08137 | 157 |
| A01434 | A08201 | 156 | A01434 | A08211 | 319 |
| A01434 | A08327 | 487 | A01434 | A08335 | 170 |
| A01434 | A08431 | 156 | A01434 | A08542 | 431 |
| A01434 | A09621 | 395 | A01434 | A11496 | 156 |
| A01434 | A11497 | 156 | A01434 | A11930 | 202 |
| A01434 | A12146 | 324 | A01434 | A12757 | 156 |
| A01434 | A13928 | 156 | A01434 | A14178 | 197 |
| A01434 | A14184 | 446 | A01434 | A14655 | 452 |
| A01434 | A15266 | 313 | A01434 | A16060 | 223 |
| A01434 | A16320 | 152 | A01434 | A16699 | 156 |
| A01435 | A01447 | 491 | A01435 | A01524 | 238 |
| A01435 | A01540 | 490 | A01435 | A01560 | 435 |
| A01435 | A01692 | 63  | A01435 | A01827 | 208 |
| A01435 | A01850 | 480 | A01435 | A02094 | 172 |
| A01435 | A02607 | 490 | A01435 | A02791 | 172 |
| A01435 | A03271 | 63  | A01435 | A03516 | 398 |
| A01435 | A03740 | 491 | A01435 | A03752 | 351 |
| A01435 | A03809 | 756 | A01435 | A03981 | 236 |
| A01435 | A04017 | 340 | A01435 | A04280 | 210 |
| A01435 | A04687 | 223 | A01435 | A05417 | 477 |
| A01435 | A05453 | 185 | A01435 | A06466 | 170 |
| A01435 | A06660 | 266 | A01435 | A07311 | 489 |
| A01435 | A07371 | 335 | A01435 | A07394 | 491 |
| A01435 | A07527 | 221 | A01435 | A08519 | 489 |
| A01435 | A08543 | 152 | A01435 | A09054 | 286 |
| A01435 | A09320 | 258 | A01435 | A09502 | 446 |
| A01435 | A11322 | 316 | A01435 | A11372 | 432 |
| A01435 | A11374 | 154 | A01435 | A11526 | 221 |
| A01435 | A11833 | 470 | A01435 | A11959 | 191 |
| A01435 | A12042 | 154 | A01435 | A12167 | 238 |

|        |        |     |        |        |     |
|--------|--------|-----|--------|--------|-----|
| A01435 | A13116 | 240 | A01435 | A13398 | 317 |
| A01435 | A13521 | 215 | A01435 | A13524 | 257 |
| A01435 | A13809 | 480 | A01435 | A14216 | 473 |
| A01435 | A14507 | 177 | A01435 | A14566 | 344 |
| A01435 | A14845 | 305 | A01435 | A14937 | 238 |
| A01435 | A15653 | 491 | A01435 | A15666 | 491 |
| A01435 | A15699 | 154 | A01435 | A15765 | 489 |
| A01435 | A15938 | 204 | A01435 | A16088 | 246 |
| A01435 | A16157 | 491 | A01435 | A16243 | 270 |
| A01435 | A16403 | 208 | A01435 | A16676 | 455 |
| A01436 | A01468 | 606 | A01436 | A01496 | 314 |
| A01436 | A01579 | 409 | A01436 | A01586 | 412 |
| A01436 | A01597 | 124 | A01436 | A01649 | 393 |
| A01436 | A01718 | 383 | A01436 | A02607 | 208 |
| A01436 | A02749 | 152 | A01436 | A02878 | 168 |
| A01436 | A03490 | 481 | A01436 | A03676 | 156 |
| A01436 | A03859 | 228 | A01436 | A03981 | 317 |
| A01436 | A05499 | 177 | A01436 | A05502 | 188 |
| A01436 | A06351 | 490 | A01436 | A07394 | 165 |
| A01436 | A07412 | 446 | A01436 | A07449 | 418 |
| A01436 | A07773 | 263 | A01436 | A08011 | 658 |
| A01436 | A08052 | 162 | A01436 | A08055 | 469 |
| A01436 | A08377 | 337 | A01436 | A08550 | 317 |
| A01436 | A08556 | 168 | A01436 | A08773 | 446 |
| A01436 | A08973 | 607 | A01436 | A09293 | 470 |
| A01436 | A09581 | 162 | A01436 | A09902 | 167 |
| A01436 | A10034 | 193 | A01436 | A10878 | 316 |
| A01436 | A11992 | 374 | A01436 | A12293 | 374 |
| A01436 | A13989 | 485 | A01436 | A14216 | 243 |
| A01436 | A14482 | 488 | A01436 | A14568 | 347 |
| A01436 | A14614 | 260 | A01436 | A15115 | 374 |
| A01436 | A15500 | 176 | A01436 | A15531 | 151 |
| A01436 | A15988 | 490 | A01436 | A16306 | 249 |
| A01437 | A01457 | 414 | A01437 | A01464 | 228 |
| A01437 | A01496 | 230 | A01437 | A01579 | 435 |
| A01437 | A01620 | 350 | A01437 | A01649 | 443 |
| A01437 | A01787 | 409 | A01437 | A02216 | 422 |
| A01437 | A02419 | 247 | A01437 | A02874 | 484 |
| A01437 | A03069 | 491 | A01437 | A03149 | 344 |
| A01437 | A03567 | 480 | A01437 | A03740 | 417 |
| A01437 | A03752 | 213 | A01437 | A03859 | 208 |
| A01437 | A03888 | 165 | A01437 | A05121 | 491 |
| A01437 | A05411 | 378 | A01437 | A05557 | 171 |
| A01437 | A06897 | 461 | A01437 | A06965 | 477 |
| A01437 | A06973 | 283 | A01437 | A07201 | 377 |
| A01437 | A07311 | 198 | A01437 | A07451 | 357 |

|        |        |     |        |        |     |
|--------|--------|-----|--------|--------|-----|
| A01437 | A07505 | 205 | A01437 | A07533 | 218 |
| A01437 | A07584 | 441 | A01437 | A08011 | 491 |
| A01437 | A08137 | 305 | A01437 | A08357 | 480 |
| A01437 | A08358 | 347 | A01437 | A08398 | 466 |
| A01437 | A08452 | 491 | A01437 | A08521 | 462 |
| A01437 | A08547 | 333 | A01437 | A08550 | 173 |
| A01437 | A08556 | 174 | A01437 | A08558 | 162 |
| A01437 | A08559 | 490 | A01437 | A08773 | 246 |
| A01437 | A08972 | 456 | A01437 | A08973 | 227 |
| A01437 | A09322 | 485 | A01437 | A09332 | 157 |
| A01437 | A09674 | 396 | A01437 | A09702 | 286 |
| A01437 | A09789 | 180 | A01437 | A09852 | 335 |
| A01437 | A09926 | 238 | A01437 | A10417 | 224 |
| A01437 | A10532 | 353 | A01437 | A11075 | 176 |
| A01437 | A11390 | 491 | A01437 | A11438 | 443 |
| A01437 | A11462 | 294 | A01437 | A11588 | 193 |
| A01437 | A11704 | 447 | A01437 | A11942 | 179 |
| A01437 | A11945 | 489 | A01437 | A11992 | 213 |
| A01437 | A12126 | 182 | A01437 | A12233 | 480 |
| A01437 | A12237 | 254 | A01437 | A12259 | 260 |
| A01437 | A12270 | 281 | A01437 | A12328 | 223 |
| A01437 | A12433 | 199 | A01437 | A12661 | 176 |
| A01437 | A12821 | 228 | A01437 | A12885 | 159 |
| A01437 | A13246 | 341 | A01437 | A13333 | 475 |
| A01437 | A13340 | 238 | A01437 | A13375 | 318 |
| A01437 | A13388 | 154 | A01437 | A13527 | 490 |
| A01437 | A13709 | 277 | A01437 | A13710 | 151 |
| A01437 | A13989 | 483 | A01437 | A14188 | 490 |
| A01437 | A14216 | 430 | A01437 | A14505 | 486 |
| A01437 | A15062 | 316 | A01437 | A15156 | 170 |
| A01437 | A15218 | 399 | A01437 | A15219 | 481 |
| A01437 | A15221 | 490 | A01437 | A15235 | 486 |
| A01437 | A15376 | 188 | A01437 | A15727 | 423 |
| A01437 | A15743 | 427 | A01437 | A15776 | 313 |
| A01437 | A15777 | 423 | A01437 | A15778 | 170 |
| A01437 | A16118 | 269 | A01437 | A16159 | 268 |
| A01437 | A16631 | 491 | A01437 | A16679 | 347 |
| A01437 | A16682 | 177 | A01437 | A17193 | 340 |
| A01438 | A01451 | 469 | A01438 | A01461 | 215 |
| A01438 | A01522 | 384 | A01438 | A01575 | 162 |
| A01438 | A01576 | 576 | A01438 | A01595 | 389 |
| A01438 | A01632 | 152 | A01438 | A01660 | 160 |
| A01438 | A01794 | 157 | A01438 | A01796 | 317 |
| A01438 | A01894 | 168 | A01438 | A01914 | 168 |
| A01438 | A02069 | 267 | A01438 | A02108 | 274 |
| A01438 | A02240 | 205 | A01438 | A02468 | 243 |

|        |        |     |        |        |     |
|--------|--------|-----|--------|--------|-----|
| A01438 | A02611 | 386 | A01438 | A03034 | 491 |
| A01438 | A03097 | 185 | A01438 | A03523 | 488 |
| A01438 | A03524 | 429 | A01438 | A03598 | 224 |
| A01438 | A03846 | 170 | A01438 | A04182 | 290 |
| A01438 | A04402 | 260 | A01438 | A04686 | 193 |
| A01438 | A04870 | 160 | A01438 | A05234 | 286 |
| A01438 | A05299 | 172 | A01438 | A05356 | 171 |
| A01438 | A06092 | 491 | A01438 | A06195 | 451 |
| A01438 | A06520 | 360 | A01438 | A06701 | 234 |
| A01438 | A07069 | 488 | A01438 | A07276 | 474 |
| A01438 | A07342 | 152 | A01438 | A07384 | 159 |
| A01438 | A07389 | 267 | A01438 | A07684 | 163 |
| A01438 | A07697 | 491 | A01438 | A07763 | 152 |
| A01438 | A07814 | 430 | A01438 | A08293 | 276 |
| A01438 | A08356 | 276 | A01438 | A08362 | 276 |
| A01438 | A08517 | 159 | A01438 | A08821 | 276 |
| A01438 | A08831 | 599 | A01438 | A08956 | 276 |
| A01438 | A09151 | 184 | A01438 | A09323 | 489 |
| A01438 | A09461 | 176 | A01438 | A09659 | 221 |
| A01438 | A09743 | 276 | A01438 | A09778 | 196 |
| A01438 | A09932 | 215 | A01438 | A09996 | 276 |
| A01438 | A10151 | 228 | A01438 | A10159 | 491 |
| A01438 | A11129 | 205 | A01438 | A11559 | 440 |
| A01438 | A11906 | 216 | A01438 | A11929 | 208 |
| A01438 | A12606 | 276 | A01438 | A13170 | 162 |
| A01438 | A13587 | 249 | A01438 | A13647 | 213 |
| A01438 | A14193 | 363 | A01438 | A14196 | 443 |
| A01438 | A14208 | 467 | A01438 | A14212 | 276 |
| A01438 | A14213 | 276 | A01438 | A14214 | 276 |
| A01438 | A14235 | 201 | A01438 | A14238 | 420 |
| A01438 | A14253 | 388 | A01438 | A14454 | 396 |
| A01438 | A14526 | 305 | A01438 | A14648 | 243 |
| A01438 | A15224 | 470 | A01438 | A15237 | 486 |
| A01438 | A15314 | 632 | A01438 | A15323 | 208 |
| A01438 | A15336 | 428 | A01438 | A15416 | 428 |
| A01438 | A15578 | 218 | A01438 | A15612 | 681 |
| A01438 | A16449 | 361 | A01438 | A16623 | 486 |
| A01438 | A16702 | 276 | A01438 | A16802 | 719 |
| A01438 | A16907 | 296 | A01439 | A01458 | 352 |
| A01439 | A01468 | 187 | A01439 | A01470 | 489 |
| A01439 | A01492 | 564 | A01439 | A01538 | 229 |
| A01439 | A01577 | 152 | A01439 | A01597 | 447 |
| A01439 | A01598 | 571 | A01439 | A01613 | 491 |
| A01439 | A01614 | 570 | A01439 | A01627 | 299 |
| A01439 | A01640 | 205 | A01439 | A01649 | 491 |
| A01439 | A01782 | 486 | A01439 | A02072 | 417 |

|        |        |     |        |        |     |
|--------|--------|-----|--------|--------|-----|
| A01439 | A02265 | 210 | A01439 | A02592 | 154 |
| A01439 | A02601 | 299 | A01439 | A02978 | 210 |
| A01439 | A03296 | 227 | A01439 | A03535 | 210 |
| A01439 | A03697 | 152 | A01439 | A04495 | 299 |
| A01439 | A05230 | 565 | A01439 | A05258 | 353 |
| A01439 | A05318 | 490 | A01439 | A05562 | 367 |
| A01439 | A06287 | 152 | A01439 | A06320 | 385 |
| A01439 | A06589 | 475 | A01439 | A06637 | 374 |
| A01439 | A07076 | 547 | A01439 | A07306 | 260 |
| A01439 | A07524 | 372 | A01439 | A07708 | 446 |
| A01439 | A07744 | 152 | A01439 | A07759 | 382 |
| A01439 | A07815 | 190 | A01439 | A07911 | 213 |
| A01439 | A08061 | 152 | A01439 | A08098 | 152 |
| A01439 | A08149 | 260 | A01439 | A08178 | 152 |
| A01439 | A08228 | 293 | A01439 | A08357 | 491 |
| A01439 | A08674 | 491 | A01439 | A08684 | 491 |
| A01439 | A08763 | 152 | A01439 | A08947 | 299 |
| A01439 | A09004 | 299 | A01439 | A09194 | 188 |
| A01439 | A09292 | 210 | A01439 | A09327 | 470 |
| A01439 | A09664 | 373 | A01439 | A09735 | 160 |
| A01439 | A10624 | 245 | A01439 | A10689 | 463 |
| A01439 | A10842 | 152 | A01439 | A11296 | 335 |
| A01439 | A11462 | 312 | A01439 | A11926 | 435 |
| A01439 | A13052 | 210 | A01439 | A13126 | 419 |
| A01439 | A13989 | 571 | A01439 | A14216 | 384 |
| A01439 | A14525 | 152 | A01439 | A14699 | 490 |
| A01439 | A14778 | 489 | A01439 | A14816 | 210 |
| A01439 | A14999 | 310 | A01439 | A15011 | 260 |
| A01439 | A15040 | 310 | A01439 | A15215 | 193 |
| A01439 | A15375 | 152 | A01439 | A15546 | 163 |
| A01439 | A15658 | 208 | A01439 | A15660 | 483 |
| A01439 | A15662 | 422 | A01439 | A15684 | 463 |
| A01439 | A15931 | 455 | A01439 | A15937 | 491 |
| A01439 | A16372 | 172 | A01439 | A16912 | 174 |
| A01440 | A01470 | 460 | A01440 | A01492 | 195 |
| A01440 | A01567 | 306 | A01440 | A01598 | 713 |
| A01440 | A01614 | 385 | A01440 | A01649 | 299 |
| A01440 | A02164 | 564 | A01440 | A02265 | 475 |
| A01440 | A02558 | 259 | A01440 | A05419 | 154 |
| A01440 | A05782 | 243 | A01440 | A06122 | 234 |
| A01440 | A06369 | 184 | A01440 | A07347 | 218 |
| A01440 | A07487 | 188 | A01440 | A07880 | 159 |
| A01440 | A08357 | 348 | A01440 | A09327 | 227 |
| A01440 | A09506 | 228 | A01440 | A12204 | 177 |
| A01440 | A13052 | 475 | A01440 | A13989 | 297 |
| A01441 | A01598 | 398 | A01441 | A02902 | 258 |

|        |        |     |        |        |     |
|--------|--------|-----|--------|--------|-----|
| A01441 | A02931 | 180 | A01441 | A03406 | 329 |
| A01441 | A11300 | 152 | A01441 | A11387 | 213 |
| A01441 | A12069 | 252 | A01441 | A13376 | 322 |
| A01441 | A13928 | 241 | A01441 | A14408 | 213 |
| A01441 | A14660 | 232 | A01441 | A15296 | 247 |
| A01441 | A15773 | 162 | A01441 | A16798 | 457 |
| A01442 | A01809 | 177 | A01442 | A01983 | 310 |
| A01442 | A02026 | 223 | A01442 | A02180 | 173 |
| A01442 | A06204 | 162 | A01442 | A06347 | 434 |
| A01442 | A06868 | 183 | A01442 | A08183 | 360 |
| A01442 | A08517 | 695 | A01442 | A08984 | 176 |
| A01442 | A10317 | 249 | A01442 | A11584 | 265 |
| A01442 | A11933 | 480 | A01442 | A14186 | 485 |
| A01442 | A14196 | 361 | A01442 | A15237 | 212 |
| A01442 | A15323 | 425 | A01442 | A15324 | 784 |
| A01442 | A15353 | 799 | A01442 | A15370 | 434 |
| A01442 | A15374 | 902 | A01442 | A15502 | 694 |
| A01442 | A15724 | 283 | A01442 | A16463 | 176 |
| A01443 | A01446 | 491 | A01443 | A01448 | 491 |
| A01443 | A01711 | 205 | A01443 | A02994 | 247 |
| A01443 | A03390 | 154 | A01443 | A03398 | 302 |
| A01443 | A03959 | 247 | A01443 | A04520 | 191 |
| A01443 | A04542 | 411 | A01443 | A04895 | 422 |
| A01443 | A07208 | 238 | A01443 | A08521 | 160 |
| A01443 | A10034 | 198 | A01443 | A10199 | 272 |
| A01443 | A11419 | 383 | A01443 | A11427 | 423 |
| A01443 | A11526 | 199 | A01443 | A11677 | 479 |
| A01443 | A11975 | 252 | A01443 | A13707 | 490 |
| A01443 | A14569 | 491 | A01443 | A14650 | 201 |
| A01443 | A14699 | 247 | A01443 | A14778 | 247 |
| A01443 | A14825 | 274 | A01443 | A14888 | 263 |
| A01443 | A15217 | 238 | A01443 | A16587 | 589 |
| A01444 | A03570 | 210 | A01444 | A05439 | 180 |
| A01444 | A08995 | 260 | A01444 | A09000 | 258 |
| A01444 | A14122 | 179 | A01444 | A14196 | 177 |
| A01444 | A15257 | 210 | A01445 | A01473 | 447 |
| A01445 | A01478 | 332 | A01445 | A01483 | 185 |
| A01445 | A01524 | 899 | A01445 | A02529 | 151 |
| A01445 | A03617 | 154 | A01445 | A03651 | 177 |
| A01445 | A03653 | 172 | A01445 | A03948 | 294 |
| A01445 | A07004 | 414 | A01445 | A07483 | 436 |
| A01445 | A08300 | 377 | A01445 | A08926 | 462 |
| A01445 | A09952 | 224 | A01445 | A12927 | 184 |
| A01445 | A14701 | 347 | A01445 | A14799 | 157 |
| A01445 | A15665 | 475 | A01445 | A16552 | 340 |
| A01445 | A16766 | 477 | A01446 | A01448 | 491 |

|        |        |     |        |        |     |
|--------|--------|-----|--------|--------|-----|
| A01446 | A01540 | 473 | A01446 | A01711 | 266 |
| A01446 | A03677 | 199 | A01446 | A03740 | 486 |
| A01446 | A03776 | 490 | A01446 | A03809 | 419 |
| A01446 | A04542 | 240 | A01446 | A04895 | 480 |
| A01446 | A05086 | 438 | A01446 | A05153 | 173 |
| A01446 | A07208 | 463 | A01446 | A08011 | 268 |
| A01446 | A08521 | 187 | A01446 | A08700 | 154 |
| A01446 | A08773 | 367 | A01446 | A08835 | 274 |
| A01446 | A08987 | 462 | A01446 | A09298 | 299 |
| A01446 | A09616 | 190 | A01446 | A10199 | 190 |
| A01446 | A10316 | 167 | A01446 | A10797 | 395 |
| A01446 | A10798 | 446 | A01446 | A11296 | 369 |
| A01446 | A11322 | 490 | A01446 | A11337 | 213 |
| A01446 | A11338 | 462 | A01446 | A11374 | 489 |
| A01446 | A11419 | 491 | A01446 | A11427 | 491 |
| A01446 | A11677 | 445 | A01446 | A11975 | 468 |
| A01446 | A12221 | 200 | A01446 | A12687 | 159 |
| A01446 | A13707 | 490 | A01446 | A13787 | 227 |
| A01446 | A14482 | 218 | A01446 | A14569 | 491 |
| A01446 | A14825 | 326 | A01446 | A14845 | 486 |
| A01446 | A14888 | 395 | A01446 | A15624 | 324 |
| A01446 | A15651 | 313 | A01446 | A15758 | 402 |
| A01446 | A16587 | 489 | A01447 | A01540 | 226 |
| A01447 | A01571 | 443 | A01447 | A01601 | 223 |
| A01447 | A02165 | 303 | A01447 | A02607 | 491 |
| A01447 | A02924 | 196 | A01447 | A03014 | 420 |
| A01447 | A03516 | 167 | A01447 | A03752 | 188 |
| A01447 | A04017 | 373 | A01447 | A05234 | 187 |
| A01447 | A05417 | 491 | A01447 | A05557 | 288 |
| A01447 | A05981 | 433 | A01447 | A07311 | 185 |
| A01447 | A07371 | 369 | A01447 | A07394 | 491 |
| A01447 | A08222 | 216 | A01447 | A08319 | 207 |
| A01447 | A08519 | 483 | A01447 | A08556 | 279 |
| A01447 | A08653 | 185 | A01447 | A09709 | 322 |
| A01447 | A09806 | 377 | A01447 | A09978 | 174 |
| A01447 | A11526 | 368 | A01447 | A11735 | 176 |
| A01447 | A11737 | 358 | A01447 | A11833 | 465 |
| A01447 | A12042 | 200 | A01447 | A12170 | 188 |
| A01447 | A13063 | 172 | A01447 | A13116 | 293 |
| A01447 | A13398 | 355 | A01447 | A13524 | 294 |
| A01447 | A13788 | 393 | A01447 | A13809 | 481 |
| A01447 | A14321 | 193 | A01447 | A14566 | 313 |
| A01447 | A14843 | 424 | A01447 | A14845 | 258 |
| A01447 | A15653 | 491 | A01447 | A15666 | 491 |
| A01447 | A15765 | 486 | A01447 | A16157 | 491 |
| A01447 | A16243 | 396 | A01447 | A16403 | 430 |



|        |        |     |        |        |     |
|--------|--------|-----|--------|--------|-----|
| A01447 | A16676 | 446 | A01447 | A17012 | 176 |
| A01447 | A17133 | 174 | A01448 | A02814 | 393 |
| A01448 | A03298 | 185 | A01448 | A03677 | 347 |
| A01448 | A03740 | 269 | A01448 | A03809 | 393 |
| A01448 | A03931 | 177 | A01448 | A04895 | 491 |
| A01448 | A05323 | 208 | A01448 | A05449 | 267 |
| A01448 | A06813 | 205 | A01448 | A06959 | 185 |
| A01448 | A07360 | 291 | A01448 | A07412 | 168 |
| A01448 | A07569 | 180 | A01448 | A08521 | 338 |
| A01448 | A08760 | 185 | A01448 | A08773 | 207 |
| A01448 | A08835 | 272 | A01448 | A08987 | 260 |
| A01448 | A09616 | 229 | A01448 | A09735 | 162 |
| A01448 | A10034 | 151 | A01448 | A10199 | 356 |
| A01448 | A11338 | 313 | A01448 | A11374 | 391 |
| A01448 | A11419 | 436 | A01448 | A11427 | 491 |
| A01448 | A11975 | 207 | A01448 | A12195 | 154 |
| A01448 | A13069 | 351 | A01448 | A13707 | 475 |
| A01448 | A13787 | 263 | A01448 | A14482 | 202 |
| A01448 | A14569 | 491 | A01448 | A14816 | 208 |
| A01448 | A15624 | 238 | A01448 | A16118 | 190 |
| A01448 | A16587 | 457 | A01448 | A16855 | 475 |
| A01448 | A17133 | 180 | A01449 | A01579 | 193 |
| A01449 | A03490 | 180 | A01449 | A05499 | 407 |
| A01449 | A05501 | 479 | A01449 | A05502 | 213 |
| A01449 | A06564 | 173 | A01449 | A06897 | 263 |
| A01449 | A07047 | 182 | A01449 | A07349 | 305 |
| A01449 | A08011 | 201 | A01449 | A08131 | 176 |
| A01449 | A08154 | 484 | A01449 | A08301 | 190 |
| A01449 | A08358 | 364 | A01449 | A08419 | 460 |
| A01449 | A08501 | 488 | A01449 | A08543 | 465 |
| A01449 | A08556 | 490 | A01449 | A08559 | 293 |
| A01449 | A09622 | 451 | A01449 | A09735 | 483 |
| A01449 | A09852 | 404 | A01449 | A10417 | 187 |
| A01449 | A11593 | 441 | A01449 | A11597 | 278 |
| A01449 | A11616 | 408 | A01449 | A11992 | 177 |
| A01449 | A12011 | 380 | A01449 | A12477 | 245 |
| A01449 | A12821 | 440 | A01449 | A13989 | 227 |
| A01449 | A14478 | 215 | A01449 | A14479 | 369 |
| A01449 | A14508 | 180 | A01449 | A14568 | 369 |
| A01449 | A14813 | 272 | A01449 | A15500 | 462 |
| A01449 | A15732 | 208 | A01449 | A15771 | 424 |
| A01450 | A01473 | 174 | A01450 | A01512 | 313 |
| A01450 | A01572 | 401 | A01450 | A01668 | 238 |
| A01450 | A01688 | 344 | A01450 | A01789 | 467 |
| A01450 | A01796 | 196 | A01450 | A01844 | 428 |
| A01450 | A03007 | 152 | A01450 | A03258 | 241 |

|        |        |     |        |        |     |
|--------|--------|-----|--------|--------|-----|
| A01450 | A03778 | 521 | A01450 | A03787 | 224 |
| A01450 | A04237 | 218 | A01450 | A04342 | 182 |
| A01450 | A06610 | 293 | A01450 | A06615 | 172 |
| A01450 | A06988 | 353 | A01450 | A08851 | 441 |
| A01450 | A09124 | 335 | A01450 | A13194 | 254 |
| A01450 | A13239 | 205 | A01450 | A15682 | 174 |
| A01451 | A01452 | 470 | A01451 | A01453 | 670 |
| A01451 | A01457 | 637 | A01451 | A01458 | 876 |
| A01451 | A01459 | 603 | A01451 | A01460 | 456 |
| A01451 | A01461 | 698 | A01451 | A01478 | 457 |
| A01451 | A01479 | 170 | A01451 | A01492 | 534 |
| A01451 | A01500 | 583 | A01451 | A01501 | 486 |
| A01451 | A01503 | 849 | A01451 | A01507 | 296 |
| A01451 | A01513 | 581 | A01451 | A01514 | 635 |
| A01451 | A01515 | 579 | A01451 | A01516 | 347 |
| A01451 | A01517 | 200 | A01451 | A01518 | 201 |
| A01451 | A01520 | 433 | A01451 | A01521 | 434 |
| A01451 | A01522 | 569 | A01451 | A01542 | 491 |
| A01451 | A01555 | 577 | A01451 | A01556 | 452 |
| A01451 | A01563 | 196 | A01451 | A01568 | 491 |
| A01451 | A01573 | 534 | A01451 | A01574 | 631 |
| A01451 | A01575 | 712 | A01451 | A01583 | 504 |
| A01451 | A01585 | 692 | A01451 | A01612 | 527 |
| A01451 | A01631 | 468 | A01451 | A01634 | 775 |
| A01451 | A01646 | 754 | A01451 | A01647 | 468 |
| A01451 | A01660 | 652 | A01451 | A01671 | 558 |
| A01451 | A01672 | 63  | A01451 | A01683 | 685 |
| A01451 | A01687 | 491 | A01451 | A01706 | 598 |
| A01451 | A01712 | 252 | A01451 | A01715 | 176 |
| A01451 | A01717 | 454 | A01451 | A01761 | 217 |
| A01451 | A01781 | 480 | A01451 | A01809 | 566 |
| A01451 | A01811 | 399 | A01451 | A01976 | 188 |
| A01451 | A01988 | 566 | A01451 | A02110 | 188 |
| A01451 | A02116 | 163 | A01451 | A02212 | 488 |
| A01451 | A02289 | 283 | A01451 | A02343 | 212 |
| A01451 | A02364 | 217 | A01451 | A02452 | 485 |
| A01451 | A02535 | 254 | A01451 | A02855 | 274 |
| A01451 | A03057 | 384 | A01451 | A03104 | 163 |
| A01451 | A03293 | 538 | A01451 | A03294 | 63  |
| A01451 | A03330 | 462 | A01451 | A03473 | 157 |
| A01451 | A03480 | 566 | A01451 | A03496 | 279 |
| A01451 | A03556 | 333 | A01451 | A03567 | 416 |
| A01451 | A03569 | 546 | A01451 | A03591 | 213 |
| A01451 | A03597 | 566 | A01451 | A03617 | 563 |
| A01451 | A03618 | 470 | A01451 | A03626 | 335 |
| A01451 | A03682 | 475 | A01451 | A03718 | 63  |

|        |        |     |        |        |     |
|--------|--------|-----|--------|--------|-----|
| A01451 | A03742 | 157 | A01451 | A03880 | 217 |
| A01451 | A03889 | 360 | A01451 | A03891 | 324 |
| A01451 | A03892 | 577 | A01451 | A03901 | 506 |
| A01451 | A04011 | 224 | A01451 | A04062 | 174 |
| A01451 | A04292 | 400 | A01451 | A04337 | 452 |
| A01451 | A04449 | 218 | A01451 | A04668 | 206 |
| A01451 | A04686 | 542 | A01451 | A04835 | 168 |
| A01451 | A04900 | 152 | A01451 | A04929 | 63  |
| A01451 | A05024 | 520 | A01451 | A05155 | 157 |
| A01451 | A05220 | 457 | A01451 | A05234 | 700 |
| A01451 | A05273 | 200 | A01451 | A05288 | 539 |
| A01451 | A05356 | 430 | A01451 | A05393 | 458 |
| A01451 | A05531 | 565 | A01451 | A05539 | 514 |
| A01451 | A05563 | 457 | A01451 | A05605 | 555 |
| A01451 | A05638 | 539 | A01451 | A05702 | 188 |
| A01451 | A05986 | 223 | A01451 | A06011 | 269 |
| A01451 | A06204 | 563 | A01451 | A06347 | 440 |
| A01451 | A06543 | 274 | A01451 | A06659 | 179 |
| A01451 | A06783 | 306 | A01451 | A06785 | 188 |
| A01451 | A06819 | 226 | A01451 | A06907 | 550 |
| A01451 | A07054 | 452 | A01451 | A07069 | 313 |
| A01451 | A07180 | 566 | A01451 | A07203 | 559 |
| A01451 | A07242 | 491 | A01451 | A07294 | 162 |
| A01451 | A07312 | 208 | A01451 | A07483 | 537 |
| A01451 | A07495 | 491 | A01451 | A07521 | 490 |
| A01451 | A07524 | 157 | A01451 | A07696 | 389 |
| A01451 | A07708 | 433 | A01451 | A07729 | 82  |
| A01451 | A07760 | 245 | A01451 | A07893 | 391 |
| A01451 | A07954 | 463 | A01451 | A07965 | 546 |
| A01451 | A08097 | 167 | A01451 | A08137 | 491 |
| A01451 | A08183 | 174 | A01451 | A08280 | 199 |
| A01451 | A08400 | 555 | A01451 | A08484 | 269 |
| A01451 | A08517 | 217 | A01451 | A08770 | 288 |
| A01451 | A08775 | 63  | A01451 | A08780 | 463 |
| A01451 | A08781 | 258 | A01451 | A08782 | 167 |
| A01451 | A08982 | 484 | A01451 | A08990 | 358 |
| A01451 | A09298 | 303 | A01451 | A09326 | 269 |
| A01451 | A09625 | 248 | A01451 | A09628 | 200 |
| A01451 | A09666 | 374 | A01451 | A09848 | 63  |
| A01451 | A09857 | 63  | A01451 | A09996 | 386 |
| A01451 | A10159 | 274 | A01451 | A10317 | 299 |
| A01451 | A10372 | 279 | A01451 | A10584 | 475 |
| A01451 | A10603 | 366 | A01451 | A10655 | 430 |
| A01451 | A10662 | 63  | A01451 | A10794 | 63  |
| A01451 | A10803 | 306 | A01451 | A11247 | 313 |
| A01451 | A11277 | 443 | A01451 | A11279 | 283 |

|        |        |     |        |        |     |
|--------|--------|-----|--------|--------|-----|
| A01451 | A11287 | 391 | A01451 | A11337 | 165 |
| A01451 | A11377 | 180 | A01451 | A11436 | 172 |
| A01451 | A11472 | 397 | A01451 | A11480 | 188 |
| A01451 | A11497 | 173 | A01451 | A11559 | 221 |
| A01451 | A11598 | 439 | A01451 | A11885 | 430 |
| A01451 | A12047 | 491 | A01451 | A12824 | 427 |
| A01451 | A13130 | 419 | A01451 | A13384 | 465 |
| A01451 | A13587 | 463 | A01451 | A13617 | 509 |
| A01451 | A13784 | 491 | A01451 | A13830 | 234 |
| A01451 | A13831 | 565 | A01451 | A13835 | 65  |
| A01451 | A13837 | 199 | A01451 | A13858 | 434 |
| A01451 | A13876 | 435 | A01451 | A13881 | 200 |
| A01451 | A13882 | 468 | A01451 | A13889 | 273 |
| A01451 | A13895 | 407 | A01451 | A13902 | 470 |
| A01451 | A13968 | 63  | A01451 | A14009 | 457 |
| A01451 | A14016 | 177 | A01451 | A14056 | 642 |
| A01451 | A14080 | 274 | A01451 | A14087 | 338 |
| A01451 | A14088 | 430 | A01451 | A14170 | 143 |
| A01451 | A14171 | 200 | A01451 | A14179 | 200 |
| A01451 | A14180 | 200 | A01451 | A14182 | 269 |
| A01451 | A14186 | 457 | A01451 | A14193 | 527 |
| A01451 | A14196 | 586 | A01451 | A14209 | 489 |
| A01451 | A14220 | 216 | A01451 | A14237 | 217 |
| A01451 | A14246 | 243 | A01451 | A14247 | 569 |
| A01451 | A14253 | 296 | A01451 | A14266 | 474 |
| A01451 | A14272 | 490 | A01451 | A14276 | 157 |
| A01451 | A14281 | 491 | A01451 | A14303 | 257 |
| A01451 | A14356 | 200 | A01451 | A14381 | 438 |
| A01451 | A14461 | 378 | A01451 | A14474 | 485 |
| A01451 | A14475 | 201 | A01451 | A14484 | 447 |
| A01451 | A14589 | 213 | A01451 | A14621 | 228 |
| A01451 | A14633 | 316 | A01451 | A14644 | 324 |
| A01451 | A14661 | 350 | A01451 | A14701 | 251 |
| A01451 | A14711 | 269 | A01451 | A14761 | 167 |
| A01451 | A14783 | 269 | A01451 | A14813 | 188 |
| A01451 | A15180 | 352 | A01451 | A15237 | 553 |
| A01451 | A15257 | 229 | A01451 | A15297 | 623 |
| A01451 | A15314 | 140 | A01451 | A15315 | 528 |
| A01451 | A15323 | 490 | A01451 | A15324 | 423 |
| A01451 | A15330 | 63  | A01451 | A15338 | 235 |
| A01451 | A15346 | 157 | A01451 | A15347 | 496 |
| A01451 | A15366 | 357 | A01451 | A15370 | 565 |
| A01451 | A15384 | 217 | A01451 | A15419 | 422 |
| A01451 | A15505 | 63  | A01451 | A15559 | 168 |
| A01451 | A15568 | 68  | A01451 | A15613 | 170 |
| A01451 | A15626 | 300 | A01451 | A15648 | 167 |

|        |        |     |        |        |     |
|--------|--------|-----|--------|--------|-----|
| A01451 | A15657 | 191 | A01451 | A15660 | 350 |
| A01451 | A15665 | 594 | A01451 | A15682 | 310 |
| A01451 | A15712 | 433 | A01451 | A15719 | 200 |
| A01451 | A15724 | 472 | A01451 | A15757 | 346 |
| A01451 | A15770 | 156 | A01451 | A15852 | 184 |
| A01451 | A15917 | 404 | A01451 | A15932 | 274 |
| A01451 | A15945 | 217 | A01451 | A16066 | 288 |
| A01451 | A16128 | 391 | A01451 | A16216 | 170 |
| A01451 | A16463 | 477 | A01451 | A16496 | 170 |
| A01451 | A16551 | 167 | A01451 | A16552 | 199 |
| A01451 | A16634 | 200 | A01451 | A16657 | 63  |
| A01451 | A16664 | 177 | A01451 | A16680 | 559 |
| A01451 | A16857 | 343 | A01451 | A16919 | 200 |
| A01451 | A17063 | 483 | A01452 | A01453 | 668 |
| A01452 | A01457 | 503 | A01452 | A01458 | 544 |
| A01452 | A01459 | 445 | A01452 | A01501 | 468 |
| A01452 | A01514 | 425 | A01452 | A01517 | 162 |
| A01452 | A01518 | 467 | A01452 | A01524 | 195 |
| A01452 | A01555 | 424 | A01452 | A01575 | 109 |
| A01452 | A01583 | 63  | A01452 | A01585 | 63  |
| A01452 | A01591 | 199 | A01452 | A01646 | 265 |
| A01452 | A01671 | 323 | A01452 | A01672 | 105 |
| A01452 | A01683 | 266 | A01452 | A01741 | 223 |
| A01452 | A01809 | 452 | A01452 | A01908 | 259 |
| A01452 | A01988 | 266 | A01452 | A02116 | 216 |
| A01452 | A02183 | 434 | A01452 | A02268 | 171 |
| A01452 | A02425 | 183 | A01452 | A02454 | 168 |
| A01452 | A02619 | 188 | A01452 | A02664 | 191 |
| A01452 | A02770 | 160 | A01452 | A02803 | 398 |
| A01452 | A02954 | 191 | A01452 | A03014 | 488 |
| A01452 | A03050 | 311 | A01452 | A03121 | 187 |
| A01452 | A03480 | 151 | A01452 | A03556 | 152 |
| A01452 | A03597 | 430 | A01452 | A03617 | 65  |
| A01452 | A03618 | 91  | A01452 | A03626 | 63  |
| A01452 | A03732 | 163 | A01452 | A04286 | 210 |
| A01452 | A04292 | 63  | A01452 | A04310 | 188 |
| A01452 | A04511 | 279 | A01452 | A05288 | 420 |
| A01452 | A05539 | 461 | A01452 | A05563 | 475 |
| A01452 | A05638 | 143 | A01452 | A05795 | 167 |
| A01452 | A06347 | 70  | A01452 | A06361 | 157 |
| A01452 | A06521 | 217 | A01452 | A06581 | 414 |
| A01452 | A06597 | 438 | A01452 | A06718 | 276 |
| A01452 | A06758 | 481 | A01452 | A06795 | 224 |
| A01452 | A07004 | 199 | A01452 | A07135 | 409 |
| A01452 | A07180 | 293 | A01452 | A07200 | 446 |
| A01452 | A07294 | 172 | A01452 | A07311 | 321 |

|        |        |     |        |        |     |
|--------|--------|-----|--------|--------|-----|
| A01452 | A07706 | 199 | A01452 | A07729 | 224 |
| A01452 | A07876 | 188 | A01452 | A07961 | 305 |
| A01452 | A08133 | 199 | A01452 | A08280 | 199 |
| A01452 | A08551 | 319 | A01452 | A08788 | 199 |
| A01452 | A08874 | 63  | A01452 | A08948 | 202 |
| A01452 | A09625 | 302 | A01452 | A09628 | 141 |
| A01452 | A09713 | 157 | A01452 | A09842 | 171 |
| A01452 | A10662 | 423 | A01452 | A10664 | 180 |
| A01452 | A10739 | 140 | A01452 | A10790 | 160 |
| A01452 | A10815 | 260 | A01452 | A10834 | 188 |
| A01452 | A10897 | 152 | A01452 | A11346 | 199 |
| A01452 | A12554 | 179 | A01452 | A13027 | 260 |
| A01452 | A13257 | 191 | A01452 | A13823 | 310 |
| A01452 | A13831 | 472 | A01452 | A13835 | 196 |
| A01452 | A14056 | 330 | A01452 | A14170 | 137 |
| A01452 | A14193 | 263 | A01452 | A14198 | 490 |
| A01452 | A14440 | 208 | A01452 | A14481 | 207 |
| A01452 | A14540 | 230 | A01452 | A14621 | 174 |
| A01452 | A14833 | 234 | A01452 | A15073 | 310 |
| A01452 | A15105 | 366 | A01452 | A15120 | 310 |
| A01452 | A15370 | 110 | A01452 | A15703 | 210 |
| A01452 | A15718 | 213 | A01452 | A15757 | 141 |
| A01452 | A15862 | 246 | A01452 | A16634 | 98  |
| A01452 | A16989 | 310 | A01452 | A17166 | 196 |
| A01453 | A01457 | 651 | A01453 | A01458 | 753 |
| A01453 | A01459 | 435 | A01453 | A01492 | 193 |
| A01453 | A01494 | 329 | A01453 | A01501 | 405 |
| A01453 | A01503 | 268 | A01453 | A01513 | 288 |
| A01453 | A01514 | 670 | A01453 | A01515 | 274 |
| A01453 | A01518 | 112 | A01453 | A01522 | 324 |
| A01453 | A01555 | 486 | A01453 | A01574 | 291 |
| A01453 | A01575 | 552 | A01453 | A01583 | 196 |
| A01453 | A01585 | 353 | A01453 | A01634 | 385 |
| A01453 | A01646 | 615 | A01453 | A01683 | 769 |
| A01453 | A01706 | 63  | A01453 | A01809 | 305 |
| A01453 | A01822 | 249 | A01453 | A01988 | 247 |
| A01453 | A02268 | 151 | A01453 | A02954 | 240 |
| A01453 | A03597 | 360 | A01453 | A03626 | 63  |
| A01453 | A03892 | 219 | A01453 | A03902 | 170 |
| A01453 | A04686 | 343 | A01453 | A04693 | 252 |
| A01453 | A05024 | 452 | A01453 | A05563 | 469 |
| A01453 | A05638 | 224 | A01453 | A06966 | 375 |
| A01453 | A07180 | 390 | A01453 | A07203 | 683 |
| A01453 | A08962 | 270 | A01453 | A09625 | 132 |
| A01453 | A10578 | 371 | A01453 | A10803 | 534 |
| A01453 | A11547 | 177 | A01453 | A13831 | 742 |

|        |        |     |        |        |     |
|--------|--------|-----|--------|--------|-----|
| A01453 | A13835 | 245 | A01453 | A13902 | 263 |
| A01453 | A14056 | 657 | A01453 | A14077 | 313 |
| A01453 | A14170 | 185 | A01453 | A14173 | 152 |
| A01453 | A15367 | 363 | A01453 | A15650 | 144 |
| A01453 | A16216 | 63  | A01454 | A01478 | 557 |
| A01454 | A01479 | 491 | A01454 | A01484 | 477 |
| A01454 | A01557 | 491 | A01454 | A01559 | 477 |
| A01454 | A01566 | 168 | A01454 | A01568 | 491 |
| A01454 | A01578 | 460 | A01454 | A01580 | 491 |
| A01454 | A01595 | 491 | A01454 | A01630 | 636 |
| A01454 | A01632 | 409 | A01454 | A01645 | 229 |
| A01454 | A01647 | 491 | A01454 | A01660 | 489 |
| A01454 | A01661 | 380 | A01454 | A01681 | 363 |
| A01454 | A01687 | 491 | A01454 | A01705 | 165 |
| A01454 | A01717 | 208 | A01454 | A01768 | 210 |
| A01454 | A01798 | 204 | A01454 | A01839 | 316 |
| A01454 | A02129 | 245 | A01454 | A02219 | 172 |
| A01454 | A02228 | 246 | A01454 | A02718 | 176 |
| A01454 | A02940 | 165 | A01454 | A03297 | 306 |
| A01454 | A03321 | 480 | A01454 | A03471 | 196 |
| A01454 | A03496 | 458 | A01454 | A03720 | 180 |
| A01454 | A03728 | 263 | A01454 | A03861 | 160 |
| A01454 | A03929 | 274 | A01454 | A04108 | 491 |
| A01454 | A04139 | 873 | A01454 | A04239 | 152 |
| A01454 | A04410 | 436 | A01454 | A04602 | 224 |
| A01454 | A04715 | 475 | A01454 | A04790 | 490 |
| A01454 | A04845 | 491 | A01454 | A04903 | 195 |
| A01454 | A04904 | 213 | A01454 | A05034 | 484 |
| A01454 | A05094 | 394 | A01454 | A05301 | 491 |
| A01454 | A05396 | 168 | A01454 | A05418 | 201 |
| A01454 | A05445 | 486 | A01454 | A05894 | 488 |
| A01454 | A06100 | 432 | A01454 | A06277 | 356 |
| A01454 | A06385 | 301 | A01454 | A06591 | 600 |
| A01454 | A06608 | 251 | A01454 | A06610 | 212 |
| A01454 | A06635 | 425 | A01454 | A06661 | 182 |
| A01454 | A06752 | 406 | A01454 | A06778 | 157 |
| A01454 | A06819 | 291 | A01454 | A06876 | 165 |
| A01454 | A07004 | 196 | A01454 | A07054 | 491 |
| A01454 | A07242 | 491 | A01454 | A07282 | 272 |
| A01454 | A07483 | 491 | A01454 | A07495 | 618 |
| A01454 | A07665 | 343 | A01454 | A07687 | 328 |
| A01454 | A07709 | 491 | A01454 | A07732 | 450 |
| A01454 | A07816 | 491 | A01454 | A07893 | 491 |
| A01454 | A07934 | 483 | A01454 | A08056 | 477 |
| A01454 | A08531 | 236 | A01454 | A08536 | 491 |
| A01454 | A08551 | 491 | A01454 | A08569 | 488 |

|        |        |     |        |        |     |
|--------|--------|-----|--------|--------|-----|
| A01454 | A08910 | 246 | A01454 | A09342 | 411 |
| A01454 | A09574 | 187 | A01454 | A09662 | 273 |
| A01454 | A09727 | 196 | A01454 | A09995 | 285 |
| A01454 | A10525 | 414 | A01454 | A10672 | 162 |
| A01454 | A11160 | 216 | A01454 | A11278 | 174 |
| A01454 | A11281 | 375 | A01454 | A11283 | 297 |
| A01454 | A11285 | 193 | A01454 | A11292 | 308 |
| A01454 | A11293 | 303 | A01454 | A11330 | 193 |
| A01454 | A11346 | 408 | A01454 | A11473 | 491 |
| A01454 | A11717 | 165 | A01454 | A11727 | 260 |
| A01454 | A11819 | 319 | A01454 | A11876 | 321 |
| A01454 | A12047 | 491 | A01454 | A12230 | 224 |
| A01454 | A12231 | 224 | A01454 | A12258 | 170 |
| A01454 | A12337 | 210 | A01454 | A12365 | 244 |
| A01454 | A12530 | 224 | A01454 | A12571 | 187 |
| A01454 | A12650 | 219 | A01454 | A12722 | 491 |
| A01454 | A13260 | 319 | A01454 | A13369 | 317 |
| A01454 | A13489 | 224 | A01454 | A13608 | 224 |
| A01454 | A13760 | 224 | A01454 | A13866 | 441 |
| A01454 | A13894 | 265 | A01454 | A14009 | 485 |
| A01454 | A14060 | 285 | A01454 | A14077 | 334 |
| A01454 | A14163 | 340 | A01454 | A14266 | 486 |
| A01454 | A14279 | 515 | A01454 | A14281 | 605 |
| A01454 | A14375 | 218 | A01454 | A14410 | 310 |
| A01454 | A14471 | 333 | A01454 | A14484 | 488 |
| A01454 | A14633 | 465 | A01454 | A14661 | 312 |
| A01454 | A14969 | 440 | A01454 | A15078 | 224 |
| A01454 | A15232 | 224 | A01454 | A15277 | 191 |
| A01454 | A15281 | 182 | A01454 | A15336 | 356 |
| A01454 | A15626 | 380 | A01454 | A15704 | 263 |
| A01454 | A16052 | 165 | A01454 | A16147 | 165 |
| A01454 | A16261 | 491 | A01454 | A16536 | 165 |
| A01454 | A16926 | 319 | A01455 | A01492 | 462 |
| A01455 | A01506 | 151 | A01455 | A01569 | 188 |
| A01455 | A01581 | 247 | A01455 | A01598 | 462 |
| A01455 | A01608 | 313 | A01455 | A01633 | 232 |
| A01455 | A01649 | 462 | A01455 | A01826 | 247 |
| A01455 | A03180 | 327 | A01455 | A03439 | 427 |
| A01455 | A03453 | 536 | A01455 | A03472 | 323 |
| A01455 | A03885 | 224 | A01455 | A04021 | 293 |
| A01455 | A04055 | 281 | A01455 | A04447 | 174 |
| A01455 | A05025 | 358 | A01455 | A06030 | 319 |
| A01455 | A07165 | 170 | A01455 | A07481 | 245 |
| A01455 | A07568 | 252 | A01455 | A09024 | 204 |
| A01455 | A09638 | 316 | A01455 | A09717 | 247 |
| A01455 | A10490 | 210 | A01455 | A11075 | 270 |



|        |        |     |        |        |     |
|--------|--------|-----|--------|--------|-----|
| A01455 | A11409 | 243 | A01455 | A11578 | 236 |
| A01455 | A12903 | 435 | A01455 | A13135 | 313 |
| A01455 | A13659 | 353 | A01455 | A14074 | 247 |
| A01455 | A15673 | 368 | A01456 | A03884 | 363 |
| A01456 | A07196 | 380 | A01457 | A01458 | 896 |
| A01457 | A01459 | 531 | A01457 | A01460 | 620 |
| A01457 | A01461 | 550 | A01457 | A01468 | 435 |
| A01457 | A01470 | 480 | A01457 | A01474 | 171 |
| A01457 | A01488 | 154 | A01457 | A01492 | 545 |
| A01457 | A01494 | 198 | A01457 | A01500 | 607 |
| A01457 | A01501 | 70  | A01457 | A01503 | 892 |
| A01457 | A01513 | 601 | A01457 | A01514 | 201 |
| A01457 | A01515 | 490 | A01457 | A01520 | 185 |
| A01457 | A01522 | 671 | A01457 | A01524 | 959 |
| A01457 | A01542 | 491 | A01457 | A01555 | 604 |
| A01457 | A01569 | 276 | A01457 | A01572 | 460 |
| A01457 | A01574 | 789 | A01457 | A01575 | 806 |
| A01457 | A01576 | 528 | A01457 | A01578 | 249 |
| A01457 | A01583 | 63  | A01457 | A01585 | 792 |
| A01457 | A01595 | 460 | A01457 | A01598 | 294 |
| A01457 | A01612 | 529 | A01457 | A01614 | 241 |
| A01457 | A01634 | 749 | A01457 | A01646 | 988 |
| A01457 | A01649 | 490 | A01457 | A01660 | 480 |
| A01457 | A01678 | 63  | A01457 | A01683 | 719 |
| A01457 | A01684 | 456 | A01457 | A01715 | 66  |
| A01457 | A01809 | 490 | A01457 | A01811 | 63  |
| A01457 | A01837 | 472 | A01457 | A01855 | 307 |
| A01457 | A01905 | 163 | A01457 | A01988 | 63  |
| A01457 | A02223 | 254 | A01457 | A02353 | 353 |
| A01457 | A02836 | 254 | A01457 | A03069 | 463 |
| A01457 | A03293 | 613 | A01457 | A03294 | 330 |
| A01457 | A03329 | 63  | A01457 | A03330 | 63  |
| A01457 | A03480 | 328 | A01457 | A03489 | 63  |
| A01457 | A03565 | 63  | A01457 | A03569 | 483 |
| A01457 | A03597 | 480 | A01457 | A03617 | 63  |
| A01457 | A03618 | 229 | A01457 | A03626 | 63  |
| A01457 | A03682 | 641 | A01457 | A03718 | 303 |
| A01457 | A03752 | 221 | A01457 | A03892 | 530 |
| A01457 | A03981 | 208 | A01457 | A04145 | 63  |
| A01457 | A04151 | 217 | A01457 | A04607 | 173 |
| A01457 | A04682 | 254 | A01457 | A04686 | 547 |
| A01457 | A04835 | 224 | A01457 | A05024 | 221 |
| A01457 | A05110 | 200 | A01457 | A05121 | 182 |
| A01457 | A05220 | 458 | A01457 | A05427 | 200 |
| A01457 | A05443 | 350 | A01457 | A05449 | 406 |
| A01457 | A05531 | 63  | A01457 | A05563 | 290 |

|        |        |     |        |        |     |
|--------|--------|-----|--------|--------|-----|
| A01457 | A06037 | 301 | A01457 | A06168 | 491 |
| A01457 | A06340 | 480 | A01457 | A06395 | 200 |
| A01457 | A06758 | 63  | A01457 | A06965 | 436 |
| A01457 | A07004 | 480 | A01457 | A07180 | 470 |
| A01457 | A07203 | 592 | A01457 | A07451 | 486 |
| A01457 | A07521 | 424 | A01457 | A07700 | 162 |
| A01457 | A07726 | 290 | A01457 | A08011 | 235 |
| A01457 | A08131 | 293 | A01457 | A08137 | 548 |
| A01457 | A08306 | 154 | A01457 | A08357 | 297 |
| A01457 | A08398 | 238 | A01457 | A08400 | 568 |
| A01457 | A08452 | 488 | A01457 | A08484 | 344 |
| A01457 | A08627 | 380 | A01457 | A08834 | 283 |
| A01457 | A09078 | 491 | A01457 | A09263 | 221 |
| A01457 | A09277 | 408 | A01457 | A09332 | 477 |
| A01457 | A09352 | 477 | A01457 | A09848 | 63  |
| A01457 | A09857 | 63  | A01457 | A09996 | 443 |
| A01457 | A10065 | 254 | A01457 | A10159 | 176 |
| A01457 | A10532 | 530 | A01457 | A10584 | 583 |
| A01457 | A10596 | 63  | A01457 | A10597 | 63  |
| A01457 | A10603 | 63  | A01457 | A10640 | 63  |
| A01457 | A10739 | 63  | A01457 | A10790 | 236 |
| A01457 | A10793 | 190 | A01457 | A10794 | 210 |
| A01457 | A10797 | 389 | A01457 | A10798 | 468 |
| A01457 | A10799 | 363 | A01457 | A10803 | 434 |
| A01457 | A10873 | 200 | A01457 | A10874 | 200 |
| A01457 | A10897 | 372 | A01457 | A11244 | 450 |
| A01457 | A11247 | 469 | A01457 | A11297 | 260 |
| A01457 | A11326 | 491 | A01457 | A11337 | 363 |
| A01457 | A11438 | 374 | A01457 | A11480 | 269 |
| A01457 | A11487 | 243 | A01457 | A11617 | 168 |
| A01457 | A11939 | 396 | A01457 | A12329 | 404 |
| A01457 | A12408 | 221 | A01457 | A12696 | 162 |
| A01457 | A13231 | 254 | A01457 | A13328 | 607 |
| A01457 | A13340 | 157 | A01457 | A13748 | 162 |
| A01457 | A13830 | 474 | A01457 | A13831 | 741 |
| A01457 | A13837 | 63  | A01457 | A13850 | 200 |
| A01457 | A13858 | 266 | A01457 | A13889 | 187 |
| A01457 | A13989 | 529 | A01457 | A13992 | 419 |
| A01457 | A14009 | 176 | A01457 | A14056 | 855 |
| A01457 | A14095 | 63  | A01457 | A14216 | 530 |
| A01457 | A14246 | 157 | A01457 | A14247 | 618 |
| A01457 | A14257 | 396 | A01457 | A14272 | 443 |
| A01457 | A14461 | 489 | A01457 | A14475 | 322 |
| A01457 | A14505 | 200 | A01457 | A14829 | 224 |
| A01457 | A15235 | 277 | A01457 | A15297 | 435 |
| A01457 | A15314 | 163 | A01457 | A15367 | 221 |

|        |        |     |        |        |     |
|--------|--------|-----|--------|--------|-----|
| A01457 | A15386 | 63  | A01457 | A15660 | 491 |
| A01457 | A15684 | 491 | A01457 | A15719 | 63  |
| A01457 | A15931 | 467 | A01457 | A16509 | 162 |
| A01457 | A16523 | 196 | A01457 | A16575 | 339 |
| A01457 | A16681 | 391 | A01457 | A16784 | 200 |
| A01457 | A16822 | 408 | A01457 | A16886 | 160 |
| A01457 | A17134 | 447 | A01457 | A17138 | 480 |
| A01458 | A01459 | 531 | A01458 | A01460 | 802 |
| A01458 | A01461 | 797 | A01458 | A01492 | 698 |
| A01458 | A01494 | 527 | A01458 | A01499 | 63  |
| A01458 | A01500 | 572 | A01458 | A01501 | 467 |
| A01458 | A01503 | 898 | A01458 | A01509 | 63  |
| A01458 | A01510 | 70  | A01458 | A01513 | 686 |
| A01458 | A01514 | 554 | A01458 | A01515 | 491 |
| A01458 | A01516 | 79  | A01458 | A01517 | 63  |
| A01458 | A01518 | 462 | A01458 | A01520 | 491 |
| A01458 | A01521 | 488 | A01458 | A01522 | 757 |
| A01458 | A01524 | 947 | A01458 | A01542 | 544 |
| A01458 | A01555 | 566 | A01458 | A01573 | 540 |
| A01458 | A01574 | 828 | A01458 | A01575 | 879 |
| A01458 | A01576 | 240 | A01458 | A01583 | 443 |
| A01458 | A01585 | 894 | A01458 | A01612 | 511 |
| A01458 | A01613 | 343 | A01458 | A01634 | 858 |
| A01458 | A01646 | 886 | A01458 | A01660 | 527 |
| A01458 | A01671 | 486 | A01458 | A01677 | 312 |
| A01458 | A01678 | 63  | A01458 | A01683 | 985 |
| A01458 | A01687 | 215 | A01458 | A01706 | 548 |
| A01458 | A01715 | 63  | A01458 | A01716 | 333 |
| A01458 | A01718 | 466 | A01458 | A01779 | 454 |
| A01458 | A01792 | 200 | A01458 | A01809 | 491 |
| A01458 | A01811 | 456 | A01458 | A01837 | 326 |
| A01458 | A01988 | 546 | A01458 | A02219 | 200 |
| A01458 | A02223 | 200 | A01458 | A02364 | 200 |
| A01458 | A02535 | 333 | A01458 | A02931 | 254 |
| A01458 | A03057 | 382 | A01458 | A03293 | 826 |
| A01458 | A03294 | 63  | A01458 | A03329 | 63  |
| A01458 | A03330 | 484 | A01458 | A03440 | 269 |
| A01458 | A03480 | 469 | A01458 | A03494 | 439 |
| A01458 | A03556 | 452 | A01458 | A03559 | 160 |
| A01458 | A03569 | 491 | A01458 | A03597 | 491 |
| A01458 | A03617 | 71  | A01458 | A03618 | 490 |
| A01458 | A03626 | 340 | A01458 | A03682 | 610 |
| A01458 | A03718 | 320 | A01458 | A03837 | 298 |
| A01458 | A03880 | 200 | A01458 | A03891 | 489 |
| A01458 | A03892 | 565 | A01458 | A04145 | 371 |
| A01458 | A04292 | 467 | A01458 | A04682 | 398 |

|        |        |     |        |        |     |
|--------|--------|-----|--------|--------|-----|
| A01458 | A04686 | 796 | A01458 | A04835 | 299 |
| A01458 | A04848 | 400 | A01458 | A04893 | 353 |
| A01458 | A04929 | 63  | A01458 | A05024 | 208 |
| A01458 | A05027 | 456 | A01458 | A05220 | 491 |
| A01458 | A05234 | 253 | A01458 | A05273 | 301 |
| A01458 | A05427 | 157 | A01458 | A05449 | 157 |
| A01458 | A05531 | 427 | A01458 | A05539 | 491 |
| A01458 | A05563 | 491 | A01458 | A05638 | 456 |
| A01458 | A05914 | 173 | A01458 | A06011 | 235 |
| A01458 | A06168 | 246 | A01458 | A06204 | 491 |
| A01458 | A06320 | 243 | A01458 | A06340 | 460 |
| A01458 | A06347 | 491 | A01458 | A06361 | 435 |
| A01458 | A06689 | 179 | A01458 | A06758 | 491 |
| A01458 | A06941 | 279 | A01458 | A07054 | 157 |
| A01458 | A07180 | 491 | A01458 | A07203 | 719 |
| A01458 | A07294 | 486 | A01458 | A07409 | 490 |
| A01458 | A07521 | 486 | A01458 | A07729 | 160 |
| A01458 | A07820 | 440 | A01458 | A07881 | 279 |
| A01458 | A07961 | 258 | A01458 | A07983 | 152 |
| A01458 | A08137 | 426 | A01458 | A08369 | 426 |
| A01458 | A08400 | 549 | A01458 | A08452 | 488 |
| A01458 | A08484 | 447 | A01458 | A08531 | 200 |
| A01458 | A08544 | 259 | A01458 | A08766 | 117 |
| A01458 | A08775 | 102 | A01458 | A08874 | 63  |
| A01458 | A08943 | 157 | A01458 | A09277 | 247 |
| A01458 | A09326 | 63  | A01458 | A09344 | 118 |
| A01458 | A09607 | 288 | A01458 | A09625 | 483 |
| A01458 | A09857 | 79  | A01458 | A10317 | 489 |
| A01458 | A10490 | 228 | A01458 | A10584 | 753 |
| A01458 | A10596 | 63  | A01458 | A10603 | 224 |
| A01458 | A10655 | 240 | A01458 | A10664 | 174 |
| A01458 | A10701 | 174 | A01458 | A10739 | 66  |
| A01458 | A10790 | 156 | A01458 | A10794 | 63  |
| A01458 | A10798 | 470 | A01458 | A10799 | 187 |
| A01458 | A10803 | 520 | A01458 | A10804 | 82  |
| A01458 | A10821 | 63  | A01458 | A10859 | 152 |
| A01458 | A10897 | 224 | A01458 | A11244 | 230 |
| A01458 | A11247 | 388 | A01458 | A11337 | 429 |
| A01458 | A11885 | 491 | A01458 | A11931 | 181 |
| A01458 | A12903 | 174 | A01458 | A13130 | 585 |
| A01458 | A13222 | 63  | A01458 | A13328 | 570 |
| A01458 | A13384 | 446 | A01458 | A13626 | 217 |
| A01458 | A13831 | 982 | A01458 | A13835 | 63  |
| A01458 | A13837 | 406 | A01458 | A13855 | 84  |
| A01458 | A13873 | 200 | A01458 | A13882 | 229 |
| A01458 | A13895 | 210 | A01458 | A13902 | 439 |

|        |        |     |        |        |     |
|--------|--------|-----|--------|--------|-----|
| A01458 | A13989 | 586 | A01458 | A13992 | 443 |
| A01458 | A14009 | 401 | A01458 | A14056 | 982 |
| A01458 | A14087 | 353 | A01458 | A14088 | 475 |
| A01458 | A14170 | 193 | A01458 | A14173 | 323 |
| A01458 | A14179 | 252 | A01458 | A14180 | 207 |
| A01458 | A14186 | 491 | A01458 | A14247 | 805 |
| A01458 | A14272 | 491 | A01458 | A14356 | 240 |
| A01458 | A14358 | 66  | A01458 | A14461 | 491 |
| A01458 | A14469 | 104 | A01458 | A14502 | 156 |
| A01458 | A14559 | 174 | A01458 | A14699 | 475 |
| A01458 | A14838 | 374 | A01458 | A15049 | 152 |
| A01458 | A15297 | 533 | A01458 | A15338 | 438 |
| A01458 | A15363 | 63  | A01458 | A15370 | 491 |
| A01458 | A15378 | 63  | A01458 | A15384 | 200 |
| A01458 | A15408 | 63  | A01458 | A15498 | 335 |
| A01458 | A15505 | 63  | A01458 | A15560 | 63  |
| A01458 | A15569 | 218 | A01458 | A15646 | 414 |
| A01458 | A15647 | 167 | A01458 | A15650 | 68  |
| A01458 | A15656 | 87  | A01458 | A15660 | 491 |
| A01458 | A15664 | 173 | A01458 | A15703 | 140 |
| A01458 | A15710 | 63  | A01458 | A15712 | 338 |
| A01458 | A15718 | 474 | A01458 | A15719 | 393 |
| A01458 | A15724 | 477 | A01458 | A15757 | 68  |
| A01458 | A15770 | 358 | A01458 | A15931 | 154 |
| A01458 | A15960 | 63  | A01458 | A16066 | 152 |
| A01458 | A16400 | 157 | A01458 | A16449 | 200 |
| A01458 | A16634 | 455 | A01458 | A16652 | 63  |
| A01458 | A16664 | 480 | A01458 | A16674 | 401 |
| A01458 | A17123 | 380 | A01459 | A01494 | 238 |
| A01459 | A01501 | 491 | A01459 | A01503 | 462 |
| A01459 | A01507 | 491 | A01459 | A01510 | 63  |
| A01459 | A01513 | 328 | A01459 | A01514 | 650 |
| A01459 | A01516 | 358 | A01459 | A01517 | 366 |
| A01459 | A01518 | 414 | A01459 | A01521 | 393 |
| A01459 | A01555 | 63  | A01459 | A01568 | 587 |
| A01459 | A01575 | 118 | A01459 | A01583 | 336 |
| A01459 | A01646 | 441 | A01459 | A01647 | 469 |
| A01459 | A01671 | 542 | A01459 | A01672 | 63  |
| A01459 | A01677 | 63  | A01459 | A01683 | 63  |
| A01459 | A01687 | 491 | A01459 | A01706 | 269 |
| A01459 | A01715 | 286 | A01459 | A01790 | 314 |
| A01459 | A01809 | 564 | A01459 | A01811 | 95  |
| A01459 | A01988 | 739 | A01459 | A02116 | 430 |
| A01459 | A02119 | 322 | A01459 | A02436 | 154 |
| A01459 | A03050 | 221 | A01459 | A03330 | 542 |
| A01459 | A03480 | 334 | A01459 | A03494 | 213 |

|        |        |     |        |        |     |
|--------|--------|-----|--------|--------|-----|
| A01459 | A03556 | 216 | A01459 | A03597 | 566 |
| A01459 | A03617 | 486 | A01459 | A03626 | 63  |
| A01459 | A03682 | 224 | A01459 | A03718 | 63  |
| A01459 | A03720 | 215 | A01459 | A04145 | 63  |
| A01459 | A04292 | 277 | A01459 | A04544 | 210 |
| A01459 | A04929 | 107 | A01459 | A05008 | 191 |
| A01459 | A05015 | 235 | A01459 | A05024 | 269 |
| A01459 | A05220 | 369 | A01459 | A05273 | 200 |
| A01459 | A05411 | 450 | A01459 | A05428 | 378 |
| A01459 | A05531 | 558 | A01459 | A05539 | 535 |
| A01459 | A05563 | 360 | A01459 | A05605 | 285 |
| A01459 | A05638 | 596 | A01459 | A06011 | 269 |
| A01459 | A06176 | 249 | A01459 | A06204 | 565 |
| A01459 | A06347 | 491 | A01459 | A06348 | 180 |
| A01459 | A06361 | 283 | A01459 | A06661 | 294 |
| A01459 | A06680 | 317 | A01459 | A06750 | 173 |
| A01459 | A06758 | 79  | A01459 | A06785 | 168 |
| A01459 | A06819 | 477 | A01459 | A06941 | 455 |
| A01459 | A07054 | 491 | A01459 | A07164 | 191 |
| A01459 | A07180 | 566 | A01459 | A07203 | 483 |
| A01459 | A07207 | 451 | A01459 | A07242 | 491 |
| A01459 | A07253 | 195 | A01459 | A07294 | 352 |
| A01459 | A07404 | 490 | A01459 | A07495 | 491 |
| A01459 | A07709 | 385 | A01459 | A07756 | 162 |
| A01459 | A07816 | 491 | A01459 | A07893 | 481 |
| A01459 | A07954 | 396 | A01459 | A08272 | 394 |
| A01459 | A08400 | 548 | A01459 | A08402 | 396 |
| A01459 | A08484 | 269 | A01459 | A08669 | 378 |
| A01459 | A08780 | 68  | A01459 | A08781 | 174 |
| A01459 | A09044 | 243 | A01459 | A09121 | 323 |
| A01459 | A09303 | 177 | A01459 | A09326 | 269 |
| A01459 | A09333 | 63  | A01459 | A09344 | 196 |
| A01459 | A09625 | 322 | A01459 | A09628 | 200 |
| A01459 | A09659 | 163 | A01459 | A09662 | 491 |
| A01459 | A09666 | 490 | A01459 | A09673 | 174 |
| A01459 | A10317 | 274 | A01459 | A10373 | 182 |
| A01459 | A10553 | 152 | A01459 | A10578 | 157 |
| A01459 | A10603 | 135 | A01459 | A10664 | 107 |
| A01459 | A11112 | 174 | A01459 | A11247 | 63  |
| A01459 | A11256 | 210 | A01459 | A11279 | 269 |
| A01459 | A11281 | 191 | A01459 | A11284 | 491 |
| A01459 | A11621 | 235 | A01459 | A11690 | 210 |
| A01459 | A11855 | 353 | A01459 | A12047 | 491 |
| A01459 | A12507 | 210 | A01459 | A12722 | 477 |
| A01459 | A12824 | 401 | A01459 | A13130 | 363 |
| A01459 | A13146 | 363 | A01459 | A13384 | 491 |

|        |        |     |        |        |     |
|--------|--------|-----|--------|--------|-----|
| A01459 | A13831 | 552 | A01459 | A13835 | 93  |
| A01459 | A13837 | 74  | A01459 | A13876 | 276 |
| A01459 | A13877 | 196 | A01459 | A13881 | 200 |
| A01459 | A13895 | 269 | A01459 | A13949 | 579 |
| A01459 | A14056 | 279 | A01459 | A14077 | 157 |
| A01459 | A14088 | 179 | A01459 | A14170 | 216 |
| A01459 | A14171 | 200 | A01459 | A14179 | 200 |
| A01459 | A14180 | 200 | A01459 | A14182 | 269 |
| A01459 | A14186 | 479 | A01459 | A14209 | 544 |
| A01459 | A14222 | 490 | A01459 | A14266 | 460 |
| A01459 | A14281 | 491 | A01459 | A14356 | 200 |
| A01459 | A14358 | 110 | A01459 | A14469 | 408 |
| A01459 | A14474 | 474 | A01459 | A14475 | 246 |
| A01459 | A14484 | 491 | A01459 | A14540 | 163 |
| A01459 | A14589 | 278 | A01459 | A14633 | 484 |
| A01459 | A14661 | 269 | A01459 | A14711 | 269 |
| A01459 | A14783 | 269 | A01459 | A14838 | 63  |
| A01459 | A15175 | 174 | A01459 | A15295 | 372 |
| A01459 | A15363 | 63  | A01459 | A15370 | 566 |
| A01459 | A15380 | 491 | A01459 | A15383 | 483 |
| A01459 | A15431 | 380 | A01459 | A15512 | 378 |
| A01459 | A15528 | 333 | A01459 | A15530 | 177 |
| A01459 | A15542 | 363 | A01459 | A15543 | 405 |
| A01459 | A15646 | 399 | A01459 | A15664 | 126 |
| A01459 | A15665 | 270 | A01459 | A15682 | 173 |
| A01459 | A15712 | 200 | A01459 | A15719 | 200 |
| A01459 | A15724 | 379 | A01459 | A15757 | 411 |
| A01459 | A15930 | 227 | A01459 | A16048 | 458 |
| A01459 | A16066 | 200 | A01459 | A16128 | 314 |
| A01459 | A16465 | 63  | A01459 | A16552 | 200 |
| A01459 | A16634 | 555 | A01459 | A16919 | 200 |
| A01459 | A16935 | 262 | A01460 | A01461 | 572 |
| A01460 | A01499 | 490 | A01460 | A01500 | 213 |
| A01460 | A01503 | 456 | A01460 | A01509 | 323 |
| A01460 | A01513 | 559 | A01460 | A01515 | 586 |
| A01460 | A01520 | 491 | A01460 | A01521 | 424 |
| A01460 | A01522 | 491 | A01460 | A01523 | 127 |
| A01460 | A01524 | 156 | A01460 | A01525 | 310 |
| A01460 | A01546 | 157 | A01460 | A01573 | 491 |
| A01460 | A01574 | 540 | A01460 | A01575 | 555 |
| A01460 | A01583 | 177 | A01460 | A01585 | 777 |
| A01460 | A01593 | 457 | A01460 | A01634 | 491 |
| A01460 | A01646 | 384 | A01460 | A01677 | 489 |
| A01460 | A01678 | 279 | A01460 | A01683 | 479 |
| A01460 | A01706 | 457 | A01460 | A01710 | 490 |
| A01460 | A01741 | 324 | A01460 | A01926 | 491 |

|        |        |     |        |        |     |
|--------|--------|-----|--------|--------|-----|
| A01460 | A02148 | 281 | A01460 | A02221 | 281 |
| A01460 | A02222 | 265 | A01460 | A02896 | 443 |
| A01460 | A03238 | 472 | A01460 | A03293 | 590 |
| A01460 | A03294 | 167 | A01460 | A03326 | 115 |
| A01460 | A03452 | 226 | A01460 | A03481 | 63  |
| A01460 | A03597 | 463 | A01460 | A03618 | 204 |
| A01460 | A03682 | 443 | A01460 | A03686 | 256 |
| A01460 | A03718 | 191 | A01460 | A03889 | 316 |
| A01460 | A03891 | 454 | A01460 | A03892 | 552 |
| A01460 | A04145 | 177 | A01460 | A04182 | 173 |
| A01460 | A04342 | 174 | A01460 | A04686 | 599 |
| A01460 | A05028 | 483 | A01460 | A05376 | 439 |
| A01460 | A05401 | 180 | A01460 | A05979 | 191 |
| A01460 | A06381 | 258 | A01460 | A06657 | 318 |
| A01460 | A07207 | 256 | A01460 | A07244 | 294 |
| A01460 | A07433 | 232 | A01460 | A07664 | 313 |
| A01460 | A08765 | 63  | A01460 | A08863 | 516 |
| A01460 | A08943 | 319 | A01460 | A09053 | 185 |
| A01460 | A09054 | 483 | A01460 | A09055 | 277 |
| A01460 | A09277 | 491 | A01460 | A09526 | 283 |
| A01460 | A10578 | 168 | A01460 | A10594 | 435 |
| A01460 | A11016 | 185 | A01460 | A11279 | 384 |
| A01460 | A11287 | 109 | A01460 | A11526 | 152 |
| A01460 | A11527 | 238 | A01460 | A11859 | 488 |
| A01460 | A11885 | 491 | A01460 | A13328 | 443 |
| A01460 | A13732 | 195 | A01460 | A13816 | 481 |
| A01460 | A13830 | 435 | A01460 | A13831 | 513 |
| A01460 | A13832 | 484 | A01460 | A13855 | 319 |
| A01460 | A13874 | 491 | A01460 | A13983 | 259 |
| A01460 | A14052 | 490 | A01460 | A14056 | 422 |
| A01460 | A14058 | 207 | A01460 | A14247 | 657 |
| A01460 | A14258 | 344 | A01460 | A14481 | 279 |
| A01460 | A14661 | 490 | A01460 | A14693 | 191 |
| A01460 | A14838 | 205 | A01460 | A15295 | 162 |
| A01460 | A15366 | 413 | A01460 | A15462 | 339 |
| A01460 | A15463 | 318 | A01460 | A15498 | 489 |
| A01460 | A15552 | 246 | A01460 | A15909 | 210 |
| A01460 | A15918 | 63  | A01460 | A15933 | 63  |
| A01460 | A16449 | 383 | A01460 | A16625 | 277 |
| A01460 | A17061 | 457 | A01461 | A01478 | 489 |
| A01461 | A01494 | 375 | A01461 | A01499 | 491 |
| A01461 | A01500 | 500 | A01461 | A01503 | 554 |
| A01461 | A01509 | 490 | A01461 | A01513 | 363 |
| A01461 | A01515 | 987 | A01461 | A01520 | 711 |
| A01461 | A01521 | 488 | A01461 | A01522 | 659 |
| A01461 | A01523 | 144 | A01461 | A01524 | 993 |



|        |        |     |        |        |     |
|--------|--------|-----|--------|--------|-----|
| A01461 | A01525 | 440 | A01461 | A01530 | 190 |
| A01461 | A01536 | 177 | A01461 | A01542 | 537 |
| A01461 | A01556 | 263 | A01461 | A01561 | 258 |
| A01461 | A01571 | 414 | A01461 | A01572 | 486 |
| A01461 | A01573 | 603 | A01461 | A01574 | 885 |
| A01461 | A01575 | 884 | A01461 | A01576 | 688 |
| A01461 | A01578 | 491 | A01461 | A01583 | 491 |
| A01461 | A01585 | 989 | A01461 | A01592 | 199 |
| A01461 | A01595 | 465 | A01461 | A01612 | 481 |
| A01461 | A01634 | 846 | A01461 | A01646 | 491 |
| A01461 | A01660 | 586 | A01461 | A01673 | 488 |
| A01461 | A01677 | 491 | A01461 | A01678 | 486 |
| A01461 | A01683 | 572 | A01461 | A01706 | 681 |
| A01461 | A01710 | 602 | A01461 | A01761 | 485 |
| A01461 | A01779 | 401 | A01461 | A01809 | 489 |
| A01461 | A01811 | 435 | A01461 | A01926 | 603 |
| A01461 | A01933 | 490 | A01461 | A01937 | 205 |
| A01461 | A02008 | 201 | A01461 | A02148 | 590 |
| A01461 | A02158 | 168 | A01461 | A02264 | 297 |
| A01461 | A02268 | 360 | A01461 | A02272 | 302 |
| A01461 | A02275 | 432 | A01461 | A02300 | 260 |
| A01461 | A02343 | 179 | A01461 | A02402 | 363 |
| A01461 | A02405 | 382 | A01461 | A02454 | 327 |
| A01461 | A02803 | 490 | A01461 | A02887 | 530 |
| A01461 | A02950 | 332 | A01461 | A02979 | 491 |
| A01461 | A03034 | 469 | A01461 | A03091 | 252 |
| A01461 | A03154 | 335 | A01461 | A03155 | 318 |
| A01461 | A03238 | 491 | A01461 | A03271 | 299 |
| A01461 | A03293 | 532 | A01461 | A03294 | 569 |
| A01461 | A03326 | 353 | A01461 | A03329 | 491 |
| A01461 | A03395 | 157 | A01461 | A03428 | 419 |
| A01461 | A03452 | 491 | A01461 | A03481 | 491 |
| A01461 | A03489 | 569 | A01461 | A03518 | 489 |
| A01461 | A03523 | 306 | A01461 | A03565 | 316 |
| A01461 | A03569 | 490 | A01461 | A03575 | 199 |
| A01461 | A03597 | 160 | A01461 | A03618 | 491 |
| A01461 | A03626 | 491 | A01461 | A03682 | 227 |
| A01461 | A03718 | 569 | A01461 | A03726 | 937 |
| A01461 | A03889 | 491 | A01461 | A03890 | 391 |
| A01461 | A03891 | 491 | A01461 | A03892 | 846 |
| A01461 | A04008 | 477 | A01461 | A04145 | 491 |
| A01461 | A04151 | 191 | A01461 | A04292 | 490 |
| A01461 | A04337 | 490 | A01461 | A04623 | 188 |
| A01461 | A04682 | 177 | A01461 | A04686 | 633 |
| A01461 | A04715 | 490 | A01461 | A04728 | 491 |
| A01461 | A04839 | 602 | A01461 | A04893 | 490 |

|        |        |     |        |        |     |
|--------|--------|-----|--------|--------|-----|
| A01461 | A04894 | 176 | A01461 | A04897 | 489 |
| A01461 | A04929 | 469 | A01461 | A05004 | 409 |
| A01461 | A05024 | 557 | A01461 | A05028 | 491 |
| A01461 | A05061 | 386 | A01461 | A05131 | 229 |
| A01461 | A05143 | 330 | A01461 | A05154 | 489 |
| A01461 | A05200 | 408 | A01461 | A05234 | 369 |
| A01461 | A05356 | 615 | A01461 | A05376 | 602 |
| A01461 | A05401 | 605 | A01461 | A05419 | 266 |
| A01461 | A05459 | 182 | A01461 | A05501 | 419 |
| A01461 | A05914 | 154 | A01461 | A06011 | 249 |
| A01461 | A06037 | 491 | A01461 | A06039 | 304 |
| A01461 | A06159 | 276 | A01461 | A06167 | 406 |
| A01461 | A06168 | 485 | A01461 | A06340 | 265 |
| A01461 | A06610 | 297 | A01461 | A06659 | 491 |
| A01461 | A06675 | 174 | A01461 | A06831 | 338 |
| A01461 | A06890 | 446 | A01461 | A06930 | 235 |
| A01461 | A06941 | 491 | A01461 | A07020 | 204 |
| A01461 | A07091 | 899 | A01461 | A07180 | 278 |
| A01461 | A07208 | 460 | A01461 | A07231 | 378 |
| A01461 | A07442 | 224 | A01461 | A07471 | 234 |
| A01461 | A07475 | 212 | A01461 | A07477 | 191 |
| A01461 | A07499 | 491 | A01461 | A07521 | 491 |
| A01461 | A07541 | 351 | A01461 | A07664 | 353 |
| A01461 | A07736 | 456 | A01461 | A07820 | 491 |
| A01461 | A07913 | 172 | A01461 | A07973 | 402 |
| A01461 | A08001 | 285 | A01461 | A08077 | 480 |
| A01461 | A08137 | 585 | A01461 | A08177 | 469 |
| A01461 | A08210 | 205 | A01461 | A08309 | 348 |
| A01461 | A08369 | 319 | A01461 | A08400 | 491 |
| A01461 | A08454 | 302 | A01461 | A08461 | 483 |
| A01461 | A08484 | 491 | A01461 | A08506 | 486 |
| A01461 | A08544 | 490 | A01461 | A08765 | 221 |
| A01461 | A08766 | 223 | A01461 | A08772 | 223 |
| A01461 | A08776 | 105 | A01461 | A08785 | 477 |
| A01461 | A08874 | 486 | A01461 | A08881 | 270 |
| A01461 | A09013 | 140 | A01461 | A09050 | 491 |
| A01461 | A09053 | 327 | A01461 | A09054 | 665 |
| A01461 | A09055 | 140 | A01461 | A09056 | 304 |
| A01461 | A09060 | 96  | A01461 | A09078 | 477 |
| A01461 | A09277 | 491 | A01461 | A09326 | 490 |
| A01461 | A09333 | 491 | A01461 | A09426 | 353 |
| A01461 | A09742 | 491 | A01461 | A10052 | 449 |
| A01461 | A10367 | 486 | A01461 | A10466 | 234 |
| A01461 | A10527 | 358 | A01461 | A10528 | 357 |
| A01461 | A10584 | 491 | A01461 | A10594 | 602 |
| A01461 | A10655 | 639 | A01461 | A10663 | 491 |

|        |        |     |        |        |     |
|--------|--------|-----|--------|--------|-----|
| A01461 | A10684 | 218 | A01461 | A10794 | 446 |
| A01461 | A10797 | 485 | A01461 | A10798 | 620 |
| A01461 | A10799 | 484 | A01461 | A10804 | 416 |
| A01461 | A10808 | 899 | A01461 | A10826 | 63  |
| A01461 | A11068 | 276 | A01461 | A11157 | 176 |
| A01461 | A11247 | 259 | A01461 | A11265 | 490 |
| A01461 | A11279 | 596 | A01461 | A11287 | 491 |
| A01461 | A11303 | 491 | A01461 | A11324 | 186 |
| A01461 | A11329 | 424 | A01461 | A11337 | 486 |
| A01461 | A11343 | 446 | A01461 | A11366 | 473 |
| A01461 | A11373 | 229 | A01461 | A11431 | 260 |
| A01461 | A11444 | 418 | A01461 | A11456 | 479 |
| A01461 | A11527 | 469 | A01461 | A11548 | 319 |
| A01461 | A11552 | 418 | A01461 | A11570 | 268 |
| A01461 | A11730 | 297 | A01461 | A11859 | 351 |
| A01461 | A11885 | 491 | A01461 | A11925 | 269 |
| A01461 | A11950 | 202 | A01461 | A12058 | 441 |
| A01461 | A12199 | 276 | A01461 | A12206 | 297 |
| A01461 | A12295 | 396 | A01461 | A12738 | 224 |
| A01461 | A12792 | 191 | A01461 | A12820 | 243 |
| A01461 | A12869 | 457 | A01461 | A13021 | 193 |
| A01461 | A13106 | 454 | A01461 | A13129 | 460 |
| A01461 | A13225 | 899 | A01461 | A13387 | 445 |
| A01461 | A13456 | 303 | A01461 | A13479 | 193 |
| A01461 | A13517 | 486 | A01461 | A13628 | 223 |
| A01461 | A13786 | 391 | A01461 | A13816 | 278 |
| A01461 | A13830 | 491 | A01461 | A13831 | 424 |
| A01461 | A13832 | 491 | A01461 | A13845 | 424 |
| A01461 | A13855 | 423 | A01461 | A13867 | 454 |
| A01461 | A13871 | 483 | A01461 | A13874 | 491 |
| A01461 | A13882 | 483 | A01461 | A13894 | 491 |
| A01461 | A13895 | 596 | A01461 | A13902 | 557 |
| A01461 | A13963 | 177 | A01461 | A13987 | 463 |
| A01461 | A13989 | 163 | A01461 | A14009 | 302 |
| A01461 | A14052 | 491 | A01461 | A14056 | 544 |
| A01461 | A14058 | 353 | A01461 | A14095 | 475 |
| A01461 | A14175 | 174 | A01461 | A14182 | 491 |
| A01461 | A14193 | 209 | A01461 | A14202 | 486 |
| A01461 | A14247 | 922 | A01461 | A14257 | 207 |
| A01461 | A14258 | 621 | A01461 | A14272 | 429 |
| A01461 | A14399 | 409 | A01461 | A14461 | 488 |
| A01461 | A14473 | 269 | A01461 | A14481 | 457 |
| A01461 | A14527 | 474 | A01461 | A14655 | 213 |
| A01461 | A14661 | 711 | A01461 | A14693 | 603 |
| A01461 | A14710 | 307 | A01461 | A14711 | 490 |
| A01461 | A14783 | 200 | A01461 | A14788 | 260 |

|        |        |     |        |        |     |
|--------|--------|-----|--------|--------|-----|
| A01461 | A14799 | 279 | A01461 | A14829 | 243 |
| A01461 | A14838 | 491 | A01461 | A14844 | 457 |
| A01461 | A14877 | 383 | A01461 | A14901 | 157 |
| A01461 | A14917 | 205 | A01461 | A15229 | 291 |
| A01461 | A15292 | 469 | A01461 | A15297 | 683 |
| A01461 | A15301 | 601 | A01461 | A15302 | 594 |
| A01461 | A15312 | 308 | A01461 | A15315 | 491 |
| A01461 | A15336 | 676 | A01461 | A15347 | 204 |
| A01461 | A15352 | 184 | A01461 | A15366 | 603 |
| A01461 | A15402 | 388 | A01461 | A15413 | 401 |
| A01461 | A15430 | 655 | A01461 | A15432 | 252 |
| A01461 | A15462 | 603 | A01461 | A15463 | 603 |
| A01461 | A15498 | 538 | A01461 | A15528 | 227 |
| A01461 | A15552 | 483 | A01461 | A15560 | 463 |
| A01461 | A15609 | 229 | A01461 | A15617 | 510 |
| A01461 | A15647 | 488 | A01461 | A15650 | 328 |
| A01461 | A15660 | 279 | A01461 | A15669 | 474 |
| A01461 | A15770 | 490 | A01461 | A15779 | 288 |
| A01461 | A15880 | 246 | A01461 | A15896 | 195 |
| A01461 | A15909 | 473 | A01461 | A15917 | 234 |
| A01461 | A15949 | 177 | A01461 | A15992 | 260 |
| A01461 | A16364 | 152 | A01461 | A16436 | 401 |
| A01461 | A16617 | 483 | A01461 | A16621 | 458 |
| A01461 | A16648 | 157 | A01461 | A16649 | 223 |
| A01461 | A16669 | 258 | A01461 | A16681 | 218 |
| A01461 | A16776 | 176 | A01461 | A16804 | 99  |
| A01461 | A16808 | 483 | A01461 | A16815 | 338 |
| A01461 | A16821 | 491 | A01461 | A16927 | 479 |
| A01461 | A17061 | 491 | A01461 | A17091 | 473 |
| A01461 | A17121 | 221 | A01461 | A17126 | 474 |
| A01461 | A17144 | 433 | A01461 | A17190 | 163 |
| A01462 | A01463 | 229 | A01462 | A01466 | 398 |
| A01462 | A01475 | 399 | A01462 | A01476 | 367 |
| A01462 | A01626 | 234 | A01462 | A01676 | 160 |
| A01462 | A01722 | 286 | A01462 | A01769 | 243 |
| A01462 | A02104 | 380 | A01462 | A02117 | 210 |
| A01462 | A02141 | 369 | A01462 | A02301 | 324 |
| A01462 | A02306 | 235 | A01462 | A02425 | 269 |
| A01462 | A02495 | 265 | A01462 | A02754 | 301 |
| A01462 | A02785 | 218 | A01462 | A02875 | 249 |
| A01462 | A02877 | 159 | A01462 | A03043 | 340 |
| A01462 | A03054 | 470 | A01462 | A03417 | 307 |
| A01462 | A03599 | 393 | A01462 | A04218 | 367 |
| A01462 | A04471 | 375 | A01462 | A05701 | 294 |
| A01462 | A05963 | 429 | A01462 | A05964 | 413 |
| A01462 | A09031 | 401 | A01462 | A09242 | 285 |

|        |        |     |        |        |     |
|--------|--------|-----|--------|--------|-----|
| A01462 | A09369 | 404 | A01462 | A14665 | 297 |
| A01463 | A01466 | 265 | A01463 | A01476 | 196 |
| A01463 | A01542 | 491 | A01463 | A01626 | 475 |
| A01463 | A01741 | 191 | A01463 | A01761 | 416 |
| A01463 | A02052 | 219 | A01463 | A02115 | 319 |
| A01463 | A02465 | 216 | A01463 | A02481 | 247 |
| A01463 | A02766 | 318 | A01463 | A03174 | 219 |
| A01463 | A03498 | 171 | A01463 | A03600 | 484 |
| A01463 | A03609 | 160 | A01463 | A03728 | 165 |
| A01463 | A04472 | 252 | A01463 | A05138 | 301 |
| A01463 | A05155 | 468 | A01463 | A05217 | 229 |
| A01463 | A06379 | 333 | A01463 | A07184 | 180 |
| A01463 | A07766 | 491 | A01463 | A07794 | 447 |
| A01463 | A08335 | 224 | A01463 | A09243 | 314 |
| A01463 | A10612 | 491 | A01463 | A11696 | 162 |
| A01463 | A13127 | 180 | A01463 | A13369 | 420 |
| A01463 | A14128 | 490 | A01463 | A14430 | 183 |
| A01463 | A14442 | 290 | A01463 | A14870 | 491 |
| A01463 | A14872 | 491 | A01463 | A14874 | 441 |
| A01463 | A15395 | 297 | A01463 | A15430 | 491 |
| A01463 | A15601 | 168 | A01463 | A15607 | 319 |
| A01463 | A16430 | 168 | A01463 | A16436 | 468 |
| A01463 | A16963 | 489 | A01464 | A01468 | 439 |
| A01464 | A01470 | 467 | A01464 | A01496 | 486 |
| A01464 | A01531 | 252 | A01464 | A01579 | 488 |
| A01464 | A01597 | 270 | A01464 | A01618 | 670 |
| A01464 | A01619 | 301 | A01464 | A01620 | 163 |
| A01464 | A01649 | 458 | A01464 | A01734 | 210 |
| A01464 | A01822 | 662 | A01464 | A02978 | 545 |
| A01464 | A02980 | 238 | A01464 | A03030 | 319 |
| A01464 | A03069 | 251 | A01464 | A03453 | 323 |
| A01464 | A03567 | 491 | A01464 | A03671 | 188 |
| A01464 | A03705 | 491 | A01464 | A03754 | 668 |
| A01464 | A03809 | 274 | A01464 | A03859 | 423 |
| A01464 | A03888 | 670 | A01464 | A03981 | 412 |
| A01464 | A04647 | 258 | A01464 | A04760 | 205 |
| A01464 | A05375 | 412 | A01464 | A05449 | 624 |
| A01464 | A06599 | 204 | A01464 | A06812 | 329 |
| A01464 | A06861 | 486 | A01464 | A06909 | 205 |
| A01464 | A06965 | 490 | A01464 | A06973 | 565 |
| A01464 | A07201 | 491 | A01464 | A07207 | 356 |
| A01464 | A07243 | 461 | A01464 | A07325 | 262 |
| A01464 | A07451 | 299 | A01464 | A07731 | 157 |
| A01464 | A08011 | 385 | A01464 | A08099 | 534 |
| A01464 | A08398 | 441 | A01464 | A08452 | 539 |
| A01464 | A08521 | 200 | A01464 | A08558 | 200 |

|        |        |     |        |        |     |
|--------|--------|-----|--------|--------|-----|
| A01464 | A08559 | 447 | A01464 | A08664 | 571 |
| A01464 | A08723 | 223 | A01464 | A08724 | 174 |
| A01464 | A08752 | 308 | A01464 | A09044 | 200 |
| A01464 | A09322 | 470 | A01464 | A09674 | 348 |
| A01464 | A09702 | 330 | A01464 | A09862 | 70  |
| A01464 | A09865 | 91  | A01464 | A10417 | 669 |
| A01464 | A10529 | 180 | A01464 | A11264 | 154 |
| A01464 | A11355 | 167 | A01464 | A11438 | 495 |
| A01464 | A11550 | 176 | A01464 | A11729 | 200 |
| A01464 | A11802 | 301 | A01464 | A11945 | 260 |
| A01464 | A12105 | 458 | A01464 | A12177 | 235 |
| A01464 | A12952 | 534 | A01464 | A13023 | 191 |
| A01464 | A13142 | 301 | A01464 | A13333 | 200 |
| A01464 | A13600 | 301 | A01464 | A13989 | 434 |
| A01464 | A13992 | 445 | A01464 | A14169 | 441 |
| A01464 | A14216 | 485 | A01464 | A14505 | 191 |
| A01464 | A15624 | 276 | A01464 | A15659 | 313 |
| A01464 | A15660 | 185 | A01464 | A15684 | 489 |
| A01464 | A15776 | 347 | A01464 | A15777 | 176 |
| A01464 | A16075 | 193 | A01464 | A16118 | 484 |
| A01464 | A16686 | 337 | A01464 | A17193 | 151 |
| A01465 | A01493 | 411 | A01465 | A01722 | 346 |
| A01465 | A02330 | 334 | A01465 | A03748 | 307 |
| A01465 | A05786 | 418 | A01465 | A06607 | 187 |
| A01465 | A07296 | 422 | A01465 | A13987 | 294 |
| A01465 | A14122 | 319 | A01465 | A15292 | 198 |
| A01465 | A15419 | 333 | A01465 | A15420 | 317 |
| A01466 | A01475 | 416 | A01466 | A01476 | 384 |
| A01466 | A01490 | 380 | A01466 | A01722 | 314 |
| A01466 | A02104 | 396 | A01466 | A02112 | 302 |
| A01466 | A02115 | 429 | A01466 | A02141 | 385 |
| A01466 | A02215 | 307 | A01466 | A02301 | 348 |
| A01466 | A02306 | 270 | A01466 | A02425 | 299 |
| A01466 | A03054 | 475 | A01466 | A03164 | 319 |
| A01466 | A03174 | 394 | A01466 | A04218 | 384 |
| A01466 | A04471 | 393 | A01466 | A05487 | 335 |
| A01466 | A05494 | 337 | A01466 | A07541 | 272 |
| A01466 | A09073 | 346 | A01466 | A13879 | 330 |
| A01467 | A02049 | 296 | A01467 | A04415 | 394 |
| A01467 | A08835 | 288 | A01468 | A01470 | 491 |
| A01468 | A01487 | 439 | A01468 | A01488 | 270 |
| A01468 | A01492 | 491 | A01468 | A01495 | 467 |
| A01468 | A01496 | 491 | A01468 | A01500 | 201 |
| A01468 | A01506 | 385 | A01468 | A01538 | 488 |
| A01468 | A01539 | 457 | A01468 | A01540 | 488 |
| A01468 | A01546 | 390 | A01468 | A01558 | 443 |

|        |        |     |        |        |     |
|--------|--------|-----|--------|--------|-----|
| A01468 | A01561 | 199 | A01468 | A01569 | 490 |
| A01468 | A01579 | 491 | A01468 | A01586 | 881 |
| A01468 | A01597 | 460 | A01468 | A01598 | 489 |
| A01468 | A01601 | 491 | A01468 | A01606 | 293 |
| A01468 | A01612 | 479 | A01468 | A01614 | 489 |
| A01468 | A01621 | 218 | A01468 | A01647 | 278 |
| A01468 | A01649 | 491 | A01468 | A01652 | 312 |
| A01468 | A01684 | 485 | A01468 | A01707 | 467 |
| A01468 | A01718 | 272 | A01468 | A01720 | 458 |
| A01468 | A01741 | 491 | A01468 | A01787 | 430 |
| A01468 | A01797 | 210 | A01468 | A01917 | 326 |
| A01468 | A02003 | 491 | A01468 | A02227 | 182 |
| A01468 | A02265 | 286 | A01468 | A02308 | 262 |
| A01468 | A02350 | 490 | A01468 | A02541 | 358 |
| A01468 | A02702 | 170 | A01468 | A02837 | 288 |
| A01468 | A02859 | 226 | A01468 | A02895 | 260 |
| A01468 | A02978 | 350 | A01468 | A03112 | 481 |
| A01468 | A03143 | 484 | A01468 | A03224 | 205 |
| A01468 | A03259 | 369 | A01468 | A03304 | 475 |
| A01468 | A03398 | 176 | A01468 | A03437 | 168 |
| A01468 | A03438 | 477 | A01468 | A03461 | 490 |
| A01468 | A03490 | 317 | A01468 | A03493 | 357 |
| A01468 | A03494 | 198 | A01468 | A03567 | 491 |
| A01468 | A03570 | 154 | A01468 | A03601 | 486 |
| A01468 | A03671 | 362 | A01468 | A03678 | 229 |
| A01468 | A03705 | 393 | A01468 | A03734 | 486 |
| A01468 | A03740 | 279 | A01468 | A03859 | 457 |
| A01468 | A03963 | 308 | A01468 | A03981 | 628 |
| A01468 | A04116 | 213 | A01468 | A04230 | 413 |
| A01468 | A04372 | 229 | A01468 | A04622 | 490 |
| A01468 | A04648 | 436 | A01468 | A04697 | 367 |
| A01468 | A04759 | 152 | A01468 | A04846 | 371 |
| A01468 | A05301 | 143 | A01468 | A05375 | 427 |
| A01468 | A05411 | 274 | A01468 | A05423 | 180 |
| A01468 | A05443 | 340 | A01468 | A05501 | 491 |
| A01468 | A05654 | 439 | A01468 | A05673 | 152 |
| A01468 | A06239 | 218 | A01468 | A06275 | 395 |
| A01468 | A06279 | 480 | A01468 | A06340 | 488 |
| A01468 | A06351 | 337 | A01468 | A06534 | 286 |
| A01468 | A06661 | 171 | A01468 | A06814 | 467 |
| A01468 | A06861 | 385 | A01468 | A06897 | 425 |
| A01468 | A06901 | 160 | A01468 | A06965 | 485 |
| A01468 | A06973 | 486 | A01468 | A07047 | 352 |
| A01468 | A07307 | 286 | A01468 | A07323 | 491 |
| A01468 | A07347 | 184 | A01468 | A07398 | 479 |
| A01468 | A07399 | 334 | A01468 | A07412 | 176 |

|        |        |     |        |        |     |
|--------|--------|-----|--------|--------|-----|
| A01468 | A07449 | 446 | A01468 | A07451 | 489 |
| A01468 | A07498 | 218 | A01468 | A07536 | 251 |
| A01468 | A07549 | 218 | A01468 | A07581 | 290 |
| A01468 | A07583 | 369 | A01468 | A07700 | 283 |
| A01468 | A07726 | 480 | A01468 | A07781 | 180 |
| A01468 | A07851 | 302 | A01468 | A07924 | 177 |
| A01468 | A08011 | 265 | A01468 | A08022 | 243 |
| A01468 | A08055 | 388 | A01468 | A08072 | 218 |
| A01468 | A08131 | 463 | A01468 | A08233 | 218 |
| A01468 | A08301 | 174 | A01468 | A08350 | 180 |
| A01468 | A08357 | 491 | A01468 | A08359 | 491 |
| A01468 | A08377 | 317 | A01468 | A08408 | 486 |
| A01468 | A08433 | 218 | A01468 | A08476 | 401 |
| A01468 | A08516 | 391 | A01468 | A08533 | 273 |
| A01468 | A08550 | 317 | A01468 | A08571 | 436 |
| A01468 | A08652 | 174 | A01468 | A08761 | 171 |
| A01468 | A08769 | 441 | A01468 | A08973 | 317 |
| A01468 | A09128 | 221 | A01468 | A09308 | 408 |
| A01468 | A09596 | 229 | A01468 | A09618 | 218 |
| A01468 | A09676 | 436 | A01468 | A09697 | 433 |
| A01468 | A09862 | 254 | A01468 | A09868 | 338 |
| A01468 | A10532 | 463 | A01468 | A10616 | 391 |
| A01468 | A10624 | 407 | A01468 | A10625 | 454 |
| A01468 | A10633 | 152 | A01468 | A11175 | 218 |
| A01468 | A11176 | 218 | A01468 | A11236 | 450 |
| A01468 | A11263 | 171 | A01468 | A11277 | 332 |
| A01468 | A11356 | 218 | A01468 | A11420 | 241 |
| A01468 | A11443 | 401 | A01468 | A11535 | 465 |
| A01468 | A11550 | 480 | A01468 | A11618 | 218 |
| A01468 | A12053 | 160 | A01468 | A12293 | 218 |
| A01468 | A12305 | 180 | A01468 | A12310 | 180 |
| A01468 | A12556 | 394 | A01468 | A12819 | 218 |
| A01468 | A12821 | 174 | A01468 | A12925 | 213 |
| A01468 | A13027 | 160 | A01468 | A13066 | 260 |
| A01468 | A13126 | 474 | A01468 | A13207 | 489 |
| A01468 | A13276 | 180 | A01468 | A13340 | 463 |
| A01468 | A13454 | 160 | A01468 | A13494 | 260 |
| A01468 | A13752 | 179 | A01468 | A13875 | 163 |
| A01468 | A13989 | 491 | A01468 | A13992 | 469 |
| A01468 | A14006 | 491 | A01468 | A14029 | 486 |
| A01468 | A14073 | 328 | A01468 | A14172 | 369 |
| A01468 | A14176 | 306 | A01468 | A14202 | 491 |
| A01468 | A14216 | 600 | A01468 | A14505 | 152 |
| A01468 | A14594 | 273 | A01468 | A14596 | 368 |
| A01468 | A14597 | 480 | A01468 | A14869 | 249 |
| A01468 | A14937 | 172 | A01468 | A14959 | 218 |



|        |        |     |        |        |     |
|--------|--------|-----|--------|--------|-----|
| A01468 | A14978 | 218 | A01468 | A15115 | 218 |
| A01468 | A15147 | 160 | A01468 | A15174 | 291 |
| A01468 | A15204 | 160 | A01468 | A15210 | 160 |
| A01468 | A15215 | 213 | A01468 | A15365 | 491 |
| A01468 | A15470 | 162 | A01468 | A15475 | 171 |
| A01468 | A15500 | 443 | A01468 | A15538 | 439 |
| A01468 | A15660 | 491 | A01468 | A15672 | 171 |
| A01468 | A15684 | 491 | A01468 | A15711 | 154 |
| A01468 | A15988 | 273 | A01468 | A16053 | 160 |
| A01468 | A16060 | 240 | A01468 | A16064 | 184 |
| A01468 | A16118 | 319 | A01468 | A16272 | 408 |
| A01468 | A16410 | 160 | A01468 | A16762 | 305 |
| A01469 | A01536 | 491 | A01469 | A01559 | 491 |
| A01469 | A01589 | 491 | A01469 | A01594 | 491 |
| A01469 | A01602 | 241 | A01469 | A01616 | 491 |
| A01469 | A01625 | 491 | A01469 | A01659 | 491 |
| A01469 | A01686 | 491 | A01469 | A01723 | 286 |
| A01469 | A01910 | 347 | A01469 | A02058 | 462 |
| A01469 | A02075 | 340 | A01469 | A02887 | 473 |
| A01469 | A03057 | 489 | A01469 | A03207 | 193 |
| A01469 | A03301 | 480 | A01469 | A04012 | 162 |
| A01469 | A04033 | 385 | A01469 | A04073 | 475 |
| A01469 | A04668 | 491 | A01469 | A05193 | 254 |
| A01469 | A05334 | 432 | A01469 | A06000 | 375 |
| A01469 | A06029 | 491 | A01469 | A06161 | 152 |
| A01469 | A06242 | 491 | A01469 | A06297 | 344 |
| A01469 | A06851 | 316 | A01469 | A06864 | 491 |
| A01469 | A06982 | 481 | A01469 | A07079 | 491 |
| A01469 | A07224 | 296 | A01469 | A07319 | 491 |
| A01469 | A07346 | 486 | A01469 | A07466 | 307 |
| A01469 | A07480 | 441 | A01469 | A07534 | 434 |
| A01469 | A07603 | 461 | A01469 | A07647 | 491 |
| A01469 | A07902 | 473 | A01469 | A07989 | 430 |
| A01469 | A07996 | 489 | A01469 | A08000 | 486 |
| A01469 | A08030 | 491 | A01469 | A08117 | 491 |
| A01469 | A08141 | 420 | A01469 | A08208 | 480 |
| A01469 | A08820 | 491 | A01469 | A08902 | 491 |
| A01469 | A08919 | 335 | A01469 | A09272 | 168 |
| A01469 | A09654 | 196 | A01469 | A09663 | 256 |
| A01469 | A09706 | 251 | A01469 | A09764 | 456 |
| A01469 | A10625 | 490 | A01469 | A11782 | 357 |
| A01469 | A11916 | 489 | A01469 | A11983 | 168 |
| A01469 | A12577 | 278 | A01469 | A13429 | 430 |
| A01469 | A13949 | 419 | A01469 | A14076 | 481 |
| A01469 | A14079 | 491 | A01469 | A14155 | 201 |
| A01469 | A14177 | 469 | A01469 | A14273 | 491 |

|        |        |     |        |        |     |
|--------|--------|-----|--------|--------|-----|
| A01469 | A14460 | 288 | A01469 | A14694 | 428 |
| A01469 | A15369 | 491 | A01469 | A15371 | 68  |
| A01469 | A15645 | 115 | A01469 | A15714 | 154 |
| A01469 | A15837 | 328 | A01469 | A15939 | 144 |
| A01469 | A15941 | 70  | A01469 | A16127 | 491 |
| A01469 | A16128 | 488 | A01469 | A16129 | 467 |
| A01469 | A16134 | 118 | A01469 | A16225 | 340 |
| A01469 | A16226 | 491 | A01469 | A16378 | 226 |
| A01469 | A16549 | 254 | A01469 | A16613 | 470 |
| A01469 | A16616 | 193 | A01469 | A16626 | 472 |
| A01469 | A16646 | 132 | A01469 | A16754 | 462 |
| A01469 | A16830 | 319 | A01470 | A01487 | 484 |
| A01470 | A01488 | 491 | A01470 | A01492 | 491 |
| A01470 | A01495 | 491 | A01470 | A01496 | 424 |
| A01470 | A01506 | 489 | A01470 | A01538 | 473 |
| A01470 | A01539 | 435 | A01470 | A01558 | 489 |
| A01470 | A01569 | 491 | A01470 | A01577 | 466 |
| A01470 | A01579 | 491 | A01470 | A01588 | 215 |
| A01470 | A01597 | 491 | A01470 | A01598 | 491 |
| A01470 | A01601 | 479 | A01470 | A01612 | 491 |
| A01470 | A01614 | 491 | A01470 | A01615 | 360 |
| A01470 | A01640 | 451 | A01470 | A01649 | 491 |
| A01470 | A01684 | 490 | A01470 | A01707 | 347 |
| A01470 | A01721 | 260 | A01470 | A01781 | 246 |
| A01470 | A02003 | 346 | A01470 | A02064 | 358 |
| A01470 | A02265 | 463 | A01470 | A02855 | 319 |
| A01470 | A02978 | 475 | A01470 | A02980 | 160 |
| A01470 | A03069 | 307 | A01470 | A03296 | 486 |
| A01470 | A03298 | 353 | A01470 | A03304 | 375 |
| A01470 | A03438 | 481 | A01470 | A03446 | 256 |
| A01470 | A03453 | 302 | A01470 | A03494 | 480 |
| A01470 | A03567 | 491 | A01470 | A03569 | 490 |
| A01470 | A03705 | 328 | A01470 | A03734 | 361 |
| A01470 | A03740 | 489 | A01470 | A03859 | 491 |
| A01470 | A04846 | 479 | A01470 | A05025 | 340 |
| A01470 | A05230 | 473 | A01470 | A05501 | 491 |
| A01470 | A05654 | 249 | A01470 | A05845 | 154 |
| A01470 | A06197 | 184 | A01470 | A06275 | 488 |
| A01470 | A06279 | 433 | A01470 | A06340 | 460 |
| A01470 | A06543 | 396 | A01470 | A06584 | 254 |
| A01470 | A06825 | 291 | A01470 | A06843 | 314 |
| A01470 | A06861 | 457 | A01470 | A06965 | 491 |
| A01470 | A07323 | 486 | A01470 | A07347 | 491 |
| A01470 | A07348 | 488 | A01470 | A07378 | 446 |
| A01470 | A07398 | 172 | A01470 | A07451 | 467 |
| A01470 | A07481 | 208 | A01470 | A07487 | 484 |

|        |        |     |        |        |     |
|--------|--------|-----|--------|--------|-----|
| A01470 | A07524 | 489 | A01470 | A07581 | 330 |
| A01470 | A07583 | 363 | A01470 | A07604 | 362 |
| A01470 | A07625 | 291 | A01470 | A07677 | 154 |
| A01470 | A07700 | 489 | A01470 | A07706 | 490 |
| A01470 | A07773 | 228 | A01470 | A07924 | 443 |
| A01470 | A08022 | 489 | A01470 | A08053 | 151 |
| A01470 | A08118 | 402 | A01470 | A08137 | 489 |
| A01470 | A08357 | 491 | A01470 | A08359 | 460 |
| A01470 | A08462 | 232 | A01470 | A08565 | 180 |
| A01470 | A08571 | 491 | A01470 | A08756 | 369 |
| A01470 | A08952 | 177 | A01470 | A09292 | 286 |
| A01470 | A09322 | 395 | A01470 | A09327 | 423 |
| A01470 | A09337 | 157 | A01470 | A09352 | 159 |
| A01470 | A09705 | 416 | A01470 | A09707 | 480 |
| A01470 | A10165 | 395 | A01470 | A10362 | 269 |
| A01470 | A10532 | 491 | A01470 | A10615 | 154 |
| A01470 | A10616 | 491 | A01470 | A10624 | 488 |
| A01470 | A10625 | 456 | A01470 | A11316 | 283 |
| A01470 | A11409 | 361 | A01470 | A11462 | 485 |
| A01470 | A11496 | 171 | A01470 | A11518 | 152 |
| A01470 | A11535 | 263 | A01470 | A11562 | 486 |
| A01470 | A11612 | 224 | A01470 | A12138 | 452 |
| A01470 | A12937 | 152 | A01470 | A13066 | 152 |
| A01470 | A13097 | 165 | A01470 | A13126 | 490 |
| A01470 | A13874 | 165 | A01470 | A13875 | 490 |
| A01470 | A13989 | 542 | A01470 | A14006 | 491 |
| A01470 | A14073 | 353 | A01470 | A14151 | 246 |
| A01470 | A14169 | 475 | A01470 | A14172 | 199 |
| A01470 | A14216 | 491 | A01470 | A14596 | 491 |
| A01470 | A14597 | 491 | A01470 | A14699 | 243 |
| A01470 | A15204 | 313 | A01470 | A15205 | 383 |
| A01470 | A15206 | 383 | A01470 | A15207 | 383 |
| A01470 | A15208 | 334 | A01470 | A15209 | 238 |
| A01470 | A15210 | 313 | A01470 | A15297 | 489 |
| A01470 | A15338 | 491 | A01470 | A15500 | 477 |
| A01470 | A15559 | 438 | A01470 | A15660 | 491 |
| A01470 | A15684 | 491 | A01470 | A15708 | 191 |
| A01470 | A15764 | 156 | A01470 | A15890 | 238 |
| A01470 | A16053 | 180 | A01470 | A16118 | 485 |
| A01470 | A16218 | 245 | A01470 | A16233 | 251 |
| A01470 | A16235 | 246 | A01470 | A16302 | 413 |
| A01470 | A16320 | 167 | A01470 | A16686 | 219 |
| A01470 | A16768 | 191 | A01471 | A01474 | 193 |
| A01471 | A01558 | 201 | A01471 | A01685 | 172 |
| A01471 | A02003 | 246 | A01471 | A03161 | 383 |
| A01471 | A03438 | 157 | A01471 | A03467 | 367 |

|        |        |     |        |        |     |
|--------|--------|-----|--------|--------|-----|
| A01471 | A03494 | 416 | A01471 | A03601 | 152 |
| A01471 | A04861 | 188 | A01471 | A05301 | 278 |
| A01471 | A08554 | 266 | A01471 | A08571 | 491 |
| A01471 | A08885 | 485 | A01471 | A10853 | 173 |
| A01471 | A13019 | 335 | A01471 | A13978 | 210 |
| A01472 | A01524 | 899 | A01472 | A02463 | 291 |
| A01472 | A03112 | 319 | A01472 | A03512 | 177 |
| A01472 | A03528 | 488 | A01472 | A03889 | 152 |
| A01472 | A04681 | 199 | A01472 | A06181 | 368 |
| A01472 | A07422 | 943 | A01472 | A07762 | 183 |
| A01472 | A09182 | 208 | A01472 | A09945 | 405 |
| A01472 | A10824 | 318 | A01472 | A12671 | 405 |
| A01472 | A14484 | 945 | A01472 | A14633 | 491 |
| A01472 | A15770 | 228 | A01473 | A01474 | 481 |
| A01473 | A01503 | 210 | A01473 | A01524 | 489 |
| A01473 | A01527 | 945 | A01473 | A01553 | 187 |
| A01473 | A01558 | 899 | A01473 | A01559 | 268 |
| A01473 | A01560 | 319 | A01473 | A01572 | 582 |
| A01473 | A01588 | 899 | A01473 | A01589 | 362 |
| A01473 | A01594 | 243 | A01473 | A01610 | 457 |
| A01473 | A01686 | 385 | A01473 | A01692 | 329 |
| A01473 | A01704 | 63  | A01473 | A01799 | 63  |
| A01473 | A01870 | 207 | A01473 | A02076 | 945 |
| A01473 | A02157 | 157 | A01473 | A02163 | 934 |
| A01473 | A02183 | 200 | A01473 | A02268 | 279 |
| A01473 | A02454 | 375 | A01473 | A02518 | 474 |
| A01473 | A02563 | 176 | A01473 | A02717 | 63  |
| A01473 | A02731 | 63  | A01473 | A02751 | 199 |
| A01473 | A02801 | 260 | A01473 | A02864 | 63  |
| A01473 | A02870 | 269 | A01473 | A02896 | 63  |
| A01473 | A02916 | 63  | A01473 | A02944 | 63  |
| A01473 | A02961 | 63  | A01473 | A02972 | 63  |
| A01473 | A02976 | 63  | A01473 | A02993 | 393 |
| A01473 | A03001 | 389 | A01473 | A03131 | 218 |
| A01473 | A03271 | 91  | A01473 | A03555 | 165 |
| A01473 | A03686 | 393 | A01473 | A03728 | 393 |
| A01473 | A03809 | 238 | A01473 | A03839 | 184 |
| A01473 | A04161 | 488 | A01473 | A04300 | 260 |
| A01473 | A04589 | 199 | A01473 | A04666 | 199 |
| A01473 | A04949 | 486 | A01473 | A05213 | 176 |
| A01473 | A05871 | 174 | A01473 | A06242 | 217 |
| A01473 | A06936 | 204 | A01473 | A07004 | 491 |
| A01473 | A07051 | 462 | A01473 | A07180 | 254 |
| A01473 | A07421 | 417 | A01473 | A08137 | 199 |
| A01473 | A08300 | 490 | A01473 | A08926 | 486 |
| A01473 | A09633 | 438 | A01473 | A09675 | 226 |

|        |        |     |        |        |     |
|--------|--------|-----|--------|--------|-----|
| A01473 | A09710 | 176 | A01473 | A10387 | 151 |
| A01473 | A10514 | 246 | A01473 | A10587 | 185 |
| A01473 | A10721 | 481 | A01473 | A10818 | 176 |
| A01473 | A10904 | 434 | A01473 | A11079 | 199 |
| A01473 | A11487 | 475 | A01473 | A11983 | 217 |
| A01473 | A12094 | 299 | A01473 | A12383 | 348 |
| A01473 | A12560 | 226 | A01473 | A12726 | 385 |
| A01473 | A12835 | 669 | A01473 | A12927 | 486 |
| A01473 | A12992 | 900 | A01473 | A13385 | 252 |
| A01473 | A13455 | 176 | A01473 | A13511 | 283 |
| A01473 | A13587 | 571 | A01473 | A13827 | 338 |
| A01473 | A13889 | 589 | A01473 | A13979 | 369 |
| A01473 | A13980 | 345 | A01473 | A13982 | 180 |
| A01473 | A13986 | 491 | A01473 | A14006 | 279 |
| A01473 | A14007 | 491 | A01473 | A14011 | 423 |
| A01473 | A14072 | 340 | A01473 | A14198 | 210 |
| A01473 | A14300 | 491 | A01473 | A14408 | 213 |
| A01473 | A14438 | 193 | A01473 | A14443 | 899 |
| A01473 | A14452 | 491 | A01473 | A14481 | 199 |
| A01473 | A14635 | 171 | A01473 | A14758 | 199 |
| A01473 | A14773 | 176 | A01473 | A14830 | 152 |
| A01473 | A14900 | 260 | A01473 | A14930 | 411 |
| A01473 | A15323 | 324 | A01473 | A15356 | 479 |
| A01473 | A15420 | 477 | A01473 | A15726 | 491 |
| A01473 | A15848 | 204 | A01473 | A15912 | 366 |
| A01473 | A15941 | 491 | A01473 | A15980 | 204 |
| A01473 | A16073 | 391 | A01473 | A16260 | 157 |
| A01473 | A16852 | 176 | A01473 | A16994 | 486 |
| A01474 | A01492 | 484 | A01474 | A01527 | 386 |
| A01474 | A01576 | 491 | A01474 | A01598 | 257 |
| A01474 | A01610 | 479 | A01474 | A01612 | 281 |
| A01474 | A01628 | 311 | A01474 | A01667 | 270 |
| A01474 | A01701 | 380 | A01474 | A01715 | 271 |
| A01474 | A01790 | 208 | A01474 | A02303 | 195 |
| A01474 | A02344 | 182 | A01474 | A03079 | 174 |
| A01474 | A03525 | 420 | A01474 | A03716 | 154 |
| A01474 | A03739 | 480 | A01474 | A04033 | 484 |
| A01474 | A04314 | 159 | A01474 | A04638 | 180 |
| A01474 | A04992 | 162 | A01474 | A05168 | 182 |
| A01474 | A05313 | 400 | A01474 | A06701 | 176 |
| A01474 | A07004 | 491 | A01474 | A08975 | 159 |
| A01474 | A09057 | 171 | A01474 | A10514 | 326 |
| A01474 | A10586 | 307 | A01474 | A11487 | 335 |
| A01474 | A11983 | 491 | A01474 | A12233 | 290 |
| A01474 | A13814 | 193 | A01474 | A13831 | 232 |
| A01474 | A13929 | 491 | A01474 | A13989 | 409 |

|        |        |     |        |        |     |
|--------|--------|-----|--------|--------|-----|
| A01474 | A14055 | 401 | A01474 | A14471 | 230 |
| A01474 | A14485 | 343 | A01474 | A14635 | 486 |
| A01474 | A15360 | 216 | A01474 | A15448 | 193 |
| A01474 | A16323 | 201 | A01474 | A16994 | 218 |
| A01474 | A17175 | 357 | A01475 | A01476 | 460 |
| A01475 | A01490 | 257 | A01475 | A01493 | 286 |
| A01475 | A01524 | 473 | A01475 | A01527 | 176 |
| A01475 | A01722 | 369 | A01475 | A01905 | 366 |
| A01475 | A02104 | 290 | A01475 | A02141 | 268 |
| A01475 | A02215 | 369 | A01475 | A02301 | 196 |
| A01475 | A02425 | 254 | A01475 | A02624 | 232 |
| A01475 | A02812 | 185 | A01475 | A02945 | 156 |
| A01475 | A02972 | 208 | A01475 | A03054 | 486 |
| A01475 | A03591 | 274 | A01475 | A03813 | 162 |
| A01475 | A03977 | 260 | A01475 | A04163 | 202 |
| A01475 | A04218 | 263 | A01475 | A04471 | 281 |
| A01475 | A04639 | 215 | A01475 | A04683 | 316 |
| A01475 | A04952 | 340 | A01475 | A05124 | 182 |
| A01475 | A05533 | 435 | A01475 | A06615 | 369 |
| A01475 | A06762 | 219 | A01475 | A07174 | 252 |
| A01475 | A08718 | 229 | A01475 | A09031 | 455 |
| A01475 | A09038 | 480 | A01475 | A09219 | 277 |
| A01475 | A09235 | 165 | A01475 | A09672 | 168 |
| A01475 | A10419 | 307 | A01475 | A10801 | 208 |
| A01475 | A10894 | 160 | A01475 | A11369 | 447 |
| A01475 | A11628 | 251 | A01475 | A11834 | 171 |
| A01475 | A11932 | 185 | A01475 | A13879 | 168 |
| A01475 | A14299 | 384 | A01475 | A14416 | 272 |
| A01475 | A14443 | 452 | A01475 | A14444 | 481 |
| A01475 | A14539 | 373 | A01475 | A14543 | 228 |
| A01476 | A01490 | 343 | A01476 | A01722 | 458 |
| A01476 | A01859 | 297 | A01476 | A02104 | 364 |
| A01476 | A02141 | 430 | A01476 | A02215 | 224 |
| A01476 | A02257 | 278 | A01476 | A02301 | 299 |
| A01476 | A02306 | 201 | A01476 | A02425 | 238 |
| A01476 | A02465 | 274 | A01476 | A02785 | 185 |
| A01476 | A03054 | 486 | A01476 | A03087 | 283 |
| A01476 | A03099 | 334 | A01476 | A03303 | 401 |
| A01476 | A03498 | 332 | A01476 | A04218 | 347 |
| A01476 | A04471 | 435 | A01476 | A04909 | 335 |
| A01476 | A04914 | 302 | A01476 | A05533 | 465 |
| A01476 | A05575 | 369 | A01476 | A06607 | 285 |
| A01476 | A06979 | 322 | A01476 | A09031 | 449 |
| A01476 | A14443 | 174 | A01477 | A01527 | 899 |
| A01477 | A02126 | 899 | A01477 | A02186 | 344 |
| A01477 | A02425 | 299 | A01477 | A03271 | 246 |

|        |        |     |        |        |     |
|--------|--------|-----|--------|--------|-----|
| A01477 | A03639 | 899 | A01477 | A04914 | 351 |
| A01478 | A01479 | 651 | A01478 | A01486 | 490 |
| A01478 | A01527 | 327 | A01478 | A01532 | 238 |
| A01478 | A01533 | 385 | A01478 | A01537 | 491 |
| A01478 | A01551 | 262 | A01478 | A01553 | 199 |
| A01478 | A01557 | 348 | A01478 | A01558 | 899 |
| A01478 | A01561 | 255 | A01478 | A01568 | 475 |
| A01478 | A01572 | 448 | A01478 | A01578 | 385 |
| A01478 | A01580 | 564 | A01478 | A01588 | 989 |
| A01478 | A01591 | 982 | A01478 | A01592 | 938 |
| A01478 | A01593 | 63  | A01478 | A01595 | 554 |
| A01478 | A01596 | 649 | A01478 | A01612 | 347 |
| A01478 | A01615 | 362 | A01478 | A01628 | 489 |
| A01478 | A01630 | 462 | A01478 | A01631 | 177 |
| A01478 | A01632 | 458 | A01478 | A01636 | 931 |
| A01478 | A01638 | 285 | A01478 | A01647 | 484 |
| A01478 | A01650 | 974 | A01478 | A01651 | 414 |
| A01478 | A01660 | 531 | A01478 | A01661 | 394 |
| A01478 | A01668 | 485 | A01478 | A01681 | 323 |
| A01478 | A01685 | 483 | A01478 | A01687 | 565 |
| A01478 | A01689 | 491 | A01478 | A01705 | 230 |
| A01478 | A01717 | 422 | A01478 | A01751 | 491 |
| A01478 | A01796 | 483 | A01478 | A01844 | 899 |
| A01478 | A01914 | 329 | A01478 | A02054 | 235 |
| A01478 | A02228 | 173 | A01478 | A02573 | 157 |
| A01478 | A03297 | 154 | A01478 | A03298 | 293 |
| A01478 | A03407 | 319 | A01478 | A03422 | 486 |
| A01478 | A03434 | 288 | A01478 | A03492 | 719 |
| A01478 | A03496 | 416 | A01478 | A03528 | 190 |
| A01478 | A03566 | 152 | A01478 | A03569 | 485 |
| A01478 | A03575 | 996 | A01478 | A03637 | 188 |
| A01478 | A03813 | 308 | A01478 | A03892 | 396 |
| A01478 | A04079 | 238 | A01478 | A04668 | 185 |
| A01478 | A04715 | 480 | A01478 | A04790 | 368 |
| A01478 | A04971 | 312 | A01478 | A05008 | 980 |
| A01478 | A05009 | 983 | A01478 | A05015 | 955 |
| A01478 | A05284 | 196 | A01478 | A05383 | 188 |
| A01478 | A05428 | 942 | A01478 | A05438 | 179 |
| A01478 | A05443 | 332 | A01478 | A05621 | 427 |
| A01478 | A05625 | 501 | A01478 | A05853 | 445 |
| A01478 | A05880 | 491 | A01478 | A05892 | 422 |
| A01478 | A05894 | 469 | A01478 | A05895 | 279 |
| A01478 | A06143 | 269 | A01478 | A06176 | 157 |
| A01478 | A06348 | 472 | A01478 | A06379 | 436 |
| A01478 | A06428 | 564 | A01478 | A06572 | 490 |
| A01478 | A06602 | 249 | A01478 | A06607 | 491 |

|        |        |     |        |        |     |
|--------|--------|-----|--------|--------|-----|
| A01478 | A06688 | 291 | A01478 | A06715 | 469 |
| A01478 | A06830 | 276 | A01478 | A06907 | 467 |
| A01478 | A07054 | 451 | A01478 | A07177 | 491 |
| A01478 | A07204 | 170 | A01478 | A07242 | 486 |
| A01478 | A07313 | 486 | A01478 | A07433 | 795 |
| A01478 | A07762 | 328 | A01478 | A07944 | 154 |
| A01478 | A07967 | 154 | A01478 | A08184 | 409 |
| A01478 | A08185 | 486 | A01478 | A08196 | 480 |
| A01478 | A08293 | 228 | A01478 | A08549 | 490 |
| A01478 | A08552 | 358 | A01478 | A08561 | 463 |
| A01478 | A08571 | 986 | A01478 | A08746 | 307 |
| A01478 | A08800 | 185 | A01478 | A08812 | 406 |
| A01478 | A08839 | 977 | A01478 | A08853 | 491 |
| A01478 | A08854 | 454 | A01478 | A08855 | 63  |
| A01478 | A08858 | 963 | A01478 | A08885 | 736 |
| A01478 | A08894 | 490 | A01478 | A09052 | 491 |
| A01478 | A09256 | 468 | A01478 | A09370 | 433 |
| A01478 | A09443 | 409 | A01478 | A09747 | 338 |
| A01478 | A09828 | 84  | A01478 | A10175 | 488 |
| A01478 | A10250 | 193 | A01478 | A10460 | 338 |
| A01478 | A10580 | 483 | A01478 | A10604 | 362 |
| A01478 | A10619 | 490 | A01478 | A10998 | 218 |
| A01478 | A11033 | 177 | A01478 | A11046 | 185 |
| A01478 | A11074 | 185 | A01478 | A11099 | 398 |
| A01478 | A11104 | 470 | A01478 | A11138 | 84  |
| A01478 | A11283 | 488 | A01478 | A11487 | 432 |
| A01478 | A11656 | 299 | A01478 | A11777 | 160 |
| A01478 | A11967 | 185 | A01478 | A12044 | 185 |
| A01478 | A12047 | 539 | A01478 | A12178 | 185 |
| A01478 | A12275 | 168 | A01478 | A12365 | 235 |
| A01478 | A12533 | 307 | A01478 | A12552 | 102 |
| A01478 | A12582 | 185 | A01478 | A12941 | 185 |
| A01478 | A13399 | 183 | A01478 | A13511 | 270 |
| A01478 | A13819 | 305 | A01478 | A13866 | 154 |
| A01478 | A13924 | 450 | A01478 | A13982 | 165 |
| A01478 | A14009 | 311 | A01478 | A14037 | 422 |
| A01478 | A14084 | 490 | A01478 | A14128 | 213 |
| A01478 | A14156 | 472 | A01478 | A14163 | 180 |
| A01478 | A14190 | 332 | A01478 | A14193 | 452 |
| A01478 | A14202 | 196 | A01478 | A14203 | 168 |
| A01478 | A14227 | 491 | A01478 | A14258 | 165 |
| A01478 | A14261 | 127 | A01478 | A14279 | 491 |
| A01478 | A14281 | 358 | A01478 | A14285 | 489 |
| A01478 | A14291 | 234 | A01478 | A14299 | 199 |
| A01478 | A14302 | 185 | A01478 | A14306 | 102 |
| A01478 | A14309 | 302 | A01478 | A14310 | 391 |



|        |        |     |        |        |     |
|--------|--------|-----|--------|--------|-----|
| A01478 | A14410 | 332 | A01478 | A14443 | 208 |
| A01478 | A14633 | 618 | A01478 | A14648 | 329 |
| A01478 | A14661 | 424 | A01478 | A14714 | 63  |
| A01478 | A14886 | 481 | A01478 | A15292 | 174 |
| A01478 | A15297 | 486 | A01478 | A15315 | 301 |
| A01478 | A15338 | 270 | A01478 | A15366 | 494 |
| A01478 | A15533 | 458 | A01478 | A15726 | 654 |
| A01478 | A16077 | 321 | A01478 | A16281 | 488 |
| A01478 | A16364 | 270 | A01478 | A16503 | 257 |
| A01478 | A16517 | 160 | A01479 | A01486 | 374 |
| A01479 | A01533 | 191 | A01479 | A01537 | 491 |
| A01479 | A01557 | 238 | A01479 | A01568 | 258 |
| A01479 | A01580 | 491 | A01479 | A01591 | 491 |
| A01479 | A01592 | 191 | A01479 | A01593 | 63  |
| A01479 | A01595 | 491 | A01479 | A01596 | 491 |
| A01479 | A01630 | 469 | A01479 | A01638 | 118 |
| A01479 | A01650 | 425 | A01479 | A01660 | 470 |
| A01479 | A01685 | 353 | A01479 | A01687 | 491 |
| A01479 | A01689 | 490 | A01479 | A01703 | 162 |
| A01479 | A01717 | 198 | A01479 | A02042 | 245 |
| A01479 | A03201 | 196 | A01479 | A03422 | 353 |
| A01479 | A03492 | 491 | A01479 | A03496 | 475 |
| A01479 | A03528 | 174 | A01479 | A03575 | 691 |
| A01479 | A03847 | 245 | A01479 | A03848 | 171 |
| A01479 | A03870 | 216 | A01479 | A03929 | 452 |
| A01479 | A04123 | 216 | A01479 | A05008 | 490 |
| A01479 | A05009 | 491 | A01479 | A05015 | 460 |
| A01479 | A05383 | 218 | A01479 | A05422 | 208 |
| A01479 | A05625 | 358 | A01479 | A05880 | 245 |
| A01479 | A05892 | 68  | A01479 | A05894 | 490 |
| A01479 | A06176 | 363 | A01479 | A06348 | 327 |
| A01479 | A06385 | 193 | A01479 | A06572 | 401 |
| A01479 | A06606 | 330 | A01479 | A07242 | 489 |
| A01479 | A07313 | 179 | A01479 | A07433 | 458 |
| A01479 | A07495 | 335 | A01479 | A07762 | 479 |
| A01479 | A07869 | 240 | A01479 | A07893 | 191 |
| A01479 | A08296 | 159 | A01479 | A08360 | 213 |
| A01479 | A08536 | 369 | A01479 | A08551 | 477 |
| A01479 | A08552 | 419 | A01479 | A08569 | 446 |
| A01479 | A08839 | 481 | A01479 | A08853 | 441 |
| A01479 | A08858 | 719 | A01479 | A08885 | 413 |
| A01479 | A08894 | 390 | A01479 | A09052 | 124 |
| A01479 | A09195 | 374 | A01479 | A09370 | 291 |
| A01479 | A09443 | 162 | A01479 | A10580 | 488 |
| A01479 | A10604 | 79  | A01479 | A10619 | 414 |
| A01479 | A10645 | 219 | A01479 | A11104 | 483 |

|        |        |     |        |        |     |
|--------|--------|-----|--------|--------|-----|
| A01479 | A11283 | 491 | A01479 | A11656 | 159 |
| A01479 | A11661 | 259 | A01479 | A11840 | 156 |
| A01479 | A11995 | 208 | A01479 | A12047 | 491 |
| A01479 | A12225 | 216 | A01479 | A12513 | 433 |
| A01479 | A12533 | 297 | A01479 | A13315 | 235 |
| A01479 | A13804 | 156 | A01479 | A13908 | 245 |
| A01479 | A13924 | 301 | A01479 | A14009 | 452 |
| A01479 | A14156 | 391 | A01479 | A14227 | 451 |
| A01479 | A14279 | 491 | A01479 | A14281 | 215 |
| A01479 | A14291 | 245 | A01479 | A14310 | 481 |
| A01479 | A14484 | 335 | A01479 | A14509 | 312 |
| A01479 | A14633 | 369 | A01479 | A14878 | 201 |
| A01479 | A15533 | 353 | A01479 | A15726 | 401 |
| A01479 | A15994 | 279 | A01479 | A16064 | 174 |
| A01479 | A16131 | 156 | A01479 | A16387 | 156 |
| A01479 | A16402 | 201 | A01479 | A16517 | 191 |
| A01479 | A16587 | 236 | A01479 | A16684 | 279 |
| A01479 | A16704 | 213 | A01480 | A02292 | 260 |
| A01480 | A03412 | 324 | A01481 | A01483 | 314 |
| A01481 | A01543 | 367 | A01481 | A01606 | 201 |
| A01481 | A01632 | 306 | A01481 | A01635 | 467 |
| A01481 | A01642 | 180 | A01481 | A01695 | 221 |
| A01481 | A01705 | 152 | A01481 | A01746 | 268 |
| A01481 | A01758 | 254 | A01481 | A01763 | 388 |
| A01481 | A01855 | 294 | A01481 | A01983 | 334 |
| A01481 | A01995 | 274 | A01481 | A02009 | 221 |
| A01481 | A02053 | 157 | A01481 | A02075 | 246 |
| A01481 | A02147 | 172 | A01481 | A02154 | 267 |
| A01481 | A02186 | 193 | A01481 | A02283 | 317 |
| A01481 | A02319 | 246 | A01481 | A02336 | 154 |
| A01481 | A02412 | 226 | A01481 | A02468 | 188 |
| A01481 | A02545 | 159 | A01481 | A02546 | 195 |
| A01481 | A02620 | 180 | A01481 | A02669 | 154 |
| A01481 | A02702 | 179 | A01481 | A02719 | 205 |
| A01481 | A02803 | 195 | A01481 | A02905 | 260 |
| A01481 | A02924 | 379 | A01481 | A02940 | 271 |
| A01481 | A02992 | 316 | A01481 | A03003 | 490 |
| A01481 | A03064 | 236 | A01481 | A03065 | 340 |
| A01481 | A03075 | 432 | A01481 | A03095 | 372 |
| A01481 | A03104 | 251 | A01481 | A03172 | 157 |
| A01481 | A03323 | 236 | A01481 | A03324 | 344 |
| A01481 | A03373 | 162 | A01481 | A03398 | 286 |
| A01481 | A03413 | 462 | A01481 | A03417 | 274 |
| A01481 | A03440 | 162 | A01481 | A03477 | 272 |
| A01481 | A03487 | 279 | A01481 | A03500 | 210 |
| A01481 | A03527 | 180 | A01481 | A03545 | 323 |

|        |        |     |        |        |     |
|--------|--------|-----|--------|--------|-----|
| A01481 | A04072 | 263 | A01481 | A04211 | 489 |
| A01481 | A04307 | 160 | A01481 | A04337 | 452 |
| A01481 | A04369 | 162 | A01481 | A04372 | 221 |
| A01481 | A04449 | 274 | A01481 | A04500 | 290 |
| A01481 | A04532 | 337 | A01481 | A04620 | 168 |
| A01481 | A04736 | 210 | A01481 | A04824 | 172 |
| A01481 | A04961 | 162 | A01481 | A05020 | 319 |
| A01481 | A05259 | 152 | A01481 | A05284 | 196 |
| A01481 | A05302 | 168 | A01481 | A05310 | 362 |
| A01481 | A05356 | 156 | A01481 | A05472 | 358 |
| A01481 | A05600 | 152 | A01481 | A05771 | 221 |
| A01481 | A05774 | 168 | A01481 | A05891 | 247 |
| A01481 | A06015 | 191 | A01481 | A06029 | 196 |
| A01481 | A06086 | 193 | A01481 | A06195 | 291 |
| A01481 | A06211 | 180 | A01481 | A06252 | 152 |
| A01481 | A06277 | 443 | A01481 | A06302 | 318 |
| A01481 | A06358 | 351 | A01481 | A06558 | 257 |
| A01481 | A06592 | 443 | A01481 | A06699 | 177 |
| A01481 | A06756 | 196 | A01481 | A06773 | 156 |
| A01481 | A06956 | 305 | A01481 | A06979 | 343 |
| A01481 | A07039 | 257 | A01481 | A07122 | 461 |
| A01481 | A07209 | 405 | A01481 | A07221 | 163 |
| A01481 | A07234 | 257 | A01481 | A07256 | 184 |
| A01481 | A07322 | 286 | A01481 | A07376 | 154 |
| A01481 | A07413 | 446 | A01481 | A07459 | 229 |
| A01481 | A07471 | 255 | A01481 | A07479 | 380 |
| A01481 | A07553 | 307 | A01481 | A07659 | 293 |
| A01481 | A07660 | 390 | A01481 | A07688 | 296 |
| A01481 | A07713 | 229 | A01481 | A07753 | 446 |
| A01481 | A07800 | 491 | A01481 | A07990 | 210 |
| A01481 | A08158 | 290 | A01481 | A08238 | 152 |
| A01481 | A09161 | 318 | A01481 | A09188 | 271 |
| A01481 | A09245 | 288 | A01481 | A09332 | 204 |
| A01481 | A09632 | 445 | A01481 | A09879 | 302 |
| A01481 | A10020 | 271 | A01481 | A10151 | 188 |
| A01481 | A10156 | 283 | A01481 | A10237 | 215 |
| A01481 | A10441 | 425 | A01481 | A10443 | 380 |
| A01481 | A10456 | 484 | A01481 | A10547 | 353 |
| A01481 | A10670 | 271 | A01481 | A10681 | 276 |
| A01481 | A10703 | 438 | A01481 | A10712 | 353 |
| A01481 | A10714 | 457 | A01481 | A10778 | 380 |
| A01481 | A10866 | 172 | A01481 | A10924 | 215 |
| A01481 | A11122 | 210 | A01481 | A11309 | 489 |
| A01481 | A11313 | 255 | A01481 | A11325 | 210 |
| A01481 | A11381 | 358 | A01481 | A11411 | 152 |
| A01481 | A11414 | 362 | A01481 | A11421 | 217 |

|        |        |     |        |        |     |
|--------|--------|-----|--------|--------|-----|
| A01481 | A11433 | 321 | A01481 | A11513 | 162 |
| A01481 | A11553 | 383 | A01481 | A11556 | 163 |
| A01481 | A11590 | 307 | A01481 | A11983 | 347 |
| A01481 | A12420 | 229 | A01481 | A12421 | 200 |
| A01481 | A12674 | 229 | A01481 | A12692 | 236 |
| A01481 | A13314 | 167 | A01481 | A13326 | 184 |
| A01481 | A13361 | 172 | A01481 | A13369 | 270 |
| A01481 | A13433 | 271 | A01481 | A13544 | 318 |
| A01481 | A13841 | 290 | A01481 | A13906 | 168 |
| A01481 | A13932 | 152 | A01481 | A14125 | 400 |
| A01481 | A14313 | 356 | A01481 | A14381 | 477 |
| A01481 | A14589 | 369 | A01481 | A14685 | 229 |
| A01481 | A14862 | 184 | A01481 | A15282 | 491 |
| A01481 | A15344 | 216 | A01481 | A15497 | 436 |
| A01481 | A15637 | 216 | A01481 | A15874 | 433 |
| A01481 | A15905 | 159 | A01481 | A15907 | 318 |
| A01481 | A16002 | 238 | A01481 | A16028 | 267 |
| A01481 | A16262 | 201 | A01481 | A16354 | 257 |
| A01481 | A16368 | 350 | A01481 | A16419 | 450 |
| A01481 | A16511 | 174 | A01481 | A16528 | 215 |
| A01481 | A16529 | 488 | A01481 | A16767 | 427 |
| A01481 | A16959 | 187 | A01481 | A17020 | 177 |
| A01481 | A17078 | 470 | A01481 | A17155 | 154 |
| A01482 | A01635 | 205 | A01482 | A01829 | 363 |
| A01482 | A05516 | 430 | A01482 | A07122 | 366 |
| A01483 | A01485 | 154 | A01483 | A01508 | 391 |
| A01483 | A01528 | 313 | A01483 | A01554 | 168 |
| A01483 | A01572 | 199 | A01483 | A01582 | 240 |
| A01483 | A01643 | 162 | A01483 | A01647 | 364 |
| A01483 | A01660 | 205 | A01483 | A01676 | 278 |
| A01483 | A01718 | 205 | A01483 | A01741 | 449 |
| A01483 | A01910 | 180 | A01483 | A02026 | 152 |
| A01483 | A02037 | 156 | A01483 | A02049 | 277 |
| A01483 | A02061 | 432 | A01483 | A02178 | 394 |
| A01483 | A02180 | 469 | A01483 | A02215 | 329 |
| A01483 | A02216 | 217 | A01483 | A02227 | 279 |
| A01483 | A02292 | 491 | A01483 | A02294 | 200 |
| A01483 | A02304 | 486 | A01483 | A02620 | 152 |
| A01483 | A02774 | 185 | A01483 | A02836 | 329 |
| A01483 | A02877 | 319 | A01483 | A03070 | 308 |
| A01483 | A03095 | 491 | A01483 | A03237 | 455 |
| A01483 | A03259 | 191 | A01483 | A03328 | 561 |
| A01483 | A03396 | 200 | A01483 | A03404 | 218 |
| A01483 | A03405 | 319 | A01483 | A03406 | 486 |
| A01483 | A03407 | 447 | A01483 | A03408 | 408 |
| A01483 | A03411 | 347 | A01483 | A03412 | 491 |

|        |        |     |        |        |     |
|--------|--------|-----|--------|--------|-----|
| A01483 | A03420 | 327 | A01483 | A03422 | 267 |
| A01483 | A03435 | 424 | A01483 | A03468 | 219 |
| A01483 | A03501 | 375 | A01483 | A03595 | 171 |
| A01483 | A03598 | 156 | A01483 | A03651 | 520 |
| A01483 | A03725 | 324 | A01483 | A03728 | 249 |
| A01483 | A03775 | 265 | A01483 | A04307 | 452 |
| A01483 | A04429 | 416 | A01483 | A04430 | 319 |
| A01483 | A04506 | 229 | A01483 | A04736 | 180 |
| A01483 | A04737 | 454 | A01483 | A04769 | 423 |
| A01483 | A04931 | 168 | A01483 | A04963 | 265 |
| A01483 | A04977 | 491 | A01483 | A05141 | 165 |
| A01483 | A05262 | 346 | A01483 | A05316 | 265 |
| A01483 | A05332 | 406 | A01483 | A05336 | 296 |
| A01483 | A05353 | 353 | A01483 | A05388 | 176 |
| A01483 | A05433 | 229 | A01483 | A05624 | 245 |
| A01483 | A05873 | 245 | A01483 | A05901 | 193 |
| A01483 | A06111 | 466 | A01483 | A06203 | 340 |
| A01483 | A06217 | 162 | A01483 | A06274 | 382 |
| A01483 | A06284 | 200 | A01483 | A06654 | 377 |
| A01483 | A06689 | 491 | A01483 | A06802 | 265 |
| A01483 | A06819 | 491 | A01483 | A06970 | 491 |
| A01483 | A06981 | 344 | A01483 | A06990 | 450 |
| A01483 | A07222 | 475 | A01483 | A07241 | 265 |
| A01483 | A07277 | 368 | A01483 | A07333 | 188 |
| A01483 | A07413 | 208 | A01483 | A07571 | 223 |
| A01483 | A07736 | 167 | A01483 | A07880 | 184 |
| A01483 | A07931 | 489 | A01483 | A08133 | 199 |
| A01483 | A08289 | 335 | A01483 | A08524 | 534 |
| A01483 | A08814 | 234 | A01483 | A08917 | 457 |
| A01483 | A08936 | 332 | A01483 | A08939 | 200 |
| A01483 | A08984 | 168 | A01483 | A09010 | 445 |
| A01483 | A09077 | 176 | A01483 | A09153 | 208 |
| A01483 | A09160 | 168 | A01483 | A09187 | 245 |
| A01483 | A09389 | 265 | A01483 | A09431 | 162 |
| A01483 | A09541 | 193 | A01483 | A09667 | 176 |
| A01483 | A09809 | 213 | A01483 | A09817 | 229 |
| A01483 | A09911 | 137 | A01483 | A09915 | 296 |
| A01483 | A10053 | 296 | A01483 | A10081 | 171 |
| A01483 | A10084 | 208 | A01483 | A10437 | 162 |
| A01483 | A10452 | 268 | A01483 | A10530 | 357 |
| A01483 | A10656 | 174 | A01483 | A10676 | 167 |
| A01483 | A10694 | 353 | A01483 | A10992 | 296 |
| A01483 | A11055 | 245 | A01483 | A11606 | 176 |
| A01483 | A11673 | 377 | A01483 | A11943 | 322 |
| A01483 | A12035 | 405 | A01483 | A12313 | 398 |
| A01483 | A12554 | 162 | A01483 | A12955 | 265 |

|        |        |     |        |        |     |
|--------|--------|-----|--------|--------|-----|
| A01483 | A13120 | 265 | A01483 | A13577 | 296 |
| A01483 | A14234 | 296 | A01483 | A14289 | 491 |
| A01483 | A14524 | 408 | A01483 | A14525 | 485 |
| A01483 | A14642 | 212 | A01483 | A14643 | 165 |
| A01483 | A14701 | 347 | A01483 | A14753 | 265 |
| A01483 | A14803 | 489 | A01483 | A14858 | 218 |
| A01483 | A14867 | 265 | A01483 | A14944 | 176 |
| A01483 | A15059 | 296 | A01483 | A15270 | 159 |
| A01483 | A15372 | 488 | A01483 | A15772 | 187 |
| A01483 | A15877 | 177 | A01483 | A15894 | 200 |
| A01483 | A16531 | 286 | A01483 | A16753 | 488 |
| A01483 | A16763 | 199 | A01483 | A16958 | 245 |
| A01483 | A17026 | 187 | A01484 | A01505 | 210 |
| A01484 | A01557 | 341 | A01484 | A01578 | 151 |
| A01484 | A01630 | 428 | A01484 | A01645 | 174 |
| A01484 | A01647 | 156 | A01484 | A01728 | 395 |
| A01484 | A01751 | 157 | A01484 | A02311 | 218 |
| A01484 | A02611 | 174 | A01484 | A02761 | 188 |
| A01484 | A03077 | 307 | A01484 | A03861 | 177 |
| A01484 | A04424 | 229 | A01484 | A04667 | 301 |
| A01484 | A04710 | 165 | A01484 | A04715 | 196 |
| A01484 | A04790 | 308 | A01484 | A04903 | 193 |
| A01484 | A04949 | 406 | A01484 | A05075 | 332 |
| A01484 | A06162 | 177 | A01484 | A06307 | 317 |
| A01484 | A06385 | 472 | A01484 | A06889 | 361 |
| A01484 | A07090 | 339 | A01484 | A08573 | 353 |
| A01484 | A09953 | 332 | A01484 | A11023 | 151 |
| A01484 | A14236 | 277 | A01484 | A14281 | 238 |
| A01484 | A14485 | 226 | A01484 | A15258 | 374 |
| A01484 | A15260 | 346 | A01484 | A15277 | 324 |
| A01484 | A16333 | 257 | A01485 | A01520 | 419 |
| A01485 | A01524 | 899 | A01485 | A01527 | 899 |
| A01485 | A01529 | 296 | A01485 | A01543 | 196 |
| A01485 | A01557 | 201 | A01485 | A01582 | 157 |
| A01485 | A01591 | 320 | A01485 | A01593 | 484 |
| A01485 | A01599 | 480 | A01485 | A01668 | 249 |
| A01485 | A01691 | 165 | A01485 | A01979 | 265 |
| A01485 | A02046 | 188 | A01485 | A02082 | 240 |
| A01485 | A02109 | 190 | A01485 | A02111 | 469 |
| A01485 | A02142 | 224 | A01485 | A02143 | 193 |
| A01485 | A02144 | 388 | A01485 | A02148 | 486 |
| A01485 | A02170 | 185 | A01485 | A02181 | 246 |
| A01485 | A02213 | 235 | A01485 | A02221 | 185 |
| A01485 | A02239 | 163 | A01485 | A02301 | 301 |
| A01485 | A02303 | 338 | A01485 | A02304 | 486 |
| A01485 | A02305 | 152 | A01485 | A02306 | 351 |

|        |        |     |        |        |     |
|--------|--------|-----|--------|--------|-----|
| A01485 | A02312 | 465 | A01485 | A02323 | 445 |
| A01485 | A02324 | 443 | A01485 | A02326 | 221 |
| A01485 | A02340 | 157 | A01485 | A02388 | 246 |
| A01485 | A02397 | 319 | A01485 | A02423 | 165 |
| A01485 | A02425 | 218 | A01485 | A02427 | 179 |
| A01485 | A02443 | 340 | A01485 | A02467 | 162 |
| A01485 | A02468 | 377 | A01485 | A02469 | 303 |
| A01485 | A02470 | 236 | A01485 | A02504 | 945 |
| A01485 | A02523 | 160 | A01485 | A02531 | 213 |
| A01485 | A02605 | 191 | A01485 | A02616 | 224 |
| A01485 | A02618 | 221 | A01485 | A02621 | 288 |
| A01485 | A02636 | 154 | A01485 | A02638 | 303 |
| A01485 | A02644 | 174 | A01485 | A02660 | 205 |
| A01485 | A02671 | 157 | A01485 | A02673 | 483 |
| A01485 | A02733 | 188 | A01485 | A02758 | 195 |
| A01485 | A02759 | 297 | A01485 | A02761 | 285 |
| A01485 | A02819 | 232 | A01485 | A03112 | 188 |
| A01485 | A03124 | 347 | A01485 | A03201 | 457 |
| A01485 | A03263 | 263 | A01485 | A03310 | 243 |
| A01485 | A03314 | 249 | A01485 | A03334 | 188 |
| A01485 | A03338 | 173 | A01485 | A03583 | 265 |
| A01485 | A03609 | 216 | A01485 | A03955 | 201 |
| A01485 | A03960 | 256 | A01485 | A04078 | 180 |
| A01485 | A04087 | 358 | A01485 | A04092 | 168 |
| A01485 | A04163 | 174 | A01485 | A04202 | 443 |
| A01485 | A04208 | 251 | A01485 | A04222 | 467 |
| A01485 | A04256 | 483 | A01485 | A04366 | 212 |
| A01485 | A04410 | 429 | A01485 | A04423 | 486 |
| A01485 | A04424 | 193 | A01485 | A04486 | 283 |
| A01485 | A04491 | 205 | A01485 | A04493 | 162 |
| A01485 | A04517 | 218 | A01485 | A04562 | 184 |
| A01485 | A04749 | 256 | A01485 | A04759 | 183 |
| A01485 | A04977 | 168 | A01485 | A05150 | 199 |
| A01485 | A05168 | 218 | A01485 | A05462 | 204 |
| A01485 | A05533 | 152 | A01485 | A05825 | 276 |
| A01485 | A05826 | 288 | A01485 | A06035 | 347 |
| A01485 | A06219 | 306 | A01485 | A06234 | 294 |
| A01485 | A06298 | 157 | A01485 | A06333 | 254 |
| A01485 | A06400 | 174 | A01485 | A06521 | 299 |
| A01485 | A06535 | 389 | A01485 | A06943 | 329 |
| A01485 | A07069 | 177 | A01485 | A07136 | 276 |
| A01485 | A07276 | 243 | A01485 | A07384 | 199 |
| A01485 | A07494 | 347 | A01485 | A07655 | 212 |
| A01485 | A08951 | 294 | A01485 | A09028 | 400 |
| A01485 | A09131 | 283 | A01485 | A09200 | 241 |
| A01485 | A09398 | 347 | A01485 | A09784 | 486 |

|        |        |     |        |        |     |
|--------|--------|-----|--------|--------|-----|
| A01485 | A09906 | 299 | A01485 | A09911 | 243 |
| A01485 | A10040 | 479 | A01485 | A10476 | 422 |
| A01485 | A10541 | 367 | A01485 | A10844 | 218 |
| A01485 | A12654 | 251 | A01485 | A14571 | 461 |
| A01485 | A14643 | 229 | A01485 | A14722 | 416 |
| A01485 | A15233 | 216 | A01485 | A15277 | 486 |
| A01485 | A15295 | 621 | A01485 | A15498 | 714 |
| A01486 | A01532 | 256 | A01486 | A01537 | 424 |
| A01486 | A01559 | 240 | A01486 | A01591 | 408 |
| A01486 | A01595 | 491 | A01486 | A01606 | 396 |
| A01486 | A01630 | 272 | A01486 | A01772 | 163 |
| A01486 | A03259 | 183 | A01486 | A03422 | 375 |
| A01486 | A03484 | 165 | A01486 | A03575 | 457 |
| A01486 | A03637 | 486 | A01486 | A03820 | 254 |
| A01486 | A04117 | 252 | A01486 | A04971 | 208 |
| A01486 | A05008 | 265 | A01486 | A05009 | 443 |
| A01486 | A05383 | 490 | A01486 | A05894 | 249 |
| A01486 | A08839 | 374 | A01486 | A08854 | 195 |
| A01486 | A08889 | 173 | A01486 | A09022 | 176 |
| A01486 | A09052 | 235 | A01486 | A09182 | 333 |
| A01486 | A09370 | 455 | A01486 | A09443 | 490 |
| A01486 | A09491 | 338 | A01486 | A09506 | 218 |
| A01486 | A10175 | 240 | A01486 | A10250 | 485 |
| A01486 | A10619 | 162 | A01486 | A14006 | 398 |
| A01486 | A14485 | 74  | A01486 | A14529 | 193 |
| A01486 | A14633 | 483 | A01487 | A01488 | 121 |
| A01487 | A01492 | 490 | A01487 | A01495 | 449 |
| A01487 | A01598 | 290 | A01487 | A01612 | 393 |
| A01487 | A01614 | 252 | A01487 | A01721 | 451 |
| A01487 | A01917 | 208 | A01487 | A02003 | 234 |
| A01487 | A02456 | 252 | A01487 | A02978 | 185 |
| A01487 | A03438 | 141 | A01487 | A03569 | 286 |
| A01487 | A03570 | 160 | A01487 | A03705 | 221 |
| A01487 | A03859 | 408 | A01487 | A04105 | 160 |
| A01487 | A06832 | 151 | A01487 | A07347 | 313 |
| A01487 | A07409 | 268 | A01487 | A07625 | 201 |
| A01487 | A07968 | 347 | A01487 | A08112 | 347 |
| A01487 | A09160 | 218 | A01487 | A13250 | 165 |
| A01487 | A13870 | 229 | A01487 | A13989 | 489 |
| A01488 | A01492 | 491 | A01488 | A01538 | 263 |
| A01488 | A01579 | 241 | A01488 | A01597 | 198 |
| A01488 | A01598 | 489 | A01488 | A01612 | 491 |
| A01488 | A01614 | 452 | A01488 | A01649 | 489 |
| A01488 | A01660 | 255 | A01488 | A02265 | 93  |
| A01488 | A02456 | 177 | A01488 | A03300 | 246 |
| A01488 | A03567 | 162 | A01488 | A03569 | 486 |



|        |        |     |        |        |     |
|--------|--------|-----|--------|--------|-----|
| A01488 | A05665 | 190 | A01488 | A06275 | 485 |
| A01488 | A06340 | 361 | A01488 | A06642 | 176 |
| A01488 | A07347 | 313 | A01488 | A07524 | 383 |
| A01488 | A07533 | 243 | A01488 | A07581 | 236 |
| A01488 | A07625 | 457 | A01488 | A07700 | 293 |
| A01488 | A07924 | 281 | A01488 | A08137 | 490 |
| A01488 | A08571 | 301 | A01488 | A08610 | 256 |
| A01488 | A08756 | 224 | A01488 | A08807 | 234 |
| A01488 | A09664 | 278 | A01488 | A10465 | 413 |
| A01488 | A10616 | 491 | A01488 | A11206 | 213 |
| A01488 | A11562 | 435 | A01488 | A11831 | 402 |
| A01488 | A11832 | 433 | A01488 | A12849 | 374 |
| A01488 | A13294 | 347 | A01488 | A13875 | 491 |
| A01488 | A13989 | 491 | A01488 | A14006 | 185 |
| A01488 | A14151 | 324 | A01488 | A14216 | 246 |
| A01488 | A14505 | 424 | A01488 | A15297 | 193 |
| A01488 | A15338 | 480 | A01488 | A15764 | 445 |
| A01488 | A15884 | 205 | A01488 | A16302 | 457 |
| A01489 | A01561 | 70  | A01489 | A01605 | 210 |
| A01489 | A01631 | 899 | A01489 | A02308 | 210 |
| A01489 | A02559 | 176 | A01489 | A02675 | 288 |
| A01489 | A02875 | 157 | A01489 | A03591 | 899 |
| A01489 | A03782 | 196 | A01489 | A04293 | 314 |
| A01489 | A04334 | 272 | A01489 | A04853 | 266 |
| A01489 | A05530 | 236 | A01489 | A06289 | 899 |
| A01489 | A06601 | 899 | A01489 | A07163 | 423 |
| A01489 | A07311 | 63  | A01489 | A08732 | 899 |
| A01489 | A09058 | 305 | A01489 | A09221 | 267 |
| A01489 | A09396 | 307 | A01489 | A09577 | 249 |
| A01489 | A10018 | 213 | A01489 | A10506 | 171 |
| A01489 | A10581 | 279 | A01489 | A10844 | 399 |
| A01489 | A11109 | 340 | A01489 | A11704 | 221 |
| A01489 | A12383 | 489 | A01489 | A12625 | 167 |
| A01489 | A13965 | 333 | A01489 | A14008 | 218 |
| A01489 | A14138 | 263 | A01489 | A14232 | 899 |
| A01489 | A14443 | 899 | A01489 | A15854 | 199 |
| A01490 | A01493 | 358 | A01490 | A01722 | 371 |
| A01490 | A01793 | 229 | A01490 | A01832 | 337 |
| A01490 | A02114 | 396 | A01490 | A02215 | 213 |
| A01490 | A02254 | 274 | A01490 | A02257 | 462 |
| A01490 | A02284 | 256 | A01490 | A02286 | 236 |
| A01490 | A02465 | 435 | A01490 | A02988 | 230 |
| A01490 | A03054 | 400 | A01490 | A03087 | 462 |
| A01490 | A03099 | 193 | A01490 | A03174 | 434 |
| A01490 | A03520 | 319 | A01490 | A03609 | 229 |
| A01490 | A03786 | 394 | A01490 | A03859 | 152 |

|        |        |     |        |        |     |
|--------|--------|-----|--------|--------|-----|
| A01490 | A05224 | 369 | A01490 | A05309 | 160 |
| A01490 | A05424 | 422 | A01490 | A05494 | 277 |
| A01490 | A05533 | 279 | A01490 | A06762 | 311 |
| A01490 | A07471 | 210 | A01490 | A07538 | 363 |
| A01490 | A07908 | 407 | A01490 | A08197 | 335 |
| A01490 | A10616 | 221 | A01490 | A10679 | 335 |
| A01490 | A11897 | 299 | A01490 | A14152 | 219 |
| A01490 | A14443 | 167 | A01490 | A14444 | 180 |
| A01491 | A01643 | 196 | A01491 | A01727 | 151 |
| A01491 | A03513 | 324 | A01491 | A06783 | 177 |
| A01491 | A07436 | 163 | A01491 | A13989 | 63  |
| A01492 | A01495 | 491 | A01492 | A01503 | 599 |
| A01492 | A01506 | 485 | A01492 | A01512 | 899 |
| A01492 | A01514 | 170 | A01492 | A01527 | 903 |
| A01492 | A01531 | 491 | A01492 | A01538 | 568 |
| A01492 | A01539 | 491 | A01492 | A01542 | 490 |
| A01492 | A01555 | 581 | A01492 | A01558 | 938 |
| A01492 | A01562 | 899 | A01492 | A01569 | 485 |
| A01492 | A01577 | 294 | A01492 | A01579 | 332 |
| A01492 | A01586 | 190 | A01492 | A01588 | 950 |
| A01492 | A01593 | 899 | A01492 | A01597 | 490 |
| A01492 | A01598 | 731 | A01492 | A01601 | 559 |
| A01492 | A01605 | 405 | A01492 | A01609 | 210 |
| A01492 | A01612 | 529 | A01492 | A01614 | 572 |
| A01492 | A01615 | 472 | A01492 | A01638 | 899 |
| A01492 | A01640 | 408 | A01492 | A01646 | 504 |
| A01492 | A01649 | 784 | A01492 | A01684 | 491 |
| A01492 | A01692 | 899 | A01492 | A01721 | 407 |
| A01492 | A01730 | 899 | A01492 | A01748 | 484 |
| A01492 | A01761 | 224 | A01492 | A01770 | 899 |
| A01492 | A01779 | 246 | A01492 | A02003 | 252 |
| A01492 | A02179 | 234 | A01492 | A02242 | 172 |
| A01492 | A02265 | 570 | A01492 | A02381 | 491 |
| A01492 | A02437 | 434 | A01492 | A02803 | 899 |
| A01492 | A02855 | 321 | A01492 | A02978 | 561 |
| A01492 | A03014 | 162 | A01492 | A03083 | 63  |
| A01492 | A03169 | 489 | A01492 | A03271 | 899 |
| A01492 | A03296 | 430 | A01492 | A03438 | 550 |
| A01492 | A03446 | 480 | A01492 | A03494 | 491 |
| A01492 | A03567 | 475 | A01492 | A03569 | 491 |
| A01492 | A03582 | 63  | A01492 | A03625 | 899 |
| A01492 | A03652 | 170 | A01492 | A03686 | 899 |
| A01492 | A03705 | 157 | A01492 | A03787 | 157 |
| A01492 | A03859 | 491 | A01492 | A03863 | 418 |
| A01492 | A03981 | 236 | A01492 | A04093 | 380 |
| A01492 | A04161 | 193 | A01492 | A04230 | 259 |

|        |        |     |        |        |     |
|--------|--------|-----|--------|--------|-----|
| A01492 | A04666 | 281 | A01492 | A04697 | 332 |
| A01492 | A04856 | 361 | A01492 | A05024 | 193 |
| A01492 | A05037 | 899 | A01492 | A05230 | 551 |
| A01492 | A05443 | 399 | A01492 | A05563 | 279 |
| A01492 | A05654 | 438 | A01492 | A05914 | 193 |
| A01492 | A06197 | 316 | A01492 | A06275 | 486 |
| A01492 | A06340 | 480 | A01492 | A06356 | 170 |
| A01492 | A06543 | 593 | A01492 | A06642 | 469 |
| A01492 | A06698 | 218 | A01492 | A06814 | 174 |
| A01492 | A06825 | 238 | A01492 | A07004 | 346 |
| A01492 | A07076 | 210 | A01492 | A07203 | 279 |
| A01492 | A07244 | 182 | A01492 | A07265 | 491 |
| A01492 | A07303 | 157 | A01492 | A07323 | 388 |
| A01492 | A07347 | 491 | A01492 | A07348 | 353 |
| A01492 | A07378 | 271 | A01492 | A07398 | 404 |
| A01492 | A07409 | 291 | A01492 | A07422 | 899 |
| A01492 | A07432 | 174 | A01492 | A07524 | 552 |
| A01492 | A07584 | 246 | A01492 | A07588 | 491 |
| A01492 | A07604 | 215 | A01492 | A07625 | 550 |
| A01492 | A07700 | 424 | A01492 | A07706 | 571 |
| A01492 | A07726 | 899 | A01492 | A07744 | 446 |
| A01492 | A07838 | 157 | A01492 | A07881 | 491 |
| A01492 | A07888 | 157 | A01492 | A07924 | 549 |
| A01492 | A07999 | 323 | A01492 | A08011 | 281 |
| A01492 | A08022 | 480 | A01492 | A08072 | 157 |
| A01492 | A08112 | 182 | A01492 | A08118 | 289 |
| A01492 | A08137 | 544 | A01492 | A08211 | 170 |
| A01492 | A08228 | 451 | A01492 | A08248 | 188 |
| A01492 | A08326 | 193 | A01492 | A08327 | 480 |
| A01492 | A08357 | 491 | A01492 | A08491 | 430 |
| A01492 | A08571 | 949 | A01492 | A08695 | 157 |
| A01492 | A08740 | 582 | A01492 | A08773 | 281 |
| A01492 | A08973 | 281 | A01492 | A09054 | 235 |
| A01492 | A09078 | 422 | A01492 | A09292 | 506 |
| A01492 | A09327 | 355 | A01492 | A09334 | 229 |
| A01492 | A09526 | 152 | A01492 | A09618 | 157 |
| A01492 | A09621 | 193 | A01492 | A09664 | 160 |
| A01492 | A09697 | 179 | A01492 | A09707 | 424 |
| A01492 | A09715 | 193 | A01492 | A10159 | 899 |
| A01492 | A10250 | 251 | A01492 | A10465 | 361 |
| A01492 | A10532 | 665 | A01492 | A10575 | 899 |
| A01492 | A10616 | 488 | A01492 | A10633 | 389 |
| A01492 | A10645 | 485 | A01492 | A10755 | 475 |
| A01492 | A10803 | 281 | A01492 | A11190 | 191 |
| A01492 | A11209 | 279 | A01492 | A11462 | 460 |
| A01492 | A11487 | 477 | A01492 | A11535 | 241 |

|        |        |     |        |        |     |
|--------|--------|-----|--------|--------|-----|
| A01492 | A11544 | 218 | A01492 | A11555 | 151 |
| A01492 | A11562 | 486 | A01492 | A11718 | 157 |
| A01492 | A11831 | 174 | A01492 | A11832 | 197 |
| A01492 | A11942 | 200 | A01492 | A11983 | 899 |
| A01492 | A12450 | 157 | A01492 | A12673 | 157 |
| A01492 | A13052 | 210 | A01492 | A13126 | 490 |
| A01492 | A13298 | 491 | A01492 | A13511 | 224 |
| A01492 | A13620 | 193 | A01492 | A13824 | 899 |
| A01492 | A13829 | 899 | A01492 | A13870 | 489 |
| A01492 | A13874 | 457 | A01492 | A13875 | 490 |
| A01492 | A13989 | 989 | A01492 | A14006 | 535 |
| A01492 | A14055 | 899 | A01492 | A14056 | 171 |
| A01492 | A14090 | 327 | A01492 | A14148 | 899 |
| A01492 | A14150 | 419 | A01492 | A14151 | 430 |
| A01492 | A14172 | 397 | A01492 | A14196 | 553 |
| A01492 | A14202 | 162 | A01492 | A14208 | 899 |
| A01492 | A14216 | 527 | A01492 | A14246 | 933 |
| A01492 | A14247 | 193 | A01492 | A14257 | 388 |
| A01492 | A14272 | 224 | A01492 | A14597 | 396 |
| A01492 | A14662 | 899 | A01492 | A14674 | 281 |
| A01492 | A14699 | 490 | A01492 | A14778 | 479 |
| A01492 | A14816 | 210 | A01492 | A14826 | 188 |
| A01492 | A14891 | 157 | A01492 | A14959 | 157 |
| A01492 | A15019 | 168 | A01492 | A15215 | 154 |
| A01492 | A15232 | 157 | A01492 | A15297 | 949 |
| A01492 | A15323 | 899 | A01492 | A15324 | 899 |
| A01492 | A15338 | 491 | A01492 | A15353 | 899 |
| A01492 | A15359 | 899 | A01492 | A15547 | 899 |
| A01492 | A15559 | 945 | A01492 | A15614 | 899 |
| A01492 | A15660 | 491 | A01492 | A15684 | 545 |
| A01492 | A15729 | 213 | A01492 | A15763 | 418 |
| A01492 | A15764 | 414 | A01492 | A15945 | 224 |
| A01492 | A16048 | 462 | A01492 | A16302 | 353 |
| A01492 | A16320 | 260 | A01492 | A16400 | 174 |
| A01492 | A16418 | 153 | A01492 | A16738 | 281 |
| A01492 | A17063 | 477 | A01492 | A17168 | 303 |
| A01493 | A01722 | 480 | A01493 | A02215 | 353 |
| A01493 | A02803 | 213 | A01493 | A03054 | 414 |
| A01493 | A03271 | 202 | A01493 | A03520 | 221 |
| A01493 | A03609 | 260 | A01493 | A05487 | 303 |
| A01493 | A05494 | 305 | A01493 | A07471 | 243 |
| A01493 | A10379 | 427 | A01493 | A14647 | 338 |
| A01494 | A01524 | 899 | A01494 | A01542 | 969 |
| A01494 | A01553 | 904 | A01494 | A01576 | 401 |
| A01494 | A01585 | 489 | A01494 | A01593 | 899 |
| A01494 | A01601 | 127 | A01494 | A01606 | 177 |

|        |        |     |        |        |     |
|--------|--------|-----|--------|--------|-----|
| A01494 | A01677 | 338 | A01494 | A01927 | 335 |
| A01494 | A02020 | 322 | A01494 | A03205 | 491 |
| A01494 | A03444 | 943 | A01494 | A03580 | 322 |
| A01494 | A03726 | 899 | A01494 | A04050 | 899 |
| A01494 | A04610 | 180 | A01494 | A06039 | 199 |
| A01494 | A06581 | 547 | A01494 | A07111 | 486 |
| A01494 | A07452 | 276 | A01494 | A07524 | 190 |
| A01494 | A07563 | 152 | A01494 | A07635 | 201 |
| A01494 | A07706 | 199 | A01494 | A07740 | 167 |
| A01494 | A08249 | 288 | A01494 | A08318 | 204 |
| A01494 | A08903 | 945 | A01494 | A10373 | 227 |
| A01494 | A10810 | 644 | A01494 | A11363 | 941 |
| A01494 | A11856 | 899 | A01494 | A12107 | 367 |
| A01494 | A13504 | 152 | A01494 | A13520 | 240 |
| A01494 | A13831 | 452 | A01494 | A13989 | 473 |
| A01494 | A14025 | 656 | A01494 | A14127 | 190 |
| A01494 | A14193 | 199 | A01494 | A14331 | 180 |
| A01494 | A14475 | 558 | A01494 | A14485 | 490 |
| A01494 | A14585 | 489 | A01494 | A14589 | 491 |
| A01494 | A14643 | 461 | A01494 | A14986 | 281 |
| A01494 | A15297 | 899 | A01494 | A15338 | 899 |
| A01494 | A15626 | 207 | A01494 | A16037 | 165 |
| A01494 | A16082 | 486 | A01495 | A01539 | 177 |
| A01495 | A01569 | 369 | A01495 | A01577 | 152 |
| A01495 | A01579 | 188 | A01495 | A01597 | 335 |
| A01495 | A01598 | 483 | A01495 | A01632 | 151 |
| A01495 | A01649 | 443 | A01495 | A01748 | 425 |
| A01495 | A02195 | 266 | A01495 | A02575 | 241 |
| A01495 | A02719 | 170 | A01495 | A02978 | 366 |
| A01495 | A03227 | 156 | A01495 | A03296 | 405 |
| A01495 | A03438 | 159 | A01495 | A03476 | 215 |
| A01495 | A03567 | 423 | A01495 | A03601 | 208 |
| A01495 | A03705 | 307 | A01495 | A03859 | 294 |
| A01495 | A03886 | 204 | A01495 | A03913 | 216 |
| A01495 | A04846 | 226 | A01495 | A05019 | 230 |
| A01495 | A05501 | 191 | A01495 | A06020 | 323 |
| A01495 | A06909 | 301 | A01495 | A07223 | 334 |
| A01495 | A07430 | 368 | A01495 | A07700 | 334 |
| A01495 | A07725 | 334 | A01495 | A09033 | 230 |
| A01495 | A10532 | 172 | A01495 | A10574 | 205 |
| A01495 | A10917 | 277 | A01495 | A13460 | 165 |
| A01495 | A13875 | 279 | A01495 | A13989 | 491 |
| A01495 | A14073 | 340 | A01495 | A14216 | 435 |
| A01495 | A14525 | 394 | A01495 | A14597 | 347 |
| A01495 | A15215 | 173 | A01495 | A16371 | 176 |
| A01495 | A17135 | 188 | A01496 | A01527 | 899 |

|        |        |     |        |        |     |
|--------|--------|-----|--------|--------|-----|
| A01496 | A01538 | 121 | A01496 | A01539 | 335 |
| A01496 | A01540 | 462 | A01496 | A01546 | 165 |
| A01496 | A01569 | 474 | A01496 | A01572 | 296 |
| A01496 | A01579 | 491 | A01496 | A01586 | 469 |
| A01496 | A01597 | 249 | A01496 | A01601 | 491 |
| A01496 | A01605 | 79  | A01496 | A01618 | 184 |
| A01496 | A01649 | 483 | A01496 | A01652 | 185 |
| A01496 | A01787 | 443 | A01496 | A01822 | 491 |
| A01496 | A02064 | 489 | A01496 | A02156 | 414 |
| A01496 | A02164 | 63  | A01496 | A02165 | 489 |
| A01496 | A02350 | 480 | A01496 | A02412 | 63  |
| A01496 | A02414 | 107 | A01496 | A02416 | 63  |
| A01496 | A02432 | 241 | A01496 | A02590 | 135 |
| A01496 | A02592 | 63  | A01496 | A02992 | 259 |
| A01496 | A03069 | 63  | A01496 | A03079 | 249 |
| A01496 | A03259 | 195 | A01496 | A03304 | 154 |
| A01496 | A03437 | 236 | A01496 | A03438 | 486 |
| A01496 | A03453 | 152 | A01496 | A03567 | 475 |
| A01496 | A03644 | 88  | A01496 | A03652 | 472 |
| A01496 | A03671 | 452 | A01496 | A03748 | 389 |
| A01496 | A03752 | 329 | A01496 | A03809 | 307 |
| A01496 | A03887 | 347 | A01496 | A03888 | 302 |
| A01496 | A03901 | 299 | A01496 | A03981 | 688 |
| A01496 | A04230 | 457 | A01496 | A04778 | 167 |
| A01496 | A04846 | 183 | A01496 | A05007 | 316 |
| A01496 | A05149 | 324 | A01496 | A05153 | 277 |
| A01496 | A05191 | 191 | A01496 | A05255 | 204 |
| A01496 | A05411 | 424 | A01496 | A05443 | 174 |
| A01496 | A05449 | 474 | A01496 | A05501 | 491 |
| A01496 | A05566 | 346 | A01496 | A05654 | 199 |
| A01496 | A06084 | 272 | A01496 | A06351 | 465 |
| A01496 | A06356 | 234 | A01496 | A06358 | 154 |
| A01496 | A06466 | 408 | A01496 | A06475 | 185 |
| A01496 | A06534 | 201 | A01496 | A06564 | 299 |
| A01496 | A06689 | 279 | A01496 | A06791 | 201 |
| A01496 | A06811 | 259 | A01496 | A06814 | 432 |
| A01496 | A06825 | 486 | A01496 | A06861 | 347 |
| A01496 | A06912 | 165 | A01496 | A06916 | 212 |
| A01496 | A06965 | 486 | A01496 | A06973 | 473 |
| A01496 | A06987 | 229 | A01496 | A07047 | 369 |
| A01496 | A07122 | 171 | A01496 | A07201 | 477 |
| A01496 | A07243 | 467 | A01496 | A07258 | 398 |
| A01496 | A07272 | 223 | A01496 | A07307 | 488 |
| A01496 | A07323 | 479 | A01496 | A07349 | 296 |
| A01496 | A07398 | 296 | A01496 | A07447 | 223 |
| A01496 | A07451 | 477 | A01496 | A07477 | 311 |

|        |        |     |        |        |     |
|--------|--------|-----|--------|--------|-----|
| A01496 | A07506 | 472 | A01496 | A07558 | 488 |
| A01496 | A07581 | 151 | A01496 | A07692 | 249 |
| A01496 | A07726 | 350 | A01496 | A07823 | 154 |
| A01496 | A08011 | 335 | A01496 | A08055 | 353 |
| A01496 | A08131 | 463 | A01496 | A08321 | 162 |
| A01496 | A08357 | 423 | A01496 | A08358 | 483 |
| A01496 | A08359 | 491 | A01496 | A08377 | 489 |
| A01496 | A08398 | 258 | A01496 | A08408 | 473 |
| A01496 | A08452 | 232 | A01496 | A08457 | 179 |
| A01496 | A08476 | 435 | A01496 | A08501 | 172 |
| A01496 | A08521 | 156 | A01496 | A08543 | 260 |
| A01496 | A08550 | 425 | A01496 | A08559 | 335 |
| A01496 | A08583 | 191 | A01496 | A08653 | 79  |
| A01496 | A08664 | 174 | A01496 | A08682 | 489 |
| A01496 | A08768 | 283 | A01496 | A08773 | 272 |
| A01496 | A09044 | 260 | A01496 | A09381 | 171 |
| A01496 | A09656 | 234 | A01496 | A09657 | 260 |
| A01496 | A09722 | 185 | A01496 | A09734 | 423 |
| A01496 | A09852 | 419 | A01496 | A10001 | 258 |
| A01496 | A10034 | 367 | A01496 | A10362 | 297 |
| A01496 | A10417 | 483 | A01496 | A10441 | 200 |
| A01496 | A10490 | 269 | A01496 | A10532 | 491 |
| A01496 | A10564 | 127 | A01496 | A10658 | 200 |
| A01496 | A10659 | 351 | A01496 | A10686 | 303 |
| A01496 | A10693 | 378 | A01496 | A10745 | 223 |
| A01496 | A10901 | 137 | A01496 | A10928 | 201 |
| A01496 | A11263 | 226 | A01496 | A11269 | 259 |
| A01496 | A11288 | 167 | A01496 | A11297 | 249 |
| A01496 | A11334 | 485 | A01496 | A11344 | 188 |
| A01496 | A11420 | 462 | A01496 | A11438 | 454 |
| A01496 | A11550 | 355 | A01496 | A11857 | 176 |
| A01496 | A11922 | 238 | A01496 | A12059 | 201 |
| A01496 | A12079 | 154 | A01496 | A12293 | 259 |
| A01496 | A12329 | 170 | A01496 | A12393 | 283 |
| A01496 | A12404 | 279 | A01496 | A12821 | 256 |
| A01496 | A12848 | 201 | A01496 | A13052 | 346 |
| A01496 | A13126 | 218 | A01496 | A13317 | 154 |
| A01496 | A13338 | 396 | A01496 | A13340 | 490 |
| A01496 | A13576 | 223 | A01496 | A13989 | 491 |
| A01496 | A13992 | 417 | A01496 | A14073 | 358 |
| A01496 | A14090 | 139 | A01496 | A14122 | 243 |
| A01496 | A14176 | 247 | A01496 | A14216 | 688 |
| A01496 | A14229 | 312 | A01496 | A14447 | 185 |
| A01496 | A14508 | 238 | A01496 | A14527 | 63  |
| A01496 | A14530 | 291 | A01496 | A14561 | 185 |
| A01496 | A14738 | 246 | A01496 | A14803 | 256 |

|        |        |     |        |        |     |
|--------|--------|-----|--------|--------|-----|
| A01496 | A14923 | 163 | A01496 | A15063 | 63  |
| A01496 | A15215 | 202 | A01496 | A15357 | 259 |
| A01496 | A15400 | 405 | A01496 | A15402 | 307 |
| A01496 | A15500 | 490 | A01496 | A15624 | 369 |
| A01496 | A15652 | 312 | A01496 | A15659 | 462 |
| A01496 | A15660 | 490 | A01496 | A15662 | 154 |
| A01496 | A15684 | 491 | A01496 | A15707 | 154 |
| A01496 | A15746 | 269 | A01496 | A15918 | 435 |
| A01496 | A15920 | 251 | A01496 | A15931 | 474 |
| A01496 | A15933 | 335 | A01496 | A15988 | 452 |
| A01496 | A16053 | 201 | A01496 | A16088 | 472 |
| A01496 | A16095 | 249 | A01496 | A16118 | 452 |
| A01496 | A16149 | 159 | A01496 | A16233 | 177 |
| A01496 | A16272 | 398 | A01496 | A16325 | 411 |
| A01496 | A16328 | 486 | A01496 | A16686 | 260 |
| A01496 | A16840 | 185 | A01496 | A17035 | 486 |
| A01497 | A01582 | 436 | A01497 | A01736 | 223 |
| A01497 | A01752 | 240 | A01497 | A03010 | 269 |
| A01497 | A03520 | 182 | A01497 | A03984 | 241 |
| A01497 | A04097 | 249 | A01498 | A01729 | 255 |
| A01498 | A01759 | 346 | A01498 | A02676 | 398 |
| A01498 | A02704 | 286 | A01498 | A02775 | 428 |
| A01498 | A02842 | 317 | A01498 | A03451 | 185 |
| A01498 | A04944 | 318 | A01499 | A01500 | 200 |
| A01499 | A01501 | 85  | A01499 | A01503 | 63  |
| A01499 | A01509 | 631 | A01499 | A01515 | 477 |
| A01499 | A01522 | 201 | A01499 | A01573 | 491 |
| A01499 | A01574 | 491 | A01499 | A01575 | 326 |
| A01499 | A01576 | 491 | A01499 | A01583 | 212 |
| A01499 | A01585 | 483 | A01499 | A01634 | 301 |
| A01499 | A01646 | 63  | A01499 | A01677 | 634 |
| A01499 | A01678 | 631 | A01499 | A01683 | 391 |
| A01499 | A01706 | 491 | A01499 | A01710 | 491 |
| A01499 | A01918 | 324 | A01499 | A03046 | 154 |
| A01499 | A03293 | 85  | A01499 | A03294 | 99  |
| A01499 | A03326 | 402 | A01499 | A03329 | 457 |
| A01499 | A03428 | 632 | A01499 | A03452 | 633 |
| A01499 | A03565 | 332 | A01499 | A03618 | 488 |
| A01499 | A03626 | 486 | A01499 | A03889 | 613 |
| A01499 | A03891 | 157 | A01499 | A04292 | 488 |
| A01499 | A04406 | 486 | A01499 | A04894 | 517 |
| A01499 | A05027 | 195 | A01499 | A05028 | 486 |
| A01499 | A05200 | 180 | A01499 | A05202 | 218 |
| A01499 | A05862 | 441 | A01499 | A06011 | 446 |
| A01499 | A06168 | 235 | A01499 | A06657 | 278 |
| A01499 | A06783 | 152 | A01499 | A06890 | 235 |



|        |        |     |        |        |     |
|--------|--------|-----|--------|--------|-----|
| A01499 | A07062 | 154 | A01499 | A07521 | 297 |
| A01499 | A07820 | 630 | A01499 | A08400 | 326 |
| A01499 | A08454 | 191 | A01499 | A08765 | 468 |
| A01499 | A08766 | 324 | A01499 | A08772 | 235 |
| A01499 | A08776 | 324 | A01499 | A08777 | 236 |
| A01499 | A08778 | 324 | A01499 | A08874 | 90  |
| A01499 | A09056 | 318 | A01499 | A09060 | 191 |
| A01499 | A09326 | 581 | A01499 | A09333 | 473 |
| A01499 | A10663 | 485 | A01499 | A10739 | 329 |
| A01499 | A10804 | 167 | A01499 | A11456 | 414 |
| A01499 | A13222 | 285 | A01499 | A13830 | 278 |
| A01499 | A13845 | 602 | A01499 | A13902 | 174 |
| A01499 | A14168 | 245 | A01499 | A14182 | 490 |
| A01499 | A14247 | 491 | A01499 | A14710 | 227 |
| A01499 | A14827 | 168 | A01499 | A14838 | 629 |
| A01499 | A15647 | 290 | A01499 | A15650 | 154 |
| A01499 | A15685 | 199 | A01499 | A15770 | 227 |
| A01499 | A16617 | 631 | A01499 | A16758 | 241 |
| A01499 | A17091 | 177 | A01500 | A01503 | 879 |
| A01500 | A01513 | 640 | A01500 | A01522 | 380 |
| A01500 | A01524 | 273 | A01500 | A01555 | 486 |
| A01500 | A01573 | 596 | A01500 | A01574 | 642 |
| A01500 | A01575 | 529 | A01500 | A01585 | 531 |
| A01500 | A01627 | 162 | A01500 | A01634 | 475 |
| A01500 | A01646 | 585 | A01500 | A01647 | 190 |
| A01500 | A01660 | 457 | A01500 | A01677 | 347 |
| A01500 | A01683 | 374 | A01500 | A01706 | 372 |
| A01500 | A01720 | 195 | A01500 | A01724 | 279 |
| A01500 | A01815 | 199 | A01500 | A03293 | 489 |
| A01500 | A03452 | 384 | A01500 | A03489 | 63  |
| A01500 | A03565 | 63  | A01500 | A03618 | 491 |
| A01500 | A03626 | 452 | A01500 | A03682 | 578 |
| A01500 | A03892 | 484 | A01500 | A04292 | 218 |
| A01500 | A04648 | 419 | A01500 | A04686 | 466 |
| A01500 | A04687 | 156 | A01500 | A04835 | 241 |
| A01500 | A05023 | 383 | A01500 | A05024 | 635 |
| A01500 | A05027 | 841 | A01500 | A05220 | 434 |
| A01500 | A05234 | 484 | A01500 | A05564 | 281 |
| A01500 | A06168 | 401 | A01500 | A06803 | 426 |
| A01500 | A06881 | 243 | A01500 | A06941 | 177 |
| A01500 | A07180 | 183 | A01500 | A07203 | 491 |
| A01500 | A07483 | 241 | A01500 | A07521 | 151 |
| A01500 | A07670 | 241 | A01500 | A07700 | 162 |
| A01500 | A07820 | 449 | A01500 | A07850 | 217 |
| A01500 | A07887 | 533 | A01500 | A08022 | 490 |
| A01500 | A08097 | 191 | A01500 | A08383 | 185 |

|        |        |     |        |        |     |
|--------|--------|-----|--------|--------|-----|
| A01500 | A08400 | 491 | A01500 | A08461 | 489 |
| A01500 | A08553 | 479 | A01500 | A08818 | 156 |
| A01500 | A09043 | 414 | A01500 | A09326 | 436 |
| A01500 | A09333 | 736 | A01500 | A09502 | 156 |
| A01500 | A10380 | 168 | A01500 | A10553 | 227 |
| A01500 | A10655 | 286 | A01500 | A10663 | 430 |
| A01500 | A11068 | 188 | A01500 | A11256 | 281 |
| A01500 | A11344 | 156 | A01500 | A11456 | 422 |
| A01500 | A11472 | 352 | A01500 | A11674 | 218 |
| A01500 | A11983 | 185 | A01500 | A12883 | 199 |
| A01500 | A13798 | 227 | A01500 | A13831 | 511 |
| A01500 | A13837 | 260 | A01500 | A13902 | 281 |
| A01500 | A14006 | 479 | A01500 | A14056 | 499 |
| A01500 | A14080 | 491 | A01500 | A14090 | 173 |
| A01500 | A14247 | 462 | A01500 | A14272 | 477 |
| A01500 | A14461 | 423 | A01500 | A14655 | 604 |
| A01500 | A14838 | 430 | A01500 | A15034 | 167 |
| A01500 | A15295 | 322 | A01500 | A15498 | 279 |
| A01500 | A15557 | 188 | A01500 | A15626 | 241 |
| A01500 | A15647 | 424 | A01500 | A15726 | 254 |
| A01500 | A15917 | 219 | A01500 | A15946 | 281 |
| A01500 | A16088 | 254 | A01500 | A16109 | 258 |
| A01500 | A16212 | 328 | A01500 | A16228 | 272 |
| A01500 | A16617 | 408 | A01500 | A17167 | 180 |
| A01501 | A01503 | 63  | A01501 | A01507 | 276 |
| A01501 | A01514 | 445 | A01501 | A01518 | 438 |
| A01501 | A01535 | 185 | A01501 | A01555 | 117 |
| A01501 | A01689 | 327 | A01501 | A01706 | 134 |
| A01501 | A01809 | 272 | A01501 | A01818 | 184 |
| A01501 | A01988 | 375 | A01501 | A02954 | 288 |
| A01501 | A03019 | 356 | A01501 | A03098 | 205 |
| A01501 | A03330 | 307 | A01501 | A03480 | 446 |
| A01501 | A03565 | 98  | A01501 | A03597 | 188 |
| A01501 | A03617 | 488 | A01501 | A04006 | 152 |
| A01501 | A04011 | 238 | A01501 | A05234 | 249 |
| A01501 | A05563 | 110 | A01501 | A05605 | 208 |
| A01501 | A05621 | 177 | A01501 | A05638 | 93  |
| A01501 | A06361 | 157 | A01501 | A07180 | 385 |
| A01501 | A07439 | 174 | A01501 | A08827 | 226 |
| A01501 | A09135 | 215 | A01501 | A09625 | 187 |
| A01501 | A10372 | 420 | A01501 | A12655 | 213 |
| A01501 | A13831 | 369 | A01501 | A13835 | 293 |
| A01501 | A14171 | 430 | A01501 | A14179 | 358 |
| A01501 | A14469 | 278 | A01501 | A14524 | 190 |
| A01501 | A14694 | 144 | A01501 | A15370 | 93  |
| A01501 | A15757 | 469 | A01501 | A16857 | 263 |

|        |        |     |        |        |     |
|--------|--------|-----|--------|--------|-----|
| A01501 | A16935 | 266 | A01502 | A01504 | 208 |
| A01502 | A01582 | 443 | A01502 | A01711 | 382 |
| A01502 | A01815 | 440 | A01502 | A01816 | 364 |
| A01502 | A01819 | 412 | A01502 | A01825 | 440 |
| A01502 | A01832 | 296 | A01502 | A01833 | 369 |
| A01502 | A02492 | 193 | A01502 | A02875 | 167 |
| A01502 | A02994 | 360 | A01502 | A02997 | 375 |
| A01502 | A03525 | 190 | A01502 | A03526 | 265 |
| A01502 | A03856 | 291 | A01502 | A03959 | 160 |
| A01502 | A04056 | 429 | A01502 | A07046 | 249 |
| A01502 | A08249 | 163 | A01502 | A09321 | 360 |
| A01502 | A11526 | 270 | A01502 | A15379 | 224 |
| A01502 | A15668 | 318 | A01502 | A15917 | 162 |
| A01503 | A01510 | 63  | A01503 | A01513 | 583 |
| A01503 | A01514 | 104 | A01503 | A01515 | 477 |
| A01503 | A01520 | 163 | A01503 | A01522 | 706 |
| A01503 | A01524 | 921 | A01503 | A01542 | 532 |
| A01503 | A01546 | 466 | A01503 | A01555 | 696 |
| A01503 | A01573 | 346 | A01503 | A01574 | 815 |
| A01503 | A01575 | 644 | A01503 | A01576 | 162 |
| A01503 | A01583 | 63  | A01503 | A01585 | 833 |
| A01503 | A01587 | 299 | A01503 | A01612 | 505 |
| A01503 | A01634 | 705 | A01503 | A01646 | 882 |
| A01503 | A01660 | 486 | A01503 | A01683 | 597 |
| A01503 | A01761 | 213 | A01503 | A01809 | 455 |
| A01503 | A01811 | 63  | A01503 | A01832 | 291 |
| A01503 | A02470 | 393 | A01503 | A02855 | 269 |
| A01503 | A02955 | 474 | A01503 | A03293 | 738 |
| A01503 | A03294 | 63  | A01503 | A03329 | 63  |
| A01503 | A03330 | 63  | A01503 | A03569 | 474 |
| A01503 | A03597 | 268 | A01503 | A03617 | 63  |
| A01503 | A03618 | 234 | A01503 | A03626 | 63  |
| A01503 | A03682 | 617 | A01503 | A03718 | 213 |
| A01503 | A03734 | 185 | A01503 | A03837 | 164 |
| A01503 | A03892 | 489 | A01503 | A04115 | 184 |
| A01503 | A04145 | 70  | A01503 | A04682 | 418 |
| A01503 | A04686 | 672 | A01503 | A04929 | 63  |
| A01503 | A05024 | 193 | A01503 | A05027 | 491 |
| A01503 | A05220 | 491 | A01503 | A05427 | 165 |
| A01503 | A05531 | 63  | A01503 | A05563 | 63  |
| A01503 | A05914 | 184 | A01503 | A06168 | 480 |
| A01503 | A06204 | 63  | A01503 | A06543 | 284 |
| A01503 | A07180 | 229 | A01503 | A07203 | 731 |
| A01503 | A07212 | 224 | A01503 | A07398 | 270 |
| A01503 | A07521 | 329 | A01503 | A07706 | 227 |
| A01503 | A07803 | 269 | A01503 | A07850 | 430 |

|        |        |     |        |        |     |
|--------|--------|-----|--------|--------|-----|
| A01503 | A07887 | 470 | A01503 | A08022 | 574 |
| A01503 | A08137 | 506 | A01503 | A08382 | 446 |
| A01503 | A08400 | 491 | A01503 | A08439 | 319 |
| A01503 | A08462 | 278 | A01503 | A08484 | 480 |
| A01503 | A08522 | 288 | A01503 | A08527 | 324 |
| A01503 | A08544 | 303 | A01503 | A08553 | 486 |
| A01503 | A08874 | 63  | A01503 | A08943 | 165 |
| A01503 | A08952 | 212 | A01503 | A08996 | 274 |
| A01503 | A09010 | 429 | A01503 | A09078 | 223 |
| A01503 | A09326 | 63  | A01503 | A09333 | 485 |
| A01503 | A09607 | 475 | A01503 | A09703 | 263 |
| A01503 | A09708 | 308 | A01503 | A09857 | 63  |
| A01503 | A10584 | 666 | A01503 | A10597 | 63  |
| A01503 | A10603 | 63  | A01503 | A10790 | 63  |
| A01503 | A10794 | 63  | A01503 | A10803 | 314 |
| A01503 | A10897 | 63  | A01503 | A11247 | 288 |
| A01503 | A11395 | 469 | A01503 | A11439 | 210 |
| A01503 | A11674 | 480 | A01503 | A11702 | 360 |
| A01503 | A11885 | 377 | A01503 | A11939 | 460 |
| A01503 | A12256 | 174 | A01503 | A12365 | 348 |
| A01503 | A12401 | 157 | A01503 | A13130 | 265 |
| A01503 | A13231 | 239 | A01503 | A13620 | 184 |
| A01503 | A13831 | 562 | A01503 | A13837 | 486 |
| A01503 | A13989 | 557 | A01503 | A14006 | 534 |
| A01503 | A14056 | 799 | A01503 | A14246 | 132 |
| A01503 | A14247 | 167 | A01503 | A14257 | 438 |
| A01503 | A14461 | 490 | A01503 | A14655 | 491 |
| A01503 | A14760 | 157 | A01503 | A14838 | 96  |
| A01503 | A15034 | 165 | A01503 | A15297 | 527 |
| A01503 | A15314 | 138 | A01503 | A15338 | 63  |
| A01503 | A15363 | 70  | A01503 | A15373 | 188 |
| A01503 | A15386 | 269 | A01503 | A15505 | 91  |
| A01503 | A15559 | 516 | A01503 | A15749 | 455 |
| A01503 | A15773 | 157 | A01503 | A15788 | 424 |
| A01503 | A15944 | 436 | A01503 | A15945 | 482 |
| A01503 | A15946 | 486 | A01503 | A16048 | 343 |
| A01503 | A16067 | 489 | A01503 | A16093 | 369 |
| A01503 | A16109 | 200 | A01503 | A16144 | 152 |
| A01503 | A16212 | 486 | A01503 | A16216 | 257 |
| A01503 | A16449 | 229 | A01503 | A16668 | 157 |
| A01503 | A17123 | 491 | A01504 | A01582 | 424 |
| A01504 | A01667 | 296 | A01504 | A01815 | 328 |
| A01504 | A01819 | 457 | A01504 | A01825 | 212 |
| A01504 | A01833 | 328 | A01504 | A02526 | 358 |
| A01504 | A02817 | 185 | A01504 | A02994 | 163 |
| A01504 | A02996 | 416 | A01504 | A03431 | 240 |

|        |        |     |        |        |     |
|--------|--------|-----|--------|--------|-----|
| A01504 | A03440 | 290 | A01504 | A03447 | 230 |
| A01504 | A03676 | 165 | A01504 | A03856 | 356 |
| A01504 | A03885 | 193 | A01504 | A04056 | 296 |
| A01504 | A05051 | 235 | A01504 | A05445 | 210 |
| A01504 | A05734 | 255 | A01504 | A05745 | 346 |
| A01504 | A06424 | 358 | A01504 | A07101 | 182 |
| A01504 | A07196 | 299 | A01504 | A07605 | 167 |
| A01504 | A07675 | 255 | A01504 | A08572 | 412 |
| A01504 | A08608 | 163 | A01504 | A08938 | 314 |
| A01504 | A09321 | 314 | A01504 | A10598 | 205 |
| A01504 | A11433 | 283 | A01504 | A11712 | 346 |
| A01504 | A12454 | 377 | A01504 | A13432 | 188 |
| A01504 | A14748 | 358 | A01504 | A15659 | 195 |
| A01504 | A15668 | 260 | A01505 | A03321 | 152 |
| A01505 | A04054 | 314 | A01505 | A04710 | 462 |
| A01505 | A08573 | 486 | A01505 | A14313 | 352 |
| A01505 | A14391 | 154 | A01506 | A01569 | 446 |
| A01506 | A01577 | 518 | A01506 | A01598 | 401 |
| A01506 | A01614 | 263 | A01506 | A01649 | 335 |
| A01506 | A01684 | 713 | A01506 | A01917 | 701 |
| A01506 | A02702 | 152 | A01506 | A02896 | 343 |
| A01506 | A03472 | 488 | A01506 | A03567 | 396 |
| A01506 | A03859 | 210 | A01506 | A04055 | 238 |
| A01506 | A05025 | 488 | A01506 | A05654 | 173 |
| A01506 | A06287 | 152 | A01506 | A06466 | 63  |
| A01506 | A06543 | 684 | A01506 | A07348 | 246 |
| A01506 | A07677 | 232 | A01506 | A07744 | 361 |
| A01506 | A08022 | 483 | A01506 | A08098 | 343 |
| A01506 | A08178 | 343 | A01506 | A08211 | 162 |
| A01506 | A08357 | 291 | A01506 | A08457 | 160 |
| A01506 | A08896 | 249 | A01506 | A09123 | 213 |
| A01506 | A09697 | 190 | A01506 | A10238 | 218 |
| A01506 | A10532 | 466 | A01506 | A11462 | 408 |
| A01506 | A12227 | 317 | A01506 | A12247 | 283 |
| A01506 | A13150 | 369 | A01506 | A13989 | 491 |
| A01506 | A14596 | 474 | A01506 | A15660 | 313 |
| A01506 | A15684 | 344 | A01506 | A15800 | 179 |
| A01506 | A15840 | 156 | A01506 | A16573 | 177 |
| A01506 | A16732 | 271 | A01506 | A17123 | 195 |
| A01507 | A01512 | 424 | A01507 | A01514 | 477 |
| A01507 | A01516 | 347 | A01507 | A01536 | 396 |
| A01507 | A01602 | 681 | A01507 | A01606 | 491 |
| A01507 | A01639 | 152 | A01507 | A01647 | 491 |
| A01507 | A01688 | 151 | A01507 | A01692 | 216 |
| A01507 | A01698 | 491 | A01507 | A01708 | 141 |
| A01507 | A01724 | 470 | A01507 | A01790 | 190 |

|        |        |     |        |        |     |
|--------|--------|-----|--------|--------|-----|
| A01507 | A01850 | 243 | A01507 | A01988 | 432 |
| A01507 | A02343 | 93  | A01507 | A02705 | 163 |
| A01507 | A02711 | 249 | A01507 | A02822 | 204 |
| A01507 | A03304 | 489 | A01507 | A03465 | 489 |
| A01507 | A03632 | 311 | A01507 | A03778 | 310 |
| A01507 | A03822 | 474 | A01507 | A03971 | 347 |
| A01507 | A04006 | 335 | A01507 | A04017 | 151 |
| A01507 | A04073 | 163 | A01507 | A04449 | 491 |
| A01507 | A05101 | 469 | A01507 | A05181 | 224 |
| A01507 | A05891 | 151 | A01507 | A06588 | 307 |
| A01507 | A06819 | 491 | A01507 | A06859 | 440 |
| A01507 | A06925 | 177 | A01507 | A07101 | 451 |
| A01507 | A07160 | 199 | A01507 | A07207 | 343 |
| A01507 | A07756 | 456 | A01507 | A07802 | 165 |
| A01507 | A07803 | 183 | A01507 | A07936 | 332 |
| A01507 | A08022 | 491 | A01507 | A08282 | 272 |
| A01507 | A08621 | 424 | A01507 | A08692 | 156 |
| A01507 | A08815 | 285 | A01507 | A08875 | 202 |
| A01507 | A08878 | 281 | A01507 | A09162 | 384 |
| A01507 | A09487 | 177 | A01507 | A09659 | 457 |
| A01507 | A09791 | 305 | A01507 | A10014 | 63  |
| A01507 | A10090 | 170 | A01507 | A10743 | 162 |
| A01507 | A10808 | 943 | A01507 | A10811 | 491 |
| A01507 | A11290 | 401 | A01507 | A11300 | 306 |
| A01507 | A11345 | 162 | A01507 | A11525 | 188 |
| A01507 | A11983 | 373 | A01507 | A12047 | 491 |
| A01507 | A12824 | 466 | A01507 | A12971 | 256 |
| A01507 | A13397 | 235 | A01507 | A13571 | 362 |
| A01507 | A13971 | 157 | A01507 | A13997 | 286 |
| A01507 | A14005 | 160 | A01507 | A14170 | 207 |
| A01507 | A14211 | 210 | A01507 | A14475 | 190 |
| A01507 | A14589 | 252 | A01507 | A14642 | 290 |
| A01507 | A14653 | 465 | A01507 | A14925 | 457 |
| A01507 | A15111 | 177 | A01507 | A15295 | 205 |
| A01507 | A15559 | 286 | A01507 | A15729 | 205 |
| A01507 | A16626 | 229 | A01508 | A01548 | 265 |
| A01508 | A01569 | 479 | A01508 | A01622 | 488 |
| A01508 | A01635 | 489 | A01508 | A01743 | 216 |
| A01508 | A01829 | 152 | A01508 | A01855 | 383 |
| A01508 | A01857 | 157 | A01508 | A01895 | 394 |
| A01508 | A02154 | 157 | A01508 | A02290 | 307 |
| A01508 | A02319 | 263 | A01508 | A02363 | 191 |
| A01508 | A02366 | 255 | A01508 | A02541 | 154 |
| A01508 | A02546 | 215 | A01508 | A02988 | 235 |
| A01508 | A02992 | 159 | A01508 | A03004 | 281 |
| A01508 | A03005 | 215 | A01508 | A03008 | 305 |

|        |        |     |        |        |     |
|--------|--------|-----|--------|--------|-----|
| A01508 | A03059 | 191 | A01508 | A03167 | 439 |
| A01508 | A03168 | 227 | A01508 | A03259 | 277 |
| A01508 | A03264 | 160 | A01508 | A03311 | 341 |
| A01508 | A03431 | 160 | A01508 | A03441 | 474 |
| A01508 | A03443 | 288 | A01508 | A03468 | 279 |
| A01508 | A03477 | 455 | A01508 | A03487 | 168 |
| A01508 | A03501 | 413 | A01508 | A03560 | 469 |
| A01508 | A03586 | 301 | A01508 | A03710 | 274 |
| A01508 | A03843 | 213 | A01508 | A03858 | 151 |
| A01508 | A03861 | 296 | A01508 | A04095 | 187 |
| A01508 | A04211 | 171 | A01508 | A04372 | 241 |
| A01508 | A04620 | 188 | A01508 | A04660 | 285 |
| A01508 | A04779 | 469 | A01508 | A04781 | 188 |
| A01508 | A04784 | 229 | A01508 | A04850 | 475 |
| A01508 | A05006 | 229 | A01508 | A05007 | 483 |
| A01508 | A05026 | 204 | A01508 | A05102 | 430 |
| A01508 | A05192 | 305 | A01508 | A05262 | 386 |
| A01508 | A05310 | 380 | A01508 | A05332 | 455 |
| A01508 | A05416 | 199 | A01508 | A05419 | 154 |
| A01508 | A05472 | 202 | A01508 | A05516 | 469 |
| A01508 | A05600 | 172 | A01508 | A05699 | 229 |
| A01508 | A05712 | 224 | A01508 | A05738 | 286 |
| A01508 | A05759 | 262 | A01508 | A05770 | 341 |
| A01508 | A05772 | 201 | A01508 | A05774 | 188 |
| A01508 | A05937 | 188 | A01508 | A06088 | 196 |
| A01508 | A06089 | 255 | A01508 | A06211 | 201 |
| A01508 | A06358 | 196 | A01508 | A06359 | 277 |
| A01508 | A06360 | 224 | A01508 | A06368 | 170 |
| A01508 | A06558 | 274 | A01508 | A06592 | 324 |
| A01508 | A06633 | 419 | A01508 | A06689 | 219 |
| A01508 | A06700 | 285 | A01508 | A06819 | 489 |
| A01508 | A06912 | 152 | A01508 | A06970 | 160 |
| A01508 | A07002 | 364 | A01508 | A07080 | 307 |
| A01508 | A07109 | 358 | A01508 | A07122 | 491 |
| A01508 | A07185 | 466 | A01508 | A07232 | 202 |
| A01508 | A07304 | 232 | A01508 | A07333 | 457 |
| A01508 | A07413 | 179 | A01508 | A07553 | 152 |
| A01508 | A07554 | 333 | A01508 | A07688 | 218 |
| A01508 | A07800 | 456 | A01508 | A07823 | 246 |
| A01508 | A07824 | 263 | A01508 | A07931 | 301 |
| A01508 | A08097 | 227 | A01508 | A08265 | 396 |
| A01508 | A08751 | 204 | A01508 | A08978 | 468 |
| A01508 | A09096 | 224 | A01508 | A09276 | 439 |
| A01508 | A10027 | 332 | A01508 | A10302 | 288 |
| A01508 | A10420 | 185 | A01508 | A10456 | 305 |
| A01508 | A10536 | 332 | A01508 | A10658 | 177 |

|        |        |     |        |        |     |
|--------|--------|-----|--------|--------|-----|
| A01508 | A10738 | 305 | A01508 | A10860 | 396 |
| A01508 | A10880 | 305 | A01508 | A11304 | 157 |
| A01508 | A11309 | 390 | A01508 | A11855 | 157 |
| A01508 | A12730 | 152 | A01508 | A13033 | 288 |
| A01508 | A13206 | 288 | A01508 | A13388 | 270 |
| A01508 | A13906 | 188 | A01508 | A14685 | 246 |
| A01508 | A14803 | 382 | A01508 | A14827 | 416 |
| A01508 | A14862 | 204 | A01508 | A14871 | 255 |
| A01508 | A15190 | 319 | A01508 | A15372 | 443 |
| A01508 | A15497 | 152 | A01508 | A15550 | 241 |
| A01508 | A15637 | 241 | A01508 | A15696 | 152 |
| A01508 | A15874 | 327 | A01508 | A15905 | 467 |
| A01508 | A16026 | 352 | A01508 | A16027 | 469 |
| A01508 | A16028 | 157 | A01508 | A16262 | 232 |
| A01508 | A16283 | 191 | A01508 | A16350 | 406 |
| A01508 | A16531 | 172 | A01508 | A16753 | 480 |
| A01508 | A16761 | 229 | A01508 | A16769 | 412 |
| A01508 | A17155 | 173 | A01509 | A01510 | 130 |
| A01509 | A01515 | 321 | A01509 | A01573 | 491 |
| A01509 | A01574 | 491 | A01509 | A01576 | 435 |
| A01509 | A01583 | 71  | A01509 | A01585 | 412 |
| A01509 | A01646 | 63  | A01509 | A01677 | 634 |
| A01509 | A01678 | 633 | A01509 | A01683 | 422 |
| A01509 | A01706 | 486 | A01509 | A01710 | 491 |
| A01509 | A01918 | 452 | A01509 | A03293 | 127 |
| A01509 | A03329 | 465 | A01509 | A03428 | 631 |
| A01509 | A03452 | 633 | A01509 | A03618 | 462 |
| A01509 | A03626 | 474 | A01509 | A03889 | 618 |
| A01509 | A04007 | 188 | A01509 | A04292 | 480 |
| A01509 | A04894 | 622 | A01509 | A05023 | 454 |
| A01509 | A05200 | 446 | A01509 | A05862 | 228 |
| A01509 | A06011 | 600 | A01509 | A06890 | 481 |
| A01509 | A06941 | 475 | A01509 | A07521 | 467 |
| A01509 | A07820 | 632 | A01509 | A08400 | 324 |
| A01509 | A08772 | 235 | A01509 | A08777 | 251 |
| A01509 | A08778 | 344 | A01509 | A09326 | 235 |
| A01509 | A09333 | 215 | A01509 | A10584 | 118 |
| A01509 | A11456 | 167 | A01509 | A13816 | 219 |
| A01509 | A13845 | 460 | A01509 | A13855 | 472 |
| A01509 | A14168 | 272 | A01509 | A14182 | 269 |
| A01509 | A14247 | 491 | A01509 | A14838 | 620 |
| A01509 | A15650 | 396 | A01509 | A16617 | 608 |
| A01510 | A01513 | 152 | A01510 | A01514 | 63  |
| A01510 | A01519 | 388 | A01510 | A01521 | 126 |
| A01510 | A01573 | 152 | A01510 | A01574 | 63  |
| A01510 | A01575 | 160 | A01510 | A01583 | 607 |



|        |        |     |        |        |     |
|--------|--------|-----|--------|--------|-----|
| A01510 | A01585 | 98  | A01510 | A01634 | 130 |
| A01510 | A01677 | 456 | A01510 | A01678 | 363 |
| A01510 | A01715 | 600 | A01510 | A01811 | 491 |
| A01510 | A02343 | 174 | A01510 | A02630 | 355 |
| A01510 | A03205 | 291 | A01510 | A03293 | 63  |
| A01510 | A03565 | 373 | A01510 | A03626 | 622 |
| A01510 | A03718 | 263 | A01510 | A03891 | 334 |
| A01510 | A03892 | 74  | A01510 | A04893 | 596 |
| A01510 | A04894 | 266 | A01510 | A04929 | 196 |
| A01510 | A05023 | 632 | A01510 | A05233 | 429 |
| A01510 | A06659 | 500 | A01510 | A06675 | 538 |
| A01510 | A07223 | 152 | A01510 | A09050 | 334 |
| A01510 | A09056 | 385 | A01510 | A09952 | 246 |
| A01510 | A10804 | 238 | A01510 | A13831 | 377 |
| A01510 | A13844 | 334 | A01510 | A13846 | 334 |
| A01510 | A14182 | 334 | A01510 | A14838 | 110 |
| A01510 | A16617 | 156 | A01511 | A01866 | 332 |
| A01511 | A01972 | 262 | A01511 | A02020 | 188 |
| A01511 | A02363 | 346 | A01511 | A03005 | 435 |
| A01511 | A03441 | 377 | A01511 | A03443 | 322 |
| A01511 | A04779 | 157 | A01511 | A05007 | 382 |
| A01511 | A05337 | 305 | A01511 | A06632 | 367 |
| A01511 | A06668 | 358 | A01511 | A07080 | 268 |
| A01511 | A07413 | 251 | A01511 | A07710 | 191 |
| A01511 | A16027 | 234 | A01511 | A16028 | 323 |
| A01512 | A01524 | 989 | A01512 | A01527 | 899 |
| A01512 | A01553 | 944 | A01512 | A01554 | 945 |
| A01512 | A01558 | 899 | A01512 | A01560 | 945 |
| A01512 | A01561 | 907 | A01512 | A01562 | 930 |
| A01512 | A01572 | 899 | A01512 | A01588 | 989 |
| A01512 | A01591 | 899 | A01512 | A01601 | 899 |
| A01512 | A01602 | 907 | A01512 | A01605 | 907 |
| A01512 | A01606 | 673 | A01512 | A01615 | 899 |
| A01512 | A01628 | 943 | A01512 | A01631 | 63  |
| A01512 | A01636 | 899 | A01512 | A01639 | 945 |
| A01512 | A01640 | 910 | A01512 | A01651 | 899 |
| A01512 | A01680 | 899 | A01512 | A01688 | 945 |
| A01512 | A01697 | 937 | A01512 | A01698 | 101 |
| A01512 | A01702 | 940 | A01512 | A01708 | 909 |
| A01512 | A01709 | 944 | A01512 | A01718 | 943 |
| A01512 | A01719 | 940 | A01512 | A01724 | 246 |
| A01512 | A01798 | 256 | A01512 | A01844 | 152 |
| A01512 | A01850 | 254 | A01512 | A01908 | 93  |
| A01512 | A01920 | 901 | A01512 | A02164 | 172 |
| A01512 | A02343 | 63  | A01512 | A02411 | 915 |
| A01512 | A02452 | 172 | A01512 | A02492 | 165 |

|        |        |     |        |        |     |
|--------|--------|-----|--------|--------|-----|
| A01512 | A02586 | 232 | A01512 | A02645 | 232 |
| A01512 | A02662 | 247 | A01512 | A02822 | 899 |
| A01512 | A02843 | 152 | A01512 | A02908 | 899 |
| A01512 | A02958 | 899 | A01512 | A03007 | 218 |
| A01512 | A03223 | 232 | A01512 | A03336 | 268 |
| A01512 | A03594 | 156 | A01512 | A03739 | 389 |
| A01512 | A03778 | 210 | A01512 | A03822 | 457 |
| A01512 | A03869 | 221 | A01512 | A04005 | 174 |
| A01512 | A04020 | 475 | A01512 | A04074 | 368 |
| A01512 | A04227 | 268 | A01512 | A04317 | 221 |
| A01512 | A04320 | 899 | A01512 | A04342 | 386 |
| A01512 | A04449 | 945 | A01512 | A04527 | 162 |
| A01512 | A04528 | 247 | A01512 | A04539 | 190 |
| A01512 | A04622 | 218 | A01512 | A04699 | 901 |
| A01512 | A04807 | 899 | A01512 | A04929 | 160 |
| A01512 | A05038 | 170 | A01512 | A05082 | 899 |
| A01512 | A05216 | 899 | A01512 | A05414 | 185 |
| A01512 | A05997 | 156 | A01512 | A06277 | 932 |
| A01512 | A06305 | 899 | A01512 | A06550 | 241 |
| A01512 | A06601 | 411 | A01512 | A06610 | 486 |
| A01512 | A07311 | 994 | A01512 | A07422 | 899 |
| A01512 | A07936 | 232 | A01512 | A08133 | 199 |
| A01512 | A08284 | 162 | A01512 | A08427 | 156 |
| A01512 | A08691 | 268 | A01512 | A08692 | 200 |
| A01512 | A08878 | 942 | A01512 | A09018 | 485 |
| A01512 | A09162 | 584 | A01512 | A09319 | 922 |
| A01512 | A09363 | 162 | A01512 | A09508 | 165 |
| A01512 | A09577 | 922 | A01512 | A09750 | 238 |
| A01512 | A09804 | 346 | A01512 | A10014 | 74  |
| A01512 | A10340 | 174 | A01512 | A10392 | 207 |
| A01512 | A10580 | 899 | A01512 | A10621 | 63  |
| A01512 | A10623 | 943 | A01512 | A10665 | 159 |
| A01512 | A10728 | 213 | A01512 | A10743 | 903 |
| A01512 | A10808 | 945 | A01512 | A10811 | 402 |
| A01512 | A10982 | 436 | A01512 | A11125 | 899 |
| A01512 | A11346 | 199 | A01512 | A11369 | 63  |
| A01512 | A11604 | 899 | A01512 | A11943 | 436 |
| A01512 | A11983 | 945 | A01512 | A12091 | 232 |
| A01512 | A12304 | 278 | A01512 | A12383 | 940 |
| A01512 | A12421 | 174 | A01512 | A12457 | 212 |
| A01512 | A12647 | 221 | A01512 | A12664 | 899 |
| A01512 | A12724 | 299 | A01512 | A13228 | 179 |
| A01512 | A13917 | 224 | A01512 | A13985 | 899 |
| A01512 | A13989 | 899 | A01512 | A13997 | 393 |
| A01512 | A14005 | 925 | A01512 | A14008 | 130 |
| A01512 | A14016 | 196 | A01512 | A14033 | 221 |

|        |        |     |        |        |     |
|--------|--------|-----|--------|--------|-----|
| A01512 | A14039 | 162 | A01512 | A14044 | 899 |
| A01512 | A14055 | 899 | A01512 | A14059 | 899 |
| A01512 | A14127 | 204 | A01512 | A14211 | 160 |
| A01512 | A14306 | 221 | A01512 | A14520 | 279 |
| A01512 | A14570 | 199 | A01512 | A14758 | 199 |
| A01512 | A14925 | 201 | A01512 | A15020 | 221 |
| A01512 | A15281 | 156 | A01512 | A15622 | 179 |
| A01512 | A16590 | 179 | A01512 | A16952 | 170 |
| A01512 | A17017 | 340 | A01512 | A17050 | 268 |
| A01512 | A17160 | 899 | A01513 | A01514 | 152 |
| A01513 | A01515 | 400 | A01513 | A01520 | 491 |
| A01513 | A01521 | 491 | A01513 | A01522 | 472 |
| A01513 | A01524 | 281 | A01513 | A01574 | 507 |
| A01513 | A01575 | 475 | A01513 | A01583 | 190 |
| A01513 | A01585 | 477 | A01513 | A01634 | 424 |
| A01513 | A01646 | 455 | A01513 | A01683 | 412 |
| A01513 | A01988 | 156 | A01513 | A02405 | 168 |
| A01513 | A02887 | 74  | A01513 | A03259 | 249 |
| A01513 | A03293 | 251 | A01513 | A03617 | 154 |
| A01513 | A03682 | 677 | A01513 | A03718 | 341 |
| A01513 | A03892 | 324 | A01513 | A04893 | 156 |
| A01513 | A05220 | 326 | A01513 | A05563 | 238 |
| A01513 | A11245 | 358 | A01513 | A13130 | 767 |
| A01513 | A13384 | 263 | A01513 | A13816 | 124 |
| A01513 | A13831 | 642 | A01513 | A13832 | 159 |
| A01513 | A14052 | 202 | A01513 | A14056 | 682 |
| A01513 | A14173 | 216 | A01513 | A14543 | 218 |
| A01513 | A15338 | 462 | A01513 | A15498 | 334 |
| A01513 | A15718 | 207 | A01514 | A01516 | 223 |
| A01514 | A01517 | 280 | A01514 | A01518 | 303 |
| A01514 | A01522 | 195 | A01514 | A01555 | 63  |
| A01514 | A01568 | 491 | A01514 | A01574 | 102 |
| A01514 | A01575 | 281 | A01514 | A01580 | 486 |
| A01514 | A01583 | 269 | A01514 | A01585 | 98  |
| A01514 | A01595 | 170 | A01514 | A01634 | 154 |
| A01514 | A01646 | 411 | A01514 | A01647 | 486 |
| A01514 | A01671 | 264 | A01514 | A01683 | 401 |
| A01514 | A01687 | 491 | A01514 | A01706 | 269 |
| A01514 | A01715 | 63  | A01514 | A01809 | 559 |
| A01514 | A01811 | 400 | A01514 | A01988 | 646 |
| A01514 | A03197 | 433 | A01514 | A03330 | 299 |
| A01514 | A03480 | 288 | A01514 | A03488 | 374 |
| A01514 | A03489 | 63  | A01514 | A03556 | 200 |
| A01514 | A03565 | 63  | A01514 | A03597 | 563 |
| A01514 | A03617 | 211 | A01514 | A03626 | 63  |
| A01514 | A03653 | 374 | A01514 | A03682 | 63  |

|        |        |     |        |        |     |
|--------|--------|-----|--------|--------|-----|
| A01514 | A04139 | 188 | A01514 | A04292 | 269 |
| A01514 | A04686 | 223 | A01514 | A04929 | 177 |
| A01514 | A05024 | 434 | A01514 | A05218 | 183 |
| A01514 | A05273 | 200 | A01514 | A05301 | 329 |
| A01514 | A05531 | 370 | A01514 | A05539 | 222 |
| A01514 | A05563 | 157 | A01514 | A05605 | 286 |
| A01514 | A05638 | 599 | A01514 | A06011 | 269 |
| A01514 | A06176 | 489 | A01514 | A06204 | 565 |
| A01514 | A06347 | 491 | A01514 | A06675 | 202 |
| A01514 | A06819 | 407 | A01514 | A06941 | 472 |
| A01514 | A07054 | 491 | A01514 | A07083 | 469 |
| A01514 | A07180 | 564 | A01514 | A07203 | 573 |
| A01514 | A07207 | 469 | A01514 | A07242 | 491 |
| A01514 | A07294 | 263 | A01514 | A07404 | 408 |
| A01514 | A07495 | 596 | A01514 | A07696 | 393 |
| A01514 | A07816 | 491 | A01514 | A07893 | 490 |
| A01514 | A07954 | 475 | A01514 | A08056 | 485 |
| A01514 | A08402 | 445 | A01514 | A08438 | 191 |
| A01514 | A08484 | 269 | A01514 | A08775 | 63  |
| A01514 | A08874 | 63  | A01514 | A08917 | 438 |
| A01514 | A09083 | 285 | A01514 | A09326 | 269 |
| A01514 | A09333 | 63  | A01514 | A09625 | 200 |
| A01514 | A09628 | 200 | A01514 | A10317 | 438 |
| A01514 | A10578 | 432 | A01514 | A10584 | 63  |
| A01514 | A10597 | 63  | A01514 | A10603 | 63  |
| A01514 | A10803 | 374 | A01514 | A11247 | 63  |
| A01514 | A11279 | 269 | A01514 | A12047 | 548 |
| A01514 | A13146 | 366 | A01514 | A13384 | 491 |
| A01514 | A13617 | 432 | A01514 | A13672 | 374 |
| A01514 | A13784 | 491 | A01514 | A13831 | 551 |
| A01514 | A13837 | 294 | A01514 | A13866 | 380 |
| A01514 | A13876 | 200 | A01514 | A13881 | 200 |
| A01514 | A13894 | 227 | A01514 | A13895 | 602 |
| A01514 | A13949 | 475 | A01514 | A14056 | 457 |
| A01514 | A14074 | 374 | A01514 | A14167 | 229 |
| A01514 | A14171 | 200 | A01514 | A14179 | 200 |
| A01514 | A14180 | 200 | A01514 | A14182 | 269 |
| A01514 | A14186 | 187 | A01514 | A14202 | 232 |
| A01514 | A14209 | 491 | A01514 | A14222 | 491 |
| A01514 | A14266 | 491 | A01514 | A14272 | 374 |
| A01514 | A14281 | 640 | A01514 | A14356 | 200 |
| A01514 | A14474 | 491 | A01514 | A14484 | 491 |
| A01514 | A14589 | 340 | A01514 | A14633 | 490 |
| A01514 | A14661 | 518 | A01514 | A14711 | 269 |
| A01514 | A14783 | 269 | A01514 | A14854 | 212 |
| A01514 | A15315 | 454 | A01514 | A15347 | 475 |

|        |        |     |        |        |     |
|--------|--------|-----|--------|--------|-----|
| A01514 | A15370 | 565 | A01514 | A15380 | 491 |
| A01514 | A15383 | 480 | A01514 | A15556 | 290 |
| A01514 | A15617 | 446 | A01514 | A15646 | 347 |
| A01514 | A15650 | 63  | A01514 | A15665 | 491 |
| A01514 | A15712 | 497 | A01514 | A15719 | 200 |
| A01514 | A15724 | 314 | A01514 | A15757 | 200 |
| A01514 | A16048 | 491 | A01514 | A16066 | 200 |
| A01514 | A16552 | 157 | A01514 | A16634 | 200 |
| A01514 | A16802 | 274 | A01514 | A16850 | 484 |
| A01514 | A16919 | 200 | A01514 | A16980 | 212 |
| A01514 | A17057 | 414 | A01515 | A01520 | 744 |
| A01515 | A01521 | 470 | A01515 | A01522 | 653 |
| A01515 | A01523 | 319 | A01515 | A01524 | 941 |
| A01515 | A01525 | 371 | A01515 | A01527 | 274 |
| A01515 | A01542 | 296 | A01515 | A01571 | 490 |
| A01515 | A01573 | 603 | A01515 | A01574 | 637 |
| A01515 | A01575 | 779 | A01515 | A01576 | 505 |
| A01515 | A01578 | 409 | A01515 | A01583 | 469 |
| A01515 | A01585 | 868 | A01515 | A01634 | 979 |
| A01515 | A01646 | 486 | A01515 | A01673 | 266 |
| A01515 | A01677 | 491 | A01515 | A01678 | 382 |
| A01515 | A01683 | 491 | A01515 | A01706 | 491 |
| A01515 | A01710 | 602 | A01515 | A01817 | 200 |
| A01515 | A01926 | 603 | A01515 | A02148 | 743 |
| A01515 | A02156 | 160 | A01515 | A02188 | 414 |
| A01515 | A02222 | 390 | A01515 | A02268 | 190 |
| A01515 | A02803 | 256 | A01515 | A03014 | 271 |
| A01515 | A03086 | 347 | A01515 | A03186 | 559 |
| A01515 | A03238 | 491 | A01515 | A03259 | 414 |
| A01515 | A03293 | 491 | A01515 | A03294 | 652 |
| A01515 | A03326 | 344 | A01515 | A03329 | 350 |
| A01515 | A03428 | 170 | A01515 | A03452 | 429 |
| A01515 | A03545 | 279 | A01515 | A03618 | 454 |
| A01515 | A03626 | 485 | A01515 | A03718 | 481 |
| A01515 | A03726 | 935 | A01515 | A03889 | 441 |
| A01515 | A03891 | 491 | A01515 | A03892 | 688 |
| A01515 | A04145 | 491 | A01515 | A04146 | 252 |
| A01515 | A04202 | 299 | A01515 | A04292 | 475 |
| A01515 | A04318 | 229 | A01515 | A04337 | 213 |
| A01515 | A04342 | 384 | A01515 | A04686 | 583 |
| A01515 | A04715 | 221 | A01515 | A04728 | 191 |
| A01515 | A04839 | 413 | A01515 | A04893 | 391 |
| A01515 | A04929 | 439 | A01515 | A05004 | 263 |
| A01515 | A05024 | 631 | A01515 | A05028 | 489 |
| A01515 | A05155 | 263 | A01515 | A05376 | 595 |
| A01515 | A05401 | 587 | A01515 | A05785 | 179 |

|        |        |     |        |        |     |
|--------|--------|-----|--------|--------|-----|
| A01515 | A05862 | 183 | A01515 | A06011 | 227 |
| A01515 | A06439 | 179 | A01515 | A06659 | 434 |
| A01515 | A06729 | 279 | A01515 | A06925 | 157 |
| A01515 | A06941 | 472 | A01515 | A06953 | 240 |
| A01515 | A07020 | 177 | A01515 | A07231 | 235 |
| A01515 | A07369 | 167 | A01515 | A07499 | 165 |
| A01515 | A07521 | 489 | A01515 | A08244 | 157 |
| A01515 | A08400 | 296 | A01515 | A08484 | 491 |
| A01515 | A08506 | 479 | A01515 | A08544 | 480 |
| A01515 | A08863 | 180 | A01515 | A08881 | 269 |
| A01515 | A09036 | 202 | A01515 | A09050 | 271 |
| A01515 | A09054 | 489 | A01515 | A09056 | 269 |
| A01515 | A09277 | 491 | A01515 | A09742 | 472 |
| A01515 | A09891 | 179 | A01515 | A10005 | 191 |
| A01515 | A10527 | 441 | A01515 | A10578 | 227 |
| A01515 | A10584 | 486 | A01515 | A10594 | 584 |
| A01515 | A10663 | 486 | A01515 | A10684 | 362 |
| A01515 | A10794 | 367 | A01515 | A10799 | 306 |
| A01515 | A10804 | 443 | A01515 | A11237 | 252 |
| A01515 | A11241 | 157 | A01515 | A11279 | 477 |
| A01515 | A11287 | 467 | A01515 | A11337 | 422 |
| A01515 | A11373 | 279 | A01515 | A11444 | 302 |
| A01515 | A11527 | 307 | A01515 | A11548 | 330 |
| A01515 | A11602 | 371 | A01515 | A11859 | 210 |
| A01515 | A11885 | 491 | A01515 | A11925 | 269 |
| A01515 | A12273 | 338 | A01515 | A12682 | 195 |
| A01515 | A12820 | 157 | A01515 | A12824 | 475 |
| A01515 | A13225 | 899 | A01515 | A13369 | 283 |
| A01515 | A13387 | 283 | A01515 | A13479 | 195 |
| A01515 | A13628 | 216 | A01515 | A13732 | 167 |
| A01515 | A13816 | 446 | A01515 | A13830 | 490 |
| A01515 | A13831 | 473 | A01515 | A13832 | 491 |
| A01515 | A13867 | 180 | A01515 | A13874 | 491 |
| A01515 | A13894 | 473 | A01515 | A13895 | 467 |
| A01515 | A13902 | 334 | A01515 | A13987 | 191 |
| A01515 | A14051 | 216 | A01515 | A14052 | 491 |
| A01515 | A14056 | 475 | A01515 | A14058 | 393 |
| A01515 | A14182 | 477 | A01515 | A14247 | 752 |
| A01515 | A14258 | 477 | A01515 | A14350 | 167 |
| A01515 | A14399 | 218 | A01515 | A14461 | 293 |
| A01515 | A14473 | 269 | A01515 | A14481 | 495 |
| A01515 | A14504 | 216 | A01515 | A14571 | 263 |
| A01515 | A14661 | 491 | A01515 | A14693 | 565 |
| A01515 | A14711 | 224 | A01515 | A14788 | 435 |
| A01515 | A14933 | 252 | A01515 | A15016 | 252 |
| A01515 | A15037 | 157 | A01515 | A15229 | 210 |

|        |        |     |        |        |     |
|--------|--------|-----|--------|--------|-----|
| A01515 | A15301 | 459 | A01515 | A15302 | 269 |
| A01515 | A15366 | 599 | A01515 | A15430 | 526 |
| A01515 | A15462 | 556 | A01515 | A15463 | 577 |
| A01515 | A15498 | 491 | A01515 | A15513 | 152 |
| A01515 | A15552 | 423 | A01515 | A15909 | 355 |
| A01515 | A15992 | 281 | A01515 | A16617 | 179 |
| A01515 | A16621 | 409 | A01515 | A16648 | 385 |
| A01515 | A16669 | 299 | A01515 | A16681 | 484 |
| A01515 | A17061 | 458 | A01516 | A01517 | 430 |
| A01516 | A01585 | 63  | A01516 | A01671 | 200 |
| A01516 | A01710 | 154 | A01516 | A01809 | 200 |
| A01516 | A01988 | 408 | A01516 | A03330 | 368 |
| A01516 | A03480 | 200 | A01516 | A03556 | 200 |
| A01516 | A03597 | 542 | A01516 | A03617 | 200 |
| A01516 | A03626 | 144 | A01516 | A03676 | 269 |
| A01516 | A05273 | 200 | A01516 | A05531 | 200 |
| A01516 | A05539 | 200 | A01516 | A05605 | 200 |
| A01516 | A05638 | 200 | A01516 | A05998 | 314 |
| A01516 | A06204 | 200 | A01516 | A06819 | 268 |
| A01516 | A07180 | 508 | A01516 | A07457 | 252 |
| A01516 | A07756 | 405 | A01516 | A09625 | 200 |
| A01516 | A09628 | 200 | A01516 | A11885 | 177 |
| A01516 | A12824 | 281 | A01516 | A13876 | 200 |
| A01516 | A13881 | 200 | A01516 | A13945 | 163 |
| A01516 | A14170 | 412 | A01516 | A14171 | 200 |
| A01516 | A14179 | 200 | A01516 | A14180 | 200 |
| A01516 | A14356 | 200 | A01516 | A14597 | 157 |
| A01516 | A15370 | 200 | A01516 | A15712 | 200 |
| A01516 | A15719 | 200 | A01516 | A15757 | 200 |
| A01516 | A16066 | 200 | A01516 | A16634 | 200 |
| A01516 | A16919 | 200 | A01517 | A01671 | 200 |
| A01517 | A01809 | 200 | A01517 | A01988 | 318 |
| A01517 | A03330 | 200 | A01517 | A03480 | 200 |
| A01517 | A03556 | 200 | A01517 | A03597 | 392 |
| A01517 | A03617 | 200 | A01517 | A05273 | 200 |
| A01517 | A05531 | 200 | A01517 | A05539 | 200 |
| A01517 | A05605 | 200 | A01517 | A05638 | 200 |
| A01517 | A05998 | 352 | A01517 | A06204 | 200 |
| A01517 | A07180 | 386 | A01517 | A09625 | 200 |
| A01517 | A09628 | 200 | A01517 | A13876 | 200 |
| A01517 | A13881 | 200 | A01517 | A14171 | 200 |
| A01517 | A14179 | 200 | A01517 | A14180 | 200 |
| A01517 | A14356 | 200 | A01517 | A15370 | 200 |
| A01517 | A15712 | 200 | A01517 | A15719 | 200 |
| A01517 | A15757 | 200 | A01517 | A16066 | 200 |
| A01517 | A16634 | 200 | A01517 | A16919 | 200 |

|        |        |     |        |        |     |
|--------|--------|-----|--------|--------|-----|
| A01518 | A01555 | 68  | A01518 | A01655 | 63  |
| A01518 | A01672 | 377 | A01518 | A01809 | 477 |
| A01518 | A01988 | 491 | A01518 | A02035 | 157 |
| A01518 | A02868 | 160 | A01518 | A02954 | 246 |
| A01518 | A03480 | 141 | A01518 | A03565 | 65  |
| A01518 | A03597 | 369 | A01518 | A03617 | 102 |
| A01518 | A03880 | 176 | A01518 | A04086 | 154 |
| A01518 | A04152 | 171 | A01518 | A04826 | 294 |
| A01518 | A05058 | 193 | A01518 | A05563 | 346 |
| A01518 | A05600 | 195 | A01518 | A05638 | 480 |
| A01518 | A05751 | 152 | A01518 | A05759 | 377 |
| A01518 | A05803 | 463 | A01518 | A05972 | 283 |
| A01518 | A06065 | 449 | A01518 | A06122 | 152 |
| A01518 | A06204 | 63  | A01518 | A06347 | 76  |
| A01518 | A06361 | 395 | A01518 | A07180 | 441 |
| A01518 | A07185 | 241 | A01518 | A08094 | 177 |
| A01518 | A08265 | 306 | A01518 | A08366 | 157 |
| A01518 | A08507 | 205 | A01518 | A09020 | 390 |
| A01518 | A09206 | 177 | A01518 | A09301 | 212 |
| A01518 | A09343 | 207 | A01518 | A09509 | 152 |
| A01518 | A09756 | 188 | A01518 | A10444 | 154 |
| A01518 | A10662 | 463 | A01518 | A10755 | 249 |
| A01518 | A11366 | 188 | A01518 | A11569 | 306 |
| A01518 | A13607 | 268 | A01518 | A13831 | 185 |
| A01518 | A13835 | 372 | A01518 | A13837 | 144 |
| A01518 | A13935 | 212 | A01518 | A14170 | 191 |
| A01518 | A14873 | 283 | A01518 | A14878 | 256 |
| A01518 | A14917 | 174 | A01518 | A15370 | 63  |
| A01518 | A15506 | 367 | A01518 | A15757 | 196 |
| A01518 | A16568 | 256 | A01518 | A16667 | 202 |
| A01518 | A17057 | 241 | A01519 | A01520 | 151 |
| A01519 | A01521 | 212 | A01519 | A01573 | 401 |
| A01519 | A01575 | 468 | A01519 | A01583 | 597 |
| A01519 | A01585 | 714 | A01519 | A01706 | 63  |
| A01519 | A01715 | 630 | A01519 | A01811 | 627 |
| A01519 | A02887 | 246 | A01519 | A03489 | 475 |
| A01519 | A03565 | 616 | A01519 | A03626 | 697 |
| A01519 | A03890 | 452 | A01519 | A03891 | 334 |
| A01519 | A03892 | 527 | A01519 | A04292 | 475 |
| A01519 | A04893 | 390 | A01519 | A04896 | 183 |
| A01519 | A04929 | 167 | A01519 | A05023 | 566 |
| A01519 | A05024 | 162 | A01519 | A05201 | 379 |
| A01519 | A05233 | 334 | A01519 | A05449 | 276 |
| A01519 | A05692 | 277 | A01519 | A06659 | 384 |
| A01519 | A06675 | 712 | A01519 | A06890 | 151 |
| A01519 | A07276 | 249 | A01519 | A07814 | 294 |



|        |        |     |        |        |     |
|--------|--------|-----|--------|--------|-----|
| A01519 | A08874 | 633 | A01519 | A09043 | 267 |
| A01519 | A09050 | 334 | A01519 | A10423 | 224 |
| A01519 | A13844 | 491 | A01519 | A13846 | 408 |
| A01519 | A13857 | 196 | A01519 | A13887 | 294 |
| A01519 | A13902 | 228 | A01519 | A14182 | 334 |
| A01519 | A14247 | 406 | A01519 | A14650 | 182 |
| A01519 | A16316 | 294 | A01519 | A16911 | 157 |
| A01520 | A01521 | 491 | A01520 | A01522 | 491 |
| A01520 | A01524 | 366 | A01520 | A01527 | 265 |
| A01520 | A01573 | 165 | A01520 | A01574 | 491 |
| A01520 | A01575 | 606 | A01520 | A01576 | 358 |
| A01520 | A01583 | 454 | A01520 | A01585 | 619 |
| A01520 | A01591 | 440 | A01520 | A01593 | 577 |
| A01520 | A01634 | 491 | A01520 | A01646 | 391 |
| A01520 | A01677 | 221 | A01520 | A01683 | 485 |
| A01520 | A01945 | 63  | A01520 | A01983 | 218 |
| A01520 | A02000 | 168 | A01520 | A02148 | 662 |
| A01520 | A02221 | 202 | A01520 | A02222 | 457 |
| A01520 | A02479 | 252 | A01520 | A02873 | 188 |
| A01520 | A02887 | 144 | A01520 | A02964 | 201 |
| A01520 | A03178 | 174 | A01520 | A03293 | 491 |
| A01520 | A03294 | 288 | A01520 | A03450 | 219 |
| A01520 | A03489 | 608 | A01520 | A03618 | 388 |
| A01520 | A03625 | 430 | A01520 | A03626 | 481 |
| A01520 | A03686 | 193 | A01520 | A03718 | 718 |
| A01520 | A03726 | 286 | A01520 | A03891 | 491 |
| A01520 | A03892 | 684 | A01520 | A04025 | 173 |
| A01520 | A04081 | 152 | A01520 | A04145 | 230 |
| A01520 | A04151 | 318 | A01520 | A04631 | 268 |
| A01520 | A04686 | 491 | A01520 | A04893 | 443 |
| A01520 | A05061 | 224 | A01520 | A05401 | 678 |
| A01520 | A05710 | 238 | A01520 | A06463 | 162 |
| A01520 | A06535 | 352 | A01520 | A06659 | 183 |
| A01520 | A06675 | 230 | A01520 | A06930 | 170 |
| A01520 | A07186 | 188 | A01520 | A07207 | 63  |
| A01520 | A07208 | 477 | A01520 | A07521 | 268 |
| A01520 | A08461 | 333 | A01520 | A08874 | 269 |
| A01520 | A09277 | 168 | A01520 | A09583 | 252 |
| A01520 | A10584 | 353 | A01520 | A10655 | 446 |
| A01520 | A10790 | 196 | A01520 | A10794 | 180 |
| A01520 | A10797 | 454 | A01520 | A10798 | 475 |
| A01520 | A10799 | 311 | A01520 | A10804 | 419 |
| A01520 | A10812 | 391 | A01520 | A11244 | 129 |
| A01520 | A11247 | 180 | A01520 | A11296 | 324 |
| A01520 | A11337 | 234 | A01520 | A11373 | 252 |
| A01520 | A11575 | 193 | A01520 | A11885 | 362 |

|        |        |     |        |        |     |
|--------|--------|-----|--------|--------|-----|
| A01520 | A12221 | 212 | A01520 | A12282 | 182 |
| A01520 | A12295 | 483 | A01520 | A12560 | 308 |
| A01520 | A13816 | 469 | A01520 | A13824 | 91  |
| A01520 | A13829 | 63  | A01520 | A13830 | 405 |
| A01520 | A13831 | 269 | A01520 | A13857 | 135 |
| A01520 | A13867 | 390 | A01520 | A13874 | 238 |
| A01520 | A13882 | 305 | A01520 | A13902 | 329 |
| A01520 | A14193 | 225 | A01520 | A14204 | 286 |
| A01520 | A14233 | 188 | A01520 | A14247 | 489 |
| A01520 | A14854 | 335 | A01520 | A15295 | 466 |
| A01520 | A15303 | 430 | A01520 | A15346 | 266 |
| A01520 | A15498 | 655 | A01520 | A15684 | 183 |
| A01520 | A16891 | 441 | A01520 | A16910 | 388 |
| A01521 | A01522 | 491 | A01521 | A01574 | 474 |
| A01521 | A01575 | 491 | A01521 | A01583 | 252 |
| A01521 | A01585 | 491 | A01521 | A01634 | 491 |
| A01521 | A01646 | 286 | A01521 | A01811 | 432 |
| A01521 | A02873 | 235 | A01521 | A02887 | 127 |
| A01521 | A02964 | 247 | A01521 | A03293 | 477 |
| A01521 | A03440 | 353 | A01521 | A03450 | 263 |
| A01521 | A03489 | 405 | A01521 | A03565 | 180 |
| A01521 | A03625 | 132 | A01521 | A03626 | 455 |
| A01521 | A03686 | 74  | A01521 | A03718 | 491 |
| A01521 | A03891 | 414 | A01521 | A03892 | 489 |
| A01521 | A04630 | 288 | A01521 | A04686 | 485 |
| A01521 | A04893 | 352 | A01521 | A05401 | 469 |
| A01521 | A06930 | 216 | A01521 | A07186 | 235 |
| A01521 | A07207 | 73  | A01521 | A07208 | 204 |
| A01521 | A08874 | 228 | A01521 | A10797 | 115 |
| A01521 | A10798 | 245 | A01521 | A10812 | 316 |
| A01521 | A11244 | 174 | A01521 | A11337 | 198 |
| A01521 | A11885 | 283 | A01521 | A12282 | 229 |
| A01521 | A12295 | 488 | A01521 | A13816 | 447 |
| A01521 | A13824 | 63  | A01521 | A13829 | 63  |
| A01521 | A13831 | 219 | A01521 | A13857 | 314 |
| A01521 | A14056 | 162 | A01521 | A14741 | 299 |
| A01521 | A15241 | 168 | A01521 | A15498 | 485 |
| A01521 | A15647 | 218 | A01522 | A01523 | 226 |
| A01522 | A01524 | 944 | A01522 | A01527 | 935 |
| A01522 | A01530 | 490 | A01522 | A01542 | 390 |
| A01522 | A01571 | 347 | A01522 | A01573 | 475 |
| A01522 | A01574 | 693 | A01522 | A01575 | 803 |
| A01522 | A01576 | 527 | A01522 | A01578 | 480 |
| A01522 | A01583 | 383 | A01522 | A01585 | 817 |
| A01522 | A01600 | 312 | A01522 | A01627 | 324 |
| A01522 | A01634 | 987 | A01522 | A01646 | 763 |

|        |        |     |        |        |     |
|--------|--------|-----|--------|--------|-----|
| A01522 | A01677 | 306 | A01522 | A01683 | 678 |
| A01522 | A01706 | 386 | A01522 | A02148 | 620 |
| A01522 | A02574 | 246 | A01522 | A03079 | 386 |
| A01522 | A03104 | 191 | A01522 | A03186 | 375 |
| A01522 | A03293 | 963 | A01522 | A03294 | 452 |
| A01522 | A03452 | 229 | A01522 | A03489 | 230 |
| A01522 | A03512 | 327 | A01522 | A03545 | 168 |
| A01522 | A03569 | 219 | A01522 | A03618 | 484 |
| A01522 | A03625 | 353 | A01522 | A03626 | 452 |
| A01522 | A03718 | 646 | A01522 | A03726 | 945 |
| A01522 | A03891 | 491 | A01522 | A03892 | 590 |
| A01522 | A03974 | 424 | A01522 | A04145 | 454 |
| A01522 | A04151 | 201 | A01522 | A04337 | 286 |
| A01522 | A04686 | 965 | A01522 | A04715 | 167 |
| A01522 | A04728 | 152 | A01522 | A04835 | 380 |
| A01522 | A04893 | 358 | A01522 | A04929 | 272 |
| A01522 | A04992 | 154 | A01522 | A05024 | 461 |
| A01522 | A05202 | 463 | A01522 | A05401 | 484 |
| A01522 | A05680 | 173 | A01522 | A05722 | 173 |
| A01522 | A06092 | 366 | A01522 | A06168 | 477 |
| A01522 | A06925 | 163 | A01522 | A06941 | 363 |
| A01522 | A07203 | 511 | A01522 | A07208 | 485 |
| A01522 | A07815 | 159 | A01522 | A07823 | 154 |
| A01522 | A08097 | 469 | A01522 | A08137 | 211 |
| A01522 | A08301 | 170 | A01522 | A08377 | 401 |
| A01522 | A08400 | 396 | A01522 | A08450 | 165 |
| A01522 | A08461 | 443 | A01522 | A08484 | 385 |
| A01522 | A08518 | 219 | A01522 | A08543 | 422 |
| A01522 | A08544 | 201 | A01522 | A08550 | 467 |
| A01522 | A08552 | 389 | A01522 | A08560 | 430 |
| A01522 | A08561 | 423 | A01522 | A08814 | 409 |
| A01522 | A08863 | 400 | A01522 | A08874 | 183 |
| A01522 | A09031 | 163 | A01522 | A09277 | 327 |
| A01522 | A09333 | 152 | A01522 | A09401 | 229 |
| A01522 | A09539 | 369 | A01522 | A09609 | 396 |
| A01522 | A09648 | 193 | A01522 | A09742 | 195 |
| A01522 | A09828 | 198 | A01522 | A09886 | 223 |
| A01522 | A10235 | 201 | A01522 | A10316 | 210 |
| A01522 | A10584 | 973 | A01522 | A10597 | 288 |
| A01522 | A10655 | 475 | A01522 | A10684 | 205 |
| A01522 | A10739 | 191 | A01522 | A10789 | 293 |
| A01522 | A10793 | 283 | A01522 | A10794 | 301 |
| A01522 | A10797 | 334 | A01522 | A10798 | 491 |
| A01522 | A10799 | 449 | A01522 | A10803 | 600 |
| A01522 | A10804 | 252 | A01522 | A10809 | 254 |
| A01522 | A10812 | 185 | A01522 | A10821 | 405 |

|        |        |     |        |        |     |
|--------|--------|-----|--------|--------|-----|
| A01522 | A11131 | 294 | A01522 | A11244 | 436 |
| A01522 | A11247 | 417 | A01522 | A11250 | 254 |
| A01522 | A11279 | 456 | A01522 | A11301 | 450 |
| A01522 | A11337 | 491 | A01522 | A11373 | 154 |
| A01522 | A11472 | 350 | A01522 | A11496 | 468 |
| A01522 | A11497 | 469 | A01522 | A11566 | 185 |
| A01522 | A11667 | 185 | A01522 | A11735 | 461 |
| A01522 | A11737 | 162 | A01522 | A11885 | 491 |
| A01522 | A11914 | 450 | A01522 | A11915 | 283 |
| A01522 | A11917 | 443 | A01522 | A11954 | 180 |
| A01522 | A12207 | 163 | A01522 | A12254 | 363 |
| A01522 | A12282 | 489 | A01522 | A12295 | 451 |
| A01522 | A12433 | 446 | A01522 | A12501 | 174 |
| A01522 | A12506 | 345 | A01522 | A12507 | 391 |
| A01522 | A12508 | 319 | A01522 | A12606 | 470 |
| A01522 | A12625 | 260 | A01522 | A12645 | 318 |
| A01522 | A12658 | 446 | A01522 | A12665 | 279 |
| A01522 | A12725 | 353 | A01522 | A12726 | 212 |
| A01522 | A12740 | 258 | A01522 | A12771 | 173 |
| A01522 | A12825 | 221 | A01522 | A12858 | 479 |
| A01522 | A12873 | 183 | A01522 | A13169 | 174 |
| A01522 | A13313 | 351 | A01522 | A13321 | 277 |
| A01522 | A13479 | 201 | A01522 | A13708 | 154 |
| A01522 | A13711 | 258 | A01522 | A13781 | 393 |
| A01522 | A13782 | 185 | A01522 | A13783 | 281 |
| A01522 | A13784 | 430 | A01522 | A13786 | 283 |
| A01522 | A13788 | 351 | A01522 | A13805 | 157 |
| A01522 | A13809 | 433 | A01522 | A13816 | 353 |
| A01522 | A13826 | 235 | A01522 | A13831 | 541 |
| A01522 | A13832 | 401 | A01522 | A13867 | 188 |
| A01522 | A13873 | 165 | A01522 | A13874 | 281 |
| A01522 | A13902 | 152 | A01522 | A13983 | 191 |
| A01522 | A14056 | 605 | A01522 | A14182 | 201 |
| A01522 | A14208 | 63  | A01522 | A14214 | 457 |
| A01522 | A14222 | 255 | A01522 | A14247 | 768 |
| A01522 | A14255 | 223 | A01522 | A14272 | 467 |
| A01522 | A14289 | 212 | A01522 | A14358 | 154 |
| A01522 | A14443 | 899 | A01522 | A14461 | 491 |
| A01522 | A14462 | 301 | A01522 | A14569 | 462 |
| A01522 | A14571 | 243 | A01522 | A14661 | 473 |
| A01522 | A14706 | 268 | A01522 | A14718 | 172 |
| A01522 | A14739 | 154 | A01522 | A14799 | 366 |
| A01522 | A14827 | 362 | A01522 | A14903 | 360 |
| A01522 | A14917 | 268 | A01522 | A14921 | 272 |
| A01522 | A15187 | 228 | A01522 | A15189 | 263 |
| A01522 | A15262 | 226 | A01522 | A15346 | 252 |

|        |        |     |        |        |     |
|--------|--------|-----|--------|--------|-----|
| A01522 | A15361 | 63  | A01522 | A15366 | 171 |
| A01522 | A15463 | 198 | A01522 | A15498 | 491 |
| A01522 | A15519 | 213 | A01522 | A15541 | 377 |
| A01522 | A15626 | 217 | A01522 | A15639 | 63  |
| A01522 | A15647 | 423 | A01522 | A15650 | 230 |
| A01522 | A15653 | 226 | A01522 | A15680 | 411 |
| A01522 | A15683 | 191 | A01522 | A15709 | 371 |
| A01522 | A15711 | 223 | A01522 | A15868 | 160 |
| A01522 | A15976 | 63  | A01522 | A16157 | 480 |
| A01522 | A16462 | 378 | A01522 | A16552 | 432 |
| A01522 | A16565 | 469 | A01522 | A16587 | 340 |
| A01522 | A16597 | 420 | A01522 | A16611 | 473 |
| A01522 | A16664 | 462 | A01522 | A16669 | 173 |
| A01522 | A16675 | 335 | A01522 | A16680 | 259 |
| A01522 | A16682 | 180 | A01522 | A16684 | 223 |
| A01522 | A16690 | 279 | A01522 | A16691 | 243 |
| A01522 | A16693 | 259 | A01522 | A16695 | 360 |
| A01522 | A16704 | 375 | A01522 | A16707 | 185 |
| A01522 | A16776 | 191 | A01522 | A16788 | 201 |
| A01522 | A16829 | 357 | A01522 | A16866 | 241 |
| A01522 | A16874 | 273 | A01522 | A16905 | 193 |
| A01522 | A16908 | 154 | A01522 | A16944 | 201 |
| A01522 | A17012 | 165 | A01523 | A09054 | 216 |
| A01523 | A13874 | 254 | A01524 | A01527 | 998 |
| A01524 | A01550 | 899 | A01524 | A01553 | 899 |
| A01524 | A01554 | 899 | A01524 | A01556 | 326 |
| A01524 | A01558 | 950 | A01524 | A01560 | 945 |
| A01524 | A01561 | 917 | A01524 | A01562 | 921 |
| A01524 | A01572 | 477 | A01524 | A01574 | 990 |
| A01524 | A01575 | 303 | A01524 | A01576 | 903 |
| A01524 | A01582 | 400 | A01524 | A01585 | 993 |
| A01524 | A01588 | 993 | A01524 | A01593 | 989 |
| A01524 | A01596 | 994 | A01524 | A01605 | 903 |
| A01524 | A01612 | 899 | A01524 | A01615 | 994 |
| A01524 | A01628 | 939 | A01524 | A01634 | 993 |
| A01524 | A01637 | 899 | A01524 | A01639 | 899 |
| A01524 | A01646 | 916 | A01524 | A01651 | 899 |
| A01524 | A01654 | 198 | A01524 | A01661 | 899 |
| A01524 | A01669 | 899 | A01524 | A01675 | 899 |
| A01524 | A01683 | 911 | A01524 | A01688 | 944 |
| A01524 | A01692 | 924 | A01524 | A01702 | 899 |
| A01524 | A01705 | 177 | A01524 | A01708 | 905 |
| A01524 | A01709 | 917 | A01524 | A01718 | 899 |
| A01524 | A01719 | 903 | A01524 | A01726 | 899 |
| A01524 | A01730 | 160 | A01524 | A01737 | 899 |
| A01524 | A01749 | 899 | A01524 | A01775 | 899 |

|        |        |     |        |        |     |
|--------|--------|-----|--------|--------|-----|
| A01524 | A01781 | 899 | A01524 | A01786 | 899 |
| A01524 | A01790 | 469 | A01524 | A01844 | 994 |
| A01524 | A01860 | 899 | A01524 | A01878 | 899 |
| A01524 | A01920 | 899 | A01524 | A01931 | 274 |
| A01524 | A01983 | 899 | A01524 | A01995 | 479 |
| A01524 | A01996 | 899 | A01524 | A02000 | 548 |
| A01524 | A02074 | 375 | A01524 | A02076 | 909 |
| A01524 | A02163 | 996 | A01524 | A02221 | 899 |
| A01524 | A02284 | 899 | A01524 | A02382 | 521 |
| A01524 | A02416 | 913 | A01524 | A02424 | 249 |
| A01524 | A02425 | 905 | A01524 | A02467 | 899 |
| A01524 | A02477 | 432 | A01524 | A02502 | 899 |
| A01524 | A02504 | 899 | A01524 | A02521 | 283 |
| A01524 | A02564 | 318 | A01524 | A02640 | 152 |
| A01524 | A02778 | 899 | A01524 | A02787 | 899 |
| A01524 | A02788 | 899 | A01524 | A02896 | 152 |
| A01524 | A02908 | 899 | A01524 | A02942 | 899 |
| A01524 | A02945 | 420 | A01524 | A02962 | 221 |
| A01524 | A02968 | 899 | A01524 | A02972 | 386 |
| A01524 | A02981 | 208 | A01524 | A03010 | 899 |
| A01524 | A03018 | 463 | A01524 | A03099 | 899 |
| A01524 | A03107 | 899 | A01524 | A03203 | 190 |
| A01524 | A03209 | 989 | A01524 | A03271 | 899 |
| A01524 | A03293 | 939 | A01524 | A03304 | 199 |
| A01524 | A03434 | 480 | A01524 | A03436 | 491 |
| A01524 | A03444 | 899 | A01524 | A03451 | 394 |
| A01524 | A03497 | 906 | A01524 | A03512 | 475 |
| A01524 | A03536 | 486 | A01524 | A03575 | 909 |
| A01524 | A03591 | 938 | A01524 | A03611 | 452 |
| A01524 | A03625 | 903 | A01524 | A03654 | 440 |
| A01524 | A03682 | 959 | A01524 | A03718 | 900 |
| A01524 | A03723 | 899 | A01524 | A03726 | 899 |
| A01524 | A03741 | 899 | A01524 | A03778 | 479 |
| A01524 | A03790 | 468 | A01524 | A03803 | 933 |
| A01524 | A03809 | 950 | A01524 | A03817 | 899 |
| A01524 | A03821 | 911 | A01524 | A03892 | 922 |
| A01524 | A03913 | 899 | A01524 | A03990 | 916 |
| A01524 | A04033 | 173 | A01524 | A04062 | 173 |
| A01524 | A04074 | 920 | A01524 | A04086 | 905 |
| A01524 | A04117 | 345 | A01524 | A04138 | 899 |
| A01524 | A04147 | 899 | A01524 | A04151 | 899 |
| A01524 | A04162 | 400 | A01524 | A04202 | 262 |
| A01524 | A04257 | 201 | A01524 | A04337 | 265 |
| A01524 | A04347 | 899 | A01524 | A04363 | 152 |
| A01524 | A04398 | 903 | A01524 | A04422 | 899 |
| A01524 | A04449 | 423 | A01524 | A04473 | 165 |

|        |        |     |        |        |     |
|--------|--------|-----|--------|--------|-----|
| A01524 | A04484 | 899 | A01524 | A04520 | 302 |
| A01524 | A04525 | 899 | A01524 | A04527 | 899 |
| A01524 | A04699 | 902 | A01524 | A04807 | 358 |
| A01524 | A04977 | 899 | A01524 | A04981 | 899 |
| A01524 | A05062 | 63  | A01524 | A05082 | 945 |
| A01524 | A05120 | 171 | A01524 | A05124 | 485 |
| A01524 | A05208 | 899 | A01524 | A05216 | 899 |
| A01524 | A05245 | 297 | A01524 | A05288 | 180 |
| A01524 | A05401 | 270 | A01524 | A05414 | 899 |
| A01524 | A05418 | 491 | A01524 | A05428 | 63  |
| A01524 | A05435 | 180 | A01524 | A05453 | 899 |
| A01524 | A05597 | 899 | A01524 | A05760 | 899 |
| A01524 | A05816 | 210 | A01524 | A05854 | 191 |
| A01524 | A06451 | 232 | A01524 | A06463 | 385 |
| A01524 | A06588 | 227 | A01524 | A06603 | 899 |
| A01524 | A06608 | 899 | A01524 | A06610 | 491 |
| A01524 | A06660 | 899 | A01524 | A06762 | 899 |
| A01524 | A07006 | 899 | A01524 | A07165 | 899 |
| A01524 | A07283 | 899 | A01524 | A07311 | 994 |
| A01524 | A07422 | 899 | A01524 | A07460 | 899 |
| A01524 | A07483 | 899 | A01524 | A07834 | 328 |
| A01524 | A08044 | 163 | A01524 | A08133 | 899 |
| A01524 | A08247 | 180 | A01524 | A08278 | 899 |
| A01524 | A08300 | 944 | A01524 | A08400 | 187 |
| A01524 | A08461 | 899 | A01524 | A08571 | 489 |
| A01524 | A08602 | 899 | A01524 | A08732 | 899 |
| A01524 | A08747 | 152 | A01524 | A08768 | 152 |
| A01524 | A08858 | 989 | A01524 | A08859 | 207 |
| A01524 | A08878 | 945 | A01524 | A08926 | 188 |
| A01524 | A08943 | 899 | A01524 | A09072 | 899 |
| A01524 | A09210 | 899 | A01524 | A09220 | 928 |
| A01524 | A09235 | 262 | A01524 | A09258 | 899 |
| A01524 | A09377 | 899 | A01524 | A09390 | 899 |
| A01524 | A09391 | 899 | A01524 | A09416 | 319 |
| A01524 | A09419 | 440 | A01524 | A09542 | 899 |
| A01524 | A09568 | 899 | A01524 | A09643 | 899 |
| A01524 | A09804 | 899 | A01524 | A09937 | 303 |
| A01524 | A10174 | 900 | A01524 | A10185 | 899 |
| A01524 | A10214 | 904 | A01524 | A10218 | 899 |
| A01524 | A10278 | 899 | A01524 | A10340 | 899 |
| A01524 | A10365 | 899 | A01524 | A10483 | 238 |
| A01524 | A10496 | 899 | A01524 | A10532 | 899 |
| A01524 | A10580 | 977 | A01524 | A10584 | 899 |
| A01524 | A10597 | 899 | A01524 | A10601 | 899 |
| A01524 | A10623 | 899 | A01524 | A10667 | 408 |
| A01524 | A10760 | 365 | A01524 | A10793 | 990 |

|        |        |     |        |        |     |
|--------|--------|-----|--------|--------|-----|
| A01524 | A10801 | 921 | A01524 | A10813 | 899 |
| A01524 | A10894 | 491 | A01524 | A10899 | 165 |
| A01524 | A11089 | 180 | A01524 | A11125 | 900 |
| A01524 | A11230 | 238 | A01524 | A11283 | 899 |
| A01524 | A11308 | 301 | A01524 | A11326 | 168 |
| A01524 | A11327 | 340 | A01524 | A11369 | 903 |
| A01524 | A11604 | 201 | A01524 | A11839 | 899 |
| A01524 | A11850 | 899 | A01524 | A11983 | 995 |
| A01524 | A12047 | 938 | A01524 | A12111 | 296 |
| A01524 | A12119 | 152 | A01524 | A12295 | 193 |
| A01524 | A12341 | 163 | A01524 | A12373 | 899 |
| A01524 | A12379 | 201 | A01524 | A12383 | 902 |
| A01524 | A12408 | 177 | A01524 | A12560 | 928 |
| A01524 | A12614 | 201 | A01524 | A12664 | 909 |
| A01524 | A12682 | 180 | A01524 | A12705 | 932 |
| A01524 | A12886 | 156 | A01524 | A12927 | 899 |
| A01524 | A12961 | 899 | A01524 | A12969 | 921 |
| A01524 | A12971 | 899 | A01524 | A12990 | 899 |
| A01524 | A13003 | 899 | A01524 | A13147 | 196 |
| A01524 | A13313 | 216 | A01524 | A13344 | 899 |
| A01524 | A13369 | 922 | A01524 | A13387 | 904 |
| A01524 | A13390 | 908 | A01524 | A13391 | 899 |
| A01524 | A13393 | 899 | A01524 | A13552 | 163 |
| A01524 | A13555 | 171 | A01524 | A13605 | 915 |
| A01524 | A13667 | 340 | A01524 | A13720 | 899 |
| A01524 | A13781 | 273 | A01524 | A13782 | 163 |
| A01524 | A13824 | 935 | A01524 | A13826 | 899 |
| A01524 | A13831 | 965 | A01524 | A13832 | 913 |
| A01524 | A13867 | 899 | A01524 | A13873 | 899 |
| A01524 | A13930 | 899 | A01524 | A13935 | 899 |
| A01524 | A13975 | 993 | A01524 | A13980 | 939 |
| A01524 | A13981 | 989 | A01524 | A13983 | 943 |
| A01524 | A13984 | 899 | A01524 | A13985 | 941 |
| A01524 | A13987 | 899 | A01524 | A13988 | 899 |
| A01524 | A13991 | 899 | A01524 | A13997 | 313 |
| A01524 | A14001 | 899 | A01524 | A14002 | 900 |
| A01524 | A14003 | 900 | A01524 | A14010 | 989 |
| A01524 | A14012 | 899 | A01524 | A14025 | 899 |
| A01524 | A14029 | 899 | A01524 | A14030 | 899 |
| A01524 | A14032 | 190 | A01524 | A14035 | 899 |
| A01524 | A14042 | 899 | A01524 | A14043 | 899 |
| A01524 | A14047 | 163 | A01524 | A14055 | 899 |
| A01524 | A14056 | 915 | A01524 | A14061 | 899 |
| A01524 | A14071 | 899 | A01524 | A14157 | 928 |
| A01524 | A14189 | 899 | A01524 | A14190 | 899 |
| A01524 | A14191 | 899 | A01524 | A14193 | 904 |



|        |        |     |        |        |     |
|--------|--------|-----|--------|--------|-----|
| A01524 | A14196 | 914 | A01524 | A14198 | 954 |
| A01524 | A14204 | 156 | A01524 | A14206 | 900 |
| A01524 | A14208 | 927 | A01524 | A14211 | 899 |
| A01524 | A14231 | 899 | A01524 | A14242 | 899 |
| A01524 | A14246 | 991 | A01524 | A14299 | 916 |
| A01524 | A14366 | 899 | A01524 | A14369 | 899 |
| A01524 | A14371 | 989 | A01524 | A14374 | 924 |
| A01524 | A14379 | 899 | A01524 | A14391 | 185 |
| A01524 | A14393 | 466 | A01524 | A14397 | 899 |
| A01524 | A14408 | 899 | A01524 | A14433 | 928 |
| A01524 | A14439 | 404 | A01524 | A14443 | 995 |
| A01524 | A14444 | 994 | A01524 | A14452 | 483 |
| A01524 | A14456 | 899 | A01524 | A14484 | 899 |
| A01524 | A14511 | 899 | A01524 | A14543 | 490 |
| A01524 | A14557 | 899 | A01524 | A14604 | 916 |
| A01524 | A14633 | 899 | A01524 | A14654 | 899 |
| A01524 | A14661 | 899 | A01524 | A15114 | 363 |
| A01524 | A15120 | 238 | A01524 | A15182 | 899 |
| A01524 | A15292 | 905 | A01524 | A15293 | 899 |
| A01524 | A15294 | 899 | A01524 | A15295 | 904 |
| A01524 | A15296 | 921 | A01524 | A15297 | 899 |
| A01524 | A15300 | 899 | A01524 | A15301 | 899 |
| A01524 | A15302 | 899 | A01524 | A15303 | 230 |
| A01524 | A15312 | 899 | A01524 | A15315 | 899 |
| A01524 | A15323 | 908 | A01524 | A15327 | 899 |
| A01524 | A15338 | 899 | A01524 | A15339 | 462 |
| A01524 | A15342 | 317 | A01524 | A15343 | 162 |
| A01524 | A15346 | 899 | A01524 | A15347 | 899 |
| A01524 | A15366 | 899 | A01524 | A15369 | 899 |
| A01524 | A15402 | 899 | A01524 | A15409 | 899 |
| A01524 | A15410 | 899 | A01524 | A15422 | 912 |
| A01524 | A15452 | 899 | A01524 | A15480 | 899 |
| A01524 | A15606 | 357 | A01524 | A15614 | 899 |
| A01524 | A15617 | 899 | A01524 | A15620 | 899 |
| A01524 | A15634 | 899 | A01524 | A15709 | 899 |
| A01524 | A15726 | 650 | A01524 | A15795 | 921 |
| A01524 | A15848 | 180 | A01524 | A15868 | 483 |
| A01524 | A15917 | 283 | A01524 | A15933 | 899 |
| A01524 | A15951 | 899 | A01524 | A15989 | 163 |
| A01524 | A15997 | 899 | A01524 | A16030 | 899 |
| A01524 | A16072 | 457 | A01524 | A16075 | 274 |
| A01524 | A16078 | 899 | A01524 | A16084 | 907 |
| A01524 | A16253 | 899 | A01524 | A16424 | 252 |
| A01524 | A16891 | 185 | A01524 | A16910 | 156 |
| A01524 | A16988 | 899 | A01524 | A17119 | 899 |
| A01524 | A17214 | 899 | A01524 | A17229 | 899 |

|        |        |     |        |        |     |
|--------|--------|-----|--------|--------|-----|
| A01525 | A01573 | 296 | A01525 | A01701 | 335 |
| A01525 | A11527 | 449 | A01525 | A12820 | 413 |
| A01525 | A13832 | 330 | A01525 | A13874 | 297 |
| A01525 | A14247 | 311 | A01525 | A14399 | 218 |
| A01525 | A15909 | 379 | A01525 | A17061 | 430 |
| A01526 | A01556 | 491 | A01526 | A01578 | 491 |
| A01526 | A01630 | 210 | A01526 | A01632 | 241 |
| A01526 | A01640 | 151 | A01526 | A01743 | 335 |
| A01526 | A01749 | 184 | A01526 | A01768 | 218 |
| A01526 | A01982 | 491 | A01526 | A02048 | 491 |
| A01526 | A02154 | 223 | A01526 | A02167 | 234 |
| A01526 | A02183 | 473 | A01526 | A02188 | 316 |
| A01526 | A02192 | 210 | A01526 | A02205 | 375 |
| A01526 | A02224 | 213 | A01526 | A02333 | 172 |
| A01526 | A02340 | 163 | A01526 | A02686 | 191 |
| A01526 | A02859 | 329 | A01526 | A03067 | 463 |
| A01526 | A03080 | 491 | A01526 | A03247 | 353 |
| A01526 | A03259 | 286 | A01526 | A03344 | 454 |
| A01526 | A03345 | 238 | A01526 | A03346 | 360 |
| A01526 | A03347 | 491 | A01526 | A03348 | 375 |
| A01526 | A03349 | 490 | A01526 | A03350 | 441 |
| A01526 | A03351 | 491 | A01526 | A03353 | 491 |
| A01526 | A03357 | 436 | A01526 | A03358 | 474 |
| A01526 | A03359 | 267 | A01526 | A03361 | 462 |
| A01526 | A03366 | 238 | A01526 | A03368 | 420 |
| A01526 | A03369 | 491 | A01526 | A03370 | 491 |
| A01526 | A03371 | 491 | A01526 | A03373 | 490 |
| A01526 | A03374 | 473 | A01526 | A03375 | 414 |
| A01526 | A03376 | 491 | A01526 | A03378 | 144 |
| A01526 | A03379 | 491 | A01526 | A03383 | 457 |
| A01526 | A03384 | 357 | A01526 | A03387 | 243 |
| A01526 | A03397 | 374 | A01526 | A03532 | 451 |
| A01526 | A03711 | 326 | A01526 | A03729 | 327 |
| A01526 | A04150 | 263 | A01526 | A04279 | 165 |
| A01526 | A04337 | 419 | A01526 | A04361 | 265 |
| A01526 | A04410 | 230 | A01526 | A04532 | 199 |
| A01526 | A04543 | 213 | A01526 | A04832 | 399 |
| A01526 | A05094 | 174 | A01526 | A05231 | 350 |
| A01526 | A05286 | 350 | A01526 | A05356 | 486 |
| A01526 | A05438 | 236 | A01526 | A05587 | 380 |
| A01526 | A05657 | 259 | A01526 | A05731 | 469 |
| A01526 | A05739 | 441 | A01526 | A05777 | 195 |
| A01526 | A05861 | 270 | A01526 | A05890 | 350 |
| A01526 | A05891 | 356 | A01526 | A05927 | 350 |
| A01526 | A06069 | 480 | A01526 | A06321 | 256 |
| A01526 | A06346 | 374 | A01526 | A06574 | 179 |

|        |        |     |        |        |     |
|--------|--------|-----|--------|--------|-----|
| A01526 | A06887 | 293 | A01526 | A06953 | 338 |
| A01526 | A07187 | 177 | A01526 | A07218 | 491 |
| A01526 | A07361 | 465 | A01526 | A07442 | 179 |
| A01526 | A07471 | 199 | A01526 | A07475 | 154 |
| A01526 | A07542 | 170 | A01526 | A07543 | 177 |
| A01526 | A07704 | 174 | A01526 | A07705 | 162 |
| A01526 | A07754 | 252 | A01526 | A07810 | 350 |
| A01526 | A07843 | 234 | A01526 | A08244 | 310 |
| A01526 | A08292 | 213 | A01526 | A08685 | 249 |
| A01526 | A08785 | 196 | A01526 | A09139 | 326 |
| A01526 | A10228 | 234 | A01526 | A10561 | 256 |
| A01526 | A10651 | 182 | A01526 | A10742 | 263 |
| A01526 | A11317 | 361 | A01526 | A11339 | 297 |
| A01526 | A12117 | 335 | A01526 | A12845 | 283 |
| A01526 | A13121 | 369 | A01526 | A13369 | 291 |
| A01526 | A14353 | 281 | A01526 | A14377 | 245 |
| A01526 | A15552 | 256 | A01526 | A15880 | 270 |
| A01526 | A16340 | 350 | A01527 | A01553 | 994 |
| A01527 | A01554 | 990 | A01527 | A01558 | 954 |
| A01527 | A01560 | 945 | A01527 | A01561 | 906 |
| A01527 | A01562 | 990 | A01527 | A01572 | 921 |
| A01527 | A01574 | 903 | A01527 | A01576 | 904 |
| A01527 | A01585 | 903 | A01527 | A01588 | 995 |
| A01527 | A01591 | 490 | A01527 | A01592 | 355 |
| A01527 | A01593 | 993 | A01527 | A01595 | 199 |
| A01527 | A01602 | 899 | A01527 | A01604 | 899 |
| A01527 | A01605 | 993 | A01527 | A01615 | 994 |
| A01527 | A01626 | 899 | A01527 | A01628 | 934 |
| A01527 | A01634 | 935 | A01527 | A01636 | 899 |
| A01527 | A01637 | 990 | A01527 | A01638 | 904 |
| A01527 | A01639 | 901 | A01527 | A01640 | 991 |
| A01527 | A01650 | 418 | A01527 | A01654 | 274 |
| A01527 | A01665 | 899 | A01527 | A01669 | 899 |
| A01527 | A01676 | 899 | A01527 | A01688 | 940 |
| A01527 | A01692 | 914 | A01527 | A01702 | 989 |
| A01527 | A01708 | 993 | A01527 | A01709 | 993 |
| A01527 | A01717 | 899 | A01527 | A01718 | 934 |
| A01527 | A01719 | 932 | A01527 | A01727 | 899 |
| A01527 | A01730 | 899 | A01527 | A01770 | 899 |
| A01527 | A01781 | 899 | A01527 | A01789 | 943 |
| A01527 | A01790 | 207 | A01527 | A01844 | 993 |
| A01527 | A01879 | 899 | A01527 | A01880 | 901 |
| A01527 | A01887 | 406 | A01527 | A01920 | 899 |
| A01527 | A01974 | 910 | A01527 | A01995 | 491 |
| A01527 | A02000 | 232 | A01527 | A02018 | 899 |
| A01527 | A02030 | 219 | A01527 | A02074 | 279 |

|        |        |     |        |        |     |
|--------|--------|-----|--------|--------|-----|
| A01527 | A02076 | 910 | A01527 | A02088 | 903 |
| A01527 | A02094 | 903 | A01527 | A02104 | 899 |
| A01527 | A02105 | 899 | A01527 | A02126 | 899 |
| A01527 | A02143 | 899 | A01527 | A02156 | 899 |
| A01527 | A02163 | 899 | A01527 | A02215 | 899 |
| A01527 | A02330 | 899 | A01527 | A02337 | 899 |
| A01527 | A02369 | 318 | A01527 | A02390 | 899 |
| A01527 | A02416 | 989 | A01527 | A02423 | 899 |
| A01527 | A02425 | 901 | A01527 | A02460 | 899 |
| A01527 | A02464 | 899 | A01527 | A02465 | 900 |
| A01527 | A02467 | 899 | A01527 | A02477 | 369 |
| A01527 | A02481 | 899 | A01527 | A02482 | 438 |
| A01527 | A02490 | 899 | A01527 | A02502 | 899 |
| A01527 | A02504 | 163 | A01527 | A02521 | 307 |
| A01527 | A02615 | 899 | A01527 | A02618 | 157 |
| A01527 | A02668 | 899 | A01527 | A02698 | 230 |
| A01527 | A02709 | 441 | A01527 | A02737 | 899 |
| A01527 | A02756 | 899 | A01527 | A02787 | 992 |
| A01527 | A02788 | 909 | A01527 | A02825 | 899 |
| A01527 | A02864 | 902 | A01527 | A02872 | 899 |
| A01527 | A02908 | 899 | A01527 | A02917 | 219 |
| A01527 | A02942 | 899 | A01527 | A02945 | 255 |
| A01527 | A02968 | 899 | A01527 | A02982 | 899 |
| A01527 | A03010 | 899 | A01527 | A03018 | 391 |
| A01527 | A03050 | 162 | A01527 | A03054 | 899 |
| A01527 | A03100 | 899 | A01527 | A03107 | 899 |
| A01527 | A03110 | 899 | A01527 | A03204 | 899 |
| A01527 | A03209 | 899 | A01527 | A03219 | 269 |
| A01527 | A03293 | 944 | A01527 | A03294 | 238 |
| A01527 | A03299 | 909 | A01527 | A03332 | 900 |
| A01527 | A03434 | 486 | A01527 | A03436 | 491 |
| A01527 | A03445 | 899 | A01527 | A03451 | 313 |
| A01527 | A03470 | 899 | A01527 | A03492 | 232 |
| A01527 | A03498 | 899 | A01527 | A03512 | 382 |
| A01527 | A03536 | 491 | A01527 | A03575 | 901 |
| A01527 | A03585 | 191 | A01527 | A03611 | 465 |
| A01527 | A03630 | 929 | A01527 | A03633 | 899 |
| A01527 | A03639 | 899 | A01527 | A03682 | 243 |
| A01527 | A03685 | 899 | A01527 | A03723 | 899 |
| A01527 | A03726 | 899 | A01527 | A03766 | 319 |
| A01527 | A03778 | 168 | A01527 | A03790 | 363 |
| A01527 | A03799 | 899 | A01527 | A03800 | 899 |
| A01527 | A03803 | 899 | A01527 | A03809 | 918 |
| A01527 | A03821 | 931 | A01527 | A03832 | 418 |
| A01527 | A03913 | 899 | A01527 | A03961 | 899 |
| A01527 | A03975 | 902 | A01527 | A03990 | 919 |

|        |        |     |        |        |     |
|--------|--------|-----|--------|--------|-----|
| A01527 | A04012 | 899 | A01527 | A04062 | 914 |
| A01527 | A04071 | 430 | A01527 | A04115 | 162 |
| A01527 | A04151 | 899 | A01527 | A04162 | 327 |
| A01527 | A04206 | 183 | A01527 | A04225 | 899 |
| A01527 | A04226 | 899 | A01527 | A04237 | 899 |
| A01527 | A04248 | 899 | A01527 | A04304 | 210 |
| A01527 | A04320 | 918 | A01527 | A04347 | 154 |
| A01527 | A04357 | 185 | A01527 | A04398 | 927 |
| A01527 | A04403 | 899 | A01527 | A04473 | 901 |
| A01527 | A04481 | 241 | A01527 | A04484 | 899 |
| A01527 | A04567 | 201 | A01527 | A04609 | 899 |
| A01527 | A04639 | 899 | A01527 | A04659 | 405 |
| A01527 | A04807 | 905 | A01527 | A04811 | 899 |
| A01527 | A04879 | 456 | A01527 | A04988 | 213 |
| A01527 | A05008 | 292 | A01527 | A05015 | 285 |
| A01527 | A05062 | 126 | A01527 | A05064 | 899 |
| A01527 | A05082 | 938 | A01527 | A05090 | 899 |
| A01527 | A05124 | 363 | A01527 | A05216 | 899 |
| A01527 | A05240 | 165 | A01527 | A05326 | 899 |
| A01527 | A05401 | 319 | A01527 | A05418 | 518 |
| A01527 | A05428 | 90  | A01527 | A05533 | 899 |
| A01527 | A05597 | 899 | A01527 | A05625 | 232 |
| A01527 | A05633 | 196 | A01527 | A05712 | 899 |
| A01527 | A05756 | 899 | A01527 | A05760 | 899 |
| A01527 | A05809 | 899 | A01527 | A05867 | 913 |
| A01527 | A05944 | 899 | A01527 | A06129 | 201 |
| A01527 | A06348 | 899 | A01527 | A06463 | 256 |
| A01527 | A06608 | 899 | A01527 | A06609 | 899 |
| A01527 | A06610 | 490 | A01527 | A06660 | 899 |
| A01527 | A06882 | 899 | A01527 | A06893 | 899 |
| A01527 | A07004 | 482 | A01527 | A07143 | 899 |
| A01527 | A07157 | 899 | A01527 | A07165 | 899 |
| A01527 | A07201 | 899 | A01527 | A07311 | 994 |
| A01527 | A07339 | 924 | A01527 | A07422 | 902 |
| A01527 | A07726 | 428 | A01527 | A07834 | 218 |
| A01527 | A08133 | 199 | A01527 | A08571 | 996 |
| A01527 | A08732 | 899 | A01527 | A08858 | 899 |
| A01527 | A08865 | 899 | A01527 | A08878 | 933 |
| A01527 | A09124 | 899 | A01527 | A09181 | 917 |
| A01527 | A09188 | 185 | A01527 | A09220 | 899 |
| A01527 | A09241 | 187 | A01527 | A09258 | 899 |
| A01527 | A09263 | 933 | A01527 | A09319 | 989 |
| A01527 | A09363 | 902 | A01527 | A09377 | 905 |
| A01527 | A09390 | 165 | A01527 | A09415 | 208 |
| A01527 | A09416 | 375 | A01527 | A09474 | 208 |
| A01527 | A09490 | 932 | A01527 | A09542 | 899 |

|        |        |     |        |        |     |
|--------|--------|-----|--------|--------|-----|
| A01527 | A09543 | 899 | A01527 | A09778 | 177 |
| A01527 | A09799 | 159 | A01527 | A09804 | 899 |
| A01527 | A09876 | 207 | A01527 | A09937 | 374 |
| A01527 | A09959 | 171 | A01527 | A10141 | 159 |
| A01527 | A10174 | 899 | A01527 | A10179 | 171 |
| A01527 | A10185 | 899 | A01527 | A10214 | 401 |
| A01527 | A10233 | 907 | A01527 | A10254 | 185 |
| A01527 | A10332 | 385 | A01527 | A10340 | 899 |
| A01527 | A10392 | 899 | A01527 | A10542 | 899 |
| A01527 | A10580 | 928 | A01527 | A10581 | 899 |
| A01527 | A10584 | 899 | A01527 | A10623 | 911 |
| A01527 | A10735 | 942 | A01527 | A10798 | 201 |
| A01527 | A10801 | 993 | A01527 | A10824 | 87  |
| A01527 | A10894 | 483 | A01527 | A10913 | 207 |
| A01527 | A11099 | 468 | A01527 | A11125 | 899 |
| A01527 | A11206 | 899 | A01527 | A11230 | 245 |
| A01527 | A11270 | 245 | A01527 | A11327 | 167 |
| A01527 | A11346 | 199 | A01527 | A11369 | 994 |
| A01527 | A11681 | 899 | A01527 | A11983 | 954 |
| A01527 | A12295 | 202 | A01527 | A12341 | 899 |
| A01527 | A12383 | 989 | A01527 | A12420 | 908 |
| A01527 | A12421 | 905 | A01527 | A12500 | 187 |
| A01527 | A12560 | 208 | A01527 | A12645 | 196 |
| A01527 | A12666 | 899 | A01527 | A12668 | 899 |
| A01527 | A12680 | 899 | A01527 | A12824 | 173 |
| A01527 | A12886 | 430 | A01527 | A12902 | 899 |
| A01527 | A12920 | 900 | A01527 | A12969 | 940 |
| A01527 | A12971 | 899 | A01527 | A12988 | 899 |
| A01527 | A12990 | 291 | A01527 | A12992 | 907 |
| A01527 | A13147 | 213 | A01527 | A13194 | 171 |
| A01527 | A13232 | 171 | A01527 | A13368 | 899 |
| A01527 | A13391 | 899 | A01527 | A13397 | 899 |
| A01527 | A13401 | 899 | A01527 | A13433 | 185 |
| A01527 | A13580 | 899 | A01527 | A13605 | 906 |
| A01527 | A13667 | 446 | A01527 | A13772 | 199 |
| A01527 | A13824 | 992 | A01527 | A13827 | 899 |
| A01527 | A13841 | 208 | A01527 | A13975 | 945 |
| A01527 | A13978 | 74  | A01527 | A13980 | 937 |
| A01527 | A13981 | 989 | A01527 | A13983 | 989 |
| A01527 | A13985 | 899 | A01527 | A13989 | 899 |
| A01527 | A13991 | 900 | A01527 | A13996 | 899 |
| A01527 | A13997 | 916 | A01527 | A14029 | 899 |
| A01527 | A14031 | 919 | A01527 | A14032 | 899 |
| A01527 | A14033 | 899 | A01527 | A14035 | 899 |
| A01527 | A14038 | 899 | A01527 | A14046 | 208 |
| A01527 | A14059 | 899 | A01527 | A14065 | 899 |

|        |        |     |        |        |     |
|--------|--------|-----|--------|--------|-----|
| A01527 | A14066 | 899 | A01527 | A14068 | 263 |
| A01527 | A14069 | 899 | A01527 | A14157 | 208 |
| A01527 | A14158 | 185 | A01527 | A14188 | 899 |
| A01527 | A14192 | 207 | A01527 | A14193 | 924 |
| A01527 | A14198 | 994 | A01527 | A14202 | 548 |
| A01527 | A14204 | 913 | A01527 | A14208 | 227 |
| A01527 | A14221 | 160 | A01527 | A14222 | 350 |
| A01527 | A14231 | 993 | A01527 | A14236 | 899 |
| A01527 | A14278 | 685 | A01527 | A14364 | 899 |
| A01527 | A14366 | 156 | A01527 | A14371 | 899 |
| A01527 | A14391 | 362 | A01527 | A14393 | 942 |
| A01527 | A14426 | 224 | A01527 | A14433 | 899 |
| A01527 | A14438 | 899 | A01527 | A14439 | 162 |
| A01527 | A14443 | 994 | A01527 | A14444 | 994 |
| A01527 | A14452 | 278 | A01527 | A14506 | 899 |
| A01527 | A14543 | 454 | A01527 | A14596 | 899 |
| A01527 | A14773 | 159 | A01527 | A14929 | 899 |
| A01527 | A15290 | 183 | A01527 | A15293 | 923 |
| A01527 | A15294 | 931 | A01527 | A15297 | 908 |
| A01527 | A15303 | 358 | A01527 | A15340 | 899 |
| A01527 | A15350 | 899 | A01527 | A15386 | 159 |
| A01527 | A15506 | 329 | A01527 | A15598 | 210 |
| A01527 | A15600 | 159 | A01527 | A15606 | 196 |
| A01527 | A15641 | 353 | A01527 | A15649 | 235 |
| A01527 | A15726 | 954 | A01527 | A15782 | 171 |
| A01527 | A16072 | 151 | A01527 | A16084 | 928 |
| A01527 | A16085 | 899 | A01527 | A16207 | 199 |
| A01527 | A16294 | 238 | A01527 | A16518 | 208 |
| A01527 | A16519 | 185 | A01527 | A16891 | 420 |
| A01527 | A16910 | 268 | A01527 | A17190 | 207 |
| A01527 | A17215 | 899 | A01527 | A17216 | 899 |
| A01528 | A01591 | 318 | A01528 | A01660 | 491 |
| A01528 | A01717 | 274 | A01528 | A03728 | 379 |
| A01528 | A06591 | 424 | A01528 | A06907 | 229 |
| A01528 | A08137 | 362 | A01528 | A08571 | 63  |
| A01528 | A08655 | 226 | A01528 | A08910 | 228 |
| A01528 | A09256 | 329 | A01528 | A11346 | 277 |
| A01528 | A12069 | 168 | A01528 | A12952 | 163 |
| A01528 | A13889 | 465 | A01528 | A13928 | 398 |
| A01528 | A14009 | 417 | A01528 | A14221 | 257 |
| A01528 | A14260 | 228 | A01528 | A14279 | 276 |
| A01528 | A14289 | 177 | A01528 | A15104 | 368 |
| A01528 | A15124 | 368 | A01528 | A15312 | 357 |
| A01528 | A15365 | 173 | A01528 | A15400 | 439 |
| A01529 | A01530 | 491 | A01529 | A01531 | 165 |
| A01529 | A01747 | 168 | A01529 | A01797 | 269 |

|        |        |     |        |        |     |
|--------|--------|-----|--------|--------|-----|
| A01529 | A02048 | 328 | A01529 | A02188 | 474 |
| A01529 | A02221 | 486 | A01529 | A02228 | 202 |
| A01529 | A02231 | 274 | A01529 | A02504 | 355 |
| A01529 | A03178 | 187 | A01529 | A03477 | 480 |
| A01529 | A03573 | 414 | A01529 | A03726 | 445 |
| A01529 | A04070 | 462 | A01529 | A04133 | 278 |
| A01529 | A04239 | 243 | A01529 | A04337 | 219 |
| A01529 | A04358 | 337 | A01529 | A04361 | 196 |
| A01529 | A04410 | 168 | A01529 | A04424 | 257 |
| A01529 | A04534 | 340 | A01529 | A05065 | 218 |
| A01529 | A05425 | 180 | A01529 | A05680 | 356 |
| A01529 | A05720 | 396 | A01529 | A05721 | 490 |
| A01529 | A05722 | 434 | A01529 | A05779 | 291 |
| A01529 | A05979 | 273 | A01529 | A06057 | 350 |
| A01529 | A06212 | 486 | A01529 | A06428 | 488 |
| A01529 | A06480 | 340 | A01529 | A06653 | 266 |
| A01529 | A06655 | 326 | A01529 | A06729 | 196 |
| A01529 | A06731 | 177 | A01529 | A06739 | 226 |
| A01529 | A06925 | 350 | A01529 | A07014 | 288 |
| A01529 | A07282 | 193 | A01529 | A07286 | 363 |
| A01529 | A07384 | 262 | A01529 | A07641 | 272 |
| A01529 | A08043 | 371 | A01529 | A08237 | 436 |
| A01529 | A08310 | 345 | A01529 | A09123 | 273 |
| A01529 | A09380 | 443 | A01529 | A09479 | 345 |
| A01529 | A09900 | 243 | A01529 | A10278 | 486 |
| A01529 | A11289 | 385 | A01529 | A11315 | 234 |
| A01529 | A11321 | 422 | A01529 | A11467 | 340 |
| A01529 | A12132 | 356 | A01529 | A12512 | 396 |
| A01529 | A12551 | 380 | A01529 | A12708 | 380 |
| A01529 | A12965 | 371 | A01529 | A14633 | 160 |
| A01529 | A15638 | 297 | A01529 | A15840 | 218 |
| A01529 | A16427 | 396 | A01529 | A16514 | 396 |
| A01529 | A16732 | 321 | A01530 | A01543 | 180 |
| A01530 | A01551 | 246 | A01530 | A01557 | 273 |
| A01530 | A01578 | 281 | A01530 | A01630 | 341 |
| A01530 | A01632 | 288 | A01530 | A01653 | 465 |
| A01530 | A01768 | 202 | A01530 | A01931 | 218 |
| A01530 | A02048 | 412 | A01530 | A02154 | 208 |
| A01530 | A02167 | 218 | A01530 | A02188 | 457 |
| A01530 | A02221 | 472 | A01530 | A02228 | 281 |
| A01530 | A02261 | 201 | A01530 | A02333 | 152 |
| A01530 | A02504 | 154 | A01530 | A03477 | 491 |
| A01530 | A03505 | 316 | A01530 | A03573 | 458 |
| A01530 | A03726 | 943 | A01530 | A03992 | 353 |
| A01530 | A04070 | 307 | A01530 | A04195 | 286 |
| A01530 | A04239 | 168 | A01530 | A04337 | 407 |



|        |        |     |        |        |     |
|--------|--------|-----|--------|--------|-----|
| A01530 | A04351 | 210 | A01530 | A04361 | 457 |
| A01530 | A04410 | 383 | A01530 | A04424 | 184 |
| A01530 | A04520 | 427 | A01530 | A04715 | 335 |
| A01530 | A04747 | 176 | A01530 | A04832 | 172 |
| A01530 | A04840 | 257 | A01530 | A04879 | 281 |
| A01530 | A05148 | 413 | A01530 | A05266 | 402 |
| A01530 | A05395 | 413 | A01530 | A05416 | 207 |
| A01530 | A05484 | 363 | A01530 | A05603 | 413 |
| A01530 | A05680 | 477 | A01530 | A05720 | 363 |
| A01530 | A05721 | 491 | A01530 | A05722 | 468 |
| A01530 | A05777 | 180 | A01530 | A05813 | 419 |
| A01530 | A05896 | 419 | A01530 | A05897 | 286 |
| A01530 | A05898 | 299 | A01530 | A05986 | 299 |
| A01530 | A06057 | 477 | A01530 | A06141 | 447 |
| A01530 | A06148 | 469 | A01530 | A06212 | 491 |
| A01530 | A06293 | 347 | A01530 | A06428 | 491 |
| A01530 | A06448 | 307 | A01530 | A06539 | 363 |
| A01530 | A06610 | 196 | A01530 | A06655 | 384 |
| A01530 | A06739 | 151 | A01530 | A06868 | 167 |
| A01530 | A06919 | 170 | A01530 | A06925 | 944 |
| A01530 | A07010 | 307 | A01530 | A07014 | 480 |
| A01530 | A07110 | 455 | A01530 | A07135 | 182 |
| A01530 | A07268 | 327 | A01530 | A07384 | 190 |
| A01530 | A07407 | 185 | A01530 | A07605 | 267 |
| A01530 | A07622 | 413 | A01530 | A07641 | 201 |
| A01530 | A07841 | 340 | A01530 | A07917 | 363 |
| A01530 | A08043 | 327 | A01530 | A08163 | 260 |
| A01530 | A08236 | 391 | A01530 | A08310 | 466 |
| A01530 | A08448 | 340 | A01530 | A08671 | 236 |
| A01530 | A09088 | 363 | A01530 | A09380 | 350 |
| A01530 | A09539 | 173 | A01530 | A09603 | 286 |
| A01530 | A10278 | 477 | A01530 | A11315 | 380 |
| A01530 | A11318 | 215 | A01530 | A11321 | 474 |
| A01530 | A11378 | 272 | A01530 | A11467 | 395 |
| A01530 | A11483 | 391 | A01530 | A12132 | 407 |
| A01530 | A12339 | 363 | A01530 | A12551 | 340 |
| A01530 | A12612 | 363 | A01530 | A12708 | 340 |
| A01530 | A12941 | 363 | A01530 | A13369 | 475 |
| A01530 | A14548 | 445 | A01530 | A14918 | 183 |
| A01530 | A15282 | 218 | A01530 | A15498 | 480 |
| A01530 | A15638 | 311 | A01530 | A16427 | 363 |
| A01530 | A17061 | 163 | A01531 | A02039 | 183 |
| A01531 | A02437 | 251 | A01531 | A02584 | 251 |
| A01531 | A02660 | 208 | A01531 | A02981 | 152 |
| A01531 | A03033 | 185 | A01531 | A03434 | 199 |
| A01531 | A03436 | 160 | A01531 | A03456 | 238 |

|        |        |     |        |        |     |
|--------|--------|-----|--------|--------|-----|
| A01531 | A03671 | 183 | A01531 | A03941 | 296 |
| A01531 | A03963 | 162 | A01531 | A04202 | 378 |
| A01531 | A04639 | 188 | A01531 | A04678 | 268 |
| A01531 | A05536 | 246 | A01531 | A05721 | 200 |
| A01531 | A06434 | 221 | A01531 | A06753 | 201 |
| A01531 | A06756 | 165 | A01531 | A06813 | 236 |
| A01531 | A06919 | 183 | A01531 | A09363 | 165 |
| A01531 | A09469 | 207 | A01531 | A09748 | 208 |
| A01531 | A09809 | 205 | A01531 | A11522 | 224 |
| A01531 | A12897 | 327 | A01531 | A13241 | 195 |
| A01531 | A13989 | 427 | A01531 | A14048 | 333 |
| A01531 | A14635 | 358 | A01531 | A15415 | 205 |
| A01531 | A15544 | 262 | A01531 | A16042 | 227 |
| A01531 | A16068 | 185 | A01531 | A16626 | 180 |
| A01531 | A16831 | 154 | A01531 | A17195 | 434 |
| A01532 | A01689 | 486 | A01532 | A01789 | 185 |
| A01532 | A03421 | 260 | A01532 | A03422 | 213 |
| A01532 | A03575 | 165 | A01532 | A05008 | 183 |
| A01532 | A05009 | 191 | A01532 | A05383 | 338 |
| A01532 | A06379 | 213 | A01532 | A06775 | 358 |
| A01532 | A09195 | 290 | A01532 | A09370 | 372 |
| A01532 | A15649 | 204 | A01533 | A01537 | 377 |
| A01533 | A01591 | 491 | A01533 | A01592 | 481 |
| A01533 | A01593 | 160 | A01533 | A01638 | 174 |
| A01533 | A01650 | 472 | A01533 | A01660 | 151 |
| A01533 | A01685 | 241 | A01533 | A01687 | 430 |
| A01533 | A01703 | 260 | A01533 | A01717 | 283 |
| A01533 | A01759 | 152 | A01533 | A03338 | 180 |
| A01533 | A03422 | 154 | A01533 | A03492 | 489 |
| A01533 | A03496 | 456 | A01533 | A03528 | 299 |
| A01533 | A03575 | 176 | A01533 | A03845 | 234 |
| A01533 | A03994 | 294 | A01533 | A04079 | 191 |
| A01533 | A05009 | 368 | A01533 | A05016 | 188 |
| A01533 | A05220 | 411 | A01533 | A05553 | 409 |
| A01533 | A05625 | 235 | A01533 | A05892 | 422 |
| A01533 | A06348 | 318 | A01533 | A07593 | 451 |
| A01533 | A07762 | 390 | A01533 | A07942 | 208 |
| A01533 | A08126 | 204 | A01533 | A08416 | 302 |
| A01533 | A08839 | 221 | A01533 | A08868 | 488 |
| A01533 | A09195 | 490 | A01533 | A09256 | 152 |
| A01533 | A09443 | 157 | A01533 | A09506 | 361 |
| A01533 | A09767 | 213 | A01533 | A09793 | 432 |
| A01533 | A09829 | 205 | A01533 | A09862 | 160 |
| A01533 | A09996 | 160 | A01533 | A10604 | 167 |
| A01533 | A11156 | 168 | A01533 | A11258 | 160 |
| A01533 | A11534 | 278 | A01533 | A11884 | 226 |

|        |        |     |        |        |     |
|--------|--------|-----|--------|--------|-----|
| A01533 | A11902 | 156 | A01533 | A12044 | 371 |
| A01533 | A12047 | 324 | A01533 | A13917 | 213 |
| A01533 | A13982 | 347 | A01533 | A14222 | 267 |
| A01533 | A14278 | 236 | A01533 | A14484 | 475 |
| A01533 | A14577 | 283 | A01533 | A14633 | 254 |
| A01533 | A15726 | 299 | A01534 | A01582 | 165 |
| A01534 | A02454 | 262 | A01534 | A02978 | 199 |
| A01534 | A03472 | 302 | A01534 | A07157 | 249 |
| A01534 | A15624 | 154 | A01535 | A01536 | 491 |
| A01535 | A01559 | 302 | A01535 | A01616 | 63  |
| A01535 | A01625 | 212 | A01535 | A01659 | 63  |
| A01535 | A01686 | 490 | A01535 | A02058 | 433 |
| A01535 | A03057 | 185 | A01535 | A03227 | 490 |
| A01535 | A04058 | 215 | A01535 | A04668 | 411 |
| A01535 | A05275 | 491 | A01535 | A05334 | 491 |
| A01535 | A05937 | 215 | A01535 | A06000 | 82  |
| A01535 | A06242 | 63  | A01535 | A06431 | 481 |
| A01535 | A06829 | 173 | A01535 | A06851 | 306 |
| A01535 | A06864 | 66  | A01535 | A07079 | 404 |
| A01535 | A07319 | 160 | A01535 | A07332 | 301 |
| A01535 | A07346 | 472 | A01535 | A07708 | 182 |
| A01535 | A07996 | 63  | A01535 | A08141 | 144 |
| A01535 | A08856 | 430 | A01535 | A09454 | 236 |
| A01535 | A09623 | 346 | A01535 | A13949 | 428 |
| A01535 | A14079 | 435 | A01535 | A14273 | 252 |
| A01535 | A15369 | 232 | A01535 | A16127 | 441 |
| A01535 | A16128 | 441 | A01535 | A16606 | 127 |
| A01536 | A01559 | 491 | A01536 | A01589 | 491 |
| A01536 | A01594 | 491 | A01536 | A01602 | 193 |
| A01536 | A01616 | 491 | A01536 | A01625 | 491 |
| A01536 | A01659 | 491 | A01536 | A01680 | 480 |
| A01536 | A01686 | 491 | A01536 | A01741 | 423 |
| A01536 | A01812 | 257 | A01536 | A02058 | 491 |
| A01536 | A02278 | 488 | A01536 | A02528 | 176 |
| A01536 | A02570 | 165 | A01536 | A02592 | 245 |
| A01536 | A02806 | 413 | A01536 | A02847 | 396 |
| A01536 | A02887 | 440 | A01536 | A03057 | 491 |
| A01536 | A03227 | 489 | A01536 | A03301 | 491 |
| A01536 | A03327 | 329 | A01536 | A03420 | 429 |
| A01536 | A03822 | 485 | A01536 | A04073 | 491 |
| A01536 | A04540 | 228 | A01536 | A04553 | 167 |
| A01536 | A04668 | 491 | A01536 | A04686 | 382 |
| A01536 | A04808 | 269 | A01536 | A05275 | 491 |
| A01536 | A05334 | 491 | A01536 | A06000 | 424 |
| A01536 | A06029 | 457 | A01536 | A06037 | 346 |
| A01536 | A06242 | 491 | A01536 | A06297 | 490 |

|        |        |     |        |        |     |
|--------|--------|-----|--------|--------|-----|
| A01536 | A06353 | 427 | A01536 | A06431 | 484 |
| A01536 | A06775 | 364 | A01536 | A06851 | 486 |
| A01536 | A06864 | 491 | A01536 | A06924 | 151 |
| A01536 | A06982 | 491 | A01536 | A07079 | 491 |
| A01536 | A07164 | 475 | A01536 | A07229 | 465 |
| A01536 | A07319 | 491 | A01536 | A07332 | 378 |
| A01536 | A07346 | 491 | A01536 | A07353 | 412 |
| A01536 | A07466 | 389 | A01536 | A07480 | 491 |
| A01536 | A07534 | 491 | A01536 | A07603 | 491 |
| A01536 | A07647 | 486 | A01536 | A07902 | 485 |
| A01536 | A07996 | 491 | A01536 | A08000 | 488 |
| A01536 | A08025 | 260 | A01536 | A08030 | 491 |
| A01536 | A08117 | 491 | A01536 | A08141 | 465 |
| A01536 | A08208 | 491 | A01536 | A08212 | 419 |
| A01536 | A08356 | 462 | A01536 | A08362 | 408 |
| A01536 | A08516 | 486 | A01536 | A08669 | 490 |
| A01536 | A08769 | 483 | A01536 | A08820 | 491 |
| A01536 | A08822 | 221 | A01536 | A08856 | 362 |
| A01536 | A08902 | 491 | A01536 | A09218 | 475 |
| A01536 | A09288 | 396 | A01536 | A09500 | 151 |
| A01536 | A09598 | 490 | A01536 | A09617 | 259 |
| A01536 | A09623 | 480 | A01536 | A09626 | 139 |
| A01536 | A09629 | 63  | A01536 | A09660 | 488 |
| A01536 | A09706 | 481 | A01536 | A09764 | 486 |
| A01536 | A10078 | 274 | A01536 | A10373 | 491 |
| A01536 | A10466 | 159 | A01536 | A10497 | 260 |
| A01536 | A10625 | 456 | A01536 | A10915 | 353 |
| A01536 | A11236 | 489 | A01536 | A11540 | 436 |
| A01536 | A11744 | 204 | A01536 | A11782 | 373 |
| A01536 | A11792 | 483 | A01536 | A11841 | 281 |
| A01536 | A11867 | 165 | A01536 | A11916 | 491 |
| A01536 | A12190 | 204 | A01536 | A12556 | 491 |
| A01536 | A12932 | 490 | A01536 | A13348 | 160 |
| A01536 | A13429 | 215 | A01536 | A13907 | 489 |
| A01536 | A13949 | 491 | A01536 | A14076 | 491 |
| A01536 | A14079 | 491 | A01536 | A14093 | 386 |
| A01536 | A14094 | 488 | A01536 | A14128 | 475 |
| A01536 | A14155 | 270 | A01536 | A14177 | 490 |
| A01536 | A14230 | 491 | A01536 | A14273 | 491 |
| A01536 | A14460 | 491 | A01536 | A14694 | 491 |
| A01536 | A14706 | 491 | A01536 | A14962 | 184 |
| A01536 | A15295 | 252 | A01536 | A15297 | 241 |
| A01536 | A15369 | 491 | A01536 | A15371 | 124 |
| A01536 | A15498 | 409 | A01536 | A15524 | 462 |
| A01536 | A15539 | 350 | A01536 | A15654 | 430 |
| A01536 | A15714 | 188 | A01536 | A15837 | 402 |

|        |        |     |        |        |     |
|--------|--------|-----|--------|--------|-----|
| A01536 | A15939 | 408 | A01536 | A15941 | 484 |
| A01536 | A16127 | 491 | A01536 | A16128 | 491 |
| A01536 | A16129 | 484 | A01536 | A16225 | 283 |
| A01536 | A16226 | 491 | A01536 | A16294 | 428 |
| A01536 | A16299 | 256 | A01536 | A16331 | 185 |
| A01536 | A16378 | 408 | A01536 | A16452 | 234 |
| A01536 | A16461 | 378 | A01536 | A16549 | 176 |
| A01536 | A16606 | 491 | A01536 | A16612 | 205 |
| A01536 | A16613 | 490 | A01536 | A16616 | 174 |
| A01536 | A16626 | 489 | A01536 | A16646 | 477 |
| A01536 | A16746 | 165 | A01536 | A16754 | 480 |
| A01536 | A16762 | 351 | A01536 | A16830 | 229 |
| A01537 | A01591 | 401 | A01537 | A01592 | 63  |
| A01537 | A01595 | 491 | A01537 | A01660 | 334 |
| A01537 | A01668 | 414 | A01537 | A01687 | 491 |
| A01537 | A01689 | 491 | A01537 | A01717 | 360 |
| A01537 | A02116 | 185 | A01537 | A02381 | 430 |
| A01537 | A03492 | 159 | A01537 | A03496 | 429 |
| A01537 | A03575 | 406 | A01537 | A03981 | 170 |
| A01537 | A04331 | 177 | A01537 | A05008 | 472 |
| A01537 | A05009 | 491 | A01537 | A05880 | 269 |
| A01537 | A05892 | 135 | A01537 | A05894 | 63  |
| A01537 | A05987 | 391 | A01537 | A06348 | 491 |
| A01537 | A06572 | 412 | A01537 | A06661 | 327 |
| A01537 | A07425 | 462 | A01537 | A07433 | 462 |
| A01537 | A07593 | 484 | A01537 | A08184 | 445 |
| A01537 | A08185 | 445 | A01537 | A08318 | 152 |
| A01537 | A08525 | 452 | A01537 | A08839 | 446 |
| A01537 | A08853 | 484 | A01537 | A08854 | 489 |
| A01537 | A08894 | 491 | A01537 | A09052 | 480 |
| A01537 | A09443 | 490 | A01537 | A10604 | 156 |
| A01537 | A10619 | 173 | A01537 | A10732 | 177 |
| A01537 | A10871 | 163 | A01537 | A11283 | 193 |
| A01537 | A11656 | 419 | A01537 | A13829 | 199 |
| A01537 | A14037 | 63  | A01537 | A14203 | 182 |
| A01537 | A14216 | 368 | A01537 | A14227 | 491 |
| A01537 | A14306 | 347 | A01537 | A14307 | 368 |
| A01537 | A14309 | 447 | A01537 | A14509 | 163 |
| A01537 | A15008 | 321 | A01537 | A15232 | 297 |
| A01537 | A15533 | 469 | A01537 | A16088 | 491 |
| A01537 | A16516 | 297 | A01538 | A01566 | 157 |
| A01538 | A01598 | 727 | A01538 | A01614 | 726 |
| A01538 | A01647 | 619 | A01538 | A01649 | 236 |
| A01538 | A01652 | 212 | A01538 | A01721 | 160 |
| A01538 | A02164 | 63  | A01538 | A02265 | 245 |
| A01538 | A02268 | 188 | A01538 | A02527 | 199 |

|        |        |     |        |        |     |
|--------|--------|-----|--------|--------|-----|
| A01538 | A02978 | 502 | A01538 | A03158 | 208 |
| A01538 | A03291 | 174 | A01538 | A03438 | 547 |
| A01538 | A03652 | 170 | A01538 | A03981 | 170 |
| A01538 | A05076 | 245 | A01538 | A05230 | 210 |
| A01538 | A05654 | 424 | A01538 | A06356 | 170 |
| A01538 | A06382 | 255 | A01538 | A06486 | 276 |
| A01538 | A06543 | 182 | A01538 | A06825 | 124 |
| A01538 | A07076 | 210 | A01538 | A07243 | 151 |
| A01538 | A07244 | 170 | A01538 | A07524 | 170 |
| A01538 | A07851 | 174 | A01538 | A07924 | 170 |
| A01538 | A08211 | 170 | A01538 | A08357 | 260 |
| A01538 | A09292 | 210 | A01538 | A09697 | 170 |
| A01538 | A11263 | 469 | A01538 | A11392 | 168 |
| A01538 | A13052 | 210 | A01538 | A13126 | 402 |
| A01538 | A13989 | 572 | A01538 | A14006 | 171 |
| A01538 | A14196 | 263 | A01538 | A14216 | 364 |
| A01538 | A14816 | 210 | A01538 | A15840 | 267 |
| A01538 | A16048 | 177 | A01539 | A01540 | 491 |
| A01539 | A01548 | 439 | A01539 | A01564 | 291 |
| A01539 | A01569 | 730 | A01539 | A01577 | 479 |
| A01539 | A01579 | 491 | A01539 | A01586 | 177 |
| A01539 | A01598 | 491 | A01539 | A01613 | 473 |
| A01539 | A01614 | 162 | A01539 | A01660 | 171 |
| A01539 | A01770 | 474 | A01539 | A01782 | 171 |
| A01539 | A01850 | 173 | A01539 | A01900 | 407 |
| A01539 | A01917 | 290 | A01539 | A02269 | 199 |
| A01539 | A02353 | 416 | A01539 | A03446 | 722 |
| A01539 | A03494 | 296 | A01539 | A03567 | 346 |
| A01539 | A03617 | 249 | A01539 | A03738 | 218 |
| A01539 | A03740 | 489 | A01539 | A03752 | 571 |
| A01539 | A03863 | 729 | A01539 | A04021 | 396 |
| A01539 | A04117 | 184 | A01539 | A04507 | 235 |
| A01539 | A05258 | 199 | A01539 | A05501 | 249 |
| A01539 | A05621 | 251 | A01539 | A05689 | 185 |
| A01539 | A05712 | 451 | A01539 | A05930 | 235 |
| A01539 | A06365 | 213 | A01539 | A06466 | 488 |
| A01539 | A06606 | 308 | A01539 | A06812 | 160 |
| A01539 | A07160 | 271 | A01539 | A07223 | 452 |
| A01539 | A07247 | 378 | A01539 | A07277 | 213 |
| A01539 | A07311 | 488 | A01539 | A07347 | 491 |
| A01539 | A07725 | 489 | A01539 | A08193 | 207 |
| A01539 | A08267 | 199 | A01539 | A08357 | 217 |
| A01539 | A08359 | 457 | A01539 | A08400 | 314 |
| A01539 | A08476 | 324 | A01539 | A08546 | 712 |
| A01539 | A08684 | 213 | A01539 | A08707 | 472 |
| A01539 | A08859 | 472 | A01539 | A08896 | 394 |

|        |        |     |        |        |     |
|--------|--------|-----|--------|--------|-----|
| A01539 | A09011 | 269 | A01539 | A10006 | 419 |
| A01539 | A10248 | 270 | A01539 | A10282 | 213 |
| A01539 | A10490 | 491 | A01539 | A10493 | 168 |
| A01539 | A10532 | 659 | A01539 | A11002 | 235 |
| A01539 | A11240 | 372 | A01539 | A11409 | 491 |
| A01539 | A11550 | 223 | A01539 | A12133 | 213 |
| A01539 | A12223 | 302 | A01539 | A12323 | 235 |
| A01539 | A13311 | 152 | A01539 | A13340 | 485 |
| A01539 | A13609 | 491 | A01539 | A13799 | 235 |
| A01539 | A13989 | 549 | A01539 | A14073 | 479 |
| A01539 | A14216 | 279 | A01539 | A14738 | 210 |
| A01539 | A14817 | 396 | A01539 | A14919 | 213 |
| A01539 | A15525 | 165 | A01539 | A15653 | 357 |
| A01539 | A15666 | 378 | A01539 | A15684 | 460 |
| A01539 | A15698 | 372 | A01539 | A15709 | 232 |
| A01539 | A15735 | 491 | A01539 | A15739 | 424 |
| A01539 | A16272 | 163 | A01539 | A16330 | 160 |
| A01539 | A16756 | 335 | A01539 | A16834 | 182 |
| A01539 | A16904 | 414 | A01540 | A01560 | 272 |
| A01540 | A01569 | 465 | A01540 | A01577 | 294 |
| A01540 | A01579 | 488 | A01540 | A01586 | 385 |
| A01540 | A01641 | 184 | A01540 | A01649 | 489 |
| A01540 | A01822 | 373 | A01540 | A01827 | 409 |
| A01540 | A01850 | 633 | A01540 | A02026 | 167 |
| A01540 | A02040 | 263 | A01540 | A02072 | 224 |
| A01540 | A02084 | 152 | A01540 | A02158 | 347 |
| A01540 | A02185 | 401 | A01540 | A02227 | 491 |
| A01540 | A02237 | 243 | A01540 | A02350 | 343 |
| A01540 | A02353 | 346 | A01540 | A02601 | 313 |
| A01540 | A02607 | 481 | A01540 | A02692 | 218 |
| A01540 | A02813 | 489 | A01540 | A02994 | 174 |
| A01540 | A03257 | 165 | A01540 | A03298 | 274 |
| A01540 | A03467 | 238 | A01540 | A03490 | 259 |
| A01540 | A03494 | 475 | A01540 | A03516 | 632 |
| A01540 | A03567 | 172 | A01540 | A03570 | 196 |
| A01540 | A03571 | 281 | A01540 | A03651 | 196 |
| A01540 | A03654 | 185 | A01540 | A03715 | 196 |
| A01540 | A03740 | 654 | A01540 | A03752 | 582 |
| A01540 | A03798 | 333 | A01540 | A03809 | 475 |
| A01540 | A03858 | 199 | A01540 | A03930 | 232 |
| A01540 | A03981 | 393 | A01540 | A04099 | 152 |
| A01540 | A04209 | 443 | A01540 | A04265 | 195 |
| A01540 | A04461 | 152 | A01540 | A04508 | 232 |
| A01540 | A04579 | 373 | A01540 | A04838 | 429 |
| A01540 | A05086 | 580 | A01540 | A05109 | 212 |
| A01540 | A05147 | 184 | A01540 | A05153 | 177 |

|        |        |     |        |        |     |
|--------|--------|-----|--------|--------|-----|
| A01540 | A05417 | 479 | A01540 | A05449 | 154 |
| A01540 | A05453 | 152 | A01540 | A05501 | 290 |
| A01540 | A05608 | 174 | A01540 | A05801 | 174 |
| A01540 | A05840 | 268 | A01540 | A06048 | 268 |
| A01540 | A06077 | 374 | A01540 | A06466 | 491 |
| A01540 | A06589 | 185 | A01540 | A06754 | 268 |
| A01540 | A06794 | 268 | A01540 | A06795 | 346 |
| A01540 | A06804 | 268 | A01540 | A06933 | 159 |
| A01540 | A06957 | 344 | A01540 | A07053 | 196 |
| A01540 | A07063 | 257 | A01540 | A07086 | 205 |
| A01540 | A07102 | 324 | A01540 | A07187 | 371 |
| A01540 | A07208 | 360 | A01540 | A07311 | 491 |
| A01540 | A07394 | 183 | A01540 | A07502 | 268 |
| A01540 | A07527 | 452 | A01540 | A07686 | 307 |
| A01540 | A07742 | 318 | A01540 | A07773 | 455 |
| A01540 | A07792 | 193 | A01540 | A07798 | 366 |
| A01540 | A07845 | 268 | A01540 | A07846 | 268 |
| A01540 | A07947 | 212 | A01540 | A08073 | 196 |
| A01540 | A08133 | 199 | A01540 | A08222 | 333 |
| A01540 | A08233 | 268 | A01540 | A08319 | 389 |
| A01540 | A08371 | 152 | A01540 | A08420 | 196 |
| A01540 | A08422 | 184 | A01540 | A08424 | 159 |
| A01540 | A08460 | 268 | A01540 | A08461 | 329 |
| A01540 | A08488 | 333 | A01540 | A08519 | 283 |
| A01540 | A08571 | 454 | A01540 | A08596 | 156 |
| A01540 | A08679 | 210 | A01540 | A08835 | 490 |
| A01540 | A08922 | 268 | A01540 | A08924 | 268 |
| A01540 | A08967 | 196 | A01540 | A08968 | 212 |
| A01540 | A08976 | 360 | A01540 | A08987 | 485 |
| A01540 | A09005 | 159 | A01540 | A09054 | 449 |
| A01540 | A09093 | 159 | A01540 | A09228 | 272 |
| A01540 | A09302 | 196 | A01540 | A09339 | 394 |
| A01540 | A09475 | 232 | A01540 | A09476 | 200 |
| A01540 | A09522 | 232 | A01540 | A09549 | 184 |
| A01540 | A09577 | 290 | A01540 | A09581 | 272 |
| A01540 | A09792 | 285 | A01540 | A10385 | 268 |
| A01540 | A10487 | 268 | A01540 | A10532 | 425 |
| A01540 | A10535 | 256 | A01540 | A10797 | 470 |
| A01540 | A10798 | 469 | A01540 | A10935 | 278 |
| A01540 | A11078 | 212 | A01540 | A11139 | 205 |
| A01540 | A11296 | 167 | A01540 | A11302 | 262 |
| A01540 | A11322 | 491 | A01540 | A11337 | 160 |
| A01540 | A11338 | 480 | A01540 | A11372 | 440 |
| A01540 | A11374 | 632 | A01540 | A11419 | 480 |
| A01540 | A11427 | 408 | A01540 | A11677 | 274 |
| A01540 | A11694 | 324 | A01540 | A11724 | 517 |



|        |        |     |        |        |     |
|--------|--------|-----|--------|--------|-----|
| A01540 | A11833 | 165 | A01540 | A12001 | 232 |
| A01540 | A12027 | 232 | A01540 | A12056 | 268 |
| A01540 | A12070 | 184 | A01540 | A12075 | 268 |
| A01540 | A12076 | 268 | A01540 | A12143 | 268 |
| A01540 | A12167 | 494 | A01540 | A12179 | 174 |
| A01540 | A12241 | 288 | A01540 | A12692 | 307 |
| A01540 | A12703 | 268 | A01540 | A12746 | 232 |
| A01540 | A12795 | 268 | A01540 | A12990 | 457 |
| A01540 | A13024 | 307 | A01540 | A13037 | 268 |
| A01540 | A13116 | 157 | A01540 | A13251 | 458 |
| A01540 | A13340 | 486 | A01540 | A13524 | 196 |
| A01540 | A13547 | 268 | A01540 | A13617 | 199 |
| A01540 | A13721 | 268 | A01540 | A13728 | 341 |
| A01540 | A13754 | 268 | A01540 | A14073 | 634 |
| A01540 | A14178 | 205 | A01540 | A14216 | 363 |
| A01540 | A14246 | 191 | A01540 | A14471 | 296 |
| A01540 | A14481 | 199 | A01540 | A14566 | 483 |
| A01540 | A14592 | 268 | A01540 | A14642 | 633 |
| A01540 | A14699 | 486 | A01540 | A14738 | 329 |
| A01540 | A14830 | 265 | A01540 | A14845 | 405 |
| A01540 | A14888 | 394 | A01540 | A15075 | 268 |
| A01540 | A15076 | 268 | A01540 | A15081 | 268 |
| A01540 | A15084 | 268 | A01540 | A15109 | 196 |
| A01540 | A15117 | 268 | A01540 | A15121 | 369 |
| A01540 | A15143 | 196 | A01540 | A15653 | 469 |
| A01540 | A15660 | 474 | A01540 | A15666 | 430 |
| A01540 | A15684 | 486 | A01540 | A15742 | 252 |
| A01540 | A15765 | 406 | A01540 | A15843 | 327 |
| A01540 | A15891 | 204 | A01540 | A15931 | 458 |
| A01540 | A15938 | 272 | A01540 | A16272 | 245 |
| A01540 | A16351 | 174 | A01540 | A16403 | 278 |
| A01540 | A16430 | 279 | A01540 | A16548 | 212 |
| A01540 | A16591 | 196 | A01540 | A16662 | 184 |
| A01540 | A16683 | 184 | A01540 | A16688 | 174 |
| A01540 | A16793 | 221 | A01540 | A17000 | 232 |
| A01541 | A01569 | 419 | A01541 | A01577 | 455 |
| A01541 | A01598 | 199 | A01541 | A01649 | 252 |
| A01541 | A01707 | 411 | A01541 | A03261 | 308 |
| A01541 | A03438 | 224 | A01541 | A03446 | 210 |
| A01541 | A03638 | 468 | A01541 | A03654 | 489 |
| A01541 | A03785 | 163 | A01541 | A03817 | 221 |
| A01541 | A03820 | 491 | A01541 | A03843 | 188 |
| A01541 | A04442 | 152 | A01541 | A04562 | 174 |
| A01541 | A04944 | 213 | A01541 | A05122 | 395 |
| A01541 | A05247 | 190 | A01541 | A05928 | 340 |
| A01541 | A06182 | 727 | A01541 | A06400 | 299 |

|        |        |     |        |        |     |
|--------|--------|-----|--------|--------|-----|
| A01541 | A07311 | 210 | A01541 | A07706 | 445 |
| A01541 | A08118 | 452 | A01541 | A08261 | 193 |
| A01541 | A08377 | 168 | A01541 | A08560 | 176 |
| A01541 | A08561 | 168 | A01541 | A08571 | 174 |
| A01541 | A08814 | 202 | A01541 | A08844 | 183 |
| A01541 | A09146 | 246 | A01541 | A09609 | 254 |
| A01541 | A09621 | 502 | A01541 | A09828 | 293 |
| A01541 | A10399 | 463 | A01541 | A10490 | 151 |
| A01541 | A10853 | 224 | A01541 | A11209 | 218 |
| A01541 | A11324 | 502 | A01541 | A11346 | 199 |
| A01541 | A11362 | 327 | A01541 | A11394 | 258 |
| A01541 | A11409 | 165 | A01541 | A11496 | 172 |
| A01541 | A11497 | 159 | A01541 | A11616 | 157 |
| A01541 | A11672 | 277 | A01541 | A11674 | 152 |
| A01541 | A11705 | 191 | A01541 | A11735 | 213 |
| A01541 | A11737 | 318 | A01541 | A11851 | 160 |
| A01541 | A11940 | 221 | A01541 | A12254 | 324 |
| A01541 | A12433 | 157 | A01541 | A12725 | 154 |
| A01541 | A12858 | 213 | A01541 | A13099 | 212 |
| A01541 | A13116 | 187 | A01541 | A13356 | 238 |
| A01541 | A13809 | 361 | A01541 | A13989 | 446 |
| A01541 | A14006 | 375 | A01541 | A14074 | 235 |
| A01541 | A14188 | 168 | A01541 | A14449 | 344 |
| A01541 | A14706 | 162 | A01541 | A14838 | 168 |
| A01541 | A14903 | 215 | A01541 | A15261 | 224 |
| A01541 | A15711 | 174 | A01541 | A16157 | 243 |
| A01541 | A16261 | 154 | A01541 | A16322 | 243 |
| A01541 | A16565 | 247 | A01541 | A16587 | 329 |
| A01541 | A16611 | 177 | A01541 | A16675 | 201 |
| A01541 | A16680 | 229 | A01541 | A16692 | 188 |
| A01541 | A16693 | 273 | A01541 | A16764 | 480 |
| A01541 | A16774 | 251 | A01541 | A16790 | 196 |
| A01541 | A16829 | 212 | A01542 | A01574 | 489 |
| A01542 | A01576 | 565 | A01542 | A01585 | 536 |
| A01542 | A01593 | 919 | A01542 | A01601 | 101 |
| A01542 | A01612 | 486 | A01542 | A01660 | 491 |
| A01542 | A01779 | 246 | A01542 | A01798 | 469 |
| A01542 | A01923 | 418 | A01542 | A01924 | 329 |
| A01542 | A01925 | 160 | A01542 | A01926 | 279 |
| A01542 | A01927 | 427 | A01542 | A02092 | 152 |
| A01542 | A02107 | 172 | A01542 | A02114 | 167 |
| A01542 | A02148 | 321 | A01542 | A02188 | 350 |
| A01542 | A02215 | 457 | A01542 | A02545 | 412 |
| A01542 | A03050 | 433 | A01542 | A03186 | 354 |
| A01542 | A03205 | 490 | A01542 | A03444 | 447 |
| A01542 | A03524 | 157 | A01542 | A03569 | 463 |

|        |        |     |        |        |     |
|--------|--------|-----|--------|--------|-----|
| A01542 | A03597 | 157 | A01542 | A03600 | 288 |
| A01542 | A03726 | 899 | A01542 | A03892 | 939 |
| A01542 | A04610 | 160 | A01542 | A04686 | 384 |
| A01542 | A05234 | 221 | A01542 | A05330 | 183 |
| A01542 | A05356 | 480 | A01542 | A05914 | 246 |
| A01542 | A06581 | 486 | A01542 | A07004 | 435 |
| A01542 | A07111 | 491 | A01542 | A07355 | 154 |
| A01542 | A07452 | 418 | A01542 | A07471 | 375 |
| A01542 | A07541 | 373 | A01542 | A07630 | 176 |
| A01542 | A07758 | 219 | A01542 | A07815 | 262 |
| A01542 | A08137 | 217 | A01542 | A08785 | 435 |
| A01542 | A08882 | 299 | A01542 | A08903 | 491 |
| A01542 | A09303 | 279 | A01542 | A09932 | 202 |
| A01542 | A10643 | 183 | A01542 | A10810 | 491 |
| A01542 | A10967 | 187 | A01542 | A11048 | 240 |
| A01542 | A11287 | 286 | A01542 | A11288 | 477 |
| A01542 | A11363 | 943 | A01542 | A11487 | 322 |
| A01542 | A11508 | 294 | A01542 | A11856 | 899 |
| A01542 | A11931 | 350 | A01542 | A11956 | 160 |
| A01542 | A12107 | 430 | A01542 | A12589 | 160 |
| A01542 | A13293 | 165 | A01542 | A13520 | 219 |
| A01542 | A13830 | 170 | A01542 | A13989 | 530 |
| A01542 | A14006 | 517 | A01542 | A14009 | 291 |
| A01542 | A14025 | 578 | A01542 | A14193 | 526 |
| A01542 | A14204 | 404 | A01542 | A14253 | 435 |
| A01542 | A14331 | 160 | A01542 | A14453 | 183 |
| A01542 | A14475 | 565 | A01542 | A14485 | 457 |
| A01542 | A14559 | 188 | A01542 | A14585 | 485 |
| A01542 | A14589 | 491 | A01542 | A14643 | 450 |
| A01542 | A14655 | 191 | A01542 | A14837 | 219 |
| A01542 | A14907 | 183 | A01542 | A14986 | 396 |
| A01542 | A15315 | 188 | A01542 | A15498 | 210 |
| A01542 | A16082 | 488 | A01543 | A01551 | 470 |
| A01543 | A01557 | 265 | A01543 | A01578 | 485 |
| A01543 | A01595 | 208 | A01543 | A01600 | 491 |
| A01543 | A01632 | 491 | A01543 | A01645 | 262 |
| A01543 | A01757 | 235 | A01543 | A01819 | 154 |
| A01543 | A01930 | 174 | A01543 | A02039 | 480 |
| A01543 | A02511 | 491 | A01543 | A02695 | 486 |
| A01543 | A02787 | 174 | A01543 | A02830 | 452 |
| A01543 | A02867 | 254 | A01543 | A02927 | 204 |
| A01543 | A03034 | 332 | A01543 | A03104 | 311 |
| A01543 | A03211 | 491 | A01543 | A03241 | 326 |
| A01543 | A03434 | 302 | A01543 | A03725 | 441 |
| A01543 | A03728 | 366 | A01543 | A03984 | 310 |
| A01543 | A04006 | 165 | A01543 | A04175 | 314 |

|        |        |     |        |        |     |
|--------|--------|-----|--------|--------|-----|
| A01543 | A04275 | 401 | A01543 | A04324 | 254 |
| A01543 | A04399 | 347 | A01543 | A04406 | 163 |
| A01543 | A04410 | 430 | A01543 | A04418 | 465 |
| A01543 | A04435 | 299 | A01543 | A04493 | 491 |
| A01543 | A04520 | 351 | A01543 | A04549 | 384 |
| A01543 | A04710 | 249 | A01543 | A04715 | 491 |
| A01543 | A04717 | 243 | A01543 | A04790 | 480 |
| A01543 | A04903 | 288 | A01543 | A04944 | 491 |
| A01543 | A04947 | 468 | A01543 | A04964 | 491 |
| A01543 | A04972 | 152 | A01543 | A04985 | 488 |
| A01543 | A05031 | 268 | A01543 | A05106 | 488 |
| A01543 | A05288 | 463 | A01543 | A05356 | 196 |
| A01543 | A05416 | 491 | A01543 | A05556 | 352 |
| A01543 | A05608 | 234 | A01543 | A05666 | 603 |
| A01543 | A06035 | 286 | A01543 | A06100 | 481 |
| A01543 | A06106 | 268 | A01543 | A06151 | 358 |
| A01543 | A06152 | 353 | A01543 | A06153 | 268 |
| A01543 | A06222 | 268 | A01543 | A06313 | 383 |
| A01543 | A06530 | 449 | A01543 | A06535 | 472 |
| A01543 | A06651 | 168 | A01543 | A06686 | 491 |
| A01543 | A06708 | 317 | A01543 | A06720 | 360 |
| A01543 | A06721 | 384 | A01543 | A06749 | 316 |
| A01543 | A06871 | 268 | A01543 | A06872 | 316 |
| A01543 | A06895 | 226 | A01543 | A06896 | 268 |
| A01543 | A07149 | 195 | A01543 | A07209 | 373 |
| A01543 | A07452 | 167 | A01543 | A07481 | 236 |
| A01543 | A07541 | 355 | A01543 | A07804 | 316 |
| A01543 | A07815 | 484 | A01543 | A07852 | 234 |
| A01543 | A07995 | 212 | A01543 | A08093 | 489 |
| A01543 | A08146 | 268 | A01543 | A08224 | 353 |
| A01543 | A08274 | 174 | A01543 | A08374 | 436 |
| A01543 | A08386 | 268 | A01543 | A08387 | 268 |
| A01543 | A08445 | 283 | A01543 | A08557 | 467 |
| A01543 | A08711 | 212 | A01543 | A08785 | 246 |
| A01543 | A08847 | 347 | A01543 | A09113 | 316 |
| A01543 | A09624 | 168 | A01543 | A09964 | 212 |
| A01543 | A10553 | 268 | A01543 | A10639 | 212 |
| A01543 | A10672 | 163 | A01543 | A11306 | 353 |
| A01543 | A11308 | 174 | A01543 | A11311 | 180 |
| A01543 | A11413 | 188 | A01543 | A11983 | 460 |
| A01543 | A12446 | 286 | A01543 | A12675 | 234 |
| A01543 | A13163 | 438 | A01543 | A13277 | 243 |
| A01543 | A13369 | 480 | A01543 | A13704 | 316 |
| A01543 | A13716 | 151 | A01543 | A13790 | 316 |
| A01543 | A13885 | 361 | A01543 | A14071 | 262 |
| A01543 | A14405 | 255 | A01543 | A14611 | 323 |

|        |        |     |        |        |     |
|--------|--------|-----|--------|--------|-----|
| A01543 | A14635 | 243 | A01543 | A14986 | 185 |
| A01543 | A14990 | 185 | A01543 | A15190 | 296 |
| A01543 | A15292 | 157 | A01543 | A15348 | 171 |
| A01543 | A15403 | 163 | A01543 | A15432 | 184 |
| A01543 | A16274 | 215 | A01543 | A16387 | 165 |
| A01543 | A17085 | 447 | A01544 | A01890 | 274 |
| A01544 | A02499 | 201 | A01544 | A02507 | 319 |
| A01544 | A02708 | 238 | A01544 | A02784 | 385 |
| A01544 | A03138 | 165 | A01544 | A03242 | 279 |
| A01544 | A03260 | 151 | A01544 | A03451 | 491 |
| A01544 | A03480 | 219 | A01544 | A03497 | 243 |
| A01544 | A03536 | 257 | A01544 | A03745 | 191 |
| A01544 | A03798 | 212 | A01544 | A03977 | 317 |
| A01544 | A04080 | 201 | A01544 | A04199 | 263 |
| A01544 | A04561 | 249 | A01544 | A04909 | 167 |
| A01544 | A05065 | 481 | A01544 | A05120 | 399 |
| A01544 | A05240 | 490 | A01544 | A05343 | 310 |
| A01544 | A05465 | 313 | A01544 | A05605 | 278 |
| A01544 | A06581 | 234 | A01544 | A08251 | 229 |
| A01544 | A09237 | 263 | A01544 | A09417 | 208 |
| A01544 | A09561 | 171 | A01544 | A09562 | 170 |
| A01544 | A09647 | 489 | A01544 | A09778 | 396 |
| A01544 | A09803 | 434 | A01544 | A10209 | 296 |
| A01544 | A11100 | 283 | A01544 | A12997 | 273 |
| A01544 | A13627 | 313 | A01544 | A14674 | 168 |
| A01544 | A15022 | 339 | A01544 | A16019 | 375 |
| A01544 | A16738 | 355 | A01545 | A01724 | 314 |
| A01545 | A02179 | 290 | A01545 | A02874 | 219 |
| A01545 | A02877 | 215 | A01545 | A03420 | 294 |
| A01545 | A07178 | 373 | A01545 | A12978 | 409 |
| A01545 | A14281 | 182 | A01546 | A01652 | 179 |
| A01546 | A02143 | 226 | A01546 | A02171 | 179 |
| A01546 | A02860 | 255 | A01546 | A03213 | 154 |
| A01546 | A03314 | 291 | A01546 | A03438 | 146 |
| A01546 | A03981 | 63  | A01546 | A04101 | 184 |
| A01546 | A04697 | 174 | A01546 | A04759 | 461 |
| A01546 | A05085 | 285 | A01546 | A05182 | 399 |
| A01546 | A06324 | 199 | A01546 | A06807 | 235 |
| A01546 | A06814 | 168 | A01546 | A07079 | 154 |
| A01546 | A07568 | 286 | A01546 | A08502 | 190 |
| A01546 | A09428 | 180 | A01546 | A09494 | 246 |
| A01546 | A09676 | 216 | A01546 | A13488 | 235 |
| A01546 | A13989 | 185 | A01546 | A14006 | 162 |
| A01546 | A14054 | 190 | A01546 | A14113 | 340 |
| A01546 | A14655 | 172 | A01546 | A15559 | 475 |
| A01546 | A15682 | 321 | A01547 | A01611 | 259 |

|        |        |     |        |        |     |
|--------|--------|-----|--------|--------|-----|
| A01547 | A01668 | 174 | A01547 | A02167 | 312 |
| A01547 | A02212 | 205 | A01547 | A02312 | 402 |
| A01547 | A02320 | 185 | A01547 | A02501 | 249 |
| A01547 | A02531 | 404 | A01547 | A02673 | 414 |
| A01547 | A03076 | 180 | A01547 | A03115 | 334 |
| A01547 | A03219 | 230 | A01547 | A04133 | 303 |
| A01547 | A04256 | 432 | A01547 | A04380 | 347 |
| A01547 | A04418 | 278 | A01547 | A04688 | 271 |
| A01547 | A05825 | 347 | A01547 | A06400 | 268 |
| A01547 | A06653 | 291 | A01547 | A08901 | 281 |
| A01547 | A09083 | 364 | A01547 | A15233 | 302 |
| A01547 | A15680 | 288 | A01547 | A16225 | 219 |
| A01547 | A16257 | 259 | A01548 | A01569 | 491 |
| A01548 | A01572 | 446 | A01548 | A01577 | 188 |
| A01548 | A01602 | 488 | A01548 | A01603 | 424 |
| A01548 | A01635 | 205 | A01548 | A01660 | 398 |
| A01548 | A01688 | 447 | A01548 | A01728 | 273 |
| A01548 | A01747 | 488 | A01548 | A01755 | 232 |
| A01548 | A01824 | 183 | A01548 | A01841 | 490 |
| A01548 | A01855 | 485 | A01548 | A01859 | 77  |
| A01548 | A01907 | 488 | A01548 | A02268 | 154 |
| A01548 | A02278 | 259 | A01548 | A02353 | 491 |
| A01548 | A02452 | 469 | A01548 | A02470 | 271 |
| A01548 | A02520 | 408 | A01548 | A02598 | 165 |
| A01548 | A02636 | 154 | A01548 | A02640 | 269 |
| A01548 | A02687 | 491 | A01548 | A02695 | 208 |
| A01548 | A02718 | 491 | A01548 | A02719 | 435 |
| A01548 | A02723 | 146 | A01548 | A02781 | 156 |
| A01548 | A02843 | 156 | A01548 | A02965 | 318 |
| A01548 | A03003 | 350 | A01548 | A03007 | 63  |
| A01548 | A03188 | 256 | A01548 | A03223 | 185 |
| A01548 | A03311 | 168 | A01548 | A03322 | 200 |
| A01548 | A03453 | 168 | A01548 | A03477 | 491 |
| A01548 | A03586 | 491 | A01548 | A03854 | 201 |
| A01548 | A03863 | 486 | A01548 | A03951 | 173 |
| A01548 | A04124 | 452 | A01548 | A04362 | 152 |
| A01548 | A04468 | 173 | A01548 | A04519 | 269 |
| A01548 | A04691 | 302 | A01548 | A04785 | 162 |
| A01548 | A04852 | 173 | A01548 | A04879 | 486 |
| A01548 | A04880 | 461 | A01548 | A05006 | 356 |
| A01548 | A05029 | 195 | A01548 | A05082 | 262 |
| A01548 | A05216 | 486 | A01548 | A05310 | 335 |
| A01548 | A05515 | 247 | A01548 | A05712 | 401 |
| A01548 | A05772 | 159 | A01548 | A05797 | 486 |
| A01548 | A06359 | 486 | A01548 | A06360 | 182 |
| A01548 | A06516 | 224 | A01548 | A06610 | 491 |

|        |        |     |        |        |     |
|--------|--------|-----|--------|--------|-----|
| A01548 | A06642 | 180 | A01548 | A07080 | 246 |
| A01548 | A07135 | 208 | A01548 | A07288 | 173 |
| A01548 | A07523 | 162 | A01548 | A07688 | 162 |
| A01548 | A07746 | 486 | A01548 | A08079 | 156 |
| A01548 | A08627 | 446 | A01548 | A08817 | 456 |
| A01548 | A08946 | 187 | A01548 | A08978 | 414 |
| A01548 | A09024 | 154 | A01548 | A09124 | 451 |
| A01548 | A09169 | 247 | A01548 | A09641 | 235 |
| A01548 | A09727 | 486 | A01548 | A09826 | 491 |
| A01548 | A10006 | 252 | A01548 | A10047 | 138 |
| A01548 | A10521 | 199 | A01548 | A10532 | 234 |
| A01548 | A10574 | 224 | A01548 | A10614 | 258 |
| A01548 | A10682 | 215 | A01548 | A10813 | 204 |
| A01548 | A10846 | 229 | A01548 | A10934 | 364 |
| A01548 | A11304 | 467 | A01548 | A11474 | 202 |
| A01548 | A11529 | 162 | A01548 | A11677 | 430 |
| A01548 | A11694 | 224 | A01548 | A13108 | 224 |
| A01548 | A13295 | 199 | A01548 | A13416 | 345 |
| A01548 | A13426 | 343 | A01548 | A13462 | 215 |
| A01548 | A13478 | 302 | A01548 | A13609 | 473 |
| A01548 | A13616 | 302 | A01548 | A13997 | 221 |
| A01548 | A14016 | 484 | A01548 | A14200 | 477 |
| A01548 | A14410 | 200 | A01548 | A15521 | 207 |
| A01548 | A15840 | 425 | A01548 | A16026 | 306 |
| A01548 | A16216 | 423 | A01548 | A16392 | 353 |
| A01548 | A17063 | 187 | A01549 | A02342 | 227 |
| A01549 | A02502 | 160 | A01549 | A03488 | 170 |
| A01549 | A03861 | 270 | A01549 | A11196 | 347 |
| A01549 | A14281 | 201 | A01550 | A01615 | 899 |
| A01550 | A01692 | 420 | A01550 | A01709 | 452 |
| A01550 | A01755 | 191 | A01550 | A01886 | 243 |
| A01550 | A02325 | 483 | A01550 | A02384 | 299 |
| A01550 | A02647 | 422 | A01550 | A02703 | 352 |
| A01550 | A02842 | 157 | A01550 | A02895 | 212 |
| A01550 | A02902 | 472 | A01550 | A02924 | 172 |
| A01550 | A02965 | 193 | A01550 | A03401 | 168 |
| A01550 | A03472 | 193 | A01550 | A04256 | 216 |
| A01550 | A05868 | 259 | A01550 | A06683 | 344 |
| A01550 | A07164 | 162 | A01550 | A07815 | 425 |
| A01550 | A08815 | 167 | A01550 | A08899 | 475 |
| A01550 | A09242 | 170 | A01550 | A09476 | 213 |
| A01550 | A10148 | 183 | A01550 | A10233 | 256 |
| A01550 | A10346 | 470 | A01550 | A11125 | 899 |
| A01550 | A11304 | 168 | A01550 | A11387 | 182 |
| A01550 | A11921 | 232 | A01550 | A11932 | 210 |
| A01550 | A13985 | 919 | A01550 | A15733 | 288 |

|        |        |     |        |        |     |
|--------|--------|-----|--------|--------|-----|
| A01551 | A01560 | 165 | A01551 | A01582 | 486 |
| A01551 | A01595 | 246 | A01551 | A01627 | 319 |
| A01551 | A01630 | 201 | A01551 | A01632 | 491 |
| A01551 | A01647 | 374 | A01551 | A01654 | 177 |
| A01551 | A01664 | 456 | A01551 | A01668 | 491 |
| A01551 | A01670 | 490 | A01551 | A01676 | 432 |
| A01551 | A01692 | 424 | A01551 | A01705 | 491 |
| A01551 | A01723 | 443 | A01551 | A01725 | 399 |
| A01551 | A01728 | 473 | A01551 | A01729 | 184 |
| A01551 | A01731 | 353 | A01551 | A01732 | 352 |
| A01551 | A01733 | 267 | A01551 | A01736 | 366 |
| A01551 | A01737 | 463 | A01551 | A01741 | 435 |
| A01551 | A01743 | 491 | A01551 | A01746 | 490 |
| A01551 | A01747 | 337 | A01551 | A01751 | 480 |
| A01551 | A01754 | 235 | A01551 | A01757 | 472 |
| A01551 | A01758 | 491 | A01551 | A01762 | 174 |
| A01551 | A01763 | 475 | A01551 | A01766 | 246 |
| A01551 | A01771 | 193 | A01551 | A01772 | 491 |
| A01551 | A01778 | 427 | A01551 | A01779 | 452 |
| A01551 | A01780 | 188 | A01551 | A01790 | 483 |
| A01551 | A01794 | 416 | A01551 | A01796 | 416 |
| A01551 | A01802 | 307 | A01551 | A01872 | 212 |
| A01551 | A01883 | 394 | A01551 | A01888 | 467 |
| A01551 | A01891 | 156 | A01551 | A01893 | 489 |
| A01551 | A01894 | 491 | A01551 | A01909 | 491 |
| A01551 | A01931 | 408 | A01551 | A01950 | 279 |
| A01551 | A01967 | 219 | A01551 | A01986 | 165 |
| A01551 | A02020 | 188 | A01551 | A02075 | 430 |
| A01551 | A02080 | 154 | A01551 | A02083 | 294 |
| A01551 | A02278 | 191 | A01551 | A02298 | 335 |
| A01551 | A02300 | 332 | A01551 | A02307 | 160 |
| A01551 | A02335 | 438 | A01551 | A02338 | 371 |
| A01551 | A02477 | 380 | A01551 | A02490 | 439 |
| A01551 | A02491 | 474 | A01551 | A02570 | 156 |
| A01551 | A02613 | 193 | A01551 | A02645 | 177 |
| A01551 | A02691 | 491 | A01551 | A02697 | 174 |
| A01551 | A02701 | 180 | A01551 | A02702 | 236 |
| A01551 | A02709 | 491 | A01551 | A02713 | 76  |
| A01551 | A02756 | 293 | A01551 | A02783 | 235 |
| A01551 | A02785 | 486 | A01551 | A02812 | 486 |
| A01551 | A02837 | 271 | A01551 | A02841 | 260 |
| A01551 | A02859 | 491 | A01551 | A02863 | 224 |
| A01551 | A02874 | 488 | A01551 | A02905 | 154 |
| A01551 | A02915 | 191 | A01551 | A02923 | 156 |
| A01551 | A02988 | 441 | A01551 | A03032 | 240 |
| A01551 | A03034 | 180 | A01551 | A03050 | 252 |



|        |        |     |        |        |     |
|--------|--------|-----|--------|--------|-----|
| A01551 | A03079 | 151 | A01551 | A03188 | 475 |
| A01551 | A03244 | 154 | A01551 | A03259 | 454 |
| A01551 | A03268 | 224 | A01551 | A03275 | 414 |
| A01551 | A03304 | 486 | A01551 | A03682 | 263 |
| A01551 | A03819 | 358 | A01551 | A03849 | 215 |
| A01551 | A03851 | 452 | A01551 | A03872 | 179 |
| A01551 | A04006 | 443 | A01551 | A04014 | 251 |
| A01551 | A04033 | 491 | A01551 | A04045 | 177 |
| A01551 | A04049 | 305 | A01551 | A04072 | 491 |
| A01551 | A04122 | 435 | A01551 | A04275 | 379 |
| A01551 | A04279 | 171 | A01551 | A04284 | 177 |
| A01551 | A04286 | 479 | A01551 | A04290 | 251 |
| A01551 | A04334 | 422 | A01551 | A04449 | 230 |
| A01551 | A04572 | 177 | A01551 | A04620 | 205 |
| A01551 | A04626 | 193 | A01551 | A04630 | 180 |
| A01551 | A04757 | 215 | A01551 | A04950 | 177 |
| A01551 | A04997 | 193 | A01551 | A05220 | 404 |
| A01551 | A05269 | 232 | A01551 | A05346 | 288 |
| A01551 | A05366 | 177 | A01551 | A05416 | 193 |
| A01551 | A05418 | 441 | A01551 | A05506 | 198 |
| A01551 | A05637 | 215 | A01551 | A05746 | 193 |
| A01551 | A06092 | 353 | A01551 | A06228 | 165 |
| A01551 | A06277 | 213 | A01551 | A06429 | 260 |
| A01551 | A06569 | 449 | A01551 | A06607 | 473 |
| A01551 | A06635 | 347 | A01551 | A06701 | 490 |
| A01551 | A06896 | 193 | A01551 | A06961 | 165 |
| A01551 | A07165 | 477 | A01551 | A07177 | 449 |
| A01551 | A07200 | 491 | A01551 | A07209 | 435 |
| A01551 | A07229 | 406 | A01551 | A07663 | 215 |
| A01551 | A08635 | 401 | A01551 | A08793 | 177 |
| A01551 | A08827 | 157 | A01551 | A08878 | 274 |
| A01551 | A09020 | 154 | A01551 | A09022 | 301 |
| A01551 | A09245 | 160 | A01551 | A09492 | 215 |
| A01551 | A09724 | 235 | A01551 | A09752 | 238 |
| A01551 | A09933 | 473 | A01551 | A09973 | 215 |
| A01551 | A10085 | 489 | A01551 | A10496 | 251 |
| A01551 | A10638 | 205 | A01551 | A11097 | 177 |
| A01551 | A11231 | 251 | A01551 | A11460 | 314 |
| A01551 | A11469 | 480 | A01551 | A11485 | 286 |
| A01551 | A11499 | 251 | A01551 | A11702 | 152 |
| A01551 | A11983 | 491 | A01551 | A12212 | 279 |
| A01551 | A13316 | 251 | A01551 | A13369 | 430 |
| A01551 | A13824 | 162 | A01551 | A14204 | 154 |
| A01551 | A14215 | 162 | A01551 | A14405 | 486 |
| A01551 | A14410 | 394 | A01551 | A14440 | 452 |
| A01551 | A14570 | 344 | A01551 | A14635 | 491 |

|        |        |     |        |        |     |
|--------|--------|-----|--------|--------|-----|
| A01551 | A14648 | 491 | A01551 | A14858 | 165 |
| A01551 | A14986 | 358 | A01551 | A15238 | 157 |
| A01551 | A15241 | 201 | A01551 | A15282 | 477 |
| A01551 | A15295 | 491 | A01551 | A15395 | 180 |
| A01551 | A15470 | 229 | A01551 | A15495 | 311 |
| A01551 | A15606 | 414 | A01551 | A15655 | 273 |
| A01551 | A15917 | 318 | A01551 | A15976 | 221 |
| A01551 | A16450 | 420 | A01551 | A16636 | 485 |
| A01551 | A16978 | 193 | A01552 | A01660 | 162 |
| A01552 | A01825 | 167 | A01552 | A02116 | 329 |
| A01552 | A03832 | 384 | A01552 | A03880 | 198 |
| A01552 | A05273 | 162 | A01552 | A05398 | 172 |
| A01552 | A05706 | 218 | A01552 | A06914 | 438 |
| A01552 | A08463 | 386 | A01552 | A09345 | 273 |
| A01552 | A09736 | 157 | A01552 | A09738 | 219 |
| A01552 | A10262 | 353 | A01552 | A10611 | 318 |
| A01552 | A11830 | 219 | A01552 | A12165 | 258 |
| A01552 | A12882 | 353 | A01552 | A14122 | 260 |
| A01552 | A14170 | 204 | A01552 | A14221 | 491 |
| A01552 | A14621 | 213 | A01552 | A14898 | 353 |
| A01552 | A15292 | 154 | A01552 | A15356 | 380 |
| A01552 | A15718 | 380 | A01552 | A15752 | 491 |
| A01552 | A16328 | 251 | A01552 | A16488 | 218 |
| A01552 | A17198 | 152 | A01553 | A01554 | 994 |
| A01553 | A01558 | 899 | A01553 | A01560 | 945 |
| A01553 | A01561 | 978 | A01553 | A01562 | 994 |
| A01553 | A01572 | 329 | A01553 | A01588 | 899 |
| A01553 | A01591 | 923 | A01553 | A01605 | 945 |
| A01553 | A01610 | 463 | A01553 | A01615 | 899 |
| A01553 | A01628 | 994 | A01553 | A01631 | 491 |
| A01553 | A01639 | 955 | A01553 | A01640 | 994 |
| A01553 | A01680 | 945 | A01553 | A01692 | 490 |
| A01553 | A01697 | 945 | A01553 | A01702 | 994 |
| A01553 | A01708 | 945 | A01553 | A01709 | 994 |
| A01553 | A01718 | 945 | A01553 | A01719 | 945 |
| A01553 | A01726 | 313 | A01553 | A01730 | 263 |
| A01553 | A01742 | 899 | A01553 | A01755 | 205 |
| A01553 | A01797 | 63  | A01553 | A01844 | 291 |
| A01553 | A01905 | 162 | A01553 | A01908 | 369 |
| A01553 | A01914 | 160 | A01553 | A01920 | 899 |
| A01553 | A02030 | 412 | A01553 | A02060 | 157 |
| A01553 | A02064 | 375 | A01553 | A02110 | 219 |
| A01553 | A02161 | 191 | A01553 | A02803 | 63  |
| A01553 | A02908 | 899 | A01553 | A02950 | 214 |
| A01553 | A02968 | 899 | A01553 | A03010 | 216 |
| A01553 | A03213 | 63  | A01553 | A03214 | 77  |

|        |        |     |        |        |     |
|--------|--------|-----|--------|--------|-----|
| A01553 | A03331 | 451 | A01553 | A03335 | 899 |
| A01553 | A03444 | 899 | A01553 | A03504 | 183 |
| A01553 | A03580 | 313 | A01553 | A03591 | 459 |
| A01553 | A03657 | 165 | A01553 | A03797 | 899 |
| A01553 | A04012 | 179 | A01553 | A04242 | 177 |
| A01553 | A04320 | 306 | A01553 | A04347 | 934 |
| A01553 | A04699 | 938 | A01553 | A04759 | 173 |
| A01553 | A04939 | 212 | A01553 | A05216 | 899 |
| A01553 | A06039 | 219 | A01553 | A06289 | 538 |
| A01553 | A06444 | 177 | A01553 | A06466 | 217 |
| A01553 | A06588 | 243 | A01553 | A06601 | 353 |
| A01553 | A06610 | 341 | A01553 | A06615 | 296 |
| A01553 | A06865 | 235 | A01553 | A07311 | 994 |
| A01553 | A07422 | 899 | A01553 | A07495 | 199 |
| A01553 | A08087 | 191 | A01553 | A08088 | 183 |
| A01553 | A08193 | 172 | A01553 | A08551 | 183 |
| A01553 | A08571 | 918 | A01553 | A09162 | 470 |
| A01553 | A09181 | 302 | A01553 | A09220 | 899 |
| A01553 | A09241 | 165 | A01553 | A09319 | 989 |
| A01553 | A09526 | 172 | A01553 | A09542 | 63  |
| A01553 | A09577 | 995 | A01553 | A09643 | 475 |
| A01553 | A09644 | 468 | A01553 | A09752 | 269 |
| A01553 | A09804 | 908 | A01553 | A09871 | 263 |
| A01553 | A09937 | 302 | A01553 | A10014 | 475 |
| A01553 | A10054 | 313 | A01553 | A10160 | 165 |
| A01553 | A10174 | 899 | A01553 | A10365 | 943 |
| A01553 | A10392 | 390 | A01553 | A10430 | 313 |
| A01553 | A10580 | 899 | A01553 | A10623 | 63  |
| A01553 | A10735 | 172 | A01553 | A10743 | 190 |
| A01553 | A10801 | 899 | A01553 | A10808 | 461 |
| A01553 | A10813 | 286 | A01553 | A10899 | 156 |
| A01553 | A10902 | 132 | A01553 | A10913 | 363 |
| A01553 | A10971 | 256 | A01553 | A10992 | 288 |
| A01553 | A11125 | 329 | A01553 | A11369 | 491 |
| A01553 | A11485 | 429 | A01553 | A11487 | 194 |
| A01553 | A11549 | 340 | A01553 | A11707 | 490 |
| A01553 | A11840 | 260 | A01553 | A11871 | 371 |
| A01553 | A11937 | 467 | A01553 | A11983 | 199 |
| A01553 | A12235 | 221 | A01553 | A12383 | 994 |
| A01553 | A12666 | 899 | A01553 | A12966 | 208 |
| A01553 | A12971 | 899 | A01553 | A12990 | 418 |
| A01553 | A13012 | 313 | A01553 | A13218 | 157 |
| A01553 | A13605 | 188 | A01553 | A13824 | 221 |
| A01553 | A13827 | 277 | A01553 | A13889 | 305 |
| A01553 | A13980 | 217 | A01553 | A13985 | 899 |
| A01553 | A14006 | 470 | A01553 | A14008 | 484 |

|        |        |     |        |        |     |
|--------|--------|-----|--------|--------|-----|
| A01553 | A14013 | 257 | A01553 | A14022 | 340 |
| A01553 | A14024 | 235 | A01553 | A14025 | 899 |
| A01553 | A14038 | 899 | A01553 | A14073 | 435 |
| A01553 | A14096 | 236 | A01553 | A14192 | 199 |
| A01553 | A14198 | 185 | A01553 | A14275 | 157 |
| A01553 | A14443 | 899 | A01553 | A14772 | 256 |
| A01553 | A14942 | 180 | A01553 | A15293 | 899 |
| A01553 | A15294 | 899 | A01553 | A15369 | 199 |
| A01553 | A15626 | 207 | A01553 | A15682 | 272 |
| A01553 | A15726 | 170 | A01553 | A16085 | 899 |
| A01553 | A16327 | 899 | A01553 | A16835 | 171 |
| A01553 | A16847 | 313 | A01553 | A16994 | 412 |
| A01553 | A17014 | 273 | A01554 | A01558 | 989 |
| A01554 | A01560 | 945 | A01554 | A01561 | 949 |
| A01554 | A01562 | 945 | A01554 | A01588 | 899 |
| A01554 | A01596 | 199 | A01554 | A01605 | 994 |
| A01554 | A01615 | 899 | A01554 | A01626 | 899 |
| A01554 | A01628 | 945 | A01554 | A01631 | 447 |
| A01554 | A01636 | 899 | A01554 | A01639 | 945 |
| A01554 | A01640 | 945 | A01554 | A01651 | 899 |
| A01554 | A01680 | 388 | A01554 | A01692 | 466 |
| A01554 | A01697 | 994 | A01554 | A01702 | 945 |
| A01554 | A01708 | 945 | A01554 | A01709 | 995 |
| A01554 | A01718 | 945 | A01554 | A01719 | 945 |
| A01554 | A01741 | 299 | A01554 | A01742 | 899 |
| A01554 | A01797 | 63  | A01554 | A01844 | 903 |
| A01554 | A01877 | 229 | A01554 | A01908 | 63  |
| A01554 | A02064 | 193 | A01554 | A02089 | 188 |
| A01554 | A02143 | 152 | A01554 | A02212 | 201 |
| A01554 | A02293 | 263 | A01554 | A02483 | 204 |
| A01554 | A02764 | 162 | A01554 | A02768 | 91  |
| A01554 | A02795 | 251 | A01554 | A02825 | 912 |
| A01554 | A02906 | 151 | A01554 | A03331 | 469 |
| A01554 | A03451 | 899 | A01554 | A03575 | 899 |
| A01554 | A03591 | 258 | A01554 | A03752 | 312 |
| A01554 | A03775 | 358 | A01554 | A03848 | 172 |
| A01554 | A03929 | 229 | A01554 | A04699 | 941 |
| A01554 | A04744 | 204 | A01554 | A04968 | 188 |
| A01554 | A05216 | 899 | A01554 | A05673 | 152 |
| A01554 | A06289 | 240 | A01554 | A06404 | 157 |
| A01554 | A06416 | 162 | A01554 | A06466 | 490 |
| A01554 | A06601 | 443 | A01554 | A06779 | 176 |
| A01554 | A07155 | 160 | A01554 | A07311 | 994 |
| A01554 | A07422 | 901 | A01554 | A07706 | 257 |
| A01554 | A08250 | 160 | A01554 | A08571 | 899 |
| A01554 | A08858 | 899 | A01554 | A09162 | 488 |

|        |        |     |        |        |     |
|--------|--------|-----|--------|--------|-----|
| A01554 | A09220 | 208 | A01554 | A09290 | 160 |
| A01554 | A09319 | 952 | A01554 | A09531 | 198 |
| A01554 | A09577 | 994 | A01554 | A09643 | 246 |
| A01554 | A09804 | 912 | A01554 | A09871 | 160 |
| A01554 | A09989 | 172 | A01554 | A10014 | 363 |
| A01554 | A10077 | 246 | A01554 | A10174 | 899 |
| A01554 | A10185 | 899 | A01554 | A10294 | 423 |
| A01554 | A10365 | 923 | A01554 | A10392 | 314 |
| A01554 | A10560 | 299 | A01554 | A10580 | 945 |
| A01554 | A10601 | 945 | A01554 | A10623 | 945 |
| A01554 | A10728 | 238 | A01554 | A10754 | 168 |
| A01554 | A10808 | 469 | A01554 | A10811 | 190 |
| A01554 | A10913 | 454 | A01554 | A11125 | 490 |
| A01554 | A11369 | 283 | A01554 | A11943 | 491 |
| A01554 | A12101 | 204 | A01554 | A12383 | 994 |
| A01554 | A12545 | 217 | A01554 | A12723 | 290 |
| A01554 | A12980 | 151 | A01554 | A13320 | 176 |
| A01554 | A13340 | 334 | A01554 | A13917 | 375 |
| A01554 | A13946 | 115 | A01554 | A13980 | 940 |
| A01554 | A13985 | 107 | A01554 | A14008 | 246 |
| A01554 | A14022 | 235 | A01554 | A14024 | 260 |
| A01554 | A14030 | 940 | A01554 | A14073 | 490 |
| A01554 | A14157 | 923 | A01554 | A14430 | 171 |
| A01554 | A14452 | 63  | A01554 | A14571 | 170 |
| A01554 | A14785 | 184 | A01554 | A15291 | 423 |
| A01554 | A15324 | 491 | A01554 | A15353 | 490 |
| A01554 | A15502 | 157 | A01554 | A15649 | 156 |
| A01554 | A16296 | 406 | A01555 | A01574 | 391 |
| A01555 | A01575 | 82  | A01555 | A01583 | 277 |
| A01555 | A01585 | 63  | A01555 | A01598 | 632 |
| A01555 | A01614 | 269 | A01555 | A01634 | 63  |
| A01555 | A01646 | 673 | A01555 | A01649 | 229 |
| A01555 | A01655 | 63  | A01555 | A01677 | 63  |
| A01555 | A01683 | 63  | A01555 | A01706 | 63  |
| A01555 | A01761 | 515 | A01555 | A01988 | 63  |
| A01555 | A02855 | 561 | A01555 | A03293 | 63  |
| A01555 | A03294 | 65  | A01555 | A03452 | 63  |
| A01555 | A03626 | 63  | A01555 | A05563 | 102 |
| A01555 | A06543 | 561 | A01555 | A06608 | 424 |
| A01555 | A07203 | 424 | A01555 | A07242 | 491 |
| A01555 | A07893 | 208 | A01555 | A07954 | 288 |
| A01555 | A08022 | 486 | A01555 | A09078 | 417 |
| A01555 | A09703 | 213 | A01555 | A09743 | 383 |
| A01555 | A11301 | 484 | A01555 | A11397 | 456 |
| A01555 | A11443 | 174 | A01555 | A11554 | 283 |
| A01555 | A11845 | 249 | A01555 | A11939 | 180 |

|        |        |     |        |        |     |
|--------|--------|-----|--------|--------|-----|
| A01555 | A12365 | 439 | A01555 | A12873 | 488 |
| A01555 | A13321 | 291 | A01555 | A13831 | 489 |
| A01555 | A13837 | 212 | A01555 | A13989 | 595 |
| A01555 | A14006 | 636 | A01555 | A14147 | 171 |
| A01555 | A14196 | 228 | A01555 | A14462 | 335 |
| A01555 | A15520 | 167 | A01555 | A15700 | 378 |
| A01555 | A15945 | 515 | A01555 | A15946 | 200 |
| A01555 | A16691 | 184 | A01555 | A17057 | 191 |
| A01556 | A01557 | 179 | A01556 | A01578 | 491 |
| A01556 | A01632 | 307 | A01556 | A01652 | 168 |
| A01556 | A01689 | 229 | A01556 | A01741 | 221 |
| A01556 | A01743 | 360 | A01556 | A01935 | 307 |
| A01556 | A01961 | 267 | A01556 | A01982 | 491 |
| A01556 | A02005 | 202 | A01556 | A02010 | 159 |
| A01556 | A02021 | 286 | A01556 | A02048 | 491 |
| A01556 | A02049 | 369 | A01556 | A02146 | 257 |
| A01556 | A02148 | 369 | A01556 | A02183 | 491 |
| A01556 | A02186 | 391 | A01556 | A02188 | 436 |
| A01556 | A02205 | 470 | A01556 | A02215 | 472 |
| A01556 | A02221 | 286 | A01556 | A02222 | 190 |
| A01556 | A02228 | 374 | A01556 | A02291 | 152 |
| A01556 | A02328 | 157 | A01556 | A02333 | 439 |
| A01556 | A02412 | 160 | A01556 | A02541 | 157 |
| A01556 | A02713 | 163 | A01556 | A02738 | 163 |
| A01556 | A02874 | 364 | A01556 | A03050 | 270 |
| A01556 | A03067 | 489 | A01556 | A03080 | 491 |
| A01556 | A03146 | 177 | A01556 | A03178 | 77  |
| A01556 | A03184 | 174 | A01556 | A03186 | 90  |
| A01556 | A03247 | 296 | A01556 | A03344 | 486 |
| A01556 | A03345 | 434 | A01556 | A03346 | 484 |
| A01556 | A03347 | 491 | A01556 | A03348 | 441 |
| A01556 | A03349 | 468 | A01556 | A03350 | 417 |
| A01556 | A03351 | 491 | A01556 | A03353 | 491 |
| A01556 | A03356 | 263 | A01556 | A03357 | 210 |
| A01556 | A03358 | 490 | A01556 | A03359 | 205 |
| A01556 | A03361 | 491 | A01556 | A03363 | 402 |
| A01556 | A03364 | 398 | A01556 | A03365 | 307 |
| A01556 | A03368 | 480 | A01556 | A03369 | 491 |
| A01556 | A03370 | 491 | A01556 | A03371 | 491 |
| A01556 | A03373 | 491 | A01556 | A03374 | 205 |
| A01556 | A03375 | 383 | A01556 | A03376 | 491 |
| A01556 | A03378 | 486 | A01556 | A03379 | 491 |
| A01556 | A03383 | 322 | A01556 | A03384 | 385 |
| A01556 | A03385 | 249 | A01556 | A03387 | 435 |
| A01556 | A03388 | 452 | A01556 | A03391 | 266 |
| A01556 | A03394 | 249 | A01556 | A03397 | 324 |

|        |        |     |        |        |     |
|--------|--------|-----|--------|--------|-----|
| A01556 | A03491 | 307 | A01556 | A03532 | 488 |
| A01556 | A03708 | 262 | A01556 | A03711 | 277 |
| A01556 | A03733 | 157 | A01556 | A03918 | 168 |
| A01556 | A04010 | 185 | A01556 | A04152 | 151 |
| A01556 | A04193 | 160 | A01556 | A04202 | 216 |
| A01556 | A04337 | 490 | A01556 | A04361 | 183 |
| A01556 | A04407 | 202 | A01556 | A04410 | 474 |
| A01556 | A04493 | 226 | A01556 | A04520 | 263 |
| A01556 | A04672 | 290 | A01556 | A04832 | 439 |
| A01556 | A04833 | 241 | A01556 | A04835 | 187 |
| A01556 | A04840 | 210 | A01556 | A04928 | 355 |
| A01556 | A05094 | 234 | A01556 | A05264 | 272 |
| A01556 | A05274 | 226 | A01556 | A05286 | 307 |
| A01556 | A05299 | 152 | A01556 | A05340 | 205 |
| A01556 | A05356 | 491 | A01556 | A05457 | 257 |
| A01556 | A05587 | 202 | A01556 | A05603 | 408 |
| A01556 | A05657 | 489 | A01556 | A05716 | 411 |
| A01556 | A05718 | 290 | A01556 | A05720 | 334 |
| A01556 | A05731 | 312 | A01556 | A05739 | 491 |
| A01556 | A05777 | 356 | A01556 | A05861 | 340 |
| A01556 | A05887 | 291 | A01556 | A05890 | 307 |
| A01556 | A05891 | 358 | A01556 | A05968 | 221 |
| A01556 | A05977 | 290 | A01556 | A06069 | 480 |
| A01556 | A06070 | 213 | A01556 | A06071 | 435 |
| A01556 | A06148 | 319 | A01556 | A06321 | 193 |
| A01556 | A06322 | 307 | A01556 | A06346 | 475 |
| A01556 | A06430 | 408 | A01556 | A06574 | 401 |
| A01556 | A06711 | 180 | A01556 | A06729 | 486 |
| A01556 | A06731 | 483 | A01556 | A06887 | 362 |
| A01556 | A06907 | 172 | A01556 | A06920 | 257 |
| A01556 | A06953 | 366 | A01556 | A07044 | 422 |
| A01556 | A07218 | 491 | A01556 | A07286 | 277 |
| A01556 | A07361 | 463 | A01556 | A07442 | 441 |
| A01556 | A07452 | 201 | A01556 | A07471 | 402 |
| A01556 | A07475 | 207 | A01556 | A07601 | 213 |
| A01556 | A07605 | 461 | A01556 | A07704 | 396 |
| A01556 | A07705 | 321 | A01556 | A07722 | 307 |
| A01556 | A07843 | 303 | A01556 | A07949 | 334 |
| A01556 | A07990 | 488 | A01556 | A08040 | 375 |
| A01556 | A08044 | 277 | A01556 | A08157 | 249 |
| A01556 | A08158 | 408 | A01556 | A08163 | 213 |
| A01556 | A08172 | 184 | A01556 | A08244 | 377 |
| A01556 | A08247 | 290 | A01556 | A08292 | 281 |
| A01556 | A08594 | 311 | A01556 | A08671 | 400 |
| A01556 | A08685 | 167 | A01556 | A08785 | 291 |
| A01556 | A09053 | 257 | A01556 | A09139 | 277 |

|        |        |     |        |        |     |
|--------|--------|-----|--------|--------|-----|
| A01556 | A09140 | 307 | A01556 | A09141 | 163 |
| A01556 | A09154 | 334 | A01556 | A09380 | 172 |
| A01556 | A09416 | 152 | A01556 | A09796 | 266 |
| A01556 | A09861 | 226 | A01556 | A09949 | 334 |
| A01556 | A10095 | 200 | A01556 | A10101 | 307 |
| A01556 | A10349 | 408 | A01556 | A10561 | 193 |
| A01556 | A11091 | 307 | A01556 | A11289 | 151 |
| A01556 | A11313 | 286 | A01556 | A11317 | 456 |
| A01556 | A11318 | 165 | A01556 | A11319 | 406 |
| A01556 | A11339 | 366 | A01556 | A11340 | 290 |
| A01556 | A11391 | 213 | A01556 | A11446 | 205 |
| A01556 | A11449 | 332 | A01556 | A11552 | 165 |
| A01556 | A11557 | 443 | A01556 | A11566 | 277 |
| A01556 | A11599 | 307 | A01556 | A11956 | 443 |
| A01556 | A11983 | 312 | A01556 | A12117 | 290 |
| A01556 | A12459 | 257 | A01556 | A12496 | 334 |
| A01556 | A12787 | 172 | A01556 | A12845 | 226 |
| A01556 | A12876 | 408 | A01556 | A12917 | 257 |
| A01556 | A13104 | 307 | A01556 | A13351 | 266 |
| A01556 | A13361 | 306 | A01556 | A13369 | 438 |
| A01556 | A14353 | 221 | A01556 | A14377 | 344 |
| A01556 | A14381 | 273 | A01556 | A15035 | 193 |
| A01556 | A15451 | 163 | A01556 | A15457 | 188 |
| A01556 | A15880 | 210 | A01556 | A17078 | 398 |
| A01557 | A01572 | 373 | A01557 | A01578 | 491 |
| A01557 | A01595 | 489 | A01557 | A01622 | 177 |
| A01557 | A01630 | 491 | A01557 | A01632 | 486 |
| A01557 | A01645 | 266 | A01557 | A01660 | 463 |
| A01557 | A01681 | 326 | A01557 | A01687 | 438 |
| A01557 | A01689 | 193 | A01557 | A01768 | 356 |
| A01557 | A01780 | 208 | A01557 | A01790 | 435 |
| A01557 | A01839 | 254 | A01557 | A01912 | 198 |
| A01557 | A01931 | 363 | A01557 | A02129 | 356 |
| A01557 | A02180 | 436 | A01557 | A02188 | 423 |
| A01557 | A02206 | 137 | A01557 | A02219 | 63  |
| A01557 | A02221 | 373 | A01557 | A02228 | 281 |
| A01557 | A02303 | 228 | A01557 | A02523 | 193 |
| A01557 | A02687 | 317 | A01557 | A02700 | 160 |
| A01557 | A02736 | 191 | A01557 | A02738 | 416 |
| A01557 | A02909 | 279 | A01557 | A03080 | 417 |
| A01557 | A03104 | 176 | A01557 | A03138 | 266 |
| A01557 | A03178 | 241 | A01557 | A03211 | 200 |
| A01557 | A03259 | 303 | A01557 | A03297 | 472 |
| A01557 | A03305 | 229 | A01557 | A03351 | 270 |
| A01557 | A03496 | 375 | A01557 | A03511 | 191 |
| A01557 | A03899 | 332 | A01557 | A03909 | 167 |



|        |        |     |        |        |     |
|--------|--------|-----|--------|--------|-----|
| A01557 | A03926 | 263 | A01557 | A03928 | 271 |
| A01557 | A04139 | 484 | A01557 | A04193 | 361 |
| A01557 | A04239 | 386 | A01557 | A04252 | 174 |
| A01557 | A04257 | 180 | A01557 | A04331 | 204 |
| A01557 | A04359 | 246 | A01557 | A04360 | 335 |
| A01557 | A04361 | 490 | A01557 | A04382 | 246 |
| A01557 | A04383 | 167 | A01557 | A04410 | 490 |
| A01557 | A04413 | 229 | A01557 | A04435 | 303 |
| A01557 | A04520 | 396 | A01557 | A04603 | 226 |
| A01557 | A04715 | 491 | A01557 | A04747 | 227 |
| A01557 | A04790 | 488 | A01557 | A04832 | 221 |
| A01557 | A04903 | 293 | A01557 | A04921 | 290 |
| A01557 | A04928 | 230 | A01557 | A05041 | 215 |
| A01557 | A05075 | 236 | A01557 | A05114 | 230 |
| A01557 | A05128 | 465 | A01557 | A05155 | 235 |
| A01557 | A05299 | 460 | A01557 | A05418 | 344 |
| A01557 | A05422 | 221 | A01557 | A05556 | 290 |
| A01557 | A05603 | 386 | A01557 | A05632 | 318 |
| A01557 | A05666 | 311 | A01557 | A05829 | 236 |
| A01557 | A06038 | 154 | A01557 | A06106 | 271 |
| A01557 | A06329 | 191 | A01557 | A06346 | 480 |
| A01557 | A06428 | 475 | A01557 | A06591 | 479 |
| A01557 | A06739 | 193 | A01557 | A06790 | 396 |
| A01557 | A06970 | 344 | A01557 | A07218 | 452 |
| A01557 | A07242 | 157 | A01557 | A07282 | 249 |
| A01557 | A07338 | 257 | A01557 | A07383 | 318 |
| A01557 | A07384 | 243 | A01557 | A07396 | 257 |
| A01557 | A07495 | 252 | A01557 | A07511 | 152 |
| A01557 | A07558 | 152 | A01557 | A07704 | 379 |
| A01557 | A07705 | 414 | A01557 | A08172 | 338 |
| A01557 | A08278 | 205 | A01557 | A08291 | 236 |
| A01557 | A08292 | 352 | A01557 | A08306 | 184 |
| A01557 | A08346 | 177 | A01557 | A08458 | 221 |
| A01557 | A08499 | 318 | A01557 | A08643 | 462 |
| A01557 | A08685 | 418 | A01557 | A08686 | 332 |
| A01557 | A09257 | 221 | A01557 | A09269 | 144 |
| A01557 | A09456 | 318 | A01557 | A09903 | 257 |
| A01557 | A10127 | 486 | A01557 | A10198 | 271 |
| A01557 | A10303 | 318 | A01557 | A10309 | 318 |
| A01557 | A10351 | 195 | A01557 | A10600 | 318 |
| A01557 | A10658 | 157 | A01557 | A10852 | 290 |
| A01557 | A10871 | 191 | A01557 | A11160 | 204 |
| A01557 | A11161 | 246 | A01557 | A11289 | 353 |
| A01557 | A11424 | 200 | A01557 | A11527 | 167 |
| A01557 | A11682 | 271 | A01557 | A11983 | 182 |
| A01557 | A12154 | 290 | A01557 | A12441 | 318 |

|        |        |     |        |        |     |
|--------|--------|-----|--------|--------|-----|
| A01557 | A12442 | 318 | A01557 | A12493 | 271 |
| A01557 | A12621 | 271 | A01557 | A13369 | 491 |
| A01557 | A13831 | 254 | A01557 | A14265 | 238 |
| A01557 | A14272 | 152 | A01557 | A14279 | 449 |
| A01557 | A14366 | 396 | A01557 | A14471 | 375 |
| A01557 | A14500 | 318 | A01557 | A14523 | 154 |
| A01557 | A14570 | 196 | A01557 | A14633 | 621 |
| A01557 | A14643 | 188 | A01557 | A15232 | 318 |
| A01557 | A15277 | 467 | A01557 | A15336 | 491 |
| A01557 | A15510 | 323 | A01557 | A15622 | 204 |
| A01557 | A15638 | 489 | A01557 | A16004 | 191 |
| A01557 | A16038 | 246 | A01557 | A16055 | 154 |
| A01557 | A16068 | 460 | A01557 | A16147 | 271 |
| A01557 | A16493 | 356 | A01557 | A16626 | 234 |
| A01557 | A16951 | 180 | A01557 | A17085 | 216 |
| A01558 | A01560 | 993 | A01558 | A01561 | 899 |
| A01558 | A01562 | 989 | A01558 | A01572 | 993 |
| A01558 | A01576 | 917 | A01558 | A01588 | 994 |
| A01558 | A01591 | 949 | A01558 | A01592 | 941 |
| A01558 | A01593 | 945 | A01558 | A01596 | 199 |
| A01558 | A01598 | 356 | A01558 | A01602 | 941 |
| A01558 | A01605 | 899 | A01558 | A01612 | 945 |
| A01558 | A01614 | 404 | A01558 | A01615 | 994 |
| A01558 | A01626 | 152 | A01558 | A01628 | 899 |
| A01558 | A01636 | 919 | A01558 | A01637 | 943 |
| A01558 | A01638 | 945 | A01558 | A01639 | 992 |
| A01558 | A01640 | 899 | A01558 | A01649 | 221 |
| A01558 | A01650 | 940 | A01558 | A01651 | 994 |
| A01558 | A01660 | 191 | A01558 | A01665 | 899 |
| A01558 | A01680 | 899 | A01558 | A01685 | 63  |
| A01558 | A01688 | 901 | A01558 | A01692 | 901 |
| A01558 | A01697 | 989 | A01558 | A01702 | 899 |
| A01558 | A01708 | 899 | A01558 | A01709 | 989 |
| A01558 | A01717 | 899 | A01558 | A01718 | 899 |
| A01558 | A01719 | 899 | A01558 | A01722 | 899 |
| A01558 | A01730 | 199 | A01558 | A01755 | 899 |
| A01558 | A01844 | 989 | A01558 | A01908 | 899 |
| A01558 | A01914 | 223 | A01558 | A01920 | 899 |
| A01558 | A01995 | 457 | A01558 | A01996 | 899 |
| A01558 | A02018 | 899 | A01558 | A02163 | 899 |
| A01558 | A02211 | 899 | A01558 | A02382 | 899 |
| A01558 | A02411 | 899 | A01558 | A02416 | 899 |
| A01558 | A02419 | 899 | A01558 | A02464 | 899 |
| A01558 | A02564 | 899 | A01558 | A02671 | 265 |
| A01558 | A02718 | 199 | A01558 | A02803 | 899 |
| A01558 | A02908 | 899 | A01558 | A02968 | 899 |

|        |        |     |        |        |     |
|--------|--------|-----|--------|--------|-----|
| A01558 | A03209 | 899 | A01558 | A03261 | 899 |
| A01558 | A03271 | 899 | A01558 | A03298 | 477 |
| A01558 | A03299 | 63  | A01558 | A03401 | 199 |
| A01558 | A03435 | 290 | A01558 | A03436 | 322 |
| A01558 | A03451 | 899 | A01558 | A03470 | 899 |
| A01558 | A03494 | 396 | A01558 | A03528 | 126 |
| A01558 | A03567 | 326 | A01558 | A03569 | 351 |
| A01558 | A03575 | 990 | A01558 | A03591 | 989 |
| A01558 | A03625 | 899 | A01558 | A03686 | 899 |
| A01558 | A03726 | 939 | A01558 | A03741 | 944 |
| A01558 | A03809 | 899 | A01558 | A03817 | 899 |
| A01558 | A03990 | 943 | A01558 | A04012 | 929 |
| A01558 | A04033 | 473 | A01558 | A04304 | 183 |
| A01558 | A04398 | 899 | A01558 | A04600 | 899 |
| A01558 | A04699 | 899 | A01558 | A04751 | 899 |
| A01558 | A05008 | 899 | A01558 | A05009 | 899 |
| A01558 | A05015 | 942 | A01558 | A05029 | 899 |
| A01558 | A05037 | 899 | A01558 | A05062 | 944 |
| A01558 | A05216 | 899 | A01558 | A05428 | 945 |
| A01558 | A05453 | 899 | A01558 | A05482 | 899 |
| A01558 | A05633 | 324 | A01558 | A05859 | 199 |
| A01558 | A06163 | 899 | A01558 | A06273 | 174 |
| A01558 | A06277 | 899 | A01558 | A06289 | 899 |
| A01558 | A06295 | 899 | A01558 | A06348 | 488 |
| A01558 | A06581 | 899 | A01558 | A06597 | 491 |
| A01558 | A06608 | 899 | A01558 | A06610 | 899 |
| A01558 | A06660 | 910 | A01558 | A06701 | 477 |
| A01558 | A06715 | 224 | A01558 | A07083 | 63  |
| A01558 | A07091 | 908 | A01558 | A07135 | 899 |
| A01558 | A07165 | 899 | A01558 | A07311 | 994 |
| A01558 | A07339 | 406 | A01558 | A07380 | 229 |
| A01558 | A07422 | 925 | A01558 | A07425 | 449 |
| A01558 | A07454 | 165 | A01558 | A07495 | 199 |
| A01558 | A07524 | 199 | A01558 | A07706 | 447 |
| A01558 | A07726 | 263 | A01558 | A07797 | 899 |
| A01558 | A07834 | 236 | A01558 | A08118 | 486 |
| A01558 | A08133 | 199 | A01558 | A08137 | 900 |
| A01558 | A08450 | 157 | A01558 | A08528 | 333 |
| A01558 | A08571 | 997 | A01558 | A08732 | 899 |
| A01558 | A08839 | 944 | A01558 | A08858 | 899 |
| A01558 | A08864 | 899 | A01558 | A08865 | 899 |
| A01558 | A08878 | 939 | A01558 | A08885 | 447 |
| A01558 | A09124 | 899 | A01558 | A09181 | 899 |
| A01558 | A09218 | 899 | A01558 | A09220 | 899 |
| A01558 | A09256 | 363 | A01558 | A09319 | 908 |
| A01558 | A09383 | 899 | A01558 | A09542 | 899 |

|        |        |     |        |        |     |
|--------|--------|-----|--------|--------|-----|
| A01558 | A09556 | 899 | A01558 | A09558 | 899 |
| A01558 | A09568 | 989 | A01558 | A09577 | 899 |
| A01558 | A09644 | 899 | A01558 | A10159 | 899 |
| A01558 | A10174 | 899 | A01558 | A10185 | 899 |
| A01558 | A10365 | 899 | A01558 | A10392 | 899 |
| A01558 | A10580 | 899 | A01558 | A10601 | 899 |
| A01558 | A10615 | 945 | A01558 | A10623 | 899 |
| A01558 | A10624 | 491 | A01558 | A10666 | 191 |
| A01558 | A10756 | 899 | A01558 | A10801 | 989 |
| A01558 | A10833 | 899 | A01558 | A10853 | 110 |
| A01558 | A10894 | 285 | A01558 | A11125 | 899 |
| A01558 | A11134 | 899 | A01558 | A11139 | 353 |
| A01558 | A11258 | 267 | A01558 | A11277 | 414 |
| A01558 | A11291 | 346 | A01558 | A11369 | 899 |
| A01558 | A11478 | 201 | A01558 | A11487 | 945 |
| A01558 | A11601 | 899 | A01558 | A11604 | 899 |
| A01558 | A11834 | 899 | A01558 | A11850 | 899 |
| A01558 | A11853 | 899 | A01558 | A11920 | 168 |
| A01558 | A11923 | 413 | A01558 | A11983 | 955 |
| A01558 | A12383 | 899 | A01558 | A12606 | 607 |
| A01558 | A12664 | 899 | A01558 | A12668 | 899 |
| A01558 | A12705 | 899 | A01558 | A12992 | 899 |
| A01558 | A13099 | 199 | A01558 | A13147 | 933 |
| A01558 | A13250 | 989 | A01558 | A13390 | 899 |
| A01558 | A13391 | 899 | A01558 | A13393 | 899 |
| A01558 | A13605 | 899 | A01558 | A13711 | 224 |
| A01558 | A13824 | 899 | A01558 | A13826 | 571 |
| A01558 | A13829 | 899 | A01558 | A13944 | 899 |
| A01558 | A13975 | 908 | A01558 | A13977 | 899 |
| A01558 | A13978 | 899 | A01558 | A13980 | 899 |
| A01558 | A13982 | 899 | A01558 | A13983 | 902 |
| A01558 | A13984 | 899 | A01558 | A13985 | 899 |
| A01558 | A13989 | 945 | A01558 | A13990 | 899 |
| A01558 | A13991 | 899 | A01558 | A13998 | 899 |
| A01558 | A14001 | 899 | A01558 | A14004 | 899 |
| A01558 | A14005 | 899 | A01558 | A14006 | 491 |
| A01558 | A14009 | 70  | A01558 | A14030 | 899 |
| A01558 | A14032 | 899 | A01558 | A14035 | 899 |
| A01558 | A14036 | 899 | A01558 | A14039 | 296 |
| A01558 | A14042 | 899 | A01558 | A14044 | 899 |
| A01558 | A14188 | 899 | A01558 | A14196 | 945 |
| A01558 | A14198 | 993 | A01558 | A14202 | 899 |
| A01558 | A14208 | 899 | A01558 | A14210 | 899 |
| A01558 | A14220 | 465 | A01558 | A14226 | 902 |
| A01558 | A14246 | 908 | A01558 | A14276 | 606 |
| A01558 | A14299 | 899 | A01558 | A14371 | 899 |

|        |        |     |        |        |     |
|--------|--------|-----|--------|--------|-----|
| A01558 | A14379 | 899 | A01558 | A14393 | 899 |
| A01558 | A14408 | 899 | A01558 | A14433 | 899 |
| A01558 | A14443 | 992 | A01558 | A14444 | 989 |
| A01558 | A14456 | 899 | A01558 | A14472 | 899 |
| A01558 | A14474 | 63  | A01558 | A14476 | 294 |
| A01558 | A14511 | 899 | A01558 | A14596 | 439 |
| A01558 | A14633 | 157 | A01558 | A14662 | 899 |
| A01558 | A14826 | 168 | A01558 | A14920 | 899 |
| A01558 | A14929 | 899 | A01558 | A15182 | 899 |
| A01558 | A15291 | 899 | A01558 | A15292 | 899 |
| A01558 | A15293 | 899 | A01558 | A15294 | 899 |
| A01558 | A15297 | 899 | A01558 | A15314 | 899 |
| A01558 | A15323 | 909 | A01558 | A15324 | 910 |
| A01558 | A15338 | 414 | A01558 | A15346 | 601 |
| A01558 | A15353 | 913 | A01558 | A15359 | 899 |
| A01558 | A15409 | 366 | A01558 | A15506 | 526 |
| A01558 | A15559 | 942 | A01558 | A15614 | 906 |
| A01558 | A15665 | 294 | A01558 | A15726 | 945 |
| A01558 | A15920 | 899 | A01558 | A16070 | 899 |
| A01558 | A16171 | 165 | A01558 | A16453 | 174 |
| A01558 | A16690 | 188 | A01558 | A16938 | 899 |
| A01558 | A17027 | 899 | A01558 | A17063 | 269 |
| A01558 | A17160 | 899 | A01558 | A17197 | 154 |
| A01558 | A17212 | 899 | A01558 | A17220 | 899 |
| A01559 | A01572 | 480 | A01559 | A01589 | 491 |
| A01559 | A01594 | 760 | A01559 | A01602 | 190 |
| A01559 | A01604 | 312 | A01559 | A01616 | 491 |
| A01559 | A01625 | 491 | A01559 | A01659 | 491 |
| A01559 | A01660 | 643 | A01559 | A01680 | 490 |
| A01559 | A01686 | 491 | A01559 | A01690 | 238 |
| A01559 | A01741 | 235 | A01559 | A01972 | 269 |
| A01559 | A02058 | 411 | A01559 | A02148 | 436 |
| A01559 | A02183 | 363 | A01559 | A02222 | 475 |
| A01559 | A02248 | 441 | A01559 | A02382 | 515 |
| A01559 | A02432 | 491 | A01559 | A02598 | 170 |
| A01559 | A02859 | 343 | A01559 | A02887 | 330 |
| A01559 | A03020 | 208 | A01559 | A03057 | 666 |
| A01559 | A03259 | 352 | A01559 | A03301 | 485 |
| A01559 | A03401 | 221 | A01559 | A03728 | 242 |
| A01559 | A04012 | 168 | A01559 | A04375 | 446 |
| A01559 | A04668 | 566 | A01559 | A04713 | 152 |
| A01559 | A05334 | 491 | A01559 | A05986 | 360 |
| A01559 | A06130 | 355 | A01559 | A06206 | 218 |
| A01559 | A06242 | 491 | A01559 | A06437 | 465 |
| A01559 | A06829 | 176 | A01559 | A06851 | 945 |
| A01559 | A06864 | 491 | A01559 | A06924 | 356 |

|        |        |     |        |        |     |
|--------|--------|-----|--------|--------|-----|
| A01559 | A06982 | 566 | A01559 | A07079 | 462 |
| A01559 | A07224 | 171 | A01559 | A07319 | 491 |
| A01559 | A07339 | 338 | A01559 | A07346 | 491 |
| A01559 | A07466 | 557 | A01559 | A07480 | 719 |
| A01559 | A07534 | 491 | A01559 | A07603 | 491 |
| A01559 | A07647 | 480 | A01559 | A07902 | 461 |
| A01559 | A07989 | 201 | A01559 | A07996 | 491 |
| A01559 | A08000 | 361 | A01559 | A08030 | 491 |
| A01559 | A08117 | 491 | A01559 | A08133 | 199 |
| A01559 | A08141 | 346 | A01559 | A08208 | 491 |
| A01559 | A08212 | 491 | A01559 | A08516 | 475 |
| A01559 | A08526 | 263 | A01559 | A08669 | 565 |
| A01559 | A08769 | 441 | A01559 | A08820 | 566 |
| A01559 | A08912 | 224 | A01559 | A08917 | 462 |
| A01559 | A09078 | 241 | A01559 | A09135 | 256 |
| A01559 | A09195 | 341 | A01559 | A09288 | 291 |
| A01559 | A09390 | 208 | A01559 | A09454 | 477 |
| A01559 | A09598 | 491 | A01559 | A09617 | 170 |
| A01559 | A09626 | 302 | A01559 | A09764 | 491 |
| A01559 | A09800 | 208 | A01559 | A10109 | 165 |
| A01559 | A10368 | 208 | A01559 | A10373 | 564 |
| A01559 | A10581 | 165 | A01559 | A10724 | 477 |
| A01559 | A11236 | 475 | A01559 | A11540 | 491 |
| A01559 | A11916 | 484 | A01559 | A12288 | 171 |
| A01559 | A12365 | 200 | A01559 | A12556 | 491 |
| A01559 | A12939 | 293 | A01559 | A13429 | 468 |
| A01559 | A13510 | 329 | A01559 | A13641 | 371 |
| A01559 | A13642 | 371 | A01559 | A13741 | 162 |
| A01559 | A13889 | 517 | A01559 | A13913 | 470 |
| A01559 | A13949 | 491 | A01559 | A13986 | 428 |
| A01559 | A14007 | 416 | A01559 | A14009 | 643 |
| A01559 | A14076 | 491 | A01559 | A14077 | 372 |
| A01559 | A14079 | 491 | A01559 | A14091 | 200 |
| A01559 | A14094 | 565 | A01559 | A14153 | 489 |
| A01559 | A14177 | 565 | A01559 | A14192 | 200 |
| A01559 | A14223 | 548 | A01559 | A14230 | 491 |
| A01559 | A14273 | 491 | A01559 | A14299 | 285 |
| A01559 | A14318 | 171 | A01559 | A14443 | 270 |
| A01559 | A14460 | 490 | A01559 | A14694 | 566 |
| A01559 | A14706 | 445 | A01559 | A14887 | 489 |
| A01559 | A14964 | 224 | A01559 | A15369 | 491 |
| A01559 | A15371 | 439 | A01559 | A15420 | 418 |
| A01559 | A15510 | 445 | A01559 | A15511 | 154 |
| A01559 | A15524 | 466 | A01559 | A15539 | 235 |
| A01559 | A15654 | 468 | A01559 | A15714 | 294 |
| A01559 | A15837 | 491 | A01559 | A15894 | 235 |

|        |        |     |        |        |     |
|--------|--------|-----|--------|--------|-----|
| A01559 | A15941 | 490 | A01559 | A16052 | 281 |
| A01559 | A16068 | 480 | A01559 | A16073 | 246 |
| A01559 | A16127 | 491 | A01559 | A16128 | 491 |
| A01559 | A16129 | 480 | A01559 | A16134 | 200 |
| A01559 | A16226 | 491 | A01559 | A16274 | 200 |
| A01559 | A16290 | 171 | A01559 | A16299 | 486 |
| A01559 | A16606 | 486 | A01559 | A16613 | 491 |
| A01559 | A16616 | 434 | A01559 | A16626 | 491 |
| A01559 | A16646 | 174 | A01559 | A16754 | 451 |
| A01559 | A17207 | 191 | A01560 | A01561 | 945 |
| A01560 | A01562 | 994 | A01560 | A01572 | 935 |
| A01560 | A01576 | 254 | A01560 | A01588 | 989 |
| A01560 | A01591 | 460 | A01560 | A01592 | 937 |
| A01560 | A01602 | 899 | A01560 | A01605 | 327 |
| A01560 | A01615 | 901 | A01560 | A01628 | 944 |
| A01560 | A01630 | 199 | A01560 | A01631 | 63  |
| A01560 | A01638 | 201 | A01560 | A01639 | 458 |
| A01560 | A01640 | 943 | A01560 | A01647 | 199 |
| A01560 | A01651 | 927 | A01560 | A01680 | 928 |
| A01560 | A01688 | 899 | A01560 | A01692 | 956 |
| A01560 | A01697 | 997 | A01560 | A01702 | 934 |
| A01560 | A01707 | 491 | A01560 | A01708 | 327 |
| A01560 | A01709 | 945 | A01560 | A01718 | 991 |
| A01560 | A01719 | 460 | A01560 | A01730 | 278 |
| A01560 | A01822 | 344 | A01560 | A01844 | 990 |
| A01560 | A01850 | 193 | A01560 | A01920 | 913 |
| A01560 | A01995 | 297 | A01560 | A02411 | 499 |
| A01560 | A02586 | 418 | A01560 | A02678 | 63  |
| A01560 | A02715 | 441 | A01560 | A02734 | 462 |
| A01560 | A02803 | 63  | A01560 | A03014 | 430 |
| A01560 | A03031 | 180 | A01560 | A03191 | 156 |
| A01560 | A03289 | 373 | A01560 | A03401 | 199 |
| A01560 | A03436 | 201 | A01560 | A03451 | 899 |
| A01560 | A03465 | 63  | A01560 | A03536 | 252 |
| A01560 | A03591 | 996 | A01560 | A03611 | 314 |
| A01560 | A03697 | 191 | A01560 | A03739 | 165 |
| A01560 | A03740 | 461 | A01560 | A03752 | 612 |
| A01560 | A03797 | 899 | A01560 | A03867 | 218 |
| A01560 | A03990 | 531 | A01560 | A04020 | 157 |
| A01560 | A04115 | 174 | A01560 | A04209 | 488 |
| A01560 | A04342 | 213 | A01560 | A04622 | 399 |
| A01560 | A04699 | 939 | A01560 | A04722 | 466 |
| A01560 | A05216 | 899 | A01560 | A05453 | 945 |
| A01560 | A05937 | 260 | A01560 | A06008 | 157 |
| A01560 | A06258 | 329 | A01560 | A06268 | 156 |
| A01560 | A06289 | 63  | A01560 | A06466 | 528 |

|        |        |     |        |        |     |
|--------|--------|-----|--------|--------|-----|
| A01560 | A06554 | 156 | A01560 | A06610 | 234 |
| A01560 | A06615 | 174 | A01560 | A07311 | 994 |
| A01560 | A07339 | 251 | A01560 | A07762 | 491 |
| A01560 | A07798 | 582 | A01560 | A07803 | 243 |
| A01560 | A08054 | 208 | A01560 | A08280 | 360 |
| A01560 | A08571 | 462 | A01560 | A08701 | 63  |
| A01560 | A08860 | 621 | A01560 | A09162 | 235 |
| A01560 | A09443 | 168 | A01560 | A09568 | 474 |
| A01560 | A09577 | 944 | A01560 | A09804 | 491 |
| A01560 | A09876 | 165 | A01560 | A09881 | 165 |
| A01560 | A09888 | 369 | A01560 | A09902 | 491 |
| A01560 | A09933 | 77  | A01560 | A10014 | 335 |
| A01560 | A10248 | 218 | A01560 | A10294 | 152 |
| A01560 | A10365 | 945 | A01560 | A10392 | 63  |
| A01560 | A10532 | 177 | A01560 | A10576 | 63  |
| A01560 | A10580 | 270 | A01560 | A10623 | 417 |
| A01560 | A10728 | 491 | A01560 | A10735 | 65  |
| A01560 | A10801 | 938 | A01560 | A10833 | 937 |
| A01560 | A10834 | 198 | A01560 | A11125 | 899 |
| A01560 | A11147 | 123 | A01560 | A11206 | 245 |
| A01560 | A11286 | 440 | A01560 | A11346 | 257 |
| A01560 | A11369 | 445 | A01560 | A11983 | 928 |
| A01560 | A12328 | 489 | A01560 | A12383 | 489 |
| A01560 | A12664 | 363 | A01560 | A12705 | 943 |
| A01560 | A12979 | 307 | A01560 | A12987 | 157 |
| A01560 | A12990 | 446 | A01560 | A13149 | 491 |
| A01560 | A13234 | 234 | A01560 | A13320 | 185 |
| A01560 | A13335 | 441 | A01560 | A13340 | 546 |
| A01560 | A13364 | 154 | A01560 | A13499 | 218 |
| A01560 | A13605 | 899 | A01560 | A13917 | 388 |
| A01560 | A13975 | 377 | A01560 | A13980 | 119 |
| A01560 | A13983 | 63  | A01560 | A13984 | 243 |
| A01560 | A13985 | 942 | A01560 | A13991 | 899 |
| A01560 | A14006 | 358 | A01560 | A14008 | 63  |
| A01560 | A14013 | 70  | A01560 | A14016 | 199 |
| A01560 | A14019 | 63  | A01560 | A14024 | 899 |
| A01560 | A14073 | 477 | A01560 | A14188 | 945 |
| A01560 | A14196 | 199 | A01560 | A14198 | 945 |
| A01560 | A14208 | 413 | A01560 | A14209 | 288 |
| A01560 | A14215 | 63  | A01560 | A14220 | 165 |
| A01560 | A14472 | 899 | A01560 | A14577 | 390 |
| A01560 | A14648 | 363 | A01560 | A14653 | 63  |
| A01560 | A14859 | 157 | A01560 | A15146 | 157 |
| A01560 | A15244 | 486 | A01560 | A15291 | 213 |
| A01560 | A15293 | 171 | A01560 | A15295 | 477 |
| A01560 | A15386 | 243 | A01560 | A15546 | 409 |



|        |        |     |        |        |     |
|--------|--------|-----|--------|--------|-----|
| A01560 | A15630 | 243 | A01560 | A15665 | 252 |
| A01560 | A15726 | 485 | A01560 | A15734 | 460 |
| A01560 | A15786 | 205 | A01560 | A15933 | 269 |
| A01560 | A16060 | 486 | A01560 | A16128 | 191 |
| A01560 | A16216 | 299 | A01560 | A16272 | 208 |
| A01560 | A16296 | 243 | A01560 | A16318 | 243 |
| A01560 | A16741 | 388 | A01560 | A16835 | 210 |
| A01561 | A01562 | 491 | A01561 | A01572 | 254 |
| A01561 | A01575 | 605 | A01561 | A01585 | 184 |
| A01561 | A01588 | 989 | A01561 | A01592 | 915 |
| A01561 | A01593 | 899 | A01561 | A01601 | 227 |
| A01561 | A01605 | 945 | A01561 | A01615 | 989 |
| A01561 | A01628 | 945 | A01561 | A01637 | 899 |
| A01561 | A01638 | 901 | A01561 | A01639 | 955 |
| A01561 | A01640 | 950 | A01561 | A01651 | 917 |
| A01561 | A01660 | 280 | A01561 | A01686 | 899 |
| A01561 | A01688 | 899 | A01561 | A01692 | 994 |
| A01561 | A01697 | 945 | A01561 | A01702 | 945 |
| A01561 | A01708 | 945 | A01561 | A01709 | 945 |
| A01561 | A01718 | 944 | A01561 | A01719 | 945 |
| A01561 | A01844 | 899 | A01561 | A01995 | 180 |
| A01561 | A02110 | 154 | A01561 | A02411 | 285 |
| A01561 | A02522 | 236 | A01561 | A02803 | 63  |
| A01561 | A02968 | 899 | A01561 | A03331 | 362 |
| A01561 | A03536 | 227 | A01561 | A03591 | 949 |
| A01561 | A03637 | 193 | A01561 | A03665 | 227 |
| A01561 | A03697 | 177 | A01561 | A03892 | 152 |
| A01561 | A03972 | 200 | A01561 | A04449 | 227 |
| A01561 | A04666 | 199 | A01561 | A04699 | 927 |
| A01561 | A05062 | 899 | A01561 | A05356 | 199 |
| A01561 | A05416 | 367 | A01561 | A05418 | 189 |
| A01561 | A05453 | 942 | A01561 | A06256 | 190 |
| A01561 | A06277 | 239 | A01561 | A06286 | 177 |
| A01561 | A06289 | 328 | A01561 | A06466 | 159 |
| A01561 | A06554 | 177 | A01561 | A06597 | 199 |
| A01561 | A06599 | 164 | A01561 | A06608 | 899 |
| A01561 | A06610 | 328 | A01561 | A07311 | 960 |
| A01561 | A07422 | 899 | A01561 | A07797 | 899 |
| A01561 | A08088 | 174 | A01561 | A08205 | 199 |
| A01561 | A08571 | 199 | A01561 | A08865 | 899 |
| A01561 | A09111 | 152 | A01561 | A09162 | 483 |
| A01561 | A09303 | 191 | A01561 | A09542 | 899 |
| A01561 | A09568 | 924 | A01561 | A09577 | 422 |
| A01561 | A09644 | 372 | A01561 | A09804 | 230 |
| A01561 | A09876 | 154 | A01561 | A09933 | 98  |
| A01561 | A09937 | 85  | A01561 | A10014 | 527 |

|        |        |     |        |        |     |
|--------|--------|-----|--------|--------|-----|
| A01561 | A10165 | 193 | A01561 | A10294 | 398 |
| A01561 | A10365 | 938 | A01561 | A10430 | 227 |
| A01561 | A10580 | 899 | A01561 | A10615 | 899 |
| A01561 | A10623 | 91  | A01561 | A10655 | 154 |
| A01561 | A10735 | 241 | A01561 | A10756 | 922 |
| A01561 | A10833 | 912 | A01561 | A11369 | 461 |
| A01561 | A11549 | 200 | A01561 | A11645 | 152 |
| A01561 | A11934 | 414 | A01561 | A11937 | 897 |
| A01561 | A11983 | 261 | A01561 | A12300 | 162 |
| A01561 | A12365 | 154 | A01561 | A12383 | 945 |
| A01561 | A12886 | 219 | A01561 | A12987 | 227 |
| A01561 | A13012 | 227 | A01561 | A13063 | 177 |
| A01561 | A13390 | 899 | A01561 | A13391 | 899 |
| A01561 | A13393 | 899 | A01561 | A13617 | 257 |
| A01561 | A13889 | 200 | A01561 | A13902 | 154 |
| A01561 | A13917 | 490 | A01561 | A13982 | 302 |
| A01561 | A13984 | 899 | A01561 | A14000 | 899 |
| A01561 | A14008 | 276 | A01561 | A14035 | 899 |
| A01561 | A14042 | 899 | A01561 | A14192 | 207 |
| A01561 | A14198 | 240 | A01561 | A14221 | 199 |
| A01561 | A14278 | 154 | A01561 | A14410 | 227 |
| A01561 | A14444 | 899 | A01561 | A14472 | 899 |
| A01561 | A15529 | 269 | A01561 | A15665 | 386 |
| A01561 | A15682 | 297 | A01561 | A15726 | 899 |
| A01561 | A15850 | 174 | A01561 | A15854 | 227 |
| A01561 | A15918 | 154 | A01561 | A16552 | 185 |
| A01561 | A16608 | 383 | A01561 | A16847 | 227 |
| A01561 | A16938 | 899 | A01562 | A01572 | 273 |
| A01562 | A01588 | 899 | A01562 | A01593 | 899 |
| A01562 | A01602 | 899 | A01562 | A01605 | 491 |
| A01562 | A01615 | 902 | A01562 | A01628 | 945 |
| A01562 | A01631 | 419 | A01562 | A01639 | 945 |
| A01562 | A01640 | 960 | A01562 | A01653 | 162 |
| A01562 | A01665 | 899 | A01562 | A01688 | 899 |
| A01562 | A01692 | 955 | A01562 | A01697 | 490 |
| A01562 | A01702 | 960 | A01562 | A01708 | 994 |
| A01562 | A01709 | 994 | A01562 | A01718 | 959 |
| A01562 | A01719 | 945 | A01562 | A01844 | 990 |
| A01562 | A02030 | 174 | A01562 | A02325 | 391 |
| A01562 | A02494 | 438 | A01562 | A02687 | 191 |
| A01562 | A02803 | 899 | A01562 | A02860 | 180 |
| A01562 | A02870 | 184 | A01562 | A02895 | 156 |
| A01562 | A03126 | 899 | A01562 | A03271 | 920 |
| A01562 | A03591 | 489 | A01562 | A03625 | 63  |
| A01562 | A04012 | 380 | A01562 | A04699 | 944 |
| A01562 | A04706 | 245 | A01562 | A04957 | 438 |

|        |        |     |        |        |     |
|--------|--------|-----|--------|--------|-----|
| A01562 | A05037 | 899 | A01562 | A05288 | 168 |
| A01562 | A05787 | 212 | A01562 | A05867 | 247 |
| A01562 | A05902 | 154 | A01562 | A05918 | 162 |
| A01562 | A06289 | 439 | A01562 | A06610 | 366 |
| A01562 | A06968 | 226 | A01562 | A06993 | 165 |
| A01562 | A07311 | 994 | A01562 | A07422 | 193 |
| A01562 | A07791 | 312 | A01562 | A07989 | 283 |
| A01562 | A08259 | 191 | A01562 | A08732 | 899 |
| A01562 | A08846 | 202 | A01562 | A08862 | 323 |
| A01562 | A08899 | 899 | A01562 | A09162 | 491 |
| A01562 | A09241 | 182 | A01562 | A09352 | 167 |
| A01562 | A09516 | 232 | A01562 | A09577 | 921 |
| A01562 | A09643 | 224 | A01562 | A09644 | 302 |
| A01562 | A09727 | 245 | A01562 | A09826 | 329 |
| A01562 | A09963 | 174 | A01562 | A09989 | 159 |
| A01562 | A10014 | 347 | A01562 | A10159 | 899 |
| A01562 | A10365 | 107 | A01562 | A10392 | 402 |
| A01562 | A10560 | 899 | A01562 | A10623 | 63  |
| A01562 | A10808 | 226 | A01562 | A10813 | 937 |
| A01562 | A11125 | 899 | A01562 | A11736 | 268 |
| A01562 | A11852 | 201 | A01562 | A11983 | 899 |
| A01562 | A12383 | 491 | A01562 | A12664 | 899 |
| A01562 | A12705 | 899 | A01562 | A12969 | 945 |
| A01562 | A12971 | 925 | A01562 | A13401 | 899 |
| A01562 | A13977 | 899 | A01562 | A13978 | 384 |
| A01562 | A13982 | 226 | A01562 | A13984 | 198 |
| A01562 | A13985 | 944 | A01562 | A13989 | 899 |
| A01562 | A13999 | 899 | A01562 | A14004 | 353 |
| A01562 | A14008 | 373 | A01562 | A14019 | 899 |
| A01562 | A14031 | 299 | A01562 | A14033 | 937 |
| A01562 | A14035 | 335 | A01562 | A14043 | 899 |
| A01562 | A14188 | 899 | A01562 | A14208 | 899 |
| A01562 | A14242 | 899 | A01562 | A14325 | 299 |
| A01562 | A14335 | 201 | A01562 | A14452 | 180 |
| A01562 | A14539 | 288 | A01562 | A14662 | 899 |
| A01562 | A14772 | 268 | A01562 | A15106 | 190 |
| A01562 | A15297 | 899 | A01562 | A15323 | 899 |
| A01562 | A15324 | 899 | A01562 | A15353 | 899 |
| A01562 | A15359 | 899 | A01562 | A15726 | 177 |
| A01562 | A16411 | 202 | A01562 | A16453 | 291 |
| A01562 | A16993 | 899 | A01562 | A16994 | 247 |
| A01562 | A17035 | 353 | A01563 | A01645 | 174 |
| A01563 | A01751 | 156 | A01563 | A01770 | 429 |
| A01563 | A01772 | 210 | A01563 | A01889 | 165 |
| A01563 | A02390 | 157 | A01563 | A02424 | 168 |
| A01563 | A02690 | 251 | A01563 | A02837 | 213 |

|        |        |     |        |        |     |
|--------|--------|-----|--------|--------|-----|
| A01563 | A03597 | 439 | A01563 | A03985 | 229 |
| A01563 | A04115 | 154 | A01563 | A04710 | 165 |
| A01563 | A05417 | 399 | A01563 | A05709 | 269 |
| A01563 | A07123 | 219 | A01563 | A08345 | 232 |
| A01563 | A08861 | 168 | A01563 | A10625 | 240 |
| A01563 | A11045 | 355 | A01563 | A13786 | 204 |
| A01563 | A14227 | 191 | A01563 | A15096 | 163 |
| A01563 | A15347 | 183 | A01563 | A15617 | 167 |
| A01564 | A01569 | 190 | A01564 | A03863 | 450 |
| A01565 | A01604 | 187 | A01565 | A01632 | 210 |
| A01565 | A01737 | 488 | A01565 | A01794 | 152 |
| A01565 | A01856 | 238 | A01565 | A01884 | 213 |
| A01565 | A02138 | 363 | A01565 | A02154 | 172 |
| A01565 | A02319 | 277 | A01565 | A02541 | 168 |
| A01565 | A02546 | 229 | A01565 | A02586 | 484 |
| A01565 | A02606 | 174 | A01565 | A02621 | 335 |
| A01565 | A02698 | 817 | A01565 | A02704 | 290 |
| A01565 | A02818 | 466 | A01565 | A02821 | 157 |
| A01565 | A03104 | 245 | A01565 | A03109 | 162 |
| A01565 | A03185 | 221 | A01565 | A03211 | 337 |
| A01565 | A03224 | 247 | A01565 | A03264 | 177 |
| A01565 | A03735 | 163 | A01565 | A03788 | 456 |
| A01565 | A03828 | 317 | A01565 | A03829 | 335 |
| A01565 | A03948 | 483 | A01565 | A04034 | 260 |
| A01565 | A04036 | 288 | A01565 | A04049 | 201 |
| A01565 | A04058 | 204 | A01565 | A04108 | 241 |
| A01565 | A04109 | 234 | A01565 | A04135 | 193 |
| A01565 | A04136 | 288 | A01565 | A04257 | 216 |
| A01565 | A04273 | 379 | A01565 | A04275 | 346 |
| A01565 | A04372 | 255 | A01565 | A04449 | 456 |
| A01565 | A04536 | 232 | A01565 | A04620 | 204 |
| A01565 | A04964 | 262 | A01565 | A05449 | 632 |
| A01565 | A05495 | 341 | A01565 | A05556 | 779 |
| A01565 | A05577 | 777 | A01565 | A05601 | 491 |
| A01565 | A05767 | 477 | A01565 | A05865 | 384 |
| A01565 | A06055 | 402 | A01565 | A06211 | 216 |
| A01565 | A06466 | 353 | A01565 | A06558 | 288 |
| A01565 | A06588 | 520 | A01565 | A06803 | 228 |
| A01565 | A07050 | 152 | A01565 | A07126 | 278 |
| A01565 | A07311 | 379 | A01565 | A08093 | 170 |
| A01565 | A08178 | 188 | A01565 | A08280 | 157 |
| A01565 | A08471 | 341 | A01565 | A08850 | 808 |
| A01565 | A09030 | 317 | A01565 | A09046 | 185 |
| A01565 | A09462 | 413 | A01565 | A10102 | 341 |
| A01565 | A10169 | 288 | A01565 | A10173 | 404 |
| A01565 | A10403 | 299 | A01565 | A10969 | 269 |

|        |        |     |        |        |     |
|--------|--------|-----|--------|--------|-----|
| A01565 | A11312 | 151 | A01565 | A11476 | 221 |
| A01565 | A11944 | 213 | A01565 | A11952 | 174 |
| A01565 | A12147 | 299 | A01565 | A12252 | 290 |
| A01565 | A12540 | 396 | A01565 | A12599 | 413 |
| A01565 | A12768 | 341 | A01565 | A12769 | 341 |
| A01565 | A12786 | 413 | A01565 | A13023 | 573 |
| A01565 | A13320 | 236 | A01565 | A13340 | 460 |
| A01565 | A13815 | 341 | A01565 | A13906 | 204 |
| A01565 | A13988 | 152 | A01565 | A14236 | 601 |
| A01565 | A14366 | 811 | A01565 | A14372 | 183 |
| A01565 | A14388 | 288 | A01565 | A14394 | 457 |
| A01565 | A14497 | 226 | A01565 | A14588 | 235 |
| A01565 | A14596 | 754 | A01565 | A14659 | 762 |
| A01565 | A14685 | 260 | A01565 | A14738 | 230 |
| A01565 | A15233 | 171 | A01565 | A15314 | 152 |
| A01565 | A15361 | 173 | A01565 | A15386 | 467 |
| A01565 | A15606 | 624 | A01565 | A15660 | 477 |
| A01565 | A15684 | 404 | A01565 | A15741 | 245 |
| A01565 | A15769 | 232 | A01565 | A15794 | 168 |
| A01565 | A15981 | 177 | A01565 | A16298 | 294 |
| A01565 | A17127 | 163 | A01565 | A17155 | 188 |
| A01566 | A01595 | 196 | A01566 | A01607 | 491 |
| A01566 | A01632 | 490 | A01566 | A01652 | 329 |
| A01566 | A01730 | 63  | A01566 | A01743 | 190 |
| A01566 | A01822 | 270 | A01566 | A01834 | 252 |
| A01566 | A01930 | 228 | A01566 | A01940 | 351 |
| A01566 | A02143 | 154 | A01566 | A02188 | 347 |
| A01566 | A02351 | 154 | A01566 | A02477 | 259 |
| A01566 | A02502 | 326 | A01566 | A03104 | 341 |
| A01566 | A03211 | 481 | A01566 | A03241 | 156 |
| A01566 | A03351 | 162 | A01566 | A03451 | 491 |
| A01566 | A03471 | 485 | A01566 | A03705 | 274 |
| A01566 | A03861 | 333 | A01566 | A03923 | 174 |
| A01566 | A03941 | 269 | A01566 | A04078 | 372 |
| A01566 | A04175 | 245 | A01566 | A04275 | 184 |
| A01566 | A04418 | 154 | A01566 | A04424 | 162 |
| A01566 | A04493 | 260 | A01566 | A04535 | 217 |
| A01566 | A04655 | 228 | A01566 | A04715 | 347 |
| A01566 | A04727 | 219 | A01566 | A04778 | 183 |
| A01566 | A04787 | 217 | A01566 | A04944 | 288 |
| A01566 | A04976 | 236 | A01566 | A05114 | 159 |
| A01566 | A05250 | 249 | A01566 | A05289 | 479 |
| A01566 | A05300 | 263 | A01566 | A05574 | 463 |
| A01566 | A05894 | 217 | A01566 | A06092 | 196 |
| A01566 | A06100 | 238 | A01566 | A06279 | 180 |
| A01566 | A06384 | 281 | A01566 | A06566 | 327 |

|        |        |     |        |        |     |
|--------|--------|-----|--------|--------|-----|
| A01566 | A06609 | 259 | A01566 | A06623 | 180 |
| A01566 | A06688 | 361 | A01566 | A06744 | 180 |
| A01566 | A06896 | 312 | A01566 | A07209 | 163 |
| A01566 | A07282 | 319 | A01566 | A07384 | 168 |
| A01566 | A07815 | 288 | A01566 | A07984 | 327 |
| A01566 | A08573 | 160 | A01566 | A08578 | 200 |
| A01566 | A09384 | 351 | A01566 | A10103 | 316 |
| A01566 | A10594 | 152 | A01566 | A10949 | 170 |
| A01566 | A11426 | 274 | A01566 | A12634 | 290 |
| A01566 | A13157 | 402 | A01566 | A13369 | 216 |
| A01566 | A13824 | 327 | A01566 | A14330 | 195 |
| A01566 | A15232 | 351 | A01566 | A15398 | 157 |
| A01566 | A15929 | 327 | A01566 | A16081 | 221 |
| A01566 | A16442 | 312 | A01566 | A16723 | 205 |
| A01566 | A17009 | 241 | A01567 | A01582 | 296 |
| A01567 | A01602 | 362 | A01567 | A01604 | 374 |
| A01567 | A01611 | 196 | A01567 | A01668 | 201 |
| A01567 | A01669 | 163 | A01567 | A01705 | 63  |
| A01567 | A01775 | 68  | A01567 | A01778 | 151 |
| A01567 | A01782 | 171 | A01567 | A01803 | 249 |
| A01567 | A01922 | 245 | A01567 | A02168 | 276 |
| A01567 | A02268 | 406 | A01567 | A02275 | 174 |
| A01567 | A02405 | 179 | A01567 | A02454 | 438 |
| A01567 | A02981 | 180 | A01567 | A02988 | 353 |
| A01567 | A02994 | 174 | A01567 | A03091 | 191 |
| A01567 | A03098 | 226 | A01567 | A03259 | 274 |
| A01567 | A03456 | 263 | A01567 | A03723 | 217 |
| A01567 | A03759 | 157 | A01567 | A03937 | 212 |
| A01567 | A04117 | 257 | A01567 | A04286 | 216 |
| A01567 | A05021 | 313 | A01567 | A05346 | 328 |
| A01567 | A05375 | 210 | A01567 | A05621 | 163 |
| A01567 | A05659 | 191 | A01567 | A05682 | 241 |
| A01567 | A06048 | 382 | A01567 | A06701 | 162 |
| A01567 | A07178 | 227 | A01567 | A09052 | 152 |
| A01567 | A10760 | 179 | A01567 | A11913 | 168 |
| A01567 | A13993 | 406 | A01568 | A01580 | 491 |
| A01568 | A01630 | 234 | A01568 | A01647 | 708 |
| A01568 | A01687 | 491 | A01568 | A01692 | 191 |
| A01568 | A01811 | 311 | A01568 | A01978 | 276 |
| A01568 | A01988 | 634 | A01568 | A02573 | 224 |
| A01568 | A02635 | 449 | A01568 | A03197 | 489 |
| A01568 | A03496 | 441 | A01568 | A03591 | 207 |
| A01568 | A03719 | 179 | A01568 | A03720 | 536 |
| A01568 | A03728 | 365 | A01568 | A03775 | 240 |
| A01568 | A03817 | 486 | A01568 | A03880 | 624 |
| A01568 | A03913 | 196 | A01568 | A04292 | 294 |

|        |        |     |        |        |     |
|--------|--------|-----|--------|--------|-----|
| A01568 | A05256 | 378 | A01568 | A05301 | 491 |
| A01568 | A05597 | 179 | A01568 | A06176 | 483 |
| A01568 | A06277 | 473 | A01568 | A06491 | 179 |
| A01568 | A06572 | 230 | A01568 | A06591 | 554 |
| A01568 | A06661 | 373 | A01568 | A06752 | 160 |
| A01568 | A06819 | 243 | A01568 | A06941 | 457 |
| A01568 | A06970 | 329 | A01568 | A07007 | 307 |
| A01568 | A07054 | 662 | A01568 | A07073 | 401 |
| A01568 | A07083 | 416 | A01568 | A07242 | 491 |
| A01568 | A07253 | 424 | A01568 | A07404 | 477 |
| A01568 | A07421 | 179 | A01568 | A07444 | 338 |
| A01568 | A07483 | 491 | A01568 | A07495 | 554 |
| A01568 | A07665 | 488 | A01568 | A07687 | 260 |
| A01568 | A07696 | 432 | A01568 | A07709 | 491 |
| A01568 | A07785 | 179 | A01568 | A07816 | 624 |
| A01568 | A07893 | 491 | A01568 | A07934 | 432 |
| A01568 | A07954 | 491 | A01568 | A07981 | 333 |
| A01568 | A08056 | 491 | A01568 | A08259 | 179 |
| A01568 | A08360 | 394 | A01568 | A08402 | 290 |
| A01568 | A08515 | 165 | A01568 | A08531 | 491 |
| A01568 | A08536 | 438 | A01568 | A08551 | 554 |
| A01568 | A08552 | 156 | A01568 | A08594 | 378 |
| A01568 | A08669 | 472 | A01568 | A08834 | 179 |
| A01568 | A08840 | 179 | A01568 | A08910 | 366 |
| A01568 | A08917 | 458 | A01568 | A08934 | 152 |
| A01568 | A09054 | 441 | A01568 | A09083 | 313 |
| A01568 | A09122 | 151 | A01568 | A09309 | 201 |
| A01568 | A09624 | 273 | A01568 | A09662 | 481 |
| A01568 | A09666 | 490 | A01568 | A09825 | 246 |
| A01568 | A10369 | 254 | A01568 | A10538 | 215 |
| A01568 | A10651 | 154 | A01568 | A10863 | 91  |
| A01568 | A10909 | 151 | A01568 | A11068 | 351 |
| A01568 | A11112 | 188 | A01568 | A11150 | 332 |
| A01568 | A11202 | 265 | A01568 | A11281 | 454 |
| A01568 | A11346 | 491 | A01568 | A11472 | 274 |
| A01568 | A11490 | 269 | A01568 | A11558 | 179 |
| A01568 | A11690 | 330 | A01568 | A11881 | 409 |
| A01568 | A11917 | 243 | A01568 | A11987 | 452 |
| A01568 | A12047 | 491 | A01568 | A12210 | 188 |
| A01568 | A12215 | 168 | A01568 | A12254 | 234 |
| A01568 | A12499 | 201 | A01568 | A12722 | 490 |
| A01568 | A12954 | 165 | A01568 | A13207 | 486 |
| A01568 | A13309 | 271 | A01568 | A13454 | 165 |
| A01568 | A13460 | 491 | A01568 | A13479 | 165 |
| A01568 | A13489 | 226 | A01568 | A13784 | 473 |
| A01568 | A13805 | 202 | A01568 | A13809 | 252 |

|        |        |     |        |        |     |
|--------|--------|-----|--------|--------|-----|
| A01568 | A13819 | 307 | A01568 | A13831 | 210 |
| A01568 | A13866 | 608 | A01568 | A13894 | 271 |
| A01568 | A13912 | 313 | A01568 | A13942 | 245 |
| A01568 | A13949 | 414 | A01568 | A14009 | 227 |
| A01568 | A14149 | 221 | A01568 | A14163 | 429 |
| A01568 | A14202 | 179 | A01568 | A14214 | 185 |
| A01568 | A14239 | 497 | A01568 | A14266 | 491 |
| A01568 | A14281 | 491 | A01568 | A14366 | 179 |
| A01568 | A14474 | 491 | A01568 | A14484 | 491 |
| A01568 | A14570 | 261 | A01568 | A14633 | 491 |
| A01568 | A14661 | 477 | A01568 | A14799 | 302 |
| A01568 | A14854 | 226 | A01568 | A14994 | 226 |
| A01568 | A15105 | 332 | A01568 | A15147 | 165 |
| A01568 | A15189 | 187 | A01568 | A15200 | 226 |
| A01568 | A15324 | 279 | A01568 | A15358 | 179 |
| A01568 | A15470 | 179 | A01568 | A15484 | 179 |
| A01568 | A15501 | 491 | A01568 | A15502 | 486 |
| A01568 | A15505 | 217 | A01568 | A15626 | 490 |
| A01568 | A15768 | 462 | A01568 | A15770 | 478 |
| A01568 | A15895 | 226 | A01568 | A15930 | 475 |
| A01568 | A16048 | 491 | A01568 | A16128 | 414 |
| A01568 | A16157 | 174 | A01568 | A16478 | 374 |
| A01568 | A16552 | 215 | A01568 | A16565 | 215 |
| A01568 | A16597 | 285 | A01568 | A16675 | 193 |
| A01568 | A16677 | 165 | A01568 | A16680 | 180 |
| A01568 | A16708 | 159 | A01568 | A16714 | 226 |
| A01568 | A16727 | 165 | A01568 | A16788 | 165 |
| A01568 | A16807 | 618 | A01568 | A16829 | 227 |
| A01568 | A16859 | 165 | A01568 | A16875 | 188 |
| A01568 | A16905 | 351 | A01568 | A16913 | 288 |
| A01568 | A16944 | 340 | A01568 | A17013 | 221 |
| A01568 | A17124 | 165 | A01568 | A17211 | 307 |
| A01569 | A01577 | 491 | A01569 | A01579 | 491 |
| A01569 | A01586 | 457 | A01569 | A01597 | 385 |
| A01569 | A01598 | 438 | A01569 | A01601 | 457 |
| A01569 | A01635 | 481 | A01569 | A01649 | 486 |
| A01569 | A01684 | 330 | A01569 | A01688 | 151 |
| A01569 | A01747 | 341 | A01569 | A01770 | 249 |
| A01569 | A01822 | 323 | A01569 | A01841 | 404 |
| A01569 | A01917 | 401 | A01569 | A02269 | 201 |
| A01569 | A02340 | 293 | A01569 | A02353 | 491 |
| A01569 | A02426 | 188 | A01569 | A02718 | 486 |
| A01569 | A02719 | 472 | A01569 | A02737 | 341 |
| A01569 | A02877 | 216 | A01569 | A03255 | 151 |
| A01569 | A03334 | 154 | A01569 | A03401 | 195 |
| A01569 | A03446 | 491 | A01569 | A03453 | 483 |



|        |        |     |        |        |     |
|--------|--------|-----|--------|--------|-----|
| A01569 | A03476 | 440 | A01569 | A03477 | 491 |
| A01569 | A03494 | 339 | A01569 | A03560 | 491 |
| A01569 | A03567 | 488 | A01569 | A03586 | 385 |
| A01569 | A03738 | 466 | A01569 | A03740 | 489 |
| A01569 | A03809 | 422 | A01569 | A03859 | 235 |
| A01569 | A03863 | 726 | A01569 | A03981 | 479 |
| A01569 | A04106 | 177 | A01569 | A04124 | 408 |
| A01569 | A04307 | 254 | A01569 | A04519 | 363 |
| A01569 | A04761 | 236 | A01569 | A04785 | 350 |
| A01569 | A04879 | 406 | A01569 | A04880 | 480 |
| A01569 | A05006 | 221 | A01569 | A05102 | 215 |
| A01569 | A05310 | 396 | A01569 | A05449 | 217 |
| A01569 | A05501 | 419 | A01569 | A05712 | 486 |
| A01569 | A05857 | 272 | A01569 | A05930 | 236 |
| A01569 | A05996 | 322 | A01569 | A06025 | 236 |
| A01569 | A06030 | 277 | A01569 | A06091 | 243 |
| A01569 | A06359 | 234 | A01569 | A06466 | 168 |
| A01569 | A06901 | 216 | A01569 | A06965 | 380 |
| A01569 | A07061 | 159 | A01569 | A07247 | 489 |
| A01569 | A07323 | 162 | A01569 | A07449 | 182 |
| A01569 | A07644 | 200 | A01569 | A07746 | 475 |
| A01569 | A07822 | 243 | A01569 | A07897 | 322 |
| A01569 | A08061 | 481 | A01569 | A08072 | 272 |
| A01569 | A08261 | 171 | A01569 | A08357 | 451 |
| A01569 | A08359 | 371 | A01569 | A08390 | 420 |
| A01569 | A08546 | 319 | A01569 | A08896 | 332 |
| A01569 | A08940 | 312 | A01569 | A08978 | 491 |
| A01569 | A09024 | 396 | A01569 | A09285 | 151 |
| A01569 | A09396 | 219 | A01569 | A09502 | 198 |
| A01569 | A09587 | 452 | A01569 | A09591 | 281 |
| A01569 | A09618 | 272 | A01569 | A09632 | 193 |
| A01569 | A09911 | 228 | A01569 | A10006 | 420 |
| A01569 | A10238 | 367 | A01569 | A10266 | 201 |
| A01569 | A10490 | 491 | A01569 | A10532 | 491 |
| A01569 | A10846 | 182 | A01569 | A11028 | 236 |
| A01569 | A11302 | 212 | A01569 | A11374 | 245 |
| A01569 | A11409 | 491 | A01569 | A11618 | 272 |
| A01569 | A11657 | 335 | A01569 | A12053 | 216 |
| A01569 | A12329 | 156 | A01569 | A12607 | 177 |
| A01569 | A13132 | 236 | A01569 | A13135 | 361 |
| A01569 | A13340 | 294 | A01569 | A13388 | 489 |
| A01569 | A13395 | 272 | A01569 | A13609 | 400 |
| A01569 | A13989 | 491 | A01569 | A14006 | 346 |
| A01569 | A14073 | 490 | A01569 | A14102 | 177 |
| A01569 | A14216 | 475 | A01569 | A14351 | 491 |
| A01569 | A14525 | 378 | A01569 | A14596 | 177 |

|        |        |     |        |        |     |
|--------|--------|-----|--------|--------|-----|
| A01569 | A14827 | 157 | A01569 | A14959 | 272 |
| A01569 | A15437 | 221 | A01569 | A15550 | 296 |
| A01569 | A15624 | 152 | A01569 | A15659 | 345 |
| A01569 | A15660 | 491 | A01569 | A15684 | 491 |
| A01569 | A15840 | 196 | A01569 | A15905 | 165 |
| A01569 | A16741 | 205 | A01569 | A16756 | 238 |
| A01569 | A17048 | 236 | A01570 | A01572 | 582 |
| A01570 | A01576 | 224 | A01570 | A02076 | 63  |
| A01570 | A02838 | 221 | A01570 | A03012 | 162 |
| A01570 | A03492 | 174 | A01570 | A03686 | 77  |
| A01570 | A05791 | 236 | A01570 | A06597 | 319 |
| A01570 | A07183 | 263 | A01570 | A07190 | 174 |
| A01570 | A10544 | 63  | A01570 | A10721 | 63  |
| A01570 | A16996 | 63  | A01571 | A01632 | 267 |
| A01571 | A01730 | 165 | A01571 | A01781 | 344 |
| A01571 | A01817 | 419 | A01571 | A02049 | 219 |
| A01571 | A02173 | 159 | A01571 | A02178 | 324 |
| A01571 | A02510 | 249 | A01571 | A02518 | 480 |
| A01571 | A02808 | 182 | A01571 | A02927 | 151 |
| A01571 | A02953 | 162 | A01571 | A03014 | 491 |
| A01571 | A03116 | 334 | A01571 | A03211 | 308 |
| A01571 | A03247 | 201 | A01571 | A03276 | 199 |
| A01571 | A03284 | 267 | A01571 | A03663 | 157 |
| A01571 | A03726 | 154 | A01571 | A03891 | 358 |
| A01571 | A03922 | 196 | A01571 | A04114 | 180 |
| A01571 | A04425 | 246 | A01571 | A04605 | 277 |
| A01571 | A04686 | 356 | A01571 | A04879 | 266 |
| A01571 | A05004 | 329 | A01571 | A05288 | 485 |
| A01571 | A05981 | 480 | A01571 | A06581 | 238 |
| A01571 | A06588 | 193 | A01571 | A06620 | 294 |
| A01571 | A06628 | 208 | A01571 | A06653 | 183 |
| A01571 | A07051 | 439 | A01571 | A07138 | 208 |
| A01571 | A07154 | 187 | A01571 | A07339 | 363 |
| A01571 | A08309 | 461 | A01571 | A08524 | 283 |
| A01571 | A08686 | 485 | A01571 | A08905 | 179 |
| A01571 | A09054 | 232 | A01571 | A09723 | 249 |
| A01571 | A09806 | 272 | A01571 | A09842 | 182 |
| A01571 | A10146 | 380 | A01571 | A11196 | 419 |
| A01571 | A11683 | 174 | A01571 | A11735 | 302 |
| A01571 | A13069 | 232 | A01571 | A13170 | 395 |
| A01571 | A13729 | 201 | A01571 | A13788 | 481 |
| A01571 | A13853 | 241 | A01571 | A14006 | 210 |
| A01571 | A14052 | 163 | A01571 | A14247 | 420 |
| A01571 | A14350 | 297 | A01571 | A14788 | 254 |
| A01571 | A15498 | 466 | A01571 | A15666 | 491 |
| A01571 | A16281 | 243 | A01571 | A16690 | 411 |

|        |        |     |        |        |     |
|--------|--------|-----|--------|--------|-----|
| A01571 | A16750 | 307 | A01571 | A16887 | 283 |
| A01572 | A01576 | 491 | A01572 | A01588 | 899 |
| A01572 | A01591 | 490 | A01572 | A01592 | 486 |
| A01572 | A01593 | 933 | A01572 | A01594 | 254 |
| A01572 | A01596 | 255 | A01572 | A01602 | 490 |
| A01572 | A01610 | 481 | A01572 | A01615 | 343 |
| A01572 | A01628 | 361 | A01572 | A01630 | 351 |
| A01572 | A01631 | 191 | A01572 | A01636 | 272 |
| A01572 | A01638 | 899 | A01572 | A01640 | 210 |
| A01572 | A01647 | 199 | A01572 | A01660 | 491 |
| A01572 | A01668 | 369 | A01572 | A01707 | 443 |
| A01572 | A01709 | 322 | A01572 | A01730 | 300 |
| A01572 | A01761 | 218 | A01572 | A01770 | 445 |
| A01572 | A01796 | 427 | A01572 | A01798 | 205 |
| A01572 | A01808 | 156 | A01572 | A01809 | 422 |
| A01572 | A01844 | 945 | A01572 | A01870 | 199 |
| A01572 | A01995 | 335 | A01572 | A02054 | 462 |
| A01572 | A02076 | 486 | A01572 | A02086 | 489 |
| A01572 | A02119 | 207 | A01572 | A02157 | 285 |
| A01572 | A02183 | 375 | A01572 | A02199 | 174 |
| A01572 | A02226 | 357 | A01572 | A02292 | 199 |
| A01572 | A02343 | 394 | A01572 | A02362 | 450 |
| A01572 | A02432 | 346 | A01572 | A02518 | 767 |
| A01572 | A02635 | 211 | A01572 | A02637 | 228 |
| A01572 | A02715 | 486 | A01572 | A02751 | 199 |
| A01572 | A03115 | 266 | A01572 | A03151 | 165 |
| A01572 | A03171 | 489 | A01572 | A03188 | 481 |
| A01572 | A03223 | 463 | A01572 | A03313 | 683 |
| A01572 | A03321 | 296 | A01572 | A03331 | 935 |
| A01572 | A03575 | 326 | A01572 | A03725 | 340 |
| A01572 | A03831 | 154 | A01572 | A03838 | 238 |
| A01572 | A03892 | 525 | A01572 | A03990 | 489 |
| A01572 | A04098 | 156 | A01572 | A04161 | 576 |
| A01572 | A04589 | 222 | A01572 | A04600 | 899 |
| A01572 | A04622 | 408 | A01572 | A04662 | 316 |
| A01572 | A04666 | 199 | A01572 | A04699 | 249 |
| A01572 | A05155 | 216 | A01572 | A05216 | 491 |
| A01572 | A05315 | 905 | A01572 | A05356 | 469 |
| A01572 | A05418 | 246 | A01572 | A05501 | 243 |
| A01572 | A05762 | 156 | A01572 | A06082 | 649 |
| A01572 | A06242 | 160 | A01572 | A06286 | 218 |
| A01572 | A06408 | 162 | A01572 | A06428 | 229 |
| A01572 | A06584 | 63  | A01572 | A06597 | 201 |
| A01572 | A06610 | 491 | A01572 | A06615 | 490 |
| A01572 | A06642 | 477 | A01572 | A07004 | 414 |
| A01572 | A07011 | 382 | A01572 | A07051 | 473 |

|        |        |     |        |        |     |
|--------|--------|-----|--------|--------|-----|
| A01572 | A07166 | 329 | A01572 | A07183 | 440 |
| A01572 | A07190 | 241 | A01572 | A07311 | 610 |
| A01572 | A07314 | 409 | A01572 | A07339 | 398 |
| A01572 | A07366 | 210 | A01572 | A07421 | 450 |
| A01572 | A07521 | 486 | A01572 | A07754 | 382 |
| A01572 | A07771 | 391 | A01572 | A07798 | 289 |
| A01572 | A07885 | 491 | A01572 | A08133 | 199 |
| A01572 | A08137 | 199 | A01572 | A08256 | 388 |
| A01572 | A08338 | 156 | A01572 | A08355 | 199 |
| A01572 | A08571 | 472 | A01572 | A08707 | 490 |
| A01572 | A08809 | 156 | A01572 | A08839 | 899 |
| A01572 | A08855 | 899 | A01572 | A08902 | 276 |
| A01572 | A09078 | 154 | A01572 | A09324 | 154 |
| A01572 | A09556 | 396 | A01572 | A09633 | 644 |
| A01572 | A09644 | 457 | A01572 | A10174 | 909 |
| A01572 | A10456 | 213 | A01572 | A10575 | 191 |
| A01572 | A10720 | 317 | A01572 | A10721 | 488 |
| A01572 | A10898 | 167 | A01572 | A10986 | 213 |
| A01572 | A11286 | 324 | A01572 | A11476 | 307 |
| A01572 | A11487 | 470 | A01572 | A11668 | 899 |
| A01572 | A11985 | 156 | A01572 | A12178 | 156 |
| A01572 | A12383 | 441 | A01572 | A12393 | 480 |
| A01572 | A12498 | 457 | A01572 | A12835 | 463 |
| A01572 | A12854 | 66  | A01572 | A12858 | 899 |
| A01572 | A13099 | 228 | A01572 | A13146 | 371 |
| A01572 | A13225 | 899 | A01572 | A13347 | 63  |
| A01572 | A13511 | 288 | A01572 | A13724 | 195 |
| A01572 | A13741 | 420 | A01572 | A13824 | 486 |
| A01572 | A13829 | 491 | A01572 | A13860 | 485 |
| A01572 | A13882 | 507 | A01572 | A13902 | 572 |
| A01572 | A13975 | 308 | A01572 | A13979 | 491 |
| A01572 | A13980 | 274 | A01572 | A13981 | 899 |
| A01572 | A13986 | 974 | A01572 | A14006 | 491 |
| A01572 | A14007 | 491 | A01572 | A14009 | 490 |
| A01572 | A14011 | 491 | A01572 | A14014 | 63  |
| A01572 | A14072 | 473 | A01572 | A14086 | 267 |
| A01572 | A14152 | 187 | A01572 | A14174 | 490 |
| A01572 | A14183 | 311 | A01572 | A14192 | 260 |
| A01572 | A14197 | 63  | A01572 | A14198 | 460 |
| A01572 | A14208 | 201 | A01572 | A14216 | 400 |
| A01572 | A14221 | 246 | A01572 | A14226 | 899 |
| A01572 | A14252 | 461 | A01572 | A14263 | 157 |
| A01572 | A14279 | 379 | A01572 | A14299 | 199 |
| A01572 | A14300 | 491 | A01572 | A14430 | 446 |
| A01572 | A14443 | 914 | A01572 | A14452 | 491 |
| A01572 | A14475 | 380 | A01572 | A14809 | 199 |

|        |        |     |        |        |     |
|--------|--------|-----|--------|--------|-----|
| A01572 | A14930 | 163 | A01572 | A14992 | 156 |
| A01572 | A15034 | 199 | A01572 | A15093 | 195 |
| A01572 | A15201 | 156 | A01572 | A15244 | 276 |
| A01572 | A15315 | 396 | A01572 | A15356 | 491 |
| A01572 | A15401 | 262 | A01572 | A15420 | 489 |
| A01572 | A15500 | 207 | A01572 | A15726 | 491 |
| A01572 | A15829 | 156 | A01572 | A15931 | 435 |
| A01572 | A15974 | 248 | A01572 | A16073 | 260 |
| A01572 | A16224 | 271 | A01572 | A16262 | 185 |
| A01572 | A16320 | 466 | A01572 | A16410 | 224 |
| A01572 | A16763 | 199 | A01572 | A16809 | 199 |
| A01572 | A16840 | 183 | A01572 | A16888 | 102 |
| A01572 | A16994 | 490 | A01572 | A17061 | 329 |
| A01572 | A17127 | 163 | A01572 | A17151 | 243 |
| A01573 | A01574 | 544 | A01573 | A01575 | 491 |
| A01573 | A01576 | 491 | A01573 | A01583 | 491 |
| A01573 | A01585 | 537 | A01573 | A01634 | 491 |
| A01573 | A01677 | 491 | A01573 | A01678 | 491 |
| A01573 | A01683 | 486 | A01573 | A01706 | 491 |
| A01573 | A01710 | 603 | A01573 | A01730 | 268 |
| A01573 | A01811 | 278 | A01573 | A01918 | 486 |
| A01573 | A01926 | 603 | A01573 | A01937 | 324 |
| A01573 | A02007 | 224 | A01573 | A02148 | 185 |
| A01573 | A02364 | 402 | A01573 | A02402 | 369 |
| A01573 | A02530 | 252 | A01573 | A02803 | 180 |
| A01573 | A02979 | 146 | A01573 | A02983 | 241 |
| A01573 | A03034 | 241 | A01573 | A03154 | 385 |
| A01573 | A03238 | 491 | A01573 | A03293 | 241 |
| A01573 | A03326 | 599 | A01573 | A03329 | 446 |
| A01573 | A03428 | 491 | A01573 | A03452 | 491 |
| A01573 | A03481 | 458 | A01573 | A03489 | 310 |
| A01573 | A03618 | 491 | A01573 | A03625 | 229 |
| A01573 | A03626 | 491 | A01573 | A03686 | 360 |
| A01573 | A03718 | 165 | A01573 | A03880 | 402 |
| A01573 | A03889 | 491 | A01573 | A03890 | 414 |
| A01573 | A03892 | 475 | A01573 | A04072 | 329 |
| A01573 | A04292 | 491 | A01573 | A04318 | 249 |
| A01573 | A04337 | 427 | A01573 | A04342 | 429 |
| A01573 | A04406 | 249 | A01573 | A04668 | 406 |
| A01573 | A04686 | 491 | A01573 | A04839 | 582 |
| A01573 | A04893 | 241 | A01573 | A04894 | 201 |
| A01573 | A05028 | 490 | A01573 | A05131 | 162 |
| A01573 | A05143 | 213 | A01573 | A05155 | 326 |
| A01573 | A05200 | 436 | A01573 | A05234 | 426 |
| A01573 | A05376 | 601 | A01573 | A05785 | 326 |
| A01573 | A05862 | 460 | A01573 | A06011 | 462 |

|        |        |     |        |        |     |
|--------|--------|-----|--------|--------|-----|
| A01573 | A06167 | 343 | A01573 | A06424 | 230 |
| A01573 | A06593 | 156 | A01573 | A06657 | 171 |
| A01573 | A06659 | 488 | A01573 | A06675 | 384 |
| A01573 | A06739 | 483 | A01573 | A06890 | 172 |
| A01573 | A06941 | 470 | A01573 | A07016 | 224 |
| A01573 | A07207 | 353 | A01573 | A07394 | 291 |
| A01573 | A07422 | 162 | A01573 | A07620 | 171 |
| A01573 | A07664 | 193 | A01573 | A07736 | 180 |
| A01573 | A07820 | 491 | A01573 | A08297 | 265 |
| A01573 | A08400 | 474 | A01573 | A08402 | 326 |
| A01573 | A08454 | 193 | A01573 | A08461 | 321 |
| A01573 | A08765 | 491 | A01573 | A08766 | 230 |
| A01573 | A08772 | 249 | A01573 | A08776 | 230 |
| A01573 | A08777 | 450 | A01573 | A08812 | 152 |
| A01573 | A08874 | 199 | A01573 | A08881 | 269 |
| A01573 | A09036 | 221 | A01573 | A09053 | 388 |
| A01573 | A09054 | 63  | A01573 | A09056 | 598 |
| A01573 | A09060 | 479 | A01573 | A09277 | 489 |
| A01573 | A09326 | 491 | A01573 | A09333 | 491 |
| A01573 | A09375 | 249 | A01573 | A09528 | 327 |
| A01573 | A09891 | 326 | A01573 | A09892 | 296 |
| A01573 | A09936 | 193 | A01573 | A09952 | 374 |
| A01573 | A10372 | 395 | A01573 | A10527 | 372 |
| A01573 | A10594 | 318 | A01573 | A10663 | 470 |
| A01573 | A11068 | 157 | A01573 | A11083 | 265 |
| A01573 | A11279 | 479 | A01573 | A11373 | 162 |
| A01573 | A11381 | 366 | A01573 | A11456 | 488 |
| A01573 | A11497 | 157 | A01573 | A11527 | 324 |
| A01573 | A11914 | 247 | A01573 | A11925 | 269 |
| A01573 | A11992 | 163 | A01573 | A12658 | 162 |
| A01573 | A12792 | 316 | A01573 | A12820 | 171 |
| A01573 | A12824 | 416 | A01573 | A12826 | 230 |
| A01573 | A12858 | 174 | A01573 | A13284 | 265 |
| A01573 | A13387 | 236 | A01573 | A13420 | 269 |
| A01573 | A13568 | 208 | A01573 | A13824 | 196 |
| A01573 | A13830 | 481 | A01573 | A13832 | 483 |
| A01573 | A13845 | 456 | A01573 | A13855 | 479 |
| A01573 | A13871 | 195 | A01573 | A13874 | 391 |
| A01573 | A13894 | 441 | A01573 | A13902 | 168 |
| A01573 | A13963 | 184 | A01573 | A14026 | 314 |
| A01573 | A14058 | 193 | A01573 | A14095 | 216 |
| A01573 | A14182 | 404 | A01573 | A14216 | 388 |
| A01573 | A14247 | 603 | A01573 | A14255 | 154 |
| A01573 | A14272 | 456 | A01573 | A14344 | 177 |
| A01573 | A14473 | 337 | A01573 | A14481 | 522 |
| A01573 | A14569 | 185 | A01573 | A14661 | 491 |

|        |        |     |        |        |     |
|--------|--------|-----|--------|--------|-----|
| A01573 | A14693 | 580 | A01573 | A14838 | 491 |
| A01573 | A14903 | 191 | A01573 | A15295 | 543 |
| A01573 | A15301 | 439 | A01573 | A15302 | 269 |
| A01573 | A15322 | 236 | A01573 | A15345 | 251 |
| A01573 | A15366 | 602 | A01573 | A15367 | 366 |
| A01573 | A15384 | 402 | A01573 | A15430 | 507 |
| A01573 | A15462 | 503 | A01573 | A15463 | 536 |
| A01573 | A15498 | 486 | A01573 | A15552 | 229 |
| A01573 | A15647 | 717 | A01573 | A15650 | 385 |
| A01573 | A15685 | 477 | A01573 | A15743 | 167 |
| A01573 | A15770 | 162 | A01573 | A15909 | 369 |
| A01573 | A15917 | 177 | A01573 | A15992 | 151 |
| A01573 | A16587 | 167 | A01573 | A16611 | 188 |
| A01573 | A16617 | 491 | A01573 | A16652 | 491 |
| A01573 | A16664 | 224 | A01573 | A16690 | 157 |
| A01573 | A16703 | 229 | A01573 | A16758 | 353 |
| A01573 | A16790 | 269 | A01573 | A16815 | 263 |
| A01573 | A16847 | 310 | A01573 | A16883 | 265 |
| A01573 | A16905 | 207 | A01573 | A17061 | 489 |
| A01573 | A17091 | 174 | A01574 | A01575 | 874 |
| A01574 | A01576 | 727 | A01574 | A01578 | 490 |
| A01574 | A01583 | 488 | A01574 | A01585 | 822 |
| A01574 | A01612 | 491 | A01574 | A01634 | 807 |
| A01574 | A01646 | 972 | A01574 | A01660 | 527 |
| A01574 | A01673 | 486 | A01574 | A01677 | 491 |
| A01574 | A01678 | 491 | A01574 | A01683 | 956 |
| A01574 | A01706 | 708 | A01574 | A01710 | 491 |
| A01574 | A01715 | 63  | A01574 | A01726 | 256 |
| A01574 | A01761 | 491 | A01574 | A01779 | 429 |
| A01574 | A01809 | 491 | A01574 | A01811 | 311 |
| A01574 | A01860 | 174 | A01574 | A01894 | 199 |
| A01574 | A01918 | 419 | A01574 | A01926 | 450 |
| A01574 | A01933 | 441 | A01574 | A02215 | 201 |
| A01574 | A02300 | 457 | A01574 | A02343 | 252 |
| A01574 | A02364 | 569 | A01574 | A02979 | 480 |
| A01574 | A03238 | 215 | A01574 | A03271 | 486 |
| A01574 | A03293 | 962 | A01574 | A03294 | 740 |
| A01574 | A03298 | 254 | A01574 | A03329 | 682 |
| A01574 | A03428 | 490 | A01574 | A03452 | 491 |
| A01574 | A03481 | 491 | A01574 | A03489 | 420 |
| A01574 | A03569 | 491 | A01574 | A03597 | 329 |
| A01574 | A03618 | 491 | A01574 | A03626 | 491 |
| A01574 | A03682 | 263 | A01574 | A03718 | 562 |
| A01574 | A03740 | 443 | A01574 | A03880 | 201 |
| A01574 | A03889 | 491 | A01574 | A03891 | 491 |
| A01574 | A03892 | 617 | A01574 | A03954 | 234 |

|        |        |     |        |        |     |
|--------|--------|-----|--------|--------|-----|
| A01574 | A03962 | 409 | A01574 | A04145 | 475 |
| A01574 | A04151 | 279 | A01574 | A04292 | 491 |
| A01574 | A04337 | 424 | A01574 | A04406 | 154 |
| A01574 | A04686 | 538 | A01574 | A04715 | 443 |
| A01574 | A04728 | 491 | A01574 | A04835 | 391 |
| A01574 | A04839 | 407 | A01574 | A04893 | 466 |
| A01574 | A04894 | 327 | A01574 | A04897 | 432 |
| A01574 | A04929 | 443 | A01574 | A05023 | 63  |
| A01574 | A05024 | 448 | A01574 | A05028 | 491 |
| A01574 | A05155 | 291 | A01574 | A05200 | 435 |
| A01574 | A05202 | 302 | A01574 | A05234 | 344 |
| A01574 | A05256 | 174 | A01574 | A05356 | 214 |
| A01574 | A05376 | 171 | A01574 | A05401 | 485 |
| A01574 | A05431 | 256 | A01574 | A05501 | 374 |
| A01574 | A05531 | 168 | A01574 | A05563 | 267 |
| A01574 | A05862 | 408 | A01574 | A06011 | 480 |
| A01574 | A06037 | 491 | A01574 | A06168 | 491 |
| A01574 | A06597 | 256 | A01574 | A06659 | 475 |
| A01574 | A06675 | 414 | A01574 | A06890 | 680 |
| A01574 | A06941 | 491 | A01574 | A07020 | 364 |
| A01574 | A07180 | 420 | A01574 | A07203 | 279 |
| A01574 | A07208 | 491 | A01574 | A07437 | 204 |
| A01574 | A07499 | 491 | A01574 | A07521 | 491 |
| A01574 | A07541 | 224 | A01574 | A07708 | 480 |
| A01574 | A07736 | 223 | A01574 | A07749 | 486 |
| A01574 | A07820 | 682 | A01574 | A08137 | 617 |
| A01574 | A08301 | 338 | A01574 | A08309 | 480 |
| A01574 | A08369 | 479 | A01574 | A08400 | 781 |
| A01574 | A08461 | 491 | A01574 | A08484 | 430 |
| A01574 | A08506 | 63  | A01574 | A08544 | 297 |
| A01574 | A08765 | 468 | A01574 | A08766 | 230 |
| A01574 | A08772 | 446 | A01574 | A08778 | 230 |
| A01574 | A08785 | 174 | A01574 | A08874 | 63  |
| A01574 | A09050 | 477 | A01574 | A09053 | 391 |
| A01574 | A09056 | 647 | A01574 | A09060 | 174 |
| A01574 | A09078 | 252 | A01574 | A09277 | 490 |
| A01574 | A09326 | 491 | A01574 | A09333 | 491 |
| A01574 | A09862 | 378 | A01574 | A09996 | 246 |
| A01574 | A10367 | 477 | A01574 | A10372 | 174 |
| A01574 | A10584 | 569 | A01574 | A10596 | 63  |
| A01574 | A10597 | 380 | A01574 | A10655 | 568 |
| A01574 | A10663 | 491 | A01574 | A10739 | 466 |
| A01574 | A10790 | 472 | A01574 | A10793 | 490 |
| A01574 | A10794 | 488 | A01574 | A10797 | 491 |
| A01574 | A10798 | 560 | A01574 | A10799 | 491 |
| A01574 | A10803 | 279 | A01574 | A10804 | 76  |



|        |        |     |        |        |     |
|--------|--------|-----|--------|--------|-----|
| A01574 | A10807 | 110 | A01574 | A10821 | 353 |
| A01574 | A10897 | 440 | A01574 | A11130 | 74  |
| A01574 | A11131 | 204 | A01574 | A11157 | 198 |
| A01574 | A11244 | 486 | A01574 | A11247 | 473 |
| A01574 | A11250 | 424 | A01574 | A11279 | 491 |
| A01574 | A11287 | 486 | A01574 | A11296 | 435 |
| A01574 | A11303 | 445 | A01574 | A11337 | 491 |
| A01574 | A11373 | 382 | A01574 | A11456 | 491 |
| A01574 | A11660 | 279 | A01574 | A11885 | 490 |
| A01574 | A12206 | 306 | A01574 | A12241 | 388 |
| A01574 | A12365 | 174 | A01574 | A12645 | 470 |
| A01574 | A12738 | 344 | A01574 | A13106 | 489 |
| A01574 | A13129 | 398 | A01574 | A13222 | 675 |
| A01574 | A13231 | 201 | A01574 | A13293 | 228 |
| A01574 | A13369 | 157 | A01574 | A13375 | 406 |
| A01574 | A13380 | 306 | A01574 | A13387 | 185 |
| A01574 | A13517 | 491 | A01574 | A13568 | 201 |
| A01574 | A13816 | 488 | A01574 | A13826 | 63  |
| A01574 | A13830 | 491 | A01574 | A13831 | 556 |
| A01574 | A13832 | 151 | A01574 | A13842 | 418 |
| A01574 | A13843 | 110 | A01574 | A13845 | 490 |
| A01574 | A13855 | 676 | A01574 | A13871 | 386 |
| A01574 | A13873 | 351 | A01574 | A13874 | 488 |
| A01574 | A13876 | 63  | A01574 | A13877 | 286 |
| A01574 | A13878 | 306 | A01574 | A13882 | 488 |
| A01574 | A13889 | 157 | A01574 | A13895 | 256 |
| A01574 | A13902 | 568 | A01574 | A13963 | 201 |
| A01574 | A14056 | 970 | A01574 | A14095 | 63  |
| A01574 | A14168 | 63  | A01574 | A14175 | 101 |
| A01574 | A14182 | 491 | A01574 | A14247 | 895 |
| A01574 | A14257 | 168 | A01574 | A14258 | 554 |
| A01574 | A14272 | 469 | A01574 | A14444 | 899 |
| A01574 | A14461 | 491 | A01574 | A14527 | 384 |
| A01574 | A14570 | 196 | A01574 | A14661 | 690 |
| A01574 | A14693 | 488 | A01574 | A14711 | 362 |
| A01574 | A14801 | 229 | A01574 | A14838 | 682 |
| A01574 | A15297 | 535 | A01574 | A15314 | 132 |
| A01574 | A15336 | 290 | A01574 | A15338 | 63  |
| A01574 | A15346 | 162 | A01574 | A15366 | 183 |
| A01574 | A15378 | 288 | A01574 | A15384 | 201 |
| A01574 | A15402 | 491 | A01574 | A15430 | 433 |
| A01574 | A15462 | 297 | A01574 | A15463 | 252 |
| A01574 | A15498 | 358 | A01574 | A15505 | 63  |
| A01574 | A15560 | 491 | A01574 | A15595 | 279 |
| A01574 | A15626 | 269 | A01574 | A15647 | 477 |
| A01574 | A15650 | 462 | A01574 | A15660 | 353 |

|        |        |     |        |        |     |
|--------|--------|-----|--------|--------|-----|
| A01574 | A15685 | 276 | A01574 | A15710 | 63  |
| A01574 | A15735 | 256 | A01574 | A15770 | 611 |
| A01574 | A15779 | 461 | A01574 | A15949 | 201 |
| A01574 | A15962 | 147 | A01574 | A16372 | 412 |
| A01574 | A16462 | 382 | A01574 | A16591 | 180 |
| A01574 | A16617 | 491 | A01574 | A16640 | 469 |
| A01574 | A16652 | 488 | A01574 | A16669 | 165 |
| A01574 | A16808 | 480 | A01574 | A16821 | 491 |
| A01574 | A16927 | 682 | A01574 | A16982 | 414 |
| A01574 | A17061 | 475 | A01574 | A17091 | 491 |
| A01574 | A17126 | 481 | A01574 | A17144 | 396 |
| A01575 | A01576 | 467 | A01575 | A01578 | 224 |
| A01575 | A01583 | 491 | A01575 | A01584 | 177 |
| A01575 | A01585 | 900 | A01575 | A01612 | 151 |
| A01575 | A01634 | 887 | A01575 | A01646 | 748 |
| A01575 | A01660 | 443 | A01575 | A01673 | 480 |
| A01575 | A01677 | 484 | A01575 | A01683 | 859 |
| A01575 | A01706 | 538 | A01575 | A01715 | 408 |
| A01575 | A01779 | 274 | A01575 | A01809 | 473 |
| A01575 | A01811 | 491 | A01575 | A01876 | 162 |
| A01575 | A01926 | 469 | A01575 | A02465 | 286 |
| A01575 | A02524 | 157 | A01575 | A02574 | 63  |
| A01575 | A02608 | 63  | A01575 | A02659 | 63  |
| A01575 | A02671 | 491 | A01575 | A02887 | 575 |
| A01575 | A02950 | 294 | A01575 | A02979 | 486 |
| A01575 | A03034 | 425 | A01575 | A03156 | 165 |
| A01575 | A03238 | 162 | A01575 | A03293 | 670 |
| A01575 | A03294 | 479 | A01575 | A03428 | 74  |
| A01575 | A03452 | 491 | A01575 | A03489 | 562 |
| A01575 | A03513 | 485 | A01575 | A03565 | 491 |
| A01575 | A03569 | 339 | A01575 | A03618 | 491 |
| A01575 | A03626 | 491 | A01575 | A03653 | 207 |
| A01575 | A03682 | 63  | A01575 | A03699 | 162 |
| A01575 | A03718 | 647 | A01575 | A03889 | 357 |
| A01575 | A03890 | 466 | A01575 | A03891 | 491 |
| A01575 | A03892 | 899 | A01575 | A04145 | 491 |
| A01575 | A04151 | 463 | A01575 | A04292 | 490 |
| A01575 | A04540 | 278 | A01575 | A04682 | 162 |
| A01575 | A04686 | 802 | A01575 | A04715 | 419 |
| A01575 | A04728 | 455 | A01575 | A04839 | 172 |
| A01575 | A04893 | 486 | A01575 | A04897 | 491 |
| A01575 | A04929 | 291 | A01575 | A05024 | 711 |
| A01575 | A05028 | 435 | A01575 | A05061 | 419 |
| A01575 | A05204 | 377 | A01575 | A05233 | 488 |
| A01575 | A05356 | 284 | A01575 | A05401 | 752 |
| A01575 | A05563 | 63  | A01575 | A06037 | 491 |

|        |        |     |        |        |     |
|--------|--------|-----|--------|--------|-----|
| A01575 | A06039 | 199 | A01575 | A06168 | 455 |
| A01575 | A06195 | 162 | A01575 | A06240 | 486 |
| A01575 | A06659 | 491 | A01575 | A06675 | 562 |
| A01575 | A06739 | 485 | A01575 | A06863 | 361 |
| A01575 | A06890 | 307 | A01575 | A06930 | 446 |
| A01575 | A06941 | 623 | A01575 | A07004 | 254 |
| A01575 | A07203 | 231 | A01575 | A07229 | 208 |
| A01575 | A07327 | 174 | A01575 | A07477 | 484 |
| A01575 | A07499 | 443 | A01575 | A07521 | 480 |
| A01575 | A07736 | 491 | A01575 | A07820 | 489 |
| A01575 | A07973 | 353 | A01575 | A08001 | 68  |
| A01575 | A08133 | 199 | A01575 | A08137 | 478 |
| A01575 | A08369 | 173 | A01575 | A08400 | 576 |
| A01575 | A08454 | 362 | A01575 | A08461 | 648 |
| A01575 | A08484 | 491 | A01575 | A08506 | 369 |
| A01575 | A08544 | 419 | A01575 | A08834 | 63  |
| A01575 | A08859 | 269 | A01575 | A08874 | 491 |
| A01575 | A08921 | 254 | A01575 | A09050 | 483 |
| A01575 | A09054 | 255 | A01575 | A09056 | 170 |
| A01575 | A09195 | 199 | A01575 | A09277 | 224 |
| A01575 | A09298 | 490 | A01575 | A09299 | 173 |
| A01575 | A09326 | 469 | A01575 | A09333 | 475 |
| A01575 | A09742 | 456 | A01575 | A09834 | 63  |
| A01575 | A10584 | 713 | A01575 | A10594 | 230 |
| A01575 | A10597 | 63  | A01575 | A10655 | 713 |
| A01575 | A10663 | 389 | A01575 | A10739 | 160 |
| A01575 | A10797 | 238 | A01575 | A10798 | 373 |
| A01575 | A10799 | 191 | A01575 | A10803 | 207 |
| A01575 | A10804 | 184 | A01575 | A10809 | 63  |
| A01575 | A10821 | 353 | A01575 | A10897 | 63  |
| A01575 | A11247 | 63  | A01575 | A11279 | 488 |
| A01575 | A11303 | 486 | A01575 | A11373 | 179 |
| A01575 | A11570 | 438 | A01575 | A11660 | 419 |
| A01575 | A11679 | 329 | A01575 | A11885 | 491 |
| A01575 | A12295 | 398 | A01575 | A12792 | 452 |
| A01575 | A12846 | 174 | A01575 | A12857 | 266 |
| A01575 | A12922 | 168 | A01575 | A13231 | 162 |
| A01575 | A13387 | 160 | A01575 | A13816 | 324 |
| A01575 | A13830 | 491 | A01575 | A13831 | 281 |
| A01575 | A13846 | 170 | A01575 | A13847 | 266 |
| A01575 | A13855 | 258 | A01575 | A13867 | 241 |
| A01575 | A13882 | 586 | A01575 | A13894 | 490 |
| A01575 | A13895 | 491 | A01575 | A13902 | 713 |
| A01575 | A14056 | 592 | A01575 | A14095 | 488 |
| A01575 | A14120 | 207 | A01575 | A14168 | 63  |
| A01575 | A14175 | 317 | A01575 | A14182 | 456 |

|        |        |     |        |        |     |
|--------|--------|-----|--------|--------|-----|
| A01575 | A14193 | 487 | A01575 | A14199 | 278 |
| A01575 | A14202 | 232 | A01575 | A14229 | 207 |
| A01575 | A14247 | 894 | A01575 | A14272 | 491 |
| A01575 | A14356 | 63  | A01575 | A14461 | 414 |
| A01575 | A14661 | 530 | A01575 | A14711 | 399 |
| A01575 | A14717 | 174 | A01575 | A14783 | 441 |
| A01575 | A14838 | 473 | A01575 | A14868 | 174 |
| A01575 | A15261 | 63  | A01575 | A15303 | 465 |
| A01575 | A15314 | 188 | A01575 | A15315 | 525 |
| A01575 | A15336 | 455 | A01575 | A15347 | 515 |
| A01575 | A15366 | 481 | A01575 | A15462 | 407 |
| A01575 | A15463 | 380 | A01575 | A15498 | 535 |
| A01575 | A15555 | 207 | A01575 | A15557 | 257 |
| A01575 | A15617 | 195 | A01575 | A15626 | 408 |
| A01575 | A15647 | 491 | A01575 | A15650 | 297 |
| A01575 | A15680 | 272 | A01575 | A15917 | 288 |
| A01575 | A15962 | 63  | A01575 | A16073 | 199 |
| A01575 | A16364 | 162 | A01575 | A16397 | 186 |
| A01575 | A16617 | 486 | A01575 | A16652 | 213 |
| A01575 | A16817 | 185 | A01575 | A16850 | 385 |
| A01575 | A16910 | 483 | A01575 | A16954 | 191 |
| A01575 | A17010 | 65  | A01575 | A17061 | 262 |
| A01575 | A17121 | 198 | A01575 | A17126 | 350 |
| A01575 | A17133 | 461 | A01575 | A17143 | 462 |
| A01575 | A17144 | 404 | A01575 | A17224 | 179 |
| A01576 | A01583 | 93  | A01576 | A01585 | 641 |
| A01576 | A01587 | 485 | A01576 | A01588 | 903 |
| A01576 | A01634 | 491 | A01576 | A01646 | 519 |
| A01576 | A01677 | 490 | A01576 | A01678 | 104 |
| A01576 | A01683 | 176 | A01576 | A01706 | 489 |
| A01576 | A01710 | 430 | A01576 | A01746 | 196 |
| A01576 | A01809 | 160 | A01576 | A01851 | 199 |
| A01576 | A01860 | 963 | A01576 | A01876 | 576 |
| A01576 | A01945 | 604 | A01576 | A01950 | 456 |
| A01576 | A02030 | 490 | A01576 | A02256 | 228 |
| A01576 | A02342 | 185 | A01576 | A02353 | 160 |
| A01576 | A02382 | 314 | A01576 | A02411 | 160 |
| A01576 | A02499 | 443 | A01576 | A02630 | 232 |
| A01576 | A02718 | 157 | A01576 | A02722 | 477 |
| A01576 | A02864 | 899 | A01576 | A02896 | 168 |
| A01576 | A02942 | 899 | A01576 | A02965 | 486 |
| A01576 | A03009 | 229 | A01576 | A03050 | 241 |
| A01576 | A03205 | 490 | A01576 | A03293 | 837 |
| A01576 | A03294 | 143 | A01576 | A03428 | 384 |
| A01576 | A03477 | 160 | A01576 | A03489 | 374 |
| A01576 | A03625 | 491 | A01576 | A03626 | 317 |

|        |        |     |        |        |     |
|--------|--------|-----|--------|--------|-----|
| A01576 | A03686 | 961 | A01576 | A03699 | 199 |
| A01576 | A03726 | 899 | A01576 | A03815 | 491 |
| A01576 | A03834 | 210 | A01576 | A03838 | 269 |
| A01576 | A03854 | 411 | A01576 | A03889 | 160 |
| A01576 | A03892 | 205 | A01576 | A03965 | 169 |
| A01576 | A03985 | 238 | A01576 | A04033 | 491 |
| A01576 | A04050 | 488 | A01576 | A04096 | 488 |
| A01576 | A04097 | 477 | A01576 | A04115 | 217 |
| A01576 | A04627 | 372 | A01576 | A04662 | 486 |
| A01576 | A04682 | 263 | A01576 | A04686 | 617 |
| A01576 | A04835 | 399 | A01576 | A04929 | 401 |
| A01576 | A04930 | 340 | A01576 | A05020 | 160 |
| A01576 | A05028 | 461 | A01576 | A05034 | 199 |
| A01576 | A05082 | 160 | A01576 | A05221 | 554 |
| A01576 | A05309 | 490 | A01576 | A05349 | 260 |
| A01576 | A05914 | 200 | A01576 | A06039 | 536 |
| A01576 | A06161 | 208 | A01576 | A06168 | 477 |
| A01576 | A06359 | 160 | A01576 | A06379 | 395 |
| A01576 | A06492 | 445 | A01576 | A06520 | 449 |
| A01576 | A06597 | 523 | A01576 | A06735 | 168 |
| A01576 | A06779 | 160 | A01576 | A06783 | 160 |
| A01576 | A07004 | 529 | A01576 | A07175 | 213 |
| A01576 | A07207 | 702 | A01576 | A07209 | 416 |
| A01576 | A07218 | 466 | A01576 | A07276 | 321 |
| A01576 | A07347 | 899 | A01576 | A07380 | 303 |
| A01576 | A07697 | 491 | A01576 | A07820 | 491 |
| A01576 | A07826 | 462 | A01576 | A07885 | 400 |
| A01576 | A08024 | 324 | A01576 | A08091 | 219 |
| A01576 | A08099 | 160 | A01576 | A08133 | 199 |
| A01576 | A08235 | 337 | A01576 | A08251 | 274 |
| A01576 | A08293 | 771 | A01576 | A08356 | 635 |
| A01576 | A08362 | 788 | A01576 | A08394 | 200 |
| A01576 | A08518 | 321 | A01576 | A08604 | 200 |
| A01576 | A08699 | 183 | A01576 | A08780 | 207 |
| A01576 | A08821 | 491 | A01576 | A08831 | 470 |
| A01576 | A08850 | 240 | A01576 | A08859 | 296 |
| A01576 | A08863 | 952 | A01576 | A08874 | 234 |
| A01576 | A08942 | 63  | A01576 | A08943 | 969 |
| A01576 | A08956 | 489 | A01576 | A09010 | 313 |
| A01576 | A09023 | 400 | A01576 | A09044 | 168 |
| A01576 | A09291 | 363 | A01576 | A09323 | 157 |
| A01576 | A09335 | 168 | A01576 | A09395 | 176 |
| A01576 | A09449 | 472 | A01576 | A09584 | 241 |
| A01576 | A09664 | 160 | A01576 | A09734 | 156 |
| A01576 | A09742 | 490 | A01576 | A09743 | 441 |
| A01576 | A09744 | 63  | A01576 | A09833 | 63  |

|        |        |     |        |        |     |
|--------|--------|-----|--------|--------|-----|
| A01576 | A09843 | 63  | A01576 | A09977 | 491 |
| A01576 | A09996 | 491 | A01576 | A10159 | 589 |
| A01576 | A10427 | 418 | A01576 | A10576 | 199 |
| A01576 | A10584 | 144 | A01576 | A10591 | 491 |
| A01576 | A10596 | 561 | A01576 | A10597 | 945 |
| A01576 | A10601 | 498 | A01576 | A10606 | 374 |
| A01576 | A10669 | 477 | A01576 | A10674 | 465 |
| A01576 | A10684 | 440 | A01576 | A10727 | 126 |
| A01576 | A10733 | 490 | A01576 | A10794 | 63  |
| A01576 | A10798 | 413 | A01576 | A10805 | 229 |
| A01576 | A11130 | 63  | A01576 | A11131 | 485 |
| A01576 | A11247 | 63  | A01576 | A11337 | 468 |
| A01576 | A11454 | 488 | A01576 | A11464 | 477 |
| A01576 | A11536 | 174 | A01576 | A11559 | 360 |
| A01576 | A11621 | 385 | A01576 | A11655 | 180 |
| A01576 | A11839 | 969 | A01576 | A11862 | 486 |
| A01576 | A11983 | 306 | A01576 | A11991 | 327 |
| A01576 | A12211 | 486 | A01576 | A12214 | 303 |
| A01576 | A12250 | 468 | A01576 | A12260 | 219 |
| A01576 | A12606 | 793 | A01576 | A12824 | 268 |
| A01576 | A12920 | 452 | A01576 | A12952 | 160 |
| A01576 | A12961 | 419 | A01576 | A13043 | 174 |
| A01576 | A13070 | 157 | A01576 | A13084 | 63  |
| A01576 | A13170 | 488 | A01576 | A13231 | 249 |
| A01576 | A13491 | 255 | A01576 | A13591 | 199 |
| A01576 | A13737 | 373 | A01576 | A13786 | 205 |
| A01576 | A13824 | 966 | A01576 | A13826 | 821 |
| A01576 | A13829 | 337 | A01576 | A13839 | 241 |
| A01576 | A13845 | 219 | A01576 | A13873 | 604 |
| A01576 | A13895 | 160 | A01576 | A13899 | 77  |
| A01576 | A13963 | 293 | A01576 | A13975 | 274 |
| A01576 | A13983 | 812 | A01576 | A14001 | 177 |
| A01576 | A14003 | 943 | A01576 | A14006 | 899 |
| A01576 | A14016 | 199 | A01576 | A14026 | 218 |
| A01576 | A14054 | 470 | A01576 | A14056 | 63  |
| A01576 | A14098 | 63  | A01576 | A14122 | 255 |
| A01576 | A14175 | 63  | A01576 | A14182 | 401 |
| A01576 | A14191 | 561 | A01576 | A14193 | 265 |
| A01576 | A14196 | 491 | A01576 | A14199 | 656 |
| A01576 | A14204 | 542 | A01576 | A14207 | 318 |
| A01576 | A14208 | 962 | A01576 | A14212 | 604 |
| A01576 | A14213 | 491 | A01576 | A14214 | 491 |
| A01576 | A14218 | 491 | A01576 | A14229 | 491 |
| A01576 | A14237 | 601 | A01576 | A14238 | 491 |
| A01576 | A14247 | 621 | A01576 | A14253 | 379 |
| A01576 | A14276 | 757 | A01576 | A14292 | 488 |

|        |        |     |        |        |     |
|--------|--------|-----|--------|--------|-----|
| A01576 | A14362 | 288 | A01576 | A14367 | 475 |
| A01576 | A14374 | 212 | A01576 | A14461 | 469 |
| A01576 | A14585 | 425 | A01576 | A14635 | 491 |
| A01576 | A14647 | 489 | A01576 | A14652 | 490 |
| A01576 | A14830 | 202 | A01576 | A14838 | 468 |
| A01576 | A14843 | 486 | A01576 | A14986 | 230 |
| A01576 | A15181 | 157 | A01576 | A15291 | 635 |
| A01576 | A15294 | 231 | A01576 | A15295 | 621 |
| A01576 | A15297 | 93  | A01576 | A15314 | 594 |
| A01576 | A15320 | 401 | A01576 | A15322 | 527 |
| A01576 | A15328 | 488 | A01576 | A15330 | 477 |
| A01576 | A15336 | 251 | A01576 | A15345 | 506 |
| A01576 | A15346 | 757 | A01576 | A15357 | 551 |
| A01576 | A15360 | 469 | A01576 | A15361 | 491 |
| A01576 | A15363 | 63  | A01576 | A15367 | 480 |
| A01576 | A15386 | 451 | A01576 | A15388 | 307 |
| A01576 | A15400 | 489 | A01576 | A15402 | 489 |
| A01576 | A15409 | 527 | A01576 | A15410 | 490 |
| A01576 | A15411 | 63  | A01576 | A15463 | 173 |
| A01576 | A15506 | 532 | A01576 | A15555 | 160 |
| A01576 | A15559 | 472 | A01576 | A15566 | 63  |
| A01576 | A15577 | 63  | A01576 | A15578 | 490 |
| A01576 | A15581 | 102 | A01576 | A15613 | 462 |
| A01576 | A15614 | 199 | A01576 | A15620 | 176 |
| A01576 | A15630 | 63  | A01576 | A15639 | 63  |
| A01576 | A15680 | 160 | A01576 | A15701 | 488 |
| A01576 | A15733 | 160 | A01576 | A15783 | 130 |
| A01576 | A15834 | 193 | A01576 | A15962 | 63  |
| A01576 | A15976 | 63  | A01576 | A16007 | 480 |
| A01576 | A16073 | 199 | A01576 | A16216 | 491 |
| A01576 | A16217 | 470 | A01576 | A16316 | 229 |
| A01576 | A16356 | 335 | A01576 | A16400 | 174 |
| A01576 | A16449 | 602 | A01576 | A16467 | 341 |
| A01576 | A16502 | 144 | A01576 | A16538 | 241 |
| A01576 | A16581 | 246 | A01576 | A16617 | 425 |
| A01576 | A16681 | 430 | A01576 | A16702 | 559 |
| A01576 | A16802 | 310 | A01576 | A16831 | 481 |
| A01576 | A16847 | 455 | A01576 | A16854 | 168 |
| A01576 | A16904 | 491 | A01576 | A16916 | 461 |
| A01576 | A17097 | 321 | A01577 | A01612 | 199 |
| A01577 | A01627 | 152 | A01577 | A01684 | 486 |
| A01577 | A01707 | 156 | A01577 | A01748 | 179 |
| A01577 | A01770 | 441 | A01577 | A01917 | 571 |
| A01577 | A02601 | 152 | A01577 | A02719 | 266 |
| A01577 | A02896 | 343 | A01577 | A03057 | 180 |
| A01577 | A03298 | 302 | A01577 | A03325 | 355 |

|        |        |     |        |        |     |
|--------|--------|-----|--------|--------|-----|
| A01577 | A03446 | 486 | A01577 | A03456 | 252 |
| A01577 | A03476 | 477 | A01577 | A03560 | 384 |
| A01577 | A03567 | 291 | A01577 | A03572 | 430 |
| A01577 | A03669 | 385 | A01577 | A03697 | 317 |
| A01577 | A03738 | 462 | A01577 | A03740 | 475 |
| A01577 | A03863 | 319 | A01577 | A04339 | 179 |
| A01577 | A04495 | 152 | A01577 | A04537 | 285 |
| A01577 | A05227 | 245 | A01577 | A05712 | 260 |
| A01577 | A05941 | 372 | A01577 | A06025 | 263 |
| A01577 | A06178 | 427 | A01577 | A06287 | 680 |
| A01577 | A06388 | 163 | A01577 | A06543 | 637 |
| A01577 | A06637 | 434 | A01577 | A06812 | 324 |
| A01577 | A06909 | 329 | A01577 | A07160 | 168 |
| A01577 | A07247 | 489 | A01577 | A07311 | 358 |
| A01577 | A07744 | 682 | A01577 | A08061 | 317 |
| A01577 | A08098 | 682 | A01577 | A08178 | 670 |
| A01577 | A08295 | 228 | A01577 | A08763 | 337 |
| A01577 | A08947 | 152 | A01577 | A09004 | 152 |
| A01577 | A09024 | 326 | A01577 | A09330 | 157 |
| A01577 | A09825 | 63  | A01577 | A10006 | 241 |
| A01577 | A10083 | 378 | A01577 | A10208 | 199 |
| A01577 | A10238 | 391 | A01577 | A10399 | 475 |
| A01577 | A10532 | 491 | A01577 | A10586 | 173 |
| A01577 | A10842 | 152 | A01577 | A11817 | 130 |
| A01577 | A12221 | 157 | A01577 | A12903 | 230 |
| A01577 | A12958 | 152 | A01577 | A13310 | 152 |
| A01577 | A13465 | 216 | A01577 | A14073 | 491 |
| A01577 | A14083 | 358 | A01577 | A14131 | 160 |
| A01577 | A14525 | 317 | A01577 | A14699 | 491 |
| A01577 | A15375 | 431 | A01577 | A15389 | 157 |
| A01577 | A15546 | 317 | A01578 | A01584 | 213 |
| A01578 | A01595 | 489 | A01578 | A01630 | 484 |
| A01578 | A01632 | 490 | A01578 | A01634 | 266 |
| A01578 | A01671 | 378 | A01578 | A01687 | 326 |
| A01578 | A01694 | 165 | A01578 | A01706 | 486 |
| A01578 | A01931 | 205 | A01578 | A01933 | 212 |
| A01578 | A02007 | 223 | A01578 | A02116 | 296 |
| A01578 | A02157 | 356 | A01578 | A02188 | 457 |
| A01578 | A02205 | 177 | A01578 | A02221 | 389 |
| A01578 | A02228 | 468 | A01578 | A02278 | 490 |
| A01578 | A02307 | 101 | A01578 | A02402 | 63  |
| A01578 | A02489 | 326 | A01578 | A02491 | 63  |
| A01578 | A02548 | 172 | A01578 | A02593 | 463 |
| A01578 | A02685 | 266 | A01578 | A02738 | 198 |
| A01578 | A02771 | 134 | A01578 | A02996 | 170 |
| A01578 | A03057 | 232 | A01578 | A03080 | 491 |



|        |        |     |        |        |     |
|--------|--------|-----|--------|--------|-----|
| A01578 | A03090 | 420 | A01578 | A03104 | 475 |
| A01578 | A03259 | 411 | A01578 | A03346 | 228 |
| A01578 | A03347 | 224 | A01578 | A03348 | 227 |
| A01578 | A03349 | 486 | A01578 | A03351 | 491 |
| A01578 | A03357 | 121 | A01578 | A03358 | 480 |
| A01578 | A03361 | 180 | A01578 | A03363 | 109 |
| A01578 | A03365 | 229 | A01578 | A03369 | 279 |
| A01578 | A03370 | 398 | A01578 | A03374 | 118 |
| A01578 | A03376 | 486 | A01578 | A03378 | 85  |
| A01578 | A03379 | 486 | A01578 | A03383 | 322 |
| A01578 | A03384 | 369 | A01578 | A03385 | 162 |
| A01578 | A03395 | 180 | A01578 | A03417 | 167 |
| A01578 | A03440 | 156 | A01578 | A03482 | 435 |
| A01578 | A03651 | 383 | A01578 | A03682 | 347 |
| A01578 | A03708 | 329 | A01578 | A03724 | 408 |
| A01578 | A03851 | 351 | A01578 | A03891 | 212 |
| A01578 | A03914 | 195 | A01578 | A03974 | 364 |
| A01578 | A03984 | 193 | A01578 | A04145 | 432 |
| A01578 | A04149 | 263 | A01578 | A04150 | 483 |
| A01578 | A04275 | 484 | A01578 | A04305 | 184 |
| A01578 | A04337 | 491 | A01578 | A04361 | 301 |
| A01578 | A04399 | 286 | A01578 | A04410 | 486 |
| A01578 | A04465 | 154 | A01578 | A04520 | 458 |
| A01578 | A04603 | 235 | A01578 | A04715 | 491 |
| A01578 | A04790 | 486 | A01578 | A04832 | 477 |
| A01578 | A04903 | 345 | A01578 | A04964 | 240 |
| A01578 | A04985 | 262 | A01578 | A05004 | 179 |
| A01578 | A05015 | 481 | A01578 | A05087 | 183 |
| A01578 | A05231 | 229 | A01578 | A05264 | 157 |
| A01578 | A05294 | 196 | A01578 | A05299 | 172 |
| A01578 | A05356 | 490 | A01578 | A05407 | 246 |
| A01578 | A05556 | 235 | A01578 | A05587 | 238 |
| A01578 | A05603 | 330 | A01578 | A05653 | 241 |
| A01578 | A05657 | 486 | A01578 | A05718 | 207 |
| A01578 | A05739 | 491 | A01578 | A05744 | 356 |
| A01578 | A05777 | 241 | A01578 | A05812 | 497 |
| A01578 | A05829 | 170 | A01578 | A05865 | 172 |
| A01578 | A05887 | 179 | A01578 | A05891 | 422 |
| A01578 | A06022 | 207 | A01578 | A06069 | 463 |
| A01578 | A06071 | 180 | A01578 | A06100 | 462 |
| A01578 | A06148 | 217 | A01578 | A06346 | 258 |
| A01578 | A06415 | 254 | A01578 | A06424 | 229 |
| A01578 | A06428 | 322 | A01578 | A06517 | 180 |
| A01578 | A06701 | 229 | A01578 | A06708 | 372 |
| A01578 | A06731 | 466 | A01578 | A06739 | 396 |
| A01578 | A06907 | 491 | A01578 | A06920 | 302 |

|        |        |     |        |        |     |
|--------|--------|-----|--------|--------|-----|
| A01578 | A06954 | 154 | A01578 | A07038 | 263 |
| A01578 | A07114 | 154 | A01578 | A07209 | 486 |
| A01578 | A07218 | 489 | A01578 | A07384 | 154 |
| A01578 | A07471 | 257 | A01578 | A07605 | 329 |
| A01578 | A07651 | 229 | A01578 | A07666 | 313 |
| A01578 | A07722 | 229 | A01578 | A07752 | 191 |
| A01578 | A07784 | 229 | A01578 | A07810 | 229 |
| A01578 | A07815 | 424 | A01578 | A08097 | 291 |
| A01578 | A08111 | 263 | A01578 | A08157 | 452 |
| A01578 | A08162 | 162 | A01578 | A08171 | 224 |
| A01578 | A08172 | 302 | A01578 | A08227 | 356 |
| A01578 | A08244 | 302 | A01578 | A08268 | 356 |
| A01578 | A08296 | 328 | A01578 | A08309 | 273 |
| A01578 | A08388 | 229 | A01578 | A08392 | 207 |
| A01578 | A08454 | 294 | A01578 | A08484 | 452 |
| A01578 | A08506 | 291 | A01578 | A08544 | 297 |
| A01578 | A08686 | 263 | A01578 | A08708 | 191 |
| A01578 | A08754 | 229 | A01578 | A08785 | 312 |
| A01578 | A08834 | 157 | A01578 | A08859 | 427 |
| A01578 | A08921 | 273 | A01578 | A08938 | 162 |
| A01578 | A09053 | 432 | A01578 | A09056 | 226 |
| A01578 | A09154 | 263 | A01578 | A09205 | 423 |
| A01578 | A09477 | 263 | A01578 | A09525 | 229 |
| A01578 | A09552 | 303 | A01578 | A09734 | 321 |
| A01578 | A09742 | 441 | A01578 | A09758 | 373 |
| A01578 | A09843 | 162 | A01578 | A09862 | 389 |
| A01578 | A09942 | 263 | A01578 | A09949 | 263 |
| A01578 | A10349 | 356 | A01578 | A10350 | 207 |
| A01578 | A10351 | 469 | A01578 | A10401 | 465 |
| A01578 | A10404 | 263 | A01578 | A10515 | 263 |
| A01578 | A10590 | 281 | A01578 | A10594 | 190 |
| A01578 | A10611 | 434 | A01578 | A10619 | 301 |
| A01578 | A10724 | 345 | A01578 | A10921 | 251 |
| A01578 | A10989 | 414 | A01578 | A11049 | 263 |
| A01578 | A11070 | 147 | A01578 | A11091 | 229 |
| A01578 | A11313 | 524 | A01578 | A11342 | 154 |
| A01578 | A11449 | 489 | A01578 | A11454 | 377 |
| A01578 | A11481 | 207 | A01578 | A11507 | 263 |
| A01578 | A11552 | 188 | A01578 | A11599 | 229 |
| A01578 | A11712 | 207 | A01578 | A11722 | 207 |
| A01578 | A11946 | 180 | A01578 | A11983 | 488 |
| A01578 | A12038 | 263 | A01578 | A12065 | 263 |
| A01578 | A12066 | 263 | A01578 | A12110 | 263 |
| A01578 | A12117 | 207 | A01578 | A12147 | 207 |
| A01578 | A12426 | 338 | A01578 | A12454 | 263 |
| A01578 | A12467 | 263 | A01578 | A12480 | 263 |

|        |        |     |        |        |     |
|--------|--------|-----|--------|--------|-----|
| A01578 | A12648 | 207 | A01578 | A12695 | 263 |
| A01578 | A12787 | 458 | A01578 | A12930 | 263 |
| A01578 | A12935 | 180 | A01578 | A13074 | 408 |
| A01578 | A13106 | 302 | A01578 | A13369 | 491 |
| A01578 | A13745 | 263 | A01578 | A13830 | 368 |
| A01578 | A13899 | 159 | A01578 | A13905 | 393 |
| A01578 | A13953 | 162 | A01578 | A13966 | 180 |
| A01578 | A14071 | 205 | A01578 | A14103 | 191 |
| A01578 | A14136 | 162 | A01578 | A14193 | 484 |
| A01578 | A14202 | 432 | A01578 | A14204 | 467 |
| A01578 | A14210 | 328 | A01578 | A14221 | 369 |
| A01578 | A14247 | 491 | A01578 | A14303 | 488 |
| A01578 | A14306 | 180 | A01578 | A14307 | 207 |
| A01578 | A14377 | 411 | A01578 | A14378 | 338 |
| A01578 | A14395 | 490 | A01578 | A14408 | 294 |
| A01578 | A14570 | 485 | A01578 | A14633 | 486 |
| A01578 | A14661 | 491 | A01578 | A14711 | 485 |
| A01578 | A14799 | 196 | A01578 | A14877 | 217 |
| A01578 | A14917 | 277 | A01578 | A15277 | 341 |
| A01578 | A15282 | 205 | A01578 | A15292 | 469 |
| A01578 | A15314 | 462 | A01578 | A15322 | 485 |
| A01578 | A15328 | 450 | A01578 | A15336 | 405 |
| A01578 | A15366 | 486 | A01578 | A15398 | 468 |
| A01578 | A15436 | 217 | A01578 | A15463 | 380 |
| A01578 | A15477 | 162 | A01578 | A15495 | 200 |
| A01578 | A15556 | 180 | A01578 | A15557 | 462 |
| A01578 | A15578 | 255 | A01578 | A15638 | 165 |
| A01578 | A15680 | 483 | A01578 | A15770 | 371 |
| A01578 | A16022 | 468 | A01578 | A16113 | 187 |
| A01578 | A16117 | 310 | A01578 | A16189 | 207 |
| A01578 | A16415 | 202 | A01578 | A16428 | 260 |
| A01578 | A16480 | 162 | A01578 | A16493 | 162 |
| A01578 | A16495 | 260 | A01578 | A16526 | 263 |
| A01578 | A16534 | 154 | A01578 | A16584 | 207 |
| A01578 | A16648 | 313 | A01578 | A16803 | 207 |
| A01578 | A16904 | 246 | A01578 | A16920 | 229 |
| A01578 | A17053 | 263 | A01578 | A17124 | 207 |
| A01578 | A17196 | 154 | A01578 | A17198 | 491 |
| A01579 | A01586 | 491 | A01579 | A01597 | 457 |
| A01579 | A01598 | 424 | A01579 | A01601 | 588 |
| A01579 | A01612 | 473 | A01579 | A01614 | 353 |
| A01579 | A01649 | 491 | A01579 | A01652 | 165 |
| A01579 | A01718 | 360 | A01579 | A01787 | 484 |
| A01579 | A01822 | 490 | A01579 | A02064 | 219 |
| A01579 | A02179 | 422 | A01579 | A02216 | 270 |
| A01579 | A02227 | 383 | A01579 | A02350 | 491 |

|        |        |     |        |        |     |
|--------|--------|-----|--------|--------|-----|
| A01579 | A02675 | 193 | A01579 | A02737 | 217 |
| A01579 | A03069 | 432 | A01579 | A03083 | 221 |
| A01579 | A03164 | 441 | A01579 | A03289 | 157 |
| A01579 | A03304 | 424 | A01579 | A03446 | 227 |
| A01579 | A03453 | 190 | A01579 | A03493 | 423 |
| A01579 | A03567 | 491 | A01579 | A03671 | 191 |
| A01579 | A03697 | 475 | A01579 | A03740 | 486 |
| A01579 | A03752 | 491 | A01579 | A03809 | 390 |
| A01579 | A03859 | 200 | A01579 | A03981 | 688 |
| A01579 | A04230 | 249 | A01579 | A04662 | 479 |
| A01579 | A04846 | 450 | A01579 | A05086 | 391 |
| A01579 | A05298 | 170 | A01579 | A05443 | 188 |
| A01579 | A05449 | 423 | A01579 | A05499 | 375 |
| A01579 | A05501 | 575 | A01579 | A05502 | 271 |
| A01579 | A06114 | 243 | A01579 | A06275 | 232 |
| A01579 | A06279 | 317 | A01579 | A06280 | 358 |
| A01579 | A06343 | 157 | A01579 | A06351 | 457 |
| A01579 | A06466 | 489 | A01579 | A06488 | 146 |
| A01579 | A06534 | 527 | A01579 | A06564 | 489 |
| A01579 | A06814 | 586 | A01579 | A06843 | 218 |
| A01579 | A06861 | 439 | A01579 | A06897 | 481 |
| A01579 | A06965 | 563 | A01579 | A06973 | 588 |
| A01579 | A07047 | 588 | A01579 | A07305 | 170 |
| A01579 | A07311 | 462 | A01579 | A07323 | 490 |
| A01579 | A07349 | 267 | A01579 | A07398 | 587 |
| A01579 | A07449 | 383 | A01579 | A07451 | 452 |
| A01579 | A07581 | 491 | A01579 | A07726 | 427 |
| A01579 | A07775 | 346 | A01579 | A07965 | 326 |
| A01579 | A08055 | 173 | A01579 | A08131 | 566 |
| A01579 | A08137 | 356 | A01579 | A08154 | 205 |
| A01579 | A08277 | 177 | A01579 | A08301 | 466 |
| A01579 | A08357 | 486 | A01579 | A08358 | 488 |
| A01579 | A08359 | 566 | A01579 | A08369 | 562 |
| A01579 | A08398 | 345 | A01579 | A08408 | 588 |
| A01579 | A08419 | 167 | A01579 | A08433 | 243 |
| A01579 | A08452 | 386 | A01579 | A08457 | 564 |
| A01579 | A08462 | 241 | A01579 | A08466 | 200 |
| A01579 | A08476 | 579 | A01579 | A08501 | 213 |
| A01579 | A08543 | 477 | A01579 | A08546 | 341 |
| A01579 | A08556 | 281 | A01579 | A08559 | 241 |
| A01579 | A08682 | 335 | A01579 | A08787 | 170 |
| A01579 | A08929 | 241 | A01579 | A08983 | 371 |
| A01579 | A09144 | 208 | A01579 | A09285 | 438 |
| A01579 | A09308 | 356 | A01579 | A09322 | 490 |
| A01579 | A09613 | 303 | A01579 | A09620 | 241 |
| A01579 | A09622 | 294 | A01579 | A09722 | 170 |

|        |        |     |        |        |     |
|--------|--------|-----|--------|--------|-----|
| A01579 | A09726 | 353 | A01579 | A09735 | 221 |
| A01579 | A09741 | 306 | A01579 | A09808 | 185 |
| A01579 | A09852 | 154 | A01579 | A09862 | 446 |
| A01579 | A10362 | 174 | A01579 | A10490 | 157 |
| A01579 | A10518 | 224 | A01579 | A10532 | 480 |
| A01579 | A10616 | 228 | A01579 | A10633 | 446 |
| A01579 | A11223 | 156 | A01579 | A11334 | 430 |
| A01579 | A11420 | 353 | A01579 | A11438 | 446 |
| A01579 | A11440 | 419 | A01579 | A11487 | 154 |
| A01579 | A11496 | 484 | A01579 | A11497 | 481 |
| A01579 | A11550 | 491 | A01579 | A11562 | 441 |
| A01579 | A11578 | 204 | A01579 | A11593 | 199 |
| A01579 | A11616 | 168 | A01579 | A11728 | 586 |
| A01579 | A11857 | 488 | A01579 | A11861 | 387 |
| A01579 | A11924 | 413 | A01579 | A12011 | 165 |
| A01579 | A12053 | 185 | A01579 | A12079 | 417 |
| A01579 | A12160 | 279 | A01579 | A12177 | 170 |
| A01579 | A12193 | 185 | A01579 | A12227 | 241 |
| A01579 | A12270 | 475 | A01579 | A12293 | 243 |
| A01579 | A12404 | 262 | A01579 | A12575 | 243 |
| A01579 | A12821 | 486 | A01579 | A13333 | 230 |
| A01579 | A13340 | 491 | A01579 | A13439 | 243 |
| A01579 | A13710 | 484 | A01579 | A13830 | 420 |
| A01579 | A13989 | 491 | A01579 | A13992 | 488 |
| A01579 | A14073 | 395 | A01579 | A14152 | 159 |
| A01579 | A14169 | 475 | A01579 | A14176 | 470 |
| A01579 | A14188 | 427 | A01579 | A14216 | 712 |
| A01579 | A14508 | 491 | A01579 | A14530 | 270 |
| A01579 | A14566 | 371 | A01579 | A14573 | 170 |
| A01579 | A14816 | 283 | A01579 | A14923 | 279 |
| A01579 | A14940 | 339 | A01579 | A15202 | 200 |
| A01579 | A15225 | 469 | A01579 | A15236 | 291 |
| A01579 | A15268 | 523 | A01579 | A15338 | 369 |
| A01579 | A15381 | 562 | A01579 | A15499 | 339 |
| A01579 | A15500 | 491 | A01579 | A15659 | 430 |
| A01579 | A15660 | 491 | A01579 | A15684 | 491 |
| A01579 | A15711 | 286 | A01579 | A15732 | 484 |
| A01579 | A15918 | 449 | A01579 | A15931 | 391 |
| A01579 | A15932 | 208 | A01579 | A15933 | 407 |
| A01579 | A15988 | 299 | A01579 | A16107 | 191 |
| A01579 | A16118 | 477 | A01579 | A16151 | 291 |
| A01579 | A16233 | 157 | A01579 | A16272 | 379 |
| A01579 | A16658 | 465 | A01579 | A16682 | 396 |
| A01579 | A16686 | 491 | A01579 | A17095 | 262 |
| A01580 | A01591 | 279 | A01580 | A01596 | 876 |
| A01580 | A01687 | 490 | A01580 | A03300 | 457 |

|        |        |     |        |        |     |
|--------|--------|-----|--------|--------|-----|
| A01580 | A03328 | 347 | A01580 | A03492 | 405 |
| A01580 | A03528 | 294 | A01580 | A03575 | 594 |
| A01580 | A03929 | 348 | A01580 | A05009 | 486 |
| A01580 | A05283 | 151 | A01580 | A05894 | 480 |
| A01580 | A06144 | 151 | A01580 | A06602 | 480 |
| A01580 | A06819 | 491 | A01580 | A06982 | 215 |
| A01580 | A06991 | 208 | A01580 | A07018 | 216 |
| A01580 | A07242 | 491 | A01580 | A07433 | 293 |
| A01580 | A07483 | 491 | A01580 | A07495 | 491 |
| A01580 | A07762 | 490 | A01580 | A07816 | 414 |
| A01580 | A07869 | 180 | A01580 | A07893 | 491 |
| A01580 | A08056 | 417 | A01580 | A08352 | 405 |
| A01580 | A08360 | 718 | A01580 | A08379 | 462 |
| A01580 | A08409 | 340 | A01580 | A08536 | 491 |
| A01580 | A08551 | 491 | A01580 | A08552 | 462 |
| A01580 | A08569 | 491 | A01580 | A08839 | 171 |
| A01580 | A08858 | 477 | A01580 | A08884 | 191 |
| A01580 | A08986 | 207 | A01580 | A09516 | 200 |
| A01580 | A09567 | 207 | A01580 | A09624 | 283 |
| A01580 | A09764 | 462 | A01580 | A10183 | 272 |
| A01580 | A10247 | 198 | A01580 | A10580 | 718 |
| A01580 | A11283 | 491 | A01580 | A11332 | 468 |
| A01580 | A11483 | 156 | A01580 | A11828 | 196 |
| A01580 | A11849 | 177 | A01580 | A11917 | 391 |
| A01580 | A12047 | 768 | A01580 | A12341 | 443 |
| A01580 | A13313 | 408 | A01580 | A13708 | 188 |
| A01580 | A13949 | 479 | A01580 | A14156 | 470 |
| A01580 | A14266 | 335 | A01580 | A14358 | 170 |
| A01580 | A14484 | 466 | A01580 | A14661 | 177 |
| A01580 | A15854 | 218 | A01580 | A16468 | 296 |
| A01581 | A01826 | 247 | A01581 | A03453 | 247 |
| A01581 | A09717 | 247 | A01581 | A14074 | 247 |
| A01582 | A01585 | 451 | A01582 | A01600 | 288 |
| A01582 | A01612 | 321 | A01582 | A01627 | 490 |
| A01582 | A01629 | 313 | A01582 | A01632 | 491 |
| A01582 | A01664 | 283 | A01582 | A01668 | 363 |
| A01582 | A01711 | 191 | A01582 | A01746 | 391 |
| A01582 | A01763 | 232 | A01582 | A01790 | 341 |
| A01582 | A01887 | 172 | A01582 | A01931 | 419 |
| A01582 | A02058 | 228 | A01582 | A02148 | 283 |
| A01582 | A02215 | 488 | A01582 | A02228 | 152 |
| A01582 | A02329 | 286 | A01582 | A02443 | 188 |
| A01582 | A02477 | 491 | A01582 | A02494 | 188 |
| A01582 | A02501 | 424 | A01582 | A02605 | 200 |
| A01582 | A02738 | 443 | A01582 | A02878 | 337 |
| A01582 | A02924 | 278 | A01582 | A03050 | 382 |

|        |        |     |        |        |     |
|--------|--------|-----|--------|--------|-----|
| A01582 | A03166 | 188 | A01582 | A03211 | 490 |
| A01582 | A03304 | 205 | A01582 | A03334 | 417 |
| A01582 | A03351 | 219 | A01582 | A03494 | 191 |
| A01582 | A03569 | 481 | A01582 | A03570 | 385 |
| A01582 | A03676 | 191 | A01582 | A03708 | 200 |
| A01582 | A03819 | 234 | A01582 | A03885 | 491 |
| A01582 | A03971 | 154 | A01582 | A04033 | 428 |
| A01582 | A04270 | 232 | A01582 | A04337 | 457 |
| A01582 | A04371 | 188 | A01582 | A04493 | 160 |
| A01582 | A04520 | 423 | A01582 | A04532 | 377 |
| A01582 | A04633 | 230 | A01582 | A04635 | 302 |
| A01582 | A04647 | 255 | A01582 | A04666 | 396 |
| A01582 | A04668 | 480 | A01582 | A04782 | 407 |
| A01582 | A04873 | 185 | A01582 | A04925 | 369 |
| A01582 | A05119 | 322 | A01582 | A05133 | 232 |
| A01582 | A05234 | 180 | A01582 | A05288 | 490 |
| A01582 | A05337 | 201 | A01582 | A05479 | 267 |
| A01582 | A05640 | 246 | A01582 | A06336 | 246 |
| A01582 | A06346 | 469 | A01582 | A06474 | 177 |
| A01582 | A06491 | 235 | A01582 | A06588 | 229 |
| A01582 | A06625 | 154 | A01582 | A06918 | 383 |
| A01582 | A07114 | 195 | A01582 | A07237 | 210 |
| A01582 | A07407 | 202 | A01582 | A07442 | 491 |
| A01582 | A07470 | 177 | A01582 | A07471 | 204 |
| A01582 | A07472 | 170 | A01582 | A07497 | 195 |
| A01582 | A07541 | 174 | A01582 | A07544 | 195 |
| A01582 | A07621 | 165 | A01582 | A07634 | 215 |
| A01582 | A07635 | 198 | A01582 | A07641 | 326 |
| A01582 | A07705 | 154 | A01582 | A07756 | 241 |
| A01582 | A07972 | 267 | A01582 | A08191 | 436 |
| A01582 | A08210 | 271 | A01582 | A08242 | 232 |
| A01582 | A08292 | 221 | A01582 | A08671 | 271 |
| A01582 | A08715 | 177 | A01582 | A08783 | 219 |
| A01582 | A08931 | 279 | A01582 | A09447 | 274 |
| A01582 | A09507 | 435 | A01582 | A09580 | 173 |
| A01582 | A09597 | 168 | A01582 | A09698 | 226 |
| A01582 | A09766 | 324 | A01582 | A09973 | 267 |
| A01582 | A10109 | 157 | A01582 | A10214 | 193 |
| A01582 | A10432 | 246 | A01582 | A10447 | 297 |
| A01582 | A10649 | 267 | A01582 | A10782 | 232 |
| A01582 | A10816 | 157 | A01582 | A11135 | 201 |
| A01582 | A11242 | 219 | A01582 | A11352 | 452 |
| A01582 | A11433 | 160 | A01582 | A11448 | 267 |
| A01582 | A11461 | 188 | A01582 | A11513 | 477 |
| A01582 | A11528 | 246 | A01582 | A11568 | 173 |
| A01582 | A11655 | 165 | A01582 | A11709 | 246 |

|        |        |     |        |        |     |
|--------|--------|-----|--------|--------|-----|
| A01582 | A11983 | 340 | A01582 | A12095 | 369 |
| A01582 | A12285 | 316 | A01582 | A12824 | 317 |
| A01582 | A12940 | 267 | A01582 | A13008 | 422 |
| A01582 | A13139 | 201 | A01582 | A13166 | 246 |
| A01582 | A13239 | 183 | A01582 | A13245 | 297 |
| A01582 | A13369 | 185 | A01582 | A13418 | 297 |
| A01582 | A13432 | 480 | A01582 | A13803 | 297 |
| A01582 | A14062 | 340 | A01582 | A14073 | 177 |
| A01582 | A14181 | 173 | A01582 | A14196 | 185 |
| A01582 | A14272 | 210 | A01582 | A14299 | 172 |
| A01582 | A14418 | 168 | A01582 | A14498 | 350 |
| A01582 | A14589 | 308 | A01582 | A14597 | 162 |
| A01582 | A14701 | 475 | A01582 | A14723 | 297 |
| A01582 | A14875 | 195 | A01582 | A14876 | 168 |
| A01582 | A15282 | 360 | A01582 | A15295 | 483 |
| A01582 | A15505 | 363 | A01582 | A15624 | 488 |
| A01582 | A15684 | 475 | A01582 | A15707 | 201 |
| A01582 | A15917 | 491 | A01582 | A15920 | 337 |
| A01582 | A16626 | 162 | A01582 | A16666 | 348 |
| A01582 | A17078 | 473 | A01582 | A17079 | 416 |
| A01583 | A01585 | 491 | A01583 | A01634 | 486 |
| A01583 | A01646 | 288 | A01583 | A01677 | 480 |
| A01583 | A01678 | 353 | A01583 | A01683 | 281 |
| A01583 | A01706 | 594 | A01583 | A01710 | 283 |
| A01583 | A01715 | 638 | A01583 | A01811 | 638 |
| A01583 | A01926 | 347 | A01583 | A01988 | 63  |
| A01583 | A02402 | 440 | A01583 | A02530 | 232 |
| A01583 | A02950 | 177 | A01583 | A03044 | 193 |
| A01583 | A03154 | 202 | A01583 | A03238 | 291 |
| A01583 | A03270 | 213 | A01583 | A03293 | 271 |
| A01583 | A03329 | 80  | A01583 | A03452 | 457 |
| A01583 | A03489 | 440 | A01583 | A03513 | 399 |
| A01583 | A03565 | 519 | A01583 | A03618 | 457 |
| A01583 | A03626 | 638 | A01583 | A03718 | 477 |
| A01583 | A03889 | 406 | A01583 | A03890 | 486 |
| A01583 | A03891 | 337 | A01583 | A03892 | 480 |
| A01583 | A04117 | 185 | A01583 | A04145 | 154 |
| A01583 | A04292 | 574 | A01583 | A04318 | 228 |
| A01583 | A04839 | 151 | A01583 | A04893 | 637 |
| A01583 | A04896 | 362 | A01583 | A04929 | 405 |
| A01583 | A05023 | 381 | A01583 | A05024 | 312 |
| A01583 | A05027 | 188 | A01583 | A05143 | 201 |
| A01583 | A05201 | 347 | A01583 | A05202 | 213 |
| A01583 | A05204 | 361 | A01583 | A05233 | 577 |
| A01583 | A05309 | 235 | A01583 | A05401 | 319 |
| A01583 | A05531 | 350 | A01583 | A05638 | 269 |



|        |        |     |        |        |     |
|--------|--------|-----|--------|--------|-----|
| A01583 | A05692 | 235 | A01583 | A05785 | 291 |
| A01583 | A06011 | 269 | A01583 | A06137 | 157 |
| A01583 | A06659 | 637 | A01583 | A06675 | 638 |
| A01583 | A06739 | 345 | A01583 | A06831 | 240 |
| A01583 | A06890 | 228 | A01583 | A06930 | 185 |
| A01583 | A06941 | 413 | A01583 | A07180 | 63  |
| A01583 | A07477 | 391 | A01583 | A07664 | 185 |
| A01583 | A07736 | 483 | A01583 | A07753 | 183 |
| A01583 | A07973 | 395 | A01583 | A08484 | 531 |
| A01583 | A08874 | 291 | A01583 | A09036 | 208 |
| A01583 | A09043 | 353 | A01583 | A09050 | 334 |
| A01583 | A09326 | 269 | A01583 | A09333 | 76  |
| A01583 | A09375 | 228 | A01583 | A09891 | 291 |
| A01583 | A09892 | 267 | A01583 | A10235 | 305 |
| A01583 | A10584 | 88  | A01583 | A10739 | 193 |
| A01583 | A10804 | 294 | A01583 | A10809 | 240 |
| A01583 | A10897 | 205 | A01583 | A11279 | 269 |
| A01583 | A12792 | 201 | A01583 | A13387 | 213 |
| A01583 | A13826 | 63  | A01583 | A13832 | 389 |
| A01583 | A13844 | 623 | A01583 | A13846 | 466 |
| A01583 | A13855 | 63  | A01583 | A13857 | 151 |
| A01583 | A13882 | 391 | A01583 | A13895 | 269 |
| A01583 | A13902 | 167 | A01583 | A14056 | 124 |
| A01583 | A14095 | 412 | A01583 | A14182 | 334 |
| A01583 | A14247 | 491 | A01583 | A14481 | 278 |
| A01583 | A14661 | 316 | A01583 | A14693 | 399 |
| A01583 | A14711 | 269 | A01583 | A14783 | 269 |
| A01583 | A14838 | 63  | A01583 | A15316 | 162 |
| A01583 | A15462 | 171 | A01583 | A15498 | 358 |
| A01583 | A15647 | 358 | A01583 | A15650 | 281 |
| A01583 | A16617 | 193 | A01584 | A01585 | 290 |
| A01584 | A03565 | 224 | A01584 | A03617 | 276 |
| A01584 | A03626 | 439 | A01584 | A03892 | 95  |
| A01584 | A04893 | 277 | A01584 | A05024 | 293 |
| A01584 | A05233 | 296 | A01584 | A06675 | 235 |
| A01584 | A06973 | 205 | A01584 | A07421 | 265 |
| A01584 | A09862 | 291 | A01584 | A12792 | 352 |
| A01584 | A16686 | 291 | A01585 | A01593 | 173 |
| A01585 | A01612 | 534 | A01585 | A01627 | 152 |
| A01585 | A01634 | 988 | A01585 | A01646 | 770 |
| A01585 | A01660 | 519 | A01585 | A01673 | 457 |
| A01585 | A01677 | 491 | A01585 | A01678 | 398 |
| A01585 | A01683 | 777 | A01585 | A01706 | 595 |
| A01585 | A01710 | 477 | A01585 | A01715 | 490 |
| A01585 | A01779 | 391 | A01585 | A01809 | 469 |
| A01585 | A01811 | 491 | A01585 | A01876 | 174 |

|        |        |     |        |        |     |
|--------|--------|-----|--------|--------|-----|
| A01585 | A01926 | 484 | A01585 | A01983 | 404 |
| A01585 | A02148 | 548 | A01585 | A02222 | 461 |
| A01585 | A02275 | 278 | A01585 | A02335 | 435 |
| A01585 | A02364 | 191 | A01585 | A02402 | 443 |
| A01585 | A02411 | 899 | A01585 | A02465 | 260 |
| A01585 | A02477 | 404 | A01585 | A02671 | 339 |
| A01585 | A02887 | 594 | A01585 | A02950 | 465 |
| A01585 | A02979 | 425 | A01585 | A03034 | 486 |
| A01585 | A03156 | 162 | A01585 | A03213 | 174 |
| A01585 | A03238 | 469 | A01585 | A03293 | 757 |
| A01585 | A03294 | 568 | A01585 | A03329 | 251 |
| A01585 | A03428 | 274 | A01585 | A03452 | 491 |
| A01585 | A03481 | 291 | A01585 | A03488 | 461 |
| A01585 | A03489 | 810 | A01585 | A03513 | 419 |
| A01585 | A03523 | 247 | A01585 | A03565 | 490 |
| A01585 | A03569 | 491 | A01585 | A03597 | 63  |
| A01585 | A03618 | 491 | A01585 | A03625 | 223 |
| A01585 | A03626 | 715 | A01585 | A03682 | 63  |
| A01585 | A03699 | 174 | A01585 | A03718 | 662 |
| A01585 | A03880 | 174 | A01585 | A03889 | 486 |
| A01585 | A03890 | 369 | A01585 | A03891 | 491 |
| A01585 | A03892 | 989 | A01585 | A04145 | 491 |
| A01585 | A04151 | 483 | A01585 | A04292 | 489 |
| A01585 | A04337 | 490 | A01585 | A04540 | 339 |
| A01585 | A04631 | 168 | A01585 | A04682 | 353 |
| A01585 | A04686 | 815 | A01585 | A04728 | 491 |
| A01585 | A04835 | 455 | A01585 | A04839 | 159 |
| A01585 | A04893 | 491 | A01585 | A04896 | 208 |
| A01585 | A04897 | 491 | A01585 | A04929 | 485 |
| A01585 | A05023 | 127 | A01585 | A05024 | 728 |
| A01585 | A05027 | 277 | A01585 | A05028 | 479 |
| A01585 | A05061 | 458 | A01585 | A05155 | 245 |
| A01585 | A05200 | 232 | A01585 | A05204 | 393 |
| A01585 | A05233 | 489 | A01585 | A05234 | 559 |
| A01585 | A05356 | 355 | A01585 | A05376 | 296 |
| A01585 | A05401 | 691 | A01585 | A05449 | 347 |
| A01585 | A05710 | 308 | A01585 | A05751 | 174 |
| A01585 | A05914 | 152 | A01585 | A06011 | 413 |
| A01585 | A06037 | 491 | A01585 | A06168 | 484 |
| A01585 | A06195 | 332 | A01585 | A06240 | 491 |
| A01585 | A06517 | 168 | A01585 | A06659 | 491 |
| A01585 | A06675 | 758 | A01585 | A06689 | 378 |
| A01585 | A06739 | 417 | A01585 | A06890 | 414 |
| A01585 | A06930 | 180 | A01585 | A06941 | 556 |
| A01585 | A07180 | 174 | A01585 | A07203 | 435 |
| A01585 | A07409 | 263 | A01585 | A07442 | 491 |

|        |        |     |        |        |     |
|--------|--------|-----|--------|--------|-----|
| A01585 | A07477 | 469 | A01585 | A07499 | 491 |
| A01585 | A07521 | 489 | A01585 | A07541 | 385 |
| A01585 | A07736 | 491 | A01585 | A07820 | 491 |
| A01585 | A07973 | 470 | A01585 | A08001 | 299 |
| A01585 | A08137 | 540 | A01585 | A08309 | 152 |
| A01585 | A08369 | 496 | A01585 | A08400 | 491 |
| A01585 | A08454 | 180 | A01585 | A08461 | 662 |
| A01585 | A08484 | 491 | A01585 | A08506 | 112 |
| A01585 | A08544 | 481 | A01585 | A08766 | 113 |
| A01585 | A08777 | 224 | A01585 | A08785 | 405 |
| A01585 | A08874 | 715 | A01585 | A08943 | 138 |
| A01585 | A09050 | 488 | A01585 | A09054 | 156 |
| A01585 | A09078 | 174 | A01585 | A09277 | 488 |
| A01585 | A09286 | 272 | A01585 | A09299 | 389 |
| A01585 | A09326 | 479 | A01585 | A09333 | 479 |
| A01585 | A09347 | 168 | A01585 | A09526 | 224 |
| A01585 | A09742 | 394 | A01585 | A09851 | 63  |
| A01585 | A10052 | 215 | A01585 | A10226 | 190 |
| A01585 | A10423 | 402 | A01585 | A10584 | 728 |
| A01585 | A10594 | 347 | A01585 | A10597 | 130 |
| A01585 | A10655 | 636 | A01585 | A10663 | 434 |
| A01585 | A10684 | 335 | A01585 | A10701 | 188 |
| A01585 | A10739 | 473 | A01585 | A10790 | 82  |
| A01585 | A10794 | 414 | A01585 | A10797 | 450 |
| A01585 | A10798 | 481 | A01585 | A10799 | 467 |
| A01585 | A10803 | 305 | A01585 | A10804 | 469 |
| A01585 | A10809 | 283 | A01585 | A10812 | 288 |
| A01585 | A10821 | 462 | A01585 | A10897 | 139 |
| A01585 | A11130 | 76  | A01585 | A11157 | 303 |
| A01585 | A11247 | 384 | A01585 | A11279 | 488 |
| A01585 | A11287 | 177 | A01585 | A11303 | 491 |
| A01585 | A11337 | 468 | A01585 | A11373 | 328 |
| A01585 | A11456 | 430 | A01585 | A11496 | 435 |
| A01585 | A11497 | 462 | A01585 | A11570 | 439 |
| A01585 | A11602 | 176 | A01585 | A11617 | 221 |
| A01585 | A11660 | 427 | A01585 | A11679 | 461 |
| A01585 | A11885 | 491 | A01585 | A12206 | 205 |
| A01585 | A12215 | 303 | A01585 | A12295 | 486 |
| A01585 | A12722 | 152 | A01585 | A12792 | 483 |
| A01585 | A12922 | 378 | A01585 | A12951 | 205 |
| A01585 | A13130 | 190 | A01585 | A13222 | 63  |
| A01585 | A13328 | 224 | A01585 | A13369 | 193 |
| A01585 | A13387 | 247 | A01585 | A13816 | 462 |
| A01585 | A13826 | 63  | A01585 | A13830 | 491 |
| A01585 | A13831 | 527 | A01585 | A13832 | 160 |
| A01585 | A13845 | 174 | A01585 | A13846 | 369 |

|        |        |     |        |        |     |
|--------|--------|-----|--------|--------|-----|
| A01585 | A13847 | 235 | A01585 | A13855 | 463 |
| A01585 | A13867 | 488 | A01585 | A13871 | 218 |
| A01585 | A13874 | 449 | A01585 | A13882 | 594 |
| A01585 | A13887 | 63  | A01585 | A13894 | 485 |
| A01585 | A13895 | 368 | A01585 | A13902 | 636 |
| A01585 | A13981 | 899 | A01585 | A14056 | 606 |
| A01585 | A14095 | 594 | A01585 | A14168 | 110 |
| A01585 | A14175 | 104 | A01585 | A14182 | 401 |
| A01585 | A14199 | 303 | A01585 | A14212 | 174 |
| A01585 | A14247 | 886 | A01585 | A14258 | 260 |
| A01585 | A14272 | 491 | A01585 | A14276 | 63  |
| A01585 | A14461 | 452 | A01585 | A14661 | 491 |
| A01585 | A14693 | 488 | A01585 | A14711 | 283 |
| A01585 | A14783 | 462 | A01585 | A14838 | 484 |
| A01585 | A14868 | 63  | A01585 | A14942 | 172 |
| A01585 | A15202 | 252 | A01585 | A15297 | 101 |
| A01585 | A15315 | 368 | A01585 | A15346 | 63  |
| A01585 | A15347 | 221 | A01585 | A15360 | 63  |
| A01585 | A15366 | 398 | A01585 | A15384 | 183 |
| A01585 | A15402 | 313 | A01585 | A15422 | 463 |
| A01585 | A15462 | 373 | A01585 | A15463 | 399 |
| A01585 | A15498 | 537 | A01585 | A15505 | 63  |
| A01585 | A15528 | 224 | A01585 | A15581 | 63  |
| A01585 | A15617 | 521 | A01585 | A15647 | 491 |
| A01585 | A15650 | 456 | A01585 | A15660 | 232 |
| A01585 | A15712 | 177 | A01585 | A15917 | 489 |
| A01585 | A15932 | 489 | A01585 | A15962 | 63  |
| A01585 | A16117 | 324 | A01585 | A16449 | 174 |
| A01585 | A16587 | 335 | A01585 | A16617 | 363 |
| A01585 | A16652 | 418 | A01585 | A16808 | 171 |
| A01585 | A16850 | 154 | A01585 | A16927 | 195 |
| A01585 | A17061 | 445 | A01585 | A17121 | 430 |
| A01585 | A17126 | 474 | A01585 | A17133 | 480 |
| A01585 | A17143 | 483 | A01585 | A17144 | 488 |
| A01586 | A01601 | 489 | A01586 | A01649 | 445 |
| A01586 | A01999 | 196 | A01586 | A02003 | 474 |
| A01586 | A02601 | 221 | A01586 | A03048 | 159 |
| A01586 | A03143 | 168 | A01586 | A03291 | 159 |
| A01586 | A03437 | 160 | A01586 | A03461 | 450 |
| A01586 | A03490 | 317 | A01586 | A03567 | 416 |
| A01586 | A03570 | 193 | A01586 | A03601 | 268 |
| A01586 | A03705 | 364 | A01586 | A03981 | 622 |
| A01586 | A04099 | 160 | A01586 | A04106 | 281 |
| A01586 | A04230 | 262 | A01586 | A05501 | 483 |
| A01586 | A05562 | 205 | A01586 | A06117 | 327 |
| A01586 | A06324 | 216 | A01586 | A06649 | 212 |

|        |        |     |        |        |     |
|--------|--------|-----|--------|--------|-----|
| A01586 | A06814 | 340 | A01586 | A07323 | 324 |
| A01586 | A07398 | 316 | A01586 | A07451 | 167 |
| A01586 | A07581 | 232 | A01586 | A07726 | 486 |
| A01586 | A07730 | 156 | A01586 | A08011 | 157 |
| A01586 | A08052 | 401 | A01586 | A08154 | 290 |
| A01586 | A08273 | 196 | A01586 | A08377 | 317 |
| A01586 | A08408 | 335 | A01586 | A08543 | 249 |
| A01586 | A08550 | 317 | A01586 | A08578 | 200 |
| A01586 | A08973 | 317 | A01586 | A09308 | 157 |
| A01586 | A09332 | 177 | A01586 | A09722 | 299 |
| A01586 | A09741 | 124 | A01586 | A09868 | 274 |
| A01586 | A10532 | 165 | A01586 | A12293 | 351 |
| A01586 | A12687 | 196 | A01586 | A13989 | 491 |
| A01586 | A13992 | 374 | A01586 | A14171 | 208 |
| A01586 | A14216 | 488 | A01586 | A14566 | 163 |
| A01586 | A14816 | 207 | A01586 | A15365 | 271 |
| A01586 | A15499 | 190 | A01586 | A15684 | 435 |
| A01586 | A15932 | 63  | A01586 | A17095 | 384 |
| A01587 | A01660 | 283 | A01587 | A01685 | 73  |
| A01587 | A01717 | 104 | A01587 | A01988 | 316 |
| A01587 | A02075 | 408 | A01587 | A02702 | 449 |
| A01587 | A03321 | 427 | A01587 | A03728 | 226 |
| A01587 | A03856 | 154 | A01587 | A04033 | 356 |
| A01587 | A04411 | 303 | A01587 | A07242 | 481 |
| A01587 | A07311 | 899 | A01587 | A08022 | 334 |
| A01587 | A08130 | 400 | A01587 | A08571 | 272 |
| A01587 | A09179 | 254 | A01587 | A09256 | 84  |
| A01587 | A09739 | 218 | A01587 | A11258 | 104 |
| A01587 | A11284 | 229 | A01587 | A13539 | 184 |
| A01587 | A14009 | 491 | A01587 | A14188 | 165 |
| A01587 | A14636 | 283 | A01587 | A14894 | 235 |
| A01587 | A14897 | 226 | A01587 | A15175 | 311 |
| A01587 | A15631 | 173 | A01587 | A15871 | 173 |
| A01587 | A16316 | 364 | A01588 | A01591 | 941 |
| A01588 | A01592 | 993 | A01588 | A01593 | 994 |
| A01588 | A01594 | 899 | A01588 | A01602 | 993 |
| A01588 | A01612 | 944 | A01588 | A01615 | 994 |
| A01588 | A01628 | 899 | A01588 | A01631 | 899 |
| A01588 | A01636 | 991 | A01588 | A01637 | 993 |
| A01588 | A01638 | 945 | A01588 | A01639 | 989 |
| A01588 | A01640 | 899 | A01588 | A01650 | 922 |
| A01588 | A01651 | 993 | A01588 | A01665 | 899 |
| A01588 | A01676 | 899 | A01588 | A01680 | 899 |
| A01588 | A01687 | 899 | A01588 | A01688 | 919 |
| A01588 | A01692 | 989 | A01588 | A01697 | 989 |
| A01588 | A01702 | 899 | A01588 | A01708 | 899 |

|        |        |     |        |        |     |
|--------|--------|-----|--------|--------|-----|
| A01588 | A01709 | 899 | A01588 | A01717 | 63  |
| A01588 | A01718 | 899 | A01588 | A01719 | 989 |
| A01588 | A01755 | 899 | A01588 | A01844 | 989 |
| A01588 | A01908 | 899 | A01588 | A01914 | 899 |
| A01588 | A01920 | 989 | A01588 | A01995 | 230 |
| A01588 | A01996 | 899 | A01588 | A02018 | 899 |
| A01588 | A02163 | 899 | A01588 | A02211 | 899 |
| A01588 | A02381 | 491 | A01588 | A02382 | 899 |
| A01588 | A02411 | 899 | A01588 | A02671 | 484 |
| A01588 | A02803 | 899 | A01588 | A02869 | 362 |
| A01588 | A02908 | 899 | A01588 | A02942 | 942 |
| A01588 | A02968 | 899 | A01588 | A03057 | 899 |
| A01588 | A03209 | 989 | A01588 | A03261 | 899 |
| A01588 | A03271 | 899 | A01588 | A03298 | 409 |
| A01588 | A03299 | 80  | A01588 | A03569 | 63  |
| A01588 | A03575 | 989 | A01588 | A03591 | 899 |
| A01588 | A03686 | 899 | A01588 | A03726 | 992 |
| A01588 | A03741 | 993 | A01588 | A03817 | 914 |
| A01588 | A03990 | 936 | A01588 | A04012 | 899 |
| A01588 | A04020 | 319 | A01588 | A04033 | 423 |
| A01588 | A04398 | 899 | A01588 | A04600 | 899 |
| A01588 | A04699 | 899 | A01588 | A04908 | 299 |
| A01588 | A05008 | 989 | A01588 | A05009 | 899 |
| A01588 | A05015 | 899 | A01588 | A05029 | 899 |
| A01588 | A05037 | 899 | A01588 | A05062 | 408 |
| A01588 | A05082 | 227 | A01588 | A05216 | 899 |
| A01588 | A05315 | 363 | A01588 | A05428 | 933 |
| A01588 | A05453 | 899 | A01588 | A05482 | 899 |
| A01588 | A05552 | 171 | A01588 | A05760 | 899 |
| A01588 | A05854 | 162 | A01588 | A05958 | 263 |
| A01588 | A05997 | 238 | A01588 | A06017 | 212 |
| A01588 | A06163 | 899 | A01588 | A06176 | 899 |
| A01588 | A06277 | 899 | A01588 | A06295 | 899 |
| A01588 | A06348 | 88  | A01588 | A06597 | 455 |
| A01588 | A06608 | 899 | A01588 | A06610 | 911 |
| A01588 | A06660 | 922 | A01588 | A07091 | 899 |
| A01588 | A07311 | 990 | A01588 | A07339 | 923 |
| A01588 | A07422 | 899 | A01588 | A07425 | 63  |
| A01588 | A07483 | 899 | A01588 | A07797 | 899 |
| A01588 | A07834 | 409 | A01588 | A07835 | 286 |
| A01588 | A08248 | 160 | A01588 | A08281 | 429 |
| A01588 | A08524 | 491 | A01588 | A08536 | 899 |
| A01588 | A08549 | 899 | A01588 | A08561 | 899 |
| A01588 | A08571 | 945 | A01588 | A08732 | 899 |
| A01588 | A08839 | 903 | A01588 | A08858 | 899 |
| A01588 | A08864 | 899 | A01588 | A08865 | 899 |

|        |        |     |        |        |     |
|--------|--------|-----|--------|--------|-----|
| A01588 | A08876 | 73  | A01588 | A08878 | 899 |
| A01588 | A08885 | 152 | A01588 | A09005 | 154 |
| A01588 | A09124 | 899 | A01588 | A09181 | 899 |
| A01588 | A09256 | 71  | A01588 | A09319 | 899 |
| A01588 | A09362 | 196 | A01588 | A09383 | 899 |
| A01588 | A09526 | 208 | A01588 | A09542 | 899 |
| A01588 | A09556 | 899 | A01588 | A09568 | 989 |
| A01588 | A09577 | 899 | A01588 | A10038 | 899 |
| A01588 | A10159 | 899 | A01588 | A10174 | 899 |
| A01588 | A10185 | 899 | A01588 | A10365 | 899 |
| A01588 | A10392 | 899 | A01588 | A10580 | 899 |
| A01588 | A10601 | 899 | A01588 | A10615 | 994 |
| A01588 | A10623 | 899 | A01588 | A10624 | 486 |
| A01588 | A10801 | 989 | A01588 | A10833 | 899 |
| A01588 | A10853 | 117 | A01588 | A10894 | 306 |
| A01588 | A11125 | 899 | A01588 | A11134 | 899 |
| A01588 | A11304 | 333 | A01588 | A11369 | 899 |
| A01588 | A11478 | 193 | A01588 | A11487 | 899 |
| A01588 | A11601 | 899 | A01588 | A11604 | 899 |
| A01588 | A11675 | 899 | A01588 | A11834 | 899 |
| A01588 | A11850 | 899 | A01588 | A11983 | 989 |
| A01588 | A12020 | 243 | A01588 | A12383 | 899 |
| A01588 | A12478 | 180 | A01588 | A12597 | 229 |
| A01588 | A12604 | 193 | A01588 | A12664 | 899 |
| A01588 | A12668 | 899 | A01588 | A12705 | 991 |
| A01588 | A12992 | 989 | A01588 | A13147 | 905 |
| A01588 | A13250 | 989 | A01588 | A13390 | 899 |
| A01588 | A13391 | 899 | A01588 | A13393 | 899 |
| A01588 | A13605 | 899 | A01588 | A13824 | 899 |
| A01588 | A13975 | 914 | A01588 | A13977 | 899 |
| A01588 | A13978 | 899 | A01588 | A13980 | 903 |
| A01588 | A13981 | 899 | A01588 | A13982 | 899 |
| A01588 | A13983 | 899 | A01588 | A13984 | 899 |
| A01588 | A13985 | 900 | A01588 | A13989 | 935 |
| A01588 | A13990 | 899 | A01588 | A13991 | 899 |
| A01588 | A14001 | 899 | A01588 | A14004 | 899 |
| A01588 | A14005 | 899 | A01588 | A14006 | 424 |
| A01588 | A14030 | 899 | A01588 | A14035 | 899 |
| A01588 | A14036 | 899 | A01588 | A14037 | 899 |
| A01588 | A14039 | 123 | A01588 | A14042 | 899 |
| A01588 | A14044 | 899 | A01588 | A14148 | 899 |
| A01588 | A14188 | 899 | A01588 | A14196 | 531 |
| A01588 | A14198 | 899 | A01588 | A14202 | 989 |
| A01588 | A14208 | 899 | A01588 | A14218 | 291 |
| A01588 | A14220 | 900 | A01588 | A14246 | 935 |
| A01588 | A14270 | 899 | A01588 | A14278 | 899 |

|        |        |     |        |        |     |
|--------|--------|-----|--------|--------|-----|
| A01588 | A14299 | 991 | A01588 | A14310 | 899 |
| A01588 | A14393 | 899 | A01588 | A14433 | 899 |
| A01588 | A14443 | 992 | A01588 | A14444 | 990 |
| A01588 | A14456 | 899 | A01588 | A14472 | 899 |
| A01588 | A14476 | 63  | A01588 | A14490 | 899 |
| A01588 | A14539 | 288 | A01588 | A14540 | 154 |
| A01588 | A14662 | 899 | A01588 | A14778 | 256 |
| A01588 | A14920 | 899 | A01588 | A14929 | 899 |
| A01588 | A15182 | 899 | A01588 | A15239 | 171 |
| A01588 | A15291 | 899 | A01588 | A15292 | 989 |
| A01588 | A15293 | 899 | A01588 | A15294 | 899 |
| A01588 | A15297 | 899 | A01588 | A15323 | 909 |
| A01588 | A15324 | 899 | A01588 | A15338 | 491 |
| A01588 | A15353 | 899 | A01588 | A15359 | 899 |
| A01588 | A15547 | 899 | A01588 | A15559 | 491 |
| A01588 | A15614 | 899 | A01588 | A15726 | 945 |
| A01588 | A15729 | 472 | A01588 | A15788 | 447 |
| A01588 | A15920 | 899 | A01588 | A16294 | 299 |
| A01588 | A16400 | 247 | A01588 | A16453 | 188 |
| A01588 | A16661 | 171 | A01588 | A16690 | 491 |
| A01588 | A16827 | 899 | A01588 | A16866 | 489 |
| A01588 | A16912 | 63  | A01588 | A16938 | 899 |
| A01588 | A17019 | 281 | A01588 | A17027 | 899 |
| A01588 | A17063 | 489 | A01588 | A17160 | 899 |
| A01588 | A17197 | 314 | A01588 | A17212 | 899 |
| A01589 | A01594 | 491 | A01589 | A01616 | 491 |
| A01589 | A01625 | 491 | A01589 | A01659 | 491 |
| A01589 | A01680 | 344 | A01589 | A01686 | 491 |
| A01589 | A02058 | 465 | A01589 | A02117 | 172 |
| A01589 | A02887 | 477 | A01589 | A03057 | 491 |
| A01589 | A03301 | 491 | A01589 | A04073 | 391 |
| A01589 | A04364 | 481 | A01589 | A04668 | 491 |
| A01589 | A05193 | 213 | A01589 | A05334 | 486 |
| A01589 | A06000 | 318 | A01589 | A06029 | 490 |
| A01589 | A06242 | 491 | A01589 | A06297 | 460 |
| A01589 | A06851 | 299 | A01589 | A06864 | 491 |
| A01589 | A06982 | 491 | A01589 | A07079 | 491 |
| A01589 | A07319 | 491 | A01589 | A07346 | 491 |
| A01589 | A07466 | 488 | A01589 | A07480 | 491 |
| A01589 | A07534 | 491 | A01589 | A07603 | 491 |
| A01589 | A07647 | 491 | A01589 | A07902 | 490 |
| A01589 | A07989 | 491 | A01589 | A07996 | 491 |
| A01589 | A08000 | 491 | A01589 | A08029 | 208 |
| A01589 | A08030 | 491 | A01589 | A08117 | 491 |
| A01589 | A08141 | 489 | A01589 | A08208 | 491 |
| A01589 | A08212 | 479 | A01589 | A08669 | 491 |



|        |        |     |        |        |     |
|--------|--------|-----|--------|--------|-----|
| A01589 | A08820 | 491 | A01589 | A08902 | 491 |
| A01589 | A08919 | 180 | A01589 | A09597 | 162 |
| A01589 | A09598 | 490 | A01589 | A09663 | 486 |
| A01589 | A10083 | 159 | A01589 | A10625 | 490 |
| A01589 | A11540 | 467 | A01589 | A11782 | 399 |
| A01589 | A11916 | 491 | A01589 | A13758 | 260 |
| A01589 | A13949 | 491 | A01589 | A13986 | 312 |
| A01589 | A14007 | 438 | A01589 | A14076 | 480 |
| A01589 | A14079 | 491 | A01589 | A14273 | 491 |
| A01589 | A14452 | 160 | A01589 | A14460 | 491 |
| A01589 | A14694 | 486 | A01589 | A14930 | 180 |
| A01589 | A14962 | 234 | A01589 | A15369 | 491 |
| A01589 | A15371 | 443 | A01589 | A15420 | 446 |
| A01589 | A15524 | 265 | A01589 | A15645 | 361 |
| A01589 | A15654 | 434 | A01589 | A15714 | 338 |
| A01589 | A15837 | 469 | A01589 | A15939 | 96  |
| A01589 | A15941 | 475 | A01589 | A16073 | 294 |
| A01589 | A16127 | 491 | A01589 | A16128 | 491 |
| A01589 | A16129 | 486 | A01589 | A16134 | 441 |
| A01589 | A16225 | 467 | A01589 | A16226 | 491 |
| A01589 | A16294 | 288 | A01589 | A16606 | 491 |
| A01589 | A16612 | 190 | A01589 | A16613 | 491 |
| A01589 | A16626 | 491 | A01589 | A16646 | 159 |
| A01589 | A16754 | 490 | A01590 | A01722 | 363 |
| A01590 | A01741 | 272 | A01590 | A01743 | 208 |
| A01590 | A01884 | 413 | A01590 | A01923 | 190 |
| A01590 | A01926 | 430 | A01590 | A02071 | 340 |
| A01590 | A02074 | 491 | A01590 | A02083 | 491 |
| A01590 | A02142 | 177 | A01590 | A02152 | 207 |
| A01590 | A02187 | 312 | A01590 | A02215 | 221 |
| A01590 | A02284 | 371 | A01590 | A02305 | 432 |
| A01590 | A02306 | 491 | A01590 | A02309 | 279 |
| A01590 | A02316 | 193 | A01590 | A02317 | 486 |
| A01590 | A02318 | 187 | A01590 | A02329 | 413 |
| A01590 | A02330 | 491 | A01590 | A02405 | 326 |
| A01590 | A02410 | 335 | A01590 | A02423 | 246 |
| A01590 | A02461 | 200 | A01590 | A02471 | 216 |
| A01590 | A02707 | 160 | A01590 | A02749 | 483 |
| A01590 | A02759 | 488 | A01590 | A02760 | 160 |
| A01590 | A02774 | 268 | A01590 | A02785 | 481 |
| A01590 | A02859 | 347 | A01590 | A02951 | 221 |
| A01590 | A02966 | 288 | A01590 | A03019 | 174 |
| A01590 | A03050 | 489 | A01590 | A03051 | 367 |
| A01590 | A03054 | 348 | A01590 | A03063 | 260 |
| A01590 | A03087 | 224 | A01590 | A03099 | 491 |
| A01590 | A03172 | 401 | A01590 | A03183 | 224 |

|        |        |     |        |        |     |
|--------|--------|-----|--------|--------|-----|
| A01590 | A03238 | 360 | A01590 | A03402 | 424 |
| A01590 | A03545 | 308 | A01590 | A03919 | 177 |
| A01590 | A03961 | 195 | A01590 | A04162 | 489 |
| A01590 | A04258 | 477 | A01590 | A04368 | 346 |
| A01590 | A04369 | 470 | A01590 | A04371 | 457 |
| A01590 | A04373 | 229 | A01590 | A04423 | 185 |
| A01590 | A04437 | 302 | A01590 | A04622 | 229 |
| A01590 | A04633 | 432 | A01590 | A04635 | 357 |
| A01590 | A04637 | 445 | A01590 | A04679 | 210 |
| A01590 | A04723 | 187 | A01590 | A04746 | 384 |
| A01590 | A04822 | 177 | A01590 | A04823 | 255 |
| A01590 | A04974 | 469 | A01590 | A04975 | 450 |
| A01590 | A04981 | 490 | A01590 | A05184 | 452 |
| A01590 | A05208 | 435 | A01590 | A05237 | 288 |
| A01590 | A05311 | 229 | A01590 | A05356 | 489 |
| A01590 | A05390 | 485 | A01590 | A05432 | 160 |
| A01590 | A05533 | 430 | A01590 | A05696 | 462 |
| A01590 | A05736 | 486 | A01590 | A05737 | 443 |
| A01590 | A05740 | 341 | A01590 | A05786 | 469 |
| A01590 | A05945 | 414 | A01590 | A05992 | 288 |
| A01590 | A06037 | 329 | A01590 | A06263 | 491 |
| A01590 | A06579 | 168 | A01590 | A06607 | 491 |
| A01590 | A06650 | 152 | A01590 | A06663 | 229 |
| A01590 | A06762 | 277 | A01590 | A06769 | 491 |
| A01590 | A06874 | 480 | A01590 | A06922 | 278 |
| A01590 | A07021 | 288 | A01590 | A07037 | 201 |
| A01590 | A07164 | 171 | A01590 | A07200 | 279 |
| A01590 | A07296 | 255 | A01590 | A07297 | 260 |
| A01590 | A07567 | 340 | A01590 | A07652 | 313 |
| A01590 | A07653 | 396 | A01590 | A07654 | 170 |
| A01590 | A07723 | 187 | A01590 | A07754 | 185 |
| A01590 | A07808 | 317 | A01590 | A07912 | 455 |
| A01590 | A08404 | 486 | A01590 | A08746 | 479 |
| A01590 | A09072 | 486 | A01590 | A09559 | 249 |
| A01590 | A10634 | 226 | A01590 | A10700 | 243 |
| A01590 | A10757 | 234 | A01590 | A11424 | 234 |
| A01590 | A13140 | 269 | A01590 | A14443 | 154 |
| A01591 | A01592 | 998 | A01591 | A01593 | 491 |
| A01591 | A01595 | 475 | A01591 | A01604 | 199 |
| A01591 | A01610 | 180 | A01591 | A01612 | 418 |
| A01591 | A01615 | 945 | A01591 | A01628 | 525 |
| A01591 | A01631 | 374 | A01591 | A01636 | 972 |
| A01591 | A01637 | 366 | A01591 | A01638 | 945 |
| A01591 | A01650 | 999 | A01591 | A01651 | 945 |
| A01591 | A01660 | 490 | A01591 | A01685 | 489 |
| A01591 | A01687 | 549 | A01591 | A01689 | 63  |

|        |        |     |        |        |     |
|--------|--------|-----|--------|--------|-----|
| A01591 | A01717 | 486 | A01591 | A01796 | 440 |
| A01591 | A01839 | 210 | A01591 | A01844 | 259 |
| A01591 | A02148 | 398 | A01591 | A02222 | 382 |
| A01591 | A02942 | 899 | A01591 | A02968 | 899 |
| A01591 | A03098 | 227 | A01591 | A03298 | 474 |
| A01591 | A03299 | 335 | A01591 | A03422 | 490 |
| A01591 | A03492 | 714 | A01591 | A03496 | 509 |
| A01591 | A03528 | 319 | A01591 | A03569 | 252 |
| A01591 | A03575 | 950 | A01591 | A03726 | 249 |
| A01591 | A03892 | 174 | A01591 | A04086 | 227 |
| A01591 | A04440 | 254 | A01591 | A04479 | 160 |
| A01591 | A04668 | 154 | A01591 | A04719 | 160 |
| A01591 | A04863 | 151 | A01591 | A04901 | 165 |
| A01591 | A05008 | 975 | A01591 | A05009 | 784 |
| A01591 | A05015 | 953 | A01591 | A05029 | 417 |
| A01591 | A05062 | 452 | A01591 | A05219 | 160 |
| A01591 | A05401 | 201 | A01591 | A05625 | 664 |
| A01591 | A05722 | 160 | A01591 | A05880 | 191 |
| A01591 | A05892 | 489 | A01591 | A05894 | 485 |
| A01591 | A06106 | 188 | A01591 | A06143 | 358 |
| A01591 | A06144 | 406 | A01591 | A06177 | 63  |
| A01591 | A06348 | 385 | A01591 | A06379 | 319 |
| A01591 | A06534 | 266 | A01591 | A06535 | 238 |
| A01591 | A06572 | 473 | A01591 | A06694 | 210 |
| A01591 | A06919 | 458 | A01591 | A07218 | 245 |
| A01591 | A07313 | 63  | A01591 | A07422 | 421 |
| A01591 | A07433 | 757 | A01591 | A07480 | 227 |
| A01591 | A07593 | 306 | A01591 | A07603 | 285 |
| A01591 | A07706 | 199 | A01591 | A07762 | 490 |
| A01591 | A07834 | 434 | A01591 | A08133 | 199 |
| A01591 | A08536 | 218 | A01591 | A08551 | 200 |
| A01591 | A08554 | 324 | A01591 | A08571 | 979 |
| A01591 | A08783 | 160 | A01591 | A08788 | 199 |
| A01591 | A08839 | 750 | A01591 | A08853 | 332 |
| A01591 | A08858 | 957 | A01591 | A08865 | 185 |
| A01591 | A08885 | 707 | A01591 | A08894 | 306 |
| A01591 | A08903 | 157 | A01591 | A09052 | 396 |
| A01591 | A09195 | 623 | A01591 | A09256 | 490 |
| A01591 | A09370 | 377 | A01591 | A09443 | 302 |
| A01591 | A09449 | 493 | A01591 | A09491 | 152 |
| A01591 | A09793 | 480 | A01591 | A09912 | 246 |
| A01591 | A10012 | 188 | A01591 | A10250 | 306 |
| A01591 | A10395 | 205 | A01591 | A10604 | 483 |
| A01591 | A10619 | 99  | A01591 | A10624 | 467 |
| A01591 | A10645 | 217 | A01591 | A10833 | 310 |
| A01591 | A10894 | 191 | A01591 | A10986 | 177 |

|        |        |     |        |        |     |
|--------|--------|-----|--------|--------|-----|
| A01591 | A10998 | 160 | A01591 | A11027 | 291 |
| A01591 | A11138 | 135 | A01591 | A11156 | 251 |
| A01591 | A11258 | 404 | A01591 | A11346 | 263 |
| A01591 | A11379 | 196 | A01591 | A11478 | 372 |
| A01591 | A11487 | 433 | A01591 | A11621 | 199 |
| A01591 | A11876 | 170 | A01591 | A12044 | 246 |
| A01591 | A12047 | 473 | A01591 | A12178 | 246 |
| A01591 | A12275 | 249 | A01591 | A12401 | 109 |
| A01591 | A12533 | 208 | A01591 | A12552 | 160 |
| A01591 | A12582 | 246 | A01591 | A12722 | 226 |
| A01591 | A13082 | 188 | A01591 | A13146 | 177 |
| A01591 | A13194 | 173 | A01591 | A13315 | 480 |
| A01591 | A13573 | 246 | A01591 | A13739 | 151 |
| A01591 | A13817 | 210 | A01591 | A13889 | 194 |
| A01591 | A13917 | 443 | A01591 | A13978 | 299 |
| A01591 | A13981 | 188 | A01591 | A13982 | 463 |
| A01591 | A14009 | 541 | A01591 | A14037 | 63  |
| A01591 | A14193 | 199 | A01591 | A14222 | 355 |
| A01591 | A14227 | 63  | A01591 | A14278 | 210 |
| A01591 | A14291 | 306 | A01591 | A14474 | 252 |
| A01591 | A14484 | 180 | A01591 | A14577 | 594 |
| A01591 | A14633 | 168 | A01591 | A14649 | 177 |
| A01591 | A15180 | 273 | A01591 | A15295 | 527 |
| A01591 | A15498 | 550 | A01591 | A15533 | 157 |
| A01591 | A15726 | 961 | A01591 | A15915 | 188 |
| A01591 | A16198 | 188 | A01591 | A16391 | 180 |
| A01592 | A01593 | 994 | A01592 | A01615 | 994 |
| A01592 | A01636 | 997 | A01592 | A01637 | 939 |
| A01592 | A01638 | 994 | A01592 | A01650 | 973 |
| A01592 | A01651 | 993 | A01592 | A01660 | 240 |
| A01592 | A01667 | 321 | A01592 | A01692 | 994 |
| A01592 | A01703 | 157 | A01592 | A01844 | 177 |
| A01592 | A02908 | 899 | A01592 | A03284 | 191 |
| A01592 | A03422 | 486 | A01592 | A03492 | 748 |
| A01592 | A03575 | 945 | A01592 | A03591 | 899 |
| A01592 | A03854 | 285 | A01592 | A03994 | 196 |
| A01592 | A04065 | 182 | A01592 | A05008 | 968 |
| A01592 | A05009 | 345 | A01592 | A05015 | 394 |
| A01592 | A05029 | 443 | A01592 | A05625 | 576 |
| A01592 | A05829 | 218 | A01592 | A05894 | 63  |
| A01592 | A06188 | 165 | A01592 | A06480 | 204 |
| A01592 | A06610 | 272 | A01592 | A07311 | 899 |
| A01592 | A07621 | 173 | A01592 | A07762 | 469 |
| A01592 | A07834 | 477 | A01592 | A08571 | 491 |
| A01592 | A08839 | 251 | A01592 | A08858 | 955 |
| A01592 | A09195 | 463 | A01592 | A09256 | 221 |

|        |        |     |        |        |     |
|--------|--------|-----|--------|--------|-----|
| A01592 | A09380 | 260 | A01592 | A09449 | 570 |
| A01592 | A09568 | 188 | A01592 | A10604 | 76  |
| A01592 | A10615 | 919 | A01592 | A10624 | 436 |
| A01592 | A10833 | 916 | A01592 | A10894 | 374 |
| A01592 | A11871 | 170 | A01592 | A12341 | 899 |
| A01592 | A13146 | 899 | A01592 | A13225 | 899 |
| A01592 | A13741 | 399 | A01592 | A13917 | 154 |
| A01592 | A14009 | 457 | A01592 | A14193 | 199 |
| A01592 | A14227 | 63  | A01592 | A14443 | 899 |
| A01592 | A14481 | 199 | A01592 | A14577 | 669 |
| A01592 | A14649 | 286 | A01592 | A14694 | 195 |
| A01592 | A15726 | 945 | A01592 | A16391 | 383 |
| A01593 | A01602 | 899 | A01593 | A01615 | 425 |
| A01593 | A01636 | 937 | A01593 | A01637 | 945 |
| A01593 | A01638 | 945 | A01593 | A01650 | 391 |
| A01593 | A01651 | 943 | A01593 | A01692 | 899 |
| A01593 | A01786 | 899 | A01593 | A01796 | 168 |
| A01593 | A01844 | 903 | A01593 | A02102 | 296 |
| A01593 | A02148 | 416 | A01593 | A02326 | 172 |
| A01593 | A02803 | 899 | A01593 | A02908 | 899 |
| A01593 | A02942 | 899 | A01593 | A02968 | 899 |
| A01593 | A03086 | 170 | A01593 | A03186 | 182 |
| A01593 | A03225 | 151 | A01593 | A03271 | 899 |
| A01593 | A03332 | 899 | A01593 | A03489 | 366 |
| A01593 | A03492 | 70  | A01593 | A03691 | 187 |
| A01593 | A03718 | 366 | A01593 | A03726 | 899 |
| A01593 | A03851 | 899 | A01593 | A04050 | 899 |
| A01593 | A04091 | 899 | A01593 | A04668 | 899 |
| A01593 | A05008 | 899 | A01593 | A05037 | 899 |
| A01593 | A05132 | 240 | A01593 | A05428 | 990 |
| A01593 | A05577 | 281 | A01593 | A05580 | 296 |
| A01593 | A06176 | 899 | A01593 | A07165 | 899 |
| A01593 | A07268 | 296 | A01593 | A07311 | 899 |
| A01593 | A07433 | 262 | A01593 | A07468 | 348 |
| A01593 | A07469 | 165 | A01593 | A07764 | 196 |
| A01593 | A07815 | 159 | A01593 | A08355 | 899 |
| A01593 | A08551 | 490 | A01593 | A08571 | 434 |
| A01593 | A08707 | 899 | A01593 | A08839 | 942 |
| A01593 | A08852 | 177 | A01593 | A08903 | 899 |
| A01593 | A09506 | 180 | A01593 | A09848 | 218 |
| A01593 | A10131 | 154 | A01593 | A10159 | 899 |
| A01593 | A10174 | 899 | A01593 | A10278 | 899 |
| A01593 | A10532 | 899 | A01593 | A10547 | 385 |
| A01593 | A10580 | 899 | A01593 | A10601 | 899 |
| A01593 | A10801 | 899 | A01593 | A11075 | 173 |
| A01593 | A11893 | 266 | A01593 | A12232 | 213 |

|        |        |     |        |        |     |
|--------|--------|-----|--------|--------|-----|
| A01593 | A12606 | 168 | A01593 | A12726 | 199 |
| A01593 | A13225 | 899 | A01593 | A13344 | 899 |
| A01593 | A13391 | 899 | A01593 | A13399 | 168 |
| A01593 | A13987 | 252 | A01593 | A13989 | 899 |
| A01593 | A13994 | 899 | A01593 | A14096 | 899 |
| A01593 | A14160 | 899 | A01593 | A14208 | 899 |
| A01593 | A14222 | 352 | A01593 | A14252 | 899 |
| A01593 | A14369 | 899 | A01593 | A14443 | 901 |
| A01593 | A14452 | 367 | A01593 | A14484 | 306 |
| A01593 | A14557 | 899 | A01593 | A14661 | 899 |
| A01593 | A14662 | 899 | A01593 | A15292 | 900 |
| A01593 | A15295 | 968 | A01593 | A15297 | 899 |
| A01593 | A15302 | 900 | A01593 | A15323 | 899 |
| A01593 | A15324 | 899 | A01593 | A15353 | 899 |
| A01593 | A15357 | 899 | A01593 | A15359 | 899 |
| A01593 | A15452 | 899 | A01593 | A15498 | 717 |
| A01593 | A15624 | 193 | A01593 | A15684 | 379 |
| A01593 | A15726 | 363 | A01593 | A16096 | 177 |
| A01593 | A16540 | 165 | A01593 | A16938 | 899 |
| A01593 | A17027 | 899 | A01594 | A01616 | 491 |
| A01594 | A01625 | 484 | A01594 | A01659 | 491 |
| A01594 | A01660 | 200 | A01594 | A01680 | 491 |
| A01594 | A01686 | 491 | A01594 | A01692 | 302 |
| A01594 | A02054 | 202 | A01594 | A02183 | 429 |
| A01594 | A03057 | 693 | A01594 | A03301 | 409 |
| A01594 | A03591 | 311 | A01594 | A03728 | 200 |
| A01594 | A04012 | 216 | A01594 | A04161 | 490 |
| A01594 | A04668 | 566 | A01594 | A05334 | 491 |
| A01594 | A05706 | 468 | A01594 | A06029 | 185 |
| A01594 | A06242 | 491 | A01594 | A06353 | 317 |
| A01594 | A06575 | 154 | A01594 | A06851 | 488 |
| A01594 | A06864 | 490 | A01594 | A06982 | 566 |
| A01594 | A07079 | 340 | A01594 | A07314 | 491 |
| A01594 | A07319 | 491 | A01594 | A07339 | 238 |
| A01594 | A07346 | 491 | A01594 | A07466 | 566 |
| A01594 | A07480 | 747 | A01594 | A07534 | 479 |
| A01594 | A07603 | 491 | A01594 | A07647 | 450 |
| A01594 | A07771 | 299 | A01594 | A07902 | 246 |
| A01594 | A07996 | 481 | A01594 | A08029 | 152 |
| A01594 | A08030 | 486 | A01594 | A08117 | 466 |
| A01594 | A08208 | 434 | A01594 | A08212 | 326 |
| A01594 | A08215 | 247 | A01594 | A08516 | 436 |
| A01594 | A08669 | 566 | A01594 | A08707 | 455 |
| A01594 | A08820 | 566 | A01594 | A09135 | 391 |
| A01594 | A09288 | 485 | A01594 | A09301 | 213 |
| A01594 | A09598 | 491 | A01594 | A09751 | 490 |

|        |        |     |        |        |     |
|--------|--------|-----|--------|--------|-----|
| A01594 | A09752 | 491 | A01594 | A09754 | 351 |
| A01594 | A09764 | 490 | A01594 | A10373 | 556 |
| A01594 | A10624 | 899 | A01594 | A10848 | 184 |
| A01594 | A11236 | 210 | A01594 | A11491 | 257 |
| A01594 | A11540 | 484 | A01594 | A11841 | 173 |
| A01594 | A11870 | 221 | A01594 | A12365 | 200 |
| A01594 | A12556 | 420 | A01594 | A12783 | 221 |
| A01594 | A13083 | 257 | A01594 | A13257 | 446 |
| A01594 | A13429 | 479 | A01594 | A13589 | 224 |
| A01594 | A13670 | 257 | A01594 | A13889 | 200 |
| A01594 | A13913 | 395 | A01594 | A13949 | 491 |
| A01594 | A13986 | 240 | A01594 | A14007 | 191 |
| A01594 | A14009 | 200 | A01594 | A14076 | 163 |
| A01594 | A14079 | 491 | A01594 | A14091 | 200 |
| A01594 | A14094 | 467 | A01594 | A14155 | 177 |
| A01594 | A14177 | 566 | A01594 | A14192 | 200 |
| A01594 | A14223 | 486 | A01594 | A14230 | 232 |
| A01594 | A14273 | 450 | A01594 | A14460 | 454 |
| A01594 | A14477 | 316 | A01594 | A14593 | 162 |
| A01594 | A14631 | 257 | A01594 | A14674 | 491 |
| A01594 | A14694 | 565 | A01594 | A15095 | 162 |
| A01594 | A15096 | 208 | A01594 | A15165 | 172 |
| A01594 | A15369 | 491 | A01594 | A15420 | 454 |
| A01594 | A15714 | 363 | A01594 | A15837 | 491 |
| A01594 | A16052 | 200 | A01594 | A16068 | 440 |
| A01594 | A16071 | 154 | A01594 | A16073 | 307 |
| A01594 | A16127 | 484 | A01594 | A16128 | 490 |
| A01594 | A16134 | 207 | A01594 | A16226 | 462 |
| A01594 | A16274 | 200 | A01594 | A16299 | 446 |
| A01594 | A16613 | 456 | A01594 | A16626 | 491 |
| A01594 | A16738 | 274 | A01594 | A16746 | 162 |
| A01594 | A17075 | 470 | A01595 | A01630 | 489 |
| A01595 | A01632 | 157 | A01595 | A01638 | 63  |
| A01595 | A01647 | 470 | A01595 | A01660 | 241 |
| A01595 | A01687 | 491 | A01595 | A01689 | 477 |
| A01595 | A01839 | 160 | A01595 | A01912 | 151 |
| A01595 | A02864 | 322 | A01595 | A02979 | 296 |
| A01595 | A03104 | 157 | A01595 | A03321 | 191 |
| A01595 | A03492 | 102 | A01595 | A03496 | 485 |
| A01595 | A03569 | 462 | A01595 | A03575 | 477 |
| A01595 | A03637 | 319 | A01595 | A03653 | 428 |
| A01595 | A03752 | 188 | A01595 | A04715 | 486 |
| A01595 | A04790 | 466 | A01595 | A04870 | 205 |
| A01595 | A05008 | 490 | A01595 | A05009 | 491 |
| A01595 | A05356 | 375 | A01595 | A05383 | 191 |
| A01595 | A05547 | 172 | A01595 | A05621 | 297 |

|        |        |     |        |        |     |
|--------|--------|-----|--------|--------|-----|
| A01595 | A05892 | 63  | A01595 | A05894 | 63  |
| A01595 | A05958 | 451 | A01595 | A06092 | 361 |
| A01595 | A06100 | 480 | A01595 | A06132 | 256 |
| A01595 | A06187 | 196 | A01595 | A06428 | 416 |
| A01595 | A06530 | 174 | A01595 | A06591 | 366 |
| A01595 | A06597 | 199 | A01595 | A06708 | 436 |
| A01595 | A07069 | 412 | A01595 | A07529 | 198 |
| A01595 | A07706 | 199 | A01595 | A07815 | 234 |
| A01595 | A08838 | 352 | A01595 | A08839 | 367 |
| A01595 | A08853 | 356 | A01595 | A08854 | 406 |
| A01595 | A08855 | 85  | A01595 | A08894 | 490 |
| A01595 | A09052 | 480 | A01595 | A09298 | 428 |
| A01595 | A09443 | 276 | A01595 | A10003 | 232 |
| A01595 | A10175 | 221 | A01595 | A10604 | 455 |
| A01595 | A10619 | 371 | A01595 | A11033 | 183 |
| A01595 | A11104 | 63  | A01595 | A11185 | 174 |
| A01595 | A11279 | 177 | A01595 | A11346 | 199 |
| A01595 | A11983 | 199 | A01595 | A12047 | 333 |
| A01595 | A12533 | 190 | A01595 | A12567 | 232 |
| A01595 | A12952 | 165 | A01595 | A13163 | 307 |
| A01595 | A13772 | 199 | A01595 | A13798 | 174 |
| A01595 | A13819 | 165 | A01595 | A13928 | 260 |
| A01595 | A14127 | 483 | A01595 | A14193 | 524 |
| A01595 | A14227 | 273 | A01595 | A14247 | 449 |
| A01595 | A14279 | 491 | A01595 | A14291 | 378 |
| A01595 | A14443 | 180 | A01595 | A14633 | 491 |
| A01595 | A15039 | 277 | A01595 | A15232 | 232 |
| A01595 | A15260 | 157 | A01595 | A15533 | 135 |
| A01595 | A15626 | 207 | A01595 | A16207 | 199 |
| A01595 | A16274 | 391 | A01595 | A16493 | 256 |
| A01595 | A16517 | 107 | A01595 | A16802 | 340 |
| A01596 | A01639 | 480 | A01596 | A01920 | 616 |
| A01596 | A01974 | 335 | A01596 | A02054 | 205 |
| A01596 | A02174 | 154 | A01596 | A02703 | 198 |
| A01596 | A03300 | 490 | A01596 | A03321 | 185 |
| A01596 | A03328 | 486 | A01596 | A03566 | 480 |
| A01596 | A03575 | 885 | A01596 | A03611 | 307 |
| A01596 | A03929 | 351 | A01596 | A03939 | 321 |
| A01596 | A03948 | 199 | A01596 | A04012 | 197 |
| A01596 | A05009 | 491 | A01596 | A05221 | 270 |
| A01596 | A05283 | 179 | A01596 | A05417 | 353 |
| A01596 | A05690 | 488 | A01596 | A05859 | 199 |
| A01596 | A06039 | 199 | A01596 | A06277 | 252 |
| A01596 | A06338 | 193 | A01596 | A06602 | 486 |
| A01596 | A06779 | 252 | A01596 | A06869 | 193 |
| A01596 | A06914 | 171 | A01596 | A06991 | 345 |



|        |        |     |        |        |     |
|--------|--------|-----|--------|--------|-----|
| A01596 | A07004 | 199 | A01596 | A07005 | 288 |
| A01596 | A07311 | 613 | A01596 | A07394 | 171 |
| A01596 | A07422 | 554 | A01596 | A07687 | 460 |
| A01596 | A07869 | 486 | A01596 | A08118 | 291 |
| A01596 | A08351 | 263 | A01596 | A08352 | 489 |
| A01596 | A08356 | 154 | A01596 | A08360 | 609 |
| A01596 | A08369 | 198 | A01596 | A08536 | 423 |
| A01596 | A08552 | 491 | A01596 | A08571 | 254 |
| A01596 | A08599 | 243 | A01596 | A08732 | 899 |
| A01596 | A08839 | 447 | A01596 | A08858 | 957 |
| A01596 | A08884 | 434 | A01596 | A09054 | 198 |
| A01596 | A09516 | 243 | A01596 | A09760 | 375 |
| A01596 | A09764 | 252 | A01596 | A09854 | 475 |
| A01596 | A09872 | 479 | A01596 | A10183 | 193 |
| A01596 | A10247 | 480 | A01596 | A10580 | 788 |
| A01596 | A10623 | 246 | A01596 | A10728 | 270 |
| A01596 | A10863 | 154 | A01596 | A10905 | 358 |
| A01596 | A11283 | 491 | A01596 | A11332 | 609 |
| A01596 | A11621 | 352 | A01596 | A11828 | 452 |
| A01596 | A11840 | 436 | A01596 | A12047 | 864 |
| A01596 | A12085 | 394 | A01596 | A12307 | 156 |
| A01596 | A12499 | 481 | A01596 | A13250 | 329 |
| A01596 | A13949 | 447 | A01596 | A14005 | 225 |
| A01596 | A14156 | 945 | A01596 | A14204 | 491 |
| A01596 | A14212 | 198 | A01596 | A14229 | 484 |
| A01596 | A14279 | 494 | A01596 | A14299 | 730 |
| A01596 | A14443 | 961 | A01596 | A14444 | 165 |
| A01596 | A14452 | 468 | A01596 | A14484 | 333 |
| A01596 | A14577 | 252 | A01596 | A14704 | 291 |
| A01596 | A15321 | 489 | A01596 | A15322 | 491 |
| A01596 | A15347 | 491 | A01596 | A15357 | 340 |
| A01596 | A15400 | 475 | A01596 | A15402 | 479 |
| A01596 | A15617 | 164 | A01596 | A15649 | 241 |
| A01596 | A15945 | 198 | A01596 | A16400 | 154 |
| A01596 | A16678 | 154 | A01596 | A16796 | 193 |
| A01597 | A01598 | 491 | A01597 | A01614 | 491 |
| A01597 | A01649 | 491 | A01597 | A03296 | 474 |
| A01597 | A03493 | 160 | A01597 | A03567 | 468 |
| A01597 | A03767 | 216 | A01597 | A04697 | 235 |
| A01597 | A04846 | 238 | A01597 | A05011 | 425 |
| A01597 | A05501 | 405 | A01597 | A05654 | 316 |
| A01597 | A05845 | 363 | A01597 | A06275 | 391 |
| A01597 | A06965 | 343 | A01597 | A07258 | 274 |
| A01597 | A07312 | 281 | A01597 | A07323 | 368 |
| A01597 | A07348 | 259 | A01597 | A08055 | 182 |
| A01597 | A08357 | 491 | A01597 | A08408 | 156 |

|        |        |     |        |        |     |
|--------|--------|-----|--------|--------|-----|
| A01597 | A09285 | 294 | A01597 | A10616 | 324 |
| A01597 | A10917 | 286 | A01597 | A11562 | 157 |
| A01597 | A13066 | 323 | A01597 | A13126 | 368 |
| A01597 | A13875 | 291 | A01597 | A13989 | 491 |
| A01597 | A14216 | 337 | A01597 | A14508 | 154 |
| A01597 | A14597 | 180 | A01597 | A15660 | 423 |
| A01597 | A15684 | 257 | A01597 | A16127 | 177 |
| A01598 | A01612 | 491 | A01598 | A01614 | 730 |
| A01598 | A01640 | 491 | A01598 | A01646 | 252 |
| A01598 | A01649 | 708 | A01598 | A01684 | 484 |
| A01598 | A01761 | 310 | A01598 | A01980 | 229 |
| A01598 | A02064 | 306 | A01598 | A02164 | 705 |
| A01598 | A02203 | 204 | A01598 | A02265 | 713 |
| A01598 | A02437 | 68  | A01598 | A02452 | 216 |
| A01598 | A02454 | 201 | A01598 | A02671 | 229 |
| A01598 | A02855 | 650 | A01598 | A02878 | 366 |
| A01598 | A02916 | 245 | A01598 | A02978 | 681 |
| A01598 | A03050 | 212 | A01598 | A03083 | 63  |
| A01598 | A03188 | 243 | A01598 | A03296 | 377 |
| A01598 | A03298 | 469 | A01598 | A03304 | 182 |
| A01598 | A03438 | 550 | A01598 | A03494 | 154 |
| A01598 | A03567 | 490 | A01598 | A03569 | 491 |
| A01598 | A03582 | 63  | A01598 | A03652 | 170 |
| A01598 | A03740 | 394 | A01598 | A03759 | 302 |
| A01598 | A03778 | 243 | A01598 | A03859 | 480 |
| A01598 | A03863 | 184 | A01598 | A03981 | 170 |
| A01598 | A04525 | 173 | A01598 | A04589 | 152 |
| A01598 | A05121 | 281 | A01598 | A05127 | 366 |
| A01598 | A05230 | 570 | A01598 | A05288 | 486 |
| A01598 | A05775 | 462 | A01598 | A06204 | 379 |
| A01598 | A06275 | 201 | A01598 | A06340 | 263 |
| A01598 | A06347 | 466 | A01598 | A06356 | 170 |
| A01598 | A06369 | 205 | A01598 | A06543 | 666 |
| A01598 | A06662 | 259 | A01598 | A06814 | 243 |
| A01598 | A06825 | 490 | A01598 | A06901 | 152 |
| A01598 | A06907 | 488 | A01598 | A06941 | 268 |
| A01598 | A07004 | 491 | A01598 | A07076 | 210 |
| A01598 | A07244 | 402 | A01598 | A07347 | 489 |
| A01598 | A07348 | 475 | A01598 | A07378 | 290 |
| A01598 | A07524 | 550 | A01598 | A07604 | 491 |
| A01598 | A07677 | 299 | A01598 | A07700 | 470 |
| A01598 | A07706 | 491 | A01598 | A07744 | 234 |
| A01598 | A07924 | 532 | A01598 | A08022 | 486 |
| A01598 | A08072 | 212 | A01598 | A08118 | 405 |
| A01598 | A08137 | 491 | A01598 | A08211 | 271 |
| A01598 | A08248 | 273 | A01598 | A08357 | 491 |

|        |        |     |        |        |     |
|--------|--------|-----|--------|--------|-----|
| A01598 | A08359 | 371 | A01598 | A08383 | 183 |
| A01598 | A08571 | 491 | A01598 | A08768 | 63  |
| A01598 | A08810 | 260 | A01598 | A08965 | 174 |
| A01598 | A09004 | 180 | A01598 | A09056 | 302 |
| A01598 | A09078 | 299 | A01598 | A09248 | 63  |
| A01598 | A09292 | 425 | A01598 | A09327 | 424 |
| A01598 | A09618 | 212 | A01598 | A09697 | 170 |
| A01598 | A09705 | 457 | A01598 | A09715 | 188 |
| A01598 | A09825 | 380 | A01598 | A09952 | 291 |
| A01598 | A10218 | 218 | A01598 | A10317 | 422 |
| A01598 | A10321 | 254 | A01598 | A10616 | 252 |
| A01598 | A10624 | 479 | A01598 | A10625 | 491 |
| A01598 | A10925 | 174 | A01598 | A11223 | 204 |
| A01598 | A11279 | 201 | A01598 | A11291 | 362 |
| A01598 | A11300 | 179 | A01598 | A11387 | 177 |
| A01598 | A11462 | 445 | A01598 | A11562 | 338 |
| A01598 | A11618 | 212 | A01598 | A11832 | 329 |
| A01598 | A11965 | 256 | A01598 | A12109 | 174 |
| A01598 | A12111 | 165 | A01598 | A12138 | 491 |
| A01598 | A12365 | 441 | A01598 | A12390 | 274 |
| A01598 | A12543 | 272 | A01598 | A12647 | 252 |
| A01598 | A12849 | 196 | A01598 | A13052 | 475 |
| A01598 | A13126 | 491 | A01598 | A13231 | 302 |
| A01598 | A13310 | 252 | A01598 | A13376 | 338 |
| A01598 | A13875 | 288 | A01598 | A13928 | 441 |
| A01598 | A13989 | 632 | A01598 | A14006 | 552 |
| A01598 | A14147 | 377 | A01598 | A14151 | 63  |
| A01598 | A14169 | 483 | A01598 | A14172 | 63  |
| A01598 | A14188 | 156 | A01598 | A14196 | 527 |
| A01598 | A14216 | 490 | A01598 | A14220 | 491 |
| A01598 | A14253 | 200 | A01598 | A14257 | 371 |
| A01598 | A14448 | 152 | A01598 | A14476 | 350 |
| A01598 | A14566 | 167 | A01598 | A14596 | 477 |
| A01598 | A14597 | 441 | A01598 | A14659 | 263 |
| A01598 | A14661 | 201 | A01598 | A14699 | 452 |
| A01598 | A14755 | 174 | A01598 | A14778 | 162 |
| A01598 | A14816 | 210 | A01598 | A14817 | 469 |
| A01598 | A14959 | 212 | A01598 | A15116 | 184 |
| A01598 | A15204 | 152 | A01598 | A15208 | 174 |
| A01598 | A15210 | 152 | A01598 | A15215 | 490 |
| A01598 | A15297 | 439 | A01598 | A15338 | 480 |
| A01598 | A15366 | 472 | A01598 | A15559 | 558 |
| A01598 | A15596 | 483 | A01598 | A15660 | 456 |
| A01598 | A15729 | 428 | A01598 | A15747 | 226 |
| A01598 | A15749 | 327 | A01598 | A15763 | 475 |
| A01598 | A15764 | 457 | A01598 | A15773 | 213 |

|        |        |     |        |        |     |
|--------|--------|-----|--------|--------|-----|
| A01598 | A15774 | 235 | A01598 | A15779 | 263 |
| A01598 | A15867 | 251 | A01598 | A15945 | 302 |
| A01598 | A16020 | 230 | A01598 | A16048 | 400 |
| A01598 | A16093 | 238 | A01598 | A16590 | 196 |
| A01598 | A16658 | 171 | A01598 | A16798 | 271 |
| A01598 | A17063 | 490 | A01598 | A17141 | 157 |
| A01599 | A01691 | 356 | A01599 | A01897 | 193 |
| A01599 | A01972 | 205 | A01599 | A02278 | 159 |
| A01599 | A02492 | 165 | A01599 | A02608 | 296 |
| A01599 | A02609 | 335 | A01599 | A02745 | 202 |
| A01599 | A02751 | 258 | A01599 | A03110 | 357 |
| A01599 | A03183 | 210 | A01599 | A03219 | 198 |
| A01599 | A03259 | 260 | A01599 | A03412 | 185 |
| A01599 | A03773 | 188 | A01599 | A03799 | 168 |
| A01599 | A03942 | 177 | A01599 | A03955 | 483 |
| A01599 | A04423 | 480 | A01599 | A04428 | 319 |
| A01599 | A04756 | 260 | A01599 | A05047 | 396 |
| A01599 | A06641 | 262 | A01599 | A06943 | 491 |
| A01599 | A07035 | 396 | A01599 | A08484 | 162 |
| A01599 | A08690 | 324 | A01599 | A09242 | 180 |
| A01599 | A09784 | 486 | A01599 | A09787 | 355 |
| A01599 | A10506 | 152 | A01599 | A14048 | 259 |
| A01599 | A14210 | 188 | A01599 | A14371 | 217 |
| A01599 | A14598 | 278 | A01599 | A15318 | 151 |
| A01599 | A15922 | 190 | A01599 | A16300 | 180 |
| A01600 | A01630 | 177 | A01600 | A01632 | 491 |
| A01600 | A01743 | 408 | A01600 | A01930 | 243 |
| A01600 | A02039 | 483 | A01600 | A02228 | 272 |
| A01600 | A02511 | 491 | A01600 | A02564 | 156 |
| A01600 | A02711 | 411 | A01600 | A02775 | 323 |
| A01600 | A02860 | 160 | A01600 | A02878 | 491 |
| A01600 | A02927 | 288 | A01600 | A02969 | 168 |
| A01600 | A03014 | 328 | A01600 | A03211 | 491 |
| A01600 | A03241 | 388 | A01600 | A03276 | 205 |
| A01600 | A03333 | 177 | A01600 | A03545 | 168 |
| A01600 | A03566 | 162 | A01600 | A03618 | 405 |
| A01600 | A03632 | 337 | A01600 | A03747 | 263 |
| A01600 | A04175 | 269 | A01600 | A04282 | 179 |
| A01600 | A04305 | 363 | A01600 | A04410 | 205 |
| A01600 | A04418 | 456 | A01600 | A04424 | 179 |
| A01600 | A04493 | 486 | A01600 | A04520 | 249 |
| A01600 | A04547 | 228 | A01600 | A04603 | 170 |
| A01600 | A04639 | 172 | A01600 | A04715 | 475 |
| A01600 | A04782 | 160 | A01600 | A04903 | 273 |
| A01600 | A04944 | 490 | A01600 | A04947 | 236 |
| A01600 | A04956 | 267 | A01600 | A04964 | 491 |

|        |        |     |        |        |     |
|--------|--------|-----|--------|--------|-----|
| A01600 | A04972 | 221 | A01600 | A05106 | 491 |
| A01600 | A05245 | 317 | A01600 | A05288 | 491 |
| A01600 | A05336 | 360 | A01600 | A05356 | 501 |
| A01600 | A05471 | 187 | A01600 | A06092 | 386 |
| A01600 | A06106 | 323 | A01600 | A06151 | 408 |
| A01600 | A06152 | 288 | A01600 | A06153 | 454 |
| A01600 | A06307 | 277 | A01600 | A06364 | 362 |
| A01600 | A06524 | 174 | A01600 | A06530 | 249 |
| A01600 | A06535 | 435 | A01600 | A06686 | 469 |
| A01600 | A06708 | 383 | A01600 | A06844 | 401 |
| A01600 | A06895 | 465 | A01600 | A06953 | 185 |
| A01600 | A07056 | 355 | A01600 | A07209 | 196 |
| A01600 | A07253 | 288 | A01600 | A07384 | 184 |
| A01600 | A07501 | 165 | A01600 | A07567 | 279 |
| A01600 | A07687 | 174 | A01600 | A07842 | 272 |
| A01600 | A07852 | 401 | A01600 | A07892 | 360 |
| A01600 | A07893 | 601 | A01600 | A07970 | 294 |
| A01600 | A07985 | 210 | A01600 | A07997 | 208 |
| A01600 | A08274 | 366 | A01600 | A08361 | 405 |
| A01600 | A09362 | 213 | A01600 | A10525 | 249 |
| A01600 | A10530 | 409 | A01600 | A11300 | 154 |
| A01600 | A11306 | 198 | A01600 | A11389 | 249 |
| A01600 | A11413 | 479 | A01600 | A11564 | 288 |
| A01600 | A11738 | 179 | A01600 | A12446 | 338 |
| A01600 | A12479 | 360 | A01600 | A13369 | 455 |
| A01600 | A13885 | 338 | A01600 | A14370 | 195 |
| A01600 | A14648 | 200 | A01600 | A14876 | 259 |
| A01600 | A15321 | 402 | A01600 | A17085 | 162 |
| A01601 | A01605 | 954 | A01601 | A01628 | 239 |
| A01601 | A01640 | 469 | A01601 | A01649 | 430 |
| A01601 | A01718 | 491 | A01601 | A01995 | 317 |
| A01601 | A02179 | 477 | A01601 | A02286 | 488 |
| A01601 | A02350 | 465 | A01601 | A02397 | 232 |
| A01601 | A02494 | 177 | A01601 | A02737 | 409 |
| A01601 | A03083 | 63  | A01601 | A03273 | 157 |
| A01601 | A03304 | 485 | A01601 | A03445 | 945 |
| A01601 | A03451 | 185 | A01601 | A03461 | 305 |
| A01601 | A03567 | 519 | A01601 | A03858 | 218 |
| A01601 | A03939 | 276 | A01601 | A03963 | 411 |
| A01601 | A03981 | 488 | A01601 | A04099 | 460 |
| A01601 | A04202 | 435 | A01601 | A04230 | 263 |
| A01601 | A04827 | 385 | A01601 | A04846 | 302 |
| A01601 | A04856 | 276 | A01601 | A05029 | 172 |
| A01601 | A05090 | 926 | A01601 | A05221 | 213 |
| A01601 | A05443 | 408 | A01601 | A05501 | 574 |
| A01601 | A05654 | 200 | A01601 | A05914 | 190 |

|        |        |     |        |        |     |
|--------|--------|-----|--------|--------|-----|
| A01601 | A06286 | 218 | A01601 | A06340 | 329 |
| A01601 | A06466 | 475 | A01601 | A06534 | 588 |
| A01601 | A06814 | 798 | A01601 | A06861 | 208 |
| A01601 | A06965 | 358 | A01601 | A06973 | 588 |
| A01601 | A07047 | 424 | A01601 | A07203 | 339 |
| A01601 | A07307 | 278 | A01601 | A07311 | 949 |
| A01601 | A07323 | 490 | A01601 | A07398 | 670 |
| A01601 | A07422 | 928 | A01601 | A07451 | 343 |
| A01601 | A07481 | 165 | A01601 | A07506 | 445 |
| A01601 | A07726 | 554 | A01601 | A07767 | 230 |
| A01601 | A08011 | 162 | A01601 | A08131 | 491 |
| A01601 | A08357 | 416 | A01601 | A08358 | 347 |
| A01601 | A08359 | 491 | A01601 | A08369 | 588 |
| A01601 | A08408 | 260 | A01601 | A08423 | 154 |
| A01601 | A08466 | 351 | A01601 | A08476 | 534 |
| A01601 | A08519 | 176 | A01601 | A08521 | 286 |
| A01601 | A08533 | 263 | A01601 | A08567 | 227 |
| A01601 | A08835 | 177 | A01601 | A08983 | 243 |
| A01601 | A09308 | 584 | A01601 | A09322 | 636 |
| A01601 | A09449 | 190 | A01601 | A09539 | 226 |
| A01601 | A09607 | 276 | A01601 | A09620 | 570 |
| A01601 | A09697 | 152 | A01601 | A10001 | 199 |
| A01601 | A10336 | 277 | A01601 | A10466 | 276 |
| A01601 | A10599 | 373 | A01601 | A10616 | 258 |
| A01601 | A10633 | 479 | A01601 | A10645 | 469 |
| A01601 | A11190 | 372 | A01601 | A11206 | 899 |
| A01601 | A11392 | 360 | A01601 | A11440 | 485 |
| A01601 | A11535 | 274 | A01601 | A11550 | 384 |
| A01601 | A11562 | 383 | A01601 | A11728 | 588 |
| A01601 | A11853 | 396 | A01601 | A11936 | 366 |
| A01601 | A11983 | 906 | A01601 | A12042 | 232 |
| A01601 | A12084 | 232 | A01601 | A12215 | 254 |
| A01601 | A12227 | 241 | A01601 | A12270 | 165 |
| A01601 | A12970 | 232 | A01601 | A13063 | 614 |
| A01601 | A13108 | 441 | A01601 | A13311 | 470 |
| A01601 | A13340 | 481 | A01601 | A13549 | 255 |
| A01601 | A13581 | 210 | A01601 | A13682 | 276 |
| A01601 | A13812 | 322 | A01601 | A13875 | 63  |
| A01601 | A13989 | 980 | A01601 | A13992 | 491 |
| A01601 | A13994 | 945 | A01601 | A14055 | 899 |
| A01601 | A14072 | 277 | A01601 | A14172 | 491 |
| A01601 | A14176 | 460 | A01601 | A14216 | 332 |
| A01601 | A14265 | 205 | A01601 | A14496 | 447 |
| A01601 | A14511 | 318 | A01601 | A14591 | 152 |
| A01601 | A14738 | 179 | A01601 | A14908 | 351 |
| A01601 | A14937 | 322 | A01601 | A15174 | 154 |

|        |        |     |        |        |     |
|--------|--------|-----|--------|--------|-----|
| A01601 | A15229 | 428 | A01601 | A15268 | 588 |
| A01601 | A15381 | 588 | A01601 | A15500 | 193 |
| A01601 | A15551 | 358 | A01601 | A15653 | 418 |
| A01601 | A15660 | 184 | A01601 | A15711 | 489 |
| A01601 | A15932 | 394 | A01601 | A15988 | 204 |
| A01601 | A16107 | 489 | A01601 | A16243 | 294 |
| A01601 | A16272 | 473 | A01601 | A16418 | 452 |
| A01601 | A16658 | 260 | A01601 | A16682 | 479 |
| A01601 | A16686 | 481 | A01601 | A16778 | 457 |
| A01601 | A16793 | 279 | A01601 | A16814 | 157 |
| A01601 | A16839 | 440 | A01601 | A16937 | 310 |
| A01602 | A01615 | 901 | A01602 | A01636 | 899 |
| A01602 | A01638 | 899 | A01602 | A01639 | 899 |
| A01602 | A01651 | 913 | A01602 | A01665 | 489 |
| A01602 | A01692 | 899 | A01602 | A01724 | 172 |
| A01602 | A01726 | 393 | A01602 | A01741 | 419 |
| A01602 | A01796 | 184 | A01602 | A01844 | 945 |
| A01602 | A02163 | 901 | A01602 | A02208 | 411 |
| A01602 | A02253 | 165 | A01602 | A02268 | 157 |
| A01602 | A02343 | 165 | A01602 | A02401 | 165 |
| A01602 | A02454 | 154 | A01602 | A02505 | 259 |
| A01602 | A02544 | 899 | A01602 | A02564 | 412 |
| A01602 | A02675 | 63  | A01602 | A02687 | 296 |
| A01602 | A02775 | 212 | A01602 | A02822 | 302 |
| A01602 | A02965 | 323 | A01602 | A03115 | 185 |
| A01602 | A03213 | 491 | A01602 | A03214 | 138 |
| A01602 | A03219 | 184 | A01602 | A03223 | 358 |
| A01602 | A03273 | 469 | A01602 | A03304 | 485 |
| A01602 | A03465 | 477 | A01602 | A03575 | 900 |
| A01602 | A03591 | 899 | A01602 | A03643 | 224 |
| A01602 | A03719 | 184 | A01602 | A03985 | 254 |
| A01602 | A04007 | 486 | A01602 | A04012 | 913 |
| A01602 | A04622 | 160 | A01602 | A04828 | 196 |
| A01602 | A04943 | 174 | A01602 | A05158 | 380 |
| A01602 | A05216 | 463 | A01602 | A05221 | 398 |
| A01602 | A05309 | 188 | A01602 | A05418 | 176 |
| A01602 | A05797 | 352 | A01602 | A06067 | 184 |
| A01602 | A06200 | 438 | A01602 | A06242 | 196 |
| A01602 | A06286 | 174 | A01602 | A06289 | 899 |
| A01602 | A06578 | 184 | A01602 | A06597 | 451 |
| A01602 | A06610 | 489 | A01602 | A07203 | 408 |
| A01602 | A07209 | 348 | A01602 | A07311 | 899 |
| A01602 | A07339 | 400 | A01602 | A07422 | 899 |
| A01602 | A07598 | 184 | A01602 | A08280 | 319 |
| A01602 | A08470 | 232 | A01602 | A08472 | 232 |
| A01602 | A08621 | 312 | A01602 | A08734 | 196 |

|        |        |     |        |        |     |
|--------|--------|-----|--------|--------|-----|
| A01602 | A08839 | 899 | A01602 | A08858 | 899 |
| A01602 | A09351 | 184 | A01602 | A09395 | 177 |
| A01602 | A09487 | 463 | A01602 | A09624 | 329 |
| A01602 | A09826 | 308 | A01602 | A10133 | 184 |
| A01602 | A10255 | 412 | A01602 | A10440 | 224 |
| A01602 | A10623 | 899 | A01602 | A10637 | 232 |
| A01602 | A11068 | 899 | A01602 | A11369 | 899 |
| A01602 | A11558 | 184 | A01602 | A11564 | 165 |
| A01602 | A11851 | 184 | A01602 | A11983 | 933 |
| A01602 | A13111 | 160 | A01602 | A13356 | 184 |
| A01602 | A13390 | 899 | A01602 | A13824 | 165 |
| A01602 | A13829 | 468 | A01602 | A13977 | 899 |
| A01602 | A13980 | 899 | A01602 | A13981 | 899 |
| A01602 | A13984 | 899 | A01602 | A13997 | 375 |
| A01602 | A14029 | 899 | A01602 | A14055 | 200 |
| A01602 | A14188 | 902 | A01602 | A14198 | 899 |
| A01602 | A14204 | 180 | A01602 | A14210 | 184 |
| A01602 | A14211 | 201 | A01602 | A14496 | 229 |
| A01602 | A14506 | 268 | A01602 | A14561 | 196 |
| A01602 | A14635 | 251 | A01602 | A14653 | 489 |
| A01602 | A14830 | 162 | A01602 | A14930 | 899 |
| A01602 | A15239 | 174 | A01602 | A15293 | 899 |
| A01602 | A15294 | 899 | A01602 | A15557 | 329 |
| A01602 | A16152 | 184 | A01602 | A16281 | 288 |
| A01602 | A17160 | 899 | A01603 | A01688 | 196 |
| A01603 | A01959 | 201 | A01603 | A02191 | 156 |
| A01603 | A02631 | 460 | A01603 | A02637 | 406 |
| A01603 | A02659 | 316 | A01603 | A02678 | 168 |
| A01603 | A02689 | 95  | A01603 | A02739 | 246 |
| A01603 | A02834 | 191 | A01603 | A02874 | 212 |
| A01603 | A02916 | 180 | A01603 | A02920 | 223 |
| A01603 | A02970 | 221 | A01603 | A03006 | 154 |
| A01603 | A03215 | 489 | A01603 | A03271 | 432 |
| A01603 | A03275 | 196 | A01603 | A03477 | 177 |
| A01603 | A03984 | 491 | A01603 | A03985 | 435 |
| A01603 | A03998 | 205 | A01603 | A04010 | 154 |
| A01603 | A04051 | 286 | A01603 | A04096 | 340 |
| A01603 | A04097 | 395 | A01603 | A04364 | 176 |
| A01603 | A04494 | 481 | A01603 | A04519 | 463 |
| A01603 | A04615 | 202 | A01603 | A04807 | 238 |
| A01603 | A04879 | 434 | A01603 | A04880 | 372 |
| A01603 | A05006 | 154 | A01603 | A05082 | 154 |
| A01603 | A05088 | 263 | A01603 | A05349 | 152 |
| A01603 | A05463 | 193 | A01603 | A05506 | 229 |
| A01603 | A06041 | 338 | A01603 | A06339 | 198 |
| A01603 | A06422 | 177 | A01603 | A06610 | 299 |



|        |        |     |        |        |     |
|--------|--------|-----|--------|--------|-----|
| A01603 | A07147 | 465 | A01603 | A08085 | 302 |
| A01603 | A08266 | 323 | A01603 | A08535 | 188 |
| A01603 | A08696 | 338 | A01603 | A08771 | 162 |
| A01603 | A09392 | 243 | A01603 | A09395 | 472 |
| A01603 | A11471 | 170 | A01603 | A12215 | 235 |
| A01603 | A12826 | 338 | A01603 | A12835 | 245 |
| A01603 | A12850 | 252 | A01603 | A13074 | 202 |
| A01603 | A13315 | 190 | A01603 | A13788 | 200 |
| A01603 | A13829 | 260 | A01603 | A14208 | 457 |
| A01603 | A14235 | 224 | A01603 | A14270 | 173 |
| A01603 | A14489 | 162 | A01603 | A14719 | 174 |
| A01603 | A14843 | 439 | A01603 | A14872 | 179 |
| A01603 | A14937 | 180 | A01603 | A15613 | 269 |
| A01603 | A15834 | 267 | A01603 | A15904 | 281 |
| A01603 | A15962 | 407 | A01603 | A15987 | 263 |
| A01603 | A16216 | 491 | A01603 | A16567 | 236 |
| A01603 | A17133 | 195 | A01604 | A01640 | 944 |
| A01604 | A01654 | 477 | A01604 | A01704 | 230 |
| A01604 | A01743 | 389 | A01604 | A01859 | 899 |
| A01604 | A01867 | 274 | A01604 | A01870 | 491 |
| A01604 | A01878 | 174 | A01604 | A01879 | 483 |
| A01604 | A01887 | 171 | A01604 | A01888 | 276 |
| A01604 | A01908 | 345 | A01604 | A02054 | 117 |
| A01604 | A02138 | 82  | A01604 | A02143 | 232 |
| A01604 | A02240 | 199 | A01604 | A02250 | 408 |
| A01604 | A02251 | 427 | A01604 | A02268 | 251 |
| A01604 | A02281 | 318 | A01604 | A02333 | 458 |
| A01604 | A02337 | 163 | A01604 | A02350 | 303 |
| A01604 | A02370 | 460 | A01604 | A02372 | 446 |
| A01604 | A02382 | 335 | A01604 | A02383 | 162 |
| A01604 | A02400 | 249 | A01604 | A02412 | 80  |
| A01604 | A02413 | 129 | A01604 | A02415 | 451 |
| A01604 | A02416 | 489 | A01604 | A02460 | 249 |
| A01604 | A02490 | 443 | A01604 | A02491 | 484 |
| A01604 | A02516 | 404 | A01604 | A02578 | 489 |
| A01604 | A02581 | 235 | A01604 | A02582 | 322 |
| A01604 | A02606 | 174 | A01604 | A02608 | 329 |
| A01604 | A02611 | 313 | A01604 | A02630 | 369 |
| A01604 | A02634 | 152 | A01604 | A02637 | 447 |
| A01604 | A02639 | 159 | A01604 | A02654 | 475 |
| A01604 | A02655 | 416 | A01604 | A02659 | 474 |
| A01604 | A02681 | 204 | A01604 | A02727 | 171 |
| A01604 | A02751 | 152 | A01604 | A02752 | 152 |
| A01604 | A02769 | 472 | A01604 | A02800 | 188 |
| A01604 | A02808 | 157 | A01604 | A02812 | 332 |
| A01604 | A02851 | 470 | A01604 | A02873 | 201 |

|        |        |     |        |        |     |
|--------|--------|-----|--------|--------|-----|
| A01604 | A02884 | 213 | A01604 | A02896 | 481 |
| A01604 | A02897 | 162 | A01604 | A02931 | 338 |
| A01604 | A02935 | 154 | A01604 | A02936 | 177 |
| A01604 | A02945 | 469 | A01604 | A02961 | 165 |
| A01604 | A02986 | 313 | A01604 | A03049 | 312 |
| A01604 | A03109 | 297 | A01604 | A03128 | 279 |
| A01604 | A03183 | 224 | A01604 | A03204 | 419 |
| A01604 | A03224 | 439 | A01604 | A03228 | 347 |
| A01604 | A03259 | 455 | A01604 | A03271 | 450 |
| A01604 | A03275 | 229 | A01604 | A03280 | 281 |
| A01604 | A03310 | 201 | A01604 | A03313 | 165 |
| A01604 | A03316 | 344 | A01604 | A03331 | 179 |
| A01604 | A03788 | 234 | A01604 | A03799 | 272 |
| A01604 | A03817 | 434 | A01604 | A03821 | 159 |
| A01604 | A03913 | 469 | A01604 | A04103 | 301 |
| A01604 | A04138 | 172 | A01604 | A04223 | 205 |
| A01604 | A04244 | 391 | A01604 | A04248 | 335 |
| A01604 | A04398 | 199 | A01604 | A04450 | 232 |
| A01604 | A04478 | 165 | A01604 | A04490 | 255 |
| A01604 | A04492 | 165 | A01604 | A04510 | 177 |
| A01604 | A04536 | 417 | A01604 | A04589 | 479 |
| A01604 | A04605 | 256 | A01604 | A04741 | 256 |
| A01604 | A04748 | 249 | A01604 | A04755 | 208 |
| A01604 | A04756 | 375 | A01604 | A04800 | 213 |
| A01604 | A04854 | 288 | A01604 | A05090 | 245 |
| A01604 | A05305 | 157 | A01604 | A05329 | 221 |
| A01604 | A05477 | 224 | A01604 | A05577 | 434 |
| A01604 | A05677 | 235 | A01604 | A05679 | 352 |
| A01604 | A05815 | 240 | A01604 | A05944 | 422 |
| A01604 | A05985 | 472 | A01604 | A06034 | 270 |
| A01604 | A06054 | 483 | A01604 | A06055 | 404 |
| A01604 | A06149 | 154 | A01604 | A06344 | 188 |
| A01604 | A06414 | 457 | A01604 | A06415 | 483 |
| A01604 | A06618 | 318 | A01604 | A06642 | 306 |
| A01604 | A06818 | 188 | A01604 | A06899 | 329 |
| A01604 | A06944 | 277 | A01604 | A07006 | 270 |
| A01604 | A07031 | 305 | A01604 | A07138 | 489 |
| A01604 | A07140 | 205 | A01604 | A07145 | 204 |
| A01604 | A07148 | 458 | A01604 | A07151 | 241 |
| A01604 | A07152 | 263 | A01604 | A07157 | 491 |
| A01604 | A07161 | 489 | A01604 | A07164 | 173 |
| A01604 | A07166 | 486 | A01604 | A07173 | 412 |
| A01604 | A07372 | 419 | A01604 | A07390 | 174 |
| A01604 | A07583 | 378 | A01604 | A08013 | 205 |
| A01604 | A08117 | 201 | A01604 | A08383 | 305 |
| A01604 | A08580 | 301 | A01604 | A08612 | 380 |

|        |        |     |        |        |     |
|--------|--------|-----|--------|--------|-----|
| A01604 | A08688 | 302 | A01604 | A08714 | 408 |
| A01604 | A09386 | 205 | A01604 | A09559 | 249 |
| A01604 | A09561 | 283 | A01604 | A10115 | 318 |
| A01604 | A10249 | 270 | A01604 | A10336 | 338 |
| A01604 | A10343 | 301 | A01604 | A10357 | 208 |
| A01604 | A10402 | 240 | A01604 | A10455 | 235 |
| A01604 | A10501 | 240 | A01604 | A10720 | 91  |
| A01604 | A10821 | 174 | A01604 | A11832 | 157 |
| A01604 | A12267 | 318 | A01604 | A12427 | 228 |
| A01604 | A12970 | 263 | A01604 | A13131 | 347 |
| A01604 | A13735 | 165 | A01604 | A13736 | 182 |
| A01604 | A13872 | 356 | A01604 | A14009 | 183 |
| A01604 | A14071 | 324 | A01604 | A14190 | 152 |
| A01604 | A14366 | 201 | A01604 | A14372 | 364 |
| A01604 | A14374 | 491 | A01604 | A14392 | 450 |
| A01604 | A14430 | 265 | A01604 | A14432 | 196 |
| A01604 | A14439 | 475 | A01604 | A14442 | 286 |
| A01604 | A14511 | 260 | A01604 | A14554 | 302 |
| A01604 | A14597 | 196 | A01604 | A14598 | 174 |
| A01604 | A14599 | 443 | A01604 | A15300 | 191 |
| A01604 | A15394 | 480 | A01604 | A15395 | 441 |
| A01604 | A15420 | 224 | A01604 | A15425 | 384 |
| A01604 | A15453 | 235 | A01604 | A15467 | 174 |
| A01604 | A15476 | 363 | A01604 | A15478 | 255 |
| A01604 | A15484 | 399 | A01604 | A15517 | 270 |
| A01604 | A15518 | 205 | A01604 | A15603 | 283 |
| A01604 | A15607 | 317 | A01604 | A15640 | 279 |
| A01604 | A15795 | 447 | A01604 | A15800 | 260 |
| A01604 | A15806 | 190 | A01604 | A15826 | 228 |
| A01604 | A15832 | 270 | A01604 | A15964 | 152 |
| A01604 | A16008 | 208 | A01604 | A16037 | 288 |
| A01604 | A16286 | 151 | A01604 | A16674 | 177 |
| A01604 | A17041 | 163 | A01605 | A01615 | 899 |
| A01605 | A01628 | 994 | A01605 | A01639 | 945 |
| A01605 | A01640 | 994 | A01605 | A01688 | 899 |
| A01605 | A01697 | 945 | A01605 | A01702 | 945 |
| A01605 | A01708 | 945 | A01605 | A01709 | 956 |
| A01605 | A01718 | 994 | A01605 | A01719 | 994 |
| A01605 | A02265 | 63  | A01605 | A02318 | 278 |
| A01605 | A02425 | 281 | A01605 | A02579 | 165 |
| A01605 | A02597 | 193 | A01605 | A02791 | 165 |
| A01605 | A02908 | 899 | A01605 | A03209 | 281 |
| A01605 | A03219 | 152 | A01605 | A03271 | 235 |
| A01605 | A03331 | 452 | A01605 | A03339 | 230 |
| A01605 | A03444 | 943 | A01605 | A03445 | 65  |
| A01605 | A03470 | 256 | A01605 | A03584 | 174 |

|        |        |     |        |        |     |
|--------|--------|-----|--------|--------|-----|
| A01605 | A03639 | 316 | A01605 | A03657 | 199 |
| A01605 | A03800 | 201 | A01605 | A03854 | 899 |
| A01605 | A03960 | 172 | A01605 | A03963 | 198 |
| A01605 | A04062 | 899 | A01605 | A04099 | 329 |
| A01605 | A04196 | 193 | A01605 | A04202 | 462 |
| A01605 | A04230 | 481 | A01605 | A04422 | 205 |
| A01605 | A04490 | 305 | A01605 | A04562 | 321 |
| A01605 | A04705 | 190 | A01605 | A04827 | 411 |
| A01605 | A05005 | 132 | A01605 | A05359 | 154 |
| A01605 | A06289 | 196 | A01605 | A06371 | 379 |
| A01605 | A06398 | 152 | A01605 | A06534 | 93  |
| A01605 | A06588 | 340 | A01605 | A06601 | 391 |
| A01605 | A06610 | 457 | A01605 | A06798 | 427 |
| A01605 | A06814 | 284 | A01605 | A06825 | 63  |
| A01605 | A07091 | 305 | A01605 | A07311 | 990 |
| A01605 | A07367 | 184 | A01605 | A07398 | 134 |
| A01605 | A07422 | 899 | A01605 | A07834 | 217 |
| A01605 | A08714 | 199 | A01605 | A08869 | 484 |
| A01605 | A09162 | 475 | A01605 | A09247 | 434 |
| A01605 | A09249 | 216 | A01605 | A09539 | 477 |
| A01605 | A09644 | 486 | A01605 | A09727 | 224 |
| A01605 | A10354 | 168 | A01605 | A10531 | 241 |
| A01605 | A10599 | 479 | A01605 | A10725 | 236 |
| A01605 | A10743 | 334 | A01605 | A10810 | 73  |
| A01605 | A11210 | 163 | A01605 | A11392 | 102 |
| A01605 | A11522 | 283 | A01605 | A11808 | 294 |
| A01605 | A11844 | 279 | A01605 | A11943 | 288 |
| A01605 | A12383 | 489 | A01605 | A12667 | 110 |
| A01605 | A13336 | 330 | A01605 | A13864 | 174 |
| A01605 | A13944 | 121 | A01605 | A13978 | 899 |
| A01605 | A13989 | 531 | A01605 | A13992 | 393 |
| A01605 | A13994 | 945 | A01605 | A14008 | 339 |
| A01605 | A14013 | 160 | A01605 | A14025 | 943 |
| A01605 | A14032 | 899 | A01605 | A14033 | 241 |
| A01605 | A14038 | 944 | A01605 | A14050 | 230 |
| A01605 | A14072 | 423 | A01605 | A14151 | 262 |
| A01605 | A14172 | 63  | A01605 | A14187 | 899 |
| A01605 | A14190 | 466 | A01605 | A14221 | 273 |
| A01605 | A14369 | 319 | A01605 | A14370 | 251 |
| A01605 | A14371 | 488 | A01605 | A14433 | 899 |
| A01605 | A14444 | 899 | A01605 | A14475 | 157 |
| A01605 | A14496 | 475 | A01605 | A14511 | 462 |
| A01605 | A14529 | 241 | A01605 | A14716 | 167 |
| A01605 | A15480 | 334 | A01605 | A15671 | 159 |
| A01605 | A16257 | 191 | A01605 | A16555 | 323 |
| A01605 | A16840 | 187 | A01605 | A17102 | 110 |

|        |        |     |        |        |     |
|--------|--------|-----|--------|--------|-----|
| A01606 | A01639 | 184 | A01606 | A01681 | 196 |
| A01606 | A01688 | 294 | A01606 | A01698 | 419 |
| A01606 | A01740 | 115 | A01606 | A01742 | 389 |
| A01606 | A01756 | 160 | A01606 | A01850 | 491 |
| A01606 | A01920 | 958 | A01606 | A02343 | 477 |
| A01606 | A02703 | 191 | A01606 | A02705 | 490 |
| A01606 | A02706 | 172 | A01606 | A02786 | 260 |
| A01606 | A02789 | 303 | A01606 | A02822 | 404 |
| A01606 | A02924 | 345 | A01606 | A02991 | 430 |
| A01606 | A03095 | 202 | A01606 | A03201 | 358 |
| A01606 | A03304 | 469 | A01606 | A03321 | 63  |
| A01606 | A03336 | 491 | A01606 | A03451 | 267 |
| A01606 | A03611 | 272 | A01606 | A03612 | 77  |
| A01606 | A03663 | 408 | A01606 | A03822 | 490 |
| A01606 | A04020 | 405 | A01606 | A04449 | 491 |
| A01606 | A05032 | 329 | A01606 | A05056 | 266 |
| A01606 | A05165 | 353 | A01606 | A05169 | 163 |
| A01606 | A05176 | 388 | A01606 | A05414 | 286 |
| A01606 | A05436 | 188 | A01606 | A05449 | 366 |
| A01606 | A05848 | 201 | A01606 | A06231 | 210 |
| A01606 | A06277 | 486 | A01606 | A06601 | 303 |
| A01606 | A06752 | 474 | A01606 | A06817 | 297 |
| A01606 | A06859 | 157 | A01606 | A06925 | 210 |
| A01606 | A07209 | 266 | A01606 | A07269 | 382 |
| A01606 | A07574 | 174 | A01606 | A08022 | 160 |
| A01606 | A08274 | 422 | A01606 | A08308 | 230 |
| A01606 | A08692 | 373 | A01606 | A08860 | 243 |
| A01606 | A08878 | 434 | A01606 | A09016 | 297 |
| A01606 | A09162 | 441 | A01606 | A09372 | 210 |
| A01606 | A09524 | 177 | A01606 | A09670 | 201 |
| A01606 | A09732 | 346 | A01606 | A10201 | 281 |
| A01606 | A10247 | 277 | A01606 | A10357 | 276 |
| A01606 | A10484 | 391 | A01606 | A10501 | 177 |
| A01606 | A10623 | 286 | A01606 | A10808 | 483 |
| A01606 | A10811 | 168 | A01606 | A11007 | 201 |
| A01606 | A11061 | 383 | A01606 | A11293 | 491 |
| A01606 | A11306 | 226 | A01606 | A11412 | 219 |
| A01606 | A11524 | 182 | A01606 | A11574 | 172 |
| A01606 | A11604 | 171 | A01606 | A11673 | 157 |
| A01606 | A11725 | 399 | A01606 | A11758 | 230 |
| A01606 | A11769 | 210 | A01606 | A11931 | 391 |
| A01606 | A11943 | 899 | A01606 | A11973 | 210 |
| A01606 | A11983 | 607 | A01606 | A12024 | 466 |
| A01606 | A12036 | 297 | A01606 | A12062 | 337 |
| A01606 | A12101 | 188 | A01606 | A12216 | 246 |
| A01606 | A12810 | 193 | A01606 | A13607 | 201 |

|        |        |     |        |        |     |
|--------|--------|-----|--------|--------|-----|
| A01606 | A13619 | 297 | A01606 | A13995 | 899 |
| A01606 | A13997 | 210 | A01606 | A14211 | 157 |
| A01606 | A14264 | 201 | A01606 | A14498 | 269 |
| A01606 | A14527 | 279 | A01606 | A14589 | 198 |
| A01606 | A14596 | 313 | A01606 | A14643 | 321 |
| A01606 | A14701 | 419 | A01606 | A14925 | 427 |
| A01606 | A15282 | 480 | A01606 | A15474 | 182 |
| A01606 | A15715 | 188 | A01606 | A15754 | 172 |
| A01606 | A15837 | 183 | A01606 | A16400 | 373 |
| A01606 | A16686 | 388 | A01606 | A16926 | 266 |
| A01607 | A01632 | 139 | A01607 | A01724 | 210 |
| A01607 | A01730 | 269 | A01607 | A01769 | 274 |
| A01607 | A01770 | 74  | A01607 | A02494 | 224 |
| A01607 | A02502 | 484 | A01607 | A02591 | 329 |
| A01607 | A02687 | 182 | A01607 | A02697 | 177 |
| A01607 | A03451 | 491 | A01607 | A03807 | 270 |
| A01607 | A03904 | 188 | A01607 | A03971 | 252 |
| A01607 | A04033 | 172 | A01607 | A04101 | 353 |
| A01607 | A04175 | 177 | A01607 | A04282 | 187 |
| A01607 | A04655 | 251 | A01607 | A04787 | 455 |
| A01607 | A04939 | 204 | A01607 | A05219 | 152 |
| A01607 | A05300 | 283 | A01607 | A05574 | 404 |
| A01607 | A05712 | 157 | A01607 | A06434 | 212 |
| A01607 | A06566 | 343 | A01607 | A06623 | 316 |
| A01607 | A06947 | 294 | A01607 | A07531 | 213 |
| A01607 | A07984 | 343 | A01607 | A09168 | 363 |
| A01607 | A09384 | 363 | A01607 | A09428 | 221 |
| A01607 | A09497 | 274 | A01607 | A10277 | 419 |
| A01607 | A10441 | 358 | A01607 | A10490 | 152 |
| A01607 | A10742 | 252 | A01607 | A11426 | 294 |
| A01607 | A12340 | 308 | A01607 | A13157 | 318 |
| A01607 | A13468 | 329 | A01607 | A14062 | 154 |
| A01607 | A14204 | 272 | A01607 | A14583 | 218 |
| A01607 | A14636 | 168 | A01607 | A14728 | 199 |
| A01607 | A16723 | 480 | A01607 | A17009 | 263 |
| A01608 | A01725 | 235 | A01608 | A02994 | 310 |
| A01608 | A03180 | 394 | A01608 | A03885 | 330 |
| A01609 | A01707 | 390 | A01609 | A03069 | 160 |
| A01609 | A03289 | 256 | A01609 | A03567 | 188 |
| A01609 | A03675 | 489 | A01609 | A05424 | 198 |
| A01609 | A06279 | 198 | A01609 | A08909 | 294 |
| A01609 | A08942 | 274 | A01609 | A14143 | 254 |
| A01609 | A16060 | 391 | A01609 | A17159 | 408 |
| A01610 | A01628 | 366 | A01610 | A01694 | 283 |
| A01610 | A01708 | 196 | A01610 | A02030 | 489 |
| A01610 | A02076 | 380 | A01610 | A02731 | 270 |

|        |        |     |        |        |     |
|--------|--------|-----|--------|--------|-----|
| A01610 | A02864 | 160 | A01610 | A03203 | 171 |
| A01610 | A03466 | 227 | A01610 | A03479 | 251 |
| A01610 | A03800 | 470 | A01610 | A03886 | 247 |
| A01610 | A03887 | 165 | A01610 | A03949 | 221 |
| A01610 | A03990 | 183 | A01610 | A04012 | 193 |
| A01610 | A04169 | 405 | A01610 | A05082 | 360 |
| A01610 | A07004 | 491 | A01610 | A07051 | 350 |
| A01610 | A07117 | 202 | A01610 | A07339 | 202 |
| A01610 | A07421 | 383 | A01610 | A07885 | 241 |
| A01610 | A08137 | 232 | A01610 | A08864 | 274 |
| A01610 | A08885 | 221 | A01610 | A09732 | 483 |
| A01610 | A09734 | 217 | A01610 | A10514 | 433 |
| A01610 | A11180 | 241 | A01610 | A11345 | 238 |
| A01610 | A11412 | 420 | A01610 | A11487 | 490 |
| A01610 | A11779 | 388 | A01610 | A11875 | 385 |
| A01610 | A11915 | 273 | A01610 | A13987 | 472 |
| A01610 | A13997 | 454 | A01610 | A14006 | 491 |
| A01610 | A14007 | 419 | A01610 | A14010 | 407 |
| A01610 | A14055 | 232 | A01610 | A14072 | 425 |
| A01610 | A14122 | 452 | A01610 | A14124 | 227 |
| A01610 | A14305 | 177 | A01610 | A14371 | 238 |
| A01610 | A14378 | 268 | A01610 | A14399 | 303 |
| A01610 | A14452 | 769 | A01610 | A14511 | 413 |
| A01610 | A14827 | 162 | A01610 | A14986 | 187 |
| A01610 | A15292 | 490 | A01610 | A15301 | 183 |
| A01610 | A15312 | 371 | A01610 | A15313 | 160 |
| A01610 | A15317 | 286 | A01610 | A15348 | 416 |
| A01610 | A15349 | 479 | A01610 | A15352 | 363 |
| A01610 | A15366 | 241 | A01610 | A15390 | 310 |
| A01610 | A15413 | 213 | A01610 | A15420 | 246 |
| A01610 | A15432 | 187 | A01610 | A15433 | 215 |
| A01610 | A15444 | 312 | A01610 | A15452 | 363 |
| A01610 | A15457 | 165 | A01610 | A15553 | 202 |
| A01610 | A16060 | 251 | A01610 | A16074 | 188 |
| A01610 | A16994 | 747 | A01611 | A01837 | 285 |
| A01611 | A01998 | 363 | A01611 | A01999 | 288 |
| A01611 | A02227 | 477 | A01611 | A02994 | 210 |
| A01611 | A03453 | 167 | A01611 | A03456 | 294 |
| A01611 | A03759 | 195 | A01611 | A03856 | 272 |
| A01611 | A04846 | 396 | A01611 | A05375 | 368 |
| A01611 | A05501 | 190 | A01611 | A06048 | 396 |
| A01611 | A07160 | 174 | A01611 | A07323 | 200 |
| A01611 | A09735 | 152 | A01611 | A11683 | 152 |
| A01611 | A14479 | 177 | A01611 | A15771 | 185 |
| A01612 | A01614 | 488 | A01612 | A01615 | 945 |
| A01612 | A01631 | 288 | A01612 | A01634 | 210 |

|        |        |     |        |        |     |
|--------|--------|-----|--------|--------|-----|
| A01612 | A01646 | 215 | A01612 | A01647 | 489 |
| A01612 | A01649 | 491 | A01612 | A01660 | 582 |
| A01612 | A01685 | 63  | A01612 | A01707 | 488 |
| A01612 | A01717 | 451 | A01612 | A01779 | 196 |
| A01612 | A01798 | 208 | A01612 | A01844 | 899 |
| A01612 | A02030 | 263 | A01612 | A02219 | 162 |
| A01612 | A02227 | 236 | A01612 | A02452 | 330 |
| A01612 | A03293 | 542 | A01612 | A03298 | 491 |
| A01612 | A03299 | 63  | A01612 | A03446 | 475 |
| A01612 | A03494 | 491 | A01612 | A03528 | 63  |
| A01612 | A03567 | 434 | A01612 | A03569 | 491 |
| A01612 | A03752 | 290 | A01612 | A03859 | 404 |
| A01612 | A04050 | 332 | A01612 | A04682 | 236 |
| A01612 | A04760 | 183 | A01612 | A04761 | 208 |
| A01612 | A04767 | 183 | A01612 | A04833 | 274 |
| A01612 | A05015 | 457 | A01612 | A05024 | 214 |
| A01612 | A05062 | 63  | A01612 | A05216 | 937 |
| A01612 | A05230 | 162 | A01612 | A05428 | 63  |
| A01612 | A05501 | 188 | A01612 | A05986 | 342 |
| A01612 | A06082 | 205 | A01612 | A06109 | 173 |
| A01612 | A06143 | 483 | A01612 | A06348 | 63  |
| A01612 | A06351 | 167 | A01612 | A06466 | 233 |
| A01612 | A06761 | 157 | A01612 | A06907 | 582 |
| A01612 | A06965 | 201 | A01612 | A07165 | 899 |
| A01612 | A07201 | 205 | A01612 | A07303 | 177 |
| A01612 | A07311 | 296 | A01612 | A07347 | 457 |
| A01612 | A07425 | 63  | A01612 | A07520 | 236 |
| A01612 | A07524 | 187 | A01612 | A07581 | 185 |
| A01612 | A07583 | 462 | A01612 | A07604 | 491 |
| A01612 | A07625 | 481 | A01612 | A07706 | 172 |
| A01612 | A07798 | 174 | A01612 | A07834 | 473 |
| A01612 | A07898 | 360 | A01612 | A07924 | 452 |
| A01612 | A08137 | 719 | A01612 | A08280 | 339 |
| A01612 | A08327 | 480 | A01612 | A08359 | 490 |
| A01612 | A08431 | 467 | A01612 | A08542 | 230 |
| A01612 | A08571 | 629 | A01612 | A08756 | 474 |
| A01612 | A08885 | 362 | A01612 | A08904 | 199 |
| A01612 | A09319 | 382 | A01612 | A09507 | 151 |
| A01612 | A09539 | 224 | A01612 | A09699 | 151 |
| A01612 | A09758 | 199 | A01612 | A10159 | 305 |
| A01612 | A10208 | 199 | A01612 | A10250 | 491 |
| A01612 | A10615 | 102 | A01612 | A10616 | 422 |
| A01612 | A10624 | 385 | A01612 | A10853 | 486 |
| A01612 | A10894 | 223 | A01612 | A11105 | 110 |
| A01612 | A11139 | 326 | A01612 | A11168 | 490 |
| A01612 | A11258 | 223 | A01612 | A11277 | 473 |



|        |        |     |        |        |     |
|--------|--------|-----|--------|--------|-----|
| A01612 | A11286 | 483 | A01612 | A11291 | 468 |
| A01612 | A11297 | 281 | A01612 | A11346 | 172 |
| A01612 | A11405 | 384 | A01612 | A11409 | 467 |
| A01612 | A11478 | 65  | A01612 | A11487 | 454 |
| A01612 | A11567 | 199 | A01612 | A11575 | 446 |
| A01612 | A11702 | 270 | A01612 | A11704 | 408 |
| A01612 | A11842 | 306 | A01612 | A11857 | 302 |
| A01612 | A11920 | 386 | A01612 | A11938 | 157 |
| A01612 | A12082 | 367 | A01612 | A12146 | 193 |
| A01612 | A12189 | 207 | A01612 | A12202 | 447 |
| A01612 | A12300 | 157 | A01612 | A12329 | 350 |
| A01612 | A12392 | 199 | A01612 | A12543 | 224 |
| A01612 | A12757 | 480 | A01612 | A12821 | 152 |
| A01612 | A12829 | 165 | A01612 | A12920 | 63  |
| A01612 | A13186 | 223 | A01612 | A13310 | 171 |
| A01612 | A13320 | 234 | A01612 | A13335 | 608 |
| A01612 | A13510 | 483 | A01612 | A13522 | 165 |
| A01612 | A13609 | 474 | A01612 | A13889 | 188 |
| A01612 | A13928 | 428 | A01612 | A13975 | 232 |
| A01612 | A13989 | 540 | A01612 | A14006 | 491 |
| A01612 | A14009 | 467 | A01612 | A14103 | 223 |
| A01612 | A14148 | 483 | A01612 | A14178 | 388 |
| A01612 | A14184 | 435 | A01612 | A14193 | 489 |
| A01612 | A14196 | 528 | A01612 | A14216 | 193 |
| A01612 | A14220 | 490 | A01612 | A14221 | 490 |
| A01612 | A14246 | 491 | A01612 | A14257 | 491 |
| A01612 | A14303 | 560 | A01612 | A14399 | 238 |
| A01612 | A14475 | 277 | A01612 | A14476 | 467 |
| A01612 | A14505 | 154 | A01612 | A14508 | 385 |
| A01612 | A14589 | 385 | A01612 | A14594 | 254 |
| A01612 | A14597 | 489 | A01612 | A14699 | 296 |
| A01612 | A14701 | 174 | A01612 | A14728 | 484 |
| A01612 | A14758 | 199 | A01612 | A14986 | 447 |
| A01612 | A15019 | 371 | A01612 | A15266 | 160 |
| A01612 | A15297 | 545 | A01612 | A15315 | 549 |
| A01612 | A15323 | 347 | A01612 | A15324 | 205 |
| A01612 | A15338 | 575 | A01612 | A15347 | 623 |
| A01612 | A15363 | 200 | A01612 | A15366 | 462 |
| A01612 | A15383 | 236 | A01612 | A15500 | 297 |
| A01612 | A15505 | 363 | A01612 | A15521 | 363 |
| A01612 | A15559 | 491 | A01612 | A15561 | 443 |
| A01612 | A15617 | 566 | A01612 | A15629 | 407 |
| A01612 | A15660 | 423 | A01612 | A15710 | 489 |
| A01612 | A15726 | 440 | A01612 | A15729 | 491 |
| A01612 | A15752 | 368 | A01612 | A15764 | 182 |
| A01612 | A15773 | 232 | A01612 | A15779 | 483 |

|        |        |     |        |        |     |
|--------|--------|-----|--------|--------|-----|
| A01612 | A15851 | 279 | A01612 | A15935 | 319 |
| A01612 | A16320 | 152 | A01612 | A16364 | 210 |
| A01612 | A16491 | 213 | A01612 | A16557 | 177 |
| A01612 | A17063 | 491 | A01612 | A17131 | 190 |
| A01612 | A17134 | 373 | A01612 | A17146 | 199 |
| A01612 | A17171 | 199 | A01613 | A01649 | 329 |
| A01613 | A01782 | 340 | A01613 | A02227 | 486 |
| A01613 | A03005 | 251 | A01613 | A05318 | 491 |
| A01613 | A05915 | 332 | A01613 | A06320 | 384 |
| A01613 | A06411 | 177 | A01613 | A06589 | 488 |
| A01613 | A07524 | 353 | A01613 | A08588 | 154 |
| A01613 | A08684 | 418 | A01613 | A09664 | 474 |
| A01613 | A09735 | 434 | A01613 | A10117 | 317 |
| A01613 | A11296 | 288 | A01613 | A14188 | 485 |
| A01613 | A14699 | 491 | A01613 | A14778 | 486 |
| A01613 | A14857 | 183 | A01613 | A15652 | 441 |
| A01613 | A15662 | 489 | A01613 | A15684 | 474 |
| A01613 | A15937 | 491 | A01613 | A16048 | 163 |
| A01614 | A01615 | 191 | A01614 | A01640 | 243 |
| A01614 | A01649 | 491 | A01614 | A01684 | 294 |
| A01614 | A02265 | 455 | A01614 | A02855 | 480 |
| A01614 | A02978 | 564 | A01614 | A03035 | 408 |
| A01614 | A03296 | 322 | A01614 | A03298 | 406 |
| A01614 | A03438 | 532 | A01614 | A03567 | 330 |
| A01614 | A03569 | 446 | A01614 | A03652 | 170 |
| A01614 | A03859 | 294 | A01614 | A03963 | 247 |
| A01614 | A03981 | 170 | A01614 | A05011 | 255 |
| A01614 | A05230 | 568 | A01614 | A05370 | 201 |
| A01614 | A06275 | 159 | A01614 | A06340 | 279 |
| A01614 | A06356 | 170 | A01614 | A06825 | 465 |
| A01614 | A06907 | 200 | A01614 | A07004 | 485 |
| A01614 | A07076 | 221 | A01614 | A07244 | 170 |
| A01614 | A07323 | 316 | A01614 | A07347 | 193 |
| A01614 | A07348 | 449 | A01614 | A07524 | 549 |
| A01614 | A07604 | 324 | A01614 | A07700 | 351 |
| A01614 | A07706 | 385 | A01614 | A07924 | 402 |
| A01614 | A08022 | 163 | A01614 | A08118 | 329 |
| A01614 | A08137 | 484 | A01614 | A08211 | 170 |
| A01614 | A08357 | 491 | A01614 | A08462 | 187 |
| A01614 | A08477 | 224 | A01614 | A08571 | 490 |
| A01614 | A08679 | 401 | A01614 | A08960 | 160 |
| A01614 | A09292 | 232 | A01614 | A09313 | 165 |
| A01614 | A09327 | 303 | A01614 | A09621 | 401 |
| A01614 | A09697 | 199 | A01614 | A09702 | 224 |
| A01614 | A09857 | 241 | A01614 | A10282 | 255 |
| A01614 | A10616 | 156 | A01614 | A10624 | 475 |

|        |        |     |        |        |     |
|--------|--------|-----|--------|--------|-----|
| A01614 | A10625 | 480 | A01614 | A10917 | 182 |
| A01614 | A11297 | 319 | A01614 | A11462 | 303 |
| A01614 | A11562 | 330 | A01614 | A12138 | 424 |
| A01614 | A12416 | 165 | A01614 | A13052 | 210 |
| A01614 | A13126 | 477 | A01614 | A13231 | 152 |
| A01614 | A13875 | 335 | A01614 | A13989 | 572 |
| A01614 | A14006 | 353 | A01614 | A14169 | 390 |
| A01614 | A14216 | 490 | A01614 | A14448 | 255 |
| A01614 | A14596 | 481 | A01614 | A14597 | 255 |
| A01614 | A14659 | 185 | A01614 | A14816 | 210 |
| A01614 | A14835 | 213 | A01614 | A14941 | 191 |
| A01614 | A15188 | 196 | A01614 | A15215 | 491 |
| A01614 | A15221 | 180 | A01614 | A15255 | 157 |
| A01614 | A15297 | 168 | A01614 | A15338 | 278 |
| A01614 | A15362 | 241 | A01614 | A15559 | 352 |
| A01614 | A17089 | 229 | A01615 | A01628 | 899 |
| A01615 | A01636 | 994 | A01615 | A01637 | 935 |
| A01615 | A01638 | 945 | A01615 | A01639 | 899 |
| A01615 | A01640 | 989 | A01615 | A01650 | 488 |
| A01615 | A01651 | 944 | A01615 | A01660 | 283 |
| A01615 | A01680 | 899 | A01615 | A01685 | 63  |
| A01615 | A01688 | 899 | A01615 | A01692 | 899 |
| A01615 | A01697 | 989 | A01615 | A01702 | 989 |
| A01615 | A01708 | 899 | A01615 | A01709 | 902 |
| A01615 | A01717 | 916 | A01615 | A01718 | 989 |
| A01615 | A01719 | 899 | A01615 | A01722 | 899 |
| A01615 | A01796 | 294 | A01615 | A01844 | 989 |
| A01615 | A01894 | 199 | A01615 | A01920 | 899 |
| A01615 | A02411 | 899 | A01615 | A02416 | 899 |
| A01615 | A02419 | 899 | A01615 | A02464 | 899 |
| A01615 | A02565 | 156 | A01615 | A02618 | 185 |
| A01615 | A02908 | 899 | A01615 | A02942 | 899 |
| A01615 | A02968 | 899 | A01615 | A03298 | 470 |
| A01615 | A03299 | 177 | A01615 | A03422 | 168 |
| A01615 | A03451 | 899 | A01615 | A03470 | 899 |
| A01615 | A03494 | 599 | A01615 | A03528 | 63  |
| A01615 | A03566 | 474 | A01615 | A03569 | 491 |
| A01615 | A03575 | 489 | A01615 | A03591 | 899 |
| A01615 | A03611 | 308 | A01615 | A03686 | 899 |
| A01615 | A03726 | 930 | A01615 | A03741 | 938 |
| A01615 | A03809 | 899 | A01615 | A03990 | 899 |
| A01615 | A04012 | 899 | A01615 | A04050 | 899 |
| A01615 | A04398 | 899 | A01615 | A04699 | 899 |
| A01615 | A04722 | 313 | A01615 | A04751 | 916 |
| A01615 | A04807 | 224 | A01615 | A05015 | 943 |
| A01615 | A05062 | 936 | A01615 | A05082 | 286 |

|        |        |     |        |        |     |
|--------|--------|-----|--------|--------|-----|
| A01615 | A05216 | 899 | A01615 | A05284 | 199 |
| A01615 | A05428 | 270 | A01615 | A05760 | 899 |
| A01615 | A05845 | 191 | A01615 | A05990 | 394 |
| A01615 | A06124 | 154 | A01615 | A06226 | 162 |
| A01615 | A06348 | 337 | A01615 | A06480 | 154 |
| A01615 | A06581 | 899 | A01615 | A06610 | 240 |
| A01615 | A06615 | 174 | A01615 | A06660 | 899 |
| A01615 | A07062 | 241 | A01615 | A07091 | 899 |
| A01615 | A07135 | 899 | A01615 | A07311 | 991 |
| A01615 | A07422 | 899 | A01615 | A07425 | 82  |
| A01615 | A07728 | 394 | A01615 | A07797 | 899 |
| A01615 | A07834 | 491 | A01615 | A08013 | 224 |
| A01615 | A08137 | 491 | A01615 | A08183 | 218 |
| A01615 | A08503 | 182 | A01615 | A08571 | 945 |
| A01615 | A08839 | 228 | A01615 | A08865 | 915 |
| A01615 | A08878 | 899 | A01615 | A08885 | 369 |
| A01615 | A09033 | 199 | A01615 | A09181 | 899 |
| A01615 | A09218 | 899 | A01615 | A09220 | 899 |
| A01615 | A09256 | 446 | A01615 | A09319 | 899 |
| A01615 | A09542 | 899 | A01615 | A09577 | 899 |
| A01615 | A09644 | 899 | A01615 | A10293 | 171 |
| A01615 | A10365 | 899 | A01615 | A10376 | 171 |
| A01615 | A10615 | 943 | A01615 | A10624 | 451 |
| A01615 | A10756 | 899 | A01615 | A10801 | 899 |
| A01615 | A10853 | 329 | A01615 | A10894 | 491 |
| A01615 | A11019 | 899 | A01615 | A11027 | 101 |
| A01615 | A11125 | 899 | A01615 | A11168 | 252 |
| A01615 | A11258 | 185 | A01615 | A11369 | 899 |
| A01615 | A11487 | 335 | A01615 | A11575 | 224 |
| A01615 | A11751 | 154 | A01615 | A11920 | 90  |
| A01615 | A11937 | 199 | A01615 | A11983 | 989 |
| A01615 | A11995 | 154 | A01615 | A12383 | 989 |
| A01615 | A12992 | 899 | A01615 | A13147 | 921 |
| A01615 | A13250 | 899 | A01615 | A13605 | 899 |
| A01615 | A13824 | 899 | A01615 | A13928 | 223 |
| A01615 | A13944 | 899 | A01615 | A13975 | 908 |
| A01615 | A13977 | 154 | A01615 | A13978 | 899 |
| A01615 | A13989 | 483 | A01615 | A13991 | 901 |
| A01615 | A14006 | 402 | A01615 | A14009 | 70  |
| A01615 | A14032 | 899 | A01615 | A14039 | 246 |
| A01615 | A14044 | 899 | A01615 | A14184 | 232 |
| A01615 | A14196 | 899 | A01615 | A14198 | 993 |
| A01615 | A14202 | 899 | A01615 | A14208 | 899 |
| A01615 | A14210 | 899 | A01615 | A14221 | 409 |
| A01615 | A14226 | 899 | A01615 | A14252 | 424 |
| A01615 | A14255 | 152 | A01615 | A14257 | 408 |

|        |        |     |        |        |     |
|--------|--------|-----|--------|--------|-----|
| A01615 | A14371 | 899 | A01615 | A14379 | 899 |
| A01615 | A14408 | 899 | A01615 | A14443 | 990 |
| A01615 | A14444 | 991 | A01615 | A14472 | 899 |
| A01615 | A14476 | 63  | A01615 | A14511 | 899 |
| A01615 | A15292 | 899 | A01615 | A15297 | 425 |
| A01615 | A15314 | 899 | A01615 | A15338 | 458 |
| A01615 | A15559 | 160 | A01615 | A15726 | 945 |
| A01615 | A15773 | 185 | A01615 | A15920 | 899 |
| A01615 | A16912 | 63  | A01616 | A01625 | 491 |
| A01616 | A01659 | 491 | A01616 | A01680 | 340 |
| A01616 | A01686 | 491 | A01616 | A01690 | 491 |
| A01616 | A01737 | 491 | A01616 | A02058 | 474 |
| A01616 | A02158 | 219 | A01616 | A02806 | 486 |
| A01616 | A02847 | 491 | A01616 | A02887 | 468 |
| A01616 | A02959 | 238 | A01616 | A03057 | 486 |
| A01616 | A03301 | 491 | A01616 | A03817 | 490 |
| A01616 | A04073 | 135 | A01616 | A04668 | 491 |
| A01616 | A05157 | 168 | A01616 | A05218 | 384 |
| A01616 | A05334 | 413 | A01616 | A06000 | 63  |
| A01616 | A06242 | 491 | A01616 | A06297 | 491 |
| A01616 | A06817 | 208 | A01616 | A06864 | 491 |
| A01616 | A06982 | 491 | A01616 | A07079 | 358 |
| A01616 | A07097 | 205 | A01616 | A07319 | 491 |
| A01616 | A07346 | 491 | A01616 | A07466 | 285 |
| A01616 | A07480 | 491 | A01616 | A07534 | 490 |
| A01616 | A07603 | 491 | A01616 | A07647 | 462 |
| A01616 | A07902 | 491 | A01616 | A07996 | 491 |
| A01616 | A08000 | 491 | A01616 | A08030 | 491 |
| A01616 | A08117 | 491 | A01616 | A08141 | 462 |
| A01616 | A08208 | 491 | A01616 | A08212 | 490 |
| A01616 | A08488 | 332 | A01616 | A08516 | 491 |
| A01616 | A08669 | 491 | A01616 | A08769 | 491 |
| A01616 | A08820 | 491 | A01616 | A08902 | 286 |
| A01616 | A08919 | 463 | A01616 | A08995 | 246 |
| A01616 | A09000 | 307 | A01616 | A09135 | 469 |
| A01616 | A09288 | 491 | A01616 | A09626 | 77  |
| A01616 | A09653 | 352 | A01616 | A09654 | 416 |
| A01616 | A09706 | 490 | A01616 | A09762 | 424 |
| A01616 | A09764 | 208 | A01616 | A09836 | 416 |
| A01616 | A10373 | 488 | A01616 | A10840 | 208 |
| A01616 | A11236 | 491 | A01616 | A11596 | 361 |
| A01616 | A11782 | 385 | A01616 | A11829 | 201 |
| A01616 | A11852 | 230 | A01616 | A11916 | 491 |
| A01616 | A11991 | 326 | A01616 | A12165 | 414 |
| A01616 | A12556 | 491 | A01616 | A12625 | 488 |
| A01616 | A12952 | 469 | A01616 | A13247 | 414 |

|        |        |     |        |        |     |
|--------|--------|-----|--------|--------|-----|
| A01616 | A13448 | 208 | A01616 | A13907 | 353 |
| A01616 | A13949 | 491 | A01616 | A14076 | 491 |
| A01616 | A14079 | 491 | A01616 | A14093 | 63  |
| A01616 | A14094 | 491 | A01616 | A14177 | 340 |
| A01616 | A14223 | 491 | A01616 | A14230 | 470 |
| A01616 | A14273 | 491 | A01616 | A14460 | 420 |
| A01616 | A14694 | 491 | A01616 | A14706 | 484 |
| A01616 | A15356 | 490 | A01616 | A15369 | 491 |
| A01616 | A15371 | 422 | A01616 | A15524 | 180 |
| A01616 | A15531 | 257 | A01616 | A15539 | 382 |
| A01616 | A15654 | 193 | A01616 | A15939 | 433 |
| A01616 | A15941 | 489 | A01616 | A16127 | 491 |
| A01616 | A16128 | 491 | A01616 | A16129 | 491 |
| A01616 | A16130 | 249 | A01616 | A16226 | 490 |
| A01616 | A16294 | 338 | A01616 | A16300 | 257 |
| A01616 | A16378 | 490 | A01616 | A16452 | 357 |
| A01616 | A16461 | 107 | A01616 | A16606 | 432 |
| A01616 | A16612 | 467 | A01616 | A16613 | 486 |
| A01616 | A16616 | 223 | A01616 | A16626 | 456 |
| A01616 | A16646 | 479 | A01616 | A16656 | 355 |
| A01616 | A16692 | 474 | A01616 | A16754 | 480 |
| A01616 | A16762 | 477 | A01616 | A16830 | 257 |
| A01617 | A01618 | 491 | A01617 | A01718 | 899 |
| A01617 | A02494 | 160 | A01617 | A03437 | 305 |
| A01617 | A03567 | 429 | A01617 | A03754 | 485 |
| A01617 | A03888 | 355 | A01617 | A05385 | 428 |
| A01617 | A05464 | 390 | A01617 | A05709 | 335 |
| A01617 | A06233 | 416 | A01617 | A06812 | 373 |
| A01617 | A06861 | 224 | A01617 | A06965 | 429 |
| A01617 | A07201 | 165 | A01617 | A07422 | 899 |
| A01617 | A08452 | 198 | A01617 | A08835 | 160 |
| A01617 | A09322 | 228 | A01617 | A11400 | 457 |
| A01617 | A11438 | 252 | A01617 | A12918 | 438 |
| A01617 | A13992 | 319 | A01617 | A15416 | 216 |
| A01617 | A15649 | 156 | A01617 | A16118 | 229 |
| A01618 | A01619 | 484 | A01618 | A01620 | 475 |
| A01618 | A01718 | 144 | A01618 | A01822 | 393 |
| A01618 | A02068 | 404 | A01618 | A02122 | 208 |
| A01618 | A02814 | 152 | A01618 | A02978 | 200 |
| A01618 | A03048 | 207 | A01618 | A03083 | 299 |
| A01618 | A03163 | 165 | A01618 | A03437 | 474 |
| A01618 | A03461 | 201 | A01618 | A03567 | 475 |
| A01618 | A03582 | 246 | A01618 | A03671 | 198 |
| A01618 | A03690 | 201 | A01618 | A03705 | 191 |
| A01618 | A03754 | 670 | A01618 | A03888 | 665 |
| A01618 | A03981 | 160 | A01618 | A04230 | 182 |

|        |        |     |        |        |     |
|--------|--------|-----|--------|--------|-----|
| A01618 | A04760 | 313 | A01618 | A05385 | 265 |
| A01618 | A05449 | 545 | A01618 | A05464 | 334 |
| A01618 | A05709 | 252 | A01618 | A06488 | 170 |
| A01618 | A06812 | 408 | A01618 | A06965 | 432 |
| A01618 | A06973 | 461 | A01618 | A07201 | 756 |
| A01618 | A07243 | 470 | A01618 | A08398 | 200 |
| A01618 | A08452 | 414 | A01618 | A08521 | 200 |
| A01618 | A08558 | 200 | A01618 | A08664 | 505 |
| A01618 | A08835 | 469 | A01618 | A09044 | 200 |
| A01618 | A09248 | 351 | A01618 | A09702 | 200 |
| A01618 | A10119 | 357 | A01618 | A10417 | 601 |
| A01618 | A11073 | 307 | A01618 | A11400 | 419 |
| A01618 | A11438 | 200 | A01618 | A11535 | 156 |
| A01618 | A11729 | 200 | A01618 | A11872 | 283 |
| A01618 | A11981 | 195 | A01618 | A12105 | 299 |
| A01618 | A12237 | 307 | A01618 | A12657 | 299 |
| A01618 | A12661 | 469 | A01618 | A13333 | 200 |
| A01618 | A13992 | 299 | A01618 | A15416 | 232 |
| A01618 | A16118 | 347 | A01618 | A17193 | 270 |
| A01619 | A01620 | 469 | A01619 | A03437 | 458 |
| A01619 | A03754 | 294 | A01619 | A03888 | 274 |
| A01619 | A06973 | 234 | A01619 | A07201 | 346 |
| A01619 | A11981 | 330 | A01619 | A12237 | 395 |
| A01619 | A12661 | 463 | A01619 | A15416 | 263 |
| A01620 | A03069 | 232 | A01620 | A03437 | 473 |
| A01620 | A03645 | 394 | A01620 | A03888 | 272 |
| A01620 | A07201 | 413 | A01620 | A08559 | 286 |
| A01620 | A10417 | 450 | A01620 | A11981 | 419 |
| A01620 | A12661 | 481 | A01620 | A15743 | 429 |
| A01620 | A17193 | 477 | A01622 | A01679 | 317 |
| A01622 | A01899 | 268 | A01622 | A02120 | 221 |
| A01622 | A03119 | 346 | A01622 | A03232 | 208 |
| A01622 | A03710 | 689 | A01622 | A03728 | 471 |
| A01622 | A04375 | 394 | A01622 | A04376 | 294 |
| A01622 | A04389 | 241 | A01622 | A04967 | 360 |
| A01622 | A05223 | 332 | A01622 | A05332 | 388 |
| A01622 | A05609 | 317 | A01622 | A05874 | 360 |
| A01622 | A06085 | 438 | A01622 | A06264 | 443 |
| A01622 | A06472 | 151 | A01622 | A06753 | 185 |
| A01622 | A06819 | 344 | A01622 | A06829 | 193 |
| A01622 | A06924 | 518 | A01622 | A07222 | 317 |
| A01622 | A07232 | 173 | A01622 | A07274 | 272 |
| A01622 | A07333 | 659 | A01622 | A07396 | 312 |
| A01622 | A07571 | 317 | A01622 | A07694 | 360 |
| A01622 | A07704 | 154 | A01622 | A07880 | 451 |
| A01622 | A07889 | 358 | A01622 | A07974 | 317 |

|        |        |     |        |        |     |
|--------|--------|-----|--------|--------|-----|
| A01622 | A08097 | 622 | A01622 | A08105 | 312 |
| A01622 | A08253 | 360 | A01622 | A08254 | 424 |
| A01622 | A08291 | 294 | A01622 | A08292 | 193 |
| A01622 | A08312 | 338 | A01622 | A08319 | 228 |
| A01622 | A08939 | 438 | A01622 | A09254 | 171 |
| A01622 | A09257 | 283 | A01622 | A09276 | 235 |
| A01622 | A09340 | 495 | A01622 | A09368 | 323 |
| A01622 | A09478 | 312 | A01622 | A10159 | 224 |
| A01622 | A10223 | 323 | A01622 | A10872 | 360 |
| A01622 | A11023 | 221 | A01622 | A12090 | 411 |
| A01622 | A12888 | 411 | A01622 | A13397 | 162 |
| A01622 | A13431 | 360 | A01622 | A14634 | 260 |
| A01622 | A15367 | 438 | A01622 | A15372 | 310 |
| A01622 | A16068 | 346 | A01622 | A16350 | 246 |
| A01622 | A16626 | 311 | A01623 | A01718 | 184 |
| A01623 | A01850 | 228 | A01623 | A01974 | 380 |
| A01623 | A03740 | 224 | A01623 | A03971 | 294 |
| A01623 | A06701 | 279 | A01623 | A07891 | 299 |
| A01623 | A08289 | 199 | A01623 | A09417 | 291 |
| A01623 | A09873 | 179 | A01623 | A10076 | 306 |
| A01623 | A10183 | 386 | A01623 | A14068 | 324 |
| A01623 | A14546 | 226 | A01623 | A14642 | 348 |
| A01623 | A15765 | 208 | A01624 | A02000 | 305 |
| A01624 | A02185 | 438 | A01624 | A04222 | 302 |
| A01624 | A08194 | 418 | A01624 | A15809 | 386 |
| A01624 | A15922 | 409 | A01625 | A01659 | 491 |
| A01625 | A01686 | 491 | A01625 | A01741 | 466 |
| A01625 | A01787 | 234 | A01625 | A01959 | 344 |
| A01625 | A02058 | 491 | A01625 | A02887 | 163 |
| A01625 | A03057 | 488 | A01625 | A03301 | 491 |
| A01625 | A03420 | 428 | A01625 | A04073 | 463 |
| A01625 | A04328 | 265 | A01625 | A04344 | 208 |
| A01625 | A04353 | 283 | A01625 | A04668 | 491 |
| A01625 | A05030 | 171 | A01625 | A05334 | 307 |
| A01625 | A05841 | 152 | A01625 | A06000 | 204 |
| A01625 | A06029 | 364 | A01625 | A06242 | 491 |
| A01625 | A06297 | 491 | A01625 | A06353 | 475 |
| A01625 | A06431 | 201 | A01625 | A06769 | 216 |
| A01625 | A06775 | 362 | A01625 | A06864 | 491 |
| A01625 | A06982 | 491 | A01625 | A07079 | 491 |
| A01625 | A07319 | 491 | A01625 | A07346 | 491 |
| A01625 | A07353 | 268 | A01625 | A07466 | 204 |
| A01625 | A07480 | 475 | A01625 | A07534 | 490 |
| A01625 | A07603 | 486 | A01625 | A07647 | 481 |
| A01625 | A07902 | 461 | A01625 | A07996 | 489 |
| A01625 | A08030 | 490 | A01625 | A08117 | 486 |



|        |        |     |        |        |     |
|--------|--------|-----|--------|--------|-----|
| A01625 | A08141 | 473 | A01625 | A08208 | 481 |
| A01625 | A08212 | 224 | A01625 | A08669 | 460 |
| A01625 | A08820 | 491 | A01625 | A08840 | 168 |
| A01625 | A08902 | 475 | A01625 | A09162 | 210 |
| A01625 | A09598 | 435 | A01625 | A09626 | 223 |
| A01625 | A09764 | 177 | A01625 | A10466 | 405 |
| A01625 | A11540 | 193 | A01625 | A11782 | 414 |
| A01625 | A11916 | 439 | A01625 | A12952 | 486 |
| A01625 | A13012 | 210 | A01625 | A13228 | 196 |
| A01625 | A13590 | 246 | A01625 | A13594 | 486 |
| A01625 | A13672 | 229 | A01625 | A13907 | 472 |
| A01625 | A13949 | 473 | A01625 | A14076 | 419 |
| A01625 | A14079 | 491 | A01625 | A14093 | 232 |
| A01625 | A14155 | 360 | A01625 | A14273 | 489 |
| A01625 | A14460 | 405 | A01625 | A14694 | 490 |
| A01625 | A15190 | 160 | A01625 | A15369 | 491 |
| A01625 | A15531 | 154 | A01625 | A15941 | 251 |
| A01625 | A16127 | 491 | A01625 | A16128 | 488 |
| A01625 | A16129 | 461 | A01625 | A16226 | 489 |
| A01625 | A16299 | 353 | A01625 | A16378 | 195 |
| A01625 | A16400 | 257 | A01625 | A16606 | 420 |
| A01625 | A16613 | 407 | A01625 | A16616 | 172 |
| A01625 | A16626 | 439 | A01625 | A16646 | 202 |
| A01625 | A16754 | 390 | A01626 | A01668 | 246 |
| A01626 | A01675 | 215 | A01626 | A01676 | 451 |
| A01626 | A01699 | 144 | A01626 | A01741 | 451 |
| A01626 | A01743 | 401 | A01626 | A01767 | 154 |
| A01626 | A01770 | 221 | A01626 | A01781 | 490 |
| A01626 | A01797 | 463 | A01626 | A01839 | 177 |
| A01626 | A01935 | 323 | A01626 | A01939 | 419 |
| A01626 | A01946 | 317 | A01626 | A02026 | 165 |
| A01626 | A02094 | 414 | A01626 | A02117 | 258 |
| A01626 | A02159 | 276 | A01626 | A02214 | 170 |
| A01626 | A02234 | 218 | A01626 | A02390 | 475 |
| A01626 | A02400 | 375 | A01626 | A02401 | 269 |
| A01626 | A02407 | 367 | A01626 | A02409 | 375 |
| A01626 | A02465 | 323 | A01626 | A02481 | 170 |
| A01626 | A02490 | 152 | A01626 | A02495 | 162 |
| A01626 | A02517 | 285 | A01626 | A02581 | 241 |
| A01626 | A02582 | 229 | A01626 | A02629 | 157 |
| A01626 | A02634 | 160 | A01626 | A02639 | 469 |
| A01626 | A02694 | 151 | A01626 | A02747 | 352 |
| A01626 | A02749 | 256 | A01626 | A02811 | 162 |
| A01626 | A02836 | 455 | A01626 | A02837 | 357 |
| A01626 | A02857 | 218 | A01626 | A02878 | 191 |
| A01626 | A02896 | 307 | A01626 | A02944 | 279 |

|        |        |     |        |        |     |
|--------|--------|-----|--------|--------|-----|
| A01626 | A03011 | 238 | A01626 | A03046 | 152 |
| A01626 | A03070 | 172 | A01626 | A03082 | 430 |
| A01626 | A03090 | 241 | A01626 | A03112 | 385 |
| A01626 | A03115 | 177 | A01626 | A03186 | 201 |
| A01626 | A03208 | 294 | A01626 | A03218 | 167 |
| A01626 | A03267 | 285 | A01626 | A03542 | 347 |
| A01626 | A03584 | 238 | A01626 | A03611 | 154 |
| A01626 | A03639 | 914 | A01626 | A03785 | 461 |
| A01626 | A03801 | 323 | A01626 | A03965 | 435 |
| A01626 | A04053 | 286 | A01626 | A04106 | 276 |
| A01626 | A04472 | 257 | A01626 | A04473 | 196 |
| A01626 | A04517 | 180 | A01626 | A04922 | 165 |
| A01626 | A04928 | 152 | A01626 | A05184 | 172 |
| A01626 | A05342 | 201 | A01626 | A05377 | 157 |
| A01626 | A05845 | 188 | A01626 | A05976 | 307 |
| A01626 | A06038 | 196 | A01626 | A06443 | 263 |
| A01626 | A06528 | 347 | A01626 | A06581 | 268 |
| A01626 | A06648 | 305 | A01626 | A07062 | 151 |
| A01626 | A07127 | 168 | A01626 | A07165 | 347 |
| A01626 | A07178 | 291 | A01626 | A07351 | 323 |
| A01626 | A07422 | 308 | A01626 | A07799 | 221 |
| A01626 | A08704 | 269 | A01626 | A08756 | 216 |
| A01626 | A09068 | 294 | A01626 | A09421 | 201 |
| A01626 | A09509 | 255 | A01626 | A09523 | 323 |
| A01626 | A09540 | 218 | A01626 | A09673 | 249 |
| A01626 | A09748 | 168 | A01626 | A09789 | 190 |
| A01626 | A10148 | 210 | A01626 | A10244 | 323 |
| A01626 | A10273 | 294 | A01626 | A10506 | 259 |
| A01626 | A10703 | 162 | A01626 | A10753 | 294 |
| A01626 | A11029 | 347 | A01626 | A11150 | 196 |
| A01626 | A11850 | 165 | A01626 | A12023 | 347 |
| A01626 | A12298 | 276 | A01626 | A12371 | 187 |
| A01626 | A12828 | 340 | A01626 | A13348 | 168 |
| A01626 | A14012 | 187 | A01626 | A14320 | 307 |
| A01626 | A14649 | 260 | A01626 | A14657 | 210 |
| A01626 | A15269 | 285 | A01626 | A15649 | 167 |
| A01626 | A15980 | 307 | A01626 | A16024 | 276 |
| A01626 | A16062 | 263 | A01627 | A01629 | 163 |
| A01627 | A01647 | 372 | A01627 | A01680 | 229 |
| A01627 | A01682 | 438 | A01627 | A01772 | 196 |
| A01627 | A01782 | 162 | A01627 | A02139 | 247 |
| A01627 | A02205 | 173 | A01627 | A02477 | 479 |
| A01627 | A02505 | 167 | A01627 | A02601 | 299 |
| A01627 | A03024 | 286 | A01627 | A03079 | 561 |
| A01627 | A03293 | 380 | A01627 | A03327 | 229 |
| A01627 | A03412 | 146 | A01627 | A03498 | 235 |

|        |        |     |        |        |     |
|--------|--------|-----|--------|--------|-----|
| A01627 | A03653 | 177 | A01627 | A03697 | 152 |
| A01627 | A03910 | 318 | A01627 | A04193 | 241 |
| A01627 | A04337 | 430 | A01627 | A04361 | 154 |
| A01627 | A04495 | 299 | A01627 | A04532 | 346 |
| A01627 | A04931 | 193 | A01627 | A05234 | 443 |
| A01627 | A05356 | 408 | A01627 | A05690 | 229 |
| A01627 | A05777 | 343 | A01627 | A05901 | 312 |
| A01627 | A06130 | 229 | A01627 | A06287 | 152 |
| A01627 | A06381 | 229 | A01627 | A06520 | 199 |
| A01627 | A06750 | 438 | A01627 | A07353 | 229 |
| A01627 | A07403 | 307 | A01627 | A07442 | 461 |
| A01627 | A07479 | 193 | A01627 | A07670 | 438 |
| A01627 | A07744 | 152 | A01627 | A07894 | 229 |
| A01627 | A08061 | 152 | A01627 | A08098 | 152 |
| A01627 | A08178 | 152 | A01627 | A08763 | 152 |
| A01627 | A08947 | 299 | A01627 | A09004 | 299 |
| A01627 | A09204 | 174 | A01627 | A09447 | 270 |
| A01627 | A09506 | 228 | A01627 | A09740 | 269 |
| A01627 | A09745 | 159 | A01627 | A10321 | 470 |
| A01627 | A10760 | 172 | A01627 | A10842 | 152 |
| A01627 | A11313 | 154 | A01627 | A11865 | 199 |
| A01627 | A12284 | 372 | A01627 | A12824 | 372 |
| A01627 | A12940 | 360 | A01627 | A13369 | 497 |
| A01627 | A14080 | 337 | A01627 | A14193 | 152 |
| A01627 | A14216 | 241 | A01627 | A14405 | 157 |
| A01627 | A14525 | 152 | A01627 | A15295 | 434 |
| A01627 | A15322 | 358 | A01627 | A15347 | 187 |
| A01627 | A15375 | 152 | A01627 | A15546 | 152 |
| A01627 | A15626 | 414 | A01627 | A15837 | 238 |
| A01627 | A15917 | 484 | A01627 | A16626 | 229 |
| A01627 | A16643 | 229 | A01628 | A01631 | 490 |
| A01628 | A01639 | 994 | A01628 | A01640 | 995 |
| A01628 | A01660 | 486 | A01628 | A01688 | 899 |
| A01628 | A01692 | 486 | A01628 | A01697 | 945 |
| A01628 | A01702 | 945 | A01628 | A01708 | 951 |
| A01628 | A01709 | 994 | A01628 | A01718 | 994 |
| A01628 | A01719 | 960 | A01628 | A01730 | 198 |
| A01628 | A01796 | 394 | A01628 | A01797 | 899 |
| A01628 | A01844 | 899 | A01628 | A01908 | 353 |
| A01628 | A01914 | 154 | A01628 | A02029 | 205 |
| A01628 | A02030 | 427 | A01628 | A02161 | 205 |
| A01628 | A02390 | 899 | A01628 | A02606 | 899 |
| A01628 | A02908 | 899 | A01628 | A02968 | 151 |
| A01628 | A03271 | 129 | A01628 | A03331 | 391 |
| A01628 | A03335 | 74  | A01628 | A03440 | 63  |
| A01628 | A03531 | 281 | A01628 | A03591 | 167 |

|        |        |     |        |        |     |
|--------|--------|-----|--------|--------|-----|
| A01628 | A03797 | 899 | A01628 | A03809 | 168 |
| A01628 | A03817 | 424 | A01628 | A03854 | 899 |
| A01628 | A03860 | 351 | A01628 | A04012 | 322 |
| A01628 | A04104 | 383 | A01628 | A04248 | 929 |
| A01628 | A04682 | 307 | A01628 | A04699 | 463 |
| A01628 | A05144 | 235 | A01628 | A05256 | 899 |
| A01628 | A05583 | 191 | A01628 | A05585 | 191 |
| A01628 | A05692 | 172 | A01628 | A05974 | 152 |
| A01628 | A06098 | 205 | A01628 | A06289 | 489 |
| A01628 | A06610 | 350 | A01628 | A06701 | 171 |
| A01628 | A07091 | 291 | A01628 | A07157 | 439 |
| A01628 | A07311 | 994 | A01628 | A08087 | 205 |
| A01628 | A08088 | 199 | A01628 | A08137 | 154 |
| A01628 | A08567 | 195 | A01628 | A08773 | 899 |
| A01628 | A09162 | 489 | A01628 | A09334 | 150 |
| A01628 | A09418 | 205 | A01628 | A09577 | 938 |
| A01628 | A09607 | 238 | A01628 | A09643 | 483 |
| A01628 | A09644 | 446 | A01628 | A09727 | 449 |
| A01628 | A09752 | 465 | A01628 | A09937 | 321 |
| A01628 | A10014 | 271 | A01628 | A10300 | 301 |
| A01628 | A10365 | 112 | A01628 | A10392 | 297 |
| A01628 | A10560 | 899 | A01628 | A10623 | 208 |
| A01628 | A10735 | 110 | A01628 | A10808 | 63  |
| A01628 | A10811 | 356 | A01628 | A10902 | 146 |
| A01628 | A10909 | 235 | A01628 | A10981 | 235 |
| A01628 | A11124 | 288 | A01628 | A11125 | 899 |
| A01628 | A11369 | 449 | A01628 | A11549 | 352 |
| A01628 | A11983 | 899 | A01628 | A12353 | 157 |
| A01628 | A12383 | 994 | A01628 | A12705 | 899 |
| A01628 | A12827 | 301 | A01628 | A12886 | 457 |
| A01628 | A12980 | 269 | A01628 | A12990 | 408 |
| A01628 | A13198 | 168 | A01628 | A13440 | 270 |
| A01628 | A13605 | 98  | A01628 | A13970 | 899 |
| A01628 | A13980 | 63  | A01628 | A13983 | 63  |
| A01628 | A13985 | 899 | A01628 | A14006 | 328 |
| A01628 | A14008 | 491 | A01628 | A14009 | 460 |
| A01628 | A14013 | 144 | A01628 | A14019 | 899 |
| A01628 | A14043 | 899 | A01628 | A14187 | 899 |
| A01628 | A14188 | 899 | A01628 | A14242 | 899 |
| A01628 | A14281 | 179 | A01628 | A14335 | 205 |
| A01628 | A14433 | 899 | A01628 | A14443 | 899 |
| A01628 | A14452 | 80  | A01628 | A14528 | 213 |
| A01628 | A14694 | 183 | A01628 | A14714 | 165 |
| A01628 | A14827 | 185 | A01628 | A15522 | 157 |
| A01628 | A15665 | 202 | A01628 | A15726 | 63  |
| A01628 | A16084 | 899 | A01628 | A16198 | 249 |

|        |        |     |        |        |     |
|--------|--------|-----|--------|--------|-----|
| A01628 | A16840 | 266 | A01628 | A16994 | 483 |
| A01629 | A01666 | 226 | A01629 | A01691 | 339 |
| A01629 | A01722 | 452 | A01629 | A01767 | 259 |
| A01629 | A01792 | 160 | A01629 | A01890 | 361 |
| A01629 | A01905 | 157 | A01629 | A01929 | 281 |
| A01629 | A02088 | 213 | A01629 | A02108 | 146 |
| A01629 | A02111 | 171 | A01629 | A02117 | 296 |
| A01629 | A02238 | 234 | A01629 | A02419 | 210 |
| A01629 | A02427 | 417 | A01629 | A02429 | 235 |
| A01629 | A02435 | 451 | A01629 | A02465 | 435 |
| A01629 | A02468 | 489 | A01629 | A02470 | 196 |
| A01629 | A02477 | 408 | A01629 | A02501 | 196 |
| A01629 | A02565 | 179 | A01629 | A02605 | 234 |
| A01629 | A02620 | 296 | A01629 | A02669 | 273 |
| A01629 | A02738 | 157 | A01629 | A03029 | 249 |
| A01629 | A03056 | 205 | A01629 | A03107 | 360 |
| A01629 | A03127 | 475 | A01629 | A03158 | 263 |
| A01629 | A03458 | 260 | A01629 | A03750 | 173 |
| A01629 | A03961 | 168 | A01629 | A04074 | 477 |
| A01629 | A04092 | 341 | A01629 | A04105 | 285 |
| A01629 | A04218 | 389 | A01629 | A04222 | 156 |
| A01629 | A04383 | 283 | A01629 | A04402 | 326 |
| A01629 | A04460 | 303 | A01629 | A04471 | 293 |
| A01629 | A04747 | 228 | A01629 | A04769 | 296 |
| A01629 | A04773 | 179 | A01629 | A05374 | 358 |
| A01629 | A05780 | 479 | A01629 | A06028 | 386 |
| A01629 | A06298 | 200 | A01629 | A06455 | 341 |
| A01629 | A06576 | 369 | A01629 | A06610 | 255 |
| A01629 | A07167 | 201 | A01629 | A07205 | 207 |
| A01629 | A07282 | 170 | A01629 | A07307 | 252 |
| A01629 | A07339 | 163 | A01629 | A08837 | 160 |
| A01629 | A08842 | 345 | A01629 | A09074 | 310 |
| A01629 | A09149 | 185 | A01629 | A09388 | 246 |
| A01629 | A09390 | 480 | A01629 | A09513 | 335 |
| A01629 | A10613 | 330 | A01629 | A11166 | 326 |
| A01629 | A11167 | 301 | A01629 | A11545 | 184 |
| A01629 | A11683 | 257 | A01629 | A12429 | 369 |
| A01629 | A12719 | 330 | A01629 | A14544 | 350 |
| A01629 | A15195 | 350 | A01629 | A15230 | 200 |
| A01629 | A15498 | 316 | A01629 | A15707 | 330 |
| A01629 | A15917 | 238 | A01629 | A15922 | 168 |
| A01629 | A15989 | 350 | A01629 | A16068 | 238 |
| A01629 | A16271 | 358 | A01629 | A16626 | 329 |
| A01629 | A16738 | 288 | A01630 | A01632 | 490 |
| A01630 | A01645 | 491 | A01630 | A01647 | 466 |
| A01630 | A01660 | 303 | A01630 | A01687 | 438 |

|        |        |     |        |        |     |
|--------|--------|-----|--------|--------|-----|
| A01630 | A01689 | 424 | A01630 | A01729 | 414 |
| A01630 | A01768 | 260 | A01630 | A01781 | 450 |
| A01630 | A01839 | 484 | A01630 | A02188 | 185 |
| A01630 | A02228 | 408 | A01630 | A02368 | 199 |
| A01630 | A02485 | 163 | A01630 | A02642 | 152 |
| A01630 | A02678 | 223 | A01630 | A02687 | 190 |
| A01630 | A02691 | 461 | A01630 | A02700 | 160 |
| A01630 | A02705 | 157 | A01630 | A02856 | 177 |
| A01630 | A03243 | 151 | A01630 | A03297 | 488 |
| A01630 | A03344 | 152 | A01630 | A03351 | 270 |
| A01630 | A03376 | 202 | A01630 | A03496 | 489 |
| A01630 | A03528 | 193 | A01630 | A03637 | 462 |
| A01630 | A03641 | 246 | A01630 | A03819 | 274 |
| A01630 | A03861 | 400 | A01630 | A04139 | 470 |
| A01630 | A04171 | 191 | A01630 | A04239 | 386 |
| A01630 | A04257 | 180 | A01630 | A04355 | 286 |
| A01630 | A04361 | 254 | A01630 | A04410 | 479 |
| A01630 | A04435 | 374 | A01630 | A04710 | 335 |
| A01630 | A04715 | 491 | A01630 | A04790 | 491 |
| A01630 | A04823 | 221 | A01630 | A04829 | 271 |
| A01630 | A04903 | 367 | A01630 | A04904 | 204 |
| A01630 | A04949 | 473 | A01630 | A04955 | 246 |
| A01630 | A05008 | 193 | A01630 | A05075 | 235 |
| A01630 | A05114 | 230 | A01630 | A05120 | 157 |
| A01630 | A05307 | 221 | A01630 | A05396 | 329 |
| A01630 | A05421 | 318 | A01630 | A05422 | 350 |
| A01630 | A05666 | 311 | A01630 | A05731 | 156 |
| A01630 | A05779 | 154 | A01630 | A05825 | 199 |
| A01630 | A05886 | 172 | A01630 | A06106 | 271 |
| A01630 | A06190 | 221 | A01630 | A06379 | 260 |
| A01630 | A06385 | 463 | A01630 | A06428 | 305 |
| A01630 | A06533 | 156 | A01630 | A06591 | 622 |
| A01630 | A06608 | 485 | A01630 | A06863 | 157 |
| A01630 | A06896 | 271 | A01630 | A06970 | 207 |
| A01630 | A06971 | 294 | A01630 | A07090 | 246 |
| A01630 | A07242 | 291 | A01630 | A07288 | 195 |
| A01630 | A07529 | 184 | A01630 | A08002 | 228 |
| A01630 | A08136 | 199 | A01630 | A08813 | 440 |
| A01630 | A08904 | 199 | A01630 | A09122 | 257 |
| A01630 | A09324 | 165 | A01630 | A09418 | 228 |
| A01630 | A09952 | 63  | A01630 | A09953 | 235 |
| A01630 | A10127 | 256 | A01630 | A10445 | 177 |
| A01630 | A10604 | 369 | A01630 | A11172 | 246 |
| A01630 | A11424 | 199 | A01630 | A11460 | 174 |
| A01630 | A11484 | 406 | A01630 | A12382 | 318 |
| A01630 | A12649 | 271 | A01630 | A13369 | 475 |

|        |        |     |        |        |     |
|--------|--------|-----|--------|--------|-----|
| A01630 | A14006 | 477 | A01630 | A14077 | 162 |
| A01630 | A14190 | 162 | A01630 | A14279 | 249 |
| A01630 | A14281 | 597 | A01630 | A14366 | 221 |
| A01630 | A14633 | 491 | A01630 | A14758 | 199 |
| A01630 | A15277 | 364 | A01630 | A15336 | 229 |
| A01630 | A15344 | 215 | A01630 | A16335 | 199 |
| A01630 | A16732 | 191 | A01631 | A01639 | 353 |
| A01631 | A01640 | 454 | A01631 | A01660 | 489 |
| A01631 | A01668 | 159 | A01631 | A01681 | 168 |
| A01631 | A01692 | 940 | A01631 | A01697 | 110 |
| A01631 | A01708 | 477 | A01631 | A01709 | 85  |
| A01631 | A01719 | 265 | A01631 | A01730 | 903 |
| A01631 | A01741 | 899 | A01631 | A01755 | 190 |
| A01631 | A01789 | 310 | A01631 | A01797 | 63  |
| A01631 | A01850 | 63  | A01631 | A01908 | 87  |
| A01631 | A02154 | 157 | A01631 | A02231 | 152 |
| A01631 | A02303 | 157 | A01631 | A02344 | 157 |
| A01631 | A02515 | 246 | A01631 | A02827 | 224 |
| A01631 | A03139 | 190 | A01631 | A03436 | 157 |
| A01631 | A03569 | 411 | A01631 | A03632 | 174 |
| A01631 | A03684 | 285 | A01631 | A03716 | 240 |
| A01631 | A03817 | 357 | A01631 | A03912 | 200 |
| A01631 | A03990 | 350 | A01631 | A04385 | 229 |
| A01631 | A04409 | 188 | A01631 | A05593 | 200 |
| A01631 | A05882 | 305 | A01631 | A06010 | 152 |
| A01631 | A06289 | 901 | A01631 | A06512 | 305 |
| A01631 | A06601 | 902 | A01631 | A06748 | 407 |
| A01631 | A07138 | 168 | A01631 | A07311 | 109 |
| A01631 | A07944 | 218 | A01631 | A09162 | 174 |
| A01631 | A09360 | 305 | A01631 | A09577 | 297 |
| A01631 | A09643 | 85  | A01631 | A09645 | 305 |
| A01631 | A10014 | 486 | A01631 | A10365 | 63  |
| A01631 | A10392 | 174 | A01631 | A10534 | 196 |
| A01631 | A10897 | 184 | A01631 | A10899 | 112 |
| A01631 | A10968 | 396 | A01631 | A10971 | 305 |
| A01631 | A10981 | 274 | A01631 | A11124 | 252 |
| A01631 | A11290 | 416 | A01631 | A11487 | 483 |
| A01631 | A12383 | 488 | A01631 | A13761 | 274 |
| A01631 | A14006 | 485 | A01631 | A14008 | 367 |
| A01631 | A14009 | 363 | A01631 | A14022 | 899 |
| A01631 | A14232 | 899 | A01631 | A14790 | 165 |
| A01631 | A15745 | 274 | A01631 | A15875 | 182 |
| A01631 | A16931 | 210 | A01631 | A16994 | 260 |
| A01631 | A17137 | 234 | A01632 | A01668 | 457 |
| A01632 | A01676 | 449 | A01632 | A01689 | 221 |
| A01632 | A01730 | 485 | A01632 | A01743 | 456 |

|        |        |     |        |        |     |
|--------|--------|-----|--------|--------|-----|
| A01632 | A01746 | 185 | A01632 | A01758 | 267 |
| A01632 | A01839 | 390 | A01632 | A01891 | 205 |
| A01632 | A01894 | 179 | A01632 | A01916 | 201 |
| A01632 | A01953 | 190 | A01632 | A02039 | 489 |
| A01632 | A02068 | 279 | A01632 | A02131 | 156 |
| A01632 | A02144 | 269 | A01632 | A02154 | 227 |
| A01632 | A02180 | 180 | A01632 | A02188 | 486 |
| A01632 | A02215 | 380 | A01632 | A02221 | 475 |
| A01632 | A02228 | 488 | A01632 | A02303 | 174 |
| A01632 | A02320 | 419 | A01632 | A02443 | 267 |
| A01632 | A02459 | 165 | A01632 | A02477 | 484 |
| A01632 | A02511 | 491 | A01632 | A02548 | 321 |
| A01632 | A02642 | 202 | A01632 | A02691 | 369 |
| A01632 | A02695 | 177 | A01632 | A02707 | 212 |
| A01632 | A02709 | 413 | A01632 | A02736 | 291 |
| A01632 | A02737 | 277 | A01632 | A02830 | 151 |
| A01632 | A02867 | 227 | A01632 | A02878 | 441 |
| A01632 | A02909 | 340 | A01632 | A02927 | 267 |
| A01632 | A03034 | 198 | A01632 | A03104 | 446 |
| A01632 | A03178 | 391 | A01632 | A03211 | 491 |
| A01632 | A03241 | 457 | A01632 | A03297 | 353 |
| A01632 | A03304 | 468 | A01632 | A03351 | 285 |
| A01632 | A03376 | 160 | A01632 | A03413 | 171 |
| A01632 | A03451 | 156 | A01632 | A03742 | 285 |
| A01632 | A03839 | 335 | A01632 | A03945 | 185 |
| A01632 | A04006 | 490 | A01632 | A04030 | 205 |
| A01632 | A04033 | 363 | A01632 | A04053 | 191 |
| A01632 | A04171 | 159 | A01632 | A04175 | 491 |
| A01632 | A04275 | 484 | A01632 | A04305 | 241 |
| A01632 | A04337 | 294 | A01632 | A04349 | 302 |
| A01632 | A04361 | 356 | A01632 | A04372 | 190 |
| A01632 | A04402 | 190 | A01632 | A04410 | 486 |
| A01632 | A04418 | 491 | A01632 | A04424 | 299 |
| A01632 | A04435 | 259 | A01632 | A04493 | 491 |
| A01632 | A04520 | 491 | A01632 | A04603 | 288 |
| A01632 | A04710 | 288 | A01632 | A04715 | 491 |
| A01632 | A04778 | 221 | A01632 | A04790 | 489 |
| A01632 | A04840 | 156 | A01632 | A04870 | 446 |
| A01632 | A04903 | 423 | A01632 | A04925 | 241 |
| A01632 | A04944 | 491 | A01632 | A04947 | 481 |
| A01632 | A04964 | 491 | A01632 | A04972 | 347 |
| A01632 | A04985 | 491 | A01632 | A05106 | 488 |
| A01632 | A05155 | 452 | A01632 | A05234 | 380 |
| A01632 | A05245 | 375 | A01632 | A05250 | 168 |
| A01632 | A05288 | 491 | A01632 | A05300 | 183 |
| A01632 | A05356 | 333 | A01632 | A05556 | 428 |



|        |        |     |        |        |     |
|--------|--------|-----|--------|--------|-----|
| A01632 | A05601 | 400 | A01632 | A05610 | 190 |
| A01632 | A05777 | 190 | A01632 | A05866 | 391 |
| A01632 | A05899 | 205 | A01632 | A05940 | 246 |
| A01632 | A06069 | 170 | A01632 | A06100 | 252 |
| A01632 | A06106 | 241 | A01632 | A06151 | 488 |
| A01632 | A06152 | 329 | A01632 | A06153 | 241 |
| A01632 | A06222 | 366 | A01632 | A06226 | 196 |
| A01632 | A06227 | 205 | A01632 | A06307 | 183 |
| A01632 | A06313 | 443 | A01632 | A06336 | 241 |
| A01632 | A06403 | 190 | A01632 | A06530 | 462 |
| A01632 | A06535 | 455 | A01632 | A06565 | 227 |
| A01632 | A06574 | 168 | A01632 | A06601 | 405 |
| A01632 | A06607 | 477 | A01632 | A06608 | 319 |
| A01632 | A06650 | 241 | A01632 | A06686 | 491 |
| A01632 | A06688 | 490 | A01632 | A06701 | 481 |
| A01632 | A06708 | 435 | A01632 | A06720 | 205 |
| A01632 | A06721 | 405 | A01632 | A06844 | 337 |
| A01632 | A06868 | 353 | A01632 | A06871 | 366 |
| A01632 | A06872 | 294 | A01632 | A06895 | 196 |
| A01632 | A06896 | 241 | A01632 | A07004 | 152 |
| A01632 | A07056 | 259 | A01632 | A07069 | 173 |
| A01632 | A07114 | 190 | A01632 | A07200 | 188 |
| A01632 | A07209 | 470 | A01632 | A07218 | 372 |
| A01632 | A07282 | 352 | A01632 | A07310 | 241 |
| A01632 | A07384 | 460 | A01632 | A07442 | 488 |
| A01632 | A07472 | 162 | A01632 | A07704 | 263 |
| A01632 | A07828 | 241 | A01632 | A07842 | 391 |
| A01632 | A07852 | 205 | A01632 | A07903 | 472 |
| A01632 | A07985 | 247 | A01632 | A07995 | 183 |
| A01632 | A08093 | 491 | A01632 | A08097 | 296 |
| A01632 | A08136 | 168 | A01632 | A08162 | 196 |
| A01632 | A08172 | 357 | A01632 | A08224 | 329 |
| A01632 | A08274 | 368 | A01632 | A08309 | 357 |
| A01632 | A08389 | 301 | A01632 | A08392 | 241 |
| A01632 | A08573 | 191 | A01632 | A08624 | 241 |
| A01632 | A08686 | 413 | A01632 | A08949 | 246 |
| A01632 | A09248 | 210 | A01632 | A09409 | 227 |
| A01632 | A09646 | 441 | A01632 | A09838 | 177 |
| A01632 | A10051 | 230 | A01632 | A10082 | 190 |
| A01632 | A10103 | 472 | A01632 | A10205 | 187 |
| A01632 | A10297 | 294 | A01632 | A10547 | 226 |
| A01632 | A11012 | 294 | A01632 | A11299 | 398 |
| A01632 | A11306 | 428 | A01632 | A11336 | 196 |
| A01632 | A11342 | 190 | A01632 | A11413 | 159 |
| A01632 | A11468 | 227 | A01632 | A11582 | 227 |
| A01632 | A11587 | 241 | A01632 | A11983 | 165 |

|        |        |     |        |        |     |
|--------|--------|-----|--------|--------|-----|
| A01632 | A12119 | 215 | A01632 | A12373 | 157 |
| A01632 | A12446 | 262 | A01632 | A12481 | 294 |
| A01632 | A12614 | 380 | A01632 | A12634 | 215 |
| A01632 | A12675 | 205 | A01632 | A12761 | 294 |
| A01632 | A12781 | 241 | A01632 | A13157 | 227 |
| A01632 | A13369 | 491 | A01632 | A13885 | 230 |
| A01632 | A13972 | 458 | A01632 | A14381 | 391 |
| A01632 | A14633 | 452 | A01632 | A14648 | 490 |
| A01632 | A14732 | 227 | A01632 | A14873 | 215 |
| A01632 | A15190 | 263 | A01632 | A15232 | 294 |
| A01632 | A15282 | 174 | A01632 | A15295 | 435 |
| A01632 | A15336 | 167 | A01632 | A15422 | 260 |
| A01632 | A15431 | 281 | A01632 | A15638 | 404 |
| A01632 | A15917 | 484 | A01632 | A15929 | 262 |
| A01632 | A16125 | 162 | A01632 | A16274 | 251 |
| A01632 | A17078 | 183 | A01632 | A17085 | 452 |
| A01632 | A17124 | 241 | A01633 | A02542 | 193 |
| A01633 | A03954 | 229 | A01633 | A03980 | 251 |
| A01633 | A04687 | 281 | A01633 | A08161 | 452 |
| A01633 | A08834 | 232 | A01633 | A14778 | 162 |
| A01633 | A15321 | 302 | A01634 | A01646 | 764 |
| A01634 | A01673 | 337 | A01634 | A01677 | 480 |
| A01634 | A01678 | 218 | A01634 | A01683 | 975 |
| A01634 | A01706 | 483 | A01634 | A01710 | 218 |
| A01634 | A01715 | 236 | A01634 | A01811 | 313 |
| A01634 | A01822 | 252 | A01634 | A02607 | 270 |
| A01634 | A02685 | 316 | A01634 | A02887 | 393 |
| A01634 | A03293 | 569 | A01634 | A03294 | 646 |
| A01634 | A03321 | 162 | A01634 | A03452 | 356 |
| A01634 | A03489 | 213 | A01634 | A03565 | 63  |
| A01634 | A03569 | 485 | A01634 | A03618 | 491 |
| A01634 | A03625 | 185 | A01634 | A03626 | 491 |
| A01634 | A03682 | 63  | A01634 | A03718 | 647 |
| A01634 | A03891 | 491 | A01634 | A03892 | 973 |
| A01634 | A04145 | 491 | A01634 | A04151 | 371 |
| A01634 | A04292 | 419 | A01634 | A04337 | 352 |
| A01634 | A04631 | 385 | A01634 | A04686 | 672 |
| A01634 | A04728 | 488 | A01634 | A04893 | 490 |
| A01634 | A04929 | 491 | A01634 | A05001 | 226 |
| A01634 | A05023 | 63  | A01634 | A05024 | 745 |
| A01634 | A05028 | 262 | A01634 | A05148 | 179 |
| A01634 | A05401 | 491 | A01634 | A05710 | 265 |
| A01634 | A05813 | 193 | A01634 | A06168 | 481 |
| A01634 | A06334 | 157 | A01634 | A06675 | 256 |
| A01634 | A06689 | 204 | A01634 | A06941 | 441 |
| A01634 | A07203 | 559 | A01634 | A07442 | 481 |

|        |        |     |        |        |     |
|--------|--------|-----|--------|--------|-----|
| A01634 | A07499 | 385 | A01634 | A07521 | 102 |
| A01634 | A07541 | 246 | A01634 | A07736 | 290 |
| A01634 | A07749 | 96  | A01634 | A07820 | 469 |
| A01634 | A08001 | 258 | A01634 | A08137 | 667 |
| A01634 | A08189 | 179 | A01634 | A08400 | 443 |
| A01634 | A08454 | 435 | A01634 | A08461 | 489 |
| A01634 | A08484 | 491 | A01634 | A08506 | 484 |
| A01634 | A08544 | 483 | A01634 | A08874 | 310 |
| A01634 | A09326 | 117 | A01634 | A09333 | 141 |
| A01634 | A09401 | 216 | A01634 | A09742 | 259 |
| A01634 | A10235 | 193 | A01634 | A10584 | 747 |
| A01634 | A10597 | 337 | A01634 | A10655 | 480 |
| A01634 | A10684 | 190 | A01634 | A10739 | 363 |
| A01634 | A10790 | 98  | A01634 | A10793 | 274 |
| A01634 | A10794 | 440 | A01634 | A10797 | 323 |
| A01634 | A10798 | 322 | A01634 | A10799 | 428 |
| A01634 | A10803 | 537 | A01634 | A10804 | 489 |
| A01634 | A10812 | 312 | A01634 | A10821 | 451 |
| A01634 | A10897 | 91  | A01634 | A11247 | 291 |
| A01634 | A11250 | 246 | A01634 | A11279 | 263 |
| A01634 | A11303 | 454 | A01634 | A11337 | 398 |
| A01634 | A11513 | 215 | A01634 | A11885 | 491 |
| A01634 | A11939 | 229 | A01634 | A12206 | 193 |
| A01634 | A12295 | 424 | A01634 | A12375 | 252 |
| A01634 | A12645 | 380 | A01634 | A13222 | 63  |
| A01634 | A13628 | 216 | A01634 | A13816 | 286 |
| A01634 | A13824 | 181 | A01634 | A13826 | 455 |
| A01634 | A13830 | 374 | A01634 | A13831 | 547 |
| A01634 | A13855 | 63  | A01634 | A13867 | 466 |
| A01634 | A13882 | 297 | A01634 | A13902 | 469 |
| A01634 | A14051 | 216 | A01634 | A14056 | 605 |
| A01634 | A14168 | 121 | A01634 | A14182 | 79  |
| A01634 | A14247 | 807 | A01634 | A14272 | 490 |
| A01634 | A14276 | 232 | A01634 | A14381 | 256 |
| A01634 | A14461 | 483 | A01634 | A14661 | 486 |
| A01634 | A14832 | 252 | A01634 | A14838 | 391 |
| A01634 | A14914 | 193 | A01634 | A15306 | 193 |
| A01634 | A15346 | 174 | A01634 | A15402 | 322 |
| A01634 | A15432 | 312 | A01634 | A15498 | 491 |
| A01634 | A15647 | 460 | A01634 | A15650 | 126 |
| A01634 | A16652 | 63  | A01634 | A16669 | 167 |
| A01634 | A16821 | 63  | A01634 | A16927 | 369 |
| A01635 | A01642 | 391 | A01635 | A01714 | 168 |
| A01635 | A01730 | 308 | A01635 | A01741 | 463 |
| A01635 | A01743 | 435 | A01635 | A01972 | 162 |
| A01635 | A01990 | 187 | A01635 | A02008 | 254 |

|        |        |     |        |        |     |
|--------|--------|-----|--------|--------|-----|
| A01635 | A02014 | 279 | A01635 | A02020 | 224 |
| A01635 | A02053 | 374 | A01635 | A02082 | 156 |
| A01635 | A02107 | 174 | A01635 | A02134 | 232 |
| A01635 | A02148 | 491 | A01635 | A02156 | 163 |
| A01635 | A02215 | 226 | A01635 | A02254 | 401 |
| A01635 | A02285 | 171 | A01635 | A02335 | 273 |
| A01635 | A02432 | 270 | A01635 | A02468 | 183 |
| A01635 | A02525 | 310 | A01635 | A02574 | 170 |
| A01635 | A02691 | 152 | A01635 | A02847 | 296 |
| A01635 | A02922 | 157 | A01635 | A02992 | 480 |
| A01635 | A03003 | 191 | A01635 | A03004 | 254 |
| A01635 | A03005 | 324 | A01635 | A03016 | 228 |
| A01635 | A03033 | 218 | A01635 | A03034 | 277 |
| A01635 | A03050 | 202 | A01635 | A03064 | 232 |
| A01635 | A03115 | 294 | A01635 | A03146 | 283 |
| A01635 | A03148 | 246 | A01635 | A03167 | 488 |
| A01635 | A03168 | 195 | A01635 | A03186 | 480 |
| A01635 | A03259 | 329 | A01635 | A03353 | 188 |
| A01635 | A03370 | 180 | A01635 | A03477 | 488 |
| A01635 | A03484 | 313 | A01635 | A03487 | 481 |
| A01635 | A03513 | 477 | A01635 | A03858 | 299 |
| A01635 | A04211 | 238 | A01635 | A04307 | 489 |
| A01635 | A04570 | 171 | A01635 | A04674 | 232 |
| A01635 | A04779 | 473 | A01635 | A04791 | 429 |
| A01635 | A04834 | 351 | A01635 | A04879 | 246 |
| A01635 | A04880 | 445 | A01635 | A04883 | 272 |
| A01635 | A04927 | 277 | A01635 | A04995 | 218 |
| A01635 | A05007 | 486 | A01635 | A05088 | 328 |
| A01635 | A05102 | 193 | A01635 | A05103 | 196 |
| A01635 | A05138 | 488 | A01635 | A05222 | 177 |
| A01635 | A05277 | 378 | A01635 | A05310 | 473 |
| A01635 | A05320 | 286 | A01635 | A05356 | 191 |
| A01635 | A05358 | 257 | A01635 | A05376 | 196 |
| A01635 | A05393 | 293 | A01635 | A05416 | 414 |
| A01635 | A05418 | 366 | A01635 | A05437 | 232 |
| A01635 | A05451 | 187 | A01635 | A05463 | 407 |
| A01635 | A05471 | 475 | A01635 | A05472 | 491 |
| A01635 | A05516 | 224 | A01635 | A05532 | 241 |
| A01635 | A05550 | 196 | A01635 | A05573 | 401 |
| A01635 | A05600 | 279 | A01635 | A05615 | 165 |
| A01635 | A05660 | 414 | A01635 | A05752 | 314 |
| A01635 | A05759 | 433 | A01635 | A05767 | 452 |
| A01635 | A05768 | 490 | A01635 | A05771 | 218 |
| A01635 | A05774 | 384 | A01635 | A05782 | 401 |
| A01635 | A05789 | 177 | A01635 | A05947 | 314 |
| A01635 | A06018 | 286 | A01635 | A06091 | 486 |

|        |        |     |        |        |     |
|--------|--------|-----|--------|--------|-----|
| A01635 | A06111 | 313 | A01635 | A06300 | 395 |
| A01635 | A06301 | 435 | A01635 | A06358 | 430 |
| A01635 | A06359 | 457 | A01635 | A06360 | 332 |
| A01635 | A06386 | 457 | A01635 | A06397 | 210 |
| A01635 | A06439 | 230 | A01635 | A06473 | 357 |
| A01635 | A06523 | 477 | A01635 | A06533 | 479 |
| A01635 | A06629 | 446 | A01635 | A06630 | 347 |
| A01635 | A06632 | 445 | A01635 | A06633 | 344 |
| A01635 | A06640 | 232 | A01635 | A06641 | 241 |
| A01635 | A06689 | 489 | A01635 | A06692 | 458 |
| A01635 | A06700 | 249 | A01635 | A06756 | 369 |
| A01635 | A06847 | 271 | A01635 | A06853 | 314 |
| A01635 | A06855 | 171 | A01635 | A06912 | 485 |
| A01635 | A06916 | 296 | A01635 | A06970 | 484 |
| A01635 | A06979 | 238 | A01635 | A07059 | 252 |
| A01635 | A07061 | 491 | A01635 | A07078 | 193 |
| A01635 | A07080 | 171 | A01635 | A07088 | 168 |
| A01635 | A07109 | 329 | A01635 | A07122 | 491 |
| A01635 | A07185 | 196 | A01635 | A07198 | 168 |
| A01635 | A07200 | 260 | A01635 | A07205 | 193 |
| A01635 | A07238 | 490 | A01635 | A07239 | 290 |
| A01635 | A07256 | 180 | A01635 | A07267 | 210 |
| A01635 | A07326 | 314 | A01635 | A07381 | 378 |
| A01635 | A07407 | 232 | A01635 | A07413 | 386 |
| A01635 | A07424 | 435 | A01635 | A07477 | 399 |
| A01635 | A07520 | 272 | A01635 | A07553 | 462 |
| A01635 | A07558 | 246 | A01635 | A07590 | 447 |
| A01635 | A07674 | 187 | A01635 | A07688 | 440 |
| A01635 | A07711 | 162 | A01635 | A07718 | 152 |
| A01635 | A07721 | 399 | A01635 | A07736 | 360 |
| A01635 | A07753 | 268 | A01635 | A07757 | 218 |
| A01635 | A07800 | 486 | A01635 | A07831 | 314 |
| A01635 | A07832 | 314 | A01635 | A07851 | 324 |
| A01635 | A07933 | 198 | A01635 | A07973 | 170 |
| A01635 | A08108 | 227 | A01635 | A08127 | 196 |
| A01635 | A08199 | 363 | A01635 | A08751 | 313 |
| A01635 | A09632 | 263 | A01635 | A09711 | 267 |
| A01635 | A09973 | 286 | A01635 | A10020 | 267 |
| A01635 | A10420 | 228 | A01635 | A10424 | 180 |
| A01635 | A10441 | 154 | A01635 | A10443 | 377 |
| A01635 | A10456 | 488 | A01635 | A10635 | 350 |
| A01635 | A10658 | 154 | A01635 | A10659 | 196 |
| A01635 | A10694 | 424 | A01635 | A10703 | 240 |
| A01635 | A10712 | 401 | A01635 | A10714 | 377 |
| A01635 | A11309 | 475 | A01635 | A11325 | 308 |
| A01635 | A11381 | 353 | A01635 | A13011 | 314 |

|        |        |     |        |        |     |
|--------|--------|-----|--------|--------|-----|
| A01635 | A13314 | 296 | A01635 | A14803 | 407 |
| A01635 | A14827 | 348 | A01635 | A14862 | 180 |
| A01635 | A15637 | 485 | A01635 | A15874 | 491 |
| A01635 | A15905 | 255 | A01635 | A16027 | 486 |
| A01635 | A16262 | 395 | A01635 | A16263 | 162 |
| A01635 | A16283 | 168 | A01635 | A16528 | 210 |
| A01635 | A16529 | 447 | A01635 | A16739 | 486 |
| A01635 | A16741 | 491 | A01635 | A16744 | 486 |
| A01635 | A16767 | 156 | A01635 | A16959 | 438 |
| A01635 | A17078 | 474 | A01636 | A01637 | 945 |
| A01636 | A01638 | 921 | A01636 | A01650 | 967 |
| A01636 | A01651 | 945 | A01636 | A01687 | 126 |
| A01636 | A01859 | 235 | A01636 | A01914 | 263 |
| A01636 | A01920 | 899 | A01636 | A02485 | 191 |
| A01636 | A02690 | 162 | A01636 | A02968 | 899 |
| A01636 | A03422 | 240 | A01636 | A03451 | 899 |
| A01636 | A03492 | 330 | A01636 | A03575 | 945 |
| A01636 | A05008 | 944 | A01636 | A05009 | 269 |
| A01636 | A05029 | 942 | A01636 | A05216 | 899 |
| A01636 | A06379 | 238 | A01636 | A06480 | 246 |
| A01636 | A06502 | 255 | A01636 | A07422 | 899 |
| A01636 | A07785 | 283 | A01636 | A07834 | 470 |
| A01636 | A08318 | 207 | A01636 | A08571 | 449 |
| A01636 | A08855 | 177 | A01636 | A08858 | 942 |
| A01636 | A09033 | 176 | A01636 | A09380 | 176 |
| A01636 | A09793 | 112 | A01636 | A10293 | 260 |
| A01636 | A10894 | 414 | A01636 | A11124 | 408 |
| A01636 | A11604 | 899 | A01636 | A13975 | 899 |
| A01636 | A13991 | 899 | A01636 | A14044 | 899 |
| A01636 | A14443 | 899 | A01636 | A15726 | 408 |
| A01637 | A01638 | 942 | A01637 | A01650 | 945 |
| A01637 | A01651 | 994 | A01637 | A01687 | 146 |
| A01637 | A01844 | 152 | A01637 | A01996 | 899 |
| A01637 | A02825 | 185 | A01637 | A02908 | 899 |
| A01637 | A05008 | 467 | A01637 | A05015 | 232 |
| A01637 | A05029 | 491 | A01637 | A05216 | 899 |
| A01637 | A05428 | 993 | A01637 | A06348 | 263 |
| A01637 | A06572 | 191 | A01637 | A07311 | 899 |
| A01637 | A08536 | 63  | A01637 | A08571 | 202 |
| A01637 | A08839 | 943 | A01637 | A08858 | 74  |
| A01637 | A10547 | 171 | A01637 | A13391 | 899 |
| A01637 | A13991 | 899 | A01637 | A14299 | 899 |
| A01637 | A14443 | 989 | A01637 | A14444 | 989 |
| A01637 | A15239 | 326 | A01637 | A16938 | 899 |
| A01638 | A01650 | 944 | A01638 | A01651 | 945 |
| A01638 | A01665 | 899 | A01638 | A01688 | 899 |

|        |        |     |        |        |     |
|--------|--------|-----|--------|--------|-----|
| A01638 | A02278 | 165 | A01638 | A03298 | 256 |
| A01638 | A03446 | 408 | A01638 | A03492 | 401 |
| A01638 | A03575 | 249 | A01638 | A05008 | 390 |
| A01638 | A05029 | 254 | A01638 | A05062 | 429 |
| A01638 | A05428 | 937 | A01638 | A06191 | 241 |
| A01638 | A07311 | 899 | A01638 | A07762 | 396 |
| A01638 | A08571 | 945 | A01638 | A08839 | 945 |
| A01638 | A08858 | 910 | A01638 | A08885 | 299 |
| A01638 | A09195 | 205 | A01638 | A09506 | 324 |
| A01638 | A09568 | 901 | A01638 | A09793 | 252 |
| A01638 | A10615 | 461 | A01638 | A10624 | 491 |
| A01638 | A11139 | 190 | A01638 | A11273 | 184 |
| A01638 | A11291 | 467 | A01638 | A11387 | 207 |
| A01638 | A11575 | 212 | A01638 | A11920 | 227 |
| A01638 | A12660 | 170 | A01638 | A13147 | 180 |
| A01638 | A13390 | 899 | A01638 | A13391 | 899 |
| A01638 | A13762 | 246 | A01638 | A13917 | 152 |
| A01638 | A13984 | 899 | A01638 | A13989 | 936 |
| A01638 | A14042 | 899 | A01638 | A14148 | 899 |
| A01638 | A14220 | 490 | A01638 | A14222 | 256 |
| A01638 | A14246 | 902 | A01638 | A14964 | 238 |
| A01638 | A15297 | 899 | A01638 | A15324 | 899 |
| A01638 | A15353 | 899 | A01638 | A15359 | 899 |
| A01638 | A15547 | 899 | A01638 | A15614 | 899 |
| A01638 | A16938 | 899 | A01638 | A17063 | 256 |
| A01638 | A17197 | 201 | A01639 | A01640 | 961 |
| A01639 | A01651 | 899 | A01639 | A01653 | 491 |
| A01639 | A01664 | 486 | A01639 | A01692 | 483 |
| A01639 | A01697 | 945 | A01639 | A01702 | 945 |
| A01639 | A01708 | 945 | A01639 | A01709 | 945 |
| A01639 | A01718 | 945 | A01639 | A01719 | 964 |
| A01639 | A01726 | 353 | A01639 | A01775 | 899 |
| A01639 | A02161 | 221 | A01639 | A02645 | 251 |
| A01639 | A02662 | 265 | A01639 | A02825 | 183 |
| A01639 | A02843 | 171 | A01639 | A02902 | 174 |
| A01639 | A02908 | 899 | A01639 | A02942 | 899 |
| A01639 | A03095 | 456 | A01639 | A03331 | 216 |
| A01639 | A03591 | 157 | A01639 | A03846 | 285 |
| A01639 | A03947 | 185 | A01639 | A04205 | 486 |
| A01639 | A04449 | 480 | A01639 | A04528 | 265 |
| A01639 | A04536 | 435 | A01639 | A04699 | 945 |
| A01639 | A04827 | 208 | A01639 | A05038 | 188 |
| A01639 | A05453 | 921 | A01639 | A05634 | 156 |
| A01639 | A05944 | 919 | A01639 | A05953 | 174 |
| A01639 | A06055 | 414 | A01639 | A06235 | 484 |
| A01639 | A06289 | 944 | A01639 | A06550 | 452 |

|        |        |     |        |        |     |
|--------|--------|-----|--------|--------|-----|
| A01639 | A06588 | 422 | A01639 | A06601 | 488 |
| A01639 | A06610 | 462 | A01639 | A06701 | 491 |
| A01639 | A07001 | 185 | A01639 | A07311 | 944 |
| A01639 | A07422 | 945 | A01639 | A07944 | 193 |
| A01639 | A07985 | 475 | A01639 | A08133 | 199 |
| A01639 | A08310 | 221 | A01639 | A08376 | 229 |
| A01639 | A08571 | 991 | A01639 | A08902 | 173 |
| A01639 | A09059 | 434 | A01639 | A09111 | 193 |
| A01639 | A09162 | 491 | A01639 | A09241 | 207 |
| A01639 | A09374 | 154 | A01639 | A09558 | 899 |
| A01639 | A09577 | 245 | A01639 | A09643 | 255 |
| A01639 | A09644 | 385 | A01639 | A09660 | 183 |
| A01639 | A09871 | 165 | A01639 | A10156 | 172 |
| A01639 | A10365 | 137 | A01639 | A10392 | 945 |
| A01639 | A10499 | 394 | A01639 | A10534 | 171 |
| A01639 | A10580 | 924 | A01639 | A10623 | 945 |
| A01639 | A10730 | 215 | A01639 | A10743 | 433 |
| A01639 | A10808 | 488 | A01639 | A10982 | 424 |
| A01639 | A11125 | 899 | A01639 | A11321 | 202 |
| A01639 | A11379 | 383 | A01639 | A11549 | 240 |
| A01639 | A11834 | 899 | A01639 | A11983 | 521 |
| A01639 | A12086 | 188 | A01639 | A12383 | 945 |
| A01639 | A12468 | 283 | A01639 | A13250 | 906 |
| A01639 | A13977 | 929 | A01639 | A13978 | 991 |
| A01639 | A13985 | 905 | A01639 | A14006 | 168 |
| A01639 | A14008 | 425 | A01639 | A14192 | 226 |
| A01639 | A14248 | 171 | A01639 | A14275 | 188 |
| A01639 | A14643 | 170 | A01639 | A15196 | 311 |
| A01639 | A15282 | 353 | A01639 | A15493 | 208 |
| A01639 | A15626 | 208 | A01639 | A15726 | 202 |
| A01639 | A15849 | 899 | A01639 | A16083 | 899 |
| A01639 | A16305 | 340 | A01639 | A16792 | 252 |
| A01639 | A17160 | 899 | A01640 | A01660 | 283 |
| A01640 | A01661 | 217 | A01640 | A01688 | 899 |
| A01640 | A01692 | 935 | A01640 | A01697 | 945 |
| A01640 | A01702 | 994 | A01640 | A01708 | 962 |
| A01640 | A01709 | 945 | A01640 | A01718 | 994 |
| A01640 | A01719 | 975 | A01640 | A01730 | 899 |
| A01640 | A01770 | 234 | A01640 | A01844 | 210 |
| A01640 | A02030 | 224 | A01640 | A02064 | 221 |
| A01640 | A02161 | 193 | A01640 | A02223 | 160 |
| A01640 | A02278 | 160 | A01640 | A03123 | 179 |
| A01640 | A03331 | 475 | A01640 | A03370 | 356 |
| A01640 | A03470 | 217 | A01640 | A03531 | 262 |
| A01640 | A03797 | 899 | A01640 | A03799 | 154 |
| A01640 | A03854 | 899 | A01640 | A04062 | 899 |



|        |        |     |        |        |     |
|--------|--------|-----|--------|--------|-----|
| A01640 | A04104 | 152 | A01640 | A04159 | 210 |
| A01640 | A04230 | 251 | A01640 | A04422 | 935 |
| A01640 | A04490 | 262 | A01640 | A04639 | 180 |
| A01640 | A04699 | 389 | A01640 | A04751 | 389 |
| A01640 | A04759 | 279 | A01640 | A04827 | 313 |
| A01640 | A04923 | 238 | A01640 | A05005 | 324 |
| A01640 | A05337 | 293 | A01640 | A05407 | 152 |
| A01640 | A05469 | 201 | A01640 | A05925 | 210 |
| A01640 | A05944 | 899 | A01640 | A06046 | 378 |
| A01640 | A06166 | 185 | A01640 | A06289 | 937 |
| A01640 | A06534 | 260 | A01640 | A06601 | 357 |
| A01640 | A06610 | 394 | A01640 | A06628 | 163 |
| A01640 | A06819 | 486 | A01640 | A06882 | 163 |
| A01640 | A07001 | 246 | A01640 | A07183 | 366 |
| A01640 | A07218 | 486 | A01640 | A07311 | 944 |
| A01640 | A08087 | 193 | A01640 | A08088 | 185 |
| A01640 | A08880 | 240 | A01640 | A09162 | 472 |
| A01640 | A09247 | 196 | A01640 | A09319 | 899 |
| A01640 | A09418 | 193 | A01640 | A09454 | 154 |
| A01640 | A09490 | 201 | A01640 | A09577 | 177 |
| A01640 | A09643 | 294 | A01640 | A09644 | 994 |
| A01640 | A09727 | 154 | A01640 | A09871 | 266 |
| A01640 | A10014 | 151 | A01640 | A10068 | 291 |
| A01640 | A10160 | 168 | A01640 | A10392 | 424 |
| A01640 | A10581 | 201 | A01640 | A10599 | 486 |
| A01640 | A10743 | 193 | A01640 | A10808 | 361 |
| A01640 | A10811 | 157 | A01640 | A10834 | 163 |
| A01640 | A11078 | 238 | A01640 | A11281 | 160 |
| A01640 | A11369 | 207 | A01640 | A11734 | 291 |
| A01640 | A11788 | 238 | A01640 | A11874 | 238 |
| A01640 | A11943 | 308 | A01640 | A12084 | 193 |
| A01640 | A12383 | 945 | A01640 | A12660 | 400 |
| A01640 | A12886 | 234 | A01640 | A12945 | 193 |
| A01640 | A12990 | 393 | A01640 | A13133 | 223 |
| A01640 | A13199 | 159 | A01640 | A13336 | 385 |
| A01640 | A13734 | 363 | A01640 | A13917 | 204 |
| A01640 | A13970 | 899 | A01640 | A13989 | 480 |
| A01640 | A13991 | 899 | A01640 | A13992 | 348 |
| A01640 | A14006 | 441 | A01640 | A14008 | 469 |
| A01640 | A14019 | 899 | A01640 | A14032 | 899 |
| A01640 | A14033 | 210 | A01640 | A14128 | 465 |
| A01640 | A14187 | 899 | A01640 | A14188 | 900 |
| A01640 | A14190 | 945 | A01640 | A14194 | 177 |
| A01640 | A14275 | 159 | A01640 | A14281 | 455 |
| A01640 | A14369 | 279 | A01640 | A14370 | 212 |
| A01640 | A14371 | 467 | A01640 | A14433 | 899 |

|        |        |     |        |        |     |
|--------|--------|-----|--------|--------|-----|
| A01640 | A14443 | 899 | A01640 | A14511 | 428 |
| A01640 | A14528 | 201 | A01640 | A14529 | 306 |
| A01640 | A14799 | 335 | A01640 | A15222 | 366 |
| A01640 | A15480 | 205 | A01640 | A15692 | 258 |
| A01640 | A15854 | 462 | A01640 | A16555 | 159 |
| A01641 | A01643 | 317 | A01641 | A15938 | 408 |
| A01642 | A01913 | 291 | A01642 | A02695 | 156 |
| A01642 | A03064 | 452 | A01642 | A03441 | 291 |
| A01642 | A03487 | 356 | A01642 | A03742 | 173 |
| A01642 | A04051 | 193 | A01642 | A05472 | 302 |
| A01642 | A06018 | 416 | A01642 | A07122 | 215 |
| A01642 | A09396 | 361 | A01642 | A12660 | 262 |
| A01643 | A01739 | 313 | A01643 | A01741 | 373 |
| A01643 | A01743 | 377 | A01643 | A01765 | 152 |
| A01643 | A01899 | 156 | A01643 | A01971 | 165 |
| A01643 | A02148 | 157 | A01643 | A02237 | 263 |
| A01643 | A02254 | 281 | A01643 | A02316 | 490 |
| A01643 | A02318 | 235 | A01643 | A02521 | 491 |
| A01643 | A02524 | 428 | A01643 | A02529 | 486 |
| A01643 | A02551 | 409 | A01643 | A02898 | 196 |
| A01643 | A02991 | 168 | A01643 | A03086 | 224 |
| A01643 | A03087 | 152 | A01643 | A03230 | 288 |
| A01643 | A03234 | 488 | A01643 | A03313 | 344 |
| A01643 | A03423 | 390 | A01643 | A03513 | 491 |
| A01643 | A03545 | 193 | A01643 | A03599 | 293 |
| A01643 | A03986 | 293 | A01643 | A04095 | 488 |
| A01643 | A04227 | 430 | A01643 | A04228 | 305 |
| A01643 | A04305 | 379 | A01643 | A04307 | 271 |
| A01643 | A04316 | 401 | A01643 | A04502 | 335 |
| A01643 | A04543 | 213 | A01643 | A04725 | 348 |
| A01643 | A04883 | 373 | A01643 | A04927 | 451 |
| A01643 | A05045 | 303 | A01643 | A05109 | 335 |
| A01643 | A05337 | 198 | A01643 | A05358 | 491 |
| A01643 | A05420 | 324 | A01643 | A05451 | 480 |
| A01643 | A05452 | 465 | A01643 | A05472 | 152 |
| A01643 | A05538 | 408 | A01643 | A05550 | 488 |
| A01643 | A05615 | 252 | A01643 | A05622 | 408 |
| A01643 | A05883 | 491 | A01643 | A05912 | 335 |
| A01643 | A06067 | 159 | A01643 | A06090 | 406 |
| A01643 | A06137 | 201 | A01643 | A06405 | 443 |
| A01643 | A06439 | 469 | A01643 | A06650 | 168 |
| A01643 | A06689 | 188 | A01643 | A06734 | 486 |
| A01643 | A06800 | 457 | A01643 | A06860 | 491 |
| A01643 | A06994 | 255 | A01643 | A07037 | 486 |
| A01643 | A07088 | 422 | A01643 | A07257 | 205 |
| A01643 | A07520 | 491 | A01643 | A07553 | 400 |

|        |        |     |        |        |     |
|--------|--------|-----|--------|--------|-----|
| A01643 | A07684 | 409 | A01643 | A07763 | 196 |
| A01643 | A07771 | 462 | A01643 | A07796 | 249 |
| A01643 | A08114 | 286 | A01643 | A08155 | 255 |
| A01643 | A08197 | 229 | A01643 | A08630 | 188 |
| A01643 | A08688 | 217 | A01643 | A09052 | 408 |
| A01643 | A09079 | 335 | A01643 | A09905 | 369 |
| A01643 | A09940 | 230 | A01643 | A09972 | 348 |
| A01643 | A10103 | 217 | A01643 | A10156 | 154 |
| A01643 | A10422 | 252 | A01643 | A10446 | 208 |
| A01643 | A10481 | 348 | A01643 | A10676 | 389 |
| A01643 | A10677 | 157 | A01643 | A10679 | 358 |
| A01643 | A10687 | 269 | A01643 | A10693 | 193 |
| A01643 | A10694 | 241 | A01643 | A10869 | 466 |
| A01643 | A10885 | 221 | A01643 | A12062 | 224 |
| A01643 | A13347 | 205 | A01643 | A13726 | 210 |
| A01643 | A14252 | 375 | A01643 | A14306 | 317 |
| A01643 | A14496 | 358 | A01643 | A14620 | 348 |
| A01643 | A14639 | 238 | A01643 | A14643 | 238 |
| A01643 | A14654 | 183 | A01643 | A14785 | 276 |
| A01643 | A14821 | 266 | A01643 | A15891 | 235 |
| A01643 | A16741 | 159 | A01644 | A03821 | 182 |
| A01644 | A06173 | 396 | A01645 | A01669 | 173 |
| A01645 | A01675 | 173 | A01645 | A01729 | 176 |
| A01645 | A01739 | 215 | A01645 | A01781 | 179 |
| A01645 | A01839 | 491 | A01645 | A01859 | 338 |
| A01645 | A01915 | 249 | A01645 | A02261 | 249 |
| A01645 | A02303 | 154 | A01645 | A02485 | 279 |
| A01645 | A02629 | 234 | A01645 | A02642 | 170 |
| A01645 | A02687 | 394 | A01645 | A02691 | 337 |
| A01645 | A02695 | 228 | A01645 | A02912 | 259 |
| A01645 | A03305 | 227 | A01645 | A03637 | 319 |
| A01645 | A03641 | 340 | A01645 | A03708 | 230 |
| A01645 | A03861 | 180 | A01645 | A04107 | 288 |
| A01645 | A04257 | 294 | A01645 | A04361 | 170 |
| A01645 | A04418 | 226 | A01645 | A04422 | 215 |
| A01645 | A04425 | 299 | A01645 | A04435 | 337 |
| A01645 | A04710 | 302 | A01645 | A04715 | 477 |
| A01645 | A04790 | 491 | A01645 | A04903 | 329 |
| A01645 | A04949 | 283 | A01645 | A04977 | 210 |
| A01645 | A05075 | 335 | A01645 | A06106 | 357 |
| A01645 | A06162 | 180 | A01645 | A06379 | 374 |
| A01645 | A06608 | 353 | A01645 | A07903 | 215 |
| A01645 | A09182 | 160 | A01645 | A09840 | 173 |
| A01645 | A11348 | 236 | A01645 | A12651 | 215 |
| A01645 | A14633 | 310 | A01646 | A01660 | 236 |
| A01646 | A01677 | 63  | A01646 | A01678 | 63  |

|        |        |     |        |        |     |
|--------|--------|-----|--------|--------|-----|
| A01646 | A01683 | 711 | A01646 | A01706 | 63  |
| A01646 | A01792 | 441 | A01646 | A01809 | 480 |
| A01646 | A01822 | 157 | A01646 | A01988 | 71  |
| A01646 | A03293 | 695 | A01646 | A03294 | 428 |
| A01646 | A03329 | 63  | A01646 | A03569 | 199 |
| A01646 | A03597 | 90  | A01646 | A03626 | 188 |
| A01646 | A03682 | 273 | A01646 | A03718 | 408 |
| A01646 | A03892 | 541 | A01646 | A04145 | 73  |
| A01646 | A04631 | 213 | A01646 | A04682 | 374 |
| A01646 | A04686 | 588 | A01646 | A04929 | 68  |
| A01646 | A05023 | 160 | A01646 | A05024 | 337 |
| A01646 | A05027 | 333 | A01646 | A05220 | 469 |
| A01646 | A05773 | 157 | A01646 | A06168 | 439 |
| A01646 | A06204 | 63  | A01646 | A06340 | 447 |
| A01646 | A06610 | 154 | A01646 | A07180 | 484 |
| A01646 | A07203 | 627 | A01646 | A07208 | 302 |
| A01646 | A07521 | 417 | A01646 | A08022 | 412 |
| A01646 | A08137 | 257 | A01646 | A08382 | 232 |
| A01646 | A08400 | 486 | A01646 | A08461 | 391 |
| A01646 | A09043 | 151 | A01646 | A09743 | 198 |
| A01646 | A10578 | 193 | A01646 | A10584 | 646 |
| A01646 | A10739 | 343 | A01646 | A10790 | 139 |
| A01646 | A10793 | 433 | A01646 | A10797 | 341 |
| A01646 | A10798 | 481 | A01646 | A10803 | 602 |
| A01646 | A10897 | 260 | A01646 | A11130 | 213 |
| A01646 | A11244 | 455 | A01646 | A11245 | 260 |
| A01646 | A11246 | 260 | A01646 | A11247 | 469 |
| A01646 | A11251 | 293 | A01646 | A11256 | 293 |
| A01646 | A11326 | 177 | A01646 | A11337 | 294 |
| A01646 | A11397 | 191 | A01646 | A11939 | 451 |
| A01646 | A12873 | 260 | A01646 | A13130 | 162 |
| A01646 | A13568 | 240 | A01646 | A13826 | 63  |
| A01646 | A13831 | 571 | A01646 | A13989 | 541 |
| A01646 | A14006 | 452 | A01646 | A14056 | 858 |
| A01646 | A14080 | 324 | A01646 | A14247 | 573 |
| A01646 | A14272 | 456 | A01646 | A14461 | 477 |
| A01646 | A15297 | 63  | A01646 | A15330 | 63  |
| A01646 | A15338 | 63  | A01646 | A15346 | 63  |
| A01646 | A15505 | 63  | A01646 | A15700 | 168 |
| A01646 | A16591 | 353 | A01646 | A16640 | 235 |
| A01647 | A01660 | 582 | A01647 | A01665 | 159 |
| A01647 | A01682 | 372 | A01647 | A01687 | 479 |
| A01647 | A01730 | 526 | A01647 | A01775 | 199 |
| A01647 | A01978 | 276 | A01647 | A01995 | 273 |
| A01647 | A02052 | 364 | A01647 | A02119 | 199 |
| A01647 | A02212 | 168 | A01647 | A02292 | 199 |

|        |        |     |        |        |     |
|--------|--------|-----|--------|--------|-----|
| A01647 | A02717 | 180 | A01647 | A02721 | 182 |
| A01647 | A03333 | 339 | A01647 | A03569 | 491 |
| A01647 | A03698 | 489 | A01647 | A03728 | 601 |
| A01647 | A03752 | 485 | A01647 | A03880 | 624 |
| A01647 | A03963 | 489 | A01647 | A04072 | 226 |
| A01647 | A04815 | 412 | A01647 | A05016 | 187 |
| A01647 | A05225 | 484 | A01647 | A05301 | 491 |
| A01647 | A05545 | 486 | A01647 | A05621 | 457 |
| A01647 | A05800 | 467 | A01647 | A05824 | 227 |
| A01647 | A05907 | 271 | A01647 | A05958 | 385 |
| A01647 | A05966 | 199 | A01647 | A05998 | 490 |
| A01647 | A06550 | 445 | A01647 | A06559 | 469 |
| A01647 | A06560 | 385 | A01647 | A06563 | 285 |
| A01647 | A06591 | 283 | A01647 | A06597 | 199 |
| A01647 | A06606 | 286 | A01647 | A06615 | 488 |
| A01647 | A06629 | 226 | A01647 | A06689 | 411 |
| A01647 | A06750 | 372 | A01647 | A06819 | 398 |
| A01647 | A06907 | 462 | A01647 | A06970 | 769 |
| A01647 | A06990 | 208 | A01647 | A07007 | 623 |
| A01647 | A07054 | 629 | A01647 | A07207 | 585 |
| A01647 | A07242 | 553 | A01647 | A07264 | 165 |
| A01647 | A07339 | 369 | A01647 | A07483 | 717 |
| A01647 | A07495 | 490 | A01647 | A07604 | 201 |
| A01647 | A07670 | 372 | A01647 | A07798 | 177 |
| A01647 | A07802 | 229 | A01647 | A07816 | 382 |
| A01647 | A07848 | 199 | A01647 | A07981 | 619 |
| A01647 | A08060 | 190 | A01647 | A08133 | 199 |
| A01647 | A08137 | 427 | A01647 | A08297 | 227 |
| A01647 | A08411 | 227 | A01647 | A08541 | 185 |
| A01647 | A09054 | 616 | A01647 | A09566 | 174 |
| A01647 | A09759 | 177 | A01647 | A10378 | 417 |
| A01647 | A10734 | 182 | A01647 | A10909 | 152 |
| A01647 | A11068 | 235 | A01647 | A11189 | 485 |
| A01647 | A11202 | 477 | A01647 | A11277 | 152 |
| A01647 | A11346 | 249 | A01647 | A11472 | 361 |
| A01647 | A11487 | 575 | A01647 | A11710 | 168 |
| A01647 | A11869 | 240 | A01647 | A11983 | 199 |
| A01647 | A12047 | 490 | A01647 | A12118 | 168 |
| A01647 | A12191 | 454 | A01647 | A12284 | 621 |
| A01647 | A12824 | 372 | A01647 | A13022 | 168 |
| A01647 | A13415 | 491 | A01647 | A13617 | 154 |
| A01647 | A13819 | 621 | A01647 | A13866 | 619 |
| A01647 | A13889 | 213 | A01647 | A13895 | 266 |
| A01647 | A13920 | 486 | A01647 | A13928 | 314 |
| A01647 | A13934 | 475 | A01647 | A14006 | 555 |
| A01647 | A14009 | 491 | A01647 | A14016 | 196 |

|        |        |     |        |        |     |
|--------|--------|-----|--------|--------|-----|
| A01647 | A14077 | 491 | A01647 | A14121 | 152 |
| A01647 | A14148 | 296 | A01647 | A14150 | 432 |
| A01647 | A14196 | 188 | A01647 | A14221 | 345 |
| A01647 | A14239 | 406 | A01647 | A14266 | 383 |
| A01647 | A14279 | 442 | A01647 | A14281 | 469 |
| A01647 | A14283 | 288 | A01647 | A14378 | 168 |
| A01647 | A14399 | 196 | A01647 | A14444 | 221 |
| A01647 | A14475 | 208 | A01647 | A14484 | 323 |
| A01647 | A14596 | 249 | A01647 | A14648 | 160 |
| A01647 | A14655 | 241 | A01647 | A14822 | 323 |
| A01647 | A14994 | 227 | A01647 | A15200 | 227 |
| A01647 | A15232 | 227 | A01647 | A15297 | 281 |
| A01647 | A15323 | 345 | A01647 | A15338 | 458 |
| A01647 | A15366 | 436 | A01647 | A15501 | 461 |
| A01647 | A15502 | 167 | A01647 | A15556 | 152 |
| A01647 | A15915 | 168 | A01647 | A16088 | 254 |
| A01647 | A16119 | 272 | A01647 | A16410 | 243 |
| A01647 | A16478 | 485 | A01647 | A16543 | 190 |
| A01647 | A16708 | 263 | A01647 | A16763 | 199 |
| A01647 | A16807 | 621 | A01647 | A16878 | 302 |
| A01647 | A16894 | 227 | A01647 | A16928 | 190 |
| A01647 | A17063 | 475 | A01647 | A17140 | 279 |
| A01647 | A17198 | 255 | A01648 | A02737 | 260 |
| A01648 | A03560 | 334 | A01648 | A04495 | 330 |
| A01648 | A05029 | 334 | A01648 | A05086 | 195 |
| A01648 | A07378 | 334 | A01648 | A07481 | 427 |
| A01648 | A08900 | 281 | A01648 | A09056 | 180 |
| A01648 | A09591 | 334 | A01648 | A11158 | 221 |
| A01648 | A11769 | 340 | A01648 | A13172 | 433 |
| A01648 | A13394 | 433 | A01648 | A14178 | 334 |
| A01648 | A14381 | 170 | A01648 | A16840 | 210 |
| A01648 | A17088 | 334 | A01649 | A01684 | 452 |
| A01649 | A01707 | 363 | A01649 | A01787 | 151 |
| A01649 | A02003 | 121 | A01649 | A02216 | 286 |
| A01649 | A02265 | 243 | A01649 | A02350 | 246 |
| A01649 | A02978 | 477 | A01649 | A03035 | 278 |
| A01649 | A03069 | 470 | A01649 | A03296 | 467 |
| A01649 | A03298 | 167 | A01649 | A03304 | 412 |
| A01649 | A03438 | 417 | A01649 | A03446 | 470 |
| A01649 | A03494 | 251 | A01649 | A03567 | 491 |
| A01649 | A03569 | 467 | A01649 | A03570 | 419 |
| A01649 | A03697 | 191 | A01649 | A03740 | 489 |
| A01649 | A03754 | 380 | A01649 | A03859 | 491 |
| A01649 | A04846 | 405 | A01649 | A05147 | 167 |
| A01649 | A05230 | 490 | A01649 | A05238 | 179 |
| A01649 | A05301 | 63  | A01649 | A05501 | 491 |

|        |        |     |        |        |     |
|--------|--------|-----|--------|--------|-----|
| A01649 | A05562 | 188 | A01649 | A06037 | 229 |
| A01649 | A06275 | 436 | A01649 | A06279 | 377 |
| A01649 | A06351 | 452 | A01649 | A06369 | 219 |
| A01649 | A06466 | 321 | A01649 | A06543 | 246 |
| A01649 | A06564 | 212 | A01649 | A06584 | 462 |
| A01649 | A06825 | 334 | A01649 | A06826 | 185 |
| A01649 | A06843 | 230 | A01649 | A06861 | 477 |
| A01649 | A06897 | 443 | A01649 | A06965 | 491 |
| A01649 | A06973 | 470 | A01649 | A07076 | 435 |
| A01649 | A07133 | 179 | A01649 | A07203 | 201 |
| A01649 | A07306 | 195 | A01649 | A07311 | 188 |
| A01649 | A07323 | 484 | A01649 | A07347 | 475 |
| A01649 | A07348 | 483 | A01649 | A07360 | 341 |
| A01649 | A07378 | 299 | A01649 | A07398 | 384 |
| A01649 | A07451 | 395 | A01649 | A07487 | 305 |
| A01649 | A07524 | 473 | A01649 | A07597 | 278 |
| A01649 | A07604 | 326 | A01649 | A07700 | 406 |
| A01649 | A07706 | 477 | A01649 | A07759 | 317 |
| A01649 | A07924 | 462 | A01649 | A07968 | 167 |
| A01649 | A08055 | 344 | A01649 | A08118 | 217 |
| A01649 | A08131 | 461 | A01649 | A08137 | 491 |
| A01649 | A08350 | 217 | A01649 | A08357 | 760 |
| A01649 | A08359 | 480 | A01649 | A08398 | 361 |
| A01649 | A08408 | 399 | A01649 | A08433 | 252 |
| A01649 | A08452 | 490 | A01649 | A08521 | 227 |
| A01649 | A08571 | 488 | A01649 | A08674 | 473 |
| A01649 | A08684 | 386 | A01649 | A08835 | 168 |
| A01649 | A08952 | 301 | A01649 | A08965 | 217 |
| A01649 | A09128 | 135 | A01649 | A09292 | 491 |
| A01649 | A09322 | 490 | A01649 | A09327 | 488 |
| A01649 | A09613 | 179 | A01649 | A09697 | 218 |
| A01649 | A09702 | 241 | A01649 | A09705 | 307 |
| A01649 | A09707 | 491 | A01649 | A09722 | 179 |
| A01649 | A09736 | 210 | A01649 | A10362 | 185 |
| A01649 | A10518 | 432 | A01649 | A10532 | 463 |
| A01649 | A10616 | 481 | A01649 | A10624 | 489 |
| A01649 | A10625 | 470 | A01649 | A10853 | 238 |
| A01649 | A10878 | 157 | A01649 | A11223 | 168 |
| A01649 | A11297 | 378 | A01649 | A11322 | 312 |
| A01649 | A11338 | 260 | A01649 | A11372 | 283 |
| A01649 | A11390 | 163 | A01649 | A11400 | 337 |
| A01649 | A11427 | 389 | A01649 | A11438 | 451 |
| A01649 | A11462 | 491 | A01649 | A11496 | 436 |
| A01649 | A11497 | 427 | A01649 | A11518 | 167 |
| A01649 | A11562 | 472 | A01649 | A11790 | 346 |
| A01649 | A11791 | 353 | A01649 | A11942 | 454 |

|        |        |     |        |        |     |
|--------|--------|-----|--------|--------|-----|
| A01649 | A11945 | 452 | A01649 | A12053 | 195 |
| A01649 | A12138 | 433 | A01649 | A12198 | 195 |
| A01649 | A12233 | 168 | A01649 | A12293 | 252 |
| A01649 | A12305 | 217 | A01649 | A12329 | 152 |
| A01649 | A12687 | 176 | A01649 | A13066 | 301 |
| A01649 | A13126 | 491 | A01649 | A13207 | 470 |
| A01649 | A13340 | 364 | A01649 | A13460 | 265 |
| A01649 | A13494 | 167 | A01649 | A13771 | 217 |
| A01649 | A13875 | 490 | A01649 | A13989 | 626 |
| A01649 | A13992 | 187 | A01649 | A14006 | 457 |
| A01649 | A14073 | 480 | A01649 | A14090 | 227 |
| A01649 | A14169 | 262 | A01649 | A14172 | 160 |
| A01649 | A14178 | 105 | A01649 | A14188 | 213 |
| A01649 | A14216 | 491 | A01649 | A14505 | 363 |
| A01649 | A14508 | 299 | A01649 | A14596 | 485 |
| A01649 | A14597 | 457 | A01649 | A14659 | 177 |
| A01649 | A14816 | 414 | A01649 | A14927 | 149 |
| A01649 | A14941 | 258 | A01649 | A15062 | 217 |
| A01649 | A15204 | 328 | A01649 | A15205 | 393 |
| A01649 | A15206 | 393 | A01649 | A15207 | 393 |
| A01649 | A15208 | 346 | A01649 | A15209 | 252 |
| A01649 | A15210 | 328 | A01649 | A15215 | 491 |
| A01649 | A15218 | 364 | A01649 | A15221 | 274 |
| A01649 | A15235 | 160 | A01649 | A15256 | 324 |
| A01649 | A15297 | 423 | A01649 | A15338 | 483 |
| A01649 | A15365 | 279 | A01649 | A15500 | 472 |
| A01649 | A15559 | 380 | A01649 | A15660 | 491 |
| A01649 | A15684 | 491 | A01649 | A15708 | 450 |
| A01649 | A15729 | 321 | A01649 | A15764 | 180 |
| A01649 | A15776 | 176 | A01649 | A15779 | 329 |
| A01649 | A15931 | 481 | A01649 | A15937 | 249 |
| A01649 | A15988 | 268 | A01649 | A16053 | 195 |
| A01649 | A16060 | 374 | A01649 | A16096 | 174 |
| A01649 | A16118 | 458 | A01649 | A16218 | 467 |
| A01649 | A16302 | 388 | A01649 | A16768 | 226 |
| A01649 | A16838 | 312 | A01650 | A01651 | 945 |
| A01650 | A01685 | 435 | A01650 | A01687 | 645 |
| A01650 | A01717 | 409 | A01650 | A01719 | 204 |
| A01650 | A01839 | 174 | A01650 | A01844 | 199 |
| A01650 | A01859 | 216 | A01650 | A02698 | 171 |
| A01650 | A03105 | 235 | A01650 | A03112 | 196 |
| A01650 | A03298 | 283 | A01650 | A03299 | 366 |
| A01650 | A03422 | 489 | A01650 | A03488 | 328 |
| A01650 | A03492 | 758 | A01650 | A03496 | 547 |
| A01650 | A03575 | 943 | A01650 | A03637 | 157 |
| A01650 | A03967 | 484 | A01650 | A04737 | 230 |



|        |        |     |        |        |     |
|--------|--------|-----|--------|--------|-----|
| A01650 | A05008 | 981 | A01650 | A05009 | 645 |
| A01650 | A05015 | 945 | A01650 | A05029 | 491 |
| A01650 | A05070 | 254 | A01650 | A05476 | 187 |
| A01650 | A05594 | 199 | A01650 | A05625 | 759 |
| A01650 | A05880 | 230 | A01650 | A05892 | 470 |
| A01650 | A06004 | 182 | A01650 | A06348 | 205 |
| A01650 | A06379 | 441 | A01650 | A06572 | 483 |
| A01650 | A06615 | 324 | A01650 | A06661 | 346 |
| A01650 | A06715 | 271 | A01650 | A06919 | 238 |
| A01650 | A07242 | 434 | A01650 | A07311 | 256 |
| A01650 | A07313 | 210 | A01650 | A07433 | 497 |
| A01650 | A07762 | 441 | A01650 | A07814 | 154 |
| A01650 | A07834 | 340 | A01650 | A08126 | 265 |
| A01650 | A08520 | 154 | A01650 | A08536 | 573 |
| A01650 | A08549 | 462 | A01650 | A08554 | 177 |
| A01650 | A08561 | 252 | A01650 | A08569 | 63  |
| A01650 | A08571 | 982 | A01650 | A08839 | 423 |
| A01650 | A08853 | 87  | A01650 | A08854 | 79  |
| A01650 | A08858 | 939 | A01650 | A08868 | 456 |
| A01650 | A08885 | 860 | A01650 | A08902 | 488 |
| A01650 | A09195 | 307 | A01650 | A09256 | 470 |
| A01650 | A09448 | 230 | A01650 | A09464 | 160 |
| A01650 | A09660 | 291 | A01650 | A09793 | 490 |
| A01650 | A10368 | 271 | A01650 | A10604 | 293 |
| A01650 | A10894 | 160 | A01650 | A10998 | 319 |
| A01650 | A11002 | 235 | A01650 | A11027 | 324 |
| A01650 | A11138 | 162 | A01650 | A11156 | 462 |
| A01650 | A11258 | 427 | A01650 | A11441 | 162 |
| A01650 | A11478 | 401 | A01650 | A11668 | 202 |
| A01650 | A12401 | 356 | A01650 | A12932 | 291 |
| A01650 | A12974 | 63  | A01650 | A13146 | 214 |
| A01650 | A13223 | 235 | A01650 | A13315 | 452 |
| A01650 | A13817 | 235 | A01650 | A13829 | 273 |
| A01650 | A13908 | 199 | A01650 | A13917 | 479 |
| A01650 | A13978 | 185 | A01650 | A13981 | 215 |
| A01650 | A14009 | 225 | A01650 | A14037 | 283 |
| A01650 | A14127 | 199 | A01650 | A14202 | 196 |
| A01650 | A14261 | 215 | A01650 | A14263 | 479 |
| A01650 | A14279 | 296 | A01650 | A14310 | 319 |
| A01650 | A14577 | 268 | A01650 | A14643 | 391 |
| A01650 | A14839 | 162 | A01650 | A15383 | 184 |
| A01650 | A15726 | 955 | A01650 | A16387 | 232 |
| A01651 | A01687 | 435 | A01651 | A01692 | 899 |
| A01651 | A01920 | 899 | A01651 | A01996 | 899 |
| A01651 | A03149 | 176 | A01651 | A03422 | 396 |
| A01651 | A03492 | 433 | A01651 | A03496 | 188 |

|        |        |     |        |        |     |
|--------|--------|-----|--------|--------|-----|
| A01651 | A03575 | 183 | A01651 | A04699 | 899 |
| A01651 | A05008 | 481 | A01651 | A05009 | 224 |
| A01651 | A05029 | 945 | A01651 | A05062 | 281 |
| A01651 | A05428 | 930 | A01651 | A06715 | 243 |
| A01651 | A07311 | 899 | A01651 | A07422 | 899 |
| A01651 | A07762 | 430 | A01651 | A08416 | 174 |
| A01651 | A08536 | 301 | A01651 | A08571 | 477 |
| A01651 | A08839 | 945 | A01651 | A08858 | 146 |
| A01651 | A09256 | 159 | A01651 | A09434 | 156 |
| A01651 | A09506 | 238 | A01651 | A09568 | 899 |
| A01651 | A09793 | 488 | A01651 | A10365 | 899 |
| A01651 | A10624 | 163 | A01651 | A10833 | 899 |
| A01651 | A11559 | 307 | A01651 | A11604 | 899 |
| A01651 | A13390 | 899 | A01651 | A13391 | 899 |
| A01651 | A13817 | 353 | A01651 | A13917 | 321 |
| A01651 | A13975 | 899 | A01651 | A13978 | 159 |
| A01651 | A13984 | 899 | A01651 | A14042 | 899 |
| A01651 | A14044 | 899 | A01651 | A14208 | 168 |
| A01651 | A14226 | 899 | A01651 | A14299 | 899 |
| A01651 | A14443 | 899 | A01651 | A14444 | 899 |
| A01651 | A14964 | 294 | A01651 | A14998 | 373 |
| A01651 | A15726 | 241 | A01651 | A16938 | 899 |
| A01652 | A01813 | 212 | A01652 | A02502 | 290 |
| A01652 | A02878 | 177 | A01652 | A02910 | 246 |
| A01652 | A03361 | 177 | A01652 | A03437 | 310 |
| A01652 | A03451 | 419 | A01652 | A03469 | 369 |
| A01652 | A03490 | 269 | A01652 | A03601 | 218 |
| A01652 | A03734 | 213 | A01652 | A03861 | 266 |
| A01652 | A04101 | 337 | A01652 | A04520 | 190 |
| A01652 | A04563 | 344 | A01652 | A04666 | 217 |
| A01652 | A04808 | 369 | A01652 | A06279 | 229 |
| A01652 | A08578 | 335 | A01652 | A09221 | 307 |
| A01652 | A13126 | 379 | A01652 | A15241 | 200 |
| A01652 | A15659 | 190 | A01653 | A01974 | 183 |
| A01653 | A02411 | 112 | A01653 | A02689 | 167 |
| A01653 | A02842 | 167 | A01653 | A03071 | 273 |
| A01653 | A03095 | 350 | A01653 | A03639 | 185 |
| A01653 | A04038 | 469 | A01653 | A04449 | 144 |
| A01653 | A04722 | 243 | A01653 | A05395 | 436 |
| A01653 | A05450 | 247 | A01653 | A05813 | 369 |
| A01653 | A05944 | 329 | A01653 | A06008 | 369 |
| A01653 | A06141 | 283 | A01653 | A06212 | 259 |
| A01653 | A06428 | 389 | A01653 | A06588 | 154 |
| A01653 | A06701 | 96  | A01653 | A07561 | 205 |
| A01653 | A08860 | 93  | A01653 | A08902 | 151 |
| A01653 | A09018 | 167 | A01653 | A09247 | 260 |

|        |        |     |        |        |     |
|--------|--------|-----|--------|--------|-----|
| A01653 | A09568 | 171 | A01653 | A10005 | 235 |
| A01653 | A10392 | 472 | A01653 | A10833 | 260 |
| A01653 | A10982 | 330 | A01653 | A11190 | 226 |
| A01653 | A11379 | 367 | A01653 | A11721 | 355 |
| A01653 | A13977 | 200 | A01653 | A14248 | 408 |
| A01653 | A14653 | 163 | A01653 | A15875 | 297 |
| A01653 | A16911 | 215 | A01654 | A01704 | 484 |
| A01654 | A01726 | 395 | A01654 | A01741 | 212 |
| A01654 | A01743 | 291 | A01654 | A01747 | 429 |
| A01654 | A01784 | 208 | A01654 | A01790 | 312 |
| A01654 | A01842 | 252 | A01654 | A01870 | 489 |
| A01654 | A01876 | 254 | A01654 | A01879 | 409 |
| A01654 | A01880 | 489 | A01654 | A01881 | 274 |
| A01654 | A01888 | 486 | A01654 | A01889 | 316 |
| A01654 | A01908 | 202 | A01654 | A01931 | 174 |
| A01654 | A02012 | 152 | A01654 | A02136 | 188 |
| A01654 | A02143 | 246 | A01654 | A02220 | 270 |
| A01654 | A02260 | 173 | A01654 | A02337 | 491 |
| A01654 | A02340 | 457 | A01654 | A02370 | 443 |
| A01654 | A02381 | 319 | A01654 | A02382 | 480 |
| A01654 | A02383 | 170 | A01654 | A02416 | 362 |
| A01654 | A02439 | 182 | A01654 | A02457 | 151 |
| A01654 | A02458 | 307 | A01654 | A02459 | 266 |
| A01654 | A02460 | 396 | A01654 | A02490 | 154 |
| A01654 | A02582 | 229 | A01654 | A02604 | 373 |
| A01654 | A02606 | 396 | A01654 | A02608 | 205 |
| A01654 | A02611 | 429 | A01654 | A02615 | 313 |
| A01654 | A02617 | 347 | A01654 | A02621 | 246 |
| A01654 | A02624 | 168 | A01654 | A02630 | 288 |
| A01654 | A02637 | 490 | A01654 | A02639 | 173 |
| A01654 | A02654 | 216 | A01654 | A02657 | 243 |
| A01654 | A02659 | 162 | A01654 | A02661 | 207 |
| A01654 | A02668 | 223 | A01654 | A02681 | 212 |
| A01654 | A02698 | 481 | A01654 | A02711 | 185 |
| A01654 | A02730 | 485 | A01654 | A02732 | 135 |
| A01654 | A02741 | 249 | A01654 | A02751 | 380 |
| A01654 | A02764 | 218 | A01654 | A02770 | 217 |
| A01654 | A02788 | 63  | A01654 | A02795 | 180 |
| A01654 | A02800 | 196 | A01654 | A02803 | 63  |
| A01654 | A02808 | 299 | A01654 | A02812 | 483 |
| A01654 | A02834 | 170 | A01654 | A02841 | 63  |
| A01654 | A02843 | 221 | A01654 | A02851 | 196 |
| A01654 | A02854 | 486 | A01654 | A02859 | 283 |
| A01654 | A02863 | 491 | A01654 | A02884 | 351 |
| A01654 | A02886 | 393 | A01654 | A02887 | 96  |
| A01654 | A02896 | 491 | A01654 | A02916 | 335 |

|        |        |     |        |        |     |
|--------|--------|-----|--------|--------|-----|
| A01654 | A02917 | 491 | A01654 | A02935 | 380 |
| A01654 | A02944 | 281 | A01654 | A02945 | 491 |
| A01654 | A02955 | 363 | A01654 | A03010 | 332 |
| A01654 | A03019 | 130 | A01654 | A03049 | 463 |
| A01654 | A03104 | 334 | A01654 | A03157 | 350 |
| A01654 | A03185 | 232 | A01654 | A03195 | 135 |
| A01654 | A03204 | 285 | A01654 | A03259 | 344 |
| A01654 | A03260 | 165 | A01654 | A03271 | 488 |
| A01654 | A03275 | 319 | A01654 | A03280 | 466 |
| A01654 | A03284 | 252 | A01654 | A03305 | 151 |
| A01654 | A03610 | 462 | A01654 | A03746 | 179 |
| A01654 | A03799 | 408 | A01654 | A03807 | 243 |
| A01654 | A03817 | 307 | A01654 | A03923 | 168 |
| A01654 | A03934 | 258 | A01654 | A03966 | 234 |
| A01654 | A04033 | 491 | A01654 | A04040 | 191 |
| A01654 | A04051 | 322 | A01654 | A04089 | 353 |
| A01654 | A04206 | 205 | A01654 | A04217 | 247 |
| A01654 | A04238 | 452 | A01654 | A04244 | 317 |
| A01654 | A04248 | 491 | A01654 | A04257 | 224 |
| A01654 | A04263 | 430 | A01654 | A04272 | 195 |
| A01654 | A04276 | 313 | A01654 | A04320 | 302 |
| A01654 | A04415 | 180 | A01654 | A04478 | 307 |
| A01654 | A04518 | 213 | A01654 | A04519 | 408 |
| A01654 | A04536 | 486 | A01654 | A04567 | 281 |
| A01654 | A04589 | 195 | A01654 | A04727 | 213 |
| A01654 | A04734 | 417 | A01654 | A04741 | 263 |
| A01654 | A04755 | 346 | A01654 | A04756 | 296 |
| A01654 | A04798 | 258 | A01654 | A04865 | 294 |
| A01654 | A04878 | 398 | A01654 | A05078 | 422 |
| A01654 | A05173 | 307 | A01654 | A05174 | 185 |
| A01654 | A05221 | 369 | A01654 | A05253 | 243 |
| A01654 | A05305 | 488 | A01654 | A05329 | 228 |
| A01654 | A05349 | 369 | A01654 | A05679 | 285 |
| A01654 | A05847 | 183 | A01654 | A05860 | 286 |
| A01654 | A05931 | 395 | A01654 | A05944 | 490 |
| A01654 | A05985 | 491 | A01654 | A06054 | 413 |
| A01654 | A06055 | 469 | A01654 | A06095 | 486 |
| A01654 | A06344 | 196 | A01654 | A06404 | 413 |
| A01654 | A06414 | 319 | A01654 | A06415 | 486 |
| A01654 | A06422 | 425 | A01654 | A06650 | 467 |
| A01654 | A06737 | 323 | A01654 | A06747 | 252 |
| A01654 | A06780 | 238 | A01654 | A06818 | 196 |
| A01654 | A06981 | 193 | A01654 | A07031 | 212 |
| A01654 | A07126 | 156 | A01654 | A07142 | 238 |
| A01654 | A07145 | 215 | A01654 | A07146 | 185 |
| A01654 | A07148 | 191 | A01654 | A07152 | 274 |

|        |        |     |        |        |     |
|--------|--------|-----|--------|--------|-----|
| A01654 | A07157 | 467 | A01654 | A07161 | 485 |
| A01654 | A07164 | 439 | A01654 | A07166 | 420 |
| A01654 | A07173 | 491 | A01654 | A07178 | 160 |
| A01654 | A07209 | 466 | A01654 | A07289 | 347 |
| A01654 | A07390 | 183 | A01654 | A07691 | 323 |
| A01654 | A08596 | 159 | A01654 | A08601 | 323 |
| A01654 | A08623 | 323 | A01654 | A08634 | 294 |
| A01654 | A08677 | 185 | A01654 | A08725 | 307 |
| A01654 | A08908 | 172 | A01654 | A09245 | 343 |
| A01654 | A09570 | 353 | A01654 | A09981 | 347 |
| A01654 | A10813 | 154 | A01654 | A12009 | 168 |
| A01654 | A12393 | 317 | A01654 | A14012 | 188 |
| A01654 | A14071 | 252 | A01654 | A14196 | 247 |
| A01654 | A14236 | 474 | A01654 | A14373 | 218 |
| A01654 | A14374 | 319 | A01654 | A14391 | 327 |
| A01654 | A14392 | 353 | A01654 | A14416 | 412 |
| A01654 | A14425 | 347 | A01654 | A14432 | 445 |
| A01654 | A14439 | 254 | A01654 | A14442 | 491 |
| A01654 | A14598 | 183 | A01654 | A14635 | 488 |
| A01654 | A14930 | 196 | A01654 | A15241 | 489 |
| A01654 | A15314 | 491 | A01654 | A15322 | 173 |
| A01654 | A15337 | 235 | A01654 | A15361 | 330 |
| A01654 | A15394 | 491 | A01654 | A15395 | 491 |
| A01654 | A15403 | 341 | A01654 | A15425 | 255 |
| A01654 | A15475 | 157 | A01654 | A15518 | 344 |
| A01654 | A15587 | 277 | A01654 | A15598 | 154 |
| A01654 | A15599 | 463 | A01654 | A15600 | 286 |
| A01654 | A15601 | 491 | A01654 | A15602 | 484 |
| A01654 | A15603 | 491 | A01654 | A15604 | 450 |
| A01654 | A15605 | 491 | A01654 | A15606 | 491 |
| A01654 | A15607 | 477 | A01654 | A15608 | 491 |
| A01654 | A15630 | 486 | A01654 | A15795 | 223 |
| A01654 | A15806 | 462 | A01654 | A15884 | 196 |
| A01654 | A15958 | 323 | A01654 | A15964 | 294 |
| A01654 | A15981 | 490 | A01654 | A16015 | 243 |
| A01654 | A16511 | 347 | A01654 | A16513 | 224 |
| A01654 | A16518 | 323 | A01654 | A16527 | 247 |
| A01655 | A01675 | 333 | A01655 | A01707 | 423 |
| A01655 | A01770 | 384 | A01655 | A01810 | 441 |
| A01655 | A02715 | 170 | A01655 | A03421 | 177 |
| A01655 | A03714 | 274 | A01655 | A03874 | 427 |
| A01655 | A05458 | 447 | A01655 | A07311 | 252 |
| A01655 | A08571 | 238 | A01655 | A08926 | 160 |
| A01655 | A10618 | 424 | A01655 | A10795 | 357 |
| A01655 | A11789 | 355 | A01655 | A13896 | 259 |
| A01655 | A13900 | 246 | A01655 | A13941 | 172 |

|        |        |     |        |        |     |
|--------|--------|-----|--------|--------|-----|
| A01655 | A13989 | 457 | A01655 | A14006 | 491 |
| A01655 | A14037 | 310 | A01655 | A14080 | 481 |
| A01655 | A14105 | 477 | A01655 | A14106 | 372 |
| A01655 | A14655 | 475 | A01655 | A15504 | 223 |
| A01655 | A15643 | 187 | A01655 | A15649 | 391 |
| A01655 | A16320 | 391 | A01655 | A17077 | 413 |
| A01655 | A17168 | 384 | A01656 | A01694 | 294 |
| A01656 | A01798 | 285 | A01656 | A02114 | 316 |
| A01656 | A02436 | 302 | A01656 | A02450 | 338 |
| A01656 | A03107 | 428 | A01656 | A03854 | 330 |
| A01656 | A03968 | 350 | A01656 | A04157 | 409 |
| A01656 | A04349 | 369 | A01656 | A04383 | 412 |
| A01656 | A04460 | 419 | A01656 | A05288 | 177 |
| A01656 | A05381 | 435 | A01656 | A09364 | 425 |
| A01656 | A15241 | 329 | A01657 | A03297 | 271 |
| A01657 | A03769 | 419 | A01657 | A05500 | 335 |
| A01657 | A06162 | 469 | A01657 | A06778 | 276 |
| A01657 | A07375 | 252 | A01657 | A07897 | 321 |
| A01657 | A08097 | 191 | A01657 | A09195 | 224 |
| A01657 | A09229 | 405 | A01657 | A14281 | 447 |
| A01657 | A14484 | 185 | A01657 | A14633 | 207 |
| A01657 | A15241 | 170 | A01657 | A16763 | 229 |
| A01658 | A01663 | 465 | A01658 | A02044 | 899 |
| A01658 | A02052 | 357 | A01658 | A02143 | 343 |
| A01658 | A02158 | 200 | A01658 | A02186 | 286 |
| A01658 | A02237 | 357 | A01658 | A02298 | 212 |
| A01658 | A02382 | 179 | A01658 | A02639 | 168 |
| A01658 | A02771 | 255 | A01658 | A02902 | 176 |
| A01658 | A03093 | 316 | A01658 | A03370 | 177 |
| A01658 | A03661 | 196 | A01658 | A03719 | 243 |
| A01658 | A03753 | 399 | A01658 | A03820 | 191 |
| A01658 | A03825 | 334 | A01658 | A03880 | 173 |
| A01658 | A03936 | 323 | A01658 | A04159 | 389 |
| A01658 | A04759 | 305 | A01658 | A04830 | 326 |
| A01658 | A04989 | 372 | A01658 | A04992 | 380 |
| A01658 | A08861 | 263 | A01658 | A08910 | 165 |
| A01658 | A10084 | 385 | A01658 | A11902 | 278 |
| A01658 | A13926 | 332 | A01658 | A14579 | 270 |
| A01659 | A01680 | 208 | A01659 | A01686 | 491 |
| A01659 | A01690 | 436 | A01659 | A02058 | 491 |
| A01659 | A02806 | 196 | A01659 | A02847 | 348 |
| A01659 | A02887 | 188 | A01659 | A03057 | 490 |
| A01659 | A03301 | 491 | A01659 | A03420 | 327 |
| A01659 | A03817 | 180 | A01659 | A04073 | 398 |
| A01659 | A04668 | 491 | A01659 | A05218 | 221 |
| A01659 | A05334 | 430 | A01659 | A05949 | 199 |

|        |        |     |        |        |     |
|--------|--------|-----|--------|--------|-----|
| A01659 | A06000 | 91  | A01659 | A06029 | 157 |
| A01659 | A06130 | 294 | A01659 | A06242 | 491 |
| A01659 | A06297 | 489 | A01659 | A06431 | 173 |
| A01659 | A06775 | 241 | A01659 | A06864 | 491 |
| A01659 | A06982 | 491 | A01659 | A07079 | 486 |
| A01659 | A07319 | 491 | A01659 | A07346 | 491 |
| A01659 | A07466 | 391 | A01659 | A07480 | 491 |
| A01659 | A07534 | 491 | A01659 | A07603 | 491 |
| A01659 | A07647 | 402 | A01659 | A07902 | 418 |
| A01659 | A07996 | 491 | A01659 | A08000 | 475 |
| A01659 | A08029 | 317 | A01659 | A08030 | 491 |
| A01659 | A08117 | 490 | A01659 | A08141 | 473 |
| A01659 | A08208 | 491 | A01659 | A08212 | 489 |
| A01659 | A08516 | 438 | A01659 | A08526 | 310 |
| A01659 | A08669 | 490 | A01659 | A08769 | 462 |
| A01659 | A08820 | 491 | A01659 | A08859 | 272 |
| A01659 | A08919 | 188 | A01659 | A08995 | 159 |
| A01659 | A09288 | 488 | A01659 | A09598 | 485 |
| A01659 | A09706 | 467 | A01659 | A09762 | 327 |
| A01659 | A09764 | 475 | A01659 | A10373 | 456 |
| A01659 | A11236 | 452 | A01659 | A11415 | 262 |
| A01659 | A11540 | 408 | A01659 | A11782 | 461 |
| A01659 | A11829 | 401 | A01659 | A11841 | 485 |
| A01659 | A11880 | 156 | A01659 | A11916 | 489 |
| A01659 | A12190 | 245 | A01659 | A12556 | 491 |
| A01659 | A12625 | 351 | A01659 | A12959 | 208 |
| A01659 | A13429 | 281 | A01659 | A13907 | 369 |
| A01659 | A13949 | 491 | A01659 | A14076 | 491 |
| A01659 | A14079 | 491 | A01659 | A14094 | 491 |
| A01659 | A14155 | 152 | A01659 | A14177 | 457 |
| A01659 | A14223 | 489 | A01659 | A14230 | 475 |
| A01659 | A14273 | 491 | A01659 | A14460 | 491 |
| A01659 | A14694 | 491 | A01659 | A14706 | 363 |
| A01659 | A15356 | 162 | A01659 | A15369 | 491 |
| A01659 | A15371 | 395 | A01659 | A15654 | 454 |
| A01659 | A15837 | 355 | A01659 | A15941 | 488 |
| A01659 | A16127 | 491 | A01659 | A16128 | 491 |
| A01659 | A16129 | 491 | A01659 | A16226 | 491 |
| A01659 | A16294 | 223 | A01659 | A16461 | 201 |
| A01659 | A16606 | 490 | A01659 | A16612 | 285 |
| A01659 | A16613 | 488 | A01659 | A16616 | 243 |
| A01659 | A16626 | 491 | A01659 | A16646 | 483 |
| A01659 | A16656 | 296 | A01659 | A16754 | 401 |
| A01659 | A16762 | 243 | A01660 | A01674 | 157 |
| A01660 | A01687 | 491 | A01660 | A01692 | 481 |
| A01660 | A01697 | 172 | A01660 | A01707 | 394 |

|        |        |     |        |        |     |
|--------|--------|-----|--------|--------|-----|
| A01660 | A01717 | 491 | A01660 | A01726 | 401 |
| A01660 | A01730 | 351 | A01660 | A01763 | 286 |
| A01660 | A01796 | 362 | A01660 | A01897 | 157 |
| A01660 | A01908 | 281 | A01660 | A02059 | 187 |
| A01660 | A02308 | 199 | A01660 | A02452 | 416 |
| A01660 | A02687 | 401 | A01660 | A02813 | 313 |
| A01660 | A03057 | 247 | A01660 | A03136 | 481 |
| A01660 | A03293 | 491 | A01660 | A03440 | 385 |
| A01660 | A03496 | 458 | A01660 | A03569 | 491 |
| A01660 | A03618 | 229 | A01660 | A03637 | 363 |
| A01660 | A03728 | 566 | A01660 | A03752 | 482 |
| A01660 | A03812 | 165 | A01660 | A03819 | 360 |
| A01660 | A03828 | 162 | A01660 | A03880 | 286 |
| A01660 | A03892 | 463 | A01660 | A04050 | 424 |
| A01660 | A04079 | 299 | A01660 | A04337 | 195 |
| A01660 | A04449 | 484 | A01660 | A04668 | 200 |
| A01660 | A04962 | 256 | A01660 | A05288 | 488 |
| A01660 | A05356 | 484 | A01660 | A05621 | 199 |
| A01660 | A06039 | 396 | A01660 | A06082 | 512 |
| A01660 | A06092 | 171 | A01660 | A06168 | 439 |
| A01660 | A06277 | 480 | A01660 | A06466 | 199 |
| A01660 | A06520 | 260 | A01660 | A06591 | 488 |
| A01660 | A06597 | 199 | A01660 | A06701 | 475 |
| A01660 | A06907 | 649 | A01660 | A06914 | 236 |
| A01660 | A06970 | 432 | A01660 | A06982 | 200 |
| A01660 | A07180 | 296 | A01660 | A07311 | 199 |
| A01660 | A07339 | 183 | A01660 | A07466 | 200 |
| A01660 | A07495 | 578 | A01660 | A07604 | 486 |
| A01660 | A07803 | 193 | A01660 | A07896 | 162 |
| A01660 | A07973 | 195 | A01660 | A08137 | 491 |
| A01660 | A08278 | 362 | A01660 | A08280 | 371 |
| A01660 | A08293 | 473 | A01660 | A08355 | 218 |
| A01660 | A08400 | 568 | A01660 | A08571 | 468 |
| A01660 | A08669 | 200 | A01660 | A08820 | 383 |
| A01660 | A08821 | 285 | A01660 | A08904 | 199 |
| A01660 | A08982 | 173 | A01660 | A09078 | 205 |
| A01660 | A09524 | 180 | A01660 | A09546 | 477 |
| A01660 | A09826 | 458 | A01660 | A10014 | 468 |
| A01660 | A10373 | 200 | A01660 | A10593 | 434 |
| A01660 | A10604 | 152 | A01660 | A10611 | 165 |
| A01660 | A10712 | 215 | A01660 | A10724 | 260 |
| A01660 | A10743 | 212 | A01660 | A10810 | 183 |
| A01660 | A10970 | 162 | A01660 | A11279 | 639 |
| A01660 | A11287 | 479 | A01660 | A11291 | 317 |
| A01660 | A11300 | 235 | A01660 | A11346 | 188 |
| A01660 | A11379 | 193 | A01660 | A11405 | 398 |



|        |        |     |        |        |     |
|--------|--------|-----|--------|--------|-----|
| A01660 | A11430 | 313 | A01660 | A11433 | 159 |
| A01660 | A11487 | 491 | A01660 | A11800 | 162 |
| A01660 | A12000 | 162 | A01660 | A12365 | 200 |
| A01660 | A12370 | 162 | A01660 | A12383 | 302 |
| A01660 | A12472 | 188 | A01660 | A12543 | 340 |
| A01660 | A12606 | 524 | A01660 | A12952 | 454 |
| A01660 | A13146 | 199 | A01660 | A13340 | 567 |
| A01660 | A13486 | 162 | A01660 | A13530 | 162 |
| A01660 | A13587 | 485 | A01660 | A13688 | 162 |
| A01660 | A13741 | 380 | A01660 | A13826 | 631 |
| A01660 | A13852 | 204 | A01660 | A13882 | 249 |
| A01660 | A13889 | 643 | A01660 | A13902 | 252 |
| A01660 | A13917 | 312 | A01660 | A13928 | 620 |
| A01660 | A13983 | 481 | A01660 | A14006 | 490 |
| A01660 | A14009 | 696 | A01660 | A14016 | 477 |
| A01660 | A14091 | 200 | A01660 | A14094 | 200 |
| A01660 | A14097 | 165 | A01660 | A14148 | 151 |
| A01660 | A14177 | 200 | A01660 | A14191 | 240 |
| A01660 | A14192 | 566 | A01660 | A14193 | 529 |
| A01660 | A14196 | 528 | A01660 | A14209 | 264 |
| A01660 | A14220 | 481 | A01660 | A14221 | 491 |
| A01660 | A14223 | 200 | A01660 | A14237 | 474 |
| A01660 | A14247 | 532 | A01660 | A14253 | 445 |
| A01660 | A14257 | 486 | A01660 | A14258 | 446 |
| A01660 | A14276 | 545 | A01660 | A14279 | 581 |
| A01660 | A14303 | 486 | A01660 | A14457 | 273 |
| A01660 | A14461 | 273 | A01660 | A14475 | 474 |
| A01660 | A14648 | 361 | A01660 | A14661 | 538 |
| A01660 | A14694 | 300 | A01660 | A14758 | 199 |
| A01660 | A15232 | 200 | A01660 | A15282 | 449 |
| A01660 | A15291 | 498 | A01660 | A15297 | 550 |
| A01660 | A15309 | 154 | A01660 | A15315 | 491 |
| A01660 | A15323 | 454 | A01660 | A15338 | 457 |
| A01660 | A15346 | 545 | A01660 | A15347 | 369 |
| A01660 | A15356 | 485 | A01660 | A15366 | 491 |
| A01660 | A15384 | 264 | A01660 | A15400 | 210 |
| A01660 | A15510 | 467 | A01660 | A15512 | 325 |
| A01660 | A15559 | 536 | A01660 | A15617 | 358 |
| A01660 | A15626 | 199 | A01660 | A15665 | 571 |
| A01660 | A15682 | 293 | A01660 | A15685 | 188 |
| A01660 | A15690 | 190 | A01660 | A15752 | 439 |
| A01660 | A15852 | 355 | A01660 | A16073 | 530 |
| A01660 | A16127 | 490 | A01660 | A16274 | 200 |
| A01660 | A16364 | 301 | A01660 | A16410 | 401 |
| A01660 | A16467 | 320 | A01660 | A17063 | 491 |
| A01660 | A17198 | 419 | A01661 | A01726 | 430 |

|        |        |     |        |        |     |
|--------|--------|-----|--------|--------|-----|
| A01661 | A01839 | 335 | A01661 | A01970 | 307 |
| A01661 | A01993 | 154 | A01661 | A01997 | 368 |
| A01661 | A02214 | 93  | A01661 | A02416 | 241 |
| A01661 | A02572 | 198 | A01661 | A03045 | 241 |
| A01661 | A03079 | 480 | A01661 | A03170 | 180 |
| A01661 | A03401 | 193 | A01661 | A03408 | 357 |
| A01661 | A03714 | 180 | A01661 | A03721 | 190 |
| A01661 | A03724 | 491 | A01661 | A03731 | 262 |
| A01661 | A03732 | 221 | A01661 | A03753 | 330 |
| A01661 | A03899 | 491 | A01661 | A03945 | 274 |
| A01661 | A04063 | 202 | A01661 | A05396 | 355 |
| A01661 | A05778 | 286 | A01661 | A06428 | 151 |
| A01661 | A06828 | 399 | A01661 | A08148 | 277 |
| A01661 | A08209 | 151 | A01661 | A08399 | 174 |
| A01661 | A08407 | 374 | A01661 | A08639 | 484 |
| A01661 | A08683 | 489 | A01661 | A08746 | 491 |
| A01661 | A08861 | 415 | A01661 | A08866 | 455 |
| A01661 | A09205 | 491 | A01661 | A09206 | 424 |
| A01661 | A09469 | 196 | A01661 | A09742 | 485 |
| A01661 | A10315 | 489 | A01661 | A10448 | 462 |
| A01661 | A10453 | 195 | A01661 | A10632 | 210 |
| A01661 | A10685 | 157 | A01661 | A11383 | 488 |
| A01661 | A11422 | 333 | A01661 | A11431 | 152 |
| A01661 | A11808 | 252 | A01661 | A12047 | 469 |
| A01661 | A12137 | 470 | A01661 | A12485 | 252 |
| A01661 | A12874 | 490 | A01661 | A12897 | 489 |
| A01661 | A13411 | 286 | A01661 | A13796 | 157 |
| A01661 | A13935 | 943 | A01661 | A13945 | 283 |
| A01661 | A13987 | 445 | A01661 | A14037 | 159 |
| A01661 | A14190 | 266 | A01661 | A14202 | 491 |
| A01661 | A14299 | 241 | A01661 | A14378 | 352 |
| A01661 | A14399 | 491 | A01661 | A14408 | 338 |
| A01661 | A14490 | 399 | A01661 | A14739 | 321 |
| A01661 | A14893 | 491 | A01661 | A15300 | 943 |
| A01661 | A15301 | 191 | A01661 | A15302 | 423 |
| A01661 | A15312 | 224 | A01661 | A15316 | 193 |
| A01661 | A15318 | 481 | A01661 | A15366 | 443 |
| A01661 | A15422 | 477 | A01661 | A15462 | 456 |
| A01661 | A15463 | 485 | A01661 | A15464 | 480 |
| A01661 | A15475 | 183 | A01661 | A15513 | 205 |
| A01661 | A15556 | 486 | A01661 | A15644 | 489 |
| A01661 | A15683 | 486 | A01661 | A16015 | 157 |
| A01661 | A16030 | 475 | A01661 | A16114 | 443 |
| A01661 | A16117 | 450 | A01661 | A17224 | 187 |
| A01662 | A01668 | 184 | A01662 | A02416 | 321 |
| A01662 | A06581 | 249 | A01663 | A02146 | 337 |

|        |        |     |        |        |     |
|--------|--------|-----|--------|--------|-----|
| A01663 | A02186 | 319 | A01663 | A02616 | 358 |
| A01663 | A03080 | 165 | A01663 | A03213 | 168 |
| A01663 | A03825 | 358 | A01663 | A03880 | 213 |
| A01663 | A03965 | 311 | A01663 | A04375 | 240 |
| A01663 | A04681 | 279 | A01663 | A10084 | 401 |
| A01663 | A15837 | 210 | A01663 | A16068 | 243 |
| A01663 | A16626 | 176 | A01664 | A02059 | 245 |
| A01664 | A02709 | 195 | A01664 | A03090 | 177 |
| A01664 | A03107 | 241 | A01664 | A03181 | 162 |
| A01664 | A04072 | 430 | A01664 | A04349 | 162 |
| A01664 | A04639 | 210 | A01664 | A05245 | 221 |
| A01664 | A06569 | 260 | A01664 | A06701 | 491 |
| A01664 | A07142 | 291 | A01664 | A07985 | 486 |
| A01664 | A08681 | 205 | A01664 | A08753 | 191 |
| A01664 | A09162 | 201 | A01664 | A10730 | 411 |
| A01664 | A10743 | 218 | A01664 | A10911 | 256 |
| A01664 | A11101 | 218 | A01664 | A11379 | 204 |
| A01664 | A13369 | 165 | A01664 | A13975 | 193 |
| A01664 | A14013 | 268 | A01664 | A14022 | 329 |
| A01664 | A14275 | 399 | A01665 | A01692 | 899 |
| A01665 | A01886 | 229 | A01665 | A02544 | 899 |
| A01665 | A02902 | 196 | A01665 | A02903 | 294 |
| A01665 | A03575 | 899 | A01665 | A04722 | 218 |
| A01665 | A04784 | 313 | A01665 | A04850 | 180 |
| A01665 | A04937 | 274 | A01665 | A05699 | 313 |
| A01665 | A06063 | 160 | A01665 | A06200 | 372 |
| A01665 | A06609 | 899 | A01665 | A07311 | 899 |
| A01665 | A08505 | 162 | A01665 | A08839 | 899 |
| A01665 | A08858 | 899 | A01665 | A09556 | 252 |
| A01665 | A10174 | 185 | A01665 | A11474 | 291 |
| A01665 | A11679 | 311 | A01665 | A11745 | 257 |
| A01665 | A13829 | 160 | A01665 | A13977 | 899 |
| A01665 | A14220 | 296 | A01665 | A14377 | 152 |
| A01665 | A17063 | 184 | A01666 | A01676 | 184 |
| A01666 | A01889 | 217 | A01666 | A02143 | 167 |
| A01666 | A02730 | 246 | A01666 | A02772 | 408 |
| A01666 | A02837 | 291 | A01666 | A02868 | 279 |
| A01666 | A02869 | 215 | A01666 | A02984 | 187 |
| A01666 | A03112 | 213 | A01666 | A03406 | 196 |
| A01666 | A03420 | 157 | A01666 | A03440 | 224 |
| A01666 | A03449 | 333 | A01666 | A03606 | 312 |
| A01666 | A03782 | 202 | A01666 | A04174 | 229 |
| A01666 | A04698 | 219 | A01666 | A05284 | 247 |
| A01666 | A05299 | 291 | A01666 | A05370 | 267 |
| A01666 | A06234 | 353 | A01666 | A07135 | 324 |
| A01666 | A07935 | 424 | A01666 | A09561 | 200 |

|        |        |     |        |        |     |
|--------|--------|-----|--------|--------|-----|
| A01666 | A10035 | 343 | A01666 | A12543 | 201 |
| A01666 | A15701 | 208 | A01667 | A01703 | 216 |
| A01667 | A01815 | 283 | A01667 | A01819 | 199 |
| A01667 | A01825 | 450 | A01667 | A02040 | 160 |
| A01667 | A02167 | 190 | A01667 | A02261 | 171 |
| A01667 | A02548 | 305 | A01667 | A02778 | 479 |
| A01667 | A02779 | 362 | A01667 | A02989 | 379 |
| A01667 | A02994 | 481 | A01667 | A02996 | 274 |
| A01667 | A03115 | 174 | A01667 | A03386 | 346 |
| A01667 | A03422 | 386 | A01667 | A03423 | 163 |
| A01667 | A03459 | 321 | A01667 | A03651 | 394 |
| A01667 | A03657 | 245 | A01667 | A03841 | 374 |
| A01667 | A03856 | 386 | A01667 | A04056 | 245 |
| A01667 | A04268 | 322 | A01667 | A04351 | 182 |
| A01667 | A04794 | 305 | A01667 | A05019 | 191 |
| A01667 | A05234 | 183 | A01667 | A05709 | 196 |
| A01667 | A07165 | 207 | A01667 | A08147 | 346 |
| A01667 | A08151 | 249 | A01667 | A09323 | 190 |
| A01667 | A09409 | 293 | A01667 | A09797 | 179 |
| A01667 | A10532 | 182 | A01667 | A10833 | 159 |
| A01667 | A10966 | 305 | A01667 | A11296 | 162 |
| A01667 | A12985 | 260 | A01667 | A13929 | 154 |
| A01667 | A13930 | 180 | A01667 | A14487 | 389 |
| A01667 | A14577 | 329 | A01667 | A14635 | 474 |
| A01667 | A14699 | 472 | A01667 | A15273 | 369 |
| A01667 | A16323 | 193 | A01667 | A16734 | 274 |
| A01668 | A01670 | 479 | A01668 | A01674 | 219 |
| A01668 | A01676 | 490 | A01668 | A01704 | 449 |
| A01668 | A01705 | 491 | A01668 | A01711 | 229 |
| A01668 | A01727 | 283 | A01668 | A01728 | 489 |
| A01668 | A01729 | 212 | A01668 | A01731 | 306 |
| A01668 | A01732 | 310 | A01668 | A01733 | 188 |
| A01668 | A01736 | 475 | A01668 | A01737 | 475 |
| A01668 | A01741 | 491 | A01668 | A01743 | 491 |
| A01668 | A01746 | 480 | A01668 | A01747 | 272 |
| A01668 | A01748 | 474 | A01668 | A01751 | 491 |
| A01668 | A01757 | 481 | A01668 | A01758 | 491 |
| A01668 | A01762 | 132 | A01668 | A01763 | 490 |
| A01668 | A01765 | 172 | A01668 | A01766 | 463 |
| A01668 | A01769 | 168 | A01668 | A01772 | 486 |
| A01668 | A01775 | 210 | A01668 | A01778 | 477 |
| A01668 | A01779 | 344 | A01668 | A01787 | 180 |
| A01668 | A01789 | 469 | A01668 | A01794 | 99  |
| A01668 | A01796 | 491 | A01668 | A01797 | 483 |
| A01668 | A01798 | 481 | A01668 | A01802 | 462 |
| A01668 | A01812 | 488 | A01668 | A01813 | 485 |

|        |        |     |        |        |     |
|--------|--------|-----|--------|--------|-----|
| A01668 | A01830 | 229 | A01668 | A01844 | 288 |
| A01668 | A01883 | 465 | A01668 | A01888 | 488 |
| A01668 | A01893 | 489 | A01668 | A01894 | 491 |
| A01668 | A01909 | 491 | A01668 | A01914 | 483 |
| A01668 | A01956 | 160 | A01668 | A02006 | 475 |
| A01668 | A02010 | 249 | A01668 | A02049 | 201 |
| A01668 | A02063 | 193 | A01668 | A02072 | 224 |
| A01668 | A02075 | 317 | A01668 | A02083 | 355 |
| A01668 | A02086 | 229 | A01668 | A02117 | 455 |
| A01668 | A02143 | 199 | A01668 | A02180 | 256 |
| A01668 | A02207 | 162 | A01668 | A02268 | 232 |
| A01668 | A02278 | 201 | A01668 | A02298 | 469 |
| A01668 | A02300 | 483 | A01668 | A02307 | 183 |
| A01668 | A02338 | 170 | A01668 | A02377 | 469 |
| A01668 | A02418 | 165 | A01668 | A02431 | 307 |
| A01668 | A02468 | 188 | A01668 | A02473 | 273 |
| A01668 | A02477 | 208 | A01668 | A02490 | 486 |
| A01668 | A02491 | 489 | A01668 | A02492 | 358 |
| A01668 | A02493 | 356 | A01668 | A02639 | 249 |
| A01668 | A02668 | 404 | A01668 | A02691 | 489 |
| A01668 | A02695 | 391 | A01668 | A02709 | 234 |
| A01668 | A02713 | 63  | A01668 | A02720 | 221 |
| A01668 | A02722 | 205 | A01668 | A02730 | 273 |
| A01668 | A02741 | 480 | A01668 | A02745 | 414 |
| A01668 | A02749 | 465 | A01668 | A02756 | 353 |
| A01668 | A02771 | 256 | A01668 | A02783 | 247 |
| A01668 | A02785 | 491 | A01668 | A02789 | 234 |
| A01668 | A02790 | 191 | A01668 | A02812 | 481 |
| A01668 | A02814 | 446 | A01668 | A02830 | 409 |
| A01668 | A02833 | 162 | A01668 | A02836 | 340 |
| A01668 | A02837 | 491 | A01668 | A02859 | 491 |
| A01668 | A02874 | 491 | A01668 | A02896 | 438 |
| A01668 | A02901 | 156 | A01668 | A02924 | 241 |
| A01668 | A02929 | 265 | A01668 | A02944 | 363 |
| A01668 | A02951 | 467 | A01668 | A02973 | 184 |
| A01668 | A02988 | 486 | A01668 | A02995 | 484 |
| A01668 | A03051 | 435 | A01668 | A03076 | 212 |
| A01668 | A03080 | 162 | A01668 | A03095 | 193 |
| A01668 | A03097 | 313 | A01668 | A03102 | 213 |
| A01668 | A03107 | 294 | A01668 | A03112 | 488 |
| A01668 | A03131 | 162 | A01668 | A03141 | 236 |
| A01668 | A03157 | 252 | A01668 | A03188 | 236 |
| A01668 | A03223 | 363 | A01668 | A03244 | 470 |
| A01668 | A03259 | 491 | A01668 | A03261 | 157 |
| A01668 | A03275 | 491 | A01668 | A03281 | 307 |
| A01668 | A03288 | 152 | A01668 | A03304 | 486 |

|        |        |     |        |        |     |
|--------|--------|-----|--------|--------|-----|
| A01668 | A03361 | 254 | A01668 | A03378 | 151 |
| A01668 | A03403 | 159 | A01668 | A03427 | 162 |
| A01668 | A03432 | 301 | A01668 | A03438 | 162 |
| A01668 | A03550 | 375 | A01668 | A03608 | 409 |
| A01668 | A03609 | 347 | A01668 | A03663 | 302 |
| A01668 | A03690 | 159 | A01668 | A03719 | 375 |
| A01668 | A03739 | 467 | A01668 | A03803 | 190 |
| A01668 | A03818 | 313 | A01668 | A03834 | 356 |
| A01668 | A03841 | 259 | A01668 | A03843 | 358 |
| A01668 | A03849 | 184 | A01668 | A03851 | 486 |
| A01668 | A03861 | 154 | A01668 | A03872 | 379 |
| A01668 | A03894 | 170 | A01668 | A03910 | 193 |
| A01668 | A03990 | 465 | A01668 | A04010 | 489 |
| A01668 | A04014 | 221 | A01668 | A04015 | 429 |
| A01668 | A04023 | 165 | A01668 | A04043 | 221 |
| A01668 | A04049 | 159 | A01668 | A04050 | 251 |
| A01668 | A04051 | 440 | A01668 | A04053 | 256 |
| A01668 | A04067 | 232 | A01668 | A04117 | 274 |
| A01668 | A04122 | 314 | A01668 | A04226 | 162 |
| A01668 | A04229 | 307 | A01668 | A04263 | 472 |
| A01668 | A04286 | 474 | A01668 | A04290 | 221 |
| A01668 | A04502 | 162 | A01668 | A04520 | 294 |
| A01668 | A04584 | 216 | A01668 | A04589 | 173 |
| A01668 | A04598 | 187 | A01668 | A04614 | 360 |
| A01668 | A04617 | 187 | A01668 | A04620 | 265 |
| A01668 | A04622 | 485 | A01668 | A04623 | 401 |
| A01668 | A04698 | 279 | A01668 | A04710 | 202 |
| A01668 | A04794 | 162 | A01668 | A04891 | 184 |
| A01668 | A04933 | 479 | A01668 | A04939 | 451 |
| A01668 | A05054 | 252 | A01668 | A05107 | 418 |
| A01668 | A05122 | 236 | A01668 | A05155 | 490 |
| A01668 | A05221 | 193 | A01668 | A05244 | 221 |
| A01668 | A05260 | 246 | A01668 | A05269 | 296 |
| A01668 | A05308 | 221 | A01668 | A05309 | 481 |
| A01668 | A05320 | 184 | A01668 | A05349 | 205 |
| A01668 | A05458 | 177 | A01668 | A05506 | 156 |
| A01668 | A05551 | 162 | A01668 | A05637 | 184 |
| A01668 | A05664 | 221 | A01668 | A05831 | 221 |
| A01668 | A05866 | 475 | A01668 | A05949 | 172 |
| A01668 | A06050 | 184 | A01668 | A06286 | 477 |
| A01668 | A06377 | 162 | A01668 | A06390 | 221 |
| A01668 | A06402 | 165 | A01668 | A06415 | 324 |
| A01668 | A06581 | 462 | A01668 | A06588 | 174 |
| A01668 | A06597 | 432 | A01668 | A06607 | 491 |
| A01668 | A06610 | 486 | A01668 | A06635 | 152 |
| A01668 | A06647 | 162 | A01668 | A06653 | 190 |

|        |        |     |        |        |     |
|--------|--------|-----|--------|--------|-----|
| A01668 | A06660 | 154 | A01668 | A06688 | 419 |
| A01668 | A06755 | 170 | A01668 | A06797 | 224 |
| A01668 | A06926 | 159 | A01668 | A06949 | 355 |
| A01668 | A06984 | 221 | A01668 | A07123 | 157 |
| A01668 | A07145 | 208 | A01668 | A07157 | 491 |
| A01668 | A07158 | 451 | A01668 | A07160 | 152 |
| A01668 | A07164 | 218 | A01668 | A07165 | 491 |
| A01668 | A07177 | 491 | A01668 | A07200 | 491 |
| A01668 | A07218 | 174 | A01668 | A07270 | 162 |
| A01668 | A07350 | 184 | A01668 | A07405 | 221 |
| A01668 | A07486 | 205 | A01668 | A07525 | 162 |
| A01668 | A07663 | 184 | A01668 | A07695 | 170 |
| A01668 | A07854 | 221 | A01668 | A07925 | 221 |
| A01668 | A08017 | 184 | A01668 | A08265 | 162 |
| A01668 | A08389 | 202 | A01668 | A08487 | 294 |
| A01668 | A08571 | 188 | A01668 | A08609 | 208 |
| A01668 | A08691 | 184 | A01668 | A08834 | 480 |
| A01668 | A08840 | 414 | A01668 | A08841 | 167 |
| A01668 | A08851 | 490 | A01668 | A08863 | 221 |
| A01668 | A08875 | 157 | A01668 | A08910 | 279 |
| A01668 | A09018 | 202 | A01668 | A09026 | 152 |
| A01668 | A09038 | 301 | A01668 | A09047 | 162 |
| A01668 | A09070 | 162 | A01668 | A09073 | 202 |
| A01668 | A09101 | 162 | A01668 | A09109 | 294 |
| A01668 | A09251 | 216 | A01668 | A09274 | 162 |
| A01668 | A09509 | 276 | A01668 | A09744 | 208 |
| A01668 | A09756 | 227 | A01668 | A09833 | 202 |
| A01668 | A09882 | 378 | A01668 | A09933 | 274 |
| A01668 | A10075 | 184 | A01668 | A10085 | 446 |
| A01668 | A10227 | 221 | A01668 | A10242 | 221 |
| A01668 | A10369 | 176 | A01668 | A10382 | 266 |
| A01668 | A10418 | 274 | A01668 | A10463 | 221 |
| A01668 | A10473 | 162 | A01668 | A10496 | 221 |
| A01668 | A10591 | 176 | A01668 | A10601 | 188 |
| A01668 | A10612 | 355 | A01668 | A10657 | 561 |
| A01668 | A10963 | 184 | A01668 | A10986 | 338 |
| A01668 | A11127 | 221 | A01668 | A11191 | 190 |
| A01668 | A11204 | 162 | A01668 | A11280 | 337 |
| A01668 | A11282 | 184 | A01668 | A11294 | 162 |
| A01668 | A11369 | 355 | A01668 | A11486 | 162 |
| A01668 | A11529 | 362 | A01668 | A11547 | 221 |
| A01668 | A11556 | 258 | A01668 | A11665 | 162 |
| A01668 | A11771 | 159 | A01668 | A11850 | 467 |
| A01668 | A11951 | 235 | A01668 | A12026 | 162 |
| A01668 | A12029 | 277 | A01668 | A12087 | 221 |
| A01668 | A12121 | 252 | A01668 | A12568 | 221 |

|        |        |     |        |        |     |
|--------|--------|-----|--------|--------|-----|
| A01668 | A12897 | 221 | A01668 | A12927 | 435 |
| A01668 | A12944 | 221 | A01668 | A12951 | 162 |
| A01668 | A13007 | 162 | A01668 | A13369 | 490 |
| A01668 | A13748 | 317 | A01668 | A13749 | 221 |
| A01668 | A13826 | 491 | A01668 | A13829 | 473 |
| A01668 | A13870 | 462 | A01668 | A13899 | 441 |
| A01668 | A14071 | 213 | A01668 | A14080 | 210 |
| A01668 | A14128 | 489 | A01668 | A14196 | 207 |
| A01668 | A14208 | 413 | A01668 | A14394 | 326 |
| A01668 | A14395 | 198 | A01668 | A14405 | 486 |
| A01668 | A14440 | 479 | A01668 | A14541 | 184 |
| A01668 | A14590 | 162 | A01668 | A14643 | 277 |
| A01668 | A14648 | 347 | A01668 | A14667 | 163 |
| A01668 | A14789 | 412 | A01668 | A14812 | 296 |
| A01668 | A15198 | 196 | A01668 | A15241 | 362 |
| A01668 | A15277 | 470 | A01668 | A15282 | 364 |
| A01668 | A15291 | 486 | A01668 | A15292 | 436 |
| A01668 | A15295 | 489 | A01668 | A15314 | 195 |
| A01668 | A15318 | 395 | A01668 | A15322 | 363 |
| A01668 | A15346 | 483 | A01668 | A15352 | 279 |
| A01668 | A15361 | 515 | A01668 | A15365 | 218 |
| A01668 | A15390 | 218 | A01668 | A15403 | 159 |
| A01668 | A15411 | 341 | A01668 | A15422 | 335 |
| A01668 | A15430 | 479 | A01668 | A15455 | 258 |
| A01668 | A15456 | 252 | A01668 | A15495 | 199 |
| A01668 | A15624 | 256 | A01668 | A15804 | 170 |
| A01668 | A15819 | 386 | A01668 | A15829 | 221 |
| A01668 | A15858 | 168 | A01668 | A15912 | 221 |
| A01668 | A15935 | 184 | A01668 | A16091 | 202 |
| A01668 | A16095 | 159 | A01668 | A16224 | 213 |
| A01668 | A16281 | 467 | A01668 | A16300 | 413 |
| A01668 | A16487 | 162 | A01668 | A16636 | 491 |
| A01668 | A16717 | 184 | A01668 | A16741 | 205 |
| A01668 | A16787 | 252 | A01668 | A17022 | 221 |
| A01668 | A17066 | 251 | A01669 | A01729 | 170 |
| A01669 | A01781 | 944 | A01669 | A01839 | 187 |
| A01669 | A01880 | 183 | A01669 | A01973 | 332 |
| A01669 | A02215 | 327 | A01669 | A02232 | 201 |
| A01669 | A02249 | 219 | A01669 | A02416 | 212 |
| A01669 | A02590 | 224 | A01669 | A02785 | 193 |
| A01669 | A02854 | 185 | A01669 | A03095 | 312 |
| A01669 | A03281 | 215 | A01669 | A03322 | 223 |
| A01669 | A03541 | 235 | A01669 | A03662 | 310 |
| A01669 | A03802 | 283 | A01669 | A03936 | 241 |
| A01669 | A04023 | 418 | A01669 | A04138 | 251 |
| A01669 | A04176 | 258 | A01669 | A04201 | 278 |



|        |        |     |        |        |     |
|--------|--------|-----|--------|--------|-----|
| A01669 | A04369 | 172 | A01669 | A04490 | 207 |
| A01669 | A04536 | 435 | A01669 | A04754 | 305 |
| A01669 | A05121 | 210 | A01669 | A05174 | 256 |
| A01669 | A05583 | 316 | A01669 | A05944 | 168 |
| A01669 | A06055 | 200 | A01669 | A07146 | 256 |
| A01669 | A07153 | 235 | A01669 | A07187 | 208 |
| A01669 | A07422 | 217 | A01669 | A07633 | 316 |
| A01669 | A07903 | 210 | A01669 | A10074 | 367 |
| A01669 | A11017 | 346 | A01669 | A11598 | 215 |
| A01669 | A11735 | 269 | A01669 | A12083 | 312 |
| A01669 | A12654 | 283 | A01669 | A12662 | 390 |
| A01669 | A13982 | 307 | A01669 | A14444 | 899 |
| A01669 | A16113 | 324 | A01669 | A16373 | 367 |
| A01669 | A16381 | 285 | A01670 | A01705 | 486 |
| A01670 | A01736 | 489 | A01670 | A01743 | 391 |
| A01670 | A01746 | 162 | A01670 | A01751 | 162 |
| A01670 | A01757 | 485 | A01670 | A01758 | 402 |
| A01670 | A01763 | 360 | A01670 | A01766 | 291 |
| A01670 | A01772 | 215 | A01670 | A01778 | 162 |
| A01670 | A01787 | 118 | A01670 | A01788 | 249 |
| A01670 | A01794 | 491 | A01670 | A01798 | 260 |
| A01670 | A01893 | 488 | A01670 | A01894 | 483 |
| A01670 | A01909 | 491 | A01670 | A01911 | 276 |
| A01670 | A01982 | 154 | A01670 | A02075 | 454 |
| A01670 | A02240 | 168 | A01670 | A02335 | 263 |
| A01670 | A02338 | 358 | A01670 | A02355 | 272 |
| A01670 | A02412 | 154 | A01670 | A02469 | 212 |
| A01670 | A02495 | 263 | A01670 | A02691 | 400 |
| A01670 | A02701 | 207 | A01670 | A02785 | 306 |
| A01670 | A02918 | 160 | A01670 | A02926 | 324 |
| A01670 | A03014 | 462 | A01670 | A03050 | 456 |
| A01670 | A03112 | 154 | A01670 | A03167 | 265 |
| A01670 | A03168 | 207 | A01670 | A03268 | 401 |
| A01670 | A03348 | 288 | A01670 | A03378 | 179 |
| A01670 | A03663 | 347 | A01670 | A03872 | 384 |
| A01670 | A04014 | 386 | A01670 | A04053 | 358 |
| A01670 | A04122 | 266 | A01670 | A04163 | 217 |
| A01670 | A04279 | 201 | A01670 | A04290 | 386 |
| A01670 | A04334 | 391 | A01670 | A04620 | 490 |
| A01670 | A04757 | 369 | A01670 | A05332 | 217 |
| A01670 | A05463 | 249 | A01670 | A05746 | 358 |
| A01670 | A06607 | 461 | A01670 | A06810 | 413 |
| A01670 | A07200 | 491 | A01670 | A07222 | 201 |
| A01670 | A07407 | 423 | A01670 | A07542 | 207 |
| A01670 | A07543 | 213 | A01670 | A07571 | 251 |
| A01670 | A07630 | 294 | A01670 | A10087 | 232 |

|        |        |     |        |        |     |
|--------|--------|-----|--------|--------|-----|
| A01670 | A11275 | 196 | A01670 | A14405 | 391 |
| A01670 | A14440 | 288 | A01670 | A14758 | 199 |
| A01670 | A14956 | 252 | A01670 | A15238 | 255 |
| A01670 | A15655 | 263 | A01670 | A15976 | 184 |
| A01671 | A01809 | 565 | A01671 | A01988 | 434 |
| A01671 | A02157 | 205 | A01671 | A02212 | 218 |
| A01671 | A02278 | 356 | A01671 | A02687 | 333 |
| A01671 | A02803 | 235 | A01671 | A03330 | 275 |
| A01671 | A03480 | 200 | A01671 | A03556 | 562 |
| A01671 | A03597 | 553 | A01671 | A03617 | 254 |
| A01671 | A04011 | 218 | A01671 | A04845 | 157 |
| A01671 | A04990 | 267 | A01671 | A05273 | 517 |
| A01671 | A05531 | 468 | A01671 | A05539 | 564 |
| A01671 | A05605 | 200 | A01671 | A05638 | 200 |
| A01671 | A06204 | 423 | A01671 | A06758 | 458 |
| A01671 | A06907 | 263 | A01671 | A07180 | 549 |
| A01671 | A07209 | 205 | A01671 | A07294 | 485 |
| A01671 | A08775 | 208 | A01671 | A09625 | 533 |
| A01671 | A09628 | 337 | A01671 | A09736 | 456 |
| A01671 | A09737 | 326 | A01671 | A09738 | 235 |
| A01671 | A10317 | 229 | A01671 | A10603 | 489 |
| A01671 | A10611 | 332 | A01671 | A10662 | 423 |
| A01671 | A10664 | 474 | A01671 | A11496 | 170 |
| A01671 | A11954 | 213 | A01671 | A12543 | 328 |
| A01671 | A12858 | 212 | A01671 | A13074 | 208 |
| A01671 | A13837 | 172 | A01671 | A13876 | 200 |
| A01671 | A13881 | 200 | A01671 | A14016 | 171 |
| A01671 | A14087 | 312 | A01671 | A14088 | 314 |
| A01671 | A14167 | 226 | A01671 | A14170 | 218 |
| A01671 | A14171 | 200 | A01671 | A14173 | 319 |
| A01671 | A14179 | 200 | A01671 | A14180 | 538 |
| A01671 | A14186 | 117 | A01671 | A14193 | 491 |
| A01671 | A14286 | 201 | A01671 | A14289 | 167 |
| A01671 | A14356 | 200 | A01671 | A14358 | 291 |
| A01671 | A15370 | 542 | A01671 | A15377 | 243 |
| A01671 | A15541 | 232 | A01671 | A15568 | 281 |
| A01671 | A15569 | 276 | A01671 | A15709 | 193 |
| A01671 | A15712 | 200 | A01671 | A15718 | 177 |
| A01671 | A15719 | 541 | A01671 | A15743 | 196 |
| A01671 | A15757 | 200 | A01671 | A15818 | 173 |
| A01671 | A16066 | 200 | A01671 | A16611 | 176 |
| A01671 | A16634 | 200 | A01671 | A16664 | 119 |
| A01671 | A16843 | 374 | A01671 | A16905 | 156 |
| A01671 | A16919 | 200 | A01671 | A17063 | 318 |
| A01671 | A17133 | 200 | A01671 | A17144 | 190 |
| A01671 | A17166 | 276 | A01671 | A17198 | 480 |

|        |        |     |        |        |     |
|--------|--------|-----|--------|--------|-----|
| A01672 | A01809 | 424 | A01672 | A01988 | 121 |
| A01672 | A03597 | 99  | A01672 | A06361 | 241 |
| A01672 | A07180 | 489 | A01673 | A01683 | 191 |
| A01673 | A01731 | 243 | A01673 | A01860 | 184 |
| A01673 | A03326 | 219 | A01673 | A03618 | 180 |
| A01673 | A03892 | 274 | A01673 | A03896 | 324 |
| A01673 | A04145 | 157 | A01673 | A04897 | 216 |
| A01673 | A06593 | 427 | A01673 | A06941 | 340 |
| A01673 | A07521 | 182 | A01673 | A08177 | 406 |
| A01673 | A08400 | 210 | A01673 | A08484 | 324 |
| A01673 | A08785 | 324 | A01673 | A09056 | 196 |
| A01673 | A11279 | 340 | A01673 | A11287 | 489 |
| A01673 | A11742 | 424 | A01673 | A12922 | 341 |
| A01673 | A13222 | 324 | A01673 | A13430 | 441 |
| A01673 | A13819 | 200 | A01673 | A13830 | 484 |
| A01673 | A14052 | 249 | A01673 | A14182 | 307 |
| A01673 | A14247 | 491 | A01673 | A14258 | 355 |
| A01673 | A14461 | 307 | A01673 | A14661 | 625 |
| A01673 | A14710 | 412 | A01673 | A14711 | 307 |
| A01673 | A14844 | 324 | A01673 | A14877 | 324 |
| A01673 | A15650 | 254 | A01673 | A15909 | 286 |
| A01673 | A17061 | 324 | A01674 | A02675 | 173 |
| A01674 | A03512 | 441 | A01674 | A03695 | 291 |
| A01674 | A03778 | 480 | A01674 | A03909 | 235 |
| A01674 | A05155 | 391 | A01674 | A06022 | 326 |
| A01674 | A07311 | 424 | A01674 | A07379 | 306 |
| A01674 | A07647 | 163 | A01674 | A07766 | 288 |
| A01674 | A09804 | 283 | A01674 | A10365 | 159 |
| A01674 | A10612 | 205 | A01674 | A11140 | 488 |
| A01674 | A11380 | 267 | A01674 | A11604 | 157 |
| A01674 | A11983 | 196 | A01674 | A12111 | 202 |
| A01674 | A13127 | 210 | A01674 | A13369 | 260 |
| A01674 | A14128 | 450 | A01674 | A14529 | 191 |
| A01674 | A14623 | 249 | A01674 | A14807 | 285 |
| A01674 | A14897 | 473 | A01674 | A15158 | 271 |
| A01674 | A15430 | 353 | A01674 | A15455 | 234 |
| A01674 | A15492 | 160 | A01674 | A15504 | 235 |
| A01674 | A15870 | 329 | A01674 | A15925 | 364 |
| A01674 | A15934 | 168 | A01674 | A16139 | 314 |
| A01674 | A16475 | 297 | A01674 | A16952 | 263 |
| A01675 | A01694 | 165 | A01675 | A01702 | 173 |
| A01675 | A01739 | 210 | A01675 | A01759 | 180 |
| A01675 | A01796 | 472 | A01675 | A01797 | 308 |
| A01675 | A01914 | 484 | A01675 | A02183 | 462 |
| A01675 | A02418 | 180 | A01675 | A02465 | 173 |
| A01675 | A02520 | 208 | A01675 | A02613 | 355 |

|        |        |     |        |        |     |
|--------|--------|-----|--------|--------|-----|
| A01675 | A02629 | 229 | A01675 | A02636 | 190 |
| A01675 | A02734 | 230 | A01675 | A02857 | 171 |
| A01675 | A03149 | 201 | A01675 | A03258 | 338 |
| A01675 | A03515 | 218 | A01675 | A03593 | 355 |
| A01675 | A03594 | 290 | A01675 | A03663 | 343 |
| A01675 | A03904 | 229 | A01675 | A03990 | 246 |
| A01675 | A04004 | 362 | A01675 | A04020 | 246 |
| A01675 | A04107 | 285 | A01675 | A04209 | 241 |
| A01675 | A04249 | 398 | A01675 | A04310 | 406 |
| A01675 | A04437 | 369 | A01675 | A04623 | 490 |
| A01675 | A05309 | 170 | A01675 | A05940 | 382 |
| A01675 | A06607 | 329 | A01675 | A09438 | 425 |
| A01675 | A09542 | 79  | A01675 | A09988 | 177 |
| A01675 | A10148 | 165 | A01675 | A11348 | 358 |
| A01675 | A11539 | 452 | A01675 | A11606 | 469 |
| A01675 | A11983 | 899 | A01675 | A13373 | 193 |
| A01675 | A13896 | 307 | A01675 | A14320 | 355 |
| A01675 | A14332 | 389 | A01675 | A16281 | 489 |
| A01675 | A16450 | 174 | A01676 | A01705 | 188 |
| A01676 | A01729 | 451 | A01676 | A01730 | 933 |
| A01676 | A01741 | 491 | A01676 | A01743 | 491 |
| A01676 | A01746 | 303 | A01676 | A01754 | 202 |
| A01676 | A01759 | 229 | A01676 | A01767 | 288 |
| A01676 | A01769 | 177 | A01676 | A01770 | 63  |
| A01676 | A01775 | 475 | A01676 | A01785 | 170 |
| A01676 | A01789 | 347 | A01676 | A01797 | 943 |
| A01676 | A01832 | 184 | A01676 | A01879 | 252 |
| A01676 | A01888 | 486 | A01676 | A01896 | 187 |
| A01676 | A01897 | 291 | A01676 | A01899 | 324 |
| A01676 | A01900 | 357 | A01676 | A01901 | 486 |
| A01676 | A01909 | 294 | A01676 | A01916 | 202 |
| A01676 | A01939 | 285 | A01676 | A01944 | 163 |
| A01676 | A02006 | 152 | A01676 | A02026 | 229 |
| A01676 | A02037 | 152 | A01676 | A02071 | 154 |
| A01676 | A02086 | 391 | A01676 | A02124 | 173 |
| A01676 | A02147 | 271 | A01676 | A02180 | 183 |
| A01676 | A02288 | 152 | A01676 | A02304 | 463 |
| A01676 | A02331 | 249 | A01676 | A02344 | 228 |
| A01676 | A02377 | 154 | A01676 | A02380 | 268 |
| A01676 | A02382 | 199 | A01676 | A02407 | 408 |
| A01676 | A02450 | 205 | A01676 | A02481 | 456 |
| A01676 | A02484 | 232 | A01676 | A02488 | 440 |
| A01676 | A02491 | 449 | A01676 | A02492 | 240 |
| A01676 | A02493 | 274 | A01676 | A02506 | 213 |
| A01676 | A02564 | 361 | A01676 | A02568 | 451 |
| A01676 | A02591 | 243 | A01676 | A02633 | 445 |

|        |        |     |        |        |     |
|--------|--------|-----|--------|--------|-----|
| A01676 | A02639 | 385 | A01676 | A02664 | 173 |
| A01676 | A02687 | 424 | A01676 | A02689 | 159 |
| A01676 | A02694 | 188 | A01676 | A02697 | 171 |
| A01676 | A02706 | 480 | A01676 | A02709 | 224 |
| A01676 | A02749 | 463 | A01676 | A02754 | 481 |
| A01676 | A02777 | 168 | A01676 | A02792 | 196 |
| A01676 | A02817 | 260 | A01676 | A02828 | 400 |
| A01676 | A02830 | 152 | A01676 | A02837 | 491 |
| A01676 | A02844 | 184 | A01676 | A02859 | 477 |
| A01676 | A02869 | 447 | A01676 | A02874 | 443 |
| A01676 | A02877 | 312 | A01676 | A02878 | 202 |
| A01676 | A02942 | 157 | A01676 | A02961 | 159 |
| A01676 | A02968 | 323 | A01676 | A03011 | 383 |
| A01676 | A03019 | 260 | A01676 | A03022 | 216 |
| A01676 | A03041 | 229 | A01676 | A03076 | 207 |
| A01676 | A03111 | 243 | A01676 | A03112 | 486 |
| A01676 | A03145 | 184 | A01676 | A03150 | 163 |
| A01676 | A03211 | 374 | A01676 | A03259 | 445 |
| A01676 | A03275 | 221 | A01676 | A03309 | 177 |
| A01676 | A03375 | 216 | A01676 | A03451 | 334 |
| A01676 | A03488 | 414 | A01676 | A03611 | 347 |
| A01676 | A03627 | 163 | A01676 | A03642 | 899 |
| A01676 | A03725 | 491 | A01676 | A03787 | 198 |
| A01676 | A03817 | 899 | A01676 | A03821 | 307 |
| A01676 | A03965 | 490 | A01676 | A03988 | 160 |
| A01676 | A03990 | 483 | A01676 | A04006 | 224 |
| A01676 | A04015 | 243 | A01676 | A04026 | 205 |
| A01676 | A04080 | 174 | A01676 | A04111 | 184 |
| A01676 | A04117 | 256 | A01676 | A04246 | 173 |
| A01676 | A04256 | 154 | A01676 | A04334 | 390 |
| A01676 | A04446 | 430 | A01676 | A04452 | 228 |
| A01676 | A04453 | 480 | A01676 | A04455 | 263 |
| A01676 | A04476 | 294 | A01676 | A04493 | 154 |
| A01676 | A04503 | 294 | A01676 | A04533 | 380 |
| A01676 | A04576 | 440 | A01676 | A04598 | 156 |
| A01676 | A04622 | 196 | A01676 | A04627 | 446 |
| A01676 | A04710 | 430 | A01676 | A04717 | 216 |
| A01676 | A04789 | 243 | A01676 | A04794 | 243 |
| A01676 | A04832 | 466 | A01676 | A04867 | 177 |
| A01676 | A04902 | 224 | A01676 | A04908 | 491 |
| A01676 | A04939 | 399 | A01676 | A05015 | 170 |
| A01676 | A05122 | 386 | A01676 | A05164 | 177 |
| A01676 | A05250 | 168 | A01676 | A05260 | 235 |
| A01676 | A05264 | 205 | A01676 | A05274 | 173 |
| A01676 | A05282 | 205 | A01676 | A05286 | 263 |
| A01676 | A05297 | 302 | A01676 | A05349 | 167 |

|        |        |     |        |        |     |
|--------|--------|-----|--------|--------|-----|
| A01676 | A05589 | 168 | A01676 | A05794 | 228 |
| A01676 | A05798 | 152 | A01676 | A05832 | 191 |
| A01676 | A05868 | 316 | A01676 | A05910 | 198 |
| A01676 | A06050 | 263 | A01676 | A06199 | 243 |
| A01676 | A06295 | 899 | A01676 | A06581 | 470 |
| A01676 | A06595 | 443 | A01676 | A06620 | 361 |
| A01676 | A06623 | 238 | A01676 | A06628 | 414 |
| A01676 | A06648 | 457 | A01676 | A06649 | 355 |
| A01676 | A06669 | 288 | A01676 | A06692 | 156 |
| A01676 | A06717 | 198 | A01676 | A06904 | 294 |
| A01676 | A06949 | 204 | A01676 | A07033 | 263 |
| A01676 | A07063 | 293 | A01676 | A07135 | 246 |
| A01676 | A07153 | 491 | A01676 | A07157 | 899 |
| A01676 | A07164 | 167 | A01676 | A07165 | 491 |
| A01676 | A07178 | 200 | A01676 | A07187 | 272 |
| A01676 | A07200 | 306 | A01676 | A07201 | 491 |
| A01676 | A07339 | 193 | A01676 | A07344 | 198 |
| A01676 | A07589 | 228 | A01676 | A07833 | 302 |
| A01676 | A07961 | 343 | A01676 | A08233 | 294 |
| A01676 | A08574 | 177 | A01676 | A08732 | 152 |
| A01676 | A08905 | 202 | A01676 | A09011 | 302 |
| A01676 | A09028 | 294 | A01676 | A09039 | 294 |
| A01676 | A09101 | 366 | A01676 | A09112 | 198 |
| A01676 | A09237 | 205 | A01676 | A09242 | 338 |
| A01676 | A09402 | 228 | A01676 | A09431 | 160 |
| A01676 | A09492 | 263 | A01676 | A09524 | 173 |
| A01676 | A09561 | 177 | A01676 | A09975 | 198 |
| A01676 | A09989 | 152 | A01676 | A10018 | 484 |
| A01676 | A10247 | 200 | A01676 | A10279 | 243 |
| A01676 | A10291 | 288 | A01676 | A10382 | 201 |
| A01676 | A10559 | 263 | A01676 | A10752 | 168 |
| A01676 | A10809 | 168 | A01676 | A10966 | 243 |
| A01676 | A11285 | 474 | A01676 | A11404 | 491 |
| A01676 | A11683 | 210 | A01676 | A11911 | 193 |
| A01676 | A11936 | 163 | A01676 | A12246 | 160 |
| A01676 | A12785 | 294 | A01676 | A12897 | 433 |
| A01676 | A12910 | 263 | A01676 | A13607 | 198 |
| A01676 | A14193 | 430 | A01676 | A14198 | 899 |
| A01676 | A14434 | 198 | A01676 | A14436 | 177 |
| A01676 | A14596 | 899 | A01676 | A14643 | 311 |
| A01676 | A14664 | 363 | A01676 | A14790 | 240 |
| A01676 | A14839 | 190 | A01676 | A15233 | 328 |
| A01676 | A15293 | 899 | A01676 | A15294 | 899 |
| A01676 | A15627 | 198 | A01676 | A15809 | 195 |
| A01676 | A15837 | 301 | A01676 | A15838 | 160 |
| A01676 | A16068 | 369 | A01676 | A16300 | 224 |

|        |        |     |        |        |     |
|--------|--------|-----|--------|--------|-----|
| A01676 | A16636 | 340 | A01676 | A16738 | 162 |
| A01676 | A16740 | 184 | A01676 | A16877 | 201 |
| A01676 | A16911 | 238 | A01677 | A01678 | 634 |
| A01677 | A01683 | 488 | A01677 | A01706 | 491 |
| A01677 | A01710 | 491 | A01677 | A01715 | 149 |
| A01677 | A01741 | 380 | A01677 | A01810 | 212 |
| A01677 | A01811 | 115 | A01677 | A01853 | 241 |
| A01677 | A01918 | 582 | A01677 | A01926 | 311 |
| A01677 | A02254 | 151 | A01677 | A02346 | 187 |
| A01677 | A02530 | 174 | A01677 | A02721 | 160 |
| A01677 | A02887 | 480 | A01677 | A03016 | 210 |
| A01677 | A03238 | 355 | A01677 | A03271 | 276 |
| A01677 | A03281 | 196 | A01677 | A03293 | 327 |
| A01677 | A03326 | 343 | A01677 | A03329 | 490 |
| A01677 | A03428 | 634 | A01677 | A03452 | 634 |
| A01677 | A03481 | 416 | A01677 | A03489 | 63  |
| A01677 | A03565 | 77  | A01677 | A03618 | 491 |
| A01677 | A03626 | 491 | A01677 | A03718 | 95  |
| A01677 | A03876 | 174 | A01677 | A03889 | 633 |
| A01677 | A03892 | 368 | A01677 | A04145 | 87  |
| A01677 | A04292 | 491 | A01677 | A04318 | 303 |
| A01677 | A04487 | 208 | A01677 | A04686 | 352 |
| A01677 | A04883 | 252 | A01677 | A04894 | 599 |
| A01677 | A04929 | 77  | A01677 | A04995 | 200 |
| A01677 | A05028 | 488 | A01677 | A05200 | 456 |
| A01677 | A05204 | 312 | A01677 | A05774 | 152 |
| A01677 | A05785 | 241 | A01677 | A05862 | 263 |
| A01677 | A06011 | 610 | A01677 | A06168 | 252 |
| A01677 | A06675 | 246 | A01677 | A06831 | 182 |
| A01677 | A06890 | 574 | A01677 | A06941 | 484 |
| A01677 | A07109 | 311 | A01677 | A07520 | 162 |
| A01677 | A07521 | 400 | A01677 | A07723 | 263 |
| A01677 | A07820 | 634 | A01677 | A08400 | 960 |
| A01677 | A08454 | 129 | A01677 | A08765 | 491 |
| A01677 | A08766 | 274 | A01677 | A08772 | 497 |
| A01677 | A08777 | 574 | A01677 | A08778 | 274 |
| A01677 | A08874 | 356 | A01677 | A09007 | 167 |
| A01677 | A09036 | 281 | A01677 | A09043 | 167 |
| A01677 | A09056 | 374 | A01677 | A09277 | 293 |
| A01677 | A09326 | 581 | A01677 | A09333 | 470 |
| A01677 | A09375 | 170 | A01677 | A09891 | 241 |
| A01677 | A09892 | 212 | A01677 | A09943 | 157 |
| A01677 | A10372 | 475 | A01677 | A10663 | 255 |
| A01677 | A10799 | 335 | A01677 | A10804 | 393 |
| A01677 | A11247 | 139 | A01677 | A11287 | 247 |
| A01677 | A11456 | 456 | A01677 | A11640 | 167 |

|        |        |     |        |        |     |
|--------|--------|-----|--------|--------|-----|
| A01677 | A12052 | 229 | A01677 | A13106 | 357 |
| A01677 | A13222 | 310 | A01677 | A13231 | 152 |
| A01677 | A13568 | 374 | A01677 | A13826 | 63  |
| A01677 | A13832 | 243 | A01677 | A13845 | 632 |
| A01677 | A13855 | 271 | A01677 | A13902 | 177 |
| A01677 | A14056 | 63  | A01677 | A14095 | 85  |
| A01677 | A14168 | 316 | A01677 | A14182 | 472 |
| A01677 | A14247 | 491 | A01677 | A14258 | 271 |
| A01677 | A14661 | 446 | A01677 | A14838 | 634 |
| A01677 | A14863 | 198 | A01677 | A15346 | 63  |
| A01677 | A15647 | 424 | A01677 | A15650 | 489 |
| A01677 | A15770 | 241 | A01677 | A15962 | 65  |
| A01677 | A16617 | 633 | A01677 | A16652 | 468 |
| A01677 | A16758 | 457 | A01677 | A17091 | 400 |
| A01678 | A01683 | 429 | A01678 | A01706 | 488 |
| A01678 | A01710 | 491 | A01678 | A01715 | 96  |
| A01678 | A01918 | 546 | A01678 | A03293 | 301 |
| A01678 | A03326 | 159 | A01678 | A03329 | 240 |
| A01678 | A03428 | 633 | A01678 | A03452 | 631 |
| A01678 | A03513 | 224 | A01678 | A03618 | 473 |
| A01678 | A03626 | 475 | A01678 | A03889 | 628 |
| A01678 | A03890 | 230 | A01678 | A04292 | 469 |
| A01678 | A04839 | 314 | A01678 | A04894 | 324 |
| A01678 | A05200 | 486 | A01678 | A05862 | 363 |
| A01678 | A06011 | 613 | A01678 | A06890 | 415 |
| A01678 | A06941 | 283 | A01678 | A07521 | 345 |
| A01678 | A07736 | 235 | A01678 | A07820 | 605 |
| A01678 | A08400 | 589 | A01678 | A08454 | 230 |
| A01678 | A08772 | 235 | A01678 | A08777 | 257 |
| A01678 | A09056 | 491 | A01678 | A09060 | 358 |
| A01678 | A09326 | 235 | A01678 | A10584 | 127 |
| A01678 | A10663 | 154 | A01678 | A10804 | 208 |
| A01678 | A11456 | 177 | A01678 | A13845 | 469 |
| A01678 | A13855 | 285 | A01678 | A14168 | 281 |
| A01678 | A14182 | 283 | A01678 | A14247 | 491 |
| A01678 | A14258 | 240 | A01678 | A14838 | 616 |
| A01678 | A15650 | 461 | A01678 | A16617 | 610 |
| A01678 | A17061 | 179 | A01678 | A17091 | 217 |
| A01679 | A03468 | 299 | A01679 | A03710 | 317 |
| A01679 | A05332 | 317 | A01679 | A05370 | 279 |
| A01679 | A05609 | 317 | A01679 | A06101 | 299 |
| A01679 | A06134 | 290 | A01679 | A06264 | 246 |
| A01679 | A06819 | 165 | A01679 | A07222 | 317 |
| A01679 | A07333 | 475 | A01679 | A07571 | 317 |
| A01679 | A07974 | 317 | A01679 | A08097 | 317 |
| A01679 | A09340 | 317 | A01679 | A13234 | 246 |



|        |        |     |        |        |     |
|--------|--------|-----|--------|--------|-----|
| A01679 | A14525 | 205 | A01679 | A15655 | 311 |
| A01679 | A16219 | 281 | A01680 | A01682 | 229 |
| A01680 | A01686 | 401 | A01680 | A01708 | 899 |
| A01680 | A01822 | 430 | A01680 | A01920 | 899 |
| A01680 | A03057 | 278 | A01680 | A03327 | 317 |
| A01680 | A03929 | 219 | A01680 | A04650 | 240 |
| A01680 | A04668 | 408 | A01680 | A04682 | 382 |
| A01680 | A05334 | 152 | A01680 | A05690 | 317 |
| A01680 | A06000 | 456 | A01680 | A06130 | 317 |
| A01680 | A06381 | 317 | A01680 | A06466 | 491 |
| A01680 | A06750 | 229 | A01680 | A06982 | 172 |
| A01680 | A07311 | 944 | A01680 | A07353 | 317 |
| A01680 | A07603 | 488 | A01680 | A07670 | 229 |
| A01680 | A08315 | 416 | A01680 | A08516 | 534 |
| A01680 | A08533 | 173 | A01680 | A08820 | 196 |
| A01680 | A09000 | 343 | A01680 | A09464 | 215 |
| A01680 | A09569 | 305 | A01680 | A09577 | 491 |
| A01680 | A10373 | 424 | A01680 | A10534 | 159 |
| A01680 | A10913 | 159 | A01680 | A11236 | 274 |
| A01680 | A11871 | 430 | A01680 | A12556 | 396 |
| A01680 | A12652 | 168 | A01680 | A13340 | 488 |
| A01680 | A14073 | 490 | A01680 | A14079 | 489 |
| A01680 | A14208 | 346 | A01680 | A14256 | 63  |
| A01680 | A14477 | 640 | A01680 | A14483 | 302 |
| A01680 | A14498 | 343 | A01680 | A14674 | 643 |
| A01680 | A14702 | 343 | A01680 | A15133 | 156 |
| A01680 | A15146 | 254 | A01680 | A15215 | 288 |
| A01680 | A15293 | 899 | A01680 | A15294 | 899 |
| A01680 | A15837 | 317 | A01680 | A16272 | 441 |
| A01680 | A16318 | 379 | A01680 | A16457 | 162 |
| A01680 | A16618 | 218 | A01680 | A16626 | 317 |
| A01680 | A16643 | 317 | A01680 | A16738 | 615 |
| A01680 | A17148 | 180 | A01681 | A03297 | 200 |
| A01681 | A03321 | 167 | A01681 | A03688 | 198 |
| A01681 | A04139 | 581 | A01681 | A04171 | 288 |
| A01681 | A04239 | 202 | A01681 | A04710 | 154 |
| A01681 | A04790 | 201 | A01681 | A04832 | 205 |
| A01681 | A04845 | 191 | A01681 | A05094 | 193 |
| A01681 | A05181 | 193 | A01681 | A05854 | 165 |
| A01681 | A07054 | 343 | A01681 | A07242 | 187 |
| A01681 | A07934 | 445 | A01681 | A08278 | 193 |
| A01681 | A08702 | 347 | A01681 | A08961 | 263 |
| A01681 | A10502 | 330 | A01681 | A10987 | 226 |
| A01681 | A11033 | 212 | A01681 | A11434 | 330 |
| A01681 | A12047 | 165 | A01681 | A12650 | 303 |
| A01681 | A13614 | 180 | A01681 | A13866 | 168 |

|        |        |     |        |        |     |
|--------|--------|-----|--------|--------|-----|
| A01681 | A16261 | 187 | A01681 | A16333 | 246 |
| A01682 | A03001 | 213 | A01682 | A03327 | 229 |
| A01682 | A03408 | 462 | A01682 | A05690 | 229 |
| A01682 | A06130 | 229 | A01682 | A06381 | 229 |
| A01682 | A06750 | 438 | A01682 | A07353 | 229 |
| A01682 | A07670 | 438 | A01682 | A11288 | 196 |
| A01682 | A12284 | 372 | A01682 | A12824 | 372 |
| A01682 | A13361 | 232 | A01682 | A13892 | 293 |
| A01682 | A15837 | 229 | A01682 | A16626 | 229 |
| A01682 | A16643 | 229 | A01683 | A01706 | 489 |
| A01683 | A01710 | 380 | A01683 | A01811 | 129 |
| A01683 | A01822 | 162 | A01683 | A01988 | 63  |
| A01683 | A03271 | 491 | A01683 | A03293 | 592 |
| A01683 | A03294 | 491 | A01683 | A03329 | 362 |
| A01683 | A03428 | 221 | A01683 | A03452 | 486 |
| A01683 | A03489 | 63  | A01683 | A03569 | 191 |
| A01683 | A03597 | 208 | A01683 | A03618 | 485 |
| A01683 | A03626 | 490 | A01683 | A03718 | 279 |
| A01683 | A03752 | 157 | A01683 | A03889 | 441 |
| A01683 | A03891 | 488 | A01683 | A03892 | 789 |
| A01683 | A04145 | 99  | A01683 | A04151 | 154 |
| A01683 | A04292 | 364 | A01683 | A04686 | 796 |
| A01683 | A04835 | 159 | A01683 | A04893 | 154 |
| A01683 | A04929 | 366 | A01683 | A05024 | 603 |
| A01683 | A05028 | 380 | A01683 | A05401 | 393 |
| A01683 | A06011 | 266 | A01683 | A06168 | 168 |
| A01683 | A06689 | 307 | A01683 | A06890 | 165 |
| A01683 | A06941 | 235 | A01683 | A07180 | 63  |
| A01683 | A07203 | 629 | A01683 | A07208 | 191 |
| A01683 | A07521 | 463 | A01683 | A07820 | 435 |
| A01683 | A08137 | 169 | A01683 | A08484 | 281 |
| A01683 | A08544 | 200 | A01683 | A09043 | 177 |
| A01683 | A09121 | 157 | A01683 | A09326 | 140 |
| A01683 | A09333 | 351 | A01683 | A10235 | 266 |
| A01683 | A10578 | 110 | A01683 | A10584 | 658 |
| A01683 | A10655 | 404 | A01683 | A10663 | 168 |
| A01683 | A10739 | 278 | A01683 | A10790 | 299 |
| A01683 | A10794 | 449 | A01683 | A10797 | 416 |
| A01683 | A10798 | 334 | A01683 | A10799 | 463 |
| A01683 | A10803 | 693 | A01683 | A10821 | 413 |
| A01683 | A10897 | 159 | A01683 | A11247 | 449 |
| A01683 | A11250 | 327 | A01683 | A11251 | 313 |
| A01683 | A11337 | 340 | A01683 | A11373 | 475 |
| A01683 | A11885 | 489 | A01683 | A11937 | 159 |
| A01683 | A13222 | 324 | A01683 | A13568 | 266 |
| A01683 | A13826 | 63  | A01683 | A13831 | 763 |

|        |        |     |        |        |     |
|--------|--------|-----|--------|--------|-----|
| A01683 | A13855 | 294 | A01683 | A13902 | 346 |
| A01683 | A14056 | 973 | A01683 | A14182 | 63  |
| A01683 | A14247 | 529 | A01683 | A14272 | 463 |
| A01683 | A14461 | 430 | A01683 | A14661 | 172 |
| A01683 | A14838 | 427 | A01683 | A14896 | 285 |
| A01683 | A15336 | 283 | A01683 | A15346 | 63  |
| A01683 | A15498 | 447 | A01683 | A15506 | 167 |
| A01683 | A15650 | 326 | A01683 | A16617 | 374 |
| A01683 | A16669 | 241 | A01683 | A17128 | 205 |
| A01684 | A01707 | 226 | A01684 | A01770 | 330 |
| A01684 | A01787 | 157 | A01684 | A01917 | 650 |
| A01684 | A02003 | 163 | A01684 | A02329 | 157 |
| A01684 | A02718 | 163 | A01684 | A02896 | 343 |
| A01684 | A03446 | 190 | A01684 | A03472 | 519 |
| A01684 | A03476 | 193 | A01684 | A03567 | 401 |
| A01684 | A03738 | 472 | A01684 | A03783 | 219 |
| A01684 | A03859 | 171 | A01684 | A03958 | 229 |
| A01684 | A05025 | 488 | A01684 | A05230 | 167 |
| A01684 | A05995 | 184 | A01684 | A06275 | 179 |
| A01684 | A06543 | 712 | A01684 | A06807 | 262 |
| A01684 | A06901 | 319 | A01684 | A07247 | 472 |
| A01684 | A07311 | 228 | A01684 | A07700 | 217 |
| A01684 | A07744 | 343 | A01684 | A07760 | 152 |
| A01684 | A08022 | 402 | A01684 | A08072 | 356 |
| A01684 | A08098 | 343 | A01684 | A08178 | 343 |
| A01684 | A08357 | 374 | A01684 | A09032 | 356 |
| A01684 | A09618 | 356 | A01684 | A10362 | 213 |
| A01684 | A10532 | 491 | A01684 | A11296 | 187 |
| A01684 | A11733 | 345 | A01684 | A11808 | 226 |
| A01684 | A12839 | 291 | A01684 | A13989 | 491 |
| A01684 | A14150 | 165 | A01684 | A14216 | 378 |
| A01684 | A14596 | 474 | A01684 | A14597 | 232 |
| A01684 | A14959 | 356 | A01684 | A15156 | 441 |
| A01684 | A15660 | 483 | A01684 | A15684 | 430 |
| A01684 | A15931 | 283 | A01684 | A16089 | 185 |
| A01684 | A16462 | 170 | A01685 | A01687 | 311 |
| A01685 | A01717 | 474 | A01685 | A02343 | 151 |
| A01685 | A02579 | 156 | A01685 | A03297 | 321 |
| A01685 | A03298 | 469 | A01685 | A03299 | 227 |
| A01685 | A03422 | 263 | A01685 | A03492 | 235 |
| A01685 | A03496 | 191 | A01685 | A03528 | 486 |
| A01685 | A03531 | 184 | A01685 | A03728 | 152 |
| A01685 | A04355 | 491 | A01685 | A04722 | 324 |
| A01685 | A05008 | 366 | A01685 | A05009 | 227 |
| A01685 | A05015 | 491 | A01685 | A05219 | 491 |
| A01685 | A05779 | 246 | A01685 | A05894 | 179 |

|        |        |     |        |        |     |
|--------|--------|-----|--------|--------|-----|
| A01685 | A05990 | 323 | A01685 | A06143 | 262 |
| A01685 | A06176 | 235 | A01685 | A06309 | 172 |
| A01685 | A06348 | 491 | A01685 | A06621 | 168 |
| A01685 | A06919 | 191 | A01685 | A07083 | 352 |
| A01685 | A07206 | 277 | A01685 | A07373 | 232 |
| A01685 | A07422 | 98  | A01685 | A07593 | 441 |
| A01685 | A08416 | 308 | A01685 | A08571 | 491 |
| A01685 | A08876 | 413 | A01685 | A08883 | 362 |
| A01685 | A08885 | 491 | A01685 | A09124 | 276 |
| A01685 | A09256 | 491 | A01685 | A09506 | 240 |
| A01685 | A09767 | 449 | A01685 | A09793 | 176 |
| A01685 | A09829 | 210 | A01685 | A10623 | 360 |
| A01685 | A10725 | 210 | A01685 | A11027 | 479 |
| A01685 | A11179 | 353 | A01685 | A11258 | 430 |
| A01685 | A11284 | 389 | A01685 | A11348 | 208 |
| A01685 | A11478 | 305 | A01685 | A11534 | 283 |
| A01685 | A11828 | 165 | A01685 | A11876 | 240 |
| A01685 | A12275 | 400 | A01685 | A12445 | 450 |
| A01685 | A13082 | 458 | A01685 | A13977 | 147 |
| A01685 | A13978 | 475 | A01685 | A14301 | 374 |
| A01685 | A14474 | 96  | A01685 | A14633 | 177 |
| A01685 | A14715 | 353 | A01685 | A15415 | 213 |
| A01685 | A15726 | 311 | A01685 | A15840 | 165 |
| A01685 | A15910 | 416 | A01685 | A15926 | 361 |
| A01686 | A01690 | 255 | A01686 | A01737 | 460 |
| A01686 | A02058 | 491 | A01686 | A02183 | 374 |
| A01686 | A02629 | 160 | A01686 | A02675 | 213 |
| A01686 | A02806 | 472 | A01686 | A02847 | 491 |
| A01686 | A02887 | 491 | A01686 | A03057 | 491 |
| A01686 | A03301 | 491 | A01686 | A03327 | 393 |
| A01686 | A03420 | 303 | A01686 | A03822 | 210 |
| A01686 | A04073 | 491 | A01686 | A04667 | 185 |
| A01686 | A04668 | 491 | A01686 | A05218 | 185 |
| A01686 | A05334 | 491 | A01686 | A06000 | 491 |
| A01686 | A06029 | 470 | A01686 | A06242 | 491 |
| A01686 | A06297 | 491 | A01686 | A06353 | 152 |
| A01686 | A06431 | 205 | A01686 | A06775 | 451 |
| A01686 | A06851 | 488 | A01686 | A06864 | 491 |
| A01686 | A06924 | 162 | A01686 | A06982 | 491 |
| A01686 | A07079 | 491 | A01686 | A07224 | 174 |
| A01686 | A07311 | 899 | A01686 | A07319 | 491 |
| A01686 | A07332 | 491 | A01686 | A07346 | 491 |
| A01686 | A07353 | 213 | A01686 | A07466 | 489 |
| A01686 | A07480 | 491 | A01686 | A07534 | 491 |
| A01686 | A07603 | 491 | A01686 | A07628 | 213 |
| A01686 | A07647 | 491 | A01686 | A07902 | 491 |

|        |        |     |        |        |     |
|--------|--------|-----|--------|--------|-----|
| A01686 | A07929 | 154 | A01686 | A07989 | 346 |
| A01686 | A07996 | 491 | A01686 | A08000 | 491 |
| A01686 | A08025 | 213 | A01686 | A08029 | 440 |
| A01686 | A08030 | 491 | A01686 | A08117 | 491 |
| A01686 | A08141 | 491 | A01686 | A08208 | 491 |
| A01686 | A08212 | 491 | A01686 | A08516 | 480 |
| A01686 | A08526 | 274 | A01686 | A08669 | 491 |
| A01686 | A08769 | 486 | A01686 | A08820 | 491 |
| A01686 | A08902 | 479 | A01686 | A08919 | 226 |
| A01686 | A08994 | 63  | A01686 | A09000 | 252 |
| A01686 | A09288 | 491 | A01686 | A09301 | 152 |
| A01686 | A09598 | 491 | A01686 | A09623 | 398 |
| A01686 | A09626 | 490 | A01686 | A09629 | 491 |
| A01686 | A09653 | 243 | A01686 | A09654 | 462 |
| A01686 | A09660 | 63  | A01686 | A09663 | 170 |
| A01686 | A09706 | 491 | A01686 | A09762 | 252 |
| A01686 | A09764 | 485 | A01686 | A10083 | 271 |
| A01686 | A10373 | 491 | A01686 | A10625 | 429 |
| A01686 | A10846 | 274 | A01686 | A11236 | 488 |
| A01686 | A11540 | 491 | A01686 | A11596 | 406 |
| A01686 | A11703 | 180 | A01686 | A11782 | 323 |
| A01686 | A11792 | 241 | A01686 | A11829 | 362 |
| A01686 | A11841 | 486 | A01686 | A11916 | 491 |
| A01686 | A12174 | 174 | A01686 | A12190 | 154 |
| A01686 | A12556 | 491 | A01686 | A12625 | 422 |
| A01686 | A12747 | 174 | A01686 | A12932 | 317 |
| A01686 | A13254 | 213 | A01686 | A13339 | 167 |
| A01686 | A13429 | 439 | A01686 | A13510 | 190 |
| A01686 | A13586 | 302 | A01686 | A13634 | 221 |
| A01686 | A13907 | 484 | A01686 | A13913 | 485 |
| A01686 | A13949 | 491 | A01686 | A13986 | 344 |
| A01686 | A14007 | 447 | A01686 | A14014 | 159 |
| A01686 | A14076 | 491 | A01686 | A14077 | 167 |
| A01686 | A14079 | 491 | A01686 | A14093 | 491 |
| A01686 | A14094 | 491 | A01686 | A14153 | 162 |
| A01686 | A14155 | 491 | A01686 | A14177 | 491 |
| A01686 | A14230 | 491 | A01686 | A14273 | 491 |
| A01686 | A14452 | 168 | A01686 | A14460 | 491 |
| A01686 | A14694 | 490 | A01686 | A14706 | 477 |
| A01686 | A14930 | 156 | A01686 | A14964 | 160 |
| A01686 | A15356 | 416 | A01686 | A15369 | 491 |
| A01686 | A15371 | 490 | A01686 | A15395 | 165 |
| A01686 | A15420 | 449 | A01686 | A15524 | 475 |
| A01686 | A15531 | 425 | A01686 | A15539 | 307 |
| A01686 | A15603 | 319 | A01686 | A15654 | 488 |
| A01686 | A15714 | 366 | A01686 | A15837 | 491 |

|        |        |     |        |        |     |
|--------|--------|-----|--------|--------|-----|
| A01686 | A15876 | 154 | A01686 | A15941 | 491 |
| A01686 | A15942 | 368 | A01686 | A16068 | 301 |
| A01686 | A16073 | 418 | A01686 | A16127 | 491 |
| A01686 | A16128 | 491 | A01686 | A16129 | 491 |
| A01686 | A16134 | 390 | A01686 | A16225 | 296 |
| A01686 | A16226 | 491 | A01686 | A16290 | 174 |
| A01686 | A16294 | 489 | A01686 | A16299 | 343 |
| A01686 | A16378 | 486 | A01686 | A16431 | 82  |
| A01686 | A16452 | 151 | A01686 | A16461 | 110 |
| A01686 | A16548 | 154 | A01686 | A16606 | 491 |
| A01686 | A16612 | 469 | A01686 | A16613 | 491 |
| A01686 | A16616 | 490 | A01686 | A16626 | 491 |
| A01686 | A16646 | 491 | A01686 | A16754 | 491 |
| A01686 | A16762 | 465 | A01686 | A17109 | 174 |
| A01687 | A01689 | 469 | A01687 | A01717 | 236 |
| A01687 | A01988 | 491 | A01687 | A02228 | 322 |
| A01687 | A02573 | 473 | A01687 | A03032 | 208 |
| A01687 | A03422 | 384 | A01687 | A03492 | 486 |
| A01687 | A03496 | 598 | A01687 | A03528 | 441 |
| A01687 | A03575 | 163 | A01687 | A03880 | 460 |
| A01687 | A04054 | 182 | A01687 | A04715 | 229 |
| A01687 | A05008 | 618 | A01687 | A05009 | 607 |
| A01687 | A05015 | 488 | A01687 | A05029 | 63  |
| A01687 | A05243 | 201 | A01687 | A05301 | 484 |
| A01687 | A05428 | 363 | A01687 | A05638 | 391 |
| A01687 | A05880 | 229 | A01687 | A05892 | 491 |
| A01687 | A05894 | 163 | A01687 | A06176 | 491 |
| A01687 | A06187 | 196 | A01687 | A06348 | 491 |
| A01687 | A06572 | 486 | A01687 | A06576 | 196 |
| A01687 | A06591 | 490 | A01687 | A06661 | 491 |
| A01687 | A06715 | 491 | A01687 | A07054 | 491 |
| A01687 | A07073 | 236 | A01687 | A07083 | 488 |
| A01687 | A07242 | 491 | A01687 | A07313 | 223 |
| A01687 | A07364 | 154 | A01687 | A07425 | 396 |
| A01687 | A07433 | 424 | A01687 | A07444 | 345 |
| A01687 | A07483 | 470 | A01687 | A07495 | 491 |
| A01687 | A07593 | 263 | A01687 | A07665 | 479 |
| A01687 | A07687 | 185 | A01687 | A07696 | 491 |
| A01687 | A07709 | 490 | A01687 | A07762 | 419 |
| A01687 | A07810 | 196 | A01687 | A07816 | 491 |
| A01687 | A07893 | 480 | A01687 | A07934 | 396 |
| A01687 | A07954 | 491 | A01687 | A08068 | 224 |
| A01687 | A08084 | 232 | A01687 | A08126 | 490 |
| A01687 | A08184 | 425 | A01687 | A08525 | 347 |
| A01687 | A08531 | 491 | A01687 | A08536 | 655 |
| A01687 | A08551 | 337 | A01687 | A08569 | 63  |

|        |        |     |        |        |     |
|--------|--------|-----|--------|--------|-----|
| A01687 | A08819 | 185 | A01687 | A08839 | 458 |
| A01687 | A08853 | 486 | A01687 | A08854 | 299 |
| A01687 | A08858 | 188 | A01687 | A08868 | 372 |
| A01687 | A08885 | 485 | A01687 | A08961 | 168 |
| A01687 | A09256 | 455 | A01687 | A09624 | 235 |
| A01687 | A09643 | 173 | A01687 | A09662 | 491 |
| A01687 | A09666 | 488 | A01687 | A09727 | 183 |
| A01687 | A09793 | 475 | A01687 | A10909 | 291 |
| A01687 | A11156 | 297 | A01687 | A11192 | 232 |
| A01687 | A11281 | 486 | A01687 | A11340 | 174 |
| A01687 | A11346 | 491 | A01687 | A11472 | 165 |
| A01687 | A11661 | 174 | A01687 | A11675 | 491 |
| A01687 | A11676 | 461 | A01687 | A12047 | 491 |
| A01687 | A12258 | 484 | A01687 | A12275 | 452 |
| A01687 | A12508 | 267 | A01687 | A12722 | 491 |
| A01687 | A12727 | 182 | A01687 | A12858 | 383 |
| A01687 | A12974 | 63  | A01687 | A13489 | 232 |
| A01687 | A13866 | 187 | A01687 | A13942 | 234 |
| A01687 | A14009 | 484 | A01687 | A14193 | 491 |
| A01687 | A14227 | 353 | A01687 | A14263 | 491 |
| A01687 | A14266 | 491 | A01687 | A14270 | 486 |
| A01687 | A14278 | 414 | A01687 | A14279 | 491 |
| A01687 | A14281 | 491 | A01687 | A14291 | 157 |
| A01687 | A14304 | 168 | A01687 | A14464 | 316 |
| A01687 | A14474 | 491 | A01687 | A14484 | 491 |
| A01687 | A14633 | 491 | A01687 | A14643 | 463 |
| A01687 | A14719 | 390 | A01687 | A15102 | 234 |
| A01687 | A15187 | 420 | A01687 | A15501 | 475 |
| A01687 | A15533 | 288 | A01687 | A15557 | 281 |
| A01687 | A15726 | 385 | A01687 | A15895 | 232 |
| A01687 | A16387 | 80  | A01687 | A16602 | 174 |
| A01687 | A16608 | 279 | A01687 | A16764 | 238 |
| A01687 | A16782 | 157 | A01687 | A16913 | 416 |
| A01687 | A17013 | 163 | A01687 | A17030 | 154 |
| A01687 | A17198 | 272 | A01688 | A01694 | 311 |
| A01688 | A01709 | 899 | A01688 | A01730 | 249 |
| A01688 | A01790 | 297 | A01688 | A01798 | 219 |
| A01688 | A01844 | 322 | A01688 | A01931 | 198 |
| A01688 | A02360 | 163 | A01688 | A02436 | 486 |
| A01688 | A02452 | 160 | A01688 | A02484 | 152 |
| A01688 | A02640 | 316 | A01688 | A02752 | 215 |
| A01688 | A02789 | 406 | A01688 | A02873 | 177 |
| A01688 | A03007 | 404 | A01688 | A03436 | 302 |
| A01688 | A03451 | 199 | A01688 | A03477 | 391 |
| A01688 | A03560 | 268 | A01688 | A03575 | 246 |
| A01688 | A03611 | 218 | A01688 | A03778 | 480 |

|        |        |     |        |        |     |
|--------|--------|-----|--------|--------|-----|
| A01688 | A03854 | 385 | A01688 | A03946 | 274 |
| A01688 | A04007 | 251 | A01688 | A04020 | 474 |
| A01688 | A04062 | 938 | A01688 | A04074 | 465 |
| A01688 | A04249 | 193 | A01688 | A04449 | 182 |
| A01688 | A04484 | 899 | A01688 | A04527 | 200 |
| A01688 | A04699 | 903 | A01688 | A04807 | 271 |
| A01688 | A04991 | 249 | A01688 | A05064 | 899 |
| A01688 | A05082 | 435 | A01688 | A05414 | 235 |
| A01688 | A05415 | 213 | A01688 | A05529 | 350 |
| A01688 | A05701 | 401 | A01688 | A05854 | 484 |
| A01688 | A05997 | 193 | A01688 | A06063 | 157 |
| A01688 | A06277 | 899 | A01688 | A06390 | 327 |
| A01688 | A06588 | 224 | A01688 | A06610 | 273 |
| A01688 | A06660 | 353 | A01688 | A07311 | 903 |
| A01688 | A07390 | 151 | A01688 | A07422 | 905 |
| A01688 | A08300 | 180 | A01688 | A08878 | 489 |
| A01688 | A09018 | 316 | A01688 | A09124 | 445 |
| A01688 | A09149 | 440 | A01688 | A09273 | 240 |
| A01688 | A09454 | 335 | A01688 | A09542 | 913 |
| A01688 | A10218 | 160 | A01688 | A10560 | 190 |
| A01688 | A10579 | 168 | A01688 | A10623 | 160 |
| A01688 | A10824 | 177 | A01688 | A10894 | 274 |
| A01688 | A11068 | 179 | A01688 | A11125 | 899 |
| A01688 | A11206 | 899 | A01688 | A11604 | 163 |
| A01688 | A11814 | 281 | A01688 | A11983 | 945 |
| A01688 | A12705 | 899 | A01688 | A13213 | 335 |
| A01688 | A13400 | 369 | A01688 | A13768 | 163 |
| A01688 | A13975 | 902 | A01688 | A13981 | 899 |
| A01688 | A13985 | 899 | A01688 | A13997 | 483 |
| A01688 | A14002 | 157 | A01688 | A14032 | 899 |
| A01688 | A14188 | 899 | A01688 | A14198 | 899 |
| A01688 | A14211 | 210 | A01688 | A14433 | 899 |
| A01688 | A14682 | 268 | A01688 | A15305 | 268 |
| A01688 | A16392 | 163 | A01688 | A17188 | 899 |
| A01689 | A01794 | 193 | A01689 | A01867 | 182 |
| A01689 | A02039 | 174 | A01689 | A02154 | 213 |
| A01689 | A02173 | 174 | A01689 | A02228 | 201 |
| A01689 | A02287 | 227 | A01689 | A02301 | 162 |
| A01689 | A02319 | 310 | A01689 | A02325 | 152 |
| A01689 | A02381 | 407 | A01689 | A02407 | 176 |
| A01689 | A02541 | 210 | A01689 | A02546 | 268 |
| A01689 | A02571 | 210 | A01689 | A02572 | 506 |
| A01689 | A02686 | 180 | A01689 | A02799 | 243 |
| A01689 | A03224 | 162 | A01689 | A03243 | 249 |
| A01689 | A03264 | 217 | A01689 | A03492 | 316 |
| A01689 | A03496 | 461 | A01689 | A03575 | 240 |



|        |        |     |        |        |     |
|--------|--------|-----|--------|--------|-----|
| A01689 | A04139 | 188 | A01689 | A04372 | 290 |
| A01689 | A04410 | 386 | A01689 | A04493 | 290 |
| A01689 | A04620 | 243 | A01689 | A04693 | 162 |
| A01689 | A05008 | 341 | A01689 | A05009 | 485 |
| A01689 | A05015 | 180 | A01689 | A05383 | 187 |
| A01689 | A05390 | 187 | A01689 | A05550 | 162 |
| A01689 | A05625 | 224 | A01689 | A05796 | 157 |
| A01689 | A05880 | 196 | A01689 | A05892 | 139 |
| A01689 | A05894 | 393 | A01689 | A05899 | 302 |
| A01689 | A05949 | 187 | A01689 | A05998 | 234 |
| A01689 | A06004 | 205 | A01689 | A06211 | 254 |
| A01689 | A06348 | 491 | A01689 | A06558 | 319 |
| A01689 | A06572 | 333 | A01689 | A06971 | 236 |
| A01689 | A07384 | 193 | A01689 | A07425 | 441 |
| A01689 | A07433 | 346 | A01689 | A07593 | 454 |
| A01689 | A07705 | 283 | A01689 | A08184 | 188 |
| A01689 | A08196 | 297 | A01689 | A08525 | 484 |
| A01689 | A08543 | 208 | A01689 | A08549 | 308 |
| A01689 | A08550 | 241 | A01689 | A08557 | 174 |
| A01689 | A08560 | 361 | A01689 | A08561 | 404 |
| A01689 | A08569 | 168 | A01689 | A08671 | 241 |
| A01689 | A08814 | 311 | A01689 | A08839 | 308 |
| A01689 | A08844 | 185 | A01689 | A08845 | 185 |
| A01689 | A08853 | 352 | A01689 | A08854 | 200 |
| A01689 | A08868 | 338 | A01689 | A08894 | 190 |
| A01689 | A09052 | 468 | A01689 | A09609 | 377 |
| A01689 | A09828 | 296 | A01689 | A09829 | 193 |
| A01689 | A10619 | 167 | A01689 | A10789 | 335 |
| A01689 | A11183 | 290 | A01689 | A11209 | 221 |
| A01689 | A11234 | 257 | A01689 | A11482 | 213 |
| A01689 | A11496 | 279 | A01689 | A11497 | 163 |
| A01689 | A11555 | 272 | A01689 | A11616 | 160 |
| A01689 | A11656 | 369 | A01689 | A11675 | 351 |
| A01689 | A11917 | 154 | A01689 | A12047 | 330 |
| A01689 | A12433 | 265 | A01689 | A12507 | 283 |
| A01689 | A12655 | 198 | A01689 | A12659 | 157 |
| A01689 | A12725 | 262 | A01689 | A12738 | 165 |
| A01689 | A12858 | 319 | A01689 | A13116 | 191 |
| A01689 | A13231 | 243 | A01689 | A13313 | 274 |
| A01689 | A13399 | 227 | A01689 | A13737 | 188 |
| A01689 | A13781 | 198 | A01689 | A13809 | 272 |
| A01689 | A13906 | 243 | A01689 | A13912 | 271 |
| A01689 | A13963 | 159 | A01689 | A14084 | 323 |
| A01689 | A14214 | 229 | A01689 | A14222 | 160 |
| A01689 | A14227 | 491 | A01689 | A14263 | 247 |
| A01689 | A14288 | 151 | A01689 | A14289 | 172 |

|        |        |     |        |        |     |
|--------|--------|-----|--------|--------|-----|
| A01689 | A14309 | 249 | A01689 | A14310 | 232 |
| A01689 | A14455 | 294 | A01689 | A14509 | 263 |
| A01689 | A14533 | 329 | A01689 | A14569 | 279 |
| A01689 | A14633 | 486 | A01689 | A14685 | 296 |
| A01689 | A14708 | 223 | A01689 | A15105 | 254 |
| A01689 | A15187 | 314 | A01689 | A15533 | 374 |
| A01689 | A15711 | 179 | A01689 | A16261 | 157 |
| A01689 | A16587 | 201 | A01689 | A16690 | 205 |
| A01689 | A16692 | 193 | A01689 | A16703 | 174 |
| A01689 | A16709 | 200 | A01689 | A16790 | 200 |
| A01689 | A16874 | 210 | A01689 | A17033 | 216 |
| A01689 | A17035 | 165 | A01689 | A17155 | 229 |
| A01690 | A01781 | 154 | A01690 | A02026 | 263 |
| A01690 | A02164 | 152 | A01690 | A02351 | 276 |
| A01690 | A02877 | 291 | A01690 | A02878 | 422 |
| A01690 | A03093 | 157 | A01690 | A03321 | 260 |
| A01690 | A03412 | 196 | A01690 | A03634 | 152 |
| A01690 | A03636 | 180 | A01690 | A03775 | 184 |
| A01690 | A03814 | 221 | A01690 | A04105 | 285 |
| A01690 | A04668 | 378 | A01690 | A04824 | 213 |
| A01690 | A04858 | 414 | A01690 | A05144 | 174 |
| A01690 | A05218 | 168 | A01690 | A05323 | 199 |
| A01690 | A06324 | 208 | A01690 | A06825 | 262 |
| A01690 | A06982 | 462 | A01690 | A07202 | 266 |
| A01690 | A07346 | 205 | A01690 | A07412 | 290 |
| A01690 | A08980 | 383 | A01690 | A09244 | 321 |
| A01690 | A09464 | 154 | A01690 | A09546 | 217 |
| A01690 | A09765 | 406 | A01690 | A09809 | 162 |
| A01690 | A09836 | 491 | A01690 | A09870 | 235 |
| A01690 | A09901 | 462 | A01690 | A10087 | 152 |
| A01690 | A11236 | 438 | A01690 | A12007 | 232 |
| A01690 | A12009 | 165 | A01690 | A12250 | 240 |
| A01690 | A12556 | 279 | A01690 | A12625 | 249 |
| A01690 | A12897 | 380 | A01690 | A13107 | 205 |
| A01690 | A13736 | 185 | A01690 | A13886 | 191 |
| A01690 | A14009 | 260 | A01690 | A14094 | 491 |
| A01690 | A14230 | 198 | A01690 | A14598 | 313 |
| A01690 | A14694 | 159 | A01690 | A14706 | 452 |
| A01690 | A14969 | 185 | A01690 | A15145 | 254 |
| A01690 | A15281 | 221 | A01690 | A15675 | 249 |
| A01690 | A16163 | 303 | A01690 | A16226 | 185 |
| A01691 | A01722 | 319 | A01691 | A01741 | 185 |
| A01691 | A01750 | 259 | A01691 | A01759 | 213 |
| A01691 | A01787 | 273 | A01691 | A01873 | 357 |
| A01691 | A01890 | 489 | A01691 | A01896 | 252 |
| A01691 | A01899 | 219 | A01691 | A02026 | 163 |

|        |        |     |        |        |     |
|--------|--------|-----|--------|--------|-----|
| A01691 | A02141 | 301 | A01691 | A02278 | 268 |
| A01691 | A02327 | 293 | A01691 | A02407 | 247 |
| A01691 | A02416 | 408 | A01691 | A02418 | 343 |
| A01691 | A02419 | 235 | A01691 | A02452 | 257 |
| A01691 | A02488 | 344 | A01691 | A02586 | 380 |
| A01691 | A02629 | 434 | A01691 | A02632 | 297 |
| A01691 | A02636 | 221 | A01691 | A02638 | 238 |
| A01691 | A02672 | 170 | A01691 | A02687 | 371 |
| A01691 | A02707 | 271 | A01691 | A02744 | 174 |
| A01691 | A02749 | 224 | A01691 | A02819 | 177 |
| A01691 | A03054 | 236 | A01691 | A03243 | 196 |
| A01691 | A03263 | 201 | A01691 | A03406 | 177 |
| A01691 | A03421 | 160 | A01691 | A03447 | 274 |
| A01691 | A03834 | 213 | A01691 | A03976 | 171 |
| A01691 | A04074 | 201 | A01691 | A04362 | 157 |
| A01691 | A04370 | 420 | A01691 | A04415 | 279 |
| A01691 | A04432 | 363 | A01691 | A04687 | 162 |
| A01691 | A04901 | 286 | A01691 | A05037 | 191 |
| A01691 | A05066 | 330 | A01691 | A05575 | 324 |
| A01691 | A05854 | 340 | A01691 | A05925 | 357 |
| A01691 | A06623 | 385 | A01691 | A07205 | 232 |
| A01691 | A07226 | 207 | A01691 | A07552 | 330 |
| A01691 | A08289 | 224 | A01691 | A08771 | 243 |
| A01691 | A08905 | 380 | A01691 | A09018 | 171 |
| A01691 | A09345 | 341 | A01691 | A10735 | 185 |
| A01691 | A11184 | 185 | A01691 | A11490 | 357 |
| A01691 | A12035 | 241 | A01691 | A14368 | 270 |
| A01691 | A14539 | 190 | A01691 | A14642 | 283 |
| A01691 | A14643 | 157 | A01691 | A15641 | 251 |
| A01691 | A16300 | 291 | A01692 | A01697 | 479 |
| A01692 | A01702 | 571 | A01692 | A01708 | 943 |
| A01692 | A01709 | 135 | A01692 | A01718 | 394 |
| A01692 | A01719 | 228 | A01692 | A01988 | 191 |
| A01692 | A02325 | 467 | A01692 | A02361 | 319 |
| A01692 | A02411 | 177 | A01692 | A02544 | 904 |
| A01692 | A02711 | 232 | A01692 | A02803 | 919 |
| A01692 | A02860 | 224 | A01692 | A03057 | 179 |
| A01692 | A03195 | 63  | A01692 | A03245 | 210 |
| A01692 | A03271 | 899 | A01692 | A03451 | 188 |
| A01692 | A03569 | 390 | A01692 | A03591 | 992 |
| A01692 | A03592 | 232 | A01692 | A03739 | 481 |
| A01692 | A03811 | 210 | A01692 | A03867 | 266 |
| A01692 | A03979 | 151 | A01692 | A04161 | 465 |
| A01692 | A04191 | 170 | A01692 | A04269 | 232 |
| A01692 | A04622 | 196 | A01692 | A04699 | 113 |
| A01692 | A05037 | 901 | A01692 | A05288 | 475 |

|        |        |     |        |        |     |
|--------|--------|-----|--------|--------|-----|
| A01692 | A05453 | 219 | A01692 | A06289 | 441 |
| A01692 | A06610 | 411 | A01692 | A06995 | 232 |
| A01692 | A07091 | 899 | A01692 | A07311 | 975 |
| A01692 | A07422 | 944 | A01692 | A08532 | 210 |
| A01692 | A08608 | 172 | A01692 | A08799 | 182 |
| A01692 | A08862 | 485 | A01692 | A08899 | 473 |
| A01692 | A09162 | 334 | A01692 | A09319 | 899 |
| A01692 | A09476 | 196 | A01692 | A09516 | 193 |
| A01692 | A09558 | 899 | A01692 | A09568 | 945 |
| A01692 | A09577 | 168 | A01692 | A09764 | 416 |
| A01692 | A10014 | 63  | A01692 | A10048 | 266 |
| A01692 | A10159 | 899 | A01692 | A10174 | 899 |
| A01692 | A10365 | 63  | A01692 | A10392 | 77  |
| A01692 | A10534 | 115 | A01692 | A10611 | 173 |
| A01692 | A10623 | 63  | A01692 | A10756 | 251 |
| A01692 | A10833 | 935 | A01692 | A10899 | 63  |
| A01692 | A10909 | 193 | A01692 | A10982 | 63  |
| A01692 | A11124 | 240 | A01692 | A11332 | 191 |
| A01692 | A11601 | 107 | A01692 | A11621 | 308 |
| A01692 | A11901 | 232 | A01692 | A11983 | 899 |
| A01692 | A12383 | 950 | A01692 | A12902 | 899 |
| A01692 | A12969 | 455 | A01692 | A12971 | 146 |
| A01692 | A13225 | 899 | A01692 | A13348 | 168 |
| A01692 | A13390 | 911 | A01692 | A13391 | 981 |
| A01692 | A13393 | 899 | A01692 | A13977 | 899 |
| A01692 | A13984 | 969 | A01692 | A13986 | 427 |
| A01692 | A13989 | 899 | A01692 | A14007 | 430 |
| A01692 | A14008 | 63  | A01692 | A14022 | 899 |
| A01692 | A14033 | 182 | A01692 | A14042 | 899 |
| A01692 | A14045 | 210 | A01692 | A14164 | 232 |
| A01692 | A14198 | 927 | A01692 | A14208 | 936 |
| A01692 | A14325 | 266 | A01692 | A14396 | 210 |
| A01692 | A14452 | 174 | A01692 | A14496 | 305 |
| A01692 | A14648 | 463 | A01692 | A14662 | 899 |
| A01692 | A14930 | 70  | A01692 | A15297 | 899 |
| A01692 | A15323 | 899 | A01692 | A15324 | 899 |
| A01692 | A15353 | 899 | A01692 | A15359 | 899 |
| A01692 | A15726 | 401 | A01692 | A16073 | 278 |
| A01692 | A16336 | 151 | A01692 | A16500 | 266 |
| A01692 | A16735 | 193 | A01692 | A16741 | 491 |
| A01692 | A16906 | 210 | A01693 | A02695 | 180 |
| A01693 | A02924 | 296 | A01693 | A03095 | 183 |
| A01693 | A03541 | 353 | A01693 | A03763 | 279 |
| A01693 | A04520 | 246 | A01693 | A04706 | 319 |
| A01693 | A10250 | 219 | A01693 | A14443 | 221 |
| A01694 | A01741 | 313 | A01694 | A02104 | 193 |

|        |        |     |        |        |     |
|--------|--------|-----|--------|--------|-----|
| A01694 | A02116 | 491 | A01694 | A02117 | 63  |
| A01694 | A02120 | 467 | A01694 | A02360 | 157 |
| A01694 | A02436 | 470 | A01694 | A02443 | 385 |
| A01694 | A02450 | 491 | A01694 | A02572 | 260 |
| A01694 | A02586 | 401 | A01694 | A02673 | 409 |
| A01694 | A02749 | 371 | A01694 | A03028 | 404 |
| A01694 | A03107 | 63  | A01694 | A03131 | 176 |
| A01694 | A03223 | 447 | A01694 | A03246 | 491 |
| A01694 | A03451 | 180 | A01694 | A03653 | 297 |
| A01694 | A03730 | 422 | A01694 | A03739 | 247 |
| A01694 | A03854 | 380 | A01694 | A03968 | 307 |
| A01694 | A03990 | 200 | A01694 | A04062 | 490 |
| A01694 | A04075 | 380 | A01694 | A04210 | 389 |
| A01694 | A04212 | 290 | A01694 | A04342 | 329 |
| A01694 | A04389 | 469 | A01694 | A04449 | 160 |
| A01694 | A04460 | 198 | A01694 | A04807 | 343 |
| A01694 | A05082 | 408 | A01694 | A05096 | 327 |
| A01694 | A05288 | 358 | A01694 | A05381 | 263 |
| A01694 | A05701 | 160 | A01694 | A05958 | 291 |
| A01694 | A06660 | 346 | A01694 | A06821 | 260 |
| A01694 | A06916 | 173 | A01694 | A07324 | 208 |
| A01694 | A07364 | 157 | A01694 | A07668 | 294 |
| A01694 | A08878 | 154 | A01694 | A09011 | 205 |
| A01694 | A09124 | 217 | A01694 | A09160 | 485 |
| A01694 | A09213 | 308 | A01694 | A09364 | 221 |
| A01694 | A09434 | 180 | A01694 | A09452 | 252 |
| A01694 | A09738 | 171 | A01694 | A09751 | 182 |
| A01694 | A10015 | 360 | A01694 | A10386 | 187 |
| A01694 | A10520 | 294 | A01694 | A10983 | 160 |
| A01694 | A11368 | 391 | A01694 | A11424 | 205 |
| A01694 | A11429 | 229 | A01694 | A11631 | 176 |
| A01694 | A12137 | 235 | A01694 | A12284 | 188 |
| A01694 | A14002 | 151 | A01694 | A14275 | 201 |
| A01694 | A14366 | 151 | A01694 | A14621 | 491 |
| A01694 | A15197 | 293 | A01694 | A15728 | 193 |
| A01694 | A15896 | 283 | A01694 | A16376 | 228 |
| A01694 | A16832 | 193 | A01695 | A01696 | 463 |
| A01695 | A03028 | 324 | A01695 | A04211 | 313 |
| A01695 | A07122 | 254 | A01695 | A07204 | 375 |
| A01695 | A09161 | 435 | A01695 | A09880 | 256 |
| A01695 | A13544 | 435 | A01697 | A01702 | 945 |
| A01697 | A01708 | 945 | A01697 | A01709 | 945 |
| A01697 | A01718 | 944 | A01697 | A01719 | 945 |
| A01697 | A01774 | 899 | A01697 | A01957 | 201 |
| A01697 | A02239 | 899 | A01697 | A02318 | 210 |
| A01697 | A02372 | 165 | A01697 | A02575 | 210 |

|        |        |     |        |        |     |
|--------|--------|-----|--------|--------|-----|
| A01697 | A03685 | 196 | A01697 | A04209 | 165 |
| A01697 | A04699 | 363 | A01697 | A04722 | 157 |
| A01697 | A04905 | 201 | A01697 | A05144 | 193 |
| A01697 | A05536 | 223 | A01697 | A06289 | 201 |
| A01697 | A06466 | 63  | A01697 | A06610 | 417 |
| A01697 | A07311 | 945 | A01697 | A09162 | 323 |
| A01697 | A09577 | 401 | A01697 | A09804 | 932 |
| A01697 | A10014 | 143 | A01697 | A10294 | 162 |
| A01697 | A10365 | 327 | A01697 | A10735 | 101 |
| A01697 | A10833 | 176 | A01697 | A11206 | 347 |
| A01697 | A11262 | 224 | A01697 | A11369 | 118 |
| A01697 | A11645 | 256 | A01697 | A11922 | 245 |
| A01697 | A12383 | 945 | A01697 | A12705 | 899 |
| A01697 | A12987 | 318 | A01697 | A13429 | 154 |
| A01697 | A13827 | 241 | A01697 | A13917 | 174 |
| A01697 | A13990 | 213 | A01697 | A14008 | 240 |
| A01697 | A14452 | 306 | A01697 | A14644 | 210 |
| A01697 | A14774 | 223 | A01697 | A15195 | 306 |
| A01697 | A15486 | 188 | A01697 | A15726 | 63  |
| A01698 | A01724 | 399 | A01698 | A01776 | 283 |
| A01698 | A01790 | 456 | A01698 | A01850 | 481 |
| A01698 | A01866 | 367 | A01698 | A01931 | 427 |
| A01698 | A02189 | 236 | A01698 | A02343 | 374 |
| A01698 | A02674 | 291 | A01698 | A02695 | 184 |
| A01698 | A02821 | 217 | A01698 | A03304 | 277 |
| A01698 | A03465 | 369 | A01698 | A03778 | 400 |
| A01698 | A04092 | 183 | A01698 | A04314 | 215 |
| A01698 | A04449 | 472 | A01698 | A04600 | 182 |
| A01698 | A04883 | 160 | A01698 | A04992 | 311 |
| A01698 | A05310 | 165 | A01698 | A06217 | 281 |
| A01698 | A06277 | 452 | A01698 | A06630 | 221 |
| A01698 | A06858 | 332 | A01698 | A07209 | 251 |
| A01698 | A07311 | 899 | A01698 | A08692 | 462 |
| A01698 | A09162 | 188 | A01698 | A09611 | 255 |
| A01698 | A10808 | 283 | A01698 | A11293 | 441 |
| A01698 | A11983 | 451 | A01698 | A12507 | 414 |
| A01698 | A14433 | 152 | A01698 | A14636 | 195 |
| A01698 | A14640 | 281 | A01698 | A14643 | 256 |
| A01698 | A14653 | 338 | A01698 | A15282 | 256 |
| A01698 | A15337 | 160 | A01698 | A15339 | 167 |
| A01698 | A15358 | 170 | A01698 | A15531 | 151 |
| A01699 | A01730 | 162 | A01699 | A01907 | 201 |
| A01699 | A02026 | 313 | A01699 | A02093 | 456 |
| A01699 | A02249 | 265 | A01699 | A02389 | 417 |
| A01699 | A02407 | 263 | A01699 | A02413 | 254 |
| A01699 | A02468 | 240 | A01699 | A02542 | 191 |

|        |        |     |        |        |     |
|--------|--------|-----|--------|--------|-----|
| A01699 | A02579 | 228 | A01699 | A02687 | 318 |
| A01699 | A02703 | 157 | A01699 | A02816 | 177 |
| A01699 | A02875 | 160 | A01699 | A03415 | 177 |
| A01699 | A03680 | 260 | A01699 | A04074 | 217 |
| A01699 | A04265 | 299 | A01699 | A04570 | 322 |
| A01699 | A04622 | 152 | A01699 | A04880 | 180 |
| A01699 | A05873 | 380 | A01699 | A06046 | 283 |
| A01699 | A06472 | 247 | A01699 | A07206 | 347 |
| A01699 | A07339 | 232 | A01699 | A07576 | 402 |
| A01699 | A08660 | 258 | A01699 | A09084 | 272 |
| A01699 | A09093 | 352 | A01699 | A09124 | 266 |
| A01699 | A09714 | 352 | A01699 | A09826 | 288 |
| A01699 | A10640 | 294 | A01699 | A11755 | 389 |
| A01699 | A14016 | 378 | A01699 | A14368 | 283 |
| A01700 | A01980 | 260 | A01700 | A02268 | 243 |
| A01700 | A03091 | 188 | A01700 | A03762 | 271 |
| A01700 | A04643 | 333 | A01700 | A04694 | 333 |
| A01700 | A04911 | 251 | A01700 | A05142 | 468 |
| A01700 | A06400 | 334 | A01700 | A06819 | 232 |
| A01700 | A06965 | 179 | A01700 | A08897 | 380 |
| A01700 | A09507 | 249 | A01700 | A11542 | 190 |
| A01700 | A11578 | 215 | A01700 | A12604 | 340 |
| A01700 | A13346 | 479 | A01700 | A14882 | 251 |
| A01700 | A15215 | 199 | A01700 | A15502 | 334 |
| A01700 | A15525 | 227 | A01700 | A15739 | 215 |
| A01700 | A15830 | 246 | A01701 | A01723 | 191 |
| A01701 | A01791 | 281 | A01701 | A01907 | 165 |
| A01701 | A02405 | 196 | A01701 | A02416 | 110 |
| A01701 | A02451 | 335 | A01701 | A02464 | 446 |
| A01701 | A02539 | 177 | A01701 | A03238 | 162 |
| A01701 | A03477 | 174 | A01701 | A04072 | 260 |
| A01701 | A04504 | 329 | A01701 | A04679 | 296 |
| A01701 | A05311 | 311 | A01701 | A05376 | 215 |
| A01701 | A11527 | 288 | A01701 | A14247 | 98  |
| A01701 | A14481 | 165 | A01701 | A14485 | 468 |
| A01701 | A15909 | 462 | A01701 | A17061 | 221 |
| A01702 | A01708 | 945 | A01702 | A01709 | 945 |
| A01702 | A01718 | 945 | A01702 | A01719 | 945 |
| A01702 | A01730 | 899 | A01702 | A01844 | 321 |
| A01702 | A02908 | 899 | A01702 | A03217 | 176 |
| A01702 | A03304 | 249 | A01702 | A03415 | 213 |
| A01702 | A03531 | 224 | A01702 | A03591 | 269 |
| A01702 | A03977 | 165 | A01702 | A03981 | 179 |
| A01702 | A04699 | 941 | A01702 | A04938 | 162 |
| A01702 | A04957 | 157 | A01702 | A06088 | 190 |
| A01702 | A06513 | 327 | A01702 | A06602 | 477 |

|        |        |     |        |        |     |
|--------|--------|-----|--------|--------|-----|
| A01702 | A06610 | 176 | A01702 | A06615 | 927 |
| A01702 | A07210 | 251 | A01702 | A07311 | 944 |
| A01702 | A07583 | 402 | A01702 | A08667 | 152 |
| A01702 | A09162 | 489 | A01702 | A09423 | 236 |
| A01702 | A09537 | 247 | A01702 | A09556 | 205 |
| A01702 | A09644 | 915 | A01702 | A10014 | 318 |
| A01702 | A10161 | 281 | A01702 | A10294 | 240 |
| A01702 | A10365 | 899 | A01702 | A10440 | 179 |
| A01702 | A10801 | 905 | A01702 | A10808 | 179 |
| A01702 | A11125 | 899 | A01702 | A11262 | 179 |
| A01702 | A11767 | 157 | A01702 | A11934 | 208 |
| A01702 | A11943 | 230 | A01702 | A12102 | 268 |
| A01702 | A12383 | 945 | A01702 | A12664 | 899 |
| A01702 | A12897 | 491 | A01702 | A13175 | 281 |
| A01702 | A13250 | 152 | A01702 | A13970 | 899 |
| A01702 | A13985 | 899 | A01702 | A14013 | 179 |
| A01702 | A14019 | 899 | A01702 | A14033 | 257 |
| A01702 | A14597 | 447 | A01702 | A14925 | 341 |
| A01702 | A15726 | 899 | A01702 | A16524 | 268 |
| A01702 | A16592 | 221 | A01702 | A16911 | 196 |
| A01703 | A02779 | 265 | A01703 | A02991 | 308 |
| A01703 | A03422 | 201 | A01703 | A03496 | 377 |
| A01703 | A03566 | 228 | A01703 | A04520 | 218 |
| A01703 | A04971 | 346 | A01703 | A05009 | 177 |
| A01703 | A07354 | 388 | A01703 | A08858 | 324 |
| A01703 | A09195 | 475 | A01703 | A09506 | 352 |
| A01703 | A14037 | 268 | A01704 | A01741 | 385 |
| A01704 | A01743 | 333 | A01704 | A01775 | 489 |
| A01704 | A01785 | 451 | A01704 | A01789 | 167 |
| A01704 | A01879 | 490 | A01704 | A01881 | 160 |
| A01704 | A01887 | 491 | A01704 | A01888 | 314 |
| A01704 | A01930 | 238 | A01704 | A02175 | 174 |
| A01704 | A02203 | 201 | A01704 | A02337 | 399 |
| A01704 | A02340 | 363 | A01704 | A02370 | 215 |
| A01704 | A02380 | 357 | A01704 | A02457 | 168 |
| A01704 | A02479 | 160 | A01704 | A02605 | 172 |
| A01704 | A02611 | 119 | A01704 | A02630 | 172 |
| A01704 | A02631 | 259 | A01704 | A02645 | 308 |
| A01704 | A02699 | 167 | A01704 | A02730 | 273 |
| A01704 | A02742 | 202 | A01704 | A02754 | 340 |
| A01704 | A02769 | 217 | A01704 | A02780 | 215 |
| A01704 | A02787 | 452 | A01704 | A02795 | 198 |
| A01704 | A02803 | 369 | A01704 | A02812 | 408 |
| A01704 | A02837 | 201 | A01704 | A02843 | 238 |
| A01704 | A02854 | 260 | A01704 | A02859 | 450 |
| A01704 | A02860 | 288 | A01704 | A02863 | 486 |



|        |        |     |        |        |     |
|--------|--------|-----|--------|--------|-----|
| A01704 | A02864 | 160 | A01704 | A02866 | 268 |
| A01704 | A02874 | 279 | A01704 | A02884 | 363 |
| A01704 | A02896 | 491 | A01704 | A02916 | 491 |
| A01704 | A02917 | 257 | A01704 | A02922 | 243 |
| A01704 | A02935 | 179 | A01704 | A02939 | 238 |
| A01704 | A02944 | 488 | A01704 | A02945 | 333 |
| A01704 | A02951 | 462 | A01704 | A02953 | 382 |
| A01704 | A02961 | 483 | A01704 | A02971 | 245 |
| A01704 | A02972 | 294 | A01704 | A02976 | 121 |
| A01704 | A02977 | 156 | A01704 | A02986 | 205 |
| A01704 | A02988 | 296 | A01704 | A03001 | 110 |
| A01704 | A03010 | 127 | A01704 | A03019 | 63  |
| A01704 | A03204 | 455 | A01704 | A03223 | 269 |
| A01704 | A03259 | 427 | A01704 | A03271 | 113 |
| A01704 | A03275 | 457 | A01704 | A03280 | 174 |
| A01704 | A03281 | 160 | A01704 | A03282 | 486 |
| A01704 | A03555 | 191 | A01704 | A03609 | 191 |
| A01704 | A03731 | 235 | A01704 | A03824 | 157 |
| A01704 | A03831 | 285 | A01704 | A03937 | 162 |
| A01704 | A03996 | 357 | A01704 | A03999 | 335 |
| A01704 | A04040 | 208 | A01704 | A04051 | 191 |
| A01704 | A04107 | 235 | A01704 | A04200 | 299 |
| A01704 | A04206 | 475 | A01704 | A04240 | 308 |
| A01704 | A04244 | 200 | A01704 | A04247 | 273 |
| A01704 | A04248 | 266 | A01704 | A04265 | 205 |
| A01704 | A04276 | 196 | A01704 | A04304 | 364 |
| A01704 | A04305 | 263 | A01704 | A04471 | 238 |
| A01704 | A04526 | 394 | A01704 | A04528 | 319 |
| A01704 | A04542 | 285 | A01704 | A04566 | 308 |
| A01704 | A04567 | 430 | A01704 | A04589 | 218 |
| A01704 | A04613 | 241 | A01704 | A04616 | 205 |
| A01704 | A04734 | 238 | A01704 | A04865 | 177 |
| A01704 | A04939 | 187 | A01704 | A05112 | 452 |
| A01704 | A05163 | 285 | A01704 | A05247 | 313 |
| A01704 | A05305 | 314 | A01704 | A05309 | 185 |
| A01704 | A05349 | 388 | A01704 | A05363 | 180 |
| A01704 | A05570 | 168 | A01704 | A05577 | 115 |
| A01704 | A05641 | 230 | A01704 | A05646 | 195 |
| A01704 | A05810 | 168 | A01704 | A05878 | 185 |
| A01704 | A05985 | 475 | A01704 | A06095 | 228 |
| A01704 | A06122 | 303 | A01704 | A06127 | 319 |
| A01704 | A06149 | 393 | A01704 | A06422 | 488 |
| A01704 | A06544 | 185 | A01704 | A06627 | 154 |
| A01704 | A06642 | 278 | A01704 | A06652 | 285 |
| A01704 | A06780 | 255 | A01704 | A06806 | 173 |
| A01704 | A07135 | 251 | A01704 | A07138 | 210 |

|        |        |     |        |        |     |
|--------|--------|-----|--------|--------|-----|
| A01704 | A07152 | 193 | A01704 | A07157 | 490 |
| A01704 | A07164 | 205 | A01704 | A07173 | 389 |
| A01704 | A07191 | 202 | A01704 | A07237 | 180 |
| A01704 | A08086 | 217 | A01704 | A08366 | 176 |
| A01704 | A08610 | 263 | A01704 | A08627 | 246 |
| A01704 | A08790 | 221 | A01704 | A09222 | 217 |
| A01704 | A09981 | 357 | A01704 | A10791 | 324 |
| A01704 | A10905 | 350 | A01704 | A12752 | 319 |
| A01704 | A13643 | 308 | A01704 | A14374 | 160 |
| A01704 | A14387 | 226 | A01704 | A14543 | 180 |
| A01704 | A14643 | 191 | A01704 | A14830 | 180 |
| A01704 | A15395 | 224 | A01704 | A15498 | 187 |
| A01704 | A15601 | 324 | A01704 | A15602 | 241 |
| A01704 | A15603 | 176 | A01704 | A15608 | 288 |
| A01704 | A15795 | 245 | A01704 | A15806 | 215 |
| A01704 | A15955 | 357 | A01704 | A15981 | 335 |
| A01704 | A15983 | 335 | A01704 | A15987 | 259 |
| A01705 | A01725 | 174 | A01705 | A01728 | 335 |
| A01705 | A01731 | 188 | A01705 | A01732 | 346 |
| A01705 | A01733 | 162 | A01705 | A01736 | 490 |
| A01705 | A01737 | 486 | A01705 | A01743 | 491 |
| A01705 | A01746 | 274 | A01705 | A01751 | 447 |
| A01705 | A01753 | 130 | A01705 | A01757 | 491 |
| A01705 | A01758 | 491 | A01705 | A01762 | 252 |
| A01705 | A01764 | 63  | A01705 | A01772 | 82  |
| A01705 | A01777 | 200 | A01705 | A01778 | 447 |
| A01705 | A01779 | 440 | A01705 | A01787 | 205 |
| A01705 | A01788 | 110 | A01705 | A01790 | 205 |
| A01705 | A01794 | 472 | A01705 | A01796 | 485 |
| A01705 | A01802 | 445 | A01705 | A01803 | 243 |
| A01705 | A01872 | 152 | A01705 | A01883 | 438 |
| A01705 | A01888 | 489 | A01705 | A01893 | 491 |
| A01705 | A01894 | 491 | A01705 | A01909 | 491 |
| A01705 | A02075 | 362 | A01705 | A02078 | 152 |
| A01705 | A02298 | 441 | A01705 | A02307 | 156 |
| A01705 | A02335 | 156 | A01705 | A02338 | 205 |
| A01705 | A02490 | 480 | A01705 | A02491 | 490 |
| A01705 | A02613 | 251 | A01705 | A02668 | 188 |
| A01705 | A02691 | 477 | A01705 | A02695 | 356 |
| A01705 | A02701 | 171 | A01705 | A02756 | 479 |
| A01705 | A02785 | 457 | A01705 | A02814 | 63  |
| A01705 | A02859 | 477 | A01705 | A02874 | 260 |
| A01705 | A02923 | 215 | A01705 | A02951 | 205 |
| A01705 | A02988 | 490 | A01705 | A03050 | 461 |
| A01705 | A03168 | 171 | A01705 | A03185 | 165 |
| A01705 | A03259 | 263 | A01705 | A03473 | 168 |

|        |        |     |        |        |     |
|--------|--------|-----|--------|--------|-----|
| A01705 | A03516 | 434 | A01705 | A03575 | 216 |
| A01705 | A03637 | 311 | A01705 | A03872 | 486 |
| A01705 | A03948 | 174 | A01705 | A04010 | 326 |
| A01705 | A04053 | 205 | A01705 | A04120 | 215 |
| A01705 | A04279 | 165 | A01705 | A04286 | 418 |
| A01705 | A04380 | 177 | A01705 | A04620 | 479 |
| A01705 | A04757 | 271 | A01705 | A04790 | 152 |
| A01705 | A04839 | 230 | A01705 | A05164 | 188 |
| A01705 | A05221 | 491 | A01705 | A05346 | 215 |
| A01705 | A05760 | 260 | A01705 | A06162 | 236 |
| A01705 | A06190 | 469 | A01705 | A06379 | 213 |
| A01705 | A06578 | 436 | A01705 | A06607 | 369 |
| A01705 | A06635 | 388 | A01705 | A06650 | 254 |
| A01705 | A06678 | 207 | A01705 | A07164 | 183 |
| A01705 | A07165 | 393 | A01705 | A07177 | 425 |
| A01705 | A07200 | 491 | A01705 | A07209 | 232 |
| A01705 | A07311 | 152 | A01705 | A07803 | 180 |
| A01705 | A08289 | 263 | A01705 | A08735 | 302 |
| A01705 | A08836 | 281 | A01705 | A08861 | 472 |
| A01705 | A09743 | 217 | A01705 | A10081 | 177 |
| A01705 | A11900 | 165 | A01705 | A12365 | 378 |
| A01705 | A12916 | 251 | A01705 | A13313 | 352 |
| A01705 | A13413 | 200 | A01705 | A13781 | 414 |
| A01705 | A14279 | 193 | A01705 | A14389 | 177 |
| A01705 | A14405 | 488 | A01705 | A14410 | 479 |
| A01705 | A14440 | 486 | A01705 | A15034 | 213 |
| A01705 | A15368 | 177 | A01705 | A15630 | 167 |
| A01705 | A15685 | 200 | A01705 | A16636 | 491 |
| A01705 | A16904 | 484 | A01705 | A16916 | 236 |
| A01706 | A01710 | 469 | A01706 | A01715 | 63  |
| A01706 | A01811 | 360 | A01706 | A01918 | 235 |
| A01706 | A02803 | 329 | A01706 | A02842 | 491 |
| A01706 | A02887 | 353 | A01706 | A03271 | 408 |
| A01706 | A03293 | 333 | A01706 | A03294 | 167 |
| A01706 | A03326 | 205 | A01706 | A03329 | 490 |
| A01706 | A03428 | 481 | A01706 | A03452 | 491 |
| A01706 | A03481 | 491 | A01706 | A03489 | 488 |
| A01706 | A03618 | 715 | A01706 | A03626 | 491 |
| A01706 | A03718 | 118 | A01706 | A03889 | 491 |
| A01706 | A03892 | 490 | A01706 | A03922 | 268 |
| A01706 | A04145 | 176 | A01706 | A04292 | 603 |
| A01706 | A04686 | 399 | A01706 | A05024 | 536 |
| A01706 | A05028 | 491 | A01706 | A05563 | 63  |
| A01706 | A05573 | 475 | A01706 | A05638 | 269 |
| A01706 | A05862 | 219 | A01706 | A05894 | 486 |
| A01706 | A06011 | 368 | A01706 | A06463 | 201 |

|        |        |     |        |        |     |
|--------|--------|-----|--------|--------|-----|
| A01706 | A06597 | 176 | A01706 | A06659 | 249 |
| A01706 | A06890 | 458 | A01706 | A06930 | 210 |
| A01706 | A06941 | 491 | A01706 | A07242 | 480 |
| A01706 | A07521 | 479 | A01706 | A07664 | 383 |
| A01706 | A07732 | 475 | A01706 | A07816 | 291 |
| A01706 | A07820 | 490 | A01706 | A07893 | 479 |
| A01706 | A08056 | 341 | A01706 | A08369 | 433 |
| A01706 | A08400 | 491 | A01706 | A08484 | 515 |
| A01706 | A08765 | 401 | A01706 | A08766 | 243 |
| A01706 | A08772 | 491 | A01706 | A08874 | 299 |
| A01706 | A09286 | 193 | A01706 | A09326 | 682 |
| A01706 | A09333 | 477 | A01706 | A10514 | 475 |
| A01706 | A10584 | 235 | A01706 | A10655 | 435 |
| A01706 | A10663 | 486 | A01706 | A10797 | 154 |
| A01706 | A10807 | 243 | A01706 | A10897 | 115 |
| A01706 | A11279 | 518 | A01706 | A11287 | 179 |
| A01706 | A11436 | 475 | A01706 | A11456 | 321 |
| A01706 | A13106 | 217 | A01706 | A13222 | 449 |
| A01706 | A13387 | 174 | A01706 | A13830 | 452 |
| A01706 | A13845 | 491 | A01706 | A13846 | 63  |
| A01706 | A13855 | 126 | A01706 | A13882 | 274 |
| A01706 | A13894 | 416 | A01706 | A13895 | 336 |
| A01706 | A13902 | 271 | A01706 | A13963 | 428 |
| A01706 | A14056 | 63  | A01706 | A14095 | 139 |
| A01706 | A14168 | 146 | A01706 | A14175 | 274 |
| A01706 | A14182 | 602 | A01706 | A14247 | 704 |
| A01706 | A14258 | 424 | A01706 | A14357 | 207 |
| A01706 | A14371 | 475 | A01706 | A14461 | 283 |
| A01706 | A14661 | 665 | A01706 | A14711 | 447 |
| A01706 | A14783 | 269 | A01706 | A14838 | 480 |
| A01706 | A15297 | 163 | A01706 | A15328 | 63  |
| A01706 | A15347 | 409 | A01706 | A15505 | 63  |
| A01706 | A15528 | 490 | A01706 | A15617 | 234 |
| A01706 | A15647 | 440 | A01706 | A15650 | 73  |
| A01706 | A15770 | 456 | A01706 | A15949 | 428 |
| A01706 | A16617 | 480 | A01706 | A16652 | 443 |
| A01706 | A16669 | 193 | A01706 | A16940 | 176 |
| A01707 | A01995 | 278 | A01707 | A02470 | 344 |
| A01707 | A02598 | 174 | A01707 | A02607 | 328 |
| A01707 | A02715 | 159 | A01707 | A02991 | 179 |
| A01707 | A03029 | 238 | A01707 | A03289 | 355 |
| A01707 | A03298 | 432 | A01707 | A03408 | 246 |
| A01707 | A03446 | 477 | A01707 | A03461 | 380 |
| A01707 | A03569 | 457 | A01707 | A03738 | 156 |
| A01707 | A03740 | 479 | A01707 | A03752 | 491 |
| A01707 | A03817 | 468 | A01707 | A04211 | 223 |

|        |        |     |        |        |     |
|--------|--------|-----|--------|--------|-----|
| A01707 | A04230 | 180 | A01707 | A05501 | 154 |
| A01707 | A06102 | 259 | A01707 | A06275 | 251 |
| A01707 | A06340 | 180 | A01707 | A06466 | 491 |
| A01707 | A07247 | 308 | A01707 | A07311 | 491 |
| A01707 | A07349 | 238 | A01707 | A07394 | 236 |
| A01707 | A07574 | 193 | A01707 | A07604 | 170 |
| A01707 | A07706 | 484 | A01707 | A07798 | 485 |
| A01707 | A07800 | 430 | A01707 | A08137 | 490 |
| A01707 | A08214 | 157 | A01707 | A08519 | 274 |
| A01707 | A08527 | 348 | A01707 | A08571 | 485 |
| A01707 | A09009 | 210 | A01707 | A09804 | 281 |
| A01707 | A10365 | 201 | A01707 | A10532 | 491 |
| A01707 | A10616 | 247 | A01707 | A10618 | 198 |
| A01707 | A10728 | 152 | A01707 | A10917 | 185 |
| A01707 | A11227 | 185 | A01707 | A11254 | 307 |
| A01707 | A11277 | 185 | A01707 | A11451 | 223 |
| A01707 | A11452 | 483 | A01707 | A11487 | 227 |
| A01707 | A11930 | 199 | A01707 | A12990 | 283 |
| A01707 | A13310 | 174 | A01707 | A13340 | 484 |
| A01707 | A13870 | 491 | A01707 | A13989 | 491 |
| A01707 | A14006 | 491 | A01707 | A14073 | 163 |
| A01707 | A14178 | 481 | A01707 | A14216 | 377 |
| A01707 | A14220 | 267 | A01707 | A14221 | 185 |
| A01707 | A14257 | 182 | A01707 | A14451 | 199 |
| A01707 | A14508 | 252 | A01707 | A14566 | 479 |
| A01707 | A14596 | 389 | A01707 | A15252 | 226 |
| A01707 | A15428 | 208 | A01707 | A15546 | 218 |
| A01707 | A15660 | 210 | A01707 | A15721 | 196 |
| A01707 | A16060 | 491 | A01707 | A16764 | 323 |
| A01707 | A16922 | 307 | A01707 | A16986 | 167 |
| A01707 | A17063 | 457 | A01707 | A17142 | 390 |
| A01708 | A01709 | 945 | A01708 | A01718 | 945 |
| A01708 | A01719 | 996 | A01708 | A01786 | 159 |
| A01708 | A01844 | 63  | A01708 | A01877 | 281 |
| A01708 | A01878 | 171 | A01708 | A01880 | 899 |
| A01708 | A01889 | 196 | A01708 | A01904 | 152 |
| A01708 | A01908 | 419 | A01708 | A01910 | 241 |
| A01708 | A01920 | 316 | A01708 | A02025 | 285 |
| A01708 | A02161 | 259 | A01708 | A02239 | 899 |
| A01708 | A02803 | 172 | A01708 | A02870 | 241 |
| A01708 | A03019 | 65  | A01708 | A03271 | 236 |
| A01708 | A03331 | 276 | A01708 | A03444 | 163 |
| A01708 | A03451 | 257 | A01708 | A03797 | 899 |
| A01708 | A03817 | 408 | A01708 | A04091 | 230 |
| A01708 | A04138 | 168 | A01708 | A04543 | 160 |
| A01708 | A04699 | 929 | A01708 | A04888 | 167 |

|        |        |     |        |        |     |
|--------|--------|-----|--------|--------|-----|
| A01708 | A04945 | 193 | A01708 | A05443 | 180 |
| A01708 | A05715 | 297 | A01708 | A06078 | 174 |
| A01708 | A06200 | 165 | A01708 | A06289 | 485 |
| A01708 | A06416 | 221 | A01708 | A07006 | 266 |
| A01708 | A07311 | 994 | A01708 | A07376 | 185 |
| A01708 | A08012 | 241 | A01708 | A08087 | 259 |
| A01708 | A08088 | 252 | A01708 | A08278 | 246 |
| A01708 | A08279 | 216 | A01708 | A09018 | 160 |
| A01708 | A09162 | 483 | A01708 | A09220 | 79  |
| A01708 | A09303 | 157 | A01708 | A09490 | 266 |
| A01708 | A09577 | 939 | A01708 | A09643 | 491 |
| A01708 | A09644 | 383 | A01708 | A09660 | 234 |
| A01708 | A09752 | 466 | A01708 | A09937 | 374 |
| A01708 | A10014 | 118 | A01708 | A10560 | 899 |
| A01708 | A10580 | 899 | A01708 | A10623 | 188 |
| A01708 | A10735 | 180 | A01708 | A10808 | 310 |
| A01708 | A10811 | 438 | A01708 | A10899 | 124 |
| A01708 | A10902 | 333 | A01708 | A10949 | 152 |
| A01708 | A11125 | 899 | A01708 | A11206 | 191 |
| A01708 | A11369 | 279 | A01708 | A11549 | 274 |
| A01708 | A11840 | 201 | A01708 | A11884 | 171 |
| A01708 | A11902 | 324 | A01708 | A11943 | 343 |
| A01708 | A12383 | 945 | A01708 | A12664 | 899 |
| A01708 | A12886 | 457 | A01708 | A12980 | 327 |
| A01708 | A13291 | 314 | A01708 | A13667 | 899 |
| A01708 | A13985 | 899 | A01708 | A14008 | 485 |
| A01708 | A14009 | 172 | A01708 | A14043 | 899 |
| A01708 | A14242 | 899 | A01708 | A15841 | 259 |
| A01708 | A16084 | 162 | A01709 | A01718 | 945 |
| A01709 | A01719 | 945 | A01709 | A01844 | 903 |
| A01709 | A01897 | 93  | A01709 | A01904 | 154 |
| A01709 | A01908 | 63  | A01709 | A02239 | 899 |
| A01709 | A02465 | 210 | A01709 | A02502 | 226 |
| A01709 | A02764 | 210 | A01709 | A02795 | 171 |
| A01709 | A03271 | 63  | A01709 | A03331 | 177 |
| A01709 | A03531 | 254 | A01709 | A03797 | 899 |
| A01709 | A03817 | 899 | A01709 | A04320 | 924 |
| A01709 | A04699 | 945 | A01709 | A04807 | 903 |
| A01709 | A05064 | 899 | A01709 | A05082 | 899 |
| A01709 | A05217 | 226 | A01709 | A06010 | 168 |
| A01709 | A06149 | 152 | A01709 | A06289 | 63  |
| A01709 | A06398 | 193 | A01709 | A06466 | 63  |
| A01709 | A06610 | 260 | A01709 | A06779 | 223 |
| A01709 | A06818 | 187 | A01709 | A07311 | 994 |
| A01709 | A07422 | 899 | A01709 | A09162 | 486 |
| A01709 | A09290 | 207 | A01709 | A09476 | 238 |

|        |        |     |        |        |     |
|--------|--------|-----|--------|--------|-----|
| A01709 | A09577 | 945 | A01709 | A09643 | 915 |
| A01709 | A09871 | 338 | A01709 | A09997 | 154 |
| A01709 | A10014 | 245 | A01709 | A10365 | 63  |
| A01709 | A10560 | 944 | A01709 | A10580 | 899 |
| A01709 | A10623 | 902 | A01709 | A10735 | 84  |
| A01709 | A10808 | 313 | A01709 | A10811 | 124 |
| A01709 | A10902 | 205 | A01709 | A10913 | 343 |
| A01709 | A11125 | 945 | A01709 | A11206 | 899 |
| A01709 | A11369 | 63  | A01709 | A11604 | 202 |
| A01709 | A11943 | 163 | A01709 | A11983 | 899 |
| A01709 | A12071 | 341 | A01709 | A12383 | 994 |
| A01709 | A12664 | 935 | A01709 | A12705 | 915 |
| A01709 | A12980 | 198 | A01709 | A13729 | 177 |
| A01709 | A13980 | 339 | A01709 | A13981 | 899 |
| A01709 | A13985 | 938 | A01709 | A13997 | 235 |
| A01709 | A14008 | 313 | A01709 | A14157 | 317 |
| A01709 | A14188 | 899 | A01709 | A15726 | 73  |
| A01709 | A16042 | 179 | A01710 | A01918 | 407 |
| A01710 | A01926 | 568 | A01710 | A02138 | 152 |
| A01710 | A02346 | 240 | A01710 | A02983 | 385 |
| A01710 | A03326 | 557 | A01710 | A03428 | 491 |
| A01710 | A03452 | 491 | A01710 | A03626 | 479 |
| A01710 | A03876 | 228 | A01710 | A03889 | 461 |
| A01710 | A03901 | 167 | A01710 | A03984 | 180 |
| A01710 | A04292 | 486 | A01710 | A04686 | 183 |
| A01710 | A04839 | 271 | A01710 | A04894 | 188 |
| A01710 | A05028 | 63  | A01710 | A05200 | 432 |
| A01710 | A05376 | 414 | A01710 | A05862 | 188 |
| A01710 | A06011 | 428 | A01710 | A06689 | 182 |
| A01710 | A06890 | 223 | A01710 | A07127 | 162 |
| A01710 | A07481 | 152 | A01710 | A07499 | 160 |
| A01710 | A07521 | 182 | A01710 | A07894 | 296 |
| A01710 | A08765 | 432 | A01710 | A08777 | 486 |
| A01710 | A08881 | 269 | A01710 | A09013 | 343 |
| A01710 | A09054 | 63  | A01710 | A09056 | 603 |
| A01710 | A09060 | 395 | A01710 | A09277 | 411 |
| A01710 | A10372 | 414 | A01710 | A10594 | 269 |
| A01710 | A11925 | 269 | A01710 | A13293 | 340 |
| A01710 | A13387 | 208 | A01710 | A13830 | 256 |
| A01710 | A13832 | 385 | A01710 | A13874 | 70  |
| A01710 | A14170 | 185 | A01710 | A14247 | 603 |
| A01710 | A14473 | 269 | A01710 | A14481 | 312 |
| A01710 | A14661 | 417 | A01710 | A14693 | 344 |
| A01710 | A14838 | 216 | A01710 | A15301 | 269 |
| A01710 | A15302 | 269 | A01710 | A15366 | 270 |
| A01710 | A15430 | 269 | A01710 | A15462 | 428 |

|        |        |     |        |        |     |
|--------|--------|-----|--------|--------|-----|
| A01710 | A15463 | 311 | A01710 | A15552 | 208 |
| A01710 | A15595 | 196 | A01710 | A15650 | 419 |
| A01710 | A15932 | 63  | A01710 | A16258 | 221 |
| A01710 | A17061 | 258 | A01711 | A01741 | 294 |
| A01711 | A01815 | 294 | A01711 | A01819 | 213 |
| A01711 | A01822 | 463 | A01711 | A01825 | 385 |
| A01711 | A01827 | 368 | A01711 | A01832 | 479 |
| A01711 | A01833 | 294 | A01711 | A02040 | 173 |
| A01711 | A02124 | 257 | A01711 | A02814 | 230 |
| A01711 | A02994 | 343 | A01711 | A03526 | 151 |
| A01711 | A03527 | 423 | A01711 | A03671 | 154 |
| A01711 | A03676 | 486 | A01711 | A03713 | 198 |
| A01711 | A03856 | 436 | A01711 | A03958 | 224 |
| A01711 | A03981 | 255 | A01711 | A04056 | 257 |
| A01711 | A04661 | 154 | A01711 | A04895 | 229 |
| A01711 | A04898 | 202 | A01711 | A05449 | 274 |
| A01711 | A05702 | 160 | A01711 | A05982 | 281 |
| A01711 | A06084 | 188 | A01711 | A06276 | 468 |
| A01711 | A06356 | 238 | A01711 | A06568 | 329 |
| A01711 | A06825 | 199 | A01711 | A06938 | 288 |
| A01711 | A07046 | 262 | A01711 | A07220 | 156 |
| A01711 | A07237 | 306 | A01711 | A07258 | 238 |
| A01711 | A08794 | 443 | A01711 | A08796 | 329 |
| A01711 | A08801 | 353 | A01711 | A08808 | 286 |
| A01711 | A09321 | 279 | A01711 | A09597 | 249 |
| A01711 | A10034 | 154 | A01711 | A10383 | 294 |
| A01711 | A10598 | 160 | A01711 | A11427 | 230 |
| A01711 | A11724 | 191 | A01711 | A14216 | 475 |
| A01711 | A14479 | 200 | A01711 | A14482 | 208 |
| A01711 | A15379 | 466 | A01711 | A15624 | 469 |
| A01711 | A15668 | 217 | A01711 | A15684 | 364 |
| A01711 | A16088 | 447 | A01712 | A01954 | 364 |
| A01712 | A01956 | 486 | A01712 | A01967 | 218 |
| A01712 | A02007 | 338 | A01712 | A02010 | 491 |
| A01712 | A02035 | 152 | A01712 | A02157 | 73  |
| A01712 | A02208 | 283 | A01712 | A02213 | 193 |
| A01712 | A02293 | 184 | A01712 | A02476 | 152 |
| A01712 | A02918 | 188 | A01712 | A03023 | 257 |
| A01712 | A03025 | 364 | A01712 | A03134 | 465 |
| A01712 | A03344 | 188 | A01712 | A03345 | 191 |
| A01712 | A03692 | 257 | A01712 | A03701 | 485 |
| A01712 | A03703 | 257 | A01712 | A03722 | 207 |
| A01712 | A03803 | 238 | A01712 | A04152 | 297 |
| A01712 | A04166 | 435 | A01712 | A04340 | 380 |
| A01712 | A04942 | 188 | A01712 | A05216 | 160 |
| A01712 | A05361 | 228 | A01712 | A05393 | 270 |



|        |        |     |        |        |     |
|--------|--------|-----|--------|--------|-----|
| A01712 | A05705 | 245 | A01712 | A06727 | 179 |
| A01712 | A07054 | 519 | A01712 | A07242 | 343 |
| A01712 | A07495 | 337 | A01712 | A08555 | 223 |
| A01712 | A08596 | 152 | A01712 | A08686 | 235 |
| A01712 | A08870 | 378 | A01712 | A09198 | 288 |
| A01712 | A09356 | 221 | A01712 | A09702 | 157 |
| A01712 | A09824 | 193 | A01712 | A10726 | 462 |
| A01712 | A11199 | 212 | A01712 | A11951 | 477 |
| A01712 | A11961 | 228 | A01712 | A12935 | 475 |
| A01712 | A12960 | 428 | A01712 | A12976 | 424 |
| A01712 | A12982 | 232 | A01712 | A13410 | 481 |
| A01712 | A13590 | 172 | A01712 | A13745 | 343 |
| A01712 | A14127 | 466 | A01712 | A14180 | 157 |
| A01712 | A14253 | 472 | A01712 | A14266 | 561 |
| A01712 | A14579 | 216 | A01712 | A14683 | 343 |
| A01712 | A15292 | 168 | A01712 | A15312 | 285 |
| A01712 | A15313 | 310 | A01712 | A15324 | 428 |
| A01712 | A15352 | 201 | A01712 | A15399 | 324 |
| A01712 | A15404 | 329 | A01712 | A15419 | 160 |
| A01712 | A15435 | 195 | A01712 | A15436 | 196 |
| A01712 | A15451 | 179 | A01712 | A15456 | 277 |
| A01712 | A15467 | 176 | A01712 | A15495 | 243 |
| A01712 | A15804 | 212 | A01712 | A15809 | 440 |
| A01712 | A15908 | 263 | A01712 | A15922 | 374 |
| A01712 | A16533 | 241 | A01712 | A16951 | 218 |
| A01713 | A01731 | 160 | A01713 | A01741 | 274 |
| A01713 | A01743 | 285 | A01713 | A01757 | 177 |
| A01713 | A01928 | 252 | A01713 | A01933 | 152 |
| A01713 | A01947 | 157 | A01713 | A01972 | 407 |
| A01713 | A01978 | 489 | A01713 | A02075 | 229 |
| A01713 | A02168 | 468 | A01713 | A02170 | 168 |
| A01713 | A02192 | 188 | A01713 | A02215 | 486 |
| A01713 | A02355 | 217 | A01713 | A02356 | 208 |
| A01713 | A02530 | 252 | A01713 | A02538 | 399 |
| A01713 | A02542 | 96  | A01713 | A02859 | 475 |
| A01713 | A02992 | 490 | A01713 | A03027 | 318 |
| A01713 | A03050 | 491 | A01713 | A03146 | 218 |
| A01713 | A03545 | 347 | A01713 | A04369 | 404 |
| A01713 | A04487 | 170 | A01713 | A04633 | 198 |
| A01713 | A04839 | 491 | A01713 | A05094 | 151 |
| A01713 | A05153 | 154 | A01713 | A05356 | 468 |
| A01713 | A05389 | 232 | A01713 | A05390 | 390 |
| A01713 | A05407 | 249 | A01713 | A05516 | 170 |
| A01713 | A05775 | 427 | A01713 | A05776 | 477 |
| A01713 | A05858 | 321 | A01713 | A05926 | 221 |
| A01713 | A06009 | 324 | A01713 | A06252 | 215 |

|        |        |     |        |        |     |
|--------|--------|-----|--------|--------|-----|
| A01713 | A06294 | 358 | A01713 | A06527 | 477 |
| A01713 | A06607 | 210 | A01713 | A06633 | 187 |
| A01713 | A06908 | 183 | A01713 | A07019 | 165 |
| A01713 | A07300 | 391 | A01713 | A07407 | 391 |
| A01713 | A07452 | 408 | A01713 | A07472 | 283 |
| A01713 | A07541 | 481 | A01713 | A07542 | 420 |
| A01713 | A07543 | 451 | A01713 | A07544 | 279 |
| A01713 | A07561 | 457 | A01713 | A07610 | 379 |
| A01713 | A07629 | 215 | A01713 | A07632 | 235 |
| A01713 | A07633 | 274 | A01713 | A07634 | 401 |
| A01713 | A07635 | 307 | A01713 | A07674 | 187 |
| A01713 | A07754 | 224 | A01713 | A07928 | 210 |
| A01713 | A07958 | 165 | A01713 | A08079 | 240 |
| A01713 | A08089 | 224 | A01713 | A08210 | 229 |
| A01713 | A08404 | 317 | A01713 | A08693 | 278 |
| A01713 | A10056 | 236 | A01713 | A10527 | 246 |
| A01713 | A10967 | 348 | A01713 | A11032 | 408 |
| A01713 | A13602 | 358 | A01713 | A13871 | 491 |
| A01713 | A14247 | 265 | A01713 | A15992 | 240 |
| A01713 | A17078 | 491 | A01713 | A17108 | 174 |
| A01714 | A02992 | 383 | A01714 | A03003 | 307 |
| A01714 | A03016 | 418 | A01714 | A04834 | 340 |
| A01714 | A05774 | 363 | A01714 | A05937 | 363 |
| A01714 | A06063 | 272 | A01714 | A06397 | 385 |
| A01714 | A07530 | 348 | A01714 | A07634 | 281 |
| A01714 | A07847 | 314 | A01714 | A17078 | 195 |
| A01715 | A01811 | 633 | A01715 | A02812 | 224 |
| A01715 | A03293 | 63  | A01715 | A03565 | 636 |
| A01715 | A03626 | 638 | A01715 | A03718 | 199 |
| A01715 | A03890 | 480 | A01715 | A03891 | 334 |
| A01715 | A04893 | 636 | A01715 | A04896 | 429 |
| A01715 | A04929 | 278 | A01715 | A05023 | 609 |
| A01715 | A05201 | 366 | A01715 | A05233 | 392 |
| A01715 | A05692 | 378 | A01715 | A06659 | 629 |
| A01715 | A06675 | 638 | A01715 | A06941 | 246 |
| A01715 | A08874 | 104 | A01715 | A08943 | 204 |
| A01715 | A09043 | 249 | A01715 | A09050 | 371 |
| A01715 | A09056 | 241 | A01715 | A09060 | 210 |
| A01715 | A10804 | 188 | A01715 | A12792 | 226 |
| A01715 | A13844 | 616 | A01715 | A13846 | 552 |
| A01715 | A13882 | 255 | A01715 | A13887 | 277 |
| A01715 | A14095 | 474 | A01715 | A14182 | 334 |
| A01715 | A15444 | 159 | A01715 | A15650 | 174 |
| A01716 | A01899 | 232 | A01716 | A02001 | 311 |
| A01716 | A02180 | 187 | A01716 | A02191 | 251 |
| A01716 | A02803 | 409 | A01716 | A04874 | 299 |

|        |        |     |        |        |     |
|--------|--------|-----|--------|--------|-----|
| A01716 | A05052 | 227 | A01716 | A05157 | 279 |
| A01716 | A05419 | 191 | A01716 | A05539 | 301 |
| A01716 | A06067 | 235 | A01716 | A06471 | 340 |
| A01716 | A07140 | 215 | A01716 | A07655 | 286 |
| A01716 | A07878 | 232 | A01716 | A08688 | 286 |
| A01716 | A10664 | 366 | A01716 | A11739 | 358 |
| A01716 | A15383 | 224 | A01716 | A16843 | 327 |
| A01717 | A01726 | 168 | A01717 | A02567 | 207 |
| A01717 | A03298 | 383 | A01717 | A03496 | 188 |
| A01717 | A03569 | 480 | A01717 | A03728 | 174 |
| A01717 | A05009 | 305 | A01717 | A05015 | 491 |
| A01717 | A06143 | 445 | A01717 | A06348 | 474 |
| A01717 | A06572 | 201 | A01717 | A06591 | 343 |
| A01717 | A06611 | 219 | A01717 | A06919 | 274 |
| A01717 | A07054 | 210 | A01717 | A07180 | 174 |
| A01717 | A07422 | 63  | A01717 | A07425 | 104 |
| A01717 | A07571 | 176 | A01717 | A07613 | 247 |
| A01717 | A08571 | 491 | A01717 | A08707 | 157 |
| A01717 | A08876 | 165 | A01717 | A08885 | 63  |
| A01717 | A09066 | 180 | A01717 | A09256 | 422 |
| A01717 | A09730 | 296 | A01717 | A09739 | 235 |
| A01717 | A09767 | 172 | A01717 | A10623 | 205 |
| A01717 | A10683 | 160 | A01717 | A10824 | 210 |
| A01717 | A11258 | 245 | A01717 | A11885 | 243 |
| A01717 | A12401 | 454 | A01717 | A12920 | 180 |
| A01717 | A13082 | 307 | A01717 | A13889 | 168 |
| A01717 | A13978 | 467 | A01717 | A14009 | 483 |
| A01717 | A14191 | 188 | A01717 | A14279 | 208 |
| A01717 | A14474 | 63  | A01717 | A15356 | 396 |
| A01717 | A15726 | 356 | A01717 | A15926 | 188 |
| A01717 | A16161 | 278 | A01718 | A01719 | 945 |
| A01718 | A01880 | 198 | A01718 | A01908 | 168 |
| A01718 | A01974 | 363 | A01718 | A01983 | 490 |
| A01718 | A02064 | 393 | A01718 | A02068 | 249 |
| A01718 | A02293 | 213 | A01718 | A02586 | 180 |
| A01718 | A02836 | 407 | A01718 | A02859 | 899 |
| A01718 | A02908 | 899 | A01718 | A02942 | 899 |
| A01718 | A03057 | 188 | A01718 | A03126 | 338 |
| A01718 | A03171 | 65  | A01718 | A03331 | 491 |
| A01718 | A03332 | 420 | A01718 | A03437 | 74  |
| A01718 | A03444 | 193 | A01718 | A03531 | 488 |
| A01718 | A03567 | 489 | A01718 | A03571 | 213 |
| A01718 | A03753 | 377 | A01718 | A03775 | 443 |
| A01718 | A03854 | 212 | A01718 | A03913 | 945 |
| A01718 | A04347 | 663 | A01718 | A04608 | 899 |
| A01718 | A04626 | 223 | A01718 | A04639 | 159 |

|        |        |     |        |        |     |
|--------|--------|-----|--------|--------|-----|
| A01718 | A04699 | 899 | A01718 | A04754 | 479 |
| A01718 | A04761 | 469 | A01718 | A04832 | 425 |
| A01718 | A04940 | 243 | A01718 | A05052 | 446 |
| A01718 | A05385 | 243 | A01718 | A05443 | 454 |
| A01718 | A05996 | 330 | A01718 | A06279 | 63  |
| A01718 | A06601 | 418 | A01718 | A06750 | 163 |
| A01718 | A06812 | 170 | A01718 | A06861 | 198 |
| A01718 | A06965 | 485 | A01718 | A07101 | 371 |
| A01718 | A07183 | 165 | A01718 | A07282 | 249 |
| A01718 | A07311 | 990 | A01718 | A07398 | 480 |
| A01718 | A07422 | 899 | A01718 | A07451 | 446 |
| A01718 | A08011 | 399 | A01718 | A08055 | 319 |
| A01718 | A08087 | 177 | A01718 | A08088 | 170 |
| A01718 | A08331 | 207 | A01718 | A08498 | 170 |
| A01718 | A08571 | 899 | A01718 | A08624 | 223 |
| A01718 | A08835 | 485 | A01718 | A09124 | 290 |
| A01718 | A09162 | 458 | A01718 | A09409 | 207 |
| A01718 | A09469 | 409 | A01718 | A09488 | 243 |
| A01718 | A09490 | 185 | A01718 | A09577 | 202 |
| A01718 | A09585 | 185 | A01718 | A09644 | 401 |
| A01718 | A09809 | 180 | A01718 | A09906 | 177 |
| A01718 | A10154 | 152 | A01718 | A10297 | 278 |
| A01718 | A10365 | 899 | A01718 | A10392 | 162 |
| A01718 | A10622 | 162 | A01718 | A10743 | 353 |
| A01718 | A10949 | 454 | A01718 | A11090 | 290 |
| A01718 | A11298 | 236 | A01718 | A11400 | 378 |
| A01718 | A11612 | 299 | A01718 | A11791 | 157 |
| A01718 | A11943 | 485 | A01718 | A12134 | 278 |
| A01718 | A12135 | 278 | A01718 | A12147 | 223 |
| A01718 | A12159 | 223 | A01718 | A12383 | 489 |
| A01718 | A12651 | 486 | A01718 | A12735 | 278 |
| A01718 | A12897 | 395 | A01718 | A12990 | 750 |
| A01718 | A13207 | 187 | A01718 | A13427 | 278 |
| A01718 | A13945 | 317 | A01718 | A13989 | 401 |
| A01718 | A13992 | 945 | A01718 | A14008 | 338 |
| A01718 | A14048 | 174 | A01718 | A14197 | 188 |
| A01718 | A14443 | 899 | A01718 | A14495 | 391 |
| A01718 | A14519 | 243 | A01718 | A14725 | 177 |
| A01718 | A15195 | 207 | A01718 | A15325 | 205 |
| A01718 | A15892 | 152 | A01718 | A15894 | 472 |
| A01718 | A16030 | 899 | A01718 | A16042 | 208 |
| A01718 | A16118 | 388 | A01718 | A16336 | 162 |
| A01719 | A01904 | 167 | A01719 | A01908 | 360 |
| A01719 | A01920 | 207 | A01719 | A02161 | 272 |
| A01719 | A02337 | 899 | A01719 | A02351 | 152 |
| A01719 | A02411 | 63  | A01719 | A02616 | 191 |

|        |        |     |        |        |     |
|--------|--------|-----|--------|--------|-----|
| A01719 | A02669 | 201 | A01719 | A02803 | 196 |
| A01719 | A02908 | 899 | A01719 | A03019 | 922 |
| A01719 | A03204 | 156 | A01719 | A03271 | 98  |
| A01719 | A03331 | 369 | A01719 | A03784 | 167 |
| A01719 | A03817 | 313 | A01719 | A04091 | 249 |
| A01719 | A04323 | 152 | A01719 | A04439 | 272 |
| A01719 | A04682 | 157 | A01719 | A04699 | 942 |
| A01719 | A04815 | 228 | A01719 | A04968 | 246 |
| A01719 | A05005 | 185 | A01719 | A05326 | 899 |
| A01719 | A06100 | 234 | A01719 | A06289 | 477 |
| A01719 | A06306 | 212 | A01719 | A06652 | 272 |
| A01719 | A07311 | 943 | A01719 | A08087 | 272 |
| A01719 | A08088 | 266 | A01719 | A08279 | 230 |
| A01719 | A09162 | 475 | A01719 | A09303 | 172 |
| A01719 | A09577 | 274 | A01719 | A09643 | 465 |
| A01719 | A09752 | 461 | A01719 | A09778 | 202 |
| A01719 | A09937 | 302 | A01719 | A10073 | 63  |
| A01719 | A10392 | 99  | A01719 | A10560 | 224 |
| A01719 | A10623 | 208 | A01719 | A10735 | 201 |
| A01719 | A10808 | 109 | A01719 | A10811 | 265 |
| A01719 | A10902 | 486 | A01719 | A11124 | 488 |
| A01719 | A11125 | 899 | A01719 | A11206 | 207 |
| A01719 | A11369 | 102 | A01719 | A12009 | 305 |
| A01719 | A12383 | 945 | A01719 | A12664 | 899 |
| A01719 | A12831 | 196 | A01719 | A12886 | 327 |
| A01719 | A13127 | 187 | A01719 | A13980 | 171 |
| A01719 | A13983 | 63  | A01719 | A13985 | 924 |
| A01719 | A14008 | 477 | A01719 | A14043 | 899 |
| A01719 | A14067 | 348 | A01719 | A14242 | 899 |
| A01719 | A14584 | 255 | A01719 | A15275 | 196 |
| A01719 | A15726 | 63  | A01719 | A16157 | 201 |
| A01719 | A16547 | 404 | A01719 | A16877 | 165 |
| A01720 | A04648 | 254 | A01720 | A07989 | 271 |
| A01720 | A09347 | 228 | A01720 | A14132 | 283 |
| A01721 | A03438 | 80  | A01721 | A05845 | 401 |
| A01721 | A06275 | 301 | A01721 | A07223 | 193 |
| A01721 | A09664 | 251 | A01721 | A10328 | 221 |
| A01721 | A13220 | 340 | A01721 | A13719 | 385 |
| A01721 | A13989 | 353 | A01721 | A14006 | 202 |
| A01722 | A01775 | 417 | A01722 | A01792 | 268 |
| A01722 | A01890 | 344 | A01722 | A01914 | 266 |
| A01722 | A01927 | 198 | A01722 | A01929 | 263 |
| A01722 | A02004 | 335 | A01722 | A02071 | 182 |
| A01722 | A02104 | 283 | A01722 | A02112 | 121 |
| A01722 | A02141 | 260 | A01722 | A02168 | 267 |
| A01722 | A02215 | 490 | A01722 | A02251 | 162 |

|        |        |     |        |        |     |
|--------|--------|-----|--------|--------|-----|
| A01722 | A02278 | 278 | A01722 | A02301 | 322 |
| A01722 | A02306 | 299 | A01722 | A02359 | 335 |
| A01722 | A02419 | 188 | A01722 | A02423 | 438 |
| A01722 | A02425 | 402 | A01722 | A02429 | 213 |
| A01722 | A02435 | 202 | A01722 | A02454 | 112 |
| A01722 | A02462 | 296 | A01722 | A02465 | 488 |
| A01722 | A02529 | 152 | A01722 | A02601 | 152 |
| A01722 | A02612 | 328 | A01722 | A02613 | 429 |
| A01722 | A02616 | 477 | A01722 | A02669 | 430 |
| A01722 | A02734 | 346 | A01722 | A02759 | 185 |
| A01722 | A02785 | 174 | A01722 | A02893 | 314 |
| A01722 | A02965 | 159 | A01722 | A03053 | 358 |
| A01722 | A03054 | 491 | A01722 | A03084 | 240 |
| A01722 | A03099 | 196 | A01722 | A03127 | 379 |
| A01722 | A03417 | 163 | A01722 | A03458 | 363 |
| A01722 | A03750 | 151 | A01722 | A04216 | 259 |
| A01722 | A04218 | 490 | A01722 | A04237 | 310 |
| A01722 | A04380 | 293 | A01722 | A04417 | 187 |
| A01722 | A04439 | 314 | A01722 | A04470 | 346 |
| A01722 | A04471 | 484 | A01722 | A04548 | 196 |
| A01722 | A04912 | 470 | A01722 | A04968 | 293 |
| A01722 | A05294 | 182 | A01722 | A05337 | 213 |
| A01722 | A05407 | 283 | A01722 | A05411 | 154 |
| A01722 | A05487 | 455 | A01722 | A05493 | 438 |
| A01722 | A05494 | 490 | A01722 | A05533 | 484 |
| A01722 | A05942 | 277 | A01722 | A06028 | 377 |
| A01722 | A06175 | 335 | A01722 | A06527 | 179 |
| A01722 | A06574 | 193 | A01722 | A06607 | 451 |
| A01722 | A06622 | 174 | A01722 | A06650 | 455 |
| A01722 | A06696 | 353 | A01722 | A06742 | 456 |
| A01722 | A06762 | 341 | A01722 | A06769 | 357 |
| A01722 | A07069 | 196 | A01722 | A07447 | 358 |
| A01722 | A07453 | 321 | A01722 | A07471 | 472 |
| A01722 | A07486 | 185 | A01722 | A07491 | 180 |
| A01722 | A07538 | 395 | A01722 | A07704 | 188 |
| A01722 | A08125 | 358 | A01722 | A08292 | 228 |
| A01722 | A09062 | 283 | A01722 | A09149 | 163 |
| A01722 | A09833 | 184 | A01722 | A10093 | 424 |
| A01722 | A10131 | 224 | A01722 | A12824 | 154 |
| A01722 | A12887 | 305 | A01722 | A13879 | 452 |
| A01722 | A14382 | 335 | A01722 | A14401 | 257 |
| A01722 | A16417 | 218 | A01723 | A01772 | 218 |
| A01723 | A01790 | 485 | A01723 | A01895 | 281 |
| A01723 | A01931 | 373 | A01723 | A02020 | 398 |
| A01723 | A02275 | 188 | A01723 | A02530 | 306 |
| A01723 | A02673 | 200 | A01723 | A02709 | 224 |

|        |        |     |        |        |     |
|--------|--------|-----|--------|--------|-----|
| A01723 | A02754 | 180 | A01723 | A02812 | 207 |
| A01723 | A02924 | 162 | A01723 | A03104 | 475 |
| A01723 | A03154 | 283 | A01723 | A03238 | 160 |
| A01723 | A03304 | 384 | A01723 | A03688 | 218 |
| A01723 | A03722 | 177 | A01723 | A04006 | 187 |
| A01723 | A04033 | 486 | A01723 | A04260 | 162 |
| A01723 | A04318 | 302 | A01723 | A04449 | 430 |
| A01723 | A04487 | 232 | A01723 | A04504 | 328 |
| A01723 | A05143 | 281 | A01723 | A05221 | 288 |
| A01723 | A05418 | 167 | A01723 | A05785 | 351 |
| A01723 | A05891 | 171 | A01723 | A06092 | 157 |
| A01723 | A06190 | 228 | A01723 | A06196 | 344 |
| A01723 | A06578 | 177 | A01723 | A06701 | 286 |
| A01723 | A06831 | 312 | A01723 | A06858 | 358 |
| A01723 | A07209 | 475 | A01723 | A07210 | 236 |
| A01723 | A07282 | 173 | A01723 | A07726 | 165 |
| A01723 | A07803 | 475 | A01723 | A08635 | 265 |
| A01723 | A08875 | 154 | A01723 | A09036 | 286 |
| A01723 | A09316 | 157 | A01723 | A09375 | 302 |
| A01723 | A09891 | 351 | A01723 | A09892 | 333 |
| A01723 | A10237 | 323 | A01723 | A10319 | 174 |
| A01723 | A10743 | 241 | A01723 | A11132 | 177 |
| A01723 | A11335 | 375 | A01723 | A11983 | 446 |
| A01723 | A12040 | 360 | A01723 | A13832 | 185 |
| A01723 | A14010 | 152 | A01723 | A14026 | 182 |
| A01723 | A14097 | 212 | A01723 | A14218 | 198 |
| A01723 | A14635 | 435 | A01723 | A14636 | 399 |
| A01723 | A15282 | 299 | A01723 | A15293 | 191 |
| A01723 | A15331 | 183 | A01723 | A15337 | 191 |
| A01723 | A15358 | 201 | A01723 | A15361 | 249 |
| A01723 | A15433 | 223 | A01723 | A15456 | 235 |
| A01723 | A15457 | 286 | A01723 | A15460 | 256 |
| A01723 | A15599 | 228 | A01723 | A15617 | 269 |
| A01723 | A15630 | 274 | A01723 | A15922 | 172 |
| A01723 | A16847 | 179 | A01723 | A16916 | 185 |
| A01724 | A03007 | 263 | A01724 | A03304 | 436 |
| A01724 | A03336 | 165 | A01724 | A03465 | 489 |
| A01724 | A03778 | 491 | A01724 | A04297 | 285 |
| A01724 | A04449 | 443 | A01724 | A05221 | 207 |
| A01724 | A05405 | 281 | A01724 | A07550 | 307 |
| A01724 | A08621 | 452 | A01724 | A09487 | 208 |
| A01724 | A11345 | 196 | A01724 | A11659 | 408 |
| A01724 | A11855 | 221 | A01724 | A11983 | 229 |
| A01724 | A13111 | 200 | A01724 | A13997 | 199 |
| A01724 | A14653 | 491 | A01724 | A16323 | 232 |
| A01724 | A16741 | 154 | A01725 | A01726 | 294 |

|        |        |     |        |        |     |
|--------|--------|-----|--------|--------|-----|
| A01725 | A01728 | 791 | A01725 | A01729 | 491 |
| A01725 | A01731 | 140 | A01725 | A01732 | 185 |
| A01725 | A01736 | 344 | A01725 | A01743 | 752 |
| A01725 | A01744 | 165 | A01725 | A01746 | 462 |
| A01725 | A01750 | 286 | A01725 | A01751 | 90  |
| A01725 | A01754 | 160 | A01725 | A01757 | 288 |
| A01725 | A01769 | 438 | A01725 | A01782 | 324 |
| A01725 | A01798 | 491 | A01725 | A01829 | 173 |
| A01725 | A01839 | 382 | A01725 | A01872 | 216 |
| A01725 | A01873 | 283 | A01725 | A01883 | 358 |
| A01725 | A01909 | 210 | A01725 | A01939 | 224 |
| A01725 | A01972 | 326 | A01725 | A02190 | 240 |
| A01725 | A02274 | 283 | A01725 | A02335 | 395 |
| A01725 | A02336 | 195 | A01725 | A02338 | 283 |
| A01725 | A02691 | 486 | A01725 | A02692 | 356 |
| A01725 | A02694 | 473 | A01725 | A02700 | 201 |
| A01725 | A02736 | 232 | A01725 | A02834 | 385 |
| A01725 | A02858 | 899 | A01725 | A02905 | 173 |
| A01725 | A02906 | 204 | A01725 | A03004 | 172 |
| A01725 | A03027 | 162 | A01725 | A03167 | 160 |
| A01725 | A03649 | 183 | A01725 | A03662 | 451 |
| A01725 | A03962 | 462 | A01725 | A04108 | 486 |
| A01725 | A04135 | 330 | A01725 | A04510 | 182 |
| A01725 | A04573 | 235 | A01725 | A04791 | 279 |
| A01725 | A05103 | 363 | A01725 | A05789 | 221 |
| A01725 | A05797 | 469 | A01725 | A06098 | 267 |
| A01725 | A06224 | 260 | A01725 | A06597 | 435 |
| A01725 | A06599 | 234 | A01725 | A06601 | 385 |
| A01725 | A06607 | 152 | A01725 | A06635 | 491 |
| A01725 | A06650 | 491 | A01725 | A06654 | 156 |
| A01725 | A06970 | 196 | A01725 | A07109 | 446 |
| A01725 | A07200 | 291 | A01725 | A09646 | 204 |
| A01725 | A09768 | 151 | A01725 | A14404 | 174 |
| A01725 | A15135 | 221 | A01725 | A15281 | 221 |
| A01725 | A15660 | 399 | A01725 | A15931 | 446 |
| A01725 | A16355 | 468 | A01725 | A16741 | 191 |
| A01725 | A17041 | 168 | A01725 | A17208 | 321 |
| A01726 | A01727 | 491 | A01726 | A01729 | 152 |
| A01726 | A01731 | 185 | A01726 | A01733 | 491 |
| A01726 | A01734 | 490 | A01726 | A01736 | 470 |
| A01726 | A01737 | 945 | A01726 | A01738 | 483 |
| A01726 | A01741 | 340 | A01726 | A01743 | 374 |
| A01726 | A01745 | 172 | A01726 | A01748 | 490 |
| A01726 | A01749 | 945 | A01726 | A01752 | 449 |
| A01726 | A01757 | 294 | A01726 | A01758 | 489 |
| A01726 | A01760 | 191 | A01726 | A01761 | 221 |



|        |        |     |        |        |     |
|--------|--------|-----|--------|--------|-----|
| A01726 | A01763 | 157 | A01726 | A01769 | 490 |
| A01726 | A01775 | 294 | A01726 | A01875 | 212 |
| A01726 | A01876 | 385 | A01726 | A01893 | 202 |
| A01726 | A01894 | 491 | A01726 | A01900 | 484 |
| A01726 | A01902 | 179 | A01726 | A01909 | 221 |
| A01726 | A01912 | 177 | A01726 | A01936 | 430 |
| A01726 | A01941 | 489 | A01726 | A01991 | 199 |
| A01726 | A02011 | 163 | A01726 | A02054 | 486 |
| A01726 | A02086 | 179 | A01726 | A02112 | 457 |
| A01726 | A02202 | 162 | A01726 | A02244 | 160 |
| A01726 | A02281 | 160 | A01726 | A02298 | 177 |
| A01726 | A02331 | 252 | A01726 | A02333 | 249 |
| A01726 | A02345 | 465 | A01726 | A02416 | 154 |
| A01726 | A02481 | 491 | A01726 | A02490 | 301 |
| A01726 | A02491 | 491 | A01726 | A02559 | 176 |
| A01726 | A02601 | 472 | A01726 | A02630 | 212 |
| A01726 | A02635 | 177 | A01726 | A02639 | 458 |
| A01726 | A02689 | 424 | A01726 | A02691 | 430 |
| A01726 | A02695 | 488 | A01726 | A02696 | 491 |
| A01726 | A02697 | 491 | A01726 | A02706 | 486 |
| A01726 | A02709 | 245 | A01726 | A02714 | 238 |
| A01726 | A02739 | 491 | A01726 | A02753 | 477 |
| A01726 | A02756 | 190 | A01726 | A02812 | 455 |
| A01726 | A02813 | 470 | A01726 | A02828 | 271 |
| A01726 | A02833 | 154 | A01726 | A02837 | 346 |
| A01726 | A02859 | 447 | A01726 | A02874 | 473 |
| A01726 | A02875 | 461 | A01726 | A02876 | 445 |
| A01726 | A02908 | 413 | A01726 | A02982 | 491 |
| A01726 | A02984 | 490 | A01726 | A03012 | 491 |
| A01726 | A03013 | 160 | A01726 | A03019 | 396 |
| A01726 | A03034 | 260 | A01726 | A03094 | 268 |
| A01726 | A03164 | 635 | A01726 | A03171 | 235 |
| A01726 | A03266 | 162 | A01726 | A03269 | 241 |
| A01726 | A03275 | 443 | A01726 | A03280 | 216 |
| A01726 | A03287 | 461 | A01726 | A03321 | 490 |
| A01726 | A03340 | 363 | A01726 | A03373 | 294 |
| A01726 | A03506 | 452 | A01726 | A03520 | 184 |
| A01726 | A03563 | 416 | A01726 | A03610 | 191 |
| A01726 | A03611 | 188 | A01726 | A03661 | 399 |
| A01726 | A03672 | 185 | A01726 | A03803 | 441 |
| A01726 | A03865 | 273 | A01726 | A04010 | 276 |
| A01726 | A04088 | 268 | A01726 | A04117 | 491 |
| A01726 | A04127 | 229 | A01726 | A04134 | 283 |
| A01726 | A04142 | 179 | A01726 | A04267 | 491 |
| A01726 | A04268 | 170 | A01726 | A04271 | 283 |
| A01726 | A04279 | 434 | A01726 | A04287 | 199 |

|        |        |     |        |        |     |
|--------|--------|-----|--------|--------|-----|
| A01726 | A04301 | 377 | A01726 | A04519 | 294 |
| A01726 | A04536 | 185 | A01726 | A04575 | 160 |
| A01726 | A04698 | 285 | A01726 | A04723 | 460 |
| A01726 | A04902 | 457 | A01726 | A04906 | 273 |
| A01726 | A04960 | 301 | A01726 | A04998 | 185 |
| A01726 | A05034 | 390 | A01726 | A05070 | 208 |
| A01726 | A05142 | 290 | A01726 | A05203 | 173 |
| A01726 | A05289 | 334 | A01726 | A05349 | 348 |
| A01726 | A05418 | 183 | A01726 | A05424 | 188 |
| A01726 | A05513 | 212 | A01726 | A05522 | 160 |
| A01726 | A05773 | 162 | A01726 | A05944 | 491 |
| A01726 | A06076 | 199 | A01726 | A06163 | 269 |
| A01726 | A06385 | 334 | A01726 | A06415 | 339 |
| A01726 | A06508 | 185 | A01726 | A06597 | 329 |
| A01726 | A06598 | 334 | A01726 | A06606 | 243 |
| A01726 | A06607 | 375 | A01726 | A06635 | 361 |
| A01726 | A06650 | 489 | A01726 | A06826 | 462 |
| A01726 | A06914 | 638 | A01726 | A07070 | 199 |
| A01726 | A07094 | 199 | A01726 | A07125 | 160 |
| A01726 | A07175 | 188 | A01726 | A07194 | 160 |
| A01726 | A07198 | 366 | A01726 | A07200 | 491 |
| A01726 | A07422 | 935 | A01726 | A07485 | 199 |
| A01726 | A07771 | 343 | A01726 | A08229 | 199 |
| A01726 | A08367 | 364 | A01726 | A08707 | 636 |
| A01726 | A08732 | 152 | A01726 | A08741 | 480 |
| A01726 | A08798 | 160 | A01726 | A08827 | 438 |
| A01726 | A08836 | 174 | A01726 | A09078 | 154 |
| A01726 | A09162 | 340 | A01726 | A09182 | 334 |
| A01726 | A09526 | 485 | A01726 | A09557 | 160 |
| A01726 | A09578 | 223 | A01726 | A10244 | 160 |
| A01726 | A10301 | 199 | A01726 | A10453 | 483 |
| A01726 | A10557 | 480 | A01726 | A10632 | 258 |
| A01726 | A10638 | 439 | A01726 | A10691 | 340 |
| A01726 | A10698 | 251 | A01726 | A10720 | 385 |
| A01726 | A10974 | 160 | A01726 | A11369 | 156 |
| A01726 | A12393 | 457 | A01726 | A12510 | 199 |
| A01726 | A12897 | 219 | A01726 | A12927 | 276 |
| A01726 | A12964 | 160 | A01726 | A13734 | 267 |
| A01726 | A13912 | 173 | A01726 | A13977 | 940 |
| A01726 | A14004 | 168 | A01726 | A14055 | 899 |
| A01726 | A14229 | 362 | A01726 | A14247 | 179 |
| A01726 | A14252 | 581 | A01726 | A14389 | 353 |
| A01726 | A14399 | 202 | A01726 | A14405 | 484 |
| A01726 | A14440 | 945 | A01726 | A14483 | 195 |
| A01726 | A14698 | 168 | A01726 | A14768 | 160 |
| A01726 | A14802 | 235 | A01726 | A14827 | 374 |

|        |        |     |        |        |     |
|--------|--------|-----|--------|--------|-----|
| A01726 | A15356 | 638 | A01726 | A15394 | 251 |
| A01726 | A15674 | 463 | A01726 | A15865 | 212 |
| A01726 | A15911 | 173 | A01726 | A15996 | 193 |
| A01726 | A16007 | 340 | A01726 | A16015 | 173 |
| A01726 | A16062 | 201 | A01726 | A16308 | 223 |
| A01726 | A16597 | 154 | A01726 | A16636 | 475 |
| A01726 | A16715 | 160 | A01727 | A01733 | 396 |
| A01727 | A01734 | 485 | A01727 | A01737 | 366 |
| A01727 | A01738 | 361 | A01727 | A01741 | 195 |
| A01727 | A01743 | 279 | A01727 | A01748 | 205 |
| A01727 | A01752 | 363 | A01727 | A01758 | 319 |
| A01727 | A01784 | 335 | A01727 | A01875 | 205 |
| A01727 | A01878 | 312 | A01727 | A01894 | 358 |
| A01727 | A01915 | 171 | A01727 | A02006 | 165 |
| A01727 | A02087 | 254 | A01727 | A02317 | 180 |
| A01727 | A02351 | 276 | A01727 | A02495 | 157 |
| A01727 | A02695 | 452 | A01727 | A02696 | 185 |
| A01727 | A02697 | 337 | A01727 | A02705 | 314 |
| A01727 | A02729 | 294 | A01727 | A02776 | 157 |
| A01727 | A02817 | 252 | A01727 | A02836 | 266 |
| A01727 | A02859 | 213 | A01727 | A02982 | 396 |
| A01727 | A02984 | 167 | A01727 | A02987 | 266 |
| A01727 | A03080 | 353 | A01727 | A03275 | 236 |
| A01727 | A03361 | 274 | A01727 | A03520 | 283 |
| A01727 | A03649 | 182 | A01727 | A03664 | 283 |
| A01727 | A03772 | 369 | A01727 | A03801 | 319 |
| A01727 | A03976 | 352 | A01727 | A04134 | 367 |
| A01727 | A04142 | 367 | A01727 | A04274 | 249 |
| A01727 | A04333 | 223 | A01727 | A04505 | 185 |
| A01727 | A04510 | 180 | A01727 | A04698 | 210 |
| A01727 | A04723 | 191 | A01727 | A04875 | 235 |
| A01727 | A04907 | 218 | A01727 | A04941 | 165 |
| A01727 | A05034 | 314 | A01727 | A05070 | 281 |
| A01727 | A05288 | 260 | A01727 | A05344 | 215 |
| A01727 | A05432 | 297 | A01727 | A05453 | 152 |
| A01727 | A08677 | 180 | A01727 | A08741 | 255 |
| A01727 | A08861 | 210 | A01727 | A09578 | 273 |
| A01727 | A09882 | 183 | A01727 | A09909 | 345 |
| A01727 | A09933 | 208 | A01727 | A10158 | 218 |
| A01727 | A10453 | 213 | A01727 | A11681 | 230 |
| A01727 | A12371 | 184 | A01727 | A12861 | 254 |
| A01727 | A13558 | 184 | A01727 | A13948 | 205 |
| A01727 | A14605 | 279 | A01727 | A14848 | 196 |
| A01727 | A15318 | 151 | A01727 | A15389 | 355 |
| A01727 | A15391 | 490 | A01727 | A16114 | 165 |
| A01728 | A01729 | 488 | A01728 | A01730 | 291 |

|        |        |     |        |        |     |
|--------|--------|-----|--------|--------|-----|
| A01728 | A01732 | 196 | A01728 | A01736 | 485 |
| A01728 | A01737 | 433 | A01728 | A01743 | 791 |
| A01728 | A01744 | 177 | A01728 | A01746 | 238 |
| A01728 | A01751 | 99  | A01728 | A01753 | 204 |
| A01728 | A01754 | 306 | A01728 | A01757 | 302 |
| A01728 | A01758 | 256 | A01728 | A01764 | 337 |
| A01728 | A01778 | 384 | A01728 | A01779 | 427 |
| A01728 | A01803 | 193 | A01728 | A01876 | 340 |
| A01728 | A01894 | 193 | A01728 | A01905 | 204 |
| A01728 | A01932 | 329 | A01728 | A02236 | 162 |
| A01728 | A02362 | 160 | A01728 | A02371 | 232 |
| A01728 | A02491 | 334 | A01728 | A02493 | 213 |
| A01728 | A02687 | 305 | A01728 | A02691 | 332 |
| A01728 | A02751 | 170 | A01728 | A02785 | 202 |
| A01728 | A02983 | 208 | A01728 | A02984 | 411 |
| A01728 | A03234 | 299 | A01728 | A03260 | 174 |
| A01728 | A03662 | 238 | A01728 | A03848 | 362 |
| A01728 | A03983 | 266 | A01728 | A04023 | 160 |
| A01728 | A04279 | 263 | A01728 | A04286 | 291 |
| A01728 | A04402 | 272 | A01728 | A04535 | 221 |
| A01728 | A04676 | 199 | A01728 | A04870 | 174 |
| A01728 | A04878 | 196 | A01728 | A05289 | 157 |
| A01728 | A05515 | 196 | A01728 | A05742 | 420 |
| A01728 | A06298 | 259 | A01728 | A06525 | 329 |
| A01728 | A06601 | 395 | A01728 | A06607 | 485 |
| A01728 | A06613 | 188 | A01728 | A06615 | 201 |
| A01728 | A06650 | 470 | A01728 | A06688 | 216 |
| A01728 | A06868 | 281 | A01728 | A07200 | 447 |
| A01728 | A07295 | 278 | A01728 | A07422 | 265 |
| A01728 | A08946 | 260 | A01728 | A09491 | 190 |
| A01728 | A10580 | 441 | A01728 | A10891 | 243 |
| A01728 | A11157 | 319 | A01728 | A11409 | 324 |
| A01728 | A13609 | 346 | A01728 | A13825 | 285 |
| A01728 | A14549 | 260 | A01728 | A15282 | 190 |
| A01728 | A15840 | 408 | A01728 | A16060 | 154 |
| A01728 | A16636 | 274 | A01729 | A01730 | 296 |
| A01729 | A01731 | 432 | A01729 | A01739 | 488 |
| A01729 | A01741 | 466 | A01729 | A01743 | 480 |
| A01729 | A01745 | 472 | A01729 | A01746 | 475 |
| A01729 | A01754 | 475 | A01729 | A01759 | 364 |
| A01729 | A01767 | 201 | A01729 | A01775 | 152 |
| A01729 | A01791 | 167 | A01729 | A01798 | 281 |
| A01729 | A01839 | 477 | A01729 | A01873 | 255 |
| A01729 | A01913 | 173 | A01729 | A01939 | 193 |
| A01729 | A02042 | 266 | A01729 | A02141 | 172 |
| A01729 | A02190 | 208 | A01729 | A02388 | 176 |

|        |        |     |        |        |     |
|--------|--------|-----|--------|--------|-----|
| A01729 | A02392 | 224 | A01729 | A02417 | 201 |
| A01729 | A02418 | 364 | A01729 | A02420 | 230 |
| A01729 | A02443 | 247 | A01729 | A02476 | 408 |
| A01729 | A02488 | 486 | A01729 | A02493 | 425 |
| A01729 | A02552 | 172 | A01729 | A02586 | 208 |
| A01729 | A02616 | 152 | A01729 | A02629 | 347 |
| A01729 | A02639 | 266 | A01729 | A02691 | 176 |
| A01729 | A02693 | 424 | A01729 | A02694 | 435 |
| A01729 | A02704 | 245 | A01729 | A02736 | 201 |
| A01729 | A02744 | 232 | A01729 | A02749 | 466 |
| A01729 | A02792 | 249 | A01729 | A02799 | 179 |
| A01729 | A02810 | 168 | A01729 | A02811 | 256 |
| A01729 | A02814 | 172 | A01729 | A02819 | 236 |
| A01729 | A02837 | 441 | A01729 | A02859 | 221 |
| A01729 | A02877 | 151 | A01729 | A02878 | 215 |
| A01729 | A02894 | 213 | A01729 | A02905 | 272 |
| A01729 | A02921 | 218 | A01729 | A02936 | 151 |
| A01729 | A02943 | 347 | A01729 | A03095 | 177 |
| A01729 | A03112 | 330 | A01729 | A03120 | 238 |
| A01729 | A03139 | 177 | A01729 | A03228 | 215 |
| A01729 | A03259 | 243 | A01729 | A03451 | 246 |
| A01729 | A03515 | 399 | A01729 | A03520 | 466 |
| A01729 | A03537 | 224 | A01729 | A03543 | 218 |
| A01729 | A03569 | 279 | A01729 | A03583 | 196 |
| A01729 | A03585 | 176 | A01729 | A03645 | 230 |
| A01729 | A03797 | 411 | A01729 | A03819 | 184 |
| A01729 | A03847 | 382 | A01729 | A03848 | 193 |
| A01729 | A03861 | 436 | A01729 | A03870 | 424 |
| A01729 | A03877 | 167 | A01729 | A03976 | 226 |
| A01729 | A04009 | 172 | A01729 | A04031 | 435 |
| A01729 | A04107 | 396 | A01729 | A04123 | 363 |
| A01729 | A04125 | 184 | A01729 | A04213 | 174 |
| A01729 | A04257 | 190 | A01729 | A04260 | 249 |
| A01729 | A04264 | 274 | A01729 | A04308 | 168 |
| A01729 | A04439 | 238 | A01729 | A04444 | 212 |
| A01729 | A04503 | 324 | A01729 | A04560 | 196 |
| A01729 | A04561 | 357 | A01729 | A04573 | 205 |
| A01729 | A04578 | 196 | A01729 | A04581 | 279 |
| A01729 | A04599 | 324 | A01729 | A04656 | 296 |
| A01729 | A04710 | 165 | A01729 | A04715 | 445 |
| A01729 | A04734 | 187 | A01729 | A04740 | 182 |
| A01729 | A04790 | 346 | A01729 | A04905 | 152 |
| A01729 | A04917 | 246 | A01729 | A04966 | 208 |
| A01729 | A04987 | 201 | A01729 | A05036 | 218 |
| A01729 | A05128 | 160 | A01729 | A05234 | 238 |
| A01729 | A05249 | 174 | A01729 | A05451 | 201 |

|        |        |     |        |        |     |
|--------|--------|-----|--------|--------|-----|
| A01729 | A05574 | 246 | A01729 | A05625 | 157 |
| A01729 | A05709 | 165 | A01729 | A05832 | 340 |
| A01729 | A05925 | 255 | A01729 | A06175 | 266 |
| A01729 | A06584 | 170 | A01729 | A06595 | 252 |
| A01729 | A06597 | 435 | A01729 | A06601 | 452 |
| A01729 | A06616 | 208 | A01729 | A06623 | 436 |
| A01729 | A06635 | 379 | A01729 | A06648 | 447 |
| A01729 | A06650 | 263 | A01729 | A06669 | 196 |
| A01729 | A06734 | 174 | A01729 | A06888 | 296 |
| A01729 | A07158 | 190 | A01729 | A07165 | 281 |
| A01729 | A07339 | 182 | A01729 | A07383 | 324 |
| A01729 | A07495 | 179 | A01729 | A07799 | 187 |
| A01729 | A07903 | 224 | A01729 | A08070 | 240 |
| A01729 | A08137 | 162 | A01729 | A08572 | 457 |
| A01729 | A08583 | 160 | A01729 | A09011 | 208 |
| A01729 | A09033 | 160 | A01729 | A09112 | 238 |
| A01729 | A09127 | 198 | A01729 | A09166 | 279 |
| A01729 | A09385 | 238 | A01729 | A09524 | 213 |
| A01729 | A09548 | 208 | A01729 | A09603 | 230 |
| A01729 | A09747 | 208 | A01729 | A09814 | 187 |
| A01729 | A09819 | 324 | A01729 | A09911 | 174 |
| A01729 | A09913 | 190 | A01729 | A09976 | 352 |
| A01729 | A10023 | 266 | A01729 | A10295 | 296 |
| A01729 | A10746 | 324 | A01729 | A10891 | 201 |
| A01729 | A10947 | 182 | A01729 | A11460 | 184 |
| A01729 | A11631 | 179 | A01729 | A11666 | 324 |
| A01729 | A11680 | 196 | A01729 | A11943 | 227 |
| A01729 | A12080 | 218 | A01729 | A12419 | 263 |
| A01729 | A12828 | 176 | A01729 | A12910 | 296 |
| A01729 | A13422 | 266 | A01729 | A13481 | 324 |
| A01729 | A13695 | 196 | A01729 | A13755 | 296 |
| A01729 | A13983 | 208 | A01729 | A14199 | 396 |
| A01729 | A14386 | 160 | A01729 | A14390 | 157 |
| A01729 | A14531 | 182 | A01729 | A14574 | 255 |
| A01729 | A14642 | 195 | A01729 | A14643 | 399 |
| A01729 | A15281 | 190 | A01729 | A15282 | 268 |
| A01729 | A15629 | 156 | A01729 | A15658 | 243 |
| A01729 | A15840 | 299 | A01729 | A16016 | 324 |
| A01729 | A16110 | 187 | A01729 | A16197 | 279 |
| A01729 | A16624 | 196 | A01729 | A16969 | 324 |
| A01730 | A01740 | 491 | A01730 | A01741 | 447 |
| A01730 | A01743 | 188 | A01730 | A01744 | 191 |
| A01730 | A01755 | 467 | A01730 | A01760 | 223 |
| A01730 | A01767 | 262 | A01730 | A01770 | 484 |
| A01730 | A01774 | 429 | A01730 | A01776 | 151 |
| A01730 | A01792 | 160 | A01730 | A01844 | 480 |

|        |        |     |        |        |     |
|--------|--------|-----|--------|--------|-----|
| A01730 | A01877 | 486 | A01730 | A01897 | 182 |
| A01730 | A01901 | 238 | A01730 | A02119 | 199 |
| A01730 | A02148 | 173 | A01730 | A02265 | 154 |
| A01730 | A02292 | 207 | A01730 | A02344 | 462 |
| A01730 | A02401 | 184 | A01730 | A02490 | 176 |
| A01730 | A02493 | 251 | A01730 | A02494 | 491 |
| A01730 | A02502 | 475 | A01730 | A02515 | 184 |
| A01730 | A02590 | 173 | A01730 | A02610 | 229 |
| A01730 | A02693 | 241 | A01730 | A02698 | 174 |
| A01730 | A02702 | 213 | A01730 | A02703 | 491 |
| A01730 | A02704 | 428 | A01730 | A02724 | 383 |
| A01730 | A02737 | 174 | A01730 | A02740 | 372 |
| A01730 | A02786 | 329 | A01730 | A02816 | 491 |
| A01730 | A02825 | 229 | A01730 | A02827 | 291 |
| A01730 | A02830 | 480 | A01730 | A02860 | 489 |
| A01730 | A02867 | 213 | A01730 | A02877 | 445 |
| A01730 | A02878 | 384 | A01730 | A02895 | 465 |
| A01730 | A02904 | 217 | A01730 | A02914 | 461 |
| A01730 | A02924 | 245 | A01730 | A02983 | 170 |
| A01730 | A03112 | 462 | A01730 | A03145 | 170 |
| A01730 | A03203 | 255 | A01730 | A03211 | 480 |
| A01730 | A03321 | 63  | A01730 | A03393 | 191 |
| A01730 | A03436 | 470 | A01730 | A03451 | 490 |
| A01730 | A03537 | 170 | A01730 | A03591 | 210 |
| A01730 | A03611 | 345 | A01730 | A03797 | 154 |
| A01730 | A03812 | 188 | A01730 | A03817 | 899 |
| A01730 | A03941 | 177 | A01730 | A03990 | 435 |
| A01730 | A04042 | 201 | A01730 | A04067 | 177 |
| A01730 | A04175 | 157 | A01730 | A04282 | 407 |
| A01730 | A04305 | 409 | A01730 | A04307 | 191 |
| A01730 | A04308 | 240 | A01730 | A04316 | 274 |
| A01730 | A04342 | 305 | A01730 | A04376 | 191 |
| A01730 | A04468 | 151 | A01730 | A04533 | 473 |
| A01730 | A04576 | 177 | A01730 | A04587 | 334 |
| A01730 | A04682 | 174 | A01730 | A04730 | 334 |
| A01730 | A04847 | 201 | A01730 | A04849 | 205 |
| A01730 | A05164 | 297 | A01730 | A05288 | 475 |
| A01730 | A05453 | 188 | A01730 | A05555 | 201 |
| A01730 | A05574 | 191 | A01730 | A05660 | 177 |
| A01730 | A05763 | 229 | A01730 | A05854 | 199 |
| A01730 | A05986 | 394 | A01730 | A06224 | 310 |
| A01730 | A06268 | 556 | A01730 | A06289 | 899 |
| A01730 | A06442 | 283 | A01730 | A06588 | 221 |
| A01730 | A06610 | 384 | A01730 | A06632 | 165 |
| A01730 | A06648 | 326 | A01730 | A06654 | 283 |
| A01730 | A06814 | 277 | A01730 | A06871 | 229 |

|        |        |     |        |        |     |
|--------|--------|-----|--------|--------|-----|
| A01730 | A07061 | 269 | A01730 | A07130 | 174 |
| A01730 | A07153 | 238 | A01730 | A07163 | 377 |
| A01730 | A07190 | 480 | A01730 | A07311 | 263 |
| A01730 | A07339 | 269 | A01730 | A07399 | 188 |
| A01730 | A07422 | 899 | A01730 | A07461 | 208 |
| A01730 | A07546 | 213 | A01730 | A07903 | 152 |
| A01730 | A07942 | 293 | A01730 | A08133 | 199 |
| A01730 | A09195 | 452 | A01730 | A09197 | 213 |
| A01730 | A09247 | 184 | A01730 | A09402 | 213 |
| A01730 | A09407 | 229 | A01730 | A09428 | 224 |
| A01730 | A09464 | 283 | A01730 | A09543 | 324 |
| A01730 | A09770 | 356 | A01730 | A09870 | 151 |
| A01730 | A09926 | 159 | A01730 | A09935 | 177 |
| A01730 | A10072 | 360 | A01730 | A10103 | 307 |
| A01730 | A10332 | 377 | A01730 | A10402 | 159 |
| A01730 | A10580 | 260 | A01730 | A10785 | 283 |
| A01730 | A10791 | 201 | A01730 | A11097 | 213 |
| A01730 | A11932 | 483 | A01730 | A11943 | 899 |
| A01730 | A12329 | 308 | A01730 | A12553 | 213 |
| A01730 | A12667 | 177 | A01730 | A13099 | 199 |
| A01730 | A13152 | 184 | A01730 | A13232 | 213 |
| A01730 | A13376 | 255 | A01730 | A13486 | 249 |
| A01730 | A13511 | 438 | A01730 | A13965 | 249 |
| A01730 | A13989 | 899 | A01730 | A14000 | 204 |
| A01730 | A14038 | 218 | A01730 | A14515 | 249 |
| A01730 | A14520 | 160 | A01730 | A14561 | 213 |
| A01730 | A14563 | 201 | A01730 | A14610 | 151 |
| A01730 | A15241 | 152 | A01730 | A15315 | 152 |
| A01730 | A15678 | 213 | A01730 | A15874 | 217 |
| A01730 | A15910 | 201 | A01730 | A16410 | 418 |
| A01730 | A16471 | 191 | A01730 | A16739 | 283 |
| A01730 | A16741 | 174 | A01730 | A16744 | 191 |
| A01730 | A16810 | 159 | A01730 | A17063 | 251 |
| A01731 | A01736 | 480 | A01731 | A01737 | 199 |
| A01731 | A01739 | 470 | A01731 | A01742 | 162 |
| A01731 | A01753 | 301 | A01731 | A01754 | 274 |
| A01731 | A01769 | 151 | A01731 | A01890 | 271 |
| A01731 | A01893 | 185 | A01731 | A01905 | 195 |
| A01731 | A02042 | 369 | A01731 | A02298 | 159 |
| A01731 | A02303 | 193 | A01731 | A02338 | 269 |
| A01731 | A02345 | 183 | A01731 | A02435 | 260 |
| A01731 | A02488 | 227 | A01731 | A02492 | 182 |
| A01731 | A02493 | 201 | A01731 | A02601 | 213 |
| A01731 | A02686 | 263 | A01731 | A02691 | 424 |
| A01731 | A02692 | 919 | A01731 | A02698 | 177 |
| A01731 | A02699 | 263 | A01731 | A02759 | 245 |



|        |        |     |        |        |     |
|--------|--------|-----|--------|--------|-----|
| A01731 | A02811 | 922 | A01731 | A02814 | 414 |
| A01731 | A02818 | 278 | A01731 | A02835 | 303 |
| A01731 | A02858 | 318 | A01731 | A03054 | 249 |
| A01731 | A03076 | 165 | A01731 | A03077 | 218 |
| A01731 | A03107 | 174 | A01731 | A03228 | 246 |
| A01731 | A03268 | 326 | A01731 | A03543 | 343 |
| A01731 | A03847 | 441 | A01731 | A03848 | 326 |
| A01731 | A03870 | 353 | A01731 | A03968 | 183 |
| A01731 | A03976 | 183 | A01731 | A04004 | 390 |
| A01731 | A04005 | 337 | A01731 | A04105 | 191 |
| A01731 | A04123 | 353 | A01731 | A04349 | 218 |
| A01731 | A04410 | 183 | A01731 | A04536 | 162 |
| A01731 | A05832 | 204 | A01731 | A06599 | 156 |
| A01731 | A06623 | 182 | A01731 | A06949 | 163 |
| A01731 | A07200 | 216 | A01731 | A08210 | 313 |
| A01731 | A08289 | 238 | A01731 | A08572 | 191 |
| A01731 | A09842 | 305 | A01731 | A10947 | 318 |
| A01731 | A10989 | 227 | A01731 | A11287 | 389 |
| A01731 | A14016 | 154 | A01731 | A14236 | 190 |
| A01731 | A14389 | 424 | A01731 | A14405 | 344 |
| A01731 | A14483 | 260 | A01731 | A14661 | 456 |
| A01731 | A14711 | 159 | A01731 | A14844 | 263 |
| A01731 | A15356 | 151 | A01731 | A15505 | 210 |
| A01731 | A15838 | 330 | A01732 | A01743 | 472 |
| A01732 | A01745 | 290 | A01732 | A01751 | 246 |
| A01732 | A01758 | 204 | A01732 | A01771 | 396 |
| A01732 | A01772 | 445 | A01732 | A01773 | 413 |
| A01732 | A01931 | 162 | A01732 | A02362 | 303 |
| A01732 | A02488 | 269 | A01732 | A02490 | 151 |
| A01732 | A02493 | 369 | A01732 | A02691 | 199 |
| A01732 | A02700 | 340 | A01732 | A03585 | 345 |
| A01732 | A04122 | 420 | A01732 | A04797 | 405 |
| A01732 | A06595 | 243 | A01732 | A07177 | 274 |
| A01732 | A09242 | 241 | A01732 | A09274 | 396 |
| A01732 | A10085 | 260 | A01732 | A15238 | 324 |
| A01733 | A01734 | 475 | A01733 | A01737 | 215 |
| A01733 | A01747 | 380 | A01733 | A01748 | 486 |
| A01733 | A01750 | 241 | A01733 | A01752 | 491 |
| A01733 | A01753 | 154 | A01733 | A01754 | 249 |
| A01733 | A01758 | 260 | A01733 | A01760 | 373 |
| A01733 | A01762 | 151 | A01733 | A01764 | 480 |
| A01733 | A01769 | 319 | A01733 | A01775 | 480 |
| A01733 | A01777 | 226 | A01733 | A01778 | 445 |
| A01733 | A01779 | 479 | A01733 | A01780 | 213 |
| A01733 | A01784 | 385 | A01733 | A01785 | 386 |
| A01733 | A01805 | 156 | A01733 | A01872 | 179 |

|        |        |     |        |        |     |
|--------|--------|-----|--------|--------|-----|
| A01733 | A01875 | 491 | A01733 | A01876 | 364 |
| A01733 | A01878 | 274 | A01733 | A01887 | 463 |
| A01733 | A01888 | 441 | A01733 | A01894 | 475 |
| A01733 | A01900 | 457 | A01733 | A01902 | 174 |
| A01733 | A01926 | 463 | A01733 | A01931 | 182 |
| A01733 | A02210 | 241 | A01733 | A02278 | 215 |
| A01733 | A02298 | 263 | A01733 | A02307 | 191 |
| A01733 | A02334 | 249 | A01733 | A02340 | 196 |
| A01733 | A02347 | 157 | A01733 | A02412 | 378 |
| A01733 | A02413 | 213 | A01733 | A02443 | 383 |
| A01733 | A02490 | 479 | A01733 | A02491 | 386 |
| A01733 | A02502 | 303 | A01733 | A02646 | 162 |
| A01733 | A02695 | 491 | A01733 | A02696 | 488 |
| A01733 | A02697 | 399 | A01733 | A02699 | 396 |
| A01733 | A02703 | 168 | A01733 | A02705 | 163 |
| A01733 | A02714 | 380 | A01733 | A02722 | 435 |
| A01733 | A02724 | 213 | A01733 | A02729 | 252 |
| A01733 | A02730 | 200 | A01733 | A02783 | 184 |
| A01733 | A02798 | 490 | A01733 | A02799 | 174 |
| A01733 | A02812 | 491 | A01733 | A02813 | 302 |
| A01733 | A02817 | 310 | A01733 | A02837 | 324 |
| A01733 | A02859 | 489 | A01733 | A02874 | 480 |
| A01733 | A02906 | 299 | A01733 | A02942 | 228 |
| A01733 | A02982 | 491 | A01733 | A02983 | 488 |
| A01733 | A02984 | 462 | A01733 | A03001 | 152 |
| A01733 | A03010 | 281 | A01733 | A03013 | 260 |
| A01733 | A03100 | 165 | A01733 | A03211 | 283 |
| A01733 | A03222 | 208 | A01733 | A03275 | 440 |
| A01733 | A03419 | 234 | A01733 | A03545 | 172 |
| A01733 | A03546 | 293 | A01733 | A03549 | 157 |
| A01733 | A03585 | 171 | A01733 | A03664 | 486 |
| A01733 | A03813 | 165 | A01733 | A03864 | 213 |
| A01733 | A04019 | 293 | A01733 | A04051 | 168 |
| A01733 | A04134 | 339 | A01733 | A04142 | 339 |
| A01733 | A04238 | 196 | A01733 | A04263 | 274 |
| A01733 | A04267 | 157 | A01733 | A04274 | 344 |
| A01733 | A04286 | 232 | A01733 | A04309 | 171 |
| A01733 | A04510 | 276 | A01733 | A04518 | 174 |
| A01733 | A04545 | 226 | A01733 | A04563 | 165 |
| A01733 | A04567 | 230 | A01733 | A04575 | 293 |
| A01733 | A04594 | 274 | A01733 | A04608 | 236 |
| A01733 | A04652 | 385 | A01733 | A04708 | 249 |
| A01733 | A04736 | 213 | A01733 | A04793 | 152 |
| A01733 | A04848 | 265 | A01733 | A04902 | 190 |
| A01733 | A04938 | 154 | A01733 | A05034 | 232 |
| A01733 | A05114 | 236 | A01733 | A05131 | 232 |

|        |        |     |        |        |     |
|--------|--------|-----|--------|--------|-----|
| A01733 | A05259 | 156 | A01733 | A05278 | 490 |
| A01733 | A05309 | 480 | A01733 | A05346 | 241 |
| A01733 | A05349 | 236 | A01733 | A05508 | 154 |
| A01733 | A05513 | 232 | A01733 | A05693 | 293 |
| A01733 | A05742 | 174 | A01733 | A05949 | 241 |
| A01733 | A05985 | 374 | A01733 | A06004 | 263 |
| A01733 | A06040 | 293 | A01733 | A06298 | 663 |
| A01733 | A06422 | 401 | A01733 | A06607 | 456 |
| A01733 | A06650 | 357 | A01733 | A06658 | 321 |
| A01733 | A06697 | 196 | A01733 | A06863 | 162 |
| A01733 | A06926 | 171 | A01733 | A07073 | 306 |
| A01733 | A07141 | 390 | A01733 | A07165 | 201 |
| A01733 | A07186 | 302 | A01733 | A07200 | 212 |
| A01733 | A07482 | 274 | A01733 | A08598 | 208 |
| A01733 | A08627 | 152 | A01733 | A08725 | 274 |
| A01733 | A08741 | 423 | A01733 | A08817 | 274 |
| A01733 | A09556 | 394 | A01733 | A09559 | 218 |
| A01733 | A09624 | 180 | A01733 | A09771 | 151 |
| A01733 | A10091 | 162 | A01733 | A10155 | 293 |
| A01733 | A10195 | 260 | A01733 | A10388 | 321 |
| A01733 | A10405 | 321 | A01733 | A12528 | 293 |
| A01733 | A12529 | 260 | A01733 | A13739 | 241 |
| A01733 | A13747 | 260 | A01733 | A14405 | 266 |
| A01733 | A14433 | 171 | A01733 | A14440 | 321 |
| A01733 | A14677 | 293 | A01733 | A15241 | 163 |
| A01733 | A15893 | 154 | A01733 | A16125 | 406 |
| A01733 | A16411 | 232 | A01733 | A16636 | 339 |
| A01733 | A16931 | 196 | A01734 | A01737 | 190 |
| A01734 | A01741 | 238 | A01734 | A01748 | 241 |
| A01734 | A01755 | 167 | A01734 | A01760 | 255 |
| A01734 | A01764 | 302 | A01734 | A01769 | 322 |
| A01734 | A01774 | 208 | A01734 | A01784 | 271 |
| A01734 | A01799 | 160 | A01734 | A01803 | 249 |
| A01734 | A01875 | 157 | A01734 | A01878 | 246 |
| A01734 | A01884 | 281 | A01734 | A01890 | 223 |
| A01734 | A02491 | 165 | A01734 | A02561 | 375 |
| A01734 | A02695 | 361 | A01734 | A02696 | 477 |
| A01734 | A02697 | 457 | A01734 | A02701 | 195 |
| A01734 | A02705 | 296 | A01734 | A02710 | 334 |
| A01734 | A02712 | 200 | A01734 | A02729 | 230 |
| A01734 | A02771 | 285 | A01734 | A02812 | 185 |
| A01734 | A02813 | 188 | A01734 | A02817 | 195 |
| A01734 | A02836 | 266 | A01734 | A02838 | 174 |
| A01734 | A02922 | 165 | A01734 | A02982 | 491 |
| A01734 | A02984 | 441 | A01734 | A03269 | 369 |
| A01734 | A03275 | 163 | A01734 | A03649 | 271 |

|        |        |     |        |        |     |
|--------|--------|-----|--------|--------|-----|
| A01734 | A03664 | 221 | A01734 | A03810 | 334 |
| A01734 | A03976 | 260 | A01734 | A04000 | 256 |
| A01734 | A04120 | 327 | A01734 | A04134 | 303 |
| A01734 | A04142 | 303 | A01734 | A04267 | 159 |
| A01734 | A04286 | 215 | A01734 | A04519 | 191 |
| A01734 | A04723 | 458 | A01734 | A04795 | 187 |
| A01734 | A05009 | 152 | A01734 | A05034 | 217 |
| A01734 | A05070 | 347 | A01734 | A05309 | 263 |
| A01734 | A05911 | 281 | A01734 | A06597 | 183 |
| A01734 | A06848 | 299 | A01734 | A07347 | 193 |
| A01734 | A07381 | 335 | A01734 | A07725 | 165 |
| A01734 | A08677 | 249 | A01734 | A08741 | 441 |
| A01734 | A09131 | 180 | A01734 | A09408 | 363 |
| A01734 | A11897 | 408 | A01734 | A13667 | 412 |
| A01734 | A14405 | 162 | A01734 | A14713 | 299 |
| A01734 | A15674 | 245 | A01734 | A15982 | 380 |
| A01734 | A16007 | 163 | A01735 | A01972 | 154 |
| A01735 | A02432 | 157 | A01735 | A02859 | 151 |
| A01735 | A02992 | 256 | A01735 | A03016 | 202 |
| A01735 | A03167 | 432 | A01735 | A03168 | 393 |
| A01735 | A03420 | 303 | A01735 | A03484 | 188 |
| A01735 | A04568 | 213 | A01735 | A04727 | 260 |
| A01735 | A04778 | 226 | A01735 | A04791 | 200 |
| A01735 | A05006 | 180 | A01735 | A05007 | 157 |
| A01735 | A05098 | 323 | A01735 | A05102 | 177 |
| A01735 | A05310 | 163 | A01735 | A05416 | 327 |
| A01735 | A05472 | 160 | A01735 | A05516 | 200 |
| A01735 | A05659 | 307 | A01735 | A06358 | 286 |
| A01735 | A06689 | 201 | A01735 | A06756 | 176 |
| A01735 | A06847 | 238 | A01735 | A06970 | 279 |
| A01735 | A06979 | 212 | A01735 | A07027 | 210 |
| A01735 | A07122 | 173 | A01735 | A07238 | 251 |
| A01735 | A07239 | 305 | A01735 | A07264 | 328 |
| A01735 | A07283 | 162 | A01735 | A07477 | 465 |
| A01735 | A07558 | 364 | A01735 | A07590 | 479 |
| A01735 | A07721 | 491 | A01735 | A07736 | 436 |
| A01735 | A07844 | 479 | A01735 | A07856 | 290 |
| A01735 | A07933 | 480 | A01735 | A07973 | 483 |
| A01735 | A07976 | 491 | A01735 | A08238 | 367 |
| A01735 | A08250 | 263 | A01735 | A09059 | 485 |
| A01735 | A09879 | 260 | A01735 | A10253 | 428 |
| A01735 | A10420 | 485 | A01735 | A10421 | 477 |
| A01735 | A10424 | 474 | A01735 | A10427 | 316 |
| A01735 | A10429 | 323 | A01735 | A10437 | 279 |
| A01735 | A10441 | 249 | A01735 | A10443 | 252 |
| A01735 | A10444 | 462 | A01735 | A10452 | 394 |

|        |        |     |        |        |     |
|--------|--------|-----|--------|--------|-----|
| A01735 | A10656 | 439 | A01735 | A10658 | 470 |
| A01735 | A10672 | 458 | A01735 | A10677 | 489 |
| A01735 | A10686 | 457 | A01735 | A10688 | 263 |
| A01735 | A10694 | 371 | A01735 | A10702 | 263 |
| A01735 | A10712 | 157 | A01735 | A13735 | 418 |
| A01735 | A13882 | 154 | A01735 | A14191 | 193 |
| A01735 | A14856 | 468 | A01735 | A15223 | 324 |
| A01735 | A16286 | 208 | A01735 | A16335 | 378 |
| A01735 | A16417 | 446 | A01735 | A16418 | 454 |
| A01735 | A16419 | 243 | A01735 | A17007 | 345 |
| A01735 | A17041 | 219 | A01736 | A01737 | 484 |
| A01736 | A01739 | 306 | A01736 | A01743 | 193 |
| A01736 | A01748 | 344 | A01736 | A01753 | 228 |
| A01736 | A01757 | 490 | A01736 | A01758 | 481 |
| A01736 | A01762 | 352 | A01736 | A01764 | 267 |
| A01736 | A01777 | 291 | A01736 | A01778 | 119 |
| A01736 | A01779 | 412 | A01736 | A01787 | 182 |
| A01736 | A01794 | 488 | A01736 | A01803 | 218 |
| A01736 | A01883 | 170 | A01736 | A01888 | 154 |
| A01736 | A01890 | 191 | A01736 | A01893 | 486 |
| A01736 | A01894 | 488 | A01736 | A01909 | 489 |
| A01736 | A02041 | 223 | A01736 | A02051 | 223 |
| A01736 | A02813 | 157 | A01736 | A02817 | 162 |
| A01736 | A02833 | 469 | A01736 | A02835 | 230 |
| A01736 | A02988 | 101 | A01736 | A03169 | 223 |
| A01736 | A03473 | 294 | A01736 | A03543 | 281 |
| A01736 | A03872 | 484 | A01736 | A03986 | 286 |
| A01736 | A04286 | 316 | A01736 | A04447 | 223 |
| A01736 | A04620 | 486 | A01736 | A05317 | 312 |
| A01736 | A05348 | 218 | A01736 | A06579 | 210 |
| A01736 | A06607 | 447 | A01736 | A07200 | 486 |
| A01736 | A07265 | 223 | A01736 | A07588 | 223 |
| A01736 | A07709 | 157 | A01736 | A07944 | 273 |
| A01736 | A08655 | 223 | A01736 | A08955 | 223 |
| A01736 | A08971 | 223 | A01736 | A09311 | 205 |
| A01736 | A09995 | 353 | A01736 | A10557 | 198 |
| A01736 | A10743 | 326 | A01736 | A10755 | 223 |
| A01736 | A11202 | 223 | A01736 | A11292 | 240 |
| A01736 | A11665 | 246 | A01736 | A13298 | 223 |
| A01736 | A14216 | 249 | A01736 | A14405 | 441 |
| A01736 | A14440 | 479 | A01736 | A14467 | 168 |
| A01736 | A14853 | 238 | A01737 | A01738 | 486 |
| A01737 | A01743 | 454 | A01737 | A01746 | 329 |
| A01737 | A01749 | 350 | A01737 | A01757 | 439 |
| A01737 | A01758 | 491 | A01737 | A01761 | 174 |
| A01737 | A01762 | 173 | A01737 | A01763 | 185 |

|        |        |     |        |        |     |
|--------|--------|-----|--------|--------|-----|
| A01737 | A01769 | 312 | A01737 | A01779 | 218 |
| A01737 | A01787 | 270 | A01737 | A01802 | 230 |
| A01737 | A01846 | 402 | A01737 | A01856 | 326 |
| A01737 | A01861 | 416 | A01737 | A01883 | 278 |
| A01737 | A01884 | 101 | A01737 | A01893 | 480 |
| A01737 | A01894 | 945 | A01737 | A01909 | 461 |
| A01737 | A01926 | 254 | A01737 | A02011 | 157 |
| A01737 | A02015 | 341 | A01737 | A02016 | 324 |
| A01737 | A02117 | 160 | A01737 | A02188 | 179 |
| A01737 | A02298 | 156 | A01737 | A02338 | 221 |
| A01737 | A02356 | 274 | A01737 | A02449 | 165 |
| A01737 | A02481 | 472 | A01737 | A02489 | 305 |
| A01737 | A02491 | 490 | A01737 | A02574 | 489 |
| A01737 | A02611 | 419 | A01737 | A02684 | 324 |
| A01737 | A02685 | 238 | A01737 | A02687 | 401 |
| A01737 | A02691 | 480 | A01737 | A02695 | 283 |
| A01737 | A02696 | 162 | A01737 | A02697 | 491 |
| A01737 | A02698 | 172 | A01737 | A02701 | 335 |
| A01737 | A02706 | 491 | A01737 | A02713 | 167 |
| A01737 | A02739 | 490 | A01737 | A02785 | 419 |
| A01737 | A02788 | 436 | A01737 | A02802 | 224 |
| A01737 | A02803 | 343 | A01737 | A02837 | 423 |
| A01737 | A02847 | 491 | A01737 | A02859 | 369 |
| A01737 | A02906 | 416 | A01737 | A02982 | 491 |
| A01737 | A03003 | 174 | A01737 | A03012 | 391 |
| A01737 | A03034 | 491 | A01737 | A03036 | 363 |
| A01737 | A03050 | 157 | A01737 | A03092 | 165 |
| A01737 | A03156 | 327 | A01737 | A03157 | 254 |
| A01737 | A03224 | 267 | A01737 | A03275 | 413 |
| A01737 | A03301 | 215 | A01737 | A03548 | 191 |
| A01737 | A03562 | 88  | A01737 | A03563 | 159 |
| A01737 | A03872 | 281 | A01737 | A04035 | 384 |
| A01737 | A04105 | 157 | A01737 | A04120 | 154 |
| A01737 | A04279 | 491 | A01737 | A04284 | 391 |
| A01737 | A04286 | 363 | A01737 | A04287 | 249 |
| A01737 | A04615 | 462 | A01737 | A04700 | 249 |
| A01737 | A05004 | 159 | A01737 | A05214 | 213 |
| A01737 | A05356 | 438 | A01737 | A05359 | 294 |
| A01737 | A05506 | 196 | A01737 | A05576 | 413 |
| A01737 | A05617 | 317 | A01737 | A05668 | 191 |
| A01737 | A05921 | 419 | A01737 | A05927 | 213 |
| A01737 | A05956 | 490 | A01737 | A05962 | 243 |
| A01737 | A06195 | 489 | A01737 | A06286 | 357 |
| A01737 | A06469 | 297 | A01737 | A06579 | 154 |
| A01737 | A06581 | 267 | A01737 | A06603 | 945 |
| A01737 | A06607 | 491 | A01737 | A06797 | 347 |

|        |        |     |        |        |     |
|--------|--------|-----|--------|--------|-----|
| A01737 | A06868 | 468 | A01737 | A06926 | 200 |
| A01737 | A06982 | 159 | A01737 | A07039 | 177 |
| A01737 | A07130 | 489 | A01737 | A07167 | 486 |
| A01737 | A07191 | 382 | A01737 | A07198 | 489 |
| A01737 | A07200 | 491 | A01737 | A07319 | 379 |
| A01737 | A07342 | 470 | A01737 | A07480 | 201 |
| A01737 | A07603 | 456 | A01737 | A07663 | 213 |
| A01737 | A07744 | 195 | A01737 | A07902 | 281 |
| A01737 | A07943 | 249 | A01737 | A07996 | 188 |
| A01737 | A08000 | 473 | A01737 | A08117 | 358 |
| A01737 | A08239 | 154 | A01737 | A08277 | 472 |
| A01737 | A08404 | 151 | A01737 | A08615 | 165 |
| A01737 | A08646 | 249 | A01737 | A08720 | 165 |
| A01737 | A08754 | 213 | A01737 | A08827 | 157 |
| A01737 | A09000 | 168 | A01737 | A09115 | 249 |
| A01737 | A09288 | 491 | A01737 | A09554 | 249 |
| A01737 | A09578 | 286 | A01737 | A09654 | 243 |
| A01737 | A09706 | 469 | A01737 | A09922 | 165 |
| A01737 | A10226 | 236 | A01737 | A10410 | 191 |
| A01737 | A10557 | 473 | A01737 | A10936 | 249 |
| A01737 | A10975 | 249 | A01737 | A11076 | 249 |
| A01737 | A11261 | 154 | A01737 | A11348 | 314 |
| A01737 | A11450 | 341 | A01737 | A11478 | 462 |
| A01737 | A11596 | 306 | A01737 | A11663 | 243 |
| A01737 | A12556 | 224 | A01737 | A12948 | 249 |
| A01737 | A13549 | 165 | A01737 | A13667 | 205 |
| A01737 | A13992 | 405 | A01737 | A14076 | 467 |
| A01737 | A14236 | 227 | A01737 | A14344 | 484 |
| A01737 | A14389 | 243 | A01737 | A14405 | 491 |
| A01737 | A14440 | 945 | A01737 | A14596 | 384 |
| A01737 | A15356 | 491 | A01737 | A15941 | 399 |
| A01737 | A15984 | 249 | A01737 | A16048 | 151 |
| A01737 | A16099 | 232 | A01737 | A16337 | 213 |
| A01737 | A16378 | 270 | A01737 | A16616 | 484 |
| A01737 | A16754 | 467 | A01737 | A16775 | 213 |
| A01738 | A01749 | 278 | A01738 | A01760 | 297 |
| A01738 | A01761 | 475 | A01738 | A01778 | 200 |
| A01738 | A01893 | 183 | A01738 | A01894 | 286 |
| A01738 | A01901 | 193 | A01738 | A01912 | 307 |
| A01738 | A02338 | 268 | A01738 | A02691 | 152 |
| A01738 | A02696 | 326 | A01738 | A02697 | 308 |
| A01738 | A02982 | 438 | A01738 | A02984 | 180 |
| A01738 | A03012 | 463 | A01738 | A03013 | 283 |
| A01738 | A03562 | 307 | A01738 | A03563 | 475 |
| A01738 | A03608 | 213 | A01738 | A03612 | 249 |
| A01738 | A03613 | 329 | A01738 | A03653 | 232 |

|        |        |     |        |        |     |
|--------|--------|-----|--------|--------|-----|
| A01738 | A03965 | 229 | A01738 | A04279 | 489 |
| A01738 | A04311 | 386 | A01738 | A04714 | 272 |
| A01738 | A05216 | 398 | A01738 | A05344 | 319 |
| A01738 | A06606 | 456 | A01738 | A07071 | 386 |
| A01738 | A09578 | 435 | A01738 | A09842 | 170 |
| A01738 | A10583 | 386 | A01738 | A14405 | 343 |
| A01739 | A01745 | 247 | A01739 | A01754 | 474 |
| A01739 | A01758 | 154 | A01739 | A01764 | 217 |
| A01739 | A01766 | 193 | A01739 | A01775 | 212 |
| A01739 | A01832 | 151 | A01739 | A01859 | 366 |
| A01739 | A01899 | 229 | A01739 | A01935 | 385 |
| A01739 | A02042 | 369 | A01739 | A02469 | 246 |
| A01739 | A02488 | 224 | A01739 | A02493 | 198 |
| A01739 | A02542 | 185 | A01739 | A02629 | 268 |
| A01739 | A02694 | 263 | A01739 | A02696 | 191 |
| A01739 | A02719 | 245 | A01739 | A02736 | 329 |
| A01739 | A02744 | 184 | A01739 | A02811 | 272 |
| A01739 | A02814 | 212 | A01739 | A02837 | 356 |
| A01739 | A03012 | 165 | A01739 | A03112 | 201 |
| A01739 | A03263 | 210 | A01739 | A03543 | 340 |
| A01739 | A03847 | 369 | A01739 | A03848 | 324 |
| A01739 | A03861 | 217 | A01739 | A03870 | 432 |
| A01739 | A04005 | 335 | A01739 | A04031 | 412 |
| A01739 | A04107 | 317 | A01739 | A04123 | 432 |
| A01739 | A04531 | 322 | A01739 | A04561 | 347 |
| A01739 | A04581 | 375 | A01739 | A04656 | 385 |
| A01739 | A04710 | 207 | A01739 | A04740 | 314 |
| A01739 | A05114 | 263 | A01739 | A05307 | 347 |
| A01739 | A06175 | 369 | A01739 | A06623 | 177 |
| A01739 | A06648 | 200 | A01739 | A06858 | 260 |
| A01739 | A07158 | 291 | A01739 | A08572 | 188 |
| A01739 | A09957 | 401 | A01739 | A10369 | 195 |
| A01739 | A10598 | 260 | A01739 | A12897 | 235 |
| A01739 | A14386 | 299 | A01739 | A14405 | 210 |
| A01739 | A14440 | 191 | A01739 | A14524 | 255 |
| A01739 | A15840 | 229 | A01740 | A01741 | 294 |
| A01740 | A01744 | 177 | A01740 | A01755 | 944 |
| A01740 | A01760 | 201 | A01740 | A01770 | 63  |
| A01740 | A01774 | 374 | A01740 | A01822 | 226 |
| A01740 | A01877 | 486 | A01740 | A01878 | 193 |
| A01740 | A01897 | 328 | A01740 | A01904 | 174 |
| A01740 | A02203 | 195 | A01740 | A02261 | 184 |
| A01740 | A02346 | 257 | A01740 | A02414 | 363 |
| A01740 | A02434 | 191 | A01740 | A02494 | 457 |
| A01740 | A02495 | 177 | A01740 | A02564 | 240 |
| A01740 | A02610 | 314 | A01740 | A02686 | 160 |



|        |        |     |        |        |     |
|--------|--------|-----|--------|--------|-----|
| A01740 | A02699 | 160 | A01740 | A02702 | 347 |
| A01740 | A02703 | 491 | A01740 | A02704 | 63  |
| A01740 | A02705 | 230 | A01740 | A02740 | 420 |
| A01740 | A02744 | 88  | A01740 | A02779 | 925 |
| A01740 | A02807 | 245 | A01740 | A02816 | 491 |
| A01740 | A02822 | 201 | A01740 | A02827 | 375 |
| A01740 | A02830 | 490 | A01740 | A02831 | 226 |
| A01740 | A02860 | 490 | A01740 | A02877 | 179 |
| A01740 | A02878 | 210 | A01740 | A02895 | 480 |
| A01740 | A02904 | 294 | A01740 | A02914 | 470 |
| A01740 | A02924 | 382 | A01740 | A03093 | 172 |
| A01740 | A03112 | 479 | A01740 | A03276 | 193 |
| A01740 | A03321 | 226 | A01740 | A03336 | 139 |
| A01740 | A03423 | 285 | A01740 | A03437 | 165 |
| A01740 | A03568 | 205 | A01740 | A03594 | 235 |
| A01740 | A03611 | 176 | A01740 | A03818 | 216 |
| A01740 | A03821 | 183 | A01740 | A03845 | 201 |
| A01740 | A04042 | 294 | A01740 | A04230 | 268 |
| A01740 | A04249 | 235 | A01740 | A04308 | 344 |
| A01740 | A04316 | 162 | A01740 | A04342 | 232 |
| A01740 | A04406 | 240 | A01740 | A04416 | 252 |
| A01740 | A04419 | 302 | A01740 | A04563 | 217 |
| A01740 | A04576 | 272 | A01740 | A04587 | 400 |
| A01740 | A04682 | 299 | A01740 | A04730 | 400 |
| A01740 | A04861 | 390 | A01740 | A04881 | 167 |
| A01740 | A04905 | 198 | A01740 | A05051 | 191 |
| A01740 | A05247 | 173 | A01740 | A05253 | 252 |
| A01740 | A05297 | 168 | A01740 | A05342 | 213 |
| A01740 | A05383 | 165 | A01740 | A05398 | 171 |
| A01740 | A05410 | 245 | A01740 | A06074 | 218 |
| A01740 | A06224 | 386 | A01740 | A06405 | 224 |
| A01740 | A06489 | 218 | A01740 | A06654 | 302 |
| A01740 | A06742 | 294 | A01740 | A07143 | 252 |
| A01740 | A07163 | 400 | A01740 | A07307 | 185 |
| A01740 | A07339 | 179 | A01740 | A07412 | 171 |
| A01740 | A07583 | 473 | A01740 | A08415 | 353 |
| A01740 | A08427 | 235 | A01740 | A08558 | 367 |
| A01740 | A08681 | 154 | A01740 | A09020 | 187 |
| A01740 | A09172 | 353 | A01740 | A09247 | 172 |
| A01740 | A09402 | 302 | A01740 | A09428 | 202 |
| A01740 | A09464 | 168 | A01740 | A09550 | 245 |
| A01740 | A09901 | 152 | A01740 | A09926 | 257 |
| A01740 | A09985 | 235 | A01740 | A09988 | 241 |
| A01740 | A10294 | 157 | A01740 | A10645 | 167 |
| A01740 | A10814 | 224 | A01740 | A10903 | 329 |
| A01740 | A11097 | 302 | A01740 | A11429 | 156 |

|        |        |     |        |        |     |
|--------|--------|-----|--------|--------|-----|
| A01740 | A11550 | 276 | A01740 | A11574 | 252 |
| A01740 | A11932 | 355 | A01740 | A12233 | 402 |
| A01740 | A12383 | 255 | A01740 | A12667 | 167 |
| A01740 | A13375 | 205 | A01740 | A13986 | 165 |
| A01740 | A13989 | 204 | A01740 | A14000 | 489 |
| A01740 | A14013 | 221 | A01740 | A14019 | 152 |
| A01740 | A14124 | 160 | A01740 | A14597 | 438 |
| A01740 | A15459 | 165 | A01740 | A15910 | 294 |
| A01740 | A16012 | 353 | A01740 | A16122 | 358 |
| A01740 | A16292 | 210 | A01740 | A16302 | 180 |
| A01740 | A16462 | 165 | A01740 | A17196 | 272 |
| A01741 | A01743 | 491 | A01741 | A01746 | 313 |
| A01741 | A01747 | 367 | A01741 | A01755 | 324 |
| A01741 | A01759 | 338 | A01741 | A01767 | 489 |
| A01741 | A01775 | 489 | A01741 | A01781 | 470 |
| A01741 | A01785 | 338 | A01741 | A01786 | 63  |
| A01741 | A01789 | 490 | A01741 | A01790 | 252 |
| A01741 | A01796 | 491 | A01741 | A01797 | 491 |
| A01741 | A01798 | 221 | A01741 | A01844 | 488 |
| A01741 | A01863 | 360 | A01741 | A01878 | 474 |
| A01741 | A01879 | 188 | A01741 | A01887 | 380 |
| A01741 | A01888 | 469 | A01741 | A01891 | 238 |
| A01741 | A01902 | 274 | A01741 | A01904 | 167 |
| A01741 | A01909 | 358 | A01741 | A01913 | 260 |
| A01741 | A01926 | 475 | A01741 | A01959 | 347 |
| A01741 | A01963 | 173 | A01741 | A01971 | 251 |
| A01741 | A01972 | 205 | A01741 | A01981 | 372 |
| A01741 | A01982 | 390 | A01741 | A02000 | 213 |
| A01741 | A02006 | 475 | A01741 | A02010 | 470 |
| A01741 | A02011 | 257 | A01741 | A02020 | 385 |
| A01741 | A02028 | 283 | A01741 | A02047 | 163 |
| A01741 | A02048 | 411 | A01741 | A02049 | 299 |
| A01741 | A02058 | 353 | A01741 | A02080 | 188 |
| A01741 | A02096 | 173 | A01741 | A02146 | 228 |
| A01741 | A02148 | 339 | A01741 | A02158 | 385 |
| A01741 | A02164 | 435 | A01741 | A02171 | 212 |
| A01741 | A02178 | 371 | A01741 | A02180 | 299 |
| A01741 | A02202 | 157 | A01741 | A02210 | 238 |
| A01741 | A02215 | 369 | A01741 | A02226 | 281 |
| A01741 | A02227 | 157 | A01741 | A02229 | 241 |
| A01741 | A02237 | 163 | A01741 | A02247 | 210 |
| A01741 | A02265 | 417 | A01741 | A02268 | 490 |
| A01741 | A02275 | 278 | A01741 | A02278 | 341 |
| A01741 | A02293 | 299 | A01741 | A02300 | 419 |
| A01741 | A02340 | 170 | A01741 | A02351 | 356 |
| A01741 | A02353 | 202 | A01741 | A02361 | 296 |

|        |        |     |        |        |     |
|--------|--------|-----|--------|--------|-----|
| A01741 | A02376 | 210 | A01741 | A02377 | 491 |
| A01741 | A02382 | 154 | A01741 | A02387 | 191 |
| A01741 | A02390 | 159 | A01741 | A02405 | 151 |
| A01741 | A02414 | 185 | A01741 | A02415 | 283 |
| A01741 | A02416 | 468 | A01741 | A02418 | 215 |
| A01741 | A02423 | 260 | A01741 | A02434 | 348 |
| A01741 | A02436 | 151 | A01741 | A02448 | 173 |
| A01741 | A02452 | 208 | A01741 | A02454 | 490 |
| A01741 | A02460 | 196 | A01741 | A02470 | 263 |
| A01741 | A02483 | 210 | A01741 | A02488 | 411 |
| A01741 | A02490 | 319 | A01741 | A02491 | 481 |
| A01741 | A02492 | 486 | A01741 | A02494 | 458 |
| A01741 | A02495 | 491 | A01741 | A02505 | 278 |
| A01741 | A02506 | 319 | A01741 | A02509 | 173 |
| A01741 | A02510 | 177 | A01741 | A02512 | 347 |
| A01741 | A02521 | 449 | A01741 | A02542 | 249 |
| A01741 | A02562 | 460 | A01741 | A02564 | 424 |
| A01741 | A02568 | 434 | A01741 | A02574 | 218 |
| A01741 | A02586 | 483 | A01741 | A02591 | 151 |
| A01741 | A02593 | 385 | A01741 | A02598 | 173 |
| A01741 | A02605 | 152 | A01741 | A02607 | 388 |
| A01741 | A02634 | 162 | A01741 | A02639 | 204 |
| A01741 | A02695 | 475 | A01741 | A02698 | 191 |
| A01741 | A02703 | 445 | A01741 | A02705 | 491 |
| A01741 | A02706 | 490 | A01741 | A02707 | 334 |
| A01741 | A02714 | 263 | A01741 | A02729 | 170 |
| A01741 | A02730 | 314 | A01741 | A02739 | 204 |
| A01741 | A02745 | 454 | A01741 | A02749 | 486 |
| A01741 | A02754 | 488 | A01741 | A02776 | 162 |
| A01741 | A02778 | 472 | A01741 | A02779 | 413 |
| A01741 | A02784 | 215 | A01741 | A02785 | 469 |
| A01741 | A02787 | 367 | A01741 | A02789 | 383 |
| A01741 | A02790 | 170 | A01741 | A02812 | 480 |
| A01741 | A02814 | 490 | A01741 | A02816 | 469 |
| A01741 | A02817 | 491 | A01741 | A02818 | 379 |
| A01741 | A02819 | 352 | A01741 | A02820 | 65  |
| A01741 | A02830 | 491 | A01741 | A02832 | 245 |
| A01741 | A02834 | 177 | A01741 | A02836 | 485 |
| A01741 | A02837 | 491 | A01741 | A02842 | 173 |
| A01741 | A02856 | 160 | A01741 | A02859 | 491 |
| A01741 | A02861 | 475 | A01741 | A02862 | 451 |
| A01741 | A02869 | 433 | A01741 | A02874 | 491 |
| A01741 | A02875 | 435 | A01741 | A02877 | 340 |
| A01741 | A02895 | 308 | A01741 | A02915 | 378 |
| A01741 | A02927 | 467 | A01741 | A02961 | 176 |
| A01741 | A02982 | 249 | A01741 | A02983 | 335 |

|        |        |     |        |        |     |
|--------|--------|-----|--------|--------|-----|
| A01741 | A02984 | 228 | A01741 | A02994 | 212 |
| A01741 | A02996 | 238 | A01741 | A03034 | 296 |
| A01741 | A03036 | 224 | A01741 | A03044 | 221 |
| A01741 | A03051 | 461 | A01741 | A03056 | 465 |
| A01741 | A03068 | 205 | A01741 | A03079 | 221 |
| A01741 | A03080 | 479 | A01741 | A03091 | 443 |
| A01741 | A03095 | 486 | A01741 | A03099 | 373 |
| A01741 | A03109 | 268 | A01741 | A03110 | 286 |
| A01741 | A03112 | 491 | A01741 | A03121 | 457 |
| A01741 | A03131 | 388 | A01741 | A03141 | 434 |
| A01741 | A03144 | 335 | A01741 | A03157 | 449 |
| A01741 | A03167 | 152 | A01741 | A03168 | 260 |
| A01741 | A03181 | 200 | A01741 | A03219 | 396 |
| A01741 | A03223 | 488 | A01741 | A03228 | 262 |
| A01741 | A03259 | 491 | A01741 | A03275 | 491 |
| A01741 | A03278 | 177 | A01741 | A03281 | 419 |
| A01741 | A03301 | 350 | A01741 | A03313 | 183 |
| A01741 | A03347 | 177 | A01741 | A03353 | 174 |
| A01741 | A03355 | 151 | A01741 | A03359 | 401 |
| A01741 | A03361 | 339 | A01741 | A03369 | 152 |
| A01741 | A03370 | 323 | A01741 | A03371 | 213 |
| A01741 | A03377 | 173 | A01741 | A03378 | 265 |
| A01741 | A03379 | 162 | A01741 | A03389 | 173 |
| A01741 | A03415 | 409 | A01741 | A03420 | 296 |
| A01741 | A03427 | 228 | A01741 | A03438 | 469 |
| A01741 | A03451 | 305 | A01741 | A03513 | 324 |
| A01741 | A03520 | 353 | A01741 | A03523 | 337 |
| A01741 | A03590 | 177 | A01741 | A03596 | 490 |
| A01741 | A03597 | 258 | A01741 | A03604 | 218 |
| A01741 | A03609 | 477 | A01741 | A03614 | 286 |
| A01741 | A03649 | 85  | A01741 | A03661 | 401 |
| A01741 | A03703 | 268 | A01741 | A03721 | 251 |
| A01741 | A03722 | 419 | A01741 | A03724 | 425 |
| A01741 | A03725 | 486 | A01741 | A03732 | 294 |
| A01741 | A03736 | 177 | A01741 | A03748 | 208 |
| A01741 | A03750 | 246 | A01741 | A03799 | 243 |
| A01741 | A03811 | 283 | A01741 | A03814 | 163 |
| A01741 | A03820 | 152 | A01741 | A03843 | 491 |
| A01741 | A03887 | 472 | A01741 | A03894 | 383 |
| A01741 | A03899 | 170 | A01741 | A03902 | 424 |
| A01741 | A03933 | 210 | A01741 | A03937 | 291 |
| A01741 | A03976 | 290 | A01741 | A03977 | 310 |
| A01741 | A03981 | 344 | A01741 | A04010 | 485 |
| A01741 | A04032 | 210 | A01741 | A04046 | 293 |
| A01741 | A04048 | 436 | A01741 | A04049 | 328 |
| A01741 | A04053 | 152 | A01741 | A04076 | 425 |

|        |        |     |        |        |     |
|--------|--------|-----|--------|--------|-----|
| A01741 | A04078 | 213 | A01741 | A04080 | 475 |
| A01741 | A04095 | 245 | A01741 | A04100 | 234 |
| A01741 | A04106 | 238 | A01741 | A04117 | 440 |
| A01741 | A04134 | 299 | A01741 | A04138 | 193 |
| A01741 | A04142 | 195 | A01741 | A04165 | 249 |
| A01741 | A04220 | 210 | A01741 | A04229 | 317 |
| A01741 | A04280 | 238 | A01741 | A04333 | 428 |
| A01741 | A04334 | 488 | A01741 | A04338 | 173 |
| A01741 | A04342 | 491 | A01741 | A04414 | 210 |
| A01741 | A04441 | 183 | A01741 | A04444 | 183 |
| A01741 | A04466 | 210 | A01741 | A04476 | 210 |
| A01741 | A04477 | 168 | A01741 | A04516 | 319 |
| A01741 | A04584 | 306 | A01741 | A04622 | 491 |
| A01741 | A04649 | 160 | A01741 | A04655 | 160 |
| A01741 | A04679 | 156 | A01741 | A04698 | 450 |
| A01741 | A04735 | 218 | A01741 | A04738 | 210 |
| A01741 | A04750 | 227 | A01741 | A04759 | 219 |
| A01741 | A04763 | 229 | A01741 | A04771 | 156 |
| A01741 | A04778 | 190 | A01741 | A04794 | 151 |
| A01741 | A04813 | 191 | A01741 | A04818 | 307 |
| A01741 | A04828 | 265 | A01741 | A04830 | 341 |
| A01741 | A04883 | 217 | A01741 | A04891 | 173 |
| A01741 | A04911 | 404 | A01741 | A04939 | 483 |
| A01741 | A04966 | 188 | A01741 | A05007 | 337 |
| A01741 | A05027 | 208 | A01741 | A05032 | 389 |
| A01741 | A05070 | 232 | A01741 | A05098 | 208 |
| A01741 | A05102 | 321 | A01741 | A05112 | 377 |
| A01741 | A05122 | 481 | A01741 | A05141 | 408 |
| A01741 | A05143 | 319 | A01741 | A05155 | 439 |
| A01741 | A05194 | 265 | A01741 | A05216 | 473 |
| A01741 | A05220 | 457 | A01741 | A05221 | 221 |
| A01741 | A05229 | 227 | A01741 | A05250 | 188 |
| A01741 | A05264 | 377 | A01741 | A05309 | 491 |
| A01741 | A05318 | 271 | A01741 | A05331 | 294 |
| A01741 | A05349 | 271 | A01741 | A05397 | 151 |
| A01741 | A05416 | 221 | A01741 | A05444 | 210 |
| A01741 | A05467 | 199 | A01741 | A05470 | 151 |
| A01741 | A05472 | 288 | A01741 | A05506 | 324 |
| A01741 | A05531 | 324 | A01741 | A05573 | 215 |
| A01741 | A05580 | 151 | A01741 | A05629 | 236 |
| A01741 | A05723 | 249 | A01741 | A05727 | 151 |
| A01741 | A05735 | 483 | A01741 | A05759 | 157 |
| A01741 | A05767 | 213 | A01741 | A05795 | 417 |
| A01741 | A05891 | 346 | A01741 | A05949 | 430 |
| A01741 | A06001 | 483 | A01741 | A06004 | 185 |
| A01741 | A06067 | 355 | A01741 | A06072 | 210 |

|        |        |     |        |        |     |
|--------|--------|-----|--------|--------|-----|
| A01741 | A06086 | 249 | A01741 | A06088 | 160 |
| A01741 | A06192 | 210 | A01741 | A06253 | 238 |
| A01741 | A06358 | 332 | A01741 | A06359 | 168 |
| A01741 | A06377 | 151 | A01741 | A06387 | 427 |
| A01741 | A06405 | 245 | A01741 | A06439 | 281 |
| A01741 | A06442 | 210 | A01741 | A06473 | 348 |
| A01741 | A06497 | 173 | A01741 | A06569 | 408 |
| A01741 | A06578 | 391 | A01741 | A06581 | 491 |
| A01741 | A06589 | 193 | A01741 | A06591 | 245 |
| A01741 | A06592 | 177 | A01741 | A06597 | 352 |
| A01741 | A06610 | 221 | A01741 | A06615 | 373 |
| A01741 | A06632 | 201 | A01741 | A06642 | 457 |
| A01741 | A06659 | 240 | A01741 | A06660 | 462 |
| A01741 | A06773 | 414 | A01741 | A06797 | 278 |
| A01741 | A06825 | 480 | A01741 | A06829 | 419 |
| A01741 | A06851 | 445 | A01741 | A06860 | 293 |
| A01741 | A06870 | 210 | A01741 | A06931 | 151 |
| A01741 | A06949 | 488 | A01741 | A06956 | 152 |
| A01741 | A07023 | 173 | A01741 | A07061 | 307 |
| A01741 | A07079 | 462 | A01741 | A07122 | 223 |
| A01741 | A07132 | 204 | A01741 | A07135 | 456 |
| A01741 | A07137 | 173 | A01741 | A07147 | 301 |
| A01741 | A07153 | 405 | A01741 | A07157 | 486 |
| A01741 | A07158 | 324 | A01741 | A07163 | 319 |
| A01741 | A07164 | 305 | A01741 | A07165 | 491 |
| A01741 | A07197 | 373 | A01741 | A07201 | 348 |
| A01741 | A07209 | 227 | A01741 | A07211 | 210 |
| A01741 | A07218 | 477 | A01741 | A07267 | 208 |
| A01741 | A07285 | 173 | A01741 | A07319 | 176 |
| A01741 | A07339 | 432 | A01741 | A07342 | 152 |
| A01741 | A07346 | 411 | A01741 | A07360 | 267 |
| A01741 | A07394 | 405 | A01741 | A07399 | 489 |
| A01741 | A07413 | 177 | A01741 | A07421 | 162 |
| A01741 | A07424 | 163 | A01741 | A07477 | 443 |
| A01741 | A07486 | 429 | A01741 | A07520 | 308 |
| A01741 | A07525 | 151 | A01741 | A07558 | 414 |
| A01741 | A07585 | 241 | A01741 | A07590 | 460 |
| A01741 | A07621 | 177 | A01741 | A07736 | 343 |
| A01741 | A07766 | 491 | A01741 | A07794 | 394 |
| A01741 | A07800 | 201 | A01741 | A07931 | 277 |
| A01741 | A07935 | 157 | A01741 | A07993 | 341 |
| A01741 | A08011 | 394 | A01741 | A08108 | 232 |
| A01741 | A08114 | 232 | A01741 | A08141 | 213 |
| A01741 | A08150 | 306 | A01741 | A08180 | 173 |
| A01741 | A08182 | 160 | A01741 | A08201 | 174 |
| A01741 | A08250 | 152 | A01741 | A08265 | 151 |

|        |        |     |        |        |     |
|--------|--------|-----|--------|--------|-----|
| A01741 | A08280 | 353 | A01741 | A08293 | 213 |
| A01741 | A08339 | 210 | A01741 | A08356 | 172 |
| A01741 | A08385 | 362 | A01741 | A08518 | 187 |
| A01741 | A08526 | 401 | A01741 | A08550 | 249 |
| A01741 | A08553 | 251 | A01741 | A08561 | 185 |
| A01741 | A08567 | 481 | A01741 | A08571 | 899 |
| A01741 | A08572 | 357 | A01741 | A08590 | 227 |
| A01741 | A08652 | 163 | A01741 | A08700 | 447 |
| A01741 | A08741 | 265 | A01741 | A08773 | 167 |
| A01741 | A08812 | 452 | A01741 | A08813 | 481 |
| A01741 | A08827 | 191 | A01741 | A08831 | 210 |
| A01741 | A08837 | 368 | A01741 | A08840 | 238 |
| A01741 | A08842 | 472 | A01741 | A08875 | 353 |
| A01741 | A08879 | 407 | A01741 | A08909 | 172 |
| A01741 | A08944 | 154 | A01741 | A08949 | 167 |
| A01741 | A08977 | 183 | A01741 | A09007 | 151 |
| A01741 | A09010 | 163 | A01741 | A09011 | 188 |
| A01741 | A09025 | 210 | A01741 | A09028 | 429 |
| A01741 | A09029 | 319 | A01741 | A09073 | 321 |
| A01741 | A09126 | 480 | A01741 | A09132 | 173 |
| A01741 | A09145 | 378 | A01741 | A09147 | 195 |
| A01741 | A09172 | 210 | A01741 | A09202 | 152 |
| A01741 | A09209 | 168 | A01741 | A09235 | 198 |
| A01741 | A09340 | 324 | A01741 | A09381 | 193 |
| A01741 | A09403 | 151 | A01741 | A09431 | 177 |
| A01741 | A09448 | 279 | A01741 | A09453 | 347 |
| A01741 | A09481 | 173 | A01741 | A09497 | 299 |
| A01741 | A09561 | 486 | A01741 | A09573 | 467 |
| A01741 | A09598 | 490 | A01741 | A09633 | 224 |
| A01741 | A09664 | 340 | A01741 | A09672 | 204 |
| A01741 | A09732 | 424 | A01741 | A09733 | 290 |
| A01741 | A09734 | 187 | A01741 | A09735 | 238 |
| A01741 | A09740 | 269 | A01741 | A09741 | 353 |
| A01741 | A09764 | 183 | A01741 | A09789 | 212 |
| A01741 | A09790 | 208 | A01741 | A09791 | 163 |
| A01741 | A09862 | 162 | A01741 | A09882 | 486 |
| A01741 | A09890 | 156 | A01741 | A09916 | 210 |
| A01741 | A09932 | 171 | A01741 | A09951 | 173 |
| A01741 | A10047 | 234 | A01741 | A10148 | 243 |
| A01741 | A10159 | 252 | A01741 | A10174 | 221 |
| A01741 | A10235 | 151 | A01741 | A10279 | 151 |
| A01741 | A10322 | 151 | A01741 | A10334 | 173 |
| A01741 | A10347 | 210 | A01741 | A10369 | 328 |
| A01741 | A10382 | 246 | A01741 | A10383 | 249 |
| A01741 | A10418 | 328 | A01741 | A10420 | 182 |
| A01741 | A10426 | 173 | A01741 | A10444 | 366 |

|        |        |     |        |        |     |
|--------|--------|-----|--------|--------|-----|
| A01741 | A10456 | 184 | A01741 | A10486 | 173 |
| A01741 | A10533 | 210 | A01741 | A10535 | 157 |
| A01741 | A10559 | 173 | A01741 | A10579 | 227 |
| A01741 | A10592 | 401 | A01741 | A10598 | 226 |
| A01741 | A10612 | 457 | A01741 | A10625 | 491 |
| A01741 | A10637 | 173 | A01741 | A10645 | 368 |
| A01741 | A10656 | 204 | A01741 | A10658 | 229 |
| A01741 | A10694 | 229 | A01741 | A10783 | 353 |
| A01741 | A10789 | 480 | A01741 | A10835 | 210 |
| A01741 | A10850 | 177 | A01741 | A10927 | 183 |
| A01741 | A10984 | 210 | A01741 | A11040 | 151 |
| A01741 | A11051 | 210 | A01741 | A11060 | 173 |
| A01741 | A11069 | 210 | A01741 | A11122 | 201 |
| A01741 | A11184 | 327 | A01741 | A11282 | 167 |
| A01741 | A11288 | 246 | A01741 | A11309 | 252 |
| A01741 | A11431 | 353 | A01741 | A11435 | 412 |
| A01741 | A11444 | 357 | A01741 | A11469 | 313 |
| A01741 | A11485 | 165 | A01741 | A11497 | 215 |
| A01741 | A11526 | 463 | A01741 | A11540 | 281 |
| A01741 | A11545 | 207 | A01741 | A11558 | 281 |
| A01741 | A11578 | 228 | A01741 | A11597 | 409 |
| A01741 | A11628 | 207 | A01741 | A11683 | 184 |
| A01741 | A11688 | 180 | A01741 | A11696 | 258 |
| A01741 | A11729 | 198 | A01741 | A11759 | 355 |
| A01741 | A11830 | 324 | A01741 | A11858 | 152 |
| A01741 | A11992 | 372 | A01741 | A12055 | 313 |
| A01741 | A12140 | 183 | A01741 | A12195 | 294 |
| A01741 | A12326 | 183 | A01741 | A12361 | 185 |
| A01741 | A12373 | 407 | A01741 | A12507 | 358 |
| A01741 | A12606 | 199 | A01741 | A12629 | 210 |
| A01741 | A12785 | 210 | A01741 | A12824 | 473 |
| A01741 | A12897 | 489 | A01741 | A12991 | 173 |
| A01741 | A13027 | 151 | A01741 | A13053 | 151 |
| A01741 | A13124 | 374 | A01741 | A13144 | 173 |
| A01741 | A13208 | 173 | A01741 | A13334 | 210 |
| A01741 | A13338 | 327 | A01741 | A13341 | 183 |
| A01741 | A13355 | 210 | A01741 | A13369 | 160 |
| A01741 | A13460 | 180 | A01741 | A13545 | 307 |
| A01741 | A13548 | 173 | A01741 | A13568 | 151 |
| A01741 | A13737 | 227 | A01741 | A13829 | 200 |
| A01741 | A13870 | 409 | A01741 | A13890 | 210 |
| A01741 | A13956 | 215 | A01741 | A13963 | 480 |
| A01741 | A13969 | 286 | A01741 | A13987 | 286 |
| A01741 | A14064 | 173 | A01741 | A14094 | 172 |
| A01741 | A14109 | 343 | A01741 | A14122 | 408 |
| A01741 | A14123 | 256 | A01741 | A14124 | 301 |



|        |        |     |        |        |     |
|--------|--------|-----|--------|--------|-----|
| A01741 | A14126 | 322 | A01741 | A14128 | 485 |
| A01741 | A14129 | 485 | A01741 | A14190 | 913 |
| A01741 | A14197 | 308 | A01741 | A14202 | 433 |
| A01741 | A14210 | 429 | A01741 | A14222 | 463 |
| A01741 | A14229 | 204 | A01741 | A14232 | 899 |
| A01741 | A14235 | 234 | A01741 | A14297 | 218 |
| A01741 | A14330 | 296 | A01741 | A14336 | 313 |
| A01741 | A14345 | 173 | A01741 | A14383 | 173 |
| A01741 | A14386 | 221 | A01741 | A14390 | 364 |
| A01741 | A14395 | 262 | A01741 | A14399 | 439 |
| A01741 | A14430 | 408 | A01741 | A14445 | 262 |
| A01741 | A14469 | 177 | A01741 | A14479 | 256 |
| A01741 | A14482 | 388 | A01741 | A14510 | 173 |
| A01741 | A14511 | 462 | A01741 | A14534 | 210 |
| A01741 | A14570 | 281 | A01741 | A14620 | 173 |
| A01741 | A14643 | 484 | A01741 | A14664 | 394 |
| A01741 | A14669 | 173 | A01741 | A14674 | 160 |
| A01741 | A14679 | 173 | A01741 | A14680 | 210 |
| A01741 | A14693 | 221 | A01741 | A14806 | 210 |
| A01741 | A14810 | 286 | A01741 | A14831 | 299 |
| A01741 | A14857 | 177 | A01741 | A14870 | 188 |
| A01741 | A14928 | 484 | A01741 | A15041 | 210 |
| A01741 | A15046 | 210 | A01741 | A15108 | 151 |
| A01741 | A15130 | 393 | A01741 | A15241 | 491 |
| A01741 | A15292 | 463 | A01741 | A15300 | 227 |
| A01741 | A15301 | 374 | A01741 | A15302 | 447 |
| A01741 | A15310 | 288 | A01741 | A15312 | 207 |
| A01741 | A15313 | 229 | A01741 | A15317 | 363 |
| A01741 | A15322 | 343 | A01741 | A15331 | 367 |
| A01741 | A15345 | 260 | A01741 | A15348 | 474 |
| A01741 | A15349 | 480 | A01741 | A15352 | 383 |
| A01741 | A15357 | 285 | A01741 | A15398 | 229 |
| A01741 | A15400 | 337 | A01741 | A15402 | 159 |
| A01741 | A15413 | 245 | A01741 | A15416 | 311 |
| A01741 | A15422 | 204 | A01741 | A15430 | 489 |
| A01741 | A15431 | 180 | A01741 | A15444 | 383 |
| A01741 | A15445 | 378 | A01741 | A15452 | 230 |
| A01741 | A15454 | 179 | A01741 | A15461 | 404 |
| A01741 | A15463 | 465 | A01741 | A15464 | 347 |
| A01741 | A15476 | 296 | A01741 | A15480 | 191 |
| A01741 | A15487 | 477 | A01741 | A15489 | 152 |
| A01741 | A15498 | 491 | A01741 | A15524 | 151 |
| A01741 | A15546 | 199 | A01741 | A15624 | 469 |
| A01741 | A15626 | 343 | A01741 | A15630 | 446 |
| A01741 | A15652 | 208 | A01741 | A15661 | 185 |
| A01741 | A15662 | 168 | A01741 | A15669 | 279 |

|        |        |     |        |        |     |
|--------|--------|-----|--------|--------|-----|
| A01741 | A15673 | 208 | A01741 | A15733 | 172 |
| A01741 | A15800 | 385 | A01741 | A15801 | 286 |
| A01741 | A15804 | 156 | A01741 | A15817 | 441 |
| A01741 | A15837 | 358 | A01741 | A15858 | 151 |
| A01741 | A15874 | 235 | A01741 | A15911 | 273 |
| A01741 | A15925 | 157 | A01741 | A15932 | 454 |
| A01741 | A15933 | 246 | A01741 | A15934 | 212 |
| A01741 | A15935 | 333 | A01741 | A15945 | 414 |
| A01741 | A15949 | 481 | A01741 | A16064 | 173 |
| A01741 | A16068 | 294 | A01741 | A16081 | 152 |
| A01741 | A16095 | 484 | A01741 | A16096 | 210 |
| A01741 | A16120 | 245 | A01741 | A16138 | 173 |
| A01741 | A16222 | 234 | A01741 | A16295 | 151 |
| A01741 | A16300 | 307 | A01741 | A16360 | 265 |
| A01741 | A16381 | 156 | A01741 | A16419 | 307 |
| A01741 | A16436 | 171 | A01741 | A16440 | 279 |
| A01741 | A16657 | 266 | A01741 | A16687 | 313 |
| A01741 | A16739 | 316 | A01741 | A16741 | 167 |
| A01741 | A16744 | 172 | A01741 | A16748 | 341 |
| A01741 | A16911 | 156 | A01741 | A16959 | 163 |
| A01741 | A16963 | 160 | A01741 | A16969 | 210 |
| A01741 | A17058 | 160 | A01741 | A17156 | 456 |
| A01741 | A17230 | 210 | A01742 | A01756 | 430 |
| A01742 | A01776 | 433 | A01742 | A01850 | 152 |
| A01742 | A01910 | 271 | A01742 | A02189 | 208 |
| A01742 | A02337 | 191 | A01742 | A02383 | 191 |
| A01742 | A02498 | 177 | A01742 | A02670 | 215 |
| A01742 | A02695 | 350 | A01742 | A02699 | 490 |
| A01742 | A02751 | 180 | A01742 | A02789 | 413 |
| A01742 | A02821 | 481 | A01742 | A02822 | 212 |
| A01742 | A02866 | 385 | A01742 | A02873 | 488 |
| A01742 | A02898 | 176 | A01742 | A02909 | 344 |
| A01742 | A02963 | 228 | A01742 | A03013 | 193 |
| A01742 | A03054 | 154 | A01742 | A03213 | 219 |
| A01742 | A03336 | 149 | A01742 | A03541 | 486 |
| A01742 | A03598 | 247 | A01742 | A03612 | 157 |
| A01742 | A03869 | 405 | A01742 | A03871 | 409 |
| A01742 | A03942 | 219 | A01742 | A04007 | 310 |
| A01742 | A04049 | 232 | A01742 | A04053 | 176 |
| A01742 | A04089 | 245 | A01742 | A04445 | 205 |
| A01742 | A04536 | 490 | A01742 | A04584 | 271 |
| A01742 | A04623 | 162 | A01742 | A04809 | 168 |
| A01742 | A05436 | 276 | A01742 | A05573 | 258 |
| A01742 | A06654 | 180 | A01742 | A07957 | 358 |
| A01742 | A08459 | 337 | A01742 | A08485 | 358 |
| A01742 | A08493 | 358 | A01742 | A08615 | 405 |

|        |        |     |        |        |     |
|--------|--------|-----|--------|--------|-----|
| A01742 | A08692 | 174 | A01742 | A09236 | 213 |
| A01742 | A09509 | 182 | A01742 | A09577 | 899 |
| A01742 | A10264 | 302 | A01742 | A10540 | 276 |
| A01742 | A10743 | 435 | A01742 | A11061 | 374 |
| A01742 | A11150 | 218 | A01742 | A11271 | 201 |
| A01742 | A11292 | 224 | A01742 | A11293 | 484 |
| A01742 | A11335 | 198 | A01742 | A11492 | 899 |
| A01742 | A11750 | 185 | A01742 | A11759 | 270 |
| A01742 | A11978 | 358 | A01742 | A12619 | 337 |
| A01742 | A12796 | 337 | A01742 | A12986 | 286 |
| A01742 | A13997 | 177 | A01742 | A14293 | 358 |
| A01742 | A14553 | 337 | A01742 | A14605 | 173 |
| A01742 | A14638 | 201 | A01742 | A15130 | 319 |
| A01742 | A15540 | 154 | A01742 | A16463 | 154 |
| A01743 | A01744 | 241 | A01743 | A01745 | 274 |
| A01743 | A01746 | 409 | A01743 | A01747 | 213 |
| A01743 | A01751 | 366 | A01743 | A01752 | 162 |
| A01743 | A01753 | 177 | A01743 | A01754 | 232 |
| A01743 | A01757 | 439 | A01743 | A01758 | 470 |
| A01743 | A01762 | 77  | A01743 | A01763 | 329 |
| A01743 | A01764 | 291 | A01743 | A01767 | 352 |
| A01743 | A01769 | 356 | A01743 | A01772 | 191 |
| A01743 | A01774 | 201 | A01743 | A01775 | 427 |
| A01743 | A01778 | 177 | A01743 | A01779 | 218 |
| A01743 | A01781 | 188 | A01743 | A01789 | 388 |
| A01743 | A01791 | 188 | A01743 | A01794 | 135 |
| A01743 | A01796 | 438 | A01743 | A01797 | 491 |
| A01743 | A01802 | 428 | A01743 | A01812 | 159 |
| A01743 | A01815 | 165 | A01743 | A01851 | 168 |
| A01743 | A01870 | 391 | A01743 | A01872 | 210 |
| A01743 | A01876 | 204 | A01743 | A01879 | 385 |
| A01743 | A01883 | 457 | A01743 | A01888 | 490 |
| A01743 | A01893 | 469 | A01743 | A01894 | 490 |
| A01743 | A01899 | 154 | A01743 | A01902 | 219 |
| A01743 | A01909 | 461 | A01743 | A01914 | 316 |
| A01743 | A01923 | 256 | A01743 | A01926 | 441 |
| A01743 | A01931 | 269 | A01743 | A01941 | 371 |
| A01743 | A01982 | 232 | A01743 | A01995 | 184 |
| A01743 | A02006 | 489 | A01743 | A02010 | 299 |
| A01743 | A02034 | 297 | A01743 | A02037 | 223 |
| A01743 | A02048 | 322 | A01743 | A02049 | 457 |
| A01743 | A02072 | 193 | A01743 | A02083 | 232 |
| A01743 | A02086 | 339 | A01743 | A02117 | 353 |
| A01743 | A02135 | 162 | A01743 | A02136 | 168 |
| A01743 | A02156 | 281 | A01743 | A02167 | 174 |
| A01743 | A02183 | 168 | A01743 | A02186 | 170 |

|        |        |     |        |        |     |
|--------|--------|-----|--------|--------|-----|
| A01743 | A02198 | 171 | A01743 | A02215 | 286 |
| A01743 | A02218 | 251 | A01743 | A02254 | 226 |
| A01743 | A02278 | 232 | A01743 | A02298 | 373 |
| A01743 | A02300 | 455 | A01743 | A02307 | 159 |
| A01743 | A02320 | 179 | A01743 | A02331 | 489 |
| A01743 | A02338 | 307 | A01743 | A02340 | 165 |
| A01743 | A02349 | 316 | A01743 | A02356 | 274 |
| A01743 | A02382 | 297 | A01743 | A02390 | 179 |
| A01743 | A02412 | 353 | A01743 | A02416 | 281 |
| A01743 | A02434 | 260 | A01743 | A02460 | 183 |
| A01743 | A02464 | 168 | A01743 | A02473 | 198 |
| A01743 | A02475 | 193 | A01743 | A02477 | 165 |
| A01743 | A02490 | 486 | A01743 | A02491 | 490 |
| A01743 | A02493 | 318 | A01743 | A02495 | 475 |
| A01743 | A02511 | 339 | A01743 | A02521 | 326 |
| A01743 | A02525 | 193 | A01743 | A02539 | 193 |
| A01743 | A02541 | 157 | A01743 | A02559 | 262 |
| A01743 | A02639 | 472 | A01743 | A02644 | 195 |
| A01743 | A02668 | 408 | A01743 | A02670 | 177 |
| A01743 | A02687 | 179 | A01743 | A02691 | 488 |
| A01743 | A02693 | 179 | A01743 | A02695 | 416 |
| A01743 | A02697 | 451 | A01743 | A02698 | 173 |
| A01743 | A02700 | 294 | A01743 | A02701 | 177 |
| A01743 | A02705 | 385 | A01743 | A02706 | 334 |
| A01743 | A02707 | 245 | A01743 | A02709 | 366 |
| A01743 | A02713 | 74  | A01743 | A02714 | 268 |
| A01743 | A02729 | 238 | A01743 | A02739 | 229 |
| A01743 | A02741 | 162 | A01743 | A02745 | 454 |
| A01743 | A02748 | 165 | A01743 | A02749 | 462 |
| A01743 | A02754 | 208 | A01743 | A02756 | 443 |
| A01743 | A02763 | 279 | A01743 | A02776 | 414 |
| A01743 | A02778 | 208 | A01743 | A02785 | 486 |
| A01743 | A02789 | 360 | A01743 | A02792 | 465 |
| A01743 | A02812 | 491 | A01743 | A02814 | 462 |
| A01743 | A02816 | 188 | A01743 | A02817 | 335 |
| A01743 | A02830 | 434 | A01743 | A02834 | 385 |
| A01743 | A02836 | 467 | A01743 | A02837 | 491 |
| A01743 | A02859 | 491 | A01743 | A02869 | 193 |
| A01743 | A02874 | 491 | A01743 | A02875 | 327 |
| A01743 | A02877 | 429 | A01743 | A02878 | 302 |
| A01743 | A02918 | 174 | A01743 | A02927 | 187 |
| A01743 | A02929 | 163 | A01743 | A02936 | 167 |
| A01743 | A02945 | 268 | A01743 | A02951 | 323 |
| A01743 | A02982 | 229 | A01743 | A02996 | 154 |
| A01743 | A03016 | 369 | A01743 | A03020 | 251 |
| A01743 | A03034 | 308 | A01743 | A03035 | 171 |

|        |        |     |        |        |     |
|--------|--------|-----|--------|--------|-----|
| A01743 | A03050 | 290 | A01743 | A03051 | 318 |
| A01743 | A03080 | 460 | A01743 | A03087 | 232 |
| A01743 | A03090 | 317 | A01743 | A03095 | 423 |
| A01743 | A03112 | 491 | A01743 | A03157 | 198 |
| A01743 | A03167 | 260 | A01743 | A03182 | 177 |
| A01743 | A03184 | 180 | A01743 | A03211 | 458 |
| A01743 | A03259 | 491 | A01743 | A03268 | 391 |
| A01743 | A03275 | 489 | A01743 | A03281 | 353 |
| A01743 | A03316 | 215 | A01743 | A03347 | 412 |
| A01743 | A03353 | 380 | A01743 | A03361 | 469 |
| A01743 | A03369 | 400 | A01743 | A03370 | 477 |
| A01743 | A03371 | 245 | A01743 | A03373 | 286 |
| A01743 | A03378 | 288 | A01743 | A03379 | 423 |
| A01743 | A03415 | 257 | A01743 | A03417 | 299 |
| A01743 | A03473 | 176 | A01743 | A03513 | 369 |
| A01743 | A03520 | 475 | A01743 | A03544 | 238 |
| A01743 | A03595 | 402 | A01743 | A03609 | 468 |
| A01743 | A03633 | 196 | A01743 | A03653 | 371 |
| A01743 | A03681 | 162 | A01743 | A03690 | 210 |
| A01743 | A03722 | 202 | A01743 | A03748 | 232 |
| A01743 | A03782 | 241 | A01743 | A03803 | 419 |
| A01743 | A03832 | 361 | A01743 | A03843 | 235 |
| A01743 | A03849 | 213 | A01743 | A03851 | 466 |
| A01743 | A03910 | 183 | A01743 | A03914 | 327 |
| A01743 | A03965 | 235 | A01743 | A03976 | 335 |
| A01743 | A03978 | 165 | A01743 | A03990 | 441 |
| A01743 | A04010 | 485 | A01743 | A04015 | 317 |
| A01743 | A04016 | 154 | A01743 | A04023 | 216 |
| A01743 | A04080 | 430 | A01743 | A04095 | 200 |
| A01743 | A04117 | 489 | A01743 | A04120 | 154 |
| A01743 | A04122 | 173 | A01743 | A04229 | 184 |
| A01743 | A04260 | 171 | A01743 | A04269 | 213 |
| A01743 | A04279 | 170 | A01743 | A04281 | 207 |
| A01743 | A04286 | 299 | A01743 | A04333 | 221 |
| A01743 | A04334 | 480 | A01743 | A04342 | 179 |
| A01743 | A04361 | 380 | A01743 | A04367 | 154 |
| A01743 | A04397 | 154 | A01743 | A04493 | 173 |
| A01743 | A04520 | 401 | A01743 | A04583 | 165 |
| A01743 | A04601 | 165 | A01743 | A04622 | 491 |
| A01743 | A04698 | 461 | A01743 | A04702 | 177 |
| A01743 | A04795 | 165 | A01743 | A04797 | 213 |
| A01743 | A04806 | 177 | A01743 | A04820 | 165 |
| A01743 | A04830 | 252 | A01743 | A04839 | 176 |
| A01743 | A04842 | 174 | A01743 | A04891 | 213 |
| A01743 | A04908 | 420 | A01743 | A04916 | 177 |
| A01743 | A04939 | 420 | A01743 | A04944 | 213 |

|        |        |     |        |        |     |
|--------|--------|-----|--------|--------|-----|
| A01743 | A04960 | 174 | A01743 | A04964 | 428 |
| A01743 | A04996 | 318 | A01743 | A05003 | 193 |
| A01743 | A05007 | 301 | A01743 | A05078 | 228 |
| A01743 | A05098 | 199 | A01743 | A05102 | 262 |
| A01743 | A05106 | 390 | A01743 | A05113 | 311 |
| A01743 | A05122 | 480 | A01743 | A05141 | 338 |
| A01743 | A05155 | 388 | A01743 | A05174 | 167 |
| A01743 | A05248 | 177 | A01743 | A05303 | 213 |
| A01743 | A05309 | 483 | A01743 | A05325 | 154 |
| A01743 | A05349 | 299 | A01743 | A05368 | 165 |
| A01743 | A05433 | 177 | A01743 | A05437 | 154 |
| A01743 | A05451 | 333 | A01743 | A05470 | 193 |
| A01743 | A05472 | 362 | A01743 | A05506 | 196 |
| A01743 | A05531 | 265 | A01743 | A05555 | 165 |
| A01743 | A05574 | 154 | A01743 | A05603 | 463 |
| A01743 | A05626 | 193 | A01743 | A05658 | 251 |
| A01743 | A05659 | 257 | A01743 | A05694 | 193 |
| A01743 | A05715 | 193 | A01743 | A05723 | 165 |
| A01743 | A05737 | 177 | A01743 | A05771 | 270 |
| A01743 | A05794 | 177 | A01743 | A05926 | 173 |
| A01743 | A06018 | 213 | A01743 | A06050 | 213 |
| A01743 | A06054 | 185 | A01743 | A06151 | 160 |
| A01743 | A06248 | 213 | A01743 | A06298 | 374 |
| A01743 | A06346 | 452 | A01743 | A06358 | 221 |
| A01743 | A06402 | 207 | A01743 | A06405 | 334 |
| A01743 | A06410 | 165 | A01743 | A06414 | 348 |
| A01743 | A06415 | 401 | A01743 | A06425 | 218 |
| A01743 | A06439 | 249 | A01743 | A06581 | 465 |
| A01743 | A06595 | 249 | A01743 | A06597 | 475 |
| A01743 | A06605 | 193 | A01743 | A06607 | 480 |
| A01743 | A06612 | 251 | A01743 | A06614 | 177 |
| A01743 | A06621 | 162 | A01743 | A06635 | 291 |
| A01743 | A06638 | 165 | A01743 | A06648 | 180 |
| A01743 | A06734 | 301 | A01743 | A06756 | 174 |
| A01743 | A06797 | 279 | A01743 | A06868 | 283 |
| A01743 | A06870 | 251 | A01743 | A06912 | 337 |
| A01743 | A06916 | 375 | A01743 | A06949 | 291 |
| A01743 | A06961 | 165 | A01743 | A06979 | 378 |
| A01743 | A07027 | 229 | A01743 | A07031 | 195 |
| A01743 | A07037 | 200 | A01743 | A07061 | 273 |
| A01743 | A07109 | 195 | A01743 | A07122 | 312 |
| A01743 | A07135 | 238 | A01743 | A07145 | 274 |
| A01743 | A07152 | 271 | A01743 | A07157 | 451 |
| A01743 | A07164 | 435 | A01743 | A07165 | 490 |
| A01743 | A07177 | 313 | A01743 | A07178 | 313 |
| A01743 | A07200 | 491 | A01743 | A07201 | 177 |

|        |        |     |        |        |     |
|--------|--------|-----|--------|--------|-----|
| A01743 | A07218 | 483 | A01743 | A07239 | 165 |
| A01743 | A07269 | 213 | A01743 | A07399 | 343 |
| A01743 | A07503 | 210 | A01743 | A07520 | 358 |
| A01743 | A07546 | 177 | A01743 | A07553 | 348 |
| A01743 | A07558 | 195 | A01743 | A07590 | 208 |
| A01743 | A07695 | 308 | A01743 | A07699 | 165 |
| A01743 | A07704 | 270 | A01743 | A07705 | 249 |
| A01743 | A07721 | 170 | A01743 | A07736 | 286 |
| A01743 | A07803 | 288 | A01743 | A07860 | 177 |
| A01743 | A07900 | 201 | A01743 | A07933 | 151 |
| A01743 | A07935 | 156 | A01743 | A07958 | 276 |
| A01743 | A07970 | 154 | A01743 | A08057 | 154 |
| A01743 | A08070 | 352 | A01743 | A08085 | 165 |
| A01743 | A08364 | 177 | A01743 | A08491 | 172 |
| A01743 | A08587 | 193 | A01743 | A08594 | 180 |
| A01743 | A08677 | 165 | A01743 | A08827 | 157 |
| A01743 | A08834 | 460 | A01743 | A08840 | 469 |
| A01743 | A08861 | 277 | A01743 | A08875 | 228 |
| A01743 | A08911 | 190 | A01743 | A08977 | 238 |
| A01743 | A09028 | 408 | A01743 | A09126 | 461 |
| A01743 | A09224 | 154 | A01743 | A09274 | 193 |
| A01743 | A09381 | 341 | A01743 | A09394 | 270 |
| A01743 | A09434 | 226 | A01743 | A09462 | 213 |
| A01743 | A09493 | 286 | A01743 | A09509 | 481 |
| A01743 | A09519 | 193 | A01743 | A09561 | 238 |
| A01743 | A09598 | 205 | A01743 | A09744 | 200 |
| A01743 | A09749 | 156 | A01743 | A09800 | 251 |
| A01743 | A09833 | 262 | A01743 | A09835 | 193 |
| A01743 | A09848 | 305 | A01743 | A09850 | 321 |
| A01743 | A09879 | 204 | A01743 | A09923 | 213 |
| A01743 | A09954 | 251 | A01743 | A09973 | 213 |
| A01743 | A10018 | 450 | A01743 | A10033 | 193 |
| A01743 | A10087 | 369 | A01743 | A10219 | 213 |
| A01743 | A10313 | 188 | A01743 | A10337 | 455 |
| A01743 | A10376 | 286 | A01743 | A10418 | 238 |
| A01743 | A10440 | 200 | A01743 | A10441 | 188 |
| A01743 | A10444 | 221 | A01743 | A10456 | 321 |
| A01743 | A10471 | 165 | A01743 | A10589 | 177 |
| A01743 | A10608 | 165 | A01743 | A10618 | 353 |
| A01743 | A10638 | 204 | A01743 | A10656 | 193 |
| A01743 | A10658 | 291 | A01743 | A10677 | 240 |
| A01743 | A10693 | 368 | A01743 | A10702 | 367 |
| A01743 | A10731 | 156 | A01743 | A10783 | 228 |
| A01743 | A10829 | 177 | A01743 | A10878 | 154 |
| A01743 | A11016 | 154 | A01743 | A11248 | 251 |
| A01743 | A11369 | 468 | A01743 | A11526 | 205 |

|        |        |     |        |        |     |
|--------|--------|-----|--------|--------|-----|
| A01743 | A11565 | 329 | A01743 | A11581 | 251 |
| A01743 | A11639 | 213 | A01743 | A11759 | 433 |
| A01743 | A11786 | 154 | A01743 | A11911 | 218 |
| A01743 | A11951 | 177 | A01743 | A12108 | 154 |
| A01743 | A12373 | 191 | A01743 | A12458 | 154 |
| A01743 | A12729 | 324 | A01743 | A12730 | 154 |
| A01743 | A12886 | 173 | A01743 | A12897 | 279 |
| A01743 | A12927 | 443 | A01743 | A13180 | 165 |
| A01743 | A13294 | 196 | A01743 | A13369 | 303 |
| A01743 | A13371 | 154 | A01743 | A13373 | 165 |
| A01743 | A13475 | 213 | A01743 | A13548 | 213 |
| A01743 | A13825 | 154 | A01743 | A13826 | 489 |
| A01743 | A13871 | 252 | A01743 | A13899 | 473 |
| A01743 | A13903 | 179 | A01743 | A13957 | 177 |
| A01743 | A14080 | 232 | A01743 | A14125 | 215 |
| A01743 | A14128 | 196 | A01743 | A14137 | 243 |
| A01743 | A14229 | 279 | A01743 | A14345 | 213 |
| A01743 | A14405 | 484 | A01743 | A14440 | 394 |
| A01743 | A14611 | 208 | A01743 | A14637 | 409 |
| A01743 | A14638 | 159 | A01743 | A14640 | 396 |
| A01743 | A14664 | 369 | A01743 | A14876 | 238 |
| A01743 | A15089 | 213 | A01743 | A15111 | 154 |
| A01743 | A15143 | 177 | A01743 | A15238 | 157 |
| A01743 | A15308 | 252 | A01743 | A15314 | 274 |
| A01743 | A15318 | 303 | A01743 | A15322 | 480 |
| A01743 | A15328 | 262 | A01743 | A15333 | 177 |
| A01743 | A15346 | 479 | A01743 | A15348 | 163 |
| A01743 | A15357 | 322 | A01743 | A15391 | 299 |
| A01743 | A15400 | 263 | A01743 | A15402 | 398 |
| A01743 | A15425 | 238 | A01743 | A15430 | 361 |
| A01743 | A15486 | 251 | A01743 | A15607 | 277 |
| A01743 | A15617 | 243 | A01743 | A15624 | 422 |
| A01743 | A15669 | 224 | A01743 | A15802 | 286 |
| A01743 | A15815 | 262 | A01743 | A15816 | 375 |
| A01743 | A15822 | 154 | A01743 | A15827 | 207 |
| A01743 | A15843 | 160 | A01743 | A15874 | 213 |
| A01743 | A15910 | 165 | A01743 | A15952 | 213 |
| A01743 | A16027 | 159 | A01743 | A16055 | 363 |
| A01743 | A16095 | 296 | A01743 | A16141 | 204 |
| A01743 | A16224 | 385 | A01743 | A16262 | 199 |
| A01743 | A16265 | 251 | A01743 | A16300 | 486 |
| A01743 | A16346 | 193 | A01743 | A16389 | 251 |
| A01743 | A16550 | 165 | A01743 | A16636 | 491 |
| A01743 | A16739 | 313 | A01743 | A16741 | 307 |
| A01743 | A16744 | 240 | A01743 | A16849 | 251 |
| A01743 | A16972 | 251 | A01743 | A17078 | 279 |



|        |        |     |        |        |     |
|--------|--------|-----|--------|--------|-----|
| A01743 | A17223 | 177 | A01744 | A01749 | 173 |
| A01744 | A01754 | 296 | A01744 | A01760 | 452 |
| A01744 | A01761 | 279 | A01744 | A01762 | 318 |
| A01744 | A01764 | 245 | A01744 | A01765 | 430 |
| A01744 | A01780 | 439 | A01744 | A02703 | 180 |
| A01744 | A02812 | 151 | A01744 | A02983 | 154 |
| A01744 | A03012 | 205 | A01744 | A03473 | 383 |
| A01744 | A03545 | 182 | A01744 | A03549 | 417 |
| A01744 | A03563 | 409 | A01744 | A03613 | 347 |
| A01744 | A03662 | 246 | A01744 | A03848 | 343 |
| A01744 | A03983 | 361 | A01744 | A04105 | 217 |
| A01744 | A04848 | 363 | A01744 | A05348 | 314 |
| A01744 | A05349 | 171 | A01744 | A05827 | 343 |
| A01744 | A06615 | 179 | A01744 | A08604 | 377 |
| A01744 | A08699 | 372 | A01744 | A09192 | 358 |
| A01745 | A01748 | 201 | A01745 | A01766 | 324 |
| A01745 | A02145 | 395 | A01745 | A02481 | 230 |
| A01745 | A02488 | 219 | A01745 | A02520 | 246 |
| A01745 | A02697 | 198 | A01745 | A02752 | 167 |
| A01745 | A02924 | 191 | A01745 | A03474 | 188 |
| A01745 | A03849 | 385 | A01745 | A04010 | 416 |
| A01745 | A04051 | 430 | A01745 | A07158 | 154 |
| A01745 | A07923 | 308 | A01745 | A08806 | 213 |
| A01745 | A10477 | 266 | A01746 | A01750 | 235 |
| A01746 | A01756 | 185 | A01746 | A01758 | 251 |
| A01746 | A01763 | 152 | A01746 | A01798 | 188 |
| A01746 | A01802 | 174 | A01746 | A01872 | 173 |
| A01746 | A01883 | 208 | A01746 | A01888 | 461 |
| A01746 | A01891 | 235 | A01746 | A01894 | 207 |
| A01746 | A01909 | 154 | A01746 | A01916 | 241 |
| A01746 | A02298 | 168 | A01746 | A02335 | 346 |
| A01746 | A02373 | 307 | A01746 | A02477 | 332 |
| A01746 | A02490 | 432 | A01746 | A02491 | 486 |
| A01746 | A02498 | 235 | A01746 | A02549 | 176 |
| A01746 | A02586 | 190 | A01746 | A02611 | 160 |
| A01746 | A02632 | 288 | A01746 | A02691 | 468 |
| A01746 | A02706 | 174 | A01746 | A02749 | 168 |
| A01746 | A02756 | 174 | A01746 | A02785 | 187 |
| A01746 | A02819 | 218 | A01746 | A02821 | 247 |
| A01746 | A02830 | 419 | A01746 | A02841 | 458 |
| A01746 | A02859 | 490 | A01746 | A02866 | 208 |
| A01746 | A02874 | 262 | A01746 | A02928 | 366 |
| A01746 | A03167 | 193 | A01746 | A03244 | 470 |
| A01746 | A03263 | 156 | A01746 | A03304 | 491 |
| A01746 | A03420 | 157 | A01746 | A03541 | 245 |
| A01746 | A03543 | 208 | A01746 | A03627 | 193 |

|        |        |     |        |        |     |
|--------|--------|-----|--------|--------|-----|
| A01746 | A03662 | 491 | A01746 | A03663 | 213 |
| A01746 | A03778 | 188 | A01746 | A04010 | 302 |
| A01746 | A04015 | 183 | A01746 | A04089 | 179 |
| A01746 | A04108 | 388 | A01746 | A04263 | 399 |
| A01746 | A04302 | 171 | A01746 | A04417 | 201 |
| A01746 | A04536 | 490 | A01746 | A04718 | 384 |
| A01746 | A04868 | 256 | A01746 | A04961 | 160 |
| A01746 | A05125 | 288 | A01746 | A05618 | 288 |
| A01746 | A05729 | 256 | A01746 | A05798 | 183 |
| A01746 | A05810 | 227 | A01746 | A06055 | 301 |
| A01746 | A06063 | 238 | A01746 | A06277 | 188 |
| A01746 | A06409 | 256 | A01746 | A06451 | 408 |
| A01746 | A06623 | 485 | A01746 | A07127 | 252 |
| A01746 | A07158 | 258 | A01746 | A07164 | 217 |
| A01746 | A07185 | 198 | A01746 | A07189 | 219 |
| A01746 | A07198 | 260 | A01746 | A07200 | 486 |
| A01746 | A07302 | 390 | A01746 | A07812 | 223 |
| A01746 | A08633 | 160 | A01746 | A08738 | 429 |
| A01746 | A08911 | 208 | A01746 | A09031 | 235 |
| A01746 | A09096 | 335 | A01746 | A09120 | 219 |
| A01746 | A09275 | 256 | A01746 | A09489 | 245 |
| A01746 | A09509 | 182 | A01746 | A09814 | 176 |
| A01746 | A10049 | 168 | A01746 | A10082 | 219 |
| A01746 | A10650 | 256 | A01746 | A11467 | 219 |
| A01746 | A11513 | 263 | A01746 | A12927 | 205 |
| A01746 | A13607 | 227 | A01746 | A14579 | 165 |
| A01746 | A14624 | 256 | A01746 | A14634 | 193 |
| A01746 | A14637 | 418 | A01746 | A14640 | 190 |
| A01746 | A14643 | 486 | A01746 | A14666 | 159 |
| A01746 | A14669 | 288 | A01746 | A14685 | 227 |
| A01746 | A14698 | 259 | A01746 | A16636 | 470 |
| A01746 | A16748 | 176 | A01747 | A01767 | 151 |
| A01747 | A01772 | 363 | A01747 | A01781 | 308 |
| A01747 | A01790 | 208 | A01747 | A01824 | 185 |
| A01747 | A01841 | 491 | A01747 | A01878 | 243 |
| A01747 | A01881 | 369 | A01747 | A01888 | 238 |
| A01747 | A01898 | 152 | A01747 | A01907 | 353 |
| A01747 | A02185 | 391 | A01747 | A02337 | 430 |
| A01747 | A02353 | 491 | A01747 | A02401 | 208 |
| A01747 | A02407 | 193 | A01747 | A02416 | 443 |
| A01747 | A02462 | 183 | A01747 | A02471 | 160 |
| A01747 | A02495 | 160 | A01747 | A02503 | 477 |
| A01747 | A02504 | 168 | A01747 | A02559 | 162 |
| A01747 | A02590 | 205 | A01747 | A02642 | 221 |
| A01747 | A02695 | 430 | A01747 | A02698 | 196 |
| A01747 | A02709 | 247 | A01747 | A02718 | 491 |

|        |        |     |        |        |     |
|--------|--------|-----|--------|--------|-----|
| A01747 | A02719 | 281 | A01747 | A02749 | 367 |
| A01747 | A02788 | 319 | A01747 | A02836 | 312 |
| A01747 | A02863 | 326 | A01747 | A02877 | 296 |
| A01747 | A02917 | 389 | A01747 | A03011 | 174 |
| A01747 | A03051 | 293 | A01747 | A03059 | 151 |
| A01747 | A03095 | 162 | A01747 | A03188 | 491 |
| A01747 | A03309 | 188 | A01747 | A03426 | 170 |
| A01747 | A03451 | 411 | A01747 | A03453 | 475 |
| A01747 | A03457 | 243 | A01747 | A03477 | 491 |
| A01747 | A03520 | 306 | A01747 | A03543 | 188 |
| A01747 | A03544 | 174 | A01747 | A03636 | 245 |
| A01747 | A03661 | 185 | A01747 | A03666 | 317 |
| A01747 | A03681 | 160 | A01747 | A03683 | 160 |
| A01747 | A03748 | 180 | A01747 | A03775 | 279 |
| A01747 | A03863 | 265 | A01747 | A03904 | 212 |
| A01747 | A03922 | 193 | A01747 | A04009 | 364 |
| A01747 | A04035 | 224 | A01747 | A04091 | 429 |
| A01747 | A04117 | 191 | A01747 | A04222 | 193 |
| A01747 | A04248 | 159 | A01747 | A04280 | 243 |
| A01747 | A04282 | 210 | A01747 | A04289 | 226 |
| A01747 | A04302 | 151 | A01747 | A04321 | 226 |
| A01747 | A04358 | 327 | A01747 | A04374 | 252 |
| A01747 | A04428 | 170 | A01747 | A04449 | 263 |
| A01747 | A04482 | 179 | A01747 | A04534 | 201 |
| A01747 | A04537 | 162 | A01747 | A04561 | 201 |
| A01747 | A04680 | 208 | A01747 | A04706 | 334 |
| A01747 | A04713 | 154 | A01747 | A04739 | 234 |
| A01747 | A04795 | 162 | A01747 | A04806 | 238 |
| A01747 | A04999 | 386 | A01747 | A05006 | 357 |
| A01747 | A05057 | 216 | A01747 | A05065 | 156 |
| A01747 | A05071 | 226 | A01747 | A05102 | 171 |
| A01747 | A05124 | 259 | A01747 | A05172 | 373 |
| A01747 | A05204 | 174 | A01747 | A05239 | 362 |
| A01747 | A05240 | 171 | A01747 | A05310 | 154 |
| A01747 | A05660 | 201 | A01747 | A05911 | 157 |
| A01747 | A06147 | 208 | A01747 | A06523 | 174 |
| A01747 | A06616 | 179 | A01747 | A06632 | 188 |
| A01747 | A06648 | 208 | A01747 | A06722 | 252 |
| A01747 | A06728 | 216 | A01747 | A06756 | 272 |
| A01747 | A06807 | 317 | A01747 | A06815 | 208 |
| A01747 | A07006 | 346 | A01747 | A07135 | 326 |
| A01747 | A07163 | 316 | A01747 | A07288 | 307 |
| A01747 | A07339 | 356 | A01747 | A07668 | 385 |
| A01747 | A07688 | 165 | A01747 | A07746 | 491 |
| A01747 | A07803 | 441 | A01747 | A08741 | 279 |
| A01747 | A08751 | 162 | A01747 | A08817 | 491 |

|        |        |     |        |        |     |
|--------|--------|-----|--------|--------|-----|
| A01747 | A09123 | 488 | A01747 | A09464 | 212 |
| A01747 | A09500 | 201 | A01747 | A09603 | 201 |
| A01747 | A09819 | 302 | A01747 | A09849 | 296 |
| A01747 | A09964 | 193 | A01747 | A10055 | 179 |
| A01747 | A10087 | 207 | A01747 | A10111 | 201 |
| A01747 | A10233 | 224 | A01747 | A10278 | 213 |
| A01747 | A10411 | 208 | A01747 | A10614 | 411 |
| A01747 | A10731 | 256 | A01747 | A10744 | 160 |
| A01747 | A10809 | 179 | A01747 | A10812 | 238 |
| A01747 | A10826 | 157 | A01747 | A10827 | 272 |
| A01747 | A11261 | 216 | A01747 | A11262 | 277 |
| A01747 | A11264 | 377 | A01747 | A11538 | 272 |
| A01747 | A11706 | 334 | A01747 | A11897 | 185 |
| A01747 | A12197 | 238 | A01747 | A12236 | 193 |
| A01747 | A12290 | 238 | A01747 | A12334 | 385 |
| A01747 | A12365 | 208 | A01747 | A12400 | 272 |
| A01747 | A12483 | 302 | A01747 | A12484 | 302 |
| A01747 | A12657 | 188 | A01747 | A12777 | 302 |
| A01747 | A12965 | 252 | A01747 | A13030 | 272 |
| A01747 | A13135 | 174 | A01747 | A13189 | 399 |
| A01747 | A13330 | 477 | A01747 | A14393 | 152 |
| A01747 | A14410 | 491 | A01747 | A14517 | 162 |
| A01747 | A14636 | 193 | A01747 | A14650 | 232 |
| A01747 | A15137 | 385 | A01747 | A15150 | 302 |
| A01747 | A15573 | 183 | A01747 | A15605 | 168 |
| A01747 | A15651 | 173 | A01747 | A15838 | 455 |
| A01747 | A15839 | 245 | A01747 | A15840 | 491 |
| A01747 | A15841 | 474 | A01747 | A15845 | 226 |
| A01747 | A15881 | 373 | A01747 | A15905 | 439 |
| A01747 | A15993 | 201 | A01747 | A16026 | 204 |
| A01747 | A16030 | 358 | A01747 | A16112 | 475 |
| A01747 | A16325 | 470 | A01747 | A16328 | 488 |
| A01747 | A16427 | 302 | A01747 | A16469 | 255 |
| A01747 | A16489 | 238 | A01747 | A16503 | 179 |
| A01747 | A16718 | 255 | A01747 | A16732 | 455 |
| A01747 | A16887 | 208 | A01747 | A17096 | 302 |
| A01748 | A01749 | 424 | A01748 | A01752 | 470 |
| A01748 | A01754 | 115 | A01748 | A01775 | 63  |
| A01748 | A01779 | 318 | A01748 | A01784 | 291 |
| A01748 | A01875 | 243 | A01748 | A01878 | 263 |
| A01748 | A01894 | 258 | A01748 | A01899 | 174 |
| A01748 | A02159 | 232 | A01748 | A02291 | 210 |
| A01748 | A02559 | 188 | A01748 | A02636 | 177 |
| A01748 | A02639 | 391 | A01748 | A02695 | 473 |
| A01748 | A02696 | 306 | A01748 | A02697 | 173 |
| A01748 | A02705 | 151 | A01748 | A02709 | 205 |

|        |        |     |        |        |     |
|--------|--------|-----|--------|--------|-----|
| A01748 | A02729 | 241 | A01748 | A02768 | 311 |
| A01748 | A02789 | 184 | A01748 | A02812 | 368 |
| A01748 | A02817 | 193 | A01748 | A02825 | 288 |
| A01748 | A02833 | 333 | A01748 | A02836 | 408 |
| A01748 | A02837 | 246 | A01748 | A02859 | 63  |
| A01748 | A02861 | 268 | A01748 | A02874 | 480 |
| A01748 | A02875 | 241 | A01748 | A02939 | 172 |
| A01748 | A02964 | 306 | A01748 | A02982 | 489 |
| A01748 | A02983 | 185 | A01748 | A02984 | 285 |
| A01748 | A03015 | 241 | A01748 | A03027 | 241 |
| A01748 | A03100 | 152 | A01748 | A03263 | 151 |
| A01748 | A03269 | 454 | A01748 | A03321 | 305 |
| A01748 | A03416 | 182 | A01748 | A03419 | 489 |
| A01748 | A03450 | 323 | A01748 | A03520 | 335 |
| A01748 | A03577 | 193 | A01748 | A03608 | 484 |
| A01748 | A03612 | 307 | A01748 | A03657 | 199 |
| A01748 | A03664 | 430 | A01748 | A03812 | 252 |
| A01748 | A03826 | 167 | A01748 | A03834 | 165 |
| A01748 | A03895 | 185 | A01748 | A03965 | 173 |
| A01748 | A04048 | 358 | A01748 | A04050 | 276 |
| A01748 | A04122 | 272 | A01748 | A04134 | 330 |
| A01748 | A04142 | 330 | A01748 | A04187 | 176 |
| A01748 | A04264 | 353 | A01748 | A04280 | 201 |
| A01748 | A04698 | 151 | A01748 | A04706 | 172 |
| A01748 | A04727 | 163 | A01748 | A04763 | 152 |
| A01748 | A04869 | 241 | A01748 | A05032 | 174 |
| A01748 | A05073 | 152 | A01748 | A05342 | 152 |
| A01748 | A05363 | 481 | A01748 | A05446 | 405 |
| A01748 | A05634 | 157 | A01748 | A05708 | 241 |
| A01748 | A05742 | 480 | A01748 | A06417 | 314 |
| A01748 | A06490 | 314 | A01748 | A06728 | 232 |
| A01748 | A07163 | 350 | A01748 | A07192 | 162 |
| A01748 | A07279 | 216 | A01748 | A07283 | 171 |
| A01748 | A07422 | 462 | A01748 | A07770 | 314 |
| A01748 | A08532 | 152 | A01748 | A08741 | 469 |
| A01748 | A08898 | 190 | A01748 | A09127 | 173 |
| A01748 | A09434 | 165 | A01748 | A09464 | 396 |
| A01748 | A09840 | 484 | A01748 | A09870 | 190 |
| A01748 | A10009 | 452 | A01748 | A10470 | 210 |
| A01748 | A10571 | 241 | A01748 | A11027 | 157 |
| A01748 | A11205 | 157 | A01748 | A11579 | 241 |
| A01748 | A11605 | 190 | A01748 | A11894 | 252 |
| A01748 | A11911 | 160 | A01748 | A12487 | 241 |
| A01748 | A12506 | 191 | A01748 | A12569 | 414 |
| A01748 | A12692 | 232 | A01748 | A13021 | 266 |
| A01748 | A13302 | 185 | A01748 | A13343 | 314 |

|        |        |     |        |        |     |
|--------|--------|-----|--------|--------|-----|
| A01748 | A13665 | 200 | A01748 | A13856 | 241 |
| A01748 | A13865 | 285 | A01748 | A13938 | 210 |
| A01748 | A13939 | 438 | A01748 | A14208 | 467 |
| A01748 | A14327 | 241 | A01748 | A14367 | 312 |
| A01748 | A14610 | 190 | A01748 | A14699 | 481 |
| A01748 | A15388 | 329 | A01748 | A15565 | 172 |
| A01748 | A15573 | 199 | A01748 | A15575 | 462 |
| A01748 | A15674 | 355 | A01748 | A15726 | 258 |
| A01748 | A16108 | 204 | A01748 | A16300 | 168 |
| A01748 | A16581 | 353 | A01749 | A01755 | 330 |
| A01749 | A01765 | 341 | A01749 | A01769 | 457 |
| A01749 | A01773 | 174 | A01749 | A01775 | 80  |
| A01749 | A01799 | 104 | A01749 | A01896 | 156 |
| A01749 | A01956 | 154 | A01749 | A02021 | 182 |
| A01749 | A02288 | 232 | A01749 | A02333 | 435 |
| A01749 | A02457 | 156 | A01749 | A02489 | 159 |
| A01749 | A02491 | 401 | A01749 | A02639 | 386 |
| A01749 | A02684 | 311 | A01749 | A02685 | 246 |
| A01749 | A02686 | 286 | A01749 | A02687 | 396 |
| A01749 | A02689 | 363 | A01749 | A02690 | 185 |
| A01749 | A02694 | 157 | A01749 | A02695 | 185 |
| A01749 | A02696 | 198 | A01749 | A02697 | 455 |
| A01749 | A02709 | 218 | A01749 | A02782 | 247 |
| A01749 | A02835 | 204 | A01749 | A02837 | 317 |
| A01749 | A02874 | 319 | A01749 | A02982 | 294 |
| A01749 | A02983 | 400 | A01749 | A03100 | 328 |
| A01749 | A03269 | 201 | A01749 | A03321 | 409 |
| A01749 | A03338 | 274 | A01749 | A03349 | 394 |
| A01749 | A03357 | 362 | A01749 | A03358 | 405 |
| A01749 | A03379 | 311 | A01749 | A03391 | 162 |
| A01749 | A03417 | 338 | A01749 | A03418 | 409 |
| A01749 | A03419 | 312 | A01749 | A03520 | 212 |
| A01749 | A03563 | 185 | A01749 | A03609 | 174 |
| A01749 | A03612 | 486 | A01749 | A03634 | 160 |
| A01749 | A03760 | 236 | A01749 | A03813 | 486 |
| A01749 | A04004 | 171 | A01749 | A04073 | 167 |
| A01749 | A04125 | 224 | A01749 | A04139 | 427 |
| A01749 | A04315 | 210 | A01749 | A04708 | 290 |
| A01749 | A04709 | 156 | A01749 | A04815 | 357 |
| A01749 | A04960 | 461 | A01749 | A05001 | 232 |
| A01749 | A05073 | 208 | A01749 | A05104 | 212 |
| A01749 | A05278 | 152 | A01749 | A05283 | 257 |
| A01749 | A05344 | 224 | A01749 | A05355 | 240 |
| A01749 | A05591 | 210 | A01749 | A05651 | 351 |
| A01749 | A05665 | 398 | A01749 | A05861 | 236 |
| A01749 | A05871 | 185 | A01749 | A05889 | 205 |

|        |        |     |        |        |     |
|--------|--------|-----|--------|--------|-----|
| A01749 | A05891 | 317 | A01749 | A05911 | 227 |
| A01749 | A06039 | 199 | A01749 | A06226 | 274 |
| A01749 | A06278 | 441 | A01749 | A06603 | 288 |
| A01749 | A06686 | 156 | A01749 | A06697 | 240 |
| A01749 | A07167 | 256 | A01749 | A07339 | 234 |
| A01749 | A07605 | 241 | A01749 | A07990 | 257 |
| A01749 | A08345 | 299 | A01749 | A08925 | 177 |
| A01749 | A09018 | 183 | A01749 | A09147 | 252 |
| A01749 | A09242 | 305 | A01749 | A09509 | 396 |
| A01749 | A09759 | 159 | A01749 | A09976 | 262 |
| A01749 | A10741 | 327 | A01749 | A10742 | 357 |
| A01749 | A11101 | 163 | A01749 | A11133 | 327 |
| A01749 | A11216 | 227 | A01749 | A11313 | 428 |
| A01749 | A11317 | 473 | A01749 | A11391 | 240 |
| A01749 | A11446 | 477 | A01749 | A11450 | 247 |
| A01749 | A11835 | 174 | A01749 | A11929 | 323 |
| A01749 | A11983 | 899 | A01749 | A12019 | 311 |
| A01749 | A12037 | 357 | A01749 | A12569 | 384 |
| A01749 | A12730 | 183 | A01749 | A13667 | 151 |
| A01749 | A13877 | 252 | A01749 | A13942 | 445 |
| A01749 | A14012 | 193 | A01749 | A14267 | 408 |
| A01749 | A14401 | 208 | A01749 | A14481 | 199 |
| A01749 | A14647 | 165 | A01749 | A14735 | 205 |
| A01749 | A15649 | 177 | A01749 | A15996 | 262 |
| A01749 | A16341 | 351 | A01749 | A16559 | 311 |
| A01749 | A16872 | 324 | A01749 | A16990 | 327 |
| A01750 | A01753 | 313 | A01750 | A01754 | 288 |
| A01750 | A01872 | 329 | A01750 | A01873 | 372 |
| A01750 | A01883 | 266 | A01750 | A02228 | 241 |
| A01750 | A02335 | 188 | A01750 | A02488 | 241 |
| A01750 | A02544 | 246 | A01750 | A02668 | 160 |
| A01750 | A02692 | 489 | A01750 | A02811 | 288 |
| A01750 | A03228 | 260 | A01750 | A03473 | 258 |
| A01750 | A03637 | 450 | A01750 | A04263 | 235 |
| A01750 | A05925 | 372 | A01750 | A06650 | 446 |
| A01750 | A07736 | 201 | A01751 | A01758 | 221 |
| A01751 | A01766 | 363 | A01751 | A01772 | 329 |
| A01751 | A01794 | 348 | A01751 | A01796 | 461 |
| A01751 | A01798 | 230 | A01751 | A01867 | 340 |
| A01751 | A01883 | 196 | A01751 | A01894 | 428 |
| A01751 | A01909 | 154 | A01751 | A01914 | 483 |
| A01751 | A02307 | 177 | A01751 | A02338 | 213 |
| A01751 | A02490 | 251 | A01751 | A02668 | 205 |
| A01751 | A02691 | 213 | A01751 | A02774 | 205 |
| A01751 | A02906 | 263 | A01751 | A03077 | 160 |
| A01751 | A03224 | 190 | A01751 | A03348 | 272 |

|        |        |     |        |        |     |
|--------|--------|-----|--------|--------|-----|
| A01751 | A03378 | 160 | A01751 | A03408 | 184 |
| A01751 | A03667 | 312 | A01751 | A03841 | 216 |
| A01751 | A04053 | 213 | A01751 | A04620 | 269 |
| A01751 | A04623 | 462 | A01751 | A04667 | 152 |
| A01751 | A04710 | 152 | A01751 | A04933 | 443 |
| A01751 | A05309 | 152 | A01751 | A05659 | 184 |
| A01751 | A05796 | 185 | A01751 | A05866 | 469 |
| A01751 | A05940 | 430 | A01751 | A06298 | 180 |
| A01751 | A06607 | 491 | A01751 | A06650 | 210 |
| A01751 | A06688 | 291 | A01751 | A07177 | 491 |
| A01751 | A07200 | 480 | A01751 | A08389 | 294 |
| A01751 | A08643 | 218 | A01751 | A09262 | 288 |
| A01751 | A09359 | 329 | A01751 | A09935 | 312 |
| A01751 | A10103 | 235 | A01751 | A11539 | 307 |
| A01751 | A11606 | 299 | A01751 | A13152 | 317 |
| A01751 | A14342 | 347 | A01751 | A14349 | 338 |
| A01751 | A14405 | 288 | A01751 | A14440 | 361 |
| A01751 | A15368 | 294 | A01751 | A16281 | 445 |
| A01752 | A01760 | 241 | A01752 | A01764 | 288 |
| A01752 | A01773 | 221 | A01752 | A01775 | 413 |
| A01752 | A01778 | 414 | A01752 | A01779 | 447 |
| A01752 | A01780 | 187 | A01752 | A01784 | 433 |
| A01752 | A01803 | 235 | A01752 | A01875 | 486 |
| A01752 | A01878 | 360 | A01752 | A01881 | 195 |
| A01752 | A01888 | 283 | A01752 | A01907 | 443 |
| A01752 | A01915 | 227 | A01752 | A02085 | 333 |
| A01752 | A02173 | 195 | A01752 | A02307 | 170 |
| A01752 | A02312 | 228 | A01752 | A02490 | 240 |
| A01752 | A02695 | 491 | A01752 | A02696 | 353 |
| A01752 | A02697 | 302 | A01752 | A02705 | 281 |
| A01752 | A02714 | 183 | A01752 | A02729 | 466 |
| A01752 | A02812 | 485 | A01752 | A02817 | 314 |
| A01752 | A02859 | 348 | A01752 | A02874 | 441 |
| A01752 | A02975 | 162 | A01752 | A02982 | 484 |
| A01752 | A02983 | 404 | A01752 | A02984 | 486 |
| A01752 | A03259 | 241 | A01752 | A03275 | 422 |
| A01752 | A03419 | 191 | A01752 | A03441 | 152 |
| A01752 | A03475 | 174 | A01752 | A03520 | 180 |
| A01752 | A03545 | 208 | A01752 | A03546 | 356 |
| A01752 | A03549 | 249 | A01752 | A03625 | 268 |
| A01752 | A03649 | 255 | A01752 | A03664 | 490 |
| A01752 | A03686 | 180 | A01752 | A03777 | 260 |
| A01752 | A04010 | 195 | A01752 | A04015 | 170 |
| A01752 | A04134 | 399 | A01752 | A04138 | 232 |
| A01752 | A04142 | 466 | A01752 | A04143 | 302 |
| A01752 | A04262 | 312 | A01752 | A04263 | 154 |



|        |        |     |        |        |     |
|--------|--------|-----|--------|--------|-----|
| A01752 | A04286 | 333 | A01752 | A04288 | 204 |
| A01752 | A04510 | 235 | A01752 | A04518 | 263 |
| A01752 | A04555 | 391 | A01752 | A05041 | 302 |
| A01752 | A05309 | 243 | A01752 | A05346 | 318 |
| A01752 | A05742 | 152 | A01752 | A05839 | 232 |
| A01752 | A07135 | 224 | A01752 | A07141 | 427 |
| A01752 | A07184 | 236 | A01752 | A07207 | 174 |
| A01752 | A08371 | 404 | A01752 | A08741 | 458 |
| A01752 | A09793 | 180 | A01752 | A10007 | 374 |
| A01752 | A10794 | 251 | A01752 | A11897 | 191 |
| A01752 | A14302 | 374 | A01752 | A14936 | 196 |
| A01752 | A15620 | 251 | A01752 | A15674 | 232 |
| A01752 | A15676 | 210 | A01752 | A16648 | 324 |
| A01753 | A01754 | 317 | A01753 | A01883 | 296 |
| A01753 | A01893 | 236 | A01753 | A01894 | 252 |
| A01753 | A01909 | 263 | A01753 | A02338 | 311 |
| A01753 | A02701 | 291 | A01753 | A02709 | 190 |
| A01753 | A02748 | 389 | A01753 | A02785 | 311 |
| A01753 | A02814 | 265 | A01753 | A04005 | 367 |
| A01753 | A04268 | 268 | A01753 | A14405 | 263 |
| A01754 | A01758 | 312 | A01754 | A01769 | 171 |
| A01754 | A01874 | 386 | A01754 | A01879 | 208 |
| A01754 | A01883 | 385 | A01754 | A01893 | 337 |
| A01754 | A01894 | 447 | A01754 | A02236 | 283 |
| A01754 | A02306 | 162 | A01754 | A02338 | 286 |
| A01754 | A02544 | 252 | A01754 | A02691 | 390 |
| A01754 | A02692 | 269 | A01754 | A02693 | 265 |
| A01754 | A02700 | 324 | A01754 | A02811 | 293 |
| A01754 | A02814 | 235 | A01754 | A02858 | 332 |
| A01754 | A02982 | 259 | A01754 | A03110 | 170 |
| A01754 | A03268 | 425 | A01754 | A03870 | 466 |
| A01754 | A03942 | 216 | A01754 | A04004 | 294 |
| A01754 | A04005 | 348 | A01754 | A04031 | 472 |
| A01754 | A04107 | 334 | A01754 | A04135 | 322 |
| A01754 | A04575 | 396 | A01754 | A04581 | 447 |
| A01754 | A04656 | 396 | A01754 | A05418 | 258 |
| A01754 | A05560 | 324 | A01754 | A05911 | 335 |
| A01754 | A06311 | 408 | A01754 | A06635 | 210 |
| A01754 | A07199 | 327 | A01754 | A07200 | 475 |
| A01754 | A07350 | 396 | A01754 | A09451 | 254 |
| A01754 | A09515 | 252 | A01754 | A09538 | 238 |
| A01754 | A10580 | 414 | A01754 | A11646 | 277 |
| A01754 | A12304 | 332 | A01754 | A12927 | 154 |
| A01754 | A14198 | 201 | A01754 | A14405 | 360 |
| A01754 | A14440 | 465 | A01755 | A01768 | 252 |
| A01755 | A01770 | 229 | A01755 | A01774 | 449 |

|        |        |     |        |        |     |
|--------|--------|-----|--------|--------|-----|
| A01755 | A01795 | 277 | A01755 | A01844 | 63  |
| A01755 | A01873 | 340 | A01755 | A01877 | 238 |
| A01755 | A01886 | 230 | A01755 | A01901 | 154 |
| A01755 | A02109 | 230 | A01755 | A02110 | 174 |
| A01755 | A02288 | 296 | A01755 | A02301 | 208 |
| A01755 | A02392 | 319 | A01755 | A02417 | 302 |
| A01755 | A02434 | 255 | A01755 | A02469 | 210 |
| A01755 | A02488 | 187 | A01755 | A02493 | 294 |
| A01755 | A02494 | 190 | A01755 | A02501 | 328 |
| A01755 | A02508 | 283 | A01755 | A02521 | 177 |
| A01755 | A02568 | 212 | A01755 | A02575 | 154 |
| A01755 | A02579 | 185 | A01755 | A02687 | 340 |
| A01755 | A02702 | 190 | A01755 | A02703 | 467 |
| A01755 | A02705 | 174 | A01755 | A02738 | 156 |
| A01755 | A02744 | 278 | A01755 | A02758 | 235 |
| A01755 | A02760 | 246 | A01755 | A02779 | 938 |
| A01755 | A02784 | 398 | A01755 | A02786 | 299 |
| A01755 | A02790 | 330 | A01755 | A02811 | 238 |
| A01755 | A02814 | 174 | A01755 | A02816 | 477 |
| A01755 | A02830 | 386 | A01755 | A02831 | 286 |
| A01755 | A02877 | 216 | A01755 | A02878 | 205 |
| A01755 | A02904 | 274 | A01755 | A02927 | 210 |
| A01755 | A02931 | 360 | A01755 | A02943 | 316 |
| A01755 | A02965 | 179 | A01755 | A03010 | 185 |
| A01755 | A03028 | 177 | A01755 | A03112 | 335 |
| A01755 | A03120 | 329 | A01755 | A03126 | 490 |
| A01755 | A03276 | 433 | A01755 | A03338 | 414 |
| A01755 | A03423 | 445 | A01755 | A03515 | 224 |
| A01755 | A03537 | 319 | A01755 | A03583 | 299 |
| A01755 | A03585 | 283 | A01755 | A03586 | 396 |
| A01755 | A03653 | 195 | A01755 | A03760 | 299 |
| A01755 | A03847 | 348 | A01755 | A03870 | 329 |
| A01755 | A04004 | 241 | A01755 | A04031 | 286 |
| A01755 | A04123 | 329 | A01755 | A04260 | 157 |
| A01755 | A04342 | 157 | A01755 | A04479 | 340 |
| A01755 | A04560 | 299 | A01755 | A04729 | 364 |
| A01755 | A04816 | 340 | A01755 | A04883 | 187 |
| A01755 | A04905 | 262 | A01755 | A05036 | 316 |
| A01755 | A05051 | 255 | A01755 | A05163 | 329 |
| A01755 | A05297 | 235 | A01755 | A06405 | 170 |
| A01755 | A06439 | 160 | A01755 | A06595 | 160 |
| A01755 | A06607 | 201 | A01755 | A06620 | 221 |
| A01755 | A06654 | 235 | A01755 | A07088 | 185 |
| A01755 | A07311 | 899 | A01755 | A07643 | 488 |
| A01755 | A08269 | 281 | A01755 | A08559 | 162 |
| A01755 | A08664 | 258 | A01755 | A08741 | 208 |

|        |        |     |        |        |     |
|--------|--------|-----|--------|--------|-----|
| A01755 | A08744 | 385 | A01755 | A08911 | 213 |
| A01755 | A09123 | 249 | A01755 | A09770 | 434 |
| A01755 | A09788 | 319 | A01755 | A10033 | 358 |
| A01755 | A10266 | 348 | A01755 | A10417 | 190 |
| A01755 | A12105 | 188 | A01755 | A12569 | 324 |
| A01755 | A13466 | 245 | A01755 | A14946 | 299 |
| A01755 | A17055 | 358 | A01756 | A01776 | 383 |
| A01756 | A01850 | 235 | A01756 | A02699 | 473 |
| A01756 | A02752 | 260 | A01756 | A02753 | 240 |
| A01756 | A02789 | 378 | A01756 | A02821 | 460 |
| A01756 | A03541 | 427 | A01756 | A03662 | 301 |
| A01756 | A03778 | 216 | A01756 | A03869 | 402 |
| A01756 | A03871 | 407 | A01756 | A04089 | 375 |
| A01756 | A04445 | 355 | A01756 | A04536 | 372 |
| A01757 | A01758 | 490 | A01757 | A01766 | 213 |
| A01757 | A01767 | 185 | A01757 | A01779 | 174 |
| A01757 | A01787 | 171 | A01757 | A01788 | 297 |
| A01757 | A01794 | 443 | A01757 | A01872 | 330 |
| A01757 | A01883 | 435 | A01757 | A01888 | 151 |
| A01757 | A01892 | 408 | A01757 | A01893 | 491 |
| A01757 | A01894 | 485 | A01757 | A01909 | 489 |
| A01757 | A01912 | 193 | A01757 | A02108 | 200 |
| A01757 | A02300 | 198 | A01757 | A02307 | 249 |
| A01757 | A02335 | 322 | A01757 | A02338 | 283 |
| A01757 | A02460 | 188 | A01757 | A02477 | 180 |
| A01757 | A02479 | 274 | A01757 | A02668 | 162 |
| A01757 | A02686 | 278 | A01757 | A02691 | 455 |
| A01757 | A02695 | 207 | A01757 | A02701 | 260 |
| A01757 | A02785 | 364 | A01757 | A02988 | 195 |
| A01757 | A03268 | 337 | A01757 | A03287 | 296 |
| A01757 | A03872 | 490 | A01757 | A04010 | 162 |
| A01757 | A04285 | 368 | A01757 | A04286 | 278 |
| A01757 | A04304 | 335 | A01757 | A04443 | 321 |
| A01757 | A04620 | 472 | A01757 | A06635 | 337 |
| A01757 | A07200 | 489 | A01757 | A10557 | 291 |
| A01757 | A14405 | 480 | A01757 | A14440 | 474 |
| A01757 | A16636 | 210 | A01758 | A01761 | 208 |
| A01758 | A01762 | 207 | A01758 | A01769 | 337 |
| A01758 | A01772 | 154 | A01758 | A01778 | 104 |
| A01758 | A01779 | 347 | A01758 | A01787 | 396 |
| A01758 | A01794 | 435 | A01758 | A01829 | 191 |
| A01758 | A01846 | 408 | A01758 | A01883 | 374 |
| A01758 | A01884 | 236 | A01758 | A01893 | 483 |
| A01758 | A01894 | 491 | A01758 | A01895 | 486 |
| A01758 | A01896 | 486 | A01758 | A01909 | 481 |
| A01758 | A01911 | 218 | A01758 | A01914 | 201 |

|        |        |     |        |        |     |
|--------|--------|-----|--------|--------|-----|
| A01758 | A02008 | 191 | A01758 | A02075 | 393 |
| A01758 | A02111 | 230 | A01758 | A02148 | 221 |
| A01758 | A02154 | 198 | A01758 | A02298 | 268 |
| A01758 | A02333 | 236 | A01758 | A02338 | 171 |
| A01758 | A02491 | 472 | A01758 | A02525 | 154 |
| A01758 | A02639 | 398 | A01758 | A02649 | 216 |
| A01758 | A02686 | 165 | A01758 | A02687 | 243 |
| A01758 | A02691 | 428 | A01758 | A02695 | 281 |
| A01758 | A02697 | 238 | A01758 | A02701 | 277 |
| A01758 | A02706 | 307 | A01758 | A02709 | 379 |
| A01758 | A02739 | 238 | A01758 | A02802 | 306 |
| A01758 | A02906 | 221 | A01758 | A02982 | 318 |
| A01758 | A03225 | 180 | A01758 | A03243 | 230 |
| A01758 | A03304 | 419 | A01758 | A03726 | 154 |
| A01758 | A03819 | 439 | A01758 | A03872 | 412 |
| A01758 | A04004 | 182 | A01758 | A04072 | 171 |
| A01758 | A04137 | 319 | A01758 | A04279 | 363 |
| A01758 | A04284 | 450 | A01758 | A04286 | 468 |
| A01758 | A04301 | 277 | A01758 | A04304 | 364 |
| A01758 | A04372 | 277 | A01758 | A04443 | 219 |
| A01758 | A04620 | 452 | A01758 | A04945 | 221 |
| A01758 | A04981 | 219 | A01758 | A05203 | 258 |
| A01758 | A05245 | 177 | A01758 | A05348 | 201 |
| A01758 | A06277 | 191 | A01758 | A06579 | 326 |
| A01758 | A06607 | 446 | A01758 | A06635 | 379 |
| A01758 | A06926 | 353 | A01758 | A07167 | 269 |
| A01758 | A07177 | 260 | A01758 | A07198 | 463 |
| A01758 | A07200 | 491 | A01758 | A07331 | 277 |
| A01758 | A07350 | 334 | A01758 | A07442 | 245 |
| A01758 | A07469 | 195 | A01758 | A07663 | 334 |
| A01758 | A09578 | 290 | A01758 | A09939 | 235 |
| A01758 | A10655 | 198 | A01758 | A11282 | 180 |
| A01758 | A11727 | 171 | A01758 | A11983 | 171 |
| A01758 | A12335 | 319 | A01758 | A13369 | 165 |
| A01758 | A13667 | 162 | A01758 | A13917 | 177 |
| A01758 | A14184 | 162 | A01758 | A14389 | 258 |
| A01758 | A14405 | 491 | A01758 | A14423 | 179 |
| A01758 | A14440 | 491 | A01758 | A14648 | 191 |
| A01758 | A14956 | 191 | A01758 | A15282 | 447 |
| A01758 | A15368 | 377 | A01758 | A15623 | 357 |
| A01758 | A16302 | 185 | A01758 | A16844 | 185 |
| A01758 | A17088 | 165 | A01759 | A01787 | 123 |
| A01759 | A01843 | 281 | A01759 | A01896 | 358 |
| A01759 | A01899 | 199 | A01759 | A01902 | 188 |
| A01759 | A01904 | 246 | A01759 | A02010 | 160 |
| A01759 | A02028 | 168 | A01759 | A02048 | 202 |

|        |        |     |        |        |     |
|--------|--------|-----|--------|--------|-----|
| A01759 | A02108 | 151 | A01759 | A02110 | 182 |
| A01759 | A02198 | 340 | A01759 | A02248 | 230 |
| A01759 | A02291 | 154 | A01759 | A02407 | 228 |
| A01759 | A02416 | 329 | A01759 | A02418 | 488 |
| A01759 | A02505 | 191 | A01759 | A02520 | 221 |
| A01759 | A02591 | 361 | A01759 | A02634 | 243 |
| A01759 | A02636 | 201 | A01759 | A02693 | 213 |
| A01759 | A02704 | 235 | A01759 | A02749 | 489 |
| A01759 | A02859 | 219 | A01759 | A02888 | 234 |
| A01759 | A02906 | 283 | A01759 | A03131 | 290 |
| A01759 | A03414 | 163 | A01759 | A03474 | 162 |
| A01759 | A03515 | 230 | A01759 | A03520 | 390 |
| A01759 | A03750 | 177 | A01759 | A03845 | 474 |
| A01759 | A03965 | 198 | A01759 | A04015 | 333 |
| A01759 | A04053 | 238 | A01759 | A04121 | 339 |
| A01759 | A04279 | 208 | A01759 | A04307 | 184 |
| A01759 | A04568 | 246 | A01759 | A04616 | 268 |
| A01759 | A04850 | 190 | A01759 | A05027 | 162 |
| A01759 | A05065 | 200 | A01759 | A05122 | 162 |
| A01759 | A05701 | 176 | A01759 | A05798 | 302 |
| A01759 | A05849 | 373 | A01759 | A06235 | 202 |
| A01759 | A06263 | 226 | A01759 | A06569 | 154 |
| A01759 | A06596 | 271 | A01759 | A06603 | 234 |
| A01759 | A06721 | 224 | A01759 | A06868 | 224 |
| A01759 | A06956 | 293 | A01759 | A07178 | 243 |
| A01759 | A07668 | 441 | A01759 | A08911 | 219 |
| A01759 | A09023 | 305 | A01759 | A09058 | 277 |
| A01759 | A09211 | 249 | A01759 | A09277 | 165 |
| A01759 | A10530 | 353 | A01759 | A11348 | 243 |
| A01759 | A11450 | 313 | A01759 | A12675 | 339 |
| A01759 | A12927 | 221 | A01759 | A13241 | 238 |
| A01759 | A14184 | 230 | A01759 | A14588 | 335 |
| A01759 | A14643 | 226 | A01759 | A14647 | 243 |
| A01759 | A15345 | 177 | A01759 | A15784 | 389 |
| A01759 | A16095 | 157 | A01759 | A16120 | 243 |
| A01760 | A01764 | 383 | A01760 | A01777 | 375 |
| A01760 | A01778 | 371 | A01760 | A01779 | 474 |
| A01760 | A01780 | 293 | A01760 | A01803 | 419 |
| A01760 | A01805 | 337 | A01760 | A02696 | 241 |
| A01760 | A02703 | 202 | A01760 | A02712 | 293 |
| A01760 | A02714 | 443 | A01760 | A02982 | 299 |
| A01760 | A02983 | 391 | A01760 | A02984 | 356 |
| A01760 | A02990 | 340 | A01760 | A03473 | 286 |
| A01760 | A03549 | 473 | A01760 | A03554 | 276 |
| A01760 | A03613 | 477 | A01760 | A04121 | 383 |
| A01760 | A04286 | 477 | A01760 | A04530 | 443 |

|        |        |     |        |        |     |
|--------|--------|-----|--------|--------|-----|
| A01760 | A04796 | 417 | A01760 | A04797 | 406 |
| A01760 | A04848 | 472 | A01760 | A05216 | 269 |
| A01760 | A05827 | 357 | A01760 | A06177 | 188 |
| A01760 | A08741 | 290 | A01760 | A09192 | 441 |
| A01761 | A01765 | 99  | A01761 | A01900 | 160 |
| A01761 | A01912 | 419 | A01761 | A01957 | 168 |
| A01761 | A01976 | 256 | A01761 | A02014 | 176 |
| A01761 | A02480 | 171 | A01761 | A02641 | 162 |
| A01761 | A02845 | 259 | A01761 | A02855 | 561 |
| A01761 | A02894 | 228 | A01761 | A03012 | 433 |
| A01761 | A03013 | 479 | A01761 | A03019 | 326 |
| A01761 | A03562 | 184 | A01761 | A03563 | 491 |
| A01761 | A04194 | 163 | A01761 | A04284 | 391 |
| A01761 | A04311 | 308 | A01761 | A04848 | 190 |
| A01761 | A05216 | 435 | A01761 | A05567 | 335 |
| A01761 | A05738 | 294 | A01761 | A05832 | 279 |
| A01761 | A05881 | 182 | A01761 | A06543 | 561 |
| A01761 | A06606 | 455 | A01761 | A06774 | 291 |
| A01761 | A07071 | 308 | A01761 | A07252 | 308 |
| A01761 | A07442 | 185 | A01761 | A07545 | 491 |
| A01761 | A08739 | 160 | A01761 | A10065 | 486 |
| A01761 | A10583 | 308 | A01761 | A11406 | 162 |
| A01761 | A11573 | 201 | A01761 | A12040 | 291 |
| A01761 | A13989 | 224 | A01761 | A13993 | 232 |
| A01761 | A14006 | 335 | A01761 | A14151 | 162 |
| A01761 | A14195 | 174 | A01761 | A14196 | 225 |
| A01761 | A14405 | 368 | A01761 | A15297 | 469 |
| A01761 | A15430 | 485 | A01761 | A15945 | 515 |
| A01761 | A16390 | 245 | A01761 | A16767 | 184 |
| A01762 | A01764 | 484 | A01762 | A01765 | 274 |
| A01762 | A01777 | 375 | A01762 | A01778 | 489 |
| A01762 | A01779 | 486 | A01762 | A01780 | 400 |
| A01762 | A01788 | 322 | A01762 | A01802 | 386 |
| A01762 | A01803 | 419 | A01762 | A01804 | 364 |
| A01762 | A01912 | 224 | A01762 | A01914 | 167 |
| A01762 | A03473 | 396 | A01762 | A03548 | 398 |
| A01762 | A03563 | 327 | A01762 | A04281 | 475 |
| A01762 | A04286 | 449 | A01762 | A04848 | 379 |
| A01762 | A05098 | 297 | A01762 | A05348 | 420 |
| A01762 | A05563 | 224 | A01762 | A06607 | 165 |
| A01762 | A07200 | 277 | A01762 | A07545 | 200 |
| A01762 | A09192 | 369 | A01762 | A10870 | 302 |
| A01762 | A14405 | 260 | A01762 | A14440 | 243 |
| A01762 | A15023 | 364 | A01762 | A16912 | 179 |
| A01763 | A01764 | 180 | A01763 | A01772 | 327 |
| A01763 | A01787 | 180 | A01763 | A01795 | 388 |

|        |        |     |        |        |     |
|--------|--------|-----|--------|--------|-----|
| A01763 | A01798 | 217 | A01763 | A01894 | 412 |
| A01763 | A01896 | 118 | A01763 | A01911 | 486 |
| A01763 | A02075 | 160 | A01763 | A02085 | 267 |
| A01763 | A02447 | 177 | A01763 | A02510 | 201 |
| A01763 | A02552 | 173 | A01763 | A02608 | 171 |
| A01763 | A02706 | 271 | A01763 | A02820 | 174 |
| A01763 | A02949 | 219 | A01763 | A03230 | 219 |
| A01763 | A03440 | 358 | A01763 | A03477 | 229 |
| A01763 | A03549 | 165 | A01763 | A03663 | 432 |
| A01763 | A03708 | 247 | A01763 | A03814 | 401 |
| A01763 | A03832 | 249 | A01763 | A03841 | 347 |
| A01763 | A03885 | 226 | A01763 | A03948 | 154 |
| A01763 | A03977 | 165 | A01763 | A04015 | 199 |
| A01763 | A04049 | 177 | A01763 | A04053 | 247 |
| A01763 | A04263 | 180 | A01763 | A04418 | 241 |
| A01763 | A04432 | 267 | A01763 | A04444 | 316 |
| A01763 | A04449 | 400 | A01763 | A04529 | 159 |
| A01763 | A04561 | 232 | A01763 | A04745 | 238 |
| A01763 | A04769 | 191 | A01763 | A04793 | 159 |
| A01763 | A04856 | 296 | A01763 | A04869 | 256 |
| A01763 | A04938 | 160 | A01763 | A05062 | 283 |
| A01763 | A05065 | 198 | A01763 | A05122 | 332 |
| A01763 | A05551 | 279 | A01763 | A05891 | 162 |
| A01763 | A06579 | 367 | A01763 | A06595 | 152 |
| A01763 | A06607 | 488 | A01763 | A06648 | 259 |
| A01763 | A06650 | 221 | A01763 | A06686 | 241 |
| A01763 | A06987 | 191 | A01763 | A07197 | 255 |
| A01763 | A07200 | 386 | A01763 | A08603 | 467 |
| A01763 | A08859 | 215 | A01763 | A08878 | 165 |
| A01763 | A08911 | 391 | A01763 | A09026 | 173 |
| A01763 | A09901 | 232 | A01763 | A10149 | 246 |
| A01763 | A10547 | 187 | A01763 | A11553 | 174 |
| A01763 | A11923 | 205 | A01763 | A12227 | 335 |
| A01763 | A12246 | 201 | A01763 | A13294 | 174 |
| A01763 | A14039 | 198 | A01763 | A14196 | 259 |
| A01763 | A14200 | 160 | A01763 | A14648 | 183 |
| A01763 | A14658 | 246 | A01763 | A15282 | 379 |
| A01763 | A15295 | 176 | A01763 | A15296 | 330 |
| A01763 | A15596 | 279 | A01763 | A16648 | 256 |
| A01764 | A01765 | 440 | A01764 | A01773 | 369 |
| A01764 | A01777 | 418 | A01764 | A01778 | 428 |
| A01764 | A01779 | 490 | A01764 | A01780 | 213 |
| A01764 | A01788 | 251 | A01764 | A01802 | 440 |
| A01764 | A01803 | 379 | A01764 | A01804 | 408 |
| A01764 | A01875 | 171 | A01764 | A01912 | 138 |
| A01764 | A02696 | 156 | A01764 | A02697 | 156 |

|        |        |     |        |        |     |
|--------|--------|-----|--------|--------|-----|
| A01764 | A02712 | 213 | A01764 | A03139 | 180 |
| A01764 | A03338 | 216 | A01764 | A03347 | 172 |
| A01764 | A03353 | 202 | A01764 | A03473 | 445 |
| A01764 | A03548 | 358 | A01764 | A03549 | 386 |
| A01764 | A03563 | 257 | A01764 | A04281 | 396 |
| A01764 | A04286 | 451 | A01764 | A04848 | 486 |
| A01764 | A05317 | 341 | A01764 | A05348 | 434 |
| A01764 | A05742 | 440 | A01764 | A05827 | 297 |
| A01764 | A06650 | 255 | A01764 | A07146 | 262 |
| A01764 | A07184 | 262 | A01764 | A08741 | 210 |
| A01764 | A09192 | 317 | A01764 | A09744 | 174 |
| A01764 | A14216 | 293 | A01764 | A14554 | 170 |
| A01764 | A14937 | 601 | A01765 | A01773 | 430 |
| A01765 | A01780 | 417 | A01765 | A01797 | 247 |
| A01765 | A01804 | 413 | A01765 | A01806 | 241 |
| A01765 | A01941 | 216 | A01765 | A02169 | 269 |
| A01765 | A02361 | 156 | A01765 | A02559 | 277 |
| A01765 | A02579 | 195 | A01765 | A02611 | 321 |
| A01765 | A02983 | 321 | A01765 | A03473 | 215 |
| A01765 | A03506 | 180 | A01765 | A03549 | 279 |
| A01765 | A03602 | 162 | A01765 | A03613 | 408 |
| A01765 | A03653 | 205 | A01765 | A03662 | 191 |
| A01765 | A04848 | 317 | A01765 | A04906 | 271 |
| A01765 | A04922 | 251 | A01765 | A05216 | 180 |
| A01765 | A05659 | 212 | A01765 | A05742 | 374 |
| A01765 | A06260 | 341 | A01765 | A06606 | 351 |
| A01765 | A07558 | 180 | A01765 | A09989 | 305 |
| A01765 | A11759 | 205 | A01765 | A12725 | 234 |
| A01765 | A13779 | 391 | A01765 | A16121 | 243 |
| A01766 | A01881 | 198 | A01766 | A01893 | 249 |
| A01766 | A01909 | 152 | A01766 | A02335 | 235 |
| A01766 | A02559 | 238 | A01766 | A02691 | 210 |
| A01766 | A02701 | 185 | A01766 | A03163 | 301 |
| A01766 | A03849 | 358 | A01766 | A04279 | 180 |
| A01766 | A04620 | 266 | A01766 | A06607 | 159 |
| A01766 | A06688 | 286 | A01766 | A07016 | 266 |
| A01766 | A07177 | 305 | A01766 | A13302 | 285 |
| A01767 | A01774 | 170 | A01767 | A01775 | 185 |
| A01767 | A01798 | 263 | A01767 | A01879 | 218 |
| A01767 | A01889 | 246 | A01767 | A01905 | 491 |
| A01767 | A01939 | 252 | A01767 | A02002 | 165 |
| A01767 | A02117 | 303 | A01767 | A02182 | 183 |
| A01767 | A02192 | 196 | A01767 | A02288 | 252 |
| A01767 | A02338 | 314 | A01767 | A02351 | 174 |
| A01767 | A02415 | 266 | A01767 | A02418 | 265 |
| A01767 | A02436 | 213 | A01767 | A02504 | 152 |



|        |        |     |        |        |     |
|--------|--------|-----|--------|--------|-----|
| A01767 | A02515 | 291 | A01767 | A02525 | 165 |
| A01767 | A02548 | 201 | A01767 | A02616 | 213 |
| A01767 | A02639 | 366 | A01767 | A02668 | 162 |
| A01767 | A02686 | 176 | A01767 | A02692 | 160 |
| A01767 | A02705 | 251 | A01767 | A02738 | 473 |
| A01767 | A02744 | 216 | A01767 | A02749 | 366 |
| A01767 | A02768 | 165 | A01767 | A02776 | 187 |
| A01767 | A02789 | 196 | A01767 | A02819 | 389 |
| A01767 | A02832 | 185 | A01767 | A02837 | 218 |
| A01767 | A02859 | 235 | A01767 | A02860 | 165 |
| A01767 | A02874 | 356 | A01767 | A02894 | 272 |
| A01767 | A02896 | 265 | A01767 | A03056 | 234 |
| A01767 | A03107 | 199 | A01767 | A03112 | 380 |
| A01767 | A03121 | 208 | A01767 | A03259 | 249 |
| A01767 | A03397 | 240 | A01767 | A03427 | 177 |
| A01767 | A03537 | 281 | A01767 | A03550 | 217 |
| A01767 | A03587 | 190 | A01767 | A03634 | 182 |
| A01767 | A03667 | 286 | A01767 | A03685 | 208 |
| A01767 | A03820 | 152 | A01767 | A03824 | 167 |
| A01767 | A03825 | 213 | A01767 | A03854 | 171 |
| A01767 | A03904 | 185 | A01767 | A03988 | 260 |
| A01767 | A04077 | 306 | A01767 | A04078 | 303 |
| A01767 | A04110 | 170 | A01767 | A04206 | 229 |
| A01767 | A04282 | 317 | A01767 | A04289 | 407 |
| A01767 | A04293 | 236 | A01767 | A04309 | 236 |
| A01767 | A04349 | 257 | A01767 | A04446 | 173 |
| A01767 | A04476 | 362 | A01767 | A04535 | 424 |
| A01767 | A04541 | 267 | A01767 | A04627 | 238 |
| A01767 | A04769 | 249 | A01767 | A04842 | 152 |
| A01767 | A04853 | 177 | A01767 | A04991 | 180 |
| A01767 | A05288 | 202 | A01767 | A05316 | 340 |
| A01767 | A05342 | 228 | A01767 | A05641 | 240 |
| A01767 | A05763 | 326 | A01767 | A05951 | 257 |
| A01767 | A06151 | 208 | A01767 | A06201 | 252 |
| A01767 | A06581 | 185 | A01767 | A06608 | 281 |
| A01767 | A06609 | 151 | A01767 | A06891 | 218 |
| A01767 | A07128 | 185 | A01767 | A07132 | 213 |
| A01767 | A07147 | 218 | A01767 | A07153 | 279 |
| A01767 | A07158 | 182 | A01767 | A07165 | 384 |
| A01767 | A07199 | 235 | A01767 | A07218 | 436 |
| A01767 | A07486 | 154 | A01767 | A07552 | 272 |
| A01767 | A08054 | 252 | A01767 | A08804 | 232 |
| A01767 | A09028 | 180 | A01767 | A09123 | 201 |
| A01767 | A09399 | 291 | A01767 | A09404 | 276 |
| A01767 | A09935 | 286 | A01767 | A09983 | 252 |
| A01767 | A09989 | 252 | A01767 | A09999 | 223 |

|        |        |     |        |        |     |
|--------|--------|-----|--------|--------|-----|
| A01767 | A10382 | 187 | A01767 | A10825 | 314 |
| A01767 | A10854 | 271 | A01767 | A12898 | 326 |
| A01767 | A13152 | 291 | A01767 | A13548 | 340 |
| A01767 | A13851 | 281 | A01767 | A14241 | 245 |
| A01767 | A14385 | 281 | A01767 | A14642 | 185 |
| A01767 | A14643 | 390 | A01767 | A15635 | 217 |
| A01767 | A15838 | 260 | A01767 | A15989 | 314 |
| A01767 | A16075 | 174 | A01767 | A16610 | 452 |
| A01768 | A01769 | 185 | A01768 | A01873 | 380 |
| A01768 | A01900 | 205 | A01768 | A02075 | 238 |
| A01768 | A02109 | 296 | A01768 | A02154 | 317 |
| A01768 | A02167 | 324 | A01768 | A02188 | 202 |
| A01768 | A02301 | 278 | A01768 | A02303 | 419 |
| A01768 | A02342 | 208 | A01768 | A02351 | 291 |
| A01768 | A02392 | 366 | A01768 | A02417 | 352 |
| A01768 | A02469 | 279 | A01768 | A02488 | 259 |
| A01768 | A02493 | 235 | A01768 | A02575 | 229 |
| A01768 | A02702 | 380 | A01768 | A02703 | 188 |
| A01768 | A02737 | 196 | A01768 | A02758 | 299 |
| A01768 | A02785 | 159 | A01768 | A02811 | 302 |
| A01768 | A02814 | 247 | A01768 | A02827 | 360 |
| A01768 | A02906 | 335 | A01768 | A02943 | 363 |
| A01768 | A03120 | 372 | A01768 | A03321 | 475 |
| A01768 | A03488 | 152 | A01768 | A03537 | 366 |
| A01768 | A03583 | 350 | A01768 | A03585 | 338 |
| A01768 | A03653 | 266 | A01768 | A03654 | 263 |
| A01768 | A03847 | 385 | A01768 | A03870 | 372 |
| A01768 | A04004 | 306 | A01768 | A04031 | 340 |
| A01768 | A04123 | 372 | A01768 | A04133 | 317 |
| A01768 | A04260 | 232 | A01768 | A04410 | 218 |
| A01768 | A04520 | 176 | A01768 | A04560 | 350 |
| A01768 | A04845 | 278 | A01768 | A04905 | 416 |
| A01768 | A04907 | 344 | A01768 | A05032 | 263 |
| A01768 | A05036 | 363 | A01768 | A05114 | 446 |
| A01768 | A06004 | 411 | A01768 | A06863 | 428 |
| A01768 | A08452 | 190 | A01768 | A09018 | 218 |
| A01768 | A10819 | 375 | A01768 | A13511 | 238 |
| A01768 | A14060 | 307 | A01768 | A14637 | 199 |
| A01768 | A14642 | 199 | A01768 | A14643 | 322 |
| A01768 | A14683 | 273 | A01769 | A01775 | 154 |
| A01769 | A01785 | 146 | A01769 | A01844 | 63  |
| A01769 | A01884 | 229 | A01769 | A01887 | 369 |
| A01769 | A01890 | 165 | A01769 | A01894 | 329 |
| A01769 | A01908 | 63  | A01769 | A01911 | 210 |
| A01769 | A01915 | 183 | A01769 | A02143 | 157 |
| A01769 | A02249 | 156 | A01769 | A02289 | 326 |

|        |        |     |        |        |     |
|--------|--------|-----|--------|--------|-----|
| A01769 | A02331 | 191 | A01769 | A02333 | 488 |
| A01769 | A02335 | 173 | A01769 | A02336 | 207 |
| A01769 | A02489 | 162 | A01769 | A02491 | 406 |
| A01769 | A02493 | 210 | A01769 | A02535 | 152 |
| A01769 | A02561 | 201 | A01769 | A02686 | 488 |
| A01769 | A02687 | 491 | A01769 | A02690 | 188 |
| A01769 | A02691 | 458 | A01769 | A02692 | 274 |
| A01769 | A02696 | 377 | A01769 | A02697 | 481 |
| A01769 | A02698 | 369 | A01769 | A02699 | 157 |
| A01769 | A02701 | 445 | A01769 | A02706 | 394 |
| A01769 | A02739 | 312 | A01769 | A02745 | 115 |
| A01769 | A02751 | 168 | A01769 | A02754 | 489 |
| A01769 | A02834 | 179 | A01769 | A02837 | 371 |
| A01769 | A02875 | 252 | A01769 | A02908 | 71  |
| A01769 | A02982 | 491 | A01769 | A02984 | 288 |
| A01769 | A03097 | 198 | A01769 | A03281 | 151 |
| A01769 | A03417 | 475 | A01769 | A03599 | 265 |
| A01769 | A03612 | 276 | A01769 | A03810 | 399 |
| A01769 | A03813 | 229 | A01769 | A03866 | 243 |
| A01769 | A03964 | 201 | A01769 | A04004 | 174 |
| A01769 | A04005 | 372 | A01769 | A04105 | 489 |
| A01769 | A04125 | 475 | A01769 | A04135 | 210 |
| A01769 | A04139 | 396 | A01769 | A04242 | 265 |
| A01769 | A04296 | 291 | A01769 | A04589 | 205 |
| A01769 | A04960 | 423 | A01769 | A05008 | 230 |
| A01769 | A05009 | 160 | A01769 | A05073 | 340 |
| A01769 | A05122 | 205 | A01769 | A05235 | 470 |
| A01769 | A05261 | 283 | A01769 | A05309 | 172 |
| A01769 | A05591 | 213 | A01769 | A05665 | 323 |
| A01769 | A05666 | 229 | A01769 | A05829 | 283 |
| A01769 | A05861 | 240 | A01769 | A05889 | 411 |
| A01769 | A05891 | 472 | A01769 | A05899 | 283 |
| A01769 | A05911 | 452 | A01769 | A05943 | 302 |
| A01769 | A06298 | 258 | A01769 | A06368 | 202 |
| A01769 | A06379 | 446 | A01769 | A06603 | 291 |
| A01769 | A06635 | 193 | A01769 | A07165 | 401 |
| A01769 | A07199 | 466 | A01769 | A07200 | 312 |
| A01769 | A07295 | 277 | A01769 | A07711 | 219 |
| A01769 | A08628 | 291 | A01769 | A08692 | 162 |
| A01769 | A09040 | 267 | A01769 | A09180 | 319 |
| A01769 | A09242 | 205 | A01769 | A09842 | 274 |
| A01769 | A09900 | 151 | A01769 | A10582 | 302 |
| A01769 | A10613 | 277 | A01769 | A10655 | 188 |
| A01769 | A10741 | 329 | A01769 | A10742 | 232 |
| A01769 | A10835 | 352 | A01769 | A12304 | 224 |
| A01769 | A12420 | 480 | A01769 | A12421 | 477 |

|        |        |     |        |        |     |
|--------|--------|-----|--------|--------|-----|
| A01769 | A12585 | 352 | A01769 | A13667 | 490 |
| A01769 | A14405 | 329 | A01769 | A14440 | 306 |
| A01769 | A14534 | 352 | A01769 | A16636 | 272 |
| A01769 | A16786 | 171 | A01770 | A01844 | 255 |
| A01770 | A01882 | 274 | A01770 | A01914 | 183 |
| A01770 | A01992 | 232 | A01770 | A02018 | 152 |
| A01770 | A02117 | 388 | A01770 | A02470 | 341 |
| A01770 | A02605 | 160 | A01770 | A02715 | 160 |
| A01770 | A02762 | 252 | A01770 | A02805 | 210 |
| A01770 | A03102 | 185 | A01770 | A03112 | 74  |
| A01770 | A03157 | 201 | A01770 | A03446 | 259 |
| A01770 | A03476 | 182 | A01770 | A03511 | 240 |
| A01770 | A03568 | 330 | A01770 | A03572 | 247 |
| A01770 | A03664 | 380 | A01770 | A03738 | 394 |
| A01770 | A04048 | 247 | A01770 | A04124 | 177 |
| A01770 | A04126 | 350 | A01770 | A04282 | 162 |
| A01770 | A04512 | 299 | A01770 | A04850 | 234 |
| A01770 | A04851 | 235 | A01770 | A04957 | 193 |
| A01770 | A05417 | 468 | A01770 | A05516 | 156 |
| A01770 | A05589 | 247 | A01770 | A05712 | 357 |
| A01770 | A05878 | 173 | A01770 | A06121 | 224 |
| A01770 | A06543 | 160 | A01770 | A06949 | 156 |
| A01770 | A07247 | 391 | A01770 | A07711 | 216 |
| A01770 | A07726 | 908 | A01770 | A08504 | 350 |
| A01770 | A08572 | 416 | A01770 | A08815 | 299 |
| A01770 | A08896 | 216 | A01770 | A08900 | 207 |
| A01770 | A09058 | 202 | A01770 | A09197 | 299 |
| A01770 | A09385 | 274 | A01770 | A09540 | 224 |
| A01770 | A10006 | 404 | A01770 | A10181 | 350 |
| A01770 | A10215 | 243 | A01770 | A10238 | 184 |
| A01770 | A10266 | 299 | A01770 | A10532 | 750 |
| A01770 | A10575 | 899 | A01770 | A11240 | 544 |
| A01770 | A11403 | 268 | A01770 | A11773 | 396 |
| A01770 | A13511 | 212 | A01770 | A13569 | 311 |
| A01770 | A13989 | 901 | A01770 | A14006 | 480 |
| A01770 | A14105 | 182 | A01770 | A14653 | 281 |
| A01770 | A15141 | 229 | A01771 | A01773 | 390 |
| A01771 | A01779 | 319 | A01771 | A03552 | 401 |
| A01772 | A01778 | 196 | A01772 | A01790 | 473 |
| A01772 | A01893 | 313 | A01772 | A01931 | 236 |
| A01772 | A02278 | 406 | A01772 | A02283 | 323 |
| A01772 | A02335 | 168 | A01772 | A02477 | 159 |
| A01772 | A02488 | 221 | A01772 | A02493 | 404 |
| A01772 | A02691 | 371 | A01772 | A02693 | 241 |
| A01772 | A02709 | 262 | A01772 | A02789 | 168 |
| A01772 | A03076 | 160 | A01772 | A03104 | 338 |

|        |        |     |        |        |     |
|--------|--------|-----|--------|--------|-----|
| A01772 | A03188 | 333 | A01772 | A03413 | 249 |
| A01772 | A04033 | 424 | A01772 | A04122 | 446 |
| A01772 | A04163 | 249 | A01772 | A04272 | 297 |
| A01772 | A05383 | 266 | A01772 | A05637 | 385 |
| A01772 | A05853 | 185 | A01772 | A06601 | 210 |
| A01772 | A07177 | 228 | A01772 | A07803 | 193 |
| A01772 | A09245 | 229 | A01772 | A09274 | 375 |
| A01772 | A09509 | 162 | A01772 | A09779 | 334 |
| A01772 | A10085 | 212 | A01772 | A10175 | 201 |
| A01772 | A10596 | 156 | A01772 | A14381 | 196 |
| A01772 | A14405 | 210 | A01772 | A14554 | 204 |
| A01772 | A14635 | 408 | A01772 | A15238 | 285 |
| A01772 | A15282 | 434 | A01772 | A15606 | 291 |
| A01773 | A01779 | 486 | A01773 | A01780 | 274 |
| A01773 | A01802 | 374 | A01773 | A01804 | 432 |
| A01773 | A01806 | 306 | A01773 | A02488 | 252 |
| A01773 | A02916 | 193 | A01773 | A03473 | 268 |
| A01773 | A03545 | 396 | A01773 | A03549 | 470 |
| A01773 | A03613 | 430 | A01773 | A04286 | 286 |
| A01773 | A04724 | 411 | A01773 | A04848 | 425 |
| A01773 | A05122 | 223 | A01773 | A05619 | 484 |
| A01773 | A07154 | 303 | A01773 | A07184 | 314 |
| A01773 | A07933 | 160 | A01773 | A09180 | 408 |
| A01773 | A13779 | 411 | A01774 | A01775 | 218 |
| A01774 | A01791 | 307 | A01774 | A01844 | 65  |
| A01774 | A01877 | 462 | A01774 | A01915 | 286 |
| A01774 | A02006 | 182 | A01774 | A02072 | 255 |
| A01774 | A02082 | 310 | A01774 | A02091 | 364 |
| A01774 | A02110 | 216 | A01774 | A02239 | 899 |
| A01774 | A02340 | 240 | A01774 | A02342 | 176 |
| A01774 | A02389 | 218 | A01774 | A02470 | 246 |
| A01774 | A02494 | 436 | A01774 | A02501 | 235 |
| A01774 | A02559 | 177 | A01774 | A02568 | 252 |
| A01774 | A02621 | 238 | A01774 | A02634 | 274 |
| A01774 | A02687 | 212 | A01774 | A02703 | 424 |
| A01774 | A02737 | 297 | A01774 | A02744 | 188 |
| A01774 | A02749 | 243 | A01774 | A02761 | 234 |
| A01774 | A02786 | 249 | A01774 | A02789 | 174 |
| A01774 | A02792 | 272 | A01774 | A02816 | 484 |
| A01774 | A02830 | 472 | A01774 | A02877 | 279 |
| A01774 | A02878 | 258 | A01774 | A02927 | 372 |
| A01774 | A03112 | 423 | A01774 | A03263 | 216 |
| A01774 | A03276 | 294 | A01774 | A03976 | 185 |
| A01774 | A04346 | 256 | A01774 | A04737 | 255 |
| A01774 | A04852 | 335 | A01774 | A05032 | 232 |
| A01774 | A05066 | 340 | A01774 | A06544 | 281 |

|        |        |     |        |        |     |
|--------|--------|-----|--------|--------|-----|
| A01774 | A06581 | 159 | A01774 | A06595 | 201 |
| A01774 | A06622 | 236 | A01774 | A06654 | 273 |
| A01774 | A06858 | 266 | A01774 | A07198 | 163 |
| A01774 | A07280 | 338 | A01774 | A08070 | 193 |
| A01774 | A09708 | 228 | A01774 | A11395 | 340 |
| A01774 | A13753 | 285 | A01774 | A14085 | 323 |
| A01774 | A14946 | 329 | A01774 | A15912 | 191 |
| A01775 | A01782 | 74  | A01775 | A01785 | 491 |
| A01775 | A01789 | 424 | A01775 | A01790 | 483 |
| A01775 | A01791 | 290 | A01775 | A01792 | 63  |
| A01775 | A01797 | 368 | A01775 | A01799 | 255 |
| A01775 | A01836 | 235 | A01775 | A01844 | 63  |
| A01775 | A01849 | 135 | A01775 | A01875 | 252 |
| A01775 | A01879 | 486 | A01775 | A01887 | 491 |
| A01775 | A01888 | 341 | A01775 | A01889 | 152 |
| A01775 | A01902 | 486 | A01775 | A01908 | 207 |
| A01775 | A01914 | 247 | A01775 | A01939 | 183 |
| A01775 | A01941 | 160 | A01775 | A02147 | 171 |
| A01775 | A02156 | 168 | A01775 | A02298 | 379 |
| A01775 | A02347 | 152 | A01775 | A02371 | 263 |
| A01775 | A02380 | 168 | A01775 | A02416 | 291 |
| A01775 | A02479 | 322 | A01775 | A02490 | 486 |
| A01775 | A02496 | 270 | A01775 | A02505 | 352 |
| A01775 | A02516 | 270 | A01775 | A02525 | 210 |
| A01775 | A02591 | 270 | A01775 | A02619 | 199 |
| A01775 | A02639 | 243 | A01775 | A02668 | 457 |
| A01775 | A02695 | 477 | A01775 | A02696 | 227 |
| A01775 | A02705 | 71  | A01775 | A02709 | 420 |
| A01775 | A02710 | 208 | A01775 | A02717 | 63  |
| A01775 | A02730 | 193 | A01775 | A02745 | 432 |
| A01775 | A02756 | 262 | A01775 | A02787 | 385 |
| A01775 | A02788 | 218 | A01775 | A02793 | 177 |
| A01775 | A02796 | 154 | A01775 | A02812 | 328 |
| A01775 | A02818 | 246 | A01775 | A02828 | 223 |
| A01775 | A02837 | 486 | A01775 | A02839 | 433 |
| A01775 | A02840 | 228 | A01775 | A02859 | 486 |
| A01775 | A02874 | 473 | A01775 | A02875 | 249 |
| A01775 | A02877 | 348 | A01775 | A02896 | 480 |
| A01775 | A02897 | 127 | A01775 | A02906 | 162 |
| A01775 | A02908 | 899 | A01775 | A02916 | 180 |
| A01775 | A02923 | 235 | A01775 | A02944 | 297 |
| A01775 | A02961 | 210 | A01775 | A02982 | 151 |
| A01775 | A02983 | 270 | A01775 | A02984 | 449 |
| A01775 | A02988 | 201 | A01775 | A03001 | 65  |
| A01775 | A03006 | 308 | A01775 | A03112 | 357 |
| A01775 | A03126 | 198 | A01775 | A03131 | 168 |

|        |        |     |        |        |     |
|--------|--------|-----|--------|--------|-----|
| A01775 | A03275 | 348 | A01775 | A03282 | 224 |
| A01775 | A03312 | 183 | A01775 | A03417 | 171 |
| A01775 | A03486 | 329 | A01775 | A03534 | 257 |
| A01775 | A03847 | 257 | A01775 | A03865 | 274 |
| A01775 | A03914 | 193 | A01775 | A03976 | 432 |
| A01775 | A03994 | 215 | A01775 | A04011 | 420 |
| A01775 | A04107 | 174 | A01775 | A04113 | 318 |
| A01775 | A04117 | 200 | A01775 | A04134 | 204 |
| A01775 | A04206 | 291 | A01775 | A04247 | 414 |
| A01775 | A04267 | 335 | A01775 | A04271 | 154 |
| A01775 | A04274 | 463 | A01775 | A04288 | 489 |
| A01775 | A04322 | 235 | A01775 | A04327 | 176 |
| A01775 | A04338 | 288 | A01775 | A04367 | 235 |
| A01775 | A04420 | 191 | A01775 | A04538 | 235 |
| A01775 | A04564 | 228 | A01775 | A04652 | 491 |
| A01775 | A04706 | 177 | A01775 | A04798 | 344 |
| A01775 | A04868 | 257 | A01775 | A04873 | 218 |
| A01775 | A04939 | 350 | A01775 | A04942 | 151 |
| A01775 | A04975 | 187 | A01775 | A05049 | 318 |
| A01775 | A05066 | 204 | A01775 | A05073 | 157 |
| A01775 | A05087 | 268 | A01775 | A05122 | 316 |
| A01775 | A05213 | 245 | A01775 | A05228 | 235 |
| A01775 | A05285 | 183 | A01775 | A05309 | 491 |
| A01775 | A05322 | 417 | A01775 | A05868 | 252 |
| A01775 | A05901 | 221 | A01775 | A05944 | 156 |
| A01775 | A05991 | 318 | A01775 | A06230 | 318 |
| A01775 | A06269 | 187 | A01775 | A06306 | 163 |
| A01775 | A06422 | 235 | A01775 | A06581 | 268 |
| A01775 | A06597 | 446 | A01775 | A06610 | 461 |
| A01775 | A06615 | 941 | A01775 | A06650 | 490 |
| A01775 | A06769 | 438 | A01775 | A06942 | 318 |
| A01775 | A07135 | 400 | A01775 | A07157 | 377 |
| A01775 | A07165 | 483 | A01775 | A07182 | 228 |
| A01775 | A07187 | 210 | A01775 | A07278 | 318 |
| A01775 | A07339 | 205 | A01775 | A07432 | 268 |
| A01775 | A08133 | 199 | A01775 | A08222 | 171 |
| A01775 | A08319 | 162 | A01775 | A08399 | 215 |
| A01775 | A08460 | 318 | A01775 | A08587 | 270 |
| A01775 | A08600 | 270 | A01775 | A08627 | 491 |
| A01775 | A08755 | 245 | A01775 | A08805 | 215 |
| A01775 | A08879 | 236 | A01775 | A09112 | 228 |
| A01775 | A09127 | 180 | A01775 | A09184 | 270 |
| A01775 | A09236 | 279 | A01775 | A09237 | 235 |
| A01775 | A09397 | 174 | A01775 | A09437 | 235 |
| A01775 | A09491 | 265 | A01775 | A09707 | 152 |
| A01775 | A09837 | 191 | A01775 | A10007 | 318 |

|        |        |     |        |        |     |
|--------|--------|-----|--------|--------|-----|
| A01775 | A10070 | 208 | A01775 | A10192 | 288 |
| A01775 | A10279 | 270 | A01775 | A10392 | 899 |
| A01775 | A10551 | 163 | A01775 | A11404 | 152 |
| A01775 | A11513 | 162 | A01775 | A11902 | 177 |
| A01775 | A12412 | 187 | A01775 | A12421 | 199 |
| A01775 | A12897 | 452 | A01775 | A13184 | 270 |
| A01775 | A13511 | 385 | A01775 | A13667 | 221 |
| A01775 | A13716 | 152 | A01775 | A13823 | 318 |
| A01775 | A13856 | 245 | A01775 | A14279 | 199 |
| A01775 | A14374 | 245 | A01775 | A14386 | 151 |
| A01775 | A14388 | 257 | A01775 | A14416 | 165 |
| A01775 | A14443 | 899 | A01775 | A14621 | 198 |
| A01775 | A14726 | 318 | A01775 | A14790 | 277 |
| A01775 | A15052 | 157 | A01775 | A15379 | 259 |
| A01775 | A15630 | 201 | A01775 | A15836 | 288 |
| A01775 | A15843 | 224 | A01775 | A15976 | 168 |
| A01775 | A15996 | 215 | A01775 | A16075 | 224 |
| A01775 | A16377 | 183 | A01775 | A16404 | 171 |
| A01775 | A16636 | 484 | A01776 | A01903 | 235 |
| A01776 | A02300 | 274 | A01776 | A02402 | 221 |
| A01776 | A02699 | 339 | A01776 | A02821 | 348 |
| A01776 | A02866 | 391 | A01776 | A02873 | 372 |
| A01776 | A03541 | 347 | A01776 | A03869 | 406 |
| A01776 | A03871 | 409 | A01776 | A04536 | 257 |
| A01776 | A07157 | 254 | A01776 | A15395 | 291 |
| A01777 | A01778 | 312 | A01777 | A01779 | 462 |
| A01777 | A01780 | 346 | A01777 | A01788 | 367 |
| A01777 | A01797 | 199 | A01777 | A01802 | 420 |
| A01777 | A01803 | 373 | A01777 | A01804 | 398 |
| A01777 | A01805 | 378 | A01777 | A01912 | 291 |
| A01777 | A03473 | 425 | A01777 | A03523 | 272 |
| A01777 | A03545 | 276 | A01777 | A03548 | 422 |
| A01777 | A03554 | 333 | A01777 | A03562 | 382 |
| A01777 | A03563 | 371 | A01777 | A03613 | 395 |
| A01777 | A04281 | 449 | A01777 | A04286 | 353 |
| A01777 | A04848 | 454 | A01777 | A05317 | 414 |
| A01777 | A05348 | 441 | A01777 | A05827 | 391 |
| A01777 | A07200 | 221 | A01777 | A08321 | 330 |
| A01778 | A01779 | 491 | A01778 | A01780 | 327 |
| A01778 | A01802 | 489 | A01778 | A01803 | 486 |
| A01778 | A01804 | 294 | A01778 | A01875 | 152 |
| A01778 | A02232 | 188 | A01778 | A02535 | 235 |
| A01778 | A02695 | 353 | A01778 | A02983 | 285 |
| A01778 | A03322 | 210 | A01778 | A03473 | 398 |
| A01778 | A03543 | 302 | A01778 | A03545 | 218 |
| A01778 | A03548 | 347 | A01778 | A03550 | 249 |



|        |        |     |        |        |     |
|--------|--------|-----|--------|--------|-----|
| A01778 | A03553 | 167 | A01778 | A03563 | 238 |
| A01778 | A03585 | 267 | A01778 | A03662 | 162 |
| A01778 | A03922 | 162 | A01778 | A04281 | 462 |
| A01778 | A04286 | 491 | A01778 | A04848 | 466 |
| A01778 | A05032 | 174 | A01778 | A05346 | 323 |
| A01778 | A05348 | 486 | A01778 | A05513 | 317 |
| A01778 | A05742 | 263 | A01778 | A06309 | 182 |
| A01778 | A06347 | 326 | A01778 | A06606 | 299 |
| A01778 | A06607 | 452 | A01778 | A06614 | 338 |
| A01778 | A06650 | 477 | A01778 | A07184 | 243 |
| A01778 | A07200 | 457 | A01778 | A07205 | 187 |
| A01778 | A07911 | 162 | A01778 | A09180 | 362 |
| A01778 | A09192 | 405 | A01778 | A10581 | 224 |
| A01778 | A10870 | 207 | A01778 | A11297 | 311 |
| A01778 | A12652 | 285 | A01778 | A15023 | 294 |
| A01778 | A15096 | 152 | A01778 | A15188 | 263 |
| A01778 | A15819 | 188 | A01778 | A16092 | 157 |
| A01778 | A16293 | 157 | A01779 | A01780 | 450 |
| A01779 | A01788 | 323 | A01779 | A01802 | 489 |
| A01779 | A01803 | 491 | A01779 | A01804 | 377 |
| A01779 | A01805 | 213 | A01779 | A01912 | 85  |
| A01779 | A02695 | 207 | A01779 | A02712 | 152 |
| A01779 | A02990 | 346 | A01779 | A03013 | 188 |
| A01779 | A03420 | 157 | A01779 | A03473 | 419 |
| A01779 | A03545 | 430 | A01779 | A03548 | 319 |
| A01779 | A03549 | 447 | A01779 | A03552 | 218 |
| A01779 | A03562 | 221 | A01779 | A03563 | 196 |
| A01779 | A04004 | 182 | A01779 | A04281 | 358 |
| A01779 | A04286 | 491 | A01779 | A04724 | 357 |
| A01779 | A04848 | 489 | A01779 | A05346 | 291 |
| A01779 | A05348 | 443 | A01779 | A05619 | 452 |
| A01779 | A05739 | 171 | A01779 | A05742 | 458 |
| A01779 | A05827 | 427 | A01779 | A06607 | 361 |
| A01779 | A06650 | 485 | A01779 | A07184 | 202 |
| A01779 | A07200 | 435 | A01779 | A07374 | 334 |
| A01779 | A07537 | 196 | A01779 | A07663 | 334 |
| A01779 | A08137 | 263 | A01779 | A09180 | 402 |
| A01779 | A09192 | 267 | A01779 | A10109 | 243 |
| A01779 | A10870 | 163 | A01779 | A11552 | 204 |
| A01779 | A15023 | 377 | A01779 | A15314 | 170 |
| A01780 | A01804 | 332 | A01780 | A01805 | 489 |
| A01780 | A01806 | 445 | A01780 | A03012 | 73  |
| A01780 | A03473 | 236 | A01780 | A03475 | 358 |
| A01780 | A03546 | 385 | A01780 | A03549 | 299 |
| A01780 | A03608 | 208 | A01780 | A03613 | 326 |
| A01780 | A03664 | 380 | A01780 | A04122 | 293 |

|        |        |     |        |        |     |
|--------|--------|-----|--------|--------|-----|
| A01780 | A04286 | 257 | A01780 | A04608 | 188 |
| A01780 | A04848 | 207 | A01780 | A05216 | 160 |
| A01780 | A05742 | 479 | A01780 | A06606 | 330 |
| A01780 | A06613 | 283 | A01780 | A08685 | 191 |
| A01780 | A13779 | 399 | A01780 | A14566 | 321 |
| A01781 | A01797 | 469 | A01781 | A01809 | 180 |
| A01781 | A01897 | 168 | A01781 | A01904 | 260 |
| A01781 | A01990 | 202 | A01781 | A02195 | 199 |
| A01781 | A02390 | 462 | A01781 | A02532 | 174 |
| A01781 | A02582 | 185 | A01781 | A02592 | 491 |
| A01781 | A02636 | 201 | A01781 | A02639 | 195 |
| A01781 | A02715 | 480 | A01781 | A02837 | 291 |
| A01781 | A03337 | 152 | A01781 | A03609 | 409 |
| A01781 | A03859 | 302 | A01781 | A03906 | 185 |
| A01781 | A04088 | 152 | A01781 | A04102 | 281 |
| A01781 | A04429 | 177 | A01781 | A04649 | 188 |
| A01781 | A04726 | 299 | A01781 | A04790 | 174 |
| A01781 | A04845 | 218 | A01781 | A04931 | 221 |
| A01781 | A05094 | 219 | A01781 | A05119 | 227 |
| A01781 | A05284 | 212 | A01781 | A05422 | 358 |
| A01781 | A05449 | 477 | A01781 | A06012 | 184 |
| A01781 | A06021 | 328 | A01781 | A06078 | 154 |
| A01781 | A06140 | 257 | A01781 | A06324 | 177 |
| A01781 | A06505 | 184 | A01781 | A06606 | 210 |
| A01781 | A06814 | 263 | A01781 | A06949 | 446 |
| A01781 | A07155 | 184 | A01781 | A07163 | 281 |
| A01781 | A07178 | 408 | A01781 | A07311 | 424 |
| A01781 | A07597 | 324 | A01781 | A08118 | 193 |
| A01781 | A08378 | 257 | A01781 | A08400 | 198 |
| A01781 | A08560 | 184 | A01781 | A08813 | 190 |
| A01781 | A09068 | 267 | A01781 | A09804 | 384 |
| A01781 | A09961 | 326 | A01781 | A09999 | 162 |
| A01781 | A10276 | 326 | A01781 | A10443 | 171 |
| A01781 | A11132 | 170 | A01781 | A11201 | 196 |
| A01781 | A11290 | 306 | A01781 | A11297 | 491 |
| A01781 | A11313 | 351 | A01781 | A11562 | 291 |
| A01781 | A11604 | 247 | A01781 | A11774 | 191 |
| A01781 | A11831 | 152 | A01781 | A12105 | 193 |
| A01781 | A12124 | 257 | A01781 | A12215 | 457 |
| A01781 | A12329 | 491 | A01781 | A12460 | 326 |
| A01781 | A12660 | 454 | A01781 | A13069 | 184 |
| A01781 | A13302 | 202 | A01781 | A13817 | 299 |
| A01781 | A13864 | 191 | A01781 | A13912 | 210 |
| A01781 | A14239 | 156 | A01781 | A14274 | 257 |
| A01781 | A14386 | 162 | A01781 | A14444 | 899 |
| A01781 | A14591 | 190 | A01781 | A14643 | 154 |

|        |        |     |        |        |     |
|--------|--------|-----|--------|--------|-----|
| A01781 | A14738 | 279 | A01781 | A15188 | 468 |
| A01781 | A15254 | 246 | A01781 | A15373 | 160 |
| A01781 | A15507 | 446 | A01781 | A15545 | 241 |
| A01781 | A15547 | 218 | A01781 | A15659 | 433 |
| A01781 | A15660 | 479 | A01781 | A15684 | 477 |
| A01781 | A15699 | 167 | A01781 | A15705 | 299 |
| A01781 | A15708 | 369 | A01781 | A15746 | 324 |
| A01781 | A15764 | 215 | A01781 | A15769 | 491 |
| A01781 | A15931 | 446 | A01781 | A16218 | 438 |
| A01781 | A16243 | 152 | A01781 | A16293 | 279 |
| A01781 | A16317 | 281 | A01781 | A16333 | 286 |
| A01781 | A16464 | 416 | A01781 | A16627 | 185 |
| A01781 | A16774 | 191 | A01781 | A16778 | 207 |
| A01781 | A16788 | 281 | A01781 | A16793 | 481 |
| A01781 | A16822 | 151 | A01781 | A16829 | 152 |
| A01781 | A16868 | 247 | A01781 | A16944 | 305 |
| A01782 | A01789 | 163 | A01782 | A01906 | 467 |
| A01782 | A02710 | 215 | A01782 | A02813 | 201 |
| A01782 | A02820 | 281 | A01782 | A02988 | 270 |
| A01782 | A04304 | 294 | A01782 | A04531 | 294 |
| A01782 | A05258 | 199 | A01782 | A05318 | 183 |
| A01782 | A06320 | 229 | A01782 | A06637 | 218 |
| A01782 | A07160 | 372 | A01782 | A08684 | 207 |
| A01782 | A09263 | 151 | A01782 | A11296 | 268 |
| A01782 | A11462 | 167 | A01782 | A12227 | 223 |
| A01782 | A16020 | 163 | A01783 | A06606 | 243 |
| A01784 | A01875 | 462 | A01784 | A01878 | 425 |
| A01784 | A01883 | 307 | A01784 | A01888 | 201 |
| A01784 | A01906 | 179 | A01784 | A01907 | 460 |
| A01784 | A02309 | 324 | A01784 | A02347 | 475 |
| A01784 | A02611 | 279 | A01784 | A02695 | 417 |
| A01784 | A02696 | 259 | A01784 | A02705 | 389 |
| A01784 | A02729 | 489 | A01784 | A02783 | 443 |
| A01784 | A02790 | 296 | A01784 | A02812 | 477 |
| A01784 | A02817 | 405 | A01784 | A02859 | 481 |
| A01784 | A02874 | 361 | A01784 | A02922 | 279 |
| A01784 | A02945 | 272 | A01784 | A02984 | 369 |
| A01784 | A03256 | 278 | A01784 | A03275 | 469 |
| A01784 | A03419 | 210 | A01784 | A03649 | 375 |
| A01784 | A03664 | 454 | A01784 | A04010 | 213 |
| A01784 | A04051 | 177 | A01784 | A04127 | 358 |
| A01784 | A04134 | 443 | A01784 | A04142 | 443 |
| A01784 | A04211 | 268 | A01784 | A04262 | 386 |
| A01784 | A05034 | 274 | A01784 | A05309 | 307 |
| A01784 | A06415 | 180 | A01784 | A07164 | 254 |
| A01784 | A07173 | 263 | A01784 | A08741 | 406 |

|        |        |     |        |        |     |
|--------|--------|-----|--------|--------|-----|
| A01785 | A01799 | 208 | A01785 | A01837 | 162 |
| A01785 | A01875 | 205 | A01785 | A01879 | 458 |
| A01785 | A01887 | 469 | A01785 | A01889 | 205 |
| A01785 | A01908 | 353 | A01785 | A02479 | 255 |
| A01785 | A02490 | 324 | A01785 | A02695 | 177 |
| A01785 | A02696 | 190 | A01785 | A02717 | 190 |
| A01785 | A02730 | 362 | A01785 | A02812 | 246 |
| A01785 | A02837 | 79  | A01785 | A02859 | 343 |
| A01785 | A02916 | 160 | A01785 | A02920 | 303 |
| A01785 | A02961 | 179 | A01785 | A02982 | 219 |
| A01785 | A02984 | 310 | A01785 | A02986 | 291 |
| A01785 | A03209 | 174 | A01785 | A03259 | 396 |
| A01785 | A03269 | 193 | A01785 | A03914 | 235 |
| A01785 | A04010 | 272 | A01785 | A04088 | 290 |
| A01785 | A04138 | 395 | A01785 | A04206 | 407 |
| A01785 | A04247 | 427 | A01785 | A04288 | 380 |
| A01785 | A04652 | 490 | A01785 | A04798 | 344 |
| A01785 | A05305 | 273 | A01785 | A05309 | 490 |
| A01785 | A06161 | 198 | A01785 | A06422 | 435 |
| A01785 | A07147 | 401 | A01785 | A07157 | 152 |
| A01785 | A08627 | 491 | A01785 | A08672 | 362 |
| A01785 | A09401 | 344 | A01785 | A09572 | 314 |
| A01785 | A11338 | 198 | A01785 | A11435 | 246 |
| A01785 | A13743 | 297 | A01785 | A14122 | 288 |
| A01785 | A15349 | 188 | A01785 | A15498 | 299 |
| A01785 | A15611 | 204 | A01785 | A15722 | 265 |
| A01785 | A16636 | 286 | A01786 | A01791 | 328 |
| A01786 | A01878 | 937 | A01786 | A01888 | 296 |
| A01786 | A01891 | 374 | A01786 | A02730 | 268 |
| A01786 | A02739 | 168 | A01786 | A02745 | 429 |
| A01786 | A02818 | 302 | A01786 | A02820 | 333 |
| A01786 | A02915 | 329 | A01786 | A02928 | 217 |
| A01786 | A03649 | 417 | A01786 | A03949 | 465 |
| A01786 | A04091 | 945 | A01786 | A05351 | 334 |
| A01786 | A07006 | 374 | A01786 | A07421 | 232 |
| A01786 | A07660 | 339 | A01786 | A09341 | 185 |
| A01786 | A11779 | 285 | A01786 | A14434 | 369 |
| A01786 | A15841 | 369 | A01787 | A01794 | 174 |
| A01787 | A01796 | 485 | A01787 | A01852 | 332 |
| A01787 | A01893 | 90  | A01787 | A01894 | 488 |
| A01787 | A01895 | 414 | A01787 | A01896 | 162 |
| A01787 | A01909 | 112 | A01787 | A01911 | 414 |
| A01787 | A01914 | 483 | A01787 | A02350 | 180 |
| A01787 | A02409 | 269 | A01787 | A02686 | 162 |
| A01787 | A02985 | 255 | A01787 | A02988 | 491 |
| A01787 | A03740 | 283 | A01787 | A03752 | 283 |

|        |        |     |        |        |     |
|--------|--------|-----|--------|--------|-----|
| A01787 | A03872 | 207 | A01787 | A03964 | 205 |
| A01787 | A04301 | 274 | A01787 | A04443 | 217 |
| A01787 | A04510 | 196 | A01787 | A04529 | 205 |
| A01787 | A04620 | 226 | A01787 | A04933 | 243 |
| A01787 | A05317 | 296 | A01787 | A05366 | 407 |
| A01787 | A05377 | 171 | A01787 | A05866 | 191 |
| A01787 | A06280 | 165 | A01787 | A06466 | 307 |
| A01787 | A06589 | 193 | A01787 | A06607 | 430 |
| A01787 | A06926 | 418 | A01787 | A06968 | 467 |
| A01787 | A07160 | 374 | A01787 | A07200 | 373 |
| A01787 | A07306 | 317 | A01787 | A07311 | 475 |
| A01787 | A07451 | 266 | A01787 | A07726 | 157 |
| A01787 | A08357 | 372 | A01787 | A08359 | 484 |
| A01787 | A08452 | 156 | A01787 | A08521 | 344 |
| A01787 | A08547 | 224 | A01787 | A08771 | 154 |
| A01787 | A08835 | 281 | A01787 | A09313 | 364 |
| A01787 | A11254 | 243 | A01787 | A11282 | 176 |
| A01787 | A11302 | 221 | A01787 | A11400 | 394 |
| A01787 | A11411 | 208 | A01787 | A12456 | 420 |
| A01787 | A13340 | 238 | A01787 | A13989 | 218 |
| A01787 | A14073 | 226 | A01787 | A14405 | 232 |
| A01787 | A14505 | 160 | A01787 | A15498 | 176 |
| A01787 | A15598 | 167 | A01787 | A15684 | 240 |
| A01787 | A16021 | 317 | A01787 | A16462 | 299 |
| A01787 | A16658 | 177 | A01788 | A01797 | 466 |
| A01788 | A01804 | 356 | A01788 | A01909 | 243 |
| A01788 | A02812 | 157 | A01788 | A03304 | 230 |
| A01788 | A03473 | 462 | A01788 | A03545 | 188 |
| A01788 | A03554 | 260 | A01788 | A03562 | 491 |
| A01788 | A03609 | 340 | A01788 | A03819 | 254 |
| A01788 | A04286 | 291 | A01788 | A04788 | 468 |
| A01788 | A05216 | 405 | A01788 | A05317 | 380 |
| A01788 | A05827 | 347 | A01788 | A06569 | 219 |
| A01788 | A06606 | 322 | A01788 | A06650 | 221 |
| A01788 | A07229 | 174 | A01788 | A08321 | 258 |
| A01788 | A09178 | 412 | A01788 | A11513 | 247 |
| A01788 | A14410 | 396 | A01789 | A01797 | 486 |
| A01789 | A01799 | 68  | A01789 | A01844 | 906 |
| A01789 | A01887 | 121 | A01789 | A02462 | 202 |
| A01789 | A02748 | 243 | A01789 | A02820 | 162 |
| A01789 | A02837 | 195 | A01789 | A02874 | 260 |
| A01789 | A02875 | 246 | A01789 | A02988 | 399 |
| A01789 | A03223 | 407 | A01789 | A03339 | 235 |
| A01789 | A03543 | 208 | A01789 | A03585 | 454 |
| A01789 | A03608 | 481 | A01789 | A03609 | 427 |
| A01789 | A03650 | 367 | A01789 | A03861 | 266 |

|        |        |     |        |        |     |
|--------|--------|-----|--------|--------|-----|
| A01789 | A04004 | 344 | A01789 | A04069 | 219 |
| A01789 | A04304 | 457 | A01789 | A04531 | 179 |
| A01789 | A04600 | 201 | A01789 | A04622 | 488 |
| A01789 | A04649 | 176 | A01789 | A04714 | 339 |
| A01789 | A04939 | 491 | A01789 | A04955 | 243 |
| A01789 | A05272 | 317 | A01789 | A05639 | 449 |
| A01789 | A05727 | 269 | A01789 | A05790 | 156 |
| A01789 | A06606 | 438 | A01789 | A06615 | 432 |
| A01789 | A06623 | 204 | A01789 | A07159 | 246 |
| A01789 | A07165 | 470 | A01789 | A08571 | 199 |
| A01789 | A09263 | 217 | A01789 | A09370 | 170 |
| A01789 | A09490 | 235 | A01789 | A10018 | 254 |
| A01789 | A10398 | 219 | A01789 | A10441 | 288 |
| A01789 | A10561 | 170 | A01789 | A13352 | 208 |
| A01789 | A14758 | 199 | A01789 | A14942 | 329 |
| A01789 | A17136 | 424 | A01790 | A01889 | 299 |
| A01790 | A01903 | 461 | A01790 | A01931 | 491 |
| A01790 | A01936 | 425 | A01790 | A01938 | 267 |
| A01790 | A01995 | 481 | A01790 | A02020 | 475 |
| A01790 | A02104 | 160 | A01790 | A02278 | 190 |
| A01790 | A02412 | 472 | A01790 | A02443 | 190 |
| A01790 | A02476 | 205 | A01790 | A02478 | 232 |
| A01790 | A02491 | 311 | A01790 | A02502 | 429 |
| A01790 | A02575 | 187 | A01790 | A02709 | 393 |
| A01790 | A02812 | 208 | A01790 | A02839 | 491 |
| A01790 | A02875 | 338 | A01790 | A03042 | 165 |
| A01790 | A03095 | 207 | A01790 | A03104 | 475 |
| A01790 | A03111 | 246 | A01790 | A03188 | 414 |
| A01790 | A03312 | 291 | A01790 | A03436 | 458 |
| A01790 | A03451 | 491 | A01790 | A03522 | 177 |
| A01790 | A03535 | 196 | A01790 | A03612 | 174 |
| A01790 | A03697 | 173 | A01790 | A03703 | 154 |
| A01790 | A03719 | 441 | A01790 | A03778 | 208 |
| A01790 | A03819 | 235 | A01790 | A03893 | 477 |
| A01790 | A04020 | 345 | A01790 | A04033 | 491 |
| A01790 | A04079 | 333 | A01790 | A04410 | 167 |
| A01790 | A04420 | 297 | A01790 | A04441 | 302 |
| A01790 | A04449 | 490 | A01790 | A04488 | 177 |
| A01790 | A04877 | 177 | A01790 | A05002 | 312 |
| A01790 | A05181 | 171 | A01790 | A05221 | 428 |
| A01790 | A05349 | 252 | A01790 | A05418 | 491 |
| A01790 | A05439 | 389 | A01790 | A05529 | 183 |
| A01790 | A05896 | 369 | A01790 | A05897 | 196 |
| A01790 | A06190 | 243 | A01790 | A06196 | 221 |
| A01790 | A06201 | 157 | A01790 | A06207 | 341 |
| A01790 | A06277 | 490 | A01790 | A06578 | 302 |

|        |        |     |        |        |     |
|--------|--------|-----|--------|--------|-----|
| A01790 | A06588 | 479 | A01790 | A07117 | 177 |
| A01790 | A07206 | 218 | A01790 | A07209 | 491 |
| A01790 | A07229 | 400 | A01790 | A07311 | 229 |
| A01790 | A07442 | 174 | A01790 | A07459 | 202 |
| A01790 | A07803 | 488 | A01790 | A07917 | 299 |
| A01790 | A08309 | 196 | A01790 | A08399 | 188 |
| A01790 | A08587 | 246 | A01790 | A08625 | 299 |
| A01790 | A08675 | 299 | A01790 | A08718 | 484 |
| A01790 | A08859 | 361 | A01790 | A08875 | 179 |
| A01790 | A08878 | 491 | A01790 | A09147 | 393 |
| A01790 | A09272 | 413 | A01790 | A09309 | 218 |
| A01790 | A09363 | 160 | A01790 | A09470 | 167 |
| A01790 | A09509 | 479 | A01790 | A09513 | 210 |
| A01790 | A09570 | 154 | A01790 | A09732 | 413 |
| A01790 | A09740 | 188 | A01790 | A10107 | 267 |
| A01790 | A10336 | 236 | A01790 | A10596 | 345 |
| A01790 | A10731 | 388 | A01790 | A10998 | 449 |
| A01790 | A11068 | 310 | A01790 | A11132 | 215 |
| A01790 | A11300 | 179 | A01790 | A11415 | 162 |
| A01790 | A11899 | 358 | A01790 | A11983 | 491 |
| A01790 | A12111 | 316 | A01790 | A12212 | 202 |
| A01790 | A12363 | 160 | A01790 | A12365 | 423 |
| A01790 | A12373 | 172 | A01790 | A12561 | 267 |
| A01790 | A12897 | 470 | A01790 | A13370 | 174 |
| A01790 | A13673 | 152 | A01790 | A13874 | 238 |
| A01790 | A13917 | 223 | A01790 | A14035 | 202 |
| A01790 | A14055 | 385 | A01790 | A14196 | 490 |
| A01790 | A14202 | 238 | A01790 | A14210 | 310 |
| A01790 | A14220 | 171 | A01790 | A14410 | 467 |
| A01790 | A14411 | 299 | A01790 | A14413 | 316 |
| A01790 | A14511 | 402 | A01790 | A14586 | 157 |
| A01790 | A14635 | 491 | A01790 | A14636 | 445 |
| A01790 | A14643 | 362 | A01790 | A14650 | 324 |
| A01790 | A14660 | 238 | A01790 | A15238 | 432 |
| A01790 | A15282 | 490 | A01790 | A15292 | 477 |
| A01790 | A15296 | 185 | A01790 | A15314 | 455 |
| A01790 | A15322 | 394 | A01790 | A15331 | 224 |
| A01790 | A15337 | 324 | A01790 | A15339 | 210 |
| A01790 | A15349 | 416 | A01790 | A15412 | 157 |
| A01790 | A15433 | 182 | A01790 | A15434 | 191 |
| A01790 | A15445 | 353 | A01790 | A15452 | 183 |
| A01790 | A15456 | 198 | A01790 | A15478 | 152 |
| A01790 | A15480 | 357 | A01790 | A15506 | 344 |
| A01790 | A15559 | 281 | A01790 | A15606 | 480 |
| A01790 | A15630 | 243 | A01790 | A15816 | 210 |
| A01790 | A15836 | 267 | A01790 | A15868 | 223 |

|        |        |     |        |        |     |
|--------|--------|-----|--------|--------|-----|
| A01790 | A16626 | 456 | A01791 | A01799 | 461 |
| A01791 | A01888 | 401 | A01791 | A01937 | 353 |
| A01791 | A02265 | 252 | A01791 | A02340 | 291 |
| A01791 | A02397 | 313 | A01791 | A02405 | 283 |
| A01791 | A02415 | 281 | A01791 | A02416 | 462 |
| A01791 | A02451 | 384 | A01791 | A02461 | 352 |
| A01791 | A02547 | 380 | A01791 | A02615 | 334 |
| A01791 | A02730 | 294 | A01791 | A02745 | 276 |
| A01791 | A02788 | 333 | A01791 | A02886 | 422 |
| A01791 | A03100 | 272 | A01791 | A03238 | 254 |
| A01791 | A03661 | 204 | A01791 | A03666 | 441 |
| A01791 | A03805 | 378 | A01791 | A04011 | 341 |
| A01791 | A04138 | 423 | A01791 | A04144 | 443 |
| A01791 | A04276 | 333 | A01791 | A04734 | 358 |
| A01791 | A04806 | 396 | A01791 | A04855 | 391 |
| A01791 | A04900 | 208 | A01791 | A10574 | 327 |
| A01791 | A12361 | 270 | A01791 | A15528 | 210 |
| A01792 | A01797 | 352 | A01792 | A01849 | 235 |
| A01792 | A01877 | 218 | A01792 | A01908 | 85  |
| A01792 | A02105 | 355 | A01792 | A02385 | 251 |
| A01792 | A02419 | 188 | A01792 | A02465 | 157 |
| A01792 | A02566 | 305 | A01792 | A02579 | 163 |
| A01792 | A02621 | 177 | A01792 | A02641 | 236 |
| A01792 | A02803 | 281 | A01792 | A02808 | 221 |
| A01792 | A02927 | 191 | A01792 | A02954 | 296 |
| A01792 | A03019 | 63  | A01792 | A03112 | 221 |
| A01792 | A03228 | 187 | A01792 | A03259 | 63  |
| A01792 | A03271 | 345 | A01792 | A03330 | 316 |
| A01792 | A03420 | 210 | A01792 | A03786 | 335 |
| A01792 | A04012 | 446 | A01792 | A04218 | 257 |
| A01792 | A04293 | 265 | A01792 | A04430 | 305 |
| A01792 | A05122 | 266 | A01792 | A05363 | 218 |
| A01792 | A05531 | 185 | A01792 | A05654 | 190 |
| A01792 | A06054 | 190 | A01792 | A06387 | 272 |
| A01792 | A06652 | 314 | A01792 | A07332 | 486 |
| A01792 | A07372 | 286 | A01792 | A08535 | 224 |
| A01792 | A08710 | 346 | A01792 | A09076 | 272 |
| A01792 | A09979 | 346 | A01792 | A09985 | 277 |
| A01792 | A10009 | 263 | A01792 | A10018 | 283 |
| A01792 | A10156 | 171 | A01792 | A11739 | 321 |
| A01792 | A12988 | 179 | A01792 | A13181 | 152 |
| A01792 | A14283 | 152 | A01792 | A14667 | 165 |
| A01792 | A15237 | 229 | A01792 | A15563 | 452 |
| A01792 | A15713 | 346 | A01792 | A15718 | 207 |
| A01792 | A15746 | 375 | A01792 | A15911 | 191 |
| A01792 | A16452 | 409 | A01792 | A17167 | 314 |



|        |        |     |        |        |     |
|--------|--------|-----|--------|--------|-----|
| A01793 | A01796 | 126 | A01793 | A01865 | 193 |
| A01793 | A01914 | 417 | A01793 | A02020 | 174 |
| A01793 | A02023 | 400 | A01793 | A02114 | 257 |
| A01793 | A02254 | 276 | A01793 | A02525 | 174 |
| A01793 | A02548 | 210 | A01793 | A02734 | 329 |
| A01793 | A03167 | 213 | A01793 | A03174 | 433 |
| A01793 | A03225 | 200 | A01793 | A03442 | 322 |
| A01793 | A03513 | 218 | A01793 | A03520 | 159 |
| A01793 | A03550 | 227 | A01793 | A03598 | 262 |
| A01793 | A04095 | 428 | A01793 | A04286 | 185 |
| A01793 | A04310 | 276 | A01793 | A04314 | 333 |
| A01793 | A04781 | 249 | A01793 | A04791 | 319 |
| A01793 | A04927 | 281 | A01793 | A05014 | 351 |
| A01793 | A05026 | 380 | A01793 | A05140 | 254 |
| A01793 | A05330 | 443 | A01793 | A05337 | 193 |
| A01793 | A05424 | 388 | A01793 | A05433 | 322 |
| A01793 | A05451 | 269 | A01793 | A05549 | 333 |
| A01793 | A05550 | 385 | A01793 | A05610 | 294 |
| A01793 | A05659 | 294 | A01793 | A05912 | 422 |
| A01793 | A06245 | 288 | A01793 | A06641 | 333 |
| A01793 | A06847 | 353 | A01793 | A06970 | 157 |
| A01793 | A06994 | 372 | A01793 | A07027 | 329 |
| A01793 | A07059 | 357 | A01793 | A07408 | 380 |
| A01793 | A07501 | 313 | A01793 | A07619 | 400 |
| A01793 | A07674 | 210 | A01793 | A07723 | 358 |
| A01793 | A08045 | 484 | A01793 | A08313 | 240 |
| A01793 | A10657 | 183 | A01793 | A14426 | 199 |
| A01794 | A01798 | 235 | A01794 | A01800 | 369 |
| A01794 | A01867 | 441 | A01794 | A01883 | 270 |
| A01794 | A01893 | 473 | A01794 | A01894 | 488 |
| A01794 | A01909 | 491 | A01794 | A01910 | 353 |
| A01794 | A02026 | 196 | A01794 | A02075 | 224 |
| A01794 | A02083 | 183 | A01794 | A02154 | 307 |
| A01794 | A02319 | 374 | A01794 | A02541 | 305 |
| A01794 | A02546 | 346 | A01794 | A02574 | 246 |
| A01794 | A02691 | 173 | A01794 | A02788 | 160 |
| A01794 | A03014 | 236 | A01794 | A03224 | 382 |
| A01794 | A03234 | 208 | A01794 | A03243 | 228 |
| A01794 | A03264 | 310 | A01794 | A03858 | 208 |
| A01794 | A03872 | 413 | A01794 | A04053 | 395 |
| A01794 | A04372 | 361 | A01794 | A04620 | 490 |
| A01794 | A04710 | 229 | A01794 | A05153 | 168 |
| A01794 | A05550 | 265 | A01794 | A06211 | 337 |
| A01794 | A06558 | 380 | A01794 | A06572 | 152 |
| A01794 | A06607 | 308 | A01794 | A07177 | 372 |
| A01794 | A07200 | 490 | A01794 | A13906 | 329 |

|        |        |     |        |        |     |
|--------|--------|-----|--------|--------|-----|
| A01794 | A14440 | 344 | A01794 | A14637 | 185 |
| A01794 | A14685 | 364 | A01794 | A15238 | 305 |
| A01794 | A17155 | 319 | A01795 | A01796 | 338 |
| A01795 | A01911 | 348 | A01795 | A01914 | 394 |
| A01795 | A02075 | 380 | A01795 | A02304 | 213 |
| A01795 | A02493 | 260 | A01795 | A02502 | 170 |
| A01795 | A02687 | 154 | A01795 | A02788 | 202 |
| A01795 | A02831 | 357 | A01795 | A02878 | 324 |
| A01795 | A02988 | 240 | A01795 | A03100 | 274 |
| A01795 | A03112 | 152 | A01795 | A03422 | 187 |
| A01795 | A03473 | 297 | A01795 | A03609 | 238 |
| A01795 | A03661 | 207 | A01795 | A03855 | 299 |
| A01795 | A04280 | 199 | A01795 | A04856 | 429 |
| A01795 | A05255 | 265 | A01795 | A05348 | 339 |
| A01795 | A06161 | 262 | A01795 | A06579 | 422 |
| A01795 | A06607 | 184 | A01795 | A07163 | 152 |
| A01795 | A07165 | 154 | A01795 | A07200 | 452 |
| A01795 | A07381 | 224 | A01795 | A08602 | 368 |
| A01795 | A11460 | 435 | A01796 | A01797 | 473 |
| A01796 | A01798 | 469 | A01796 | A01844 | 423 |
| A01796 | A01873 | 200 | A01796 | A01894 | 491 |
| A01796 | A01895 | 115 | A01796 | A01896 | 74  |
| A01796 | A01911 | 335 | A01796 | A01914 | 491 |
| A01796 | A02117 | 202 | A01796 | A02157 | 281 |
| A01796 | A02220 | 182 | A01796 | A02361 | 480 |
| A01796 | A02390 | 249 | A01796 | A02392 | 168 |
| A01796 | A02734 | 283 | A01796 | A02744 | 294 |
| A01796 | A02778 | 414 | A01796 | A02893 | 182 |
| A01796 | A02943 | 162 | A01796 | A02988 | 491 |
| A01796 | A03014 | 63  | A01796 | A03120 | 182 |
| A01796 | A03223 | 210 | A01796 | A03225 | 479 |
| A01796 | A03537 | 168 | A01796 | A03543 | 162 |
| A01796 | A03598 | 445 | A01796 | A03739 | 382 |
| A01796 | A03847 | 213 | A01796 | A03870 | 182 |
| A01796 | A03880 | 465 | A01796 | A04053 | 353 |
| A01796 | A04120 | 191 | A01796 | A04123 | 182 |
| A01796 | A04137 | 228 | A01796 | A04314 | 290 |
| A01796 | A04342 | 191 | A01796 | A04622 | 457 |
| A01796 | A04623 | 490 | A01796 | A04791 | 167 |
| A01796 | A04933 | 272 | A01796 | A05032 | 434 |
| A01796 | A05036 | 162 | A01796 | A05288 | 212 |
| A01796 | A05309 | 177 | A01796 | A05334 | 200 |
| A01796 | A05383 | 174 | A01796 | A05579 | 174 |
| A01796 | A05746 | 228 | A01796 | A05940 | 329 |
| A01796 | A06581 | 393 | A01796 | A06597 | 462 |
| A01796 | A06607 | 473 | A01796 | A06610 | 490 |

|        |        |     |        |        |     |
|--------|--------|-----|--------|--------|-----|
| A01796 | A06911 | 191 | A01796 | A07123 | 162 |
| A01796 | A07135 | 258 | A01796 | A07165 | 193 |
| A01796 | A07177 | 364 | A01796 | A07200 | 491 |
| A01796 | A07399 | 273 | A01796 | A07641 | 302 |
| A01796 | A08389 | 285 | A01796 | A08463 | 427 |
| A01796 | A08700 | 213 | A01796 | A09126 | 160 |
| A01796 | A09319 | 157 | A01796 | A10211 | 249 |
| A01796 | A10364 | 162 | A01796 | A10963 | 249 |
| A01796 | A11411 | 227 | A01796 | A11460 | 353 |
| A01796 | A11539 | 468 | A01796 | A11606 | 425 |
| A01796 | A11983 | 201 | A01796 | A13215 | 228 |
| A01796 | A13829 | 353 | A01796 | A13982 | 302 |
| A01796 | A14009 | 391 | A01796 | A14332 | 468 |
| A01796 | A14635 | 380 | A01796 | A14643 | 210 |
| A01796 | A14741 | 475 | A01796 | A15241 | 341 |
| A01796 | A15498 | 283 | A01796 | A15726 | 174 |
| A01796 | A16281 | 491 | A01796 | A16438 | 452 |
| A01796 | A16605 | 200 | A01797 | A01798 | 391 |
| A01797 | A01817 | 364 | A01797 | A01850 | 63  |
| A01797 | A01902 | 63  | A01797 | A01908 | 63  |
| A01797 | A01914 | 367 | A01797 | A01939 | 160 |
| A01797 | A02006 | 252 | A01797 | A02080 | 232 |
| A01797 | A02175 | 208 | A01797 | A02178 | 174 |
| A01797 | A02215 | 162 | A01797 | A02411 | 283 |
| A01797 | A02418 | 384 | A01797 | A02488 | 243 |
| A01797 | A02493 | 288 | A01797 | A02505 | 490 |
| A01797 | A02510 | 168 | A01797 | A02586 | 405 |
| A01797 | A02588 | 213 | A01797 | A02670 | 255 |
| A01797 | A02722 | 174 | A01797 | A02734 | 99  |
| A01797 | A02744 | 177 | A01797 | A02749 | 318 |
| A01797 | A02752 | 156 | A01797 | A02771 | 207 |
| A01797 | A02789 | 312 | A01797 | A02792 | 310 |
| A01797 | A02803 | 63  | A01797 | A02814 | 311 |
| A01797 | A02830 | 423 | A01797 | A02837 | 486 |
| A01797 | A02859 | 486 | A01797 | A02877 | 455 |
| A01797 | A02878 | 151 | A01797 | A02893 | 205 |
| A01797 | A02968 | 151 | A01797 | A03019 | 63  |
| A01797 | A03095 | 454 | A01797 | A03110 | 193 |
| A01797 | A03112 | 491 | A01797 | A03125 | 270 |
| A01797 | A03252 | 235 | A01797 | A03259 | 469 |
| A01797 | A03309 | 319 | A01797 | A03319 | 160 |
| A01797 | A03343 | 213 | A01797 | A03414 | 196 |
| A01797 | A03451 | 238 | A01797 | A03473 | 489 |
| A01797 | A03475 | 160 | A01797 | A03486 | 198 |
| A01797 | A03522 | 180 | A01797 | A03523 | 274 |
| A01797 | A03544 | 306 | A01797 | A03554 | 151 |

|        |        |     |        |        |     |
|--------|--------|-----|--------|--------|-----|
| A01797 | A03562 | 267 | A01797 | A03585 | 144 |
| A01797 | A03596 | 491 | A01797 | A03598 | 452 |
| A01797 | A03604 | 199 | A01797 | A03608 | 413 |
| A01797 | A03609 | 491 | A01797 | A03642 | 899 |
| A01797 | A03644 | 260 | A01797 | A03739 | 307 |
| A01797 | A03755 | 180 | A01797 | A03820 | 173 |
| A01797 | A03843 | 424 | A01797 | A03981 | 191 |
| A01797 | A03990 | 412 | A01797 | A04007 | 308 |
| A01797 | A04117 | 184 | A01797 | A04280 | 240 |
| A01797 | A04442 | 346 | A01797 | A04527 | 165 |
| A01797 | A04622 | 490 | A01797 | A04623 | 188 |
| A01797 | A04848 | 454 | A01797 | A04939 | 486 |
| A01797 | A04954 | 172 | A01797 | A04996 | 317 |
| A01797 | A05094 | 174 | A01797 | A05122 | 193 |
| A01797 | A05155 | 417 | A01797 | A05216 | 490 |
| A01797 | A05309 | 238 | A01797 | A05317 | 224 |
| A01797 | A05639 | 199 | A01797 | A05735 | 425 |
| A01797 | A05827 | 475 | A01797 | A06050 | 270 |
| A01797 | A06140 | 224 | A01797 | A06161 | 204 |
| A01797 | A06166 | 199 | A01797 | A06244 | 205 |
| A01797 | A06312 | 152 | A01797 | A06400 | 182 |
| A01797 | A06410 | 224 | A01797 | A06428 | 180 |
| A01797 | A06488 | 152 | A01797 | A06581 | 372 |
| A01797 | A06606 | 475 | A01797 | A06608 | 229 |
| A01797 | A06623 | 168 | A01797 | A06650 | 321 |
| A01797 | A06697 | 168 | A01797 | A07091 | 281 |
| A01797 | A07116 | 172 | A01797 | A07127 | 224 |
| A01797 | A07135 | 363 | A01797 | A07165 | 391 |
| A01797 | A07206 | 223 | A01797 | A07313 | 165 |
| A01797 | A07339 | 419 | A01797 | A07742 | 224 |
| A01797 | A08070 | 274 | A01797 | A08203 | 157 |
| A01797 | A08603 | 257 | A01797 | A08700 | 480 |
| A01797 | A08851 | 232 | A01797 | A09151 | 246 |
| A01797 | A09153 | 213 | A01797 | A09173 | 372 |
| A01797 | A09192 | 319 | A01797 | A09211 | 221 |
| A01797 | A09389 | 270 | A01797 | A09394 | 245 |
| A01797 | A09932 | 184 | A01797 | A09963 | 177 |
| A01797 | A10018 | 481 | A01797 | A10047 | 361 |
| A01797 | A10551 | 272 | A01797 | A10725 | 317 |
| A01797 | A10832 | 249 | A01797 | A11450 | 177 |
| A01797 | A11683 | 226 | A01797 | A11759 | 393 |
| A01797 | A11840 | 278 | A01797 | A11926 | 160 |
| A01797 | A12275 | 187 | A01797 | A12401 | 168 |
| A01797 | A12544 | 301 | A01797 | A12546 | 301 |
| A01797 | A12547 | 301 | A01797 | A12568 | 301 |
| A01797 | A12642 | 301 | A01797 | A12707 | 224 |

|        |        |     |        |        |     |
|--------|--------|-----|--------|--------|-----|
| A01797 | A12960 | 187 | A01797 | A12976 | 177 |
| A01797 | A13348 | 224 | A01797 | A13369 | 299 |
| A01797 | A13697 | 301 | A01797 | A13734 | 212 |
| A01797 | A14210 | 263 | A01797 | A14353 | 177 |
| A01797 | A14515 | 270 | A01797 | A14520 | 351 |
| A01797 | A14588 | 260 | A01797 | A14664 | 249 |
| A01797 | A14682 | 361 | A01797 | A14741 | 404 |
| A01797 | A15241 | 196 | A01797 | A15491 | 249 |
| A01797 | A15704 | 154 | A01797 | A15726 | 279 |
| A01797 | A15804 | 152 | A01797 | A15836 | 270 |
| A01797 | A16095 | 272 | A01797 | A16281 | 256 |
| A01797 | A16411 | 337 | A01797 | A16848 | 235 |
| A01797 | A16934 | 199 | A01798 | A01844 | 408 |
| A01798 | A01872 | 170 | A01798 | A01883 | 307 |
| A01798 | A01909 | 249 | A01798 | A02131 | 183 |
| A01798 | A02335 | 184 | A01798 | A02343 | 157 |
| A01798 | A02364 | 390 | A01798 | A02505 | 163 |
| A01798 | A02605 | 228 | A01798 | A02691 | 446 |
| A01798 | A02694 | 451 | A01798 | A02985 | 327 |
| A01798 | A02991 | 191 | A01798 | A03004 | 252 |
| A01798 | A03571 | 285 | A01798 | A03575 | 201 |
| A01798 | A03594 | 176 | A01798 | A03667 | 475 |
| A01798 | A03739 | 470 | A01798 | A03841 | 330 |
| A01798 | A03843 | 258 | A01798 | A03872 | 368 |
| A01798 | A03962 | 251 | A01798 | A04014 | 314 |
| A01798 | A04053 | 452 | A01798 | A04108 | 484 |
| A01798 | A04290 | 314 | A01798 | A04342 | 306 |
| A01798 | A04460 | 185 | A01798 | A04622 | 286 |
| A01798 | A04713 | 170 | A01798 | A04933 | 436 |
| A01798 | A05103 | 195 | A01798 | A05381 | 252 |
| A01798 | A05789 | 176 | A01798 | A05866 | 486 |
| A01798 | A05940 | 278 | A01798 | A05958 | 201 |
| A01798 | A06337 | 235 | A01798 | A06550 | 170 |
| A01798 | A06607 | 455 | A01798 | A06610 | 491 |
| A01798 | A06635 | 491 | A01798 | A06688 | 411 |
| A01798 | A06970 | 273 | A01798 | A07177 | 174 |
| A01798 | A07200 | 190 | A01798 | A07499 | 438 |
| A01798 | A07565 | 232 | A01798 | A07574 | 205 |
| A01798 | A08389 | 327 | A01798 | A08739 | 260 |
| A01798 | A08858 | 156 | A01798 | A08872 | 184 |
| A01798 | A09018 | 400 | A01798 | A09262 | 470 |
| A01798 | A09359 | 425 | A01798 | A09364 | 210 |
| A01798 | A09566 | 167 | A01798 | A09935 | 475 |
| A01798 | A10397 | 267 | A01798 | A10707 | 294 |
| A01798 | A10810 | 162 | A01798 | A10839 | 291 |
| A01798 | A11447 | 314 | A01798 | A11575 | 163 |

|        |        |     |        |        |     |
|--------|--------|-----|--------|--------|-----|
| A01798 | A11626 | 224 | A01798 | A13152 | 475 |
| A01798 | A13593 | 477 | A01798 | A13638 | 241 |
| A01798 | A13861 | 252 | A01798 | A14013 | 162 |
| A01798 | A14016 | 152 | A01798 | A14133 | 152 |
| A01798 | A14169 | 291 | A01798 | A14248 | 173 |
| A01798 | A14342 | 435 | A01798 | A14349 | 457 |
| A01798 | A14520 | 226 | A01798 | A14655 | 243 |
| A01798 | A14741 | 489 | A01798 | A14839 | 217 |
| A01798 | A14996 | 425 | A01798 | A15095 | 232 |
| A01798 | A15295 | 323 | A01798 | A15726 | 208 |
| A01798 | A16281 | 441 | A01798 | A16355 | 438 |
| A01798 | A16741 | 265 | A01798 | A17149 | 167 |
| A01798 | A17207 | 469 | A01799 | A01881 | 213 |
| A01799 | A01889 | 163 | A01799 | A01922 | 247 |
| A01799 | A02145 | 249 | A01799 | A02168 | 279 |
| A01799 | A02251 | 176 | A01799 | A02327 | 263 |
| A01799 | A02377 | 210 | A01799 | A02606 | 252 |
| A01799 | A02639 | 360 | A01799 | A02642 | 163 |
| A01799 | A02709 | 208 | A01799 | A02776 | 229 |
| A01799 | A02837 | 119 | A01799 | A02986 | 256 |
| A01799 | A03100 | 168 | A01799 | A03287 | 241 |
| A01799 | A03390 | 171 | A01799 | A03684 | 246 |
| A01799 | A03813 | 168 | A01799 | A04117 | 177 |
| A01799 | A04279 | 193 | A01799 | A04497 | 265 |
| A01799 | A04706 | 183 | A01799 | A04710 | 162 |
| A01799 | A04729 | 235 | A01799 | A05002 | 307 |
| A01799 | A05597 | 358 | A01799 | A05949 | 353 |
| A01799 | A07140 | 167 | A01799 | A07887 | 274 |
| A01799 | A08248 | 173 | A01799 | A08911 | 205 |
| A01799 | A09200 | 386 | A01799 | A09375 | 294 |
| A01799 | A09744 | 165 | A01799 | A09749 | 185 |
| A01799 | A09967 | 353 | A01799 | A11086 | 288 |
| A01799 | A11738 | 227 | A01799 | A12361 | 167 |
| A01799 | A13373 | 191 | A01799 | A14449 | 218 |
| A01799 | A15763 | 269 | A01799 | A15775 | 294 |
| A01799 | A16110 | 286 | A01799 | A16716 | 433 |
| A01800 | A01801 | 425 | A01800 | A01802 | 340 |
| A01800 | A01906 | 251 | A01800 | A01910 | 407 |
| A01800 | A03550 | 383 | A01800 | A13340 | 165 |
| A01800 | A14471 | 262 | A01801 | A12897 | 218 |
| A01802 | A01803 | 268 | A01802 | A01804 | 316 |
| A01802 | A01894 | 420 | A01802 | A02108 | 152 |
| A01802 | A02608 | 285 | A01802 | A02769 | 281 |
| A01802 | A02812 | 317 | A01802 | A02859 | 224 |
| A01802 | A02874 | 240 | A01802 | A02945 | 177 |
| A01802 | A03049 | 185 | A01802 | A03259 | 235 |

|        |        |     |        |        |     |
|--------|--------|-----|--------|--------|-----|
| A01802 | A03473 | 344 | A01802 | A03548 | 363 |
| A01802 | A03550 | 488 | A01802 | A03554 | 201 |
| A01802 | A03557 | 260 | A01802 | A03563 | 263 |
| A01802 | A03608 | 396 | A01802 | A03621 | 340 |
| A01802 | A03773 | 174 | A01802 | A03818 | 173 |
| A01802 | A04281 | 294 | A01802 | A04286 | 235 |
| A01802 | A04709 | 235 | A01802 | A04848 | 396 |
| A01802 | A05107 | 286 | A01802 | A05348 | 461 |
| A01802 | A05742 | 198 | A01802 | A05985 | 159 |
| A01802 | A06054 | 348 | A01802 | A06286 | 195 |
| A01802 | A06899 | 285 | A01802 | A07154 | 256 |
| A01802 | A07161 | 212 | A01802 | A07166 | 174 |
| A01802 | A07200 | 480 | A01802 | A08447 | 341 |
| A01802 | A08604 | 429 | A01802 | A08699 | 425 |
| A01802 | A10431 | 319 | A01802 | A14186 | 195 |
| A01802 | A14405 | 184 | A01802 | A14440 | 163 |
| A01802 | A14652 | 273 | A01803 | A01804 | 362 |
| A01803 | A01806 | 188 | A01803 | A01888 | 176 |
| A01803 | A01912 | 218 | A01803 | A02696 | 235 |
| A01803 | A02712 | 288 | A01803 | A02984 | 223 |
| A01803 | A02988 | 221 | A01803 | A02990 | 457 |
| A01803 | A03516 | 218 | A01803 | A03545 | 199 |
| A01803 | A03548 | 396 | A01803 | A03550 | 329 |
| A01803 | A03557 | 319 | A01803 | A03563 | 322 |
| A01803 | A04281 | 346 | A01803 | A04286 | 467 |
| A01803 | A04848 | 374 | A01803 | A05346 | 380 |
| A01803 | A05348 | 326 | A01803 | A05742 | 156 |
| A01803 | A07200 | 270 | A01803 | A07537 | 322 |
| A01803 | A08741 | 285 | A01803 | A09292 | 216 |
| A01804 | A01806 | 369 | A01804 | A01912 | 274 |
| A01804 | A03548 | 416 | A01804 | A03549 | 369 |
| A01804 | A03551 | 398 | A01804 | A03563 | 358 |
| A01804 | A03613 | 447 | A01804 | A04281 | 378 |
| A01804 | A04286 | 340 | A01804 | A04848 | 449 |
| A01804 | A05348 | 363 | A01804 | A07200 | 199 |
| A01804 | A10477 | 347 | A01804 | A13779 | 430 |
| A01805 | A01806 | 462 | A01805 | A02812 | 180 |
| A01805 | A03475 | 396 | A01805 | A03608 | 267 |
| A01805 | A03621 | 385 | A01805 | A04286 | 307 |
| A01805 | A04608 | 249 | A01805 | A05742 | 455 |
| A01805 | A06242 | 260 | A01805 | A07480 | 213 |
| A01805 | A07911 | 168 | A01805 | A17136 | 198 |
| A01806 | A02990 | 204 | A01806 | A03549 | 201 |
| A01806 | A03552 | 205 | A01806 | A03553 | 474 |
| A01806 | A03554 | 121 | A01806 | A03557 | 180 |
| A01806 | A03613 | 363 | A01806 | A03615 | 267 |

|        |        |     |        |        |     |
|--------|--------|-----|--------|--------|-----|
| A01806 | A04709 | 451 | A01806 | A04848 | 221 |
| A01806 | A05621 | 207 | A01806 | A05742 | 491 |
| A01806 | A06359 | 210 | A01806 | A07524 | 441 |
| A01806 | A08450 | 185 | A01806 | A08561 | 234 |
| A01806 | A11735 | 182 | A01806 | A11737 | 184 |
| A01806 | A12606 | 196 | A01806 | A12625 | 159 |
| A01806 | A12730 | 180 | A01806 | A12858 | 182 |
| A01806 | A13737 | 152 | A01806 | A13779 | 350 |
| A01806 | A14214 | 185 | A01806 | A14270 | 156 |
| A01806 | A14569 | 345 | A01806 | A14903 | 191 |
| A01806 | A14917 | 180 | A01806 | A14962 | 191 |
| A01806 | A15709 | 163 | A01806 | A15774 | 157 |
| A01806 | A15940 | 180 | A01806 | A16157 | 204 |
| A01806 | A16187 | 267 | A01806 | A16215 | 198 |
| A01806 | A16585 | 229 | A01806 | A16587 | 174 |
| A01806 | A16597 | 218 | A01806 | A16664 | 317 |
| A01806 | A16680 | 196 | A01806 | A16695 | 256 |
| A01806 | A16699 | 154 | A01806 | A16774 | 229 |
| A01806 | A16815 | 246 | A01806 | A16838 | 160 |
| A01806 | A16900 | 208 | A01807 | A02989 | 451 |
| A01807 | A07160 | 274 | A01807 | A14589 | 165 |
| A01808 | A02803 | 339 | A01809 | A01900 | 263 |
| A01809 | A01988 | 545 | A01809 | A02268 | 240 |
| A01809 | A02343 | 319 | A01809 | A02420 | 200 |
| A01809 | A02454 | 236 | A01809 | A02535 | 398 |
| A01809 | A02853 | 216 | A01809 | A03330 | 288 |
| A01809 | A03480 | 481 | A01809 | A03556 | 536 |
| A01809 | A03597 | 565 | A01809 | A03617 | 415 |
| A01809 | A03626 | 285 | A01809 | A03718 | 167 |
| A01809 | A03892 | 485 | A01809 | A04686 | 435 |
| A01809 | A04848 | 413 | A01809 | A05273 | 225 |
| A01809 | A05350 | 208 | A01809 | A05531 | 448 |
| A01809 | A05539 | 565 | A01809 | A05563 | 246 |
| A01809 | A05605 | 232 | A01809 | A05621 | 571 |
| A01809 | A05638 | 256 | A01809 | A06204 | 560 |
| A01809 | A06347 | 491 | A01809 | A06361 | 468 |
| A01809 | A06758 | 486 | A01809 | A06838 | 177 |
| A01809 | A07180 | 566 | A01809 | A07294 | 480 |
| A01809 | A07521 | 458 | A01809 | A07961 | 447 |
| A01809 | A08183 | 371 | A01809 | A08400 | 490 |
| A01809 | A08447 | 167 | A01809 | A08715 | 183 |
| A01809 | A08770 | 296 | A01809 | A08780 | 147 |
| A01809 | A09344 | 183 | A01809 | A09566 | 151 |
| A01809 | A09625 | 393 | A01809 | A09628 | 200 |
| A01809 | A10317 | 491 | A01809 | A10603 | 191 |
| A01809 | A10655 | 262 | A01809 | A10662 | 366 |



|        |        |     |        |        |     |
|--------|--------|-----|--------|--------|-----|
| A01809 | A10664 | 270 | A01809 | A12824 | 503 |
| A01809 | A13570 | 193 | A01809 | A13831 | 462 |
| A01809 | A13837 | 193 | A01809 | A13876 | 200 |
| A01809 | A13881 | 200 | A01809 | A13882 | 457 |
| A01809 | A13902 | 490 | A01809 | A14056 | 191 |
| A01809 | A14087 | 378 | A01809 | A14088 | 490 |
| A01809 | A14171 | 200 | A01809 | A14173 | 424 |
| A01809 | A14179 | 536 | A01809 | A14180 | 333 |
| A01809 | A14186 | 491 | A01809 | A14247 | 229 |
| A01809 | A14356 | 200 | A01809 | A14358 | 208 |
| A01809 | A15357 | 601 | A01809 | A15370 | 566 |
| A01809 | A15556 | 180 | A01809 | A15568 | 327 |
| A01809 | A15569 | 188 | A01809 | A15712 | 355 |
| A01809 | A15718 | 480 | A01809 | A15719 | 433 |
| A01809 | A15724 | 406 | A01809 | A15757 | 260 |
| A01809 | A16066 | 200 | A01809 | A16232 | 200 |
| A01809 | A16611 | 210 | A01809 | A16634 | 223 |
| A01809 | A16657 | 160 | A01809 | A16919 | 200 |
| A01810 | A03874 | 396 | A01810 | A10795 | 391 |
| A01810 | A11131 | 405 | A01810 | A13831 | 339 |
| A01810 | A13900 | 398 | A01810 | A14006 | 328 |
| A01810 | A14105 | 373 | A01811 | A01988 | 93  |
| A01811 | A03293 | 63  | A01811 | A03330 | 180 |
| A01811 | A03489 | 210 | A01811 | A03565 | 445 |
| A01811 | A03618 | 210 | A01811 | A03626 | 631 |
| A01811 | A03718 | 401 | A01811 | A03890 | 455 |
| A01811 | A03891 | 334 | A01811 | A03892 | 446 |
| A01811 | A04048 | 172 | A01811 | A04292 | 273 |
| A01811 | A04686 | 157 | A01811 | A04893 | 609 |
| A01811 | A04896 | 329 | A01811 | A05023 | 517 |
| A01811 | A05201 | 386 | A01811 | A05233 | 569 |
| A01811 | A05531 | 185 | A01811 | A05692 | 288 |
| A01811 | A06659 | 486 | A01811 | A06675 | 635 |
| A01811 | A06930 | 367 | A01811 | A06941 | 452 |
| A01811 | A07242 | 361 | A01811 | A08056 | 157 |
| A01811 | A09050 | 334 | A01811 | A10655 | 249 |
| A01811 | A12047 | 151 | A01811 | A13844 | 620 |
| A01811 | A13846 | 417 | A01811 | A13867 | 249 |
| A01811 | A13882 | 160 | A01811 | A13887 | 303 |
| A01811 | A13902 | 245 | A01811 | A14095 | 401 |
| A01811 | A14182 | 334 | A01811 | A14247 | 417 |
| A01811 | A14281 | 279 | A01811 | A14661 | 488 |
| A01811 | A15626 | 432 | A01812 | A01813 | 491 |
| A01812 | A01861 | 255 | A01812 | A02117 | 154 |
| A01812 | A02192 | 218 | A01812 | A02629 | 208 |
| A01812 | A02995 | 491 | A01812 | A03432 | 190 |

|        |        |     |        |        |     |
|--------|--------|-----|--------|--------|-----|
| A01812 | A03730 | 177 | A01812 | A03882 | 252 |
| A01812 | A03949 | 196 | A01812 | A04079 | 201 |
| A01812 | A04879 | 208 | A01812 | A06046 | 218 |
| A01812 | A06622 | 168 | A01812 | A07192 | 157 |
| A01812 | A08768 | 236 | A01812 | A08905 | 480 |
| A01812 | A09356 | 274 | A01812 | A09509 | 221 |
| A01812 | A09783 | 263 | A01812 | A09797 | 230 |
| A01812 | A09821 | 277 | A01812 | A11300 | 296 |
| A01812 | A14644 | 163 | A01812 | A15365 | 185 |
| A01813 | A01825 | 310 | A01813 | A01956 | 170 |
| A01813 | A02117 | 208 | A01813 | A02228 | 183 |
| A01813 | A02361 | 205 | A01813 | A02995 | 491 |
| A01813 | A03131 | 234 | A01813 | A03207 | 247 |
| A01813 | A03704 | 152 | A01813 | A03882 | 424 |
| A01813 | A04079 | 236 | A01813 | A04696 | 229 |
| A01813 | A05621 | 159 | A01813 | A06032 | 177 |
| A01813 | A06064 | 266 | A01813 | A07446 | 408 |
| A01813 | A07920 | 167 | A01813 | A08905 | 469 |
| A01813 | A09355 | 266 | A01813 | A09356 | 247 |
| A01813 | A09821 | 251 | A01813 | A11817 | 224 |
| A01813 | A15295 | 400 | A01813 | A15297 | 238 |
| A01813 | A15338 | 395 | A01815 | A01816 | 418 |
| A01815 | A01819 | 391 | A01815 | A01825 | 441 |
| A01815 | A01832 | 294 | A01815 | A01833 | 420 |
| A01815 | A02994 | 345 | A01815 | A03856 | 379 |
| A01815 | A03959 | 293 | A01815 | A04056 | 408 |
| A01815 | A09321 | 416 | A01815 | A14699 | 174 |
| A01815 | A15668 | 394 | A01816 | A01825 | 366 |
| A01816 | A02859 | 152 | A01816 | A14622 | 339 |
| A01817 | A02185 | 224 | A01817 | A02306 | 208 |
| A01817 | A02749 | 316 | A01817 | A02812 | 191 |
| A01817 | A03112 | 156 | A01817 | A03399 | 257 |
| A01817 | A03851 | 200 | A01817 | A03882 | 257 |
| A01817 | A03976 | 249 | A01817 | A05260 | 288 |
| A01817 | A05914 | 205 | A01817 | A09633 | 290 |
| A01817 | A10710 | 215 | A01817 | A14642 | 230 |
| A01817 | A14664 | 243 | A01818 | A02905 | 283 |
| A01818 | A03029 | 391 | A01818 | A03081 | 246 |
| A01818 | A03112 | 200 | A01818 | A03181 | 213 |
| A01818 | A03453 | 480 | A01818 | A04537 | 416 |
| A01818 | A06818 | 299 | A01818 | A06979 | 271 |
| A01818 | A07145 | 207 | A01818 | A07167 | 234 |
| A01818 | A08482 | 400 | A01818 | A10111 | 347 |
| A01818 | A10215 | 329 | A01818 | A10506 | 297 |
| A01818 | A11075 | 291 | A01818 | A11239 | 400 |
| A01818 | A13609 | 235 | A01819 | A01825 | 318 |

|        |        |     |        |        |     |
|--------|--------|-----|--------|--------|-----|
| A01819 | A01832 | 213 | A01819 | A01833 | 391 |
| A01819 | A02994 | 391 | A01819 | A02996 | 388 |
| A01819 | A03422 | 184 | A01819 | A03440 | 274 |
| A01819 | A03734 | 224 | A01819 | A03759 | 265 |
| A01819 | A03856 | 329 | A01819 | A03959 | 210 |
| A01819 | A04056 | 441 | A01819 | A05880 | 160 |
| A01819 | A07433 | 177 | A01819 | A08549 | 219 |
| A01819 | A08812 | 157 | A01819 | A09321 | 384 |
| A01819 | A14699 | 305 | A01819 | A14778 | 218 |
| A01819 | A15668 | 351 | A01820 | A01832 | 316 |
| A01821 | A07695 | 277 | A01822 | A01824 | 414 |
| A01822 | A02165 | 151 | A01822 | A02204 | 201 |
| A01822 | A02874 | 379 | A01822 | A02877 | 491 |
| A01822 | A02878 | 262 | A01822 | A02893 | 263 |
| A01822 | A02959 | 227 | A01822 | A03211 | 160 |
| A01822 | A03676 | 408 | A01822 | A03677 | 160 |
| A01822 | A03752 | 491 | A01822 | A03754 | 393 |
| A01822 | A03809 | 201 | A01822 | A03888 | 643 |
| A01822 | A03948 | 166 | A01822 | A03958 | 185 |
| A01822 | A03981 | 491 | A01822 | A04456 | 333 |
| A01822 | A04507 | 201 | A01822 | A04681 | 424 |
| A01822 | A04686 | 157 | A01822 | A04824 | 475 |
| A01822 | A04931 | 249 | A01822 | A04949 | 346 |
| A01822 | A05024 | 249 | A01822 | A05271 | 152 |
| A01822 | A05331 | 205 | A01822 | A05418 | 162 |
| A01822 | A05449 | 668 | A01822 | A05557 | 196 |
| A01822 | A05562 | 486 | A01822 | A05955 | 254 |
| A01822 | A06161 | 224 | A01822 | A06466 | 491 |
| A01822 | A06554 | 283 | A01822 | A06581 | 445 |
| A01822 | A06599 | 258 | A01822 | A06676 | 364 |
| A01822 | A06796 | 201 | A01822 | A06814 | 224 |
| A01822 | A06884 | 208 | A01822 | A07201 | 465 |
| A01822 | A07203 | 208 | A01822 | A07243 | 393 |
| A01822 | A07251 | 484 | A01822 | A07311 | 562 |
| A01822 | A07451 | 238 | A01822 | A07581 | 432 |
| A01822 | A07798 | 491 | A01822 | A07851 | 548 |
| A01822 | A07984 | 201 | A01822 | A08301 | 490 |
| A01822 | A08315 | 265 | A01822 | A08358 | 393 |
| A01822 | A08408 | 434 | A01822 | A08449 | 201 |
| A01822 | A08501 | 196 | A01822 | A08519 | 299 |
| A01822 | A08533 | 537 | A01822 | A08543 | 319 |
| A01822 | A08556 | 208 | A01822 | A08559 | 458 |
| A01822 | A08662 | 173 | A01822 | A08664 | 394 |
| A01822 | A08684 | 405 | A01822 | A08727 | 481 |
| A01822 | A08748 | 491 | A01822 | A08859 | 480 |
| A01822 | A09045 | 486 | A01822 | A09129 | 179 |

|        |        |     |        |        |     |
|--------|--------|-----|--------|--------|-----|
| A01822 | A09297 | 543 | A01822 | A09449 | 249 |
| A01822 | A09576 | 346 | A01822 | A09577 | 488 |
| A01822 | A09655 | 491 | A01822 | A09733 | 434 |
| A01822 | A09881 | 793 | A01822 | A09902 | 227 |
| A01822 | A10266 | 163 | A01822 | A10417 | 398 |
| A01822 | A10427 | 412 | A01822 | A10532 | 471 |
| A01822 | A10586 | 173 | A01822 | A10709 | 160 |
| A01822 | A10803 | 346 | A01822 | A11113 | 486 |
| A01822 | A11381 | 249 | A01822 | A11616 | 241 |
| A01822 | A11822 | 450 | A01822 | A11823 | 333 |
| A01822 | A11992 | 191 | A01822 | A12011 | 156 |
| A01822 | A12043 | 160 | A01822 | A12084 | 263 |
| A01822 | A12127 | 201 | A01822 | A12170 | 151 |
| A01822 | A12222 | 333 | A01822 | A12227 | 407 |
| A01822 | A12328 | 469 | A01822 | A12329 | 457 |
| A01822 | A12342 | 163 | A01822 | A13044 | 475 |
| A01822 | A13157 | 163 | A01822 | A13340 | 545 |
| A01822 | A13344 | 179 | A01822 | A13375 | 160 |
| A01822 | A13557 | 238 | A01822 | A13609 | 172 |
| A01822 | A13720 | 179 | A01822 | A13949 | 283 |
| A01822 | A14000 | 196 | A01822 | A14056 | 216 |
| A01822 | A14073 | 480 | A01822 | A14188 | 491 |
| A01822 | A14216 | 532 | A01822 | A14247 | 167 |
| A01822 | A14263 | 208 | A01822 | A14279 | 152 |
| A01822 | A14738 | 274 | A01822 | A15133 | 479 |
| A01822 | A15146 | 179 | A01822 | A15244 | 272 |
| A01822 | A15624 | 465 | A01822 | A15659 | 457 |
| A01822 | A15660 | 490 | A01822 | A15684 | 534 |
| A01822 | A15918 | 454 | A01822 | A15929 | 201 |
| A01822 | A15931 | 474 | A01822 | A15932 | 544 |
| A01822 | A15933 | 545 | A01822 | A15951 | 179 |
| A01822 | A16088 | 469 | A01822 | A16095 | 324 |
| A01822 | A16144 | 400 | A01822 | A16272 | 520 |
| A01822 | A16318 | 356 | A01822 | A16418 | 185 |
| A01822 | A16437 | 535 | A01822 | A16446 | 160 |
| A01822 | A16462 | 352 | A01822 | A16585 | 187 |
| A01822 | A16766 | 172 | A01822 | A16829 | 246 |
| A01822 | A16837 | 328 | A01822 | A16912 | 195 |
| A01822 | A17193 | 296 | A01823 | A03676 | 419 |
| A01823 | A06382 | 388 | A01823 | A15624 | 168 |
| A01823 | A15660 | 185 | A01823 | A15920 | 291 |
| A01823 | A15932 | 200 | A01824 | A02353 | 480 |
| A01824 | A02487 | 228 | A01824 | A02718 | 424 |
| A01824 | A03453 | 469 | A01824 | A03490 | 449 |
| A01824 | A03601 | 167 | A01824 | A03881 | 434 |
| A01824 | A05417 | 218 | A01824 | A06000 | 183 |

|        |        |     |        |        |     |
|--------|--------|-----|--------|--------|-----|
| A01824 | A06365 | 302 | A01824 | A06425 | 322 |
| A01824 | A06466 | 386 | A01824 | A06975 | 324 |
| A01824 | A07581 | 218 | A01824 | A08301 | 452 |
| A01824 | A08408 | 219 | A01824 | A08901 | 382 |
| A01824 | A08932 | 313 | A01824 | A09297 | 212 |
| A01824 | A09587 | 388 | A01824 | A13340 | 406 |
| A01824 | A15624 | 347 | A01824 | A15932 | 491 |
| A01824 | A15933 | 371 | A01824 | A15951 | 310 |
| A01825 | A01832 | 301 | A01825 | A01833 | 371 |
| A01825 | A01837 | 180 | A01825 | A02994 | 424 |
| A01825 | A02997 | 377 | A01825 | A03856 | 294 |
| A01825 | A03959 | 297 | A01825 | A04056 | 347 |
| A01825 | A06546 | 278 | A01825 | A06929 | 407 |
| A01825 | A07446 | 305 | A01825 | A09321 | 362 |
| A01825 | A14699 | 457 | A01825 | A15668 | 321 |
| A01826 | A02203 | 340 | A01826 | A02542 | 254 |
| A01826 | A02998 | 353 | A01826 | A03453 | 247 |
| A01826 | A03820 | 205 | A01826 | A03901 | 249 |
| A01826 | A03902 | 424 | A01826 | A03907 | 422 |
| A01826 | A04055 | 351 | A01826 | A05154 | 305 |
| A01826 | A06084 | 338 | A01826 | A06832 | 369 |
| A01826 | A08289 | 296 | A01826 | A09042 | 316 |
| A01826 | A09713 | 358 | A01826 | A09717 | 247 |
| A01826 | A13894 | 228 | A01826 | A14074 | 247 |
| A01827 | A02009 | 346 | A01827 | A02040 | 490 |
| A01827 | A02225 | 269 | A01827 | A02527 | 281 |
| A01827 | A02607 | 196 | A01827 | A02743 | 259 |
| A01827 | A02994 | 475 | A01827 | A03328 | 188 |
| A01827 | A03715 | 367 | A01827 | A03798 | 218 |
| A01827 | A03930 | 385 | A01827 | A04209 | 451 |
| A01827 | A04508 | 385 | A01827 | A04661 | 252 |
| A01827 | A04777 | 355 | A01827 | A05417 | 215 |
| A01827 | A05812 | 218 | A01827 | A06546 | 260 |
| A01827 | A07237 | 269 | A01827 | A07394 | 402 |
| A01827 | A07756 | 171 | A01827 | A10829 | 367 |
| A01827 | A11526 | 254 | A01827 | A15379 | 207 |
| A01827 | A15666 | 185 | A01828 | A02541 | 307 |
| A01828 | A03327 | 281 | A01828 | A03328 | 414 |
| A01828 | A04140 | 480 | A01828 | A06493 | 371 |
| A01828 | A07205 | 265 | A01828 | A11854 | 462 |
| A01828 | A12013 | 462 | A01828 | A14703 | 321 |
| A01829 | A01888 | 168 | A01829 | A01982 | 227 |
| A01829 | A02028 | 235 | A01829 | A02048 | 154 |
| A01829 | A02173 | 286 | A01829 | A02325 | 268 |
| A01829 | A02559 | 210 | A01829 | A02701 | 276 |
| A01829 | A02753 | 185 | A01829 | A03373 | 249 |

|        |        |     |        |        |     |
|--------|--------|-----|--------|--------|-----|
| A01829 | A04286 | 293 | A01829 | A04681 | 224 |
| A01829 | A04757 | 401 | A01829 | A05331 | 162 |
| A01829 | A05447 | 385 | A01829 | A06635 | 223 |
| A01829 | A07122 | 165 | A01829 | A07200 | 260 |
| A01829 | A07239 | 270 | A01829 | A07656 | 230 |
| A01829 | A10337 | 255 | A01829 | A14405 | 246 |
| A01829 | A17078 | 154 | A01830 | A01835 | 361 |
| A01830 | A02081 | 344 | A01830 | A02361 | 234 |
| A01830 | A02995 | 228 | A01830 | A03042 | 435 |
| A01830 | A03115 | 235 | A01830 | A03259 | 279 |
| A01830 | A03456 | 340 | A01830 | A03840 | 285 |
| A01830 | A03893 | 229 | A01830 | A06608 | 152 |
| A01830 | A08655 | 333 | A01830 | A09124 | 435 |
| A01830 | A09434 | 271 | A01830 | A11131 | 229 |
| A01830 | A12357 | 294 | A01830 | A14430 | 176 |
| A01830 | A14475 | 230 | A01830 | A14585 | 163 |
| A01830 | A15346 | 188 | A01830 | A15379 | 260 |
| A01831 | A02602 | 334 | A01831 | A03228 | 332 |
| A01831 | A05017 | 334 | A01831 | A06425 | 334 |
| A01831 | A06827 | 334 | A01831 | A07531 | 334 |
| A01831 | A08201 | 334 | A01831 | A15624 | 503 |
| A01831 | A15651 | 334 | A01831 | A15750 | 334 |
| A01831 | A15917 | 334 | A01831 | A15932 | 334 |
| A01831 | A15937 | 334 | A01832 | A01833 | 446 |
| A01832 | A02026 | 286 | A01832 | A02122 | 167 |
| A01832 | A02257 | 241 | A01832 | A02422 | 286 |
| A01832 | A02435 | 157 | A01832 | A02675 | 427 |
| A01832 | A02678 | 378 | A01832 | A02694 | 162 |
| A01832 | A02695 | 335 | A01832 | A02743 | 162 |
| A01832 | A02795 | 191 | A01832 | A02878 | 212 |
| A01832 | A02994 | 245 | A01832 | A03087 | 249 |
| A01832 | A03095 | 204 | A01832 | A03174 | 235 |
| A01832 | A03451 | 316 | A01832 | A03453 | 187 |
| A01832 | A03456 | 212 | A01832 | A03520 | 221 |
| A01832 | A03526 | 152 | A01832 | A03650 | 294 |
| A01832 | A03683 | 235 | A01832 | A03790 | 168 |
| A01832 | A03856 | 317 | A01832 | A03860 | 385 |
| A01832 | A03931 | 183 | A01832 | A04056 | 258 |
| A01832 | A04075 | 204 | A01832 | A04346 | 151 |
| A01832 | A04348 | 263 | A01832 | A04473 | 210 |
| A01832 | A04505 | 201 | A01832 | A04548 | 151 |
| A01832 | A04578 | 427 | A01832 | A04731 | 302 |
| A01832 | A04784 | 263 | A01832 | A04853 | 162 |
| A01832 | A04864 | 384 | A01832 | A04895 | 232 |
| A01832 | A04907 | 232 | A01832 | A04908 | 283 |
| A01832 | A05111 | 435 | A01832 | A05168 | 193 |

|        |        |     |        |        |     |
|--------|--------|-----|--------|--------|-----|
| A01832 | A05310 | 255 | A01832 | A05375 | 154 |
| A01832 | A05424 | 187 | A01832 | A05608 | 465 |
| A01832 | A05734 | 212 | A01832 | A06048 | 353 |
| A01832 | A06137 | 173 | A01832 | A06595 | 213 |
| A01832 | A07046 | 263 | A01832 | A07201 | 356 |
| A01832 | A07217 | 355 | A01832 | A08022 | 489 |
| A01832 | A08070 | 307 | A01832 | A08381 | 412 |
| A01832 | A08382 | 485 | A01832 | A08430 | 443 |
| A01832 | A08439 | 483 | A01832 | A09026 | 218 |
| A01832 | A09051 | 286 | A01832 | A09103 | 286 |
| A01832 | A09229 | 188 | A01832 | A09321 | 279 |
| A01832 | A09624 | 345 | A01832 | A09703 | 291 |
| A01832 | A09708 | 486 | A01832 | A09897 | 330 |
| A01832 | A09989 | 238 | A01832 | A10214 | 162 |
| A01832 | A10614 | 208 | A01832 | A10997 | 330 |
| A01832 | A11395 | 488 | A01832 | A11439 | 477 |
| A01832 | A12654 | 228 | A01832 | A13212 | 165 |
| A01832 | A14085 | 358 | A01832 | A14166 | 401 |
| A01832 | A14188 | 223 | A01832 | A15498 | 240 |
| A01832 | A15598 | 430 | A01832 | A15600 | 294 |
| A01832 | A15668 | 218 | A01832 | A15762 | 477 |
| A01832 | A15913 | 386 | A01832 | A15943 | 480 |
| A01832 | A15944 | 299 | A01832 | A15945 | 399 |
| A01832 | A15946 | 491 | A01832 | A16067 | 483 |
| A01832 | A16093 | 486 | A01832 | A16144 | 465 |
| A01832 | A16149 | 183 | A01832 | A16518 | 330 |
| A01832 | A16519 | 316 | A01832 | A16641 | 330 |
| A01833 | A02994 | 345 | A01833 | A03856 | 379 |
| A01833 | A03959 | 293 | A01833 | A04056 | 408 |
| A01833 | A09321 | 416 | A01833 | A14699 | 174 |
| A01833 | A15668 | 394 | A01834 | A02854 | 321 |
| A01834 | A02918 | 297 | A01834 | A02947 | 372 |
| A01834 | A03292 | 394 | A01834 | A03506 | 305 |
| A01834 | A04536 | 266 | A01834 | A04961 | 374 |
| A01834 | A05985 | 288 | A01834 | A06499 | 447 |
| A01834 | A07157 | 262 | A01834 | A13872 | 338 |
| A01835 | A01867 | 337 | A01835 | A02698 | 160 |
| A01835 | A02864 | 246 | A01835 | A03042 | 383 |
| A01835 | A03649 | 279 | A01835 | A03651 | 450 |
| A01835 | A06471 | 388 | A01835 | A06588 | 160 |
| A01835 | A06688 | 226 | A01835 | A07088 | 307 |
| A01835 | A10414 | 339 | A01835 | A13212 | 339 |
| A01836 | A02298 | 291 | A01836 | A02340 | 347 |
| A01836 | A02414 | 352 | A01836 | A02635 | 269 |
| A01836 | A02729 | 441 | A01836 | A02730 | 348 |
| A01836 | A02735 | 358 | A01836 | A02751 | 369 |

|        |        |     |        |        |     |
|--------|--------|-----|--------|--------|-----|
| A01836 | A02756 | 294 | A01836 | A02808 | 371 |
| A01836 | A02812 | 262 | A01836 | A02841 | 283 |
| A01836 | A02859 | 152 | A01836 | A02874 | 210 |
| A01836 | A03275 | 246 | A01836 | A04088 | 380 |
| A01836 | A04206 | 389 | A01836 | A04247 | 457 |
| A01836 | A04274 | 407 | A01836 | A04298 | 422 |
| A01836 | A04518 | 393 | A01836 | A04548 | 358 |
| A01836 | A04567 | 363 | A01836 | A05171 | 438 |
| A01836 | A06415 | 252 | A01837 | A02986 | 212 |
| A01837 | A03453 | 307 | A01837 | A03456 | 486 |
| A01837 | A03671 | 168 | A01837 | A04642 | 160 |
| A01837 | A05025 | 168 | A01837 | A05228 | 296 |
| A01837 | A05375 | 167 | A01837 | A06048 | 361 |
| A01837 | A07160 | 472 | A01837 | A07773 | 232 |
| A01837 | A09232 | 270 | A01837 | A09336 | 262 |
| A01837 | A09352 | 154 | A01837 | A10798 | 383 |
| A01837 | A11244 | 171 | A01837 | A11337 | 195 |
| A01837 | A11521 | 391 | A01837 | A13342 | 308 |
| A01837 | A13905 | 277 | A01837 | A13989 | 212 |
| A01837 | A14479 | 218 | A01837 | A14536 | 251 |
| A01837 | A15312 | 183 | A01837 | A15813 | 201 |
| A01837 | A16462 | 179 | A01837 | A16886 | 195 |
| A01838 | A01889 | 162 | A01838 | A01900 | 185 |
| A01838 | A02687 | 329 | A01838 | A02706 | 236 |
| A01838 | A02777 | 272 | A01838 | A02878 | 195 |
| A01838 | A02968 | 317 | A01838 | A03001 | 157 |
| A01838 | A03256 | 168 | A01838 | A03444 | 243 |
| A01838 | A03582 | 260 | A01838 | A03611 | 353 |
| A01838 | A03679 | 364 | A01838 | A03754 | 160 |
| A01838 | A03819 | 176 | A01838 | A03830 | 159 |
| A01838 | A03832 | 470 | A01838 | A04406 | 174 |
| A01838 | A05104 | 385 | A01838 | A05568 | 168 |
| A01838 | A05591 | 154 | A01838 | A05665 | 249 |
| A01838 | A05666 | 285 | A01838 | A05791 | 195 |
| A01838 | A06058 | 412 | A01838 | A06138 | 263 |
| A01838 | A06341 | 383 | A01838 | A06877 | 379 |
| A01838 | A08289 | 190 | A01838 | A09248 | 236 |
| A01838 | A09519 | 353 | A01838 | A10018 | 163 |
| A01838 | A10313 | 268 | A01838 | A12667 | 226 |
| A01838 | A13346 | 285 | A01838 | A13969 | 154 |
| A01838 | A14025 | 165 | A01838 | A15528 | 326 |
| A01838 | A17033 | 252 | A01839 | A01930 | 200 |
| A01839 | A01939 | 205 | A01839 | A02099 | 193 |
| A01839 | A02333 | 174 | A01839 | A02352 | 212 |
| A01839 | A02388 | 188 | A01839 | A02485 | 187 |
| A01839 | A02586 | 229 | A01839 | A02687 | 168 |



|        |        |     |        |        |     |
|--------|--------|-----|--------|--------|-----|
| A01839 | A02877 | 447 | A01839 | A03113 | 154 |
| A01839 | A03321 | 151 | A01839 | A03451 | 369 |
| A01839 | A03498 | 154 | A01839 | A03520 | 251 |
| A01839 | A03611 | 477 | A01839 | A03861 | 196 |
| A01839 | A04175 | 491 | A01839 | A04225 | 236 |
| A01839 | A04257 | 202 | A01839 | A04435 | 229 |
| A01839 | A04444 | 329 | A01839 | A04492 | 152 |
| A01839 | A04595 | 319 | A01839 | A04715 | 491 |
| A01839 | A04790 | 491 | A01839 | A04849 | 154 |
| A01839 | A04903 | 218 | A01839 | A05075 | 257 |
| A01839 | A05076 | 202 | A01839 | A05174 | 163 |
| A01839 | A06021 | 205 | A01839 | A06083 | 277 |
| A01839 | A06106 | 290 | A01839 | A06162 | 196 |
| A01839 | A06379 | 488 | A01839 | A06428 | 154 |
| A01839 | A06623 | 243 | A01839 | A07375 | 491 |
| A01839 | A07903 | 241 | A01839 | A08037 | 408 |
| A01839 | A08049 | 334 | A01839 | A08571 | 531 |
| A01839 | A08700 | 163 | A01839 | A09020 | 154 |
| A01839 | A09124 | 162 | A01839 | A09396 | 180 |
| A01839 | A09646 | 438 | A01839 | A09698 | 152 |
| A01839 | A09976 | 236 | A01839 | A10051 | 382 |
| A01839 | A10205 | 170 | A01839 | A11072 | 221 |
| A01839 | A11258 | 215 | A01839 | A11348 | 416 |
| A01839 | A11529 | 338 | A01839 | A12471 | 334 |
| A01839 | A12951 | 290 | A01839 | A13369 | 328 |
| A01839 | A14279 | 235 | A01839 | A14633 | 363 |
| A01839 | A15685 | 167 | A01839 | A15704 | 213 |
| A01839 | A15726 | 375 | A01839 | A17064 | 277 |
| A01840 | A01876 | 219 | A01840 | A02697 | 404 |
| A01840 | A02836 | 162 | A01840 | A03095 | 183 |
| A01840 | A04271 | 307 | A01840 | A07187 | 424 |
| A01841 | A01855 | 224 | A01841 | A01857 | 219 |
| A01841 | A01858 | 294 | A01841 | A01859 | 301 |
| A01841 | A01907 | 343 | A01841 | A02353 | 491 |
| A01841 | A02568 | 172 | A01841 | A02608 | 241 |
| A01841 | A02695 | 374 | A01841 | A02718 | 491 |
| A01841 | A02866 | 285 | A01841 | A02991 | 165 |
| A01841 | A03003 | 163 | A01841 | A03443 | 218 |
| A01841 | A03453 | 473 | A01841 | A03477 | 491 |
| A01841 | A03826 | 252 | A01841 | A03832 | 409 |
| A01841 | A03841 | 193 | A01841 | A03863 | 329 |
| A01841 | A03983 | 290 | A01841 | A04035 | 205 |
| A01841 | A04049 | 246 | A01841 | A05006 | 168 |
| A01841 | A05436 | 290 | A01841 | A05515 | 224 |
| A01841 | A06358 | 366 | A01841 | A07288 | 273 |
| A01841 | A07688 | 160 | A01841 | A07746 | 491 |

|        |        |     |        |        |     |
|--------|--------|-----|--------|--------|-----|
| A01841 | A08280 | 322 | A01841 | A08741 | 385 |
| A01841 | A08748 | 212 | A01841 | A08817 | 491 |
| A01841 | A09587 | 334 | A01841 | A10047 | 241 |
| A01841 | A10614 | 358 | A01841 | A13330 | 472 |
| A01841 | A13416 | 450 | A01841 | A13426 | 480 |
| A01841 | A15674 | 218 | A01841 | A15840 | 424 |
| A01841 | A16325 | 281 | A01841 | A16328 | 185 |
| A01841 | A16636 | 252 | A01841 | A16741 | 154 |
| A01842 | A01993 | 339 | A01842 | A02190 | 394 |
| A01842 | A02603 | 414 | A01842 | A02609 | 399 |
| A01842 | A02637 | 412 | A01842 | A02769 | 374 |
| A01842 | A02812 | 236 | A01842 | A02835 | 374 |
| A01842 | A03019 | 162 | A01842 | A03111 | 418 |
| A01842 | A03782 | 299 | A01842 | A04756 | 355 |
| A01842 | A06054 | 337 | A01842 | A14366 | 252 |
| A01842 | A15394 | 319 | A01842 | A15395 | 302 |
| A01842 | A15516 | 329 | A01842 | A15974 | 260 |
| A01843 | A01849 | 422 | A01843 | A02377 | 199 |
| A01843 | A02564 | 409 | A01843 | A02639 | 176 |
| A01843 | A02641 | 335 | A01843 | A02693 | 297 |
| A01843 | A02798 | 232 | A01843 | A03001 | 263 |
| A01843 | A03474 | 254 | A01843 | A04223 | 433 |
| A01843 | A04260 | 256 | A01843 | A05949 | 318 |
| A01843 | A06863 | 270 | A01843 | A07191 | 245 |
| A01843 | A07339 | 210 | A01843 | A10160 | 373 |
| A01844 | A01886 | 71  | A01844 | A02411 | 899 |
| A01844 | A02450 | 899 | A01844 | A02464 | 899 |
| A01844 | A02470 | 299 | A01844 | A02472 | 899 |
| A01844 | A02494 | 912 | A01844 | A02517 | 899 |
| A01844 | A02564 | 475 | A01844 | A02677 | 218 |
| A01844 | A02689 | 193 | A01844 | A02703 | 63  |
| A01844 | A02717 | 135 | A01844 | A02731 | 63  |
| A01844 | A02737 | 63  | A01844 | A02825 | 63  |
| A01844 | A02828 | 899 | A01844 | A02830 | 232 |
| A01844 | A02864 | 80  | A01844 | A02904 | 333 |
| A01844 | A02908 | 899 | A01844 | A02920 | 223 |
| A01844 | A02942 | 899 | A01844 | A02951 | 899 |
| A01844 | A02958 | 899 | A01844 | A02968 | 899 |
| A01844 | A03001 | 63  | A01844 | A03010 | 63  |
| A01844 | A03112 | 262 | A01844 | A03130 | 202 |
| A01844 | A03209 | 899 | A01844 | A03213 | 263 |
| A01844 | A03214 | 246 | A01844 | A03223 | 463 |
| A01844 | A03226 | 159 | A01844 | A03259 | 182 |
| A01844 | A03322 | 154 | A01844 | A03436 | 330 |
| A01844 | A03461 | 151 | A01844 | A03477 | 288 |
| A01844 | A03575 | 307 | A01844 | A03591 | 899 |

|        |        |     |        |        |     |
|--------|--------|-----|--------|--------|-----|
| A01844 | A03718 | 899 | A01844 | A03726 | 199 |
| A01844 | A03741 | 899 | A01844 | A03843 | 296 |
| A01844 | A03893 | 405 | A01844 | A03979 | 159 |
| A01844 | A04288 | 257 | A01844 | A04346 | 419 |
| A01844 | A04600 | 899 | A01844 | A04622 | 455 |
| A01844 | A04699 | 989 | A01844 | A04807 | 160 |
| A01844 | A05082 | 252 | A01844 | A05211 | 159 |
| A01844 | A05284 | 216 | A01844 | A05621 | 288 |
| A01844 | A05760 | 899 | A01844 | A05767 | 293 |
| A01844 | A06039 | 199 | A01844 | A06544 | 899 |
| A01844 | A06610 | 491 | A01844 | A06636 | 159 |
| A01844 | A06642 | 273 | A01844 | A07091 | 899 |
| A01844 | A07190 | 491 | A01844 | A07311 | 989 |
| A01844 | A07339 | 899 | A01844 | A07999 | 427 |
| A01844 | A08280 | 430 | A01844 | A08517 | 249 |
| A01844 | A08571 | 270 | A01844 | A08732 | 899 |
| A01844 | A08851 | 165 | A01844 | A08858 | 899 |
| A01844 | A09319 | 899 | A01844 | A09390 | 208 |
| A01844 | A09542 | 899 | A01844 | A09556 | 490 |
| A01844 | A09558 | 160 | A01844 | A09577 | 63  |
| A01844 | A09643 | 63  | A01844 | A09804 | 899 |
| A01844 | A10084 | 180 | A01844 | A10174 | 913 |
| A01844 | A10311 | 191 | A01844 | A10372 | 445 |
| A01844 | A10580 | 899 | A01844 | A10615 | 899 |
| A01844 | A10624 | 899 | A01844 | A10625 | 369 |
| A01844 | A10941 | 159 | A01844 | A11019 | 899 |
| A01844 | A11125 | 899 | A01844 | A11180 | 168 |
| A01844 | A11250 | 274 | A01844 | A11369 | 99  |
| A01844 | A11917 | 428 | A01844 | A11983 | 900 |
| A01844 | A12666 | 152 | A01844 | A12705 | 899 |
| A01844 | A13146 | 899 | A01844 | A13225 | 899 |
| A01844 | A13244 | 191 | A01844 | A13293 | 241 |
| A01844 | A13313 | 462 | A01844 | A13346 | 303 |
| A01844 | A13824 | 151 | A01844 | A13829 | 461 |
| A01844 | A13902 | 188 | A01844 | A13981 | 899 |
| A01844 | A13985 | 899 | A01844 | A14004 | 899 |
| A01844 | A14006 | 165 | A01844 | A14019 | 899 |
| A01844 | A14029 | 63  | A01844 | A14188 | 249 |
| A01844 | A14207 | 899 | A01844 | A14300 | 265 |
| A01844 | A14443 | 989 | A01844 | A14444 | 903 |
| A01844 | A14481 | 209 | A01844 | A14489 | 419 |
| A01844 | A14643 | 312 | A01844 | A15239 | 180 |
| A01844 | A15353 | 229 | A01844 | A15397 | 899 |
| A01844 | A15559 | 390 | A01844 | A15560 | 195 |
| A01844 | A15726 | 208 | A01844 | A15923 | 156 |
| A01844 | A16245 | 202 | A01844 | A16372 | 256 |

|        |        |     |        |        |     |
|--------|--------|-----|--------|--------|-----|
| A01844 | A16911 | 283 | A01845 | A01846 | 462 |
| A01845 | A01847 | 449 | A01845 | A01848 | 465 |
| A01845 | A01868 | 414 | A01845 | A02011 | 266 |
| A01845 | A02753 | 227 | A01845 | A02802 | 419 |
| A01845 | A03465 | 221 | A01845 | A05570 | 327 |
| A01845 | A07706 | 205 | A01845 | A08365 | 156 |
| A01845 | A08933 | 379 | A01845 | A14265 | 323 |
| A01846 | A01847 | 488 | A01846 | A01848 | 481 |
| A01846 | A01900 | 223 | A01846 | A01941 | 451 |
| A01846 | A02008 | 322 | A01846 | A02011 | 424 |
| A01846 | A02331 | 167 | A01846 | A02371 | 262 |
| A01846 | A02454 | 218 | A01846 | A02481 | 162 |
| A01846 | A02574 | 480 | A01846 | A02802 | 486 |
| A01846 | A03034 | 254 | A01846 | A03036 | 302 |
| A01846 | A03278 | 319 | A01846 | A03292 | 229 |
| A01846 | A03742 | 267 | A01846 | A05203 | 438 |
| A01846 | A05570 | 305 | A01846 | A06190 | 188 |
| A01846 | A06408 | 348 | A01846 | A06631 | 294 |
| A01846 | A07191 | 232 | A01846 | A07342 | 307 |
| A01846 | A07399 | 260 | A01846 | A07706 | 268 |
| A01846 | A10214 | 303 | A01846 | A10689 | 198 |
| A01846 | A14344 | 324 | A01846 | A16099 | 313 |
| A01847 | A01848 | 468 | A01847 | A01868 | 379 |
| A01847 | A01900 | 416 | A01847 | A01941 | 490 |
| A01847 | A02011 | 469 | A01847 | A02086 | 435 |
| A01847 | A02439 | 168 | A01847 | A02454 | 373 |
| A01847 | A02637 | 198 | A01847 | A02657 | 324 |
| A01847 | A02739 | 246 | A01847 | A02802 | 488 |
| A01847 | A03019 | 465 | A01847 | A03156 | 221 |
| A01847 | A03177 | 216 | A01847 | A03243 | 323 |
| A01847 | A03279 | 279 | A01847 | A03742 | 180 |
| A01847 | A04859 | 379 | A01847 | A04908 | 286 |
| A01847 | A06195 | 160 | A01847 | A06408 | 406 |
| A01847 | A06631 | 362 | A01847 | A07706 | 243 |
| A01847 | A08358 | 165 | A01847 | A08732 | 221 |
| A01847 | A09672 | 201 | A01847 | A09991 | 281 |
| A01847 | A13772 | 174 | A01847 | A14416 | 299 |
| A01848 | A01941 | 353 | A01848 | A02008 | 425 |
| A01848 | A02011 | 380 | A01848 | A02574 | 446 |
| A01848 | A02739 | 344 | A01848 | A02802 | 472 |
| A01848 | A02951 | 229 | A01848 | A03034 | 374 |
| A01848 | A03982 | 396 | A01848 | A05570 | 324 |
| A01848 | A06631 | 316 | A01848 | A07342 | 419 |
| A01848 | A08732 | 305 | A01848 | A14344 | 458 |
| A01848 | A16337 | 460 | A01849 | A01856 | 274 |
| A01849 | A01900 | 313 | A01849 | A01941 | 210 |

|        |        |     |        |        |     |
|--------|--------|-----|--------|--------|-----|
| A01849 | A02162 | 356 | A01849 | A02331 | 377 |
| A01849 | A02345 | 219 | A01849 | A02377 | 176 |
| A01849 | A02564 | 184 | A01849 | A02639 | 285 |
| A01849 | A02731 | 165 | A01849 | A02864 | 191 |
| A01849 | A02904 | 219 | A01849 | A02945 | 243 |
| A01849 | A02962 | 308 | A01849 | A03001 | 241 |
| A01849 | A03601 | 208 | A01849 | A03803 | 281 |
| A01849 | A03821 | 216 | A01849 | A04114 | 306 |
| A01849 | A04687 | 212 | A01849 | A04779 | 151 |
| A01849 | A05043 | 424 | A01849 | A05349 | 182 |
| A01849 | A06004 | 314 | A01849 | A06863 | 371 |
| A01849 | A08070 | 229 | A01849 | A10414 | 299 |
| A01849 | A10731 | 267 | A01849 | A11086 | 347 |
| A01849 | A11850 | 213 | A01849 | A14208 | 219 |
| A01850 | A01900 | 215 | A01850 | A01956 | 152 |
| A01850 | A02178 | 305 | A01850 | A02189 | 324 |
| A01850 | A02343 | 329 | A01850 | A02353 | 324 |
| A01850 | A02425 | 405 | A01850 | A02562 | 243 |
| A01850 | A02616 | 191 | A01850 | A02674 | 249 |
| A01850 | A02699 | 285 | A01850 | A02722 | 180 |
| A01850 | A02789 | 268 | A01850 | A02790 | 486 |
| A01850 | A02821 | 170 | A01850 | A02822 | 193 |
| A01850 | A02889 | 346 | A01850 | A02950 | 187 |
| A01850 | A02963 | 307 | A01850 | A03001 | 313 |
| A01850 | A03019 | 63  | A01850 | A03516 | 533 |
| A01850 | A03611 | 468 | A01850 | A03691 | 202 |
| A01850 | A03740 | 634 | A01850 | A03752 | 406 |
| A01850 | A04007 | 159 | A01850 | A04038 | 152 |
| A01850 | A04249 | 228 | A01850 | A04449 | 344 |
| A01850 | A04490 | 268 | A01850 | A04571 | 249 |
| A01850 | A04838 | 212 | A01850 | A05086 | 324 |
| A01850 | A05139 | 310 | A01850 | A05144 | 182 |
| A01850 | A05176 | 246 | A01850 | A05453 | 160 |
| A01850 | A05568 | 165 | A01850 | A05848 | 272 |
| A01850 | A05910 | 386 | A01850 | A06247 | 270 |
| A01850 | A06567 | 279 | A01850 | A06601 | 223 |
| A01850 | A06703 | 456 | A01850 | A07102 | 324 |
| A01850 | A07187 | 324 | A01850 | A07311 | 934 |
| A01850 | A07466 | 302 | A01850 | A08692 | 485 |
| A01850 | A08835 | 266 | A01850 | A08910 | 172 |
| A01850 | A08924 | 348 | A01850 | A08987 | 256 |
| A01850 | A09220 | 297 | A01850 | A09476 | 252 |
| A01850 | A09502 | 322 | A01850 | A10115 | 324 |
| A01850 | A10247 | 351 | A01850 | A10501 | 372 |
| A01850 | A10580 | 899 | A01850 | A10623 | 208 |
| A01850 | A10808 | 328 | A01850 | A10811 | 137 |

|        |        |     |        |        |     |
|--------|--------|-----|--------|--------|-----|
| A01850 | A11293 | 374 | A01850 | A11302 | 358 |
| A01850 | A11322 | 417 | A01850 | A11374 | 353 |
| A01850 | A11591 | 188 | A01850 | A11621 | 202 |
| A01850 | A11694 | 324 | A01850 | A11724 | 185 |
| A01850 | A12215 | 217 | A01850 | A12703 | 348 |
| A01850 | A12897 | 475 | A01850 | A13232 | 446 |
| A01850 | A13609 | 180 | A01850 | A14073 | 632 |
| A01850 | A14642 | 630 | A01850 | A14790 | 193 |
| A01850 | A15286 | 198 | A01850 | A15843 | 324 |
| A01850 | A15938 | 249 | A01850 | A16610 | 205 |
| A01850 | A16911 | 488 | A01851 | A02050 | 272 |
| A01851 | A02064 | 491 | A01851 | A02108 | 205 |
| A01851 | A02450 | 180 | A01851 | A02468 | 274 |
| A01851 | A03001 | 474 | A01851 | A03056 | 491 |
| A01851 | A03107 | 479 | A01851 | A03121 | 490 |
| A01851 | A03217 | 230 | A01851 | A03537 | 277 |
| A01851 | A03709 | 434 | A01851 | A03833 | 312 |
| A01851 | A03992 | 219 | A01851 | A04013 | 417 |
| A01851 | A04078 | 165 | A01851 | A04233 | 347 |
| A01851 | A04349 | 440 | A01851 | A04545 | 283 |
| A01851 | A04687 | 443 | A01851 | A04949 | 353 |
| A01851 | A04965 | 425 | A01851 | A05034 | 199 |
| A01851 | A05138 | 195 | A01851 | A05288 | 340 |
| A01851 | A05295 | 490 | A01851 | A05346 | 294 |
| A01851 | A05795 | 486 | A01851 | A05881 | 418 |
| A01851 | A06039 | 199 | A01851 | A06470 | 232 |
| A01851 | A06797 | 160 | A01851 | A06841 | 288 |
| A01851 | A06848 | 263 | A01851 | A06881 | 488 |
| A01851 | A07019 | 168 | A01851 | A07154 | 193 |
| A01851 | A07559 | 152 | A01851 | A07812 | 475 |
| A01851 | A09470 | 152 | A01851 | A09647 | 152 |
| A01851 | A09894 | 288 | A01851 | A09987 | 360 |
| A01851 | A10140 | 272 | A01851 | A10218 | 345 |
| A01851 | A10798 | 199 | A01851 | A10891 | 256 |
| A01851 | A12647 | 477 | A01851 | A14195 | 217 |
| A01851 | A14315 | 232 | A01851 | A14501 | 360 |
| A01851 | A16073 | 199 | A01851 | A16075 | 170 |
| A01851 | A16590 | 489 | A01851 | A16744 | 188 |
| A01853 | A02910 | 335 | A01853 | A03259 | 179 |
| A01853 | A04630 | 363 | A01853 | A14589 | 235 |
| A01853 | A15650 | 375 | A01854 | A04571 | 390 |
| A01855 | A01856 | 489 | A01855 | A01864 | 207 |
| A01855 | A01900 | 422 | A01855 | A02345 | 329 |
| A01855 | A02353 | 467 | A01855 | A02520 | 486 |
| A01855 | A02718 | 291 | A01855 | A02729 | 205 |
| A01855 | A02812 | 152 | A01855 | A02859 | 425 |

|        |        |     |        |        |     |
|--------|--------|-----|--------|--------|-----|
| A01855 | A02991 | 167 | A01855 | A03003 | 454 |
| A01855 | A03243 | 260 | A01855 | A03311 | 272 |
| A01855 | A03477 | 489 | A01855 | A03501 | 198 |
| A01855 | A03508 | 296 | A01855 | A03586 | 463 |
| A01855 | A03717 | 324 | A01855 | A04132 | 455 |
| A01855 | A04493 | 165 | A01855 | A04879 | 195 |
| A01855 | A04880 | 219 | A01855 | A04888 | 218 |
| A01855 | A05006 | 172 | A01855 | A05310 | 375 |
| A01855 | A05515 | 451 | A01855 | A05797 | 252 |
| A01855 | A06098 | 405 | A01855 | A06256 | 308 |
| A01855 | A06287 | 152 | A01855 | A06339 | 216 |
| A01855 | A06359 | 258 | A01855 | A06699 | 458 |
| A01855 | A06756 | 167 | A01855 | A07080 | 491 |
| A01855 | A07122 | 263 | A01855 | A07288 | 389 |
| A01855 | A07746 | 171 | A01855 | A08098 | 215 |
| A01855 | A09220 | 241 | A01855 | A09412 | 369 |
| A01855 | A09507 | 355 | A01855 | A10488 | 413 |
| A01855 | A10738 | 348 | A01855 | A11304 | 488 |
| A01855 | A12730 | 347 | A01855 | A12757 | 184 |
| A01855 | A13135 | 274 | A01855 | A14368 | 208 |
| A01855 | A14403 | 269 | A01855 | A14596 | 413 |
| A01855 | A15905 | 269 | A01855 | A16026 | 401 |
| A01855 | A16034 | 205 | A01856 | A01859 | 228 |
| A01856 | A01861 | 401 | A01856 | A01864 | 263 |
| A01856 | A01923 | 185 | A01856 | A02014 | 288 |
| A01856 | A02152 | 196 | A01856 | A02202 | 347 |
| A01856 | A02336 | 290 | A01856 | A02338 | 252 |
| A01856 | A02474 | 380 | A01856 | A02520 | 235 |
| A01856 | A02579 | 205 | A01856 | A02696 | 176 |
| A01856 | A02904 | 165 | A01856 | A03001 | 187 |
| A01856 | A03003 | 486 | A01856 | A03007 | 195 |
| A01856 | A03034 | 272 | A01856 | A03477 | 193 |
| A01856 | A03861 | 201 | A01856 | A04132 | 435 |
| A01856 | A04260 | 179 | A01856 | A04540 | 196 |
| A01856 | A04751 | 185 | A01856 | A04956 | 328 |
| A01856 | A05043 | 404 | A01856 | A05138 | 268 |
| A01856 | A05378 | 369 | A01856 | A05730 | 361 |
| A01856 | A06609 | 223 | A01856 | A06764 | 330 |
| A01856 | A06765 | 306 | A01856 | A07080 | 210 |
| A01856 | A07140 | 196 | A01856 | A07170 | 324 |
| A01856 | A07190 | 162 | A01856 | A07191 | 475 |
| A01856 | A08660 | 236 | A01856 | A08667 | 278 |
| A01856 | A10488 | 433 | A01856 | A10527 | 201 |
| A01856 | A12730 | 474 | A01856 | A15471 | 268 |
| A01856 | A15896 | 205 | A01857 | A02320 | 210 |
| A01857 | A02738 | 236 | A01857 | A03237 | 208 |

|        |        |     |        |        |     |
|--------|--------|-----|--------|--------|-----|
| A01857 | A03441 | 256 | A01857 | A03863 | 226 |
| A01857 | A04010 | 187 | A01857 | A04834 | 414 |
| A01857 | A04870 | 310 | A01857 | A05310 | 270 |
| A01857 | A05774 | 343 | A01857 | A05838 | 260 |
| A01857 | A05859 | 171 | A01857 | A06252 | 457 |
| A01857 | A06668 | 358 | A01857 | A07122 | 307 |
| A01857 | A07190 | 350 | A01857 | A07256 | 352 |
| A01857 | A07413 | 249 | A01857 | A07746 | 180 |
| A01857 | A07800 | 347 | A01857 | A09711 | 472 |
| A01857 | A15497 | 230 | A01857 | A15637 | 398 |
| A01857 | A16026 | 404 | A01857 | A16028 | 322 |
| A01858 | A01859 | 480 | A01858 | A02075 | 314 |
| A01858 | A02353 | 213 | A01858 | A02695 | 329 |
| A01858 | A02718 | 219 | A01858 | A02741 | 281 |
| A01858 | A02771 | 313 | A01858 | A03035 | 443 |
| A01858 | A03281 | 351 | A01858 | A04010 | 383 |
| A01858 | A04712 | 469 | A01858 | A04783 | 484 |
| A01858 | A04852 | 396 | A01858 | A05349 | 266 |
| A01858 | A07135 | 218 | A01858 | A11292 | 310 |
| A01859 | A01864 | 384 | A01859 | A01907 | 398 |
| A01859 | A01923 | 191 | A01859 | A02353 | 294 |
| A01859 | A02520 | 241 | A01859 | A02569 | 382 |
| A01859 | A02693 | 234 | A01859 | A02695 | 271 |
| A01859 | A02718 | 418 | A01859 | A02719 | 362 |
| A01859 | A02771 | 191 | A01859 | A02789 | 160 |
| A01859 | A02865 | 311 | A01859 | A03003 | 358 |
| A01859 | A03007 | 201 | A01859 | A03035 | 396 |
| A01859 | A03281 | 246 | A01859 | A03431 | 283 |
| A01859 | A03843 | 152 | A01859 | A03861 | 480 |
| A01859 | A03990 | 191 | A01859 | A04524 | 398 |
| A01859 | A04710 | 198 | A01859 | A04712 | 481 |
| A01859 | A04783 | 488 | A01859 | A04842 | 358 |
| A01859 | A04850 | 210 | A01859 | A04851 | 319 |
| A01859 | A04852 | 326 | A01859 | A04888 | 279 |
| A01859 | A04922 | 267 | A01859 | A05032 | 219 |
| A01859 | A05203 | 329 | A01859 | A05342 | 297 |
| A01859 | A05378 | 372 | A01859 | A05516 | 254 |
| A01859 | A05729 | 363 | A01859 | A05926 | 187 |
| A01859 | A06124 | 343 | A01859 | A06161 | 190 |
| A01859 | A06188 | 318 | A01859 | A06422 | 260 |
| A01859 | A06596 | 288 | A01859 | A06597 | 293 |
| A01859 | A06648 | 472 | A01859 | A06764 | 335 |
| A01859 | A06765 | 311 | A01859 | A07128 | 380 |
| A01859 | A07165 | 193 | A01859 | A07189 | 427 |
| A01859 | A07191 | 486 | A01859 | A08817 | 208 |
| A01859 | A08908 | 272 | A01859 | A09913 | 314 |



|        |        |     |        |        |     |
|--------|--------|-----|--------|--------|-----|
| A01859 | A11474 | 188 | A01859 | A13302 | 323 |
| A01859 | A16503 | 329 | A01860 | A02797 | 168 |
| A01860 | A03490 | 162 | A01860 | A03815 | 157 |
| A01860 | A07283 | 302 | A01860 | A08293 | 180 |
| A01860 | A08821 | 218 | A01860 | A08943 | 899 |
| A01860 | A11742 | 305 | A01860 | A12920 | 234 |
| A01860 | A13826 | 299 | A01860 | A13873 | 436 |
| A01860 | A13983 | 384 | A01860 | A14003 | 918 |
| A01860 | A14191 | 205 | A01860 | A14276 | 221 |
| A01860 | A14661 | 232 | A01860 | A14711 | 218 |
| A01860 | A15347 | 162 | A01860 | A16449 | 661 |
| A01861 | A01864 | 456 | A01861 | A01923 | 265 |
| A01861 | A02028 | 263 | A01861 | A02147 | 358 |
| A01861 | A02385 | 347 | A01861 | A02449 | 394 |
| A01861 | A02574 | 395 | A01861 | A02611 | 277 |
| A01861 | A02691 | 218 | A01861 | A02982 | 216 |
| A01861 | A03003 | 402 | A01861 | A03007 | 274 |
| A01861 | A03034 | 462 | A01861 | A03147 | 324 |
| A01861 | A03224 | 302 | A01861 | A03432 | 308 |
| A01861 | A04842 | 299 | A01861 | A05310 | 290 |
| A01861 | A05359 | 352 | A01861 | A05577 | 183 |
| A01861 | A06286 | 283 | A01861 | A06764 | 378 |
| A01861 | A06825 | 185 | A01861 | A07130 | 414 |
| A01861 | A07191 | 477 | A01861 | A07195 | 450 |
| A01861 | A08910 | 177 | A01861 | A10011 | 422 |
| A01861 | A12361 | 274 | A01861 | A14683 | 297 |
| A01862 | A02156 | 172 | A01862 | A04931 | 260 |
| A01862 | A05153 | 294 | A01862 | A13550 | 224 |
| A01862 | A14661 | 162 | A01862 | A14918 | 279 |
| A01862 | A15652 | 154 | A01863 | A03034 | 363 |
| A01863 | A06653 | 382 | A01863 | A07191 | 328 |
| A01863 | A08910 | 271 | A01863 | A14208 | 152 |
| A01864 | A01923 | 227 | A01864 | A02008 | 306 |
| A01864 | A02011 | 216 | A01864 | A03003 | 486 |
| A01864 | A03007 | 490 | A01864 | A03034 | 452 |
| A01864 | A03484 | 277 | A01864 | A03861 | 243 |
| A01864 | A04842 | 382 | A01864 | A04888 | 308 |
| A01864 | A05926 | 224 | A01864 | A06764 | 481 |
| A01864 | A06765 | 457 | A01864 | A07191 | 491 |
| A01864 | A07958 | 182 | A01864 | A10967 | 182 |
| A01864 | A12730 | 307 | A01864 | A14080 | 260 |
| A01864 | A14568 | 215 | A01864 | A16503 | 352 |
| A01865 | A01907 | 213 | A01865 | A02924 | 213 |
| A01865 | A03863 | 200 | A01865 | A04124 | 296 |
| A01865 | A05310 | 246 | A01865 | A06779 | 338 |
| A01865 | A07424 | 334 | A01865 | A07746 | 286 |

|        |        |     |        |        |     |
|--------|--------|-----|--------|--------|-----|
| A01865 | A09197 | 378 | A01865 | A13330 | 395 |
| A01865 | A13992 | 291 | A01865 | A14783 | 224 |
| A01865 | A16258 | 335 | A01866 | A02695 | 252 |
| A01866 | A02992 | 246 | A01866 | A03441 | 266 |
| A01866 | A03443 | 329 | A01866 | A04364 | 311 |
| A01866 | A04779 | 454 | A01866 | A04834 | 418 |
| A01866 | A04850 | 272 | A01866 | A04883 | 274 |
| A01866 | A05007 | 274 | A01866 | A05112 | 254 |
| A01866 | A05310 | 279 | A01866 | A05759 | 313 |
| A01866 | A06630 | 323 | A01866 | A15752 | 168 |
| A01866 | A16741 | 183 | A01867 | A01909 | 221 |
| A01867 | A01956 | 272 | A01867 | A01982 | 333 |
| A01867 | A02026 | 185 | A01867 | A02075 | 213 |
| A01867 | A02083 | 173 | A01867 | A02147 | 324 |
| A01867 | A02154 | 297 | A01867 | A02173 | 266 |
| A01867 | A02177 | 408 | A01867 | A02240 | 347 |
| A01867 | A02293 | 306 | A01867 | A02300 | 190 |
| A01867 | A02319 | 369 | A01867 | A02345 | 191 |
| A01867 | A02371 | 226 | A01867 | A02450 | 173 |
| A01867 | A02493 | 210 | A01867 | A02541 | 296 |
| A01867 | A02546 | 340 | A01867 | A02574 | 235 |
| A01867 | A02585 | 257 | A01867 | A02668 | 154 |
| A01867 | A02730 | 249 | A01867 | A02741 | 305 |
| A01867 | A02745 | 229 | A01867 | A02746 | 306 |
| A01867 | A02754 | 353 | A01867 | A02780 | 311 |
| A01867 | A02787 | 307 | A01867 | A02788 | 422 |
| A01867 | A02812 | 263 | A01867 | A02840 | 358 |
| A01867 | A02847 | 247 | A01867 | A02854 | 240 |
| A01867 | A02874 | 193 | A01867 | A02875 | 165 |
| A01867 | A02888 | 273 | A01867 | A02927 | 258 |
| A01867 | A02931 | 185 | A01867 | A03107 | 183 |
| A01867 | A03224 | 432 | A01867 | A03228 | 255 |
| A01867 | A03234 | 196 | A01867 | A03239 | 221 |
| A01867 | A03243 | 414 | A01867 | A03260 | 443 |
| A01867 | A03264 | 302 | A01867 | A03269 | 207 |
| A01867 | A03753 | 255 | A01867 | A03788 | 170 |
| A01867 | A03819 | 232 | A01867 | A03858 | 198 |
| A01867 | A03861 | 229 | A01867 | A04010 | 424 |
| A01867 | A04212 | 232 | A01867 | A04349 | 355 |
| A01867 | A04372 | 355 | A01867 | A04620 | 416 |
| A01867 | A04710 | 218 | A01867 | A04867 | 159 |
| A01867 | A04913 | 475 | A01867 | A05153 | 157 |
| A01867 | A05550 | 255 | A01867 | A05828 | 319 |
| A01867 | A05985 | 198 | A01867 | A06211 | 329 |
| A01867 | A06558 | 374 | A01867 | A07145 | 221 |
| A01867 | A07154 | 290 | A01867 | A07156 | 391 |

|        |        |     |        |        |     |
|--------|--------|-----|--------|--------|-----|
| A01867 | A07164 | 405 | A01867 | A07173 | 339 |
| A01867 | A07177 | 364 | A01867 | A07210 | 277 |
| A01867 | A08572 | 201 | A01867 | A08596 | 475 |
| A01867 | A13163 | 335 | A01867 | A13212 | 439 |
| A01867 | A13410 | 341 | A01867 | A13906 | 322 |
| A01867 | A14071 | 456 | A01867 | A14372 | 207 |
| A01867 | A14373 | 326 | A01867 | A14391 | 168 |
| A01867 | A14392 | 322 | A01867 | A14637 | 174 |
| A01867 | A14685 | 358 | A01867 | A15399 | 423 |
| A01867 | A15516 | 246 | A01867 | A15809 | 168 |
| A01867 | A15969 | 358 | A01867 | A16636 | 201 |
| A01867 | A17155 | 409 | A01868 | A02753 | 419 |
| A01869 | A01870 | 318 | A01869 | A06588 | 263 |
| A01869 | A10462 | 441 | A01870 | A01876 | 314 |
| A01870 | A01879 | 174 | A01870 | A02011 | 177 |
| A01870 | A02051 | 212 | A01870 | A02062 | 279 |
| A01870 | A02113 | 318 | A01870 | A02135 | 310 |
| A01870 | A02136 | 313 | A01870 | A02138 | 491 |
| A01870 | A02143 | 235 | A01870 | A02240 | 488 |
| A01870 | A02245 | 157 | A01870 | A02251 | 321 |
| A01870 | A02337 | 165 | A01870 | A02369 | 221 |
| A01870 | A02370 | 440 | A01870 | A02382 | 419 |
| A01870 | A02412 | 283 | A01870 | A02416 | 199 |
| A01870 | A02439 | 489 | A01870 | A02456 | 382 |
| A01870 | A02457 | 473 | A01870 | A02458 | 491 |
| A01870 | A02459 | 489 | A01870 | A02460 | 491 |
| A01870 | A02578 | 400 | A01870 | A02604 | 369 |
| A01870 | A02608 | 462 | A01870 | A02609 | 372 |
| A01870 | A02611 | 316 | A01870 | A02624 | 380 |
| A01870 | A02637 | 489 | A01870 | A02643 | 302 |
| A01870 | A02644 | 262 | A01870 | A02648 | 405 |
| A01870 | A02653 | 246 | A01870 | A02654 | 491 |
| A01870 | A02655 | 490 | A01870 | A02659 | 375 |
| A01870 | A02681 | 445 | A01870 | A02727 | 469 |
| A01870 | A02751 | 199 | A01870 | A02769 | 441 |
| A01870 | A02851 | 439 | A01870 | A02853 | 271 |
| A01870 | A02859 | 408 | A01870 | A02873 | 201 |
| A01870 | A02875 | 132 | A01870 | A02884 | 345 |
| A01870 | A02885 | 271 | A01870 | A02896 | 484 |
| A01870 | A02917 | 328 | A01870 | A02920 | 196 |
| A01870 | A02932 | 271 | A01870 | A02935 | 286 |
| A01870 | A02936 | 313 | A01870 | A02944 | 168 |
| A01870 | A02945 | 490 | A01870 | A02962 | 380 |
| A01870 | A02986 | 180 | A01870 | A03006 | 491 |
| A01870 | A03045 | 402 | A01870 | A03157 | 270 |
| A01870 | A03177 | 335 | A01870 | A03209 | 160 |

|        |        |     |        |        |     |
|--------|--------|-----|--------|--------|-----|
| A01870 | A03210 | 290 | A01870 | A03224 | 457 |
| A01870 | A03228 | 251 | A01870 | A03239 | 490 |
| A01870 | A03244 | 174 | A01870 | A03248 | 343 |
| A01870 | A03249 | 343 | A01870 | A03259 | 279 |
| A01870 | A03260 | 291 | A01870 | A03271 | 246 |
| A01870 | A03280 | 465 | A01870 | A03315 | 307 |
| A01870 | A03316 | 465 | A01870 | A03610 | 268 |
| A01870 | A03735 | 167 | A01870 | A03746 | 172 |
| A01870 | A03761 | 191 | A01870 | A03788 | 491 |
| A01870 | A03807 | 236 | A01870 | A03815 | 213 |
| A01870 | A03817 | 347 | A01870 | A03865 | 180 |
| A01870 | A03900 | 393 | A01870 | A03923 | 452 |
| A01870 | A03932 | 160 | A01870 | A03974 | 210 |
| A01870 | A03979 | 251 | A01870 | A03988 | 229 |
| A01870 | A04039 | 302 | A01870 | A04040 | 436 |
| A01870 | A04051 | 152 | A01870 | A04110 | 361 |
| A01870 | A04130 | 491 | A01870 | A04217 | 489 |
| A01870 | A04244 | 469 | A01870 | A04276 | 172 |
| A01870 | A04410 | 167 | A01870 | A04450 | 232 |
| A01870 | A04461 | 251 | A01870 | A04478 | 167 |
| A01870 | A04482 | 236 | A01870 | A04518 | 207 |
| A01870 | A04536 | 236 | A01870 | A04538 | 271 |
| A01870 | A04539 | 251 | A01870 | A04566 | 290 |
| A01870 | A04589 | 247 | A01870 | A04609 | 254 |
| A01870 | A04614 | 413 | A01870 | A04734 | 215 |
| A01870 | A04741 | 257 | A01870 | A04748 | 372 |
| A01870 | A04755 | 463 | A01870 | A04756 | 288 |
| A01870 | A04800 | 345 | A01870 | A04899 | 251 |
| A01870 | A04950 | 290 | A01870 | A05174 | 179 |
| A01870 | A05329 | 221 | A01870 | A05517 | 174 |
| A01870 | A05577 | 491 | A01870 | A05597 | 290 |
| A01870 | A05679 | 491 | A01870 | A05878 | 160 |
| A01870 | A05944 | 446 | A01870 | A05985 | 490 |
| A01870 | A06024 | 218 | A01870 | A06047 | 343 |
| A01870 | A06054 | 475 | A01870 | A06095 | 335 |
| A01870 | A06113 | 302 | A01870 | A06292 | 343 |
| A01870 | A06344 | 323 | A01870 | A06414 | 491 |
| A01870 | A06415 | 491 | A01870 | A06604 | 416 |
| A01870 | A06674 | 343 | A01870 | A06747 | 468 |
| A01870 | A06899 | 479 | A01870 | A06988 | 263 |
| A01870 | A07053 | 290 | A01870 | A07126 | 371 |
| A01870 | A07135 | 385 | A01870 | A07143 | 232 |
| A01870 | A07145 | 461 | A01870 | A07152 | 491 |
| A01870 | A07157 | 316 | A01870 | A07161 | 480 |
| A01870 | A07164 | 174 | A01870 | A07166 | 571 |
| A01870 | A07173 | 488 | A01870 | A07174 | 183 |

|        |        |     |        |        |     |
|--------|--------|-----|--------|--------|-----|
| A01870 | A07753 | 313 | A01870 | A07803 | 183 |
| A01870 | A08137 | 199 | A01870 | A08585 | 302 |
| A01870 | A08596 | 283 | A01870 | A08601 | 318 |
| A01870 | A08612 | 380 | A01870 | A08632 | 457 |
| A01870 | A08634 | 443 | A01870 | A08651 | 263 |
| A01870 | A08757 | 318 | A01870 | A08828 | 251 |
| A01870 | A08834 | 210 | A01870 | A08908 | 297 |
| A01870 | A09090 | 263 | A01870 | A09259 | 326 |
| A01870 | A09394 | 179 | A01870 | A10343 | 302 |
| A01870 | A10462 | 318 | A01870 | A10585 | 382 |
| A01870 | A10586 | 262 | A01870 | A10587 | 241 |
| A01870 | A10605 | 435 | A01870 | A10640 | 307 |
| A01870 | A10935 | 246 | A01870 | A10993 | 343 |
| A01870 | A11495 | 343 | A01870 | A11502 | 318 |
| A01870 | A11631 | 207 | A01870 | A12009 | 162 |
| A01870 | A12809 | 391 | A01870 | A12927 | 394 |
| A01870 | A13023 | 269 | A01870 | A13084 | 306 |
| A01870 | A13131 | 218 | A01870 | A13304 | 302 |
| A01870 | A13312 | 196 | A01870 | A13821 | 447 |
| A01870 | A13872 | 357 | A01870 | A13903 | 457 |
| A01870 | A13983 | 210 | A01870 | A13988 | 375 |
| A01870 | A14012 | 180 | A01870 | A14071 | 490 |
| A01870 | A14125 | 425 | A01870 | A14146 | 491 |
| A01870 | A14190 | 368 | A01870 | A14199 | 486 |
| A01870 | A14201 | 371 | A01870 | A14366 | 480 |
| A01870 | A14368 | 428 | A01870 | A14372 | 484 |
| A01870 | A14374 | 491 | A01870 | A14376 | 321 |
| A01870 | A14380 | 246 | A01870 | A14391 | 491 |
| A01870 | A14392 | 486 | A01870 | A14416 | 205 |
| A01870 | A14432 | 405 | A01870 | A14439 | 491 |
| A01870 | A14442 | 451 | A01870 | A14554 | 419 |
| A01870 | A14598 | 391 | A01870 | A14599 | 491 |
| A01870 | A14600 | 263 | A01870 | A14608 | 290 |
| A01870 | A14628 | 210 | A01870 | A15285 | 443 |
| A01870 | A15290 | 329 | A01870 | A15308 | 334 |
| A01870 | A15313 | 236 | A01870 | A15349 | 176 |
| A01870 | A15394 | 491 | A01870 | A15395 | 488 |
| A01870 | A15425 | 491 | A01870 | A15426 | 302 |
| A01870 | A15427 | 491 | A01870 | A15475 | 151 |
| A01870 | A15516 | 467 | A01870 | A15517 | 385 |
| A01870 | A15518 | 409 | A01870 | A15607 | 396 |
| A01870 | A15608 | 260 | A01870 | A15609 | 263 |
| A01870 | A15640 | 279 | A01870 | A15642 | 491 |
| A01870 | A15790 | 279 | A01870 | A15792 | 188 |
| A01870 | A15795 | 449 | A01870 | A15806 | 472 |
| A01870 | A15841 | 263 | A01870 | A15964 | 485 |

|        |        |     |        |        |     |
|--------|--------|-----|--------|--------|-----|
| A01870 | A15966 | 251 | A01870 | A15969 | 263 |
| A01870 | A15974 | 279 | A01870 | A15999 | 290 |
| A01870 | A16011 | 318 | A01870 | A16014 | 290 |
| A01870 | A16015 | 362 | A01870 | A16031 | 271 |
| A01870 | A16033 | 165 | A01870 | A16108 | 246 |
| A01870 | A16282 | 343 | A01870 | A16319 | 343 |
| A01871 | A02046 | 193 | A01871 | A03676 | 199 |
| A01871 | A04193 | 223 | A01871 | A06608 | 219 |
| A01871 | A08133 | 199 | A01871 | A09869 | 288 |
| A01872 | A01883 | 452 | A01872 | A01893 | 260 |
| A01872 | A01909 | 283 | A01872 | A02246 | 402 |
| A01872 | A02300 | 256 | A01872 | A02334 | 454 |
| A01872 | A02335 | 457 | A01872 | A02338 | 419 |
| A01872 | A02691 | 480 | A01872 | A02692 | 313 |
| A01872 | A02857 | 286 | A01872 | A03268 | 371 |
| A01872 | A03821 | 254 | A01872 | A03864 | 446 |
| A01872 | A04005 | 379 | A01872 | A04010 | 223 |
| A01872 | A04285 | 395 | A01872 | A04327 | 296 |
| A01872 | A05094 | 313 | A01872 | A06635 | 380 |
| A01872 | A07200 | 174 | A01872 | A07482 | 408 |
| A01872 | A10405 | 424 | A01872 | A12309 | 424 |
| A01872 | A12528 | 414 | A01872 | A12529 | 402 |
| A01872 | A15673 | 249 | A01873 | A01887 | 319 |
| A01873 | A01888 | 278 | A01873 | A02109 | 371 |
| A01873 | A02301 | 358 | A01873 | A02392 | 412 |
| A01873 | A02417 | 404 | A01873 | A02469 | 360 |
| A01873 | A02488 | 429 | A01873 | A02493 | 329 |
| A01873 | A02575 | 326 | A01873 | A02671 | 221 |
| A01873 | A02691 | 294 | A01873 | A02702 | 347 |
| A01873 | A02703 | 294 | A01873 | A02758 | 373 |
| A01873 | A02785 | 271 | A01873 | A02811 | 443 |
| A01873 | A02814 | 339 | A01873 | A02906 | 394 |
| A01873 | A02943 | 409 | A01873 | A03120 | 416 |
| A01873 | A03259 | 167 | A01873 | A03537 | 412 |
| A01873 | A03583 | 402 | A01873 | A03585 | 395 |
| A01873 | A03653 | 351 | A01873 | A03847 | 424 |
| A01873 | A03870 | 416 | A01873 | A04004 | 375 |
| A01873 | A04031 | 396 | A01873 | A04123 | 416 |
| A01873 | A04260 | 328 | A01873 | A04560 | 402 |
| A01873 | A04905 | 385 | A01873 | A05036 | 409 |
| A01873 | A05925 | 420 | A01873 | A06635 | 321 |
| A01874 | A01883 | 374 | A01874 | A02338 | 384 |
| A01874 | A02636 | 366 | A01874 | A02691 | 316 |
| A01874 | A02693 | 372 | A01874 | A02700 | 402 |
| A01874 | A03268 | 411 | A01874 | A03847 | 430 |
| A01874 | A03870 | 424 | A01874 | A04135 | 401 |

|        |        |     |        |        |     |
|--------|--------|-----|--------|--------|-----|
| A01874 | A04715 | 234 | A01874 | A05911 | 408 |
| A01874 | A06635 | 340 | A01874 | A09727 | 283 |
| A01875 | A01876 | 355 | A01875 | A01878 | 371 |
| A01875 | A01882 | 323 | A01875 | A01907 | 449 |
| A01875 | A02298 | 234 | A01875 | A02307 | 438 |
| A01875 | A02347 | 263 | A01875 | A02412 | 274 |
| A01875 | A02490 | 450 | A01875 | A02695 | 489 |
| A01875 | A02696 | 447 | A01875 | A02703 | 227 |
| A01875 | A02705 | 297 | A01875 | A02729 | 489 |
| A01875 | A02730 | 191 | A01875 | A02771 | 154 |
| A01875 | A02783 | 313 | A01875 | A02812 | 491 |
| A01875 | A02817 | 329 | A01875 | A02857 | 167 |
| A01875 | A02859 | 457 | A01875 | A02874 | 118 |
| A01875 | A02883 | 293 | A01875 | A02975 | 177 |
| A01875 | A02982 | 445 | A01875 | A02984 | 412 |
| A01875 | A03046 | 219 | A01875 | A03269 | 279 |
| A01875 | A03275 | 401 | A01875 | A03407 | 357 |
| A01875 | A03419 | 99  | A01875 | A03649 | 273 |
| A01875 | A03664 | 480 | A01875 | A04010 | 318 |
| A01875 | A04023 | 218 | A01875 | A04134 | 449 |
| A01875 | A04136 | 343 | A01875 | A04138 | 246 |
| A01875 | A04142 | 468 | A01875 | A04143 | 313 |
| A01875 | A04206 | 269 | A01875 | A04262 | 417 |
| A01875 | A04267 | 160 | A01875 | A04583 | 423 |
| A01875 | A04709 | 218 | A01875 | A04739 | 168 |
| A01875 | A05329 | 288 | A01875 | A05911 | 283 |
| A01875 | A06298 | 188 | A01875 | A06422 | 224 |
| A01875 | A07006 | 329 | A01875 | A07411 | 382 |
| A01875 | A08083 | 383 | A01875 | A08741 | 473 |
| A01875 | A09059 | 165 | A01875 | A14008 | 168 |
| A01875 | A14034 | 297 | A01875 | A14127 | 329 |
| A01875 | A14646 | 215 | A01875 | A15674 | 246 |
| A01875 | A16636 | 367 | A01876 | A01879 | 328 |
| A01876 | A01880 | 302 | A01876 | A01881 | 489 |
| A01876 | A01888 | 447 | A01876 | A01889 | 486 |
| A01876 | A01902 | 190 | A01876 | A02298 | 352 |
| A01876 | A02303 | 152 | A01876 | A02490 | 257 |
| A01876 | A02491 | 490 | A01876 | A02559 | 412 |
| A01876 | A02600 | 271 | A01876 | A02695 | 417 |
| A01876 | A02696 | 425 | A01876 | A02697 | 491 |
| A01876 | A02698 | 477 | A01876 | A02706 | 283 |
| A01876 | A02711 | 470 | A01876 | A02730 | 318 |
| A01876 | A02812 | 490 | A01876 | A02813 | 101 |
| A01876 | A02832 | 260 | A01876 | A02858 | 188 |
| A01876 | A02859 | 335 | A01876 | A02863 | 296 |
| A01876 | A02982 | 477 | A01876 | A02984 | 473 |

|        |        |     |        |        |     |
|--------|--------|-----|--------|--------|-----|
| A01876 | A02986 | 452 | A01876 | A03010 | 371 |
| A01876 | A03265 | 207 | A01876 | A03269 | 71  |
| A01876 | A03748 | 167 | A01876 | A03783 | 308 |
| A01876 | A03802 | 188 | A01876 | A03815 | 288 |
| A01876 | A03865 | 379 | A01876 | A03892 | 252 |
| A01876 | A03974 | 180 | A01876 | A04110 | 475 |
| A01876 | A04129 | 329 | A01876 | A04138 | 152 |
| A01876 | A04139 | 400 | A01876 | A04201 | 183 |
| A01876 | A04214 | 271 | A01876 | A04267 | 174 |
| A01876 | A04268 | 185 | A01876 | A04271 | 455 |
| A01876 | A04272 | 165 | A01876 | A04309 | 183 |
| A01876 | A04510 | 156 | A01876 | A04535 | 183 |
| A01876 | A04742 | 252 | A01876 | A04798 | 230 |
| A01876 | A04800 | 326 | A01876 | A04950 | 385 |
| A01876 | A04960 | 396 | A01876 | A04961 | 393 |
| A01876 | A05037 | 165 | A01876 | A05113 | 201 |
| A01876 | A05117 | 193 | A01876 | A05133 | 271 |
| A01876 | A05221 | 196 | A01876 | A05235 | 216 |
| A01876 | A05322 | 157 | A01876 | A05344 | 191 |
| A01876 | A05470 | 285 | A01876 | A05693 | 172 |
| A01876 | A06055 | 219 | A01876 | A06314 | 491 |
| A01876 | A06415 | 488 | A01876 | A06459 | 441 |
| A01876 | A06578 | 358 | A01876 | A06650 | 491 |
| A01876 | A06747 | 318 | A01876 | A07135 | 301 |
| A01876 | A07146 | 157 | A01876 | A07152 | 414 |
| A01876 | A07198 | 489 | A01876 | A07200 | 165 |
| A01876 | A08293 | 485 | A01876 | A08677 | 479 |
| A01876 | A08741 | 391 | A01876 | A08821 | 196 |
| A01876 | A09062 | 204 | A01876 | A09090 | 243 |
| A01876 | A09508 | 207 | A01876 | A10074 | 302 |
| A01876 | A10742 | 490 | A01876 | A11132 | 279 |
| A01876 | A11363 | 204 | A01876 | A12789 | 477 |
| A01876 | A12927 | 240 | A01876 | A12948 | 348 |
| A01876 | A13667 | 243 | A01876 | A13826 | 279 |
| A01876 | A13983 | 491 | A01876 | A14071 | 358 |
| A01876 | A14191 | 324 | A01876 | A14199 | 730 |
| A01876 | A14204 | 205 | A01876 | A14229 | 205 |
| A01876 | A14374 | 391 | A01876 | A14392 | 316 |
| A01876 | A14405 | 179 | A01876 | A14437 | 341 |
| A01876 | A15241 | 271 | A01876 | A15290 | 176 |
| A01876 | A15293 | 199 | A01876 | A15294 | 281 |
| A01876 | A15308 | 481 | A01876 | A15320 | 485 |
| A01876 | A15321 | 374 | A01876 | A15322 | 201 |
| A01876 | A15342 | 326 | A01876 | A15346 | 249 |
| A01876 | A15356 | 246 | A01876 | A15409 | 163 |
| A01876 | A15421 | 224 | A01876 | A15425 | 361 |



|        |        |     |        |        |     |
|--------|--------|-----|--------|--------|-----|
| A01876 | A15427 | 401 | A01876 | A15506 | 488 |
| A01876 | A15535 | 167 | A01876 | A15555 | 457 |
| A01876 | A15674 | 152 | A01876 | A15679 | 191 |
| A01876 | A15726 | 281 | A01876 | A15847 | 252 |
| A01876 | A16120 | 443 | A01876 | A16554 | 329 |
| A01876 | A16636 | 258 | A01877 | A01888 | 154 |
| A01877 | A02110 | 235 | A01877 | A02389 | 238 |
| A01877 | A02418 | 245 | A01877 | A02488 | 246 |
| A01877 | A02494 | 268 | A01877 | A02501 | 254 |
| A01877 | A02511 | 234 | A01877 | A02568 | 269 |
| A01877 | A02610 | 386 | A01877 | A02703 | 469 |
| A01877 | A02740 | 452 | A01877 | A02786 | 141 |
| A01877 | A02803 | 279 | A01877 | A02816 | 486 |
| A01877 | A02830 | 379 | A01877 | A02860 | 438 |
| A01877 | A02877 | 201 | A01877 | A02887 | 270 |
| A01877 | A02895 | 375 | A01877 | A02914 | 406 |
| A01877 | A02924 | 416 | A01877 | A02927 | 269 |
| A01877 | A03112 | 112 | A01877 | A03171 | 156 |
| A01877 | A03195 | 269 | A01877 | A03271 | 268 |
| A01877 | A03276 | 308 | A01877 | A03338 | 271 |
| A01877 | A03571 | 256 | A01877 | A03662 | 241 |
| A01877 | A03817 | 208 | A01877 | A04042 | 374 |
| A01877 | A04248 | 255 | A01877 | A04312 | 396 |
| A01877 | A04539 | 358 | A01877 | A04587 | 443 |
| A01877 | A04682 | 395 | A01877 | A04730 | 443 |
| A01877 | A05247 | 293 | A01877 | A06224 | 436 |
| A01877 | A06544 | 296 | A01877 | A06654 | 288 |
| A01877 | A07127 | 299 | A01877 | A07163 | 235 |
| A01877 | A07197 | 291 | A01877 | A08070 | 213 |
| A01877 | A09263 | 210 | A01877 | A09428 | 316 |
| A01877 | A16012 | 408 | A01877 | A16262 | 198 |
| A01878 | A01880 | 266 | A01878 | A01897 | 251 |
| A01878 | A01908 | 308 | A01878 | A01913 | 256 |
| A01878 | A01941 | 216 | A01878 | A02337 | 314 |
| A01878 | A02495 | 465 | A01878 | A02695 | 238 |
| A01878 | A02696 | 235 | A01878 | A02705 | 489 |
| A01878 | A02706 | 469 | A01878 | A02729 | 409 |
| A01878 | A02786 | 294 | A01878 | A02812 | 299 |
| A01878 | A02817 | 488 | A01878 | A02818 | 451 |
| A01878 | A02859 | 157 | A01878 | A02861 | 455 |
| A01878 | A02862 | 443 | A01878 | A02984 | 350 |
| A01878 | A03091 | 278 | A01878 | A03100 | 255 |
| A01878 | A03171 | 176 | A01878 | A03228 | 283 |
| A01878 | A03275 | 281 | A01878 | A03649 | 358 |
| A01878 | A03664 | 406 | A01878 | A03933 | 369 |
| A01878 | A04028 | 326 | A01878 | A04046 | 361 |

|        |        |     |        |        |     |
|--------|--------|-----|--------|--------|-----|
| A01878 | A04091 | 439 | A01878 | A04134 | 436 |
| A01878 | A04142 | 436 | A01878 | A04450 | 358 |
| A01878 | A04458 | 395 | A01878 | A04539 | 440 |
| A01878 | A04590 | 402 | A01878 | A04729 | 311 |
| A01878 | A04962 | 191 | A01878 | A04980 | 389 |
| A01878 | A05034 | 243 | A01878 | A05250 | 361 |
| A01878 | A05330 | 308 | A01878 | A05331 | 168 |
| A01878 | A07006 | 484 | A01878 | A07197 | 468 |
| A01878 | A08741 | 394 | A01878 | A09014 | 389 |
| A01878 | A09263 | 229 | A01878 | A09367 | 395 |
| A01878 | A09497 | 363 | A01878 | A11169 | 341 |
| A01878 | A14386 | 422 | A01878 | A15630 | 219 |
| A01878 | A15841 | 443 | A01878 | A16008 | 345 |
| A01878 | A16037 | 389 | A01879 | A01880 | 945 |
| A01879 | A01887 | 491 | A01879 | A01888 | 480 |
| A01879 | A01902 | 283 | A01879 | A01908 | 452 |
| A01879 | A02337 | 218 | A01879 | A02340 | 168 |
| A01879 | A02372 | 330 | A01879 | A02382 | 265 |
| A01879 | A02415 | 156 | A01879 | A02432 | 375 |
| A01879 | A02467 | 173 | A01879 | A02582 | 154 |
| A01879 | A02611 | 279 | A01879 | A02630 | 201 |
| A01879 | A02637 | 447 | A01879 | A02639 | 330 |
| A01879 | A02645 | 419 | A01879 | A02656 | 307 |
| A01879 | A02659 | 446 | A01879 | A02662 | 340 |
| A01879 | A02681 | 256 | A01879 | A02709 | 358 |
| A01879 | A02730 | 432 | A01879 | A02741 | 313 |
| A01879 | A02742 | 232 | A01879 | A02746 | 236 |
| A01879 | A02756 | 210 | A01879 | A02787 | 213 |
| A01879 | A02788 | 180 | A01879 | A02800 | 241 |
| A01879 | A02808 | 412 | A01879 | A02812 | 160 |
| A01879 | A02829 | 185 | A01879 | A02837 | 93  |
| A01879 | A02843 | 473 | A01879 | A02847 | 243 |
| A01879 | A02851 | 241 | A01879 | A02854 | 380 |
| A01879 | A02859 | 380 | A01879 | A02863 | 285 |
| A01879 | A02896 | 484 | A01879 | A02897 | 217 |
| A01879 | A02912 | 230 | A01879 | A02916 | 215 |
| A01879 | A02917 | 157 | A01879 | A02936 | 232 |
| A01879 | A02945 | 268 | A01879 | A02984 | 335 |
| A01879 | A03010 | 286 | A01879 | A03100 | 276 |
| A01879 | A03110 | 296 | A01879 | A03160 | 221 |
| A01879 | A03183 | 291 | A01879 | A03195 | 180 |
| A01879 | A03204 | 491 | A01879 | A03259 | 491 |
| A01879 | A03275 | 236 | A01879 | A03280 | 202 |
| A01879 | A03316 | 266 | A01879 | A03319 | 271 |
| A01879 | A03610 | 191 | A01879 | A03942 | 252 |
| A01879 | A03965 | 160 | A01879 | A03995 | 340 |

|        |        |     |        |        |     |
|--------|--------|-----|--------|--------|-----|
| A01879 | A04028 | 299 | A01879 | A04040 | 236 |
| A01879 | A04092 | 179 | A01879 | A04110 | 323 |
| A01879 | A04138 | 227 | A01879 | A04206 | 371 |
| A01879 | A04223 | 258 | A01879 | A04244 | 420 |
| A01879 | A04247 | 296 | A01879 | A04248 | 430 |
| A01879 | A04265 | 234 | A01879 | A04320 | 215 |
| A01879 | A04346 | 185 | A01879 | A04478 | 219 |
| A01879 | A04519 | 173 | A01879 | A04528 | 340 |
| A01879 | A04536 | 462 | A01879 | A04589 | 255 |
| A01879 | A04600 | 177 | A01879 | A04605 | 302 |
| A01879 | A04741 | 302 | A01879 | A04798 | 296 |
| A01879 | A04800 | 382 | A01879 | A04822 | 232 |
| A01879 | A04866 | 391 | A01879 | A04961 | 372 |
| A01879 | A05038 | 281 | A01879 | A05113 | 160 |
| A01879 | A05305 | 210 | A01879 | A05313 | 174 |
| A01879 | A05985 | 457 | A01879 | A06029 | 172 |
| A01879 | A06055 | 390 | A01879 | A06127 | 340 |
| A01879 | A06422 | 443 | A01879 | A06747 | 171 |
| A01879 | A06950 | 179 | A01879 | A07031 | 363 |
| A01879 | A07138 | 238 | A01879 | A07146 | 232 |
| A01879 | A07148 | 362 | A01879 | A07152 | 232 |
| A01879 | A07154 | 218 | A01879 | A07157 | 491 |
| A01879 | A07161 | 306 | A01879 | A07164 | 457 |
| A01879 | A07165 | 210 | A01879 | A07166 | 486 |
| A01879 | A07471 | 308 | A01879 | A07688 | 170 |
| A01879 | A07736 | 240 | A01879 | A07763 | 202 |
| A01879 | A07973 | 157 | A01879 | A08238 | 241 |
| A01879 | A08368 | 329 | A01879 | A08687 | 263 |
| A01879 | A09046 | 240 | A01879 | A10081 | 285 |
| A01879 | A10418 | 212 | A01879 | A10677 | 162 |
| A01879 | A10791 | 221 | A01879 | A11369 | 63  |
| A01879 | A11433 | 388 | A01879 | A11825 | 238 |
| A01879 | A13860 | 183 | A01879 | A13872 | 458 |
| A01879 | A13907 | 196 | A01879 | A14442 | 208 |
| A01879 | A15394 | 424 | A01879 | A15395 | 356 |
| A01879 | A15427 | 324 | A01879 | A15640 | 321 |
| A01879 | A15806 | 367 | A01879 | A16636 | 183 |
| A01880 | A01887 | 288 | A01880 | A01888 | 465 |
| A01880 | A01902 | 191 | A01880 | A01908 | 224 |
| A01880 | A01936 | 251 | A01880 | A02039 | 229 |
| A01880 | A02072 | 224 | A01880 | A02131 | 307 |
| A01880 | A02232 | 215 | A01880 | A02249 | 232 |
| A01880 | A02337 | 491 | A01880 | A02340 | 208 |
| A01880 | A02370 | 391 | A01880 | A02382 | 477 |
| A01880 | A02383 | 374 | A01880 | A02457 | 235 |
| A01880 | A02505 | 193 | A01880 | A02508 | 290 |

|        |        |     |        |        |     |
|--------|--------|-----|--------|--------|-----|
| A01880 | A02616 | 270 | A01880 | A02634 | 246 |
| A01880 | A02637 | 438 | A01880 | A02655 | 174 |
| A01880 | A02657 | 314 | A01880 | A02659 | 369 |
| A01880 | A02698 | 417 | A01880 | A02711 | 99  |
| A01880 | A02730 | 340 | A01880 | A02732 | 221 |
| A01880 | A02769 | 281 | A01880 | A02788 | 232 |
| A01880 | A02851 | 278 | A01880 | A02854 | 443 |
| A01880 | A02863 | 441 | A01880 | A02875 | 350 |
| A01880 | A02886 | 262 | A01880 | A02917 | 405 |
| A01880 | A02935 | 369 | A01880 | A02945 | 391 |
| A01880 | A02971 | 303 | A01880 | A03010 | 193 |
| A01880 | A03041 | 266 | A01880 | A03049 | 185 |
| A01880 | A03081 | 221 | A01880 | A03204 | 363 |
| A01880 | A03259 | 310 | A01880 | A03417 | 193 |
| A01880 | A03610 | 230 | A01880 | A03802 | 294 |
| A01880 | A03817 | 238 | A01880 | A03936 | 256 |
| A01880 | A04060 | 286 | A01880 | A04110 | 229 |
| A01880 | A04117 | 474 | A01880 | A04138 | 435 |
| A01880 | A04201 | 290 | A01880 | A04248 | 491 |
| A01880 | A04263 | 322 | A01880 | A04320 | 252 |
| A01880 | A04349 | 188 | A01880 | A04536 | 260 |
| A01880 | A04613 | 301 | A01880 | A04734 | 299 |
| A01880 | A04756 | 369 | A01880 | A04800 | 299 |
| A01880 | A04865 | 368 | A01880 | A05305 | 249 |
| A01880 | A05944 | 481 | A01880 | A05985 | 157 |
| A01880 | A06054 | 218 | A01880 | A06055 | 465 |
| A01880 | A06187 | 374 | A01880 | A06211 | 301 |
| A01880 | A06404 | 291 | A01880 | A06415 | 302 |
| A01880 | A06429 | 262 | A01880 | A06525 | 374 |
| A01880 | A06780 | 312 | A01880 | A06818 | 278 |
| A01880 | A07031 | 179 | A01880 | A07127 | 254 |
| A01880 | A07146 | 269 | A01880 | A07154 | 256 |
| A01880 | A07157 | 352 | A01880 | A07161 | 412 |
| A01880 | A07164 | 157 | A01880 | A07173 | 430 |
| A01880 | A07199 | 288 | A01880 | A07311 | 899 |
| A01880 | A07390 | 266 | A01880 | A08399 | 326 |
| A01880 | A08589 | 390 | A01880 | A08875 | 159 |
| A01880 | A09014 | 353 | A01880 | A09240 | 314 |
| A01880 | A09422 | 190 | A01880 | A09520 | 221 |
| A01880 | A09570 | 301 | A01880 | A10074 | 374 |
| A01880 | A10605 | 270 | A01880 | A11169 | 290 |
| A01880 | A11902 | 199 | A01880 | A13860 | 235 |
| A01880 | A13872 | 224 | A01880 | A14236 | 159 |
| A01880 | A14366 | 334 | A01880 | A14392 | 279 |
| A01880 | A14399 | 162 | A01880 | A14430 | 385 |
| A01880 | A14442 | 247 | A01880 | A14524 | 229 |

|        |        |     |        |        |     |
|--------|--------|-----|--------|--------|-----|
| A01880 | A15394 | 193 | A01880 | A15395 | 305 |
| A01880 | A15471 | 257 | A01880 | A15601 | 377 |
| A01880 | A15603 | 367 | A01880 | A15605 | 465 |
| A01881 | A01888 | 461 | A01881 | A01889 | 491 |
| A01881 | A01890 | 272 | A01881 | A02345 | 184 |
| A01881 | A02542 | 190 | A01881 | A02559 | 486 |
| A01881 | A02615 | 291 | A01881 | A02689 | 184 |
| A01881 | A02697 | 208 | A01881 | A02698 | 490 |
| A01881 | A02711 | 407 | A01881 | A02730 | 364 |
| A01881 | A02784 | 227 | A01881 | A02917 | 356 |
| A01881 | A02986 | 296 | A01881 | A03010 | 353 |
| A01881 | A03049 | 216 | A01881 | A03090 | 235 |
| A01881 | A03255 | 343 | A01881 | A03923 | 391 |
| A01881 | A03934 | 347 | A01881 | A04073 | 172 |
| A01881 | A04484 | 425 | A01881 | A04830 | 286 |
| A01881 | A04938 | 302 | A01881 | A04961 | 311 |
| A01881 | A04991 | 269 | A01881 | A05597 | 277 |
| A01881 | A05891 | 207 | A01881 | A05985 | 190 |
| A01881 | A06314 | 340 | A01881 | A06415 | 240 |
| A01881 | A06650 | 380 | A01881 | A06658 | 401 |
| A01881 | A09499 | 463 | A01881 | A09533 | 469 |
| A01881 | A09534 | 449 | A01881 | A10801 | 259 |
| A01881 | A14236 | 489 | A01881 | A14373 | 319 |
| A01881 | A15241 | 450 | A01881 | A15395 | 202 |
| A01881 | A15601 | 395 | A01881 | A15832 | 358 |
| A01882 | A02298 | 285 | A01882 | A02668 | 273 |
| A01882 | A02729 | 367 | A01882 | A02756 | 288 |
| A01882 | A02812 | 255 | A01882 | A02814 | 472 |
| A01882 | A03275 | 240 | A01882 | A03848 | 395 |
| A01882 | A04027 | 406 | A01882 | A04136 | 419 |
| A01882 | A04512 | 419 | A01882 | A04681 | 308 |
| A01882 | A05036 | 404 | A01882 | A07006 | 413 |
| A01882 | A07165 | 223 | A01882 | A16636 | 207 |
| A01883 | A01886 | 263 | A01883 | A01888 | 257 |
| A01883 | A01890 | 267 | A01883 | A01893 | 469 |
| A01883 | A01894 | 358 | A01883 | A01895 | 305 |
| A01883 | A01899 | 227 | A01883 | A01909 | 463 |
| A01883 | A02075 | 200 | A01883 | A02298 | 154 |
| A01883 | A02300 | 174 | A01883 | A02316 | 201 |
| A01883 | A02335 | 430 | A01883 | A02336 | 299 |
| A01883 | A02338 | 479 | A01883 | A02341 | 251 |
| A01883 | A02347 | 299 | A01883 | A02687 | 307 |
| A01883 | A02691 | 481 | A01883 | A02692 | 245 |
| A01883 | A02693 | 241 | A01883 | A02694 | 260 |
| A01883 | A02700 | 305 | A01883 | A02701 | 363 |
| A01883 | A02707 | 277 | A01883 | A02729 | 274 |

|        |        |     |        |        |     |
|--------|--------|-----|--------|--------|-----|
| A01883 | A02756 | 157 | A01883 | A02759 | 240 |
| A01883 | A02785 | 345 | A01883 | A02814 | 340 |
| A01883 | A02857 | 210 | A01883 | A02859 | 185 |
| A01883 | A02874 | 174 | A01883 | A02982 | 218 |
| A01883 | A02988 | 173 | A01883 | A03004 | 281 |
| A01883 | A03268 | 454 | A01883 | A03484 | 249 |
| A01883 | A03870 | 351 | A01883 | A03964 | 296 |
| A01883 | A04005 | 422 | A01883 | A04108 | 296 |
| A01883 | A04135 | 302 | A01883 | A04279 | 235 |
| A01883 | A04285 | 434 | A01883 | A04304 | 319 |
| A01883 | A04443 | 449 | A01883 | A04449 | 374 |
| A01883 | A05911 | 318 | A01883 | A06607 | 182 |
| A01883 | A06635 | 490 | A01883 | A06868 | 249 |
| A01883 | A07059 | 208 | A01883 | A07088 | 221 |
| A01883 | A07109 | 205 | A01883 | A07141 | 159 |
| A01883 | A07164 | 184 | A01883 | A07177 | 227 |
| A01883 | A07199 | 408 | A01883 | A07200 | 489 |
| A01883 | A11983 | 374 | A01883 | A13917 | 162 |
| A01883 | A14405 | 446 | A01883 | A14440 | 400 |
| A01883 | A15368 | 333 | A01883 | A16355 | 328 |
| A01883 | A16741 | 350 | A01884 | A01894 | 286 |
| A01884 | A02074 | 399 | A01884 | A02083 | 366 |
| A01884 | A02306 | 221 | A01884 | A02317 | 348 |
| A01884 | A02330 | 258 | A01884 | A02341 | 454 |
| A01884 | A02342 | 430 | A01884 | A02698 | 369 |
| A01884 | A02701 | 411 | A01884 | A03099 | 221 |
| A01884 | A03779 | 404 | A01884 | A03964 | 433 |
| A01884 | A04135 | 358 | A01884 | A04136 | 404 |
| A01884 | A04162 | 443 | A01884 | A04315 | 361 |
| A01884 | A04443 | 463 | A01884 | A05412 | 425 |
| A01884 | A05891 | 281 | A01884 | A06263 | 322 |
| A01884 | A06607 | 207 | A01884 | A06635 | 480 |
| A01884 | A07200 | 310 | A01884 | A10239 | 404 |
| A01884 | A11646 | 323 | A01884 | A13667 | 324 |
| A01884 | A13982 | 213 | A01884 | A14236 | 267 |
| A01884 | A14388 | 404 | A01884 | A14405 | 288 |
| A01884 | A16021 | 408 | A01885 | A04015 | 366 |
| A01885 | A07199 | 405 | A01886 | A02143 | 173 |
| A01886 | A02261 | 294 | A01886 | A02410 | 324 |
| A01886 | A02823 | 375 | A01886 | A02842 | 328 |
| A01886 | A02868 | 286 | A01886 | A02874 | 198 |
| A01886 | A02902 | 461 | A01886 | A02903 | 335 |
| A01886 | A02965 | 230 | A01886 | A03305 | 276 |
| A01886 | A03419 | 156 | A01886 | A03725 | 385 |
| A01886 | A04080 | 294 | A01886 | A05185 | 293 |
| A01886 | A06200 | 297 | A01886 | A07089 | 357 |

|        |        |     |        |        |     |
|--------|--------|-----|--------|--------|-----|
| A01886 | A07158 | 174 | A01886 | A09020 | 401 |
| A01886 | A09136 | 357 | A01886 | A09476 | 251 |
| A01886 | A10985 | 375 | A01886 | A11424 | 344 |
| A01886 | A15912 | 202 | A01886 | A16300 | 323 |
| A01886 | A16994 | 154 | A01887 | A01888 | 491 |
| A01887 | A01902 | 423 | A01887 | A01908 | 171 |
| A01887 | A02176 | 229 | A01887 | A02340 | 301 |
| A01887 | A02372 | 196 | A01887 | A02382 | 263 |
| A01887 | A02415 | 286 | A01887 | A02439 | 401 |
| A01887 | A02552 | 249 | A01887 | A02590 | 199 |
| A01887 | A02611 | 369 | A01887 | A02639 | 246 |
| A01887 | A02659 | 207 | A01887 | A02661 | 249 |
| A01887 | A02695 | 454 | A01887 | A02696 | 249 |
| A01887 | A02709 | 174 | A01887 | A02730 | 386 |
| A01887 | A02731 | 266 | A01887 | A02742 | 357 |
| A01887 | A02745 | 149 | A01887 | A02780 | 241 |
| A01887 | A02787 | 470 | A01887 | A02788 | 360 |
| A01887 | A02800 | 241 | A01887 | A02803 | 162 |
| A01887 | A02808 | 340 | A01887 | A02812 | 395 |
| A01887 | A02813 | 168 | A01887 | A02826 | 286 |
| A01887 | A02837 | 255 | A01887 | A02838 | 154 |
| A01887 | A02851 | 241 | A01887 | A02859 | 463 |
| A01887 | A02863 | 283 | A01887 | A02864 | 198 |
| A01887 | A02874 | 329 | A01887 | A02896 | 457 |
| A01887 | A02916 | 447 | A01887 | A02944 | 236 |
| A01887 | A02982 | 183 | A01887 | A02984 | 232 |
| A01887 | A03010 | 152 | A01887 | A03019 | 63  |
| A01887 | A03183 | 157 | A01887 | A03204 | 462 |
| A01887 | A03259 | 480 | A01887 | A03275 | 235 |
| A01887 | A03282 | 193 | A01887 | A03549 | 241 |
| A01887 | A03666 | 443 | A01887 | A03865 | 232 |
| A01887 | A03966 | 154 | A01887 | A04040 | 424 |
| A01887 | A04078 | 188 | A01887 | A04134 | 286 |
| A01887 | A04138 | 224 | A01887 | A04206 | 470 |
| A01887 | A04242 | 296 | A01887 | A04248 | 163 |
| A01887 | A04263 | 449 | A01887 | A04265 | 232 |
| A01887 | A04272 | 238 | A01887 | A04327 | 157 |
| A01887 | A04518 | 458 | A01887 | A04538 | 313 |
| A01887 | A04546 | 276 | A01887 | A04567 | 489 |
| A01887 | A04600 | 177 | A01887 | A04798 | 296 |
| A01887 | A04800 | 263 | A01887 | A04879 | 201 |
| A01887 | A05577 | 389 | A01887 | A05679 | 401 |
| A01887 | A05741 | 373 | A01887 | A06127 | 339 |
| A01887 | A06130 | 195 | A01887 | A06149 | 463 |
| A01887 | A06314 | 329 | A01887 | A06415 | 385 |
| A01887 | A06422 | 491 | A01887 | A06650 | 179 |

|        |        |     |        |        |     |
|--------|--------|-----|--------|--------|-----|
| A01887 | A06899 | 429 | A01887 | A07135 | 299 |
| A01887 | A07148 | 235 | A01887 | A07154 | 216 |
| A01887 | A07157 | 489 | A01887 | A07161 | 171 |
| A01887 | A07217 | 259 | A01887 | A07461 | 154 |
| A01887 | A08520 | 296 | A01887 | A08741 | 177 |
| A01887 | A10131 | 213 | A01887 | A10602 | 270 |
| A01887 | A10901 | 291 | A01887 | A11369 | 63  |
| A01887 | A11697 | 255 | A01887 | A12420 | 408 |
| A01887 | A12421 | 283 | A01887 | A13699 | 193 |
| A01887 | A13872 | 185 | A01887 | A14364 | 277 |
| A01887 | A15614 | 176 | A01887 | A15887 | 307 |
| A01887 | A16000 | 372 | A01887 | A17085 | 185 |
| A01887 | A17207 | 180 | A01888 | A01889 | 419 |
| A01888 | A01893 | 269 | A01888 | A01902 | 450 |
| A01888 | A01908 | 104 | A01888 | A01909 | 204 |
| A01888 | A01931 | 318 | A01888 | A01936 | 159 |
| A01888 | A02034 | 198 | A01888 | A02298 | 440 |
| A01888 | A02300 | 344 | A01888 | A02307 | 232 |
| A01888 | A02336 | 190 | A01888 | A02337 | 429 |
| A01888 | A02340 | 491 | A01888 | A02346 | 240 |
| A01888 | A02347 | 323 | A01888 | A02382 | 334 |
| A01888 | A02415 | 221 | A01888 | A02416 | 485 |
| A01888 | A02471 | 217 | A01888 | A02490 | 490 |
| A01888 | A02491 | 488 | A01888 | A02503 | 196 |
| A01888 | A02547 | 256 | A01888 | A02582 | 388 |
| A01888 | A02615 | 305 | A01888 | A02616 | 179 |
| A01888 | A02630 | 369 | A01888 | A02634 | 374 |
| A01888 | A02637 | 546 | A01888 | A02661 | 443 |
| A01888 | A02668 | 432 | A01888 | A02695 | 450 |
| A01888 | A02697 | 191 | A01888 | A02698 | 477 |
| A01888 | A02705 | 310 | A01888 | A02706 | 184 |
| A01888 | A02714 | 347 | A01888 | A02726 | 341 |
| A01888 | A02729 | 378 | A01888 | A02730 | 491 |
| A01888 | A02731 | 266 | A01888 | A02732 | 127 |
| A01888 | A02735 | 355 | A01888 | A02741 | 491 |
| A01888 | A02746 | 316 | A01888 | A02751 | 285 |
| A01888 | A02756 | 480 | A01888 | A02780 | 190 |
| A01888 | A02785 | 330 | A01888 | A02787 | 323 |
| A01888 | A02788 | 491 | A01888 | A02805 | 198 |
| A01888 | A02807 | 227 | A01888 | A02808 | 452 |
| A01888 | A02812 | 330 | A01888 | A02822 | 183 |
| A01888 | A02834 | 294 | A01888 | A02837 | 483 |
| A01888 | A02840 | 262 | A01888 | A02841 | 490 |
| A01888 | A02854 | 490 | A01888 | A02859 | 491 |
| A01888 | A02863 | 472 | A01888 | A02874 | 466 |
| A01888 | A02886 | 480 | A01888 | A02896 | 350 |



|        |        |     |        |        |     |
|--------|--------|-----|--------|--------|-----|
| A01888 | A02905 | 168 | A01888 | A02917 | 430 |
| A01888 | A02918 | 187 | A01888 | A02935 | 286 |
| A01888 | A02936 | 311 | A01888 | A02945 | 302 |
| A01888 | A02951 | 223 | A01888 | A02982 | 196 |
| A01888 | A02983 | 179 | A01888 | A02984 | 162 |
| A01888 | A03010 | 219 | A01888 | A03019 | 68  |
| A01888 | A03093 | 152 | A01888 | A03100 | 423 |
| A01888 | A03113 | 168 | A01888 | A03126 | 384 |
| A01888 | A03204 | 419 | A01888 | A03243 | 199 |
| A01888 | A03259 | 582 | A01888 | A03260 | 157 |
| A01888 | A03271 | 243 | A01888 | A03275 | 472 |
| A01888 | A03276 | 174 | A01888 | A03340 | 301 |
| A01888 | A03610 | 266 | A01888 | A03735 | 165 |
| A01888 | A03802 | 208 | A01888 | A03805 | 249 |
| A01888 | A03807 | 361 | A01888 | A03825 | 179 |
| A01888 | A03845 | 183 | A01888 | A03865 | 179 |
| A01888 | A03870 | 262 | A01888 | A03934 | 249 |
| A01888 | A03936 | 162 | A01888 | A03966 | 324 |
| A01888 | A03977 | 190 | A01888 | A04009 | 198 |
| A01888 | A04011 | 184 | A01888 | A04030 | 270 |
| A01888 | A04031 | 339 | A01888 | A04088 | 176 |
| A01888 | A04091 | 335 | A01888 | A04125 | 210 |
| A01888 | A04138 | 489 | A01888 | A04144 | 368 |
| A01888 | A04201 | 335 | A01888 | A04206 | 196 |
| A01888 | A04238 | 353 | A01888 | A04247 | 249 |
| A01888 | A04248 | 466 | A01888 | A04263 | 491 |
| A01888 | A04276 | 171 | A01888 | A04320 | 475 |
| A01888 | A04415 | 305 | A01888 | A04484 | 363 |
| A01888 | A04517 | 173 | A01888 | A04518 | 205 |
| A01888 | A04519 | 341 | A01888 | A04526 | 262 |
| A01888 | A04528 | 301 | A01888 | A04536 | 480 |
| A01888 | A04545 | 256 | A01888 | A04548 | 411 |
| A01888 | A04567 | 484 | A01888 | A04568 | 156 |
| A01888 | A04584 | 245 | A01888 | A04620 | 205 |
| A01888 | A04681 | 174 | A01888 | A04714 | 152 |
| A01888 | A04734 | 446 | A01888 | A04783 | 390 |
| A01888 | A04798 | 249 | A01888 | A04800 | 213 |
| A01888 | A04801 | 301 | A01888 | A04806 | 288 |
| A01888 | A04854 | 288 | A01888 | A04855 | 278 |
| A01888 | A04865 | 450 | A01888 | A04866 | 357 |
| A01888 | A04878 | 311 | A01888 | A04908 | 252 |
| A01888 | A04951 | 301 | A01888 | A04961 | 198 |
| A01888 | A05113 | 329 | A01888 | A05117 | 213 |
| A01888 | A05279 | 301 | A01888 | A05297 | 281 |
| A01888 | A05309 | 226 | A01888 | A05322 | 177 |
| A01888 | A05346 | 270 | A01888 | A05349 | 293 |

|        |        |     |        |        |     |
|--------|--------|-----|--------|--------|-----|
| A01888 | A05481 | 341 | A01888 | A05558 | 262 |
| A01888 | A05691 | 152 | A01888 | A05741 | 201 |
| A01888 | A05847 | 174 | A01888 | A05943 | 288 |
| A01888 | A05959 | 235 | A01888 | A05985 | 404 |
| A01888 | A06055 | 344 | A01888 | A06082 | 168 |
| A01888 | A06142 | 317 | A01888 | A06211 | 217 |
| A01888 | A06344 | 188 | A01888 | A06415 | 368 |
| A01888 | A06422 | 463 | A01888 | A06654 | 281 |
| A01888 | A06747 | 241 | A01888 | A07135 | 277 |
| A01888 | A07146 | 469 | A01888 | A07153 | 374 |
| A01888 | A07154 | 382 | A01888 | A07157 | 480 |
| A01888 | A07158 | 379 | A01888 | A07161 | 243 |
| A01888 | A07164 | 486 | A01888 | A07165 | 473 |
| A01888 | A07173 | 290 | A01888 | A07178 | 152 |
| A01888 | A07200 | 486 | A01888 | A07201 | 168 |
| A01888 | A07266 | 154 | A01888 | A07302 | 210 |
| A01888 | A07311 | 199 | A01888 | A07469 | 171 |
| A01888 | A07884 | 288 | A01888 | A07948 | 317 |
| A01888 | A08093 | 462 | A01888 | A08133 | 199 |
| A01888 | A08193 | 199 | A01888 | A08834 | 207 |
| A01888 | A09220 | 80  | A01888 | A09469 | 160 |
| A01888 | A09499 | 270 | A01888 | A10074 | 317 |
| A01888 | A10626 | 205 | A01888 | A10759 | 249 |
| A01888 | A10805 | 249 | A01888 | A11299 | 198 |
| A01888 | A11369 | 63  | A01888 | A11582 | 288 |
| A01888 | A11604 | 199 | A01888 | A12009 | 160 |
| A01888 | A12420 | 262 | A01888 | A12421 | 235 |
| A01888 | A12927 | 391 | A01888 | A13052 | 246 |
| A01888 | A13667 | 267 | A01888 | A13872 | 355 |
| A01888 | A13944 | 162 | A01888 | A13996 | 288 |
| A01888 | A14132 | 173 | A01888 | A14236 | 465 |
| A01888 | A14390 | 184 | A01888 | A14405 | 205 |
| A01888 | A14442 | 154 | A01888 | A14784 | 341 |
| A01888 | A15089 | 317 | A01888 | A15238 | 432 |
| A01888 | A15241 | 475 | A01888 | A15395 | 368 |
| A01888 | A15417 | 193 | A01888 | A15601 | 165 |
| A01888 | A15828 | 163 | A01888 | A15838 | 419 |
| A01888 | A15841 | 262 | A01888 | A15981 | 391 |
| A01888 | A16547 | 700 | A01888 | A16636 | 491 |
| A01889 | A01900 | 466 | A01889 | A01902 | 174 |
| A01889 | A02180 | 216 | A01889 | A02252 | 190 |
| A01889 | A02340 | 191 | A01889 | A02345 | 489 |
| A01889 | A02416 | 208 | A01889 | A02491 | 328 |
| A01889 | A02512 | 159 | A01889 | A02559 | 352 |
| A01889 | A02615 | 247 | A01889 | A02693 | 199 |
| A01889 | A02695 | 215 | A01889 | A02697 | 457 |

|        |        |     |        |        |     |
|--------|--------|-----|--------|--------|-----|
| A01889 | A02698 | 491 | A01889 | A02706 | 418 |
| A01889 | A02709 | 207 | A01889 | A02711 | 367 |
| A01889 | A02712 | 204 | A01889 | A02768 | 208 |
| A01889 | A02783 | 182 | A01889 | A02863 | 308 |
| A01889 | A02917 | 180 | A01889 | A02983 | 193 |
| A01889 | A02986 | 255 | A01889 | A03010 | 310 |
| A01889 | A03040 | 364 | A01889 | A03141 | 190 |
| A01889 | A03204 | 221 | A01889 | A03243 | 428 |
| A01889 | A03260 | 452 | A01889 | A03419 | 213 |
| A01889 | A03586 | 174 | A01889 | A03744 | 162 |
| A01889 | A04053 | 224 | A01889 | A04074 | 165 |
| A01889 | A04078 | 343 | A01889 | A04117 | 332 |
| A01889 | A04127 | 278 | A01889 | A04138 | 247 |
| A01889 | A04202 | 241 | A01889 | A04252 | 281 |
| A01889 | A04267 | 162 | A01889 | A04271 | 297 |
| A01889 | A04279 | 326 | A01889 | A04280 | 420 |
| A01889 | A04451 | 165 | A01889 | A04567 | 217 |
| A01889 | A04795 | 190 | A01889 | A04798 | 313 |
| A01889 | A04818 | 221 | A01889 | A04832 | 213 |
| A01889 | A04854 | 344 | A01889 | A04941 | 238 |
| A01889 | A04960 | 373 | A01889 | A04961 | 272 |
| A01889 | A04965 | 446 | A01889 | A05305 | 489 |
| A01889 | A05920 | 324 | A01889 | A05931 | 335 |
| A01889 | A06142 | 364 | A01889 | A06465 | 353 |
| A01889 | A06597 | 193 | A01889 | A06609 | 193 |
| A01889 | A06650 | 232 | A01889 | A07148 | 258 |
| A01889 | A07163 | 327 | A01889 | A07173 | 151 |
| A01889 | A07192 | 308 | A01889 | A07206 | 165 |
| A01889 | A08070 | 274 | A01889 | A09090 | 324 |
| A01889 | A09254 | 217 | A01889 | A09404 | 310 |
| A01889 | A09562 | 430 | A01889 | A10156 | 183 |
| A01889 | A10244 | 364 | A01889 | A10358 | 208 |
| A01889 | A10623 | 156 | A01889 | A10813 | 223 |
| A01889 | A12383 | 263 | A01889 | A14236 | 481 |
| A01889 | A14364 | 302 | A01889 | A14385 | 313 |
| A01889 | A14588 | 190 | A01889 | A15241 | 326 |
| A01889 | A15394 | 176 | A01889 | A15395 | 154 |
| A01889 | A15843 | 276 | A01889 | A15952 | 364 |
| A01889 | A15981 | 252 | A01889 | A16075 | 217 |
| A01890 | A01896 | 278 | A01890 | A01899 | 428 |
| A01890 | A01901 | 210 | A01890 | A01927 | 271 |
| A01890 | A02340 | 252 | A01890 | A02341 | 270 |
| A01890 | A02342 | 190 | A01890 | A02416 | 154 |
| A01890 | A02418 | 364 | A01890 | A02586 | 321 |
| A01890 | A02620 | 335 | A01890 | A02629 | 394 |
| A01890 | A02632 | 414 | A01890 | A02661 | 322 |

|        |        |     |        |        |     |
|--------|--------|-----|--------|--------|-----|
| A01890 | A02687 | 432 | A01890 | A02691 | 168 |
| A01890 | A02701 | 260 | A01890 | A02704 | 160 |
| A01890 | A02707 | 294 | A01890 | A02730 | 256 |
| A01890 | A02741 | 177 | A01890 | A02745 | 235 |
| A01890 | A02788 | 157 | A01890 | A02854 | 246 |
| A01890 | A02874 | 202 | A01890 | A03010 | 240 |
| A01890 | A03054 | 263 | A01890 | A03309 | 352 |
| A01890 | A03392 | 363 | A01890 | A03661 | 160 |
| A01890 | A03810 | 372 | A01890 | A03872 | 411 |
| A01890 | A03922 | 259 | A01890 | A03948 | 288 |
| A01890 | A03964 | 477 | A01890 | A04001 | 337 |
| A01890 | A04004 | 291 | A01890 | A04074 | 229 |
| A01890 | A04138 | 302 | A01890 | A04201 | 324 |
| A01890 | A04263 | 235 | A01890 | A04280 | 152 |
| A01890 | A04302 | 419 | A01890 | A04443 | 321 |
| A01890 | A04869 | 372 | A01890 | A04909 | 303 |
| A01890 | A04933 | 424 | A01890 | A04938 | 313 |
| A01890 | A04940 | 394 | A01890 | A05911 | 333 |
| A01890 | A06451 | 348 | A01890 | A06487 | 407 |
| A01890 | A06584 | 229 | A01890 | A06588 | 196 |
| A01890 | A06603 | 279 | A01890 | A06607 | 366 |
| A01890 | A06623 | 462 | A01890 | A06658 | 407 |
| A01890 | A07146 | 307 | A01890 | A07154 | 296 |
| A01890 | A07199 | 455 | A01890 | A07671 | 407 |
| A01890 | A08019 | 407 | A01890 | A08020 | 407 |
| A01890 | A08021 | 407 | A01890 | A09251 | 352 |
| A01890 | A09254 | 277 | A01890 | A09826 | 167 |
| A01890 | A10220 | 407 | A01890 | A11348 | 286 |
| A01890 | A12323 | 394 | A01890 | A12626 | 407 |
| A01890 | A13464 | 407 | A01890 | A13667 | 274 |
| A01890 | A13872 | 269 | A01890 | A14016 | 168 |
| A01890 | A14236 | 205 | A01890 | A14642 | 180 |
| A01890 | A14643 | 299 | A01890 | A14984 | 407 |
| A01891 | A02705 | 420 | A01891 | A02706 | 226 |
| A01891 | A02711 | 260 | A01891 | A02817 | 352 |
| A01891 | A02820 | 391 | A01891 | A02915 | 389 |
| A01891 | A03243 | 328 | A01891 | A03293 | 196 |
| A01891 | A03304 | 216 | A01891 | A04307 | 334 |
| A01891 | A05940 | 385 | A01891 | A06107 | 405 |
| A01891 | A06214 | 438 | A01891 | A14381 | 323 |
| A01892 | A01909 | 384 | A01892 | A02307 | 393 |
| A01892 | A02460 | 363 | A01892 | A03268 | 427 |
| A01892 | A04285 | 438 | A01892 | A06650 | 232 |
| A01893 | A01894 | 484 | A01893 | A01909 | 491 |
| A01893 | A02072 | 180 | A01893 | A02075 | 260 |
| A01893 | A02167 | 235 | A01893 | A02183 | 174 |

|        |        |     |        |        |     |
|--------|--------|-----|--------|--------|-----|
| A01893 | A02298 | 305 | A01893 | A02335 | 321 |
| A01893 | A02338 | 462 | A01893 | A02468 | 162 |
| A01893 | A02541 | 221 | A01893 | A02613 | 337 |
| A01893 | A02686 | 191 | A01893 | A02691 | 479 |
| A01893 | A02695 | 171 | A01893 | A02701 | 305 |
| A01893 | A02785 | 338 | A01893 | A02841 | 188 |
| A01893 | A02859 | 374 | A01893 | A02988 | 107 |
| A01893 | A03224 | 174 | A01893 | A03268 | 384 |
| A01893 | A03287 | 215 | A01893 | A03872 | 362 |
| A01893 | A04005 | 281 | A01893 | A04023 | 195 |
| A01893 | A04279 | 299 | A01893 | A04285 | 311 |
| A01893 | A04620 | 486 | A01893 | A05221 | 393 |
| A01893 | A05673 | 249 | A01893 | A05746 | 424 |
| A01893 | A06635 | 339 | A01893 | A07165 | 204 |
| A01893 | A07167 | 165 | A01893 | A07177 | 157 |
| A01893 | A07200 | 491 | A01893 | A07350 | 351 |
| A01893 | A07958 | 198 | A01893 | A11640 | 268 |
| A01893 | A14389 | 281 | A01893 | A14405 | 490 |
| A01893 | A14440 | 469 | A01893 | A15368 | 281 |
| A01893 | A16904 | 297 | A01894 | A01895 | 265 |
| A01894 | A01909 | 491 | A01894 | A01911 | 489 |
| A01894 | A01912 | 157 | A01894 | A01914 | 491 |
| A01894 | A02071 | 345 | A01894 | A02075 | 461 |
| A01894 | A02084 | 191 | A01894 | A02298 | 462 |
| A01894 | A02300 | 375 | A01894 | A02306 | 174 |
| A01894 | A02338 | 306 | A01894 | A02378 | 234 |
| A01894 | A02412 | 466 | A01894 | A02490 | 483 |
| A01894 | A02491 | 446 | A01894 | A02668 | 183 |
| A01894 | A02686 | 195 | A01894 | A02691 | 434 |
| A01894 | A02701 | 168 | A01894 | A02709 | 165 |
| A01894 | A02756 | 455 | A01894 | A02785 | 489 |
| A01894 | A02812 | 212 | A01894 | A02859 | 369 |
| A01894 | A02984 | 165 | A01894 | A02985 | 174 |
| A01894 | A02988 | 491 | A01894 | A03034 | 326 |
| A01894 | A03099 | 249 | A01894 | A03211 | 291 |
| A01894 | A03225 | 213 | A01894 | A03435 | 173 |
| A01894 | A03516 | 316 | A01894 | A03598 | 160 |
| A01894 | A03809 | 291 | A01894 | A03872 | 408 |
| A01894 | A03915 | 191 | A01894 | A04005 | 174 |
| A01894 | A04023 | 198 | A01894 | A04053 | 202 |
| A01894 | A04120 | 343 | A01894 | A04125 | 151 |
| A01894 | A04137 | 249 | A01894 | A04279 | 160 |
| A01894 | A04285 | 213 | A01894 | A04301 | 441 |
| A01894 | A04304 | 156 | A01894 | A04371 | 191 |
| A01894 | A04573 | 171 | A01894 | A04620 | 276 |
| A01894 | A05227 | 291 | A01894 | A05309 | 477 |

|        |        |     |        |        |     |
|--------|--------|-----|--------|--------|-----|
| A01894 | A05418 | 306 | A01894 | A05535 | 408 |
| A01894 | A05746 | 249 | A01894 | A05829 | 213 |
| A01894 | A06579 | 481 | A01894 | A06597 | 199 |
| A01894 | A06607 | 488 | A01894 | A06642 | 241 |
| A01894 | A06926 | 486 | A01894 | A07177 | 249 |
| A01894 | A07200 | 945 | A01894 | A07350 | 269 |
| A01894 | A07881 | 291 | A01894 | A07911 | 462 |
| A01894 | A08228 | 291 | A01894 | A08548 | 291 |
| A01894 | A08667 | 340 | A01894 | A09179 | 204 |
| A01894 | A09578 | 446 | A01894 | A10085 | 224 |
| A01894 | A10149 | 343 | A01894 | A10557 | 485 |
| A01894 | A10606 | 276 | A01894 | A11123 | 151 |
| A01894 | A11460 | 151 | A01894 | A13734 | 208 |
| A01894 | A14198 | 364 | A01894 | A14389 | 308 |
| A01894 | A14405 | 491 | A01894 | A14440 | 945 |
| A01894 | A14699 | 291 | A01894 | A14778 | 291 |
| A01894 | A14801 | 199 | A01894 | A16438 | 460 |
| A01894 | A16636 | 483 | A01894 | A16690 | 238 |
| A01894 | A17102 | 205 | A01895 | A01896 | 477 |
| A01895 | A01914 | 394 | A01895 | A02502 | 170 |
| A01895 | A02565 | 274 | A01895 | A02639 | 469 |
| A01895 | A02691 | 215 | A01895 | A02701 | 299 |
| A01895 | A02985 | 441 | A01895 | A02988 | 240 |
| A01895 | A04302 | 357 | A01895 | A04304 | 436 |
| A01895 | A04933 | 366 | A01895 | A05309 | 170 |
| A01895 | A05866 | 335 | A01895 | A06579 | 334 |
| A01895 | A14405 | 273 | A01895 | A16281 | 205 |
| A01896 | A01899 | 424 | A01896 | A01904 | 283 |
| A01896 | A01911 | 411 | A01896 | A01914 | 127 |
| A01896 | A02010 | 215 | A01896 | A02179 | 156 |
| A01896 | A02327 | 308 | A01896 | A02341 | 380 |
| A01896 | A02388 | 319 | A01896 | A02418 | 358 |
| A01896 | A02586 | 435 | A01896 | A02591 | 382 |
| A01896 | A02629 | 278 | A01896 | A02636 | 241 |
| A01896 | A02675 | 163 | A01896 | A02689 | 191 |
| A01896 | A02707 | 288 | A01896 | A02749 | 407 |
| A01896 | A02750 | 374 | A01896 | A02752 | 182 |
| A01896 | A02753 | 159 | A01896 | A02789 | 180 |
| A01896 | A02819 | 198 | A01896 | A02830 | 277 |
| A01896 | A02877 | 185 | A01896 | A02878 | 266 |
| A01896 | A03032 | 285 | A01896 | A03112 | 386 |
| A01896 | A03131 | 322 | A01896 | A03420 | 160 |
| A01896 | A03661 | 152 | A01896 | A03663 | 263 |
| A01896 | A03822 | 180 | A01896 | A03964 | 407 |
| A01896 | A03965 | 238 | A01896 | A04015 | 366 |
| A01896 | A04082 | 291 | A01896 | A04133 | 297 |

|        |        |     |        |        |     |
|--------|--------|-----|--------|--------|-----|
| A01896 | A04314 | 283 | A01896 | A04710 | 218 |
| A01896 | A04853 | 272 | A01896 | A05323 | 313 |
| A01896 | A06254 | 268 | A01896 | A06623 | 470 |
| A01896 | A07145 | 219 | A01896 | A07201 | 260 |
| A01896 | A07436 | 160 | A01896 | A08417 | 241 |
| A01896 | A09127 | 174 | A01896 | A09509 | 176 |
| A01896 | A09825 | 162 | A01896 | A10184 | 405 |
| A01896 | A10277 | 382 | A01896 | A11104 | 291 |
| A01896 | A13877 | 345 | A01896 | A13924 | 263 |
| A01896 | A14405 | 221 | A01896 | A14431 | 215 |
| A01896 | A14524 | 265 | A01896 | A14642 | 173 |
| A01896 | A14643 | 185 | A01896 | A16612 | 212 |
| A01897 | A01899 | 318 | A01897 | A01900 | 185 |
| A01897 | A01901 | 278 | A01897 | A01913 | 385 |
| A01897 | A01992 | 291 | A01897 | A02184 | 314 |
| A01897 | A02352 | 185 | A01897 | A02414 | 199 |
| A01897 | A02703 | 110 | A01897 | A02705 | 430 |
| A01897 | A02733 | 350 | A01897 | A02743 | 219 |
| A01897 | A02816 | 127 | A01897 | A02817 | 199 |
| A01897 | A02827 | 306 | A01897 | A02841 | 224 |
| A01897 | A02861 | 255 | A01897 | A02862 | 339 |
| A01897 | A03611 | 201 | A01897 | A04046 | 302 |
| A01897 | A04305 | 319 | A01897 | A04307 | 168 |
| A01897 | A04316 | 221 | A01897 | A04502 | 353 |
| A01897 | A04576 | 319 | A01897 | A04579 | 257 |
| A01897 | A04661 | 213 | A01897 | A04706 | 182 |
| A01897 | A04739 | 171 | A01897 | A04853 | 219 |
| A01897 | A06063 | 154 | A01897 | A06078 | 255 |
| A01897 | A06847 | 375 | A01897 | A07197 | 229 |
| A01897 | A07201 | 291 | A01897 | A07451 | 168 |
| A01897 | A07533 | 311 | A01897 | A08055 | 201 |
| A01897 | A08490 | 236 | A01897 | A08547 | 276 |
| A01897 | A08729 | 405 | A01897 | A08768 | 255 |
| A01897 | A08969 | 414 | A01897 | A09263 | 446 |
| A01897 | A09577 | 85  | A01897 | A10392 | 159 |
| A01897 | A10558 | 306 | A01897 | A10616 | 246 |
| A01897 | A10621 | 313 | A01897 | A10927 | 241 |
| A01897 | A11390 | 188 | A01897 | A11704 | 173 |
| A01897 | A12215 | 440 | A01897 | A13181 | 165 |
| A01897 | A13809 | 179 | A01897 | A14643 | 288 |
| A01897 | A14648 | 274 | A01897 | A16089 | 238 |
| A01897 | A16243 | 373 | A01898 | A01900 | 944 |
| A01898 | A01913 | 93  | A01898 | A02491 | 154 |
| A01898 | A02571 | 165 | A01898 | A02690 | 165 |
| A01898 | A02698 | 63  | A01898 | A02704 | 467 |
| A01898 | A02706 | 904 | A01898 | A02781 | 207 |

|        |        |     |        |        |     |
|--------|--------|-----|--------|--------|-----|
| A01898 | A02841 | 291 | A01898 | A02846 | 445 |
| A01898 | A02960 | 273 | A01898 | A03101 | 152 |
| A01898 | A03639 | 180 | A01898 | A04117 | 335 |
| A01898 | A04280 | 338 | A01898 | A04553 | 208 |
| A01898 | A04902 | 313 | A01898 | A05568 | 475 |
| A01898 | A05876 | 163 | A01898 | A06582 | 263 |
| A01898 | A06597 | 263 | A01898 | A06610 | 391 |
| A01898 | A07199 | 193 | A01898 | A07421 | 183 |
| A01898 | A09386 | 462 | A01898 | A10621 | 318 |
| A01898 | A13160 | 283 | A01898 | A13447 | 234 |
| A01898 | A13759 | 196 | A01898 | A14364 | 201 |
| A01898 | A14575 | 386 | A01898 | A15099 | 183 |
| A01899 | A01900 | 221 | A01899 | A01901 | 168 |
| A01899 | A01913 | 190 | A01899 | A02254 | 199 |
| A01899 | A02268 | 277 | A01899 | A02327 | 281 |
| A01899 | A02346 | 322 | A01899 | A02521 | 481 |
| A01899 | A02629 | 246 | A01899 | A02632 | 286 |
| A01899 | A02687 | 174 | A01899 | A02707 | 377 |
| A01899 | A02743 | 241 | A01899 | A02814 | 188 |
| A01899 | A02819 | 162 | A01899 | A03087 | 201 |
| A01899 | A03100 | 188 | A01899 | A03263 | 188 |
| A01899 | A03484 | 229 | A01899 | A03513 | 152 |
| A01899 | A03795 | 277 | A01899 | A03948 | 238 |
| A01899 | A04179 | 405 | A01899 | A04228 | 348 |
| A01899 | A04710 | 184 | A01899 | A04713 | 299 |
| A01899 | A04883 | 201 | A01899 | A05157 | 256 |
| A01899 | A05369 | 364 | A01899 | A05573 | 200 |
| A01899 | A06263 | 232 | A01899 | A06405 | 184 |
| A01899 | A06439 | 390 | A01899 | A06471 | 416 |
| A01899 | A06623 | 154 | A01899 | A06700 | 185 |
| A01899 | A06860 | 204 | A01899 | A07037 | 294 |
| A01899 | A07059 | 187 | A01899 | A07088 | 462 |
| A01899 | A07140 | 321 | A01899 | A07239 | 343 |
| A01899 | A07281 | 329 | A01899 | A07655 | 473 |
| A01899 | A07674 | 278 | A01899 | A07748 | 213 |
| A01899 | A07757 | 235 | A01899 | A07878 | 338 |
| A01899 | A08155 | 446 | A01899 | A08630 | 238 |
| A01899 | A08660 | 356 | A01899 | A08667 | 271 |
| A01899 | A08688 | 460 | A01899 | A08690 | 414 |
| A01899 | A09438 | 260 | A01899 | A10126 | 334 |
| A01899 | A10652 | 269 | A01899 | A10686 | 286 |
| A01899 | A10696 | 477 | A01899 | A10882 | 329 |
| A01899 | A11021 | 329 | A01899 | A11943 | 157 |
| A01899 | A16531 | 177 | A01899 | A16612 | 177 |
| A01900 | A01908 | 124 | A01900 | A01913 | 458 |
| A01900 | A01927 | 160 | A01900 | A01941 | 491 |



|        |        |     |        |        |     |
|--------|--------|-----|--------|--------|-----|
| A01900 | A02000 | 163 | A01900 | A02086 | 491 |
| A01900 | A02226 | 483 | A01900 | A02268 | 198 |
| A01900 | A02278 | 430 | A01900 | A02331 | 281 |
| A01900 | A02345 | 491 | A01900 | A02371 | 468 |
| A01900 | A02376 | 434 | A01900 | A02377 | 490 |
| A01900 | A02481 | 208 | A01900 | A02491 | 491 |
| A01900 | A02492 | 394 | A01900 | A02495 | 278 |
| A01900 | A02506 | 195 | A01900 | A02513 | 221 |
| A01900 | A02528 | 204 | A01900 | A02550 | 152 |
| A01900 | A02563 | 204 | A01900 | A02564 | 383 |
| A01900 | A02571 | 488 | A01900 | A02581 | 157 |
| A01900 | A02593 | 157 | A01900 | A02619 | 157 |
| A01900 | A02677 | 358 | A01900 | A02688 | 167 |
| A01900 | A02689 | 424 | A01900 | A02697 | 347 |
| A01900 | A02698 | 488 | A01900 | A02704 | 485 |
| A01900 | A02706 | 945 | A01900 | A02709 | 424 |
| A01900 | A02721 | 265 | A01900 | A02739 | 481 |
| A01900 | A02746 | 226 | A01900 | A02753 | 347 |
| A01900 | A02798 | 461 | A01900 | A02799 | 408 |
| A01900 | A02803 | 241 | A01900 | A02833 | 266 |
| A01900 | A02837 | 329 | A01900 | A02842 | 219 |
| A01900 | A02846 | 490 | A01900 | A02864 | 162 |
| A01900 | A02874 | 191 | A01900 | A02899 | 187 |
| A01900 | A02908 | 443 | A01900 | A02925 | 355 |
| A01900 | A02956 | 216 | A01900 | A02982 | 488 |
| A01900 | A02983 | 174 | A01900 | A02984 | 216 |
| A01900 | A03001 | 334 | A01900 | A03012 | 346 |
| A01900 | A03019 | 491 | A01900 | A03089 | 195 |
| A01900 | A03147 | 187 | A01900 | A03223 | 318 |
| A01900 | A03240 | 172 | A01900 | A03243 | 491 |
| A01900 | A03254 | 195 | A01900 | A03256 | 491 |
| A01900 | A03260 | 369 | A01900 | A03321 | 452 |
| A01900 | A03415 | 339 | A01900 | A03587 | 87  |
| A01900 | A03611 | 489 | A01900 | A03680 | 262 |
| A01900 | A03742 | 469 | A01900 | A03803 | 457 |
| A01900 | A03821 | 212 | A01900 | A03983 | 172 |
| A01900 | A04117 | 489 | A01900 | A04133 | 213 |
| A01900 | A04315 | 341 | A01900 | A04322 | 195 |
| A01900 | A04332 | 167 | A01900 | A04354 | 285 |
| A01900 | A04446 | 355 | A01900 | A04474 | 162 |
| A01900 | A04490 | 151 | A01900 | A04515 | 252 |
| A01900 | A04553 | 481 | A01900 | A04802 | 172 |
| A01900 | A04803 | 232 | A01900 | A04853 | 486 |
| A01900 | A04861 | 489 | A01900 | A04902 | 491 |
| A01900 | A04908 | 278 | A01900 | A04914 | 255 |
| A01900 | A04942 | 396 | A01900 | A05067 | 232 |

|        |        |     |        |        |     |
|--------|--------|-----|--------|--------|-----|
| A01900 | A05164 | 299 | A01900 | A05211 | 172 |
| A01900 | A05214 | 252 | A01900 | A05278 | 400 |
| A01900 | A05305 | 191 | A01900 | A05322 | 463 |
| A01900 | A05542 | 285 | A01900 | A05568 | 491 |
| A01900 | A05569 | 260 | A01900 | A05577 | 423 |
| A01900 | A05582 | 346 | A01900 | A05630 | 268 |
| A01900 | A05683 | 195 | A01900 | A05693 | 236 |
| A01900 | A05719 | 470 | A01900 | A05767 | 165 |
| A01900 | A05791 | 457 | A01900 | A05832 | 469 |
| A01900 | A05949 | 455 | A01900 | A06004 | 475 |
| A01900 | A06073 | 251 | A01900 | A06094 | 216 |
| A01900 | A06135 | 157 | A01900 | A06138 | 232 |
| A01900 | A06139 | 252 | A01900 | A06339 | 205 |
| A01900 | A06595 | 252 | A01900 | A06606 | 338 |
| A01900 | A06697 | 463 | A01900 | A06863 | 484 |
| A01900 | A06971 | 344 | A01900 | A07023 | 252 |
| A01900 | A07136 | 157 | A01900 | A07165 | 385 |
| A01900 | A07176 | 409 | A01900 | A07321 | 215 |
| A01900 | A07343 | 285 | A01900 | A07598 | 228 |
| A01900 | A07727 | 373 | A01900 | A07961 | 378 |
| A01900 | A08098 | 232 | A01900 | A08572 | 154 |
| A01900 | A08604 | 204 | A01900 | A08608 | 208 |
| A01900 | A08628 | 204 | A01900 | A08699 | 195 |
| A01900 | A08709 | 435 | A01900 | A08714 | 249 |
| A01900 | A08720 | 204 | A01900 | A08879 | 467 |
| A01900 | A09220 | 944 | A01900 | A09435 | 378 |
| A01900 | A09535 | 419 | A01900 | A09672 | 201 |
| A01900 | A09704 | 204 | A01900 | A09975 | 438 |
| A01900 | A09988 | 480 | A01900 | A10062 | 157 |
| A01900 | A10091 | 240 | A01900 | A10215 | 152 |
| A01900 | A10329 | 373 | A01900 | A10411 | 185 |
| A01900 | A10555 | 358 | A01900 | A10557 | 191 |
| A01900 | A10625 | 291 | A01900 | A11345 | 184 |
| A01900 | A11583 | 232 | A01900 | A12009 | 196 |
| A01900 | A12523 | 232 | A01900 | A12675 | 195 |
| A01900 | A13160 | 414 | A01900 | A13180 | 204 |
| A01900 | A13734 | 152 | A01900 | A13851 | 172 |
| A01900 | A14020 | 252 | A01900 | A14188 | 472 |
| A01900 | A14190 | 463 | A01900 | A14196 | 899 |
| A01900 | A14198 | 382 | A01900 | A14207 | 899 |
| A01900 | A14218 | 899 | A01900 | A14364 | 458 |
| A01900 | A14382 | 216 | A01900 | A14387 | 247 |
| A01900 | A14430 | 63  | A01900 | A14511 | 187 |
| A01900 | A14544 | 216 | A01900 | A14771 | 252 |
| A01900 | A15201 | 285 | A01900 | A15325 | 217 |
| A01900 | A15675 | 167 | A01900 | A15836 | 252 |

|        |        |     |        |        |     |
|--------|--------|-----|--------|--------|-----|
| A01900 | A16311 | 246 | A01900 | A16775 | 252 |
| A01901 | A02584 | 263 | A01901 | A02743 | 202 |
| A01901 | A02825 | 174 | A01901 | A02869 | 276 |
| A01901 | A03804 | 283 | A01901 | A04038 | 201 |
| A01901 | A04104 | 246 | A01901 | A04446 | 208 |
| A01901 | A04542 | 411 | A01901 | A04576 | 408 |
| A01901 | A04627 | 271 | A01901 | A04706 | 384 |
| A01901 | A04739 | 154 | A01901 | A04850 | 157 |
| A01901 | A04908 | 232 | A01901 | A04970 | 356 |
| A01901 | A05064 | 170 | A01901 | A05163 | 469 |
| A01901 | A06565 | 333 | A01901 | A06615 | 463 |
| A01901 | A07153 | 490 | A01901 | A07201 | 490 |
| A01901 | A08326 | 279 | A01901 | A09104 | 246 |
| A01901 | A09402 | 333 | A01901 | A09816 | 312 |
| A01901 | A11758 | 333 | A01901 | A12105 | 163 |
| A01901 | A13188 | 343 | A01901 | A13592 | 274 |
| A01901 | A15920 | 255 | A01902 | A02053 | 278 |
| A01902 | A02119 | 193 | A01902 | A02251 | 185 |
| A01902 | A02260 | 252 | A01902 | A02294 | 332 |
| A01902 | A02319 | 344 | A01902 | A02340 | 202 |
| A01902 | A02347 | 274 | A01902 | A02349 | 240 |
| A01902 | A02350 | 183 | A01902 | A02412 | 157 |
| A01902 | A02490 | 179 | A01902 | A02491 | 190 |
| A01902 | A02630 | 361 | A01902 | A02637 | 314 |
| A01902 | A02639 | 371 | A01902 | A02696 | 157 |
| A01902 | A02714 | 465 | A01902 | A02729 | 245 |
| A01902 | A02730 | 462 | A01902 | A02735 | 219 |
| A01902 | A02739 | 224 | A01902 | A02745 | 317 |
| A01902 | A02746 | 384 | A01902 | A02749 | 88  |
| A01902 | A02754 | 180 | A01902 | A02768 | 219 |
| A01902 | A02783 | 193 | A01902 | A02808 | 456 |
| A01902 | A02828 | 82  | A01902 | A02834 | 371 |
| A01902 | A02837 | 228 | A01902 | A02843 | 294 |
| A01902 | A02856 | 294 | A01902 | A02859 | 288 |
| A01902 | A02873 | 283 | A01902 | A02918 | 163 |
| A01902 | A02923 | 337 | A01902 | A02945 | 172 |
| A01902 | A02983 | 382 | A01902 | A03049 | 179 |
| A01902 | A03113 | 255 | A01902 | A03144 | 165 |
| A01902 | A03204 | 232 | A01902 | A03224 | 212 |
| A01902 | A03259 | 490 | A01902 | A03269 | 160 |
| A01902 | A03275 | 184 | A01902 | A03280 | 236 |
| A01902 | A03661 | 332 | A01902 | A03744 | 174 |
| A01902 | A03783 | 279 | A01902 | A03865 | 265 |
| A01902 | A03882 | 154 | A01902 | A04059 | 389 |
| A01902 | A04088 | 479 | A01902 | A04109 | 311 |
| A01902 | A04138 | 259 | A01902 | A04268 | 182 |

|        |        |     |        |        |     |
|--------|--------|-----|--------|--------|-----|
| A01902 | A04287 | 388 | A01902 | A04519 | 463 |
| A01902 | A04589 | 380 | A01902 | A04652 | 345 |
| A01902 | A04734 | 294 | A01902 | A04739 | 182 |
| A01902 | A04800 | 294 | A01902 | A05309 | 490 |
| A01902 | A05350 | 332 | A01902 | A05473 | 216 |
| A01902 | A05558 | 332 | A01902 | A05634 | 281 |
| A01902 | A05774 | 288 | A01902 | A05985 | 152 |
| A01902 | A06054 | 213 | A01902 | A06650 | 406 |
| A01902 | A06847 | 267 | A01902 | A07132 | 263 |
| A01902 | A07135 | 432 | A01902 | A07157 | 247 |
| A01902 | A07161 | 205 | A01902 | A07164 | 285 |
| A01902 | A07165 | 162 | A01902 | A07256 | 299 |
| A01902 | A07264 | 227 | A01902 | A08615 | 344 |
| A01902 | A08627 | 230 | A01902 | A08677 | 263 |
| A01902 | A09546 | 182 | A01902 | A09850 | 296 |
| A01902 | A10020 | 360 | A01902 | A10085 | 180 |
| A01902 | A12897 | 180 | A01902 | A12927 | 218 |
| A01902 | A13872 | 219 | A01902 | A14074 | 163 |
| A01902 | A14093 | 168 | A01902 | A14236 | 154 |
| A01902 | A15905 | 179 | A01903 | A01908 | 63  |
| A01903 | A01931 | 378 | A01903 | A02268 | 154 |
| A01903 | A02453 | 319 | A01903 | A02505 | 224 |
| A01903 | A02698 | 488 | A01903 | A02839 | 77  |
| A01903 | A03076 | 385 | A01903 | A03095 | 399 |
| A01903 | A03212 | 269 | A01903 | A03648 | 198 |
| A01903 | A03788 | 240 | A01903 | A04949 | 156 |
| A01903 | A05259 | 191 | A01903 | A05283 | 249 |
| A01903 | A05479 | 319 | A01903 | A05598 | 480 |
| A01903 | A05721 | 157 | A01903 | A05869 | 324 |
| A01903 | A06067 | 238 | A01903 | A06588 | 486 |
| A01903 | A06607 | 491 | A01903 | A06650 | 322 |
| A01903 | A06688 | 424 | A01903 | A07016 | 210 |
| A01903 | A08718 | 380 | A01903 | A08871 | 319 |
| A01903 | A09018 | 472 | A01903 | A09145 | 160 |
| A01903 | A09147 | 243 | A01903 | A09220 | 185 |
| A01903 | A09509 | 488 | A01903 | A09513 | 439 |
| A01903 | A10038 | 191 | A01903 | A10459 | 187 |
| A01903 | A10731 | 235 | A01903 | A11413 | 230 |
| A01903 | A13213 | 230 | A01903 | A13415 | 187 |
| A01903 | A13434 | 488 | A01903 | A14793 | 393 |
| A01904 | A01923 | 224 | A01904 | A02591 | 386 |
| A01904 | A02752 | 195 | A01904 | A02792 | 288 |
| A01904 | A03110 | 171 | A01904 | A03131 | 330 |
| A01904 | A03259 | 238 | A01904 | A03520 | 156 |
| A01904 | A03595 | 350 | A01904 | A03602 | 213 |
| A01904 | A03609 | 330 | A01904 | A03775 | 215 |

|        |        |     |        |        |     |
|--------|--------|-----|--------|--------|-----|
| A01904 | A04010 | 167 | A01904 | A04015 | 457 |
| A01904 | A04334 | 162 | A01904 | A04444 | 263 |
| A01904 | A05410 | 345 | A01904 | A05470 | 386 |
| A01904 | A06595 | 221 | A01904 | A06615 | 173 |
| A01904 | A07061 | 358 | A01904 | A07399 | 362 |
| A01904 | A08572 | 213 | A01904 | A09242 | 347 |
| A01904 | A10602 | 340 | A01904 | A11400 | 357 |
| A01904 | A12927 | 156 | A01904 | A16718 | 316 |
| A01905 | A02466 | 205 | A01905 | A02505 | 160 |
| A01905 | A02585 | 185 | A01905 | A02616 | 240 |
| A01905 | A02636 | 170 | A01905 | A02638 | 321 |
| A01905 | A02694 | 205 | A01905 | A02705 | 281 |
| A01905 | A02735 | 191 | A01905 | A02738 | 486 |
| A01905 | A02803 | 172 | A01905 | A02835 | 249 |
| A01905 | A02874 | 185 | A01905 | A02971 | 277 |
| A01905 | A02972 | 196 | A01905 | A03093 | 213 |
| A01905 | A03338 | 190 | A01905 | A03645 | 307 |
| A01905 | A03664 | 208 | A01905 | A03680 | 193 |
| A01905 | A03685 | 234 | A01905 | A03904 | 212 |
| A01905 | A04077 | 324 | A01905 | A04289 | 418 |
| A01905 | A04321 | 324 | A01905 | A04541 | 475 |
| A01905 | A04569 | 324 | A01905 | A04613 | 274 |
| A01905 | A04683 | 408 | A01905 | A04764 | 343 |
| A01905 | A05123 | 312 | A01905 | A05212 | 191 |
| A01905 | A05288 | 470 | A01905 | A06074 | 472 |
| A01905 | A06608 | 927 | A01905 | A06891 | 243 |
| A01905 | A07298 | 384 | A01905 | A08438 | 236 |
| A01905 | A08611 | 375 | A01905 | A09496 | 283 |
| A01905 | A10049 | 263 | A01905 | A10744 | 486 |
| A01905 | A10825 | 422 | A01905 | A11393 | 286 |
| A01905 | A13820 | 343 | A01905 | A13973 | 312 |
| A01905 | A14125 | 156 | A01905 | A14443 | 909 |
| A01905 | A14444 | 989 | A01905 | A14606 | 334 |
| A01905 | A15516 | 472 | A01905 | A15764 | 180 |
| A01905 | A15989 | 334 | A01905 | A16060 | 314 |
| A01905 | A16324 | 352 | A01905 | A16328 | 205 |
| A01905 | A16604 | 279 | A01906 | A01909 | 176 |
| A01906 | A01910 | 224 | A01906 | A02022 | 196 |
| A01906 | A02335 | 63  | A01906 | A02691 | 102 |
| A01906 | A02700 | 174 | A01906 | A02810 | 174 |
| A01906 | A02893 | 243 | A01906 | A02985 | 215 |
| A01906 | A03585 | 182 | A01906 | A04024 | 326 |
| A01906 | A04118 | 301 | A01906 | A04127 | 396 |
| A01906 | A04279 | 213 | A01906 | A04301 | 454 |
| A01906 | A04953 | 301 | A01906 | A05153 | 335 |
| A01906 | A06926 | 182 | A01906 | A07200 | 162 |

|        |        |     |        |        |     |
|--------|--------|-----|--------|--------|-----|
| A01906 | A07617 | 313 | A01906 | A08467 | 443 |
| A01906 | A08617 | 424 | A01906 | A09556 | 210 |
| A01906 | A09911 | 179 | A01906 | A10967 | 191 |
| A01906 | A10983 | 168 | A01906 | A12335 | 283 |
| A01906 | A13591 | 394 | A01906 | A13740 | 196 |
| A01906 | A14389 | 414 | A01906 | A15368 | 215 |
| A01906 | A15623 | 329 | A01906 | A15884 | 167 |
| A01907 | A02012 | 208 | A01907 | A02105 | 227 |
| A01907 | A02309 | 213 | A01907 | A02347 | 373 |
| A01907 | A02353 | 480 | A01907 | A02418 | 165 |
| A01907 | A02606 | 238 | A01907 | A02636 | 174 |
| A01907 | A02639 | 160 | A01907 | A02695 | 485 |
| A01907 | A02718 | 466 | A01907 | A02729 | 475 |
| A01907 | A02783 | 168 | A01907 | A02790 | 177 |
| A01907 | A02792 | 213 | A01907 | A02812 | 355 |
| A01907 | A02859 | 356 | A01907 | A02874 | 104 |
| A01907 | A02878 | 177 | A01907 | A02984 | 121 |
| A01907 | A03015 | 328 | A01907 | A03273 | 489 |
| A01907 | A03275 | 335 | A01907 | A03419 | 91  |
| A01907 | A03477 | 441 | A01907 | A03484 | 196 |
| A01907 | A03611 | 265 | A01907 | A03664 | 212 |
| A01907 | A03797 | 291 | A01907 | A03820 | 191 |
| A01907 | A04010 | 200 | A01907 | A04142 | 401 |
| A01907 | A04143 | 305 | A01907 | A04218 | 256 |
| A01907 | A04262 | 314 | A01907 | A04452 | 335 |
| A01907 | A04728 | 173 | A01907 | A04729 | 221 |
| A01907 | A04740 | 269 | A01907 | A04818 | 208 |
| A01907 | A04970 | 358 | A01907 | A05006 | 188 |
| A01907 | A05064 | 174 | A01907 | A05216 | 165 |
| A01907 | A06158 | 236 | A01907 | A06312 | 271 |
| A01907 | A06369 | 159 | A01907 | A06501 | 263 |
| A01907 | A07141 | 326 | A01907 | A07205 | 184 |
| A01907 | A07684 | 223 | A01907 | A07737 | 241 |
| A01907 | A07746 | 414 | A01907 | A07763 | 212 |
| A01907 | A07815 | 249 | A01907 | A08341 | 228 |
| A01907 | A08621 | 252 | A01907 | A08693 | 184 |
| A01907 | A08761 | 213 | A01907 | A08817 | 452 |
| A01907 | A08971 | 236 | A01907 | A09084 | 210 |
| A01907 | A09581 | 170 | A01907 | A09826 | 208 |
| A01907 | A10122 | 358 | A01907 | A10337 | 162 |
| A01907 | A10402 | 296 | A01907 | A10413 | 377 |
| A01907 | A10506 | 396 | A01907 | A10551 | 262 |
| A01907 | A11345 | 216 | A01907 | A11910 | 377 |
| A01907 | A13330 | 216 | A01907 | A13822 | 185 |
| A01907 | A13840 | 377 | A01907 | A14653 | 344 |
| A01907 | A15186 | 358 | A01907 | A15295 | 191 |

|        |        |     |        |        |     |
|--------|--------|-----|--------|--------|-----|
| A01907 | A16676 | 267 | A01907 | A16969 | 377 |
| A01908 | A01983 | 380 | A01908 | A02107 | 213 |
| A01908 | A02111 | 200 | A01908 | A02138 | 364 |
| A01908 | A02260 | 165 | A01908 | A02337 | 163 |
| A01908 | A02340 | 238 | A01908 | A02370 | 190 |
| A01908 | A02412 | 177 | A01908 | A02608 | 196 |
| A01908 | A02611 | 210 | A01908 | A02637 | 447 |
| A01908 | A02659 | 154 | A01908 | A02730 | 118 |
| A01908 | A02731 | 63  | A01908 | A02734 | 283 |
| A01908 | A02751 | 152 | A01908 | A02800 | 322 |
| A01908 | A02803 | 491 | A01908 | A02808 | 157 |
| A01908 | A02843 | 213 | A01908 | A02887 | 411 |
| A01908 | A02931 | 154 | A01908 | A03019 | 491 |
| A01908 | A03170 | 432 | A01908 | A03171 | 457 |
| A01908 | A03204 | 276 | A01908 | A03259 | 160 |
| A01908 | A03271 | 491 | A01908 | A03517 | 263 |
| A01908 | A03656 | 221 | A01908 | A03784 | 377 |
| A01908 | A03817 | 491 | A01908 | A03975 | 329 |
| A01908 | A03998 | 174 | A01908 | A04040 | 183 |
| A01908 | A04071 | 176 | A01908 | A04138 | 172 |
| A01908 | A04160 | 263 | A01908 | A04161 | 201 |
| A01908 | A04205 | 344 | A01908 | A04206 | 196 |
| A01908 | A04247 | 249 | A01908 | A04248 | 335 |
| A01908 | A04519 | 343 | A01908 | A04652 | 255 |
| A01908 | A04682 | 369 | A01908 | A04756 | 154 |
| A01908 | A04798 | 249 | A01908 | A05339 | 245 |
| A01908 | A05535 | 263 | A01908 | A06095 | 204 |
| A01908 | A06224 | 256 | A01908 | A06249 | 301 |
| A01908 | A06404 | 205 | A01908 | A06491 | 389 |
| A01908 | A06499 | 224 | A01908 | A06737 | 318 |
| A01908 | A07148 | 317 | A01908 | A07157 | 439 |
| A01908 | A07166 | 193 | A01908 | A07186 | 201 |
| A01908 | A07311 | 213 | A01908 | A07372 | 228 |
| A01908 | A07555 | 318 | A01908 | A09220 | 180 |
| A01908 | A09263 | 277 | A01908 | A09401 | 212 |
| A01908 | A09577 | 63  | A01908 | A09643 | 99  |
| A01908 | A09776 | 249 | A01908 | A09834 | 188 |
| A01908 | A09962 | 263 | A01908 | A10172 | 288 |
| A01908 | A10510 | 232 | A01908 | A11129 | 201 |
| A01908 | A11259 | 301 | A01908 | A11369 | 384 |
| A01908 | A11406 | 174 | A01908 | A11625 | 318 |
| A01908 | A12009 | 294 | A01908 | A12383 | 219 |
| A01908 | A13864 | 217 | A01908 | A13983 | 63  |
| A01908 | A14008 | 903 | A01908 | A14198 | 335 |
| A01908 | A14364 | 424 | A01908 | A14886 | 154 |
| A01908 | A15217 | 177 | A01908 | A15309 | 168 |

|        |        |     |        |        |     |
|--------|--------|-----|--------|--------|-----|
| A01908 | A15579 | 182 | A01908 | A16545 | 318 |
| A01908 | A16674 | 177 | A01909 | A01911 | 385 |
| A01909 | A01914 | 409 | A01909 | A02039 | 215 |
| A01909 | A02071 | 196 | A01909 | A02072 | 208 |
| A01909 | A02075 | 291 | A01909 | A02167 | 260 |
| A01909 | A02300 | 358 | A01909 | A02301 | 202 |
| A01909 | A02307 | 188 | A01909 | A02319 | 338 |
| A01909 | A02328 | 249 | A01909 | A02335 | 254 |
| A01909 | A02338 | 353 | A01909 | A02385 | 263 |
| A01909 | A02417 | 297 | A01909 | A02468 | 191 |
| A01909 | A02490 | 167 | A01909 | A02491 | 332 |
| A01909 | A02539 | 163 | A01909 | A02541 | 249 |
| A01909 | A02636 | 188 | A01909 | A02666 | 252 |
| A01909 | A02691 | 474 | A01909 | A02700 | 272 |
| A01909 | A02701 | 200 | A01909 | A02705 | 168 |
| A01909 | A02771 | 157 | A01909 | A02785 | 369 |
| A01909 | A02817 | 200 | A01909 | A02841 | 226 |
| A01909 | A02863 | 177 | A01909 | A02893 | 324 |
| A01909 | A02918 | 154 | A01909 | A02936 | 255 |
| A01909 | A02988 | 262 | A01909 | A03020 | 384 |
| A01909 | A03224 | 201 | A01909 | A03268 | 291 |
| A01909 | A03281 | 213 | A01909 | A03417 | 179 |
| A01909 | A03585 | 278 | A01909 | A03813 | 170 |
| A01909 | A03872 | 435 | A01909 | A03923 | 238 |
| A01909 | A04005 | 406 | A01909 | A04010 | 219 |
| A01909 | A04053 | 353 | A01909 | A04114 | 234 |
| A01909 | A04118 | 366 | A01909 | A04279 | 195 |
| A01909 | A04285 | 330 | A01909 | A04567 | 219 |
| A01909 | A04620 | 490 | A01909 | A04710 | 163 |
| A01909 | A04713 | 283 | A01909 | A04953 | 366 |
| A01909 | A05106 | 172 | A01909 | A05153 | 224 |
| A01909 | A05309 | 272 | A01909 | A05673 | 274 |
| A01909 | A06607 | 375 | A01909 | A06851 | 217 |
| A01909 | A07177 | 187 | A01909 | A07200 | 491 |
| A01909 | A07267 | 212 | A01909 | A09454 | 297 |
| A01909 | A09800 | 384 | A01909 | A10677 | 187 |
| A01909 | A10871 | 297 | A01909 | A11348 | 230 |
| A01909 | A13665 | 205 | A01909 | A14405 | 480 |
| A01909 | A14440 | 449 | A01909 | A14956 | 246 |
| A01909 | A15238 | 249 | A01909 | A16418 | 187 |
| A01909 | A16636 | 412 | A01910 | A01912 | 475 |
| A01910 | A01914 | 229 | A01910 | A02075 | 306 |
| A01910 | A02304 | 260 | A01910 | A03012 | 390 |
| A01910 | A03598 | 449 | A01910 | A03612 | 424 |
| A01910 | A04449 | 334 | A01910 | A04623 | 343 |
| A01910 | A05216 | 177 | A01910 | A09643 | 314 |



|        |        |     |        |        |     |
|--------|--------|-----|--------|--------|-----|
| A01910 | A11335 | 465 | A01911 | A01914 | 435 |
| A01911 | A02687 | 152 | A01911 | A02988 | 424 |
| A01911 | A06607 | 180 | A01911 | A06926 | 432 |
| A01911 | A07200 | 157 | A01911 | A09454 | 367 |
| A01911 | A10149 | 449 | A01911 | A10277 | 401 |
| A01912 | A02075 | 249 | A01912 | A02154 | 216 |
| A01912 | A02738 | 238 | A01912 | A02899 | 196 |
| A01912 | A03012 | 463 | A01912 | A03013 | 463 |
| A01912 | A03344 | 229 | A01912 | A03472 | 267 |
| A01912 | A03473 | 162 | A01912 | A03548 | 330 |
| A01912 | A03563 | 213 | A01912 | A03598 | 260 |
| A01912 | A03612 | 170 | A01912 | A03680 | 174 |
| A01912 | A03720 | 240 | A01912 | A03872 | 228 |
| A01912 | A04281 | 249 | A01912 | A04301 | 291 |
| A01912 | A04311 | 345 | A01912 | A04714 | 195 |
| A01912 | A04870 | 199 | A01912 | A04999 | 267 |
| A01912 | A05094 | 165 | A01912 | A05348 | 219 |
| A01912 | A05584 | 174 | A01912 | A05881 | 235 |
| A01912 | A06329 | 267 | A01912 | A06346 | 188 |
| A01912 | A06606 | 241 | A01912 | A06926 | 243 |
| A01912 | A06955 | 157 | A01912 | A07071 | 345 |
| A01912 | A07210 | 323 | A01912 | A07704 | 165 |
| A01912 | A07705 | 154 | A01912 | A08292 | 205 |
| A01912 | A08603 | 229 | A01912 | A09341 | 467 |
| A01912 | A09578 | 305 | A01912 | A09758 | 177 |
| A01912 | A10583 | 345 | A01912 | A11335 | 412 |
| A01912 | A13207 | 167 | A01912 | A14718 | 151 |
| A01912 | A15222 | 167 | A01912 | A15918 | 191 |
| A01912 | A16438 | 232 | A01913 | A01992 | 294 |
| A01913 | A02086 | 267 | A01913 | A02376 | 424 |
| A01913 | A02377 | 449 | A01913 | A02473 | 168 |
| A01913 | A02506 | 174 | A01913 | A02510 | 299 |
| A01913 | A02642 | 168 | A01913 | A02689 | 271 |
| A01913 | A02690 | 373 | A01913 | A02705 | 305 |
| A01913 | A02721 | 396 | A01913 | A02798 | 260 |
| A01913 | A02817 | 335 | A01913 | A02846 | 486 |
| A01913 | A02861 | 260 | A01913 | A02862 | 213 |
| A01913 | A02878 | 201 | A01913 | A03007 | 171 |
| A01913 | A03321 | 346 | A01913 | A03414 | 154 |
| A01913 | A03552 | 273 | A01913 | A04046 | 307 |
| A01913 | A04342 | 152 | A01913 | A04579 | 260 |
| A01913 | A04793 | 263 | A01913 | A04861 | 165 |
| A01913 | A04902 | 484 | A01913 | A04938 | 266 |
| A01913 | A04942 | 267 | A01913 | A04945 | 276 |
| A01913 | A05164 | 452 | A01913 | A05568 | 465 |
| A01913 | A05790 | 273 | A01913 | A05791 | 332 |

|        |        |     |        |        |     |
|--------|--------|-----|--------|--------|-----|
| A01913 | A05832 | 160 | A01913 | A05835 | 452 |
| A01913 | A05906 | 385 | A01913 | A06562 | 328 |
| A01913 | A06591 | 201 | A01913 | A06913 | 368 |
| A01913 | A07197 | 234 | A01913 | A07242 | 227 |
| A01913 | A08436 | 385 | A01913 | A08583 | 267 |
| A01913 | A08879 | 358 | A01913 | A09263 | 278 |
| A01913 | A10369 | 156 | A01913 | A10621 | 318 |
| A01913 | A10625 | 243 | A01913 | A10754 | 191 |
| A01913 | A12639 | 385 | A01913 | A13392 | 465 |
| A01913 | A14638 | 252 | A01913 | A15840 | 191 |
| A01913 | A15892 | 477 | A01913 | A16566 | 263 |
| A01914 | A02341 | 118 | A01914 | A02734 | 358 |
| A01914 | A02744 | 388 | A01914 | A02976 | 191 |
| A01914 | A02988 | 491 | A01914 | A03225 | 490 |
| A01914 | A03488 | 213 | A01914 | A03598 | 483 |
| A01914 | A03646 | 263 | A01914 | A03841 | 262 |
| A01914 | A03872 | 170 | A01914 | A04012 | 308 |
| A01914 | A04304 | 443 | A01914 | A04314 | 484 |
| A01914 | A04615 | 157 | A01914 | A04623 | 491 |
| A01914 | A04692 | 460 | A01914 | A04713 | 402 |
| A01914 | A04715 | 334 | A01914 | A04790 | 166 |
| A01914 | A04933 | 339 | A01914 | A05866 | 424 |
| A01914 | A05940 | 172 | A01914 | A06273 | 472 |
| A01914 | A06579 | 152 | A01914 | A06607 | 488 |
| A01914 | A06631 | 240 | A01914 | A06650 | 207 |
| A01914 | A06688 | 408 | A01914 | A06703 | 219 |
| A01914 | A06769 | 394 | A01914 | A06926 | 398 |
| A01914 | A07004 | 318 | A01914 | A07135 | 308 |
| A01914 | A07177 | 423 | A01914 | A07200 | 484 |
| A01914 | A07311 | 329 | A01914 | A07335 | 174 |
| A01914 | A07848 | 157 | A01914 | A08389 | 219 |
| A01914 | A08450 | 479 | A01914 | A08609 | 224 |
| A01914 | A08860 | 437 | A01914 | A09454 | 210 |
| A01914 | A09609 | 204 | A01914 | A09694 | 241 |
| A01914 | A10666 | 319 | A01914 | A10735 | 163 |
| A01914 | A11124 | 614 | A01914 | A11335 | 152 |
| A01914 | A11460 | 441 | A01914 | A11487 | 208 |
| A01914 | A11539 | 469 | A01914 | A11606 | 418 |
| A01914 | A11675 | 182 | A01914 | A11929 | 408 |
| A01914 | A12255 | 256 | A01914 | A12658 | 193 |
| A01914 | A13706 | 167 | A01914 | A13783 | 162 |
| A01914 | A13787 | 360 | A01914 | A13788 | 154 |
| A01914 | A13804 | 322 | A01914 | A14198 | 173 |
| A01914 | A14270 | 255 | A01914 | A14299 | 338 |
| A01914 | A14332 | 488 | A01914 | A14405 | 288 |
| A01914 | A14426 | 416 | A01914 | A14917 | 374 |

|        |        |     |        |        |     |
|--------|--------|-----|--------|--------|-----|
| A01914 | A15498 | 201 | A01914 | A15504 | 187 |
| A01914 | A15506 | 374 | A01914 | A16281 | 491 |
| A01914 | A16438 | 456 | A01914 | A16565 | 283 |
| A01914 | A16566 | 167 | A01914 | A16567 | 191 |
| A01914 | A16701 | 184 | A01914 | A16774 | 201 |
| A01914 | A16815 | 219 | A01914 | A16874 | 156 |
| A01914 | A16944 | 180 | A01914 | A17012 | 152 |
| A01915 | A02085 | 447 | A01915 | A02327 | 327 |
| A01915 | A02335 | 205 | A01915 | A02336 | 328 |
| A01915 | A02511 | 245 | A01915 | A02539 | 241 |
| A01915 | A02687 | 252 | A01915 | A02690 | 316 |
| A01915 | A02691 | 185 | A01915 | A02713 | 319 |
| A01915 | A02830 | 171 | A01915 | A02846 | 247 |
| A01915 | A03388 | 319 | A01915 | A04105 | 224 |
| A01915 | A04135 | 330 | A01915 | A04139 | 195 |
| A01915 | A04410 | 216 | A01915 | A04710 | 241 |
| A01915 | A04715 | 208 | A01915 | A04805 | 314 |
| A01915 | A05310 | 263 | A01915 | A05591 | 235 |
| A01915 | A05669 | 400 | A01915 | A05899 | 375 |
| A01915 | A06385 | 174 | A01915 | A06653 | 306 |
| A01915 | A07335 | 328 | A01915 | A08002 | 372 |
| A01915 | A11172 | 380 | A01915 | A13609 | 151 |
| A01915 | A14302 | 413 | A01915 | A14423 | 302 |
| A01916 | A02068 | 276 | A01916 | A02373 | 334 |
| A01916 | A02491 | 358 | A01916 | A02697 | 454 |
| A01916 | A02737 | 317 | A01916 | A03033 | 279 |
| A01916 | A03051 | 221 | A01916 | A03211 | 283 |
| A01916 | A03304 | 490 | A01916 | A04718 | 329 |
| A01916 | A05638 | 174 | A01916 | A06428 | 210 |
| A01916 | A07209 | 198 | A01916 | A11023 | 216 |
| A01916 | A13373 | 258 | A01916 | A13945 | 165 |
| A01916 | A14381 | 221 | A01916 | A14392 | 200 |
| A01916 | A14698 | 302 | A01916 | A14782 | 329 |
| A01917 | A02877 | 66  | A01917 | A02896 | 343 |
| A01917 | A03415 | 154 | A01917 | A03439 | 252 |
| A01917 | A03446 | 382 | A01917 | A03472 | 488 |
| A01917 | A03586 | 204 | A01917 | A03738 | 419 |
| A01917 | A03740 | 174 | A01917 | A04818 | 371 |
| A01917 | A05025 | 585 | A01917 | A06543 | 533 |
| A01917 | A07247 | 462 | A01917 | A07744 | 343 |
| A01917 | A08098 | 343 | A01917 | A08178 | 343 |
| A01917 | A09638 | 323 | A01917 | A09902 | 213 |
| A01917 | A10532 | 490 | A01917 | A10615 | 151 |
| A01917 | A11705 | 260 | A01917 | A12839 | 364 |
| A01917 | A13230 | 249 | A01917 | A14475 | 230 |
| A01918 | A02188 | 235 | A01918 | A03326 | 293 |

|        |        |     |        |        |     |
|--------|--------|-----|--------|--------|-----|
| A01918 | A03329 | 254 | A01918 | A03428 | 592 |
| A01918 | A03452 | 571 | A01918 | A03626 | 191 |
| A01918 | A03889 | 431 | A01918 | A04292 | 460 |
| A01918 | A04894 | 324 | A01918 | A05862 | 347 |
| A01918 | A06011 | 324 | A01918 | A06890 | 235 |
| A01918 | A07820 | 324 | A01918 | A08400 | 324 |
| A01918 | A08772 | 235 | A01918 | A08777 | 235 |
| A01918 | A09326 | 235 | A01918 | A13845 | 324 |
| A01918 | A14247 | 412 | A01918 | A14838 | 324 |
| A01918 | A16617 | 324 | A01919 | A08630 | 404 |
| A01919 | A09028 | 406 | A01920 | A01974 | 368 |
| A01920 | A02589 | 170 | A01920 | A02931 | 179 |
| A01920 | A03336 | 184 | A01920 | A03451 | 899 |
| A01920 | A04012 | 136 | A01920 | A04558 | 283 |
| A01920 | A05695 | 204 | A01920 | A06019 | 210 |
| A01920 | A06409 | 246 | A01920 | A06869 | 310 |
| A01920 | A07166 | 227 | A01920 | A08102 | 196 |
| A01920 | A08118 | 291 | A01920 | A08610 | 193 |
| A01920 | A09162 | 201 | A01920 | A09414 | 226 |
| A01920 | A09577 | 910 | A01920 | A10580 | 923 |
| A01920 | A10615 | 903 | A01920 | A11307 | 196 |
| A01920 | A11604 | 491 | A01920 | A11793 | 310 |
| A01920 | A11983 | 216 | A01920 | A12204 | 491 |
| A01920 | A13198 | 180 | A01920 | A13250 | 406 |
| A01920 | A13995 | 899 | A01920 | A14040 | 740 |
| A01920 | A14044 | 940 | A01920 | A14204 | 488 |
| A01920 | A14264 | 414 | A01920 | A14299 | 616 |
| A01920 | A14704 | 291 | A01920 | A14825 | 170 |
| A01920 | A15321 | 339 | A01920 | A15322 | 388 |
| A01920 | A15347 | 438 | A01920 | A16906 | 379 |
| A01922 | A03422 | 160 | A01922 | A05216 | 246 |
| A01922 | A06701 | 274 | A01923 | A01924 | 491 |
| A01923 | A01925 | 430 | A01923 | A01926 | 491 |
| A01923 | A02022 | 391 | A01923 | A02074 | 296 |
| A01923 | A02077 | 450 | A01923 | A02078 | 462 |
| A01923 | A02083 | 330 | A01923 | A02092 | 435 |
| A01923 | A02107 | 390 | A01923 | A02222 | 293 |
| A01923 | A02229 | 347 | A01923 | A02305 | 435 |
| A01923 | A02306 | 201 | A01923 | A02317 | 367 |
| A01923 | A02336 | 257 | A01923 | A02410 | 438 |
| A01923 | A02461 | 267 | A01923 | A02464 | 185 |
| A01923 | A02524 | 182 | A01923 | A02545 | 462 |
| A01923 | A02667 | 285 | A01923 | A02859 | 174 |
| A01923 | A02983 | 183 | A01923 | A03003 | 399 |
| A01923 | A03007 | 290 | A01923 | A03099 | 306 |
| A01923 | A03148 | 229 | A01923 | A03238 | 270 |

|        |        |     |        |        |     |
|--------|--------|-----|--------|--------|-----|
| A01923 | A03426 | 290 | A01923 | A03520 | 191 |
| A01923 | A03524 | 165 | A01923 | A03553 | 168 |
| A01923 | A03554 | 176 | A01923 | A03596 | 157 |
| A01923 | A04114 | 224 | A01923 | A04164 | 318 |
| A01923 | A04368 | 484 | A01923 | A04373 | 293 |
| A01923 | A04437 | 363 | A01923 | A04629 | 307 |
| A01923 | A05153 | 491 | A01923 | A05356 | 324 |
| A01923 | A05376 | 324 | A01923 | A05926 | 491 |
| A01923 | A05957 | 411 | A01923 | A06764 | 406 |
| A01923 | A07018 | 347 | A01923 | A07190 | 251 |
| A01923 | A07191 | 259 | A01923 | A07468 | 486 |
| A01923 | A07469 | 238 | A01923 | A07541 | 205 |
| A01923 | A07558 | 154 | A01923 | A07617 | 383 |
| A01923 | A07740 | 257 | A01923 | A07958 | 489 |
| A01923 | A08173 | 339 | A01923 | A09036 | 269 |
| A01923 | A09151 | 246 | A01923 | A09174 | 157 |
| A01923 | A09892 | 318 | A01923 | A10091 | 260 |
| A01923 | A10504 | 165 | A01923 | A10967 | 488 |
| A01923 | A12793 | 455 | A01923 | A15851 | 288 |
| A01923 | A17108 | 447 | A01924 | A01925 | 455 |
| A01924 | A01926 | 490 | A01924 | A02074 | 389 |
| A01924 | A02083 | 224 | A01924 | A02092 | 351 |
| A01924 | A02107 | 358 | A01924 | A02222 | 386 |
| A01924 | A02229 | 319 | A01924 | A02305 | 396 |
| A01924 | A02306 | 334 | A01924 | A02317 | 424 |
| A01924 | A02377 | 199 | A01924 | A02461 | 352 |
| A01924 | A02492 | 241 | A01924 | A02983 | 188 |
| A01924 | A03099 | 334 | A01924 | A03238 | 254 |
| A01924 | A04164 | 384 | A01924 | A04368 | 435 |
| A01924 | A04373 | 369 | A01924 | A04487 | 314 |
| A01924 | A05153 | 208 | A01924 | A05309 | 167 |
| A01924 | A05376 | 297 | A01924 | A06642 | 170 |
| A01924 | A07468 | 247 | A01924 | A09036 | 432 |
| A01924 | A09892 | 384 | A01924 | A10967 | 347 |
| A01924 | A12793 | 279 | A01924 | A14258 | 174 |
| A01924 | A17108 | 317 | A01925 | A01926 | 427 |
| A01925 | A01929 | 405 | A01925 | A02464 | 369 |
| A01925 | A03892 | 200 | A01925 | A04487 | 382 |
| A01925 | A09036 | 457 | A01925 | A09892 | 424 |
| A01925 | A13849 | 425 | A01926 | A01928 | 160 |
| A01926 | A01929 | 486 | A01926 | A01937 | 265 |
| A01926 | A01941 | 457 | A01926 | A01960 | 205 |
| A01926 | A02008 | 389 | A01926 | A02011 | 462 |
| A01926 | A02012 | 368 | A01926 | A02014 | 345 |
| A01926 | A02031 | 216 | A01926 | A02083 | 416 |
| A01926 | A02092 | 260 | A01926 | A02095 | 198 |

|        |        |     |        |        |     |
|--------|--------|-----|--------|--------|-----|
| A01926 | A02097 | 188 | A01926 | A02107 | 146 |
| A01926 | A02138 | 63  | A01926 | A02156 | 486 |
| A01926 | A02167 | 243 | A01926 | A02170 | 366 |
| A01926 | A02222 | 451 | A01926 | A02229 | 475 |
| A01926 | A02268 | 443 | A01926 | A02275 | 465 |
| A01926 | A02305 | 241 | A01926 | A02306 | 160 |
| A01926 | A02317 | 232 | A01926 | A02330 | 446 |
| A01926 | A02346 | 173 | A01926 | A02355 | 249 |
| A01926 | A02356 | 238 | A01926 | A02377 | 486 |
| A01926 | A02402 | 259 | A01926 | A02405 | 490 |
| A01926 | A02410 | 416 | A01926 | A02461 | 486 |
| A01926 | A02464 | 460 | A01926 | A02481 | 336 |
| A01926 | A02491 | 249 | A01926 | A02492 | 460 |
| A01926 | A02524 | 458 | A01926 | A02530 | 293 |
| A01926 | A02539 | 201 | A01926 | A02542 | 168 |
| A01926 | A02545 | 182 | A01926 | A02552 | 355 |
| A01926 | A02574 | 440 | A01926 | A02613 | 243 |
| A01926 | A02687 | 375 | A01926 | A02689 | 490 |
| A01926 | A02695 | 180 | A01926 | A02749 | 456 |
| A01926 | A02798 | 491 | A01926 | A02807 | 160 |
| A01926 | A02859 | 347 | A01926 | A02911 | 168 |
| A01926 | A02942 | 296 | A01926 | A02961 | 159 |
| A01926 | A03007 | 208 | A01926 | A03034 | 491 |
| A01926 | A03036 | 185 | A01926 | A03058 | 294 |
| A01926 | A03086 | 229 | A01926 | A03091 | 254 |
| A01926 | A03099 | 490 | A01926 | A03144 | 345 |
| A01926 | A03146 | 348 | A01926 | A03147 | 483 |
| A01926 | A03148 | 212 | A01926 | A03152 | 134 |
| A01926 | A03154 | 411 | A01926 | A03155 | 363 |
| A01926 | A03156 | 152 | A01926 | A03192 | 184 |
| A01926 | A03238 | 491 | A01926 | A03259 | 223 |
| A01926 | A03326 | 269 | A01926 | A03618 | 270 |
| A01926 | A03873 | 334 | A01926 | A03892 | 286 |
| A01926 | A03919 | 234 | A01926 | A03940 | 329 |
| A01926 | A04198 | 184 | A01926 | A04212 | 414 |
| A01926 | A04215 | 228 | A01926 | A04231 | 216 |
| A01926 | A04268 | 303 | A01926 | A04318 | 474 |
| A01926 | A04444 | 157 | A01926 | A04449 | 334 |
| A01926 | A04460 | 160 | A01926 | A04487 | 491 |
| A01926 | A04600 | 162 | A01926 | A04644 | 294 |
| A01926 | A04805 | 224 | A01926 | A04839 | 647 |
| A01926 | A04902 | 396 | A01926 | A04958 | 205 |
| A01926 | A05129 | 243 | A01926 | A05143 | 353 |
| A01926 | A05278 | 491 | A01926 | A05311 | 296 |
| A01926 | A05356 | 457 | A01926 | A05376 | 649 |
| A01926 | A05377 | 198 | A01926 | A05393 | 160 |

|        |        |     |        |        |     |
|--------|--------|-----|--------|--------|-----|
| A01926 | A05409 | 228 | A01926 | A05410 | 160 |
| A01926 | A05435 | 243 | A01926 | A05459 | 455 |
| A01926 | A05487 | 232 | A01926 | A05559 | 205 |
| A01926 | A05580 | 243 | A01926 | A05591 | 491 |
| A01926 | A05653 | 152 | A01926 | A05667 | 205 |
| A01926 | A05785 | 228 | A01926 | A05949 | 299 |
| A01926 | A06037 | 232 | A01926 | A06159 | 173 |
| A01926 | A06167 | 285 | A01926 | A06248 | 263 |
| A01926 | A06276 | 228 | A01926 | A06405 | 356 |
| A01926 | A06439 | 187 | A01926 | A06473 | 238 |
| A01926 | A06607 | 388 | A01926 | A06650 | 165 |
| A01926 | A06663 | 163 | A01926 | A06697 | 160 |
| A01926 | A06733 | 268 | A01926 | A06831 | 455 |
| A01926 | A07078 | 157 | A01926 | A07129 | 401 |
| A01926 | A07342 | 371 | A01926 | A07407 | 301 |
| A01926 | A07477 | 310 | A01926 | A07650 | 163 |
| A01926 | A07736 | 490 | A01926 | A08445 | 249 |
| A01926 | A08628 | 216 | A01926 | A08709 | 190 |
| A01926 | A08850 | 334 | A01926 | A08881 | 353 |
| A01926 | A09036 | 491 | A01926 | A09041 | 451 |
| A01926 | A09056 | 269 | A01926 | A09080 | 345 |
| A01926 | A09122 | 228 | A01926 | A09173 | 243 |
| A01926 | A09220 | 488 | A01926 | A09277 | 472 |
| A01926 | A09375 | 377 | A01926 | A09535 | 156 |
| A01926 | A09652 | 383 | A01926 | A09837 | 160 |
| A01926 | A09891 | 228 | A01926 | A09892 | 462 |
| A01926 | A09934 | 243 | A01926 | A10052 | 477 |
| A01926 | A10091 | 490 | A01926 | A10270 | 216 |
| A01926 | A10339 | 228 | A01926 | A10410 | 243 |
| A01926 | A10483 | 294 | A01926 | A10527 | 408 |
| A01926 | A10537 | 294 | A01926 | A10552 | 435 |
| A01926 | A10594 | 539 | A01926 | A10609 | 489 |
| A01926 | A10967 | 377 | A01926 | A11217 | 294 |
| A01926 | A11279 | 491 | A01926 | A11329 | 419 |
| A01926 | A11343 | 393 | A01926 | A11498 | 355 |
| A01926 | A11559 | 334 | A01926 | A11925 | 353 |
| A01926 | A12140 | 163 | A01926 | A12326 | 163 |
| A01926 | A12373 | 334 | A01926 | A12629 | 294 |
| A01926 | A12824 | 451 | A01926 | A13061 | 216 |
| A01926 | A13826 | 218 | A01926 | A13830 | 228 |
| A01926 | A13832 | 219 | A01926 | A13849 | 445 |
| A01926 | A13871 | 469 | A01926 | A13874 | 228 |
| A01926 | A13987 | 440 | A01926 | A14202 | 466 |
| A01926 | A14210 | 334 | A01926 | A14247 | 649 |
| A01926 | A14258 | 486 | A01926 | A14344 | 223 |
| A01926 | A14371 | 334 | A01926 | A14453 | 263 |

|        |        |     |        |        |     |
|--------|--------|-----|--------|--------|-----|
| A01926 | A14473 | 269 | A01926 | A14481 | 353 |
| A01926 | A14502 | 177 | A01926 | A14559 | 195 |
| A01926 | A14636 | 334 | A01926 | A14661 | 490 |
| A01926 | A14693 | 522 | A01926 | A14757 | 160 |
| A01926 | A15228 | 451 | A01926 | A15292 | 316 |
| A01926 | A15301 | 599 | A01926 | A15302 | 367 |
| A01926 | A15366 | 649 | A01926 | A15430 | 586 |
| A01926 | A15462 | 648 | A01926 | A15463 | 647 |
| A01926 | A15498 | 486 | A01926 | A15992 | 208 |
| A01926 | A16337 | 263 | A01926 | A16362 | 190 |
| A01926 | A16621 | 177 | A01926 | A17061 | 168 |
| A01927 | A02545 | 152 | A01927 | A03219 | 213 |
| A01927 | A03256 | 216 | A01927 | A03976 | 183 |
| A01927 | A04092 | 247 | A01927 | A04100 | 308 |
| A01927 | A04315 | 308 | A01927 | A05494 | 229 |
| A01927 | A06635 | 188 | A01927 | A06858 | 263 |
| A01927 | A07199 | 312 | A01927 | A08000 | 151 |
| A01927 | A08902 | 299 | A01927 | A08903 | 362 |
| A01927 | A09977 | 182 | A01927 | A10337 | 221 |
| A01927 | A10810 | 221 | A01927 | A12932 | 238 |
| A01927 | A13520 | 401 | A01927 | A13879 | 221 |
| A01927 | A14401 | 307 | A01927 | A16082 | 299 |
| A01927 | A16754 | 174 | A01928 | A02075 | 291 |
| A01928 | A02178 | 234 | A01928 | A02229 | 340 |
| A01928 | A02837 | 162 | A01928 | A03050 | 168 |
| A01928 | A03742 | 183 | A01928 | A05356 | 235 |
| A01928 | A07201 | 216 | A01928 | A07205 | 321 |
| A01928 | A07541 | 236 | A01928 | A10967 | 249 |
| A01929 | A02229 | 324 | A01929 | A02397 | 318 |
| A01929 | A02464 | 297 | A01929 | A02530 | 369 |
| A01929 | A02749 | 183 | A01929 | A03110 | 216 |
| A01929 | A03146 | 351 | A01929 | A03155 | 317 |
| A01929 | A03209 | 245 | A01929 | A04258 | 322 |
| A01929 | A04318 | 368 | A01929 | A04487 | 489 |
| A01929 | A05376 | 303 | A01929 | A09036 | 475 |
| A01929 | A09059 | 174 | A01929 | A09122 | 399 |
| A01929 | A09375 | 368 | A01929 | A10074 | 412 |
| A01929 | A10091 | 352 | A01929 | A11017 | 399 |
| A01929 | A12361 | 276 | A01929 | A13849 | 450 |
| A01930 | A02006 | 258 | A01930 | A02116 | 229 |
| A01930 | A02484 | 348 | A01930 | A02826 | 296 |
| A01930 | A02896 | 227 | A01930 | A02916 | 245 |
| A01930 | A02944 | 262 | A01930 | A03211 | 210 |
| A01930 | A03241 | 328 | A01930 | A03520 | 344 |
| A01930 | A04175 | 234 | A01930 | A04418 | 327 |
| A01930 | A04444 | 312 | A01930 | A05112 | 278 |



|        |        |     |        |        |     |
|--------|--------|-----|--------|--------|-----|
| A01930 | A07135 | 174 | A01930 | A07165 | 172 |
| A01930 | A12373 | 190 | A01930 | A13704 | 425 |
| A01931 | A01936 | 446 | A01931 | A01938 | 305 |
| A01931 | A01995 | 227 | A01931 | A02020 | 182 |
| A01931 | A02148 | 236 | A01931 | A02278 | 436 |
| A01931 | A02333 | 63  | A01931 | A02410 | 188 |
| A01931 | A02412 | 491 | A01931 | A02413 | 234 |
| A01931 | A02415 | 93  | A01931 | A02416 | 462 |
| A01931 | A02421 | 255 | A01931 | A02443 | 491 |
| A01931 | A02470 | 352 | A01931 | A02476 | 489 |
| A01931 | A02477 | 362 | A01931 | A02478 | 274 |
| A01931 | A02490 | 63  | A01931 | A02501 | 212 |
| A01931 | A02502 | 271 | A01931 | A02615 | 156 |
| A01931 | A02616 | 162 | A01931 | A02698 | 180 |
| A01931 | A02812 | 303 | A01931 | A02839 | 485 |
| A01931 | A02875 | 286 | A01931 | A02924 | 346 |
| A01931 | A02952 | 168 | A01931 | A03104 | 469 |
| A01931 | A03111 | 288 | A01931 | A03436 | 159 |
| A01931 | A03451 | 456 | A01931 | A03719 | 391 |
| A01931 | A03819 | 198 | A01931 | A03961 | 174 |
| A01931 | A04019 | 305 | A01931 | A04033 | 491 |
| A01931 | A04122 | 165 | A01931 | A04194 | 160 |
| A01931 | A04222 | 157 | A01931 | A04228 | 329 |
| A01931 | A04229 | 180 | A01931 | A04337 | 388 |
| A01931 | A04420 | 412 | A01931 | A04441 | 215 |
| A01931 | A04449 | 341 | A01931 | A04454 | 483 |
| A01931 | A04597 | 224 | A01931 | A04608 | 159 |
| A01931 | A04736 | 229 | A01931 | A04746 | 151 |
| A01931 | A04822 | 160 | A01931 | A04879 | 201 |
| A01931 | A04906 | 162 | A01931 | A05087 | 291 |
| A01931 | A05128 | 170 | A01931 | A05221 | 394 |
| A01931 | A05259 | 305 | A01931 | A05418 | 488 |
| A01931 | A05726 | 241 | A01931 | A06196 | 263 |
| A01931 | A06211 | 201 | A01931 | A06277 | 433 |
| A01931 | A06298 | 472 | A01931 | A06313 | 187 |
| A01931 | A06578 | 362 | A01931 | A06731 | 257 |
| A01931 | A06855 | 195 | A01931 | A06891 | 168 |
| A01931 | A06999 | 305 | A01931 | A07065 | 274 |
| A01931 | A07066 | 241 | A01931 | A07209 | 490 |
| A01931 | A07229 | 177 | A01931 | A07442 | 486 |
| A01931 | A07605 | 201 | A01931 | A07803 | 483 |
| A01931 | A07923 | 187 | A01931 | A08587 | 288 |
| A01931 | A08690 | 218 | A01931 | A08718 | 472 |
| A01931 | A08725 | 288 | A01931 | A08754 | 305 |
| A01931 | A08875 | 152 | A01931 | A08878 | 458 |
| A01931 | A08929 | 168 | A01931 | A08951 | 241 |

|        |        |     |        |        |     |
|--------|--------|-----|--------|--------|-----|
| A01931 | A09467 | 274 | A01931 | A09479 | 246 |
| A01931 | A09509 | 435 | A01931 | A10107 | 305 |
| A01931 | A10296 | 263 | A01931 | A10332 | 151 |
| A01931 | A10459 | 165 | A01931 | A10731 | 477 |
| A01931 | A10922 | 274 | A01931 | A11132 | 180 |
| A01931 | A11164 | 234 | A01931 | A11243 | 162 |
| A01931 | A11282 | 269 | A01931 | A11513 | 293 |
| A01931 | A11523 | 335 | A01931 | A11573 | 198 |
| A01931 | A11983 | 491 | A01931 | A12033 | 255 |
| A01931 | A12561 | 305 | A01931 | A12897 | 439 |
| A01931 | A13874 | 230 | A01931 | A14196 | 467 |
| A01931 | A14377 | 462 | A01931 | A14381 | 348 |
| A01931 | A14410 | 191 | A01931 | A14538 | 246 |
| A01931 | A14635 | 490 | A01931 | A14636 | 184 |
| A01931 | A14643 | 385 | A01931 | A15238 | 451 |
| A01931 | A15282 | 419 | A01931 | A15292 | 232 |
| A01931 | A15314 | 468 | A01931 | A15322 | 213 |
| A01931 | A15457 | 187 | A01931 | A15460 | 152 |
| A01931 | A15552 | 191 | A01931 | A15606 | 480 |
| A01931 | A15875 | 182 | A01931 | A15884 | 172 |
| A01931 | A15909 | 297 | A01931 | A15932 | 165 |
| A01931 | A16143 | 191 | A01931 | A16610 | 177 |
| A01932 | A04228 | 383 | A01932 | A14549 | 424 |
| A01933 | A01934 | 246 | A01933 | A02156 | 152 |
| A01933 | A02573 | 286 | A01933 | A02763 | 310 |
| A01933 | A02992 | 188 | A01933 | A03016 | 379 |
| A01933 | A03402 | 299 | A01933 | A03535 | 346 |
| A01933 | A04839 | 160 | A01933 | A05007 | 347 |
| A01933 | A05356 | 277 | A01933 | A05682 | 279 |
| A01933 | A05775 | 249 | A01933 | A06397 | 341 |
| A01933 | A06979 | 269 | A01933 | A07122 | 252 |
| A01933 | A07452 | 217 | A01933 | A07635 | 260 |
| A01933 | A07673 | 454 | A01933 | A07754 | 193 |
| A01933 | A07913 | 402 | A01933 | A07928 | 294 |
| A01933 | A08404 | 458 | A01933 | A08785 | 372 |
| A01933 | A09078 | 396 | A01933 | A09263 | 182 |
| A01933 | A10156 | 224 | A01933 | A11358 | 299 |
| A01933 | A13830 | 424 | A01933 | A13874 | 168 |
| A01933 | A14247 | 483 | A01933 | A14661 | 389 |
| A01933 | A14862 | 321 | A01934 | A02432 | 221 |
| A01934 | A02518 | 152 | A01934 | A02992 | 324 |
| A01934 | A03016 | 382 | A01934 | A03050 | 182 |
| A01934 | A05356 | 396 | A01934 | A07452 | 221 |
| A01934 | A07471 | 156 | A01934 | A07472 | 246 |
| A01934 | A07541 | 272 | A01934 | A07635 | 265 |
| A01934 | A07653 | 299 | A01934 | A07654 | 286 |

|        |        |     |        |        |     |
|--------|--------|-----|--------|--------|-----|
| A01934 | A07673 | 364 | A01934 | A07754 | 329 |
| A01934 | A07913 | 200 | A01934 | A07914 | 400 |
| A01934 | A08404 | 353 | A01934 | A08785 | 154 |
| A01934 | A10427 | 159 | A01935 | A02188 | 340 |
| A01935 | A02493 | 360 | A01935 | A13369 | 249 |
| A01936 | A02278 | 480 | A01936 | A02304 | 174 |
| A01936 | A02371 | 241 | A01936 | A02376 | 350 |
| A01936 | A02377 | 163 | A01936 | A02382 | 152 |
| A01936 | A02412 | 218 | A01936 | A02416 | 383 |
| A01936 | A02459 | 273 | A01936 | A02476 | 294 |
| A01936 | A02616 | 314 | A01936 | A02787 | 188 |
| A01936 | A02788 | 165 | A01936 | A02839 | 463 |
| A01936 | A02982 | 266 | A01936 | A03081 | 274 |
| A01936 | A03904 | 399 | A01936 | A03926 | 308 |
| A01936 | A03928 | 389 | A01936 | A04454 | 427 |
| A01936 | A04867 | 174 | A01936 | A05349 | 170 |
| A01936 | A05398 | 294 | A01936 | A06211 | 340 |
| A01936 | A07209 | 202 | A01936 | A08742 | 363 |
| A01936 | A08754 | 396 | A01936 | A09509 | 324 |
| A01936 | A14366 | 165 | A01936 | A15238 | 308 |
| A01936 | A15630 | 204 | A01936 | A15992 | 236 |
| A01937 | A02156 | 452 | A01937 | A02397 | 319 |
| A01937 | A02405 | 291 | A01937 | A02451 | 388 |
| A01937 | A02461 | 357 | A01937 | A03086 | 427 |
| A01937 | A03238 | 262 | A01937 | A03890 | 346 |
| A01937 | A04066 | 291 | A01937 | A05376 | 305 |
| A01937 | A06030 | 377 | A01937 | A11279 | 157 |
| A01937 | A13757 | 348 | A01937 | A14247 | 337 |
| A01937 | A15277 | 296 | A01938 | A02478 | 435 |
| A01938 | A08718 | 396 | A01938 | A09834 | 408 |
| A01939 | A02048 | 205 | A01939 | A02158 | 232 |
| A01939 | A02226 | 210 | A01939 | A02581 | 383 |
| A01939 | A02830 | 224 | A01939 | A03611 | 422 |
| A01939 | A08336 | 427 | A01940 | A02284 | 380 |
| A01940 | A02502 | 326 | A01940 | A03451 | 269 |
| A01940 | A03471 | 394 | A01940 | A06623 | 369 |
| A01940 | A11426 | 436 | A01941 | A02011 | 366 |
| A01941 | A02086 | 490 | A01941 | A02208 | 278 |
| A01941 | A02226 | 232 | A01941 | A02229 | 182 |
| A01941 | A02245 | 191 | A01941 | A02278 | 491 |
| A01941 | A02332 | 152 | A01941 | A02345 | 491 |
| A01941 | A02371 | 490 | A01941 | A02375 | 362 |
| A01941 | A02376 | 491 | A01941 | A02377 | 491 |
| A01941 | A02413 | 152 | A01941 | A02466 | 489 |
| A01941 | A02491 | 491 | A01941 | A02571 | 424 |
| A01941 | A02635 | 252 | A01941 | A02678 | 74  |

|        |        |     |        |        |     |
|--------|--------|-----|--------|--------|-----|
| A01941 | A02680 | 179 | A01941 | A02689 | 486 |
| A01941 | A02706 | 462 | A01941 | A02739 | 485 |
| A01941 | A02753 | 156 | A01941 | A02798 | 490 |
| A01941 | A02799 | 255 | A01941 | A02802 | 285 |
| A01941 | A02837 | 364 | A01941 | A02976 | 200 |
| A01941 | A02982 | 374 | A01941 | A02984 | 422 |
| A01941 | A03019 | 491 | A01941 | A03199 | 107 |
| A01941 | A03218 | 196 | A01941 | A03223 | 174 |
| A01941 | A03243 | 491 | A01941 | A03256 | 491 |
| A01941 | A03265 | 422 | A01941 | A03278 | 199 |
| A01941 | A03742 | 424 | A01941 | A03803 | 204 |
| A01941 | A03927 | 224 | A01941 | A04059 | 475 |
| A01941 | A04075 | 156 | A01941 | A04117 | 165 |
| A01941 | A04213 | 249 | A01941 | A04310 | 157 |
| A01941 | A04446 | 394 | A01941 | A04653 | 252 |
| A01941 | A04721 | 294 | A01941 | A04819 | 433 |
| A01941 | A04902 | 491 | A01941 | A04938 | 230 |
| A01941 | A04942 | 474 | A01941 | A04990 | 157 |
| A01941 | A05033 | 252 | A01941 | A05214 | 252 |
| A01941 | A05278 | 486 | A01941 | A05322 | 322 |
| A01941 | A05377 | 183 | A01941 | A05409 | 217 |
| A01941 | A05416 | 355 | A01941 | A05507 | 380 |
| A01941 | A05543 | 232 | A01941 | A05567 | 286 |
| A01941 | A05568 | 252 | A01941 | A05577 | 152 |
| A01941 | A05589 | 157 | A01941 | A05630 | 269 |
| A01941 | A05693 | 238 | A01941 | A05719 | 358 |
| A01941 | A05791 | 382 | A01941 | A05832 | 486 |
| A01941 | A05868 | 302 | A01941 | A05900 | 252 |
| A01941 | A05921 | 438 | A01941 | A05949 | 180 |
| A01941 | A05962 | 157 | A01941 | A06004 | 205 |
| A01941 | A06140 | 205 | A01941 | A06631 | 394 |
| A01941 | A06644 | 267 | A01941 | A06736 | 217 |
| A01941 | A06774 | 232 | A01941 | A06969 | 205 |
| A01941 | A07252 | 252 | A01941 | A07480 | 346 |
| A01941 | A08207 | 488 | A01941 | A08720 | 205 |
| A01941 | A08941 | 185 | A01941 | A09122 | 217 |
| A01941 | A09254 | 77  | A01941 | A09500 | 179 |
| A01941 | A09672 | 290 | A01941 | A09766 | 213 |
| A01941 | A09883 | 205 | A01941 | A10270 | 335 |
| A01941 | A10286 | 63  | A01941 | A10330 | 252 |
| A01941 | A10937 | 217 | A01941 | A11086 | 269 |
| A01941 | A11369 | 63  | A01941 | A12198 | 232 |
| A01941 | A12325 | 157 | A01941 | A12824 | 340 |
| A01941 | A13090 | 294 | A01941 | A13973 | 185 |
| A01941 | A14403 | 276 | A01941 | A14554 | 386 |
| A01941 | A14570 | 455 | A01941 | A14634 | 152 |

|        |        |     |        |        |     |
|--------|--------|-----|--------|--------|-----|
| A01941 | A15370 | 235 | A01941 | A16636 | 210 |
| A01941 | A16775 | 252 | A01942 | A04793 | 406 |
| A01942 | A06385 | 322 | A01942 | A09726 | 408 |
| A01943 | A02383 | 373 | A01943 | A06054 | 353 |
| A01944 | A02789 | 267 | A01944 | A02868 | 461 |
| A01944 | A02983 | 226 | A01944 | A03314 | 294 |
| A01944 | A04627 | 294 | A01944 | A04922 | 348 |
| A01944 | A07201 | 219 | A01944 | A10291 | 383 |
| A01945 | A03293 | 323 | A01945 | A03625 | 219 |
| A01945 | A03686 | 682 | A01945 | A03699 | 174 |
| A01945 | A03892 | 63  | A01945 | A04616 | 340 |
| A01945 | A05221 | 435 | A01945 | A06693 | 165 |
| A01945 | A07207 | 436 | A01945 | A08293 | 201 |
| A01945 | A08356 | 473 | A01945 | A08362 | 641 |
| A01945 | A08863 | 184 | A01945 | A08943 | 719 |
| A01945 | A09023 | 486 | A01945 | A10591 | 491 |
| A01945 | A10596 | 355 | A01945 | A10597 | 489 |
| A01945 | A10727 | 312 | A01945 | A10733 | 489 |
| A01945 | A11464 | 234 | A01945 | A11839 | 637 |
| A01945 | A12606 | 224 | A01945 | A12961 | 245 |
| A01945 | A13824 | 628 | A01945 | A13826 | 694 |
| A01945 | A13873 | 490 | A01945 | A13983 | 196 |
| A01945 | A14003 | 408 | A01945 | A14054 | 223 |
| A01945 | A14191 | 490 | A01945 | A14204 | 217 |
| A01945 | A14208 | 329 | A01945 | A14276 | 357 |
| A01945 | A14647 | 395 | A01945 | A15056 | 360 |
| A01945 | A15315 | 263 | A01945 | A15345 | 374 |
| A01945 | A15346 | 491 | A01945 | A15347 | 383 |
| A01945 | A15409 | 213 | A01945 | A15410 | 389 |
| A01946 | A02390 | 243 | A01946 | A02400 | 369 |
| A01946 | A02401 | 375 | A01946 | A02409 | 369 |
| A01946 | A02481 | 291 | A01946 | A03082 | 313 |
| A01946 | A03112 | 260 | A01946 | A03479 | 479 |
| A01946 | A03725 | 252 | A01946 | A03981 | 160 |
| A01946 | A10148 | 251 | A01946 | A11334 | 252 |
| A01946 | A14216 | 160 | A01947 | A01972 | 218 |
| A01947 | A01993 | 791 | A01947 | A02097 | 486 |
| A01947 | A02268 | 168 | A01947 | A02275 | 219 |
| A01947 | A02454 | 167 | A01947 | A02727 | 286 |
| A01947 | A03006 | 245 | A01947 | A03007 | 210 |
| A01947 | A03044 | 299 | A01947 | A03050 | 182 |
| A01947 | A03091 | 236 | A01947 | A03224 | 243 |
| A01947 | A03238 | 191 | A01947 | A03773 | 201 |
| A01947 | A04025 | 401 | A01947 | A04406 | 218 |
| A01947 | A04410 | 313 | A01947 | A04616 | 293 |
| A01947 | A04839 | 296 | A01947 | A07062 | 380 |

|        |        |     |        |        |     |
|--------|--------|-----|--------|--------|-----|
| A01947 | A07603 | 221 | A01947 | A08089 | 477 |
| A01947 | A08584 | 375 | A01947 | A08647 | 490 |
| A01947 | A08693 | 491 | A01947 | A09107 | 491 |
| A01947 | A09134 | 491 | A01947 | A10527 | 491 |
| A01947 | A10591 | 269 | A01947 | A10678 | 375 |
| A01947 | A10762 | 417 | A01947 | A15896 | 219 |
| A01947 | A15992 | 791 | A01947 | A16636 | 286 |
| A01948 | A02017 | 388 | A01948 | A02091 | 420 |
| A01948 | A02149 | 383 | A01948 | A02188 | 408 |
| A01948 | A02223 | 361 | A01948 | A02320 | 307 |
| A01948 | A02539 | 335 | A01948 | A02560 | 418 |
| A01948 | A03178 | 420 | A01948 | A04431 | 440 |
| A01948 | A05176 | 351 | A01948 | A05247 | 374 |
| A01948 | A05898 | 418 | A01948 | A10237 | 412 |
| A01948 | A15233 | 383 | A01949 | A02072 | 457 |
| A01949 | A02140 | 432 | A01949 | A02430 | 432 |
| A01949 | A04163 | 457 | A01949 | A04238 | 449 |
| A01949 | A04334 | 246 | A01949 | A09236 | 466 |
| A01949 | A12373 | 217 | A01949 | A14188 | 324 |
| A01950 | A02065 | 167 | A01950 | A02185 | 301 |
| A01950 | A02213 | 240 | A01950 | A02248 | 399 |
| A01950 | A02356 | 229 | A01950 | A02385 | 235 |
| A01950 | A02950 | 115 | A01950 | A03079 | 362 |
| A01950 | A03163 | 152 | A01950 | A03625 | 460 |
| A01950 | A03686 | 486 | A01950 | A05313 | 168 |
| A01950 | A07207 | 650 | A01950 | A07991 | 369 |
| A01950 | A09145 | 205 | A01950 | A09584 | 362 |
| A01950 | A10047 | 243 | A01950 | A13036 | 324 |
| A01950 | A13824 | 491 | A01950 | A13829 | 402 |
| A01950 | A14026 | 603 | A01950 | A14120 | 404 |
| A01950 | A14210 | 362 | A01950 | A14469 | 272 |
| A01950 | A15295 | 488 | A01950 | A15620 | 240 |
| A01950 | A16407 | 362 | A01950 | A16847 | 565 |
| A01951 | A02122 | 366 | A01951 | A02749 | 254 |
| A01951 | A03024 | 399 | A01951 | A03080 | 210 |
| A01951 | A08738 | 260 | A01951 | A11735 | 311 |
| A01951 | A14197 | 278 | A01951 | A14643 | 204 |
| A01952 | A01956 | 405 | A01952 | A02010 | 311 |
| A01952 | A02672 | 369 | A01952 | A07214 | 435 |
| A01953 | A01957 | 374 | A01953 | A01962 | 341 |
| A01953 | A02010 | 412 | A01953 | A02240 | 317 |
| A01953 | A02541 | 369 | A01953 | A03022 | 414 |
| A01953 | A03032 | 363 | A01953 | A03159 | 435 |
| A01953 | A03234 | 302 | A01953 | A03239 | 319 |
| A01953 | A04307 | 323 | A01953 | A04877 | 400 |
| A01953 | A05704 | 396 | A01953 | A05705 | 401 |

|        |        |     |        |        |     |
|--------|--------|-----|--------|--------|-----|
| A01953 | A05834 | 411 | A01953 | A05922 | 427 |
| A01953 | A06946 | 427 | A01953 | A07212 | 341 |
| A01953 | A07219 | 411 | A01953 | A08713 | 435 |
| A01953 | A12897 | 165 | A01953 | A13369 | 177 |
| A01953 | A14372 | 310 | A01953 | A14381 | 312 |
| A01953 | A14554 | 317 | A01954 | A02010 | 327 |
| A01954 | A02741 | 266 | A01954 | A03051 | 299 |
| A01954 | A03209 | 281 | A01954 | A03701 | 371 |
| A01954 | A08859 | 171 | A01954 | A10726 | 405 |
| A01954 | A11951 | 369 | A01954 | A12935 | 408 |
| A01954 | A13410 | 391 | A01954 | A15638 | 391 |
| A01955 | A02010 | 311 | A01955 | A12500 | 401 |
| A01956 | A02007 | 470 | A01956 | A02010 | 490 |
| A01956 | A02057 | 347 | A01956 | A02293 | 303 |
| A01956 | A02672 | 323 | A01956 | A02783 | 236 |
| A01956 | A03023 | 353 | A01956 | A03025 | 474 |
| A01956 | A03080 | 369 | A01956 | A03134 | 440 |
| A01956 | A03344 | 307 | A01956 | A03345 | 310 |
| A01956 | A03703 | 183 | A01956 | A03721 | 219 |
| A01956 | A03722 | 221 | A01956 | A03723 | 271 |
| A01956 | A03894 | 235 | A01956 | A04152 | 290 |
| A01956 | A04166 | 358 | A01956 | A04329 | 306 |
| A01956 | A04867 | 157 | A01956 | A06591 | 177 |
| A01956 | A07054 | 378 | A01956 | A07214 | 353 |
| A01956 | A07216 | 358 | A01956 | A07242 | 226 |
| A01956 | A07413 | 217 | A01956 | A07954 | 246 |
| A01956 | A08277 | 215 | A01956 | A08572 | 200 |
| A01956 | A08596 | 278 | A01956 | A09198 | 441 |
| A01956 | A09421 | 313 | A01956 | A09890 | 324 |
| A01956 | A09978 | 291 | A01956 | A11885 | 165 |
| A01956 | A12976 | 340 | A01956 | A12983 | 351 |
| A01956 | A13410 | 340 | A01956 | A15399 | 232 |
| A01956 | A15673 | 182 | A01956 | A15809 | 165 |
| A01957 | A01962 | 286 | A01957 | A02010 | 357 |
| A01957 | A02048 | 165 | A01957 | A02635 | 177 |
| A01957 | A02672 | 489 | A01957 | A03022 | 385 |
| A01957 | A03032 | 313 | A01957 | A03159 | 416 |
| A01957 | A03361 | 174 | A01957 | A03373 | 260 |
| A01957 | A04338 | 405 | A01957 | A05679 | 232 |
| A01957 | A05704 | 361 | A01957 | A05705 | 368 |
| A01957 | A05834 | 382 | A01957 | A05922 | 405 |
| A01957 | A06946 | 405 | A01957 | A07212 | 285 |
| A01957 | A07219 | 382 | A01957 | A08713 | 416 |
| A01957 | A09243 | 377 | A01957 | A10018 | 256 |
| A01957 | A16951 | 353 | A01958 | A01975 | 272 |
| A01958 | A02027 | 291 | A01958 | A02028 | 386 |

|        |        |     |        |        |     |
|--------|--------|-----|--------|--------|-----|
| A01958 | A02672 | 151 | A01958 | A03663 | 224 |
| A01958 | A04228 | 215 | A01958 | A04791 | 235 |
| A01958 | A05027 | 163 | A01958 | A05716 | 306 |
| A01958 | A06860 | 330 | A01958 | A07217 | 293 |
| A01958 | A07613 | 318 | A01958 | A07684 | 372 |
| A01958 | A07713 | 335 | A01958 | A07885 | 199 |
| A01958 | A08192 | 338 | A01958 | A08385 | 236 |
| A01958 | A08576 | 283 | A01958 | A08818 | 480 |
| A01958 | A09846 | 380 | A01958 | A10126 | 329 |
| A01958 | A10144 | 390 | A01958 | A10316 | 177 |
| A01958 | A10453 | 184 | A01958 | A10486 | 373 |
| A01958 | A10670 | 362 | A01958 | A10683 | 245 |
| A01958 | A10699 | 193 | A01958 | A10778 | 394 |
| A01958 | A11395 | 302 | A01958 | A13330 | 243 |
| A01958 | A16344 | 199 | A01958 | A17006 | 277 |
| A01958 | A17062 | 154 | A01959 | A02143 | 198 |
| A01959 | A02206 | 151 | A01959 | A02209 | 402 |
| A01959 | A02226 | 486 | A01959 | A02265 | 152 |
| A01959 | A02331 | 208 | A01959 | A02461 | 180 |
| A01959 | A02539 | 172 | A01959 | A02541 | 281 |
| A01959 | A02837 | 173 | A01959 | A02874 | 177 |
| A01959 | A02896 | 174 | A01959 | A03127 | 177 |
| A01959 | A03178 | 162 | A01959 | A03275 | 188 |
| A01959 | A03649 | 247 | A01959 | A03687 | 229 |
| A01959 | A03766 | 466 | A01959 | A04424 | 256 |
| A01959 | A04463 | 308 | A01959 | A04837 | 207 |
| A01959 | A05259 | 167 | A01959 | A05536 | 435 |
| A01959 | A05568 | 326 | A01959 | A05621 | 491 |
| A01959 | A05958 | 477 | A01959 | A06288 | 202 |
| A01959 | A06588 | 165 | A01959 | A06891 | 162 |
| A01959 | A08647 | 296 | A01959 | A10320 | 157 |
| A01959 | A10353 | 224 | A01959 | A10461 | 196 |
| A01959 | A10885 | 151 | A01959 | A11607 | 152 |
| A01959 | A11810 | 218 | A01959 | A14672 | 154 |
| A01959 | A14969 | 160 | A01959 | A15404 | 174 |
| A01959 | A15451 | 157 | A01959 | A15804 | 190 |
| A01960 | A01961 | 439 | A01960 | A02010 | 353 |
| A01960 | A04410 | 310 | A01960 | A06067 | 345 |
| A01960 | A15498 | 168 | A01961 | A02005 | 335 |
| A01961 | A02010 | 473 | A01961 | A02156 | 176 |
| A01961 | A02157 | 329 | A01961 | A02198 | 257 |
| A01961 | A02995 | 196 | A01961 | A03003 | 258 |
| A01961 | A03022 | 373 | A01961 | A03080 | 204 |
| A01961 | A03349 | 234 | A01961 | A03387 | 319 |
| A01961 | A03388 | 307 | A01961 | A03701 | 317 |
| A01961 | A03722 | 229 | A01961 | A03744 | 355 |



|        |        |     |        |        |     |
|--------|--------|-----|--------|--------|-----|
| A01961 | A03968 | 200 | A01961 | A04366 | 299 |
| A01961 | A04842 | 258 | A01961 | A04928 | 281 |
| A01961 | A05716 | 424 | A01961 | A06067 | 251 |
| A01961 | A06346 | 310 | A01961 | A06949 | 180 |
| A01961 | A09064 | 408 | A01961 | A10156 | 246 |
| A01961 | A12497 | 408 | A01961 | A13428 | 394 |
| A01961 | A14689 | 463 | A01961 | A15318 | 185 |
| A01961 | A15422 | 172 | A01961 | A16224 | 230 |
| A01962 | A01963 | 382 | A01962 | A01967 | 412 |
| A01962 | A02010 | 479 | A01962 | A02228 | 205 |
| A01962 | A02323 | 272 | A01962 | A02415 | 213 |
| A01962 | A02470 | 229 | A01962 | A02638 | 238 |
| A01962 | A02673 | 432 | A01962 | A03022 | 357 |
| A01962 | A03032 | 383 | A01962 | A03159 | 396 |
| A01962 | A03882 | 179 | A01962 | A05704 | 484 |
| A01962 | A05705 | 335 | A01962 | A05834 | 352 |
| A01962 | A05922 | 446 | A01962 | A06623 | 168 |
| A01962 | A06946 | 446 | A01962 | A07136 | 328 |
| A01962 | A07212 | 232 | A01962 | A07215 | 441 |
| A01962 | A07219 | 432 | A01962 | A07314 | 235 |
| A01962 | A08524 | 308 | A01962 | A08713 | 396 |
| A01962 | A11683 | 154 | A01962 | A12736 | 330 |
| A01962 | A14487 | 274 | A01962 | A16866 | 412 |
| A01963 | A01967 | 416 | A01963 | A02010 | 391 |
| A01963 | A02415 | 373 | A01963 | A02428 | 334 |
| A01963 | A03135 | 429 | A01963 | A07219 | 430 |
| A01964 | A01979 | 399 | A01964 | A03948 | 274 |
| A01964 | A05796 | 351 | A01964 | A07214 | 411 |
| A01965 | A01968 | 445 | A01965 | A02010 | 311 |
| A01966 | A03141 | 337 | A01967 | A02010 | 468 |
| A01967 | A02039 | 418 | A01967 | A02300 | 260 |
| A01967 | A02333 | 351 | A01967 | A02415 | 299 |
| A01967 | A02636 | 306 | A01967 | A02698 | 283 |
| A01967 | A03023 | 391 | A01967 | A03032 | 458 |
| A01967 | A03080 | 154 | A01967 | A03135 | 394 |
| A01967 | A03361 | 213 | A01967 | A04410 | 263 |
| A01967 | A05361 | 378 | A01967 | A05603 | 247 |
| A01967 | A05833 | 425 | A01967 | A07165 | 176 |
| A01967 | A07201 | 205 | A01967 | A07219 | 396 |
| A01967 | A08698 | 291 | A01967 | A09241 | 323 |
| A01968 | A02010 | 262 | A01968 | A07216 | 424 |
| A01969 | A02153 | 308 | A01969 | A03304 | 183 |
| A01969 | A04752 | 299 | A01969 | A13826 | 191 |
| A01969 | A13899 | 279 | A01970 | A02028 | 230 |
| A01970 | A02157 | 210 | A01970 | A02158 | 177 |
| A01970 | A02738 | 227 | A01970 | A03051 | 232 |

|        |        |     |        |        |     |
|--------|--------|-----|--------|--------|-----|
| A01970 | A03141 | 156 | A01970 | A03408 | 160 |
| A01970 | A03699 | 293 | A01970 | A03719 | 221 |
| A01970 | A03724 | 372 | A01970 | A03744 | 241 |
| A01970 | A03748 | 172 | A01970 | A03910 | 251 |
| A01970 | A04361 | 364 | A01970 | A04410 | 213 |
| A01970 | A04795 | 266 | A01970 | A04818 | 293 |
| A01970 | A04928 | 291 | A01970 | A06346 | 323 |
| A01970 | A06783 | 193 | A01970 | A08707 | 266 |
| A01970 | A09205 | 294 | A01970 | A09509 | 198 |
| A01970 | A09900 | 283 | A01970 | A12897 | 183 |
| A01970 | A14378 | 157 | A01970 | A15277 | 263 |
| A01970 | A15436 | 235 | A01970 | A15447 | 204 |
| A01971 | A01980 | 475 | A01971 | A01981 | 419 |
| A01971 | A02215 | 216 | A01971 | A04351 | 391 |
| A01971 | A05156 | 484 | A01971 | A05625 | 286 |
| A01971 | A06067 | 491 | A01971 | A07491 | 224 |
| A01971 | A07520 | 154 | A01971 | A08861 | 196 |
| A01971 | A09560 | 348 | A01971 | A15321 | 467 |
| A01972 | A02020 | 234 | A01972 | A02071 | 205 |
| A01972 | A02074 | 183 | A01972 | A02077 | 366 |
| A01972 | A02078 | 291 | A01972 | A02097 | 230 |
| A01972 | A02311 | 224 | A01972 | A02316 | 168 |
| A01972 | A02321 | 318 | A01972 | A02329 | 417 |
| A01972 | A02363 | 290 | A01972 | A02432 | 460 |
| A01972 | A02484 | 262 | A01972 | A02565 | 180 |
| A01972 | A02601 | 176 | A01972 | A02671 | 232 |
| A01972 | A02758 | 238 | A01972 | A02785 | 308 |
| A01972 | A02826 | 188 | A01972 | A02992 | 427 |
| A01972 | A03016 | 360 | A01972 | A03027 | 488 |
| A01972 | A03050 | 491 | A01972 | A03051 | 165 |
| A01972 | A03167 | 462 | A01972 | A03168 | 411 |
| A01972 | A03172 | 474 | A01972 | A03234 | 151 |
| A01972 | A03484 | 219 | A01972 | A03513 | 364 |
| A01972 | A03858 | 374 | A01972 | A03917 | 491 |
| A01972 | A03926 | 257 | A01972 | A03942 | 159 |
| A01972 | A03955 | 243 | A01972 | A03962 | 177 |
| A01972 | A04211 | 168 | A01972 | A04258 | 235 |
| A01972 | A04369 | 490 | A01972 | A04449 | 260 |
| A01972 | A04556 | 385 | A01972 | A04839 | 356 |
| A01972 | A04920 | 441 | A01972 | A04927 | 193 |
| A01972 | A04974 | 318 | A01972 | A04977 | 213 |
| A01972 | A04981 | 279 | A01972 | A04995 | 226 |
| A01972 | A05007 | 188 | A01972 | A05098 | 350 |
| A01972 | A05237 | 351 | A01972 | A05335 | 202 |
| A01972 | A05337 | 236 | A01972 | A05358 | 256 |
| A01972 | A05389 | 486 | A01972 | A05390 | 424 |

|        |        |     |        |        |     |
|--------|--------|-----|--------|--------|-----|
| A01972 | A05393 | 279 | A01972 | A05416 | 479 |
| A01972 | A05444 | 388 | A01972 | A05532 | 343 |
| A01972 | A05550 | 210 | A01972 | A05624 | 358 |
| A01972 | A05659 | 408 | A01972 | A05757 | 467 |
| A01972 | A05789 | 296 | A01972 | A06098 | 332 |
| A01972 | A06263 | 417 | A01972 | A06358 | 319 |
| A01972 | A06607 | 283 | A01972 | A06629 | 177 |
| A01972 | A06632 | 318 | A01972 | A06635 | 152 |
| A01972 | A06668 | 307 | A01972 | A06692 | 302 |
| A01972 | A06700 | 174 | A01972 | A06855 | 291 |
| A01972 | A06970 | 386 | A01972 | A06979 | 366 |
| A01972 | A06981 | 269 | A01972 | A07080 | 191 |
| A01972 | A07264 | 226 | A01972 | A07367 | 335 |
| A01972 | A07376 | 274 | A01972 | A07385 | 343 |
| A01972 | A07413 | 173 | A01972 | A07477 | 438 |
| A01972 | A07543 | 215 | A01972 | A07558 | 307 |
| A01972 | A07561 | 185 | A01972 | A07590 | 435 |
| A01972 | A07631 | 343 | A01972 | A07674 | 266 |
| A01972 | A07721 | 302 | A01972 | A07736 | 422 |
| A01972 | A07808 | 371 | A01972 | A07844 | 154 |
| A01972 | A07933 | 385 | A01972 | A07973 | 401 |
| A01972 | A08040 | 256 | A01972 | A08647 | 269 |
| A01972 | A09072 | 195 | A01972 | A09879 | 286 |
| A01972 | A09951 | 371 | A01972 | A10172 | 351 |
| A01972 | A10424 | 299 | A01972 | A10452 | 212 |
| A01972 | A10527 | 182 | A01972 | A10656 | 218 |
| A01972 | A10677 | 196 | A01972 | A10713 | 202 |
| A01972 | A12115 | 371 | A01972 | A13258 | 441 |
| A01972 | A14430 | 208 | A01972 | A14637 | 256 |
| A01972 | A14789 | 265 | A01972 | A14812 | 305 |
| A01972 | A15637 | 221 | A01972 | A16355 | 305 |
| A01972 | A16445 | 213 | A01972 | A16741 | 212 |
| A01972 | A16746 | 337 | A01972 | A17007 | 369 |
| A01972 | A17078 | 374 | A01973 | A03114 | 396 |
| A01973 | A04342 | 230 | A01974 | A02791 | 165 |
| A01974 | A03596 | 154 | A01974 | A04562 | 205 |
| A01974 | A04909 | 238 | A01974 | A05118 | 329 |
| A01974 | A06492 | 167 | A01974 | A09056 | 152 |
| A01974 | A09059 | 152 | A01974 | A10179 | 337 |
| A01974 | A12666 | 936 | A01974 | A12990 | 205 |
| A01974 | A14046 | 931 | A01974 | A14068 | 311 |
| A01974 | A14299 | 491 | A01975 | A01982 | 425 |
| A01975 | A02000 | 469 | A01975 | A02044 | 293 |
| A01975 | A02185 | 339 | A01975 | A02202 | 190 |
| A01975 | A02551 | 317 | A01975 | A02711 | 173 |
| A01975 | A03141 | 307 | A01975 | A03373 | 380 |

|        |        |     |        |        |     |
|--------|--------|-----|--------|--------|-----|
| A01975 | A03632 | 255 | A01975 | A03906 | 269 |
| A01975 | A04351 | 419 | A01975 | A04449 | 151 |
| A01975 | A04774 | 406 | A01975 | A09983 | 462 |
| A01975 | A11911 | 208 | A01975 | A16738 | 160 |
| A01976 | A01988 | 188 | A01976 | A02436 | 256 |
| A01976 | A02535 | 152 | A01976 | A02978 | 173 |
| A01976 | A03901 | 515 | A01976 | A03981 | 157 |
| A01976 | A04062 | 256 | A01976 | A04898 | 452 |
| A01976 | A05199 | 151 | A01976 | A05301 | 468 |
| A01976 | A05427 | 201 | A01976 | A05702 | 188 |
| A01976 | A05880 | 393 | A01976 | A06017 | 172 |
| A01976 | A06785 | 188 | A01976 | A06907 | 165 |
| A01976 | A07395 | 268 | A01976 | A07433 | 490 |
| A01976 | A07473 | 184 | A01976 | A07816 | 263 |
| A01976 | A07965 | 188 | A01976 | A08456 | 187 |
| A01976 | A08549 | 486 | A01976 | A08557 | 176 |
| A01976 | A08567 | 308 | A01976 | A08812 | 230 |
| A01976 | A09485 | 465 | A01976 | A09677 | 268 |
| A01976 | A10421 | 236 | A01976 | A10498 | 199 |
| A01976 | A11480 | 188 | A01976 | A11917 | 174 |
| A01976 | A13206 | 281 | A01976 | A13855 | 483 |
| A01976 | A13949 | 264 | A01976 | A13969 | 260 |
| A01976 | A14084 | 489 | A01976 | A14186 | 260 |
| A01976 | A14507 | 188 | A01976 | A14566 | 63  |
| A01976 | A14594 | 177 | A01976 | A14655 | 260 |
| A01976 | A14701 | 202 | A01976 | A14813 | 188 |
| A01976 | A15625 | 305 | A01976 | A15657 | 205 |
| A01976 | A15949 | 219 | A01976 | A16401 | 174 |
| A01976 | A16680 | 192 | A01976 | A16769 | 202 |
| A01977 | A02454 | 218 | A01977 | A02542 | 235 |
| A01977 | A10642 | 279 | A01977 | A15624 | 396 |
| A01978 | A02168 | 462 | A01978 | A02170 | 307 |
| A01978 | A02530 | 363 | A01978 | A02538 | 469 |
| A01978 | A02542 | 241 | A01978 | A02992 | 369 |
| A01978 | A03238 | 246 | A01978 | A03880 | 276 |
| A01978 | A04487 | 308 | A01978 | A04839 | 416 |
| A01978 | A05094 | 294 | A01978 | A05407 | 361 |
| A01978 | A05775 | 301 | A01978 | A05776 | 486 |
| A01978 | A06970 | 276 | A01978 | A07007 | 276 |
| A01978 | A07816 | 276 | A01978 | A07973 | 276 |
| A01978 | A07981 | 276 | A01978 | A09054 | 276 |
| A01978 | A11032 | 394 | A01978 | A13819 | 276 |
| A01978 | A13866 | 276 | A01978 | A13871 | 443 |
| A01978 | A14239 | 276 | A01978 | A16807 | 276 |
| A01979 | A02010 | 177 | A01979 | A02028 | 285 |
| A01979 | A02180 | 383 | A01979 | A02191 | 324 |

|        |        |     |        |        |     |
|--------|--------|-----|--------|--------|-----|
| A01979 | A02312 | 350 | A01979 | A02673 | 210 |
| A01979 | A06333 | 373 | A01979 | A07214 | 472 |
| A01979 | A16636 | 165 | A01980 | A01981 | 441 |
| A01980 | A02418 | 279 | A01980 | A03754 | 263 |
| A01980 | A06067 | 443 | A01980 | A10175 | 262 |
| A01980 | A14540 | 167 | A01981 | A03817 | 176 |
| A01981 | A06067 | 417 | A01981 | A06240 | 230 |
| A01981 | A15524 | 210 | A01982 | A02048 | 491 |
| A01982 | A02049 | 452 | A01982 | A02146 | 483 |
| A01982 | A02147 | 380 | A01982 | A02186 | 486 |
| A01982 | A02205 | 296 | A01982 | A02215 | 462 |
| A01982 | A02223 | 319 | A01982 | A02238 | 205 |
| A01982 | A02291 | 457 | A01982 | A02298 | 313 |
| A01982 | A02307 | 302 | A01982 | A02385 | 246 |
| A01982 | A02413 | 185 | A01982 | A02490 | 457 |
| A01982 | A02491 | 355 | A01982 | A02582 | 157 |
| A01982 | A02587 | 272 | A01982 | A02663 | 274 |
| A01982 | A02669 | 247 | A01982 | A02859 | 226 |
| A01982 | A03034 | 195 | A01982 | A03080 | 491 |
| A01982 | A03218 | 218 | A01982 | A03344 | 246 |
| A01982 | A03346 | 419 | A01982 | A03347 | 491 |
| A01982 | A03351 | 428 | A01982 | A03353 | 486 |
| A01982 | A03361 | 353 | A01982 | A03363 | 263 |
| A01982 | A03369 | 491 | A01982 | A03370 | 491 |
| A01982 | A03371 | 491 | A01982 | A03373 | 491 |
| A01982 | A03378 | 423 | A01982 | A03379 | 491 |
| A01982 | A03397 | 262 | A01982 | A03403 | 260 |
| A01982 | A03414 | 355 | A01982 | A03729 | 202 |
| A01982 | A03744 | 276 | A01982 | A03773 | 445 |
| A01982 | A03914 | 174 | A01982 | A03988 | 281 |
| A01982 | A04063 | 223 | A01982 | A04079 | 202 |
| A01982 | A04286 | 200 | A01982 | A04331 | 291 |
| A01982 | A04333 | 157 | A01982 | A04409 | 380 |
| A01982 | A04456 | 355 | A01982 | A04516 | 252 |
| A01982 | A04783 | 159 | A01982 | A04792 | 317 |
| A01982 | A04818 | 204 | A01982 | A04824 | 263 |
| A01982 | A04830 | 451 | A01982 | A04875 | 283 |
| A01982 | A05102 | 177 | A01982 | A05136 | 311 |
| A01982 | A05487 | 162 | A01982 | A05999 | 311 |
| A01982 | A06650 | 191 | A01982 | A06747 | 174 |
| A01982 | A06935 | 341 | A01982 | A07187 | 187 |
| A01982 | A07192 | 157 | A01982 | A07218 | 491 |
| A01982 | A07239 | 173 | A01982 | A07440 | 257 |
| A01982 | A07442 | 191 | A01982 | A08719 | 355 |
| A01982 | A09496 | 281 | A01982 | A09540 | 267 |
| A01982 | A09983 | 474 | A01982 | A10989 | 160 |

|        |        |     |        |        |     |
|--------|--------|-----|--------|--------|-----|
| A01982 | A13257 | 185 | A01982 | A16636 | 345 |
| A01983 | A02046 | 174 | A01983 | A02049 | 63  |
| A01983 | A02068 | 163 | A01983 | A02184 | 277 |
| A01983 | A02185 | 353 | A01983 | A02293 | 465 |
| A01983 | A02644 | 160 | A01983 | A02699 | 171 |
| A01983 | A02803 | 414 | A01983 | A02821 | 188 |
| A01983 | A02836 | 321 | A01983 | A02935 | 183 |
| A01983 | A02945 | 236 | A01983 | A03177 | 270 |
| A01983 | A03224 | 285 | A01983 | A03273 | 235 |
| A01983 | A03282 | 170 | A01983 | A03331 | 218 |
| A01983 | A03753 | 374 | A01983 | A03775 | 319 |
| A01983 | A03817 | 469 | A01983 | A03913 | 416 |
| A01983 | A03939 | 299 | A01983 | A04276 | 200 |
| A01983 | A04337 | 205 | A01983 | A04415 | 443 |
| A01983 | A04422 | 160 | A01983 | A04536 | 435 |
| A01983 | A04589 | 223 | A01983 | A04682 | 177 |
| A01983 | A04754 | 263 | A01983 | A04755 | 362 |
| A01983 | A04766 | 323 | A01983 | A04993 | 288 |
| A01983 | A05004 | 201 | A01983 | A05044 | 327 |
| A01983 | A05195 | 338 | A01983 | A05409 | 312 |
| A01983 | A05613 | 263 | A01983 | A05677 | 380 |
| A01983 | A05985 | 384 | A01983 | A05996 | 162 |
| A01983 | A06054 | 154 | A01983 | A06055 | 463 |
| A01983 | A06118 | 232 | A01983 | A07123 | 168 |
| A01983 | A07143 | 484 | A01983 | A07173 | 430 |
| A01983 | A07442 | 152 | A01983 | A07479 | 375 |
| A01983 | A07545 | 160 | A01983 | A09182 | 328 |
| A01983 | A09259 | 221 | A01983 | A09469 | 439 |
| A01983 | A09552 | 218 | A01983 | A10575 | 176 |
| A01983 | A11548 | 252 | A01983 | A11897 | 160 |
| A01983 | A12605 | 294 | A01983 | A13872 | 294 |
| A01983 | A13945 | 335 | A01983 | A15282 | 432 |
| A01983 | A15516 | 274 | A01983 | A15603 | 180 |
| A01983 | A15641 | 168 | A01983 | A15935 | 328 |
| A01984 | A02638 | 335 | A01984 | A02819 | 396 |
| A01984 | A02875 | 260 | A01984 | A03109 | 358 |
| A01984 | A04226 | 417 | A01984 | A04622 | 152 |
| A01984 | A04915 | 417 | A01984 | A05796 | 329 |
| A01984 | A06623 | 283 | A01984 | A07192 | 316 |
| A01984 | A14190 | 218 | A01984 | A14643 | 172 |
| A01984 | A16300 | 193 | A01985 | A02126 | 355 |
| A01985 | A02313 | 263 | A01985 | A02361 | 205 |
| A01985 | A02465 | 238 | A01985 | A02615 | 306 |
| A01985 | A02668 | 167 | A01985 | A02756 | 184 |
| A01985 | A02788 | 160 | A01985 | A02816 | 193 |
| A01985 | A02895 | 257 | A01985 | A03055 | 329 |

|        |        |     |        |        |     |
|--------|--------|-----|--------|--------|-----|
| A01985 | A03498 | 302 | A01985 | A03639 | 221 |
| A01985 | A03750 | 230 | A01985 | A04086 | 288 |
| A01985 | A04147 | 382 | A01985 | A04163 | 272 |
| A01985 | A04237 | 362 | A01985 | A04879 | 177 |
| A01985 | A06275 | 191 | A01985 | A09236 | 316 |
| A01985 | A09429 | 321 | A01985 | A10616 | 188 |
| A01985 | A11280 | 193 | A01985 | A15920 | 213 |
| A01985 | A15935 | 159 | A01986 | A14648 | 258 |
| A01987 | A03171 | 319 | A01988 | A03330 | 355 |
| A01988 | A03480 | 319 | A01988 | A03489 | 63  |
| A01988 | A03494 | 465 | A01988 | A03556 | 205 |
| A01988 | A03565 | 144 | A01988 | A03597 | 566 |
| A01988 | A03617 | 247 | A01988 | A03626 | 63  |
| A01988 | A03901 | 188 | A01988 | A05273 | 200 |
| A01988 | A05531 | 547 | A01988 | A05539 | 200 |
| A01988 | A05563 | 414 | A01988 | A05605 | 252 |
| A01988 | A05638 | 566 | A01988 | A05702 | 188 |
| A01988 | A06204 | 503 | A01988 | A06347 | 65  |
| A01988 | A06361 | 348 | A01988 | A06689 | 170 |
| A01988 | A06758 | 66  | A01988 | A06785 | 246 |
| A01988 | A06941 | 316 | A01988 | A07180 | 565 |
| A01988 | A07203 | 177 | A01988 | A07242 | 456 |
| A01988 | A07294 | 110 | A01988 | A07495 | 491 |
| A01988 | A07744 | 165 | A01988 | A07816 | 321 |
| A01988 | A07965 | 353 | A01988 | A08056 | 183 |
| A01988 | A08400 | 210 | A01988 | A08402 | 216 |
| A01988 | A08669 | 472 | A01988 | A08775 | 68  |
| A01988 | A08780 | 88  | A01988 | A08874 | 63  |
| A01988 | A08982 | 157 | A01988 | A08984 | 174 |
| A01988 | A09625 | 200 | A01988 | A09628 | 200 |
| A01988 | A10603 | 63  | A01988 | A10664 | 63  |
| A01988 | A11247 | 79  | A01988 | A11284 | 491 |
| A01988 | A11376 | 424 | A01988 | A11480 | 188 |
| A01988 | A12047 | 491 | A01988 | A13130 | 329 |
| A01988 | A13146 | 335 | A01988 | A13384 | 488 |
| A01988 | A13617 | 574 | A01988 | A13831 | 435 |
| A01988 | A13835 | 246 | A01988 | A13837 | 63  |
| A01988 | A13876 | 200 | A01988 | A13881 | 200 |
| A01988 | A13949 | 427 | A01988 | A14056 | 63  |
| A01988 | A14171 | 200 | A01988 | A14179 | 200 |
| A01988 | A14180 | 200 | A01988 | A14196 | 180 |
| A01988 | A14209 | 491 | A01988 | A14222 | 486 |
| A01988 | A14247 | 156 | A01988 | A14281 | 477 |
| A01988 | A14356 | 200 | A01988 | A14474 | 483 |
| A01988 | A14484 | 443 | A01988 | A14589 | 176 |
| A01988 | A14699 | 213 | A01988 | A14813 | 204 |

|        |        |     |        |        |     |
|--------|--------|-----|--------|--------|-----|
| A01988 | A14827 | 408 | A01988 | A15297 | 156 |
| A01988 | A15323 | 288 | A01988 | A15338 | 177 |
| A01988 | A15370 | 547 | A01988 | A15380 | 491 |
| A01988 | A15657 | 188 | A01988 | A15660 | 277 |
| A01988 | A15665 | 470 | A01988 | A15712 | 200 |
| A01988 | A15719 | 200 | A01988 | A15724 | 107 |
| A01988 | A15757 | 213 | A01988 | A16066 | 200 |
| A01988 | A16128 | 442 | A01988 | A16281 | 225 |
| A01988 | A16634 | 200 | A01988 | A16680 | 188 |
| A01988 | A16919 | 200 | A01989 | A02180 | 167 |
| A01989 | A03304 | 170 | A01989 | A06121 | 374 |
| A01989 | A14073 | 274 | A01990 | A02148 | 351 |
| A01990 | A02278 | 165 | A01990 | A02837 | 162 |
| A01990 | A03040 | 419 | A01990 | A04080 | 241 |
| A01990 | A04152 | 350 | A01990 | A05459 | 385 |
| A01990 | A05596 | 372 | A01990 | A06386 | 408 |
| A01990 | A06864 | 177 | A01990 | A09267 | 408 |
| A01990 | A15463 | 182 | A01991 | A02762 | 432 |
| A01992 | A03324 | 340 | A01992 | A03417 | 301 |
| A01992 | A03520 | 221 | A01992 | A04010 | 232 |
| A01992 | A04579 | 356 | A01992 | A06949 | 249 |
| A01992 | A09263 | 272 | A01992 | A10614 | 360 |
| A01992 | A14659 | 227 | A01992 | A16298 | 345 |
| A01993 | A02061 | 241 | A01993 | A02097 | 259 |
| A01993 | A02190 | 332 | A01993 | A02214 | 486 |
| A01993 | A02316 | 199 | A01993 | A02364 | 446 |
| A01993 | A02603 | 367 | A01993 | A02835 | 299 |
| A01993 | A03044 | 401 | A01993 | A03080 | 277 |
| A01993 | A03093 | 269 | A01993 | A03111 | 374 |
| A01993 | A03144 | 196 | A01993 | A03401 | 196 |
| A01993 | A04025 | 294 | A01993 | A04410 | 177 |
| A01993 | A04616 | 291 | A01993 | A05210 | 399 |
| A01993 | A05689 | 361 | A01993 | A08089 | 306 |
| A01993 | A08172 | 205 | A01993 | A08647 | 294 |
| A01993 | A08693 | 491 | A01993 | A09107 | 491 |
| A01993 | A09134 | 490 | A01993 | A10527 | 213 |
| A01993 | A10640 | 286 | A01993 | A14381 | 195 |
| A01993 | A15992 | 789 | A01994 | A02040 | 301 |
| A01994 | A03141 | 157 | A01994 | A03451 | 358 |
| A01994 | A07091 | 279 | A01994 | A11487 | 200 |
| A01994 | A14614 | 338 | A01994 | A15321 | 270 |
| A01995 | A02110 | 337 | A01995 | A02117 | 383 |
| A01995 | A02319 | 187 | A01995 | A02482 | 488 |
| A01995 | A02640 | 210 | A01995 | A03075 | 199 |
| A01995 | A03188 | 156 | A01995 | A03292 | 701 |
| A01995 | A03304 | 201 | A01995 | A03436 | 322 |



|        |        |     |        |        |     |
|--------|--------|-----|--------|--------|-----|
| A01995 | A03591 | 184 | A01995 | A03749 | 316 |
| A01995 | A03752 | 166 | A01995 | A03771 | 374 |
| A01995 | A03778 | 351 | A01995 | A03910 | 456 |
| A01995 | A03968 | 383 | A01995 | A03981 | 267 |
| A01995 | A03990 | 474 | A01995 | A04012 | 337 |
| A01995 | A04372 | 160 | A01995 | A04449 | 576 |
| A01995 | A04663 | 235 | A01995 | A04726 | 235 |
| A01995 | A04773 | 480 | A01995 | A04988 | 157 |
| A01995 | A05416 | 207 | A01995 | A05418 | 598 |
| A01995 | A05633 | 446 | A01995 | A06190 | 229 |
| A01995 | A06197 | 229 | A01995 | A06244 | 168 |
| A01995 | A06258 | 224 | A01995 | A06277 | 302 |
| A01995 | A06286 | 374 | A01995 | A06295 | 185 |
| A01995 | A06379 | 441 | A01995 | A06466 | 152 |
| A01995 | A06558 | 199 | A01995 | A06660 | 221 |
| A01995 | A06814 | 173 | A01995 | A07311 | 582 |
| A01995 | A07339 | 491 | A01995 | A07454 | 213 |
| A01995 | A07495 | 152 | A01995 | A07726 | 491 |
| A01995 | A07803 | 468 | A01995 | A08567 | 374 |
| A01995 | A08608 | 179 | A01995 | A09078 | 488 |
| A01995 | A09211 | 172 | A01995 | A09224 | 457 |
| A01995 | A09235 | 486 | A01995 | A09249 | 160 |
| A01995 | A09363 | 404 | A01995 | A09607 | 435 |
| A01995 | A09742 | 246 | A01995 | A09791 | 383 |
| A01995 | A10072 | 159 | A01995 | A10105 | 168 |
| A01995 | A10430 | 435 | A01995 | A10443 | 428 |
| A01995 | A10666 | 251 | A01995 | A10703 | 485 |
| A01995 | A10735 | 216 | A01995 | A10747 | 452 |
| A01995 | A10748 | 356 | A01995 | A11000 | 213 |
| A01995 | A11096 | 223 | A01995 | A11122 | 481 |
| A01995 | A11369 | 221 | A01995 | A11421 | 491 |
| A01995 | A11487 | 625 | A01995 | A11556 | 489 |
| A01995 | A11937 | 154 | A01995 | A11983 | 563 |
| A01995 | A12111 | 475 | A01995 | A13063 | 587 |
| A01995 | A13168 | 361 | A01995 | A13935 | 232 |
| A01995 | A13975 | 154 | A01995 | A14006 | 488 |
| A01995 | A14136 | 468 | A01995 | A14198 | 455 |
| A01995 | A14220 | 466 | A01995 | A14299 | 205 |
| A01995 | A14410 | 191 | A01995 | A14426 | 165 |
| A01995 | A14444 | 422 | A01995 | A14541 | 235 |
| A01995 | A14577 | 180 | A01995 | A14596 | 271 |
| A01995 | A14644 | 302 | A01995 | A14685 | 168 |
| A01995 | A15293 | 477 | A01995 | A15294 | 595 |
| A01995 | A15352 | 156 | A01995 | A15366 | 254 |
| A01995 | A15432 | 232 | A01995 | A15503 | 468 |
| A01995 | A15506 | 647 | A01995 | A15639 | 172 |

|        |        |     |        |        |     |
|--------|--------|-----|--------|--------|-----|
| A01995 | A15682 | 218 | A01995 | A16767 | 389 |
| A01995 | A16847 | 446 | A01996 | A14299 | 899 |
| A01996 | A14443 | 899 | A01996 | A14444 | 899 |
| A01997 | A02180 | 462 | A01997 | A03079 | 369 |
| A01997 | A03690 | 281 | A01997 | A03697 | 269 |
| A01997 | A03724 | 364 | A01997 | A03731 | 491 |
| A01997 | A03910 | 238 | A01997 | A05891 | 227 |
| A01997 | A06488 | 252 | A01997 | A06599 | 177 |
| A01997 | A06828 | 438 | A01997 | A07689 | 380 |
| A01997 | A07785 | 299 | A01997 | A08841 | 285 |
| A01997 | A08949 | 375 | A01997 | A09205 | 396 |
| A01997 | A09206 | 491 | A01997 | A09230 | 475 |
| A01997 | A09231 | 447 | A01997 | A09233 | 335 |
| A01997 | A09234 | 438 | A01997 | A09743 | 356 |
| A01997 | A10453 | 235 | A01997 | A10549 | 313 |
| A01997 | A11243 | 312 | A01997 | A11422 | 491 |
| A01997 | A11681 | 249 | A01997 | A12121 | 369 |
| A01997 | A12458 | 467 | A01997 | A12884 | 477 |
| A01997 | A13133 | 479 | A01997 | A13412 | 445 |
| A01997 | A13826 | 394 | A01997 | A13899 | 405 |
| A01997 | A14611 | 391 | A01997 | A15318 | 188 |
| A01997 | A15346 | 160 | A01997 | A15422 | 434 |
| A01997 | A15493 | 358 | A01997 | A16155 | 396 |
| A01998 | A01999 | 451 | A01998 | A02227 | 213 |
| A01998 | A14699 | 187 | A01999 | A02227 | 324 |
| A01999 | A03490 | 269 | A01999 | A05804 | 337 |
| A01999 | A15500 | 183 | A01999 | A15771 | 246 |
| A02000 | A02010 | 484 | A02000 | A02171 | 246 |
| A02000 | A02185 | 321 | A02000 | A02213 | 255 |
| A02000 | A02447 | 265 | A02000 | A02479 | 406 |
| A02000 | A02551 | 223 | A02000 | A02582 | 162 |
| A02000 | A02607 | 435 | A02000 | A02788 | 193 |
| A02000 | A03071 | 358 | A02000 | A03080 | 346 |
| A02000 | A03100 | 154 | A02000 | A03141 | 483 |
| A02000 | A03181 | 159 | A02000 | A03218 | 224 |
| A02000 | A03310 | 262 | A02000 | A03370 | 276 |
| A02000 | A03403 | 265 | A02000 | A03688 | 193 |
| A02000 | A03723 | 205 | A02000 | A03733 | 424 |
| A02000 | A03744 | 281 | A02000 | A03790 | 212 |
| A02000 | A03906 | 486 | A02000 | A03926 | 235 |
| A02000 | A04007 | 212 | A02000 | A04074 | 285 |
| A02000 | A04078 | 200 | A02000 | A04086 | 343 |
| A02000 | A04158 | 321 | A02000 | A04162 | 152 |
| A02000 | A04166 | 314 | A02000 | A04201 | 265 |
| A02000 | A04202 | 430 | A02000 | A04229 | 201 |
| A02000 | A04316 | 208 | A02000 | A04329 | 247 |

|        |        |     |        |        |     |
|--------|--------|-----|--------|--------|-----|
| A02000 | A04333 | 162 | A02000 | A04473 | 252 |
| A02000 | A04622 | 306 | A02000 | A04770 | 205 |
| A02000 | A04774 | 358 | A02000 | A04928 | 208 |
| A02000 | A05082 | 375 | A02000 | A05141 | 319 |
| A02000 | A05155 | 223 | A02000 | A05264 | 219 |
| A02000 | A05283 | 299 | A02000 | A05491 | 299 |
| A02000 | A05886 | 269 | A02000 | A05887 | 454 |
| A02000 | A06107 | 296 | A02000 | A06574 | 193 |
| A02000 | A06813 | 470 | A02000 | A07218 | 294 |
| A02000 | A07605 | 167 | A02000 | A07702 | 358 |
| A02000 | A07794 | 152 | A02000 | A07987 | 377 |
| A02000 | A08698 | 154 | A02000 | A09073 | 184 |
| A02000 | A09235 | 378 | A02000 | A09236 | 369 |
| A02000 | A09241 | 329 | A02000 | A09253 | 177 |
| A02000 | A09363 | 314 | A02000 | A09464 | 215 |
| A02000 | A09508 | 286 | A02000 | A09978 | 230 |
| A02000 | A10018 | 152 | A02000 | A10991 | 377 |
| A02000 | A11131 | 246 | A02000 | A11317 | 371 |
| A02000 | A11327 | 247 | A02000 | A11893 | 479 |
| A02000 | A12527 | 377 | A02000 | A12982 | 396 |
| A02000 | A13124 | 249 | A02000 | A13181 | 152 |
| A02000 | A13369 | 524 | A02000 | A13851 | 305 |
| A02000 | A14246 | 151 | A02000 | A14315 | 265 |
| A02000 | A15198 | 288 | A02000 | A15292 | 322 |
| A02000 | A16738 | 256 | A02000 | A16911 | 303 |
| A02001 | A02361 | 247 | A02001 | A02711 | 188 |
| A02001 | A03112 | 154 | A02001 | A06085 | 321 |
| A02001 | A14649 | 303 | A02002 | A02006 | 176 |
| A02002 | A02146 | 262 | A02002 | A02177 | 401 |
| A02002 | A02202 | 480 | A02002 | A02215 | 236 |
| A02002 | A02220 | 352 | A02002 | A02232 | 455 |
| A02002 | A02412 | 188 | A02002 | A02760 | 278 |
| A02002 | A02783 | 226 | A02002 | A02813 | 235 |
| A02002 | A03043 | 382 | A02002 | A03050 | 182 |
| A02002 | A03224 | 243 | A02002 | A03378 | 480 |
| A02002 | A03589 | 340 | A02002 | A03848 | 324 |
| A02002 | A03882 | 188 | A02002 | A04236 | 347 |
| A02002 | A04267 | 207 | A02002 | A04272 | 297 |
| A02002 | A04369 | 213 | A02002 | A05356 | 283 |
| A02002 | A05496 | 368 | A02002 | A05945 | 199 |
| A02002 | A06607 | 184 | A02002 | A06622 | 232 |
| A02002 | A07164 | 185 | A02002 | A07183 | 265 |
| A02002 | A07491 | 235 | A02002 | A07567 | 238 |
| A02002 | A07958 | 285 | A02002 | A08385 | 263 |
| A02002 | A11911 | 154 | A02002 | A15911 | 246 |
| A02002 | A16300 | 199 | A02003 | A03143 | 393 |

|        |        |     |        |        |     |
|--------|--------|-----|--------|--------|-----|
| A02003 | A03567 | 278 | A02003 | A03705 | 377 |
| A02003 | A04697 | 299 | A02003 | A09649 | 350 |
| A02003 | A09676 | 330 | A02003 | A13989 | 477 |
| A02003 | A15365 | 472 | A02004 | A02007 | 401 |
| A02004 | A02010 | 429 | A02004 | A05716 | 407 |
| A02004 | A06588 | 227 | A02004 | A12897 | 202 |
| A02005 | A02010 | 486 | A02005 | A02859 | 215 |
| A02005 | A03141 | 463 | A02005 | A03744 | 288 |
| A02005 | A03851 | 346 | A02005 | A04152 | 344 |
| A02005 | A05627 | 380 | A02005 | A05716 | 375 |
| A02005 | A06346 | 241 | A02005 | A10470 | 388 |
| A02005 | A11063 | 405 | A02005 | A11951 | 357 |
| A02005 | A11961 | 378 | A02005 | A12631 | 416 |
| A02005 | A12976 | 382 | A02005 | A12983 | 388 |
| A02005 | A13826 | 385 | A02005 | A15312 | 180 |
| A02005 | A15318 | 249 | A02005 | A15333 | 313 |
| A02005 | A15346 | 223 | A02005 | A15352 | 177 |
| A02006 | A02046 | 191 | A02006 | A02068 | 180 |
| A02006 | A02117 | 380 | A02006 | A02291 | 232 |
| A02006 | A02345 | 226 | A02006 | A02467 | 163 |
| A02006 | A02482 | 221 | A02006 | A02484 | 223 |
| A02006 | A02488 | 279 | A02006 | A02579 | 419 |
| A02006 | A02621 | 159 | A02006 | A02624 | 337 |
| A02006 | A02639 | 235 | A02006 | A02670 | 232 |
| A02006 | A02671 | 319 | A02006 | A02710 | 174 |
| A02006 | A02789 | 212 | A02006 | A02830 | 165 |
| A02006 | A02832 | 198 | A02006 | A02836 | 485 |
| A02006 | A02837 | 157 | A02006 | A02983 | 152 |
| A02006 | A02995 | 221 | A02006 | A03013 | 210 |
| A02006 | A03027 | 335 | A02006 | A03051 | 491 |
| A02006 | A03080 | 245 | A02006 | A03138 | 218 |
| A02006 | A03319 | 263 | A02006 | A03331 | 238 |
| A02006 | A03373 | 269 | A02006 | A03414 | 243 |
| A02006 | A03415 | 213 | A02006 | A03520 | 263 |
| A02006 | A03609 | 218 | A02006 | A03634 | 193 |
| A02006 | A03654 | 152 | A02006 | A03661 | 174 |
| A02006 | A03748 | 171 | A02006 | A03775 | 238 |
| A02006 | A03882 | 236 | A02006 | A03921 | 216 |
| A02006 | A03936 | 210 | A02006 | A04048 | 286 |
| A02006 | A04066 | 151 | A02006 | A04114 | 201 |
| A02006 | A04117 | 201 | A02006 | A04255 | 324 |
| A02006 | A04280 | 163 | A02006 | A04413 | 301 |
| A02006 | A04529 | 230 | A02006 | A04563 | 243 |
| A02006 | A04622 | 271 | A02006 | A04698 | 491 |
| A02006 | A04770 | 187 | A02006 | A04795 | 160 |
| A02006 | A04929 | 162 | A02006 | A04941 | 339 |

|        |        |     |        |        |     |
|--------|--------|-----|--------|--------|-----|
| A02006 | A05137 | 369 | A02006 | A05176 | 156 |
| A02006 | A05202 | 252 | A02006 | A05545 | 260 |
| A02006 | A05775 | 180 | A02006 | A05976 | 334 |
| A02006 | A06069 | 177 | A02006 | A06129 | 188 |
| A02006 | A06297 | 198 | A02006 | A06569 | 232 |
| A02006 | A06623 | 224 | A02006 | A06777 | 324 |
| A02006 | A07135 | 201 | A02006 | A07165 | 283 |
| A02006 | A07339 | 168 | A02006 | A07702 | 347 |
| A02006 | A08148 | 267 | A02006 | A08201 | 205 |
| A02006 | A09019 | 347 | A02006 | A09073 | 490 |
| A02006 | A09126 | 438 | A02006 | A09209 | 473 |
| A02006 | A09245 | 156 | A02006 | A09509 | 308 |
| A02006 | A09790 | 227 | A02006 | A09882 | 491 |
| A02006 | A10072 | 196 | A02006 | A10087 | 193 |
| A02006 | A10215 | 274 | A02006 | A10382 | 199 |
| A02006 | A10473 | 334 | A02006 | A10601 | 168 |
| A02006 | A11303 | 297 | A02006 | A11750 | 202 |
| A02006 | A11759 | 288 | A02006 | A11961 | 270 |
| A02006 | A12831 | 232 | A02006 | A12870 | 227 |
| A02006 | A13753 | 210 | A02006 | A13864 | 260 |
| A02006 | A14143 | 159 | A02006 | A14378 | 252 |
| A02006 | A15202 | 173 | A02006 | A15291 | 333 |
| A02006 | A15475 | 196 | A02006 | A16665 | 256 |
| A02007 | A02010 | 475 | A02007 | A02020 | 218 |
| A02007 | A03025 | 445 | A02007 | A03134 | 456 |
| A02007 | A03141 | 196 | A02007 | A03186 | 205 |
| A02007 | A03344 | 351 | A02007 | A03345 | 352 |
| A02007 | A03379 | 213 | A02007 | A03703 | 246 |
| A02007 | A03719 | 260 | A02007 | A03721 | 391 |
| A02007 | A03722 | 441 | A02007 | A03748 | 213 |
| A02007 | A04340 | 389 | A02007 | A05716 | 371 |
| A02007 | A06731 | 262 | A02007 | A07442 | 216 |
| A02007 | A08172 | 390 | A02007 | A08309 | 193 |
| A02007 | A09204 | 294 | A02007 | A09235 | 283 |
| A02007 | A09421 | 355 | A02007 | A09890 | 363 |
| A02007 | A13879 | 286 | A02007 | A13987 | 196 |
| A02007 | A14190 | 184 | A02007 | A15292 | 313 |
| A02007 | A15295 | 235 | A02007 | A15452 | 416 |
| A02007 | A15684 | 165 | A02007 | A16626 | 154 |
| A02008 | A02009 | 466 | A02008 | A02011 | 491 |
| A02008 | A02012 | 400 | A02008 | A02014 | 490 |
| A02008 | A02015 | 356 | A02008 | A02262 | 419 |
| A02008 | A02268 | 205 | A02008 | A02275 | 255 |
| A02008 | A02377 | 172 | A02008 | A02402 | 157 |
| A02008 | A02454 | 204 | A02008 | A02468 | 435 |
| A02008 | A02574 | 472 | A02008 | A02605 | 296 |

|        |        |     |        |        |     |
|--------|--------|-----|--------|--------|-----|
| A02008 | A02695 | 228 | A02008 | A02785 | 157 |
| A02008 | A02787 | 198 | A02008 | A02798 | 207 |
| A02008 | A02802 | 297 | A02008 | A02806 | 288 |
| A02008 | A02951 | 188 | A02008 | A02961 | 217 |
| A02008 | A02992 | 419 | A02008 | A03003 | 273 |
| A02008 | A03007 | 245 | A02008 | A03034 | 491 |
| A02008 | A03036 | 475 | A02008 | A03043 | 296 |
| A02008 | A03091 | 271 | A02008 | A03099 | 391 |
| A02008 | A03144 | 468 | A02008 | A03146 | 491 |
| A02008 | A03147 | 447 | A02008 | A03148 | 477 |
| A02008 | A03156 | 271 | A02008 | A03157 | 162 |
| A02008 | A03238 | 228 | A02008 | A03259 | 154 |
| A02008 | A04010 | 179 | A02008 | A04268 | 249 |
| A02008 | A04778 | 313 | A02008 | A05203 | 356 |
| A02008 | A05278 | 193 | A02008 | A05330 | 302 |
| A02008 | A05376 | 462 | A02008 | A05393 | 347 |
| A02008 | A06195 | 213 | A02008 | A06831 | 356 |
| A02008 | A06970 | 299 | A02008 | A07059 | 368 |
| A02008 | A07191 | 218 | A02008 | A07342 | 401 |
| A02008 | A07407 | 402 | A02008 | A07736 | 416 |
| A02008 | A09037 | 413 | A02008 | A09277 | 229 |
| A02008 | A09991 | 322 | A02008 | A10226 | 353 |
| A02008 | A10816 | 347 | A02008 | A13153 | 454 |
| A02008 | A14344 | 452 | A02008 | A15626 | 154 |
| A02008 | A15874 | 346 | A02008 | A16337 | 400 |
| A02008 | A16741 | 296 | A02009 | A02011 | 468 |
| A02009 | A02014 | 479 | A02009 | A02040 | 362 |
| A02009 | A02806 | 428 | A02009 | A03034 | 408 |
| A02009 | A03035 | 374 | A02009 | A03146 | 479 |
| A02009 | A04211 | 313 | A02009 | A10816 | 451 |
| A02010 | A02029 | 218 | A02010 | A02048 | 232 |
| A02010 | A02049 | 176 | A02010 | A02143 | 156 |
| A02010 | A02157 | 490 | A02010 | A02158 | 477 |
| A02010 | A02174 | 318 | A02010 | A02226 | 241 |
| A02010 | A02227 | 290 | A02010 | A02521 | 371 |
| A02010 | A02542 | 113 | A02010 | A02584 | 291 |
| A02010 | A02636 | 171 | A02010 | A02644 | 201 |
| A02010 | A02673 | 159 | A02010 | A02877 | 417 |
| A02010 | A03022 | 235 | A02010 | A03023 | 465 |
| A02010 | A03025 | 441 | A02010 | A03026 | 262 |
| A02010 | A03032 | 454 | A02010 | A03051 | 310 |
| A02010 | A03080 | 491 | A02010 | A03133 | 281 |
| A02010 | A03134 | 490 | A02010 | A03135 | 218 |
| A02010 | A03141 | 491 | A02010 | A03145 | 205 |
| A02010 | A03159 | 311 | A02010 | A03183 | 266 |
| A02010 | A03370 | 241 | A02010 | A03379 | 279 |

|        |        |     |        |        |     |
|--------|--------|-----|--------|--------|-----|
| A02010 | A03397 | 159 | A02010 | A03401 | 373 |
| A02010 | A03403 | 157 | A02010 | A03692 | 341 |
| A02010 | A03693 | 408 | A02010 | A03694 | 388 |
| A02010 | A03695 | 416 | A02010 | A03696 | 185 |
| A02010 | A03701 | 488 | A02010 | A03703 | 491 |
| A02010 | A03711 | 247 | A02010 | A03714 | 210 |
| A02010 | A03721 | 491 | A02010 | A03722 | 491 |
| A02010 | A03744 | 483 | A02010 | A03882 | 461 |
| A02010 | A03894 | 491 | A02010 | A03906 | 428 |
| A02010 | A03910 | 296 | A02010 | A04015 | 171 |
| A02010 | A04049 | 157 | A02010 | A04152 | 402 |
| A02010 | A04163 | 200 | A02010 | A04169 | 185 |
| A02010 | A04329 | 416 | A02010 | A04330 | 162 |
| A02010 | A04340 | 449 | A02010 | A04361 | 238 |
| A02010 | A04366 | 247 | A02010 | A04409 | 159 |
| A02010 | A04713 | 165 | A02010 | A04763 | 279 |
| A02010 | A04830 | 345 | A02010 | A04832 | 208 |
| A02010 | A04905 | 262 | A02010 | A04928 | 218 |
| A02010 | A05155 | 374 | A02010 | A05361 | 314 |
| A02010 | A05457 | 227 | A02010 | A05581 | 190 |
| A02010 | A05704 | 438 | A02010 | A05705 | 483 |
| A02010 | A05716 | 477 | A02010 | A05809 | 210 |
| A02010 | A05833 | 311 | A02010 | A05834 | 419 |
| A02010 | A05922 | 391 | A02010 | A06022 | 262 |
| A02010 | A06283 | 262 | A02010 | A06346 | 311 |
| A02010 | A06389 | 425 | A02010 | A06483 | 311 |
| A02010 | A06665 | 454 | A02010 | A06727 | 486 |
| A02010 | A06771 | 475 | A02010 | A06862 | 361 |
| A02010 | A06946 | 281 | A02010 | A06964 | 361 |
| A02010 | A07054 | 491 | A02010 | A07199 | 154 |
| A02010 | A07214 | 341 | A02010 | A07215 | 262 |
| A02010 | A07216 | 347 | A02010 | A07218 | 452 |
| A02010 | A07219 | 353 | A02010 | A07242 | 491 |
| A02010 | A07270 | 262 | A02010 | A07365 | 281 |
| A02010 | A07444 | 210 | A02010 | A07522 | 247 |
| A02010 | A07780 | 247 | A02010 | A07793 | 165 |
| A02010 | A07828 | 262 | A02010 | A07893 | 465 |
| A02010 | A07954 | 457 | A02010 | A08686 | 157 |
| A02010 | A08713 | 311 | A02010 | A08910 | 283 |
| A02010 | A09063 | 311 | A02010 | A09235 | 333 |
| A02010 | A09338 | 281 | A02010 | A09374 | 281 |
| A02010 | A09503 | 218 | A02010 | A09824 | 447 |
| A02010 | A09831 | 205 | A02010 | A09890 | 297 |
| A02010 | A09983 | 174 | A02010 | A10018 | 419 |
| A02010 | A10168 | 227 | A02010 | A10197 | 380 |
| A02010 | A10470 | 474 | A02010 | A10579 | 368 |

|        |        |     |        |        |     |
|--------|--------|-----|--------|--------|-----|
| A02010 | A10726 | 353 | A02010 | A10918 | 227 |
| A02010 | A11402 | 374 | A02010 | A11445 | 190 |
| A02010 | A11951 | 489 | A02010 | A11961 | 395 |
| A02010 | A12016 | 361 | A02010 | A12337 | 439 |
| A02010 | A12356 | 311 | A02010 | A12459 | 227 |
| A02010 | A12497 | 311 | A02010 | A12529 | 247 |
| A02010 | A12587 | 311 | A02010 | A12631 | 281 |
| A02010 | A12722 | 483 | A02010 | A12815 | 311 |
| A02010 | A12893 | 390 | A02010 | A12897 | 302 |
| A02010 | A12935 | 424 | A02010 | A12959 | 419 |
| A02010 | A12960 | 443 | A02010 | A12976 | 477 |
| A02010 | A12983 | 408 | A02010 | A13053 | 262 |
| A02010 | A13242 | 210 | A02010 | A13313 | 174 |
| A02010 | A13410 | 400 | A02010 | A13411 | 311 |
| A02010 | A13447 | 193 | A02010 | A13528 | 193 |
| A02010 | A13745 | 311 | A02010 | A13826 | 329 |
| A02010 | A13951 | 457 | A02010 | A14163 | 205 |
| A02010 | A14198 | 160 | A02010 | A14399 | 402 |
| A02010 | A14470 | 489 | A02010 | A15318 | 168 |
| A02010 | A15333 | 185 | A02010 | A15352 | 236 |
| A02010 | A15376 | 466 | A02010 | A15464 | 167 |
| A02010 | A15511 | 226 | A02010 | A15704 | 171 |
| A02010 | A15797 | 227 | A02010 | A15809 | 404 |
| A02010 | A15888 | 281 | A02010 | A16058 | 235 |
| A02010 | A16423 | 227 | A02010 | A16951 | 303 |
| A02010 | A17076 | 490 | A02011 | A02012 | 490 |
| A02011 | A02014 | 491 | A02011 | A02015 | 396 |
| A02011 | A02028 | 413 | A02011 | A02114 | 485 |
| A02011 | A02251 | 154 | A02011 | A02260 | 221 |
| A02011 | A02262 | 245 | A02011 | A02268 | 430 |
| A02011 | A02275 | 451 | A02011 | A02454 | 224 |
| A02011 | A02468 | 386 | A02011 | A02520 | 319 |
| A02011 | A02524 | 303 | A02011 | A02574 | 480 |
| A02011 | A02605 | 205 | A02011 | A02611 | 281 |
| A02011 | A02635 | 174 | A02011 | A02649 | 369 |
| A02011 | A02695 | 465 | A02011 | A02727 | 419 |
| A02011 | A02739 | 411 | A02011 | A02760 | 218 |
| A02011 | A02802 | 408 | A02011 | A02806 | 475 |
| A02011 | A02816 | 228 | A02011 | A02859 | 223 |
| A02011 | A02912 | 232 | A02011 | A02942 | 184 |
| A02011 | A02992 | 256 | A02011 | A03003 | 310 |
| A02011 | A03019 | 226 | A02011 | A03034 | 491 |
| A02011 | A03035 | 238 | A02011 | A03036 | 491 |
| A02011 | A03043 | 205 | A02011 | A03058 | 374 |
| A02011 | A03071 | 224 | A02011 | A03091 | 390 |
| A02011 | A03094 | 232 | A02011 | A03099 | 364 |



|        |        |     |        |        |     |
|--------|--------|-----|--------|--------|-----|
| A02011 | A03144 | 491 | A02011 | A03146 | 490 |
| A02011 | A03147 | 412 | A02011 | A03148 | 489 |
| A02011 | A03156 | 489 | A02011 | A03157 | 170 |
| A02011 | A03224 | 180 | A02011 | A03247 | 232 |
| A02011 | A03251 | 374 | A02011 | A03254 | 316 |
| A02011 | A03259 | 162 | A02011 | A03278 | 218 |
| A02011 | A03318 | 374 | A02011 | A03327 | 269 |
| A02011 | A03332 | 152 | A02011 | A03589 | 294 |
| A02011 | A03834 | 157 | A02011 | A04010 | 191 |
| A02011 | A04212 | 374 | A02011 | A04341 | 353 |
| A02011 | A04422 | 187 | A02011 | A04506 | 330 |
| A02011 | A04712 | 254 | A02011 | A04783 | 157 |
| A02011 | A05246 | 294 | A02011 | A05376 | 394 |
| A02011 | A05393 | 241 | A02011 | A05463 | 221 |
| A02011 | A05483 | 340 | A02011 | A05570 | 201 |
| A02011 | A05799 | 374 | A02011 | A05923 | 230 |
| A02011 | A06052 | 340 | A02011 | A06195 | 481 |
| A02011 | A06473 | 163 | A02011 | A06573 | 353 |
| A02011 | A06970 | 176 | A02011 | A07059 | 277 |
| A02011 | A07162 | 353 | A02011 | A07200 | 221 |
| A02011 | A07342 | 473 | A02011 | A07373 | 232 |
| A02011 | A07407 | 338 | A02011 | A07736 | 343 |
| A02011 | A07946 | 353 | A02011 | A08579 | 374 |
| A02011 | A08693 | 177 | A02011 | A09612 | 213 |
| A02011 | A09991 | 489 | A02011 | A10091 | 249 |
| A02011 | A10214 | 200 | A02011 | A10226 | 394 |
| A02011 | A10527 | 152 | A02011 | A10640 | 230 |
| A02011 | A10816 | 274 | A02011 | A11488 | 340 |
| A02011 | A11506 | 374 | A02011 | A11651 | 191 |
| A02011 | A12927 | 176 | A02011 | A13871 | 172 |
| A02011 | A13879 | 154 | A02011 | A14135 | 171 |
| A02011 | A14344 | 353 | A02011 | A14366 | 185 |
| A02011 | A14374 | 202 | A02011 | A14382 | 330 |
| A02011 | A14391 | 208 | A02011 | A14554 | 271 |
| A02011 | A14727 | 241 | A02011 | A15482 | 198 |
| A02011 | A15516 | 171 | A02011 | A15874 | 241 |
| A02011 | A15962 | 152 | A02011 | A15992 | 277 |
| A02011 | A16741 | 171 | A02012 | A02014 | 451 |
| A02012 | A02015 | 343 | A02012 | A02114 | 490 |
| A02012 | A02268 | 316 | A02012 | A02275 | 360 |
| A02012 | A02298 | 170 | A02012 | A02439 | 198 |
| A02012 | A02454 | 180 | A02012 | A02458 | 215 |
| A02012 | A02460 | 180 | A02012 | A02574 | 424 |
| A02012 | A02611 | 228 | A02012 | A02806 | 263 |
| A02012 | A02951 | 299 | A02012 | A02969 | 272 |
| A02012 | A02992 | 205 | A02012 | A03016 | 277 |

|        |        |     |        |        |     |
|--------|--------|-----|--------|--------|-----|
| A02012 | A03034 | 491 | A02012 | A03036 | 462 |
| A02012 | A03058 | 406 | A02012 | A03091 | 251 |
| A02012 | A03144 | 484 | A02012 | A03147 | 283 |
| A02012 | A03148 | 396 | A02012 | A03156 | 372 |
| A02012 | A03238 | 337 | A02012 | A03475 | 247 |
| A02012 | A03523 | 162 | A02012 | A04130 | 223 |
| A02012 | A04212 | 396 | A02012 | A04518 | 323 |
| A02012 | A04546 | 338 | A02012 | A04611 | 356 |
| A02012 | A05037 | 213 | A02012 | A05106 | 356 |
| A02012 | A05679 | 198 | A02012 | A06195 | 323 |
| A02012 | A07166 | 215 | A02012 | A07342 | 440 |
| A02012 | A07452 | 234 | A02012 | A07541 | 154 |
| A02012 | A07542 | 255 | A02012 | A07543 | 260 |
| A02012 | A07815 | 193 | A02012 | A08724 | 259 |
| A02012 | A08908 | 291 | A02012 | A09152 | 306 |
| A02012 | A09174 | 224 | A02012 | A09932 | 156 |
| A02012 | A10816 | 333 | A02012 | A14344 | 401 |
| A02012 | A15425 | 177 | A02012 | A15630 | 190 |
| A02013 | A03034 | 274 | A02014 | A02468 | 395 |
| A02014 | A02574 | 440 | A02014 | A02806 | 391 |
| A02014 | A02828 | 160 | A02014 | A02951 | 208 |
| A02014 | A02992 | 369 | A02014 | A03034 | 491 |
| A02014 | A03036 | 450 | A02014 | A03099 | 329 |
| A02014 | A03144 | 470 | A02014 | A03146 | 489 |
| A02014 | A03148 | 484 | A02014 | A04010 | 200 |
| A02014 | A04540 | 267 | A02014 | A05376 | 400 |
| A02014 | A05393 | 363 | A02014 | A06970 | 321 |
| A02014 | A07059 | 382 | A02014 | A07342 | 451 |
| A02014 | A07407 | 412 | A02014 | A07736 | 363 |
| A02014 | A10816 | 360 | A02014 | A14344 | 419 |
| A02014 | A14382 | 394 | A02014 | A15874 | 362 |
| A02014 | A16741 | 318 | A02015 | A02574 | 314 |
| A02015 | A02605 | 345 | A02015 | A02883 | 302 |
| A02015 | A02944 | 281 | A02015 | A03034 | 314 |
| A02015 | A03036 | 425 | A02015 | A03144 | 296 |
| A02015 | A06053 | 396 | A02015 | A07130 | 345 |
| A02015 | A07200 | 199 | A02015 | A07342 | 428 |
| A02015 | A12927 | 235 | A02015 | A14344 | 358 |
| A02016 | A03034 | 255 | A02017 | A02019 | 330 |
| A02017 | A02091 | 388 | A02017 | A02148 | 180 |
| A02017 | A02149 | 328 | A02017 | A02209 | 257 |
| A02017 | A02233 | 399 | A02017 | A02310 | 312 |
| A02017 | A02320 | 219 | A02017 | A02467 | 286 |
| A02017 | A02539 | 258 | A02017 | A02560 | 384 |
| A02017 | A03073 | 363 | A02017 | A03097 | 334 |
| A02017 | A03115 | 454 | A02017 | A03178 | 252 |

|        |        |     |        |        |     |
|--------|--------|-----|--------|--------|-----|
| A02017 | A03186 | 185 | A02017 | A04072 | 213 |
| A02017 | A04342 | 274 | A02017 | A05176 | 279 |
| A02017 | A05247 | 316 | A02017 | A05294 | 286 |
| A02017 | A05898 | 384 | A02017 | A10237 | 374 |
| A02017 | A15233 | 328 | A02018 | A02361 | 191 |
| A02018 | A02562 | 238 | A02018 | A02882 | 221 |
| A02018 | A03082 | 286 | A02018 | A03423 | 184 |
| A02018 | A04061 | 279 | A02018 | A04080 | 288 |
| A02018 | A06455 | 368 | A02018 | A09561 | 201 |
| A02018 | A11369 | 899 | A02018 | A13426 | 299 |
| A02018 | A14029 | 899 | A02018 | A14741 | 177 |
| A02019 | A02047 | 351 | A02019 | A02148 | 172 |
| A02019 | A02390 | 243 | A02019 | A02744 | 229 |
| A02019 | A03073 | 358 | A02019 | A03082 | 313 |
| A02019 | A03114 | 351 | A02019 | A03186 | 177 |
| A02019 | A03888 | 228 | A02019 | A04020 | 260 |
| A02019 | A04256 | 279 | A02019 | A06965 | 165 |
| A02019 | A14212 | 160 | A02020 | A02361 | 185 |
| A02020 | A02363 | 221 | A02020 | A02966 | 170 |
| A02020 | A03033 | 151 | A02020 | A03134 | 163 |
| A02020 | A03436 | 208 | A02020 | A03484 | 368 |
| A02020 | A03513 | 454 | A02020 | A03596 | 391 |
| A02020 | A03633 | 213 | A02020 | A03719 | 441 |
| A02020 | A03819 | 467 | A02020 | A03964 | 196 |
| A02020 | A04033 | 263 | A02020 | A04095 | 216 |
| A02020 | A04423 | 199 | A02020 | A04791 | 288 |
| A02020 | A04927 | 341 | A02020 | A04988 | 162 |
| A02020 | A05014 | 324 | A02020 | A05034 | 378 |
| A02020 | A05051 | 318 | A02020 | A05140 | 224 |
| A02020 | A05243 | 167 | A02020 | A05330 | 385 |
| A02020 | A05337 | 294 | A02020 | A05358 | 182 |
| A02020 | A05416 | 170 | A02020 | A05418 | 491 |
| A02020 | A05433 | 299 | A02020 | A05451 | 240 |
| A02020 | A05550 | 360 | A02020 | A05912 | 409 |
| A02020 | A05961 | 463 | A02020 | A06059 | 170 |
| A02020 | A06245 | 262 | A02020 | A06405 | 319 |
| A02020 | A06632 | 257 | A02020 | A06641 | 302 |
| A02020 | A06668 | 243 | A02020 | A06847 | 327 |
| A02020 | A06994 | 350 | A02020 | A07027 | 299 |
| A02020 | A07037 | 216 | A02020 | A07059 | 451 |
| A02020 | A07088 | 238 | A02020 | A07184 | 191 |
| A02020 | A07209 | 162 | A02020 | A07264 | 151 |
| A02020 | A07408 | 358 | A02020 | A07420 | 299 |
| A02020 | A07501 | 281 | A02020 | A07503 | 224 |
| A02020 | A07619 | 268 | A02020 | A07674 | 401 |
| A02020 | A07723 | 491 | A02020 | A07757 | 283 |

|        |        |     |        |        |     |
|--------|--------|-----|--------|--------|-----|
| A02020 | A07763 | 160 | A02020 | A07766 | 451 |
| A02020 | A07794 | 477 | A02020 | A07851 | 152 |
| A02020 | A08114 | 232 | A02020 | A08197 | 193 |
| A02020 | A08878 | 177 | A02020 | A09235 | 229 |
| A02020 | A10332 | 180 | A02020 | A10475 | 218 |
| A02020 | A10601 | 409 | A02020 | A10687 | 235 |
| A02020 | A11335 | 182 | A02020 | A11403 | 473 |
| A02020 | A13369 | 213 | A02020 | A13473 | 180 |
| A02020 | A13579 | 311 | A02020 | A13673 | 227 |
| A02020 | A13851 | 262 | A02020 | A14128 | 341 |
| A02020 | A14635 | 338 | A02020 | A14698 | 180 |
| A02020 | A15282 | 388 | A02020 | A15291 | 263 |
| A02020 | A15430 | 435 | A02020 | A16283 | 221 |
| A02020 | A16626 | 414 | A02020 | A16963 | 163 |
| A02020 | A17078 | 188 | A02021 | A02049 | 162 |
| A02021 | A02148 | 163 | A02021 | A02180 | 486 |
| A02021 | A02191 | 281 | A02021 | A02222 | 249 |
| A02021 | A03070 | 151 | A02021 | A03080 | 227 |
| A02021 | A03356 | 297 | A02021 | A03370 | 291 |
| A02021 | A03379 | 435 | A02021 | A03384 | 323 |
| A02021 | A03385 | 372 | A02021 | A03387 | 332 |
| A02021 | A03388 | 319 | A02021 | A03390 | 486 |
| A02021 | A03391 | 491 | A02021 | A03394 | 372 |
| A02021 | A03401 | 457 | A02021 | A03762 | 338 |
| A02021 | A04280 | 303 | A02021 | A04395 | 357 |
| A02021 | A04520 | 176 | A02021 | A05603 | 200 |
| A02021 | A05709 | 329 | A02021 | A05891 | 363 |
| A02021 | A06346 | 193 | A02021 | A07218 | 185 |
| A02021 | A07605 | 259 | A02021 | A08555 | 470 |
| A02021 | A09141 | 484 | A02021 | A11317 | 326 |
| A02021 | A11446 | 347 | A02021 | A11600 | 385 |
| A02021 | A12430 | 413 | A02021 | A12459 | 375 |
| A02021 | A17074 | 401 | A02021 | A17080 | 401 |
| A02022 | A02077 | 490 | A02022 | A02078 | 490 |
| A02022 | A02545 | 423 | A02022 | A03725 | 384 |
| A02022 | A05153 | 486 | A02022 | A05331 | 210 |
| A02022 | A05926 | 488 | A02022 | A05957 | 391 |
| A02022 | A06599 | 238 | A02022 | A07468 | 384 |
| A02022 | A07617 | 489 | A02022 | A07958 | 454 |
| A02022 | A10967 | 455 | A02022 | A12793 | 299 |
| A02023 | A02157 | 294 | A02023 | A03174 | 391 |
| A02023 | A03442 | 417 | A02023 | A04637 | 447 |
| A02023 | A05549 | 422 | A02023 | A05610 | 406 |
| A02023 | A06385 | 262 | A02023 | A07031 | 318 |
| A02024 | A03151 | 374 | A02025 | A02026 | 321 |
| A02025 | A03167 | 319 | A02025 | A03256 | 347 |

|        |        |     |        |        |     |
|--------|--------|-----|--------|--------|-----|
| A02025 | A03415 | 319 | A02025 | A07376 | 395 |
| A02025 | A09643 | 347 | A02025 | A13734 | 235 |
| A02026 | A02028 | 486 | A02026 | A02119 | 149 |
| A02026 | A02123 | 332 | A02026 | A02154 | 216 |
| A02026 | A02216 | 263 | A02026 | A02249 | 182 |
| A02026 | A02290 | 232 | A02026 | A02298 | 190 |
| A02026 | A02319 | 313 | A02026 | A02345 | 221 |
| A02026 | A02366 | 305 | A02026 | A02407 | 180 |
| A02026 | A02416 | 162 | A02026 | A02484 | 218 |
| A02026 | A02541 | 213 | A02026 | A02546 | 271 |
| A02026 | A02647 | 293 | A02026 | A02668 | 172 |
| A02026 | A02693 | 163 | A02026 | A02701 | 163 |
| A02026 | A02788 | 165 | A02026 | A03039 | 475 |
| A02026 | A03065 | 195 | A02026 | A03164 | 251 |
| A02026 | A03167 | 470 | A02026 | A03168 | 485 |
| A02026 | A03224 | 165 | A02026 | A03264 | 221 |
| A02026 | A03321 | 202 | A02026 | A03415 | 208 |
| A02026 | A03451 | 168 | A02026 | A03484 | 174 |
| A02026 | A03663 | 174 | A02026 | A03904 | 486 |
| A02026 | A04020 | 341 | A02026 | A04069 | 399 |
| A02026 | A04209 | 457 | A02026 | A04211 | 249 |
| A02026 | A04249 | 258 | A02026 | A04334 | 165 |
| A02026 | A04372 | 293 | A02026 | A04446 | 184 |
| A02026 | A04531 | 258 | A02026 | A04609 | 167 |
| A02026 | A04620 | 246 | A02026 | A04779 | 374 |
| A02026 | A04824 | 249 | A02026 | A04908 | 210 |
| A02026 | A05550 | 165 | A02026 | A05597 | 198 |
| A02026 | A05659 | 427 | A02026 | A05790 | 235 |
| A02026 | A05910 | 299 | A02026 | A05939 | 321 |
| A02026 | A06211 | 258 | A02026 | A06243 | 407 |
| A02026 | A06558 | 321 | A02026 | A06592 | 160 |
| A02026 | A06621 | 154 | A02026 | A06623 | 219 |
| A02026 | A06633 | 202 | A02026 | A06641 | 199 |
| A02026 | A06728 | 305 | A02026 | A06734 | 243 |
| A02026 | A06773 | 234 | A02026 | A06797 | 173 |
| A02026 | A07011 | 184 | A02026 | A07175 | 224 |
| A02026 | A07373 | 218 | A02026 | A07376 | 477 |
| A02026 | A07731 | 258 | A02026 | A08394 | 313 |
| A02026 | A08415 | 367 | A02026 | A08427 | 258 |
| A02026 | A08741 | 165 | A02026 | A09228 | 440 |
| A02026 | A09546 | 470 | A02026 | A09829 | 196 |
| A02026 | A10022 | 402 | A02026 | A10039 | 240 |
| A02026 | A10121 | 399 | A02026 | A10289 | 271 |
| A02026 | A10293 | 305 | A02026 | A10414 | 188 |
| A02026 | A10587 | 157 | A02026 | A10630 | 434 |
| A02026 | A10754 | 152 | A02026 | A10781 | 232 |

|        |        |     |        |        |     |
|--------|--------|-----|--------|--------|-----|
| A02026 | A11064 | 258 | A02026 | A11313 | 257 |
| A02026 | A11935 | 177 | A02026 | A12327 | 367 |
| A02026 | A12894 | 367 | A02026 | A13212 | 188 |
| A02026 | A13484 | 281 | A02026 | A13906 | 246 |
| A02026 | A13975 | 160 | A02026 | A14685 | 299 |
| A02026 | A14803 | 151 | A02026 | A14915 | 367 |
| A02026 | A16027 | 232 | A02026 | A16028 | 216 |
| A02026 | A16741 | 151 | A02026 | A17155 | 232 |
| A02027 | A02028 | 385 | A02027 | A02752 | 367 |
| A02027 | A02753 | 417 | A02027 | A02875 | 228 |
| A02027 | A02881 | 363 | A02027 | A02927 | 310 |
| A02027 | A03269 | 266 | A02027 | A04075 | 262 |
| A02027 | A04442 | 302 | A02027 | A04657 | 346 |
| A02027 | A04858 | 226 | A02027 | A05339 | 380 |
| A02027 | A06592 | 303 | A02027 | A06636 | 383 |
| A02027 | A06821 | 335 | A02027 | A06825 | 193 |
| A02027 | A07376 | 352 | A02027 | A07815 | 252 |
| A02027 | A09829 | 329 | A02027 | A10144 | 424 |
| A02027 | A10414 | 324 | A02027 | A10468 | 424 |
| A02027 | A11497 | 215 | A02027 | A12873 | 265 |
| A02027 | A13500 | 353 | A02027 | A14596 | 183 |
| A02028 | A02040 | 221 | A02028 | A02065 | 319 |
| A02028 | A02119 | 307 | A02028 | A02122 | 414 |
| A02028 | A02186 | 183 | A02028 | A02191 | 193 |
| A02028 | A02285 | 274 | A02028 | A02292 | 176 |
| A02028 | A02298 | 324 | A02028 | A02307 | 177 |
| A02028 | A02384 | 274 | A02028 | A02535 | 319 |
| A02028 | A02539 | 152 | A02028 | A02574 | 386 |
| A02028 | A02585 | 324 | A02028 | A02611 | 293 |
| A02028 | A02636 | 177 | A02028 | A02638 | 193 |
| A02028 | A02749 | 267 | A02028 | A02752 | 475 |
| A02028 | A02753 | 488 | A02028 | A02825 | 182 |
| A02028 | A02830 | 193 | A02028 | A02927 | 193 |
| A02028 | A02976 | 162 | A02028 | A02983 | 180 |
| A02028 | A03003 | 185 | A02028 | A03024 | 443 |
| A02028 | A03034 | 432 | A02028 | A03053 | 234 |
| A02028 | A03054 | 191 | A02028 | A03065 | 219 |
| A02028 | A03098 | 218 | A02028 | A03146 | 257 |
| A02028 | A03147 | 221 | A02028 | A03148 | 228 |
| A02028 | A03156 | 183 | A02028 | A03771 | 159 |
| A02028 | A03927 | 246 | A02028 | A03934 | 307 |
| A02028 | A04015 | 177 | A02028 | A04075 | 491 |
| A02028 | A04179 | 277 | A02028 | A04212 | 477 |
| A02028 | A04361 | 152 | A02028 | A04365 | 312 |
| A02028 | A04392 | 347 | A02028 | A04422 | 196 |
| A02028 | A04442 | 183 | A02028 | A04616 | 246 |

|        |        |     |        |        |     |
|--------|--------|-----|--------|--------|-----|
| A02028 | A04693 | 191 | A02028 | A04795 | 180 |
| A02028 | A04867 | 424 | A02028 | A04989 | 302 |
| A02028 | A05183 | 291 | A02028 | A06281 | 265 |
| A02028 | A06473 | 174 | A02028 | A06595 | 273 |
| A02028 | A06623 | 251 | A02028 | A07158 | 226 |
| A02028 | A07195 | 323 | A02028 | A07217 | 272 |
| A02028 | A07440 | 265 | A02028 | A08641 | 353 |
| A02028 | A09086 | 347 | A02028 | A09323 | 249 |
| A02028 | A09744 | 154 | A02028 | A09900 | 201 |
| A02028 | A10085 | 159 | A02028 | A10191 | 338 |
| A02028 | A10414 | 488 | A02028 | A10468 | 379 |
| A02028 | A11897 | 198 | A02028 | A12204 | 156 |
| A02028 | A13212 | 413 | A02028 | A13500 | 479 |
| A02028 | A14621 | 439 | A02028 | A14642 | 229 |
| A02028 | A15819 | 188 | A02028 | A16877 | 221 |
| A02029 | A02158 | 274 | A02029 | A05155 | 172 |
| A02029 | A05260 | 337 | A02029 | A06665 | 366 |
| A02029 | A10247 | 257 | A02030 | A02095 | 438 |
| A02030 | A02355 | 330 | A02030 | A02381 | 480 |
| A02030 | A02715 | 154 | A02030 | A03052 | 401 |
| A02030 | A03067 | 228 | A02030 | A03704 | 260 |
| A02030 | A05284 | 255 | A02030 | A05983 | 324 |
| A02030 | A06495 | 473 | A02030 | A06597 | 302 |
| A02030 | A07004 | 428 | A02030 | A09374 | 205 |
| A02030 | A09449 | 196 | A02030 | A10944 | 271 |
| A02030 | A12383 | 473 | A02030 | A12606 | 191 |
| A02030 | A13179 | 307 | A02030 | A14188 | 201 |
| A02030 | A14196 | 165 | A02030 | A14394 | 157 |
| A02030 | A15314 | 183 | A02030 | A15315 | 191 |
| A02030 | A15347 | 401 | A02030 | A16007 | 451 |
| A02031 | A02371 | 340 | A02032 | A02698 | 243 |
| A02032 | A04174 | 360 | A02032 | A06622 | 367 |
| A02033 | A02439 | 296 | A02033 | A02459 | 341 |
| A02033 | A02471 | 388 | A02033 | A02655 | 310 |
| A02033 | A02812 | 241 | A02033 | A02932 | 408 |
| A02033 | A02945 | 313 | A02033 | A03177 | 457 |
| A02033 | A06415 | 232 | A02033 | A15286 | 374 |
| A02033 | A15425 | 279 | A02033 | A15426 | 419 |
| A02034 | A02039 | 451 | A02034 | A02320 | 232 |
| A02034 | A02436 | 312 | A02034 | A02450 | 229 |
| A02034 | A02551 | 419 | A02034 | A02583 | 351 |
| A02034 | A02611 | 277 | A02034 | A02636 | 291 |
| A02034 | A02644 | 308 | A02034 | A03056 | 191 |
| A02034 | A03072 | 383 | A02034 | A03107 | 469 |
| A02034 | A03121 | 245 | A02034 | A03709 | 318 |
| A02034 | A04215 | 398 | A02034 | A04229 | 491 |

|        |        |     |        |        |     |
|--------|--------|-----|--------|--------|-----|
| A02034 | A04400 | 480 | A02034 | A04460 | 369 |
| A02034 | A04886 | 394 | A02034 | A04949 | 434 |
| A02034 | A05795 | 290 | A02034 | A07559 | 301 |
| A02034 | A11240 | 486 | A02035 | A02048 | 361 |
| A02035 | A02154 | 407 | A02035 | A02156 | 311 |
| A02035 | A02202 | 159 | A02035 | A02215 | 472 |
| A02035 | A02221 | 172 | A02035 | A02222 | 234 |
| A02035 | A02231 | 405 | A02035 | A02435 | 277 |
| A02035 | A03028 | 235 | A02035 | A04074 | 468 |
| A02035 | A04334 | 159 | A02035 | A05576 | 357 |
| A02035 | A05751 | 283 | A02035 | A06648 | 221 |
| A02035 | A07623 | 379 | A02035 | A09882 | 210 |
| A02035 | A13879 | 238 | A02035 | A15230 | 254 |
| A02036 | A02156 | 466 | A02036 | A02215 | 182 |
| A02036 | A02252 | 347 | A02036 | A02528 | 418 |
| A02036 | A03128 | 418 | A02036 | A03319 | 398 |
| A02036 | A03396 | 413 | A02036 | A05134 | 430 |
| A02037 | A02049 | 480 | A02037 | A02180 | 160 |
| A02037 | A02228 | 188 | A02037 | A03051 | 283 |
| A02037 | A03094 | 353 | A02037 | A03138 | 351 |
| A02037 | A03379 | 229 | A02037 | A03661 | 229 |
| A02037 | A03744 | 398 | A02037 | A04050 | 165 |
| A02037 | A04333 | 299 | A02037 | A05259 | 435 |
| A02037 | A09575 | 401 | A02037 | A11600 | 406 |
| A02037 | A11911 | 243 | A02039 | A02072 | 255 |
| A02039 | A02131 | 329 | A02039 | A02188 | 171 |
| A02039 | A02303 | 196 | A02039 | A02319 | 364 |
| A02039 | A02333 | 272 | A02039 | A02450 | 167 |
| A02039 | A02511 | 465 | A02039 | A02523 | 241 |
| A02039 | A02537 | 396 | A02039 | A02698 | 180 |
| A02039 | A02927 | 373 | A02039 | A03032 | 391 |
| A02039 | A03072 | 462 | A02039 | A03211 | 480 |
| A02039 | A03351 | 168 | A02039 | A03415 | 176 |
| A02039 | A03451 | 321 | A02039 | A03709 | 268 |
| A02039 | A03941 | 462 | A02039 | A04006 | 224 |
| A02039 | A04229 | 490 | A02039 | A04349 | 221 |
| A02039 | A04408 | 402 | A02039 | A04418 | 486 |
| A02039 | A04493 | 477 | A02039 | A04520 | 274 |
| A02039 | A04715 | 270 | A02039 | A04832 | 262 |
| A02039 | A04886 | 364 | A02039 | A04903 | 238 |
| A02039 | A04944 | 486 | A02039 | A04947 | 452 |
| A02039 | A04964 | 486 | A02039 | A05106 | 449 |
| A02039 | A05288 | 396 | A02039 | A05603 | 168 |
| A02039 | A06106 | 379 | A02039 | A06187 | 388 |
| A02039 | A06195 | 182 | A02039 | A06227 | 435 |
| A02039 | A06686 | 461 | A02039 | A06721 | 258 |



|        |        |     |        |        |     |
|--------|--------|-----|--------|--------|-----|
| A02039 | A06895 | 356 | A02039 | A06896 | 379 |
| A02039 | A07125 | 449 | A02039 | A07337 | 371 |
| A02039 | A07384 | 277 | A02039 | A07995 | 347 |
| A02039 | A08698 | 218 | A02039 | A08835 | 344 |
| A02039 | A09038 | 226 | A02039 | A09098 | 364 |
| A02039 | A10639 | 347 | A02039 | A11240 | 229 |
| A02039 | A13885 | 294 | A02039 | A14524 | 260 |
| A02039 | A15471 | 286 | A02039 | A17198 | 156 |
| A02040 | A02743 | 283 | A02040 | A02752 | 193 |
| A02040 | A02994 | 243 | A02040 | A02996 | 369 |
| A02040 | A02999 | 418 | A02040 | A03798 | 245 |
| A02040 | A04209 | 477 | A02040 | A06246 | 408 |
| A02040 | A07237 | 293 | A02040 | A07756 | 199 |
| A02040 | A09546 | 238 | A02040 | A09995 | 234 |
| A02040 | A12001 | 396 | A02040 | A12443 | 408 |
| A02040 | A13015 | 408 | A02040 | A13073 | 408 |
| A02040 | A13754 | 408 | A02040 | A14477 | 246 |
| A02040 | A14614 | 329 | A02041 | A02051 | 223 |
| A02041 | A02270 | 441 | A02041 | A03169 | 482 |
| A02041 | A03676 | 401 | A02041 | A03954 | 418 |
| A02041 | A03958 | 436 | A02041 | A03982 | 396 |
| A02041 | A04010 | 219 | A02041 | A04447 | 223 |
| A02041 | A06608 | 177 | A02041 | A07265 | 223 |
| A02041 | A07588 | 385 | A02041 | A08955 | 223 |
| A02041 | A08971 | 223 | A02041 | A10755 | 223 |
| A02041 | A11202 | 223 | A02041 | A13298 | 223 |
| A02041 | A14216 | 271 | A02042 | A02186 | 361 |
| A02042 | A02493 | 338 | A02042 | A02811 | 380 |
| A02042 | A02814 | 346 | A02042 | A03847 | 427 |
| A02042 | A03848 | 406 | A02042 | A03870 | 419 |
| A02042 | A04123 | 419 | A02042 | A04449 | 160 |
| A02042 | A06251 | 419 | A02043 | A02146 | 363 |
| A02043 | A02494 | 255 | A02043 | A02495 | 302 |
| A02043 | A03112 | 229 | A02043 | A04911 | 382 |
| A02043 | A05723 | 418 | A02043 | A09573 | 378 |
| A02043 | A13945 | 279 | A02043 | A14390 | 384 |
| A02044 | A02054 | 267 | A02044 | A02146 | 377 |
| A02044 | A02186 | 422 | A02044 | A02189 | 290 |
| A02044 | A02190 | 332 | A02044 | A02223 | 243 |
| A02044 | A02238 | 483 | A02044 | A02298 | 152 |
| A02044 | A02351 | 256 | A02044 | A02416 | 260 |
| A02044 | A02464 | 232 | A02044 | A02465 | 210 |
| A02044 | A02484 | 286 | A02044 | A02531 | 281 |
| A02044 | A02859 | 180 | A02044 | A03053 | 279 |
| A02044 | A03076 | 157 | A02044 | A03080 | 172 |
| A02044 | A03126 | 95  | A02044 | A03186 | 255 |

|        |        |     |        |        |     |
|--------|--------|-----|--------|--------|-----|
| A02044 | A03224 | 240 | A02044 | A03373 | 340 |
| A02044 | A03612 | 245 | A02044 | A04072 | 156 |
| A02044 | A04152 | 277 | A02044 | A04194 | 396 |
| A02044 | A04334 | 262 | A02044 | A04348 | 338 |
| A02044 | A04759 | 255 | A02044 | A04842 | 235 |
| A02044 | A05578 | 326 | A02044 | A05584 | 249 |
| A02044 | A06251 | 462 | A02044 | A08502 | 488 |
| A02044 | A08876 | 271 | A02044 | A09077 | 335 |
| A02044 | A11959 | 326 | A02044 | A14193 | 399 |
| A02044 | A15557 | 157 | A02044 | A15690 | 218 |
| A02045 | A11911 | 357 | A02046 | A02108 | 193 |
| A02046 | A02111 | 219 | A02046 | A02146 | 274 |
| A02046 | A02186 | 372 | A02046 | A02188 | 313 |
| A02046 | A02303 | 205 | A02046 | A02307 | 243 |
| A02046 | A02323 | 291 | A02046 | A02427 | 268 |
| A02046 | A02450 | 308 | A02046 | A02470 | 130 |
| A02046 | A02504 | 252 | A02046 | A02668 | 288 |
| A02046 | A02756 | 174 | A02046 | A02819 | 201 |
| A02046 | A03077 | 356 | A02046 | A03080 | 299 |
| A02046 | A03107 | 318 | A02046 | A03124 | 391 |
| A02046 | A03141 | 265 | A02046 | A03178 | 343 |
| A02046 | A03634 | 278 | A02046 | A04070 | 440 |
| A02046 | A04092 | 258 | A02046 | A04193 | 490 |
| A02046 | A04329 | 450 | A02046 | A04331 | 429 |
| A02046 | A04344 | 462 | A02046 | A04361 | 450 |
| A02046 | A04410 | 193 | A02046 | A04486 | 348 |
| A02046 | A04828 | 375 | A02046 | A04928 | 439 |
| A02046 | A05274 | 461 | A02046 | A05418 | 327 |
| A02046 | A05855 | 369 | A02046 | A06219 | 364 |
| A02046 | A06346 | 455 | A02046 | A06517 | 369 |
| A02046 | A06574 | 380 | A02046 | A06650 | 391 |
| A02046 | A07119 | 432 | A02046 | A07479 | 259 |
| A02046 | A07704 | 377 | A02046 | A07705 | 369 |
| A02046 | A08172 | 221 | A02046 | A08292 | 399 |
| A02046 | A08496 | 440 | A02046 | A08685 | 208 |
| A02046 | A08686 | 172 | A02046 | A10754 | 243 |
| A02046 | A14722 | 375 | A02046 | A15277 | 246 |
| A02046 | A15336 | 157 | A02046 | A15638 | 191 |
| A02046 | A16068 | 162 | A02046 | A16626 | 210 |
| A02046 | A16636 | 202 | A02047 | A02106 | 288 |
| A02047 | A02777 | 269 | A02047 | A03115 | 383 |
| A02047 | A03611 | 420 | A02047 | A04182 | 337 |
| A02047 | A06654 | 335 | A02047 | A07885 | 199 |
| A02047 | A08099 | 190 | A02047 | A10083 | 226 |
| A02047 | A14197 | 226 | A02048 | A02049 | 491 |
| A02048 | A02146 | 480 | A02048 | A02148 | 241 |

|        |        |     |        |        |     |
|--------|--------|-----|--------|--------|-----|
| A02048 | A02158 | 274 | A02048 | A02186 | 486 |
| A02048 | A02205 | 312 | A02048 | A02215 | 491 |
| A02048 | A02223 | 238 | A02048 | A02226 | 428 |
| A02048 | A02227 | 274 | A02048 | A02228 | 327 |
| A02048 | A02231 | 154 | A02048 | A02291 | 475 |
| A02048 | A02292 | 230 | A02048 | A02307 | 317 |
| A02048 | A02385 | 174 | A02048 | A02387 | 157 |
| A02048 | A02412 | 260 | A02048 | A02490 | 379 |
| A02048 | A02491 | 260 | A02048 | A02542 | 255 |
| A02048 | A02582 | 200 | A02048 | A02587 | 202 |
| A02048 | A02620 | 202 | A02048 | A02669 | 176 |
| A02048 | A02756 | 213 | A02048 | A02837 | 362 |
| A02048 | A02859 | 313 | A02048 | A02861 | 165 |
| A02048 | A02874 | 260 | A02048 | A03080 | 491 |
| A02048 | A03113 | 154 | A02048 | A03184 | 174 |
| A02048 | A03344 | 174 | A02048 | A03346 | 411 |
| A02048 | A03347 | 491 | A02048 | A03348 | 193 |
| A02048 | A03351 | 481 | A02048 | A03353 | 488 |
| A02048 | A03358 | 384 | A02048 | A03361 | 488 |
| A02048 | A03369 | 491 | A02048 | A03370 | 491 |
| A02048 | A03371 | 491 | A02048 | A03373 | 491 |
| A02048 | A03375 | 266 | A02048 | A03378 | 441 |
| A02048 | A03379 | 491 | A02048 | A03383 | 188 |
| A02048 | A03390 | 296 | A02048 | A03391 | 265 |
| A02048 | A03394 | 249 | A02048 | A03397 | 440 |
| A02048 | A03401 | 460 | A02048 | A03402 | 472 |
| A02048 | A03403 | 400 | A02048 | A03463 | 176 |
| A02048 | A03733 | 157 | A02048 | A03744 | 491 |
| A02048 | A03755 | 226 | A02048 | A03773 | 174 |
| A02048 | A03909 | 470 | A02048 | A03983 | 236 |
| A02048 | A03989 | 200 | A02048 | A04051 | 341 |
| A02048 | A04087 | 174 | A02048 | A04229 | 271 |
| A02048 | A04271 | 185 | A02048 | A04329 | 170 |
| A02048 | A04338 | 307 | A02048 | A04361 | 477 |
| A02048 | A04385 | 358 | A02048 | A04391 | 200 |
| A02048 | A04409 | 401 | A02048 | A04428 | 213 |
| A02048 | A04516 | 182 | A02048 | A04614 | 243 |
| A02048 | A04672 | 290 | A02048 | A04775 | 221 |
| A02048 | A04818 | 260 | A02048 | A04830 | 374 |
| A02048 | A04834 | 152 | A02048 | A04882 | 307 |
| A02048 | A04886 | 266 | A02048 | A04928 | 259 |
| A02048 | A04989 | 230 | A02048 | A05117 | 200 |
| A02048 | A05136 | 249 | A02048 | A05260 | 208 |
| A02048 | A05286 | 307 | A02048 | A05294 | 224 |
| A02048 | A05349 | 183 | A02048 | A05356 | 281 |
| A02048 | A05382 | 277 | A02048 | A05427 | 205 |

|        |        |     |        |        |     |
|--------|--------|-----|--------|--------|-----|
| A02048 | A05457 | 472 | A02048 | A05460 | 277 |
| A02048 | A05589 | 221 | A02048 | A05641 | 191 |
| A02048 | A05716 | 210 | A02048 | A05726 | 366 |
| A02048 | A05731 | 393 | A02048 | A05878 | 277 |
| A02048 | A05896 | 290 | A02048 | A05897 | 366 |
| A02048 | A05898 | 257 | A02048 | A06141 | 167 |
| A02048 | A06148 | 319 | A02048 | A06174 | 307 |
| A02048 | A06313 | 188 | A02048 | A06329 | 213 |
| A02048 | A06346 | 208 | A02048 | A06428 | 337 |
| A02048 | A06461 | 334 | A02048 | A06462 | 334 |
| A02048 | A06485 | 307 | A02048 | A06532 | 408 |
| A02048 | A06606 | 371 | A02048 | A06712 | 277 |
| A02048 | A06932 | 307 | A02048 | A06935 | 290 |
| A02048 | A07110 | 290 | A02048 | A07218 | 491 |
| A02048 | A07384 | 417 | A02048 | A07622 | 277 |
| A02048 | A07716 | 266 | A02048 | A07841 | 307 |
| A02048 | A07917 | 334 | A02048 | A08175 | 371 |
| A02048 | A08336 | 334 | A02048 | A08438 | 408 |
| A02048 | A09141 | 163 | A02048 | A09266 | 290 |
| A02048 | A09460 | 266 | A02048 | A09983 | 205 |
| A02048 | A10000 | 462 | A02048 | A10018 | 185 |
| A02048 | A10453 | 457 | A02048 | A10588 | 172 |
| A02048 | A10948 | 334 | A02048 | A11031 | 334 |
| A02048 | A11310 | 172 | A02048 | A11320 | 187 |
| A02048 | A12448 | 334 | A02048 | A12615 | 334 |
| A02048 | A12616 | 334 | A02048 | A12617 | 334 |
| A02048 | A12674 | 249 | A02048 | A12690 | 334 |
| A02048 | A12897 | 299 | A02048 | A12917 | 257 |
| A02048 | A13369 | 151 | A02048 | A13597 | 213 |
| A02048 | A13734 | 328 | A02048 | A13886 | 172 |
| A02048 | A13932 | 174 | A02048 | A14548 | 288 |
| A02048 | A14586 | 205 | A02048 | A16440 | 201 |
| A02048 | A16595 | 366 | A02049 | A02146 | 414 |
| A02049 | A02156 | 221 | A02049 | A02180 | 470 |
| A02049 | A02190 | 229 | A02049 | A02215 | 486 |
| A02049 | A02225 | 281 | A02049 | A02226 | 321 |
| A02049 | A02227 | 462 | A02049 | A02385 | 183 |
| A02049 | A02819 | 167 | A02049 | A02836 | 485 |
| A02049 | A02837 | 375 | A02049 | A02874 | 213 |
| A02049 | A03070 | 63  | A02049 | A03080 | 488 |
| A02049 | A03138 | 167 | A02049 | A03160 | 162 |
| A02049 | A03281 | 353 | A02049 | A03346 | 196 |
| A02049 | A03356 | 366 | A02049 | A03361 | 258 |
| A02049 | A03367 | 274 | A02049 | A03370 | 486 |
| A02049 | A03371 | 177 | A02049 | A03373 | 204 |
| A02049 | A03379 | 425 | A02049 | A03384 | 176 |

|        |        |     |        |        |     |
|--------|--------|-----|--------|--------|-----|
| A02049 | A03390 | 420 | A02049 | A03391 | 367 |
| A02049 | A03395 | 274 | A02049 | A03401 | 480 |
| A02049 | A03402 | 485 | A02049 | A03403 | 405 |
| A02049 | A03498 | 162 | A02049 | A03733 | 299 |
| A02049 | A03744 | 416 | A02049 | A03775 | 274 |
| A02049 | A03818 | 288 | A02049 | A03879 | 274 |
| A02049 | A03909 | 198 | A02049 | A03976 | 260 |
| A02049 | A04229 | 460 | A02049 | A04333 | 462 |
| A02049 | A04367 | 265 | A02049 | A04516 | 191 |
| A02049 | A04676 | 176 | A02049 | A04677 | 296 |
| A02049 | A04681 | 168 | A02049 | A04735 | 251 |
| A02049 | A04763 | 188 | A02049 | A04775 | 229 |
| A02049 | A04795 | 230 | A02049 | A04830 | 162 |
| A02049 | A04833 | 152 | A02049 | A04841 | 296 |
| A02049 | A04842 | 238 | A02049 | A04941 | 157 |
| A02049 | A04993 | 377 | A02049 | A05001 | 215 |
| A02049 | A05259 | 488 | A02049 | A05260 | 486 |
| A02049 | A05322 | 173 | A02049 | A05356 | 583 |
| A02049 | A05460 | 283 | A02049 | A06712 | 283 |
| A02049 | A07218 | 489 | A02049 | A07509 | 177 |
| A02049 | A07827 | 313 | A02049 | A08301 | 429 |
| A02049 | A08438 | 205 | A02049 | A08835 | 308 |
| A02049 | A08861 | 198 | A02049 | A09131 | 429 |
| A02049 | A09141 | 173 | A02049 | A09469 | 154 |
| A02049 | A09575 | 274 | A02049 | A09809 | 154 |
| A02049 | A09882 | 170 | A02049 | A09950 | 339 |
| A02049 | A10000 | 205 | A02049 | A10067 | 441 |
| A02049 | A10089 | 339 | A02049 | A10308 | 411 |
| A02049 | A10453 | 201 | A02049 | A10887 | 428 |
| A02049 | A11040 | 446 | A02049 | A11065 | 313 |
| A02049 | A11143 | 313 | A02049 | A11274 | 313 |
| A02049 | A11600 | 283 | A02049 | A11771 | 329 |
| A02049 | A12197 | 441 | A02049 | A12674 | 483 |
| A02049 | A12676 | 339 | A02049 | A12925 | 240 |
| A02049 | A13167 | 435 | A02049 | A13181 | 196 |
| A02049 | A13262 | 339 | A02049 | A13683 | 251 |
| A02049 | A14156 | 156 | A02049 | A14247 | 179 |
| A02049 | A14267 | 185 | A02049 | A14354 | 339 |
| A02049 | A16180 | 339 | A02049 | A16181 | 339 |
| A02049 | A16182 | 339 | A02049 | A16183 | 339 |
| A02049 | A16300 | 316 | A02049 | A16595 | 430 |
| A02049 | A16901 | 193 | A02050 | A02499 | 314 |
| A02050 | A02855 | 274 | A02050 | A03289 | 329 |
| A02050 | A04233 | 373 | A02050 | A07226 | 317 |
| A02050 | A14566 | 218 | A02050 | A14594 | 260 |
| A02051 | A02180 | 151 | A02051 | A03070 | 193 |

|        |        |     |        |        |     |
|--------|--------|-----|--------|--------|-----|
| A02051 | A03169 | 223 | A02051 | A03601 | 254 |
| A02051 | A04447 | 223 | A02051 | A05058 | 353 |
| A02051 | A07265 | 223 | A02051 | A07588 | 223 |
| A02051 | A08955 | 223 | A02051 | A08971 | 223 |
| A02051 | A10755 | 223 | A02051 | A11202 | 223 |
| A02051 | A13298 | 223 | A02051 | A14216 | 223 |
| A02052 | A02143 | 366 | A02052 | A02215 | 252 |
| A02052 | A02288 | 374 | A02052 | A02382 | 210 |
| A02052 | A02416 | 221 | A02052 | A02575 | 274 |
| A02052 | A02793 | 371 | A02052 | A02797 | 302 |
| A02052 | A02983 | 210 | A02052 | A03081 | 452 |
| A02052 | A03093 | 424 | A02052 | A03183 | 302 |
| A02052 | A03185 | 375 | A02052 | A03219 | 398 |
| A02052 | A03263 | 290 | A02052 | A03305 | 329 |
| A02052 | A03753 | 316 | A02052 | A03880 | 335 |
| A02052 | A03910 | 176 | A02052 | A03963 | 414 |
| A02052 | A04253 | 385 | A02052 | A04257 | 373 |
| A02052 | A04492 | 345 | A02052 | A05545 | 441 |
| A02052 | A06550 | 301 | A02052 | A07145 | 288 |
| A02052 | A08572 | 272 | A02052 | A09070 | 409 |
| A02052 | A09482 | 416 | A02052 | A12191 | 388 |
| A02052 | A13415 | 355 | A02052 | A13826 | 168 |
| A02052 | A14366 | 224 | A02052 | A14554 | 285 |
| A02052 | A14604 | 279 | A02052 | A15327 | 330 |
| A02052 | A15795 | 294 | A02053 | A02054 | 479 |
| A02053 | A02148 | 323 | A02053 | A02592 | 279 |
| A02053 | A03084 | 337 | A02053 | A03087 | 283 |
| A02053 | A03171 | 196 | A02053 | A04880 | 235 |
| A02053 | A05443 | 193 | A02053 | A05774 | 355 |
| A02053 | A06769 | 252 | A02053 | A06847 | 340 |
| A02053 | A07061 | 268 | A02053 | A07256 | 363 |
| A02053 | A07264 | 311 | A02053 | A07771 | 274 |
| A02053 | A08707 | 165 | A02053 | A09263 | 247 |
| A02053 | A10020 | 401 | A02053 | A13945 | 204 |
| A02053 | A14252 | 221 | A02053 | A15905 | 272 |
| A02054 | A02112 | 485 | A02054 | A02225 | 165 |
| A02054 | A02227 | 276 | A02054 | A02238 | 291 |
| A02054 | A03080 | 366 | A02054 | A03082 | 172 |
| A02054 | A03084 | 477 | A02054 | A03087 | 238 |
| A02054 | A03164 | 483 | A02054 | A03165 | 196 |
| A02054 | A03171 | 491 | A02054 | A03391 | 160 |
| A02054 | A04194 | 489 | A02054 | A04477 | 230 |
| A02054 | A04829 | 310 | A02054 | A04972 | 202 |
| A02054 | A05126 | 266 | A02054 | A05424 | 406 |
| A02054 | A06111 | 230 | A02054 | A06251 | 272 |
| A02054 | A06379 | 188 | A02054 | A06769 | 371 |

|        |        |     |        |        |     |
|--------|--------|-----|--------|--------|-----|
| A02054 | A06914 | 168 | A02054 | A07056 | 210 |
| A02054 | A07060 | 348 | A02054 | A07147 | 196 |
| A02054 | A07184 | 188 | A02054 | A07248 | 171 |
| A02054 | A07630 | 228 | A02054 | A07771 | 489 |
| A02054 | A07848 | 188 | A02054 | A07932 | 212 |
| A02054 | A08137 | 219 | A02054 | A08571 | 162 |
| A02054 | A08707 | 491 | A02054 | A08860 | 368 |
| A02054 | A08930 | 234 | A02054 | A08938 | 272 |
| A02054 | A08960 | 224 | A02054 | A09205 | 159 |
| A02054 | A09388 | 171 | A02054 | A09469 | 171 |
| A02054 | A09784 | 199 | A02054 | A09948 | 324 |
| A02054 | A10335 | 324 | A02054 | A10580 | 174 |
| A02054 | A10691 | 154 | A02054 | A10869 | 317 |
| A02054 | A12393 | 258 | A02054 | A12824 | 63  |
| A02054 | A13511 | 485 | A02054 | A14123 | 168 |
| A02054 | A14196 | 189 | A02054 | A14252 | 460 |
| A02054 | A14570 | 329 | A02054 | A15302 | 281 |
| A02054 | A15318 | 262 | A02054 | A15356 | 473 |
| A02054 | A15513 | 177 | A02054 | A16114 | 173 |
| A02054 | A16288 | 152 | A02055 | A02157 | 281 |
| A02055 | A02694 | 346 | A02055 | A03721 | 307 |
| A02055 | A03722 | 307 | A02055 | A09269 | 404 |
| A02055 | A11858 | 319 | A02055 | A14190 | 218 |
| A02055 | A14210 | 200 | A02055 | A14511 | 193 |
| A02055 | A14643 | 172 | A02055 | A15335 | 334 |
| A02055 | A15352 | 200 | A02055 | A15649 | 219 |
| A02055 | A17076 | 327 | A02056 | A03157 | 172 |
| A02056 | A03399 | 360 | A02056 | A03763 | 221 |
| A02056 | A05155 | 302 | A02056 | A05689 | 385 |
| A02056 | A05777 | 405 | A02056 | A07135 | 472 |
| A02056 | A11313 | 252 | A02056 | A11738 | 305 |
| A02056 | A15241 | 193 | A02056 | A15902 | 488 |
| A02057 | A02149 | 364 | A02057 | A02390 | 302 |
| A02057 | A06591 | 172 | A02057 | A06608 | 215 |
| A02058 | A03095 | 174 | A02058 | A03207 | 193 |
| A02058 | A03227 | 485 | A02058 | A03301 | 491 |
| A02058 | A03420 | 382 | A02058 | A04073 | 491 |
| A02058 | A04622 | 324 | A02058 | A04667 | 400 |
| A02058 | A04668 | 491 | A02058 | A05146 | 221 |
| A02058 | A05275 | 489 | A02058 | A05476 | 254 |
| A02058 | A05949 | 246 | A02058 | A06000 | 314 |
| A02058 | A06037 | 486 | A02058 | A06242 | 469 |
| A02058 | A06297 | 466 | A02058 | A06431 | 390 |
| A02058 | A06775 | 154 | A02058 | A06842 | 296 |
| A02058 | A06864 | 491 | A02058 | A06982 | 491 |
| A02058 | A07079 | 408 | A02058 | A07319 | 326 |

|        |        |     |        |        |     |
|--------|--------|-----|--------|--------|-----|
| A02058 | A07346 | 491 | A02058 | A07353 | 154 |
| A02058 | A07534 | 346 | A02058 | A07647 | 462 |
| A02058 | A07996 | 446 | A02058 | A08141 | 491 |
| A02058 | A08208 | 491 | A02058 | A08820 | 213 |
| A02058 | A08822 | 395 | A02058 | A08902 | 460 |
| A02058 | A09348 | 213 | A02058 | A09394 | 151 |
| A02058 | A09597 | 204 | A02058 | A09660 | 446 |
| A02058 | A09948 | 296 | A02058 | A10288 | 254 |
| A02058 | A10373 | 484 | A02058 | A11792 | 171 |
| A02058 | A11922 | 196 | A02058 | A12556 | 199 |
| A02058 | A12932 | 379 | A02058 | A13339 | 190 |
| A02058 | A13907 | 490 | A02058 | A13949 | 475 |
| A02058 | A14079 | 363 | A02058 | A14093 | 475 |
| A02058 | A14155 | 93  | A02058 | A14177 | 461 |
| A02058 | A14230 | 490 | A02058 | A14706 | 409 |
| A02058 | A15369 | 491 | A02058 | A15371 | 391 |
| A02058 | A15524 | 165 | A02058 | A15654 | 484 |
| A02058 | A15941 | 477 | A02058 | A16127 | 486 |
| A02058 | A16128 | 481 | A02058 | A16294 | 490 |
| A02058 | A16461 | 424 | A02058 | A16606 | 87  |
| A02058 | A16612 | 480 | A02058 | A16626 | 188 |
| A02058 | A16646 | 439 | A02058 | A17115 | 323 |
| A02059 | A03057 | 170 | A02059 | A04450 | 360 |
| A02059 | A06415 | 159 | A02059 | A06783 | 208 |
| A02059 | A07187 | 291 | A02059 | A08097 | 218 |
| A02059 | A10612 | 224 | A02059 | A14097 | 285 |
| A02059 | A14741 | 216 | A02059 | A15419 | 223 |
| A02059 | A15510 | 201 | A02059 | A16952 | 360 |
| A02060 | A02695 | 171 | A02060 | A02749 | 213 |
| A02060 | A02836 | 152 | A02060 | A03197 | 312 |
| A02060 | A03263 | 302 | A02060 | A06232 | 420 |
| A02060 | A07158 | 257 | A02060 | A09911 | 372 |
| A02060 | A10273 | 409 | A02061 | A02098 | 308 |
| A02061 | A02214 | 274 | A02061 | A02268 | 162 |
| A02061 | A02316 | 196 | A02061 | A02454 | 160 |
| A02061 | A03043 | 260 | A02061 | A03164 | 196 |
| A02061 | A03749 | 202 | A02061 | A04258 | 260 |
| A02061 | A05150 | 383 | A02061 | A05206 | 366 |
| A02061 | A05210 | 398 | A02061 | A05330 | 268 |
| A02061 | A05332 | 368 | A02061 | A05609 | 374 |
| A02061 | A05689 | 358 | A02061 | A06623 | 172 |
| A02061 | A06810 | 337 | A02061 | A07222 | 420 |
| A02061 | A07571 | 390 | A02061 | A07926 | 358 |
| A02061 | A07931 | 489 | A02061 | A09202 | 221 |
| A02061 | A10688 | 451 | A02061 | A16738 | 223 |
| A02062 | A02609 | 412 | A02062 | A02654 | 338 |



|        |        |     |        |        |     |
|--------|--------|-----|--------|--------|-----|
| A02062 | A02727 | 382 | A02062 | A02788 | 283 |
| A02062 | A03340 | 428 | A02062 | A07157 | 297 |
| A02062 | A11495 | 440 | A02062 | A14392 | 314 |
| A02063 | A02260 | 305 | A02063 | A02370 | 324 |
| A02063 | A02465 | 243 | A02063 | A02769 | 324 |
| A02063 | A02832 | 294 | A02063 | A03041 | 313 |
| A02063 | A03115 | 343 | A02063 | A04001 | 428 |
| A02063 | A04450 | 351 | A02063 | A04622 | 184 |
| A02063 | A07135 | 249 | A02063 | A07159 | 301 |
| A02063 | A14376 | 321 | A02063 | A14856 | 306 |
| A02063 | A15295 | 491 | A02063 | A15498 | 430 |
| A02064 | A02855 | 329 | A02064 | A02902 | 362 |
| A02064 | A02980 | 386 | A02064 | A03331 | 245 |
| A02064 | A03576 | 163 | A02064 | A03601 | 338 |
| A02064 | A03644 | 238 | A02064 | A03734 | 457 |
| A02064 | A03981 | 408 | A02064 | A04488 | 163 |
| A02064 | A04525 | 372 | A02064 | A04687 | 491 |
| A02064 | A05288 | 443 | A02064 | A05295 | 474 |
| A02064 | A05346 | 196 | A02064 | A05411 | 350 |
| A02064 | A05577 | 157 | A02064 | A05596 | 353 |
| A02064 | A06166 | 180 | A02064 | A06275 | 485 |
| A02064 | A06575 | 188 | A02064 | A06582 | 196 |
| A02064 | A06816 | 218 | A02064 | A06825 | 293 |
| A02064 | A06881 | 654 | A02064 | A07312 | 288 |
| A02064 | A07506 | 274 | A02064 | A07523 | 274 |
| A02064 | A07524 | 375 | A02064 | A07706 | 491 |
| A02064 | A07924 | 210 | A02064 | A08022 | 489 |
| A02064 | A08057 | 196 | A02064 | A08118 | 491 |
| A02064 | A08641 | 196 | A02064 | A08768 | 224 |
| A02064 | A08771 | 491 | A02064 | A09541 | 180 |
| A02064 | A09619 | 406 | A02064 | A09644 | 274 |
| A02064 | A09705 | 408 | A02064 | A10218 | 396 |
| A02064 | A10598 | 174 | A02064 | A10616 | 484 |
| A02064 | A11300 | 362 | A02064 | A11369 | 443 |
| A02064 | A11387 | 362 | A02064 | A11447 | 362 |
| A02064 | A12108 | 196 | A02064 | A12421 | 160 |
| A02064 | A12647 | 207 | A02064 | A12839 | 270 |
| A02064 | A12990 | 154 | A02064 | A13220 | 168 |
| A02064 | A13226 | 163 | A02064 | A13227 | 296 |
| A02064 | A13376 | 260 | A02064 | A13377 | 463 |
| A02064 | A13989 | 450 | A02064 | A14027 | 196 |
| A02064 | A14047 | 218 | A02064 | A14169 | 491 |
| A02064 | A14655 | 490 | A02064 | A15173 | 286 |
| A02064 | A15559 | 263 | A02064 | A16330 | 362 |
| A02064 | A16343 | 163 | A02064 | A16590 | 296 |
| A02064 | A16664 | 185 | A02064 | A16695 | 168 |

|        |        |     |        |        |     |
|--------|--------|-----|--------|--------|-----|
| A02064 | A16703 | 165 | A02064 | A16707 | 218 |
| A02064 | A16790 | 303 | A02064 | A16824 | 151 |
| A02064 | A16994 | 338 | A02064 | A17035 | 152 |
| A02064 | A17088 | 173 | A02065 | A02105 | 269 |
| A02065 | A02307 | 218 | A02065 | A02460 | 154 |
| A02065 | A02850 | 396 | A02065 | A02897 | 268 |
| A02065 | A02917 | 213 | A02065 | A02983 | 434 |
| A02065 | A02993 | 313 | A02065 | A03059 | 306 |
| A02065 | A03070 | 324 | A02065 | A03156 | 224 |
| A02065 | A03398 | 217 | A02065 | A03782 | 180 |
| A02065 | A03933 | 335 | A02065 | A03942 | 180 |
| A02065 | A04351 | 281 | A02065 | A04475 | 335 |
| A02065 | A04909 | 278 | A02065 | A05332 | 238 |
| A02065 | A06063 | 185 | A02065 | A06091 | 368 |
| A02065 | A06195 | 163 | A02065 | A06623 | 165 |
| A02065 | A07163 | 187 | A02065 | A07181 | 252 |
| A02065 | A07322 | 291 | A02065 | A07367 | 352 |
| A02065 | A07440 | 299 | A02065 | A07737 | 281 |
| A02065 | A07875 | 369 | A02065 | A07991 | 396 |
| A02065 | A08070 | 176 | A02065 | A08135 | 389 |
| A02065 | A08641 | 382 | A02065 | A09612 | 263 |
| A02065 | A09724 | 260 | A02065 | A10676 | 323 |
| A02065 | A10684 | 156 | A02065 | A10702 | 185 |
| A02065 | A10977 | 369 | A02065 | A12809 | 356 |
| A02065 | A13935 | 303 | A02065 | A14210 | 191 |
| A02065 | A14222 | 170 | A02065 | A14424 | 436 |
| A02065 | A15320 | 168 | A02065 | A15649 | 218 |
| A02065 | A15819 | 488 | A02067 | A02185 | 469 |
| A02067 | A03739 | 269 | A02067 | A03906 | 352 |
| A02067 | A15292 | 182 | A02068 | A02265 | 195 |
| A02068 | A02737 | 163 | A02068 | A03211 | 356 |
| A02068 | A03567 | 269 | A02068 | A03705 | 252 |
| A02068 | A03738 | 165 | A02068 | A03753 | 246 |
| A02068 | A03834 | 226 | A02068 | A06279 | 180 |
| A02068 | A06943 | 274 | A02068 | A09248 | 475 |
| A02068 | A09469 | 391 | A02068 | A10595 | 263 |
| A02068 | A13207 | 486 | A02068 | A14755 | 388 |
| A02068 | A15358 | 236 | A02068 | A16118 | 187 |
| A02069 | A02072 | 432 | A02069 | A02154 | 374 |
| A02069 | A02188 | 293 | A02069 | A02221 | 441 |
| A02069 | A02226 | 254 | A02069 | A02303 | 451 |
| A02069 | A02308 | 323 | A02069 | A02310 | 436 |
| A02069 | A02318 | 446 | A02069 | A02672 | 447 |
| A02069 | A02760 | 466 | A02069 | A03178 | 318 |
| A02069 | A03915 | 406 | A02069 | A04172 | 413 |
| A02069 | A04224 | 424 | A02069 | A04236 | 408 |

|        |        |     |        |        |     |
|--------|--------|-----|--------|--------|-----|
| A02069 | A04462 | 413 | A02069 | A04622 | 177 |
| A02069 | A05593 | 394 | A02069 | A05599 | 419 |
| A02069 | A16642 | 436 | A02070 | A02303 | 343 |
| A02070 | A02311 | 379 | A02071 | A02074 | 202 |
| A02071 | A02075 | 460 | A02071 | A02077 | 260 |
| A02071 | A02083 | 278 | A02071 | A02215 | 302 |
| A02071 | A02300 | 467 | A02071 | A02314 | 348 |
| A02071 | A02317 | 279 | A02071 | A02329 | 488 |
| A02071 | A02330 | 296 | A02071 | A02476 | 377 |
| A02071 | A02545 | 265 | A02071 | A02663 | 313 |
| A02071 | A02665 | 396 | A02071 | A02669 | 291 |
| A02071 | A02754 | 200 | A02071 | A02774 | 477 |
| A02071 | A02785 | 491 | A02071 | A02859 | 251 |
| A02071 | A02874 | 159 | A02071 | A02918 | 183 |
| A02071 | A02947 | 293 | A02071 | A03050 | 491 |
| A02071 | A03080 | 159 | A02071 | A03099 | 252 |
| A02071 | A03107 | 157 | A02071 | A03172 | 294 |
| A02071 | A03373 | 201 | A02071 | A03602 | 174 |
| A02071 | A03968 | 385 | A02071 | A04023 | 485 |
| A02071 | A04051 | 316 | A02071 | A04087 | 396 |
| A02071 | A04162 | 196 | A02071 | A04366 | 272 |
| A02071 | A04369 | 490 | A02071 | A04371 | 335 |
| A02071 | A04612 | 271 | A02071 | A04614 | 240 |
| A02071 | A04633 | 486 | A02071 | A04635 | 416 |
| A02071 | A05356 | 260 | A02071 | A05505 | 380 |
| A02071 | A06607 | 434 | A02071 | A07191 | 302 |
| A02071 | A07200 | 297 | A02071 | A07367 | 223 |
| A02071 | A07407 | 256 | A02071 | A07438 | 288 |
| A02071 | A07452 | 208 | A02071 | A07736 | 168 |
| A02071 | A08444 | 312 | A02071 | A10456 | 188 |
| A02071 | A11479 | 348 | A02071 | A12784 | 355 |
| A02071 | A12793 | 208 | A02071 | A13879 | 205 |
| A02071 | A16636 | 165 | A02071 | A16741 | 238 |
| A02071 | A17078 | 226 | A02072 | A02082 | 407 |
| A02072 | A02106 | 208 | A02072 | A02108 | 180 |
| A02072 | A02109 | 265 | A02072 | A02110 | 210 |
| A02072 | A02131 | 326 | A02072 | A02149 | 286 |
| A02072 | A02154 | 396 | A02072 | A02167 | 296 |
| A02072 | A02188 | 297 | A02072 | A02221 | 449 |
| A02072 | A02228 | 102 | A02072 | A02231 | 285 |
| A02072 | A02301 | 367 | A02072 | A02303 | 486 |
| A02072 | A02310 | 484 | A02072 | A02318 | 467 |
| A02072 | A02321 | 340 | A02072 | A02335 | 168 |
| A02072 | A02336 | 301 | A02072 | A02454 | 167 |
| A02072 | A02463 | 281 | A02072 | A02465 | 213 |
| A02072 | A02468 | 358 | A02072 | A02469 | 246 |

|        |        |     |        |        |     |
|--------|--------|-----|--------|--------|-----|
| A02072 | A02501 | 230 | A02072 | A02523 | 235 |
| A02072 | A02539 | 205 | A02072 | A02541 | 286 |
| A02072 | A02583 | 303 | A02072 | A02621 | 232 |
| A02072 | A02666 | 288 | A02072 | A02672 | 435 |
| A02072 | A02686 | 260 | A02072 | A02758 | 269 |
| A02072 | A02760 | 440 | A02072 | A02773 | 344 |
| A02072 | A03097 | 294 | A02072 | A03107 | 170 |
| A02072 | A03115 | 182 | A02072 | A03178 | 199 |
| A02072 | A03224 | 243 | A02072 | A03611 | 167 |
| A02072 | A03866 | 329 | A02072 | A03976 | 179 |
| A02072 | A04001 | 324 | A02072 | A04105 | 187 |
| A02072 | A04163 | 457 | A02072 | A04172 | 357 |
| A02072 | A04179 | 319 | A02072 | A04224 | 443 |
| A02072 | A04236 | 430 | A02072 | A04238 | 419 |
| A02072 | A04349 | 215 | A02072 | A04367 | 357 |
| A02072 | A04517 | 288 | A02072 | A04908 | 170 |
| A02072 | A04911 | 294 | A02072 | A05015 | 305 |
| A02072 | A05106 | 215 | A02072 | A05142 | 340 |
| A02072 | A05561 | 401 | A02072 | A05593 | 416 |
| A02072 | A05599 | 368 | A02072 | A05673 | 308 |
| A02072 | A06187 | 385 | A02072 | A06195 | 176 |
| A02072 | A06368 | 297 | A02072 | A06600 | 395 |
| A02072 | A06803 | 228 | A02072 | A07280 | 423 |
| A02072 | A07815 | 394 | A02072 | A07933 | 353 |
| A02072 | A07958 | 152 | A02072 | A08879 | 268 |
| A02072 | A09020 | 283 | A02072 | A09149 | 219 |
| A02072 | A09236 | 446 | A02072 | A09475 | 385 |
| A02072 | A09910 | 375 | A02072 | A10071 | 466 |
| A02072 | A10264 | 362 | A02072 | A10385 | 401 |
| A02072 | A12376 | 385 | A02072 | A13298 | 210 |
| A02072 | A13373 | 235 | A02072 | A14188 | 196 |
| A02072 | A14255 | 212 | A02072 | A14366 | 267 |
| A02072 | A14524 | 254 | A02072 | A15471 | 279 |
| A02072 | A16750 | 368 | A02073 | A04438 | 338 |
| A02073 | A13426 | 255 | A02073 | A13970 | 156 |
| A02073 | A14037 | 486 | A02073 | A14496 | 218 |
| A02073 | A14609 | 154 | A02073 | A15875 | 388 |
| A02074 | A02083 | 491 | A02074 | A02105 | 247 |
| A02074 | A02111 | 455 | A02074 | A02182 | 235 |
| A02074 | A02305 | 461 | A02074 | A02306 | 491 |
| A02074 | A02309 | 235 | A02074 | A02317 | 479 |
| A02074 | A02330 | 462 | A02074 | A02624 | 245 |
| A02074 | A02751 | 238 | A02074 | A02759 | 445 |
| A02074 | A02785 | 202 | A02074 | A03050 | 63  |
| A02074 | A03051 | 296 | A02074 | A03099 | 491 |
| A02074 | A03168 | 208 | A02074 | A03183 | 190 |

|        |        |     |        |        |     |
|--------|--------|-----|--------|--------|-----|
| A02074 | A03226 | 455 | A02074 | A03402 | 358 |
| A02074 | A03436 | 447 | A02074 | A03484 | 218 |
| A02074 | A03773 | 165 | A02074 | A03906 | 185 |
| A02074 | A04162 | 486 | A02074 | A04163 | 217 |
| A02074 | A04258 | 468 | A02074 | A04371 | 321 |
| A02074 | A04437 | 254 | A02074 | A04626 | 358 |
| A02074 | A04746 | 373 | A02074 | A04974 | 413 |
| A02074 | A04981 | 440 | A02074 | A05184 | 249 |
| A02074 | A05237 | 348 | A02074 | A05366 | 348 |
| A02074 | A05377 | 235 | A02074 | A05390 | 360 |
| A02074 | A05418 | 319 | A02074 | A05659 | 202 |
| A02074 | A05965 | 348 | A02074 | A06263 | 475 |
| A02074 | A06607 | 469 | A02074 | A06769 | 424 |
| A02074 | A06874 | 401 | A02074 | A07037 | 283 |
| A02074 | A07076 | 199 | A02074 | A07151 | 201 |
| A02074 | A07509 | 266 | A02074 | A07757 | 224 |
| A02074 | A07808 | 369 | A02074 | A08288 | 348 |
| A02074 | A08746 | 405 | A02074 | A08838 | 172 |
| A02074 | A09072 | 324 | A02074 | A09181 | 243 |
| A02074 | A09235 | 394 | A02074 | A09363 | 335 |
| A02074 | A09791 | 165 | A02074 | A09900 | 348 |
| A02074 | A10072 | 235 | A02074 | A10332 | 252 |
| A02074 | A10801 | 221 | A02074 | A11309 | 283 |
| A02074 | A11646 | 350 | A02074 | A13058 | 329 |
| A02074 | A14198 | 302 | A02074 | A14443 | 293 |
| A02074 | A14589 | 234 | A02074 | A17213 | 241 |
| A02075 | A02187 | 249 | A02075 | A02300 | 351 |
| A02075 | A02335 | 402 | A02075 | A02338 | 218 |
| A02075 | A02669 | 259 | A02075 | A02691 | 428 |
| A02075 | A02697 | 416 | A02075 | A02701 | 401 |
| A02075 | A02702 | 469 | A02075 | A02709 | 302 |
| A02075 | A02730 | 188 | A02075 | A02774 | 210 |
| A02075 | A02785 | 286 | A02075 | A02859 | 254 |
| A02075 | A03012 | 343 | A02075 | A03013 | 361 |
| A02075 | A03050 | 486 | A02075 | A03095 | 363 |
| A02075 | A04010 | 210 | A02075 | A04263 | 165 |
| A02075 | A04279 | 187 | A02075 | A04369 | 452 |
| A02075 | A04449 | 483 | A02075 | A04510 | 246 |
| A02075 | A04620 | 273 | A02075 | A04633 | 241 |
| A02075 | A04711 | 380 | A02075 | A04757 | 362 |
| A02075 | A04783 | 172 | A02075 | A04856 | 377 |
| A02075 | A04865 | 224 | A02075 | A05104 | 267 |
| A02075 | A05659 | 188 | A02075 | A05838 | 168 |
| A02075 | A05929 | 380 | A02075 | A06579 | 455 |
| A02075 | A06708 | 205 | A02075 | A06926 | 271 |
| A02075 | A07001 | 319 | A02075 | A07191 | 460 |

|        |        |     |        |        |     |
|--------|--------|-----|--------|--------|-----|
| A02075 | A07198 | 232 | A02075 | A07200 | 491 |
| A02075 | A07217 | 274 | A02075 | A07367 | 185 |
| A02075 | A07407 | 450 | A02075 | A07479 | 196 |
| A02075 | A07561 | 168 | A02075 | A07634 | 291 |
| A02075 | A08406 | 380 | A02075 | A08867 | 238 |
| A02075 | A09042 | 208 | A02075 | A09179 | 479 |
| A02075 | A10156 | 177 | A02075 | A10294 | 210 |
| A02075 | A10982 | 162 | A02075 | A11140 | 188 |
| A02075 | A11335 | 363 | A02075 | A11460 | 390 |
| A02075 | A11900 | 288 | A02075 | A12335 | 350 |
| A02075 | A12800 | 350 | A02075 | A13361 | 171 |
| A02075 | A13917 | 238 | A02075 | A14071 | 398 |
| A02075 | A14423 | 226 | A02075 | A14498 | 193 |
| A02075 | A14648 | 163 | A02075 | A14824 | 436 |
| A02075 | A15282 | 172 | A02075 | A15368 | 297 |
| A02075 | A15623 | 380 | A02075 | A16438 | 259 |
| A02075 | A17078 | 279 | A02076 | A02163 | 324 |
| A02076 | A02173 | 201 | A02076 | A06289 | 63  |
| A02076 | A06584 | 156 | A02076 | A06610 | 279 |
| A02076 | A09633 | 173 | A02076 | A09643 | 160 |
| A02076 | A10392 | 281 | A02076 | A10514 | 299 |
| A02076 | A10544 | 63  | A02076 | A10721 | 483 |
| A02076 | A11487 | 165 | A02076 | A11806 | 323 |
| A02076 | A12835 | 157 | A02076 | A13722 | 379 |
| A02076 | A13979 | 358 | A02076 | A13982 | 457 |
| A02076 | A13986 | 422 | A02076 | A13997 | 394 |
| A02076 | A14007 | 433 | A02076 | A14011 | 182 |
| A02076 | A14086 | 172 | A02076 | A14300 | 296 |
| A02076 | A14443 | 266 | A02076 | A14452 | 491 |
| A02076 | A14773 | 329 | A02076 | A16994 | 303 |
| A02076 | A16996 | 302 | A02077 | A02078 | 491 |
| A02077 | A02083 | 184 | A02077 | A02202 | 162 |
| A02077 | A02545 | 456 | A02077 | A02774 | 391 |
| A02077 | A03050 | 484 | A02077 | A03602 | 343 |
| A02077 | A03725 | 224 | A02077 | A04114 | 293 |
| A02077 | A04369 | 424 | A02077 | A04436 | 477 |
| A02077 | A04555 | 460 | A02077 | A04629 | 358 |
| A02077 | A04645 | 443 | A02077 | A05153 | 486 |
| A02077 | A05926 | 475 | A02077 | A05945 | 223 |
| A02077 | A05957 | 465 | A02077 | A07468 | 411 |
| A02077 | A07541 | 297 | A02077 | A07617 | 486 |
| A02077 | A07634 | 232 | A02077 | A07958 | 457 |
| A02077 | A10967 | 469 | A02077 | A12793 | 427 |
| A02077 | A17108 | 286 | A02078 | A02079 | 424 |
| A02078 | A02202 | 218 | A02078 | A02545 | 356 |
| A02078 | A03725 | 293 | A02078 | A04114 | 335 |

|        |        |     |        |        |     |
|--------|--------|-----|--------|--------|-----|
| A02078 | A04369 | 288 | A02078 | A04629 | 447 |
| A02078 | A04918 | 414 | A02078 | A05153 | 475 |
| A02078 | A05331 | 205 | A02078 | A05926 | 480 |
| A02078 | A05957 | 388 | A02078 | A06599 | 232 |
| A02078 | A07190 | 255 | A02078 | A07255 | 424 |
| A02078 | A07468 | 263 | A02078 | A07617 | 488 |
| A02078 | A07958 | 452 | A02078 | A10967 | 423 |
| A02079 | A04629 | 434 | A02079 | A07190 | 368 |
| A02079 | A07255 | 452 | A02079 | A07617 | 422 |
| A02080 | A02215 | 188 | A02080 | A02260 | 311 |
| A02080 | A02304 | 184 | A02080 | A02307 | 266 |
| A02080 | A02328 | 479 | A02080 | A02460 | 483 |
| A02080 | A02668 | 394 | A02080 | A02756 | 329 |
| A02080 | A02771 | 485 | A02080 | A02876 | 252 |
| A02080 | A03027 | 306 | A02080 | A03315 | 316 |
| A02080 | A03755 | 360 | A02080 | A03773 | 238 |
| A02080 | A03918 | 360 | A02080 | A04558 | 328 |
| A02080 | A04698 | 428 | A02080 | A04763 | 332 |
| A02080 | A04996 | 302 | A02080 | A07218 | 185 |
| A02080 | A09040 | 276 | A02080 | A09394 | 321 |
| A02080 | A09882 | 227 | A02080 | A10081 | 357 |
| A02080 | A10382 | 302 | A02080 | A10987 | 195 |
| A02080 | A11911 | 193 | A02080 | A13346 | 235 |
| A02080 | A16636 | 234 | A02081 | A02416 | 204 |
| A02081 | A02779 | 430 | A02081 | A03042 | 369 |
| A02081 | A03423 | 241 | A02081 | A03832 | 172 |
| A02081 | A03862 | 345 | A02081 | A03893 | 249 |
| A02081 | A05598 | 467 | A02081 | A06588 | 259 |
| A02081 | A06607 | 457 | A02081 | A14378 | 191 |
| A02081 | A14650 | 368 | A02082 | A02109 | 318 |
| A02082 | A02194 | 402 | A02082 | A02301 | 301 |
| A02082 | A02303 | 374 | A02082 | A02304 | 213 |
| A02082 | A02308 | 384 | A02082 | A02310 | 484 |
| A02082 | A02311 | 311 | A02082 | A02312 | 333 |
| A02082 | A02318 | 346 | A02082 | A02320 | 230 |
| A02082 | A02322 | 361 | A02082 | A02469 | 302 |
| A02082 | A02523 | 294 | A02082 | A02540 | 420 |
| A02082 | A02672 | 243 | A02082 | A02673 | 182 |
| A02082 | A02758 | 321 | A02082 | A02760 | 329 |
| A02082 | A03112 | 152 | A02082 | A03202 | 480 |
| A02082 | A03583 | 366 | A02082 | A03602 | 252 |
| A02082 | A03976 | 245 | A02082 | A04204 | 420 |
| A02082 | A04256 | 296 | A02082 | A04438 | 451 |
| A02082 | A04637 | 434 | A02082 | A05472 | 285 |
| A02082 | A05767 | 160 | A02082 | A07280 | 441 |
| A02082 | A07431 | 420 | A02082 | A08379 | 188 |

|        |        |     |        |        |     |
|--------|--------|-----|--------|--------|-----|
| A02082 | A08835 | 179 | A02082 | A09186 | 420 |
| A02082 | A09507 | 425 | A02083 | A02111 | 475 |
| A02083 | A02154 | 202 | A02083 | A02156 | 353 |
| A02083 | A02167 | 213 | A02083 | A02284 | 234 |
| A02083 | A02299 | 263 | A02083 | A02305 | 269 |
| A02083 | A02306 | 491 | A02083 | A02314 | 294 |
| A02083 | A02317 | 480 | A02083 | A02319 | 302 |
| A02083 | A02329 | 452 | A02083 | A02330 | 491 |
| A02083 | A02522 | 226 | A02083 | A02533 | 294 |
| A02083 | A02541 | 201 | A02083 | A02546 | 259 |
| A02083 | A02644 | 475 | A02083 | A02667 | 338 |
| A02083 | A02749 | 360 | A02083 | A02751 | 182 |
| A02083 | A02758 | 180 | A02083 | A02759 | 479 |
| A02083 | A02774 | 302 | A02083 | A02785 | 371 |
| A02083 | A02788 | 247 | A02083 | A02888 | 173 |
| A02083 | A02930 | 165 | A02083 | A02966 | 187 |
| A02083 | A03050 | 480 | A02083 | A03051 | 329 |
| A02083 | A03087 | 262 | A02083 | A03099 | 491 |
| A02083 | A03172 | 352 | A02083 | A03224 | 152 |
| A02083 | A03234 | 210 | A02083 | A03238 | 323 |
| A02083 | A03264 | 208 | A02083 | A03369 | 226 |
| A02083 | A03402 | 414 | A02083 | A03513 | 302 |
| A02083 | A03523 | 162 | A02083 | A03915 | 277 |
| A02083 | A03919 | 208 | A02083 | A03940 | 288 |
| A02083 | A03961 | 474 | A02083 | A03968 | 379 |
| A02083 | A04023 | 173 | A02083 | A04053 | 177 |
| A02083 | A04092 | 154 | A02083 | A04160 | 396 |
| A02083 | A04162 | 485 | A02083 | A04163 | 160 |
| A02083 | A04258 | 480 | A02083 | A04326 | 281 |
| A02083 | A04369 | 406 | A02083 | A04371 | 440 |
| A02083 | A04372 | 281 | A02083 | A04373 | 259 |
| A02083 | A04437 | 199 | A02083 | A04490 | 157 |
| A02083 | A04620 | 235 | A02083 | A04626 | 323 |
| A02083 | A04633 | 406 | A02083 | A04635 | 259 |
| A02083 | A04637 | 469 | A02083 | A04746 | 491 |
| A02083 | A04822 | 208 | A02083 | A04933 | 252 |
| A02083 | A04974 | 438 | A02083 | A04975 | 430 |
| A02083 | A04981 | 489 | A02083 | A04995 | 168 |
| A02083 | A05045 | 283 | A02083 | A05153 | 159 |
| A02083 | A05184 | 327 | A02083 | A05208 | 208 |
| A02083 | A05237 | 312 | A02083 | A05277 | 228 |
| A02083 | A05297 | 180 | A02083 | A05356 | 491 |
| A02083 | A05366 | 312 | A02083 | A05376 | 152 |
| A02083 | A05390 | 480 | A02083 | A05394 | 218 |
| A02083 | A05550 | 152 | A02083 | A05696 | 405 |
| A02083 | A05736 | 353 | A02083 | A05737 | 312 |



|        |        |     |        |        |     |
|--------|--------|-----|--------|--------|-----|
| A02083 | A05786 | 272 | A02083 | A05940 | 218 |
| A02083 | A05945 | 330 | A02083 | A05957 | 281 |
| A02083 | A06211 | 246 | A02083 | A06263 | 491 |
| A02083 | A06405 | 240 | A02083 | A06439 | 227 |
| A02083 | A06558 | 312 | A02083 | A06588 | 340 |
| A02083 | A06607 | 491 | A02083 | A06650 | 184 |
| A02083 | A06762 | 391 | A02083 | A06769 | 489 |
| A02083 | A06874 | 483 | A02083 | A06922 | 302 |
| A02083 | A06979 | 184 | A02083 | A07078 | 151 |
| A02083 | A07132 | 208 | A02083 | A07496 | 272 |
| A02083 | A07541 | 152 | A02083 | A07610 | 162 |
| A02083 | A07654 | 201 | A02083 | A07808 | 338 |
| A02083 | A08445 | 219 | A02083 | A08688 | 198 |
| A02083 | A08718 | 187 | A02083 | A08746 | 272 |
| A02083 | A09072 | 470 | A02083 | A09080 | 302 |
| A02083 | A09540 | 240 | A02083 | A09876 | 377 |
| A02083 | A09932 | 154 | A02083 | A10103 | 329 |
| A02083 | A10635 | 259 | A02083 | A10700 | 272 |
| A02083 | A11646 | 297 | A02083 | A12500 | 162 |
| A02083 | A13140 | 294 | A02083 | A13906 | 235 |
| A02083 | A14405 | 245 | A02083 | A14440 | 219 |
| A02083 | A14443 | 915 | A02083 | A14685 | 288 |
| A02083 | A17155 | 219 | A02084 | A02378 | 416 |
| A02084 | A03019 | 167 | A02084 | A03817 | 187 |
| A02084 | A03834 | 324 | A02084 | A04589 | 303 |
| A02084 | A05904 | 419 | A02084 | A06224 | 404 |
| A02084 | A08608 | 324 | A02084 | A09581 | 328 |
| A02084 | A11307 | 343 | A02084 | A13734 | 193 |
| A02084 | A14400 | 375 | A02084 | A14440 | 302 |
| A02084 | A16430 | 363 | A02085 | A02830 | 291 |
| A02085 | A02837 | 229 | A02085 | A03112 | 249 |
| A02085 | A14302 | 441 | A02086 | A02226 | 210 |
| A02086 | A02332 | 274 | A02086 | A02371 | 182 |
| A02086 | A02376 | 362 | A02086 | A02377 | 477 |
| A02086 | A02635 | 480 | A02086 | A02688 | 159 |
| A02086 | A02689 | 416 | A02086 | A02698 | 204 |
| A02086 | A02706 | 316 | A02086 | A02712 | 323 |
| A02086 | A02739 | 485 | A02086 | A02753 | 455 |
| A02086 | A02781 | 255 | A02086 | A02802 | 168 |
| A02086 | A02846 | 386 | A02086 | A02848 | 196 |
| A02086 | A02905 | 195 | A02086 | A02982 | 395 |
| A02086 | A03019 | 470 | A02086 | A03089 | 185 |
| A02086 | A03092 | 196 | A02086 | A03223 | 467 |
| A02086 | A03243 | 326 | A02086 | A03321 | 195 |
| A02086 | A03742 | 484 | A02086 | A04059 | 328 |
| A02086 | A04117 | 491 | A02086 | A04446 | 490 |

|        |        |     |        |        |     |
|--------|--------|-----|--------|--------|-----|
| A02086 | A04553 | 281 | A02086 | A04612 | 193 |
| A02086 | A04622 | 167 | A02086 | A04902 | 491 |
| A02086 | A04908 | 373 | A02086 | A05112 | 157 |
| A02086 | A05568 | 419 | A02086 | A05598 | 226 |
| A02086 | A05691 | 278 | A02086 | A05760 | 215 |
| A02086 | A05791 | 224 | A02086 | A05794 | 208 |
| A02086 | A05815 | 152 | A02086 | A05832 | 317 |
| A02086 | A05939 | 208 | A02086 | A06221 | 278 |
| A02086 | A06774 | 223 | A02086 | A06941 | 168 |
| A02086 | A06990 | 188 | A02086 | A07017 | 263 |
| A02086 | A07912 | 159 | A02086 | A08707 | 162 |
| A02086 | A08779 | 245 | A02086 | A09290 | 246 |
| A02086 | A09672 | 188 | A02086 | A09702 | 180 |
| A02086 | A09704 | 196 | A02086 | A09732 | 174 |
| A02086 | A09883 | 196 | A02086 | A09962 | 177 |
| A02086 | A10174 | 201 | A02086 | A10247 | 63  |
| A02086 | A10444 | 167 | A02086 | A10455 | 279 |
| A02086 | A10656 | 245 | A02086 | A11583 | 324 |
| A02086 | A11735 | 205 | A02086 | A11911 | 347 |
| A02086 | A11914 | 340 | A02086 | A12824 | 414 |
| A02086 | A13208 | 245 | A02086 | A13736 | 213 |
| A02086 | A13986 | 207 | A02086 | A14077 | 196 |
| A02086 | A14188 | 215 | A02086 | A14198 | 288 |
| A02086 | A14364 | 270 | A02086 | A14613 | 152 |
| A02086 | A15376 | 348 | A02086 | A16977 | 245 |
| A02086 | A17041 | 188 | A02086 | A17112 | 262 |
| A02087 | A02088 | 427 | A02087 | A02278 | 188 |
| A02087 | A02694 | 352 | A02087 | A03633 | 380 |
| A02087 | A03756 | 412 | A02087 | A03921 | 439 |
| A02087 | A04639 | 351 | A02087 | A14190 | 229 |
| A02088 | A02174 | 157 | A02088 | A02381 | 481 |
| A02088 | A02382 | 491 | A02088 | A02464 | 358 |
| A02088 | A02747 | 319 | A02088 | A02838 | 218 |
| A02088 | A02872 | 172 | A02088 | A02931 | 168 |
| A02088 | A03110 | 418 | A02088 | A03177 | 228 |
| A02088 | A03183 | 466 | A02088 | A03581 | 188 |
| A02088 | A03633 | 307 | A02088 | A03756 | 435 |
| A02088 | A03830 | 200 | A02088 | A03921 | 463 |
| A02088 | A03942 | 399 | A02088 | A03966 | 219 |
| A02088 | A04178 | 308 | A02088 | A04398 | 201 |
| A02088 | A04540 | 208 | A02088 | A04568 | 271 |
| A02088 | A04639 | 377 | A02088 | A05174 | 443 |
| A02088 | A05706 | 404 | A02088 | A06085 | 263 |
| A02088 | A06372 | 367 | A02088 | A07426 | 346 |
| A02088 | A08817 | 446 | A02088 | A09127 | 159 |
| A02088 | A09237 | 355 | A02088 | A10265 | 423 |

|        |        |     |        |        |     |
|--------|--------|-----|--------|--------|-----|
| A02088 | A10899 | 243 | A02088 | A11578 | 259 |
| A02088 | A11738 | 263 | A02088 | A12361 | 207 |
| A02088 | A12771 | 361 | A02088 | A13860 | 477 |
| A02088 | A14055 | 226 | A02088 | A14188 | 193 |
| A02088 | A14198 | 163 | A02088 | A14429 | 361 |
| A02088 | A14443 | 899 | A02088 | A14444 | 899 |
| A02088 | A14831 | 335 | A02088 | A15913 | 328 |
| A02088 | A16224 | 208 | A02088 | A16300 | 195 |
| A02089 | A02382 | 229 | A02089 | A02416 | 425 |
| A02089 | A02462 | 391 | A02089 | A02463 | 356 |
| A02089 | A02464 | 324 | A02089 | A02704 | 245 |
| A02089 | A02787 | 263 | A02089 | A02819 | 286 |
| A02089 | A02836 | 290 | A02089 | A03201 | 335 |
| A02089 | A04417 | 329 | A02089 | A05124 | 319 |
| A02089 | A05174 | 436 | A02089 | A06599 | 256 |
| A02089 | A06689 | 187 | A02089 | A07158 | 260 |
| A02089 | A10337 | 311 | A02089 | A13181 | 303 |
| A02089 | A14378 | 229 | A02089 | A15795 | 308 |
| A02089 | A16738 | 213 | A02090 | A02387 | 414 |
| A02090 | A02406 | 433 | A02090 | A03510 | 452 |
| A02091 | A02149 | 383 | A02091 | A02192 | 378 |
| A02091 | A02303 | 324 | A02091 | A02320 | 307 |
| A02091 | A02392 | 458 | A02091 | A02424 | 337 |
| A02091 | A02501 | 351 | A02091 | A02539 | 335 |
| A02091 | A02560 | 418 | A02091 | A02583 | 391 |
| A02091 | A02672 | 317 | A02091 | A02760 | 378 |
| A02091 | A03178 | 330 | A02091 | A03211 | 276 |
| A02091 | A03642 | 465 | A02091 | A04256 | 355 |
| A02091 | A04406 | 343 | A02091 | A04423 | 389 |
| A02091 | A04491 | 378 | A02091 | A05066 | 408 |
| A02091 | A05176 | 351 | A02091 | A05247 | 374 |
| A02091 | A05898 | 418 | A02091 | A10237 | 412 |
| A02091 | A15233 | 383 | A02092 | A02099 | 435 |
| A02092 | A02102 | 404 | A02092 | A02107 | 486 |
| A02092 | A02134 | 450 | A02092 | A02142 | 341 |
| A02092 | A02148 | 193 | A02092 | A02156 | 352 |
| A02092 | A02222 | 276 | A02092 | A02292 | 188 |
| A02092 | A02317 | 425 | A02092 | A02356 | 427 |
| A02092 | A02385 | 347 | A02092 | A02405 | 286 |
| A02092 | A02481 | 180 | A02092 | A02808 | 328 |
| A02092 | A03003 | 299 | A02092 | A03056 | 191 |
| A02092 | A03099 | 338 | A02092 | A03112 | 154 |
| A02092 | A03238 | 377 | A02092 | A03314 | 435 |
| A02092 | A04229 | 340 | A02092 | A04373 | 371 |
| A02092 | A04673 | 404 | A02092 | A04888 | 335 |
| A02092 | A04949 | 174 | A02092 | A05080 | 411 |

|        |        |     |        |        |     |
|--------|--------|-----|--------|--------|-----|
| A02092 | A05439 | 353 | A02092 | A06599 | 219 |
| A02092 | A07209 | 408 | A02092 | A07210 | 454 |
| A02092 | A08572 | 255 | A02092 | A09028 | 319 |
| A02092 | A09559 | 380 | A02092 | A09977 | 246 |
| A02092 | A14190 | 177 | A02092 | A14210 | 157 |
| A02092 | A14253 | 190 | A02092 | A14258 | 179 |
| A02092 | A14375 | 274 | A02092 | A14511 | 151 |
| A02093 | A02389 | 466 | A02093 | A03410 | 360 |
| A02093 | A06455 | 401 | A02093 | A07205 | 316 |
| A02093 | A09414 | 452 | A02094 | A02390 | 386 |
| A02094 | A02521 | 182 | A02094 | A03115 | 258 |
| A02094 | A03639 | 272 | A02094 | A06037 | 165 |
| A02094 | A08575 | 424 | A02094 | A09068 | 455 |
| A02094 | A09417 | 439 | A02095 | A02355 | 383 |
| A02095 | A02837 | 201 | A02095 | A02982 | 162 |
| A02095 | A03052 | 462 | A02095 | A03067 | 457 |
| A02095 | A05506 | 386 | A02095 | A07209 | 193 |
| A02095 | A07218 | 170 | A02095 | A08827 | 374 |
| A02095 | A09922 | 416 | A02095 | A10638 | 389 |
| A02096 | A02102 | 412 | A02096 | A02356 | 358 |
| A02096 | A02443 | 281 | A02096 | A02859 | 223 |
| A02096 | A03739 | 201 | A02096 | A04770 | 333 |
| A02096 | A05157 | 428 | A02096 | A05229 | 473 |
| A02096 | A05439 | 470 | A02096 | A07209 | 485 |
| A02096 | A08417 | 311 | A02096 | A08630 | 333 |
| A02096 | A09509 | 256 | A02096 | A12412 | 379 |
| A02097 | A02214 | 290 | A02097 | A02257 | 230 |
| A02097 | A03044 | 310 | A02097 | A03069 | 479 |
| A02097 | A03184 | 310 | A02097 | A03238 | 204 |
| A02097 | A03545 | 165 | A02097 | A03773 | 413 |
| A02097 | A04025 | 307 | A02097 | A04369 | 226 |
| A02097 | A04927 | 238 | A02097 | A06405 | 218 |
| A02097 | A06547 | 405 | A02097 | A06764 | 347 |
| A02097 | A07209 | 182 | A02097 | A07440 | 319 |
| A02097 | A07503 | 326 | A02097 | A07952 | 374 |
| A02097 | A08089 | 491 | A02097 | A08209 | 257 |
| A02097 | A08584 | 382 | A02097 | A08647 | 491 |
| A02097 | A08693 | 486 | A02097 | A09837 | 337 |
| A02097 | A10527 | 491 | A02097 | A10678 | 469 |
| A02097 | A10762 | 488 | A02097 | A13181 | 221 |
| A02097 | A15992 | 491 | A02098 | A05222 | 446 |
| A02098 | A05330 | 330 | A02098 | A05332 | 313 |
| A02098 | A05609 | 321 | A02098 | A07222 | 302 |
| A02098 | A07931 | 288 | A02098 | A15498 | 463 |
| A02099 | A02983 | 202 | A02099 | A03104 | 489 |
| A02099 | A03314 | 474 | A02099 | A04252 | 438 |

|        |        |     |        |        |     |
|--------|--------|-----|--------|--------|-----|
| A02099 | A05439 | 452 | A02099 | A07209 | 461 |
| A02099 | A09028 | 326 | A02099 | A09559 | 385 |
| A02099 | A09886 | 414 | A02099 | A14190 | 187 |
| A02099 | A14210 | 301 | A02099 | A14511 | 160 |
| A02099 | A16300 | 162 | A02099 | A16904 | 229 |
| A02100 | A02223 | 385 | A02101 | A03186 | 343 |
| A02102 | A02107 | 408 | A02102 | A02134 | 425 |
| A02102 | A02142 | 396 | A02102 | A02326 | 396 |
| A02102 | A02356 | 398 | A02102 | A04163 | 375 |
| A02102 | A04673 | 434 | A02102 | A05580 | 434 |
| A02102 | A15498 | 205 | A02103 | A14399 | 311 |
| A02104 | A02105 | 347 | A02104 | A02141 | 367 |
| A02104 | A02251 | 302 | A02104 | A02301 | 322 |
| A02104 | A02305 | 311 | A02104 | A02306 | 232 |
| A02104 | A02425 | 382 | A02104 | A02502 | 198 |
| A02104 | A02667 | 291 | A02104 | A02709 | 228 |
| A02104 | A02981 | 307 | A02104 | A03053 | 430 |
| A02104 | A03054 | 416 | A02104 | A03436 | 221 |
| A02104 | A04020 | 179 | A02104 | A04218 | 364 |
| A02104 | A04471 | 374 | A02104 | A13942 | 321 |
| A02105 | A02112 | 210 | A02105 | A02493 | 229 |
| A02105 | A02917 | 256 | A02105 | A03053 | 308 |
| A02105 | A03054 | 274 | A02105 | A03171 | 165 |
| A02105 | A03408 | 160 | A02105 | A03609 | 207 |
| A02105 | A03990 | 245 | A02105 | A04002 | 263 |
| A02105 | A04471 | 340 | A02105 | A04909 | 313 |
| A02105 | A05122 | 353 | A02105 | A07768 | 215 |
| A02105 | A08891 | 288 | A02105 | A09149 | 252 |
| A02105 | A14366 | 170 | A02106 | A02149 | 249 |
| A02106 | A02318 | 263 | A02106 | A02321 | 311 |
| A02106 | A02418 | 312 | A02106 | A02463 | 241 |
| A02106 | A02621 | 190 | A02106 | A02694 | 221 |
| A02106 | A02773 | 314 | A02106 | A03041 | 251 |
| A02106 | A03398 | 185 | A02106 | A03412 | 154 |
| A02106 | A03451 | 311 | A02106 | A03773 | 157 |
| A02106 | A03820 | 382 | A02106 | A04001 | 291 |
| A02106 | A04182 | 229 | A02106 | A04184 | 274 |
| A02106 | A04236 | 319 | A02106 | A04706 | 183 |
| A02106 | A04838 | 439 | A02106 | A04911 | 375 |
| A02106 | A05142 | 311 | A02106 | A05354 | 302 |
| A02106 | A06654 | 490 | A02106 | A08189 | 344 |
| A02106 | A08255 | 154 | A02106 | A08301 | 185 |
| A02106 | A08869 | 367 | A02106 | A09813 | 383 |
| A02106 | A09814 | 286 | A02106 | A10039 | 272 |
| A02106 | A10083 | 213 | A02106 | A10544 | 246 |
| A02106 | A10754 | 187 | A02106 | A11132 | 165 |

|        |        |     |        |        |     |
|--------|--------|-----|--------|--------|-----|
| A02106 | A12079 | 324 | A02106 | A12665 | 157 |
| A02106 | A13665 | 204 | A02106 | A14583 | 257 |
| A02107 | A02134 | 452 | A02107 | A02138 | 401 |
| A02107 | A02142 | 430 | A02107 | A02148 | 210 |
| A02107 | A02222 | 288 | A02107 | A02309 | 333 |
| A02107 | A02317 | 430 | A02107 | A02461 | 465 |
| A02107 | A02670 | 462 | A02107 | A02772 | 357 |
| A02107 | A02789 | 430 | A02107 | A03050 | 154 |
| A02107 | A03099 | 350 | A02107 | A03126 | 176 |
| A02107 | A03238 | 385 | A02107 | A03788 | 364 |
| A02107 | A04163 | 414 | A02107 | A04373 | 378 |
| A02107 | A04457 | 474 | A02107 | A04673 | 408 |
| A02107 | A05138 | 341 | A02107 | A05535 | 393 |
| A02107 | A05768 | 339 | A02107 | A05846 | 481 |
| A02107 | A06091 | 324 | A02107 | A07143 | 302 |
| A02107 | A10625 | 165 | A02107 | A14253 | 205 |
| A02107 | A14258 | 195 | A02108 | A02109 | 328 |
| A02108 | A02110 | 140 | A02108 | A02154 | 223 |
| A02108 | A02231 | 218 | A02108 | A02240 | 262 |
| A02108 | A02299 | 279 | A02108 | A02301 | 174 |
| A02108 | A02303 | 457 | A02108 | A02310 | 199 |
| A02108 | A02320 | 384 | A02108 | A02323 | 213 |
| A02108 | A02325 | 162 | A02108 | A02329 | 184 |
| A02108 | A02335 | 217 | A02108 | A02338 | 196 |
| A02108 | A02427 | 490 | A02108 | A02428 | 196 |
| A02108 | A02436 | 140 | A02108 | A02444 | 430 |
| A02108 | A02450 | 380 | A02108 | A02468 | 491 |
| A02108 | A02469 | 176 | A02108 | A02470 | 65  |
| A02108 | A02479 | 185 | A02108 | A02484 | 226 |
| A02108 | A02504 | 168 | A02108 | A02760 | 212 |
| A02108 | A02761 | 157 | A02108 | A02955 | 338 |
| A02108 | A03056 | 480 | A02108 | A03062 | 457 |
| A02108 | A03107 | 491 | A02108 | A03121 | 228 |
| A02108 | A03124 | 350 | A02108 | A03127 | 246 |
| A02108 | A03550 | 232 | A02108 | A03735 | 215 |
| A02108 | A03926 | 348 | A02108 | A04074 | 269 |
| A02108 | A04326 | 402 | A02108 | A04329 | 234 |
| A02108 | A04336 | 379 | A02108 | A04349 | 488 |
| A02108 | A04383 | 251 | A02108 | A04384 | 283 |
| A02108 | A04402 | 402 | A02108 | A04460 | 273 |
| A02108 | A04464 | 326 | A02108 | A04465 | 297 |
| A02108 | A04486 | 288 | A02108 | A04870 | 205 |
| A02108 | A05288 | 246 | A02108 | A05370 | 188 |
| A02108 | A05502 | 180 | A02108 | A05593 | 263 |
| A02108 | A06069 | 180 | A02108 | A06219 | 310 |
| A02108 | A06464 | 350 | A02108 | A06467 | 238 |

|        |        |     |        |        |     |
|--------|--------|-----|--------|--------|-----|
| A02108 | A06797 | 180 | A02108 | A07019 | 188 |
| A02108 | A07559 | 388 | A02108 | A07704 | 174 |
| A02108 | A08052 | 154 | A02108 | A08660 | 180 |
| A02108 | A08678 | 157 | A02108 | A09201 | 170 |
| A02108 | A09376 | 326 | A02108 | A09388 | 208 |
| A02108 | A09390 | 232 | A02108 | A09526 | 469 |
| A02108 | A10140 | 288 | A02108 | A10208 | 485 |
| A02108 | A10475 | 254 | A02108 | A11977 | 326 |
| A02108 | A13562 | 318 | A02108 | A14332 | 249 |
| A02108 | A14722 | 326 | A02108 | A15292 | 488 |
| A02108 | A15440 | 199 | A02108 | A15471 | 213 |
| A02108 | A15689 | 191 | A02108 | A16049 | 491 |
| A02109 | A02144 | 262 | A02109 | A02154 | 301 |
| A02109 | A02194 | 383 | A02109 | A02221 | 165 |
| A02109 | A02231 | 297 | A02109 | A02301 | 486 |
| A02109 | A02303 | 338 | A02109 | A02304 | 162 |
| A02109 | A02310 | 393 | A02109 | A02311 | 271 |
| A02109 | A02318 | 312 | A02109 | A02320 | 180 |
| A02109 | A02392 | 353 | A02109 | A02417 | 339 |
| A02109 | A02436 | 127 | A02109 | A02443 | 210 |
| A02109 | A02450 | 177 | A02109 | A02465 | 229 |
| A02109 | A02468 | 247 | A02109 | A02469 | 491 |
| A02109 | A02488 | 238 | A02109 | A02493 | 213 |
| A02109 | A02540 | 406 | A02109 | A02575 | 208 |
| A02109 | A02671 | 419 | A02109 | A02672 | 327 |
| A02109 | A02702 | 241 | A02109 | A02703 | 165 |
| A02109 | A02758 | 393 | A02109 | A02760 | 291 |
| A02109 | A02785 | 414 | A02109 | A02811 | 286 |
| A02109 | A02814 | 227 | A02109 | A02819 | 201 |
| A02109 | A02943 | 350 | A02109 | A03099 | 154 |
| A02109 | A03120 | 483 | A02109 | A03202 | 361 |
| A02109 | A03537 | 353 | A02109 | A03583 | 337 |
| A02109 | A03585 | 323 | A02109 | A03653 | 368 |
| A02109 | A03847 | 375 | A02109 | A03870 | 361 |
| A02109 | A03948 | 152 | A02109 | A03992 | 313 |
| A02109 | A04004 | 288 | A02109 | A04031 | 326 |
| A02109 | A04092 | 260 | A02109 | A04123 | 361 |
| A02109 | A04231 | 371 | A02109 | A04260 | 210 |
| A02109 | A04389 | 328 | A02109 | A04560 | 337 |
| A02109 | A04637 | 324 | A02109 | A04905 | 306 |
| A02109 | A05036 | 350 | A02109 | A05288 | 157 |
| A02109 | A05576 | 353 | A02109 | A05593 | 332 |
| A02109 | A05603 | 177 | A02109 | A05806 | 406 |
| A02109 | A06607 | 210 | A02109 | A06756 | 254 |
| A02109 | A07605 | 238 | A02109 | A10026 | 393 |
| A02109 | A11261 | 366 | A02109 | A14366 | 154 |

|        |        |     |        |        |     |
|--------|--------|-----|--------|--------|-----|
| A02110 | A02111 | 165 | A02110 | A02130 | 286 |
| A02110 | A02144 | 208 | A02110 | A02181 | 279 |
| A02110 | A02191 | 208 | A02110 | A02301 | 335 |
| A02110 | A02304 | 228 | A02110 | A02316 | 160 |
| A02110 | A02360 | 382 | A02110 | A02427 | 216 |
| A02110 | A02428 | 485 | A02110 | A02435 | 218 |
| A02110 | A02436 | 82  | A02110 | A02450 | 246 |
| A02110 | A02468 | 193 | A02110 | A02470 | 489 |
| A02110 | A02484 | 256 | A02110 | A02501 | 191 |
| A02110 | A02568 | 208 | A02110 | A02595 | 355 |
| A02110 | A02608 | 273 | A02110 | A02666 | 430 |
| A02110 | A02671 | 219 | A02110 | A02672 | 416 |
| A02110 | A02710 | 208 | A02110 | A02758 | 358 |
| A02110 | A02760 | 241 | A02110 | A02761 | 188 |
| A02110 | A02927 | 207 | A02110 | A03028 | 174 |
| A02110 | A03127 | 274 | A02110 | A03178 | 157 |
| A02110 | A03246 | 177 | A02110 | A03276 | 254 |
| A02110 | A03591 | 274 | A02110 | A03638 | 273 |
| A02110 | A03926 | 430 | A02110 | A04087 | 382 |
| A02110 | A04092 | 337 | A02110 | A04349 | 174 |
| A02110 | A04366 | 247 | A02110 | A04398 | 165 |
| A02110 | A04429 | 279 | A02110 | A04449 | 315 |
| A02110 | A04795 | 195 | A02110 | A05027 | 152 |
| A02110 | A05247 | 235 | A02110 | A05416 | 297 |
| A02110 | A06283 | 355 | A02110 | A06466 | 227 |
| A02110 | A06654 | 230 | A02110 | A07311 | 227 |
| A02110 | A07848 | 188 | A02110 | A09364 | 317 |
| A02110 | A09504 | 247 | A02110 | A10081 | 306 |
| A02110 | A10430 | 534 | A02110 | A11487 | 408 |
| A02110 | A11937 | 243 | A02110 | A12799 | 385 |
| A02110 | A12801 | 385 | A02110 | A15226 | 407 |
| A02110 | A15233 | 372 | A02110 | A15240 | 332 |
| A02110 | A15249 | 339 | A02110 | A15258 | 256 |
| A02110 | A15272 | 405 | A02110 | A15277 | 191 |
| A02110 | A15279 | 367 | A02110 | A15297 | 210 |
| A02110 | A15665 | 201 | A02110 | A15682 | 329 |
| A02110 | A15770 | 308 | A02110 | A16847 | 534 |
| A02110 | A17091 | 246 | A02111 | A02117 | 177 |
| A02111 | A02142 | 252 | A02111 | A02143 | 434 |
| A02111 | A02144 | 202 | A02111 | A02148 | 193 |
| A02111 | A02181 | 439 | A02111 | A02306 | 489 |
| A02111 | A02313 | 195 | A02111 | A02317 | 249 |
| A02111 | A02360 | 260 | A02111 | A02428 | 110 |
| A02111 | A02442 | 335 | A02111 | A02450 | 117 |
| A02111 | A02470 | 283 | A02111 | A02504 | 193 |
| A02111 | A02615 | 246 | A02111 | A02618 | 249 |



|        |        |     |        |        |     |
|--------|--------|-----|--------|--------|-----|
| A02111 | A02644 | 474 | A02111 | A02667 | 159 |
| A02111 | A02759 | 404 | A02111 | A02931 | 475 |
| A02111 | A02961 | 263 | A02111 | A03051 | 152 |
| A02111 | A03099 | 489 | A02111 | A03107 | 251 |
| A02111 | A03186 | 419 | A02111 | A03275 | 165 |
| A02111 | A03310 | 272 | A02111 | A03314 | 154 |
| A02111 | A03334 | 219 | A02111 | A03511 | 294 |
| A02111 | A03584 | 182 | A02111 | A03919 | 252 |
| A02111 | A03926 | 245 | A02111 | A03960 | 394 |
| A02111 | A03968 | 413 | A02111 | A04078 | 210 |
| A02111 | A04092 | 491 | A02111 | A04157 | 473 |
| A02111 | A04162 | 296 | A02111 | A04163 | 337 |
| A02111 | A04202 | 339 | A02111 | A04222 | 274 |
| A02111 | A04256 | 193 | A02111 | A04258 | 221 |
| A02111 | A04378 | 291 | A02111 | A04383 | 439 |
| A02111 | A04535 | 274 | A02111 | A04541 | 301 |
| A02111 | A04614 | 208 | A02111 | A04750 | 323 |
| A02111 | A04813 | 245 | A02111 | A04926 | 382 |
| A02111 | A05288 | 458 | A02111 | A05311 | 297 |
| A02111 | A05632 | 382 | A02111 | A05751 | 417 |
| A02111 | A05985 | 269 | A02111 | A06283 | 352 |
| A02111 | A06286 | 174 | A02111 | A06608 | 340 |
| A02111 | A08499 | 382 | A02111 | A08746 | 185 |
| A02111 | A08864 | 255 | A02111 | A09072 | 180 |
| A02111 | A09480 | 283 | A02111 | A10090 | 416 |
| A02111 | A10525 | 167 | A02111 | A10744 | 286 |
| A02111 | A10825 | 343 | A02111 | A11309 | 270 |
| A02111 | A12927 | 303 | A02111 | A13346 | 151 |
| A02111 | A14925 | 154 | A02111 | A15226 | 404 |
| A02111 | A15230 | 439 | A02111 | A15233 | 369 |
| A02111 | A15258 | 249 | A02111 | A15272 | 297 |
| A02111 | A15277 | 185 | A02111 | A16374 | 249 |
| A02112 | A02115 | 347 | A02112 | A02484 | 223 |
| A02112 | A03054 | 172 | A02112 | A03084 | 418 |
| A02112 | A03094 | 223 | A02112 | A03164 | 491 |
| A02112 | A03171 | 430 | A02112 | A03174 | 262 |
| A02112 | A03484 | 179 | A02112 | A03672 | 480 |
| A02112 | A04050 | 899 | A02112 | A04194 | 418 |
| A02112 | A04373 | 274 | A02112 | A04781 | 251 |
| A02112 | A04791 | 190 | A02112 | A05105 | 369 |
| A02112 | A05347 | 369 | A02112 | A05452 | 286 |
| A02112 | A05617 | 291 | A02112 | A05623 | 417 |
| A02112 | A05700 | 335 | A02112 | A05732 | 424 |
| A02112 | A06345 | 369 | A02112 | A06385 | 171 |
| A02112 | A06693 | 184 | A02112 | A08707 | 369 |
| A02112 | A09821 | 268 | A02112 | A11331 | 160 |

|        |        |     |        |        |     |
|--------|--------|-----|--------|--------|-----|
| A02112 | A11646 | 182 | A02112 | A12218 | 347 |
| A02112 | A14182 | 356 | A02112 | A14252 | 198 |
| A02112 | A15356 | 277 | A02112 | A15608 | 177 |
| A02112 | A16417 | 201 | A02113 | A02648 | 438 |
| A02113 | A02654 | 366 | A02113 | A03316 | 416 |
| A02113 | A14374 | 330 | A02114 | A02117 | 85  |
| A02114 | A02254 | 321 | A02114 | A02257 | 385 |
| A02114 | A02290 | 188 | A02114 | A02366 | 268 |
| A02114 | A02484 | 174 | A02114 | A02806 | 252 |
| A02114 | A03004 | 165 | A02114 | A03034 | 490 |
| A02114 | A03036 | 446 | A02114 | A03087 | 429 |
| A02114 | A03107 | 333 | A02114 | A03121 | 160 |
| A02114 | A03144 | 457 | A02114 | A03146 | 190 |
| A02114 | A03156 | 339 | A02114 | A03167 | 151 |
| A02114 | A03168 | 245 | A02114 | A03174 | 447 |
| A02114 | A03225 | 154 | A02114 | A03550 | 180 |
| A02114 | A03737 | 389 | A02114 | A03968 | 490 |
| A02114 | A04157 | 327 | A02114 | A04212 | 343 |
| A02114 | A04349 | 210 | A02114 | A04378 | 221 |
| A02114 | A04383 | 201 | A02114 | A04781 | 204 |
| A02114 | A04834 | 165 | A02114 | A05026 | 347 |
| A02114 | A05106 | 208 | A02114 | A05138 | 162 |
| A02114 | A05208 | 176 | A02114 | A05224 | 454 |
| A02114 | A05330 | 286 | A02114 | A05331 | 174 |
| A02114 | A05424 | 428 | A02114 | A05714 | 277 |
| A02114 | A06059 | 156 | A02114 | A06148 | 199 |
| A02114 | A06195 | 157 | A02114 | A06245 | 247 |
| A02114 | A06633 | 157 | A02114 | A06635 | 170 |
| A02114 | A06734 | 199 | A02114 | A06924 | 154 |
| A02114 | A06970 | 341 | A02114 | A07477 | 215 |
| A02114 | A07490 | 234 | A02114 | A07690 | 157 |
| A02114 | A07812 | 486 | A02114 | A08197 | 179 |
| A02114 | A08203 | 345 | A02114 | A08755 | 277 |
| A02114 | A09035 | 340 | A02114 | A09110 | 449 |
| A02114 | A09991 | 179 | A02114 | A10450 | 277 |
| A02114 | A10679 | 180 | A02114 | A13617 | 180 |
| A02114 | A14875 | 254 | A02114 | A15263 | 316 |
| A02114 | A15643 | 165 | A02114 | A16028 | 172 |
| A02114 | A16741 | 179 | A02115 | A03164 | 362 |
| A02115 | A03174 | 461 | A02116 | A02117 | 457 |
| A02116 | A02293 | 200 | A02116 | A02312 | 185 |
| A02116 | A02436 | 486 | A02116 | A02443 | 96  |
| A02116 | A02450 | 396 | A02116 | A02673 | 279 |
| A02116 | A03060 | 283 | A02116 | A03223 | 249 |
| A02116 | A03246 | 455 | A02116 | A03567 | 353 |
| A02116 | A03748 | 229 | A02116 | A04062 | 491 |

|        |        |     |        |        |     |
|--------|--------|-----|--------|--------|-----|
| A02116 | A04072 | 160 | A02116 | A04210 | 313 |
| A02116 | A04212 | 243 | A02116 | A04352 | 291 |
| A02116 | A05150 | 171 | A02116 | A05220 | 249 |
| A02116 | A05273 | 160 | A02116 | A05539 | 347 |
| A02116 | A05769 | 352 | A02116 | A05958 | 357 |
| A02116 | A06072 | 352 | A02116 | A06281 | 217 |
| A02116 | A06758 | 335 | A02116 | A07062 | 160 |
| A02116 | A07210 | 165 | A02116 | A07294 | 172 |
| A02116 | A07427 | 224 | A02116 | A08080 | 302 |
| A02116 | A08775 | 190 | A02116 | A08841 | 162 |
| A02116 | A08857 | 224 | A02116 | A09338 | 329 |
| A02116 | A09345 | 385 | A02116 | A09673 | 356 |
| A02116 | A09930 | 329 | A02116 | A10664 | 263 |
| A02116 | A11631 | 221 | A02116 | A11640 | 235 |
| A02116 | A11986 | 156 | A02116 | A12225 | 277 |
| A02116 | A12226 | 302 | A02116 | A12252 | 174 |
| A02116 | A12313 | 265 | A02116 | A14072 | 279 |
| A02116 | A14122 | 156 | A02116 | A14124 | 159 |
| A02116 | A14471 | 201 | A02116 | A14621 | 491 |
| A02116 | A15461 | 212 | A02116 | A15718 | 427 |
| A02116 | A15824 | 162 | A02116 | A16055 | 207 |
| A02117 | A02256 | 257 | A02117 | A02304 | 188 |
| A02117 | A02321 | 229 | A02117 | A02428 | 63  |
| A02117 | A02434 | 288 | A02117 | A02435 | 405 |
| A02117 | A02436 | 483 | A02117 | A02450 | 433 |
| A02117 | A02470 | 63  | A02117 | A02921 | 229 |
| A02117 | A03028 | 188 | A02117 | A03042 | 210 |
| A02117 | A03051 | 401 | A02117 | A03056 | 486 |
| A02117 | A03060 | 255 | A02117 | A03107 | 472 |
| A02117 | A03157 | 404 | A02117 | A03158 | 162 |
| A02117 | A03165 | 170 | A02117 | A03186 | 162 |
| A02117 | A03217 | 184 | A02117 | A03511 | 412 |
| A02117 | A03568 | 302 | A02117 | A03649 | 255 |
| A02117 | A03657 | 418 | A02117 | A03709 | 469 |
| A02117 | A03725 | 213 | A02117 | A03968 | 435 |
| A02117 | A04062 | 483 | A02117 | A04074 | 363 |
| A02117 | A04091 | 317 | A02117 | A04092 | 395 |
| A02117 | A04157 | 480 | A02117 | A04336 | 404 |
| A02117 | A04343 | 215 | A02117 | A04349 | 441 |
| A02117 | A04378 | 409 | A02117 | A04379 | 302 |
| A02117 | A04383 | 319 | A02117 | A04387 | 332 |
| A02117 | A04437 | 152 | A02117 | A04505 | 163 |
| A02117 | A04583 | 263 | A02117 | A04877 | 224 |
| A02117 | A04938 | 170 | A02117 | A04942 | 305 |
| A02117 | A04997 | 288 | A02117 | A05288 | 270 |
| A02117 | A05398 | 265 | A02117 | A05417 | 258 |

|        |        |     |        |        |     |
|--------|--------|-----|--------|--------|-----|
| A02117 | A05741 | 184 | A02117 | A05958 | 327 |
| A02117 | A06581 | 207 | A02117 | A06797 | 238 |
| A02117 | A06949 | 481 | A02117 | A07158 | 207 |
| A02117 | A07165 | 162 | A02117 | A07486 | 430 |
| A02117 | A07559 | 227 | A02117 | A08655 | 163 |
| A02117 | A08675 | 332 | A02117 | A09072 | 207 |
| A02117 | A09073 | 326 | A02117 | A09240 | 218 |
| A02117 | A09257 | 240 | A02117 | A09789 | 165 |
| A02117 | A09790 | 297 | A02117 | A09791 | 383 |
| A02117 | A10382 | 265 | A02117 | A10418 | 417 |
| A02117 | A10554 | 154 | A02117 | A11623 | 305 |
| A02117 | A11872 | 210 | A02117 | A11879 | 288 |
| A02117 | A12554 | 210 | A02117 | A12720 | 288 |
| A02117 | A13127 | 293 | A02117 | A14079 | 168 |
| A02117 | A14127 | 490 | A02117 | A14236 | 152 |
| A02117 | A14444 | 899 | A02117 | A14652 | 224 |
| A02117 | A15233 | 154 | A02117 | A15271 | 488 |
| A02117 | A15295 | 405 | A02118 | A02414 | 352 |
| A02118 | A02449 | 418 | A02118 | A02480 | 383 |
| A02118 | A02481 | 252 | A02118 | A02491 | 185 |
| A02118 | A02739 | 274 | A02118 | A02818 | 371 |
| A02118 | A02902 | 260 | A02118 | A03071 | 375 |
| A02118 | A03126 | 235 | A02118 | A03451 | 174 |
| A02118 | A04037 | 405 | A02119 | A02292 | 199 |
| A02119 | A02574 | 200 | A02119 | A02792 | 245 |
| A02119 | A03846 | 154 | A02119 | A09828 | 221 |
| A02119 | A10065 | 188 | A02119 | A10414 | 241 |
| A02119 | A10854 | 179 | A02119 | A11937 | 199 |
| A02119 | A14193 | 171 | A02120 | A02390 | 258 |
| A02120 | A02450 | 221 | A02120 | A02673 | 177 |
| A02120 | A03028 | 386 | A02120 | A03246 | 490 |
| A02120 | A04546 | 366 | A02120 | A10328 | 277 |
| A02120 | A12365 | 179 | A02120 | A14300 | 274 |
| A02120 | A14335 | 316 | A02120 | A14694 | 170 |
| A02120 | A15257 | 247 | A02121 | A02122 | 474 |
| A02121 | A02361 | 188 | A02121 | A02390 | 205 |
| A02121 | A02429 | 274 | A02121 | A02481 | 245 |
| A02121 | A02564 | 373 | A02121 | A02575 | 199 |
| A02121 | A02787 | 168 | A02121 | A02875 | 160 |
| A02121 | A02916 | 170 | A02121 | A03927 | 404 |
| A02121 | A04080 | 450 | A02121 | A05112 | 207 |
| A02121 | A06949 | 167 | A02121 | A08057 | 361 |
| A02121 | A08911 | 255 | A02121 | A09141 | 297 |
| A02121 | A10267 | 339 | A02121 | A10801 | 921 |
| A02121 | A14198 | 177 | A02121 | A16300 | 208 |
| A02122 | A02307 | 369 | A02122 | A02328 | 404 |

|        |        |     |        |        |     |
|--------|--------|-----|--------|--------|-----|
| A02122 | A02436 | 255 | A02122 | A02541 | 446 |
| A02122 | A02542 | 201 | A02122 | A02545 | 165 |
| A02122 | A02575 | 208 | A02122 | A02689 | 196 |
| A02122 | A02753 | 163 | A02122 | A02869 | 221 |
| A02122 | A02924 | 210 | A02122 | A02980 | 187 |
| A02122 | A03048 | 279 | A02122 | A03379 | 156 |
| A02122 | A03927 | 307 | A02122 | A04075 | 337 |
| A02122 | A04698 | 227 | A02122 | A04902 | 473 |
| A02122 | A05278 | 174 | A02122 | A05340 | 335 |
| A02122 | A05914 | 152 | A02122 | A05975 | 406 |
| A02122 | A05976 | 384 | A02122 | A05977 | 384 |
| A02122 | A05978 | 406 | A02122 | A06069 | 266 |
| A02122 | A06595 | 213 | A02122 | A07165 | 228 |
| A02122 | A07201 | 360 | A02122 | A07205 | 256 |
| A02122 | A07218 | 157 | A02122 | A07378 | 177 |
| A02122 | A08911 | 263 | A02122 | A09449 | 171 |
| A02123 | A09228 | 417 | A02123 | A14643 | 241 |
| A02124 | A02180 | 180 | A02124 | A02191 | 335 |
| A02124 | A02303 | 399 | A02124 | A03096 | 423 |
| A02124 | A04394 | 395 | A02124 | A05826 | 398 |
| A02124 | A12824 | 154 | A02124 | A14722 | 412 |
| A02125 | A02215 | 218 | A02125 | A04982 | 406 |
| A02125 | A10875 | 364 | A02126 | A02644 | 340 |
| A02126 | A03498 | 477 | A02126 | A03639 | 936 |
| A02126 | A03750 | 310 | A02126 | A04147 | 335 |
| A02126 | A04647 | 374 | A02126 | A05533 | 326 |
| A02126 | A09217 | 414 | A02127 | A02668 | 350 |
| A02128 | A02709 | 345 | A02128 | A13734 | 302 |
| A02129 | A02443 | 469 | A02129 | A04389 | 391 |
| A02129 | A06584 | 326 | A02129 | A07520 | 294 |
| A02130 | A03922 | 191 | A02130 | A15321 | 228 |
| A02131 | A02221 | 243 | A02131 | A02228 | 191 |
| A02131 | A02320 | 257 | A02131 | A02322 | 374 |
| A02131 | A02452 | 230 | A02131 | A03076 | 252 |
| A02131 | A03077 | 299 | A02131 | A03123 | 391 |
| A02131 | A04349 | 299 | A02131 | A04410 | 270 |
| A02131 | A06187 | 418 | A02131 | A06195 | 266 |
| A02131 | A11735 | 270 | A02131 | A14279 | 179 |
| A02131 | A14366 | 230 | A02131 | A14524 | 329 |
| A02131 | A14986 | 259 | A02131 | A15471 | 347 |
| A02131 | A17198 | 243 | A02132 | A02138 | 371 |
| A02132 | A02215 | 182 | A02132 | A02654 | 330 |
| A02132 | A03788 | 399 | A02132 | A04839 | 297 |
| A02132 | A05934 | 413 | A02132 | A13871 | 347 |
| A02132 | A14366 | 276 | A02132 | A15498 | 168 |
| A02133 | A02329 | 401 | A02133 | A02785 | 337 |

|        |        |     |        |        |     |
|--------|--------|-----|--------|--------|-----|
| A02133 | A05288 | 215 | A02133 | A07297 | 436 |
| A02134 | A02142 | 382 | A02134 | A02148 | 266 |
| A02134 | A02156 | 398 | A02134 | A04673 | 425 |
| A02134 | A05138 | 374 | A02134 | A05768 | 372 |
| A02134 | A06067 | 345 | A02134 | A06091 | 361 |
| A02135 | A02136 | 455 | A02135 | A02137 | 414 |
| A02135 | A02138 | 285 | A02135 | A02439 | 419 |
| A02135 | A02456 | 313 | A02135 | A02459 | 286 |
| A02135 | A02460 | 212 | A02135 | A02639 | 157 |
| A02135 | A02654 | 252 | A02135 | A02655 | 368 |
| A02135 | A02711 | 165 | A02135 | A04217 | 274 |
| A02135 | A05577 | 475 | A02135 | A05634 | 339 |
| A02135 | A06415 | 424 | A02135 | A06627 | 288 |
| A02135 | A06747 | 278 | A02135 | A07152 | 221 |
| A02135 | A07192 | 262 | A02135 | A13821 | 475 |
| A02135 | A14071 | 207 | A02135 | A14125 | 491 |
| A02135 | A14374 | 195 | A02135 | A14391 | 200 |
| A02135 | A15425 | 208 | A02135 | A16342 | 414 |
| A02136 | A02138 | 378 | A02136 | A02240 | 373 |
| A02136 | A02367 | 416 | A02136 | A02412 | 238 |
| A02136 | A02439 | 468 | A02136 | A02458 | 369 |
| A02136 | A02459 | 291 | A02136 | A02460 | 414 |
| A02136 | A02654 | 257 | A02136 | A02655 | 371 |
| A02136 | A03006 | 288 | A02136 | A03239 | 256 |
| A02136 | A03746 | 417 | A02136 | A03788 | 338 |
| A02136 | A03923 | 316 | A02136 | A04040 | 332 |
| A02136 | A04217 | 279 | A02136 | A04255 | 391 |
| A02136 | A04671 | 303 | A02136 | A05577 | 383 |
| A02136 | A05679 | 358 | A02136 | A06414 | 329 |
| A02136 | A06415 | 452 | A02136 | A06604 | 353 |
| A02136 | A06747 | 281 | A02136 | A07126 | 307 |
| A02136 | A07152 | 224 | A02136 | A07766 | 152 |
| A02136 | A13821 | 351 | A02136 | A14071 | 210 |
| A02136 | A14125 | 479 | A02136 | A14190 | 157 |
| A02136 | A14199 | 177 | A02136 | A14366 | 319 |
| A02136 | A14372 | 243 | A02136 | A14374 | 332 |
| A02136 | A14391 | 205 | A02136 | A14439 | 393 |
| A02136 | A14554 | 252 | A02136 | A15290 | 340 |
| A02136 | A15425 | 212 | A02136 | A15649 | 160 |
| A02136 | A16015 | 363 | A02136 | A16342 | 416 |
| A02136 | A16626 | 256 | A02137 | A14125 | 386 |
| A02138 | A02143 | 196 | A02138 | A02240 | 401 |
| A02138 | A02283 | 198 | A02138 | A02313 | 102 |
| A02138 | A02412 | 484 | A02138 | A02439 | 480 |
| A02138 | A02457 | 345 | A02138 | A02458 | 491 |
| A02138 | A02459 | 465 | A02138 | A02460 | 491 |

|        |        |     |        |        |     |
|--------|--------|-----|--------|--------|-----|
| A02138 | A02461 | 312 | A02138 | A02606 | 152 |
| A02138 | A02654 | 473 | A02138 | A02655 | 399 |
| A02138 | A02670 | 296 | A02138 | A02789 | 215 |
| A02138 | A02945 | 272 | A02138 | A03006 | 465 |
| A02138 | A03063 | 241 | A02138 | A03104 | 127 |
| A02138 | A03224 | 221 | A02138 | A03239 | 355 |
| A02138 | A03259 | 305 | A02138 | A03735 | 274 |
| A02138 | A03761 | 480 | A02138 | A03788 | 491 |
| A02138 | A03804 | 408 | A02138 | A03848 | 198 |
| A02138 | A03900 | 154 | A02138 | A03903 | 235 |
| A02138 | A03914 | 212 | A02138 | A03923 | 477 |
| A02138 | A03974 | 177 | A02138 | A04040 | 160 |
| A02138 | A04130 | 485 | A02138 | A04217 | 380 |
| A02138 | A04457 | 385 | A02138 | A05083 | 467 |
| A02138 | A05155 | 221 | A02138 | A05210 | 159 |
| A02138 | A05517 | 423 | A02138 | A05535 | 366 |
| A02138 | A05577 | 491 | A02138 | A05580 | 283 |
| A02138 | A05597 | 262 | A02138 | A05679 | 489 |
| A02138 | A05846 | 385 | A02138 | A05934 | 241 |
| A02138 | A06390 | 328 | A02138 | A06414 | 288 |
| A02138 | A06415 | 490 | A02138 | A06604 | 195 |
| A02138 | A06625 | 195 | A02138 | A06783 | 429 |
| A02138 | A07126 | 350 | A02138 | A07133 | 269 |
| A02138 | A07145 | 173 | A02138 | A07152 | 483 |
| A02138 | A07209 | 439 | A02138 | A07799 | 191 |
| A02138 | A08193 | 224 | A02138 | A08238 | 165 |
| A02138 | A08630 | 243 | A02138 | A08667 | 374 |
| A02138 | A09552 | 165 | A02138 | A09847 | 172 |
| A02138 | A10172 | 385 | A02138 | A10319 | 274 |
| A02138 | A10336 | 219 | A02138 | A10571 | 377 |
| A02138 | A10744 | 195 | A02138 | A10993 | 470 |
| A02138 | A11276 | 328 | A02138 | A11455 | 241 |
| A02138 | A12472 | 290 | A02138 | A13131 | 195 |
| A02138 | A13638 | 259 | A02138 | A13821 | 191 |
| A02138 | A13903 | 219 | A02138 | A13988 | 411 |
| A02138 | A14012 | 157 | A02138 | A14071 | 357 |
| A02138 | A14125 | 456 | A02138 | A14135 | 312 |
| A02138 | A14146 | 263 | A02138 | A14190 | 191 |
| A02138 | A14199 | 361 | A02138 | A14366 | 491 |
| A02138 | A14372 | 479 | A02138 | A14374 | 491 |
| A02138 | A14391 | 488 | A02138 | A14418 | 208 |
| A02138 | A14430 | 221 | A02138 | A14439 | 472 |
| A02138 | A14502 | 335 | A02138 | A14554 | 350 |
| A02138 | A14599 | 396 | A02138 | A15292 | 213 |
| A02138 | A15295 | 489 | A02138 | A15300 | 170 |
| A02138 | A15314 | 183 | A02138 | A15322 | 246 |

|        |        |     |        |        |     |
|--------|--------|-----|--------|--------|-----|
| A02138 | A15425 | 489 | A02138 | A15480 | 361 |
| A02138 | A15642 | 418 | A02138 | A15904 | 235 |
| A02138 | A16001 | 328 | A02138 | A16108 | 223 |
| A02138 | A16323 | 165 | A02138 | A16640 | 159 |
| A02139 | A02288 | 356 | A02139 | A02415 | 270 |
| A02139 | A02416 | 185 | A02139 | A02464 | 281 |
| A02139 | A03155 | 302 | A02139 | A03219 | 260 |
| A02139 | A03259 | 174 | A02139 | A03399 | 238 |
| A02139 | A03759 | 252 | A02139 | A03760 | 358 |
| A02139 | A04076 | 473 | A02139 | A04308 | 340 |
| A02139 | A04398 | 254 | A02139 | A05182 | 424 |
| A02139 | A07201 | 170 | A02139 | A08840 | 213 |
| A02139 | A09202 | 386 | A02139 | A09447 | 461 |
| A02139 | A09732 | 157 | A02139 | A14378 | 174 |
| A02139 | A15292 | 177 | A02139 | A15422 | 202 |
| A02139 | A15432 | 347 | A02139 | A16738 | 159 |
| A02140 | A02430 | 452 | A02141 | A02143 | 224 |
| A02141 | A02174 | 228 | A02141 | A02299 | 373 |
| A02141 | A02301 | 302 | A02141 | A02306 | 207 |
| A02141 | A02382 | 191 | A02141 | A02425 | 241 |
| A02141 | A02447 | 356 | A02141 | A02481 | 180 |
| A02141 | A02819 | 457 | A02141 | A03054 | 468 |
| A02141 | A03081 | 306 | A02141 | A03406 | 252 |
| A02141 | A03651 | 195 | A02141 | A03820 | 204 |
| A02141 | A04218 | 351 | A02141 | A04280 | 201 |
| A02141 | A04471 | 362 | A02141 | A04909 | 338 |
| A02141 | A04915 | 404 | A02141 | A05575 | 371 |
| A02141 | A05796 | 467 | A02141 | A06447 | 422 |
| A02141 | A06623 | 245 | A02141 | A07158 | 226 |
| A02141 | A08372 | 210 | A02141 | A08911 | 306 |
| A02141 | A12383 | 168 | A02141 | A14642 | 229 |
| A02141 | A15626 | 185 | A02141 | A15649 | 177 |
| A02141 | A16222 | 352 | A02141 | A16738 | 176 |
| A02142 | A02148 | 174 | A02142 | A02156 | 205 |
| A02142 | A02305 | 276 | A02142 | A02306 | 321 |
| A02142 | A02309 | 408 | A02142 | A02326 | 328 |
| A02142 | A02415 | 384 | A02142 | A02416 | 318 |
| A02142 | A02423 | 286 | A02142 | A02461 | 343 |
| A02142 | A02490 | 423 | A02142 | A02582 | 267 |
| A02142 | A02587 | 353 | A02142 | A02749 | 160 |
| A02142 | A02772 | 424 | A02142 | A02800 | 335 |
| A02142 | A03157 | 174 | A02142 | A03578 | 257 |
| A02142 | A04163 | 445 | A02142 | A04423 | 334 |
| A02142 | A04562 | 301 | A02142 | A04607 | 208 |
| A02142 | A04652 | 290 | A02142 | A04673 | 396 |
| A02142 | A05309 | 152 | A02142 | A05568 | 154 |



|        |        |     |        |        |     |
|--------|--------|-----|--------|--------|-----|
| A02142 | A05790 | 339 | A02142 | A05791 | 283 |
| A02142 | A05923 | 326 | A02142 | A05944 | 257 |
| A02142 | A07143 | 486 | A02142 | A08714 | 396 |
| A02142 | A09550 | 358 | A02142 | A10594 | 205 |
| A02142 | A14146 | 313 | A02142 | A14371 | 160 |
| A02142 | A15301 | 213 | A02142 | A15302 | 227 |
| A02143 | A02144 | 154 | A02143 | A02148 | 224 |
| A02143 | A02161 | 395 | A02143 | A02171 | 340 |
| A02143 | A02191 | 154 | A02143 | A02217 | 293 |
| A02143 | A02245 | 183 | A02143 | A02251 | 252 |
| A02143 | A02260 | 191 | A02143 | A02261 | 191 |
| A02143 | A02263 | 265 | A02143 | A02288 | 369 |
| A02143 | A02304 | 394 | A02143 | A02313 | 146 |
| A02143 | A02361 | 202 | A02143 | A02382 | 369 |
| A02143 | A02384 | 236 | A02143 | A02416 | 443 |
| A02143 | A02473 | 236 | A02143 | A02477 | 174 |
| A02143 | A02491 | 230 | A02143 | A02494 | 358 |
| A02143 | A02502 | 190 | A02143 | A02505 | 408 |
| A02143 | A02550 | 256 | A02143 | A02606 | 201 |
| A02143 | A02615 | 199 | A02143 | A02644 | 157 |
| A02143 | A02666 | 201 | A02143 | A02751 | 179 |
| A02143 | A02788 | 243 | A02143 | A02875 | 165 |
| A02143 | A02877 | 196 | A02143 | A02902 | 216 |
| A02143 | A03025 | 265 | A02143 | A03047 | 243 |
| A02143 | A03055 | 452 | A02143 | A03081 | 286 |
| A02143 | A03181 | 247 | A02143 | A03183 | 259 |
| A02143 | A03185 | 457 | A02143 | A03201 | 157 |
| A02143 | A03218 | 187 | A02143 | A03219 | 340 |
| A02143 | A03229 | 252 | A02143 | A03261 | 167 |
| A02143 | A03263 | 340 | A02143 | A03305 | 486 |
| A02143 | A03399 | 424 | A02143 | A03408 | 227 |
| A02143 | A03451 | 462 | A02143 | A03634 | 174 |
| A02143 | A03639 | 107 | A02143 | A03680 | 160 |
| A02143 | A03749 | 338 | A02143 | A03788 | 353 |
| A02143 | A03820 | 241 | A02143 | A03892 | 899 |
| A02143 | A03973 | 299 | A02143 | A04078 | 162 |
| A02143 | A04082 | 193 | A02143 | A04117 | 393 |
| A02143 | A04163 | 157 | A02143 | A04257 | 366 |
| A02143 | A04268 | 246 | A02143 | A04365 | 279 |
| A02143 | A04368 | 243 | A02143 | A04415 | 199 |
| A02143 | A04417 | 422 | A02143 | A04473 | 217 |
| A02143 | A04492 | 324 | A02143 | A04614 | 159 |
| A02143 | A04643 | 404 | A02143 | A04759 | 483 |
| A02143 | A04802 | 388 | A02143 | A04905 | 338 |
| A02143 | A04909 | 200 | A02143 | A04976 | 371 |
| A02143 | A04996 | 180 | A02143 | A05124 | 266 |

|        |        |     |        |        |     |
|--------|--------|-----|--------|--------|-----|
| A02143 | A05145 | 256 | A02143 | A05256 | 191 |
| A02143 | A05289 | 301 | A02143 | A05473 | 154 |
| A02143 | A05497 | 310 | A02143 | A05517 | 200 |
| A02143 | A05679 | 205 | A02143 | A05843 | 335 |
| A02143 | A05901 | 391 | A02143 | A05914 | 324 |
| A02143 | A05959 | 379 | A02143 | A06078 | 205 |
| A02143 | A06581 | 310 | A02143 | A06623 | 198 |
| A02143 | A07145 | 455 | A02143 | A07158 | 452 |
| A02143 | A07163 | 160 | A02143 | A07173 | 324 |
| A02143 | A07261 | 335 | A02143 | A07753 | 205 |
| A02143 | A08576 | 223 | A02143 | A08704 | 286 |
| A02143 | A09020 | 195 | A02143 | A09079 | 321 |
| A02143 | A09085 | 232 | A02143 | A09092 | 447 |
| A02143 | A09208 | 274 | A02143 | A09212 | 404 |
| A02143 | A09428 | 210 | A02143 | A09433 | 457 |
| A02143 | A09570 | 366 | A02143 | A09803 | 210 |
| A02143 | A09900 | 160 | A02143 | A09970 | 416 |
| A02143 | A10044 | 299 | A02143 | A10045 | 299 |
| A02143 | A10046 | 310 | A02143 | A10985 | 310 |
| A02143 | A11035 | 286 | A02143 | A11090 | 269 |
| A02143 | A11125 | 208 | A02143 | A11771 | 229 |
| A02143 | A14007 | 466 | A02143 | A14190 | 196 |
| A02143 | A14366 | 484 | A02143 | A14374 | 345 |
| A02143 | A14387 | 227 | A02143 | A14391 | 168 |
| A02143 | A14535 | 265 | A02143 | A14599 | 159 |
| A02143 | A14642 | 357 | A02143 | A14692 | 160 |
| A02143 | A15285 | 224 | A02143 | A15394 | 351 |
| A02143 | A15395 | 226 | A02143 | A15518 | 358 |
| A02143 | A15601 | 191 | A02143 | A16222 | 223 |
| A02143 | A16256 | 299 | A02143 | A16635 | 286 |
| A02143 | A16738 | 425 | A02144 | A02181 | 483 |
| A02144 | A02188 | 382 | A02144 | A02221 | 420 |
| A02144 | A02228 | 215 | A02144 | A02278 | 173 |
| A02144 | A02301 | 241 | A02144 | A02303 | 477 |
| A02144 | A02310 | 382 | A02144 | A02316 | 199 |
| A02144 | A02320 | 162 | A02144 | A02322 | 317 |
| A02144 | A02427 | 252 | A02144 | A02444 | 308 |
| A02144 | A02468 | 230 | A02144 | A02621 | 475 |
| A02144 | A02666 | 443 | A02144 | A02671 | 174 |
| A02144 | A02672 | 310 | A02144 | A03061 | 355 |
| A02144 | A03076 | 291 | A02144 | A03077 | 341 |
| A02144 | A03097 | 445 | A02144 | A03104 | 335 |
| A02144 | A03107 | 167 | A02144 | A03123 | 341 |
| A02144 | A03376 | 241 | A02144 | A03417 | 218 |
| A02144 | A03771 | 210 | A02144 | A03976 | 177 |
| A02144 | A04023 | 260 | A02144 | A04556 | 294 |

|        |        |     |        |        |     |
|--------|--------|-----|--------|--------|-----|
| A02144 | A04807 | 202 | A02144 | A04870 | 272 |
| A02144 | A04879 | 151 | A02144 | A05221 | 247 |
| A02144 | A05415 | 167 | A02144 | A05439 | 154 |
| A02144 | A05801 | 462 | A02144 | A05932 | 400 |
| A02144 | A06415 | 230 | A02144 | A06623 | 174 |
| A02144 | A06701 | 221 | A02144 | A07019 | 256 |
| A02144 | A07126 | 263 | A02144 | A07209 | 162 |
| A02144 | A07634 | 338 | A02144 | A08686 | 154 |
| A02144 | A08700 | 290 | A02144 | A09952 | 157 |
| A02144 | A11278 | 263 | A02144 | A14071 | 159 |
| A02144 | A14207 | 191 | A02144 | A14391 | 152 |
| A02144 | A14635 | 213 | A02144 | A15277 | 229 |
| A02144 | A15416 | 167 | A02144 | A16216 | 382 |
| A02144 | A16274 | 182 | A02144 | A16904 | 369 |
| A02145 | A02147 | 344 | A02145 | A02305 | 461 |
| A02145 | A02306 | 435 | A02145 | A02752 | 213 |
| A02145 | A02783 | 267 | A02145 | A02785 | 297 |
| A02145 | A03186 | 174 | A02145 | A03402 | 446 |
| A02145 | A03552 | 335 | A02145 | A03846 | 221 |
| A02145 | A03899 | 245 | A02145 | A04051 | 283 |
| A02145 | A04260 | 236 | A02145 | A04437 | 452 |
| A02145 | A04808 | 364 | A02145 | A05356 | 162 |
| A02145 | A05577 | 157 | A02145 | A06607 | 154 |
| A02145 | A07695 | 210 | A02145 | A14197 | 183 |
| A02145 | A14316 | 338 | A02145 | A15539 | 246 |
| A02146 | A02177 | 408 | A02146 | A02186 | 491 |
| A02146 | A02190 | 341 | A02146 | A02215 | 393 |
| A02146 | A02238 | 277 | A02146 | A02291 | 196 |
| A02146 | A02298 | 475 | A02146 | A02300 | 190 |
| A02146 | A02352 | 364 | A02146 | A02385 | 310 |
| A02146 | A02412 | 334 | A02146 | A02413 | 259 |
| A02146 | A02414 | 254 | A02146 | A02416 | 279 |
| A02146 | A02458 | 213 | A02146 | A02460 | 180 |
| A02146 | A02465 | 227 | A02146 | A02478 | 374 |
| A02146 | A02490 | 467 | A02146 | A02491 | 160 |
| A02146 | A02505 | 232 | A02146 | A02542 | 198 |
| A02146 | A02582 | 232 | A02146 | A02601 | 221 |
| A02146 | A02605 | 277 | A02146 | A02644 | 380 |
| A02146 | A02668 | 451 | A02146 | A02691 | 162 |
| A02146 | A02756 | 433 | A02146 | A02771 | 343 |
| A02146 | A02836 | 173 | A02146 | A02874 | 193 |
| A02146 | A02875 | 165 | A02146 | A02922 | 227 |
| A02146 | A03053 | 293 | A02146 | A03069 | 151 |
| A02146 | A03080 | 475 | A02146 | A03095 | 201 |
| A02146 | A03112 | 218 | A02146 | A03351 | 176 |
| A02146 | A03361 | 269 | A02146 | A03369 | 208 |

|        |        |     |        |        |     |
|--------|--------|-----|--------|--------|-----|
| A02146 | A03370 | 443 | A02146 | A03371 | 207 |
| A02146 | A03373 | 353 | A02146 | A03378 | 227 |
| A02146 | A03379 | 450 | A02146 | A03408 | 363 |
| A02146 | A03414 | 205 | A02146 | A03639 | 210 |
| A02146 | A03653 | 243 | A02146 | A03773 | 213 |
| A02146 | A03936 | 290 | A02146 | A03976 | 191 |
| A02146 | A04051 | 246 | A02146 | A04193 | 297 |
| A02146 | A04385 | 347 | A02146 | A04409 | 322 |
| A02146 | A04456 | 391 | A02146 | A04824 | 324 |
| A02146 | A04830 | 399 | A02146 | A04875 | 340 |
| A02146 | A04989 | 430 | A02146 | A05136 | 358 |
| A02146 | A05264 | 283 | A02146 | A05427 | 167 |
| A02146 | A05731 | 313 | A02146 | A06251 | 358 |
| A02146 | A07218 | 424 | A02146 | A07440 | 319 |
| A02146 | A11911 | 167 | A02146 | A13597 | 337 |
| A02146 | A16636 | 201 | A02147 | A02175 | 329 |
| A02147 | A02187 | 347 | A02147 | A02469 | 312 |
| A02147 | A02785 | 332 | A02147 | A02803 | 201 |
| A02147 | A03034 | 374 | A02147 | A03080 | 146 |
| A02147 | A05264 | 333 | A02147 | A07191 | 258 |
| A02147 | A10085 | 285 | A02147 | A12361 | 281 |
| A02147 | A13879 | 288 | A02148 | A02156 | 454 |
| A02148 | A02171 | 177 | A02148 | A02188 | 419 |
| A02148 | A02199 | 330 | A02148 | A02209 | 369 |
| A02148 | A02213 | 399 | A02148 | A02222 | 491 |
| A02148 | A02228 | 283 | A02148 | A02306 | 281 |
| A02148 | A02311 | 260 | A02148 | A02312 | 163 |
| A02148 | A02326 | 172 | A02148 | A02330 | 256 |
| A02148 | A02333 | 393 | A02148 | A02368 | 230 |
| A02148 | A02405 | 219 | A02148 | A02443 | 436 |
| A02148 | A02468 | 332 | A02148 | A02477 | 314 |
| A02148 | A02484 | 172 | A02148 | A02531 | 165 |
| A02148 | A02543 | 258 | A02148 | A02661 | 193 |
| A02148 | A02667 | 88  | A02148 | A02673 | 157 |
| A02148 | A02738 | 406 | A02148 | A02808 | 152 |
| A02148 | A02970 | 188 | A02148 | A03040 | 313 |
| A02148 | A03076 | 416 | A02148 | A03080 | 283 |
| A02148 | A03082 | 288 | A02148 | A03084 | 172 |
| A02148 | A03099 | 281 | A02148 | A03104 | 313 |
| A02148 | A03113 | 163 | A02148 | A03114 | 213 |
| A02148 | A03115 | 398 | A02148 | A03141 | 491 |
| A02148 | A03158 | 174 | A02148 | A03178 | 486 |
| A02148 | A03186 | 491 | A02148 | A03259 | 312 |
| A02148 | A03293 | 449 | A02148 | A03314 | 187 |
| A02148 | A03351 | 63  | A02148 | A03358 | 107 |
| A02148 | A03361 | 95  | A02148 | A03379 | 109 |

|        |        |     |        |        |     |
|--------|--------|-----|--------|--------|-----|
| A02148 | A03390 | 205 | A02148 | A03391 | 277 |
| A02148 | A03477 | 274 | A02148 | A03487 | 313 |
| A02148 | A03578 | 91  | A02148 | A03609 | 151 |
| A02148 | A03639 | 183 | A02148 | A03726 | 450 |
| A02148 | A03733 | 455 | A02148 | A03829 | 201 |
| A02148 | A03839 | 174 | A02148 | A03901 | 160 |
| A02148 | A03906 | 480 | A02148 | A03915 | 246 |
| A02148 | A03926 | 299 | A02148 | A03935 | 235 |
| A02148 | A03936 | 159 | A02148 | A03944 | 188 |
| A02148 | A04037 | 361 | A02148 | A04092 | 246 |
| A02148 | A04152 | 380 | A02148 | A04157 | 324 |
| A02148 | A04256 | 236 | A02148 | A04307 | 378 |
| A02148 | A04320 | 156 | A02148 | A04337 | 306 |
| A02148 | A04423 | 182 | A02148 | A04551 | 266 |
| A02148 | A04674 | 266 | A02148 | A04751 | 290 |
| A02148 | A04840 | 218 | A02148 | A04879 | 307 |
| A02148 | A04880 | 479 | A02148 | A05131 | 258 |
| A02148 | A05138 | 160 | A02148 | A05277 | 401 |
| A02148 | A05471 | 152 | A02148 | A05472 | 388 |
| A02148 | A05525 | 235 | A02148 | A05536 | 196 |
| A02148 | A05578 | 223 | A02148 | A05596 | 201 |
| A02148 | A05660 | 252 | A02148 | A05768 | 154 |
| A02148 | A05825 | 230 | A02148 | A05891 | 190 |
| A02148 | A06111 | 216 | A02148 | A06277 | 205 |
| A02148 | A06293 | 180 | A02148 | A06300 | 313 |
| A02148 | A06301 | 297 | A02148 | A06346 | 371 |
| A02148 | A06386 | 394 | A02148 | A06397 | 246 |
| A02148 | A06473 | 391 | A02148 | A06632 | 241 |
| A02148 | A06642 | 221 | A02148 | A06689 | 246 |
| A02148 | A06696 | 156 | A02148 | A06711 | 190 |
| A02148 | A06729 | 475 | A02148 | A06847 | 177 |
| A02148 | A06912 | 296 | A02148 | A06916 | 199 |
| A02148 | A07049 | 340 | A02148 | A07061 | 417 |
| A02148 | A07209 | 321 | A02148 | A07218 | 463 |
| A02148 | A07498 | 340 | A02148 | A07549 | 340 |
| A02148 | A07570 | 204 | A02148 | A07601 | 418 |
| A02148 | A07605 | 319 | A02148 | A07644 | 308 |
| A02148 | A07781 | 313 | A02148 | A08128 | 340 |
| A02148 | A08635 | 173 | A02148 | A08926 | 265 |
| A02148 | A09141 | 307 | A02148 | A09266 | 401 |
| A02148 | A09380 | 182 | A02148 | A09504 | 163 |
| A02148 | A10000 | 463 | A02148 | A11101 | 369 |
| A02148 | A11123 | 207 | A02148 | A11154 | 412 |
| A02148 | A11175 | 340 | A02148 | A11176 | 340 |
| A02148 | A11310 | 182 | A02148 | A11317 | 395 |
| A02148 | A11318 | 174 | A02148 | A11320 | 196 |

|        |        |     |        |        |     |
|--------|--------|-----|--------|--------|-----|
| A02148 | A11328 | 188 | A02148 | A11335 | 165 |
| A02148 | A11602 | 272 | A02148 | A11765 | 185 |
| A02148 | A12295 | 207 | A02148 | A12449 | 285 |
| A02148 | A12581 | 297 | A02148 | A12824 | 229 |
| A02148 | A12949 | 266 | A02148 | A13110 | 285 |
| A02148 | A13346 | 286 | A02148 | A13673 | 210 |
| A02148 | A13867 | 182 | A02148 | A13989 | 176 |
| A02148 | A14381 | 183 | A02148 | A14405 | 200 |
| A02148 | A14440 | 174 | A02148 | A14978 | 340 |
| A02148 | A15230 | 232 | A02148 | A15233 | 168 |
| A02148 | A15268 | 540 | A02148 | A15282 | 152 |
| A02148 | A15295 | 581 | A02148 | A15318 | 620 |
| A02148 | A15381 | 697 | A02148 | A15415 | 152 |
| A02148 | A15419 | 152 | A02148 | A15422 | 470 |
| A02148 | A15498 | 491 | A02148 | A15684 | 490 |
| A02148 | A15833 | 235 | A02148 | A15874 | 262 |
| A02148 | A16741 | 260 | A02148 | A16744 | 154 |
| A02149 | A02318 | 329 | A02149 | A02320 | 207 |
| A02149 | A02321 | 364 | A02149 | A02390 | 238 |
| A02149 | A02463 | 314 | A02149 | A02467 | 277 |
| A02149 | A02539 | 246 | A02149 | A02560 | 378 |
| A02149 | A02621 | 272 | A02149 | A02773 | 368 |
| A02149 | A03077 | 255 | A02149 | A03082 | 311 |
| A02149 | A03178 | 240 | A02149 | A03186 | 173 |
| A02149 | A04001 | 351 | A02149 | A04236 | 371 |
| A02149 | A04911 | 326 | A02149 | A05107 | 221 |
| A02149 | A05142 | 364 | A02149 | A05176 | 269 |
| A02149 | A05247 | 306 | A02149 | A05898 | 378 |
| A02149 | A06286 | 260 | A02149 | A06314 | 154 |
| A02149 | A06759 | 414 | A02149 | A09476 | 274 |
| A02149 | A10237 | 368 | A02149 | A10624 | 165 |
| A02149 | A15233 | 319 | A02149 | A16257 | 279 |
| A02150 | A09709 | 379 | A02150 | A13826 | 216 |
| A02151 | A02494 | 152 | A02151 | A02672 | 218 |
| A02151 | A02739 | 176 | A02151 | A03189 | 377 |
| A02151 | A04990 | 358 | A02151 | A05240 | 276 |
| A02151 | A05617 | 470 | A02151 | A06037 | 252 |
| A02151 | A06375 | 414 | A02151 | A06975 | 348 |
| A02151 | A07138 | 418 | A02151 | A08473 | 386 |
| A02151 | A09709 | 324 | A02151 | A10756 | 402 |
| A02151 | A11353 | 355 | A02151 | A11835 | 308 |
| A02151 | A14190 | 279 | A02152 | A02376 | 154 |
| A02152 | A02534 | 367 | A02152 | A02611 | 174 |
| A02152 | A02637 | 174 | A02152 | A02826 | 182 |
| A02152 | A02945 | 165 | A02152 | A03019 | 456 |
| A02152 | A03036 | 223 | A02152 | A03068 | 152 |

|        |        |     |        |        |     |
|--------|--------|-----|--------|--------|-----|
| A02152 | A03146 | 270 | A02152 | A03178 | 159 |
| A02152 | A03188 | 283 | A02152 | A03800 | 208 |
| A02152 | A04162 | 168 | A02152 | A04342 | 446 |
| A02152 | A04490 | 208 | A02152 | A06263 | 216 |
| A02152 | A07173 | 156 | A02152 | A07218 | 435 |
| A02152 | A08160 | 154 | A02152 | A10078 | 157 |
| A02152 | A10116 | 296 | A02152 | A11318 | 259 |
| A02152 | A13743 | 265 | A02152 | A15865 | 327 |
| A02152 | A16046 | 278 | A02153 | A02877 | 294 |
| A02153 | A03439 | 229 | A02153 | A03675 | 249 |
| A02153 | A03738 | 483 | A02153 | A03782 | 152 |
| A02153 | A06463 | 254 | A02153 | A09147 | 308 |
| A02153 | A10245 | 385 | A02153 | A10588 | 380 |
| A02153 | A10595 | 480 | A02153 | A11545 | 393 |
| A02153 | A12971 | 226 | A02153 | A13197 | 63  |
| A02153 | A13659 | 346 | A02153 | A14074 | 156 |
| A02153 | A14130 | 477 | A02153 | A14131 | 299 |
| A02153 | A14169 | 326 | A02153 | A14449 | 491 |
| A02154 | A02156 | 405 | A02154 | A02167 | 329 |
| A02154 | A02180 | 238 | A02154 | A02188 | 411 |
| A02154 | A02198 | 390 | A02154 | A02199 | 213 |
| A02154 | A02215 | 299 | A02154 | A02221 | 491 |
| A02154 | A02222 | 254 | A02154 | A02228 | 472 |
| A02154 | A02231 | 414 | A02154 | A02301 | 283 |
| A02154 | A02303 | 423 | A02154 | A02310 | 449 |
| A02154 | A02318 | 330 | A02154 | A02319 | 383 |
| A02154 | A02320 | 340 | A02154 | A02325 | 273 |
| A02154 | A02465 | 256 | A02154 | A02468 | 273 |
| A02154 | A02469 | 285 | A02154 | A02541 | 319 |
| A02154 | A02546 | 358 | A02154 | A02574 | 265 |
| A02154 | A02621 | 273 | A02154 | A02672 | 417 |
| A02154 | A02673 | 159 | A02154 | A02760 | 313 |
| A02154 | A02785 | 165 | A02154 | A02788 | 180 |
| A02154 | A03076 | 335 | A02154 | A03077 | 256 |
| A02154 | A03167 | 215 | A02154 | A03178 | 364 |
| A02154 | A03188 | 152 | A02154 | A03224 | 281 |
| A02154 | A03234 | 227 | A02154 | A03243 | 246 |
| A02154 | A03264 | 324 | A02154 | A03390 | 256 |
| A02154 | A03421 | 341 | A02154 | A03858 | 228 |
| A02154 | A04172 | 379 | A02154 | A04224 | 395 |
| A02154 | A04236 | 371 | A02154 | A04372 | 441 |
| A02154 | A04410 | 223 | A02154 | A04520 | 313 |
| A02154 | A04556 | 329 | A02154 | A04620 | 343 |
| A02154 | A04673 | 395 | A02154 | A04870 | 450 |
| A02154 | A04945 | 338 | A02154 | A05153 | 188 |
| A02154 | A05377 | 305 | A02154 | A05550 | 281 |

|        |        |     |        |        |     |
|--------|--------|-----|--------|--------|-----|
| A02154 | A05593 | 485 | A02154 | A05599 | 388 |
| A02154 | A06211 | 348 | A02154 | A06558 | 388 |
| A02154 | A07282 | 246 | A02154 | A07331 | 371 |
| A02154 | A10278 | 407 | A02154 | A10858 | 388 |
| A02154 | A12422 | 414 | A02154 | A12580 | 414 |
| A02154 | A13879 | 259 | A02154 | A13906 | 343 |
| A02154 | A13987 | 165 | A02154 | A14122 | 199 |
| A02154 | A14410 | 191 | A02154 | A14637 | 205 |
| A02154 | A14685 | 374 | A02154 | A15430 | 279 |
| A02154 | A17155 | 333 | A02155 | A04201 | 423 |
| A02155 | A07142 | 430 | A02156 | A02215 | 491 |
| A02156 | A02221 | 71  | A02156 | A02222 | 491 |
| A02156 | A02229 | 469 | A02156 | A02231 | 195 |
| A02156 | A02260 | 190 | A02156 | A02262 | 213 |
| A02156 | A02268 | 288 | A02156 | A02272 | 207 |
| A02156 | A02275 | 252 | A02156 | A02311 | 162 |
| A02156 | A02312 | 193 | A02156 | A02313 | 146 |
| A02156 | A02330 | 416 | A02156 | A02336 | 215 |
| A02156 | A02405 | 258 | A02156 | A02432 | 458 |
| A02156 | A02518 | 160 | A02156 | A02524 | 445 |
| A02156 | A02545 | 157 | A02156 | A02574 | 256 |
| A02156 | A02607 | 490 | A02156 | A02927 | 152 |
| A02156 | A03016 | 172 | A02156 | A03033 | 163 |
| A02156 | A03036 | 167 | A02156 | A03086 | 479 |
| A02156 | A03099 | 468 | A02156 | A03104 | 449 |
| A02156 | A03167 | 188 | A02156 | A03173 | 319 |
| A02156 | A03186 | 416 | A02156 | A03238 | 480 |
| A02156 | A03247 | 201 | A02156 | A03259 | 288 |
| A02156 | A03396 | 285 | A02156 | A03570 | 491 |
| A02156 | A03694 | 303 | A02156 | A03722 | 339 |
| A02156 | A03903 | 278 | A02156 | A04089 | 241 |
| A02156 | A04163 | 156 | A02156 | A04164 | 285 |
| A02156 | A04229 | 332 | A02156 | A04357 | 319 |
| A02156 | A04366 | 193 | A02156 | A04423 | 212 |
| A02156 | A04433 | 241 | A02156 | A04562 | 165 |
| A02156 | A04608 | 318 | A02156 | A04670 | 335 |
| A02156 | A04673 | 414 | A02156 | A04770 | 165 |
| A02156 | A05007 | 252 | A02156 | A05087 | 491 |
| A02156 | A05208 | 335 | A02156 | A05210 | 207 |
| A02156 | A05277 | 352 | A02156 | A05289 | 165 |
| A02156 | A05330 | 180 | A02156 | A05377 | 484 |
| A02156 | A05439 | 170 | A02156 | A05653 | 245 |
| A02156 | A05659 | 273 | A02156 | A05682 | 191 |
| A02156 | A05697 | 319 | A02156 | A05801 | 291 |
| A02156 | A06038 | 215 | A02156 | A06100 | 393 |
| A02156 | A06607 | 435 | A02156 | A06654 | 176 |



|        |        |     |        |        |     |
|--------|--------|-----|--------|--------|-----|
| A02156 | A06689 | 232 | A02156 | A06696 | 185 |
| A02156 | A06729 | 236 | A02156 | A06953 | 182 |
| A02156 | A06970 | 375 | A02156 | A07123 | 165 |
| A02156 | A07124 | 235 | A02156 | A07209 | 262 |
| A02156 | A07342 | 306 | A02156 | A07376 | 215 |
| A02156 | A07520 | 184 | A02156 | A07530 | 338 |
| A02156 | A07558 | 486 | A02156 | A07736 | 201 |
| A02156 | A07836 | 247 | A02156 | A08197 | 207 |
| A02156 | A08238 | 213 | A02156 | A08688 | 193 |
| A02156 | A09078 | 355 | A02156 | A09824 | 449 |
| A02156 | A09876 | 323 | A02156 | A09966 | 335 |
| A02156 | A10052 | 224 | A02156 | A10444 | 172 |
| A02156 | A10656 | 156 | A02156 | A10658 | 347 |
| A02156 | A10659 | 458 | A02156 | A10686 | 416 |
| A02156 | A10703 | 180 | A02156 | A11081 | 335 |
| A02156 | A11885 | 165 | A02156 | A13735 | 191 |
| A02156 | A13757 | 212 | A02156 | A13879 | 405 |
| A02156 | A14344 | 195 | A02156 | A14803 | 413 |
| A02156 | A15223 | 159 | A02156 | A15498 | 313 |
| A02156 | A15809 | 165 | A02156 | A16058 | 446 |
| A02156 | A16103 | 207 | A02156 | A16377 | 245 |
| A02157 | A02158 | 358 | A02157 | A02382 | 252 |
| A02157 | A02499 | 268 | A02157 | A02542 | 232 |
| A02157 | A02672 | 224 | A02157 | A03080 | 468 |
| A02157 | A03134 | 196 | A02157 | A03174 | 260 |
| A02157 | A03218 | 205 | A02157 | A03387 | 238 |
| A02157 | A03388 | 221 | A02157 | A03403 | 247 |
| A02157 | A03442 | 323 | A02157 | A03692 | 294 |
| A02157 | A03694 | 191 | A02157 | A03703 | 491 |
| A02157 | A03721 | 486 | A02157 | A03722 | 443 |
| A02157 | A03739 | 312 | A02157 | A03744 | 356 |
| A02157 | A03818 | 251 | A02157 | A04340 | 301 |
| A02157 | A04928 | 190 | A02157 | A05549 | 334 |
| A02157 | A05610 | 294 | A02157 | A05716 | 267 |
| A02157 | A05897 | 294 | A02157 | A06022 | 334 |
| A02157 | A06586 | 190 | A02157 | A06665 | 201 |
| A02157 | A06886 | 323 | A02157 | A08268 | 347 |
| A02157 | A08296 | 373 | A02157 | A08840 | 306 |
| A02157 | A09205 | 193 | A02157 | A09824 | 236 |
| A02157 | A10579 | 454 | A02157 | A12648 | 334 |
| A02157 | A12893 | 193 | A02157 | A13638 | 314 |
| A02157 | A14403 | 267 | A02157 | A14470 | 490 |
| A02157 | A15297 | 299 | A02157 | A15335 | 170 |
| A02157 | A15376 | 162 | A02157 | A15511 | 196 |
| A02157 | A17076 | 475 | A02158 | A02192 | 174 |
| A02158 | A02226 | 477 | A02158 | A02237 | 357 |

|        |        |     |        |        |     |
|--------|--------|-----|--------|--------|-----|
| A02158 | A02291 | 188 | A02158 | A02342 | 171 |
| A02158 | A02425 | 279 | A02158 | A02542 | 190 |
| A02158 | A02859 | 180 | A02158 | A03080 | 256 |
| A02158 | A03218 | 173 | A02158 | A03399 | 299 |
| A02158 | A03401 | 288 | A02158 | A03719 | 193 |
| A02158 | A03744 | 450 | A02158 | A03763 | 407 |
| A02158 | A03894 | 241 | A02158 | A03910 | 465 |
| A02158 | A04169 | 367 | A02158 | A04361 | 219 |
| A02158 | A04830 | 180 | A02158 | A04928 | 157 |
| A02158 | A04992 | 274 | A02158 | A05154 | 361 |
| A02158 | A05155 | 188 | A02158 | A06280 | 157 |
| A02158 | A06389 | 216 | A02158 | A06398 | 208 |
| A02158 | A06665 | 168 | A02158 | A06754 | 351 |
| A02158 | A07793 | 352 | A02158 | A08077 | 364 |
| A02158 | A08078 | 405 | A02158 | A08304 | 187 |
| A02158 | A08418 | 480 | A02158 | A09042 | 152 |
| A02158 | A09205 | 160 | A02158 | A09277 | 306 |
| A02158 | A09374 | 210 | A02158 | A09797 | 187 |
| A02158 | A09928 | 198 | A02158 | A10265 | 252 |
| A02158 | A10740 | 204 | A02158 | A11051 | 351 |
| A02158 | A11537 | 360 | A02158 | A11621 | 207 |
| A02158 | A11679 | 252 | A02158 | A11865 | 291 |
| A02158 | A11940 | 200 | A02158 | A11958 | 351 |
| A02158 | A12017 | 311 | A02158 | A12037 | 475 |
| A02158 | A12184 | 351 | A02158 | A12379 | 327 |
| A02158 | A12897 | 255 | A02158 | A13515 | 327 |
| A02158 | A13826 | 345 | A02158 | A13899 | 356 |
| A02158 | A13921 | 327 | A02158 | A13942 | 361 |
| A02158 | A13951 | 240 | A02158 | A14123 | 388 |
| A02158 | A14267 | 204 | A02158 | A14378 | 200 |
| A02158 | A15292 | 202 | A02158 | A15313 | 174 |
| A02158 | A15346 | 369 | A02158 | A15352 | 226 |
| A02158 | A15411 | 170 | A02158 | A15414 | 240 |
| A02158 | A15438 | 460 | A02158 | A15439 | 485 |
| A02158 | A15440 | 162 | A02158 | A15441 | 485 |
| A02158 | A15442 | 384 | A02158 | A15443 | 384 |
| A02158 | A15445 | 491 | A02158 | A15448 | 299 |
| A02158 | A15449 | 458 | A02158 | A15450 | 290 |
| A02158 | A15456 | 379 | A02158 | A15485 | 185 |
| A02158 | A15802 | 204 | A02158 | A16166 | 351 |
| A02158 | A16167 | 402 | A02158 | A16190 | 446 |
| A02158 | A16198 | 311 | A02158 | A16300 | 348 |
| A02158 | A16687 | 434 | A02158 | A16903 | 351 |
| A02159 | A02495 | 302 | A02159 | A02695 | 212 |
| A02159 | A03520 | 270 | A02159 | A03686 | 208 |
| A02159 | A05016 | 283 | A02159 | A09243 | 332 |

|        |        |     |        |        |     |
|--------|--------|-----|--------|--------|-----|
| A02160 | A02180 | 293 | A02160 | A02512 | 288 |
| A02160 | A04174 | 446 | A02160 | A06120 | 386 |
| A02161 | A04082 | 372 | A02161 | A04759 | 357 |
| A02161 | A05959 | 401 | A02161 | A06581 | 184 |
| A02162 | A02428 | 252 | A02162 | A02860 | 332 |
| A02162 | A04212 | 196 | A02162 | A05584 | 333 |
| A02162 | A06004 | 353 | A02162 | A07436 | 369 |
| A02163 | A02382 | 508 | A02163 | A02384 | 235 |
| A02163 | A02732 | 152 | A02163 | A03838 | 228 |
| A02163 | A03949 | 296 | A02163 | A04091 | 414 |
| A02163 | A04540 | 240 | A02163 | A05128 | 210 |
| A02163 | A05247 | 179 | A02163 | A05701 | 232 |
| A02163 | A05809 | 278 | A02163 | A06610 | 463 |
| A02163 | A07011 | 485 | A02163 | A07033 | 334 |
| A02163 | A07421 | 473 | A02163 | A07885 | 286 |
| A02163 | A08355 | 283 | A02163 | A08583 | 213 |
| A02163 | A09098 | 299 | A02163 | A09124 | 374 |
| A02163 | A09742 | 210 | A02163 | A10128 | 299 |
| A02163 | A10863 | 251 | A02163 | A11431 | 207 |
| A02163 | A11487 | 357 | A02163 | A11650 | 394 |
| A02163 | A11658 | 450 | A02163 | A11765 | 215 |
| A02163 | A11779 | 467 | A02163 | A12992 | 899 |
| A02163 | A13979 | 446 | A02163 | A13986 | 174 |
| A02163 | A14007 | 480 | A02163 | A14011 | 270 |
| A02163 | A14300 | 404 | A02163 | A14452 | 152 |
| A02163 | A14535 | 263 | A02163 | A15293 | 899 |
| A02163 | A15294 | 899 | A02163 | A15413 | 306 |
| A02164 | A02165 | 102 | A02164 | A02265 | 699 |
| A02164 | A02414 | 159 | A02164 | A02415 | 63  |
| A02164 | A03438 | 491 | A02164 | A03502 | 466 |
| A02164 | A03609 | 401 | A02164 | A03935 | 173 |
| A02164 | A03981 | 491 | A02164 | A04567 | 184 |
| A02164 | A04622 | 193 | A02164 | A04762 | 262 |
| A02164 | A05331 | 259 | A02164 | A05477 | 288 |
| A02164 | A05646 | 463 | A02164 | A05850 | 294 |
| A02164 | A06122 | 479 | A02164 | A06204 | 208 |
| A02164 | A06251 | 196 | A02164 | A06814 | 65  |
| A02164 | A06825 | 491 | A02164 | A06958 | 196 |
| A02164 | A07312 | 216 | A02164 | A08131 | 221 |
| A02164 | A08682 | 451 | A02164 | A08768 | 467 |
| A02164 | A08860 | 219 | A02164 | A09876 | 199 |
| A02164 | A10034 | 177 | A02164 | A10791 | 450 |
| A02164 | A10814 | 472 | A02164 | A11331 | 386 |
| A02164 | A11981 | 174 | A02164 | A12589 | 241 |
| A02164 | A12824 | 154 | A02164 | A13052 | 715 |
| A02164 | A13590 | 212 | A02164 | A15063 | 262 |

|        |        |     |        |        |     |
|--------|--------|-----|--------|--------|-----|
| A02164 | A15370 | 318 | A02164 | A15624 | 417 |
| A02164 | A15649 | 168 | A02164 | A15750 | 188 |
| A02164 | A15930 | 185 | A02164 | A15932 | 489 |
| A02164 | A17189 | 340 | A02165 | A02249 | 207 |
| A02165 | A02414 | 188 | A02165 | A02527 | 361 |
| A02165 | A02830 | 193 | A02165 | A03438 | 486 |
| A02165 | A03601 | 115 | A02165 | A03615 | 404 |
| A02165 | A03644 | 256 | A02165 | A03652 | 486 |
| A02165 | A03782 | 450 | A02165 | A03981 | 424 |
| A02165 | A04176 | 456 | A02165 | A05023 | 191 |
| A02165 | A05146 | 327 | A02165 | A05191 | 254 |
| A02165 | A05566 | 319 | A02165 | A06084 | 424 |
| A02165 | A06356 | 463 | A02165 | A06814 | 121 |
| A02165 | A06815 | 317 | A02165 | A06825 | 488 |
| A02165 | A06955 | 183 | A02165 | A06965 | 173 |
| A02165 | A07116 | 291 | A02165 | A07237 | 221 |
| A02165 | A07243 | 188 | A02165 | A07349 | 290 |
| A02165 | A07360 | 221 | A02165 | A07558 | 152 |
| A02165 | A08653 | 481 | A02165 | A08682 | 427 |
| A02165 | A08773 | 215 | A02165 | A09044 | 474 |
| A02165 | A09656 | 393 | A02165 | A09688 | 329 |
| A02165 | A11264 | 277 | A02165 | A11331 | 180 |
| A02165 | A11427 | 157 | A02165 | A11981 | 201 |
| A02165 | A12687 | 249 | A02165 | A13052 | 522 |
| A02165 | A13887 | 307 | A02165 | A13989 | 259 |
| A02165 | A14216 | 361 | A02165 | A14843 | 673 |
| A02165 | A15666 | 554 | A02165 | A16681 | 404 |
| A02165 | A17012 | 235 | A02165 | A17035 | 193 |
| A02166 | A03451 | 174 | A02166 | A03523 | 286 |
| A02166 | A05143 | 389 | A02166 | A09453 | 418 |
| A02167 | A02188 | 348 | A02167 | A02202 | 191 |
| A02167 | A02228 | 152 | A02167 | A02335 | 223 |
| A02167 | A02356 | 334 | A02167 | A02416 | 190 |
| A02167 | A02468 | 281 | A02167 | A02532 | 428 |
| A02167 | A02539 | 258 | A02167 | A02541 | 327 |
| A02167 | A02691 | 204 | A02167 | A03107 | 224 |
| A02167 | A03224 | 291 | A02167 | A03766 | 358 |
| A02167 | A03873 | 278 | A02167 | A03882 | 241 |
| A02167 | A03940 | 479 | A02167 | A04410 | 234 |
| A02167 | A04520 | 191 | A02167 | A04698 | 262 |
| A02167 | A05106 | 266 | A02167 | A05142 | 371 |
| A02167 | A05573 | 273 | A02167 | A05673 | 346 |
| A02167 | A06635 | 238 | A02167 | A07078 | 288 |
| A02167 | A07209 | 236 | A02167 | A07210 | 311 |
| A02167 | A07958 | 208 | A02167 | A08445 | 458 |
| A02167 | A09080 | 449 | A02167 | A14366 | 191 |

|        |        |     |        |        |     |
|--------|--------|-----|--------|--------|-----|
| A02168 | A02170 | 322 | A02168 | A02192 | 335 |
| A02168 | A02316 | 273 | A02168 | A02530 | 372 |
| A02168 | A02538 | 451 | A02168 | A02542 | 258 |
| A02168 | A02601 | 391 | A02168 | A02616 | 346 |
| A02168 | A02859 | 302 | A02168 | A02992 | 483 |
| A02168 | A03016 | 418 | A02168 | A03167 | 246 |
| A02168 | A03858 | 259 | A02168 | A04487 | 323 |
| A02168 | A04779 | 185 | A02168 | A04839 | 238 |
| A02168 | A04883 | 291 | A02168 | A04927 | 294 |
| A02168 | A05407 | 371 | A02168 | A05573 | 291 |
| A02168 | A05659 | 302 | A02168 | A05682 | 338 |
| A02168 | A05775 | 314 | A02168 | A06397 | 383 |
| A02168 | A06405 | 277 | A02168 | A06439 | 269 |
| A02168 | A07520 | 243 | A02168 | A10206 | 424 |
| A02168 | A13871 | 301 | A02168 | A14444 | 201 |
| A02168 | A16048 | 170 | A02168 | A17078 | 193 |
| A02169 | A02491 | 205 | A02169 | A02493 | 366 |
| A02169 | A02494 | 380 | A02169 | A03486 | 299 |
| A02169 | A03739 | 154 | A02169 | A03797 | 362 |
| A02169 | A07499 | 159 | A02170 | A02222 | 224 |
| A02170 | A02272 | 303 | A02170 | A02415 | 234 |
| A02170 | A02501 | 241 | A02170 | A02523 | 247 |
| A02170 | A02530 | 457 | A02170 | A02538 | 363 |
| A02170 | A02542 | 479 | A02170 | A02579 | 232 |
| A02170 | A02624 | 286 | A02170 | A02667 | 217 |
| A02170 | A02737 | 171 | A02170 | A03152 | 452 |
| A02170 | A03153 | 374 | A02170 | A03154 | 317 |
| A02170 | A03155 | 436 | A02170 | A03428 | 204 |
| A02170 | A03661 | 152 | A02170 | A03671 | 461 |
| A02170 | A03775 | 201 | A02170 | A04066 | 236 |
| A02170 | A04487 | 273 | A02170 | A05143 | 488 |
| A02170 | A05375 | 382 | A02170 | A05407 | 334 |
| A02170 | A06435 | 322 | A02170 | A07072 | 358 |
| A02170 | A07894 | 288 | A02170 | A08831 | 358 |
| A02170 | A09652 | 424 | A02170 | A10717 | 391 |
| A02170 | A10937 | 374 | A02170 | A12361 | 221 |
| A02170 | A14376 | 307 | A02171 | A02278 | 246 |
| A02171 | A02416 | 321 | A02171 | A02479 | 299 |
| A02171 | A02543 | 379 | A02171 | A02788 | 190 |
| A02171 | A03070 | 165 | A02171 | A03100 | 262 |
| A02171 | A03141 | 174 | A02171 | A03744 | 258 |
| A02171 | A04080 | 198 | A02171 | A04201 | 347 |
| A02171 | A04432 | 391 | A02171 | A04759 | 405 |
| A02171 | A05124 | 480 | A02171 | A05525 | 367 |
| A02171 | A06813 | 339 | A02171 | A13589 | 201 |
| A02171 | A16738 | 480 | A02172 | A10044 | 424 |

|        |        |     |        |        |     |
|--------|--------|-----|--------|--------|-----|
| A02173 | A02272 | 297 | A02173 | A02301 | 249 |
| A02173 | A02303 | 195 | A02173 | A02309 | 385 |
| A02173 | A02312 | 286 | A02173 | A02320 | 489 |
| A02173 | A02428 | 157 | A02173 | A02510 | 332 |
| A02173 | A02523 | 241 | A02173 | A02535 | 485 |
| A02173 | A02539 | 340 | A02173 | A02585 | 457 |
| A02173 | A02777 | 190 | A02173 | A02874 | 183 |
| A02173 | A02927 | 457 | A02173 | A03178 | 202 |
| A02173 | A03489 | 156 | A02173 | A03777 | 412 |
| A02173 | A04212 | 491 | A02173 | A04267 | 210 |
| A02173 | A04410 | 184 | A02173 | A04533 | 326 |
| A02173 | A04867 | 485 | A02173 | A04870 | 489 |
| A02173 | A05447 | 371 | A02173 | A05596 | 316 |
| A02173 | A05919 | 351 | A02173 | A06675 | 172 |
| A02173 | A07177 | 232 | A02173 | A07656 | 196 |
| A02173 | A09397 | 319 | A02173 | A13212 | 436 |
| A02174 | A02176 | 205 | A02174 | A02245 | 438 |
| A02174 | A02303 | 218 | A02174 | A02318 | 347 |
| A02174 | A02429 | 179 | A02174 | A02621 | 364 |
| A02174 | A02624 | 323 | A02174 | A02644 | 294 |
| A02174 | A02673 | 301 | A02174 | A02692 | 156 |
| A02174 | A02995 | 200 | A02174 | A03110 | 396 |
| A02174 | A03183 | 413 | A02174 | A03238 | 221 |
| A02174 | A03310 | 357 | A02174 | A03314 | 232 |
| A02174 | A03315 | 201 | A02174 | A03698 | 232 |
| A02174 | A03942 | 472 | A02174 | A03945 | 171 |
| A02174 | A04031 | 236 | A02174 | A04163 | 475 |
| A02174 | A04450 | 259 | A02174 | A04976 | 252 |
| A02174 | A05042 | 323 | A02174 | A05299 | 196 |
| A02174 | A05370 | 168 | A02174 | A05441 | 259 |
| A02174 | A05450 | 170 | A02174 | A05706 | 232 |
| A02174 | A05815 | 383 | A02174 | A05866 | 201 |
| A02174 | A06054 | 154 | A02174 | A06559 | 288 |
| A02174 | A06797 | 160 | A02174 | A07218 | 221 |
| A02174 | A07339 | 205 | A02174 | A07390 | 205 |
| A02174 | A07760 | 157 | A02174 | A07803 | 154 |
| A02174 | A08366 | 180 | A02174 | A08714 | 286 |
| A02174 | A09241 | 934 | A02174 | A09556 | 184 |
| A02174 | A10018 | 340 | A02174 | A10168 | 294 |
| A02174 | A10444 | 310 | A02174 | A10645 | 177 |
| A02174 | A11007 | 396 | A02174 | A11324 | 462 |
| A02174 | A12047 | 243 | A02174 | A12643 | 267 |
| A02174 | A13920 | 252 | A02174 | A14210 | 452 |
| A02174 | A14379 | 229 | A02174 | A14511 | 159 |
| A02174 | A14554 | 337 | A02174 | A14679 | 338 |
| A02174 | A15226 | 263 | A02174 | A15327 | 173 |

|        |        |     |        |        |     |
|--------|--------|-----|--------|--------|-----|
| A02174 | A15329 | 193 | A02174 | A15886 | 277 |
| A02174 | A16281 | 152 | A02174 | A16323 | 218 |
| A02175 | A02495 | 323 | A02175 | A02942 | 156 |
| A02175 | A02968 | 246 | A02175 | A03421 | 188 |
| A02175 | A04516 | 321 | A02175 | A04553 | 302 |
| A02175 | A04941 | 294 | A02175 | A05070 | 281 |
| A02175 | A05072 | 363 | A02175 | A06076 | 407 |
| A02175 | A06623 | 196 | A02175 | A06717 | 363 |
| A02175 | A07138 | 312 | A02175 | A09026 | 322 |
| A02175 | A10129 | 407 | A02175 | A11062 | 475 |
| A02175 | A11878 | 394 | A02175 | A12897 | 398 |
| A02175 | A13997 | 179 | A02176 | A02178 | 183 |
| A02176 | A02236 | 405 | A02176 | A02382 | 170 |
| A02176 | A02390 | 243 | A02176 | A02983 | 303 |
| A02176 | A03049 | 256 | A02176 | A03110 | 401 |
| A02176 | A03228 | 283 | A02176 | A03310 | 425 |
| A02176 | A03314 | 246 | A02176 | A03315 | 416 |
| A02176 | A03319 | 432 | A02176 | A03413 | 291 |
| A02176 | A04180 | 340 | A02176 | A05180 | 416 |
| A02176 | A08572 | 234 | A02176 | A09213 | 344 |
| A02176 | A09394 | 326 | A02176 | A10580 | 288 |
| A02176 | A11412 | 210 | A02176 | A15427 | 294 |
| A02177 | A02506 | 154 | A02177 | A02568 | 400 |
| A02177 | A02639 | 341 | A02177 | A02732 | 190 |
| A02177 | A02783 | 301 | A02177 | A02812 | 77  |
| A02177 | A02859 | 96  | A02177 | A02874 | 188 |
| A02177 | A02883 | 279 | A02177 | A02922 | 156 |
| A02177 | A02929 | 174 | A02177 | A02944 | 124 |
| A02177 | A02951 | 313 | A02177 | A02977 | 193 |
| A02177 | A03069 | 443 | A02177 | A03141 | 171 |
| A02177 | A03273 | 294 | A02177 | A03275 | 68  |
| A02177 | A03287 | 227 | A02177 | A03419 | 196 |
| A02177 | A03664 | 210 | A02177 | A03824 | 195 |
| A02177 | A04010 | 374 | A02177 | A04051 | 252 |
| A02177 | A04117 | 151 | A02177 | A04271 | 151 |
| A02177 | A04278 | 173 | A02177 | A04428 | 283 |
| A02177 | A04609 | 187 | A02177 | A04819 | 303 |
| A02177 | A04965 | 257 | A02177 | A04996 | 217 |
| A02177 | A05113 | 168 | A02177 | A05165 | 190 |
| A02177 | A05252 | 327 | A02177 | A05322 | 240 |
| A02177 | A05329 | 278 | A02177 | A05349 | 374 |
| A02177 | A05427 | 215 | A02177 | A05955 | 308 |
| A02177 | A07183 | 210 | A02177 | A07367 | 177 |
| A02177 | A08126 | 215 | A02177 | A08293 | 179 |
| A02177 | A08356 | 228 | A02177 | A08362 | 193 |
| A02177 | A08821 | 319 | A02177 | A09875 | 193 |

|        |        |     |        |        |     |
|--------|--------|-----|--------|--------|-----|
| A02177 | A10787 | 319 | A02177 | A11171 | 377 |
| A02177 | A12105 | 167 | A02177 | A12292 | 313 |
| A02177 | A12357 | 190 | A02177 | A13163 | 281 |
| A02177 | A13822 | 183 | A02177 | A14012 | 241 |
| A02177 | A14071 | 465 | A02177 | A14610 | 288 |
| A02177 | A14613 | 294 | A02177 | A15985 | 251 |
| A02177 | A16636 | 196 | A02177 | A17009 | 283 |
| A02177 | A17082 | 377 | A02178 | A02180 | 491 |
| A02178 | A02190 | 241 | A02178 | A02225 | 160 |
| A02178 | A02239 | 351 | A02178 | A02304 | 491 |
| A02178 | A02501 | 241 | A02178 | A02586 | 160 |
| A02178 | A02676 | 218 | A02178 | A02711 | 465 |
| A02178 | A02836 | 405 | A02178 | A03065 | 160 |
| A02178 | A03070 | 452 | A02178 | A03113 | 174 |
| A02178 | A03300 | 396 | A02178 | A03390 | 389 |
| A02178 | A03393 | 389 | A02178 | A03398 | 479 |
| A02178 | A03401 | 68  | A02178 | A03406 | 288 |
| A02178 | A03421 | 341 | A02178 | A03451 | 160 |
| A02178 | A03540 | 238 | A02178 | A03740 | 246 |
| A02178 | A03752 | 372 | A02178 | A03851 | 199 |
| A02178 | A03895 | 234 | A02178 | A04080 | 224 |
| A02178 | A04133 | 180 | A02178 | A04184 | 208 |
| A02178 | A04185 | 262 | A02178 | A04348 | 251 |
| A02178 | A05132 | 251 | A02178 | A05299 | 307 |
| A02178 | A05575 | 363 | A02178 | A05640 | 306 |
| A02178 | A05682 | 307 | A02178 | A06403 | 262 |
| A02178 | A06466 | 465 | A02178 | A06509 | 462 |
| A02178 | A06606 | 263 | A02178 | A06607 | 215 |
| A02178 | A07311 | 454 | A02178 | A07433 | 266 |
| A02178 | A07798 | 160 | A02178 | A07869 | 171 |
| A02178 | A08309 | 177 | A02178 | A08416 | 350 |
| A02178 | A08549 | 168 | A02178 | A08567 | 306 |
| A02178 | A08685 | 372 | A02178 | A08686 | 489 |
| A02178 | A08753 | 411 | A02178 | A08812 | 443 |
| A02178 | A08813 | 324 | A02178 | A08835 | 258 |
| A02178 | A08844 | 424 | A02178 | A09020 | 174 |
| A02178 | A09158 | 380 | A02178 | A09209 | 227 |
| A02178 | A09577 | 180 | A02178 | A09761 | 285 |
| A02178 | A09789 | 190 | A02178 | A09878 | 489 |
| A02178 | A09901 | 272 | A02178 | A10049 | 213 |
| A02178 | A10208 | 193 | A02178 | A10224 | 276 |
| A02178 | A10278 | 159 | A02178 | A10453 | 217 |
| A02178 | A10789 | 353 | A02178 | A10949 | 162 |
| A02178 | A11066 | 347 | A02178 | A11262 | 210 |
| A02178 | A11278 | 286 | A02178 | A11298 | 339 |
| A02178 | A11463 | 276 | A02178 | A11543 | 385 |



|        |        |     |        |        |     |
|--------|--------|-----|--------|--------|-----|
| A02178 | A11965 | 215 | A02178 | A12328 | 240 |
| A02178 | A12502 | 322 | A02178 | A12507 | 226 |
| A02178 | A12897 | 172 | A02178 | A13340 | 263 |
| A02178 | A13399 | 288 | A02178 | A13537 | 283 |
| A02178 | A13737 | 329 | A02178 | A13963 | 255 |
| A02178 | A14055 | 461 | A02178 | A14073 | 364 |
| A02178 | A14400 | 196 | A02178 | A14642 | 389 |
| A02178 | A14713 | 241 | A02178 | A15139 | 347 |
| A02178 | A15217 | 489 | A02178 | A15244 | 432 |
| A02178 | A15267 | 208 | A02178 | A15416 | 263 |
| A02178 | A15638 | 170 | A02178 | A15854 | 193 |
| A02178 | A15949 | 286 | A02178 | A16006 | 183 |
| A02178 | A16008 | 215 | A02178 | A16446 | 227 |
| A02178 | A16635 | 339 | A02178 | A16740 | 375 |
| A02178 | A16911 | 485 | A02179 | A02216 | 430 |
| A02179 | A02494 | 420 | A02179 | A02874 | 180 |
| A02179 | A02877 | 469 | A02179 | A02878 | 288 |
| A02179 | A02924 | 202 | A02179 | A03069 | 311 |
| A02179 | A03070 | 491 | A02179 | A03083 | 243 |
| A02179 | A03185 | 236 | A02179 | A03300 | 468 |
| A02179 | A03651 | 430 | A02179 | A03775 | 196 |
| A02179 | A03936 | 177 | A02179 | A04272 | 200 |
| A02179 | A04449 | 201 | A02179 | A04678 | 236 |
| A02179 | A04729 | 171 | A02179 | A04846 | 195 |
| A02179 | A04988 | 162 | A02179 | A05132 | 257 |
| A02179 | A05283 | 257 | A02179 | A05298 | 402 |
| A02179 | A05354 | 457 | A02179 | A05370 | 152 |
| A02179 | A06121 | 488 | A02179 | A06698 | 281 |
| A02179 | A06814 | 205 | A02179 | A07159 | 172 |
| A02179 | A07178 | 165 | A02179 | A07251 | 241 |
| A02179 | A07254 | 443 | A02179 | A07536 | 474 |
| A02179 | A07546 | 402 | A02179 | A07719 | 351 |
| A02179 | A07726 | 489 | A02179 | A08810 | 306 |
| A02179 | A08835 | 465 | A02179 | A09312 | 351 |
| A02179 | A09342 | 188 | A02179 | A09778 | 205 |
| A02179 | A09809 | 172 | A02179 | A10362 | 204 |
| A02179 | A10503 | 290 | A02179 | A10633 | 491 |
| A02179 | A10748 | 491 | A02179 | A10824 | 213 |
| A02179 | A11096 | 474 | A02179 | A11400 | 484 |
| A02179 | A11420 | 243 | A02179 | A11472 | 490 |
| A02179 | A11544 | 422 | A02179 | A11817 | 210 |
| A02179 | A12196 | 380 | A02179 | A13116 | 165 |
| A02179 | A13340 | 63  | A02179 | A13989 | 210 |
| A02179 | A14543 | 168 | A02179 | A14643 | 243 |
| A02179 | A14937 | 163 | A02179 | A16075 | 154 |
| A02179 | A16243 | 190 | A02179 | A16701 | 213 |

|        |        |     |        |        |     |
|--------|--------|-----|--------|--------|-----|
| A02180 | A02190 | 434 | A02180 | A02191 | 491 |
| A02180 | A02219 | 63  | A02180 | A02239 | 480 |
| A02180 | A02292 | 474 | A02180 | A02319 | 223 |
| A02180 | A02322 | 154 | A02180 | A02352 | 151 |
| A02180 | A02368 | 176 | A02180 | A02512 | 488 |
| A02180 | A02546 | 171 | A02180 | A02568 | 176 |
| A02180 | A02647 | 198 | A02180 | A02776 | 210 |
| A02180 | A02784 | 241 | A02180 | A02790 | 449 |
| A02180 | A02793 | 154 | A02180 | A02819 | 182 |
| A02180 | A02836 | 461 | A02180 | A02877 | 470 |
| A02180 | A03040 | 269 | A02180 | A03070 | 491 |
| A02180 | A03272 | 207 | A02180 | A03319 | 160 |
| A02180 | A03356 | 95  | A02180 | A03375 | 223 |
| A02180 | A03385 | 205 | A02180 | A03386 | 301 |
| A02180 | A03387 | 263 | A02180 | A03388 | 241 |
| A02180 | A03390 | 480 | A02180 | A03391 | 470 |
| A02180 | A03398 | 390 | A02180 | A03401 | 491 |
| A02180 | A03408 | 434 | A02180 | A03412 | 290 |
| A02180 | A03421 | 310 | A02180 | A03571 | 156 |
| A02180 | A03725 | 372 | A02180 | A03731 | 283 |
| A02180 | A03762 | 486 | A02180 | A03764 | 180 |
| A02180 | A03775 | 187 | A02180 | A03814 | 157 |
| A02180 | A03820 | 171 | A02180 | A03895 | 167 |
| A02180 | A04174 | 486 | A02180 | A04183 | 475 |
| A02180 | A04184 | 271 | A02180 | A04185 | 462 |
| A02180 | A04187 | 486 | A02180 | A04257 | 157 |
| A02180 | A04280 | 238 | A02180 | A04306 | 213 |
| A02180 | A04359 | 351 | A02180 | A04360 | 180 |
| A02180 | A04372 | 198 | A02180 | A04395 | 477 |
| A02180 | A04396 | 360 | A02180 | A04403 | 371 |
| A02180 | A04404 | 351 | A02180 | A04405 | 462 |
| A02180 | A04413 | 408 | A02180 | A04414 | 301 |
| A02180 | A04472 | 191 | A02180 | A04507 | 269 |
| A02180 | A04514 | 223 | A02180 | A04573 | 171 |
| A02180 | A04605 | 198 | A02180 | A04645 | 223 |
| A02180 | A05065 | 390 | A02180 | A05132 | 185 |
| A02180 | A05133 | 235 | A02180 | A05135 | 249 |
| A02180 | A05299 | 466 | A02180 | A05410 | 301 |
| A02180 | A05587 | 157 | A02180 | A05798 | 160 |
| A02180 | A06016 | 371 | A02180 | A06120 | 319 |
| A02180 | A06121 | 283 | A02180 | A06211 | 157 |
| A02180 | A06223 | 269 | A02180 | A06387 | 151 |
| A02180 | A06558 | 235 | A02180 | A06591 | 408 |
| A02180 | A06606 | 466 | A02180 | A06670 | 176 |
| A02180 | A07151 | 263 | A02180 | A07163 | 193 |
| A02180 | A07214 | 198 | A02180 | A07249 | 343 |

|        |        |     |        |        |     |
|--------|--------|-----|--------|--------|-----|
| A02180 | A07442 | 180 | A02180 | A08070 | 272 |
| A02180 | A08212 | 312 | A02180 | A08309 | 481 |
| A02180 | A08353 | 269 | A02180 | A08366 | 208 |
| A02180 | A08685 | 446 | A02180 | A08686 | 463 |
| A02180 | A08753 | 274 | A02180 | A08835 | 260 |
| A02180 | A08836 | 346 | A02180 | A08884 | 193 |
| A02180 | A08910 | 391 | A02180 | A08972 | 241 |
| A02180 | A09001 | 174 | A02180 | A09067 | 405 |
| A02180 | A09070 | 249 | A02180 | A09141 | 456 |
| A02180 | A09177 | 371 | A02180 | A09205 | 205 |
| A02180 | A09206 | 234 | A02180 | A09230 | 191 |
| A02180 | A09231 | 371 | A02180 | A09269 | 490 |
| A02180 | A09371 | 371 | A02180 | A09372 | 343 |
| A02180 | A09670 | 205 | A02180 | A09958 | 301 |
| A02180 | A10019 | 269 | A02180 | A10258 | 191 |
| A02180 | A10289 | 388 | A02180 | A10293 | 213 |
| A02180 | A10314 | 366 | A02180 | A10389 | 301 |
| A02180 | A10549 | 457 | A02180 | A10698 | 235 |
| A02180 | A11026 | 452 | A02180 | A11227 | 176 |
| A02180 | A11321 | 185 | A02180 | A11326 | 272 |
| A02180 | A11342 | 198 | A02180 | A11584 | 157 |
| A02180 | A11594 | 371 | A02180 | A11600 | 452 |
| A02180 | A11633 | 269 | A02180 | A11791 | 185 |
| A02180 | A11858 | 330 | A02180 | A12121 | 213 |
| A02180 | A12458 | 213 | A02180 | A12463 | 269 |
| A02180 | A12504 | 301 | A02180 | A12505 | 301 |
| A02180 | A12588 | 301 | A02180 | A12598 | 235 |
| A02180 | A12627 | 235 | A02180 | A12750 | 301 |
| A02180 | A12751 | 301 | A02180 | A12865 | 301 |
| A02180 | A12884 | 223 | A02180 | A13042 | 235 |
| A02180 | A13123 | 235 | A02180 | A13226 | 180 |
| A02180 | A13246 | 154 | A02180 | A13407 | 301 |
| A02180 | A13412 | 360 | A02180 | A13484 | 251 |
| A02180 | A13529 | 371 | A02180 | A13535 | 371 |
| A02180 | A13665 | 176 | A02180 | A13726 | 223 |
| A02180 | A13913 | 452 | A02180 | A14351 | 438 |
| A02180 | A14366 | 174 | A02180 | A14643 | 235 |
| A02180 | A14685 | 205 | A02180 | A14770 | 191 |
| A02180 | A14873 | 223 | A02180 | A14898 | 301 |
| A02180 | A15083 | 301 | A02180 | A15217 | 243 |
| A02180 | A15237 | 302 | A02180 | A15353 | 435 |
| A02180 | A15416 | 236 | A02180 | A15493 | 191 |
| A02180 | A15502 | 475 | A02180 | A15638 | 375 |
| A02180 | A15649 | 312 | A02180 | A15725 | 296 |
| A02180 | A15748 | 290 | A02180 | A15772 | 191 |
| A02180 | A16155 | 269 | A02180 | A16440 | 238 |

|        |        |     |        |        |     |
|--------|--------|-----|--------|--------|-----|
| A02180 | A16624 | 296 | A02180 | A16913 | 157 |
| A02180 | A17074 | 269 | A02181 | A02470 | 188 |
| A02181 | A03275 | 177 | A02181 | A07165 | 162 |
| A02181 | A14071 | 234 | A02182 | A02672 | 196 |
| A02182 | A05458 | 213 | A02182 | A05621 | 229 |
| A02182 | A09233 | 332 | A02182 | A10754 | 247 |
| A02182 | A11044 | 340 | A02182 | A12258 | 328 |
| A02182 | A13643 | 378 | A02182 | A15422 | 170 |
| A02183 | A02305 | 240 | A02183 | A02309 | 156 |
| A02183 | A02338 | 152 | A02183 | A02770 | 213 |
| A02183 | A02872 | 167 | A02183 | A02888 | 281 |
| A02183 | A02906 | 204 | A02183 | A02908 | 422 |
| A02183 | A02918 | 491 | A02183 | A02919 | 174 |
| A02183 | A03067 | 491 | A02183 | A03080 | 480 |
| A02183 | A03209 | 167 | A02183 | A03247 | 182 |
| A02183 | A03345 | 196 | A02183 | A03347 | 470 |
| A02183 | A03351 | 424 | A02183 | A03353 | 457 |
| A02183 | A03356 | 154 | A02183 | A03369 | 485 |
| A02183 | A03370 | 486 | A02183 | A03371 | 486 |
| A02183 | A03379 | 488 | A02183 | A03384 | 187 |
| A02183 | A03387 | 200 | A02183 | A03532 | 491 |
| A02183 | A03729 | 151 | A02183 | A03942 | 190 |
| A02183 | A04540 | 385 | A02183 | A04551 | 274 |
| A02183 | A04568 | 475 | A02183 | A04623 | 271 |
| A02183 | A05280 | 322 | A02183 | A05288 | 445 |
| A02183 | A07218 | 486 | A02183 | A07361 | 168 |
| A02183 | A07421 | 303 | A02183 | A07900 | 491 |
| A02183 | A07923 | 208 | A02183 | A08219 | 306 |
| A02183 | A08594 | 481 | A02183 | A09438 | 168 |
| A02183 | A10721 | 217 | A02183 | A10804 | 163 |
| A02183 | A11348 | 452 | A02183 | A11450 | 241 |
| A02183 | A11539 | 374 | A02183 | A11546 | 472 |
| A02183 | A11552 | 185 | A02183 | A11606 | 368 |
| A02183 | A12097 | 480 | A02183 | A12927 | 286 |
| A02183 | A13986 | 399 | A02183 | A14198 | 486 |
| A02183 | A14251 | 236 | A02183 | A14332 | 338 |
| A02183 | A14364 | 321 | A02183 | A14452 | 337 |
| A02183 | A14629 | 229 | A02183 | A15320 | 174 |
| A02183 | A15726 | 443 | A02183 | A16281 | 301 |
| A02184 | A02188 | 281 | A02184 | A02293 | 373 |
| A02184 | A02869 | 313 | A02184 | A03275 | 226 |
| A02184 | A03346 | 314 | A02184 | A03361 | 246 |
| A02184 | A03379 | 258 | A02184 | A04520 | 375 |
| A02184 | A04870 | 358 | A02184 | A05004 | 368 |
| A02184 | A05044 | 363 | A02184 | A05603 | 391 |
| A02184 | A06588 | 184 | A02184 | A07068 | 465 |

|        |        |     |        |        |     |
|--------|--------|-----|--------|--------|-----|
| A02184 | A07098 | 434 | A02184 | A11405 | 257 |
| A02184 | A13998 | 434 | A02184 | A16300 | 205 |
| A02185 | A02213 | 217 | A02185 | A02261 | 324 |
| A02185 | A02293 | 208 | A02185 | A02522 | 221 |
| A02185 | A02560 | 291 | A02185 | A02629 | 174 |
| A02185 | A02638 | 152 | A02185 | A02732 | 152 |
| A02185 | A02813 | 270 | A02185 | A02836 | 246 |
| A02185 | A03041 | 332 | A02185 | A03071 | 193 |
| A02185 | A03261 | 165 | A02185 | A03581 | 269 |
| A02185 | A03684 | 193 | A02185 | A03739 | 191 |
| A02185 | A03775 | 210 | A02185 | A03790 | 173 |
| A02185 | A03799 | 306 | A02185 | A03906 | 251 |
| A02185 | A03975 | 221 | A02185 | A04078 | 160 |
| A02185 | A04138 | 196 | A02185 | A04158 | 445 |
| A02185 | A04171 | 251 | A02185 | A04363 | 446 |
| A02185 | A04473 | 345 | A02185 | A04556 | 210 |
| A02185 | A04574 | 294 | A02185 | A04681 | 312 |
| A02185 | A04759 | 163 | A02185 | A04774 | 335 |
| A02185 | A04829 | 319 | A02185 | A04982 | 229 |
| A02185 | A05044 | 188 | A02185 | A05443 | 313 |
| A02185 | A05473 | 152 | A02185 | A05500 | 481 |
| A02185 | A05779 | 215 | A02185 | A06107 | 263 |
| A02185 | A06147 | 283 | A02185 | A06349 | 357 |
| A02185 | A06434 | 199 | A02185 | A06623 | 299 |
| A02185 | A06669 | 247 | A02185 | A06814 | 552 |
| A02185 | A07127 | 187 | A02185 | A07163 | 157 |
| A02185 | A07382 | 357 | A02185 | A07412 | 269 |
| A02185 | A07750 | 357 | A02185 | A08052 | 269 |
| A02185 | A08194 | 480 | A02185 | A08273 | 269 |
| A02185 | A08315 | 269 | A02185 | A09120 | 278 |
| A02185 | A09200 | 223 | A02185 | A09620 | 269 |
| A02185 | A09697 | 269 | A02185 | A09809 | 184 |
| A02185 | A09900 | 159 | A02185 | A10221 | 268 |
| A02185 | A10973 | 335 | A02185 | A11044 | 251 |
| A02185 | A13581 | 269 | A02185 | A13757 | 210 |
| A02185 | A13930 | 332 | A02185 | A14443 | 899 |
| A02185 | A14468 | 268 | A02185 | A14624 | 307 |
| A02185 | A14642 | 405 | A02185 | A14652 | 411 |
| A02185 | A14931 | 165 | A02185 | A15140 | 899 |
| A02185 | A15269 | 446 | A02185 | A15809 | 486 |
| A02185 | A15837 | 269 | A02185 | A15922 | 486 |
| A02185 | A16027 | 269 | A02185 | A16042 | 205 |
| A02185 | A16738 | 457 | A02185 | A17195 | 241 |
| A02186 | A02205 | 213 | A02186 | A02215 | 434 |
| A02186 | A02238 | 490 | A02186 | A02291 | 303 |
| A02186 | A02298 | 446 | A02186 | A02307 | 217 |

|        |        |     |        |        |     |
|--------|--------|-----|--------|--------|-----|
| A02186 | A02385 | 288 | A02186 | A02412 | 308 |
| A02186 | A02413 | 234 | A02186 | A02419 | 229 |
| A02186 | A02465 | 200 | A02186 | A02490 | 469 |
| A02186 | A02491 | 127 | A02186 | A02582 | 205 |
| A02186 | A02611 | 200 | A02186 | A02668 | 130 |
| A02186 | A02771 | 438 | A02186 | A02783 | 212 |
| A02186 | A02874 | 260 | A02186 | A02951 | 267 |
| A02186 | A03053 | 271 | A02186 | A03080 | 484 |
| A02186 | A03186 | 241 | A02186 | A03238 | 177 |
| A02186 | A03315 | 274 | A02186 | A03351 | 149 |
| A02186 | A03369 | 395 | A02186 | A03370 | 466 |
| A02186 | A03371 | 313 | A02186 | A03373 | 406 |
| A02186 | A03379 | 457 | A02186 | A03397 | 302 |
| A02186 | A03639 | 184 | A02186 | A03773 | 187 |
| A02186 | A03914 | 351 | A02186 | A04051 | 383 |
| A02186 | A04159 | 475 | A02186 | A04193 | 276 |
| A02186 | A04385 | 330 | A02186 | A04391 | 308 |
| A02186 | A04409 | 405 | A02186 | A04410 | 165 |
| A02186 | A04433 | 311 | A02186 | A04456 | 380 |
| A02186 | A04509 | 324 | A02186 | A04608 | 311 |
| A02186 | A04609 | 358 | A02186 | A04751 | 185 |
| A02186 | A04824 | 305 | A02186 | A04830 | 271 |
| A02186 | A04832 | 243 | A02186 | A04875 | 322 |
| A02186 | A04923 | 369 | A02186 | A04989 | 486 |
| A02186 | A05113 | 343 | A02186 | A05136 | 344 |
| A02186 | A05349 | 255 | A02186 | A05356 | 173 |
| A02186 | A05469 | 430 | A02186 | A05578 | 319 |
| A02186 | A05731 | 399 | A02186 | A06251 | 344 |
| A02186 | A07031 | 191 | A02186 | A07154 | 267 |
| A02186 | A07218 | 462 | A02186 | A07273 | 330 |
| A02186 | A07754 | 396 | A02186 | A08739 | 274 |
| A02186 | A10408 | 361 | A02186 | A13597 | 319 |
| A02186 | A13734 | 163 | A02186 | A14194 | 368 |
| A02186 | A14198 | 389 | A02186 | A15282 | 219 |
| A02186 | A15605 | 224 | A02186 | A16636 | 399 |
| A02187 | A02202 | 187 | A02187 | A02669 | 337 |
| A02187 | A02785 | 171 | A02187 | A03050 | 246 |
| A02187 | A03725 | 256 | A02187 | A03948 | 185 |
| A02187 | A05356 | 465 | A02187 | A05659 | 281 |
| A02187 | A06607 | 263 | A02187 | A07039 | 391 |
| A02187 | A07198 | 208 | A02187 | A07471 | 205 |
| A02187 | A07541 | 190 | A02187 | A07567 | 283 |
| A02187 | A07673 | 285 | A02187 | A08785 | 334 |
| A02187 | A09416 | 234 | A02187 | A11370 | 456 |
| A02187 | A11371 | 405 | A02187 | A11399 | 405 |
| A02187 | A13879 | 263 | A02187 | A17078 | 165 |

|        |        |     |        |        |     |
|--------|--------|-----|--------|--------|-----|
| A02188 | A02198 | 465 | A02188 | A02221 | 491 |
| A02188 | A02228 | 491 | A02188 | A02231 | 445 |
| A02188 | A02301 | 159 | A02188 | A02303 | 477 |
| A02188 | A02304 | 76  | A02188 | A02310 | 318 |
| A02188 | A02311 | 389 | A02188 | A02312 | 202 |
| A02188 | A02318 | 223 | A02188 | A02320 | 457 |
| A02188 | A02326 | 212 | A02188 | A02333 | 152 |
| A02188 | A02470 | 308 | A02188 | A02504 | 154 |
| A02188 | A02518 | 405 | A02188 | A02523 | 423 |
| A02188 | A02525 | 165 | A02188 | A02539 | 404 |
| A02188 | A02541 | 408 | A02188 | A02671 | 144 |
| A02188 | A02672 | 424 | A02188 | A02686 | 176 |
| A02188 | A02687 | 263 | A02188 | A02706 | 168 |
| A02188 | A02713 | 213 | A02188 | A02760 | 329 |
| A02188 | A02761 | 144 | A02188 | A03061 | 299 |
| A02188 | A03076 | 468 | A02188 | A03077 | 458 |
| A02188 | A03080 | 398 | A02188 | A03093 | 188 |
| A02188 | A03162 | 277 | A02188 | A03178 | 491 |
| A02188 | A03186 | 786 | A02188 | A03188 | 433 |
| A02188 | A03217 | 235 | A02188 | A03297 | 165 |
| A02188 | A03334 | 313 | A02188 | A03346 | 124 |
| A02188 | A03351 | 294 | A02188 | A03358 | 143 |
| A02188 | A03361 | 63  | A02188 | A03379 | 71  |
| A02188 | A03388 | 212 | A02188 | A03477 | 274 |
| A02188 | A03726 | 273 | A02188 | A03766 | 423 |
| A02188 | A03769 | 238 | A02188 | A04035 | 195 |
| A02188 | A04070 | 307 | A02188 | A04172 | 402 |
| A02188 | A04184 | 235 | A02188 | A04193 | 480 |
| A02188 | A04195 | 480 | A02188 | A04224 | 419 |
| A02188 | A04236 | 286 | A02188 | A04279 | 151 |
| A02188 | A04337 | 215 | A02188 | A04358 | 441 |
| A02188 | A04402 | 286 | A02188 | A04410 | 489 |
| A02188 | A04411 | 215 | A02188 | A04424 | 481 |
| A02188 | A04520 | 447 | A02188 | A04543 | 200 |
| A02188 | A04715 | 335 | A02188 | A04832 | 456 |
| A02188 | A04840 | 257 | A02188 | A04841 | 327 |
| A02188 | A04870 | 324 | A02188 | A04944 | 316 |
| A02188 | A05001 | 254 | A02188 | A05155 | 238 |
| A02188 | A05234 | 223 | A02188 | A05294 | 424 |
| A02188 | A05356 | 183 | A02188 | A05438 | 223 |
| A02188 | A05471 | 193 | A02188 | A05593 | 470 |
| A02188 | A05594 | 452 | A02188 | A05596 | 363 |
| A02188 | A05599 | 413 | A02188 | A05603 | 293 |
| A02188 | A05722 | 408 | A02188 | A05777 | 394 |
| A02188 | A05896 | 327 | A02188 | A05927 | 340 |
| A02188 | A05979 | 334 | A02188 | A06069 | 299 |

|        |        |     |        |        |     |
|--------|--------|-----|--------|--------|-----|
| A02188 | A06100 | 168 | A02188 | A06141 | 346 |
| A02188 | A06148 | 361 | A02188 | A06212 | 399 |
| A02188 | A06217 | 260 | A02188 | A06307 | 391 |
| A02188 | A06428 | 388 | A02188 | A06480 | 480 |
| A02188 | A06574 | 165 | A02188 | A06670 | 268 |
| A02188 | A06703 | 268 | A02188 | A06739 | 450 |
| A02188 | A06868 | 167 | A02188 | A07068 | 340 |
| A02188 | A07085 | 340 | A02188 | A07282 | 402 |
| A02188 | A07384 | 190 | A02188 | A07442 | 262 |
| A02188 | A07479 | 160 | A02188 | A07704 | 159 |
| A02188 | A07828 | 327 | A02188 | A08036 | 363 |
| A02188 | A08162 | 293 | A02188 | A08314 | 363 |
| A02188 | A08392 | 327 | A02188 | A08944 | 183 |
| A02188 | A09162 | 157 | A02188 | A09200 | 232 |
| A02188 | A09380 | 491 | A02188 | A09470 | 157 |
| A02188 | A09812 | 251 | A02188 | A09950 | 363 |
| A02188 | A09997 | 190 | A02188 | A10101 | 340 |
| A02188 | A10278 | 398 | A02188 | A10651 | 168 |
| A02188 | A10742 | 251 | A02188 | A10934 | 168 |
| A02188 | A11282 | 191 | A02188 | A11466 | 299 |
| A02188 | A11483 | 281 | A02188 | A11573 | 247 |
| A02188 | A12962 | 425 | A02188 | A13369 | 486 |
| A02188 | A13413 | 286 | A02188 | A14366 | 156 |
| A02188 | A14381 | 398 | A02188 | A14654 | 168 |
| A02188 | A14740 | 363 | A02188 | A15232 | 363 |
| A02188 | A15336 | 162 | A02188 | A15638 | 311 |
| A02188 | A16305 | 281 | A02188 | A16427 | 363 |
| A02189 | A02232 | 286 | A02189 | A02343 | 262 |
| A02189 | A02498 | 408 | A02189 | A02670 | 423 |
| A02189 | A02674 | 366 | A02189 | A02699 | 302 |
| A02189 | A02789 | 486 | A02189 | A02821 | 314 |
| A02189 | A02828 | 152 | A02189 | A02963 | 246 |
| A02189 | A03422 | 170 | A02189 | A04608 | 241 |
| A02189 | A04880 | 221 | A02189 | A05176 | 276 |
| A02189 | A06601 | 259 | A02189 | A06701 | 152 |
| A02189 | A08692 | 306 | A02189 | A09523 | 405 |
| A02189 | A10623 | 249 | A02189 | A10743 | 310 |
| A02190 | A02191 | 332 | A02190 | A02226 | 226 |
| A02190 | A02603 | 411 | A02190 | A02776 | 347 |
| A02190 | A02835 | 369 | A02190 | A03111 | 416 |
| A02190 | A03401 | 190 | A02190 | A03408 | 232 |
| A02190 | A03725 | 185 | A02190 | A04360 | 391 |
| A02190 | A04395 | 470 | A02190 | A04413 | 401 |
| A02190 | A04573 | 388 | A02190 | A05349 | 246 |
| A02190 | A06251 | 401 | A02191 | A02221 | 279 |
| A02191 | A02239 | 236 | A02191 | A02352 | 226 |



|        |        |     |        |        |     |
|--------|--------|-----|--------|--------|-----|
| A02191 | A02435 | 255 | A02191 | A02498 | 263 |
| A02191 | A02583 | 302 | A02191 | A02595 | 374 |
| A02191 | A02672 | 174 | A02191 | A02784 | 218 |
| A02191 | A02836 | 152 | A02191 | A02854 | 224 |
| A02191 | A03070 | 479 | A02191 | A03244 | 180 |
| A02191 | A03398 | 226 | A02191 | A03401 | 90  |
| A02191 | A03408 | 249 | A02191 | A03571 | 229 |
| A02191 | A03661 | 267 | A02191 | A03762 | 450 |
| A02191 | A03846 | 308 | A02191 | A03968 | 176 |
| A02191 | A04349 | 212 | A02191 | A04395 | 420 |
| A02191 | A04403 | 374 | A02191 | A04404 | 361 |
| A02191 | A04405 | 307 | A02191 | A04429 | 308 |
| A02191 | A04874 | 293 | A02191 | A05322 | 288 |
| A02191 | A05709 | 299 | A02191 | A05838 | 215 |
| A02191 | A06629 | 207 | A02191 | A07140 | 338 |
| A02191 | A07146 | 288 | A02191 | A07151 | 232 |
| A02191 | A09141 | 288 | A02191 | A09254 | 257 |
| A02191 | A09372 | 355 | A02191 | A10389 | 326 |
| A02191 | A10527 | 212 | A02191 | A10635 | 218 |
| A02191 | A14236 | 183 | A02191 | A14443 | 230 |
| A02192 | A02288 | 344 | A02192 | A02300 | 208 |
| A02192 | A02303 | 221 | A02192 | A02308 | 235 |
| A02192 | A02392 | 362 | A02192 | A02412 | 219 |
| A02192 | A02424 | 238 | A02192 | A02466 | 290 |
| A02192 | A02495 | 201 | A02192 | A02501 | 433 |
| A02192 | A02532 | 329 | A02192 | A02555 | 411 |
| A02192 | A02583 | 455 | A02192 | A02672 | 210 |
| A02192 | A02709 | 165 | A02192 | A02760 | 406 |
| A02192 | A02785 | 152 | A02192 | A02787 | 191 |
| A02192 | A02896 | 174 | A02192 | A03078 | 373 |
| A02192 | A03080 | 218 | A02192 | A03112 | 340 |
| A02192 | A03211 | 157 | A02192 | A03642 | 383 |
| A02192 | A04172 | 373 | A02192 | A04179 | 340 |
| A02192 | A04228 | 385 | A02192 | A04229 | 173 |
| A02192 | A04256 | 267 | A02192 | A04406 | 247 |
| A02192 | A04423 | 321 | A02192 | A04491 | 302 |
| A02192 | A04520 | 168 | A02192 | A04712 | 329 |
| A02192 | A06722 | 390 | A02192 | A07139 | 378 |
| A02192 | A07239 | 380 | A02192 | A07281 | 436 |
| A02192 | A07739 | 438 | A02192 | A08645 | 411 |
| A02192 | A08870 | 299 | A02192 | A09573 | 408 |
| A02192 | A09968 | 390 | A02192 | A10597 | 236 |
| A02192 | A10696 | 346 | A02192 | A11683 | 193 |
| A02192 | A11911 | 185 | A02192 | A11932 | 262 |
| A02192 | A16257 | 269 | A02193 | A03851 | 341 |
| A02193 | A08834 | 350 | A02194 | A02303 | 343 |

|        |        |     |        |        |     |
|--------|--------|-----|--------|--------|-----|
| A02194 | A02304 | 313 | A02194 | A02310 | 385 |
| A02194 | A02311 | 379 | A02194 | A02318 | 400 |
| A02194 | A02320 | 327 | A02194 | A02469 | 374 |
| A02194 | A02473 | 353 | A02194 | A02521 | 279 |
| A02194 | A02540 | 445 | A02194 | A02672 | 335 |
| A02194 | A02760 | 390 | A02194 | A03202 | 424 |
| A02194 | A04637 | 406 | A02194 | A04825 | 430 |
| A02195 | A03307 | 473 | A02195 | A03768 | 469 |
| A02195 | A05315 | 294 | A02195 | A06608 | 193 |
| A02195 | A07432 | 353 | A02195 | A14188 | 176 |
| A02197 | A13986 | 224 | A02197 | A14452 | 212 |
| A02197 | A14664 | 294 | A02198 | A02199 | 291 |
| A02198 | A02215 | 302 | A02198 | A02221 | 490 |
| A02198 | A02228 | 491 | A02198 | A02301 | 232 |
| A02198 | A02303 | 311 | A02198 | A02311 | 243 |
| A02198 | A02320 | 374 | A02198 | A02432 | 208 |
| A02198 | A02485 | 299 | A02198 | A02523 | 450 |
| A02198 | A02539 | 326 | A02198 | A02541 | 274 |
| A02198 | A02611 | 201 | A02198 | A03076 | 491 |
| A02198 | A03077 | 491 | A02198 | A03178 | 185 |
| A02198 | A03217 | 299 | A02198 | A03602 | 174 |
| A02198 | A03766 | 165 | A02198 | A04063 | 269 |
| A02198 | A04337 | 218 | A02198 | A04411 | 281 |
| A02198 | A04498 | 362 | A02198 | A04520 | 252 |
| A02198 | A04839 | 151 | A02198 | A04870 | 262 |
| A02198 | A04889 | 355 | A02198 | A05294 | 226 |
| A02198 | A05486 | 307 | A02198 | A05593 | 312 |
| A02198 | A05603 | 281 | A02198 | A05777 | 252 |
| A02198 | A05979 | 271 | A02198 | A06100 | 358 |
| A02198 | A06696 | 266 | A02198 | A06710 | 340 |
| A02198 | A06739 | 224 | A02198 | A07209 | 247 |
| A02198 | A07282 | 324 | A02198 | A07833 | 443 |
| A02198 | A08046 | 440 | A02198 | A08257 | 396 |
| A02198 | A09064 | 396 | A02198 | A10858 | 362 |
| A02198 | A11054 | 396 | A02198 | A11411 | 288 |
| A02198 | A11989 | 380 | A02198 | A11990 | 380 |
| A02198 | A12476 | 396 | A02198 | A12526 | 369 |
| A02198 | A12736 | 329 | A02198 | A13409 | 380 |
| A02198 | A16450 | 201 | A02199 | A02221 | 82  |
| A02199 | A02228 | 488 | A02199 | A02467 | 159 |
| A02199 | A02673 | 456 | A02199 | A03076 | 458 |
| A02199 | A03077 | 263 | A02199 | A03160 | 446 |
| A02199 | A03203 | 247 | A02199 | A03420 | 177 |
| A02199 | A03434 | 326 | A02199 | A05596 | 245 |
| A02199 | A06609 | 157 | A02199 | A07027 | 193 |
| A02199 | A07069 | 173 | A02199 | A07339 | 230 |

|        |        |     |        |        |     |
|--------|--------|-----|--------|--------|-----|
| A02199 | A07833 | 443 | A02199 | A09200 | 238 |
| A02199 | A09470 | 162 | A02199 | A14127 | 313 |
| A02199 | A14521 | 157 | A02199 | A14857 | 202 |
| A02199 | A15230 | 154 | A02199 | A15848 | 330 |
| A02199 | A16449 | 210 | A02199 | A16453 | 251 |
| A02200 | A02564 | 350 | A02200 | A02641 | 414 |
| A02200 | A02703 | 355 | A02200 | A02904 | 369 |
| A02200 | A03078 | 438 | A02200 | A03220 | 434 |
| A02200 | A06218 | 452 | A02201 | A04357 | 430 |
| A02201 | A11048 | 419 | A02202 | A02215 | 486 |
| A02202 | A02220 | 269 | A02202 | A02232 | 486 |
| A02202 | A02543 | 269 | A02202 | A02775 | 307 |
| A02202 | A02789 | 160 | A02202 | A02837 | 356 |
| A02202 | A02859 | 162 | A02202 | A02898 | 154 |
| A02202 | A03027 | 165 | A02202 | A03051 | 199 |
| A02202 | A03080 | 168 | A02202 | A03113 | 174 |
| A02202 | A03237 | 154 | A02202 | A03361 | 193 |
| A02202 | A03378 | 390 | A02202 | A03435 | 491 |
| A02202 | A03977 | 196 | A02202 | A04049 | 210 |
| A02202 | A04334 | 406 | A02202 | A04407 | 418 |
| A02202 | A04763 | 201 | A02202 | A04875 | 238 |
| A02202 | A05156 | 241 | A02202 | A05259 | 195 |
| A02202 | A05264 | 162 | A02202 | A05281 | 257 |
| A02202 | A05496 | 294 | A02202 | A05525 | 246 |
| A02202 | A05659 | 348 | A02202 | A05705 | 251 |
| A02202 | A06597 | 479 | A02202 | A07210 | 154 |
| A02202 | A07218 | 234 | A02202 | A07653 | 193 |
| A02202 | A07958 | 238 | A02202 | A09356 | 227 |
| A02202 | A09374 | 202 | A02202 | A09403 | 307 |
| A02202 | A09419 | 174 | A02202 | A09541 | 262 |
| A02202 | A09997 | 162 | A02202 | A10891 | 234 |
| A02202 | A10947 | 215 | A02202 | A11314 | 283 |
| A02202 | A11852 | 154 | A02202 | A11897 | 268 |
| A02202 | A11955 | 227 | A02202 | A12660 | 172 |
| A02202 | A12730 | 391 | A02202 | A13186 | 446 |
| A02202 | A14127 | 165 | A02202 | A14399 | 201 |
| A02202 | A14669 | 323 | A02202 | A14820 | 262 |
| A02202 | A15775 | 230 | A02202 | A16377 | 227 |
| A02202 | A16443 | 210 | A02203 | A02749 | 157 |
| A02203 | A03907 | 416 | A02203 | A05199 | 324 |
| A02203 | A05646 | 321 | A02203 | A06122 | 302 |
| A02203 | A06825 | 296 | A02203 | A06832 | 224 |
| A02203 | A07312 | 259 | A02203 | A09010 | 172 |
| A02203 | A14449 | 187 | A02203 | A14661 | 63  |
| A02203 | A15624 | 391 | A02203 | A15644 | 177 |
| A02203 | A15649 | 156 | A02203 | A15651 | 224 |

|        |        |     |        |        |     |
|--------|--------|-----|--------|--------|-----|
| A02203 | A15652 | 184 | A02204 | A02549 | 416 |
| A02204 | A02634 | 395 | A02204 | A02837 | 265 |
| A02205 | A02232 | 347 | A02205 | A02291 | 160 |
| A02205 | A02922 | 188 | A02205 | A03080 | 491 |
| A02205 | A03247 | 270 | A02205 | A03346 | 436 |
| A02205 | A03347 | 395 | A02205 | A03348 | 296 |
| A02205 | A03351 | 445 | A02205 | A03361 | 477 |
| A02205 | A03363 | 296 | A02205 | A03370 | 385 |
| A02205 | A03373 | 322 | A02205 | A03374 | 407 |
| A02205 | A03376 | 416 | A02205 | A03378 | 323 |
| A02205 | A03379 | 483 | A02205 | A03397 | 294 |
| A02205 | A03414 | 302 | A02205 | A04329 | 277 |
| A02205 | A04409 | 294 | A02205 | A05264 | 251 |
| A02205 | A06627 | 224 | A02205 | A06935 | 363 |
| A02205 | A07218 | 477 | A02205 | A07361 | 375 |
| A02205 | A07843 | 277 | A02205 | A09882 | 296 |
| A02205 | A11911 | 353 | A02205 | A16007 | 187 |
| A02205 | A16281 | 240 | A02206 | A02209 | 245 |
| A02206 | A02219 | 488 | A02206 | A03401 | 490 |
| A02206 | A03700 | 401 | A02206 | A03766 | 348 |
| A02206 | A04190 | 388 | A02206 | A04410 | 221 |
| A02206 | A05016 | 322 | A02206 | A05536 | 339 |
| A02206 | A07158 | 200 | A02206 | A08698 | 252 |
| A02206 | A09243 | 252 | A02206 | A12897 | 296 |
| A02206 | A14644 | 162 | A02206 | A15336 | 184 |
| A02206 | A15638 | 218 | A02206 | A16994 | 180 |
| A02207 | A02211 | 422 | A02207 | A02227 | 356 |
| A02207 | A14496 | 307 | A02207 | A14521 | 369 |
| A02207 | A14643 | 241 | A02208 | A02209 | 468 |
| A02208 | A02227 | 167 | A02208 | A02437 | 269 |
| A02208 | A02672 | 486 | A02208 | A02995 | 152 |
| A02208 | A03019 | 159 | A02208 | A03223 | 472 |
| A02208 | A03687 | 168 | A02208 | A03741 | 429 |
| A02208 | A03846 | 156 | A02208 | A04079 | 443 |
| A02208 | A04818 | 191 | A02208 | A04902 | 462 |
| A02208 | A05016 | 491 | A02208 | A05221 | 314 |
| A02208 | A05536 | 357 | A02208 | A05765 | 269 |
| A02208 | A07203 | 332 | A02208 | A07344 | 196 |
| A02208 | A08183 | 235 | A02208 | A08910 | 488 |
| A02208 | A08926 | 286 | A02208 | A09084 | 193 |
| A02208 | A09243 | 481 | A02208 | A10286 | 269 |
| A02208 | A10625 | 273 | A02208 | A11277 | 486 |
| A02208 | A12897 | 314 | A02208 | A13971 | 184 |
| A02208 | A14127 | 491 | A02208 | A14644 | 491 |
| A02208 | A14714 | 156 | A02208 | A15321 | 269 |
| A02208 | A15420 | 263 | A02208 | A15555 | 269 |

|        |        |     |        |        |     |
|--------|--------|-----|--------|--------|-----|
| A02208 | A16255 | 269 | A02208 | A16281 | 217 |
| A02208 | A16636 | 188 | A02209 | A02219 | 218 |
| A02209 | A02226 | 439 | A02209 | A02228 | 156 |
| A02209 | A03186 | 302 | A02209 | A03401 | 319 |
| A02209 | A03730 | 195 | A02209 | A03766 | 355 |
| A02209 | A03909 | 273 | A02209 | A05536 | 438 |
| A02209 | A06162 | 388 | A02209 | A06288 | 398 |
| A02209 | A07123 | 213 | A02209 | A09243 | 429 |
| A02209 | A09718 | 165 | A02209 | A09997 | 229 |
| A02209 | A11160 | 198 | A02209 | A11161 | 334 |
| A02209 | A11398 | 460 | A02209 | A13819 | 162 |
| A02209 | A14127 | 408 | A02209 | A14644 | 440 |
| A02210 | A02278 | 210 | A02210 | A02859 | 152 |
| A02210 | A03892 | 162 | A02210 | A04897 | 341 |
| A02211 | A02227 | 434 | A02211 | A02586 | 288 |
| A02211 | A02804 | 324 | A02211 | A03817 | 193 |
| A02211 | A09762 | 301 | A02211 | A11703 | 366 |
| A02211 | A14077 | 204 | A02211 | A15277 | 335 |
| A02211 | A15376 | 258 | A02212 | A02228 | 227 |
| A02212 | A02452 | 477 | A02212 | A02953 | 193 |
| A02212 | A03104 | 152 | A02212 | A03494 | 428 |
| A02212 | A03567 | 368 | A02212 | A04922 | 413 |
| A02212 | A05219 | 170 | A02212 | A05766 | 340 |
| A02212 | A06059 | 213 | A02212 | A06122 | 201 |
| A02212 | A07096 | 160 | A02212 | A07226 | 160 |
| A02212 | A07266 | 210 | A02212 | A07756 | 666 |
| A02212 | A07956 | 672 | A02212 | A07986 | 302 |
| A02212 | A08248 | 372 | A02212 | A08281 | 436 |
| A02212 | A08490 | 215 | A02212 | A08516 | 154 |
| A02212 | A08517 | 580 | A02212 | A08834 | 160 |
| A02212 | A08982 | 363 | A02212 | A09314 | 281 |
| A02212 | A09627 | 414 | A02212 | A09737 | 213 |
| A02212 | A09833 | 174 | A02212 | A10150 | 340 |
| A02212 | A10372 | 160 | A02212 | A10611 | 221 |
| A02212 | A11277 | 187 | A02212 | A11365 | 160 |
| A02212 | A11735 | 160 | A02212 | A11737 | 160 |
| A02212 | A11914 | 160 | A02212 | A12292 | 307 |
| A02212 | A12658 | 160 | A02212 | A12824 | 539 |
| A02212 | A13279 | 340 | A02212 | A14007 | 160 |
| A02212 | A14196 | 491 | A02212 | A14257 | 227 |
| A02212 | A14498 | 311 | A02212 | A14511 | 355 |
| A02212 | A15237 | 427 | A02212 | A15257 | 214 |
| A02212 | A15292 | 419 | A02212 | A15297 | 486 |
| A02212 | A15309 | 241 | A02212 | A15314 | 308 |
| A02212 | A15323 | 491 | A02212 | A15324 | 490 |
| A02212 | A15330 | 188 | A02212 | A15337 | 157 |

|        |        |     |        |        |     |
|--------|--------|-----|--------|--------|-----|
| A02212 | A15339 | 462 | A02212 | A15353 | 486 |
| A02212 | A15355 | 180 | A02212 | A15363 | 156 |
| A02212 | A15419 | 490 | A02212 | A15431 | 477 |
| A02212 | A15502 | 314 | A02212 | A15559 | 360 |
| A02212 | A15788 | 486 | A02212 | A15909 | 235 |
| A02212 | A16311 | 312 | A02212 | A16463 | 571 |
| A02212 | A17063 | 395 | A02213 | A02228 | 160 |
| A02213 | A02304 | 208 | A02213 | A02330 | 238 |
| A02213 | A02385 | 343 | A02213 | A02467 | 293 |
| A02213 | A02468 | 288 | A02213 | A02495 | 232 |
| A02213 | A02502 | 165 | A02213 | A02869 | 265 |
| A02213 | A03001 | 260 | A02213 | A03178 | 258 |
| A02213 | A03186 | 193 | A02213 | A03201 | 303 |
| A02213 | A03314 | 260 | A02213 | A03639 | 258 |
| A02213 | A04166 | 383 | A02213 | A05377 | 318 |
| A02213 | A05443 | 191 | A02213 | A09028 | 313 |
| A02213 | A09791 | 260 | A02213 | A11132 | 267 |
| A02213 | A12111 | 235 | A02213 | A12982 | 368 |
| A02213 | A13874 | 234 | A02213 | A15230 | 288 |
| A02213 | A15268 | 249 | A02213 | A15381 | 238 |
| A02213 | A15419 | 236 | A02214 | A02316 | 234 |
| A02214 | A02364 | 366 | A02214 | A02524 | 265 |
| A02214 | A03044 | 324 | A02214 | A03093 | 299 |
| A02214 | A03401 | 241 | A02214 | A03763 | 208 |
| A02214 | A03945 | 288 | A02214 | A04167 | 193 |
| A02214 | A05150 | 299 | A02214 | A05210 | 319 |
| A02214 | A05689 | 379 | A02214 | A06296 | 224 |
| A02214 | A08089 | 330 | A02214 | A10083 | 306 |
| A02214 | A10640 | 313 | A02214 | A14350 | 445 |
| A02214 | A14621 | 159 | A02215 | A02220 | 390 |
| A02215 | A02221 | 443 | A02215 | A02222 | 491 |
| A02215 | A02224 | 183 | A02215 | A02228 | 424 |
| A02215 | A02229 | 485 | A02215 | A02231 | 457 |
| A02215 | A02232 | 371 | A02215 | A02249 | 152 |
| A02215 | A02262 | 449 | A02215 | A02306 | 305 |
| A02215 | A02321 | 154 | A02215 | A02329 | 243 |
| A02215 | A02412 | 454 | A02215 | A02432 | 274 |
| A02215 | A02439 | 340 | A02215 | A02460 | 481 |
| A02215 | A02465 | 176 | A02215 | A02477 | 460 |
| A02215 | A02490 | 480 | A02215 | A02491 | 400 |
| A02215 | A02505 | 185 | A02215 | A02542 | 462 |
| A02215 | A02545 | 491 | A02215 | A02582 | 185 |
| A02215 | A02587 | 350 | A02215 | A02605 | 263 |
| A02215 | A02668 | 360 | A02215 | A02756 | 435 |
| A02215 | A02774 | 251 | A02215 | A02785 | 486 |
| A02215 | A02859 | 462 | A02215 | A02874 | 391 |

|        |        |     |        |        |     |
|--------|--------|-----|--------|--------|-----|
| A02215 | A03043 | 263 | A02215 | A03050 | 491 |
| A02215 | A03054 | 455 | A02215 | A03069 | 245 |
| A02215 | A03077 | 63  | A02215 | A03080 | 491 |
| A02215 | A03104 | 380 | A02215 | A03216 | 182 |
| A02215 | A03218 | 177 | A02215 | A03233 | 182 |
| A02215 | A03237 | 163 | A02215 | A03333 | 398 |
| A02215 | A03369 | 227 | A02215 | A03370 | 486 |
| A02215 | A03373 | 332 | A02215 | A03378 | 334 |
| A02215 | A03379 | 465 | A02215 | A03402 | 491 |
| A02215 | A03413 | 238 | A02215 | A03414 | 77  |
| A02215 | A03499 | 307 | A02215 | A03504 | 454 |
| A02215 | A03554 | 199 | A02215 | A03605 | 160 |
| A02215 | A03638 | 227 | A02215 | A03639 | 480 |
| A02215 | A03651 | 369 | A02215 | A03708 | 160 |
| A02215 | A03725 | 332 | A02215 | A03744 | 435 |
| A02215 | A03910 | 322 | A02215 | A03975 | 227 |
| A02215 | A04051 | 279 | A02215 | A04202 | 157 |
| A02215 | A04260 | 299 | A02215 | A04337 | 486 |
| A02215 | A04357 | 218 | A02215 | A04369 | 439 |
| A02215 | A04400 | 191 | A02215 | A04410 | 195 |
| A02215 | A04412 | 390 | A02215 | A04456 | 240 |
| A02215 | A04511 | 240 | A02215 | A04520 | 433 |
| A02215 | A04532 | 163 | A02215 | A04633 | 369 |
| A02215 | A04635 | 270 | A02215 | A04670 | 240 |
| A02215 | A04672 | 416 | A02215 | A04824 | 241 |
| A02215 | A04836 | 367 | A02215 | A04839 | 420 |
| A02215 | A04843 | 191 | A02215 | A04875 | 446 |
| A02215 | A04912 | 314 | A02215 | A04924 | 165 |
| A02215 | A04975 | 260 | A02215 | A04993 | 173 |
| A02215 | A04996 | 171 | A02215 | A05087 | 418 |
| A02215 | A05126 | 165 | A02215 | A05156 | 367 |
| A02215 | A05231 | 240 | A02215 | A05234 | 419 |
| A02215 | A05245 | 170 | A02215 | A05259 | 216 |
| A02215 | A05281 | 160 | A02215 | A05356 | 491 |
| A02215 | A05377 | 470 | A02215 | A05382 | 204 |
| A02215 | A05460 | 204 | A02215 | A05485 | 154 |
| A02215 | A05486 | 457 | A02215 | A05487 | 491 |
| A02215 | A05493 | 485 | A02215 | A05494 | 491 |
| A02215 | A05496 | 204 | A02215 | A05521 | 274 |
| A02215 | A05527 | 182 | A02215 | A05533 | 480 |
| A02215 | A05535 | 173 | A02215 | A05545 | 252 |
| A02215 | A05572 | 204 | A02215 | A05603 | 160 |
| A02215 | A05678 | 489 | A02215 | A05687 | 347 |
| A02215 | A05860 | 401 | A02215 | A05901 | 165 |
| A02215 | A05945 | 363 | A02215 | A06033 | 218 |
| A02215 | A06036 | 185 | A02215 | A06212 | 168 |

|        |        |     |        |        |     |
|--------|--------|-----|--------|--------|-----|
| A02215 | A06266 | 274 | A02215 | A06363 | 240 |
| A02215 | A06509 | 182 | A02215 | A06527 | 486 |
| A02215 | A06569 | 205 | A02215 | A06606 | 399 |
| A02215 | A06607 | 491 | A02215 | A06696 | 488 |
| A02215 | A06729 | 252 | A02215 | A06875 | 281 |
| A02215 | A06908 | 485 | A02215 | A07123 | 152 |
| A02215 | A07218 | 490 | A02215 | A07297 | 173 |
| A02215 | A07407 | 165 | A02215 | A07442 | 486 |
| A02215 | A07452 | 490 | A02215 | A07455 | 204 |
| A02215 | A07468 | 477 | A02215 | A07471 | 491 |
| A02215 | A07472 | 491 | A02215 | A07475 | 491 |
| A02215 | A07482 | 218 | A02215 | A07491 | 491 |
| A02215 | A07515 | 419 | A02215 | A07538 | 443 |
| A02215 | A07541 | 491 | A02215 | A07542 | 486 |
| A02215 | A07543 | 488 | A02215 | A07544 | 165 |
| A02215 | A07561 | 491 | A02215 | A07562 | 218 |
| A02215 | A07563 | 191 | A02215 | A07608 | 409 |
| A02215 | A07610 | 489 | A02215 | A07629 | 472 |
| A02215 | A07630 | 458 | A02215 | A07631 | 191 |
| A02215 | A07632 | 468 | A02215 | A07633 | 452 |
| A02215 | A07634 | 491 | A02215 | A07635 | 490 |
| A02215 | A07636 | 457 | A02215 | A07638 | 274 |
| A02215 | A07639 | 240 | A02215 | A07653 | 213 |
| A02215 | A07657 | 240 | A02215 | A07662 | 191 |
| A02215 | A07685 | 218 | A02215 | A07736 | 200 |
| A02215 | A07740 | 321 | A02215 | A07741 | 173 |
| A02215 | A07754 | 481 | A02215 | A07827 | 240 |
| A02215 | A07890 | 274 | A02215 | A07913 | 429 |
| A02215 | A07914 | 205 | A02215 | A07928 | 383 |
| A02215 | A07958 | 491 | A02215 | A07990 | 154 |
| A02215 | A08172 | 323 | A02215 | A08179 | 274 |
| A02215 | A08210 | 434 | A02215 | A08246 | 182 |
| A02215 | A08404 | 491 | A02215 | A08444 | 350 |
| A02215 | A08656 | 182 | A02215 | A08783 | 461 |
| A02215 | A08784 | 274 | A02215 | A08785 | 491 |
| A02215 | A08786 | 461 | A02215 | A09031 | 314 |
| A02215 | A09085 | 400 | A02215 | A09157 | 218 |
| A02215 | A09483 | 204 | A02215 | A09740 | 455 |
| A02215 | A09932 | 358 | A02215 | A09966 | 240 |
| A02215 | A10084 | 182 | A02215 | A10174 | 899 |
| A02215 | A10278 | 76  | A02215 | A10634 | 360 |
| A02215 | A10649 | 364 | A02215 | A10651 | 383 |
| A02215 | A10667 | 299 | A02215 | A10678 | 218 |
| A02215 | A10680 | 274 | A02215 | A10948 | 274 |
| A02215 | A10967 | 490 | A02215 | A10991 | 274 |
| A02215 | A11031 | 274 | A02215 | A11054 | 274 |



|        |        |     |        |        |     |
|--------|--------|-----|--------|--------|-----|
| A02215 | A11059 | 274 | A02215 | A11081 | 364 |
| A02215 | A11275 | 293 | A02215 | A11282 | 353 |
| A02215 | A11311 | 409 | A02215 | A11313 | 374 |
| A02215 | A11317 | 317 | A02215 | A11321 | 154 |
| A02215 | A11329 | 438 | A02215 | A11343 | 154 |
| A02215 | A11414 | 182 | A02215 | A11428 | 363 |
| A02215 | A11433 | 260 | A02215 | A11442 | 240 |
| A02215 | A11448 | 240 | A02215 | A11513 | 176 |
| A02215 | A11664 | 274 | A02215 | A11721 | 191 |
| A02215 | A11897 | 380 | A02215 | A11989 | 240 |
| A02215 | A11990 | 240 | A02215 | A12003 | 204 |
| A02215 | A12019 | 218 | A02215 | A12084 | 173 |
| A02215 | A12371 | 307 | A02215 | A12374 | 274 |
| A02215 | A12527 | 274 | A02215 | A12674 | 390 |
| A02215 | A12793 | 457 | A02215 | A12892 | 218 |
| A02215 | A13010 | 173 | A02215 | A13327 | 427 |
| A02215 | A13329 | 401 | A02215 | A13369 | 439 |
| A02215 | A13415 | 446 | A02215 | A13721 | 274 |
| A02215 | A13734 | 265 | A02215 | A13863 | 360 |
| A02215 | A13869 | 335 | A02215 | A13871 | 406 |
| A02215 | A13879 | 491 | A02215 | A14063 | 173 |
| A02215 | A14381 | 457 | A02215 | A14399 | 420 |
| A02215 | A14453 | 364 | A02215 | A15328 | 174 |
| A02215 | A15373 | 235 | A02215 | A15498 | 371 |
| A02215 | A15638 | 472 | A02215 | A15655 | 205 |
| A02215 | A15791 | 218 | A02215 | A15880 | 260 |
| A02215 | A15917 | 441 | A02215 | A16450 | 454 |
| A02215 | A16595 | 299 | A02215 | A16636 | 469 |
| A02215 | A16746 | 182 | A02215 | A17078 | 486 |
| A02216 | A02389 | 174 | A02216 | A02466 | 226 |
| A02216 | A02632 | 272 | A02216 | A02717 | 152 |
| A02216 | A02738 | 154 | A02216 | A02797 | 185 |
| A02216 | A02878 | 375 | A02216 | A02901 | 278 |
| A02216 | A03069 | 389 | A02216 | A03243 | 165 |
| A02216 | A03261 | 221 | A02216 | A03651 | 379 |
| A02216 | A04446 | 335 | A02216 | A05318 | 312 |
| A02216 | A06606 | 375 | A02216 | A06965 | 296 |
| A02216 | A07412 | 234 | A02216 | A07584 | 162 |
| A02216 | A08289 | 195 | A02216 | A08398 | 374 |
| A02216 | A08417 | 191 | A02216 | A08452 | 236 |
| A02216 | A08694 | 458 | A02216 | A08972 | 257 |
| A02216 | A09485 | 258 | A02216 | A09598 | 286 |
| A02216 | A10503 | 339 | A02216 | A10518 | 399 |
| A02216 | A10878 | 333 | A02216 | A11438 | 385 |
| A02216 | A11945 | 196 | A02216 | A12233 | 257 |
| A02216 | A13992 | 221 | A02216 | A14377 | 151 |

|        |        |     |        |        |     |
|--------|--------|-----|--------|--------|-----|
| A02216 | A14505 | 221 | A02216 | A14566 | 171 |
| A02216 | A15727 | 307 | A02217 | A02382 | 263 |
| A02217 | A02473 | 329 | A02217 | A03081 | 356 |
| A02217 | A03219 | 332 | A02217 | A03511 | 401 |
| A02217 | A04078 | 360 | A02217 | A04678 | 454 |
| A02217 | A04747 | 465 | A02217 | A06146 | 422 |
| A02217 | A06752 | 251 | A02217 | A07145 | 330 |
| A02217 | A07282 | 328 | A02217 | A07641 | 374 |
| A02217 | A14366 | 276 | A02217 | A15336 | 391 |
| A02217 | A15837 | 254 | A02217 | A16068 | 395 |
| A02217 | A16101 | 425 | A02217 | A16626 | 466 |
| A02218 | A02278 | 297 | A02219 | A02931 | 561 |
| A02219 | A03057 | 228 | A02219 | A03070 | 63  |
| A02219 | A03208 | 238 | A02219 | A03328 | 396 |
| A02219 | A03401 | 491 | A02219 | A03575 | 162 |
| A02219 | A03700 | 273 | A02219 | A03710 | 212 |
| A02219 | A04079 | 408 | A02219 | A04190 | 363 |
| A02219 | A05621 | 294 | A02219 | A05967 | 399 |
| A02219 | A06223 | 172 | A02219 | A06387 | 154 |
| A02219 | A06615 | 383 | A02219 | A06635 | 185 |
| A02219 | A06776 | 184 | A02219 | A07054 | 472 |
| A02219 | A07301 | 205 | A02219 | A08137 | 363 |
| A02219 | A08574 | 188 | A02219 | A09111 | 179 |
| A02219 | A11394 | 167 | A02219 | A11828 | 157 |
| A02219 | A11877 | 273 | A02219 | A12598 | 238 |
| A02219 | A12897 | 313 | A02219 | A13986 | 380 |
| A02219 | A14539 | 296 | A02219 | A16741 | 159 |
| A02220 | A02232 | 347 | A02220 | A02545 | 279 |
| A02220 | A02863 | 333 | A02220 | A04260 | 314 |
| A02220 | A05487 | 423 | A02220 | A05494 | 424 |
| A02220 | A05496 | 419 | A02220 | A05860 | 416 |
| A02220 | A07173 | 316 | A02220 | A07471 | 283 |
| A02220 | A07958 | 393 | A02220 | A10634 | 398 |
| A02220 | A13879 | 330 | A02221 | A02222 | 235 |
| A02221 | A02228 | 491 | A02221 | A02231 | 491 |
| A02221 | A02301 | 367 | A02221 | A02303 | 490 |
| A02221 | A02308 | 107 | A02221 | A02310 | 475 |
| A02221 | A02311 | 378 | A02221 | A02316 | 324 |
| A02221 | A02318 | 339 | A02221 | A02320 | 404 |
| A02221 | A02511 | 232 | A02221 | A02523 | 461 |
| A02221 | A02666 | 328 | A02221 | A02671 | 271 |
| A02221 | A02672 | 486 | A02221 | A02673 | 286 |
| A02221 | A02758 | 171 | A02221 | A02760 | 457 |
| A02221 | A02773 | 268 | A02221 | A03061 | 286 |
| A02221 | A03076 | 480 | A02221 | A03077 | 485 |
| A02221 | A03097 | 201 | A02221 | A03162 | 263 |

|        |        |     |        |        |     |
|--------|--------|-----|--------|--------|-----|
| A02221 | A03178 | 490 | A02221 | A03334 | 297 |
| A02221 | A03349 | 235 | A02221 | A03358 | 256 |
| A02221 | A03451 | 258 | A02221 | A03477 | 477 |
| A02221 | A03505 | 305 | A02221 | A04172 | 443 |
| A02221 | A04193 | 326 | A02221 | A04224 | 452 |
| A02221 | A04229 | 241 | A02221 | A04236 | 274 |
| A02221 | A04252 | 230 | A02221 | A04337 | 277 |
| A02221 | A04361 | 228 | A02221 | A04410 | 486 |
| A02221 | A04411 | 443 | A02221 | A04520 | 379 |
| A02221 | A04556 | 205 | A02221 | A04715 | 167 |
| A02221 | A04729 | 177 | A02221 | A04964 | 188 |
| A02221 | A05155 | 329 | A02221 | A05294 | 472 |
| A02221 | A05324 | 157 | A02221 | A05356 | 212 |
| A02221 | A05593 | 490 | A02221 | A05599 | 406 |
| A02221 | A05721 | 173 | A02221 | A05722 | 401 |
| A02221 | A05777 | 384 | A02221 | A05896 | 316 |
| A02221 | A05979 | 489 | A02221 | A06035 | 330 |
| A02221 | A06068 | 353 | A02221 | A06069 | 151 |
| A02221 | A06070 | 246 | A02221 | A06100 | 249 |
| A02221 | A06141 | 491 | A02221 | A06148 | 417 |
| A02221 | A06193 | 452 | A02221 | A06212 | 491 |
| A02221 | A06293 | 205 | A02221 | A06346 | 470 |
| A02221 | A06428 | 302 | A02221 | A06574 | 281 |
| A02221 | A06655 | 470 | A02221 | A06731 | 205 |
| A02221 | A06739 | 477 | A02221 | A06820 | 353 |
| A02221 | A07019 | 159 | A02221 | A07209 | 176 |
| A02221 | A07282 | 326 | A02221 | A07384 | 390 |
| A02221 | A07641 | 319 | A02221 | A07833 | 238 |
| A02221 | A08036 | 353 | A02221 | A08093 | 358 |
| A02221 | A08097 | 179 | A02221 | A08171 | 154 |
| A02221 | A08172 | 484 | A02221 | A08236 | 436 |
| A02221 | A08292 | 183 | A02221 | A08309 | 468 |
| A02221 | A08310 | 391 | A02221 | A08686 | 475 |
| A02221 | A08700 | 198 | A02221 | A08753 | 367 |
| A02221 | A08936 | 391 | A02221 | A09109 | 316 |
| A02221 | A09380 | 338 | A02221 | A10101 | 330 |
| A02221 | A10278 | 945 | A02221 | A10532 | 327 |
| A02221 | A10629 | 480 | A02221 | A10858 | 406 |
| A02221 | A11054 | 353 | A02221 | A11289 | 185 |
| A02221 | A11299 | 452 | A02221 | A11315 | 368 |
| A02221 | A11323 | 162 | A02221 | A11342 | 274 |
| A02221 | A11454 | 157 | A02221 | A11466 | 286 |
| A02221 | A11483 | 436 | A02221 | A11486 | 162 |
| A02221 | A11573 | 234 | A02221 | A11989 | 330 |
| A02221 | A11990 | 330 | A02221 | A12422 | 353 |
| A02221 | A12580 | 353 | A02221 | A13346 | 216 |

|        |        |     |        |        |     |
|--------|--------|-----|--------|--------|-----|
| A02221 | A13369 | 460 | A02221 | A13382 | 468 |
| A02221 | A13853 | 236 | A02221 | A14381 | 216 |
| A02221 | A14586 | 240 | A02221 | A14633 | 193 |
| A02221 | A14740 | 353 | A02221 | A15064 | 277 |
| A02221 | A15258 | 196 | A02221 | A15260 | 305 |
| A02221 | A15318 | 172 | A02221 | A15498 | 413 |
| A02221 | A15638 | 440 | A02221 | A16887 | 279 |
| A02222 | A02225 | 235 | A02222 | A02229 | 489 |
| A02222 | A02231 | 249 | A02222 | A02317 | 257 |
| A02222 | A02405 | 458 | A02222 | A02530 | 299 |
| A02222 | A02667 | 165 | A02222 | A03104 | 188 |
| A02222 | A03152 | 278 | A02222 | A03178 | 160 |
| A02222 | A03186 | 382 | A02222 | A03238 | 450 |
| A02222 | A03314 | 160 | A02222 | A03391 | 232 |
| A02222 | A03625 | 195 | A02222 | A03806 | 260 |
| A02222 | A03829 | 283 | A02222 | A03893 | 353 |
| A02222 | A03935 | 310 | A02222 | A03945 | 418 |
| A02222 | A04002 | 441 | A02222 | A04275 | 271 |
| A02222 | A04337 | 409 | A02222 | A04412 | 472 |
| A02222 | A04487 | 226 | A02222 | A04608 | 152 |
| A02222 | A04679 | 286 | A02222 | A05087 | 472 |
| A02222 | A05208 | 258 | A02222 | A05277 | 276 |
| A02222 | A05311 | 302 | A02222 | A05376 | 205 |
| A02222 | A05377 | 422 | A02222 | A05494 | 398 |
| A02222 | A05533 | 190 | A02222 | A05556 | 266 |
| A02222 | A05577 | 188 | A02222 | A05580 | 356 |
| A02222 | A05653 | 294 | A02222 | A05678 | 228 |
| A02222 | A05768 | 241 | A02222 | A05812 | 183 |
| A02222 | A06036 | 246 | A02222 | A06298 | 195 |
| A02222 | A06696 | 366 | A02222 | A06729 | 486 |
| A02222 | A06831 | 307 | A02222 | A06953 | 238 |
| A02222 | A07143 | 400 | A02222 | A07424 | 291 |
| A02222 | A07491 | 198 | A02222 | A07558 | 167 |
| A02222 | A07836 | 296 | A02222 | A08127 | 307 |
| A02222 | A09204 | 188 | A02222 | A09242 | 154 |
| A02222 | A09380 | 266 | A02222 | A10410 | 356 |
| A02222 | A10634 | 299 | A02222 | A11081 | 368 |
| A02222 | A11897 | 213 | A02222 | A13879 | 312 |
| A02222 | A14258 | 183 | A02222 | A14372 | 156 |
| A02222 | A15233 | 252 | A02222 | A15295 | 481 |
| A02222 | A15422 | 236 | A02222 | A15432 | 256 |
| A02222 | A15498 | 429 | A02222 | A15620 | 385 |
| A02222 | A15624 | 291 | A02222 | A15669 | 182 |
| A02222 | A15684 | 486 | A02222 | A15913 | 160 |
| A02222 | A17078 | 296 | A02223 | A02233 | 374 |
| A02223 | A02238 | 380 | A02223 | A02311 | 254 |

|        |        |     |        |        |     |
|--------|--------|-----|--------|--------|-----|
| A02223 | A02400 | 341 | A02223 | A02796 | 301 |
| A02223 | A02842 | 177 | A02223 | A03041 | 286 |
| A02223 | A03080 | 452 | A02223 | A03175 | 271 |
| A02223 | A03186 | 256 | A02223 | A03369 | 193 |
| A02223 | A03370 | 343 | A02223 | A03379 | 266 |
| A02223 | A03497 | 341 | A02223 | A03498 | 281 |
| A02223 | A03609 | 171 | A02223 | A03744 | 205 |
| A02223 | A04080 | 273 | A02223 | A04194 | 288 |
| A02223 | A04379 | 296 | A02223 | A04607 | 633 |
| A02223 | A08860 | 340 | A02223 | A09983 | 322 |
| A02223 | A10408 | 367 | A02223 | A10427 | 156 |
| A02223 | A13942 | 241 | A02223 | A14192 | 286 |
| A02223 | A14209 | 513 | A02223 | A14377 | 188 |
| A02223 | A16288 | 258 | A02224 | A02232 | 272 |
| A02224 | A02333 | 168 | A02224 | A02983 | 157 |
| A02224 | A03080 | 221 | A02224 | A03177 | 262 |
| A02224 | A03763 | 208 | A02224 | A04337 | 462 |
| A02224 | A05259 | 324 | A02224 | A05264 | 299 |
| A02224 | A07157 | 187 | A02224 | A07442 | 433 |
| A02224 | A10523 | 369 | A02224 | A11326 | 182 |
| A02224 | A15673 | 204 | A02225 | A02227 | 184 |
| A02225 | A02412 | 213 | A02225 | A02482 | 200 |
| A02225 | A02607 | 396 | A02225 | A02826 | 245 |
| A02225 | A03401 | 452 | A02225 | A03570 | 212 |
| A02225 | A03893 | 191 | A02225 | A04002 | 256 |
| A02225 | A05812 | 245 | A02225 | A06308 | 422 |
| A02225 | A09131 | 251 | A02225 | A10910 | 324 |
| A02226 | A02291 | 157 | A02226 | A02349 | 274 |
| A02226 | A02356 | 171 | A02226 | A02360 | 177 |
| A02226 | A02412 | 347 | A02226 | A02490 | 202 |
| A02226 | A02545 | 401 | A02226 | A02620 | 338 |
| A02226 | A02802 | 269 | A02226 | A02875 | 210 |
| A02226 | A03019 | 218 | A02226 | A03080 | 441 |
| A02226 | A03141 | 157 | A02226 | A03401 | 358 |
| A02226 | A03402 | 236 | A02226 | A03403 | 326 |
| A02226 | A03744 | 188 | A02226 | A03882 | 470 |
| A02226 | A04051 | 213 | A02226 | A04063 | 286 |
| A02226 | A04138 | 162 | A02226 | A04294 | 260 |
| A02226 | A04405 | 191 | A02226 | A04472 | 241 |
| A02226 | A04780 | 196 | A02226 | A04818 | 265 |
| A02226 | A04830 | 157 | A02226 | A04881 | 269 |
| A02226 | A05536 | 324 | A02226 | A05621 | 490 |
| A02226 | A06370 | 218 | A02226 | A06387 | 201 |
| A02226 | A06408 | 198 | A02226 | A06663 | 221 |
| A02226 | A07175 | 171 | A02226 | A07706 | 223 |
| A02226 | A08661 | 152 | A02226 | A09243 | 193 |

|        |        |     |        |        |     |
|--------|--------|-----|--------|--------|-----|
| A02226 | A09455 | 293 | A02226 | A09797 | 296 |
| A02226 | A10353 | 485 | A02226 | A11273 | 168 |
| A02226 | A11398 | 180 | A02226 | A11958 | 335 |
| A02226 | A12184 | 335 | A02226 | A12897 | 445 |
| A02226 | A13716 | 180 | A02226 | A13886 | 176 |
| A02226 | A14197 | 188 | A02226 | A14199 | 167 |
| A02226 | A15909 | 171 | A02227 | A02696 | 236 |
| A02227 | A02830 | 317 | A02227 | A02877 | 454 |
| A02227 | A03095 | 491 | A02227 | A03218 | 369 |
| A02227 | A03388 | 317 | A02227 | A03401 | 334 |
| A02227 | A03403 | 469 | A02227 | A03433 | 249 |
| A02227 | A03468 | 302 | A02227 | A03493 | 489 |
| A02227 | A03501 | 177 | A02227 | A03568 | 227 |
| A02227 | A03576 | 159 | A02227 | A03584 | 364 |
| A02227 | A03600 | 348 | A02227 | A03770 | 484 |
| A02227 | A03881 | 191 | A02227 | A04229 | 456 |
| A02227 | A04265 | 218 | A02227 | A04488 | 159 |
| A02227 | A04688 | 480 | A02227 | A04844 | 363 |
| A02227 | A05156 | 154 | A02227 | A05198 | 260 |
| A02227 | A05199 | 462 | A02227 | A05239 | 213 |
| A02227 | A05262 | 430 | A02227 | A05318 | 198 |
| A02227 | A05501 | 447 | A02227 | A05510 | 213 |
| A02227 | A05512 | 224 | A02227 | A05629 | 241 |
| A02227 | A05702 | 451 | A02227 | A05733 | 249 |
| A02227 | A05804 | 394 | A02227 | A06064 | 291 |
| A02227 | A06101 | 299 | A02227 | A06109 | 176 |
| A02227 | A06564 | 277 | A02227 | A06589 | 462 |
| A02227 | A06597 | 259 | A02227 | A06785 | 187 |
| A02227 | A06788 | 249 | A02227 | A06819 | 330 |
| A02227 | A07248 | 484 | A02227 | A07349 | 343 |
| A02227 | A07414 | 491 | A02227 | A07713 | 183 |
| A02227 | A07730 | 401 | A02227 | A08501 | 228 |
| A02227 | A08760 | 461 | A02227 | A08761 | 358 |
| A02227 | A08886 | 183 | A02227 | A08901 | 480 |
| A02227 | A09096 | 159 | A02227 | A09124 | 179 |
| A02227 | A09131 | 490 | A02227 | A09193 | 356 |
| A02227 | A09338 | 249 | A02227 | A09520 | 486 |
| A02227 | A09575 | 462 | A02227 | A09635 | 96  |
| A02227 | A09719 | 269 | A02227 | A09735 | 491 |
| A02227 | A10117 | 229 | A02227 | A10144 | 283 |
| A02227 | A10338 | 283 | A02227 | A10910 | 238 |
| A02227 | A11146 | 191 | A02227 | A11255 | 324 |
| A02227 | A11401 | 488 | A02227 | A11745 | 213 |
| A02227 | A12657 | 163 | A02227 | A12897 | 217 |
| A02227 | A12905 | 201 | A02227 | A13529 | 229 |
| A02227 | A14443 | 316 | A02227 | A14478 | 156 |

|        |        |     |        |        |     |
|--------|--------|-----|--------|--------|-----|
| A02227 | A14479 | 466 | A02227 | A14568 | 360 |
| A02227 | A14622 | 205 | A02227 | A15347 | 187 |
| A02227 | A15372 | 216 | A02227 | A15500 | 417 |
| A02227 | A15771 | 243 | A02227 | A16007 | 276 |
| A02227 | A17152 | 247 | A02228 | A02229 | 119 |
| A02228 | A02231 | 445 | A02228 | A02252 | 196 |
| A02228 | A02301 | 210 | A02228 | A02303 | 379 |
| A02228 | A02304 | 319 | A02228 | A02311 | 227 |
| A02228 | A02320 | 473 | A02228 | A02482 | 433 |
| A02228 | A02502 | 163 | A02228 | A02523 | 483 |
| A02228 | A02531 | 361 | A02228 | A02532 | 299 |
| A02228 | A02539 | 428 | A02228 | A02541 | 477 |
| A02228 | A02672 | 63  | A02228 | A02673 | 489 |
| A02228 | A02706 | 255 | A02228 | A02761 | 188 |
| A02228 | A03061 | 241 | A02228 | A03076 | 491 |
| A02228 | A03077 | 491 | A02228 | A03080 | 152 |
| A02228 | A03104 | 324 | A02228 | A03120 | 232 |
| A02228 | A03178 | 491 | A02228 | A03203 | 176 |
| A02228 | A03216 | 241 | A02228 | A03217 | 302 |
| A02228 | A03226 | 447 | A02228 | A03292 | 217 |
| A02228 | A03477 | 215 | A02228 | A03765 | 371 |
| A02228 | A03766 | 364 | A02228 | A03769 | 171 |
| A02228 | A03893 | 297 | A02228 | A03909 | 432 |
| A02228 | A04001 | 188 | A02228 | A04195 | 226 |
| A02228 | A04372 | 226 | A02228 | A04379 | 154 |
| A02228 | A04410 | 486 | A02228 | A04411 | 491 |
| A02228 | A04424 | 435 | A02228 | A04498 | 260 |
| A02228 | A04520 | 457 | A02228 | A04595 | 168 |
| A02228 | A04710 | 260 | A02228 | A04832 | 228 |
| A02228 | A04840 | 191 | A02228 | A04870 | 407 |
| A02228 | A05192 | 400 | A02228 | A05274 | 340 |
| A02228 | A05593 | 318 | A02228 | A05596 | 174 |
| A02228 | A05603 | 423 | A02228 | A05673 | 168 |
| A02228 | A05707 | 321 | A02228 | A05777 | 338 |
| A02228 | A05896 | 274 | A02228 | A05899 | 241 |
| A02228 | A05979 | 491 | A02228 | A06002 | 321 |
| A02228 | A06100 | 247 | A02228 | A06148 | 385 |
| A02228 | A06212 | 246 | A02228 | A06307 | 347 |
| A02228 | A06346 | 263 | A02228 | A06550 | 182 |
| A02228 | A06701 | 160 | A02228 | A06710 | 226 |
| A02228 | A06739 | 200 | A02228 | A06820 | 321 |
| A02228 | A07132 | 369 | A02228 | A07209 | 307 |
| A02228 | A07282 | 427 | A02228 | A07384 | 406 |
| A02228 | A07386 | 293 | A02228 | A07387 | 321 |
| A02228 | A07641 | 443 | A02228 | A07705 | 195 |
| A02228 | A07785 | 355 | A02228 | A07833 | 489 |

|        |        |     |        |        |     |
|--------|--------|-----|--------|--------|-----|
| A02228 | A07895 | 241 | A02228 | A08046 | 388 |
| A02228 | A08162 | 232 | A02228 | A08172 | 160 |
| A02228 | A08236 | 484 | A02228 | A08237 | 379 |
| A02228 | A08292 | 260 | A02228 | A08309 | 265 |
| A02228 | A08392 | 274 | A02228 | A08685 | 241 |
| A02228 | A08686 | 182 | A02228 | A09109 | 388 |
| A02228 | A09380 | 154 | A02228 | A09382 | 241 |
| A02228 | A10072 | 245 | A02228 | A10257 | 321 |
| A02228 | A10278 | 404 | A02228 | A10858 | 434 |
| A02228 | A11054 | 321 | A02228 | A11314 | 430 |
| A02228 | A11411 | 156 | A02228 | A11483 | 219 |
| A02228 | A11989 | 400 | A02228 | A11990 | 400 |
| A02228 | A12132 | 249 | A02228 | A12526 | 274 |
| A02228 | A13369 | 488 | A02228 | A14196 | 218 |
| A02228 | A14506 | 321 | A02228 | A14586 | 322 |
| A02228 | A14633 | 152 | A02228 | A15064 | 314 |
| A02228 | A15226 | 204 | A02228 | A15227 | 321 |
| A02228 | A15248 | 321 | A02228 | A15258 | 368 |
| A02228 | A15260 | 379 | A02228 | A15277 | 296 |
| A02228 | A15314 | 241 | A02228 | A15498 | 260 |
| A02228 | A15638 | 299 | A02228 | A16260 | 232 |
| A02229 | A02231 | 301 | A02229 | A02397 | 278 |
| A02229 | A02482 | 195 | A02229 | A02618 | 306 |
| A02229 | A02667 | 224 | A02229 | A02753 | 165 |
| A02229 | A03146 | 318 | A02229 | A03155 | 277 |
| A02229 | A03961 | 480 | A02229 | A04163 | 268 |
| A02229 | A04327 | 243 | A02229 | A04368 | 335 |
| A02229 | A04412 | 363 | A02229 | A04423 | 313 |
| A02229 | A04487 | 475 | A02229 | A05087 | 406 |
| A02229 | A05376 | 379 | A02229 | A05377 | 491 |
| A02229 | A05439 | 177 | A02229 | A05591 | 218 |
| A02229 | A06036 | 297 | A02229 | A06495 | 196 |
| A02229 | A07833 | 234 | A02229 | A08878 | 201 |
| A02229 | A09036 | 324 | A02229 | A09054 | 152 |
| A02229 | A09892 | 363 | A02229 | A10967 | 173 |
| A02229 | A11081 | 394 | A02229 | A11983 | 196 |
| A02229 | A12793 | 240 | A02229 | A13874 | 191 |
| A02229 | A15913 | 218 | A02230 | A02377 | 321 |
| A02230 | A02837 | 265 | A02231 | A02301 | 279 |
| A02231 | A02303 | 229 | A02231 | A02310 | 301 |
| A02231 | A02465 | 252 | A02231 | A02468 | 269 |
| A02231 | A02469 | 281 | A02231 | A02523 | 272 |
| A02231 | A02672 | 218 | A02231 | A02738 | 232 |
| A02231 | A03178 | 362 | A02231 | A04193 | 414 |
| A02231 | A04329 | 326 | A02231 | A04361 | 477 |
| A02231 | A04412 | 373 | A02231 | A04520 | 310 |



|        |        |     |        |        |     |
|--------|--------|-----|--------|--------|-----|
| A02231 | A04921 | 401 | A02231 | A05012 | 414 |
| A02231 | A05186 | 414 | A02231 | A05294 | 388 |
| A02231 | A05377 | 301 | A02231 | A05382 | 386 |
| A02231 | A05593 | 429 | A02231 | A05599 | 386 |
| A02231 | A05979 | 313 | A02231 | A06100 | 185 |
| A02231 | A06141 | 417 | A02231 | A06212 | 405 |
| A02231 | A06329 | 353 | A02231 | A06346 | 479 |
| A02231 | A06655 | 358 | A02231 | A07027 | 302 |
| A02231 | A07282 | 243 | A02231 | A07492 | 414 |
| A02231 | A07641 | 313 | A02231 | A07705 | 270 |
| A02231 | A07833 | 252 | A02231 | A08036 | 414 |
| A02231 | A08093 | 160 | A02231 | A08187 | 414 |
| A02231 | A08292 | 311 | A02231 | A10278 | 302 |
| A02231 | A10948 | 414 | A02231 | A11031 | 414 |
| A02231 | A11299 | 243 | A02231 | A11323 | 294 |
| A02231 | A13369 | 205 | A02231 | A15390 | 281 |
| A02231 | A15917 | 188 | A02232 | A02249 | 251 |
| A02232 | A02278 | 268 | A02232 | A02498 | 259 |
| A02232 | A02789 | 160 | A02232 | A02874 | 347 |
| A02232 | A03080 | 399 | A02232 | A03322 | 254 |
| A02232 | A03346 | 199 | A02232 | A03378 | 205 |
| A02232 | A03773 | 191 | A02232 | A03802 | 308 |
| A02232 | A03936 | 272 | A02232 | A03976 | 171 |
| A02232 | A04138 | 279 | A02232 | A04201 | 305 |
| A02232 | A05259 | 293 | A02232 | A05264 | 265 |
| A02232 | A05496 | 363 | A02232 | A05659 | 356 |
| A02232 | A07730 | 254 | A02232 | A08861 | 406 |
| A02232 | A09199 | 259 | A02232 | A10074 | 382 |
| A02232 | A11576 | 188 | A02232 | A13734 | 274 |
| A02232 | A15911 | 238 | A02233 | A02310 | 385 |
| A02233 | A02400 | 419 | A02233 | A02467 | 369 |
| A02233 | A02687 | 266 | A02233 | A02796 | 401 |
| A02233 | A03041 | 395 | A02233 | A03097 | 398 |
| A02233 | A03115 | 338 | A02233 | A03178 | 347 |
| A02233 | A03186 | 302 | A02233 | A04079 | 259 |
| A02233 | A05294 | 369 | A02233 | A15726 | 200 |
| A02234 | A02237 | 369 | A02234 | A02481 | 193 |
| A02234 | A02620 | 369 | A02234 | A02749 | 193 |
| A02234 | A03186 | 212 | A02234 | A04536 | 238 |
| A02234 | A05220 | 180 | A02234 | A05469 | 395 |
| A02234 | A05578 | 443 | A02234 | A07157 | 235 |
| A02234 | A07605 | 296 | A02234 | A12824 | 252 |
| A02234 | A14372 | 272 | A02235 | A02306 | 224 |
| A02235 | A02360 | 271 | A02235 | A02467 | 205 |
| A02235 | A02482 | 272 | A02235 | A02759 | 338 |
| A02235 | A03077 | 180 | A02235 | A03178 | 163 |

|        |        |     |        |        |     |
|--------|--------|-----|--------|--------|-----|
| A02235 | A03304 | 236 | A02235 | A05112 | 165 |
| A02235 | A05247 | 240 | A02235 | A05288 | 486 |
| A02235 | A06607 | 385 | A02235 | A06688 | 213 |
| A02235 | A07333 | 227 | A02235 | A07839 | 386 |
| A02235 | A08584 | 358 | A02235 | A08732 | 202 |
| A02235 | A09083 | 439 | A02235 | A09149 | 185 |
| A02235 | A09994 | 407 | A02235 | A10072 | 236 |
| A02235 | A11881 | 224 | A02235 | A12373 | 362 |
| A02235 | A14859 | 358 | A02235 | A15992 | 174 |
| A02236 | A02240 | 218 | A02236 | A02243 | 418 |
| A02236 | A02318 | 451 | A02236 | A02423 | 255 |
| A02236 | A02472 | 428 | A02236 | A02582 | 234 |
| A02236 | A02606 | 301 | A02236 | A02671 | 196 |
| A02236 | A03081 | 489 | A02236 | A03110 | 491 |
| A02236 | A03310 | 319 | A02236 | A03644 | 411 |
| A02236 | A03942 | 445 | A02236 | A03975 | 317 |
| A02236 | A04180 | 319 | A02236 | A04216 | 317 |
| A02236 | A04676 | 489 | A02236 | A05270 | 383 |
| A02236 | A05517 | 299 | A02236 | A06118 | 322 |
| A02236 | A06385 | 151 | A02236 | A06805 | 467 |
| A02236 | A07145 | 223 | A02236 | A07243 | 255 |
| A02236 | A08031 | 406 | A02236 | A08572 | 202 |
| A02236 | A09062 | 335 | A02236 | A09421 | 314 |
| A02236 | A10018 | 351 | A02236 | A10295 | 391 |
| A02236 | A10580 | 348 | A02236 | A11412 | 179 |
| A02236 | A11953 | 269 | A02236 | A13485 | 369 |
| A02236 | A14210 | 481 | A02236 | A14364 | 355 |
| A02236 | A14366 | 152 | A02236 | A14371 | 252 |
| A02236 | A14379 | 413 | A02236 | A14380 | 348 |
| A02236 | A14511 | 319 | A02236 | A14536 | 333 |
| A02236 | A14554 | 218 | A02236 | A14603 | 353 |
| A02236 | A14604 | 210 | A02236 | A15310 | 238 |
| A02236 | A15454 | 252 | A02236 | A16224 | 224 |
| A02237 | A02416 | 221 | A02237 | A02471 | 373 |
| A02237 | A03080 | 154 | A02237 | A03112 | 173 |
| A02237 | A03181 | 294 | A02237 | A03370 | 208 |
| A02237 | A03415 | 255 | A02237 | A03602 | 272 |
| A02237 | A03744 | 288 | A02237 | A03936 | 427 |
| A02237 | A04063 | 344 | A02237 | A04681 | 270 |
| A02237 | A04830 | 345 | A02237 | A04989 | 385 |
| A02237 | A04992 | 394 | A02237 | A05469 | 396 |
| A02237 | A05578 | 378 | A02237 | A08222 | 368 |
| A02237 | A08861 | 288 | A02237 | A09374 | 362 |
| A02237 | A12179 | 396 | A02237 | A12897 | 251 |
| A02237 | A15673 | 256 | A02238 | A02298 | 389 |
| A02238 | A02416 | 152 | A02238 | A02419 | 259 |

|        |        |     |        |        |     |
|--------|--------|-----|--------|--------|-----|
| A02238 | A02425 | 191 | A02238 | A02428 | 303 |
| A02238 | A02435 | 273 | A02238 | A02465 | 230 |
| A02238 | A02468 | 249 | A02238 | A02490 | 243 |
| A02238 | A02668 | 291 | A02238 | A02756 | 176 |
| A02238 | A02874 | 199 | A02238 | A02875 | 170 |
| A02238 | A03053 | 296 | A02238 | A03069 | 154 |
| A02238 | A03071 | 296 | A02238 | A03186 | 369 |
| A02238 | A03369 | 213 | A02238 | A03379 | 156 |
| A02238 | A03726 | 165 | A02238 | A03744 | 224 |
| A02238 | A04194 | 406 | A02238 | A04472 | 353 |
| A02238 | A04751 | 217 | A02238 | A05114 | 278 |
| A02238 | A05584 | 268 | A02238 | A06251 | 362 |
| A02238 | A06615 | 162 | A02238 | A06670 | 345 |
| A02238 | A06860 | 243 | A02238 | A06949 | 177 |
| A02238 | A08837 | 210 | A02238 | A09390 | 308 |
| A02238 | A09469 | 291 | A02238 | A09809 | 290 |
| A02238 | A11470 | 243 | A02238 | A12824 | 170 |
| A02238 | A14193 | 213 | A02238 | A14194 | 274 |
| A02238 | A14198 | 369 | A02238 | A15729 | 226 |
| A02238 | A15809 | 306 | A02238 | A16636 | 205 |
| A02239 | A03292 | 168 | A02239 | A03725 | 177 |
| A02239 | A04114 | 263 | A02239 | A04174 | 208 |
| A02239 | A05992 | 265 | A02239 | A06197 | 302 |
| A02239 | A09071 | 380 | A02239 | A09561 | 180 |
| A02239 | A09809 | 266 | A02239 | A09906 | 429 |
| A02239 | A11943 | 170 | A02239 | A12990 | 263 |
| A02239 | A13667 | 899 | A02239 | A14074 | 185 |
| A02239 | A14925 | 188 | A02239 | A15353 | 196 |
| A02239 | A15543 | 154 | A02239 | A15932 | 296 |
| A02239 | A15933 | 268 | A02239 | A16084 | 273 |
| A02240 | A02242 | 391 | A02240 | A02243 | 278 |
| A02240 | A02260 | 238 | A02240 | A02355 | 262 |
| A02240 | A02424 | 162 | A02240 | A02457 | 217 |
| A02240 | A02458 | 286 | A02240 | A02468 | 319 |
| A02240 | A02624 | 234 | A02240 | A02654 | 428 |
| A02240 | A02859 | 260 | A02240 | A02926 | 317 |
| A02240 | A02936 | 251 | A02240 | A02976 | 168 |
| A02240 | A03006 | 332 | A02240 | A03079 | 312 |
| A02240 | A03081 | 202 | A02240 | A03086 | 247 |
| A02240 | A03093 | 451 | A02240 | A03177 | 185 |
| A02240 | A03224 | 196 | A02240 | A03239 | 491 |
| A02240 | A03243 | 157 | A02240 | A03280 | 223 |
| A02240 | A03283 | 382 | A02240 | A03316 | 283 |
| A02240 | A03417 | 174 | A02240 | A03447 | 481 |
| A02240 | A03710 | 154 | A02240 | A03732 | 180 |
| A02240 | A03735 | 454 | A02240 | A03746 | 490 |

|        |        |     |        |        |     |
|--------|--------|-----|--------|--------|-----|
| A02240 | A03772 | 307 | A02240 | A03788 | 234 |
| A02240 | A03900 | 457 | A02240 | A03923 | 358 |
| A02240 | A03948 | 205 | A02240 | A04039 | 351 |
| A02240 | A04076 | 168 | A02240 | A04130 | 294 |
| A02240 | A04217 | 188 | A02240 | A04337 | 173 |
| A02240 | A04501 | 341 | A02240 | A04609 | 330 |
| A02240 | A04679 | 279 | A02240 | A04850 | 172 |
| A02240 | A05355 | 294 | A02240 | A06024 | 490 |
| A02240 | A06293 | 375 | A02240 | A06344 | 378 |
| A02240 | A06415 | 465 | A02240 | A06441 | 341 |
| A02240 | A06606 | 174 | A02240 | A06747 | 190 |
| A02240 | A06868 | 205 | A02240 | A07010 | 334 |
| A02240 | A07138 | 257 | A02240 | A07145 | 160 |
| A02240 | A07152 | 409 | A02240 | A07161 | 191 |
| A02240 | A07529 | 288 | A02240 | A07764 | 438 |
| A02240 | A07960 | 351 | A02240 | A08632 | 312 |
| A02240 | A08685 | 279 | A02240 | A09219 | 278 |
| A02240 | A09259 | 263 | A02240 | A09394 | 251 |
| A02240 | A09743 | 159 | A02240 | A09768 | 219 |
| A02240 | A10236 | 382 | A02240 | A10487 | 382 |
| A02240 | A10504 | 170 | A02240 | A10585 | 235 |
| A02240 | A11950 | 215 | A02240 | A12455 | 363 |
| A02240 | A13453 | 382 | A02240 | A13485 | 480 |
| A02240 | A13903 | 196 | A02240 | A14125 | 468 |
| A02240 | A14135 | 188 | A02240 | A14146 | 230 |
| A02240 | A14362 | 208 | A02240 | A14366 | 311 |
| A02240 | A14368 | 235 | A02240 | A14372 | 491 |
| A02240 | A14373 | 279 | A02240 | A14374 | 452 |
| A02240 | A14376 | 259 | A02240 | A14380 | 486 |
| A02240 | A14381 | 481 | A02240 | A14391 | 332 |
| A02240 | A14439 | 191 | A02240 | A14511 | 232 |
| A02240 | A14554 | 490 | A02240 | A14598 | 247 |
| A02240 | A14599 | 445 | A02240 | A14600 | 322 |
| A02240 | A14603 | 477 | A02240 | A14604 | 473 |
| A02240 | A15081 | 382 | A02240 | A15287 | 252 |
| A02240 | A15322 | 190 | A02240 | A15411 | 230 |
| A02240 | A15425 | 456 | A02240 | A15427 | 210 |
| A02240 | A15436 | 156 | A02240 | A15466 | 312 |
| A02240 | A15475 | 352 | A02240 | A15516 | 188 |
| A02240 | A15790 | 334 | A02240 | A15795 | 430 |
| A02240 | A15811 | 260 | A02240 | A15812 | 363 |
| A02240 | A15969 | 322 | A02240 | A16015 | 301 |
| A02240 | A16031 | 328 | A02240 | A17076 | 188 |
| A02241 | A04071 | 243 | A02242 | A02452 | 218 |
| A02242 | A02854 | 299 | A02242 | A02983 | 205 |
| A02242 | A03081 | 316 | A02242 | A03104 | 328 |

|        |        |     |        |        |     |
|--------|--------|-----|--------|--------|-----|
| A02242 | A03209 | 254 | A02242 | A03913 | 252 |
| A02242 | A03948 | 217 | A02242 | A07209 | 270 |
| A02242 | A07961 | 274 | A02242 | A09552 | 353 |
| A02242 | A14196 | 286 | A02242 | A14366 | 218 |
| A02242 | A14554 | 462 | A02242 | A14565 | 408 |
| A02242 | A15425 | 469 | A02243 | A02318 | 353 |
| A02243 | A02472 | 163 | A02243 | A02492 | 255 |
| A02243 | A02506 | 285 | A02243 | A02693 | 308 |
| A02243 | A02704 | 218 | A02243 | A03081 | 452 |
| A02243 | A03083 | 446 | A02243 | A03110 | 224 |
| A02243 | A04111 | 385 | A02243 | A12383 | 177 |
| A02243 | A13485 | 396 | A02243 | A14210 | 168 |
| A02243 | A14380 | 382 | A02243 | A14554 | 278 |
| A02243 | A14603 | 385 | A02243 | A14605 | 324 |
| A02243 | A14642 | 238 | A02244 | A02481 | 303 |
| A02244 | A02908 | 337 | A02244 | A03126 | 288 |
| A02245 | A02278 | 212 | A02245 | A02309 | 398 |
| A02245 | A02356 | 314 | A02245 | A02382 | 422 |
| A02245 | A02416 | 162 | A02245 | A02559 | 198 |
| A02245 | A02644 | 274 | A02245 | A02709 | 160 |
| A02245 | A03110 | 172 | A02245 | A03183 | 371 |
| A02245 | A03310 | 328 | A02245 | A03314 | 227 |
| A02245 | A03639 | 352 | A02245 | A03771 | 238 |
| A02245 | A03919 | 312 | A02245 | A04202 | 319 |
| A02245 | A04478 | 302 | A02245 | A04492 | 302 |
| A02245 | A04676 | 314 | A02245 | A05305 | 401 |
| A02245 | A05653 | 340 | A02245 | A05679 | 210 |
| A02245 | A05815 | 475 | A02245 | A05985 | 341 |
| A02245 | A07143 | 457 | A02245 | A07209 | 303 |
| A02245 | A08749 | 409 | A02245 | A09363 | 263 |
| A02245 | A09572 | 333 | A02245 | A09734 | 210 |
| A02245 | A10090 | 367 | A02245 | A10287 | 396 |
| A02245 | A13860 | 165 | A02245 | A14554 | 452 |
| A02245 | A15498 | 156 | A02245 | A15969 | 367 |
| A02246 | A02333 | 293 | A02246 | A02491 | 208 |
| A02246 | A02691 | 303 | A02246 | A02952 | 393 |
| A02246 | A04449 | 160 | A02246 | A05094 | 364 |
| A02246 | A15282 | 274 | A02247 | A02382 | 243 |
| A02247 | A02412 | 301 | A02247 | A02413 | 341 |
| A02247 | A02415 | 324 | A02247 | A02416 | 374 |
| A02247 | A02491 | 429 | A02247 | A02590 | 353 |
| A02247 | A02606 | 440 | A02247 | A03882 | 299 |
| A02247 | A04454 | 390 | A02247 | A06588 | 184 |
| A02247 | A14366 | 257 | A02248 | A02249 | 473 |
| A02248 | A02412 | 198 | A02248 | A02415 | 422 |
| A02248 | A02490 | 234 | A02248 | A02582 | 452 |

|        |        |     |        |        |     |
|--------|--------|-----|--------|--------|-----|
| A02248 | A02590 | 385 | A02248 | A02605 | 273 |
| A02248 | A03609 | 182 | A02248 | A03690 | 267 |
| A02248 | A04010 | 151 | A02248 | A04072 | 168 |
| A02248 | A04176 | 404 | A02248 | A04668 | 230 |
| A02248 | A06851 | 420 | A02248 | A07319 | 180 |
| A02248 | A09598 | 344 | A02248 | A10791 | 290 |
| A02248 | A10901 | 461 | A02248 | A11400 | 215 |
| A02248 | A11540 | 477 | A02248 | A14387 | 316 |
| A02248 | A14706 | 151 | A02248 | A15318 | 173 |
| A02249 | A02251 | 228 | A02249 | A02260 | 288 |
| A02249 | A02416 | 462 | A02249 | A02590 | 386 |
| A02249 | A02619 | 340 | A02249 | A02669 | 408 |
| A02249 | A02963 | 208 | A02249 | A02979 | 216 |
| A02249 | A03068 | 201 | A02249 | A03069 | 279 |
| A02249 | A03420 | 157 | A02249 | A03609 | 183 |
| A02249 | A03773 | 210 | A02249 | A03802 | 322 |
| A02249 | A03936 | 288 | A02249 | A04138 | 294 |
| A02249 | A04176 | 447 | A02249 | A04201 | 318 |
| A02249 | A04202 | 170 | A02249 | A04415 | 294 |
| A02249 | A04815 | 328 | A02249 | A05082 | 152 |
| A02249 | A05741 | 317 | A02249 | A06340 | 485 |
| A02249 | A06463 | 296 | A02249 | A06531 | 226 |
| A02249 | A06813 | 308 | A02249 | A07867 | 390 |
| A02249 | A08879 | 276 | A02249 | A10074 | 390 |
| A02249 | A10337 | 228 | A02249 | A10791 | 291 |
| A02249 | A10901 | 429 | A02249 | A13572 | 450 |
| A02249 | A14216 | 246 | A02250 | A02333 | 491 |
| A02250 | A02415 | 347 | A02250 | A02490 | 102 |
| A02250 | A02491 | 491 | A02250 | A02581 | 330 |
| A02250 | A02686 | 255 | A02250 | A02687 | 198 |
| A02250 | A03417 | 215 | A02250 | A03447 | 278 |
| A02250 | A03780 | 286 | A02250 | A03799 | 177 |
| A02250 | A03987 | 373 | A02250 | A04167 | 154 |
| A02250 | A04398 | 489 | A02250 | A05891 | 404 |
| A02250 | A07129 | 366 | A02250 | A07605 | 218 |
| A02250 | A08714 | 455 | A02250 | A08881 | 196 |
| A02250 | A09939 | 313 | A02250 | A11085 | 373 |
| A02250 | A11313 | 201 | A02250 | A11525 | 416 |
| A02250 | A11681 | 219 | A02250 | A11693 | 358 |
| A02250 | A13989 | 372 | A02250 | A14029 | 180 |
| A02250 | A14930 | 188 | A02250 | A15986 | 226 |
| A02251 | A02260 | 470 | A02251 | A02262 | 386 |
| A02251 | A02278 | 375 | A02251 | A02280 | 388 |
| A02251 | A02288 | 299 | A02251 | A02337 | 249 |
| A02251 | A02382 | 208 | A02251 | A02407 | 224 |
| A02251 | A02416 | 451 | A02251 | A02418 | 439 |

|        |        |     |        |        |     |
|--------|--------|-----|--------|--------|-----|
| A02251 | A02420 | 327 | A02251 | A02423 | 210 |
| A02251 | A02465 | 182 | A02251 | A02505 | 188 |
| A02251 | A02524 | 201 | A02251 | A02593 | 219 |
| A02251 | A02637 | 180 | A02251 | A02659 | 241 |
| A02251 | A02714 | 341 | A02251 | A02751 | 240 |
| A02251 | A02769 | 276 | A02251 | A02843 | 294 |
| A02251 | A02853 | 337 | A02251 | A02884 | 400 |
| A02251 | A02920 | 278 | A02251 | A02925 | 184 |
| A02251 | A02945 | 172 | A02251 | A03045 | 278 |
| A02251 | A03053 | 254 | A02251 | A03054 | 213 |
| A02251 | A03068 | 159 | A02251 | A03086 | 260 |
| A02251 | A03093 | 241 | A02251 | A03128 | 344 |
| A02251 | A03144 | 165 | A02251 | A03173 | 360 |
| A02251 | A03177 | 330 | A02251 | A03181 | 183 |
| A02251 | A03195 | 215 | A02251 | A03196 | 327 |
| A02251 | A03218 | 246 | A02251 | A03224 | 341 |
| A02251 | A03305 | 230 | A02251 | A03314 | 168 |
| A02251 | A03331 | 157 | A02251 | A03639 | 165 |
| A02251 | A03782 | 160 | A02251 | A03861 | 184 |
| A02251 | A03894 | 191 | A02251 | A03898 | 371 |
| A02251 | A04074 | 177 | A02251 | A04125 | 291 |
| A02251 | A04216 | 279 | A02251 | A04244 | 260 |
| A02251 | A04257 | 296 | A02251 | A04260 | 294 |
| A02251 | A04327 | 191 | A02251 | A04444 | 208 |
| A02251 | A04450 | 307 | A02251 | A04468 | 307 |
| A02251 | A04519 | 207 | A02251 | A04533 | 156 |
| A02251 | A04783 | 188 | A02251 | A04854 | 351 |
| A02251 | A04879 | 247 | A02251 | A04881 | 236 |
| A02251 | A04996 | 241 | A02251 | A05815 | 314 |
| A02251 | A05901 | 327 | A02251 | A05944 | 177 |
| A02251 | A05962 | 311 | A02251 | A05985 | 285 |
| A02251 | A06054 | 344 | A02251 | A06414 | 263 |
| A02251 | A06415 | 369 | A02251 | A06494 | 344 |
| A02251 | A06747 | 205 | A02251 | A07140 | 391 |
| A02251 | A07143 | 329 | A02251 | A07145 | 176 |
| A02251 | A07152 | 419 | A02251 | A07166 | 168 |
| A02251 | A07173 | 162 | A02251 | A07205 | 208 |
| A02251 | A07390 | 260 | A02251 | A07422 | 230 |
| A02251 | A07501 | 484 | A02251 | A07929 | 360 |
| A02251 | A08612 | 332 | A02251 | A08704 | 332 |
| A02251 | A09208 | 323 | A02251 | A09570 | 296 |
| A02251 | A09967 | 360 | A02251 | A09970 | 360 |
| A02251 | A10306 | 371 | A02251 | A10985 | 351 |
| A02251 | A11086 | 296 | A02251 | A11313 | 174 |
| A02251 | A11576 | 163 | A02251 | A12357 | 216 |
| A02251 | A13872 | 219 | A02251 | A14129 | 160 |

|        |        |     |        |        |     |
|--------|--------|-----|--------|--------|-----|
| A02251 | A14190 | 293 | A02251 | A14368 | 247 |
| A02251 | A14372 | 162 | A02251 | A14554 | 172 |
| A02251 | A14599 | 221 | A02251 | A15333 | 208 |
| A02251 | A15395 | 384 | A02251 | A15427 | 224 |
| A02251 | A15603 | 238 | A02251 | A15608 | 218 |
| A02251 | A15832 | 337 | A02251 | A16636 | 474 |
| A02252 | A02275 | 202 | A02252 | A02279 | 299 |
| A02252 | A02428 | 360 | A02252 | A02528 | 353 |
| A02252 | A02649 | 288 | A02252 | A02847 | 313 |
| A02252 | A02925 | 406 | A02252 | A02961 | 162 |
| A02252 | A03128 | 353 | A02252 | A03223 | 468 |
| A02252 | A03536 | 162 | A02252 | A04050 | 165 |
| A02252 | A05273 | 246 | A02252 | A06758 | 199 |
| A02252 | A07294 | 152 | A02252 | A09977 | 162 |
| A02252 | A10280 | 462 | A02252 | A14190 | 470 |
| A02252 | A14246 | 420 | A02252 | A14366 | 475 |
| A02252 | A14404 | 473 | A02252 | A14430 | 229 |
| A02252 | A14431 | 185 | A02252 | A14621 | 232 |
| A02252 | A14864 | 234 | A02253 | A02490 | 235 |
| A02253 | A03213 | 445 | A02253 | A03273 | 344 |
| A02253 | A06200 | 373 | A02253 | A07200 | 228 |
| A02253 | A09487 | 369 | A02253 | A10255 | 424 |
| A02253 | A16636 | 207 | A02254 | A02257 | 477 |
| A02254 | A02284 | 488 | A02254 | A02286 | 423 |
| A02254 | A02313 | 212 | A02254 | A02521 | 185 |
| A02254 | A02719 | 216 | A02254 | A02966 | 247 |
| A02254 | A03004 | 257 | A02254 | A03086 | 263 |
| A02254 | A03087 | 491 | A02254 | A03099 | 454 |
| A02254 | A03167 | 364 | A02254 | A03174 | 402 |
| A02254 | A03513 | 419 | A02254 | A03520 | 221 |
| A02254 | A03968 | 281 | A02254 | A04086 | 240 |
| A02254 | A04095 | 396 | A02254 | A04369 | 184 |
| A02254 | A04781 | 290 | A02254 | A04927 | 329 |
| A02254 | A04995 | 229 | A02254 | A05026 | 405 |
| A02254 | A05208 | 486 | A02254 | A05224 | 413 |
| A02254 | A05330 | 428 | A02254 | A05331 | 447 |
| A02254 | A05338 | 401 | A02254 | A05393 | 152 |
| A02254 | A05416 | 190 | A02254 | A05424 | 419 |
| A02254 | A05425 | 162 | A02254 | A05450 | 232 |
| A02254 | A05533 | 199 | A02254 | A05610 | 329 |
| A02254 | A05659 | 340 | A02254 | A05966 | 330 |
| A02254 | A06037 | 346 | A02254 | A06405 | 457 |
| A02254 | A06439 | 385 | A02254 | A06460 | 389 |
| A02254 | A06592 | 210 | A02254 | A06689 | 156 |
| A02254 | A06700 | 312 | A02254 | A06733 | 290 |
| A02254 | A06762 | 238 | A02254 | A06769 | 160 |



|        |        |     |        |        |     |
|--------|--------|-----|--------|--------|-----|
| A02254 | A06860 | 441 | A02254 | A06970 | 221 |
| A02254 | A07007 | 182 | A02254 | A07037 | 396 |
| A02254 | A07059 | 313 | A02254 | A07088 | 324 |
| A02254 | A07107 | 226 | A02254 | A07109 | 177 |
| A02254 | A07336 | 293 | A02254 | A07520 | 491 |
| A02254 | A07590 | 183 | A02254 | A07674 | 446 |
| A02254 | A07684 | 371 | A02254 | A07688 | 208 |
| A02254 | A07690 | 430 | A02254 | A07737 | 267 |
| A02254 | A07847 | 350 | A02254 | A07933 | 323 |
| A02254 | A08135 | 262 | A02254 | A08190 | 296 |
| A02254 | A08197 | 461 | A02254 | A08278 | 217 |
| A02254 | A08280 | 383 | A02254 | A08572 | 159 |
| A02254 | A08667 | 265 | A02254 | A10422 | 290 |
| A02254 | A10456 | 168 | A02254 | A10635 | 324 |
| A02254 | A10679 | 462 | A02254 | A10706 | 241 |
| A02254 | A11708 | 458 | A02254 | A13155 | 474 |
| A02254 | A13362 | 489 | A02254 | A14037 | 160 |
| A02254 | A14803 | 200 | A02254 | A16741 | 217 |
| A02254 | A17006 | 389 | A02254 | A17078 | 204 |
| A02255 | A02549 | 425 | A02255 | A02787 | 360 |
| A02255 | A16738 | 328 | A02256 | A04033 | 324 |
| A02256 | A07849 | 383 | A02256 | A14652 | 184 |
| A02256 | A15295 | 216 | A02256 | A15310 | 240 |
| A02257 | A02284 | 430 | A02257 | A02286 | 369 |
| A02257 | A02330 | 274 | A02257 | A02350 | 183 |
| A02257 | A02492 | 368 | A02257 | A02535 | 165 |
| A02257 | A02601 | 176 | A02257 | A03028 | 180 |
| A02257 | A03087 | 488 | A02257 | A03174 | 446 |
| A02257 | A03520 | 217 | A02257 | A04314 | 243 |
| A02257 | A04487 | 358 | A02257 | A04791 | 230 |
| A02257 | A04990 | 409 | A02257 | A04995 | 226 |
| A02257 | A05224 | 314 | A02257 | A05330 | 243 |
| A02257 | A05424 | 366 | A02257 | A05751 | 232 |
| A02257 | A05803 | 343 | A02257 | A06092 | 288 |
| A02257 | A06347 | 402 | A02257 | A06473 | 195 |
| A02257 | A06769 | 157 | A02257 | A06847 | 266 |
| A02257 | A07656 | 160 | A02257 | A08197 | 383 |
| A02257 | A08473 | 351 | A02257 | A09514 | 337 |
| A02257 | A09734 | 283 | A02257 | A09821 | 302 |
| A02257 | A10288 | 343 | A02257 | A10527 | 182 |
| A02257 | A10679 | 384 | A02257 | A11393 | 307 |
| A02257 | A13949 | 489 | A02257 | A13980 | 271 |
| A02257 | A13987 | 205 | A02257 | A15436 | 170 |
| A02257 | A16612 | 167 | A02257 | A17196 | 327 |
| A02258 | A02330 | 324 | A02258 | A05356 | 312 |
| A02258 | A05429 | 441 | A02258 | A06037 | 249 |

|        |        |     |        |        |     |
|--------|--------|-----|--------|--------|-----|
| A02260 | A02262 | 324 | A02260 | A02268 | 202 |
| A02260 | A02275 | 252 | A02260 | A02278 | 324 |
| A02260 | A02292 | 154 | A02260 | A02370 | 418 |
| A02260 | A02371 | 246 | A02260 | A02387 | 313 |
| A02260 | A02416 | 168 | A02260 | A02418 | 255 |
| A02260 | A02454 | 333 | A02260 | A02460 | 201 |
| A02260 | A02465 | 247 | A02260 | A02491 | 190 |
| A02260 | A02495 | 205 | A02260 | A02502 | 269 |
| A02260 | A02505 | 252 | A02260 | A02524 | 266 |
| A02260 | A02637 | 469 | A02260 | A02643 | 450 |
| A02260 | A02656 | 441 | A02260 | A02657 | 433 |
| A02260 | A02659 | 402 | A02260 | A02681 | 335 |
| A02260 | A02751 | 299 | A02260 | A02754 | 246 |
| A02260 | A02785 | 156 | A02260 | A02789 | 202 |
| A02260 | A02795 | 313 | A02260 | A02798 | 204 |
| A02260 | A02803 | 159 | A02260 | A02843 | 341 |
| A02260 | A02896 | 311 | A02260 | A02931 | 205 |
| A02260 | A03047 | 344 | A02260 | A03049 | 245 |
| A02260 | A03086 | 316 | A02260 | A03173 | 391 |
| A02260 | A03196 | 439 | A02260 | A03224 | 274 |
| A02260 | A03239 | 241 | A02260 | A03259 | 335 |
| A02260 | A03588 | 374 | A02260 | A03653 | 263 |
| A02260 | A03817 | 221 | A02260 | A03925 | 379 |
| A02260 | A03976 | 213 | A02260 | A03995 | 450 |
| A02260 | A04074 | 243 | A02260 | A04248 | 263 |
| A02260 | A04260 | 228 | A02260 | A04417 | 274 |
| A02260 | A04426 | 412 | A02260 | A04519 | 270 |
| A02260 | A04536 | 191 | A02260 | A04564 | 371 |
| A02260 | A04770 | 288 | A02260 | A04773 | 246 |
| A02260 | A04908 | 205 | A02260 | A05127 | 193 |
| A02260 | A05278 | 191 | A02260 | A06095 | 335 |
| A02260 | A06404 | 337 | A02260 | A06422 | 296 |
| A02260 | A06623 | 341 | A02260 | A06737 | 399 |
| A02260 | A07140 | 243 | A02260 | A07143 | 260 |
| A02260 | A07148 | 321 | A02260 | A07157 | 188 |
| A02260 | A07161 | 436 | A02260 | A07166 | 234 |
| A02260 | A07209 | 210 | A02260 | A08714 | 276 |
| A02260 | A08847 | 272 | A02260 | A09837 | 350 |
| A02260 | A10382 | 299 | A02260 | A10552 | 361 |
| A02260 | A11157 | 234 | A02260 | A14122 | 190 |
| A02260 | A14366 | 172 | A02260 | A14372 | 229 |
| A02260 | A15795 | 247 | A02261 | A02278 | 224 |
| A02261 | A02304 | 182 | A02261 | A02418 | 256 |
| A02261 | A02549 | 343 | A02261 | A02638 | 279 |
| A02261 | A02703 | 185 | A02261 | A02711 | 156 |
| A02261 | A02763 | 215 | A02261 | A02816 | 205 |

|        |        |     |        |        |     |
|--------|--------|-----|--------|--------|-----|
| A02261 | A02819 | 417 | A02261 | A03090 | 483 |
| A02261 | A03177 | 263 | A02261 | A03181 | 249 |
| A02261 | A03201 | 283 | A02261 | A03263 | 368 |
| A02261 | A03609 | 208 | A02261 | A03638 | 330 |
| A02261 | A04117 | 416 | A02261 | A04138 | 314 |
| A02261 | A04351 | 414 | A02261 | A04361 | 241 |
| A02261 | A04842 | 272 | A02261 | A04977 | 277 |
| A02261 | A06428 | 219 | A02261 | A06623 | 213 |
| A02261 | A06670 | 356 | A02261 | A07158 | 491 |
| A02261 | A07165 | 251 | A02261 | A07232 | 191 |
| A02261 | A07486 | 273 | A02261 | A08911 | 279 |
| A02261 | A09020 | 312 | A02261 | A10382 | 299 |
| A02261 | A11097 | 385 | A02261 | A13020 | 400 |
| A02261 | A13930 | 317 | A02262 | A02278 | 475 |
| A02262 | A02416 | 193 | A02262 | A02418 | 276 |
| A02262 | A02524 | 286 | A02262 | A02727 | 329 |
| A02262 | A02798 | 228 | A02262 | A03043 | 451 |
| A02262 | A03086 | 332 | A02262 | A03090 | 283 |
| A02262 | A03157 | 184 | A02262 | A03173 | 400 |
| A02262 | A03477 | 152 | A02262 | A03586 | 274 |
| A02262 | A04497 | 341 | A02262 | A05278 | 215 |
| A02262 | A05617 | 409 | A02262 | A05797 | 255 |
| A02262 | A05962 | 368 | A02262 | A07140 | 265 |
| A02262 | A07887 | 243 | A02262 | A09127 | 221 |
| A02262 | A14366 | 196 | A02262 | A14391 | 213 |
| A02262 | A14399 | 272 | A02262 | A14554 | 260 |
| A02263 | A02278 | 177 | A02263 | A02636 | 324 |
| A02263 | A03263 | 408 | A02263 | A04534 | 400 |
| A02263 | A04901 | 367 | A02263 | A10196 | 423 |
| A02263 | A10240 | 400 | A02263 | A10250 | 219 |
| A02263 | A10731 | 322 | A02263 | A13861 | 412 |
| A02263 | A16636 | 183 | A02264 | A14247 | 87  |
| A02265 | A02397 | 202 | A02265 | A02978 | 277 |
| A02265 | A03321 | 238 | A02265 | A03332 | 154 |
| A02265 | A03432 | 191 | A02265 | A03438 | 549 |
| A02265 | A03571 | 172 | A02265 | A03582 | 489 |
| A02265 | A03652 | 170 | A02265 | A03887 | 477 |
| A02265 | A03893 | 162 | A02265 | A03963 | 361 |
| A02265 | A03981 | 198 | A02265 | A04230 | 180 |
| A02265 | A04567 | 333 | A02265 | A04622 | 224 |
| A02265 | A05230 | 210 | A02265 | A05654 | 185 |
| A02265 | A06340 | 314 | A02265 | A06344 | 247 |
| A02265 | A06356 | 170 | A02265 | A06797 | 191 |
| A02265 | A06825 | 430 | A02265 | A07076 | 210 |
| A02265 | A07244 | 170 | A02265 | A07399 | 151 |
| A02265 | A07524 | 170 | A02265 | A07924 | 170 |

|        |        |     |        |        |     |
|--------|--------|-----|--------|--------|-----|
| A02265 | A08211 | 170 | A02265 | A08417 | 170 |
| A02265 | A08682 | 152 | A02265 | A08717 | 395 |
| A02265 | A08949 | 389 | A02265 | A09248 | 484 |
| A02265 | A09292 | 210 | A02265 | A09697 | 170 |
| A02265 | A09745 | 152 | A02265 | A09960 | 333 |
| A02265 | A10766 | 268 | A02265 | A10814 | 263 |
| A02265 | A11190 | 312 | A02265 | A11326 | 205 |
| A02265 | A11400 | 276 | A02265 | A12105 | 163 |
| A02265 | A13052 | 541 | A02265 | A13126 | 281 |
| A02265 | A13338 | 184 | A02265 | A13903 | 182 |
| A02265 | A13987 | 168 | A02265 | A13989 | 568 |
| A02265 | A14038 | 454 | A02265 | A14122 | 462 |
| A02265 | A14124 | 407 | A02265 | A14561 | 457 |
| A02265 | A14611 | 200 | A02265 | A14705 | 268 |
| A02265 | A14816 | 210 | A02265 | A15490 | 356 |
| A02265 | A15764 | 180 | A02265 | A15817 | 154 |
| A02265 | A16076 | 188 | A02266 | A03099 | 347 |
| A02266 | A06626 | 433 | A02268 | A02272 | 490 |
| A02268 | A02275 | 491 | A02268 | A02341 | 171 |
| A02268 | A02454 | 491 | A02268 | A02464 | 154 |
| A02268 | A02524 | 423 | A02268 | A02659 | 191 |
| A02268 | A02673 | 313 | A02268 | A02927 | 163 |
| A02268 | A02936 | 216 | A02268 | A02966 | 196 |
| A02268 | A03034 | 246 | A02268 | A03043 | 318 |
| A02268 | A03044 | 226 | A02268 | A03046 | 316 |
| A02268 | A03047 | 252 | A02268 | A03091 | 491 |
| A02268 | A03099 | 263 | A02268 | A03104 | 438 |
| A02268 | A03146 | 229 | A02268 | A03155 | 179 |
| A02268 | A03156 | 154 | A02268 | A03158 | 218 |
| A02268 | A03193 | 260 | A02268 | A03238 | 230 |
| A02268 | A04140 | 162 | A02268 | A04468 | 267 |
| A02268 | A05097 | 343 | A02268 | A05143 | 234 |
| A02268 | A05369 | 329 | A02268 | A05376 | 160 |
| A02268 | A05459 | 270 | A02268 | A05653 | 256 |
| A02268 | A06085 | 185 | A02268 | A06118 | 240 |
| A02268 | A06159 | 486 | A02268 | A06167 | 488 |
| A02268 | A06408 | 245 | A02268 | A06471 | 274 |
| A02268 | A06827 | 226 | A02268 | A07062 | 314 |
| A02268 | A07140 | 458 | A02268 | A07180 | 232 |
| A02268 | A07209 | 288 | A02268 | A07210 | 185 |
| A02268 | A07324 | 159 | A02268 | A07477 | 265 |
| A02268 | A07655 | 445 | A02268 | A07736 | 218 |
| A02268 | A07748 | 374 | A02268 | A07878 | 369 |
| A02268 | A08341 | 202 | A02268 | A08431 | 198 |
| A02268 | A08647 | 221 | A02268 | A08660 | 386 |
| A02268 | A08667 | 215 | A02268 | A08688 | 205 |

|        |        |     |        |        |     |
|--------|--------|-----|--------|--------|-----|
| A02268 | A08724 | 296 | A02268 | A08827 | 208 |
| A02268 | A08879 | 188 | A02268 | A09107 | 232 |
| A02268 | A09340 | 168 | A02268 | A09427 | 232 |
| A02268 | A09625 | 168 | A02268 | A09988 | 265 |
| A02268 | A09991 | 218 | A02268 | A10000 | 247 |
| A02268 | A10645 | 187 | A02268 | A10744 | 252 |
| A02268 | A10762 | 256 | A02268 | A11279 | 332 |
| A02268 | A11765 | 228 | A02268 | A13257 | 163 |
| A02268 | A14247 | 246 | A02268 | A14430 | 490 |
| A02268 | A14679 | 343 | A02268 | A15750 | 182 |
| A02268 | A15896 | 414 | A02268 | A15932 | 185 |
| A02268 | A15992 | 254 | A02268 | A17002 | 263 |
| A02270 | A03169 | 462 | A02270 | A03958 | 372 |
| A02270 | A07588 | 389 | A02270 | A08377 | 241 |
| A02270 | A11420 | 310 | A02270 | A13609 | 210 |
| A02270 | A14216 | 481 | A02270 | A15988 | 243 |
| A02271 | A03990 | 313 | A02271 | A09509 | 362 |
| A02272 | A02275 | 489 | A02272 | A02454 | 490 |
| A02272 | A02464 | 393 | A02272 | A02492 | 229 |
| A02272 | A02524 | 391 | A02272 | A02749 | 296 |
| A02272 | A03091 | 490 | A02272 | A03152 | 344 |
| A02272 | A03153 | 391 | A02272 | A03154 | 343 |
| A02272 | A03155 | 405 | A02272 | A04867 | 196 |
| A02272 | A04949 | 157 | A02272 | A05143 | 340 |
| A02272 | A06159 | 483 | A02272 | A06167 | 475 |
| A02272 | A09988 | 267 | A02272 | A11279 | 263 |
| A02272 | A11485 | 208 | A02272 | A11885 | 205 |
| A02272 | A14190 | 293 | A02272 | A14247 | 228 |
| A02272 | A14376 | 335 | A02272 | A15818 | 301 |
| A02272 | A17002 | 360 | A02273 | A08806 | 240 |
| A02273 | A14177 | 191 | A02273 | A16068 | 172 |
| A02275 | A02454 | 491 | A02275 | A02601 | 177 |
| A02275 | A02634 | 241 | A02275 | A02749 | 195 |
| A02275 | A02758 | 240 | A02275 | A02966 | 246 |
| A02275 | A03034 | 246 | A02275 | A03043 | 362 |
| A02275 | A03044 | 274 | A02275 | A03046 | 360 |
| A02275 | A03091 | 491 | A02275 | A03144 | 167 |
| A02275 | A03146 | 277 | A02275 | A03156 | 337 |
| A02275 | A03165 | 273 | A02275 | A03238 | 160 |
| A02275 | A04231 | 344 | A02275 | A04288 | 232 |
| A02275 | A04389 | 293 | A02275 | A05092 | 372 |
| A02275 | A05143 | 281 | A02275 | A05376 | 212 |
| A02275 | A05459 | 312 | A02275 | A06159 | 489 |
| A02275 | A06167 | 488 | A02275 | A06312 | 293 |
| A02275 | A06659 | 173 | A02275 | A06700 | 177 |
| A02275 | A07062 | 358 | A02275 | A07140 | 312 |

|        |        |     |        |        |     |
|--------|--------|-----|--------|--------|-----|
| A02275 | A07477 | 188 | A02275 | A07530 | 268 |
| A02275 | A07736 | 151 | A02275 | A07748 | 205 |
| A02275 | A08647 | 271 | A02275 | A08724 | 345 |
| A02275 | A09107 | 279 | A02275 | A09991 | 268 |
| A02275 | A10645 | 238 | A02275 | A10658 | 279 |
| A02275 | A10703 | 245 | A02275 | A10762 | 301 |
| A02275 | A11279 | 157 | A02275 | A11765 | 276 |
| A02275 | A11885 | 347 | A02275 | A14129 | 162 |
| A02275 | A14247 | 428 | A02275 | A14430 | 462 |
| A02275 | A15639 | 185 | A02275 | A15896 | 400 |
| A02275 | A15992 | 177 | A02278 | A02281 | 383 |
| A02278 | A02333 | 163 | A02278 | A02371 | 221 |
| A02278 | A02376 | 423 | A02278 | A02377 | 439 |
| A02278 | A02386 | 373 | A02278 | A02416 | 452 |
| A02278 | A02418 | 486 | A02278 | A02419 | 271 |
| A02278 | A02420 | 328 | A02278 | A02466 | 491 |
| A02278 | A02491 | 445 | A02278 | A02579 | 234 |
| A02278 | A02591 | 246 | A02278 | A02639 | 449 |
| A02278 | A02646 | 355 | A02278 | A02672 | 163 |
| A02278 | A02689 | 251 | A02278 | A02695 | 251 |
| A02278 | A02703 | 193 | A02278 | A02753 | 326 |
| A02278 | A02773 | 188 | A02278 | A02798 | 480 |
| A02278 | A02827 | 177 | A02278 | A02836 | 443 |
| A02278 | A02837 | 240 | A02278 | A02839 | 327 |
| A02278 | A02874 | 188 | A02278 | A02877 | 477 |
| A02278 | A03011 | 168 | A02278 | A03019 | 176 |
| A02278 | A03025 | 177 | A02278 | A03069 | 245 |
| A02278 | A03078 | 210 | A02278 | A03181 | 454 |
| A02278 | A03192 | 188 | A02278 | A03231 | 267 |
| A02278 | A03392 | 201 | A02278 | A03408 | 218 |
| A02278 | A03422 | 271 | A02278 | A03451 | 224 |
| A02278 | A03591 | 263 | A02278 | A03618 | 330 |
| A02278 | A03661 | 363 | A02278 | A03749 | 299 |
| A02278 | A03757 | 154 | A02278 | A03763 | 157 |
| A02278 | A03775 | 182 | A02278 | A04103 | 246 |
| A02278 | A04271 | 215 | A02278 | A04381 | 232 |
| A02278 | A04388 | 297 | A02278 | A04417 | 432 |
| A02278 | A04420 | 165 | A02278 | A04433 | 154 |
| A02278 | A04471 | 151 | A02278 | A04477 | 157 |
| A02278 | A04655 | 151 | A02278 | A04668 | 490 |
| A02278 | A04759 | 188 | A02278 | A04795 | 154 |
| A02278 | A04819 | 322 | A02278 | A04837 | 297 |
| A02278 | A04853 | 371 | A02278 | A04902 | 375 |
| A02278 | A04942 | 252 | A02278 | A05038 | 168 |
| A02278 | A05053 | 297 | A02278 | A05122 | 274 |
| A02278 | A05249 | 268 | A02278 | A05278 | 417 |

|        |        |     |        |        |     |
|--------|--------|-----|--------|--------|-----|
| A02278 | A05416 | 171 | A02278 | A05571 | 267 |
| A02278 | A05643 | 160 | A02278 | A05653 | 157 |
| A02278 | A05693 | 257 | A02278 | A05832 | 353 |
| A02278 | A05936 | 246 | A02278 | A05962 | 173 |
| A02278 | A06057 | 340 | A02278 | A06092 | 267 |
| A02278 | A06166 | 195 | A02278 | A06177 | 473 |
| A02278 | A06211 | 154 | A02278 | A06334 | 210 |
| A02278 | A06529 | 449 | A02278 | A06606 | 391 |
| A02278 | A06622 | 151 | A02278 | A06886 | 232 |
| A02278 | A06982 | 491 | A02278 | A07165 | 190 |
| A02278 | A07168 | 195 | A02278 | A07209 | 473 |
| A02278 | A07270 | 246 | A02278 | A07339 | 259 |
| A02278 | A07346 | 247 | A02278 | A07483 | 198 |
| A02278 | A07518 | 232 | A02278 | A07553 | 177 |
| A02278 | A07605 | 473 | A02278 | A07909 | 297 |
| A02278 | A07955 | 267 | A02278 | A08207 | 307 |
| A02278 | A08461 | 154 | A02278 | A08502 | 491 |
| A02278 | A08551 | 497 | A02278 | A08552 | 274 |
| A02278 | A08754 | 267 | A02278 | A08759 | 232 |
| A02278 | A08880 | 335 | A02278 | A08996 | 154 |
| A02278 | A09085 | 274 | A02278 | A09088 | 297 |
| A02278 | A09124 | 223 | A02278 | A09233 | 151 |
| A02278 | A09361 | 157 | A02278 | A09368 | 246 |
| A02278 | A09424 | 232 | A02278 | A09486 | 267 |
| A02278 | A09509 | 396 | A02278 | A09609 | 157 |
| A02278 | A09734 | 174 | A02278 | A09736 | 366 |
| A02278 | A09758 | 184 | A02278 | A09837 | 165 |
| A02278 | A09840 | 216 | A02278 | A09870 | 168 |
| A02278 | A10025 | 246 | A02278 | A10036 | 297 |
| A02278 | A10215 | 168 | A02278 | A10277 | 246 |
| A02278 | A10298 | 297 | A02278 | A10573 | 267 |
| A02278 | A10611 | 326 | A02278 | A10930 | 232 |
| A02278 | A10945 | 267 | A02278 | A11086 | 154 |
| A02278 | A11234 | 157 | A02278 | A11332 | 152 |
| A02278 | A11446 | 378 | A02278 | A11497 | 172 |
| A02278 | A11523 | 157 | A02278 | A11759 | 151 |
| A02278 | A11899 | 232 | A02278 | A12138 | 293 |
| A02278 | A12361 | 302 | A02278 | A12437 | 297 |
| A02278 | A12501 | 151 | A02278 | A12503 | 201 |
| A02278 | A12983 | 188 | A02278 | A13135 | 168 |
| A02278 | A13181 | 215 | A02278 | A13183 | 195 |
| A02278 | A13852 | 195 | A02278 | A13912 | 306 |
| A02278 | A14102 | 210 | A02278 | A14129 | 188 |
| A02278 | A14154 | 491 | A02278 | A14156 | 163 |
| A02278 | A14190 | 243 | A02278 | A14193 | 491 |
| A02278 | A14216 | 625 | A02278 | A14303 | 435 |

|        |        |     |        |        |     |
|--------|--------|-----|--------|--------|-----|
| A02278 | A14447 | 232 | A02278 | A14492 | 246 |
| A02278 | A14528 | 210 | A02278 | A14554 | 430 |
| A02278 | A14640 | 165 | A02278 | A14670 | 183 |
| A02278 | A14737 | 267 | A02278 | A14761 | 297 |
| A02278 | A14799 | 307 | A02278 | A14846 | 262 |
| A02278 | A15189 | 191 | A02278 | A15238 | 230 |
| A02278 | A15276 | 246 | A02278 | A15281 | 154 |
| A02278 | A15403 | 271 | A02278 | A15557 | 491 |
| A02278 | A15635 | 246 | A02278 | A15960 | 177 |
| A02278 | A16016 | 297 | A02278 | A16047 | 246 |
| A02278 | A16088 | 485 | A02278 | A16411 | 201 |
| A02278 | A16550 | 219 | A02278 | A16597 | 213 |
| A02278 | A16611 | 200 | A02278 | A16695 | 183 |
| A02278 | A16707 | 232 | A02278 | A16801 | 160 |
| A02278 | A16905 | 165 | A02278 | A16913 | 154 |
| A02278 | A16951 | 154 | A02278 | A17018 | 243 |
| A02278 | A17198 | 489 | A02279 | A10280 | 396 |
| A02279 | A11326 | 224 | A02279 | A11991 | 449 |
| A02282 | A02425 | 252 | A02282 | A02472 | 163 |
| A02282 | A02624 | 335 | A02282 | A03093 | 420 |
| A02282 | A03110 | 450 | A02282 | A03281 | 318 |
| A02282 | A03413 | 316 | A02282 | A03447 | 340 |
| A02282 | A03507 | 424 | A02282 | A03726 | 226 |
| A02282 | A05654 | 311 | A02282 | A06293 | 351 |
| A02282 | A07145 | 281 | A02282 | A09245 | 299 |
| A02282 | A09552 | 353 | A02282 | A10189 | 414 |
| A02282 | A11284 | 241 | A02282 | A13435 | 386 |
| A02282 | A14190 | 398 | A02282 | A14210 | 301 |
| A02282 | A14371 | 188 | A02282 | A14372 | 269 |
| A02282 | A14381 | 272 | A02282 | A14394 | 241 |
| A02282 | A14427 | 457 | A02282 | A14554 | 278 |
| A02282 | A15498 | 224 | A02282 | A16267 | 401 |
| A02282 | A16279 | 401 | A02283 | A02582 | 301 |
| A02283 | A02603 | 406 | A02283 | A03413 | 324 |
| A02283 | A04429 | 367 | A02283 | A04681 | 273 |
| A02283 | A04985 | 274 | A02283 | A05815 | 385 |
| A02283 | A09245 | 308 | A02283 | A14381 | 489 |
| A02283 | A14554 | 288 | A02283 | A14602 | 427 |
| A02283 | A17078 | 207 | A02284 | A02286 | 443 |
| A02284 | A02306 | 205 | A02284 | A02316 | 152 |
| A02284 | A02330 | 352 | A02284 | A02644 | 335 |
| A02284 | A03084 | 246 | A02284 | A03087 | 484 |
| A02284 | A03099 | 475 | A02284 | A03164 | 152 |
| A02284 | A03172 | 263 | A02284 | A03174 | 283 |
| A02284 | A03471 | 185 | A02284 | A03484 | 204 |
| A02284 | A03524 | 168 | A02284 | A03532 | 177 |



|        |        |     |        |        |     |
|--------|--------|-----|--------|--------|-----|
| A02284 | A03596 | 160 | A02284 | A03968 | 355 |
| A02284 | A04641 | 362 | A02284 | A04781 | 274 |
| A02284 | A04791 | 215 | A02284 | A05062 | 167 |
| A02284 | A05208 | 945 | A02284 | A05224 | 302 |
| A02284 | A05330 | 227 | A02284 | A05331 | 440 |
| A02284 | A05338 | 217 | A02284 | A05452 | 306 |
| A02284 | A05462 | 230 | A02284 | A05560 | 267 |
| A02284 | A05573 | 173 | A02284 | A05675 | 362 |
| A02284 | A05740 | 380 | A02284 | A05796 | 191 |
| A02284 | A05966 | 179 | A02284 | A06037 | 490 |
| A02284 | A06402 | 276 | A02284 | A06629 | 160 |
| A02284 | A06769 | 271 | A02284 | A06860 | 391 |
| A02284 | A07027 | 224 | A02284 | A07037 | 271 |
| A02284 | A07059 | 160 | A02284 | A07107 | 207 |
| A02284 | A07369 | 333 | A02284 | A07460 | 938 |
| A02284 | A07520 | 245 | A02284 | A07684 | 229 |
| A02284 | A07796 | 271 | A02284 | A07847 | 201 |
| A02284 | A07851 | 332 | A02284 | A08056 | 168 |
| A02284 | A08197 | 373 | A02284 | A08278 | 196 |
| A02284 | A08279 | 286 | A02284 | A10422 | 274 |
| A02284 | A10444 | 218 | A02284 | A10452 | 195 |
| A02284 | A10679 | 374 | A02284 | A11426 | 319 |
| A02284 | A13362 | 291 | A02284 | A13537 | 333 |
| A02285 | A04075 | 267 | A02285 | A04212 | 177 |
| A02285 | A05222 | 301 | A02285 | A05462 | 337 |
| A02285 | A06037 | 167 | A02286 | A03087 | 375 |
| A02286 | A03174 | 265 | A02286 | A05208 | 229 |
| A02286 | A05224 | 285 | A02286 | A05424 | 329 |
| A02286 | A07398 | 221 | A02286 | A08131 | 232 |
| A02286 | A08197 | 232 | A02286 | A08369 | 174 |
| A02286 | A09061 | 311 | A02286 | A10679 | 232 |
| A02286 | A11728 | 185 | A02286 | A15381 | 452 |
| A02287 | A02655 | 257 | A02287 | A03144 | 457 |
| A02287 | A03950 | 460 | A02287 | A05829 | 385 |
| A02287 | A06643 | 389 | A02287 | A07184 | 334 |
| A02287 | A10031 | 450 | A02287 | A10556 | 344 |
| A02287 | A13034 | 374 | A02287 | A14570 | 390 |
| A02288 | A02687 | 177 | A02288 | A03155 | 330 |
| A02288 | A03305 | 422 | A02288 | A03338 | 323 |
| A02288 | A03661 | 229 | A02288 | A03760 | 378 |
| A02288 | A04033 | 182 | A02288 | A04759 | 329 |
| A02288 | A06648 | 283 | A02288 | A07145 | 291 |
| A02288 | A07201 | 208 | A02288 | A09208 | 390 |
| A02288 | A09482 | 417 | A02288 | A09570 | 374 |
| A02288 | A09742 | 160 | A02288 | A09970 | 411 |
| A02288 | A10985 | 406 | A02288 | A13826 | 172 |

|        |        |     |        |        |     |
|--------|--------|-----|--------|--------|-----|
| A02288 | A14642 | 249 | A02288 | A16738 | 198 |
| A02289 | A03440 | 433 | A02289 | A06991 | 332 |
| A02289 | A11923 | 277 | A02289 | A13617 | 188 |
| A02289 | A14077 | 249 | A02289 | A14502 | 294 |
| A02290 | A02366 | 385 | A02290 | A02521 | 162 |
| A02290 | A02701 | 294 | A02290 | A03167 | 230 |
| A02290 | A03168 | 294 | A02290 | A03441 | 270 |
| A02290 | A03962 | 267 | A02290 | A04108 | 224 |
| A02290 | A04211 | 259 | A02290 | A04410 | 238 |
| A02290 | A04791 | 469 | A02290 | A05103 | 440 |
| A02290 | A05431 | 174 | A02290 | A05463 | 326 |
| A02290 | A05573 | 278 | A02290 | A06629 | 267 |
| A02290 | A06633 | 323 | A02290 | A06970 | 190 |
| A02290 | A07190 | 235 | A02290 | A07381 | 218 |
| A02290 | A15905 | 268 | A02290 | A16027 | 369 |
| A02290 | A16028 | 333 | A02291 | A02297 | 329 |
| A02291 | A02298 | 308 | A02291 | A02299 | 283 |
| A02291 | A02328 | 226 | A02291 | A02333 | 177 |
| A02291 | A02340 | 168 | A02291 | A02412 | 249 |
| A02291 | A02415 | 156 | A02291 | A02416 | 177 |
| A02291 | A02490 | 456 | A02291 | A02491 | 485 |
| A02291 | A02501 | 163 | A02291 | A02559 | 477 |
| A02291 | A02582 | 152 | A02291 | A02587 | 268 |
| A02291 | A02668 | 291 | A02291 | A02697 | 205 |
| A02291 | A02756 | 210 | A02291 | A02785 | 160 |
| A02291 | A02837 | 171 | A02291 | A02863 | 152 |
| A02291 | A02875 | 201 | A02291 | A02878 | 163 |
| A02291 | A03053 | 221 | A02291 | A03070 | 249 |
| A02291 | A03080 | 174 | A02291 | A03184 | 241 |
| A02291 | A03269 | 351 | A02291 | A03309 | 291 |
| A02291 | A03350 | 283 | A02291 | A03358 | 162 |
| A02291 | A03362 | 296 | A02291 | A03366 | 243 |
| A02291 | A03370 | 260 | A02291 | A03373 | 463 |
| A02291 | A03376 | 177 | A02291 | A03379 | 363 |
| A02291 | A03394 | 408 | A02291 | A03397 | 377 |
| A02291 | A03402 | 326 | A02291 | A03408 | 483 |
| A02291 | A03414 | 254 | A02291 | A03589 | 291 |
| A02291 | A03634 | 479 | A02291 | A03636 | 229 |
| A02291 | A03755 | 288 | A02291 | A03773 | 490 |
| A02291 | A03914 | 170 | A02291 | A03934 | 296 |
| A02291 | A03976 | 467 | A02291 | A04048 | 162 |
| A02291 | A04127 | 258 | A02291 | A04271 | 364 |
| A02291 | A04280 | 174 | A02291 | A04391 | 265 |
| A02291 | A04392 | 339 | A02291 | A04428 | 390 |
| A02291 | A04548 | 319 | A02291 | A04989 | 291 |
| A02291 | A05132 | 291 | A02291 | A05414 | 899 |

|        |        |     |        |        |     |
|--------|--------|-----|--------|--------|-----|
| A02291 | A05861 | 274 | A02291 | A06073 | 255 |
| A02291 | A06369 | 281 | A02291 | A06463 | 420 |
| A02291 | A07025 | 329 | A02291 | A07163 | 293 |
| A02291 | A10156 | 160 | A02291 | A10214 | 196 |
| A02291 | A11366 | 235 | A02291 | A11391 | 277 |
| A02291 | A11527 | 255 | A02291 | A11897 | 318 |
| A02291 | A12506 | 174 | A02291 | A13373 | 168 |
| A02291 | A13886 | 240 | A02291 | A14399 | 201 |
| A02291 | A14647 | 205 | A02291 | A15809 | 307 |
| A02291 | A15911 | 182 | A02291 | A15949 | 462 |
| A02291 | A16286 | 205 | A02291 | A17041 | 217 |
| A02292 | A02373 | 201 | A02292 | A02501 | 221 |
| A02292 | A02521 | 205 | A02292 | A02836 | 232 |
| A02292 | A02854 | 216 | A02292 | A02873 | 324 |
| A02292 | A02886 | 160 | A02292 | A03072 | 246 |
| A02292 | A03098 | 417 | A02292 | A03190 | 293 |
| A02292 | A03197 | 313 | A02292 | A03198 | 191 |
| A02292 | A03201 | 346 | A02292 | A03399 | 163 |
| A02292 | A03406 | 160 | A02292 | A03408 | 375 |
| A02292 | A03410 | 177 | A02292 | A03412 | 491 |
| A02292 | A03451 | 241 | A02292 | A03541 | 278 |
| A02292 | A03574 | 168 | A02292 | A03762 | 193 |
| A02292 | A03912 | 207 | A02292 | A04082 | 157 |
| A02292 | A04229 | 191 | A02292 | A04320 | 151 |
| A02292 | A04432 | 279 | A02292 | A04433 | 489 |
| A02292 | A04536 | 305 | A02292 | A04614 | 249 |
| A02292 | A04663 | 198 | A02292 | A04831 | 198 |
| A02292 | A04886 | 270 | A02292 | A04924 | 246 |
| A02292 | A05018 | 293 | A02292 | A05129 | 293 |
| A02292 | A05588 | 279 | A02292 | A05733 | 310 |
| A02292 | A05985 | 260 | A02292 | A06055 | 232 |
| A02292 | A06238 | 293 | A02292 | A07078 | 335 |
| A02292 | A07146 | 168 | A02292 | A07185 | 226 |
| A02292 | A07333 | 355 | A02292 | A08155 | 198 |
| A02292 | A08289 | 224 | A02292 | A08304 | 296 |
| A02292 | A08403 | 171 | A02292 | A08615 | 270 |
| A02292 | A09009 | 412 | A02292 | A09244 | 310 |
| A02292 | A09683 | 213 | A02292 | A10438 | 213 |
| A02292 | A10926 | 254 | A02292 | A10940 | 246 |
| A02292 | A11068 | 198 | A02292 | A13558 | 170 |
| A02292 | A13853 | 338 | A02292 | A13960 | 466 |
| A02292 | A13967 | 473 | A02292 | A14524 | 252 |
| A02292 | A14643 | 256 | A02292 | A14674 | 162 |
| A02292 | A15050 | 335 | A02292 | A15251 | 293 |
| A02292 | A15498 | 326 | A02292 | A15548 | 207 |
| A02292 | A16160 | 335 | A02292 | A17112 | 210 |

|        |        |     |        |        |     |
|--------|--------|-----|--------|--------|-----|
| A02293 | A03259 | 279 | A02293 | A03275 | 157 |
| A02293 | A03331 | 241 | A02293 | A03332 | 265 |
| A02293 | A03414 | 245 | A02293 | A03632 | 255 |
| A02293 | A03892 | 899 | A02293 | A04048 | 278 |
| A02293 | A04737 | 466 | A02293 | A04761 | 255 |
| A02293 | A05004 | 419 | A02293 | A05044 | 321 |
| A02293 | A05443 | 182 | A02293 | A05996 | 297 |
| A02293 | A06501 | 347 | A02293 | A08572 | 240 |
| A02293 | A08596 | 312 | A02293 | A08753 | 290 |
| A02293 | A08835 | 165 | A02293 | A11405 | 191 |
| A02293 | A11943 | 232 | A02293 | A13410 | 364 |
| A02293 | A13945 | 193 | A02293 | A14056 | 196 |
| A02293 | A15399 | 271 | A02293 | A15809 | 208 |
| A02293 | A15935 | 188 | A02294 | A02382 | 256 |
| A02294 | A03412 | 414 | A02294 | A03449 | 396 |
| A02294 | A06376 | 467 | A02294 | A08576 | 385 |
| A02294 | A13346 | 317 | A02295 | A03028 | 241 |
| A02295 | A03345 | 323 | A02295 | A03976 | 208 |
| A02295 | A04139 | 187 | A02295 | A04833 | 204 |
| A02295 | A05976 | 389 | A02295 | A05977 | 389 |
| A02295 | A07218 | 276 | A02296 | A02565 | 347 |
| A02296 | A03098 | 378 | A02297 | A02299 | 458 |
| A02297 | A02303 | 333 | A02297 | A02857 | 347 |
| A02297 | A03589 | 414 | A02297 | A04173 | 467 |
| A02297 | A05480 | 465 | A02297 | A06100 | 302 |
| A02297 | A13824 | 208 | A02298 | A02299 | 378 |
| A02298 | A02300 | 469 | A02298 | A02302 | 291 |
| A02298 | A02307 | 490 | A02298 | A02309 | 477 |
| A02298 | A02326 | 334 | A02298 | A02352 | 263 |
| A02298 | A02385 | 344 | A02298 | A02387 | 196 |
| A02298 | A02412 | 477 | A02298 | A02423 | 369 |
| A02298 | A02427 | 160 | A02298 | A02465 | 245 |
| A02298 | A02468 | 268 | A02298 | A02488 | 129 |
| A02298 | A02490 | 491 | A02298 | A02491 | 491 |
| A02298 | A02493 | 105 | A02298 | A02582 | 407 |
| A02298 | A02587 | 241 | A02298 | A02605 | 306 |
| A02298 | A02619 | 259 | A02298 | A02644 | 480 |
| A02298 | A02668 | 491 | A02298 | A02669 | 216 |
| A02298 | A02691 | 159 | A02298 | A02692 | 152 |
| A02298 | A02696 | 385 | A02298 | A02697 | 449 |
| A02298 | A02729 | 183 | A02298 | A02730 | 273 |
| A02298 | A02735 | 157 | A02298 | A02741 | 171 |
| A02298 | A02742 | 204 | A02298 | A02746 | 208 |
| A02298 | A02756 | 491 | A02298 | A02771 | 491 |
| A02298 | A02780 | 216 | A02298 | A02783 | 259 |
| A02298 | A02785 | 480 | A02298 | A02788 | 241 |

|        |        |     |        |        |     |
|--------|--------|-----|--------|--------|-----|
| A02298 | A02851 | 213 | A02298 | A02859 | 483 |
| A02298 | A02874 | 462 | A02298 | A02922 | 436 |
| A02298 | A02951 | 480 | A02298 | A02953 | 162 |
| A02298 | A02969 | 165 | A02298 | A02982 | 195 |
| A02298 | A03053 | 472 | A02298 | A03259 | 162 |
| A02298 | A03275 | 467 | A02298 | A03280 | 174 |
| A02298 | A03310 | 226 | A02298 | A03541 | 182 |
| A02298 | A03639 | 429 | A02298 | A03653 | 414 |
| A02298 | A03773 | 329 | A02298 | A03813 | 241 |
| A02298 | A03865 | 205 | A02298 | A03914 | 472 |
| A02298 | A03915 | 474 | A02298 | A03923 | 185 |
| A02298 | A03933 | 273 | A02298 | A03934 | 386 |
| A02298 | A03970 | 335 | A02298 | A03976 | 302 |
| A02298 | A04010 | 388 | A02298 | A04023 | 386 |
| A02298 | A04051 | 395 | A02298 | A04142 | 263 |
| A02298 | A04267 | 335 | A02298 | A04335 | 335 |
| A02298 | A04391 | 424 | A02298 | A04392 | 319 |
| A02298 | A04481 | 380 | A02298 | A04482 | 259 |
| A02298 | A04509 | 378 | A02298 | A04548 | 288 |
| A02298 | A04584 | 268 | A02298 | A04585 | 358 |
| A02298 | A04607 | 402 | A02298 | A04608 | 215 |
| A02298 | A04609 | 281 | A02298 | A04652 | 423 |
| A02298 | A04906 | 205 | A02298 | A04976 | 247 |
| A02298 | A04981 | 221 | A02298 | A05113 | 412 |
| A02298 | A05117 | 238 | A02298 | A05171 | 358 |
| A02298 | A05309 | 491 | A02298 | A05349 | 475 |
| A02298 | A05414 | 899 | A02298 | A05427 | 165 |
| A02298 | A05920 | 285 | A02298 | A05934 | 394 |
| A02298 | A06415 | 398 | A02298 | A06650 | 335 |
| A02298 | A07141 | 465 | A02298 | A07164 | 310 |
| A02298 | A07200 | 489 | A02298 | A08755 | 299 |
| A02298 | A09081 | 285 | A02298 | A09480 | 238 |
| A02298 | A10650 | 308 | A02298 | A11123 | 235 |
| A02298 | A11911 | 165 | A02298 | A12927 | 377 |
| A02298 | A14194 | 430 | A02298 | A14198 | 330 |
| A02298 | A14405 | 400 | A02298 | A14423 | 180 |
| A02298 | A14440 | 385 | A02298 | A15339 | 305 |
| A02298 | A15368 | 259 | A02298 | A15868 | 400 |
| A02298 | A16636 | 491 | A02298 | A16786 | 180 |
| A02299 | A02300 | 278 | A02299 | A02303 | 288 |
| A02299 | A02306 | 243 | A02299 | A02314 | 404 |
| A02299 | A02329 | 337 | A02299 | A02390 | 296 |
| A02299 | A02417 | 385 | A02299 | A02427 | 338 |
| A02299 | A02468 | 322 | A02299 | A02493 | 294 |
| A02299 | A02579 | 313 | A02299 | A02644 | 335 |
| A02299 | A02668 | 246 | A02299 | A02669 | 440 |

|        |        |     |        |        |     |
|--------|--------|-----|--------|--------|-----|
| A02299 | A02756 | 263 | A02299 | A02771 | 296 |
| A02299 | A02785 | 227 | A02299 | A03054 | 330 |
| A02299 | A03099 | 243 | A02299 | A03589 | 394 |
| A02299 | A04079 | 185 | A02299 | A04271 | 303 |
| A02299 | A04326 | 398 | A02299 | A04975 | 385 |
| A02299 | A04981 | 372 | A02299 | A07460 | 411 |
| A02299 | A10482 | 422 | A02300 | A02306 | 404 |
| A02300 | A02307 | 156 | A02300 | A02316 | 129 |
| A02300 | A02317 | 467 | A02300 | A02326 | 223 |
| A02300 | A02329 | 457 | A02300 | A02330 | 105 |
| A02300 | A02335 | 213 | A02300 | A02336 | 235 |
| A02300 | A02346 | 281 | A02300 | A02385 | 234 |
| A02300 | A02387 | 218 | A02300 | A02412 | 339 |
| A02300 | A02468 | 159 | A02300 | A02490 | 470 |
| A02300 | A02491 | 382 | A02300 | A02493 | 347 |
| A02300 | A02495 | 462 | A02300 | A02554 | 291 |
| A02300 | A02668 | 436 | A02300 | A02669 | 235 |
| A02300 | A02691 | 366 | A02300 | A02713 | 224 |
| A02300 | A02714 | 170 | A02300 | A02730 | 162 |
| A02300 | A02746 | 229 | A02300 | A02756 | 375 |
| A02300 | A02771 | 252 | A02300 | A02774 | 458 |
| A02300 | A02785 | 491 | A02300 | A02788 | 171 |
| A02300 | A02807 | 271 | A02300 | A02810 | 241 |
| A02300 | A02837 | 159 | A02300 | A02859 | 324 |
| A02300 | A02874 | 434 | A02300 | A02929 | 160 |
| A02300 | A02944 | 229 | A02300 | A02951 | 188 |
| A02300 | A02984 | 224 | A02300 | A03050 | 378 |
| A02300 | A03099 | 172 | A02300 | A03259 | 378 |
| A02300 | A03260 | 204 | A02300 | A03268 | 263 |
| A02300 | A03402 | 213 | A02300 | A03533 | 286 |
| A02300 | A03540 | 274 | A02300 | A03550 | 229 |
| A02300 | A03577 | 278 | A02300 | A03653 | 156 |
| A02300 | A04010 | 177 | A02300 | A04023 | 491 |
| A02300 | A04051 | 228 | A02300 | A04109 | 278 |
| A02300 | A04162 | 358 | A02300 | A04286 | 188 |
| A02300 | A04369 | 363 | A02300 | A04420 | 271 |
| A02300 | A04519 | 297 | A02300 | A04633 | 218 |
| A02300 | A04635 | 274 | A02300 | A04830 | 213 |
| A02300 | A04842 | 165 | A02300 | A04974 | 286 |
| A02300 | A04975 | 267 | A02300 | A05217 | 271 |
| A02300 | A05260 | 152 | A02300 | A05364 | 335 |
| A02300 | A05365 | 243 | A02300 | A05494 | 152 |
| A02300 | A05992 | 408 | A02300 | A06607 | 398 |
| A02300 | A06621 | 159 | A02300 | A06635 | 234 |
| A02300 | A06874 | 263 | A02300 | A07146 | 224 |
| A02300 | A07161 | 163 | A02300 | A07200 | 469 |

|        |        |     |        |        |     |
|--------|--------|-----|--------|--------|-----|
| A02300 | A07218 | 184 | A02300 | A07297 | 302 |
| A02300 | A07361 | 208 | A02300 | A07407 | 196 |
| A02300 | A08404 | 160 | A02300 | A10382 | 199 |
| A02300 | A10804 | 204 | A02300 | A10942 | 405 |
| A02300 | A11331 | 160 | A02300 | A11911 | 469 |
| A02300 | A11981 | 180 | A02300 | A13425 | 223 |
| A02300 | A13734 | 168 | A02300 | A13830 | 491 |
| A02300 | A14423 | 479 | A02300 | A14430 | 152 |
| A02300 | A15231 | 369 | A02300 | A16636 | 255 |
| A02300 | A17155 | 235 | A02301 | A02303 | 396 |
| A02301 | A02304 | 141 | A02301 | A02306 | 356 |
| A02301 | A02310 | 380 | A02301 | A02311 | 249 |
| A02301 | A02316 | 486 | A02301 | A02392 | 340 |
| A02301 | A02417 | 324 | A02301 | A02425 | 168 |
| A02301 | A02427 | 249 | A02301 | A02465 | 208 |
| A02301 | A02468 | 355 | A02301 | A02469 | 455 |
| A02301 | A02470 | 232 | A02301 | A02488 | 217 |
| A02301 | A02493 | 191 | A02301 | A02501 | 224 |
| A02301 | A02523 | 486 | A02301 | A02539 | 200 |
| A02301 | A02575 | 185 | A02301 | A02621 | 355 |
| A02301 | A02666 | 463 | A02301 | A02671 | 488 |
| A02301 | A02672 | 456 | A02301 | A02673 | 112 |
| A02301 | A02702 | 219 | A02301 | A02758 | 491 |
| A02301 | A02760 | 273 | A02301 | A02761 | 223 |
| A02301 | A02785 | 118 | A02301 | A02811 | 267 |
| A02301 | A02814 | 205 | A02301 | A02943 | 337 |
| A02301 | A03054 | 240 | A02301 | A03076 | 154 |
| A02301 | A03115 | 176 | A02301 | A03120 | 430 |
| A02301 | A03123 | 340 | A02301 | A03234 | 177 |
| A02301 | A03535 | 344 | A02301 | A03537 | 340 |
| A02301 | A03583 | 416 | A02301 | A03585 | 307 |
| A02301 | A03653 | 224 | A02301 | A03847 | 364 |
| A02301 | A03870 | 348 | A02301 | A03992 | 401 |
| A02301 | A04001 | 319 | A02301 | A04004 | 269 |
| A02301 | A04023 | 257 | A02301 | A04031 | 311 |
| A02301 | A04087 | 446 | A02301 | A04123 | 348 |
| A02301 | A04209 | 152 | A02301 | A04218 | 299 |
| A02301 | A04219 | 383 | A02301 | A04228 | 424 |
| A02301 | A04231 | 435 | A02301 | A04260 | 188 |
| A02301 | A04366 | 390 | A02301 | A04471 | 314 |
| A02301 | A04556 | 291 | A02301 | A04560 | 322 |
| A02301 | A04905 | 288 | A02301 | A05036 | 337 |
| A02301 | A05493 | 313 | A02301 | A05533 | 221 |
| A02301 | A05593 | 317 | A02301 | A05932 | 398 |
| A02301 | A06596 | 291 | A02301 | A07139 | 358 |
| A02301 | A07177 | 221 | A02301 | A08070 | 182 |

|        |        |     |        |        |     |
|--------|--------|-----|--------|--------|-----|
| A02301 | A10337 | 343 | A02301 | A10476 | 467 |
| A02301 | A11485 | 151 | A02301 | A11989 | 383 |
| A02301 | A11990 | 383 | A02301 | A13346 | 191 |
| A02301 | A13879 | 212 | A02301 | A14642 | 154 |
| A02301 | A14664 | 168 | A02301 | A15651 | 172 |
| A02301 | A15789 | 337 | A02302 | A02490 | 367 |
| A02302 | A02491 | 185 | A02302 | A02668 | 391 |
| A02302 | A02756 | 294 | A02302 | A02785 | 262 |
| A02302 | A03540 | 401 | A02302 | A03653 | 428 |
| A02302 | A14120 | 323 | A02302 | A16636 | 215 |
| A02303 | A02304 | 93  | A02303 | A02308 | 144 |
| A02303 | A02310 | 486 | A02303 | A02311 | 462 |
| A02303 | A02312 | 228 | A02303 | A02318 | 429 |
| A02303 | A02320 | 393 | A02303 | A02321 | 296 |
| A02303 | A02322 | 385 | A02303 | A02325 | 172 |
| A02303 | A02382 | 170 | A02303 | A02392 | 302 |
| A02303 | A02428 | 210 | A02303 | A02444 | 379 |
| A02303 | A02465 | 154 | A02303 | A02468 | 306 |
| A02303 | A02469 | 319 | A02303 | A02470 | 262 |
| A02303 | A02501 | 432 | A02303 | A02539 | 368 |
| A02303 | A02540 | 374 | A02303 | A02582 | 159 |
| A02303 | A02583 | 373 | A02303 | A02605 | 207 |
| A02303 | A02621 | 306 | A02303 | A02636 | 170 |
| A02303 | A02638 | 187 | A02303 | A02642 | 419 |
| A02303 | A02666 | 360 | A02303 | A02671 | 456 |
| A02303 | A02672 | 491 | A02303 | A02673 | 344 |
| A02303 | A02706 | 210 | A02303 | A02733 | 205 |
| A02303 | A02758 | 340 | A02303 | A02760 | 490 |
| A02303 | A02761 | 168 | A02303 | A03062 | 266 |
| A02303 | A03068 | 259 | A02303 | A03077 | 374 |
| A02303 | A03096 | 434 | A02303 | A03107 | 232 |
| A02303 | A03115 | 247 | A02303 | A03178 | 477 |
| A02303 | A03188 | 152 | A02303 | A03202 | 312 |
| A02303 | A03211 | 174 | A02303 | A03217 | 259 |
| A02303 | A03264 | 238 | A02303 | A03349 | 152 |
| A02303 | A03358 | 168 | A02303 | A03589 | 296 |
| A02303 | A03642 | 333 | A02303 | A03708 | 207 |
| A02303 | A03771 | 152 | A02303 | A03818 | 362 |
| A02303 | A04087 | 246 | A02303 | A04171 | 281 |
| A02303 | A04172 | 414 | A02303 | A04179 | 271 |
| A02303 | A04224 | 343 | A02303 | A04229 | 195 |
| A02303 | A04236 | 307 | A02303 | A04256 | 177 |
| A02303 | A04393 | 374 | A02303 | A04394 | 477 |
| A02303 | A04406 | 157 | A02303 | A04423 | 246 |
| A02303 | A04424 | 208 | A02303 | A04491 | 221 |
| A02303 | A04520 | 188 | A02303 | A04637 | 263 |



|        |        |     |        |        |     |
|--------|--------|-----|--------|--------|-----|
| A02303 | A04710 | 368 | A02303 | A04870 | 346 |
| A02303 | A05274 | 293 | A02303 | A05370 | 199 |
| A02303 | A05388 | 293 | A02303 | A05451 | 281 |
| A02303 | A05593 | 462 | A02303 | A05599 | 333 |
| A02303 | A05801 | 414 | A02303 | A05826 | 405 |
| A02303 | A05899 | 318 | A02303 | A06129 | 201 |
| A02303 | A06346 | 316 | A02303 | A06623 | 241 |
| A02303 | A06739 | 310 | A02303 | A07280 | 288 |
| A02303 | A07704 | 184 | A02303 | A07705 | 306 |
| A02303 | A08194 | 162 | A02303 | A08220 | 374 |
| A02303 | A08292 | 223 | A02303 | A08309 | 162 |
| A02303 | A08681 | 196 | A02303 | A08686 | 319 |
| A02303 | A08753 | 184 | A02303 | A08835 | 480 |
| A02303 | A10642 | 173 | A02303 | A14364 | 152 |
| A02303 | A14643 | 416 | A02303 | A14722 | 333 |
| A02303 | A15258 | 235 | A02303 | A15277 | 388 |
| A02303 | A15416 | 452 | A02303 | A15638 | 340 |
| A02303 | A15838 | 281 | A02304 | A02310 | 165 |
| A02304 | A02311 | 152 | A02304 | A02312 | 318 |
| A02304 | A02318 | 205 | A02304 | A02320 | 271 |
| A02304 | A02359 | 302 | A02304 | A02388 | 347 |
| A02304 | A02397 | 157 | A02304 | A02502 | 329 |
| A02304 | A02540 | 352 | A02304 | A02549 | 229 |
| A02304 | A02586 | 353 | A02304 | A02616 | 196 |
| A02304 | A02671 | 115 | A02304 | A02672 | 290 |
| A02304 | A02673 | 490 | A02304 | A02711 | 474 |
| A02304 | A02749 | 185 | A02304 | A02760 | 177 |
| A02304 | A02761 | 489 | A02304 | A02819 | 196 |
| A02304 | A02836 | 347 | A02304 | A03021 | 271 |
| A02304 | A03076 | 475 | A02304 | A03077 | 232 |
| A02304 | A03160 | 183 | A02304 | A03178 | 99  |
| A02304 | A03181 | 235 | A02304 | A03201 | 420 |
| A02304 | A03202 | 277 | A02304 | A03261 | 288 |
| A02304 | A03263 | 228 | A02304 | A03275 | 260 |
| A02304 | A03305 | 159 | A02304 | A03391 | 165 |
| A02304 | A03451 | 355 | A02304 | A03598 | 235 |
| A02304 | A03638 | 213 | A02304 | A03747 | 251 |
| A02304 | A03893 | 234 | A02304 | A03960 | 229 |
| A02304 | A04133 | 190 | A02304 | A04202 | 450 |
| A02304 | A04424 | 297 | A02304 | A04430 | 265 |
| A02304 | A04547 | 215 | A02304 | A04637 | 221 |
| A02304 | A04639 | 157 | A02304 | A04704 | 151 |
| A02304 | A04749 | 357 | A02304 | A04847 | 399 |
| A02304 | A04977 | 272 | A02304 | A05168 | 190 |
| A02304 | A05596 | 221 | A02304 | A05640 | 313 |
| A02304 | A05891 | 319 | A02304 | A06078 | 196 |

|        |        |     |        |        |     |
|--------|--------|-----|--------|--------|-----|
| A02304 | A06284 | 277 | A02304 | A06307 | 382 |
| A02304 | A06552 | 302 | A02304 | A06623 | 288 |
| A02304 | A06648 | 316 | A02304 | A07132 | 193 |
| A02304 | A07158 | 260 | A02304 | A07833 | 486 |
| A02304 | A09153 | 283 | A02304 | A09200 | 215 |
| A02304 | A09470 | 362 | A02304 | A09643 | 232 |
| A02304 | A09733 | 346 | A02304 | A09928 | 201 |
| A02304 | A09937 | 307 | A02304 | A10081 | 372 |
| A02304 | A10224 | 283 | A02304 | A10813 | 162 |
| A02304 | A11262 | 218 | A02304 | A11335 | 185 |
| A02304 | A11543 | 328 | A02304 | A12554 | 243 |
| A02304 | A13181 | 226 | A02304 | A13537 | 291 |
| A02304 | A13860 | 229 | A02304 | A14055 | 470 |
| A02304 | A14210 | 230 | A02304 | A14524 | 151 |
| A02304 | A14642 | 450 | A02304 | A15226 | 372 |
| A02304 | A15233 | 399 | A02304 | A15241 | 328 |
| A02304 | A15258 | 441 | A02304 | A15267 | 217 |
| A02304 | A15272 | 369 | A02304 | A15277 | 352 |
| A02304 | A15641 | 156 | A02304 | A16006 | 193 |
| A02304 | A16008 | 224 | A02304 | A17132 | 217 |
| A02304 | A17153 | 329 | A02305 | A02306 | 489 |
| A02305 | A02317 | 273 | A02305 | A02423 | 221 |
| A02305 | A02425 | 154 | A02305 | A02461 | 293 |
| A02305 | A02575 | 170 | A02305 | A02667 | 491 |
| A02305 | A02692 | 353 | A02305 | A02751 | 251 |
| A02305 | A02755 | 330 | A02305 | A02785 | 221 |
| A02305 | A02887 | 213 | A02305 | A03099 | 243 |
| A02305 | A03402 | 463 | A02305 | A03578 | 321 |
| A02305 | A03633 | 293 | A02305 | A03919 | 274 |
| A02305 | A03960 | 303 | A02305 | A04002 | 213 |
| A02305 | A04163 | 357 | A02305 | A04258 | 246 |
| A02305 | A04279 | 216 | A02305 | A04316 | 243 |
| A02305 | A04368 | 306 | A02305 | A04423 | 281 |
| A02305 | A04437 | 490 | A02305 | A04551 | 345 |
| A02305 | A04562 | 238 | A02305 | A04574 | 362 |
| A02305 | A04700 | 393 | A02305 | A04751 | 179 |
| A02305 | A04773 | 193 | A02305 | A04813 | 268 |
| A02305 | A05356 | 246 | A02305 | A06607 | 446 |
| A02305 | A07154 | 260 | A02305 | A07164 | 163 |
| A02305 | A07438 | 283 | A02305 | A07740 | 283 |
| A02305 | A08173 | 357 | A02305 | A08858 | 899 |
| A02305 | A09272 | 443 | A02305 | A09559 | 330 |
| A02305 | A10358 | 232 | A02305 | A11313 | 185 |
| A02305 | A11390 | 210 | A02305 | A12409 | 245 |
| A02305 | A13299 | 351 | A02305 | A14198 | 238 |
| A02305 | A14667 | 201 | A02305 | A15103 | 380 |

|        |        |     |        |        |     |
|--------|--------|-----|--------|--------|-----|
| A02305 | A16226 | 163 | A02306 | A02314 | 277 |
| A02306 | A02316 | 205 | A02306 | A02317 | 481 |
| A02306 | A02326 | 185 | A02306 | A02330 | 490 |
| A02306 | A02425 | 273 | A02306 | A02461 | 208 |
| A02306 | A02621 | 246 | A02306 | A02644 | 477 |
| A02306 | A02666 | 183 | A02306 | A02667 | 382 |
| A02306 | A02749 | 329 | A02306 | A02751 | 160 |
| A02306 | A02758 | 291 | A02306 | A02759 | 491 |
| A02306 | A02785 | 491 | A02306 | A02859 | 224 |
| A02306 | A03054 | 413 | A02306 | A03099 | 491 |
| A02306 | A03112 | 207 | A02306 | A03172 | 201 |
| A02306 | A03310 | 208 | A02306 | A03314 | 204 |
| A02306 | A03402 | 489 | A02306 | A03578 | 318 |
| A02306 | A03583 | 232 | A02306 | A03584 | 339 |
| A02306 | A03915 | 258 | A02306 | A03919 | 319 |
| A02306 | A03961 | 422 | A02306 | A03968 | 279 |
| A02306 | A04001 | 228 | A02306 | A04002 | 246 |
| A02306 | A04023 | 152 | A02306 | A04053 | 154 |
| A02306 | A04071 | 185 | A02306 | A04086 | 157 |
| A02306 | A04087 | 196 | A02306 | A04162 | 491 |
| A02306 | A04163 | 362 | A02306 | A04218 | 201 |
| A02306 | A04256 | 252 | A02306 | A04258 | 474 |
| A02306 | A04302 | 216 | A02306 | A04326 | 263 |
| A02306 | A04366 | 176 | A02306 | A04368 | 224 |
| A02306 | A04423 | 193 | A02306 | A04428 | 235 |
| A02306 | A04437 | 391 | A02306 | A04441 | 238 |
| A02306 | A04471 | 221 | A02306 | A04626 | 307 |
| A02306 | A04637 | 213 | A02306 | A04974 | 430 |
| A02306 | A04975 | 452 | A02306 | A04981 | 483 |
| A02306 | A05184 | 172 | A02306 | A05208 | 319 |
| A02306 | A05297 | 159 | A02306 | A05348 | 185 |
| A02306 | A05356 | 483 | A02306 | A05366 | 294 |
| A02306 | A05377 | 159 | A02306 | A05390 | 156 |
| A02306 | A05533 | 485 | A02306 | A05696 | 285 |
| A02306 | A05736 | 335 | A02306 | A05737 | 294 |
| A02306 | A05940 | 196 | A02306 | A05945 | 419 |
| A02306 | A06055 | 256 | A02306 | A06263 | 491 |
| A02306 | A06460 | 347 | A02306 | A06607 | 491 |
| A02306 | A06650 | 396 | A02306 | A06762 | 375 |
| A02306 | A06769 | 491 | A02306 | A06874 | 452 |
| A02306 | A07124 | 218 | A02306 | A07200 | 396 |
| A02306 | A07440 | 208 | A02306 | A07509 | 191 |
| A02306 | A07515 | 243 | A02306 | A07652 | 400 |
| A02306 | A07653 | 327 | A02306 | A07654 | 312 |
| A02306 | A08288 | 294 | A02306 | A08404 | 477 |
| A02306 | A08746 | 486 | A02306 | A09033 | 193 |

|        |        |     |        |        |     |
|--------|--------|-----|--------|--------|-----|
| A02306 | A09072 | 467 | A02306 | A09220 | 190 |
| A02306 | A09388 | 168 | A02306 | A09442 | 353 |
| A02306 | A09559 | 258 | A02306 | A11646 | 472 |
| A02306 | A13734 | 177 | A02306 | A13879 | 328 |
| A02306 | A14198 | 417 | A02306 | A14440 | 191 |
| A02306 | A17183 | 347 | A02307 | A02309 | 249 |
| A02307 | A02328 | 461 | A02307 | A02338 | 246 |
| A02307 | A02347 | 285 | A02307 | A02412 | 468 |
| A02307 | A02423 | 221 | A02307 | A02460 | 146 |
| A02307 | A02465 | 327 | A02307 | A02490 | 491 |
| A02307 | A02491 | 462 | A02307 | A02582 | 462 |
| A02307 | A02616 | 276 | A02307 | A02668 | 490 |
| A02307 | A02669 | 394 | A02307 | A02695 | 152 |
| A02307 | A02696 | 386 | A02307 | A02729 | 256 |
| A02307 | A02756 | 488 | A02307 | A02771 | 491 |
| A02307 | A02783 | 445 | A02307 | A02785 | 221 |
| A02307 | A02812 | 324 | A02307 | A02859 | 367 |
| A02307 | A02874 | 249 | A02307 | A02922 | 441 |
| A02307 | A02982 | 343 | A02307 | A03053 | 265 |
| A02307 | A03113 | 266 | A02307 | A03144 | 177 |
| A02307 | A03259 | 162 | A02307 | A03268 | 308 |
| A02307 | A03275 | 419 | A02307 | A03373 | 326 |
| A02307 | A03473 | 219 | A02307 | A03653 | 210 |
| A02307 | A03865 | 276 | A02307 | A03914 | 491 |
| A02307 | A03915 | 330 | A02307 | A03918 | 176 |
| A02307 | A03923 | 258 | A02307 | A03934 | 330 |
| A02307 | A03966 | 202 | A02307 | A04010 | 247 |
| A02307 | A04262 | 340 | A02307 | A04285 | 345 |
| A02307 | A04391 | 449 | A02307 | A04462 | 474 |
| A02307 | A04481 | 484 | A02307 | A04509 | 479 |
| A02307 | A05113 | 445 | A02307 | A05309 | 198 |
| A02307 | A05349 | 405 | A02307 | A05432 | 259 |
| A02307 | A05516 | 243 | A02307 | A06635 | 297 |
| A02307 | A06650 | 344 | A02307 | A07152 | 154 |
| A02307 | A07165 | 177 | A02307 | A07440 | 294 |
| A02307 | A07479 | 226 | A02307 | A09983 | 308 |
| A02307 | A12927 | 234 | A02307 | A14071 | 272 |
| A02307 | A14405 | 190 | A02307 | A14440 | 170 |
| A02307 | A16636 | 491 | A02308 | A02309 | 224 |
| A02308 | A02318 | 260 | A02308 | A02323 | 236 |
| A02308 | A02429 | 224 | A02308 | A02555 | 382 |
| A02308 | A02663 | 288 | A02308 | A02672 | 132 |
| A02308 | A02760 | 362 | A02308 | A03202 | 323 |
| A02308 | A03416 | 291 | A02308 | A03583 | 291 |
| A02308 | A03639 | 151 | A02308 | A03919 | 251 |
| A02308 | A03922 | 173 | A02308 | A04066 | 313 |

|        |        |     |        |        |     |
|--------|--------|-----|--------|--------|-----|
| A02308 | A04204 | 382 | A02308 | A04516 | 268 |
| A02308 | A04792 | 328 | A02308 | A07187 | 204 |
| A02308 | A07280 | 301 | A02308 | A07431 | 382 |
| A02308 | A08335 | 174 | A02308 | A08540 | 262 |
| A02308 | A08719 | 363 | A02308 | A08876 | 232 |
| A02308 | A09186 | 382 | A02308 | A10081 | 301 |
| A02308 | A10087 | 221 | A02308 | A10743 | 199 |
| A02308 | A13928 | 199 | A02308 | A14209 | 199 |
| A02308 | A15665 | 199 | A02308 | A15697 | 190 |
| A02308 | A16839 | 297 | A02309 | A02317 | 306 |
| A02309 | A02318 | 314 | A02309 | A02323 | 296 |
| A02309 | A02326 | 449 | A02309 | A02330 | 196 |
| A02309 | A02347 | 316 | A02309 | A02490 | 346 |
| A02309 | A02491 | 170 | A02309 | A02508 | 324 |
| A02309 | A02535 | 235 | A02309 | A02539 | 224 |
| A02309 | A02585 | 263 | A02309 | A02644 | 461 |
| A02309 | A02668 | 380 | A02309 | A02729 | 291 |
| A02309 | A02756 | 393 | A02309 | A02772 | 452 |
| A02309 | A02790 | 457 | A02309 | A02795 | 302 |
| A02309 | A02927 | 460 | A02309 | A03053 | 402 |
| A02309 | A03186 | 151 | A02309 | A03259 | 229 |
| A02309 | A03484 | 269 | A02309 | A03639 | 414 |
| A02309 | A03818 | 218 | A02309 | A03915 | 462 |
| A02309 | A03934 | 356 | A02309 | A03976 | 199 |
| A02309 | A04008 | 348 | A02309 | A04163 | 384 |
| A02309 | A04212 | 240 | A02309 | A04462 | 367 |
| A02309 | A04482 | 347 | A02309 | A04533 | 339 |
| A02309 | A04923 | 385 | A02309 | A05208 | 307 |
| A02309 | A05638 | 171 | A02309 | A05731 | 318 |
| A02309 | A07037 | 324 | A02309 | A07141 | 180 |
| A02309 | A07143 | 246 | A02309 | A07757 | 274 |
| A02309 | A09217 | 378 | A02309 | A10081 | 347 |
| A02309 | A10650 | 378 | A02309 | A12361 | 229 |
| A02309 | A14037 | 210 | A02309 | A14440 | 210 |
| A02309 | A14646 | 389 | A02310 | A02311 | 274 |
| A02310 | A02316 | 417 | A02310 | A02318 | 452 |
| A02310 | A02320 | 185 | A02310 | A02322 | 333 |
| A02310 | A02428 | 173 | A02310 | A02450 | 180 |
| A02310 | A02465 | 234 | A02310 | A02467 | 257 |
| A02310 | A02468 | 252 | A02310 | A02469 | 435 |
| A02310 | A02470 | 265 | A02310 | A02523 | 255 |
| A02310 | A02540 | 407 | A02310 | A02621 | 373 |
| A02310 | A02644 | 384 | A02310 | A02671 | 204 |
| A02310 | A02672 | 485 | A02310 | A02760 | 466 |
| A02310 | A02859 | 307 | A02310 | A02864 | 170 |
| A02310 | A02951 | 171 | A02310 | A03097 | 310 |

|        |        |     |        |        |     |
|--------|--------|-----|--------|--------|-----|
| A02310 | A03115 | 201 | A02310 | A03178 | 218 |
| A02310 | A03202 | 436 | A02310 | A03235 | 319 |
| A02310 | A03315 | 302 | A02310 | A03421 | 188 |
| A02310 | A03609 | 193 | A02310 | A04010 | 162 |
| A02310 | A04080 | 165 | A02310 | A04163 | 268 |
| A02310 | A04172 | 466 | A02310 | A04179 | 422 |
| A02310 | A04224 | 385 | A02310 | A04236 | 358 |
| A02310 | A04438 | 441 | A02310 | A04556 | 312 |
| A02310 | A04622 | 168 | A02310 | A04637 | 419 |
| A02310 | A04669 | 452 | A02310 | A05113 | 246 |
| A02310 | A05294 | 257 | A02310 | A05349 | 160 |
| A02310 | A05593 | 473 | A02310 | A05599 | 378 |
| A02310 | A06129 | 390 | A02310 | A06598 | 243 |
| A02310 | A07280 | 347 | A02310 | A09507 | 408 |
| A02310 | A10071 | 378 | A02311 | A02312 | 288 |
| A02311 | A02316 | 446 | A02311 | A02318 | 305 |
| A02311 | A02319 | 366 | A02311 | A02320 | 305 |
| A02311 | A02469 | 252 | A02311 | A02540 | 402 |
| A02311 | A02671 | 187 | A02311 | A02672 | 319 |
| A02311 | A02758 | 274 | A02311 | A02760 | 394 |
| A02311 | A03160 | 288 | A02311 | A03186 | 267 |
| A02311 | A03202 | 356 | A02311 | A03224 | 249 |
| A02311 | A03234 | 191 | A02311 | A03434 | 152 |
| A02311 | A03513 | 395 | A02311 | A03917 | 303 |
| A02311 | A04095 | 316 | A02311 | A04366 | 396 |
| A02311 | A04556 | 405 | A02311 | A04637 | 318 |
| A02311 | A04751 | 207 | A02311 | A05208 | 296 |
| A02311 | A05358 | 290 | A02311 | A05603 | 168 |
| A02311 | A05690 | 230 | A02311 | A05801 | 361 |
| A02311 | A06629 | 216 | A02311 | A07090 | 483 |
| A02311 | A07177 | 235 | A02311 | A07477 | 224 |
| A02311 | A07590 | 416 | A02311 | A07736 | 399 |
| A02311 | A08250 | 319 | A02311 | A09084 | 271 |
| A02311 | A09340 | 283 | A02311 | A09882 | 196 |
| A02311 | A14071 | 168 | A02312 | A02320 | 462 |
| A02312 | A02531 | 412 | A02312 | A02673 | 491 |
| A02312 | A02761 | 382 | A02312 | A03077 | 251 |
| A02312 | A03178 | 235 | A02312 | A03224 | 278 |
| A02312 | A03259 | 259 | A02312 | A03602 | 226 |
| A02312 | A03609 | 341 | A02312 | A03777 | 424 |
| A02312 | A04256 | 484 | A02312 | A04424 | 467 |
| A02312 | A05603 | 200 | A02312 | A05801 | 375 |
| A02312 | A05825 | 357 | A02312 | A06307 | 438 |
| A02312 | A06333 | 343 | A02312 | A07177 | 263 |
| A02312 | A08660 | 394 | A02312 | A08857 | 243 |
| A02312 | A14071 | 200 | A02312 | A14860 | 420 |

|        |        |     |        |        |     |
|--------|--------|-----|--------|--------|-----|
| A02312 | A15226 | 357 | A02312 | A15233 | 452 |
| A02312 | A15258 | 469 | A02312 | A15272 | 433 |
| A02312 | A15277 | 435 | A02312 | A15712 | 258 |
| A02313 | A02405 | 345 | A02313 | A03104 | 109 |
| A02313 | A03107 | 160 | A02313 | A03219 | 333 |
| A02313 | A03305 | 252 | A02313 | A03310 | 405 |
| A02313 | A03314 | 400 | A02313 | A03451 | 296 |
| A02313 | A03639 | 481 | A02313 | A03650 | 357 |
| A02313 | A03761 | 439 | A02313 | A03818 | 188 |
| A02313 | A04086 | 486 | A02313 | A04092 | 361 |
| A02313 | A04163 | 364 | A02313 | A04202 | 151 |
| A02313 | A04365 | 341 | A02313 | A04368 | 313 |
| A02313 | A04482 | 328 | A02313 | A04749 | 469 |
| A02313 | A04964 | 167 | A02313 | A04976 | 452 |
| A02313 | A05208 | 283 | A02313 | A05439 | 279 |
| A02313 | A05653 | 413 | A02313 | A05751 | 457 |
| A02313 | A05826 | 338 | A02313 | A06039 | 200 |
| A02313 | A06578 | 405 | A02313 | A06735 | 260 |
| A02313 | A07122 | 436 | A02313 | A09236 | 288 |
| A02313 | A09429 | 401 | A02313 | A09480 | 469 |
| A02313 | A09570 | 412 | A02313 | A09724 | 380 |
| A02313 | A10072 | 260 | A02313 | A10336 | 160 |
| A02313 | A10993 | 408 | A02313 | A11190 | 229 |
| A02313 | A11485 | 278 | A02313 | A13370 | 456 |
| A02313 | A13944 | 270 | A02313 | A14511 | 184 |
| A02313 | A15230 | 224 | A02313 | A15401 | 198 |
| A02314 | A02644 | 358 | A02314 | A02669 | 385 |
| A02314 | A02785 | 262 | A02314 | A03050 | 213 |
| A02314 | A03099 | 277 | A02314 | A04079 | 223 |
| A02314 | A04326 | 411 | A02314 | A04369 | 334 |
| A02314 | A04633 | 378 | A02314 | A04975 | 399 |
| A02314 | A04981 | 389 | A02314 | A05505 | 430 |
| A02314 | A08655 | 382 | A02315 | A02468 | 299 |
| A02315 | A02494 | 188 | A02315 | A02666 | 343 |
| A02315 | A02671 | 144 | A02315 | A02672 | 252 |
| A02315 | A02749 | 187 | A02315 | A02758 | 328 |
| A02315 | A03122 | 424 | A02315 | A03609 | 247 |
| A02315 | A06910 | 470 | A02316 | A02321 | 468 |
| A02316 | A02330 | 255 | A02316 | A02428 | 327 |
| A02316 | A02443 | 144 | A02316 | A02529 | 291 |
| A02316 | A02557 | 350 | A02316 | A02584 | 273 |
| A02316 | A02621 | 184 | A02316 | A02666 | 481 |
| A02316 | A02671 | 486 | A02316 | A02672 | 460 |
| A02316 | A02758 | 488 | A02316 | A02760 | 232 |
| A02316 | A02966 | 229 | A02316 | A03016 | 218 |
| A02316 | A03050 | 63  | A02316 | A03099 | 205 |

|        |        |     |        |        |     |
|--------|--------|-----|--------|--------|-----|
| A02316 | A03234 | 443 | A02316 | A03334 | 216 |
| A02316 | A03484 | 335 | A02316 | A03513 | 491 |
| A02316 | A03583 | 288 | A02316 | A03917 | 256 |
| A02316 | A04001 | 286 | A02316 | A04087 | 458 |
| A02316 | A04095 | 438 | A02316 | A04179 | 281 |
| A02316 | A04227 | 362 | A02316 | A04258 | 416 |
| A02316 | A04305 | 314 | A02316 | A04307 | 383 |
| A02316 | A04316 | 216 | A02316 | A04341 | 362 |
| A02316 | A04366 | 489 | A02316 | A04485 | 271 |
| A02316 | A04556 | 479 | A02316 | A04634 | 350 |
| A02316 | A04636 | 380 | A02316 | A04637 | 439 |
| A02316 | A04883 | 307 | A02316 | A04927 | 177 |
| A02316 | A05139 | 350 | A02316 | A05208 | 247 |
| A02316 | A05210 | 251 | A02316 | A05266 | 326 |
| A02316 | A05294 | 188 | A02316 | A05356 | 329 |
| A02316 | A05358 | 364 | A02316 | A05376 | 193 |
| A02316 | A05533 | 313 | A02316 | A05538 | 484 |
| A02316 | A05549 | 350 | A02316 | A05573 | 433 |
| A02316 | A05622 | 418 | A02316 | A05689 | 333 |
| A02316 | A05883 | 243 | A02316 | A05912 | 350 |
| A02316 | A05992 | 228 | A02316 | A06019 | 477 |
| A02316 | A06405 | 288 | A02316 | A06439 | 369 |
| A02316 | A06607 | 174 | A02316 | A06629 | 380 |
| A02316 | A06739 | 188 | A02316 | A06860 | 435 |
| A02316 | A07019 | 210 | A02316 | A07027 | 224 |
| A02316 | A07229 | 208 | A02316 | A07281 | 310 |
| A02316 | A07477 | 302 | A02316 | A07520 | 402 |
| A02316 | A07590 | 452 | A02316 | A07681 | 294 |
| A02316 | A07736 | 443 | A02316 | A07757 | 210 |
| A02316 | A08250 | 276 | A02316 | A08252 | 246 |
| A02316 | A08514 | 230 | A02316 | A08700 | 247 |
| A02316 | A10134 | 362 | A02316 | A10141 | 333 |
| A02316 | A10635 | 172 | A02316 | A10652 | 243 |
| A02316 | A10761 | 472 | A02316 | A13341 | 294 |
| A02316 | A14348 | 380 | A02316 | A17078 | 177 |
| A02317 | A02330 | 480 | A02317 | A02461 | 340 |
| A02317 | A02759 | 475 | A02317 | A02785 | 168 |
| A02317 | A03050 | 243 | A02317 | A03051 | 243 |
| A02317 | A03099 | 489 | A02317 | A03167 | 217 |
| A02317 | A03168 | 283 | A02317 | A03238 | 362 |
| A02317 | A03402 | 216 | A02317 | A03484 | 291 |
| A02317 | A04162 | 488 | A02317 | A04258 | 477 |
| A02317 | A04316 | 302 | A02317 | A04369 | 258 |
| A02317 | A04371 | 467 | A02317 | A04635 | 358 |
| A02317 | A04974 | 367 | A02317 | A04975 | 481 |
| A02317 | A04981 | 424 | A02317 | A05659 | 279 |



|        |        |     |        |        |     |
|--------|--------|-----|--------|--------|-----|
| A02317 | A06263 | 445 | A02317 | A06607 | 340 |
| A02317 | A06769 | 361 | A02317 | A06874 | 475 |
| A02317 | A07037 | 343 | A02317 | A07757 | 296 |
| A02317 | A08746 | 388 | A02317 | A09072 | 385 |
| A02317 | A11313 | 252 | A02317 | A13982 | 174 |
| A02317 | A14253 | 168 | A02317 | A14258 | 157 |
| A02318 | A02320 | 223 | A02318 | A02321 | 373 |
| A02318 | A02323 | 324 | A02318 | A02463 | 326 |
| A02318 | A02469 | 296 | A02318 | A02494 | 172 |
| A02318 | A02540 | 419 | A02318 | A02621 | 285 |
| A02318 | A02672 | 424 | A02318 | A02760 | 454 |
| A02318 | A02773 | 374 | A02318 | A03081 | 402 |
| A02318 | A03110 | 204 | A02318 | A03178 | 255 |
| A02318 | A03202 | 382 | A02318 | A03639 | 254 |
| A02318 | A03963 | 188 | A02318 | A04001 | 360 |
| A02318 | A04172 | 385 | A02318 | A04224 | 400 |
| A02318 | A04236 | 443 | A02318 | A04637 | 351 |
| A02318 | A04911 | 335 | A02318 | A05142 | 373 |
| A02318 | A05593 | 358 | A02318 | A05599 | 394 |
| A02318 | A06314 | 170 | A02318 | A09249 | 378 |
| A02318 | A10018 | 460 | A02318 | A10081 | 368 |
| A02318 | A14190 | 167 | A02318 | A14210 | 369 |
| A02318 | A14496 | 198 | A02318 | A16323 | 340 |
| A02319 | A02490 | 252 | A02319 | A02491 | 196 |
| A02319 | A02541 | 382 | A02319 | A02546 | 406 |
| A02319 | A02574 | 347 | A02319 | A02739 | 283 |
| A02319 | A02778 | 247 | A02319 | A02785 | 271 |
| A02319 | A02788 | 283 | A02319 | A03144 | 329 |
| A02319 | A03224 | 358 | A02319 | A03234 | 321 |
| A02319 | A03243 | 335 | A02319 | A03264 | 385 |
| A02319 | A03858 | 321 | A02319 | A04117 | 198 |
| A02319 | A04372 | 414 | A02319 | A04620 | 396 |
| A02319 | A05153 | 291 | A02319 | A05416 | 258 |
| A02319 | A05418 | 180 | A02319 | A05550 | 358 |
| A02319 | A06211 | 401 | A02319 | A06558 | 424 |
| A02319 | A07135 | 243 | A02319 | A07200 | 245 |
| A02319 | A13906 | 396 | A02319 | A14637 | 303 |
| A02319 | A14685 | 416 | A02319 | A15430 | 255 |
| A02319 | A17155 | 390 | A02320 | A02322 | 247 |
| A02320 | A02441 | 251 | A02320 | A02444 | 486 |
| A02320 | A02468 | 369 | A02320 | A02469 | 160 |
| A02320 | A02523 | 373 | A02320 | A02535 | 388 |
| A02320 | A02539 | 488 | A02320 | A02540 | 363 |
| A02320 | A02541 | 408 | A02320 | A02560 | 299 |
| A02320 | A02583 | 229 | A02320 | A02672 | 210 |
| A02320 | A02673 | 412 | A02320 | A02691 | 353 |

|        |        |     |        |        |     |
|--------|--------|-----|--------|--------|-----|
| A02320 | A02738 | 229 | A02320 | A02760 | 329 |
| A02320 | A02761 | 446 | A02320 | A02891 | 254 |
| A02320 | A03056 | 379 | A02320 | A03062 | 477 |
| A02320 | A03076 | 366 | A02320 | A03077 | 441 |
| A02320 | A03107 | 491 | A02320 | A03178 | 399 |
| A02320 | A03202 | 293 | A02320 | A03217 | 423 |
| A02320 | A03224 | 157 | A02320 | A03471 | 279 |
| A02320 | A03766 | 313 | A02320 | A03777 | 486 |
| A02320 | A03964 | 219 | A02320 | A04193 | 208 |
| A02320 | A04212 | 491 | A02320 | A04256 | 152 |
| A02320 | A04326 | 396 | A02320 | A04336 | 456 |
| A02320 | A04349 | 486 | A02320 | A04383 | 238 |
| A02320 | A04384 | 385 | A02320 | A04402 | 286 |
| A02320 | A04410 | 212 | A02320 | A04424 | 484 |
| A02320 | A04459 | 402 | A02320 | A04464 | 316 |
| A02320 | A04465 | 286 | A02320 | A04498 | 316 |
| A02320 | A04520 | 156 | A02320 | A04637 | 240 |
| A02320 | A04870 | 491 | A02320 | A05188 | 363 |
| A02320 | A05247 | 190 | A02320 | A05294 | 152 |
| A02320 | A05297 | 185 | A02320 | A05301 | 249 |
| A02320 | A05467 | 210 | A02320 | A05596 | 363 |
| A02320 | A05777 | 313 | A02320 | A05801 | 299 |
| A02320 | A05825 | 268 | A02320 | A05828 | 361 |
| A02320 | A05898 | 299 | A02320 | A05919 | 286 |
| A02320 | A06069 | 165 | A02320 | A06255 | 460 |
| A02320 | A06307 | 281 | A02320 | A06464 | 425 |
| A02320 | A06468 | 363 | A02320 | A06710 | 286 |
| A02320 | A07019 | 307 | A02320 | A07167 | 463 |
| A02320 | A07233 | 340 | A02320 | A07318 | 363 |
| A02320 | A07384 | 190 | A02320 | A07559 | 377 |
| A02320 | A07704 | 159 | A02320 | A07807 | 396 |
| A02320 | A07932 | 235 | A02320 | A08174 | 327 |
| A02320 | A08342 | 419 | A02320 | A08686 | 183 |
| A02320 | A09074 | 268 | A02320 | A09240 | 384 |
| A02320 | A09365 | 316 | A02320 | A09435 | 201 |
| A02320 | A09571 | 425 | A02320 | A10237 | 281 |
| A02320 | A11014 | 218 | A02320 | A11411 | 223 |
| A02320 | A11698 | 293 | A02320 | A11977 | 316 |
| A02320 | A12164 | 340 | A02320 | A12466 | 363 |
| A02320 | A12596 | 327 | A02320 | A12721 | 340 |
| A02320 | A13369 | 187 | A02320 | A13397 | 167 |
| A02320 | A14178 | 286 | A02320 | A14251 | 263 |
| A02320 | A14666 | 357 | A02320 | A15233 | 338 |
| A02320 | A15258 | 465 | A02320 | A15272 | 263 |
| A02320 | A15277 | 369 | A02320 | A15573 | 272 |
| A02320 | A16171 | 327 | A02320 | A16174 | 316 |

|        |        |     |        |        |     |
|--------|--------|-----|--------|--------|-----|
| A02320 | A16195 | 316 | A02320 | A16222 | 230 |
| A02320 | A16573 | 165 | A02320 | A16721 | 299 |
| A02321 | A02463 | 361 | A02321 | A02621 | 329 |
| A02321 | A02773 | 399 | A02321 | A03917 | 372 |
| A02321 | A04001 | 386 | A02321 | A04087 | 373 |
| A02321 | A04236 | 401 | A02321 | A04366 | 477 |
| A02321 | A04636 | 433 | A02321 | A04637 | 380 |
| A02321 | A04911 | 369 | A02321 | A05142 | 396 |
| A02321 | A05432 | 358 | A02321 | A06314 | 227 |
| A02321 | A07561 | 318 | A02322 | A02325 | 306 |
| A02322 | A02673 | 332 | A02322 | A02761 | 302 |
| A02322 | A03034 | 159 | A02322 | A03097 | 352 |
| A02322 | A03104 | 199 | A02322 | A03777 | 363 |
| A02322 | A04424 | 332 | A02322 | A04434 | 454 |
| A02322 | A04438 | 399 | A02322 | A05899 | 396 |
| A02322 | A06100 | 230 | A02322 | A06284 | 393 |
| A02322 | A08835 | 196 | A02322 | A09507 | 351 |
| A02322 | A11531 | 404 | A02322 | A12385 | 425 |
| A02322 | A12488 | 425 | A02322 | A12490 | 425 |
| A02322 | A15258 | 430 | A02322 | A15277 | 468 |
| A02323 | A02427 | 283 | A02323 | A02468 | 263 |
| A02323 | A02504 | 270 | A02323 | A03079 | 256 |
| A02323 | A03080 | 221 | A02323 | A03082 | 406 |
| A02323 | A03124 | 399 | A02323 | A03399 | 221 |
| A02323 | A03566 | 180 | A02323 | A03639 | 229 |
| A02323 | A04061 | 297 | A02323 | A04208 | 338 |
| A02323 | A04486 | 360 | A02323 | A06206 | 257 |
| A02323 | A06219 | 374 | A02323 | A06333 | 339 |
| A02323 | A07136 | 433 | A02323 | A07158 | 191 |
| A02323 | A08000 | 180 | A02323 | A09421 | 328 |
| A02323 | A09911 | 333 | A02323 | A10040 | 460 |
| A02323 | A10081 | 353 | A02323 | A14722 | 384 |
| A02323 | A15233 | 313 | A02323 | A15318 | 198 |
| A02323 | A15419 | 208 | A02323 | A15420 | 185 |
| A02324 | A02758 | 356 | A02324 | A03639 | 307 |
| A02324 | A04517 | 368 | A02324 | A05825 | 396 |
| A02324 | A05826 | 401 | A02324 | A10040 | 449 |
| A02324 | A10141 | 412 | A02324 | A14722 | 416 |
| A02325 | A02444 | 297 | A02325 | A02468 | 216 |
| A02325 | A02673 | 102 | A02325 | A02686 | 243 |
| A02325 | A02703 | 262 | A02325 | A02761 | 212 |
| A02325 | A03062 | 302 | A02325 | A03104 | 217 |
| A02325 | A03107 | 152 | A02325 | A03167 | 152 |
| A02325 | A03777 | 297 | A02325 | A03821 | 157 |
| A02325 | A04157 | 291 | A02325 | A04372 | 337 |
| A02325 | A04424 | 251 | A02325 | A04945 | 294 |

|        |        |     |        |        |     |
|--------|--------|-----|--------|--------|-----|
| A02325 | A05390 | 249 | A02325 | A05899 | 347 |
| A02325 | A06279 | 159 | A02325 | A06959 | 271 |
| A02325 | A07331 | 337 | A02325 | A07815 | 162 |
| A02325 | A08899 | 297 | A02325 | A10346 | 418 |
| A02325 | A10633 | 168 | A02325 | A11184 | 176 |
| A02325 | A11531 | 358 | A02325 | A11921 | 424 |
| A02325 | A12385 | 394 | A02325 | A12488 | 394 |
| A02325 | A12490 | 394 | A02325 | A13985 | 252 |
| A02325 | A14533 | 367 | A02325 | A15230 | 217 |
| A02325 | A15233 | 438 | A02325 | A15277 | 213 |
| A02325 | A15575 | 241 | A02325 | A15905 | 193 |
| A02326 | A02418 | 265 | A02326 | A02425 | 450 |
| A02326 | A02490 | 279 | A02326 | A02491 | 205 |
| A02326 | A02502 | 151 | A02326 | A02644 | 481 |
| A02326 | A02668 | 439 | A02326 | A02704 | 187 |
| A02326 | A02756 | 337 | A02326 | A02759 | 283 |
| A02326 | A02764 | 347 | A02326 | A02772 | 457 |
| A02326 | A02776 | 307 | A02326 | A02795 | 322 |
| A02326 | A02841 | 193 | A02326 | A03099 | 184 |
| A02326 | A03310 | 340 | A02326 | A03314 | 246 |
| A02326 | A03511 | 357 | A02326 | A03976 | 226 |
| A02326 | A04163 | 466 | A02326 | A04237 | 373 |
| A02326 | A04243 | 390 | A02326 | A04256 | 279 |
| A02326 | A04260 | 240 | A02326 | A04482 | 362 |
| A02326 | A04547 | 425 | A02326 | A04773 | 258 |
| A02326 | A05580 | 396 | A02326 | A06404 | 344 |
| A02326 | A06779 | 355 | A02326 | A06818 | 333 |
| A02326 | A07151 | 474 | A02326 | A07244 | 177 |
| A02326 | A07373 | 324 | A02326 | A11313 | 252 |
| A02326 | A14027 | 380 | A02326 | A14169 | 257 |
| A02326 | A14258 | 157 | A02326 | A14402 | 310 |
| A02326 | A14438 | 332 | A02327 | A02494 | 172 |
| A02327 | A02629 | 314 | A02327 | A02636 | 283 |
| A02327 | A02776 | 317 | A02327 | A03070 | 171 |
| A02327 | A03144 | 254 | A02327 | A03243 | 260 |
| A02327 | A03259 | 84  | A02327 | A03263 | 382 |
| A02327 | A03451 | 207 | A02327 | A03680 | 302 |
| A02327 | A03681 | 285 | A02327 | A04085 | 361 |
| A02327 | A04451 | 263 | A02327 | A04706 | 279 |
| A02327 | A05575 | 366 | A02327 | A07158 | 216 |
| A02327 | A08911 | 297 | A02327 | A11512 | 419 |
| A02328 | A02405 | 265 | A02328 | A02668 | 458 |
| A02328 | A02756 | 407 | A02328 | A02771 | 477 |
| A02328 | A02869 | 369 | A02328 | A03027 | 308 |
| A02328 | A03319 | 351 | A02328 | A03361 | 168 |
| A02328 | A03370 | 162 | A02328 | A03376 | 281 |

|        |        |     |        |        |     |
|--------|--------|-----|--------|--------|-----|
| A02328 | A03379 | 180 | A02328 | A03755 | 465 |
| A02328 | A03918 | 424 | A02328 | A03930 | 401 |
| A02328 | A04763 | 423 | A02328 | A04830 | 316 |
| A02328 | A05127 | 201 | A02328 | A06797 | 286 |
| A02328 | A06949 | 201 | A02328 | A07165 | 355 |
| A02328 | A07218 | 190 | A02328 | A08835 | 154 |
| A02328 | A09235 | 255 | A02328 | A09394 | 323 |
| A02328 | A11911 | 196 | A02328 | A14404 | 317 |
| A02328 | A15416 | 210 | A02329 | A02330 | 180 |
| A02329 | A02450 | 383 | A02329 | A02493 | 201 |
| A02329 | A02545 | 285 | A02329 | A02774 | 262 |
| A02329 | A02785 | 490 | A02329 | A03027 | 278 |
| A02329 | A03028 | 347 | A02329 | A03050 | 490 |
| A02329 | A03051 | 201 | A02329 | A03099 | 273 |
| A02329 | A03172 | 408 | A02329 | A03402 | 307 |
| A02329 | A04023 | 435 | A02329 | A04051 | 398 |
| A02329 | A04366 | 286 | A02329 | A04369 | 491 |
| A02329 | A04371 | 346 | A02329 | A04612 | 286 |
| A02329 | A04614 | 256 | A02329 | A04633 | 486 |
| A02329 | A04635 | 473 | A02329 | A04981 | 408 |
| A02329 | A05146 | 251 | A02329 | A05356 | 202 |
| A02329 | A05427 | 157 | A02329 | A05736 | 308 |
| A02329 | A05945 | 202 | A02329 | A06263 | 458 |
| A02329 | A06607 | 190 | A02329 | A06874 | 326 |
| A02329 | A07297 | 433 | A02329 | A07407 | 271 |
| A02329 | A07438 | 302 | A02329 | A07455 | 369 |
| A02329 | A07460 | 369 | A02329 | A09072 | 420 |
| A02329 | A10482 | 388 | A02329 | A11313 | 210 |
| A02329 | A11479 | 358 | A02329 | A12784 | 363 |
| A02329 | A17078 | 246 | A02330 | A02405 | 422 |
| A02330 | A02410 | 457 | A02330 | A02476 | 329 |
| A02330 | A02524 | 159 | A02330 | A02544 | 286 |
| A02330 | A02548 | 213 | A02330 | A02644 | 177 |
| A02330 | A02759 | 430 | A02330 | A02785 | 249 |
| A02330 | A02936 | 224 | A02330 | A03050 | 377 |
| A02330 | A03099 | 491 | A02330 | A03186 | 162 |
| A02330 | A03238 | 401 | A02330 | A03402 | 213 |
| A02330 | A03459 | 347 | A02330 | A03484 | 177 |
| A02330 | A03748 | 171 | A02330 | A03968 | 393 |
| A02330 | A04087 | 360 | A02330 | A04162 | 263 |
| A02330 | A04163 | 177 | A02330 | A04258 | 441 |
| A02330 | A04369 | 362 | A02330 | A04371 | 398 |
| A02330 | A04373 | 274 | A02330 | A04441 | 386 |
| A02330 | A04487 | 190 | A02330 | A04633 | 217 |
| A02330 | A04635 | 274 | A02330 | A04974 | 395 |
| A02330 | A04975 | 435 | A02330 | A04981 | 477 |

|        |        |     |        |        |     |
|--------|--------|-----|--------|--------|-----|
| A02330 | A05184 | 340 | A02330 | A05208 | 352 |
| A02330 | A05277 | 243 | A02330 | A05356 | 477 |
| A02330 | A05376 | 168 | A02330 | A05429 | 368 |
| A02330 | A05696 | 314 | A02330 | A05736 | 425 |
| A02330 | A05740 | 368 | A02330 | A05770 | 270 |
| A02330 | A05786 | 395 | A02330 | A05945 | 251 |
| A02330 | A05965 | 324 | A02330 | A05992 | 407 |
| A02330 | A06037 | 193 | A02330 | A06059 | 204 |
| A02330 | A06263 | 484 | A02330 | A06473 | 285 |
| A02330 | A06607 | 479 | A02330 | A06769 | 339 |
| A02330 | A06874 | 380 | A02330 | A07037 | 247 |
| A02330 | A07296 | 296 | A02330 | A07297 | 301 |
| A02330 | A07471 | 193 | A02330 | A07613 | 281 |
| A02330 | A07757 | 184 | A02330 | A08746 | 157 |
| A02330 | A09072 | 152 | A02330 | A10700 | 286 |
| A02330 | A10882 | 290 | A02330 | A11424 | 277 |
| A02330 | A11646 | 180 | A02330 | A13473 | 213 |
| A02330 | A14122 | 195 | A02330 | A14443 | 899 |
| A02330 | A15322 | 328 | A02330 | A15327 | 190 |
| A02330 | A15402 | 263 | A02330 | A15462 | 226 |
| A02330 | A15800 | 177 | A02330 | A15839 | 223 |
| A02330 | A16453 | 157 | A02330 | A16741 | 156 |
| A02331 | A02372 | 130 | A02331 | A02377 | 93  |
| A02331 | A02579 | 201 | A02331 | A02752 | 316 |
| A02331 | A02828 | 473 | A02331 | A02837 | 419 |
| A02331 | A02859 | 157 | A02331 | A02882 | 87  |
| A02331 | A02968 | 210 | A02331 | A03001 | 435 |
| A02331 | A03047 | 202 | A02331 | A03090 | 317 |
| A02331 | A03094 | 162 | A02331 | A03157 | 241 |
| A02331 | A03195 | 235 | A02331 | A03259 | 328 |
| A02331 | A03574 | 163 | A02331 | A03803 | 491 |
| A02331 | A03990 | 162 | A02331 | A04037 | 226 |
| A02331 | A04117 | 202 | A02331 | A04267 | 182 |
| A02331 | A04508 | 307 | A02331 | A04704 | 246 |
| A02331 | A04741 | 243 | A02331 | A04793 | 170 |
| A02331 | A04908 | 230 | A02331 | A04938 | 305 |
| A02331 | A05122 | 398 | A02331 | A05253 | 450 |
| A02331 | A05263 | 333 | A02331 | A05568 | 201 |
| A02331 | A05709 | 177 | A02331 | A05876 | 157 |
| A02331 | A05889 | 469 | A02331 | A06004 | 152 |
| A02331 | A06697 | 213 | A02331 | A07483 | 438 |
| A02331 | A07588 | 151 | A02331 | A07799 | 200 |
| A02331 | A08610 | 226 | A02331 | A09020 | 154 |
| A02331 | A09026 | 184 | A02331 | A09123 | 152 |
| A02331 | A09180 | 377 | A02331 | A09298 | 179 |
| A02331 | A09890 | 196 | A02331 | A09913 | 334 |

|        |        |     |        |        |     |
|--------|--------|-----|--------|--------|-----|
| A02331 | A10313 | 180 | A02331 | A11318 | 165 |
| A02331 | A11369 | 491 | A02331 | A11750 | 273 |
| A02331 | A14397 | 279 | A02331 | A14483 | 251 |
| A02331 | A15786 | 226 | A02331 | A15846 | 353 |
| A02331 | A15896 | 200 | A02331 | A16064 | 210 |
| A02331 | A17029 | 333 | A02331 | A17189 | 183 |
| A02332 | A02345 | 276 | A02332 | A02353 | 187 |
| A02332 | A02371 | 303 | A02332 | A02376 | 288 |
| A02332 | A02377 | 361 | A02332 | A02689 | 277 |
| A02332 | A02698 | 165 | A02332 | A02706 | 184 |
| A02332 | A02984 | 274 | A02332 | A03243 | 297 |
| A02332 | A03832 | 205 | A02332 | A04902 | 318 |
| A02332 | A05033 | 420 | A02332 | A05949 | 343 |
| A02332 | A07746 | 236 | A02332 | A09535 | 383 |
| A02332 | A15487 | 260 | A02333 | A02338 | 283 |
| A02333 | A02415 | 229 | A02333 | A02416 | 205 |
| A02333 | A02443 | 441 | A02333 | A02460 | 154 |
| A02333 | A02475 | 305 | A02333 | A02476 | 377 |
| A02333 | A02489 | 283 | A02333 | A02490 | 446 |
| A02333 | A02491 | 491 | A02333 | A02492 | 170 |
| A02333 | A02581 | 363 | A02333 | A02607 | 63  |
| A02333 | A02669 | 195 | A02333 | A02684 | 305 |
| A02333 | A02686 | 473 | A02333 | A02687 | 483 |
| A02333 | A02690 | 311 | A02333 | A02691 | 374 |
| A02333 | A02696 | 187 | A02333 | A02697 | 473 |
| A02333 | A02698 | 157 | A02333 | A02700 | 201 |
| A02333 | A02706 | 271 | A02333 | A02751 | 157 |
| A02333 | A02811 | 160 | A02333 | A02837 | 391 |
| A02333 | A02859 | 157 | A02333 | A02872 | 165 |
| A02333 | A02901 | 205 | A02333 | A02909 | 190 |
| A02333 | A02996 | 274 | A02333 | A03032 | 296 |
| A02333 | A03080 | 163 | A02333 | A03104 | 329 |
| A02333 | A03181 | 322 | A02333 | A03186 | 285 |
| A02333 | A03268 | 224 | A02333 | A03304 | 249 |
| A02333 | A03321 | 196 | A02333 | A03351 | 334 |
| A02333 | A03417 | 490 | A02333 | A03447 | 172 |
| A02333 | A03540 | 235 | A02333 | A03634 | 374 |
| A02333 | A03771 | 216 | A02333 | A03810 | 283 |
| A02333 | A03919 | 183 | A02333 | A04082 | 172 |
| A02333 | A04105 | 456 | A02333 | A04125 | 216 |
| A02333 | A04139 | 457 | A02333 | A04214 | 293 |
| A02333 | A04337 | 375 | A02333 | A04392 | 305 |
| A02333 | A04398 | 488 | A02333 | A04428 | 232 |
| A02333 | A04449 | 443 | A02333 | A04510 | 435 |
| A02333 | A04678 | 229 | A02333 | A04742 | 274 |
| A02333 | A04790 | 168 | A02333 | A04938 | 191 |

|        |        |     |        |        |     |
|--------|--------|-----|--------|--------|-----|
| A02333 | A04947 | 213 | A02333 | A04960 | 475 |
| A02333 | A04996 | 160 | A02333 | A05008 | 285 |
| A02333 | A05075 | 274 | A02333 | A05079 | 240 |
| A02333 | A05094 | 441 | A02333 | A05128 | 191 |
| A02333 | A05155 | 345 | A02333 | A05235 | 425 |
| A02333 | A05329 | 224 | A02333 | A05445 | 152 |
| A02333 | A05509 | 321 | A02333 | A05587 | 221 |
| A02333 | A05739 | 152 | A02333 | A05861 | 419 |
| A02333 | A05891 | 491 | A02333 | A05901 | 260 |
| A02333 | A05911 | 218 | A02333 | A05935 | 346 |
| A02333 | A05943 | 293 | A02333 | A05959 | 240 |
| A02333 | A06073 | 208 | A02333 | A06158 | 179 |
| A02333 | A06298 | 436 | A02333 | A06379 | 266 |
| A02333 | A06424 | 321 | A02333 | A06520 | 266 |
| A02333 | A06585 | 393 | A02333 | A06729 | 210 |
| A02333 | A06953 | 162 | A02333 | A07025 | 293 |
| A02333 | A07129 | 413 | A02333 | A07196 | 249 |
| A02333 | A07577 | 356 | A02333 | A07605 | 491 |
| A02333 | A08345 | 157 | A02333 | A08458 | 260 |
| A02333 | A08714 | 489 | A02333 | A08938 | 267 |
| A02333 | A09354 | 321 | A02333 | A09581 | 454 |
| A02333 | A09838 | 249 | A02333 | A09939 | 486 |
| A02333 | A10610 | 346 | A02333 | A10613 | 383 |
| A02333 | A10752 | 455 | A02333 | A10821 | 180 |
| A02333 | A10906 | 393 | A02333 | A10943 | 374 |
| A02333 | A11082 | 346 | A02333 | A11101 | 466 |
| A02333 | A11216 | 218 | A02333 | A11313 | 446 |
| A02333 | A11317 | 401 | A02333 | A11339 | 434 |
| A02333 | A11446 | 224 | A02333 | A11465 | 407 |
| A02333 | A11525 | 489 | A02333 | A11561 | 489 |
| A02333 | A11693 | 463 | A02333 | A11712 | 407 |
| A02333 | A11771 | 208 | A02333 | A11983 | 443 |
| A02333 | A12021 | 321 | A02333 | A12267 | 321 |
| A02333 | A12429 | 321 | A02333 | A12454 | 346 |
| A02333 | A12464 | 399 | A02333 | A12578 | 346 |
| A02333 | A12633 | 363 | A02333 | A12702 | 346 |
| A02333 | A12719 | 267 | A02333 | A12807 | 416 |
| A02333 | A12879 | 346 | A02333 | A13369 | 452 |
| A02333 | A13419 | 466 | A02333 | A14377 | 412 |
| A02333 | A14399 | 196 | A02333 | A14781 | 171 |
| A02333 | A14892 | 346 | A02333 | A15282 | 479 |
| A02333 | A15635 | 188 | A02333 | A15809 | 380 |
| A02333 | A16636 | 174 | A02333 | A16719 | 249 |
| A02333 | A17078 | 174 | A02333 | A17155 | 195 |
| A02334 | A02335 | 477 | A02334 | A02338 | 467 |
| A02334 | A02692 | 360 | A02334 | A03864 | 409 |



|        |        |     |        |        |     |
|--------|--------|-----|--------|--------|-----|
| A02334 | A04005 | 407 | A02334 | A06607 | 291 |
| A02334 | A06635 | 321 | A02334 | A07482 | 466 |
| A02334 | A09436 | 416 | A02334 | A10405 | 440 |
| A02334 | A12528 | 468 | A02334 | A12529 | 465 |
| A02335 | A02336 | 419 | A02335 | A02338 | 438 |
| A02335 | A02341 | 171 | A02335 | A02342 | 469 |
| A02335 | A02686 | 313 | A02335 | A02687 | 480 |
| A02335 | A02690 | 210 | A02335 | A02691 | 491 |
| A02335 | A02692 | 165 | A02335 | A02697 | 179 |
| A02335 | A02700 | 234 | A02335 | A02701 | 466 |
| A02335 | A02789 | 223 | A02335 | A02826 | 270 |
| A02335 | A03004 | 205 | A02335 | A03097 | 219 |
| A02335 | A03719 | 223 | A02335 | A03728 | 223 |
| A02335 | A03752 | 223 | A02335 | A03858 | 224 |
| A02335 | A03862 | 223 | A02335 | A03864 | 279 |
| A02335 | A03866 | 380 | A02335 | A03964 | 223 |
| A02335 | A04005 | 271 | A02335 | A04010 | 165 |
| A02335 | A04035 | 199 | A02335 | A04105 | 227 |
| A02335 | A04108 | 196 | A02335 | A04135 | 232 |
| A02335 | A04139 | 188 | A02335 | A04279 | 286 |
| A02335 | A04314 | 195 | A02335 | A04315 | 468 |
| A02335 | A04443 | 234 | A02335 | A04620 | 243 |
| A02335 | A04784 | 279 | A02335 | A04960 | 236 |
| A02335 | A04995 | 177 | A02335 | A05094 | 162 |
| A02335 | A05572 | 318 | A02335 | A05573 | 270 |
| A02335 | A05603 | 193 | A02335 | A05659 | 156 |
| A02335 | A05714 | 310 | A02335 | A05911 | 251 |
| A02335 | A06091 | 176 | A02335 | A06244 | 401 |
| A02335 | A06298 | 152 | A02335 | A06368 | 224 |
| A02335 | A06385 | 160 | A02335 | A06635 | 491 |
| A02335 | A06689 | 223 | A02335 | A06819 | 371 |
| A02335 | A06829 | 201 | A02335 | A06830 | 422 |
| A02335 | A06847 | 219 | A02335 | A06912 | 207 |
| A02335 | A06916 | 241 | A02335 | A06926 | 241 |
| A02335 | A06970 | 334 | A02335 | A07056 | 236 |
| A02335 | A07088 | 270 | A02335 | A07109 | 347 |
| A02335 | A07129 | 167 | A02335 | A07190 | 384 |
| A02335 | A07198 | 188 | A02335 | A07199 | 238 |
| A02335 | A07200 | 394 | A02335 | A07222 | 223 |
| A02335 | A07333 | 223 | A02335 | A07335 | 229 |
| A02335 | A07482 | 456 | A02335 | A07737 | 217 |
| A02335 | A08023 | 310 | A02335 | A08135 | 210 |
| A02335 | A08474 | 364 | A02335 | A08724 | 163 |
| A02335 | A09436 | 294 | A02335 | A10405 | 364 |
| A02335 | A10627 | 364 | A02335 | A10736 | 364 |
| A02335 | A10749 | 343 | A02335 | A10832 | 329 |

|        |        |     |        |        |     |
|--------|--------|-----|--------|--------|-----|
| A02335 | A11886 | 427 | A02335 | A12309 | 364 |
| A02335 | A12335 | 329 | A02335 | A12528 | 427 |
| A02335 | A12529 | 414 | A02335 | A12831 | 224 |
| A02335 | A13822 | 223 | A02335 | A13871 | 152 |
| A02335 | A14337 | 279 | A02335 | A14401 | 468 |
| A02335 | A14525 | 256 | A02335 | A14637 | 191 |
| A02335 | A14698 | 207 | A02335 | A14804 | 223 |
| A02335 | A15282 | 412 | A02335 | A15368 | 438 |
| A02335 | A15372 | 223 | A02335 | A15623 | 364 |
| A02335 | A16219 | 223 | A02335 | A16355 | 263 |
| A02335 | A16531 | 223 | A02335 | A16741 | 481 |
| A02335 | A16744 | 196 | A02336 | A02338 | 313 |
| A02336 | A02339 | 401 | A02336 | A02341 | 406 |
| A02336 | A02405 | 279 | A02336 | A02511 | 267 |
| A02336 | A02686 | 310 | A02336 | A02690 | 332 |
| A02336 | A02691 | 208 | A02336 | A02713 | 335 |
| A02336 | A02788 | 196 | A02336 | A02810 | 347 |
| A02336 | A02859 | 177 | A02336 | A03097 | 338 |
| A02336 | A03188 | 168 | A02336 | A03864 | 374 |
| A02336 | A03866 | 363 | A02336 | A04004 | 322 |
| A02336 | A04023 | 312 | A02336 | A04105 | 246 |
| A02336 | A04319 | 408 | A02336 | A04520 | 198 |
| A02336 | A05591 | 258 | A02336 | A06310 | 401 |
| A02336 | A06368 | 340 | A02336 | A06385 | 196 |
| A02336 | A06609 | 291 | A02336 | A07018 | 401 |
| A02336 | A07141 | 219 | A02336 | A07190 | 481 |
| A02336 | A07199 | 350 | A02336 | A07200 | 152 |
| A02336 | A07335 | 343 | A02336 | A10620 | 375 |
| A02336 | A11084 | 401 | A02336 | A13009 | 457 |
| A02336 | A15282 | 173 | A02337 | A02370 | 326 |
| A02337 | A02381 | 270 | A02337 | A02382 | 377 |
| A02337 | A02416 | 168 | A02337 | A02457 | 290 |
| A02337 | A02508 | 334 | A02337 | A02547 | 366 |
| A02337 | A02617 | 412 | A02337 | A02630 | 294 |
| A02337 | A02637 | 428 | A02337 | A02655 | 234 |
| A02337 | A02657 | 353 | A02337 | A02659 | 402 |
| A02337 | A02730 | 384 | A02337 | A02795 | 313 |
| A02337 | A02803 | 157 | A02337 | A02851 | 324 |
| A02337 | A02854 | 377 | A02337 | A02863 | 457 |
| A02337 | A02875 | 185 | A02337 | A02908 | 191 |
| A02337 | A02917 | 375 | A02337 | A02935 | 299 |
| A02337 | A02945 | 424 | A02337 | A03010 | 252 |
| A02337 | A03019 | 193 | A02337 | A03204 | 924 |
| A02337 | A03610 | 285 | A02337 | A03817 | 322 |
| A02337 | A03966 | 254 | A02337 | A04091 | 380 |
| A02337 | A04110 | 283 | A02337 | A04138 | 313 |

|        |        |     |        |        |     |
|--------|--------|-----|--------|--------|-----|
| A02337 | A04248 | 491 | A02337 | A04276 | 312 |
| A02337 | A04536 | 440 | A02337 | A04756 | 299 |
| A02337 | A04865 | 297 | A02337 | A05127 | 191 |
| A02337 | A05944 | 489 | A02337 | A05985 | 449 |
| A02337 | A06054 | 439 | A02337 | A06055 | 473 |
| A02337 | A06404 | 424 | A02337 | A06747 | 267 |
| A02337 | A06780 | 462 | A02337 | A06818 | 324 |
| A02337 | A07006 | 374 | A02337 | A07133 | 384 |
| A02337 | A07152 | 208 | A02337 | A07157 | 319 |
| A02337 | A07161 | 436 | A02337 | A07173 | 419 |
| A02337 | A07178 | 296 | A02337 | A07311 | 899 |
| A02337 | A07372 | 350 | A02337 | A13873 | 159 |
| A02337 | A14236 | 218 | A02337 | A14373 | 339 |
| A02337 | A14392 | 208 | A02337 | A15394 | 252 |
| A02337 | A15395 | 358 | A02337 | A15425 | 196 |
| A02337 | A15601 | 469 | A02337 | A15603 | 401 |
| A02337 | A15605 | 480 | A02337 | A15607 | 321 |
| A02337 | A15608 | 441 | A02337 | A15841 | 467 |
| A02338 | A02341 | 383 | A02338 | A02342 | 188 |
| A02338 | A02477 | 177 | A02338 | A02479 | 271 |
| A02338 | A02490 | 243 | A02338 | A02491 | 167 |
| A02338 | A02687 | 329 | A02338 | A02691 | 430 |
| A02338 | A02692 | 262 | A02338 | A02693 | 258 |
| A02338 | A02700 | 319 | A02338 | A02701 | 433 |
| A02338 | A02709 | 151 | A02338 | A02785 | 269 |
| A02338 | A02818 | 288 | A02338 | A02872 | 191 |
| A02338 | A03099 | 154 | A02338 | A03268 | 480 |
| A02338 | A03417 | 236 | A02338 | A03821 | 191 |
| A02338 | A03864 | 351 | A02338 | A03870 | 362 |
| A02338 | A03964 | 408 | A02338 | A04005 | 428 |
| A02338 | A04105 | 204 | A02338 | A04135 | 317 |
| A02338 | A04279 | 252 | A02338 | A04313 | 406 |
| A02338 | A04443 | 483 | A02338 | A04510 | 303 |
| A02338 | A05746 | 446 | A02338 | A05891 | 219 |
| A02338 | A05911 | 330 | A02338 | A05951 | 337 |
| A02338 | A06609 | 252 | A02338 | A06635 | 443 |
| A02338 | A07199 | 322 | A02338 | A07200 | 433 |
| A02338 | A07482 | 384 | A02338 | A09436 | 362 |
| A02338 | A10405 | 406 | A02338 | A10460 | 286 |
| A02338 | A10832 | 384 | A02338 | A12528 | 393 |
| A02338 | A12529 | 377 | A02338 | A14389 | 345 |
| A02338 | A14405 | 467 | A02338 | A14440 | 208 |
| A02338 | A16132 | 219 | A02339 | A02341 | 377 |
| A02339 | A02687 | 266 | A02339 | A03832 | 279 |
| A02339 | A03964 | 399 | A02339 | A04443 | 402 |
| A02339 | A04449 | 174 | A02339 | A06257 | 412 |

|        |        |     |        |        |     |
|--------|--------|-----|--------|--------|-----|
| A02339 | A07018 | 434 | A02339 | A07030 | 434 |
| A02339 | A14381 | 347 | A02339 | A14452 | 262 |
| A02340 | A02416 | 344 | A02340 | A02471 | 310 |
| A02340 | A02495 | 154 | A02340 | A02498 | 252 |
| A02340 | A02547 | 338 | A02340 | A02606 | 276 |
| A02340 | A02611 | 198 | A02340 | A02630 | 372 |
| A02340 | A02661 | 446 | A02340 | A02729 | 260 |
| A02340 | A02730 | 490 | A02340 | A02741 | 418 |
| A02340 | A02745 | 201 | A02340 | A02746 | 283 |
| A02340 | A02751 | 256 | A02340 | A02783 | 210 |
| A02340 | A02788 | 469 | A02340 | A02795 | 273 |
| A02340 | A02808 | 260 | A02340 | A02812 | 109 |
| A02340 | A02834 | 265 | A02340 | A02837 | 254 |
| A02340 | A02840 | 343 | A02340 | A02854 | 412 |
| A02340 | A02856 | 307 | A02340 | A02859 | 373 |
| A02340 | A02863 | 335 | A02340 | A02874 | 70  |
| A02340 | A02945 | 188 | A02340 | A02955 | 168 |
| A02340 | A03019 | 63  | A02340 | A03100 | 461 |
| A02340 | A03155 | 245 | A02340 | A03204 | 369 |
| A02340 | A03228 | 227 | A02340 | A03259 | 380 |
| A02340 | A03275 | 205 | A02340 | A03282 | 245 |
| A02340 | A03610 | 241 | A02340 | A03620 | 360 |
| A02340 | A03664 | 252 | A02340 | A03677 | 213 |
| A02340 | A03805 | 334 | A02340 | A03807 | 417 |
| A02340 | A03865 | 279 | A02340 | A04011 | 283 |
| A02340 | A04060 | 294 | A02340 | A04088 | 277 |
| A02340 | A04138 | 488 | A02340 | A04144 | 329 |
| A02340 | A04201 | 299 | A02340 | A04206 | 466 |
| A02340 | A04238 | 469 | A02340 | A04247 | 334 |
| A02340 | A04263 | 483 | A02340 | A04320 | 263 |
| A02340 | A04361 | 191 | A02340 | A04540 | 196 |
| A02340 | A04609 | 229 | A02340 | A04865 | 256 |
| A02340 | A04951 | 368 | A02340 | A05305 | 260 |
| A02340 | A05931 | 353 | A02340 | A06422 | 252 |
| A02340 | A07135 | 188 | A02340 | A07146 | 390 |
| A02340 | A07154 | 266 | A02340 | A07158 | 273 |
| A02340 | A07165 | 288 | A02340 | A07166 | 185 |
| A02340 | A07173 | 179 | A02340 | A08623 | 379 |
| A02340 | A08741 | 228 | A02340 | A09018 | 163 |
| A02340 | A09499 | 347 | A02340 | A11149 | 202 |
| A02340 | A11322 | 176 | A02340 | A11334 | 401 |
| A02340 | A11902 | 340 | A02340 | A12041 | 294 |
| A02340 | A13872 | 361 | A02340 | A14364 | 198 |
| A02340 | A14390 | 283 | A02340 | A15394 | 205 |
| A02340 | A15395 | 316 | A02340 | A15635 | 283 |
| A02340 | A15765 | 228 | A02340 | A15806 | 288 |

|        |        |     |        |        |     |
|--------|--------|-----|--------|--------|-----|
| A02340 | A15981 | 278 | A02340 | A16426 | 249 |
| A02341 | A02342 | 491 | A02341 | A02574 | 226 |
| A02341 | A02611 | 216 | A02341 | A02687 | 488 |
| A02341 | A02693 | 245 | A02341 | A02694 | 265 |
| A02341 | A02701 | 367 | A02341 | A02709 | 360 |
| A02341 | A03007 | 212 | A02341 | A03087 | 227 |
| A02341 | A03268 | 324 | A02341 | A03304 | 188 |
| A02341 | A03596 | 213 | A02341 | A03779 | 440 |
| A02341 | A03945 | 262 | A02341 | A03964 | 489 |
| A02341 | A04004 | 277 | A02341 | A04071 | 323 |
| A02341 | A04079 | 198 | A02341 | A04443 | 491 |
| A02341 | A04449 | 168 | A02341 | A04574 | 377 |
| A02341 | A04671 | 382 | A02341 | A06244 | 353 |
| A02341 | A06635 | 321 | A02341 | A06765 | 452 |
| A02341 | A07018 | 377 | A02341 | A07030 | 377 |
| A02341 | A07190 | 179 | A02341 | A07199 | 409 |
| A02341 | A10239 | 369 | A02341 | A10721 | 215 |
| A02341 | A10832 | 377 | A02341 | A12536 | 447 |
| A02341 | A14071 | 163 | A02341 | A14204 | 174 |
| A02341 | A14381 | 200 | A02341 | A15282 | 241 |
| A02341 | A15383 | 221 | A02342 | A02351 | 180 |
| A02342 | A02687 | 488 | A02342 | A02701 | 294 |
| A02342 | A02709 | 157 | A02342 | A02906 | 238 |
| A02342 | A03035 | 221 | A02342 | A03259 | 196 |
| A02342 | A03520 | 154 | A02342 | A03545 | 362 |
| A02342 | A03596 | 258 | A02342 | A03618 | 329 |
| A02342 | A03779 | 452 | A02342 | A03861 | 360 |
| A02342 | A03964 | 224 | A02342 | A04004 | 198 |
| A02342 | A04105 | 481 | A02342 | A04133 | 213 |
| A02342 | A04443 | 469 | A02342 | A04852 | 269 |
| A02342 | A04907 | 252 | A02342 | A05015 | 269 |
| A02342 | A05114 | 185 | A02342 | A05911 | 252 |
| A02342 | A06244 | 446 | A02342 | A06544 | 200 |
| A02342 | A06588 | 489 | A02342 | A06731 | 232 |
| A02342 | A06924 | 462 | A02342 | A06941 | 180 |
| A02342 | A07146 | 218 | A02342 | A07165 | 274 |
| A02342 | A07199 | 455 | A02342 | A08464 | 296 |
| A02342 | A08974 | 213 | A02342 | A09286 | 311 |
| A02342 | A10460 | 195 | A02342 | A10514 | 270 |
| A02342 | A10819 | 406 | A02342 | A12013 | 259 |
| A02342 | A12037 | 457 | A02342 | A12219 | 428 |
| A02342 | A12536 | 63  | A02342 | A12548 | 474 |
| A02342 | A12927 | 154 | A02342 | A14683 | 159 |
| A02342 | A14709 | 172 | A02342 | A15605 | 157 |
| A02342 | A17113 | 281 | A02343 | A02381 | 180 |
| A02343 | A02674 | 312 | A02343 | A02821 | 243 |

|        |        |     |        |        |     |
|--------|--------|-----|--------|--------|-----|
| A02343 | A02822 | 382 | A02343 | A02929 | 198 |
| A02343 | A03201 | 217 | A02343 | A03287 | 247 |
| A02343 | A03297 | 217 | A02343 | A03336 | 205 |
| A02343 | A03780 | 260 | A02343 | A04007 | 358 |
| A02343 | A04222 | 286 | A02343 | A04449 | 319 |
| A02343 | A04710 | 170 | A02343 | A04731 | 234 |
| A02343 | A05114 | 229 | A02343 | A05414 | 221 |
| A02343 | A05458 | 159 | A02343 | A07187 | 413 |
| A02343 | A07521 | 156 | A02343 | A08400 | 167 |
| A02343 | A08692 | 422 | A02343 | A09273 | 419 |
| A02343 | A09388 | 243 | A02343 | A09561 | 154 |
| A02343 | A10014 | 205 | A02343 | A10514 | 185 |
| A02343 | A10808 | 393 | A02343 | A11061 | 302 |
| A02343 | A11983 | 179 | A02343 | A12361 | 174 |
| A02343 | A13882 | 182 | A02343 | A13902 | 271 |
| A02343 | A13978 | 188 | A02343 | A13997 | 251 |
| A02343 | A15314 | 176 | A02343 | A15354 | 193 |
| A02343 | A16043 | 285 | A02343 | A16721 | 335 |
| A02344 | A02414 | 281 | A02344 | A02520 | 288 |
| A02344 | A02902 | 162 | A02344 | A03101 | 311 |
| A02344 | A04033 | 213 | A02344 | A04265 | 326 |
| A02344 | A04305 | 488 | A02344 | A04316 | 477 |
| A02344 | A04533 | 475 | A02344 | A04543 | 469 |
| A02344 | A04627 | 469 | A02344 | A05810 | 297 |
| A02344 | A06385 | 180 | A02344 | A07153 | 196 |
| A02344 | A07242 | 218 | A02344 | A07954 | 285 |
| A02344 | A09941 | 371 | A02344 | A11983 | 235 |
| A02344 | A12722 | 174 | A02344 | A14163 | 356 |
| A02344 | A14635 | 283 | A02344 | A14636 | 187 |
| A02344 | A14637 | 205 | A02344 | A14639 | 333 |
| A02344 | A14643 | 473 | A02344 | A14785 | 358 |
| A02345 | A02371 | 472 | A02345 | A02376 | 475 |
| A02345 | A02377 | 171 | A02345 | A02488 | 151 |
| A02345 | A02491 | 485 | A02345 | A02492 | 229 |
| A02345 | A02550 | 276 | A02345 | A02559 | 322 |
| A02345 | A02571 | 466 | A02345 | A02628 | 317 |
| A02345 | A02630 | 196 | A02345 | A02680 | 297 |
| A02345 | A02689 | 229 | A02345 | A02697 | 196 |
| A02345 | A02698 | 433 | A02345 | A02706 | 491 |
| A02345 | A02709 | 77  | A02345 | A02739 | 465 |
| A02345 | A02746 | 358 | A02345 | A02749 | 324 |
| A02345 | A02753 | 291 | A02345 | A02768 | 180 |
| A02345 | A02770 | 256 | A02345 | A02783 | 154 |
| A02345 | A02799 | 252 | A02345 | A02818 | 207 |
| A02345 | A02833 | 313 | A02345 | A02856 | 260 |
| A02345 | A02874 | 249 | A02345 | A02875 | 195 |

|        |        |     |        |        |     |
|--------|--------|-----|--------|--------|-----|
| A02345 | A02877 | 156 | A02345 | A02888 | 191 |
| A02345 | A02899 | 334 | A02345 | A02904 | 230 |
| A02345 | A02956 | 326 | A02345 | A03113 | 217 |
| A02345 | A03243 | 491 | A02345 | A03256 | 490 |
| A02345 | A03260 | 207 | A02345 | A03297 | 313 |
| A02345 | A03415 | 463 | A02345 | A03420 | 188 |
| A02345 | A03502 | 270 | A02345 | A03708 | 196 |
| A02345 | A03904 | 200 | A02345 | A04020 | 196 |
| A02345 | A04069 | 297 | A02345 | A04088 | 353 |
| A02345 | A04122 | 232 | A02345 | A04127 | 252 |
| A02345 | A04264 | 219 | A02345 | A04267 | 263 |
| A02345 | A04283 | 266 | A02345 | A04314 | 205 |
| A02345 | A04327 | 152 | A02345 | A04334 | 277 |
| A02345 | A04446 | 193 | A02345 | A04526 | 303 |
| A02345 | A04649 | 260 | A02345 | A04653 | 350 |
| A02345 | A04795 | 382 | A02345 | A04818 | 193 |
| A02345 | A04861 | 470 | A02345 | A04902 | 279 |
| A02345 | A04941 | 412 | A02345 | A04942 | 236 |
| A02345 | A04965 | 240 | A02345 | A04971 | 223 |
| A02345 | A04991 | 195 | A02345 | A05033 | 350 |
| A02345 | A05055 | 283 | A02345 | A05260 | 154 |
| A02345 | A05305 | 408 | A02345 | A05322 | 227 |
| A02345 | A05504 | 310 | A02345 | A05517 | 223 |
| A02345 | A05693 | 240 | A02345 | A05719 | 260 |
| A02345 | A05868 | 210 | A02345 | A05884 | 350 |
| A02345 | A05920 | 303 | A02345 | A06004 | 216 |
| A02345 | A06863 | 361 | A02345 | A06971 | 428 |
| A02345 | A07135 | 205 | A02345 | A07163 | 198 |
| A02345 | A07324 | 170 | A02345 | A07748 | 163 |
| A02345 | A07878 | 157 | A02345 | A08681 | 185 |
| A02345 | A08692 | 195 | A02345 | A08768 | 228 |
| A02345 | A09104 | 236 | A02345 | A09211 | 208 |
| A02345 | A09431 | 273 | A02345 | A09500 | 401 |
| A02345 | A09888 | 276 | A02345 | A09988 | 278 |
| A02345 | A10192 | 350 | A02345 | A10215 | 276 |
| A02345 | A10289 | 440 | A02345 | A10330 | 350 |
| A02345 | A10557 | 337 | A02345 | A10813 | 195 |
| A02345 | A10866 | 256 | A02345 | A11206 | 243 |
| A02345 | A12362 | 369 | A02345 | A12413 | 350 |
| A02345 | A13363 | 151 | A02345 | A13973 | 303 |
| A02345 | A14198 | 63  | A02345 | A14368 | 210 |
| A02345 | A14375 | 268 | A02345 | A14390 | 232 |
| A02345 | A14403 | 473 | A02345 | A14404 | 218 |
| A02345 | A14416 | 251 | A02345 | A14462 | 272 |
| A02345 | A14524 | 184 | A02345 | A15459 | 195 |
| A02346 | A02416 | 245 | A02346 | A02698 | 174 |

|        |        |     |        |        |     |
|--------|--------|-----|--------|--------|-----|
| A02346 | A02714 | 333 | A02346 | A02807 | 388 |
| A02346 | A03199 | 204 | A02346 | A03314 | 301 |
| A02346 | A07140 | 307 | A02346 | A07145 | 307 |
| A02346 | A07894 | 356 | A02346 | A08574 | 395 |
| A02347 | A02490 | 294 | A02347 | A02491 | 326 |
| A02347 | A02668 | 201 | A02347 | A02695 | 130 |
| A02347 | A02729 | 490 | A02347 | A02756 | 347 |
| A02347 | A02783 | 463 | A02347 | A02785 | 180 |
| A02347 | A02790 | 288 | A02347 | A02812 | 435 |
| A02347 | A02841 | 207 | A02347 | A02859 | 480 |
| A02347 | A02874 | 485 | A02347 | A02875 | 413 |
| A02347 | A02922 | 436 | A02347 | A02951 | 341 |
| A02347 | A03259 | 185 | A02347 | A03275 | 384 |
| A02347 | A03419 | 332 | A02347 | A04088 | 335 |
| A02347 | A04262 | 383 | A02347 | A04263 | 272 |
| A02347 | A04267 | 263 | A02347 | A04271 | 382 |
| A02347 | A04520 | 198 | A02347 | A04607 | 218 |
| A02347 | A05113 | 393 | A02347 | A05309 | 162 |
| A02347 | A05349 | 407 | A02347 | A06415 | 171 |
| A02347 | A07164 | 243 | A02347 | A07200 | 152 |
| A02347 | A09864 | 351 | A02347 | A15578 | 154 |
| A02347 | A16059 | 419 | A02348 | A05066 | 432 |
| A02349 | A02495 | 326 | A02349 | A02611 | 235 |
| A02349 | A02754 | 235 | A02349 | A02788 | 159 |
| A02349 | A02817 | 262 | A02349 | A02837 | 420 |
| A02349 | A02842 | 201 | A02349 | A02929 | 255 |
| A02349 | A02958 | 327 | A02349 | A02990 | 319 |
| A02349 | A03102 | 306 | A02349 | A03204 | 283 |
| A02349 | A03287 | 299 | A02349 | A03420 | 171 |
| A02349 | A03520 | 152 | A02349 | A03664 | 286 |
| A02349 | A03976 | 201 | A02349 | A04128 | 361 |
| A02349 | A04142 | 351 | A02349 | A04745 | 363 |
| A02349 | A05039 | 369 | A02349 | A05116 | 408 |
| A02349 | A05344 | 333 | A02349 | A07935 | 249 |
| A02349 | A09175 | 395 | A02349 | A11911 | 177 |
| A02349 | A12787 | 314 | A02349 | A14494 | 330 |
| A02350 | A02372 | 121 | A02350 | A02425 | 369 |
| A02350 | A02587 | 191 | A02350 | A02630 | 124 |
| A02350 | A02637 | 79  | A02350 | A02751 | 469 |
| A02350 | A02752 | 63  | A02350 | A02754 | 279 |
| A02350 | A02837 | 462 | A02350 | A02861 | 154 |
| A02350 | A02864 | 491 | A02350 | A02901 | 174 |
| A02350 | A02936 | 152 | A02350 | A03049 | 174 |
| A02350 | A03164 | 160 | A02350 | A03259 | 98  |
| A02350 | A03271 | 63  | A02350 | A03595 | 210 |
| A02350 | A03609 | 63  | A02350 | A03740 | 204 |



|        |        |     |        |        |     |
|--------|--------|-----|--------|--------|-----|
| A02350 | A03782 | 332 | A02350 | A03803 | 430 |
| A02350 | A03809 | 491 | A02350 | A04046 | 210 |
| A02350 | A04088 | 151 | A02350 | A04446 | 419 |
| A02350 | A04741 | 358 | A02350 | A04908 | 299 |
| A02350 | A05038 | 337 | A02350 | A05076 | 191 |
| A02350 | A05078 | 199 | A02350 | A05094 | 218 |
| A02350 | A05220 | 167 | A02350 | A05283 | 219 |
| A02350 | A05501 | 335 | A02350 | A05889 | 454 |
| A02350 | A05984 | 267 | A02350 | A06414 | 152 |
| A02350 | A06564 | 174 | A02350 | A06897 | 452 |
| A02350 | A06919 | 232 | A02350 | A06973 | 432 |
| A02350 | A07047 | 467 | A02350 | A07742 | 432 |
| A02350 | A08131 | 428 | A02350 | A08357 | 152 |
| A02350 | A08359 | 474 | A02350 | A08408 | 456 |
| A02350 | A08457 | 204 | A02350 | A08841 | 438 |
| A02350 | A08983 | 246 | A02350 | A09254 | 340 |
| A02350 | A09546 | 177 | A02350 | A09792 | 226 |
| A02350 | A09834 | 162 | A02350 | A10367 | 358 |
| A02350 | A10381 | 226 | A02350 | A11210 | 313 |
| A02350 | A11263 | 188 | A02350 | A11372 | 488 |
| A02350 | A11857 | 283 | A02350 | A12068 | 226 |
| A02350 | A12952 | 446 | A02350 | A13710 | 255 |
| A02350 | A13989 | 218 | A02350 | A14176 | 294 |
| A02350 | A14216 | 348 | A02350 | A15096 | 165 |
| A02350 | A15274 | 290 | A02350 | A15383 | 165 |
| A02350 | A15394 | 185 | A02350 | A15640 | 256 |
| A02350 | A15806 | 165 | A02350 | A16289 | 297 |
| A02350 | A16537 | 294 | A02350 | A16686 | 460 |
| A02350 | A16985 | 246 | A02351 | A02535 | 223 |
| A02351 | A02552 | 314 | A02351 | A02640 | 369 |
| A02351 | A02696 | 201 | A02351 | A02705 | 221 |
| A02351 | A02754 | 489 | A02351 | A02837 | 293 |
| A02351 | A02869 | 414 | A02351 | A02906 | 314 |
| A02351 | A03783 | 313 | A02351 | A04117 | 160 |
| A02351 | A04133 | 296 | A02351 | A04444 | 490 |
| A02351 | A04578 | 333 | A02351 | A04681 | 196 |
| A02351 | A04868 | 374 | A02351 | A04907 | 480 |
| A02351 | A05114 | 272 | A02351 | A05618 | 390 |
| A02351 | A06325 | 380 | A02351 | A06581 | 165 |
| A02351 | A06615 | 152 | A02351 | A06868 | 260 |
| A02351 | A07153 | 163 | A02351 | A07165 | 322 |
| A02351 | A07187 | 258 | A02351 | A10358 | 262 |
| A02351 | A11450 | 340 | A02351 | A14637 | 171 |
| A02351 | A14642 | 171 | A02351 | A14683 | 247 |
| A02352 | A02434 | 268 | A02352 | A02501 | 208 |
| A02352 | A02644 | 357 | A02352 | A02659 | 251 |

|        |        |     |        |        |     |
|--------|--------|-----|--------|--------|-----|
| A02352 | A02668 | 246 | A02352 | A02771 | 177 |
| A02352 | A02836 | 491 | A02352 | A03102 | 269 |
| A02352 | A03165 | 279 | A02352 | A03315 | 268 |
| A02352 | A03408 | 328 | A02352 | A03515 | 236 |
| A02352 | A03710 | 177 | A02352 | A03747 | 319 |
| A02352 | A03966 | 406 | A02352 | A04048 | 208 |
| A02352 | A04089 | 407 | A02352 | A04192 | 339 |
| A02352 | A04260 | 172 | A02352 | A04445 | 272 |
| A02352 | A04547 | 290 | A02352 | A04736 | 326 |
| A02352 | A05078 | 408 | A02352 | A05173 | 364 |
| A02352 | A05350 | 339 | A02352 | A05995 | 258 |
| A02352 | A06095 | 294 | A02352 | A08131 | 199 |
| A02352 | A08725 | 364 | A02352 | A09242 | 171 |
| A02352 | A09254 | 238 | A02352 | A09840 | 321 |
| A02352 | A09882 | 167 | A02352 | A10051 | 272 |
| A02352 | A10156 | 205 | A02352 | A10589 | 357 |
| A02352 | A13181 | 187 | A02352 | A14132 | 269 |
| A02353 | A02357 | 263 | A02353 | A02608 | 152 |
| A02353 | A02636 | 277 | A02353 | A02695 | 302 |
| A02353 | A02708 | 201 | A02353 | A02718 | 738 |
| A02353 | A02878 | 179 | A02353 | A03453 | 491 |
| A02353 | A03477 | 791 | A02353 | A03516 | 324 |
| A02353 | A03543 | 333 | A02353 | A03560 | 290 |
| A02353 | A03586 | 260 | A02353 | A03666 | 461 |
| A02353 | A03740 | 324 | A02353 | A03832 | 489 |
| A02353 | A03841 | 226 | A02353 | A03863 | 477 |
| A02353 | A03983 | 207 | A02353 | A04309 | 291 |
| A02353 | A04519 | 288 | A02353 | A04707 | 263 |
| A02353 | A04712 | 286 | A02353 | A04783 | 490 |
| A02353 | A04852 | 398 | A02353 | A04937 | 152 |
| A02353 | A05020 | 786 | A02353 | A05086 | 324 |
| A02353 | A05216 | 469 | A02353 | A05240 | 291 |
| A02353 | A05302 | 160 | A02353 | A05436 | 409 |
| A02353 | A06334 | 356 | A02353 | A06358 | 260 |
| A02353 | A06359 | 789 | A02353 | A06466 | 411 |
| A02353 | A06597 | 256 | A02353 | A06606 | 183 |
| A02353 | A06634 | 391 | A02353 | A06717 | 416 |
| A02353 | A07080 | 165 | A02353 | A07102 | 324 |
| A02353 | A07187 | 324 | A02353 | A07190 | 191 |
| A02353 | A07288 | 187 | A02353 | A07311 | 328 |
| A02353 | A07746 | 491 | A02353 | A08371 | 207 |
| A02353 | A08748 | 439 | A02353 | A08817 | 491 |
| A02353 | A08978 | 312 | A02353 | A09243 | 458 |
| A02353 | A09587 | 479 | A02353 | A10047 | 283 |
| A02353 | A10122 | 393 | A02353 | A10506 | 417 |
| A02353 | A10614 | 274 | A02353 | A10738 | 283 |

|        |        |     |        |        |     |
|--------|--------|-----|--------|--------|-----|
| A02353 | A11261 | 228 | A02353 | A11374 | 324 |
| A02353 | A11538 | 283 | A02353 | A11683 | 254 |
| A02353 | A11694 | 324 | A02353 | A12334 | 283 |
| A02353 | A12400 | 393 | A02353 | A13189 | 486 |
| A02353 | A13196 | 393 | A02353 | A13330 | 491 |
| A02353 | A13340 | 417 | A02353 | A13346 | 226 |
| A02353 | A13416 | 475 | A02353 | A13426 | 491 |
| A02353 | A13509 | 283 | A02353 | A13609 | 229 |
| A02353 | A14073 | 324 | A02353 | A14196 | 263 |
| A02353 | A14469 | 183 | A02353 | A14642 | 324 |
| A02353 | A15840 | 353 | A02353 | A15843 | 324 |
| A02353 | A15905 | 247 | A02353 | A16325 | 404 |
| A02353 | A16328 | 302 | A02354 | A07127 | 390 |
| A02354 | A13589 | 316 | A02355 | A02356 | 338 |
| A02355 | A02415 | 278 | A02355 | A02535 | 152 |
| A02355 | A02904 | 238 | A02355 | A02918 | 254 |
| A02355 | A02926 | 379 | A02355 | A02984 | 236 |
| A02355 | A03076 | 221 | A02355 | A03862 | 340 |
| A02355 | A06965 | 177 | A02355 | A09526 | 213 |
| A02355 | A15498 | 200 | A02356 | A02405 | 273 |
| A02356 | A02620 | 353 | A02356 | A02697 | 267 |
| A02356 | A02869 | 255 | A02356 | A02951 | 201 |
| A02356 | A03034 | 254 | A02356 | A03056 | 174 |
| A02356 | A03103 | 405 | A02356 | A03275 | 156 |
| A02356 | A03545 | 202 | A02356 | A03610 | 299 |
| A02356 | A04051 | 157 | A02356 | A04608 | 241 |
| A02356 | A04770 | 302 | A02356 | A04780 | 429 |
| A02356 | A04865 | 312 | A02356 | A04949 | 157 |
| A02356 | A05349 | 191 | A02356 | A05506 | 428 |
| A02356 | A05573 | 436 | A02356 | A05653 | 356 |
| A02356 | A06248 | 405 | A02356 | A06499 | 358 |
| A02356 | A07031 | 255 | A02356 | A07209 | 232 |
| A02356 | A07210 | 450 | A02356 | A08827 | 324 |
| A02356 | A09434 | 269 | A02356 | A09559 | 441 |
| A02356 | A10638 | 429 | A02356 | A10936 | 417 |
| A02356 | A10975 | 417 | A02356 | A12373 | 157 |
| A02356 | A13252 | 417 | A02356 | A13667 | 299 |
| A02356 | A13872 | 294 | A02356 | A14392 | 227 |
| A02356 | A15308 | 218 | A02356 | A15346 | 187 |
| A02357 | A02564 | 311 | A02357 | A02737 | 323 |
| A02357 | A02788 | 306 | A02357 | A07746 | 306 |
| A02357 | A09434 | 361 | A02357 | A15394 | 361 |
| A02358 | A03126 | 260 | A02358 | A03163 | 380 |
| A02358 | A03175 | 306 | A02358 | A03495 | 235 |
| A02358 | A11157 | 240 | A02359 | A02446 | 427 |
| A02359 | A02785 | 281 | A02359 | A03127 | 398 |

|        |        |     |        |        |     |
|--------|--------|-----|--------|--------|-----|
| A02359 | A05356 | 179 | A02360 | A02416 | 193 |
| A02360 | A02428 | 341 | A02360 | A02432 | 274 |
| A02360 | A02436 | 168 | A02360 | A02470 | 456 |
| A02360 | A02632 | 344 | A02360 | A02672 | 235 |
| A02360 | A03056 | 180 | A02360 | A03076 | 218 |
| A02360 | A03077 | 269 | A02360 | A03123 | 374 |
| A02360 | A03178 | 255 | A02360 | A03186 | 399 |
| A02360 | A04092 | 296 | A02360 | A04460 | 363 |
| A02360 | A05247 | 318 | A02360 | A05381 | 394 |
| A02360 | A05398 | 317 | A02360 | A06006 | 408 |
| A02360 | A06323 | 419 | A02360 | A07019 | 307 |
| A02360 | A07145 | 263 | A02360 | A07165 | 278 |
| A02360 | A07559 | 293 | A02360 | A08910 | 167 |
| A02360 | A09149 | 274 | A02360 | A09364 | 479 |
| A02360 | A10153 | 400 | A02360 | A10525 | 268 |
| A02361 | A02390 | 353 | A02361 | A02423 | 172 |
| A02361 | A02435 | 190 | A02361 | A02586 | 321 |
| A02361 | A02797 | 156 | A02361 | A03082 | 212 |
| A02361 | A03213 | 176 | A02361 | A03261 | 191 |
| A02361 | A03498 | 218 | A02361 | A03591 | 429 |
| A02361 | A03599 | 294 | A02361 | A03654 | 157 |
| A02361 | A03681 | 162 | A02361 | A03725 | 188 |
| A02361 | A03739 | 235 | A02361 | A04080 | 187 |
| A02361 | A04334 | 279 | A02361 | A04379 | 236 |
| A02361 | A05032 | 291 | A02361 | A05158 | 190 |
| A02361 | A05212 | 182 | A02361 | A06513 | 371 |
| A02361 | A07399 | 273 | A02361 | A07506 | 191 |
| A02361 | A08878 | 252 | A02361 | A09470 | 174 |
| A02361 | A10161 | 337 | A02361 | A10376 | 409 |
| A02361 | A11379 | 187 | A02361 | A11995 | 299 |
| A02361 | A13397 | 183 | A02361 | A14655 | 196 |
| A02362 | A03841 | 279 | A02362 | A08643 | 279 |
| A02362 | A14527 | 210 | A02362 | A16281 | 154 |
| A02363 | A02593 | 413 | A02363 | A03095 | 151 |
| A02363 | A03423 | 249 | A02363 | A04995 | 321 |
| A02363 | A05007 | 291 | A02363 | A05337 | 328 |
| A02363 | A05516 | 455 | A02363 | A05772 | 368 |
| A02363 | A05783 | 396 | A02363 | A06252 | 475 |
| A02363 | A06632 | 382 | A02363 | A06668 | 375 |
| A02363 | A06756 | 407 | A02363 | A07080 | 400 |
| A02363 | A07088 | 293 | A02363 | A07109 | 279 |
| A02363 | A07122 | 463 | A02363 | A07267 | 317 |
| A02363 | A07800 | 156 | A02363 | A09924 | 455 |
| A02363 | A10635 | 293 | A02363 | A16033 | 338 |
| A02364 | A02635 | 307 | A02364 | A02727 | 249 |
| A02364 | A03044 | 266 | A02364 | A03218 | 238 |

|        |        |     |        |        |     |
|--------|--------|-----|--------|--------|-----|
| A02364 | A03880 | 515 | A02364 | A03962 | 385 |
| A02364 | A04668 | 428 | A02364 | A05155 | 443 |
| A02364 | A05210 | 259 | A02364 | A05234 | 515 |
| A02364 | A05401 | 173 | A02364 | A05435 | 355 |
| A02364 | A05473 | 208 | A02364 | A05678 | 226 |
| A02364 | A05845 | 259 | A02364 | A06137 | 232 |
| A02364 | A06337 | 232 | A02364 | A07020 | 332 |
| A02364 | A07654 | 249 | A02364 | A07809 | 332 |
| A02364 | A08739 | 251 | A02364 | A09652 | 405 |
| A02364 | A10394 | 355 | A02364 | A11271 | 372 |
| A02364 | A11295 | 210 | A02364 | A12097 | 288 |
| A02364 | A13240 | 187 | A02364 | A13517 | 335 |
| A02364 | A14003 | 254 | A02364 | A14196 | 207 |
| A02364 | A14207 | 152 | A02364 | A14554 | 162 |
| A02364 | A15315 | 462 | A02364 | A15322 | 358 |
| A02364 | A15345 | 404 | A02364 | A15347 | 567 |
| A02364 | A15384 | 515 | A02364 | A15560 | 185 |
| A02364 | A15617 | 452 | A02364 | A15795 | 174 |
| A02364 | A17207 | 338 | A02365 | A03728 | 228 |
| A02365 | A06101 | 360 | A02365 | A07200 | 208 |
| A02365 | A09683 | 389 | A02366 | A03167 | 303 |
| A02366 | A03168 | 352 | A02366 | A04211 | 324 |
| A02366 | A06236 | 430 | A02366 | A06633 | 372 |
| A02366 | A06970 | 270 | A02366 | A08309 | 258 |
| A02366 | A12824 | 188 | A02366 | A16027 | 316 |
| A02366 | A16028 | 379 | A02367 | A02459 | 400 |
| A02367 | A02460 | 363 | A02367 | A03788 | 358 |
| A02367 | A05679 | 372 | A02368 | A02758 | 347 |
| A02368 | A02811 | 348 | A02368 | A03076 | 263 |
| A02368 | A03186 | 235 | A02368 | A04955 | 407 |
| A02368 | A06307 | 396 | A02368 | A08194 | 314 |
| A02368 | A08836 | 290 | A02368 | A09091 | 416 |
| A02368 | A09526 | 257 | A02368 | A16636 | 177 |
| A02369 | A02803 | 213 | A02369 | A03019 | 484 |
| A02369 | A03228 | 318 | A02369 | A03271 | 202 |
| A02369 | A03817 | 156 | A02369 | A06224 | 391 |
| A02369 | A08596 | 337 | A02369 | A09201 | 317 |
| A02369 | A12009 | 428 | A02369 | A14198 | 283 |
| A02370 | A02416 | 195 | A02370 | A02578 | 460 |
| A02370 | A02630 | 452 | A02370 | A02637 | 489 |
| A02370 | A02639 | 172 | A02370 | A02645 | 395 |
| A02370 | A02654 | 266 | A02370 | A02657 | 369 |
| A02370 | A02659 | 479 | A02370 | A02681 | 351 |
| A02370 | A02751 | 318 | A02370 | A02769 | 488 |
| A02370 | A02812 | 182 | A02370 | A02843 | 357 |
| A02370 | A02931 | 230 | A02370 | A02935 | 319 |

|        |        |     |        |        |     |
|--------|--------|-----|--------|--------|-----|
| A02370 | A02945 | 262 | A02370 | A03019 | 110 |
| A02370 | A03049 | 269 | A02370 | A03157 | 185 |
| A02370 | A03224 | 296 | A02370 | A03259 | 185 |
| A02370 | A03271 | 173 | A02370 | A03817 | 469 |
| A02370 | A04089 | 358 | A02370 | A04110 | 305 |
| A02370 | A04248 | 443 | A02370 | A04426 | 419 |
| A02370 | A04450 | 367 | A02370 | A04536 | 414 |
| A02370 | A04755 | 353 | A02370 | A04756 | 319 |
| A02370 | A05127 | 218 | A02370 | A05329 | 361 |
| A02370 | A05944 | 461 | A02370 | A05985 | 243 |
| A02370 | A06054 | 467 | A02370 | A06055 | 293 |
| A02370 | A06095 | 351 | A02370 | A06344 | 341 |
| A02370 | A06404 | 352 | A02370 | A06414 | 335 |
| A02370 | A06618 | 408 | A02370 | A06737 | 408 |
| A02370 | A07134 | 401 | A02370 | A07135 | 151 |
| A02370 | A07143 | 283 | A02370 | A07148 | 339 |
| A02370 | A07152 | 235 | A02370 | A07157 | 344 |
| A02370 | A07161 | 475 | A02370 | A07166 | 458 |
| A02370 | A07173 | 254 | A02370 | A07372 | 363 |
| A02370 | A08714 | 296 | A02370 | A10710 | 204 |
| A02370 | A14146 | 321 | A02370 | A14190 | 168 |
| A02370 | A14374 | 340 | A02370 | A14376 | 340 |
| A02370 | A14442 | 452 | A02370 | A15394 | 276 |
| A02370 | A15395 | 256 | A02370 | A15955 | 419 |
| A02371 | A02375 | 399 | A02371 | A02376 | 490 |
| A02371 | A02377 | 450 | A02371 | A02466 | 355 |
| A02371 | A02491 | 182 | A02371 | A02506 | 174 |
| A02371 | A02635 | 96  | A02371 | A02695 | 373 |
| A02371 | A02739 | 218 | A02371 | A02745 | 179 |
| A02371 | A02746 | 263 | A02371 | A02798 | 356 |
| A02371 | A02799 | 441 | A02371 | A02802 | 232 |
| A02371 | A02846 | 174 | A02371 | A02899 | 235 |
| A02371 | A02961 | 273 | A02371 | A02968 | 190 |
| A02371 | A03045 | 273 | A02371 | A03068 | 154 |
| A02371 | A03113 | 249 | A02371 | A03181 | 177 |
| A02371 | A03243 | 468 | A02371 | A03256 | 434 |
| A02371 | A03259 | 63  | A02371 | A03265 | 301 |
| A02371 | A03275 | 177 | A02371 | A03278 | 367 |
| A02371 | A03744 | 168 | A02371 | A03861 | 179 |
| A02371 | A04213 | 279 | A02371 | A04264 | 252 |
| A02371 | A04327 | 187 | A02371 | A04653 | 368 |
| A02371 | A04861 | 165 | A02371 | A04902 | 489 |
| A02371 | A05416 | 436 | A02371 | A05506 | 279 |
| A02371 | A05568 | 358 | A02371 | A05691 | 235 |
| A02371 | A05693 | 490 | A02371 | A05832 | 488 |
| A02371 | A05949 | 420 | A02371 | A06863 | 305 |

|        |        |     |        |        |     |
|--------|--------|-----|--------|--------|-----|
| A02371 | A06971 | 277 | A02371 | A08698 | 174 |
| A02371 | A08827 | 252 | A02371 | A10115 | 368 |
| A02371 | A10213 | 277 | A02371 | A10330 | 368 |
| A02371 | A10638 | 283 | A02371 | A13090 | 409 |
| A02371 | A13858 | 301 | A02371 | A13973 | 328 |
| A02371 | A14403 | 297 | A02372 | A02380 | 454 |
| A02372 | A02513 | 449 | A02372 | A02578 | 310 |
| A02372 | A02630 | 277 | A02372 | A02636 | 367 |
| A02372 | A02637 | 227 | A02372 | A02639 | 252 |
| A02372 | A02654 | 223 | A02372 | A02659 | 393 |
| A02372 | A02745 | 229 | A02372 | A02751 | 281 |
| A02372 | A02802 | 391 | A02372 | A02851 | 310 |
| A02372 | A02896 | 157 | A02372 | A02929 | 428 |
| A02372 | A02969 | 271 | A02372 | A03206 | 360 |
| A02372 | A03259 | 435 | A02372 | A03263 | 224 |
| A02372 | A03280 | 279 | A02372 | A03999 | 391 |
| A02372 | A04010 | 156 | A02372 | A04059 | 313 |
| A02372 | A04060 | 318 | A02372 | A04088 | 301 |
| A02372 | A04138 | 297 | A02372 | A04451 | 467 |
| A02372 | A04546 | 338 | A02372 | A04687 | 185 |
| A02372 | A04800 | 329 | A02372 | A04908 | 458 |
| A02372 | A04938 | 308 | A02372 | A05475 | 391 |
| A02372 | A05985 | 199 | A02372 | A06339 | 446 |
| A02372 | A06465 | 382 | A02372 | A06961 | 369 |
| A02372 | A07135 | 227 | A02372 | A07148 | 468 |
| A02372 | A07150 | 382 | A02372 | A07157 | 301 |
| A02372 | A07161 | 372 | A02372 | A07166 | 344 |
| A02372 | A08627 | 154 | A02372 | A10905 | 316 |
| A02372 | A11908 | 338 | A02372 | A14071 | 174 |
| A02372 | A15487 | 174 | A02373 | A02537 | 341 |
| A02373 | A03098 | 330 | A02373 | A03304 | 286 |
| A02373 | A03611 | 272 | A02373 | A04072 | 240 |
| A02373 | A13589 | 229 | A02373 | A14540 | 185 |
| A02374 | A14482 | 296 | A02375 | A02376 | 439 |
| A02375 | A02377 | 221 | A02375 | A02506 | 291 |
| A02375 | A02798 | 255 | A02375 | A02968 | 303 |
| A02375 | A03019 | 262 | A02375 | A03112 | 173 |
| A02375 | A03265 | 378 | A02375 | A03278 | 343 |
| A02375 | A04902 | 171 | A02375 | A05693 | 360 |
| A02375 | A05949 | 334 | A02375 | A10270 | 454 |
| A02376 | A02377 | 491 | A02376 | A02459 | 191 |
| A02376 | A02466 | 339 | A02376 | A02491 | 401 |
| A02376 | A02635 | 82  | A02376 | A02636 | 173 |
| A02376 | A02637 | 156 | A02376 | A02689 | 457 |
| A02376 | A02712 | 190 | A02376 | A02735 | 193 |
| A02376 | A02798 | 235 | A02376 | A02799 | 266 |

|        |        |     |        |        |     |
|--------|--------|-----|--------|--------|-----|
| A02376 | A02842 | 246 | A02376 | A02846 | 154 |
| A02376 | A02864 | 488 | A02376 | A02954 | 294 |
| A02376 | A02968 | 170 | A02376 | A03019 | 236 |
| A02376 | A03068 | 262 | A02376 | A03243 | 463 |
| A02376 | A03256 | 474 | A02376 | A03265 | 475 |
| A02376 | A03278 | 467 | A02376 | A03373 | 156 |
| A02376 | A03708 | 210 | A02376 | A04213 | 260 |
| A02376 | A04248 | 174 | A02376 | A04721 | 294 |
| A02376 | A04902 | 488 | A02376 | A04942 | 249 |
| A02376 | A05014 | 240 | A02376 | A05114 | 208 |
| A02376 | A05472 | 165 | A02376 | A05507 | 294 |
| A02376 | A05568 | 488 | A02376 | A05630 | 276 |
| A02376 | A05693 | 430 | A02376 | A05791 | 314 |
| A02376 | A05832 | 477 | A02376 | A05848 | 313 |
| A02376 | A05871 | 235 | A02376 | A05949 | 210 |
| A02376 | A05962 | 291 | A02376 | A05966 | 170 |
| A02376 | A06221 | 377 | A02376 | A06697 | 285 |
| A02376 | A06971 | 259 | A02376 | A07483 | 255 |
| A02376 | A08879 | 480 | A02376 | A09988 | 160 |
| A02376 | A10270 | 327 | A02376 | A10625 | 486 |
| A02376 | A11086 | 276 | A02377 | A02491 | 416 |
| A02377 | A02492 | 491 | A02377 | A02493 | 196 |
| A02377 | A02506 | 480 | A02377 | A02521 | 235 |
| A02377 | A02605 | 152 | A02377 | A02689 | 491 |
| A02377 | A02690 | 177 | A02377 | A02697 | 277 |
| A02377 | A02777 | 179 | A02377 | A02778 | 355 |
| A02377 | A02781 | 218 | A02377 | A02787 | 489 |
| A02377 | A02798 | 491 | A02377 | A02799 | 340 |
| A02377 | A02830 | 290 | A02377 | A02837 | 391 |
| A02377 | A02842 | 171 | A02377 | A02846 | 216 |
| A02377 | A02864 | 491 | A02377 | A02908 | 243 |
| A02377 | A02911 | 240 | A02377 | A02944 | 173 |
| A02377 | A02961 | 490 | A02377 | A03003 | 251 |
| A02377 | A03019 | 361 | A02377 | A03144 | 196 |
| A02377 | A03243 | 205 | A02377 | A03256 | 216 |
| A02377 | A03265 | 452 | A02377 | A03278 | 486 |
| A02377 | A03391 | 154 | A02377 | A03438 | 162 |
| A02377 | A03502 | 356 | A02377 | A03893 | 208 |
| A02377 | A04010 | 216 | A02377 | A04213 | 205 |
| A02377 | A04327 | 332 | A02377 | A04477 | 224 |
| A02377 | A04487 | 279 | A02377 | A04553 | 414 |
| A02377 | A04612 | 172 | A02377 | A04883 | 330 |
| A02377 | A04888 | 308 | A02377 | A04902 | 491 |
| A02377 | A04904 | 245 | A02377 | A04927 | 232 |
| A02377 | A04938 | 324 | A02377 | A04942 | 326 |
| A02377 | A04952 | 293 | A02377 | A04990 | 240 |



|        |        |     |        |        |     |
|--------|--------|-----|--------|--------|-----|
| A02377 | A05038 | 235 | A02377 | A05051 | 177 |
| A02377 | A05138 | 168 | A02377 | A05278 | 485 |
| A02377 | A05322 | 183 | A02377 | A05507 | 456 |
| A02377 | A05543 | 406 | A02377 | A05568 | 238 |
| A02377 | A05569 | 216 | A02377 | A05589 | 363 |
| A02377 | A05630 | 480 | A02377 | A05685 | 210 |
| A02377 | A05693 | 329 | A02377 | A05751 | 151 |
| A02377 | A05790 | 405 | A02377 | A05791 | 406 |
| A02377 | A05832 | 489 | A02377 | A05906 | 346 |
| A02377 | A05949 | 488 | A02377 | A06004 | 388 |
| A02377 | A06094 | 293 | A02377 | A06122 | 151 |
| A02377 | A06149 | 159 | A02377 | A06217 | 232 |
| A02377 | A06221 | 346 | A02377 | A06377 | 305 |
| A02377 | A06385 | 208 | A02377 | A06697 | 232 |
| A02377 | A06736 | 293 | A02377 | A06863 | 212 |
| A02377 | A06924 | 162 | A02377 | A06971 | 443 |
| A02377 | A07088 | 228 | A02377 | A07157 | 235 |
| A02377 | A07312 | 218 | A02377 | A07347 | 288 |
| A02377 | A07926 | 283 | A02377 | A08238 | 193 |
| A02377 | A08250 | 213 | A02377 | A08280 | 168 |
| A02377 | A08583 | 401 | A02377 | A08598 | 245 |
| A02377 | A08655 | 185 | A02377 | A08709 | 379 |
| A02377 | A08879 | 486 | A02377 | A09145 | 162 |
| A02377 | A09535 | 356 | A02377 | A09598 | 322 |
| A02377 | A09741 | 240 | A02377 | A09851 | 165 |
| A02377 | A09988 | 477 | A02377 | A10091 | 199 |
| A02377 | A10418 | 162 | A02377 | A10437 | 232 |
| A02377 | A10444 | 152 | A02377 | A10552 | 249 |
| A02377 | A10557 | 162 | A02377 | A10565 | 346 |
| A02377 | A10625 | 491 | A02377 | A10672 | 208 |
| A02377 | A11086 | 221 | A02377 | A11748 | 255 |
| A02377 | A13858 | 232 | A02377 | A14579 | 324 |
| A02377 | A14643 | 152 | A02378 | A02611 | 347 |
| A02378 | A02742 | 390 | A02378 | A02896 | 299 |
| A02378 | A13734 | 235 | A02378 | A14440 | 334 |
| A02380 | A02513 | 475 | A02380 | A02837 | 141 |
| A02380 | A02847 | 185 | A02380 | A02869 | 277 |
| A02380 | A02897 | 423 | A02380 | A02908 | 234 |
| A02380 | A02920 | 355 | A02380 | A02929 | 446 |
| A02380 | A03609 | 247 | A02380 | A04908 | 456 |
| A02380 | A05285 | 369 | A02380 | A06339 | 474 |
| A02380 | A07799 | 366 | A02380 | A07961 | 269 |
| A02380 | A10905 | 486 | A02380 | A14197 | 215 |
| A02380 | A15638 | 251 | A02380 | A15639 | 286 |
| A02381 | A02382 | 491 | A02381 | A02617 | 327 |
| A02381 | A02657 | 212 | A02381 | A02659 | 258 |

|        |        |     |        |        |     |
|--------|--------|-----|--------|--------|-----|
| A02381 | A02764 | 398 | A02381 | A02795 | 420 |
| A02381 | A02838 | 191 | A02381 | A02851 | 163 |
| A02381 | A02865 | 187 | A02381 | A02917 | 193 |
| A02381 | A02942 | 460 | A02381 | A03010 | 293 |
| A02381 | A03012 | 274 | A02381 | A03049 | 435 |
| A02381 | A03152 | 177 | A02381 | A03183 | 296 |
| A02381 | A03523 | 455 | A02381 | A03524 | 411 |
| A02381 | A03554 | 374 | A02381 | A03641 | 257 |
| A02381 | A03645 | 234 | A02381 | A03782 | 151 |
| A02381 | A03919 | 286 | A02381 | A03966 | 191 |
| A02381 | A03994 | 227 | A02381 | A04221 | 221 |
| A02381 | A04244 | 151 | A02381 | A04248 | 202 |
| A02381 | A04308 | 306 | A02381 | A04478 | 446 |
| A02381 | A04514 | 257 | A02381 | A04548 | 330 |
| A02381 | A04854 | 268 | A02381 | A04907 | 190 |
| A02381 | A05078 | 406 | A02381 | A05174 | 451 |
| A02381 | A05284 | 316 | A02381 | A05331 | 218 |
| A02381 | A05498 | 327 | A02381 | A05815 | 217 |
| A02381 | A05944 | 277 | A02381 | A06054 | 221 |
| A02381 | A06055 | 215 | A02381 | A06095 | 179 |
| A02381 | A06348 | 475 | A02381 | A06372 | 268 |
| A02381 | A06404 | 314 | A02381 | A06572 | 228 |
| A02381 | A06615 | 162 | A02381 | A06649 | 174 |
| A02381 | A06780 | 208 | A02381 | A06818 | 296 |
| A02381 | A06819 | 152 | A02381 | A07143 | 199 |
| A02381 | A07151 | 210 | A02381 | A07199 | 310 |
| A02381 | A07339 | 246 | A02381 | A07433 | 469 |
| A02381 | A07593 | 160 | A02381 | A07887 | 241 |
| A02381 | A08248 | 286 | A02381 | A08503 | 396 |
| A02381 | A08524 | 489 | A02381 | A08525 | 488 |
| A02381 | A09018 | 414 | A02381 | A09152 | 157 |
| A02381 | A09174 | 277 | A02381 | A09932 | 486 |
| A02381 | A10905 | 172 | A02381 | A11656 | 184 |
| A02381 | A11668 | 159 | A02381 | A11884 | 373 |
| A02381 | A12897 | 477 | A02381 | A13860 | 474 |
| A02381 | A14196 | 484 | A02381 | A14218 | 379 |
| A02381 | A14226 | 193 | A02381 | A14227 | 462 |
| A02381 | A14309 | 398 | A02381 | A14373 | 187 |
| A02381 | A14429 | 257 | A02381 | A14645 | 299 |
| A02381 | A14657 | 179 | A02381 | A15533 | 422 |
| A02381 | A15775 | 200 | A02381 | A15832 | 247 |
| A02381 | A16602 | 281 | A02382 | A02383 | 424 |
| A02382 | A02384 | 462 | A02382 | A02578 | 180 |
| A02382 | A02606 | 301 | A02382 | A02615 | 384 |
| A02382 | A02616 | 173 | A02382 | A02617 | 338 |
| A02382 | A02637 | 201 | A02382 | A02657 | 229 |

|        |        |     |        |        |     |
|--------|--------|-----|--------|--------|-----|
| A02382 | A02659 | 369 | A02382 | A02698 | 481 |
| A02382 | A02711 | 477 | A02382 | A02742 | 171 |
| A02382 | A02751 | 277 | A02382 | A02760 | 154 |
| A02382 | A02764 | 204 | A02382 | A02795 | 384 |
| A02382 | A02808 | 151 | A02382 | A02837 | 205 |
| A02382 | A02838 | 316 | A02382 | A02851 | 395 |
| A02382 | A02859 | 433 | A02382 | A02863 | 423 |
| A02382 | A02896 | 198 | A02382 | A02897 | 154 |
| A02382 | A02902 | 243 | A02382 | A02913 | 263 |
| A02382 | A02917 | 425 | A02382 | A02918 | 177 |
| A02382 | A02944 | 157 | A02382 | A02945 | 414 |
| A02382 | A02971 | 213 | A02382 | A03010 | 470 |
| A02382 | A03042 | 221 | A02382 | A03049 | 418 |
| A02382 | A03055 | 199 | A02382 | A03081 | 247 |
| A02382 | A03093 | 369 | A02382 | A03094 | 170 |
| A02382 | A03110 | 290 | A02382 | A03177 | 224 |
| A02382 | A03183 | 489 | A02382 | A03204 | 268 |
| A02382 | A03219 | 198 | A02382 | A03224 | 241 |
| A02382 | A03239 | 193 | A02382 | A03280 | 273 |
| A02382 | A03316 | 207 | A02382 | A03756 | 386 |
| A02382 | A03782 | 277 | A02382 | A03900 | 170 |
| A02382 | A03923 | 152 | A02382 | A03942 | 276 |
| A02382 | A03966 | 462 | A02382 | A03994 | 243 |
| A02382 | A04040 | 176 | A02382 | A04096 | 195 |
| A02382 | A04244 | 301 | A02382 | A04248 | 465 |
| A02382 | A04320 | 424 | A02382 | A04410 | 156 |
| A02382 | A04417 | 241 | A02382 | A04445 | 170 |
| A02382 | A04450 | 224 | A02382 | A04478 | 491 |
| A02382 | A04514 | 273 | A02382 | A04541 | 229 |
| A02382 | A04613 | 210 | A02382 | A04659 | 183 |
| A02382 | A04747 | 358 | A02382 | A04805 | 163 |
| A02382 | A04854 | 283 | A02382 | A04877 | 232 |
| A02382 | A04878 | 305 | A02382 | A05078 | 414 |
| A02382 | A05174 | 488 | A02382 | A05221 | 408 |
| A02382 | A05274 | 232 | A02382 | A05350 | 256 |
| A02382 | A05432 | 154 | A02382 | A05679 | 263 |
| A02382 | A05731 | 185 | A02382 | A05815 | 232 |
| A02382 | A05944 | 443 | A02382 | A05985 | 398 |
| A02382 | A06054 | 343 | A02382 | A06095 | 196 |
| A02382 | A06118 | 196 | A02382 | A06211 | 210 |
| A02382 | A06224 | 249 | A02382 | A06372 | 441 |
| A02382 | A06399 | 296 | A02382 | A06404 | 330 |
| A02382 | A06414 | 305 | A02382 | A06415 | 399 |
| A02382 | A06623 | 337 | A02382 | A06780 | 224 |
| A02382 | A06818 | 314 | A02382 | A07143 | 390 |
| A02382 | A07145 | 416 | A02382 | A07146 | 171 |

|        |        |     |        |        |     |
|--------|--------|-----|--------|--------|-----|
| A02382 | A07148 | 176 | A02382 | A07157 | 408 |
| A02382 | A07164 | 162 | A02382 | A07165 | 258 |
| A02382 | A07173 | 454 | A02382 | A07182 | 256 |
| A02382 | A07209 | 257 | A02382 | A07314 | 245 |
| A02382 | A07390 | 430 | A02382 | A07426 | 249 |
| A02382 | A07683 | 386 | A02382 | A08172 | 193 |
| A02382 | A08292 | 156 | A02382 | A08634 | 283 |
| A02382 | A08675 | 338 | A02382 | A09121 | 191 |
| A02382 | A09732 | 219 | A02382 | A09763 | 232 |
| A02382 | A10086 | 283 | A02382 | A10131 | 152 |
| A02382 | A10265 | 232 | A02382 | A10269 | 338 |
| A02382 | A11063 | 283 | A02382 | A11543 | 443 |
| A02382 | A11601 | 196 | A02382 | A11983 | 305 |
| A02382 | A12913 | 296 | A02382 | A13860 | 491 |
| A02382 | A13872 | 252 | A02382 | A13935 | 199 |
| A02382 | A14055 | 219 | A02382 | A14188 | 170 |
| A02382 | A14208 | 312 | A02382 | A14210 | 486 |
| A02382 | A14236 | 462 | A02382 | A14276 | 412 |
| A02382 | A14346 | 312 | A02382 | A14366 | 443 |
| A02382 | A14372 | 176 | A02382 | A14373 | 335 |
| A02382 | A14376 | 179 | A02382 | A14385 | 243 |
| A02382 | A14391 | 218 | A02382 | A14392 | 252 |
| A02382 | A14429 | 273 | A02382 | A14432 | 188 |
| A02382 | A14439 | 235 | A02382 | A14517 | 413 |
| A02382 | A14554 | 188 | A02382 | A14601 | 338 |
| A02382 | A14635 | 337 | A02382 | A15241 | 402 |
| A02382 | A15267 | 193 | A02382 | A15394 | 313 |
| A02382 | A15601 | 291 | A02382 | A15602 | 210 |
| A02382 | A15603 | 274 | A02382 | A15605 | 234 |
| A02382 | A15607 | 176 | A02382 | A15608 | 249 |
| A02382 | A15638 | 152 | A02382 | A15675 | 238 |
| A02382 | A15726 | 489 | A02382 | A15832 | 263 |
| A02382 | A15916 | 173 | A02382 | A16222 | 188 |
| A02382 | A16489 | 283 | A02382 | A16503 | 356 |
| A02382 | A16645 | 338 | A02382 | A16745 | 338 |
| A02382 | A16904 | 481 | A02382 | A16951 | 210 |
| A02382 | A17096 | 338 | A02383 | A02498 | 400 |
| A02383 | A02568 | 276 | A02383 | A02711 | 152 |
| A02383 | A02764 | 339 | A02383 | A02795 | 312 |
| A02383 | A02812 | 286 | A02383 | A02854 | 257 |
| A02383 | A03010 | 252 | A02383 | A03049 | 243 |
| A02383 | A03541 | 299 | A02383 | A03639 | 229 |
| A02383 | A03817 | 218 | A02383 | A03846 | 210 |
| A02383 | A03961 | 360 | A02383 | A03966 | 252 |
| A02383 | A04248 | 379 | A02383 | A04320 | 303 |
| A02383 | A04536 | 190 | A02383 | A04736 | 358 |

|        |        |     |        |        |     |
|--------|--------|-----|--------|--------|-----|
| A02383 | A04748 | 362 | A02383 | A04756 | 299 |
| A02383 | A04900 | 176 | A02383 | A05305 | 299 |
| A02383 | A05944 | 364 | A02383 | A06054 | 462 |
| A02383 | A07190 | 208 | A02383 | A07390 | 491 |
| A02383 | A07683 | 479 | A02383 | A09550 | 430 |
| A02383 | A10813 | 291 | A02383 | A13997 | 191 |
| A02383 | A14346 | 454 | A02383 | A14442 | 299 |
| A02383 | A14511 | 339 | A02383 | A15267 | 420 |
| A02383 | A15395 | 229 | A02383 | A15726 | 447 |
| A02384 | A02606 | 347 | A02384 | A02639 | 326 |
| A02384 | A02788 | 218 | A02384 | A02902 | 201 |
| A02384 | A03035 | 350 | A02384 | A03790 | 329 |
| A02384 | A03880 | 196 | A02384 | A04334 | 218 |
| A02384 | A04747 | 324 | A02384 | A05370 | 323 |
| A02384 | A06623 | 375 | A02384 | A07217 | 364 |
| A02384 | A09079 | 408 | A02384 | A09120 | 388 |
| A02384 | A11346 | 167 | A02384 | A11881 | 416 |
| A02384 | A12913 | 408 | A02384 | A14266 | 328 |
| A02384 | A14378 | 205 | A02384 | A14535 | 380 |
| A02384 | A16222 | 358 | A02384 | A16738 | 399 |
| A02385 | A02412 | 428 | A02385 | A02413 | 296 |
| A02385 | A02416 | 193 | A02385 | A02490 | 380 |
| A02385 | A02491 | 104 | A02385 | A02495 | 228 |
| A02385 | A02501 | 283 | A02385 | A02505 | 274 |
| A02385 | A02582 | 388 | A02385 | A02605 | 313 |
| A02385 | A02668 | 201 | A02385 | A02785 | 313 |
| A02385 | A02812 | 180 | A02385 | A02922 | 384 |
| A02385 | A02951 | 208 | A02385 | A03001 | 258 |
| A02385 | A03080 | 252 | A02385 | A03188 | 167 |
| A02385 | A03189 | 385 | A02385 | A03275 | 296 |
| A02385 | A03370 | 179 | A02385 | A03379 | 196 |
| A02385 | A03447 | 327 | A02385 | A03821 | 232 |
| A02385 | A03848 | 360 | A02385 | A03914 | 288 |
| A02385 | A03923 | 322 | A02385 | A03991 | 378 |
| A02385 | A04123 | 382 | A02385 | A04607 | 217 |
| A02385 | A04906 | 335 | A02385 | A05112 | 256 |
| A02385 | A05113 | 279 | A02385 | A05309 | 162 |
| A02385 | A05349 | 330 | A02385 | A05767 | 154 |
| A02385 | A05920 | 446 | A02385 | A07191 | 240 |
| A02385 | A08910 | 167 | A02385 | A09977 | 236 |
| A02385 | A13886 | 340 | A02385 | A14410 | 207 |
| A02386 | A02417 | 484 | A02386 | A02418 | 481 |
| A02386 | A02490 | 185 | A02386 | A02493 | 474 |
| A02386 | A02687 | 172 | A02386 | A03107 | 252 |
| A02386 | A03832 | 187 | A02386 | A03984 | 271 |
| A02387 | A02393 | 394 | A02387 | A02406 | 438 |

|        |        |     |        |        |     |
|--------|--------|-----|--------|--------|-----|
| A02387 | A02493 | 238 | A02387 | A02495 | 340 |
| A02387 | A02505 | 259 | A02387 | A02559 | 213 |
| A02387 | A02570 | 378 | A02387 | A02668 | 183 |
| A02387 | A02785 | 162 | A02387 | A02788 | 177 |
| A02387 | A02789 | 208 | A02387 | A03141 | 162 |
| A02387 | A03370 | 162 | A02387 | A03510 | 414 |
| A02387 | A03588 | 378 | A02387 | A03653 | 384 |
| A02387 | A03976 | 219 | A02387 | A04260 | 234 |
| A02387 | A05264 | 306 | A02387 | A05477 | 352 |
| A02387 | A06606 | 329 | A02387 | A08324 | 394 |
| A02387 | A12361 | 249 | A02387 | A14366 | 177 |
| A02387 | A16300 | 252 | A02388 | A02389 | 281 |
| A02388 | A02407 | 316 | A02388 | A02408 | 423 |
| A02388 | A02501 | 296 | A02388 | A02502 | 177 |
| A02388 | A02586 | 241 | A02388 | A02616 | 345 |
| A02388 | A02636 | 294 | A02388 | A02749 | 318 |
| A02388 | A02750 | 400 | A02388 | A02816 | 241 |
| A02388 | A02877 | 263 | A02388 | A02878 | 198 |
| A02388 | A03112 | 159 | A02388 | A03244 | 256 |
| A02388 | A03263 | 279 | A02388 | A03421 | 241 |
| A02388 | A03922 | 184 | A02388 | A04728 | 193 |
| A02388 | A04825 | 400 | A02388 | A04908 | 241 |
| A02388 | A06622 | 296 | A02388 | A06623 | 371 |
| A02388 | A06648 | 269 | A02388 | A07178 | 419 |
| A02388 | A14664 | 246 | A02388 | A16300 | 157 |
| A02389 | A02521 | 174 | A02389 | A02590 | 229 |
| A02389 | A02629 | 232 | A02389 | A02632 | 274 |
| A02389 | A02749 | 185 | A02389 | A03014 | 480 |
| A02389 | A03207 | 296 | A02389 | A03273 | 419 |
| A02389 | A03410 | 269 | A02389 | A03412 | 160 |
| A02389 | A03422 | 198 | A02389 | A03486 | 226 |
| A02389 | A04260 | 156 | A02389 | A04342 | 154 |
| A02389 | A04739 | 177 | A02389 | A04878 | 259 |
| A02389 | A05325 | 334 | A02389 | A05741 | 279 |
| A02389 | A05981 | 475 | A02389 | A09846 | 255 |
| A02389 | A09917 | 319 | A02389 | A11301 | 179 |
| A02389 | A11576 | 159 | A02389 | A11735 | 418 |
| A02389 | A14237 | 236 | A02389 | A14238 | 301 |
| A02389 | A14683 | 201 | A02389 | A16860 | 190 |
| A02390 | A02401 | 318 | A02390 | A02409 | 307 |
| A02390 | A02435 | 205 | A02390 | A02517 | 329 |
| A02390 | A02518 | 218 | A02390 | A02562 | 174 |
| A02390 | A02715 | 232 | A02390 | A02797 | 172 |
| A02390 | A03082 | 468 | A02390 | A03114 | 279 |
| A02390 | A03115 | 353 | A02390 | A03186 | 191 |
| A02390 | A03225 | 352 | A02390 | A03246 | 384 |

|        |        |     |        |        |     |
|--------|--------|-----|--------|--------|-----|
| A02390 | A03312 | 283 | A02390 | A03906 | 385 |
| A02390 | A04080 | 210 | A02390 | A04256 | 185 |
| A02390 | A04258 | 215 | A02390 | A04783 | 168 |
| A02390 | A04922 | 224 | A02390 | A05508 | 252 |
| A02390 | A05533 | 174 | A02390 | A05550 | 191 |
| A02390 | A05859 | 411 | A02390 | A06534 | 193 |
| A02390 | A06628 | 263 | A02390 | A06934 | 266 |
| A02390 | A07016 | 270 | A02390 | A07220 | 205 |
| A02390 | A07245 | 291 | A02390 | A07322 | 256 |
| A02390 | A07473 | 272 | A02390 | A08098 | 386 |
| A02390 | A08366 | 218 | A02390 | A08417 | 177 |
| A02390 | A08518 | 288 | A02390 | A08524 | 232 |
| A02390 | A08763 | 443 | A02390 | A08835 | 167 |
| A02390 | A08941 | 318 | A02390 | A09068 | 338 |
| A02390 | A09387 | 272 | A02390 | A09446 | 324 |
| A02390 | A09804 | 185 | A02390 | A10267 | 296 |
| A02390 | A10466 | 479 | A02390 | A10645 | 217 |
| A02390 | A11090 | 302 | A02390 | A11214 | 347 |
| A02390 | A11326 | 213 | A02390 | A13294 | 266 |
| A02390 | A14863 | 307 | A02390 | A15416 | 241 |
| A02390 | A16726 | 379 | A02391 | A02744 | 372 |
| A02391 | A02837 | 296 | A02392 | A02417 | 393 |
| A02392 | A02424 | 316 | A02392 | A02469 | 341 |
| A02392 | A02488 | 326 | A02392 | A02493 | 307 |
| A02392 | A02501 | 330 | A02392 | A02575 | 302 |
| A02392 | A02583 | 378 | A02392 | A02671 | 188 |
| A02392 | A02672 | 291 | A02392 | A02702 | 328 |
| A02392 | A02703 | 268 | A02392 | A02758 | 356 |
| A02392 | A02760 | 362 | A02392 | A02785 | 241 |
| A02392 | A02811 | 358 | A02392 | A02814 | 317 |
| A02392 | A02943 | 399 | A02392 | A03120 | 406 |
| A02392 | A03211 | 246 | A02392 | A03537 | 401 |
| A02392 | A03583 | 391 | A02392 | A03585 | 382 |
| A02392 | A03642 | 461 | A02392 | A03653 | 330 |
| A02392 | A03847 | 416 | A02392 | A03870 | 406 |
| A02392 | A04004 | 360 | A02392 | A04031 | 385 |
| A02392 | A04123 | 406 | A02392 | A04256 | 335 |
| A02392 | A04260 | 305 | A02392 | A04406 | 322 |
| A02392 | A04423 | 374 | A02392 | A04491 | 362 |
| A02392 | A04560 | 391 | A02392 | A04905 | 371 |
| A02392 | A05036 | 399 | A02392 | A07178 | 357 |
| A02393 | A03580 | 341 | A02393 | A03976 | 335 |
| A02393 | A06615 | 219 | A02394 | A03014 | 402 |
| A02394 | A03763 | 276 | A02394 | A09264 | 388 |
| A02394 | A09806 | 396 | A02395 | A02622 | 435 |
| A02395 | A03184 | 408 | A02395 | A03976 | 350 |

|        |        |     |        |        |     |
|--------|--------|-----|--------|--------|-----|
| A02395 | A07218 | 236 | A02396 | A02405 | 391 |
| A02396 | A02772 | 419 | A02396 | A03919 | 416 |
| A02396 | A05459 | 430 | A02396 | A06831 | 430 |
| A02396 | A15498 | 262 | A02397 | A02405 | 490 |
| A02397 | A02451 | 358 | A02397 | A02461 | 318 |
| A02397 | A02465 | 226 | A02397 | A02467 | 249 |
| A02397 | A02489 | 274 | A02397 | A02491 | 160 |
| A02397 | A02572 | 288 | A02397 | A02697 | 218 |
| A02397 | A03104 | 127 | A02397 | A03146 | 312 |
| A02397 | A03155 | 270 | A02397 | A03238 | 204 |
| A02397 | A03304 | 200 | A02397 | A03314 | 446 |
| A02397 | A03639 | 486 | A02397 | A03800 | 259 |
| A02397 | A03961 | 215 | A02397 | A03963 | 366 |
| A02397 | A04202 | 469 | A02397 | A04351 | 299 |
| A02397 | A04487 | 273 | A02397 | A04504 | 355 |
| A02397 | A04749 | 328 | A02397 | A05533 | 240 |
| A02397 | A05571 | 391 | A02397 | A05923 | 446 |
| A02397 | A05992 | 283 | A02397 | A06038 | 311 |
| A02397 | A07129 | 259 | A02397 | A07198 | 171 |
| A02397 | A07209 | 361 | A02397 | A09028 | 274 |
| A02397 | A09247 | 441 | A02397 | A09550 | 337 |
| A02397 | A13944 | 396 | A02397 | A13994 | 238 |
| A02397 | A14432 | 314 | A02398 | A07706 | 246 |
| A02399 | A13589 | 353 | A02400 | A02409 | 455 |
| A02400 | A02491 | 163 | A02400 | A02518 | 269 |
| A02400 | A02687 | 210 | A02400 | A02796 | 377 |
| A02400 | A03041 | 369 | A02400 | A03082 | 436 |
| A02400 | A03112 | 207 | A02400 | A03114 | 449 |
| A02400 | A03115 | 294 | A02400 | A03186 | 251 |
| A02400 | A03313 | 363 | A02400 | A07166 | 308 |
| A02400 | A08813 | 230 | A02400 | A09644 | 281 |
| A02400 | A11683 | 279 | A02401 | A02481 | 245 |
| A02401 | A03115 | 306 | A02401 | A03479 | 283 |
| A02401 | A14188 | 217 | A02401 | A14399 | 218 |
| A02401 | A15230 | 341 | A02402 | A02698 | 491 |
| A02402 | A02859 | 441 | A02402 | A03050 | 210 |
| A02402 | A03513 | 243 | A02402 | A03545 | 432 |
| A02402 | A03963 | 452 | A02402 | A04433 | 207 |
| A02402 | A04778 | 159 | A02402 | A05098 | 475 |
| A02402 | A05376 | 335 | A02402 | A05416 | 419 |
| A02402 | A05570 | 262 | A02402 | A06019 | 246 |
| A02402 | A06584 | 191 | A02402 | A06831 | 224 |
| A02402 | A07078 | 396 | A02402 | A07416 | 174 |
| A02402 | A07736 | 154 | A02402 | A07973 | 424 |
| A02402 | A08456 | 201 | A02402 | A08667 | 165 |
| A02402 | A08785 | 404 | A02402 | A09174 | 191 |



|        |        |     |        |        |     |
|--------|--------|-----|--------|--------|-----|
| A02402 | A10056 | 201 | A02402 | A10489 | 269 |
| A02402 | A10635 | 491 | A02402 | A10675 | 363 |
| A02402 | A13594 | 159 | A02402 | A14253 | 314 |
| A02402 | A16278 | 260 | A02403 | A14596 | 235 |
| A02404 | A02414 | 352 | A02404 | A02564 | 281 |
| A02404 | A02655 | 326 | A02404 | A02788 | 276 |
| A02404 | A04808 | 407 | A02404 | A04899 | 408 |
| A02404 | A15497 | 314 | A02405 | A02410 | 466 |
| A02405 | A02451 | 457 | A02405 | A02461 | 396 |
| A02405 | A02537 | 260 | A02405 | A02552 | 286 |
| A02405 | A02587 | 302 | A02405 | A02667 | 179 |
| A02405 | A02669 | 279 | A02405 | A02771 | 174 |
| A02405 | A02772 | 279 | A02405 | A02808 | 251 |
| A02405 | A02857 | 187 | A02405 | A03034 | 154 |
| A02405 | A03098 | 245 | A02405 | A03099 | 455 |
| A02405 | A03104 | 96  | A02405 | A03144 | 172 |
| A02405 | A03238 | 490 | A02405 | A03314 | 456 |
| A02405 | A03639 | 172 | A02405 | A03919 | 385 |
| A02405 | A04202 | 358 | A02405 | A04437 | 262 |
| A02405 | A04487 | 424 | A02405 | A04504 | 332 |
| A02405 | A04551 | 341 | A02405 | A04679 | 477 |
| A02405 | A05311 | 477 | A02405 | A05376 | 466 |
| A02405 | A05439 | 260 | A02405 | A05459 | 486 |
| A02405 | A05653 | 449 | A02405 | A05705 | 323 |
| A02405 | A05923 | 473 | A02405 | A06038 | 279 |
| A02405 | A06708 | 229 | A02405 | A06831 | 486 |
| A02405 | A07143 | 462 | A02405 | A07198 | 413 |
| A02405 | A07209 | 374 | A02405 | A07210 | 241 |
| A02405 | A08630 | 235 | A02405 | A09040 | 216 |
| A02405 | A09247 | 247 | A02405 | A09277 | 168 |
| A02405 | A10052 | 286 | A02405 | A10609 | 396 |
| A02405 | A11932 | 208 | A02405 | A13832 | 191 |
| A02405 | A13871 | 210 | A02405 | A14247 | 256 |
| A02405 | A15462 | 154 | A02406 | A02493 | 302 |
| A02406 | A03510 | 433 | A02406 | A07304 | 283 |
| A02406 | A14197 | 252 | A02407 | A02408 | 402 |
| A02407 | A02418 | 228 | A02407 | A02488 | 229 |
| A02407 | A02585 | 251 | A02407 | A02586 | 174 |
| A02407 | A02599 | 318 | A02407 | A02629 | 274 |
| A02407 | A02636 | 236 | A02407 | A02702 | 232 |
| A02407 | A02703 | 157 | A02407 | A02744 | 190 |
| A02407 | A02749 | 343 | A02407 | A02752 | 177 |
| A02407 | A02771 | 207 | A02407 | A02777 | 401 |
| A02407 | A02789 | 174 | A02407 | A02811 | 278 |
| A02407 | A03076 | 168 | A02407 | A03091 | 243 |
| A02407 | A03112 | 210 | A02407 | A03421 | 174 |

|        |        |     |        |        |     |
|--------|--------|-----|--------|--------|-----|
| A02407 | A03824 | 258 | A02407 | A04015 | 236 |
| A02407 | A04681 | 326 | A02407 | A04739 | 221 |
| A02407 | A04852 | 335 | A02407 | A05064 | 424 |
| A02407 | A05299 | 288 | A02407 | A06416 | 232 |
| A02407 | A06595 | 202 | A02407 | A06949 | 165 |
| A02407 | A06995 | 389 | A02407 | A07201 | 350 |
| A02407 | A09390 | 301 | A02407 | A09655 | 259 |
| A02407 | A10313 | 310 | A02409 | A02491 | 163 |
| A02409 | A03082 | 436 | A02409 | A03112 | 207 |
| A02409 | A03213 | 193 | A02409 | A05533 | 329 |
| A02409 | A06581 | 170 | A02410 | A02472 | 160 |
| A02410 | A03099 | 446 | A02410 | A03238 | 263 |
| A02410 | A04368 | 367 | A02410 | A04487 | 323 |
| A02410 | A05376 | 307 | A02410 | A08837 | 267 |
| A02411 | A02675 | 451 | A02411 | A02908 | 899 |
| A02411 | A02968 | 899 | A02411 | A03101 | 281 |
| A02411 | A03470 | 160 | A02411 | A03591 | 71  |
| A02411 | A03632 | 187 | A02411 | A03661 | 191 |
| A02411 | A03739 | 376 | A02411 | A03948 | 218 |
| A02411 | A03990 | 174 | A02411 | A04104 | 156 |
| A02411 | A04446 | 491 | A02411 | A04449 | 214 |
| A02411 | A05760 | 899 | A02411 | A06289 | 63  |
| A02411 | A06950 | 241 | A02411 | A07040 | 227 |
| A02411 | A07159 | 151 | A02411 | A07160 | 160 |
| A02411 | A07163 | 176 | A02411 | A07311 | 949 |
| A02411 | A07339 | 899 | A02411 | A07399 | 196 |
| A02411 | A07941 | 202 | A02411 | A08700 | 170 |
| A02411 | A08872 | 329 | A02411 | A08878 | 205 |
| A02411 | A09018 | 256 | A02411 | A09141 | 170 |
| A02411 | A09334 | 218 | A02411 | A09383 | 218 |
| A02411 | A09546 | 93  | A02411 | A09566 | 200 |
| A02411 | A09568 | 160 | A02411 | A09750 | 462 |
| A02411 | A10018 | 191 | A02411 | A10174 | 899 |
| A02411 | A10183 | 337 | A02411 | A10365 | 281 |
| A02411 | A10616 | 899 | A02411 | A10650 | 281 |
| A02411 | A10999 | 184 | A02411 | A11124 | 134 |
| A02411 | A11253 | 223 | A02411 | A11721 | 271 |
| A02411 | A11835 | 152 | A02411 | A11937 | 224 |
| A02411 | A11983 | 913 | A02411 | A12383 | 385 |
| A02411 | A12824 | 283 | A02411 | A13089 | 380 |
| A02411 | A13234 | 213 | A02411 | A13350 | 281 |
| A02411 | A13391 | 184 | A02411 | A13517 | 213 |
| A02411 | A13785 | 218 | A02411 | A13946 | 152 |
| A02411 | A13983 | 243 | A02411 | A13997 | 224 |
| A02411 | A14005 | 902 | A02411 | A14021 | 311 |
| A02411 | A14022 | 899 | A02411 | A14033 | 271 |

|        |        |     |        |        |     |
|--------|--------|-----|--------|--------|-----|
| A02411 | A14034 | 223 | A02411 | A14096 | 899 |
| A02411 | A14210 | 899 | A02411 | A14393 | 899 |
| A02411 | A14433 | 202 | A02411 | A14520 | 174 |
| A02411 | A14790 | 174 | A02411 | A15506 | 157 |
| A02411 | A15568 | 241 | A02411 | A16123 | 899 |
| A02411 | A16131 | 196 | A02411 | A16400 | 302 |
| A02411 | A16771 | 241 | A02411 | A16777 | 176 |
| A02412 | A02413 | 481 | A02412 | A02415 | 160 |
| A02412 | A02416 | 439 | A02412 | A02458 | 268 |
| A02412 | A02459 | 187 | A02412 | A02460 | 328 |
| A02412 | A02465 | 152 | A02412 | A02469 | 185 |
| A02412 | A02490 | 491 | A02412 | A02491 | 491 |
| A02412 | A02505 | 157 | A02412 | A02575 | 130 |
| A02412 | A02582 | 489 | A02412 | A02587 | 272 |
| A02412 | A02605 | 474 | A02412 | A02612 | 324 |
| A02412 | A02668 | 443 | A02412 | A02745 | 154 |
| A02412 | A02753 | 303 | A02412 | A02756 | 427 |
| A02412 | A02771 | 445 | A02412 | A02783 | 296 |
| A02412 | A02785 | 432 | A02412 | A02787 | 218 |
| A02412 | A02837 | 179 | A02412 | A02839 | 245 |
| A02412 | A02874 | 339 | A02412 | A02875 | 423 |
| A02412 | A02982 | 379 | A02412 | A03189 | 317 |
| A02412 | A03224 | 182 | A02412 | A03269 | 260 |
| A02412 | A03312 | 274 | A02412 | A03370 | 165 |
| A02412 | A03379 | 190 | A02412 | A03413 | 191 |
| A02412 | A03447 | 226 | A02412 | A03653 | 168 |
| A02412 | A03757 | 386 | A02412 | A03848 | 274 |
| A02412 | A03865 | 238 | A02412 | A03882 | 254 |
| A02412 | A03904 | 210 | A02412 | A03914 | 434 |
| A02412 | A03923 | 218 | A02412 | A03975 | 254 |
| A02412 | A03991 | 306 | A02412 | A04023 | 202 |
| A02412 | A04033 | 162 | A02412 | A04040 | 241 |
| A02412 | A04122 | 241 | A02412 | A04163 | 190 |
| A02412 | A04214 | 332 | A02412 | A04391 | 270 |
| A02412 | A04454 | 486 | A02412 | A04614 | 191 |
| A02412 | A04830 | 226 | A02412 | A04922 | 217 |
| A02412 | A04976 | 278 | A02412 | A05126 | 468 |
| A02412 | A05472 | 162 | A02412 | A05494 | 163 |
| A02412 | A05535 | 451 | A02412 | A05721 | 212 |
| A02412 | A05771 | 306 | A02412 | A06414 | 236 |
| A02412 | A06415 | 252 | A02412 | A06604 | 272 |
| A02412 | A06747 | 174 | A02412 | A07141 | 218 |
| A02412 | A07442 | 191 | A02412 | A08667 | 469 |
| A02412 | A08878 | 180 | A02412 | A09046 | 245 |
| A02412 | A09245 | 168 | A02412 | A09479 | 311 |
| A02412 | A09509 | 324 | A02412 | A10087 | 205 |

|        |        |     |        |        |     |
|--------|--------|-----|--------|--------|-----|
| A02412 | A10337 | 157 | A02412 | A10731 | 385 |
| A02412 | A11513 | 152 | A02412 | A11983 | 195 |
| A02412 | A12371 | 238 | A02412 | A12897 | 212 |
| A02412 | A13338 | 182 | A02412 | A13886 | 368 |
| A02412 | A14374 | 308 | A02412 | A14391 | 212 |
| A02412 | A14405 | 279 | A02412 | A14430 | 168 |
| A02412 | A14439 | 177 | A02412 | A14635 | 267 |
| A02412 | A15296 | 154 | A02412 | A15314 | 259 |
| A02412 | A15630 | 238 | A02412 | A15809 | 210 |
| A02412 | A16636 | 484 | A02413 | A02416 | 460 |
| A02413 | A02490 | 477 | A02413 | A02491 | 491 |
| A02413 | A02504 | 235 | A02413 | A02542 | 182 |
| A02413 | A02559 | 168 | A02413 | A02571 | 283 |
| A02413 | A02575 | 188 | A02413 | A02582 | 346 |
| A02413 | A02605 | 380 | A02413 | A02696 | 187 |
| A02413 | A02716 | 350 | A02413 | A02813 | 232 |
| A02413 | A02816 | 165 | A02413 | A02817 | 238 |
| A02413 | A02877 | 165 | A02413 | A02878 | 247 |
| A02413 | A02899 | 268 | A02413 | A02982 | 302 |
| A02413 | A02984 | 307 | A02413 | A02992 | 188 |
| A02413 | A03189 | 355 | A02413 | A03243 | 201 |
| A02413 | A03256 | 208 | A02413 | A03447 | 462 |
| A02413 | A03634 | 263 | A02413 | A03653 | 227 |
| A02413 | A03882 | 185 | A02413 | A03976 | 176 |
| A02413 | A03991 | 346 | A02413 | A04127 | 311 |
| A02413 | A04214 | 367 | A02413 | A04222 | 187 |
| A02413 | A04267 | 202 | A02413 | A04454 | 416 |
| A02413 | A04456 | 385 | A02413 | A04510 | 465 |
| A02413 | A04824 | 313 | A02413 | A04875 | 329 |
| A02413 | A04965 | 184 | A02413 | A05079 | 332 |
| A02413 | A05094 | 241 | A02413 | A05153 | 273 |
| A02413 | A05509 | 385 | A02413 | A07176 | 162 |
| A02413 | A07546 | 367 | A02413 | A09122 | 367 |
| A02413 | A12267 | 385 | A02413 | A13346 | 193 |
| A02413 | A13886 | 475 | A02413 | A14188 | 193 |
| A02413 | A14236 | 316 | A02413 | A14399 | 195 |
| A02413 | A16636 | 283 | A02414 | A02415 | 344 |
| A02414 | A02416 | 475 | A02414 | A02418 | 213 |
| A02414 | A02490 | 99  | A02414 | A02494 | 227 |
| A02414 | A02505 | 212 | A02414 | A02527 | 278 |
| A02414 | A02593 | 243 | A02414 | A02637 | 205 |
| A02414 | A02695 | 168 | A02414 | A02703 | 273 |
| A02414 | A02859 | 260 | A02414 | A02874 | 165 |
| A02414 | A03071 | 277 | A02414 | A03259 | 183 |
| A02414 | A03437 | 377 | A02414 | A03438 | 165 |
| A02414 | A03609 | 165 | A02414 | A03812 | 202 |

|        |        |     |        |        |     |
|--------|--------|-----|--------|--------|-----|
| A02414 | A03936 | 272 | A02414 | A03981 | 382 |
| A02414 | A04305 | 221 | A02414 | A04540 | 202 |
| A02414 | A04853 | 254 | A02414 | A05411 | 201 |
| A02414 | A05515 | 286 | A02414 | A06108 | 398 |
| A02414 | A06728 | 352 | A02414 | A06814 | 180 |
| A02414 | A06825 | 396 | A02414 | A07307 | 274 |
| A02414 | A07457 | 221 | A02414 | A08682 | 337 |
| A02414 | A08881 | 193 | A02414 | A09145 | 266 |
| A02414 | A09464 | 260 | A02414 | A10616 | 157 |
| A02414 | A11981 | 245 | A02414 | A16112 | 323 |
| A02414 | A17099 | 372 | A02415 | A02416 | 491 |
| A02415 | A02439 | 154 | A02415 | A02488 | 195 |
| A02415 | A02490 | 491 | A02415 | A02491 | 446 |
| A02415 | A02501 | 202 | A02415 | A02530 | 307 |
| A02415 | A02542 | 156 | A02415 | A02582 | 401 |
| A02415 | A02624 | 251 | A02415 | A02637 | 185 |
| A02415 | A02705 | 182 | A02415 | A02739 | 452 |
| A02415 | A02745 | 188 | A02415 | A02747 | 404 |
| A02415 | A02756 | 355 | A02415 | A02787 | 443 |
| A02415 | A02788 | 230 | A02415 | A02800 | 276 |
| A02415 | A02839 | 285 | A02415 | A02859 | 221 |
| A02415 | A02874 | 236 | A02415 | A02875 | 251 |
| A02415 | A02886 | 260 | A02415 | A02897 | 252 |
| A02415 | A02976 | 187 | A02415 | A03022 | 346 |
| A02415 | A03029 | 255 | A02415 | A03051 | 168 |
| A02415 | A03081 | 221 | A02415 | A03112 | 266 |
| A02415 | A03220 | 324 | A02415 | A03406 | 157 |
| A02415 | A03438 | 63  | A02415 | A03552 | 281 |
| A02415 | A03584 | 199 | A02415 | A03585 | 288 |
| A02415 | A03935 | 318 | A02415 | A03973 | 346 |
| A02415 | A04076 | 188 | A02415 | A04223 | 291 |
| A02415 | A04237 | 329 | A02415 | A04244 | 265 |
| A02415 | A04327 | 196 | A02415 | A04398 | 176 |
| A02415 | A04454 | 302 | A02415 | A04540 | 183 |
| A02415 | A04589 | 165 | A02415 | A04600 | 216 |
| A02415 | A04605 | 329 | A02415 | A04698 | 182 |
| A02415 | A04806 | 353 | A02415 | A04860 | 340 |
| A02415 | A04872 | 373 | A02415 | A05126 | 329 |
| A02415 | A05182 | 279 | A02415 | A05329 | 302 |
| A02415 | A05342 | 281 | A02415 | A05944 | 180 |
| A02415 | A06108 | 390 | A02415 | A06144 | 321 |
| A02415 | A06149 | 368 | A02415 | A06251 | 335 |
| A02415 | A07135 | 171 | A02415 | A07138 | 273 |
| A02415 | A07143 | 406 | A02415 | A07147 | 462 |
| A02415 | A07159 | 249 | A02415 | A07165 | 167 |
| A02415 | A07173 | 167 | A02415 | A07211 | 390 |

|        |        |     |        |        |     |
|--------|--------|-----|--------|--------|-----|
| A02415 | A07219 | 340 | A02415 | A08714 | 218 |
| A02415 | A08768 | 269 | A02415 | A09550 | 307 |
| A02415 | A14194 | 232 | A02415 | A14377 | 162 |
| A02415 | A15516 | 205 | A02415 | A15795 | 185 |
| A02415 | A15969 | 335 | A02415 | A16397 | 195 |
| A02415 | A16825 | 390 | A02415 | A17085 | 224 |
| A02416 | A02418 | 228 | A02416 | A02439 | 281 |
| A02416 | A02452 | 63  | A02416 | A02460 | 154 |
| A02416 | A02462 | 368 | A02416 | A02464 | 480 |
| A02416 | A02465 | 102 | A02416 | A02471 | 417 |
| A02416 | A02476 | 157 | A02416 | A02479 | 272 |
| A02416 | A02490 | 945 | A02416 | A02491 | 477 |
| A02416 | A02542 | 179 | A02416 | A02547 | 260 |
| A02416 | A02575 | 188 | A02416 | A02582 | 327 |
| A02416 | A02584 | 210 | A02416 | A02586 | 157 |
| A02416 | A02590 | 151 | A02416 | A02605 | 152 |
| A02416 | A02615 | 177 | A02416 | A02632 | 199 |
| A02416 | A02634 | 290 | A02416 | A02637 | 217 |
| A02416 | A02638 | 412 | A02416 | A02657 | 240 |
| A02416 | A02661 | 335 | A02416 | A02730 | 247 |
| A02416 | A02741 | 243 | A02416 | A02756 | 245 |
| A02416 | A02780 | 195 | A02416 | A02787 | 329 |
| A02416 | A02788 | 488 | A02416 | A02789 | 259 |
| A02416 | A02812 | 183 | A02416 | A02819 | 361 |
| A02416 | A02839 | 278 | A02416 | A02854 | 335 |
| A02416 | A02863 | 327 | A02416 | A02874 | 236 |
| A02416 | A02877 | 152 | A02416 | A02878 | 188 |
| A02416 | A02886 | 434 | A02416 | A02917 | 232 |
| A02416 | A02931 | 160 | A02416 | A02935 | 159 |
| A02416 | A02945 | 379 | A02416 | A03022 | 283 |
| A02416 | A03051 | 299 | A02416 | A03053 | 172 |
| A02416 | A03055 | 340 | A02416 | A03079 | 232 |
| A02416 | A03081 | 262 | A02416 | A03090 | 117 |
| A02416 | A03093 | 291 | A02416 | A03100 | 318 |
| A02416 | A03112 | 414 | A02416 | A03127 | 204 |
| A02416 | A03181 | 219 | A02416 | A03185 | 229 |
| A02416 | A03219 | 101 | A02416 | A03220 | 255 |
| A02416 | A03228 | 129 | A02416 | A03259 | 288 |
| A02416 | A03263 | 385 | A02416 | A03451 | 332 |
| A02416 | A03536 | 171 | A02416 | A03576 | 245 |
| A02416 | A03753 | 256 | A02416 | A03760 | 229 |
| A02416 | A03763 | 165 | A02416 | A03802 | 213 |
| A02416 | A03816 | 346 | A02416 | A03817 | 160 |
| A02416 | A03900 | 180 | A02416 | A03904 | 156 |
| A02416 | A03910 | 283 | A02416 | A03921 | 174 |
| A02416 | A03925 | 283 | A02416 | A03936 | 430 |

|        |        |     |        |        |     |
|--------|--------|-----|--------|--------|-----|
| A02416 | A03948 | 358 | A02416 | A03976 | 353 |
| A02416 | A04051 | 157 | A02416 | A04076 | 221 |
| A02416 | A04117 | 185 | A02416 | A04122 | 188 |
| A02416 | A04133 | 179 | A02416 | A04138 | 469 |
| A02416 | A04144 | 249 | A02416 | A04176 | 396 |
| A02416 | A04201 | 409 | A02416 | A04238 | 358 |
| A02416 | A04248 | 241 | A02416 | A04263 | 323 |
| A02416 | A04276 | 391 | A02416 | A04320 | 165 |
| A02416 | A04367 | 274 | A02416 | A04402 | 260 |
| A02416 | A04415 | 311 | A02416 | A04426 | 346 |
| A02416 | A04428 | 232 | A02416 | A04454 | 480 |
| A02416 | A04478 | 171 | A02416 | A04485 | 208 |
| A02416 | A04492 | 171 | A02416 | A04517 | 179 |
| A02416 | A04518 | 210 | A02416 | A04589 | 468 |
| A02416 | A04617 | 229 | A02416 | A04734 | 218 |
| A02416 | A04749 | 218 | A02416 | A04756 | 160 |
| A02416 | A04762 | 321 | A02416 | A04806 | 293 |
| A02416 | A04855 | 393 | A02416 | A04872 | 416 |
| A02416 | A04888 | 176 | A02416 | A04933 | 229 |
| A02416 | A04949 | 157 | A02416 | A04992 | 267 |
| A02416 | A04996 | 160 | A02416 | A05120 | 405 |
| A02416 | A05124 | 238 | A02416 | A05142 | 249 |
| A02416 | A05174 | 183 | A02416 | A05329 | 224 |
| A02416 | A05342 | 199 | A02416 | A05351 | 208 |
| A02416 | A05706 | 200 | A02416 | A05741 | 337 |
| A02416 | A05985 | 360 | A02416 | A06078 | 185 |
| A02416 | A06095 | 208 | A02416 | A06149 | 159 |
| A02416 | A06415 | 411 | A02416 | A06607 | 208 |
| A02416 | A06615 | 172 | A02416 | A06623 | 351 |
| A02416 | A06654 | 156 | A02416 | A06672 | 346 |
| A02416 | A06728 | 274 | A02416 | A06813 | 328 |
| A02416 | A07133 | 293 | A02416 | A07135 | 212 |
| A02416 | A07141 | 246 | A02416 | A07143 | 236 |
| A02416 | A07145 | 382 | A02416 | A07146 | 316 |
| A02416 | A07152 | 167 | A02416 | A07154 | 168 |
| A02416 | A07158 | 241 | A02416 | A07166 | 419 |
| A02416 | A07173 | 369 | A02416 | A07191 | 174 |
| A02416 | A07211 | 346 | A02416 | A07552 | 245 |
| A02416 | A08394 | 283 | A02416 | A08612 | 267 |
| A02416 | A08861 | 241 | A02416 | A08879 | 154 |
| A02416 | A09202 | 396 | A02416 | A09211 | 297 |
| A02416 | A09374 | 333 | A02416 | A09419 | 172 |
| A02416 | A09447 | 210 | A02416 | A09464 | 156 |
| A02416 | A09480 | 218 | A02416 | A09550 | 232 |
| A02416 | A09562 | 180 | A02416 | A09748 | 165 |
| A02416 | A09799 | 283 | A02416 | A10055 | 240 |

|        |        |     |        |        |     |
|--------|--------|-----|--------|--------|-----|
| A02416 | A10074 | 321 | A02416 | A10240 | 260 |
| A02416 | A10813 | 151 | A02416 | A10947 | 213 |
| A02416 | A11086 | 221 | A02416 | A11634 | 346 |
| A02416 | A11868 | 293 | A02416 | A13131 | 221 |
| A02416 | A13851 | 255 | A02416 | A14140 | 346 |
| A02416 | A14190 | 319 | A02416 | A14299 | 241 |
| A02416 | A14366 | 208 | A02416 | A14368 | 165 |
| A02416 | A14378 | 422 | A02416 | A14526 | 305 |
| A02416 | A14535 | 245 | A02416 | A14544 | 293 |
| A02416 | A14642 | 423 | A02416 | A14643 | 224 |
| A02416 | A14645 | 321 | A02416 | A15317 | 165 |
| A02416 | A15318 | 152 | A02416 | A15453 | 240 |
| A02416 | A15601 | 171 | A02416 | A15603 | 156 |
| A02416 | A15607 | 188 | A02416 | A15608 | 265 |
| A02416 | A15964 | 157 | A02416 | A16047 | 305 |
| A02416 | A16055 | 195 | A02416 | A16112 | 452 |
| A02416 | A16256 | 441 | A02416 | A16711 | 151 |
| A02417 | A02418 | 408 | A02417 | A02469 | 326 |
| A02417 | A02488 | 307 | A02417 | A02493 | 486 |
| A02417 | A02575 | 283 | A02417 | A02579 | 307 |
| A02417 | A02671 | 165 | A02417 | A02702 | 311 |
| A02417 | A02703 | 246 | A02417 | A02758 | 341 |
| A02417 | A02785 | 218 | A02417 | A02811 | 344 |
| A02417 | A02814 | 299 | A02417 | A02943 | 390 |
| A02417 | A03020 | 429 | A02417 | A03107 | 265 |
| A02417 | A03120 | 398 | A02417 | A03537 | 393 |
| A02417 | A03583 | 380 | A02417 | A03585 | 371 |
| A02417 | A03653 | 313 | A02417 | A03847 | 408 |
| A02417 | A03870 | 398 | A02417 | A03872 | 363 |
| A02417 | A04004 | 346 | A02417 | A04031 | 374 |
| A02417 | A04123 | 398 | A02417 | A04260 | 285 |
| A02417 | A04560 | 380 | A02417 | A04713 | 374 |
| A02417 | A04905 | 358 | A02417 | A05036 | 390 |
| A02417 | A09800 | 429 | A02417 | A14366 | 234 |
| A02418 | A02421 | 339 | A02418 | A02434 | 262 |
| A02418 | A02488 | 461 | A02418 | A02493 | 385 |
| A02418 | A02586 | 363 | A02418 | A02599 | 290 |
| A02418 | A02629 | 241 | A02418 | A02694 | 235 |
| A02418 | A02702 | 196 | A02418 | A02744 | 154 |
| A02418 | A02749 | 458 | A02418 | A02819 | 157 |
| A02418 | A02837 | 232 | A02418 | A02859 | 294 |
| A02418 | A02869 | 176 | A02418 | A03041 | 263 |
| A02418 | A03090 | 201 | A02418 | A03101 | 249 |
| A02418 | A03112 | 430 | A02418 | A03130 | 353 |
| A02418 | A03177 | 201 | A02418 | A03201 | 223 |
| A02418 | A03309 | 321 | A02418 | A03343 | 339 |



|        |        |     |        |        |     |
|--------|--------|-----|--------|--------|-----|
| A02418 | A03406 | 157 | A02418 | A03515 | 230 |
| A02418 | A03630 | 317 | A02418 | A03845 | 271 |
| A02418 | A03984 | 160 | A02418 | A03990 | 162 |
| A02418 | A04256 | 208 | A02418 | A04293 | 288 |
| A02418 | A04901 | 270 | A02418 | A04971 | 263 |
| A02418 | A05122 | 162 | A02418 | A05299 | 257 |
| A02418 | A05411 | 180 | A02418 | A05701 | 176 |
| A02418 | A06260 | 339 | A02418 | A06400 | 221 |
| A02418 | A06487 | 389 | A02418 | A06584 | 180 |
| A02418 | A06595 | 167 | A02418 | A06623 | 420 |
| A02418 | A07127 | 252 | A02418 | A07165 | 269 |
| A02418 | A07178 | 243 | A02418 | A07671 | 389 |
| A02418 | A07935 | 200 | A02418 | A08019 | 389 |
| A02418 | A08020 | 389 | A02418 | A08021 | 389 |
| A02418 | A08070 | 291 | A02418 | A09368 | 361 |
| A02418 | A10313 | 281 | A02418 | A12079 | 334 |
| A02418 | A12357 | 218 | A02418 | A12626 | 389 |
| A02418 | A13346 | 168 | A02418 | A14048 | 243 |
| A02418 | A14640 | 307 | A02418 | A14643 | 226 |
| A02418 | A14984 | 389 | A02419 | A02425 | 168 |
| A02419 | A02465 | 208 | A02419 | A02551 | 270 |
| A02419 | A02634 | 263 | A02419 | A02756 | 152 |
| A02419 | A02783 | 347 | A02419 | A02787 | 154 |
| A02419 | A02788 | 259 | A02419 | A02803 | 119 |
| A02419 | A02874 | 477 | A02419 | A02875 | 277 |
| A02419 | A02887 | 232 | A02419 | A03054 | 238 |
| A02419 | A03094 | 285 | A02419 | A03100 | 205 |
| A02419 | A03209 | 480 | A02419 | A03271 | 329 |
| A02419 | A03611 | 159 | A02419 | A03817 | 269 |
| A02419 | A04018 | 302 | A02419 | A04020 | 191 |
| A02419 | A04965 | 180 | A02419 | A05084 | 344 |
| A02419 | A05176 | 224 | A02419 | A05363 | 266 |
| A02419 | A05408 | 383 | A02419 | A06249 | 373 |
| A02419 | A06306 | 449 | A02419 | A07166 | 193 |
| A02419 | A09549 | 463 | A02419 | A11064 | 317 |
| A02419 | A12361 | 202 | A02419 | A14190 | 324 |
| A02419 | A14210 | 198 | A02419 | A14381 | 191 |
| A02419 | A14603 | 340 | A02419 | A15498 | 204 |
| A02419 | A15529 | 374 | A02419 | A15913 | 191 |
| A02419 | A15976 | 212 | A02420 | A02689 | 297 |
| A02420 | A02789 | 288 | A02420 | A03846 | 296 |
| A02420 | A04334 | 262 | A02420 | A04622 | 170 |
| A02420 | A04938 | 378 | A02420 | A05914 | 260 |
| A02420 | A06620 | 352 | A02420 | A07180 | 196 |
| A02421 | A02786 | 258 | A02421 | A02792 | 367 |
| A02421 | A02837 | 208 | A02421 | A03112 | 229 |

|        |        |     |        |        |     |
|--------|--------|-----|--------|--------|-----|
| A02421 | A04308 | 389 | A02422 | A02423 | 352 |
| A02422 | A03419 | 278 | A02422 | A04147 | 353 |
| A02423 | A02425 | 165 | A02423 | A02465 | 491 |
| A02423 | A02668 | 477 | A02423 | A02689 | 171 |
| A02423 | A02756 | 491 | A02423 | A02783 | 217 |
| A02423 | A03053 | 486 | A02423 | A03054 | 424 |
| A02423 | A03126 | 91  | A02423 | A03144 | 188 |
| A02423 | A03540 | 324 | A02423 | A03578 | 200 |
| A02423 | A03639 | 322 | A02423 | A04163 | 241 |
| A02423 | A04225 | 944 | A02423 | A04391 | 313 |
| A02423 | A04398 | 196 | A02423 | A04423 | 291 |
| A02423 | A04462 | 352 | A02423 | A04481 | 420 |
| A02423 | A04484 | 938 | A02423 | A04562 | 251 |
| A02423 | A04908 | 160 | A02423 | A05020 | 245 |
| A02423 | A05310 | 219 | A02423 | A05533 | 348 |
| A02423 | A05670 | 305 | A02423 | A06086 | 419 |
| A02423 | A06242 | 174 | A02423 | A06359 | 193 |
| A02423 | A06473 | 218 | A02423 | A06773 | 446 |
| A02423 | A06843 | 319 | A02423 | A07141 | 151 |
| A02423 | A09217 | 363 | A02423 | A12366 | 382 |
| A02423 | A14194 | 372 | A02423 | A16636 | 480 |
| A02424 | A02425 | 262 | A02424 | A02501 | 188 |
| A02424 | A02583 | 269 | A02424 | A02760 | 240 |
| A02424 | A03049 | 168 | A02424 | A03100 | 168 |
| A02424 | A03633 | 274 | A02424 | A03642 | 345 |
| A02424 | A04216 | 271 | A02424 | A04256 | 196 |
| A02424 | A04375 | 221 | A02424 | A04406 | 176 |
| A02424 | A04417 | 201 | A02424 | A04423 | 263 |
| A02424 | A04468 | 301 | A02424 | A04491 | 238 |
| A02424 | A04747 | 219 | A02424 | A05176 | 188 |
| A02424 | A07807 | 319 | A02424 | A08692 | 224 |
| A02424 | A08807 | 288 | A02424 | A08861 | 167 |
| A02424 | A09127 | 480 | A02424 | A09387 | 281 |
| A02424 | A09815 | 366 | A02424 | A09900 | 213 |
| A02424 | A11099 | 347 | A02424 | A11738 | 227 |
| A02424 | A12383 | 163 | A02424 | A12720 | 353 |
| A02424 | A12893 | 226 | A02424 | A13484 | 185 |
| A02424 | A14375 | 168 | A02424 | A14379 | 157 |
| A02424 | A15287 | 256 | A02424 | A15391 | 219 |
| A02424 | A16703 | 344 | A02425 | A02429 | 402 |
| A02425 | A02435 | 183 | A02425 | A02465 | 139 |
| A02425 | A02472 | 104 | A02425 | A02481 | 232 |
| A02425 | A02751 | 198 | A02425 | A02759 | 165 |
| A02425 | A02772 | 468 | A02425 | A02790 | 475 |
| A02425 | A02803 | 475 | A02425 | A02864 | 364 |
| A02425 | A02875 | 188 | A02425 | A02889 | 429 |

|        |        |     |        |        |     |
|--------|--------|-----|--------|--------|-----|
| A02425 | A03054 | 302 | A02425 | A03110 | 477 |
| A02425 | A03126 | 110 | A02425 | A03127 | 241 |
| A02425 | A03458 | 350 | A02425 | A03633 | 368 |
| A02425 | A03639 | 123 | A02425 | A03809 | 486 |
| A02425 | A03826 | 373 | A02425 | A03942 | 241 |
| A02425 | A03961 | 441 | A02425 | A04147 | 168 |
| A02425 | A04160 | 299 | A02425 | A04180 | 245 |
| A02425 | A04216 | 455 | A02425 | A04218 | 363 |
| A02425 | A04256 | 162 | A02425 | A04320 | 205 |
| A02425 | A04380 | 276 | A02425 | A04398 | 257 |
| A02425 | A04422 | 174 | A02425 | A04471 | 257 |
| A02425 | A04490 | 469 | A02425 | A04522 | 288 |
| A02425 | A04676 | 226 | A02425 | A04682 | 324 |
| A02425 | A04751 | 347 | A02425 | A04813 | 216 |
| A02425 | A04867 | 180 | A02425 | A05288 | 173 |
| A02425 | A05493 | 254 | A02425 | A05533 | 152 |
| A02425 | A05784 | 368 | A02425 | A05889 | 235 |
| A02425 | A06086 | 380 | A02425 | A06597 | 243 |
| A02425 | A06610 | 159 | A02425 | A06703 | 276 |
| A02425 | A06762 | 191 | A02425 | A07188 | 285 |
| A02425 | A08837 | 243 | A02425 | A09220 | 400 |
| A02425 | A09395 | 212 | A02425 | A09570 | 260 |
| A02425 | A10735 | 436 | A02425 | A13370 | 276 |
| A02425 | A14190 | 374 | A02425 | A14198 | 362 |
| A02425 | A14210 | 396 | A02425 | A14259 | 404 |
| A02425 | A14369 | 436 | A02425 | A14370 | 412 |
| A02425 | A14371 | 466 | A02425 | A14379 | 249 |
| A02425 | A14429 | 313 | A02425 | A14443 | 907 |
| A02425 | A14511 | 420 | A02425 | A15230 | 291 |
| A02425 | A15512 | 201 | A02425 | A15641 | 185 |
| A02425 | A15732 | 171 | A02426 | A02791 | 345 |
| A02426 | A04075 | 324 | A02426 | A05302 | 396 |
| A02427 | A02428 | 291 | A02427 | A02436 | 241 |
| A02427 | A02447 | 314 | A02427 | A02450 | 384 |
| A02427 | A02468 | 491 | A02427 | A02469 | 251 |
| A02427 | A02470 | 246 | A02427 | A02484 | 294 |
| A02427 | A02504 | 243 | A02427 | A02616 | 296 |
| A02427 | A02621 | 238 | A02427 | A02756 | 297 |
| A02427 | A02760 | 283 | A02427 | A02771 | 205 |
| A02427 | A02944 | 185 | A02427 | A03028 | 348 |
| A02427 | A03056 | 409 | A02427 | A03080 | 184 |
| A02427 | A03107 | 457 | A02427 | A03123 | 347 |
| A02427 | A03124 | 388 | A02427 | A03127 | 451 |
| A02427 | A03926 | 398 | A02427 | A04023 | 267 |
| A02427 | A04074 | 345 | A02427 | A04092 | 249 |
| A02427 | A04193 | 291 | A02427 | A04225 | 347 |

|        |        |     |        |        |     |
|--------|--------|-----|--------|--------|-----|
| A02427 | A04326 | 351 | A02427 | A04349 | 449 |
| A02427 | A04384 | 340 | A02427 | A04402 | 351 |
| A02427 | A04460 | 332 | A02427 | A04486 | 344 |
| A02427 | A05288 | 424 | A02427 | A05521 | 401 |
| A02427 | A05780 | 351 | A02427 | A05932 | 401 |
| A02427 | A06219 | 360 | A02427 | A07019 | 263 |
| A02427 | A07559 | 369 | A02427 | A08086 | 307 |
| A02427 | A08869 | 491 | A02427 | A09388 | 441 |
| A02427 | A09390 | 299 | A02427 | A14722 | 371 |
| A02427 | A15498 | 224 | A02427 | A15606 | 372 |
| A02428 | A02441 | 485 | A02428 | A02444 | 419 |
| A02428 | A02450 | 477 | A02428 | A02468 | 360 |
| A02428 | A02470 | 485 | A02428 | A02484 | 332 |
| A02428 | A02490 | 180 | A02428 | A02666 | 443 |
| A02428 | A02671 | 278 | A02428 | A02672 | 195 |
| A02428 | A02758 | 307 | A02428 | A02760 | 185 |
| A02428 | A02761 | 260 | A02428 | A02966 | 180 |
| A02428 | A03056 | 63  | A02428 | A03060 | 396 |
| A02428 | A03062 | 358 | A02428 | A03076 | 465 |
| A02428 | A03107 | 84  | A02428 | A03135 | 283 |
| A02428 | A03178 | 221 | A02428 | A03926 | 327 |
| A02428 | A03978 | 297 | A02428 | A04092 | 449 |
| A02428 | A04253 | 266 | A02428 | A04349 | 243 |
| A02428 | A04740 | 230 | A02428 | A04870 | 313 |
| A02428 | A05584 | 288 | A02428 | A05590 | 290 |
| A02428 | A05654 | 279 | A02428 | A06177 | 418 |
| A02428 | A06283 | 319 | A02428 | A06403 | 277 |
| A02428 | A06949 | 273 | A02428 | A06981 | 208 |
| A02428 | A07266 | 312 | A02428 | A07511 | 212 |
| A02428 | A09092 | 413 | A02428 | A09364 | 271 |
| A02428 | A09778 | 345 | A02428 | A10083 | 324 |
| A02428 | A10683 | 176 | A02428 | A12799 | 356 |
| A02428 | A12801 | 356 | A02428 | A13126 | 398 |
| A02428 | A14194 | 162 | A02428 | A15226 | 377 |
| A02428 | A15233 | 328 | A02428 | A15240 | 290 |
| A02428 | A15249 | 297 | A02428 | A15258 | 200 |
| A02428 | A15272 | 374 | A02428 | A15279 | 334 |
| A02428 | A16150 | 334 | A02428 | A16636 | 210 |
| A02429 | A02465 | 234 | A02429 | A03076 | 180 |
| A02429 | A03314 | 219 | A02429 | A03458 | 306 |
| A02429 | A03536 | 198 | A02429 | A03750 | 227 |
| A02429 | A03818 | 218 | A02429 | A03851 | 281 |
| A02429 | A03942 | 341 | A02429 | A03961 | 351 |
| A02429 | A04080 | 165 | A02429 | A04162 | 228 |
| A02429 | A04218 | 319 | A02429 | A05709 | 318 |
| A02429 | A06762 | 281 | A02429 | A07311 | 899 |

|        |        |     |        |        |     |
|--------|--------|-----|--------|--------|-----|
| A02429 | A08608 | 240 | A02429 | A08694 | 372 |
| A02429 | A09394 | 307 | A02429 | A14007 | 182 |
| A02429 | A14072 | 191 | A02429 | A14369 | 276 |
| A02429 | A14429 | 372 | A02429 | A14444 | 899 |
| A02429 | A14490 | 201 | A02429 | A14577 | 364 |
| A02431 | A02959 | 405 | A02431 | A03010 | 193 |
| A02431 | A03049 | 184 | A02431 | A03104 | 202 |
| A02431 | A03110 | 119 | A02431 | A03183 | 196 |
| A02431 | A03259 | 307 | A02431 | A03314 | 306 |
| A02431 | A03639 | 302 | A02431 | A03748 | 232 |
| A02431 | A03851 | 221 | A02431 | A03925 | 346 |
| A02431 | A03942 | 429 | A02431 | A04076 | 188 |
| A02431 | A04169 | 407 | A02431 | A04492 | 375 |
| A02431 | A04881 | 481 | A02431 | A05093 | 335 |
| A02431 | A05157 | 251 | A02431 | A06488 | 201 |
| A02431 | A06534 | 218 | A02431 | A07803 | 157 |
| A02431 | A08630 | 358 | A02431 | A08714 | 218 |
| A02431 | A08840 | 263 | A02431 | A08859 | 465 |
| A02431 | A08881 | 173 | A02431 | A09447 | 291 |
| A02431 | A09732 | 484 | A02431 | A09733 | 461 |
| A02431 | A09744 | 180 | A02431 | A09833 | 213 |
| A02431 | A09848 | 196 | A02431 | A09933 | 180 |
| A02431 | A10164 | 278 | A02431 | A10563 | 174 |
| A02431 | A11392 | 232 | A02431 | A11415 | 341 |
| A02431 | A11537 | 216 | A02431 | A11543 | 182 |
| A02431 | A11784 | 274 | A02431 | A12854 | 199 |
| A02431 | A13826 | 428 | A02431 | A13899 | 462 |
| A02431 | A13950 | 288 | A02431 | A14010 | 288 |
| A02431 | A14129 | 297 | A02431 | A14190 | 195 |
| A02431 | A14371 | 373 | A02431 | A14379 | 171 |
| A02431 | A14511 | 449 | A02431 | A14536 | 302 |
| A02431 | A14604 | 168 | A02431 | A14667 | 193 |
| A02431 | A15184 | 362 | A02431 | A15277 | 204 |
| A02431 | A15292 | 489 | A02431 | A15310 | 404 |
| A02431 | A15312 | 279 | A02431 | A15316 | 249 |
| A02431 | A15317 | 473 | A02431 | A15318 | 266 |
| A02431 | A15334 | 272 | A02431 | A15346 | 332 |
| A02431 | A15348 | 480 | A02431 | A15349 | 391 |
| A02431 | A15352 | 480 | A02431 | A15404 | 283 |
| A02431 | A15436 | 307 | A02431 | A15444 | 417 |
| A02431 | A15445 | 305 | A02431 | A15452 | 468 |
| A02431 | A15454 | 341 | A02431 | A15456 | 363 |
| A02431 | A15495 | 490 | A02431 | A15515 | 394 |
| A02431 | A15799 | 247 | A02431 | A15815 | 326 |
| A02431 | A15828 | 256 | A02431 | A16224 | 182 |
| A02432 | A02468 | 204 | A02432 | A02470 | 93  |

|        |        |     |        |        |     |
|--------|--------|-----|--------|--------|-----|
| A02432 | A02730 | 208 | A02432 | A02992 | 294 |
| A02432 | A03010 | 191 | A02432 | A03016 | 236 |
| A02432 | A03027 | 369 | A02432 | A03167 | 477 |
| A02432 | A03168 | 413 | A02432 | A03204 | 361 |
| A02432 | A03225 | 246 | A02432 | A03319 | 405 |
| A02432 | A03513 | 419 | A02432 | A03692 | 329 |
| A02432 | A03722 | 180 | A02432 | A03737 | 345 |
| A02432 | A03766 | 279 | A02432 | A03858 | 156 |
| A02432 | A03917 | 274 | A02432 | A04244 | 263 |
| A02432 | A04367 | 339 | A02432 | A04536 | 256 |
| A02432 | A04778 | 259 | A02432 | A04961 | 283 |
| A02432 | A04995 | 229 | A02432 | A05098 | 451 |
| A02432 | A05155 | 187 | A02432 | A05289 | 232 |
| A02432 | A05416 | 457 | A02432 | A05417 | 179 |
| A02432 | A05472 | 195 | A02432 | A05659 | 339 |
| A02432 | A05757 | 227 | A02432 | A05789 | 402 |
| A02432 | A05985 | 288 | A02432 | A06282 | 324 |
| A02432 | A06358 | 188 | A02432 | A06402 | 291 |
| A02432 | A06422 | 240 | A02432 | A06439 | 167 |
| A02432 | A06641 | 246 | A02432 | A06654 | 241 |
| A02432 | A06689 | 156 | A02432 | A06970 | 323 |
| A02432 | A06981 | 272 | A02432 | A07031 | 176 |
| A02432 | A07157 | 348 | A02432 | A07376 | 277 |
| A02432 | A07477 | 460 | A02432 | A07590 | 486 |
| A02432 | A07721 | 307 | A02432 | A07736 | 465 |
| A02432 | A07794 | 180 | A02432 | A07933 | 219 |
| A02432 | A07973 | 193 | A02432 | A08155 | 291 |
| A02432 | A09876 | 368 | A02432 | A10452 | 215 |
| A02432 | A10612 | 279 | A02432 | A10659 | 452 |
| A02432 | A10686 | 441 | A02432 | A10694 | 279 |
| A02432 | A11576 | 167 | A02432 | A13735 | 255 |
| A02432 | A13829 | 402 | A02432 | A14097 | 213 |
| A02432 | A14128 | 427 | A02432 | A14654 | 224 |
| A02432 | A14803 | 199 | A02432 | A14870 | 213 |
| A02432 | A14872 | 241 | A02432 | A15430 | 185 |
| A02432 | A15925 | 330 | A02432 | A15934 | 353 |
| A02432 | A16746 | 339 | A02433 | A02695 | 159 |
| A02433 | A07311 | 899 | A02433 | A15447 | 258 |
| A02434 | A02435 | 445 | A02434 | A02585 | 281 |
| A02434 | A02636 | 269 | A02434 | A02961 | 221 |
| A02434 | A03028 | 255 | A02434 | A03112 | 256 |
| A02434 | A03131 | 341 | A02434 | A03184 | 329 |
| A02434 | A05477 | 353 | A02434 | A06339 | 316 |
| A02434 | A06825 | 160 | A02434 | A06832 | 219 |
| A02434 | A07399 | 252 | A02434 | A08572 | 229 |
| A02434 | A10743 | 303 | A02434 | A11331 | 272 |

|        |        |     |        |        |     |
|--------|--------|-----|--------|--------|-----|
| A02434 | A13626 | 217 | A02435 | A02465 | 221 |
| A02435 | A02518 | 159 | A02435 | A02566 | 348 |
| A02435 | A02595 | 380 | A02435 | A02654 | 218 |
| A02435 | A02672 | 319 | A02435 | A02676 | 323 |
| A02435 | A02787 | 168 | A02435 | A03028 | 417 |
| A02435 | A03077 | 221 | A02435 | A03107 | 393 |
| A02435 | A03127 | 412 | A02435 | A03415 | 177 |
| A02435 | A03965 | 235 | A02435 | A03968 | 321 |
| A02435 | A04074 | 414 | A02435 | A04080 | 152 |
| A02435 | A04349 | 352 | A02435 | A04379 | 305 |
| A02435 | A04383 | 413 | A02435 | A04429 | 317 |
| A02435 | A04460 | 334 | A02435 | A06489 | 316 |
| A02435 | A06949 | 168 | A02435 | A07116 | 337 |
| A02435 | A08572 | 196 | A02435 | A08837 | 202 |
| A02435 | A09388 | 283 | A02435 | A09633 | 360 |
| A02435 | A10018 | 216 | A02435 | A10148 | 213 |
| A02435 | A10858 | 373 | A02435 | A10932 | 402 |
| A02435 | A13899 | 182 | A02435 | A14163 | 195 |
| A02435 | A14236 | 193 | A02435 | A14489 | 260 |
| A02435 | A15258 | 296 | A02435 | A15260 | 373 |
| A02435 | A15277 | 240 | A02436 | A02450 | 491 |
| A02436 | A02468 | 383 | A02436 | A02470 | 63  |
| A02436 | A02484 | 377 | A02436 | A02515 | 243 |
| A02436 | A03028 | 474 | A02436 | A03056 | 491 |
| A02436 | A03062 | 188 | A02436 | A03072 | 238 |
| A02436 | A03107 | 491 | A02436 | A03121 | 485 |
| A02436 | A03137 | 367 | A02436 | A03138 | 152 |
| A02436 | A03246 | 414 | A02436 | A03537 | 230 |
| A02436 | A03611 | 163 | A02436 | A03709 | 475 |
| A02436 | A03739 | 193 | A02436 | A03854 | 391 |
| A02436 | A03926 | 283 | A02436 | A04033 | 468 |
| A02436 | A04048 | 205 | A02436 | A04062 | 836 |
| A02436 | A04215 | 385 | A02436 | A04326 | 238 |
| A02436 | A04349 | 489 | A02436 | A04352 | 260 |
| A02436 | A04382 | 260 | A02436 | A04384 | 348 |
| A02436 | A04460 | 474 | A02436 | A04807 | 174 |
| A02436 | A05082 | 262 | A02436 | A05288 | 334 |
| A02436 | A05340 | 201 | A02436 | A05381 | 272 |
| A02436 | A05701 | 405 | A02436 | A05779 | 303 |
| A02436 | A05795 | 475 | A02436 | A05881 | 174 |
| A02436 | A05948 | 302 | A02436 | A05958 | 154 |
| A02436 | A05975 | 329 | A02436 | A05976 | 285 |
| A02436 | A05977 | 285 | A02436 | A05978 | 329 |
| A02436 | A06660 | 360 | A02436 | A06677 | 196 |
| A02436 | A06891 | 165 | A02436 | A06998 | 385 |
| A02436 | A07019 | 485 | A02436 | A07192 | 191 |

|        |        |     |        |        |     |
|--------|--------|-----|--------|--------|-----|
| A02436 | A07400 | 329 | A02436 | A07559 | 491 |
| A02436 | A07731 | 196 | A02436 | A07739 | 238 |
| A02436 | A08878 | 177 | A02436 | A08990 | 165 |
| A02436 | A09124 | 236 | A02436 | A09364 | 358 |
| A02436 | A09860 | 160 | A02436 | A10223 | 285 |
| A02436 | A10386 | 196 | A02436 | A10466 | 183 |
| A02436 | A10665 | 406 | A02436 | A11014 | 452 |
| A02436 | A11695 | 167 | A02436 | A13337 | 329 |
| A02436 | A14207 | 157 | A02436 | A14366 | 524 |
| A02436 | A14570 | 246 | A02436 | A14596 | 569 |
| A02436 | A14621 | 480 | A02436 | A14635 | 196 |
| A02436 | A14659 | 167 | A02436 | A15270 | 204 |
| A02436 | A15271 | 208 | A02436 | A15288 | 154 |
| A02436 | A15297 | 364 | A02436 | A15323 | 486 |
| A02436 | A16157 | 151 | A02436 | A16879 | 288 |
| A02437 | A02980 | 368 | A02437 | A03787 | 449 |
| A02437 | A05765 | 269 | A02437 | A08568 | 310 |
| A02437 | A09715 | 362 | A02437 | A10286 | 269 |
| A02437 | A11936 | 374 | A02437 | A13989 | 327 |
| A02437 | A15321 | 269 | A02437 | A15555 | 269 |
| A02437 | A16255 | 269 | A02438 | A02439 | 491 |
| A02438 | A02456 | 302 | A02438 | A02637 | 243 |
| A02438 | A02654 | 240 | A02438 | A02787 | 191 |
| A02438 | A02951 | 314 | A02438 | A02952 | 414 |
| A02438 | A03316 | 340 | A02438 | A03683 | 341 |
| A02438 | A03684 | 308 | A02438 | A03788 | 188 |
| A02438 | A03974 | 485 | A02438 | A04110 | 281 |
| A02438 | A04130 | 363 | A02438 | A04461 | 436 |
| A02438 | A05234 | 218 | A02438 | A05517 | 312 |
| A02438 | A05577 | 419 | A02438 | A05597 | 446 |
| A02438 | A05679 | 475 | A02438 | A06415 | 491 |
| A02438 | A06604 | 427 | A02438 | A08881 | 230 |
| A02438 | A08908 | 303 | A02438 | A10571 | 378 |
| A02438 | A10590 | 408 | A02438 | A10605 | 469 |
| A02438 | A13131 | 341 | A02438 | A13667 | 283 |
| A02438 | A13826 | 115 | A02438 | A13988 | 481 |
| A02438 | A14012 | 488 | A02438 | A14071 | 486 |
| A02438 | A14374 | 314 | A02438 | A14381 | 228 |
| A02438 | A14391 | 398 | A02438 | A14599 | 279 |
| A02438 | A15400 | 180 | A02438 | A15427 | 283 |
| A02439 | A02456 | 447 | A02439 | A02457 | 329 |
| A02439 | A02458 | 443 | A02439 | A02459 | 313 |
| A02439 | A02460 | 480 | A02439 | A02637 | 277 |
| A02439 | A02654 | 462 | A02439 | A02655 | 484 |
| A02439 | A02693 | 174 | A02439 | A02727 | 224 |
| A02439 | A02739 | 179 | A02439 | A02788 | 180 |



|        |        |     |        |        |     |
|--------|--------|-----|--------|--------|-----|
| A02439 | A02803 | 265 | A02439 | A02808 | 446 |
| A02439 | A02834 | 216 | A02439 | A02875 | 303 |
| A02439 | A02917 | 157 | A02439 | A02932 | 313 |
| A02439 | A02945 | 414 | A02439 | A02952 | 362 |
| A02439 | A02962 | 213 | A02439 | A03006 | 393 |
| A02439 | A03045 | 246 | A02439 | A03239 | 462 |
| A02439 | A03263 | 366 | A02439 | A03282 | 193 |
| A02439 | A03316 | 265 | A02439 | A03735 | 218 |
| A02439 | A03742 | 204 | A02439 | A03782 | 252 |
| A02439 | A03788 | 488 | A02439 | A03804 | 277 |
| A02439 | A03900 | 356 | A02439 | A03923 | 213 |
| A02439 | A03936 | 217 | A02439 | A03974 | 462 |
| A02439 | A04025 | 236 | A02439 | A04130 | 484 |
| A02439 | A04217 | 167 | A02439 | A04244 | 228 |
| A02439 | A04461 | 467 | A02439 | A04518 | 257 |
| A02439 | A04589 | 408 | A02439 | A04590 | 352 |
| A02439 | A05277 | 249 | A02439 | A05487 | 157 |
| A02439 | A05517 | 467 | A02439 | A05577 | 491 |
| A02439 | A05597 | 490 | A02439 | A05679 | 489 |
| A02439 | A06047 | 372 | A02439 | A06415 | 491 |
| A02439 | A06604 | 486 | A02439 | A06747 | 168 |
| A02439 | A06899 | 457 | A02439 | A06908 | 210 |
| A02439 | A07053 | 456 | A02439 | A07135 | 213 |
| A02439 | A07145 | 363 | A02439 | A07152 | 474 |
| A02439 | A07166 | 357 | A02439 | A08651 | 307 |
| A02439 | A08680 | 372 | A02439 | A08908 | 217 |
| A02439 | A09354 | 352 | A02439 | A09750 | 154 |
| A02439 | A10585 | 344 | A02439 | A10590 | 352 |
| A02439 | A10605 | 486 | A02439 | A13699 | 193 |
| A02439 | A13821 | 380 | A02439 | A13903 | 480 |
| A02439 | A13988 | 463 | A02439 | A14012 | 490 |
| A02439 | A14071 | 483 | A02439 | A14125 | 490 |
| A02439 | A14199 | 270 | A02439 | A14316 | 249 |
| A02439 | A14328 | 372 | A02439 | A14366 | 473 |
| A02439 | A14372 | 475 | A02439 | A14374 | 475 |
| A02439 | A14391 | 486 | A02439 | A14392 | 332 |
| A02439 | A14439 | 388 | A02439 | A14598 | 228 |
| A02439 | A14599 | 458 | A02439 | A14617 | 352 |
| A02439 | A15394 | 152 | A02439 | A15425 | 472 |
| A02439 | A15426 | 339 | A02439 | A15475 | 202 |
| A02439 | A15516 | 385 | A02439 | A15640 | 319 |
| A02439 | A15642 | 293 | A02439 | A15964 | 205 |
| A02439 | A16222 | 247 | A02441 | A02444 | 366 |
| A02441 | A02470 | 202 | A02441 | A02501 | 307 |
| A02441 | A03725 | 165 | A02441 | A03990 | 173 |
| A02441 | A04440 | 348 | A02441 | A04911 | 353 |

|        |        |     |        |        |     |
|--------|--------|-----|--------|--------|-----|
| A02441 | A08114 | 230 | A02441 | A12466 | 425 |
| A02441 | A14588 | 308 | A02442 | A03968 | 317 |
| A02442 | A04622 | 195 | A02442 | A05751 | 477 |
| A02443 | A02469 | 190 | A02443 | A02476 | 491 |
| A02443 | A02477 | 429 | A02443 | A02611 | 156 |
| A02443 | A02673 | 267 | A02443 | A02686 | 205 |
| A02443 | A02691 | 208 | A02443 | A03027 | 221 |
| A02443 | A03028 | 157 | A02443 | A03042 | 285 |
| A02443 | A03050 | 195 | A02443 | A03104 | 398 |
| A02443 | A03107 | 235 | A02443 | A03120 | 313 |
| A02443 | A03131 | 266 | A02443 | A03172 | 256 |
| A02443 | A03186 | 363 | A02443 | A03195 | 190 |
| A02443 | A03324 | 218 | A02443 | A03523 | 208 |
| A02443 | A03524 | 160 | A02443 | A03708 | 210 |
| A02443 | A03819 | 162 | A02443 | A04019 | 358 |
| A02443 | A04220 | 303 | A02443 | A04366 | 230 |
| A02443 | A04389 | 484 | A02443 | A04516 | 258 |
| A02443 | A04633 | 234 | A02443 | A04736 | 299 |
| A02443 | A04763 | 256 | A02443 | A04877 | 296 |
| A02443 | A04879 | 215 | A02443 | A04880 | 240 |
| A02443 | A05128 | 457 | A02443 | A05155 | 296 |
| A02443 | A05293 | 377 | A02443 | A05310 | 171 |
| A02443 | A05439 | 221 | A02443 | A06277 | 180 |
| A02443 | A06298 | 491 | A02443 | A06584 | 152 |
| A02443 | A06660 | 224 | A02443 | A06718 | 154 |
| A02443 | A06855 | 385 | A02443 | A07019 | 201 |
| A02443 | A07209 | 174 | A02443 | A07239 | 177 |
| A02443 | A07438 | 249 | A02443 | A07605 | 430 |
| A02443 | A07737 | 241 | A02443 | A08097 | 235 |
| A02443 | A08675 | 377 | A02443 | A08725 | 345 |
| A02443 | A08878 | 188 | A02443 | A08951 | 308 |
| A02443 | A09246 | 180 | A02443 | A09452 | 419 |
| A02443 | A09632 | 238 | A02443 | A09878 | 216 |
| A02443 | A10590 | 234 | A02443 | A10652 | 235 |
| A02443 | A11101 | 213 | A02443 | A11282 | 347 |
| A02443 | A11983 | 486 | A02443 | A12033 | 319 |
| A02443 | A12402 | 377 | A02443 | A13361 | 382 |
| A02443 | A13369 | 243 | A02443 | A13917 | 229 |
| A02443 | A14125 | 159 | A02443 | A14373 | 385 |
| A02443 | A14377 | 491 | A02443 | A14475 | 170 |
| A02443 | A14936 | 200 | A02443 | A15282 | 160 |
| A02443 | A15295 | 350 | A02443 | A15422 | 314 |
| A02443 | A15605 | 313 | A02443 | A15606 | 401 |
| A02443 | A15637 | 196 | A02443 | A15917 | 311 |
| A02443 | A16143 | 268 | A02443 | A17078 | 269 |
| A02444 | A02450 | 358 | A02444 | A02468 | 446 |

|        |        |     |        |        |     |
|--------|--------|-----|--------|--------|-----|
| A02444 | A02673 | 188 | A02444 | A02761 | 294 |
| A02444 | A02924 | 265 | A02444 | A03056 | 196 |
| A02444 | A03062 | 490 | A02444 | A03107 | 490 |
| A02444 | A03961 | 272 | A02444 | A03990 | 159 |
| A02444 | A04326 | 385 | A02444 | A04336 | 438 |
| A02444 | A04337 | 184 | A02444 | A04349 | 441 |
| A02444 | A04383 | 358 | A02444 | A04384 | 377 |
| A02444 | A04465 | 385 | A02444 | A04870 | 419 |
| A02444 | A05801 | 391 | A02444 | A06255 | 477 |
| A02444 | A07233 | 412 | A02444 | A08342 | 457 |
| A02444 | A09240 | 374 | A02444 | A09365 | 400 |
| A02444 | A11411 | 350 | A02444 | A11698 | 388 |
| A02444 | A11977 | 400 | A02444 | A12596 | 457 |
| A02444 | A14423 | 329 | A02444 | A15277 | 296 |
| A02444 | A15498 | 218 | A02445 | A03401 | 262 |
| A02447 | A02616 | 345 | A02447 | A02687 | 160 |
| A02447 | A03071 | 338 | A02447 | A03081 | 408 |
| A02447 | A03127 | 356 | A02447 | A03211 | 479 |
| A02447 | A03651 | 200 | A02447 | A03922 | 184 |
| A02447 | A04078 | 316 | A02447 | A04484 | 377 |
| A02447 | A04769 | 366 | A02447 | A05082 | 215 |
| A02447 | A06623 | 249 | A02447 | A08911 | 310 |
| A02447 | A09240 | 374 | A02447 | A09388 | 332 |
| A02447 | A14366 | 210 | A02449 | A02480 | 449 |
| A02449 | A02481 | 262 | A02449 | A03126 | 243 |
| A02449 | A07130 | 371 | A02449 | A07191 | 319 |
| A02449 | A14683 | 356 | A02449 | A16636 | 224 |
| A02450 | A02468 | 462 | A02450 | A02469 | 288 |
| A02450 | A02470 | 63  | A02450 | A02484 | 489 |
| A02450 | A02515 | 288 | A02450 | A02551 | 188 |
| A02450 | A02556 | 360 | A02450 | A02761 | 269 |
| A02450 | A02816 | 191 | A02450 | A02817 | 152 |
| A02450 | A02828 | 395 | A02450 | A03028 | 491 |
| A02450 | A03056 | 491 | A02450 | A03060 | 296 |
| A02450 | A03062 | 363 | A02450 | A03072 | 283 |
| A02450 | A03107 | 491 | A02450 | A03121 | 446 |
| A02450 | A03127 | 229 | A02450 | A03148 | 191 |
| A02450 | A03246 | 491 | A02450 | A03537 | 277 |
| A02450 | A03709 | 457 | A02450 | A03926 | 479 |
| A02450 | A03968 | 205 | A02450 | A04023 | 307 |
| A02450 | A04033 | 316 | A02450 | A04062 | 391 |
| A02450 | A04092 | 375 | A02450 | A04124 | 195 |
| A02450 | A04138 | 202 | A02450 | A04163 | 160 |
| A02450 | A04193 | 335 | A02450 | A04228 | 152 |
| A02450 | A04229 | 156 | A02450 | A04331 | 384 |
| A02450 | A04343 | 260 | A02450 | A04344 | 277 |

|        |        |     |        |        |     |
|--------|--------|-----|--------|--------|-----|
| A02450 | A04349 | 489 | A02450 | A04361 | 340 |
| A02450 | A04379 | 217 | A02450 | A04382 | 302 |
| A02450 | A04383 | 232 | A02450 | A04384 | 436 |
| A02450 | A04387 | 360 | A02450 | A04389 | 364 |
| A02450 | A04460 | 256 | A02450 | A04540 | 405 |
| A02450 | A04870 | 187 | A02450 | A04879 | 171 |
| A02450 | A04928 | 308 | A02450 | A05082 | 156 |
| A02450 | A05274 | 436 | A02450 | A05288 | 190 |
| A02450 | A05381 | 312 | A02450 | A05795 | 362 |
| A02450 | A06195 | 201 | A02450 | A06346 | 277 |
| A02450 | A06574 | 160 | A02450 | A07019 | 455 |
| A02450 | A07119 | 390 | A02450 | A07260 | 360 |
| A02450 | A07559 | 474 | A02450 | A07704 | 154 |
| A02450 | A08292 | 193 | A02450 | A08496 | 406 |
| A02450 | A08517 | 193 | A02450 | A09020 | 199 |
| A02450 | A09033 | 217 | A02450 | A09132 | 338 |
| A02450 | A09160 | 479 | A02450 | A09184 | 324 |
| A02450 | A09240 | 263 | A02450 | A09364 | 390 |
| A02450 | A09434 | 260 | A02450 | A09518 | 302 |
| A02450 | A09982 | 338 | A02450 | A10127 | 195 |
| A02450 | A10325 | 360 | A02450 | A10559 | 338 |
| A02450 | A11368 | 396 | A02450 | A11429 | 168 |
| A02450 | A11983 | 303 | A02450 | A14500 | 360 |
| A02450 | A14596 | 193 | A02450 | A14621 | 416 |
| A02450 | A15271 | 256 | A02450 | A16068 | 163 |
| A02450 | A16150 | 338 | A02451 | A02461 | 386 |
| A02451 | A02464 | 427 | A02451 | A03238 | 469 |
| A02451 | A04679 | 472 | A02451 | A05311 | 473 |
| A02451 | A05376 | 347 | A02451 | A07143 | 424 |
| A02452 | A02629 | 157 | A02452 | A02749 | 414 |
| A02452 | A03057 | 477 | A02452 | A03131 | 213 |
| A02452 | A03446 | 163 | A02452 | A03567 | 283 |
| A02452 | A03720 | 195 | A02452 | A03835 | 193 |
| A02452 | A04050 | 187 | A02452 | A04844 | 162 |
| A02452 | A04932 | 488 | A02452 | A04991 | 154 |
| A02452 | A05397 | 307 | A02452 | A06298 | 480 |
| A02452 | A06660 | 335 | A02452 | A06907 | 472 |
| A02452 | A08022 | 299 | A02452 | A08137 | 297 |
| A02452 | A08248 | 224 | A02452 | A08345 | 160 |
| A02452 | A08517 | 162 | A02452 | A08571 | 177 |
| A02452 | A08982 | 407 | A02452 | A09124 | 286 |
| A02452 | A09737 | 165 | A02452 | A10459 | 191 |
| A02452 | A10813 | 154 | A02452 | A11277 | 259 |
| A02452 | A11291 | 407 | A02452 | A11386 | 488 |
| A02452 | A11387 | 208 | A02452 | A11474 | 199 |
| A02452 | A11906 | 218 | A02452 | A13661 | 238 |

|        |        |     |        |        |     |
|--------|--------|-----|--------|--------|-----|
| A02452 | A13829 | 219 | A02452 | A13917 | 154 |
| A02452 | A14170 | 191 | A02452 | A14193 | 372 |
| A02452 | A14196 | 491 | A02452 | A14208 | 216 |
| A02452 | A14246 | 243 | A02452 | A14511 | 414 |
| A02452 | A14956 | 176 | A02452 | A15237 | 154 |
| A02452 | A15292 | 188 | A02452 | A15297 | 486 |
| A02452 | A15309 | 490 | A02452 | A15314 | 235 |
| A02452 | A15323 | 371 | A02452 | A15324 | 457 |
| A02452 | A15330 | 307 | A02452 | A15338 | 152 |
| A02452 | A15339 | 190 | A02452 | A15341 | 319 |
| A02452 | A15355 | 263 | A02452 | A15366 | 400 |
| A02452 | A15419 | 477 | A02452 | A15431 | 201 |
| A02452 | A15543 | 157 | A02452 | A15613 | 235 |
| A02452 | A16520 | 204 | A02452 | A17063 | 483 |
| A02453 | A05283 | 424 | A02454 | A02464 | 152 |
| A02454 | A02472 | 96  | A02454 | A02524 | 281 |
| A02454 | A02837 | 224 | A02454 | A02966 | 193 |
| A02454 | A03043 | 317 | A02454 | A03044 | 224 |
| A02454 | A03046 | 180 | A02454 | A03047 | 252 |
| A02454 | A03091 | 491 | A02454 | A03099 | 159 |
| A02454 | A03104 | 224 | A02454 | A03110 | 272 |
| A02454 | A03144 | 115 | A02454 | A03146 | 228 |
| A02454 | A03149 | 157 | A02454 | A03155 | 177 |
| A02454 | A03275 | 294 | A02454 | A03925 | 307 |
| A02454 | A03937 | 173 | A02454 | A04092 | 160 |
| A02454 | A04140 | 160 | A02454 | A04622 | 316 |
| A02454 | A04813 | 409 | A02454 | A05095 | 278 |
| A02454 | A05143 | 232 | A02454 | A05157 | 196 |
| A02454 | A05459 | 269 | A02454 | A05782 | 191 |
| A02454 | A06085 | 185 | A02454 | A06118 | 424 |
| A02454 | A06159 | 488 | A02454 | A06167 | 488 |
| A02454 | A06338 | 363 | A02454 | A06408 | 243 |
| A02454 | A06627 | 165 | A02454 | A06827 | 224 |
| A02454 | A07062 | 180 | A02454 | A07140 | 483 |
| A02454 | A07180 | 230 | A02454 | A07265 | 224 |
| A02454 | A07324 | 157 | A02454 | A07336 | 243 |
| A02454 | A07655 | 335 | A02454 | A07658 | 258 |
| A02454 | A07748 | 283 | A02454 | A08341 | 201 |
| A02454 | A08431 | 196 | A02454 | A08630 | 177 |
| A02454 | A08647 | 221 | A02454 | A08655 | 218 |
| A02454 | A08724 | 294 | A02454 | A08771 | 168 |
| A02454 | A08834 | 162 | A02454 | A08841 | 182 |
| A02454 | A09028 | 182 | A02454 | A09107 | 229 |
| A02454 | A09427 | 229 | A02454 | A09625 | 168 |
| A02454 | A10645 | 185 | A02454 | A10762 | 255 |
| A02454 | A11162 | 294 | A02454 | A11279 | 258 |

|        |        |     |        |        |     |
|--------|--------|-----|--------|--------|-----|
| A02454 | A12532 | 328 | A02454 | A12534 | 299 |
| A02454 | A13826 | 168 | A02454 | A14190 | 299 |
| A02454 | A14210 | 338 | A02454 | A14369 | 176 |
| A02454 | A14371 | 302 | A02454 | A14430 | 490 |
| A02454 | A14469 | 262 | A02454 | A14679 | 341 |
| A02454 | A14986 | 196 | A02454 | A15346 | 156 |
| A02454 | A15641 | 176 | A02454 | A15792 | 351 |
| A02454 | A15896 | 265 | A02454 | A15916 | 216 |
| A02454 | A15932 | 269 | A02454 | A17002 | 262 |
| A02454 | A17060 | 288 | A02455 | A02950 | 228 |
| A02455 | A03199 | 351 | A02455 | A05068 | 460 |
| A02455 | A06673 | 419 | A02455 | A06867 | 199 |
| A02455 | A08891 | 246 | A02455 | A14174 | 491 |
| A02456 | A02458 | 420 | A02456 | A02459 | 439 |
| A02456 | A02460 | 198 | A02456 | A02654 | 240 |
| A02456 | A02655 | 422 | A02456 | A02859 | 63  |
| A02456 | A02875 | 183 | A02456 | A02877 | 210 |
| A02456 | A02935 | 296 | A02456 | A03144 | 229 |
| A02456 | A03316 | 340 | A02456 | A03788 | 188 |
| A02456 | A04130 | 363 | A02456 | A04217 | 473 |
| A02456 | A04276 | 310 | A02456 | A04447 | 230 |
| A02456 | A05487 | 252 | A02456 | A05577 | 447 |
| A02456 | A05591 | 229 | A02456 | A05679 | 413 |
| A02456 | A06415 | 486 | A02456 | A07152 | 207 |
| A02456 | A07961 | 419 | A02456 | A08078 | 319 |
| A02456 | A08610 | 356 | A02456 | A10107 | 398 |
| A02456 | A10319 | 236 | A02456 | A10556 | 327 |
| A02456 | A10750 | 369 | A02456 | A11994 | 406 |
| A02456 | A13821 | 340 | A02456 | A13903 | 270 |
| A02456 | A13988 | 467 | A02456 | A14012 | 317 |
| A02456 | A14071 | 401 | A02456 | A14125 | 456 |
| A02456 | A14253 | 152 | A02456 | A15336 | 173 |
| A02456 | A15806 | 324 | A02457 | A02458 | 486 |
| A02457 | A02459 | 479 | A02457 | A02460 | 490 |
| A02457 | A02653 | 347 | A02457 | A02654 | 221 |
| A02457 | A02655 | 213 | A02457 | A02922 | 227 |
| A02457 | A02936 | 302 | A02457 | A02945 | 217 |
| A02457 | A02962 | 286 | A02457 | A03019 | 165 |
| A02457 | A03209 | 188 | A02457 | A03224 | 255 |
| A02457 | A03239 | 466 | A02457 | A03735 | 445 |
| A02457 | A03746 | 296 | A02457 | A03788 | 432 |
| A02457 | A03932 | 286 | A02457 | A03975 | 316 |
| A02457 | A04130 | 466 | A02457 | A04217 | 490 |
| A02457 | A04248 | 367 | A02457 | A04609 | 257 |
| A02457 | A04614 | 263 | A02457 | A04950 | 374 |
| A02457 | A05679 | 404 | A02457 | A06414 | 447 |

|        |        |     |        |        |     |
|--------|--------|-----|--------|--------|-----|
| A02457 | A06415 | 491 | A02457 | A06747 | 429 |
| A02457 | A07152 | 491 | A02457 | A07173 | 208 |
| A02457 | A08908 | 290 | A02457 | A09202 | 238 |
| A02457 | A09753 | 279 | A02457 | A10319 | 347 |
| A02457 | A10585 | 288 | A02457 | A10586 | 263 |
| A02457 | A12809 | 369 | A02457 | A13903 | 374 |
| A02457 | A13988 | 281 | A02457 | A14071 | 174 |
| A02457 | A14125 | 229 | A02457 | A14146 | 285 |
| A02457 | A14197 | 152 | A02457 | A14372 | 339 |
| A02457 | A14374 | 382 | A02457 | A14391 | 168 |
| A02457 | A14394 | 177 | A02457 | A14439 | 372 |
| A02457 | A15290 | 316 | A02457 | A15322 | 63  |
| A02457 | A15394 | 232 | A02457 | A15425 | 489 |
| A02457 | A15427 | 383 | A02457 | A15516 | 246 |
| A02457 | A15609 | 358 | A02457 | A15642 | 424 |
| A02457 | A15673 | 184 | A02457 | A16108 | 347 |
| A02458 | A02459 | 491 | A02458 | A02460 | 491 |
| A02458 | A02605 | 217 | A02458 | A02630 | 217 |
| A02458 | A02637 | 382 | A02458 | A02654 | 379 |
| A02458 | A02655 | 422 | A02458 | A02785 | 180 |
| A02458 | A02859 | 316 | A02458 | A02932 | 324 |
| A02458 | A02936 | 246 | A02458 | A02945 | 286 |
| A02458 | A02983 | 288 | A02458 | A03006 | 472 |
| A02458 | A03228 | 193 | A02458 | A03239 | 378 |
| A02458 | A03259 | 188 | A02458 | A03316 | 279 |
| A02458 | A03610 | 207 | A02458 | A03735 | 469 |
| A02458 | A03746 | 240 | A02458 | A03761 | 279 |
| A02458 | A03788 | 491 | A02458 | A03900 | 368 |
| A02458 | A03923 | 475 | A02458 | A03974 | 294 |
| A02458 | A03975 | 263 | A02458 | A04040 | 252 |
| A02458 | A04045 | 340 | A02458 | A04130 | 491 |
| A02458 | A04217 | 491 | A02458 | A04248 | 314 |
| A02458 | A04609 | 195 | A02458 | A05037 | 281 |
| A02458 | A05083 | 477 | A02458 | A05577 | 172 |
| A02458 | A05679 | 491 | A02458 | A06344 | 256 |
| A02458 | A06414 | 369 | A02458 | A06415 | 491 |
| A02458 | A06604 | 281 | A02458 | A06747 | 477 |
| A02458 | A07145 | 157 | A02458 | A07152 | 491 |
| A02458 | A07209 | 341 | A02458 | A08632 | 308 |
| A02458 | A08707 | 156 | A02458 | A08908 | 358 |
| A02458 | A10319 | 375 | A02458 | A10585 | 230 |
| A02458 | A10586 | 333 | A02458 | A10605 | 369 |
| A02458 | A10750 | 319 | A02458 | A11213 | 380 |
| A02458 | A13338 | 193 | A02458 | A13903 | 191 |
| A02458 | A13988 | 450 | A02458 | A14071 | 479 |
| A02458 | A14146 | 353 | A02458 | A14199 | 367 |

|        |        |     |        |        |     |
|--------|--------|-----|--------|--------|-----|
| A02458 | A14229 | 218 | A02458 | A14362 | 204 |
| A02458 | A14372 | 419 | A02458 | A14374 | 488 |
| A02458 | A14375 | 159 | A02458 | A14391 | 481 |
| A02458 | A14439 | 477 | A02458 | A14442 | 224 |
| A02458 | A14599 | 485 | A02458 | A15314 | 285 |
| A02458 | A15322 | 428 | A02458 | A15394 | 170 |
| A02458 | A15425 | 491 | A02458 | A15427 | 338 |
| A02458 | A15477 | 319 | A02458 | A15630 | 251 |
| A02458 | A15642 | 457 | A02458 | A15964 | 223 |
| A02458 | A16015 | 401 | A02459 | A02460 | 491 |
| A02459 | A02637 | 210 | A02459 | A02654 | 338 |
| A02459 | A02655 | 443 | A02459 | A02756 | 157 |
| A02459 | A02876 | 212 | A02459 | A02917 | 221 |
| A02459 | A02918 | 193 | A02459 | A02932 | 355 |
| A02459 | A02945 | 201 | A02459 | A02975 | 219 |
| A02459 | A03006 | 243 | A02459 | A03211 | 251 |
| A02459 | A03271 | 234 | A02459 | A03305 | 259 |
| A02459 | A03316 | 317 | A02459 | A03682 | 252 |
| A02459 | A03788 | 483 | A02459 | A03873 | 353 |
| A02459 | A03923 | 462 | A02459 | A04130 | 489 |
| A02459 | A04187 | 226 | A02459 | A04217 | 491 |
| A02459 | A04248 | 229 | A02459 | A04391 | 317 |
| A02459 | A04481 | 335 | A02459 | A04509 | 332 |
| A02459 | A04589 | 191 | A02459 | A04607 | 156 |
| A02459 | A05083 | 424 | A02459 | A05127 | 156 |
| A02459 | A05439 | 154 | A02459 | A05577 | 235 |
| A02459 | A05597 | 271 | A02459 | A05679 | 484 |
| A02459 | A06415 | 491 | A02459 | A06747 | 481 |
| A02459 | A06988 | 351 | A02459 | A07141 | 157 |
| A02459 | A07152 | 491 | A02459 | A07209 | 162 |
| A02459 | A07961 | 193 | A02459 | A08651 | 351 |
| A02459 | A08908 | 277 | A02459 | A10319 | 335 |
| A02459 | A10586 | 249 | A02459 | A12897 | 377 |
| A02459 | A13988 | 269 | A02459 | A14071 | 480 |
| A02459 | A14125 | 213 | A02459 | A14229 | 85  |
| A02459 | A14372 | 191 | A02459 | A14374 | 420 |
| A02459 | A14391 | 374 | A02459 | A14599 | 249 |
| A02459 | A15322 | 104 | A02459 | A15348 | 156 |
| A02459 | A15408 | 276 | A02459 | A15425 | 427 |
| A02459 | A15426 | 374 | A02459 | A15427 | 252 |
| A02459 | A15630 | 173 | A02459 | A15642 | 353 |
| A02460 | A02490 | 112 | A02460 | A02491 | 177 |
| A02460 | A02559 | 204 | A02460 | A02582 | 137 |
| A02460 | A02605 | 317 | A02460 | A02612 | 307 |
| A02460 | A02637 | 258 | A02460 | A02654 | 440 |
| A02460 | A02655 | 401 | A02460 | A02664 | 273 |



|        |        |     |        |        |     |
|--------|--------|-----|--------|--------|-----|
| A02460 | A02668 | 267 | A02460 | A02669 | 353 |
| A02460 | A02756 | 187 | A02460 | A02769 | 229 |
| A02460 | A02771 | 241 | A02460 | A02781 | 249 |
| A02460 | A02788 | 259 | A02460 | A02884 | 249 |
| A02460 | A02896 | 268 | A02460 | A02945 | 246 |
| A02460 | A02962 | 196 | A02460 | A02983 | 240 |
| A02460 | A02986 | 216 | A02460 | A03006 | 380 |
| A02460 | A03239 | 407 | A02460 | A03262 | 307 |
| A02460 | A03268 | 255 | A02460 | A03540 | 266 |
| A02460 | A03610 | 174 | A02460 | A03697 | 163 |
| A02460 | A03725 | 163 | A02460 | A03735 | 443 |
| A02460 | A03761 | 479 | A02460 | A03788 | 491 |
| A02460 | A03900 | 213 | A02460 | A03914 | 152 |
| A02460 | A03923 | 485 | A02460 | A03975 | 489 |
| A02460 | A04039 | 328 | A02460 | A04080 | 168 |
| A02460 | A04110 | 172 | A02460 | A04130 | 491 |
| A02460 | A04217 | 490 | A02460 | A04244 | 212 |
| A02460 | A04285 | 301 | A02460 | A04286 | 177 |
| A02460 | A04391 | 249 | A02460 | A04481 | 273 |
| A02460 | A04509 | 269 | A02460 | A04671 | 180 |
| A02460 | A04798 | 283 | A02460 | A04800 | 371 |
| A02460 | A04996 | 191 | A02460 | A05079 | 269 |
| A02460 | A05083 | 480 | A02460 | A05155 | 168 |
| A02460 | A05517 | 340 | A02460 | A05577 | 412 |
| A02460 | A05597 | 191 | A02460 | A05679 | 491 |
| A02460 | A05985 | 324 | A02460 | A06095 | 238 |
| A02460 | A06344 | 224 | A02460 | A06414 | 215 |
| A02460 | A06415 | 491 | A02460 | A06747 | 465 |
| A02460 | A06899 | 358 | A02460 | A07141 | 188 |
| A02460 | A07152 | 491 | A02460 | A07161 | 154 |
| A02460 | A07166 | 340 | A02460 | A07173 | 235 |
| A02460 | A08908 | 200 | A02460 | A09201 | 157 |
| A02460 | A09855 | 165 | A02460 | A10081 | 269 |
| A02460 | A10319 | 347 | A02460 | A10382 | 188 |
| A02460 | A10585 | 329 | A02460 | A10586 | 455 |
| A02460 | A10605 | 346 | A02460 | A10993 | 428 |
| A02460 | A11771 | 238 | A02460 | A13131 | 373 |
| A02460 | A13312 | 230 | A02460 | A13419 | 317 |
| A02460 | A13821 | 249 | A02460 | A13903 | 291 |
| A02460 | A13988 | 440 | A02460 | A14071 | 481 |
| A02460 | A14146 | 193 | A02460 | A14190 | 213 |
| A02460 | A14333 | 252 | A02460 | A14366 | 157 |
| A02460 | A14368 | 198 | A02460 | A14372 | 396 |
| A02460 | A14374 | 488 | A02460 | A14391 | 456 |
| A02460 | A14424 | 317 | A02460 | A14439 | 465 |
| A02460 | A14598 | 212 | A02460 | A14599 | 430 |

|        |        |     |        |        |     |
|--------|--------|-----|--------|--------|-----|
| A02460 | A15308 | 198 | A02460 | A15314 | 317 |
| A02460 | A15425 | 491 | A02460 | A15427 | 306 |
| A02460 | A15444 | 165 | A02460 | A15475 | 187 |
| A02460 | A15806 | 227 | A02460 | A16108 | 278 |
| A02460 | A16541 | 317 | A02460 | A16636 | 236 |
| A02461 | A02530 | 369 | A02461 | A02552 | 353 |
| A02461 | A02670 | 429 | A02461 | A02789 | 363 |
| A02461 | A03099 | 208 | A02461 | A03238 | 260 |
| A02461 | A03788 | 355 | A02461 | A04010 | 213 |
| A02461 | A04457 | 473 | A02461 | A04487 | 319 |
| A02461 | A04679 | 361 | A02461 | A05131 | 386 |
| A02461 | A05252 | 394 | A02461 | A05278 | 227 |
| A02461 | A05311 | 372 | A02461 | A05846 | 454 |
| A02461 | A07143 | 475 | A02461 | A08714 | 306 |
| A02461 | A09036 | 357 | A02461 | A09219 | 360 |
| A02462 | A02469 | 335 | A02462 | A02704 | 249 |
| A02462 | A02785 | 232 | A02462 | A02836 | 162 |
| A02462 | A03094 | 363 | A02462 | A03256 | 310 |
| A02462 | A03948 | 245 | A02462 | A04917 | 405 |
| A02462 | A05494 | 319 | A02462 | A05533 | 322 |
| A02462 | A05578 | 388 | A02462 | A06599 | 260 |
| A02462 | A07165 | 199 | A02462 | A09419 | 358 |
| A02462 | A09799 | 408 | A02462 | A13181 | 307 |
| A02463 | A02621 | 266 | A02463 | A02638 | 391 |
| A02463 | A02773 | 363 | A02463 | A02819 | 450 |
| A02463 | A03451 | 281 | A02463 | A03583 | 348 |
| A02463 | A04001 | 347 | A02463 | A04133 | 316 |
| A02463 | A04138 | 452 | A02463 | A04229 | 177 |
| A02463 | A04236 | 367 | A02463 | A04280 | 168 |
| A02463 | A04622 | 414 | A02463 | A04911 | 321 |
| A02463 | A05082 | 177 | A02463 | A05142 | 361 |
| A02463 | A05247 | 301 | A02463 | A07088 | 256 |
| A02463 | A07158 | 326 | A02463 | A07520 | 204 |
| A02463 | A14378 | 159 | A02463 | A14642 | 196 |
| A02463 | A14643 | 216 | A02463 | A16281 | 174 |
| A02463 | A16738 | 366 | A02464 | A02471 | 311 |
| A02464 | A02490 | 95  | A02464 | A02667 | 191 |
| A02464 | A02687 | 290 | A02464 | A02816 | 154 |
| A02464 | A03055 | 302 | A02464 | A03079 | 340 |
| A02464 | A03083 | 210 | A02464 | A03109 | 268 |
| A02464 | A03110 | 443 | A02464 | A03183 | 340 |
| A02464 | A03219 | 196 | A02464 | A03238 | 177 |
| A02464 | A03314 | 185 | A02464 | A03408 | 335 |
| A02464 | A03584 | 213 | A02464 | A03721 | 193 |
| A02464 | A03760 | 413 | A02464 | A03816 | 395 |
| A02464 | A03910 | 187 | A02464 | A03942 | 435 |

|        |        |     |        |        |     |
|--------|--------|-----|--------|--------|-----|
| A02464 | A03949 | 243 | A02464 | A03961 | 188 |
| A02464 | A03992 | 290 | A02464 | A04487 | 249 |
| A02464 | A04679 | 306 | A02464 | A04813 | 386 |
| A02464 | A05311 | 321 | A02464 | A05322 | 279 |
| A02464 | A05706 | 458 | A02464 | A07135 | 294 |
| A02464 | A07143 | 943 | A02464 | A07163 | 183 |
| A02464 | A07757 | 243 | A02464 | A08714 | 358 |
| A02464 | A09036 | 299 | A02464 | A09847 | 293 |
| A02464 | A10174 | 210 | A02464 | A11650 | 343 |
| A02464 | A11779 | 241 | A02464 | A13003 | 263 |
| A02464 | A13849 | 347 | A02464 | A13987 | 229 |
| A02464 | A14190 | 316 | A02464 | A14371 | 449 |
| A02464 | A14376 | 286 | A02464 | A14413 | 202 |
| A02464 | A14426 | 259 | A02464 | A14444 | 899 |
| A02464 | A14511 | 407 | A02464 | A14613 | 328 |
| A02464 | A14667 | 207 | A02464 | A15292 | 177 |
| A02464 | A15310 | 210 | A02464 | A15313 | 212 |
| A02464 | A15331 | 200 | A02464 | A15333 | 227 |
| A02464 | A15349 | 171 | A02464 | A15419 | 160 |
| A02464 | A15476 | 245 | A02464 | A15484 | 163 |
| A02464 | A15799 | 260 | A02464 | A16300 | 180 |
| A02465 | A02468 | 196 | A02465 | A02469 | 210 |
| A02465 | A02472 | 335 | A02465 | A02481 | 457 |
| A02465 | A02566 | 319 | A02465 | A02615 | 933 |
| A02465 | A02668 | 490 | A02465 | A02756 | 480 |
| A02465 | A02787 | 251 | A02465 | A03053 | 486 |
| A02465 | A03054 | 463 | A02465 | A03068 | 154 |
| A02465 | A03126 | 160 | A02465 | A03271 | 188 |
| A02465 | A03281 | 218 | A02465 | A03458 | 259 |
| A02465 | A03639 | 475 | A02465 | A03750 | 170 |
| A02465 | A03782 | 156 | A02465 | A03786 | 347 |
| A02465 | A03798 | 184 | A02465 | A03892 | 358 |
| A02465 | A03927 | 380 | A02465 | A03975 | 276 |
| A02465 | A04051 | 361 | A02465 | A04082 | 249 |
| A02465 | A04218 | 462 | A02465 | A04225 | 414 |
| A02465 | A04237 | 927 | A02465 | A04462 | 335 |
| A02465 | A04471 | 398 | A02465 | A04472 | 319 |
| A02465 | A04473 | 922 | A02465 | A04481 | 409 |
| A02465 | A04612 | 371 | A02465 | A04647 | 271 |
| A02465 | A04914 | 213 | A02465 | A04957 | 263 |
| A02465 | A05349 | 226 | A02465 | A05401 | 177 |
| A02465 | A05494 | 188 | A02465 | A05533 | 401 |
| A02465 | A05593 | 293 | A02465 | A07538 | 302 |
| A02465 | A08461 | 352 | A02465 | A09299 | 276 |
| A02465 | A09550 | 302 | A02465 | A09643 | 177 |
| A02465 | A09979 | 357 | A02465 | A09985 | 293 |

|        |        |     |        |        |     |
|--------|--------|-----|--------|--------|-----|
| A02465 | A10018 | 171 | A02465 | A10797 | 160 |
| A02465 | A11064 | 293 | A02465 | A11604 | 224 |
| A02465 | A13604 | 319 | A02465 | A15922 | 167 |
| A02465 | A16636 | 456 | A02466 | A02467 | 252 |
| A02466 | A02477 | 174 | A02466 | A02501 | 245 |
| A02466 | A02798 | 436 | A02466 | A02869 | 219 |
| A02466 | A02904 | 193 | A02466 | A03001 | 216 |
| A02466 | A03181 | 229 | A02466 | A03243 | 219 |
| A02466 | A03403 | 322 | A02466 | A03576 | 346 |
| A02466 | A03744 | 350 | A02466 | A04333 | 232 |
| A02466 | A04446 | 165 | A02466 | A04449 | 276 |
| A02466 | A04477 | 333 | A02466 | A04655 | 329 |
| A02466 | A05278 | 171 | A02466 | A05416 | 405 |
| A02466 | A05472 | 238 | A02466 | A05832 | 475 |
| A02466 | A07209 | 288 | A02466 | A09573 | 297 |
| A02466 | A09988 | 232 | A02466 | A14605 | 274 |
| A02467 | A02482 | 452 | A02467 | A02501 | 218 |
| A02467 | A02673 | 391 | A02467 | A02761 | 217 |
| A02467 | A03097 | 283 | A02467 | A03104 | 326 |
| A02467 | A03115 | 468 | A02467 | A03211 | 238 |
| A02467 | A03576 | 329 | A02467 | A03580 | 177 |
| A02467 | A03720 | 182 | A02467 | A03942 | 180 |
| A02467 | A04603 | 247 | A02467 | A04706 | 213 |
| A02467 | A05294 | 227 | A02467 | A05414 | 243 |
| A02467 | A05472 | 213 | A02467 | A05917 | 232 |
| A02467 | A06369 | 204 | A02467 | A07136 | 326 |
| A02467 | A07209 | 332 | A02467 | A07803 | 477 |
| A02467 | A10072 | 258 | A02467 | A10081 | 455 |
| A02467 | A10813 | 254 | A02467 | A12393 | 165 |
| A02467 | A14055 | 317 | A02467 | A14511 | 182 |
| A02467 | A14704 | 243 | A02467 | A14777 | 276 |
| A02467 | A14913 | 356 | A02467 | A15314 | 224 |
| A02467 | A15495 | 219 | A02468 | A02469 | 356 |
| A02468 | A02470 | 319 | A02468 | A02476 | 252 |
| A02468 | A02477 | 273 | A02468 | A02479 | 238 |
| A02468 | A02484 | 276 | A02468 | A02488 | 205 |
| A02468 | A02493 | 180 | A02468 | A02495 | 374 |
| A02468 | A02504 | 350 | A02468 | A02539 | 188 |
| A02468 | A02541 | 271 | A02468 | A02554 | 333 |
| A02468 | A02574 | 337 | A02468 | A02595 | 367 |
| A02468 | A02605 | 249 | A02468 | A02620 | 307 |
| A02468 | A02621 | 216 | A02468 | A02668 | 348 |
| A02468 | A02669 | 396 | A02468 | A02672 | 380 |
| A02468 | A02756 | 272 | A02468 | A02761 | 212 |
| A02468 | A02771 | 182 | A02468 | A02774 | 241 |
| A02468 | A02992 | 307 | A02468 | A03034 | 163 |

|        |        |     |        |        |     |
|--------|--------|-----|--------|--------|-----|
| A02468 | A03056 | 490 | A02468 | A03062 | 405 |
| A02468 | A03099 | 345 | A02468 | A03105 | 378 |
| A02468 | A03107 | 491 | A02468 | A03121 | 427 |
| A02468 | A03122 | 394 | A02468 | A03123 | 333 |
| A02468 | A03127 | 400 | A02468 | A03146 | 396 |
| A02468 | A03148 | 380 | A02468 | A03224 | 226 |
| A02468 | A03540 | 319 | A02468 | A03755 | 324 |
| A02468 | A03918 | 179 | A02468 | A03926 | 385 |
| A02468 | A03968 | 294 | A02468 | A04023 | 246 |
| A02468 | A04074 | 324 | A02468 | A04092 | 228 |
| A02468 | A04326 | 473 | A02468 | A04349 | 490 |
| A02468 | A04383 | 297 | A02468 | A04384 | 418 |
| A02468 | A04402 | 337 | A02468 | A04464 | 435 |
| A02468 | A04465 | 337 | A02468 | A04783 | 204 |
| A02468 | A04949 | 308 | A02468 | A05073 | 290 |
| A02468 | A05079 | 322 | A02468 | A05106 | 196 |
| A02468 | A05288 | 174 | A02468 | A05376 | 353 |
| A02468 | A05393 | 296 | A02468 | A05593 | 307 |
| A02468 | A05673 | 296 | A02468 | A05780 | 337 |
| A02468 | A05873 | 367 | A02468 | A05932 | 394 |
| A02468 | A06472 | 224 | A02468 | A06970 | 236 |
| A02468 | A07019 | 241 | A02468 | A07059 | 324 |
| A02468 | A07218 | 202 | A02468 | A07407 | 373 |
| A02468 | A07559 | 451 | A02468 | A07736 | 383 |
| A02468 | A07812 | 241 | A02468 | A08086 | 288 |
| A02468 | A09074 | 322 | A02468 | A09388 | 379 |
| A02468 | A09390 | 486 | A02468 | A09398 | 378 |
| A02468 | A09714 | 337 | A02468 | A10040 | 408 |
| A02468 | A10140 | 329 | A02468 | A11009 | 358 |
| A02468 | A13419 | 358 | A02468 | A14423 | 256 |
| A02468 | A14430 | 228 | A02468 | A15399 | 205 |
| A02468 | A15498 | 185 | A02468 | A15545 | 243 |
| A02468 | A15874 | 294 | A02468 | A16039 | 394 |
| A02468 | A16741 | 232 | A02469 | A02470 | 235 |
| A02469 | A02477 | 156 | A02469 | A02488 | 218 |
| A02469 | A02493 | 193 | A02469 | A02540 | 399 |
| A02469 | A02575 | 188 | A02469 | A02621 | 229 |
| A02469 | A02671 | 489 | A02469 | A02672 | 307 |
| A02469 | A02702 | 223 | A02469 | A02758 | 382 |
| A02469 | A02760 | 274 | A02469 | A02785 | 341 |
| A02469 | A02811 | 269 | A02469 | A02814 | 208 |
| A02469 | A02872 | 171 | A02469 | A02943 | 338 |
| A02469 | A03120 | 462 | A02469 | A03202 | 350 |
| A02469 | A03537 | 341 | A02469 | A03583 | 323 |
| A02469 | A03585 | 307 | A02469 | A03653 | 227 |
| A02469 | A03685 | 285 | A02469 | A03847 | 367 |

|        |        |     |        |        |     |
|--------|--------|-----|--------|--------|-----|
| A02469 | A03870 | 350 | A02469 | A03926 | 283 |
| A02469 | A03992 | 481 | A02469 | A04004 | 271 |
| A02469 | A04031 | 312 | A02469 | A04087 | 467 |
| A02469 | A04092 | 241 | A02469 | A04123 | 350 |
| A02469 | A04163 | 246 | A02469 | A04220 | 341 |
| A02469 | A04231 | 360 | A02469 | A04260 | 190 |
| A02469 | A04560 | 323 | A02469 | A04637 | 310 |
| A02469 | A04905 | 290 | A02469 | A05036 | 338 |
| A02469 | A05113 | 224 | A02469 | A05266 | 355 |
| A02469 | A05398 | 267 | A02469 | A05593 | 319 |
| A02469 | A05709 | 299 | A02469 | A05761 | 433 |
| A02469 | A06650 | 157 | A02469 | A09479 | 430 |
| A02469 | A10180 | 360 | A02469 | A10407 | 399 |
| A02469 | A14524 | 251 | A02469 | A15913 | 195 |
| A02470 | A02477 | 475 | A02470 | A02483 | 469 |
| A02470 | A02484 | 294 | A02470 | A02598 | 411 |
| A02470 | A02621 | 386 | A02470 | A02632 | 180 |
| A02470 | A02666 | 294 | A02470 | A02671 | 491 |
| A02470 | A02672 | 422 | A02470 | A02673 | 297 |
| A02470 | A02687 | 167 | A02470 | A02715 | 408 |
| A02470 | A02816 | 229 | A02470 | A02949 | 230 |
| A02470 | A02950 | 152 | A02470 | A02955 | 255 |
| A02470 | A03028 | 191 | A02470 | A03115 | 333 |
| A02470 | A03178 | 402 | A02470 | A03276 | 160 |
| A02470 | A03319 | 205 | A02470 | A03643 | 322 |
| A02470 | A03698 | 188 | A02470 | A03795 | 168 |
| A02470 | A03926 | 288 | A02470 | A03990 | 162 |
| A02470 | A03993 | 243 | A02470 | A04001 | 205 |
| A02470 | A04087 | 174 | A02470 | A04092 | 396 |
| A02470 | A04101 | 174 | A02470 | A04229 | 184 |
| A02470 | A04423 | 172 | A02470 | A04474 | 226 |
| A02470 | A04879 | 204 | A02470 | A04911 | 167 |
| A02470 | A05142 | 230 | A02470 | A05247 | 363 |
| A02470 | A05617 | 446 | A02470 | A05881 | 180 |
| A02470 | A06283 | 290 | A02470 | A06317 | 176 |
| A02470 | A06559 | 249 | A02470 | A06681 | 307 |
| A02470 | A06723 | 249 | A02470 | A07136 | 221 |
| A02470 | A07165 | 307 | A02470 | A07596 | 333 |
| A02470 | A09364 | 235 | A02470 | A09507 | 165 |
| A02470 | A09727 | 438 | A02470 | A09955 | 217 |
| A02470 | A10083 | 265 | A02470 | A10294 | 475 |
| A02470 | A10541 | 333 | A02470 | A10754 | 462 |
| A02470 | A10934 | 402 | A02470 | A12799 | 333 |
| A02470 | A12801 | 333 | A02470 | A13920 | 208 |
| A02470 | A13986 | 185 | A02470 | A14006 | 486 |
| A02470 | A14399 | 229 | A02470 | A14790 | 168 |

|        |        |     |        |        |     |
|--------|--------|-----|--------|--------|-----|
| A02470 | A15195 | 276 | A02470 | A15226 | 417 |
| A02470 | A15233 | 290 | A02470 | A15240 | 257 |
| A02470 | A15249 | 266 | A02470 | A15258 | 294 |
| A02470 | A15272 | 414 | A02470 | A15277 | 319 |
| A02470 | A15279 | 307 | A02470 | A15641 | 252 |
| A02470 | A16150 | 307 | A02471 | A02788 | 224 |
| A02471 | A02874 | 154 | A02471 | A03112 | 173 |
| A02471 | A03181 | 294 | A02471 | A03822 | 254 |
| A02471 | A04138 | 348 | A02471 | A07173 | 278 |
| A02471 | A09123 | 345 | A02471 | A09374 | 362 |
| A02471 | A09509 | 249 | A02471 | A14378 | 210 |
| A02471 | A15349 | 163 | A02472 | A02624 | 340 |
| A02472 | A03081 | 91  | A02472 | A03110 | 424 |
| A02472 | A03310 | 156 | A02472 | A03942 | 303 |
| A02472 | A04180 | 377 | A02472 | A04216 | 423 |
| A02472 | A04472 | 409 | A02472 | A04676 | 414 |
| A02472 | A04961 | 154 | A02472 | A05043 | 159 |
| A02472 | A05248 | 249 | A02472 | A05741 | 156 |
| A02472 | A05784 | 313 | A02472 | A06510 | 207 |
| A02472 | A06650 | 190 | A02472 | A07145 | 328 |
| A02472 | A07314 | 488 | A02472 | A07505 | 249 |
| A02472 | A08031 | 313 | A02472 | A08806 | 154 |
| A02472 | A09984 | 238 | A02472 | A09999 | 144 |
| A02472 | A12813 | 417 | A02472 | A14014 | 167 |
| A02472 | A14190 | 383 | A02472 | A14210 | 174 |
| A02472 | A14364 | 152 | A02472 | A14371 | 152 |
| A02472 | A14372 | 369 | A02472 | A14600 | 221 |
| A02472 | A14640 | 183 | A02472 | A16751 | 196 |
| A02472 | A16854 | 221 | A02473 | A02502 | 271 |
| A02473 | A02749 | 177 | A02473 | A02836 | 490 |
| A02473 | A02838 | 179 | A02473 | A02841 | 473 |
| A02473 | A02846 | 168 | A02473 | A02859 | 409 |
| A02473 | A02895 | 191 | A02473 | A02917 | 180 |
| A02473 | A02945 | 160 | A02473 | A03081 | 205 |
| A02473 | A03109 | 241 | A02473 | A03219 | 167 |
| A02473 | A03259 | 414 | A02473 | A03263 | 167 |
| A02473 | A03451 | 458 | A02473 | A03488 | 180 |
| A02473 | A03717 | 221 | A02473 | A03739 | 434 |
| A02473 | A04073 | 347 | A02473 | A04078 | 213 |
| A02473 | A04208 | 279 | A02473 | A04263 | 306 |
| A02473 | A04305 | 187 | A02473 | A04398 | 160 |
| A02473 | A04547 | 385 | A02473 | A04639 | 218 |
| A02473 | A05065 | 185 | A02473 | A05779 | 265 |
| A02473 | A06595 | 152 | A02473 | A06660 | 243 |
| A02473 | A07145 | 383 | A02473 | A07158 | 338 |
| A02473 | A07302 | 283 | A02473 | A07479 | 202 |

|        |        |     |        |        |     |
|--------|--------|-----|--------|--------|-----|
| A02473 | A07956 | 191 | A02473 | A08024 | 185 |
| A02473 | A08194 | 180 | A02473 | A08835 | 180 |
| A02473 | A08930 | 293 | A02473 | A09476 | 324 |
| A02473 | A09672 | 173 | A02473 | A09797 | 249 |
| A02473 | A10587 | 191 | A02473 | A11204 | 353 |
| A02473 | A11285 | 190 | A02473 | A11295 | 207 |
| A02473 | A11330 | 361 | A02473 | A11932 | 190 |
| A02473 | A12969 | 340 | A02473 | A12971 | 223 |
| A02473 | A13338 | 200 | A02473 | A13748 | 364 |
| A02473 | A14366 | 314 | A02473 | A14635 | 227 |
| A02473 | A15641 | 484 | A02473 | A15750 | 221 |
| A02474 | A02484 | 404 | A02474 | A02579 | 372 |
| A02474 | A02877 | 262 | A02474 | A10527 | 369 |
| A02474 | A15896 | 372 | A02475 | A02491 | 223 |
| A02475 | A07605 | 362 | A02476 | A02488 | 367 |
| A02476 | A02493 | 347 | A02476 | A02612 | 373 |
| A02476 | A02691 | 303 | A02476 | A03028 | 235 |
| A02476 | A03099 | 293 | A02476 | A03104 | 266 |
| A02476 | A03351 | 185 | A02476 | A03926 | 302 |
| A02476 | A03928 | 385 | A02476 | A03968 | 333 |
| A02476 | A04087 | 413 | A02476 | A04220 | 357 |
| A02476 | A04879 | 391 | A02476 | A05128 | 477 |
| A02476 | A05439 | 179 | A02476 | A06209 | 408 |
| A02476 | A06298 | 490 | A02476 | A06672 | 408 |
| A02476 | A06729 | 229 | A02476 | A10456 | 235 |
| A02476 | A10752 | 347 | A02476 | A10998 | 373 |
| A02476 | A11983 | 200 | A02476 | A12521 | 408 |
| A02476 | A13361 | 241 | A02476 | A14377 | 486 |
| A02476 | A14381 | 347 | A02476 | A15396 | 382 |
| A02476 | A15606 | 425 | A02476 | A16741 | 279 |
| A02477 | A02479 | 299 | A02477 | A02483 | 277 |
| A02477 | A02485 | 468 | A02477 | A02501 | 462 |
| A02477 | A02605 | 177 | A02477 | A02620 | 246 |
| A02477 | A02621 | 273 | A02477 | A02651 | 191 |
| A02477 | A02709 | 243 | A02477 | A02774 | 168 |
| A02477 | A03050 | 219 | A02477 | A03292 | 204 |
| A02477 | A03304 | 299 | A02477 | A03314 | 396 |
| A02477 | A03323 | 294 | A02477 | A03324 | 318 |
| A02477 | A03351 | 183 | A02477 | A03512 | 440 |
| A02477 | A03573 | 252 | A02477 | A03576 | 267 |
| A02477 | A04337 | 401 | A02477 | A04427 | 360 |
| A02477 | A04436 | 288 | A02477 | A04532 | 177 |
| A02477 | A04747 | 171 | A02477 | A04787 | 232 |
| A02477 | A04873 | 299 | A02477 | A05148 | 312 |
| A02477 | A05153 | 157 | A02477 | A05289 | 303 |
| A02477 | A05332 | 160 | A02477 | A05398 | 182 |



|        |        |     |        |        |     |
|--------|--------|-----|--------|--------|-----|
| A02477 | A05449 | 159 | A02477 | A05485 | 272 |
| A02477 | A05515 | 340 | A02477 | A05572 | 312 |
| A02477 | A05682 | 196 | A02477 | A05751 | 174 |
| A02477 | A05777 | 174 | A02477 | A05780 | 393 |
| A02477 | A05923 | 202 | A02477 | A06533 | 350 |
| A02477 | A06979 | 184 | A02477 | A07209 | 195 |
| A02477 | A07221 | 229 | A02477 | A07307 | 196 |
| A02477 | A07407 | 313 | A02477 | A07442 | 491 |
| A02477 | A07469 | 332 | A02477 | A07634 | 243 |
| A02477 | A07684 | 188 | A02477 | A07707 | 338 |
| A02477 | A07958 | 168 | A02477 | A08091 | 240 |
| A02477 | A09507 | 208 | A02477 | A09573 | 200 |
| A02477 | A10214 | 172 | A02477 | A10371 | 236 |
| A02477 | A10598 | 172 | A02477 | A10672 | 232 |
| A02477 | A11264 | 366 | A02477 | A11513 | 439 |
| A02477 | A11602 | 308 | A02477 | A11683 | 182 |
| A02477 | A12363 | 252 | A02477 | A12614 | 424 |
| A02477 | A13162 | 251 | A02477 | A13369 | 316 |
| A02477 | A14381 | 329 | A02477 | A14498 | 152 |
| A02477 | A14894 | 272 | A02477 | A15035 | 236 |
| A02477 | A15230 | 366 | A02477 | A15422 | 270 |
| A02477 | A15498 | 473 | A02477 | A15505 | 340 |
| A02477 | A15707 | 288 | A02477 | A15917 | 491 |
| A02477 | A16458 | 281 | A02477 | A16723 | 221 |
| A02477 | A17078 | 470 | A02478 | A02668 | 297 |
| A02478 | A02771 | 340 | A02478 | A03080 | 232 |
| A02478 | A03361 | 285 | A02478 | A04051 | 269 |
| A02478 | A05427 | 307 | A02478 | A08718 | 382 |
| A02479 | A02482 | 182 | A02479 | A03100 | 218 |
| A02479 | A03169 | 187 | A02479 | A03292 | 318 |
| A02479 | A03635 | 379 | A02479 | A03854 | 154 |
| A02479 | A03878 | 338 | A02479 | A04080 | 151 |
| A02479 | A04201 | 316 | A02479 | A04469 | 388 |
| A02479 | A04818 | 269 | A02479 | A05695 | 347 |
| A02479 | A06622 | 236 | A02479 | A06752 | 435 |
| A02479 | A06813 | 449 | A02479 | A07178 | 274 |
| A02479 | A07232 | 160 | A02479 | A07961 | 202 |
| A02479 | A09300 | 259 | A02479 | A09370 | 319 |
| A02479 | A16068 | 154 | A02479 | A16635 | 171 |
| A02479 | A16725 | 344 | A02480 | A02481 | 297 |
| A02480 | A02585 | 291 | A02480 | A02673 | 168 |
| A02480 | A02703 | 202 | A02480 | A02828 | 156 |
| A02480 | A02902 | 173 | A02480 | A02984 | 229 |
| A02480 | A03001 | 252 | A02480 | A03803 | 162 |
| A02480 | A08581 | 375 | A02480 | A09026 | 344 |
| A02480 | A09977 | 232 | A02480 | A10506 | 218 |

|        |        |     |        |        |     |
|--------|--------|-----|--------|--------|-----|
| A02480 | A16636 | 252 | A02481 | A02566 | 232 |
| A02481 | A02574 | 302 | A02481 | A02611 | 412 |
| A02481 | A02623 | 185 | A02481 | A02668 | 440 |
| A02481 | A02696 | 469 | A02481 | A02706 | 340 |
| A02481 | A02742 | 159 | A02481 | A02782 | 217 |
| A02481 | A02831 | 190 | A02481 | A02864 | 457 |
| A02481 | A02876 | 188 | A02481 | A02908 | 291 |
| A02481 | A02945 | 277 | A02481 | A02982 | 489 |
| A02481 | A02984 | 235 | A02481 | A03012 | 485 |
| A02481 | A03034 | 425 | A02481 | A03053 | 149 |
| A02481 | A03094 | 490 | A02481 | A03126 | 491 |
| A02481 | A03144 | 347 | A02481 | A03280 | 259 |
| A02481 | A03287 | 277 | A02481 | A03415 | 463 |
| A02481 | A03783 | 311 | A02481 | A03821 | 416 |
| A02481 | A03873 | 334 | A02481 | A03927 | 382 |
| A02481 | A03940 | 245 | A02481 | A04075 | 152 |
| A02481 | A04080 | 419 | A02481 | A04264 | 152 |
| A02481 | A04391 | 328 | A02481 | A04407 | 199 |
| A02481 | A04449 | 334 | A02481 | A04453 | 433 |
| A02481 | A04473 | 925 | A02481 | A04517 | 286 |
| A02481 | A04836 | 414 | A02481 | A04902 | 221 |
| A02481 | A05203 | 347 | A02481 | A05246 | 227 |
| A02481 | A05506 | 182 | A02481 | A05629 | 180 |
| A02481 | A05670 | 185 | A02481 | A05834 | 252 |
| A02481 | A05876 | 152 | A02481 | A06216 | 279 |
| A02481 | A06415 | 279 | A02481 | A06469 | 434 |
| A02481 | A06499 | 205 | A02481 | A06625 | 330 |
| A02481 | A06880 | 330 | A02481 | A07142 | 213 |
| A02481 | A07152 | 232 | A02481 | A07311 | 899 |
| A02481 | A07741 | 245 | A02481 | A08804 | 180 |
| A02481 | A08850 | 334 | A02481 | A09040 | 223 |
| A02481 | A09474 | 303 | A02481 | A09486 | 303 |
| A02481 | A10086 | 273 | A02481 | A10505 | 330 |
| A02481 | A10638 | 187 | A02481 | A11559 | 334 |
| A02481 | A12373 | 334 | A02481 | A13645 | 273 |
| A02481 | A13654 | 330 | A02481 | A13734 | 260 |
| A02481 | A14198 | 409 | A02481 | A14210 | 334 |
| A02481 | A14364 | 185 | A02481 | A14371 | 334 |
| A02481 | A14636 | 334 | A02481 | A15839 | 157 |
| A02481 | A16300 | 221 | A02481 | A16636 | 319 |
| A02482 | A02673 | 457 | A02482 | A02731 | 391 |
| A02482 | A02815 | 301 | A02482 | A02889 | 249 |
| A02482 | A03104 | 323 | A02482 | A03203 | 252 |
| A02482 | A03226 | 258 | A02482 | A03292 | 491 |
| A02482 | A03436 | 490 | A02482 | A03723 | 399 |
| A02482 | A03771 | 267 | A02482 | A03854 | 185 |

|        |        |     |        |        |     |
|--------|--------|-----|--------|--------|-----|
| A02482 | A03878 | 277 | A02482 | A04316 | 190 |
| A02482 | A04344 | 290 | A02482 | A04441 | 273 |
| A02482 | A04487 | 188 | A02482 | A04548 | 177 |
| A02482 | A04630 | 167 | A02482 | A04663 | 373 |
| A02482 | A05288 | 174 | A02482 | A05418 | 439 |
| A02482 | A05653 | 263 | A02482 | A06581 | 208 |
| A02482 | A07311 | 475 | A02482 | A07339 | 422 |
| A02482 | A07619 | 294 | A02482 | A07956 | 159 |
| A02482 | A08201 | 205 | A02482 | A09837 | 270 |
| A02482 | A10072 | 483 | A02482 | A10332 | 343 |
| A02482 | A10801 | 180 | A02482 | A11369 | 240 |
| A02482 | A13605 | 196 | A02482 | A13667 | 183 |
| A02482 | A13824 | 196 | A02482 | A13975 | 162 |
| A02482 | A14187 | 185 | A02482 | A14498 | 168 |
| A02482 | A14562 | 208 | A02482 | A14577 | 369 |
| A02482 | A14871 | 307 | A02482 | A15238 | 216 |
| A02482 | A15293 | 477 | A02482 | A15314 | 337 |
| A02482 | A15506 | 394 | A02482 | A16438 | 235 |
| A02483 | A02706 | 204 | A02483 | A03112 | 207 |
| A02483 | A03401 | 205 | A02483 | A03414 | 303 |
| A02483 | A04832 | 347 | A02483 | A07158 | 274 |
| A02483 | A07200 | 213 | A02483 | A09573 | 367 |
| A02484 | A02551 | 313 | A02484 | A02598 | 355 |
| A02484 | A02826 | 265 | A02484 | A02859 | 160 |
| A02484 | A03027 | 312 | A02484 | A03028 | 377 |
| A02484 | A03056 | 302 | A02484 | A03094 | 324 |
| A02484 | A03121 | 224 | A02484 | A03141 | 168 |
| A02484 | A03246 | 262 | A02484 | A03511 | 357 |
| A02484 | A03602 | 234 | A02484 | A03709 | 302 |
| A02484 | A03926 | 486 | A02484 | A03928 | 396 |
| A02484 | A04344 | 369 | A02484 | A04349 | 260 |
| A02484 | A04373 | 358 | A02484 | A04375 | 188 |
| A02484 | A04382 | 385 | A02484 | A04383 | 343 |
| A02484 | A04747 | 299 | A02484 | A04920 | 404 |
| A02484 | A05274 | 438 | A02484 | A05288 | 208 |
| A02484 | A05795 | 272 | A02484 | A06346 | 201 |
| A02484 | A06949 | 205 | A02484 | A08040 | 321 |
| A02484 | A09364 | 369 | A02484 | A09456 | 416 |
| A02484 | A12373 | 152 | A02484 | A12785 | 416 |
| A02484 | A14188 | 257 | A02484 | A16068 | 193 |
| A02484 | A16150 | 456 | A02485 | A02803 | 195 |
| A02485 | A03440 | 279 | A02485 | A03854 | 348 |
| A02485 | A04337 | 477 | A02485 | A04361 | 274 |
| A02485 | A05486 | 361 | A02485 | A06346 | 226 |
| A02485 | A07442 | 412 | A02485 | A08869 | 323 |
| A02485 | A15917 | 449 | A02486 | A02789 | 302 |

|        |        |     |        |        |     |
|--------|--------|-----|--------|--------|-----|
| A02486 | A03570 | 316 | A02486 | A05398 | 369 |
| A02486 | A12363 | 399 | A02487 | A02544 | 205 |
| A02487 | A02564 | 344 | A02487 | A02641 | 384 |
| A02487 | A02736 | 312 | A02487 | A02737 | 443 |
| A02487 | A02825 | 343 | A02487 | A02830 | 113 |
| A02487 | A02903 | 307 | A02487 | A02904 | 288 |
| A02487 | A03029 | 434 | A02487 | A03112 | 77  |
| A02487 | A03121 | 154 | A02487 | A03169 | 378 |
| A02487 | A03453 | 152 | A02487 | A04288 | 241 |
| A02487 | A04783 | 199 | A02487 | A05645 | 266 |
| A02487 | A06398 | 286 | A02487 | A06610 | 201 |
| A02487 | A09568 | 293 | A02487 | A09587 | 457 |
| A02487 | A09653 | 208 | A02487 | A10238 | 266 |
| A02488 | A02493 | 430 | A02488 | A02495 | 273 |
| A02488 | A02512 | 176 | A02488 | A02575 | 382 |
| A02488 | A02579 | 401 | A02488 | A02612 | 346 |
| A02488 | A02629 | 241 | A02488 | A02634 | 245 |
| A02488 | A02639 | 419 | A02488 | A02691 | 346 |
| A02488 | A02693 | 447 | A02488 | A02702 | 198 |
| A02488 | A02709 | 228 | A02488 | A02744 | 154 |
| A02488 | A02758 | 243 | A02488 | A02792 | 241 |
| A02488 | A02793 | 297 | A02488 | A02810 | 283 |
| A02488 | A02811 | 246 | A02488 | A02814 | 183 |
| A02488 | A02818 | 249 | A02488 | A02832 | 243 |
| A02488 | A02837 | 319 | A02488 | A02943 | 416 |
| A02488 | A03001 | 174 | A02488 | A03112 | 163 |
| A02488 | A03120 | 335 | A02488 | A03181 | 187 |
| A02488 | A03224 | 216 | A02488 | A03228 | 215 |
| A02488 | A03280 | 241 | A02488 | A03321 | 294 |
| A02488 | A03431 | 266 | A02488 | A03520 | 224 |
| A02488 | A03537 | 326 | A02488 | A03583 | 306 |
| A02488 | A03585 | 288 | A02488 | A03653 | 202 |
| A02488 | A03812 | 183 | A02488 | A03847 | 353 |
| A02488 | A03867 | 390 | A02488 | A03870 | 335 |
| A02488 | A04004 | 371 | A02488 | A04009 | 285 |
| A02488 | A04031 | 293 | A02488 | A04035 | 251 |
| A02488 | A04066 | 198 | A02488 | A04122 | 272 |
| A02488 | A04123 | 335 | A02488 | A04218 | 281 |
| A02488 | A04260 | 165 | A02488 | A04539 | 326 |
| A02488 | A04560 | 306 | A02488 | A04710 | 177 |
| A02488 | A04784 | 322 | A02488 | A04850 | 191 |
| A02488 | A04905 | 269 | A02488 | A05036 | 322 |
| A02488 | A05066 | 318 | A02488 | A05122 | 163 |
| A02488 | A05165 | 219 | A02488 | A05925 | 346 |
| A02488 | A05952 | 346 | A02488 | A05968 | 314 |
| A02488 | A06144 | 322 | A02488 | A06175 | 353 |

|        |        |     |        |        |     |
|--------|--------|-----|--------|--------|-----|
| A02488 | A06648 | 171 | A02488 | A06949 | 260 |
| A02488 | A07127 | 252 | A02488 | A07135 | 171 |
| A02488 | A07206 | 182 | A02488 | A07759 | 296 |
| A02488 | A07799 | 297 | A02488 | A08163 | 307 |
| A02488 | A08574 | 322 | A02488 | A08844 | 238 |
| A02488 | A09011 | 314 | A02488 | A09274 | 362 |
| A02488 | A09385 | 335 | A02488 | A09431 | 307 |
| A02488 | A09890 | 296 | A02488 | A10085 | 185 |
| A02488 | A10139 | 353 | A02488 | A10369 | 165 |
| A02488 | A10561 | 293 | A02488 | A10824 | 286 |
| A02488 | A11318 | 269 | A02488 | A11566 | 353 |
| A02488 | A11631 | 291 | A02488 | A12581 | 362 |
| A02488 | A13755 | 373 | A02488 | A15285 | 285 |
| A02488 | A15843 | 160 | A02489 | A02635 | 274 |
| A02489 | A02684 | 446 | A02489 | A02685 | 491 |
| A02489 | A02686 | 274 | A02489 | A02697 | 489 |
| A02489 | A02705 | 226 | A02489 | A02875 | 168 |
| A02489 | A03417 | 361 | A02489 | A03420 | 163 |
| A02489 | A04125 | 328 | A02489 | A04139 | 307 |
| A02489 | A04268 | 229 | A02489 | A04742 | 364 |
| A02489 | A04960 | 340 | A02489 | A05094 | 258 |
| A02489 | A05235 | 344 | A02489 | A06073 | 322 |
| A02489 | A06271 | 353 | A02489 | A08875 | 201 |
| A02489 | A10337 | 358 | A02489 | A11101 | 281 |
| A02489 | A14374 | 165 | A02489 | A14391 | 171 |
| A02489 | A16068 | 162 | A02490 | A02491 | 491 |
| A02490 | A02505 | 180 | A02490 | A02514 | 278 |
| A02490 | A02530 | 199 | A02490 | A02542 | 416 |
| A02490 | A02546 | 202 | A02490 | A02575 | 241 |
| A02490 | A02582 | 491 | A02490 | A02605 | 491 |
| A02490 | A02612 | 252 | A02490 | A02644 | 224 |
| A02490 | A02668 | 491 | A02490 | A02669 | 294 |
| A02490 | A02691 | 382 | A02490 | A02695 | 163 |
| A02490 | A02696 | 383 | A02490 | A02697 | 486 |
| A02490 | A02698 | 329 | A02490 | A02706 | 400 |
| A02490 | A02730 | 461 | A02490 | A02741 | 423 |
| A02490 | A02745 | 407 | A02490 | A02756 | 491 |
| A02490 | A02771 | 490 | A02490 | A02783 | 457 |
| A02490 | A02785 | 491 | A02490 | A02787 | 347 |
| A02490 | A02788 | 404 | A02490 | A02812 | 438 |
| A02490 | A02813 | 202 | A02490 | A02837 | 424 |
| A02490 | A02839 | 226 | A02490 | A02854 | 294 |
| A02490 | A02859 | 491 | A02490 | A02874 | 489 |
| A02490 | A02875 | 465 | A02490 | A02896 | 409 |
| A02490 | A02905 | 270 | A02490 | A02906 | 170 |
| A02490 | A02917 | 187 | A02490 | A02920 | 165 |

|        |        |     |        |        |     |
|--------|--------|-----|--------|--------|-----|
| A02490 | A02922 | 465 | A02490 | A02932 | 243 |
| A02490 | A02944 | 412 | A02490 | A02951 | 463 |
| A02490 | A02953 | 232 | A02490 | A02961 | 224 |
| A02490 | A02982 | 461 | A02490 | A03053 | 269 |
| A02490 | A03080 | 160 | A02490 | A03184 | 160 |
| A02490 | A03189 | 427 | A02490 | A03243 | 263 |
| A02490 | A03259 | 440 | A02490 | A03275 | 485 |
| A02490 | A03319 | 191 | A02490 | A03379 | 156 |
| A02490 | A03403 | 174 | A02490 | A03447 | 269 |
| A02490 | A03550 | 154 | A02490 | A03588 | 243 |
| A02490 | A03627 | 202 | A02490 | A03639 | 446 |
| A02490 | A03647 | 212 | A02490 | A03653 | 443 |
| A02490 | A03773 | 339 | A02490 | A03865 | 151 |
| A02490 | A03904 | 347 | A02490 | A03914 | 490 |
| A02490 | A03915 | 351 | A02490 | A03975 | 168 |
| A02490 | A03976 | 436 | A02490 | A03988 | 479 |
| A02490 | A03991 | 229 | A02490 | A04010 | 433 |
| A02490 | A04023 | 401 | A02490 | A04051 | 475 |
| A02490 | A04087 | 160 | A02490 | A04142 | 212 |
| A02490 | A04176 | 151 | A02490 | A04180 | 172 |
| A02490 | A04214 | 263 | A02490 | A04238 | 199 |
| A02490 | A04260 | 246 | A02490 | A04263 | 176 |
| A02490 | A04267 | 398 | A02490 | A04274 | 217 |
| A02490 | A04286 | 236 | A02490 | A04308 | 168 |
| A02490 | A04309 | 307 | A02490 | A04333 | 180 |
| A02490 | A04372 | 229 | A02490 | A04391 | 396 |
| A02490 | A04398 | 480 | A02490 | A04407 | 188 |
| A02490 | A04428 | 199 | A02490 | A04454 | 191 |
| A02490 | A04482 | 208 | A02490 | A04509 | 339 |
| A02490 | A04510 | 279 | A02490 | A04548 | 224 |
| A02490 | A04584 | 217 | A02490 | A04593 | 296 |
| A02490 | A04594 | 278 | A02490 | A04607 | 344 |
| A02490 | A04608 | 243 | A02490 | A04609 | 385 |
| A02490 | A04620 | 177 | A02490 | A04652 | 484 |
| A02490 | A04735 | 229 | A02490 | A04742 | 243 |
| A02490 | A04801 | 278 | A02490 | A04866 | 202 |
| A02490 | A04875 | 202 | A02490 | A05040 | 324 |
| A02490 | A05113 | 457 | A02490 | A05117 | 319 |
| A02490 | A05153 | 165 | A02490 | A05309 | 491 |
| A02490 | A05329 | 191 | A02490 | A05349 | 484 |
| A02490 | A05414 | 899 | A02490 | A05494 | 188 |
| A02490 | A05534 | 243 | A02490 | A05535 | 235 |
| A02490 | A05558 | 235 | A02490 | A05934 | 361 |
| A02490 | A05959 | 208 | A02490 | A06095 | 174 |
| A02490 | A06211 | 188 | A02490 | A06415 | 323 |
| A02490 | A06467 | 162 | A02490 | A06558 | 263 |

|        |        |     |        |        |     |
|--------|--------|-----|--------|--------|-----|
| A02490 | A06581 | 235 | A02490 | A06607 | 258 |
| A02490 | A06650 | 411 | A02490 | A07141 | 489 |
| A02490 | A07143 | 468 | A02490 | A07164 | 477 |
| A02490 | A07166 | 154 | A02490 | A07177 | 193 |
| A02490 | A07200 | 491 | A02490 | A07639 | 296 |
| A02490 | A08627 | 468 | A02490 | A08755 | 252 |
| A02490 | A09509 | 283 | A02490 | A09550 | 330 |
| A02490 | A09939 | 183 | A02490 | A10650 | 263 |
| A02490 | A10805 | 223 | A02490 | A11064 | 322 |
| A02490 | A11123 | 316 | A02490 | A12267 | 296 |
| A02490 | A12927 | 456 | A02490 | A13225 | 899 |
| A02490 | A13886 | 378 | A02490 | A13906 | 177 |
| A02490 | A13909 | 296 | A02490 | A14194 | 434 |
| A02490 | A14198 | 322 | A02490 | A14405 | 271 |
| A02490 | A14443 | 899 | A02490 | A14685 | 235 |
| A02490 | A14825 | 188 | A02490 | A15089 | 296 |
| A02490 | A15356 | 364 | A02490 | A15911 | 218 |
| A02490 | A15913 | 152 | A02490 | A15976 | 180 |
| A02490 | A16636 | 491 | A02490 | A17155 | 380 |
| A02491 | A02492 | 468 | A02491 | A02493 | 447 |
| A02491 | A02495 | 324 | A02491 | A02505 | 483 |
| A02491 | A02506 | 441 | A02491 | A02514 | 352 |
| A02491 | A02515 | 177 | A02491 | A02559 | 374 |
| A02491 | A02571 | 375 | A02491 | A02581 | 420 |
| A02491 | A02582 | 486 | A02491 | A02587 | 258 |
| A02491 | A02590 | 165 | A02491 | A02605 | 167 |
| A02491 | A02606 | 307 | A02491 | A02668 | 490 |
| A02491 | A02669 | 224 | A02491 | A02687 | 367 |
| A02491 | A02689 | 486 | A02491 | A02691 | 337 |
| A02491 | A02695 | 316 | A02491 | A02696 | 457 |
| A02491 | A02697 | 491 | A02491 | A02698 | 337 |
| A02491 | A02706 | 491 | A02491 | A02709 | 177 |
| A02491 | A02712 | 382 | A02491 | A02730 | 369 |
| A02491 | A02739 | 490 | A02491 | A02741 | 419 |
| A02491 | A02746 | 385 | A02491 | A02749 | 187 |
| A02491 | A02753 | 491 | A02491 | A02756 | 491 |
| A02491 | A02767 | 196 | A02491 | A02771 | 408 |
| A02491 | A02783 | 202 | A02491 | A02785 | 486 |
| A02491 | A02787 | 165 | A02491 | A02796 | 227 |
| A02491 | A02812 | 213 | A02491 | A02813 | 369 |
| A02491 | A02818 | 361 | A02491 | A02837 | 469 |
| A02491 | A02846 | 180 | A02491 | A02854 | 205 |
| A02491 | A02859 | 491 | A02491 | A02874 | 483 |
| A02491 | A02875 | 475 | A02491 | A02878 | 221 |
| A02491 | A02899 | 279 | A02491 | A02915 | 232 |
| A02491 | A02918 | 152 | A02491 | A02920 | 229 |

|        |        |     |        |        |     |
|--------|--------|-----|--------|--------|-----|
| A02491 | A02922 | 388 | A02491 | A02944 | 281 |
| A02491 | A02951 | 411 | A02491 | A02952 | 319 |
| A02491 | A02982 | 491 | A02491 | A02984 | 460 |
| A02491 | A03019 | 430 | A02491 | A03069 | 188 |
| A02491 | A03082 | 185 | A02491 | A03112 | 226 |
| A02491 | A03189 | 185 | A02491 | A03243 | 435 |
| A02491 | A03256 | 491 | A02491 | A03259 | 469 |
| A02491 | A03260 | 180 | A02491 | A03269 | 363 |
| A02491 | A03275 | 435 | A02491 | A03278 | 291 |
| A02491 | A03321 | 324 | A02491 | A03417 | 425 |
| A02491 | A03447 | 441 | A02491 | A03520 | 170 |
| A02491 | A03522 | 152 | A02491 | A03540 | 144 |
| A02491 | A03588 | 185 | A02491 | A03634 | 348 |
| A02491 | A03639 | 154 | A02491 | A03653 | 210 |
| A02491 | A03757 | 353 | A02491 | A03773 | 319 |
| A02491 | A03803 | 180 | A02491 | A03865 | 383 |
| A02491 | A03887 | 290 | A02491 | A03914 | 307 |
| A02491 | A03915 | 163 | A02491 | A03919 | 208 |
| A02491 | A03933 | 163 | A02491 | A03976 | 490 |
| A02491 | A03991 | 170 | A02491 | A04023 | 398 |
| A02491 | A04037 | 152 | A02491 | A04051 | 401 |
| A02491 | A04069 | 170 | A02491 | A04111 | 163 |
| A02491 | A04114 | 177 | A02491 | A04117 | 310 |
| A02491 | A04127 | 243 | A02491 | A04134 | 152 |
| A02491 | A04139 | 438 | A02491 | A04213 | 238 |
| A02491 | A04214 | 409 | A02491 | A04229 | 196 |
| A02491 | A04246 | 152 | A02491 | A04260 | 401 |
| A02491 | A04267 | 488 | A02491 | A04271 | 332 |
| A02491 | A04272 | 322 | A02491 | A04279 | 221 |
| A02491 | A04280 | 241 | A02491 | A04286 | 159 |
| A02491 | A04398 | 491 | A02491 | A04449 | 340 |
| A02491 | A04456 | 243 | A02491 | A04510 | 489 |
| A02491 | A04538 | 185 | A02491 | A04548 | 246 |
| A02491 | A04587 | 196 | A02491 | A04649 | 469 |
| A02491 | A04675 | 177 | A02491 | A04680 | 177 |
| A02491 | A04708 | 196 | A02491 | A04742 | 185 |
| A02491 | A04748 | 163 | A02491 | A04798 | 163 |
| A02491 | A04801 | 223 | A02491 | A04824 | 246 |
| A02491 | A04860 | 185 | A02491 | A04902 | 486 |
| A02491 | A04906 | 210 | A02491 | A04927 | 290 |
| A02491 | A04960 | 486 | A02491 | A05055 | 285 |
| A02491 | A05079 | 420 | A02491 | A05095 | 157 |
| A02491 | A05113 | 401 | A02491 | A05117 | 408 |
| A02491 | A05164 | 157 | A02491 | A05215 | 208 |
| A02491 | A05309 | 165 | A02491 | A05322 | 470 |
| A02491 | A05329 | 357 | A02491 | A05349 | 461 |



|        |        |     |        |        |     |
|--------|--------|-----|--------|--------|-----|
| A02491 | A05478 | 243 | A02491 | A05507 | 285 |
| A02491 | A05509 | 243 | A02491 | A05568 | 369 |
| A02491 | A05580 | 223 | A02491 | A05588 | 339 |
| A02491 | A05832 | 317 | A02491 | A05861 | 266 |
| A02491 | A05891 | 322 | A02491 | A05900 | 243 |
| A02491 | A05901 | 170 | A02491 | A05934 | 311 |
| A02491 | A05935 | 278 | A02491 | A05943 | 208 |
| A02491 | A06073 | 241 | A02491 | A06094 | 208 |
| A02491 | A06095 | 241 | A02491 | A06271 | 454 |
| A02491 | A06378 | 278 | A02491 | A06415 | 245 |
| A02491 | A06439 | 236 | A02491 | A06597 | 162 |
| A02491 | A06620 | 154 | A02491 | A06652 | 177 |
| A02491 | A06682 | 352 | A02491 | A06737 | 243 |
| A02491 | A06902 | 278 | A02491 | A07025 | 208 |
| A02491 | A07088 | 196 | A02491 | A07143 | 294 |
| A02491 | A07158 | 160 | A02491 | A07164 | 441 |
| A02491 | A07165 | 395 | A02491 | A07197 | 174 |
| A02491 | A07198 | 473 | A02491 | A07200 | 491 |
| A02491 | A07202 | 177 | A02491 | A07546 | 339 |
| A02491 | A07552 | 152 | A02491 | A07605 | 198 |
| A02491 | A07684 | 182 | A02491 | A08275 | 278 |
| A02491 | A08677 | 422 | A02491 | A08691 | 243 |
| A02491 | A08714 | 491 | A02491 | A08738 | 267 |
| A02491 | A09122 | 208 | A02491 | A09497 | 152 |
| A02491 | A09509 | 312 | A02491 | A09883 | 196 |
| A02491 | A09939 | 480 | A02491 | A10077 | 208 |
| A02491 | A10260 | 163 | A02491 | A10305 | 223 |
| A02491 | A10320 | 307 | A02491 | A10337 | 424 |
| A02491 | A10410 | 223 | A02491 | A10625 | 380 |
| A02491 | A10650 | 208 | A02491 | A10731 | 430 |
| A02491 | A10752 | 371 | A02491 | A10792 | 185 |
| A02491 | A10937 | 208 | A02491 | A11064 | 258 |
| A02491 | A11082 | 278 | A02491 | A11123 | 347 |
| A02491 | A11132 | 173 | A02491 | A11212 | 243 |
| A02491 | A11313 | 414 | A02491 | A11465 | 352 |
| A02491 | A11525 | 483 | A02491 | A11561 | 483 |
| A02491 | A11693 | 461 | A02491 | A11712 | 352 |
| A02491 | A12267 | 243 | A02491 | A12578 | 278 |
| A02491 | A12702 | 278 | A02491 | A12807 | 243 |
| A02491 | A12879 | 278 | A02491 | A13377 | 196 |
| A02491 | A13396 | 196 | A02491 | A13419 | 208 |
| A02491 | A13886 | 486 | A02491 | A13909 | 243 |
| A02491 | A14188 | 491 | A02491 | A14190 | 458 |
| A02491 | A14236 | 291 | A02491 | A14366 | 185 |
| A02491 | A14399 | 477 | A02491 | A14405 | 334 |
| A02491 | A14544 | 208 | A02491 | A14892 | 278 |

|        |        |     |        |        |     |
|--------|--------|-----|--------|--------|-----|
| A02491 | A15282 | 191 | A02491 | A15472 | 182 |
| A02491 | A15635 | 317 | A02491 | A15795 | 184 |
| A02491 | A15809 | 227 | A02491 | A15911 | 419 |
| A02491 | A16024 | 185 | A02491 | A16047 | 223 |
| A02491 | A16636 | 491 | A02491 | A17155 | 484 |
| A02492 | A02506 | 489 | A02492 | A02508 | 249 |
| A02492 | A02562 | 286 | A02492 | A02702 | 154 |
| A02492 | A02704 | 177 | A02492 | A02784 | 149 |
| A02492 | A02787 | 204 | A02492 | A02811 | 335 |
| A02492 | A02894 | 441 | A02492 | A02961 | 229 |
| A02492 | A02985 | 279 | A02492 | A03001 | 257 |
| A02492 | A03019 | 208 | A02492 | A03083 | 152 |
| A02492 | A03087 | 152 | A02492 | A03228 | 171 |
| A02492 | A03256 | 270 | A02492 | A03814 | 263 |
| A02492 | A03977 | 238 | A02492 | A04089 | 263 |
| A02492 | A04111 | 399 | A02492 | A04327 | 152 |
| A02492 | A04445 | 224 | A02492 | A04487 | 324 |
| A02492 | A04548 | 180 | A02492 | A04649 | 260 |
| A02492 | A04718 | 249 | A02492 | A04853 | 191 |
| A02492 | A04902 | 278 | A02492 | A04991 | 195 |
| A02492 | A05032 | 288 | A02492 | A05051 | 219 |
| A02492 | A05117 | 260 | A02492 | A05168 | 221 |
| A02492 | A05568 | 227 | A02492 | A05691 | 406 |
| A02492 | A05751 | 193 | A02492 | A05949 | 441 |
| A02492 | A06769 | 241 | A02492 | A07143 | 156 |
| A02492 | A08583 | 361 | A02492 | A08598 | 283 |
| A02492 | A08681 | 185 | A02492 | A08714 | 433 |
| A02492 | A09390 | 230 | A02492 | A10201 | 260 |
| A02492 | A11454 | 185 | A02492 | A11714 | 263 |
| A02492 | A11943 | 330 | A02492 | A12824 | 341 |
| A02492 | A13786 | 172 | A02492 | A13884 | 257 |
| A02492 | A14520 | 457 | A02492 | A14605 | 191 |
| A02492 | A14666 | 243 | A02492 | A15396 | 173 |
| A02492 | A15687 | 228 | A02492 | A15874 | 229 |
| A02493 | A02494 | 167 | A02493 | A02498 | 216 |
| A02493 | A02575 | 268 | A02493 | A02579 | 385 |
| A02493 | A02585 | 324 | A02493 | A02612 | 419 |
| A02493 | A02668 | 96  | A02493 | A02669 | 256 |
| A02493 | A02674 | 299 | A02493 | A02687 | 414 |
| A02493 | A02701 | 188 | A02493 | A02702 | 173 |
| A02493 | A02746 | 249 | A02493 | A02758 | 218 |
| A02493 | A02780 | 256 | A02493 | A02785 | 466 |
| A02493 | A02811 | 350 | A02493 | A02814 | 378 |
| A02493 | A02836 | 168 | A02493 | A02837 | 193 |
| A02493 | A02901 | 265 | A02493 | A02929 | 180 |
| A02493 | A02943 | 302 | A02493 | A03049 | 157 |

|        |        |     |        |        |     |
|--------|--------|-----|--------|--------|-----|
| A02493 | A03053 | 234 | A02493 | A03055 | 270 |
| A02493 | A03120 | 317 | A02493 | A03224 | 190 |
| A02493 | A03243 | 152 | A02493 | A03260 | 224 |
| A02493 | A03451 | 293 | A02493 | A03486 | 210 |
| A02493 | A03537 | 307 | A02493 | A03583 | 285 |
| A02493 | A03585 | 268 | A02493 | A03611 | 184 |
| A02493 | A03653 | 177 | A02493 | A03681 | 179 |
| A02493 | A03797 | 294 | A02493 | A03819 | 167 |
| A02493 | A03845 | 249 | A02493 | A03847 | 424 |
| A02493 | A03848 | 281 | A02493 | A03870 | 413 |
| A02493 | A03904 | 218 | A02493 | A03976 | 350 |
| A02493 | A04004 | 224 | A02493 | A04031 | 272 |
| A02493 | A04122 | 371 | A02493 | A04123 | 413 |
| A02493 | A04260 | 271 | A02493 | A04272 | 252 |
| A02493 | A04278 | 177 | A02493 | A04334 | 198 |
| A02493 | A04505 | 369 | A02493 | A04515 | 360 |
| A02493 | A04560 | 285 | A02493 | A04729 | 224 |
| A02493 | A04842 | 319 | A02493 | A04905 | 246 |
| A02493 | A05036 | 302 | A02493 | A05324 | 491 |
| A02493 | A05381 | 338 | A02493 | A05438 | 254 |
| A02493 | A05507 | 299 | A02493 | A05568 | 156 |
| A02493 | A05709 | 258 | A02493 | A05796 | 187 |
| A02493 | A05832 | 277 | A02493 | A05865 | 234 |
| A02493 | A06036 | 491 | A02493 | A06199 | 347 |
| A02493 | A06232 | 360 | A02493 | A06596 | 249 |
| A02493 | A06607 | 167 | A02493 | A07127 | 229 |
| A02493 | A07165 | 232 | A02493 | A07178 | 218 |
| A02493 | A07529 | 281 | A02493 | A07634 | 156 |
| A02493 | A07935 | 174 | A02493 | A08655 | 247 |
| A02493 | A09274 | 347 | A02493 | A09481 | 360 |
| A02493 | A10018 | 154 | A02493 | A10085 | 159 |
| A02493 | A10337 | 165 | A02493 | A10941 | 307 |
| A02493 | A11576 | 274 | A02493 | A13396 | 329 |
| A02493 | A14283 | 154 | A02493 | A14405 | 157 |
| A02493 | A14643 | 273 | A02493 | A14790 | 249 |
| A02493 | A15238 | 238 | A02493 | A15272 | 291 |
| A02493 | A15599 | 205 | A02493 | A16145 | 335 |
| A02493 | A17128 | 198 | A02493 | A17155 | 256 |
| A02494 | A02502 | 460 | A02494 | A02512 | 174 |
| A02494 | A02593 | 435 | A02494 | A02664 | 224 |
| A02494 | A02666 | 157 | A02494 | A02672 | 324 |
| A02494 | A02698 | 353 | A02494 | A02703 | 467 |
| A02494 | A02704 | 485 | A02494 | A02768 | 238 |
| A02494 | A02816 | 491 | A02494 | A02827 | 352 |
| A02494 | A02830 | 252 | A02494 | A02859 | 151 |
| A02494 | A02860 | 435 | A02494 | A02877 | 446 |

|        |        |     |        |        |     |
|--------|--------|-----|--------|--------|-----|
| A02494 | A02878 | 446 | A02494 | A02895 | 472 |
| A02494 | A02901 | 184 | A02494 | A02958 | 187 |
| A02494 | A03055 | 188 | A02494 | A03070 | 347 |
| A02494 | A03083 | 205 | A02494 | A03086 | 157 |
| A02494 | A03112 | 296 | A02494 | A03228 | 228 |
| A02494 | A03332 | 191 | A02494 | A03412 | 433 |
| A02494 | A03451 | 434 | A02494 | A03568 | 170 |
| A02494 | A03571 | 484 | A02494 | A03581 | 159 |
| A02494 | A03583 | 207 | A02494 | A03611 | 171 |
| A02494 | A03652 | 344 | A02494 | A03749 | 180 |
| A02494 | A03797 | 218 | A02494 | A03798 | 418 |
| A02494 | A03824 | 241 | A02494 | A03908 | 305 |
| A02494 | A04101 | 172 | A02494 | A04194 | 160 |
| A02494 | A04230 | 224 | A02494 | A04234 | 255 |
| A02494 | A04236 | 240 | A02494 | A04280 | 165 |
| A02494 | A04334 | 172 | A02494 | A04399 | 240 |
| A02494 | A04402 | 240 | A02494 | A04444 | 224 |
| A02494 | A04497 | 173 | A02494 | A04529 | 168 |
| A02494 | A04539 | 234 | A02494 | A04813 | 154 |
| A02494 | A04849 | 152 | A02494 | A04911 | 480 |
| A02494 | A04956 | 224 | A02494 | A04957 | 297 |
| A02494 | A05385 | 188 | A02494 | A05477 | 409 |
| A02494 | A05634 | 182 | A02494 | A05811 | 160 |
| A02494 | A06117 | 305 | A02494 | A06144 | 229 |
| A02494 | A06216 | 281 | A02494 | A06313 | 187 |
| A02494 | A06324 | 319 | A02494 | A06530 | 190 |
| A02494 | A06663 | 215 | A02494 | A06728 | 432 |
| A02494 | A06768 | 204 | A02494 | A06814 | 491 |
| A02494 | A07016 | 188 | A02494 | A07123 | 249 |
| A02494 | A07138 | 430 | A02494 | A07163 | 232 |
| A02494 | A07165 | 236 | A02494 | A07251 | 210 |
| A02494 | A08372 | 268 | A02494 | A08635 | 294 |
| A02494 | A09249 | 240 | A02494 | A09558 | 179 |
| A02494 | A09562 | 293 | A02494 | A09573 | 451 |
| A02494 | A09989 | 204 | A02494 | A10234 | 388 |
| A02494 | A10645 | 132 | A02494 | A10955 | 332 |
| A02494 | A11932 | 484 | A02494 | A12049 | 201 |
| A02494 | A12246 | 210 | A02494 | A13466 | 367 |
| A02494 | A13604 | 234 | A02494 | A13989 | 585 |
| A02494 | A14038 | 296 | A02494 | A14424 | 274 |
| A02494 | A14707 | 152 | A02494 | A14735 | 174 |
| A02494 | A15635 | 165 | A02494 | A15832 | 255 |
| A02494 | A16887 | 456 | A02494 | A17085 | 241 |
| A02495 | A02505 | 269 | A02495 | A02507 | 452 |
| A02495 | A02559 | 208 | A02495 | A02614 | 401 |
| A02495 | A02668 | 76  | A02495 | A02705 | 490 |

|        |        |     |        |        |     |
|--------|--------|-----|--------|--------|-----|
| A02495 | A02706 | 486 | A02495 | A02744 | 223 |
| A02495 | A02771 | 121 | A02495 | A02774 | 179 |
| A02495 | A02785 | 383 | A02495 | A02817 | 475 |
| A02495 | A02818 | 198 | A02495 | A02837 | 428 |
| A02495 | A02859 | 308 | A02495 | A02862 | 388 |
| A02495 | A02915 | 361 | A02495 | A03051 | 340 |
| A02495 | A03080 | 151 | A02495 | A03102 | 213 |
| A02495 | A03167 | 207 | A02495 | A03168 | 160 |
| A02495 | A03203 | 246 | A02495 | A03228 | 467 |
| A02495 | A03259 | 196 | A02495 | A03281 | 174 |
| A02495 | A03361 | 386 | A02495 | A03406 | 228 |
| A02495 | A03499 | 296 | A02495 | A03588 | 302 |
| A02495 | A03653 | 479 | A02495 | A03663 | 306 |
| A02495 | A03755 | 276 | A02495 | A03853 | 215 |
| A02495 | A03924 | 419 | A02495 | A03933 | 395 |
| A02495 | A03949 | 177 | A02495 | A03964 | 224 |
| A02495 | A03976 | 388 | A02495 | A04046 | 272 |
| A02495 | A04183 | 258 | A02495 | A04208 | 246 |
| A02495 | A04260 | 337 | A02495 | A04333 | 416 |
| A02495 | A04334 | 162 | A02495 | A04441 | 268 |
| A02495 | A04458 | 329 | A02495 | A04483 | 401 |
| A02495 | A04505 | 221 | A02495 | A04512 | 414 |
| A02495 | A04516 | 469 | A02495 | A04539 | 286 |
| A02495 | A04620 | 245 | A02495 | A04729 | 198 |
| A02495 | A04735 | 291 | A02495 | A04739 | 263 |
| A02495 | A04763 | 234 | A02495 | A04795 | 154 |
| A02495 | A04810 | 419 | A02495 | A04813 | 210 |
| A02495 | A04910 | 329 | A02495 | A05073 | 234 |
| A02495 | A05114 | 185 | A02495 | A05250 | 272 |
| A02495 | A05264 | 328 | A02495 | A05330 | 441 |
| A02495 | A05331 | 420 | A02495 | A05865 | 207 |
| A02495 | A05901 | 291 | A02495 | A06387 | 249 |
| A02495 | A06606 | 236 | A02495 | A06797 | 170 |
| A02495 | A07197 | 326 | A02495 | A07376 | 229 |
| A02495 | A08273 | 223 | A02495 | A08330 | 167 |
| A02495 | A08484 | 317 | A02495 | A08624 | 329 |
| A02495 | A09235 | 263 | A02495 | A09409 | 319 |
| A02495 | A09448 | 303 | A02495 | A09504 | 208 |
| A02495 | A09573 | 446 | A02495 | A10412 | 364 |
| A02495 | A10559 | 344 | A02495 | A11135 | 401 |
| A02495 | A11211 | 281 | A02495 | A11897 | 303 |
| A02495 | A11911 | 474 | A02495 | A12373 | 215 |
| A02495 | A12458 | 302 | A02495 | A12897 | 174 |
| A02495 | A14386 | 228 | A02495 | A14390 | 418 |
| A02495 | A14404 | 210 | A02495 | A14473 | 190 |
| A02495 | A14498 | 296 | A02495 | A14683 | 157 |

|        |        |     |        |        |     |
|--------|--------|-----|--------|--------|-----|
| A02495 | A14835 | 188 | A02495 | A15281 | 255 |
| A02495 | A15911 | 168 | A02495 | A16016 | 364 |
| A02495 | A16112 | 265 | A02495 | A16816 | 276 |
| A02496 | A02783 | 363 | A02496 | A02874 | 246 |
| A02496 | A04200 | 428 | A02496 | A04201 | 405 |
| A02496 | A04242 | 419 | A02496 | A04254 | 430 |
| A02496 | A04255 | 430 | A02496 | A15498 | 205 |
| A02496 | A17171 | 445 | A02497 | A02559 | 286 |
| A02497 | A02698 | 185 | A02497 | A14236 | 297 |
| A02498 | A02505 | 238 | A02498 | A02699 | 277 |
| A02498 | A02789 | 485 | A02498 | A02821 | 291 |
| A02498 | A02830 | 152 | A02498 | A03244 | 202 |
| A02498 | A03312 | 335 | A02498 | A03319 | 335 |
| A02498 | A03846 | 196 | A02498 | A03871 | 378 |
| A02498 | A03989 | 420 | A02498 | A04248 | 249 |
| A02498 | A04320 | 293 | A02498 | A04879 | 173 |
| A02498 | A05944 | 355 | A02498 | A05985 | 204 |
| A02498 | A06054 | 263 | A02498 | A06780 | 343 |
| A02498 | A07390 | 303 | A02498 | A08591 | 358 |
| A02498 | A09394 | 307 | A02498 | A09509 | 182 |
| A02498 | A09732 | 440 | A02498 | A09733 | 394 |
| A02498 | A11149 | 236 | A02498 | A11284 | 183 |
| A02498 | A11412 | 436 | A02498 | A11460 | 329 |
| A02498 | A11738 | 283 | A02498 | A13181 | 227 |
| A02498 | A15598 | 281 | A02498 | A15913 | 217 |
| A02499 | A02776 | 235 | A02499 | A02790 | 196 |
| A02499 | A02855 | 348 | A02499 | A02965 | 177 |
| A02499 | A03205 | 162 | A02499 | A03261 | 223 |
| A02499 | A03289 | 198 | A02499 | A03628 | 375 |
| A02499 | A03629 | 290 | A02499 | A03721 | 171 |
| A02499 | A03790 | 420 | A02499 | A04221 | 314 |
| A02499 | A04737 | 213 | A02499 | A06595 | 157 |
| A02499 | A07226 | 177 | A02499 | A07697 | 294 |
| A02499 | A07826 | 268 | A02499 | A07956 | 196 |
| A02499 | A08070 | 151 | A02499 | A08248 | 177 |
| A02499 | A08383 | 168 | A02499 | A09028 | 228 |
| A02499 | A09210 | 254 | A02499 | A09215 | 385 |
| A02499 | A09242 | 154 | A02499 | A09291 | 297 |
| A02499 | A09417 | 290 | A02499 | A10547 | 183 |
| A02499 | A10579 | 272 | A02499 | A11590 | 288 |
| A02499 | A14132 | 374 | A02499 | A14470 | 182 |
| A02499 | A14543 | 238 | A02499 | A15701 | 160 |
| A02499 | A17076 | 329 | A02500 | A02786 | 383 |
| A02500 | A06654 | 373 | A02501 | A02505 | 200 |
| A02501 | A02512 | 184 | A02501 | A02532 | 291 |
| A02501 | A02542 | 165 | A02501 | A02583 | 475 |

|        |        |     |        |        |     |
|--------|--------|-----|--------|--------|-----|
| A02501 | A02618 | 274 | A02501 | A02621 | 213 |
| A02501 | A02636 | 210 | A02501 | A02666 | 272 |
| A02501 | A02671 | 151 | A02501 | A02672 | 425 |
| A02501 | A02673 | 101 | A02501 | A02758 | 372 |
| A02501 | A02760 | 434 | A02501 | A02761 | 208 |
| A02501 | A02814 | 191 | A02501 | A02816 | 281 |
| A02501 | A02830 | 400 | A02501 | A02855 | 273 |
| A02501 | A02878 | 452 | A02501 | A03072 | 335 |
| A02501 | A03115 | 294 | A02501 | A03181 | 196 |
| A02501 | A03190 | 366 | A02501 | A03211 | 110 |
| A02501 | A03263 | 191 | A02501 | A03300 | 335 |
| A02501 | A03314 | 180 | A02501 | A03412 | 179 |
| A02501 | A03576 | 417 | A02501 | A03634 | 246 |
| A02501 | A03642 | 358 | A02501 | A03681 | 213 |
| A02501 | A03839 | 276 | A02501 | A03882 | 168 |
| A02501 | A04047 | 274 | A02501 | A04172 | 345 |
| A02501 | A04174 | 199 | A02501 | A04176 | 276 |
| A02501 | A04229 | 405 | A02501 | A04256 | 218 |
| A02501 | A04260 | 174 | A02501 | A04305 | 210 |
| A02501 | A04333 | 199 | A02501 | A04406 | 329 |
| A02501 | A04418 | 485 | A02501 | A04423 | 281 |
| A02501 | A04477 | 408 | A02501 | A04491 | 260 |
| A02501 | A04548 | 232 | A02501 | A04816 | 351 |
| A02501 | A04886 | 351 | A02501 | A04911 | 278 |
| A02501 | A04964 | 290 | A02501 | A05018 | 366 |
| A02501 | A05106 | 195 | A02501 | A05288 | 243 |
| A02501 | A05472 | 205 | A02501 | A05640 | 366 |
| A02501 | A05682 | 265 | A02501 | A06038 | 285 |
| A02501 | A06074 | 294 | A02501 | A06400 | 420 |
| A02501 | A06511 | 393 | A02501 | A06998 | 358 |
| A02501 | A07163 | 176 | A02501 | A07634 | 188 |
| A02501 | A08352 | 218 | A02501 | A08718 | 375 |
| A02501 | A09220 | 170 | A02501 | A09409 | 358 |
| A02501 | A09464 | 372 | A02501 | A09480 | 303 |
| A02501 | A10018 | 188 | A02501 | A10066 | 366 |
| A02501 | A10357 | 299 | A02501 | A10684 | 279 |
| A02501 | A11424 | 321 | A02501 | A11576 | 177 |
| A02501 | A12361 | 190 | A02501 | A12654 | 299 |
| A02501 | A13140 | 345 | A02501 | A13280 | 358 |
| A02501 | A14410 | 257 | A02501 | A14770 | 330 |
| A02501 | A15570 | 351 | A02501 | A15630 | 154 |
| A02501 | A15917 | 256 | A02502 | A02505 | 185 |
| A02502 | A02544 | 899 | A02502 | A02673 | 124 |
| A02502 | A02676 | 185 | A02502 | A02698 | 157 |
| A02502 | A02711 | 283 | A02502 | A02764 | 185 |
| A02502 | A02816 | 297 | A02502 | A02836 | 188 |

|        |        |     |        |        |     |
|--------|--------|-----|--------|--------|-----|
| A02502 | A02981 | 441 | A02502 | A03076 | 196 |
| A02502 | A03304 | 353 | A02502 | A03398 | 196 |
| A02502 | A03434 | 167 | A02502 | A03451 | 491 |
| A02502 | A03771 | 278 | A02502 | A03842 | 232 |
| A02502 | A03925 | 256 | A02502 | A03960 | 188 |
| A02502 | A03993 | 422 | A02502 | A04033 | 364 |
| A02502 | A04101 | 475 | A02502 | A04133 | 369 |
| A02502 | A04358 | 224 | A02502 | A04417 | 319 |
| A02502 | A04444 | 213 | A02502 | A04474 | 447 |
| A02502 | A04484 | 899 | A02502 | A04505 | 154 |
| A02502 | A04534 | 232 | A02502 | A04563 | 173 |
| A02502 | A04808 | 219 | A02502 | A04878 | 152 |
| A02502 | A05052 | 188 | A02502 | A05065 | 374 |
| A02502 | A05288 | 185 | A02502 | A05374 | 279 |
| A02502 | A05546 | 290 | A02502 | A05574 | 369 |
| A02502 | A05779 | 163 | A02502 | A06317 | 163 |
| A02502 | A06404 | 180 | A02502 | A06595 | 254 |
| A02502 | A06623 | 486 | A02502 | A06653 | 262 |
| A02502 | A06779 | 198 | A02502 | A06818 | 162 |
| A02502 | A07132 | 152 | A02502 | A07311 | 899 |
| A02502 | A07315 | 232 | A02502 | A07339 | 434 |
| A02502 | A07367 | 379 | A02502 | A07422 | 899 |
| A02502 | A07992 | 297 | A02502 | A08578 | 160 |
| A02502 | A08899 | 899 | A02502 | A09073 | 212 |
| A02502 | A09280 | 224 | A02502 | A09900 | 230 |
| A02502 | A10341 | 326 | A02502 | A10560 | 188 |
| A02502 | A10668 | 210 | A02502 | A10808 | 912 |
| A02502 | A10809 | 210 | A02502 | A10894 | 170 |
| A02502 | A10960 | 486 | A02502 | A11061 | 201 |
| A02502 | A11125 | 154 | A02502 | A11392 | 338 |
| A02502 | A11426 | 424 | A02502 | A11658 | 324 |
| A02502 | A11760 | 293 | A02502 | A11836 | 173 |
| A02502 | A11897 | 477 | A02502 | A11932 | 485 |
| A02502 | A11983 | 312 | A02502 | A12371 | 479 |
| A02502 | A12965 | 279 | A02502 | A13391 | 299 |
| A02502 | A13619 | 326 | A02502 | A13795 | 238 |
| A02502 | A13886 | 160 | A02502 | A13977 | 899 |
| A02502 | A13990 | 384 | A02502 | A14494 | 182 |
| A02502 | A14620 | 297 | A02502 | A14636 | 168 |
| A02502 | A14643 | 400 | A02502 | A14785 | 205 |
| A02502 | A15241 | 463 | A02502 | A15296 | 409 |
| A02502 | A15568 | 224 | A02502 | A15730 | 185 |
| A02502 | A16257 | 213 | A02502 | A16732 | 201 |
| A02502 | A17155 | 163 | A02502 | A17188 | 899 |
| A02503 | A02642 | 473 | A02503 | A02668 | 208 |
| A02503 | A02718 | 157 | A02503 | A02787 | 227 |



|        |        |     |        |        |     |
|--------|--------|-----|--------|--------|-----|
| A02503 | A02788 | 443 | A02503 | A03100 | 274 |
| A02503 | A04999 | 368 | A02503 | A05172 | 402 |
| A02503 | A07344 | 385 | A02503 | A09123 | 457 |
| A02503 | A10731 | 288 | A02503 | A12373 | 172 |
| A02503 | A15838 | 439 | A02503 | A15840 | 288 |
| A02503 | A16112 | 368 | A02504 | A02548 | 273 |
| A02504 | A02583 | 294 | A02504 | A02584 | 305 |
| A02504 | A02618 | 391 | A02504 | A02671 | 162 |
| A02504 | A02819 | 174 | A02504 | A03107 | 159 |
| A02504 | A03124 | 380 | A02504 | A03726 | 266 |
| A02504 | A04092 | 452 | A02504 | A04105 | 176 |
| A02504 | A04222 | 491 | A02504 | A04256 | 227 |
| A02504 | A04282 | 432 | A02504 | A04394 | 333 |
| A02504 | A04423 | 288 | A02504 | A04486 | 333 |
| A02504 | A04491 | 267 | A02504 | A05393 | 168 |
| A02504 | A05763 | 371 | A02504 | A06219 | 350 |
| A02504 | A07132 | 393 | A02504 | A07265 | 176 |
| A02504 | A07588 | 171 | A02504 | A07711 | 302 |
| A02504 | A09398 | 446 | A02504 | A09479 | 460 |
| A02504 | A09784 | 291 | A02504 | A10040 | 313 |
| A02504 | A11983 | 228 | A02504 | A12654 | 307 |
| A02504 | A14722 | 363 | A02504 | A14887 | 305 |
| A02504 | A15638 | 165 | A02504 | A16427 | 396 |
| A02504 | A16433 | 302 | A02505 | A02585 | 215 |
| A02505 | A02590 | 235 | A02505 | A02601 | 177 |
| A02505 | A02667 | 174 | A02505 | A02670 | 273 |
| A02505 | A02771 | 168 | A02505 | A02785 | 208 |
| A02505 | A02787 | 258 | A02505 | A02789 | 267 |
| A02505 | A02832 | 241 | A02505 | A02869 | 174 |
| A02505 | A02875 | 247 | A02505 | A03027 | 246 |
| A02505 | A03068 | 160 | A02505 | A03095 | 491 |
| A02505 | A03181 | 185 | A02505 | A03218 | 249 |
| A02505 | A03319 | 301 | A02505 | A03346 | 177 |
| A02505 | A03588 | 338 | A02505 | A03653 | 332 |
| A02505 | A03771 | 314 | A02505 | A03861 | 185 |
| A02505 | A04007 | 362 | A02505 | A04049 | 396 |
| A02505 | A04260 | 162 | A02505 | A04510 | 263 |
| A02505 | A04939 | 270 | A02505 | A04996 | 469 |
| A02505 | A05259 | 274 | A02505 | A05450 | 357 |
| A02505 | A05529 | 319 | A02505 | A05679 | 152 |
| A02505 | A05901 | 472 | A02505 | A06088 | 296 |
| A02505 | A06286 | 190 | A02505 | A06858 | 232 |
| A02505 | A07091 | 217 | A02505 | A07163 | 160 |
| A02505 | A07165 | 266 | A02505 | A07205 | 210 |
| A02505 | A08704 | 333 | A02505 | A09085 | 288 |
| A02505 | A09147 | 316 | A02505 | A09272 | 281 |

|        |        |     |        |        |     |
|--------|--------|-----|--------|--------|-----|
| A02505 | A09394 | 265 | A02505 | A09509 | 357 |
| A02505 | A11135 | 333 | A02505 | A11313 | 176 |
| A02505 | A11911 | 251 | A02505 | A12371 | 267 |
| A02505 | A12897 | 389 | A02505 | A13886 | 273 |
| A02505 | A14125 | 185 | A02505 | A14498 | 343 |
| A02505 | A14875 | 328 | A02505 | A15130 | 159 |
| A02505 | A15911 | 218 | A02506 | A02508 | 281 |
| A02506 | A02512 | 299 | A02506 | A02525 | 213 |
| A02506 | A02837 | 218 | A02506 | A03003 | 407 |
| A02506 | A03278 | 243 | A02506 | A03398 | 324 |
| A02506 | A03432 | 213 | A02506 | A03498 | 249 |
| A02506 | A04111 | 319 | A02506 | A04649 | 290 |
| A02506 | A04852 | 303 | A02506 | A04888 | 430 |
| A02506 | A04902 | 330 | A02506 | A05032 | 400 |
| A02506 | A05568 | 279 | A02506 | A05791 | 201 |
| A02506 | A05832 | 294 | A02506 | A07399 | 174 |
| A02506 | A08583 | 268 | A02506 | A08878 | 307 |
| A02506 | A11902 | 188 | A02506 | A11983 | 174 |
| A02506 | A13545 | 368 | A02506 | A14605 | 226 |
| A02507 | A02708 | 374 | A02507 | A02861 | 338 |
| A02507 | A03228 | 296 | A02507 | A03420 | 210 |
| A02507 | A04422 | 302 | A02507 | A04483 | 383 |
| A02507 | A04512 | 396 | A02507 | A04516 | 347 |
| A02507 | A04710 | 382 | A02507 | A04810 | 401 |
| A02507 | A05240 | 401 | A02507 | A06078 | 338 |
| A02507 | A06392 | 419 | A02507 | A06623 | 238 |
| A02507 | A07178 | 319 | A02507 | A15838 | 366 |
| A02508 | A02525 | 311 | A02508 | A02762 | 377 |
| A02508 | A02776 | 327 | A02508 | A02784 | 288 |
| A02508 | A03126 | 165 | A02508 | A03977 | 351 |
| A02508 | A04334 | 210 | A02508 | A04622 | 240 |
| A02508 | A06055 | 302 | A02508 | A06779 | 369 |
| A02508 | A07151 | 299 | A02510 | A02655 | 291 |
| A02510 | A02878 | 221 | A02510 | A03112 | 317 |
| A02510 | A03739 | 205 | A02510 | A04212 | 193 |
| A02510 | A05082 | 363 | A02510 | A05184 | 350 |
| A02510 | A05220 | 196 | A02510 | A06038 | 363 |
| A02510 | A10221 | 390 | A02510 | A16738 | 205 |
| A02511 | A02690 | 249 | A02511 | A02830 | 210 |
| A02511 | A02867 | 345 | A02511 | A02877 | 402 |
| A02511 | A02878 | 198 | A02511 | A02897 | 364 |
| A02511 | A02909 | 380 | A02511 | A02927 | 205 |
| A02511 | A03211 | 491 | A02511 | A03241 | 450 |
| A02511 | A04275 | 268 | A02511 | A04324 | 345 |
| A02511 | A04410 | 362 | A02511 | A04418 | 221 |
| A02511 | A04493 | 491 | A02511 | A04603 | 416 |

|        |        |     |        |        |     |
|--------|--------|-----|--------|--------|-----|
| A02511 | A04715 | 425 | A02511 | A04903 | 324 |
| A02511 | A04944 | 491 | A02511 | A04947 | 393 |
| A02511 | A04964 | 491 | A02511 | A04972 | 486 |
| A02511 | A05106 | 307 | A02511 | A05119 | 316 |
| A02511 | A05245 | 422 | A02511 | A05288 | 479 |
| A02511 | A05556 | 358 | A02511 | A05591 | 157 |
| A02511 | A05847 | 252 | A02511 | A06106 | 355 |
| A02511 | A06151 | 373 | A02511 | A06152 | 326 |
| A02511 | A06222 | 355 | A02511 | A06227 | 330 |
| A02511 | A06364 | 393 | A02511 | A06432 | 439 |
| A02511 | A06524 | 224 | A02511 | A06530 | 307 |
| A02511 | A06535 | 305 | A02511 | A06549 | 384 |
| A02511 | A06686 | 488 | A02511 | A06708 | 213 |
| A02511 | A06721 | 343 | A02511 | A06844 | 330 |
| A02511 | A06895 | 418 | A02511 | A06967 | 384 |
| A02511 | A07056 | 439 | A02511 | A07335 | 267 |
| A02511 | A07678 | 345 | A02511 | A07852 | 330 |
| A02511 | A07857 | 439 | A02511 | A07860 | 460 |
| A02511 | A07861 | 433 | A02511 | A07862 | 433 |
| A02511 | A07995 | 316 | A02511 | A08093 | 191 |
| A02511 | A08172 | 384 | A02511 | A08274 | 286 |
| A02511 | A08668 | 297 | A02511 | A09056 | 165 |
| A02511 | A10274 | 384 | A02511 | A10771 | 384 |
| A02511 | A10774 | 384 | A02511 | A11306 | 246 |
| A02511 | A11389 | 291 | A02511 | A12675 | 330 |
| A02511 | A12716 | 384 | A02511 | A12811 | 384 |
| A02511 | A13885 | 254 | A02511 | A14876 | 301 |
| A02511 | A16354 | 345 | A02511 | A17085 | 412 |
| A02512 | A02564 | 215 | A02512 | A02590 | 218 |
| A02512 | A02615 | 245 | A02512 | A02751 | 226 |
| A02512 | A02784 | 174 | A02512 | A02807 | 293 |
| A02512 | A02877 | 474 | A02512 | A02880 | 328 |
| A02512 | A03112 | 380 | A02512 | A03185 | 290 |
| A02512 | A03334 | 218 | A02512 | A03415 | 486 |
| A02512 | A03453 | 409 | A02512 | A03785 | 202 |
| A02512 | A04008 | 152 | A02512 | A04048 | 182 |
| A02512 | A04183 | 288 | A02512 | A04446 | 224 |
| A02512 | A04451 | 162 | A02512 | A04808 | 307 |
| A02512 | A05122 | 368 | A02512 | A05875 | 351 |
| A02512 | A05995 | 234 | A02512 | A06998 | 341 |
| A02512 | A07140 | 162 | A02512 | A08061 | 265 |
| A02512 | A09232 | 303 | A02512 | A09587 | 420 |
| A02512 | A10221 | 307 | A02512 | A10328 | 172 |
| A02512 | A10490 | 188 | A02512 | A11312 | 406 |
| A02512 | A11368 | 154 | A02512 | A11480 | 154 |
| A02512 | A11773 | 334 | A02512 | A11973 | 328 |

|        |        |     |        |        |     |
|--------|--------|-----|--------|--------|-----|
| A02512 | A12251 | 252 | A02512 | A13181 | 160 |
| A02512 | A13545 | 363 | A02512 | A13609 | 357 |
| A02512 | A14197 | 210 | A02512 | A15698 | 200 |
| A02513 | A02639 | 162 | A02513 | A02737 | 208 |
| A02513 | A02745 | 435 | A02513 | A02747 | 353 |
| A02513 | A02783 | 272 | A02513 | A02806 | 168 |
| A02513 | A02920 | 339 | A02513 | A02925 | 263 |
| A02513 | A02929 | 440 | A02513 | A04681 | 235 |
| A02513 | A04908 | 449 | A02513 | A06339 | 470 |
| A02513 | A06977 | 391 | A02513 | A07147 | 457 |
| A02513 | A07961 | 245 | A02513 | A10082 | 374 |
| A02513 | A10905 | 425 | A02513 | A12142 | 396 |
| A02513 | A12557 | 382 | A02513 | A12920 | 324 |
| A02513 | A13851 | 371 | A02513 | A14647 | 310 |
| A02513 | A15376 | 314 | A02513 | A15639 | 263 |
| A02514 | A04483 | 424 | A02514 | A04510 | 396 |
| A02514 | A05478 | 438 | A02514 | A05588 | 430 |
| A02514 | A16636 | 251 | A02514 | A17155 | 401 |
| A02515 | A02620 | 394 | A02515 | A03056 | 256 |
| A02515 | A03537 | 406 | A02515 | A05985 | 307 |
| A02515 | A06095 | 388 | A02515 | A07145 | 324 |
| A02515 | A07157 | 283 | A02515 | A07612 | 436 |
| A02516 | A02752 | 419 | A02517 | A05082 | 288 |
| A02517 | A06615 | 191 | A02517 | A07220 | 366 |
| A02517 | A07339 | 182 | A02517 | A10247 | 273 |
| A02517 | A16024 | 418 | A02518 | A02544 | 409 |
| A02518 | A02715 | 402 | A02518 | A02786 | 491 |
| A02518 | A03104 | 285 | A02518 | A03313 | 827 |
| A02518 | A03331 | 422 | A02518 | A03805 | 269 |
| A02518 | A03861 | 340 | A02518 | A03958 | 226 |
| A02518 | A04242 | 269 | A02518 | A04424 | 170 |
| A02518 | A04715 | 481 | A02518 | A05220 | 329 |
| A02518 | A06082 | 196 | A02518 | A06100 | 446 |
| A02518 | A06608 | 329 | A02518 | A06958 | 281 |
| A02518 | A07051 | 491 | A02518 | A07209 | 401 |
| A02518 | A07282 | 430 | A02518 | A07311 | 391 |
| A02518 | A07836 | 243 | A02518 | A07920 | 159 |
| A02518 | A08573 | 167 | A02518 | A08686 | 163 |
| A02518 | A08915 | 332 | A02518 | A09633 | 801 |
| A02518 | A09644 | 454 | A02518 | A09818 | 407 |
| A02518 | A10502 | 446 | A02518 | A10844 | 193 |
| A02518 | A12835 | 234 | A02518 | A14124 | 162 |
| A02518 | A14300 | 241 | A02518 | A14430 | 363 |
| A02518 | A15232 | 355 | A02518 | A16074 | 358 |
| A02518 | A17198 | 154 | A02519 | A03057 | 168 |
| A02520 | A02569 | 385 | A02520 | A02754 | 212 |

|        |        |     |        |        |     |
|--------|--------|-----|--------|--------|-----|
| A02520 | A02760 | 278 | A02520 | A03003 | 469 |
| A02520 | A03043 | 265 | A02520 | A03113 | 393 |
| A02520 | A03423 | 173 | A02520 | A03477 | 424 |
| A02520 | A03586 | 218 | A02520 | A03589 | 340 |
| A02520 | A04334 | 414 | A02520 | A04506 | 368 |
| A02520 | A04795 | 234 | A02520 | A04888 | 285 |
| A02520 | A04908 | 168 | A02520 | A05032 | 355 |
| A02520 | A05797 | 198 | A02520 | A05842 | 291 |
| A02520 | A06597 | 252 | A02520 | A07080 | 224 |
| A02520 | A07128 | 436 | A02520 | A07191 | 182 |
| A02520 | A11304 | 400 | A02520 | A11493 | 182 |
| A02520 | A11513 | 213 | A02520 | A14457 | 183 |
| A02521 | A02564 | 251 | A02521 | A02698 | 333 |
| A02521 | A02708 | 218 | A02521 | A02766 | 154 |
| A02521 | A02777 | 491 | A02521 | A02778 | 490 |
| A02521 | A02779 | 490 | A02521 | A02822 | 156 |
| A02521 | A02846 | 174 | A02521 | A02858 | 395 |
| A02521 | A02877 | 151 | A02521 | A02878 | 291 |
| A02521 | A02942 | 238 | A02521 | A03009 | 224 |
| A02521 | A03056 | 347 | A02521 | A03087 | 190 |
| A02521 | A03121 | 223 | A02521 | A03328 | 484 |
| A02521 | A03412 | 154 | A02521 | A03421 | 208 |
| A02521 | A03423 | 491 | A02521 | A03484 | 393 |
| A02521 | A03496 | 183 | A02521 | A03513 | 475 |
| A02521 | A03649 | 324 | A02521 | A03745 | 172 |
| A02521 | A03795 | 377 | A02521 | A04026 | 368 |
| A02521 | A04065 | 208 | A02521 | A04095 | 310 |
| A02521 | A04228 | 385 | A02521 | A04256 | 380 |
| A02521 | A04349 | 177 | A02521 | A04465 | 230 |
| A02521 | A04621 | 208 | A02521 | A04678 | 196 |
| A02521 | A04702 | 266 | A02521 | A04791 | 340 |
| A02521 | A04822 | 151 | A02521 | A04883 | 491 |
| A02521 | A04891 | 401 | A02521 | A04927 | 491 |
| A02521 | A05045 | 491 | A02521 | A05050 | 472 |
| A02521 | A05051 | 477 | A02521 | A05078 | 196 |
| A02521 | A05140 | 184 | A02521 | A05297 | 440 |
| A02521 | A05325 | 246 | A02521 | A05331 | 213 |
| A02521 | A05337 | 249 | A02521 | A05355 | 201 |
| A02521 | A05358 | 274 | A02521 | A05365 | 172 |
| A02521 | A05419 | 238 | A02521 | A05420 | 266 |
| A02521 | A05548 | 165 | A02521 | A05573 | 412 |
| A02521 | A05615 | 179 | A02521 | A05774 | 179 |
| A02521 | A05795 | 299 | A02521 | A05986 | 288 |
| A02521 | A06063 | 255 | A02521 | A06402 | 182 |
| A02521 | A06405 | 491 | A02521 | A06439 | 491 |
| A02521 | A06517 | 255 | A02521 | A06553 | 279 |

|        |        |     |        |        |     |
|--------|--------|-----|--------|--------|-----|
| A02521 | A06607 | 162 | A02521 | A06638 | 255 |
| A02521 | A06727 | 373 | A02521 | A06733 | 179 |
| A02521 | A06855 | 318 | A02521 | A06860 | 414 |
| A02521 | A07037 | 310 | A02521 | A07059 | 491 |
| A02521 | A07084 | 255 | A02521 | A07088 | 491 |
| A02521 | A07271 | 255 | A02521 | A07303 | 324 |
| A02521 | A07354 | 357 | A02521 | A07370 | 193 |
| A02521 | A07444 | 230 | A02521 | A07503 | 477 |
| A02521 | A07520 | 469 | A02521 | A07674 | 208 |
| A02521 | A07687 | 341 | A02521 | A07690 | 262 |
| A02521 | A07757 | 474 | A02521 | A07856 | 213 |
| A02521 | A08114 | 168 | A02521 | A08126 | 252 |
| A02521 | A08152 | 213 | A02521 | A08197 | 154 |
| A02521 | A08836 | 245 | A02521 | A08961 | 172 |
| A02521 | A09076 | 184 | A02521 | A09169 | 152 |
| A02521 | A09269 | 156 | A02521 | A09455 | 279 |
| A02521 | A09544 | 363 | A02521 | A09561 | 328 |
| A02521 | A09680 | 255 | A02521 | A10114 | 291 |
| A02521 | A10635 | 484 | A02521 | A10679 | 156 |
| A02521 | A10686 | 301 | A02521 | A10687 | 196 |
| A02521 | A10690 | 182 | A02521 | A10705 | 357 |
| A02521 | A10780 | 208 | A02521 | A10850 | 406 |
| A02521 | A11067 | 324 | A02521 | A11276 | 324 |
| A02521 | A11434 | 255 | A02521 | A11457 | 255 |
| A02521 | A11543 | 170 | A02521 | A11828 | 480 |
| A02521 | A12859 | 324 | A02521 | A12938 | 391 |
| A02521 | A14431 | 396 | A02521 | A14790 | 288 |
| A02521 | A14791 | 324 | A02521 | A15138 | 165 |
| A02521 | A16100 | 213 | A02521 | A16741 | 218 |
| A02521 | A16779 | 324 | A02521 | A16785 | 401 |
| A02521 | A17006 | 160 | A02522 | A02621 | 291 |
| A02522 | A02759 | 402 | A02522 | A03099 | 204 |
| A02522 | A03243 | 461 | A02522 | A08746 | 291 |
| A02522 | A12365 | 183 | A02522 | A14190 | 174 |
| A02522 | A14321 | 427 | A02523 | A02539 | 481 |
| A02523 | A02541 | 386 | A02523 | A02773 | 335 |
| A02523 | A03076 | 278 | A02523 | A03077 | 332 |
| A02523 | A03202 | 343 | A02523 | A03216 | 347 |
| A02523 | A03217 | 297 | A02523 | A03570 | 306 |
| A02523 | A04224 | 369 | A02523 | A04498 | 361 |
| A02523 | A04637 | 302 | A02523 | A04832 | 243 |
| A02523 | A04870 | 260 | A02523 | A05145 | 321 |
| A02523 | A05146 | 234 | A02523 | A05294 | 224 |
| A02523 | A05348 | 279 | A02523 | A05707 | 395 |
| A02523 | A05777 | 372 | A02523 | A06002 | 395 |
| A02523 | A06710 | 339 | A02523 | A06731 | 174 |

|        |        |     |        |        |     |
|--------|--------|-----|--------|--------|-----|
| A02523 | A07386 | 380 | A02523 | A07442 | 252 |
| A02523 | A07833 | 200 | A02523 | A08911 | 234 |
| A02523 | A09104 | 288 | A02523 | A10257 | 395 |
| A02523 | A10278 | 375 | A02523 | A10433 | 380 |
| A02523 | A10770 | 380 | A02523 | A10865 | 380 |
| A02523 | A14255 | 196 | A02523 | A14381 | 183 |
| A02523 | A15498 | 191 | A02523 | A16274 | 170 |
| A02523 | A17078 | 326 | A02524 | A02551 | 379 |
| A02524 | A02698 | 249 | A02524 | A03086 | 388 |
| A02524 | A03091 | 221 | A02524 | A03101 | 260 |
| A02524 | A03144 | 180 | A02524 | A03148 | 263 |
| A02524 | A03155 | 243 | A02524 | A03173 | 368 |
| A02524 | A03238 | 174 | A02524 | A03513 | 157 |
| A02524 | A03580 | 433 | A02524 | A04095 | 297 |
| A02524 | A04164 | 341 | A02524 | A04927 | 208 |
| A02524 | A05045 | 226 | A02524 | A05150 | 257 |
| A02524 | A05210 | 279 | A02524 | A05926 | 177 |
| A02524 | A06014 | 337 | A02524 | A06195 | 159 |
| A02524 | A06439 | 180 | A02524 | A06659 | 321 |
| A02524 | A07088 | 205 | A02524 | A07140 | 326 |
| A02524 | A07184 | 278 | A02524 | A07477 | 201 |
| A02524 | A07520 | 152 | A02524 | A07553 | 170 |
| A02524 | A07558 | 188 | A02524 | A07736 | 297 |
| A02524 | A09268 | 360 | A02524 | A09941 | 337 |
| A02524 | A10527 | 199 | A02524 | A10693 | 247 |
| A02524 | A15992 | 324 | A02525 | A02548 | 281 |
| A02525 | A02672 | 179 | A02525 | A02929 | 232 |
| A02525 | A02987 | 352 | A02525 | A03167 | 171 |
| A02525 | A03421 | 168 | A02525 | A03513 | 174 |
| A02525 | A03649 | 188 | A02525 | A03976 | 394 |
| A02525 | A04271 | 208 | A02525 | A04723 | 299 |
| A02525 | A04927 | 226 | A02525 | A05014 | 291 |
| A02525 | A05330 | 273 | A02525 | A05463 | 279 |
| A02525 | A05471 | 274 | A02525 | A05472 | 224 |
| A02525 | A05550 | 243 | A02525 | A05767 | 213 |
| A02525 | A05838 | 218 | A02525 | A05912 | 375 |
| A02525 | A06201 | 324 | A02525 | A06629 | 411 |
| A02525 | A06632 | 340 | A02525 | A06641 | 386 |
| A02525 | A06847 | 294 | A02525 | A06994 | 314 |
| A02525 | A07027 | 270 | A02525 | A07059 | 210 |
| A02525 | A07408 | 324 | A02525 | A07501 | 255 |
| A02525 | A07674 | 168 | A02525 | A07723 | 299 |
| A02525 | A08655 | 294 | A02525 | A08867 | 283 |
| A02525 | A08875 | 185 | A02525 | A09127 | 162 |
| A02525 | A10337 | 218 | A02525 | A10820 | 368 |
| A02525 | A11313 | 207 | A02525 | A15874 | 180 |

|        |        |     |        |        |     |
|--------|--------|-----|--------|--------|-----|
| A02526 | A03440 | 369 | A02526 | A07101 | 380 |
| A02526 | A14381 | 360 | A02527 | A02586 | 208 |
| A02527 | A02994 | 258 | A02527 | A03438 | 394 |
| A02527 | A03652 | 358 | A02527 | A03981 | 390 |
| A02527 | A05411 | 369 | A02527 | A06084 | 316 |
| A02527 | A06356 | 348 | A02527 | A06825 | 425 |
| A02527 | A07471 | 195 | A02527 | A08682 | 252 |
| A02527 | A11981 | 286 | A02527 | A13626 | 213 |
| A02528 | A02586 | 308 | A02528 | A02636 | 351 |
| A02528 | A03128 | 420 | A02528 | A15425 | 305 |
| A02529 | A02584 | 279 | A02529 | A02759 | 200 |
| A02529 | A03234 | 484 | A02529 | A03513 | 443 |
| A02529 | A03919 | 255 | A02529 | A04095 | 390 |
| A02529 | A04162 | 165 | A02529 | A04227 | 366 |
| A02529 | A04307 | 171 | A02529 | A04316 | 223 |
| A02529 | A04485 | 277 | A02529 | A05046 | 353 |
| A02529 | A05139 | 353 | A02529 | A05358 | 428 |
| A02529 | A05451 | 401 | A02529 | A05452 | 409 |
| A02529 | A05538 | 330 | A02529 | A05549 | 353 |
| A02529 | A05550 | 407 | A02529 | A05883 | 457 |
| A02529 | A05966 | 185 | A02529 | A06090 | 324 |
| A02529 | A06629 | 167 | A02529 | A06641 | 235 |
| A02529 | A06734 | 462 | A02529 | A06800 | 353 |
| A02529 | A06860 | 470 | A02529 | A07037 | 390 |
| A02529 | A07477 | 176 | A02529 | A07520 | 350 |
| A02529 | A08015 | 366 | A02529 | A10521 | 319 |
| A02529 | A10563 | 160 | A02529 | A10714 | 154 |
| A02529 | A14306 | 337 | A02529 | A14337 | 311 |
| A02529 | A14482 | 196 | A02529 | A14701 | 408 |
| A02529 | A15558 | 404 | A02529 | A15738 | 172 |
| A02529 | A16654 | 266 | A02530 | A02538 | 401 |
| A02530 | A02542 | 462 | A02530 | A02778 | 193 |
| A02530 | A03154 | 440 | A02530 | A03238 | 283 |
| A02530 | A03489 | 246 | A02530 | A04318 | 446 |
| A02530 | A04487 | 457 | A02530 | A04679 | 374 |
| A02530 | A05131 | 398 | A02530 | A05143 | 439 |
| A02530 | A05252 | 404 | A02530 | A05311 | 384 |
| A02530 | A05407 | 380 | A02530 | A05785 | 457 |
| A02530 | A06688 | 226 | A02530 | A06831 | 385 |
| A02530 | A07143 | 313 | A02530 | A09036 | 441 |
| A02530 | A09219 | 374 | A02530 | A09375 | 446 |
| A02530 | A09891 | 457 | A02530 | A09892 | 452 |
| A02530 | A13832 | 303 | A02531 | A02673 | 424 |
| A02531 | A02761 | 382 | A02531 | A02817 | 277 |
| A02531 | A03021 | 369 | A02531 | A03072 | 369 |
| A02531 | A03114 | 429 | A02531 | A03190 | 393 |



|        |        |     |        |        |     |
|--------|--------|-----|--------|--------|-----|
| A02531 | A04229 | 180 | A02531 | A04256 | 274 |
| A02531 | A04424 | 299 | A02531 | A04886 | 380 |
| A02531 | A05018 | 393 | A02531 | A06597 | 198 |
| A02531 | A11485 | 196 | A02531 | A12361 | 247 |
| A02531 | A15233 | 317 | A02531 | A16111 | 414 |
| A02532 | A02539 | 385 | A02532 | A02541 | 335 |
| A02532 | A02689 | 246 | A02532 | A03077 | 390 |
| A02532 | A03112 | 286 | A02532 | A03377 | 411 |
| A02532 | A03649 | 255 | A02532 | A05379 | 422 |
| A02532 | A07340 | 422 | A02532 | A07815 | 246 |
| A02533 | A03516 | 305 | A02533 | A05356 | 157 |
| A02533 | A05393 | 311 | A02533 | A05394 | 385 |
| A02533 | A07339 | 172 | A02533 | A07496 | 407 |
| A02534 | A03050 | 270 | A02534 | A15992 | 366 |
| A02535 | A02539 | 491 | A02535 | A02542 | 488 |
| A02535 | A02585 | 419 | A02535 | A02826 | 170 |
| A02535 | A02831 | 170 | A02535 | A02864 | 490 |
| A02535 | A02927 | 475 | A02535 | A03146 | 152 |
| A02535 | A03337 | 230 | A02535 | A03522 | 201 |
| A02535 | A03777 | 163 | A02535 | A03803 | 160 |
| A02535 | A04012 | 273 | A02535 | A04075 | 480 |
| A02535 | A04212 | 491 | A02535 | A04308 | 157 |
| A02535 | A04533 | 221 | A02535 | A04604 | 269 |
| A02535 | A04709 | 327 | A02535 | A04848 | 491 |
| A02535 | A04867 | 491 | A02535 | A04870 | 402 |
| A02535 | A05016 | 561 | A02535 | A05188 | 317 |
| A02535 | A05596 | 167 | A02535 | A05837 | 207 |
| A02535 | A05919 | 449 | A02535 | A05983 | 288 |
| A02535 | A05986 | 191 | A02535 | A06050 | 288 |
| A02535 | A06204 | 491 | A02535 | A06281 | 488 |
| A02535 | A06347 | 491 | A02535 | A06650 | 424 |
| A02535 | A06778 | 463 | A02535 | A06968 | 160 |
| A02535 | A07318 | 317 | A02535 | A07932 | 162 |
| A02535 | A08183 | 483 | A02535 | A08447 | 468 |
| A02535 | A08581 | 218 | A02535 | A08591 | 218 |
| A02535 | A08737 | 317 | A02535 | A09180 | 491 |
| A02535 | A09397 | 433 | A02535 | A10197 | 170 |
| A02535 | A10317 | 477 | A02535 | A10431 | 201 |
| A02535 | A10710 | 457 | A02535 | A10871 | 188 |
| A02535 | A12553 | 255 | A02535 | A13212 | 490 |
| A02535 | A13357 | 438 | A02535 | A14088 | 208 |
| A02535 | A14186 | 491 | A02535 | A14554 | 246 |
| A02535 | A15100 | 226 | A02535 | A15171 | 255 |
| A02535 | A15370 | 491 | A02535 | A15639 | 162 |
| A02535 | A15724 | 479 | A02535 | A15795 | 160 |
| A02535 | A15838 | 188 | A02535 | A16664 | 458 |

|        |        |     |        |        |     |
|--------|--------|-----|--------|--------|-----|
| A02535 | A16674 | 268 | A02537 | A02564 | 313 |
| A02537 | A02673 | 450 | A02537 | A03873 | 262 |
| A02537 | A05439 | 195 | A02537 | A05659 | 271 |
| A02537 | A08630 | 291 | A02537 | A09083 | 257 |
| A02537 | A09098 | 380 | A02537 | A14521 | 271 |
| A02537 | A14800 | 391 | A02538 | A02542 | 313 |
| A02538 | A02575 | 319 | A02538 | A02992 | 319 |
| A02538 | A04487 | 363 | A02538 | A04839 | 297 |
| A02538 | A04917 | 416 | A02538 | A05407 | 454 |
| A02539 | A02541 | 485 | A02539 | A02542 | 140 |
| A02539 | A02560 | 329 | A02539 | A02672 | 134 |
| A02539 | A02673 | 361 | A02539 | A02760 | 236 |
| A02539 | A02761 | 396 | A02539 | A02768 | 207 |
| A02539 | A02773 | 313 | A02539 | A02846 | 167 |
| A02539 | A02918 | 151 | A02539 | A02927 | 201 |
| A02539 | A03077 | 302 | A02539 | A03104 | 360 |
| A02539 | A03178 | 424 | A02539 | A03217 | 386 |
| A02539 | A03224 | 199 | A02539 | A03276 | 249 |
| A02539 | A03759 | 157 | A02539 | A03766 | 260 |
| A02539 | A03777 | 274 | A02539 | A03873 | 183 |
| A02539 | A04015 | 319 | A02539 | A04072 | 435 |
| A02539 | A04135 | 267 | A02539 | A04212 | 481 |
| A02539 | A04224 | 352 | A02539 | A04424 | 418 |
| A02539 | A04498 | 427 | A02539 | A04520 | 210 |
| A02539 | A04597 | 305 | A02539 | A04772 | 323 |
| A02539 | A04867 | 390 | A02539 | A04870 | 477 |
| A02539 | A05106 | 168 | A02539 | A05176 | 318 |
| A02539 | A05188 | 382 | A02539 | A05247 | 229 |
| A02539 | A05294 | 193 | A02539 | A05310 | 183 |
| A02539 | A05379 | 382 | A02539 | A05398 | 228 |
| A02539 | A05591 | 374 | A02539 | A05596 | 389 |
| A02539 | A05603 | 241 | A02539 | A05673 | 273 |
| A02539 | A05691 | 228 | A02539 | A05777 | 221 |
| A02539 | A05828 | 273 | A02539 | A05898 | 329 |
| A02539 | A05899 | 329 | A02539 | A05919 | 318 |
| A02539 | A06100 | 221 | A02539 | A06281 | 386 |
| A02539 | A06708 | 411 | A02539 | A06710 | 318 |
| A02539 | A06739 | 191 | A02539 | A06778 | 212 |
| A02539 | A07318 | 382 | A02539 | A07324 | 196 |
| A02539 | A07340 | 382 | A02539 | A07748 | 191 |
| A02539 | A07815 | 358 | A02539 | A07833 | 168 |
| A02539 | A07847 | 205 | A02539 | A07932 | 273 |
| A02539 | A08638 | 343 | A02539 | A08737 | 382 |
| A02539 | A09249 | 318 | A02539 | A09362 | 486 |
| A02539 | A10237 | 313 | A02539 | A10278 | 227 |
| A02539 | A13212 | 417 | A02539 | A13277 | 335 |

|        |        |     |        |        |     |
|--------|--------|-----|--------|--------|-----|
| A02539 | A13500 | 265 | A02539 | A14005 | 162 |
| A02539 | A15233 | 246 | A02539 | A15295 | 157 |
| A02539 | A15470 | 311 | A02539 | A15913 | 152 |
| A02539 | A17078 | 183 | A02540 | A02672 | 369 |
| A02540 | A02760 | 411 | A02540 | A03202 | 436 |
| A02540 | A04637 | 424 | A02541 | A02545 | 188 |
| A02541 | A02546 | 356 | A02541 | A02574 | 262 |
| A02541 | A02673 | 157 | A02541 | A02785 | 162 |
| A02541 | A02788 | 177 | A02541 | A03107 | 210 |
| A02541 | A03178 | 424 | A02541 | A03216 | 378 |
| A02541 | A03217 | 338 | A02541 | A03224 | 391 |
| A02541 | A03234 | 353 | A02541 | A03243 | 245 |
| A02541 | A03264 | 323 | A02541 | A03351 | 204 |
| A02541 | A03766 | 416 | A02541 | A03858 | 226 |
| A02541 | A04140 | 281 | A02541 | A04372 | 441 |
| A02541 | A04424 | 447 | A02541 | A04498 | 386 |
| A02541 | A04620 | 340 | A02541 | A04908 | 210 |
| A02541 | A05106 | 254 | A02541 | A05153 | 319 |
| A02541 | A05415 | 210 | A02541 | A05550 | 279 |
| A02541 | A05603 | 202 | A02541 | A05673 | 424 |
| A02541 | A05707 | 414 | A02541 | A06002 | 414 |
| A02541 | A06211 | 347 | A02541 | A06346 | 196 |
| A02541 | A06558 | 386 | A02541 | A06623 | 218 |
| A02541 | A07201 | 427 | A02541 | A07205 | 277 |
| A02541 | A07386 | 401 | A02541 | A07469 | 317 |
| A02541 | A07833 | 254 | A02541 | A07958 | 193 |
| A02541 | A10257 | 414 | A02541 | A13906 | 340 |
| A02541 | A14366 | 312 | A02541 | A14637 | 334 |
| A02541 | A14685 | 374 | A02541 | A17155 | 330 |
| A02542 | A02545 | 301 | A02542 | A02582 | 286 |
| A02542 | A02668 | 188 | A02542 | A02783 | 160 |
| A02542 | A02785 | 160 | A02542 | A02874 | 417 |
| A02542 | A02998 | 249 | A02542 | A03080 | 260 |
| A02542 | A03218 | 345 | A02542 | A03403 | 256 |
| A02542 | A03576 | 288 | A02542 | A03814 | 269 |
| A02542 | A03882 | 480 | A02542 | A04055 | 246 |
| A02542 | A04066 | 291 | A02542 | A04212 | 452 |
| A02542 | A04333 | 285 | A02542 | A04477 | 272 |
| A02542 | A04487 | 199 | A02542 | A04704 | 190 |
| A02542 | A04867 | 193 | A02542 | A05002 | 288 |
| A02542 | A05091 | 353 | A02542 | A05154 | 179 |
| A02542 | A05407 | 274 | A02542 | A05493 | 263 |
| A02542 | A05494 | 160 | A02542 | A05726 | 302 |
| A02542 | A05919 | 302 | A02542 | A06281 | 254 |
| A02542 | A06400 | 185 | A02542 | A06531 | 283 |
| A02542 | A06607 | 212 | A02542 | A06622 | 165 |

|        |        |     |        |        |     |
|--------|--------|-----|--------|--------|-----|
| A02542 | A06832 | 235 | A02542 | A07205 | 174 |
| A02542 | A08055 | 179 | A02542 | A08235 | 434 |
| A02542 | A08403 | 235 | A02542 | A09042 | 193 |
| A02542 | A09127 | 216 | A02542 | A09443 | 160 |
| A02542 | A09997 | 210 | A02542 | A11081 | 353 |
| A02542 | A11852 | 201 | A02542 | A13302 | 278 |
| A02542 | A13879 | 152 | A02542 | A14399 | 288 |
| A02542 | A14594 | 196 | A02542 | A14661 | 364 |
| A02542 | A14667 | 154 | A02542 | A15642 | 160 |
| A02542 | A15772 | 401 | A02542 | A15809 | 379 |
| A02542 | A15911 | 395 | A02542 | A15941 | 344 |
| A02542 | A15985 | 243 | A02542 | A16110 | 266 |
| A02542 | A16646 | 241 | A02543 | A03977 | 383 |
| A02543 | A04080 | 276 | A02543 | A05525 | 481 |
| A02544 | A02667 | 183 | A02544 | A02686 | 240 |
| A02544 | A02692 | 353 | A02544 | A02786 | 462 |
| A02544 | A02811 | 252 | A02544 | A02877 | 63  |
| A02544 | A02895 | 212 | A02544 | A02904 | 290 |
| A02544 | A02912 | 438 | A02544 | A02995 | 154 |
| A02544 | A03056 | 221 | A02544 | A03095 | 338 |
| A02544 | A03121 | 156 | A02544 | A03147 | 251 |
| A02544 | A03288 | 193 | A02544 | A03709 | 243 |
| A02544 | A03776 | 224 | A02544 | A04005 | 319 |
| A02544 | A04264 | 267 | A02544 | A04288 | 241 |
| A02544 | A04447 | 177 | A02544 | A04712 | 290 |
| A02544 | A04818 | 243 | A02544 | A05003 | 438 |
| A02544 | A05288 | 165 | A02544 | A05304 | 364 |
| A02544 | A06124 | 334 | A02544 | A06595 | 174 |
| A02544 | A06596 | 277 | A02544 | A06601 | 188 |
| A02544 | A06648 | 177 | A02544 | A06882 | 319 |
| A02544 | A07091 | 899 | A02544 | A07199 | 291 |
| A02544 | A07422 | 900 | A02544 | A08568 | 224 |
| A02544 | A08635 | 273 | A02544 | A09220 | 168 |
| A02544 | A09319 | 899 | A02544 | A09818 | 357 |
| A02544 | A10018 | 185 | A02544 | A12304 | 402 |
| A02544 | A12730 | 266 | A02544 | A13375 | 279 |
| A02544 | A13879 | 196 | A02544 | A13977 | 899 |
| A02544 | A14005 | 185 | A02544 | A14152 | 417 |
| A02544 | A14196 | 419 | A02544 | A14218 | 462 |
| A02544 | A14283 | 185 | A02544 | A14508 | 196 |
| A02544 | A15323 | 270 | A02544 | A15324 | 230 |
| A02544 | A15376 | 232 | A02544 | A16886 | 259 |
| A02545 | A02575 | 205 | A02545 | A02774 | 157 |
| A02545 | A02864 | 151 | A02545 | A02876 | 235 |
| A02545 | A02904 | 190 | A02545 | A02919 | 188 |
| A02545 | A02930 | 154 | A02545 | A02966 | 176 |

|        |        |     |        |        |     |
|--------|--------|-----|--------|--------|-----|
| A02545 | A02983 | 210 | A02545 | A03033 | 157 |
| A02545 | A03050 | 198 | A02545 | A03099 | 317 |
| A02545 | A03147 | 306 | A02545 | A03216 | 286 |
| A02545 | A03237 | 168 | A02545 | A03402 | 466 |
| A02545 | A03545 | 152 | A02545 | A03725 | 477 |
| A02545 | A03746 | 188 | A02545 | A04010 | 323 |
| A02545 | A04016 | 286 | A02545 | A04035 | 177 |
| A02545 | A04182 | 171 | A02545 | A04228 | 417 |
| A02545 | A04366 | 319 | A02545 | A04369 | 235 |
| A02545 | A04486 | 434 | A02545 | A04672 | 314 |
| A02545 | A04765 | 314 | A02545 | A05098 | 152 |
| A02545 | A05153 | 491 | A02545 | A05356 | 435 |
| A02545 | A05393 | 489 | A02545 | A05394 | 474 |
| A02545 | A05418 | 177 | A02545 | A05485 | 460 |
| A02545 | A05496 | 302 | A02545 | A05515 | 198 |
| A02545 | A05520 | 329 | A02545 | A05678 | 165 |
| A02545 | A05687 | 452 | A02545 | A05860 | 294 |
| A02545 | A05926 | 488 | A02545 | A05945 | 216 |
| A02545 | A06033 | 412 | A02545 | A06086 | 358 |
| A02545 | A06092 | 201 | A02545 | A06526 | 383 |
| A02545 | A06607 | 302 | A02545 | A06625 | 361 |
| A02545 | A06855 | 468 | A02545 | A06874 | 238 |
| A02545 | A07027 | 305 | A02545 | A07121 | 353 |
| A02545 | A07148 | 201 | A02545 | A07330 | 435 |
| A02545 | A07376 | 208 | A02545 | A07455 | 447 |
| A02545 | A07468 | 491 | A02545 | A07469 | 490 |
| A02545 | A07541 | 235 | A02545 | A07610 | 151 |
| A02545 | A07613 | 257 | A02545 | A07617 | 416 |
| A02545 | A07652 | 200 | A02545 | A07653 | 205 |
| A02545 | A07660 | 229 | A02545 | A07711 | 466 |
| A02545 | A07717 | 452 | A02545 | A07718 | 486 |
| A02545 | A07736 | 193 | A02545 | A07740 | 339 |
| A02545 | A07763 | 165 | A02545 | A07812 | 291 |
| A02545 | A07871 | 329 | A02545 | A07890 | 353 |
| A02545 | A07958 | 427 | A02545 | A08063 | 406 |
| A02545 | A08173 | 302 | A02545 | A08199 | 200 |
| A02545 | A08242 | 302 | A02545 | A08249 | 475 |
| A02545 | A08324 | 314 | A02545 | A08687 | 475 |
| A02545 | A08785 | 154 | A02545 | A08896 | 221 |
| A02545 | A09364 | 267 | A02545 | A10072 | 168 |
| A02545 | A10261 | 314 | A02545 | A10314 | 152 |
| A02545 | A10509 | 314 | A02545 | A10532 | 185 |
| A02545 | A10679 | 201 | A02545 | A10810 | 241 |
| A02545 | A10967 | 491 | A02545 | A11834 | 491 |
| A02545 | A12363 | 241 | A02545 | A12793 | 489 |
| A02545 | A13520 | 353 | A02545 | A14828 | 279 |

|        |        |     |        |        |     |
|--------|--------|-----|--------|--------|-----|
| A02545 | A15456 | 163 | A02545 | A16082 | 335 |
| A02545 | A17073 | 314 | A02545 | A17108 | 454 |
| A02546 | A02574 | 312 | A02546 | A02778 | 198 |
| A02546 | A02785 | 223 | A02546 | A02788 | 238 |
| A02546 | A03077 | 305 | A02546 | A03224 | 326 |
| A02546 | A03234 | 279 | A02546 | A03243 | 297 |
| A02546 | A03264 | 360 | A02546 | A03858 | 281 |
| A02546 | A04372 | 396 | A02546 | A04520 | 238 |
| A02546 | A04620 | 374 | A02546 | A05153 | 245 |
| A02546 | A05393 | 278 | A02546 | A05416 | 208 |
| A02546 | A05511 | 460 | A02546 | A05550 | 326 |
| A02546 | A05866 | 356 | A02546 | A06211 | 380 |
| A02546 | A06558 | 409 | A02546 | A06635 | 281 |
| A02546 | A07200 | 195 | A02546 | A11008 | 430 |
| A02546 | A13906 | 374 | A02546 | A13929 | 343 |
| A02546 | A14637 | 260 | A02546 | A14685 | 399 |
| A02546 | A15336 | 243 | A02546 | A15430 | 205 |
| A02546 | A17155 | 367 | A02547 | A02788 | 262 |
| A02547 | A03100 | 322 | A02547 | A03275 | 232 |
| A02547 | A03805 | 404 | A02547 | A04011 | 377 |
| A02547 | A04138 | 371 | A02547 | A04144 | 401 |
| A02547 | A04248 | 335 | A02547 | A04257 | 391 |
| A02547 | A04756 | 362 | A02547 | A07133 | 417 |
| A02547 | A11353 | 396 | A02547 | A14190 | 235 |
| A02547 | A14366 | 263 | A02547 | A14372 | 310 |
| A02547 | A14391 | 278 | A02547 | A14599 | 348 |
| A02547 | A15601 | 367 | A02547 | A15607 | 375 |
| A02547 | A15608 | 347 | A02548 | A02551 | 306 |
| A02548 | A02673 | 152 | A02548 | A03361 | 296 |
| A02548 | A03379 | 308 | A02548 | A03459 | 454 |
| A02548 | A03968 | 346 | A02548 | A04282 | 297 |
| A02548 | A05418 | 276 | A02548 | A05763 | 391 |
| A02548 | A06063 | 234 | A02548 | A07209 | 213 |
| A02548 | A07218 | 286 | A02548 | A13369 | 201 |
| A02548 | A14846 | 332 | A02548 | A16439 | 372 |
| A02548 | A16734 | 375 | A02549 | A02634 | 335 |
| A02549 | A02638 | 317 | A02549 | A02733 | 329 |
| A02549 | A02787 | 243 | A02549 | A02819 | 383 |
| A02549 | A03090 | 406 | A02549 | A03224 | 313 |
| A02549 | A03263 | 288 | A02549 | A04417 | 313 |
| A02549 | A06063 | 277 | A02549 | A06623 | 259 |
| A02549 | A07127 | 340 | A02549 | A07158 | 364 |
| A02549 | A16738 | 191 | A02550 | A02575 | 396 |
| A02550 | A02718 | 193 | A02550 | A02877 | 162 |
| A02550 | A03636 | 358 | A02550 | A05039 | 401 |
| A02550 | A09742 | 173 | A02550 | A15649 | 212 |

|        |        |     |        |        |     |
|--------|--------|-----|--------|--------|-----|
| A02550 | A16004 | 384 | A02551 | A02585 | 271 |
| A02551 | A02814 | 238 | A02551 | A02816 | 198 |
| A02551 | A02872 | 204 | A02551 | A03056 | 152 |
| A02551 | A03121 | 205 | A02551 | A03246 | 246 |
| A02551 | A03415 | 199 | A02551 | A03771 | 240 |
| A02551 | A03926 | 308 | A02551 | A04215 | 382 |
| A02551 | A04229 | 170 | A02551 | A04460 | 347 |
| A02551 | A04983 | 396 | A02551 | A05795 | 256 |
| A02551 | A06309 | 262 | A02551 | A07559 | 268 |
| A02551 | A07771 | 425 | A02551 | A08707 | 260 |
| A02551 | A09446 | 372 | A02551 | A10869 | 469 |
| A02551 | A11324 | 363 | A02551 | A14252 | 185 |
| A02551 | A14520 | 223 | A02552 | A02601 | 274 |
| A02552 | A02864 | 218 | A02552 | A03112 | 154 |
| A02552 | A03922 | 312 | A02552 | A04444 | 477 |
| A02552 | A04600 | 302 | A02552 | A04868 | 398 |
| A02552 | A05122 | 259 | A02552 | A05618 | 411 |
| A02552 | A06295 | 215 | A02552 | A09127 | 230 |
| A02552 | A09242 | 259 | A02552 | A09388 | 329 |
| A02552 | A11683 | 357 | A02553 | A14471 | 271 |
| A02553 | A15353 | 243 | A02553 | A15498 | 311 |
| A02554 | A02668 | 260 | A02554 | A02874 | 188 |
| A02554 | A03056 | 243 | A02554 | A03107 | 285 |
| A02554 | A03918 | 307 | A02554 | A04919 | 419 |
| A02554 | A09242 | 303 | A02554 | A09561 | 405 |
| A02554 | A10989 | 326 | A02554 | A14430 | 243 |
| A02555 | A02760 | 411 | A02556 | A03028 | 385 |
| A02556 | A09132 | 447 | A02556 | A10325 | 452 |
| A02557 | A03513 | 333 | A02557 | A10146 | 417 |
| A02558 | A03437 | 301 | A02558 | A07307 | 316 |
| A02558 | A08692 | 299 | A02558 | A08738 | 160 |
| A02558 | A13126 | 249 | A02558 | A13772 | 230 |
| A02559 | A02614 | 297 | A02559 | A02615 | 213 |
| A02559 | A02678 | 313 | A02559 | A02694 | 185 |
| A02559 | A02697 | 420 | A02559 | A02698 | 229 |
| A02559 | A02706 | 265 | A02559 | A02753 | 435 |
| A02559 | A02784 | 274 | A02559 | A02836 | 438 |
| A02559 | A02837 | 363 | A02559 | A02873 | 241 |
| A02559 | A02874 | 235 | A02559 | A02875 | 185 |
| A02559 | A02906 | 238 | A02559 | A02909 | 226 |
| A02559 | A02984 | 218 | A02559 | A03149 | 162 |
| A02559 | A03269 | 479 | A02559 | A03373 | 263 |
| A02559 | A03394 | 297 | A02559 | A03397 | 246 |
| A02559 | A03414 | 338 | A02559 | A03419 | 491 |
| A02559 | A03427 | 185 | A02559 | A03541 | 198 |
| A02559 | A03612 | 170 | A02559 | A03634 | 188 |

|        |        |     |        |        |     |
|--------|--------|-----|--------|--------|-----|
| A02559 | A03661 | 401 | A02559 | A03922 | 311 |
| A02559 | A03923 | 333 | A02559 | A03983 | 286 |
| A02559 | A04015 | 151 | A02559 | A04020 | 184 |
| A02559 | A04048 | 473 | A02559 | A04049 | 243 |
| A02559 | A04268 | 265 | A02559 | A04271 | 488 |
| A02559 | A04409 | 246 | A02559 | A04603 | 182 |
| A02559 | A04649 | 254 | A02559 | A04698 | 411 |
| A02559 | A04723 | 229 | A02559 | A04795 | 154 |
| A02559 | A04830 | 208 | A02559 | A04832 | 313 |
| A02559 | A04950 | 321 | A02559 | A04962 | 177 |
| A02559 | A04965 | 230 | A02559 | A04996 | 196 |
| A02559 | A05004 | 213 | A02559 | A05006 | 165 |
| A02559 | A05141 | 165 | A02559 | A05314 | 321 |
| A02559 | A06217 | 266 | A02559 | A06544 | 201 |
| A02559 | A06579 | 210 | A02559 | A06609 | 157 |
| A02559 | A07132 | 219 | A02559 | A08677 | 466 |
| A02559 | A09090 | 297 | A02559 | A09497 | 278 |
| A02559 | A10214 | 185 | A02559 | A10891 | 266 |
| A02559 | A11738 | 191 | A02559 | A14315 | 243 |
| A02559 | A14366 | 163 | A02559 | A14390 | 226 |
| A02559 | A14403 | 263 | A02559 | A14416 | 243 |
| A02559 | A14436 | 281 | A02559 | A14437 | 385 |
| A02559 | A14517 | 260 | A02559 | A14588 | 154 |
| A02559 | A15965 | 345 | A02560 | A02914 | 377 |
| A02560 | A03178 | 324 | A02560 | A04556 | 384 |
| A02560 | A04646 | 425 | A02560 | A05176 | 345 |
| A02560 | A05247 | 369 | A02560 | A05562 | 386 |
| A02560 | A05898 | 416 | A02560 | A10237 | 408 |
| A02560 | A15158 | 405 | A02560 | A15233 | 378 |
| A02561 | A02593 | 297 | A02561 | A02902 | 174 |
| A02561 | A03271 | 168 | A02561 | A03596 | 262 |
| A02561 | A03648 | 341 | A02561 | A10838 | 399 |
| A02561 | A13980 | 228 | A02561 | A14430 | 177 |
| A02561 | A14520 | 246 | A02562 | A02567 | 480 |
| A02562 | A02568 | 480 | A02562 | A02703 | 255 |
| A02562 | A02860 | 229 | A02562 | A02880 | 343 |
| A02562 | A02904 | 156 | A02562 | A02927 | 352 |
| A02562 | A03112 | 472 | A02562 | A03186 | 229 |
| A02562 | A03213 | 252 | A02562 | A03276 | 436 |
| A02562 | A04333 | 196 | A02562 | A04874 | 276 |
| A02562 | A04922 | 254 | A02562 | A05141 | 348 |
| A02562 | A05260 | 201 | A02562 | A06806 | 245 |
| A02562 | A08875 | 162 | A02562 | A09027 | 374 |
| A02562 | A10592 | 172 | A02562 | A14664 | 152 |
| A02563 | A03019 | 199 | A02563 | A03275 | 257 |
| A02563 | A03778 | 272 | A02563 | A06863 | 338 |



|        |        |     |        |        |     |
|--------|--------|-----|--------|--------|-----|
| A02563 | A14006 | 249 | A02564 | A02567 | 212 |
| A02564 | A02568 | 363 | A02564 | A02641 | 489 |
| A02564 | A02655 | 212 | A02564 | A02673 | 187 |
| A02564 | A02703 | 243 | A02564 | A02737 | 393 |
| A02564 | A02766 | 193 | A02564 | A02775 | 311 |
| A02564 | A02787 | 340 | A02564 | A02805 | 212 |
| A02564 | A02816 | 168 | A02564 | A02825 | 129 |
| A02564 | A02830 | 408 | A02564 | A02847 | 454 |
| A02564 | A02874 | 180 | A02564 | A02878 | 201 |
| A02564 | A02881 | 418 | A02564 | A02902 | 193 |
| A02564 | A02903 | 232 | A02564 | A02904 | 491 |
| A02564 | A02908 | 154 | A02564 | A02925 | 333 |
| A02564 | A02927 | 270 | A02564 | A02995 | 177 |
| A02564 | A03019 | 332 | A02564 | A03055 | 218 |
| A02564 | A03078 | 281 | A02564 | A03086 | 188 |
| A02564 | A03109 | 177 | A02564 | A03112 | 486 |
| A02564 | A03213 | 63  | A02564 | A03220 | 479 |
| A02564 | A03223 | 360 | A02564 | A03231 | 327 |
| A02564 | A03273 | 63  | A02564 | A03276 | 188 |
| A02564 | A03821 | 176 | A02564 | A03976 | 183 |
| A02564 | A03983 | 262 | A02564 | A04191 | 176 |
| A02564 | A04223 | 347 | A02564 | A04233 | 333 |
| A02564 | A04288 | 157 | A02564 | A04346 | 276 |
| A02564 | A04830 | 180 | A02564 | A04908 | 170 |
| A02564 | A04945 | 212 | A02564 | A04956 | 373 |
| A02564 | A05082 | 314 | A02564 | A05106 | 484 |
| A02564 | A05157 | 173 | A02564 | A05211 | 380 |
| A02564 | A05288 | 441 | A02564 | A05418 | 379 |
| A02564 | A06218 | 350 | A02564 | A06339 | 314 |
| A02564 | A06370 | 240 | A02564 | A06471 | 252 |
| A02564 | A06620 | 151 | A02564 | A06636 | 434 |
| A02564 | A06654 | 163 | A02564 | A06949 | 394 |
| A02564 | A07140 | 324 | A02564 | A07158 | 154 |
| A02564 | A07655 | 180 | A02564 | A07746 | 221 |
| A02564 | A07961 | 205 | A02564 | A08512 | 268 |
| A02564 | A08630 | 154 | A02564 | A08667 | 190 |
| A02564 | A08688 | 180 | A02564 | A08732 | 899 |
| A02564 | A08810 | 172 | A02564 | A09092 | 202 |
| A02564 | A09539 | 152 | A02564 | A10061 | 257 |
| A02564 | A10434 | 327 | A02564 | A10557 | 170 |
| A02564 | A11564 | 274 | A02564 | A11744 | 311 |
| A02564 | A11964 | 247 | A02564 | A11966 | 247 |
| A02564 | A13108 | 288 | A02564 | A14029 | 191 |
| A02564 | A14132 | 187 | A02564 | A14174 | 195 |
| A02564 | A14208 | 366 | A02564 | A14431 | 385 |
| A02564 | A16739 | 163 | A02564 | A16744 | 172 |

|        |        |     |        |        |     |
|--------|--------|-----|--------|--------|-----|
| A02565 | A02924 | 157 | A02565 | A03098 | 234 |
| A02565 | A03238 | 154 | A02565 | A03856 | 246 |
| A02565 | A04304 | 293 | A02565 | A05335 | 198 |
| A02565 | A05417 | 168 | A02565 | A05741 | 279 |
| A02565 | A06340 | 204 | A02565 | A09340 | 229 |
| A02565 | A11285 | 196 | A02565 | A11411 | 268 |
| A02565 | A14405 | 172 | A02565 | A15917 | 234 |
| A02566 | A02567 | 380 | A02566 | A02787 | 277 |
| A02566 | A02788 | 256 | A02566 | A02874 | 188 |
| A02567 | A02737 | 227 | A02567 | A02904 | 246 |
| A02567 | A03269 | 260 | A02567 | A05015 | 154 |
| A02567 | A05415 | 236 | A02567 | A07589 | 398 |
| A02567 | A14801 | 224 | A02568 | A02718 | 205 |
| A02568 | A02723 | 311 | A02568 | A02737 | 156 |
| A02568 | A02789 | 165 | A02568 | A02811 | 269 |
| A02568 | A02816 | 385 | A02568 | A02830 | 259 |
| A02568 | A02860 | 247 | A02568 | A02880 | 355 |
| A02568 | A02924 | 191 | A02568 | A02927 | 477 |
| A02568 | A03112 | 486 | A02568 | A03195 | 243 |
| A02568 | A03276 | 286 | A02568 | A03284 | 338 |
| A02568 | A03609 | 170 | A02568 | A03843 | 157 |
| A02568 | A03861 | 213 | A02568 | A04049 | 308 |
| A02568 | A04622 | 236 | A02568 | A04729 | 272 |
| A02568 | A04794 | 374 | A02568 | A04888 | 283 |
| A02568 | A04908 | 167 | A02568 | A04939 | 168 |
| A02568 | A04952 | 367 | A02568 | A05107 | 177 |
| A02568 | A05122 | 188 | A02568 | A06151 | 286 |
| A02568 | A06628 | 318 | A02568 | A06648 | 196 |
| A02568 | A06649 | 305 | A02568 | A06654 | 266 |
| A02568 | A06688 | 252 | A02568 | A07390 | 286 |
| A02568 | A09020 | 281 | A02568 | A09399 | 350 |
| A02568 | A10148 | 202 | A02568 | A11513 | 210 |
| A02568 | A13982 | 252 | A02568 | A14405 | 207 |
| A02568 | A15912 | 317 | A02569 | A02696 | 356 |
| A02569 | A03003 | 380 | A02569 | A04888 | 401 |
| A02569 | A06295 | 329 | A02569 | A07128 | 395 |
| A02569 | A07191 | 351 | A02570 | A02592 | 338 |
| A02570 | A03141 | 262 | A02570 | A03851 | 269 |
| A02570 | A05477 | 399 | A02570 | A06037 | 229 |
| A02570 | A08834 | 279 | A02570 | A09218 | 374 |
| A02570 | A13904 | 467 | A02571 | A02689 | 221 |
| A02571 | A02739 | 177 | A02571 | A02799 | 341 |
| A02571 | A02830 | 176 | A02571 | A02920 | 334 |
| A02571 | A03001 | 243 | A02571 | A03019 | 205 |
| A02571 | A03243 | 477 | A02571 | A03256 | 479 |
| A02571 | A03297 | 288 | A02571 | A03314 | 241 |

|        |        |     |        |        |     |
|--------|--------|-----|--------|--------|-----|
| A02571 | A04525 | 308 | A02571 | A04861 | 469 |
| A02571 | A04902 | 252 | A02571 | A04908 | 212 |
| A02571 | A04942 | 329 | A02571 | A05214 | 401 |
| A02571 | A05582 | 388 | A02571 | A05719 | 461 |
| A02571 | A05949 | 301 | A02571 | A06004 | 316 |
| A02571 | A06697 | 355 | A02571 | A06863 | 470 |
| A02571 | A06971 | 424 | A02571 | A08118 | 154 |
| A02571 | A10286 | 269 | A02571 | A11086 | 348 |
| A02572 | A03155 | 286 | A02572 | A03314 | 230 |
| A02572 | A03639 | 228 | A02572 | A04202 | 191 |
| A02572 | A04504 | 364 | A02572 | A08463 | 267 |
| A02572 | A08857 | 362 | A02572 | A13905 | 228 |
| A02572 | A15419 | 251 | A02573 | A02722 | 224 |
| A02573 | A02866 | 366 | A02573 | A05682 | 318 |
| A02573 | A06397 | 369 | A02573 | A06979 | 308 |
| A02573 | A07054 | 455 | A02573 | A07242 | 355 |
| A02573 | A07495 | 434 | A02573 | A07560 | 401 |
| A02573 | A07816 | 154 | A02573 | A07893 | 219 |
| A02573 | A07954 | 374 | A02573 | A08535 | 312 |
| A02573 | A11346 | 411 | A02573 | A12722 | 310 |
| A02573 | A14084 | 299 | A02573 | A14266 | 159 |
| A02573 | A14525 | 226 | A02573 | A14862 | 352 |
| A02573 | A15501 | 200 | A02574 | A02611 | 489 |
| A02574 | A02646 | 281 | A02574 | A02802 | 366 |
| A02574 | A02849 | 390 | A02574 | A02859 | 357 |
| A02574 | A02951 | 347 | A02574 | A02992 | 297 |
| A02574 | A03003 | 212 | A02574 | A03034 | 491 |
| A02574 | A03036 | 423 | A02574 | A03099 | 398 |
| A02574 | A03104 | 204 | A02574 | A03144 | 388 |
| A02574 | A03146 | 391 | A02574 | A03147 | 246 |
| A02574 | A03148 | 374 | A02574 | A03168 | 215 |
| A02574 | A03195 | 489 | A02574 | A03224 | 217 |
| A02574 | A03234 | 157 | A02574 | A03238 | 383 |
| A02574 | A03243 | 177 | A02574 | A03264 | 268 |
| A02574 | A03275 | 191 | A02574 | A03292 | 152 |
| A02574 | A03524 | 191 | A02574 | A03858 | 157 |
| A02574 | A03873 | 201 | A02574 | A04010 | 238 |
| A02574 | A04212 | 358 | A02574 | A04372 | 330 |
| A02574 | A04421 | 340 | A02574 | A04589 | 165 |
| A02574 | A04620 | 291 | A02574 | A05045 | 216 |
| A02574 | A05153 | 243 | A02574 | A05359 | 394 |
| A02574 | A05376 | 414 | A02574 | A05393 | 286 |
| A02574 | A05506 | 288 | A02574 | A05550 | 217 |
| A02574 | A05576 | 326 | A02574 | A05956 | 391 |
| A02574 | A06053 | 326 | A02574 | A06074 | 488 |
| A02574 | A06092 | 452 | A02574 | A06195 | 371 |

|        |        |     |        |        |     |
|--------|--------|-----|--------|--------|-----|
| A02574 | A06211 | 301 | A02574 | A06405 | 179 |
| A02574 | A06439 | 168 | A02574 | A06520 | 353 |
| A02574 | A06558 | 353 | A02574 | A06769 | 162 |
| A02574 | A06970 | 224 | A02574 | A07059 | 316 |
| A02574 | A07142 | 477 | A02574 | A07195 | 425 |
| A02574 | A07336 | 294 | A02574 | A07342 | 485 |
| A02574 | A07407 | 366 | A02574 | A07736 | 286 |
| A02574 | A08646 | 390 | A02574 | A08731 | 373 |
| A02574 | A10214 | 235 | A02574 | A13338 | 217 |
| A02574 | A13906 | 291 | A02574 | A14344 | 486 |
| A02574 | A14648 | 193 | A02574 | A14685 | 335 |
| A02574 | A15874 | 285 | A02574 | A16099 | 369 |
| A02574 | A16337 | 373 | A02574 | A16741 | 218 |
| A02574 | A17131 | 290 | A02574 | A17155 | 279 |
| A02575 | A02579 | 160 | A02575 | A02582 | 293 |
| A02575 | A02590 | 207 | A02575 | A02629 | 210 |
| A02575 | A02639 | 259 | A02575 | A02695 | 443 |
| A02575 | A02702 | 167 | A02575 | A02758 | 212 |
| A02575 | A02791 | 160 | A02575 | A02811 | 216 |
| A02575 | A02814 | 151 | A02575 | A02859 | 159 |
| A02575 | A02943 | 297 | A02575 | A02977 | 191 |
| A02575 | A03068 | 132 | A02575 | A03120 | 313 |
| A02575 | A03181 | 288 | A02575 | A03256 | 285 |
| A02575 | A03312 | 390 | A02575 | A03417 | 160 |
| A02575 | A03537 | 302 | A02575 | A03583 | 279 |
| A02575 | A03585 | 262 | A02575 | A03653 | 171 |
| A02575 | A03744 | 279 | A02575 | A03847 | 334 |
| A02575 | A03870 | 313 | A02575 | A03929 | 216 |
| A02575 | A03964 | 245 | A02575 | A03967 | 256 |
| A02575 | A03981 | 63  | A02575 | A03989 | 438 |
| A02575 | A04004 | 218 | A02575 | A04007 | 208 |
| A02575 | A04031 | 267 | A02575 | A04053 | 208 |
| A02575 | A04123 | 313 | A02575 | A04267 | 419 |
| A02575 | A04482 | 290 | A02575 | A04498 | 334 |
| A02575 | A04560 | 279 | A02575 | A04596 | 319 |
| A02575 | A04603 | 201 | A02575 | A04770 | 201 |
| A02575 | A04830 | 228 | A02575 | A04905 | 363 |
| A02575 | A05036 | 297 | A02575 | A05144 | 232 |
| A02575 | A05407 | 279 | A02575 | A06046 | 221 |
| A02575 | A06280 | 205 | A02575 | A06607 | 154 |
| A02575 | A06765 | 269 | A02575 | A06807 | 294 |
| A02575 | A06815 | 313 | A02575 | A07759 | 269 |
| A02575 | A07799 | 272 | A02575 | A08319 | 258 |
| A02575 | A08841 | 338 | A02575 | A08911 | 188 |
| A02575 | A09201 | 314 | A02575 | A09236 | 245 |
| A02575 | A09459 | 375 | A02575 | A09978 | 228 |

|        |        |     |        |        |     |
|--------|--------|-----|--------|--------|-----|
| A02575 | A10549 | 243 | A02575 | A11106 | 326 |
| A02575 | A11262 | 262 | A02575 | A11678 | 260 |
| A02575 | A11681 | 299 | A02575 | A11738 | 210 |
| A02575 | A11742 | 302 | A02575 | A11759 | 172 |
| A02575 | A11949 | 418 | A02575 | A12885 | 221 |
| A02575 | A13050 | 254 | A02575 | A13387 | 283 |
| A02575 | A13987 | 168 | A02575 | A14370 | 227 |
| A02575 | A14399 | 491 | A02575 | A14414 | 279 |
| A02575 | A14470 | 160 | A02575 | A14538 | 313 |
| A02575 | A14586 | 390 | A02575 | A14612 | 344 |
| A02575 | A15198 | 443 | A02575 | A15310 | 165 |
| A02575 | A15316 | 218 | A02575 | A15911 | 399 |
| A02575 | A15929 | 357 | A02575 | A17022 | 375 |
| A02576 | A02878 | 283 | A02577 | A02637 | 368 |
| A02577 | A02843 | 416 | A02577 | A04519 | 380 |
| A02577 | A09433 | 419 | A02578 | A02608 | 346 |
| A02578 | A02630 | 313 | A02578 | A02637 | 269 |
| A02578 | A02654 | 382 | A02578 | A02655 | 257 |
| A02578 | A02659 | 452 | A02578 | A02769 | 343 |
| A02578 | A02812 | 180 | A02578 | A02851 | 474 |
| A02578 | A02896 | 201 | A02578 | A02922 | 269 |
| A02578 | A03228 | 294 | A02578 | A03259 | 474 |
| A02578 | A03280 | 452 | A02578 | A03316 | 356 |
| A02578 | A03817 | 251 | A02578 | A04110 | 303 |
| A02578 | A04263 | 271 | A02578 | A04510 | 333 |
| A02578 | A04589 | 249 | A02578 | A04755 | 353 |
| A02578 | A05349 | 199 | A02578 | A05944 | 265 |
| A02578 | A06054 | 296 | A02578 | A06414 | 334 |
| A02578 | A06618 | 408 | A02578 | A07148 | 424 |
| A02578 | A07157 | 341 | A02578 | A07161 | 485 |
| A02578 | A07164 | 241 | A02578 | A07166 | 488 |
| A02578 | A07173 | 252 | A02578 | A08714 | 296 |
| A02578 | A09559 | 374 | A02578 | A10501 | 369 |
| A02578 | A14374 | 339 | A02578 | A14391 | 213 |
| A02578 | A14599 | 405 | A02578 | A15394 | 274 |
| A02578 | A15642 | 391 | A02579 | A02582 | 190 |
| A02579 | A02587 | 402 | A02579 | A02639 | 417 |
| A02579 | A02832 | 241 | A02579 | A02877 | 224 |
| A02579 | A02983 | 316 | A02579 | A03001 | 171 |
| A02579 | A03112 | 160 | A02579 | A03181 | 185 |
| A02579 | A03201 | 221 | A02579 | A03224 | 213 |
| A02579 | A03378 | 184 | A02579 | A03782 | 162 |
| A02579 | A03845 | 270 | A02579 | A04110 | 226 |
| A02579 | A04355 | 198 | A02579 | A04506 | 352 |
| A02579 | A04595 | 285 | A02579 | A05219 | 205 |
| A02579 | A07135 | 168 | A02579 | A07434 | 230 |

|        |        |     |        |        |     |
|--------|--------|-----|--------|--------|-----|
| A02579 | A07576 | 389 | A02579 | A09124 | 218 |
| A02579 | A09757 | 185 | A02579 | A09929 | 324 |
| A02579 | A10527 | 185 | A02579 | A10697 | 245 |
| A02579 | A11750 | 246 | A02579 | A12569 | 419 |
| A02579 | A14379 | 168 | A02579 | A14399 | 260 |
| A02579 | A15896 | 190 | A02579 | A15912 | 288 |
| A02579 | A16324 | 182 | A02580 | A14674 | 339 |
| A02581 | A02693 | 329 | A02581 | A03612 | 333 |
| A02581 | A04214 | 411 | A02581 | A04533 | 288 |
| A02581 | A04710 | 302 | A02581 | A05073 | 371 |
| A02581 | A06599 | 256 | A02581 | A08662 | 372 |
| A02581 | A14198 | 167 | A02581 | A14371 | 216 |
| A02581 | A14511 | 399 | A02581 | A15478 | 273 |
| A02582 | A02605 | 491 | A02582 | A02668 | 474 |
| A02582 | A02696 | 159 | A02582 | A02730 | 409 |
| A02582 | A02756 | 484 | A02582 | A02771 | 430 |
| A02582 | A02785 | 380 | A02582 | A02854 | 329 |
| A02582 | A02859 | 393 | A02582 | A02874 | 416 |
| A02582 | A02896 | 467 | A02582 | A02932 | 338 |
| A02582 | A02936 | 265 | A02582 | A02944 | 422 |
| A02582 | A03069 | 229 | A02582 | A03080 | 232 |
| A02582 | A03081 | 218 | A02582 | A03178 | 167 |
| A02582 | A03189 | 424 | A02582 | A03218 | 249 |
| A02582 | A03275 | 364 | A02582 | A03399 | 157 |
| A02582 | A03403 | 286 | A02582 | A03438 | 63  |
| A02582 | A03447 | 255 | A02582 | A03541 | 246 |
| A02582 | A03634 | 236 | A02582 | A03639 | 165 |
| A02582 | A03653 | 200 | A02582 | A03773 | 170 |
| A02582 | A03914 | 483 | A02582 | A03923 | 249 |
| A02582 | A03935 | 316 | A02582 | A03966 | 191 |
| A02582 | A03975 | 281 | A02582 | A03976 | 279 |
| A02582 | A03988 | 483 | A02582 | A03991 | 328 |
| A02582 | A04051 | 293 | A02582 | A04087 | 274 |
| A02582 | A04244 | 263 | A02582 | A04263 | 185 |
| A02582 | A04272 | 273 | A02582 | A04333 | 188 |
| A02582 | A04391 | 296 | A02582 | A04584 | 319 |
| A02582 | A04585 | 389 | A02582 | A04589 | 162 |
| A02582 | A04598 | 302 | A02582 | A04609 | 215 |
| A02582 | A04865 | 241 | A02582 | A04985 | 156 |
| A02582 | A05113 | 404 | A02582 | A05309 | 184 |
| A02582 | A05349 | 454 | A02582 | A05384 | 389 |
| A02582 | A05985 | 286 | A02582 | A06956 | 291 |
| A02582 | A07140 | 179 | A02582 | A07141 | 257 |
| A02582 | A07143 | 198 | A02582 | A07164 | 154 |
| A02582 | A07165 | 347 | A02582 | A07218 | 180 |
| A02582 | A09468 | 360 | A02582 | A09513 | 338 |

|        |        |     |        |        |     |
|--------|--------|-----|--------|--------|-----|
| A02582 | A10729 | 276 | A02582 | A10791 | 255 |
| A02582 | A13872 | 221 | A02582 | A13886 | 273 |
| A02582 | A13909 | 372 | A02582 | A13941 | 241 |
| A02582 | A14210 | 268 | A02582 | A14362 | 351 |
| A02582 | A14371 | 193 | A02582 | A14372 | 162 |
| A02582 | A14381 | 165 | A02582 | A14399 | 259 |
| A02582 | A14405 | 313 | A02582 | A14440 | 160 |
| A02582 | A14554 | 173 | A02582 | A14602 | 389 |
| A02582 | A14604 | 384 | A02582 | A14643 | 223 |
| A02582 | A15335 | 215 | A02582 | A15475 | 363 |
| A02582 | A15981 | 265 | A02582 | A16114 | 251 |
| A02582 | A16636 | 485 | A02583 | A02672 | 241 |
| A02583 | A02703 | 213 | A02583 | A02760 | 328 |
| A02583 | A02830 | 329 | A02583 | A02872 | 238 |
| A02583 | A02878 | 188 | A02583 | A03107 | 234 |
| A02583 | A03211 | 191 | A02583 | A03642 | 396 |
| A02583 | A03661 | 204 | A02583 | A03681 | 290 |
| A02583 | A04172 | 449 | A02583 | A04174 | 279 |
| A02583 | A04179 | 358 | A02583 | A04187 | 286 |
| A02583 | A04236 | 380 | A02583 | A04256 | 294 |
| A02583 | A04406 | 440 | A02583 | A04423 | 343 |
| A02583 | A04491 | 327 | A02583 | A04532 | 318 |
| A02584 | A02714 | 307 | A02584 | A02834 | 335 |
| A02584 | A03234 | 258 | A02584 | A04202 | 235 |
| A02584 | A04307 | 283 | A02584 | A04485 | 435 |
| A02584 | A04850 | 288 | A02584 | A05139 | 406 |
| A02584 | A05538 | 393 | A02584 | A05549 | 406 |
| A02584 | A06629 | 279 | A02584 | A07229 | 215 |
| A02585 | A02586 | 429 | A02585 | A02696 | 185 |
| A02585 | A02752 | 297 | A02585 | A02831 | 409 |
| A02585 | A02869 | 200 | A02585 | A02874 | 272 |
| A02585 | A02908 | 152 | A02585 | A02927 | 455 |
| A02585 | A03095 | 177 | A02585 | A03314 | 195 |
| A02585 | A03406 | 180 | A02585 | A03651 | 247 |
| A02585 | A03662 | 212 | A02585 | A03681 | 227 |
| A02585 | A03771 | 207 | A02585 | A04034 | 348 |
| A02585 | A04075 | 184 | A02585 | A04212 | 422 |
| A02585 | A04222 | 185 | A02585 | A04267 | 201 |
| A02585 | A04280 | 255 | A02585 | A04346 | 246 |
| A02585 | A04417 | 238 | A02585 | A04533 | 469 |
| A02585 | A04729 | 270 | A02585 | A04795 | 229 |
| A02585 | A04867 | 417 | A02585 | A04941 | 274 |
| A02585 | A04964 | 171 | A02585 | A05042 | 373 |
| A02585 | A05253 | 330 | A02585 | A05601 | 168 |
| A02585 | A05865 | 278 | A02585 | A06544 | 272 |
| A02585 | A08581 | 345 | A02585 | A08591 | 345 |

|        |        |     |        |        |     |
|--------|--------|-----|--------|--------|-----|
| A02585 | A09396 | 299 | A02585 | A09397 | 411 |
| A02585 | A10398 | 345 | A02585 | A12654 | 311 |
| A02585 | A13212 | 433 | A02585 | A14125 | 210 |
| A02585 | A14341 | 399 | A02585 | A14643 | 263 |
| A02585 | A15606 | 180 | A02585 | A16300 | 296 |
| A02586 | A02599 | 243 | A02586 | A02629 | 399 |
| A02586 | A02632 | 358 | A02586 | A02636 | 279 |
| A02586 | A02638 | 384 | A02586 | A02707 | 333 |
| A02586 | A02749 | 221 | A02586 | A02752 | 204 |
| A02586 | A02819 | 391 | A02586 | A03014 | 185 |
| A02586 | A03032 | 196 | A02586 | A03112 | 440 |
| A02586 | A03242 | 324 | A02586 | A03335 | 154 |
| A02586 | A03661 | 163 | A02586 | A03739 | 462 |
| A02586 | A03820 | 157 | A02586 | A03839 | 218 |
| A02586 | A03854 | 176 | A02586 | A04015 | 279 |
| A02586 | A04133 | 212 | A02586 | A04273 | 294 |
| A02586 | A04275 | 216 | A02586 | A04280 | 154 |
| A02586 | A04342 | 441 | A02586 | A04351 | 215 |
| A02586 | A04367 | 302 | A02586 | A04622 | 319 |
| A02586 | A04795 | 152 | A02586 | A04868 | 318 |
| A02586 | A04901 | 219 | A02586 | A04977 | 163 |
| A02586 | A05082 | 269 | A02586 | A05185 | 201 |
| A02586 | A05370 | 177 | A02586 | A05556 | 210 |
| A02586 | A05574 | 302 | A02586 | A05601 | 489 |
| A02586 | A05701 | 249 | A02586 | A05767 | 195 |
| A02586 | A05865 | 337 | A02586 | A05909 | 364 |
| A02586 | A05958 | 419 | A02586 | A06134 | 191 |
| A02586 | A06289 | 235 | A02586 | A06304 | 364 |
| A02586 | A06623 | 486 | A02586 | A06669 | 260 |
| A02586 | A06868 | 170 | A02586 | A07127 | 333 |
| A02586 | A07311 | 260 | A02586 | A07399 | 409 |
| A02586 | A07610 | 170 | A02586 | A08093 | 418 |
| A02586 | A08171 | 173 | A02586 | A08480 | 364 |
| A02586 | A08610 | 274 | A02586 | A09018 | 450 |
| A02586 | A09046 | 224 | A02586 | A09120 | 288 |
| A02586 | A09545 | 271 | A02586 | A10024 | 456 |
| A02586 | A10576 | 200 | A02586 | A10651 | 171 |
| A02586 | A10728 | 291 | A02586 | A10743 | 190 |
| A02586 | A11982 | 435 | A02586 | A12353 | 470 |
| A02586 | A14496 | 266 | A02586 | A14520 | 488 |
| A02586 | A14521 | 377 | A02586 | A14529 | 196 |
| A02586 | A14549 | 391 | A02586 | A14588 | 465 |
| A02586 | A14624 | 318 | A02586 | A14642 | 441 |
| A02586 | A14643 | 423 | A02586 | A14687 | 302 |
| A02586 | A14785 | 267 | A02586 | A15856 | 218 |
| A02586 | A16300 | 174 | A02587 | A02619 | 382 |



|        |        |     |        |        |     |
|--------|--------|-----|--------|--------|-----|
| A02587 | A02668 | 229 | A02587 | A02756 | 245 |
| A02587 | A02771 | 281 | A02587 | A02785 | 208 |
| A02587 | A02837 | 285 | A02587 | A03107 | 255 |
| A02587 | A03413 | 322 | A02587 | A03773 | 281 |
| A02587 | A04976 | 375 | A02587 | A07165 | 176 |
| A02587 | A09245 | 306 | A02587 | A10165 | 218 |
| A02589 | A02877 | 449 | A02589 | A02878 | 446 |
| A02589 | A03773 | 281 | A02589 | A07163 | 174 |
| A02589 | A08289 | 308 | A02589 | A09119 | 425 |
| A02589 | A11496 | 235 | A02589 | A11683 | 369 |
| A02589 | A15935 | 221 | A02590 | A02664 | 347 |
| A02590 | A02744 | 198 | A02590 | A02961 | 195 |
| A02590 | A03224 | 933 | A02590 | A03314 | 216 |
| A02590 | A03644 | 313 | A02590 | A03949 | 271 |
| A02590 | A03981 | 486 | A02590 | A04124 | 293 |
| A02590 | A04176 | 468 | A02590 | A04234 | 364 |
| A02590 | A04263 | 230 | A02590 | A04482 | 344 |
| A02590 | A05183 | 340 | A02590 | A05741 | 470 |
| A02590 | A06084 | 297 | A02590 | A06807 | 475 |
| A02590 | A06814 | 316 | A02590 | A06815 | 361 |
| A02590 | A06825 | 262 | A02590 | A07243 | 375 |
| A02590 | A10564 | 344 | A02590 | A10791 | 401 |
| A02590 | A10901 | 486 | A02590 | A11326 | 163 |
| A02590 | A11735 | 195 | A02590 | A11738 | 279 |
| A02590 | A13593 | 165 | A02590 | A13886 | 408 |
| A02590 | A14372 | 210 | A02590 | A14391 | 171 |
| A02591 | A03131 | 406 | A02591 | A03922 | 285 |
| A02591 | A10277 | 434 | A02592 | A02598 | 303 |
| A02592 | A03228 | 213 | A02592 | A03272 | 238 |
| A02592 | A03331 | 159 | A02592 | A03412 | 168 |
| A02592 | A03722 | 179 | A02592 | A03753 | 213 |
| A02592 | A03799 | 152 | A02592 | A04073 | 414 |
| A02592 | A04415 | 260 | A02592 | A04579 | 268 |
| A02592 | A04931 | 216 | A02592 | A05670 | 396 |
| A02592 | A07397 | 271 | A02592 | A08137 | 274 |
| A02592 | A08539 | 369 | A02592 | A08954 | 307 |
| A02592 | A10231 | 435 | A02592 | A10469 | 333 |
| A02592 | A10752 | 313 | A02592 | A11290 | 486 |
| A02592 | A11344 | 383 | A02592 | A11647 | 226 |
| A02592 | A11935 | 226 | A02592 | A12105 | 327 |
| A02592 | A12244 | 270 | A02592 | A12329 | 491 |
| A02592 | A13904 | 372 | A02592 | A15659 | 466 |
| A02592 | A15660 | 490 | A02592 | A15684 | 488 |
| A02592 | A15708 | 393 | A02592 | A15746 | 398 |
| A02592 | A15918 | 408 | A02592 | A15931 | 477 |
| A02592 | A15937 | 208 | A02592 | A16092 | 435 |

|        |        |     |        |        |     |
|--------|--------|-----|--------|--------|-----|
| A02592 | A16218 | 469 | A02592 | A16464 | 373 |
| A02592 | A16925 | 307 | A02592 | A17137 | 324 |
| A02592 | A17140 | 425 | A02593 | A02619 | 335 |
| A02593 | A02698 | 277 | A02593 | A02792 | 268 |
| A02593 | A02798 | 171 | A02593 | A02864 | 152 |
| A02593 | A03212 | 255 | A02593 | A04030 | 358 |
| A02593 | A04048 | 230 | A02593 | A04305 | 232 |
| A02593 | A04985 | 188 | A02593 | A05256 | 283 |
| A02593 | A05322 | 293 | A02593 | A05598 | 241 |
| A02593 | A05709 | 303 | A02593 | A06254 | 258 |
| A02593 | A06313 | 312 | A02593 | A06663 | 332 |
| A02593 | A06756 | 240 | A02593 | A06863 | 340 |
| A02593 | A07122 | 258 | A02593 | A07124 | 318 |
| A02593 | A07129 | 249 | A02593 | A08813 | 235 |
| A02593 | A11023 | 193 | A02593 | A11345 | 271 |
| A02593 | A14653 | 177 | A02593 | A16863 | 377 |
| A02594 | A02666 | 449 | A02594 | A03259 | 179 |
| A02594 | A04449 | 160 | A02594 | A05417 | 260 |
| A02594 | A05883 | 388 | A02594 | A06607 | 171 |
| A02594 | A09149 | 352 | A02594 | A15498 | 190 |
| A02595 | A02672 | 423 | A02595 | A03968 | 335 |
| A02595 | A04349 | 358 | A02595 | A04429 | 405 |
| A02596 | A08557 | 293 | A02596 | A13824 | 196 |
| A02596 | A14963 | 398 | A02597 | A02642 | 302 |
| A02597 | A03112 | 191 | A02597 | A03584 | 318 |
| A02597 | A04490 | 332 | A02597 | A05373 | 475 |
| A02597 | A09014 | 411 | A02597 | A09247 | 348 |
| A02597 | A09363 | 326 | A02597 | A09373 | 407 |
| A02598 | A03028 | 299 | A02598 | A03795 | 358 |
| A02598 | A03992 | 363 | A02598 | A04429 | 369 |
| A02598 | A04579 | 358 | A02598 | A05568 | 199 |
| A02598 | A06689 | 174 | A02598 | A07079 | 266 |
| A02598 | A07136 | 385 | A02598 | A09263 | 274 |
| A02598 | A14079 | 152 | A02598 | A16150 | 418 |
| A02599 | A02601 | 441 | A02599 | A02671 | 144 |
| A02599 | A02702 | 294 | A02599 | A03112 | 160 |
| A02599 | A04449 | 180 | A02599 | A05008 | 165 |
| A02599 | A05015 | 160 | A02599 | A08514 | 334 |
| A02599 | A09397 | 363 | A02599 | A11326 | 224 |
| A02599 | A15257 | 260 | A02599 | A15596 | 232 |
| A02600 | A02698 | 229 | A02600 | A02832 | 379 |
| A02600 | A03783 | 396 | A02600 | A03861 | 350 |
| A02600 | A05133 | 427 | A02600 | A05568 | 267 |
| A02600 | A06648 | 339 | A02600 | A14393 | 256 |
| A02600 | A15528 | 302 | A02601 | A02616 | 257 |
| A02601 | A03091 | 196 | A02601 | A03567 | 195 |

|        |        |     |        |        |     |
|--------|--------|-----|--------|--------|-----|
| A02601 | A03697 | 152 | A02601 | A03917 | 380 |
| A02601 | A04495 | 299 | A02601 | A04791 | 221 |
| A02601 | A04839 | 249 | A02601 | A04990 | 303 |
| A02601 | A05775 | 213 | A02601 | A06009 | 243 |
| A02601 | A06287 | 152 | A02601 | A06595 | 154 |
| A02601 | A06607 | 375 | A02601 | A06648 | 157 |
| A02601 | A07061 | 299 | A02601 | A07140 | 168 |
| A02601 | A07744 | 152 | A02601 | A08061 | 152 |
| A02601 | A08098 | 152 | A02601 | A08178 | 152 |
| A02601 | A08210 | 278 | A02601 | A08473 | 345 |
| A02601 | A08763 | 152 | A02601 | A08947 | 299 |
| A02601 | A09004 | 299 | A02601 | A09164 | 265 |
| A02601 | A09211 | 238 | A02601 | A09253 | 191 |
| A02601 | A09388 | 238 | A02601 | A09514 | 330 |
| A02601 | A10288 | 338 | A02601 | A10842 | 152 |
| A02601 | A11513 | 172 | A02601 | A11576 | 154 |
| A02601 | A12361 | 468 | A02601 | A12363 | 294 |
| A02601 | A12399 | 384 | A02601 | A13871 | 193 |
| A02601 | A14324 | 294 | A02601 | A14498 | 201 |
| A02601 | A14525 | 152 | A02601 | A14542 | 384 |
| A02601 | A14639 | 266 | A02601 | A15235 | 188 |
| A02601 | A15375 | 152 | A02601 | A15526 | 257 |
| A02601 | A15546 | 152 | A02601 | A17078 | 291 |
| A02602 | A03289 | 294 | A02602 | A04485 | 353 |
| A02602 | A05017 | 334 | A02602 | A06425 | 334 |
| A02602 | A06827 | 535 | A02602 | A07531 | 334 |
| A02602 | A08201 | 334 | A02602 | A08974 | 337 |
| A02602 | A15624 | 536 | A02602 | A15649 | 176 |
| A02602 | A15651 | 549 | A02602 | A15750 | 334 |
| A02602 | A15917 | 334 | A02602 | A15932 | 400 |
| A02602 | A15937 | 334 | A02603 | A02835 | 395 |
| A02603 | A03111 | 430 | A02603 | A03239 | 344 |
| A02603 | A07764 | 399 | A02603 | A14372 | 335 |
| A02604 | A02608 | 479 | A02604 | A02637 | 412 |
| A02604 | A02651 | 358 | A02604 | A02655 | 306 |
| A02604 | A02681 | 380 | A02604 | A02945 | 307 |
| A02604 | A03271 | 229 | A02604 | A04050 | 191 |
| A02604 | A04589 | 299 | A02604 | A04741 | 401 |
| A02604 | A04755 | 446 | A02604 | A04756 | 481 |
| A02604 | A05613 | 472 | A02604 | A05985 | 293 |
| A02604 | A06415 | 226 | A02604 | A07152 | 286 |
| A02604 | A07161 | 332 | A02604 | A08618 | 424 |
| A02604 | A12927 | 245 | A02604 | A14392 | 285 |
| A02604 | A14431 | 307 | A02604 | A15394 | 414 |
| A02604 | A15395 | 406 | A02604 | A15426 | 418 |
| A02604 | A15607 | 369 | A02604 | A15964 | 353 |

|        |        |     |        |        |     |
|--------|--------|-----|--------|--------|-----|
| A02605 | A02668 | 427 | A02605 | A02730 | 252 |
| A02605 | A02745 | 232 | A02605 | A02756 | 391 |
| A02605 | A02771 | 217 | A02605 | A02783 | 241 |
| A02605 | A02787 | 177 | A02605 | A02814 | 228 |
| A02605 | A02859 | 216 | A02605 | A02864 | 168 |
| A02605 | A02874 | 302 | A02605 | A02883 | 351 |
| A02605 | A02886 | 402 | A02605 | A02924 | 210 |
| A02605 | A02951 | 168 | A02605 | A03080 | 200 |
| A02605 | A03099 | 154 | A02605 | A03178 | 216 |
| A02605 | A03189 | 366 | A02605 | A03196 | 358 |
| A02605 | A03447 | 296 | A02605 | A03545 | 168 |
| A02605 | A03914 | 252 | A02605 | A03975 | 319 |
| A02605 | A03988 | 486 | A02605 | A03991 | 358 |
| A02605 | A04023 | 277 | A02605 | A04087 | 313 |
| A02605 | A04263 | 232 | A02605 | A04520 | 154 |
| A02605 | A04607 | 308 | A02605 | A04614 | 268 |
| A02605 | A04734 | 420 | A02605 | A04817 | 393 |
| A02605 | A05349 | 378 | A02605 | A05414 | 899 |
| A02605 | A05861 | 337 | A02605 | A05920 | 435 |
| A02605 | A06046 | 291 | A02605 | A06058 | 353 |
| A02605 | A06980 | 384 | A02605 | A07138 | 310 |
| A02605 | A07141 | 177 | A02605 | A07442 | 157 |
| A02605 | A07695 | 184 | A02605 | A07736 | 199 |
| A02605 | A08280 | 202 | A02605 | A12355 | 406 |
| A02605 | A13824 | 167 | A02605 | A13886 | 311 |
| A02605 | A14643 | 191 | A02605 | A15851 | 224 |
| A02605 | A16636 | 205 | A02605 | A16724 | 185 |
| A02606 | A02639 | 290 | A02606 | A02695 | 238 |
| A02606 | A02709 | 179 | A02606 | A02945 | 369 |
| A02606 | A03081 | 288 | A02606 | A03185 | 353 |
| A02606 | A03244 | 229 | A02606 | A03305 | 299 |
| A02606 | A03788 | 201 | A02606 | A03880 | 160 |
| A02606 | A03975 | 338 | A02606 | A03976 | 224 |
| A02606 | A04162 | 252 | A02606 | A04257 | 350 |
| A02606 | A04327 | 267 | A02606 | A04679 | 347 |
| A02606 | A04680 | 375 | A02606 | A05104 | 339 |
| A02606 | A05517 | 322 | A02606 | A07138 | 419 |
| A02606 | A07164 | 229 | A02606 | A07173 | 363 |
| A02606 | A08825 | 414 | A02606 | A08828 | 369 |
| A02606 | A09421 | 335 | A02606 | A09509 | 208 |
| A02606 | A09901 | 293 | A02606 | A10640 | 322 |
| A02606 | A11881 | 294 | A02606 | A11910 | 414 |
| A02606 | A12913 | 395 | A02606 | A14190 | 154 |
| A02606 | A14250 | 347 | A02606 | A14266 | 159 |
| A02606 | A14311 | 402 | A02606 | A14366 | 484 |
| A02606 | A14419 | 389 | A02606 | A14443 | 899 |

|        |        |     |        |        |     |
|--------|--------|-----|--------|--------|-----|
| A02606 | A15140 | 899 | A02606 | A15518 | 343 |
| A02606 | A15605 | 279 | A02606 | A15795 | 377 |
| A02607 | A02785 | 312 | A02607 | A03570 | 486 |
| A02607 | A03676 | 232 | A02607 | A03797 | 191 |
| A02607 | A03959 | 223 | A02607 | A04668 | 229 |
| A02607 | A04686 | 372 | A02607 | A04838 | 288 |
| A02607 | A05034 | 199 | A02607 | A05066 | 196 |
| A02607 | A05087 | 490 | A02607 | A05143 | 151 |
| A02607 | A05417 | 491 | A02607 | A05697 | 263 |
| A02607 | A05812 | 160 | A02607 | A06014 | 213 |
| A02607 | A06039 | 199 | A02607 | A06158 | 257 |
| A02607 | A06689 | 279 | A02607 | A07111 | 455 |
| A02607 | A07394 | 491 | A02607 | A07453 | 228 |
| A02607 | A08222 | 382 | A02607 | A08319 | 374 |
| A02607 | A08519 | 177 | A02607 | A08745 | 316 |
| A02607 | A09045 | 185 | A02607 | A09054 | 489 |
| A02607 | A09508 | 182 | A02607 | A09581 | 350 |
| A02607 | A09754 | 196 | A02607 | A10535 | 328 |
| A02607 | A10551 | 288 | A02607 | A10853 | 210 |
| A02607 | A11081 | 281 | A02607 | A11253 | 319 |
| A02607 | A11307 | 199 | A02607 | A11313 | 241 |
| A02607 | A11526 | 462 | A02607 | A11833 | 254 |
| A02607 | A12140 | 438 | A02607 | A12326 | 398 |
| A02607 | A12831 | 364 | A02607 | A13446 | 281 |
| A02607 | A14089 | 281 | A02607 | A14566 | 201 |
| A02607 | A14758 | 199 | A02607 | A15321 | 163 |
| A02607 | A15531 | 151 | A02607 | A15653 | 465 |
| A02607 | A15666 | 490 | A02607 | A15765 | 479 |
| A02607 | A16060 | 152 | A02607 | A16162 | 380 |
| A02607 | A16813 | 263 | A02608 | A02609 | 445 |
| A02608 | A02637 | 389 | A02608 | A02639 | 177 |
| A02608 | A02751 | 323 | A02608 | A02769 | 347 |
| A02608 | A02812 | 188 | A02608 | A02896 | 208 |
| A02608 | A02945 | 383 | A02608 | A03049 | 388 |
| A02608 | A03157 | 191 | A02608 | A03177 | 291 |
| A02608 | A03271 | 393 | A02608 | A03477 | 160 |
| A02608 | A03773 | 263 | A02608 | A03817 | 260 |
| A02608 | A04248 | 291 | A02608 | A04278 | 290 |
| A02608 | A04428 | 368 | A02608 | A04741 | 382 |
| A02608 | A04748 | 379 | A02608 | A04755 | 463 |
| A02608 | A04756 | 484 | A02608 | A04766 | 456 |
| A02608 | A05047 | 420 | A02608 | A05613 | 467 |
| A02608 | A05679 | 247 | A02608 | A05944 | 385 |
| A02608 | A05985 | 249 | A02608 | A06054 | 468 |
| A02608 | A06055 | 297 | A02608 | A06899 | 351 |
| A02608 | A07157 | 219 | A02608 | A07161 | 296 |

|        |        |     |        |        |     |
|--------|--------|-----|--------|--------|-----|
| A02608 | A07166 | 380 | A02608 | A07372 | 368 |
| A02608 | A07390 | 338 | A02608 | A08618 | 458 |
| A02608 | A14146 | 324 | A02608 | A14199 | 193 |
| A02608 | A14376 | 428 | A02608 | A14392 | 364 |
| A02608 | A14432 | 351 | A02608 | A15605 | 296 |
| A02608 | A15642 | 286 | A02609 | A02654 | 316 |
| A02609 | A02727 | 367 | A02609 | A02751 | 357 |
| A02609 | A03157 | 246 | A02609 | A03773 | 310 |
| A02609 | A03817 | 187 | A02609 | A04428 | 393 |
| A02609 | A04755 | 385 | A02609 | A04756 | 435 |
| A02609 | A05047 | 434 | A02609 | A06054 | 340 |
| A02609 | A11495 | 434 | A02609 | A14391 | 273 |
| A02609 | A14392 | 443 | A02609 | A14432 | 379 |
| A02609 | A15394 | 324 | A02609 | A15516 | 333 |
| A02610 | A02611 | 357 | A02610 | A02703 | 316 |
| A02610 | A02740 | 438 | A02610 | A02803 | 296 |
| A02610 | A02816 | 329 | A02610 | A02860 | 377 |
| A02610 | A02887 | 288 | A02610 | A02895 | 368 |
| A02610 | A02914 | 393 | A02610 | A02924 | 346 |
| A02610 | A03195 | 374 | A02610 | A03271 | 286 |
| A02610 | A03817 | 246 | A02610 | A04042 | 428 |
| A02610 | A04587 | 428 | A02610 | A04682 | 384 |
| A02610 | A04730 | 428 | A02610 | A06224 | 422 |
| A02611 | A02637 | 176 | A02611 | A02653 | 412 |
| A02611 | A02657 | 307 | A02611 | A02659 | 362 |
| A02611 | A02681 | 281 | A02611 | A02783 | 188 |
| A02611 | A02788 | 322 | A02611 | A02795 | 254 |
| A02611 | A02800 | 269 | A02611 | A02828 | 174 |
| A02611 | A02851 | 269 | A02611 | A02854 | 440 |
| A02611 | A02863 | 182 | A02611 | A02883 | 168 |
| A02611 | A02888 | 226 | A02611 | A02896 | 430 |
| A02611 | A02916 | 126 | A02611 | A02918 | 159 |
| A02611 | A02944 | 274 | A02611 | A02945 | 430 |
| A02611 | A02947 | 272 | A02611 | A02953 | 221 |
| A02611 | A03034 | 491 | A02611 | A03036 | 353 |
| A02611 | A03126 | 160 | A02611 | A03144 | 380 |
| A02611 | A03147 | 236 | A02611 | A03157 | 205 |
| A02611 | A03195 | 491 | A02611 | A03204 | 451 |
| A02611 | A03256 | 174 | A02611 | A03271 | 413 |
| A02611 | A03275 | 80  | A02611 | A03279 | 260 |
| A02611 | A03282 | 352 | A02611 | A03966 | 185 |
| A02611 | A04010 | 226 | A02611 | A04051 | 180 |
| A02611 | A04110 | 218 | A02611 | A04142 | 311 |
| A02611 | A04211 | 162 | A02611 | A04244 | 257 |
| A02611 | A04248 | 195 | A02611 | A04263 | 179 |
| A02611 | A04276 | 252 | A02611 | A04307 | 174 |

|        |        |     |        |        |     |
|--------|--------|-----|--------|--------|-----|
| A02611 | A04478 | 247 | A02611 | A04520 | 221 |
| A02611 | A04536 | 345 | A02611 | A04540 | 174 |
| A02611 | A04566 | 347 | A02611 | A04609 | 208 |
| A02611 | A04627 | 162 | A02611 | A04800 | 290 |
| A02611 | A04801 | 357 | A02611 | A04865 | 235 |
| A02611 | A04961 | 277 | A02611 | A05212 | 213 |
| A02611 | A05277 | 277 | A02611 | A05475 | 368 |
| A02611 | A05668 | 357 | A02611 | A05810 | 226 |
| A02611 | A05817 | 319 | A02611 | A05956 | 272 |
| A02611 | A05985 | 463 | A02611 | A06073 | 281 |
| A02611 | A06092 | 283 | A02611 | A06187 | 368 |
| A02611 | A06195 | 491 | A02611 | A06271 | 319 |
| A02611 | A06286 | 184 | A02611 | A06298 | 196 |
| A02611 | A06469 | 425 | A02611 | A06499 | 297 |
| A02611 | A06665 | 238 | A02611 | A06747 | 200 |
| A02611 | A06899 | 276 | A02611 | A07031 | 302 |
| A02611 | A07135 | 159 | A02611 | A07140 | 172 |
| A02611 | A07142 | 486 | A02611 | A07146 | 259 |
| A02611 | A07148 | 263 | A02611 | A07151 | 199 |
| A02611 | A07157 | 340 | A02611 | A07161 | 333 |
| A02611 | A07166 | 382 | A02611 | A07172 | 368 |
| A02611 | A07173 | 452 | A02611 | A07195 | 334 |
| A02611 | A07308 | 357 | A02611 | A07342 | 229 |
| A02611 | A08731 | 368 | A02611 | A09323 | 265 |
| A02611 | A12523 | 357 | A02611 | A13229 | 319 |
| A02611 | A13872 | 345 | A02611 | A14374 | 236 |
| A02611 | A14387 | 391 | A02611 | A14439 | 201 |
| A02611 | A15394 | 183 | A02611 | A15395 | 160 |
| A02611 | A15601 | 247 | A02611 | A15605 | 201 |
| A02611 | A15806 | 270 | A02611 | A15865 | 329 |
| A02611 | A15964 | 235 | A02612 | A02613 | 428 |
| A02612 | A02664 | 408 | A02612 | A02669 | 390 |
| A02612 | A02734 | 373 | A02612 | A03975 | 393 |
| A02612 | A04010 | 288 | A02612 | A04237 | 414 |
| A02612 | A04912 | 418 | A02612 | A05865 | 380 |
| A02612 | A06175 | 424 | A02612 | A09481 | 433 |
| A02612 | A16636 | 224 | A02613 | A02616 | 396 |
| A02613 | A02669 | 401 | A02613 | A02734 | 385 |
| A02613 | A04237 | 422 | A02613 | A04912 | 465 |
| A02613 | A06175 | 430 | A02613 | A06635 | 340 |
| A02613 | A07381 | 322 | A02613 | A14635 | 207 |
| A02613 | A16636 | 251 | A02614 | A02615 | 374 |
| A02614 | A02668 | 273 | A02614 | A02784 | 334 |
| A02614 | A03653 | 340 | A02614 | A04512 | 419 |
| A02614 | A04539 | 406 | A02614 | A04810 | 424 |
| A02614 | A07165 | 223 | A02614 | A09170 | 429 |

|        |        |     |        |        |     |
|--------|--------|-----|--------|--------|-----|
| A02615 | A02616 | 417 | A02615 | A02639 | 154 |
| A02615 | A02668 | 942 | A02615 | A02698 | 329 |
| A02615 | A02711 | 162 | A02615 | A02730 | 276 |
| A02615 | A02751 | 305 | A02615 | A02756 | 201 |
| A02615 | A02788 | 179 | A02615 | A02836 | 424 |
| A02615 | A02917 | 435 | A02615 | A03110 | 188 |
| A02615 | A03185 | 353 | A02615 | A03415 | 212 |
| A02615 | A03639 | 238 | A02615 | A03934 | 439 |
| A02615 | A04237 | 940 | A02615 | A04473 | 420 |
| A02615 | A04484 | 436 | A02615 | A04517 | 319 |
| A02615 | A04878 | 323 | A02615 | A07145 | 457 |
| A02615 | A07173 | 236 | A02615 | A08714 | 283 |
| A02615 | A09247 | 306 | A02615 | A11740 | 414 |
| A02615 | A14071 | 204 | A02615 | A14190 | 151 |
| A02615 | A14236 | 355 | A02615 | A14379 | 240 |
| A02615 | A15241 | 400 | A02615 | A15601 | 314 |
| A02615 | A15916 | 324 | A02616 | A02638 | 290 |
| A02616 | A02639 | 162 | A02616 | A02668 | 191 |
| A02616 | A02669 | 457 | A02616 | A02753 | 196 |
| A02616 | A02756 | 208 | A02616 | A02875 | 201 |
| A02616 | A03081 | 399 | A02616 | A03263 | 258 |
| A02616 | A03407 | 160 | A02616 | A03417 | 267 |
| A02616 | A03451 | 196 | A02616 | A03922 | 293 |
| A02616 | A04222 | 238 | A02616 | A04225 | 371 |
| A02616 | A04439 | 378 | A02616 | A04473 | 424 |
| A02616 | A04481 | 366 | A02616 | A04509 | 363 |
| A02616 | A04562 | 301 | A02616 | A04912 | 469 |
| A02616 | A04968 | 363 | A02616 | A05065 | 274 |
| A02616 | A05487 | 270 | A02616 | A06211 | 353 |
| A02616 | A06742 | 447 | A02616 | A07145 | 432 |
| A02616 | A07157 | 204 | A02616 | A07381 | 208 |
| A02616 | A08070 | 236 | A02616 | A09070 | 396 |
| A02616 | A09127 | 212 | A02616 | A09240 | 363 |
| A02616 | A09548 | 436 | A02616 | A09647 | 286 |
| A02616 | A09803 | 332 | A02616 | A10699 | 268 |
| A02616 | A11683 | 212 | A02616 | A14366 | 398 |
| A02616 | A14375 | 258 | A02616 | A15917 | 198 |
| A02616 | A16738 | 157 | A02617 | A02630 | 406 |
| A02617 | A02637 | 385 | A02617 | A02657 | 430 |
| A02617 | A02659 | 408 | A02617 | A02851 | 419 |
| A02617 | A02863 | 388 | A02617 | A02917 | 390 |
| A02617 | A04248 | 393 | A02617 | A05944 | 384 |
| A02617 | A06404 | 424 | A02617 | A07161 | 396 |
| A02617 | A14236 | 373 | A02617 | A14373 | 424 |
| A02618 | A02787 | 207 | A02618 | A02878 | 171 |
| A02618 | A03104 | 160 | A02618 | A03158 | 328 |



|        |        |     |        |        |     |
|--------|--------|-----|--------|--------|-----|
| A02618 | A03333 | 305 | A02618 | A03334 | 302 |
| A02618 | A04092 | 286 | A02618 | A04162 | 254 |
| A02618 | A04222 | 454 | A02618 | A04394 | 367 |
| A02618 | A04418 | 299 | A02618 | A04964 | 351 |
| A02618 | A05288 | 450 | A02618 | A05377 | 307 |
| A02618 | A05603 | 208 | A02618 | A06038 | 335 |
| A02618 | A06379 | 165 | A02618 | A06610 | 238 |
| A02618 | A08064 | 430 | A02618 | A12365 | 296 |
| A02618 | A12373 | 152 | A02618 | A12654 | 346 |
| A02619 | A02620 | 382 | A02619 | A02664 | 450 |
| A02619 | A02667 | 301 | A02619 | A02668 | 246 |
| A02619 | A02669 | 369 | A02619 | A02693 | 329 |
| A02619 | A02771 | 296 | A02619 | A02785 | 353 |
| A02619 | A04260 | 291 | A02619 | A04511 | 422 |
| A02619 | A05322 | 363 | A02619 | A05617 | 252 |
| A02619 | A07165 | 195 | A02619 | A08502 | 299 |
| A02619 | A11911 | 258 | A02620 | A02624 | 340 |
| A02620 | A02637 | 293 | A02620 | A02669 | 358 |
| A02620 | A02854 | 303 | A02620 | A02983 | 210 |
| A02620 | A03080 | 286 | A02620 | A04040 | 355 |
| A02620 | A04865 | 337 | A02620 | A05985 | 269 |
| A02620 | A07145 | 288 | A02620 | A07161 | 312 |
| A02620 | A09390 | 355 | A02621 | A02636 | 213 |
| A02621 | A02638 | 229 | A02621 | A02666 | 439 |
| A02621 | A02671 | 425 | A02621 | A02672 | 467 |
| A02621 | A02694 | 246 | A02621 | A02733 | 246 |
| A02621 | A02758 | 252 | A02621 | A02761 | 212 |
| A02621 | A02773 | 333 | A02621 | A02815 | 340 |
| A02621 | A02816 | 152 | A02621 | A02819 | 168 |
| A02621 | A02958 | 297 | A02621 | A03010 | 202 |
| A02621 | A03054 | 228 | A02621 | A03076 | 274 |
| A02621 | A03077 | 196 | A02621 | A03097 | 279 |
| A02621 | A03104 | 217 | A02621 | A03123 | 333 |
| A02621 | A03178 | 180 | A02621 | A03263 | 193 |
| A02621 | A03314 | 316 | A02621 | A03315 | 272 |
| A02621 | A03334 | 246 | A02621 | A03417 | 202 |
| A02621 | A03421 | 283 | A02621 | A03583 | 313 |
| A02621 | A03735 | 266 | A02621 | A03820 | 243 |
| A02621 | A03906 | 201 | A02621 | A04001 | 409 |
| A02621 | A04015 | 213 | A02621 | A04023 | 246 |
| A02621 | A04092 | 228 | A02621 | A04236 | 337 |
| A02621 | A04423 | 283 | A02621 | A04444 | 223 |
| A02621 | A04556 | 281 | A02621 | A04727 | 299 |
| A02621 | A04759 | 241 | A02621 | A04911 | 279 |
| A02621 | A05142 | 329 | A02621 | A05176 | 213 |
| A02621 | A05221 | 372 | A02621 | A05533 | 210 |

|        |        |     |        |        |     |
|--------|--------|-----|--------|--------|-----|
| A02621 | A05838 | 200 | A02621 | A05932 | 394 |
| A02621 | A06623 | 160 | A02621 | A06868 | 235 |
| A02621 | A07126 | 249 | A02621 | A07209 | 240 |
| A02621 | A08875 | 168 | A02621 | A09245 | 213 |
| A02621 | A09562 | 276 | A02621 | A09812 | 307 |
| A02621 | A11007 | 340 | A02621 | A13346 | 180 |
| A02621 | A13753 | 265 | A02621 | A14635 | 274 |
| A02621 | A15314 | 213 | A02622 | A02668 | 297 |
| A02622 | A02771 | 340 | A02622 | A03184 | 452 |
| A02622 | A03262 | 424 | A02622 | A03976 | 326 |
| A02623 | A02639 | 185 | A02623 | A02697 | 159 |
| A02623 | A02804 | 283 | A02623 | A02833 | 236 |
| A02623 | A03094 | 343 | A02623 | A03275 | 177 |
| A02623 | A03783 | 353 | A02623 | A05591 | 269 |
| A02623 | A08911 | 408 | A02623 | A12927 | 204 |
| A02624 | A02654 | 424 | A02624 | A02727 | 408 |
| A02624 | A02885 | 372 | A02624 | A02983 | 154 |
| A02624 | A03045 | 455 | A02624 | A03081 | 388 |
| A02624 | A03110 | 174 | A02624 | A03157 | 288 |
| A02624 | A03314 | 229 | A02624 | A03447 | 306 |
| A02624 | A03520 | 160 | A02624 | A03746 | 308 |
| A02624 | A03821 | 205 | A02624 | A04162 | 238 |
| A02624 | A04237 | 363 | A02624 | A04244 | 312 |
| A02624 | A04293 | 332 | A02624 | A04780 | 334 |
| A02624 | A05965 | 383 | A02624 | A06415 | 363 |
| A02624 | A07138 | 319 | A02624 | A07145 | 490 |
| A02624 | A09219 | 335 | A02624 | A09263 | 215 |
| A02624 | A09390 | 318 | A02624 | A09442 | 340 |
| A02624 | A09552 | 322 | A02624 | A10640 | 409 |
| A02624 | A14199 | 378 | A02624 | A14366 | 430 |
| A02624 | A14372 | 450 | A02624 | A14374 | 435 |
| A02624 | A14381 | 227 | A02624 | A14391 | 396 |
| A02624 | A14416 | 422 | A02624 | A14554 | 477 |
| A02624 | A14604 | 226 | A02624 | A15285 | 456 |
| A02624 | A15516 | 379 | A02624 | A15630 | 205 |
| A02624 | A15795 | 481 | A02624 | A15969 | 368 |
| A02624 | A16014 | 383 | A02624 | A16031 | 372 |
| A02626 | A02811 | 224 | A02626 | A04055 | 260 |
| A02626 | A07277 | 350 | A02626 | A07583 | 157 |
| A02626 | A10282 | 350 | A02626 | A10493 | 319 |
| A02626 | A13506 | 350 | A02626 | A14059 | 422 |
| A02626 | A14701 | 302 | A02626 | A15338 | 168 |
| A02627 | A04755 | 424 | A02628 | A02636 | 351 |
| A02628 | A02638 | 361 | A02628 | A02768 | 363 |
| A02628 | A03587 | 374 | A02628 | A04283 | 401 |
| A02629 | A02632 | 319 | A02629 | A02638 | 265 |

|        |        |     |        |        |     |
|--------|--------|-----|--------|--------|-----|
| A02629 | A02707 | 294 | A02629 | A02736 | 340 |
| A02629 | A02744 | 202 | A02629 | A02749 | 443 |
| A02629 | A02752 | 190 | A02629 | A02796 | 318 |
| A02629 | A02819 | 205 | A02629 | A02908 | 177 |
| A02629 | A02921 | 352 | A02629 | A02942 | 156 |
| A02629 | A02943 | 352 | A02629 | A02968 | 246 |
| A02629 | A03001 | 221 | A02629 | A03051 | 217 |
| A02629 | A03069 | 157 | A02629 | A03259 | 132 |
| A02629 | A03392 | 363 | A02629 | A03948 | 156 |
| A02629 | A04015 | 249 | A02629 | A04107 | 330 |
| A02629 | A04246 | 348 | A02629 | A04370 | 430 |
| A02629 | A04770 | 277 | A02629 | A04939 | 191 |
| A02629 | A04971 | 303 | A02629 | A05065 | 247 |
| A02629 | A06623 | 479 | A02629 | A06648 | 218 |
| A02629 | A06649 | 322 | A02629 | A07178 | 286 |
| A02629 | A07226 | 235 | A02629 | A07799 | 333 |
| A02629 | A08465 | 348 | A02629 | A09250 | 407 |
| A02629 | A09438 | 296 | A02629 | A09509 | 183 |
| A02629 | A13555 | 319 | A02629 | A14642 | 477 |
| A02629 | A16738 | 255 | A02630 | A02636 | 246 |
| A02630 | A02637 | 468 | A02630 | A02645 | 377 |
| A02630 | A02657 | 428 | A02630 | A02659 | 395 |
| A02630 | A02662 | 446 | A02630 | A02681 | 324 |
| A02630 | A02714 | 259 | A02630 | A02730 | 374 |
| A02630 | A02746 | 408 | A02630 | A02769 | 316 |
| A02630 | A02808 | 475 | A02630 | A02834 | 445 |
| A02630 | A02843 | 420 | A02630 | A02851 | 313 |
| A02630 | A02854 | 243 | A02630 | A02863 | 235 |
| A02630 | A02896 | 160 | A02630 | A02916 | 179 |
| A02630 | A02917 | 364 | A02630 | A02935 | 286 |
| A02630 | A03019 | 171 | A02630 | A03204 | 278 |
| A02630 | A03243 | 221 | A02630 | A03256 | 229 |
| A02630 | A03259 | 454 | A02630 | A03263 | 227 |
| A02630 | A03271 | 259 | A02630 | A03282 | 274 |
| A02630 | A03661 | 157 | A02630 | A03846 | 196 |
| A02630 | A04059 | 413 | A02630 | A04088 | 449 |
| A02630 | A04138 | 404 | A02630 | A04248 | 369 |
| A02630 | A04451 | 226 | A02630 | A04519 | 457 |
| A02630 | A04528 | 384 | A02630 | A04536 | 391 |
| A02630 | A04589 | 340 | A02630 | A04668 | 160 |
| A02630 | A04879 | 171 | A02630 | A05038 | 341 |
| A02630 | A05309 | 483 | A02630 | A05329 | 335 |
| A02630 | A05558 | 362 | A02630 | A05944 | 227 |
| A02630 | A05985 | 201 | A02630 | A06055 | 256 |
| A02630 | A06344 | 313 | A02630 | A06404 | 324 |
| A02630 | A06465 | 384 | A02630 | A07135 | 332 |

|        |        |     |        |        |     |
|--------|--------|-----|--------|--------|-----|
| A02630 | A07157 | 432 | A02630 | A07158 | 174 |
| A02630 | A07161 | 457 | A02630 | A07164 | 334 |
| A02630 | A07166 | 347 | A02630 | A09046 | 311 |
| A02630 | A10215 | 341 | A02630 | A14236 | 202 |
| A02630 | A14373 | 329 | A02630 | A15394 | 362 |
| A02630 | A15395 | 215 | A02630 | A15673 | 188 |
| A02630 | A16537 | 311 | A02631 | A02739 | 455 |
| A02631 | A02828 | 208 | A02631 | A02859 | 238 |
| A02631 | A03195 | 332 | A02631 | A03215 | 477 |
| A02631 | A03984 | 396 | A02631 | A06156 | 411 |
| A02631 | A07147 | 483 | A02631 | A08266 | 416 |
| A02631 | A08697 | 430 | A02631 | A13828 | 430 |
| A02631 | A14364 | 307 | A02631 | A14664 | 389 |
| A02631 | A14843 | 229 | A02631 | A15994 | 422 |
| A02631 | A16216 | 200 | A02632 | A02687 | 152 |
| A02632 | A02707 | 328 | A02632 | A02749 | 176 |
| A02632 | A02752 | 232 | A02632 | A02784 | 281 |
| A02632 | A02834 | 328 | A02632 | A02878 | 188 |
| A02632 | A03100 | 272 | A02632 | A03243 | 266 |
| A02632 | A03263 | 271 | A02632 | A03406 | 249 |
| A02632 | A03408 | 191 | A02632 | A03922 | 390 |
| A02632 | A03948 | 200 | A02632 | A04015 | 288 |
| A02632 | A04370 | 373 | A02632 | A04963 | 409 |
| A02632 | A05065 | 286 | A02632 | A05094 | 299 |
| A02632 | A05925 | 391 | A02632 | A06623 | 477 |
| A02632 | A06648 | 260 | A02632 | A07135 | 154 |
| A02632 | A09404 | 375 | A02632 | A09509 | 227 |
| A02632 | A10299 | 391 | A02632 | A11055 | 401 |
| A02632 | A14642 | 224 | A02632 | A14643 | 408 |
| A02632 | A14652 | 232 | A02632 | A15301 | 228 |
| A02632 | A15302 | 241 | A02632 | A15462 | 243 |
| A02633 | A04108 | 297 | A02633 | A04576 | 411 |
| A02633 | A07153 | 465 | A02633 | A11404 | 469 |
| A02634 | A02655 | 224 | A02634 | A02816 | 191 |
| A02634 | A02819 | 208 | A02634 | A02836 | 185 |
| A02634 | A03195 | 267 | A02634 | A03263 | 485 |
| A02634 | A03423 | 196 | A02634 | A03870 | 363 |
| A02634 | A04031 | 420 | A02634 | A04078 | 274 |
| A02634 | A04117 | 177 | A02634 | A04517 | 306 |
| A02634 | A04622 | 276 | A02634 | A04826 | 379 |
| A02634 | A04879 | 176 | A02634 | A04880 | 195 |
| A02634 | A04965 | 340 | A02634 | A05261 | 369 |
| A02634 | A05481 | 408 | A02634 | A06381 | 279 |
| A02634 | A07158 | 180 | A02634 | A07721 | 269 |
| A02634 | A09419 | 301 | A02634 | A13973 | 363 |
| A02634 | A14272 | 154 | A02634 | A14364 | 235 |

|        |        |     |        |        |     |
|--------|--------|-----|--------|--------|-----|
| A02634 | A14403 | 425 | A02634 | A14643 | 199 |
| A02634 | A14870 | 263 | A02635 | A02729 | 156 |
| A02635 | A02739 | 485 | A02635 | A02746 | 180 |
| A02635 | A02751 | 151 | A02635 | A02754 | 96  |
| A02635 | A02837 | 63  | A02635 | A02843 | 213 |
| A02635 | A02858 | 207 | A02635 | A02984 | 160 |
| A02635 | A03019 | 66  | A02635 | A03092 | 277 |
| A02635 | A03243 | 196 | A02635 | A03259 | 104 |
| A02635 | A03270 | 207 | A02635 | A03769 | 201 |
| A02635 | A03962 | 204 | A02635 | A04011 | 183 |
| A02635 | A04117 | 411 | A02635 | A04245 | 269 |
| A02635 | A04247 | 249 | A02635 | A04517 | 172 |
| A02635 | A04518 | 204 | A02635 | A04526 | 260 |
| A02635 | A04801 | 299 | A02635 | A05301 | 401 |
| A02635 | A05790 | 193 | A02635 | A06182 | 167 |
| A02635 | A06277 | 212 | A02635 | A06584 | 204 |
| A02635 | A06687 | 219 | A02635 | A06739 | 238 |
| A02635 | A07020 | 341 | A02635 | A07054 | 427 |
| A02635 | A07164 | 170 | A02635 | A07242 | 491 |
| A02635 | A07495 | 343 | A02635 | A07654 | 168 |
| A02635 | A07954 | 151 | A02635 | A08640 | 341 |
| A02635 | A08738 | 252 | A02635 | A08985 | 177 |
| A02635 | A09536 | 286 | A02635 | A09545 | 234 |
| A02635 | A09704 | 277 | A02635 | A11149 | 216 |
| A02635 | A12258 | 207 | A02635 | A14266 | 318 |
| A02635 | A14941 | 243 | A02635 | A15114 | 201 |
| A02635 | A15190 | 201 | A02635 | A15682 | 185 |
| A02635 | A16392 | 187 | A02635 | A16809 | 199 |
| A02635 | A16847 | 205 | A02635 | A16951 | 216 |
| A02635 | A17155 | 188 | A02636 | A02638 | 488 |
| A02636 | A02672 | 157 | A02636 | A02695 | 391 |
| A02636 | A02732 | 227 | A02636 | A02733 | 367 |
| A02636 | A02749 | 208 | A02636 | A02768 | 477 |
| A02636 | A02819 | 475 | A02636 | A02877 | 324 |
| A02636 | A03001 | 180 | A02636 | A03032 | 256 |
| A02636 | A03033 | 238 | A02636 | A03091 | 217 |
| A02636 | A03243 | 185 | A02636 | A03263 | 489 |
| A02636 | A03399 | 168 | A02636 | A03414 | 173 |
| A02636 | A03422 | 219 | A02636 | A03782 | 306 |
| A02636 | A03813 | 191 | A02636 | A03821 | 154 |
| A02636 | A04015 | 210 | A02636 | A04059 | 286 |
| A02636 | A04067 | 335 | A02636 | A04088 | 273 |
| A02636 | A04122 | 279 | A02636 | A04138 | 269 |
| A02636 | A04268 | 195 | A02636 | A04417 | 223 |
| A02636 | A04451 | 322 | A02636 | A04716 | 377 |
| A02636 | A04783 | 201 | A02636 | A04965 | 167 |

|        |        |     |        |        |     |
|--------|--------|-----|--------|--------|-----|
| A02636 | A05124 | 210 | A02636 | A05473 | 228 |
| A02636 | A05530 | 213 | A02636 | A05575 | 317 |
| A02636 | A05656 | 393 | A02636 | A05833 | 393 |
| A02636 | A05838 | 198 | A02636 | A06465 | 366 |
| A02636 | A06623 | 290 | A02636 | A06648 | 179 |
| A02636 | A07118 | 335 | A02636 | A07148 | 391 |
| A02636 | A07158 | 470 | A02636 | A07192 | 199 |
| A02636 | A07339 | 187 | A02636 | A10797 | 177 |
| A02636 | A11911 | 263 | A02636 | A14433 | 196 |
| A02636 | A14577 | 201 | A02637 | A02639 | 187 |
| A02637 | A02643 | 434 | A02637 | A02654 | 172 |
| A02637 | A02655 | 163 | A02637 | A02656 | 472 |
| A02637 | A02657 | 477 | A02637 | A02659 | 491 |
| A02637 | A02681 | 475 | A02637 | A02730 | 406 |
| A02637 | A02746 | 380 | A02637 | A02751 | 235 |
| A02637 | A02764 | 288 | A02637 | A02769 | 480 |
| A02637 | A02800 | 436 | A02637 | A02803 | 93  |
| A02637 | A02808 | 425 | A02637 | A02834 | 245 |
| A02637 | A02837 | 63  | A02637 | A02843 | 465 |
| A02637 | A02851 | 473 | A02637 | A02854 | 570 |
| A02637 | A02859 | 204 | A02637 | A02863 | 182 |
| A02637 | A02886 | 373 | A02637 | A02896 | 570 |
| A02637 | A02917 | 439 | A02637 | A02945 | 484 |
| A02637 | A02977 | 213 | A02637 | A03010 | 184 |
| A02637 | A03019 | 344 | A02637 | A03049 | 390 |
| A02637 | A03157 | 205 | A02637 | A03177 | 193 |
| A02637 | A03204 | 419 | A02637 | A03224 | 207 |
| A02637 | A03259 | 580 | A02637 | A03271 | 440 |
| A02637 | A03280 | 468 | A02637 | A03417 | 183 |
| A02637 | A03610 | 219 | A02637 | A03817 | 221 |
| A02637 | A03923 | 243 | A02637 | A03995 | 462 |
| A02637 | A04040 | 380 | A02637 | A04109 | 307 |
| A02637 | A04110 | 218 | A02637 | A04217 | 196 |
| A02637 | A04248 | 481 | A02637 | A04249 | 293 |
| A02637 | A04263 | 179 | A02637 | A04272 | 267 |
| A02637 | A04519 | 479 | A02637 | A04536 | 404 |
| A02637 | A04540 | 174 | A02637 | A04564 | 419 |
| A02637 | A04589 | 567 | A02637 | A04734 | 398 |
| A02637 | A04756 | 424 | A02637 | A04865 | 235 |
| A02637 | A05174 | 259 | A02637 | A05315 | 305 |
| A02637 | A05475 | 368 | A02637 | A05613 | 307 |
| A02637 | A05645 | 252 | A02637 | A05679 | 419 |
| A02637 | A05944 | 486 | A02637 | A05985 | 481 |
| A02637 | A06054 | 474 | A02637 | A06055 | 408 |
| A02637 | A06095 | 281 | A02637 | A06108 | 385 |
| A02637 | A06191 | 307 | A02637 | A06404 | 394 |

|        |        |     |        |        |     |
|--------|--------|-----|--------|--------|-----|
| A02637 | A06414 | 259 | A02637 | A06415 | 484 |
| A02637 | A06422 | 452 | A02637 | A06737 | 368 |
| A02637 | A06818 | 269 | A02637 | A06899 | 276 |
| A02637 | A07134 | 357 | A02637 | A07135 | 462 |
| A02637 | A07143 | 191 | A02637 | A07148 | 263 |
| A02637 | A07150 | 357 | A02637 | A07152 | 445 |
| A02637 | A07157 | 485 | A02637 | A07161 | 491 |
| A02637 | A07164 | 479 | A02637 | A07166 | 480 |
| A02637 | A07173 | 157 | A02637 | A07311 | 199 |
| A02637 | A07372 | 301 | A02637 | A07390 | 257 |
| A02637 | A08133 | 199 | A02637 | A08193 | 199 |
| A02637 | A08596 | 234 | A02637 | A08677 | 258 |
| A02637 | A08714 | 340 | A02637 | A11604 | 199 |
| A02637 | A12927 | 210 | A02637 | A13163 | 297 |
| A02637 | A13338 | 207 | A02637 | A13667 | 221 |
| A02637 | A14071 | 251 | A02637 | A14146 | 240 |
| A02637 | A14373 | 288 | A02637 | A14374 | 236 |
| A02637 | A14376 | 267 | A02637 | A14391 | 402 |
| A02637 | A14432 | 276 | A02637 | A14439 | 201 |
| A02637 | A14442 | 469 | A02637 | A14599 | 216 |
| A02637 | A15394 | 436 | A02637 | A15395 | 380 |
| A02637 | A15425 | 252 | A02637 | A15426 | 357 |
| A02637 | A15518 | 394 | A02637 | A15603 | 234 |
| A02637 | A15605 | 333 | A02637 | A15607 | 263 |
| A02637 | A15795 | 311 | A02637 | A15865 | 329 |
| A02637 | A15962 | 457 | A02638 | A02695 | 174 |
| A02638 | A02707 | 276 | A02638 | A02733 | 472 |
| A02638 | A02749 | 112 | A02638 | A02750 | 367 |
| A02638 | A02768 | 429 | A02638 | A02796 | 299 |
| A02638 | A02819 | 491 | A02638 | A02831 | 313 |
| A02638 | A02877 | 347 | A02638 | A03033 | 255 |
| A02638 | A03065 | 267 | A02638 | A03090 | 227 |
| A02638 | A03109 | 278 | A02638 | A03112 | 374 |
| A02638 | A03242 | 268 | A02638 | A03243 | 201 |
| A02638 | A03259 | 63  | A02638 | A03263 | 486 |
| A02638 | A03420 | 277 | A02638 | A03421 | 165 |
| A02638 | A03422 | 243 | A02638 | A03451 | 369 |
| A02638 | A03587 | 270 | A02638 | A03619 | 303 |
| A02638 | A03790 | 263 | A02638 | A03936 | 277 |
| A02638 | A04122 | 293 | A02638 | A04280 | 258 |
| A02638 | A04417 | 240 | A02638 | A04622 | 480 |
| A02638 | A04716 | 385 | A02638 | A04795 | 230 |
| A02638 | A04901 | 399 | A02638 | A05120 | 302 |
| A02638 | A05124 | 227 | A02638 | A05575 | 329 |
| A02638 | A05798 | 321 | A02638 | A06595 | 193 |
| A02638 | A06623 | 486 | A02638 | A06648 | 328 |

|        |        |     |        |        |     |
|--------|--------|-----|--------|--------|-----|
| A02638 | A06649 | 305 | A02638 | A07018 | 374 |
| A02638 | A07127 | 276 | A02638 | A07158 | 479 |
| A02638 | A07192 | 217 | A02638 | A08655 | 291 |
| A02638 | A09120 | 346 | A02638 | A09546 | 210 |
| A02638 | A11745 | 288 | A02638 | A11891 | 374 |
| A02638 | A11911 | 283 | A02638 | A13226 | 335 |
| A02638 | A13930 | 286 | A02638 | A14642 | 157 |
| A02638 | A14643 | 483 | A02638 | A15704 | 227 |
| A02639 | A02646 | 176 | A02639 | A02657 | 218 |
| A02639 | A02677 | 286 | A02639 | A02681 | 185 |
| A02639 | A02695 | 395 | A02639 | A02697 | 156 |
| A02639 | A02698 | 243 | A02639 | A02709 | 469 |
| A02639 | A02710 | 334 | A02639 | A02711 | 357 |
| A02639 | A02713 | 160 | A02639 | A02749 | 388 |
| A02639 | A02766 | 162 | A02639 | A02769 | 174 |
| A02639 | A02780 | 172 | A02639 | A02788 | 170 |
| A02639 | A02800 | 170 | A02639 | A02832 | 263 |
| A02639 | A02833 | 366 | A02639 | A02837 | 447 |
| A02639 | A02843 | 196 | A02639 | A02863 | 195 |
| A02639 | A02876 | 468 | A02639 | A02877 | 384 |
| A02639 | A02878 | 446 | A02639 | A02945 | 278 |
| A02639 | A02982 | 263 | A02639 | A02983 | 232 |
| A02639 | A03001 | 171 | A02639 | A03011 | 344 |
| A02639 | A03035 | 162 | A02639 | A03095 | 198 |
| A02639 | A03112 | 347 | A02639 | A03157 | 151 |
| A02639 | A03256 | 185 | A02639 | A03259 | 272 |
| A02639 | A03520 | 243 | A02639 | A03657 | 223 |
| A02639 | A03661 | 491 | A02639 | A03683 | 199 |
| A02639 | A03684 | 152 | A02639 | A03783 | 177 |
| A02639 | A03824 | 467 | A02639 | A03825 | 162 |
| A02639 | A03965 | 469 | A02639 | A03978 | 263 |
| A02639 | A03994 | 358 | A02639 | A04020 | 154 |
| A02639 | A04040 | 297 | A02639 | A04053 | 409 |
| A02639 | A04105 | 152 | A02639 | A04117 | 488 |
| A02639 | A04138 | 154 | A02639 | A04280 | 162 |
| A02639 | A04348 | 228 | A02639 | A04473 | 172 |
| A02639 | A04478 | 279 | A02639 | A04517 | 156 |
| A02639 | A04564 | 246 | A02639 | A04681 | 424 |
| A02639 | A04704 | 475 | A02639 | A04727 | 188 |
| A02639 | A04739 | 188 | A02639 | A04747 | 249 |
| A02639 | A04749 | 196 | A02639 | A04775 | 218 |
| A02639 | A04819 | 232 | A02639 | A04965 | 152 |
| A02639 | A04968 | 218 | A02639 | A04991 | 257 |
| A02639 | A04996 | 267 | A02639 | A05104 | 180 |
| A02639 | A05261 | 254 | A02639 | A05634 | 180 |
| A02639 | A05811 | 160 | A02639 | A05876 | 285 |



|        |        |     |        |        |     |
|--------|--------|-----|--------|--------|-----|
| A02639 | A06063 | 165 | A02639 | A06131 | 303 |
| A02639 | A06254 | 246 | A02639 | A06414 | 160 |
| A02639 | A06422 | 355 | A02639 | A06465 | 286 |
| A02639 | A06477 | 396 | A02639 | A06505 | 323 |
| A02639 | A06606 | 362 | A02639 | A06618 | 303 |
| A02639 | A06622 | 210 | A02639 | A06682 | 286 |
| A02639 | A06899 | 177 | A02639 | A07127 | 274 |
| A02639 | A07135 | 395 | A02639 | A07145 | 283 |
| A02639 | A07148 | 165 | A02639 | A07157 | 286 |
| A02639 | A07161 | 219 | A02639 | A07165 | 451 |
| A02639 | A07166 | 168 | A02639 | A07173 | 162 |
| A02639 | A07178 | 263 | A02639 | A07339 | 411 |
| A02639 | A07557 | 223 | A02639 | A08201 | 273 |
| A02639 | A08206 | 254 | A02639 | A08430 | 162 |
| A02639 | A08609 | 223 | A02639 | A08704 | 369 |
| A02639 | A08720 | 380 | A02639 | A08959 | 180 |
| A02639 | A08992 | 274 | A02639 | A09101 | 286 |
| A02639 | A09124 | 156 | A02639 | A09127 | 213 |
| A02639 | A09191 | 330 | A02639 | A09347 | 263 |
| A02639 | A09408 | 303 | A02639 | A09442 | 199 |
| A02639 | A09509 | 301 | A02639 | A09548 | 347 |
| A02639 | A09831 | 232 | A02639 | A09930 | 303 |
| A02639 | A09974 | 274 | A02639 | A09988 | 371 |
| A02639 | A10049 | 188 | A02639 | A10197 | 190 |
| A02639 | A10215 | 213 | A02639 | A10244 | 303 |
| A02639 | A10542 | 238 | A02639 | A10729 | 172 |
| A02639 | A10734 | 196 | A02639 | A10974 | 303 |
| A02639 | A11348 | 263 | A02639 | A11413 | 210 |
| A02639 | A11683 | 213 | A02639 | A11759 | 313 |
| A02639 | A11849 | 254 | A02639 | A11867 | 254 |
| A02639 | A11881 | 246 | A02639 | A11895 | 286 |
| A02639 | A11902 | 204 | A02639 | A11910 | 330 |
| A02639 | A11993 | 228 | A02639 | A12197 | 274 |
| A02639 | A12361 | 180 | A02639 | A12510 | 330 |
| A02639 | A12809 | 263 | A02639 | A12913 | 286 |
| A02639 | A12971 | 352 | A02639 | A13822 | 326 |
| A02639 | A13851 | 232 | A02639 | A14367 | 344 |
| A02639 | A14517 | 202 | A02639 | A14610 | 213 |
| A02639 | A14642 | 296 | A02639 | A14841 | 303 |
| A02639 | A15025 | 330 | A02639 | A15370 | 177 |
| A02639 | A15718 | 252 | A02639 | A16062 | 363 |
| A02639 | A16110 | 329 | A02639 | A16300 | 151 |
| A02639 | A16442 | 286 | A02639 | A16550 | 263 |
| A02639 | A16775 | 303 | A02639 | A16987 | 165 |
| A02639 | A16990 | 303 | A02640 | A02696 | 312 |
| A02640 | A02749 | 104 | A02640 | A02752 | 378 |

|        |        |     |        |        |     |
|--------|--------|-----|--------|--------|-----|
| A02640 | A02754 | 462 | A02640 | A02768 | 240 |
| A02640 | A03223 | 152 | A02640 | A03259 | 63  |
| A02640 | A03611 | 152 | A02640 | A03783 | 296 |
| A02640 | A03854 | 267 | A02640 | A04074 | 198 |
| A02640 | A04342 | 188 | A02640 | A04442 | 224 |
| A02640 | A04444 | 356 | A02640 | A04807 | 401 |
| A02640 | A04879 | 273 | A02640 | A04907 | 310 |
| A02640 | A05067 | 369 | A02640 | A05082 | 259 |
| A02640 | A05701 | 441 | A02640 | A08911 | 236 |
| A02640 | A09124 | 468 | A02640 | A09242 | 180 |
| A02640 | A14433 | 204 | A02640 | A15293 | 388 |
| A02640 | A15639 | 205 | A02640 | A15976 | 207 |
| A02641 | A02703 | 193 | A02641 | A02737 | 407 |
| A02641 | A02787 | 335 | A02641 | A02788 | 313 |
| A02641 | A02825 | 388 | A02641 | A02864 | 193 |
| A02641 | A02874 | 234 | A02641 | A02881 | 346 |
| A02641 | A02902 | 162 | A02641 | A02903 | 351 |
| A02641 | A02904 | 484 | A02641 | A03078 | 379 |
| A02641 | A03112 | 130 | A02641 | A03220 | 488 |
| A02641 | A03803 | 285 | A02641 | A03983 | 440 |
| A02641 | A04223 | 343 | A02641 | A04346 | 475 |
| A02641 | A04956 | 363 | A02641 | A06218 | 414 |
| A02641 | A07542 | 279 | A02641 | A07746 | 180 |
| A02641 | A08710 | 452 | A02641 | A09020 | 317 |
| A02641 | A13212 | 301 | A02642 | A02706 | 322 |
| A02642 | A02788 | 447 | A02642 | A02863 | 176 |
| A02642 | A02874 | 212 | A02642 | A02910 | 151 |
| A02642 | A02945 | 160 | A02642 | A03068 | 488 |
| A02642 | A03100 | 168 | A02642 | A03157 | 196 |
| A02642 | A03178 | 154 | A02642 | A03284 | 310 |
| A02642 | A03426 | 296 | A02642 | A03708 | 224 |
| A02642 | A03803 | 278 | A02642 | A03904 | 228 |
| A02642 | A04009 | 272 | A02642 | A04212 | 156 |
| A02642 | A04278 | 187 | A02642 | A04446 | 395 |
| A02642 | A04614 | 210 | A02642 | A04699 | 196 |
| A02642 | A04706 | 314 | A02642 | A04710 | 428 |
| A02642 | A04751 | 156 | A02642 | A04972 | 266 |
| A02642 | A04980 | 428 | A02642 | A04999 | 446 |
| A02642 | A06595 | 152 | A02642 | A06625 | 288 |
| A02642 | A07175 | 256 | A02642 | A07295 | 324 |
| A02642 | A07311 | 899 | A02642 | A07384 | 230 |
| A02642 | A09014 | 344 | A02642 | A09123 | 243 |
| A02642 | A10813 | 223 | A02642 | A13593 | 228 |
| A02642 | A15277 | 188 | A02642 | A15611 | 160 |
| A02642 | A15838 | 296 | A02642 | A16112 | 296 |
| A02643 | A02656 | 463 | A02643 | A02659 | 447 |

|        |        |     |        |        |     |
|--------|--------|-----|--------|--------|-----|
| A02643 | A02896 | 409 | A02643 | A03610 | 379 |
| A02643 | A03995 | 469 | A02643 | A04244 | 395 |
| A02643 | A05985 | 340 | A02643 | A07161 | 441 |
| A02643 | A15394 | 361 | A02644 | A02667 | 205 |
| A02644 | A02668 | 481 | A02644 | A02756 | 488 |
| A02644 | A02759 | 366 | A02644 | A02771 | 201 |
| A02644 | A02772 | 302 | A02644 | A03099 | 488 |
| A02644 | A03315 | 288 | A02644 | A03408 | 352 |
| A02644 | A03906 | 221 | A02644 | A03915 | 345 |
| A02644 | A03919 | 399 | A02644 | A03968 | 313 |
| A02644 | A03976 | 180 | A02644 | A04048 | 230 |
| A02644 | A04163 | 457 | A02644 | A04256 | 238 |
| A02644 | A04326 | 348 | A02644 | A04482 | 335 |
| A02644 | A04647 | 302 | A02644 | A04975 | 327 |
| A02644 | A04981 | 307 | A02644 | A05450 | 260 |
| A02644 | A06113 | 377 | A02644 | A07143 | 420 |
| A02644 | A07491 | 236 | A02644 | A09217 | 369 |
| A02644 | A10044 | 363 | A02644 | A10045 | 363 |
| A02644 | A10046 | 440 | A02644 | A10287 | 385 |
| A02644 | A10925 | 385 | A02644 | A11123 | 318 |
| A02644 | A11313 | 339 | A02644 | A12927 | 260 |
| A02644 | A14608 | 369 | A02644 | A16087 | 224 |
| A02644 | A16636 | 467 | A02645 | A02662 | 430 |
| A02645 | A02769 | 396 | A02645 | A02808 | 382 |
| A02645 | A02843 | 456 | A02645 | A03177 | 358 |
| A02645 | A03204 | 375 | A02645 | A03224 | 364 |
| A02645 | A03259 | 179 | A02645 | A03846 | 324 |
| A02645 | A04528 | 430 | A02645 | A04536 | 310 |
| A02645 | A04589 | 335 | A02645 | A05038 | 409 |
| A02645 | A06055 | 363 | A02645 | A07157 | 450 |
| A02645 | A07164 | 329 | A02645 | A07166 | 424 |
| A02645 | A09046 | 394 | A02645 | A14372 | 335 |
| A02645 | A15395 | 338 | A02645 | A15955 | 441 |
| A02646 | A02798 | 232 | A02646 | A02842 | 241 |
| A02646 | A03244 | 469 | A02646 | A03256 | 273 |
| A02646 | A03278 | 456 | A02646 | A03661 | 204 |
| A02646 | A05153 | 208 | A02646 | A05278 | 221 |
| A02646 | A05416 | 170 | A02646 | A05634 | 351 |
| A02646 | A06682 | 401 | A02646 | A10557 | 324 |
| A02646 | A10625 | 368 | A02646 | A16099 | 322 |
| A02647 | A02902 | 246 | A02647 | A03401 | 210 |
| A02647 | A05617 | 273 | A02647 | A07815 | 297 |
| A02647 | A08910 | 235 | A02647 | A10148 | 318 |
| A02647 | A10289 | 396 | A02647 | A10293 | 411 |
| A02647 | A10334 | 427 | A02647 | A11921 | 351 |
| A02648 | A02654 | 433 | A02648 | A02859 | 188 |

|        |        |     |        |        |     |
|--------|--------|-----|--------|--------|-----|
| A02648 | A03248 | 445 | A02648 | A03249 | 445 |
| A02648 | A03259 | 195 | A02648 | A03316 | 457 |
| A02648 | A04130 | 353 | A02648 | A05679 | 339 |
| A02648 | A06415 | 285 | A02648 | A07152 | 334 |
| A02648 | A14374 | 413 | A02648 | A15517 | 425 |
| A02648 | A16011 | 438 | A02649 | A02802 | 317 |
| A02649 | A02816 | 358 | A02649 | A02847 | 303 |
| A02649 | A03034 | 267 | A02649 | A03036 | 409 |
| A02649 | A03144 | 377 | A02649 | A03247 | 423 |
| A02649 | A03251 | 419 | A02649 | A03254 | 386 |
| A02649 | A03379 | 201 | A02649 | A04327 | 281 |
| A02649 | A06510 | 377 | A02649 | A06903 | 335 |
| A02649 | A07175 | 339 | A02649 | A07294 | 357 |
| A02649 | A07373 | 335 | A02649 | A14490 | 241 |
| A02649 | A15417 | 347 | A02649 | A15419 | 236 |
| A02650 | A02942 | 346 | A02650 | A02968 | 391 |
| A02651 | A02846 | 243 | A02651 | A03271 | 144 |
| A02651 | A03625 | 151 | A02651 | A03686 | 101 |
| A02651 | A03851 | 160 | A02651 | A04615 | 312 |
| A02651 | A04756 | 297 | A02651 | A04877 | 356 |
| A02651 | A04890 | 398 | A02651 | A05227 | 307 |
| A02651 | A05313 | 268 | A02651 | A05446 | 257 |
| A02651 | A05568 | 265 | A02651 | A06637 | 296 |
| A02651 | A06919 | 281 | A02651 | A07126 | 291 |
| A02651 | A07154 | 303 | A02651 | A07207 | 99  |
| A02651 | A08834 | 172 | A02651 | A09410 | 346 |
| A02651 | A09744 | 238 | A02651 | A09857 | 246 |
| A02651 | A10601 | 167 | A02651 | A10960 | 263 |
| A02651 | A11617 | 168 | A02651 | A13824 | 85  |
| A02651 | A14135 | 263 | A02651 | A14208 | 449 |
| A02651 | A14244 | 378 | A02651 | A14367 | 224 |
| A02651 | A14431 | 452 | A02651 | A15314 | 407 |
| A02651 | A15399 | 252 | A02651 | A15482 | 286 |
| A02651 | A15620 | 324 | A02651 | A15976 | 249 |
| A02652 | A03432 | 401 | A02653 | A02654 | 451 |
| A02653 | A02655 | 306 | A02653 | A02874 | 183 |
| A02653 | A03019 | 162 | A02653 | A03204 | 430 |
| A02653 | A03804 | 390 | A02653 | A04018 | 378 |
| A02653 | A04410 | 288 | A02653 | A04522 | 399 |
| A02653 | A05577 | 357 | A02653 | A05767 | 210 |
| A02653 | A06415 | 226 | A02653 | A07961 | 302 |
| A02653 | A14374 | 380 | A02653 | A14391 | 384 |
| A02653 | A14439 | 422 | A02653 | A15290 | 377 |
| A02654 | A02655 | 491 | A02654 | A02659 | 358 |
| A02654 | A02727 | 457 | A02654 | A02745 | 174 |
| A02654 | A02787 | 121 | A02654 | A02808 | 235 |

|        |        |     |        |        |     |
|--------|--------|-----|--------|--------|-----|
| A02654 | A02843 | 286 | A02654 | A02851 | 265 |
| A02654 | A02859 | 271 | A02654 | A02896 | 105 |
| A02654 | A02945 | 296 | A02654 | A02986 | 257 |
| A02654 | A03006 | 445 | A02654 | A03045 | 385 |
| A02654 | A03157 | 302 | A02654 | A03165 | 263 |
| A02654 | A03224 | 201 | A02654 | A03248 | 384 |
| A02654 | A03249 | 384 | A02654 | A03253 | 63  |
| A02654 | A03259 | 386 | A02654 | A03316 | 490 |
| A02654 | A03318 | 384 | A02654 | A03610 | 216 |
| A02654 | A03682 | 201 | A02654 | A03788 | 401 |
| A02654 | A03804 | 488 | A02654 | A03817 | 451 |
| A02654 | A03873 | 319 | A02654 | A03900 | 254 |
| A02654 | A03979 | 316 | A02654 | A04018 | 274 |
| A02654 | A04040 | 378 | A02654 | A04110 | 215 |
| A02654 | A04130 | 468 | A02654 | A04176 | 257 |
| A02654 | A04217 | 441 | A02654 | A04244 | 252 |
| A02654 | A04361 | 165 | A02654 | A04501 | 345 |
| A02654 | A04589 | 152 | A02654 | A04755 | 281 |
| A02654 | A04800 | 286 | A02654 | A05155 | 165 |
| A02654 | A05349 | 219 | A02654 | A05483 | 353 |
| A02654 | A05517 | 372 | A02654 | A05577 | 474 |
| A02654 | A05679 | 486 | A02654 | A06054 | 205 |
| A02654 | A06136 | 384 | A02654 | A06344 | 265 |
| A02654 | A06414 | 374 | A02654 | A06415 | 490 |
| A02654 | A06441 | 345 | A02654 | A06604 | 288 |
| A02654 | A06747 | 195 | A02654 | A06899 | 486 |
| A02654 | A07135 | 254 | A02654 | A07138 | 262 |
| A02654 | A07152 | 443 | A02654 | A07157 | 399 |
| A02654 | A07161 | 404 | A02654 | A07166 | 427 |
| A02654 | A07205 | 199 | A02654 | A07718 | 168 |
| A02654 | A07807 | 321 | A02654 | A07946 | 366 |
| A02654 | A08634 | 345 | A02654 | A08693 | 199 |
| A02654 | A10148 | 163 | A02654 | A10640 | 477 |
| A02654 | A10796 | 279 | A02654 | A11488 | 353 |
| A02654 | A11495 | 384 | A02654 | A12009 | 240 |
| A02654 | A13821 | 286 | A02654 | A13872 | 210 |
| A02654 | A13903 | 201 | A02654 | A14071 | 344 |
| A02654 | A14125 | 307 | A02654 | A14199 | 460 |
| A02654 | A14366 | 480 | A02654 | A14372 | 285 |
| A02654 | A14374 | 491 | A02654 | A14391 | 491 |
| A02654 | A14439 | 491 | A02654 | A14554 | 452 |
| A02654 | A14598 | 252 | A02654 | A14599 | 486 |
| A02654 | A14603 | 316 | A02654 | A14925 | 157 |
| A02654 | A15285 | 439 | A02654 | A15290 | 462 |
| A02654 | A15394 | 435 | A02654 | A15408 | 241 |
| A02654 | A15425 | 345 | A02654 | A15427 | 215 |

|        |        |     |        |        |     |
|--------|--------|-----|--------|--------|-----|
| A02654 | A15516 | 441 | A02654 | A15517 | 330 |
| A02654 | A15642 | 185 | A02654 | A15795 | 433 |
| A02654 | A15983 | 366 | A02654 | A15992 | 168 |
| A02654 | A16011 | 366 | A02654 | A16031 | 420 |
| A02655 | A02673 | 279 | A02655 | A02727 | 241 |
| A02655 | A02769 | 260 | A02655 | A02832 | 223 |
| A02655 | A02863 | 170 | A02655 | A02873 | 269 |
| A02655 | A02875 | 107 | A02655 | A02917 | 174 |
| A02655 | A02932 | 326 | A02655 | A02945 | 286 |
| A02655 | A02962 | 230 | A02655 | A03006 | 196 |
| A02655 | A03045 | 380 | A02655 | A03194 | 362 |
| A02655 | A03223 | 193 | A02655 | A03239 | 291 |
| A02655 | A03263 | 160 | A02655 | A03316 | 480 |
| A02655 | A03610 | 208 | A02655 | A03788 | 330 |
| A02655 | A03804 | 445 | A02655 | A03974 | 162 |
| A02655 | A04018 | 267 | A02655 | A04040 | 252 |
| A02655 | A04076 | 165 | A02655 | A04130 | 452 |
| A02655 | A04176 | 249 | A02655 | A04211 | 151 |
| A02655 | A04216 | 265 | A02655 | A04217 | 438 |
| A02655 | A04248 | 182 | A02655 | A04263 | 165 |
| A02655 | A04826 | 340 | A02655 | A05261 | 326 |
| A02655 | A05517 | 367 | A02655 | A05522 | 362 |
| A02655 | A05577 | 483 | A02655 | A05597 | 227 |
| A02655 | A05679 | 480 | A02655 | A05944 | 160 |
| A02655 | A05985 | 265 | A02655 | A06015 | 398 |
| A02655 | A06047 | 380 | A02655 | A06055 | 324 |
| A02655 | A06344 | 257 | A02655 | A06414 | 369 |
| A02655 | A06415 | 491 | A02655 | A06604 | 393 |
| A02655 | A06747 | 398 | A02655 | A06899 | 435 |
| A02655 | A07145 | 157 | A02655 | A07152 | 486 |
| A02655 | A07173 | 277 | A02655 | A07461 | 173 |
| A02655 | A07462 | 362 | A02655 | A09745 | 162 |
| A02655 | A10131 | 230 | A02655 | A10319 | 156 |
| A02655 | A10556 | 263 | A02655 | A10605 | 371 |
| A02655 | A10703 | 227 | A02655 | A10796 | 273 |
| A02655 | A11797 | 319 | A02655 | A11994 | 423 |
| A02655 | A12809 | 332 | A02655 | A13131 | 283 |
| A02655 | A13338 | 193 | A02655 | A13903 | 193 |
| A02655 | A14071 | 454 | A02655 | A14125 | 430 |
| A02655 | A14146 | 228 | A02655 | A14199 | 190 |
| A02655 | A14366 | 420 | A02655 | A14368 | 232 |
| A02655 | A14372 | 368 | A02655 | A14374 | 491 |
| A02655 | A14391 | 491 | A02655 | A14392 | 350 |
| A02655 | A14432 | 265 | A02655 | A14439 | 477 |
| A02655 | A14598 | 245 | A02655 | A14599 | 473 |
| A02655 | A14611 | 210 | A02655 | A15290 | 265 |

|        |        |     |        |        |     |
|--------|--------|-----|--------|--------|-----|
| A02655 | A15394 | 171 | A02655 | A15425 | 467 |
| A02655 | A15426 | 430 | A02655 | A15427 | 207 |
| A02655 | A15518 | 273 | A02655 | A15605 | 188 |
| A02655 | A15607 | 252 | A02655 | A15642 | 177 |
| A02655 | A15789 | 407 | A02655 | A15795 | 384 |
| A02655 | A17207 | 198 | A02656 | A02659 | 438 |
| A02656 | A02800 | 382 | A02656 | A02843 | 393 |
| A02656 | A02896 | 388 | A02656 | A03209 | 299 |
| A02656 | A03995 | 477 | A02656 | A04519 | 345 |
| A02656 | A04690 | 424 | A02656 | A07157 | 394 |
| A02656 | A07161 | 428 | A02656 | A07166 | 414 |
| A02656 | A11487 | 184 | A02656 | A13860 | 270 |
| A02656 | A15312 | 229 | A02657 | A02659 | 430 |
| A02657 | A02681 | 443 | A02657 | A02803 | 229 |
| A02657 | A02851 | 466 | A02657 | A02863 | 312 |
| A02657 | A02917 | 316 | A02657 | A02931 | 274 |
| A02657 | A02977 | 335 | A02657 | A03157 | 230 |
| A02657 | A03177 | 321 | A02657 | A03259 | 246 |
| A02657 | A03817 | 172 | A02657 | A04248 | 416 |
| A02657 | A04426 | 430 | A02657 | A04564 | 401 |
| A02657 | A04879 | 258 | A02657 | A04908 | 272 |
| A02657 | A05577 | 219 | A02657 | A05944 | 305 |
| A02657 | A06055 | 327 | A02657 | A06404 | 375 |
| A02657 | A06422 | 346 | A02657 | A07157 | 258 |
| A02657 | A07161 | 418 | A02657 | A07164 | 285 |
| A02657 | A07166 | 296 | A02657 | A14236 | 286 |
| A02657 | A14373 | 379 | A02657 | A14391 | 378 |
| A02657 | A15962 | 308 | A02658 | A02734 | 360 |
| A02658 | A02749 | 238 | A02658 | A03611 | 321 |
| A02658 | A03817 | 193 | A02658 | A03843 | 283 |
| A02658 | A04017 | 401 | A02659 | A02681 | 328 |
| A02659 | A02751 | 290 | A02659 | A02764 | 333 |
| A02659 | A02769 | 454 | A02659 | A02800 | 318 |
| A02659 | A02808 | 400 | A02659 | A02843 | 335 |
| A02659 | A02851 | 491 | A02659 | A02863 | 241 |
| A02659 | A02887 | 140 | A02659 | A02896 | 468 |
| A02659 | A02917 | 246 | A02659 | A02936 | 310 |
| A02659 | A02977 | 272 | A02659 | A03019 | 180 |
| A02659 | A03259 | 441 | A02659 | A03271 | 266 |
| A02659 | A03280 | 396 | A02659 | A03610 | 277 |
| A02659 | A03782 | 216 | A02659 | A03817 | 380 |
| A02659 | A03995 | 447 | A02659 | A04110 | 276 |
| A02659 | A04244 | 307 | A02659 | A04248 | 430 |
| A02659 | A04263 | 238 | A02659 | A04272 | 316 |
| A02659 | A04564 | 364 | A02659 | A04589 | 217 |
| A02659 | A04756 | 291 | A02659 | A04854 | 380 |

|        |        |     |        |        |     |
|--------|--------|-----|--------|--------|-----|
| A02659 | A04860 | 369 | A02659 | A04880 | 196 |
| A02659 | A05315 | 358 | A02659 | A05350 | 364 |
| A02659 | A05475 | 452 | A02659 | A05944 | 358 |
| A02659 | A05985 | 208 | A02659 | A06054 | 267 |
| A02659 | A06055 | 262 | A02659 | A06095 | 328 |
| A02659 | A06404 | 329 | A02659 | A06415 | 358 |
| A02659 | A06818 | 318 | A02659 | A07134 | 386 |
| A02659 | A07135 | 339 | A02659 | A07138 | 314 |
| A02659 | A07148 | 452 | A02659 | A07150 | 386 |
| A02659 | A07152 | 332 | A02659 | A07157 | 486 |
| A02659 | A07161 | 491 | A02659 | A07166 | 490 |
| A02659 | A08714 | 267 | A02659 | A13872 | 272 |
| A02659 | A14146 | 293 | A02659 | A14236 | 210 |
| A02659 | A14373 | 333 | A02659 | A14374 | 307 |
| A02659 | A14439 | 379 | A02659 | A14442 | 291 |
| A02659 | A15394 | 243 | A02659 | A15395 | 221 |
| A02659 | A15603 | 288 | A02659 | A15795 | 238 |
| A02659 | A15806 | 319 | A02659 | A15832 | 369 |
| A02659 | A15962 | 424 | A02660 | A03051 | 229 |
| A02660 | A03818 | 230 | A02660 | A04147 | 272 |
| A02660 | A05377 | 296 | A02660 | A05536 | 332 |
| A02660 | A06578 | 363 | A02660 | A09882 | 221 |
| A02661 | A02730 | 446 | A02661 | A02741 | 353 |
| A02661 | A02751 | 324 | A02661 | A02788 | 337 |
| A02661 | A02803 | 193 | A02661 | A02841 | 345 |
| A02661 | A02854 | 475 | A02661 | A02859 | 294 |
| A02661 | A02863 | 283 | A02661 | A02886 | 335 |
| A02661 | A02917 | 286 | A02661 | A02951 | 218 |
| A02661 | A03195 | 305 | A02661 | A03204 | 318 |
| A02661 | A03271 | 180 | A02661 | A03275 | 390 |
| A02661 | A03807 | 373 | A02661 | A03948 | 204 |
| A02661 | A03966 | 285 | A02661 | A04040 | 344 |
| A02661 | A04138 | 424 | A02661 | A04201 | 356 |
| A02661 | A04238 | 369 | A02661 | A04240 | 398 |
| A02661 | A04263 | 484 | A02661 | A04536 | 226 |
| A02661 | A04961 | 353 | A02661 | A05113 | 288 |
| A02661 | A05349 | 208 | A02661 | A05985 | 252 |
| A02661 | A07146 | 474 | A02661 | A07154 | 330 |
| A02661 | A07157 | 221 | A02661 | A07158 | 226 |
| A02661 | A07948 | 411 | A02661 | A13181 | 273 |
| A02661 | A13872 | 308 | A02661 | A15498 | 210 |
| A02662 | A02808 | 388 | A02662 | A02843 | 408 |
| A02662 | A03204 | 383 | A02662 | A03259 | 195 |
| A02662 | A03846 | 335 | A02662 | A04059 | 401 |
| A02662 | A04245 | 425 | A02662 | A04528 | 434 |
| A02662 | A04536 | 322 | A02662 | A04589 | 345 |



|        |        |     |        |        |     |
|--------|--------|-----|--------|--------|-----|
| A02662 | A05038 | 414 | A02662 | A06055 | 371 |
| A02662 | A07157 | 319 | A02662 | A07164 | 340 |
| A02662 | A07166 | 348 | A02662 | A09046 | 399 |
| A02663 | A02668 | 232 | A02663 | A02755 | 480 |
| A02663 | A03315 | 351 | A02663 | A04369 | 401 |
| A02663 | A04436 | 452 | A02663 | A04509 | 383 |
| A02663 | A04516 | 363 | A02663 | A04553 | 238 |
| A02663 | A04555 | 443 | A02663 | A04792 | 398 |
| A02663 | A07187 | 323 | A02663 | A08719 | 417 |
| A02664 | A02669 | 441 | A02664 | A02785 | 232 |
| A02664 | A02878 | 360 | A02664 | A03975 | 374 |
| A02664 | A04260 | 296 | A02664 | A04511 | 423 |
| A02664 | A05617 | 257 | A02664 | A07165 | 330 |
| A02664 | A08553 | 213 | A02665 | A02774 | 404 |
| A02665 | A02812 | 337 | A02666 | A02671 | 481 |
| A02666 | A02672 | 475 | A02666 | A02749 | 157 |
| A02666 | A02758 | 468 | A02666 | A02760 | 313 |
| A02666 | A02966 | 311 | A02666 | A03054 | 285 |
| A02666 | A03115 | 227 | A02666 | A03513 | 218 |
| A02666 | A03583 | 353 | A02666 | A03609 | 218 |
| A02666 | A03882 | 232 | A02666 | A03940 | 375 |
| A02666 | A04001 | 432 | A02666 | A04061 | 307 |
| A02666 | A04229 | 187 | A02666 | A04556 | 329 |
| A02666 | A05415 | 213 | A02666 | A05533 | 270 |
| A02666 | A05883 | 454 | A02666 | A05914 | 180 |
| A02666 | A06860 | 269 | A02666 | A06949 | 408 |
| A02666 | A07019 | 296 | A02666 | A07520 | 213 |
| A02666 | A08700 | 324 | A02666 | A09126 | 296 |
| A02666 | A10337 | 260 | A02666 | A10942 | 375 |
| A02666 | A13413 | 372 | A02667 | A02759 | 196 |
| A02667 | A02785 | 188 | A02667 | A03099 | 313 |
| A02667 | A03186 | 93  | A02667 | A03314 | 374 |
| A02667 | A03478 | 154 | A02667 | A03578 | 162 |
| A02667 | A03584 | 469 | A02667 | A03919 | 252 |
| A02667 | A03935 | 305 | A02667 | A03960 | 283 |
| A02667 | A03966 | 177 | A02667 | A04002 | 470 |
| A02667 | A04086 | 224 | A02667 | A04162 | 162 |
| A02667 | A04256 | 193 | A02667 | A04368 | 286 |
| A02667 | A04437 | 490 | A02667 | A04449 | 232 |
| A02667 | A04491 | 361 | A02667 | A04504 | 318 |
| A02667 | A04551 | 328 | A02667 | A04596 | 328 |
| A02667 | A04633 | 245 | A02667 | A04813 | 245 |
| A02667 | A05485 | 308 | A02667 | A05533 | 183 |
| A02667 | A05687 | 352 | A02667 | A05812 | 174 |
| A02667 | A06011 | 174 | A02667 | A06263 | 208 |
| A02667 | A06757 | 382 | A02667 | A06970 | 374 |

|        |        |     |        |        |     |
|--------|--------|-----|--------|--------|-----|
| A02667 | A07438 | 379 | A02667 | A07479 | 201 |
| A02667 | A07912 | 308 | A02667 | A08732 | 899 |
| A02667 | A09272 | 384 | A02667 | A09750 | 176 |
| A02667 | A10694 | 266 | A02667 | A11205 | 270 |
| A02667 | A11313 | 160 | A02667 | A12363 | 291 |
| A02667 | A14215 | 185 | A02667 | A14247 | 183 |
| A02667 | A15614 | 406 | A02668 | A02669 | 201 |
| A02668 | A02696 | 196 | A02668 | A02729 | 170 |
| A02668 | A02741 | 152 | A02668 | A02746 | 195 |
| A02668 | A02756 | 491 | A02668 | A02771 | 491 |
| A02668 | A02785 | 486 | A02668 | A02787 | 156 |
| A02668 | A02837 | 174 | A02668 | A02859 | 480 |
| A02668 | A02863 | 235 | A02668 | A02868 | 167 |
| A02668 | A02874 | 477 | A02668 | A02905 | 180 |
| A02668 | A02922 | 329 | A02668 | A02944 | 286 |
| A02668 | A02945 | 215 | A02668 | A02951 | 327 |
| A02668 | A02982 | 163 | A02668 | A03053 | 477 |
| A02668 | A03080 | 318 | A02668 | A03094 | 188 |
| A02668 | A03126 | 227 | A02668 | A03144 | 205 |
| A02668 | A03184 | 201 | A02668 | A03189 | 281 |
| A02668 | A03268 | 232 | A02668 | A03275 | 413 |
| A02668 | A03315 | 184 | A02668 | A03323 | 281 |
| A02668 | A03324 | 168 | A02668 | A03414 | 200 |
| A02668 | A03447 | 179 | A02668 | A03515 | 151 |
| A02668 | A03540 | 243 | A02668 | A03627 | 243 |
| A02668 | A03639 | 308 | A02668 | A03653 | 405 |
| A02668 | A03664 | 293 | A02668 | A03773 | 210 |
| A02668 | A03904 | 382 | A02668 | A03914 | 441 |
| A02668 | A03915 | 379 | A02668 | A03918 | 204 |
| A02668 | A03927 | 193 | A02668 | A03934 | 260 |
| A02668 | A03976 | 285 | A02668 | A03991 | 267 |
| A02668 | A04000 | 329 | A02668 | A04010 | 313 |
| A02668 | A04023 | 156 | A02668 | A04051 | 436 |
| A02668 | A04142 | 372 | A02668 | A04225 | 260 |
| A02668 | A04237 | 939 | A02668 | A04238 | 238 |
| A02668 | A04391 | 226 | A02668 | A04462 | 391 |
| A02668 | A04472 | 260 | A02668 | A04473 | 201 |
| A02668 | A04481 | 483 | A02668 | A04482 | 246 |
| A02668 | A04509 | 456 | A02668 | A04516 | 208 |
| A02668 | A04536 | 152 | A02668 | A04607 | 152 |
| A02668 | A04652 | 416 | A02668 | A04749 | 226 |
| A02668 | A04770 | 152 | A02668 | A04865 | 165 |
| A02668 | A05113 | 243 | A02668 | A05126 | 267 |
| A02668 | A05309 | 486 | A02668 | A05349 | 413 |
| A02668 | A05414 | 899 | A02668 | A05516 | 424 |
| A02668 | A05855 | 465 | A02668 | A05901 | 267 |

|        |        |     |        |        |     |
|--------|--------|-----|--------|--------|-----|
| A02668 | A05934 | 386 | A02668 | A06095 | 215 |
| A02668 | A06625 | 229 | A02668 | A06843 | 235 |
| A02668 | A07141 | 427 | A02668 | A07177 | 246 |
| A02668 | A07200 | 361 | A02668 | A07221 | 213 |
| A02668 | A07479 | 268 | A02668 | A08627 | 226 |
| A02668 | A08755 | 288 | A02668 | A09051 | 281 |
| A02668 | A09395 | 179 | A02668 | A09491 | 184 |
| A02668 | A09540 | 223 | A02668 | A11060 | 326 |
| A02668 | A11064 | 468 | A02668 | A11123 | 223 |
| A02668 | A11313 | 321 | A02668 | A12371 | 191 |
| A02668 | A12927 | 296 | A02668 | A13225 | 899 |
| A02668 | A13886 | 330 | A02668 | A14176 | 241 |
| A02668 | A14385 | 260 | A02668 | A14405 | 221 |
| A02668 | A14430 | 198 | A02668 | A14440 | 196 |
| A02668 | A14664 | 174 | A02668 | A15368 | 246 |
| A02668 | A15403 | 215 | A02668 | A15639 | 332 |
| A02668 | A16636 | 491 | A02669 | A02785 | 395 |
| A02669 | A02851 | 341 | A02669 | A02875 | 213 |
| A02669 | A02878 | 185 | A02669 | A02927 | 297 |
| A02669 | A03050 | 132 | A02669 | A03238 | 249 |
| A02669 | A03417 | 276 | A02669 | A03540 | 367 |
| A02669 | A03577 | 369 | A02669 | A03975 | 347 |
| A02669 | A04048 | 283 | A02669 | A04271 | 266 |
| A02669 | A04369 | 270 | A02669 | A04439 | 383 |
| A02669 | A04481 | 371 | A02669 | A04509 | 369 |
| A02669 | A04633 | 330 | A02669 | A04912 | 385 |
| A02669 | A04968 | 369 | A02669 | A05079 | 369 |
| A02669 | A05505 | 408 | A02669 | A05659 | 291 |
| A02669 | A06729 | 266 | A02669 | A07165 | 279 |
| A02669 | A07381 | 218 | A02669 | A09390 | 339 |
| A02669 | A13419 | 395 | A02669 | A16636 | 260 |
| A02669 | A17078 | 177 | A02670 | A02699 | 307 |
| A02670 | A02749 | 302 | A02670 | A02789 | 489 |
| A02670 | A02816 | 226 | A02670 | A02837 | 247 |
| A02670 | A03004 | 326 | A02670 | A03095 | 257 |
| A02670 | A03201 | 299 | A02670 | A03336 | 398 |
| A02670 | A03422 | 177 | A02670 | A03486 | 307 |
| A02670 | A03788 | 344 | A02670 | A03842 | 378 |
| A02670 | A04457 | 451 | A02670 | A04536 | 213 |
| A02670 | A04744 | 374 | A02670 | A05176 | 463 |
| A02670 | A05398 | 314 | A02670 | A05846 | 451 |
| A02670 | A05985 | 241 | A02670 | A08692 | 311 |
| A02670 | A09509 | 219 | A02670 | A10018 | 262 |
| A02670 | A10064 | 389 | A02670 | A10320 | 249 |
| A02670 | A13864 | 357 | A02670 | A13872 | 299 |
| A02670 | A14129 | 247 | A02670 | A16877 | 316 |

|        |        |     |        |        |     |
|--------|--------|-----|--------|--------|-----|
| A02671 | A02672 | 486 | A02671 | A02673 | 127 |
| A02671 | A02758 | 483 | A02671 | A02760 | 219 |
| A02671 | A02761 | 66  | A02671 | A02785 | 63  |
| A02671 | A02943 | 184 | A02671 | A03050 | 63  |
| A02671 | A03085 | 232 | A02671 | A03110 | 187 |
| A02671 | A03120 | 335 | A02671 | A03177 | 152 |
| A02671 | A03178 | 199 | A02671 | A03202 | 202 |
| A02671 | A03230 | 317 | A02671 | A03264 | 118 |
| A02671 | A03537 | 188 | A02671 | A03576 | 177 |
| A02671 | A03583 | 294 | A02671 | A03599 | 322 |
| A02671 | A03752 | 286 | A02671 | A03847 | 232 |
| A02671 | A03870 | 202 | A02671 | A03892 | 473 |
| A02671 | A03917 | 251 | A02671 | A03992 | 485 |
| A02671 | A04001 | 291 | A02671 | A04020 | 245 |
| A02671 | A04087 | 485 | A02671 | A04123 | 202 |
| A02671 | A04231 | 350 | A02671 | A04366 | 329 |
| A02671 | A04424 | 202 | A02671 | A04468 | 168 |
| A02671 | A04556 | 439 | A02671 | A04560 | 162 |
| A02671 | A04634 | 247 | A02671 | A05036 | 184 |
| A02671 | A05129 | 247 | A02671 | A05142 | 184 |
| A02671 | A05266 | 210 | A02671 | A05533 | 330 |
| A02671 | A05593 | 154 | A02671 | A05617 | 409 |
| A02671 | A05761 | 465 | A02671 | A05918 | 162 |
| A02671 | A06046 | 217 | A02671 | A06090 | 202 |
| A02671 | A06874 | 157 | A02671 | A07604 | 193 |
| A02671 | A07638 | 299 | A02671 | A08461 | 156 |
| A02671 | A08514 | 217 | A02671 | A08571 | 210 |
| A02671 | A08998 | 162 | A02671 | A09073 | 477 |
| A02671 | A09444 | 299 | A02671 | A09479 | 473 |
| A02671 | A09507 | 401 | A02671 | A09556 | 223 |
| A02671 | A09788 | 188 | A02671 | A09882 | 339 |
| A02671 | A10033 | 247 | A02671 | A10141 | 221 |
| A02671 | A10208 | 467 | A02671 | A10476 | 369 |
| A02671 | A10534 | 152 | A02671 | A11304 | 340 |
| A02671 | A11584 | 154 | A02671 | A11938 | 468 |
| A02671 | A13346 | 196 | A02671 | A13882 | 232 |
| A02671 | A14210 | 388 | A02671 | A14220 | 338 |
| A02671 | A14371 | 490 | A02671 | A14407 | 232 |
| A02671 | A14536 | 157 | A02671 | A14826 | 180 |
| A02671 | A15315 | 348 | A02671 | A15327 | 196 |
| A02671 | A15347 | 162 | A02671 | A15366 | 372 |
| A02671 | A16328 | 486 | A02672 | A02673 | 245 |
| A02672 | A02756 | 93  | A02672 | A02758 | 462 |
| A02672 | A02760 | 491 | A02672 | A02761 | 377 |
| A02672 | A02777 | 236 | A02672 | A02819 | 238 |
| A02672 | A02854 | 154 | A02672 | A02860 | 180 |

|        |        |     |        |        |     |
|--------|--------|-----|--------|--------|-----|
| A02672 | A02958 | 249 | A02672 | A03115 | 334 |
| A02672 | A03178 | 254 | A02672 | A03181 | 274 |
| A02672 | A03202 | 302 | A02672 | A03305 | 191 |
| A02672 | A03434 | 278 | A02672 | A03583 | 269 |
| A02672 | A03639 | 350 | A02672 | A03642 | 324 |
| A02672 | A03663 | 180 | A02672 | A03976 | 229 |
| A02672 | A04001 | 266 | A02672 | A04059 | 240 |
| A02672 | A04067 | 297 | A02672 | A04087 | 235 |
| A02672 | A04172 | 450 | A02672 | A04224 | 335 |
| A02672 | A04236 | 401 | A02672 | A04256 | 165 |
| A02672 | A04349 | 274 | A02672 | A04366 | 217 |
| A02672 | A04384 | 283 | A02672 | A04391 | 260 |
| A02672 | A04423 | 234 | A02672 | A04424 | 196 |
| A02672 | A04429 | 249 | A02672 | A04438 | 317 |
| A02672 | A04444 | 168 | A02672 | A04491 | 210 |
| A02672 | A04503 | 369 | A02672 | A04556 | 358 |
| A02672 | A04637 | 252 | A02672 | A04853 | 191 |
| A02672 | A05183 | 276 | A02672 | A05306 | 369 |
| A02672 | A05342 | 241 | A02672 | A05467 | 223 |
| A02672 | A05533 | 156 | A02672 | A05593 | 473 |
| A02672 | A05599 | 324 | A02672 | A05693 | 240 |
| A02672 | A07019 | 188 | A02672 | A07138 | 358 |
| A02672 | A07214 | 297 | A02672 | A07501 | 185 |
| A02672 | A08700 | 353 | A02672 | A08835 | 241 |
| A02672 | A08870 | 205 | A02672 | A08981 | 152 |
| A02672 | A09524 | 283 | A02672 | A10625 | 274 |
| A02672 | A10857 | 369 | A02672 | A11651 | 183 |
| A02672 | A15277 | 160 | A02673 | A02727 | 288 |
| A02673 | A02758 | 137 | A02673 | A02761 | 491 |
| A02673 | A02815 | 249 | A02673 | A03045 | 313 |
| A02673 | A03057 | 461 | A02673 | A03076 | 490 |
| A02673 | A03077 | 193 | A02673 | A03115 | 333 |
| A02673 | A03160 | 285 | A02673 | A03178 | 172 |
| A02673 | A03186 | 165 | A02673 | A03193 | 340 |
| A02673 | A03203 | 327 | A02673 | A03223 | 416 |
| A02673 | A03292 | 458 | A02673 | A03415 | 377 |
| A02673 | A03436 | 162 | A02673 | A03459 | 307 |
| A02673 | A03609 | 236 | A02673 | A03909 | 188 |
| A02673 | A03927 | 167 | A02673 | A04075 | 159 |
| A02673 | A04202 | 216 | A02673 | A04256 | 477 |
| A02673 | A04283 | 205 | A02673 | A04389 | 441 |
| A02673 | A04424 | 461 | A02673 | A04434 | 266 |
| A02673 | A04465 | 243 | A02673 | A04520 | 334 |
| A02673 | A04746 | 152 | A02673 | A04749 | 200 |
| A02673 | A05418 | 216 | A02673 | A05705 | 230 |
| A02673 | A05801 | 257 | A02673 | A05814 | 277 |

|        |        |     |        |        |     |
|--------|--------|-----|--------|--------|-----|
| A02673 | A05834 | 257 | A02673 | A05902 | 335 |
| A02673 | A05914 | 174 | A02673 | A05958 | 286 |
| A02673 | A06135 | 221 | A02673 | A06284 | 249 |
| A02673 | A06307 | 424 | A02673 | A06333 | 404 |
| A02673 | A06517 | 382 | A02673 | A06969 | 266 |
| A02673 | A07136 | 450 | A02673 | A07339 | 219 |
| A02673 | A07489 | 290 | A02673 | A07655 | 154 |
| A02673 | A07833 | 193 | A02673 | A07878 | 384 |
| A02673 | A08319 | 184 | A02673 | A08660 | 341 |
| A02673 | A09083 | 419 | A02673 | A09132 | 307 |
| A02673 | A09375 | 210 | A02673 | A09429 | 177 |
| A02673 | A09963 | 221 | A02673 | A10057 | 188 |
| A02673 | A10072 | 461 | A02673 | A10196 | 307 |
| A02673 | A10290 | 334 | A02673 | A10541 | 334 |
| A02673 | A10858 | 277 | A02673 | A11531 | 277 |
| A02673 | A12388 | 334 | A02673 | A12410 | 334 |
| A02673 | A12797 | 334 | A02673 | A12803 | 334 |
| A02673 | A12984 | 408 | A02673 | A13500 | 177 |
| A02673 | A14366 | 440 | A02673 | A14554 | 466 |
| A02673 | A14621 | 243 | A02673 | A14634 | 217 |
| A02673 | A14860 | 477 | A02673 | A15226 | 350 |
| A02673 | A15233 | 425 | A02673 | A15240 | 257 |
| A02673 | A15242 | 334 | A02673 | A15253 | 334 |
| A02673 | A15258 | 483 | A02673 | A15260 | 277 |
| A02673 | A15272 | 347 | A02673 | A15277 | 484 |
| A02673 | A15789 | 358 | A02673 | A16036 | 277 |
| A02673 | A16140 | 334 | A02673 | A16168 | 334 |
| A02673 | A16169 | 334 | A02673 | A16172 | 334 |
| A02673 | A16175 | 334 | A02673 | A16178 | 334 |
| A02673 | A16179 | 334 | A02673 | A16184 | 334 |
| A02673 | A16185 | 334 | A02673 | A16186 | 334 |
| A02673 | A16453 | 160 | A02673 | A17132 | 187 |
| A02674 | A02788 | 246 | A02674 | A02789 | 439 |
| A02674 | A02821 | 353 | A02674 | A02963 | 402 |
| A02674 | A02984 | 281 | A02674 | A04451 | 307 |
| A02674 | A05176 | 323 | A02674 | A06854 | 455 |
| A02674 | A07422 | 177 | A02674 | A08410 | 432 |
| A02674 | A08692 | 347 | A02674 | A13864 | 384 |
| A02675 | A02743 | 165 | A02675 | A03101 | 180 |
| A02675 | A03213 | 129 | A02675 | A03656 | 241 |
| A02675 | A03695 | 281 | A02675 | A03822 | 283 |
| A02675 | A04714 | 174 | A02675 | A04939 | 183 |
| A02675 | A07073 | 299 | A02675 | A07163 | 310 |
| A02675 | A08382 | 382 | A02675 | A08848 | 318 |
| A02675 | A08872 | 491 | A02675 | A09051 | 288 |
| A02675 | A09211 | 182 | A02675 | A09396 | 216 |

|        |        |     |        |        |     |
|--------|--------|-----|--------|--------|-----|
| A02675 | A09624 | 347 | A02675 | A09644 | 177 |
| A02675 | A10805 | 270 | A02675 | A10834 | 432 |
| A02675 | A10949 | 177 | A02675 | A11109 | 260 |
| A02675 | A11205 | 416 | A02675 | A11347 | 379 |
| A02675 | A11439 | 266 | A02675 | A11549 | 296 |
| A02675 | A11577 | 218 | A02675 | A11604 | 324 |
| A02675 | A11697 | 419 | A02675 | A11808 | 224 |
| A02675 | A12251 | 201 | A02675 | A12529 | 306 |
| A02675 | A12831 | 208 | A02675 | A13003 | 180 |
| A02675 | A14450 | 241 | A02675 | A14621 | 463 |
| A02675 | A14957 | 252 | A02675 | A15415 | 180 |
| A02675 | A15934 | 157 | A02675 | A15944 | 302 |
| A02675 | A15946 | 439 | A02675 | A16067 | 466 |
| A02675 | A16285 | 217 | A02675 | A16300 | 428 |
| A02675 | A16877 | 176 | A02675 | A16906 | 318 |
| A02676 | A02737 | 238 | A02676 | A02775 | 408 |
| A02676 | A02792 | 456 | A02676 | A02842 | 377 |
| A02676 | A02877 | 273 | A02676 | A02878 | 205 |
| A02676 | A03415 | 470 | A02676 | A03654 | 299 |
| A02676 | A03977 | 356 | A02676 | A04080 | 475 |
| A02676 | A04952 | 402 | A02676 | A05185 | 339 |
| A02676 | A05868 | 339 | A02676 | A07165 | 170 |
| A02676 | A09370 | 364 | A02676 | A13589 | 229 |
| A02678 | A02696 | 199 | A02678 | A02752 | 177 |
| A02678 | A02768 | 259 | A02678 | A02770 | 321 |
| A02678 | A02864 | 291 | A02678 | A03019 | 71  |
| A02678 | A03094 | 296 | A02678 | A03243 | 213 |
| A02678 | A03254 | 361 | A02678 | A03292 | 187 |
| A02678 | A03680 | 260 | A02678 | A04297 | 346 |
| A02678 | A04451 | 217 | A02678 | A04519 | 369 |
| A02678 | A04578 | 480 | A02678 | A04965 | 196 |
| A02678 | A05111 | 480 | A02678 | A05603 | 170 |
| A02678 | A07157 | 162 | A02678 | A07311 | 154 |
| A02678 | A07835 | 246 | A02678 | A09007 | 179 |
| A02678 | A09897 | 389 | A02678 | A12543 | 199 |
| A02678 | A14198 | 360 | A02678 | A14284 | 294 |
| A02678 | A14375 | 218 | A02678 | A14433 | 224 |
| A02678 | A14438 | 305 | A02678 | A16911 | 235 |
| A02679 | A02836 | 285 | A02679 | A02841 | 352 |
| A02679 | A02859 | 246 | A02679 | A03275 | 326 |
| A02679 | A04263 | 386 | A02679 | A04567 | 404 |
| A02679 | A07146 | 416 | A02679 | A07302 | 424 |
| A02680 | A02784 | 329 | A02680 | A02864 | 274 |
| A02680 | A02972 | 351 | A02680 | A03556 | 326 |
| A02680 | A03987 | 422 | A02680 | A04867 | 270 |
| A02681 | A02853 | 391 | A02681 | A02874 | 271 |

|        |        |     |        |        |     |
|--------|--------|-----|--------|--------|-----|
| A02681 | A02896 | 216 | A02681 | A02935 | 328 |
| A02681 | A02944 | 252 | A02681 | A02969 | 318 |
| A02681 | A03019 | 121 | A02681 | A03157 | 199 |
| A02681 | A03271 | 185 | A02681 | A03275 | 177 |
| A02681 | A03699 | 322 | A02681 | A04088 | 343 |
| A02681 | A04115 | 266 | A02681 | A04519 | 477 |
| A02681 | A04564 | 388 | A02681 | A05329 | 367 |
| A02681 | A05985 | 256 | A02681 | A06344 | 350 |
| A02681 | A06422 | 324 | A02681 | A07157 | 227 |
| A02681 | A07161 | 485 | A02681 | A10740 | 351 |
| A02681 | A13826 | 154 | A02681 | A13899 | 245 |
| A02681 | A14391 | 228 | A02681 | A15394 | 396 |
| A02681 | A15395 | 268 | A02681 | A15642 | 293 |
| A02682 | A02884 | 425 | A02683 | A02689 | 369 |
| A02684 | A02685 | 364 | A02684 | A03417 | 361 |
| A02684 | A05094 | 373 | A02684 | A05260 | 363 |
| A02684 | A11983 | 174 | A02684 | A14633 | 246 |
| A02685 | A02686 | 238 | A02685 | A02737 | 266 |
| A02685 | A03057 | 159 | A02685 | A04075 | 165 |
| A02685 | A04267 | 184 | A02685 | A04652 | 224 |
| A02685 | A04742 | 343 | A02685 | A04960 | 172 |
| A02685 | A05584 | 230 | A02685 | A05591 | 176 |
| A02685 | A05701 | 183 | A02685 | A06319 | 191 |
| A02685 | A10610 | 391 | A02685 | A10943 | 329 |
| A02685 | A13941 | 249 | A02685 | A14192 | 160 |
| A02685 | A14247 | 212 | A02685 | A16400 | 221 |
| A02686 | A02687 | 486 | A02686 | A02691 | 293 |
| A02686 | A02692 | 257 | A02686 | A02696 | 407 |
| A02686 | A02697 | 217 | A02686 | A02698 | 187 |
| A02686 | A02701 | 252 | A02686 | A02751 | 279 |
| A02686 | A02811 | 281 | A02686 | A02828 | 117 |
| A02686 | A02837 | 87  | A02686 | A02869 | 217 |
| A02686 | A02875 | 296 | A02686 | A02982 | 323 |
| A02686 | A02984 | 188 | A02686 | A03097 | 302 |
| A02686 | A03167 | 182 | A02686 | A03168 | 252 |
| A02686 | A03766 | 188 | A02686 | A03803 | 246 |
| A02686 | A03810 | 440 | A02686 | A03866 | 335 |
| A02686 | A04004 | 283 | A02686 | A04028 | 159 |
| A02686 | A04105 | 405 | A02686 | A04125 | 455 |
| A02686 | A04139 | 302 | A02686 | A04267 | 218 |
| A02686 | A04279 | 246 | A02686 | A04543 | 290 |
| A02686 | A04678 | 334 | A02686 | A04742 | 363 |
| A02686 | A04805 | 294 | A02686 | A04879 | 165 |
| A02686 | A04960 | 338 | A02686 | A05106 | 226 |
| A02686 | A05235 | 340 | A02686 | A05390 | 276 |
| A02686 | A05438 | 307 | A02686 | A05603 | 173 |



|        |        |     |        |        |     |
|--------|--------|-----|--------|--------|-----|
| A02686 | A05889 | 311 | A02686 | A05891 | 213 |
| A02686 | A05899 | 363 | A02686 | A05927 | 391 |
| A02686 | A05943 | 441 | A02686 | A06278 | 363 |
| A02686 | A06298 | 243 | A02686 | A06368 | 307 |
| A02686 | A06635 | 196 | A02686 | A07129 | 377 |
| A02686 | A07165 | 219 | A02686 | A08724 | 256 |
| A02686 | A09220 | 201 | A02686 | A10741 | 391 |
| A02686 | A10742 | 329 | A02686 | A10943 | 351 |
| A02686 | A11525 | 235 | A02686 | A12420 | 358 |
| A02686 | A13667 | 435 | A02686 | A14077 | 204 |
| A02686 | A14405 | 221 | A02686 | A14533 | 380 |
| A02687 | A02690 | 259 | A02687 | A02691 | 485 |
| A02687 | A02697 | 299 | A02687 | A02700 | 286 |
| A02687 | A02701 | 486 | A02687 | A02706 | 229 |
| A02687 | A02713 | 461 | A02687 | A02752 | 185 |
| A02687 | A02777 | 210 | A02687 | A02837 | 380 |
| A02687 | A02906 | 157 | A02687 | A02939 | 172 |
| A02687 | A02964 | 172 | A02687 | A02965 | 157 |
| A02687 | A02982 | 187 | A02687 | A02988 | 63  |
| A02687 | A03039 | 210 | A02687 | A03041 | 262 |
| A02687 | A03112 | 172 | A02687 | A03186 | 273 |
| A02687 | A03244 | 210 | A02687 | A03268 | 177 |
| A02687 | A03271 | 235 | A02687 | A03321 | 254 |
| A02687 | A03338 | 378 | A02687 | A03401 | 167 |
| A02687 | A03450 | 190 | A02687 | A03643 | 160 |
| A02687 | A03760 | 182 | A02687 | A03810 | 469 |
| A02687 | A03958 | 163 | A02687 | A03964 | 418 |
| A02687 | A04004 | 340 | A02687 | A04015 | 177 |
| A02687 | A04020 | 238 | A02687 | A04035 | 480 |
| A02687 | A04037 | 330 | A02687 | A04105 | 488 |
| A02687 | A04125 | 386 | A02687 | A04134 | 199 |
| A02687 | A04139 | 412 | A02687 | A04199 | 230 |
| A02687 | A04279 | 364 | A02687 | A04310 | 193 |
| A02687 | A04342 | 457 | A02687 | A04442 | 185 |
| A02687 | A04443 | 465 | A02687 | A04449 | 160 |
| A02687 | A04520 | 286 | A02687 | A04619 | 266 |
| A02687 | A04715 | 154 | A02687 | A04790 | 196 |
| A02687 | A04805 | 257 | A02687 | A04902 | 408 |
| A02687 | A04904 | 199 | A02687 | A04952 | 252 |
| A02687 | A05008 | 180 | A02687 | A05015 | 172 |
| A02687 | A05075 | 230 | A02687 | A05164 | 204 |
| A02687 | A05216 | 470 | A02687 | A05235 | 441 |
| A02687 | A05261 | 230 | A02687 | A05283 | 204 |
| A02687 | A05367 | 323 | A02687 | A05559 | 230 |
| A02687 | A05584 | 313 | A02687 | A05591 | 417 |
| A02687 | A05665 | 356 | A02687 | A05669 | 285 |

|        |        |     |        |        |     |
|--------|--------|-----|--------|--------|-----|
| A02687 | A05703 | 252 | A02687 | A05797 | 473 |
| A02687 | A05829 | 230 | A02687 | A05861 | 182 |
| A02687 | A05891 | 467 | A02687 | A05911 | 469 |
| A02687 | A05927 | 285 | A02687 | A05943 | 252 |
| A02687 | A06244 | 223 | A02687 | A06298 | 182 |
| A02687 | A06379 | 174 | A02687 | A06519 | 313 |
| A02687 | A06607 | 364 | A02687 | A06610 | 441 |
| A02687 | A06635 | 405 | A02687 | A06830 | 152 |
| A02687 | A06882 | 193 | A02687 | A06961 | 241 |
| A02687 | A06971 | 157 | A02687 | A07018 | 266 |
| A02687 | A07030 | 266 | A02687 | A07114 | 216 |
| A02687 | A07129 | 306 | A02687 | A07198 | 377 |
| A02687 | A07199 | 427 | A02687 | A07200 | 361 |
| A02687 | A07476 | 313 | A02687 | A07585 | 159 |
| A02687 | A07663 | 285 | A02687 | A07977 | 313 |
| A02687 | A08520 | 210 | A02687 | A08627 | 441 |
| A02687 | A08758 | 193 | A02687 | A08836 | 221 |
| A02687 | A08946 | 204 | A02687 | A09242 | 308 |
| A02687 | A09554 | 313 | A02687 | A09566 | 475 |
| A02687 | A09727 | 224 | A02687 | A09826 | 491 |
| A02687 | A09897 | 285 | A02687 | A09914 | 382 |
| A02687 | A10025 | 266 | A02687 | A10039 | 157 |
| A02687 | A10177 | 252 | A02687 | A10239 | 252 |
| A02687 | A10247 | 258 | A02687 | A10320 | 226 |
| A02687 | A10350 | 266 | A02687 | A10609 | 157 |
| A02687 | A10613 | 351 | A02687 | A10742 | 174 |
| A02687 | A10934 | 208 | A02687 | A11055 | 266 |
| A02687 | A11086 | 174 | A02687 | A11253 | 190 |
| A02687 | A11490 | 241 | A02687 | A11571 | 285 |
| A02687 | A11919 | 210 | A02687 | A11983 | 160 |
| A02687 | A12000 | 160 | A02687 | A12420 | 223 |
| A02687 | A12421 | 193 | A02687 | A12429 | 285 |
| A02687 | A12464 | 252 | A02687 | A12536 | 285 |
| A02687 | A12569 | 447 | A02687 | A12711 | 223 |
| A02687 | A12719 | 223 | A02687 | A12771 | 241 |
| A02687 | A13089 | 230 | A02687 | A13410 | 193 |
| A02687 | A13667 | 215 | A02687 | A13763 | 266 |
| A02687 | A13848 | 252 | A02687 | A13865 | 285 |
| A02687 | A14016 | 491 | A02687 | A14148 | 157 |
| A02687 | A14200 | 399 | A02687 | A14335 | 329 |
| A02687 | A14423 | 236 | A02687 | A14457 | 208 |
| A02687 | A14846 | 154 | A02687 | A14946 | 182 |
| A02687 | A15193 | 234 | A02687 | A15870 | 224 |
| A02687 | A16201 | 168 | A02687 | A16439 | 223 |
| A02687 | A16441 | 172 | A02687 | A16857 | 168 |
| A02687 | A17063 | 185 | A02687 | A17198 | 152 |

|        |        |     |        |        |     |
|--------|--------|-----|--------|--------|-----|
| A02688 | A02739 | 251 | A02688 | A02842 | 288 |
| A02688 | A03012 | 174 | A02688 | A04209 | 270 |
| A02688 | A04446 | 263 | A02688 | A05568 | 221 |
| A02688 | A07436 | 260 | A02689 | A02690 | 221 |
| A02689 | A02703 | 296 | A02689 | A02773 | 293 |
| A02689 | A02787 | 380 | A02689 | A02798 | 477 |
| A02689 | A02830 | 472 | A02689 | A02837 | 247 |
| A02689 | A02842 | 330 | A02689 | A02846 | 446 |
| A02689 | A02864 | 369 | A02689 | A02881 | 259 |
| A02689 | A02902 | 335 | A02689 | A02942 | 173 |
| A02689 | A02944 | 232 | A02689 | A02961 | 466 |
| A02689 | A02965 | 274 | A02689 | A02982 | 174 |
| A02689 | A03087 | 152 | A02689 | A03112 | 283 |
| A02689 | A03256 | 271 | A02689 | A03273 | 443 |
| A02689 | A03391 | 199 | A02689 | A03432 | 180 |
| A02689 | A04308 | 245 | A02689 | A04314 | 205 |
| A02689 | A04861 | 262 | A02689 | A04902 | 490 |
| A02689 | A04938 | 361 | A02689 | A04990 | 279 |
| A02689 | A05055 | 441 | A02689 | A05278 | 491 |
| A02689 | A05568 | 439 | A02689 | A05569 | 259 |
| A02689 | A05584 | 183 | A02689 | A05630 | 380 |
| A02689 | A05693 | 364 | A02689 | A05791 | 301 |
| A02689 | A05832 | 256 | A02689 | A05871 | 350 |
| A02689 | A05949 | 483 | A02689 | A06004 | 216 |
| A02689 | A06149 | 202 | A02689 | A06221 | 369 |
| A02689 | A06620 | 187 | A02689 | A06697 | 273 |
| A02689 | A06727 | 227 | A02689 | A06736 | 326 |
| A02689 | A07321 | 224 | A02689 | A07339 | 176 |
| A02689 | A08583 | 424 | A02689 | A08880 | 162 |
| A02689 | A09242 | 247 | A02689 | A09870 | 277 |
| A02689 | A09988 | 279 | A02689 | A10031 | 318 |
| A02689 | A10215 | 277 | A02689 | A10260 | 293 |
| A02689 | A10552 | 288 | A02689 | A10625 | 393 |
| A02689 | A11589 | 335 | A02689 | A13531 | 279 |
| A02690 | A02701 | 279 | A02690 | A02709 | 176 |
| A02690 | A02749 | 154 | A02690 | A02752 | 212 |
| A02690 | A02830 | 176 | A02690 | A02846 | 374 |
| A02690 | A02875 | 195 | A02690 | A03113 | 316 |
| A02690 | A03273 | 345 | A02690 | A03984 | 232 |
| A02690 | A04105 | 229 | A02690 | A04139 | 201 |
| A02690 | A04268 | 255 | A02690 | A04603 | 294 |
| A02690 | A04805 | 318 | A02690 | A04960 | 236 |
| A02690 | A05556 | 217 | A02690 | A05559 | 378 |
| A02690 | A05591 | 469 | A02690 | A05634 | 337 |
| A02690 | A05667 | 378 | A02690 | A06379 | 294 |
| A02690 | A06385 | 179 | A02690 | A06562 | 374 |

|        |        |     |        |        |     |
|--------|--------|-----|--------|--------|-----|
| A02690 | A06585 | 446 | A02690 | A06623 | 348 |
| A02690 | A07129 | 285 | A02690 | A07218 | 190 |
| A02690 | A07335 | 332 | A02690 | A10906 | 446 |
| A02690 | A13392 | 347 | A02691 | A02692 | 146 |
| A02691 | A02693 | 141 | A02691 | A02694 | 162 |
| A02691 | A02697 | 303 | A02691 | A02700 | 490 |
| A02691 | A02701 | 417 | A02691 | A02706 | 396 |
| A02691 | A02713 | 196 | A02691 | A02735 | 151 |
| A02691 | A02785 | 401 | A02691 | A02810 | 447 |
| A02691 | A02811 | 307 | A02691 | A02814 | 396 |
| A02691 | A02815 | 279 | A02691 | A02858 | 227 |
| A02691 | A02859 | 413 | A02691 | A02893 | 391 |
| A02691 | A02906 | 218 | A02691 | A03097 | 201 |
| A02691 | A03104 | 195 | A02691 | A03167 | 179 |
| A02691 | A03241 | 160 | A02691 | A03243 | 224 |
| A02691 | A03268 | 469 | A02691 | A03297 | 151 |
| A02691 | A03304 | 204 | A02691 | A03585 | 351 |
| A02691 | A03618 | 394 | A02691 | A03653 | 257 |
| A02691 | A03708 | 165 | A02691 | A03866 | 368 |
| A02691 | A03870 | 279 | A02691 | A03872 | 205 |
| A02691 | A03964 | 335 | A02691 | A03983 | 268 |
| A02691 | A04004 | 469 | A02691 | A04005 | 254 |
| A02691 | A04010 | 238 | A02691 | A04028 | 389 |
| A02691 | A04031 | 227 | A02691 | A04035 | 179 |
| A02691 | A04105 | 305 | A02691 | A04108 | 170 |
| A02691 | A04118 | 420 | A02691 | A04135 | 413 |
| A02691 | A04139 | 462 | A02691 | A04171 | 246 |
| A02691 | A04279 | 477 | A02691 | A04285 | 286 |
| A02691 | A04286 | 160 | A02691 | A04304 | 235 |
| A02691 | A04307 | 235 | A02691 | A04315 | 215 |
| A02691 | A04361 | 227 | A02691 | A04410 | 191 |
| A02691 | A04449 | 274 | A02691 | A04510 | 196 |
| A02691 | A04530 | 273 | A02691 | A04620 | 353 |
| A02691 | A04710 | 226 | A02691 | A04715 | 357 |
| A02691 | A04784 | 262 | A02691 | A04790 | 380 |
| A02691 | A04797 | 330 | A02691 | A04870 | 176 |
| A02691 | A04953 | 330 | A02691 | A05036 | 262 |
| A02691 | A05245 | 173 | A02691 | A05289 | 160 |
| A02691 | A05310 | 254 | A02691 | A05406 | 330 |
| A02691 | A05899 | 286 | A02691 | A05911 | 422 |
| A02691 | A06021 | 424 | A02691 | A06092 | 445 |
| A02691 | A06298 | 412 | A02691 | A06311 | 353 |
| A02691 | A06346 | 159 | A02691 | A06368 | 205 |
| A02691 | A06599 | 154 | A02691 | A06635 | 489 |
| A02691 | A06654 | 170 | A02691 | A06868 | 283 |
| A02691 | A06926 | 221 | A02691 | A07088 | 246 |

|        |        |     |        |        |     |
|--------|--------|-----|--------|--------|-----|
| A02691 | A07109 | 391 | A02691 | A07165 | 308 |
| A02691 | A07198 | 266 | A02691 | A07200 | 489 |
| A02691 | A07663 | 330 | A02691 | A07943 | 353 |
| A02691 | A08836 | 207 | A02691 | A09272 | 215 |
| A02691 | A10291 | 241 | A02691 | A11348 | 480 |
| A02691 | A11983 | 274 | A02691 | A12335 | 316 |
| A02691 | A13369 | 388 | A02691 | A13997 | 163 |
| A02691 | A14337 | 262 | A02691 | A14389 | 374 |
| A02691 | A14401 | 213 | A02691 | A14405 | 474 |
| A02691 | A15238 | 190 | A02691 | A15282 | 473 |
| A02691 | A15368 | 254 | A02691 | A15623 | 353 |
| A02691 | A16741 | 469 | A02692 | A02734 | 266 |
| A02692 | A02811 | 921 | A02692 | A03095 | 179 |
| A02692 | A03473 | 236 | A02692 | A04004 | 271 |
| A02692 | A04005 | 472 | A02692 | A04105 | 184 |
| A02692 | A04249 | 414 | A02692 | A04263 | 213 |
| A02692 | A04302 | 411 | A02692 | A04449 | 157 |
| A02692 | A04573 | 329 | A02692 | A04574 | 430 |
| A02692 | A05348 | 288 | A02692 | A06650 | 490 |
| A02692 | A07030 | 374 | A02692 | A07197 | 267 |
| A02692 | A07199 | 307 | A02692 | A07200 | 205 |
| A02692 | A08878 | 171 | A02692 | A09081 | 350 |
| A02692 | A11348 | 267 | A02692 | A12304 | 312 |
| A02692 | A14386 | 296 | A02692 | A15870 | 190 |
| A02693 | A02694 | 432 | A02693 | A02698 | 160 |
| A02693 | A02700 | 299 | A02693 | A02701 | 452 |
| A02693 | A02706 | 185 | A02693 | A02709 | 252 |
| A02693 | A02725 | 347 | A02693 | A02744 | 174 |
| A02693 | A02761 | 221 | A02693 | A02789 | 160 |
| A02693 | A02837 | 162 | A02693 | A02845 | 352 |
| A02693 | A02931 | 162 | A02693 | A02982 | 63  |
| A02693 | A02984 | 168 | A02693 | A03023 | 343 |
| A02693 | A03268 | 318 | A02693 | A03474 | 184 |
| A02693 | A03646 | 358 | A02693 | A03775 | 180 |
| A02693 | A03870 | 347 | A02693 | A04009 | 301 |
| A02693 | A04035 | 269 | A02693 | A04048 | 221 |
| A02693 | A04059 | 296 | A02693 | A04107 | 409 |
| A02693 | A04114 | 266 | A02693 | A04135 | 297 |
| A02693 | A04279 | 229 | A02693 | A04533 | 180 |
| A02693 | A04574 | 247 | A02693 | A04783 | 213 |
| A02693 | A04842 | 230 | A02693 | A04863 | 352 |
| A02693 | A04965 | 179 | A02693 | A05694 | 372 |
| A02693 | A05911 | 313 | A02693 | A06635 | 177 |
| A02693 | A06648 | 191 | A02693 | A06924 | 163 |
| A02693 | A06949 | 152 | A02693 | A07164 | 177 |
| A02693 | A07834 | 180 | A02693 | A08720 | 358 |

|        |        |     |        |        |     |
|--------|--------|-----|--------|--------|-----|
| A02693 | A08844 | 258 | A02693 | A09011 | 329 |
| A02693 | A09124 | 246 | A02693 | A09127 | 154 |
| A02693 | A09220 | 182 | A02693 | A09419 | 274 |
| A02693 | A11307 | 241 | A02693 | A11334 | 200 |
| A02693 | A11348 | 263 | A02693 | A12361 | 201 |
| A02693 | A14236 | 177 | A02693 | A14364 | 205 |
| A02693 | A14387 | 302 | A02693 | A14509 | 417 |
| A02693 | A14574 | 358 | A02693 | A15533 | 353 |
| A02693 | A15696 | 278 | A02693 | A15920 | 180 |
| A02693 | A16197 | 372 | A02693 | A16775 | 382 |
| A02694 | A02695 | 198 | A02694 | A02702 | 240 |
| A02694 | A02710 | 260 | A02694 | A02744 | 196 |
| A02694 | A02837 | 193 | A02694 | A02968 | 241 |
| A02694 | A03004 | 294 | A02694 | A03069 | 152 |
| A02694 | A03645 | 356 | A02694 | A03680 | 265 |
| A02694 | A04041 | 382 | A02694 | A04105 | 201 |
| A02694 | A04108 | 435 | A02694 | A04302 | 324 |
| A02694 | A04505 | 407 | A02694 | A04529 | 307 |
| A02694 | A04574 | 268 | A02694 | A04939 | 185 |
| A02694 | A06506 | 369 | A02694 | A06595 | 210 |
| A02694 | A06635 | 486 | A02694 | A07106 | 324 |
| A02694 | A07339 | 327 | A02694 | A09011 | 343 |
| A02694 | A09090 | 360 | A02694 | A09269 | 213 |
| A02694 | A09434 | 235 | A02694 | A10982 | 224 |
| A02694 | A12499 | 288 | A02694 | A14156 | 191 |
| A02694 | A14392 | 188 | A02694 | A16300 | 217 |
| A02694 | A16355 | 338 | A02695 | A02696 | 491 |
| A02695 | A02697 | 484 | A02695 | A02713 | 241 |
| A02695 | A02718 | 417 | A02695 | A02719 | 172 |
| A02695 | A02723 | 276 | A02695 | A02729 | 385 |
| A02695 | A02730 | 344 | A02695 | A02736 | 167 |
| A02695 | A02753 | 266 | A02695 | A02768 | 180 |
| A02695 | A02812 | 491 | A02695 | A02813 | 396 |
| A02695 | A02817 | 168 | A02695 | A02830 | 357 |
| A02695 | A02836 | 454 | A02695 | A02837 | 296 |
| A02695 | A02853 | 212 | A02695 | A02859 | 491 |
| A02695 | A02874 | 438 | A02695 | A02877 | 177 |
| A02695 | A02878 | 382 | A02695 | A02921 | 185 |
| A02695 | A02922 | 312 | A02695 | A02943 | 185 |
| A02695 | A02951 | 461 | A02695 | A02982 | 486 |
| A02695 | A02983 | 380 | A02695 | A02984 | 435 |
| A02695 | A03004 | 228 | A02695 | A03034 | 468 |
| A02695 | A03036 | 371 | A02695 | A03095 | 210 |
| A02695 | A03128 | 221 | A02695 | A03144 | 446 |
| A02695 | A03157 | 433 | A02695 | A03254 | 212 |
| A02695 | A03259 | 252 | A02695 | A03273 | 369 |

|        |        |     |        |        |     |
|--------|--------|-----|--------|--------|-----|
| A02695 | A03275 | 480 | A02695 | A03408 | 151 |
| A02695 | A03414 | 193 | A02695 | A03415 | 152 |
| A02695 | A03419 | 177 | A02695 | A03423 | 159 |
| A02695 | A03431 | 468 | A02695 | A03477 | 486 |
| A02695 | A03664 | 446 | A02695 | A03725 | 475 |
| A02695 | A03823 | 299 | A02695 | A03861 | 230 |
| A02695 | A03870 | 204 | A02695 | A03872 | 252 |
| A02695 | A03878 | 174 | A02695 | A04037 | 180 |
| A02695 | A04134 | 313 | A02695 | A04142 | 313 |
| A02695 | A04214 | 234 | A02695 | A04246 | 180 |
| A02695 | A04262 | 204 | A02695 | A04268 | 313 |
| A02695 | A04274 | 185 | A02695 | A04280 | 162 |
| A02695 | A04299 | 351 | A02695 | A04328 | 249 |
| A02695 | A04334 | 171 | A02695 | A04376 | 212 |
| A02695 | A04400 | 221 | A02695 | A04444 | 165 |
| A02695 | A04451 | 218 | A02695 | A04455 | 269 |
| A02695 | A04545 | 196 | A02695 | A04596 | 212 |
| A02695 | A04708 | 221 | A02695 | A04731 | 204 |
| A02695 | A04784 | 185 | A02695 | A04792 | 212 |
| A02695 | A04798 | 191 | A02695 | A04804 | 299 |
| A02695 | A04847 | 221 | A02695 | A04849 | 332 |
| A02695 | A04850 | 477 | A02695 | A04881 | 204 |
| A02695 | A04903 | 489 | A02695 | A04944 | 170 |
| A02695 | A05020 | 184 | A02695 | A05034 | 154 |
| A02695 | A05066 | 180 | A02695 | A05169 | 167 |
| A02695 | A05203 | 174 | A02695 | A05216 | 468 |
| A02695 | A05274 | 313 | A02695 | A05283 | 318 |
| A02695 | A05307 | 196 | A02695 | A05309 | 168 |
| A02695 | A05310 | 424 | A02695 | A05319 | 249 |
| A02695 | A05346 | 212 | A02695 | A05349 | 402 |
| A02695 | A05398 | 208 | A02695 | A05504 | 212 |
| A02695 | A05570 | 302 | A02695 | A05661 | 249 |
| A02695 | A05669 | 269 | A02695 | A05719 | 152 |
| A02695 | A05799 | 299 | A02695 | A05808 | 299 |
| A02695 | A05895 | 269 | A02695 | A05899 | 212 |
| A02695 | A06053 | 191 | A02695 | A06063 | 286 |
| A02695 | A06124 | 196 | A02695 | A06159 | 180 |
| A02695 | A06167 | 159 | A02695 | A06195 | 321 |
| A02695 | A06359 | 430 | A02695 | A06422 | 307 |
| A02695 | A06473 | 424 | A02695 | A06573 | 269 |
| A02695 | A06597 | 243 | A02695 | A06607 | 259 |
| A02695 | A06640 | 204 | A02695 | A06643 | 221 |
| A02695 | A06645 | 167 | A02695 | A06650 | 422 |
| A02695 | A06686 | 299 | A02695 | A06756 | 267 |
| A02695 | A06937 | 171 | A02695 | A07148 | 249 |
| A02695 | A07162 | 269 | A02695 | A07163 | 385 |

|        |        |     |        |        |     |
|--------|--------|-----|--------|--------|-----|
| A02695 | A07256 | 159 | A02695 | A07310 | 249 |
| A02695 | A07342 | 201 | A02695 | A07477 | 234 |
| A02695 | A07484 | 234 | A02695 | A07608 | 159 |
| A02695 | A07685 | 249 | A02695 | A07736 | 259 |
| A02695 | A07746 | 361 | A02695 | A07837 | 269 |
| A02695 | A07959 | 485 | A02695 | A08005 | 269 |
| A02695 | A08009 | 249 | A02695 | A08073 | 234 |
| A02695 | A08224 | 204 | A02695 | A08304 | 399 |
| A02695 | A08344 | 299 | A02695 | A08379 | 489 |
| A02695 | A08445 | 257 | A02695 | A08532 | 262 |
| A02695 | A08741 | 485 | A02695 | A08825 | 299 |
| A02695 | A08828 | 191 | A02695 | A09358 | 384 |
| A02695 | A09437 | 212 | A02695 | A09509 | 299 |
| A02695 | A09976 | 191 | A02695 | A09991 | 246 |
| A02695 | A10048 | 299 | A02695 | A10085 | 224 |
| A02695 | A10112 | 162 | A02695 | A10122 | 269 |
| A02695 | A10143 | 299 | A02695 | A10210 | 191 |
| A02695 | A10226 | 171 | A02695 | A10229 | 299 |
| A02695 | A10506 | 401 | A02695 | A10556 | 357 |
| A02695 | A10614 | 458 | A02695 | A10717 | 269 |
| A02695 | A10871 | 167 | A02695 | A10891 | 167 |
| A02695 | A11076 | 299 | A02695 | A11145 | 269 |
| A02695 | A11219 | 384 | A02695 | A11332 | 154 |
| A02695 | A11432 | 204 | A02695 | A11504 | 249 |
| A02695 | A11506 | 299 | A02695 | A11683 | 456 |
| A02695 | A11840 | 276 | A02695 | A11910 | 299 |
| A02695 | A12008 | 185 | A02695 | A12211 | 446 |
| A02695 | A12325 | 341 | A02695 | A13024 | 212 |
| A02695 | A13386 | 299 | A02695 | A13400 | 212 |
| A02695 | A13416 | 212 | A02695 | A13489 | 299 |
| A02695 | A13772 | 185 | A02695 | A13795 | 204 |
| A02695 | A14156 | 167 | A02695 | A14247 | 481 |
| A02695 | A14311 | 269 | A02695 | A14423 | 212 |
| A02695 | A14440 | 274 | A02695 | A14453 | 269 |
| A02695 | A14511 | 899 | A02695 | A14605 | 198 |
| A02695 | A14664 | 408 | A02695 | A14726 | 299 |
| A02695 | A14783 | 213 | A02695 | A15182 | 185 |
| A02695 | A15565 | 152 | A02695 | A15674 | 454 |
| A02695 | A16125 | 171 | A02695 | A16300 | 299 |
| A02695 | A16476 | 162 | A02695 | A16636 | 316 |
| A02695 | A16870 | 384 | A02696 | A02697 | 491 |
| A02696 | A02700 | 255 | A02696 | A02701 | 182 |
| A02696 | A02712 | 187 | A02696 | A02729 | 347 |
| A02696 | A02751 | 213 | A02696 | A02754 | 283 |
| A02696 | A02756 | 321 | A02696 | A02768 | 191 |
| A02696 | A02785 | 168 | A02696 | A02812 | 463 |



|        |        |     |        |        |     |
|--------|--------|-----|--------|--------|-----|
| A02696 | A02813 | 489 | A02696 | A02817 | 182 |
| A02696 | A02837 | 268 | A02696 | A02838 | 162 |
| A02696 | A02839 | 246 | A02696 | A02859 | 350 |
| A02696 | A02864 | 422 | A02696 | A02874 | 184 |
| A02696 | A02875 | 382 | A02696 | A02922 | 152 |
| A02696 | A02951 | 208 | A02696 | A02952 | 367 |
| A02696 | A02982 | 491 | A02696 | A02984 | 491 |
| A02696 | A03269 | 134 | A02696 | A03275 | 246 |
| A02696 | A03664 | 208 | A02696 | A03865 | 363 |
| A02696 | A03870 | 312 | A02696 | A03914 | 176 |
| A02696 | A03949 | 199 | A02696 | A04031 | 266 |
| A02696 | A04120 | 318 | A02696 | A04125 | 268 |
| A02696 | A04134 | 400 | A02696 | A04142 | 293 |
| A02696 | A04214 | 333 | A02696 | A04265 | 238 |
| A02696 | A04267 | 490 | A02696 | A04268 | 286 |
| A02696 | A04272 | 428 | A02696 | A04279 | 176 |
| A02696 | A04286 | 201 | A02696 | A04391 | 271 |
| A02696 | A04481 | 293 | A02696 | A04509 | 288 |
| A02696 | A04538 | 318 | A02696 | A04612 | 227 |
| A02696 | A04708 | 324 | A02696 | A04723 | 246 |
| A02696 | A04792 | 318 | A02696 | A04798 | 302 |
| A02696 | A04906 | 454 | A02696 | A04960 | 358 |
| A02696 | A05113 | 167 | A02696 | A05185 | 224 |
| A02696 | A05309 | 243 | A02696 | A05319 | 343 |
| A02696 | A05617 | 205 | A02696 | A05669 | 356 |
| A02696 | A06073 | 260 | A02696 | A06650 | 440 |
| A02696 | A06765 | 268 | A02696 | A07148 | 241 |
| A02696 | A07154 | 224 | A02696 | A08677 | 235 |
| A02696 | A08741 | 491 | A02696 | A08975 | 162 |
| A02696 | A10337 | 157 | A02696 | A10753 | 215 |
| A02696 | A11616 | 182 | A02696 | A12145 | 293 |
| A02696 | A12654 | 266 | A02696 | A13667 | 198 |
| A02696 | A14258 | 255 | A02696 | A14387 | 259 |
| A02696 | A14400 | 249 | A02696 | A14423 | 215 |
| A02696 | A14661 | 157 | A02696 | A14844 | 334 |
| A02696 | A14918 | 208 | A02696 | A15674 | 489 |
| A02696 | A15847 | 414 | A02696 | A15911 | 188 |
| A02696 | A16453 | 177 | A02696 | A16636 | 279 |
| A02697 | A02698 | 490 | A02697 | A02706 | 491 |
| A02697 | A02711 | 171 | A02697 | A02712 | 302 |
| A02697 | A02739 | 204 | A02697 | A02753 | 357 |
| A02697 | A02756 | 163 | A02697 | A02812 | 400 |
| A02697 | A02813 | 409 | A02697 | A02833 | 486 |
| A02697 | A02836 | 305 | A02697 | A02859 | 364 |
| A02697 | A02864 | 428 | A02697 | A02873 | 157 |
| A02697 | A02874 | 345 | A02697 | A02875 | 430 |

|        |        |     |        |        |     |
|--------|--------|-----|--------|--------|-----|
| A02697 | A02906 | 154 | A02697 | A02915 | 283 |
| A02697 | A02982 | 491 | A02697 | A02984 | 477 |
| A02697 | A03019 | 334 | A02697 | A03034 | 205 |
| A02697 | A03265 | 183 | A02697 | A03269 | 307 |
| A02697 | A03275 | 408 | A02697 | A03612 | 302 |
| A02697 | A03659 | 283 | A02697 | A03780 | 491 |
| A02697 | A03866 | 183 | A02697 | A03870 | 221 |
| A02697 | A04010 | 215 | A02697 | A04031 | 163 |
| A02697 | A04049 | 159 | A02697 | A04105 | 362 |
| A02697 | A04125 | 299 | A02697 | A04139 | 491 |
| A02697 | A04142 | 196 | A02697 | A04213 | 288 |
| A02697 | A04250 | 221 | A02697 | A04267 | 326 |
| A02697 | A04271 | 246 | A02697 | A04279 | 409 |
| A02697 | A04296 | 238 | A02697 | A04449 | 462 |
| A02697 | A04509 | 191 | A02697 | A04510 | 260 |
| A02697 | A04535 | 159 | A02697 | A04548 | 204 |
| A02697 | A04655 | 170 | A02697 | A04723 | 367 |
| A02697 | A04745 | 221 | A02697 | A04792 | 229 |
| A02697 | A04902 | 339 | A02697 | A04960 | 491 |
| A02697 | A04961 | 154 | A02697 | A04999 | 183 |
| A02697 | A05015 | 293 | A02697 | A05104 | 286 |
| A02697 | A05117 | 455 | A02697 | A05164 | 201 |
| A02697 | A05309 | 428 | A02697 | A05319 | 263 |
| A02697 | A05344 | 167 | A02697 | A05507 | 196 |
| A02697 | A05669 | 283 | A02697 | A05906 | 313 |
| A02697 | A06132 | 221 | A02697 | A06149 | 232 |
| A02697 | A06271 | 446 | A02697 | A06459 | 263 |
| A02697 | A06499 | 180 | A02697 | A06572 | 327 |
| A02697 | A06650 | 414 | A02697 | A07198 | 491 |
| A02697 | A07199 | 157 | A02697 | A07200 | 435 |
| A02697 | A08677 | 443 | A02697 | A08741 | 475 |
| A02697 | A08742 | 213 | A02697 | A09090 | 221 |
| A02697 | A09500 | 213 | A02697 | A09518 | 238 |
| A02697 | A09535 | 180 | A02697 | A10156 | 273 |
| A02697 | A10337 | 159 | A02697 | A10742 | 469 |
| A02697 | A10813 | 223 | A02697 | A10936 | 313 |
| A02697 | A10975 | 313 | A02697 | A11038 | 180 |
| A02697 | A11299 | 238 | A02697 | A11482 | 491 |
| A02697 | A11485 | 468 | A02697 | A11897 | 306 |
| A02697 | A12421 | 191 | A02697 | A12789 | 229 |
| A02697 | A13302 | 396 | A02697 | A14236 | 469 |
| A02697 | A14387 | 157 | A02697 | A14423 | 234 |
| A02697 | A14441 | 313 | A02697 | A14481 | 235 |
| A02697 | A14588 | 179 | A02697 | A14841 | 283 |
| A02697 | A15674 | 441 | A02697 | A15847 | 229 |
| A02697 | A16007 | 460 | A02697 | A16636 | 484 |

|        |        |     |        |        |     |
|--------|--------|-----|--------|--------|-----|
| A02698 | A02701 | 263 | A02698 | A02704 | 491 |
| A02698 | A02706 | 480 | A02698 | A02709 | 491 |
| A02698 | A02711 | 491 | A02698 | A02730 | 338 |
| A02698 | A02776 | 201 | A02698 | A02788 | 160 |
| A02698 | A02807 | 160 | A02698 | A02837 | 229 |
| A02698 | A02863 | 483 | A02698 | A02917 | 456 |
| A02698 | A02956 | 229 | A02698 | A02982 | 458 |
| A02698 | A03010 | 414 | A02698 | A03032 | 208 |
| A02698 | A03040 | 263 | A02698 | A03086 | 232 |
| A02698 | A03111 | 243 | A02698 | A03147 | 204 |
| A02698 | A03243 | 202 | A02698 | A03260 | 208 |
| A02698 | A03451 | 337 | A02698 | A03518 | 393 |
| A02698 | A03611 | 210 | A02698 | A03630 | 174 |
| A02698 | A03650 | 217 | A02698 | A03661 | 307 |
| A02698 | A03780 | 234 | A02698 | A03809 | 302 |
| A02698 | A03821 | 310 | A02698 | A03841 | 196 |
| A02698 | A03934 | 185 | A02698 | A03948 | 475 |
| A02698 | A03965 | 238 | A02698 | A04033 | 491 |
| A02698 | A04079 | 159 | A02698 | A04105 | 452 |
| A02698 | A04136 | 229 | A02698 | A04248 | 246 |
| A02698 | A04256 | 461 | A02698 | A04264 | 393 |
| A02698 | A04279 | 255 | A02698 | A04433 | 151 |
| A02698 | A04449 | 490 | A02698 | A04474 | 174 |
| A02698 | A04484 | 307 | A02698 | A04529 | 343 |
| A02698 | A04545 | 191 | A02698 | A04581 | 243 |
| A02698 | A04798 | 185 | A02698 | A04805 | 452 |
| A02698 | A04815 | 151 | A02698 | A04816 | 217 |
| A02698 | A04878 | 335 | A02698 | A04914 | 402 |
| A02698 | A04962 | 180 | A02698 | A05015 | 288 |
| A02698 | A05098 | 466 | A02698 | A05117 | 279 |
| A02698 | A05133 | 229 | A02698 | A05272 | 296 |
| A02698 | A05304 | 243 | A02698 | A05305 | 380 |
| A02698 | A05369 | 243 | A02698 | A05416 | 162 |
| A02698 | A05438 | 247 | A02698 | A05449 | 515 |
| A02698 | A05556 | 608 | A02698 | A05577 | 580 |
| A02698 | A05598 | 449 | A02698 | A05622 | 207 |
| A02698 | A05927 | 263 | A02698 | A06019 | 191 |
| A02698 | A06213 | 296 | A02698 | A06277 | 473 |
| A02698 | A06453 | 243 | A02698 | A06474 | 174 |
| A02698 | A06475 | 229 | A02698 | A06588 | 733 |
| A02698 | A06607 | 488 | A02698 | A06650 | 485 |
| A02698 | A06663 | 454 | A02698 | A06688 | 446 |
| A02698 | A06728 | 338 | A02698 | A06733 | 270 |
| A02698 | A06830 | 408 | A02698 | A06969 | 217 |
| A02698 | A07078 | 343 | A02698 | A07140 | 362 |
| A02698 | A07169 | 179 | A02698 | A07173 | 343 |

|        |        |     |        |        |     |
|--------|--------|-----|--------|--------|-----|
| A02698 | A07182 | 330 | A02698 | A07227 | 470 |
| A02698 | A07298 | 276 | A02698 | A07324 | 488 |
| A02698 | A07336 | 446 | A02698 | A07591 | 243 |
| A02698 | A07665 | 490 | A02698 | A07748 | 481 |
| A02698 | A07878 | 484 | A02698 | A07975 | 263 |
| A02698 | A08093 | 263 | A02698 | A08280 | 187 |
| A02698 | A08622 | 263 | A02698 | A08635 | 398 |
| A02698 | A08660 | 277 | A02698 | A08667 | 234 |
| A02698 | A08688 | 223 | A02698 | A08717 | 165 |
| A02698 | A08720 | 447 | A02698 | A08785 | 193 |
| A02698 | A08850 | 720 | A02698 | A08855 | 279 |
| A02698 | A08869 | 193 | A02698 | A08934 | 408 |
| A02698 | A08941 | 199 | A02698 | A08962 | 207 |
| A02698 | A09072 | 382 | A02698 | A09135 | 212 |
| A02698 | A09220 | 177 | A02698 | A09236 | 243 |
| A02698 | A09246 | 338 | A02698 | A09407 | 243 |
| A02698 | A09429 | 252 | A02698 | A09464 | 200 |
| A02698 | A09496 | 160 | A02698 | A09497 | 174 |
| A02698 | A09499 | 338 | A02698 | A09533 | 367 |
| A02698 | A09534 | 263 | A02698 | A09964 | 185 |
| A02698 | A10055 | 170 | A02698 | A10105 | 199 |
| A02698 | A10394 | 243 | A02698 | A10532 | 443 |
| A02698 | A10617 | 263 | A02698 | A10635 | 490 |
| A02698 | A10675 | 318 | A02698 | A10742 | 151 |
| A02698 | A10805 | 185 | A02698 | A10813 | 193 |
| A02698 | A10943 | 185 | A02698 | A11006 | 243 |
| A02698 | A11022 | 346 | A02698 | A11023 | 491 |
| A02698 | A11097 | 229 | A02698 | A11103 | 207 |
| A02698 | A11149 | 491 | A02698 | A11150 | 439 |
| A02698 | A11152 | 296 | A02698 | A11180 | 480 |
| A02698 | A11185 | 367 | A02698 | A11193 | 207 |
| A02698 | A11281 | 452 | A02698 | A11299 | 400 |
| A02698 | A11389 | 154 | A02698 | A11393 | 297 |
| A02698 | A11543 | 210 | A02698 | A11547 | 335 |
| A02698 | A11665 | 363 | A02698 | A11716 | 179 |
| A02698 | A11902 | 380 | A02698 | A11983 | 469 |
| A02698 | A12051 | 466 | A02698 | A12092 | 263 |
| A02698 | A12161 | 229 | A02698 | A12405 | 296 |
| A02698 | A12540 | 229 | A02698 | A12561 | 263 |
| A02698 | A12763 | 296 | A02698 | A12911 | 296 |
| A02698 | A13023 | 199 | A02698 | A13652 | 296 |
| A02698 | A13739 | 207 | A02698 | A13795 | 199 |
| A02698 | A13927 | 456 | A02698 | A14236 | 791 |
| A02698 | A14306 | 346 | A02698 | A14366 | 807 |
| A02698 | A14373 | 276 | A02698 | A14387 | 358 |
| A02698 | A14388 | 229 | A02698 | A14391 | 198 |

|        |        |     |        |        |     |
|--------|--------|-----|--------|--------|-----|
| A02698 | A14570 | 154 | A02698 | A14596 | 626 |
| A02698 | A14634 | 165 | A02698 | A14635 | 281 |
| A02698 | A14659 | 566 | A02698 | A14771 | 263 |
| A02698 | A14839 | 191 | A02698 | A15035 | 446 |
| A02698 | A15179 | 185 | A02698 | A15238 | 226 |
| A02698 | A15241 | 491 | A02698 | A15282 | 414 |
| A02698 | A15395 | 488 | A02698 | A15598 | 441 |
| A02698 | A15599 | 467 | A02698 | A15600 | 217 |
| A02698 | A15601 | 477 | A02698 | A15603 | 303 |
| A02698 | A15605 | 447 | A02698 | A15606 | 771 |
| A02698 | A15608 | 404 | A02698 | A15883 | 263 |
| A02698 | A15981 | 486 | A02698 | A16080 | 199 |
| A02698 | A16101 | 243 | A02698 | A16489 | 452 |
| A02698 | A16494 | 191 | A02698 | A16503 | 430 |
| A02698 | A16513 | 151 | A02698 | A16518 | 263 |
| A02698 | A16527 | 174 | A02698 | A16636 | 249 |
| A02698 | A16775 | 380 | A02698 | A17096 | 296 |
| A02698 | A17176 | 356 | A02699 | A02703 | 294 |
| A02699 | A02705 | 221 | A02699 | A02712 | 257 |
| A02699 | A02789 | 180 | A02699 | A02816 | 180 |
| A02699 | A02817 | 252 | A02699 | A02821 | 489 |
| A02699 | A02822 | 406 | A02699 | A02866 | 429 |
| A02699 | A02898 | 274 | A02699 | A02909 | 407 |
| A02699 | A02963 | 208 | A02699 | A02982 | 238 |
| A02699 | A03095 | 199 | A02699 | A03201 | 260 |
| A02699 | A03336 | 430 | A02699 | A03417 | 232 |
| A02699 | A03541 | 394 | A02699 | A03842 | 353 |
| A02699 | A03869 | 368 | A02699 | A03871 | 441 |
| A02699 | A04007 | 276 | A02699 | A04049 | 319 |
| A02699 | A04089 | 329 | A02699 | A04202 | 305 |
| A02699 | A04275 | 191 | A02699 | A04445 | 299 |
| A02699 | A04519 | 249 | A02699 | A04536 | 475 |
| A02699 | A04603 | 480 | A02699 | A04879 | 165 |
| A02699 | A05073 | 313 | A02699 | A05556 | 438 |
| A02699 | A06421 | 433 | A02699 | A06628 | 199 |
| A02699 | A07143 | 238 | A02699 | A08692 | 388 |
| A02699 | A09046 | 307 | A02699 | A10195 | 374 |
| A02699 | A11252 | 374 | A02699 | A11436 | 182 |
| A02699 | A11513 | 224 | A02699 | A11548 | 334 |
| A02699 | A13916 | 324 | A02699 | A14777 | 294 |
| A02699 | A15323 | 238 | A02700 | A02893 | 385 |
| A02700 | A03268 | 363 | A02700 | A03585 | 433 |
| A02700 | A03870 | 385 | A02700 | A03964 | 344 |
| A02700 | A04004 | 326 | A02700 | A04015 | 290 |
| A02700 | A04118 | 409 | A02700 | A04135 | 348 |
| A02700 | A04361 | 270 | A02700 | A04797 | 409 |

|        |        |     |        |        |     |
|--------|--------|-----|--------|--------|-----|
| A02700 | A04953 | 409 | A02700 | A05572 | 396 |
| A02700 | A05911 | 361 | A02700 | A06298 | 399 |
| A02700 | A06346 | 221 | A02700 | A06519 | 420 |
| A02700 | A06622 | 291 | A02700 | A06635 | 249 |
| A02700 | A07129 | 305 | A02700 | A07482 | 402 |
| A02700 | A11348 | 323 | A02700 | A14415 | 389 |
| A02701 | A02709 | 469 | A02701 | A02785 | 236 |
| A02701 | A02814 | 201 | A02701 | A02837 | 162 |
| A02701 | A02872 | 165 | A02701 | A02982 | 205 |
| A02701 | A02984 | 168 | A02701 | A02988 | 165 |
| A02701 | A03243 | 196 | A02701 | A03268 | 414 |
| A02701 | A03441 | 204 | A02701 | A03611 | 156 |
| A02701 | A03810 | 357 | A02701 | A03964 | 290 |
| A02701 | A04005 | 328 | A02701 | A04107 | 311 |
| A02701 | A04125 | 311 | A02701 | A04135 | 446 |
| A02701 | A04136 | 363 | A02701 | A04264 | 278 |
| A02701 | A04268 | 337 | A02701 | A04304 | 314 |
| A02701 | A04351 | 283 | A02701 | A04410 | 171 |
| A02701 | A04510 | 283 | A02701 | A04603 | 251 |
| A02701 | A04791 | 254 | A02701 | A04964 | 168 |
| A02701 | A05032 | 219 | A02701 | A05412 | 396 |
| A02701 | A05473 | 238 | A02701 | A05556 | 165 |
| A02701 | A05686 | 396 | A02701 | A05891 | 193 |
| A02701 | A05892 | 210 | A02701 | A05911 | 313 |
| A02701 | A06607 | 168 | A02701 | A06635 | 434 |
| A02701 | A06678 | 347 | A02701 | A06830 | 297 |
| A02701 | A06911 | 352 | A02701 | A06926 | 406 |
| A02701 | A07200 | 443 | A02701 | A10211 | 382 |
| A02701 | A10239 | 363 | A02701 | A11719 | 382 |
| A02701 | A12335 | 372 | A02701 | A13667 | 369 |
| A02701 | A14388 | 363 | A02701 | A14405 | 407 |
| A02701 | A14423 | 263 | A02701 | A15368 | 328 |
| A02701 | A15623 | 396 | A02701 | A15630 | 165 |
| A02701 | A15905 | 202 | A02701 | A16021 | 441 |
| A02701 | A16027 | 179 | A02701 | A16840 | 229 |
| A02702 | A02736 | 311 | A02702 | A02758 | 246 |
| A02702 | A02811 | 249 | A02702 | A02814 | 187 |
| A02702 | A02943 | 324 | A02702 | A03120 | 337 |
| A02702 | A03321 | 451 | A02702 | A03451 | 185 |
| A02702 | A03537 | 328 | A02702 | A03571 | 208 |
| A02702 | A03583 | 307 | A02702 | A03585 | 291 |
| A02702 | A03653 | 205 | A02702 | A03847 | 355 |
| A02702 | A03870 | 337 | A02702 | A04004 | 252 |
| A02702 | A04031 | 296 | A02702 | A04072 | 358 |
| A02702 | A04123 | 337 | A02702 | A04249 | 302 |
| A02702 | A04260 | 168 | A02702 | A04560 | 307 |

|        |        |     |        |        |     |
|--------|--------|-----|--------|--------|-----|
| A02702 | A04905 | 462 | A02702 | A05036 | 324 |
| A02702 | A08415 | 391 | A02702 | A08427 | 302 |
| A02702 | A09011 | 317 | A02702 | A09179 | 337 |
| A02702 | A09218 | 258 | A02702 | A09901 | 420 |
| A02702 | A10201 | 404 | A02702 | A10923 | 317 |
| A02702 | A13465 | 347 | A02702 | A13511 | 310 |
| A02702 | A15297 | 163 | A02702 | A16093 | 205 |
| A02703 | A02705 | 232 | A02703 | A02740 | 420 |
| A02703 | A02758 | 171 | A02703 | A02786 | 286 |
| A02703 | A02811 | 174 | A02703 | A02816 | 491 |
| A02703 | A02822 | 202 | A02703 | A02827 | 458 |
| A02703 | A02830 | 455 | A02703 | A02831 | 228 |
| A02703 | A02837 | 266 | A02703 | A02859 | 198 |
| A02703 | A02860 | 491 | A02703 | A02874 | 193 |
| A02703 | A02878 | 213 | A02703 | A02895 | 486 |
| A02703 | A02901 | 221 | A02703 | A02904 | 191 |
| A02703 | A02914 | 481 | A02703 | A02924 | 424 |
| A02703 | A02927 | 369 | A02703 | A02931 | 474 |
| A02703 | A02943 | 263 | A02703 | A03078 | 286 |
| A02703 | A03112 | 362 | A02703 | A03120 | 279 |
| A02703 | A03126 | 157 | A02703 | A03220 | 268 |
| A02703 | A03276 | 441 | A02703 | A03321 | 93  |
| A02703 | A03537 | 268 | A02703 | A03583 | 243 |
| A02703 | A03585 | 223 | A02703 | A03740 | 334 |
| A02703 | A03824 | 152 | A02703 | A03846 | 191 |
| A02703 | A03847 | 305 | A02703 | A03870 | 279 |
| A02703 | A03906 | 245 | A02703 | A03976 | 191 |
| A02703 | A04004 | 177 | A02703 | A04031 | 228 |
| A02703 | A04038 | 160 | A02703 | A04042 | 294 |
| A02703 | A04067 | 274 | A02703 | A04123 | 279 |
| A02703 | A04202 | 167 | A02703 | A04265 | 200 |
| A02703 | A04517 | 193 | A02703 | A04560 | 243 |
| A02703 | A04567 | 160 | A02703 | A04570 | 230 |
| A02703 | A04571 | 259 | A02703 | A04587 | 401 |
| A02703 | A04682 | 301 | A02703 | A04730 | 401 |
| A02703 | A04791 | 162 | A02703 | A04816 | 294 |
| A02703 | A04822 | 198 | A02703 | A04905 | 200 |
| A02703 | A05036 | 263 | A02703 | A05590 | 286 |
| A02703 | A05775 | 154 | A02703 | A06218 | 355 |
| A02703 | A06224 | 388 | A02703 | A06422 | 168 |
| A02703 | A06586 | 163 | A02703 | A06640 | 168 |
| A02703 | A06654 | 303 | A02703 | A07158 | 162 |
| A02703 | A07163 | 232 | A02703 | A07178 | 172 |
| A02703 | A07426 | 274 | A02703 | A07546 | 305 |
| A02703 | A07613 | 259 | A02703 | A07778 | 330 |
| A02703 | A08054 | 335 | A02703 | A08583 | 208 |

|        |        |     |        |        |     |
|--------|--------|-----|--------|--------|-----|
| A02703 | A08591 | 274 | A02703 | A08662 | 216 |
| A02703 | A08821 | 160 | A02703 | A08899 | 223 |
| A02703 | A09027 | 330 | A02703 | A09093 | 274 |
| A02703 | A09104 | 208 | A02703 | A09220 | 205 |
| A02703 | A09428 | 205 | A02703 | A09491 | 191 |
| A02703 | A09561 | 207 | A02703 | A09655 | 154 |
| A02703 | A09770 | 413 | A02703 | A09847 | 213 |
| A02703 | A10034 | 288 | A02703 | A10201 | 234 |
| A02703 | A10233 | 180 | A02703 | A10332 | 187 |
| A02703 | A10342 | 263 | A02703 | A11097 | 305 |
| A02703 | A11372 | 441 | A02703 | A11900 | 243 |
| A02703 | A11981 | 154 | A02703 | A12167 | 171 |
| A02703 | A12373 | 182 | A02703 | A12661 | 198 |
| A02703 | A13346 | 449 | A02703 | A13376 | 228 |
| A02703 | A13857 | 165 | A02703 | A13977 | 335 |
| A02703 | A14335 | 168 | A02703 | A15102 | 193 |
| A02703 | A15233 | 191 | A02703 | A17193 | 230 |
| A02704 | A02707 | 172 | A02704 | A02709 | 297 |
| A02704 | A02766 | 191 | A02704 | A02771 | 205 |
| A02704 | A02818 | 168 | A02704 | A02836 | 480 |
| A02704 | A02846 | 223 | A02704 | A02878 | 427 |
| A02704 | A02914 | 313 | A02704 | A02982 | 63  |
| A02704 | A03019 | 479 | A02704 | A03065 | 162 |
| A02704 | A03102 | 184 | A02704 | A03287 | 174 |
| A02704 | A03321 | 474 | A02704 | A03611 | 299 |
| A02704 | A04111 | 259 | A02704 | A04133 | 184 |
| A02704 | A04176 | 190 | A02704 | A04272 | 196 |
| A02704 | A04547 | 208 | A02704 | A04639 | 152 |
| A02704 | A04822 | 188 | A02704 | A04954 | 241 |
| A02704 | A05291 | 236 | A02704 | A05568 | 247 |
| A02704 | A06004 | 177 | A02704 | A06134 | 162 |
| A02704 | A06562 | 271 | A02704 | A06728 | 279 |
| A02704 | A07169 | 374 | A02704 | A07412 | 162 |
| A02704 | A08346 | 435 | A02704 | A08402 | 490 |
| A02704 | A08720 | 286 | A02704 | A09404 | 254 |
| A02704 | A09407 | 408 | A02704 | A09462 | 324 |
| A02704 | A09464 | 294 | A02704 | A09988 | 229 |
| A02704 | A10247 | 396 | A02704 | A10320 | 302 |
| A02704 | A10582 | 296 | A02704 | A12618 | 313 |
| A02704 | A13873 | 199 | A02704 | A14077 | 488 |
| A02704 | A14191 | 640 | A02704 | A14236 | 187 |
| A02704 | A14272 | 490 | A02704 | A14387 | 210 |
| A02704 | A14443 | 260 | A02704 | A14605 | 154 |
| A02704 | A14707 | 179 | A02704 | A15367 | 317 |
| A02704 | A15606 | 265 | A02704 | A15877 | 366 |
| A02704 | A16635 | 159 | A02704 | A16775 | 324 |



|        |        |     |        |        |     |
|--------|--------|-----|--------|--------|-----|
| A02705 | A02706 | 491 | A02705 | A02714 | 202 |
| A02705 | A02729 | 362 | A02705 | A02751 | 358 |
| A02705 | A02783 | 185 | A02705 | A02812 | 299 |
| A02705 | A02817 | 491 | A02705 | A02818 | 469 |
| A02705 | A02819 | 277 | A02705 | A02822 | 260 |
| A02705 | A02831 | 283 | A02705 | A02832 | 232 |
| A02705 | A02836 | 278 | A02705 | A02837 | 364 |
| A02705 | A02856 | 288 | A02705 | A02859 | 413 |
| A02705 | A02861 | 483 | A02705 | A02862 | 474 |
| A02705 | A02915 | 438 | A02705 | A02984 | 266 |
| A02705 | A03224 | 202 | A02705 | A03228 | 335 |
| A02705 | A03243 | 165 | A02705 | A03259 | 208 |
| A02705 | A03275 | 355 | A02705 | A03281 | 215 |
| A02705 | A03336 | 333 | A02705 | A03520 | 207 |
| A02705 | A03612 | 208 | A02705 | A03649 | 279 |
| A02705 | A03664 | 355 | A02705 | A03783 | 273 |
| A02705 | A03933 | 413 | A02705 | A04008 | 293 |
| A02705 | A04046 | 305 | A02705 | A04134 | 408 |
| A02705 | A04142 | 408 | A02705 | A04263 | 176 |
| A02705 | A04307 | 172 | A02705 | A04329 | 263 |
| A02705 | A04444 | 201 | A02705 | A04528 | 355 |
| A02705 | A04590 | 367 | A02705 | A04723 | 266 |
| A02705 | A04735 | 321 | A02705 | A05034 | 228 |
| A02705 | A05070 | 226 | A02705 | A05120 | 271 |
| A02705 | A05264 | 235 | A02705 | A05351 | 391 |
| A02705 | A05940 | 266 | A02705 | A06107 | 308 |
| A02705 | A06214 | 385 | A02705 | A07159 | 238 |
| A02705 | A07171 | 346 | A02705 | A07197 | 468 |
| A02705 | A08741 | 408 | A02705 | A09028 | 226 |
| A02705 | A09453 | 338 | A02705 | A09497 | 450 |
| A02705 | A09573 | 249 | A02705 | A13772 | 281 |
| A02705 | A14381 | 157 | A02705 | A14386 | 266 |
| A02705 | A14390 | 380 | A02705 | A14508 | 177 |
| A02705 | A15601 | 245 | A02705 | A15602 | 290 |
| A02705 | A16360 | 429 | A02705 | A16686 | 324 |
| A02706 | A02709 | 193 | A02706 | A02739 | 484 |
| A02706 | A02764 | 163 | A02706 | A02817 | 486 |
| A02706 | A02818 | 479 | A02706 | A02819 | 290 |
| A02706 | A02820 | 286 | A02706 | A02861 | 356 |
| A02706 | A02862 | 460 | A02706 | A02902 | 163 |
| A02706 | A02915 | 449 | A02706 | A02956 | 246 |
| A02706 | A02982 | 466 | A02706 | A03228 | 412 |
| A02706 | A03243 | 456 | A02706 | A03256 | 385 |
| A02706 | A03415 | 176 | A02706 | A03587 | 332 |
| A02706 | A03649 | 63  | A02706 | A03819 | 157 |
| A02706 | A03841 | 221 | A02706 | A03983 | 204 |

|        |        |     |        |        |     |
|--------|--------|-----|--------|--------|-----|
| A02706 | A04035 | 236 | A02706 | A04046 | 399 |
| A02706 | A04053 | 219 | A02706 | A04105 | 205 |
| A02706 | A04117 | 411 | A02706 | A04246 | 193 |
| A02706 | A04270 | 369 | A02706 | A04279 | 455 |
| A02706 | A04280 | 190 | A02706 | A04410 | 191 |
| A02706 | A04449 | 340 | A02706 | A04582 | 279 |
| A02706 | A04620 | 157 | A02706 | A04698 | 241 |
| A02706 | A04710 | 235 | A02706 | A04795 | 176 |
| A02706 | A04832 | 207 | A02706 | A04840 | 176 |
| A02706 | A04852 | 184 | A02706 | A04902 | 154 |
| A02706 | A04960 | 218 | A02706 | A04999 | 180 |
| A02706 | A05008 | 168 | A02706 | A05015 | 159 |
| A02706 | A05033 | 279 | A02706 | A05070 | 450 |
| A02706 | A05072 | 218 | A02706 | A05117 | 167 |
| A02706 | A05250 | 188 | A02706 | A05274 | 193 |
| A02706 | A05351 | 288 | A02706 | A05470 | 260 |
| A02706 | A05480 | 235 | A02706 | A05567 | 310 |
| A02706 | A05832 | 224 | A02706 | A05884 | 279 |
| A02706 | A05891 | 229 | A02706 | A05920 | 218 |
| A02706 | A05927 | 279 | A02706 | A06225 | 491 |
| A02706 | A06392 | 310 | A02706 | A06400 | 196 |
| A02706 | A06774 | 260 | A02706 | A06845 | 210 |
| A02706 | A06868 | 375 | A02706 | A07167 | 358 |
| A02706 | A07171 | 246 | A02706 | A07197 | 490 |
| A02706 | A07198 | 157 | A02706 | A07200 | 176 |
| A02706 | A07201 | 235 | A02706 | A07252 | 279 |
| A02706 | A08162 | 218 | A02706 | A08365 | 486 |
| A02706 | A08392 | 260 | A02706 | A08720 | 235 |
| A02706 | A08738 | 162 | A02706 | A09036 | 156 |
| A02706 | A09409 | 246 | A02706 | A09437 | 353 |
| A02706 | A09497 | 441 | A02706 | A09750 | 157 |
| A02706 | A10621 | 429 | A02706 | A10742 | 170 |
| A02706 | A11086 | 170 | A02706 | A11983 | 390 |
| A02706 | A13396 | 235 | A02706 | A14236 | 202 |
| A02706 | A14375 | 326 | A02706 | A14386 | 484 |
| A02706 | A14387 | 152 | A02706 | A14390 | 480 |
| A02706 | A14434 | 218 | A02706 | A14436 | 198 |
| A02706 | A14588 | 174 | A02706 | A14613 | 193 |
| A02706 | A14943 | 351 | A02706 | A15166 | 188 |
| A02706 | A15281 | 170 | A02706 | A15282 | 345 |
| A02706 | A15323 | 167 | A02706 | A15971 | 218 |
| A02706 | A16016 | 310 | A02706 | A16360 | 369 |
| A02706 | A16775 | 279 | A02707 | A02790 | 263 |
| A02707 | A02803 | 156 | A02707 | A02814 | 241 |
| A02707 | A02819 | 218 | A02707 | A03422 | 152 |
| A02707 | A03609 | 205 | A02707 | A03811 | 390 |

|        |        |     |        |        |     |
|--------|--------|-----|--------|--------|-----|
| A02707 | A03948 | 168 | A02707 | A04032 | 411 |
| A02707 | A04053 | 485 | A02707 | A04246 | 462 |
| A02707 | A05094 | 273 | A02707 | A05615 | 335 |
| A02707 | A05866 | 483 | A02707 | A05940 | 484 |
| A02707 | A06607 | 380 | A02707 | A06623 | 340 |
| A02707 | A06688 | 160 | A02707 | A07723 | 324 |
| A02707 | A08389 | 475 | A02707 | A13945 | 172 |
| A02707 | A14643 | 210 | A02707 | A15282 | 277 |
| A02708 | A03181 | 316 | A02708 | A03321 | 163 |
| A02708 | A03423 | 283 | A02708 | A03949 | 346 |
| A02708 | A05240 | 334 | A02709 | A02710 | 470 |
| A02709 | A02742 | 182 | A02709 | A02763 | 274 |
| A02709 | A02787 | 245 | A02709 | A02788 | 205 |
| A02709 | A02812 | 180 | A02709 | A02865 | 215 |
| A02709 | A02875 | 232 | A02709 | A02954 | 243 |
| A02709 | A02982 | 322 | A02709 | A02986 | 317 |
| A02709 | A03010 | 226 | A02709 | A03100 | 213 |
| A02709 | A03113 | 172 | A02709 | A03147 | 290 |
| A02709 | A03304 | 173 | A02709 | A03416 | 228 |
| A02709 | A03450 | 235 | A02709 | A03451 | 329 |
| A02709 | A03463 | 193 | A02709 | A03488 | 167 |
| A02709 | A03585 | 207 | A02709 | A03611 | 340 |
| A02709 | A03780 | 180 | A02709 | A03813 | 213 |
| A02709 | A03819 | 327 | A02709 | A03821 | 267 |
| A02709 | A03868 | 291 | A02709 | A03964 | 188 |
| A02709 | A04005 | 238 | A02709 | A04033 | 388 |
| A02709 | A04053 | 151 | A02709 | A04072 | 477 |
| A02709 | A04105 | 473 | A02709 | A04110 | 416 |
| A02709 | A04114 | 379 | A02709 | A04117 | 310 |
| A02709 | A04221 | 247 | A02709 | A04264 | 477 |
| A02709 | A04268 | 319 | A02709 | A04303 | 319 |
| A02709 | A04443 | 200 | A02709 | A04449 | 172 |
| A02709 | A04491 | 165 | A02709 | A04529 | 322 |
| A02709 | A04671 | 420 | A02709 | A04805 | 307 |
| A02709 | A04824 | 212 | A02709 | A04935 | 345 |
| A02709 | A04954 | 235 | A02709 | A04958 | 273 |
| A02709 | A04965 | 180 | A02709 | A05177 | 260 |
| A02709 | A05253 | 238 | A02709 | A05304 | 303 |
| A02709 | A05322 | 182 | A02709 | A05344 | 215 |
| A02709 | A05517 | 177 | A02709 | A05556 | 347 |
| A02709 | A05597 | 291 | A02709 | A05799 | 345 |
| A02709 | A06164 | 345 | A02709 | A06213 | 345 |
| A02709 | A06293 | 188 | A02709 | A06415 | 162 |
| A02709 | A06573 | 319 | A02709 | A06701 | 446 |
| A02709 | A06893 | 291 | A02709 | A06956 | 212 |
| A02709 | A06978 | 200 | A02709 | A07135 | 210 |

|        |        |     |        |        |     |
|--------|--------|-----|--------|--------|-----|
| A02709 | A07154 | 167 | A02709 | A07162 | 319 |
| A02709 | A07229 | 297 | A02709 | A07339 | 208 |
| A02709 | A08280 | 167 | A02709 | A08283 | 235 |
| A02709 | A08609 | 243 | A02709 | A08635 | 457 |
| A02709 | A08720 | 393 | A02709 | A09046 | 190 |
| A02709 | A09179 | 266 | A02709 | A09464 | 154 |
| A02709 | A10087 | 151 | A02709 | A10254 | 303 |
| A02709 | A10719 | 228 | A02709 | A10844 | 177 |
| A02709 | A11022 | 281 | A02709 | A11185 | 303 |
| A02709 | A11506 | 345 | A02709 | A12304 | 212 |
| A02709 | A12719 | 382 | A02709 | A12897 | 230 |
| A02709 | A13181 | 208 | A02709 | A13388 | 160 |
| A02709 | A13567 | 260 | A02709 | A13825 | 273 |
| A02709 | A14125 | 218 | A02709 | A14236 | 360 |
| A02709 | A14335 | 152 | A02709 | A14364 | 216 |
| A02709 | A14366 | 207 | A02709 | A14374 | 374 |
| A02709 | A14381 | 193 | A02709 | A14387 | 445 |
| A02709 | A14648 | 489 | A02709 | A14918 | 152 |
| A02709 | A15282 | 477 | A02709 | A15606 | 317 |
| A02709 | A15765 | 351 | A02709 | A15917 | 311 |
| A02709 | A16108 | 247 | A02709 | A16321 | 303 |
| A02709 | A16581 | 174 | A02709 | A16716 | 303 |
| A02709 | A16775 | 414 | A02709 | A16987 | 187 |
| A02710 | A02820 | 307 | A02710 | A02828 | 221 |
| A02710 | A02858 | 313 | A02710 | A02865 | 413 |
| A02710 | A02988 | 173 | A02710 | A03010 | 218 |
| A02710 | A03178 | 196 | A02710 | A03680 | 372 |
| A02710 | A03813 | 210 | A02710 | A04002 | 232 |
| A02710 | A04117 | 243 | A02710 | A04221 | 339 |
| A02710 | A04263 | 213 | A02710 | A04304 | 319 |
| A02710 | A04529 | 475 | A02710 | A04531 | 319 |
| A02710 | A04574 | 254 | A02710 | A04727 | 312 |
| A02710 | A04954 | 329 | A02710 | A05377 | 267 |
| A02710 | A06210 | 400 | A02710 | A06505 | 313 |
| A02710 | A06595 | 193 | A02710 | A06597 | 182 |
| A02710 | A06606 | 176 | A02710 | A06629 | 208 |
| A02710 | A07165 | 202 | A02710 | A07339 | 305 |
| A02710 | A08609 | 335 | A02710 | A08758 | 333 |
| A02710 | A11683 | 160 | A02710 | A11759 | 229 |
| A02710 | A11895 | 374 | A02710 | A12330 | 356 |
| A02710 | A14239 | 195 | A02711 | A02741 | 63  |
| A02711 | A02749 | 223 | A02711 | A02777 | 159 |
| A02711 | A02780 | 180 | A02711 | A02795 | 162 |
| A02711 | A02834 | 152 | A02711 | A02863 | 205 |
| A02711 | A02917 | 314 | A02711 | A02986 | 168 |
| A02711 | A03010 | 486 | A02711 | A03123 | 241 |

|        |        |     |        |        |     |
|--------|--------|-----|--------|--------|-----|
| A02711 | A03165 | 310 | A02711 | A03181 | 200 |
| A02711 | A03255 | 361 | A02711 | A03610 | 254 |
| A02711 | A03636 | 165 | A02711 | A03683 | 207 |
| A02711 | A03685 | 429 | A02711 | A03781 | 335 |
| A02711 | A03914 | 228 | A02711 | A03922 | 219 |
| A02711 | A04033 | 486 | A02711 | A04176 | 302 |
| A02711 | A04320 | 423 | A02711 | A04478 | 156 |
| A02711 | A04535 | 326 | A02711 | A04681 | 263 |
| A02711 | A04736 | 235 | A02711 | A04807 | 412 |
| A02711 | A04878 | 168 | A02711 | A05008 | 368 |
| A02711 | A05015 | 170 | A02711 | A05030 | 204 |
| A02711 | A05082 | 490 | A02711 | A05106 | 460 |
| A02711 | A05339 | 235 | A02711 | A05679 | 258 |
| A02711 | A05940 | 177 | A02711 | A06107 | 229 |
| A02711 | A06314 | 456 | A02711 | A06451 | 229 |
| A02711 | A06650 | 462 | A02711 | A06708 | 251 |
| A02711 | A06752 | 291 | A02711 | A06818 | 177 |
| A02711 | A07004 | 218 | A02711 | A07158 | 303 |
| A02711 | A07173 | 276 | A02711 | A07375 | 389 |
| A02711 | A07440 | 191 | A02711 | A07691 | 310 |
| A02711 | A08416 | 486 | A02711 | A08729 | 353 |
| A02711 | A09121 | 188 | A02711 | A09200 | 399 |
| A02711 | A09214 | 270 | A02711 | A09470 | 335 |
| A02711 | A09500 | 246 | A02711 | A09524 | 229 |
| A02711 | A09544 | 374 | A02711 | A09732 | 288 |
| A02711 | A10051 | 165 | A02711 | A10055 | 226 |
| A02711 | A10313 | 184 | A02711 | A10626 | 196 |
| A02711 | A10739 | 177 | A02711 | A10899 | 401 |
| A02711 | A11317 | 176 | A02711 | A11348 | 273 |
| A02711 | A11389 | 210 | A02711 | A11413 | 466 |
| A02711 | A11543 | 491 | A02711 | A11707 | 257 |
| A02711 | A11901 | 408 | A02711 | A12971 | 265 |
| A02711 | A13860 | 466 | A02711 | A14029 | 160 |
| A02711 | A14236 | 485 | A02711 | A14294 | 229 |
| A02711 | A14327 | 270 | A02711 | A14517 | 340 |
| A02711 | A14629 | 213 | A02711 | A14639 | 180 |
| A02711 | A15241 | 468 | A02711 | A15568 | 241 |
| A02711 | A15606 | 466 | A02711 | A15726 | 451 |
| A02711 | A15913 | 177 | A02711 | A15952 | 310 |
| A02711 | A16006 | 165 | A02711 | A16008 | 198 |
| A02711 | A16476 | 213 | A02712 | A02753 | 489 |
| A02712 | A02832 | 267 | A02712 | A02908 | 156 |
| A02712 | A02983 | 123 | A02712 | A02984 | 307 |
| A02712 | A03813 | 208 | A02712 | A03985 | 263 |
| A02712 | A04117 | 241 | A02712 | A04202 | 157 |
| A02712 | A04286 | 257 | A02712 | A05419 | 396 |

|        |        |     |        |        |     |
|--------|--------|-----|--------|--------|-----|
| A02712 | A05568 | 324 | A02712 | A05832 | 196 |
| A02712 | A06385 | 263 | A02712 | A07767 | 185 |
| A02712 | A08741 | 241 | A02712 | A13346 | 193 |
| A02712 | A14188 | 491 | A02713 | A02788 | 185 |
| A02713 | A02810 | 339 | A02713 | A02819 | 234 |
| A02713 | A03832 | 151 | A02713 | A04023 | 302 |
| A02713 | A04035 | 489 | A02713 | A04139 | 205 |
| A02713 | A04520 | 185 | A02713 | A04600 | 286 |
| A02713 | A04805 | 323 | A02713 | A06697 | 358 |
| A02713 | A14423 | 311 | A02714 | A02745 | 340 |
| A02714 | A02787 | 154 | A02714 | A02789 | 160 |
| A02714 | A02807 | 324 | A02714 | A02808 | 268 |
| A02714 | A02829 | 243 | A02714 | A02834 | 438 |
| A02714 | A02861 | 286 | A02714 | A02873 | 303 |
| A02714 | A02982 | 296 | A02714 | A02983 | 480 |
| A02714 | A03259 | 185 | A02714 | A03269 | 187 |
| A02714 | A03314 | 193 | A02714 | A03865 | 286 |
| A02714 | A04008 | 193 | A02714 | A04059 | 296 |
| A02714 | A04085 | 321 | A02714 | A04088 | 394 |
| A02714 | A04268 | 208 | A02714 | A04287 | 398 |
| A02714 | A04444 | 423 | A02714 | A04519 | 232 |
| A02714 | A04526 | 347 | A02714 | A04608 | 185 |
| A02714 | A04714 | 263 | A02714 | A04783 | 215 |
| A02714 | A04922 | 268 | A02714 | A05113 | 219 |
| A02714 | A06584 | 202 | A02714 | A07140 | 202 |
| A02714 | A07153 | 278 | A02714 | A07165 | 299 |
| A02714 | A07180 | 170 | A02714 | A08615 | 358 |
| A02714 | A08677 | 285 | A02714 | A14236 | 179 |
| A02714 | A14483 | 251 | A02715 | A02724 | 388 |
| A02715 | A02897 | 195 | A02715 | A03237 | 367 |
| A02715 | A03479 | 356 | A02715 | A03740 | 358 |
| A02715 | A04038 | 173 | A02715 | A04776 | 171 |
| A02715 | A05082 | 159 | A02715 | A06064 | 270 |
| A02715 | A07155 | 455 | A02715 | A07311 | 480 |
| A02715 | A07586 | 205 | A02715 | A08137 | 368 |
| A02715 | A08161 | 270 | A02715 | A09135 | 193 |
| A02715 | A09253 | 419 | A02715 | A09448 | 162 |
| A02715 | A09556 | 188 | A02715 | A09804 | 489 |
| A02715 | A10269 | 361 | A02715 | A12409 | 177 |
| A02715 | A13989 | 252 | A02715 | A14006 | 488 |
| A02715 | A14029 | 217 | A02715 | A14073 | 317 |
| A02715 | A14399 | 469 | A02715 | A15545 | 307 |
| A02715 | A16050 | 291 | A02716 | A02984 | 302 |
| A02716 | A04127 | 389 | A02716 | A05309 | 238 |
| A02717 | A02726 | 374 | A02717 | A02731 | 173 |
| A02717 | A02745 | 156 | A02717 | A02897 | 221 |

|        |        |     |        |        |     |
|--------|--------|-----|--------|--------|-----|
| A02717 | A02908 | 218 | A02717 | A02925 | 288 |
| A02717 | A02942 | 188 | A02717 | A03001 | 272 |
| A02717 | A03821 | 238 | A02717 | A04207 | 271 |
| A02717 | A05760 | 306 | A02717 | A06610 | 452 |
| A02717 | A07154 | 352 | A02717 | A08566 | 216 |
| A02717 | A11681 | 165 | A02717 | A11964 | 288 |
| A02717 | A14727 | 243 | A02717 | A15182 | 296 |
| A02717 | A15639 | 156 | A02718 | A02719 | 377 |
| A02718 | A03309 | 208 | A02718 | A03401 | 207 |
| A02718 | A03453 | 460 | A02718 | A03477 | 738 |
| A02718 | A03586 | 168 | A02718 | A03832 | 488 |
| A02718 | A03863 | 450 | A02718 | A03983 | 213 |
| A02718 | A04049 | 165 | A02718 | A04124 | 254 |
| A02718 | A04712 | 427 | A02718 | A04783 | 485 |
| A02718 | A04852 | 193 | A02718 | A04966 | 198 |
| A02718 | A05020 | 732 | A02718 | A05216 | 440 |
| A02718 | A05958 | 157 | A02718 | A06039 | 199 |
| A02718 | A06358 | 167 | A02718 | A06359 | 735 |
| A02718 | A06597 | 329 | A02718 | A06634 | 316 |
| A02718 | A07080 | 174 | A02718 | A07190 | 201 |
| A02718 | A07207 | 308 | A02718 | A07288 | 193 |
| A02718 | A07495 | 199 | A02718 | A07688 | 369 |
| A02718 | A07746 | 491 | A02718 | A08133 | 199 |
| A02718 | A08817 | 491 | A02718 | A08978 | 218 |
| A02718 | A09556 | 268 | A02718 | A09587 | 402 |
| A02718 | A10122 | 396 | A02718 | A10506 | 341 |
| A02718 | A10614 | 281 | A02718 | A11261 | 235 |
| A02718 | A12334 | 288 | A02718 | A13189 | 208 |
| A02718 | A13330 | 490 | A02718 | A13416 | 423 |
| A02718 | A13426 | 481 | A02718 | A13824 | 249 |
| A02718 | A14204 | 152 | A02718 | A14476 | 185 |
| A02718 | A15617 | 249 | A02718 | A15840 | 285 |
| A02718 | A16325 | 479 | A02718 | A16328 | 447 |
| A02718 | A16636 | 274 | A02718 | A17146 | 221 |
| A02719 | A02813 | 229 | A02719 | A02991 | 234 |
| A02719 | A03322 | 375 | A02719 | A03476 | 391 |
| A02719 | A03477 | 420 | A02719 | A03586 | 213 |
| A02719 | A03861 | 210 | A02719 | A04267 | 201 |
| A02719 | A04272 | 294 | A02719 | A04785 | 470 |
| A02719 | A05712 | 235 | A02719 | A06633 | 272 |
| A02719 | A07594 | 373 | A02719 | A08956 | 252 |
| A02719 | A10847 | 324 | A02719 | A11851 | 241 |
| A02719 | A13603 | 399 | A02719 | A15091 | 399 |
| A02719 | A15138 | 201 | A02719 | A16095 | 182 |
| A02720 | A03244 | 373 | A02720 | A03304 | 302 |
| A02721 | A02846 | 396 | A02721 | A05164 | 469 |

|        |        |     |        |        |     |
|--------|--------|-----|--------|--------|-----|
| A02721 | A05568 | 490 | A02721 | A05790 | 358 |
| A02721 | A05791 | 409 | A02721 | A05835 | 447 |
| A02721 | A06913 | 416 | A02721 | A08436 | 425 |
| A02721 | A08879 | 422 | A02721 | A10621 | 297 |
| A02721 | A10625 | 165 | A02721 | A12639 | 425 |
| A02721 | A14212 | 196 | A02721 | A15892 | 446 |
| A02722 | A02930 | 398 | A02722 | A02968 | 157 |
| A02722 | A03839 | 229 | A02722 | A04888 | 221 |
| A02722 | A05059 | 200 | A02722 | A05090 | 288 |
| A02722 | A05380 | 281 | A02722 | A05878 | 210 |
| A02722 | A07560 | 322 | A02722 | A08745 | 190 |
| A02722 | A09977 | 332 | A02722 | A10062 | 281 |
| A02722 | A10168 | 311 | A02722 | A13737 | 204 |
| A02722 | A16411 | 468 | A02723 | A03034 | 151 |
| A02723 | A04850 | 288 | A02723 | A04888 | 425 |
| A02723 | A05570 | 323 | A02723 | A06473 | 294 |
| A02723 | A07176 | 240 | A02723 | A07191 | 457 |
| A02723 | A14187 | 321 | A02723 | A14433 | 286 |
| A02724 | A03222 | 395 | A02724 | A03223 | 177 |
| A02724 | A06602 | 312 | A02724 | A08070 | 296 |
| A02724 | A14073 | 162 | A02725 | A02814 | 327 |
| A02725 | A03595 | 401 | A02725 | A04015 | 340 |
| A02725 | A06607 | 272 | A02725 | A07163 | 221 |
| A02725 | A11334 | 324 | A02726 | A02741 | 358 |
| A02726 | A02745 | 386 | A02726 | A03275 | 326 |
| A02726 | A07154 | 412 | A02727 | A02785 | 162 |
| A02727 | A02808 | 307 | A02727 | A02885 | 378 |
| A02727 | A03045 | 422 | A02727 | A03157 | 299 |
| A02727 | A03167 | 212 | A02727 | A03223 | 223 |
| A02727 | A03224 | 279 | A02727 | A03246 | 257 |
| A02727 | A03979 | 367 | A02727 | A05439 | 199 |
| A02727 | A05577 | 288 | A02727 | A06415 | 450 |
| A02727 | A07878 | 267 | A02727 | A09652 | 356 |
| A02727 | A10640 | 452 | A02727 | A11495 | 414 |
| A02727 | A13023 | 291 | A02727 | A14199 | 385 |
| A02727 | A14366 | 490 | A02727 | A14374 | 490 |
| A02727 | A14391 | 472 | A02727 | A14392 | 216 |
| A02727 | A14395 | 179 | A02727 | A14554 | 490 |
| A02727 | A14659 | 177 | A02727 | A15285 | 424 |
| A02727 | A15516 | 271 | A02727 | A15795 | 490 |
| A02727 | A16014 | 386 | A02727 | A16036 | 386 |
| A02729 | A02730 | 263 | A02729 | A02751 | 466 |
| A02729 | A02756 | 187 | A02729 | A02771 | 228 |
| A02729 | A02783 | 252 | A02729 | A02787 | 321 |
| A02729 | A02790 | 260 | A02729 | A02812 | 488 |
| A02729 | A02817 | 383 | A02729 | A02841 | 456 |



|        |        |     |        |        |     |
|--------|--------|-----|--------|--------|-----|
| A02729 | A02859 | 491 | A02729 | A02874 | 484 |
| A02729 | A02875 | 180 | A02729 | A02922 | 364 |
| A02729 | A02982 | 345 | A02729 | A02984 | 445 |
| A02729 | A02988 | 201 | A02729 | A03275 | 486 |
| A02729 | A03419 | 301 | A02729 | A03649 | 345 |
| A02729 | A03664 | 443 | A02729 | A04010 | 302 |
| A02729 | A04088 | 312 | A02729 | A04134 | 462 |
| A02729 | A04142 | 475 | A02729 | A04143 | 360 |
| A02729 | A04247 | 481 | A02729 | A04262 | 439 |
| A02729 | A04263 | 243 | A02729 | A04267 | 423 |
| A02729 | A04518 | 332 | A02729 | A04520 | 165 |
| A02729 | A04548 | 462 | A02729 | A04567 | 463 |
| A02729 | A04652 | 272 | A02729 | A04848 | 236 |
| A02729 | A05034 | 221 | A02729 | A05349 | 168 |
| A02729 | A07164 | 213 | A02729 | A08741 | 436 |
| A02729 | A09180 | 307 | A02729 | A16059 | 409 |
| A02729 | A16636 | 219 | A02730 | A02735 | 238 |
| A02730 | A02738 | 179 | A02730 | A02741 | 485 |
| A02730 | A02742 | 281 | A02730 | A02746 | 394 |
| A02730 | A02780 | 291 | A02730 | A02784 | 208 |
| A02730 | A02788 | 347 | A02730 | A02808 | 263 |
| A02730 | A02812 | 230 | A02730 | A02834 | 267 |
| A02730 | A02840 | 428 | A02730 | A02841 | 134 |
| A02730 | A02854 | 491 | A02730 | A02856 | 308 |
| A02730 | A02859 | 451 | A02730 | A02863 | 408 |
| A02730 | A02883 | 191 | A02730 | A02884 | 308 |
| A02730 | A02886 | 484 | A02730 | A02896 | 441 |
| A02730 | A02917 | 446 | A02730 | A02918 | 183 |
| A02730 | A02932 | 348 | A02730 | A02935 | 259 |
| A02730 | A02945 | 191 | A02730 | A02955 | 172 |
| A02730 | A02984 | 163 | A02730 | A03100 | 405 |
| A02730 | A03204 | 372 | A02730 | A03259 | 479 |
| A02730 | A03260 | 263 | A02730 | A03271 | 322 |
| A02730 | A03319 | 313 | A02730 | A03602 | 174 |
| A02730 | A03610 | 243 | A02730 | A03620 | 361 |
| A02730 | A03782 | 179 | A02730 | A03807 | 324 |
| A02730 | A03934 | 335 | A02730 | A03949 | 245 |
| A02730 | A04088 | 391 | A02730 | A04109 | 324 |
| A02730 | A04138 | 489 | A02730 | A04144 | 332 |
| A02730 | A04201 | 301 | A02730 | A04206 | 296 |
| A02730 | A04238 | 452 | A02730 | A04247 | 423 |
| A02730 | A04248 | 416 | A02730 | A04263 | 491 |
| A02730 | A04276 | 274 | A02730 | A04478 | 270 |
| A02730 | A04484 | 419 | A02730 | A04567 | 369 |
| A02730 | A04652 | 234 | A02730 | A04734 | 450 |
| A02730 | A04798 | 335 | A02730 | A04800 | 308 |

|        |        |     |        |        |     |
|--------|--------|-----|--------|--------|-----|
| A02730 | A04801 | 369 | A02730 | A04855 | 355 |
| A02730 | A04865 | 472 | A02730 | A05305 | 262 |
| A02730 | A05309 | 311 | A02730 | A05944 | 404 |
| A02730 | A05985 | 388 | A02730 | A06422 | 479 |
| A02730 | A07135 | 191 | A02730 | A07146 | 441 |
| A02730 | A07154 | 268 | A02730 | A07157 | 417 |
| A02730 | A07158 | 367 | A02730 | A07161 | 419 |
| A02730 | A07164 | 432 | A02730 | A07166 | 187 |
| A02730 | A07173 | 182 | A02730 | A09018 | 165 |
| A02730 | A12752 | 369 | A02730 | A13181 | 328 |
| A02730 | A13872 | 363 | A02730 | A14236 | 389 |
| A02730 | A14364 | 201 | A02730 | A14405 | 196 |
| A02730 | A15241 | 443 | A02730 | A15337 | 210 |
| A02730 | A15395 | 396 | A02730 | A15417 | 294 |
| A02730 | A15601 | 270 | A02730 | A15605 | 224 |
| A02730 | A15606 | 273 | A02730 | A15981 | 391 |
| A02731 | A02787 | 63  | A02731 | A02837 | 63  |
| A02731 | A02849 | 339 | A02731 | A02853 | 265 |
| A02731 | A02864 | 491 | A02731 | A02896 | 63  |
| A02731 | A02897 | 425 | A02731 | A02908 | 313 |
| A02731 | A02942 | 190 | A02731 | A03010 | 101 |
| A02731 | A03270 | 202 | A02731 | A03292 | 71  |
| A02731 | A03723 | 361 | A02731 | A03821 | 424 |
| A02731 | A04138 | 167 | A02731 | A04207 | 340 |
| A02731 | A04453 | 187 | A02731 | A04668 | 230 |
| A02731 | A05577 | 63  | A02731 | A05847 | 170 |
| A02731 | A05888 | 215 | A02731 | A05986 | 199 |
| A02731 | A06205 | 441 | A02731 | A07346 | 474 |
| A02731 | A07348 | 177 | A02731 | A08182 | 208 |
| A02731 | A08212 | 360 | A02731 | A08402 | 414 |
| A02731 | A09535 | 218 | A02731 | A09567 | 179 |
| A02731 | A09762 | 265 | A02731 | A10373 | 480 |
| A02731 | A10660 | 296 | A02731 | A10735 | 283 |
| A02731 | A10780 | 229 | A02731 | A11271 | 299 |
| A02731 | A11648 | 312 | A02731 | A11964 | 229 |
| A02731 | A12045 | 274 | A02731 | A12046 | 274 |
| A02731 | A12656 | 296 | A02731 | A13949 | 307 |
| A02731 | A14029 | 74  | A02731 | A14186 | 465 |
| A02731 | A14268 | 159 | A02731 | A14701 | 484 |
| A02731 | A15029 | 265 | A02731 | A15293 | 484 |
| A02731 | A15369 | 193 | A02731 | A15370 | 330 |
| A02731 | A15371 | 183 | A02731 | A15566 | 212 |
| A02731 | A15626 | 199 | A02731 | A15738 | 205 |
| A02731 | A15939 | 405 | A02731 | A16103 | 176 |
| A02731 | A16129 | 469 | A02731 | A16131 | 201 |
| A02731 | A16294 | 419 | A02731 | A16612 | 364 |

|        |        |     |        |        |     |
|--------|--------|-----|--------|--------|-----|
| A02731 | A16767 | 191 | A02732 | A02788 | 358 |
| A02732 | A02917 | 221 | A02732 | A03100 | 208 |
| A02732 | A03292 | 176 | A02732 | A03910 | 201 |
| A02732 | A04117 | 326 | A02732 | A04964 | 390 |
| A02732 | A07165 | 201 | A02732 | A09202 | 351 |
| A02732 | A10072 | 266 | A02732 | A11389 | 454 |
| A02732 | A11537 | 240 | A02732 | A11540 | 173 |
| A02732 | A11609 | 385 | A02732 | A12383 | 217 |
| A02732 | A12971 | 379 | A02732 | A13182 | 477 |
| A02732 | A14236 | 469 | A02732 | A14373 | 412 |
| A02732 | A14391 | 152 | A02732 | A14626 | 355 |
| A02732 | A15454 | 235 | A02733 | A02743 | 274 |
| A02733 | A02784 | 235 | A02733 | A02819 | 473 |
| A02733 | A02834 | 291 | A02733 | A03090 | 243 |
| A02733 | A03263 | 353 | A02733 | A03587 | 395 |
| A02733 | A04417 | 257 | A02733 | A04661 | 269 |
| A02733 | A06623 | 324 | A02733 | A06663 | 340 |
| A02733 | A07127 | 398 | A02733 | A07158 | 306 |
| A02733 | A07924 | 187 | A02733 | A08352 | 251 |
| A02733 | A09546 | 229 | A02733 | A13226 | 346 |
| A02733 | A14543 | 285 | A02733 | A14643 | 188 |
| A02733 | A14648 | 247 | A02733 | A16335 | 235 |
| A02733 | A16635 | 180 | A02734 | A02739 | 157 |
| A02734 | A03019 | 80  | A02734 | A03225 | 291 |
| A02734 | A03598 | 424 | A02734 | A03809 | 191 |
| A02734 | A03817 | 204 | A02734 | A03843 | 183 |
| A02734 | A04017 | 353 | A02734 | A04237 | 360 |
| A02734 | A04249 | 335 | A02734 | A04314 | 486 |
| A02734 | A04490 | 267 | A02734 | A04713 | 332 |
| A02734 | A04912 | 368 | A02734 | A04914 | 268 |
| A02734 | A05036 | 353 | A02734 | A05440 | 395 |
| A02734 | A05984 | 379 | A02734 | A06175 | 379 |
| A02734 | A06466 | 461 | A02734 | A06598 | 245 |
| A02734 | A06769 | 210 | A02734 | A07311 | 419 |
| A02734 | A08860 | 246 | A02734 | A09220 | 212 |
| A02734 | A10430 | 329 | A02734 | A11416 | 395 |
| A02734 | A13340 | 458 | A02734 | A14190 | 259 |
| A02734 | A14410 | 170 | A02734 | A14426 | 290 |
| A02735 | A02756 | 160 | A02735 | A02770 | 486 |
| A02735 | A02780 | 302 | A02735 | A02807 | 419 |
| A02735 | A02828 | 481 | A02735 | A02837 | 176 |
| A02735 | A02856 | 414 | A02735 | A02869 | 207 |
| A02735 | A02872 | 434 | A02735 | A02888 | 435 |
| A02735 | A02900 | 401 | A02735 | A02908 | 452 |
| A02735 | A02911 | 335 | A02735 | A02918 | 483 |
| A02735 | A02919 | 465 | A02735 | A02925 | 218 |

|        |        |     |        |        |     |
|--------|--------|-----|--------|--------|-----|
| A02735 | A02929 | 235 | A02735 | A03243 | 205 |
| A02735 | A03259 | 286 | A02735 | A03281 | 255 |
| A02735 | A03821 | 176 | A02735 | A03914 | 238 |
| A02735 | A04030 | 358 | A02735 | A04073 | 168 |
| A02735 | A04540 | 413 | A02735 | A05171 | 401 |
| A02735 | A05207 | 377 | A02735 | A05279 | 377 |
| A02735 | A05280 | 385 | A02735 | A05817 | 345 |
| A02735 | A06285 | 443 | A02735 | A06864 | 417 |
| A02735 | A07140 | 210 | A02735 | A07721 | 243 |
| A02735 | A09908 | 401 | A02735 | A12932 | 236 |
| A02735 | A15498 | 367 | A02735 | A15874 | 180 |
| A02735 | A16636 | 288 | A02736 | A02737 | 255 |
| A02736 | A02921 | 390 | A02736 | A02943 | 390 |
| A02736 | A03001 | 291 | A02736 | A03112 | 183 |
| A02736 | A04904 | 388 | A02736 | A04905 | 358 |
| A02736 | A05645 | 353 | A02736 | A09957 | 429 |
| A02736 | A10082 | 395 | A02737 | A02792 | 177 |
| A02737 | A02805 | 227 | A02737 | A02825 | 977 |
| A02737 | A02826 | 258 | A02737 | A02870 | 271 |
| A02737 | A02904 | 307 | A02737 | A03211 | 230 |
| A02737 | A03321 | 63  | A02737 | A03338 | 425 |
| A02737 | A03467 | 167 | A02737 | A03671 | 165 |
| A02737 | A04308 | 451 | A02737 | A04346 | 160 |
| A02737 | A04537 | 429 | A02737 | A04685 | 229 |
| A02737 | A04832 | 167 | A02737 | A04853 | 172 |
| A02737 | A05014 | 207 | A02737 | A05029 | 681 |
| A02737 | A05101 | 323 | A02737 | A05501 | 217 |
| A02737 | A05645 | 332 | A02737 | A05683 | 294 |
| A02737 | A05832 | 230 | A02737 | A05868 | 191 |
| A02737 | A06051 | 490 | A02737 | A06151 | 202 |
| A02737 | A06398 | 418 | A02737 | A06534 | 217 |
| A02737 | A06686 | 171 | A02737 | A06769 | 450 |
| A02737 | A06814 | 217 | A02737 | A06973 | 217 |
| A02737 | A07047 | 217 | A02737 | A07378 | 177 |
| A02737 | A07398 | 217 | A02737 | A07422 | 899 |
| A02737 | A07481 | 313 | A02737 | A07589 | 409 |
| A02737 | A08049 | 358 | A02737 | A08369 | 217 |
| A02737 | A08408 | 217 | A02737 | A08476 | 217 |
| A02737 | A08546 | 160 | A02737 | A08710 | 416 |
| A02737 | A08978 | 165 | A02737 | A09020 | 196 |
| A02737 | A09101 | 323 | A02737 | A09308 | 217 |
| A02737 | A09322 | 217 | A02737 | A09383 | 255 |
| A02737 | A09572 | 236 | A02737 | A09620 | 217 |
| A02737 | A10006 | 212 | A02737 | A10082 | 391 |
| A02737 | A11728 | 217 | A02737 | A11731 | 202 |
| A02737 | A12227 | 217 | A02737 | A13212 | 174 |

|        |        |     |        |        |     |
|--------|--------|-----|--------|--------|-----|
| A02737 | A13251 | 302 | A02737 | A14188 | 157 |
| A02737 | A14248 | 241 | A02737 | A14351 | 159 |
| A02737 | A14472 | 385 | A02737 | A15268 | 217 |
| A02737 | A15381 | 217 | A02737 | A15510 | 168 |
| A02737 | A15891 | 215 | A02737 | A16962 | 267 |
| A02738 | A02922 | 154 | A02738 | A03067 | 159 |
| A02738 | A03138 | 234 | A02738 | A03344 | 371 |
| A02738 | A03345 | 251 | A02738 | A03347 | 369 |
| A02738 | A03349 | 154 | A02738 | A03351 | 227 |
| A02738 | A03371 | 265 | A02738 | A03379 | 297 |
| A02738 | A03596 | 152 | A02738 | A03904 | 213 |
| A02738 | A03984 | 260 | A02738 | A04193 | 361 |
| A02738 | A04289 | 327 | A02738 | A04321 | 455 |
| A02738 | A04337 | 259 | A02738 | A04361 | 486 |
| A02738 | A04374 | 344 | A02738 | A04410 | 345 |
| A02738 | A04569 | 419 | A02738 | A04580 | 460 |
| A02738 | A04840 | 391 | A02738 | A04870 | 347 |
| A02738 | A04928 | 483 | A02738 | A05121 | 193 |
| A02738 | A05123 | 452 | A02738 | A05172 | 344 |
| A02738 | A05294 | 491 | A02738 | A05385 | 265 |
| A02738 | A05603 | 224 | A02738 | A06329 | 441 |
| A02738 | A06346 | 491 | A02738 | A06574 | 401 |
| A02738 | A06608 | 241 | A02738 | A06711 | 457 |
| A02738 | A06897 | 240 | A02738 | A06965 | 348 |
| A02738 | A07044 | 299 | A02738 | A07056 | 259 |
| A02738 | A07218 | 469 | A02738 | A07384 | 346 |
| A02738 | A07442 | 196 | A02738 | A07453 | 319 |
| A02738 | A07491 | 312 | A02738 | A07704 | 491 |
| A02738 | A07705 | 491 | A02738 | A08040 | 358 |
| A02738 | A08171 | 196 | A02738 | A08291 | 319 |
| A02738 | A08292 | 489 | A02738 | A08309 | 347 |
| A02738 | A08664 | 236 | A02738 | A08671 | 479 |
| A02738 | A08681 | 199 | A02738 | A08686 | 219 |
| A02738 | A08753 | 185 | A02738 | A08859 | 263 |
| A02738 | A08972 | 238 | A02738 | A09123 | 420 |
| A02738 | A09205 | 210 | A02738 | A09322 | 406 |
| A02738 | A09341 | 316 | A02738 | A09440 | 357 |
| A02738 | A09996 | 171 | A02738 | A10013 | 460 |
| A02738 | A10417 | 301 | A02738 | A10744 | 274 |
| A02738 | A10825 | 457 | A02738 | A10827 | 357 |
| A02738 | A11289 | 480 | A02738 | A11298 | 260 |
| A02738 | A11310 | 485 | A02738 | A11320 | 472 |
| A02738 | A11328 | 457 | A02738 | A11372 | 246 |
| A02738 | A11375 | 402 | A02738 | A11388 | 357 |
| A02738 | A11396 | 402 | A02738 | A11446 | 278 |
| A02738 | A11463 | 319 | A02738 | A11568 | 291 |

|        |        |     |        |        |     |
|--------|--------|-----|--------|--------|-----|
| A02738 | A11709 | 344 | A02738 | A12176 | 357 |
| A02738 | A12361 | 151 | A02738 | A12387 | 375 |
| A02738 | A12448 | 375 | A02738 | A12683 | 434 |
| A02738 | A12963 | 375 | A02738 | A13173 | 335 |
| A02738 | A13820 | 460 | A02738 | A14443 | 157 |
| A02738 | A14689 | 212 | A02738 | A15258 | 238 |
| A02738 | A15277 | 307 | A02738 | A15322 | 165 |
| A02738 | A15336 | 199 | A02738 | A15495 | 157 |
| A02738 | A15498 | 193 | A02738 | A15743 | 352 |
| A02738 | A15989 | 335 | A02738 | A16068 | 205 |
| A02738 | A16626 | 207 | A02739 | A02745 | 391 |
| A02739 | A02746 | 188 | A02739 | A02747 | 351 |
| A02739 | A02803 | 276 | A02739 | A02818 | 429 |
| A02739 | A02833 | 254 | A02739 | A02837 | 162 |
| A02739 | A02848 | 283 | A02739 | A02852 | 212 |
| A02739 | A02859 | 433 | A02739 | A02874 | 165 |
| A02739 | A02899 | 160 | A02739 | A02982 | 466 |
| A02739 | A02984 | 170 | A02739 | A03019 | 259 |
| A02739 | A03215 | 324 | A02739 | A03224 | 257 |
| A02739 | A03243 | 311 | A02739 | A03256 | 450 |
| A02739 | A03259 | 402 | A02739 | A03271 | 171 |
| A02739 | A03275 | 241 | A02739 | A03552 | 200 |
| A02739 | A03563 | 177 | A02739 | A03742 | 204 |
| A02739 | A03983 | 256 | A02739 | A03984 | 188 |
| A02739 | A04010 | 218 | A02739 | A04037 | 246 |
| A02739 | A04059 | 330 | A02739 | A04117 | 479 |
| A02739 | A04127 | 212 | A02739 | A04238 | 232 |
| A02739 | A04246 | 246 | A02739 | A04279 | 406 |
| A02739 | A04364 | 152 | A02739 | A04446 | 378 |
| A02739 | A04526 | 268 | A02739 | A04531 | 223 |
| A02739 | A04708 | 283 | A02739 | A04819 | 256 |
| A02739 | A04902 | 414 | A02739 | A04908 | 263 |
| A02739 | A05050 | 223 | A02739 | A05126 | 262 |
| A02739 | A05358 | 176 | A02739 | A05577 | 173 |
| A02739 | A05719 | 219 | A02739 | A05884 | 322 |
| A02739 | A06271 | 256 | A02739 | A06312 | 217 |
| A02739 | A06415 | 165 | A02739 | A06584 | 213 |
| A02739 | A06833 | 322 | A02739 | A06868 | 362 |
| A02739 | A07135 | 469 | A02739 | A07147 | 401 |
| A02739 | A07165 | 208 | A02739 | A07608 | 226 |
| A02739 | A07660 | 217 | A02739 | A08266 | 306 |
| A02739 | A08672 | 283 | A02739 | A08697 | 346 |
| A02739 | A08720 | 283 | A02739 | A08827 | 177 |
| A02739 | A10092 | 346 | A02739 | A10655 | 174 |
| A02739 | A11045 | 306 | A02739 | A13160 | 400 |
| A02739 | A13828 | 346 | A02739 | A14188 | 272 |

|        |        |     |        |        |     |
|--------|--------|-----|--------|--------|-----|
| A02739 | A14364 | 463 | A02739 | A14387 | 207 |
| A02739 | A15283 | 388 | A02739 | A15674 | 177 |
| A02739 | A15994 | 322 | A02739 | A16321 | 306 |
| A02739 | A16426 | 152 | A02739 | A16652 | 367 |
| A02739 | A16775 | 322 | A02740 | A02803 | 411 |
| A02740 | A02816 | 428 | A02740 | A02860 | 447 |
| A02740 | A02887 | 407 | A02740 | A02895 | 443 |
| A02740 | A02914 | 455 | A02740 | A02924 | 358 |
| A02740 | A03195 | 384 | A02740 | A03271 | 406 |
| A02740 | A03817 | 382 | A02740 | A04042 | 433 |
| A02740 | A04587 | 468 | A02740 | A04682 | 451 |
| A02740 | A04730 | 468 | A02740 | A06224 | 466 |
| A02741 | A02742 | 489 | A02741 | A02745 | 407 |
| A02741 | A02746 | 341 | A02741 | A02756 | 176 |
| A02741 | A02772 | 218 | A02741 | A02780 | 484 |
| A02741 | A02784 | 258 | A02741 | A02787 | 358 |
| A02741 | A02788 | 458 | A02741 | A02800 | 217 |
| A02741 | A02808 | 319 | A02741 | A02840 | 443 |
| A02741 | A02841 | 429 | A02741 | A02854 | 358 |
| A02741 | A02859 | 467 | A02741 | A02886 | 199 |
| A02741 | A02888 | 432 | A02741 | A03012 | 409 |
| A02741 | A03035 | 210 | A02741 | A03057 | 374 |
| A02741 | A03100 | 245 | A02741 | A03158 | 339 |
| A02741 | A03226 | 399 | A02741 | A03259 | 445 |
| A02741 | A03260 | 319 | A02741 | A03271 | 63  |
| A02741 | A03281 | 162 | A02741 | A03304 | 443 |
| A02741 | A03419 | 149 | A02741 | A03431 | 205 |
| A02741 | A03432 | 160 | A02741 | A04010 | 152 |
| A02741 | A04030 | 294 | A02741 | A04073 | 185 |
| A02741 | A04138 | 443 | A02741 | A04201 | 230 |
| A02741 | A04238 | 254 | A02741 | A04263 | 490 |
| A02741 | A04276 | 199 | A02741 | A04518 | 234 |
| A02741 | A04567 | 385 | A02741 | A04568 | 185 |
| A02741 | A04712 | 227 | A02741 | A04783 | 353 |
| A02741 | A04801 | 322 | A02741 | A04878 | 205 |
| A02741 | A04908 | 191 | A02741 | A04949 | 196 |
| A02741 | A05107 | 307 | A02741 | A05145 | 258 |
| A02741 | A05216 | 268 | A02741 | A05309 | 278 |
| A02741 | A05515 | 208 | A02741 | A05796 | 279 |
| A02741 | A06286 | 257 | A02741 | A06653 | 187 |
| A02741 | A07146 | 205 | A02741 | A07150 | 322 |
| A02741 | A07154 | 440 | A02741 | A07157 | 272 |
| A02741 | A07164 | 485 | A02741 | A07166 | 230 |
| A02741 | A07191 | 446 | A02741 | A07200 | 174 |
| A02741 | A08910 | 353 | A02741 | A09545 | 262 |
| A02741 | A13872 | 160 | A02741 | A14026 | 457 |

|        |        |     |        |        |     |
|--------|--------|-----|--------|--------|-----|
| A02741 | A14562 | 190 | A02741 | A14652 | 188 |
| A02741 | A15089 | 337 | A02741 | A15901 | 311 |
| A02741 | A16071 | 286 | A02741 | A16636 | 480 |
| A02742 | A02780 | 335 | A02742 | A02787 | 208 |
| A02742 | A02841 | 402 | A02742 | A02851 | 334 |
| A02742 | A02896 | 191 | A02742 | A02951 | 199 |
| A02742 | A03019 | 99  | A02742 | A03204 | 302 |
| A02742 | A03244 | 232 | A02742 | A03799 | 229 |
| A02742 | A04263 | 434 | A02742 | A04567 | 446 |
| A02742 | A05577 | 162 | A02742 | A07150 | 396 |
| A02742 | A07154 | 452 | A02742 | A07157 | 334 |
| A02742 | A07442 | 188 | A02742 | A10336 | 218 |
| A02743 | A02779 | 200 | A02743 | A02819 | 199 |
| A02743 | A02951 | 296 | A02743 | A02996 | 363 |
| A02743 | A03101 | 286 | A02743 | A03451 | 386 |
| A02743 | A03594 | 329 | A02743 | A03681 | 368 |
| A02743 | A04117 | 163 | A02743 | A04209 | 171 |
| A02743 | A04316 | 274 | A02743 | A04595 | 319 |
| A02743 | A05473 | 259 | A02743 | A05812 | 234 |
| A02743 | A10148 | 218 | A02743 | A11943 | 193 |
| A02743 | A14643 | 185 | A02744 | A02812 | 157 |
| A02744 | A02816 | 324 | A02744 | A02830 | 174 |
| A02744 | A02837 | 168 | A02744 | A02842 | 113 |
| A02744 | A02853 | 313 | A02744 | A02858 | 259 |
| A02744 | A02859 | 213 | A02744 | A02877 | 319 |
| A02744 | A02878 | 345 | A02744 | A02895 | 165 |
| A02744 | A02904 | 235 | A02744 | A02920 | 246 |
| A02744 | A02927 | 179 | A02744 | A03112 | 469 |
| A02744 | A03215 | 238 | A02744 | A03322 | 196 |
| A02744 | A03415 | 223 | A02744 | A03417 | 152 |
| A02744 | A03603 | 372 | A02744 | A03663 | 185 |
| A02744 | A04015 | 162 | A02744 | A04296 | 319 |
| A02744 | A04415 | 224 | A02744 | A04692 | 473 |
| A02744 | A04710 | 362 | A02744 | A04783 | 154 |
| A02744 | A04818 | 198 | A02744 | A05480 | 319 |
| A02744 | A06130 | 195 | A02744 | A06544 | 213 |
| A02744 | A06621 | 165 | A02744 | A07169 | 291 |
| A02744 | A08844 | 200 | A02744 | A09567 | 236 |
| A02744 | A09899 | 338 | A02744 | A10337 | 151 |
| A02744 | A11357 | 249 | A02744 | A11641 | 286 |
| A02744 | A13361 | 152 | A02744 | A13753 | 217 |
| A02744 | A13821 | 263 | A02744 | A14025 | 272 |
| A02745 | A02746 | 383 | A02745 | A02747 | 294 |
| A02745 | A02749 | 87  | A02745 | A02751 | 238 |
| A02745 | A02771 | 165 | A02745 | A02780 | 273 |
| A02745 | A02783 | 191 | A02745 | A02806 | 303 |



|        |        |     |        |        |     |
|--------|--------|-----|--------|--------|-----|
| A02745 | A02814 | 177 | A02745 | A02828 | 80  |
| A02745 | A02837 | 224 | A02745 | A02859 | 488 |
| A02745 | A02874 | 374 | A02745 | A02908 | 126 |
| A02745 | A02969 | 226 | A02745 | A02983 | 310 |
| A02745 | A03010 | 187 | A02745 | A03112 | 154 |
| A02745 | A03259 | 443 | A02745 | A03275 | 408 |
| A02745 | A03281 | 417 | A02745 | A03942 | 157 |
| A02745 | A03949 | 451 | A02745 | A04010 | 395 |
| A02745 | A04589 | 159 | A02745 | A04614 | 218 |
| A02745 | A04652 | 475 | A02745 | A05309 | 480 |
| A02745 | A06584 | 176 | A02745 | A06620 | 224 |
| A02745 | A06834 | 252 | A02745 | A06961 | 341 |
| A02745 | A07145 | 174 | A02745 | A07147 | 436 |
| A02745 | A07154 | 249 | A02745 | A07157 | 246 |
| A02745 | A07164 | 151 | A02745 | A07165 | 260 |
| A02745 | A07191 | 279 | A02745 | A07199 | 281 |
| A02745 | A07660 | 290 | A02745 | A08430 | 263 |
| A02745 | A08627 | 452 | A02745 | A08881 | 165 |
| A02745 | A09235 | 180 | A02745 | A09849 | 297 |
| A02745 | A10602 | 297 | A02745 | A11288 | 371 |
| A02745 | A11597 | 151 | A02745 | A12927 | 215 |
| A02745 | A13772 | 154 | A02745 | A14390 | 268 |
| A02745 | A14431 | 301 | A02745 | A15691 | 270 |
| A02745 | A16120 | 238 | A02745 | A16636 | 441 |
| A02745 | A16664 | 168 | A02746 | A02749 | 165 |
| A02746 | A02780 | 339 | A02746 | A02785 | 174 |
| A02746 | A02788 | 190 | A02746 | A02808 | 479 |
| A02746 | A02837 | 119 | A02746 | A02843 | 432 |
| A02746 | A02856 | 353 | A02746 | A02859 | 168 |
| A02746 | A02896 | 404 | A02746 | A03204 | 307 |
| A02746 | A03259 | 454 | A02746 | A03263 | 260 |
| A02746 | A03275 | 378 | A02746 | A03280 | 310 |
| A02746 | A03574 | 330 | A02746 | A04109 | 364 |
| A02746 | A04138 | 327 | A02746 | A04229 | 195 |
| A02746 | A04264 | 326 | A02746 | A04881 | 310 |
| A02746 | A05279 | 398 | A02746 | A05309 | 377 |
| A02746 | A05690 | 154 | A02746 | A07154 | 321 |
| A02746 | A07157 | 207 | A02746 | A07161 | 285 |
| A02746 | A07164 | 236 | A02746 | A07166 | 252 |
| A02746 | A07795 | 386 | A02746 | A09633 | 274 |
| A02746 | A12927 | 183 | A02746 | A14405 | 260 |
| A02746 | A15258 | 329 | A02747 | A02874 | 154 |
| A02747 | A04860 | 396 | A02747 | A07135 | 312 |
| A02747 | A07147 | 434 | A02747 | A08077 | 319 |
| A02747 | A16321 | 409 | A02748 | A02792 | 372 |
| A02749 | A02750 | 273 | A02749 | A02752 | 490 |

|        |        |     |        |        |     |
|--------|--------|-----|--------|--------|-----|
| A02749 | A02753 | 457 | A02749 | A02785 | 226 |
| A02749 | A02787 | 208 | A02749 | A02819 | 389 |
| A02749 | A02837 | 246 | A02749 | A02859 | 480 |
| A02749 | A02877 | 411 | A02749 | A02878 | 401 |
| A02749 | A02888 | 126 | A02749 | A02893 | 246 |
| A02749 | A03024 | 205 | A02749 | A03091 | 218 |
| A02749 | A03099 | 171 | A02749 | A03102 | 154 |
| A02749 | A03112 | 472 | A02749 | A03114 | 199 |
| A02749 | A03238 | 258 | A02749 | A03259 | 473 |
| A02749 | A03263 | 362 | A02749 | A03275 | 193 |
| A02749 | A03321 | 202 | A02749 | A03428 | 157 |
| A02749 | A03451 | 322 | A02749 | A03515 | 246 |
| A02749 | A03520 | 477 | A02749 | A03587 | 267 |
| A02749 | A03595 | 218 | A02749 | A03609 | 455 |
| A02749 | A03611 | 408 | A02749 | A03614 | 213 |
| A02749 | A03636 | 157 | A02749 | A03718 | 232 |
| A02749 | A03762 | 185 | A02749 | A03813 | 184 |
| A02749 | A03845 | 297 | A02749 | A03854 | 467 |
| A02749 | A03922 | 204 | A02749 | A03990 | 294 |
| A02749 | A04015 | 382 | A02749 | A04062 | 445 |
| A02749 | A04085 | 205 | A02749 | A04117 | 254 |
| A02749 | A04308 | 177 | A02749 | A04334 | 168 |
| A02749 | A04351 | 157 | A02749 | A04442 | 477 |
| A02749 | A04451 | 180 | A02749 | A04729 | 270 |
| A02749 | A04793 | 165 | A02749 | A04794 | 286 |
| A02749 | A04795 | 317 | A02749 | A04807 | 435 |
| A02749 | A04809 | 345 | A02749 | A04822 | 160 |
| A02749 | A04904 | 221 | A02749 | A05065 | 207 |
| A02749 | A05082 | 418 | A02749 | A05122 | 486 |
| A02749 | A05200 | 152 | A02749 | A05237 | 386 |
| A02749 | A05309 | 266 | A02749 | A05701 | 454 |
| A02749 | A05798 | 201 | A02749 | A06135 | 218 |
| A02749 | A06159 | 221 | A02749 | A06582 | 254 |
| A02749 | A06595 | 430 | A02749 | A06596 | 165 |
| A02749 | A06608 | 321 | A02749 | A06616 | 218 |
| A02749 | A06623 | 485 | A02749 | A06648 | 270 |
| A02749 | A06825 | 218 | A02749 | A07127 | 419 |
| A02749 | A07135 | 491 | A02749 | A07143 | 205 |
| A02749 | A07145 | 179 | A02749 | A07151 | 217 |
| A02749 | A07155 | 190 | A02749 | A07158 | 205 |
| A02749 | A07159 | 462 | A02749 | A07164 | 247 |
| A02749 | A07165 | 232 | A02749 | A07166 | 168 |
| A02749 | A07174 | 162 | A02749 | A07192 | 193 |
| A02749 | A07201 | 221 | A02749 | A07362 | 162 |
| A02749 | A08040 | 151 | A02749 | A08070 | 391 |
| A02749 | A08203 | 199 | A02749 | A08309 | 217 |

|        |        |     |        |        |     |
|--------|--------|-----|--------|--------|-----|
| A02749 | A08638 | 273 | A02749 | A08641 | 363 |
| A02749 | A08686 | 291 | A02749 | A08704 | 246 |
| A02749 | A08768 | 160 | A02749 | A09036 | 185 |
| A02749 | A09120 | 424 | A02749 | A09124 | 447 |
| A02749 | A09215 | 330 | A02749 | A09242 | 159 |
| A02749 | A09385 | 246 | A02749 | A09509 | 213 |
| A02749 | A09545 | 218 | A02749 | A09550 | 208 |
| A02749 | A09779 | 347 | A02749 | A10000 | 193 |
| A02749 | A10006 | 165 | A02749 | A10018 | 179 |
| A02749 | A10049 | 187 | A02749 | A10313 | 176 |
| A02749 | A10530 | 273 | A02749 | A10599 | 219 |
| A02749 | A10739 | 170 | A02749 | A10805 | 232 |
| A02749 | A11123 | 193 | A02749 | A11453 | 154 |
| A02749 | A11631 | 187 | A02749 | A12642 | 330 |
| A02749 | A12661 | 160 | A02749 | A12828 | 185 |
| A02749 | A13242 | 238 | A02749 | A13294 | 183 |
| A02749 | A13502 | 254 | A02749 | A13997 | 207 |
| A02749 | A14132 | 154 | A02749 | A14353 | 218 |
| A02749 | A14535 | 221 | A02749 | A14588 | 470 |
| A02749 | A14621 | 152 | A02749 | A14624 | 273 |
| A02749 | A14642 | 404 | A02749 | A14681 | 303 |
| A02749 | A14946 | 205 | A02749 | A15922 | 173 |
| A02749 | A16062 | 238 | A02749 | A16088 | 168 |
| A02749 | A16095 | 335 | A02749 | A17115 | 199 |
| A02749 | A17153 | 303 | A02750 | A02819 | 329 |
| A02750 | A02877 | 227 | A02750 | A03263 | 346 |
| A02750 | A03587 | 380 | A02750 | A04739 | 347 |
| A02750 | A05798 | 406 | A02750 | A06623 | 417 |
| A02750 | A09124 | 286 | A02750 | A09509 | 314 |
| A02751 | A02787 | 317 | A02751 | A02788 | 159 |
| A02751 | A02841 | 489 | A02751 | A02854 | 249 |
| A02751 | A02859 | 485 | A02751 | A02864 | 173 |
| A02751 | A02874 | 446 | A02751 | A02896 | 299 |
| A02751 | A02916 | 185 | A02751 | A02917 | 246 |
| A02751 | A02922 | 235 | A02751 | A02988 | 329 |
| A02751 | A03049 | 234 | A02751 | A03224 | 263 |
| A02751 | A03228 | 263 | A02751 | A03259 | 234 |
| A02751 | A03275 | 352 | A02751 | A03773 | 223 |
| A02751 | A03782 | 215 | A02751 | A03803 | 356 |
| A02751 | A03809 | 371 | A02751 | A04040 | 411 |
| A02751 | A04163 | 271 | A02751 | A04238 | 343 |
| A02751 | A04240 | 445 | A02751 | A04244 | 307 |
| A02751 | A04247 | 481 | A02751 | A04248 | 252 |
| A02751 | A04258 | 285 | A02751 | A04263 | 481 |
| A02751 | A04428 | 343 | A02751 | A04518 | 472 |
| A02751 | A04528 | 385 | A02751 | A04536 | 180 |

|        |        |     |        |        |     |
|--------|--------|-----|--------|--------|-----|
| A02751 | A04548 | 488 | A02751 | A04567 | 491 |
| A02751 | A04589 | 199 | A02751 | A04741 | 361 |
| A02751 | A04756 | 291 | A02751 | A04854 | 379 |
| A02751 | A04908 | 326 | A02751 | A04965 | 210 |
| A02751 | A05039 | 369 | A02751 | A05047 | 408 |
| A02751 | A05127 | 180 | A02751 | A05847 | 408 |
| A02751 | A05985 | 208 | A02751 | A06095 | 327 |
| A02751 | A06404 | 329 | A02751 | A06737 | 395 |
| A02751 | A06961 | 374 | A02751 | A07143 | 249 |
| A02751 | A07146 | 308 | A02751 | A07148 | 313 |
| A02751 | A07173 | 218 | A02751 | A08137 | 199 |
| A02751 | A08714 | 266 | A02751 | A10055 | 347 |
| A02751 | A12927 | 152 | A02751 | A13872 | 271 |
| A02751 | A14390 | 313 | A02751 | A15601 | 299 |
| A02751 | A15603 | 288 | A02751 | A15832 | 369 |
| A02751 | A16904 | 173 | A02752 | A02753 | 488 |
| A02752 | A02766 | 417 | A02752 | A02768 | 171 |
| A02752 | A02805 | 238 | A02752 | A02811 | 193 |
| A02752 | A02828 | 210 | A02752 | A02837 | 79  |
| A02752 | A03019 | 63  | A02752 | A03076 | 193 |
| A02752 | A03259 | 63  | A02752 | A03321 | 196 |
| A02752 | A03581 | 234 | A02752 | A03594 | 255 |
| A02752 | A03611 | 488 | A02752 | A03663 | 172 |
| A02752 | A03854 | 436 | A02752 | A03990 | 338 |
| A02752 | A04062 | 291 | A02752 | A04209 | 293 |
| A02752 | A04342 | 185 | A02752 | A04442 | 466 |
| A02752 | A04793 | 418 | A02752 | A04807 | 440 |
| A02752 | A04809 | 312 | A02752 | A04853 | 183 |
| A02752 | A04904 | 276 | A02752 | A04957 | 221 |
| A02752 | A05082 | 168 | A02752 | A05181 | 165 |
| A02752 | A05529 | 279 | A02752 | A05665 | 343 |
| A02752 | A05701 | 457 | A02752 | A06109 | 291 |
| A02752 | A06134 | 191 | A02752 | A06166 | 291 |
| A02752 | A06595 | 339 | A02752 | A06623 | 216 |
| A02752 | A06631 | 171 | A02752 | A07159 | 199 |
| A02752 | A08070 | 330 | A02752 | A08289 | 152 |
| A02752 | A08739 | 212 | A02752 | A09018 | 321 |
| A02752 | A09020 | 208 | A02752 | A09051 | 302 |
| A02752 | A09124 | 424 | A02752 | A10038 | 355 |
| A02752 | A10144 | 364 | A02752 | A10247 | 327 |
| A02752 | A10414 | 185 | A02752 | A10468 | 364 |
| A02752 | A11318 | 218 | A02752 | A13500 | 232 |
| A02752 | A13877 | 276 | A02752 | A14335 | 188 |
| A02752 | A16354 | 319 | A02753 | A02828 | 171 |
| A02753 | A02832 | 168 | A02753 | A02833 | 491 |
| A02753 | A02837 | 323 | A02753 | A02846 | 230 |

|        |        |     |        |        |     |
|--------|--------|-----|--------|--------|-----|
| A02753 | A02875 | 252 | A02753 | A02899 | 303 |
| A02753 | A02908 | 159 | A02753 | A02976 | 235 |
| A02753 | A02982 | 469 | A02753 | A02984 | 411 |
| A02753 | A03024 | 240 | A02753 | A03112 | 299 |
| A02753 | A03243 | 104 | A02753 | A03259 | 63  |
| A02753 | A03594 | 232 | A02753 | A03854 | 329 |
| A02753 | A03865 | 196 | A02753 | A03873 | 439 |
| A02753 | A03927 | 329 | A02753 | A03985 | 165 |
| A02753 | A04020 | 484 | A02753 | A04075 | 485 |
| A02753 | A04134 | 255 | A02753 | A04253 | 260 |
| A02753 | A04271 | 328 | A02753 | A04442 | 477 |
| A02753 | A04616 | 329 | A02753 | A04651 | 207 |
| A02753 | A04698 | 394 | A02753 | A04740 | 224 |
| A02753 | A04795 | 411 | A02753 | A04809 | 375 |
| A02753 | A04853 | 291 | A02753 | A04902 | 294 |
| A02753 | A04958 | 283 | A02753 | A04991 | 382 |
| A02753 | A05073 | 210 | A02753 | A05082 | 235 |
| A02753 | A05253 | 251 | A02753 | A05306 | 352 |
| A02753 | A05344 | 227 | A02753 | A05568 | 174 |
| A02753 | A05701 | 390 | A02753 | A06385 | 439 |
| A02753 | A06625 | 232 | A02753 | A06677 | 232 |
| A02753 | A07118 | 271 | A02753 | A08094 | 187 |
| A02753 | A08432 | 352 | A02753 | A08677 | 193 |
| A02753 | A08772 | 165 | A02753 | A09122 | 302 |
| A02753 | A09240 | 251 | A02753 | A09247 | 170 |
| A02753 | A09309 | 177 | A02753 | A09397 | 227 |
| A02753 | A09504 | 318 | A02753 | A09528 | 160 |
| A02753 | A09736 | 154 | A02753 | A09883 | 291 |
| A02753 | A10144 | 352 | A02753 | A10386 | 232 |
| A02753 | A10414 | 452 | A02753 | A10468 | 352 |
| A02753 | A10693 | 162 | A02753 | A10725 | 171 |
| A02753 | A11077 | 352 | A02753 | A11206 | 213 |
| A02753 | A13308 | 193 | A02753 | A13500 | 411 |
| A02753 | A13734 | 333 | A02753 | A13877 | 255 |
| A02753 | A14188 | 490 | A02753 | A14198 | 424 |
| A02753 | A14372 | 311 | A02753 | A14375 | 228 |
| A02753 | A14390 | 333 | A02753 | A14403 | 240 |
| A02753 | A14438 | 202 | A02753 | A14780 | 313 |
| A02753 | A15281 | 422 | A02753 | A15674 | 322 |
| A02753 | A15850 | 271 | A02753 | A15956 | 352 |
| A02754 | A02760 | 243 | A02754 | A02768 | 213 |
| A02754 | A02788 | 218 | A02754 | A02837 | 218 |
| A02754 | A02847 | 180 | A02754 | A02869 | 299 |
| A02754 | A02875 | 338 | A02754 | A02918 | 157 |
| A02754 | A02936 | 259 | A02754 | A02947 | 271 |
| A02754 | A02982 | 407 | A02754 | A03043 | 356 |

|        |        |     |        |        |     |
|--------|--------|-----|--------|--------|-----|
| A02754 | A03275 | 176 | A02754 | A03417 | 395 |
| A02754 | A03427 | 224 | A02754 | A03474 | 154 |
| A02754 | A03478 | 160 | A02754 | A03589 | 313 |
| A02754 | A03599 | 318 | A02754 | A03783 | 274 |
| A02754 | A04045 | 347 | A02754 | A04444 | 462 |
| A02754 | A04445 | 257 | A02754 | A04453 | 271 |
| A02754 | A04516 | 274 | A02754 | A04793 | 263 |
| A02754 | A04907 | 290 | A02754 | A04908 | 260 |
| A02754 | A05122 | 154 | A02754 | A05133 | 347 |
| A02754 | A05709 | 271 | A02754 | A05758 | 201 |
| A02754 | A06123 | 385 | A02754 | A06385 | 218 |
| A02754 | A06581 | 393 | A02754 | A06615 | 174 |
| A02754 | A07164 | 369 | A02754 | A07165 | 391 |
| A02754 | A07187 | 341 | A02754 | A07201 | 416 |
| A02754 | A07295 | 328 | A02754 | A10128 | 340 |
| A02754 | A10418 | 240 | A02754 | A15738 | 434 |
| A02754 | A16324 | 174 | A02755 | A04117 | 165 |
| A02755 | A04268 | 319 | A02755 | A04369 | 319 |
| A02755 | A04436 | 406 | A02755 | A04437 | 366 |
| A02755 | A04555 | 450 | A02755 | A07468 | 297 |
| A02755 | A10967 | 271 | A02755 | A12793 | 324 |
| A02756 | A02763 | 307 | A02756 | A02771 | 491 |
| A02756 | A02783 | 263 | A02756 | A02785 | 452 |
| A02756 | A02812 | 371 | A02756 | A02829 | 160 |
| A02756 | A02859 | 484 | A02756 | A02874 | 440 |
| A02756 | A02896 | 154 | A02756 | A02922 | 406 |
| A02756 | A02951 | 269 | A02756 | A02982 | 204 |
| A02756 | A03053 | 441 | A02756 | A03162 | 271 |
| A02756 | A03259 | 346 | A02756 | A03275 | 396 |
| A02756 | A03282 | 170 | A02756 | A03540 | 377 |
| A02756 | A03634 | 176 | A02756 | A03639 | 228 |
| A02756 | A03653 | 269 | A02756 | A03750 | 340 |
| A02756 | A03914 | 419 | A02756 | A03915 | 389 |
| A02756 | A03923 | 188 | A02756 | A03934 | 276 |
| A02756 | A03936 | 191 | A02756 | A03970 | 337 |
| A02756 | A03976 | 204 | A02756 | A04010 | 337 |
| A02756 | A04023 | 389 | A02756 | A04147 | 152 |
| A02756 | A04225 | 944 | A02756 | A04237 | 281 |
| A02756 | A04267 | 238 | A02756 | A04391 | 469 |
| A02756 | A04462 | 294 | A02756 | A04481 | 486 |
| A02756 | A04482 | 263 | A02756 | A04484 | 939 |
| A02756 | A04509 | 435 | A02756 | A04607 | 176 |
| A02756 | A04652 | 288 | A02756 | A04883 | 260 |
| A02756 | A04939 | 193 | A02756 | A04949 | 285 |
| A02756 | A05113 | 265 | A02756 | A05171 | 360 |
| A02756 | A05309 | 467 | A02756 | A05349 | 335 |

|        |        |     |        |        |     |
|--------|--------|-----|--------|--------|-----|
| A02756 | A05934 | 288 | A02756 | A06263 | 162 |
| A02756 | A06314 | 358 | A02756 | A06415 | 291 |
| A02756 | A07141 | 407 | A02756 | A07143 | 266 |
| A02756 | A07164 | 480 | A02756 | A07177 | 266 |
| A02756 | A07200 | 486 | A02756 | A08714 | 154 |
| A02756 | A08755 | 302 | A02756 | A08836 | 219 |
| A02756 | A11064 | 368 | A02756 | A11123 | 489 |
| A02756 | A12927 | 236 | A02756 | A13909 | 337 |
| A02756 | A14071 | 360 | A02756 | A14194 | 480 |
| A02756 | A14198 | 461 | A02756 | A14385 | 276 |
| A02756 | A15368 | 263 | A02756 | A15403 | 232 |
| A02756 | A16636 | 491 | A02757 | A02789 | 364 |
| A02757 | A04007 | 407 | A02757 | A05216 | 193 |
| A02758 | A02760 | 446 | A02758 | A02761 | 249 |
| A02758 | A02785 | 141 | A02758 | A02811 | 288 |
| A02758 | A02814 | 230 | A02758 | A02943 | 353 |
| A02758 | A03099 | 159 | A02758 | A03115 | 335 |
| A02758 | A03120 | 436 | A02758 | A03186 | 152 |
| A02758 | A03234 | 335 | A02758 | A03264 | 307 |
| A02758 | A03513 | 402 | A02758 | A03537 | 356 |
| A02758 | A03583 | 424 | A02758 | A03585 | 326 |
| A02758 | A03589 | 353 | A02758 | A03609 | 193 |
| A02758 | A03653 | 249 | A02758 | A03820 | 156 |
| A02758 | A03847 | 378 | A02758 | A03870 | 363 |
| A02758 | A03917 | 313 | A02758 | A03978 | 373 |
| A02758 | A03992 | 413 | A02758 | A04001 | 337 |
| A02758 | A04004 | 291 | A02758 | A04031 | 329 |
| A02758 | A04087 | 412 | A02758 | A04123 | 363 |
| A02758 | A04228 | 262 | A02758 | A04229 | 162 |
| A02758 | A04231 | 484 | A02758 | A04253 | 432 |
| A02758 | A04260 | 215 | A02758 | A04366 | 404 |
| A02758 | A04550 | 385 | A02758 | A04556 | 411 |
| A02758 | A04560 | 340 | A02758 | A04634 | 385 |
| A02758 | A04637 | 419 | A02758 | A04905 | 308 |
| A02758 | A05036 | 353 | A02758 | A05358 | 301 |
| A02758 | A05533 | 247 | A02758 | A05590 | 368 |
| A02758 | A06315 | 350 | A02758 | A06596 | 312 |
| A02758 | A06629 | 357 | A02758 | A06949 | 180 |
| A02758 | A07590 | 232 | A02758 | A07736 | 202 |
| A02758 | A08070 | 208 | A02758 | A09091 | 385 |
| A02758 | A10141 | 441 | A02758 | A11573 | 333 |
| A02758 | A14642 | 180 | A02758 | A15498 | 330 |
| A02759 | A02785 | 235 | A02759 | A02789 | 291 |
| A02759 | A03054 | 362 | A02759 | A03086 | 281 |
| A02759 | A03099 | 490 | A02759 | A03234 | 174 |
| A02759 | A03310 | 405 | A02759 | A03314 | 324 |

|        |        |     |        |        |     |
|--------|--------|-----|--------|--------|-----|
| A02759 | A03402 | 293 | A02759 | A03513 | 165 |
| A02759 | A03578 | 200 | A02759 | A03584 | 218 |
| A02759 | A03961 | 193 | A02759 | A04023 | 374 |
| A02759 | A04162 | 479 | A02759 | A04256 | 420 |
| A02759 | A04258 | 483 | A02759 | A04371 | 338 |
| A02759 | A04410 | 170 | A02759 | A04813 | 278 |
| A02759 | A04839 | 154 | A02759 | A04939 | 162 |
| A02759 | A04975 | 319 | A02759 | A05045 | 232 |
| A02759 | A05208 | 283 | A02759 | A05377 | 260 |
| A02759 | A05533 | 466 | A02759 | A05719 | 312 |
| A02759 | A05966 | 218 | A02759 | A06263 | 427 |
| A02759 | A06405 | 196 | A02759 | A06439 | 187 |
| A02759 | A06607 | 435 | A02759 | A06650 | 229 |
| A02759 | A06762 | 375 | A02759 | A06769 | 469 |
| A02759 | A06860 | 218 | A02759 | A06874 | 317 |
| A02759 | A07140 | 201 | A02759 | A07191 | 173 |
| A02759 | A07509 | 288 | A02759 | A08746 | 490 |
| A02759 | A09033 | 291 | A02759 | A09220 | 313 |
| A02759 | A09509 | 154 | A02759 | A10635 | 213 |
| A02759 | A11646 | 246 | A02759 | A13871 | 226 |
| A02759 | A16087 | 213 | A02759 | A17183 | 396 |
| A02760 | A02761 | 259 | A02760 | A02830 | 165 |
| A02760 | A03043 | 293 | A02760 | A03115 | 213 |
| A02760 | A03178 | 229 | A02760 | A03202 | 369 |
| A02760 | A03211 | 159 | A02760 | A03589 | 435 |
| A02760 | A03642 | 384 | A02760 | A03978 | 378 |
| A02760 | A04172 | 373 | A02760 | A04224 | 390 |
| A02760 | A04229 | 174 | A02760 | A04236 | 366 |
| A02760 | A04253 | 358 | A02760 | A04256 | 435 |
| A02760 | A04406 | 249 | A02760 | A04423 | 322 |
| A02760 | A04491 | 303 | A02760 | A04637 | 335 |
| A02760 | A04883 | 252 | A02760 | A05051 | 312 |
| A02760 | A05590 | 373 | A02760 | A05593 | 343 |
| A02760 | A05599 | 384 | A02760 | A06640 | 294 |
| A02760 | A06641 | 404 | A02760 | A08835 | 276 |
| A02760 | A09381 | 312 | A02761 | A02777 | 162 |
| A02761 | A03056 | 221 | A02761 | A03062 | 299 |
| A02761 | A03077 | 193 | A02761 | A03115 | 293 |
| A02761 | A03121 | 156 | A02761 | A03178 | 177 |
| A02761 | A03261 | 238 | A02761 | A03304 | 393 |
| A02761 | A03391 | 247 | A02761 | A03477 | 184 |
| A02761 | A03777 | 294 | A02761 | A04256 | 217 |
| A02761 | A04349 | 193 | A02761 | A04410 | 157 |
| A02761 | A04424 | 485 | A02761 | A04552 | 350 |
| A02761 | A04727 | 296 | A02761 | A04870 | 254 |
| A02761 | A05294 | 217 | A02761 | A05591 | 177 |



|        |        |     |        |        |     |
|--------|--------|-----|--------|--------|-----|
| A02761 | A05596 | 401 | A02761 | A05902 | 305 |
| A02761 | A05944 | 188 | A02761 | A06307 | 480 |
| A02761 | A06428 | 296 | A02761 | A06623 | 156 |
| A02761 | A08174 | 364 | A02761 | A08638 | 434 |
| A02761 | A09028 | 243 | A02761 | A09160 | 224 |
| A02761 | A09571 | 375 | A02761 | A11050 | 391 |
| A02761 | A11531 | 462 | A02761 | A12385 | 391 |
| A02761 | A12410 | 391 | A02761 | A12488 | 391 |
| A02761 | A12490 | 391 | A02761 | A12721 | 375 |
| A02761 | A13772 | 168 | A02761 | A14589 | 152 |
| A02761 | A15226 | 319 | A02761 | A15233 | 384 |
| A02761 | A15258 | 484 | A02761 | A15271 | 313 |
| A02761 | A15272 | 413 | A02761 | A15277 | 486 |
| A02762 | A02763 | 475 | A02762 | A02776 | 430 |
| A02762 | A02784 | 414 | A02762 | A02790 | 326 |
| A02762 | A04199 | 475 | A02762 | A04949 | 217 |
| A02762 | A14787 | 366 | A02763 | A02764 | 377 |
| A02763 | A02776 | 462 | A02763 | A02784 | 423 |
| A02763 | A02790 | 429 | A02763 | A02792 | 199 |
| A02763 | A02975 | 151 | A02763 | A03090 | 159 |
| A02763 | A03261 | 190 | A02763 | A03518 | 167 |
| A02763 | A03820 | 173 | A02763 | A03848 | 267 |
| A02763 | A04199 | 409 | A02763 | A04221 | 288 |
| A02763 | A04243 | 326 | A02763 | A04267 | 265 |
| A02763 | A04409 | 374 | A02763 | A04560 | 270 |
| A02763 | A04706 | 154 | A02763 | A04729 | 207 |
| A02763 | A04737 | 180 | A02763 | A05353 | 243 |
| A02763 | A05388 | 283 | A02763 | A06254 | 187 |
| A02763 | A07158 | 202 | A02763 | A07348 | 249 |
| A02763 | A08624 | 335 | A02763 | A08746 | 160 |
| A02763 | A08836 | 246 | A02763 | A08911 | 177 |
| A02763 | A11023 | 246 | A02763 | A11149 | 279 |
| A02763 | A11497 | 177 | A02763 | A12078 | 369 |
| A02763 | A12138 | 432 | A02763 | A13886 | 235 |
| A02763 | A14229 | 185 | A02763 | A14245 | 210 |
| A02763 | A14321 | 234 | A02763 | A14335 | 198 |
| A02763 | A14596 | 177 | A02763 | A14646 | 190 |
| A02763 | A14649 | 174 | A02763 | A14659 | 174 |
| A02763 | A14787 | 229 | A02763 | A15313 | 466 |
| A02763 | A15322 | 377 | A02763 | A15331 | 274 |
| A02763 | A15357 | 454 | A02763 | A15398 | 204 |
| A02763 | A15402 | 484 | A02763 | A15675 | 288 |
| A02763 | A15774 | 195 | A02763 | A16371 | 180 |
| A02763 | A16877 | 202 | A02764 | A02769 | 357 |
| A02764 | A02776 | 333 | A02764 | A02790 | 305 |
| A02764 | A02795 | 489 | A02764 | A02917 | 296 |

|        |        |     |        |        |     |
|--------|--------|-----|--------|--------|-----|
| A02764 | A02951 | 232 | A02764 | A03049 | 286 |
| A02764 | A03271 | 193 | A02764 | A03314 | 277 |
| A02764 | A03421 | 247 | A02764 | A03423 | 252 |
| A02764 | A03825 | 348 | A02764 | A03826 | 364 |
| A02764 | A04050 | 157 | A02764 | A04051 | 188 |
| A02764 | A04163 | 414 | A02764 | A04478 | 340 |
| A02764 | A04536 | 238 | A02764 | A04560 | 373 |
| A02764 | A04564 | 391 | A02764 | A04773 | 288 |
| A02764 | A05078 | 441 | A02764 | A05127 | 424 |
| A02764 | A05427 | 235 | A02764 | A05944 | 285 |
| A02764 | A06054 | 313 | A02764 | A06404 | 483 |
| A02764 | A06737 | 414 | A02764 | A06779 | 467 |
| A02764 | A06780 | 377 | A02764 | A06818 | 489 |
| A02764 | A06865 | 408 | A02764 | A07141 | 240 |
| A02764 | A07151 | 489 | A02764 | A07161 | 307 |
| A02764 | A07173 | 272 | A02764 | A07390 | 347 |
| A02764 | A14589 | 152 | A02765 | A02797 | 436 |
| A02765 | A03820 | 305 | A02765 | A04010 | 310 |
| A02765 | A04814 | 465 | A02766 | A02777 | 235 |
| A02766 | A02805 | 343 | A02766 | A03012 | 232 |
| A02766 | A04073 | 218 | A02766 | A04442 | 283 |
| A02766 | A04793 | 334 | A02766 | A06851 | 191 |
| A02766 | A09509 | 215 | A02766 | A09546 | 263 |
| A02766 | A10247 | 456 | A02766 | A10414 | 307 |
| A02766 | A11348 | 312 | A02766 | A11540 | 227 |
| A02768 | A02813 | 236 | A02768 | A02819 | 460 |
| A02768 | A02877 | 171 | A02768 | A02961 | 180 |
| A02768 | A02963 | 199 | A02768 | A03090 | 232 |
| A02768 | A03218 | 390 | A02768 | A03263 | 341 |
| A02768 | A03681 | 234 | A02768 | A03775 | 190 |
| A02768 | A04018 | 308 | A02768 | A04072 | 160 |
| A02768 | A04085 | 327 | A02768 | A04122 | 296 |
| A02768 | A04260 | 402 | A02768 | A04323 | 262 |
| A02768 | A04444 | 241 | A02768 | A04698 | 212 |
| A02768 | A04706 | 227 | A02768 | A04965 | 188 |
| A02768 | A04996 | 273 | A02768 | A05124 | 232 |
| A02768 | A05473 | 457 | A02768 | A06034 | 358 |
| A02768 | A06595 | 196 | A02768 | A07158 | 379 |
| A02768 | A07165 | 207 | A02768 | A07192 | 350 |
| A02768 | A08837 | 196 | A02768 | A08845 | 157 |
| A02768 | A09659 | 322 | A02768 | A09952 | 162 |
| A02768 | A10337 | 219 | A02768 | A10731 | 229 |
| A02768 | A11911 | 288 | A02768 | A11943 | 180 |
| A02768 | A12009 | 279 | A02768 | A14236 | 187 |
| A02768 | A14404 | 286 | A02768 | A15281 | 322 |
| A02768 | A15635 | 296 | A02768 | A15795 | 216 |

|        |        |     |        |        |     |
|--------|--------|-----|--------|--------|-----|
| A02768 | A15832 | 358 | A02769 | A02812 | 184 |
| A02769 | A02837 | 129 | A02769 | A02843 | 358 |
| A02769 | A02851 | 427 | A02769 | A02873 | 351 |
| A02769 | A02896 | 205 | A02769 | A02945 | 380 |
| A02769 | A03019 | 230 | A02769 | A03049 | 270 |
| A02769 | A03224 | 296 | A02769 | A03259 | 188 |
| A02769 | A03271 | 308 | A02769 | A03280 | 452 |
| A02769 | A03817 | 458 | A02769 | A04248 | 288 |
| A02769 | A04263 | 274 | A02769 | A04450 | 368 |
| A02769 | A04564 | 383 | A02769 | A04755 | 355 |
| A02769 | A04756 | 321 | A02769 | A05577 | 176 |
| A02769 | A05613 | 440 | A02769 | A05679 | 243 |
| A02769 | A05944 | 436 | A02769 | A05985 | 246 |
| A02769 | A06054 | 402 | A02769 | A06055 | 294 |
| A02769 | A06415 | 433 | A02769 | A06818 | 343 |
| A02769 | A06899 | 347 | A02769 | A07148 | 340 |
| A02769 | A07157 | 447 | A02769 | A07161 | 481 |
| A02769 | A07166 | 378 | A02769 | A07372 | 366 |
| A02769 | A07390 | 423 | A02769 | A10612 | 238 |
| A02769 | A10710 | 205 | A02769 | A13163 | 363 |
| A02769 | A13903 | 296 | A02769 | A14199 | 188 |
| A02769 | A14374 | 212 | A02769 | A14376 | 341 |
| A02769 | A14392 | 362 | A02769 | A14430 | 185 |
| A02769 | A14432 | 347 | A02769 | A15605 | 399 |
| A02769 | A15608 | 302 | A02769 | A15955 | 419 |
| A02770 | A02856 | 439 | A02770 | A02888 | 324 |
| A02770 | A02908 | 361 | A02770 | A02918 | 271 |
| A02770 | A03032 | 334 | A02770 | A03126 | 170 |
| A02770 | A03243 | 391 | A02770 | A03256 | 285 |
| A02770 | A04540 | 283 | A02770 | A04568 | 333 |
| A02770 | A04578 | 372 | A02770 | A05111 | 382 |
| A02770 | A05280 | 460 | A02770 | A06650 | 183 |
| A02770 | A07135 | 386 | A02770 | A07164 | 379 |
| A02770 | A07900 | 319 | A02771 | A02772 | 258 |
| A02771 | A02783 | 391 | A02771 | A02784 | 171 |
| A02771 | A02785 | 455 | A02771 | A02812 | 285 |
| A02771 | A02859 | 251 | A02771 | A02874 | 429 |
| A02771 | A02922 | 162 | A02771 | A02929 | 183 |
| A02771 | A02982 | 217 | A02771 | A03027 | 228 |
| A02771 | A03035 | 249 | A02771 | A03275 | 160 |
| A02771 | A03281 | 205 | A02771 | A03315 | 364 |
| A02771 | A03319 | 394 | A02771 | A03432 | 201 |
| A02771 | A03653 | 394 | A02771 | A03664 | 347 |
| A02771 | A03683 | 281 | A02771 | A03755 | 301 |
| A02771 | A03786 | 340 | A02771 | A03914 | 491 |
| A02771 | A03923 | 229 | A02771 | A03966 | 172 |

|        |        |     |        |        |     |
|--------|--------|-----|--------|--------|-----|
| A02771 | A03976 | 257 | A02771 | A04023 | 213 |
| A02771 | A04048 | 179 | A02771 | A04089 | 281 |
| A02771 | A04159 | 420 | A02771 | A04176 | 249 |
| A02771 | A04262 | 319 | A02771 | A04391 | 391 |
| A02771 | A04430 | 308 | A02771 | A04481 | 404 |
| A02771 | A04509 | 467 | A02771 | A04510 | 246 |
| A02771 | A04712 | 266 | A02771 | A04763 | 262 |
| A02771 | A04783 | 171 | A02771 | A04989 | 406 |
| A02771 | A05113 | 176 | A02771 | A05309 | 157 |
| A02771 | A05315 | 157 | A02771 | A05349 | 311 |
| A02771 | A05901 | 313 | A02771 | A06314 | 271 |
| A02771 | A06562 | 319 | A02771 | A06622 | 180 |
| A02771 | A06797 | 332 | A02771 | A07200 | 243 |
| A02771 | A07935 | 177 | A02771 | A08289 | 183 |
| A02771 | A09051 | 324 | A02771 | A09394 | 428 |
| A02771 | A10148 | 154 | A02771 | A10582 | 340 |
| A02771 | A11313 | 288 | A02771 | A12927 | 193 |
| A02771 | A14405 | 159 | A02771 | A16636 | 488 |
| A02772 | A02878 | 185 | A02772 | A02984 | 236 |
| A02772 | A03157 | 185 | A02772 | A03915 | 375 |
| A02772 | A03919 | 335 | A02772 | A04048 | 283 |
| A02772 | A04163 | 467 | A02772 | A04280 | 193 |
| A02772 | A04377 | 374 | A02772 | A04451 | 266 |
| A02772 | A04546 | 363 | A02772 | A04644 | 419 |
| A02772 | A05459 | 369 | A02772 | A06831 | 369 |
| A02772 | A07021 | 395 | A02772 | A07135 | 151 |
| A02772 | A07143 | 283 | A02772 | A08851 | 224 |
| A02772 | A09028 | 313 | A02772 | A09217 | 395 |
| A02772 | A15233 | 332 | A02773 | A03263 | 317 |
| A02773 | A04001 | 390 | A02773 | A04224 | 419 |
| A02773 | A04236 | 404 | A02773 | A04911 | 372 |
| A02773 | A05008 | 210 | A02773 | A05015 | 207 |
| A02773 | A05052 | 326 | A02773 | A05142 | 399 |
| A02773 | A06314 | 232 | A02773 | A10215 | 394 |
| A02773 | A10278 | 357 | A02774 | A02785 | 477 |
| A02774 | A02939 | 324 | A02774 | A02963 | 207 |
| A02774 | A03050 | 488 | A02774 | A03095 | 196 |
| A02774 | A03107 | 179 | A02774 | A03755 | 343 |
| A02774 | A04023 | 436 | A02774 | A04051 | 241 |
| A02774 | A04307 | 221 | A02774 | A04369 | 480 |
| A02774 | A04371 | 348 | A02774 | A04436 | 434 |
| A02774 | A04555 | 420 | A02774 | A04633 | 475 |
| A02774 | A04635 | 473 | A02774 | A04839 | 173 |
| A02774 | A05332 | 259 | A02774 | A06263 | 262 |
| A02774 | A06607 | 199 | A02774 | A06874 | 329 |
| A02774 | A07039 | 373 | A02774 | A07200 | 324 |

|        |        |     |        |        |     |
|--------|--------|-----|--------|--------|-----|
| A02774 | A07222 | 243 | A02774 | A07407 | 276 |
| A02774 | A07438 | 307 | A02774 | A07561 | 226 |
| A02774 | A07696 | 299 | A02774 | A07931 | 228 |
| A02774 | A07974 | 279 | A02774 | A08444 | 328 |
| A02774 | A10319 | 215 | A02774 | A12047 | 174 |
| A02774 | A13484 | 236 | A02774 | A14423 | 279 |
| A02774 | A14430 | 262 | A02774 | A15917 | 157 |
| A02775 | A02842 | 335 | A02775 | A03451 | 213 |
| A02775 | A04407 | 409 | A02775 | A04956 | 417 |
| A02775 | A05106 | 357 | A02775 | A05288 | 154 |
| A02775 | A11564 | 424 | A02776 | A02784 | 243 |
| A02776 | A02790 | 256 | A02776 | A02877 | 200 |
| A02776 | A02951 | 173 | A02776 | A03261 | 279 |
| A02776 | A03820 | 157 | A02776 | A04221 | 353 |
| A02776 | A04243 | 379 | A02776 | A04334 | 159 |
| A02776 | A04737 | 271 | A02776 | A05124 | 252 |
| A02776 | A05427 | 177 | A02776 | A06260 | 369 |
| A02776 | A07141 | 182 | A02776 | A08875 | 208 |
| A02776 | A08911 | 269 | A02776 | A10506 | 188 |
| A02776 | A11911 | 177 | A02776 | A13979 | 210 |
| A02776 | A14787 | 311 | A02776 | A14790 | 313 |
| A02776 | A16877 | 290 | A02777 | A02778 | 371 |
| A02777 | A02828 | 477 | A02777 | A02836 | 232 |
| A02777 | A03014 | 212 | A02777 | A03112 | 205 |
| A02777 | A03276 | 229 | A02777 | A03423 | 484 |
| A02777 | A03426 | 278 | A02777 | A03444 | 223 |
| A02777 | A03611 | 321 | A02777 | A03649 | 247 |
| A02777 | A03795 | 236 | A02777 | A03841 | 204 |
| A02777 | A03904 | 205 | A02777 | A04009 | 252 |
| A02777 | A04212 | 223 | A02777 | A04228 | 177 |
| A02777 | A04256 | 389 | A02777 | A04442 | 171 |
| A02777 | A04517 | 228 | A02777 | A04705 | 281 |
| A02777 | A04867 | 193 | A02777 | A04883 | 452 |
| A02777 | A04902 | 290 | A02777 | A04973 | 307 |
| A02777 | A04999 | 390 | A02777 | A05045 | 486 |
| A02777 | A05051 | 227 | A02777 | A05297 | 205 |
| A02777 | A05420 | 329 | A02777 | A05649 | 373 |
| A02777 | A05665 | 228 | A02777 | A05967 | 224 |
| A02777 | A05986 | 216 | A02777 | A06243 | 313 |
| A02777 | A06405 | 417 | A02777 | A06439 | 486 |
| A02777 | A06607 | 408 | A02777 | A06616 | 285 |
| A02777 | A06626 | 293 | A02777 | A07088 | 466 |
| A02777 | A08053 | 232 | A02777 | A09160 | 180 |
| A02777 | A10247 | 266 | A02777 | A10313 | 247 |
| A02777 | A10635 | 156 | A02777 | A11457 | 321 |
| A02777 | A14621 | 167 | A02777 | A17006 | 241 |

|        |        |     |        |        |     |
|--------|--------|-----|--------|--------|-----|
| A02777 | A17012 | 223 | A02778 | A02779 | 491 |
| A02778 | A02783 | 286 | A02778 | A02908 | 179 |
| A02778 | A03361 | 451 | A02778 | A03423 | 461 |
| A02778 | A03649 | 439 | A02778 | A03725 | 174 |
| A02778 | A04372 | 224 | A02778 | A04620 | 172 |
| A02778 | A04622 | 256 | A02778 | A04794 | 273 |
| A02778 | A04852 | 198 | A02778 | A05419 | 228 |
| A02778 | A05811 | 274 | A02778 | A06211 | 183 |
| A02778 | A06558 | 259 | A02778 | A06888 | 291 |
| A02778 | A06889 | 247 | A02778 | A07796 | 168 |
| A02778 | A08133 | 486 | A02778 | A08581 | 224 |
| A02778 | A10197 | 174 | A02778 | A10689 | 245 |
| A02778 | A10850 | 489 | A02778 | A10905 | 162 |
| A02778 | A11098 | 291 | A02778 | A11424 | 201 |
| A02778 | A11902 | 182 | A02778 | A12723 | 160 |
| A02778 | A13514 | 291 | A02778 | A13906 | 172 |
| A02778 | A13981 | 899 | A02778 | A14195 | 152 |
| A02778 | A14206 | 899 | A02778 | A14685 | 230 |
| A02778 | A16100 | 463 | A02778 | A17155 | 156 |
| A02779 | A02783 | 162 | A02779 | A02859 | 223 |
| A02779 | A03361 | 273 | A02779 | A03423 | 491 |
| A02779 | A04702 | 330 | A02779 | A04883 | 475 |
| A02779 | A05045 | 393 | A02779 | A05051 | 356 |
| A02779 | A05243 | 212 | A02779 | A05297 | 339 |
| A02779 | A05598 | 391 | A02779 | A05795 | 165 |
| A02779 | A05986 | 369 | A02779 | A06405 | 273 |
| A02779 | A06439 | 460 | A02779 | A06588 | 257 |
| A02779 | A06607 | 486 | A02779 | A06688 | 174 |
| A02779 | A07088 | 425 | A02779 | A07187 | 185 |
| A02779 | A07230 | 340 | A02779 | A07354 | 406 |
| A02779 | A07503 | 265 | A02779 | A08133 | 335 |
| A02779 | A08975 | 157 | A02779 | A09073 | 177 |
| A02779 | A09195 | 269 | A02779 | A09464 | 208 |
| A02779 | A09928 | 241 | A02779 | A10103 | 224 |
| A02779 | A10850 | 489 | A02779 | A13879 | 154 |
| A02779 | A14047 | 330 | A02779 | A14621 | 170 |
| A02779 | A15985 | 246 | A02780 | A02784 | 390 |
| A02780 | A02785 | 180 | A02780 | A02788 | 196 |
| A02780 | A02840 | 446 | A02780 | A02841 | 207 |
| A02780 | A02854 | 281 | A02780 | A02859 | 80  |
| A02780 | A02863 | 274 | A02780 | A02918 | 254 |
| A02780 | A03260 | 322 | A02780 | A03271 | 173 |
| A02780 | A04263 | 386 | A02780 | A04567 | 308 |
| A02780 | A05446 | 283 | A02780 | A05515 | 337 |
| A02780 | A06247 | 299 | A02780 | A07157 | 213 |
| A02780 | A07173 | 254 | A02780 | A07200 | 152 |

|        |        |     |        |        |     |
|--------|--------|-----|--------|--------|-----|
| A02780 | A10055 | 369 | A02780 | A13346 | 256 |
| A02780 | A14405 | 267 | A02781 | A04130 | 286 |
| A02781 | A04902 | 301 | A02781 | A05034 | 157 |
| A02781 | A10247 | 208 | A02781 | A10586 | 319 |
| A02782 | A02787 | 263 | A02782 | A02874 | 173 |
| A02782 | A02875 | 375 | A02782 | A03126 | 198 |
| A02782 | A03417 | 313 | A02782 | A04027 | 452 |
| A02782 | A09029 | 398 | A02782 | A11216 | 380 |
| A02782 | A15673 | 273 | A02783 | A02785 | 216 |
| A02783 | A02787 | 265 | A02783 | A02812 | 319 |
| A02783 | A02859 | 457 | A02783 | A02874 | 491 |
| A02783 | A02875 | 441 | A02783 | A02922 | 481 |
| A02783 | A02944 | 156 | A02783 | A02951 | 440 |
| A02783 | A02961 | 154 | A02783 | A02984 | 152 |
| A02783 | A03023 | 332 | A02783 | A03224 | 218 |
| A02783 | A03259 | 238 | A02783 | A03275 | 479 |
| A02783 | A03282 | 235 | A02783 | A03361 | 451 |
| A02783 | A03417 | 196 | A02783 | A03419 | 117 |
| A02783 | A03426 | 311 | A02783 | A03552 | 283 |
| A02783 | A03554 | 202 | A02783 | A03664 | 427 |
| A02783 | A03744 | 182 | A02783 | A03848 | 305 |
| A02783 | A03914 | 212 | A02783 | A04010 | 241 |
| A02783 | A04051 | 301 | A02783 | A04089 | 302 |
| A02783 | A04262 | 337 | A02783 | A04484 | 319 |
| A02783 | A04607 | 263 | A02783 | A04608 | 299 |
| A02783 | A04609 | 221 | A02783 | A04612 | 260 |
| A02783 | A04614 | 228 | A02783 | A04794 | 363 |
| A02783 | A04818 | 241 | A02783 | A04832 | 232 |
| A02783 | A05113 | 334 | A02783 | A05309 | 296 |
| A02783 | A05314 | 433 | A02783 | A05329 | 449 |
| A02783 | A05349 | 340 | A02783 | A05920 | 337 |
| A02783 | A05985 | 160 | A02783 | A06306 | 290 |
| A02783 | A06762 | 241 | A02783 | A07164 | 160 |
| A02783 | A07200 | 177 | A02783 | A07216 | 337 |
| A02783 | A08321 | 200 | A02783 | A10791 | 260 |
| A02783 | A12325 | 165 | A02783 | A14194 | 235 |
| A02783 | A14364 | 188 | A02783 | A14399 | 347 |
| A02783 | A15325 | 269 | A02783 | A15913 | 173 |
| A02783 | A16046 | 290 | A02783 | A16636 | 389 |
| A02783 | A17207 | 221 | A02784 | A02790 | 490 |
| A02784 | A02816 | 363 | A02784 | A02836 | 210 |
| A02784 | A02860 | 223 | A02784 | A02877 | 472 |
| A02784 | A03540 | 311 | A02784 | A03654 | 199 |
| A02784 | A03725 | 154 | A02784 | A03926 | 260 |
| A02784 | A03977 | 480 | A02784 | A04080 | 241 |
| A02784 | A04196 | 313 | A02784 | A04199 | 340 |

|        |        |     |        |        |     |
|--------|--------|-----|--------|--------|-----|
| A02784 | A04398 | 176 | A02784 | A04516 | 283 |
| A02784 | A04562 | 232 | A02784 | A04737 | 351 |
| A02784 | A04743 | 307 | A02784 | A04969 | 318 |
| A02784 | A04982 | 291 | A02784 | A04988 | 425 |
| A02784 | A05122 | 452 | A02784 | A05141 | 345 |
| A02784 | A05185 | 254 | A02784 | A05354 | 412 |
| A02784 | A05925 | 346 | A02784 | A06797 | 221 |
| A02784 | A07143 | 200 | A02784 | A08624 | 361 |
| A02784 | A09489 | 346 | A02784 | A09497 | 318 |
| A02784 | A09561 | 162 | A02784 | A10156 | 199 |
| A02784 | A12373 | 190 | A02784 | A13579 | 361 |
| A02784 | A14197 | 335 | A02784 | A16335 | 193 |
| A02785 | A02788 | 185 | A02785 | A02813 | 229 |
| A02785 | A02816 | 323 | A02785 | A02837 | 327 |
| A02785 | A02859 | 460 | A02785 | A02869 | 188 |
| A02785 | A02874 | 477 | A02785 | A02922 | 302 |
| A02785 | A02943 | 236 | A02785 | A02951 | 296 |
| A02785 | A02958 | 193 | A02785 | A03045 | 185 |
| A02785 | A03050 | 491 | A02785 | A03094 | 168 |
| A02785 | A03099 | 457 | A02785 | A03120 | 255 |
| A02785 | A03172 | 319 | A02785 | A03184 | 179 |
| A02785 | A03259 | 191 | A02785 | A03264 | 168 |
| A02785 | A03275 | 213 | A02785 | A03303 | 294 |
| A02785 | A03312 | 212 | A02785 | A03402 | 474 |
| A02785 | A03522 | 232 | A02785 | A03537 | 241 |
| A02785 | A03574 | 302 | A02785 | A03583 | 215 |
| A02785 | A03585 | 193 | A02785 | A03588 | 262 |
| A02785 | A03602 | 165 | A02785 | A03639 | 177 |
| A02785 | A03653 | 486 | A02785 | A03685 | 165 |
| A02785 | A03757 | 339 | A02785 | A03847 | 281 |
| A02785 | A03848 | 212 | A02785 | A03858 | 160 |
| A02785 | A03870 | 255 | A02785 | A03923 | 151 |
| A02785 | A03968 | 337 | A02785 | A03976 | 154 |
| A02785 | A04005 | 227 | A02785 | A04011 | 176 |
| A02785 | A04023 | 491 | A02785 | A04031 | 200 |
| A02785 | A04045 | 281 | A02785 | A04051 | 216 |
| A02785 | A04059 | 183 | A02785 | A04120 | 262 |
| A02785 | A04123 | 255 | A02785 | A04162 | 296 |
| A02785 | A04179 | 205 | A02785 | A04260 | 472 |
| A02785 | A04271 | 193 | A02785 | A04334 | 185 |
| A02785 | A04369 | 491 | A02785 | A04372 | 247 |
| A02785 | A04428 | 218 | A02785 | A04436 | 255 |
| A02785 | A04437 | 294 | A02785 | A04449 | 329 |
| A02785 | A04516 | 188 | A02785 | A04555 | 215 |
| A02785 | A04560 | 215 | A02785 | A04584 | 236 |
| A02785 | A04598 | 215 | A02785 | A04612 | 157 |



|        |        |     |        |        |     |
|--------|--------|-----|--------|--------|-----|
| A02785 | A04620 | 196 | A02785 | A04633 | 488 |
| A02785 | A04635 | 467 | A02785 | A04723 | 179 |
| A02785 | A04792 | 262 | A02785 | A04813 | 162 |
| A02785 | A04905 | 171 | A02785 | A04974 | 424 |
| A02785 | A04975 | 345 | A02785 | A05004 | 162 |
| A02785 | A05036 | 236 | A02785 | A05113 | 217 |
| A02785 | A05138 | 156 | A02785 | A05217 | 347 |
| A02785 | A05349 | 424 | A02785 | A05356 | 468 |
| A02785 | A05389 | 329 | A02785 | A05494 | 215 |
| A02785 | A05505 | 311 | A02785 | A05533 | 480 |
| A02785 | A05768 | 151 | A02785 | A05868 | 152 |
| A02785 | A05901 | 247 | A02785 | A05992 | 369 |
| A02785 | A06211 | 208 | A02785 | A06263 | 350 |
| A02785 | A06558 | 281 | A02785 | A06579 | 160 |
| A02785 | A06607 | 491 | A02785 | A06650 | 180 |
| A02785 | A06696 | 152 | A02785 | A06874 | 341 |
| A02785 | A07165 | 368 | A02785 | A07200 | 490 |
| A02785 | A07209 | 393 | A02785 | A07297 | 430 |
| A02785 | A07407 | 417 | A02785 | A07438 | 179 |
| A02785 | A07491 | 229 | A02785 | A07561 | 204 |
| A02785 | A07699 | 271 | A02785 | A08288 | 281 |
| A02785 | A08404 | 416 | A02785 | A08598 | 232 |
| A02785 | A09031 | 262 | A02785 | A09196 | 385 |
| A02785 | A09378 | 311 | A02785 | A09390 | 174 |
| A02785 | A09428 | 176 | A02785 | A09460 | 271 |
| A02785 | A10129 | 337 | A02785 | A10694 | 185 |
| A02785 | A11261 | 262 | A02785 | A11313 | 190 |
| A02785 | A11911 | 452 | A02785 | A12290 | 281 |
| A02785 | A12927 | 174 | A02785 | A13258 | 311 |
| A02785 | A13879 | 379 | A02785 | A13906 | 196 |
| A02785 | A14405 | 475 | A02785 | A14423 | 481 |
| A02785 | A14430 | 247 | A02785 | A14440 | 433 |
| A02785 | A14685 | 255 | A02785 | A14943 | 165 |
| A02785 | A15630 | 423 | A02785 | A15913 | 177 |
| A02785 | A16036 | 281 | A02785 | A16636 | 484 |
| A02785 | A17078 | 310 | A02785 | A17155 | 180 |
| A02786 | A02787 | 303 | A02786 | A02788 | 263 |
| A02786 | A02816 | 232 | A02786 | A02860 | 119 |
| A02786 | A02861 | 165 | A02786 | A02874 | 423 |
| A02786 | A02877 | 391 | A02786 | A02878 | 407 |
| A02786 | A02895 | 389 | A02786 | A02924 | 76  |
| A02786 | A03229 | 344 | A02786 | A03419 | 182 |
| A02786 | A03820 | 176 | A02786 | A03965 | 313 |
| A02786 | A04308 | 183 | A02786 | A04590 | 307 |
| A02786 | A04783 | 204 | A02786 | A04905 | 165 |
| A02786 | A05140 | 198 | A02786 | A05291 | 213 |

|        |        |     |        |        |     |
|--------|--------|-----|--------|--------|-----|
| A02786 | A05299 | 154 | A02786 | A05438 | 174 |
| A02786 | A05902 | 335 | A02786 | A05918 | 210 |
| A02786 | A06967 | 334 | A02786 | A07325 | 470 |
| A02786 | A07505 | 190 | A02786 | A08706 | 307 |
| A02786 | A08748 | 154 | A02786 | A08815 | 160 |
| A02786 | A09428 | 171 | A02786 | A09464 | 267 |
| A02786 | A09504 | 154 | A02786 | A09770 | 398 |
| A02786 | A09818 | 440 | A02786 | A10008 | 258 |
| A02786 | A10502 | 383 | A02786 | A11022 | 267 |
| A02786 | A11023 | 346 | A02786 | A11281 | 461 |
| A02786 | A11908 | 213 | A02786 | A13368 | 899 |
| A02786 | A13936 | 258 | A02786 | A15258 | 162 |
| A02786 | A16449 | 156 | A02787 | A02788 | 945 |
| A02787 | A02792 | 179 | A02787 | A02837 | 63  |
| A02787 | A02839 | 208 | A02787 | A02841 | 263 |
| A02787 | A02859 | 226 | A02787 | A02864 | 270 |
| A02787 | A02874 | 491 | A02787 | A02875 | 452 |
| A02787 | A02888 | 307 | A02787 | A02896 | 462 |
| A02787 | A02897 | 326 | A02787 | A02916 | 183 |
| A02787 | A02918 | 228 | A02787 | A02944 | 422 |
| A02787 | A02947 | 223 | A02787 | A02961 | 489 |
| A02787 | A03100 | 247 | A02787 | A03110 | 263 |
| A02787 | A03228 | 152 | A02787 | A03271 | 63  |
| A02787 | A03275 | 398 | A02787 | A03278 | 326 |
| A02787 | A03333 | 179 | A02787 | A03417 | 130 |
| A02787 | A03583 | 252 | A02787 | A03803 | 924 |
| A02787 | A03865 | 210 | A02787 | A03927 | 212 |
| A02787 | A03936 | 193 | A02787 | A04030 | 296 |
| A02787 | A04206 | 353 | A02787 | A04223 | 235 |
| A02787 | A04247 | 390 | A02787 | A04257 | 246 |
| A02787 | A04417 | 154 | A02787 | A04454 | 249 |
| A02787 | A04493 | 279 | A02787 | A04518 | 235 |
| A02787 | A04548 | 294 | A02787 | A04567 | 456 |
| A02787 | A04600 | 154 | A02787 | A04605 | 283 |
| A02787 | A04652 | 157 | A02787 | A04807 | 240 |
| A02787 | A04817 | 338 | A02787 | A04902 | 450 |
| A02787 | A04913 | 396 | A02787 | A04947 | 238 |
| A02787 | A04964 | 202 | A02787 | A04965 | 425 |
| A02787 | A04968 | 380 | A02787 | A05055 | 268 |
| A02787 | A05174 | 208 | A02787 | A05349 | 154 |
| A02787 | A05408 | 338 | A02787 | A05449 | 301 |
| A02787 | A05507 | 268 | A02787 | A05577 | 700 |
| A02787 | A05597 | 185 | A02787 | A05861 | 252 |
| A02787 | A05949 | 179 | A02787 | A06004 | 441 |
| A02787 | A06149 | 318 | A02787 | A06400 | 160 |
| A02787 | A06422 | 457 | A02787 | A06463 | 205 |

|        |        |     |        |        |     |
|--------|--------|-----|--------|--------|-----|
| A02787 | A07031 | 118 | A02787 | A07138 | 215 |
| A02787 | A07154 | 193 | A02787 | A07157 | 353 |
| A02787 | A07159 | 188 | A02787 | A07164 | 316 |
| A02787 | A07165 | 170 | A02787 | A07186 | 357 |
| A02787 | A07187 | 159 | A02787 | A07360 | 433 |
| A02787 | A07380 | 277 | A02787 | A08738 | 221 |
| A02787 | A08755 | 302 | A02787 | A08879 | 180 |
| A02787 | A08954 | 256 | A02787 | A09465 | 338 |
| A02787 | A09509 | 288 | A02787 | A09733 | 182 |
| A02787 | A09818 | 312 | A02787 | A10009 | 230 |
| A02787 | A10091 | 224 | A02787 | A10557 | 187 |
| A02787 | A10586 | 162 | A02787 | A10625 | 432 |
| A02787 | A11016 | 296 | A02787 | A11264 | 243 |
| A02787 | A11297 | 374 | A02787 | A11908 | 256 |
| A02787 | A12242 | 215 | A02787 | A12355 | 360 |
| A02787 | A12408 | 229 | A02787 | A13023 | 601 |
| A02787 | A13153 | 338 | A02787 | A13872 | 162 |
| A02787 | A14299 | 418 | A02787 | A14596 | 435 |
| A02787 | A14666 | 227 | A02787 | A15188 | 218 |
| A02787 | A15254 | 176 | A02787 | A15318 | 185 |
| A02787 | A15498 | 324 | A02787 | A16462 | 177 |
| A02787 | A16636 | 398 | A02788 | A02789 | 160 |
| A02788 | A02792 | 156 | A02788 | A02803 | 104 |
| A02788 | A02810 | 202 | A02788 | A02832 | 159 |
| A02788 | A02834 | 168 | A02788 | A02837 | 419 |
| A02788 | A02842 | 174 | A02788 | A02854 | 337 |
| A02788 | A02859 | 462 | A02788 | A02863 | 329 |
| A02788 | A02874 | 491 | A02788 | A02875 | 441 |
| A02788 | A02878 | 191 | A02788 | A02886 | 311 |
| A02788 | A02887 | 174 | A02788 | A02888 | 281 |
| A02788 | A02896 | 307 | A02788 | A02916 | 252 |
| A02788 | A02918 | 373 | A02788 | A02945 | 96  |
| A02788 | A02947 | 199 | A02788 | A02982 | 152 |
| A02788 | A03034 | 259 | A02788 | A03069 | 299 |
| A02788 | A03093 | 160 | A02788 | A03100 | 491 |
| A02788 | A03259 | 294 | A02788 | A03260 | 163 |
| A02788 | A03263 | 318 | A02788 | A03264 | 185 |
| A02788 | A03271 | 93  | A02788 | A03275 | 316 |
| A02788 | A03320 | 256 | A02788 | A03340 | 407 |
| A02788 | A03450 | 238 | A02788 | A03451 | 159 |
| A02788 | A03655 | 347 | A02788 | A03782 | 191 |
| A02788 | A03802 | 480 | A02788 | A03803 | 944 |
| A02788 | A03805 | 457 | A02788 | A03892 | 63  |
| A02788 | A03921 | 176 | A02788 | A03936 | 303 |
| A02788 | A04011 | 191 | A02788 | A04023 | 151 |
| A02788 | A04030 | 276 | A02788 | A04088 | 183 |

|        |        |     |        |        |     |
|--------|--------|-----|--------|--------|-----|
| A02788 | A04117 | 460 | A02788 | A04138 | 469 |
| A02788 | A04144 | 372 | A02788 | A04151 | 202 |
| A02788 | A04201 | 411 | A02788 | A04242 | 457 |
| A02788 | A04263 | 391 | A02788 | A04276 | 311 |
| A02788 | A04280 | 489 | A02788 | A04372 | 262 |
| A02788 | A04454 | 227 | A02788 | A04456 | 322 |
| A02788 | A04518 | 343 | A02788 | A04589 | 414 |
| A02788 | A04620 | 213 | A02788 | A04694 | 283 |
| A02788 | A04706 | 235 | A02788 | A04731 | 156 |
| A02788 | A04734 | 221 | A02788 | A04806 | 294 |
| A02788 | A04807 | 312 | A02788 | A04855 | 283 |
| A02788 | A04869 | 283 | A02788 | A04901 | 188 |
| A02788 | A04913 | 384 | A02788 | A04949 | 245 |
| A02788 | A04965 | 486 | A02788 | A05104 | 337 |
| A02788 | A05116 | 347 | A02788 | A05281 | 256 |
| A02788 | A05299 | 174 | A02788 | A05570 | 151 |
| A02788 | A05597 | 294 | A02788 | A05741 | 208 |
| A02788 | A05798 | 227 | A02788 | A06211 | 224 |
| A02788 | A06217 | 234 | A02788 | A06306 | 208 |
| A02788 | A06422 | 156 | A02788 | A06489 | 208 |
| A02788 | A06558 | 294 | A02788 | A06664 | 196 |
| A02788 | A06813 | 329 | A02788 | A06956 | 215 |
| A02788 | A07146 | 396 | A02788 | A07154 | 303 |
| A02788 | A07157 | 324 | A02788 | A07163 | 343 |
| A02788 | A07164 | 456 | A02788 | A07165 | 346 |
| A02788 | A07166 | 306 | A02788 | A07200 | 218 |
| A02788 | A07201 | 180 | A02788 | A07217 | 215 |
| A02788 | A08727 | 246 | A02788 | A09471 | 224 |
| A02788 | A09509 | 254 | A02788 | A09546 | 221 |
| A02788 | A09622 | 152 | A02788 | A09794 | 283 |
| A02788 | A09818 | 294 | A02788 | A10009 | 208 |
| A02788 | A10016 | 227 | A02788 | A10793 | 185 |
| A02788 | A10826 | 221 | A02788 | A10901 | 251 |
| A02788 | A12383 | 402 | A02788 | A13181 | 316 |
| A02788 | A13542 | 347 | A02788 | A13849 | 276 |
| A02788 | A13872 | 268 | A02788 | A13906 | 213 |
| A02788 | A13981 | 899 | A02788 | A13988 | 160 |
| A02788 | A13989 | 283 | A02788 | A14012 | 185 |
| A02788 | A14071 | 251 | A02788 | A14125 | 223 |
| A02788 | A14236 | 183 | A02788 | A14327 | 283 |
| A02788 | A14444 | 899 | A02788 | A14570 | 185 |
| A02788 | A14605 | 151 | A02788 | A14685 | 269 |
| A02788 | A15220 | 306 | A02788 | A15498 | 321 |
| A02788 | A15503 | 180 | A02788 | A15621 | 283 |
| A02788 | A15635 | 440 | A02788 | A15838 | 234 |
| A02788 | A16636 | 425 | A02788 | A17155 | 196 |

|        |        |     |        |        |     |
|--------|--------|-----|--------|--------|-----|
| A02789 | A02814 | 257 | A02789 | A02816 | 461 |
| A02789 | A02821 | 329 | A02789 | A02842 | 216 |
| A02789 | A02898 | 319 | A02789 | A02984 | 213 |
| A02789 | A03112 | 179 | A02789 | A03172 | 232 |
| A02789 | A03201 | 170 | A02789 | A03218 | 330 |
| A02789 | A03312 | 257 | A02789 | A03319 | 257 |
| A02789 | A03321 | 270 | A02789 | A03719 | 223 |
| A02789 | A03728 | 223 | A02789 | A03744 | 252 |
| A02789 | A03752 | 223 | A02789 | A03788 | 291 |
| A02789 | A03846 | 318 | A02789 | A04007 | 319 |
| A02789 | A04133 | 212 | A02789 | A04256 | 156 |
| A02789 | A04258 | 185 | A02789 | A04366 | 207 |
| A02789 | A04378 | 260 | A02789 | A04423 | 224 |
| A02789 | A04449 | 210 | A02789 | A04457 | 414 |
| A02789 | A04491 | 200 | A02789 | A04556 | 223 |
| A02789 | A04744 | 283 | A02789 | A04813 | 208 |
| A02789 | A04823 | 396 | A02789 | A04922 | 488 |
| A02789 | A04941 | 201 | A02789 | A05004 | 210 |
| A02789 | A05165 | 165 | A02789 | A05176 | 481 |
| A02789 | A05281 | 394 | A02789 | A05398 | 485 |
| A02789 | A05577 | 226 | A02789 | A05609 | 179 |
| A02789 | A05767 | 195 | A02789 | A05846 | 414 |
| A02789 | A06505 | 246 | A02789 | A06597 | 218 |
| A02789 | A06689 | 223 | A02789 | A06819 | 223 |
| A02789 | A07128 | 190 | A02789 | A07153 | 362 |
| A02789 | A07166 | 243 | A02789 | A07222 | 223 |
| A02789 | A07333 | 223 | A02789 | A08692 | 185 |
| A02789 | A09272 | 234 | A02789 | A09394 | 217 |
| A02789 | A09437 | 302 | A02789 | A09467 | 318 |
| A02789 | A09509 | 372 | A02789 | A10087 | 185 |
| A02789 | A10585 | 200 | A02789 | A10743 | 190 |
| A02789 | A10773 | 247 | A02789 | A10924 | 283 |
| A02789 | A11876 | 223 | A02789 | A12208 | 185 |
| A02789 | A12371 | 218 | A02789 | A13822 | 223 |
| A02789 | A13864 | 457 | A02789 | A13903 | 160 |
| A02789 | A14004 | 163 | A02789 | A14129 | 234 |
| A02789 | A14439 | 157 | A02789 | A14484 | 200 |
| A02789 | A14524 | 173 | A02789 | A14525 | 223 |
| A02789 | A14554 | 247 | A02789 | A14638 | 210 |
| A02789 | A14646 | 177 | A02789 | A14657 | 241 |
| A02789 | A14804 | 223 | A02789 | A15372 | 223 |
| A02789 | A16037 | 318 | A02789 | A16219 | 223 |
| A02789 | A16531 | 223 | A02789 | A17075 | 241 |
| A02790 | A02816 | 152 | A02790 | A02819 | 170 |
| A02790 | A02860 | 235 | A02790 | A02877 | 247 |
| A02790 | A02889 | 467 | A02790 | A02924 | 177 |

|        |        |     |        |        |     |
|--------|--------|-----|--------|--------|-----|
| A02790 | A03070 | 319 | A02790 | A03275 | 205 |
| A02790 | A03421 | 283 | A02790 | A03423 | 157 |
| A02790 | A03654 | 341 | A02790 | A03790 | 372 |
| A02790 | A03977 | 288 | A02790 | A04008 | 184 |
| A02790 | A04080 | 257 | A02790 | A04199 | 429 |
| A02790 | A04490 | 358 | A02790 | A04560 | 483 |
| A02790 | A04739 | 198 | A02790 | A04982 | 404 |
| A02790 | A04988 | 252 | A02790 | A05042 | 368 |
| A02790 | A05078 | 313 | A02790 | A05117 | 307 |
| A02790 | A06404 | 301 | A02790 | A06615 | 405 |
| A02790 | A06703 | 323 | A02790 | A06813 | 288 |
| A02790 | A08685 | 177 | A02790 | A09059 | 307 |
| A02790 | A09220 | 307 | A02790 | A09417 | 307 |
| A02790 | A09888 | 319 | A02790 | A12361 | 193 |
| A02790 | A12370 | 379 | A02790 | A13980 | 157 |
| A02790 | A14543 | 258 | A02790 | A16335 | 205 |
| A02791 | A02796 | 278 | A02791 | A02815 | 334 |
| A02791 | A02977 | 221 | A02791 | A03638 | 281 |
| A02791 | A03740 | 308 | A02791 | A03818 | 168 |
| A02791 | A04365 | 329 | A02791 | A04490 | 218 |
| A02791 | A04562 | 488 | A02791 | A04739 | 458 |
| A02791 | A04909 | 262 | A02791 | A05086 | 191 |
| A02791 | A05101 | 162 | A02791 | A05118 | 428 |
| A02791 | A05240 | 210 | A02791 | A07773 | 168 |
| A02791 | A09586 | 399 | A02791 | A09653 | 202 |
| A02791 | A11322 | 162 | A02791 | A11338 | 168 |
| A02791 | A11374 | 177 | A02791 | A11521 | 491 |
| A02791 | A11844 | 277 | A02791 | A12423 | 389 |
| A02791 | A12897 | 185 | A02791 | A14381 | 167 |
| A02791 | A16587 | 252 | A02792 | A02842 | 198 |
| A02792 | A02877 | 297 | A02792 | A02878 | 472 |
| A02792 | A03095 | 208 | A02792 | A03112 | 452 |
| A02792 | A03415 | 322 | A02792 | A03515 | 274 |
| A02792 | A03523 | 167 | A02792 | A03611 | 191 |
| A02792 | A03922 | 258 | A02792 | A03977 | 314 |
| A02792 | A03990 | 393 | A02792 | A04015 | 247 |
| A02792 | A04080 | 296 | A02792 | A04280 | 151 |
| A02792 | A04308 | 319 | A02792 | A04444 | 258 |
| A02792 | A04715 | 439 | A02792 | A04729 | 398 |
| A02792 | A04822 | 307 | A02792 | A04870 | 290 |
| A02792 | A04908 | 188 | A02792 | A05122 | 210 |
| A02792 | A05868 | 294 | A02792 | A06623 | 196 |
| A02792 | A07165 | 229 | A02792 | A07399 | 229 |
| A02792 | A07505 | 229 | A02792 | A08614 | 367 |
| A02792 | A09166 | 385 | A02792 | A09174 | 228 |
| A02792 | A09438 | 294 | A02792 | A09556 | 183 |

|        |        |     |        |        |     |
|--------|--------|-----|--------|--------|-----|
| A02792 | A10018 | 419 | A02792 | A10551 | 454 |
| A02792 | A11735 | 199 | A02792 | A13755 | 451 |
| A02792 | A16877 | 286 | A02793 | A02796 | 435 |
| A02793 | A03590 | 375 | A02793 | A03654 | 302 |
| A02793 | A04119 | 416 | A02793 | A04552 | 399 |
| A02793 | A04739 | 291 | A02793 | A11334 | 286 |
| A02794 | A02830 | 247 | A02794 | A02877 | 435 |
| A02794 | A03738 | 272 | A02794 | A04446 | 263 |
| A02794 | A09320 | 449 | A02794 | A10532 | 179 |
| A02794 | A11994 | 360 | A02794 | A12839 | 344 |
| A02794 | A14223 | 229 | A02794 | A14265 | 224 |
| A02795 | A02812 | 163 | A02795 | A02916 | 204 |
| A02795 | A03010 | 458 | A02795 | A03282 | 294 |
| A02795 | A03415 | 212 | A02795 | A03421 | 210 |
| A02795 | A03602 | 229 | A02795 | A03782 | 234 |
| A02795 | A04080 | 319 | A02795 | A04163 | 396 |
| A02795 | A04248 | 271 | A02795 | A04263 | 256 |
| A02795 | A04320 | 311 | A02795 | A04478 | 412 |
| A02795 | A04547 | 337 | A02795 | A04609 | 281 |
| A02795 | A04727 | 341 | A02795 | A04773 | 254 |
| A02795 | A04799 | 401 | A02795 | A05078 | 353 |
| A02795 | A05122 | 234 | A02795 | A05127 | 333 |
| A02795 | A05174 | 323 | A02795 | A05985 | 227 |
| A02795 | A06055 | 278 | A02795 | A06404 | 488 |
| A02795 | A06586 | 297 | A02795 | A06737 | 401 |
| A02795 | A06779 | 475 | A02795 | A06780 | 434 |
| A02795 | A06818 | 486 | A02795 | A06865 | 452 |
| A02795 | A07151 | 489 | A02795 | A07173 | 236 |
| A02795 | A07390 | 321 | A02795 | A09732 | 281 |
| A02795 | A13872 | 288 | A02795 | A14122 | 198 |
| A02795 | A15395 | 240 | A02795 | A15608 | 286 |
| A02795 | A15701 | 240 | A02795 | A15726 | 168 |
| A02796 | A03041 | 335 | A02796 | A03070 | 174 |
| A02796 | A03186 | 193 | A02796 | A03590 | 466 |
| A02796 | A03654 | 283 | A02796 | A03820 | 198 |
| A02796 | A04080 | 207 | A02796 | A04560 | 477 |
| A02796 | A04739 | 273 | A02796 | A06623 | 238 |
| A02796 | A06649 | 348 | A02796 | A08835 | 174 |
| A02796 | A10769 | 419 | A02797 | A03398 | 204 |
| A02797 | A03407 | 201 | A02797 | A03422 | 470 |
| A02797 | A03636 | 269 | A02797 | A03654 | 334 |
| A02797 | A03820 | 474 | A02797 | A03965 | 201 |
| A02797 | A04080 | 245 | A02797 | A04092 | 219 |
| A02797 | A04174 | 193 | A02797 | A04256 | 213 |
| A02797 | A04257 | 302 | A02797 | A04492 | 259 |
| A02797 | A04814 | 458 | A02797 | A04977 | 219 |

|        |        |     |        |        |     |
|--------|--------|-----|--------|--------|-----|
| A02797 | A05043 | 291 | A02797 | A05122 | 167 |
| A02797 | A05240 | 215 | A02797 | A05838 | 191 |
| A02797 | A06203 | 341 | A02797 | A08289 | 208 |
| A02797 | A09225 | 355 | A02797 | A09941 | 332 |
| A02797 | A10442 | 323 | A02797 | A10443 | 285 |
| A02797 | A10457 | 297 | A02797 | A10715 | 385 |
| A02797 | A10884 | 335 | A02797 | A13415 | 274 |
| A02797 | A13484 | 202 | A02797 | A13665 | 221 |
| A02797 | A14005 | 182 | A02797 | A14455 | 477 |
| A02797 | A15105 | 228 | A02798 | A02799 | 469 |
| A02798 | A02908 | 190 | A02798 | A02911 | 272 |
| A02798 | A02942 | 490 | A02798 | A03265 | 265 |
| A02798 | A03278 | 201 | A02798 | A03314 | 245 |
| A02798 | A03413 | 303 | A02798 | A03862 | 224 |
| A02798 | A04075 | 229 | A02798 | A04176 | 347 |
| A02798 | A04477 | 377 | A02798 | A04773 | 412 |
| A02798 | A04793 | 224 | A02798 | A04888 | 210 |
| A02798 | A04902 | 491 | A02798 | A04942 | 419 |
| A02798 | A05216 | 152 | A02798 | A05278 | 491 |
| A02798 | A05416 | 215 | A02798 | A05630 | 255 |
| A02798 | A05685 | 427 | A02798 | A05693 | 358 |
| A02798 | A05832 | 485 | A02798 | A05949 | 460 |
| A02798 | A06697 | 265 | A02798 | A06864 | 171 |
| A02798 | A06971 | 238 | A02798 | A07209 | 215 |
| A02798 | A07301 | 184 | A02798 | A07803 | 172 |
| A02798 | A08207 | 475 | A02798 | A08598 | 389 |
| A02798 | A08709 | 443 | A02798 | A09254 | 180 |
| A02798 | A09480 | 252 | A02798 | A09535 | 260 |
| A02798 | A10066 | 329 | A02798 | A10091 | 358 |
| A02798 | A10270 | 310 | A02798 | A10552 | 475 |
| A02798 | A11750 | 196 | A02799 | A03243 | 389 |
| A02799 | A03256 | 393 | A02799 | A04861 | 274 |
| A02799 | A04902 | 466 | A02799 | A05568 | 394 |
| A02799 | A05832 | 438 | A02799 | A05949 | 418 |
| A02799 | A06004 | 338 | A02799 | A06438 | 424 |
| A02799 | A06825 | 193 | A02799 | A06863 | 279 |
| A02799 | A06971 | 434 | A02799 | A13219 | 429 |
| A02799 | A16410 | 205 | A02800 | A02843 | 356 |
| A02800 | A02859 | 406 | A02800 | A02944 | 238 |
| A02800 | A02951 | 208 | A02800 | A03157 | 317 |
| A02800 | A03204 | 311 | A02800 | A03271 | 171 |
| A02800 | A03843 | 218 | A02800 | A04040 | 337 |
| A02800 | A04097 | 255 | A02800 | A04245 | 447 |
| A02800 | A04248 | 394 | A02800 | A04519 | 443 |
| A02800 | A04536 | 216 | A02800 | A04607 | 217 |
| A02800 | A04690 | 400 | A02800 | A05310 | 281 |



|        |        |     |        |        |     |
|--------|--------|-----|--------|--------|-----|
| A02800 | A05773 | 436 | A02800 | A06415 | 168 |
| A02800 | A06422 | 313 | A02800 | A07147 | 339 |
| A02800 | A07148 | 337 | A02800 | A07157 | 412 |
| A02800 | A07161 | 398 | A02800 | A07164 | 241 |
| A02800 | A07166 | 375 | A02800 | A09242 | 249 |
| A02800 | A10512 | 419 | A02800 | A13860 | 196 |
| A02800 | A14146 | 319 | A02800 | A16216 | 152 |
| A02801 | A02916 | 361 | A02801 | A03275 | 326 |
| A02801 | A04040 | 417 | A02801 | A04300 | 452 |
| A02801 | A06949 | 360 | A02801 | A10174 | 390 |
| A02802 | A02852 | 418 | A02802 | A02908 | 177 |
| A02802 | A02968 | 246 | A02802 | A03001 | 219 |
| A02802 | A03072 | 358 | A02802 | A03156 | 254 |
| A02802 | A03370 | 270 | A02802 | A05051 | 302 |
| A02802 | A05203 | 346 | A02802 | A05760 | 251 |
| A02802 | A06195 | 195 | A02802 | A06470 | 324 |
| A02802 | A07027 | 286 | A02802 | A07122 | 278 |
| A02802 | A07168 | 358 | A02802 | A07191 | 333 |
| A02802 | A07239 | 252 | A02802 | A07342 | 281 |
| A02802 | A07706 | 367 | A02802 | A08114 | 162 |
| A02802 | A08732 | 255 | A02802 | A09991 | 308 |
| A02802 | A10689 | 165 | A02802 | A16063 | 407 |
| A02802 | A16099 | 288 | A02803 | A02808 | 283 |
| A02803 | A02812 | 163 | A02803 | A02816 | 243 |
| A02803 | A02818 | 152 | A02803 | A02834 | 156 |
| A02803 | A02851 | 182 | A02803 | A02860 | 458 |
| A02803 | A02861 | 174 | A02803 | A02863 | 210 |
| A02803 | A02864 | 213 | A02803 | A02887 | 491 |
| A02803 | A02895 | 229 | A02803 | A02896 | 112 |
| A02803 | A02914 | 296 | A02803 | A02916 | 63  |
| A02803 | A02917 | 102 | A02803 | A02931 | 485 |
| A02803 | A02940 | 296 | A02803 | A02945 | 294 |
| A02803 | A02947 | 185 | A02803 | A02948 | 265 |
| A02803 | A02950 | 347 | A02803 | A02954 | 234 |
| A02803 | A02966 | 152 | A02803 | A03019 | 462 |
| A02803 | A03101 | 152 | A02803 | A03157 | 171 |
| A02803 | A03195 | 121 | A02803 | A03196 | 251 |
| A02803 | A03271 | 945 | A02803 | A03335 | 234 |
| A02803 | A03597 | 486 | A02803 | A03618 | 396 |
| A02803 | A03625 | 63  | A02803 | A03767 | 152 |
| A02803 | A03776 | 245 | A02803 | A03809 | 395 |
| A02803 | A03817 | 491 | A02803 | A03834 | 213 |
| A02803 | A03892 | 63  | A02803 | A04018 | 193 |
| A02803 | A04042 | 273 | A02803 | A04161 | 188 |
| A02803 | A04274 | 238 | A02803 | A04526 | 257 |
| A02803 | A04587 | 386 | A02803 | A04589 | 406 |

|        |        |     |        |        |     |
|--------|--------|-----|--------|--------|-----|
| A02803 | A04657 | 174 | A02803 | A04682 | 446 |
| A02803 | A04685 | 195 | A02803 | A04713 | 205 |
| A02803 | A04730 | 386 | A02803 | A04755 | 201 |
| A02803 | A04879 | 368 | A02803 | A04906 | 174 |
| A02803 | A04954 | 224 | A02803 | A05028 | 483 |
| A02803 | A05037 | 912 | A02803 | A05073 | 188 |
| A02803 | A05082 | 199 | A02803 | A05288 | 269 |
| A02803 | A05363 | 420 | A02803 | A05539 | 456 |
| A02803 | A05902 | 210 | A02803 | A05904 | 296 |
| A02803 | A05944 | 198 | A02803 | A05953 | 210 |
| A02803 | A05985 | 267 | A02803 | A06054 | 245 |
| A02803 | A06055 | 238 | A02803 | A06077 | 427 |
| A02803 | A06224 | 430 | A02803 | A06237 | 273 |
| A02803 | A06256 | 265 | A02803 | A06289 | 63  |
| A02803 | A06421 | 251 | A02803 | A06466 | 369 |
| A02803 | A06521 | 257 | A02803 | A06758 | 308 |
| A02803 | A06780 | 224 | A02803 | A07311 | 174 |
| A02803 | A08315 | 257 | A02803 | A08505 | 288 |
| A02803 | A08597 | 339 | A02803 | A08608 | 488 |
| A02803 | A08616 | 339 | A02803 | A08775 | 168 |
| A02803 | A08781 | 313 | A02803 | A09122 | 283 |
| A02803 | A09326 | 291 | A02803 | A09869 | 221 |
| A02803 | A10159 | 899 | A02803 | A10214 | 267 |
| A02803 | A10662 | 195 | A02803 | A10664 | 489 |
| A02803 | A10721 | 201 | A02803 | A11369 | 428 |
| A02803 | A11411 | 316 | A02803 | A11414 | 265 |
| A02803 | A11433 | 218 | A02803 | A11683 | 232 |
| A02803 | A12009 | 154 | A02803 | A13592 | 210 |
| A02803 | A13824 | 63  | A02803 | A13845 | 191 |
| A02803 | A13983 | 63  | A02803 | A13989 | 899 |
| A02803 | A14180 | 151 | A02803 | A14188 | 172 |
| A02803 | A14198 | 323 | A02803 | A14208 | 916 |
| A02803 | A14231 | 217 | A02803 | A14247 | 481 |
| A02803 | A14356 | 201 | A02803 | A14364 | 419 |
| A02803 | A14400 | 396 | A02803 | A14440 | 276 |
| A02803 | A14662 | 899 | A02803 | A15297 | 899 |
| A02803 | A15323 | 899 | A02803 | A15324 | 899 |
| A02803 | A15353 | 899 | A02803 | A15359 | 899 |
| A02803 | A15516 | 229 | A02803 | A15569 | 238 |
| A02803 | A15962 | 308 | A02803 | A16392 | 395 |
| A02803 | A16815 | 356 | A02804 | A02833 | 256 |
| A02804 | A03197 | 188 | A02804 | A03570 | 152 |
| A02804 | A03663 | 218 | A02804 | A03728 | 462 |
| A02804 | A03817 | 486 | A02804 | A07495 | 384 |
| A02804 | A07893 | 430 | A02804 | A07989 | 217 |
| A02804 | A10714 | 160 | A02804 | A16753 | 201 |

|        |        |     |        |        |     |
|--------|--------|-----|--------|--------|-----|
| A02805 | A04334 | 205 | A02805 | A05122 | 259 |
| A02805 | A05415 | 236 | A02805 | A08875 | 252 |
| A02805 | A14366 | 205 | A02805 | A14554 | 269 |
| A02806 | A02807 | 346 | A02806 | A02828 | 202 |
| A02806 | A03034 | 488 | A02806 | A03035 | 170 |
| A02806 | A03036 | 355 | A02806 | A03144 | 454 |
| A02806 | A03146 | 395 | A02806 | A03148 | 281 |
| A02806 | A03213 | 63  | A02806 | A04076 | 374 |
| A02806 | A04306 | 260 | A02806 | A04668 | 489 |
| A02806 | A05956 | 180 | A02806 | A06053 | 363 |
| A02806 | A06216 | 286 | A02806 | A06575 | 252 |
| A02806 | A06982 | 268 | A02806 | A07097 | 240 |
| A02806 | A07147 | 173 | A02806 | A07346 | 449 |
| A02806 | A07480 | 488 | A02806 | A07603 | 488 |
| A02806 | A07996 | 469 | A02806 | A08212 | 469 |
| A02806 | A08516 | 466 | A02806 | A08669 | 483 |
| A02806 | A08768 | 168 | A02806 | A08769 | 420 |
| A02806 | A08919 | 353 | A02806 | A09151 | 168 |
| A02806 | A09288 | 255 | A02806 | A09535 | 213 |
| A02806 | A09623 | 221 | A02806 | A09762 | 393 |
| A02806 | A10373 | 486 | A02806 | A10816 | 208 |
| A02806 | A11236 | 314 | A02806 | A12015 | 260 |
| A02806 | A12556 | 446 | A02806 | A13339 | 337 |
| A02806 | A13767 | 202 | A02806 | A14076 | 480 |
| A02806 | A14129 | 463 | A02806 | A14230 | 483 |
| A02806 | A14282 | 252 | A02806 | A14344 | 157 |
| A02806 | A14636 | 193 | A02806 | A14706 | 345 |
| A02806 | A15369 | 294 | A02806 | A15524 | 196 |
| A02806 | A15531 | 299 | A02806 | A15539 | 288 |
| A02806 | A15654 | 199 | A02806 | A15939 | 167 |
| A02806 | A15941 | 368 | A02806 | A16127 | 369 |
| A02806 | A16128 | 420 | A02806 | A16129 | 269 |
| A02806 | A16226 | 154 | A02806 | A16636 | 279 |
| A02806 | A16646 | 154 | A02806 | A16762 | 246 |
| A02807 | A02828 | 485 | A02807 | A02872 | 484 |
| A02807 | A02888 | 337 | A02807 | A02918 | 488 |
| A02807 | A02919 | 432 | A02807 | A02925 | 303 |
| A02807 | A02947 | 366 | A02807 | A02957 | 429 |
| A02807 | A03199 | 191 | A02807 | A03314 | 291 |
| A02807 | A04902 | 180 | A02807 | A05725 | 429 |
| A02807 | A07140 | 467 | A02807 | A12730 | 353 |
| A02808 | A02834 | 301 | A02808 | A02843 | 473 |
| A02808 | A02854 | 374 | A02808 | A02856 | 338 |
| A02808 | A02886 | 408 | A02808 | A02896 | 388 |
| A02808 | A02917 | 372 | A02808 | A02932 | 371 |
| A02808 | A02936 | 411 | A02808 | A03157 | 152 |

|        |        |     |        |        |     |
|--------|--------|-----|--------|--------|-----|
| A02808 | A03204 | 286 | A02808 | A03259 | 486 |
| A02808 | A03263 | 454 | A02808 | A03280 | 443 |
| A02808 | A03846 | 205 | A02808 | A04010 | 168 |
| A02808 | A04059 | 323 | A02808 | A04110 | 279 |
| A02808 | A04138 | 308 | A02808 | A04206 | 326 |
| A02808 | A04229 | 168 | A02808 | A04264 | 307 |
| A02808 | A04274 | 357 | A02808 | A04298 | 382 |
| A02808 | A04514 | 375 | A02808 | A04519 | 380 |
| A02808 | A04528 | 388 | A02808 | A04536 | 185 |
| A02808 | A04589 | 484 | A02808 | A04734 | 424 |
| A02808 | A04880 | 200 | A02808 | A05038 | 348 |
| A02808 | A05279 | 388 | A02808 | A06055 | 265 |
| A02808 | A06422 | 398 | A02808 | A07135 | 402 |
| A02808 | A07154 | 302 | A02808 | A07157 | 457 |
| A02808 | A07161 | 380 | A02808 | A07164 | 488 |
| A02808 | A07166 | 467 | A02808 | A07210 | 290 |
| A02808 | A09046 | 319 | A02808 | A12927 | 157 |
| A02808 | A14372 | 221 | A02808 | A14374 | 177 |
| A02808 | A14391 | 436 | A02808 | A14442 | 294 |
| A02808 | A15430 | 260 | A02808 | A15806 | 322 |
| A02809 | A03739 | 196 | A02809 | A03888 | 269 |
| A02809 | A03981 | 218 | A02809 | A04939 | 259 |
| A02809 | A04949 | 196 | A02809 | A05410 | 379 |
| A02809 | A07399 | 294 | A02810 | A02857 | 439 |
| A02810 | A02893 | 447 | A02810 | A02983 | 191 |
| A02810 | A03157 | 191 | A02810 | A03472 | 278 |
| A02810 | A03821 | 363 | A02810 | A04020 | 152 |
| A02810 | A04023 | 316 | A02810 | A04066 | 286 |
| A02810 | A04401 | 420 | A02810 | A04515 | 409 |
| A02810 | A04520 | 204 | A02810 | A04573 | 369 |
| A02810 | A04596 | 449 | A02810 | A05313 | 297 |
| A02810 | A05973 | 409 | A02810 | A07135 | 157 |
| A02810 | A07200 | 159 | A02810 | A07220 | 312 |
| A02810 | A09436 | 385 | A02810 | A09791 | 263 |
| A02810 | A12304 | 357 | A02811 | A02814 | 452 |
| A02811 | A02921 | 355 | A02811 | A02943 | 355 |
| A02811 | A02982 | 157 | A02811 | A03120 | 366 |
| A02811 | A03537 | 358 | A02811 | A03583 | 341 |
| A02811 | A03585 | 329 | A02811 | A03653 | 254 |
| A02811 | A03847 | 445 | A02811 | A03848 | 340 |
| A02811 | A03870 | 438 | A02811 | A04004 | 294 |
| A02811 | A04031 | 420 | A02811 | A04123 | 438 |
| A02811 | A04260 | 218 | A02811 | A04560 | 341 |
| A02811 | A04905 | 312 | A02811 | A04955 | 374 |
| A02811 | A05036 | 433 | A02811 | A05497 | 380 |
| A02811 | A06311 | 408 | A02811 | A07164 | 210 |

|        |        |     |        |        |     |
|--------|--------|-----|--------|--------|-----|
| A02811 | A08741 | 266 | A02811 | A09220 | 215 |
| A02811 | A09989 | 340 | A02811 | A13373 | 258 |
| A02811 | A13860 | 162 | A02811 | A14664 | 199 |
| A02811 | A15185 | 313 | A02812 | A02813 | 452 |
| A02812 | A02814 | 196 | A02812 | A02817 | 236 |
| A02812 | A02837 | 425 | A02812 | A02839 | 258 |
| A02812 | A02859 | 491 | A02812 | A02863 | 380 |
| A02812 | A02869 | 188 | A02812 | A02874 | 490 |
| A02812 | A02883 | 188 | A02812 | A02884 | 337 |
| A02812 | A02896 | 196 | A02812 | A02916 | 313 |
| A02812 | A02920 | 185 | A02812 | A02922 | 475 |
| A02812 | A02951 | 404 | A02812 | A02961 | 154 |
| A02812 | A02977 | 347 | A02812 | A02982 | 338 |
| A02812 | A02984 | 251 | A02812 | A03049 | 301 |
| A02812 | A03189 | 262 | A02812 | A03259 | 473 |
| A02812 | A03275 | 491 | A02812 | A03371 | 173 |
| A02812 | A03419 | 467 | A02812 | A03475 | 227 |
| A02812 | A03520 | 174 | A02812 | A03562 | 188 |
| A02812 | A03626 | 317 | A02812 | A03649 | 165 |
| A02812 | A03664 | 481 | A02812 | A03735 | 157 |
| A02812 | A03872 | 177 | A02812 | A03914 | 229 |
| A02812 | A03923 | 151 | A02812 | A04010 | 457 |
| A02812 | A04027 | 241 | A02812 | A04033 | 488 |
| A02812 | A04039 | 294 | A02812 | A04051 | 441 |
| A02812 | A04088 | 168 | A02812 | A04110 | 255 |
| A02812 | A04130 | 296 | A02812 | A04134 | 358 |
| A02812 | A04138 | 163 | A02812 | A04142 | 358 |
| A02812 | A04206 | 188 | A02812 | A04247 | 241 |
| A02812 | A04262 | 374 | A02812 | A04263 | 307 |
| A02812 | A04267 | 368 | A02812 | A04272 | 177 |
| A02812 | A04274 | 236 | A02812 | A04349 | 201 |
| A02812 | A04391 | 205 | A02812 | A04478 | 157 |
| A02812 | A04481 | 232 | A02812 | A04509 | 227 |
| A02812 | A04518 | 196 | A02812 | A04526 | 255 |
| A02812 | A04536 | 307 | A02812 | A04545 | 247 |
| A02812 | A04567 | 260 | A02812 | A04607 | 307 |
| A02812 | A04608 | 452 | A02812 | A04609 | 435 |
| A02812 | A04614 | 251 | A02812 | A04615 | 165 |
| A02812 | A04906 | 171 | A02812 | A05071 | 271 |
| A02812 | A05113 | 427 | A02812 | A05221 | 406 |
| A02812 | A05309 | 462 | A02812 | A05349 | 489 |
| A02812 | A05773 | 218 | A02812 | A05865 | 157 |
| A02812 | A05888 | 212 | A02812 | A05985 | 160 |
| A02812 | A06054 | 340 | A02812 | A06095 | 327 |
| A02812 | A06190 | 273 | A02812 | A06241 | 232 |
| A02812 | A06414 | 168 | A02812 | A06415 | 299 |

|        |        |     |        |        |     |
|--------|--------|-----|--------|--------|-----|
| A02812 | A06422 | 446 | A02812 | A06607 | 168 |
| A02812 | A06618 | 311 | A02812 | A06650 | 283 |
| A02812 | A06675 | 380 | A02812 | A06899 | 188 |
| A02812 | A06975 | 212 | A02812 | A07141 | 412 |
| A02812 | A07157 | 407 | A02812 | A07166 | 182 |
| A02812 | A07179 | 262 | A02812 | A07248 | 151 |
| A02812 | A07390 | 299 | A02812 | A07531 | 165 |
| A02812 | A07653 | 177 | A02812 | A08629 | 294 |
| A02812 | A08741 | 339 | A02812 | A09394 | 168 |
| A02812 | A09397 | 202 | A02812 | A09756 | 173 |
| A02812 | A10421 | 180 | A02812 | A11273 | 168 |
| A02812 | A11597 | 162 | A02812 | A11688 | 191 |
| A02812 | A12792 | 188 | A02812 | A12927 | 174 |
| A02812 | A13061 | 271 | A02812 | A14071 | 226 |
| A02812 | A14191 | 154 | A02812 | A14196 | 165 |
| A02812 | A14229 | 352 | A02812 | A14635 | 484 |
| A02812 | A15238 | 294 | A02812 | A15241 | 401 |
| A02812 | A15294 | 406 | A02812 | A15314 | 944 |
| A02812 | A15322 | 455 | A02812 | A15395 | 281 |
| A02812 | A15506 | 432 | A02812 | A15601 | 157 |
| A02812 | A15606 | 224 | A02812 | A15607 | 174 |
| A02812 | A15691 | 177 | A02812 | A15865 | 255 |
| A02812 | A16015 | 227 | A02812 | A16308 | 262 |
| A02812 | A16511 | 202 | A02812 | A16636 | 457 |
| A02812 | A16931 | 218 | A02813 | A02859 | 247 |
| A02813 | A02875 | 268 | A02813 | A02917 | 210 |
| A02813 | A02922 | 199 | A02813 | A02965 | 333 |
| A02813 | A02982 | 483 | A02813 | A02984 | 452 |
| A02813 | A03269 | 393 | A02813 | A03275 | 311 |
| A02813 | A03752 | 348 | A02813 | A03865 | 281 |
| A02813 | A04134 | 327 | A02813 | A04260 | 179 |
| A02813 | A04267 | 489 | A02813 | A04268 | 332 |
| A02813 | A04272 | 443 | A02813 | A04279 | 221 |
| A02813 | A04538 | 347 | A02813 | A04612 | 270 |
| A02813 | A04642 | 234 | A02813 | A04798 | 423 |
| A02813 | A04866 | 321 | A02813 | A04906 | 391 |
| A02813 | A05305 | 260 | A02813 | A05349 | 254 |
| A02813 | A05473 | 232 | A02813 | A06138 | 288 |
| A02813 | A06650 | 294 | A02813 | A07160 | 170 |
| A02813 | A08741 | 356 | A02813 | A09253 | 347 |
| A02813 | A09546 | 199 | A02813 | A09929 | 335 |
| A02813 | A10057 | 299 | A02813 | A10148 | 191 |
| A02813 | A10731 | 213 | A02813 | A13721 | 395 |
| A02813 | A14073 | 226 | A02813 | A14442 | 377 |
| A02813 | A15395 | 183 | A02813 | A16418 | 213 |
| A02813 | A16511 | 306 | A02814 | A02858 | 283 |

|        |        |     |        |        |     |
|--------|--------|-----|--------|--------|-----|
| A02814 | A02859 | 382 | A02814 | A02943 | 313 |
| A02814 | A03112 | 423 | A02814 | A03120 | 327 |
| A02814 | A03259 | 389 | A02814 | A03268 | 400 |
| A02814 | A03275 | 278 | A02814 | A03301 | 338 |
| A02814 | A03515 | 219 | A02814 | A03537 | 317 |
| A02814 | A03571 | 193 | A02814 | A03583 | 296 |
| A02814 | A03585 | 279 | A02814 | A03609 | 358 |
| A02814 | A03653 | 191 | A02814 | A03750 | 167 |
| A02814 | A03847 | 429 | A02814 | A03848 | 400 |
| A02814 | A03870 | 419 | A02814 | A04004 | 363 |
| A02814 | A04027 | 317 | A02814 | A04031 | 283 |
| A02814 | A04088 | 374 | A02814 | A04123 | 419 |
| A02814 | A04260 | 154 | A02814 | A04333 | 179 |
| A02814 | A04560 | 296 | A02814 | A04622 | 177 |
| A02814 | A04905 | 259 | A02814 | A04932 | 171 |
| A02814 | A04955 | 339 | A02814 | A05036 | 451 |
| A02814 | A05255 | 162 | A02814 | A05982 | 212 |
| A02814 | A06358 | 179 | A02814 | A06473 | 188 |
| A02814 | A06607 | 193 | A02814 | A06807 | 308 |
| A02814 | A06938 | 218 | A02814 | A06959 | 251 |
| A02814 | A07164 | 368 | A02814 | A07243 | 201 |
| A02814 | A07597 | 208 | A02814 | A07881 | 262 |
| A02814 | A08548 | 333 | A02814 | A09340 | 226 |
| A02814 | A10535 | 230 | A02814 | A11992 | 177 |
| A02814 | A12195 | 348 | A02814 | A13516 | 283 |
| A02814 | A13581 | 257 | A02814 | A14515 | 367 |
| A02814 | A14520 | 154 | A02814 | A15658 | 151 |
| A02814 | A15661 | 296 | A02814 | A15665 | 185 |
| A02814 | A16807 | 191 | A02814 | A16840 | 198 |
| A02815 | A02837 | 201 | A02815 | A03054 | 348 |
| A02815 | A03292 | 302 | A02815 | A06147 | 411 |
| A02815 | A16300 | 218 | A02816 | A02817 | 160 |
| A02816 | A02827 | 389 | A02816 | A02830 | 480 |
| A02816 | A02836 | 383 | A02816 | A02837 | 229 |
| A02816 | A02859 | 447 | A02816 | A02860 | 491 |
| A02816 | A02868 | 327 | A02816 | A02869 | 347 |
| A02816 | A02877 | 443 | A02816 | A02878 | 420 |
| A02816 | A02880 | 302 | A02816 | A02887 | 229 |
| A02816 | A02895 | 491 | A02816 | A02901 | 238 |
| A02816 | A02914 | 486 | A02816 | A02924 | 481 |
| A02816 | A02927 | 165 | A02816 | A02943 | 279 |
| A02816 | A02958 | 241 | A02816 | A03033 | 177 |
| A02816 | A03036 | 313 | A02816 | A03112 | 480 |
| A02816 | A03144 | 241 | A02816 | A03172 | 232 |
| A02816 | A03195 | 165 | A02816 | A03247 | 216 |
| A02816 | A03251 | 364 | A02816 | A03254 | 302 |

|        |        |     |        |        |     |
|--------|--------|-----|--------|--------|-----|
| A02816 | A03263 | 257 | A02816 | A03271 | 226 |
| A02816 | A03276 | 344 | A02816 | A03281 | 174 |
| A02816 | A03288 | 358 | A02816 | A03387 | 232 |
| A02816 | A03415 | 205 | A02816 | A03423 | 210 |
| A02816 | A03451 | 301 | A02816 | A03681 | 151 |
| A02816 | A03822 | 202 | A02816 | A03878 | 272 |
| A02816 | A04042 | 310 | A02816 | A04073 | 201 |
| A02816 | A04265 | 347 | A02816 | A04273 | 296 |
| A02816 | A04496 | 364 | A02816 | A04570 | 249 |
| A02816 | A04587 | 408 | A02816 | A04682 | 398 |
| A02816 | A04730 | 408 | A02816 | A04737 | 170 |
| A02816 | A04956 | 276 | A02816 | A04977 | 297 |
| A02816 | A05176 | 371 | A02816 | A05264 | 195 |
| A02816 | A05398 | 191 | A02816 | A05654 | 165 |
| A02816 | A06111 | 258 | A02816 | A06224 | 398 |
| A02816 | A06387 | 249 | A02816 | A06654 | 440 |
| A02816 | A06781 | 419 | A02816 | A06970 | 252 |
| A02816 | A07123 | 179 | A02816 | A07163 | 419 |
| A02816 | A07165 | 185 | A02816 | A07171 | 319 |
| A02816 | A07175 | 221 | A02816 | A07373 | 216 |
| A02816 | A07748 | 286 | A02816 | A07807 | 290 |
| A02816 | A08070 | 229 | A02816 | A08606 | 344 |
| A02816 | A08607 | 344 | A02816 | A09093 | 290 |
| A02816 | A09428 | 224 | A02816 | A09770 | 419 |
| A02816 | A09812 | 255 | A02816 | A09929 | 285 |
| A02816 | A10034 | 174 | A02816 | A10139 | 319 |
| A02816 | A10342 | 279 | A02816 | A10813 | 185 |
| A02816 | A10899 | 165 | A02816 | A10924 | 285 |
| A02816 | A11097 | 319 | A02816 | A11253 | 268 |
| A02816 | A11331 | 152 | A02816 | A11932 | 423 |
| A02816 | A11981 | 173 | A02816 | A12971 | 318 |
| A02816 | A14393 | 191 | A02816 | A15516 | 152 |
| A02816 | A16257 | 160 | A02816 | A16391 | 230 |
| A02817 | A02818 | 473 | A02817 | A02819 | 177 |
| A02817 | A02822 | 288 | A02817 | A02859 | 380 |
| A02817 | A02861 | 475 | A02817 | A02862 | 455 |
| A02817 | A02915 | 299 | A02817 | A02984 | 302 |
| A02817 | A03228 | 360 | A02817 | A03275 | 425 |
| A02817 | A03336 | 232 | A02817 | A03649 | 313 |
| A02817 | A03664 | 377 | A02817 | A03949 | 249 |
| A02817 | A03976 | 171 | A02817 | A04046 | 419 |
| A02817 | A04134 | 420 | A02817 | A04142 | 420 |
| A02817 | A04329 | 290 | A02817 | A04569 | 357 |
| A02817 | A04590 | 382 | A02817 | A04680 | 347 |
| A02817 | A05034 | 174 | A02817 | A05264 | 265 |
| A02817 | A05603 | 152 | A02817 | A05723 | 357 |



|        |        |     |        |        |     |
|--------|--------|-----|--------|--------|-----|
| A02817 | A06214 | 396 | A02817 | A07164 | 176 |
| A02817 | A07171 | 363 | A02817 | A07197 | 472 |
| A02817 | A08741 | 361 | A02817 | A09263 | 177 |
| A02817 | A09394 | 283 | A02817 | A09453 | 357 |
| A02817 | A09497 | 457 | A02817 | A09509 | 154 |
| A02817 | A09561 | 314 | A02817 | A09573 | 390 |
| A02817 | A10156 | 218 | A02817 | A10559 | 382 |
| A02817 | A10808 | 205 | A02817 | A11748 | 338 |
| A02817 | A14381 | 188 | A02817 | A14386 | 293 |
| A02817 | A14390 | 290 | A02817 | A14405 | 201 |
| A02817 | A15601 | 274 | A02817 | A15602 | 314 |
| A02817 | A15839 | 393 | A02817 | A16360 | 438 |
| A02818 | A02928 | 474 | A02818 | A03228 | 268 |
| A02818 | A03327 | 151 | A02818 | A04037 | 353 |
| A02818 | A04229 | 168 | A02818 | A04270 | 382 |
| A02818 | A04275 | 207 | A02818 | A04327 | 251 |
| A02818 | A04536 | 185 | A02818 | A05351 | 330 |
| A02818 | A05377 | 291 | A02818 | A05601 | 201 |
| A02818 | A05891 | 229 | A02818 | A06949 | 187 |
| A02818 | A07197 | 466 | A02818 | A09462 | 396 |
| A02818 | A09497 | 462 | A02818 | A12540 | 382 |
| A02818 | A14386 | 491 | A02818 | A14434 | 483 |
| A02818 | A15971 | 466 | A02818 | A15990 | 409 |
| A02818 | A16360 | 479 | A02819 | A02831 | 262 |
| A02819 | A02836 | 307 | A02819 | A02862 | 398 |
| A02819 | A02877 | 480 | A02819 | A02878 | 167 |
| A02819 | A02915 | 251 | A02819 | A03032 | 213 |
| A02819 | A03054 | 180 | A02819 | A03065 | 208 |
| A02819 | A03090 | 299 | A02819 | A03109 | 219 |
| A02819 | A03112 | 208 | A02819 | A03177 | 165 |
| A02819 | A03242 | 210 | A02819 | A03263 | 486 |
| A02819 | A03423 | 230 | A02819 | A03451 | 449 |
| A02819 | A03587 | 412 | A02819 | A03844 | 279 |
| A02819 | A03936 | 218 | A02819 | A03948 | 362 |
| A02819 | A04015 | 165 | A02819 | A04067 | 302 |
| A02819 | A04133 | 229 | A02819 | A04226 | 340 |
| A02819 | A04264 | 227 | A02819 | A04415 | 228 |
| A02819 | A04417 | 179 | A02819 | A04622 | 486 |
| A02819 | A04901 | 424 | A02819 | A05004 | 228 |
| A02819 | A05120 | 249 | A02819 | A05575 | 281 |
| A02819 | A05576 | 297 | A02819 | A05723 | 322 |
| A02819 | A05796 | 457 | A02819 | A05798 | 480 |
| A02819 | A05806 | 373 | A02819 | A06084 | 227 |
| A02819 | A06400 | 185 | A02819 | A06595 | 260 |
| A02819 | A06608 | 229 | A02819 | A06623 | 488 |
| A02819 | A07018 | 340 | A02819 | A07127 | 449 |

|        |        |     |        |        |     |
|--------|--------|-----|--------|--------|-----|
| A02819 | A07158 | 447 | A02819 | A07339 | 188 |
| A02819 | A09040 | 177 | A02819 | A09120 | 302 |
| A02819 | A09404 | 294 | A02819 | A09464 | 207 |
| A02819 | A09790 | 236 | A02819 | A09944 | 373 |
| A02819 | A09999 | 243 | A02819 | A10026 | 353 |
| A02819 | A10047 | 251 | A02819 | A10337 | 154 |
| A02819 | A10733 | 217 | A02819 | A11104 | 221 |
| A02819 | A11332 | 167 | A02819 | A11752 | 235 |
| A02819 | A11891 | 340 | A02819 | A13226 | 290 |
| A02819 | A13930 | 230 | A02819 | A14198 | 165 |
| A02819 | A14320 | 340 | A02819 | A14378 | 165 |
| A02819 | A14390 | 240 | A02819 | A14643 | 475 |
| A02819 | A15635 | 238 | A02820 | A02828 | 173 |
| A02820 | A02839 | 251 | A02820 | A02988 | 243 |
| A02820 | A03587 | 419 | A02820 | A03612 | 408 |
| A02820 | A04053 | 322 | A02820 | A04304 | 364 |
| A02820 | A04531 | 364 | A02820 | A06648 | 267 |
| A02820 | A07339 | 219 | A02820 | A10625 | 283 |
| A02821 | A02866 | 434 | A02821 | A02898 | 290 |
| A02821 | A02909 | 319 | A02821 | A02916 | 191 |
| A02821 | A02963 | 467 | A02821 | A03056 | 152 |
| A02821 | A03107 | 199 | A02821 | A03311 | 429 |
| A02821 | A03541 | 297 | A02821 | A03778 | 151 |
| A02821 | A03869 | 377 | A02821 | A03871 | 382 |
| A02821 | A04049 | 420 | A02821 | A04089 | 425 |
| A02821 | A04445 | 411 | A02821 | A04536 | 319 |
| A02821 | A05281 | 361 | A02821 | A05556 | 204 |
| A02821 | A08692 | 288 | A02822 | A03336 | 288 |
| A02822 | A03739 | 160 | A02822 | A03778 | 477 |
| A02822 | A03821 | 228 | A02822 | A03825 | 332 |
| A02822 | A04007 | 490 | A02822 | A04355 | 277 |
| A02822 | A04710 | 257 | A02822 | A04833 | 228 |
| A02822 | A04988 | 310 | A02822 | A05168 | 328 |
| A02822 | A05219 | 283 | A02822 | A05355 | 361 |
| A02822 | A08097 | 221 | A02822 | A09124 | 180 |
| A02822 | A09246 | 285 | A02822 | A10014 | 288 |
| A02822 | A13667 | 302 | A02822 | A13917 | 217 |
| A02823 | A02842 | 418 | A02823 | A02868 | 445 |
| A02823 | A09020 | 447 | A02823 | A09136 | 417 |
| A02823 | A10148 | 343 | A02823 | A14257 | 260 |
| A02824 | A04006 | 351 | A02825 | A02826 | 338 |
| A02825 | A02830 | 121 | A02825 | A02867 | 360 |
| A02825 | A02870 | 329 | A02825 | A02872 | 160 |
| A02825 | A02888 | 246 | A02825 | A02904 | 429 |
| A02825 | A02918 | 180 | A02825 | A02925 | 201 |
| A02825 | A03338 | 452 | A02825 | A04075 | 174 |

|        |        |     |        |        |     |
|--------|--------|-----|--------|--------|-----|
| A02825 | A04346 | 362 | A02825 | A04537 | 411 |
| A02825 | A04685 | 297 | A02825 | A04861 | 188 |
| A02825 | A05029 | 646 | A02825 | A05645 | 273 |
| A02825 | A06398 | 445 | A02825 | A07422 | 920 |
| A02825 | A08710 | 369 | A02825 | A14208 | 385 |
| A02825 | A14367 | 179 | A02825 | A14472 | 241 |
| A02825 | A16877 | 257 | A02826 | A02955 | 156 |
| A02826 | A03068 | 380 | A02826 | A03167 | 364 |
| A02826 | A03168 | 213 | A02826 | A03451 | 335 |
| A02826 | A03518 | 208 | A02826 | A03717 | 235 |
| A02826 | A03858 | 156 | A02826 | A04244 | 263 |
| A02826 | A04327 | 461 | A02826 | A04848 | 180 |
| A02826 | A04944 | 151 | A02826 | A05114 | 235 |
| A02826 | A05393 | 152 | A02826 | A05659 | 340 |
| A02826 | A06204 | 388 | A02826 | A06217 | 307 |
| A02826 | A06273 | 340 | A02826 | A06347 | 406 |
| A02826 | A07246 | 389 | A02826 | A07754 | 167 |
| A02826 | A07913 | 170 | A02826 | A10233 | 249 |
| A02826 | A11423 | 281 | A02826 | A11455 | 334 |
| A02826 | A12952 | 226 | A02826 | A13413 | 329 |
| A02826 | A13511 | 172 | A02826 | A13942 | 215 |
| A02826 | A13978 | 328 | A02826 | A14267 | 277 |
| A02826 | A14337 | 414 | A02826 | A15266 | 202 |
| A02826 | A15372 | 151 | A02826 | A15837 | 198 |
| A02826 | A15925 | 199 | A02827 | A02830 | 367 |
| A02827 | A02877 | 172 | A02827 | A02878 | 235 |
| A02827 | A02895 | 326 | A02827 | A03112 | 196 |
| A02827 | A03321 | 159 | A02827 | A03775 | 291 |
| A02827 | A03798 | 317 | A02827 | A04737 | 338 |
| A02827 | A07163 | 404 | A02827 | A14790 | 367 |
| A02828 | A02833 | 286 | A02828 | A02837 | 335 |
| A02828 | A02841 | 256 | A02828 | A02856 | 485 |
| A02828 | A02869 | 939 | A02828 | A02872 | 491 |
| A02828 | A02882 | 172 | A02828 | A02888 | 483 |
| A02828 | A02908 | 945 | A02828 | A02911 | 208 |
| A02828 | A02918 | 491 | A02828 | A02919 | 489 |
| A02828 | A02925 | 281 | A02828 | A02929 | 483 |
| A02828 | A02933 | 254 | A02828 | A02941 | 368 |
| A02828 | A02942 | 899 | A02828 | A02947 | 297 |
| A02828 | A02948 | 245 | A02828 | A02957 | 324 |
| A02828 | A02958 | 176 | A02828 | A02959 | 95  |
| A02828 | A02983 | 462 | A02828 | A03035 | 424 |
| A02828 | A03611 | 208 | A02828 | A03803 | 429 |
| A02828 | A04008 | 475 | A02828 | A04020 | 405 |
| A02828 | A04030 | 245 | A02828 | A04062 | 163 |
| A02828 | A04304 | 190 | A02828 | A04497 | 162 |

|        |        |     |        |        |     |
|--------|--------|-----|--------|--------|-----|
| A02828 | A04531 | 190 | A02828 | A04540 | 491 |
| A02828 | A04568 | 486 | A02828 | A04861 | 162 |
| A02828 | A05035 | 899 | A02828 | A05207 | 279 |
| A02828 | A05568 | 314 | A02828 | A05570 | 340 |
| A02828 | A05725 | 324 | A02828 | A05817 | 418 |
| A02828 | A06156 | 265 | A02828 | A07135 | 218 |
| A02828 | A07140 | 272 | A02828 | A07165 | 335 |
| A02828 | A07218 | 257 | A02828 | A07242 | 401 |
| A02828 | A07483 | 451 | A02828 | A07900 | 452 |
| A02828 | A08879 | 347 | A02828 | A09098 | 254 |
| A02828 | A09488 | 296 | A02828 | A09523 | 296 |
| A02828 | A09548 | 208 | A02828 | A09731 | 279 |
| A02828 | A10174 | 899 | A02828 | A10247 | 212 |
| A02828 | A10313 | 299 | A02828 | A10406 | 324 |
| A02828 | A10626 | 490 | A02828 | A11369 | 221 |
| A02828 | A11546 | 229 | A02828 | A11750 | 353 |
| A02828 | A12645 | 177 | A02828 | A12730 | 273 |
| A02828 | A13796 | 208 | A02829 | A02854 | 228 |
| A02829 | A02869 | 205 | A02829 | A03260 | 274 |
| A02829 | A03373 | 213 | A02829 | A03634 | 266 |
| A02829 | A03657 | 338 | A02829 | A03661 | 271 |
| A02829 | A03965 | 227 | A02829 | A04112 | 326 |
| A02829 | A04681 | 187 | A02829 | A04928 | 263 |
| A02829 | A06747 | 236 | A02829 | A08730 | 363 |
| A02829 | A10259 | 401 | A02829 | A14385 | 344 |
| A02830 | A02837 | 351 | A02830 | A02847 | 160 |
| A02830 | A02859 | 489 | A02830 | A02867 | 291 |
| A02830 | A02874 | 353 | A02830 | A02877 | 490 |
| A02830 | A02878 | 490 | A02830 | A02895 | 341 |
| A02830 | A02902 | 479 | A02830 | A02904 | 452 |
| A02830 | A02927 | 480 | A02830 | A02931 | 475 |
| A02830 | A02961 | 274 | A02830 | A02966 | 160 |
| A02830 | A03109 | 168 | A02830 | A03112 | 491 |
| A02830 | A03211 | 188 | A02830 | A03275 | 236 |
| A02830 | A03276 | 480 | A02830 | A03292 | 168 |
| A02830 | A03304 | 477 | A02830 | A03415 | 157 |
| A02830 | A03437 | 152 | A02830 | A03609 | 162 |
| A02830 | A03649 | 180 | A02830 | A03812 | 213 |
| A02830 | A04176 | 317 | A02830 | A04229 | 213 |
| A02830 | A04308 | 200 | A02830 | A04342 | 279 |
| A02830 | A04453 | 196 | A02830 | A04505 | 185 |
| A02830 | A04718 | 338 | A02830 | A04904 | 243 |
| A02830 | A04906 | 183 | A02830 | A04908 | 157 |
| A02830 | A04944 | 274 | A02830 | A05039 | 273 |
| A02830 | A05055 | 243 | A02830 | A05094 | 256 |
| A02830 | A05185 | 167 | A02830 | A05288 | 398 |

|        |        |     |        |        |     |
|--------|--------|-----|--------|--------|-----|
| A02830 | A05309 | 234 | A02830 | A05490 | 291 |
| A02830 | A05545 | 221 | A02830 | A05589 | 238 |
| A02830 | A05765 | 329 | A02830 | A05913 | 345 |
| A02830 | A05983 | 319 | A02830 | A06012 | 212 |
| A02830 | A06050 | 319 | A02830 | A06074 | 205 |
| A02830 | A06151 | 311 | A02830 | A06152 | 266 |
| A02830 | A06391 | 345 | A02830 | A06535 | 363 |
| A02830 | A06579 | 173 | A02830 | A06607 | 205 |
| A02830 | A06654 | 154 | A02830 | A07027 | 156 |
| A02830 | A07163 | 488 | A02830 | A07397 | 188 |
| A02830 | A07399 | 213 | A02830 | A07414 | 491 |
| A02830 | A07587 | 424 | A02830 | A07961 | 193 |
| A02830 | A08070 | 182 | A02830 | A08445 | 193 |
| A02830 | A08974 | 177 | A02830 | A09131 | 234 |
| A02830 | A09225 | 291 | A02830 | A09247 | 157 |
| A02830 | A09361 | 224 | A02830 | A09388 | 163 |
| A02830 | A09399 | 266 | A02830 | A09409 | 291 |
| A02830 | A09441 | 221 | A02830 | A09546 | 319 |
| A02830 | A09976 | 254 | A02830 | A10033 | 303 |
| A02830 | A10050 | 386 | A02830 | A10072 | 154 |
| A02830 | A10382 | 156 | A02830 | A10611 | 168 |
| A02830 | A11300 | 301 | A02830 | A11387 | 491 |
| A02830 | A11401 | 488 | A02830 | A11423 | 198 |
| A02830 | A11460 | 215 | A02830 | A11583 | 461 |
| A02830 | A11727 | 151 | A02830 | A11978 | 345 |
| A02830 | A12111 | 162 | A02830 | A12742 | 345 |
| A02830 | A12796 | 319 | A02830 | A13070 | 259 |
| A02830 | A13173 | 291 | A02830 | A13219 | 183 |
| A02830 | A13516 | 212 | A02830 | A14302 | 345 |
| A02830 | A14782 | 210 | A02830 | A14800 | 406 |
| A02830 | A15674 | 176 | A02830 | A15720 | 162 |
| A02830 | A16488 | 201 | A02831 | A02878 | 202 |
| A02831 | A02901 | 463 | A02831 | A02927 | 411 |
| A02831 | A03304 | 151 | A02831 | A03422 | 199 |
| A02831 | A04034 | 450 | A02831 | A04212 | 174 |
| A02831 | A04453 | 355 | A02831 | A04533 | 473 |
| A02831 | A04867 | 418 | A02831 | A05410 | 374 |
| A02831 | A05438 | 353 | A02831 | A05477 | 372 |
| A02831 | A05918 | 372 | A02831 | A06623 | 374 |
| A02831 | A07159 | 335 | A02831 | A08369 | 213 |
| A02831 | A08591 | 470 | A02831 | A08738 | 196 |
| A02831 | A11187 | 396 | A02831 | A13212 | 326 |
| A02831 | A16201 | 364 | A02832 | A02833 | 438 |
| A02832 | A02836 | 184 | A02832 | A02837 | 202 |
| A02832 | A02875 | 307 | A02832 | A02899 | 396 |
| A02832 | A03011 | 345 | A02832 | A03186 | 152 |

|        |        |     |        |        |     |
|--------|--------|-----|--------|--------|-----|
| A02832 | A03608 | 358 | A02832 | A03661 | 162 |
| A02832 | A03783 | 416 | A02832 | A03813 | 232 |
| A02832 | A03824 | 272 | A02832 | A03865 | 310 |
| A02832 | A03906 | 241 | A02832 | A03965 | 246 |
| A02832 | A04086 | 286 | A02832 | A04117 | 176 |
| A02832 | A04134 | 350 | A02832 | A04202 | 182 |
| A02832 | A04327 | 245 | A02832 | A04605 | 360 |
| A02832 | A04710 | 228 | A02832 | A05133 | 379 |
| A02832 | A05901 | 360 | A02832 | A06622 | 252 |
| A02832 | A07339 | 154 | A02832 | A08070 | 210 |
| A02832 | A08677 | 307 | A02832 | A09070 | 385 |
| A02832 | A09466 | 395 | A02832 | A09797 | 305 |
| A02832 | A09958 | 408 | A02832 | A11654 | 373 |
| A02832 | A13370 | 347 | A02832 | A14366 | 159 |
| A02832 | A14375 | 230 | A02832 | A14637 | 183 |
| A02832 | A15281 | 335 | A02833 | A02899 | 460 |
| A02833 | A02908 | 286 | A02833 | A02983 | 138 |
| A02833 | A03011 | 263 | A02833 | A03113 | 201 |
| A02833 | A03419 | 157 | A02833 | A03608 | 440 |
| A02833 | A03661 | 157 | A02833 | A03965 | 417 |
| A02833 | A04117 | 252 | A02833 | A04659 | 224 |
| A02833 | A04704 | 168 | A02833 | A04802 | 441 |
| A02833 | A04803 | 326 | A02833 | A04809 | 307 |
| A02833 | A04959 | 425 | A02833 | A05302 | 238 |
| A02833 | A05645 | 205 | A02833 | A05888 | 252 |
| A02833 | A06134 | 187 | A02833 | A06544 | 193 |
| A02833 | A06588 | 419 | A02833 | A08094 | 205 |
| A02833 | A08391 | 313 | A02833 | A08577 | 193 |
| A02833 | A09206 | 205 | A02833 | A09309 | 195 |
| A02833 | A09428 | 218 | A02833 | A09466 | 425 |
| A02833 | A09569 | 362 | A02833 | A09642 | 326 |
| A02833 | A09785 | 340 | A02833 | A10091 | 228 |
| A02833 | A11280 | 299 | A02833 | A11282 | 190 |
| A02833 | A11326 | 486 | A02833 | A11654 | 407 |
| A02833 | A12420 | 291 | A02833 | A12679 | 362 |
| A02833 | A12806 | 326 | A02833 | A12897 | 162 |
| A02833 | A13017 | 174 | A02833 | A13246 | 246 |
| A02833 | A13825 | 297 | A02833 | A13935 | 238 |
| A02833 | A13946 | 193 | A02833 | A14188 | 412 |
| A02833 | A14196 | 271 | A02833 | A14208 | 179 |
| A02833 | A14304 | 168 | A02833 | A14404 | 204 |
| A02833 | A14524 | 168 | A02833 | A14654 | 168 |
| A02833 | A15281 | 249 | A02833 | A15314 | 455 |
| A02834 | A02940 | 450 | A02834 | A03100 | 243 |
| A02834 | A03157 | 290 | A02834 | A03215 | 322 |
| A02834 | A03259 | 446 | A02834 | A03649 | 219 |

|        |        |     |        |        |     |
|--------|--------|-----|--------|--------|-----|
| A02834 | A03657 | 356 | A02834 | A03662 | 247 |
| A02834 | A03782 | 224 | A02834 | A03803 | 272 |
| A02834 | A03936 | 305 | A02834 | A04059 | 326 |
| A02834 | A04108 | 328 | A02834 | A04138 | 312 |
| A02834 | A04274 | 358 | A02834 | A04519 | 268 |
| A02834 | A04536 | 190 | A02834 | A04602 | 411 |
| A02834 | A04865 | 296 | A02834 | A04880 | 205 |
| A02834 | A05797 | 229 | A02834 | A07135 | 249 |
| A02834 | A07158 | 190 | A02834 | A07166 | 232 |
| A02834 | A08616 | 411 | A02834 | A10754 | 260 |
| A02834 | A11759 | 260 | A02834 | A12204 | 241 |
| A02834 | A13772 | 221 | A02834 | A14125 | 246 |
| A02834 | A14366 | 168 | A02834 | A14392 | 208 |
| A02834 | A15642 | 257 | A02834 | A15981 | 316 |
| A02834 | A17076 | 265 | A02835 | A02855 | 221 |
| A02835 | A03111 | 401 | A02835 | A03661 | 200 |
| A02835 | A04028 | 208 | A02835 | A04047 | 335 |
| A02835 | A05288 | 455 | A02835 | A06608 | 291 |
| A02835 | A10808 | 271 | A02835 | A12373 | 384 |
| A02836 | A02837 | 391 | A02836 | A02838 | 210 |
| A02836 | A02841 | 491 | A02836 | A02842 | 219 |
| A02836 | A02859 | 480 | A02836 | A02875 | 167 |
| A02836 | A02877 | 355 | A02836 | A02878 | 351 |
| A02836 | A02921 | 167 | A02836 | A02928 | 229 |
| A02836 | A03070 | 367 | A02836 | A03100 | 193 |
| A02836 | A03190 | 232 | A02836 | A03263 | 278 |
| A02836 | A03361 | 179 | A02836 | A03408 | 465 |
| A02836 | A03412 | 257 | A02836 | A03414 | 319 |
| A02836 | A03420 | 299 | A02836 | A03421 | 480 |
| A02836 | A03422 | 63  | A02836 | A03424 | 333 |
| A02836 | A03451 | 249 | A02836 | A03488 | 488 |
| A02836 | A03540 | 152 | A02836 | A03717 | 465 |
| A02836 | A03747 | 157 | A02836 | A03775 | 154 |
| A02836 | A03993 | 179 | A02836 | A04253 | 167 |
| A02836 | A04260 | 162 | A02836 | A04263 | 288 |
| A02836 | A04280 | 366 | A02836 | A04334 | 205 |
| A02836 | A04413 | 185 | A02836 | A04445 | 386 |
| A02836 | A04504 | 179 | A02836 | A04515 | 252 |
| A02836 | A04547 | 490 | A02836 | A04639 | 490 |
| A02836 | A04736 | 299 | A02836 | A04737 | 258 |
| A02836 | A04754 | 157 | A02836 | A04790 | 205 |
| A02836 | A04799 | 252 | A02836 | A05052 | 479 |
| A02836 | A05078 | 447 | A02836 | A05126 | 179 |
| A02836 | A05137 | 285 | A02836 | A05173 | 358 |
| A02836 | A05216 | 168 | A02836 | A05285 | 272 |
| A02836 | A05307 | 179 | A02836 | A05350 | 185 |

|        |        |     |        |        |     |
|--------|--------|-----|--------|--------|-----|
| A02836 | A05436 | 173 | A02836 | A05525 | 162 |
| A02836 | A05767 | 329 | A02836 | A05834 | 195 |
| A02836 | A06135 | 157 | A02836 | A06256 | 195 |
| A02836 | A06515 | 285 | A02836 | A06581 | 458 |
| A02836 | A06606 | 196 | A02836 | A06616 | 157 |
| A02836 | A06717 | 185 | A02836 | A06797 | 156 |
| A02836 | A06845 | 179 | A02836 | A07158 | 177 |
| A02836 | A07163 | 486 | A02836 | A07245 | 152 |
| A02836 | A07302 | 470 | A02836 | A07303 | 285 |
| A02836 | A07311 | 537 | A02836 | A07315 | 430 |
| A02836 | A07412 | 290 | A02836 | A07457 | 372 |
| A02836 | A08725 | 232 | A02836 | A08977 | 152 |
| A02836 | A09017 | 167 | A02836 | A09403 | 232 |
| A02836 | A09428 | 228 | A02836 | A09806 | 173 |
| A02836 | A09840 | 393 | A02836 | A09882 | 154 |
| A02836 | A09901 | 263 | A02836 | A10247 | 174 |
| A02836 | A10685 | 157 | A02836 | A10714 | 475 |
| A02836 | A11204 | 232 | A02836 | A11285 | 490 |
| A02836 | A11330 | 488 | A02836 | A11360 | 422 |
| A02836 | A11369 | 185 | A02836 | A11683 | 262 |
| A02836 | A11717 | 358 | A02836 | A11834 | 293 |
| A02836 | A11878 | 252 | A02836 | A12147 | 232 |
| A02836 | A12276 | 252 | A02836 | A12277 | 252 |
| A02836 | A12352 | 216 | A02836 | A12361 | 190 |
| A02836 | A12371 | 486 | A02836 | A12373 | 195 |
| A02836 | A12383 | 340 | A02836 | A12487 | 335 |
| A02836 | A12530 | 285 | A02836 | A12571 | 252 |
| A02836 | A12770 | 285 | A02836 | A12897 | 347 |
| A02836 | A13016 | 285 | A02836 | A13123 | 216 |
| A02836 | A13181 | 443 | A02836 | A13215 | 358 |
| A02836 | A13235 | 414 | A02836 | A13241 | 408 |
| A02836 | A13243 | 252 | A02836 | A13484 | 221 |
| A02836 | A13734 | 152 | A02836 | A14062 | 682 |
| A02836 | A14191 | 201 | A02836 | A14193 | 152 |
| A02836 | A14204 | 208 | A02836 | A14436 | 167 |
| A02836 | A15296 | 474 | A02836 | A15315 | 256 |
| A02836 | A15347 | 187 | A02836 | A15358 | 414 |
| A02836 | A15466 | 173 | A02836 | A15598 | 177 |
| A02836 | A15606 | 475 | A02836 | A15704 | 310 |
| A02836 | A15811 | 232 | A02836 | A15922 | 179 |
| A02836 | A16188 | 216 | A02836 | A16300 | 375 |
| A02836 | A16503 | 157 | A02836 | A16536 | 232 |
| A02837 | A02838 | 319 | A02837 | A02842 | 474 |
| A02837 | A02859 | 491 | A02837 | A02864 | 377 |
| A02837 | A02869 | 491 | A02837 | A02872 | 156 |
| A02837 | A02874 | 491 | A02837 | A02875 | 196 |



|        |        |     |        |        |     |
|--------|--------|-----|--------|--------|-----|
| A02837 | A02894 | 176 | A02837 | A02896 | 63  |
| A02837 | A02905 | 107 | A02837 | A02906 | 263 |
| A02837 | A02908 | 207 | A02837 | A02918 | 105 |
| A02837 | A02929 | 390 | A02837 | A02944 | 411 |
| A02837 | A02948 | 208 | A02837 | A02958 | 362 |
| A02837 | A02982 | 204 | A02837 | A02983 | 455 |
| A02837 | A02984 | 371 | A02837 | A03001 | 112 |
| A02837 | A03019 | 63  | A02837 | A03080 | 184 |
| A02837 | A03081 | 274 | A02837 | A03091 | 258 |
| A02837 | A03095 | 200 | A02837 | A03100 | 435 |
| A02837 | A03112 | 490 | A02837 | A03258 | 218 |
| A02837 | A03259 | 490 | A02837 | A03275 | 473 |
| A02837 | A03281 | 408 | A02837 | A03287 | 219 |
| A02837 | A03292 | 63  | A02837 | A03415 | 229 |
| A02837 | A03416 | 159 | A02837 | A03417 | 135 |
| A02837 | A03419 | 423 | A02837 | A03427 | 369 |
| A02837 | A03450 | 167 | A02837 | A03577 | 171 |
| A02837 | A03590 | 296 | A02837 | A03602 | 177 |
| A02837 | A03641 | 218 | A02837 | A03653 | 423 |
| A02837 | A03661 | 311 | A02837 | A03744 | 208 |
| A02837 | A03782 | 341 | A02837 | A03803 | 413 |
| A02837 | A03810 | 218 | A02837 | A03813 | 475 |
| A02837 | A03824 | 281 | A02837 | A03848 | 156 |
| A02837 | A03941 | 193 | A02837 | A03982 | 218 |
| A02837 | A03988 | 162 | A02837 | A04010 | 363 |
| A02837 | A04080 | 180 | A02837 | A04106 | 208 |
| A02837 | A04107 | 278 | A02837 | A04111 | 187 |
| A02837 | A04112 | 159 | A02837 | A04117 | 311 |
| A02837 | A04123 | 201 | A02837 | A04238 | 162 |
| A02837 | A04334 | 238 | A02837 | A04452 | 357 |
| A02837 | A04584 | 180 | A02837 | A04594 | 245 |
| A02837 | A04605 | 193 | A02837 | A04622 | 451 |
| A02837 | A04633 | 229 | A02837 | A04652 | 170 |
| A02837 | A04681 | 439 | A02837 | A04710 | 469 |
| A02837 | A04735 | 193 | A02837 | A04799 | 265 |
| A02837 | A04832 | 184 | A02837 | A04842 | 260 |
| A02837 | A04847 | 218 | A02837 | A04860 | 208 |
| A02837 | A04908 | 305 | A02837 | A04939 | 232 |
| A02837 | A04986 | 265 | A02837 | A05015 | 177 |
| A02837 | A05039 | 208 | A02837 | A05122 | 340 |
| A02837 | A05141 | 165 | A02837 | A05153 | 404 |
| A02837 | A05235 | 171 | A02837 | A05260 | 240 |
| A02837 | A05292 | 245 | A02837 | A05309 | 425 |
| A02837 | A05344 | 278 | A02837 | A05506 | 266 |
| A02837 | A05568 | 290 | A02837 | A05572 | 229 |
| A02837 | A05691 | 205 | A02837 | A05743 | 265 |

|        |        |     |        |        |     |
|--------|--------|-----|--------|--------|-----|
| A02837 | A05769 | 296 | A02837 | A05829 | 208 |
| A02837 | A05832 | 351 | A02837 | A05868 | 319 |
| A02837 | A05999 | 332 | A02837 | A06140 | 218 |
| A02837 | A06175 | 229 | A02837 | A06208 | 357 |
| A02837 | A06247 | 172 | A02837 | A06283 | 245 |
| A02837 | A06410 | 347 | A02837 | A06414 | 238 |
| A02837 | A06456 | 296 | A02837 | A06545 | 162 |
| A02837 | A06595 | 346 | A02837 | A06597 | 319 |
| A02837 | A06607 | 156 | A02837 | A06615 | 245 |
| A02837 | A06648 | 283 | A02837 | A06703 | 171 |
| A02837 | A06949 | 484 | A02837 | A07135 | 353 |
| A02837 | A07140 | 213 | A02837 | A07147 | 246 |
| A02837 | A07158 | 417 | A02837 | A07163 | 466 |
| A02837 | A07165 | 491 | A02837 | A07187 | 173 |
| A02837 | A07201 | 367 | A02837 | A07218 | 353 |
| A02837 | A07399 | 217 | A02837 | A07469 | 229 |
| A02837 | A07486 | 345 | A02837 | A07702 | 265 |
| A02837 | A07757 | 185 | A02837 | A07952 | 229 |
| A02837 | A08070 | 177 | A02837 | A08209 | 271 |
| A02837 | A08574 | 180 | A02837 | A08672 | 218 |
| A02837 | A08700 | 238 | A02837 | A08714 | 168 |
| A02837 | A08827 | 229 | A02837 | A09070 | 245 |
| A02837 | A09249 | 193 | A02837 | A09270 | 208 |
| A02837 | A09271 | 218 | A02837 | A09350 | 171 |
| A02837 | A09442 | 152 | A02837 | A09873 | 221 |
| A02837 | A09922 | 218 | A02837 | A09958 | 296 |
| A02837 | A10060 | 245 | A02837 | A10086 | 229 |
| A02837 | A10140 | 180 | A02837 | A10191 | 229 |
| A02837 | A10271 | 296 | A02837 | A10279 | 245 |
| A02837 | A10291 | 159 | A02837 | A10320 | 188 |
| A02837 | A10369 | 274 | A02837 | A10625 | 419 |
| A02837 | A10638 | 272 | A02837 | A10726 | 208 |
| A02837 | A10752 | 171 | A02837 | A10891 | 162 |
| A02837 | A11062 | 187 | A02837 | A11101 | 201 |
| A02837 | A11679 | 176 | A02837 | A11750 | 423 |
| A02837 | A11850 | 235 | A02837 | A11911 | 435 |
| A02837 | A12197 | 229 | A02837 | A12569 | 193 |
| A02837 | A12927 | 223 | A02837 | A12935 | 218 |
| A02837 | A12976 | 171 | A02837 | A13163 | 159 |
| A02837 | A13373 | 152 | A02837 | A13377 | 218 |
| A02837 | A13416 | 208 | A02837 | A13496 | 265 |
| A02837 | A13610 | 296 | A02837 | A13627 | 265 |
| A02837 | A13772 | 180 | A02837 | A13865 | 265 |
| A02837 | A14019 | 180 | A02837 | A14229 | 475 |
| A02837 | A14297 | 193 | A02837 | A14517 | 156 |
| A02837 | A14590 | 245 | A02837 | A14595 | 167 |

|        |        |     |        |        |     |
|--------|--------|-----|--------|--------|-----|
| A02837 | A14794 | 245 | A02837 | A14799 | 176 |
| A02837 | A15226 | 171 | A02837 | A15241 | 260 |
| A02837 | A15272 | 167 | A02837 | A15322 | 485 |
| A02837 | A15327 | 193 | A02837 | A15357 | 334 |
| A02837 | A15398 | 418 | A02837 | A15400 | 263 |
| A02837 | A15402 | 461 | A02837 | A15750 | 193 |
| A02837 | A15836 | 265 | A02837 | A15838 | 162 |
| A02837 | A15977 | 218 | A02837 | A16011 | 265 |
| A02837 | A16057 | 229 | A02837 | A16079 | 296 |
| A02837 | A16125 | 167 | A02837 | A16300 | 474 |
| A02837 | A16317 | 245 | A02837 | A16636 | 406 |
| A02837 | A16934 | 193 | A02838 | A03966 | 479 |
| A02838 | A04020 | 162 | A02838 | A04478 | 256 |
| A02838 | A04548 | 224 | A02838 | A04961 | 395 |
| A02838 | A05008 | 168 | A02838 | A05015 | 162 |
| A02838 | A05113 | 199 | A02838 | A05174 | 267 |
| A02838 | A05393 | 152 | A02838 | A06085 | 240 |
| A02838 | A06095 | 288 | A02838 | A07479 | 218 |
| A02838 | A08881 | 172 | A02838 | A09214 | 346 |
| A02838 | A10899 | 218 | A02838 | A11331 | 205 |
| A02838 | A11478 | 207 | A02838 | A11681 | 196 |
| A02838 | A11876 | 273 | A02838 | A12934 | 321 |
| A02838 | A13181 | 180 | A02838 | A13860 | 334 |
| A02838 | A14846 | 283 | A02838 | A15314 | 191 |
| A02838 | A15704 | 201 | A02839 | A02874 | 327 |
| A02839 | A02875 | 443 | A02839 | A02911 | 281 |
| A02839 | A02984 | 229 | A02839 | A03220 | 294 |
| A02839 | A03227 | 160 | A02839 | A03299 | 221 |
| A02839 | A03414 | 251 | A02839 | A03451 | 185 |
| A02839 | A03893 | 229 | A02839 | A03904 | 201 |
| A02839 | A04033 | 469 | A02839 | A04048 | 160 |
| A02839 | A04082 | 218 | A02839 | A04229 | 183 |
| A02839 | A04420 | 388 | A02839 | A04441 | 390 |
| A02839 | A04454 | 268 | A02839 | A04493 | 168 |
| A02839 | A04969 | 286 | A02839 | A04977 | 176 |
| A02839 | A05002 | 286 | A02839 | A05349 | 286 |
| A02839 | A05398 | 204 | A02839 | A05450 | 191 |
| A02839 | A05896 | 337 | A02839 | A06207 | 409 |
| A02839 | A06277 | 160 | A02839 | A07209 | 312 |
| A02839 | A07568 | 210 | A02839 | A07803 | 278 |
| A02839 | A08754 | 351 | A02839 | A08878 | 324 |
| A02839 | A09147 | 395 | A02839 | A09491 | 223 |
| A02839 | A09509 | 384 | A02839 | A09729 | 208 |
| A02839 | A10731 | 291 | A02839 | A11848 | 200 |
| A02839 | A11983 | 414 | A02839 | A13370 | 281 |
| A02839 | A14124 | 193 | A02839 | A14554 | 263 |

|        |        |     |        |        |     |
|--------|--------|-----|--------|--------|-----|
| A02839 | A14635 | 364 | A02839 | A15238 | 350 |
| A02839 | A15296 | 243 | A02839 | A15337 | 286 |
| A02839 | A15339 | 157 | A02839 | A15456 | 196 |
| A02839 | A15911 | 312 | A02839 | A16511 | 260 |
| A02840 | A02854 | 338 | A02840 | A02859 | 144 |
| A02840 | A03260 | 367 | A02840 | A03271 | 246 |
| A02840 | A04138 | 374 | A02840 | A04263 | 329 |
| A02840 | A06767 | 419 | A02841 | A02854 | 124 |
| A02841 | A02859 | 491 | A02841 | A02872 | 285 |
| A02841 | A02874 | 262 | A02841 | A02886 | 319 |
| A02841 | A02896 | 321 | A02841 | A02897 | 177 |
| A02841 | A02919 | 185 | A02841 | A02928 | 481 |
| A02841 | A02988 | 180 | A02841 | A03094 | 193 |
| A02841 | A03184 | 335 | A02841 | A03275 | 260 |
| A02841 | A03545 | 151 | A02841 | A03807 | 251 |
| A02841 | A04049 | 218 | A02841 | A04238 | 243 |
| A02841 | A04247 | 473 | A02841 | A04263 | 491 |
| A02841 | A04320 | 311 | A02841 | A04518 | 480 |
| A02841 | A04547 | 490 | A02841 | A04548 | 488 |
| A02841 | A04567 | 491 | A02841 | A04568 | 173 |
| A02841 | A04600 | 462 | A02841 | A04627 | 216 |
| A02841 | A04919 | 313 | A02841 | A05039 | 283 |
| A02841 | A05113 | 249 | A02841 | A05174 | 327 |
| A02841 | A05515 | 196 | A02841 | A05835 | 265 |
| A02841 | A05847 | 490 | A02841 | A06107 | 374 |
| A02841 | A06195 | 286 | A02841 | A06615 | 491 |
| A02841 | A06924 | 177 | A02841 | A07146 | 193 |
| A02841 | A07153 | 335 | A02841 | A07158 | 340 |
| A02841 | A07302 | 490 | A02841 | A07440 | 447 |
| A02841 | A07948 | 329 | A02841 | A08729 | 457 |
| A02841 | A10055 | 483 | A02841 | A10291 | 240 |
| A02841 | A11360 | 411 | A02841 | A11384 | 411 |
| A02841 | A12352 | 302 | A02841 | A12553 | 302 |
| A02841 | A12927 | 217 | A02841 | A13181 | 486 |
| A02841 | A13235 | 467 | A02841 | A13511 | 216 |
| A02841 | A14596 | 443 | A02841 | A14672 | 191 |
| A02841 | A15913 | 212 | A02841 | A15964 | 168 |
| A02841 | A16636 | 335 | A02842 | A02846 | 462 |
| A02842 | A02859 | 271 | A02842 | A02868 | 408 |
| A02842 | A02869 | 413 | A02842 | A02880 | 310 |
| A02842 | A02902 | 151 | A02842 | A02958 | 251 |
| A02842 | A03112 | 109 | A02842 | A03265 | 273 |
| A02842 | A03273 | 184 | A02842 | A03287 | 213 |
| A02842 | A03415 | 102 | A02842 | A03427 | 191 |
| A02842 | A03611 | 154 | A02842 | A03771 | 363 |
| A02842 | A03839 | 228 | A02842 | A03919 | 227 |

|        |        |     |        |        |     |
|--------|--------|-----|--------|--------|-----|
| A02842 | A03977 | 238 | A02842 | A04080 | 184 |
| A02842 | A04201 | 251 | A02842 | A04243 | 326 |
| A02842 | A04440 | 221 | A02842 | A04516 | 243 |
| A02842 | A04710 | 358 | A02842 | A04773 | 417 |
| A02842 | A04818 | 193 | A02842 | A04894 | 236 |
| A02842 | A04902 | 279 | A02842 | A05141 | 456 |
| A02842 | A05256 | 215 | A02842 | A05351 | 251 |
| A02842 | A05584 | 182 | A02842 | A05868 | 486 |
| A02842 | A06091 | 187 | A02842 | A06385 | 173 |
| A02842 | A06398 | 241 | A02842 | A06581 | 215 |
| A02842 | A06597 | 208 | A02842 | A06971 | 246 |
| A02842 | A07486 | 170 | A02842 | A09020 | 447 |
| A02842 | A09098 | 317 | A02842 | A09136 | 297 |
| A02842 | A09476 | 163 | A02842 | A09988 | 278 |
| A02842 | A10148 | 263 | A02842 | A10174 | 152 |
| A02842 | A10625 | 276 | A02842 | A13392 | 260 |
| A02842 | A13986 | 302 | A02842 | A14299 | 154 |
| A02842 | A14726 | 369 | A02843 | A02896 | 227 |
| A02843 | A02932 | 396 | A02843 | A02936 | 350 |
| A02843 | A03204 | 329 | A02843 | A03224 | 412 |
| A02843 | A03259 | 450 | A02843 | A03275 | 400 |
| A02843 | A03280 | 332 | A02843 | A03846 | 260 |
| A02843 | A03995 | 408 | A02843 | A04011 | 353 |
| A02843 | A04040 | 353 | A02843 | A04212 | 180 |
| A02843 | A04248 | 305 | A02843 | A04519 | 451 |
| A02843 | A04528 | 408 | A02843 | A04536 | 241 |
| A02843 | A04589 | 386 | A02843 | A04867 | 229 |
| A02843 | A05038 | 378 | A02843 | A06055 | 312 |
| A02843 | A06415 | 195 | A02843 | A06422 | 332 |
| A02843 | A07135 | 174 | A02843 | A07157 | 477 |
| A02843 | A07164 | 382 | A02843 | A07166 | 488 |
| A02843 | A07200 | 177 | A02843 | A09046 | 355 |
| A02843 | A14128 | 163 | A02843 | A14374 | 234 |
| A02843 | A15381 | 259 | A02843 | A15955 | 425 |
| A02844 | A04334 | 256 | A02844 | A09900 | 346 |
| A02844 | A16068 | 266 | A02844 | A16099 | 486 |
| A02846 | A02910 | 157 | A02846 | A02961 | 272 |
| A02846 | A02965 | 177 | A02846 | A04135 | 273 |
| A02846 | A04553 | 466 | A02846 | A04600 | 205 |
| A02846 | A04608 | 152 | A02846 | A04773 | 174 |
| A02846 | A04853 | 353 | A02846 | A04861 | 299 |
| A02846 | A04902 | 458 | A02846 | A04945 | 277 |
| A02846 | A05050 | 445 | A02846 | A05055 | 311 |
| A02846 | A05164 | 452 | A02846 | A05310 | 190 |
| A02846 | A05351 | 391 | A02846 | A05568 | 491 |
| A02846 | A05790 | 386 | A02846 | A05791 | 333 |

|        |        |     |        |        |     |
|--------|--------|-----|--------|--------|-----|
| A02846 | A05832 | 380 | A02846 | A05835 | 414 |
| A02846 | A05899 | 333 | A02846 | A06135 | 307 |
| A02846 | A06913 | 368 | A02846 | A07059 | 171 |
| A02846 | A07503 | 286 | A02846 | A08436 | 385 |
| A02846 | A08608 | 183 | A02846 | A08879 | 422 |
| A02846 | A09098 | 340 | A02846 | A09988 | 180 |
| A02846 | A10621 | 185 | A02846 | A10625 | 328 |
| A02846 | A11469 | 199 | A02846 | A12639 | 385 |
| A02846 | A13219 | 260 | A02846 | A13392 | 290 |
| A02846 | A13976 | 193 | A02846 | A14244 | 340 |
| A02846 | A14319 | 217 | A02846 | A15892 | 311 |
| A02847 | A02852 | 185 | A02847 | A02874 | 243 |
| A02847 | A02883 | 353 | A02847 | A02884 | 193 |
| A02847 | A02895 | 210 | A02847 | A02904 | 380 |
| A02847 | A02908 | 201 | A02847 | A02925 | 486 |
| A02847 | A02934 | 329 | A02847 | A02950 | 65  |
| A02847 | A02961 | 380 | A02847 | A02972 | 240 |
| A02847 | A02992 | 337 | A02847 | A03064 | 251 |
| A02847 | A03126 | 391 | A02847 | A03254 | 251 |
| A02847 | A03279 | 488 | A02847 | A03318 | 329 |
| A02847 | A03802 | 187 | A02847 | A04050 | 468 |
| A02847 | A04051 | 267 | A02847 | A04155 | 229 |
| A02847 | A04206 | 174 | A02847 | A04446 | 188 |
| A02847 | A04668 | 435 | A02847 | A04908 | 470 |
| A02847 | A04956 | 218 | A02847 | A05106 | 288 |
| A02847 | A05211 | 229 | A02847 | A05467 | 154 |
| A02847 | A05483 | 283 | A02847 | A05539 | 208 |
| A02847 | A05577 | 469 | A02847 | A05760 | 208 |
| A02847 | A05936 | 283 | A02847 | A06086 | 215 |
| A02847 | A06127 | 283 | A02847 | A06286 | 193 |
| A02847 | A06312 | 323 | A02847 | A06414 | 157 |
| A02847 | A06510 | 229 | A02847 | A06773 | 303 |
| A02847 | A06981 | 162 | A02847 | A06982 | 481 |
| A02847 | A07062 | 249 | A02847 | A07088 | 193 |
| A02847 | A07168 | 361 | A02847 | A07319 | 484 |
| A02847 | A07413 | 173 | A02847 | A07433 | 447 |
| A02847 | A07480 | 456 | A02847 | A07553 | 329 |
| A02847 | A07603 | 491 | A02847 | A07660 | 190 |
| A02847 | A07800 | 201 | A02847 | A07902 | 483 |
| A02847 | A07946 | 302 | A02847 | A07955 | 405 |
| A02847 | A07961 | 488 | A02847 | A07996 | 491 |
| A02847 | A08000 | 490 | A02847 | A08030 | 484 |
| A02847 | A08117 | 488 | A02847 | A08208 | 369 |
| A02847 | A08516 | 389 | A02847 | A08612 | 243 |
| A02847 | A08667 | 154 | A02847 | A08669 | 168 |
| A02847 | A08692 | 252 | A02847 | A08715 | 218 |

|        |        |     |        |        |     |
|--------|--------|-----|--------|--------|-----|
| A02847 | A08732 | 215 | A02847 | A08759 | 271 |
| A02847 | A08960 | 193 | A02847 | A09000 | 447 |
| A02847 | A09288 | 491 | A02847 | A09654 | 486 |
| A02847 | A09706 | 491 | A02847 | A09713 | 185 |
| A02847 | A09913 | 196 | A02847 | A10083 | 168 |
| A02847 | A10260 | 420 | A02847 | A10373 | 329 |
| A02847 | A10424 | 199 | A02847 | A10456 | 348 |
| A02847 | A10573 | 405 | A02847 | A10640 | 152 |
| A02847 | A10659 | 215 | A02847 | A10676 | 210 |
| A02847 | A10685 | 215 | A02847 | A10688 | 187 |
| A02847 | A10702 | 462 | A02847 | A10712 | 296 |
| A02847 | A10714 | 160 | A02847 | A10885 | 423 |
| A02847 | A10905 | 174 | A02847 | A10930 | 385 |
| A02847 | A11023 | 335 | A02847 | A11150 | 168 |
| A02847 | A11180 | 488 | A02847 | A11325 | 395 |
| A02847 | A11381 | 414 | A02847 | A11436 | 307 |
| A02847 | A11488 | 283 | A02847 | A11547 | 425 |
| A02847 | A11583 | 385 | A02847 | A11596 | 488 |
| A02847 | A11641 | 218 | A02847 | A11665 | 458 |
| A02847 | A11902 | 199 | A02847 | A11964 | 215 |
| A02847 | A12556 | 466 | A02847 | A12625 | 294 |
| A02847 | A12980 | 177 | A02847 | A13302 | 207 |
| A02847 | A13326 | 330 | A02847 | A13927 | 380 |
| A02847 | A14076 | 491 | A02847 | A14079 | 285 |
| A02847 | A14204 | 200 | A02847 | A14208 | 488 |
| A02847 | A14484 | 202 | A02847 | A14554 | 170 |
| A02847 | A14686 | 199 | A02847 | A14830 | 461 |
| A02847 | A14862 | 199 | A02847 | A15356 | 491 |
| A02847 | A15369 | 208 | A02847 | A15639 | 185 |
| A02847 | A15896 | 191 | A02847 | A15939 | 152 |
| A02847 | A15941 | 479 | A02847 | A15942 | 162 |
| A02847 | A15960 | 475 | A02847 | A15962 | 467 |
| A02847 | A16084 | 419 | A02847 | A16128 | 382 |
| A02847 | A16129 | 454 | A02847 | A16226 | 486 |
| A02847 | A16262 | 312 | A02847 | A16335 | 193 |
| A02847 | A16378 | 491 | A02847 | A16419 | 299 |
| A02847 | A16616 | 490 | A02847 | A16754 | 489 |
| A02847 | A16766 | 154 | A02847 | A16799 | 187 |
| A02847 | A16830 | 193 | A02847 | A16965 | 224 |
| A02847 | A17007 | 268 | A02847 | A17040 | 170 |
| A02850 | A04050 | 305 | A02851 | A02863 | 274 |
| A02851 | A02896 | 443 | A02851 | A02917 | 278 |
| A02851 | A03144 | 254 | A02851 | A03157 | 184 |
| A02851 | A03204 | 311 | A02851 | A03259 | 467 |
| A02851 | A03280 | 483 | A02851 | A04248 | 394 |
| A02851 | A05108 | 419 | A02851 | A05349 | 199 |

|        |        |     |        |        |     |
|--------|--------|-----|--------|--------|-----|
| A02851 | A05475 | 457 | A02851 | A05944 | 265 |
| A02851 | A06055 | 291 | A02851 | A06404 | 351 |
| A02851 | A06414 | 334 | A02851 | A07135 | 281 |
| A02851 | A07148 | 337 | A02851 | A07150 | 400 |
| A02851 | A07157 | 465 | A02851 | A07161 | 490 |
| A02851 | A07166 | 483 | A02851 | A07168 | 378 |
| A02851 | A08199 | 424 | A02851 | A08249 | 338 |
| A02851 | A14236 | 243 | A02851 | A14373 | 353 |
| A02851 | A14374 | 208 | A02851 | A14392 | 358 |
| A02851 | A14439 | 398 | A02851 | A15962 | 270 |
| A02852 | A02883 | 440 | A02852 | A02908 | 234 |
| A02852 | A02935 | 329 | A02852 | A02968 | 294 |
| A02852 | A03254 | 393 | A02852 | A04051 | 183 |
| A02852 | A04734 | 366 | A02852 | A05760 | 299 |
| A02852 | A06370 | 372 | A02852 | A06510 | 446 |
| A02852 | A07130 | 418 | A02852 | A07148 | 347 |
| A02852 | A07191 | 375 | A02852 | A07961 | 269 |
| A02852 | A08732 | 405 | A02852 | A14208 | 171 |
| A02852 | A14707 | 425 | A02852 | A15578 | 170 |
| A02852 | A15976 | 288 | A02853 | A02884 | 396 |
| A02853 | A02920 | 449 | A02853 | A02944 | 311 |
| A02853 | A03195 | 355 | A02853 | A03275 | 246 |
| A02853 | A04088 | 380 | A02853 | A04519 | 350 |
| A02853 | A04536 | 293 | A02853 | A04783 | 339 |
| A02853 | A05350 | 413 | A02853 | A07961 | 323 |
| A02853 | A13872 | 358 | A02854 | A02859 | 362 |
| A02854 | A02863 | 404 | A02854 | A02886 | 490 |
| A02854 | A02887 | 98  | A02854 | A02896 | 553 |
| A02854 | A02917 | 486 | A02854 | A02932 | 343 |
| A02854 | A02935 | 477 | A02854 | A02945 | 469 |
| A02854 | A02988 | 151 | A02854 | A03162 | 324 |
| A02854 | A03195 | 352 | A02854 | A03234 | 160 |
| A02854 | A03259 | 512 | A02854 | A03260 | 374 |
| A02854 | A03271 | 96  | A02854 | A03275 | 196 |
| A02854 | A03292 | 154 | A02854 | A03610 | 234 |
| A02854 | A03807 | 414 | A02854 | A04040 | 480 |
| A02854 | A04138 | 435 | A02854 | A04201 | 293 |
| A02854 | A04238 | 312 | A02854 | A04240 | 356 |
| A02854 | A04244 | 269 | A02854 | A04248 | 446 |
| A02854 | A04263 | 491 | A02854 | A04276 | 382 |
| A02854 | A04320 | 256 | A02854 | A04415 | 266 |
| A02854 | A04519 | 215 | A02854 | A04536 | 461 |
| A02854 | A04589 | 551 | A02854 | A04710 | 182 |
| A02854 | A04734 | 447 | A02854 | A04755 | 296 |
| A02854 | A04865 | 491 | A02854 | A04866 | 314 |
| A02854 | A04951 | 363 | A02854 | A04961 | 288 |



|        |        |     |        |        |     |
|--------|--------|-----|--------|--------|-----|
| A02854 | A05305 | 252 | A02854 | A05679 | 291 |
| A02854 | A05847 | 269 | A02854 | A05944 | 319 |
| A02854 | A05985 | 561 | A02854 | A06055 | 217 |
| A02854 | A06095 | 293 | A02854 | A06422 | 456 |
| A02854 | A06499 | 308 | A02854 | A06747 | 213 |
| A02854 | A06818 | 279 | A02854 | A06833 | 374 |
| A02854 | A07143 | 205 | A02854 | A07146 | 488 |
| A02854 | A07151 | 474 | A02854 | A07154 | 258 |
| A02854 | A07157 | 460 | A02854 | A07158 | 263 |
| A02854 | A07161 | 480 | A02854 | A07164 | 428 |
| A02854 | A07166 | 391 | A02854 | A07173 | 480 |
| A02854 | A07390 | 269 | A02854 | A10504 | 326 |
| A02854 | A11921 | 232 | A02854 | A13181 | 185 |
| A02854 | A13872 | 467 | A02854 | A14391 | 260 |
| A02854 | A14392 | 152 | A02854 | A14405 | 185 |
| A02854 | A14442 | 249 | A02854 | A15395 | 390 |
| A02854 | A15601 | 260 | A02855 | A02977 | 162 |
| A02855 | A03981 | 163 | A02855 | A04028 | 432 |
| A02855 | A04047 | 486 | A02855 | A04418 | 307 |
| A02855 | A04541 | 265 | A02855 | A04946 | 313 |
| A02855 | A05288 | 486 | A02855 | A06543 | 625 |
| A02855 | A06608 | 277 | A02855 | A07157 | 174 |
| A02855 | A10744 | 247 | A02855 | A10825 | 313 |
| A02855 | A11300 | 395 | A02855 | A12661 | 210 |
| A02855 | A13989 | 290 | A02855 | A14006 | 391 |
| A02855 | A14196 | 263 | A02855 | A15945 | 561 |
| A02856 | A02869 | 394 | A02856 | A02872 | 472 |
| A02856 | A02888 | 486 | A02856 | A02908 | 455 |
| A02856 | A02911 | 380 | A02856 | A02918 | 389 |
| A02856 | A02919 | 345 | A02856 | A02925 | 293 |
| A02856 | A02929 | 449 | A02856 | A03243 | 283 |
| A02856 | A03256 | 288 | A02856 | A03259 | 218 |
| A02856 | A04030 | 396 | A02856 | A04138 | 347 |
| A02856 | A04540 | 396 | A02856 | A04568 | 337 |
| A02856 | A05120 | 358 | A02856 | A05817 | 386 |
| A02856 | A07135 | 174 | A02856 | A07140 | 286 |
| A02856 | A07164 | 266 | A02856 | A08681 | 324 |
| A02856 | A10626 | 366 | A02856 | A12730 | 345 |
| A02856 | A14077 | 160 | A02856 | A16636 | 156 |
| A02857 | A02893 | 328 | A02857 | A03268 | 294 |
| A02857 | A04066 | 187 | A02857 | A04173 | 356 |
| A02857 | A04285 | 333 | A02857 | A04401 | 385 |
| A02857 | A04515 | 368 | A02857 | A04596 | 333 |
| A02857 | A04960 | 157 | A02857 | A05141 | 205 |
| A02857 | A05480 | 340 | A02857 | A05911 | 288 |
| A02857 | A05926 | 156 | A02857 | A06037 | 486 |

|        |        |     |        |        |     |
|--------|--------|-----|--------|--------|-----|
| A02857 | A06298 | 195 | A02857 | A07311 | 249 |
| A02857 | A11116 | 340 | A02857 | A11608 | 389 |
| A02857 | A12227 | 218 | A02857 | A13830 | 347 |
| A02857 | A14247 | 260 | A02857 | A14320 | 356 |
| A02857 | A14609 | 156 | A02857 | A15691 | 266 |
| A02857 | A15710 | 152 | A02857 | A15730 | 286 |
| A02857 | A16440 | 395 | A02857 | A16450 | 176 |
| A02858 | A03112 | 163 | A02858 | A03268 | 369 |
| A02858 | A03965 | 296 | A02858 | A04004 | 334 |
| A02858 | A04902 | 162 | A02858 | A08525 | 165 |
| A02858 | A08858 | 188 | A02858 | A12122 | 457 |
| A02859 | A02863 | 216 | A02859 | A02869 | 187 |
| A02859 | A02874 | 491 | A02859 | A02876 | 205 |
| A02859 | A02883 | 263 | A02859 | A02886 | 391 |
| A02859 | A02896 | 580 | A02859 | A02905 | 249 |
| A02859 | A02909 | 171 | A02859 | A02912 | 160 |
| A02859 | A02916 | 163 | A02859 | A02922 | 490 |
| A02859 | A02924 | 238 | A02859 | A02944 | 428 |
| A02859 | A02951 | 945 | A02859 | A02953 | 286 |
| A02859 | A02961 | 427 | A02859 | A02977 | 423 |
| A02859 | A02982 | 484 | A02859 | A02983 | 291 |
| A02859 | A02984 | 369 | A02859 | A02992 | 391 |
| A02859 | A02997 | 174 | A02859 | A03003 | 326 |
| A02859 | A03008 | 210 | A02859 | A03016 | 434 |
| A02859 | A03022 | 162 | A02859 | A03034 | 483 |
| A02859 | A03035 | 167 | A02859 | A03036 | 293 |
| A02859 | A03050 | 483 | A02859 | A03080 | 470 |
| A02859 | A03095 | 353 | A02859 | A03104 | 208 |
| A02859 | A03112 | 491 | A02859 | A03126 | 317 |
| A02859 | A03131 | 199 | A02859 | A03141 | 283 |
| A02859 | A03144 | 363 | A02859 | A03146 | 180 |
| A02859 | A03148 | 238 | A02859 | A03157 | 243 |
| A02859 | A03184 | 357 | A02859 | A03189 | 152 |
| A02859 | A03238 | 352 | A02859 | A03248 | 246 |
| A02859 | A03249 | 246 | A02859 | A03259 | 491 |
| A02859 | A03271 | 257 | A02859 | A03275 | 945 |
| A02859 | A03280 | 225 | A02859 | A03281 | 350 |
| A02859 | A03288 | 283 | A02859 | A03304 | 154 |
| A02859 | A03347 | 328 | A02859 | A03353 | 323 |
| A02859 | A03369 | 307 | A02859 | A03370 | 391 |
| A02859 | A03371 | 163 | A02859 | A03373 | 204 |
| A02859 | A03379 | 457 | A02859 | A03419 | 371 |
| A02859 | A03475 | 160 | A02859 | A03505 | 174 |
| A02859 | A03513 | 363 | A02859 | A03520 | 441 |
| A02859 | A03554 | 472 | A02859 | A03602 | 152 |
| A02859 | A03609 | 467 | A02859 | A03621 | 152 |

|        |        |     |        |        |     |
|--------|--------|-----|--------|--------|-----|
| A02859 | A03664 | 367 | A02859 | A03719 | 345 |
| A02859 | A03724 | 390 | A02859 | A03732 | 230 |
| A02859 | A03733 | 154 | A02859 | A03748 | 328 |
| A02859 | A03779 | 174 | A02859 | A03799 | 210 |
| A02859 | A03851 | 473 | A02859 | A03899 | 182 |
| A02859 | A03900 | 160 | A02859 | A03914 | 435 |
| A02859 | A03963 | 384 | A02859 | A03980 | 162 |
| A02859 | A03991 | 266 | A02859 | A04010 | 491 |
| A02859 | A04015 | 154 | A02859 | A04023 | 210 |
| A02859 | A04040 | 272 | A02859 | A04051 | 490 |
| A02859 | A04078 | 198 | A02859 | A04088 | 160 |
| A02859 | A04097 | 313 | A02859 | A04127 | 199 |
| A02859 | A04134 | 245 | A02859 | A04138 | 154 |
| A02859 | A04142 | 245 | A02859 | A04163 | 188 |
| A02859 | A04245 | 152 | A02859 | A04247 | 441 |
| A02859 | A04263 | 491 | A02859 | A04267 | 472 |
| A02859 | A04268 | 386 | A02859 | A04278 | 405 |
| A02859 | A04296 | 162 | A02859 | A04298 | 174 |
| A02859 | A04321 | 162 | A02859 | A04322 | 152 |
| A02859 | A04334 | 221 | A02859 | A04369 | 204 |
| A02859 | A04374 | 188 | A02859 | A04375 | 238 |
| A02859 | A04432 | 174 | A02859 | A04437 | 151 |
| A02859 | A04449 | 899 | A02859 | A04452 | 174 |
| A02859 | A04518 | 486 | A02859 | A04536 | 218 |
| A02859 | A04547 | 457 | A02859 | A04548 | 477 |
| A02859 | A04567 | 491 | A02859 | A04596 | 152 |
| A02859 | A04607 | 940 | A02859 | A04608 | 481 |
| A02859 | A04609 | 479 | A02859 | A04612 | 247 |
| A02859 | A04614 | 394 | A02859 | A04615 | 157 |
| A02859 | A04616 | 347 | A02859 | A04618 | 177 |
| A02859 | A04622 | 491 | A02859 | A04735 | 266 |
| A02859 | A04839 | 409 | A02859 | A04867 | 247 |
| A02859 | A04911 | 269 | A02859 | A04919 | 188 |
| A02859 | A04980 | 174 | A02859 | A05007 | 395 |
| A02859 | A05039 | 152 | A02859 | A05054 | 152 |
| A02859 | A05071 | 162 | A02859 | A05098 | 193 |
| A02859 | A05110 | 246 | A02859 | A05113 | 944 |
| A02859 | A05153 | 184 | A02859 | A05155 | 355 |
| A02859 | A05174 | 162 | A02859 | A05221 | 491 |
| A02859 | A05229 | 274 | A02859 | A05237 | 307 |
| A02859 | A05302 | 199 | A02859 | A05309 | 491 |
| A02859 | A05315 | 899 | A02859 | A05325 | 152 |
| A02859 | A05349 | 945 | A02859 | A05356 | 408 |
| A02859 | A05416 | 180 | A02859 | A05433 | 174 |
| A02859 | A05437 | 152 | A02859 | A05439 | 218 |
| A02859 | A05449 | 446 | A02859 | A05515 | 163 |

|        |        |     |        |        |     |
|--------|--------|-----|--------|--------|-----|
| A02859 | A05601 | 190 | A02859 | A05603 | 229 |
| A02859 | A05735 | 215 | A02859 | A05759 | 219 |
| A02859 | A05774 | 374 | A02859 | A05847 | 488 |
| A02859 | A05935 | 246 | A02859 | A06089 | 152 |
| A02859 | A06107 | 245 | A02859 | A06140 | 162 |
| A02859 | A06211 | 215 | A02859 | A06252 | 176 |
| A02859 | A06346 | 212 | A02859 | A06395 | 246 |
| A02859 | A06415 | 474 | A02859 | A06422 | 305 |
| A02859 | A06537 | 246 | A02859 | A06569 | 339 |
| A02859 | A06578 | 458 | A02859 | A06607 | 340 |
| A02859 | A06610 | 369 | A02859 | A06627 | 185 |
| A02859 | A06659 | 260 | A02859 | A06734 | 193 |
| A02859 | A06747 | 163 | A02859 | A06756 | 168 |
| A02859 | A06829 | 326 | A02859 | A06833 | 210 |
| A02859 | A06851 | 285 | A02859 | A06924 | 188 |
| A02859 | A06931 | 188 | A02859 | A06949 | 157 |
| A02859 | A06980 | 188 | A02859 | A07062 | 210 |
| A02859 | A07109 | 188 | A02859 | A07122 | 302 |
| A02859 | A07135 | 350 | A02859 | A07141 | 452 |
| A02859 | A07146 | 162 | A02859 | A07147 | 171 |
| A02859 | A07152 | 196 | A02859 | A07157 | 491 |
| A02859 | A07164 | 553 | A02859 | A07165 | 491 |
| A02859 | A07166 | 177 | A02859 | A07187 | 185 |
| A02859 | A07191 | 210 | A02859 | A07200 | 489 |
| A02859 | A07209 | 486 | A02859 | A07218 | 430 |
| A02859 | A07302 | 446 | A02859 | A07369 | 162 |
| A02859 | A07373 | 160 | A02859 | A07405 | 246 |
| A02859 | A07413 | 263 | A02859 | A07440 | 369 |
| A02859 | A07468 | 218 | A02859 | A07546 | 174 |
| A02859 | A07609 | 246 | A02859 | A07627 | 152 |
| A02859 | A07653 | 173 | A02859 | A07688 | 162 |
| A02859 | A07736 | 210 | A02859 | A07766 | 353 |
| A02859 | A07800 | 425 | A02859 | A07803 | 375 |
| A02859 | A07958 | 268 | A02859 | A08099 | 219 |
| A02859 | A08238 | 435 | A02859 | A08265 | 188 |
| A02859 | A08313 | 291 | A02859 | A08368 | 307 |
| A02859 | A08404 | 348 | A02859 | A08546 | 346 |
| A02859 | A08567 | 157 | A02859 | A08587 | 188 |
| A02859 | A08641 | 235 | A02859 | A08649 | 210 |
| A02859 | A08652 | 317 | A02859 | A08670 | 210 |
| A02859 | A08687 | 310 | A02859 | A08693 | 170 |
| A02859 | A08741 | 177 | A02859 | A08764 | 210 |
| A02859 | A08827 | 254 | A02859 | A08834 | 465 |
| A02859 | A08840 | 340 | A02859 | A08841 | 213 |
| A02859 | A08866 | 180 | A02859 | A08977 | 232 |
| A02859 | A09137 | 246 | A02859 | A09147 | 245 |

|        |        |     |        |        |     |
|--------|--------|-----|--------|--------|-----|
| A02859 | A09199 | 218 | A02859 | A09204 | 303 |
| A02859 | A09224 | 152 | A02859 | A09263 | 340 |
| A02859 | A09294 | 162 | A02859 | A09428 | 171 |
| A02859 | A09573 | 469 | A02859 | A09598 | 296 |
| A02859 | A09732 | 389 | A02859 | A09745 | 383 |
| A02859 | A09768 | 213 | A02859 | A09833 | 483 |
| A02859 | A09834 | 176 | A02859 | A09835 | 188 |
| A02859 | A09847 | 363 | A02859 | A09973 | 210 |
| A02859 | A09985 | 215 | A02859 | A10027 | 246 |
| A02859 | A10055 | 400 | A02859 | A10085 | 201 |
| A02859 | A10173 | 190 | A02859 | A10187 | 210 |
| A02859 | A10204 | 246 | A02859 | A10435 | 246 |
| A02859 | A10512 | 246 | A02859 | A10550 | 307 |
| A02859 | A10571 | 162 | A02859 | A10585 | 238 |
| A02859 | A10586 | 277 | A02859 | A10596 | 152 |
| A02859 | A10612 | 198 | A02859 | A10638 | 199 |
| A02859 | A10723 | 378 | A02859 | A10740 | 358 |
| A02859 | A10792 | 152 | A02859 | A10827 | 210 |
| A02859 | A10881 | 174 | A02859 | A10935 | 348 |
| A02859 | A10967 | 363 | A02859 | A11037 | 210 |
| A02859 | A11122 | 251 | A02859 | A11136 | 246 |
| A02859 | A11204 | 188 | A02859 | A11248 | 246 |
| A02859 | A11309 | 286 | A02859 | A11421 | 281 |
| A02859 | A11537 | 176 | A02859 | A11540 | 323 |
| A02859 | A11556 | 193 | A02859 | A11627 | 188 |
| A02859 | A11631 | 374 | A02859 | A11688 | 329 |
| A02859 | A11830 | 193 | A02859 | A11867 | 152 |
| A02859 | A12644 | 199 | A02859 | A12885 | 238 |
| A02859 | A12927 | 483 | A02859 | A12973 | 188 |
| A02859 | A13018 | 417 | A02859 | A13031 | 152 |
| A02859 | A13046 | 188 | A02859 | A13171 | 188 |
| A02859 | A13181 | 332 | A02859 | A13235 | 174 |
| A02859 | A13302 | 228 | A02859 | A13369 | 321 |
| A02859 | A13546 | 152 | A02859 | A13691 | 210 |
| A02859 | A13748 | 210 | A02859 | A13826 | 491 |
| A02859 | A13871 | 246 | A02859 | A13899 | 486 |
| A02859 | A13909 | 210 | A02859 | A13950 | 373 |
| A02859 | A13957 | 174 | A02859 | A13987 | 174 |
| A02859 | A14112 | 187 | A02859 | A14116 | 162 |
| A02859 | A14191 | 423 | A02859 | A14204 | 490 |
| A02859 | A14208 | 490 | A02859 | A14210 | 475 |
| A02859 | A14229 | 480 | A02859 | A14245 | 293 |
| A02859 | A14276 | 424 | A02859 | A14336 | 411 |
| A02859 | A14344 | 334 | A02859 | A14372 | 357 |
| A02859 | A14374 | 446 | A02859 | A14384 | 187 |
| A02859 | A14391 | 212 | A02859 | A14393 | 899 |

|        |        |     |        |        |     |
|--------|--------|-----|--------|--------|-----|
| A02859 | A14394 | 345 | A02859 | A14395 | 473 |
| A02859 | A14405 | 335 | A02859 | A14424 | 174 |
| A02859 | A14482 | 433 | A02859 | A14511 | 240 |
| A02859 | A14570 | 424 | A02859 | A14590 | 188 |
| A02859 | A14599 | 191 | A02859 | A14667 | 294 |
| A02859 | A14729 | 162 | A02859 | A14745 | 245 |
| A02859 | A14810 | 334 | A02859 | A14816 | 184 |
| A02859 | A14862 | 218 | A02859 | A15292 | 457 |
| A02859 | A15293 | 335 | A02859 | A15308 | 303 |
| A02859 | A15313 | 185 | A02859 | A15314 | 481 |
| A02859 | A15317 | 260 | A02859 | A15318 | 170 |
| A02859 | A15321 | 290 | A02859 | A15322 | 491 |
| A02859 | A15328 | 486 | A02859 | A15336 | 424 |
| A02859 | A15343 | 177 | A02859 | A15345 | 246 |
| A02859 | A15346 | 488 | A02859 | A15348 | 221 |
| A02859 | A15352 | 221 | A02859 | A15357 | 466 |
| A02859 | A15369 | 199 | A02859 | A15391 | 205 |
| A02859 | A15395 | 263 | A02859 | A15398 | 157 |
| A02859 | A15400 | 412 | A02859 | A15402 | 479 |
| A02859 | A15413 | 213 | A02859 | A15425 | 408 |
| A02859 | A15430 | 446 | A02859 | A15449 | 348 |
| A02859 | A15451 | 162 | A02859 | A15454 | 326 |
| A02859 | A15455 | 296 | A02859 | A15480 | 346 |
| A02859 | A15495 | 198 | A02859 | A15498 | 185 |
| A02859 | A15506 | 407 | A02859 | A15515 | 193 |
| A02859 | A15517 | 283 | A02859 | A15578 | 240 |
| A02859 | A15615 | 152 | A02859 | A15630 | 364 |
| A02859 | A15639 | 210 | A02859 | A15792 | 355 |
| A02859 | A15815 | 258 | A02859 | A15825 | 152 |
| A02859 | A15837 | 341 | A02859 | A15887 | 366 |
| A02859 | A15912 | 221 | A02859 | A15916 | 267 |
| A02859 | A15962 | 208 | A02859 | A15976 | 348 |
| A02859 | A15991 | 246 | A02859 | A16011 | 210 |
| A02859 | A16059 | 246 | A02859 | A16068 | 352 |
| A02859 | A16120 | 412 | A02859 | A16121 | 307 |
| A02859 | A16216 | 474 | A02859 | A16300 | 469 |
| A02859 | A16306 | 184 | A02859 | A16337 | 210 |
| A02859 | A16393 | 358 | A02859 | A16417 | 374 |
| A02859 | A16418 | 234 | A02859 | A16424 | 270 |
| A02859 | A16529 | 196 | A02859 | A16636 | 491 |
| A02859 | A16659 | 162 | A02859 | A16717 | 210 |
| A02859 | A16904 | 469 | A02859 | A16916 | 462 |
| A02859 | A16917 | 210 | A02859 | A17078 | 485 |
| A02859 | A17092 | 188 | A02860 | A02863 | 417 |
| A02860 | A02877 | 77  | A02860 | A02880 | 358 |
| A02860 | A02887 | 241 | A02860 | A02895 | 490 |

|        |        |     |        |        |     |
|--------|--------|-----|--------|--------|-----|
| A02860 | A02914 | 485 | A02860 | A02924 | 472 |
| A02860 | A02927 | 247 | A02860 | A03195 | 247 |
| A02860 | A03271 | 238 | A02860 | A03288 | 217 |
| A02860 | A03581 | 193 | A02860 | A03611 | 272 |
| A02860 | A03817 | 279 | A02860 | A04042 | 363 |
| A02860 | A04209 | 159 | A02860 | A04342 | 207 |
| A02860 | A04587 | 436 | A02860 | A04607 | 160 |
| A02860 | A04682 | 383 | A02860 | A04730 | 436 |
| A02860 | A04939 | 172 | A02860 | A05891 | 204 |
| A02860 | A06224 | 430 | A02860 | A06324 | 312 |
| A02860 | A06814 | 297 | A02860 | A06832 | 179 |
| A02860 | A06949 | 160 | A02860 | A07163 | 205 |
| A02860 | A07399 | 213 | A02860 | A08315 | 374 |
| A02860 | A09213 | 313 | A02860 | A09464 | 270 |
| A02860 | A10342 | 340 | A02860 | A10418 | 276 |
| A02860 | A11937 | 162 | A02860 | A14026 | 215 |
| A02860 | A14164 | 385 | A02860 | A15420 | 152 |
| A02860 | A15630 | 176 | A02860 | A15834 | 229 |
| A02861 | A02862 | 445 | A02861 | A02895 | 391 |
| A02861 | A04028 | 198 | A02861 | A04046 | 436 |
| A02861 | A04088 | 328 | A02861 | A04329 | 333 |
| A02861 | A04582 | 405 | A02861 | A04590 | 405 |
| A02861 | A05264 | 313 | A02861 | A05671 | 456 |
| A02861 | A07197 | 311 | A02861 | A08851 | 345 |
| A02861 | A09263 | 235 | A02861 | A09453 | 385 |
| A02861 | A10324 | 456 | A02861 | A11193 | 382 |
| A02861 | A11237 | 416 | A02861 | A12361 | 257 |
| A02861 | A14386 | 335 | A02861 | A14933 | 416 |
| A02861 | A15322 | 168 | A02861 | A15357 | 152 |
| A02861 | A15402 | 255 | A02861 | A15630 | 224 |
| A02861 | A15971 | 378 | A02862 | A02915 | 307 |
| A02862 | A03228 | 367 | A02862 | A04046 | 457 |
| A02862 | A05289 | 260 | A02862 | A05962 | 335 |
| A02862 | A07197 | 271 | A02862 | A08572 | 188 |
| A02862 | A09263 | 185 | A02862 | A14390 | 401 |
| A02863 | A02896 | 434 | A02863 | A02917 | 491 |
| A02863 | A02945 | 486 | A02863 | A02955 | 154 |
| A02863 | A02982 | 168 | A02863 | A03019 | 63  |
| A02863 | A03081 | 218 | A02863 | A03100 | 180 |
| A02863 | A03104 | 198 | A02863 | A03183 | 193 |
| A02863 | A03204 | 234 | A02863 | A03260 | 246 |
| A02863 | A03271 | 299 | A02863 | A03284 | 319 |
| A02863 | A03610 | 226 | A02863 | A03782 | 160 |
| A02863 | A03799 | 151 | A02863 | A03904 | 240 |
| A02863 | A03942 | 160 | A02863 | A03996 | 388 |
| A02863 | A03999 | 371 | A02863 | A04033 | 473 |

|        |        |     |        |        |     |
|--------|--------|-----|--------|--------|-----|
| A02863 | A04110 | 224 | A02863 | A04206 | 391 |
| A02863 | A04238 | 407 | A02863 | A04248 | 488 |
| A02863 | A04263 | 458 | A02863 | A04267 | 174 |
| A02863 | A04272 | 272 | A02863 | A04278 | 200 |
| A02863 | A04517 | 260 | A02863 | A04518 | 288 |
| A02863 | A04526 | 333 | A02863 | A04528 | 360 |
| A02863 | A04536 | 351 | A02863 | A04567 | 229 |
| A02863 | A04589 | 162 | A02863 | A04603 | 229 |
| A02863 | A04755 | 291 | A02863 | A04865 | 241 |
| A02863 | A04878 | 265 | A02863 | A05113 | 196 |
| A02863 | A05305 | 368 | A02863 | A05487 | 193 |
| A02863 | A05679 | 152 | A02863 | A05741 | 285 |
| A02863 | A05860 | 344 | A02863 | A05944 | 312 |
| A02863 | A05985 | 374 | A02863 | A06404 | 288 |
| A02863 | A06422 | 238 | A02863 | A06650 | 324 |
| A02863 | A07145 | 177 | A02863 | A07158 | 254 |
| A02863 | A07161 | 207 | A02863 | A07173 | 490 |
| A02863 | A07289 | 388 | A02863 | A08315 | 224 |
| A02863 | A08634 | 351 | A02863 | A08875 | 154 |
| A02863 | A09245 | 199 | A02863 | A09319 | 899 |
| A02863 | A09644 | 899 | A02863 | A09981 | 388 |
| A02863 | A10055 | 312 | A02863 | A10813 | 235 |
| A02863 | A10901 | 319 | A02863 | A14236 | 483 |
| A02863 | A14299 | 152 | A02863 | A14364 | 183 |
| A02863 | A14367 | 162 | A02863 | A14373 | 293 |
| A02863 | A14385 | 323 | A02863 | A14635 | 435 |
| A02863 | A15241 | 483 | A02863 | A15394 | 322 |
| A02863 | A15395 | 430 | A02863 | A15403 | 286 |
| A02863 | A15599 | 228 | A02863 | A15601 | 457 |
| A02863 | A15602 | 297 | A02863 | A15603 | 455 |
| A02863 | A15604 | 294 | A02863 | A15605 | 409 |
| A02863 | A15606 | 468 | A02863 | A15607 | 269 |
| A02863 | A15608 | 219 | A02863 | A15981 | 480 |
| A02864 | A02865 | 230 | A02864 | A02896 | 65  |
| A02864 | A02897 | 484 | A02864 | A02908 | 163 |
| A02864 | A02916 | 77  | A02864 | A02952 | 205 |
| A02864 | A02961 | 369 | A02864 | A03001 | 105 |
| A02864 | A03094 | 196 | A02864 | A03265 | 246 |
| A02864 | A03270 | 229 | A02864 | A03278 | 436 |
| A02864 | A03337 | 314 | A02864 | A03391 | 170 |
| A02864 | A03780 | 196 | A02864 | A03784 | 176 |
| A02864 | A03803 | 423 | A02864 | A03809 | 491 |
| A02864 | A03821 | 489 | A02864 | A03961 | 224 |
| A02864 | A04018 | 218 | A02864 | A04139 | 347 |
| A02864 | A04163 | 151 | A02864 | A04207 | 423 |
| A02864 | A04212 | 165 | A02864 | A04288 | 163 |



|        |        |     |        |        |     |
|--------|--------|-----|--------|--------|-----|
| A02864 | A04422 | 151 | A02864 | A04541 | 255 |
| A02864 | A04567 | 160 | A02864 | A04578 | 243 |
| A02864 | A04600 | 484 | A02864 | A04604 | 316 |
| A02864 | A04731 | 168 | A02864 | A04867 | 484 |
| A02864 | A04960 | 213 | A02864 | A04964 | 293 |
| A02864 | A05168 | 193 | A02864 | A05246 | 263 |
| A02864 | A05507 | 259 | A02864 | A05543 | 413 |
| A02864 | A05569 | 230 | A02864 | A05570 | 163 |
| A02864 | A05591 | 321 | A02864 | A05630 | 236 |
| A02864 | A05709 | 213 | A02864 | A05719 | 234 |
| A02864 | A05888 | 240 | A02864 | A05918 | 243 |
| A02864 | A06140 | 294 | A02864 | A06778 | 474 |
| A02864 | A07141 | 165 | A02864 | A07148 | 408 |
| A02864 | A07157 | 260 | A02864 | A07175 | 201 |
| A02864 | A07186 | 221 | A02864 | A07557 | 378 |
| A02864 | A08732 | 414 | A02864 | A08841 | 165 |
| A02864 | A08879 | 455 | A02864 | A09026 | 218 |
| A02864 | A09535 | 243 | A02864 | A09699 | 259 |
| A02864 | A10197 | 229 | A02864 | A10625 | 475 |
| A02864 | A10735 | 99  | A02864 | A11086 | 236 |
| A02864 | A11271 | 193 | A02864 | A11372 | 468 |
| A02864 | A11482 | 193 | A02864 | A13212 | 430 |
| A02864 | A13302 | 246 | A02864 | A13376 | 229 |
| A02864 | A14443 | 899 | A02864 | A14452 | 302 |
| A02864 | A15579 | 899 | A02864 | A16086 | 154 |
| A02864 | A16289 | 332 | A02865 | A03010 | 294 |
| A02865 | A04221 | 383 | A02865 | A11301 | 187 |
| A02865 | A13302 | 374 | A02865 | A13882 | 291 |
| A02865 | A13902 | 256 | A02866 | A02873 | 379 |
| A02866 | A03541 | 356 | A02866 | A03869 | 409 |
| A02866 | A03871 | 414 | A02866 | A04445 | 367 |
| A02866 | A04536 | 385 | A02866 | A04727 | 380 |
| A02866 | A05436 | 399 | A02866 | A07309 | 247 |
| A02866 | A07746 | 251 | A02866 | A13330 | 353 |
| A02866 | A13426 | 367 | A02867 | A03211 | 286 |
| A02867 | A04493 | 362 | A02867 | A04944 | 326 |
| A02867 | A04964 | 324 | A02867 | A06530 | 347 |
| A02867 | A14643 | 226 | A02867 | A16300 | 247 |
| A02868 | A02895 | 257 | A02868 | A02902 | 276 |
| A02868 | A03227 | 254 | A02868 | A03276 | 308 |
| A02868 | A03321 | 84  | A02868 | A03412 | 223 |
| A02868 | A03415 | 193 | A02868 | A04174 | 243 |
| A02868 | A04280 | 157 | A02868 | A04965 | 212 |
| A02868 | A05370 | 279 | A02868 | A06234 | 362 |
| A02868 | A06491 | 245 | A02868 | A06628 | 212 |
| A02868 | A06863 | 234 | A02868 | A07062 | 283 |

|        |        |     |        |        |     |
|--------|--------|-----|--------|--------|-----|
| A02868 | A07165 | 236 | A02868 | A09020 | 468 |
| A02868 | A09136 | 362 | A02868 | A09221 | 283 |
| A02868 | A10145 | 380 | A02868 | A14023 | 369 |
| A02869 | A02872 | 258 | A02869 | A02888 | 347 |
| A02869 | A02897 | 236 | A02869 | A02906 | 270 |
| A02869 | A02908 | 935 | A02869 | A02911 | 301 |
| A02869 | A02918 | 151 | A02869 | A02919 | 367 |
| A02869 | A02925 | 911 | A02869 | A02929 | 489 |
| A02869 | A02942 | 899 | A02869 | A02949 | 408 |
| A02869 | A02958 | 484 | A02869 | A02983 | 369 |
| A02869 | A03100 | 165 | A02869 | A03112 | 238 |
| A02869 | A03144 | 152 | A02869 | A03201 | 207 |
| A02869 | A03260 | 232 | A02869 | A03275 | 165 |
| A02869 | A03281 | 210 | A02869 | A03287 | 481 |
| A02869 | A03288 | 168 | A02869 | A03373 | 168 |
| A02869 | A03403 | 274 | A02869 | A03427 | 218 |
| A02869 | A03681 | 187 | A02869 | A03803 | 172 |
| A02869 | A03821 | 257 | A02869 | A03919 | 373 |
| A02869 | A04030 | 329 | A02869 | A04059 | 265 |
| A02869 | A04134 | 305 | A02869 | A04442 | 191 |
| A02869 | A04444 | 328 | A02869 | A04540 | 384 |
| A02869 | A04601 | 335 | A02869 | A04681 | 272 |
| A02869 | A04698 | 163 | A02869 | A04710 | 160 |
| A02869 | A04941 | 236 | A02869 | A05035 | 899 |
| A02869 | A05141 | 198 | A02869 | A05144 | 245 |
| A02869 | A05216 | 355 | A02869 | A05309 | 163 |
| A02869 | A05494 | 180 | A02869 | A05570 | 218 |
| A02869 | A05817 | 313 | A02869 | A06544 | 235 |
| A02869 | A06605 | 352 | A02869 | A06696 | 235 |
| A02869 | A06949 | 338 | A02869 | A07132 | 252 |
| A02869 | A07140 | 163 | A02869 | A07153 | 332 |
| A02869 | A07165 | 385 | A02869 | A07280 | 301 |
| A02869 | A07935 | 317 | A02869 | A08574 | 308 |
| A02869 | A09396 | 266 | A02869 | A09911 | 272 |
| A02869 | A09997 | 229 | A02869 | A10174 | 899 |
| A02869 | A10337 | 173 | A02869 | A11319 | 283 |
| A02869 | A13879 | 172 | A02869 | A15283 | 329 |
| A02870 | A02904 | 443 | A02870 | A03338 | 340 |
| A02870 | A04346 | 340 | A02870 | A06819 | 151 |
| A02871 | A02909 | 418 | A02871 | A03541 | 409 |
| A02871 | A03832 | 324 | A02871 | A04728 | 337 |
| A02872 | A02888 | 490 | A02872 | A02908 | 486 |
| A02872 | A02911 | 277 | A02872 | A02918 | 491 |
| A02872 | A02919 | 414 | A02872 | A02925 | 417 |
| A02872 | A02929 | 425 | A02872 | A02941 | 408 |
| A02872 | A02942 | 901 | A02872 | A02947 | 236 |

|        |        |     |        |        |     |
|--------|--------|-----|--------|--------|-----|
| A02872 | A02948 | 307 | A02872 | A02959 | 84  |
| A02872 | A02968 | 899 | A02872 | A02988 | 218 |
| A02872 | A03259 | 82  | A02872 | A03545 | 188 |
| A02872 | A04008 | 252 | A02872 | A04030 | 408 |
| A02872 | A04510 | 221 | A02872 | A04540 | 489 |
| A02872 | A04568 | 491 | A02872 | A05207 | 333 |
| A02872 | A05570 | 188 | A02872 | A05817 | 443 |
| A02872 | A07086 | 232 | A02872 | A07135 | 398 |
| A02872 | A07140 | 413 | A02872 | A07900 | 457 |
| A02872 | A08527 | 183 | A02872 | A08679 | 343 |
| A02872 | A08732 | 899 | A02872 | A09054 | 162 |
| A02872 | A09540 | 254 | A02872 | A10626 | 371 |
| A02872 | A11369 | 899 | A02872 | A11546 | 294 |
| A02872 | A12167 | 328 | A02872 | A12730 | 215 |
| A02872 | A14059 | 899 | A02872 | A14830 | 201 |
| A02872 | A15768 | 185 | A02872 | A16311 | 168 |
| A02872 | A16860 | 151 | A02873 | A02896 | 213 |
| A02873 | A02909 | 346 | A02873 | A03479 | 224 |
| A02873 | A03541 | 480 | A02873 | A03612 | 307 |
| A02873 | A03718 | 245 | A02873 | A03869 | 394 |
| A02873 | A03871 | 399 | A02873 | A04049 | 357 |
| A02873 | A04268 | 281 | A02873 | A04275 | 371 |
| A02873 | A04287 | 422 | A02873 | A04536 | 475 |
| A02873 | A04603 | 413 | A02873 | A04723 | 347 |
| A02873 | A04728 | 191 | A02873 | A04960 | 263 |
| A02873 | A05414 | 313 | A02873 | A05558 | 386 |
| A02873 | A05573 | 286 | A02873 | A05577 | 185 |
| A02873 | A05854 | 283 | A02873 | A05944 | 276 |
| A02873 | A06055 | 447 | A02873 | A08615 | 472 |
| A02873 | A09995 | 276 | A02873 | A12062 | 340 |
| A02873 | A13903 | 302 | A02873 | A14236 | 255 |
| A02873 | A14392 | 245 | A02873 | A14432 | 353 |
| A02873 | A15605 | 299 | A02874 | A02875 | 491 |
| A02874 | A02877 | 481 | A02874 | A02883 | 63  |
| A02874 | A02884 | 151 | A02874 | A02896 | 456 |
| A02874 | A02922 | 308 | A02874 | A02931 | 152 |
| A02874 | A02944 | 435 | A02874 | A02951 | 473 |
| A02874 | A02961 | 252 | A02874 | A02969 | 190 |
| A02874 | A02982 | 456 | A02874 | A02984 | 450 |
| A02874 | A03016 | 198 | A02874 | A03019 | 174 |
| A02874 | A03039 | 188 | A02874 | A03069 | 454 |
| A02874 | A03080 | 435 | A02874 | A03094 | 238 |
| A02874 | A03112 | 406 | A02874 | A03157 | 338 |
| A02874 | A03244 | 260 | A02874 | A03259 | 491 |
| A02874 | A03269 | 190 | A02874 | A03275 | 491 |
| A02874 | A03281 | 363 | A02874 | A03338 | 176 |

|        |        |     |        |        |     |
|--------|--------|-----|--------|--------|-----|
| A02874 | A03342 | 267 | A02874 | A03347 | 296 |
| A02874 | A03353 | 260 | A02874 | A03369 | 193 |
| A02874 | A03370 | 404 | A02874 | A03371 | 190 |
| A02874 | A03379 | 361 | A02874 | A03389 | 267 |
| A02874 | A03417 | 234 | A02874 | A03419 | 491 |
| A02874 | A03426 | 383 | A02874 | A03432 | 177 |
| A02874 | A03520 | 154 | A02874 | A03552 | 260 |
| A02874 | A03554 | 245 | A02874 | A03561 | 173 |
| A02874 | A03595 | 173 | A02874 | A03627 | 168 |
| A02874 | A03653 | 249 | A02874 | A03664 | 469 |
| A02874 | A03684 | 229 | A02874 | A03744 | 212 |
| A02874 | A03773 | 201 | A02874 | A03824 | 408 |
| A02874 | A03914 | 260 | A02874 | A03922 | 180 |
| A02874 | A03935 | 177 | A02874 | A03991 | 327 |
| A02874 | A04010 | 491 | A02874 | A04020 | 182 |
| A02874 | A04023 | 195 | A02874 | A04051 | 485 |
| A02874 | A04069 | 195 | A02874 | A04117 | 223 |
| A02874 | A04142 | 311 | A02874 | A04143 | 399 |
| A02874 | A04209 | 208 | A02874 | A04212 | 364 |
| A02874 | A04238 | 165 | A02874 | A04247 | 439 |
| A02874 | A04262 | 201 | A02874 | A04267 | 433 |
| A02874 | A04271 | 462 | A02874 | A04272 | 249 |
| A02874 | A04280 | 157 | A02874 | A04333 | 230 |
| A02874 | A04391 | 151 | A02874 | A04454 | 157 |
| A02874 | A04477 | 157 | A02874 | A04518 | 366 |
| A02874 | A04522 | 188 | A02874 | A04548 | 358 |
| A02874 | A04567 | 414 | A02874 | A04596 | 210 |
| A02874 | A04609 | 168 | A02874 | A04622 | 262 |
| A02874 | A04652 | 276 | A02874 | A04735 | 195 |
| A02874 | A04753 | 267 | A02874 | A04779 | 307 |
| A02874 | A04817 | 267 | A02874 | A04819 | 188 |
| A02874 | A04824 | 277 | A02874 | A04851 | 160 |
| A02874 | A04867 | 480 | A02874 | A04874 | 246 |
| A02874 | A04875 | 168 | A02874 | A04877 | 177 |
| A02874 | A04911 | 243 | A02874 | A04939 | 308 |
| A02874 | A04965 | 419 | A02874 | A04968 | 306 |
| A02874 | A04999 | 165 | A02874 | A05001 | 157 |
| A02874 | A05004 | 232 | A02874 | A05107 | 324 |
| A02874 | A05112 | 286 | A02874 | A05142 | 183 |
| A02874 | A05259 | 350 | A02874 | A05264 | 210 |
| A02874 | A05309 | 428 | A02874 | A05314 | 232 |
| A02874 | A05329 | 378 | A02874 | A05349 | 489 |
| A02874 | A05358 | 229 | A02874 | A05451 | 165 |
| A02874 | A05603 | 218 | A02874 | A05723 | 219 |
| A02874 | A05767 | 208 | A02874 | A05835 | 188 |
| A02874 | A05861 | 160 | A02874 | A05946 | 246 |

|        |        |     |        |        |     |
|--------|--------|-----|--------|--------|-----|
| A02874 | A06073 | 271 | A02874 | A06135 | 173 |
| A02874 | A06208 | 422 | A02874 | A06249 | 369 |
| A02874 | A06306 | 268 | A02874 | A06314 | 183 |
| A02874 | A06346 | 205 | A02874 | A06370 | 165 |
| A02874 | A06415 | 180 | A02874 | A06592 | 160 |
| A02874 | A06606 | 276 | A02874 | A06607 | 355 |
| A02874 | A06658 | 297 | A02874 | A06682 | 246 |
| A02874 | A06845 | 195 | A02874 | A07025 | 232 |
| A02874 | A07066 | 195 | A02874 | A07123 | 190 |
| A02874 | A07141 | 213 | A02874 | A07147 | 247 |
| A02874 | A07163 | 301 | A02874 | A07164 | 332 |
| A02874 | A07165 | 491 | A02874 | A07187 | 278 |
| A02874 | A07191 | 256 | A02874 | A07200 | 434 |
| A02874 | A07218 | 477 | A02874 | A07251 | 297 |
| A02874 | A07376 | 255 | A02874 | A07522 | 232 |
| A02874 | A07553 | 177 | A02874 | A08290 | 297 |
| A02874 | A08617 | 195 | A02874 | A08649 | 267 |
| A02874 | A08670 | 267 | A02874 | A08755 | 219 |
| A02874 | A08764 | 267 | A02874 | A08910 | 177 |
| A02874 | A09029 | 195 | A02874 | A09373 | 219 |
| A02874 | A09465 | 383 | A02874 | A09468 | 246 |
| A02874 | A09470 | 451 | A02874 | A09509 | 296 |
| A02874 | A09818 | 232 | A02874 | A09872 | 157 |
| A02874 | A10021 | 151 | A02874 | A10146 | 177 |
| A02874 | A10291 | 160 | A02874 | A10473 | 246 |
| A02874 | A10511 | 188 | A02874 | A10731 | 386 |
| A02874 | A10826 | 151 | A02874 | A11136 | 297 |
| A02874 | A11264 | 151 | A02874 | A11275 | 151 |
| A02874 | A11687 | 151 | A02874 | A11822 | 219 |
| A02874 | A11926 | 156 | A02874 | A11955 | 157 |
| A02874 | A12355 | 297 | A02874 | A12361 | 302 |
| A02874 | A12553 | 232 | A02874 | A13044 | 195 |
| A02874 | A13180 | 219 | A02874 | A13212 | 198 |
| A02874 | A13334 | 297 | A02874 | A13376 | 277 |
| A02874 | A13667 | 187 | A02874 | A13735 | 224 |
| A02874 | A14023 | 210 | A02874 | A14364 | 371 |
| A02874 | A14367 | 190 | A02874 | A14399 | 176 |
| A02874 | A14487 | 226 | A02874 | A14643 | 170 |
| A02874 | A14684 | 297 | A02874 | A15162 | 173 |
| A02874 | A15464 | 245 | A02874 | A15835 | 219 |
| A02874 | A16059 | 297 | A02874 | A16269 | 168 |
| A02874 | A16551 | 297 | A02874 | A16636 | 486 |
| A02874 | A16674 | 238 | A02874 | A16999 | 297 |
| A02874 | A17041 | 221 | A02874 | A17080 | 267 |
| A02875 | A02877 | 188 | A02875 | A02932 | 288 |
| A02875 | A02969 | 162 | A02875 | A02982 | 395 |

|        |        |     |        |        |     |
|--------|--------|-----|--------|--------|-----|
| A02875 | A02984 | 191 | A02875 | A03039 | 270 |
| A02875 | A03069 | 419 | A02875 | A03094 | 199 |
| A02875 | A03209 | 413 | A02875 | A03269 | 491 |
| A02875 | A03275 | 185 | A02875 | A03305 | 165 |
| A02875 | A03403 | 224 | A02875 | A03416 | 245 |
| A02875 | A03417 | 491 | A02875 | A03418 | 318 |
| A02875 | A03419 | 383 | A02875 | A03426 | 249 |
| A02875 | A03447 | 188 | A02875 | A03599 | 270 |
| A02875 | A03634 | 386 | A02875 | A03664 | 388 |
| A02875 | A03865 | 334 | A02875 | A03976 | 299 |
| A02875 | A04027 | 270 | A02875 | A04069 | 276 |
| A02875 | A04127 | 228 | A02875 | A04134 | 260 |
| A02875 | A04139 | 167 | A02875 | A04217 | 265 |
| A02875 | A04259 | 401 | A02875 | A04267 | 484 |
| A02875 | A04268 | 241 | A02875 | A04271 | 489 |
| A02875 | A04272 | 208 | A02875 | A04293 | 224 |
| A02875 | A04420 | 371 | A02875 | A04439 | 281 |
| A02875 | A04714 | 174 | A02875 | A04742 | 288 |
| A02875 | A04779 | 193 | A02875 | A04795 | 266 |
| A02875 | A04798 | 270 | A02875 | A04805 | 193 |
| A02875 | A04913 | 281 | A02875 | A04962 | 152 |
| A02875 | A04965 | 486 | A02875 | A04968 | 257 |
| A02875 | A04991 | 168 | A02875 | A05339 | 382 |
| A02875 | A05480 | 296 | A02875 | A05578 | 249 |
| A02875 | A05667 | 288 | A02875 | A06073 | 224 |
| A02875 | A06271 | 270 | A02875 | A06314 | 446 |
| A02875 | A06415 | 348 | A02875 | A06596 | 205 |
| A02875 | A06607 | 198 | A02875 | A06647 | 228 |
| A02875 | A06650 | 367 | A02875 | A06858 | 165 |
| A02875 | A06926 | 224 | A02875 | A07163 | 236 |
| A02875 | A07376 | 343 | A02875 | A08589 | 356 |
| A02875 | A08603 | 210 | A02875 | A08677 | 330 |
| A02875 | A08741 | 463 | A02875 | A08847 | 343 |
| A02875 | A09095 | 318 | A02875 | A09147 | 260 |
| A02875 | A09275 | 306 | A02875 | A09449 | 156 |
| A02875 | A09509 | 174 | A02875 | A09758 | 157 |
| A02875 | A10121 | 276 | A02875 | A10337 | 121 |
| A02875 | A10363 | 165 | A02875 | A10605 | 201 |
| A02875 | A10731 | 355 | A02875 | A10781 | 213 |
| A02875 | A11073 | 276 | A02875 | A11101 | 389 |
| A02875 | A11363 | 245 | A02875 | A12068 | 270 |
| A02875 | A12273 | 188 | A02875 | A13726 | 185 |
| A02875 | A13817 | 333 | A02875 | A13886 | 208 |
| A02875 | A14193 | 171 | A02875 | A14333 | 238 |
| A02875 | A14364 | 340 | A02875 | A14368 | 183 |
| A02875 | A14383 | 333 | A02875 | A14387 | 223 |

|        |        |     |        |        |     |
|--------|--------|-----|--------|--------|-----|
| A02875 | A14390 | 207 | A02875 | A14392 | 190 |
| A02875 | A14393 | 249 | A02875 | A14399 | 230 |
| A02875 | A15281 | 363 | A02875 | A15635 | 205 |
| A02875 | A15828 | 187 | A02875 | A15847 | 288 |
| A02875 | A15911 | 422 | A02875 | A15976 | 405 |
| A02875 | A17151 | 422 | A02876 | A02982 | 318 |
| A02876 | A03071 | 252 | A02876 | A03275 | 179 |
| A02876 | A03574 | 260 | A02876 | A03824 | 218 |
| A02876 | A03922 | 185 | A02876 | A04187 | 461 |
| A02876 | A04651 | 271 | A02876 | A04681 | 465 |
| A02876 | A05349 | 227 | A02876 | A07218 | 172 |
| A02876 | A08815 | 154 | A02876 | A09269 | 296 |
| A02876 | A09340 | 332 | A02876 | A13181 | 306 |
| A02876 | A14035 | 329 | A02876 | A14319 | 218 |
| A02877 | A02878 | 491 | A02877 | A02880 | 205 |
| A02877 | A02893 | 196 | A02877 | A02895 | 66  |
| A02877 | A02904 | 314 | A02877 | A02910 | 486 |
| A02877 | A02927 | 267 | A02877 | A03043 | 296 |
| A02877 | A03069 | 159 | A02877 | A03070 | 412 |
| A02877 | A03082 | 899 | A02877 | A03095 | 374 |
| A02877 | A03102 | 109 | A02877 | A03112 | 457 |
| A02877 | A03228 | 159 | A02877 | A03229 | 291 |
| A02877 | A03243 | 200 | A02877 | A03263 | 208 |
| A02877 | A03276 | 229 | A02877 | A03321 | 434 |
| A02877 | A03399 | 258 | A02877 | A03415 | 424 |
| A02877 | A03419 | 162 | A02877 | A03422 | 363 |
| A02877 | A03423 | 229 | A02877 | A03447 | 218 |
| A02877 | A03450 | 162 | A02877 | A03451 | 423 |
| A02877 | A03537 | 183 | A02877 | A03642 | 227 |
| A02877 | A03677 | 238 | A02877 | A03747 | 167 |
| A02877 | A03752 | 215 | A02877 | A03763 | 232 |
| A02877 | A03770 | 160 | A02877 | A03775 | 259 |
| A02877 | A03790 | 193 | A02877 | A03812 | 481 |
| A02877 | A03820 | 226 | A02877 | A03824 | 173 |
| A02877 | A03837 | 443 | A02877 | A03922 | 382 |
| A02877 | A03936 | 213 | A02877 | A04029 | 294 |
| A02877 | A04115 | 485 | A02877 | A04191 | 317 |
| A02877 | A04279 | 151 | A02877 | A04280 | 446 |
| A02877 | A04334 | 229 | A02877 | A04342 | 235 |
| A02877 | A04416 | 167 | A02877 | A04417 | 160 |
| A02877 | A04441 | 162 | A02877 | A04456 | 380 |
| A02877 | A04474 | 306 | A02877 | A04485 | 414 |
| A02877 | A04507 | 262 | A02877 | A04563 | 460 |
| A02877 | A04598 | 154 | A02877 | A04681 | 414 |
| A02877 | A04706 | 441 | A02877 | A04744 | 183 |
| A02877 | A04770 | 183 | A02877 | A04808 | 311 |

|        |        |     |        |        |     |
|--------|--------|-----|--------|--------|-----|
| A02877 | A04818 | 294 | A02877 | A04824 | 363 |
| A02877 | A04873 | 358 | A02877 | A04875 | 162 |
| A02877 | A04977 | 265 | A02877 | A04996 | 306 |
| A02877 | A05011 | 241 | A02877 | A05087 | 229 |
| A02877 | A05124 | 241 | A02877 | A05342 | 350 |
| A02877 | A05541 | 335 | A02877 | A05562 | 475 |
| A02877 | A05875 | 364 | A02877 | A05944 | 402 |
| A02877 | A05955 | 188 | A02877 | A06147 | 196 |
| A02877 | A06222 | 241 | A02877 | A06328 | 162 |
| A02877 | A06379 | 314 | A02877 | A06382 | 159 |
| A02877 | A06466 | 472 | A02877 | A06606 | 436 |
| A02877 | A06615 | 434 | A02877 | A06623 | 367 |
| A02877 | A06769 | 174 | A02877 | A06871 | 241 |
| A02877 | A06967 | 294 | A02877 | A07011 | 457 |
| A02877 | A07127 | 212 | A02877 | A07163 | 491 |
| A02877 | A07165 | 374 | A02877 | A07192 | 224 |
| A02877 | A07205 | 156 | A02877 | A07248 | 446 |
| A02877 | A07251 | 427 | A02877 | A07311 | 902 |
| A02877 | A07338 | 227 | A02877 | A07339 | 353 |
| A02877 | A07349 | 361 | A02877 | A07399 | 210 |
| A02877 | A07498 | 294 | A02877 | A07546 | 227 |
| A02877 | A07549 | 294 | A02877 | A07781 | 262 |
| A02877 | A07798 | 269 | A02877 | A07881 | 191 |
| A02877 | A07903 | 272 | A02877 | A07918 | 294 |
| A02877 | A08037 | 262 | A02877 | A08070 | 172 |
| A02877 | A08228 | 377 | A02877 | A08255 | 188 |
| A02877 | A08289 | 484 | A02877 | A08301 | 238 |
| A02877 | A08408 | 371 | A02877 | A08501 | 168 |
| A02877 | A08533 | 256 | A02877 | A08534 | 227 |
| A02877 | A08559 | 345 | A02877 | A08674 | 165 |
| A02877 | A08727 | 306 | A02877 | A08746 | 385 |
| A02877 | A08748 | 450 | A02877 | A08810 | 311 |
| A02877 | A08920 | 262 | A02877 | A09017 | 177 |
| A02877 | A09045 | 162 | A02877 | A09093 | 188 |
| A02877 | A09127 | 344 | A02877 | A09190 | 241 |
| A02877 | A09308 | 188 | A02877 | A09320 | 375 |
| A02877 | A09464 | 196 | A02877 | A09471 | 279 |
| A02877 | A09497 | 172 | A02877 | A09516 | 227 |
| A02877 | A09546 | 407 | A02877 | A09614 | 262 |
| A02877 | A09655 | 473 | A02877 | A09699 | 306 |
| A02877 | A09808 | 241 | A02877 | A09837 | 159 |
| A02877 | A09926 | 172 | A02877 | A09929 | 183 |
| A02877 | A10221 | 177 | A02877 | A10402 | 172 |
| A02877 | A10503 | 215 | A02877 | A10509 | 241 |
| A02877 | A10556 | 488 | A02877 | A10629 | 188 |
| A02877 | A10630 | 152 | A02877 | A10719 | 154 |



|        |        |     |        |        |     |
|--------|--------|-----|--------|--------|-----|
| A02877 | A10822 | 196 | A02877 | A10868 | 294 |
| A02877 | A10892 | 294 | A02877 | A10917 | 167 |
| A02877 | A11113 | 296 | A02877 | A11175 | 294 |
| A02877 | A11176 | 294 | A02877 | A11227 | 167 |
| A02877 | A11253 | 162 | A02877 | A11266 | 196 |
| A02877 | A11334 | 430 | A02877 | A11409 | 462 |
| A02877 | A11523 | 152 | A02877 | A11683 | 283 |
| A02877 | A11781 | 262 | A02877 | A11811 | 167 |
| A02877 | A11822 | 215 | A02877 | A11823 | 380 |
| A02877 | A11935 | 279 | A02877 | A11994 | 462 |
| A02877 | A12266 | 227 | A02877 | A12323 | 262 |
| A02877 | A12327 | 294 | A02877 | A12365 | 486 |
| A02877 | A12373 | 157 | A02877 | A12383 | 205 |
| A02877 | A12503 | 297 | A02877 | A12508 | 229 |
| A02877 | A12894 | 294 | A02877 | A12897 | 475 |
| A02877 | A12926 | 205 | A02877 | A12996 | 241 |
| A02877 | A13034 | 469 | A02877 | A13044 | 400 |
| A02877 | A13149 | 324 | A02877 | A13302 | 159 |
| A02877 | A13340 | 335 | A02877 | A13402 | 215 |
| A02877 | A13470 | 205 | A02877 | A13522 | 183 |
| A02877 | A13599 | 167 | A02877 | A13609 | 385 |
| A02877 | A13633 | 436 | A02877 | A13812 | 301 |
| A02877 | A14035 | 196 | A02877 | A14130 | 457 |
| A02877 | A14131 | 427 | A02877 | A14188 | 322 |
| A02877 | A14216 | 451 | A02877 | A14274 | 215 |
| A02877 | A14319 | 278 | A02877 | A14321 | 241 |
| A02877 | A14335 | 296 | A02877 | A14394 | 390 |
| A02877 | A14403 | 154 | A02877 | A14447 | 227 |
| A02877 | A14512 | 294 | A02877 | A14643 | 260 |
| A02877 | A14650 | 348 | A02877 | A14678 | 172 |
| A02877 | A14737 | 262 | A02877 | A14800 | 364 |
| A02877 | A14915 | 294 | A02877 | A14978 | 294 |
| A02877 | A15250 | 205 | A02877 | A15269 | 215 |
| A02877 | A15272 | 162 | A02877 | A15323 | 340 |
| A02877 | A15438 | 183 | A02877 | A15448 | 227 |
| A02877 | A15449 | 177 | A02877 | A15565 | 277 |
| A02877 | A15649 | 343 | A02877 | A15684 | 347 |
| A02877 | A15716 | 172 | A02877 | A15811 | 246 |
| A02877 | A16300 | 221 | A02877 | A16495 | 167 |
| A02877 | A16811 | 196 | A02877 | A16819 | 172 |
| A02877 | A16877 | 201 | A02877 | A16923 | 353 |
| A02878 | A02901 | 195 | A02878 | A02904 | 475 |
| A02878 | A02910 | 485 | A02878 | A02924 | 177 |
| A02878 | A02927 | 405 | A02878 | A03084 | 171 |
| A02878 | A03112 | 456 | A02878 | A03130 | 283 |
| A02878 | A03211 | 454 | A02878 | A03214 | 132 |

|        |        |     |        |        |     |
|--------|--------|-----|--------|--------|-----|
| A02878 | A03243 | 191 | A02878 | A03276 | 430 |
| A02878 | A03309 | 240 | A02878 | A03310 | 195 |
| A02878 | A03415 | 328 | A02878 | A03420 | 362 |
| A02878 | A03422 | 247 | A02878 | A03451 | 468 |
| A02878 | A03632 | 190 | A02878 | A03642 | 283 |
| A02878 | A03747 | 229 | A02878 | A03763 | 152 |
| A02878 | A03773 | 185 | A02878 | A03991 | 251 |
| A02878 | A04080 | 204 | A02878 | A04127 | 200 |
| A02878 | A04223 | 200 | A02878 | A04280 | 465 |
| A02878 | A04305 | 393 | A02878 | A04351 | 171 |
| A02878 | A04359 | 274 | A02878 | A04360 | 235 |
| A02878 | A04413 | 258 | A02878 | A04414 | 339 |
| A02878 | A04418 | 266 | A02878 | A04451 | 196 |
| A02878 | A04547 | 326 | A02878 | A04622 | 218 |
| A02878 | A04811 | 198 | A02878 | A04944 | 159 |
| A02878 | A04956 | 235 | A02878 | A04964 | 154 |
| A02878 | A05106 | 307 | A02878 | A05119 | 368 |
| A02878 | A05223 | 296 | A02878 | A05288 | 491 |
| A02878 | A05508 | 180 | A02878 | A05562 | 319 |
| A02878 | A05790 | 188 | A02878 | A05847 | 170 |
| A02878 | A05901 | 251 | A02878 | A05967 | 163 |
| A02878 | A06077 | 245 | A02878 | A06153 | 401 |
| A02878 | A06364 | 202 | A02878 | A06601 | 201 |
| A02878 | A06606 | 323 | A02878 | A06607 | 367 |
| A02878 | A06623 | 154 | A02878 | A06647 | 200 |
| A02878 | A06648 | 439 | A02878 | A06649 | 193 |
| A02878 | A06672 | 339 | A02878 | A07127 | 157 |
| A02878 | A07149 | 238 | A02878 | A07163 | 491 |
| A02878 | A07165 | 324 | A02878 | A07283 | 322 |
| A02878 | A07498 | 339 | A02878 | A07546 | 394 |
| A02878 | A07549 | 339 | A02878 | A07693 | 205 |
| A02878 | A07781 | 313 | A02878 | A07973 | 217 |
| A02878 | A08070 | 170 | A02878 | A08289 | 489 |
| A02878 | A08346 | 491 | A02878 | A08361 | 386 |
| A02878 | A08591 | 251 | A02878 | A08614 | 265 |
| A02878 | A08712 | 339 | A02878 | A08748 | 467 |
| A02878 | A08973 | 221 | A02878 | A09118 | 313 |
| A02878 | A09131 | 221 | A02878 | A09166 | 296 |
| A02878 | A09221 | 269 | A02878 | A09293 | 188 |
| A02878 | A09388 | 154 | A02878 | A09504 | 162 |
| A02878 | A09546 | 307 | A02878 | A09556 | 319 |
| A02878 | A09836 | 377 | A02878 | A10039 | 193 |
| A02878 | A10174 | 218 | A02878 | A10221 | 363 |
| A02878 | A10337 | 210 | A02878 | A10389 | 221 |
| A02878 | A10399 | 163 | A02878 | A10402 | 235 |
| A02878 | A10644 | 265 | A02878 | A11175 | 339 |

|        |        |     |        |        |     |
|--------|--------|-----|--------|--------|-----|
| A02878 | A11176 | 339 | A02878 | A11306 | 162 |
| A02878 | A11745 | 171 | A02878 | A11822 | 386 |
| A02878 | A11902 | 219 | A02878 | A12052 | 274 |
| A02878 | A12872 | 318 | A02878 | A12910 | 313 |
| A02878 | A13470 | 435 | A02878 | A13589 | 212 |
| A02878 | A13721 | 339 | A02878 | A13755 | 313 |
| A02878 | A14094 | 452 | A02878 | A14191 | 615 |
| A02878 | A14272 | 243 | A02878 | A14642 | 316 |
| A02878 | A14643 | 199 | A02878 | A14670 | 240 |
| A02878 | A14707 | 163 | A02878 | A14729 | 274 |
| A02878 | A14978 | 339 | A02878 | A15269 | 274 |
| A02878 | A15518 | 200 | A02878 | A15614 | 343 |
| A02878 | A15726 | 391 | A02878 | A15988 | 208 |
| A02878 | A16062 | 251 | A02878 | A16113 | 229 |
| A02878 | A16300 | 176 | A02878 | A16680 | 405 |
| A02878 | A16851 | 191 | A02878 | A16969 | 339 |
| A02879 | A04666 | 362 | A02880 | A02927 | 355 |
| A02880 | A03112 | 229 | A02880 | A03415 | 302 |
| A02880 | A05463 | 374 | A02880 | A06615 | 182 |
| A02880 | A14190 | 251 | A02880 | A14197 | 278 |
| A02881 | A02904 | 479 | A02881 | A04346 | 318 |
| A02881 | A05106 | 396 | A02881 | A05245 | 333 |
| A02881 | A05288 | 263 | A02881 | A06636 | 469 |
| A02881 | A07815 | 472 | A02881 | A09829 | 422 |
| A02881 | A09870 | 377 | A02881 | A10414 | 328 |
| A02881 | A11499 | 424 | A02881 | A14502 | 319 |
| A02882 | A02908 | 121 | A02882 | A02919 | 249 |
| A02882 | A02929 | 195 | A02882 | A02983 | 201 |
| A02882 | A03056 | 199 | A02882 | A03145 | 318 |
| A02882 | A04540 | 172 | A02882 | A04881 | 230 |
| A02882 | A05096 | 296 | A02882 | A05733 | 368 |
| A02882 | A05760 | 193 | A02882 | A05775 | 215 |
| A02882 | A05832 | 160 | A02882 | A07339 | 156 |
| A02882 | A10247 | 303 | A02883 | A02944 | 135 |
| A02883 | A02951 | 109 | A02883 | A02961 | 135 |
| A02883 | A02972 | 212 | A02883 | A02976 | 170 |
| A02883 | A03050 | 216 | A02883 | A03275 | 348 |
| A02883 | A03281 | 340 | A02883 | A04051 | 486 |
| A02883 | A04361 | 162 | A02883 | A04416 | 302 |
| A02883 | A04608 | 369 | A02883 | A04609 | 200 |
| A02883 | A04614 | 208 | A02883 | A04618 | 263 |
| A02883 | A05212 | 338 | A02883 | A05329 | 288 |
| A02883 | A05349 | 318 | A02883 | A05427 | 333 |
| A02883 | A05487 | 312 | A02883 | A05760 | 188 |
| A02883 | A06312 | 281 | A02883 | A06370 | 294 |
| A02883 | A06510 | 313 | A02883 | A07130 | 351 |

|        |        |     |        |        |     |
|--------|--------|-----|--------|--------|-----|
| A02883 | A07472 | 333 | A02883 | A07560 | 215 |
| A02883 | A07913 | 286 | A02883 | A11911 | 396 |
| A02883 | A14437 | 297 | A02883 | A14830 | 357 |
| A02883 | A15613 | 394 | A02883 | A15960 | 305 |
| A02883 | A15976 | 390 | A02883 | A15985 | 263 |
| A02884 | A02896 | 227 | A02884 | A02916 | 245 |
| A02884 | A02920 | 435 | A02884 | A02944 | 262 |
| A02884 | A02945 | 283 | A02884 | A02951 | 234 |
| A02884 | A02953 | 324 | A02884 | A03239 | 286 |
| A02884 | A03254 | 396 | A02884 | A03275 | 188 |
| A02884 | A03279 | 351 | A02884 | A03282 | 326 |
| A02884 | A04010 | 226 | A02884 | A04088 | 348 |
| A02884 | A04263 | 293 | A02884 | A04446 | 234 |
| A02884 | A04494 | 366 | A02884 | A04526 | 451 |
| A02884 | A04865 | 423 | A02884 | A05349 | 224 |
| A02884 | A06415 | 195 | A02884 | A06510 | 386 |
| A02884 | A07135 | 174 | A02884 | A07157 | 236 |
| A02884 | A07166 | 279 | A02884 | A07173 | 274 |
| A02884 | A14071 | 243 | A02884 | A14372 | 274 |
| A02884 | A14830 | 335 | A02884 | A15314 | 190 |
| A02884 | A15606 | 159 | A02884 | A15630 | 375 |
| A02884 | A16216 | 177 | A02885 | A03045 | 388 |
| A02885 | A06415 | 252 | A02885 | A10640 | 379 |
| A02885 | A14199 | 268 | A02885 | A14366 | 276 |
| A02885 | A14374 | 286 | A02885 | A14391 | 291 |
| A02885 | A14554 | 328 | A02885 | A15285 | 390 |
| A02885 | A15516 | 347 | A02885 | A15795 | 335 |
| A02885 | A16014 | 422 | A02886 | A02896 | 317 |
| A02886 | A02917 | 435 | A02886 | A02924 | 235 |
| A02886 | A02935 | 406 | A02886 | A02945 | 367 |
| A02886 | A03157 | 165 | A02886 | A03259 | 343 |
| A02886 | A03260 | 307 | A02886 | A03271 | 286 |
| A02886 | A03788 | 198 | A02886 | A03807 | 358 |
| A02886 | A04097 | 238 | A02886 | A04138 | 318 |
| A02886 | A04144 | 363 | A02886 | A04244 | 454 |
| A02886 | A04248 | 269 | A02886 | A04263 | 483 |
| A02886 | A04276 | 414 | A02886 | A04320 | 310 |
| A02886 | A04337 | 152 | A02886 | A04415 | 318 |
| A02886 | A04536 | 199 | A02886 | A04567 | 294 |
| A02886 | A04607 | 330 | A02886 | A04734 | 474 |
| A02886 | A04806 | 386 | A02886 | A04855 | 382 |
| A02886 | A04865 | 477 | A02886 | A05577 | 154 |
| A02886 | A05679 | 224 | A02886 | A05847 | 319 |
| A02886 | A05985 | 226 | A02886 | A06055 | 277 |
| A02886 | A06149 | 468 | A02886 | A06422 | 467 |
| A02886 | A07000 | 382 | A02886 | A07141 | 201 |

|        |        |     |        |        |     |
|--------|--------|-----|--------|--------|-----|
| A02886 | A07157 | 402 | A02886 | A07158 | 199 |
| A02886 | A07164 | 353 | A02886 | A07173 | 361 |
| A02886 | A07558 | 246 | A02886 | A08335 | 260 |
| A02886 | A08738 | 293 | A02886 | A13181 | 247 |
| A02886 | A13491 | 441 | A02886 | A13872 | 286 |
| A02886 | A15425 | 202 | A02886 | A15427 | 291 |
| A02886 | A15528 | 187 | A02886 | A15603 | 302 |
| A02887 | A02895 | 218 | A02887 | A02896 | 102 |
| A02887 | A02914 | 375 | A02887 | A02916 | 217 |
| A02887 | A02917 | 915 | A02887 | A02931 | 480 |
| A02887 | A02945 | 80  | A02887 | A02950 | 469 |
| A02887 | A02955 | 68  | A02887 | A02962 | 146 |
| A02887 | A03019 | 63  | A02887 | A03072 | 241 |
| A02887 | A03190 | 288 | A02887 | A03195 | 235 |
| A02887 | A03271 | 491 | A02887 | A03481 | 185 |
| A02887 | A03489 | 477 | A02887 | A03817 | 314 |
| A02887 | A03834 | 201 | A02887 | A03892 | 468 |
| A02887 | A04042 | 266 | A02887 | A04280 | 413 |
| A02887 | A04587 | 382 | A02887 | A04589 | 163 |
| A02887 | A04657 | 165 | A02887 | A04682 | 357 |
| A02887 | A04685 | 319 | A02887 | A04730 | 382 |
| A02887 | A04755 | 193 | A02887 | A04886 | 266 |
| A02887 | A04906 | 165 | A02887 | A05018 | 288 |
| A02887 | A05024 | 217 | A02887 | A05028 | 388 |
| A02887 | A05202 | 193 | A02887 | A05302 | 401 |
| A02887 | A05350 | 249 | A02887 | A05577 | 63  |
| A02887 | A05902 | 201 | A02887 | A06095 | 188 |
| A02887 | A06224 | 425 | A02887 | A06242 | 455 |
| A02887 | A06289 | 63  | A02887 | A06864 | 470 |
| A02887 | A07319 | 305 | A02887 | A07346 | 490 |
| A02887 | A07480 | 405 | A02887 | A07534 | 486 |
| A02887 | A07603 | 480 | A02887 | A07820 | 168 |
| A02887 | A07902 | 257 | A02887 | A07996 | 491 |
| A02887 | A08000 | 394 | A02887 | A08030 | 486 |
| A02887 | A08117 | 480 | A02887 | A08141 | 291 |
| A02887 | A08208 | 473 | A02887 | A08608 | 201 |
| A02887 | A08669 | 182 | A02887 | A08762 | 398 |
| A02887 | A08874 | 480 | A02887 | A09074 | 221 |
| A02887 | A09392 | 462 | A02887 | A10721 | 87  |
| A02887 | A10739 | 307 | A02887 | A11916 | 491 |
| A02887 | A12165 | 226 | A02887 | A12477 | 281 |
| A02887 | A12625 | 470 | A02887 | A13845 | 486 |
| A02887 | A13887 | 361 | A02887 | A13949 | 226 |
| A02887 | A14076 | 491 | A02887 | A14079 | 491 |
| A02887 | A14201 | 263 | A02887 | A14962 | 475 |
| A02887 | A15369 | 491 | A02887 | A15371 | 352 |

|        |        |     |        |        |     |
|--------|--------|-----|--------|--------|-----|
| A02887 | A15746 | 270 | A02887 | A15941 | 446 |
| A02887 | A16127 | 488 | A02887 | A16128 | 491 |
| A02887 | A16129 | 491 | A02887 | A16130 | 193 |
| A02887 | A16226 | 491 | A02887 | A16612 | 173 |
| A02887 | A16613 | 460 | A02887 | A16616 | 383 |
| A02887 | A16646 | 388 | A02887 | A16781 | 389 |
| A02888 | A02908 | 469 | A02888 | A02911 | 341 |
| A02888 | A02918 | 486 | A02888 | A02919 | 294 |
| A02888 | A02925 | 452 | A02888 | A02929 | 456 |
| A02888 | A02933 | 369 | A02888 | A02937 | 391 |
| A02888 | A02945 | 217 | A02888 | A02947 | 313 |
| A02888 | A03243 | 218 | A02888 | A03256 | 224 |
| A02888 | A03259 | 63  | A02888 | A04030 | 438 |
| A02888 | A04540 | 224 | A02888 | A04568 | 488 |
| A02888 | A04801 | 382 | A02888 | A04833 | 188 |
| A02888 | A05817 | 432 | A02888 | A06708 | 265 |
| A02888 | A07052 | 382 | A02888 | A07135 | 327 |
| A02888 | A07140 | 223 | A02888 | A07154 | 290 |
| A02888 | A07164 | 462 | A02888 | A07436 | 160 |
| A02888 | A07900 | 461 | A02888 | A08219 | 382 |
| A02888 | A10530 | 374 | A02888 | A15089 | 391 |
| A02888 | A15394 | 232 | A02888 | A15769 | 171 |
| A02888 | A16636 | 445 | A02889 | A02961 | 254 |
| A02889 | A02963 | 270 | A02889 | A03104 | 400 |
| A02889 | A03292 | 252 | A02889 | A04600 | 307 |
| A02889 | A04733 | 413 | A02889 | A05229 | 449 |
| A02889 | A05439 | 422 | A02889 | A05653 | 369 |
| A02889 | A06703 | 443 | A02889 | A07149 | 407 |
| A02889 | A07167 | 301 | A02889 | A07209 | 358 |
| A02889 | A09059 | 435 | A02889 | A09220 | 263 |
| A02889 | A14511 | 157 | A02889 | A15495 | 187 |
| A02889 | A15639 | 286 | A02890 | A04080 | 299 |
| A02890 | A16994 | 296 | A02891 | A02911 | 383 |
| A02891 | A02942 | 226 | A02891 | A02958 | 367 |
| A02891 | A02983 | 215 | A02891 | A03963 | 221 |
| A02891 | A05112 | 283 | A02891 | A14197 | 229 |
| A02891 | A15673 | 259 | A02892 | A02942 | 394 |
| A02892 | A06470 | 395 | A02893 | A03054 | 348 |
| A02893 | A03585 | 388 | A02893 | A03936 | 369 |
| A02893 | A04118 | 429 | A02893 | A04446 | 281 |
| A02893 | A04953 | 429 | A02893 | A07135 | 226 |
| A02893 | A07339 | 163 | A02893 | A08748 | 372 |
| A02893 | A11348 | 363 | A02894 | A02983 | 234 |
| A02894 | A03592 | 423 | A02894 | A04853 | 345 |
| A02894 | A04902 | 193 | A02894 | A05297 | 350 |
| A02894 | A05832 | 301 | A02894 | A06797 | 337 |

|        |        |     |        |        |     |
|--------|--------|-----|--------|--------|-----|
| A02894 | A13734 | 182 | A02895 | A02914 | 484 |
| A02895 | A02917 | 208 | A02895 | A02924 | 489 |
| A02895 | A02945 | 188 | A02895 | A03109 | 266 |
| A02895 | A03112 | 283 | A02895 | A03195 | 229 |
| A02895 | A03271 | 216 | A02895 | A03276 | 388 |
| A02895 | A03284 | 329 | A02895 | A03288 | 405 |
| A02895 | A03596 | 193 | A02895 | A03817 | 152 |
| A02895 | A04042 | 353 | A02895 | A04587 | 432 |
| A02895 | A04682 | 371 | A02895 | A04730 | 432 |
| A02895 | A05415 | 152 | A02895 | A05671 | 443 |
| A02895 | A05891 | 185 | A02895 | A06224 | 424 |
| A02895 | A06628 | 171 | A02895 | A06814 | 170 |
| A02895 | A07143 | 212 | A02895 | A07145 | 191 |
| A02895 | A07190 | 159 | A02895 | A07785 | 263 |
| A02895 | A09020 | 269 | A02895 | A09464 | 374 |
| A02895 | A09759 | 247 | A02895 | A10324 | 443 |
| A02895 | A10342 | 329 | A02895 | A10597 | 190 |
| A02895 | A10625 | 277 | A02895 | A11387 | 188 |
| A02895 | A11746 | 394 | A02895 | A11932 | 346 |
| A02895 | A13376 | 302 | A02895 | A13941 | 254 |
| A02895 | A14366 | 246 | A02895 | A15337 | 207 |
| A02896 | A02897 | 174 | A02896 | A02898 | 160 |
| A02896 | A02916 | 491 | A02896 | A02917 | 468 |
| A02896 | A02932 | 281 | A02896 | A02935 | 165 |
| A02896 | A02936 | 191 | A02896 | A02944 | 491 |
| A02896 | A02945 | 385 | A02896 | A02951 | 328 |
| A02896 | A02952 | 196 | A02896 | A02953 | 449 |
| A02896 | A02954 | 252 | A02896 | A02955 | 190 |
| A02896 | A02961 | 490 | A02896 | A02971 | 452 |
| A02896 | A02972 | 463 | A02896 | A02976 | 110 |
| A02896 | A02986 | 191 | A02896 | A02988 | 176 |
| A02896 | A03019 | 138 | A02896 | A03157 | 474 |
| A02896 | A03195 | 140 | A02896 | A03204 | 480 |
| A02896 | A03259 | 566 | A02896 | A03260 | 170 |
| A02896 | A03271 | 441 | A02896 | A03275 | 413 |
| A02896 | A03280 | 579 | A02896 | A03282 | 489 |
| A02896 | A03288 | 229 | A02896 | A03541 | 168 |
| A02896 | A03610 | 449 | A02896 | A03799 | 185 |
| A02896 | A03949 | 151 | A02896 | A03995 | 409 |
| A02896 | A03996 | 350 | A02896 | A03999 | 327 |
| A02896 | A04010 | 477 | A02896 | A04040 | 196 |
| A02896 | A04051 | 171 | A02896 | A04088 | 188 |
| A02896 | A04110 | 371 | A02896 | A04206 | 411 |
| A02896 | A04238 | 363 | A02896 | A04240 | 299 |
| A02896 | A04244 | 460 | A02896 | A04254 | 299 |
| A02896 | A04263 | 432 | A02896 | A04267 | 218 |

|        |        |     |        |        |     |
|--------|--------|-----|--------|--------|-----|
| A02896 | A04298 | 446 | A02896 | A04322 | 281 |
| A02896 | A04478 | 177 | A02896 | A04518 | 484 |
| A02896 | A04528 | 311 | A02896 | A04536 | 255 |
| A02896 | A04567 | 489 | A02896 | A04589 | 522 |
| A02896 | A04600 | 266 | A02896 | A04613 | 356 |
| A02896 | A04616 | 191 | A02896 | A04656 | 327 |
| A02896 | A04734 | 419 | A02896 | A04755 | 350 |
| A02896 | A04766 | 311 | A02896 | A04800 | 353 |
| A02896 | A04865 | 299 | A02896 | A05039 | 281 |
| A02896 | A05112 | 423 | A02896 | A05305 | 302 |
| A02896 | A05342 | 207 | A02896 | A05349 | 374 |
| A02896 | A05577 | 184 | A02896 | A05679 | 366 |
| A02896 | A05709 | 205 | A02896 | A05773 | 240 |
| A02896 | A05847 | 321 | A02896 | A05879 | 165 |
| A02896 | A05931 | 288 | A02896 | A05985 | 579 |
| A02896 | A06095 | 414 | A02896 | A06149 | 299 |
| A02896 | A06415 | 455 | A02896 | A06422 | 475 |
| A02896 | A06543 | 343 | A02896 | A06561 | 262 |
| A02896 | A06642 | 255 | A02896 | A06652 | 439 |
| A02896 | A06747 | 257 | A02896 | A06899 | 208 |
| A02896 | A06944 | 157 | A02896 | A07031 | 218 |
| A02896 | A07135 | 399 | A02896 | A07142 | 243 |
| A02896 | A07147 | 196 | A02896 | A07148 | 328 |
| A02896 | A07152 | 407 | A02896 | A07157 | 489 |
| A02896 | A07161 | 488 | A02896 | A07164 | 568 |
| A02896 | A07166 | 210 | A02896 | A07173 | 485 |
| A02896 | A07311 | 199 | A02896 | A07744 | 343 |
| A02896 | A08086 | 205 | A02896 | A08098 | 343 |
| A02896 | A08133 | 199 | A02896 | A08178 | 343 |
| A02896 | A08193 | 199 | A02896 | A08634 | 299 |
| A02896 | A08863 | 485 | A02896 | A08870 | 168 |
| A02896 | A10645 | 162 | A02896 | A10791 | 180 |
| A02896 | A10823 | 388 | A02896 | A10976 | 299 |
| A02896 | A11583 | 201 | A02896 | A11604 | 199 |
| A02896 | A11738 | 162 | A02896 | A12927 | 210 |
| A02896 | A13131 | 356 | A02896 | A13851 | 262 |
| A02896 | A13872 | 419 | A02896 | A14071 | 428 |
| A02896 | A14146 | 302 | A02896 | A14247 | 179 |
| A02896 | A14374 | 457 | A02896 | A14385 | 380 |
| A02896 | A14392 | 435 | A02896 | A14416 | 216 |
| A02896 | A14425 | 350 | A02896 | A14432 | 340 |
| A02896 | A14439 | 355 | A02896 | A14442 | 385 |
| A02896 | A14628 | 221 | A02896 | A15233 | 185 |
| A02896 | A15314 | 193 | A02896 | A15325 | 188 |
| A02896 | A15369 | 199 | A02896 | A15394 | 491 |
| A02896 | A15395 | 581 | A02896 | A15425 | 160 |



|        |        |     |        |        |     |
|--------|--------|-----|--------|--------|-----|
| A02896 | A15427 | 281 | A02896 | A15601 | 435 |
| A02896 | A15602 | 229 | A02896 | A15603 | 383 |
| A02896 | A15605 | 411 | A02896 | A15607 | 196 |
| A02896 | A15640 | 288 | A02896 | A15642 | 344 |
| A02896 | A15645 | 152 | A02896 | A15795 | 229 |
| A02896 | A15806 | 488 | A02896 | A15865 | 274 |
| A02896 | A15964 | 454 | A02896 | A15981 | 324 |
| A02897 | A02916 | 193 | A02897 | A02983 | 156 |
| A02897 | A03821 | 409 | A02897 | A04207 | 340 |
| A02897 | A04223 | 335 | A02897 | A04600 | 386 |
| A02897 | A04605 | 366 | A02897 | A04964 | 208 |
| A02897 | A05760 | 263 | A02897 | A05847 | 313 |
| A02897 | A07138 | 321 | A02897 | A07140 | 241 |
| A02897 | A07157 | 185 | A02897 | A07324 | 270 |
| A02897 | A07557 | 356 | A02897 | A07655 | 308 |
| A02897 | A07748 | 265 | A02897 | A08182 | 340 |
| A02897 | A10823 | 369 | A02897 | A11210 | 335 |
| A02897 | A12357 | 276 | A02897 | A14088 | 213 |
| A02898 | A02916 | 179 | A02898 | A02927 | 262 |
| A02898 | A02963 | 475 | A02898 | A03113 | 296 |
| A02898 | A03276 | 302 | A02898 | A03288 | 232 |
| A02898 | A03861 | 232 | A02898 | A04908 | 187 |
| A02898 | A05122 | 210 | A02898 | A05168 | 302 |
| A02898 | A05281 | 353 | A02898 | A05415 | 185 |
| A02898 | A05634 | 319 | A02898 | A06247 | 263 |
| A02898 | A11275 | 247 | A02898 | A13864 | 333 |
| A02898 | A14664 | 191 | A02898 | A15809 | 172 |
| A02899 | A03244 | 208 | A02899 | A03661 | 163 |
| A02899 | A04004 | 294 | A02899 | A04127 | 329 |
| A02899 | A04267 | 229 | A02899 | A04271 | 232 |
| A02899 | A04279 | 259 | A02899 | A04802 | 463 |
| A02899 | A04803 | 469 | A02899 | A04858 | 174 |
| A02899 | A05344 | 333 | A02899 | A09466 | 452 |
| A02899 | A10337 | 241 | A02899 | A11654 | 441 |
| A02900 | A03259 | 252 | A02901 | A02927 | 307 |
| A02901 | A03167 | 241 | A02901 | A04533 | 375 |
| A02901 | A04867 | 346 | A02901 | A04879 | 224 |
| A02901 | A05438 | 347 | A02901 | A06689 | 465 |
| A02901 | A06970 | 479 | A02901 | A06990 | 333 |
| A02901 | A07135 | 162 | A02901 | A07590 | 278 |
| A02901 | A08591 | 469 | A02901 | A08738 | 190 |
| A02901 | A09995 | 276 | A02901 | A10156 | 291 |
| A02902 | A02903 | 340 | A02902 | A02904 | 152 |
| A02902 | A02931 | 491 | A02902 | A02958 | 193 |
| A02902 | A02965 | 489 | A02902 | A03112 | 310 |
| A02902 | A03213 | 213 | A02902 | A03229 | 217 |

|        |        |     |        |        |     |
|--------|--------|-----|--------|--------|-----|
| A02902 | A03261 | 258 | A02902 | A03321 | 224 |
| A02902 | A03415 | 63  | A02902 | A03465 | 424 |
| A02902 | A03472 | 93  | A02902 | A04033 | 182 |
| A02902 | A04104 | 154 | A02902 | A04346 | 247 |
| A02902 | A04589 | 490 | A02902 | A04847 | 270 |
| A02902 | A05185 | 152 | A02902 | A05256 | 156 |
| A02902 | A05288 | 296 | A02902 | A05370 | 353 |
| A02902 | A05811 | 168 | A02902 | A05828 | 191 |
| A02902 | A05868 | 152 | A02902 | A05902 | 207 |
| A02902 | A06078 | 168 | A02902 | A06138 | 469 |
| A02902 | A06200 | 159 | A02902 | A06466 | 445 |
| A02902 | A06881 | 362 | A02902 | A08576 | 185 |
| A02902 | A08837 | 171 | A02902 | A09020 | 157 |
| A02902 | A09361 | 210 | A02902 | A09487 | 152 |
| A02902 | A09561 | 463 | A02902 | A09789 | 173 |
| A02902 | A09940 | 173 | A02902 | A10031 | 385 |
| A02902 | A10148 | 412 | A02902 | A11184 | 171 |
| A02902 | A11300 | 508 | A02902 | A11387 | 566 |
| A02902 | A11447 | 362 | A02902 | A11515 | 229 |
| A02902 | A11574 | 226 | A02902 | A11649 | 201 |
| A02902 | A11745 | 165 | A02902 | A13373 | 226 |
| A02902 | A14047 | 279 | A02902 | A14188 | 162 |
| A02902 | A14635 | 165 | A02902 | A14710 | 338 |
| A02902 | A15909 | 171 | A02902 | A16304 | 151 |
| A02902 | A16330 | 362 | A02902 | A17132 | 191 |
| A02903 | A02965 | 296 | A02903 | A03213 | 162 |
| A02903 | A03229 | 379 | A02903 | A05289 | 330 |
| A02903 | A06200 | 348 | A02903 | A08836 | 277 |
| A02903 | A11907 | 427 | A02903 | A15507 | 159 |
| A02904 | A02908 | 204 | A02904 | A02926 | 297 |
| A02904 | A03078 | 310 | A02904 | A03086 | 224 |
| A02904 | A03089 | 310 | A02904 | A03112 | 352 |
| A02904 | A03220 | 293 | A02904 | A03276 | 224 |
| A02904 | A03338 | 393 | A02904 | A03518 | 167 |
| A02904 | A03927 | 230 | A02904 | A03973 | 318 |
| A02904 | A04282 | 199 | A02904 | A04288 | 326 |
| A02904 | A04346 | 488 | A02904 | A04692 | 195 |
| A02904 | A04731 | 199 | A02904 | A04870 | 205 |
| A02904 | A04908 | 218 | A02904 | A04956 | 394 |
| A02904 | A05106 | 488 | A02904 | A05245 | 202 |
| A02904 | A05779 | 238 | A02904 | A06010 | 218 |
| A02904 | A06130 | 191 | A02904 | A06218 | 369 |
| A02904 | A06384 | 310 | A02904 | A06385 | 405 |
| A02904 | A06595 | 348 | A02904 | A06654 | 201 |
| A02904 | A06949 | 308 | A02904 | A07163 | 199 |
| A02904 | A07190 | 227 | A02904 | A07812 | 323 |

|        |        |     |        |        |     |
|--------|--------|-----|--------|--------|-----|
| A02904 | A07961 | 252 | A02904 | A08289 | 162 |
| A02904 | A08660 | 180 | A02904 | A08667 | 226 |
| A02904 | A08738 | 151 | A02904 | A08959 | 246 |
| A02904 | A09131 | 288 | A02904 | A09388 | 210 |
| A02904 | A09870 | 277 | A02904 | A11345 | 201 |
| A02904 | A11499 | 369 | A02904 | A11738 | 199 |
| A02904 | A11851 | 174 | A02904 | A12200 | 190 |
| A02904 | A12825 | 188 | A02904 | A13373 | 163 |
| A02904 | A13707 | 157 | A02904 | A14270 | 193 |
| A02904 | A14569 | 159 | A02904 | A14903 | 229 |
| A02904 | A14917 | 218 | A02904 | A15025 | 369 |
| A02904 | A15349 | 183 | A02904 | A16187 | 174 |
| A02904 | A16585 | 263 | A02904 | A16587 | 212 |
| A02904 | A16663 | 285 | A02904 | A16695 | 288 |
| A02905 | A02909 | 324 | A02905 | A02922 | 251 |
| A02905 | A02944 | 218 | A02905 | A02953 | 290 |
| A02905 | A02961 | 218 | A02905 | A02966 | 306 |
| A02905 | A02983 | 382 | A02905 | A03259 | 157 |
| A02905 | A03281 | 443 | A02905 | A03282 | 291 |
| A02905 | A04048 | 265 | A02905 | A04049 | 338 |
| A02905 | A04105 | 224 | A02905 | A04114 | 449 |
| A02905 | A04275 | 218 | A02905 | A04446 | 188 |
| A02905 | A04603 | 291 | A02905 | A04652 | 281 |
| A02905 | A04681 | 224 | A02905 | A04735 | 369 |
| A02905 | A05349 | 179 | A02905 | A05445 | 296 |
| A02905 | A05556 | 343 | A02905 | A07141 | 198 |
| A02905 | A14647 | 301 | A02906 | A02908 | 227 |
| A02906 | A03287 | 332 | A02906 | A03866 | 369 |
| A02906 | A04133 | 338 | A02906 | A04134 | 374 |
| A02906 | A04279 | 296 | A02906 | A04296 | 394 |
| A02906 | A04307 | 277 | A02906 | A04594 | 404 |
| A02906 | A04681 | 254 | A02906 | A04710 | 271 |
| A02906 | A04783 | 283 | A02906 | A04907 | 362 |
| A02906 | A05114 | 318 | A02906 | A05309 | 305 |
| A02906 | A05402 | 308 | A02906 | A05665 | 338 |
| A02906 | A06132 | 385 | A02906 | A06603 | 469 |
| A02906 | A06635 | 252 | A02906 | A06797 | 307 |
| A02906 | A06868 | 308 | A02906 | A07165 | 290 |
| A02906 | A07167 | 446 | A02906 | A07177 | 290 |
| A02906 | A07199 | 353 | A02906 | A07663 | 411 |
| A02906 | A11348 | 324 | A02906 | A11450 | 373 |
| A02906 | A14637 | 229 | A02906 | A14642 | 229 |
| A02906 | A14683 | 297 | A02907 | A04655 | 425 |
| A02907 | A08070 | 374 | A02908 | A02918 | 491 |
| A02908 | A02919 | 441 | A02908 | A02925 | 485 |
| A02908 | A02929 | 462 | A02908 | A02941 | 294 |

|        |        |     |        |        |     |
|--------|--------|-----|--------|--------|-----|
| A02908 | A02942 | 945 | A02908 | A02947 | 348 |
| A02908 | A02949 | 922 | A02908 | A02958 | 931 |
| A02908 | A02961 | 899 | A02908 | A02967 | 311 |
| A02908 | A02968 | 944 | A02908 | A02973 | 337 |
| A02908 | A03001 | 232 | A02908 | A03092 | 405 |
| A02908 | A03094 | 205 | A02908 | A03126 | 172 |
| A02908 | A03144 | 228 | A02908 | A03214 | 899 |
| A02908 | A03259 | 168 | A02908 | A03266 | 412 |
| A02908 | A03281 | 429 | A02908 | A03575 | 899 |
| A02908 | A03783 | 224 | A02908 | A03821 | 458 |
| A02908 | A03984 | 321 | A02908 | A04004 | 398 |
| A02908 | A04207 | 364 | A02908 | A04218 | 899 |
| A02908 | A04540 | 488 | A02908 | A04568 | 485 |
| A02908 | A04594 | 322 | A02908 | A04600 | 374 |
| A02908 | A04704 | 162 | A02908 | A04717 | 302 |
| A02908 | A04902 | 243 | A02908 | A04938 | 215 |
| A02908 | A04942 | 217 | A02908 | A05035 | 899 |
| A02908 | A05246 | 271 | A02908 | A05278 | 173 |
| A02908 | A05279 | 322 | A02908 | A05322 | 207 |
| A02908 | A05410 | 254 | A02908 | A05570 | 306 |
| A02908 | A05719 | 241 | A02908 | A05760 | 908 |
| A02908 | A05878 | 399 | A02908 | A05879 | 182 |
| A02908 | A06004 | 195 | A02908 | A06285 | 322 |
| A02908 | A06289 | 899 | A02908 | A06385 | 246 |
| A02908 | A06601 | 899 | A02908 | A06697 | 430 |
| A02908 | A06708 | 162 | A02908 | A07045 | 322 |
| A02908 | A07135 | 257 | A02908 | A07140 | 243 |
| A02908 | A07155 | 899 | A02908 | A07165 | 920 |
| A02908 | A07186 | 229 | A02908 | A07187 | 157 |
| A02908 | A07311 | 899 | A02908 | A07335 | 218 |
| A02908 | A07339 | 899 | A02908 | A07434 | 302 |
| A02908 | A07557 | 382 | A02908 | A07799 | 425 |
| A02908 | A07900 | 489 | A02908 | A08309 | 213 |
| A02908 | A08571 | 899 | A02908 | A08628 | 302 |
| A02908 | A08686 | 405 | A02908 | A08709 | 441 |
| A02908 | A08732 | 932 | A02908 | A08753 | 283 |
| A02908 | A08858 | 899 | A02908 | A09026 | 227 |
| A02908 | A09319 | 899 | A02908 | A09524 | 266 |
| A02908 | A09535 | 430 | A02908 | A09577 | 899 |
| A02908 | A09785 | 204 | A02908 | A09804 | 899 |
| A02908 | A10146 | 266 | A02908 | A10174 | 899 |
| A02908 | A10555 | 322 | A02908 | A10626 | 452 |
| A02908 | A10743 | 899 | A02908 | A11278 | 391 |
| A02908 | A11298 | 356 | A02908 | A11463 | 294 |
| A02908 | A11546 | 281 | A02908 | A11964 | 262 |
| A02908 | A11983 | 899 | A02908 | A13330 | 180 |

|        |        |     |        |        |     |
|--------|--------|-----|--------|--------|-----|
| A02908 | A13368 | 899 | A02908 | A13981 | 899 |
| A02908 | A14004 | 899 | A02908 | A14226 | 899 |
| A02908 | A14443 | 899 | A02908 | A14444 | 899 |
| A02908 | A14605 | 172 | A02908 | A15283 | 294 |
| A02908 | A15822 | 294 | A02908 | A15846 | 266 |
| A02908 | A15849 | 899 | A02908 | A16636 | 221 |
| A02908 | A16799 | 235 | A02909 | A03211 | 180 |
| A02909 | A03520 | 185 | A02909 | A03541 | 469 |
| A02909 | A03612 | 294 | A02909 | A03832 | 157 |
| A02909 | A04049 | 475 | A02909 | A04114 | 316 |
| A02909 | A04175 | 205 | A02909 | A04268 | 435 |
| A02909 | A04275 | 491 | A02909 | A04536 | 413 |
| A02909 | A04603 | 491 | A02909 | A04723 | 339 |
| A02909 | A04728 | 176 | A02909 | A04944 | 234 |
| A02909 | A04964 | 230 | A02909 | A05073 | 341 |
| A02909 | A05489 | 488 | A02909 | A05556 | 491 |
| A02909 | A05558 | 445 | A02909 | A05601 | 228 |
| A02909 | A06415 | 165 | A02909 | A06421 | 377 |
| A02909 | A06654 | 313 | A02909 | A08093 | 174 |
| A02909 | A08097 | 224 | A02909 | A08658 | 366 |
| A02909 | A09046 | 457 | A02909 | A10001 | 469 |
| A02909 | A10743 | 313 | A02909 | A14071 | 216 |
| A02909 | A14396 | 399 | A02910 | A03126 | 577 |
| A02910 | A03229 | 286 | A02910 | A03277 | 232 |
| A02910 | A03812 | 288 | A02910 | A04972 | 255 |
| A02910 | A05119 | 306 | A02910 | A05573 | 385 |
| A02910 | A06256 | 322 | A02910 | A06645 | 286 |
| A02910 | A07163 | 477 | A02910 | A07822 | 450 |
| A02910 | A07893 | 171 | A02910 | A08289 | 312 |
| A02910 | A08390 | 246 | A02910 | A09093 | 310 |
| A02910 | A09221 | 411 | A02910 | A10768 | 316 |
| A02910 | A11959 | 286 | A02910 | A13614 | 177 |
| A02910 | A13978 | 168 | A02910 | A14019 | 199 |
| A02910 | A14215 | 176 | A02910 | A14433 | 160 |
| A02910 | A15064 | 190 | A02910 | A15505 | 152 |
| A02910 | A15658 | 358 | A02910 | A16131 | 268 |
| A02910 | A16214 | 378 | A02911 | A02918 | 294 |
| A02911 | A02919 | 358 | A02911 | A02929 | 322 |
| A02911 | A04030 | 404 | A02911 | A04902 | 323 |
| A02911 | A05278 | 260 | A02911 | A05817 | 396 |
| A02911 | A07140 | 305 | A02911 | A09988 | 409 |
| A02911 | A15339 | 229 | A02911 | A15606 | 180 |
| A02911 | A15788 | 221 | A02912 | A03091 | 279 |
| A02912 | A03275 | 373 | A02912 | A03332 | 260 |
| A02912 | A03835 | 238 | A02912 | A04050 | 249 |
| A02912 | A14208 | 229 | A02912 | A15314 | 238 |

|        |        |     |        |        |     |
|--------|--------|-----|--------|--------|-----|
| A02912 | A15394 | 263 | A02912 | A15445 | 245 |
| A02912 | A15515 | 254 | A02912 | A15684 | 412 |
| A02912 | A15962 | 491 | A02912 | A16006 | 484 |
| A02912 | A16008 | 474 | A02913 | A04902 | 227 |
| A02913 | A07479 | 353 | A02914 | A02924 | 423 |
| A02914 | A02929 | 270 | A02914 | A02951 | 190 |
| A02914 | A03195 | 281 | A02914 | A03271 | 285 |
| A02914 | A03817 | 227 | A02914 | A04042 | 380 |
| A02914 | A04496 | 414 | A02914 | A04556 | 326 |
| A02914 | A04587 | 446 | A02914 | A04607 | 198 |
| A02914 | A04646 | 393 | A02914 | A04682 | 402 |
| A02914 | A04730 | 446 | A02914 | A05562 | 330 |
| A02914 | A06224 | 440 | A02914 | A07546 | 386 |
| A02914 | A11911 | 193 | A02914 | A13824 | 196 |
| A02914 | A14197 | 179 | A02915 | A03228 | 299 |
| A02915 | A03949 | 312 | A02915 | A04046 | 441 |
| A02915 | A04595 | 353 | A02915 | A04606 | 458 |
| A02915 | A04684 | 409 | A02915 | A07171 | 396 |
| A02915 | A07187 | 305 | A02915 | A15874 | 245 |
| A02916 | A02917 | 414 | A02916 | A02944 | 489 |
| A02916 | A02953 | 386 | A02916 | A02961 | 312 |
| A02916 | A02971 | 251 | A02916 | A02972 | 302 |
| A02916 | A03212 | 167 | A02916 | A03275 | 353 |
| A02916 | A03282 | 490 | A02916 | A03557 | 200 |
| A02916 | A03682 | 488 | A02916 | A03807 | 265 |
| A02916 | A04040 | 345 | A02916 | A04088 | 208 |
| A02916 | A04240 | 313 | A02916 | A04244 | 338 |
| A02916 | A04300 | 361 | A02916 | A04554 | 339 |
| A02916 | A04609 | 157 | A02916 | A04865 | 185 |
| A02916 | A05577 | 63  | A02916 | A05621 | 277 |
| A02916 | A05641 | 236 | A02916 | A05985 | 318 |
| A02916 | A06149 | 319 | A02916 | A06422 | 180 |
| A02916 | A07147 | 217 | A02916 | A07157 | 174 |
| A02916 | A07173 | 329 | A02916 | A09857 | 489 |
| A02916 | A10823 | 290 | A02916 | A11291 | 196 |
| A02916 | A12009 | 193 | A02916 | A12144 | 254 |
| A02916 | A13872 | 162 | A02916 | A14220 | 419 |
| A02916 | A14461 | 213 | A02916 | A15607 | 215 |
| A02916 | A15611 | 456 | A02916 | A15795 | 252 |
| A02917 | A02931 | 144 | A02917 | A02935 | 369 |
| A02917 | A02945 | 490 | A02917 | A02955 | 159 |
| A02917 | A02961 | 152 | A02917 | A03010 | 195 |
| A02917 | A03049 | 185 | A02917 | A03104 | 205 |
| A02917 | A03109 | 257 | A02917 | A03259 | 152 |
| A02917 | A03260 | 251 | A02917 | A03271 | 419 |
| A02917 | A03610 | 357 | A02917 | A03782 | 165 |

|        |        |     |        |        |     |
|--------|--------|-----|--------|--------|-----|
| A02917 | A03934 | 327 | A02917 | A04033 | 423 |
| A02917 | A04217 | 208 | A02917 | A04238 | 408 |
| A02917 | A04248 | 408 | A02917 | A04263 | 440 |
| A02917 | A04267 | 313 | A02917 | A04484 | 414 |
| A02917 | A04536 | 356 | A02917 | A04589 | 299 |
| A02917 | A04659 | 279 | A02917 | A04681 | 160 |
| A02917 | A04734 | 446 | A02917 | A04755 | 294 |
| A02917 | A04798 | 327 | A02917 | A04865 | 369 |
| A02917 | A04878 | 269 | A02917 | A04909 | 265 |
| A02917 | A05078 | 307 | A02917 | A05679 | 157 |
| A02917 | A05931 | 347 | A02917 | A05944 | 316 |
| A02917 | A05985 | 425 | A02917 | A06054 | 219 |
| A02917 | A06095 | 290 | A02917 | A06404 | 399 |
| A02917 | A06414 | 269 | A02917 | A06415 | 302 |
| A02917 | A06422 | 366 | A02917 | A06495 | 151 |
| A02917 | A06650 | 434 | A02917 | A06747 | 210 |
| A02917 | A06818 | 278 | A02917 | A07145 | 314 |
| A02917 | A07151 | 210 | A02917 | A07157 | 408 |
| A02917 | A07161 | 212 | A02917 | A07164 | 291 |
| A02917 | A07173 | 491 | A02917 | A07174 | 272 |
| A02917 | A07192 | 193 | A02917 | A08601 | 374 |
| A02917 | A08634 | 353 | A02917 | A09245 | 204 |
| A02917 | A09570 | 302 | A02917 | A14236 | 427 |
| A02917 | A14366 | 335 | A02917 | A14373 | 296 |
| A02917 | A14432 | 285 | A02917 | A14635 | 259 |
| A02917 | A15241 | 475 | A02917 | A15314 | 195 |
| A02917 | A15394 | 327 | A02917 | A15395 | 388 |
| A02917 | A15403 | 290 | A02917 | A15599 | 358 |
| A02917 | A15601 | 458 | A02917 | A15602 | 302 |
| A02917 | A15603 | 456 | A02917 | A15605 | 474 |
| A02917 | A15606 | 446 | A02917 | A15607 | 439 |
| A02917 | A15608 | 224 | A02917 | A15981 | 384 |
| A02917 | A16636 | 247 | A02918 | A02919 | 452 |
| A02918 | A02925 | 428 | A02918 | A02926 | 311 |
| A02918 | A02929 | 312 | A02918 | A02933 | 456 |
| A02918 | A02941 | 416 | A02918 | A02944 | 252 |
| A02918 | A02947 | 375 | A02918 | A02948 | 322 |
| A02918 | A03006 | 191 | A02918 | A03259 | 180 |
| A02918 | A03271 | 165 | A02918 | A03281 | 201 |
| A02918 | A04030 | 416 | A02918 | A04217 | 179 |
| A02918 | A04540 | 466 | A02918 | A04568 | 475 |
| A02918 | A04902 | 221 | A02918 | A04942 | 252 |
| A02918 | A05349 | 201 | A02918 | A05570 | 340 |
| A02918 | A05667 | 322 | A02918 | A05817 | 449 |
| A02918 | A06415 | 160 | A02918 | A06988 | 316 |
| A02918 | A07140 | 451 | A02918 | A07146 | 243 |

|        |        |     |        |        |     |
|--------|--------|-----|--------|--------|-----|
| A02918 | A07201 | 172 | A02918 | A07900 | 491 |
| A02918 | A08219 | 347 | A02918 | A08430 | 245 |
| A02918 | A10279 | 347 | A02918 | A10626 | 384 |
| A02918 | A10787 | 416 | A02918 | A11546 | 486 |
| A02918 | A12730 | 235 | A02918 | A16636 | 355 |
| A02919 | A02925 | 374 | A02919 | A02929 | 473 |
| A02919 | A02942 | 176 | A02919 | A02947 | 330 |
| A02919 | A02948 | 377 | A02919 | A02958 | 338 |
| A02919 | A02959 | 321 | A02919 | A02983 | 163 |
| A02919 | A03259 | 159 | A02919 | A03824 | 286 |
| A02919 | A04030 | 377 | A02919 | A04444 | 276 |
| A02919 | A04540 | 457 | A02919 | A04607 | 329 |
| A02919 | A04608 | 357 | A02919 | A04609 | 279 |
| A02919 | A04622 | 196 | A02919 | A05113 | 380 |
| A02919 | A05122 | 232 | A02919 | A05153 | 184 |
| A02919 | A05817 | 439 | A02919 | A06339 | 314 |
| A02919 | A07140 | 247 | A02919 | A07339 | 899 |
| A02919 | A07900 | 396 | A02919 | A08259 | 899 |
| A02919 | A08732 | 899 | A02919 | A08738 | 157 |
| A02919 | A08739 | 317 | A02919 | A09427 | 333 |
| A02919 | A10506 | 205 | A02919 | A13146 | 899 |
| A02919 | A15283 | 377 | A02920 | A02935 | 322 |
| A02920 | A02945 | 266 | A02920 | A02950 | 247 |
| A02920 | A02951 | 215 | A02920 | A02961 | 427 |
| A02920 | A02962 | 326 | A02920 | A02975 | 281 |
| A02920 | A03157 | 190 | A02920 | A03834 | 391 |
| A02920 | A03835 | 255 | A02920 | A03984 | 252 |
| A02920 | A04050 | 363 | A02920 | A04130 | 269 |
| A02920 | A04519 | 294 | A02920 | A04536 | 221 |
| A02920 | A04609 | 299 | A02920 | A04908 | 234 |
| A02920 | A05674 | 373 | A02920 | A06339 | 332 |
| A02920 | A07152 | 238 | A02920 | A07314 | 184 |
| A02920 | A07961 | 259 | A02920 | A08572 | 251 |
| A02920 | A10905 | 348 | A02920 | A15410 | 314 |
| A02920 | A15425 | 226 | A02920 | A15630 | 424 |
| A02920 | A15639 | 276 | A02920 | A15976 | 278 |
| A02920 | A16216 | 157 | A02921 | A02923 | 407 |
| A02921 | A02943 | 452 | A02921 | A03001 | 306 |
| A02921 | A03615 | 278 | A02921 | A13146 | 205 |
| A02922 | A02944 | 366 | A02922 | A02951 | 945 |
| A02922 | A02953 | 221 | A02922 | A02960 | 340 |
| A02922 | A02961 | 143 | A02922 | A02977 | 344 |
| A02922 | A03275 | 945 | A02922 | A03281 | 218 |
| A02922 | A03282 | 418 | A02922 | A03419 | 107 |
| A02922 | A03746 | 252 | A02922 | A03807 | 307 |
| A02922 | A03914 | 483 | A02922 | A04010 | 393 |



|        |        |     |        |        |     |
|--------|--------|-----|--------|--------|-----|
| A02922 | A04051 | 943 | A02922 | A04052 | 279 |
| A02922 | A04142 | 311 | A02922 | A04262 | 329 |
| A02922 | A04278 | 461 | A02922 | A04607 | 488 |
| A02922 | A04608 | 486 | A02922 | A04609 | 480 |
| A02922 | A04612 | 249 | A02922 | A04614 | 414 |
| A02922 | A04652 | 210 | A02922 | A04735 | 324 |
| A02922 | A04851 | 299 | A02922 | A04865 | 361 |
| A02922 | A04906 | 260 | A02922 | A05032 | 191 |
| A02922 | A05036 | 314 | A02922 | A05113 | 491 |
| A02922 | A05349 | 945 | A02922 | A05920 | 419 |
| A02922 | A06247 | 212 | A02922 | A06359 | 165 |
| A02922 | A06415 | 185 | A02922 | A07141 | 249 |
| A02922 | A07173 | 157 | A02922 | A08665 | 347 |
| A02922 | A10173 | 278 | A02922 | A10791 | 249 |
| A02922 | A11132 | 171 | A02922 | A11345 | 235 |
| A02922 | A12927 | 212 | A02922 | A13772 | 152 |
| A02922 | A14071 | 252 | A02922 | A14393 | 899 |
| A02922 | A15394 | 184 | A02922 | A15642 | 190 |
| A02922 | A16636 | 456 | A02923 | A03275 | 246 |
| A02923 | A03282 | 363 | A02923 | A04117 | 188 |
| A02923 | A04734 | 396 | A02923 | A05350 | 413 |
| A02923 | A05356 | 157 | A02923 | A05878 | 372 |
| A02923 | A07200 | 235 | A02924 | A02927 | 191 |
| A02924 | A02929 | 177 | A02924 | A02962 | 224 |
| A02924 | A03064 | 321 | A02924 | A03095 | 460 |
| A02924 | A03195 | 191 | A02924 | A03271 | 162 |
| A02924 | A03288 | 452 | A02924 | A03304 | 286 |
| A02924 | A03361 | 179 | A02924 | A03432 | 196 |
| A02924 | A03541 | 221 | A02924 | A03568 | 249 |
| A02924 | A04042 | 328 | A02924 | A04163 | 195 |
| A02924 | A04244 | 238 | A02924 | A04321 | 328 |
| A02924 | A04337 | 449 | A02924 | A04374 | 346 |
| A02924 | A04454 | 279 | A02924 | A04532 | 413 |
| A02924 | A04560 | 283 | A02924 | A04587 | 328 |
| A02924 | A04666 | 395 | A02924 | A04682 | 210 |
| A02924 | A04730 | 328 | A02924 | A04883 | 165 |
| A02924 | A04927 | 168 | A02924 | A04928 | 208 |
| A02924 | A04995 | 202 | A02924 | A05107 | 251 |
| A02924 | A05288 | 160 | A02924 | A05291 | 286 |
| A02924 | A05294 | 182 | A02924 | A05360 | 305 |
| A02924 | A05467 | 238 | A02924 | A05472 | 168 |
| A02924 | A06149 | 218 | A02924 | A06224 | 310 |
| A02924 | A06601 | 154 | A02924 | A06712 | 335 |
| A02924 | A06814 | 210 | A02924 | A06949 | 224 |
| A02924 | A06980 | 346 | A02924 | A07136 | 293 |
| A02924 | A07424 | 277 | A02924 | A07442 | 199 |

|        |        |     |        |        |     |
|--------|--------|-----|--------|--------|-----|
| A02924 | A07641 | 229 | A02924 | A08154 | 208 |
| A02924 | A08335 | 165 | A02924 | A09123 | 230 |
| A02924 | A09517 | 188 | A02924 | A09856 | 288 |
| A02924 | A10156 | 455 | A02924 | A10237 | 305 |
| A02924 | A10342 | 299 | A02924 | A10601 | 296 |
| A02924 | A10744 | 277 | A02924 | A10827 | 358 |
| A02924 | A11288 | 255 | A02924 | A11411 | 477 |
| A02924 | A11526 | 201 | A02924 | A11570 | 258 |
| A02924 | A12618 | 232 | A02924 | A13397 | 196 |
| A02924 | A14404 | 232 | A02924 | A14443 | 160 |
| A02924 | A14444 | 177 | A02924 | A14498 | 488 |
| A02924 | A14540 | 390 | A02924 | A14589 | 491 |
| A02924 | A14643 | 386 | A02924 | A14648 | 154 |
| A02924 | A14674 | 177 | A02924 | A15266 | 174 |
| A02924 | A15291 | 362 | A02924 | A15707 | 314 |
| A02924 | A17078 | 167 | A02925 | A02929 | 200 |
| A02925 | A02947 | 388 | A02925 | A02949 | 899 |
| A02925 | A02968 | 899 | A02925 | A03006 | 212 |
| A02925 | A03019 | 395 | A02925 | A03064 | 335 |
| A02925 | A03486 | 229 | A02925 | A04130 | 174 |
| A02925 | A04717 | 341 | A02925 | A04908 | 414 |
| A02925 | A05211 | 479 | A02925 | A05577 | 193 |
| A02925 | A05760 | 914 | A02925 | A05878 | 246 |
| A02925 | A06285 | 358 | A02925 | A06415 | 188 |
| A02925 | A06631 | 218 | A02925 | A06636 | 321 |
| A02925 | A06803 | 193 | A02925 | A07045 | 358 |
| A02925 | A07122 | 213 | A02925 | A07173 | 160 |
| A02925 | A07961 | 382 | A02925 | A08732 | 204 |
| A02925 | A09672 | 316 | A02925 | A10050 | 335 |
| A02925 | A10592 | 160 | A02925 | A11964 | 310 |
| A02925 | A14071 | 408 | A02925 | A14178 | 439 |
| A02925 | A14208 | 490 | A02925 | A14599 | 218 |
| A02925 | A14830 | 364 | A02925 | A15314 | 180 |
| A02925 | A15608 | 217 | A02925 | A15613 | 241 |
| A02925 | A15639 | 182 | A02925 | A15642 | 193 |
| A02925 | A15960 | 313 | A02925 | A15962 | 469 |
| A02926 | A02984 | 296 | A02926 | A03076 | 283 |
| A02926 | A07167 | 458 | A02927 | A03112 | 299 |
| A02927 | A03113 | 279 | A02927 | A03211 | 347 |
| A02927 | A03276 | 480 | A02927 | A03313 | 278 |
| A02927 | A03332 | 212 | A02927 | A03541 | 270 |
| A02927 | A03913 | 168 | A02927 | A04015 | 353 |
| A02927 | A04212 | 483 | A02927 | A04316 | 260 |
| A02927 | A04533 | 458 | A02927 | A04598 | 323 |
| A02927 | A04761 | 200 | A02927 | A04867 | 486 |
| A02927 | A04944 | 480 | A02927 | A04964 | 173 |

|        |        |     |        |        |     |
|--------|--------|-----|--------|--------|-----|
| A02927 | A04985 | 184 | A02927 | A05032 | 224 |
| A02927 | A05160 | 360 | A02927 | A05288 | 202 |
| A02927 | A05490 | 439 | A02927 | A05828 | 307 |
| A02927 | A05996 | 249 | A02927 | A06151 | 395 |
| A02927 | A06152 | 350 | A02927 | A06535 | 420 |
| A02927 | A06584 | 207 | A02927 | A06654 | 265 |
| A02927 | A06858 | 258 | A02927 | A06912 | 463 |
| A02927 | A06916 | 450 | A02927 | A06949 | 156 |
| A02927 | A07163 | 198 | A02927 | A07165 | 201 |
| A02927 | A07169 | 338 | A02927 | A07189 | 346 |
| A02927 | A07486 | 238 | A02927 | A07848 | 422 |
| A02927 | A08591 | 429 | A02927 | A08738 | 340 |
| A02927 | A09633 | 223 | A02927 | A10120 | 399 |
| A02927 | A11513 | 210 | A02927 | A12653 | 310 |
| A02927 | A13052 | 236 | A02927 | A13212 | 472 |
| A02927 | A14525 | 177 | A02928 | A03586 | 285 |
| A02928 | A03587 | 340 | A02928 | A04553 | 196 |
| A02928 | A05351 | 479 | A02928 | A06950 | 312 |
| A02928 | A07302 | 483 | A02928 | A14386 | 477 |
| A02928 | A14434 | 477 | A02928 | A14589 | 180 |
| A02928 | A14704 | 188 | A02928 | A15990 | 372 |
| A02928 | A16360 | 329 | A02929 | A02942 | 245 |
| A02929 | A02949 | 419 | A02929 | A02958 | 488 |
| A02929 | A02968 | 210 | A02929 | A02973 | 378 |
| A02929 | A02983 | 229 | A02929 | A03092 | 353 |
| A02929 | A03144 | 313 | A02929 | A03287 | 473 |
| A02929 | A03639 | 180 | A02929 | A03802 | 302 |
| A02929 | A04008 | 317 | A02929 | A04030 | 347 |
| A02929 | A04540 | 472 | A02929 | A04568 | 258 |
| A02929 | A04601 | 462 | A02929 | A04908 | 374 |
| A02929 | A04976 | 313 | A02929 | A05494 | 208 |
| A02929 | A05817 | 333 | A02929 | A05868 | 263 |
| A02929 | A05999 | 341 | A02929 | A06339 | 436 |
| A02929 | A06605 | 466 | A02929 | A06696 | 262 |
| A02929 | A07140 | 193 | A02929 | A07165 | 362 |
| A02929 | A07187 | 232 | A02929 | A07191 | 165 |
| A02929 | A07295 | 341 | A02929 | A09388 | 260 |
| A02929 | A09730 | 899 | A02929 | A09934 | 368 |
| A02929 | A10905 | 291 | A02929 | A13879 | 200 |
| A02929 | A14236 | 168 | A02929 | A14243 | 899 |
| A02930 | A02939 | 323 | A02930 | A02975 | 228 |
| A02930 | A02976 | 221 | A02930 | A03484 | 257 |
| A02930 | A03513 | 394 | A02930 | A03523 | 154 |
| A02930 | A03914 | 241 | A02930 | A04608 | 196 |
| A02930 | A05112 | 445 | A02930 | A05411 | 216 |
| A02930 | A06860 | 232 | A02930 | A07123 | 263 |

|        |        |     |        |        |     |
|--------|--------|-----|--------|--------|-----|
| A02930 | A07124 | 414 | A02930 | A07321 | 294 |
| A02930 | A07933 | 414 | A02930 | A08278 | 249 |
| A02930 | A08279 | 419 | A02930 | A08366 | 273 |
| A02930 | A09977 | 184 | A02930 | A10446 | 391 |
| A02930 | A10457 | 414 | A02930 | A10625 | 445 |
| A02930 | A10677 | 234 | A02930 | A10989 | 228 |
| A02931 | A02944 | 324 | A02931 | A02945 | 127 |
| A02931 | A02950 | 477 | A02931 | A02972 | 177 |
| A02931 | A02976 | 137 | A02931 | A03019 | 63  |
| A02931 | A03109 | 337 | A02931 | A03126 | 281 |
| A02931 | A03195 | 168 | A02931 | A03223 | 490 |
| A02931 | A03228 | 163 | A02931 | A03271 | 485 |
| A02931 | A03282 | 316 | A02931 | A03788 | 191 |
| A02931 | A04015 | 151 | A02931 | A04050 | 435 |
| A02931 | A04212 | 201 | A02931 | A04278 | 152 |
| A02931 | A04426 | 366 | A02931 | A04579 | 223 |
| A02931 | A04589 | 238 | A02931 | A04614 | 174 |
| A02931 | A04657 | 350 | A02931 | A05212 | 172 |
| A02931 | A05247 | 196 | A02931 | A05288 | 456 |
| A02931 | A05350 | 401 | A02931 | A05577 | 63  |
| A02931 | A05606 | 260 | A02931 | A05677 | 274 |
| A02931 | A05902 | 257 | A02931 | A06237 | 312 |
| A02931 | A06650 | 216 | A02931 | A06755 | 251 |
| A02931 | A07106 | 249 | A02931 | A07138 | 226 |
| A02931 | A07173 | 480 | A02931 | A07188 | 393 |
| A02931 | A09084 | 188 | A02931 | A09361 | 260 |
| A02931 | A09470 | 163 | A02931 | A11285 | 154 |
| A02931 | A11300 | 402 | A02931 | A11387 | 486 |
| A02931 | A11435 | 301 | A02931 | A11708 | 303 |
| A02931 | A13376 | 470 | A02931 | A14119 | 367 |
| A02931 | A14208 | 473 | A02931 | A14596 | 285 |
| A02931 | A15314 | 276 | A02931 | A15427 | 177 |
| A02931 | A15729 | 185 | A02931 | A16798 | 299 |
| A02932 | A02936 | 446 | A02932 | A02945 | 328 |
| A02932 | A02970 | 386 | A02932 | A03157 | 266 |
| A02932 | A03259 | 290 | A02932 | A03275 | 246 |
| A02932 | A03280 | 367 | A02932 | A03974 | 333 |
| A02932 | A04589 | 319 | A02932 | A05113 | 343 |
| A02932 | A05349 | 279 | A02932 | A06415 | 373 |
| A02932 | A06689 | 224 | A02932 | A07135 | 360 |
| A02932 | A07152 | 307 | A02932 | A07157 | 290 |
| A02932 | A07166 | 324 | A02932 | A07173 | 322 |
| A02932 | A10605 | 382 | A02932 | A14809 | 228 |
| A02932 | A15425 | 296 | A02932 | A15426 | 425 |
| A02933 | A04079 | 232 | A02933 | A14809 | 236 |
| A02934 | A03279 | 416 | A02934 | A12824 | 279 |

|        |        |     |        |        |     |
|--------|--------|-----|--------|--------|-----|
| A02934 | A14208 | 227 | A02934 | A15613 | 355 |
| A02935 | A02945 | 451 | A02935 | A02950 | 208 |
| A02935 | A02953 | 390 | A02935 | A02962 | 446 |
| A02935 | A02982 | 156 | A02935 | A03010 | 243 |
| A02935 | A03157 | 281 | A02935 | A03610 | 277 |
| A02935 | A04130 | 358 | A02935 | A04248 | 254 |
| A02935 | A04263 | 363 | A02935 | A04276 | 491 |
| A02935 | A04415 | 407 | A02935 | A04536 | 314 |
| A02935 | A04609 | 266 | A02935 | A04734 | 473 |
| A02935 | A04865 | 489 | A02935 | A04866 | 429 |
| A02935 | A05329 | 339 | A02935 | A05679 | 207 |
| A02935 | A05760 | 899 | A02935 | A05944 | 232 |
| A02935 | A05985 | 340 | A02935 | A06344 | 318 |
| A02935 | A06415 | 358 | A02935 | A07143 | 251 |
| A02935 | A07152 | 443 | A02935 | A07157 | 311 |
| A02935 | A07161 | 260 | A02935 | A07173 | 449 |
| A02935 | A08572 | 212 | A02935 | A08608 | 243 |
| A02935 | A11994 | 299 | A02935 | A12121 | 369 |
| A02935 | A13872 | 272 | A02935 | A14490 | 205 |
| A02935 | A15394 | 243 | A02935 | A15395 | 350 |
| A02935 | A15425 | 398 | A02935 | A15427 | 276 |
| A02935 | A15435 | 157 | A02935 | A15630 | 199 |
| A02935 | A15639 | 363 | A02935 | A15642 | 371 |
| A02935 | A15976 | 241 | A02936 | A02938 | 374 |
| A02936 | A02944 | 228 | A02936 | A02946 | 416 |
| A02936 | A02970 | 337 | A02936 | A03157 | 307 |
| A02936 | A03228 | 285 | A02936 | A03239 | 254 |
| A02936 | A03259 | 352 | A02936 | A03280 | 468 |
| A02936 | A03282 | 299 | A02936 | A04130 | 255 |
| A02936 | A04217 | 278 | A02936 | A04244 | 324 |
| A02936 | A04589 | 425 | A02936 | A04734 | 430 |
| A02936 | A04908 | 218 | A02936 | A04981 | 339 |
| A02936 | A05127 | 205 | A02936 | A05577 | 162 |
| A02936 | A05773 | 435 | A02936 | A05985 | 232 |
| A02936 | A06415 | 159 | A02936 | A06567 | 380 |
| A02936 | A07135 | 363 | A02936 | A07152 | 224 |
| A02936 | A07157 | 334 | A02936 | A07164 | 422 |
| A02936 | A07166 | 246 | A02936 | A07187 | 291 |
| A02936 | A07201 | 167 | A02936 | A08908 | 317 |
| A02936 | A13872 | 293 | A02936 | A14285 | 157 |
| A02936 | A14391 | 202 | A02936 | A14442 | 311 |
| A02936 | A14599 | 294 | A02936 | A15394 | 266 |
| A02936 | A15395 | 245 | A02936 | A15425 | 340 |
| A02936 | A15642 | 272 | A02936 | A16397 | 268 |
| A02937 | A02982 | 230 | A02938 | A02944 | 402 |
| A02938 | A02946 | 435 | A02938 | A02953 | 432 |

|        |        |     |        |        |     |
|--------|--------|-----|--------|--------|-----|
| A02938 | A02970 | 469 | A02938 | A03271 | 240 |
| A02938 | A03280 | 358 | A02938 | A03282 | 433 |
| A02938 | A04589 | 308 | A02938 | A07135 | 347 |
| A02938 | A07166 | 412 | A02938 | A16397 | 330 |
| A02939 | A02945 | 283 | A02939 | A02962 | 424 |
| A02939 | A02963 | 277 | A02939 | A05315 | 443 |
| A02939 | A05349 | 224 | A02939 | A05878 | 339 |
| A02939 | A06149 | 335 | A02939 | A06608 | 183 |
| A02939 | A07842 | 385 | A02939 | A10625 | 299 |
| A02940 | A03157 | 401 | A02940 | A04108 | 326 |
| A02940 | A04274 | 418 | A02940 | A04602 | 445 |
| A02940 | A08616 | 445 | A02941 | A02947 | 386 |
| A02941 | A02967 | 422 | A02942 | A02949 | 899 |
| A02942 | A02958 | 340 | A02942 | A02968 | 945 |
| A02942 | A02973 | 322 | A02942 | A03092 | 283 |
| A02942 | A03821 | 348 | A02942 | A04207 | 219 |
| A02942 | A04452 | 294 | A02942 | A04902 | 337 |
| A02942 | A05035 | 899 | A02942 | A05278 | 489 |
| A02942 | A05320 | 416 | A02942 | A05445 | 374 |
| A02942 | A05591 | 200 | A02942 | A05760 | 943 |
| A02942 | A05876 | 177 | A02942 | A05879 | 160 |
| A02942 | A07210 | 154 | A02942 | A07311 | 899 |
| A02942 | A07557 | 246 | A02942 | A07618 | 899 |
| A02942 | A08524 | 240 | A02942 | A08603 | 193 |
| A02942 | A08709 | 262 | A02942 | A08732 | 919 |
| A02942 | A08858 | 899 | A02942 | A09060 | 187 |
| A02942 | A09319 | 899 | A02942 | A09804 | 899 |
| A02942 | A10061 | 372 | A02942 | A10091 | 200 |
| A02942 | A10174 | 899 | A02942 | A10574 | 899 |
| A02942 | A10643 | 322 | A02942 | A11964 | 241 |
| A02942 | A11983 | 899 | A02942 | A13145 | 268 |
| A02942 | A13975 | 899 | A02942 | A13981 | 899 |
| A02942 | A13997 | 899 | A02942 | A14004 | 899 |
| A02942 | A14208 | 899 | A02942 | A14296 | 899 |
| A02942 | A14443 | 899 | A02942 | A14444 | 899 |
| A02943 | A03001 | 306 | A02943 | A03120 | 404 |
| A02943 | A03157 | 241 | A02943 | A03537 | 399 |
| A02943 | A03583 | 389 | A02943 | A03585 | 380 |
| A02943 | A03615 | 278 | A02943 | A03653 | 327 |
| A02943 | A03847 | 414 | A02943 | A03870 | 404 |
| A02943 | A04004 | 357 | A02943 | A04031 | 382 |
| A02943 | A04051 | 223 | A02943 | A04123 | 404 |
| A02943 | A04260 | 299 | A02943 | A04560 | 389 |
| A02943 | A04905 | 368 | A02943 | A05036 | 473 |
| A02943 | A05349 | 255 | A02943 | A05353 | 375 |
| A02943 | A05488 | 424 | A02943 | A10139 | 414 |

|        |        |     |        |        |     |
|--------|--------|-----|--------|--------|-----|
| A02943 | A15613 | 263 | A02943 | A16216 | 210 |
| A02943 | A16636 | 188 | A02944 | A02945 | 480 |
| A02944 | A02950 | 339 | A02944 | A02951 | 297 |
| A02944 | A02953 | 491 | A02944 | A02961 | 491 |
| A02944 | A02962 | 340 | A02944 | A02966 | 208 |
| A02944 | A02970 | 241 | A02944 | A02971 | 484 |
| A02944 | A02972 | 491 | A02944 | A02976 | 447 |
| A02944 | A02982 | 177 | A02944 | A03183 | 154 |
| A02944 | A03271 | 65  | A02944 | A03275 | 316 |
| A02944 | A03279 | 229 | A02944 | A03281 | 318 |
| A02944 | A03282 | 491 | A02944 | A03557 | 218 |
| A02944 | A03988 | 274 | A02944 | A04010 | 456 |
| A02944 | A04040 | 232 | A02944 | A04050 | 339 |
| A02944 | A04051 | 417 | A02944 | A04240 | 327 |
| A02944 | A04244 | 224 | A02944 | A04276 | 221 |
| A02944 | A04298 | 327 | A02944 | A04318 | 271 |
| A02944 | A04322 | 311 | A02944 | A04608 | 346 |
| A02944 | A04613 | 435 | A02944 | A04616 | 356 |
| A02944 | A04652 | 177 | A02944 | A04693 | 174 |
| A02944 | A04735 | 299 | A02944 | A04865 | 202 |
| A02944 | A04906 | 229 | A02944 | A05112 | 409 |
| A02944 | A05113 | 157 | A02944 | A05349 | 486 |
| A02944 | A05376 | 173 | A02944 | A05577 | 65  |
| A02944 | A05879 | 204 | A02944 | A05949 | 198 |
| A02944 | A06149 | 335 | A02944 | A06286 | 372 |
| A02944 | A06755 | 259 | A02944 | A07141 | 205 |
| A02944 | A07164 | 238 | A02944 | A07173 | 348 |
| A02944 | A07191 | 235 | A02944 | A07961 | 350 |
| A02944 | A08430 | 229 | A02944 | A08714 | 176 |
| A02944 | A08734 | 327 | A02944 | A09145 | 207 |
| A02944 | A10009 | 249 | A02944 | A10091 | 367 |
| A02944 | A10625 | 347 | A02944 | A10942 | 406 |
| A02944 | A13195 | 396 | A02944 | A13824 | 70  |
| A02944 | A14208 | 335 | A02944 | A14333 | 265 |
| A02944 | A14439 | 168 | A02944 | A14599 | 183 |
| A02944 | A14830 | 205 | A02944 | A15325 | 227 |
| A02944 | A15475 | 200 | A02944 | A15517 | 311 |
| A02944 | A15607 | 232 | A02944 | A15609 | 305 |
| A02944 | A15613 | 297 | A02944 | A15639 | 419 |
| A02944 | A15795 | 274 | A02945 | A02950 | 139 |
| A02945 | A02951 | 107 | A02945 | A02955 | 477 |
| A02945 | A02962 | 491 | A02945 | A02972 | 340 |
| A02945 | A03006 | 200 | A02945 | A03049 | 165 |
| A02945 | A03109 | 238 | A02945 | A03144 | 152 |
| A02945 | A03195 | 201 | A02945 | A03224 | 329 |
| A02945 | A03239 | 294 | A02945 | A03256 | 165 |

|        |        |     |        |        |     |
|--------|--------|-----|--------|--------|-----|
| A02945 | A03259 | 335 | A02945 | A03260 | 232 |
| A02945 | A03271 | 406 | A02945 | A03280 | 418 |
| A02945 | A03316 | 283 | A02945 | A03610 | 486 |
| A02945 | A03735 | 240 | A02945 | A03746 | 243 |
| A02945 | A03788 | 234 | A02945 | A03817 | 205 |
| A02945 | A03900 | 371 | A02945 | A04051 | 271 |
| A02945 | A04110 | 210 | A02945 | A04130 | 294 |
| A02945 | A04162 | 162 | A02945 | A04211 | 154 |
| A02945 | A04248 | 477 | A02945 | A04263 | 302 |
| A02945 | A04276 | 367 | A02945 | A04320 | 360 |
| A02945 | A04478 | 363 | A02945 | A04517 | 246 |
| A02945 | A04536 | 235 | A02945 | A04603 | 215 |
| A02945 | A04609 | 199 | A02945 | A04734 | 283 |
| A02945 | A04747 | 216 | A02945 | A04865 | 419 |
| A02945 | A05113 | 313 | A02945 | A05305 | 357 |
| A02945 | A05679 | 267 | A02945 | A05944 | 429 |
| A02945 | A05985 | 481 | A02945 | A06054 | 443 |
| A02945 | A06055 | 441 | A02945 | A06414 | 251 |
| A02945 | A06415 | 490 | A02945 | A06747 | 324 |
| A02945 | A06899 | 268 | A02945 | A07000 | 335 |
| A02945 | A07031 | 291 | A02945 | A07145 | 162 |
| A02945 | A07152 | 488 | A02945 | A07157 | 330 |
| A02945 | A07161 | 324 | A02945 | A07166 | 154 |
| A02945 | A07173 | 491 | A02945 | A07174 | 374 |
| A02945 | A07372 | 294 | A02945 | A09612 | 230 |
| A02945 | A09768 | 219 | A02945 | A09900 | 208 |
| A02945 | A10343 | 352 | A02945 | A10586 | 337 |
| A02945 | A10731 | 182 | A02945 | A13872 | 337 |
| A02945 | A13988 | 228 | A02945 | A14071 | 435 |
| A02945 | A14146 | 357 | A02945 | A14366 | 208 |
| A02945 | A14374 | 224 | A02945 | A14385 | 313 |
| A02945 | A14391 | 396 | A02945 | A14392 | 409 |
| A02945 | A14416 | 274 | A02945 | A14432 | 383 |
| A02945 | A14439 | 193 | A02945 | A14442 | 229 |
| A02945 | A14599 | 409 | A02945 | A15241 | 221 |
| A02945 | A15394 | 433 | A02945 | A15395 | 465 |
| A02945 | A15403 | 274 | A02945 | A15425 | 475 |
| A02945 | A15426 | 432 | A02945 | A15427 | 340 |
| A02945 | A15475 | 224 | A02945 | A15516 | 321 |
| A02945 | A15517 | 328 | A02945 | A15601 | 424 |
| A02945 | A15602 | 395 | A02945 | A15603 | 451 |
| A02945 | A15605 | 461 | A02945 | A15606 | 307 |
| A02945 | A15607 | 472 | A02945 | A15608 | 462 |
| A02945 | A15609 | 416 | A02945 | A15642 | 180 |
| A02945 | A15795 | 302 | A02945 | A15865 | 322 |
| A02945 | A15964 | 353 | A02945 | A15976 | 172 |



|        |        |     |        |        |     |
|--------|--------|-----|--------|--------|-----|
| A02945 | A16010 | 382 | A02946 | A16397 | 390 |
| A02947 | A02948 | 386 | A02947 | A02957 | 419 |
| A02947 | A03281 | 306 | A02947 | A04520 | 200 |
| A02947 | A04801 | 401 | A02947 | A05725 | 419 |
| A02947 | A05817 | 377 | A02947 | A06285 | 401 |
| A02947 | A07172 | 408 | A02947 | A07201 | 180 |
| A02947 | A07900 | 307 | A02947 | A08902 | 224 |
| A02947 | A17040 | 263 | A02948 | A02959 | 286 |
| A02948 | A02983 | 265 | A02948 | A05817 | 408 |
| A02949 | A02958 | 445 | A02949 | A03144 | 302 |
| A02949 | A03287 | 361 | A02949 | A04601 | 409 |
| A02949 | A05062 | 413 | A02949 | A05760 | 899 |
| A02949 | A06605 | 418 | A02949 | A11923 | 329 |
| A02949 | A14637 | 273 | A02950 | A02952 | 363 |
| A02950 | A02953 | 324 | A02950 | A02955 | 344 |
| A02950 | A02961 | 238 | A02950 | A02962 | 215 |
| A02950 | A02972 | 191 | A02950 | A03244 | 402 |
| A02950 | A03271 | 333 | A02950 | A03496 | 517 |
| A02950 | A03611 | 162 | A02950 | A03618 | 196 |
| A02950 | A03625 | 71  | A02950 | A03626 | 343 |
| A02950 | A03686 | 93  | A02950 | A03834 | 154 |
| A02950 | A03835 | 254 | A02950 | A03892 | 422 |
| A02950 | A04050 | 443 | A02950 | A04276 | 226 |
| A02950 | A04609 | 179 | A02950 | A04657 | 477 |
| A02950 | A04731 | 204 | A02950 | A04943 | 313 |
| A02950 | A05037 | 413 | A02950 | A05409 | 329 |
| A02950 | A05577 | 68  | A02950 | A05607 | 633 |
| A02950 | A05673 | 254 | A02950 | A06046 | 215 |
| A02950 | A06169 | 353 | A02950 | A07207 | 324 |
| A02950 | A08761 | 205 | A02950 | A08874 | 485 |
| A02950 | A10296 | 321 | A02950 | A10355 | 475 |
| A02950 | A10557 | 212 | A02950 | A10739 | 241 |
| A02950 | A13824 | 63  | A02950 | A13829 | 63  |
| A02950 | A14000 | 154 | A02950 | A14208 | 409 |
| A02950 | A14231 | 157 | A02950 | A14263 | 383 |
| A02950 | A15295 | 199 | A02950 | A15314 | 118 |
| A02950 | A15386 | 102 | A02950 | A15607 | 236 |
| A02950 | A15630 | 232 | A02950 | A15976 | 152 |
| A02950 | A16125 | 391 | A02951 | A02952 | 408 |
| A02951 | A02953 | 425 | A02951 | A02961 | 457 |
| A02951 | A02963 | 319 | A02951 | A02966 | 179 |
| A02951 | A02969 | 160 | A02951 | A02970 | 213 |
| A02951 | A02977 | 474 | A02951 | A03034 | 288 |
| A02951 | A03036 | 162 | A02951 | A03080 | 196 |
| A02951 | A03138 | 193 | A02951 | A03146 | 213 |
| A02951 | A03148 | 182 | A02951 | A03157 | 302 |

|        |        |     |        |        |     |
|--------|--------|-----|--------|--------|-----|
| A02951 | A03184 | 208 | A02951 | A03275 | 945 |
| A02951 | A03282 | 160 | A02951 | A03419 | 63  |
| A02951 | A03432 | 152 | A02951 | A03515 | 160 |
| A02951 | A03545 | 157 | A02951 | A03664 | 168 |
| A02951 | A03731 | 232 | A02951 | A03831 | 281 |
| A02951 | A03914 | 267 | A02951 | A03991 | 439 |
| A02951 | A04010 | 443 | A02951 | A04023 | 297 |
| A02951 | A04051 | 945 | A02951 | A04052 | 221 |
| A02951 | A04163 | 152 | A02951 | A04278 | 490 |
| A02951 | A04296 | 296 | A02951 | A04548 | 152 |
| A02951 | A04607 | 491 | A02951 | A04608 | 945 |
| A02951 | A04609 | 489 | A02951 | A04612 | 321 |
| A02951 | A04614 | 450 | A02951 | A04618 | 412 |
| A02951 | A04712 | 218 | A02951 | A04731 | 170 |
| A02951 | A04783 | 346 | A02951 | A04851 | 243 |
| A02951 | A04877 | 259 | A02951 | A04906 | 333 |
| A02951 | A04908 | 180 | A02951 | A04950 | 305 |
| A02951 | A05113 | 491 | A02951 | A05169 | 246 |
| A02951 | A05235 | 374 | A02951 | A05315 | 899 |
| A02951 | A05349 | 945 | A02951 | A05427 | 260 |
| A02951 | A05493 | 232 | A02951 | A05584 | 154 |
| A02951 | A05620 | 251 | A02951 | A05879 | 434 |
| A02951 | A05920 | 281 | A02951 | A06286 | 246 |
| A02951 | A06415 | 191 | A02951 | A06422 | 170 |
| A02951 | A06980 | 317 | A02951 | A07141 | 452 |
| A02951 | A07150 | 317 | A02951 | A07173 | 213 |
| A02951 | A07174 | 201 | A02951 | A07191 | 486 |
| A02951 | A07218 | 201 | A02951 | A07342 | 168 |
| A02951 | A07469 | 191 | A02951 | A08617 | 388 |
| A02951 | A08739 | 193 | A02951 | A08759 | 305 |
| A02951 | A09030 | 332 | A02951 | A09222 | 213 |
| A02951 | A09254 | 160 | A02951 | A09736 | 291 |
| A02951 | A10586 | 152 | A02951 | A10611 | 187 |
| A02951 | A10791 | 188 | A02951 | A10976 | 305 |
| A02951 | A11212 | 332 | A02951 | A11760 | 207 |
| A02951 | A13555 | 215 | A02951 | A13667 | 157 |
| A02951 | A14208 | 382 | A02951 | A14344 | 190 |
| A02951 | A14393 | 899 | A02951 | A14410 | 152 |
| A02951 | A14722 | 305 | A02951 | A15287 | 201 |
| A02951 | A15397 | 899 | A02951 | A15425 | 170 |
| A02951 | A15429 | 207 | A02951 | A15506 | 899 |
| A02951 | A16018 | 183 | A02951 | A16216 | 374 |
| A02951 | A16308 | 288 | A02951 | A16337 | 332 |
| A02951 | A16636 | 477 | A02951 | A17198 | 391 |
| A02952 | A02961 | 360 | A02952 | A03275 | 160 |
| A02952 | A04007 | 311 | A02952 | A04051 | 162 |

|        |        |     |        |        |     |
|--------|--------|-----|--------|--------|-----|
| A02952 | A04267 | 479 | A02952 | A04272 | 424 |
| A02952 | A04278 | 281 | A02952 | A04612 | 479 |
| A02952 | A04798 | 374 | A02952 | A04866 | 436 |
| A02952 | A04906 | 488 | A02952 | A05113 | 390 |
| A02952 | A05349 | 196 | A02952 | A05677 | 466 |
| A02952 | A05709 | 340 | A02952 | A06314 | 165 |
| A02952 | A06735 | 313 | A02952 | A09124 | 183 |
| A02952 | A13665 | 294 | A02952 | A14012 | 422 |
| A02953 | A02954 | 341 | A02953 | A02961 | 490 |
| A02953 | A02970 | 308 | A02953 | A02971 | 472 |
| A02953 | A02972 | 472 | A02953 | A02976 | 418 |
| A02953 | A03001 | 208 | A02953 | A03271 | 123 |
| A02953 | A03275 | 236 | A02953 | A03281 | 260 |
| A02953 | A03282 | 489 | A02953 | A03557 | 290 |
| A02953 | A03788 | 165 | A02953 | A04276 | 399 |
| A02953 | A04278 | 238 | A02953 | A04461 | 347 |
| A02953 | A04526 | 356 | A02953 | A04613 | 455 |
| A02953 | A04616 | 299 | A02953 | A04652 | 254 |
| A02953 | A04735 | 352 | A02953 | A05242 | 335 |
| A02953 | A06149 | 278 | A02953 | A06286 | 228 |
| A02953 | A07135 | 218 | A02953 | A07141 | 167 |
| A02953 | A07157 | 160 | A02953 | A07166 | 208 |
| A02953 | A09145 | 279 | A02953 | A09900 | 260 |
| A02953 | A10656 | 257 | A02953 | A10694 | 310 |
| A02953 | A14372 | 201 | A02953 | A14374 | 157 |
| A02953 | A15337 | 230 | A02953 | A15394 | 228 |
| A02953 | A15639 | 418 | A02954 | A03068 | 294 |
| A02954 | A03223 | 172 | A02954 | A04867 | 255 |
| A02954 | A04954 | 390 | A02954 | A05563 | 278 |
| A02954 | A13835 | 395 | A02954 | A15639 | 313 |
| A02955 | A02962 | 447 | A02955 | A03271 | 68  |
| A02955 | A03610 | 401 | A02955 | A03807 | 285 |
| A02955 | A04248 | 165 | A02955 | A04478 | 221 |
| A02955 | A04659 | 243 | A02955 | A04906 | 234 |
| A02955 | A07173 | 353 | A02955 | A07174 | 235 |
| A02955 | A07850 | 171 | A02955 | A08345 | 208 |
| A02955 | A08571 | 240 | A02955 | A08623 | 353 |
| A02955 | A08828 | 755 | A02955 | A09526 | 486 |
| A02955 | A09642 | 340 | A02955 | A09768 | 201 |
| A02955 | A13989 | 246 | A02955 | A14146 | 341 |
| A02955 | A14659 | 182 | A02955 | A15292 | 490 |
| A02955 | A15394 | 375 | A02955 | A15395 | 260 |
| A02955 | A15475 | 205 | A02955 | A15607 | 362 |
| A02955 | A15608 | 185 | A02955 | A16049 | 475 |
| A02956 | A03825 | 391 | A02956 | A06606 | 168 |
| A02956 | A09434 | 352 | A02956 | A15575 | 373 |

|        |        |     |        |        |     |
|--------|--------|-----|--------|--------|-----|
| A02957 | A05725 | 452 | A02958 | A02983 | 196 |
| A02958 | A03090 | 294 | A02958 | A03144 | 268 |
| A02958 | A03281 | 314 | A02958 | A03287 | 484 |
| A02958 | A04444 | 303 | A02958 | A04540 | 279 |
| A02958 | A04601 | 395 | A02958 | A05309 | 177 |
| A02958 | A05868 | 334 | A02958 | A06605 | 405 |
| A02958 | A06949 | 232 | A02958 | A07165 | 294 |
| A02958 | A07201 | 191 | A02958 | A14637 | 234 |
| A02959 | A03639 | 317 | A02959 | A04881 | 167 |
| A02959 | A04928 | 162 | A02959 | A05817 | 267 |
| A02959 | A05832 | 217 | A02959 | A08859 | 491 |
| A02959 | A09732 | 491 | A02959 | A09733 | 491 |
| A02959 | A11349 | 210 | A02959 | A11415 | 414 |
| A02959 | A11875 | 152 | A02959 | A13546 | 477 |
| A02959 | A13593 | 151 | A02959 | A13970 | 486 |
| A02959 | A14000 | 243 | A02959 | A14733 | 401 |
| A02959 | A15292 | 278 | A02959 | A15312 | 243 |
| A02959 | A15352 | 310 | A02959 | A15432 | 172 |
| A02959 | A15436 | 219 | A02959 | A15452 | 326 |
| A02959 | A15498 | 236 | A02959 | A16916 | 240 |
| A02960 | A03686 | 218 | A02960 | A04051 | 258 |
| A02960 | A04052 | 394 | A02960 | A04278 | 351 |
| A02960 | A04608 | 326 | A02960 | A05036 | 409 |
| A02960 | A07141 | 302 | A02960 | A13824 | 196 |
| A02961 | A02962 | 463 | A02961 | A02963 | 255 |
| A02961 | A02969 | 190 | A02961 | A02970 | 241 |
| A02961 | A02971 | 486 | A02961 | A02972 | 490 |
| A02961 | A02976 | 473 | A02961 | A02977 | 180 |
| A02961 | A03099 | 176 | A02961 | A03147 | 204 |
| A02961 | A03223 | 157 | A02961 | A03275 | 229 |
| A02961 | A03278 | 212 | A02961 | A03281 | 185 |
| A02961 | A03282 | 488 | A02961 | A03557 | 218 |
| A02961 | A03731 | 259 | A02961 | A03831 | 303 |
| A02961 | A04010 | 361 | A02961 | A04030 | 311 |
| A02961 | A04050 | 182 | A02961 | A04051 | 441 |
| A02961 | A04052 | 249 | A02961 | A04206 | 245 |
| A02961 | A04244 | 224 | A02961 | A04247 | 294 |
| A02961 | A04278 | 160 | A02961 | A04310 | 281 |
| A02961 | A04334 | 174 | A02961 | A04566 | 326 |
| A02961 | A04600 | 389 | A02961 | A04612 | 217 |
| A02961 | A04613 | 460 | A02961 | A04616 | 229 |
| A02961 | A04618 | 238 | A02961 | A04652 | 177 |
| A02961 | A04731 | 199 | A02961 | A04735 | 299 |
| A02961 | A04865 | 202 | A02961 | A04902 | 467 |
| A02961 | A05055 | 285 | A02961 | A05112 | 256 |
| A02961 | A05113 | 288 | A02961 | A05211 | 294 |

|        |        |     |        |        |     |
|--------|--------|-----|--------|--------|-----|
| A02961 | A05212 | 180 | A02961 | A05242 | 277 |
| A02961 | A05349 | 408 | A02961 | A05507 | 285 |
| A02961 | A05569 | 259 | A02961 | A05573 | 151 |
| A02961 | A05577 | 65  | A02961 | A05709 | 241 |
| A02961 | A05832 | 257 | A02961 | A05879 | 204 |
| A02961 | A05949 | 198 | A02961 | A06004 | 346 |
| A02961 | A06149 | 335 | A02961 | A06422 | 199 |
| A02961 | A06642 | 230 | A02961 | A06644 | 187 |
| A02961 | A06863 | 416 | A02961 | A06924 | 223 |
| A02961 | A07141 | 205 | A02961 | A07149 | 170 |
| A02961 | A07157 | 302 | A02961 | A07167 | 165 |
| A02961 | A07174 | 357 | A02961 | A07961 | 480 |
| A02961 | A08583 | 238 | A02961 | A08879 | 200 |
| A02961 | A09030 | 350 | A02961 | A09222 | 241 |
| A02961 | A09741 | 160 | A02961 | A09768 | 195 |
| A02961 | A10625 | 393 | A02961 | A13191 | 394 |
| A02961 | A13824 | 63  | A02961 | A13872 | 180 |
| A02961 | A14199 | 398 | A02961 | A14208 | 424 |
| A02961 | A14387 | 249 | A02961 | A14628 | 256 |
| A02961 | A15308 | 216 | A02961 | A15607 | 232 |
| A02961 | A15609 | 406 | A02961 | A15639 | 447 |
| A02961 | A15967 | 369 | A02961 | A16520 | 245 |
| A02961 | A16610 | 243 | A02961 | A16831 | 157 |
| A02961 | A16965 | 288 | A02962 | A03263 | 240 |
| A02962 | A03271 | 143 | A02962 | A04130 | 238 |
| A02962 | A04276 | 308 | A02962 | A04473 | 323 |
| A02962 | A04609 | 272 | A02962 | A04612 | 306 |
| A02962 | A04659 | 323 | A02962 | A05289 | 285 |
| A02962 | A05679 | 343 | A02962 | A06414 | 314 |
| A02962 | A06415 | 363 | A02962 | A06747 | 263 |
| A02962 | A07000 | 377 | A02962 | A07152 | 408 |
| A02962 | A07173 | 451 | A02962 | A07174 | 452 |
| A02962 | A08070 | 218 | A02962 | A08572 | 218 |
| A02962 | A09642 | 389 | A02962 | A09768 | 288 |
| A02962 | A10586 | 278 | A02962 | A10731 | 375 |
| A02962 | A10760 | 252 | A02962 | A12809 | 377 |
| A02962 | A14197 | 168 | A02962 | A14374 | 180 |
| A02962 | A14392 | 205 | A02962 | A14599 | 279 |
| A02962 | A15308 | 196 | A02962 | A15394 | 249 |
| A02962 | A15425 | 401 | A02962 | A15427 | 281 |
| A02962 | A15475 | 293 | A02962 | A15607 | 469 |
| A02962 | A15608 | 276 | A02962 | A15609 | 466 |
| A02962 | A15630 | 335 | A02962 | A15642 | 255 |
| A02962 | A15795 | 243 | A02962 | A15834 | 256 |
| A02962 | A15976 | 247 | A02963 | A03869 | 329 |
| A02963 | A03914 | 184 | A02963 | A05176 | 177 |

|        |        |     |        |        |     |
|--------|--------|-----|--------|--------|-----|
| A02963 | A05269 | 288 | A02963 | A05398 | 221 |
| A02963 | A06247 | 404 | A02963 | A07210 | 216 |
| A02963 | A07807 | 312 | A02963 | A08692 | 213 |
| A02963 | A09463 | 272 | A02963 | A09882 | 265 |
| A02963 | A10214 | 210 | A02963 | A11275 | 179 |
| A02963 | A13864 | 279 | A02963 | A14208 | 266 |
| A02963 | A14211 | 185 | A02963 | A14524 | 202 |
| A02963 | A15912 | 461 | A02963 | A16610 | 260 |
| A02964 | A03450 | 479 | A02964 | A03782 | 273 |
| A02964 | A03922 | 195 | A02964 | A04211 | 391 |
| A02964 | A05603 | 245 | A02964 | A06592 | 310 |
| A02964 | A07011 | 235 | A02964 | A07208 | 256 |
| A02964 | A08525 | 170 | A02964 | A09880 | 213 |
| A02964 | A10798 | 213 | A02964 | A12569 | 390 |
| A02964 | A13822 | 312 | A02964 | A13865 | 416 |
| A02965 | A03205 | 163 | A02965 | A03229 | 302 |
| A02965 | A03321 | 283 | A02965 | A03472 | 435 |
| A02965 | A03742 | 338 | A02965 | A04052 | 281 |
| A02965 | A04932 | 176 | A02965 | A05007 | 185 |
| A02965 | A05094 | 411 | A02965 | A05832 | 163 |
| A02965 | A05871 | 432 | A02965 | A06138 | 489 |
| A02965 | A07958 | 243 | A02965 | A08293 | 367 |
| A02965 | A08815 | 154 | A02965 | A10148 | 455 |
| A02965 | A10334 | 369 | A02965 | A10635 | 185 |
| A02965 | A13824 | 273 | A02965 | A14080 | 281 |
| A02965 | A14200 | 168 | A02966 | A02970 | 323 |
| A02966 | A02982 | 486 | A02966 | A03087 | 251 |
| A02966 | A03099 | 165 | A02966 | A03157 | 285 |
| A02966 | A03281 | 391 | A02966 | A03282 | 283 |
| A02966 | A03432 | 276 | A02966 | A04540 | 238 |
| A02966 | A04579 | 314 | A02966 | A04610 | 449 |
| A02966 | A04615 | 310 | A02966 | A04951 | 388 |
| A02966 | A05064 | 375 | A02966 | A05113 | 252 |
| A02966 | A05349 | 168 | A02966 | A06247 | 273 |
| A02966 | A06286 | 429 | A02966 | A06949 | 187 |
| A02966 | A08910 | 360 | A02966 | A10174 | 251 |
| A02966 | A10418 | 297 | A02966 | A12824 | 184 |
| A02966 | A14331 | 388 | A02966 | A16540 | 307 |
| A02968 | A02973 | 374 | A02968 | A03001 | 312 |
| A02968 | A03092 | 348 | A02968 | A03195 | 224 |
| A02968 | A03265 | 312 | A02968 | A03278 | 258 |
| A02968 | A03427 | 240 | A02968 | A03560 | 899 |
| A02968 | A03803 | 306 | A02968 | A03821 | 152 |
| A02968 | A04342 | 174 | A02968 | A04902 | 167 |
| A02968 | A05112 | 176 | A02968 | A05113 | 204 |
| A02968 | A05315 | 185 | A02968 | A05693 | 283 |

|        |        |     |        |        |     |
|--------|--------|-----|--------|--------|-----|
| A02968 | A05760 | 929 | A02968 | A05878 | 256 |
| A02968 | A05879 | 249 | A02968 | A05938 | 899 |
| A02968 | A05949 | 245 | A02968 | A05995 | 899 |
| A02968 | A07091 | 899 | A02968 | A07165 | 899 |
| A02968 | A07206 | 187 | A02968 | A07339 | 912 |
| A02968 | A07486 | 416 | A02968 | A08531 | 899 |
| A02968 | A08571 | 899 | A02968 | A08583 | 281 |
| A02968 | A08732 | 916 | A02968 | A08836 | 168 |
| A02968 | A08861 | 185 | A02968 | A09242 | 386 |
| A02968 | A09319 | 899 | A02968 | A09581 | 899 |
| A02968 | A09644 | 899 | A02968 | A09804 | 899 |
| A02968 | A10148 | 183 | A02968 | A10174 | 899 |
| A02968 | A10313 | 286 | A02968 | A11668 | 899 |
| A02968 | A11750 | 252 | A02968 | A11983 | 899 |
| A02968 | A12897 | 196 | A02968 | A13195 | 324 |
| A02968 | A13392 | 302 | A02968 | A13773 | 899 |
| A02968 | A13977 | 899 | A02968 | A13981 | 899 |
| A02968 | A13997 | 899 | A02968 | A14004 | 899 |
| A02968 | A14096 | 899 | A02968 | A14216 | 899 |
| A02968 | A14243 | 899 | A02968 | A14443 | 899 |
| A02968 | A14974 | 899 | A02968 | A15912 | 162 |
| A02968 | A16297 | 899 | A02969 | A02972 | 263 |
| A02969 | A02976 | 224 | A02969 | A02977 | 259 |
| A02969 | A03080 | 294 | A02969 | A03144 | 339 |
| A02969 | A03478 | 208 | A02969 | A03965 | 235 |
| A02969 | A05458 | 205 | A02969 | A07154 | 288 |
| A02969 | A11435 | 255 | A02969 | A14208 | 168 |
| A02969 | A14604 | 205 | A02969 | A15327 | 271 |
| A02969 | A15386 | 172 | A02969 | A15603 | 277 |
| A02969 | A15608 | 259 | A02969 | A15630 | 477 |
| A02969 | A15795 | 224 | A02969 | A15976 | 486 |
| A02970 | A02982 | 311 | A02970 | A03282 | 311 |
| A02970 | A04446 | 213 | A02970 | A04536 | 219 |
| A02970 | A04607 | 219 | A02970 | A04609 | 299 |
| A02970 | A04706 | 283 | A02970 | A06735 | 319 |
| A02970 | A07135 | 450 | A02970 | A07961 | 257 |
| A02970 | A08088 | 380 | A02970 | A14482 | 185 |
| A02970 | A15597 | 396 | A02970 | A15967 | 419 |
| A02970 | A15974 | 208 | A02970 | A15979 | 374 |
| A02971 | A02972 | 486 | A02971 | A03282 | 472 |
| A02971 | A03608 | 294 | A02971 | A04206 | 363 |
| A02971 | A04247 | 390 | A02971 | A04566 | 406 |
| A02971 | A04613 | 484 | A02971 | A04756 | 340 |
| A02971 | A06195 | 263 | A02971 | A06415 | 201 |
| A02971 | A06422 | 335 | A02971 | A07135 | 180 |
| A02971 | A07164 | 272 | A02971 | A13860 | 229 |

|        |        |     |        |        |     |
|--------|--------|-----|--------|--------|-----|
| A02971 | A14387 | 366 | A02971 | A14392 | 263 |
| A02971 | A15639 | 297 | A02972 | A02976 | 490 |
| A02972 | A02977 | 256 | A02972 | A03279 | 297 |
| A02972 | A03282 | 435 | A02972 | A03608 | 218 |
| A02972 | A03835 | 199 | A02972 | A03987 | 379 |
| A02972 | A03998 | 294 | A02972 | A04050 | 469 |
| A02972 | A04051 | 236 | A02972 | A04206 | 311 |
| A02972 | A04247 | 347 | A02972 | A04278 | 236 |
| A02972 | A04566 | 371 | A02972 | A04608 | 473 |
| A02972 | A04613 | 484 | A02972 | A04616 | 401 |
| A02972 | A04693 | 249 | A02972 | A05112 | 205 |
| A02972 | A05242 | 423 | A02972 | A05427 | 160 |
| A02972 | A05539 | 168 | A02972 | A05577 | 246 |
| A02972 | A05620 | 335 | A02972 | A06149 | 276 |
| A02972 | A06333 | 321 | A02972 | A06422 | 272 |
| A02972 | A07135 | 217 | A02972 | A07141 | 299 |
| A02972 | A07174 | 299 | A02972 | A07961 | 202 |
| A02972 | A10178 | 388 | A02972 | A10372 | 159 |
| A02972 | A11436 | 177 | A02972 | A13997 | 165 |
| A02972 | A14199 | 263 | A02972 | A14208 | 246 |
| A02972 | A14387 | 313 | A02972 | A14628 | 319 |
| A02972 | A15308 | 307 | A02972 | A15394 | 227 |
| A02972 | A15422 | 157 | A02972 | A15613 | 157 |
| A02972 | A15639 | 223 | A02972 | A15795 | 221 |
| A02972 | A15964 | 274 | A02972 | A15996 | 347 |
| A02973 | A03092 | 433 | A02973 | A14208 | 190 |
| A02974 | A03611 | 157 | A02974 | A04446 | 246 |
| A02975 | A02976 | 187 | A02975 | A03019 | 63  |
| A02975 | A03271 | 200 | A02975 | A03275 | 190 |
| A02975 | A03834 | 326 | A02975 | A03835 | 491 |
| A02975 | A03836 | 362 | A02975 | A03837 | 490 |
| A02975 | A03838 | 443 | A02975 | A03998 | 265 |
| A02975 | A04050 | 481 | A02975 | A04052 | 286 |
| A02975 | A04096 | 180 | A02975 | A04097 | 170 |
| A02975 | A04115 | 491 | A02975 | A04130 | 180 |
| A02975 | A04217 | 205 | A02975 | A04246 | 318 |
| A02975 | A04278 | 202 | A02975 | A04685 | 286 |
| A02975 | A04693 | 217 | A02975 | A04731 | 241 |
| A02975 | A05037 | 388 | A02975 | A05674 | 414 |
| A02975 | A06537 | 390 | A02975 | A06631 | 352 |
| A02975 | A07130 | 238 | A02975 | A08070 | 160 |
| A02975 | A08745 | 452 | A02975 | A08840 | 134 |
| A02975 | A09754 | 152 | A02975 | A13772 | 160 |
| A02975 | A13826 | 469 | A02975 | A14208 | 486 |
| A02975 | A14218 | 202 | A02975 | A15314 | 432 |
| A02975 | A15346 | 330 | A02975 | A15386 | 443 |



|        |        |     |        |        |     |
|--------|--------|-----|--------|--------|-----|
| A02975 | A15477 | 335 | A02975 | A15515 | 180 |
| A02975 | A16224 | 182 | A02976 | A02977 | 216 |
| A02976 | A03001 | 165 | A02976 | A03223 | 217 |
| A02976 | A03279 | 263 | A02976 | A03556 | 314 |
| A02976 | A03834 | 185 | A02976 | A04050 | 240 |
| A02976 | A04051 | 183 | A02976 | A04096 | 306 |
| A02976 | A04278 | 328 | A02976 | A04492 | 249 |
| A02976 | A04608 | 156 | A02976 | A04613 | 400 |
| A02976 | A04616 | 486 | A02976 | A04658 | 341 |
| A02976 | A04659 | 462 | A02976 | A04685 | 281 |
| A02976 | A04693 | 446 | A02976 | A05242 | 468 |
| A02976 | A05349 | 228 | A02976 | A06149 | 238 |
| A02976 | A06385 | 221 | A02976 | A06578 | 173 |
| A02976 | A06631 | 466 | A02976 | A06644 | 221 |
| A02976 | A06797 | 216 | A02976 | A07062 | 229 |
| A02976 | A07168 | 324 | A02976 | A07955 | 369 |
| A02976 | A07961 | 160 | A02976 | A09355 | 313 |
| A02976 | A10573 | 369 | A02976 | A10930 | 348 |
| A02976 | A15639 | 486 | A02976 | A15674 | 375 |
| A02976 | A15960 | 313 | A02976 | A16224 | 174 |
| A02977 | A03095 | 185 | A02977 | A03275 | 228 |
| A02977 | A03552 | 305 | A02977 | A03731 | 317 |
| A02977 | A03831 | 352 | A02977 | A03851 | 258 |
| A02977 | A04051 | 466 | A02977 | A04052 | 310 |
| A02977 | A04248 | 232 | A02977 | A04278 | 488 |
| A02977 | A04536 | 159 | A02977 | A04596 | 357 |
| A02977 | A04607 | 291 | A02977 | A04608 | 440 |
| A02977 | A04609 | 485 | A02977 | A04614 | 485 |
| A02977 | A04617 | 418 | A02977 | A04618 | 447 |
| A02977 | A04685 | 310 | A02977 | A05113 | 355 |
| A02977 | A05349 | 446 | A02977 | A05427 | 286 |
| A02977 | A07141 | 160 | A02977 | A07218 | 318 |
| A02977 | A08741 | 243 | A02977 | A08863 | 165 |
| A02977 | A09222 | 302 | A02977 | A09925 | 219 |
| A02977 | A13826 | 301 | A02977 | A13899 | 174 |
| A02977 | A14208 | 154 | A02977 | A14374 | 151 |
| A02977 | A15322 | 899 | A02977 | A15394 | 221 |
| A02977 | A15395 | 199 | A02977 | A15642 | 228 |
| A02977 | A15914 | 401 | A02977 | A15964 | 271 |
| A02977 | A16224 | 341 | A02978 | A02980 | 668 |
| A02978 | A03567 | 491 | A02978 | A03705 | 221 |
| A02978 | A03713 | 151 | A02978 | A03843 | 279 |
| A02978 | A03859 | 491 | A02978 | A04668 | 339 |
| A02978 | A05011 | 278 | A02978 | A05230 | 210 |
| A02978 | A06861 | 491 | A02978 | A06965 | 477 |
| A02978 | A06973 | 556 | A02978 | A07076 | 210 |

|        |        |     |        |        |     |
|--------|--------|-----|--------|--------|-----|
| A02978 | A07148 | 154 | A02978 | A07378 | 278 |
| A02978 | A08131 | 363 | A02978 | A08369 | 232 |
| A02978 | A08398 | 200 | A02978 | A08403 | 152 |
| A02978 | A08430 | 151 | A02978 | A08452 | 200 |
| A02978 | A08521 | 200 | A02978 | A08558 | 564 |
| A02978 | A08664 | 200 | A02978 | A08932 | 177 |
| A02978 | A09044 | 386 | A02978 | A09292 | 210 |
| A02978 | A09305 | 212 | A02978 | A09322 | 483 |
| A02978 | A09686 | 223 | A02978 | A09702 | 364 |
| A02978 | A09862 | 491 | A02978 | A09865 | 456 |
| A02978 | A10417 | 200 | A02978 | A10529 | 212 |
| A02978 | A11227 | 207 | A02978 | A11295 | 491 |
| A02978 | A11349 | 491 | A02978 | A11390 | 196 |
| A02978 | A11438 | 200 | A02978 | A11497 | 156 |
| A02978 | A11562 | 408 | A02978 | A11704 | 177 |
| A02978 | A11728 | 163 | A02978 | A11729 | 200 |
| A02978 | A11945 | 375 | A02978 | A12824 | 446 |
| A02978 | A13052 | 210 | A02978 | A13333 | 200 |
| A02978 | A13963 | 385 | A02978 | A13989 | 568 |
| A02978 | A13993 | 393 | A02978 | A14114 | 361 |
| A02978 | A14167 | 162 | A02978 | A14169 | 670 |
| A02978 | A14176 | 187 | A02978 | A14431 | 157 |
| A02978 | A14449 | 407 | A02978 | A14566 | 473 |
| A02978 | A14816 | 210 | A02978 | A15221 | 317 |
| A02978 | A15297 | 393 | A02978 | A15524 | 235 |
| A02978 | A15558 | 393 | A02978 | A15560 | 393 |
| A02978 | A15624 | 390 | A02978 | A15649 | 470 |
| A02978 | A15666 | 308 | A02978 | A15776 | 154 |
| A02978 | A16146 | 474 | A02978 | A16320 | 262 |
| A02978 | A16333 | 149 | A02978 | A16392 | 160 |
| A02978 | A16686 | 458 | A02978 | A16697 | 369 |
| A02978 | A16821 | 256 | A02979 | A03271 | 177 |
| A02979 | A03618 | 377 | A02979 | A04897 | 457 |
| A02979 | A06941 | 238 | A02979 | A07867 | 364 |
| A02979 | A09326 | 157 | A02979 | A11303 | 193 |
| A02979 | A13387 | 165 | A02979 | A13830 | 101 |
| A02979 | A14095 | 204 | A02979 | A14247 | 491 |
| A02979 | A14473 | 226 | A02979 | A17061 | 205 |
| A02980 | A03048 | 185 | A02980 | A03567 | 490 |
| A02980 | A03859 | 485 | A02980 | A04790 | 260 |
| A02980 | A06235 | 152 | A02980 | A06965 | 379 |
| A02980 | A07244 | 152 | A02980 | A07378 | 296 |
| A02980 | A08369 | 71  | A02980 | A09862 | 372 |
| A02980 | A09865 | 396 | A02980 | A11945 | 154 |
| A02980 | A13993 | 641 | A02980 | A14169 | 670 |
| A02980 | A14188 | 260 | A02980 | A14449 | 400 |

|        |        |     |        |        |     |
|--------|--------|-----|--------|--------|-----|
| A02980 | A15297 | 393 | A02980 | A15558 | 610 |
| A02980 | A15560 | 393 | A02980 | A15779 | 285 |
| A02980 | A16686 | 281 | A02981 | A03436 | 224 |
| A02981 | A03451 | 389 | A02981 | A03496 | 154 |
| A02981 | A03518 | 213 | A02981 | A04772 | 337 |
| A02981 | A08878 | 419 | A02981 | A08981 | 332 |
| A02981 | A09580 | 317 | A02981 | A10894 | 184 |
| A02981 | A11897 | 227 | A02981 | A11983 | 486 |
| A02982 | A02983 | 182 | A02982 | A02984 | 491 |
| A02982 | A03012 | 491 | A02982 | A03013 | 171 |
| A02982 | A03099 | 218 | A02982 | A03269 | 204 |
| A02982 | A03275 | 294 | A02982 | A03276 | 185 |
| A02982 | A03321 | 180 | A02982 | A03431 | 187 |
| A02982 | A03447 | 278 | A02982 | A03563 | 180 |
| A02982 | A03803 | 347 | A02982 | A03810 | 182 |
| A02982 | A03865 | 369 | A02982 | A04005 | 263 |
| A02982 | A04010 | 288 | A02982 | A04105 | 266 |
| A02982 | A04117 | 288 | A02982 | A04134 | 269 |
| A02982 | A04264 | 179 | A02982 | A04267 | 490 |
| A02982 | A04268 | 318 | A02982 | A04272 | 200 |
| A02982 | A04279 | 198 | A02982 | A04499 | 172 |
| A02982 | A04510 | 291 | A02982 | A04538 | 305 |
| A02982 | A04575 | 230 | A02982 | A04615 | 183 |
| A02982 | A04708 | 314 | A02982 | A04723 | 306 |
| A02982 | A04798 | 281 | A02982 | A04867 | 173 |
| A02982 | A04902 | 462 | A02982 | A04906 | 294 |
| A02982 | A04970 | 230 | A02982 | A05203 | 263 |
| A02982 | A05506 | 388 | A02982 | A05758 | 401 |
| A02982 | A05832 | 291 | A02982 | A05899 | 172 |
| A02982 | A05921 | 162 | A02982 | A05956 | 208 |
| A02982 | A06019 | 156 | A02982 | A06606 | 210 |
| A02982 | A06607 | 193 | A02982 | A06643 | 182 |
| A02982 | A06650 | 408 | A02982 | A06678 | 162 |
| A02982 | A06695 | 182 | A02982 | A06911 | 172 |
| A02982 | A07030 | 208 | A02982 | A07168 | 156 |
| A02982 | A07188 | 274 | A02982 | A07199 | 218 |
| A02982 | A08657 | 230 | A02982 | A08677 | 187 |
| A02982 | A08722 | 230 | A02982 | A08728 | 182 |
| A02982 | A08741 | 490 | A02982 | A08827 | 484 |
| A02982 | A08829 | 230 | A02982 | A09357 | 200 |
| A02982 | A09376 | 193 | A02982 | A09922 | 182 |
| A02982 | A10011 | 266 | A02982 | A10128 | 182 |
| A02982 | A10270 | 182 | A02982 | A10307 | 172 |
| A02982 | A10498 | 249 | A02982 | A10638 | 430 |
| A02982 | A10823 | 162 | A02982 | A10851 | 208 |
| A02982 | A11361 | 266 | A02982 | A11719 | 230 |

|        |        |     |        |        |     |
|--------|--------|-----|--------|--------|-----|
| A02982 | A11897 | 221 | A02982 | A12420 | 899 |
| A02982 | A12421 | 907 | A02982 | A12927 | 199 |
| A02982 | A13539 | 223 | A02982 | A13667 | 489 |
| A02982 | A13734 | 274 | A02982 | A13792 | 182 |
| A02982 | A13886 | 200 | A02982 | A14198 | 450 |
| A02982 | A14405 | 235 | A02982 | A15674 | 481 |
| A02982 | A15847 | 305 | A02982 | A16021 | 208 |
| A02982 | A16636 | 452 | A02983 | A02984 | 154 |
| A02983 | A03011 | 226 | A02983 | A03025 | 234 |
| A02983 | A03259 | 350 | A02983 | A03314 | 288 |
| A02983 | A03520 | 419 | A02983 | A03543 | 238 |
| A02983 | A03563 | 165 | A02983 | A03724 | 208 |
| A02983 | A03746 | 165 | A02983 | A03794 | 185 |
| A02983 | A03799 | 160 | A02983 | A03813 | 375 |
| A02983 | A03818 | 184 | A02983 | A03945 | 265 |
| A02983 | A03963 | 267 | A02983 | A03965 | 221 |
| A02983 | A03989 | 208 | A02983 | A04008 | 290 |
| A02983 | A04017 | 238 | A02983 | A04045 | 283 |
| A02983 | A04112 | 218 | A02983 | A04169 | 200 |
| A02983 | A04306 | 265 | A02983 | A04535 | 329 |
| A02983 | A04596 | 265 | A02983 | A04601 | 274 |
| A02983 | A04714 | 278 | A02983 | A04749 | 208 |
| A02983 | A04798 | 245 | A02983 | A04902 | 364 |
| A02983 | A04922 | 152 | A02983 | A04981 | 191 |
| A02983 | A05039 | 265 | A02983 | A05083 | 238 |
| A02983 | A05309 | 215 | A02983 | A05479 | 313 |
| A02983 | A05513 | 377 | A02983 | A05545 | 210 |
| A02983 | A05568 | 218 | A02983 | A05832 | 288 |
| A02983 | A05943 | 283 | A02983 | A05998 | 179 |
| A02983 | A06118 | 196 | A02983 | A06235 | 329 |
| A02983 | A06254 | 260 | A02983 | A06500 | 339 |
| A02983 | A06505 | 334 | A02983 | A06591 | 254 |
| A02983 | A06605 | 296 | A02983 | A06953 | 151 |
| A02983 | A07047 | 213 | A02983 | A07135 | 329 |
| A02983 | A07145 | 196 | A02983 | A07165 | 185 |
| A02983 | A07270 | 296 | A02983 | A07329 | 313 |
| A02983 | A07372 | 221 | A02983 | A07740 | 184 |
| A02983 | A07922 | 196 | A02983 | A08866 | 319 |
| A02983 | A08881 | 185 | A02983 | A09023 | 218 |
| A02983 | A09086 | 296 | A02983 | A09180 | 165 |
| A02983 | A09206 | 165 | A02983 | A09213 | 200 |
| A02983 | A09316 | 352 | A02983 | A09340 | 430 |
| A02983 | A09396 | 188 | A02983 | A09406 | 265 |
| A02983 | A09447 | 200 | A02983 | A09469 | 154 |
| A02983 | A09809 | 152 | A02983 | A09833 | 238 |
| A02983 | A09868 | 377 | A02983 | A10069 | 265 |

|        |        |     |        |        |     |
|--------|--------|-----|--------|--------|-----|
| A02983 | A10164 | 184 | A02983 | A10723 | 152 |
| A02983 | A10729 | 438 | A02983 | A10792 | 265 |
| A02983 | A10993 | 205 | A02983 | A11209 | 177 |
| A02983 | A11273 | 172 | A02983 | A11366 | 177 |
| A02983 | A11422 | 180 | A02983 | A11527 | 196 |
| A02983 | A11578 | 267 | A02983 | A11653 | 177 |
| A02983 | A11681 | 218 | A02983 | A11876 | 179 |
| A02983 | A11951 | 180 | A02983 | A12169 | 339 |
| A02983 | A12884 | 274 | A02983 | A12960 | 238 |
| A02983 | A12961 | 210 | A02983 | A12975 | 245 |
| A02983 | A12976 | 229 | A02983 | A12983 | 245 |
| A02983 | A13189 | 238 | A02983 | A13274 | 283 |
| A02983 | A13352 | 238 | A02983 | A13483 | 245 |
| A02983 | A13826 | 398 | A02983 | A13886 | 180 |
| A02983 | A13941 | 369 | A02983 | A14019 | 256 |
| A02983 | A14048 | 279 | A02983 | A14112 | 191 |
| A02983 | A14126 | 326 | A02983 | A14247 | 236 |
| A02983 | A14400 | 184 | A02983 | A14554 | 294 |
| A02983 | A14647 | 277 | A02983 | A14786 | 401 |
| A02983 | A14893 | 171 | A02983 | A14941 | 238 |
| A02983 | A14952 | 339 | A02983 | A15283 | 265 |
| A02983 | A15316 | 283 | A02983 | A15460 | 162 |
| A02983 | A15498 | 172 | A02983 | A15704 | 391 |
| A02983 | A15794 | 165 | A02983 | A15998 | 339 |
| A02983 | A16114 | 156 | A02983 | A16420 | 221 |
| A02983 | A16443 | 196 | A02983 | A16464 | 157 |
| A02983 | A16475 | 265 | A02983 | A16581 | 165 |
| A02983 | A16891 | 200 | A02983 | A17007 | 152 |
| A02983 | A17095 | 251 | A02983 | A17191 | 339 |
| A02983 | A17195 | 210 | A02984 | A03019 | 205 |
| A02984 | A03243 | 260 | A02984 | A03275 | 413 |
| A02984 | A03383 | 249 | A02984 | A03427 | 190 |
| A02984 | A03649 | 238 | A02984 | A03664 | 472 |
| A02984 | A03817 | 243 | A02984 | A03865 | 451 |
| A02984 | A04010 | 177 | A02984 | A04018 | 245 |
| A02984 | A04051 | 414 | A02984 | A04125 | 488 |
| A02984 | A04127 | 251 | A02984 | A04134 | 480 |
| A02984 | A04138 | 218 | A02984 | A04142 | 393 |
| A02984 | A04209 | 374 | A02984 | A04247 | 291 |
| A02984 | A04267 | 357 | A02984 | A04272 | 232 |
| A02984 | A04279 | 162 | A02984 | A04286 | 188 |
| A02984 | A04288 | 324 | A02984 | A04289 | 316 |
| A02984 | A04510 | 352 | A02984 | A04538 | 307 |
| A02984 | A04649 | 259 | A02984 | A04706 | 152 |
| A02984 | A04723 | 235 | A02984 | A04798 | 466 |
| A02984 | A04960 | 247 | A02984 | A05176 | 156 |

|        |        |     |        |        |     |
|--------|--------|-----|--------|--------|-----|
| A02984 | A05309 | 475 | A02984 | A05832 | 252 |
| A02984 | A06429 | 218 | A02984 | A06647 | 251 |
| A02984 | A07154 | 210 | A02984 | A07257 | 205 |
| A02984 | A08677 | 223 | A02984 | A08741 | 491 |
| A02984 | A09704 | 316 | A02984 | A10180 | 316 |
| A02984 | A10225 | 369 | A02984 | A13099 | 223 |
| A02984 | A13667 | 185 | A02984 | A13864 | 262 |
| A02984 | A14405 | 414 | A02984 | A14452 | 190 |
| A02984 | A15674 | 449 | A02984 | A15847 | 307 |
| A02984 | A16636 | 170 | A02985 | A03667 | 398 |
| A02985 | A04122 | 364 | A02985 | A04301 | 398 |
| A02985 | A04302 | 378 | A02985 | A05309 | 208 |
| A02985 | A06607 | 235 | A02985 | A07200 | 199 |
| A02985 | A07726 | 196 | A02985 | A09124 | 234 |
| A02985 | A09262 | 385 | A02985 | A11400 | 302 |
| A02985 | A14349 | 411 | A02985 | A14839 | 398 |
| A02986 | A04110 | 401 | A02986 | A04244 | 327 |
| A02986 | A04303 | 405 | A02986 | A05985 | 234 |
| A02986 | A06314 | 294 | A02986 | A06578 | 256 |
| A02986 | A07152 | 224 | A02986 | A10254 | 396 |
| A02986 | A13131 | 432 | A02986 | A13307 | 165 |
| A02986 | A14245 | 213 | A02986 | A14374 | 200 |
| A02986 | A15357 | 152 | A02986 | A15917 | 198 |
| A02987 | A03080 | 201 | A02987 | A10820 | 419 |
| A02987 | A11391 | 398 | A02987 | A12897 | 172 |
| A02988 | A03225 | 200 | A02988 | A03435 | 227 |
| A02988 | A03456 | 235 | A02988 | A03531 | 171 |
| A02988 | A04004 | 201 | A02988 | A04247 | 396 |
| A02988 | A04286 | 185 | A02988 | A04304 | 483 |
| A02988 | A04443 | 240 | A02988 | A04531 | 259 |
| A02988 | A04548 | 176 | A02988 | A04567 | 318 |
| A02988 | A04568 | 201 | A02988 | A04573 | 272 |
| A02988 | A04682 | 324 | A02988 | A05346 | 307 |
| A02988 | A06095 | 246 | A02988 | A06911 | 307 |
| A02988 | A06926 | 369 | A02988 | A07157 | 294 |
| A02988 | A07160 | 396 | A02988 | A07165 | 193 |
| A02988 | A07200 | 489 | A02988 | A07900 | 180 |
| A02988 | A09124 | 157 | A02988 | A11411 | 358 |
| A02988 | A11460 | 254 | A02988 | A11546 | 294 |
| A02988 | A15241 | 182 | A02988 | A15379 | 263 |
| A02988 | A15498 | 472 | A02988 | A16438 | 452 |
| A02990 | A03516 | 234 | A02990 | A03557 | 420 |
| A02990 | A04286 | 311 | A02990 | A05742 | 305 |
| A02990 | A06606 | 355 | A02990 | A07911 | 172 |
| A02990 | A09175 | 457 | A02991 | A03322 | 252 |
| A02991 | A03477 | 198 | A02991 | A03501 | 258 |

|        |        |     |        |        |     |
|--------|--------|-----|--------|--------|-----|
| A02991 | A03586 | 208 | A02991 | A04520 | 351 |
| A02991 | A04674 | 351 | A02991 | A04710 | 195 |
| A02991 | A05006 | 234 | A02991 | A06337 | 260 |
| A02991 | A06994 | 307 | A02991 | A07080 | 213 |
| A02991 | A07238 | 177 | A02991 | A07354 | 340 |
| A02991 | A07461 | 341 | A02991 | A07574 | 491 |
| A02991 | A07757 | 246 | A02991 | A08137 | 252 |
| A02991 | A08598 | 329 | A02991 | A08739 | 278 |
| A02991 | A08817 | 205 | A02991 | A09195 | 191 |
| A02991 | A09506 | 288 | A02991 | A10131 | 267 |
| A02991 | A10983 | 293 | A02991 | A13295 | 340 |
| A02991 | A13330 | 260 | A02991 | A13740 | 313 |
| A02991 | A14152 | 152 | A02991 | A14996 | 201 |
| A02992 | A03003 | 313 | A02992 | A03016 | 491 |
| A02992 | A03033 | 200 | A02992 | A03034 | 353 |
| A02992 | A03050 | 488 | A02992 | A03099 | 191 |
| A02992 | A03146 | 373 | A02992 | A03148 | 351 |
| A02992 | A03167 | 454 | A02992 | A03168 | 436 |
| A02992 | A03259 | 171 | A02992 | A03353 | 177 |
| A02992 | A03487 | 245 | A02992 | A03513 | 240 |
| A02992 | A03515 | 201 | A02992 | A03545 | 210 |
| A02992 | A03858 | 469 | A02992 | A04023 | 205 |
| A02992 | A04229 | 196 | A02992 | A04307 | 154 |
| A02992 | A04369 | 154 | A02992 | A04674 | 319 |
| A02992 | A04779 | 393 | A02992 | A04834 | 228 |
| A02992 | A04839 | 490 | A02992 | A04883 | 296 |
| A02992 | A04927 | 167 | A02992 | A05007 | 380 |
| A02992 | A05094 | 185 | A02992 | A05098 | 328 |
| A02992 | A05102 | 395 | A02992 | A05289 | 334 |
| A02992 | A05330 | 414 | A02992 | A05331 | 173 |
| A02992 | A05376 | 317 | A02992 | A05393 | 457 |
| A02992 | A05416 | 389 | A02992 | A05471 | 218 |
| A02992 | A05472 | 297 | A02992 | A05573 | 162 |
| A02992 | A05586 | 326 | A02992 | A05659 | 312 |
| A02992 | A05682 | 355 | A02992 | A05757 | 196 |
| A02992 | A05768 | 350 | A02992 | A05774 | 265 |
| A02992 | A05775 | 195 | A02992 | A05776 | 388 |
| A02992 | A05966 | 168 | A02992 | A06013 | 423 |
| A02992 | A06263 | 196 | A02992 | A06358 | 380 |
| A02992 | A06397 | 302 | A02992 | A06527 | 176 |
| A02992 | A06592 | 180 | A02992 | A06630 | 224 |
| A02992 | A06689 | 208 | A02992 | A06744 | 259 |
| A02992 | A06756 | 180 | A02992 | A06970 | 408 |
| A02992 | A06979 | 486 | A02992 | A07027 | 213 |
| A02992 | A07059 | 281 | A02992 | A07078 | 182 |
| A02992 | A07088 | 162 | A02992 | A07122 | 358 |

|        |        |     |        |        |     |
|--------|--------|-----|--------|--------|-----|
| A02992 | A07264 | 200 | A02992 | A07267 | 195 |
| A02992 | A07322 | 249 | A02992 | A07407 | 341 |
| A02992 | A07459 | 313 | A02992 | A07477 | 466 |
| A02992 | A07520 | 232 | A02992 | A07558 | 447 |
| A02992 | A07590 | 450 | A02992 | A07692 | 286 |
| A02992 | A07718 | 283 | A02992 | A07721 | 430 |
| A02992 | A07736 | 480 | A02992 | A07737 | 238 |
| A02992 | A07739 | 307 | A02992 | A07800 | 401 |
| A02992 | A07844 | 364 | A02992 | A07856 | 400 |
| A02992 | A07933 | 361 | A02992 | A07958 | 212 |
| A02992 | A07973 | 475 | A02992 | A08099 | 443 |
| A02992 | A08199 | 241 | A02992 | A08330 | 188 |
| A02992 | A09072 | 168 | A02992 | A09612 | 218 |
| A02992 | A09879 | 435 | A02992 | A10056 | 269 |
| A02992 | A10424 | 277 | A02992 | A10441 | 479 |
| A02992 | A10443 | 432 | A02992 | A10444 | 208 |
| A02992 | A10452 | 185 | A02992 | A10456 | 224 |
| A02992 | A10656 | 324 | A02992 | A10674 | 162 |
| A02992 | A10677 | 170 | A02992 | A10686 | 254 |
| A02992 | A10694 | 254 | A02992 | A10703 | 486 |
| A02992 | A10714 | 462 | A02992 | A10866 | 267 |
| A02992 | A11309 | 254 | A02992 | A11381 | 341 |
| A02992 | A12793 | 160 | A02992 | A13314 | 434 |
| A02992 | A13326 | 390 | A02992 | A13871 | 434 |
| A02992 | A13882 | 159 | A02992 | A14215 | 173 |
| A02992 | A14862 | 277 | A02992 | A15223 | 196 |
| A02992 | A15637 | 193 | A02992 | A15874 | 246 |
| A02992 | A16262 | 238 | A02992 | A16335 | 294 |
| A02992 | A16419 | 369 | A02992 | A16741 | 279 |
| A02992 | A16767 | 457 | A02992 | A17007 | 219 |
| A02992 | A17078 | 462 | A02992 | A17089 | 230 |
| A02993 | A03686 | 393 | A02993 | A03728 | 393 |
| A02993 | A07003 | 405 | A02993 | A07181 | 330 |
| A02993 | A12835 | 393 | A02993 | A12845 | 384 |
| A02994 | A03328 | 160 | A02994 | A03456 | 278 |
| A02994 | A03520 | 221 | A02994 | A03759 | 173 |
| A02994 | A03798 | 324 | A02994 | A03856 | 374 |
| A02994 | A03959 | 292 | A02994 | A04056 | 316 |
| A02994 | A04777 | 424 | A02994 | A04783 | 191 |
| A02994 | A05375 | 224 | A02994 | A05417 | 281 |
| A02994 | A05812 | 191 | A02994 | A06048 | 389 |
| A02994 | A06235 | 201 | A02994 | A06545 | 307 |
| A02994 | A07102 | 372 | A02994 | A07160 | 154 |
| A02994 | A07698 | 389 | A02994 | A09321 | 333 |
| A02994 | A10598 | 358 | A02994 | A11677 | 247 |
| A02994 | A14479 | 157 | A02994 | A14699 | 495 |



|        |        |     |        |        |     |
|--------|--------|-----|--------|--------|-----|
| A02994 | A14778 | 297 | A02994 | A15668 | 283 |
| A02994 | A16371 | 221 | A02994 | A16587 | 247 |
| A02995 | A03207 | 263 | A02995 | A03486 | 188 |
| A02995 | A03730 | 165 | A02995 | A03882 | 467 |
| A02995 | A04187 | 154 | A02995 | A05016 | 182 |
| A02995 | A05418 | 357 | A02995 | A05705 | 285 |
| A02995 | A06046 | 205 | A02995 | A06064 | 281 |
| A02995 | A06299 | 215 | A02995 | A06826 | 168 |
| A02995 | A07046 | 160 | A02995 | A08905 | 473 |
| A02995 | A08944 | 193 | A02995 | A09383 | 270 |
| A02995 | A09821 | 266 | A02995 | A09882 | 238 |
| A02995 | A13902 | 221 | A02995 | A15295 | 406 |
| A02995 | A16234 | 323 | A02996 | A03351 | 297 |
| A02996 | A05445 | 366 | A02996 | A05812 | 339 |
| A02996 | A06424 | 430 | A02996 | A07196 | 407 |
| A02996 | A07605 | 340 | A02996 | A08938 | 413 |
| A02996 | A09764 | 232 | A02996 | A11712 | 425 |
| A02996 | A12454 | 438 | A02996 | A13589 | 286 |
| A02996 | A15321 | 168 | A02997 | A14699 | 187 |
| A02998 | A03152 | 353 | A02998 | A03155 | 313 |
| A02998 | A04055 | 347 | A02998 | A05154 | 301 |
| A02998 | A07545 | 213 | A02998 | A09042 | 312 |
| A02998 | A16738 | 174 | A02999 | A03651 | 195 |
| A02999 | A03911 | 404 | A02999 | A04072 | 228 |
| A03000 | A03821 | 307 | A03001 | A03131 | 273 |
| A03001 | A03256 | 162 | A03001 | A03803 | 401 |
| A03001 | A03824 | 204 | A03001 | A03873 | 179 |
| A03001 | A04111 | 310 | A03001 | A04327 | 174 |
| A03001 | A04600 | 195 | A03001 | A04651 | 260 |
| A03001 | A04704 | 205 | A03001 | A04793 | 255 |
| A03001 | A05295 | 472 | A03001 | A05456 | 380 |
| A03001 | A05582 | 425 | A03001 | A05662 | 380 |
| A03001 | A06004 | 424 | A03001 | A06697 | 399 |
| A03001 | A06863 | 160 | A03001 | A08827 | 241 |
| A03001 | A09026 | 267 | A03001 | A09535 | 288 |
| A03001 | A09678 | 310 | A03001 | A09988 | 386 |
| A03001 | A10085 | 162 | A03001 | A10197 | 276 |
| A03001 | A10410 | 350 | A03001 | A11369 | 63  |
| A03001 | A11750 | 228 | A03001 | A12647 | 422 |
| A03001 | A13883 | 380 | A03001 | A14375 | 160 |
| A03001 | A14867 | 362 | A03001 | A15182 | 306 |
| A03001 | A15383 | 152 | A03001 | A16590 | 468 |
| A03002 | A03311 | 367 | A03002 | A05961 | 347 |
| A03002 | A06693 | 310 | A03002 | A06914 | 235 |
| A03002 | A10778 | 348 | A03002 | A14741 | 230 |
| A03002 | A15356 | 395 | A03002 | A15905 | 272 |

|        |        |     |        |        |     |
|--------|--------|-----|--------|--------|-----|
| A03002 | A16417 | 322 | A03003 | A03007 | 483 |
| A03003 | A03016 | 254 | A03003 | A03034 | 276 |
| A03003 | A03113 | 274 | A03003 | A03432 | 240 |
| A03003 | A03477 | 198 | A03003 | A03500 | 333 |
| A03003 | A03586 | 208 | A03003 | A03861 | 205 |
| A03003 | A04132 | 363 | A03003 | A04751 | 188 |
| A03003 | A04842 | 451 | A03003 | A04880 | 160 |
| A03003 | A04888 | 480 | A03003 | A05007 | 210 |
| A03003 | A05020 | 241 | A03003 | A05138 | 271 |
| A03003 | A05203 | 326 | A03003 | A05310 | 414 |
| A03003 | A05515 | 283 | A03003 | A05730 | 363 |
| A03003 | A05759 | 257 | A03003 | A05774 | 305 |
| A03003 | A05926 | 184 | A03003 | A06359 | 191 |
| A03003 | A06700 | 196 | A03003 | A06764 | 457 |
| A03003 | A06765 | 408 | A03003 | A06979 | 262 |
| A03003 | A07080 | 343 | A03003 | A07122 | 241 |
| A03003 | A07128 | 259 | A03003 | A07190 | 165 |
| A03003 | A07191 | 489 | A03003 | A07288 | 323 |
| A03003 | A07322 | 291 | A03003 | A07407 | 257 |
| A03003 | A07459 | 345 | A03003 | A07753 | 281 |
| A03003 | A07800 | 357 | A03003 | A07958 | 364 |
| A03003 | A08099 | 208 | A03003 | A08693 | 229 |
| A03003 | A09913 | 313 | A03003 | A10441 | 294 |
| A03003 | A10443 | 296 | A03003 | A10456 | 191 |
| A03003 | A10703 | 263 | A03003 | A10714 | 185 |
| A03003 | A12730 | 388 | A03003 | A15282 | 477 |
| A03003 | A15497 | 174 | A03003 | A15905 | 200 |
| A03003 | A16026 | 252 | A03003 | A16419 | 291 |
| A03003 | A16767 | 296 | A03004 | A03431 | 319 |
| A03004 | A03443 | 316 | A03004 | A03477 | 260 |
| A03004 | A03508 | 368 | A03004 | A03513 | 210 |
| A03004 | A04108 | 406 | A03004 | A04781 | 338 |
| A03004 | A04784 | 362 | A03004 | A04834 | 312 |
| A03004 | A04850 | 254 | A03004 | A04995 | 480 |
| A03004 | A05393 | 217 | A03004 | A05431 | 151 |
| A03004 | A05757 | 286 | A03004 | A05772 | 345 |
| A03004 | A05937 | 338 | A03004 | A06420 | 385 |
| A03004 | A06635 | 450 | A03004 | A06668 | 433 |
| A03004 | A06700 | 427 | A03004 | A06801 | 454 |
| A03004 | A07059 | 245 | A03004 | A07109 | 490 |
| A03004 | A07122 | 165 | A03004 | A07304 | 446 |
| A03004 | A07530 | 416 | A03004 | A07554 | 428 |
| A03004 | A07684 | 306 | A03004 | A07688 | 436 |
| A03004 | A07875 | 391 | A03004 | A08114 | 180 |
| A03004 | A08197 | 322 | A03004 | A10064 | 484 |
| A03004 | A16026 | 294 | A03004 | A16027 | 224 |

|        |        |     |        |        |     |
|--------|--------|-----|--------|--------|-----|
| A03004 | A16028 | 317 | A03004 | A16355 | 432 |
| A03004 | A16741 | 480 | A03005 | A03441 | 303 |
| A03005 | A03443 | 357 | A03005 | A03501 | 344 |
| A03005 | A04211 | 294 | A03005 | A04779 | 212 |
| A03005 | A05262 | 364 | A03005 | A07413 | 299 |
| A03005 | A10456 | 191 | A03005 | A10702 | 291 |
| A03005 | A14857 | 430 | A03005 | A16002 | 246 |
| A03005 | A16027 | 283 | A03006 | A03224 | 238 |
| A03006 | A03239 | 335 | A03006 | A03253 | 399 |
| A03006 | A03280 | 263 | A03006 | A03283 | 399 |
| A03006 | A03316 | 316 | A03006 | A03788 | 423 |
| A03006 | A03807 | 330 | A03006 | A04130 | 483 |
| A03006 | A04167 | 156 | A03006 | A04217 | 420 |
| A03006 | A04244 | 285 | A03006 | A04361 | 201 |
| A03006 | A04410 | 174 | A03006 | A04589 | 188 |
| A03006 | A04614 | 247 | A03006 | A04756 | 268 |
| A03006 | A05577 | 454 | A03006 | A05597 | 269 |
| A03006 | A05603 | 157 | A03006 | A05679 | 489 |
| A03006 | A05985 | 313 | A03006 | A06047 | 399 |
| A03006 | A06414 | 288 | A03006 | A06415 | 489 |
| A03006 | A06441 | 366 | A03006 | A06604 | 318 |
| A03006 | A06988 | 348 | A03006 | A07053 | 366 |
| A03006 | A07135 | 201 | A03006 | A07152 | 475 |
| A03006 | A07161 | 232 | A03006 | A07164 | 180 |
| A03006 | A08595 | 384 | A03006 | A10585 | 273 |
| A03006 | A10605 | 396 | A03006 | A12012 | 360 |
| A03006 | A12809 | 360 | A03006 | A13084 | 391 |
| A03006 | A13821 | 316 | A03006 | A13823 | 399 |
| A03006 | A13872 | 246 | A03006 | A14071 | 288 |
| A03006 | A14146 | 385 | A03006 | A14199 | 347 |
| A03006 | A14372 | 190 | A03006 | A14374 | 462 |
| A03006 | A14376 | 294 | A03006 | A14392 | 171 |
| A03006 | A14416 | 307 | A03006 | A14439 | 360 |
| A03006 | A14599 | 485 | A03006 | A15425 | 488 |
| A03006 | A15427 | 430 | A03006 | A15642 | 351 |
| A03006 | A15795 | 210 | A03006 | A15992 | 205 |
| A03006 | A16108 | 337 | A03007 | A03662 | 176 |
| A03007 | A03778 | 299 | A03007 | A04020 | 488 |
| A03007 | A04449 | 168 | A03007 | A04842 | 198 |
| A03007 | A04893 | 172 | A03007 | A04927 | 185 |
| A03007 | A05353 | 270 | A03007 | A05376 | 201 |
| A03007 | A05757 | 215 | A03007 | A05854 | 176 |
| A03007 | A05926 | 154 | A03007 | A06433 | 355 |
| A03007 | A06544 | 238 | A03007 | A06597 | 486 |
| A03007 | A06650 | 165 | A03007 | A06764 | 483 |
| A03007 | A06765 | 463 | A03007 | A07190 | 263 |

|        |        |     |        |        |     |
|--------|--------|-----|--------|--------|-----|
| A03007 | A07191 | 489 | A03007 | A09388 | 238 |
| A03007 | A09633 | 185 | A03007 | A12328 | 170 |
| A03007 | A12824 | 179 | A03007 | A13346 | 156 |
| A03007 | A14005 | 165 | A03007 | A14055 | 279 |
| A03007 | A14790 | 260 | A03008 | A03259 | 217 |
| A03008 | A04660 | 401 | A03008 | A05007 | 372 |
| A03008 | A05310 | 375 | A03008 | A05600 | 408 |
| A03008 | A05738 | 334 | A03008 | A05774 | 413 |
| A03008 | A06088 | 416 | A03008 | A06089 | 430 |
| A03008 | A07122 | 316 | A03008 | A10027 | 447 |
| A03008 | A14827 | 301 | A03008 | A15905 | 367 |
| A03009 | A05577 | 235 | A03009 | A11248 | 63  |
| A03010 | A03019 | 63  | A03010 | A03049 | 182 |
| A03010 | A03100 | 182 | A03010 | A03183 | 195 |
| A03010 | A03204 | 235 | A03010 | A03417 | 191 |
| A03010 | A03610 | 228 | A03010 | A03620 | 352 |
| A03010 | A03782 | 162 | A03010 | A03923 | 249 |
| A03010 | A04077 | 345 | A03010 | A04138 | 260 |
| A03010 | A04207 | 296 | A03010 | A04221 | 319 |
| A03010 | A04244 | 263 | A03010 | A04248 | 201 |
| A03010 | A04255 | 352 | A03010 | A04320 | 457 |
| A03010 | A04327 | 195 | A03010 | A04478 | 374 |
| A03010 | A04681 | 157 | A03010 | A04736 | 319 |
| A03010 | A04798 | 324 | A03010 | A05071 | 345 |
| A03010 | A05078 | 406 | A03010 | A05174 | 435 |
| A03010 | A05853 | 156 | A03010 | A05985 | 288 |
| A03010 | A06054 | 216 | A03010 | A06055 | 210 |
| A03010 | A06107 | 317 | A03010 | A06399 | 361 |
| A03010 | A06404 | 290 | A03010 | A06414 | 266 |
| A03010 | A06415 | 195 | A03010 | A06780 | 310 |
| A03010 | A06818 | 439 | A03010 | A06865 | 361 |
| A03010 | A07031 | 176 | A03010 | A07151 | 338 |
| A03010 | A07199 | 286 | A03010 | A07985 | 152 |
| A03010 | A08171 | 226 | A03010 | A08172 | 177 |
| A03010 | A08194 | 193 | A03010 | A08596 | 241 |
| A03010 | A09214 | 345 | A03010 | A09241 | 224 |
| A03010 | A09732 | 368 | A03010 | A10823 | 334 |
| A03010 | A10899 | 217 | A03010 | A11262 | 288 |
| A03010 | A11308 | 296 | A03010 | A11369 | 63  |
| A03010 | A11543 | 394 | A03010 | A12383 | 361 |
| A03010 | A12500 | 224 | A03010 | A13181 | 179 |
| A03010 | A13860 | 432 | A03010 | A13980 | 144 |
| A03010 | A13985 | 241 | A03010 | A13996 | 432 |
| A03010 | A14029 | 924 | A03010 | A14440 | 160 |
| A03010 | A14608 | 352 | A03010 | A15241 | 402 |
| A03010 | A15394 | 191 | A03010 | A15395 | 168 |

|        |        |     |        |        |     |
|--------|--------|-----|--------|--------|-----|
| A03010 | A15605 | 208 | A03010 | A15608 | 221 |
| A03010 | A16996 | 414 | A03011 | A03661 | 241 |
| A03011 | A03813 | 302 | A03011 | A03824 | 333 |
| A03011 | A03965 | 313 | A03011 | A07128 | 345 |
| A03011 | A14197 | 240 | A03012 | A03013 | 462 |
| A03012 | A03098 | 296 | A03012 | A03523 | 246 |
| A03012 | A03563 | 428 | A03012 | A03598 | 279 |
| A03012 | A03612 | 162 | A03012 | A04005 | 163 |
| A03012 | A04311 | 259 | A03012 | A04581 | 238 |
| A03012 | A04656 | 259 | A03012 | A04902 | 152 |
| A03012 | A05203 | 163 | A03012 | A05216 | 227 |
| A03012 | A06606 | 466 | A03012 | A07071 | 259 |
| A03012 | A08316 | 259 | A03012 | A09962 | 193 |
| A03012 | A10583 | 259 | A03012 | A11335 | 484 |
| A03012 | A12055 | 180 | A03012 | A13738 | 152 |
| A03012 | A16120 | 193 | A03012 | A17089 | 406 |
| A03013 | A03574 | 318 | A03013 | A03602 | 223 |
| A03013 | A03609 | 208 | A03013 | A03627 | 353 |
| A03013 | A04311 | 399 | A03013 | A04714 | 299 |
| A03013 | A04848 | 243 | A03013 | A05216 | 308 |
| A03013 | A05832 | 358 | A03013 | A06073 | 335 |
| A03013 | A06579 | 312 | A03013 | A06606 | 319 |
| A03013 | A07071 | 399 | A03013 | A07200 | 255 |
| A03013 | A08603 | 418 | A03013 | A10583 | 399 |
| A03013 | A11326 | 183 | A03013 | A14664 | 208 |
| A03014 | A03050 | 317 | A03014 | A03116 | 286 |
| A03014 | A03150 | 191 | A03014 | A03663 | 210 |
| A03014 | A03752 | 302 | A03014 | A03910 | 249 |
| A03014 | A03942 | 224 | A03014 | A04236 | 217 |
| A03014 | A04620 | 165 | A03014 | A04629 | 463 |
| A03014 | A04879 | 480 | A03014 | A05155 | 362 |
| A03014 | A05291 | 187 | A03014 | A05339 | 205 |
| A03014 | A05353 | 152 | A03014 | A05366 | 252 |
| A03014 | A05439 | 167 | A03014 | A05601 | 347 |
| A03014 | A05603 | 260 | A03014 | A05802 | 374 |
| A03014 | A05981 | 477 | A03014 | A06466 | 449 |
| A03014 | A07200 | 191 | A03014 | A07311 | 446 |
| A03014 | A07339 | 293 | A03014 | A07798 | 425 |
| A03014 | A08137 | 191 | A03014 | A08172 | 469 |
| A03014 | A08309 | 477 | A03014 | A08685 | 477 |
| A03014 | A08686 | 491 | A03014 | A08753 | 458 |
| A03014 | A08835 | 163 | A03014 | A08842 | 160 |
| A03014 | A09125 | 267 | A03014 | A09219 | 167 |
| A03014 | A09344 | 200 | A03014 | A09517 | 199 |
| A03014 | A09804 | 368 | A03014 | A09806 | 340 |
| A03014 | A10024 | 167 | A03014 | A10146 | 332 |

|        |        |     |        |        |     |
|--------|--------|-----|--------|--------|-----|
| A03014 | A10623 | 380 | A03014 | A10728 | 491 |
| A03014 | A11259 | 267 | A03014 | A11278 | 481 |
| A03014 | A11298 | 160 | A03014 | A11315 | 443 |
| A03014 | A11598 | 385 | A03014 | A11735 | 430 |
| A03014 | A11737 | 293 | A03014 | A12352 | 252 |
| A03014 | A12634 | 241 | A03014 | A12658 | 160 |
| A03014 | A12781 | 267 | A03014 | A12966 | 241 |
| A03014 | A13364 | 490 | A03014 | A13369 | 383 |
| A03014 | A13788 | 477 | A03014 | A14111 | 188 |
| A03014 | A14190 | 154 | A03014 | A14210 | 470 |
| A03014 | A14262 | 205 | A03014 | A14366 | 347 |
| A03014 | A14369 | 218 | A03014 | A14371 | 486 |
| A03014 | A14379 | 319 | A03014 | A14511 | 443 |
| A03014 | A14570 | 240 | A03014 | A14615 | 383 |
| A03014 | A14621 | 329 | A03014 | A15106 | 210 |
| A03014 | A15292 | 252 | A03014 | A15297 | 259 |
| A03014 | A15638 | 427 | A03014 | A15666 | 477 |
| A03014 | A15808 | 352 | A03015 | A03990 | 238 |
| A03015 | A09127 | 305 | A03015 | A10337 | 344 |
| A03016 | A03050 | 378 | A03016 | A03167 | 398 |
| A03016 | A03168 | 432 | A03016 | A03259 | 224 |
| A03016 | A03329 | 334 | A03016 | A03513 | 324 |
| A03016 | A03858 | 407 | A03016 | A04520 | 154 |
| A03016 | A04779 | 254 | A03016 | A04834 | 401 |
| A03016 | A04883 | 238 | A03016 | A04927 | 241 |
| A03016 | A05007 | 469 | A03016 | A05028 | 218 |
| A03016 | A05102 | 255 | A03016 | A05416 | 406 |
| A03016 | A05573 | 238 | A03016 | A05585 | 353 |
| A03016 | A05586 | 371 | A03016 | A05659 | 373 |
| A03016 | A05774 | 324 | A03016 | A06405 | 221 |
| A03016 | A06439 | 213 | A03016 | A06689 | 319 |
| A03016 | A06756 | 254 | A03016 | A06979 | 475 |
| A03016 | A07027 | 283 | A03016 | A07122 | 462 |
| A03016 | A07164 | 201 | A03016 | A07238 | 443 |
| A03016 | A07264 | 272 | A03016 | A07477 | 486 |
| A03016 | A07520 | 184 | A03016 | A07558 | 351 |
| A03016 | A07590 | 452 | A03016 | A07627 | 366 |
| A03016 | A07692 | 341 | A03016 | A07721 | 470 |
| A03016 | A07736 | 443 | A03016 | A07844 | 389 |
| A03016 | A07933 | 419 | A03016 | A07973 | 486 |
| A03016 | A07976 | 307 | A03016 | A08238 | 451 |
| A03016 | A08250 | 326 | A03016 | A08751 | 335 |
| A03016 | A09059 | 246 | A03016 | A09528 | 390 |
| A03016 | A09876 | 184 | A03016 | A10656 | 460 |
| A03016 | A10658 | 316 | A03016 | A10672 | 479 |
| A03016 | A10677 | 469 | A03016 | A10712 | 424 |

|        |        |     |        |        |     |
|--------|--------|-----|--------|--------|-----|
| A03016 | A10764 | 393 | A03016 | A14856 | 425 |
| A03016 | A14862 | 335 | A03016 | A15497 | 201 |
| A03016 | A15637 | 267 | A03016 | A16027 | 204 |
| A03016 | A16048 | 234 | A03016 | A16419 | 312 |
| A03016 | A17078 | 262 | A03018 | A03778 | 469 |
| A03018 | A05854 | 219 | A03018 | A07011 | 154 |
| A03018 | A08355 | 168 | A03018 | A08718 | 277 |
| A03018 | A08878 | 179 | A03018 | A11658 | 249 |
| A03018 | A13213 | 329 | A03018 | A13240 | 229 |
| A03018 | A13997 | 162 | A03018 | A14443 | 238 |
| A03018 | A14577 | 224 | A03019 | A03063 | 180 |
| A03019 | A03072 | 174 | A03019 | A03204 | 401 |
| A03019 | A03223 | 257 | A03019 | A03239 | 177 |
| A03019 | A03256 | 466 | A03019 | A03271 | 358 |
| A03019 | A03280 | 174 | A03019 | A03309 | 162 |
| A03019 | A03321 | 409 | A03019 | A03611 | 457 |
| A03019 | A03742 | 462 | A03019 | A03817 | 490 |
| A03019 | A03868 | 210 | A03019 | A04117 | 355 |
| A03019 | A04323 | 165 | A03019 | A04553 | 483 |
| A03019 | A04615 | 207 | A03019 | A04755 | 251 |
| A03019 | A04902 | 430 | A03019 | A04935 | 281 |
| A03019 | A05067 | 227 | A03019 | A05098 | 152 |
| A03019 | A05213 | 199 | A03019 | A05216 | 274 |
| A03019 | A05278 | 238 | A03019 | A05322 | 470 |
| A03019 | A05331 | 227 | A03019 | A05358 | 201 |
| A03019 | A05390 | 172 | A03019 | A05475 | 247 |
| A03019 | A05516 | 165 | A03019 | A05568 | 477 |
| A03019 | A05613 | 152 | A03019 | A05883 | 207 |
| A03019 | A06034 | 188 | A03019 | A06094 | 341 |
| A03019 | A06224 | 174 | A03019 | A06252 | 226 |
| A03019 | A06335 | 281 | A03019 | A06373 | 157 |
| A03019 | A06414 | 213 | A03019 | A06474 | 157 |
| A03019 | A06652 | 313 | A03019 | A06672 | 281 |
| A03019 | A07019 | 160 | A03019 | A07161 | 414 |
| A03019 | A07165 | 297 | A03019 | A07218 | 450 |
| A03019 | A07311 | 899 | A03019 | A07674 | 190 |
| A03019 | A08207 | 479 | A03019 | A08732 | 228 |
| A03019 | A09975 | 180 | A03019 | A10320 | 491 |
| A03019 | A10834 | 152 | A03019 | A11369 | 63  |
| A03019 | A11625 | 247 | A03019 | A12006 | 247 |
| A03019 | A12009 | 457 | A03019 | A12902 | 199 |
| A03019 | A13090 | 451 | A03019 | A13980 | 63  |
| A03019 | A14188 | 170 | A03019 | A14364 | 188 |
| A03019 | A14653 | 63  | A03019 | A14694 | 185 |
| A03019 | A15201 | 281 | A03019 | A15393 | 281 |
| A03019 | A15394 | 353 | A03019 | A16286 | 176 |

|        |        |     |        |        |     |
|--------|--------|-----|--------|--------|-----|
| A03019 | A16621 | 162 | A03020 | A03872 | 418 |
| A03020 | A04713 | 424 | A03020 | A09800 | 452 |
| A03021 | A03178 | 313 | A03021 | A03186 | 257 |
| A03021 | A07833 | 324 | A03022 | A03032 | 375 |
| A03022 | A03159 | 440 | A03022 | A05704 | 406 |
| A03022 | A05705 | 409 | A03022 | A05834 | 418 |
| A03022 | A05922 | 433 | A03022 | A06946 | 433 |
| A03022 | A07212 | 357 | A03022 | A07219 | 418 |
| A03022 | A08713 | 440 | A03022 | A13428 | 433 |
| A03023 | A05705 | 401 | A03023 | A06727 | 374 |
| A03023 | A06924 | 293 | A03023 | A07216 | 408 |
| A03024 | A03050 | 165 | A03024 | A04075 | 278 |
| A03024 | A10353 | 322 | A03024 | A10414 | 337 |
| A03024 | A11735 | 270 | A03024 | A14643 | 154 |
| A03025 | A03080 | 177 | A03025 | A03134 | 430 |
| A03025 | A03141 | 232 | A03025 | A03703 | 277 |
| A03025 | A03719 | 291 | A03025 | A03721 | 307 |
| A03025 | A03722 | 307 | A03025 | A03963 | 241 |
| A03025 | A07158 | 266 | A03025 | A07270 | 417 |
| A03025 | A09124 | 238 | A03025 | A09421 | 373 |
| A03025 | A09890 | 380 | A03025 | A12983 | 398 |
| A03026 | A03725 | 433 | A03027 | A03050 | 427 |
| A03027 | A03051 | 224 | A03027 | A03056 | 151 |
| A03027 | A03138 | 308 | A03027 | A03167 | 199 |
| A03027 | A03292 | 207 | A03027 | A03379 | 165 |
| A03027 | A03858 | 213 | A03027 | A03917 | 452 |
| A03027 | A03926 | 307 | A03027 | A04010 | 168 |
| A03027 | A04048 | 256 | A03027 | A04049 | 330 |
| A03027 | A04369 | 425 | A03027 | A04516 | 326 |
| A03027 | A04698 | 362 | A03027 | A04763 | 490 |
| A03027 | A04839 | 324 | A03027 | A04920 | 396 |
| A03027 | A05310 | 254 | A03027 | A05389 | 422 |
| A03027 | A05390 | 290 | A03027 | A05416 | 263 |
| A03027 | A05663 | 409 | A03027 | A05757 | 391 |
| A03027 | A06346 | 183 | A03027 | A06635 | 213 |
| A03027 | A06970 | 157 | A03027 | A07520 | 196 |
| A03027 | A07736 | 210 | A03027 | A07933 | 157 |
| A03027 | A08040 | 307 | A03027 | A08751 | 341 |
| A03027 | A09374 | 326 | A03027 | A09882 | 447 |
| A03027 | A10124 | 409 | A03027 | A10420 | 172 |
| A03027 | A13589 | 177 | A03027 | A14430 | 151 |
| A03027 | A14698 | 306 | A03027 | A17078 | 276 |
| A03028 | A03056 | 445 | A03028 | A03077 | 177 |
| A03028 | A03107 | 477 | A03028 | A03246 | 314 |
| A03028 | A03417 | 317 | A03028 | A03709 | 229 |
| A03028 | A03926 | 374 | A03028 | A04074 | 173 |



|        |        |     |        |        |     |
|--------|--------|-----|--------|--------|-----|
| A03028 | A04314 | 240 | A03028 | A04327 | 188 |
| A03028 | A04349 | 312 | A03028 | A04384 | 312 |
| A03028 | A04540 | 174 | A03028 | A04995 | 221 |
| A03028 | A05309 | 176 | A03028 | A06629 | 173 |
| A03028 | A06847 | 263 | A03028 | A07204 | 263 |
| A03028 | A07239 | 198 | A03028 | A07264 | 221 |
| A03028 | A07310 | 357 | A03028 | A07559 | 408 |
| A03028 | A07685 | 357 | A03028 | A07837 | 369 |
| A03028 | A08005 | 369 | A03028 | A08009 | 357 |
| A03028 | A09040 | 205 | A03028 | A09132 | 369 |
| A03028 | A09161 | 385 | A03028 | A09334 | 193 |
| A03028 | A10325 | 385 | A03028 | A10691 | 227 |
| A03028 | A12337 | 251 | A03028 | A13544 | 385 |
| A03028 | A13989 | 357 | A03028 | A15271 | 302 |
| A03028 | A16150 | 369 | A03029 | A07072 | 371 |
| A03029 | A08482 | 412 | A03029 | A12824 | 88  |
| A03029 | A14642 | 195 | A03029 | A14980 | 412 |
| A03029 | A15498 | 347 | A03029 | A15651 | 212 |
| A03029 | A16201 | 340 | A03030 | A05449 | 377 |
| A03031 | A06466 | 174 | A03031 | A07311 | 232 |
| A03032 | A03133 | 396 | A03032 | A03135 | 367 |
| A03032 | A03159 | 409 | A03032 | A04015 | 256 |
| A03032 | A04334 | 297 | A03032 | A04520 | 165 |
| A03032 | A05603 | 190 | A03032 | A05704 | 430 |
| A03032 | A05705 | 357 | A03032 | A05834 | 371 |
| A03032 | A05922 | 396 | A03032 | A06623 | 205 |
| A03032 | A06946 | 396 | A03032 | A07054 | 157 |
| A03032 | A07212 | 266 | A03032 | A07219 | 371 |
| A03032 | A08698 | 238 | A03032 | A08713 | 409 |
| A03033 | A03051 | 486 | A03033 | A03141 | 469 |
| A03033 | A03167 | 179 | A03033 | A03168 | 249 |
| A03033 | A03663 | 260 | A03033 | A03688 | 432 |
| A03033 | A03719 | 404 | A03033 | A04152 | 286 |
| A03033 | A05682 | 288 | A03033 | A05816 | 457 |
| A03033 | A06277 | 180 | A03033 | A06633 | 283 |
| A03033 | A07158 | 165 | A03033 | A07674 | 177 |
| A03033 | A09209 | 329 | A03033 | A09364 | 348 |
| A03033 | A10441 | 311 | A03033 | A10470 | 348 |
| A03033 | A11047 | 332 | A03033 | A12728 | 162 |
| A03033 | A13314 | 317 | A03033 | A14698 | 290 |
| A03034 | A03035 | 254 | A03034 | A03036 | 491 |
| A03034 | A03058 | 305 | A03034 | A03091 | 170 |
| A03034 | A03092 | 355 | A03034 | A03099 | 326 |
| A03034 | A03104 | 210 | A03034 | A03144 | 491 |
| A03034 | A03146 | 486 | A03034 | A03147 | 388 |
| A03034 | A03148 | 489 | A03034 | A03156 | 491 |

|        |        |     |        |        |     |
|--------|--------|-----|--------|--------|-----|
| A03034 | A03157 | 419 | A03034 | A03168 | 176 |
| A03034 | A03195 | 490 | A03034 | A03196 | 202 |
| A03034 | A03224 | 358 | A03034 | A03238 | 353 |
| A03034 | A03251 | 305 | A03034 | A03254 | 218 |
| A03034 | A03275 | 395 | A03034 | A03432 | 368 |
| A03034 | A03513 | 414 | A03034 | A03523 | 483 |
| A03034 | A03524 | 458 | A03034 | A03573 | 168 |
| A03034 | A04010 | 193 | A03034 | A04051 | 260 |
| A03034 | A04212 | 486 | A03034 | A04349 | 323 |
| A03034 | A04402 | 202 | A03034 | A04407 | 162 |
| A03034 | A04421 | 218 | A03034 | A04518 | 151 |
| A03034 | A04520 | 185 | A03034 | A04615 | 245 |
| A03034 | A04801 | 255 | A03034 | A04956 | 185 |
| A03034 | A05376 | 358 | A03034 | A05393 | 182 |
| A03034 | A05506 | 369 | A03034 | A05570 | 380 |
| A03034 | A05576 | 329 | A03034 | A05672 | 274 |
| A03034 | A05817 | 196 | A03034 | A05926 | 293 |
| A03034 | A05956 | 489 | A03034 | A06052 | 374 |
| A03034 | A06053 | 404 | A03034 | A06092 | 490 |
| A03034 | A06195 | 491 | A03034 | A06286 | 247 |
| A03034 | A06302 | 305 | A03034 | A06307 | 196 |
| A03034 | A06466 | 260 | A03034 | A06469 | 467 |
| A03034 | A06499 | 168 | A03034 | A06520 | 481 |
| A03034 | A06642 | 190 | A03034 | A07069 | 441 |
| A03034 | A07130 | 313 | A03034 | A07141 | 445 |
| A03034 | A07142 | 457 | A03034 | A07191 | 420 |
| A03034 | A07195 | 347 | A03034 | A07200 | 335 |
| A03034 | A07209 | 187 | A03034 | A07216 | 210 |
| A03034 | A07218 | 379 | A03034 | A07336 | 154 |
| A03034 | A07342 | 491 | A03034 | A07373 | 439 |
| A03034 | A07389 | 446 | A03034 | A07407 | 213 |
| A03034 | A07468 | 188 | A03034 | A07477 | 385 |
| A03034 | A07697 | 670 | A03034 | A07721 | 281 |
| A03034 | A07736 | 466 | A03034 | A08114 | 484 |
| A03034 | A08250 | 154 | A03034 | A08646 | 305 |
| A03034 | A08731 | 388 | A03034 | A09110 | 165 |
| A03034 | A09115 | 305 | A03034 | A09179 | 210 |
| A03034 | A09323 | 460 | A03034 | A09411 | 165 |
| A03034 | A09991 | 485 | A03034 | A10091 | 270 |
| A03034 | A10214 | 205 | A03034 | A10226 | 457 |
| A03034 | A10527 | 238 | A03034 | A10630 | 165 |
| A03034 | A10638 | 151 | A03034 | A10758 | 255 |
| A03034 | A10816 | 384 | A03034 | A10936 | 305 |
| A03034 | A10975 | 305 | A03034 | A11101 | 215 |
| A03034 | A11498 | 240 | A03034 | A11561 | 159 |
| A03034 | A11663 | 488 | A03034 | A12051 | 228 |

|        |        |     |        |        |     |
|--------|--------|-----|--------|--------|-----|
| A03034 | A12523 | 430 | A03034 | A12948 | 438 |
| A03034 | A13004 | 305 | A03034 | A13153 | 388 |
| A03034 | A13229 | 483 | A03034 | A13826 | 255 |
| A03034 | A13871 | 167 | A03034 | A14071 | 232 |
| A03034 | A14247 | 188 | A03034 | A14344 | 491 |
| A03034 | A14382 | 240 | A03034 | A14757 | 173 |
| A03034 | A15462 | 180 | A03034 | A15498 | 317 |
| A03034 | A15987 | 180 | A03034 | A16337 | 388 |
| A03035 | A03281 | 297 | A03035 | A03324 | 313 |
| A03035 | A03803 | 160 | A03035 | A03880 | 301 |
| A03035 | A04075 | 240 | A03035 | A04540 | 458 |
| A03035 | A04712 | 427 | A03035 | A04739 | 263 |
| A03035 | A04783 | 461 | A03035 | A05349 | 191 |
| A03035 | A05437 | 382 | A03035 | A07373 | 329 |
| A03035 | A08207 | 221 | A03035 | A10406 | 417 |
| A03035 | A10816 | 356 | A03035 | A11881 | 481 |
| A03035 | A12913 | 398 | A03035 | A14266 | 299 |
| A03036 | A03144 | 491 | A03036 | A03146 | 483 |
| A03036 | A03147 | 281 | A03036 | A03148 | 443 |
| A03036 | A03156 | 246 | A03036 | A03157 | 267 |
| A03036 | A03238 | 202 | A03036 | A03247 | 299 |
| A03036 | A03251 | 405 | A03036 | A03254 | 363 |
| A03036 | A03292 | 190 | A03036 | A04010 | 152 |
| A03036 | A04212 | 229 | A03036 | A06052 | 380 |
| A03036 | A06053 | 351 | A03036 | A06195 | 398 |
| A03036 | A07342 | 490 | A03036 | A07373 | 402 |
| A03036 | A09991 | 302 | A03036 | A10226 | 473 |
| A03036 | A10547 | 232 | A03036 | A10689 | 157 |
| A03036 | A13004 | 405 | A03036 | A14344 | 466 |
| A03038 | A03775 | 374 | A03038 | A09882 | 374 |
| A03039 | A03401 | 205 | A03039 | A03415 | 285 |
| A03039 | A04069 | 404 | A03039 | A04779 | 422 |
| A03039 | A05563 | 286 | A03039 | A10121 | 404 |
| A03040 | A04152 | 399 | A03040 | A05596 | 413 |
| A03041 | A03186 | 176 | A03041 | A04015 | 272 |
| A03041 | A04334 | 314 | A03041 | A04381 | 389 |
| A03041 | A04808 | 366 | A03041 | A05476 | 384 |
| A03041 | A05500 | 347 | A03041 | A06161 | 241 |
| A03041 | A06489 | 340 | A03041 | A06669 | 462 |
| A03041 | A07127 | 313 | A03041 | A07485 | 414 |
| A03041 | A12079 | 375 | A03041 | A14016 | 195 |
| A03041 | A14827 | 154 | A03041 | A15726 | 353 |
| A03041 | A16741 | 171 | A03042 | A03107 | 265 |
| A03042 | A03832 | 201 | A03042 | A03893 | 283 |
| A03042 | A04410 | 273 | A03042 | A04877 | 388 |
| A03042 | A05891 | 293 | A03042 | A06607 | 224 |

|        |        |     |        |        |     |
|--------|--------|-----|--------|--------|-----|
| A03042 | A08655 | 360 | A03042 | A08675 | 429 |
| A03042 | A14236 | 279 | A03042 | A14366 | 234 |
| A03043 | A03046 | 278 | A03043 | A03047 | 333 |
| A03043 | A03091 | 252 | A03043 | A03155 | 388 |
| A03043 | A03192 | 433 | A03043 | A03462 | 406 |
| A03043 | A03589 | 351 | A03043 | A04218 | 317 |
| A03043 | A04389 | 419 | A03043 | A04820 | 371 |
| A03043 | A06648 | 216 | A03043 | A08126 | 394 |
| A03043 | A09375 | 424 | A03043 | A13690 | 406 |
| A03043 | A14374 | 167 | A03043 | A15896 | 236 |
| A03044 | A03045 | 344 | A03044 | A03046 | 486 |
| A03044 | A03086 | 332 | A03044 | A03091 | 288 |
| A03044 | A03152 | 347 | A03044 | A03155 | 307 |
| A03044 | A03183 | 278 | A03044 | A03193 | 361 |
| A03044 | A04913 | 382 | A03044 | A05483 | 400 |
| A03044 | A05685 | 351 | A03044 | A06137 | 483 |
| A03044 | A06642 | 163 | A03044 | A07062 | 486 |
| A03044 | A07736 | 238 | A03044 | A07952 | 394 |
| A03044 | A08209 | 481 | A03044 | A08647 | 339 |
| A03044 | A08739 | 329 | A03044 | A09107 | 344 |
| A03044 | A09831 | 374 | A03044 | A10527 | 270 |
| A03044 | A10655 | 238 | A03044 | A10762 | 360 |
| A03044 | A11279 | 272 | A03044 | A13902 | 234 |
| A03044 | A14190 | 167 | A03044 | A15647 | 243 |
| A03044 | A15896 | 489 | A03044 | A15992 | 382 |
| A03044 | A16038 | 389 | A03044 | A16049 | 247 |
| A03045 | A03046 | 314 | A03045 | A03155 | 312 |
| A03045 | A03157 | 323 | A03045 | A03224 | 299 |
| A03045 | A03788 | 221 | A03045 | A05143 | 348 |
| A03045 | A06415 | 434 | A03045 | A07062 | 314 |
| A03045 | A10640 | 423 | A03045 | A14190 | 173 |
| A03045 | A14199 | 440 | A03045 | A14366 | 443 |
| A03045 | A14374 | 414 | A03045 | A14391 | 416 |
| A03045 | A14554 | 435 | A03045 | A15285 | 485 |
| A03045 | A15425 | 226 | A03045 | A15479 | 388 |
| A03045 | A15516 | 398 | A03045 | A15789 | 443 |
| A03045 | A15795 | 439 | A03045 | A16014 | 396 |
| A03046 | A03091 | 251 | A03046 | A03152 | 319 |
| A03046 | A03155 | 272 | A03046 | A03183 | 238 |
| A03046 | A03310 | 319 | A03046 | A05044 | 399 |
| A03046 | A06137 | 441 | A03046 | A06650 | 343 |
| A03046 | A06822 | 383 | A03046 | A07062 | 491 |
| A03046 | A07961 | 446 | A03046 | A08209 | 486 |
| A03046 | A10671 | 340 | A03046 | A14190 | 249 |
| A03046 | A14374 | 165 | A03046 | A14516 | 159 |
| A03046 | A15896 | 491 | A03046 | A16049 | 205 |

|        |        |     |        |        |     |
|--------|--------|-----|--------|--------|-----|
| A03047 | A03091 | 312 | A03047 | A03112 | 173 |
| A03047 | A03275 | 191 | A03047 | A03803 | 196 |
| A03047 | A04182 | 337 | A03047 | A05497 | 405 |
| A03047 | A05577 | 333 | A03047 | A07165 | 176 |
| A03047 | A14372 | 277 | A03048 | A03069 | 154 |
| A03048 | A03437 | 480 | A03048 | A03567 | 180 |
| A03048 | A06495 | 193 | A03048 | A06814 | 213 |
| A03048 | A06965 | 263 | A03048 | A07135 | 229 |
| A03048 | A07201 | 263 | A03048 | A07243 | 256 |
| A03048 | A07378 | 174 | A03048 | A08358 | 196 |
| A03048 | A09788 | 353 | A03048 | A10417 | 425 |
| A03048 | A12215 | 324 | A03048 | A13626 | 190 |
| A03048 | A15988 | 296 | A03049 | A03109 | 245 |
| A03049 | A03110 | 229 | A03049 | A03183 | 185 |
| A03049 | A03213 | 227 | A03049 | A03271 | 185 |
| A03049 | A03817 | 217 | A03049 | A03910 | 154 |
| A03049 | A03923 | 241 | A03049 | A03942 | 152 |
| A03049 | A03963 | 313 | A03049 | A04169 | 162 |
| A03049 | A04248 | 324 | A03049 | A04320 | 241 |
| A03049 | A04415 | 252 | A03049 | A04478 | 246 |
| A03049 | A04748 | 318 | A03049 | A05078 | 296 |
| A03049 | A05180 | 385 | A03049 | A05944 | 432 |
| A03049 | A05985 | 368 | A03049 | A06054 | 483 |
| A03049 | A06055 | 201 | A03049 | A06095 | 391 |
| A03049 | A06269 | 490 | A03049 | A06404 | 393 |
| A03049 | A06602 | 303 | A03049 | A06737 | 367 |
| A03049 | A06818 | 267 | A03049 | A06899 | 274 |
| A03049 | A07004 | 247 | A03049 | A07143 | 322 |
| A03049 | A07148 | 262 | A03049 | A07151 | 196 |
| A03049 | A07161 | 199 | A03049 | A07173 | 156 |
| A03049 | A07372 | 299 | A03049 | A07390 | 255 |
| A03049 | A07421 | 160 | A03049 | A07524 | 497 |
| A03049 | A08171 | 216 | A03049 | A08172 | 168 |
| A03049 | A08630 | 221 | A03049 | A08714 | 207 |
| A03049 | A09247 | 235 | A03049 | A09791 | 294 |
| A03049 | A10504 | 177 | A03049 | A11190 | 199 |
| A03049 | A11537 | 205 | A03049 | A11738 | 229 |
| A03049 | A11779 | 218 | A03049 | A12365 | 190 |
| A03049 | A13447 | 469 | A03049 | A13860 | 428 |
| A03049 | A13965 | 157 | A03049 | A13994 | 187 |
| A03049 | A14102 | 333 | A03049 | A14210 | 154 |
| A03049 | A14371 | 286 | A03049 | A14376 | 265 |
| A03049 | A14554 | 165 | A03049 | A14657 | 279 |
| A03049 | A15136 | 461 | A03049 | A15310 | 185 |
| A03049 | A15329 | 245 | A03049 | A15352 | 154 |
| A03049 | A15454 | 200 | A03049 | A15605 | 199 |

|        |        |     |        |        |     |
|--------|--------|-----|--------|--------|-----|
| A03049 | A16040 | 347 | A03050 | A03051 | 474 |
| A03050 | A03099 | 252 | A03050 | A03168 | 170 |
| A03050 | A03172 | 490 | A03050 | A03233 | 213 |
| A03050 | A03321 | 243 | A03050 | A03353 | 266 |
| A03050 | A03370 | 281 | A03050 | A03379 | 252 |
| A03050 | A03402 | 368 | A03050 | A03523 | 198 |
| A03050 | A03545 | 341 | A03050 | A03602 | 274 |
| A03050 | A03917 | 458 | A03050 | A04023 | 374 |
| A03050 | A04051 | 416 | A03050 | A04087 | 257 |
| A03050 | A04179 | 154 | A03050 | A04212 | 424 |
| A03050 | A04337 | 190 | A03050 | A04366 | 232 |
| A03050 | A04369 | 491 | A03050 | A04371 | 324 |
| A03050 | A04373 | 172 | A03050 | A04436 | 408 |
| A03050 | A04555 | 297 | A03050 | A04630 | 171 |
| A03050 | A04633 | 489 | A03050 | A04635 | 480 |
| A03050 | A04645 | 224 | A03050 | A04660 | 234 |
| A03050 | A04839 | 491 | A03050 | A04875 | 172 |
| A03050 | A04927 | 388 | A03050 | A04974 | 187 |
| A03050 | A04975 | 165 | A03050 | A05153 | 447 |
| A03050 | A05184 | 227 | A03050 | A05237 | 361 |
| A03050 | A05356 | 491 | A03050 | A05389 | 473 |
| A03050 | A05390 | 461 | A03050 | A05393 | 260 |
| A03050 | A05416 | 434 | A03050 | A05486 | 283 |
| A03050 | A05487 | 485 | A03050 | A05505 | 270 |
| A03050 | A05573 | 243 | A03050 | A05586 | 224 |
| A03050 | A05678 | 307 | A03050 | A05710 | 191 |
| A03050 | A05789 | 157 | A03050 | A05926 | 474 |
| A03050 | A05945 | 461 | A03050 | A05957 | 199 |
| A03050 | A06263 | 479 | A03050 | A06527 | 490 |
| A03050 | A06579 | 234 | A03050 | A06607 | 490 |
| A03050 | A06758 | 440 | A03050 | A06874 | 160 |
| A03050 | A06875 | 314 | A03050 | A06908 | 386 |
| A03050 | A07039 | 235 | A03050 | A07122 | 229 |
| A03050 | A07200 | 450 | A03050 | A07300 | 443 |
| A03050 | A07385 | 224 | A03050 | A07407 | 491 |
| A03050 | A07419 | 177 | A03050 | A07442 | 321 |
| A03050 | A07452 | 486 | A03050 | A07468 | 182 |
| A03050 | A07471 | 490 | A03050 | A07472 | 473 |
| A03050 | A07475 | 491 | A03050 | A07491 | 162 |
| A03050 | A07515 | 177 | A03050 | A07520 | 152 |
| A03050 | A07541 | 491 | A03050 | A07542 | 491 |
| A03050 | A07543 | 491 | A03050 | A07544 | 405 |
| A03050 | A07561 | 486 | A03050 | A07563 | 224 |
| A03050 | A07608 | 160 | A03050 | A07610 | 481 |
| A03050 | A07630 | 425 | A03050 | A07633 | 191 |
| A03050 | A07634 | 489 | A03050 | A07635 | 469 |

|        |        |     |        |        |     |
|--------|--------|-----|--------|--------|-----|
| A03050 | A07636 | 152 | A03050 | A07653 | 352 |
| A03050 | A07754 | 447 | A03050 | A07808 | 270 |
| A03050 | A07958 | 483 | A03050 | A08063 | 235 |
| A03050 | A08079 | 154 | A03050 | A08347 | 301 |
| A03050 | A08404 | 489 | A03050 | A08693 | 401 |
| A03050 | A08751 | 160 | A03050 | A08775 | 238 |
| A03050 | A08785 | 486 | A03050 | A08858 | 254 |
| A03050 | A09072 | 490 | A03050 | A09837 | 168 |
| A03050 | A09932 | 372 | A03050 | A10056 | 474 |
| A03050 | A10527 | 230 | A03050 | A10651 | 185 |
| A03050 | A10942 | 337 | A03050 | A10967 | 490 |
| A03050 | A11313 | 303 | A03050 | A11370 | 270 |
| A03050 | A11479 | 213 | A03050 | A12055 | 191 |
| A03050 | A12115 | 270 | A03050 | A12784 | 352 |
| A03050 | A12793 | 443 | A03050 | A13258 | 270 |
| A03050 | A13327 | 191 | A03050 | A13617 | 262 |
| A03050 | A13734 | 154 | A03050 | A13871 | 490 |
| A03050 | A13879 | 379 | A03050 | A14062 | 265 |
| A03050 | A14381 | 201 | A03050 | A14423 | 317 |
| A03050 | A14540 | 261 | A03050 | A15992 | 369 |
| A03050 | A17078 | 491 | A03051 | A03081 | 328 |
| A03051 | A03138 | 238 | A03051 | A03141 | 358 |
| A03051 | A03203 | 385 | A03051 | A03361 | 288 |
| A03051 | A03490 | 165 | A03051 | A03654 | 174 |
| A03051 | A03771 | 159 | A03051 | A03906 | 167 |
| A03051 | A03917 | 252 | A03051 | A04049 | 268 |
| A03051 | A04066 | 172 | A03051 | A04086 | 217 |
| A03051 | A04258 | 345 | A03051 | A04369 | 380 |
| A03051 | A04441 | 445 | A03051 | A04563 | 263 |
| A03051 | A04633 | 238 | A03051 | A04635 | 291 |
| A03051 | A04698 | 489 | A03051 | A04746 | 234 |
| A03051 | A04763 | 378 | A03051 | A04770 | 339 |
| A03051 | A04822 | 245 | A03051 | A04830 | 234 |
| A03051 | A04974 | 302 | A03051 | A04981 | 379 |
| A03051 | A05184 | 422 | A03051 | A05237 | 338 |
| A03051 | A05390 | 216 | A03051 | A05716 | 286 |
| A03051 | A05775 | 201 | A03051 | A05816 | 443 |
| A03051 | A05945 | 368 | A03051 | A06129 | 208 |
| A03051 | A06263 | 443 | A03051 | A06607 | 307 |
| A03051 | A07165 | 377 | A03051 | A07212 | 188 |
| A03051 | A07453 | 323 | A03051 | A07725 | 160 |
| A03051 | A07808 | 360 | A03051 | A08718 | 224 |
| A03051 | A09072 | 491 | A03051 | A09073 | 490 |
| A03051 | A09209 | 484 | A03051 | A09235 | 380 |
| A03051 | A09363 | 185 | A03051 | A09374 | 262 |
| A03051 | A09394 | 245 | A03051 | A09496 | 288 |

|        |        |     |        |        |     |
|--------|--------|-----|--------|--------|-----|
| A03051 | A09717 | 213 | A03051 | A09882 | 489 |
| A03051 | A10382 | 219 | A03051 | A10473 | 347 |
| A03051 | A10651 | 200 | A03051 | A10757 | 294 |
| A03051 | A13617 | 207 | A03051 | A13886 | 252 |
| A03051 | A14698 | 235 | A03051 | A15840 | 176 |
| A03051 | A16112 | 396 | A03052 | A03067 | 462 |
| A03052 | A15498 | 190 | A03053 | A03054 | 462 |
| A03053 | A03750 | 243 | A03053 | A03904 | 299 |
| A03053 | A03915 | 364 | A03053 | A03934 | 438 |
| A03053 | A04391 | 344 | A03053 | A04392 | 391 |
| A03053 | A04398 | 241 | A03053 | A04481 | 358 |
| A03053 | A07141 | 196 | A03053 | A10306 | 400 |
| A03053 | A10650 | 385 | A03053 | A11060 | 400 |
| A03053 | A14048 | 302 | A03053 | A16636 | 433 |
| A03054 | A03071 | 391 | A03054 | A03084 | 286 |
| A03054 | A03107 | 165 | A03054 | A03633 | 306 |
| A03054 | A04074 | 205 | A03054 | A04180 | 306 |
| A03054 | A04218 | 404 | A03054 | A04471 | 316 |
| A03054 | A04909 | 283 | A03054 | A05407 | 323 |
| A03054 | A05487 | 218 | A03054 | A05494 | 348 |
| A03054 | A05533 | 480 | A03054 | A05575 | 328 |
| A03054 | A05796 | 235 | A03054 | A06527 | 229 |
| A03054 | A06607 | 333 | A03054 | A06696 | 386 |
| A03054 | A06762 | 260 | A03054 | A07471 | 281 |
| A03054 | A07538 | 324 | A03054 | A07957 | 399 |
| A03054 | A08444 | 318 | A03054 | A08485 | 399 |
| A03054 | A08493 | 399 | A03054 | A09031 | 462 |
| A03054 | A09369 | 360 | A03054 | A10131 | 272 |
| A03054 | A10306 | 384 | A03054 | A13181 | 204 |
| A03054 | A13734 | 176 | A03054 | A13879 | 343 |
| A03054 | A14293 | 399 | A03054 | A14382 | 366 |
| A03054 | A14518 | 399 | A03054 | A16300 | 296 |
| A03054 | A16417 | 267 | A03055 | A03748 | 343 |
| A03055 | A03760 | 371 | A03055 | A07158 | 232 |
| A03055 | A14366 | 213 | A03055 | A14378 | 199 |
| A03055 | A15353 | 167 | A03055 | A16738 | 183 |
| A03056 | A03062 | 407 | A03056 | A03072 | 249 |
| A03056 | A03107 | 491 | A03056 | A03121 | 491 |
| A03056 | A03137 | 432 | A03056 | A03184 | 313 |
| A03056 | A03378 | 306 | A03056 | A03423 | 246 |
| A03056 | A03537 | 243 | A03056 | A03545 | 363 |
| A03056 | A03709 | 491 | A03056 | A03755 | 232 |
| A03056 | A03926 | 383 | A03056 | A03968 | 447 |
| A03056 | A04215 | 393 | A03056 | A04326 | 429 |
| A03056 | A04336 | 338 | A03056 | A04349 | 491 |
| A03056 | A04382 | 272 | A03056 | A04384 | 422 |



|        |        |     |        |        |     |
|--------|--------|-----|--------|--------|-----|
| A03056 | A04389 | 204 | A03056 | A04460 | 486 |
| A03056 | A04464 | 393 | A03056 | A04870 | 281 |
| A03056 | A04920 | 312 | A03056 | A04949 | 483 |
| A03056 | A04965 | 165 | A03056 | A05096 | 217 |
| A03056 | A05288 | 486 | A03056 | A05346 | 263 |
| A03056 | A05603 | 314 | A03056 | A05795 | 491 |
| A03056 | A05881 | 187 | A03056 | A06468 | 338 |
| A03056 | A06470 | 196 | A03056 | A07019 | 491 |
| A03056 | A07154 | 156 | A03056 | A07166 | 183 |
| A03056 | A07559 | 491 | A03056 | A07812 | 470 |
| A03056 | A08040 | 162 | A03056 | A09074 | 489 |
| A03056 | A09216 | 294 | A03056 | A09364 | 243 |
| A03056 | A09518 | 272 | A03056 | A09955 | 450 |
| A03056 | A10140 | 238 | A03056 | A10665 | 490 |
| A03056 | A11009 | 283 | A03056 | A11014 | 491 |
| A03056 | A12426 | 294 | A03056 | A13081 | 263 |
| A03056 | A13337 | 338 | A03056 | A14330 | 174 |
| A03056 | A14377 | 170 | A03056 | A14444 | 902 |
| A03056 | A14676 | 401 | A03056 | A14677 | 312 |
| A03056 | A14951 | 312 | A03056 | A14975 | 338 |
| A03056 | A16043 | 491 | A03056 | A16068 | 293 |
| A03056 | A16081 | 201 | A03056 | A16138 | 490 |
| A03056 | A16171 | 294 | A03056 | A16174 | 393 |
| A03056 | A16195 | 393 | A03056 | A16296 | 163 |
| A03056 | A16721 | 479 | A03057 | A03205 | 263 |
| A03057 | A03301 | 283 | A03057 | A03401 | 173 |
| A03057 | A03480 | 162 | A03057 | A03496 | 188 |
| A03057 | A03728 | 200 | A03057 | A03752 | 227 |
| A03057 | A04161 | 621 | A03057 | A04375 | 311 |
| A03057 | A04406 | 224 | A03057 | A04490 | 279 |
| A03057 | A04668 | 566 | A03057 | A04896 | 202 |
| A03057 | A05216 | 196 | A03057 | A05334 | 491 |
| A03057 | A05760 | 168 | A03057 | A05767 | 401 |
| A03057 | A06029 | 384 | A03057 | A06242 | 491 |
| A03057 | A06851 | 246 | A03057 | A06864 | 461 |
| A03057 | A06907 | 469 | A03057 | A06982 | 564 |
| A03057 | A07079 | 208 | A03057 | A07180 | 252 |
| A03057 | A07314 | 491 | A03057 | A07319 | 477 |
| A03057 | A07346 | 486 | A03057 | A07466 | 565 |
| A03057 | A07480 | 640 | A03057 | A07603 | 491 |
| A03057 | A07604 | 443 | A03057 | A07647 | 314 |
| A03057 | A07706 | 335 | A03057 | A07720 | 217 |
| A03057 | A07811 | 374 | A03057 | A07878 | 245 |
| A03057 | A08015 | 217 | A03057 | A08030 | 401 |
| A03057 | A08137 | 238 | A03057 | A08669 | 564 |
| A03057 | A08820 | 566 | A03057 | A08856 | 259 |

|        |        |     |        |        |     |
|--------|--------|-----|--------|--------|-----|
| A03057 | A08888 | 121 | A03057 | A09135 | 488 |
| A03057 | A09195 | 193 | A03057 | A09288 | 91  |
| A03057 | A09577 | 207 | A03057 | A09591 | 160 |
| A03057 | A09598 | 491 | A03057 | A09603 | 273 |
| A03057 | A09751 | 491 | A03057 | A09752 | 490 |
| A03057 | A09753 | 232 | A03057 | A09754 | 343 |
| A03057 | A09755 | 121 | A03057 | A09764 | 486 |
| A03057 | A09788 | 360 | A03057 | A10373 | 200 |
| A03057 | A11277 | 313 | A03057 | A11291 | 491 |
| A03057 | A11540 | 480 | A03057 | A11841 | 165 |
| A03057 | A12365 | 200 | A03057 | A12835 | 419 |
| A03057 | A13257 | 347 | A03057 | A13429 | 468 |
| A03057 | A13511 | 311 | A03057 | A13889 | 200 |
| A03057 | A13928 | 450 | A03057 | A13949 | 475 |
| A03057 | A13986 | 223 | A03057 | A14009 | 556 |
| A03057 | A14079 | 477 | A03057 | A14091 | 200 |
| A03057 | A14094 | 200 | A03057 | A14173 | 235 |
| A03057 | A14177 | 566 | A03057 | A14192 | 200 |
| A03057 | A14196 | 474 | A03057 | A14220 | 490 |
| A03057 | A14223 | 559 | A03057 | A14257 | 174 |
| A03057 | A14273 | 151 | A03057 | A14460 | 259 |
| A03057 | A14574 | 168 | A03057 | A14665 | 188 |
| A03057 | A14694 | 562 | A03057 | A15291 | 314 |
| A03057 | A15366 | 461 | A03057 | A15367 | 360 |
| A03057 | A15369 | 424 | A03057 | A15430 | 274 |
| A03057 | A15714 | 281 | A03057 | A15726 | 188 |
| A03057 | A15837 | 491 | A03057 | A15851 | 281 |
| A03057 | A16052 | 195 | A03057 | A16068 | 396 |
| A03057 | A16127 | 198 | A03057 | A16128 | 176 |
| A03057 | A16274 | 200 | A03057 | A16299 | 326 |
| A03057 | A16626 | 490 | A03057 | A16742 | 157 |
| A03057 | A17075 | 378 | A03059 | A03545 | 229 |
| A03059 | A04779 | 188 | A03059 | A05573 | 399 |
| A03059 | A05714 | 396 | A03059 | A06088 | 367 |
| A03059 | A06091 | 319 | A03059 | A06358 | 398 |
| A03059 | A06359 | 276 | A03059 | A06385 | 215 |
| A03059 | A06473 | 297 | A03059 | A06934 | 435 |
| A03059 | A07002 | 386 | A03059 | A07059 | 281 |
| A03059 | A07080 | 294 | A03059 | A07109 | 279 |
| A03059 | A07122 | 463 | A03059 | A07256 | 369 |
| A03059 | A07322 | 353 | A03059 | A07381 | 361 |
| A03059 | A07413 | 279 | A03059 | A07503 | 364 |
| A03059 | A07530 | 348 | A03059 | A07696 | 235 |
| A03059 | A07737 | 347 | A03059 | A07844 | 162 |
| A03059 | A07856 | 380 | A03059 | A07875 | 407 |
| A03059 | A08114 | 351 | A03059 | A08135 | 343 |

|        |        |     |        |        |     |
|--------|--------|-----|--------|--------|-----|
| A03059 | A08385 | 418 | A03059 | A09612 | 422 |
| A03059 | A10652 | 344 | A03059 | A10676 | 375 |
| A03059 | A10780 | 443 | A03059 | A16739 | 329 |
| A03060 | A03968 | 310 | A03060 | A04343 | 401 |
| A03060 | A04352 | 418 | A03060 | A04383 | 391 |
| A03060 | A04387 | 438 | A03060 | A06072 | 438 |
| A03060 | A09240 | 404 | A03060 | A15271 | 401 |
| A03061 | A03077 | 335 | A03061 | A03175 | 441 |
| A03062 | A03107 | 491 | A03062 | A03121 | 254 |
| A03062 | A03137 | 390 | A03062 | A04215 | 401 |
| A03062 | A04336 | 466 | A03062 | A04337 | 188 |
| A03062 | A04349 | 485 | A03062 | A04383 | 435 |
| A03062 | A04460 | 374 | A03062 | A04465 | 386 |
| A03062 | A04870 | 333 | A03062 | A05288 | 259 |
| A03062 | A06255 | 479 | A03062 | A06464 | 414 |
| A03062 | A07019 | 321 | A03062 | A07233 | 460 |
| A03062 | A07559 | 408 | A03062 | A08342 | 457 |
| A03062 | A09240 | 378 | A03062 | A09365 | 401 |
| A03062 | A10665 | 369 | A03062 | A11014 | 350 |
| A03062 | A11698 | 450 | A03062 | A11934 | 406 |
| A03062 | A11937 | 238 | A03062 | A11977 | 401 |
| A03062 | A12596 | 407 | A03062 | A13337 | 424 |
| A03062 | A14675 | 424 | A03062 | A15498 | 326 |
| A03063 | A03788 | 286 | A03063 | A03968 | 406 |
| A03063 | A04750 | 458 | A03063 | A05208 | 377 |
| A03063 | A05751 | 361 | A03063 | A14372 | 314 |
| A03063 | A14443 | 899 | A03063 | A15498 | 160 |
| A03064 | A03441 | 334 | A03064 | A03487 | 384 |
| A03064 | A15960 | 405 | A03064 | A15962 | 335 |
| A03065 | A03070 | 265 | A03065 | A03398 | 490 |
| A03065 | A03451 | 343 | A03065 | A04901 | 312 |
| A03065 | A07158 | 180 | A03065 | A08515 | 385 |
| A03065 | A08839 | 193 | A03067 | A03080 | 414 |
| A03067 | A03247 | 262 | A03067 | A03346 | 307 |
| A03067 | A03347 | 484 | A03067 | A03348 | 288 |
| A03067 | A03351 | 411 | A03067 | A03353 | 479 |
| A03067 | A03356 | 361 | A03067 | A03368 | 435 |
| A03067 | A03369 | 490 | A03067 | A03370 | 485 |
| A03067 | A03371 | 491 | A03067 | A03379 | 481 |
| A03067 | A03387 | 390 | A03067 | A03388 | 262 |
| A03067 | A03532 | 491 | A03067 | A03729 | 232 |
| A03067 | A04833 | 273 | A03067 | A05356 | 396 |
| A03067 | A05506 | 283 | A03067 | A07209 | 215 |
| A03067 | A07210 | 235 | A03067 | A07218 | 454 |
| A03067 | A07475 | 191 | A03067 | A08594 | 470 |
| A03067 | A08785 | 404 | A03067 | A08827 | 472 |

|        |        |     |        |        |     |
|--------|--------|-----|--------|--------|-----|
| A03067 | A09416 | 152 | A03067 | A09922 | 343 |
| A03067 | A10638 | 286 | A03067 | A11627 | 358 |
| A03067 | A11932 | 201 | A03067 | A14212 | 193 |
| A03067 | A14377 | 157 | A03067 | A14621 | 313 |
| A03068 | A03181 | 488 | A03068 | A03218 | 221 |
| A03068 | A03224 | 184 | A03068 | A03271 | 157 |
| A03068 | A03373 | 154 | A03068 | A03636 | 236 |
| A03068 | A03748 | 191 | A03068 | A03848 | 277 |
| A03068 | A03980 | 326 | A03068 | A04077 | 326 |
| A03068 | A04114 | 217 | A03068 | A04244 | 235 |
| A03068 | A04280 | 288 | A03068 | A04327 | 165 |
| A03068 | A04398 | 419 | A03068 | A04710 | 278 |
| A03068 | A04996 | 216 | A03068 | A05876 | 232 |
| A03068 | A05901 | 307 | A03068 | A06217 | 283 |
| A03068 | A06235 | 173 | A03068 | A07205 | 180 |
| A03068 | A07213 | 302 | A03068 | A08704 | 313 |
| A03068 | A09211 | 221 | A03068 | A09253 | 174 |
| A03068 | A10174 | 165 | A03068 | A10625 | 208 |
| A03068 | A10791 | 228 | A03068 | A11086 | 480 |
| A03068 | A12357 | 322 | A03068 | A13413 | 307 |
| A03068 | A15277 | 172 | A03068 | A15925 | 168 |
| A03068 | A15945 | 219 | A03068 | A16738 | 252 |
| A03069 | A03070 | 260 | A03069 | A03093 | 162 |
| A03069 | A03149 | 258 | A03069 | A03184 | 329 |
| A03069 | A03272 | 157 | A03069 | A03399 | 367 |
| A03069 | A03450 | 238 | A03069 | A03567 | 491 |
| A03069 | A03634 | 451 | A03069 | A03754 | 208 |
| A03069 | A03773 | 491 | A03069 | A03904 | 159 |
| A03069 | A03935 | 469 | A03069 | A03936 | 305 |
| A03069 | A03944 | 200 | A03069 | A03991 | 435 |
| A03069 | A04272 | 195 | A03069 | A04428 | 235 |
| A03069 | A04596 | 277 | A03069 | A04901 | 190 |
| A03069 | A04919 | 408 | A03069 | A04989 | 252 |
| A03069 | A04991 | 154 | A03069 | A05121 | 462 |
| A03069 | A05131 | 270 | A03069 | A05230 | 152 |
| A03069 | A05252 | 286 | A03069 | A05443 | 201 |
| A03069 | A06463 | 317 | A03069 | A06861 | 405 |
| A03069 | A06965 | 490 | A03069 | A06973 | 364 |
| A03069 | A07128 | 160 | A03069 | A07187 | 267 |
| A03069 | A07311 | 185 | A03069 | A07440 | 411 |
| A03069 | A07451 | 468 | A03069 | A07533 | 333 |
| A03069 | A08011 | 382 | A03069 | A08055 | 262 |
| A03069 | A08137 | 369 | A03069 | A08177 | 210 |
| A03069 | A08357 | 465 | A03069 | A08359 | 180 |
| A03069 | A08398 | 486 | A03069 | A08452 | 491 |
| A03069 | A08465 | 247 | A03069 | A08521 | 395 |

|        |        |     |        |        |     |
|--------|--------|-----|--------|--------|-----|
| A03069 | A08527 | 230 | A03069 | A08556 | 193 |
| A03069 | A08559 | 377 | A03069 | A08773 | 332 |
| A03069 | A08954 | 235 | A03069 | A09044 | 154 |
| A03069 | A09322 | 473 | A03069 | A09332 | 171 |
| A03069 | A09418 | 270 | A03069 | A09468 | 450 |
| A03069 | A09759 | 154 | A03069 | A10417 | 338 |
| A03069 | A10518 | 400 | A03069 | A10527 | 391 |
| A03069 | A10616 | 258 | A03069 | A11390 | 245 |
| A03069 | A11438 | 449 | A03069 | A11480 | 310 |
| A03069 | A11572 | 252 | A03069 | A13525 | 335 |
| A03069 | A13527 | 176 | A03069 | A13786 | 260 |
| A03069 | A13830 | 374 | A03069 | A13989 | 430 |
| A03069 | A13992 | 369 | A03069 | A14390 | 193 |
| A03069 | A14647 | 160 | A03069 | A15218 | 198 |
| A03069 | A15281 | 224 | A03069 | A15500 | 201 |
| A03069 | A15649 | 168 | A03069 | A15679 | 218 |
| A03069 | A15690 | 333 | A03069 | A15743 | 170 |
| A03069 | A15988 | 377 | A03069 | A15992 | 216 |
| A03069 | A16118 | 361 | A03069 | A16505 | 347 |
| A03069 | A16679 | 228 | A03069 | A16697 | 185 |
| A03069 | A17193 | 218 | A03070 | A03300 | 201 |
| A03070 | A03385 | 246 | A03070 | A03387 | 177 |
| A03070 | A03388 | 159 | A03070 | A03390 | 291 |
| A03070 | A03391 | 134 | A03070 | A03398 | 477 |
| A03070 | A03401 | 291 | A03070 | A03406 | 335 |
| A03070 | A03408 | 238 | A03070 | A03451 | 218 |
| A03070 | A03571 | 213 | A03070 | A03689 | 396 |
| A03070 | A03690 | 347 | A03070 | A03696 | 414 |
| A03070 | A03704 | 394 | A03070 | A03728 | 390 |
| A03070 | A03762 | 185 | A03070 | A03895 | 340 |
| A03070 | A03933 | 234 | A03070 | A04067 | 240 |
| A03070 | A04185 | 363 | A03070 | A04395 | 218 |
| A03070 | A04404 | 263 | A03070 | A04413 | 246 |
| A03070 | A04507 | 305 | A03070 | A04676 | 163 |
| A03070 | A04795 | 216 | A03070 | A05132 | 467 |
| A03070 | A05354 | 218 | A03070 | A05410 | 210 |
| A03070 | A06001 | 490 | A03070 | A06121 | 401 |
| A03070 | A06280 | 408 | A03070 | A06319 | 188 |
| A03070 | A06363 | 305 | A03070 | A06401 | 223 |
| A03070 | A06488 | 312 | A03070 | A06502 | 438 |
| A03070 | A07016 | 188 | A03070 | A07254 | 263 |
| A03070 | A07405 | 332 | A03070 | A07427 | 401 |
| A03070 | A07536 | 180 | A03070 | A07719 | 332 |
| A03070 | A07726 | 477 | A03070 | A07730 | 252 |
| A03070 | A08070 | 154 | A03070 | A08566 | 362 |
| A03070 | A08835 | 440 | A03070 | A08849 | 286 |

|        |        |     |        |        |     |
|--------|--------|-----|--------|--------|-----|
| A03070 | A08972 | 159 | A03070 | A09227 | 173 |
| A03070 | A09251 | 228 | A03070 | A09329 | 286 |
| A03070 | A09427 | 177 | A03070 | A09741 | 424 |
| A03070 | A09748 | 274 | A03070 | A09775 | 401 |
| A03070 | A09780 | 180 | A03070 | A09825 | 195 |
| A03070 | A10148 | 177 | A03070 | A10633 | 488 |
| A03070 | A10748 | 368 | A03070 | A11182 | 274 |
| A03070 | A11223 | 159 | A03070 | A11224 | 347 |
| A03070 | A11227 | 218 | A03070 | A11406 | 156 |
| A03070 | A11544 | 344 | A03070 | A11652 | 223 |
| A03070 | A11680 | 338 | A03070 | A11691 | 467 |
| A03070 | A11737 | 422 | A03070 | A11794 | 305 |
| A03070 | A11872 | 210 | A03070 | A11952 | 452 |
| A03070 | A11984 | 234 | A03070 | A12180 | 332 |
| A03070 | A12196 | 234 | A03070 | A12241 | 451 |
| A03070 | A12882 | 188 | A03070 | A12904 | 286 |
| A03070 | A12929 | 406 | A03070 | A13246 | 196 |
| A03070 | A13324 | 332 | A03070 | A13385 | 213 |
| A03070 | A13417 | 202 | A03070 | A13421 | 246 |
| A03070 | A13422 | 439 | A03070 | A13466 | 484 |
| A03070 | A14017 | 322 | A03070 | A14041 | 255 |
| A03070 | A14050 | 255 | A03070 | A14118 | 213 |
| A03070 | A14257 | 465 | A03070 | A14622 | 418 |
| A03070 | A14770 | 360 | A03070 | A14787 | 162 |
| A03070 | A15286 | 168 | A03070 | A15624 | 163 |
| A03070 | A15684 | 290 | A03070 | A15708 | 255 |
| A03070 | A15843 | 257 | A03070 | A15859 | 332 |
| A03070 | A16131 | 188 | A03070 | A16218 | 221 |
| A03070 | A16365 | 274 | A03070 | A16738 | 200 |
| A03071 | A03144 | 235 | A03071 | A03370 | 379 |
| A03071 | A03744 | 427 | A03071 | A03790 | 297 |
| A03071 | A03809 | 317 | A03071 | A03906 | 256 |
| A03071 | A03965 | 263 | A03071 | A04078 | 288 |
| A03071 | A04415 | 316 | A03071 | A04473 | 419 |
| A03071 | A05082 | 313 | A03071 | A05155 | 725 |
| A03071 | A05360 | 366 | A03071 | A06107 | 360 |
| A03071 | A07160 | 223 | A03071 | A07218 | 185 |
| A03071 | A09127 | 201 | A03071 | A09753 | 299 |
| A03071 | A09983 | 347 | A03071 | A12099 | 372 |
| A03071 | A13181 | 246 | A03071 | A13369 | 202 |
| A03071 | A14035 | 372 | A03071 | A15282 | 152 |
| A03072 | A03190 | 463 | A03072 | A03401 | 210 |
| A03072 | A03709 | 356 | A03072 | A04229 | 473 |
| A03072 | A04375 | 268 | A03072 | A04886 | 475 |
| A03072 | A05018 | 463 | A03072 | A06470 | 385 |
| A03072 | A07125 | 427 | A03072 | A07333 | 353 |

|        |        |     |        |        |     |
|--------|--------|-----|--------|--------|-----|
| A03072 | A15622 | 400 | A03072 | A16111 | 435 |
| A03073 | A03115 | 279 | A03073 | A03256 | 302 |
| A03073 | A04446 | 251 | A03076 | A03077 | 491 |
| A03076 | A03178 | 466 | A03076 | A03186 | 324 |
| A03076 | A03434 | 307 | A03076 | A03477 | 180 |
| A03076 | A03517 | 288 | A03076 | A03745 | 229 |
| A03076 | A03846 | 205 | A03076 | A03893 | 190 |
| A03076 | A04082 | 198 | A03076 | A04133 | 335 |
| A03076 | A04282 | 180 | A03076 | A04364 | 177 |
| A03076 | A04737 | 162 | A03076 | A04870 | 188 |
| A03076 | A04880 | 196 | A03076 | A05079 | 263 |
| A03076 | A05247 | 185 | A03076 | A05449 | 162 |
| A03076 | A05593 | 246 | A03076 | A05712 | 151 |
| A03076 | A05777 | 176 | A03076 | A05979 | 329 |
| A03076 | A06317 | 221 | A03076 | A06426 | 449 |
| A03076 | A06588 | 205 | A03076 | A06609 | 909 |
| A03076 | A06610 | 347 | A03076 | A06653 | 190 |
| A03076 | A06710 | 283 | A03076 | A07050 | 185 |
| A03076 | A07126 | 179 | A03076 | A07339 | 375 |
| A03076 | A07833 | 488 | A03076 | A07895 | 296 |
| A03076 | A08944 | 179 | A03076 | A09092 | 221 |
| A03076 | A09382 | 296 | A03076 | A09539 | 168 |
| A03076 | A09611 | 229 | A03076 | A09779 | 473 |
| A03076 | A10858 | 313 | A03076 | A10934 | 163 |
| A03076 | A11314 | 303 | A03076 | A11411 | 218 |
| A03076 | A12526 | 324 | A03076 | A14210 | 258 |
| A03076 | A14299 | 358 | A03076 | A14604 | 229 |
| A03076 | A15241 | 163 | A03076 | A15318 | 291 |
| A03077 | A03178 | 467 | A03077 | A03186 | 212 |
| A03077 | A04105 | 151 | A03077 | A04410 | 366 |
| A03077 | A04411 | 260 | A03077 | A04667 | 303 |
| A03077 | A04861 | 167 | A03077 | A04870 | 363 |
| A03077 | A05247 | 238 | A03077 | A05274 | 312 |
| A03077 | A05294 | 201 | A03077 | A05593 | 293 |
| A03077 | A05596 | 394 | A03077 | A05765 | 187 |
| A03077 | A05777 | 356 | A03077 | A05866 | 252 |
| A03077 | A05979 | 371 | A03077 | A06607 | 414 |
| A03077 | A06710 | 324 | A03077 | A07704 | 208 |
| A03077 | A07705 | 196 | A03077 | A07833 | 435 |
| A03077 | A08172 | 303 | A03077 | A08292 | 246 |
| A03077 | A08685 | 291 | A03077 | A08686 | 246 |
| A03077 | A09126 | 351 | A03077 | A09149 | 184 |
| A03077 | A09382 | 335 | A03077 | A09476 | 199 |
| A03077 | A10858 | 347 | A03077 | A11411 | 269 |
| A03077 | A13929 | 232 | A03077 | A14236 | 281 |
| A03077 | A14444 | 205 | A03077 | A15336 | 228 |

|        |        |     |        |        |     |
|--------|--------|-----|--------|--------|-----|
| A03077 | A15638 | 270 | A03077 | A15738 | 177 |
| A03078 | A03220 | 408 | A03078 | A06218 | 438 |
| A03078 | A07139 | 418 | A03078 | A14281 | 172 |
| A03079 | A03091 | 212 | A03079 | A03110 | 344 |
| A03079 | A03239 | 182 | A03079 | A03259 | 236 |
| A03079 | A03690 | 235 | A03079 | A03722 | 184 |
| A03079 | A03732 | 443 | A03079 | A03851 | 326 |
| A03079 | A03942 | 165 | A03079 | A03945 | 361 |
| A03079 | A04076 | 190 | A03079 | A05127 | 260 |
| A03079 | A06295 | 246 | A03079 | A07207 | 362 |
| A03079 | A07442 | 238 | A03079 | A07505 | 185 |
| A03079 | A07558 | 180 | A03079 | A08834 | 240 |
| A03079 | A08881 | 174 | A03079 | A09204 | 201 |
| A03079 | A09206 | 263 | A03079 | A09334 | 204 |
| A03079 | A09584 | 362 | A03079 | A09734 | 157 |
| A03079 | A09740 | 299 | A03079 | A09743 | 313 |
| A03079 | A09745 | 185 | A03079 | A09833 | 215 |
| A03079 | A10592 | 168 | A03079 | A11422 | 389 |
| A03079 | A12458 | 340 | A03079 | A13826 | 344 |
| A03079 | A13860 | 235 | A03079 | A14026 | 362 |
| A03079 | A14120 | 362 | A03079 | A14124 | 235 |
| A03079 | A14135 | 208 | A03079 | A14193 | 193 |
| A03079 | A14210 | 372 | A03079 | A14216 | 293 |
| A03079 | A14368 | 254 | A03079 | A14511 | 265 |
| A03079 | A14611 | 232 | A03079 | A15288 | 267 |
| A03079 | A15292 | 316 | A03079 | A15295 | 351 |
| A03079 | A15313 | 299 | A03079 | A15318 | 945 |
| A03079 | A15329 | 257 | A03079 | A15347 | 238 |
| A03079 | A15348 | 262 | A03079 | A15349 | 256 |
| A03079 | A15365 | 221 | A03079 | A15391 | 235 |
| A03079 | A15411 | 249 | A03079 | A15412 | 481 |
| A03079 | A15419 | 486 | A03079 | A15420 | 252 |
| A03079 | A15422 | 475 | A03079 | A15431 | 224 |
| A03079 | A15440 | 243 | A03079 | A15444 | 352 |
| A03079 | A15461 | 305 | A03079 | A15626 | 472 |
| A03079 | A15802 | 279 | A03079 | A15813 | 262 |
| A03079 | A15820 | 263 | A03079 | A15886 | 455 |
| A03079 | A15902 | 291 | A03079 | A15917 | 347 |
| A03079 | A16224 | 318 | A03079 | A16407 | 362 |
| A03079 | A16847 | 362 | A03079 | A17076 | 210 |
| A03080 | A03134 | 420 | A03080 | A03138 | 232 |
| A03080 | A03145 | 188 | A03080 | A03178 | 198 |
| A03080 | A03186 | 347 | A03080 | A03344 | 127 |
| A03080 | A03345 | 129 | A03080 | A03346 | 491 |
| A03080 | A03347 | 491 | A03080 | A03348 | 419 |
| A03080 | A03349 | 307 | A03080 | A03351 | 491 |



|        |        |     |        |        |     |
|--------|--------|-----|--------|--------|-----|
| A03080 | A03353 | 491 | A03080 | A03358 | 146 |
| A03080 | A03359 | 157 | A03080 | A03361 | 491 |
| A03080 | A03363 | 447 | A03080 | A03369 | 491 |
| A03080 | A03370 | 491 | A03080 | A03371 | 491 |
| A03080 | A03373 | 491 | A03080 | A03374 | 378 |
| A03080 | A03375 | 348 | A03080 | A03376 | 486 |
| A03080 | A03378 | 490 | A03080 | A03379 | 491 |
| A03080 | A03383 | 271 | A03080 | A03388 | 238 |
| A03080 | A03390 | 463 | A03080 | A03391 | 378 |
| A03080 | A03397 | 418 | A03080 | A03401 | 490 |
| A03080 | A03402 | 306 | A03080 | A03403 | 363 |
| A03080 | A03414 | 477 | A03080 | A03491 | 267 |
| A03080 | A03504 | 195 | A03080 | A03532 | 243 |
| A03080 | A03545 | 274 | A03080 | A03634 | 200 |
| A03080 | A03729 | 196 | A03080 | A03744 | 433 |
| A03080 | A03936 | 221 | A03080 | A03976 | 375 |
| A03080 | A03983 | 188 | A03080 | A03988 | 165 |
| A03080 | A03989 | 151 | A03080 | A04020 | 425 |
| A03080 | A04051 | 463 | A03080 | A04171 | 165 |
| A03080 | A04189 | 297 | A03080 | A04190 | 232 |
| A03080 | A04329 | 475 | A03080 | A04337 | 447 |
| A03080 | A04338 | 267 | A03080 | A04340 | 407 |
| A03080 | A04342 | 188 | A03080 | A04344 | 188 |
| A03080 | A04385 | 481 | A03080 | A04407 | 154 |
| A03080 | A04409 | 489 | A03080 | A04410 | 451 |
| A03080 | A04456 | 267 | A03080 | A04548 | 177 |
| A03080 | A04621 | 173 | A03080 | A04698 | 217 |
| A03080 | A04715 | 302 | A03080 | A04830 | 491 |
| A03080 | A04832 | 491 | A03080 | A04875 | 168 |
| A03080 | A04877 | 177 | A03080 | A04882 | 267 |
| A03080 | A04950 | 232 | A03080 | A04989 | 183 |
| A03080 | A04992 | 201 | A03080 | A05094 | 168 |
| A03080 | A05141 | 167 | A03080 | A05210 | 243 |
| A03080 | A05259 | 252 | A03080 | A05264 | 480 |
| A03080 | A05286 | 267 | A03080 | A05356 | 283 |
| A03080 | A05381 | 232 | A03080 | A05390 | 201 |
| A03080 | A05427 | 340 | A03080 | A05457 | 210 |
| A03080 | A05543 | 246 | A03080 | A05641 | 366 |
| A03080 | A05643 | 160 | A03080 | A05716 | 380 |
| A03080 | A05717 | 297 | A03080 | A05718 | 246 |
| A03080 | A05723 | 219 | A03080 | A05731 | 441 |
| A03080 | A05739 | 302 | A03080 | A06112 | 188 |
| A03080 | A06148 | 268 | A03080 | A06346 | 452 |
| A03080 | A06430 | 267 | A03080 | A06483 | 297 |
| A03080 | A06574 | 176 | A03080 | A06606 | 235 |
| A03080 | A06703 | 173 | A03080 | A06782 | 210 |

|        |        |     |        |        |     |
|--------|--------|-----|--------|--------|-----|
| A03080 | A06887 | 188 | A03080 | A06935 | 428 |
| A03080 | A07013 | 297 | A03080 | A07187 | 174 |
| A03080 | A07218 | 491 | A03080 | A07279 | 328 |
| A03080 | A07361 | 322 | A03080 | A07384 | 382 |
| A03080 | A07486 | 267 | A03080 | A07743 | 246 |
| A03080 | A07828 | 369 | A03080 | A08140 | 297 |
| A03080 | A08157 | 334 | A03080 | A08192 | 461 |
| A03080 | A08209 | 170 | A03080 | A08594 | 224 |
| A03080 | A08837 | 191 | A03080 | A08861 | 408 |
| A03080 | A09029 | 195 | A03080 | A09131 | 245 |
| A03080 | A09421 | 460 | A03080 | A09453 | 348 |
| A03080 | A09503 | 334 | A03080 | A09882 | 182 |
| A03080 | A09890 | 279 | A03080 | A09983 | 157 |
| A03080 | A10018 | 363 | A03080 | A10461 | 154 |
| A03080 | A10639 | 188 | A03080 | A11319 | 151 |
| A03080 | A11339 | 328 | A03080 | A11391 | 297 |
| A03080 | A11449 | 283 | A03080 | A11599 | 267 |
| A03080 | A11652 | 177 | A03080 | A11911 | 279 |
| A03080 | A11956 | 246 | A03080 | A12004 | 195 |
| A03080 | A12356 | 297 | A03080 | A12383 | 740 |
| A03080 | A12459 | 210 | A03080 | A12496 | 297 |
| A03080 | A12897 | 456 | A03080 | A12982 | 168 |
| A03080 | A14377 | 489 | A03080 | A14395 | 171 |
| A03080 | A14437 | 168 | A03080 | A14449 | 263 |
| A03080 | A14470 | 232 | A03080 | A14475 | 216 |
| A03080 | A14496 | 346 | A03080 | A14643 | 515 |
| A03080 | A15272 | 168 | A03080 | A15649 | 179 |
| A03080 | A16040 | 232 | A03080 | A16595 | 195 |
| A03080 | A17076 | 258 | A03080 | A17078 | 321 |
| A03081 | A03093 | 269 | A03081 | A03109 | 279 |
| A03081 | A03110 | 462 | A03081 | A03183 | 223 |
| A03081 | A03219 | 411 | A03081 | A03315 | 443 |
| A03081 | A03319 | 322 | A03081 | A03821 | 173 |
| A03081 | A03878 | 333 | A03081 | A03913 | 170 |
| A03081 | A03942 | 190 | A03081 | A03975 | 305 |
| A03081 | A04078 | 254 | A03081 | A04248 | 229 |
| A03081 | A04492 | 391 | A03081 | A04676 | 293 |
| A03081 | A04698 | 208 | A03081 | A05517 | 286 |
| A03081 | A05706 | 199 | A03081 | A06211 | 319 |
| A03081 | A06623 | 308 | A03081 | A06905 | 367 |
| A03081 | A07126 | 263 | A03081 | A07127 | 277 |
| A03081 | A07140 | 208 | A03081 | A07145 | 480 |
| A03081 | A08572 | 185 | A03081 | A08911 | 246 |
| A03081 | A09243 | 208 | A03081 | A09421 | 302 |
| A03081 | A09509 | 162 | A03081 | A09513 | 356 |
| A03081 | A09572 | 313 | A03081 | A09741 | 229 |

|        |        |     |        |        |     |
|--------|--------|-----|--------|--------|-----|
| A03081 | A10018 | 205 | A03081 | A13860 | 523 |
| A03081 | A13994 | 224 | A03081 | A14190 | 229 |
| A03081 | A14210 | 204 | A03081 | A14366 | 461 |
| A03081 | A14369 | 256 | A03081 | A14370 | 279 |
| A03081 | A14371 | 232 | A03081 | A14511 | 372 |
| A03081 | A14554 | 202 | A03081 | A14565 | 374 |
| A03081 | A14604 | 327 | A03081 | A15323 | 401 |
| A03081 | A15327 | 260 | A03081 | A15795 | 678 |
| A03081 | A15884 | 297 | A03081 | A16323 | 297 |
| A03082 | A03114 | 341 | A03082 | A03115 | 213 |
| A03082 | A03165 | 321 | A03082 | A03186 | 162 |
| A03082 | A04080 | 176 | A03082 | A04256 | 267 |
| A03082 | A06650 | 213 | A03082 | A07016 | 335 |
| A03082 | A07311 | 899 | A03082 | A08677 | 313 |
| A03082 | A09387 | 335 | A03082 | A09811 | 398 |
| A03082 | A10018 | 238 | A03082 | A10267 | 353 |
| A03082 | A11214 | 390 | A03082 | A13348 | 303 |
| A03082 | A14430 | 154 | A03083 | A03582 | 277 |
| A03083 | A03754 | 393 | A03083 | A04093 | 328 |
| A03083 | A05385 | 293 | A03083 | A06666 | 328 |
| A03083 | A07104 | 324 | A03083 | A07243 | 217 |
| A03083 | A07935 | 335 | A03083 | A08815 | 163 |
| A03083 | A08981 | 330 | A03083 | A09087 | 363 |
| A03083 | A09251 | 324 | A03083 | A09893 | 347 |
| A03083 | A10080 | 355 | A03083 | A10417 | 201 |
| A03083 | A10924 | 328 | A03083 | A11535 | 323 |
| A03083 | A13989 | 277 | A03084 | A03087 | 268 |
| A03084 | A03164 | 246 | A03084 | A03171 | 457 |
| A03084 | A03186 | 391 | A03084 | A04194 | 418 |
| A03084 | A04342 | 263 | A03084 | A05370 | 297 |
| A03084 | A05617 | 195 | A03084 | A06769 | 361 |
| A03084 | A07007 | 256 | A03084 | A07570 | 429 |
| A03084 | A07771 | 258 | A03084 | A09476 | 278 |
| A03084 | A10720 | 163 | A03084 | A11646 | 294 |
| A03084 | A11885 | 201 | A03084 | A14190 | 154 |
| A03084 | A14197 | 185 | A03084 | A16281 | 185 |
| A03084 | A16285 | 241 | A03084 | A16417 | 308 |
| A03085 | A05654 | 366 | A03085 | A06654 | 378 |
| A03085 | A07201 | 391 | A03085 | A09472 | 435 |
| A03085 | A10417 | 355 | A03085 | A11981 | 369 |
| A03085 | A13435 | 417 | A03086 | A03099 | 183 |
| A03086 | A03173 | 395 | A03086 | A04095 | 341 |
| A03086 | A04927 | 268 | A03086 | A05208 | 324 |
| A03086 | A07124 | 347 | A03086 | A07140 | 252 |
| A03086 | A07520 | 213 | A03086 | A07558 | 249 |
| A03086 | A12824 | 311 | A03086 | A17230 | 369 |

|        |        |     |        |        |     |
|--------|--------|-----|--------|--------|-----|
| A03087 | A03099 | 485 | A03087 | A03174 | 405 |
| A03087 | A03443 | 380 | A03087 | A03513 | 279 |
| A03087 | A03520 | 226 | A03087 | A03968 | 424 |
| A03087 | A04071 | 160 | A03087 | A04377 | 323 |
| A03087 | A04990 | 316 | A03087 | A04995 | 232 |
| A03087 | A05062 | 188 | A03087 | A05208 | 384 |
| A03087 | A05224 | 319 | A03087 | A05309 | 294 |
| A03087 | A05330 | 371 | A03087 | A05331 | 319 |
| A03087 | A05337 | 243 | A03087 | A05424 | 449 |
| A03087 | A05462 | 252 | A03087 | A05533 | 201 |
| A03087 | A05573 | 328 | A03087 | A05820 | 353 |
| A03087 | A05883 | 265 | A03087 | A06037 | 401 |
| A03087 | A06405 | 180 | A03087 | A06439 | 170 |
| A03087 | A06460 | 390 | A03087 | A06629 | 183 |
| A03087 | A06762 | 364 | A03087 | A06769 | 162 |
| A03087 | A06855 | 296 | A03087 | A06860 | 332 |
| A03087 | A06994 | 294 | A03087 | A07037 | 290 |
| A03087 | A07059 | 183 | A03087 | A07088 | 195 |
| A03087 | A07283 | 199 | A03087 | A07520 | 446 |
| A03087 | A07590 | 185 | A03087 | A07684 | 252 |
| A03087 | A07690 | 252 | A03087 | A07771 | 187 |
| A03087 | A07851 | 260 | A03087 | A07933 | 391 |
| A03087 | A07976 | 356 | A03087 | A08190 | 385 |
| A03087 | A08197 | 385 | A03087 | A08366 | 243 |
| A03087 | A08505 | 174 | A03087 | A08875 | 160 |
| A03087 | A09442 | 302 | A03087 | A10422 | 293 |
| A03087 | A10625 | 160 | A03087 | A10679 | 386 |
| A03087 | A11708 | 474 | A03087 | A13362 | 483 |
| A03087 | A14332 | 288 | A03087 | A14803 | 201 |
| A03087 | A15215 | 221 | A03087 | A17006 | 390 |
| A03087 | A17046 | 307 | A03088 | A14204 | 193 |
| A03089 | A03271 | 255 | A03090 | A03104 | 213 |
| A03090 | A03181 | 402 | A03090 | A03263 | 323 |
| A03090 | A03839 | 276 | A03090 | A03910 | 283 |
| A03090 | A04117 | 364 | A03090 | A04351 | 386 |
| A03090 | A04361 | 319 | A03090 | A04398 | 184 |
| A03090 | A04417 | 223 | A03090 | A04510 | 273 |
| A03090 | A04842 | 347 | A03090 | A05601 | 152 |
| A03090 | A06428 | 163 | A03090 | A06567 | 345 |
| A03090 | A06623 | 157 | A03090 | A06670 | 319 |
| A03090 | A07062 | 243 | A03090 | A07127 | 260 |
| A03090 | A07158 | 486 | A03090 | A07704 | 224 |
| A03090 | A08172 | 187 | A03090 | A08209 | 475 |
| A03090 | A08685 | 174 | A03090 | A08910 | 205 |
| A03090 | A09652 | 317 | A03090 | A10671 | 317 |
| A03090 | A11101 | 249 | A03090 | A11953 | 236 |

|        |        |     |        |        |     |
|--------|--------|-----|--------|--------|-----|
| A03090 | A13181 | 188 | A03090 | A14190 | 205 |
| A03090 | A14376 | 281 | A03090 | A14378 | 224 |
| A03090 | A14395 | 243 | A03090 | A14570 | 481 |
| A03090 | A14650 | 162 | A03090 | A15328 | 208 |
| A03090 | A15638 | 156 | A03090 | A15896 | 462 |
| A03090 | A16038 | 351 | A03090 | A16911 | 207 |
| A03091 | A03104 | 221 | A03091 | A03144 | 185 |
| A03091 | A03146 | 291 | A03091 | A03155 | 246 |
| A03091 | A03212 | 241 | A03091 | A03238 | 177 |
| A03091 | A03314 | 187 | A03091 | A03332 | 201 |
| A03091 | A04450 | 322 | A03091 | A04597 | 328 |
| A03091 | A05092 | 380 | A03091 | A05143 | 296 |
| A03091 | A05157 | 265 | A03091 | A05369 | 369 |
| A03091 | A05459 | 324 | A03091 | A06159 | 486 |
| A03091 | A06167 | 488 | A03091 | A06195 | 162 |
| A03091 | A06627 | 235 | A03091 | A07006 | 348 |
| A03091 | A07062 | 249 | A03091 | A07140 | 404 |
| A03091 | A07477 | 205 | A03091 | A07655 | 272 |
| A03091 | A07658 | 317 | A03091 | A07736 | 168 |
| A03091 | A07748 | 223 | A03091 | A07878 | 216 |
| A03091 | A08630 | 246 | A03091 | A08647 | 286 |
| A03091 | A08693 | 227 | A03091 | A08724 | 358 |
| A03091 | A08850 | 165 | A03091 | A08880 | 219 |
| A03091 | A09107 | 294 | A03091 | A09988 | 205 |
| A03091 | A10394 | 369 | A03091 | A10527 | 201 |
| A03091 | A10645 | 255 | A03091 | A10762 | 313 |
| A03091 | A11279 | 180 | A03091 | A12824 | 226 |
| A03091 | A14430 | 396 | A03091 | A14679 | 380 |
| A03091 | A15463 | 182 | A03091 | A15481 | 268 |
| A03091 | A15498 | 191 | A03091 | A15896 | 338 |
| A03091 | A15962 | 201 | A03091 | A15992 | 328 |
| A03091 | A16008 | 305 | A03091 | A16037 | 361 |
| A03091 | A17002 | 319 | A03092 | A03271 | 263 |
| A03092 | A03275 | 257 | A03092 | A04600 | 358 |
| A03092 | A08731 | 433 | A03092 | A09115 | 440 |
| A03093 | A03107 | 193 | A03093 | A03109 | 299 |
| A03093 | A03110 | 302 | A03093 | A03219 | 234 |
| A03093 | A03239 | 358 | A03093 | A03507 | 408 |
| A03093 | A03634 | 286 | A03093 | A03746 | 406 |
| A03093 | A03753 | 265 | A03093 | A04229 | 165 |
| A03093 | A04949 | 411 | A03093 | A08089 | 324 |
| A03093 | A08881 | 224 | A03093 | A09033 | 316 |
| A03093 | A10640 | 307 | A03093 | A14125 | 363 |
| A03093 | A14366 | 160 | A03093 | A14372 | 414 |
| A03093 | A14375 | 232 | A03093 | A14381 | 449 |
| A03093 | A14394 | 188 | A03093 | A14410 | 172 |

|        |        |     |        |        |     |
|--------|--------|-----|--------|--------|-----|
| A03093 | A14554 | 419 | A03093 | A15281 | 337 |
| A03093 | A15793 | 340 | A03093 | A15795 | 238 |
| A03093 | A16279 | 380 | A03094 | A03126 | 268 |
| A03094 | A03144 | 469 | A03094 | A03275 | 152 |
| A03094 | A03361 | 172 | A03094 | A04267 | 251 |
| A03094 | A04373 | 358 | A03094 | A04600 | 285 |
| A03094 | A04879 | 200 | A03094 | A05246 | 439 |
| A03094 | A05260 | 269 | A03094 | A05905 | 317 |
| A03094 | A06195 | 221 | A03094 | A14198 | 229 |
| A03095 | A03172 | 361 | A03095 | A03218 | 484 |
| A03095 | A03222 | 183 | A03095 | A03259 | 307 |
| A03095 | A03304 | 417 | A03095 | A03367 | 226 |
| A03095 | A03396 | 208 | A03095 | A03419 | 184 |
| A03095 | A03430 | 346 | A03095 | A03541 | 322 |
| A03095 | A03609 | 251 | A03095 | A03612 | 456 |
| A03095 | A03646 | 226 | A03095 | A03651 | 157 |
| A03095 | A03656 | 162 | A03095 | A03679 | 272 |
| A03095 | A03725 | 294 | A03095 | A03802 | 151 |
| A03095 | A03822 | 241 | A03095 | A03825 | 249 |
| A03095 | A03832 | 480 | A03095 | A03989 | 377 |
| A03095 | A04036 | 236 | A03095 | A04045 | 236 |
| A03095 | A04049 | 473 | A03095 | A04109 | 312 |
| A03095 | A04266 | 208 | A03095 | A04307 | 414 |
| A03095 | A04337 | 319 | A03095 | A04372 | 201 |
| A03095 | A04449 | 475 | A03095 | A04488 | 436 |
| A03095 | A04536 | 219 | A03095 | A04603 | 198 |
| A03095 | A04622 | 281 | A03095 | A04718 | 447 |
| A03095 | A04791 | 375 | A03095 | A04823 | 201 |
| A03095 | A04834 | 232 | A03095 | A04922 | 221 |
| A03095 | A04927 | 252 | A03095 | A04978 | 302 |
| A03095 | A04996 | 491 | A03095 | A05012 | 302 |
| A03095 | A05103 | 312 | A03095 | A05104 | 481 |
| A03095 | A05140 | 154 | A03095 | A05141 | 174 |
| A03095 | A05175 | 272 | A03095 | A05287 | 302 |
| A03095 | A05304 | 252 | A03095 | A05367 | 469 |
| A03095 | A05463 | 330 | A03095 | A05472 | 479 |
| A03095 | A05512 | 485 | A03095 | A05555 | 353 |
| A03095 | A05556 | 168 | A03095 | A05573 | 481 |
| A03095 | A05643 | 165 | A03095 | A05660 | 201 |
| A03095 | A05714 | 353 | A03095 | A05753 | 236 |
| A03095 | A05754 | 226 | A03095 | A05764 | 272 |
| A03095 | A05771 | 443 | A03095 | A05780 | 201 |
| A03095 | A05851 | 373 | A03095 | A05924 | 302 |
| A03095 | A06088 | 474 | A03095 | A06089 | 346 |
| A03095 | A06114 | 302 | A03095 | A06263 | 188 |
| A03095 | A06289 | 154 | A03095 | A06295 | 198 |

|        |        |     |        |        |     |
|--------|--------|-----|--------|--------|-----|
| A03095 | A06387 | 154 | A03095 | A06393 | 201 |
| A03095 | A06421 | 201 | A03095 | A06474 | 469 |
| A03095 | A06475 | 424 | A03095 | A06523 | 174 |
| A03095 | A06581 | 303 | A03095 | A06588 | 462 |
| A03095 | A06589 | 240 | A03095 | A06601 | 439 |
| A03095 | A06632 | 399 | A03095 | A06668 | 174 |
| A03095 | A06688 | 302 | A03095 | A06701 | 413 |
| A03095 | A06765 | 154 | A03095 | A06791 | 252 |
| A03095 | A06801 | 272 | A03095 | A06877 | 353 |
| A03095 | A06979 | 217 | A03095 | A06986 | 302 |
| A03095 | A07063 | 170 | A03095 | A07065 | 236 |
| A03095 | A07105 | 193 | A03095 | A07109 | 452 |
| A03095 | A07144 | 236 | A03095 | A07167 | 475 |
| A03095 | A07205 | 434 | A03095 | A07248 | 486 |
| A03095 | A07331 | 201 | A03095 | A07414 | 380 |
| A03095 | A07424 | 380 | A03095 | A07554 | 160 |
| A03095 | A07613 | 183 | A03095 | A07670 | 201 |
| A03095 | A07790 | 302 | A03095 | A07810 | 272 |
| A03095 | A07961 | 204 | A03095 | A07974 | 216 |
| A03095 | A08327 | 486 | A03095 | A08760 | 335 |
| A03095 | A08850 | 479 | A03095 | A08992 | 236 |
| A03095 | A08993 | 279 | A03095 | A09072 | 152 |
| A03095 | A09278 | 174 | A03095 | A09374 | 269 |
| A03095 | A09509 | 485 | A03095 | A09520 | 490 |
| A03095 | A09735 | 486 | A03095 | A09781 | 302 |
| A03095 | A09870 | 174 | A03095 | A09934 | 252 |
| A03095 | A09946 | 208 | A03095 | A10020 | 373 |
| A03095 | A10121 | 201 | A03095 | A10156 | 460 |
| A03095 | A10197 | 151 | A03095 | A10201 | 157 |
| A03095 | A10322 | 252 | A03095 | A10392 | 451 |
| A03095 | A10396 | 302 | A03095 | A10398 | 201 |
| A03095 | A10403 | 252 | A03095 | A10768 | 409 |
| A03095 | A10813 | 205 | A03095 | A10863 | 170 |
| A03095 | A10880 | 272 | A03095 | A10969 | 414 |
| A03095 | A11135 | 208 | A03095 | A11166 | 333 |
| A03095 | A11167 | 165 | A03095 | A11198 | 272 |
| A03095 | A11208 | 419 | A03095 | A11211 | 188 |
| A03095 | A11252 | 362 | A03095 | A11326 | 201 |
| A03095 | A11460 | 154 | A03095 | A11559 | 170 |
| A03095 | A11616 | 173 | A03095 | A11683 | 229 |
| A03095 | A11714 | 475 | A03095 | A11759 | 260 |
| A03095 | A11964 | 179 | A03095 | A11973 | 346 |
| A03095 | A11987 | 193 | A03095 | A12024 | 353 |
| A03095 | A12132 | 353 | A03095 | A12262 | 454 |
| A03095 | A12304 | 151 | A03095 | A12353 | 293 |
| A03095 | A12363 | 165 | A03095 | A12415 | 302 |

|        |        |     |        |        |     |
|--------|--------|-----|--------|--------|-----|
| A03095 | A12654 | 151 | A03095 | A12687 | 252 |
| A03095 | A12897 | 401 | A03095 | A13144 | 272 |
| A03095 | A13246 | 157 | A03095 | A13250 | 446 |
| A03095 | A13349 | 353 | A03095 | A13396 | 226 |
| A03095 | A13397 | 479 | A03095 | A13463 | 302 |
| A03095 | A13646 | 302 | A03095 | A13886 | 257 |
| A03095 | A14150 | 218 | A03095 | A14272 | 353 |
| A03095 | A14275 | 174 | A03095 | A14313 | 208 |
| A03095 | A14339 | 188 | A03095 | A14396 | 252 |
| A03095 | A14477 | 329 | A03095 | A14479 | 344 |
| A03095 | A14498 | 465 | A03095 | A14517 | 162 |
| A03095 | A14549 | 188 | A03095 | A14589 | 485 |
| A03095 | A14643 | 243 | A03095 | A14674 | 449 |
| A03095 | A14686 | 162 | A03095 | A14704 | 191 |
| A03095 | A14819 | 173 | A03095 | A14862 | 162 |
| A03095 | A15241 | 200 | A03095 | A15266 | 341 |
| A03095 | A15498 | 472 | A03095 | A15874 | 262 |
| A03095 | A16035 | 174 | A03095 | A16112 | 170 |
| A03095 | A16340 | 385 | A03095 | A16476 | 165 |
| A03095 | A16657 | 293 | A03095 | A16666 | 226 |
| A03095 | A16739 | 480 | A03095 | A16741 | 491 |
| A03095 | A16744 | 463 | A03095 | A16753 | 165 |
| A03095 | A16792 | 481 | A03095 | A16862 | 216 |
| A03095 | A16870 | 272 | A03095 | A17193 | 154 |
| A03096 | A04394 | 424 | A03096 | A05826 | 425 |
| A03096 | A13734 | 270 | A03096 | A14722 | 435 |
| A03097 | A03104 | 165 | A03097 | A03115 | 232 |
| A03097 | A03178 | 247 | A03097 | A03866 | 360 |
| A03097 | A04105 | 238 | A03097 | A05294 | 283 |
| A03097 | A05801 | 382 | A03097 | A06100 | 198 |
| A03097 | A06368 | 335 | A03097 | A06868 | 296 |
| A03097 | A09109 | 398 | A03097 | A09577 | 899 |
| A03098 | A04086 | 770 | A03098 | A04433 | 423 |
| A03098 | A04790 | 205 | A03098 | A07480 | 515 |
| A03098 | A07495 | 274 | A03098 | A07603 | 561 |
| A03098 | A08133 | 199 | A03098 | A10083 | 414 |
| A03098 | A12722 | 485 | A03098 | A13889 | 391 |
| A03098 | A14192 | 286 | A03098 | A14524 | 273 |
| A03098 | A14683 | 258 | A03098 | A14806 | 408 |
| A03098 | A14848 | 318 | A03099 | A03127 | 205 |
| A03099 | A03146 | 332 | A03099 | A03148 | 302 |
| A03099 | A03186 | 401 | A03099 | A03238 | 486 |
| A03099 | A03310 | 208 | A03099 | A03402 | 263 |
| A03099 | A03442 | 294 | A03099 | A03545 | 238 |
| A03099 | A03915 | 257 | A03099 | A03919 | 185 |
| A03099 | A03968 | 435 | A03099 | A04023 | 283 |



|        |        |     |        |        |     |
|--------|--------|-----|--------|--------|-----|
| A03099 | A04087 | 404 | A03099 | A04092 | 262 |
| A03099 | A04162 | 489 | A03099 | A04163 | 269 |
| A03099 | A04168 | 277 | A03099 | A04256 | 252 |
| A03099 | A04258 | 424 | A03099 | A04326 | 263 |
| A03099 | A04366 | 176 | A03099 | A04371 | 377 |
| A03099 | A04377 | 252 | A03099 | A04378 | 230 |
| A03099 | A04437 | 391 | A03099 | A04487 | 152 |
| A03099 | A04626 | 307 | A03099 | A04637 | 213 |
| A03099 | A04746 | 174 | A03099 | A04974 | 373 |
| A03099 | A04975 | 452 | A03099 | A04981 | 473 |
| A03099 | A05143 | 204 | A03099 | A05208 | 490 |
| A03099 | A05277 | 205 | A03099 | A05330 | 163 |
| A03099 | A05356 | 440 | A03099 | A05366 | 294 |
| A03099 | A05376 | 460 | A03099 | A05393 | 177 |
| A03099 | A05459 | 427 | A03099 | A05462 | 168 |
| A03099 | A05533 | 475 | A03099 | A05696 | 395 |
| A03099 | A05736 | 335 | A03099 | A05737 | 294 |
| A03099 | A05740 | 347 | A03099 | A05786 | 373 |
| A03099 | A06037 | 418 | A03099 | A06263 | 484 |
| A03099 | A06460 | 347 | A03099 | A06588 | 160 |
| A03099 | A06607 | 491 | A03099 | A06626 | 252 |
| A03099 | A06650 | 396 | A03099 | A06762 | 945 |
| A03099 | A06769 | 491 | A03099 | A06831 | 243 |
| A03099 | A06874 | 480 | A03099 | A06922 | 285 |
| A03099 | A07059 | 319 | A03099 | A07132 | 185 |
| A03099 | A07342 | 288 | A03099 | A07407 | 290 |
| A03099 | A07509 | 191 | A03099 | A07650 | 363 |
| A03099 | A07684 | 167 | A03099 | A07736 | 283 |
| A03099 | A07763 | 288 | A03099 | A08288 | 294 |
| A03099 | A08655 | 188 | A03099 | A08688 | 176 |
| A03099 | A08746 | 468 | A03099 | A09072 | 339 |
| A03099 | A09418 | 270 | A03099 | A09442 | 353 |
| A03099 | A09540 | 218 | A03099 | A09943 | 218 |
| A03099 | A10103 | 176 | A03099 | A10700 | 252 |
| A03099 | A11261 | 277 | A03099 | A11424 | 427 |
| A03099 | A11646 | 366 | A03099 | A12663 | 224 |
| A03099 | A13140 | 389 | A03099 | A13814 | 294 |
| A03099 | A13879 | 226 | A03099 | A14344 | 177 |
| A03099 | A14503 | 285 | A03099 | A15874 | 176 |
| A03099 | A16741 | 283 | A03099 | A17201 | 417 |
| A03100 | A03141 | 196 | A03100 | A03183 | 185 |
| A03100 | A03204 | 226 | A03100 | A03269 | 286 |
| A03100 | A03416 | 401 | A03100 | A03419 | 428 |
| A03100 | A03424 | 267 | A03100 | A03655 | 385 |
| A03100 | A03782 | 154 | A03100 | A03802 | 463 |
| A03100 | A03805 | 469 | A03100 | A03936 | 243 |

|        |        |     |        |        |     |
|--------|--------|-----|--------|--------|-----|
| A03100 | A03942 | 152 | A03100 | A04011 | 263 |
| A03100 | A04117 | 388 | A03100 | A04138 | 430 |
| A03100 | A04144 | 313 | A03100 | A04201 | 279 |
| A03100 | A04238 | 446 | A03100 | A04242 | 318 |
| A03100 | A04248 | 193 | A03100 | A04263 | 391 |
| A03100 | A04276 | 251 | A03100 | A04278 | 191 |
| A03100 | A04280 | 210 | A03100 | A04320 | 241 |
| A03100 | A04614 | 213 | A03100 | A04800 | 288 |
| A03100 | A04806 | 347 | A03100 | A04962 | 466 |
| A03100 | A05024 | 193 | A03100 | A05104 | 276 |
| A03100 | A05172 | 356 | A03100 | A05235 | 306 |
| A03100 | A05305 | 238 | A03100 | A05513 | 327 |
| A03100 | A06055 | 201 | A03100 | A06813 | 269 |
| A03100 | A07031 | 167 | A03100 | A07146 | 258 |
| A03100 | A07157 | 238 | A03100 | A07165 | 152 |
| A03100 | A08574 | 313 | A03100 | A08692 | 228 |
| A03100 | A08837 | 154 | A03100 | A08876 | 238 |
| A03100 | A09127 | 249 | A03100 | A09361 | 294 |
| A03100 | A10009 | 390 | A03100 | A12383 | 168 |
| A03100 | A13817 | 367 | A03100 | A14125 | 177 |
| A03100 | A14570 | 180 | A03100 | A14598 | 255 |
| A03101 | A03651 | 424 | A03101 | A03681 | 259 |
| A03101 | A03812 | 238 | A03101 | A04209 | 319 |
| A03101 | A04446 | 435 | A03101 | A04706 | 252 |
| A03101 | A05402 | 277 | A03101 | A06075 | 382 |
| A03101 | A06109 | 363 | A03101 | A06330 | 446 |
| A03101 | A06406 | 396 | A03101 | A07486 | 267 |
| A03101 | A08390 | 317 | A03101 | A08501 | 215 |
| A03101 | A09383 | 347 | A03101 | A09546 | 241 |
| A03101 | A09726 | 321 | A03101 | A09901 | 279 |
| A03101 | A09941 | 483 | A03101 | A13250 | 351 |
| A03101 | A13517 | 182 | A03101 | A14637 | 460 |
| A03102 | A03112 | 130 | A03102 | A03415 | 213 |
| A03102 | A04209 | 201 | A03102 | A04308 | 337 |
| A03102 | A04446 | 195 | A03102 | A04563 | 424 |
| A03102 | A04908 | 344 | A03102 | A05074 | 388 |
| A03102 | A05122 | 235 | A03102 | A05165 | 286 |
| A03102 | A05443 | 173 | A03102 | A07163 | 411 |
| A03102 | A09407 | 395 | A03102 | A09464 | 305 |
| A03102 | A10532 | 378 | A03102 | A10824 | 339 |
| A03102 | A11474 | 240 | A03102 | A11743 | 379 |
| A03102 | A11911 | 198 | A03102 | A16129 | 446 |
| A03103 | A04780 | 413 | A03103 | A07210 | 393 |
| A03103 | A09559 | 425 | A03104 | A03211 | 157 |
| A03104 | A03293 | 374 | A03104 | A03314 | 477 |
| A03104 | A03315 | 288 | A03104 | A03334 | 353 |

|        |        |     |        |        |     |
|--------|--------|-----|--------|--------|-----|
| A03104 | A03415 | 374 | A03104 | A03434 | 195 |
| A03104 | A03436 | 160 | A03104 | A03466 | 249 |
| A03104 | A03488 | 216 | A03104 | A03570 | 154 |
| A03104 | A03735 | 151 | A03104 | A03757 | 462 |
| A03104 | A03806 | 299 | A03104 | A03819 | 199 |
| A03104 | A03893 | 160 | A03104 | A03910 | 167 |
| A03104 | A03961 | 176 | A03104 | A04033 | 467 |
| A03104 | A04072 | 212 | A03104 | A04163 | 340 |
| A03104 | A04252 | 404 | A03104 | A04275 | 443 |
| A03104 | A04337 | 419 | A03104 | A04360 | 224 |
| A03104 | A04420 | 212 | A03104 | A04423 | 171 |
| A03104 | A04449 | 490 | A03104 | A04488 | 419 |
| A03104 | A04548 | 241 | A03104 | A04715 | 405 |
| A03104 | A04944 | 468 | A03104 | A04964 | 324 |
| A03104 | A04976 | 339 | A03104 | A05049 | 333 |
| A03104 | A05087 | 160 | A03104 | A05155 | 483 |
| A03104 | A05157 | 446 | A03104 | A05208 | 162 |
| A03104 | A05211 | 235 | A03104 | A05221 | 396 |
| A03104 | A05228 | 256 | A03104 | A05229 | 249 |
| A03104 | A05234 | 156 | A03104 | A05288 | 375 |
| A03104 | A05356 | 429 | A03104 | A05439 | 491 |
| A03104 | A05601 | 319 | A03104 | A05603 | 366 |
| A03104 | A05653 | 474 | A03104 | A05697 | 396 |
| A03104 | A05865 | 152 | A03104 | A05891 | 176 |
| A03104 | A05923 | 157 | A03104 | A05944 | 185 |
| A03104 | A05956 | 177 | A03104 | A05985 | 152 |
| A03104 | A06038 | 490 | A03104 | A06074 | 185 |
| A03104 | A06092 | 157 | A03104 | A06100 | 490 |
| A03104 | A06171 | 288 | A03104 | A06190 | 454 |
| A03104 | A06225 | 152 | A03104 | A06277 | 434 |
| A03104 | A06298 | 217 | A03104 | A06561 | 235 |
| A03104 | A06701 | 270 | A03104 | A06708 | 480 |
| A03104 | A06729 | 286 | A03104 | A06731 | 475 |
| A03104 | A06739 | 451 | A03104 | A06997 | 232 |
| A03104 | A07126 | 262 | A03104 | A07149 | 226 |
| A03104 | A07209 | 491 | A03104 | A07210 | 262 |
| A03104 | A07310 | 288 | A03104 | A07577 | 208 |
| A03104 | A07578 | 288 | A03104 | A07605 | 307 |
| A03104 | A07626 | 156 | A03104 | A07737 | 162 |
| A03104 | A07803 | 490 | A03104 | A07815 | 468 |
| A03104 | A07833 | 191 | A03104 | A07836 | 411 |
| A03104 | A07922 | 321 | A03104 | A08097 | 486 |
| A03104 | A08600 | 288 | A03104 | A08630 | 485 |
| A03104 | A08859 | 174 | A03104 | A08875 | 154 |
| A03104 | A09062 | 208 | A03104 | A09125 | 288 |
| A03104 | A09239 | 212 | A03104 | A09245 | 477 |

|        |        |     |        |        |     |
|--------|--------|-----|--------|--------|-----|
| A03104 | A09290 | 193 | A03104 | A09362 | 386 |
| A03104 | A09559 | 235 | A03104 | A09956 | 407 |
| A03104 | A10024 | 193 | A03104 | A10603 | 246 |
| A03104 | A10752 | 221 | A03104 | A10844 | 157 |
| A03104 | A11313 | 180 | A03104 | A11335 | 154 |
| A03104 | A11454 | 249 | A03104 | A11655 | 212 |
| A03104 | A11970 | 333 | A03104 | A11982 | 216 |
| A03104 | A11983 | 488 | A03104 | A12265 | 382 |
| A03104 | A12298 | 432 | A03104 | A12393 | 369 |
| A03104 | A12633 | 221 | A03104 | A12824 | 262 |
| A03104 | A12897 | 440 | A03104 | A12950 | 306 |
| A03104 | A13322 | 157 | A03104 | A13361 | 375 |
| A03104 | A13369 | 490 | A03104 | A13546 | 156 |
| A03104 | A13945 | 180 | A03104 | A14016 | 350 |
| A03104 | A14193 | 252 | A03104 | A14196 | 480 |
| A03104 | A14210 | 358 | A03104 | A14299 | 185 |
| A03104 | A14303 | 251 | A03104 | A14343 | 249 |
| A03104 | A14372 | 267 | A03104 | A14375 | 185 |
| A03104 | A14377 | 159 | A03104 | A14381 | 452 |
| A03104 | A14394 | 219 | A03104 | A14395 | 440 |
| A03104 | A14410 | 193 | A03104 | A14430 | 458 |
| A03104 | A14511 | 484 | A03104 | A14570 | 414 |
| A03104 | A14635 | 461 | A03104 | A14679 | 306 |
| A03104 | A14936 | 246 | A03104 | A15135 | 334 |
| A03104 | A15282 | 483 | A03104 | A15292 | 480 |
| A03104 | A15313 | 279 | A03104 | A15314 | 490 |
| A03104 | A15322 | 463 | A03104 | A15336 | 270 |
| A03104 | A15341 | 162 | A03104 | A15349 | 337 |
| A03104 | A15387 | 183 | A03104 | A15419 | 322 |
| A03104 | A15457 | 188 | A03104 | A15495 | 419 |
| A03104 | A15622 | 224 | A03104 | A16041 | 276 |
| A03104 | A16274 | 335 | A03104 | A16408 | 249 |
| A03104 | A17198 | 196 | A03105 | A15545 | 390 |
| A03106 | A07242 | 174 | A03107 | A03121 | 489 |
| A03107 | A03137 | 401 | A03107 | A03224 | 162 |
| A03107 | A03310 | 240 | A03107 | A03471 | 154 |
| A03107 | A03709 | 485 | A03107 | A03755 | 276 |
| A03107 | A03926 | 340 | A03107 | A03961 | 249 |
| A03107 | A03968 | 427 | A03107 | A04092 | 297 |
| A03107 | A04157 | 361 | A03107 | A04193 | 344 |
| A03107 | A04215 | 319 | A03107 | A04229 | 433 |
| A03107 | A04326 | 481 | A03107 | A04329 | 224 |
| A03107 | A04331 | 389 | A03107 | A04336 | 485 |
| A03107 | A04349 | 491 | A03107 | A04361 | 254 |
| A03107 | A04382 | 310 | A03107 | A04383 | 489 |
| A03107 | A04384 | 486 | A03107 | A04389 | 249 |

|        |        |     |        |        |     |
|--------|--------|-----|--------|--------|-----|
| A03107 | A04400 | 310 | A03107 | A04402 | 291 |
| A03107 | A04459 | 481 | A03107 | A04460 | 473 |
| A03107 | A04464 | 452 | A03107 | A04465 | 481 |
| A03107 | A04791 | 183 | A03107 | A04870 | 462 |
| A03107 | A04877 | 276 | A03107 | A04928 | 318 |
| A03107 | A04949 | 479 | A03107 | A05247 | 195 |
| A03107 | A05274 | 389 | A03107 | A05288 | 480 |
| A03107 | A05381 | 319 | A03107 | A05533 | 279 |
| A03107 | A05673 | 240 | A03107 | A05751 | 319 |
| A03107 | A05795 | 463 | A03107 | A05801 | 302 |
| A03107 | A06069 | 171 | A03107 | A06255 | 490 |
| A03107 | A06346 | 185 | A03107 | A06464 | 344 |
| A03107 | A06608 | 905 | A03107 | A07019 | 489 |
| A03107 | A07119 | 395 | A03107 | A07154 | 202 |
| A03107 | A07218 | 170 | A03107 | A07233 | 428 |
| A03107 | A07559 | 491 | A03107 | A07704 | 296 |
| A03107 | A07705 | 152 | A03107 | A07812 | 486 |
| A03107 | A08292 | 202 | A03107 | A08342 | 456 |
| A03107 | A08496 | 409 | A03107 | A08675 | 364 |
| A03107 | A09074 | 272 | A03107 | A09240 | 474 |
| A03107 | A09364 | 285 | A03107 | A09365 | 414 |
| A03107 | A09480 | 252 | A03107 | A10127 | 204 |
| A03107 | A10140 | 391 | A03107 | A10665 | 458 |
| A03107 | A11009 | 319 | A03107 | A11014 | 450 |
| A03107 | A11101 | 191 | A03107 | A11240 | 401 |
| A03107 | A11411 | 228 | A03107 | A11698 | 481 |
| A03107 | A11977 | 452 | A03107 | A12426 | 329 |
| A03107 | A12596 | 456 | A03107 | A13330 | 191 |
| A03107 | A13337 | 364 | A03107 | A13426 | 216 |
| A03107 | A14366 | 162 | A03107 | A14500 | 364 |
| A03107 | A14675 | 364 | A03107 | A14676 | 329 |
| A03107 | A15230 | 285 | A03107 | A15241 | 176 |
| A03107 | A15271 | 265 | A03107 | A15277 | 151 |
| A03107 | A15498 | 466 | A03107 | A16043 | 368 |
| A03107 | A16068 | 357 | A03107 | A16138 | 434 |
| A03107 | A16171 | 419 | A03107 | A16174 | 452 |
| A03107 | A16195 | 319 | A03107 | A16721 | 302 |
| A03108 | A13307 | 249 | A03109 | A03110 | 394 |
| A03109 | A03167 | 205 | A03109 | A03183 | 257 |
| A03109 | A03259 | 152 | A03109 | A03305 | 291 |
| A03109 | A03438 | 221 | A03109 | A03942 | 226 |
| A03109 | A04589 | 355 | A03109 | A05706 | 234 |
| A03109 | A06269 | 347 | A03109 | A06623 | 212 |
| A03109 | A06901 | 391 | A03109 | A07145 | 425 |
| A03109 | A07173 | 229 | A03109 | A08309 | 152 |
| A03109 | A09245 | 263 | A03109 | A13860 | 173 |

|        |        |     |        |        |     |
|--------|--------|-----|--------|--------|-----|
| A03109 | A14210 | 251 | A03109 | A14366 | 388 |
| A03109 | A14379 | 232 | A03109 | A14430 | 157 |
| A03109 | A14554 | 238 | A03109 | A14604 | 229 |
| A03109 | A15336 | 177 | A03109 | A15422 | 185 |
| A03109 | A15638 | 210 | A03109 | A16149 | 307 |
| A03110 | A03183 | 491 | A03110 | A03185 | 238 |
| A03110 | A03209 | 180 | A03110 | A03219 | 329 |
| A03110 | A03259 | 480 | A03110 | A03275 | 173 |
| A03110 | A03281 | 151 | A03110 | A03310 | 346 |
| A03110 | A03447 | 183 | A03110 | A03470 | 185 |
| A03110 | A03639 | 210 | A03110 | A03701 | 205 |
| A03110 | A03788 | 156 | A03110 | A03799 | 488 |
| A03110 | A03800 | 274 | A03110 | A03851 | 451 |
| A03110 | A03887 | 151 | A03110 | A03942 | 491 |
| A03110 | A03961 | 386 | A03110 | A04169 | 369 |
| A03110 | A04180 | 414 | A03110 | A04202 | 160 |
| A03110 | A04216 | 341 | A03110 | A04257 | 232 |
| A03110 | A04258 | 162 | A03110 | A04380 | 249 |
| A03110 | A04422 | 277 | A03110 | A04423 | 201 |
| A03110 | A04490 | 366 | A03110 | A04492 | 180 |
| A03110 | A04647 | 205 | A03110 | A04676 | 491 |
| A03110 | A04751 | 213 | A03110 | A04822 | 193 |
| A03110 | A04881 | 429 | A03110 | A04938 | 201 |
| A03110 | A05248 | 404 | A03110 | A05270 | 313 |
| A03110 | A05408 | 419 | A03110 | A05696 | 291 |
| A03110 | A05706 | 385 | A03110 | A05784 | 352 |
| A03110 | A05786 | 259 | A03110 | A06118 | 449 |
| A03110 | A07126 | 163 | A03110 | A07157 | 252 |
| A03110 | A07803 | 462 | A03110 | A07912 | 259 |
| A03110 | A08834 | 232 | A03110 | A08840 | 345 |
| A03110 | A08841 | 294 | A03110 | A08859 | 312 |
| A03110 | A09062 | 238 | A03110 | A09238 | 196 |
| A03110 | A09239 | 159 | A03110 | A09241 | 371 |
| A03110 | A09422 | 235 | A03110 | A09480 | 452 |
| A03110 | A09552 | 204 | A03110 | A09572 | 352 |
| A03110 | A09732 | 486 | A03110 | A09733 | 265 |
| A03110 | A09744 | 327 | A03110 | A10189 | 328 |
| A03110 | A10336 | 484 | A03110 | A10444 | 162 |
| A03110 | A10580 | 944 | A03110 | A10587 | 259 |
| A03110 | A10744 | 232 | A03110 | A11415 | 263 |
| A03110 | A11951 | 201 | A03110 | A11986 | 156 |
| A03110 | A12366 | 328 | A03110 | A12419 | 177 |
| A03110 | A12959 | 283 | A03110 | A13007 | 313 |
| A03110 | A13084 | 185 | A03110 | A13435 | 270 |
| A03110 | A13699 | 156 | A03110 | A13826 | 485 |
| A03110 | A13899 | 358 | A03110 | A13944 | 177 |

|        |        |     |        |        |     |
|--------|--------|-----|--------|--------|-----|
| A03110 | A13986 | 245 | A03110 | A13987 | 286 |
| A03110 | A14010 | 369 | A03110 | A14124 | 157 |
| A03110 | A14126 | 213 | A03110 | A14187 | 156 |
| A03110 | A14190 | 491 | A03110 | A14198 | 172 |
| A03110 | A14202 | 383 | A03110 | A14210 | 491 |
| A03110 | A14259 | 276 | A03110 | A14364 | 232 |
| A03110 | A14369 | 486 | A03110 | A14370 | 457 |
| A03110 | A14371 | 491 | A03110 | A14379 | 491 |
| A03110 | A14394 | 165 | A03110 | A14408 | 218 |
| A03110 | A14511 | 491 | A03110 | A14523 | 337 |
| A03110 | A14536 | 361 | A03110 | A14539 | 384 |
| A03110 | A14554 | 472 | A03110 | A14598 | 191 |
| A03110 | A14604 | 485 | A03110 | A14930 | 308 |
| A03110 | A15292 | 483 | A03110 | A15312 | 405 |
| A03110 | A15313 | 455 | A03110 | A15318 | 480 |
| A03110 | A15327 | 159 | A03110 | A15346 | 465 |
| A03110 | A15348 | 159 | A03110 | A15349 | 417 |
| A03110 | A15352 | 446 | A03110 | A15381 | 183 |
| A03110 | A15391 | 290 | A03110 | A15404 | 212 |
| A03110 | A15411 | 172 | A03110 | A15419 | 180 |
| A03110 | A15447 | 172 | A03110 | A15452 | 322 |
| A03110 | A15456 | 160 | A03110 | A15480 | 165 |
| A03110 | A15489 | 162 | A03110 | A15495 | 456 |
| A03110 | A15498 | 229 | A03110 | A15726 | 215 |
| A03110 | A15792 | 201 | A03110 | A15801 | 191 |
| A03110 | A15813 | 185 | A03110 | A15828 | 180 |
| A03110 | A15904 | 270 | A03110 | A15916 | 195 |
| A03110 | A16001 | 352 | A03110 | A16136 | 212 |
| A03110 | A16188 | 301 | A03110 | A16224 | 430 |
| A03110 | A16300 | 394 | A03110 | A16580 | 196 |
| A03110 | A16711 | 160 | A03111 | A05439 | 322 |
| A03111 | A06277 | 241 | A03111 | A12561 | 438 |
| A03112 | A03131 | 160 | A03112 | A03141 | 173 |
| A03112 | A03142 | 291 | A03112 | A03181 | 154 |
| A03112 | A03186 | 191 | A03112 | A03201 | 202 |
| A03112 | A03257 | 221 | A03112 | A03259 | 486 |
| A03112 | A03268 | 176 | A03112 | A03275 | 456 |
| A03112 | A03276 | 441 | A03112 | A03321 | 134 |
| A03112 | A03377 | 283 | A03112 | A03415 | 472 |
| A03112 | A03426 | 183 | A03112 | A03451 | 333 |
| A03112 | A03534 | 249 | A03112 | A03590 | 183 |
| A03112 | A03596 | 386 | A03112 | A03604 | 213 |
| A03112 | A03609 | 457 | A03112 | A03663 | 308 |
| A03112 | A03689 | 156 | A03112 | A03696 | 187 |
| A03112 | A03843 | 165 | A03112 | A03902 | 252 |
| A03112 | A03940 | 221 | A03112 | A03975 | 152 |

|        |        |     |        |        |     |
|--------|--------|-----|--------|--------|-----|
| A03112 | A03976 | 283 | A03112 | A03990 | 165 |
| A03112 | A04009 | 154 | A03112 | A04015 | 405 |
| A03112 | A04080 | 296 | A03112 | A04116 | 201 |
| A03112 | A04117 | 285 | A03112 | A04201 | 159 |
| A03112 | A04280 | 334 | A03112 | A04293 | 291 |
| A03112 | A04297 | 201 | A03112 | A04308 | 423 |
| A03112 | A04334 | 279 | A03112 | A04342 | 297 |
| A03112 | A04441 | 187 | A03112 | A04496 | 312 |
| A03112 | A04503 | 312 | A03112 | A04508 | 283 |
| A03112 | A04598 | 179 | A03112 | A04622 | 491 |
| A03112 | A04772 | 221 | A03112 | A04775 | 191 |
| A03112 | A04783 | 162 | A03112 | A04808 | 201 |
| A03112 | A04818 | 324 | A03112 | A04820 | 238 |
| A03112 | A04853 | 388 | A03112 | A04864 | 207 |
| A03112 | A04908 | 180 | A03112 | A04916 | 249 |
| A03112 | A04939 | 480 | A03112 | A04952 | 249 |
| A03112 | A04990 | 191 | A03112 | A04999 | 183 |
| A03112 | A05105 | 312 | A03112 | A05122 | 435 |
| A03112 | A05133 | 249 | A03112 | A05250 | 191 |
| A03112 | A05303 | 283 | A03112 | A05309 | 374 |
| A03112 | A05373 | 238 | A03112 | A05410 | 183 |
| A03112 | A05477 | 179 | A03112 | A05506 | 156 |
| A03112 | A05531 | 190 | A03112 | A05580 | 263 |
| A03112 | A05589 | 324 | A03112 | A05634 | 154 |
| A03112 | A05716 | 179 | A03112 | A05741 | 156 |
| A03112 | A06001 | 380 | A03112 | A06053 | 207 |
| A03112 | A06074 | 156 | A03112 | A06243 | 229 |
| A03112 | A06387 | 167 | A03112 | A06399 | 263 |
| A03112 | A06581 | 296 | A03112 | A06597 | 288 |
| A03112 | A06622 | 176 | A03112 | A06623 | 281 |
| A03112 | A06628 | 210 | A03112 | A06647 | 160 |
| A03112 | A06648 | 313 | A03112 | A06660 | 167 |
| A03112 | A06669 | 179 | A03112 | A06845 | 213 |
| A03112 | A07145 | 243 | A03112 | A07157 | 405 |
| A03112 | A07158 | 245 | A03112 | A07159 | 238 |
| A03112 | A07165 | 432 | A03112 | A07178 | 432 |
| A03112 | A07192 | 260 | A03112 | A07211 | 312 |
| A03112 | A07280 | 191 | A03112 | A07399 | 446 |
| A03112 | A07427 | 163 | A03112 | A07700 | 252 |
| A03112 | A08070 | 363 | A03112 | A08109 | 196 |
| A03112 | A08137 | 439 | A03112 | A08445 | 277 |
| A03112 | A08531 | 168 | A03112 | A08571 | 441 |
| A03112 | A08574 | 201 | A03112 | A08680 | 312 |
| A03112 | A08911 | 443 | A03112 | A09000 | 180 |
| A03112 | A09028 | 390 | A03112 | A09120 | 213 |
| A03112 | A09374 | 152 | A03112 | A09524 | 196 |



|        |        |     |        |        |     |
|--------|--------|-----|--------|--------|-----|
| A03112 | A09735 | 168 | A03112 | A09741 | 174 |
| A03112 | A10033 | 263 | A03112 | A10047 | 423 |
| A03112 | A10148 | 324 | A03112 | A10177 | 249 |
| A03112 | A10190 | 263 | A03112 | A10197 | 163 |
| A03112 | A10221 | 201 | A03112 | A10247 | 177 |
| A03112 | A10270 | 238 | A03112 | A10551 | 288 |
| A03112 | A10592 | 223 | A03112 | A10625 | 333 |
| A03112 | A10984 | 312 | A03112 | A11545 | 157 |
| A03112 | A11597 | 294 | A03112 | A11680 | 179 |
| A03112 | A11759 | 174 | A03112 | A11774 | 173 |
| A03112 | A11858 | 168 | A03112 | A11900 | 179 |
| A03112 | A11911 | 238 | A03112 | A12189 | 238 |
| A03112 | A12246 | 183 | A03112 | A12358 | 263 |
| A03112 | A13421 | 221 | A03112 | A14141 | 249 |
| A03112 | A14257 | 195 | A03112 | A14343 | 221 |
| A03112 | A14388 | 249 | A03112 | A14424 | 249 |
| A03112 | A14469 | 183 | A03112 | A14588 | 358 |
| A03112 | A14617 | 283 | A03112 | A14745 | 329 |
| A03112 | A14780 | 263 | A03112 | A14831 | 196 |
| A03112 | A15230 | 179 | A03112 | A15846 | 196 |
| A03112 | A15932 | 241 | A03112 | A16848 | 249 |
| A03112 | A17075 | 159 | A03113 | A03186 | 168 |
| A03113 | A03243 | 241 | A03113 | A03259 | 157 |
| A03113 | A03276 | 319 | A03113 | A03373 | 249 |
| A03113 | A03419 | 177 | A03113 | A03586 | 256 |
| A03113 | A03661 | 177 | A03113 | A03861 | 374 |
| A03113 | A04059 | 329 | A03113 | A04088 | 319 |
| A03113 | A04122 | 324 | A03113 | A04334 | 391 |
| A03113 | A04519 | 273 | A03113 | A04573 | 355 |
| A03113 | A04653 | 401 | A03113 | A04795 | 385 |
| A03113 | A06379 | 157 | A03113 | A06544 | 307 |
| A03113 | A06597 | 434 | A03113 | A06649 | 335 |
| A03113 | A07128 | 404 | A03113 | A09264 | 355 |
| A03113 | A10330 | 401 | A03113 | A10506 | 205 |
| A03113 | A13973 | 372 | A03113 | A13980 | 210 |
| A03113 | A14403 | 350 | A03113 | A14669 | 401 |
| A03113 | A15599 | 290 | A03113 | A16357 | 413 |
| A03114 | A03115 | 266 | A03114 | A03186 | 218 |
| A03114 | A04256 | 312 | A03114 | A09127 | 247 |
| A03114 | A10253 | 202 | A03115 | A03149 | 173 |
| A03115 | A03178 | 441 | A03115 | A03186 | 170 |
| A03115 | A03423 | 226 | A03115 | A03611 | 317 |
| A03115 | A03840 | 168 | A03115 | A03873 | 159 |
| A03115 | A03906 | 373 | A03115 | A04058 | 256 |
| A03115 | A04229 | 184 | A03115 | A04256 | 170 |
| A03115 | A04282 | 201 | A03115 | A04418 | 193 |

|        |        |     |        |        |     |
|--------|--------|-----|--------|--------|-----|
| A03115 | A04776 | 190 | A03115 | A05247 | 338 |
| A03115 | A05277 | 249 | A03115 | A05288 | 475 |
| A03115 | A05294 | 170 | A03115 | A05472 | 156 |
| A03115 | A06621 | 163 | A03115 | A07123 | 191 |
| A03115 | A07136 | 283 | A03115 | A08317 | 306 |
| A03115 | A09387 | 258 | A03115 | A09417 | 263 |
| A03115 | A09766 | 154 | A03115 | A09790 | 232 |
| A03115 | A10267 | 283 | A03115 | A10824 | 251 |
| A03115 | A10947 | 258 | A03115 | A14211 | 168 |
| A03115 | A15295 | 416 | A03115 | A16257 | 306 |
| A03116 | A03117 | 435 | A03116 | A03422 | 310 |
| A03116 | A03451 | 234 | A03116 | A03663 | 386 |
| A03116 | A09127 | 339 | A03116 | A13744 | 447 |
| A03117 | A03422 | 281 | A03117 | A08479 | 414 |
| A03117 | A09127 | 313 | A03117 | A09921 | 441 |
| A03117 | A10959 | 441 | A03117 | A11225 | 441 |
| A03117 | A12398 | 441 | A03117 | A13744 | 441 |
| A03118 | A03223 | 241 | A03118 | A03611 | 240 |
| A03118 | A03990 | 263 | A03118 | A10247 | 296 |
| A03119 | A03217 | 347 | A03119 | A03221 | 389 |
| A03119 | A03232 | 422 | A03119 | A03750 | 260 |
| A03119 | A03922 | 299 | A03119 | A04376 | 385 |
| A03119 | A04967 | 418 | A03119 | A05514 | 418 |
| A03119 | A05874 | 418 | A03119 | A06752 | 384 |
| A03119 | A07694 | 418 | A03119 | A07880 | 369 |
| A03119 | A08105 | 394 | A03119 | A08619 | 418 |
| A03119 | A09478 | 394 | A03119 | A10223 | 399 |
| A03119 | A15837 | 302 | A03119 | A16068 | 204 |
| A03119 | A16485 | 350 | A03120 | A03537 | 406 |
| A03120 | A03583 | 396 | A03120 | A03585 | 388 |
| A03120 | A03653 | 340 | A03120 | A03847 | 419 |
| A03120 | A03870 | 411 | A03120 | A03992 | 383 |
| A03120 | A04004 | 367 | A03120 | A04031 | 390 |
| A03120 | A04123 | 411 | A03120 | A04231 | 416 |
| A03120 | A04260 | 314 | A03120 | A04560 | 396 |
| A03120 | A04905 | 378 | A03120 | A05036 | 404 |
| A03121 | A03423 | 428 | A03121 | A03545 | 369 |
| A03121 | A03709 | 481 | A03121 | A04215 | 324 |
| A03121 | A04228 | 170 | A03121 | A04349 | 486 |
| A03121 | A04384 | 283 | A03121 | A04460 | 271 |
| A03121 | A04949 | 228 | A03121 | A05224 | 283 |
| A03121 | A05288 | 483 | A03121 | A05346 | 308 |
| A03121 | A05795 | 491 | A03121 | A05881 | 425 |
| A03121 | A06151 | 221 | A03121 | A06154 | 423 |
| A03121 | A06662 | 337 | A03121 | A06783 | 491 |
| A03121 | A06795 | 491 | A03121 | A07019 | 470 |

|        |        |     |        |        |     |
|--------|--------|-----|--------|--------|-----|
| A03121 | A07154 | 210 | A03121 | A07166 | 255 |
| A03121 | A07559 | 484 | A03121 | A07812 | 321 |
| A03121 | A09074 | 462 | A03121 | A09470 | 170 |
| A03121 | A10140 | 396 | A03121 | A10665 | 435 |
| A03121 | A11014 | 452 | A03121 | A13734 | 170 |
| A03121 | A14330 | 491 | A03121 | A15277 | 159 |
| A03121 | A16043 | 252 | A03121 | A16081 | 491 |
| A03121 | A16138 | 268 | A03121 | A16721 | 308 |
| A03121 | A17102 | 196 | A03123 | A03186 | 251 |
| A03123 | A03498 | 366 | A03123 | A04023 | 352 |
| A03123 | A04477 | 390 | A03123 | A04574 | 347 |
| A03123 | A05222 | 329 | A03123 | A05609 | 350 |
| A03123 | A05932 | 434 | A03123 | A07165 | 210 |
| A03123 | A09350 | 396 | A03123 | A13734 | 193 |
| A03123 | A14188 | 204 | A03123 | A14810 | 394 |
| A03123 | A14986 | 283 | A03124 | A04467 | 438 |
| A03124 | A04486 | 424 | A03124 | A06219 | 430 |
| A03124 | A07187 | 385 | A03124 | A09388 | 398 |
| A03124 | A14722 | 435 | A03126 | A03171 | 452 |
| A03126 | A03259 | 152 | A03126 | A03408 | 491 |
| A03126 | A03415 | 191 | A03126 | A03927 | 366 |
| A03126 | A04080 | 232 | A03126 | A04306 | 235 |
| A03126 | A04348 | 339 | A03126 | A04473 | 152 |
| A03126 | A04712 | 160 | A03126 | A04925 | 269 |
| A03126 | A04982 | 167 | A03126 | A05163 | 227 |
| A03126 | A05167 | 288 | A03126 | A05246 | 446 |
| A03126 | A05380 | 198 | A03126 | A05560 | 160 |
| A03126 | A05750 | 269 | A03126 | A06166 | 218 |
| A03126 | A06188 | 182 | A03126 | A06510 | 213 |
| A03126 | A06561 | 213 | A03126 | A06598 | 489 |
| A03126 | A06662 | 404 | A03126 | A07186 | 294 |
| A03126 | A07311 | 899 | A03126 | A07341 | 170 |
| A03126 | A07426 | 218 | A03126 | A07643 | 208 |
| A03126 | A08191 | 207 | A03126 | A08368 | 255 |
| A03126 | A08402 | 472 | A03126 | A08524 | 452 |
| A03126 | A08687 | 173 | A03126 | A09387 | 170 |
| A03126 | A09542 | 899 | A03126 | A09648 | 467 |
| A03126 | A09744 | 152 | A03126 | A09770 | 384 |
| A03126 | A09989 | 182 | A03126 | A11352 | 255 |
| A03126 | A12048 | 255 | A03126 | A12102 | 255 |
| A03126 | A13835 | 207 | A03126 | A13985 | 899 |
| A03126 | A14045 | 899 | A03126 | A14112 | 425 |
| A03126 | A14252 | 379 | A03126 | A15356 | 299 |
| A03126 | A15367 | 486 | A03126 | A16690 | 467 |
| A03126 | A16866 | 168 | A03127 | A03926 | 335 |
| A03127 | A03961 | 268 | A03127 | A04074 | 462 |

|        |        |     |        |        |     |
|--------|--------|-----|--------|--------|-----|
| A03127 | A04092 | 303 | A03127 | A04264 | 424 |
| A03127 | A04402 | 383 | A03127 | A05780 | 383 |
| A03127 | A09388 | 419 | A03127 | A09390 | 344 |
| A03127 | A13589 | 218 | A03127 | A14188 | 151 |
| A03127 | A15230 | 294 | A03127 | A15498 | 210 |
| A03128 | A03177 | 351 | A03128 | A04614 | 363 |
| A03128 | A07145 | 337 | A03128 | A13899 | 313 |
| A03129 | A04117 | 151 | A03129 | A05914 | 240 |
| A03129 | A14366 | 241 | A03129 | A14391 | 458 |
| A03130 | A06607 | 171 | A03130 | A10148 | 343 |
| A03131 | A03408 | 201 | A03131 | A03891 | 363 |
| A03131 | A04334 | 213 | A03131 | A05401 | 283 |
| A03131 | A07399 | 281 | A03131 | A09011 | 375 |
| A03131 | A09452 | 396 | A03131 | A09633 | 294 |
| A03131 | A11576 | 269 | A03131 | A14300 | 286 |
| A03131 | A15241 | 223 | A03133 | A05361 | 419 |
| A03134 | A03141 | 273 | A03134 | A03701 | 413 |
| A03134 | A03719 | 208 | A03134 | A03721 | 452 |
| A03134 | A03722 | 357 | A03134 | A03894 | 367 |
| A03134 | A04329 | 313 | A03134 | A04340 | 465 |
| A03134 | A07270 | 447 | A03134 | A07442 | 160 |
| A03134 | A09235 | 235 | A03134 | A10242 | 408 |
| A03134 | A11127 | 408 | A03134 | A11951 | 412 |
| A03134 | A12935 | 373 | A03134 | A12960 | 353 |
| A03134 | A12983 | 434 | A03134 | A13410 | 347 |
| A03134 | A13745 | 408 | A03134 | A16274 | 474 |
| A03135 | A03145 | 406 | A03135 | A05361 | 398 |
| A03135 | A06581 | 184 | A03135 | A07216 | 411 |
| A03136 | A04268 | 172 | A03136 | A04275 | 221 |
| A03136 | A04449 | 491 | A03136 | A05489 | 404 |
| A03136 | A05556 | 299 | A03136 | A05601 | 210 |
| A03136 | A06277 | 269 | A03136 | A06491 | 490 |
| A03136 | A06551 | 228 | A03136 | A06907 | 259 |
| A03136 | A07483 | 310 | A03136 | A08023 | 252 |
| A03136 | A08859 | 469 | A03136 | A09745 | 271 |
| A03136 | A10001 | 382 | A03136 | A10169 | 263 |
| A03136 | A11291 | 420 | A03136 | A12393 | 163 |
| A03136 | A12952 | 226 | A03136 | A13119 | 185 |
| A03136 | A13124 | 221 | A03136 | A13587 | 491 |
| A03136 | A13889 | 488 | A03136 | A13928 | 491 |
| A03136 | A14109 | 154 | A03136 | A14139 | 190 |
| A03136 | A14220 | 291 | A03136 | A14366 | 151 |
| A03136 | A14454 | 358 | A03136 | A14457 | 227 |
| A03136 | A14490 | 308 | A03136 | A14570 | 491 |
| A03136 | A15252 | 252 | A03136 | A15274 | 152 |
| A03136 | A15297 | 216 | A03136 | A15366 | 454 |

|        |        |     |        |        |     |
|--------|--------|-----|--------|--------|-----|
| A03136 | A15396 | 213 | A03136 | A15406 | 247 |
| A03136 | A15419 | 213 | A03136 | A15431 | 218 |
| A03136 | A15492 | 433 | A03136 | A15535 | 154 |
| A03136 | A15665 | 405 | A03136 | A15749 | 184 |
| A03136 | A15817 | 173 | A03136 | A15852 | 474 |
| A03136 | A15870 | 490 | A03136 | A16410 | 218 |
| A03136 | A16724 | 485 | A03136 | A16851 | 165 |
| A03136 | A16911 | 188 | A03137 | A04215 | 419 |
| A03137 | A04349 | 329 | A03137 | A04460 | 398 |
| A03137 | A05243 | 366 | A03137 | A07019 | 357 |
| A03137 | A07559 | 429 | A03137 | A09900 | 353 |
| A03137 | A10665 | 395 | A03137 | A11014 | 379 |
| A03137 | A13337 | 436 | A03137 | A14676 | 463 |
| A03137 | A14677 | 429 | A03138 | A03378 | 255 |
| A03138 | A03744 | 369 | A03138 | A03909 | 340 |
| A03138 | A03968 | 221 | A03138 | A04361 | 369 |
| A03138 | A04410 | 350 | A03138 | A04698 | 251 |
| A03138 | A04763 | 334 | A03138 | A05897 | 371 |
| A03138 | A05898 | 378 | A03138 | A06329 | 433 |
| A03138 | A06346 | 198 | A03138 | A06484 | 223 |
| A03138 | A06835 | 401 | A03138 | A07054 | 176 |
| A03138 | A07453 | 378 | A03138 | A07494 | 401 |
| A03138 | A07699 | 383 | A03138 | A09073 | 278 |
| A03138 | A09209 | 351 | A03138 | A09460 | 383 |
| A03138 | A09825 | 193 | A03138 | A09882 | 357 |
| A03138 | A09890 | 345 | A03138 | A10954 | 374 |
| A03138 | A11911 | 196 | A03138 | A12698 | 401 |
| A03138 | A13734 | 238 | A03139 | A04579 | 263 |
| A03139 | A05765 | 188 | A03139 | A11487 | 396 |
| A03139 | A14515 | 369 | A03139 | A14852 | 385 |
| A03139 | A16647 | 316 | A03141 | A03158 | 171 |
| A03141 | A03186 | 486 | A03141 | A03203 | 332 |
| A03141 | A03292 | 152 | A03141 | A03688 | 491 |
| A03141 | A03719 | 491 | A03141 | A03723 | 263 |
| A03141 | A03745 | 190 | A03141 | A03851 | 258 |
| A03141 | A03893 | 241 | A03141 | A03906 | 491 |
| A03141 | A03936 | 154 | A03141 | A04020 | 246 |
| A03141 | A04065 | 227 | A03141 | A04070 | 385 |
| A03141 | A04079 | 162 | A03141 | A04086 | 446 |
| A03141 | A04152 | 490 | A03141 | A04193 | 297 |
| A03141 | A04201 | 193 | A03141 | A04276 | 162 |
| A03141 | A04315 | 187 | A03141 | A04375 | 195 |
| A03141 | A04405 | 191 | A03141 | A04449 | 185 |
| A03141 | A04479 | 271 | A03141 | A04616 | 171 |
| A03141 | A04633 | 162 | A03141 | A04698 | 193 |
| A03141 | A04773 | 199 | A03141 | A04795 | 227 |

|        |        |     |        |        |     |
|--------|--------|-----|--------|--------|-----|
| A03141 | A04928 | 265 | A03141 | A05048 | 391 |
| A03141 | A05128 | 177 | A03141 | A05560 | 470 |
| A03141 | A05578 | 218 | A03141 | A05627 | 450 |
| A03141 | A05634 | 190 | A03141 | A05716 | 215 |
| A03141 | A05764 | 311 | A03141 | A05816 | 345 |
| A03141 | A05838 | 307 | A03141 | A05887 | 162 |
| A03141 | A06169 | 311 | A03141 | A06277 | 195 |
| A03141 | A06551 | 247 | A03141 | A06813 | 314 |
| A03141 | A06823 | 480 | A03141 | A06847 | 172 |
| A03141 | A07026 | 165 | A03141 | A07232 | 216 |
| A03141 | A08292 | 154 | A03141 | A09235 | 460 |
| A03141 | A09236 | 434 | A03141 | A09241 | 251 |
| A03141 | A09266 | 294 | A03141 | A09363 | 396 |
| A03141 | A09508 | 347 | A03141 | A09812 | 474 |
| A03141 | A09978 | 157 | A03141 | A10056 | 201 |
| A03141 | A10090 | 255 | A03141 | A10329 | 311 |
| A03141 | A10470 | 241 | A03141 | A11063 | 281 |
| A03141 | A11198 | 311 | A03141 | A11713 | 218 |
| A03141 | A11786 | 434 | A03141 | A11961 | 218 |
| A03141 | A12009 | 152 | A03141 | A12292 | 255 |
| A03141 | A12420 | 255 | A03141 | A12631 | 311 |
| A03141 | A12944 | 337 | A03141 | A13168 | 311 |
| A03141 | A13410 | 227 | A03141 | A13826 | 165 |
| A03141 | A13926 | 430 | A03141 | A13937 | 337 |
| A03141 | A14037 | 167 | A03141 | A14060 | 152 |
| A03141 | A14375 | 193 | A03141 | A14378 | 162 |
| A03141 | A14390 | 176 | A03141 | A14404 | 160 |
| A03141 | A14789 | 303 | A03141 | A14812 | 218 |
| A03141 | A15281 | 208 | A03141 | A15294 | 299 |
| A03141 | A15321 | 489 | A03141 | A15467 | 165 |
| A03141 | A15506 | 413 | A03141 | A15555 | 257 |
| A03141 | A16016 | 337 | A03141 | A16051 | 218 |
| A03141 | A16076 | 344 | A03141 | A16110 | 205 |
| A03141 | A16300 | 168 | A03142 | A03902 | 338 |
| A03142 | A06664 | 351 | A03142 | A13207 | 212 |
| A03142 | A13460 | 302 | A03142 | A14525 | 252 |
| A03142 | A15372 | 430 | A03142 | A15376 | 205 |
| A03143 | A03705 | 272 | A03143 | A04697 | 312 |
| A03143 | A11423 | 323 | A03143 | A15365 | 484 |
| A03144 | A03146 | 377 | A03144 | A03147 | 450 |
| A03144 | A03148 | 452 | A03144 | A03156 | 396 |
| A03144 | A03194 | 360 | A03144 | A03195 | 193 |
| A03144 | A03247 | 243 | A03144 | A03251 | 379 |
| A03144 | A03254 | 324 | A03144 | A03259 | 184 |
| A03144 | A03327 | 180 | A03144 | A03950 | 432 |
| A03144 | A04010 | 205 | A03144 | A04481 | 299 |

|        |        |     |        |        |     |
|--------|--------|-----|--------|--------|-----|
| A03144 | A04518 | 270 | A03144 | A04520 | 200 |
| A03144 | A04540 | 291 | A03144 | A05246 | 468 |
| A03144 | A05670 | 436 | A03144 | A06044 | 401 |
| A03144 | A06052 | 347 | A03144 | A06195 | 475 |
| A03144 | A06230 | 379 | A03144 | A06643 | 329 |
| A03144 | A06650 | 378 | A03144 | A07184 | 245 |
| A03144 | A07342 | 475 | A03144 | A07373 | 243 |
| A03144 | A07608 | 283 | A03144 | A08199 | 247 |
| A03144 | A09471 | 279 | A03144 | A09991 | 429 |
| A03144 | A10556 | 378 | A03144 | A11485 | 224 |
| A03144 | A11662 | 299 | A03144 | A11994 | 230 |
| A03144 | A13004 | 379 | A03144 | A13832 | 162 |
| A03144 | A14344 | 236 | A03144 | A15238 | 363 |
| A03145 | A05361 | 393 | A03145 | A07216 | 406 |
| A03146 | A03148 | 484 | A03146 | A03155 | 311 |
| A03146 | A03259 | 188 | A03146 | A04010 | 335 |
| A03146 | A04075 | 249 | A03146 | A04487 | 313 |
| A03146 | A05376 | 401 | A03146 | A05393 | 366 |
| A03146 | A05601 | 235 | A03146 | A06970 | 324 |
| A03146 | A07059 | 384 | A03146 | A07342 | 316 |
| A03146 | A07407 | 414 | A03146 | A07736 | 367 |
| A03146 | A08707 | 163 | A03146 | A09110 | 436 |
| A03146 | A10816 | 362 | A03146 | A14344 | 330 |
| A03146 | A14621 | 188 | A03146 | A15874 | 364 |
| A03146 | A16741 | 321 | A03147 | A04114 | 293 |
| A03147 | A04264 | 305 | A03147 | A04268 | 424 |
| A03147 | A05304 | 386 | A03147 | A07195 | 369 |
| A03147 | A07342 | 286 | A03147 | A08635 | 310 |
| A03147 | A09037 | 408 | A03147 | A10967 | 311 |
| A03147 | A12304 | 330 | A03148 | A04010 | 173 |
| A03148 | A04540 | 241 | A03148 | A04944 | 210 |
| A03148 | A05376 | 385 | A03148 | A05393 | 341 |
| A03148 | A05570 | 288 | A03148 | A05926 | 226 |
| A03148 | A06195 | 463 | A03148 | A06970 | 294 |
| A03148 | A07059 | 363 | A03148 | A07342 | 291 |
| A03148 | A07407 | 400 | A03148 | A07736 | 343 |
| A03148 | A08550 | 483 | A03148 | A09845 | 172 |
| A03148 | A14344 | 408 | A03148 | A14382 | 383 |
| A03148 | A14738 | 188 | A03148 | A15156 | 311 |
| A03148 | A15874 | 340 | A03148 | A16157 | 425 |
| A03148 | A16741 | 290 | A03149 | A03663 | 243 |
| A03149 | A04202 | 152 | A03149 | A06118 | 305 |
| A03149 | A06450 | 372 | A03149 | A07265 | 179 |
| A03149 | A07568 | 268 | A03149 | A07670 | 187 |
| A03149 | A07834 | 180 | A03149 | A07920 | 249 |
| A03149 | A08070 | 180 | A03149 | A08417 | 221 |

|        |        |     |        |        |     |
|--------|--------|-----|--------|--------|-----|
| A03149 | A08495 | 324 | A03149 | A08505 | 191 |
| A03149 | A09705 | 213 | A03149 | A09762 | 174 |
| A03149 | A09878 | 262 | A03149 | A10315 | 307 |
| A03149 | A10586 | 243 | A03149 | A10714 | 188 |
| A03149 | A10894 | 200 | A03149 | A11039 | 294 |
| A03149 | A11322 | 183 | A03149 | A11332 | 224 |
| A03149 | A11390 | 351 | A03149 | A11846 | 405 |
| A03149 | A12532 | 372 | A03149 | A12534 | 352 |
| A03149 | A13373 | 226 | A03149 | A14196 | 353 |
| A03149 | A15309 | 307 | A03149 | A15324 | 152 |
| A03149 | A15337 | 215 | A03149 | A15339 | 338 |
| A03149 | A15586 | 323 | A03149 | A15690 | 213 |
| A03149 | A15916 | 286 | A03150 | A03843 | 260 |
| A03150 | A04148 | 452 | A03150 | A06825 | 218 |
| A03150 | A09775 | 484 | A03150 | A11818 | 409 |
| A03150 | A15624 | 480 | A03150 | A15659 | 238 |
| A03150 | A15684 | 450 | A03150 | A15750 | 340 |
| A03150 | A15843 | 480 | A03150 | A15932 | 191 |
| A03150 | A16086 | 473 | A03150 | A16088 | 221 |
| A03150 | A16149 | 352 | A03151 | A04449 | 205 |
| A03151 | A06673 | 374 | A03151 | A06992 | 441 |
| A03151 | A08022 | 263 | A03151 | A08891 | 491 |
| A03151 | A12912 | 196 | A03151 | A14174 | 490 |
| A03151 | A15684 | 458 | A03151 | A17186 | 340 |
| A03152 | A03153 | 454 | A03152 | A03154 | 433 |
| A03152 | A03155 | 490 | A03152 | A03188 | 180 |
| A03152 | A04010 | 213 | A03152 | A04873 | 313 |
| A03152 | A05044 | 422 | A03152 | A05143 | 475 |
| A03152 | A05396 | 414 | A03152 | A05580 | 405 |
| A03152 | A07062 | 319 | A03152 | A07545 | 217 |
| A03152 | A08209 | 306 | A03152 | A10395 | 235 |
| A03152 | A10410 | 405 | A03152 | A11279 | 154 |
| A03152 | A14376 | 347 | A03152 | A14410 | 218 |
| A03152 | A15896 | 394 | A03153 | A03154 | 398 |
| A03153 | A03155 | 441 | A03153 | A05143 | 396 |
| A03153 | A05396 | 374 | A03153 | A05856 | 430 |
| A03153 | A07062 | 374 | A03153 | A09080 | 424 |
| A03153 | A10339 | 427 | A03153 | A11279 | 247 |
| A03153 | A14376 | 394 | A03154 | A03155 | 489 |
| A03154 | A03238 | 258 | A03154 | A03489 | 218 |
| A03154 | A04318 | 367 | A03154 | A04410 | 246 |
| A03154 | A04487 | 318 | A03154 | A04520 | 205 |
| A03154 | A05028 | 151 | A03154 | A05106 | 278 |
| A03154 | A05143 | 485 | A03154 | A05785 | 452 |
| A03154 | A06137 | 418 | A03154 | A06167 | 364 |
| A03154 | A06831 | 373 | A03154 | A07477 | 281 |



|        |        |     |        |        |     |
|--------|--------|-----|--------|--------|-----|
| A03154 | A09036 | 356 | A03154 | A09375 | 477 |
| A03154 | A09891 | 480 | A03154 | A09892 | 447 |
| A03154 | A10339 | 398 | A03154 | A10640 | 338 |
| A03154 | A11279 | 152 | A03154 | A13832 | 279 |
| A03154 | A14247 | 266 | A03154 | A14366 | 205 |
| A03154 | A14376 | 346 | A03154 | A14377 | 375 |
| A03154 | A15277 | 293 | A03154 | A15896 | 283 |
| A03155 | A03192 | 350 | A03155 | A03310 | 317 |
| A03155 | A03434 | 260 | A03155 | A04010 | 152 |
| A03155 | A04487 | 272 | A03155 | A05044 | 288 |
| A03155 | A05143 | 489 | A03155 | A05396 | 385 |
| A03155 | A06137 | 441 | A03155 | A06167 | 330 |
| A03155 | A07545 | 157 | A03155 | A08126 | 391 |
| A03155 | A09220 | 201 | A03155 | A09375 | 457 |
| A03155 | A09652 | 338 | A03155 | A09891 | 441 |
| A03155 | A10339 | 441 | A03155 | A12723 | 219 |
| A03155 | A14193 | 461 | A03155 | A14376 | 307 |
| A03155 | A15852 | 152 | A03156 | A03195 | 232 |
| A03156 | A03196 | 339 | A03156 | A03512 | 285 |
| A03156 | A03520 | 340 | A03156 | A04212 | 196 |
| A03156 | A04422 | 236 | A03156 | A04540 | 198 |
| A03156 | A05570 | 371 | A03156 | A06052 | 369 |
| A03156 | A06195 | 491 | A03156 | A06473 | 344 |
| A03156 | A07342 | 252 | A03156 | A08594 | 152 |
| A03156 | A09991 | 491 | A03156 | A10226 | 470 |
| A03156 | A10758 | 466 | A03156 | A11663 | 324 |
| A03156 | A12948 | 419 | A03156 | A13229 | 335 |
| A03156 | A14096 | 219 | A03156 | A14344 | 273 |
| A03156 | A15498 | 424 | A03157 | A03204 | 270 |
| A03157 | A03244 | 165 | A03157 | A03271 | 235 |
| A03157 | A03280 | 367 | A03157 | A03511 | 223 |
| A03157 | A03794 | 188 | A03157 | A03838 | 199 |
| A03157 | A03965 | 221 | A03157 | A03977 | 185 |
| A03157 | A04004 | 152 | A03157 | A04040 | 177 |
| A03157 | A04206 | 191 | A03157 | A04216 | 191 |
| A03157 | A04245 | 266 | A03157 | A04267 | 195 |
| A03157 | A04272 | 182 | A03157 | A04274 | 241 |
| A03157 | A04276 | 299 | A03157 | A04428 | 223 |
| A03157 | A04596 | 266 | A03157 | A04602 | 340 |
| A03157 | A04608 | 174 | A03157 | A04610 | 297 |
| A03157 | A04831 | 204 | A03157 | A05036 | 241 |
| A03157 | A05047 | 340 | A03157 | A05129 | 297 |
| A03157 | A05157 | 154 | A03157 | A05174 | 173 |
| A03157 | A05329 | 216 | A03157 | A05349 | 199 |
| A03157 | A05359 | 191 | A03157 | A05378 | 297 |
| A03157 | A05629 | 193 | A03157 | A05773 | 223 |

|        |        |     |        |        |     |
|--------|--------|-----|--------|--------|-----|
| A03157 | A05973 | 313 | A03157 | A06127 | 297 |
| A03157 | A06216 | 160 | A03157 | A06344 | 184 |
| A03157 | A06441 | 285 | A03157 | A07135 | 433 |
| A03157 | A07164 | 269 | A03157 | A07477 | 210 |
| A03157 | A07711 | 199 | A03157 | A07736 | 162 |
| A03157 | A08535 | 154 | A03157 | A08550 | 168 |
| A03157 | A08552 | 167 | A03157 | A08616 | 340 |
| A03157 | A09104 | 184 | A03157 | A09257 | 252 |
| A03157 | A09757 | 207 | A03157 | A09780 | 193 |
| A03157 | A09989 | 216 | A03157 | A10418 | 152 |
| A03157 | A10512 | 340 | A03157 | A10640 | 168 |
| A03157 | A10789 | 180 | A03157 | A10927 | 160 |
| A03157 | A11144 | 210 | A03157 | A11394 | 218 |
| A03157 | A11472 | 157 | A03157 | A11735 | 160 |
| A03157 | A11915 | 174 | A03157 | A12215 | 201 |
| A03157 | A12508 | 218 | A03157 | A12826 | 313 |
| A03157 | A12850 | 218 | A03157 | A12858 | 262 |
| A03157 | A12878 | 274 | A03157 | A13170 | 152 |
| A03157 | A13315 | 156 | A03157 | A13356 | 185 |
| A03157 | A13527 | 163 | A03157 | A13782 | 285 |
| A03157 | A13788 | 299 | A03157 | A13804 | 201 |
| A03157 | A13811 | 152 | A03157 | A14146 | 152 |
| A03157 | A14235 | 324 | A03157 | A14366 | 279 |
| A03157 | A14374 | 215 | A03157 | A14391 | 223 |
| A03157 | A14452 | 367 | A03157 | A14554 | 296 |
| A03157 | A14569 | 226 | A03157 | A14664 | 152 |
| A03157 | A15271 | 223 | A03157 | A15285 | 327 |
| A03157 | A15376 | 184 | A03157 | A15394 | 213 |
| A03157 | A15667 | 162 | A03157 | A15795 | 205 |
| A03157 | A16157 | 176 | A03157 | A16343 | 361 |
| A03157 | A16565 | 195 | A03157 | A16566 | 177 |
| A03157 | A16567 | 335 | A03157 | A16675 | 247 |
| A03157 | A16691 | 223 | A03157 | A16693 | 361 |
| A03157 | A16695 | 241 | A03157 | A16774 | 213 |
| A03157 | A16829 | 172 | A03157 | A17121 | 207 |
| A03157 | A17133 | 160 | A03158 | A03162 | 368 |
| A03158 | A03178 | 246 | A03158 | A03186 | 180 |
| A03158 | A04222 | 238 | A03158 | A04880 | 221 |
| A03158 | A04944 | 229 | A03158 | A08141 | 204 |
| A03158 | A10174 | 271 | A03158 | A14190 | 291 |
| A03158 | A14370 | 319 | A03158 | A14371 | 160 |
| A03158 | A15313 | 157 | A03158 | A15349 | 254 |
| A03159 | A05704 | 430 | A03159 | A05705 | 433 |
| A03159 | A05834 | 438 | A03159 | A05922 | 447 |
| A03159 | A06946 | 447 | A03159 | A07212 | 396 |
| A03159 | A07219 | 438 | A03159 | A08713 | 452 |

|        |        |     |        |        |     |
|--------|--------|-----|--------|--------|-----|
| A03160 | A03186 | 301 | A03160 | A03434 | 193 |
| A03160 | A04209 | 195 | A03160 | A04280 | 302 |
| A03160 | A04622 | 191 | A03160 | A04938 | 326 |
| A03160 | A04942 | 327 | A03160 | A05415 | 205 |
| A03160 | A07745 | 413 | A03160 | A07833 | 249 |
| A03160 | A10247 | 160 | A03160 | A14127 | 249 |
| A03160 | A16453 | 490 | A03161 | A03438 | 221 |
| A03161 | A05301 | 238 | A03161 | A12111 | 208 |
| A03161 | A15461 | 230 | A03162 | A03186 | 368 |
| A03162 | A04222 | 296 | A03162 | A04375 | 257 |
| A03162 | A10278 | 353 | A03163 | A03745 | 286 |
| A03163 | A04647 | 279 | A03163 | A05706 | 174 |
| A03164 | A03171 | 373 | A03164 | A03174 | 394 |
| A03164 | A03178 | 281 | A03164 | A03484 | 204 |
| A03164 | A03672 | 449 | A03164 | A04169 | 249 |
| A03164 | A04194 | 246 | A03164 | A04781 | 386 |
| A03164 | A04791 | 345 | A03164 | A05034 | 334 |
| A03164 | A05289 | 334 | A03164 | A05452 | 306 |
| A03164 | A05550 | 195 | A03164 | A05700 | 350 |
| A03164 | A05732 | 378 | A03164 | A06245 | 311 |
| A03164 | A06385 | 356 | A03164 | A06598 | 334 |
| A03164 | A06629 | 160 | A03164 | A06847 | 252 |
| A03164 | A06914 | 334 | A03164 | A07007 | 294 |
| A03164 | A07047 | 480 | A03164 | A07059 | 160 |
| A03164 | A07581 | 301 | A03164 | A07771 | 163 |
| A03164 | A07856 | 302 | A03164 | A07926 | 333 |
| A03164 | A08197 | 252 | A03164 | A08707 | 401 |
| A03164 | A09182 | 334 | A03164 | A09612 | 228 |
| A03164 | A09727 | 165 | A03164 | A10456 | 240 |
| A03164 | A10712 | 172 | A03164 | A11235 | 258 |
| A03164 | A11542 | 191 | A03164 | A13987 | 184 |
| A03164 | A14252 | 334 | A03164 | A14508 | 170 |
| A03164 | A15292 | 380 | A03164 | A15352 | 241 |
| A03164 | A15356 | 334 | A03165 | A03259 | 180 |
| A03165 | A03520 | 187 | A03165 | A03685 | 329 |
| A03165 | A03818 | 254 | A03165 | A04152 | 324 |
| A03165 | A09069 | 372 | A03165 | A09766 | 276 |
| A03165 | A13593 | 205 | A03165 | A14374 | 207 |
| A03165 | A14430 | 180 | A03165 | A14439 | 288 |
| A03165 | A14741 | 224 | A03165 | A15498 | 195 |
| A03165 | A15913 | 374 | A03165 | A16271 | 454 |
| A03167 | A03168 | 491 | A03167 | A03259 | 401 |
| A03167 | A03297 | 172 | A03167 | A03423 | 212 |
| A03167 | A03484 | 306 | A03167 | A03513 | 316 |
| A03167 | A03518 | 159 | A03167 | A03662 | 267 |
| A03167 | A03663 | 456 | A03167 | A03685 | 215 |

|        |        |     |        |        |     |
|--------|--------|-----|--------|--------|-----|
| A03167 | A04095 | 367 | A03167 | A04108 | 199 |
| A03167 | A04211 | 246 | A03167 | A04229 | 273 |
| A03167 | A04258 | 188 | A03167 | A04372 | 291 |
| A03167 | A04520 | 163 | A03167 | A04678 | 262 |
| A03167 | A04778 | 463 | A03167 | A04779 | 372 |
| A03167 | A04834 | 208 | A03167 | A04945 | 238 |
| A03167 | A04977 | 165 | A03167 | A05007 | 272 |
| A03167 | A05026 | 378 | A03167 | A05098 | 486 |
| A03167 | A05102 | 160 | A03167 | A05114 | 185 |
| A03167 | A05289 | 435 | A03167 | A05330 | 329 |
| A03167 | A05393 | 323 | A03167 | A05416 | 490 |
| A03167 | A05424 | 318 | A03167 | A05463 | 205 |
| A03167 | A05472 | 276 | A03167 | A05624 | 330 |
| A03167 | A05659 | 491 | A03167 | A05682 | 409 |
| A03167 | A05752 | 366 | A03167 | A05757 | 176 |
| A03167 | A05789 | 256 | A03167 | A05974 | 372 |
| A03167 | A06086 | 157 | A03167 | A06263 | 174 |
| A03167 | A06282 | 286 | A03167 | A06295 | 473 |
| A03167 | A06299 | 210 | A03167 | A06358 | 269 |
| A03167 | A06629 | 258 | A03167 | A06633 | 333 |
| A03167 | A06641 | 329 | A03167 | A06654 | 191 |
| A03167 | A06689 | 488 | A03167 | A06744 | 226 |
| A03167 | A06874 | 259 | A03167 | A06970 | 491 |
| A03167 | A06979 | 196 | A03167 | A07122 | 446 |
| A03167 | A07238 | 395 | A03167 | A07246 | 366 |
| A03167 | A07322 | 230 | A03167 | A07331 | 291 |
| A03167 | A07341 | 369 | A03167 | A07367 | 156 |
| A03167 | A07376 | 490 | A03167 | A07477 | 481 |
| A03167 | A07520 | 205 | A03167 | A07553 | 329 |
| A03167 | A07558 | 351 | A03167 | A07590 | 490 |
| A03167 | A07643 | 157 | A03167 | A07688 | 157 |
| A03167 | A07721 | 319 | A03167 | A07736 | 486 |
| A03167 | A07737 | 218 | A03167 | A07800 | 327 |
| A03167 | A07844 | 335 | A03167 | A07856 | 277 |
| A03167 | A07875 | 330 | A03167 | A07933 | 479 |
| A03167 | A07973 | 446 | A03167 | A07976 | 441 |
| A03167 | A07998 | 366 | A03167 | A08108 | 185 |
| A03167 | A08135 | 213 | A03167 | A08250 | 247 |
| A03167 | A08318 | 256 | A03167 | A08656 | 303 |
| A03167 | A08751 | 259 | A03167 | A09059 | 213 |
| A03167 | A09612 | 198 | A03167 | A09876 | 215 |
| A03167 | A10172 | 319 | A03167 | A10420 | 405 |
| A03167 | A10421 | 157 | A03167 | A10444 | 439 |
| A03167 | A10452 | 383 | A03167 | A10612 | 216 |
| A03167 | A10656 | 432 | A03167 | A10658 | 235 |
| A03167 | A10659 | 273 | A03167 | A10672 | 243 |

|        |        |     |        |        |     |
|--------|--------|-----|--------|--------|-----|
| A03167 | A10676 | 269 | A03167 | A10677 | 422 |
| A03167 | A10690 | 247 | A03167 | A10694 | 235 |
| A03167 | A10703 | 196 | A03167 | A10712 | 272 |
| A03167 | A13206 | 330 | A03167 | A13369 | 274 |
| A03167 | A13734 | 159 | A03167 | A13735 | 338 |
| A03167 | A14097 | 296 | A03167 | A14337 | 391 |
| A03167 | A14782 | 246 | A03167 | A14803 | 473 |
| A03167 | A14856 | 351 | A03167 | A14862 | 259 |
| A03167 | A15223 | 391 | A03167 | A15336 | 273 |
| A03167 | A15493 | 286 | A03167 | A15494 | 330 |
| A03167 | A15637 | 174 | A03167 | A15874 | 389 |
| A03167 | A15970 | 217 | A03167 | A16027 | 452 |
| A03167 | A16028 | 215 | A03167 | A16286 | 440 |
| A03167 | A16335 | 446 | A03167 | A16529 | 180 |
| A03167 | A16739 | 191 | A03167 | A16744 | 200 |
| A03167 | A16757 | 345 | A03167 | A17007 | 200 |
| A03167 | A17041 | 443 | A03167 | A17078 | 441 |
| A03168 | A03259 | 339 | A03168 | A03297 | 243 |
| A03168 | A03484 | 243 | A03168 | A03663 | 427 |
| A03168 | A04105 | 177 | A03168 | A04211 | 401 |
| A03168 | A04678 | 319 | A03168 | A04778 | 390 |
| A03168 | A04779 | 324 | A03168 | A04791 | 254 |
| A03168 | A04834 | 274 | A03168 | A04883 | 213 |
| A03168 | A04927 | 217 | A03168 | A04995 | 249 |
| A03168 | A05007 | 213 | A03168 | A05098 | 488 |
| A03168 | A05102 | 232 | A03168 | A05289 | 372 |
| A03168 | A05416 | 488 | A03168 | A05516 | 254 |
| A03168 | A05659 | 491 | A03168 | A05682 | 274 |
| A03168 | A06263 | 245 | A03168 | A06282 | 338 |
| A03168 | A06358 | 210 | A03168 | A06633 | 384 |
| A03168 | A06689 | 363 | A03168 | A06692 | 319 |
| A03168 | A06874 | 317 | A03168 | A06970 | 438 |
| A03168 | A06979 | 380 | A03168 | A07238 | 312 |
| A03168 | A07246 | 396 | A03168 | A07267 | 245 |
| A03168 | A07304 | 297 | A03168 | A07336 | 308 |
| A03168 | A07341 | 308 | A03168 | A07342 | 257 |
| A03168 | A07373 | 283 | A03168 | A07376 | 466 |
| A03168 | A07477 | 486 | A03168 | A07590 | 483 |
| A03168 | A07721 | 395 | A03168 | A07736 | 486 |
| A03168 | A07815 | 171 | A03168 | A07844 | 187 |
| A03168 | A07933 | 438 | A03168 | A07973 | 414 |
| A03168 | A07976 | 372 | A03168 | A08238 | 293 |
| A03168 | A08250 | 308 | A03168 | A08646 | 396 |
| A03168 | A09059 | 385 | A03168 | A10174 | 216 |
| A03168 | A10444 | 377 | A03168 | A10452 | 423 |
| A03168 | A10635 | 343 | A03168 | A10656 | 366 |

|        |        |     |        |        |     |
|--------|--------|-----|--------|--------|-----|
| A03168 | A10658 | 297 | A03168 | A10672 | 449 |
| A03168 | A10677 | 484 | A03168 | A10694 | 297 |
| A03168 | A11064 | 314 | A03168 | A13735 | 274 |
| A03168 | A13736 | 286 | A03168 | A14337 | 335 |
| A03168 | A14344 | 277 | A03168 | A14803 | 416 |
| A03168 | A14856 | 412 | A03168 | A15223 | 245 |
| A03168 | A15497 | 177 | A03168 | A15874 | 171 |
| A03168 | A16027 | 435 | A03168 | A16028 | 281 |
| A03168 | A16286 | 379 | A03168 | A16335 | 213 |
| A03168 | A16418 | 219 | A03168 | A16626 | 180 |
| A03168 | A16766 | 247 | A03168 | A16968 | 335 |
| A03168 | A17007 | 384 | A03169 | A03438 | 324 |
| A03169 | A03792 | 288 | A03169 | A03863 | 454 |
| A03169 | A03952 | 240 | A03169 | A03954 | 329 |
| A03169 | A03958 | 374 | A03169 | A03972 | 318 |
| A03169 | A03982 | 318 | A03169 | A04447 | 223 |
| A03169 | A05695 | 481 | A03169 | A07265 | 371 |
| A03169 | A07588 | 577 | A03169 | A08955 | 223 |
| A03169 | A08971 | 223 | A03169 | A10755 | 251 |
| A03169 | A11202 | 223 | A03169 | A11420 | 154 |
| A03169 | A13298 | 417 | A03169 | A14216 | 353 |
| A03169 | A14699 | 163 | A03169 | A15684 | 182 |
| A03169 | A15746 | 182 | A03169 | A17149 | 257 |
| A03170 | A03724 | 326 | A03170 | A15422 | 274 |
| A03171 | A03209 | 160 | A03171 | A03817 | 480 |
| A03171 | A03894 | 226 | A03171 | A04194 | 177 |
| A03171 | A04471 | 215 | A03171 | A04754 | 236 |
| A03171 | A04880 | 157 | A03171 | A05289 | 364 |
| A03171 | A05424 | 162 | A03171 | A05582 | 290 |
| A03171 | A05623 | 290 | A03171 | A05706 | 372 |
| A03171 | A06663 | 232 | A03171 | A07184 | 179 |
| A03171 | A07604 | 232 | A03171 | A07771 | 491 |
| A03171 | A08054 | 210 | A03171 | A08137 | 352 |
| A03171 | A08403 | 183 | A03171 | A08527 | 219 |
| A03171 | A08707 | 491 | A03171 | A08930 | 224 |
| A03171 | A08938 | 263 | A03171 | A09149 | 463 |
| A03171 | A09433 | 229 | A03171 | A09469 | 380 |
| A03171 | A09485 | 179 | A03171 | A09809 | 160 |
| A03171 | A10549 | 184 | A03171 | A11344 | 187 |
| A03171 | A11577 | 198 | A03171 | A12539 | 279 |
| A03171 | A14048 | 154 | A03171 | A14252 | 467 |
| A03171 | A15356 | 386 | A03171 | A15413 | 172 |
| A03171 | A16417 | 154 | A03171 | A17135 | 276 |
| A03171 | A17142 | 450 | A03171 | A17195 | 218 |
| A03172 | A03917 | 427 | A03172 | A04369 | 462 |
| A03172 | A04822 | 338 | A03172 | A04823 | 380 |

|        |        |     |        |        |     |
|--------|--------|-----|--------|--------|-----|
| A03172 | A04920 | 409 | A03172 | A04981 | 348 |
| A03172 | A05389 | 462 | A03172 | A05390 | 318 |
| A03172 | A05786 | 375 | A03172 | A06263 | 468 |
| A03172 | A06298 | 291 | A03172 | A09072 | 480 |
| A03172 | A12115 | 409 | A03172 | A13258 | 457 |
| A03172 | A13617 | 207 | A03173 | A07140 | 355 |
| A03174 | A03234 | 268 | A03174 | A03442 | 405 |
| A03174 | A03520 | 218 | A03174 | A04781 | 367 |
| A03174 | A04791 | 329 | A03174 | A05224 | 446 |
| A03174 | A05309 | 191 | A03174 | A05417 | 185 |
| A03174 | A05424 | 434 | A03174 | A05549 | 409 |
| A03174 | A05550 | 316 | A03174 | A05610 | 391 |
| A03174 | A06245 | 388 | A03174 | A06385 | 224 |
| A03174 | A07059 | 290 | A03174 | A07710 | 232 |
| A03174 | A08197 | 353 | A03174 | A08572 | 272 |
| A03174 | A09526 | 240 | A03174 | A10037 | 416 |
| A03174 | A10679 | 355 | A03175 | A03694 | 395 |
| A03175 | A04050 | 899 | A03175 | A04809 | 281 |
| A03175 | A06439 | 221 | A03175 | A06851 | 165 |
| A03175 | A12107 | 330 | A03175 | A13816 | 205 |
| A03175 | A15359 | 204 | A03176 | A12897 | 363 |
| A03177 | A03239 | 188 | A03177 | A03746 | 269 |
| A03177 | A03756 | 351 | A03177 | A04217 | 215 |
| A03177 | A04468 | 318 | A03177 | A04741 | 335 |
| A03177 | A05472 | 205 | A03177 | A06054 | 227 |
| A03177 | A06082 | 382 | A03177 | A06415 | 208 |
| A03177 | A06623 | 157 | A03177 | A07142 | 318 |
| A03177 | A07152 | 288 | A03177 | A07173 | 308 |
| A03177 | A10714 | 177 | A03177 | A13889 | 422 |
| A03177 | A14125 | 196 | A03177 | A14146 | 256 |
| A03177 | A14368 | 260 | A03177 | A14372 | 308 |
| A03177 | A14374 | 259 | A03177 | A14598 | 386 |
| A03177 | A14670 | 328 | A03177 | A15286 | 281 |
| A03177 | A15394 | 201 | A03177 | A15395 | 312 |
| A03177 | A15603 | 251 | A03177 | A15607 | 279 |
| A03177 | A15912 | 167 | A03177 | A15964 | 252 |
| A03178 | A03186 | 457 | A03178 | A03188 | 162 |
| A03178 | A03391 | 347 | A03178 | A03766 | 408 |
| A03178 | A03834 | 168 | A03178 | A03861 | 163 |
| A03178 | A03906 | 167 | A03178 | A03944 | 258 |
| A03178 | A04023 | 212 | A03178 | A04035 | 228 |
| A03178 | A04072 | 330 | A03178 | A04076 | 163 |
| A03178 | A04087 | 374 | A03178 | A04172 | 324 |
| A03178 | A04182 | 221 | A03178 | A04184 | 383 |
| A03178 | A04193 | 364 | A03178 | A04224 | 347 |
| A03178 | A04236 | 313 | A03178 | A04239 | 202 |

|        |        |     |        |        |     |
|--------|--------|-----|--------|--------|-----|
| A03178 | A04358 | 408 | A03178 | A04410 | 408 |
| A03178 | A04424 | 466 | A03178 | A04520 | 200 |
| A03178 | A04832 | 205 | A03178 | A04870 | 353 |
| A03178 | A04954 | 291 | A03178 | A04971 | 241 |
| A03178 | A05176 | 177 | A03178 | A05247 | 418 |
| A03178 | A05274 | 299 | A03178 | A05288 | 168 |
| A03178 | A05294 | 319 | A03178 | A05305 | 224 |
| A03178 | A05593 | 441 | A03178 | A05596 | 438 |
| A03178 | A05599 | 424 | A03178 | A05603 | 232 |
| A03178 | A05777 | 344 | A03178 | A05868 | 229 |
| A03178 | A05898 | 324 | A03178 | A05899 | 324 |
| A03178 | A05979 | 235 | A03178 | A06141 | 247 |
| A03178 | A06148 | 266 | A03178 | A06307 | 307 |
| A03178 | A06346 | 430 | A03178 | A06480 | 411 |
| A03178 | A06739 | 185 | A03178 | A07085 | 435 |
| A03178 | A07192 | 167 | A03178 | A07282 | 152 |
| A03178 | A07704 | 193 | A03178 | A07705 | 314 |
| A03178 | A07828 | 347 | A03178 | A07833 | 162 |
| A03178 | A08036 | 379 | A03178 | A08070 | 265 |
| A03178 | A08172 | 375 | A03178 | A08292 | 230 |
| A03178 | A08685 | 273 | A03178 | A08686 | 227 |
| A03178 | A08911 | 196 | A03178 | A09084 | 216 |
| A03178 | A09149 | 168 | A03178 | A09200 | 380 |
| A03178 | A09380 | 374 | A03178 | A09470 | 191 |
| A03178 | A09539 | 207 | A03178 | A10237 | 307 |
| A03178 | A10754 | 177 | A03178 | A13369 | 252 |
| A03178 | A14654 | 202 | A03178 | A14689 | 218 |
| A03178 | A15232 | 379 | A03178 | A15233 | 240 |
| A03178 | A15277 | 179 | A03178 | A15336 | 207 |
| A03178 | A15638 | 251 | A03179 | A08738 | 229 |
| A03180 | A03885 | 344 | A03181 | A03201 | 217 |
| A03181 | A03218 | 243 | A03181 | A03243 | 170 |
| A03181 | A03261 | 224 | A03181 | A03417 | 185 |
| A03181 | A03680 | 218 | A03181 | A03744 | 432 |
| A03181 | A03749 | 173 | A03181 | A03986 | 321 |
| A03181 | A04176 | 380 | A03181 | A04398 | 168 |
| A03181 | A04477 | 296 | A03181 | A04498 | 348 |
| A03181 | A04622 | 420 | A03181 | A04837 | 302 |
| A03181 | A04843 | 341 | A03181 | A04996 | 238 |
| A03181 | A05006 | 210 | A03181 | A05030 | 291 |
| A03181 | A05832 | 163 | A03181 | A05891 | 167 |
| A03181 | A05901 | 324 | A03181 | A06359 | 167 |
| A03181 | A07205 | 205 | A03181 | A07605 | 188 |
| A03181 | A08445 | 272 | A03181 | A08551 | 257 |
| A03181 | A08704 | 329 | A03181 | A08847 | 182 |
| A03181 | A09112 | 329 | A03181 | A09200 | 279 |



|        |        |     |        |        |     |
|--------|--------|-----|--------|--------|-----|
| A03181 | A09374 | 277 | A03181 | A09431 | 302 |
| A03181 | A09434 | 185 | A03181 | A09459 | 386 |
| A03181 | A09480 | 291 | A03181 | A09742 | 232 |
| A03181 | A09929 | 321 | A03181 | A09972 | 369 |
| A03181 | A10066 | 358 | A03181 | A11101 | 361 |
| A03181 | A13181 | 173 | A03181 | A13484 | 193 |
| A03181 | A14399 | 390 | A03181 | A16300 | 152 |
| A03181 | A16684 | 369 | A03181 | A16738 | 183 |
| A03183 | A03185 | 307 | A03183 | A03219 | 438 |
| A03183 | A03259 | 366 | A03183 | A03305 | 236 |
| A03183 | A03310 | 288 | A03183 | A03314 | 174 |
| A03183 | A03639 | 171 | A03183 | A03782 | 165 |
| A03183 | A03799 | 377 | A03183 | A03919 | 269 |
| A03183 | A03942 | 491 | A03183 | A03955 | 249 |
| A03183 | A04248 | 205 | A03183 | A04257 | 405 |
| A03183 | A04422 | 224 | A03183 | A04450 | 313 |
| A03183 | A04478 | 433 | A03183 | A05679 | 157 |
| A03183 | A05706 | 490 | A03183 | A05815 | 414 |
| A03183 | A06118 | 290 | A03183 | A06414 | 269 |
| A03183 | A06665 | 249 | A03183 | A06727 | 269 |
| A03183 | A06755 | 296 | A03183 | A07143 | 201 |
| A03183 | A07145 | 395 | A03183 | A07157 | 255 |
| A03183 | A07803 | 341 | A03183 | A08209 | 219 |
| A03183 | A08572 | 162 | A03183 | A08881 | 174 |
| A03183 | A09230 | 327 | A03183 | A09231 | 363 |
| A03183 | A09241 | 419 | A03183 | A09243 | 185 |
| A03183 | A09732 | 416 | A03183 | A09740 | 165 |
| A03183 | A09744 | 182 | A03183 | A10018 | 481 |
| A03183 | A10148 | 179 | A03183 | A10444 | 241 |
| A03183 | A10870 | 234 | A03183 | A11090 | 323 |
| A03183 | A11299 | 177 | A03183 | A11400 | 179 |
| A03183 | A11986 | 234 | A03183 | A12419 | 254 |
| A03183 | A13826 | 396 | A03183 | A13860 | 467 |
| A03183 | A14048 | 246 | A03183 | A14190 | 299 |
| A03183 | A14210 | 485 | A03183 | A14236 | 159 |
| A03183 | A14366 | 434 | A03183 | A14369 | 232 |
| A03183 | A14371 | 488 | A03183 | A14376 | 276 |
| A03183 | A14379 | 433 | A03183 | A14511 | 263 |
| A03183 | A14554 | 177 | A03183 | A14604 | 432 |
| A03183 | A15292 | 407 | A03183 | A15318 | 462 |
| A03183 | A15327 | 362 | A03183 | A15352 | 171 |
| A03183 | A15452 | 243 | A03183 | A15484 | 152 |
| A03183 | A15495 | 469 | A03183 | A15639 | 190 |
| A03183 | A16323 | 440 | A03184 | A03262 | 389 |
| A03184 | A03347 | 262 | A03184 | A03739 | 297 |
| A03184 | A03755 | 369 | A03184 | A03914 | 288 |

|        |        |     |        |        |     |
|--------|--------|-----|--------|--------|-----|
| A03184 | A03976 | 236 | A03184 | A04023 | 310 |
| A03184 | A04263 | 385 | A03184 | A04391 | 356 |
| A03184 | A04919 | 400 | A03184 | A05113 | 279 |
| A03184 | A05349 | 199 | A03184 | A06107 | 369 |
| A03184 | A07302 | 353 | A03184 | A07440 | 490 |
| A03184 | A14377 | 369 | A03184 | A15498 | 198 |
| A03184 | A15905 | 267 | A03184 | A16636 | 259 |
| A03185 | A03219 | 296 | A03185 | A03305 | 423 |
| A03185 | A03408 | 219 | A03185 | A03415 | 260 |
| A03185 | A04257 | 468 | A03185 | A04643 | 402 |
| A03185 | A04759 | 332 | A03185 | A05556 | 266 |
| A03185 | A07145 | 400 | A03185 | A07158 | 249 |
| A03185 | A09092 | 363 | A03185 | A14366 | 230 |
| A03185 | A14372 | 283 | A03185 | A14511 | 176 |
| A03185 | A15327 | 335 | A03185 | A16636 | 165 |
| A03186 | A03314 | 88  | A03186 | A03361 | 63  |
| A03186 | A03379 | 204 | A03186 | A03511 | 228 |
| A03186 | A03609 | 157 | A03186 | A03726 | 475 |
| A03186 | A03733 | 486 | A03186 | A03839 | 180 |
| A03186 | A03842 | 257 | A03186 | A03906 | 450 |
| A03186 | A03915 | 251 | A03186 | A03935 | 364 |
| A03186 | A03936 | 163 | A03186 | A03944 | 401 |
| A03186 | A04092 | 408 | A03186 | A04101 | 188 |
| A03186 | A04152 | 165 | A03186 | A04157 | 329 |
| A03186 | A04194 | 177 | A03186 | A04320 | 162 |
| A03186 | A04327 | 226 | A03186 | A04343 | 232 |
| A03186 | A04573 | 232 | A03186 | A04880 | 462 |
| A03186 | A04909 | 174 | A03186 | A05117 | 215 |
| A03186 | A05131 | 263 | A03186 | A05247 | 288 |
| A03186 | A05277 | 330 | A03186 | A05612 | 251 |
| A03186 | A05709 | 193 | A03186 | A06251 | 263 |
| A03186 | A06293 | 185 | A03186 | A06648 | 191 |
| A03186 | A06696 | 162 | A03186 | A06729 | 446 |
| A03186 | A06912 | 168 | A03186 | A06916 | 204 |
| A03186 | A06953 | 425 | A03186 | A07044 | 245 |
| A03186 | A07128 | 152 | A03186 | A07218 | 470 |
| A03186 | A07601 | 419 | A03186 | A07605 | 326 |
| A03186 | A07834 | 177 | A03186 | A08040 | 170 |
| A03186 | A08128 | 343 | A03186 | A08194 | 327 |
| A03186 | A08203 | 218 | A03186 | A08233 | 343 |
| A03186 | A08671 | 204 | A03186 | A08926 | 271 |
| A03186 | A09017 | 245 | A03186 | A09084 | 481 |
| A03186 | A09091 | 302 | A03186 | A09266 | 405 |
| A03186 | A10000 | 480 | A03186 | A10278 | 152 |
| A03186 | A10660 | 302 | A03186 | A11441 | 257 |
| A03186 | A11577 | 196 | A03186 | A11750 | 157 |

|        |        |     |        |        |     |
|--------|--------|-----|--------|--------|-----|
| A03186 | A12273 | 168 | A03186 | A12371 | 180 |
| A03186 | A12824 | 176 | A03186 | A12949 | 271 |
| A03186 | A13110 | 288 | A03186 | A13466 | 162 |
| A03186 | A14127 | 207 | A03186 | A14550 | 318 |
| A03186 | A14664 | 160 | A03186 | A15498 | 481 |
| A03186 | A15833 | 241 | A03186 | A15913 | 191 |
| A03186 | A16122 | 215 | A03187 | A03437 | 326 |
| A03187 | A04844 | 472 | A03187 | A13473 | 339 |
| A03188 | A03363 | 188 | A03188 | A03544 | 210 |
| A03188 | A03591 | 278 | A03188 | A03752 | 428 |
| A03188 | A03757 | 196 | A03188 | A04033 | 432 |
| A03188 | A04222 | 335 | A03188 | A04289 | 260 |
| A03188 | A04449 | 425 | A03188 | A05065 | 307 |
| A03188 | A05112 | 163 | A03188 | A05348 | 290 |
| A03188 | A05653 | 200 | A03188 | A05920 | 243 |
| A03188 | A06201 | 200 | A03188 | A06466 | 353 |
| A03188 | A06606 | 318 | A03188 | A07311 | 469 |
| A03188 | A07465 | 302 | A03188 | A07711 | 182 |
| A03188 | A07803 | 474 | A03188 | A08603 | 167 |
| A03188 | A09380 | 165 | A03188 | A09764 | 157 |
| A03188 | A10049 | 318 | A03188 | A10728 | 288 |
| A03188 | A10751 | 229 | A03188 | A11088 | 283 |
| A03188 | A11313 | 174 | A03188 | A11419 | 196 |
| A03188 | A11897 | 232 | A03188 | A11945 | 210 |
| A03188 | A11983 | 193 | A03188 | A12365 | 462 |
| A03188 | A12473 | 190 | A03188 | A12897 | 165 |
| A03188 | A13340 | 467 | A03188 | A14316 | 177 |
| A03188 | A14410 | 491 | A03188 | A14635 | 344 |
| A03188 | A14636 | 334 | A03188 | A14650 | 324 |
| A03188 | A15219 | 173 | A03188 | A15241 | 183 |
| A03188 | A15606 | 367 | A03188 | A15660 | 160 |
| A03188 | A15741 | 219 | A03189 | A03447 | 375 |
| A03189 | A03991 | 411 | A03189 | A06375 | 438 |
| A03189 | A12365 | 258 | A03189 | A13886 | 385 |
| A03190 | A03401 | 262 | A03190 | A04229 | 408 |
| A03190 | A04886 | 466 | A03190 | A05018 | 469 |
| A03190 | A16111 | 445 | A03191 | A03496 | 177 |
| A03191 | A06779 | 396 | A03191 | A07291 | 364 |
| A03191 | A08133 | 213 | A03191 | A08205 | 335 |
| A03191 | A09054 | 335 | A03191 | A11346 | 199 |
| A03191 | A14472 | 199 | A03191 | A14758 | 199 |
| A03191 | A15034 | 313 | A03191 | A15315 | 230 |
| A03191 | A15347 | 151 | A03192 | A13830 | 172 |
| A03193 | A05483 | 412 | A03193 | A06822 | 412 |
| A03193 | A07062 | 457 | A03193 | A08739 | 353 |
| A03193 | A15896 | 302 | A03193 | A16038 | 402 |

|        |        |     |        |        |     |
|--------|--------|-----|--------|--------|-----|
| A03194 | A06415 | 302 | A03194 | A11994 | 399 |
| A03195 | A03263 | 207 | A03195 | A03271 | 232 |
| A03195 | A03288 | 212 | A03195 | A03432 | 247 |
| A03195 | A03790 | 263 | A03195 | A03803 | 329 |
| A03195 | A03817 | 170 | A03195 | A04042 | 360 |
| A03195 | A04536 | 154 | A03195 | A04587 | 360 |
| A03195 | A04682 | 262 | A03195 | A04730 | 360 |
| A03195 | A04783 | 218 | A03195 | A05159 | 399 |
| A03195 | A05904 | 374 | A03195 | A05946 | 374 |
| A03195 | A06092 | 185 | A03195 | A06195 | 480 |
| A03195 | A06224 | 429 | A03195 | A06298 | 229 |
| A03195 | A06769 | 319 | A03195 | A07142 | 484 |
| A03195 | A07146 | 443 | A03195 | A07164 | 180 |
| A03195 | A07173 | 191 | A03195 | A07311 | 63  |
| A03195 | A08697 | 399 | A03195 | A08731 | 384 |
| A03195 | A11307 | 428 | A03195 | A11662 | 335 |
| A03195 | A13828 | 399 | A03195 | A13872 | 247 |
| A03195 | A14364 | 210 | A03195 | A15498 | 208 |
| A03195 | A15994 | 384 | A03195 | A16430 | 390 |
| A03196 | A04867 | 270 | A03196 | A07138 | 377 |
| A03197 | A03663 | 226 | A03197 | A04433 | 404 |
| A03197 | A04977 | 449 | A03197 | A05359 | 283 |
| A03197 | A06232 | 373 | A03197 | A07020 | 213 |
| A03197 | A07054 | 414 | A03197 | A07242 | 488 |
| A03197 | A07816 | 299 | A03197 | A08070 | 160 |
| A03197 | A09645 | 373 | A03197 | A09911 | 288 |
| A03197 | A11452 | 357 | A03197 | A14084 | 213 |
| A03197 | A14265 | 486 | A03197 | A14281 | 176 |
| A03197 | A14524 | 228 | A03197 | A15930 | 235 |
| A03199 | A03739 | 353 | A03199 | A04117 | 425 |
| A03199 | A05068 | 490 | A03199 | A06642 | 417 |
| A03199 | A06867 | 468 | A03199 | A07022 | 246 |
| A03199 | A09715 | 386 | A03199 | A10286 | 491 |
| A03199 | A10526 | 355 | A03199 | A10670 | 271 |
| A03199 | A12020 | 184 | A03199 | A13305 | 318 |
| A03199 | A14493 | 318 | A03199 | A17189 | 152 |
| A03201 | A03336 | 241 | A03201 | A03583 | 327 |
| A03201 | A03842 | 348 | A03201 | A05102 | 241 |
| A03201 | A05124 | 232 | A03201 | A05138 | 281 |
| A03201 | A05145 | 332 | A03201 | A05174 | 293 |
| A03201 | A05176 | 452 | A03201 | A05222 | 230 |
| A03201 | A05281 | 345 | A03201 | A05398 | 271 |
| A03201 | A06161 | 200 | A03201 | A06622 | 232 |
| A03201 | A07158 | 159 | A03201 | A07192 | 221 |
| A03201 | A08603 | 301 | A03201 | A08692 | 266 |
| A03201 | A09016 | 401 | A03201 | A11104 | 393 |

|        |        |     |        |        |     |
|--------|--------|-----|--------|--------|-----|
| A03201 | A12361 | 210 | A03202 | A03583 | 396 |
| A03202 | A04204 | 436 | A03202 | A04637 | 449 |
| A03202 | A07431 | 436 | A03202 | A09186 | 436 |
| A03202 | A14633 | 201 | A03203 | A03226 | 279 |
| A03203 | A03292 | 255 | A03203 | A03916 | 396 |
| A03203 | A04327 | 294 | A03203 | A04441 | 375 |
| A03203 | A04746 | 425 | A03203 | A05418 | 228 |
| A03203 | A09235 | 443 | A03203 | A09241 | 413 |
| A03203 | A09508 | 374 | A03203 | A10072 | 419 |
| A03203 | A15848 | 407 | A03204 | A03259 | 480 |
| A03204 | A03280 | 391 | A03204 | A03782 | 207 |
| A03204 | A03846 | 193 | A03204 | A03966 | 362 |
| A03204 | A03996 | 406 | A03204 | A03999 | 391 |
| A03204 | A04138 | 299 | A03204 | A04142 | 346 |
| A03204 | A04206 | 413 | A03204 | A04240 | 375 |
| A03204 | A04244 | 447 | A03204 | A04248 | 246 |
| A03204 | A04263 | 229 | A03204 | A04528 | 446 |
| A03204 | A04536 | 456 | A03204 | A04567 | 272 |
| A03204 | A04589 | 339 | A03204 | A04800 | 419 |
| A03204 | A04961 | 452 | A03204 | A04965 | 201 |
| A03204 | A04985 | 201 | A03204 | A05038 | 340 |
| A03204 | A05305 | 286 | A03204 | A05931 | 440 |
| A03204 | A05944 | 224 | A03204 | A05985 | 479 |
| A03204 | A06055 | 374 | A03204 | A06422 | 391 |
| A03204 | A06465 | 383 | A03204 | A06652 | 360 |
| A03204 | A07031 | 417 | A03204 | A07135 | 228 |
| A03204 | A07146 | 302 | A03204 | A07148 | 307 |
| A03204 | A07157 | 491 | A03204 | A07164 | 406 |
| A03204 | A07166 | 215 | A03204 | A07173 | 210 |
| A03204 | A09046 | 310 | A03204 | A12009 | 290 |
| A03204 | A13872 | 435 | A03204 | A14392 | 190 |
| A03204 | A15393 | 406 | A03204 | A15394 | 235 |
| A03204 | A15806 | 312 | A03205 | A03444 | 236 |
| A03205 | A07111 | 212 | A03205 | A07311 | 176 |
| A03205 | A07697 | 172 | A03205 | A08293 | 190 |
| A03205 | A08903 | 477 | A03205 | A10563 | 152 |
| A03205 | A10810 | 430 | A03205 | A11363 | 286 |
| A03205 | A13826 | 308 | A03205 | A14585 | 165 |
| A03205 | A16082 | 430 | A03206 | A05220 | 234 |
| A03206 | A06631 | 432 | A03206 | A14077 | 210 |
| A03207 | A03422 | 210 | A03207 | A03922 | 201 |
| A03207 | A04648 | 302 | A03207 | A05027 | 278 |
| A03207 | A05767 | 319 | A03207 | A06037 | 177 |
| A03207 | A06803 | 307 | A03207 | A06864 | 170 |
| A03207 | A07534 | 184 | A03207 | A07670 | 391 |
| A03207 | A07887 | 273 | A03207 | A08141 | 243 |

|        |        |     |        |        |     |
|--------|--------|-----|--------|--------|-----|
| A03207 | A09712 | 357 | A03207 | A11737 | 269 |
| A03207 | A15939 | 277 | A03207 | A16228 | 345 |
| A03208 | A03401 | 247 | A03209 | A03224 | 168 |
| A03209 | A03280 | 193 | A03209 | A03450 | 273 |
| A03209 | A03470 | 215 | A03209 | A03531 | 172 |
| A03209 | A04147 | 168 | A03209 | A04169 | 207 |
| A03209 | A04657 | 224 | A03209 | A04693 | 168 |
| A03209 | A05818 | 368 | A03209 | A06054 | 170 |
| A03209 | A06631 | 176 | A03209 | A06882 | 277 |
| A03209 | A07684 | 204 | A03209 | A08114 | 177 |
| A03209 | A08847 | 465 | A03209 | A09542 | 899 |
| A03209 | A09829 | 200 | A03209 | A09863 | 290 |
| A03209 | A10615 | 903 | A03209 | A10725 | 200 |
| A03209 | A10875 | 152 | A03209 | A10960 | 159 |
| A03209 | A10982 | 265 | A03209 | A11757 | 313 |
| A03209 | A11784 | 229 | A03209 | A11875 | 179 |
| A03209 | A13605 | 196 | A03209 | A13826 | 456 |
| A03209 | A13983 | 228 | A03209 | A14124 | 187 |
| A03209 | A14210 | 196 | A03209 | A14371 | 316 |
| A03209 | A14442 | 200 | A03209 | A14511 | 185 |
| A03209 | A14943 | 218 | A03209 | A15292 | 213 |
| A03209 | A15294 | 294 | A03209 | A15317 | 218 |
| A03209 | A15346 | 167 | A03209 | A15348 | 198 |
| A03209 | A15456 | 190 | A03209 | A15480 | 205 |
| A03209 | A15485 | 217 | A03209 | A15515 | 262 |
| A03209 | A15799 | 201 | A03209 | A15806 | 235 |
| A03209 | A15964 | 198 | A03209 | A15969 | 299 |
| A03209 | A16076 | 173 | A03209 | A16224 | 263 |
| A03209 | A16476 | 266 | A03210 | A04130 | 428 |
| A03210 | A05679 | 329 | A03210 | A14125 | 348 |
| A03210 | A15425 | 313 | A03211 | A03304 | 297 |
| A03211 | A03434 | 226 | A03211 | A03642 | 286 |
| A03211 | A03839 | 310 | A03211 | A04006 | 213 |
| A03211 | A04082 | 296 | A03211 | A04175 | 489 |
| A03211 | A04222 | 278 | A03211 | A04275 | 462 |
| A03211 | A04308 | 193 | A03211 | A04337 | 151 |
| A03211 | A04406 | 212 | A03211 | A04418 | 488 |
| A03211 | A04423 | 183 | A03211 | A04491 | 157 |
| A03211 | A04493 | 489 | A03211 | A04520 | 396 |
| A03211 | A04576 | 252 | A03211 | A04608 | 177 |
| A03211 | A04715 | 475 | A03211 | A04717 | 276 |
| A03211 | A04778 | 299 | A03211 | A04790 | 345 |
| A03211 | A04849 | 165 | A03211 | A04873 | 262 |
| A03211 | A04879 | 221 | A03211 | A04944 | 490 |
| A03211 | A04947 | 335 | A03211 | A04964 | 491 |
| A03211 | A04972 | 322 | A03211 | A04985 | 491 |

|        |        |     |        |        |     |
|--------|--------|-----|--------|--------|-----|
| A03211 | A05106 | 485 | A03211 | A05250 | 232 |
| A03211 | A05288 | 491 | A03211 | A05462 | 156 |
| A03211 | A05556 | 256 | A03211 | A05601 | 446 |
| A03211 | A05610 | 252 | A03211 | A05866 | 385 |
| A03211 | A06151 | 475 | A03211 | A06152 | 259 |
| A03211 | A06222 | 402 | A03211 | A06313 | 332 |
| A03211 | A06403 | 252 | A03211 | A06466 | 347 |
| A03211 | A06530 | 422 | A03211 | A06535 | 358 |
| A03211 | A06565 | 286 | A03211 | A06588 | 207 |
| A03211 | A06607 | 485 | A03211 | A06608 | 286 |
| A03211 | A06615 | 152 | A03211 | A06650 | 418 |
| A03211 | A06686 | 491 | A03211 | A06688 | 490 |
| A03211 | A06719 | 183 | A03211 | A06720 | 267 |
| A03211 | A06721 | 460 | A03211 | A06844 | 267 |
| A03211 | A06868 | 353 | A03211 | A06926 | 200 |
| A03211 | A07056 | 195 | A03211 | A07310 | 297 |
| A03211 | A07384 | 373 | A03211 | A07626 | 167 |
| A03211 | A07630 | 213 | A03211 | A07842 | 241 |
| A03211 | A07903 | 351 | A03211 | A07995 | 246 |
| A03211 | A08093 | 490 | A03211 | A08224 | 259 |
| A03211 | A08274 | 210 | A03211 | A08309 | 160 |
| A03211 | A08679 | 180 | A03211 | A09113 | 340 |
| A03211 | A09248 | 290 | A03211 | A09263 | 168 |
| A03211 | A09964 | 246 | A03211 | A10103 | 475 |
| A03211 | A10672 | 200 | A03211 | A11012 | 340 |
| A03211 | A11299 | 297 | A03211 | A11306 | 297 |
| A03211 | A11336 | 259 | A03211 | A11582 | 286 |
| A03211 | A12119 | 276 | A03211 | A12212 | 259 |
| A03211 | A12675 | 267 | A03211 | A12761 | 340 |
| A03211 | A12897 | 481 | A03211 | A13157 | 286 |
| A03211 | A13369 | 386 | A03211 | A13790 | 340 |
| A03211 | A13814 | 286 | A03211 | A13972 | 428 |
| A03211 | A14732 | 286 | A03211 | A14876 | 228 |
| A03211 | A14925 | 187 | A03211 | A15917 | 363 |
| A03211 | A15929 | 314 | A03211 | A16125 | 228 |
| A03211 | A16281 | 199 | A03211 | A16951 | 213 |
| A03211 | A17085 | 409 | A03212 | A03260 | 391 |
| A03212 | A05369 | 378 | A03212 | A06688 | 443 |
| A03212 | A07123 | 263 | A03212 | A07124 | 319 |
| A03212 | A07158 | 162 | A03212 | A07164 | 190 |
| A03212 | A07655 | 286 | A03212 | A07878 | 232 |
| A03212 | A10394 | 378 | A03212 | A13597 | 332 |
| A03212 | A16636 | 190 | A03213 | A03273 | 945 |
| A03213 | A03304 | 160 | A03213 | A03465 | 324 |
| A03213 | A03963 | 163 | A03213 | A04020 | 193 |
| A03213 | A04104 | 262 | A03213 | A04600 | 174 |

|        |        |     |        |        |     |
|--------|--------|-----|--------|--------|-----|
| A03213 | A05112 | 402 | A03213 | A05158 | 371 |
| A03213 | A05169 | 302 | A03213 | A06039 | 199 |
| A03213 | A06100 | 380 | A03213 | A06200 | 434 |
| A03213 | A06269 | 165 | A03213 | A06284 | 207 |
| A03213 | A06513 | 302 | A03213 | A06610 | 446 |
| A03213 | A06708 | 413 | A03213 | A06848 | 177 |
| A03213 | A07293 | 271 | A03213 | A07848 | 199 |
| A03213 | A08133 | 199 | A03213 | A08734 | 235 |
| A03213 | A08803 | 271 | A03213 | A08875 | 185 |
| A03213 | A09195 | 199 | A03213 | A09487 | 452 |
| A03213 | A09791 | 294 | A03213 | A10161 | 251 |
| A03213 | A10255 | 430 | A03213 | A11983 | 215 |
| A03213 | A13195 | 187 | A03213 | A13373 | 263 |
| A03213 | A13821 | 156 | A03213 | A13885 | 243 |
| A03213 | A14045 | 251 | A03213 | A14198 | 183 |
| A03213 | A14294 | 182 | A03213 | A14444 | 909 |
| A03213 | A15314 | 167 | A03213 | A15509 | 199 |
| A03213 | A16996 | 187 | A03214 | A03273 | 201 |
| A03214 | A04867 | 152 | A03214 | A05349 | 899 |
| A03214 | A07165 | 916 | A03214 | A07190 | 183 |
| A03214 | A08215 | 195 | A03214 | A08817 | 223 |
| A03214 | A09556 | 484 | A03214 | A09842 | 469 |
| A03214 | A10174 | 420 | A03214 | A10399 | 401 |
| A03214 | A10506 | 173 | A03214 | A10754 | 236 |
| A03214 | A14443 | 899 | A03215 | A03477 | 372 |
| A03215 | A03984 | 428 | A03215 | A03985 | 313 |
| A03215 | A04097 | 252 | A03215 | A04278 | 281 |
| A03215 | A04494 | 430 | A03215 | A04879 | 210 |
| A03215 | A04880 | 229 | A03215 | A06610 | 255 |
| A03215 | A07147 | 457 | A03215 | A08266 | 399 |
| A03215 | A10798 | 185 | A03215 | A14843 | 313 |
| A03215 | A15346 | 191 | A03215 | A16216 | 423 |
| A03216 | A04486 | 457 | A03216 | A05707 | 438 |
| A03216 | A06002 | 438 | A03216 | A06526 | 408 |
| A03216 | A07386 | 430 | A03216 | A08240 | 438 |
| A03216 | A09276 | 393 | A03216 | A10252 | 430 |
| A03216 | A10257 | 438 | A03216 | A11889 | 438 |
| A03216 | A12520 | 438 | A03216 | A14643 | 204 |
| A03216 | A15277 | 346 | A03217 | A03221 | 394 |
| A03217 | A04424 | 470 | A03217 | A04498 | 399 |
| A03217 | A05418 | 218 | A03217 | A07812 | 317 |
| A03217 | A07833 | 279 | A03217 | A14188 | 152 |
| A03217 | A14666 | 432 | A03218 | A03312 | 343 |
| A03218 | A03315 | 310 | A03218 | A03370 | 151 |
| A03218 | A03403 | 332 | A03218 | A03541 | 297 |
| A03218 | A03612 | 274 | A03218 | A03976 | 208 |



|        |        |     |        |        |     |
|--------|--------|-----|--------|--------|-----|
| A03218 | A03989 | 339 | A03218 | A04229 | 172 |
| A03218 | A04275 | 208 | A03218 | A04333 | 247 |
| A03218 | A04334 | 167 | A03218 | A04488 | 355 |
| A03218 | A04603 | 285 | A03218 | A04922 | 467 |
| A03218 | A04996 | 490 | A03218 | A05113 | 255 |
| A03218 | A05264 | 297 | A03218 | A05299 | 306 |
| A03218 | A05377 | 294 | A03218 | A05556 | 205 |
| A03218 | A05901 | 363 | A03218 | A06505 | 335 |
| A03218 | A07205 | 489 | A03218 | A08704 | 368 |
| A03218 | A09046 | 321 | A03218 | A09195 | 358 |
| A03218 | A09968 | 389 | A03218 | A10197 | 335 |
| A03218 | A10207 | 411 | A03218 | A10215 | 350 |
| A03218 | A12371 | 316 | A03218 | A13250 | 223 |
| A03218 | A13873 | 156 | A03218 | A14589 | 221 |
| A03219 | A03259 | 389 | A03219 | A03305 | 224 |
| A03219 | A03639 | 378 | A03219 | A03719 | 184 |
| A03219 | A03753 | 204 | A03219 | A03760 | 296 |
| A03219 | A03767 | 238 | A03219 | A03800 | 208 |
| A03219 | A03894 | 184 | A03219 | A03910 | 152 |
| A03219 | A03942 | 374 | A03219 | A03961 | 162 |
| A03219 | A04078 | 217 | A03219 | A04202 | 457 |
| A03219 | A04257 | 291 | A03219 | A04492 | 456 |
| A03219 | A04976 | 296 | A03219 | A05182 | 270 |
| A03219 | A05533 | 322 | A03219 | A05706 | 160 |
| A03219 | A05992 | 236 | A03219 | A06054 | 338 |
| A03219 | A06067 | 184 | A03219 | A06196 | 339 |
| A03219 | A06578 | 275 | A03219 | A06762 | 228 |
| A03219 | A06905 | 429 | A03219 | A07145 | 302 |
| A03219 | A07422 | 306 | A03219 | A07598 | 184 |
| A03219 | A07932 | 277 | A03219 | A09245 | 191 |
| A03219 | A09351 | 184 | A03219 | A09570 | 291 |
| A03219 | A09732 | 177 | A03219 | A10090 | 327 |
| A03219 | A10623 | 160 | A03219 | A10645 | 229 |
| A03219 | A11190 | 199 | A03219 | A11558 | 554 |
| A03219 | A11851 | 184 | A03219 | A13124 | 489 |
| A03219 | A13336 | 469 | A03219 | A13356 | 184 |
| A03219 | A13875 | 183 | A03219 | A13994 | 319 |
| A03219 | A14048 | 234 | A03219 | A14129 | 152 |
| A03219 | A14172 | 419 | A03219 | A14190 | 281 |
| A03219 | A14210 | 548 | A03219 | A14371 | 466 |
| A03219 | A14379 | 159 | A03219 | A14408 | 163 |
| A03219 | A14496 | 219 | A03219 | A14511 | 491 |
| A03219 | A14539 | 291 | A03219 | A14604 | 156 |
| A03219 | A15230 | 193 | A03219 | A15292 | 351 |
| A03219 | A15306 | 355 | A03219 | A15313 | 177 |
| A03219 | A15352 | 154 | A03219 | A15396 | 205 |

|        |        |     |        |        |     |
|--------|--------|-----|--------|--------|-----|
| A03219 | A15457 | 279 | A03219 | A15480 | 483 |
| A03219 | A15481 | 469 | A03219 | A15495 | 438 |
| A03219 | A15804 | 286 | A03219 | A16152 | 184 |
| A03219 | A16224 | 171 | A03219 | A16555 | 302 |
| A03220 | A03983 | 455 | A03220 | A06218 | 434 |
| A03220 | A07746 | 256 | A03220 | A09842 | 283 |
| A03220 | A14650 | 198 | A03222 | A03223 | 305 |
| A03222 | A06602 | 307 | A03222 | A07079 | 279 |
| A03222 | A07989 | 338 | A03222 | A09556 | 271 |
| A03223 | A03631 | 294 | A03223 | A03742 | 168 |
| A03223 | A04075 | 258 | A03223 | A04079 | 268 |
| A03223 | A04085 | 154 | A03223 | A04342 | 174 |
| A03223 | A04608 | 263 | A03223 | A04615 | 227 |
| A03223 | A04622 | 286 | A03223 | A04668 | 414 |
| A03223 | A04721 | 172 | A03223 | A05112 | 424 |
| A03223 | A05212 | 352 | A03223 | A05216 | 187 |
| A03223 | A05315 | 358 | A03223 | A05583 | 183 |
| A03223 | A05598 | 154 | A03223 | A05697 | 241 |
| A03223 | A05820 | 227 | A03223 | A06446 | 262 |
| A03223 | A06610 | 485 | A03223 | A06642 | 475 |
| A03223 | A06644 | 358 | A03223 | A07168 | 188 |
| A03223 | A07294 | 353 | A03223 | A07500 | 262 |
| A03223 | A07658 | 154 | A03223 | A07955 | 262 |
| A03223 | A07961 | 390 | A03223 | A08732 | 252 |
| A03223 | A08879 | 196 | A03223 | A09018 | 157 |
| A03223 | A09838 | 177 | A03223 | A10552 | 177 |
| A03223 | A10573 | 262 | A03223 | A10930 | 227 |
| A03223 | A11113 | 162 | A03223 | A12140 | 162 |
| A03223 | A12326 | 162 | A03223 | A12902 | 215 |
| A03223 | A13044 | 188 | A03223 | A13829 | 490 |
| A03223 | A14039 | 154 | A03223 | A14119 | 263 |
| A03223 | A14188 | 157 | A03223 | A14193 | 302 |
| A03223 | A14208 | 341 | A03223 | A14343 | 196 |
| A03223 | A14366 | 350 | A03223 | A14554 | 352 |
| A03223 | A14621 | 477 | A03223 | A14882 | 236 |
| A03223 | A15683 | 154 | A03223 | A15912 | 168 |
| A03223 | A15960 | 172 | A03223 | A16528 | 183 |
| A03224 | A03234 | 177 | A03224 | A03239 | 201 |
| A03224 | A03243 | 329 | A03224 | A03264 | 286 |
| A03224 | A03280 | 434 | A03224 | A03488 | 229 |
| A03224 | A03721 | 334 | A03224 | A03782 | 185 |
| A03224 | A03845 | 290 | A03224 | A03848 | 319 |
| A03224 | A03858 | 177 | A03224 | A04124 | 274 |
| A03224 | A04234 | 353 | A03224 | A04263 | 208 |
| A03224 | A04372 | 343 | A03224 | A04519 | 232 |
| A03224 | A04528 | 373 | A03224 | A04589 | 185 |

|        |        |     |        |        |     |
|--------|--------|-----|--------|--------|-----|
| A03224 | A04609 | 238 | A03224 | A04614 | 246 |
| A03224 | A04620 | 408 | A03224 | A04880 | 165 |
| A03224 | A04908 | 162 | A03224 | A04950 | 364 |
| A03224 | A05106 | 208 | A03224 | A05113 | 219 |
| A03224 | A05216 | 152 | A03224 | A05550 | 235 |
| A03224 | A05673 | 303 | A03224 | A05679 | 176 |
| A03224 | A05741 | 303 | A03224 | A05801 | 353 |
| A03224 | A06063 | 191 | A03224 | A06211 | 316 |
| A03224 | A06251 | 347 | A03224 | A06414 | 395 |
| A03224 | A06415 | 327 | A03224 | A06465 | 373 |
| A03224 | A06558 | 364 | A03224 | A07131 | 383 |
| A03224 | A07135 | 483 | A03224 | A07145 | 201 |
| A03224 | A07152 | 302 | A03224 | A07157 | 278 |
| A03224 | A07161 | 230 | A03224 | A07164 | 311 |
| A03224 | A07166 | 193 | A03224 | A07177 | 350 |
| A03224 | A07191 | 308 | A03224 | A07421 | 193 |
| A03224 | A08612 | 347 | A03224 | A09566 | 310 |
| A03224 | A10343 | 373 | A03224 | A11477 | 294 |
| A03224 | A13906 | 307 | A03224 | A14071 | 154 |
| A03224 | A14208 | 221 | A03224 | A14366 | 259 |
| A03224 | A14372 | 187 | A03224 | A14373 | 312 |
| A03224 | A14374 | 274 | A03224 | A14392 | 168 |
| A03224 | A14442 | 266 | A03224 | A14554 | 196 |
| A03224 | A14599 | 368 | A03224 | A14637 | 154 |
| A03224 | A14643 | 159 | A03224 | A14685 | 347 |
| A03224 | A15358 | 226 | A03224 | A15394 | 213 |
| A03224 | A15395 | 191 | A03224 | A15425 | 154 |
| A03224 | A15470 | 345 | A03224 | A15475 | 379 |
| A03224 | A15516 | 353 | A03224 | A15806 | 296 |
| A03224 | A15955 | 398 | A03224 | A15964 | 380 |
| A03224 | A16074 | 227 | A03224 | A17155 | 296 |
| A03225 | A03598 | 425 | A03225 | A03737 | 374 |
| A03225 | A03968 | 205 | A03225 | A04314 | 475 |
| A03225 | A04315 | 324 | A03225 | A04623 | 277 |
| A03225 | A04713 | 335 | A03225 | A05082 | 168 |
| A03225 | A05415 | 195 | A03225 | A07135 | 241 |
| A03225 | A14426 | 293 | A03226 | A04162 | 483 |
| A03226 | A04316 | 219 | A03226 | A05315 | 162 |
| A03226 | A05330 | 229 | A03226 | A05576 | 313 |
| A03226 | A06286 | 391 | A03226 | A06578 | 162 |
| A03226 | A07293 | 363 | A03226 | A09791 | 154 |
| A03226 | A10072 | 226 | A03226 | A13058 | 323 |
| A03226 | A14521 | 191 | A03226 | A15455 | 272 |
| A03227 | A05257 | 274 | A03227 | A05275 | 489 |
| A03227 | A06000 | 162 | A03227 | A06431 | 356 |
| A03227 | A07079 | 375 | A03227 | A08822 | 446 |

|        |        |     |        |        |     |
|--------|--------|-----|--------|--------|-----|
| A03227 | A08856 | 327 | A03227 | A10145 | 475 |
| A03227 | A10466 | 196 | A03227 | A14097 | 351 |
| A03228 | A03882 | 180 | A03228 | A03949 | 430 |
| A03228 | A03976 | 172 | A03228 | A04046 | 329 |
| A03228 | A04048 | 221 | A03228 | A04106 | 352 |
| A03228 | A04271 | 201 | A03228 | A04422 | 366 |
| A03228 | A04444 | 232 | A03228 | A04539 | 339 |
| A03228 | A04589 | 185 | A03228 | A04680 | 429 |
| A03228 | A04813 | 391 | A03228 | A05592 | 383 |
| A03228 | A05865 | 389 | A03228 | A06055 | 232 |
| A03228 | A06332 | 398 | A03228 | A06392 | 398 |
| A03228 | A06798 | 303 | A03228 | A06949 | 152 |
| A03228 | A07145 | 201 | A03228 | A07152 | 168 |
| A03228 | A07173 | 188 | A03228 | A07312 | 207 |
| A03228 | A08437 | 286 | A03228 | A08572 | 313 |
| A03228 | A08596 | 262 | A03228 | A09014 | 363 |
| A03228 | A09087 | 372 | A03228 | A09201 | 232 |
| A03228 | A09218 | 273 | A03228 | A09409 | 363 |
| A03228 | A09509 | 156 | A03228 | A10172 | 363 |
| A03228 | A10796 | 307 | A03228 | A13484 | 221 |
| A03228 | A13798 | 372 | A03228 | A13865 | 383 |
| A03228 | A14390 | 398 | A03228 | A14436 | 335 |
| A03228 | A14442 | 265 | A03228 | A14811 | 441 |
| A03228 | A15394 | 213 | A03228 | A15395 | 191 |
| A03228 | A15425 | 154 | A03228 | A15427 | 247 |
| A03228 | A15484 | 171 | A03228 | A15642 | 219 |
| A03228 | A15840 | 350 | A03228 | A15964 | 263 |
| A03228 | A16724 | 294 | A03228 | A16789 | 899 |
| A03228 | A16822 | 185 | A03229 | A03321 | 278 |
| A03229 | A03725 | 176 | A03229 | A05902 | 378 |
| A03229 | A06078 | 358 | A03229 | A06863 | 297 |
| A03229 | A13970 | 190 | A03230 | A03234 | 399 |
| A03230 | A03313 | 361 | A03230 | A03599 | 399 |
| A03230 | A03992 | 374 | A03230 | A04502 | 418 |
| A03230 | A05358 | 363 | A03230 | A07163 | 201 |
| A03230 | A07553 | 446 | A03230 | A09079 | 418 |
| A03230 | A09905 | 433 | A03231 | A11966 | 422 |
| A03231 | A14635 | 229 | A03232 | A04376 | 380 |
| A03232 | A04967 | 416 | A03232 | A05874 | 416 |
| A03232 | A06130 | 301 | A03232 | A07694 | 416 |
| A03232 | A08105 | 390 | A03232 | A09478 | 390 |
| A03232 | A10223 | 396 | A03232 | A15837 | 160 |
| A03233 | A07471 | 398 | A03233 | A07475 | 340 |
| A03233 | A14272 | 171 | A03234 | A03264 | 232 |
| A03234 | A03513 | 486 | A03234 | A03917 | 240 |
| A03234 | A04095 | 472 | A03234 | A04220 | 296 |

|        |        |     |        |        |     |
|--------|--------|-----|--------|--------|-----|
| A03234 | A04227 | 352 | A03234 | A04316 | 199 |
| A03234 | A04372 | 302 | A03234 | A04485 | 255 |
| A03234 | A04491 | 215 | A03234 | A04556 | 238 |
| A03234 | A04620 | 258 | A03234 | A04781 | 258 |
| A03234 | A04791 | 196 | A03234 | A05045 | 176 |
| A03234 | A05139 | 339 | A03234 | A05243 | 208 |
| A03234 | A05337 | 335 | A03234 | A05358 | 484 |
| A03234 | A05433 | 329 | A03234 | A05451 | 390 |
| A03234 | A05452 | 399 | A03234 | A05538 | 313 |
| A03234 | A05549 | 339 | A03234 | A05550 | 480 |
| A03234 | A05883 | 480 | A03234 | A05966 | 160 |
| A03234 | A06090 | 408 | A03234 | A06211 | 268 |
| A03234 | A06245 | 296 | A03234 | A06439 | 258 |
| A03234 | A06558 | 329 | A03234 | A06629 | 273 |
| A03234 | A06630 | 217 | A03234 | A06734 | 479 |
| A03234 | A06860 | 466 | A03234 | A07037 | 457 |
| A03234 | A07146 | 232 | A03234 | A07281 | 296 |
| A03234 | A07520 | 477 | A03234 | A08108 | 199 |
| A03234 | A08707 | 232 | A03234 | A09381 | 226 |
| A03234 | A09880 | 171 | A03234 | A13906 | 258 |
| A03234 | A14306 | 321 | A03234 | A14444 | 163 |
| A03234 | A14637 | 212 | A03234 | A14685 | 307 |
| A03234 | A17155 | 243 | A03235 | A07643 | 196 |
| A03236 | A14208 | 227 | A03236 | A14431 | 380 |
| A03237 | A04834 | 201 | A03237 | A05004 | 205 |
| A03237 | A06252 | 221 | A03237 | A06309 | 281 |
| A03237 | A06502 | 303 | A03237 | A07026 | 208 |
| A03237 | A07232 | 177 | A03237 | A07586 | 208 |
| A03237 | A08352 | 151 | A03237 | A08571 | 334 |
| A03237 | A08741 | 157 | A03237 | A08884 | 270 |
| A03237 | A09135 | 472 | A03237 | A09256 | 227 |
| A03237 | A09711 | 326 | A03237 | A10084 | 297 |
| A03237 | A10607 | 276 | A03237 | A12035 | 491 |
| A03237 | A13949 | 491 | A03237 | A14272 | 213 |
| A03237 | A14570 | 174 | A03237 | A15179 | 391 |
| A03237 | A15367 | 477 | A03237 | A15504 | 236 |
| A03237 | A16026 | 179 | A03237 | A16110 | 246 |
| A03237 | A16635 | 296 | A03238 | A03545 | 313 |
| A03238 | A03609 | 238 | A03238 | A03729 | 205 |
| A03238 | A04318 | 391 | A03238 | A04369 | 154 |
| A03238 | A04433 | 274 | A03238 | A04487 | 408 |
| A03238 | A04679 | 461 | A03238 | A04839 | 477 |
| A03238 | A04927 | 299 | A03238 | A05028 | 299 |
| A03238 | A05112 | 270 | A03238 | A05143 | 375 |
| A03238 | A05208 | 238 | A03238 | A05311 | 475 |
| A03238 | A05376 | 490 | A03238 | A05459 | 475 |

|        |        |     |        |        |     |
|--------|--------|-----|--------|--------|-----|
| A03238 | A05653 | 277 | A03238 | A05785 | 334 |
| A03238 | A06046 | 221 | A03238 | A06402 | 267 |
| A03238 | A06405 | 369 | A03238 | A06831 | 475 |
| A03238 | A07143 | 168 | A03238 | A07342 | 339 |
| A03238 | A07407 | 210 | A03238 | A07503 | 384 |
| A03238 | A07610 | 193 | A03238 | A07736 | 249 |
| A03238 | A08724 | 187 | A03238 | A09036 | 434 |
| A03238 | A09277 | 358 | A03238 | A09375 | 279 |
| A03238 | A09837 | 283 | A03238 | A09891 | 334 |
| A03238 | A09892 | 313 | A03238 | A09917 | 302 |
| A03238 | A10052 | 258 | A03238 | A11279 | 462 |
| A03238 | A13832 | 290 | A03238 | A13871 | 391 |
| A03238 | A14247 | 491 | A03238 | A14258 | 339 |
| A03238 | A14344 | 230 | A03238 | A14661 | 286 |
| A03238 | A15277 | 172 | A03238 | A15366 | 473 |
| A03238 | A15430 | 246 | A03238 | A15462 | 344 |
| A03238 | A15463 | 302 | A03238 | A15498 | 330 |
| A03238 | A15669 | 294 | A03239 | A03243 | 162 |
| A03239 | A03280 | 227 | A03239 | A03314 | 157 |
| A03239 | A03447 | 490 | A03239 | A03735 | 455 |
| A03239 | A03746 | 477 | A03239 | A03788 | 400 |
| A03239 | A03900 | 479 | A03239 | A03945 | 218 |
| A03239 | A04076 | 173 | A03239 | A04130 | 165 |
| A03239 | A04671 | 221 | A03239 | A05517 | 249 |
| A03239 | A05679 | 270 | A03239 | A05891 | 291 |
| A03239 | A06024 | 288 | A03239 | A06293 | 479 |
| A03239 | A06414 | 254 | A03239 | A06415 | 488 |
| A03239 | A06553 | 353 | A03239 | A06571 | 438 |
| A03239 | A06652 | 324 | A03239 | A06739 | 193 |
| A03239 | A06747 | 402 | A03239 | A06956 | 281 |
| A03239 | A07010 | 457 | A03239 | A07145 | 480 |
| A03239 | A07152 | 412 | A03239 | A07161 | 196 |
| A03239 | A07166 | 157 | A03239 | A07173 | 283 |
| A03239 | A07243 | 199 | A03239 | A07529 | 466 |
| A03239 | A07764 | 491 | A03239 | A07765 | 353 |
| A03239 | A08002 | 455 | A03239 | A08003 | 383 |
| A03239 | A09219 | 480 | A03239 | A10504 | 174 |
| A03239 | A10585 | 238 | A03239 | A10943 | 412 |
| A03239 | A11216 | 286 | A03239 | A11368 | 157 |
| A03239 | A11950 | 218 | A03239 | A12542 | 366 |
| A03239 | A12622 | 383 | A03239 | A12936 | 337 |
| A03239 | A13485 | 337 | A03239 | A13903 | 200 |
| A03239 | A14071 | 243 | A03239 | A14125 | 469 |
| A03239 | A14146 | 234 | A03239 | A14362 | 341 |
| A03239 | A14366 | 316 | A03239 | A14368 | 238 |
| A03239 | A14372 | 491 | A03239 | A14373 | 283 |

|        |        |     |        |        |     |
|--------|--------|-----|--------|--------|-----|
| A03239 | A14374 | 330 | A03239 | A14380 | 409 |
| A03239 | A14381 | 479 | A03239 | A14391 | 399 |
| A03239 | A14439 | 196 | A03239 | A14539 | 156 |
| A03239 | A14554 | 475 | A03239 | A14598 | 251 |
| A03239 | A14599 | 340 | A03239 | A14600 | 470 |
| A03239 | A14767 | 383 | A03239 | A14930 | 151 |
| A03239 | A15292 | 208 | A03239 | A15322 | 273 |
| A03239 | A15329 | 241 | A03239 | A15395 | 154 |
| A03239 | A15425 | 438 | A03239 | A15466 | 314 |
| A03239 | A15475 | 451 | A03239 | A15498 | 357 |
| A03239 | A15790 | 457 | A03239 | A15795 | 172 |
| A03239 | A15886 | 314 | A03239 | A16015 | 302 |
| A03239 | A16286 | 228 | A03239 | A16562 | 383 |
| A03239 | A17052 | 383 | A03241 | A03769 | 319 |
| A03241 | A04493 | 249 | A03241 | A04715 | 174 |
| A03241 | A04964 | 400 | A03241 | A04972 | 312 |
| A03241 | A05106 | 353 | A03241 | A06364 | 490 |
| A03241 | A06530 | 226 | A03241 | A06601 | 223 |
| A03241 | A06895 | 435 | A03241 | A06896 | 382 |
| A03241 | A07056 | 317 | A03241 | A07337 | 374 |
| A03241 | A07341 | 324 | A03241 | A07852 | 436 |
| A03241 | A07859 | 405 | A03241 | A07863 | 405 |
| A03241 | A08361 | 368 | A03241 | A10348 | 347 |
| A03241 | A12522 | 435 | A03241 | A14876 | 424 |
| A03241 | A16472 | 382 | A03242 | A03587 | 399 |
| A03242 | A14642 | 184 | A03243 | A03256 | 491 |
| A03243 | A03259 | 121 | A03243 | A03260 | 232 |
| A03243 | A03263 | 165 | A03243 | A03264 | 252 |
| A03243 | A03278 | 236 | A03243 | A03297 | 338 |
| A03243 | A03861 | 171 | A03243 | A03866 | 294 |
| A03243 | A04059 | 435 | A03243 | A04088 | 249 |
| A03243 | A04135 | 266 | A03243 | A04260 | 279 |
| A03243 | A04279 | 191 | A03243 | A04307 | 167 |
| A03243 | A04372 | 318 | A03243 | A04578 | 291 |
| A03243 | A04620 | 276 | A03243 | A04653 | 363 |
| A03243 | A04739 | 168 | A03243 | A04795 | 188 |
| A03243 | A04861 | 474 | A03243 | A04902 | 319 |
| A03243 | A04941 | 236 | A03243 | A04945 | 270 |
| A03243 | A04965 | 272 | A03243 | A05111 | 308 |
| A03243 | A05550 | 198 | A03243 | A05569 | 281 |
| A03243 | A05575 | 297 | A03243 | A05719 | 394 |
| A03243 | A05940 | 260 | A03243 | A06004 | 241 |
| A03243 | A06107 | 305 | A03243 | A06211 | 286 |
| A03243 | A06558 | 343 | A03243 | A06631 | 205 |
| A03243 | A06863 | 296 | A03243 | A06971 | 436 |
| A03243 | A08391 | 221 | A03243 | A08628 | 335 |

|        |        |     |        |        |     |
|--------|--------|-----|--------|--------|-----|
| A03243 | A09220 | 274 | A03243 | A09500 | 318 |
| A03243 | A09535 | 399 | A03243 | A10213 | 270 |
| A03243 | A10215 | 297 | A03243 | A10330 | 363 |
| A03243 | A10791 | 241 | A03243 | A13906 | 276 |
| A03243 | A13973 | 323 | A03243 | A14373 | 281 |
| A03243 | A14376 | 433 | A03243 | A14403 | 291 |
| A03243 | A14404 | 243 | A03243 | A14685 | 323 |
| A03243 | A17155 | 380 | A03244 | A03304 | 486 |
| A03244 | A03310 | 254 | A03244 | A03343 | 313 |
| A03244 | A03431 | 357 | A03244 | A03661 | 185 |
| A03244 | A03806 | 452 | A03244 | A03936 | 218 |
| A03244 | A03950 | 243 | A03244 | A03965 | 160 |
| A03244 | A04063 | 218 | A03244 | A04167 | 213 |
| A03244 | A04473 | 243 | A03244 | A04577 | 353 |
| A03244 | A04680 | 307 | A03244 | A05032 | 162 |
| A03244 | A05070 | 200 | A03244 | A05094 | 179 |
| A03244 | A05154 | 179 | A03244 | A05165 | 180 |
| A03244 | A05705 | 293 | A03244 | A05868 | 217 |
| A03244 | A06599 | 201 | A03244 | A06653 | 213 |
| A03244 | A07178 | 205 | A03244 | A07220 | 191 |
| A03244 | A08621 | 243 | A03244 | A08869 | 157 |
| A03244 | A09099 | 353 | A03244 | A11759 | 165 |
| A03244 | A14374 | 199 | A03244 | A14605 | 330 |
| A03244 | A14642 | 447 | A03244 | A14643 | 451 |
| A03244 | A14787 | 234 | A03244 | A15394 | 154 |
| A03244 | A15981 | 232 | A03246 | A03926 | 257 |
| A03246 | A04033 | 350 | A03246 | A04062 | 486 |
| A03246 | A04271 | 176 | A03246 | A07451 | 286 |
| A03246 | A08517 | 267 | A03246 | A09567 | 269 |
| A03246 | A10328 | 187 | A03246 | A11368 | 168 |
| A03246 | A11429 | 226 | A03246 | A14335 | 235 |
| A03246 | A14554 | 171 | A03246 | A14621 | 424 |
| A03246 | A14730 | 371 | A03246 | A15257 | 154 |
| A03246 | A16822 | 160 | A03246 | A16879 | 262 |
| A03247 | A03251 | 416 | A03247 | A03254 | 380 |
| A03247 | A03376 | 285 | A03247 | A03379 | 185 |
| A03247 | A03479 | 200 | A03247 | A04446 | 196 |
| A03247 | A05059 | 306 | A03247 | A06510 | 369 |
| A03247 | A06903 | 324 | A03247 | A07175 | 329 |
| A03247 | A07373 | 324 | A03248 | A03249 | 452 |
| A03248 | A05679 | 372 | A03248 | A14374 | 355 |
| A03248 | A15517 | 438 | A03248 | A16011 | 447 |
| A03249 | A05679 | 372 | A03249 | A14374 | 355 |
| A03249 | A15517 | 438 | A03249 | A16011 | 447 |
| A03250 | A11184 | 377 | A03251 | A03254 | 438 |
| A03251 | A07373 | 416 | A03252 | A05709 | 396 |



|        |        |     |        |        |     |
|--------|--------|-----|--------|--------|-----|
| A03252 | A06595 | 337 | A03252 | A10214 | 374 |
| A03252 | A14208 | 152 | A03252 | A15314 | 157 |
| A03252 | A15976 | 351 | A03253 | A04130 | 384 |
| A03254 | A03279 | 382 | A03254 | A03880 | 258 |
| A03254 | A06037 | 229 | A03254 | A06510 | 457 |
| A03254 | A07148 | 383 | A03254 | A07373 | 380 |
| A03255 | A03846 | 288 | A03255 | A04020 | 201 |
| A03255 | A14236 | 294 | A03256 | A03278 | 367 |
| A03256 | A03503 | 199 | A03256 | A03708 | 229 |
| A03256 | A04088 | 257 | A03256 | A04211 | 162 |
| A03256 | A04260 | 375 | A03256 | A04861 | 454 |
| A03256 | A04902 | 386 | A03256 | A04942 | 267 |
| A03256 | A05214 | 368 | A03256 | A05568 | 357 |
| A03256 | A05569 | 286 | A03256 | A05617 | 433 |
| A03256 | A05719 | 443 | A03256 | A05921 | 328 |
| A03256 | A06971 | 276 | A03256 | A07023 | 439 |
| A03256 | A07173 | 157 | A03256 | A08628 | 340 |
| A03256 | A08879 | 422 | A03256 | A09548 | 307 |
| A03256 | A10625 | 385 | A03256 | A12362 | 385 |
| A03256 | A14438 | 266 | A03257 | A04265 | 378 |
| A03257 | A14073 | 180 | A03257 | A14077 | 210 |
| A03257 | A14664 | 299 | A03257 | A16216 | 229 |
| A03258 | A04170 | 380 | A03259 | A03263 | 285 |
| A03259 | A03271 | 358 | A03259 | A03275 | 491 |
| A03259 | A03276 | 165 | A03259 | A03280 | 472 |
| A03259 | A03283 | 252 | A03259 | A03316 | 218 |
| A03259 | A03370 | 375 | A03259 | A03432 | 199 |
| A03259 | A03434 | 168 | A03259 | A03438 | 154 |
| A03259 | A03487 | 179 | A03259 | A03513 | 205 |
| A03259 | A03520 | 485 | A03259 | A03596 | 283 |
| A03259 | A03609 | 480 | A03259 | A03614 | 401 |
| A03259 | A03626 | 246 | A03259 | A03657 | 348 |
| A03259 | A03682 | 154 | A03259 | A03719 | 162 |
| A03259 | A03722 | 283 | A03259 | A03732 | 241 |
| A03259 | A03733 | 162 | A03259 | A03748 | 451 |
| A03259 | A03788 | 380 | A03259 | A03799 | 449 |
| A03259 | A03843 | 241 | A03259 | A03851 | 486 |
| A03259 | A03894 | 310 | A03259 | A03902 | 159 |
| A03259 | A03910 | 386 | A03259 | A03914 | 260 |
| A03259 | A03937 | 208 | A03259 | A03942 | 398 |
| A03259 | A03972 | 167 | A03259 | A03981 | 398 |
| A03259 | A03992 | 185 | A03259 | A03999 | 217 |
| A03259 | A04010 | 485 | A03259 | A04015 | 374 |
| A03259 | A04059 | 188 | A03259 | A04078 | 402 |
| A03259 | A04088 | 350 | A03259 | A04117 | 260 |
| A03259 | A04130 | 281 | A03259 | A04138 | 162 |

|        |        |     |        |        |     |
|--------|--------|-----|--------|--------|-----|
| A03259 | A04169 | 488 | A03259 | A04212 | 265 |
| A03259 | A04248 | 323 | A03259 | A04256 | 176 |
| A03259 | A04317 | 167 | A03259 | A04337 | 215 |
| A03259 | A04342 | 435 | A03259 | A04375 | 430 |
| A03259 | A04398 | 198 | A03259 | A04404 | 167 |
| A03259 | A04423 | 180 | A03259 | A04426 | 252 |
| A03259 | A04519 | 263 | A03259 | A04528 | 328 |
| A03259 | A04536 | 344 | A03259 | A04567 | 364 |
| A03259 | A04589 | 551 | A03259 | A04592 | 217 |
| A03259 | A04609 | 188 | A03259 | A04617 | 332 |
| A03259 | A04618 | 185 | A03259 | A04622 | 491 |
| A03259 | A04660 | 159 | A03259 | A04681 | 235 |
| A03259 | A04706 | 156 | A03259 | A04734 | 321 |
| A03259 | A04800 | 218 | A03259 | A04881 | 374 |
| A03259 | A04939 | 368 | A03259 | A05007 | 401 |
| A03259 | A05045 | 183 | A03259 | A05050 | 221 |
| A03259 | A05098 | 290 | A03259 | A05102 | 337 |
| A03259 | A05106 | 217 | A03259 | A05133 | 179 |
| A03259 | A05160 | 167 | A03259 | A05167 | 217 |
| A03259 | A05210 | 174 | A03259 | A05228 | 157 |
| A03259 | A05279 | 195 | A03259 | A05294 | 334 |
| A03259 | A05309 | 485 | A03259 | A05310 | 160 |
| A03259 | A05346 | 157 | A03259 | A05349 | 249 |
| A03259 | A05358 | 341 | A03259 | A05383 | 313 |
| A03259 | A05416 | 252 | A03259 | A05417 | 226 |
| A03259 | A05449 | 339 | A03259 | A05451 | 235 |
| A03259 | A05457 | 157 | A03259 | A05472 | 235 |
| A03259 | A05475 | 217 | A03259 | A05569 | 213 |
| A03259 | A05571 | 217 | A03259 | A05599 | 179 |
| A03259 | A05600 | 184 | A03259 | A05603 | 243 |
| A03259 | A05659 | 383 | A03259 | A05689 | 167 |
| A03259 | A05735 | 221 | A03259 | A05812 | 305 |
| A03259 | A05883 | 163 | A03259 | A05886 | 313 |
| A03259 | A05887 | 265 | A03259 | A05891 | 411 |
| A03259 | A05985 | 498 | A03259 | A06055 | 266 |
| A03259 | A06089 | 157 | A03259 | A06141 | 356 |
| A03259 | A06212 | 234 | A03259 | A06346 | 162 |
| A03259 | A06355 | 252 | A03259 | A06415 | 424 |
| A03259 | A06422 | 313 | A03259 | A06439 | 369 |
| A03259 | A06610 | 344 | A03259 | A06618 | 217 |
| A03259 | A06660 | 302 | A03259 | A06689 | 462 |
| A03259 | A06729 | 452 | A03259 | A06731 | 420 |
| A03259 | A06737 | 217 | A03259 | A06799 | 195 |
| A03259 | A06851 | 427 | A03259 | A06860 | 241 |
| A03259 | A06899 | 297 | A03259 | A06901 | 195 |
| A03259 | A06931 | 195 | A03259 | A06953 | 324 |

|        |        |     |        |        |     |
|--------|--------|-----|--------|--------|-----|
| A03259 | A06970 | 455 | A03259 | A07118 | 273 |
| A03259 | A07135 | 480 | A03259 | A07143 | 160 |
| A03259 | A07145 | 416 | A03259 | A07148 | 454 |
| A03259 | A07150 | 195 | A03259 | A07152 | 375 |
| A03259 | A07154 | 151 | A03259 | A07157 | 491 |
| A03259 | A07161 | 489 | A03259 | A07164 | 491 |
| A03259 | A07165 | 486 | A03259 | A07166 | 491 |
| A03259 | A07209 | 477 | A03259 | A07218 | 170 |
| A03259 | A07238 | 236 | A03259 | A07272 | 217 |
| A03259 | A07286 | 179 | A03259 | A07311 | 199 |
| A03259 | A07341 | 210 | A03259 | A07360 | 217 |
| A03259 | A07391 | 332 | A03259 | A07416 | 179 |
| A03259 | A07477 | 299 | A03259 | A07553 | 299 |
| A03259 | A07558 | 414 | A03259 | A07590 | 391 |
| A03259 | A07692 | 340 | A03259 | A07736 | 345 |
| A03259 | A07766 | 458 | A03259 | A07803 | 446 |
| A03259 | A07874 | 217 | A03259 | A07900 | 293 |
| A03259 | A07926 | 167 | A03259 | A07973 | 152 |
| A03259 | A08108 | 371 | A03259 | A08133 | 199 |
| A03259 | A08193 | 218 | A03259 | A08309 | 179 |
| A03259 | A08323 | 157 | A03259 | A08342 | 195 |
| A03259 | A08384 | 217 | A03259 | A08567 | 279 |
| A03259 | A08572 | 303 | A03259 | A08823 | 167 |
| A03259 | A08834 | 472 | A03259 | A08840 | 433 |
| A03259 | A08841 | 308 | A03259 | A08859 | 384 |
| A03259 | A08875 | 160 | A03259 | A08908 | 151 |
| A03259 | A09022 | 367 | A03259 | A09070 | 195 |
| A03259 | A09204 | 241 | A03259 | A09224 | 157 |
| A03259 | A09263 | 159 | A03259 | A09294 | 167 |
| A03259 | A09381 | 430 | A03259 | A09405 | 252 |
| A03259 | A09421 | 191 | A03259 | A09435 | 154 |
| A03259 | A09493 | 157 | A03259 | A09494 | 265 |
| A03259 | A09643 | 899 | A03259 | A09709 | 174 |
| A03259 | A09732 | 488 | A03259 | A09733 | 352 |
| A03259 | A09742 | 366 | A03259 | A09744 | 281 |
| A03259 | A09745 | 288 | A03259 | A09833 | 337 |
| A03259 | A09835 | 195 | A03259 | A09848 | 310 |
| A03259 | A09873 | 393 | A03259 | A09875 | 285 |
| A03259 | A09958 | 252 | A03259 | A09983 | 226 |
| A03259 | A09991 | 174 | A03259 | A10011 | 252 |
| A03259 | A10027 | 252 | A03259 | A10033 | 195 |
| A03259 | A10095 | 218 | A03259 | A10120 | 252 |
| A03259 | A10141 | 167 | A03259 | A10199 | 218 |
| A03259 | A10278 | 232 | A03259 | A10336 | 462 |
| A03259 | A10350 | 195 | A03259 | A10383 | 301 |
| A03259 | A10408 | 179 | A03259 | A10422 | 207 |

|        |        |     |        |        |     |
|--------|--------|-----|--------|--------|-----|
| A03259 | A10435 | 252 | A03259 | A10441 | 369 |
| A03259 | A10444 | 224 | A03259 | A10456 | 193 |
| A03259 | A10594 | 160 | A03259 | A10612 | 378 |
| A03259 | A10656 | 352 | A03259 | A10658 | 441 |
| A03259 | A10677 | 245 | A03259 | A10681 | 174 |
| A03259 | A10689 | 267 | A03259 | A10693 | 411 |
| A03259 | A10702 | 323 | A03259 | A10723 | 420 |
| A03259 | A10781 | 185 | A03259 | A10789 | 218 |
| A03259 | A10792 | 157 | A03259 | A10914 | 252 |
| A03259 | A11064 | 221 | A03259 | A11116 | 167 |
| A03259 | A11123 | 213 | A03259 | A11191 | 385 |
| A03259 | A11204 | 195 | A03259 | A11230 | 252 |
| A03259 | A11289 | 152 | A03259 | A11310 | 180 |
| A03259 | A11328 | 188 | A03259 | A11331 | 168 |
| A03259 | A11339 | 273 | A03259 | A11412 | 391 |
| A03259 | A11431 | 353 | A03259 | A11436 | 441 |
| A03259 | A11437 | 167 | A03259 | A11487 | 199 |
| A03259 | A11498 | 179 | A03259 | A11529 | 226 |
| A03259 | A11537 | 456 | A03259 | A11540 | 377 |
| A03259 | A11542 | 177 | A03259 | A11547 | 273 |
| A03259 | A11558 | 256 | A03259 | A11587 | 195 |
| A03259 | A11604 | 207 | A03259 | A11653 | 177 |
| A03259 | A11681 | 154 | A03259 | A11784 | 179 |
| A03259 | A11830 | 303 | A03259 | A11875 | 291 |
| A03259 | A11946 | 167 | A03259 | A11960 | 157 |
| A03259 | A11977 | 179 | A03259 | A11983 | 328 |
| A03259 | A12030 | 157 | A03259 | A12087 | 252 |
| A03259 | A12094 | 157 | A03259 | A12176 | 217 |
| A03259 | A12195 | 212 | A03259 | A12224 | 179 |
| A03259 | A12304 | 210 | A03259 | A12324 | 195 |
| A03259 | A12393 | 213 | A03259 | A12483 | 252 |
| A03259 | A12484 | 252 | A03259 | A12644 | 207 |
| A03259 | A12675 | 157 | A03259 | A12683 | 217 |
| A03259 | A12729 | 328 | A03259 | A12777 | 252 |
| A03259 | A12792 | 193 | A03259 | A12927 | 475 |
| A03259 | A12934 | 258 | A03259 | A13124 | 382 |
| A03259 | A13167 | 157 | A03259 | A13180 | 167 |
| A03259 | A13262 | 252 | A03259 | A13269 | 252 |
| A03259 | A13338 | 185 | A03259 | A13367 | 398 |
| A03259 | A13369 | 241 | A03259 | A13516 | 313 |
| A03259 | A13546 | 263 | A03259 | A13748 | 346 |
| A03259 | A13826 | 489 | A03259 | A13837 | 210 |
| A03259 | A13860 | 470 | A03259 | A13899 | 372 |
| A03259 | A13916 | 449 | A03259 | A13935 | 207 |
| A03259 | A13951 | 335 | A03259 | A13963 | 224 |
| A03259 | A13987 | 457 | A03259 | A14010 | 227 |

|        |        |     |        |        |     |
|--------|--------|-----|--------|--------|-----|
| A03259 | A14020 | 217 | A03259 | A14072 | 368 |
| A03259 | A14122 | 228 | A03259 | A14123 | 241 |
| A03259 | A14126 | 196 | A03259 | A14128 | 334 |
| A03259 | A14133 | 191 | A03259 | A14135 | 256 |
| A03259 | A14144 | 217 | A03259 | A14190 | 462 |
| A03259 | A14196 | 199 | A03259 | A14202 | 434 |
| A03259 | A14210 | 481 | A03259 | A14229 | 152 |
| A03259 | A14276 | 345 | A03259 | A14290 | 193 |
| A03259 | A14292 | 157 | A03259 | A14336 | 360 |
| A03259 | A14371 | 472 | A03259 | A14378 | 450 |
| A03259 | A14394 | 435 | A03259 | A14399 | 171 |
| A03259 | A14408 | 271 | A03259 | A14424 | 179 |
| A03259 | A14511 | 486 | A03259 | A14553 | 217 |
| A03259 | A14570 | 424 | A03259 | A14599 | 355 |
| A03259 | A14635 | 468 | A03259 | A14667 | 472 |
| A03259 | A14671 | 217 | A03259 | A14700 | 195 |
| A03259 | A14716 | 462 | A03259 | A14733 | 165 |
| A03259 | A14794 | 195 | A03259 | A14803 | 160 |
| A03259 | A14873 | 167 | A03259 | A14885 | 217 |
| A03259 | A14930 | 251 | A03259 | A15089 | 217 |
| A03259 | A15222 | 188 | A03259 | A15223 | 204 |
| A03259 | A15228 | 179 | A03259 | A15241 | 268 |
| A03259 | A15267 | 303 | A03259 | A15277 | 323 |
| A03259 | A15292 | 491 | A03259 | A15300 | 188 |
| A03259 | A15301 | 182 | A03259 | A15302 | 213 |
| A03259 | A15310 | 367 | A03259 | A15311 | 380 |
| A03259 | A15312 | 480 | A03259 | A15313 | 486 |
| A03259 | A15314 | 456 | A03259 | A15317 | 485 |
| A03259 | A15318 | 435 | A03259 | A15322 | 477 |
| A03259 | A15328 | 162 | A03259 | A15331 | 463 |
| A03259 | A15333 | 386 | A03259 | A15334 | 177 |
| A03259 | A15335 | 188 | A03259 | A15346 | 423 |
| A03259 | A15348 | 489 | A03259 | A15349 | 481 |
| A03259 | A15352 | 490 | A03259 | A15362 | 179 |
| A03259 | A15396 | 345 | A03259 | A15402 | 193 |
| A03259 | A15404 | 371 | A03259 | A15413 | 435 |
| A03259 | A15422 | 369 | A03259 | A15425 | 245 |
| A03259 | A15430 | 394 | A03259 | A15431 | 159 |
| A03259 | A15438 | 265 | A03259 | A15444 | 281 |
| A03259 | A15446 | 290 | A03259 | A15447 | 364 |
| A03259 | A15448 | 179 | A03259 | A15452 | 414 |
| A03259 | A15454 | 418 | A03259 | A15456 | 223 |
| A03259 | A15462 | 340 | A03259 | A15463 | 347 |
| A03259 | A15464 | 241 | A03259 | A15475 | 229 |
| A03259 | A15480 | 418 | A03259 | A15481 | 151 |
| A03259 | A15482 | 215 | A03259 | A15484 | 465 |

|        |        |     |        |        |     |
|--------|--------|-----|--------|--------|-----|
| A03259 | A15486 | 154 | A03259 | A15494 | 195 |
| A03259 | A15495 | 486 | A03259 | A15498 | 477 |
| A03259 | A15515 | 417 | A03259 | A15523 | 179 |
| A03259 | A15793 | 230 | A03259 | A15800 | 199 |
| A03259 | A15814 | 204 | A03259 | A15816 | 378 |
| A03259 | A15817 | 294 | A03259 | A15825 | 157 |
| A03259 | A15826 | 235 | A03259 | A15828 | 152 |
| A03259 | A15837 | 386 | A03259 | A15858 | 438 |
| A03259 | A15899 | 167 | A03259 | A15934 | 205 |
| A03259 | A16055 | 290 | A03259 | A16068 | 419 |
| A03259 | A16117 | 401 | A03259 | A16136 | 193 |
| A03259 | A16189 | 195 | A03259 | A16224 | 208 |
| A03259 | A16248 | 246 | A03259 | A16277 | 221 |
| A03259 | A16286 | 377 | A03259 | A16300 | 468 |
| A03259 | A16385 | 217 | A03259 | A16386 | 252 |
| A03259 | A16419 | 184 | A03259 | A16473 | 434 |
| A03259 | A16636 | 490 | A03259 | A16659 | 167 |
| A03259 | A16717 | 217 | A03259 | A16748 | 321 |
| A03259 | A16978 | 195 | A03259 | A16999 | 252 |
| A03259 | A17041 | 251 | A03259 | A17117 | 281 |
| A03259 | A17223 | 179 | A03260 | A03620 | 382 |
| A03260 | A04248 | 258 | A03260 | A04271 | 235 |
| A03260 | A04320 | 299 | A03260 | A04536 | 185 |
| A03260 | A04607 | 185 | A03260 | A04681 | 213 |
| A03260 | A04854 | 382 | A03260 | A04965 | 215 |
| A03260 | A05305 | 296 | A03260 | A05679 | 210 |
| A03260 | A06055 | 265 | A03260 | A06414 | 313 |
| A03260 | A06581 | 188 | A03260 | A07154 | 302 |
| A03260 | A07158 | 319 | A03260 | A07164 | 213 |
| A03260 | A07173 | 351 | A03260 | A07191 | 210 |
| A03260 | A08634 | 382 | A03260 | A09791 | 228 |
| A03260 | A14125 | 366 | A03260 | A14236 | 213 |
| A03260 | A14364 | 241 | A03260 | A14366 | 165 |
| A03260 | A14391 | 183 | A03260 | A15394 | 246 |
| A03260 | A15395 | 226 | A03260 | A15642 | 252 |
| A03260 | A15832 | 371 | A03260 | A15981 | 313 |
| A03260 | A16020 | 226 | A03260 | A17155 | 322 |
| A03261 | A03305 | 270 | A03261 | A03638 | 411 |
| A03261 | A03654 | 362 | A03261 | A03725 | 205 |
| A03261 | A03820 | 481 | A03261 | A04066 | 235 |
| A03261 | A04221 | 346 | A03261 | A04497 | 308 |
| A03261 | A04552 | 367 | A03261 | A04562 | 383 |
| A03261 | A04737 | 259 | A03261 | A04795 | 243 |
| A03261 | A04853 | 270 | A03261 | A05122 | 334 |
| A03261 | A06400 | 259 | A03261 | A07158 | 168 |
| A03261 | A08377 | 154 | A03261 | A09127 | 172 |

|        |        |     |        |        |     |
|--------|--------|-----|--------|--------|-----|
| A03261 | A09194 | 340 | A03261 | A09269 | 208 |
| A03261 | A10399 | 193 | A03261 | A10506 | 176 |
| A03261 | A10966 | 445 | A03261 | A11684 | 312 |
| A03261 | A11900 | 333 | A03261 | A15241 | 157 |
| A03261 | A16764 | 219 | A03262 | A14333 | 401 |
| A03263 | A03587 | 235 | A03263 | A03680 | 213 |
| A03263 | A03922 | 180 | A03263 | A03965 | 185 |
| A03263 | A04067 | 321 | A03263 | A04122 | 260 |
| A03263 | A04138 | 251 | A03263 | A04264 | 249 |
| A03263 | A04280 | 447 | A03263 | A04297 | 313 |
| A03263 | A04370 | 308 | A03263 | A04417 | 202 |
| A03263 | A04451 | 302 | A03263 | A04473 | 267 |
| A03263 | A04589 | 152 | A03263 | A04622 | 262 |
| A03263 | A04704 | 215 | A03263 | A04826 | 346 |
| A03263 | A04965 | 278 | A03263 | A05052 | 182 |
| A03263 | A05094 | 205 | A03263 | A05120 | 271 |
| A03263 | A05124 | 190 | A03263 | A05261 | 332 |
| A03263 | A05446 | 188 | A03263 | A05575 | 302 |
| A03263 | A05798 | 293 | A03263 | A05911 | 288 |
| A03263 | A06381 | 221 | A03263 | A06465 | 355 |
| A03263 | A06609 | 196 | A03263 | A06623 | 462 |
| A03263 | A06648 | 157 | A03263 | A07037 | 279 |
| A03263 | A07127 | 366 | A03263 | A07158 | 490 |
| A03263 | A07192 | 393 | A03263 | A07902 | 213 |
| A03263 | A09404 | 313 | A03263 | A09419 | 246 |
| A03263 | A10021 | 288 | A03263 | A10735 | 154 |
| A03263 | A10760 | 184 | A03263 | A11487 | 274 |
| A03263 | A11512 | 385 | A03263 | A13861 | 346 |
| A03263 | A13930 | 254 | A03263 | A13973 | 418 |
| A03263 | A14320 | 355 | A03263 | A14391 | 339 |
| A03263 | A14643 | 208 | A03263 | A15287 | 258 |
| A03263 | A15429 | 263 | A03263 | A15649 | 180 |
| A03264 | A03589 | 368 | A03264 | A03858 | 232 |
| A03264 | A04253 | 368 | A03264 | A04372 | 374 |
| A03264 | A04550 | 396 | A03264 | A04620 | 345 |
| A03264 | A04779 | 157 | A03264 | A05153 | 193 |
| A03264 | A05416 | 154 | A03264 | A05550 | 286 |
| A03264 | A06211 | 352 | A03264 | A06558 | 390 |
| A03264 | A06629 | 256 | A03264 | A09752 | 208 |
| A03264 | A13906 | 345 | A03264 | A14637 | 208 |
| A03264 | A14685 | 377 | A03264 | A15430 | 152 |
| A03264 | A17155 | 335 | A03265 | A03278 | 461 |
| A03265 | A04209 | 254 | A03265 | A04902 | 180 |
| A03265 | A05543 | 413 | A03265 | A05568 | 334 |
| A03265 | A05693 | 366 | A03265 | A05949 | 340 |
| A03265 | A10625 | 179 | A03266 | A04819 | 283 |

|        |        |     |        |        |     |
|--------|--------|-----|--------|--------|-----|
| A03266 | A05098 | 303 | A03266 | A05243 | 191 |
| A03266 | A08738 | 317 | A03266 | A09241 | 170 |
| A03266 | A10635 | 268 | A03266 | A17051 | 291 |
| A03267 | A04038 | 368 | A03267 | A10601 | 283 |
| A03267 | A14741 | 308 | A03267 | A15291 | 195 |
| A03268 | A03870 | 395 | A03268 | A03964 | 358 |
| A03268 | A04004 | 341 | A03268 | A04135 | 363 |
| A03268 | A04285 | 452 | A03268 | A05746 | 458 |
| A03268 | A05911 | 373 | A03268 | A06635 | 385 |
| A03268 | A07200 | 183 | A03268 | A10239 | 406 |
| A03268 | A14405 | 445 | A03268 | A14585 | 201 |
| A03269 | A03321 | 243 | A03269 | A03403 | 263 |
| A03269 | A03408 | 180 | A03269 | A03416 | 281 |
| A03269 | A03417 | 296 | A03269 | A03418 | 345 |
| A03269 | A03419 | 491 | A03269 | A03515 | 202 |
| A03269 | A03664 | 212 | A03269 | A03865 | 366 |
| A03269 | A04048 | 173 | A03269 | A04117 | 310 |
| A03269 | A04127 | 435 | A03269 | A04217 | 311 |
| A03269 | A04259 | 328 | A03269 | A04267 | 281 |
| A03269 | A04268 | 378 | A03269 | A04420 | 285 |
| A03269 | A04428 | 285 | A03269 | A04798 | 305 |
| A03269 | A04906 | 243 | A03269 | A04962 | 311 |
| A03269 | A04965 | 411 | A03269 | A05006 | 188 |
| A03269 | A05073 | 256 | A03269 | A05305 | 219 |
| A03269 | A05314 | 335 | A03269 | A05339 | 299 |
| A03269 | A05344 | 271 | A03269 | A05861 | 281 |
| A03269 | A06073 | 380 | A03269 | A06314 | 160 |
| A03269 | A06607 | 159 | A03269 | A06647 | 266 |
| A03269 | A07025 | 335 | A03269 | A08677 | 424 |
| A03269 | A08741 | 187 | A03269 | A08865 | 258 |
| A03269 | A09793 | 317 | A03269 | A10337 | 294 |
| A03269 | A11262 | 263 | A03269 | A11282 | 218 |
| A03269 | A11797 | 314 | A03269 | A12106 | 423 |
| A03269 | A12971 | 208 | A03269 | A13817 | 358 |
| A03269 | A14390 | 246 | A03269 | A15726 | 185 |
| A03269 | A15976 | 162 | A03269 | A16007 | 154 |
| A03269 | A16292 | 254 | A03269 | A16341 | 377 |
| A03269 | A16429 | 221 | A03269 | A16451 | 377 |
| A03269 | A16455 | 377 | A03269 | A16456 | 358 |
| A03269 | A16486 | 358 | A03269 | A16506 | 377 |
| A03270 | A07654 | 341 | A03270 | A14693 | 252 |
| A03270 | A16834 | 255 | A03271 | A03275 | 272 |
| A03271 | A03282 | 124 | A03271 | A03329 | 151 |
| A03271 | A03330 | 473 | A03271 | A03335 | 104 |
| A03271 | A03452 | 156 | A03271 | A03647 | 224 |
| A03271 | A03736 | 210 | A03271 | A03742 | 229 |



|        |        |     |        |        |     |
|--------|--------|-----|--------|--------|-----|
| A03271 | A03817 | 489 | A03271 | A03830 | 405 |
| A03271 | A03834 | 199 | A03271 | A03835 | 262 |
| A03271 | A03889 | 177 | A03271 | A03984 | 157 |
| A03271 | A04011 | 301 | A03271 | A04042 | 263 |
| A03271 | A04050 | 489 | A03271 | A04089 | 200 |
| A03271 | A04217 | 216 | A03271 | A04218 | 177 |
| A03271 | A04237 | 240 | A03271 | A04244 | 157 |
| A03271 | A04249 | 200 | A03271 | A04276 | 154 |
| A03271 | A04292 | 224 | A03271 | A04471 | 196 |
| A03271 | A04501 | 274 | A03271 | A04536 | 294 |
| A03271 | A04564 | 246 | A03271 | A04587 | 380 |
| A03271 | A04589 | 160 | A03271 | A04598 | 207 |
| A03271 | A04600 | 229 | A03271 | A04657 | 296 |
| A03271 | A04682 | 411 | A03271 | A04685 | 184 |
| A03271 | A04727 | 188 | A03271 | A04730 | 380 |
| A03271 | A04741 | 425 | A03271 | A04755 | 191 |
| A03271 | A04756 | 268 | A03271 | A04938 | 168 |
| A03271 | A04957 | 163 | A03271 | A05028 | 434 |
| A03271 | A05037 | 901 | A03271 | A05073 | 177 |
| A03271 | A05078 | 207 | A03271 | A05202 | 191 |
| A03271 | A05577 | 63  | A03271 | A05633 | 383 |
| A03271 | A05902 | 200 | A03271 | A05944 | 183 |
| A03271 | A06011 | 301 | A03271 | A06054 | 396 |
| A03271 | A06095 | 185 | A03271 | A06135 | 218 |
| A03271 | A06149 | 361 | A03271 | A06224 | 425 |
| A03271 | A06237 | 263 | A03271 | A06289 | 259 |
| A03271 | A06421 | 240 | A03271 | A06665 | 362 |
| A03271 | A06818 | 171 | A03271 | A06891 | 168 |
| A03271 | A07031 | 80  | A03271 | A07142 | 215 |
| A03271 | A07146 | 160 | A03271 | A07148 | 165 |
| A03271 | A07157 | 399 | A03271 | A07161 | 477 |
| A03271 | A07166 | 434 | A03271 | A07173 | 430 |
| A03271 | A07218 | 286 | A03271 | A07311 | 63  |
| A03271 | A07372 | 210 | A03271 | A08608 | 198 |
| A03271 | A08672 | 263 | A03271 | A08677 | 160 |
| A03271 | A08725 | 286 | A03271 | A08840 | 63  |
| A03271 | A09060 | 163 | A03271 | A09395 | 281 |
| A03271 | A10060 | 286 | A03271 | A10159 | 899 |
| A03271 | A10174 | 202 | A03271 | A10510 | 215 |
| A03271 | A10562 | 305 | A03271 | A10721 | 85  |
| A03271 | A10739 | 171 | A03271 | A10740 | 173 |
| A03271 | A10838 | 286 | A03271 | A11117 | 305 |
| A03271 | A11129 | 184 | A03271 | A11286 | 428 |
| A03271 | A11369 | 70  | A03271 | A11739 | 374 |
| A03271 | A11820 | 162 | A03271 | A12033 | 255 |
| A03271 | A12886 | 165 | A03271 | A13222 | 469 |

|        |        |     |        |        |     |
|--------|--------|-----|--------|--------|-----|
| A03271 | A13592 | 200 | A03271 | A13604 | 234 |
| A03271 | A13824 | 63  | A03271 | A13845 | 176 |
| A03271 | A13855 | 179 | A03271 | A13989 | 899 |
| A03271 | A14020 | 305 | A03271 | A14168 | 218 |
| A03271 | A14175 | 215 | A03271 | A14194 | 249 |
| A03271 | A14196 | 236 | A03271 | A14198 | 456 |
| A03271 | A14208 | 945 | A03271 | A14364 | 474 |
| A03271 | A14376 | 168 | A03271 | A14385 | 234 |
| A03271 | A14430 | 232 | A03271 | A14431 | 173 |
| A03271 | A14440 | 157 | A03271 | A14452 | 63  |
| A03271 | A14610 | 215 | A03271 | A14662 | 899 |
| A03271 | A15297 | 899 | A03271 | A15314 | 429 |
| A03271 | A15323 | 899 | A03271 | A15324 | 899 |
| A03271 | A15353 | 899 | A03271 | A15359 | 899 |
| A03271 | A15386 | 215 | A03271 | A15394 | 198 |
| A03271 | A15395 | 270 | A03271 | A15566 | 200 |
| A03271 | A15640 | 263 | A03271 | A15726 | 85  |
| A03271 | A15806 | 173 | A03271 | A15981 | 160 |
| A03271 | A16310 | 274 | A03271 | A16547 | 168 |
| A03271 | A16891 | 188 | A03271 | A17053 | 332 |
| A03271 | A17113 | 229 | A03271 | A17167 | 246 |
| A03272 | A04873 | 273 | A03272 | A04908 | 190 |
| A03272 | A06273 | 165 | A03272 | A06907 | 353 |
| A03272 | A07083 | 212 | A03272 | A07974 | 288 |
| A03272 | A09485 | 307 | A03272 | A11405 | 157 |
| A03272 | A12301 | 407 | A03272 | A13162 | 235 |
| A03272 | A14525 | 201 | A03272 | A15218 | 316 |
| A03272 | A15235 | 247 | A03272 | A15372 | 200 |
| A03272 | A17142 | 238 | A03272 | A17198 | 386 |
| A03273 | A03860 | 187 | A03273 | A04743 | 176 |
| A03273 | A05064 | 268 | A03273 | A05630 | 165 |
| A03273 | A05665 | 249 | A03273 | A06200 | 243 |
| A03273 | A06599 | 408 | A03273 | A07794 | 319 |
| A03273 | A07959 | 491 | A03273 | A08574 | 193 |
| A03273 | A08870 | 227 | A03273 | A09409 | 243 |
| A03273 | A10148 | 229 | A03273 | A10255 | 377 |
| A03273 | A12793 | 152 | A03273 | A13373 | 171 |
| A03273 | A14279 | 199 | A03273 | A14393 | 168 |
| A03273 | A14444 | 899 | A03273 | A14610 | 180 |
| A03273 | A14801 | 199 | A03273 | A15295 | 195 |
| A03273 | A15491 | 257 | A03273 | A16996 | 193 |
| A03273 | A17051 | 307 | A03274 | A15291 | 176 |
| A03274 | A15507 | 335 | A03274 | A15612 | 313 |
| A03275 | A03281 | 334 | A03275 | A03282 | 929 |
| A03275 | A03419 | 321 | A03275 | A03432 | 229 |
| A03275 | A03522 | 216 | A03275 | A03554 | 196 |

|        |        |     |        |        |     |
|--------|--------|-----|--------|--------|-----|
| A03275 | A03664 | 347 | A03275 | A03736 | 202 |
| A03275 | A03783 | 171 | A03275 | A03914 | 312 |
| A03275 | A03966 | 190 | A03275 | A03989 | 188 |
| A03275 | A04003 | 350 | A03275 | A04010 | 490 |
| A03275 | A04027 | 226 | A03275 | A04040 | 378 |
| A03275 | A04045 | 383 | A03275 | A04051 | 945 |
| A03275 | A04088 | 152 | A03275 | A04134 | 345 |
| A03275 | A04142 | 475 | A03275 | A04143 | 226 |
| A03275 | A04206 | 171 | A03275 | A04240 | 383 |
| A03275 | A04247 | 226 | A03275 | A04258 | 249 |
| A03275 | A04262 | 424 | A03275 | A04263 | 180 |
| A03275 | A04267 | 168 | A03275 | A04272 | 160 |
| A03275 | A04278 | 445 | A03275 | A04300 | 326 |
| A03275 | A04315 | 171 | A03275 | A04342 | 218 |
| A03275 | A04397 | 246 | A03275 | A04481 | 216 |
| A03275 | A04494 | 180 | A03275 | A04518 | 313 |
| A03275 | A04545 | 232 | A03275 | A04564 | 240 |
| A03275 | A04567 | 340 | A03275 | A04604 | 281 |
| A03275 | A04607 | 396 | A03275 | A04608 | 458 |
| A03275 | A04609 | 463 | A03275 | A04614 | 332 |
| A03275 | A04618 | 165 | A03275 | A04622 | 283 |
| A03275 | A04688 | 232 | A03275 | A04735 | 232 |
| A03275 | A04860 | 246 | A03275 | A04874 | 291 |
| A03275 | A05049 | 326 | A03275 | A05071 | 257 |
| A03275 | A05113 | 486 | A03275 | A05129 | 281 |
| A03275 | A05131 | 240 | A03275 | A05278 | 191 |
| A03275 | A05279 | 281 | A03275 | A05296 | 210 |
| A03275 | A05309 | 425 | A03275 | A05314 | 267 |
| A03275 | A05320 | 299 | A03275 | A05349 | 945 |
| A03275 | A05427 | 274 | A03275 | A05506 | 308 |
| A03275 | A05630 | 191 | A03275 | A05723 | 257 |
| A03275 | A05760 | 899 | A03275 | A05962 | 210 |
| A03275 | A06370 | 202 | A03275 | A06422 | 348 |
| A03275 | A06499 | 199 | A03275 | A06501 | 177 |
| A03275 | A06545 | 202 | A03275 | A06642 | 182 |
| A03275 | A06933 | 452 | A03275 | A06949 | 283 |
| A03275 | A07135 | 152 | A03275 | A07138 | 160 |
| A03275 | A07141 | 351 | A03275 | A07146 | 424 |
| A03275 | A07154 | 269 | A03275 | A07157 | 491 |
| A03275 | A07161 | 313 | A03275 | A07164 | 419 |
| A03275 | A07165 | 411 | A03275 | A07174 | 156 |
| A03275 | A07175 | 156 | A03275 | A07200 | 156 |
| A03275 | A07302 | 185 | A03275 | A07675 | 167 |
| A03275 | A07833 | 179 | A03275 | A08677 | 152 |
| A03275 | A08741 | 218 | A03275 | A08780 | 180 |
| A03275 | A09029 | 358 | A03275 | A09115 | 326 |

|        |        |     |        |        |     |
|--------|--------|-----|--------|--------|-----|
| A03275 | A09394 | 152 | A03275 | A09411 | 196 |
| A03275 | A09427 | 168 | A03275 | A09630 | 210 |
| A03275 | A10174 | 191 | A03275 | A10936 | 326 |
| A03275 | A10975 | 326 | A03275 | A11608 | 174 |
| A03275 | A11627 | 281 | A03275 | A11955 | 196 |
| A03275 | A13131 | 191 | A03275 | A13160 | 267 |
| A03275 | A13555 | 168 | A03275 | A13871 | 207 |
| A03275 | A14071 | 286 | A03275 | A14393 | 899 |
| A03275 | A14610 | 207 | A03275 | A14664 | 221 |
| A03275 | A14813 | 168 | A03275 | A14969 | 156 |
| A03275 | A15597 | 267 | A03275 | A15835 | 257 |
| A03275 | A15933 | 177 | A03275 | A15962 | 360 |
| A03275 | A15972 | 281 | A03275 | A15973 | 246 |
| A03275 | A15978 | 232 | A03275 | A15980 | 281 |
| A03275 | A16054 | 168 | A03275 | A16136 | 171 |
| A03275 | A16636 | 480 | A03275 | A16654 | 165 |
| A03275 | A16973 | 196 | A03276 | A03968 | 224 |
| A03276 | A04015 | 272 | A03276 | A04028 | 193 |
| A03276 | A04791 | 299 | A03276 | A04944 | 224 |
| A03276 | A04985 | 232 | A03276 | A05490 | 389 |
| A03276 | A06628 | 232 | A03276 | A06654 | 306 |
| A03276 | A07163 | 260 | A03276 | A07613 | 363 |
| A03276 | A07778 | 402 | A03276 | A09020 | 319 |
| A03276 | A09027 | 402 | A03276 | A10033 | 395 |
| A03276 | A11728 | 188 | A03276 | A12373 | 151 |
| A03276 | A14245 | 208 | A03277 | A09221 | 294 |
| A03277 | A15372 | 347 | A03277 | A16219 | 293 |
| A03277 | A16753 | 271 | A03278 | A04721 | 356 |
| A03278 | A05568 | 361 | A03278 | A05693 | 326 |
| A03278 | A05719 | 340 | A03278 | A05949 | 293 |
| A03278 | A07023 | 399 | A03278 | A08879 | 446 |
| A03278 | A10557 | 299 | A03278 | A10625 | 486 |
| A03278 | A15317 | 207 | A03278 | A16904 | 183 |
| A03279 | A04010 | 191 | A03279 | A04908 | 219 |
| A03279 | A05212 | 293 | A03279 | A05936 | 396 |
| A03279 | A06510 | 371 | A03279 | A07168 | 443 |
| A03279 | A07955 | 456 | A03279 | A07961 | 245 |
| A03279 | A08759 | 391 | A03279 | A10573 | 456 |
| A03279 | A10930 | 450 | A03279 | A11436 | 348 |
| A03279 | A14208 | 417 | A03279 | A14430 | 173 |
| A03279 | A15575 | 299 | A03279 | A15613 | 201 |
| A03279 | A15960 | 438 | A03280 | A03283 | 407 |
| A03280 | A04010 | 160 | A03280 | A04564 | 363 |
| A03280 | A04589 | 446 | A03280 | A05349 | 160 |
| A03280 | A05613 | 346 | A03280 | A05679 | 201 |
| A03280 | A05773 | 340 | A03280 | A05944 | 228 |

|        |        |     |        |        |     |
|--------|--------|-----|--------|--------|-----|
| A03280 | A05985 | 204 | A03280 | A06415 | 353 |
| A03280 | A06652 | 363 | A03280 | A06997 | 262 |
| A03280 | A07135 | 454 | A03280 | A07145 | 227 |
| A03280 | A07152 | 195 | A03280 | A07157 | 306 |
| A03280 | A07161 | 486 | A03280 | A07164 | 578 |
| A03280 | A07166 | 475 | A03280 | A07173 | 213 |
| A03280 | A12009 | 293 | A03280 | A14369 | 274 |
| A03280 | A14374 | 168 | A03280 | A14376 | 313 |
| A03280 | A14385 | 355 | A03280 | A14391 | 174 |
| A03280 | A14392 | 327 | A03280 | A14442 | 288 |
| A03280 | A14598 | 303 | A03280 | A14599 | 269 |
| A03280 | A15369 | 199 | A03280 | A15394 | 454 |
| A03280 | A15395 | 572 | A03280 | A15427 | 385 |
| A03280 | A15607 | 310 | A03280 | A15642 | 368 |
| A03280 | A15795 | 232 | A03280 | A15806 | 314 |
| A03280 | A15865 | 363 | A03280 | A15964 | 485 |
| A03280 | A16308 | 367 | A03281 | A03282 | 263 |
| A03281 | A03287 | 283 | A03281 | A03634 | 269 |
| A03281 | A03949 | 262 | A03281 | A04010 | 278 |
| A03281 | A04051 | 335 | A03281 | A04267 | 210 |
| A03281 | A04540 | 216 | A03281 | A04610 | 378 |
| A03281 | A04612 | 286 | A03281 | A04652 | 372 |
| A03281 | A04712 | 311 | A03281 | A04735 | 430 |
| A03281 | A04783 | 226 | A03281 | A04906 | 296 |
| A03281 | A04908 | 174 | A03281 | A05279 | 378 |
| A03281 | A05309 | 490 | A03281 | A05349 | 277 |
| A03281 | A05539 | 167 | A03281 | A05654 | 249 |
| A03281 | A05893 | 401 | A03281 | A06285 | 378 |
| A03281 | A06295 | 151 | A03281 | A06643 | 364 |
| A03281 | A07141 | 297 | A03281 | A07157 | 159 |
| A03281 | A07165 | 212 | A03281 | A08560 | 157 |
| A03281 | A09434 | 226 | A03281 | A09448 | 255 |
| A03281 | A10189 | 388 | A03281 | A13435 | 351 |
| A03281 | A13772 | 193 | A03281 | A14331 | 378 |
| A03281 | A14647 | 273 | A03281 | A16420 | 332 |
| A03281 | A16636 | 190 | A03282 | A03835 | 202 |
| A03282 | A04040 | 303 | A03282 | A04240 | 374 |
| A03282 | A04244 | 297 | A03282 | A04263 | 227 |
| A03282 | A04589 | 204 | A03282 | A04600 | 252 |
| A03282 | A04609 | 254 | A03282 | A04652 | 257 |
| A03282 | A04734 | 326 | A03282 | A04735 | 353 |
| A03282 | A04865 | 391 | A03282 | A05349 | 152 |
| A03282 | A05577 | 126 | A03282 | A05677 | 340 |
| A03282 | A05679 | 193 | A03282 | A05879 | 279 |
| A03282 | A05985 | 196 | A03282 | A06149 | 391 |
| A03282 | A06415 | 247 | A03282 | A07135 | 324 |

|        |        |     |        |        |     |
|--------|--------|-----|--------|--------|-----|
| A03282 | A07141 | 170 | A03282 | A07157 | 163 |
| A03282 | A07173 | 408 | A03282 | A08651 | 358 |
| A03282 | A08908 | 288 | A03282 | A09145 | 283 |
| A03282 | A10791 | 291 | A03282 | A11296 | 183 |
| A03282 | A13195 | 347 | A03282 | A13872 | 260 |
| A03282 | A14374 | 294 | A03282 | A14391 | 165 |
| A03282 | A14442 | 281 | A03282 | A14628 | 323 |
| A03282 | A15394 | 420 | A03282 | A15395 | 411 |
| A03282 | A15516 | 243 | A03282 | A15639 | 227 |
| A03282 | A15916 | 301 | A03282 | A15964 | 279 |
| A03283 | A07161 | 396 | A03283 | A14376 | 418 |
| A03283 | A14599 | 401 | A03284 | A03843 | 273 |
| A03284 | A04622 | 290 | A03284 | A05508 | 372 |
| A03284 | A05767 | 210 | A03284 | A10813 | 350 |
| A03284 | A14210 | 205 | A03286 | A05811 | 390 |
| A03286 | A14443 | 899 | A03287 | A04134 | 358 |
| A03287 | A04601 | 379 | A03287 | A04902 | 243 |
| A03287 | A05309 | 268 | A03287 | A05349 | 174 |
| A03287 | A05494 | 258 | A03287 | A05760 | 265 |
| A03287 | A05868 | 306 | A03287 | A06605 | 391 |
| A03287 | A06696 | 305 | A03287 | A07165 | 249 |
| A03287 | A07187 | 279 | A03287 | A13879 | 251 |
| A03287 | A14664 | 208 | A03288 | A04447 | 163 |
| A03288 | A04589 | 290 | A03288 | A04615 | 257 |
| A03288 | A05112 | 162 | A03288 | A05216 | 490 |
| A03288 | A05467 | 458 | A03288 | A06247 | 484 |
| A03288 | A06496 | 312 | A03288 | A08910 | 479 |
| A03288 | A12472 | 460 | A03288 | A13511 | 165 |
| A03288 | A14208 | 305 | A03288 | A14638 | 256 |
| A03288 | A15406 | 235 | A03288 | A15912 | 283 |
| A03289 | A03536 | 162 | A03289 | A05124 | 215 |
| A03289 | A06105 | 273 | A03289 | A07226 | 201 |
| A03289 | A07311 | 319 | A03289 | A09476 | 219 |
| A03289 | A09902 | 215 | A03289 | A11480 | 187 |
| A03289 | A14006 | 396 | A03289 | A16060 | 462 |
| A03290 | A14699 | 174 | A03290 | A16304 | 268 |
| A03291 | A03467 | 272 | A03291 | A03609 | 190 |
| A03291 | A04931 | 260 | A03291 | A04932 | 227 |
| A03291 | A05076 | 332 | A03291 | A06049 | 347 |
| A03291 | A06287 | 241 | A03291 | A06382 | 424 |
| A03291 | A15624 | 364 | A03291 | A15652 | 286 |
| A03291 | A15659 | 154 | A03291 | A15660 | 219 |
| A03291 | A15662 | 193 | A03291 | A15684 | 462 |
| A03291 | A15746 | 157 | A03291 | A15843 | 205 |
| A03291 | A15918 | 456 | A03291 | A15933 | 163 |
| A03292 | A03323 | 310 | A03292 | A03324 | 205 |

|        |        |     |        |        |     |
|--------|--------|-----|--------|--------|-----|
| A03292 | A03436 | 470 | A03292 | A03576 | 283 |
| A03292 | A03723 | 191 | A03292 | A03854 | 294 |
| A03292 | A03878 | 279 | A03292 | A04010 | 180 |
| A03292 | A04162 | 266 | A03292 | A04344 | 293 |
| A03292 | A04441 | 276 | A03292 | A04663 | 255 |
| A03292 | A04763 | 241 | A03292 | A04873 | 477 |
| A03292 | A04961 | 246 | A03292 | A05052 | 151 |
| A03292 | A05222 | 157 | A03292 | A05349 | 283 |
| A03292 | A05418 | 424 | A03292 | A05427 | 417 |
| A03292 | A05653 | 266 | A03292 | A06499 | 385 |
| A03292 | A07221 | 247 | A03292 | A07283 | 286 |
| A03292 | A07311 | 567 | A03292 | A07339 | 400 |
| A03292 | A07342 | 196 | A03292 | A07442 | 281 |
| A03292 | A07619 | 297 | A03292 | A07803 | 187 |
| A03292 | A08718 | 207 | A03292 | A09022 | 191 |
| A03292 | A09235 | 273 | A03292 | A09837 | 273 |
| A03292 | A10072 | 479 | A03292 | A10614 | 236 |
| A03292 | A10666 | 462 | A03292 | A10870 | 188 |
| A03292 | A11369 | 160 | A03292 | A12897 | 409 |
| A03292 | A13872 | 180 | A03292 | A13975 | 168 |
| A03292 | A14299 | 482 | A03292 | A14319 | 183 |
| A03292 | A14344 | 218 | A03292 | A14562 | 210 |
| A03292 | A14577 | 281 | A03292 | A15293 | 477 |
| A03292 | A15294 | 599 | A03292 | A15437 | 243 |
| A03292 | A16225 | 257 | A03292 | A16911 | 156 |
| A03293 | A03294 | 489 | A03293 | A03329 | 152 |
| A03293 | A03452 | 360 | A03293 | A03489 | 63  |
| A03293 | A03569 | 491 | A03293 | A03618 | 475 |
| A03293 | A03625 | 345 | A03293 | A03626 | 110 |
| A03293 | A03650 | 205 | A03293 | A03682 | 63  |
| A03293 | A03718 | 618 | A03293 | A03726 | 918 |
| A03293 | A03815 | 288 | A03293 | A03889 | 87  |
| A03293 | A03891 | 491 | A03293 | A03892 | 491 |
| A03293 | A04145 | 200 | A03293 | A04337 | 480 |
| A03293 | A04682 | 693 | A03293 | A04686 | 589 |
| A03293 | A04835 | 488 | A03293 | A04929 | 140 |
| A03293 | A05200 | 99  | A03293 | A05202 | 132 |
| A03293 | A05234 | 662 | A03293 | A05272 | 286 |
| A03293 | A05356 | 358 | A03293 | A05401 | 200 |
| A03293 | A06039 | 63  | A03293 | A06092 | 314 |
| A03293 | A06168 | 491 | A03293 | A06214 | 286 |
| A03293 | A06466 | 428 | A03293 | A06582 | 196 |
| A03293 | A06893 | 218 | A03293 | A06907 | 340 |
| A03293 | A07203 | 284 | A03293 | A07208 | 491 |
| A03293 | A07286 | 218 | A03293 | A07483 | 247 |
| A03293 | A07519 | 168 | A03293 | A07521 | 162 |

|        |        |     |        |        |     |
|--------|--------|-----|--------|--------|-----|
| A03293 | A07640 | 180 | A03293 | A07749 | 257 |
| A03293 | A07820 | 63  | A03293 | A07823 | 188 |
| A03293 | A08137 | 547 | A03293 | A08400 | 446 |
| A03293 | A08461 | 296 | A03293 | A08863 | 458 |
| A03293 | A08987 | 238 | A03293 | A09416 | 234 |
| A03293 | A09764 | 212 | A03293 | A10052 | 247 |
| A03293 | A10584 | 974 | A03293 | A10596 | 107 |
| A03293 | A10739 | 235 | A03293 | A10790 | 132 |
| A03293 | A10793 | 473 | A03293 | A10794 | 339 |
| A03293 | A10797 | 485 | A03293 | A10798 | 491 |
| A03293 | A10799 | 491 | A03293 | A10804 | 88  |
| A03293 | A10809 | 159 | A03293 | A10821 | 472 |
| A03293 | A11244 | 489 | A03293 | A11247 | 435 |
| A03293 | A11250 | 425 | A03293 | A11296 | 286 |
| A03293 | A11314 | 337 | A03293 | A11337 | 945 |
| A03293 | A11373 | 188 | A03293 | A11428 | 154 |
| A03293 | A11472 | 358 | A03293 | A11839 | 193 |
| A03293 | A11885 | 469 | A03293 | A12241 | 317 |
| A03293 | A12295 | 263 | A03293 | A12375 | 286 |
| A03293 | A12645 | 477 | A03293 | A12883 | 337 |
| A03293 | A13361 | 433 | A03293 | A13601 | 188 |
| A03293 | A13617 | 413 | A03293 | A13732 | 205 |
| A03293 | A13826 | 296 | A03293 | A13831 | 456 |
| A03293 | A13842 | 372 | A03293 | A13844 | 162 |
| A03293 | A13855 | 88  | A03293 | A13873 | 507 |
| A03293 | A13902 | 63  | A03293 | A14054 | 241 |
| A03293 | A14056 | 491 | A03293 | A14080 | 443 |
| A03293 | A14182 | 63  | A03293 | A14191 | 121 |
| A03293 | A14196 | 199 | A03293 | A14247 | 528 |
| A03293 | A14272 | 486 | A03293 | A14276 | 63  |
| A03293 | A14381 | 491 | A03293 | A14461 | 491 |
| A03293 | A14647 | 85  | A03293 | A14827 | 205 |
| A03293 | A14838 | 63  | A03293 | A14896 | 254 |
| A03293 | A15314 | 88  | A03293 | A15345 | 63  |
| A03293 | A15346 | 138 | A03293 | A15386 | 63  |
| A03293 | A15498 | 474 | A03293 | A15650 | 177 |
| A03293 | A15917 | 468 | A03293 | A15976 | 63  |
| A03293 | A16005 | 286 | A03293 | A16462 | 360 |
| A03293 | A16640 | 327 | A03293 | A16651 | 286 |
| A03293 | A16780 | 180 | A03293 | A17063 | 171 |
| A03293 | A17097 | 124 | A03293 | A17128 | 395 |
| A03294 | A03329 | 414 | A03294 | A03626 | 85  |
| A03294 | A03891 | 344 | A03294 | A03892 | 609 |
| A03294 | A05401 | 385 | A03294 | A06890 | 414 |
| A03294 | A07004 | 168 | A03294 | A07521 | 278 |
| A03294 | A07820 | 414 | A03294 | A08300 | 170 |



|        |        |     |        |        |     |
|--------|--------|-----|--------|--------|-----|
| A03294 | A08461 | 449 | A03294 | A09056 | 414 |
| A03294 | A10584 | 423 | A03294 | A10663 | 179 |
| A03294 | A10793 | 254 | A03294 | A10794 | 480 |
| A03294 | A10797 | 486 | A03294 | A10798 | 489 |
| A03294 | A10799 | 486 | A03294 | A11247 | 265 |
| A03294 | A11373 | 323 | A03294 | A13222 | 414 |
| A03294 | A13830 | 388 | A03294 | A13855 | 414 |
| A03294 | A13867 | 260 | A03294 | A14056 | 102 |
| A03294 | A14182 | 99  | A03294 | A14193 | 160 |
| A03294 | A14204 | 208 | A03294 | A14247 | 532 |
| A03294 | A14838 | 414 | A03294 | A15297 | 63  |
| A03294 | A15560 | 180 | A03294 | A16640 | 432 |
| A03294 | A16927 | 414 | A03294 | A16982 | 414 |
| A03295 | A06642 | 268 | A03296 | A04846 | 451 |
| A03296 | A06020 | 380 | A03296 | A07323 | 232 |
| A03296 | A07348 | 218 | A03296 | A07378 | 184 |
| A03296 | A10890 | 408 | A03296 | A10917 | 348 |
| A03296 | A13126 | 232 | A03296 | A13989 | 457 |
| A03296 | A13992 | 296 | A03297 | A03321 | 154 |
| A03297 | A03401 | 483 | A03297 | A03637 | 263 |
| A03297 | A03909 | 312 | A03297 | A04081 | 281 |
| A03297 | A04139 | 160 | A03297 | A04171 | 329 |
| A03297 | A04355 | 229 | A03297 | A04361 | 339 |
| A03297 | A04410 | 313 | A03297 | A04715 | 160 |
| A03297 | A04928 | 263 | A03297 | A05666 | 319 |
| A03297 | A06106 | 377 | A03297 | A06162 | 449 |
| A03297 | A06346 | 288 | A03297 | A06608 | 323 |
| A03297 | A06863 | 340 | A03297 | A06971 | 408 |
| A03297 | A10989 | 224 | A03297 | A11468 | 477 |
| A03297 | A11563 | 447 | A03297 | A11574 | 423 |
| A03297 | A12514 | 385 | A03297 | A12515 | 401 |
| A03297 | A12516 | 401 | A03297 | A12517 | 401 |
| A03297 | A13369 | 337 | A03297 | A14633 | 408 |
| A03297 | A15638 | 177 | A03297 | A15704 | 230 |
| A03298 | A03299 | 479 | A03298 | A03446 | 201 |
| A03298 | A03492 | 322 | A03298 | A03494 | 465 |
| A03298 | A03528 | 321 | A03298 | A03569 | 475 |
| A03298 | A03740 | 364 | A03298 | A03752 | 162 |
| A03298 | A03893 | 424 | A03298 | A03902 | 152 |
| A03298 | A04355 | 208 | A03298 | A05008 | 165 |
| A03298 | A05015 | 489 | A03298 | A05062 | 294 |
| A03298 | A05219 | 217 | A03298 | A06143 | 400 |
| A03298 | A06176 | 472 | A03298 | A06348 | 335 |
| A03298 | A06466 | 168 | A03298 | A06761 | 251 |
| A03298 | A06907 | 160 | A03298 | A07311 | 449 |
| A03298 | A07604 | 188 | A03298 | A07898 | 160 |

|        |        |     |        |        |     |
|--------|--------|-----|--------|--------|-----|
| A03298 | A08137 | 491 | A03298 | A08359 | 198 |
| A03298 | A08571 | 491 | A03298 | A08756 | 191 |
| A03298 | A08876 | 141 | A03298 | A08885 | 491 |
| A03298 | A09256 | 357 | A03298 | A09730 | 274 |
| A03298 | A10250 | 481 | A03298 | A10615 | 480 |
| A03298 | A10623 | 171 | A03298 | A10624 | 477 |
| A03298 | A10853 | 491 | A03298 | A10894 | 82  |
| A03298 | A11027 | 314 | A03298 | A11052 | 305 |
| A03298 | A11105 | 489 | A03298 | A11139 | 488 |
| A03298 | A11258 | 470 | A03298 | A11284 | 217 |
| A03298 | A11322 | 260 | A03298 | A11478 | 217 |
| A03298 | A11857 | 160 | A03298 | A11920 | 458 |
| A03298 | A11928 | 424 | A03298 | A12416 | 408 |
| A03298 | A12861 | 234 | A03298 | A13310 | 484 |
| A03298 | A13311 | 358 | A03298 | A13335 | 213 |
| A03298 | A13977 | 85  | A03298 | A13978 | 469 |
| A03298 | A13989 | 491 | A03298 | A14148 | 215 |
| A03298 | A14474 | 63  | A03298 | A14476 | 491 |
| A03298 | A15297 | 443 | A03298 | A15338 | 480 |
| A03298 | A15500 | 160 | A03298 | A15684 | 428 |
| A03298 | A16912 | 405 | A03299 | A03492 | 217 |
| A03299 | A05015 | 254 | A03299 | A05625 | 419 |
| A03299 | A05990 | 382 | A03299 | A06176 | 143 |
| A03299 | A06348 | 369 | A03299 | A06761 | 294 |
| A03299 | A07898 | 321 | A03299 | A08554 | 312 |
| A03299 | A08571 | 479 | A03299 | A08876 | 307 |
| A03299 | A09256 | 293 | A03299 | A10615 | 208 |
| A03299 | A11027 | 335 | A03299 | A11258 | 384 |
| A03299 | A13978 | 263 | A03299 | A14266 | 154 |
| A03299 | A14474 | 63  | A03299 | A14633 | 230 |
| A03299 | A15726 | 167 | A03300 | A03575 | 386 |
| A03300 | A03761 | 172 | A03300 | A03775 | 162 |
| A03300 | A05009 | 180 | A03300 | A06280 | 238 |
| A03300 | A06595 | 168 | A03300 | A06602 | 396 |
| A03300 | A06648 | 172 | A03300 | A06991 | 276 |
| A03300 | A07687 | 424 | A03300 | A07869 | 432 |
| A03300 | A08352 | 486 | A03300 | A09235 | 321 |
| A03300 | A09342 | 267 | A03300 | A09363 | 212 |
| A03300 | A09508 | 408 | A03300 | A09516 | 353 |
| A03300 | A10580 | 199 | A03300 | A11283 | 480 |
| A03300 | A11332 | 408 | A03300 | A12047 | 491 |
| A03300 | A14156 | 465 | A03300 | A16261 | 213 |
| A03300 | A17213 | 249 | A03301 | A03415 | 184 |
| A03301 | A03420 | 257 | A03301 | A03750 | 232 |
| A03301 | A04073 | 180 | A03301 | A04668 | 489 |
| A03301 | A05812 | 251 | A03301 | A05949 | 305 |

|        |        |     |        |        |     |
|--------|--------|-----|--------|--------|-----|
| A03301 | A06000 | 201 | A03301 | A06242 | 490 |
| A03301 | A06297 | 432 | A03301 | A06353 | 419 |
| A03301 | A06431 | 283 | A03301 | A06864 | 457 |
| A03301 | A06982 | 491 | A03301 | A07079 | 457 |
| A03301 | A07319 | 491 | A03301 | A07346 | 488 |
| A03301 | A07353 | 205 | A03301 | A07466 | 235 |
| A03301 | A07480 | 490 | A03301 | A07534 | 491 |
| A03301 | A07603 | 472 | A03301 | A07647 | 475 |
| A03301 | A07989 | 154 | A03301 | A07996 | 489 |
| A03301 | A08030 | 367 | A03301 | A08117 | 434 |
| A03301 | A08141 | 265 | A03301 | A08669 | 256 |
| A03301 | A08820 | 472 | A03301 | A11236 | 159 |
| A03301 | A11782 | 440 | A03301 | A11916 | 290 |
| A03301 | A12165 | 262 | A03301 | A12556 | 319 |
| A03301 | A13907 | 165 | A03301 | A13949 | 461 |
| A03301 | A14079 | 475 | A03301 | A14093 | 107 |
| A03301 | A14094 | 457 | A03301 | A14154 | 210 |
| A03301 | A14273 | 488 | A03301 | A14282 | 160 |
| A03301 | A14460 | 488 | A03301 | A14694 | 393 |
| A03301 | A15367 | 204 | A03301 | A15369 | 441 |
| A03301 | A16127 | 383 | A03301 | A16128 | 475 |
| A03301 | A16225 | 224 | A03301 | A16226 | 470 |
| A03301 | A16606 | 468 | A03301 | A16754 | 185 |
| A03302 | A03565 | 165 | A03302 | A04557 | 398 |
| A03302 | A07096 | 260 | A03302 | A09352 | 249 |
| A03302 | A10302 | 380 | A03302 | A14484 | 167 |
| A03302 | A14485 | 374 | A03303 | A04876 | 438 |
| A03303 | A04944 | 337 | A03303 | A06979 | 386 |
| A03303 | A07848 | 270 | A03304 | A03434 | 183 |
| A03304 | A03436 | 302 | A03304 | A03451 | 363 |
| A03304 | A03459 | 272 | A03304 | A03465 | 479 |
| A03304 | A03548 | 252 | A03304 | A03581 | 425 |
| A03304 | A03611 | 184 | A03304 | A03639 | 291 |
| A03304 | A03800 | 180 | A03304 | A03806 | 407 |
| A03304 | A03819 | 457 | A03304 | A03893 | 358 |
| A03304 | A03963 | 167 | A03304 | A04006 | 240 |
| A03304 | A04033 | 416 | A03304 | A04099 | 310 |
| A03304 | A04275 | 417 | A03304 | A04321 | 226 |
| A03304 | A04337 | 491 | A03304 | A04374 | 252 |
| A03304 | A04449 | 489 | A03304 | A04671 | 204 |
| A03304 | A04718 | 489 | A03304 | A04846 | 251 |
| A03304 | A05030 | 157 | A03304 | A05202 | 151 |
| A03304 | A05269 | 170 | A03304 | A05288 | 480 |
| A03304 | A05308 | 302 | A03304 | A05317 | 226 |
| A03304 | A05418 | 419 | A03304 | A05501 | 473 |
| A03304 | A05654 | 281 | A03304 | A05851 | 252 |

|        |        |     |        |        |     |
|--------|--------|-----|--------|--------|-----|
| A03304 | A05920 | 208 | A03304 | A06277 | 485 |
| A03304 | A06279 | 171 | A03304 | A06282 | 193 |
| A03304 | A06341 | 302 | A03304 | A06559 | 208 |
| A03304 | A06610 | 257 | A03304 | A06819 | 303 |
| A03304 | A06868 | 187 | A03304 | A07177 | 154 |
| A03304 | A07210 | 208 | A03304 | A07227 | 322 |
| A03304 | A07280 | 179 | A03304 | A07298 | 154 |
| A03304 | A07323 | 485 | A03304 | A07339 | 435 |
| A03304 | A07442 | 185 | A03304 | A07665 | 157 |
| A03304 | A07726 | 366 | A03304 | A07903 | 184 |
| A03304 | A08094 | 238 | A03304 | A08714 | 281 |
| A03304 | A08875 | 284 | A03304 | A08878 | 458 |
| A03304 | A09235 | 417 | A03304 | A09411 | 162 |
| A03304 | A09496 | 170 | A03304 | A09515 | 154 |
| A03304 | A09670 | 208 | A03304 | A09770 | 940 |
| A03304 | A09853 | 216 | A03304 | A09939 | 474 |
| A03304 | A10156 | 335 | A03304 | A10354 | 154 |
| A03304 | A10744 | 160 | A03304 | A10768 | 208 |
| A03304 | A10827 | 272 | A03304 | A11023 | 350 |
| A03304 | A11025 | 272 | A03304 | A11149 | 240 |
| A03304 | A11190 | 168 | A03304 | A11281 | 184 |
| A03304 | A11293 | 351 | A03304 | A11345 | 477 |
| A03304 | A11413 | 170 | A03304 | A11467 | 201 |
| A03304 | A11529 | 162 | A03304 | A11650 | 208 |
| A03304 | A11714 | 489 | A03304 | A11983 | 486 |
| A03304 | A12053 | 252 | A03304 | A12111 | 324 |
| A03304 | A12365 | 474 | A03304 | A12373 | 435 |
| A03304 | A12897 | 266 | A03304 | A12951 | 252 |
| A03304 | A13617 | 266 | A03304 | A13920 | 165 |
| A03304 | A13989 | 491 | A03304 | A14172 | 422 |
| A03304 | A14226 | 160 | A03304 | A14272 | 488 |
| A03304 | A14371 | 364 | A03304 | A14496 | 475 |
| A03304 | A14498 | 435 | A03304 | A14530 | 441 |
| A03304 | A14589 | 363 | A03304 | A14635 | 226 |
| A03304 | A14636 | 377 | A03304 | A14643 | 486 |
| A03304 | A14648 | 185 | A03304 | A14653 | 452 |
| A03304 | A14683 | 168 | A03304 | A14749 | 216 |
| A03304 | A14800 | 252 | A03304 | A14838 | 413 |
| A03304 | A15230 | 345 | A03304 | A15277 | 260 |
| A03304 | A15282 | 486 | A03304 | A15292 | 235 |
| A03304 | A15932 | 364 | A03304 | A16003 | 302 |
| A03305 | A03638 | 413 | A03305 | A03725 | 208 |
| A03305 | A03820 | 279 | A03305 | A03923 | 286 |
| A03305 | A04139 | 171 | A03305 | A04257 | 419 |
| A03305 | A04365 | 355 | A03305 | A04368 | 329 |
| A03305 | A04492 | 291 | A03305 | A04715 | 357 |

|        |        |     |        |        |     |
|--------|--------|-----|--------|--------|-----|
| A03305 | A04759 | 385 | A03305 | A04790 | 196 |
| A03305 | A04903 | 246 | A03305 | A04976 | 335 |
| A03305 | A05083 | 347 | A03305 | A06581 | 168 |
| A03305 | A07145 | 221 | A03305 | A07158 | 171 |
| A03305 | A07191 | 195 | A03305 | A09020 | 294 |
| A03305 | A09208 | 352 | A03305 | A09212 | 440 |
| A03305 | A09539 | 269 | A03305 | A09570 | 329 |
| A03305 | A09970 | 382 | A03305 | A10478 | 374 |
| A03305 | A10985 | 443 | A03305 | A12273 | 293 |
| A03305 | A14554 | 217 | A03305 | A14642 | 174 |
| A03305 | A15336 | 154 | A03305 | A16635 | 177 |
| A03306 | A07203 | 238 | A03307 | A03768 | 456 |
| A03307 | A05315 | 330 | A03307 | A06608 | 241 |
| A03309 | A04007 | 351 | A03309 | A04428 | 390 |
| A03309 | A04451 | 312 | A03309 | A06487 | 433 |
| A03309 | A06584 | 313 | A03309 | A06623 | 286 |
| A03309 | A06648 | 303 | A03309 | A07165 | 204 |
| A03309 | A07201 | 234 | A03309 | A07206 | 313 |
| A03309 | A07671 | 433 | A03309 | A08019 | 433 |
| A03309 | A08020 | 433 | A03309 | A08021 | 433 |
| A03309 | A08692 | 350 | A03309 | A10221 | 396 |
| A03309 | A10336 | 281 | A03309 | A12626 | 433 |
| A03309 | A14984 | 433 | A03310 | A03314 | 488 |
| A03310 | A03315 | 424 | A03310 | A03319 | 366 |
| A03310 | A03936 | 333 | A03310 | A03942 | 260 |
| A03310 | A04002 | 296 | A03310 | A04092 | 407 |
| A03310 | A04103 | 405 | A03310 | A04163 | 310 |
| A03310 | A04180 | 356 | A03310 | A04202 | 230 |
| A03310 | A04256 | 299 | A03310 | A04976 | 368 |
| A03310 | A05439 | 228 | A03310 | A06415 | 180 |
| A03310 | A06607 | 294 | A03310 | A06648 | 383 |
| A03310 | A09480 | 436 | A03310 | A10444 | 322 |
| A03310 | A10580 | 180 | A03310 | A12365 | 187 |
| A03310 | A12914 | 363 | A03310 | A15230 | 296 |
| A03311 | A03441 | 301 | A03311 | A03586 | 306 |
| A03311 | A04995 | 334 | A03311 | A05102 | 321 |
| A03311 | A05309 | 201 | A03311 | A05331 | 221 |
| A03311 | A06295 | 243 | A03311 | A06700 | 296 |
| A03311 | A07080 | 310 | A03311 | A07207 | 160 |
| A03311 | A07264 | 334 | A03311 | A07304 | 384 |
| A03311 | A12730 | 353 | A03311 | A14827 | 205 |
| A03311 | A15637 | 329 | A03311 | A15905 | 402 |
| A03312 | A03819 | 301 | A03312 | A03832 | 193 |
| A03312 | A03989 | 467 | A03312 | A04603 | 330 |
| A03312 | A04751 | 283 | A03312 | A04772 | 452 |
| A03312 | A04922 | 485 | A03312 | A05241 | 457 |

|        |        |     |        |        |     |
|--------|--------|-----|--------|--------|-----|
| A03312 | A05274 | 447 | A03312 | A05284 | 314 |
| A03312 | A05377 | 337 | A03312 | A05556 | 263 |
| A03312 | A05854 | 299 | A03312 | A05865 | 347 |
| A03312 | A06934 | 366 | A03312 | A07087 | 390 |
| A03312 | A07322 | 361 | A03312 | A08280 | 160 |
| A03312 | A09012 | 457 | A03312 | A15630 | 263 |
| A03313 | A03331 | 419 | A03313 | A03851 | 165 |
| A03313 | A04502 | 391 | A03313 | A06167 | 347 |
| A03313 | A07051 | 469 | A03313 | A07166 | 235 |
| A03313 | A07311 | 280 | A03313 | A08630 | 290 |
| A03313 | A09079 | 391 | A03313 | A09633 | 702 |
| A03313 | A09644 | 407 | A03313 | A09851 | 306 |
| A03313 | A09905 | 412 | A03313 | A11885 | 324 |
| A03313 | A13829 | 256 | A03313 | A14300 | 251 |
| A03313 | A14430 | 379 | A03314 | A03315 | 425 |
| A03314 | A03319 | 285 | A03314 | A03578 | 157 |
| A03314 | A03584 | 177 | A03314 | A03639 | 473 |
| A03314 | A03746 | 240 | A03314 | A03800 | 198 |
| A03314 | A03818 | 279 | A03314 | A03906 | 168 |
| A03314 | A03961 | 152 | A03314 | A04002 | 316 |
| A03314 | A04092 | 327 | A03314 | A04145 | 468 |
| A03314 | A04163 | 201 | A03314 | A04202 | 474 |
| A03314 | A04252 | 389 | A03314 | A04256 | 188 |
| A03314 | A04331 | 301 | A03314 | A04360 | 301 |
| A03314 | A04504 | 477 | A03314 | A04597 | 404 |
| A03314 | A04813 | 240 | A03314 | A04976 | 288 |
| A03314 | A05080 | 361 | A03314 | A05439 | 474 |
| A03314 | A05534 | 324 | A03314 | A05653 | 394 |
| A03314 | A05685 | 272 | A03314 | A05736 | 263 |
| A03314 | A05737 | 340 | A03314 | A05832 | 279 |
| A03314 | A05865 | 362 | A03314 | A05923 | 243 |
| A03314 | A05949 | 218 | A03314 | A06100 | 215 |
| A03314 | A06696 | 230 | A03314 | A06797 | 200 |
| A03314 | A06863 | 159 | A03314 | A07019 | 208 |
| A03314 | A07140 | 159 | A03314 | A07145 | 290 |
| A03314 | A07209 | 443 | A03314 | A07210 | 218 |
| A03314 | A07243 | 324 | A03314 | A07486 | 191 |
| A03314 | A07559 | 191 | A03314 | A07956 | 183 |
| A03314 | A08502 | 151 | A03314 | A08576 | 263 |
| A03314 | A09022 | 212 | A03314 | A09028 | 216 |
| A03314 | A09072 | 176 | A03314 | A09123 | 235 |
| A03314 | A09245 | 469 | A03314 | A09480 | 279 |
| A03314 | A09559 | 308 | A03314 | A09880 | 193 |
| A03314 | A09955 | 294 | A03314 | A10444 | 217 |
| A03314 | A10645 | 218 | A03314 | A10665 | 285 |
| A03314 | A10773 | 277 | A03314 | A11014 | 252 |

|        |        |     |        |        |     |
|--------|--------|-----|--------|--------|-----|
| A03314 | A11086 | 281 | A03314 | A11392 | 210 |
| A03314 | A12361 | 159 | A03314 | A12365 | 278 |
| A03314 | A12945 | 319 | A03314 | A13944 | 232 |
| A03314 | A13994 | 176 | A03314 | A14072 | 457 |
| A03314 | A14193 | 433 | A03314 | A14364 | 162 |
| A03314 | A14371 | 269 | A03314 | A14372 | 274 |
| A03314 | A14375 | 159 | A03314 | A14511 | 454 |
| A03314 | A14846 | 263 | A03314 | A15422 | 221 |
| A03314 | A16043 | 272 | A03314 | A16257 | 190 |
| A03315 | A03319 | 430 | A03315 | A03434 | 200 |
| A03315 | A03854 | 191 | A03315 | A03878 | 358 |
| A03315 | A03966 | 263 | A03315 | A04000 | 328 |
| A03315 | A04080 | 187 | A03315 | A04089 | 348 |
| A03315 | A04217 | 273 | A03315 | A04509 | 358 |
| A03315 | A05439 | 332 | A03315 | A05679 | 224 |
| A03315 | A06845 | 371 | A03315 | A07145 | 249 |
| A03315 | A07152 | 218 | A03315 | A07209 | 221 |
| A03315 | A09394 | 454 | A03315 | A09480 | 429 |
| A03315 | A10720 | 159 | A03315 | A11436 | 213 |
| A03315 | A12897 | 193 | A03315 | A14071 | 335 |
| A03315 | A15427 | 291 | A03316 | A04050 | 160 |
| A03316 | A04130 | 443 | A03316 | A04217 | 307 |
| A03316 | A04244 | 347 | A03316 | A05349 | 224 |
| A03316 | A05679 | 263 | A03316 | A05985 | 266 |
| A03316 | A06415 | 441 | A03316 | A06747 | 308 |
| A03316 | A07135 | 174 | A03316 | A07152 | 479 |
| A03316 | A07157 | 362 | A03316 | A07803 | 163 |
| A03316 | A09764 | 173 | A03316 | A13872 | 319 |
| A03316 | A14071 | 243 | A03316 | A14374 | 477 |
| A03316 | A14391 | 238 | A03316 | A14439 | 310 |
| A03316 | A14599 | 484 | A03316 | A15394 | 296 |
| A03316 | A15425 | 245 | A03316 | A15427 | 323 |
| A03316 | A15642 | 301 | A03317 | A07218 | 236 |
| A03317 | A13584 | 447 | A03318 | A05483 | 445 |
| A03318 | A07946 | 447 | A03318 | A08693 | 396 |
| A03318 | A10640 | 414 | A03318 | A11488 | 445 |
| A03318 | A14366 | 347 | A03318 | A14374 | 355 |
| A03318 | A14391 | 357 | A03318 | A14554 | 382 |
| A03318 | A15516 | 394 | A03319 | A04267 | 290 |
| A03319 | A04536 | 246 | A03319 | A04649 | 373 |
| A03319 | A05134 | 417 | A03319 | A05985 | 272 |
| A03319 | A06422 | 335 | A03319 | A06797 | 324 |
| A03319 | A06949 | 249 | A03319 | A07135 | 180 |
| A03319 | A07157 | 243 | A03319 | A07165 | 179 |
| A03319 | A09394 | 433 | A03320 | A04473 | 375 |
| A03321 | A03339 | 191 | A03321 | A03350 | 154 |

|        |        |     |        |        |     |
|--------|--------|-----|--------|--------|-----|
| A03321 | A03455 | 170 | A03321 | A03518 | 234 |
| A03321 | A03611 | 432 | A03321 | A03612 | 424 |
| A03321 | A03648 | 399 | A03321 | A03803 | 258 |
| A03321 | A03812 | 466 | A03321 | A03868 | 213 |
| A03321 | A03922 | 462 | A03321 | A04054 | 255 |
| A03321 | A04117 | 156 | A03321 | A04259 | 201 |
| A03321 | A04280 | 361 | A03321 | A04342 | 196 |
| A03321 | A04446 | 159 | A03321 | A04805 | 310 |
| A03321 | A04816 | 201 | A03321 | A04845 | 443 |
| A03321 | A04905 | 477 | A03321 | A04935 | 283 |
| A03321 | A04989 | 163 | A03321 | A05073 | 236 |
| A03321 | A05075 | 191 | A03321 | A05079 | 154 |
| A03321 | A05115 | 283 | A03321 | A05175 | 372 |
| A03321 | A05215 | 213 | A03321 | A05398 | 362 |
| A03321 | A05448 | 240 | A03321 | A05584 | 340 |
| A03321 | A05665 | 424 | A03321 | A05832 | 379 |
| A03321 | A05871 | 208 | A03321 | A05887 | 208 |
| A03321 | A05958 | 241 | A03321 | A06004 | 201 |
| A03321 | A06138 | 452 | A03321 | A06162 | 286 |
| A03321 | A06591 | 180 | A03321 | A06610 | 486 |
| A03321 | A06752 | 388 | A03321 | A06863 | 390 |
| A03321 | A06876 | 229 | A03321 | A07159 | 294 |
| A03321 | A07163 | 343 | A03321 | A07339 | 445 |
| A03321 | A07594 | 420 | A03321 | A07830 | 283 |
| A03321 | A07934 | 486 | A03321 | A07967 | 204 |
| A03321 | A08061 | 486 | A03321 | A08070 | 151 |
| A03321 | A08094 | 207 | A03321 | A08152 | 159 |
| A03321 | A08398 | 340 | A03321 | A08446 | 283 |
| A03321 | A08458 | 177 | A03321 | A08551 | 259 |
| A03321 | A08571 | 156 | A03321 | A08582 | 213 |
| A03321 | A08620 | 184 | A03321 | A08961 | 341 |
| A03321 | A09019 | 249 | A03321 | A09173 | 229 |
| A03321 | A09242 | 157 | A03321 | A09309 | 475 |
| A03321 | A09548 | 154 | A03321 | A09583 | 184 |
| A03321 | A09901 | 395 | A03321 | A09946 | 184 |
| A03321 | A10087 | 174 | A03321 | A10320 | 433 |
| A03321 | A10525 | 473 | A03321 | A10788 | 184 |
| A03321 | A10847 | 463 | A03321 | A11023 | 477 |
| A03321 | A11033 | 351 | A03321 | A11160 | 491 |
| A03321 | A11161 | 334 | A03321 | A11180 | 184 |
| A03321 | A11317 | 227 | A03321 | A11326 | 414 |
| A03321 | A11463 | 191 | A03321 | A11515 | 159 |
| A03321 | A11564 | 184 | A03321 | A11902 | 299 |
| A03321 | A12007 | 419 | A03321 | A12019 | 420 |
| A03321 | A12579 | 356 | A03321 | A12594 | 283 |
| A03321 | A12888 | 213 | A03321 | A13212 | 355 |



|        |        |     |        |        |     |
|--------|--------|-----|--------|--------|-----|
| A03321 | A13218 | 465 | A03321 | A13465 | 201 |
| A03321 | A13552 | 213 | A03321 | A13974 | 213 |
| A03321 | A14197 | 273 | A03321 | A14258 | 262 |
| A03321 | A14281 | 270 | A03321 | A14647 | 180 |
| A03321 | A14657 | 247 | A03321 | A14739 | 184 |
| A03321 | A14768 | 249 | A03321 | A14918 | 279 |
| A03321 | A15078 | 283 | A03321 | A16261 | 417 |
| A03321 | A16410 | 251 | A03321 | A17203 | 191 |
| A03322 | A03477 | 330 | A03322 | A03586 | 232 |
| A03322 | A05712 | 252 | A03322 | A06633 | 396 |
| A03322 | A07445 | 382 | A03322 | A07530 | 303 |
| A03322 | A11902 | 238 | A03322 | A16026 | 274 |
| A03322 | A16033 | 291 | A03322 | A16328 | 162 |
| A03323 | A03324 | 483 | A03323 | A03477 | 236 |
| A03323 | A05160 | 418 | A03323 | A05516 | 363 |
| A03323 | A07221 | 485 | A03323 | A10614 | 447 |
| A03324 | A03861 | 241 | A03324 | A05160 | 374 |
| A03324 | A05418 | 157 | A03324 | A05516 | 283 |
| A03324 | A05759 | 396 | A03324 | A05855 | 443 |
| A03324 | A06903 | 310 | A03324 | A07122 | 154 |
| A03324 | A07221 | 486 | A03324 | A07442 | 165 |
| A03324 | A10614 | 452 | A03325 | A03681 | 358 |
| A03326 | A03329 | 163 | A03326 | A03428 | 302 |
| A03326 | A03452 | 430 | A03326 | A04292 | 218 |
| A03326 | A04839 | 269 | A03326 | A05376 | 269 |
| A03326 | A05862 | 486 | A03326 | A06011 | 330 |
| A03326 | A06593 | 334 | A03326 | A06657 | 428 |
| A03326 | A08881 | 269 | A03326 | A09056 | 269 |
| A03326 | A09277 | 172 | A03326 | A10594 | 269 |
| A03326 | A11848 | 246 | A03326 | A11925 | 269 |
| A03326 | A13819 | 188 | A03326 | A13845 | 316 |
| A03326 | A14247 | 595 | A03326 | A14473 | 269 |
| A03326 | A14481 | 269 | A03326 | A14693 | 269 |
| A03326 | A14710 | 305 | A03326 | A15301 | 269 |
| A03326 | A15302 | 269 | A03326 | A15366 | 269 |
| A03326 | A15430 | 269 | A03326 | A15462 | 269 |
| A03326 | A15463 | 269 | A03327 | A04161 | 262 |
| A03327 | A04668 | 224 | A03327 | A04776 | 260 |
| A03327 | A05334 | 187 | A03327 | A05690 | 619 |
| A03327 | A05816 | 414 | A03327 | A06130 | 317 |
| A03327 | A06381 | 317 | A03327 | A06493 | 263 |
| A03327 | A06750 | 229 | A03327 | A07314 | 160 |
| A03327 | A07353 | 317 | A03327 | A07562 | 296 |
| A03327 | A07670 | 229 | A03327 | A08832 | 477 |
| A03327 | A08884 | 430 | A03327 | A09742 | 341 |
| A03327 | A10594 | 218 | A03327 | A12498 | 217 |

|        |        |     |        |        |     |
|--------|--------|-----|--------|--------|-----|
| A03327 | A13986 | 383 | A03327 | A14223 | 151 |
| A03327 | A14384 | 400 | A03327 | A14394 | 491 |
| A03327 | A14703 | 183 | A03327 | A15164 | 263 |
| A03327 | A15638 | 252 | A03327 | A15726 | 154 |
| A03327 | A15811 | 180 | A03327 | A15827 | 443 |
| A03327 | A15837 | 317 | A03327 | A16114 | 154 |
| A03327 | A16626 | 317 | A03327 | A16643 | 317 |
| A03328 | A03651 | 462 | A03328 | A03764 | 191 |
| A03328 | A03929 | 307 | A03328 | A04140 | 319 |
| A03328 | A04174 | 160 | A03328 | A04722 | 196 |
| A03328 | A05690 | 491 | A03328 | A06318 | 258 |
| A03328 | A06423 | 290 | A03328 | A06493 | 319 |
| A03328 | A06602 | 372 | A03328 | A06671 | 252 |
| A03328 | A07687 | 307 | A03328 | A07869 | 475 |
| A03328 | A08352 | 307 | A03328 | A08524 | 669 |
| A03328 | A08552 | 307 | A03328 | A08571 | 188 |
| A03328 | A08877 | 256 | A03328 | A08884 | 486 |
| A03328 | A08887 | 221 | A03328 | A09304 | 307 |
| A03328 | A09316 | 441 | A03328 | A09340 | 375 |
| A03328 | A09342 | 235 | A03328 | A09680 | 455 |
| A03328 | A10580 | 256 | A03328 | A11067 | 375 |
| A03328 | A11107 | 344 | A03328 | A11283 | 333 |
| A03328 | A11332 | 307 | A03328 | A11828 | 624 |
| A03328 | A11840 | 307 | A03328 | A12047 | 600 |
| A03328 | A13519 | 375 | A03328 | A14449 | 372 |
| A03328 | A14976 | 319 | A03328 | A15932 | 223 |
| A03328 | A15933 | 205 | A03328 | A16440 | 294 |
| A03328 | A16690 | 561 | A03329 | A03452 | 472 |
| A03329 | A03618 | 468 | A03329 | A03626 | 396 |
| A03329 | A03718 | 112 | A03329 | A03889 | 457 |
| A03329 | A04292 | 396 | A03329 | A05028 | 447 |
| A03329 | A05862 | 366 | A03329 | A06011 | 154 |
| A03329 | A06890 | 414 | A03329 | A06941 | 430 |
| A03329 | A07521 | 475 | A03329 | A07820 | 647 |
| A03329 | A09056 | 414 | A03329 | A09299 | 249 |
| A03329 | A09326 | 266 | A03329 | A09333 | 235 |
| A03329 | A10663 | 427 | A03329 | A13222 | 499 |
| A03329 | A13604 | 297 | A03329 | A13855 | 557 |
| A03329 | A14056 | 87  | A03329 | A14168 | 285 |
| A03329 | A14182 | 467 | A03329 | A14247 | 491 |
| A03329 | A14838 | 562 | A03329 | A15647 | 121 |
| A03329 | A16617 | 411 | A03329 | A16704 | 199 |
| A03329 | A16927 | 414 | A03329 | A16982 | 414 |
| A03330 | A03480 | 200 | A03330 | A03556 | 200 |
| A03330 | A03597 | 291 | A03330 | A03617 | 200 |
| A03330 | A05202 | 306 | A03330 | A05273 | 200 |

|        |        |     |        |        |     |
|--------|--------|-----|--------|--------|-----|
| A03330 | A05531 | 200 | A03330 | A05539 | 386 |
| A03330 | A05605 | 200 | A03330 | A05638 | 200 |
| A03330 | A06204 | 200 | A03330 | A06758 | 202 |
| A03330 | A07180 | 285 | A03330 | A07294 | 288 |
| A03330 | A09625 | 350 | A03330 | A09628 | 200 |
| A03330 | A10208 | 180 | A03330 | A10317 | 180 |
| A03330 | A10664 | 419 | A03330 | A10739 | 290 |
| A03330 | A10799 | 210 | A03330 | A11739 | 475 |
| A03330 | A13384 | 179 | A03330 | A13831 | 196 |
| A03330 | A13876 | 200 | A03330 | A13881 | 200 |
| A03330 | A14088 | 168 | A03330 | A14171 | 200 |
| A03330 | A14173 | 259 | A03330 | A14179 | 385 |
| A03330 | A14180 | 200 | A03330 | A14186 | 99  |
| A03330 | A14356 | 200 | A03330 | A15370 | 279 |
| A03330 | A15712 | 200 | A03330 | A15719 | 200 |
| A03330 | A15757 | 200 | A03330 | A16049 | 177 |
| A03330 | A16066 | 200 | A03330 | A16634 | 357 |
| A03330 | A16843 | 452 | A03330 | A16919 | 200 |
| A03330 | A17167 | 485 | A03331 | A03413 | 191 |
| A03331 | A03651 | 174 | A03331 | A03656 | 274 |
| A03331 | A03753 | 316 | A03331 | A03913 | 433 |
| A03331 | A05052 | 380 | A03331 | A06100 | 201 |
| A03331 | A06416 | 163 | A03331 | A07051 | 450 |
| A03331 | A08498 | 306 | A03331 | A08753 | 183 |
| A03331 | A08835 | 257 | A03331 | A08954 | 281 |
| A03331 | A09469 | 218 | A03331 | A09558 | 899 |
| A03331 | A09577 | 939 | A03331 | A09633 | 383 |
| A03331 | A09635 | 230 | A03331 | A09643 | 943 |
| A03331 | A09644 | 945 | A03331 | A10005 | 187 |
| A03331 | A10073 | 899 | A03331 | A10365 | 913 |
| A03331 | A10392 | 945 | A03331 | A10452 | 183 |
| A03331 | A10808 | 923 | A03331 | A10949 | 215 |
| A03331 | A12383 | 457 | A03331 | A12651 | 400 |
| A03331 | A12990 | 196 | A03331 | A13992 | 296 |
| A03331 | A14008 | 945 | A03331 | A14013 | 260 |
| A03331 | A14022 | 324 | A03331 | A14124 | 201 |
| A03331 | A14275 | 285 | A03331 | A14300 | 154 |
| A03331 | A14443 | 899 | A03332 | A03571 | 196 |
| A03332 | A03611 | 213 | A03332 | A03726 | 899 |
| A03332 | A03913 | 443 | A03332 | A03955 | 364 |
| A03332 | A04754 | 308 | A03332 | A04761 | 491 |
| A03332 | A05044 | 369 | A03332 | A05443 | 489 |
| A03332 | A05996 | 491 | A03332 | A10234 | 348 |
| A03332 | A10633 | 151 | A03332 | A11400 | 170 |
| A03332 | A11612 | 329 | A03332 | A11704 | 180 |
| A03332 | A12643 | 411 | A03332 | A12653 | 395 |

|        |        |     |        |        |     |
|--------|--------|-----|--------|--------|-----|
| A03332 | A13125 | 279 | A03332 | A13989 | 326 |
| A03332 | A13992 | 226 | A03332 | A15962 | 180 |
| A03333 | A05545 | 422 | A03333 | A11139 | 210 |
| A03333 | A13415 | 469 | A03333 | A13667 | 273 |
| A03333 | A16230 | 270 | A03334 | A04256 | 252 |
| A03334 | A04449 | 276 | A03334 | A04491 | 290 |
| A03334 | A05294 | 252 | A03334 | A06739 | 372 |
| A03334 | A07014 | 450 | A03334 | A07149 | 254 |
| A03334 | A08878 | 299 | A03334 | A09504 | 294 |
| A03334 | A10186 | 375 | A03334 | A11378 | 461 |
| A03334 | A11467 | 475 | A03334 | A11983 | 344 |
| A03334 | A14196 | 232 | A03334 | A14366 | 152 |
| A03334 | A14485 | 159 | A03334 | A15917 | 162 |
| A03335 | A03817 | 157 | A03335 | A04323 | 249 |
| A03335 | A05363 | 260 | A03335 | A05530 | 218 |
| A03335 | A06077 | 335 | A03335 | A06289 | 73  |
| A03335 | A08345 | 258 | A03335 | A08450 | 168 |
| A03335 | A08608 | 489 | A03335 | A09279 | 251 |
| A03335 | A10510 | 322 | A03335 | A11307 | 235 |
| A03335 | A11929 | 193 | A03335 | A11983 | 899 |
| A03335 | A12980 | 296 | A03335 | A14005 | 899 |
| A03335 | A14299 | 448 | A03335 | A14400 | 398 |
| A03335 | A15506 | 352 | A03336 | A03842 | 341 |
| A03336 | A03862 | 288 | A03336 | A04229 | 260 |
| A03336 | A04346 | 241 | A03336 | A04853 | 252 |
| A03336 | A08692 | 256 | A03336 | A09003 | 307 |
| A03336 | A10563 | 193 | A03336 | A11412 | 154 |
| A03336 | A11793 | 396 | A03336 | A13397 | 241 |
| A03336 | A13469 | 396 | A03336 | A14264 | 346 |
| A03336 | A14860 | 296 | A03336 | A15543 | 156 |
| A03336 | A15622 | 330 | A03337 | A03784 | 219 |
| A03337 | A03929 | 218 | A03337 | A04600 | 188 |
| A03337 | A04867 | 310 | A03337 | A06778 | 407 |
| A03337 | A07433 | 388 | A03337 | A08196 | 151 |
| A03337 | A09001 | 190 | A03337 | A10039 | 260 |
| A03337 | A13587 | 408 | A03337 | A14438 | 249 |
| A03337 | A16916 | 160 | A03338 | A03410 | 299 |
| A03338 | A03609 | 173 | A03338 | A03654 | 227 |
| A03338 | A03760 | 326 | A03338 | A03821 | 390 |
| A03338 | A04321 | 362 | A03338 | A04346 | 249 |
| A03338 | A04685 | 308 | A03338 | A04806 | 368 |
| A03338 | A05239 | 368 | A03338 | A05845 | 294 |
| A03338 | A06398 | 303 | A03338 | A06648 | 330 |
| A03338 | A06897 | 173 | A03338 | A07146 | 291 |
| A03338 | A07298 | 413 | A03338 | A09496 | 328 |
| A03338 | A10744 | 321 | A03338 | A11393 | 330 |

|        |        |     |        |        |     |
|--------|--------|-----|--------|--------|-----|
| A03338 | A13978 | 224 | A03338 | A16764 | 210 |
| A03339 | A04939 | 303 | A03340 | A04681 | 340 |
| A03340 | A07157 | 319 | A03341 | A04218 | 420 |
| A03343 | A03346 | 419 | A03343 | A03361 | 266 |
| A03343 | A04063 | 374 | A03343 | A04271 | 330 |
| A03343 | A05154 | 353 | A03343 | A16007 | 333 |
| A03344 | A03345 | 491 | A03344 | A03346 | 380 |
| A03344 | A03347 | 262 | A03344 | A03349 | 480 |
| A03344 | A03350 | 477 | A03344 | A03351 | 221 |
| A03344 | A03352 | 419 | A03344 | A03353 | 396 |
| A03344 | A03358 | 441 | A03344 | A03359 | 435 |
| A03344 | A03361 | 317 | A03344 | A03368 | 335 |
| A03344 | A03369 | 252 | A03344 | A03370 | 179 |
| A03344 | A03371 | 372 | A03344 | A03373 | 269 |
| A03344 | A03378 | 269 | A03344 | A03379 | 472 |
| A03344 | A03383 | 350 | A03344 | A03821 | 232 |
| A03344 | A04010 | 200 | A03344 | A04337 | 302 |
| A03344 | A04520 | 196 | A03344 | A05356 | 183 |
| A03344 | A06321 | 432 | A03344 | A06346 | 344 |
| A03344 | A06606 | 168 | A03344 | A06729 | 263 |
| A03344 | A07165 | 278 | A03344 | A07361 | 324 |
| A03344 | A07605 | 390 | A03344 | A08007 | 419 |
| A03344 | A08270 | 419 | A03344 | A08271 | 419 |
| A03344 | A09139 | 452 | A03344 | A09204 | 279 |
| A03344 | A09238 | 243 | A03344 | A09341 | 340 |
| A03344 | A09745 | 267 | A03344 | A11599 | 408 |
| A03344 | A12845 | 369 | A03344 | A13122 | 419 |
| A03344 | A13987 | 180 | A03344 | A14010 | 241 |
| A03344 | A14071 | 219 | A03344 | A14190 | 167 |
| A03344 | A15312 | 152 | A03344 | A15313 | 165 |
| A03344 | A15432 | 224 | A03344 | A15433 | 302 |
| A03344 | A15435 | 191 | A03344 | A15451 | 334 |
| A03344 | A15452 | 201 | A03344 | A15456 | 312 |
| A03344 | A15457 | 350 | A03344 | A15495 | 168 |
| A03344 | A16338 | 419 | A03345 | A03346 | 435 |
| A03345 | A03347 | 263 | A03345 | A03348 | 433 |
| A03345 | A03349 | 480 | A03345 | A03350 | 477 |
| A03345 | A03351 | 223 | A03345 | A03352 | 419 |
| A03345 | A03358 | 441 | A03345 | A03359 | 361 |
| A03345 | A03361 | 319 | A03345 | A03363 | 353 |
| A03345 | A03369 | 254 | A03345 | A03378 | 271 |
| A03345 | A03379 | 462 | A03345 | A03384 | 338 |
| A03345 | A03821 | 234 | A03345 | A04337 | 303 |
| A03345 | A04833 | 235 | A03345 | A06321 | 353 |
| A03345 | A06346 | 216 | A03345 | A06729 | 266 |
| A03345 | A07165 | 279 | A03345 | A07218 | 317 |

|        |        |     |        |        |     |
|--------|--------|-----|--------|--------|-----|
| A03345 | A07361 | 324 | A03345 | A07605 | 391 |
| A03345 | A08270 | 419 | A03345 | A08271 | 419 |
| A03345 | A09139 | 395 | A03345 | A09204 | 281 |
| A03345 | A09238 | 246 | A03345 | A09745 | 269 |
| A03345 | A11599 | 408 | A03345 | A13122 | 419 |
| A03345 | A13987 | 180 | A03345 | A14010 | 243 |
| A03345 | A14190 | 168 | A03345 | A15312 | 154 |
| A03345 | A15313 | 168 | A03345 | A15432 | 226 |
| A03345 | A15433 | 303 | A03345 | A15435 | 193 |
| A03345 | A15451 | 335 | A03345 | A15452 | 204 |
| A03345 | A15456 | 313 | A03345 | A15457 | 351 |
| A03345 | A15495 | 171 | A03345 | A16338 | 419 |
| A03346 | A03347 | 491 | A03346 | A03348 | 391 |
| A03346 | A03349 | 170 | A03346 | A03351 | 490 |
| A03346 | A03353 | 472 | A03346 | A03358 | 318 |
| A03346 | A03361 | 491 | A03346 | A03363 | 391 |
| A03346 | A03369 | 283 | A03346 | A03370 | 489 |
| A03346 | A03371 | 422 | A03346 | A03373 | 455 |
| A03346 | A03374 | 291 | A03346 | A03375 | 337 |
| A03346 | A03376 | 333 | A03346 | A03378 | 488 |
| A03346 | A03379 | 490 | A03346 | A03383 | 276 |
| A03346 | A03397 | 278 | A03346 | A03414 | 281 |
| A03346 | A03532 | 183 | A03346 | A03688 | 207 |
| A03346 | A03729 | 417 | A03346 | A03744 | 163 |
| A03346 | A04006 | 174 | A03346 | A04329 | 260 |
| A03346 | A04520 | 213 | A03346 | A04870 | 234 |
| A03346 | A04928 | 221 | A03346 | A05264 | 232 |
| A03346 | A05286 | 364 | A03346 | A05607 | 182 |
| A03346 | A06346 | 335 | A03346 | A06627 | 205 |
| A03346 | A07068 | 364 | A03346 | A07218 | 491 |
| A03346 | A07361 | 238 | A03346 | A07704 | 201 |
| A03346 | A07705 | 190 | A03346 | A08594 | 249 |
| A03346 | A09387 | 281 | A03346 | A10854 | 152 |
| A03346 | A10987 | 399 | A03346 | A11599 | 364 |
| A03346 | A11911 | 235 | A03347 | A03348 | 475 |
| A03347 | A03349 | 302 | A03347 | A03350 | 302 |
| A03347 | A03351 | 491 | A03347 | A03353 | 491 |
| A03347 | A03358 | 184 | A03347 | A03361 | 489 |
| A03347 | A03363 | 279 | A03347 | A03367 | 335 |
| A03347 | A03368 | 256 | A03347 | A03369 | 491 |
| A03347 | A03370 | 491 | A03347 | A03371 | 491 |
| A03347 | A03373 | 490 | A03347 | A03374 | 290 |
| A03347 | A03375 | 423 | A03347 | A03376 | 406 |
| A03347 | A03378 | 455 | A03347 | A03379 | 491 |
| A03347 | A03383 | 274 | A03347 | A03397 | 390 |
| A03347 | A03532 | 469 | A03347 | A03729 | 417 |

|        |        |     |        |        |     |
|--------|--------|-----|--------|--------|-----|
| A03347 | A04329 | 377 | A03347 | A04520 | 210 |
| A03347 | A04848 | 165 | A03347 | A04928 | 221 |
| A03347 | A05264 | 230 | A03347 | A05286 | 364 |
| A03347 | A05356 | 337 | A03347 | A05891 | 157 |
| A03347 | A06346 | 433 | A03347 | A06711 | 383 |
| A03347 | A07218 | 491 | A03347 | A07361 | 238 |
| A03347 | A07704 | 332 | A03347 | A07705 | 400 |
| A03347 | A07843 | 259 | A03347 | A08292 | 238 |
| A03347 | A08594 | 246 | A03347 | A08738 | 290 |
| A03347 | A10450 | 335 | A03347 | A10563 | 159 |
| A03347 | A11310 | 260 | A03347 | A13346 | 152 |
| A03348 | A03351 | 455 | A03348 | A03353 | 406 |
| A03348 | A03361 | 462 | A03348 | A03363 | 438 |
| A03348 | A03368 | 348 | A03348 | A03369 | 385 |
| A03348 | A03370 | 479 | A03348 | A03371 | 269 |
| A03348 | A03375 | 396 | A03348 | A03378 | 286 |
| A03348 | A03379 | 414 | A03348 | A03383 | 361 |
| A03348 | A03397 | 363 | A03348 | A03532 | 296 |
| A03348 | A05264 | 333 | A03348 | A05286 | 414 |
| A03348 | A07200 | 171 | A03348 | A07218 | 400 |
| A03348 | A07843 | 351 | A03348 | A11599 | 414 |
| A03349 | A03350 | 486 | A03349 | A03351 | 127 |
| A03349 | A03353 | 332 | A03349 | A03357 | 446 |
| A03349 | A03358 | 486 | A03349 | A03359 | 294 |
| A03349 | A03361 | 204 | A03349 | A03363 | 286 |
| A03349 | A03366 | 270 | A03349 | A03368 | 434 |
| A03349 | A03369 | 490 | A03349 | A03370 | 485 |
| A03349 | A03371 | 424 | A03349 | A03376 | 207 |
| A03349 | A03378 | 177 | A03349 | A03379 | 477 |
| A03349 | A03383 | 281 | A03349 | A03384 | 262 |
| A03349 | A03729 | 228 | A03349 | A03984 | 285 |
| A03349 | A04063 | 246 | A03349 | A04329 | 265 |
| A03349 | A04833 | 416 | A03349 | A04928 | 228 |
| A03349 | A05015 | 484 | A03349 | A05155 | 259 |
| A03349 | A05313 | 201 | A03349 | A05731 | 474 |
| A03349 | A06069 | 413 | A03349 | A06321 | 286 |
| A03349 | A06346 | 341 | A03349 | A06379 | 196 |
| A03349 | A06574 | 213 | A03349 | A06711 | 273 |
| A03349 | A06731 | 151 | A03349 | A07218 | 168 |
| A03349 | A07361 | 427 | A03349 | A07676 | 385 |
| A03349 | A07704 | 338 | A03349 | A07705 | 329 |
| A03349 | A07834 | 151 | A03349 | A08033 | 385 |
| A03349 | A08034 | 328 | A03349 | A08097 | 260 |
| A03349 | A08157 | 328 | A03349 | A08244 | 334 |
| A03349 | A08292 | 368 | A03349 | A08309 | 193 |
| A03349 | A08685 | 157 | A03349 | A08855 | 160 |

|        |        |     |        |        |     |
|--------|--------|-----|--------|--------|-----|
| A03349 | A09139 | 347 | A03349 | A09246 | 200 |
| A03349 | A09976 | 319 | A03349 | A10900 | 368 |
| A03349 | A11298 | 279 | A03349 | A11313 | 168 |
| A03349 | A11319 | 290 | A03349 | A11449 | 290 |
| A03349 | A11463 | 334 | A03349 | A12845 | 409 |
| A03349 | A15495 | 288 | A03349 | A15552 | 395 |
| A03349 | A15880 | 297 | A03350 | A03351 | 266 |
| A03350 | A03353 | 324 | A03350 | A03359 | 383 |
| A03350 | A03361 | 230 | A03350 | A03368 | 363 |
| A03350 | A03369 | 466 | A03350 | A03370 | 353 |
| A03350 | A03371 | 399 | A03350 | A03375 | 407 |
| A03350 | A03379 | 367 | A03350 | A03383 | 374 |
| A03350 | A04063 | 355 | A03350 | A04329 | 366 |
| A03350 | A04520 | 243 | A03350 | A04928 | 343 |
| A03350 | A06321 | 378 | A03350 | A06346 | 259 |
| A03350 | A06711 | 371 | A03350 | A07361 | 353 |
| A03350 | A07676 | 430 | A03350 | A07704 | 329 |
| A03350 | A07705 | 322 | A03350 | A08292 | 353 |
| A03350 | A09139 | 411 | A03350 | A10900 | 422 |
| A03350 | A12845 | 450 | A03350 | A15880 | 385 |
| A03351 | A03353 | 481 | A03351 | A03358 | 141 |
| A03351 | A03361 | 490 | A03351 | A03363 | 364 |
| A03351 | A03368 | 344 | A03351 | A03369 | 491 |
| A03351 | A03370 | 491 | A03351 | A03371 | 491 |
| A03351 | A03373 | 350 | A03351 | A03374 | 252 |
| A03351 | A03375 | 407 | A03351 | A03376 | 488 |
| A03351 | A03378 | 441 | A03351 | A03379 | 491 |
| A03351 | A03383 | 361 | A03351 | A03387 | 227 |
| A03351 | A03397 | 363 | A03351 | A03526 | 165 |
| A03351 | A03532 | 362 | A03351 | A03708 | 180 |
| A03351 | A03729 | 311 | A03351 | A04337 | 485 |
| A03351 | A04410 | 208 | A03351 | A04520 | 255 |
| A03351 | A04715 | 269 | A03351 | A04832 | 432 |
| A03351 | A04879 | 174 | A03351 | A05264 | 188 |
| A03351 | A05286 | 340 | A03351 | A05294 | 151 |
| A03351 | A05356 | 465 | A03351 | A05445 | 179 |
| A03351 | A05657 | 243 | A03351 | A05731 | 224 |
| A03351 | A05739 | 179 | A03351 | A05777 | 179 |
| A03351 | A06069 | 163 | A03351 | A06299 | 202 |
| A03351 | A06346 | 407 | A03351 | A06424 | 340 |
| A03351 | A06454 | 174 | A03351 | A06711 | 227 |
| A03351 | A06920 | 297 | A03351 | A06921 | 362 |
| A03351 | A07196 | 274 | A03351 | A07218 | 491 |
| A03351 | A07361 | 195 | A03351 | A07384 | 477 |
| A03351 | A07704 | 157 | A03351 | A07754 | 232 |
| A03351 | A07810 | 340 | A03351 | A07843 | 218 |



|        |        |     |        |        |     |
|--------|--------|-----|--------|--------|-----|
| A03351 | A08039 | 305 | A03351 | A08142 | 425 |
| A03351 | A08143 | 362 | A03351 | A08594 | 490 |
| A03351 | A08747 | 305 | A03351 | A08938 | 291 |
| A03351 | A09193 | 326 | A03351 | A09736 | 171 |
| A03351 | A10351 | 262 | A03351 | A10651 | 299 |
| A03351 | A11317 | 219 | A03351 | A11599 | 340 |
| A03351 | A11610 | 340 | A03351 | A11712 | 326 |
| A03351 | A11963 | 362 | A03351 | A12128 | 362 |
| A03351 | A12194 | 362 | A03351 | A12454 | 362 |
| A03351 | A12787 | 219 | A03351 | A13369 | 184 |
| A03351 | A14221 | 159 | A03351 | A14377 | 224 |
| A03351 | A15917 | 168 | A03351 | A17078 | 221 |
| A03352 | A03359 | 427 | A03352 | A06321 | 424 |
| A03352 | A09139 | 441 | A03352 | A11599 | 447 |
| A03352 | A13122 | 452 | A03352 | A16338 | 452 |
| A03353 | A03359 | 313 | A03353 | A03361 | 455 |
| A03353 | A03363 | 305 | A03353 | A03368 | 486 |
| A03353 | A03369 | 491 | A03353 | A03370 | 491 |
| A03353 | A03371 | 491 | A03353 | A03373 | 485 |
| A03353 | A03378 | 443 | A03353 | A03379 | 491 |
| A03353 | A03383 | 301 | A03353 | A03532 | 465 |
| A03353 | A03729 | 372 | A03353 | A04329 | 286 |
| A03353 | A04848 | 196 | A03353 | A04928 | 372 |
| A03353 | A05340 | 313 | A03353 | A05356 | 454 |
| A03353 | A06069 | 238 | A03353 | A06321 | 305 |
| A03353 | A06346 | 273 | A03353 | A06711 | 294 |
| A03353 | A06953 | 262 | A03353 | A07218 | 491 |
| A03353 | A07361 | 383 | A03353 | A07471 | 272 |
| A03353 | A07475 | 212 | A03353 | A07704 | 230 |
| A03353 | A07705 | 219 | A03353 | A08292 | 268 |
| A03353 | A08738 | 228 | A03353 | A09139 | 361 |
| A03353 | A09416 | 171 | A03353 | A12845 | 328 |
| A03354 | A03355 | 445 | A03354 | A03483 | 447 |
| A03355 | A03390 | 357 | A03355 | A03401 | 262 |
| A03355 | A03483 | 438 | A03355 | A05294 | 369 |
| A03355 | A05644 | 425 | A03356 | A03371 | 341 |
| A03356 | A03384 | 489 | A03356 | A03401 | 105 |
| A03356 | A04202 | 179 | A03356 | A04833 | 491 |
| A03356 | A05891 | 348 | A03356 | A07357 | 488 |
| A03356 | A14633 | 201 | A03357 | A03358 | 483 |
| A03357 | A03360 | 399 | A03357 | A03375 | 402 |
| A03357 | A03379 | 468 | A03357 | A03984 | 279 |
| A03357 | A04833 | 266 | A03357 | A05340 | 443 |
| A03357 | A06069 | 455 | A03357 | A08244 | 399 |
| A03357 | A14633 | 294 | A03358 | A03360 | 344 |
| A03358 | A03362 | 329 | A03358 | A03363 | 446 |

|        |        |     |        |        |     |
|--------|--------|-----|--------|--------|-----|
| A03358 | A03365 | 375 | A03358 | A03366 | 283 |
| A03358 | A03367 | 350 | A03358 | A03368 | 274 |
| A03358 | A03370 | 427 | A03358 | A03378 | 440 |
| A03358 | A03379 | 491 | A03358 | A03385 | 424 |
| A03358 | A03387 | 286 | A03358 | A03388 | 271 |
| A03358 | A03394 | 338 | A03358 | A03397 | 296 |
| A03358 | A03575 | 252 | A03358 | A04048 | 207 |
| A03358 | A04407 | 305 | A03358 | A04410 | 290 |
| A03358 | A04833 | 152 | A03358 | A04840 | 310 |
| A03358 | A05015 | 491 | A03358 | A05587 | 406 |
| A03358 | A05657 | 299 | A03358 | A05731 | 285 |
| A03358 | A05739 | 367 | A03358 | A05777 | 243 |
| A03358 | A05891 | 313 | A03358 | A06069 | 475 |
| A03358 | A06070 | 469 | A03358 | A06428 | 162 |
| A03358 | A06574 | 419 | A03358 | A06729 | 185 |
| A03358 | A06731 | 165 | A03358 | A06868 | 229 |
| A03358 | A06887 | 329 | A03358 | A06920 | 344 |
| A03358 | A07165 | 174 | A03358 | A07218 | 483 |
| A03358 | A07361 | 259 | A03358 | A07605 | 333 |
| A03358 | A07784 | 375 | A03358 | A08162 | 338 |
| A03358 | A08244 | 344 | A03358 | A08309 | 213 |
| A03358 | A08392 | 364 | A03358 | A09204 | 204 |
| A03358 | A09238 | 163 | A03358 | A09745 | 190 |
| A03358 | A11315 | 224 | A03358 | A11481 | 364 |
| A03358 | A12955 | 375 | A03358 | A13120 | 375 |
| A03358 | A14010 | 160 | A03358 | A14377 | 168 |
| A03358 | A15433 | 230 | A03358 | A15451 | 273 |
| A03358 | A15456 | 243 | A03358 | A15457 | 294 |
| A03358 | A15495 | 205 | A03358 | A15552 | 297 |
| A03358 | A15678 | 356 | A03358 | A15685 | 173 |
| A03359 | A03368 | 356 | A03359 | A03369 | 281 |
| A03359 | A03370 | 210 | A03359 | A03371 | 279 |
| A03359 | A03374 | 375 | A03359 | A03379 | 229 |
| A03359 | A03383 | 367 | A03359 | A06069 | 324 |
| A03359 | A06321 | 441 | A03359 | A07361 | 345 |
| A03359 | A09139 | 475 | A03359 | A11599 | 417 |
| A03359 | A12845 | 385 | A03359 | A13122 | 427 |
| A03359 | A16338 | 427 | A03360 | A03379 | 390 |
| A03360 | A06428 | 313 | A03360 | A14633 | 210 |
| A03361 | A03363 | 335 | A03361 | A03369 | 408 |
| A03361 | A03370 | 491 | A03361 | A03371 | 477 |
| A03361 | A03373 | 420 | A03361 | A03374 | 346 |
| A03361 | A03375 | 388 | A03361 | A03376 | 344 |
| A03361 | A03378 | 488 | A03361 | A03379 | 491 |
| A03361 | A03383 | 199 | A03361 | A03414 | 358 |
| A03361 | A03568 | 182 | A03361 | A03729 | 462 |

|        |        |     |        |        |     |
|--------|--------|-----|--------|--------|-----|
| A03361 | A03733 | 168 | A03361 | A03744 | 373 |
| A03361 | A03976 | 341 | A03361 | A04051 | 224 |
| A03361 | A04196 | 230 | A03361 | A04212 | 201 |
| A03361 | A04213 | 196 | A03361 | A04333 | 314 |
| A03361 | A04334 | 193 | A03361 | A04394 | 241 |
| A03361 | A04516 | 324 | A03361 | A04520 | 281 |
| A03361 | A04698 | 419 | A03361 | A04830 | 162 |
| A03361 | A04870 | 152 | A03361 | A04966 | 230 |
| A03361 | A05264 | 465 | A03361 | A05286 | 313 |
| A03361 | A05356 | 204 | A03361 | A05641 | 201 |
| A03361 | A05716 | 218 | A03361 | A05731 | 188 |
| A03361 | A06148 | 196 | A03361 | A06299 | 165 |
| A03361 | A06328 | 227 | A03361 | A06346 | 412 |
| A03361 | A07068 | 313 | A03361 | A07218 | 491 |
| A03361 | A07416 | 180 | A03361 | A08040 | 297 |
| A03361 | A08203 | 213 | A03361 | A08747 | 439 |
| A03361 | A08804 | 193 | A03361 | A09200 | 193 |
| A03361 | A09442 | 213 | A03361 | A10563 | 191 |
| A03361 | A11599 | 313 | A03361 | A11911 | 307 |
| A03361 | A12897 | 208 | A03361 | A13726 | 157 |
| A03361 | A13734 | 224 | A03361 | A14390 | 180 |
| A03362 | A03363 | 385 | A03362 | A03370 | 364 |
| A03362 | A03373 | 452 | A03362 | A07218 | 157 |
| A03362 | A07361 | 465 | A03362 | A11391 | 486 |
| A03362 | A12787 | 374 | A03362 | A12877 | 434 |
| A03362 | A12897 | 159 | A03362 | A12964 | 425 |
| A03362 | A14322 | 434 | A03362 | A14377 | 302 |
| A03362 | A15649 | 230 | A03362 | A17209 | 425 |
| A03363 | A03368 | 461 | A03363 | A03369 | 270 |
| A03363 | A03370 | 483 | A03363 | A03371 | 269 |
| A03363 | A03378 | 443 | A03363 | A03379 | 466 |
| A03363 | A03384 | 348 | A03363 | A03744 | 279 |
| A03363 | A05015 | 163 | A03363 | A05264 | 333 |
| A03363 | A07218 | 400 | A03363 | A07361 | 480 |
| A03363 | A11391 | 374 | A03363 | A11599 | 414 |
| A03363 | A11911 | 232 | A03363 | A15682 | 162 |
| A03364 | A03379 | 307 | A03364 | A04520 | 307 |
| A03364 | A06069 | 375 | A03364 | A07361 | 390 |
| A03364 | A11319 | 408 | A03364 | A11557 | 434 |
| A03364 | A12876 | 438 | A03365 | A03379 | 417 |
| A03365 | A05731 | 408 | A03365 | A07218 | 236 |
| A03366 | A03368 | 338 | A03366 | A03369 | 374 |
| A03366 | A03371 | 252 | A03366 | A03394 | 383 |
| A03366 | A03397 | 352 | A03366 | A03545 | 212 |
| A03366 | A06069 | 302 | A03366 | A06346 | 216 |
| A03366 | A06574 | 301 | A03366 | A07361 | 324 |

|        |        |     |        |        |     |
|--------|--------|-----|--------|--------|-----|
| A03366 | A15552 | 353 | A03366 | A15649 | 170 |
| A03367 | A03379 | 286 | A03367 | A03396 | 416 |
| A03368 | A03369 | 489 | A03368 | A03370 | 433 |
| A03368 | A03371 | 490 | A03368 | A03378 | 380 |
| A03368 | A03379 | 481 | A03368 | A03383 | 346 |
| A03368 | A03532 | 439 | A03368 | A04928 | 306 |
| A03368 | A05340 | 434 | A03368 | A06069 | 401 |
| A03368 | A06321 | 348 | A03368 | A06346 | 207 |
| A03368 | A06642 | 157 | A03368 | A06711 | 340 |
| A03368 | A07218 | 202 | A03368 | A07361 | 414 |
| A03368 | A07704 | 288 | A03368 | A07705 | 279 |
| A03368 | A08292 | 319 | A03368 | A08468 | 417 |
| A03368 | A08469 | 417 | A03368 | A09139 | 391 |
| A03368 | A12845 | 367 | A03369 | A03370 | 491 |
| A03369 | A03371 | 491 | A03369 | A03373 | 491 |
| A03369 | A03375 | 329 | A03369 | A03376 | 439 |
| A03369 | A03378 | 291 | A03369 | A03379 | 491 |
| A03369 | A03383 | 435 | A03369 | A03384 | 368 |
| A03369 | A03387 | 258 | A03369 | A03513 | 245 |
| A03369 | A03532 | 491 | A03369 | A03729 | 340 |
| A03369 | A03744 | 152 | A03369 | A03984 | 265 |
| A03369 | A04010 | 201 | A03369 | A04349 | 160 |
| A03369 | A04928 | 210 | A03369 | A05286 | 358 |
| A03369 | A05340 | 281 | A03369 | A05356 | 252 |
| A03369 | A05731 | 479 | A03369 | A05777 | 210 |
| A03369 | A06069 | 472 | A03369 | A06299 | 235 |
| A03369 | A06321 | 270 | A03369 | A06574 | 195 |
| A03369 | A06729 | 374 | A03369 | A06953 | 221 |
| A03369 | A07218 | 491 | A03369 | A07361 | 475 |
| A03369 | A07442 | 303 | A03369 | A07471 | 219 |
| A03369 | A07542 | 185 | A03369 | A08247 | 346 |
| A03369 | A08594 | 234 | A03369 | A08671 | 266 |
| A03369 | A08685 | 270 | A03369 | A08738 | 274 |
| A03369 | A09139 | 337 | A03369 | A10651 | 198 |
| A03369 | A11319 | 274 | A03369 | A12845 | 296 |
| A03369 | A15880 | 283 | A03370 | A03371 | 491 |
| A03370 | A03373 | 491 | A03370 | A03374 | 210 |
| A03370 | A03375 | 270 | A03370 | A03376 | 339 |
| A03370 | A03378 | 489 | A03370 | A03379 | 491 |
| A03370 | A03383 | 193 | A03370 | A03394 | 254 |
| A03370 | A03397 | 441 | A03370 | A03401 | 358 |
| A03370 | A03403 | 193 | A03370 | A03414 | 171 |
| A03370 | A03499 | 254 | A03370 | A03532 | 477 |
| A03370 | A03545 | 361 | A03370 | A03729 | 414 |
| A03370 | A03733 | 162 | A03370 | A03744 | 475 |
| A03370 | A03968 | 152 | A03370 | A03984 | 168 |

|        |        |     |        |        |     |
|--------|--------|-----|--------|--------|-----|
| A03370 | A04051 | 391 | A03370 | A04079 | 235 |
| A03370 | A04329 | 174 | A03370 | A04361 | 294 |
| A03370 | A04369 | 374 | A03370 | A04385 | 235 |
| A03370 | A04409 | 329 | A03370 | A04672 | 294 |
| A03370 | A04830 | 378 | A03370 | A04834 | 157 |
| A03370 | A04840 | 215 | A03370 | A04928 | 488 |
| A03370 | A04989 | 235 | A03370 | A04992 | 254 |
| A03370 | A05113 | 319 | A03370 | A05286 | 311 |
| A03370 | A05294 | 230 | A03370 | A05341 | 409 |
| A03370 | A05356 | 446 | A03370 | A05390 | 269 |
| A03370 | A05457 | 262 | A03370 | A05543 | 294 |
| A03370 | A05612 | 241 | A03370 | A05641 | 196 |
| A03370 | A05731 | 484 | A03370 | A05858 | 294 |
| A03370 | A05977 | 294 | A03370 | A06299 | 160 |
| A03370 | A06322 | 409 | A03370 | A06346 | 470 |
| A03370 | A06483 | 337 | A03370 | A06527 | 328 |
| A03370 | A06574 | 475 | A03370 | A06642 | 213 |
| A03370 | A06711 | 396 | A03370 | A06712 | 281 |
| A03370 | A06729 | 191 | A03370 | A06782 | 262 |
| A03370 | A06935 | 294 | A03370 | A07000 | 270 |
| A03370 | A07218 | 491 | A03370 | A07361 | 374 |
| A03370 | A07441 | 409 | A03370 | A07515 | 226 |
| A03370 | A07538 | 218 | A03370 | A07541 | 190 |
| A03370 | A07586 | 163 | A03370 | A07632 | 199 |
| A03370 | A07705 | 224 | A03370 | A07843 | 174 |
| A03370 | A08040 | 293 | A03370 | A08203 | 208 |
| A03370 | A08206 | 262 | A03370 | A08292 | 154 |
| A03370 | A08384 | 409 | A03370 | A08392 | 294 |
| A03370 | A08393 | 337 | A03370 | A08425 | 337 |
| A03370 | A08456 | 201 | A03370 | A08738 | 154 |
| A03370 | A08861 | 193 | A03370 | A09139 | 281 |
| A03370 | A09416 | 160 | A03370 | A09983 | 446 |
| A03370 | A10000 | 201 | A03370 | A11310 | 177 |
| A03370 | A11320 | 191 | A03370 | A11328 | 183 |
| A03370 | A11391 | 218 | A03370 | A11599 | 311 |
| A03370 | A12004 | 246 | A03370 | A12345 | 311 |
| A03370 | A12351 | 311 | A03370 | A12432 | 294 |
| A03370 | A12434 | 311 | A03370 | A12435 | 294 |
| A03370 | A12574 | 337 | A03370 | A12591 | 337 |
| A03370 | A12748 | 337 | A03370 | A12787 | 177 |
| A03370 | A12982 | 351 | A03370 | A14377 | 167 |
| A03370 | A15809 | 215 | A03370 | A15880 | 215 |
| A03370 | A16595 | 246 | A03370 | A17078 | 308 |
| A03370 | A17209 | 311 | A03371 | A03373 | 491 |
| A03371 | A03375 | 328 | A03371 | A03376 | 188 |
| A03371 | A03378 | 378 | A03371 | A03379 | 491 |

|        |        |     |        |        |     |
|--------|--------|-----|--------|--------|-----|
| A03371 | A03383 | 263 | A03371 | A03384 | 243 |
| A03371 | A03387 | 375 | A03371 | A03388 | 240 |
| A03371 | A03499 | 314 | A03371 | A03532 | 491 |
| A03371 | A03711 | 335 | A03371 | A03729 | 463 |
| A03371 | A04010 | 200 | A03371 | A04520 | 195 |
| A03371 | A04833 | 243 | A03371 | A04928 | 208 |
| A03371 | A05340 | 391 | A03371 | A05356 | 484 |
| A03371 | A05890 | 358 | A03371 | A06069 | 402 |
| A03371 | A06321 | 269 | A03371 | A06346 | 321 |
| A03371 | A06642 | 152 | A03371 | A06711 | 375 |
| A03371 | A06729 | 373 | A03371 | A07218 | 491 |
| A03371 | A07361 | 419 | A03371 | A07442 | 302 |
| A03371 | A07471 | 319 | A03371 | A07475 | 168 |
| A03371 | A07542 | 185 | A03371 | A07704 | 188 |
| A03371 | A07705 | 310 | A03371 | A08292 | 353 |
| A03371 | A08468 | 377 | A03371 | A08469 | 377 |
| A03371 | A08594 | 333 | A03371 | A08738 | 170 |
| A03371 | A08785 | 472 | A03371 | A09139 | 335 |
| A03371 | A09416 | 256 | A03371 | A10450 | 328 |
| A03371 | A10651 | 196 | A03371 | A11310 | 249 |
| A03371 | A12351 | 435 | A03371 | A12574 | 377 |
| A03371 | A12845 | 296 | A03373 | A03378 | 391 |
| A03373 | A03379 | 491 | A03373 | A03413 | 215 |
| A03373 | A03414 | 156 | A03373 | A03499 | 329 |
| A03373 | A03545 | 238 | A03373 | A03634 | 229 |
| A03373 | A03773 | 162 | A03373 | A04338 | 368 |
| A03373 | A04369 | 176 | A03373 | A04795 | 196 |
| A03373 | A04830 | 249 | A03373 | A04928 | 228 |
| A03373 | A05264 | 238 | A03373 | A06606 | 193 |
| A03373 | A07218 | 491 | A03373 | A07239 | 198 |
| A03373 | A07361 | 245 | A03373 | A07440 | 279 |
| A03373 | A07913 | 160 | A03373 | A09983 | 401 |
| A03373 | A10018 | 171 | A03373 | A11391 | 447 |
| A03373 | A12351 | 368 | A03373 | A12787 | 267 |
| A03373 | A14379 | 160 | A03373 | A17209 | 368 |
| A03374 | A03379 | 356 | A03374 | A03744 | 290 |
| A03374 | A05739 | 335 | A03374 | A06069 | 324 |
| A03374 | A06627 | 323 | A03374 | A06907 | 201 |
| A03374 | A07442 | 229 | A03374 | A09139 | 406 |
| A03374 | A10563 | 396 | A03374 | A14353 | 383 |
| A03375 | A03379 | 286 | A03375 | A03383 | 395 |
| A03375 | A05286 | 433 | A03375 | A07218 | 322 |
| A03376 | A03379 | 489 | A03376 | A03383 | 407 |
| A03376 | A03384 | 396 | A03376 | A03397 | 307 |
| A03376 | A04337 | 430 | A03376 | A04361 | 201 |
| A03376 | A04532 | 260 | A03376 | A04832 | 372 |

|        |        |     |        |        |     |
|--------|--------|-----|--------|--------|-----|
| A03376 | A04928 | 257 | A03376 | A05094 | 238 |
| A03376 | A05234 | 180 | A03376 | A05356 | 390 |
| A03376 | A05657 | 312 | A03376 | A05739 | 377 |
| A03376 | A05891 | 196 | A03376 | A06069 | 427 |
| A03376 | A06574 | 243 | A03376 | A07218 | 470 |
| A03376 | A08203 | 317 | A03376 | A08247 | 373 |
| A03376 | A08685 | 188 | A03376 | A12117 | 373 |
| A03376 | A12591 | 398 | A03376 | A12748 | 398 |
| A03376 | A13074 | 283 | A03376 | A13121 | 398 |
| A03376 | A14377 | 184 | A03378 | A03379 | 491 |
| A03378 | A03390 | 177 | A03378 | A03397 | 283 |
| A03378 | A03602 | 152 | A03378 | A03733 | 255 |
| A03378 | A03882 | 283 | A03378 | A04006 | 182 |
| A03378 | A04236 | 324 | A03378 | A04333 | 182 |
| A03378 | A04407 | 294 | A03378 | A04433 | 294 |
| A03378 | A04506 | 347 | A03378 | A04548 | 216 |
| A03378 | A04608 | 154 | A03378 | A04795 | 198 |
| A03378 | A04842 | 202 | A03378 | A05234 | 151 |
| A03378 | A05260 | 188 | A03378 | A06148 | 279 |
| A03378 | A06346 | 245 | A03378 | A06711 | 274 |
| A03378 | A07218 | 490 | A03378 | A07361 | 246 |
| A03378 | A09139 | 347 | A03378 | A11313 | 170 |
| A03378 | A11897 | 215 | A03379 | A03383 | 412 |
| A03379 | A03385 | 270 | A03379 | A03387 | 202 |
| A03379 | A03388 | 185 | A03379 | A03391 | 425 |
| A03379 | A03394 | 385 | A03379 | A03396 | 270 |
| A03379 | A03397 | 413 | A03379 | A03532 | 467 |
| A03379 | A03711 | 296 | A03379 | A03729 | 374 |
| A03379 | A03733 | 313 | A03379 | A04051 | 249 |
| A03379 | A04052 | 208 | A03379 | A04329 | 193 |
| A03379 | A04337 | 328 | A03379 | A04361 | 213 |
| A03379 | A04407 | 226 | A03379 | A04409 | 213 |
| A03379 | A04520 | 302 | A03379 | A04672 | 307 |
| A03379 | A04763 | 202 | A03379 | A04840 | 232 |
| A03379 | A04870 | 165 | A03379 | A04928 | 474 |
| A03379 | A05117 | 223 | A03379 | A05264 | 163 |
| A03379 | A05286 | 324 | A03379 | A05294 | 351 |
| A03379 | A05340 | 484 | A03379 | A05356 | 440 |
| A03379 | A05427 | 243 | A03379 | A05491 | 373 |
| A03379 | A05587 | 353 | A03379 | A05603 | 425 |
| A03379 | A05611 | 347 | A03379 | A05657 | 348 |
| A03379 | A05731 | 333 | A03379 | A05739 | 286 |
| A03379 | A05777 | 374 | A03379 | A05890 | 324 |
| A03379 | A05891 | 311 | A03379 | A05975 | 347 |
| A03379 | A05976 | 408 | A03379 | A05977 | 408 |
| A03379 | A05978 | 347 | A03379 | A06069 | 491 |

|        |        |     |        |        |     |
|--------|--------|-----|--------|--------|-----|
| A03379 | A06070 | 424 | A03379 | A06321 | 217 |
| A03379 | A06322 | 324 | A03379 | A06346 | 486 |
| A03379 | A06574 | 488 | A03379 | A06711 | 334 |
| A03379 | A06712 | 296 | A03379 | A06729 | 318 |
| A03379 | A06837 | 446 | A03379 | A06920 | 390 |
| A03379 | A06935 | 307 | A03379 | A06953 | 297 |
| A03379 | A06954 | 263 | A03379 | A07044 | 373 |
| A03379 | A07068 | 324 | A03379 | A07218 | 491 |
| A03379 | A07361 | 432 | A03379 | A07391 | 232 |
| A03379 | A07442 | 219 | A03379 | A07452 | 230 |
| A03379 | A07580 | 296 | A03379 | A07601 | 477 |
| A03379 | A07605 | 235 | A03379 | A07704 | 357 |
| A03379 | A07705 | 405 | A03379 | A07752 | 296 |
| A03379 | A07785 | 171 | A03379 | A07886 | 347 |
| A03379 | A08033 | 347 | A03379 | A08034 | 480 |
| A03379 | A08035 | 347 | A03379 | A08040 | 469 |
| A03379 | A08115 | 401 | A03379 | A08116 | 450 |
| A03379 | A08162 | 270 | A03379 | A08170 | 347 |
| A03379 | A08236 | 258 | A03379 | A08247 | 450 |
| A03379 | A08292 | 388 | A03379 | A08401 | 347 |
| A03379 | A08455 | 417 | A03379 | A08456 | 348 |
| A03379 | A08486 | 347 | A03379 | A08594 | 260 |
| A03379 | A08671 | 412 | A03379 | A08738 | 184 |
| A03379 | A08747 | 286 | A03379 | A09139 | 296 |
| A03379 | A09140 | 417 | A03379 | A09141 | 319 |
| A03379 | A09509 | 154 | A03379 | A09976 | 258 |
| A03379 | A11172 | 286 | A03379 | A11289 | 173 |
| A03379 | A11310 | 328 | A03379 | A11320 | 208 |
| A03379 | A11599 | 324 | A03379 | A12004 | 263 |
| A03379 | A12459 | 390 | A03379 | A12572 | 347 |
| A03379 | A12845 | 247 | A03379 | A14353 | 243 |
| A03379 | A14377 | 369 | A03379 | A14633 | 245 |
| A03379 | A14746 | 277 | A03379 | A15296 | 259 |
| A03379 | A15451 | 187 | A03379 | A15456 | 154 |
| A03379 | A15457 | 212 | A03379 | A15673 | 268 |
| A03379 | A15880 | 232 | A03379 | A16339 | 324 |
| A03379 | A17074 | 417 | A03380 | A03381 | 452 |
| A03380 | A03382 | 452 | A03381 | A03382 | 452 |
| A03383 | A03708 | 417 | A03383 | A05015 | 475 |
| A03383 | A05286 | 412 | A03383 | A05739 | 323 |
| A03383 | A06321 | 361 | A03383 | A07361 | 334 |
| A03383 | A08835 | 185 | A03383 | A09139 | 400 |
| A03383 | A12845 | 377 | A03384 | A03385 | 379 |
| A03384 | A03387 | 340 | A03384 | A03388 | 329 |
| A03384 | A03389 | 405 | A03384 | A03391 | 408 |
| A03384 | A03401 | 414 | A03384 | A04397 | 382 |



|        |        |     |        |        |     |
|--------|--------|-----|--------|--------|-----|
| A03384 | A04833 | 480 | A03384 | A05022 | 382 |
| A03384 | A06069 | 401 | A03384 | A06731 | 240 |
| A03384 | A07218 | 202 | A03384 | A07442 | 191 |
| A03384 | A07471 | 205 | A03384 | A08134 | 457 |
| A03384 | A08309 | 168 | A03384 | A08685 | 368 |
| A03384 | A10095 | 432 | A03384 | A17080 | 405 |
| A03385 | A03387 | 384 | A03385 | A03388 | 375 |
| A03385 | A03390 | 329 | A03385 | A03391 | 363 |
| A03385 | A03401 | 347 | A03385 | A05603 | 290 |
| A03385 | A06907 | 259 | A03385 | A17080 | 429 |
| A03386 | A04351 | 416 | A03386 | A04410 | 369 |
| A03387 | A03388 | 490 | A03387 | A03390 | 388 |
| A03387 | A03391 | 414 | A03387 | A03401 | 369 |
| A03387 | A03532 | 283 | A03387 | A03744 | 268 |
| A03387 | A04193 | 335 | A03387 | A04928 | 314 |
| A03387 | A05716 | 364 | A03387 | A06502 | 310 |
| A03387 | A06574 | 303 | A03387 | A07704 | 299 |
| A03387 | A08172 | 268 | A03387 | A08594 | 229 |
| A03387 | A10095 | 358 | A03387 | A11952 | 335 |
| A03387 | A14511 | 278 | A03388 | A03389 | 404 |
| A03388 | A03390 | 377 | A03388 | A03391 | 407 |
| A03388 | A03401 | 411 | A03388 | A03744 | 252 |
| A03388 | A04410 | 226 | A03388 | A04520 | 184 |
| A03388 | A05716 | 355 | A03388 | A06502 | 296 |
| A03388 | A06653 | 313 | A03388 | A09141 | 326 |
| A03388 | A10095 | 430 | A03388 | A11313 | 252 |
| A03388 | A11952 | 455 | A03388 | A13369 | 213 |
| A03390 | A03391 | 489 | A03390 | A03394 | 329 |
| A03390 | A03398 | 401 | A03390 | A03401 | 491 |
| A03390 | A03403 | 281 | A03390 | A03412 | 162 |
| A03390 | A03499 | 329 | A03390 | A03733 | 254 |
| A03390 | A03762 | 281 | A03390 | A03895 | 302 |
| A03390 | A03922 | 363 | A03390 | A04184 | 279 |
| A03390 | A04395 | 307 | A03390 | A04704 | 218 |
| A03390 | A04795 | 198 | A03390 | A05644 | 334 |
| A03390 | A05891 | 165 | A03390 | A06216 | 247 |
| A03390 | A06752 | 456 | A03390 | A07689 | 347 |
| A03390 | A07785 | 245 | A03390 | A08070 | 151 |
| A03390 | A08476 | 348 | A03390 | A09131 | 191 |
| A03390 | A09141 | 260 | A03390 | A09227 | 385 |
| A03390 | A09748 | 243 | A03390 | A09749 | 324 |
| A03390 | A10087 | 230 | A03390 | A10563 | 165 |
| A03390 | A11101 | 234 | A03390 | A11550 | 210 |
| A03390 | A12475 | 385 | A03390 | A12865 | 385 |
| A03390 | A12882 | 283 | A03390 | A12966 | 340 |
| A03390 | A14467 | 210 | A03390 | A15118 | 385 |

|        |        |     |        |        |     |
|--------|--------|-----|--------|--------|-----|
| A03390 | A15217 | 260 | A03390 | A16839 | 305 |
| A03391 | A03394 | 363 | A03391 | A03401 | 473 |
| A03391 | A03479 | 174 | A03391 | A03534 | 378 |
| A03391 | A03762 | 324 | A03391 | A03821 | 195 |
| A03391 | A04193 | 303 | A03391 | A04280 | 283 |
| A03391 | A04395 | 347 | A03391 | A04397 | 367 |
| A03391 | A04520 | 157 | A03391 | A04562 | 276 |
| A03391 | A04770 | 277 | A03391 | A04928 | 279 |
| A03391 | A05022 | 367 | A03391 | A05596 | 327 |
| A03391 | A05891 | 221 | A03391 | A06574 | 267 |
| A03391 | A06623 | 196 | A03391 | A07158 | 177 |
| A03391 | A07605 | 241 | A03391 | A07704 | 262 |
| A03391 | A08097 | 188 | A03391 | A08555 | 386 |
| A03391 | A09141 | 486 | A03391 | A09509 | 183 |
| A03391 | A11317 | 313 | A03391 | A11446 | 337 |
| A03391 | A11600 | 378 | A03391 | A14604 | 216 |
| A03391 | A15545 | 277 | A03391 | A16911 | 246 |
| A03391 | A17074 | 394 | A03391 | A17080 | 394 |
| A03392 | A03408 | 259 | A03392 | A04759 | 357 |
| A03392 | A08186 | 424 | A03392 | A08306 | 395 |
| A03392 | A09254 | 358 | A03392 | A11326 | 279 |
| A03393 | A08463 | 429 | A03393 | A11292 | 454 |
| A03393 | A11965 | 394 | A03394 | A03397 | 480 |
| A03394 | A03611 | 195 | A03394 | A10214 | 358 |
| A03395 | A05004 | 446 | A03395 | A09131 | 348 |
| A03395 | A09882 | 324 | A03395 | A10986 | 310 |
| A03395 | A15649 | 379 | A03396 | A04051 | 241 |
| A03396 | A04520 | 269 | A03396 | A12955 | 429 |
| A03396 | A13120 | 429 | A03397 | A03408 | 201 |
| A03397 | A04280 | 208 | A03397 | A05581 | 375 |
| A03397 | A05641 | 361 | A03397 | A06595 | 268 |
| A03397 | A07218 | 434 | A03397 | A07843 | 348 |
| A03397 | A09555 | 406 | A03397 | A10214 | 322 |
| A03398 | A03421 | 479 | A03398 | A03451 | 424 |
| A03398 | A03734 | 270 | A03398 | A04492 | 263 |
| A03398 | A05132 | 326 | A03398 | A06623 | 156 |
| A03398 | A06947 | 339 | A03398 | A07884 | 357 |
| A03398 | A07935 | 207 | A03398 | A08070 | 167 |
| A03398 | A08972 | 272 | A03398 | A10608 | 213 |
| A03398 | A12665 | 480 | A03398 | A12757 | 235 |
| A03398 | A12981 | 391 | A03398 | A14642 | 269 |
| A03399 | A03408 | 452 | A03399 | A03634 | 205 |
| A03399 | A03695 | 311 | A03399 | A03732 | 165 |
| A03399 | A03763 | 236 | A03399 | A03775 | 408 |
| A03399 | A03894 | 162 | A03399 | A04208 | 263 |
| A03399 | A04417 | 180 | A03399 | A04499 | 317 |

|        |        |     |        |        |     |
|--------|--------|-----|--------|--------|-----|
| A03399 | A04671 | 202 | A03399 | A06762 | 205 |
| A03399 | A07136 | 288 | A03399 | A07309 | 362 |
| A03399 | A07487 | 159 | A03399 | A08118 | 254 |
| A03399 | A08204 | 374 | A03399 | A08528 | 408 |
| A03399 | A09004 | 348 | A03399 | A09705 | 427 |
| A03399 | A09911 | 257 | A03399 | A11326 | 306 |
| A03399 | A12232 | 272 | A03399 | A12320 | 332 |
| A03399 | A12529 | 332 | A03399 | A12869 | 272 |
| A03399 | A13398 | 439 | A03399 | A13665 | 185 |
| A03399 | A15233 | 229 | A03399 | A15442 | 305 |
| A03399 | A15451 | 235 | A03399 | A15657 | 152 |
| A03399 | A15697 | 174 | A03399 | A16883 | 374 |
| A03399 | A16904 | 205 | A03400 | A03948 | 293 |
| A03400 | A04706 | 355 | A03401 | A03403 | 157 |
| A03401 | A03419 | 417 | A03401 | A03434 | 165 |
| A03401 | A03700 | 281 | A03401 | A03766 | 190 |
| A03401 | A03770 | 188 | A03401 | A03822 | 176 |
| A03401 | A03832 | 202 | A03401 | A03882 | 449 |
| A03401 | A03909 | 157 | A03401 | A03990 | 162 |
| A03401 | A04081 | 401 | A03401 | A04171 | 180 |
| A03401 | A04190 | 247 | A03401 | A04229 | 389 |
| A03401 | A04246 | 193 | A03401 | A04385 | 199 |
| A03401 | A04397 | 353 | A03401 | A04410 | 395 |
| A03401 | A04605 | 210 | A03401 | A04886 | 235 |
| A03401 | A05009 | 187 | A03401 | A05010 | 311 |
| A03401 | A05018 | 262 | A03401 | A05022 | 353 |
| A03401 | A05075 | 227 | A03401 | A05644 | 353 |
| A03401 | A05950 | 311 | A03401 | A05967 | 491 |
| A03401 | A05989 | 235 | A03401 | A06010 | 469 |
| A03401 | A06039 | 199 | A03401 | A06162 | 447 |
| A03401 | A06223 | 490 | A03401 | A06288 | 177 |
| A03401 | A06326 | 311 | A03401 | A06387 | 297 |
| A03401 | A06536 | 281 | A03401 | A06684 | 311 |
| A03401 | A07054 | 305 | A03401 | A07218 | 443 |
| A03401 | A07235 | 311 | A03401 | A07242 | 257 |
| A03401 | A07495 | 439 | A03401 | A07513 | 311 |
| A03401 | A07774 | 311 | A03401 | A07945 | 311 |
| A03401 | A08133 | 199 | A03401 | A08153 | 311 |
| A03401 | A08574 | 199 | A03401 | A08698 | 246 |
| A03401 | A08836 | 213 | A03401 | A08910 | 283 |
| A03401 | A09024 | 170 | A03401 | A09067 | 210 |
| A03401 | A09131 | 168 | A03401 | A09324 | 157 |
| A03401 | A09889 | 247 | A03401 | A10095 | 168 |
| A03401 | A10292 | 311 | A03401 | A10641 | 311 |
| A03401 | A11367 | 227 | A03401 | A11385 | 279 |
| A03401 | A11394 | 469 | A03401 | A11398 | 274 |

|        |        |     |        |        |     |
|--------|--------|-----|--------|--------|-----|
| A03401 | A11468 | 247 | A03401 | A11574 | 460 |
| A03401 | A11611 | 247 | A03401 | A12129 | 441 |
| A03401 | A12140 | 185 | A03401 | A12192 | 262 |
| A03401 | A12234 | 152 | A03401 | A12239 | 281 |
| A03401 | A12326 | 185 | A03401 | A12537 | 311 |
| A03401 | A12538 | 311 | A03401 | A12598 | 247 |
| A03401 | A12718 | 311 | A03401 | A12834 | 332 |
| A03401 | A12869 | 171 | A03401 | A12897 | 434 |
| A03401 | A13135 | 318 | A03401 | A13373 | 177 |
| A03401 | A14266 | 154 | A03401 | A14624 | 247 |
| A03401 | A14643 | 394 | A03401 | A14678 | 193 |
| A03401 | A15518 | 159 | A03401 | A15685 | 369 |
| A03401 | A16300 | 283 | A03401 | A17080 | 281 |
| A03402 | A03403 | 364 | A03402 | A03498 | 207 |
| A03402 | A03690 | 180 | A03402 | A03725 | 462 |
| A03402 | A03744 | 350 | A03402 | A03976 | 217 |
| A03402 | A04162 | 351 | A03402 | A04437 | 411 |
| A03402 | A04633 | 340 | A03402 | A04672 | 329 |
| A03402 | A05184 | 335 | A03402 | A05356 | 491 |
| A03402 | A05377 | 190 | A03402 | A05457 | 302 |
| A03402 | A05736 | 235 | A03402 | A05945 | 491 |
| A03402 | A06033 | 329 | A03402 | A06263 | 173 |
| A03402 | A06331 | 364 | A03402 | A06607 | 491 |
| A03402 | A06696 | 200 | A03402 | A06757 | 364 |
| A03402 | A06762 | 185 | A03402 | A07020 | 379 |
| A03402 | A07292 | 272 | A03402 | A07297 | 296 |
| A03402 | A07376 | 229 | A03402 | A07438 | 488 |
| A03402 | A07452 | 269 | A03402 | A07471 | 411 |
| A03402 | A07472 | 297 | A03402 | A07496 | 391 |
| A03402 | A07509 | 488 | A03402 | A07510 | 474 |
| A03402 | A07541 | 165 | A03402 | A07567 | 474 |
| A03402 | A07623 | 319 | A03402 | A07635 | 319 |
| A03402 | A07643 | 256 | A03402 | A07650 | 384 |
| A03402 | A07652 | 348 | A03402 | A07653 | 419 |
| A03402 | A07654 | 340 | A03402 | A07656 | 235 |
| A03402 | A07660 | 249 | A03402 | A07673 | 488 |
| A03402 | A07740 | 452 | A03402 | A07741 | 296 |
| A03402 | A07754 | 486 | A03402 | A07827 | 344 |
| A03402 | A07913 | 485 | A03402 | A07914 | 416 |
| A03402 | A07916 | 232 | A03402 | A07928 | 352 |
| A03402 | A07950 | 319 | A03402 | A07958 | 182 |
| A03402 | A08165 | 364 | A03402 | A08210 | 241 |
| A03402 | A08217 | 364 | A03402 | A08246 | 302 |
| A03402 | A08288 | 414 | A03402 | A08404 | 491 |
| A03402 | A08785 | 474 | A03402 | A10967 | 286 |
| A03402 | A11428 | 268 | A03402 | A11442 | 344 |

|        |        |     |        |        |     |
|--------|--------|-----|--------|--------|-----|
| A03402 | A11552 | 218 | A03402 | A12600 | 364 |
| A03402 | A14716 | 246 | A03402 | A15913 | 241 |
| A03402 | A16595 | 290 | A03403 | A03976 | 251 |
| A03403 | A04079 | 152 | A03403 | A04229 | 345 |
| A03403 | A04333 | 286 | A03403 | A04598 | 369 |
| A03403 | A04668 | 152 | A03403 | A04727 | 360 |
| A03403 | A05141 | 306 | A03403 | A06073 | 358 |
| A03403 | A08741 | 407 | A03403 | A09131 | 399 |
| A03403 | A10332 | 337 | A03403 | A10337 | 286 |
| A03403 | A14383 | 412 | A03403 | A15847 | 391 |
| A03404 | A03405 | 412 | A03405 | A03411 | 412 |
| A03405 | A03451 | 152 | A03405 | A04020 | 207 |
| A03405 | A13781 | 218 | A03405 | A15894 | 355 |
| A03406 | A03412 | 263 | A03406 | A03413 | 188 |
| A03406 | A03420 | 374 | A03406 | A03591 | 160 |
| A03406 | A03710 | 461 | A03406 | A03753 | 179 |
| A03406 | A03775 | 348 | A03406 | A04208 | 262 |
| A03406 | A04666 | 389 | A03406 | A04737 | 187 |
| A03406 | A04818 | 334 | A03406 | A05202 | 262 |
| A03406 | A05504 | 314 | A03406 | A05575 | 283 |
| A03406 | A05852 | 425 | A03406 | A06078 | 235 |
| A03406 | A06328 | 393 | A03406 | A06488 | 163 |
| A03406 | A06580 | 330 | A03406 | A07274 | 466 |
| A03406 | A07732 | 491 | A03406 | A08732 | 173 |
| A03406 | A09131 | 162 | A03406 | A09286 | 416 |
| A03406 | A09431 | 279 | A03406 | A09448 | 319 |
| A03406 | A09541 | 303 | A03406 | A10299 | 470 |
| A03406 | A10493 | 408 | A03406 | A11420 | 160 |
| A03406 | A11576 | 356 | A03406 | A11892 | 340 |
| A03406 | A13665 | 183 | A03406 | A14237 | 210 |
| A03406 | A16798 | 180 | A03406 | A17085 | 188 |
| A03407 | A03411 | 380 | A03407 | A03947 | 208 |
| A03407 | A05329 | 201 | A03407 | A06177 | 167 |
| A03407 | A06434 | 154 | A03407 | A06488 | 207 |
| A03407 | A07358 | 232 | A03407 | A07364 | 170 |
| A03407 | A07545 | 390 | A03407 | A08094 | 152 |
| A03407 | A09319 | 899 | A03407 | A12047 | 358 |
| A03407 | A12874 | 157 | A03407 | A13123 | 273 |
| A03407 | A14464 | 213 | A03407 | A14474 | 307 |
| A03407 | A14621 | 151 | A03407 | A15894 | 259 |
| A03407 | A16406 | 185 | A03407 | A17004 | 190 |
| A03408 | A03412 | 364 | A03408 | A03424 | 185 |
| A03408 | A03444 | 165 | A03408 | A03899 | 191 |
| A03408 | A03935 | 236 | A03408 | A03944 | 188 |
| A03408 | A03960 | 210 | A03408 | A04065 | 232 |
| A03408 | A04114 | 152 | A03408 | A04216 | 193 |

|        |        |     |        |        |     |
|--------|--------|-----|--------|--------|-----|
| A03408 | A04260 | 180 | A03408 | A04422 | 254 |
| A03408 | A04428 | 352 | A03408 | A05316 | 314 |
| A03408 | A05344 | 208 | A03408 | A05414 | 899 |
| A03408 | A05861 | 219 | A03408 | A06033 | 297 |
| A03408 | A06073 | 200 | A03408 | A06203 | 267 |
| A03408 | A06463 | 171 | A03408 | A06505 | 205 |
| A03408 | A06541 | 428 | A03408 | A06755 | 208 |
| A03408 | A06867 | 152 | A03408 | A06912 | 165 |
| A03408 | A07025 | 286 | A03408 | A07163 | 185 |
| A03408 | A07680 | 297 | A03408 | A07697 | 484 |
| A03408 | A08127 | 232 | A03408 | A08399 | 246 |
| A03408 | A09570 | 213 | A03408 | A09701 | 457 |
| A03408 | A09831 | 246 | A03408 | A09847 | 191 |
| A03408 | A09997 | 151 | A03408 | A09999 | 185 |
| A03408 | A10112 | 219 | A03408 | A10748 | 159 |
| A03408 | A10985 | 286 | A03408 | A11200 | 241 |
| A03408 | A11288 | 451 | A03408 | A11290 | 152 |
| A03408 | A11704 | 210 | A03408 | A11766 | 286 |
| A03408 | A12241 | 168 | A03408 | A12885 | 157 |
| A03408 | A13367 | 224 | A03408 | A13706 | 491 |
| A03408 | A13892 | 480 | A03408 | A13930 | 171 |
| A03408 | A13957 | 286 | A03408 | A14006 | 412 |
| A03408 | A14077 | 238 | A03408 | A14210 | 377 |
| A03408 | A14371 | 307 | A03408 | A14379 | 185 |
| A03408 | A14399 | 179 | A03408 | A14511 | 177 |
| A03408 | A14549 | 241 | A03408 | A14718 | 228 |
| A03408 | A15815 | 246 | A03408 | A15833 | 236 |
| A03408 | A15998 | 340 | A03408 | A16051 | 352 |
| A03408 | A16114 | 159 | A03408 | A16218 | 469 |
| A03408 | A16300 | 180 | A03408 | A16808 | 191 |
| A03408 | A16816 | 236 | A03408 | A16867 | 424 |
| A03408 | A17107 | 176 | A03409 | A06606 | 156 |
| A03410 | A07205 | 291 | A03410 | A07244 | 188 |
| A03410 | A11326 | 207 | A03411 | A15894 | 372 |
| A03412 | A03413 | 200 | A03412 | A03449 | 286 |
| A03412 | A03574 | 246 | A03412 | A03579 | 347 |
| A03412 | A03583 | 286 | A03412 | A03820 | 198 |
| A03412 | A04114 | 224 | A03412 | A04333 | 167 |
| A03412 | A04458 | 347 | A03412 | A05124 | 177 |
| A03412 | A06376 | 361 | A03412 | A07145 | 156 |
| A03412 | A08289 | 182 | A03412 | A08576 | 262 |
| A03412 | A09331 | 249 | A03412 | A09558 | 286 |
| A03412 | A10214 | 212 | A03412 | A10438 | 286 |
| A03412 | A10453 | 159 | A03412 | A10712 | 168 |
| A03412 | A10719 | 286 | A03412 | A10990 | 379 |
| A03412 | A10992 | 379 | A03412 | A11825 | 252 |

|        |        |     |        |        |     |
|--------|--------|-----|--------|--------|-----|
| A03412 | A13484 | 176 | A03412 | A13665 | 195 |
| A03412 | A13671 | 379 | A03412 | A14588 | 180 |
| A03412 | A14648 | 160 | A03412 | A14946 | 286 |
| A03412 | A15050 | 379 | A03412 | A15217 | 246 |
| A03412 | A15877 | 333 | A03412 | A16877 | 221 |
| A03413 | A03735 | 283 | A03413 | A03767 | 277 |
| A03413 | A03773 | 334 | A03413 | A03774 | 345 |
| A03413 | A04202 | 162 | A03413 | A04305 | 232 |
| A03413 | A04608 | 193 | A03413 | A04681 | 188 |
| A03413 | A04944 | 180 | A03413 | A04976 | 327 |
| A03413 | A05278 | 157 | A03413 | A05832 | 201 |
| A03413 | A06452 | 385 | A03413 | A07888 | 401 |
| A03413 | A08837 | 196 | A03413 | A09245 | 484 |
| A03413 | A10438 | 327 | A03413 | A10712 | 221 |
| A03413 | A11683 | 163 | A03413 | A12873 | 193 |
| A03413 | A13525 | 408 | A03413 | A14381 | 473 |
| A03413 | A14394 | 165 | A03413 | A14554 | 337 |
| A03413 | A15764 | 241 | A03413 | A15765 | 243 |
| A03413 | A16279 | 369 | A03414 | A03932 | 418 |
| A03414 | A03963 | 288 | A03414 | A03976 | 247 |
| A03414 | A04048 | 469 | A03414 | A04088 | 238 |
| A03414 | A04517 | 235 | A03414 | A04698 | 285 |
| A03414 | A04850 | 160 | A03414 | A05113 | 170 |
| A03414 | A06747 | 179 | A03414 | A06797 | 193 |
| A03414 | A07163 | 221 | A03414 | A07218 | 291 |
| A03414 | A07517 | 358 | A03414 | A11470 | 170 |
| A03414 | A11897 | 193 | A03414 | A14119 | 263 |
| A03414 | A15312 | 234 | A03414 | A15425 | 227 |
| A03414 | A15540 | 188 | A03414 | A15690 | 163 |
| A03414 | A15894 | 212 | A03414 | A16224 | 152 |
| A03415 | A03434 | 184 | A03415 | A03634 | 187 |
| A03415 | A03680 | 389 | A03415 | A03749 | 255 |
| A03415 | A03797 | 272 | A03415 | A03850 | 344 |
| A03415 | A03864 | 279 | A03415 | A03976 | 321 |
| A03415 | A04049 | 241 | A03415 | A04080 | 491 |
| A03415 | A04220 | 285 | A03415 | A04283 | 258 |
| A03415 | A04429 | 241 | A03415 | A04441 | 268 |
| A03415 | A04444 | 160 | A03415 | A04548 | 469 |
| A03415 | A04737 | 170 | A03415 | A04795 | 154 |
| A03415 | A04808 | 279 | A03415 | A04815 | 255 |
| A03415 | A04870 | 196 | A03415 | A04873 | 434 |
| A03415 | A04908 | 205 | A03415 | A04941 | 201 |
| A03415 | A04944 | 321 | A03415 | A04962 | 279 |
| A03415 | A04965 | 329 | A03415 | A05105 | 364 |
| A03415 | A05122 | 235 | A03415 | A05185 | 408 |
| A03415 | A05504 | 302 | A03415 | A05902 | 255 |

|        |        |     |        |        |     |
|--------|--------|-----|--------|--------|-----|
| A03415 | A05944 | 257 | A03415 | A06586 | 184 |
| A03415 | A06615 | 469 | A03415 | A06647 | 367 |
| A03415 | A06756 | 379 | A03415 | A06998 | 319 |
| A03415 | A07149 | 159 | A03415 | A07165 | 185 |
| A03415 | A07266 | 195 | A03415 | A07339 | 348 |
| A03415 | A07486 | 293 | A03415 | A07647 | 172 |
| A03415 | A08593 | 364 | A03415 | A09093 | 291 |
| A03415 | A09235 | 263 | A03415 | A09431 | 265 |
| A03415 | A10221 | 279 | A03415 | A11983 | 399 |
| A03415 | A12357 | 167 | A03415 | A12413 | 344 |
| A03415 | A12897 | 491 | A03415 | A13241 | 321 |
| A03415 | A14735 | 232 | A03415 | A15314 | 324 |
| A03415 | A15322 | 255 | A03415 | A15376 | 154 |
| A03416 | A03417 | 303 | A03416 | A03520 | 224 |
| A03416 | A03651 | 221 | A03416 | A03922 | 204 |
| A03416 | A04334 | 229 | A03416 | A04962 | 240 |
| A03416 | A09147 | 386 | A03416 | A10605 | 357 |
| A03416 | A13817 | 418 | A03416 | A15674 | 353 |
| A03416 | A15697 | 314 | A03417 | A03418 | 435 |
| A03417 | A03426 | 307 | A03417 | A03599 | 324 |
| A03417 | A03612 | 218 | A03417 | A03634 | 236 |
| A03417 | A03813 | 180 | A03417 | A03923 | 249 |
| A03417 | A04105 | 157 | A03417 | A04125 | 294 |
| A03417 | A04185 | 329 | A03417 | A04267 | 176 |
| A03417 | A04333 | 188 | A03417 | A04337 | 443 |
| A03417 | A04439 | 333 | A03417 | A04529 | 272 |
| A03417 | A04960 | 165 | A03417 | A04965 | 290 |
| A03417 | A04968 | 451 | A03417 | A05073 | 279 |
| A03417 | A05094 | 215 | A03417 | A05174 | 266 |
| A03417 | A05235 | 313 | A03417 | A05299 | 256 |
| A03417 | A05691 | 241 | A03417 | A05812 | 191 |
| A03417 | A05891 | 489 | A03417 | A06078 | 267 |
| A03417 | A06321 | 291 | A03417 | A06414 | 266 |
| A03417 | A06415 | 193 | A03417 | A06601 | 180 |
| A03417 | A06617 | 462 | A03417 | A06731 | 159 |
| A03417 | A06769 | 159 | A03417 | A06926 | 286 |
| A03417 | A07339 | 171 | A03417 | A07361 | 251 |
| A03417 | A07391 | 303 | A03417 | A07605 | 401 |
| A03417 | A08596 | 241 | A03417 | A09147 | 413 |
| A03417 | A09878 | 241 | A03417 | A10605 | 267 |
| A03417 | A10742 | 299 | A03417 | A11101 | 455 |
| A03417 | A11216 | 296 | A03417 | A11313 | 457 |
| A03417 | A11317 | 273 | A03417 | A11449 | 296 |
| A03417 | A11493 | 152 | A03417 | A12464 | 352 |
| A03417 | A12633 | 313 | A03417 | A12789 | 339 |
| A03417 | A14372 | 163 | A03417 | A14378 | 212 |



|        |        |     |        |        |     |
|--------|--------|-----|--------|--------|-----|
| A03417 | A14554 | 174 | A03417 | A15282 | 469 |
| A03417 | A15394 | 190 | A03417 | A15395 | 168 |
| A03417 | A15674 | 260 | A03417 | A15765 | 213 |
| A03417 | A15911 | 218 | A03417 | A16320 | 174 |
| A03417 | A16719 | 414 | A03418 | A03426 | 413 |
| A03418 | A05651 | 445 | A03418 | A05861 | 412 |
| A03418 | A05871 | 394 | A03418 | A09147 | 462 |
| A03419 | A03450 | 240 | A03419 | A03451 | 232 |
| A03419 | A03627 | 240 | A03419 | A03664 | 157 |
| A03419 | A03773 | 310 | A03419 | A03822 | 163 |
| A03419 | A04017 | 254 | A03419 | A04113 | 347 |
| A03419 | A04117 | 196 | A03419 | A04142 | 249 |
| A03419 | A04143 | 259 | A03419 | A04272 | 328 |
| A03419 | A04280 | 360 | A03419 | A04806 | 296 |
| A03419 | A04869 | 286 | A03419 | A04962 | 456 |
| A03419 | A05032 | 243 | A03419 | A05256 | 174 |
| A03419 | A05314 | 296 | A03419 | A06010 | 313 |
| A03419 | A06455 | 286 | A03419 | A07163 | 390 |
| A03419 | A07251 | 236 | A03419 | A07555 | 324 |
| A03419 | A08557 | 456 | A03419 | A08571 | 185 |
| A03419 | A08677 | 185 | A03419 | A08705 | 296 |
| A03419 | A08847 | 412 | A03419 | A08876 | 167 |
| A03419 | A09090 | 271 | A03419 | A09370 | 218 |
| A03419 | A09503 | 271 | A03419 | A10403 | 307 |
| A03419 | A10833 | 162 | A03419 | A11027 | 208 |
| A03419 | A11592 | 324 | A03419 | A11697 | 213 |
| A03419 | A11797 | 271 | A03419 | A11894 | 296 |
| A03419 | A11959 | 236 | A03419 | A12009 | 170 |
| A03419 | A13627 | 324 | A03419 | A14012 | 188 |
| A03419 | A15326 | 245 | A03419 | A15338 | 321 |
| A03419 | A15354 | 245 | A03419 | A15363 | 234 |
| A03419 | A15505 | 318 | A03419 | A15675 | 254 |
| A03419 | A15726 | 433 | A03419 | A16517 | 249 |
| A03420 | A03424 | 207 | A03420 | A03451 | 187 |
| A03420 | A03841 | 167 | A03420 | A03921 | 188 |
| A03420 | A04053 | 299 | A03420 | A04208 | 227 |
| A03420 | A04485 | 221 | A03420 | A04517 | 191 |
| A03420 | A04534 | 273 | A03420 | A04568 | 174 |
| A03420 | A04586 | 302 | A03420 | A04623 | 152 |
| A03420 | A04901 | 200 | A03420 | A05065 | 255 |
| A03420 | A05243 | 173 | A03420 | A05388 | 257 |
| A03420 | A05504 | 286 | A03420 | A05742 | 273 |
| A03420 | A05779 | 208 | A03420 | A06147 | 279 |
| A03420 | A06330 | 302 | A03420 | A06596 | 201 |
| A03420 | A06623 | 440 | A03420 | A06648 | 216 |
| A03420 | A07026 | 193 | A03420 | A07123 | 157 |

|        |        |     |        |        |     |
|--------|--------|-----|--------|--------|-----|
| A03420 | A07127 | 180 | A03420 | A07178 | 170 |
| A03420 | A07210 | 167 | A03420 | A07346 | 247 |
| A03420 | A07721 | 427 | A03420 | A07844 | 299 |
| A03420 | A09059 | 262 | A03420 | A09341 | 154 |
| A03420 | A09386 | 224 | A03420 | A09431 | 245 |
| A03420 | A09541 | 273 | A03420 | A09779 | 252 |
| A03420 | A09814 | 232 | A03420 | A09904 | 294 |
| A03420 | A10034 | 154 | A03420 | A10035 | 377 |
| A03420 | A10289 | 249 | A03420 | A10311 | 294 |
| A03420 | A10421 | 224 | A03420 | A10424 | 238 |
| A03420 | A12413 | 329 | A03420 | A13272 | 294 |
| A03420 | A13506 | 314 | A03420 | A14108 | 314 |
| A03420 | A14280 | 257 | A03420 | A14642 | 451 |
| A03420 | A14687 | 286 | A03420 | A15148 | 329 |
| A03420 | A15889 | 174 | A03420 | A16103 | 200 |
| A03421 | A03423 | 446 | A03421 | A03424 | 467 |
| A03421 | A03451 | 473 | A03421 | A03540 | 267 |
| A03421 | A03570 | 328 | A03421 | A03734 | 296 |
| A03421 | A03740 | 266 | A03421 | A03776 | 162 |
| A03421 | A03885 | 168 | A03421 | A03922 | 219 |
| A03421 | A04002 | 151 | A03421 | A04080 | 273 |
| A03421 | A04088 | 215 | A03421 | A04133 | 212 |
| A03421 | A04280 | 255 | A03421 | A04334 | 159 |
| A03421 | A04363 | 308 | A03421 | A04556 | 223 |
| A03421 | A04560 | 260 | A03421 | A04737 | 168 |
| A03421 | A04795 | 152 | A03421 | A04901 | 218 |
| A03421 | A05174 | 216 | A03421 | A06029 | 156 |
| A03421 | A06404 | 243 | A03421 | A06607 | 299 |
| A03421 | A06623 | 317 | A03421 | A06813 | 228 |
| A03421 | A07127 | 200 | A03421 | A07178 | 190 |
| A03421 | A07303 | 363 | A03421 | A07935 | 278 |
| A03421 | A08273 | 221 | A03421 | A08911 | 165 |
| A03421 | A09073 | 291 | A03421 | A09133 | 308 |
| A03421 | A09722 | 414 | A03421 | A09836 | 200 |
| A03421 | A10618 | 305 | A03421 | A10867 | 363 |
| A03421 | A11262 | 241 | A03421 | A11411 | 226 |
| A03421 | A11427 | 353 | A03421 | A11724 | 212 |
| A03421 | A12059 | 329 | A03421 | A12361 | 255 |
| A03421 | A12363 | 260 | A03421 | A12956 | 329 |
| A03421 | A13992 | 163 | A03421 | A14138 | 179 |
| A03421 | A15194 | 363 | A03421 | A16329 | 343 |
| A03421 | A16755 | 329 | A03422 | A03423 | 243 |
| A03422 | A03496 | 384 | A03422 | A03575 | 463 |
| A03422 | A04209 | 218 | A03422 | A04232 | 286 |
| A03422 | A04355 | 218 | A03422 | A04440 | 162 |
| A03422 | A04540 | 195 | A03422 | A04740 | 199 |

|        |        |     |        |        |     |
|--------|--------|-----|--------|--------|-----|
| A03422 | A04805 | 160 | A03422 | A04814 | 260 |
| A03422 | A04971 | 163 | A03422 | A05008 | 456 |
| A03422 | A05009 | 485 | A03422 | A05219 | 227 |
| A03422 | A05548 | 182 | A03422 | A05590 | 260 |
| A03422 | A05853 | 396 | A03422 | A05854 | 202 |
| A03422 | A05870 | 281 | A03422 | A05892 | 310 |
| A03422 | A06093 | 218 | A03422 | A06379 | 447 |
| A03422 | A06402 | 199 | A03422 | A06572 | 255 |
| A03422 | A06606 | 210 | A03422 | A06607 | 273 |
| A03422 | A06615 | 200 | A03422 | A07163 | 247 |
| A03422 | A07354 | 369 | A03422 | A08126 | 418 |
| A03422 | A08289 | 224 | A03422 | A08503 | 163 |
| A03422 | A08521 | 205 | A03422 | A08571 | 332 |
| A03422 | A08844 | 267 | A03422 | A08858 | 486 |
| A03422 | A08868 | 159 | A03422 | A08889 | 257 |
| A03422 | A09033 | 177 | A03422 | A09348 | 357 |
| A03422 | A09370 | 199 | A03422 | A09417 | 204 |
| A03422 | A09442 | 207 | A03422 | A09443 | 216 |
| A03422 | A09491 | 296 | A03422 | A09523 | 310 |
| A03422 | A10130 | 293 | A03422 | A10175 | 712 |
| A03422 | A10293 | 260 | A03422 | A10437 | 218 |
| A03422 | A10439 | 357 | A03422 | A10457 | 201 |
| A03422 | A10518 | 216 | A03422 | A10783 | 213 |
| A03422 | A10836 | 335 | A03422 | A10955 | 335 |
| A03422 | A11019 | 270 | A03422 | A11560 | 154 |
| A03422 | A12401 | 218 | A03422 | A12582 | 335 |
| A03422 | A13107 | 324 | A03422 | A13658 | 335 |
| A03422 | A13744 | 335 | A03422 | A13924 | 406 |
| A03422 | A14227 | 238 | A03422 | A14285 | 294 |
| A03422 | A14299 | 202 | A03422 | A14485 | 196 |
| A03422 | A14509 | 218 | A03422 | A14577 | 382 |
| A03422 | A14585 | 296 | A03422 | A14640 | 218 |
| A03422 | A14713 | 226 | A03422 | A14731 | 281 |
| A03422 | A14969 | 171 | A03422 | A15649 | 395 |
| A03422 | A15704 | 219 | A03422 | A15726 | 945 |
| A03422 | A16418 | 472 | A03423 | A03424 | 422 |
| A03423 | A03541 | 200 | A03423 | A03649 | 234 |
| A03423 | A03795 | 226 | A03423 | A03844 | 268 |
| A03423 | A04560 | 263 | A03423 | A04702 | 322 |
| A03423 | A04705 | 271 | A03423 | A04737 | 174 |
| A03423 | A04791 | 185 | A03423 | A04822 | 221 |
| A03423 | A04883 | 491 | A03423 | A04891 | 346 |
| A03423 | A04927 | 479 | A03423 | A04973 | 299 |
| A03423 | A05045 | 480 | A03423 | A05050 | 258 |
| A03423 | A05051 | 447 | A03423 | A05297 | 441 |
| A03423 | A05330 | 199 | A03423 | A05467 | 218 |

|        |        |     |        |        |     |
|--------|--------|-----|--------|--------|-----|
| A03423 | A05516 | 185 | A03423 | A05665 | 217 |
| A03423 | A05795 | 151 | A03423 | A06137 | 196 |
| A03423 | A06252 | 230 | A03423 | A06405 | 490 |
| A03423 | A06439 | 486 | A03423 | A06607 | 358 |
| A03423 | A06889 | 443 | A03423 | A06994 | 249 |
| A03423 | A06997 | 167 | A03423 | A07088 | 488 |
| A03423 | A07127 | 205 | A03423 | A07230 | 332 |
| A03423 | A07354 | 293 | A03423 | A07503 | 252 |
| A03423 | A07727 | 346 | A03423 | A07757 | 314 |
| A03423 | A08836 | 238 | A03423 | A09464 | 193 |
| A03423 | A10635 | 481 | A03423 | A10773 | 457 |
| A03423 | A12507 | 291 | A03423 | A16074 | 157 |
| A03423 | A17006 | 230 | A03424 | A03435 | 243 |
| A03424 | A04000 | 339 | A03424 | A04080 | 202 |
| A03424 | A04622 | 219 | A03424 | A04779 | 168 |
| A03424 | A11195 | 374 | A03424 | A11911 | 213 |
| A03425 | A06607 | 159 | A03426 | A03545 | 247 |
| A03426 | A03904 | 341 | A03426 | A04009 | 369 |
| A03426 | A04051 | 205 | A03426 | A04612 | 352 |
| A03426 | A04939 | 266 | A03426 | A04999 | 383 |
| A03426 | A05153 | 241 | A03426 | A07469 | 353 |
| A03426 | A09147 | 388 | A03427 | A04059 | 313 |
| A03427 | A04267 | 218 | A03427 | A04444 | 252 |
| A03427 | A04906 | 302 | A03427 | A05868 | 288 |
| A03427 | A06581 | 272 | A03427 | A06797 | 379 |
| A03427 | A06949 | 490 | A03427 | A07158 | 171 |
| A03427 | A07486 | 491 | A03427 | A09842 | 180 |
| A03427 | A10118 | 405 | A03427 | A10382 | 391 |
| A03427 | A10418 | 395 | A03427 | A10473 | 382 |
| A03427 | A10506 | 179 | A03427 | A11683 | 174 |
| A03427 | A14364 | 227 | A03427 | A14656 | 307 |
| A03427 | A14683 | 251 | A03428 | A03452 | 632 |
| A03428 | A03618 | 208 | A03428 | A03626 | 272 |
| A03428 | A03889 | 420 | A03428 | A04292 | 472 |
| A03428 | A04894 | 458 | A03428 | A05200 | 480 |
| A03428 | A05862 | 247 | A03428 | A06011 | 553 |
| A03428 | A06890 | 235 | A03428 | A07820 | 595 |
| A03428 | A07894 | 352 | A03428 | A08178 | 362 |
| A03428 | A08400 | 330 | A03428 | A08765 | 168 |
| A03428 | A08772 | 235 | A03428 | A08777 | 496 |
| A03428 | A08778 | 357 | A03428 | A09056 | 490 |
| A03428 | A09060 | 489 | A03428 | A09326 | 235 |
| A03428 | A13222 | 204 | A03428 | A13293 | 267 |
| A03428 | A13845 | 478 | A03428 | A14247 | 491 |
| A03428 | A14838 | 500 | A03428 | A15650 | 337 |
| A03428 | A16067 | 229 | A03428 | A16617 | 600 |

|        |        |     |        |        |     |
|--------|--------|-----|--------|--------|-----|
| A03429 | A03508 | 411 | A03429 | A04995 | 361 |
| A03429 | A06063 | 417 | A03429 | A17078 | 258 |
| A03430 | A04834 | 375 | A03430 | A04995 | 361 |
| A03430 | A05007 | 339 | A03430 | A05472 | 340 |
| A03430 | A05515 | 382 | A03430 | A05751 | 364 |
| A03430 | A06098 | 413 | A03430 | A07122 | 384 |
| A03430 | A07424 | 396 | A03431 | A03806 | 329 |
| A03431 | A04784 | 477 | A03431 | A04834 | 414 |
| A03431 | A04850 | 483 | A03431 | A05937 | 344 |
| A03431 | A06700 | 252 | A03431 | A07164 | 230 |
| A03431 | A09434 | 265 | A03431 | A16027 | 234 |
| A03432 | A03730 | 241 | A03432 | A04842 | 240 |
| A03432 | A04888 | 286 | A03432 | A05069 | 401 |
| A03432 | A05112 | 201 | A03432 | A05349 | 273 |
| A03432 | A06092 | 190 | A03432 | A06195 | 177 |
| A03432 | A06286 | 221 | A03432 | A06769 | 191 |
| A03432 | A06797 | 251 | A03432 | A06825 | 245 |
| A03432 | A07153 | 154 | A03432 | A07191 | 183 |
| A03432 | A08863 | 165 | A03432 | A08910 | 334 |
| A03432 | A12970 | 353 | A03432 | A15912 | 321 |
| A03432 | A17102 | 268 | A03434 | A03435 | 188 |
| A03434 | A03436 | 491 | A03434 | A03466 | 311 |
| A03434 | A03569 | 184 | A03434 | A03723 | 160 |
| A03434 | A03893 | 718 | A03434 | A04033 | 441 |
| A03434 | A04079 | 154 | A03434 | A04082 | 193 |
| A03434 | A04117 | 413 | A03434 | A04155 | 163 |
| A03434 | A04358 | 163 | A03434 | A04548 | 329 |
| A03434 | A04603 | 157 | A03434 | A04773 | 386 |
| A03434 | A04880 | 190 | A03434 | A05418 | 344 |
| A03434 | A05659 | 223 | A03434 | A05756 | 156 |
| A03434 | A05846 | 208 | A03434 | A06188 | 262 |
| A03434 | A06480 | 170 | A03434 | A06494 | 196 |
| A03434 | A06693 | 152 | A03434 | A06819 | 436 |
| A03434 | A06907 | 469 | A03434 | A07085 | 243 |
| A03434 | A07246 | 278 | A03434 | A07339 | 374 |
| A03434 | A07644 | 210 | A03434 | A08194 | 398 |
| A03434 | A08402 | 740 | A03434 | A08838 | 380 |
| A03434 | A09549 | 196 | A03434 | A10079 | 243 |
| A03434 | A11408 | 185 | A03434 | A11957 | 246 |
| A03434 | A11983 | 313 | A03434 | A12111 | 193 |
| A03434 | A12324 | 223 | A03434 | A12365 | 200 |
| A03434 | A12722 | 238 | A03434 | A12897 | 716 |
| A03434 | A12990 | 302 | A03434 | A13376 | 246 |
| A03434 | A13844 | 152 | A03434 | A14127 | 485 |
| A03434 | A14148 | 305 | A03434 | A14193 | 491 |
| A03434 | A14196 | 283 | A03434 | A14253 | 327 |

|        |        |     |        |        |     |
|--------|--------|-----|--------|--------|-----|
| A03434 | A14299 | 364 | A03434 | A14337 | 291 |
| A03434 | A14474 | 402 | A03434 | A14577 | 196 |
| A03434 | A14635 | 434 | A03434 | A15292 | 224 |
| A03434 | A15313 | 176 | A03434 | A15315 | 484 |
| A03434 | A15318 | 247 | A03434 | A15323 | 278 |
| A03434 | A15347 | 335 | A03434 | A15527 | 285 |
| A03434 | A15809 | 154 | A03434 | A15878 | 274 |
| A03434 | A16521 | 223 | A03434 | A17198 | 216 |
| A03435 | A03436 | 427 | A03435 | A03625 | 402 |
| A03435 | A04033 | 423 | A03435 | A04071 | 324 |
| A03435 | A04449 | 288 | A03435 | A04752 | 443 |
| A03435 | A05037 | 187 | A03435 | A05391 | 462 |
| A03435 | A05416 | 216 | A03435 | A06202 | 294 |
| A03435 | A06597 | 321 | A03435 | A06783 | 484 |
| A03435 | A07706 | 260 | A03435 | A08118 | 165 |
| A03435 | A08467 | 151 | A03435 | A08571 | 384 |
| A03435 | A10114 | 489 | A03435 | A12543 | 173 |
| A03435 | A12660 | 307 | A03435 | A13340 | 358 |
| A03435 | A13617 | 188 | A03435 | A13928 | 321 |
| A03435 | A14127 | 484 | A03435 | A14193 | 162 |
| A03435 | A14199 | 201 | A03435 | A14221 | 176 |
| A03435 | A14609 | 385 | A03435 | A14636 | 240 |
| A03435 | A14661 | 160 | A03435 | A14690 | 278 |
| A03435 | A14785 | 160 | A03435 | A14931 | 180 |
| A03435 | A15315 | 172 | A03435 | A15345 | 251 |
| A03435 | A15626 | 199 | A03435 | A15775 | 152 |
| A03435 | A15819 | 154 | A03435 | A15913 | 340 |
| A03435 | A16678 | 157 | A03435 | A17150 | 174 |
| A03436 | A03451 | 393 | A03436 | A03512 | 329 |
| A03436 | A03581 | 179 | A03436 | A03719 | 473 |
| A03436 | A03803 | 235 | A03436 | A03961 | 195 |
| A03436 | A03990 | 408 | A03436 | A04079 | 252 |
| A03436 | A04117 | 430 | A03436 | A04162 | 475 |
| A03436 | A04308 | 195 | A03436 | A04314 | 154 |
| A03436 | A04315 | 195 | A03436 | A04650 | 288 |
| A03436 | A05288 | 446 | A03436 | A05418 | 490 |
| A03436 | A05508 | 185 | A03436 | A06273 | 362 |
| A03436 | A06295 | 213 | A03436 | A06299 | 168 |
| A03436 | A06610 | 346 | A03436 | A07174 | 180 |
| A03436 | A07311 | 202 | A03436 | A07339 | 256 |
| A03436 | A07717 | 299 | A03436 | A08838 | 419 |
| A03436 | A09076 | 210 | A03436 | A09181 | 156 |
| A03436 | A09235 | 210 | A03436 | A09363 | 241 |
| A03436 | A09375 | 221 | A03436 | A09635 | 171 |
| A03436 | A09976 | 249 | A03436 | A09997 | 286 |
| A03436 | A10072 | 473 | A03436 | A10239 | 288 |

|        |        |     |        |        |     |
|--------|--------|-----|--------|--------|-----|
| A03436 | A10332 | 475 | A03436 | A10801 | 358 |
| A03436 | A10804 | 156 | A03436 | A10824 | 199 |
| A03436 | A11233 | 183 | A03436 | A11369 | 382 |
| A03436 | A11957 | 338 | A03436 | A11983 | 262 |
| A03436 | A12225 | 260 | A03436 | A13829 | 201 |
| A03436 | A13975 | 393 | A03436 | A14198 | 480 |
| A03436 | A14245 | 241 | A03436 | A14299 | 398 |
| A03436 | A14443 | 405 | A03436 | A14444 | 177 |
| A03436 | A14577 | 219 | A03436 | A14644 | 257 |
| A03436 | A15293 | 236 | A03436 | A15506 | 363 |
| A03436 | A15649 | 152 | A03436 | A15868 | 296 |
| A03436 | A15884 | 187 | A03437 | A03567 | 288 |
| A03437 | A03601 | 185 | A03437 | A04844 | 286 |
| A03437 | A06279 | 195 | A03437 | A06435 | 326 |
| A03437 | A06812 | 358 | A03437 | A07201 | 267 |
| A03437 | A07307 | 296 | A03437 | A10417 | 367 |
| A03437 | A11981 | 269 | A03437 | A12661 | 486 |
| A03437 | A13126 | 355 | A03437 | A16118 | 333 |
| A03437 | A17193 | 329 | A03438 | A03494 | 486 |
| A03438 | A03502 | 488 | A03438 | A03609 | 447 |
| A03438 | A03652 | 206 | A03438 | A03859 | 210 |
| A03438 | A03902 | 229 | A03438 | A03935 | 177 |
| A03438 | A03981 | 550 | A03438 | A04155 | 188 |
| A03438 | A04176 | 241 | A03438 | A04567 | 191 |
| A03438 | A04622 | 160 | A03438 | A04808 | 183 |
| A03438 | A05191 | 252 | A03438 | A05220 | 218 |
| A03438 | A05411 | 217 | A03438 | A05477 | 294 |
| A03438 | A05510 | 232 | A03438 | A05566 | 430 |
| A03438 | A05712 | 162 | A03438 | A05850 | 297 |
| A03438 | A06004 | 226 | A03438 | A06017 | 262 |
| A03438 | A06027 | 201 | A03438 | A06251 | 201 |
| A03438 | A06356 | 253 | A03438 | A06436 | 154 |
| A03438 | A06807 | 177 | A03438 | A06814 | 328 |
| A03438 | A06815 | 201 | A03438 | A06825 | 491 |
| A03438 | A06843 | 160 | A03438 | A06901 | 369 |
| A03438 | A06958 | 334 | A03438 | A07203 | 475 |
| A03438 | A07243 | 165 | A03438 | A07244 | 315 |
| A03438 | A07307 | 327 | A03438 | A07399 | 219 |
| A03438 | A07456 | 210 | A03438 | A07481 | 205 |
| A03438 | A07506 | 87  | A03438 | A07524 | 474 |
| A03438 | A07537 | 232 | A03438 | A07744 | 475 |
| A03438 | A07881 | 480 | A03438 | A07924 | 170 |
| A03438 | A08072 | 297 | A03438 | A08131 | 168 |
| A03438 | A08211 | 170 | A03438 | A08228 | 308 |
| A03438 | A08491 | 307 | A03438 | A08587 | 246 |
| A03438 | A08653 | 338 | A03438 | A08682 | 483 |

|        |        |     |        |        |     |
|--------|--------|-----|--------|--------|-----|
| A03438 | A08763 | 332 | A03438 | A08768 | 491 |
| A03438 | A08933 | 173 | A03438 | A09044 | 480 |
| A03438 | A09248 | 102 | A03438 | A09257 | 195 |
| A03438 | A09589 | 262 | A03438 | A09618 | 297 |
| A03438 | A09656 | 290 | A03438 | A09665 | 327 |
| A03438 | A09686 | 322 | A03438 | A09697 | 286 |
| A03438 | A09960 | 232 | A03438 | A10250 | 303 |
| A03438 | A10791 | 489 | A03438 | A10814 | 477 |
| A03438 | A11264 | 151 | A03438 | A11331 | 446 |
| A03438 | A11618 | 297 | A03438 | A11981 | 285 |
| A03438 | A12589 | 246 | A03438 | A13052 | 550 |
| A03438 | A13298 | 260 | A03438 | A13626 | 157 |
| A03438 | A13989 | 549 | A03438 | A14073 | 447 |
| A03438 | A14083 | 475 | A03438 | A14216 | 598 |
| A03438 | A14699 | 441 | A03438 | A14778 | 338 |
| A03438 | A14843 | 463 | A03438 | A14959 | 297 |
| A03438 | A15624 | 489 | A03438 | A15684 | 483 |
| A03438 | A15932 | 255 | A03438 | A16088 | 215 |
| A03438 | A16105 | 201 | A03438 | A16149 | 323 |
| A03439 | A03453 | 329 | A03439 | A03472 | 235 |
| A03439 | A03560 | 441 | A03439 | A05025 | 439 |
| A03439 | A06030 | 348 | A03439 | A08900 | 469 |
| A03439 | A09636 | 352 | A03439 | A12903 | 406 |
| A03440 | A03447 | 249 | A03440 | A03449 | 299 |
| A03440 | A03608 | 174 | A03440 | A03650 | 340 |
| A03440 | A03815 | 177 | A03440 | A03817 | 307 |
| A03440 | A03921 | 252 | A03440 | A03931 | 428 |
| A03440 | A04337 | 185 | A03440 | A04630 | 485 |
| A03440 | A06991 | 383 | A03440 | A07101 | 201 |
| A03440 | A07361 | 245 | A03440 | A07442 | 224 |
| A03440 | A07471 | 343 | A03440 | A07515 | 307 |
| A03440 | A08608 | 184 | A03440 | A09321 | 329 |
| A03440 | A11307 | 213 | A03440 | A11433 | 446 |
| A03440 | A14077 | 238 | A03440 | A14381 | 293 |
| A03440 | A15282 | 188 | A03440 | A15295 | 243 |
| A03440 | A15917 | 335 | A03441 | A03443 | 374 |
| A03441 | A03487 | 265 | A03441 | A04779 | 288 |
| A03441 | A04791 | 226 | A03441 | A04834 | 429 |
| A03441 | A05007 | 183 | A03441 | A05013 | 328 |
| A03441 | A05516 | 451 | A03441 | A05759 | 232 |
| A03441 | A05770 | 301 | A03441 | A05774 | 283 |
| A03441 | A06063 | 160 | A03441 | A06358 | 313 |
| A03441 | A06359 | 163 | A03441 | A06473 | 190 |
| A03441 | A06629 | 171 | A03441 | A06633 | 241 |
| A03441 | A06700 | 170 | A03441 | A06756 | 333 |
| A03441 | A06978 | 274 | A03441 | A07080 | 185 |



|        |        |     |        |        |     |
|--------|--------|-----|--------|--------|-----|
| A03441 | A07109 | 168 | A03441 | A07122 | 380 |
| A03441 | A07256 | 294 | A03441 | A07267 | 216 |
| A03441 | A07413 | 301 | A03441 | A10142 | 385 |
| A03441 | A11157 | 380 | A03441 | A12055 | 319 |
| A03441 | A14827 | 180 | A03441 | A15637 | 447 |
| A03441 | A15905 | 173 | A03441 | A16028 | 255 |
| A03442 | A05007 | 352 | A03442 | A05549 | 430 |
| A03442 | A05610 | 417 | A03442 | A05755 | 441 |
| A03442 | A06385 | 294 | A03442 | A07080 | 353 |
| A03443 | A03501 | 302 | A03443 | A03508 | 371 |
| A03443 | A04779 | 374 | A03443 | A04937 | 335 |
| A03443 | A04995 | 400 | A03443 | A05007 | 260 |
| A03443 | A05262 | 329 | A03443 | A06668 | 357 |
| A03443 | A06819 | 191 | A03443 | A07109 | 246 |
| A03443 | A07122 | 170 | A03443 | A07304 | 345 |
| A03443 | A07530 | 326 | A03443 | A07688 | 274 |
| A03443 | A07811 | 152 | A03443 | A07933 | 171 |
| A03443 | A08366 | 302 | A03443 | A12927 | 173 |
| A03443 | A14332 | 339 | A03443 | A14827 | 151 |
| A03443 | A15498 | 176 | A03443 | A16028 | 319 |
| A03443 | A16033 | 313 | A03444 | A04050 | 899 |
| A03444 | A04260 | 232 | A03444 | A05965 | 385 |
| A03444 | A06621 | 268 | A03444 | A06623 | 216 |
| A03444 | A08903 | 269 | A03444 | A09124 | 167 |
| A03444 | A10810 | 432 | A03444 | A14025 | 994 |
| A03444 | A14444 | 989 | A03444 | A14485 | 316 |
| A03444 | A14589 | 232 | A03444 | A16082 | 455 |
| A03445 | A05090 | 926 | A03445 | A06340 | 198 |
| A03445 | A06534 | 202 | A03445 | A06814 | 316 |
| A03445 | A07311 | 899 | A03445 | A07398 | 491 |
| A03445 | A07422 | 915 | A03445 | A08369 | 208 |
| A03445 | A08521 | 176 | A03445 | A09469 | 235 |
| A03445 | A13989 | 335 | A03445 | A14005 | 163 |
| A03445 | A15229 | 441 | A03445 | A15268 | 491 |
| A03445 | A15381 | 491 | A03445 | A16107 | 486 |
| A03445 | A16778 | 446 | A03446 | A03476 | 279 |
| A03446 | A03560 | 405 | A03446 | A03572 | 213 |
| A03446 | A03646 | 259 | A03446 | A03665 | 223 |
| A03446 | A03738 | 474 | A03446 | A03740 | 480 |
| A03446 | A03752 | 290 | A03446 | A03783 | 404 |
| A03446 | A03785 | 473 | A03446 | A03863 | 404 |
| A03446 | A03888 | 236 | A03446 | A04021 | 183 |
| A03446 | A04681 | 385 | A03446 | A04957 | 159 |
| A03446 | A05025 | 238 | A03446 | A05417 | 172 |
| A03446 | A05712 | 427 | A03446 | A06178 | 283 |
| A03446 | A06436 | 195 | A03446 | A06466 | 469 |

|        |        |     |        |        |     |
|--------|--------|-----|--------|--------|-----|
| A03446 | A06543 | 205 | A03446 | A06907 | 388 |
| A03446 | A07247 | 489 | A03446 | A07311 | 477 |
| A03446 | A07604 | 477 | A03446 | A08137 | 480 |
| A03446 | A08139 | 328 | A03446 | A08357 | 390 |
| A03446 | A08359 | 252 | A03446 | A08390 | 160 |
| A03446 | A08546 | 515 | A03446 | A08571 | 475 |
| A03446 | A08896 | 435 | A03446 | A08991 | 404 |
| A03446 | A09252 | 283 | A03446 | A09778 | 170 |
| A03446 | A10006 | 380 | A03446 | A10490 | 313 |
| A03446 | A10532 | 659 | A03446 | A10538 | 279 |
| A03446 | A10624 | 396 | A03446 | A11240 | 372 |
| A03446 | A11286 | 212 | A03446 | A11291 | 257 |
| A03446 | A11409 | 491 | A03446 | A11924 | 235 |
| A03446 | A12011 | 160 | A03446 | A12328 | 322 |
| A03446 | A13149 | 204 | A03446 | A13609 | 490 |
| A03446 | A13989 | 491 | A03446 | A14073 | 470 |
| A03446 | A14220 | 480 | A03446 | A14257 | 362 |
| A03446 | A14467 | 328 | A03446 | A15031 | 328 |
| A03446 | A15212 | 160 | A03446 | A15469 | 180 |
| A03446 | A15491 | 283 | A03446 | A15660 | 196 |
| A03446 | A15698 | 372 | A03446 | A16705 | 235 |
| A03446 | A16723 | 170 | A03446 | A17107 | 157 |
| A03446 | A17131 | 435 | A03447 | A03735 | 409 |
| A03447 | A03746 | 412 | A03447 | A03900 | 414 |
| A03447 | A03976 | 216 | A03447 | A03991 | 368 |
| A03447 | A04267 | 243 | A03447 | A04727 | 338 |
| A03447 | A04815 | 345 | A03447 | A05603 | 199 |
| A03447 | A05891 | 238 | A03447 | A06293 | 324 |
| A03447 | A07145 | 243 | A03447 | A07529 | 347 |
| A03447 | A07764 | 423 | A03447 | A07765 | 391 |
| A03447 | A08608 | 256 | A03447 | A09552 | 419 |
| A03447 | A10943 | 438 | A03447 | A11433 | 350 |
| A03447 | A11897 | 283 | A03447 | A13485 | 380 |
| A03447 | A13886 | 479 | A03447 | A14362 | 285 |
| A03447 | A14368 | 307 | A03447 | A14372 | 452 |
| A03447 | A14381 | 452 | A03447 | A14554 | 364 |
| A03447 | A15475 | 299 | A03447 | A15630 | 341 |
| A03447 | A15795 | 249 | A03447 | A15976 | 254 |
| A03449 | A06376 | 418 | A03449 | A08576 | 366 |
| A03450 | A05597 | 347 | A03450 | A07011 | 251 |
| A03450 | A07135 | 193 | A03450 | A07208 | 271 |
| A03450 | A10798 | 230 | A03450 | A12569 | 396 |
| A03450 | A13865 | 420 | A03451 | A03471 | 199 |
| A03451 | A03520 | 269 | A03451 | A03609 | 170 |
| A03451 | A03611 | 404 | A03451 | A03716 | 159 |
| A03451 | A03719 | 199 | A03451 | A03734 | 380 |

|        |        |     |        |        |     |
|--------|--------|-----|--------|--------|-----|
| A03451 | A03778 | 481 | A03451 | A03819 | 174 |
| A03451 | A03904 | 157 | A03451 | A03906 | 174 |
| A03451 | A03941 | 379 | A03451 | A03990 | 190 |
| A03451 | A03993 | 379 | A03451 | A04015 | 191 |
| A03451 | A04020 | 393 | A03451 | A04033 | 329 |
| A03451 | A04072 | 212 | A03451 | A04101 | 483 |
| A03451 | A04133 | 440 | A03451 | A04168 | 174 |
| A03451 | A04175 | 420 | A03451 | A04282 | 393 |
| A03451 | A04292 | 440 | A03451 | A04334 | 335 |
| A03451 | A04342 | 251 | A03451 | A04358 | 152 |
| A03451 | A04417 | 434 | A03451 | A04449 | 480 |
| A03451 | A04474 | 418 | A03451 | A04507 | 234 |
| A03451 | A04520 | 226 | A03451 | A04534 | 291 |
| A03451 | A04643 | 185 | A03451 | A04720 | 213 |
| A03451 | A04777 | 174 | A03451 | A04787 | 465 |
| A03451 | A04841 | 213 | A03451 | A04878 | 296 |
| A03451 | A04992 | 167 | A03451 | A05065 | 491 |
| A03451 | A05288 | 486 | A03451 | A05289 | 327 |
| A03451 | A05300 | 285 | A03451 | A05418 | 475 |
| A03451 | A05432 | 171 | A03451 | A05574 | 434 |
| A03451 | A05779 | 446 | A03451 | A05823 | 269 |
| A03451 | A05838 | 171 | A03451 | A05854 | 256 |
| A03451 | A06077 | 152 | A03451 | A06241 | 273 |
| A03451 | A06277 | 491 | A03451 | A06327 | 269 |
| A03451 | A06385 | 452 | A03451 | A06566 | 360 |
| A03451 | A06576 | 234 | A03451 | A06578 | 154 |
| A03451 | A06608 | 489 | A03451 | A06609 | 204 |
| A03451 | A06621 | 196 | A03451 | A06623 | 491 |
| A03451 | A06648 | 396 | A03451 | A06653 | 480 |
| A03451 | A06672 | 269 | A03451 | A06728 | 174 |
| A03451 | A06752 | 263 | A03451 | A06947 | 167 |
| A03451 | A06985 | 234 | A03451 | A07127 | 274 |
| A03451 | A07132 | 457 | A03451 | A07165 | 252 |
| A03451 | A07206 | 157 | A03451 | A07209 | 279 |
| A03451 | A07339 | 481 | A03451 | A07398 | 470 |
| A03451 | A07476 | 269 | A03451 | A07803 | 224 |
| A03451 | A07984 | 234 | A03451 | A08734 | 196 |
| A03451 | A08859 | 532 | A03451 | A08878 | 490 |
| A03451 | A09124 | 263 | A03451 | A09133 | 396 |
| A03451 | A09179 | 167 | A03451 | A09247 | 160 |
| A03451 | A09384 | 269 | A03451 | A09428 | 306 |
| A03451 | A09464 | 157 | A03451 | A09474 | 234 |
| A03451 | A09498 | 269 | A03451 | A09647 | 486 |
| A03451 | A09803 | 491 | A03451 | A09894 | 167 |
| A03451 | A09900 | 378 | A03451 | A09950 | 269 |
| A03451 | A09976 | 152 | A03451 | A10018 | 154 |

|        |        |     |        |        |     |
|--------|--------|-----|--------|--------|-----|
| A03451 | A10193 | 269 | A03451 | A10219 | 360 |
| A03451 | A10471 | 185 | A03451 | A10712 | 176 |
| A03451 | A10735 | 347 | A03451 | A10864 | 269 |
| A03451 | A10942 | 167 | A03451 | A11043 | 269 |
| A03451 | A11300 | 384 | A03451 | A11426 | 454 |
| A03451 | A11483 | 152 | A03451 | A11897 | 313 |
| A03451 | A11983 | 491 | A03451 | A12051 | 185 |
| A03451 | A12340 | 318 | A03451 | A12371 | 196 |
| A03451 | A12965 | 213 | A03451 | A13157 | 329 |
| A03451 | A13201 | 269 | A03451 | A13209 | 269 |
| A03451 | A13562 | 185 | A03451 | A13717 | 159 |
| A03451 | A13795 | 167 | A03451 | A13864 | 245 |
| A03451 | A13997 | 481 | A03451 | A14055 | 352 |
| A03451 | A14198 | 152 | A03451 | A14330 | 198 |
| A03451 | A14375 | 157 | A03451 | A14605 | 247 |
| A03451 | A14636 | 174 | A03451 | A14642 | 480 |
| A03451 | A14643 | 483 | A03451 | A14648 | 202 |
| A03451 | A14970 | 234 | A03451 | A15187 | 329 |
| A03451 | A15241 | 490 | A03451 | A15282 | 489 |
| A03451 | A15505 | 152 | A03451 | A15868 | 279 |
| A03451 | A15875 | 484 | A03451 | A15929 | 234 |
| A03451 | A16081 | 232 | A03451 | A16099 | 263 |
| A03451 | A16336 | 152 | A03451 | A16723 | 477 |
| A03451 | A16730 | 269 | A03451 | A16765 | 185 |
| A03451 | A16773 | 360 | A03452 | A03489 | 63  |
| A03452 | A03618 | 688 | A03452 | A03626 | 488 |
| A03452 | A03889 | 626 | A03452 | A03891 | 324 |
| A03452 | A03892 | 456 | A03452 | A04292 | 491 |
| A03452 | A04406 | 316 | A03452 | A04686 | 414 |
| A03452 | A04894 | 324 | A03452 | A05200 | 302 |
| A03452 | A05862 | 458 | A03452 | A06011 | 623 |
| A03452 | A06659 | 195 | A03452 | A06890 | 235 |
| A03452 | A06941 | 371 | A03452 | A07127 | 160 |
| A03452 | A07521 | 455 | A03452 | A07736 | 425 |
| A03452 | A07820 | 631 | A03452 | A07974 | 151 |
| A03452 | A08400 | 343 | A03452 | A08461 | 288 |
| A03452 | A08765 | 328 | A03452 | A08772 | 302 |
| A03452 | A08777 | 235 | A03452 | A08821 | 63  |
| A03452 | A08952 | 461 | A03452 | A09056 | 302 |
| A03452 | A09326 | 581 | A03452 | A09333 | 475 |
| A03452 | A10655 | 486 | A03452 | A10663 | 451 |
| A03452 | A10799 | 322 | A03452 | A10897 | 198 |
| A03452 | A11570 | 686 | A03452 | A12138 | 184 |
| A03452 | A13222 | 363 | A03452 | A13387 | 204 |
| A03452 | A13830 | 182 | A03452 | A13845 | 547 |
| A03452 | A13855 | 483 | A03452 | A13891 | 299 |

|        |        |     |        |        |     |
|--------|--------|-----|--------|--------|-----|
| A03452 | A13894 | 455 | A03452 | A13902 | 157 |
| A03452 | A14006 | 395 | A03452 | A14168 | 232 |
| A03452 | A14170 | 182 | A03452 | A14175 | 229 |
| A03452 | A14182 | 425 | A03452 | A14247 | 491 |
| A03452 | A14709 | 208 | A03452 | A14783 | 475 |
| A03452 | A14838 | 618 | A03452 | A15647 | 671 |
| A03452 | A15650 | 273 | A03452 | A16617 | 616 |
| A03452 | A16940 | 260 | A03453 | A03456 | 424 |
| A03453 | A03560 | 473 | A03453 | A03567 | 221 |
| A03453 | A03671 | 182 | A03453 | A03705 | 174 |
| A03453 | A03937 | 183 | A03453 | A04642 | 174 |
| A03453 | A05025 | 183 | A03453 | A05086 | 279 |
| A03453 | A05375 | 180 | A03453 | A06030 | 441 |
| A03453 | A06048 | 369 | A03453 | A07160 | 396 |
| A03453 | A07481 | 198 | A03453 | A07746 | 351 |
| A03453 | A07773 | 251 | A03453 | A08900 | 363 |
| A03453 | A08932 | 251 | A03453 | A09024 | 286 |
| A03453 | A09586 | 374 | A03453 | A09587 | 491 |
| A03453 | A09639 | 369 | A03453 | A09640 | 314 |
| A03453 | A09717 | 247 | A03453 | A11024 | 258 |
| A03453 | A11239 | 369 | A03453 | A11420 | 151 |
| A03453 | A12227 | 182 | A03453 | A12903 | 221 |
| A03453 | A13139 | 301 | A03453 | A13659 | 324 |
| A03453 | A14074 | 247 | A03453 | A14351 | 176 |
| A03453 | A15684 | 305 | A03454 | A03472 | 152 |
| A03454 | A03676 | 235 | A03454 | A03677 | 156 |
| A03454 | A03855 | 229 | A03454 | A04898 | 241 |
| A03454 | A04931 | 317 | A03454 | A04932 | 156 |
| A03454 | A05318 | 154 | A03454 | A05982 | 188 |
| A03454 | A06721 | 324 | A03454 | A07046 | 533 |
| A03454 | A07360 | 579 | A03454 | A07457 | 301 |
| A03454 | A07487 | 159 | A03454 | A07744 | 340 |
| A03454 | A07822 | 229 | A03454 | A07881 | 580 |
| A03454 | A08098 | 230 | A03454 | A08106 | 241 |
| A03454 | A08228 | 549 | A03454 | A08548 | 522 |
| A03454 | A08674 | 156 | A03454 | A09328 | 390 |
| A03454 | A11290 | 156 | A03454 | A11918 | 302 |
| A03454 | A12204 | 278 | A03454 | A13298 | 436 |
| A03454 | A15624 | 382 | A03454 | A15649 | 156 |
| A03454 | A15651 | 229 | A03454 | A15652 | 516 |
| A03454 | A15661 | 530 | A03454 | A15662 | 373 |
| A03454 | A15684 | 581 | A03454 | A15720 | 156 |
| A03454 | A15721 | 156 | A03454 | A15746 | 540 |
| A03454 | A15843 | 229 | A03454 | A15917 | 229 |
| A03454 | A15918 | 229 | A03454 | A15923 | 229 |
| A03454 | A15937 | 238 | A03454 | A16088 | 229 |

|        |        |     |        |        |     |
|--------|--------|-----|--------|--------|-----|
| A03454 | A16145 | 156 | A03454 | A16307 | 156 |
| A03455 | A04330 | 385 | A03455 | A14281 | 151 |
| A03456 | A03671 | 307 | A03456 | A03759 | 263 |
| A03456 | A05375 | 306 | A03456 | A06025 | 408 |
| A03456 | A06048 | 419 | A03456 | A07160 | 469 |
| A03456 | A07851 | 219 | A03456 | A09124 | 191 |
| A03456 | A14479 | 247 | A03456 | A15379 | 384 |
| A03457 | A03822 | 344 | A03458 | A03749 | 252 |
| A03458 | A03750 | 373 | A03458 | A03942 | 238 |
| A03458 | A04180 | 340 | A03458 | A04218 | 424 |
| A03458 | A04380 | 362 | A03458 | A04490 | 288 |
| A03458 | A05349 | 187 | A03458 | A09062 | 433 |
| A03458 | A09127 | 208 | A03458 | A09654 | 273 |
| A03458 | A10336 | 218 | A03458 | A14007 | 208 |
| A03458 | A14072 | 217 | A03459 | A03968 | 350 |
| A03459 | A07339 | 230 | A03460 | A09485 | 443 |
| A03461 | A03601 | 177 | A03461 | A03754 | 215 |
| A03461 | A03888 | 191 | A03461 | A06340 | 251 |
| A03461 | A06351 | 333 | A03461 | A06814 | 310 |
| A03461 | A07323 | 219 | A03461 | A07726 | 429 |
| A03461 | A08011 | 174 | A03461 | A08052 | 235 |
| A03461 | A08273 | 303 | A03461 | A09620 | 262 |
| A03461 | A11390 | 241 | A03461 | A11945 | 243 |
| A03461 | A13989 | 490 | A03461 | A14006 | 296 |
| A03461 | A14029 | 479 | A03461 | A14216 | 174 |
| A03461 | A15499 | 299 | A03463 | A03909 | 351 |
| A03463 | A04361 | 263 | A03463 | A04903 | 286 |
| A03463 | A06461 | 419 | A03463 | A06462 | 419 |
| A03463 | A06532 | 408 | A03463 | A07384 | 319 |
| A03465 | A03778 | 396 | A03465 | A04033 | 152 |
| A03465 | A04297 | 255 | A03465 | A04380 | 246 |
| A03465 | A04449 | 404 | A03465 | A05181 | 266 |
| A03465 | A08341 | 176 | A03465 | A08621 | 473 |
| A03465 | A08692 | 157 | A03465 | A09937 | 168 |
| A03465 | A10623 | 98  | A03465 | A10811 | 266 |
| A03465 | A11345 | 162 | A03465 | A13111 | 490 |
| A03465 | A14653 | 491 | A03465 | A16304 | 343 |
| A03466 | A03887 | 283 | A03466 | A14122 | 285 |
| A03466 | A14511 | 218 | A03466 | A15292 | 152 |
| A03466 | A15311 | 343 | A03466 | A15349 | 212 |
| A03466 | A15440 | 363 | A03466 | A15484 | 302 |
| A03467 | A03609 | 182 | A03467 | A03671 | 263 |
| A03467 | A14073 | 160 | A03467 | A15891 | 305 |
| A03467 | A15917 | 156 | A03467 | A15918 | 299 |
| A03468 | A05262 | 324 | A03468 | A05332 | 463 |
| A03468 | A05370 | 288 | A03468 | A06101 | 408 |

|        |        |     |        |        |     |
|--------|--------|-----|--------|--------|-----|
| A03468 | A06134 | 299 | A03468 | A06819 | 466 |
| A03468 | A07222 | 435 | A03468 | A07931 | 477 |
| A03468 | A09276 | 337 | A03468 | A14525 | 465 |
| A03468 | A16219 | 290 | A03469 | A04101 | 373 |
| A03470 | A03800 | 283 | A03470 | A06914 | 534 |
| A03470 | A09219 | 341 | A03470 | A09577 | 157 |
| A03470 | A11614 | 441 | A03470 | A13980 | 213 |
| A03470 | A14034 | 355 | A03470 | A14371 | 909 |
| A03470 | A14395 | 177 | A03470 | A14511 | 249 |
| A03470 | A15480 | 445 | A03471 | A04349 | 199 |
| A03471 | A06100 | 259 | A03471 | A06601 | 195 |
| A03471 | A06623 | 160 | A03471 | A06739 | 221 |
| A03471 | A07815 | 162 | A03471 | A08685 | 177 |
| A03471 | A11426 | 341 | A03471 | A11914 | 428 |
| A03471 | A11953 | 241 | A03471 | A13162 | 199 |
| A03471 | A15401 | 191 | A03471 | A16274 | 385 |
| A03472 | A04447 | 165 | A03472 | A04495 | 191 |
| A03472 | A05025 | 488 | A03472 | A05871 | 256 |
| A03472 | A06138 | 271 | A03472 | A06435 | 286 |
| A03472 | A06543 | 488 | A03472 | A08815 | 465 |
| A03472 | A08901 | 232 | A03472 | A09636 | 317 |
| A03472 | A10346 | 313 | A03473 | A03543 | 334 |
| A03473 | A03549 | 485 | A03473 | A03550 | 396 |
| A03473 | A03554 | 217 | A03473 | A03562 | 446 |
| A03473 | A03613 | 321 | A03473 | A03621 | 351 |
| A03473 | A03819 | 210 | A03473 | A04275 | 168 |
| A03473 | A04286 | 372 | A03473 | A04848 | 485 |
| A03473 | A05216 | 217 | A03473 | A05317 | 462 |
| A03473 | A05348 | 489 | A03473 | A05619 | 307 |
| A03473 | A05827 | 489 | A03473 | A06607 | 252 |
| A03473 | A06635 | 174 | A03473 | A06650 | 489 |
| A03473 | A07069 | 241 | A03473 | A07200 | 196 |
| A03473 | A07242 | 351 | A03473 | A08070 | 177 |
| A03473 | A08321 | 213 | A03473 | A08602 | 321 |
| A03473 | A08604 | 462 | A03473 | A08699 | 462 |
| A03473 | A09180 | 277 | A03473 | A14410 | 268 |
| A03473 | A15254 | 254 | A03473 | A15501 | 274 |
| A03474 | A03475 | 457 | A03474 | A03478 | 490 |
| A03474 | A03521 | 357 | A03474 | A03522 | 294 |
| A03474 | A03554 | 468 | A03474 | A03615 | 489 |
| A03474 | A04051 | 151 | A03474 | A04709 | 335 |
| A03474 | A06606 | 288 | A03474 | A07761 | 385 |
| A03474 | A08321 | 165 | A03474 | A10431 | 294 |
| A03474 | A11156 | 180 | A03474 | A13703 | 299 |
| A03475 | A03478 | 317 | A03475 | A03521 | 379 |
| A03475 | A03522 | 455 | A03475 | A03523 | 491 |

|        |        |     |        |        |     |
|--------|--------|-----|--------|--------|-----|
| A03475 | A03524 | 486 | A03475 | A03544 | 319 |
| A03475 | A03552 | 291 | A03475 | A03553 | 483 |
| A03475 | A03554 | 491 | A03475 | A03596 | 327 |
| A03475 | A03615 | 474 | A03475 | A03664 | 251 |
| A03475 | A04608 | 174 | A03475 | A04709 | 246 |
| A03475 | A05309 | 202 | A03475 | A05797 | 469 |
| A03475 | A07129 | 232 | A03475 | A07452 | 204 |
| A03475 | A07542 | 224 | A03475 | A07543 | 230 |
| A03475 | A08321 | 208 | A03475 | A08603 | 286 |
| A03475 | A09151 | 441 | A03475 | A09152 | 441 |
| A03475 | A09174 | 491 | A03475 | A09435 | 267 |
| A03475 | A09461 | 272 | A03475 | A09932 | 491 |
| A03475 | A10151 | 477 | A03475 | A10213 | 294 |
| A03475 | A11753 | 457 | A03475 | A14502 | 238 |
| A03476 | A04013 | 212 | A03476 | A04307 | 251 |
| A03476 | A04681 | 226 | A03476 | A06543 | 202 |
| A03476 | A07247 | 405 | A03476 | A09033 | 327 |
| A03476 | A10532 | 246 | A03476 | A10574 | 308 |
| A03476 | A11302 | 168 | A03476 | A16118 | 221 |
| A03477 | A03501 | 400 | A03477 | A03560 | 243 |
| A03477 | A03573 | 188 | A03477 | A03586 | 491 |
| A03477 | A03643 | 167 | A03477 | A03783 | 160 |
| A03477 | A03861 | 167 | A03477 | A03863 | 488 |
| A03477 | A04299 | 246 | A03477 | A04307 | 162 |
| A03477 | A04337 | 360 | A03477 | A04364 | 235 |
| A03477 | A04411 | 367 | A03477 | A04494 | 170 |
| A03477 | A04497 | 424 | A03477 | A04519 | 196 |
| A03477 | A04721 | 335 | A03477 | A04756 | 343 |
| A03477 | A04784 | 210 | A03477 | A04850 | 352 |
| A03477 | A04879 | 491 | A03477 | A04880 | 483 |
| A03477 | A04930 | 236 | A03477 | A04937 | 467 |
| A03477 | A05006 | 491 | A03477 | A05020 | 791 |
| A03477 | A05023 | 205 | A03477 | A05102 | 374 |
| A03477 | A05302 | 170 | A03477 | A05310 | 491 |
| A03477 | A05333 | 221 | A03477 | A05442 | 271 |
| A03477 | A05516 | 229 | A03477 | A05518 | 271 |
| A03477 | A05519 | 271 | A03477 | A05594 | 377 |
| A03477 | A05600 | 374 | A03477 | A05603 | 182 |
| A03477 | A05606 | 184 | A03477 | A05660 | 221 |
| A03477 | A05673 | 165 | A03477 | A05699 | 340 |
| A03477 | A05703 | 257 | A03477 | A05712 | 302 |
| A03477 | A05721 | 401 | A03477 | A05722 | 369 |
| A03477 | A05772 | 180 | A03477 | A05774 | 170 |
| A03477 | A05797 | 241 | A03477 | A05979 | 355 |
| A03477 | A06057 | 362 | A03477 | A06141 | 462 |
| A03477 | A06212 | 483 | A03477 | A06302 | 319 |



|        |        |     |        |        |     |
|--------|--------|-----|--------|--------|-----|
| A03477 | A06358 | 273 | A03477 | A06359 | 791 |
| A03477 | A06360 | 408 | A03477 | A06428 | 486 |
| A03477 | A06473 | 362 | A03477 | A06474 | 205 |
| A03477 | A06597 | 288 | A03477 | A06610 | 179 |
| A03477 | A06633 | 457 | A03477 | A06634 | 481 |
| A03477 | A07014 | 279 | A03477 | A07080 | 454 |
| A03477 | A07122 | 436 | A03477 | A07135 | 491 |
| A03477 | A07189 | 221 | A03477 | A07221 | 165 |
| A03477 | A07238 | 224 | A03477 | A07267 | 217 |
| A03477 | A07288 | 472 | A03477 | A07413 | 152 |
| A03477 | A07688 | 193 | A03477 | A07746 | 491 |
| A03477 | A08199 | 368 | A03477 | A08236 | 216 |
| A03477 | A08741 | 204 | A03477 | A08751 | 318 |
| A03477 | A08770 | 184 | A03477 | A08817 | 489 |
| A03477 | A08930 | 188 | A03477 | A09024 | 439 |
| A03477 | A09043 | 184 | A03477 | A09088 | 319 |
| A03477 | A09149 | 172 | A03477 | A09380 | 281 |
| A03477 | A09476 | 191 | A03477 | A09564 | 319 |
| A03477 | A09913 | 180 | A03477 | A10006 | 278 |
| A03477 | A10094 | 236 | A03477 | A10147 | 319 |
| A03477 | A10278 | 468 | A03477 | A10441 | 157 |
| A03477 | A10488 | 369 | A03477 | A10540 | 216 |
| A03477 | A10629 | 417 | A03477 | A10759 | 216 |
| A03477 | A10761 | 236 | A03477 | A10846 | 258 |
| A03477 | A10882 | 216 | A03477 | A11024 | 177 |
| A03477 | A11304 | 486 | A03477 | A11378 | 335 |
| A03477 | A11409 | 235 | A03477 | A11432 | 356 |
| A03477 | A11467 | 221 | A03477 | A11483 | 447 |
| A03477 | A11657 | 302 | A03477 | A11683 | 465 |
| A03477 | A11768 | 319 | A03477 | A12290 | 257 |
| A03477 | A13154 | 246 | A03477 | A13330 | 401 |
| A03477 | A13358 | 319 | A03477 | A13382 | 377 |
| A03477 | A13416 | 236 | A03477 | A13426 | 363 |
| A03477 | A13478 | 319 | A03477 | A13603 | 319 |
| A03477 | A13609 | 313 | A03477 | A14196 | 263 |
| A03477 | A14401 | 157 | A03477 | A14469 | 191 |
| A03477 | A14725 | 229 | A03477 | A14827 | 165 |
| A03477 | A14843 | 196 | A03477 | A15091 | 319 |
| A03477 | A15230 | 190 | A03477 | A15269 | 246 |
| A03477 | A15613 | 162 | A03477 | A15840 | 411 |
| A03477 | A15874 | 297 | A03477 | A15905 | 343 |
| A03477 | A16026 | 454 | A03477 | A16027 | 438 |
| A03477 | A16135 | 174 | A03477 | A16216 | 329 |
| A03477 | A16325 | 205 | A03477 | A16328 | 160 |
| A03477 | A16416 | 319 | A03477 | A16515 | 271 |
| A03477 | A16650 | 265 | A03477 | A16741 | 338 |

|        |        |     |        |        |     |
|--------|--------|-----|--------|--------|-----|
| A03478 | A03521 | 361 | A03478 | A03522 | 301 |
| A03478 | A03554 | 176 | A03478 | A03615 | 475 |
| A03478 | A06606 | 473 | A03478 | A10213 | 265 |
| A03478 | A14319 | 204 | A03478 | A16394 | 246 |
| A03479 | A03830 | 329 | A03479 | A03862 | 208 |
| A03479 | A05082 | 468 | A03479 | A07920 | 294 |
| A03479 | A08137 | 378 | A03479 | A09160 | 449 |
| A03479 | A09374 | 219 | A03479 | A13424 | 177 |
| A03479 | A13991 | 191 | A03479 | A14006 | 154 |
| A03479 | A14399 | 491 | A03479 | A15545 | 491 |
| A03479 | A15734 | 167 | A03479 | A16050 | 463 |
| A03480 | A03512 | 182 | A03480 | A03556 | 200 |
| A03480 | A03597 | 448 | A03480 | A03617 | 535 |
| A03480 | A05273 | 200 | A03480 | A05531 | 461 |
| A03480 | A05539 | 214 | A03480 | A05563 | 484 |
| A03480 | A05605 | 517 | A03480 | A05638 | 561 |
| A03480 | A05692 | 255 | A03480 | A05782 | 180 |
| A03480 | A06204 | 200 | A03480 | A07180 | 200 |
| A03480 | A08745 | 165 | A03480 | A08780 | 357 |
| A03480 | A08818 | 162 | A03480 | A09357 | 170 |
| A03480 | A09625 | 280 | A03480 | A09628 | 200 |
| A03480 | A10372 | 266 | A03480 | A10498 | 247 |
| A03480 | A12238 | 224 | A03480 | A12727 | 232 |
| A03480 | A13858 | 252 | A03480 | A13876 | 345 |
| A03480 | A13881 | 200 | A03480 | A13912 | 259 |
| A03480 | A14087 | 170 | A03480 | A14171 | 200 |
| A03480 | A14179 | 200 | A03480 | A14180 | 200 |
| A03480 | A14356 | 200 | A03480 | A14443 | 353 |
| A03480 | A14782 | 230 | A03480 | A14903 | 205 |
| A03480 | A15187 | 168 | A03480 | A15370 | 316 |
| A03480 | A15536 | 219 | A03480 | A15712 | 200 |
| A03480 | A15719 | 200 | A03480 | A15757 | 200 |
| A03480 | A16066 | 200 | A03480 | A16634 | 200 |
| A03480 | A16704 | 168 | A03480 | A16790 | 185 |
| A03480 | A16838 | 173 | A03480 | A16919 | 200 |
| A03481 | A03962 | 168 | A03481 | A04292 | 191 |
| A03481 | A04897 | 184 | A03481 | A05028 | 489 |
| A03481 | A05356 | 281 | A03481 | A08400 | 241 |
| A03481 | A08765 | 458 | A03481 | A08772 | 491 |
| A03481 | A09277 | 152 | A03481 | A10663 | 183 |
| A03481 | A11357 | 274 | A03481 | A13830 | 477 |
| A03481 | A13845 | 491 | A03481 | A14095 | 445 |
| A03481 | A14247 | 491 | A03481 | A15330 | 219 |
| A03481 | A15560 | 184 | A03481 | A16617 | 154 |
| A03481 | A16821 | 157 | A03482 | A07722 | 433 |
| A03484 | A03513 | 391 | A03484 | A03858 | 187 |

|        |        |     |        |        |     |
|--------|--------|-----|--------|--------|-----|
| A03484 | A03968 | 180 | A03484 | A04228 | 243 |
| A03484 | A04781 | 314 | A03484 | A04791 | 263 |
| A03484 | A04883 | 419 | A03484 | A04927 | 451 |
| A03484 | A05051 | 396 | A03484 | A05330 | 274 |
| A03484 | A05393 | 183 | A03484 | A05424 | 177 |
| A03484 | A05452 | 341 | A03484 | A05472 | 226 |
| A03484 | A05548 | 303 | A03484 | A05573 | 224 |
| A03484 | A05757 | 375 | A03484 | A05789 | 323 |
| A03484 | A06402 | 469 | A03484 | A06405 | 474 |
| A03484 | A06629 | 212 | A03484 | A06633 | 278 |
| A03484 | A06860 | 229 | A03484 | A07037 | 411 |
| A03484 | A07059 | 480 | A03484 | A07088 | 352 |
| A03484 | A07239 | 236 | A03484 | A07366 | 480 |
| A03484 | A07477 | 348 | A03484 | A07503 | 452 |
| A03484 | A07674 | 171 | A03484 | A07721 | 243 |
| A03484 | A07757 | 490 | A03484 | A07851 | 160 |
| A03484 | A08366 | 270 | A03484 | A09879 | 314 |
| A03484 | A10424 | 324 | A03484 | A10446 | 277 |
| A03484 | A10457 | 318 | A03484 | A10635 | 224 |
| A03484 | A10656 | 252 | A03484 | A10713 | 236 |
| A03484 | A14637 | 162 | A03484 | A15905 | 213 |
| A03484 | A16027 | 190 | A03484 | A16741 | 256 |
| A03484 | A16744 | 277 | A03485 | A05418 | 180 |
| A03485 | A05782 | 374 | A03486 | A03632 | 216 |
| A03486 | A04782 | 260 | A03486 | A04939 | 183 |
| A03486 | A05507 | 345 | A03486 | A07232 | 489 |
| A03486 | A08430 | 302 | A03486 | A10018 | 219 |
| A03486 | A14169 | 213 | A03486 | A14430 | 265 |
| A03486 | A15945 | 305 | A03486 | A16067 | 177 |
| A03486 | A16068 | 160 | A03486 | A17123 | 167 |
| A03487 | A03858 | 238 | A03487 | A04307 | 265 |
| A03487 | A04532 | 311 | A03487 | A04674 | 384 |
| A03487 | A05088 | 366 | A03487 | A05471 | 479 |
| A03487 | A05472 | 462 | A03487 | A05660 | 377 |
| A03487 | A05738 | 208 | A03487 | A06397 | 374 |
| A03487 | A06632 | 371 | A03487 | A06979 | 316 |
| A03487 | A07061 | 260 | A03487 | A07238 | 364 |
| A03487 | A15649 | 163 | A03487 | A15874 | 452 |
| A03487 | A16026 | 307 | A03487 | A16741 | 313 |
| A03487 | A17078 | 171 | A03488 | A03717 | 490 |
| A03488 | A03721 | 182 | A03488 | A03742 | 351 |
| A03488 | A04008 | 402 | A03488 | A04018 | 182 |
| A03488 | A04710 | 179 | A03488 | A04894 | 172 |
| A03488 | A05417 | 259 | A03488 | A06021 | 204 |
| A03488 | A06273 | 185 | A03488 | A06277 | 176 |
| A03488 | A07495 | 337 | A03488 | A08022 | 168 |

|        |        |     |        |        |     |
|--------|--------|-----|--------|--------|-----|
| A03488 | A08356 | 249 | A03488 | A08990 | 274 |
| A03488 | A09054 | 374 | A03488 | A09825 | 196 |
| A03488 | A09874 | 311 | A03488 | A10291 | 207 |
| A03488 | A10504 | 371 | A03488 | A10588 | 170 |
| A03488 | A10590 | 154 | A03488 | A11285 | 491 |
| A03488 | A11301 | 473 | A03488 | A11330 | 491 |
| A03488 | A11423 | 391 | A03488 | A11436 | 229 |
| A03488 | A11455 | 369 | A03488 | A11477 | 172 |
| A03488 | A11584 | 201 | A03488 | A11621 | 157 |
| A03488 | A11717 | 288 | A03488 | A12256 | 224 |
| A03488 | A12284 | 297 | A03488 | A12873 | 260 |
| A03488 | A12882 | 188 | A03488 | A13215 | 288 |
| A03488 | A13321 | 326 | A03488 | A13617 | 362 |
| A03488 | A13989 | 382 | A03488 | A14134 | 263 |
| A03488 | A14202 | 505 | A03488 | A14636 | 183 |
| A03488 | A14815 | 332 | A03488 | A15116 | 279 |
| A03488 | A15358 | 491 | A03488 | A15465 | 455 |
| A03488 | A15468 | 324 | A03488 | A15469 | 319 |
| A03488 | A15470 | 491 | A03488 | A15471 | 479 |
| A03488 | A15472 | 484 | A03488 | A15474 | 229 |
| A03488 | A15475 | 262 | A03488 | A15559 | 480 |
| A03488 | A15561 | 281 | A03488 | A15700 | 238 |
| A03488 | A15729 | 160 | A03488 | A16061 | 404 |
| A03488 | A16522 | 423 | A03488 | A16536 | 288 |
| A03488 | A16699 | 252 | A03489 | A03565 | 475 |
| A03489 | A03618 | 475 | A03489 | A03626 | 702 |
| A03489 | A03718 | 742 | A03489 | A03892 | 779 |
| A03489 | A04145 | 79  | A03489 | A04292 | 205 |
| A03489 | A04318 | 243 | A03489 | A04487 | 163 |
| A03489 | A05024 | 357 | A03489 | A05028 | 486 |
| A03489 | A05143 | 217 | A03489 | A05200 | 401 |
| A03489 | A05233 | 414 | A03489 | A05785 | 305 |
| A03489 | A06675 | 683 | A03489 | A06831 | 255 |
| A03489 | A06941 | 445 | A03489 | A06991 | 207 |
| A03489 | A08293 | 63  | A03489 | A08356 | 63  |
| A03489 | A08430 | 200 | A03489 | A08461 | 172 |
| A03489 | A08775 | 193 | A03489 | A08821 | 73  |
| A03489 | A08874 | 714 | A03489 | A09031 | 288 |
| A03489 | A09036 | 224 | A03489 | A09286 | 296 |
| A03489 | A09375 | 243 | A03489 | A09891 | 305 |
| A03489 | A09892 | 281 | A03489 | A10663 | 126 |
| A03489 | A10739 | 208 | A03489 | A10897 | 221 |
| A03489 | A11496 | 152 | A03489 | A11679 | 259 |
| A03489 | A11735 | 193 | A03489 | A11939 | 243 |
| A03489 | A11954 | 200 | A03489 | A12792 | 217 |
| A03489 | A12858 | 193 | A03489 | A13830 | 355 |

|        |        |     |        |        |     |
|--------|--------|-----|--------|--------|-----|
| A03489 | A13845 | 226 | A03489 | A13882 | 343 |
| A03489 | A13894 | 162 | A03489 | A13902 | 293 |
| A03489 | A14095 | 473 | A03489 | A14167 | 213 |
| A03489 | A14247 | 398 | A03489 | A14286 | 188 |
| A03489 | A14289 | 154 | A03489 | A15498 | 414 |
| A03489 | A15743 | 183 | A03489 | A15818 | 160 |
| A03489 | A17130 | 355 | A03489 | A17144 | 391 |
| A03490 | A03600 | 184 | A03490 | A03601 | 265 |
| A03490 | A03652 | 162 | A03490 | A03770 | 213 |
| A03490 | A03881 | 338 | A03490 | A03981 | 317 |
| A03490 | A04563 | 283 | A03490 | A04808 | 319 |
| A03490 | A05113 | 196 | A03490 | A05146 | 217 |
| A03490 | A05191 | 274 | A03490 | A05419 | 288 |
| A03490 | A05502 | 221 | A03490 | A05702 | 230 |
| A03490 | A06351 | 598 | A03490 | A06466 | 281 |
| A03490 | A06621 | 201 | A03490 | A06975 | 299 |
| A03490 | A07283 | 193 | A03490 | A07581 | 185 |
| A03490 | A08011 | 213 | A03490 | A08301 | 479 |
| A03490 | A08377 | 317 | A03490 | A08533 | 208 |
| A03490 | A08550 | 317 | A03490 | A08901 | 235 |
| A03490 | A08973 | 524 | A03490 | A09332 | 343 |
| A03490 | A09577 | 202 | A03490 | A09978 | 255 |
| A03490 | A11688 | 176 | A03490 | A11815 | 343 |
| A03490 | A11992 | 185 | A03490 | A13340 | 243 |
| A03490 | A14478 | 223 | A03490 | A14479 | 288 |
| A03490 | A14482 | 622 | A03490 | A14568 | 154 |
| A03490 | A15500 | 427 | A03490 | A15771 | 428 |
| A03490 | A15932 | 462 | A03490 | A15933 | 340 |
| A03490 | A16157 | 215 | A03490 | A16462 | 235 |
| A03492 | A03496 | 332 | A03492 | A03528 | 162 |
| A03492 | A03575 | 475 | A03492 | A03845 | 229 |
| A03492 | A04355 | 286 | A03492 | A04990 | 278 |
| A03492 | A05008 | 733 | A03492 | A05009 | 489 |
| A03492 | A05625 | 761 | A03492 | A05894 | 489 |
| A03492 | A06176 | 218 | A03492 | A06572 | 159 |
| A03492 | A06606 | 252 | A03492 | A06661 | 285 |
| A03492 | A07433 | 63  | A03492 | A07762 | 449 |
| A03492 | A08079 | 258 | A03492 | A08535 | 205 |
| A03492 | A08571 | 676 | A03492 | A08839 | 102 |
| A03492 | A08858 | 377 | A03492 | A08885 | 172 |
| A03492 | A08894 | 329 | A03492 | A09195 | 353 |
| A03492 | A09449 | 340 | A03492 | A09793 | 165 |
| A03492 | A10604 | 428 | A03492 | A11283 | 188 |
| A03492 | A11353 | 274 | A03492 | A12047 | 265 |
| A03492 | A12225 | 467 | A03492 | A12226 | 417 |
| A03492 | A13315 | 207 | A03492 | A13484 | 154 |

|        |        |     |        |        |     |
|--------|--------|-----|--------|--------|-----|
| A03492 | A13924 | 177 | A03492 | A13982 | 341 |
| A03492 | A14310 | 424 | A03492 | A14485 | 180 |
| A03492 | A14964 | 154 | A03492 | A15726 | 550 |
| A03492 | A16075 | 185 | A03493 | A04642 | 223 |
| A03493 | A04688 | 355 | A03493 | A04782 | 224 |
| A03493 | A05258 | 205 | A03493 | A05499 | 213 |
| A03493 | A05501 | 269 | A03493 | A06308 | 296 |
| A03493 | A06388 | 312 | A03493 | A07248 | 252 |
| A03493 | A07602 | 252 | A03493 | A08760 | 260 |
| A03493 | A08761 | 469 | A03493 | A08929 | 171 |
| A03493 | A09229 | 260 | A03493 | A09293 | 283 |
| A03493 | A09613 | 353 | A03493 | A09735 | 480 |
| A03493 | A10695 | 254 | A03493 | A11857 | 267 |
| A03493 | A14479 | 160 | A03493 | A14568 | 159 |
| A03493 | A15500 | 224 | A03493 | A17152 | 290 |
| A03494 | A03567 | 335 | A03494 | A03569 | 491 |
| A03494 | A03628 | 373 | A03494 | A03740 | 480 |
| A03494 | A04156 | 216 | A03494 | A04495 | 302 |
| A03494 | A04844 | 188 | A03494 | A05563 | 205 |
| A03494 | A05581 | 157 | A03494 | A06698 | 266 |
| A03494 | A06937 | 152 | A03494 | A07432 | 215 |
| A03494 | A07706 | 216 | A03494 | A07826 | 333 |
| A03494 | A07898 | 156 | A03494 | A08137 | 480 |
| A03494 | A08201 | 473 | A03494 | A08267 | 414 |
| A03494 | A08327 | 156 | A03494 | A08431 | 180 |
| A03494 | A08524 | 383 | A03494 | A08542 | 156 |
| A03494 | A08571 | 491 | A03494 | A08756 | 353 |
| A03494 | A08915 | 252 | A03494 | A08992 | 216 |
| A03494 | A09317 | 152 | A03494 | A09451 | 480 |
| A03494 | A09515 | 489 | A03494 | A09538 | 486 |
| A03494 | A09686 | 172 | A03494 | A09923 | 252 |
| A03494 | A09992 | 160 | A03494 | A10250 | 491 |
| A03494 | A10853 | 311 | A03494 | A11099 | 168 |
| A03494 | A11139 | 496 | A03494 | A11496 | 156 |
| A03494 | A11497 | 156 | A03494 | A12189 | 204 |
| A03494 | A12294 | 327 | A03494 | A12369 | 230 |
| A03494 | A12757 | 246 | A03494 | A13019 | 389 |
| A03494 | A13116 | 184 | A03494 | A13193 | 160 |
| A03494 | A13635 | 425 | A03494 | A13805 | 438 |
| A03494 | A13928 | 156 | A03494 | A13989 | 486 |
| A03494 | A14006 | 299 | A03494 | A14073 | 414 |
| A03494 | A14178 | 459 | A03494 | A14184 | 167 |
| A03494 | A14476 | 193 | A03494 | A14597 | 400 |
| A03494 | A14622 | 404 | A03494 | A14655 | 271 |
| A03494 | A14699 | 204 | A03494 | A14728 | 299 |
| A03494 | A14758 | 160 | A03494 | A15019 | 193 |

|        |        |     |        |        |     |
|--------|--------|-----|--------|--------|-----|
| A03494 | A15297 | 274 | A03494 | A15338 | 430 |
| A03494 | A15353 | 319 | A03494 | A15660 | 378 |
| A03494 | A15711 | 438 | A03494 | A16690 | 383 |
| A03494 | A16699 | 156 | A03494 | A16866 | 383 |
| A03494 | A16912 | 245 | A03494 | A16917 | 252 |
| A03494 | A17088 | 168 | A03494 | A17168 | 380 |
| A03495 | A04038 | 205 | A03495 | A04078 | 201 |
| A03495 | A04375 | 204 | A03495 | A04747 | 338 |
| A03495 | A08150 | 301 | A03495 | A10321 | 182 |
| A03495 | A14315 | 266 | A03495 | A14523 | 254 |
| A03495 | A15202 | 193 | A03495 | A15291 | 477 |
| A03495 | A16298 | 227 | A03495 | A16400 | 436 |
| A03495 | A17189 | 152 | A03496 | A03566 | 486 |
| A03496 | A03575 | 165 | A03496 | A03694 | 208 |
| A03496 | A04790 | 277 | A03496 | A05008 | 590 |
| A03496 | A05009 | 295 | A03496 | A05243 | 219 |
| A03496 | A05425 | 491 | A03496 | A05607 | 544 |
| A03496 | A05625 | 411 | A03496 | A05825 | 314 |
| A03496 | A05826 | 329 | A03496 | A05987 | 285 |
| A03496 | A06581 | 254 | A03496 | A06591 | 286 |
| A03496 | A06661 | 339 | A03496 | A06701 | 485 |
| A03496 | A06907 | 196 | A03496 | A07054 | 486 |
| A03496 | A07073 | 180 | A03496 | A07242 | 418 |
| A03496 | A07422 | 319 | A03496 | A07495 | 465 |
| A03496 | A07687 | 207 | A03496 | A08126 | 490 |
| A03496 | A08205 | 352 | A03496 | A08518 | 314 |
| A03496 | A08531 | 363 | A03496 | A08536 | 310 |
| A03496 | A08543 | 416 | A03496 | A08550 | 450 |
| A03496 | A08552 | 449 | A03496 | A08560 | 213 |
| A03496 | A08561 | 435 | A03496 | A08807 | 162 |
| A03496 | A08868 | 488 | A03496 | A08996 | 267 |
| A03496 | A09506 | 258 | A03496 | A09609 | 165 |
| A03496 | A09828 | 283 | A03496 | A10789 | 170 |
| A03496 | A10909 | 240 | A03496 | A11156 | 489 |
| A03496 | A11234 | 299 | A03496 | A11301 | 316 |
| A03496 | A11496 | 344 | A03496 | A11497 | 374 |
| A03496 | A11675 | 477 | A03496 | A11917 | 327 |
| A03496 | A11940 | 260 | A03496 | A12047 | 412 |
| A03496 | A12433 | 430 | A03496 | A12501 | 162 |
| A03496 | A12507 | 291 | A03496 | A12508 | 151 |
| A03496 | A12606 | 347 | A03496 | A12658 | 324 |
| A03496 | A12665 | 216 | A03496 | A12723 | 167 |
| A03496 | A12725 | 183 | A03496 | A12727 | 374 |
| A03496 | A12738 | 286 | A03496 | A12858 | 475 |
| A03496 | A12873 | 286 | A03496 | A13231 | 151 |
| A03496 | A13309 | 345 | A03496 | A13313 | 371 |

|        |        |     |        |        |     |
|--------|--------|-----|--------|--------|-----|
| A03496 | A13399 | 347 | A03496 | A13590 | 433 |
| A03496 | A13707 | 259 | A03496 | A13708 | 201 |
| A03496 | A13737 | 399 | A03496 | A13781 | 455 |
| A03496 | A13784 | 491 | A03496 | A13805 | 229 |
| A03496 | A13912 | 395 | A03496 | A14009 | 210 |
| A03496 | A14084 | 291 | A03496 | A14192 | 630 |
| A03496 | A14193 | 519 | A03496 | A14214 | 408 |
| A03496 | A14222 | 290 | A03496 | A14263 | 619 |
| A03496 | A14270 | 205 | A03496 | A14279 | 463 |
| A03496 | A14281 | 291 | A03496 | A14288 | 308 |
| A03496 | A14455 | 303 | A03496 | A14474 | 152 |
| A03496 | A14569 | 429 | A03496 | A14633 | 489 |
| A03496 | A14708 | 343 | A03496 | A15034 | 167 |
| A03496 | A15105 | 399 | A03496 | A15187 | 205 |
| A03496 | A15189 | 205 | A03496 | A16157 | 439 |
| A03496 | A16261 | 172 | A03496 | A16552 | 401 |
| A03496 | A16597 | 465 | A03496 | A16608 | 170 |
| A03496 | A16611 | 393 | A03496 | A16664 | 307 |
| A03496 | A16675 | 251 | A03496 | A16684 | 274 |
| A03496 | A16690 | 249 | A03496 | A16703 | 372 |
| A03496 | A16704 | 205 | A03496 | A16709 | 394 |
| A03496 | A16764 | 316 | A03496 | A16776 | 263 |
| A03496 | A16799 | 154 | A03496 | A16838 | 383 |
| A03496 | A16858 | 218 | A03496 | A16874 | 341 |
| A03496 | A16905 | 177 | A03496 | A16913 | 294 |
| A03496 | A16954 | 329 | A03496 | A17015 | 185 |
| A03496 | A17018 | 254 | A03496 | A17030 | 263 |
| A03496 | A17033 | 247 | A03496 | A17035 | 182 |
| A03496 | A17043 | 185 | A03496 | A17211 | 245 |
| A03497 | A03498 | 438 | A03497 | A04379 | 374 |
| A03497 | A08300 | 319 | A03497 | A13385 | 394 |
| A03498 | A03639 | 235 | A03498 | A04379 | 326 |
| A03498 | A04879 | 191 | A03498 | A05533 | 943 |
| A03498 | A06253 | 402 | A03498 | A06587 | 375 |
| A03498 | A06607 | 422 | A03498 | A07292 | 434 |
| A03498 | A07403 | 477 | A03498 | A07803 | 243 |
| A03498 | A08404 | 167 | A03498 | A09387 | 340 |
| A03498 | A10453 | 249 | A03498 | A10632 | 314 |
| A03498 | A14128 | 243 | A03499 | A04553 | 279 |
| A03499 | A06606 | 416 | A03499 | A07218 | 170 |
| A03499 | A12351 | 429 | A03499 | A12429 | 429 |
| A03500 | A05020 | 341 | A03500 | A05102 | 334 |
| A03500 | A05334 | 207 | A03501 | A03586 | 238 |
| A03501 | A05262 | 313 | A03501 | A05332 | 268 |
| A03501 | A05516 | 279 | A03501 | A05609 | 277 |
| A03501 | A06555 | 385 | A03501 | A06819 | 450 |



|        |        |     |        |        |     |
|--------|--------|-----|--------|--------|-----|
| A03501 | A07080 | 243 | A03501 | A07222 | 254 |
| A03501 | A07333 | 389 | A03501 | A07746 | 156 |
| A03501 | A07931 | 363 | A03501 | A07974 | 288 |
| A03501 | A14525 | 407 | A03501 | A14858 | 372 |
| A03501 | A16531 | 221 | A03501 | A16626 | 218 |
| A03501 | A16635 | 318 | A03501 | A16753 | 374 |
| A03501 | A16761 | 352 | A03501 | A16769 | 340 |
| A03502 | A03981 | 107 | A03502 | A06275 | 258 |
| A03502 | A06814 | 173 | A03502 | A06825 | 341 |
| A03502 | A07307 | 350 | A03502 | A08768 | 357 |
| A03502 | A10616 | 257 | A03502 | A10625 | 174 |
| A03502 | A10814 | 441 | A03502 | A12589 | 412 |
| A03502 | A15764 | 319 | A03503 | A04271 | 196 |
| A03503 | A08524 | 302 | A03503 | A13706 | 185 |
| A03503 | A14196 | 296 | A03503 | A17088 | 247 |
| A03504 | A03583 | 394 | A03504 | A03633 | 384 |
| A03504 | A05891 | 316 | A03504 | A06606 | 260 |
| A03504 | A07958 | 277 | A03504 | A09085 | 385 |
| A03504 | A09157 | 422 | A03504 | A12374 | 435 |
| A03504 | A13879 | 326 | A03504 | A14633 | 195 |
| A03505 | A06212 | 379 | A03505 | A08310 | 419 |
| A03506 | A03728 | 329 | A03506 | A03820 | 208 |
| A03506 | A04292 | 185 | A03506 | A05289 | 216 |
| A03506 | A09526 | 293 | A03506 | A12725 | 208 |
| A03506 | A14062 | 191 | A03506 | A14827 | 188 |
| A03506 | A16049 | 277 | A03507 | A16279 | 441 |
| A03508 | A04995 | 353 | A03508 | A06098 | 408 |
| A03508 | A06597 | 162 | A03508 | A06668 | 396 |
| A03508 | A06699 | 390 | A03508 | A06700 | 319 |
| A03508 | A07080 | 330 | A03508 | A07109 | 318 |
| A03508 | A07122 | 254 | A03508 | A07304 | 293 |
| A03508 | A07530 | 374 | A03508 | A07688 | 339 |
| A03508 | A14827 | 235 | A03508 | A15637 | 348 |
| A03508 | A16028 | 371 | A03509 | A14071 | 899 |
| A03511 | A03926 | 353 | A03511 | A03928 | 413 |
| A03511 | A03968 | 273 | A03511 | A04074 | 297 |
| A03511 | A04092 | 324 | A03511 | A04157 | 486 |
| A03511 | A04168 | 401 | A03511 | A04215 | 408 |
| A03511 | A04343 | 384 | A03511 | A04375 | 240 |
| A03511 | A04378 | 446 | A03511 | A04382 | 404 |
| A03511 | A04383 | 371 | A03511 | A04747 | 335 |
| A03511 | A06146 | 408 | A03511 | A06752 | 205 |
| A03511 | A09456 | 429 | A03511 | A10418 | 346 |
| A03511 | A15336 | 238 | A03511 | A15383 | 196 |
| A03511 | A16068 | 367 | A03511 | A16626 | 176 |
| A03512 | A03528 | 474 | A03512 | A03536 | 483 |

|        |        |     |        |        |     |
|--------|--------|-----|--------|--------|-----|
| A03512 | A03790 | 184 | A03512 | A03885 | 165 |
| A03512 | A04540 | 408 | A03512 | A04562 | 176 |
| A03512 | A05120 | 229 | A03512 | A05240 | 288 |
| A03512 | A06182 | 205 | A03512 | A07442 | 263 |
| A03512 | A07762 | 460 | A03512 | A09417 | 249 |
| A03512 | A09603 | 288 | A03512 | A10332 | 202 |
| A03512 | A11099 | 176 | A03512 | A11342 | 288 |
| A03512 | A11487 | 375 | A03512 | A14278 | 321 |
| A03512 | A14543 | 324 | A03512 | A15422 | 176 |
| A03512 | A16048 | 188 | A03513 | A03858 | 230 |
| A03513 | A03890 | 224 | A03513 | A03892 | 432 |
| A03513 | A03917 | 229 | A03513 | A04010 | 174 |
| A03513 | A04095 | 490 | A03513 | A04220 | 288 |
| A03513 | A04307 | 266 | A03513 | A04316 | 188 |
| A03513 | A04366 | 343 | A03513 | A04556 | 356 |
| A03513 | A04778 | 213 | A03513 | A04791 | 319 |
| A03513 | A04834 | 210 | A03513 | A04839 | 307 |
| A03513 | A04883 | 463 | A03513 | A04927 | 485 |
| A03513 | A04995 | 183 | A03513 | A05007 | 276 |
| A03513 | A05014 | 450 | A03513 | A05026 | 262 |
| A03513 | A05045 | 384 | A03513 | A05050 | 259 |
| A03513 | A05098 | 177 | A03513 | A05140 | 254 |
| A03513 | A05243 | 199 | A03513 | A05313 | 162 |
| A03513 | A05330 | 406 | A03513 | A05337 | 326 |
| A03513 | A05358 | 491 | A03513 | A05416 | 436 |
| A03513 | A05418 | 393 | A03513 | A05420 | 322 |
| A03513 | A05426 | 322 | A03513 | A05433 | 416 |
| A03513 | A05451 | 484 | A03513 | A05452 | 463 |
| A03513 | A05462 | 204 | A03513 | A05463 | 208 |
| A03513 | A05472 | 420 | A03513 | A05538 | 407 |
| A03513 | A05548 | 469 | A03513 | A05550 | 489 |
| A03513 | A05573 | 419 | A03513 | A05615 | 249 |
| A03513 | A05682 | 210 | A03513 | A05714 | 313 |
| A03513 | A05771 | 294 | A03513 | A05820 | 322 |
| A03513 | A05883 | 491 | A03513 | A05912 | 422 |
| A03513 | A06019 | 466 | A03513 | A06090 | 404 |
| A03513 | A06402 | 372 | A03513 | A06405 | 480 |
| A03513 | A06439 | 480 | A03513 | A06629 | 357 |
| A03513 | A06641 | 443 | A03513 | A06659 | 408 |
| A03513 | A06689 | 419 | A03513 | A06734 | 488 |
| A03513 | A06756 | 162 | A03513 | A06800 | 333 |
| A03513 | A06847 | 353 | A03513 | A06860 | 491 |
| A03513 | A06970 | 340 | A03513 | A06979 | 330 |
| A03513 | A06994 | 430 | A03513 | A07002 | 294 |
| A03513 | A07027 | 441 | A03513 | A07037 | 488 |
| A03513 | A07059 | 491 | A03513 | A07088 | 473 |

|        |        |     |        |        |     |
|--------|--------|-----|--------|--------|-----|
| A03513 | A07109 | 409 | A03513 | A07122 | 447 |
| A03513 | A07238 | 335 | A03513 | A07239 | 159 |
| A03513 | A07264 | 183 | A03513 | A07325 | 319 |
| A03513 | A07341 | 251 | A03513 | A07408 | 380 |
| A03513 | A07424 | 259 | A03513 | A07477 | 490 |
| A03513 | A07501 | 313 | A03513 | A07503 | 254 |
| A03513 | A07520 | 491 | A03513 | A07543 | 171 |
| A03513 | A07553 | 454 | A03513 | A07558 | 409 |
| A03513 | A07590 | 470 | A03513 | A07619 | 294 |
| A03513 | A07674 | 470 | A03513 | A07684 | 202 |
| A03513 | A07690 | 483 | A03513 | A07711 | 246 |
| A03513 | A07721 | 238 | A03513 | A07723 | 232 |
| A03513 | A07736 | 491 | A03513 | A07757 | 316 |
| A03513 | A07763 | 191 | A03513 | A07796 | 246 |
| A03513 | A07856 | 279 | A03513 | A07933 | 489 |
| A03513 | A07973 | 463 | A03513 | A07976 | 373 |
| A03513 | A08108 | 323 | A03513 | A08114 | 177 |
| A03513 | A08155 | 251 | A03513 | A08199 | 224 |
| A03513 | A08250 | 372 | A03513 | A08461 | 297 |
| A03513 | A08663 | 224 | A03513 | A09381 | 217 |
| A03513 | A09845 | 174 | A03513 | A09876 | 465 |
| A03513 | A09880 | 260 | A03513 | A10420 | 358 |
| A03513 | A10444 | 191 | A03513 | A10456 | 396 |
| A03513 | A10635 | 276 | A03513 | A10656 | 174 |
| A03513 | A10658 | 238 | A03513 | A10676 | 272 |
| A03513 | A10677 | 152 | A03513 | A10679 | 227 |
| A03513 | A10687 | 265 | A03513 | A10690 | 251 |
| A03513 | A10693 | 190 | A03513 | A10694 | 363 |
| A03513 | A10715 | 224 | A03513 | A13871 | 291 |
| A03513 | A14654 | 177 | A03513 | A14821 | 262 |
| A03513 | A15637 | 177 | A03513 | A15874 | 224 |
| A03513 | A15970 | 350 | A03513 | A16286 | 195 |
| A03513 | A16741 | 391 | A03513 | A16790 | 337 |
| A03513 | A17033 | 221 | A03513 | A17046 | 265 |
| A03513 | A17092 | 333 | A03513 | A17190 | 218 |
| A03514 | A03981 | 294 | A03514 | A11688 | 337 |
| A03514 | A15291 | 195 | A03515 | A04850 | 228 |
| A03515 | A06597 | 428 | A03515 | A07135 | 221 |
| A03515 | A10337 | 227 | A03515 | A11759 | 240 |
| A03515 | A13270 | 348 | A03515 | A13484 | 236 |
| A03516 | A03557 | 480 | A03516 | A03608 | 413 |
| A03516 | A03740 | 628 | A03516 | A03752 | 479 |
| A03516 | A05086 | 324 | A03516 | A05417 | 207 |
| A03516 | A06466 | 446 | A03516 | A06709 | 470 |
| A03516 | A07102 | 324 | A03516 | A07187 | 324 |
| A03516 | A07911 | 312 | A03516 | A11374 | 373 |

|        |        |     |        |        |     |
|--------|--------|-----|--------|--------|-----|
| A03516 | A11694 | 324 | A03516 | A12167 | 193 |
| A03516 | A13340 | 223 | A03516 | A14073 | 422 |
| A03516 | A14642 | 324 | A03516 | A15660 | 449 |
| A03516 | A15708 | 267 | A03516 | A15843 | 361 |
| A03516 | A16274 | 329 | A03516 | A17140 | 152 |
| A03517 | A05418 | 162 | A03518 | A04520 | 252 |
| A03518 | A04905 | 283 | A03518 | A05094 | 358 |
| A03518 | A05106 | 201 | A03518 | A05114 | 252 |
| A03518 | A06595 | 183 | A03518 | A07227 | 488 |
| A03518 | A07231 | 319 | A03518 | A07665 | 466 |
| A03518 | A07897 | 400 | A03518 | A08409 | 255 |
| A03518 | A08703 | 380 | A03518 | A08717 | 323 |
| A03518 | A08934 | 167 | A03518 | A09527 | 396 |
| A03518 | A09901 | 366 | A03518 | A10008 | 475 |
| A03518 | A11023 | 491 | A03518 | A11149 | 486 |
| A03518 | A11180 | 260 | A03518 | A11281 | 306 |
| A03518 | A11547 | 281 | A03518 | A11665 | 303 |
| A03518 | A11902 | 344 | A03518 | A12651 | 238 |
| A03518 | A13115 | 380 | A03518 | A13894 | 489 |
| A03518 | A13895 | 491 | A03518 | A13932 | 290 |
| A03518 | A15035 | 306 | A03518 | A15145 | 335 |
| A03518 | A15157 | 380 | A03519 | A06606 | 243 |
| A03520 | A03593 | 301 | A03520 | A03609 | 469 |
| A03520 | A03612 | 257 | A03520 | A03661 | 358 |
| A03520 | A03685 | 307 | A03520 | A03686 | 221 |
| A03520 | A03813 | 208 | A03520 | A03927 | 182 |
| A03520 | A04117 | 241 | A03520 | A04175 | 308 |
| A03520 | A04223 | 205 | A03520 | A04232 | 163 |
| A03520 | A04310 | 235 | A03520 | A04351 | 177 |
| A03520 | A04376 | 270 | A03520 | A04435 | 247 |
| A03520 | A04440 | 173 | A03520 | A04505 | 314 |
| A03520 | A04533 | 177 | A03520 | A04568 | 157 |
| A03520 | A04715 | 196 | A03520 | A04941 | 162 |
| A03520 | A05021 | 251 | A03520 | A05157 | 160 |
| A03520 | A05309 | 399 | A03520 | A05398 | 152 |
| A03520 | A05423 | 318 | A03520 | A05424 | 160 |
| A03520 | A05473 | 458 | A03520 | A05625 | 185 |
| A03520 | A06195 | 160 | A03520 | A06595 | 474 |
| A03520 | A06626 | 245 | A03520 | A06649 | 199 |
| A03520 | A06665 | 156 | A03520 | A07014 | 185 |
| A03520 | A07081 | 167 | A03520 | A07135 | 279 |
| A03520 | A07339 | 200 | A03520 | A07468 | 173 |
| A03520 | A07519 | 245 | A03520 | A07626 | 171 |
| A03520 | A07826 | 188 | A03520 | A07995 | 251 |
| A03520 | A08070 | 407 | A03520 | A08572 | 281 |
| A03520 | A08652 | 218 | A03520 | A08911 | 257 |

|        |        |     |        |        |     |
|--------|--------|-----|--------|--------|-----|
| A03520 | A09046 | 187 | A03520 | A09058 | 191 |
| A03520 | A09385 | 263 | A03520 | A09504 | 168 |
| A03520 | A09562 | 177 | A03520 | A09890 | 212 |
| A03520 | A09937 | 291 | A03520 | A09991 | 182 |
| A03520 | A10154 | 240 | A03520 | A10376 | 436 |
| A03520 | A10577 | 240 | A03520 | A10668 | 235 |
| A03520 | A11431 | 174 | A03520 | A11567 | 224 |
| A03520 | A11587 | 301 | A03520 | A11726 | 301 |
| A03520 | A11835 | 160 | A03520 | A11872 | 228 |
| A03520 | A11879 | 301 | A03520 | A12037 | 218 |
| A03520 | A12353 | 218 | A03520 | A12431 | 301 |
| A03520 | A12603 | 318 | A03520 | A12793 | 221 |
| A03520 | A13167 | 270 | A03520 | A13262 | 343 |
| A03520 | A13330 | 152 | A03520 | A13442 | 318 |
| A03520 | A13726 | 162 | A03520 | A13842 | 228 |
| A03520 | A14344 | 170 | A03520 | A14368 | 160 |
| A03520 | A14756 | 301 | A03520 | A15411 | 157 |
| A03520 | A15498 | 429 | A03520 | A16054 | 327 |
| A03520 | A16143 | 208 | A03520 | A16158 | 301 |
| A03520 | A16281 | 205 | A03520 | A16429 | 157 |
| A03520 | A16434 | 165 | A03520 | A17060 | 256 |
| A03520 | A17108 | 279 | A03522 | A03554 | 454 |
| A03522 | A03615 | 274 | A03522 | A04051 | 218 |
| A03522 | A04117 | 154 | A03522 | A04709 | 428 |
| A03522 | A04848 | 307 | A03522 | A05216 | 171 |
| A03522 | A05868 | 356 | A03522 | A08321 | 319 |
| A03522 | A08603 | 441 | A03522 | A09174 | 307 |
| A03522 | A09180 | 361 | A03522 | A09390 | 439 |
| A03522 | A09435 | 358 | A03522 | A09932 | 251 |
| A03522 | A14650 | 319 | A03522 | A16636 | 183 |
| A03523 | A03524 | 491 | A03523 | A03553 | 491 |
| A03523 | A03554 | 491 | A03523 | A03596 | 489 |
| A03523 | A03613 | 245 | A03523 | A04281 | 227 |
| A03523 | A04531 | 235 | A03523 | A04622 | 377 |
| A03523 | A04740 | 227 | A03523 | A04848 | 229 |
| A03523 | A05216 | 420 | A03523 | A05767 | 160 |
| A03523 | A05926 | 210 | A03523 | A06092 | 377 |
| A03523 | A06520 | 449 | A03523 | A06606 | 378 |
| A03523 | A06858 | 160 | A03523 | A07069 | 151 |
| A03523 | A07276 | 218 | A03523 | A07389 | 279 |
| A03523 | A09151 | 491 | A03523 | A09152 | 491 |
| A03523 | A09173 | 412 | A03523 | A09174 | 491 |
| A03523 | A09426 | 447 | A03523 | A09435 | 490 |
| A03523 | A09461 | 486 | A03523 | A09932 | 491 |
| A03523 | A10419 | 262 | A03523 | A10818 | 294 |
| A03523 | A11753 | 438 | A03523 | A12977 | 329 |

|        |        |     |        |        |     |
|--------|--------|-----|--------|--------|-----|
| A03523 | A13539 | 221 | A03523 | A13824 | 63  |
| A03523 | A14332 | 218 | A03523 | A16722 | 196 |
| A03523 | A16744 | 177 | A03524 | A03553 | 485 |
| A03524 | A03554 | 486 | A03524 | A03596 | 457 |
| A03524 | A03819 | 188 | A03524 | A04731 | 236 |
| A03524 | A05234 | 288 | A03524 | A05356 | 396 |
| A03524 | A05926 | 162 | A03524 | A06092 | 288 |
| A03524 | A06277 | 223 | A03524 | A06520 | 219 |
| A03524 | A07389 | 332 | A03524 | A09151 | 489 |
| A03524 | A09152 | 490 | A03524 | A09174 | 491 |
| A03524 | A09435 | 373 | A03524 | A09461 | 458 |
| A03524 | A09932 | 491 | A03524 | A11101 | 363 |
| A03524 | A11753 | 419 | A03524 | A13361 | 322 |
| A03524 | A13965 | 163 | A03524 | A14208 | 171 |
| A03524 | A15911 | 216 | A03525 | A03526 | 457 |
| A03525 | A04141 | 228 | A03525 | A04695 | 273 |
| A03525 | A06803 | 152 | A03525 | A07046 | 160 |
| A03525 | A07290 | 345 | A03525 | A09644 | 208 |
| A03525 | A09675 | 347 | A03525 | A09712 | 228 |
| A03525 | A10642 | 291 | A03525 | A14532 | 235 |
| A03525 | A16228 | 208 | A03526 | A04648 | 224 |
| A03526 | A06803 | 468 | A03526 | A07046 | 238 |
| A03526 | A07290 | 396 | A03526 | A09712 | 481 |
| A03526 | A10642 | 469 | A03526 | A14006 | 341 |
| A03526 | A16228 | 281 | A03527 | A13752 | 374 |
| A03528 | A03566 | 262 | A03528 | A03637 | 245 |
| A03528 | A04355 | 413 | A03528 | A05008 | 188 |
| A03528 | A05015 | 438 | A03528 | A06319 | 200 |
| A03528 | A06348 | 446 | A03528 | A06502 | 243 |
| A03528 | A06598 | 210 | A03528 | A06661 | 213 |
| A03528 | A07073 | 165 | A03528 | A07242 | 165 |
| A03528 | A07422 | 71  | A03528 | A07425 | 196 |
| A03528 | A07687 | 249 | A03528 | A07762 | 486 |
| A03528 | A08571 | 489 | A03528 | A08885 | 126 |
| A03528 | A09256 | 473 | A03528 | A09945 | 395 |
| A03528 | A10615 | 899 | A03528 | A10824 | 297 |
| A03528 | A10909 | 361 | A03528 | A11027 | 401 |
| A03528 | A11258 | 447 | A03528 | A12047 | 367 |
| A03528 | A13977 | 198 | A03528 | A14222 | 167 |
| A03528 | A14278 | 168 | A03528 | A14474 | 71  |
| A03528 | A14484 | 490 | A03528 | A14633 | 489 |
| A03528 | A15163 | 343 | A03529 | A10525 | 328 |
| A03529 | A14281 | 296 | A03530 | A06141 | 405 |
| A03530 | A06148 | 458 | A03530 | A06606 | 205 |
| A03531 | A05315 | 205 | A03531 | A05385 | 311 |
| A03531 | A06606 | 486 | A03531 | A06660 | 157 |

|        |        |     |        |        |     |
|--------|--------|-----|--------|--------|-----|
| A03531 | A06701 | 219 | A03531 | A09752 | 157 |
| A03531 | A09952 | 157 | A03531 | A10725 | 436 |
| A03531 | A10949 | 489 | A03531 | A12651 | 481 |
| A03531 | A12653 | 311 | A03531 | A12990 | 272 |
| A03531 | A14151 | 443 | A03531 | A14443 | 230 |
| A03531 | A14529 | 273 | A03531 | A15894 | 486 |
| A03531 | A16042 | 398 | A03532 | A05414 | 899 |
| A03532 | A05419 | 162 | A03532 | A07218 | 393 |
| A03532 | A07762 | 277 | A03532 | A08594 | 462 |
| A03532 | A08685 | 170 | A03532 | A11260 | 201 |
| A03532 | A12927 | 228 | A03532 | A15762 | 205 |
| A03532 | A16808 | 177 | A03533 | A03602 | 296 |
| A03533 | A03647 | 395 | A03533 | A04822 | 368 |
| A03533 | A04944 | 288 | A03533 | A05216 | 177 |
| A03533 | A05414 | 899 | A03533 | A06607 | 247 |
| A03533 | A09040 | 334 | A03533 | A09155 | 433 |
| A03533 | A09360 | 424 | A03533 | A10987 | 269 |
| A03534 | A06606 | 168 | A03534 | A08738 | 279 |
| A03534 | A14566 | 380 | A03534 | A14594 | 302 |
| A03535 | A03579 | 422 | A03535 | A06606 | 260 |
| A03535 | A10156 | 333 | A03535 | A12654 | 386 |
| A03535 | A15498 | 285 | A03536 | A03654 | 491 |
| A03536 | A03752 | 446 | A03536 | A03790 | 196 |
| A03536 | A04759 | 188 | A03536 | A05120 | 455 |
| A03536 | A05124 | 425 | A03536 | A06334 | 310 |
| A03536 | A07311 | 531 | A03536 | A09417 | 379 |
| A03536 | A09448 | 179 | A03536 | A09766 | 283 |
| A03536 | A09937 | 205 | A03536 | A10076 | 389 |
| A03536 | A10894 | 414 | A03536 | A11218 | 430 |
| A03536 | A11937 | 340 | A03536 | A13207 | 174 |
| A03536 | A13340 | 235 | A03536 | A13985 | 200 |
| A03536 | A14073 | 208 | A03536 | A14543 | 473 |
| A03536 | A14801 | 402 | A03536 | A14942 | 193 |
| A03536 | A15546 | 190 | A03536 | A16764 | 491 |
| A03537 | A03583 | 391 | A03537 | A03585 | 382 |
| A03537 | A03607 | 434 | A03537 | A03653 | 330 |
| A03537 | A03847 | 416 | A03537 | A03870 | 406 |
| A03537 | A03990 | 207 | A03537 | A04004 | 360 |
| A03537 | A04031 | 385 | A03537 | A04123 | 406 |
| A03537 | A04260 | 305 | A03537 | A04560 | 391 |
| A03537 | A04905 | 371 | A03537 | A05036 | 399 |
| A03537 | A07163 | 208 | A03537 | A09894 | 457 |
| A03537 | A09987 | 434 | A03538 | A03583 | 418 |
| A03538 | A03992 | 408 | A03538 | A06606 | 205 |
| A03538 | A15498 | 227 | A03539 | A05122 | 344 |
| A03540 | A03653 | 413 | A03540 | A04000 | 363 |

|        |        |     |        |        |     |
|--------|--------|-----|--------|--------|-----|
| A03540 | A04484 | 390 | A03540 | A05079 | 388 |
| A03540 | A06606 | 328 | A03540 | A07143 | 316 |
| A03540 | A13419 | 409 | A03540 | A14194 | 338 |
| A03541 | A03612 | 272 | A03541 | A03653 | 255 |
| A03541 | A03662 | 243 | A03541 | A03826 | 333 |
| A03541 | A03832 | 480 | A03541 | A03869 | 375 |
| A03541 | A03871 | 446 | A03541 | A04049 | 419 |
| A03541 | A04080 | 171 | A03541 | A04268 | 241 |
| A03541 | A04275 | 205 | A03541 | A04536 | 481 |
| A03541 | A04577 | 396 | A03541 | A04584 | 356 |
| A03541 | A04585 | 409 | A03541 | A04603 | 283 |
| A03541 | A04723 | 319 | A03541 | A04728 | 485 |
| A03541 | A04783 | 429 | A03541 | A04996 | 294 |
| A03541 | A05113 | 252 | A03541 | A05160 | 375 |
| A03541 | A06055 | 265 | A03541 | A06063 | 224 |
| A03541 | A06654 | 291 | A03541 | A07189 | 363 |
| A03541 | A07390 | 310 | A03541 | A07746 | 162 |
| A03541 | A08459 | 396 | A03541 | A08615 | 443 |
| A03541 | A10120 | 409 | A03541 | A10197 | 333 |
| A03541 | A10337 | 243 | A03541 | A10506 | 193 |
| A03541 | A12619 | 396 | A03541 | A13772 | 216 |
| A03541 | A14443 | 268 | A03543 | A03549 | 374 |
| A03543 | A03550 | 369 | A03543 | A03562 | 377 |
| A03543 | A03585 | 380 | A03543 | A04848 | 312 |
| A03543 | A04939 | 281 | A03543 | A06614 | 414 |
| A03544 | A03553 | 310 | A03544 | A03596 | 302 |
| A03544 | A05122 | 288 | A03544 | A08603 | 366 |
| A03544 | A10337 | 307 | A03544 | A13734 | 173 |
| A03544 | A14410 | 249 | A03545 | A03562 | 218 |
| A03545 | A04023 | 165 | A03545 | A04286 | 162 |
| A03545 | A04369 | 238 | A03545 | A04686 | 461 |
| A03545 | A05020 | 154 | A03545 | A05051 | 193 |
| A03545 | A05346 | 288 | A03545 | A05356 | 217 |
| A03545 | A05573 | 347 | A03545 | A05600 | 210 |
| A03545 | A05736 | 218 | A03545 | A05795 | 353 |
| A03545 | A05827 | 241 | A03545 | A06924 | 185 |
| A03545 | A06934 | 223 | A03545 | A07019 | 160 |
| A03545 | A07122 | 221 | A03545 | A07128 | 174 |
| A03545 | A07141 | 271 | A03545 | A07218 | 271 |
| A03545 | A07267 | 154 | A03545 | A07322 | 212 |
| A03545 | A07330 | 270 | A03545 | A07469 | 193 |
| A03545 | A07559 | 367 | A03545 | A07632 | 229 |
| A03545 | A07633 | 270 | A03545 | A07721 | 290 |
| A03545 | A08284 | 245 | A03545 | A09932 | 243 |
| A03545 | A10527 | 241 | A03545 | A10652 | 196 |
| A03545 | A10692 | 276 | A03545 | A10703 | 177 |



|        |        |     |        |        |     |
|--------|--------|-----|--------|--------|-----|
| A03545 | A11014 | 205 | A03545 | A11432 | 281 |
| A03545 | A11885 | 450 | A03545 | A14330 | 202 |
| A03545 | A14423 | 177 | A03545 | A15271 | 247 |
| A03545 | A15498 | 353 | A03545 | A15992 | 234 |
| A03545 | A16216 | 165 | A03545 | A16815 | 256 |
| A03545 | A17078 | 291 | A03546 | A03664 | 393 |
| A03546 | A05216 | 286 | A03546 | A06606 | 205 |
| A03546 | A12927 | 318 | A03547 | A05827 | 427 |
| A03547 | A07911 | 329 | A03548 | A03563 | 394 |
| A03548 | A04281 | 407 | A03548 | A04848 | 355 |
| A03548 | A05348 | 396 | A03548 | A05827 | 411 |
| A03548 | A06650 | 174 | A03548 | A07200 | 270 |
| A03549 | A03550 | 339 | A03549 | A03562 | 347 |
| A03549 | A03613 | 465 | A03549 | A04724 | 419 |
| A03549 | A04848 | 490 | A03549 | A05348 | 423 |
| A03549 | A05619 | 433 | A03549 | A05787 | 385 |
| A03549 | A05827 | 483 | A03549 | A06177 | 195 |
| A03549 | A06607 | 279 | A03549 | A06650 | 341 |
| A03549 | A07200 | 152 | A03549 | A08604 | 390 |
| A03549 | A08699 | 385 | A03549 | A09180 | 457 |
| A03549 | A09192 | 441 | A03549 | A13250 | 252 |
| A03549 | A13779 | 419 | A03550 | A03562 | 341 |
| A03550 | A03621 | 383 | A03550 | A04286 | 406 |
| A03550 | A04779 | 162 | A03550 | A04848 | 260 |
| A03550 | A05424 | 228 | A03550 | A09026 | 344 |
| A03551 | A09439 | 435 | A03552 | A03554 | 395 |
| A03552 | A03615 | 230 | A03552 | A03948 | 200 |
| A03552 | A04176 | 339 | A03552 | A04267 | 267 |
| A03552 | A04334 | 201 | A03552 | A05742 | 174 |
| A03552 | A06492 | 281 | A03552 | A07761 | 435 |
| A03552 | A10213 | 351 | A03552 | A11275 | 288 |
| A03553 | A03554 | 491 | A03553 | A03596 | 477 |
| A03553 | A04709 | 358 | A03553 | A05742 | 468 |
| A03553 | A05797 | 168 | A03553 | A05926 | 165 |
| A03553 | A06644 | 227 | A03553 | A08995 | 208 |
| A03553 | A09151 | 473 | A03553 | A09152 | 473 |
| A03553 | A09174 | 486 | A03553 | A09757 | 185 |
| A03553 | A09828 | 215 | A03553 | A09932 | 491 |
| A03553 | A10392 | 172 | A03553 | A11456 | 218 |
| A03553 | A11471 | 230 | A03553 | A11551 | 196 |
| A03553 | A11597 | 154 | A03553 | A11940 | 273 |
| A03553 | A12658 | 185 | A03553 | A12665 | 305 |
| A03553 | A12825 | 229 | A03553 | A13321 | 210 |
| A03553 | A13388 | 246 | A03553 | A13707 | 198 |
| A03553 | A13781 | 176 | A03553 | A13804 | 288 |
| A03553 | A14255 | 180 | A03553 | A14569 | 200 |

|        |        |     |        |        |     |
|--------|--------|-----|--------|--------|-----|
| A03553 | A14799 | 193 | A03553 | A14903 | 267 |
| A03553 | A14917 | 257 | A03553 | A15940 | 258 |
| A03553 | A16187 | 216 | A03553 | A16565 | 176 |
| A03553 | A16587 | 251 | A03553 | A16597 | 177 |
| A03553 | A16703 | 226 | A03553 | A16704 | 234 |
| A03553 | A16776 | 274 | A03553 | A16905 | 213 |
| A03553 | A16944 | 281 | A03553 | A16954 | 249 |
| A03553 | A17030 | 274 | A03554 | A03562 | 286 |
| A03554 | A03596 | 319 | A03554 | A03615 | 446 |
| A03554 | A03773 | 177 | A03554 | A04608 | 168 |
| A03554 | A04709 | 363 | A03554 | A04848 | 319 |
| A03554 | A05827 | 307 | A03554 | A05926 | 172 |
| A03554 | A06595 | 172 | A03554 | A06606 | 221 |
| A03554 | A07129 | 226 | A03554 | A08321 | 489 |
| A03554 | A08603 | 281 | A03554 | A09151 | 484 |
| A03554 | A09152 | 462 | A03554 | A09174 | 491 |
| A03554 | A09180 | 266 | A03554 | A09461 | 266 |
| A03554 | A09932 | 491 | A03554 | A10213 | 288 |
| A03554 | A10419 | 324 | A03554 | A11753 | 422 |
| A03555 | A03627 | 353 | A03555 | A14560 | 489 |
| A03556 | A03597 | 537 | A03556 | A03617 | 217 |
| A03556 | A03724 | 184 | A03556 | A03732 | 193 |
| A03556 | A05273 | 451 | A03556 | A05531 | 436 |
| A03556 | A05539 | 565 | A03556 | A05605 | 217 |
| A03556 | A05638 | 200 | A03556 | A06204 | 328 |
| A03556 | A06347 | 77  | A03556 | A06369 | 217 |
| A03556 | A06758 | 477 | A03556 | A06832 | 217 |
| A03556 | A07180 | 468 | A03556 | A07294 | 486 |
| A03556 | A07402 | 322 | A03556 | A08148 | 404 |
| A03556 | A08183 | 217 | A03556 | A09625 | 333 |
| A03556 | A09628 | 476 | A03556 | A09673 | 217 |
| A03556 | A10603 | 224 | A03556 | A10662 | 283 |
| A03556 | A10664 | 408 | A03556 | A13876 | 200 |
| A03556 | A13877 | 313 | A03556 | A13881 | 200 |
| A03556 | A14088 | 396 | A03556 | A14170 | 269 |
| A03556 | A14171 | 384 | A03556 | A14173 | 485 |
| A03556 | A14179 | 516 | A03556 | A14180 | 510 |
| A03556 | A14186 | 85  | A03556 | A14356 | 200 |
| A03556 | A14358 | 330 | A03556 | A15370 | 256 |
| A03556 | A15377 | 217 | A03556 | A15543 | 217 |
| A03556 | A15568 | 416 | A03556 | A15644 | 218 |
| A03556 | A15683 | 429 | A03556 | A15712 | 554 |
| A03556 | A15718 | 357 | A03556 | A15719 | 537 |
| A03556 | A15724 | 256 | A03556 | A15757 | 200 |
| A03556 | A16066 | 200 | A03556 | A16322 | 170 |
| A03556 | A16432 | 245 | A03556 | A16466 | 215 |

|        |        |     |        |        |     |
|--------|--------|-----|--------|--------|-----|
| A03556 | A16634 | 200 | A03556 | A16664 | 217 |
| A03556 | A16665 | 291 | A03556 | A16919 | 200 |
| A03556 | A17166 | 414 | A03557 | A03738 | 199 |
| A03557 | A04709 | 466 | A03557 | A07311 | 224 |
| A03557 | A07911 | 488 | A03557 | A14405 | 246 |
| A03557 | A14440 | 229 | A03557 | A15734 | 294 |
| A03557 | A15752 | 151 | A03557 | A17136 | 177 |
| A03558 | A15660 | 257 | A03558 | A15684 | 305 |
| A03558 | A16976 | 63  | A03560 | A03731 | 191 |
| A03560 | A03738 | 402 | A03560 | A03773 | 168 |
| A03560 | A03783 | 404 | A03560 | A03863 | 454 |
| A03560 | A04307 | 411 | A03560 | A04447 | 167 |
| A03560 | A05029 | 434 | A03560 | A05086 | 196 |
| A03560 | A05323 | 174 | A03560 | A05712 | 221 |
| A03560 | A06030 | 221 | A03560 | A06382 | 208 |
| A03560 | A06435 | 185 | A03560 | A06466 | 443 |
| A03560 | A06814 | 374 | A03560 | A07024 | 185 |
| A03560 | A07247 | 460 | A03560 | A07311 | 438 |
| A03560 | A07378 | 371 | A03560 | A08546 | 437 |
| A03560 | A08773 | 274 | A03560 | A08835 | 207 |
| A03560 | A08900 | 434 | A03560 | A08940 | 252 |
| A03560 | A08978 | 468 | A03560 | A08991 | 404 |
| A03560 | A09024 | 469 | A03560 | A09230 | 232 |
| A03560 | A09234 | 245 | A03560 | A09248 | 272 |
| A03560 | A09293 | 174 | A03560 | A09299 | 177 |
| A03560 | A09320 | 204 | A03560 | A09591 | 508 |
| A03560 | A09748 | 364 | A03560 | A09749 | 491 |
| A03560 | A10235 | 285 | A03560 | A10490 | 215 |
| A03560 | A10532 | 486 | A03560 | A11224 | 216 |
| A03560 | A11959 | 208 | A03560 | A12882 | 185 |
| A03560 | A12903 | 156 | A03560 | A13128 | 379 |
| A03560 | A13135 | 212 | A03560 | A13424 | 358 |
| A03560 | A13426 | 157 | A03560 | A13768 | 168 |
| A03560 | A13948 | 180 | A03560 | A14138 | 438 |
| A03560 | A14161 | 238 | A03560 | A14167 | 172 |
| A03560 | A14178 | 334 | A03560 | A14351 | 234 |
| A03560 | A14559 | 168 | A03560 | A15438 | 232 |
| A03560 | A15439 | 208 | A03560 | A15469 | 184 |
| A03560 | A15503 | 154 | A03560 | A15624 | 441 |
| A03560 | A15684 | 63  | A03560 | A16090 | 329 |
| A03560 | A16167 | 272 | A03560 | A16814 | 439 |
| A03560 | A17088 | 376 | A03562 | A03563 | 335 |
| A03562 | A03608 | 274 | A03562 | A03653 | 290 |
| A03562 | A04337 | 177 | A03562 | A04788 | 449 |
| A03562 | A04848 | 272 | A03562 | A05216 | 449 |
| A03562 | A05827 | 363 | A03562 | A08321 | 285 |

|        |        |     |        |        |     |
|--------|--------|-----|--------|--------|-----|
| A03562 | A09178 | 420 | A03562 | A11513 | 276 |
| A03562 | A12040 | 402 | A03562 | A12494 | 409 |
| A03562 | A12765 | 402 | A03563 | A03613 | 355 |
| A03563 | A04281 | 343 | A03563 | A04848 | 251 |
| A03563 | A05216 | 489 | A03563 | A05348 | 323 |
| A03563 | A06606 | 388 | A03563 | A12040 | 394 |
| A03563 | A12494 | 401 | A03563 | A12765 | 394 |
| A03564 | A05216 | 154 | A03564 | A08911 | 385 |
| A03565 | A03626 | 638 | A03565 | A03708 | 174 |
| A03565 | A03891 | 334 | A03565 | A04292 | 302 |
| A03565 | A04893 | 533 | A03565 | A04896 | 160 |
| A03565 | A05023 | 554 | A03565 | A05233 | 390 |
| A03565 | A06627 | 288 | A03565 | A06659 | 334 |
| A03565 | A06675 | 629 | A03565 | A08874 | 217 |
| A03565 | A09050 | 334 | A03565 | A10739 | 215 |
| A03565 | A10804 | 185 | A03565 | A12792 | 467 |
| A03565 | A13830 | 400 | A03565 | A13834 | 252 |
| A03565 | A13844 | 334 | A03565 | A13846 | 618 |
| A03565 | A13887 | 274 | A03565 | A14095 | 490 |
| A03565 | A14182 | 465 | A03565 | A15347 | 177 |
| A03565 | A17168 | 152 | A03566 | A03611 | 249 |
| A03566 | A03964 | 201 | A03566 | A04471 | 230 |
| A03566 | A04722 | 152 | A03566 | A06650 | 208 |
| A03566 | A07869 | 182 | A03566 | A08126 | 170 |
| A03566 | A08360 | 208 | A03566 | A08571 | 475 |
| A03566 | A08839 | 177 | A03566 | A09256 | 353 |
| A03566 | A09511 | 205 | A03566 | A09671 | 152 |
| A03566 | A10284 | 469 | A03566 | A10525 | 334 |
| A03566 | A10833 | 171 | A03566 | A11332 | 257 |
| A03566 | A11487 | 385 | A03566 | A12047 | 447 |
| A03566 | A12886 | 200 | A03566 | A14198 | 573 |
| A03566 | A14928 | 174 | A03566 | A15018 | 469 |
| A03566 | A15532 | 154 | A03567 | A03569 | 171 |
| A03567 | A03570 | 159 | A03567 | A03645 | 182 |
| A03567 | A03705 | 486 | A03567 | A03740 | 491 |
| A03567 | A03754 | 486 | A03567 | A03859 | 491 |
| A03567 | A04430 | 176 | A03567 | A04760 | 190 |
| A03567 | A05230 | 177 | A03567 | A05411 | 283 |
| A03567 | A05443 | 366 | A03567 | A05501 | 491 |
| A03567 | A05502 | 162 | A03567 | A05581 | 160 |
| A03567 | A05646 | 213 | A03567 | A06122 | 180 |
| A03567 | A06275 | 339 | A03567 | A06279 | 489 |
| A03567 | A06351 | 321 | A03567 | A06812 | 316 |
| A03567 | A06861 | 582 | A03567 | A06909 | 323 |
| A03567 | A06965 | 491 | A03567 | A06973 | 491 |
| A03567 | A07243 | 249 | A03567 | A07262 | 198 |

|        |        |     |        |        |     |
|--------|--------|-----|--------|--------|-----|
| A03567 | A07307 | 208 | A03567 | A07311 | 460 |
| A03567 | A07323 | 425 | A03567 | A07347 | 281 |
| A03567 | A07348 | 379 | A03567 | A07378 | 446 |
| A03567 | A07398 | 441 | A03567 | A07451 | 491 |
| A03567 | A07581 | 294 | A03567 | A07706 | 450 |
| A03567 | A08011 | 378 | A03567 | A08022 | 424 |
| A03567 | A08055 | 254 | A03567 | A08131 | 318 |
| A03567 | A08137 | 318 | A03567 | A08357 | 491 |
| A03567 | A08359 | 167 | A03567 | A08398 | 435 |
| A03567 | A08452 | 490 | A03567 | A08517 | 208 |
| A03567 | A08571 | 475 | A03567 | A08664 | 322 |
| A03567 | A08752 | 160 | A03567 | A08982 | 470 |
| A03567 | A09044 | 379 | A03567 | A09285 | 170 |
| A03567 | A09322 | 582 | A03567 | A09327 | 274 |
| A03567 | A09345 | 182 | A03567 | A09544 | 190 |
| A03567 | A09630 | 160 | A03567 | A09674 | 396 |
| A03567 | A09702 | 372 | A03567 | A09862 | 440 |
| A03567 | A09865 | 82  | A03567 | A10417 | 371 |
| A03567 | A10439 | 299 | A03567 | A10529 | 165 |
| A03567 | A10532 | 398 | A03567 | A10616 | 460 |
| A03567 | A10624 | 249 | A03567 | A10728 | 185 |
| A03567 | A10934 | 163 | A03567 | A11277 | 491 |
| A03567 | A11316 | 341 | A03567 | A11368 | 268 |
| A03567 | A11390 | 377 | A03567 | A11429 | 170 |
| A03567 | A11438 | 490 | A03567 | A11480 | 486 |
| A03567 | A11562 | 299 | A03567 | A11704 | 491 |
| A03567 | A11945 | 441 | A03567 | A12053 | 235 |
| A03567 | A12101 | 176 | A03567 | A12233 | 221 |
| A03567 | A13125 | 347 | A03567 | A13139 | 190 |
| A03567 | A13249 | 180 | A03567 | A13600 | 288 |
| A03567 | A13830 | 391 | A03567 | A13989 | 491 |
| A03567 | A13992 | 490 | A03567 | A14029 | 154 |
| A03567 | A14070 | 348 | A03567 | A14073 | 473 |
| A03567 | A14152 | 271 | A03567 | A14169 | 491 |
| A03567 | A14188 | 424 | A03567 | A14196 | 427 |
| A03567 | A14216 | 486 | A03567 | A14505 | 353 |
| A03567 | A14566 | 480 | A03567 | A14594 | 238 |
| A03567 | A14596 | 490 | A03567 | A14597 | 489 |
| A03567 | A14701 | 180 | A03567 | A15212 | 229 |
| A03567 | A15218 | 455 | A03567 | A15221 | 152 |
| A03567 | A15235 | 374 | A03567 | A15237 | 413 |
| A03567 | A15297 | 477 | A03567 | A15324 | 380 |
| A03567 | A15338 | 452 | A03567 | A15353 | 446 |
| A03567 | A15500 | 461 | A03567 | A15502 | 327 |
| A03567 | A15660 | 491 | A03567 | A15666 | 236 |
| A03567 | A15684 | 491 | A03567 | A15708 | 408 |

|        |        |     |        |        |     |
|--------|--------|-----|--------|--------|-----|
| A03567 | A15718 | 281 | A03567 | A15725 | 172 |
| A03567 | A15727 | 160 | A03567 | A15747 | 221 |
| A03567 | A15920 | 317 | A03567 | A15931 | 424 |
| A03567 | A15971 | 190 | A03567 | A15988 | 477 |
| A03567 | A16044 | 219 | A03567 | A16118 | 491 |
| A03567 | A16218 | 430 | A03567 | A16463 | 255 |
| A03567 | A16495 | 160 | A03567 | A16631 | 458 |
| A03567 | A16686 | 230 | A03567 | A16768 | 308 |
| A03568 | A05607 | 171 | A03568 | A06073 | 348 |
| A03568 | A08900 | 343 | A03568 | A09520 | 296 |
| A03568 | A10320 | 249 | A03569 | A04050 | 412 |
| A03569 | A04686 | 174 | A03569 | A04833 | 486 |
| A03569 | A05356 | 221 | A03569 | A06039 | 167 |
| A03569 | A06143 | 460 | A03569 | A06168 | 419 |
| A03569 | A06176 | 63  | A03569 | A06348 | 63  |
| A03569 | A06689 | 156 | A03569 | A06907 | 491 |
| A03569 | A07311 | 232 | A03569 | A07422 | 63  |
| A03569 | A07524 | 369 | A03569 | A07604 | 491 |
| A03569 | A07706 | 188 | A03569 | A07834 | 84  |
| A03569 | A07898 | 152 | A03569 | A07968 | 156 |
| A03569 | A08137 | 556 | A03569 | A08280 | 483 |
| A03569 | A08327 | 202 | A03569 | A08571 | 491 |
| A03569 | A10250 | 490 | A03569 | A10616 | 596 |
| A03569 | A10853 | 377 | A03569 | A11168 | 477 |
| A03569 | A11258 | 77  | A03569 | A11291 | 393 |
| A03569 | A11405 | 466 | A03569 | A11487 | 461 |
| A03569 | A11920 | 127 | A03569 | A11928 | 63  |
| A03569 | A11930 | 271 | A03569 | A12095 | 183 |
| A03569 | A12218 | 205 | A03569 | A12543 | 380 |
| A03569 | A13740 | 207 | A03569 | A13928 | 475 |
| A03569 | A13977 | 63  | A03569 | A13989 | 491 |
| A03569 | A14006 | 491 | A03569 | A14009 | 486 |
| A03569 | A14056 | 221 | A03569 | A14148 | 660 |
| A03569 | A14184 | 395 | A03569 | A14193 | 532 |
| A03569 | A14196 | 542 | A03569 | A14208 | 384 |
| A03569 | A14220 | 486 | A03569 | A14221 | 490 |
| A03569 | A14246 | 254 | A03569 | A14257 | 491 |
| A03569 | A14265 | 171 | A03569 | A14303 | 481 |
| A03569 | A14461 | 369 | A03569 | A14476 | 63  |
| A03569 | A14508 | 201 | A03569 | A14701 | 411 |
| A03569 | A14922 | 205 | A03569 | A14953 | 168 |
| A03569 | A14993 | 241 | A03569 | A15291 | 251 |
| A03569 | A15297 | 491 | A03569 | A15315 | 466 |
| A03569 | A15322 | 227 | A03569 | A15338 | 491 |
| A03569 | A15366 | 486 | A03569 | A15559 | 491 |
| A03569 | A15561 | 425 | A03569 | A15629 | 160 |

|        |        |     |        |        |     |
|--------|--------|-----|--------|--------|-----|
| A03569 | A15702 | 236 | A03569 | A15710 | 485 |
| A03569 | A15729 | 485 | A03569 | A15752 | 409 |
| A03569 | A15773 | 249 | A03569 | A15779 | 481 |
| A03569 | A15935 | 196 | A03569 | A16722 | 256 |
| A03569 | A16844 | 439 | A03569 | A17063 | 491 |
| A03570 | A03677 | 165 | A03570 | A03697 | 184 |
| A03570 | A03885 | 321 | A03570 | A03906 | 156 |
| A03570 | A04006 | 154 | A03570 | A04441 | 283 |
| A03570 | A04770 | 198 | A03570 | A04966 | 286 |
| A03570 | A05087 | 491 | A03570 | A05590 | 316 |
| A03570 | A05634 | 254 | A03570 | A05697 | 425 |
| A03570 | A06038 | 369 | A03570 | A06393 | 303 |
| A03570 | A07398 | 440 | A03570 | A07497 | 303 |
| A03570 | A07756 | 234 | A03570 | A07853 | 274 |
| A03570 | A07956 | 171 | A03570 | A08539 | 213 |
| A03570 | A08872 | 171 | A03570 | A08882 | 188 |
| A03570 | A08927 | 362 | A03570 | A09131 | 163 |
| A03570 | A09235 | 151 | A03570 | A09300 | 191 |
| A03570 | A09703 | 196 | A03570 | A10278 | 208 |
| A03570 | A10415 | 340 | A03570 | A11368 | 267 |
| A03570 | A11386 | 305 | A03570 | A11670 | 160 |
| A03570 | A11734 | 205 | A03570 | A12095 | 340 |
| A03570 | A12238 | 254 | A03570 | A12257 | 299 |
| A03570 | A12363 | 277 | A03570 | A12824 | 443 |
| A03570 | A13039 | 374 | A03570 | A13040 | 374 |
| A03570 | A13116 | 208 | A03570 | A13310 | 173 |
| A03570 | A13870 | 180 | A03570 | A14196 | 401 |
| A03570 | A14508 | 154 | A03570 | A14591 | 159 |
| A03570 | A14596 | 399 | A03570 | A14649 | 183 |
| A03570 | A15233 | 229 | A03570 | A15297 | 417 |
| A03570 | A15323 | 375 | A03570 | A15324 | 162 |
| A03570 | A15624 | 374 | A03570 | A15659 | 440 |
| A03570 | A15660 | 491 | A03570 | A15684 | 491 |
| A03570 | A15700 | 322 | A03570 | A15708 | 363 |
| A03570 | A15918 | 314 | A03570 | A15936 | 271 |
| A03570 | A16075 | 196 | A03570 | A16218 | 343 |
| A03570 | A16259 | 408 | A03570 | A16496 | 310 |
| A03570 | A16580 | 238 | A03570 | A16838 | 205 |
| A03571 | A03754 | 185 | A03571 | A04761 | 185 |
| A03571 | A06121 | 406 | A03571 | A06814 | 485 |
| A03571 | A07536 | 293 | A03571 | A07726 | 288 |
| A03571 | A08835 | 317 | A03571 | A10633 | 168 |
| A03571 | A10748 | 262 | A03571 | A11400 | 399 |
| A03571 | A12310 | 378 | A03571 | A12990 | 351 |
| A03571 | A13107 | 294 | A03571 | A13125 | 466 |
| A03571 | A13241 | 249 | A03571 | A13466 | 260 |

|        |        |     |        |        |     |
|--------|--------|-----|--------|--------|-----|
| A03571 | A13581 | 276 | A03571 | A13989 | 301 |
| A03571 | A15416 | 283 | A03571 | A15638 | 157 |
| A03572 | A04697 | 363 | A03572 | A05417 | 462 |
| A03572 | A07247 | 262 | A03572 | A14073 | 152 |
| A03573 | A04337 | 205 | A03573 | A04361 | 293 |
| A03573 | A05148 | 481 | A03573 | A05442 | 475 |
| A03573 | A05813 | 412 | A03573 | A06240 | 215 |
| A03573 | A06277 | 156 | A03573 | A06484 | 271 |
| A03573 | A06516 | 456 | A03573 | A06729 | 294 |
| A03573 | A06731 | 278 | A03573 | A07286 | 407 |
| A03573 | A10540 | 391 | A03573 | A12698 | 418 |
| A03573 | A14303 | 224 | A03574 | A03577 | 436 |
| A03574 | A03588 | 446 | A03574 | A03602 | 486 |
| A03574 | A03627 | 435 | A03574 | A03653 | 480 |
| A03574 | A04000 | 332 | A03574 | A04127 | 345 |
| A03574 | A04334 | 185 | A03574 | A04369 | 259 |
| A03574 | A04633 | 323 | A03574 | A05216 | 174 |
| A03574 | A05414 | 899 | A03574 | A06606 | 427 |
| A03574 | A07911 | 157 | A03575 | A03611 | 417 |
| A03575 | A03637 | 308 | A03575 | A03741 | 296 |
| A03575 | A04195 | 199 | A03575 | A04342 | 262 |
| A03575 | A04668 | 249 | A03575 | A04914 | 180 |
| A03575 | A05008 | 945 | A03575 | A05009 | 956 |
| A03575 | A05015 | 488 | A03575 | A05284 | 165 |
| A03575 | A05428 | 935 | A03575 | A05853 | 271 |
| A03575 | A05892 | 141 | A03575 | A05894 | 63  |
| A03575 | A06387 | 152 | A03575 | A06602 | 224 |
| A03575 | A06603 | 302 | A03575 | A07311 | 361 |
| A03575 | A07422 | 194 | A03575 | A07433 | 582 |
| A03575 | A07552 | 408 | A03575 | A07834 | 344 |
| A03575 | A07869 | 329 | A03575 | A08185 | 255 |
| A03575 | A08352 | 165 | A03575 | A08360 | 459 |
| A03575 | A08552 | 483 | A03575 | A08571 | 427 |
| A03575 | A08839 | 960 | A03575 | A08853 | 371 |
| A03575 | A08855 | 115 | A03575 | A08858 | 985 |
| A03575 | A08894 | 210 | A03575 | A09052 | 113 |
| A03575 | A10175 | 210 | A03575 | A10185 | 899 |
| A03575 | A10580 | 975 | A03575 | A10604 | 74  |
| A03575 | A11104 | 229 | A03575 | A11283 | 491 |
| A03575 | A11332 | 428 | A03575 | A11656 | 281 |
| A03575 | A11828 | 154 | A03575 | A11840 | 278 |
| A03575 | A11849 | 215 | A03575 | A12047 | 638 |
| A03575 | A12273 | 230 | A03575 | A12533 | 154 |
| A03575 | A12552 | 352 | A03575 | A13147 | 183 |
| A03575 | A13510 | 226 | A03575 | A13917 | 229 |
| A03575 | A13924 | 288 | A03575 | A13949 | 352 |



|        |        |     |        |        |     |
|--------|--------|-----|--------|--------|-----|
| A03575 | A14156 | 943 | A03575 | A14226 | 291 |
| A03575 | A14227 | 463 | A03575 | A14278 | 335 |
| A03575 | A14279 | 574 | A03575 | A14291 | 361 |
| A03575 | A14310 | 358 | A03575 | A14443 | 911 |
| A03575 | A14944 | 182 | A03575 | A15533 | 160 |
| A03575 | A15726 | 451 | A03575 | A16135 | 152 |
| A03576 | A03813 | 310 | A03576 | A03882 | 291 |
| A03576 | A04477 | 385 | A03576 | A05472 | 319 |
| A03576 | A06400 | 337 | A03576 | A08878 | 177 |
| A03576 | A09491 | 362 | A03576 | A11485 | 263 |
| A03576 | A12383 | 210 | A03577 | A03588 | 456 |
| A03577 | A03602 | 465 | A03577 | A03653 | 454 |
| A03577 | A04000 | 439 | A03577 | A06466 | 191 |
| A03577 | A07911 | 216 | A03577 | A08330 | 332 |
| A03577 | A13340 | 257 | A03578 | A03584 | 488 |
| A03578 | A03633 | 439 | A03578 | A03914 | 195 |
| A03578 | A03960 | 286 | A03578 | A04163 | 210 |
| A03578 | A04423 | 263 | A03578 | A04504 | 319 |
| A03578 | A04562 | 218 | A03578 | A04751 | 157 |
| A03578 | A04813 | 249 | A03578 | A05216 | 205 |
| A03578 | A06606 | 259 | A03578 | A07061 | 165 |
| A03578 | A14438 | 263 | A03578 | A14930 | 152 |
| A03579 | A03583 | 412 | A03579 | A12654 | 407 |
| A03580 | A04380 | 288 | A03580 | A05210 | 238 |
| A03580 | A07803 | 291 | A03580 | A08863 | 223 |
| A03580 | A11335 | 228 | A03580 | A11875 | 193 |
| A03580 | A12171 | 374 | A03580 | A12494 | 355 |
| A03580 | A12662 | 260 | A03580 | A12765 | 341 |
| A03580 | A14190 | 249 | A03580 | A14654 | 193 |
| A03580 | A15348 | 216 | A03581 | A06814 | 269 |
| A03581 | A07412 | 269 | A03581 | A08052 | 269 |
| A03581 | A08273 | 269 | A03581 | A08315 | 269 |
| A03581 | A08875 | 489 | A03581 | A09620 | 269 |
| A03581 | A09697 | 269 | A03581 | A09764 | 308 |
| A03581 | A10624 | 173 | A03581 | A11300 | 373 |
| A03581 | A13581 | 269 | A03581 | A13672 | 210 |
| A03581 | A15837 | 269 | A03581 | A16027 | 269 |
| A03582 | A03754 | 258 | A03582 | A05591 | 254 |
| A03582 | A06486 | 374 | A03582 | A09248 | 490 |
| A03582 | A11400 | 260 | A03582 | A11462 | 256 |
| A03582 | A13989 | 63  | A03582 | A14471 | 177 |
| A03583 | A03584 | 308 | A03583 | A03585 | 369 |
| A03583 | A03589 | 389 | A03583 | A03653 | 311 |
| A03583 | A03847 | 407 | A03583 | A03870 | 396 |
| A03583 | A04001 | 378 | A03583 | A04004 | 344 |
| A03583 | A04031 | 372 | A03583 | A04123 | 396 |

|        |        |     |        |        |     |
|--------|--------|-----|--------|--------|-----|
| A03583 | A04204 | 428 | A03583 | A04260 | 281 |
| A03583 | A04280 | 226 | A03583 | A04560 | 379 |
| A03583 | A04821 | 385 | A03583 | A04822 | 356 |
| A03583 | A04905 | 357 | A03583 | A05036 | 389 |
| A03583 | A05533 | 310 | A03583 | A06606 | 217 |
| A03583 | A07431 | 428 | A03583 | A08686 | 249 |
| A03583 | A09186 | 428 | A03583 | A09187 | 412 |
| A03583 | A09467 | 407 | A03583 | A10725 | 341 |
| A03584 | A03633 | 445 | A03584 | A03653 | 445 |
| A03584 | A03961 | 180 | A03584 | A04002 | 412 |
| A03584 | A04504 | 333 | A03584 | A04822 | 272 |
| A03584 | A05216 | 477 | A03584 | A05533 | 205 |
| A03584 | A06606 | 443 | A03584 | A07019 | 235 |
| A03584 | A07559 | 218 | A03584 | A08160 | 302 |
| A03584 | A09190 | 363 | A03584 | A09247 | 249 |
| A03584 | A09467 | 356 | A03584 | A10725 | 251 |
| A03584 | A10753 | 372 | A03584 | A16257 | 218 |
| A03585 | A03653 | 294 | A03585 | A03847 | 400 |
| A03585 | A03870 | 388 | A03585 | A04004 | 472 |
| A03585 | A04031 | 361 | A03585 | A04118 | 412 |
| A03585 | A04123 | 388 | A03585 | A04260 | 263 |
| A03585 | A04304 | 366 | A03585 | A04520 | 210 |
| A03585 | A04521 | 405 | A03585 | A04531 | 366 |
| A03585 | A04560 | 369 | A03585 | A04661 | 316 |
| A03585 | A04797 | 412 | A03585 | A04905 | 345 |
| A03585 | A04939 | 243 | A03585 | A04953 | 412 |
| A03585 | A05036 | 380 | A03585 | A05639 | 385 |
| A03585 | A06606 | 293 | A03585 | A06614 | 400 |
| A03585 | A09884 | 385 | A03585 | A10128 | 395 |
| A03585 | A11348 | 327 | A03586 | A03643 | 286 |
| A03586 | A03863 | 449 | A03586 | A04074 | 177 |
| A03586 | A04497 | 462 | A03586 | A05102 | 208 |
| A03586 | A05216 | 443 | A03586 | A05284 | 208 |
| A03586 | A05310 | 329 | A03586 | A05515 | 266 |
| A03586 | A05606 | 299 | A03586 | A05712 | 210 |
| A03586 | A05772 | 297 | A03586 | A05797 | 385 |
| A03586 | A06359 | 468 | A03586 | A06360 | 316 |
| A03586 | A06634 | 299 | A03586 | A07080 | 441 |
| A03586 | A07122 | 216 | A03586 | A07288 | 450 |
| A03586 | A10009 | 285 | A03586 | A11304 | 480 |
| A03586 | A12730 | 257 | A03586 | A14596 | 191 |
| A03586 | A15905 | 180 | A03586 | A17163 | 371 |
| A03587 | A03770 | 267 | A03587 | A03771 | 236 |
| A03587 | A04053 | 286 | A03587 | A04333 | 427 |
| A03587 | A04939 | 196 | A03587 | A05351 | 329 |
| A03587 | A05798 | 340 | A03587 | A06623 | 335 |

|        |        |     |        |        |     |
|--------|--------|-----|--------|--------|-----|
| A03587 | A10760 | 249 | A03587 | A14366 | 162 |
| A03588 | A03602 | 317 | A03588 | A03653 | 428 |
| A03588 | A03976 | 310 | A03588 | A04127 | 393 |
| A03588 | A04260 | 321 | A03589 | A03653 | 327 |
| A03589 | A04253 | 396 | A03589 | A04550 | 418 |
| A03589 | A10731 | 326 | A03589 | A12952 | 247 |
| A03589 | A13824 | 159 | A03590 | A04739 | 302 |
| A03590 | A07158 | 374 | A03590 | A09562 | 357 |
| A03590 | A09899 | 413 | A03591 | A03739 | 210 |
| A03591 | A04161 | 379 | A03591 | A04449 | 160 |
| A03591 | A04773 | 291 | A03591 | A05288 | 570 |
| A03591 | A05416 | 151 | A03591 | A05427 | 251 |
| A03591 | A05621 | 199 | A03591 | A06466 | 181 |
| A03591 | A07135 | 374 | A03591 | A07311 | 972 |
| A03591 | A08438 | 374 | A03591 | A08608 | 303 |
| A03591 | A08679 | 414 | A03591 | A08862 | 486 |
| A03591 | A09470 | 152 | A03591 | A09568 | 945 |
| A03591 | A10430 | 374 | A03591 | A10735 | 174 |
| A03591 | A10833 | 297 | A03591 | A11124 | 177 |
| A03591 | A11300 | 296 | A03591 | A11487 | 243 |
| A03591 | A11621 | 491 | A03591 | A11820 | 329 |
| A03591 | A11914 | 229 | A03591 | A11937 | 207 |
| A03591 | A11983 | 899 | A03591 | A12373 | 944 |
| A03591 | A12383 | 934 | A03591 | A12749 | 162 |
| A03591 | A12969 | 530 | A03591 | A13042 | 221 |
| A03591 | A13340 | 278 | A03591 | A13391 | 899 |
| A03591 | A13511 | 340 | A03591 | A13795 | 191 |
| A03591 | A13912 | 162 | A03591 | A13984 | 940 |
| A03591 | A14042 | 899 | A03591 | A14198 | 935 |
| A03591 | A14208 | 312 | A03591 | A14410 | 308 |
| A03591 | A14443 | 916 | A03591 | A14444 | 901 |
| A03591 | A14472 | 911 | A03591 | A14527 | 899 |
| A03591 | A15294 | 182 | A03591 | A15682 | 170 |
| A03591 | A16328 | 462 | A03591 | A16741 | 475 |
| A03591 | A16847 | 374 | A03591 | A17063 | 184 |
| A03592 | A04269 | 441 | A03592 | A06606 | 205 |
| A03593 | A03594 | 409 | A03593 | A03611 | 240 |
| A03593 | A05309 | 279 | A03593 | A09242 | 345 |
| A03593 | A10247 | 296 | A03594 | A03611 | 279 |
| A03594 | A05309 | 191 | A03594 | A06606 | 208 |
| A03594 | A07165 | 176 | A03594 | A08070 | 272 |
| A03594 | A09172 | 425 | A03594 | A13665 | 319 |
| A03595 | A03602 | 396 | A03595 | A03609 | 474 |
| A03595 | A03809 | 296 | A03595 | A04108 | 267 |
| A03595 | A05064 | 321 | A03595 | A05309 | 208 |
| A03595 | A07163 | 193 | A03595 | A13294 | 374 |

|        |        |     |        |        |     |
|--------|--------|-----|--------|--------|-----|
| A03596 | A03644 | 383 | A03596 | A03739 | 174 |
| A03596 | A03981 | 196 | A03596 | A04622 | 260 |
| A03596 | A04740 | 283 | A03596 | A05034 | 228 |
| A03596 | A05122 | 152 | A03596 | A05294 | 198 |
| A03596 | A05418 | 234 | A03596 | A05926 | 154 |
| A03596 | A05961 | 271 | A03596 | A07159 | 238 |
| A03596 | A07412 | 232 | A03596 | A07505 | 170 |
| A03596 | A07723 | 266 | A03596 | A07759 | 285 |
| A03596 | A08052 | 184 | A03596 | A08273 | 260 |
| A03596 | A08700 | 488 | A03596 | A09151 | 479 |
| A03596 | A09152 | 259 | A03596 | A09173 | 355 |
| A03596 | A09174 | 430 | A03596 | A09435 | 245 |
| A03596 | A09447 | 281 | A03596 | A09756 | 259 |
| A03596 | A09932 | 477 | A03596 | A10369 | 154 |
| A03596 | A11278 | 227 | A03596 | A11331 | 193 |
| A03596 | A11926 | 327 | A03596 | A13234 | 182 |
| A03596 | A13460 | 199 | A03596 | A13946 | 238 |
| A03596 | A14520 | 285 | A03596 | A14588 | 193 |
| A03596 | A15141 | 290 | A03596 | A15624 | 288 |
| A03596 | A16095 | 369 | A03597 | A03617 | 535 |
| A03597 | A03626 | 63  | A03597 | A03832 | 307 |
| A03597 | A04686 | 154 | A03597 | A04693 | 179 |
| A03597 | A04929 | 76  | A03597 | A05273 | 320 |
| A03597 | A05531 | 554 | A03597 | A05539 | 566 |
| A03597 | A05605 | 233 | A03597 | A05638 | 206 |
| A03597 | A05702 | 377 | A03597 | A05803 | 228 |
| A03597 | A06204 | 561 | A03597 | A06347 | 454 |
| A03597 | A06361 | 249 | A03597 | A06369 | 323 |
| A03597 | A06510 | 196 | A03597 | A06758 | 441 |
| A03597 | A07180 | 565 | A03597 | A07203 | 383 |
| A03597 | A07244 | 485 | A03597 | A07294 | 450 |
| A03597 | A07312 | 441 | A03597 | A07347 | 190 |
| A03597 | A08506 | 63  | A03597 | A08775 | 243 |
| A03597 | A08781 | 273 | A03597 | A09566 | 152 |
| A03597 | A09625 | 498 | A03597 | A09628 | 261 |
| A03597 | A10317 | 355 | A03597 | A10603 | 195 |
| A03597 | A10662 | 277 | A03597 | A10664 | 77  |
| A03597 | A11247 | 137 | A03597 | A12292 | 210 |
| A03597 | A12850 | 168 | A03597 | A13384 | 468 |
| A03597 | A13711 | 303 | A03597 | A13831 | 480 |
| A03597 | A13858 | 172 | A03597 | A13876 | 389 |
| A03597 | A13881 | 200 | A03597 | A14056 | 63  |
| A03597 | A14087 | 446 | A03597 | A14088 | 419 |
| A03597 | A14091 | 180 | A03597 | A14170 | 353 |
| A03597 | A14171 | 266 | A03597 | A14173 | 217 |
| A03597 | A14179 | 251 | A03597 | A14180 | 335 |

|        |        |     |        |        |     |
|--------|--------|-----|--------|--------|-----|
| A03597 | A14186 | 460 | A03597 | A14209 | 170 |
| A03597 | A14215 | 160 | A03597 | A14356 | 200 |
| A03597 | A14621 | 301 | A03597 | A15370 | 550 |
| A03597 | A15568 | 196 | A03597 | A15569 | 323 |
| A03597 | A15646 | 162 | A03597 | A15648 | 303 |
| A03597 | A15664 | 228 | A03597 | A15683 | 491 |
| A03597 | A15703 | 201 | A03597 | A15712 | 526 |
| A03597 | A15718 | 307 | A03597 | A15719 | 246 |
| A03597 | A15724 | 374 | A03597 | A15757 | 200 |
| A03597 | A16066 | 200 | A03597 | A16611 | 391 |
| A03597 | A16634 | 316 | A03597 | A16843 | 297 |
| A03597 | A16857 | 156 | A03597 | A16919 | 200 |
| A03597 | A17166 | 190 | A03598 | A03612 | 416 |
| A03598 | A03646 | 401 | A03598 | A04314 | 425 |
| A03598 | A04449 | 201 | A03598 | A04623 | 455 |
| A03598 | A04661 | 328 | A03598 | A04708 | 401 |
| A03598 | A04713 | 371 | A03598 | A05216 | 443 |
| A03598 | A06606 | 212 | A03598 | A07135 | 180 |
| A03598 | A11335 | 461 | A03598 | A14426 | 340 |
| A03598 | A14487 | 347 | A03598 | A16281 | 229 |
| A03599 | A03633 | 380 | A03599 | A04883 | 326 |
| A03599 | A07553 | 402 | A03599 | A10481 | 425 |
| A03599 | A10689 | 266 | A03600 | A03891 | 257 |
| A03600 | A04013 | 267 | A03600 | A04642 | 213 |
| A03600 | A05738 | 468 | A03600 | A07545 | 398 |
| A03600 | A07760 | 213 | A03600 | A10065 | 391 |
| A03600 | A10131 | 243 | A03600 | A13298 | 162 |
| A03600 | A13614 | 198 | A03600 | A14478 | 218 |
| A03600 | A15096 | 455 | A03600 | A15367 | 235 |
| A03600 | A16201 | 288 | A03601 | A03644 | 353 |
| A03601 | A03881 | 299 | A03601 | A03981 | 112 |
| A03601 | A05327 | 294 | A03601 | A05375 | 293 |
| A03601 | A05501 | 384 | A03601 | A06017 | 232 |
| A03601 | A06084 | 339 | A03601 | A06105 | 243 |
| A03601 | A06273 | 168 | A03601 | A06356 | 432 |
| A03601 | A06531 | 443 | A03601 | A06814 | 163 |
| A03601 | A06815 | 445 | A03601 | A06861 | 262 |
| A03601 | A06955 | 285 | A03601 | A06975 | 255 |
| A03601 | A07242 | 235 | A03601 | A07584 | 241 |
| A03601 | A07706 | 491 | A03601 | A08304 | 210 |
| A03601 | A08653 | 413 | A03601 | A08886 | 294 |
| A03601 | A09656 | 432 | A03601 | A10538 | 337 |
| A03601 | A11264 | 249 | A03601 | A11277 | 313 |
| A03601 | A11930 | 303 | A03601 | A11981 | 170 |
| A03601 | A13187 | 427 | A03601 | A13989 | 338 |
| A03601 | A14188 | 168 | A03601 | A14566 | 489 |

|        |        |     |        |        |     |
|--------|--------|-----|--------|--------|-----|
| A03601 | A14594 | 490 | A03601 | A15275 | 223 |
| A03601 | A16152 | 296 | A03601 | A16193 | 204 |
| A03602 | A03609 | 398 | A03602 | A03627 | 463 |
| A03602 | A03644 | 246 | A03602 | A03653 | 468 |
| A03602 | A03673 | 236 | A03602 | A03981 | 226 |
| A03602 | A04000 | 425 | A03602 | A04063 | 223 |
| A03602 | A04256 | 176 | A03602 | A04516 | 252 |
| A03602 | A04555 | 278 | A03602 | A04652 | 185 |
| A03602 | A04693 | 182 | A03602 | A04694 | 417 |
| A03602 | A04705 | 283 | A03602 | A04822 | 235 |
| A03602 | A05154 | 182 | A03602 | A05216 | 355 |
| A03602 | A05414 | 899 | A03602 | A05742 | 251 |
| A03602 | A06606 | 477 | A03602 | A06696 | 218 |
| A03602 | A06848 | 288 | A03602 | A07416 | 241 |
| A03602 | A07766 | 241 | A03602 | A08257 | 374 |
| A03602 | A08330 | 185 | A03602 | A09155 | 374 |
| A03602 | A09360 | 355 | A03602 | A10087 | 205 |
| A03602 | A10431 | 399 | A03602 | A11921 | 193 |
| A03602 | A12687 | 241 | A03602 | A12897 | 210 |
| A03602 | A13219 | 236 | A03602 | A14097 | 180 |
| A03602 | A15669 | 157 | A03602 | A15925 | 165 |
| A03602 | A15934 | 193 | A03602 | A16436 | 173 |
| A03603 | A05480 | 440 | A03603 | A06599 | 356 |
| A03604 | A07399 | 322 | A03604 | A07480 | 163 |
| A03605 | A05015 | 207 | A03606 | A06466 | 232 |
| A03606 | A07107 | 307 | A03606 | A12990 | 409 |
| A03606 | A15779 | 345 | A03607 | A09894 | 436 |
| A03608 | A03650 | 458 | A03608 | A03965 | 188 |
| A03608 | A04279 | 329 | A03608 | A05272 | 385 |
| A03608 | A07911 | 286 | A03609 | A03614 | 271 |
| A03609 | A03906 | 273 | A03609 | A03981 | 486 |
| A03609 | A04040 | 226 | A03609 | A04187 | 152 |
| A03609 | A04191 | 207 | A03609 | A04256 | 294 |
| A03609 | A04346 | 174 | A03609 | A04368 | 258 |
| A03609 | A04616 | 223 | A03609 | A04870 | 200 |
| A03609 | A04939 | 447 | A03609 | A05064 | 154 |
| A03609 | A05137 | 367 | A03609 | A05255 | 251 |
| A03609 | A05345 | 346 | A03609 | A05449 | 326 |
| A03609 | A05555 | 313 | A03609 | A06400 | 173 |
| A03609 | A06440 | 299 | A03609 | A06825 | 443 |
| A03609 | A06912 | 212 | A03609 | A06916 | 246 |
| A03609 | A07158 | 193 | A03609 | A07159 | 201 |
| A03609 | A07506 | 183 | A03609 | A08381 | 156 |
| A03609 | A08382 | 168 | A03609 | A08682 | 266 |
| A03609 | A08700 | 221 | A03609 | A08942 | 180 |
| A03609 | A09192 | 283 | A03609 | A09785 | 218 |

|        |        |     |        |        |     |
|--------|--------|-----|--------|--------|-----|
| A03609 | A10551 | 243 | A03609 | A10589 | 322 |
| A03609 | A10612 | 218 | A03609 | A10748 | 205 |
| A03609 | A10905 | 238 | A03609 | A11190 | 160 |
| A03609 | A11227 | 274 | A03609 | A11313 | 353 |
| A03609 | A11331 | 288 | A03609 | A11439 | 291 |
| A03609 | A11808 | 246 | A03609 | A11825 | 355 |
| A03609 | A11926 | 291 | A03609 | A11981 | 177 |
| A03609 | A12828 | 368 | A03609 | A12896 | 367 |
| A03609 | A12927 | 157 | A03609 | A13052 | 429 |
| A03609 | A13581 | 221 | A03609 | A13626 | 216 |
| A03609 | A13942 | 167 | A03609 | A14682 | 322 |
| A03609 | A14870 | 165 | A03609 | A15063 | 346 |
| A03609 | A15624 | 296 | A03609 | A15920 | 234 |
| A03609 | A16295 | 332 | A03609 | A16371 | 307 |
| A03609 | A16531 | 406 | A03609 | A17040 | 441 |
| A03610 | A03822 | 174 | A03610 | A04206 | 311 |
| A03610 | A04217 | 363 | A03610 | A04229 | 279 |
| A03610 | A04238 | 333 | A03610 | A04244 | 294 |
| A03610 | A04248 | 238 | A03610 | A04478 | 396 |
| A03610 | A04519 | 245 | A03610 | A04536 | 165 |
| A03610 | A04611 | 352 | A03610 | A04734 | 324 |
| A03610 | A04770 | 266 | A03610 | A04865 | 276 |
| A03610 | A05113 | 234 | A03610 | A05305 | 279 |
| A03610 | A05506 | 313 | A03610 | A05679 | 323 |
| A03610 | A05985 | 401 | A03610 | A06054 | 252 |
| A03610 | A06055 | 246 | A03610 | A06415 | 243 |
| A03610 | A06650 | 330 | A03610 | A06652 | 356 |
| A03610 | A06747 | 366 | A03610 | A06899 | 311 |
| A03610 | A07031 | 343 | A03610 | A07138 | 302 |
| A03610 | A07152 | 316 | A03610 | A07157 | 294 |
| A03610 | A07173 | 483 | A03610 | A07289 | 402 |
| A03610 | A07381 | 165 | A03610 | A08634 | 372 |
| A03610 | A08827 | 291 | A03610 | A10319 | 213 |
| A03610 | A10638 | 318 | A03610 | A13872 | 375 |
| A03610 | A13988 | 389 | A03610 | A14071 | 302 |
| A03610 | A14119 | 316 | A03610 | A14146 | 391 |
| A03610 | A14229 | 445 | A03610 | A14236 | 193 |
| A03610 | A14374 | 474 | A03610 | A14391 | 480 |
| A03610 | A14392 | 488 | A03610 | A14439 | 368 |
| A03610 | A14442 | 278 | A03610 | A14599 | 258 |
| A03610 | A14608 | 372 | A03610 | A14626 | 361 |
| A03610 | A15241 | 154 | A03610 | A15290 | 409 |
| A03610 | A15342 | 323 | A03610 | A15343 | 372 |
| A03610 | A15344 | 258 | A03610 | A15394 | 467 |
| A03610 | A15395 | 479 | A03610 | A15425 | 302 |
| A03610 | A15484 | 185 | A03610 | A15516 | 425 |

|        |        |     |        |        |     |
|--------|--------|-----|--------|--------|-----|
| A03610 | A15535 | 208 | A03610 | A15572 | 389 |
| A03610 | A15601 | 286 | A03610 | A15602 | 326 |
| A03610 | A15603 | 462 | A03610 | A15605 | 367 |
| A03610 | A15607 | 301 | A03610 | A15795 | 221 |
| A03610 | A15964 | 276 | A03610 | A15981 | 401 |
| A03610 | A16040 | 372 | A03610 | A16120 | 274 |
| A03610 | A16189 | 379 | A03610 | A16424 | 254 |
| A03611 | A03649 | 413 | A03611 | A03739 | 281 |
| A03611 | A03819 | 371 | A03611 | A03843 | 201 |
| A03611 | A03854 | 463 | A03611 | A03990 | 491 |
| A03611 | A04062 | 314 | A03611 | A04209 | 460 |
| A03611 | A04442 | 249 | A03611 | A04452 | 224 |
| A03611 | A04515 | 260 | A03611 | A04629 | 180 |
| A03611 | A04729 | 475 | A03611 | A04807 | 198 |
| A03611 | A04822 | 230 | A03611 | A04864 | 180 |
| A03611 | A05070 | 188 | A03611 | A05082 | 356 |
| A03611 | A05122 | 439 | A03611 | A05250 | 299 |
| A03611 | A05412 | 293 | A03611 | A05415 | 491 |
| A03611 | A05526 | 293 | A03611 | A05568 | 400 |
| A03611 | A05623 | 224 | A03611 | A05701 | 474 |
| A03611 | A05958 | 196 | A03611 | A06166 | 188 |
| A03611 | A06397 | 180 | A03611 | A06427 | 195 |
| A03611 | A06648 | 187 | A03611 | A06707 | 196 |
| A03611 | A06897 | 302 | A03611 | A07165 | 171 |
| A03611 | A07227 | 419 | A03611 | A07339 | 483 |
| A03611 | A07375 | 383 | A03611 | A07665 | 217 |
| A03611 | A07900 | 174 | A03611 | A09124 | 474 |
| A03611 | A09242 | 263 | A03611 | A09361 | 372 |
| A03611 | A09457 | 240 | A03611 | A09699 | 171 |
| A03611 | A09844 | 165 | A03611 | A09852 | 458 |
| A03611 | A09955 | 162 | A03611 | A10018 | 485 |
| A03611 | A10072 | 195 | A03611 | A10146 | 171 |
| A03611 | A10247 | 491 | A03611 | A10941 | 180 |
| A03611 | A11023 | 330 | A03611 | A11149 | 369 |
| A03611 | A11281 | 321 | A03611 | A11546 | 188 |
| A03611 | A11856 | 202 | A03611 | A12047 | 296 |
| A03611 | A12711 | 195 | A03611 | A13002 | 286 |
| A03611 | A13346 | 184 | A03611 | A13348 | 382 |
| A03611 | A13514 | 260 | A03611 | A13897 | 240 |
| A03611 | A14120 | 441 | A03611 | A14236 | 165 |
| A03611 | A14262 | 176 | A03611 | A14621 | 201 |
| A03611 | A14643 | 446 | A03611 | A14669 | 260 |
| A03611 | A14790 | 399 | A03611 | A14862 | 422 |
| A03611 | A15606 | 191 | A03611 | A16021 | 240 |
| A03611 | A16100 | 171 | A03611 | A16468 | 188 |
| A03611 | A17064 | 224 | A03612 | A03812 | 210 |



|        |        |     |        |        |     |
|--------|--------|-----|--------|--------|-----|
| A03612 | A03813 | 210 | A03612 | A03846 | 177 |
| A03612 | A03865 | 291 | A03612 | A04008 | 199 |
| A03612 | A04049 | 310 | A03612 | A04139 | 157 |
| A03612 | A04268 | 213 | A03612 | A04275 | 311 |
| A03612 | A04449 | 160 | A03612 | A04536 | 156 |
| A03612 | A04603 | 258 | A03612 | A04623 | 252 |
| A03612 | A04627 | 199 | A03612 | A04681 | 185 |
| A03612 | A04723 | 297 | A03612 | A04888 | 283 |
| A03612 | A04960 | 193 | A03612 | A05073 | 468 |
| A03612 | A05344 | 316 | A03612 | A05414 | 252 |
| A03612 | A05438 | 297 | A03612 | A05489 | 213 |
| A03612 | A05556 | 173 | A03612 | A06055 | 238 |
| A03612 | A06859 | 322 | A03612 | A08720 | 361 |
| A03612 | A09046 | 296 | A03612 | A09509 | 162 |
| A03612 | A10835 | 400 | A03612 | A11335 | 393 |
| A03612 | A12062 | 288 | A03612 | A12540 | 367 |
| A03612 | A12765 | 374 | A03612 | A13652 | 400 |
| A03612 | A14005 | 205 | A03612 | A14483 | 256 |
| A03612 | A14534 | 400 | A03612 | A15867 | 337 |
| A03612 | A15911 | 246 | A03612 | A16872 | 485 |
| A03613 | A03621 | 455 | A03613 | A04281 | 374 |
| A03613 | A04848 | 477 | A03613 | A06606 | 221 |
| A03613 | A09192 | 450 | A03613 | A13779 | 429 |
| A03614 | A04222 | 286 | A03614 | A04939 | 269 |
| A03614 | A05449 | 272 | A03614 | A14215 | 318 |
| A03614 | A14216 | 334 | A03614 | A15624 | 159 |
| A03615 | A03664 | 185 | A03615 | A03782 | 404 |
| A03615 | A04709 | 179 | A03615 | A06606 | 462 |
| A03615 | A07129 | 165 | A03615 | A08321 | 271 |
| A03615 | A09180 | 208 | A03615 | A10213 | 423 |
| A03615 | A13052 | 404 | A03615 | A14208 | 303 |
| A03615 | A14843 | 404 | A03615 | A15171 | 414 |
| A03615 | A15666 | 404 | A03615 | A16681 | 404 |
| A03616 | A05216 | 193 | A03617 | A05273 | 338 |
| A03617 | A05531 | 432 | A03617 | A05539 | 360 |
| A03617 | A05605 | 217 | A03617 | A05638 | 200 |
| A03617 | A06204 | 228 | A03617 | A06369 | 217 |
| A03617 | A06832 | 217 | A03617 | A07180 | 256 |
| A03617 | A07294 | 258 | A03617 | A07725 | 307 |
| A03617 | A08183 | 252 | A03617 | A09625 | 439 |
| A03617 | A09628 | 200 | A03617 | A09673 | 217 |
| A03617 | A13837 | 219 | A03617 | A13876 | 523 |
| A03617 | A13881 | 200 | A03617 | A14088 | 217 |
| A03617 | A14171 | 200 | A03617 | A14179 | 200 |
| A03617 | A14180 | 200 | A03617 | A14356 | 200 |
| A03617 | A15370 | 200 | A03617 | A15377 | 302 |

|        |        |     |        |        |     |
|--------|--------|-----|--------|--------|-----|
| A03617 | A15543 | 217 | A03617 | A15712 | 302 |
| A03617 | A15719 | 200 | A03617 | A15724 | 217 |
| A03617 | A15757 | 375 | A03617 | A16066 | 200 |
| A03617 | A16634 | 200 | A03617 | A16664 | 217 |
| A03617 | A16919 | 200 | A03618 | A03626 | 490 |
| A03618 | A03889 | 484 | A03618 | A03891 | 319 |
| A03618 | A03892 | 491 | A03618 | A04292 | 491 |
| A03618 | A04686 | 489 | A03618 | A04715 | 419 |
| A03618 | A04893 | 420 | A03618 | A05024 | 401 |
| A03618 | A05028 | 491 | A03618 | A05201 | 163 |
| A03618 | A05204 | 182 | A03618 | A05233 | 454 |
| A03618 | A05401 | 328 | A03618 | A05502 | 196 |
| A03618 | A05573 | 475 | A03618 | A06011 | 152 |
| A03618 | A06092 | 488 | A03618 | A06168 | 157 |
| A03618 | A06659 | 229 | A03618 | A06739 | 174 |
| A03618 | A06863 | 236 | A03618 | A06941 | 477 |
| A03618 | A07069 | 196 | A03618 | A07477 | 251 |
| A03618 | A07521 | 479 | A03618 | A07732 | 475 |
| A03618 | A07736 | 677 | A03618 | A07820 | 491 |
| A03618 | A07973 | 259 | A03618 | A08400 | 486 |
| A03618 | A08454 | 355 | A03618 | A08461 | 491 |
| A03618 | A08484 | 182 | A03618 | A08874 | 208 |
| A03618 | A09286 | 232 | A03618 | A09326 | 711 |
| A03618 | A09333 | 491 | A03618 | A10514 | 475 |
| A03618 | A10655 | 688 | A03618 | A10663 | 340 |
| A03618 | A10739 | 139 | A03618 | A10819 | 223 |
| A03618 | A11436 | 475 | A03618 | A11456 | 190 |
| A03618 | A11570 | 644 | A03618 | A11660 | 185 |
| A03618 | A12857 | 278 | A03618 | A12922 | 339 |
| A03618 | A13830 | 467 | A03618 | A13882 | 475 |
| A03618 | A13894 | 477 | A03618 | A13902 | 490 |
| A03618 | A14168 | 319 | A03618 | A14182 | 462 |
| A03618 | A14247 | 571 | A03618 | A14272 | 458 |
| A03618 | A14371 | 475 | A03618 | A14461 | 348 |
| A03618 | A14661 | 490 | A03618 | A14838 | 491 |
| A03618 | A15498 | 196 | A03618 | A15557 | 379 |
| A03618 | A15647 | 688 | A03618 | A15650 | 316 |
| A03618 | A15770 | 386 | A03618 | A16617 | 462 |
| A03618 | A17061 | 191 | A03618 | A17091 | 241 |
| A03618 | A17169 | 278 | A03619 | A03676 | 314 |
| A03619 | A03936 | 329 | A03619 | A04931 | 405 |
| A03619 | A06768 | 438 | A03619 | A07822 | 270 |
| A03619 | A07881 | 294 | A03619 | A08228 | 156 |
| A03619 | A09655 | 308 | A03619 | A11694 | 273 |
| A03619 | A12329 | 307 | A03619 | A15624 | 347 |
| A03619 | A15659 | 408 | A03619 | A15660 | 371 |

|        |        |     |        |        |     |
|--------|--------|-----|--------|--------|-----|
| A03619 | A15662 | 241 | A03619 | A15684 | 467 |
| A03619 | A15708 | 201 | A03619 | A15746 | 480 |
| A03619 | A15843 | 254 | A03619 | A15918 | 467 |
| A03619 | A15920 | 457 | A03619 | A15928 | 434 |
| A03619 | A15931 | 394 | A03619 | A15932 | 156 |
| A03619 | A15933 | 344 | A03619 | A15936 | 362 |
| A03619 | A15937 | 477 | A03619 | A15951 | 353 |
| A03619 | A16218 | 185 | A03620 | A06606 | 168 |
| A03620 | A06615 | 204 | A03620 | A09018 | 326 |
| A03620 | A12383 | 263 | A03624 | A04280 | 405 |
| A03625 | A03686 | 966 | A03625 | A03726 | 914 |
| A03625 | A03843 | 308 | A03625 | A03892 | 63  |
| A03625 | A04410 | 252 | A03625 | A04929 | 229 |
| A03625 | A05001 | 210 | A03625 | A05234 | 398 |
| A03625 | A05401 | 196 | A03625 | A05577 | 63  |
| A03625 | A05811 | 168 | A03625 | A06319 | 198 |
| A03625 | A06463 | 165 | A03625 | A06597 | 259 |
| A03625 | A07207 | 491 | A03625 | A07655 | 235 |
| A03625 | A07815 | 151 | A03625 | A08394 | 270 |
| A03625 | A08571 | 899 | A03625 | A08827 | 160 |
| A03625 | A08943 | 151 | A03625 | A09026 | 188 |
| A03625 | A10591 | 141 | A03625 | A10596 | 216 |
| A03625 | A10597 | 413 | A03625 | A10733 | 473 |
| A03625 | A11449 | 204 | A03625 | A11602 | 491 |
| A03625 | A11655 | 217 | A03625 | A12046 | 270 |
| A03625 | A12560 | 310 | A03625 | A13617 | 299 |
| A03625 | A13729 | 168 | A03625 | A13824 | 962 |
| A03625 | A13826 | 235 | A03625 | A13829 | 932 |
| A03625 | A13989 | 899 | A03625 | A14026 | 491 |
| A03625 | A14193 | 178 | A03625 | A14208 | 63  |
| A03625 | A14246 | 899 | A03625 | A14262 | 944 |
| A03625 | A14589 | 243 | A03625 | A14690 | 402 |
| A03625 | A14969 | 171 | A03625 | A15181 | 481 |
| A03625 | A15295 | 480 | A03625 | A15297 | 899 |
| A03625 | A15315 | 454 | A03625 | A15345 | 374 |
| A03625 | A15347 | 517 | A03625 | A15498 | 489 |
| A03625 | A15559 | 899 | A03625 | A15620 | 935 |
| A03625 | A15621 | 436 | A03625 | A16072 | 294 |
| A03625 | A16595 | 246 | A03625 | A16847 | 296 |
| A03626 | A03718 | 490 | A03626 | A03889 | 443 |
| A03626 | A03890 | 305 | A03626 | A03891 | 513 |
| A03626 | A03892 | 714 | A03626 | A04145 | 456 |
| A03626 | A04292 | 483 | A03626 | A04893 | 638 |
| A03626 | A04896 | 348 | A03626 | A04929 | 229 |
| A03626 | A05023 | 626 | A03626 | A05024 | 107 |
| A03626 | A05027 | 170 | A03626 | A05028 | 440 |

|        |        |     |        |        |     |
|--------|--------|-----|--------|--------|-----|
| A03626 | A05191 | 179 | A03626 | A05200 | 428 |
| A03626 | A05201 | 335 | A03626 | A05233 | 596 |
| A03626 | A05309 | 344 | A03626 | A05401 | 302 |
| A03626 | A05710 | 241 | A03626 | A06011 | 311 |
| A03626 | A06659 | 638 | A03626 | A06675 | 714 |
| A03626 | A06890 | 313 | A03626 | A06941 | 441 |
| A03626 | A07180 | 63  | A03626 | A07521 | 401 |
| A03626 | A07820 | 491 | A03626 | A08400 | 441 |
| A03626 | A08874 | 664 | A03626 | A09043 | 210 |
| A03626 | A09050 | 548 | A03626 | A09277 | 274 |
| A03626 | A09326 | 488 | A03626 | A09333 | 486 |
| A03626 | A10597 | 85  | A03626 | A10655 | 254 |
| A03626 | A10663 | 477 | A03626 | A10739 | 179 |
| A03626 | A10804 | 491 | A03626 | A11287 | 321 |
| A03626 | A11456 | 341 | A03626 | A11939 | 215 |
| A03626 | A12792 | 398 | A03626 | A13106 | 311 |
| A03626 | A13842 | 218 | A03626 | A13844 | 453 |
| A03626 | A13846 | 636 | A03626 | A13855 | 191 |
| A03626 | A13882 | 205 | A03626 | A13902 | 388 |
| A03626 | A14095 | 343 | A03626 | A14182 | 614 |
| A03626 | A14247 | 491 | A03626 | A14258 | 297 |
| A03626 | A14481 | 174 | A03626 | A14661 | 174 |
| A03626 | A14693 | 423 | A03626 | A14788 | 221 |
| A03626 | A14838 | 491 | A03626 | A15346 | 63  |
| A03626 | A15498 | 468 | A03626 | A15647 | 160 |
| A03626 | A15650 | 414 | A03626 | A15685 | 174 |
| A03626 | A16617 | 489 | A03626 | A16652 | 271 |
| A03627 | A03653 | 317 | A03627 | A05216 | 159 |
| A03627 | A07911 | 212 | A03627 | A09127 | 262 |
| A03628 | A03629 | 438 | A03628 | A05147 | 327 |
| A03628 | A05301 | 297 | A03628 | A06051 | 254 |
| A03628 | A07378 | 391 | A03628 | A07730 | 205 |
| A03628 | A08956 | 201 | A03628 | A09291 | 281 |
| A03628 | A09434 | 163 | A03628 | A09653 | 174 |
| A03628 | A13162 | 157 | A03628 | A13207 | 195 |
| A03628 | A14178 | 477 | A03628 | A14594 | 422 |
| A03628 | A14801 | 218 | A03628 | A15469 | 263 |
| A03628 | A15567 | 303 | A03629 | A03734 | 243 |
| A03629 | A04759 | 324 | A03629 | A15349 | 160 |
| A03630 | A03661 | 249 | A03630 | A03990 | 196 |
| A03630 | A06581 | 159 | A03630 | A09490 | 936 |
| A03630 | A15339 | 232 | A03631 | A04668 | 216 |
| A03632 | A03822 | 490 | A03632 | A04015 | 183 |
| A03632 | A04449 | 485 | A03632 | A04654 | 382 |
| A03632 | A05288 | 480 | A03632 | A05370 | 413 |
| A03632 | A06362 | 382 | A03632 | A06601 | 163 |

|        |        |     |        |        |     |
|--------|--------|-----|--------|--------|-----|
| A03632 | A06761 | 213 | A03632 | A07088 | 174 |
| A03632 | A07399 | 163 | A03632 | A07712 | 382 |
| A03632 | A07802 | 163 | A03632 | A08216 | 457 |
| A03632 | A08361 | 334 | A03632 | A08566 | 356 |
| A03632 | A09750 | 174 | A03632 | A10201 | 281 |
| A03632 | A10504 | 170 | A03632 | A10844 | 485 |
| A03632 | A10949 | 229 | A03632 | A11306 | 488 |
| A03632 | A11983 | 156 | A03632 | A12357 | 201 |
| A03632 | A12383 | 480 | A03632 | A13501 | 63  |
| A03632 | A14496 | 210 | A03632 | A14579 | 170 |
| A03632 | A15345 | 254 | A03632 | A15923 | 156 |
| A03632 | A16650 | 165 | A03632 | A17013 | 162 |
| A03632 | A17050 | 436 | A03633 | A03653 | 294 |
| A03633 | A03921 | 337 | A03633 | A04080 | 216 |
| A03633 | A04180 | 356 | A03633 | A04751 | 267 |
| A03633 | A04813 | 338 | A03633 | A05216 | 925 |
| A03633 | A06606 | 185 | A03633 | A09157 | 405 |
| A03633 | A09220 | 259 | A03633 | A13879 | 283 |
| A03634 | A03661 | 290 | A03634 | A03773 | 347 |
| A03634 | A03935 | 430 | A03634 | A03936 | 400 |
| A03634 | A03944 | 316 | A03634 | A05079 | 428 |
| A03634 | A05131 | 362 | A03634 | A05679 | 200 |
| A03634 | A06463 | 302 | A03634 | A09468 | 384 |
| A03634 | A10395 | 182 | A03634 | A10732 | 347 |
| A03634 | A11420 | 241 | A03634 | A11911 | 172 |
| A03634 | A13665 | 262 | A03634 | A13886 | 311 |
| A03634 | A14375 | 227 | A03634 | A14399 | 323 |
| A03634 | A14664 | 191 | A03634 | A15281 | 333 |
| A03634 | A15329 | 294 | A03634 | A15649 | 255 |
| A03634 | A16007 | 229 | A03635 | A06606 | 184 |
| A03636 | A03820 | 182 | A03636 | A05124 | 273 |
| A03636 | A09204 | 270 | A03636 | A09509 | 210 |
| A03636 | A09742 | 402 | A03636 | A10731 | 272 |
| A03636 | A11086 | 351 | A03636 | A11735 | 226 |
| A03636 | A13987 | 168 | A03636 | A14378 | 170 |
| A03636 | A14399 | 353 | A03636 | A14413 | 262 |
| A03636 | A14504 | 404 | A03636 | A15366 | 266 |
| A03636 | A15463 | 260 | A03637 | A03820 | 491 |
| A03637 | A03960 | 218 | A03637 | A04557 | 173 |
| A03637 | A04808 | 247 | A03637 | A05008 | 281 |
| A03637 | A05015 | 335 | A03637 | A06608 | 299 |
| A03637 | A07422 | 301 | A03637 | A07766 | 151 |
| A03637 | A08571 | 439 | A03637 | A08729 | 238 |
| A03637 | A08854 | 165 | A03637 | A08868 | 172 |
| A03637 | A09182 | 414 | A03637 | A09256 | 384 |
| A03637 | A09309 | 165 | A03637 | A09751 | 226 |

|        |        |     |        |        |     |
|--------|--------|-----|--------|--------|-----|
| A03637 | A10250 | 408 | A03637 | A10332 | 170 |
| A03637 | A10395 | 151 | A03637 | A11304 | 184 |
| A03637 | A13726 | 165 | A03637 | A13889 | 243 |
| A03637 | A14221 | 228 | A03637 | A14279 | 196 |
| A03637 | A14633 | 479 | A03637 | A15366 | 324 |
| A03637 | A15678 | 291 | A03637 | A15926 | 317 |
| A03637 | A16233 | 182 | A03637 | A16827 | 173 |
| A03637 | A17075 | 207 | A03638 | A03654 | 286 |
| A03638 | A03820 | 443 | A03638 | A05122 | 257 |
| A03638 | A06182 | 333 | A03638 | A06400 | 306 |
| A03638 | A06608 | 165 | A03638 | A06623 | 243 |
| A03638 | A07165 | 154 | A03638 | A07191 | 246 |
| A03638 | A08070 | 252 | A03638 | A08377 | 212 |
| A03638 | A09127 | 228 | A03638 | A09146 | 358 |
| A03638 | A10081 | 372 | A03638 | A16764 | 273 |
| A03639 | A03747 | 294 | A03639 | A03784 | 223 |
| A03639 | A03800 | 195 | A03639 | A03818 | 463 |
| A03639 | A03915 | 307 | A03639 | A03961 | 473 |
| A03639 | A03963 | 294 | A03639 | A04010 | 205 |
| A03639 | A04092 | 191 | A03639 | A04202 | 452 |
| A03639 | A04237 | 312 | A03639 | A04351 | 243 |
| A03639 | A04490 | 441 | A03639 | A04492 | 232 |
| A03639 | A04504 | 312 | A03639 | A04547 | 263 |
| A03639 | A04639 | 210 | A03639 | A04676 | 247 |
| A03639 | A04976 | 443 | A03639 | A05184 | 232 |
| A03639 | A05494 | 172 | A03639 | A05533 | 491 |
| A03639 | A05534 | 323 | A03639 | A05535 | 413 |
| A03639 | A05923 | 240 | A03639 | A05944 | 156 |
| A03639 | A05992 | 418 | A03639 | A06033 | 347 |
| A03639 | A06610 | 430 | A03639 | A06762 | 344 |
| A03639 | A07019 | 207 | A03639 | A07141 | 329 |
| A03639 | A07143 | 174 | A03639 | A07559 | 188 |
| A03639 | A08630 | 208 | A03639 | A08859 | 185 |
| A03639 | A09245 | 177 | A03639 | A09254 | 208 |
| A03639 | A09480 | 277 | A03639 | A09550 | 486 |
| A03639 | A09732 | 469 | A03639 | A09733 | 396 |
| A03639 | A10040 | 279 | A03639 | A10081 | 294 |
| A03639 | A10665 | 281 | A03639 | A11014 | 249 |
| A03639 | A11190 | 438 | A03639 | A13879 | 296 |
| A03639 | A13944 | 229 | A03639 | A13994 | 173 |
| A03639 | A14371 | 162 | A03639 | A14511 | 463 |
| A03639 | A14554 | 151 | A03639 | A14722 | 338 |
| A03639 | A15230 | 435 | A03639 | A15268 | 265 |
| A03639 | A15292 | 466 | A03639 | A15349 | 363 |
| A03639 | A15381 | 249 | A03639 | A16107 | 202 |
| A03639 | A16636 | 204 | A03639 | A16916 | 163 |

|        |        |     |        |        |     |
|--------|--------|-----|--------|--------|-----|
| A03640 | A11933 | 347 | A03641 | A03861 | 341 |
| A03641 | A04715 | 207 | A03641 | A10905 | 393 |
| A03641 | A15726 | 172 | A03642 | A04256 | 362 |
| A03642 | A04406 | 350 | A03642 | A04423 | 394 |
| A03642 | A04491 | 383 | A03642 | A07163 | 251 |
| A03643 | A04497 | 351 | A03643 | A05797 | 269 |
| A03643 | A10934 | 313 | A03643 | A14188 | 154 |
| A03643 | A16216 | 167 | A03644 | A03981 | 486 |
| A03644 | A04406 | 388 | A03644 | A04676 | 338 |
| A03644 | A05617 | 208 | A03644 | A06084 | 472 |
| A03644 | A06356 | 463 | A03644 | A06814 | 269 |
| A03644 | A06815 | 446 | A03644 | A06955 | 398 |
| A03644 | A07243 | 446 | A03644 | A08653 | 457 |
| A03644 | A08682 | 385 | A03644 | A09432 | 369 |
| A03644 | A09656 | 435 | A03644 | A10034 | 306 |
| A03644 | A10564 | 369 | A03644 | A10901 | 374 |
| A03644 | A10928 | 401 | A03644 | A11269 | 419 |
| A03644 | A11331 | 396 | A03644 | A11926 | 396 |
| A03644 | A11981 | 406 | A03644 | A12687 | 339 |
| A03644 | A13626 | 234 | A03644 | A15624 | 243 |
| A03644 | A16095 | 369 | A03644 | A17193 | 356 |
| A03645 | A07451 | 232 | A03645 | A08752 | 398 |
| A03645 | A11981 | 350 | A03645 | A12661 | 374 |
| A03645 | A12687 | 375 | A03646 | A04661 | 366 |
| A03646 | A04716 | 433 | A03646 | A06606 | 156 |
| A03646 | A07335 | 390 | A03648 | A07165 | 152 |
| A03648 | A14227 | 183 | A03649 | A03662 | 154 |
| A03649 | A03664 | 337 | A03649 | A03841 | 409 |
| A03649 | A03872 | 243 | A03649 | A04091 | 484 |
| A03649 | A04134 | 398 | A03649 | A04142 | 398 |
| A03649 | A05034 | 424 | A03649 | A05070 | 408 |
| A03649 | A05072 | 310 | A03649 | A05419 | 457 |
| A03649 | A05866 | 228 | A03649 | A06151 | 230 |
| A03649 | A06586 | 201 | A03649 | A07197 | 210 |
| A03649 | A08741 | 314 | A03649 | A11779 | 327 |
| A03649 | A11902 | 162 | A03649 | A14649 | 183 |
| A03649 | A15840 | 165 | A03649 | A16100 | 445 |
| A03650 | A05272 | 440 | A03650 | A05751 | 369 |
| A03650 | A07122 | 277 | A03651 | A03656 | 943 |
| A03651 | A03922 | 151 | A03651 | A03936 | 160 |
| A03651 | A03986 | 246 | A03651 | A04040 | 180 |
| A03651 | A04209 | 480 | A03651 | A04533 | 353 |
| A03651 | A04753 | 412 | A03651 | A04830 | 163 |
| A03651 | A05197 | 286 | A03651 | A05417 | 210 |
| A03651 | A05812 | 694 | A03651 | A05918 | 221 |
| A03651 | A06077 | 246 | A03651 | A06379 | 462 |

|        |        |     |        |        |     |
|--------|--------|-----|--------|--------|-----|
| A03651 | A06455 | 276 | A03651 | A06471 | 362 |
| A03651 | A07245 | 228 | A03651 | A07343 | 340 |
| A03651 | A07655 | 165 | A03651 | A07695 | 327 |
| A03651 | A07897 | 401 | A03651 | A08014 | 340 |
| A03651 | A08073 | 286 | A03651 | A08248 | 210 |
| A03651 | A08300 | 208 | A03651 | A08437 | 176 |
| A03651 | A08524 | 433 | A03651 | A08591 | 252 |
| A03651 | A08667 | 173 | A03651 | A08688 | 165 |
| A03651 | A08810 | 156 | A03651 | A08835 | 154 |
| A03651 | A08926 | 266 | A03651 | A09375 | 221 |
| A03651 | A09383 | 224 | A03651 | A09546 | 207 |
| A03651 | A09661 | 299 | A03651 | A09890 | 208 |
| A03651 | A09972 | 314 | A03651 | A10154 | 236 |
| A03651 | A10354 | 208 | A03651 | A10392 | 191 |
| A03651 | A10509 | 299 | A03651 | A10531 | 276 |
| A03651 | A10551 | 198 | A03651 | A10598 | 486 |
| A03651 | A10829 | 286 | A03651 | A11024 | 210 |
| A03651 | A11313 | 723 | A03651 | A11400 | 299 |
| A03651 | A11497 | 198 | A03651 | A11695 | 458 |
| A03651 | A11842 | 462 | A03651 | A11932 | 232 |
| A03651 | A12008 | 364 | A03651 | A13146 | 402 |
| A03651 | A13283 | 314 | A03651 | A13385 | 228 |
| A03651 | A13517 | 221 | A03651 | A13721 | 340 |
| A03651 | A14013 | 200 | A03651 | A14246 | 355 |
| A03651 | A14275 | 228 | A03651 | A14562 | 291 |
| A03651 | A14579 | 383 | A03651 | A14588 | 490 |
| A03651 | A15077 | 340 | A03651 | A15498 | 341 |
| A03651 | A15729 | 187 | A03651 | A16626 | 243 |
| A03651 | A16741 | 177 | A03651 | A16747 | 299 |
| A03651 | A16770 | 340 | A03652 | A03687 | 191 |
| A03652 | A03981 | 170 | A03652 | A05566 | 316 |
| A03652 | A06084 | 358 | A03652 | A06351 | 488 |
| A03652 | A06356 | 460 | A03652 | A06825 | 167 |
| A03652 | A07237 | 218 | A03652 | A07244 | 170 |
| A03652 | A07479 | 188 | A03652 | A07524 | 170 |
| A03652 | A07924 | 170 | A03652 | A08211 | 170 |
| A03652 | A09697 | 170 | A03652 | A11288 | 458 |
| A03652 | A11427 | 152 | A03652 | A13052 | 170 |
| A03652 | A13989 | 170 | A03653 | A03847 | 358 |
| A03653 | A03870 | 340 | A03653 | A03914 | 217 |
| A03653 | A03968 | 466 | A03653 | A03976 | 291 |
| A03653 | A04000 | 391 | A03653 | A04004 | 256 |
| A03653 | A04031 | 299 | A03653 | A04123 | 340 |
| A03653 | A04127 | 401 | A03653 | A04260 | 469 |
| A03653 | A04369 | 193 | A03653 | A04510 | 273 |
| A03653 | A04560 | 311 | A03653 | A04633 | 268 |



|        |        |     |        |        |     |
|--------|--------|-----|--------|--------|-----|
| A03653 | A04739 | 193 | A03653 | A04905 | 276 |
| A03653 | A05036 | 327 | A03653 | A05216 | 193 |
| A03653 | A05322 | 274 | A03653 | A05377 | 249 |
| A03653 | A05901 | 335 | A03653 | A06606 | 486 |
| A03653 | A07192 | 199 | A03653 | A07911 | 207 |
| A03653 | A09160 | 226 | A03653 | A09170 | 377 |
| A03653 | A09707 | 185 | A03653 | A10731 | 208 |
| A03653 | A11313 | 187 | A03653 | A14405 | 190 |
| A03653 | A14440 | 170 | A03653 | A14443 | 386 |
| A03653 | A16257 | 221 | A03653 | A16802 | 534 |
| A03654 | A03790 | 368 | A03654 | A03820 | 491 |
| A03654 | A03977 | 281 | A03654 | A04174 | 196 |
| A03654 | A04256 | 345 | A03654 | A04560 | 308 |
| A03654 | A04562 | 236 | A03654 | A04698 | 187 |
| A03654 | A04845 | 221 | A03654 | A05120 | 286 |
| A03654 | A05122 | 430 | A03654 | A05291 | 312 |
| A03654 | A05838 | 195 | A03654 | A06400 | 228 |
| A03654 | A06813 | 281 | A03654 | A08883 | 179 |
| A03654 | A09269 | 176 | A03654 | A09370 | 296 |
| A03654 | A09888 | 314 | A03654 | A10894 | 185 |
| A03654 | A14543 | 373 | A03654 | A14577 | 199 |
| A03654 | A14809 | 168 | A03654 | A16764 | 489 |
| A03655 | A04276 | 414 | A03656 | A04205 | 316 |
| A03656 | A04305 | 308 | A03656 | A04556 | 358 |
| A03656 | A07590 | 294 | A03656 | A09644 | 255 |
| A03656 | A10005 | 322 | A03656 | A13204 | 417 |
| A03656 | A16626 | 168 | A03656 | A16770 | 427 |
| A03657 | A04022 | 417 | A03657 | A04365 | 400 |
| A03657 | A04478 | 358 | A03657 | A12383 | 210 |
| A03658 | A04041 | 445 | A03658 | A05288 | 215 |
| A03659 | A05113 | 374 | A03659 | A05216 | 154 |
| A03660 | A06606 | 243 | A03661 | A03744 | 216 |
| A03661 | A03782 | 196 | A03661 | A03844 | 236 |
| A03661 | A04011 | 195 | A03661 | A04059 | 334 |
| A03661 | A04069 | 265 | A03661 | A04078 | 369 |
| A03661 | A04088 | 187 | A03661 | A04117 | 491 |
| A03661 | A04183 | 229 | A03661 | A04194 | 187 |
| A03661 | A04202 | 337 | A03661 | A04223 | 216 |
| A03661 | A04250 | 272 | A03661 | A04280 | 432 |
| A03661 | A04309 | 213 | A03661 | A04320 | 171 |
| A03661 | A04519 | 256 | A03661 | A04533 | 190 |
| A03661 | A04535 | 213 | A03661 | A04553 | 235 |
| A03661 | A04598 | 234 | A03661 | A04704 | 491 |
| A03661 | A04723 | 199 | A03661 | A04739 | 327 |
| A03661 | A04888 | 180 | A03661 | A04971 | 184 |
| A03661 | A05104 | 208 | A03661 | A05200 | 180 |

|        |        |     |        |        |     |
|--------|--------|-----|--------|--------|-----|
| A03661 | A05299 | 177 | A03661 | A05473 | 481 |
| A03661 | A05513 | 272 | A03661 | A05619 | 218 |
| A03661 | A06414 | 188 | A03661 | A06505 | 218 |
| A03661 | A06606 | 273 | A03661 | A06609 | 255 |
| A03661 | A06623 | 279 | A03661 | A06682 | 308 |
| A03661 | A07135 | 221 | A03661 | A07145 | 217 |
| A03661 | A08070 | 441 | A03661 | A08626 | 234 |
| A03661 | A08824 | 348 | A03661 | A08911 | 269 |
| A03661 | A09421 | 204 | A03661 | A09849 | 357 |
| A03661 | A10240 | 382 | A03661 | A11573 | 352 |
| A03661 | A11897 | 271 | A03661 | A11902 | 401 |
| A03661 | A12383 | 156 | A03661 | A13069 | 218 |
| A03661 | A14385 | 260 | A03661 | A14389 | 245 |
| A03661 | A14401 | 204 | A03661 | A14643 | 353 |
| A03661 | A14650 | 193 | A03661 | A14707 | 180 |
| A03661 | A15269 | 286 | A03661 | A15281 | 227 |
| A03661 | A15674 | 182 | A03661 | A15965 | 324 |
| A03661 | A15981 | 188 | A03661 | A16004 | 236 |
| A03661 | A16426 | 288 | A03662 | A03663 | 219 |
| A03662 | A04536 | 483 | A03662 | A05797 | 297 |
| A03662 | A06055 | 338 | A03662 | A06650 | 321 |
| A03662 | A13539 | 168 | A03662 | A14004 | 212 |
| A03662 | A17213 | 243 | A03663 | A04015 | 232 |
| A03663 | A04253 | 341 | A03663 | A04698 | 213 |
| A03663 | A06584 | 213 | A03663 | A06648 | 201 |
| A03663 | A07200 | 215 | A03663 | A09497 | 339 |
| A03663 | A10075 | 386 | A03663 | A11683 | 165 |
| A03663 | A11759 | 234 | A03663 | A13346 | 443 |
| A03663 | A13373 | 236 | A03663 | A14643 | 172 |
| A03664 | A04010 | 160 | A03664 | A04122 | 310 |
| A03664 | A04128 | 358 | A03664 | A04134 | 430 |
| A03664 | A04142 | 430 | A03664 | A04262 | 362 |
| A03664 | A04745 | 362 | A03664 | A05034 | 208 |
| A03664 | A05329 | 335 | A03664 | A08741 | 434 |
| A03664 | A13511 | 347 | A03665 | A06554 | 561 |
| A03665 | A06599 | 534 | A03665 | A07311 | 176 |
| A03665 | A10532 | 372 | A03665 | A16060 | 267 |
| A03666 | A04518 | 379 | A03666 | A06968 | 312 |
| A03666 | A13189 | 452 | A03667 | A04122 | 375 |
| A03667 | A05128 | 378 | A03667 | A06608 | 227 |
| A03667 | A06688 | 255 | A03667 | A06970 | 375 |
| A03667 | A07177 | 334 | A03667 | A08655 | 374 |
| A03667 | A09262 | 472 | A03667 | A09359 | 483 |
| A03667 | A09935 | 475 | A03667 | A13152 | 475 |
| A03667 | A14332 | 384 | A03667 | A14342 | 477 |
| A03667 | A14349 | 484 | A03668 | A03674 | 372 |

|        |        |     |        |        |     |
|--------|--------|-----|--------|--------|-----|
| A03668 | A03855 | 330 | A03668 | A06581 | 159 |
| A03668 | A15659 | 246 | A03669 | A03706 | 430 |
| A03669 | A03738 | 263 | A03669 | A10532 | 347 |
| A03669 | A13989 | 162 | A03669 | A15649 | 465 |
| A03670 | A15624 | 173 | A03671 | A03981 | 352 |
| A03671 | A04415 | 291 | A03671 | A05375 | 472 |
| A03671 | A07160 | 191 | A03671 | A08249 | 154 |
| A03671 | A08682 | 219 | A03671 | A10417 | 232 |
| A03671 | A11334 | 215 | A03671 | A13052 | 246 |
| A03671 | A14216 | 395 | A03671 | A14479 | 193 |
| A03671 | A15891 | 302 | A03672 | A05099 | 433 |
| A03672 | A05974 | 383 | A03673 | A03674 | 338 |
| A03673 | A03676 | 297 | A03673 | A03840 | 281 |
| A03673 | A04898 | 422 | A03673 | A05153 | 195 |
| A03673 | A05486 | 348 | A03673 | A08743 | 385 |
| A03673 | A09539 | 299 | A03673 | A11275 | 440 |
| A03673 | A13879 | 263 | A03673 | A15624 | 229 |
| A03673 | A15652 | 187 | A03673 | A15659 | 319 |
| A03673 | A15919 | 347 | A03673 | A16088 | 152 |
| A03674 | A03676 | 311 | A03674 | A04898 | 340 |
| A03674 | A07164 | 246 | A03674 | A07881 | 157 |
| A03674 | A08228 | 152 | A03674 | A08743 | 391 |
| A03674 | A09539 | 308 | A03674 | A14216 | 343 |
| A03674 | A14928 | 167 | A03674 | A15624 | 246 |
| A03674 | A15660 | 215 | A03674 | A15661 | 180 |
| A03674 | A15917 | 210 | A03674 | A15932 | 152 |
| A03674 | A16088 | 401 | A03674 | A16095 | 247 |
| A03675 | A08259 | 188 | A03675 | A08909 | 469 |
| A03675 | A08942 | 481 | A03675 | A11227 | 358 |
| A03675 | A13367 | 353 | A03675 | A14130 | 363 |
| A03675 | A14143 | 462 | A03675 | A16060 | 402 |
| A03675 | A17159 | 414 | A03676 | A03677 | 538 |
| A03676 | A03855 | 566 | A03676 | A03881 | 257 |
| A03676 | A04668 | 322 | A03676 | A04898 | 432 |
| A03676 | A04932 | 361 | A03676 | A05255 | 435 |
| A03676 | A05540 | 235 | A03676 | A05982 | 491 |
| A03676 | A06049 | 353 | A03676 | A06158 | 159 |
| A03676 | A06382 | 343 | A03676 | A06425 | 201 |
| A03676 | A06750 | 177 | A03676 | A06768 | 205 |
| A03676 | A06787 | 276 | A03676 | A06938 | 491 |
| A03676 | A07046 | 497 | A03676 | A07360 | 581 |
| A03676 | A07675 | 311 | A03676 | A07822 | 538 |
| A03676 | A07881 | 542 | A03676 | A08133 | 199 |
| A03676 | A08228 | 503 | A03676 | A08548 | 312 |
| A03676 | A08674 | 156 | A03676 | A08743 | 265 |
| A03676 | A08932 | 191 | A03676 | A08945 | 288 |

|        |        |     |        |        |     |
|--------|--------|-----|--------|--------|-----|
| A03676 | A09305 | 226 | A03676 | A09581 | 208 |
| A03676 | A09735 | 302 | A03676 | A11264 | 330 |
| A03676 | A11290 | 156 | A03676 | A11394 | 208 |
| A03676 | A11918 | 156 | A03676 | A12824 | 463 |
| A03676 | A13618 | 241 | A03676 | A14216 | 475 |
| A03676 | A14482 | 430 | A03676 | A14614 | 191 |
| A03676 | A15531 | 191 | A03676 | A15624 | 581 |
| A03676 | A15649 | 534 | A03676 | A15651 | 567 |
| A03676 | A15652 | 558 | A03676 | A15659 | 470 |
| A03676 | A15660 | 490 | A03676 | A15661 | 580 |
| A03676 | A15662 | 294 | A03676 | A15668 | 184 |
| A03676 | A15684 | 581 | A03676 | A15707 | 249 |
| A03676 | A15720 | 156 | A03676 | A15721 | 156 |
| A03676 | A15746 | 540 | A03676 | A15750 | 257 |
| A03676 | A15765 | 230 | A03676 | A15843 | 457 |
| A03676 | A15917 | 336 | A03676 | A15918 | 557 |
| A03676 | A15920 | 258 | A03676 | A15923 | 322 |
| A03676 | A15931 | 452 | A03676 | A15932 | 480 |
| A03676 | A15933 | 193 | A03676 | A15936 | 201 |
| A03676 | A15937 | 507 | A03676 | A15951 | 438 |
| A03676 | A16088 | 581 | A03676 | A16095 | 257 |
| A03676 | A16145 | 156 | A03676 | A16307 | 156 |
| A03676 | A16962 | 226 | A03677 | A03855 | 156 |
| A03677 | A04015 | 208 | A03677 | A04932 | 156 |
| A03677 | A05419 | 165 | A03677 | A06466 | 353 |
| A03677 | A07046 | 156 | A03677 | A07360 | 167 |
| A03677 | A07822 | 156 | A03677 | A07881 | 358 |
| A03677 | A08098 | 188 | A03677 | A08228 | 172 |
| A03677 | A08533 | 160 | A03677 | A08548 | 156 |
| A03677 | A08605 | 391 | A03677 | A08674 | 156 |
| A03677 | A09297 | 160 | A03677 | A09902 | 160 |
| A03677 | A10372 | 259 | A03677 | A11290 | 156 |
| A03677 | A11918 | 156 | A03677 | A12043 | 160 |
| A03677 | A12195 | 236 | A03677 | A12227 | 160 |
| A03677 | A13340 | 160 | A03677 | A14479 | 165 |
| A03677 | A14699 | 173 | A03677 | A14738 | 160 |
| A03677 | A15244 | 160 | A03677 | A15624 | 438 |
| A03677 | A15649 | 156 | A03677 | A15651 | 156 |
| A03677 | A15652 | 156 | A03677 | A15659 | 240 |
| A03677 | A15661 | 156 | A03677 | A15662 | 156 |
| A03677 | A15684 | 540 | A03677 | A15720 | 156 |
| A03677 | A15721 | 156 | A03677 | A15746 | 156 |
| A03677 | A15917 | 156 | A03677 | A15918 | 472 |
| A03677 | A15923 | 156 | A03677 | A15932 | 263 |
| A03677 | A15933 | 160 | A03677 | A15937 | 156 |
| A03677 | A16088 | 522 | A03677 | A16095 | 165 |

|        |        |     |        |        |     |
|--------|--------|-----|--------|--------|-----|
| A03677 | A16096 | 171 | A03677 | A16145 | 156 |
| A03677 | A16272 | 160 | A03677 | A16307 | 156 |
| A03677 | A16318 | 160 | A03677 | A16437 | 160 |
| A03677 | A16446 | 160 | A03677 | A16585 | 160 |
| A03679 | A03832 | 401 | A03679 | A05104 | 411 |
| A03680 | A03966 | 226 | A03680 | A04280 | 360 |
| A03680 | A04451 | 212 | A03680 | A04505 | 401 |
| A03680 | A04529 | 299 | A03680 | A04541 | 335 |
| A03680 | A04795 | 236 | A03680 | A04941 | 441 |
| A03680 | A05070 | 267 | A03680 | A05072 | 353 |
| A03680 | A05367 | 333 | A03680 | A06595 | 199 |
| A03680 | A06621 | 235 | A03680 | A07106 | 317 |
| A03680 | A07158 | 160 | A03680 | A09220 | 193 |
| A03680 | A09245 | 234 | A03680 | A09341 | 156 |
| A03680 | A09418 | 353 | A03680 | A09509 | 167 |
| A03680 | A09736 | 260 | A03680 | A09842 | 171 |
| A03680 | A10611 | 394 | A03680 | A11512 | 401 |
| A03680 | A13973 | 353 | A03680 | A14364 | 347 |
| A03680 | A17198 | 154 | A03681 | A03684 | 269 |
| A03681 | A03725 | 168 | A03681 | A04085 | 313 |
| A03681 | A04104 | 162 | A03681 | A04892 | 411 |
| A03681 | A05682 | 267 | A03681 | A05779 | 286 |
| A03681 | A06063 | 469 | A03681 | A06216 | 266 |
| A03681 | A06581 | 310 | A03681 | A06595 | 177 |
| A03681 | A06897 | 156 | A03681 | A08911 | 230 |
| A03681 | A09123 | 267 | A03681 | A09269 | 180 |
| A03681 | A09485 | 276 | A03681 | A10392 | 185 |
| A03681 | A14653 | 157 | A03681 | A14683 | 221 |
| A03681 | A15867 | 188 | A03682 | A03703 | 152 |
| A03682 | A03718 | 70  | A03682 | A03851 | 484 |
| A03682 | A03873 | 227 | A03682 | A04217 | 235 |
| A03682 | A04238 | 224 | A03682 | A04337 | 152 |
| A03682 | A04430 | 247 | A03682 | A04518 | 204 |
| A03682 | A04622 | 162 | A03682 | A05027 | 283 |
| A03682 | A05220 | 491 | A03682 | A05405 | 238 |
| A03682 | A05601 | 154 | A03682 | A07051 | 160 |
| A03682 | A08093 | 254 | A03682 | A08097 | 249 |
| A03682 | A08400 | 201 | A03682 | A08834 | 480 |
| A03682 | A08840 | 63  | A03682 | A08842 | 465 |
| A03682 | A09151 | 177 | A03682 | A09152 | 179 |
| A03682 | A09174 | 202 | A03682 | A09206 | 168 |
| A03682 | A09461 | 168 | A03682 | A09740 | 283 |
| A03682 | A09744 | 201 | A03682 | A09848 | 221 |
| A03682 | A09851 | 159 | A03682 | A09857 | 491 |
| A03682 | A10384 | 340 | A03682 | A10579 | 190 |
| A03682 | A10584 | 85  | A03682 | A10596 | 63  |

|        |        |     |        |        |     |
|--------|--------|-----|--------|--------|-----|
| A03682 | A11257 | 243 | A03682 | A11299 | 195 |
| A03682 | A11542 | 475 | A03682 | A11948 | 215 |
| A03682 | A12294 | 268 | A03682 | A13005 | 299 |
| A03682 | A13130 | 229 | A03682 | A13729 | 176 |
| A03682 | A13826 | 63  | A03682 | A13831 | 674 |
| A03682 | A14006 | 168 | A03682 | A14056 | 497 |
| A03682 | A14120 | 185 | A03682 | A14129 | 477 |
| A03682 | A14196 | 65  | A03682 | A14408 | 469 |
| A03682 | A14982 | 205 | A03682 | A15278 | 268 |
| A03682 | A15292 | 417 | A03682 | A15297 | 63  |
| A03682 | A15314 | 63  | A03682 | A15317 | 339 |
| A03682 | A15408 | 160 | A03682 | A15431 | 481 |
| A03682 | A15461 | 291 | A03682 | A15498 | 297 |
| A03682 | A15611 | 483 | A03682 | A15670 | 215 |
| A03682 | A15818 | 267 | A03682 | A15824 | 367 |
| A03682 | A15884 | 185 | A03682 | A17058 | 212 |
| A03682 | A17124 | 299 | A03683 | A03684 | 489 |
| A03683 | A03831 | 394 | A03683 | A04731 | 334 |
| A03683 | A06314 | 473 | A03683 | A06415 | 329 |
| A03683 | A06650 | 299 | A03683 | A06747 | 311 |
| A03683 | A07173 | 278 | A03683 | A14071 | 246 |
| A03683 | A14691 | 249 | A03684 | A03831 | 373 |
| A03684 | A04731 | 299 | A03684 | A06314 | 483 |
| A03684 | A06415 | 281 | A03684 | A06650 | 313 |
| A03684 | A06747 | 273 | A03684 | A08070 | 228 |
| A03684 | A09403 | 393 | A03684 | A13617 | 182 |
| A03684 | A14071 | 201 | A03684 | A14691 | 202 |
| A03684 | A16110 | 345 | A03684 | A16453 | 167 |
| A03685 | A05309 | 278 | A03685 | A06949 | 202 |
| A03685 | A09937 | 408 | A03685 | A11206 | 424 |
| A03685 | A13980 | 217 | A03685 | A14188 | 252 |
| A03685 | A15913 | 364 | A03685 | A16300 | 255 |
| A03686 | A03728 | 393 | A03686 | A03843 | 210 |
| A03686 | A03892 | 149 | A03686 | A04161 | 350 |
| A03686 | A04482 | 171 | A03686 | A05309 | 467 |
| A03686 | A05313 | 159 | A03686 | A05577 | 63  |
| A03686 | A06086 | 156 | A03686 | A06689 | 156 |
| A03686 | A07151 | 256 | A03686 | A07207 | 728 |
| A03686 | A07435 | 154 | A03686 | A08293 | 272 |
| A03686 | A08356 | 252 | A03686 | A08362 | 413 |
| A03686 | A08571 | 899 | A03686 | A08943 | 621 |
| A03686 | A09526 | 293 | A03686 | A10591 | 305 |
| A03686 | A10733 | 318 | A03686 | A10757 | 171 |
| A03686 | A11602 | 485 | A03686 | A11655 | 162 |
| A03686 | A11939 | 159 | A03686 | A12835 | 393 |
| A03686 | A13586 | 174 | A03686 | A13743 | 246 |

|        |        |     |        |        |     |
|--------|--------|-----|--------|--------|-----|
| A03686 | A13824 | 982 | A03686 | A13826 | 612 |
| A03686 | A13829 | 944 | A03686 | A13873 | 210 |
| A03686 | A13983 | 498 | A03686 | A13989 | 899 |
| A03686 | A14026 | 484 | A03686 | A14054 | 257 |
| A03686 | A14199 | 371 | A03686 | A14246 | 899 |
| A03686 | A14262 | 394 | A03686 | A14431 | 112 |
| A03686 | A15295 | 633 | A03686 | A15297 | 909 |
| A03686 | A15498 | 400 | A03686 | A15559 | 899 |
| A03686 | A15620 | 475 | A03686 | A15626 | 286 |
| A03686 | A16449 | 391 | A03686 | A16595 | 193 |
| A03686 | A16847 | 490 | A03687 | A03766 | 176 |
| A03687 | A03846 | 177 | A03687 | A05419 | 185 |
| A03687 | A06351 | 188 | A03687 | A06599 | 151 |
| A03687 | A14127 | 486 | A03687 | A14408 | 202 |
| A03687 | A14496 | 269 | A03687 | A14643 | 270 |
| A03687 | A14644 | 246 | A03687 | A15333 | 238 |
| A03687 | A15396 | 243 | A03687 | A15404 | 305 |
| A03687 | A15447 | 168 | A03687 | A15451 | 291 |
| A03687 | A15456 | 263 | A03687 | A15804 | 316 |
| A03687 | A15809 | 154 | A03687 | A15922 | 201 |
| A03688 | A03719 | 477 | A03688 | A03906 | 347 |
| A03688 | A03946 | 281 | A03688 | A04079 | 193 |
| A03688 | A05048 | 368 | A03688 | A05838 | 217 |
| A03688 | A06277 | 168 | A03688 | A06731 | 188 |
| A03688 | A06823 | 337 | A03688 | A07880 | 191 |
| A03688 | A07934 | 188 | A03688 | A08698 | 210 |
| A03688 | A08875 | 185 | A03688 | A09235 | 213 |
| A03688 | A09292 | 168 | A03688 | A09316 | 188 |
| A03688 | A10470 | 344 | A03688 | A13899 | 173 |
| A03688 | A14925 | 199 | A03688 | A15467 | 396 |
| A03688 | A15478 | 170 | A03688 | A15496 | 356 |
| A03689 | A03690 | 317 | A03689 | A03691 | 351 |
| A03689 | A03696 | 486 | A03689 | A03697 | 408 |
| A03689 | A04148 | 384 | A03689 | A05309 | 174 |
| A03689 | A06001 | 385 | A03689 | A06488 | 399 |
| A03689 | A09741 | 446 | A03689 | A09775 | 435 |
| A03689 | A09825 | 221 | A03689 | A11223 | 425 |
| A03689 | A11680 | 368 | A03689 | A11818 | 399 |
| A03689 | A13417 | 366 | A03689 | A13421 | 447 |
| A03689 | A13461 | 441 | A03689 | A13575 | 379 |
| A03689 | A15843 | 258 | A03689 | A16300 | 154 |
| A03690 | A03696 | 424 | A03690 | A03697 | 257 |
| A03690 | A03721 | 218 | A03690 | A05059 | 277 |
| A03690 | A05552 | 363 | A03690 | A06001 | 344 |
| A03690 | A06488 | 486 | A03690 | A07092 | 404 |
| A03690 | A07213 | 430 | A03690 | A07879 | 404 |

|        |        |     |        |        |     |
|--------|--------|-----|--------|--------|-----|
| A03690 | A08417 | 240 | A03690 | A09248 | 286 |
| A03690 | A09741 | 241 | A03690 | A09743 | 346 |
| A03690 | A11073 | 481 | A03690 | A11223 | 446 |
| A03690 | A11422 | 307 | A03690 | A11680 | 457 |
| A03690 | A11872 | 489 | A03690 | A11879 | 469 |
| A03690 | A12458 | 363 | A03690 | A12575 | 404 |
| A03690 | A13162 | 226 | A03690 | A13422 | 374 |
| A03690 | A15318 | 174 | A03690 | A15800 | 260 |
| A03690 | A15828 | 288 | A03690 | A16224 | 221 |
| A03691 | A03752 | 347 | A03691 | A03910 | 151 |
| A03691 | A06488 | 285 | A03691 | A07311 | 276 |
| A03691 | A09775 | 355 | A03691 | A09902 | 395 |
| A03691 | A11680 | 483 | A03691 | A11818 | 396 |
| A03691 | A12885 | 324 | A03691 | A13417 | 362 |
| A03691 | A13421 | 446 | A03691 | A13461 | 368 |
| A03691 | A13575 | 468 | A03691 | A15843 | 249 |
| A03692 | A03694 | 357 | A03692 | A03722 | 416 |
| A03692 | A04340 | 408 | A03692 | A06689 | 208 |
| A03692 | A09824 | 380 | A03692 | A12897 | 165 |
| A03693 | A03694 | 462 | A03693 | A03695 | 457 |
| A03693 | A03722 | 316 | A03693 | A03894 | 455 |
| A03693 | A06022 | 419 | A03693 | A09824 | 377 |
| A03693 | A10723 | 360 | A03693 | A13899 | 288 |
| A03693 | A13951 | 393 | A03693 | A15301 | 279 |
| A03693 | A15346 | 256 | A03694 | A03722 | 467 |
| A03694 | A03894 | 238 | A03694 | A04340 | 361 |
| A03694 | A09824 | 469 | A03694 | A10723 | 288 |
| A03694 | A12837 | 353 | A03694 | A12855 | 369 |
| A03694 | A12893 | 391 | A03694 | A13899 | 188 |
| A03694 | A14926 | 463 | A03694 | A15293 | 485 |
| A03694 | A15294 | 168 | A03694 | A15346 | 152 |
| A03694 | A15506 | 283 | A03694 | A16058 | 467 |
| A03694 | A16363 | 299 | A03695 | A03894 | 473 |
| A03695 | A04520 | 269 | A03695 | A06022 | 463 |
| A03695 | A09824 | 383 | A03695 | A11652 | 401 |
| A03695 | A12016 | 416 | A03695 | A12529 | 419 |
| A03695 | A14128 | 215 | A03695 | A15301 | 291 |
| A03695 | A16300 | 218 | A03696 | A03697 | 329 |
| A03696 | A03721 | 301 | A03696 | A05309 | 205 |
| A03696 | A06280 | 340 | A03696 | A06488 | 316 |
| A03696 | A09741 | 414 | A03696 | A09775 | 375 |
| A03696 | A11223 | 435 | A03696 | A11224 | 388 |
| A03696 | A12669 | 409 | A03696 | A13417 | 380 |
| A03696 | A13421 | 399 | A03697 | A04063 | 278 |
| A03697 | A04495 | 152 | A03697 | A05552 | 433 |
| A03697 | A06280 | 434 | A03697 | A06287 | 317 |



|        |        |     |        |        |     |
|--------|--------|-----|--------|--------|-----|
| A03697 | A06319 | 210 | A03697 | A06401 | 480 |
| A03697 | A06488 | 484 | A03697 | A07213 | 460 |
| A03697 | A07744 | 317 | A03697 | A07803 | 190 |
| A03697 | A07993 | 279 | A03697 | A08061 | 317 |
| A03697 | A08098 | 317 | A03697 | A08178 | 317 |
| A03697 | A08295 | 367 | A03697 | A08763 | 317 |
| A03697 | A08947 | 152 | A03697 | A09004 | 152 |
| A03697 | A10842 | 152 | A03697 | A11131 | 174 |
| A03697 | A11223 | 396 | A03697 | A11233 | 294 |
| A03697 | A11658 | 245 | A03697 | A11759 | 228 |
| A03697 | A12870 | 291 | A03697 | A13899 | 170 |
| A03697 | A14072 | 168 | A03697 | A14525 | 502 |
| A03697 | A15318 | 160 | A03697 | A15375 | 317 |
| A03697 | A15416 | 165 | A03697 | A15445 | 196 |
| A03697 | A15447 | 165 | A03697 | A15546 | 502 |
| A03698 | A03963 | 335 | A03698 | A05998 | 347 |
| A03698 | A06559 | 388 | A03698 | A13415 | 347 |
| A03698 | A13819 | 279 | A03698 | A13920 | 477 |
| A03699 | A03892 | 252 | A03699 | A04536 | 173 |
| A03699 | A05401 | 443 | A03699 | A08133 | 199 |
| A03699 | A15642 | 241 | A03700 | A09881 | 274 |
| A03701 | A03703 | 230 | A03701 | A03721 | 382 |
| A03701 | A03722 | 267 | A03701 | A04152 | 326 |
| A03701 | A05603 | 221 | A03701 | A06914 | 230 |
| A03701 | A10726 | 447 | A03701 | A11951 | 486 |
| A03701 | A11961 | 438 | A03701 | A12497 | 419 |
| A03701 | A12587 | 419 | A03701 | A12631 | 408 |
| A03701 | A12935 | 480 | A03701 | A12959 | 469 |
| A03701 | A12960 | 467 | A03701 | A12976 | 466 |
| A03701 | A12983 | 375 | A03701 | A13410 | 466 |
| A03701 | A13745 | 419 | A03702 | A10895 | 63  |
| A03703 | A03719 | 332 | A03703 | A03721 | 491 |
| A03703 | A03722 | 491 | A03703 | A03894 | 491 |
| A03703 | A05098 | 174 | A03703 | A05220 | 358 |
| A03703 | A06001 | 251 | A03703 | A06689 | 176 |
| A03703 | A06771 | 491 | A03703 | A06964 | 409 |
| A03703 | A07732 | 389 | A03703 | A08842 | 457 |
| A03703 | A09724 | 196 | A03703 | A09740 | 399 |
| A03703 | A10579 | 489 | A03703 | A10642 | 154 |
| A03703 | A11601 | 243 | A03703 | A12500 | 174 |
| A03703 | A13410 | 273 | A03703 | A13411 | 366 |
| A03703 | A14122 | 188 | A03703 | A14129 | 238 |
| A03703 | A14190 | 221 | A03703 | A14202 | 274 |
| A03703 | A14470 | 491 | A03703 | A15297 | 235 |
| A03703 | A15376 | 157 | A03703 | A15412 | 260 |
| A03703 | A15431 | 391 | A03703 | A15461 | 402 |

|        |        |     |        |        |     |
|--------|--------|-----|--------|--------|-----|
| A03703 | A15462 | 219 | A03703 | A15464 | 279 |
| A03703 | A16260 | 297 | A03703 | A17076 | 424 |
| A03704 | A03720 | 485 | A03704 | A03880 | 232 |
| A03704 | A04342 | 196 | A03704 | A05127 | 152 |
| A03704 | A05556 | 168 | A03704 | A06001 | 404 |
| A03704 | A06488 | 221 | A03704 | A08214 | 310 |
| A03704 | A09741 | 224 | A03704 | A09757 | 208 |
| A03704 | A09825 | 491 | A03704 | A10592 | 188 |
| A03704 | A11817 | 477 | A03704 | A14000 | 213 |
| A03704 | A14118 | 486 | A03704 | A14192 | 182 |
| A03704 | A14196 | 184 | A03704 | A15417 | 299 |
| A03704 | A15810 | 344 | A03705 | A03754 | 202 |
| A03705 | A03859 | 213 | A03705 | A03888 | 313 |
| A03705 | A06279 | 391 | A03705 | A06599 | 151 |
| A03705 | A06861 | 176 | A03705 | A06909 | 351 |
| A03705 | A06965 | 401 | A03705 | A07307 | 281 |
| A03705 | A07430 | 400 | A03705 | A09322 | 180 |
| A03705 | A09674 | 446 | A03705 | A10417 | 224 |
| A03705 | A10949 | 272 | A03705 | A11438 | 338 |
| A03705 | A13989 | 380 | A03705 | A14216 | 151 |
| A03705 | A15365 | 246 | A03705 | A16118 | 457 |
| A03707 | A16904 | 332 | A03708 | A04710 | 223 |
| A03708 | A05603 | 179 | A03708 | A05657 | 329 |
| A03708 | A05968 | 460 | A03708 | A05969 | 446 |
| A03708 | A06235 | 369 | A03708 | A07218 | 157 |
| A03708 | A07773 | 216 | A03708 | A09072 | 243 |
| A03708 | A14377 | 207 | A03708 | A14637 | 177 |
| A03708 | A14673 | 406 | A03708 | A15613 | 168 |
| A03709 | A04229 | 156 | A03709 | A04326 | 356 |
| A03709 | A04336 | 329 | A03709 | A04349 | 484 |
| A03709 | A04384 | 346 | A03709 | A05795 | 477 |
| A03709 | A06783 | 174 | A03709 | A07019 | 385 |
| A03709 | A07559 | 479 | A03709 | A09216 | 383 |
| A03709 | A09470 | 256 | A03709 | A09900 | 267 |
| A03709 | A15271 | 424 | A03709 | A15874 | 193 |
| A03709 | A16744 | 288 | A03710 | A04850 | 168 |
| A03710 | A05222 | 179 | A03710 | A05332 | 317 |
| A03710 | A05595 | 380 | A03710 | A05609 | 317 |
| A03710 | A06264 | 174 | A03710 | A07222 | 317 |
| A03710 | A07274 | 477 | A03710 | A07333 | 668 |
| A03710 | A07571 | 317 | A03710 | A07824 | 420 |
| A03710 | A07825 | 380 | A03710 | A07974 | 317 |
| A03710 | A08097 | 472 | A03710 | A08312 | 362 |
| A03710 | A08576 | 263 | A03710 | A09340 | 438 |
| A03710 | A09677 | 340 | A03710 | A09781 | 380 |
| A03710 | A12415 | 380 | A03710 | A13751 | 340 |

|        |        |     |        |        |     |
|--------|--------|-----|--------|--------|-----|
| A03710 | A15221 | 193 | A03711 | A03744 | 344 |
| A03711 | A05890 | 469 | A03712 | A07165 | 170 |
| A03712 | A08701 | 340 | A03712 | A09202 | 297 |
| A03712 | A14171 | 358 | A03712 | A15683 | 217 |
| A03713 | A03959 | 196 | A03713 | A09366 | 416 |
| A03713 | A15379 | 258 | A03714 | A03724 | 326 |
| A03714 | A05778 | 435 | A03714 | A06211 | 391 |
| A03714 | A08866 | 380 | A03714 | A08881 | 314 |
| A03714 | A11681 | 332 | A03714 | A13207 | 263 |
| A03714 | A13935 | 385 | A03714 | A14371 | 238 |
| A03714 | A15391 | 353 | A03715 | A03930 | 435 |
| A03715 | A04508 | 435 | A03715 | A08571 | 201 |
| A03717 | A06599 | 165 | A03717 | A08259 | 160 |
| A03717 | A09242 | 207 | A03717 | A10588 | 308 |
| A03717 | A11285 | 369 | A03717 | A11330 | 480 |
| A03717 | A11423 | 488 | A03717 | A11455 | 360 |
| A03717 | A14134 | 466 | A03717 | A14415 | 363 |
| A03717 | A14815 | 405 | A03717 | A15358 | 491 |
| A03717 | A15465 | 434 | A03717 | A15468 | 470 |
| A03717 | A15469 | 321 | A03717 | A15470 | 490 |
| A03717 | A15471 | 490 | A03717 | A15472 | 486 |
| A03717 | A15473 | 363 | A03717 | A15474 | 430 |
| A03717 | A16061 | 329 | A03717 | A16522 | 432 |
| A03718 | A03891 | 308 | A03718 | A03892 | 608 |
| A03718 | A04145 | 98  | A03718 | A04893 | 489 |
| A03718 | A04929 | 380 | A03718 | A05233 | 160 |
| A03718 | A05309 | 368 | A03718 | A05401 | 472 |
| A03718 | A05531 | 384 | A03718 | A06675 | 208 |
| A03718 | A07180 | 63  | A03718 | A08137 | 252 |
| A03718 | A08874 | 240 | A03718 | A09121 | 241 |
| A03718 | A09277 | 402 | A03718 | A09952 | 200 |
| A03718 | A10584 | 485 | A03718 | A10739 | 232 |
| A03718 | A10804 | 462 | A03718 | A11337 | 212 |
| A03718 | A12295 | 485 | A03718 | A12792 | 240 |
| A03718 | A13052 | 165 | A03718 | A13816 | 393 |
| A03718 | A13882 | 364 | A03718 | A13902 | 323 |
| A03718 | A14095 | 306 | A03718 | A14168 | 276 |
| A03718 | A14247 | 423 | A03718 | A14868 | 63  |
| A03718 | A15314 | 63  | A03718 | A15498 | 686 |
| A03718 | A15647 | 232 | A03718 | A16086 | 180 |
| A03719 | A03720 | 179 | A03719 | A03723 | 200 |
| A03719 | A03724 | 154 | A03719 | A03728 | 223 |
| A03719 | A03745 | 255 | A03719 | A03752 | 223 |
| A03719 | A03778 | 165 | A03719 | A03880 | 179 |
| A03719 | A03906 | 288 | A03719 | A04065 | 286 |
| A03719 | A04086 | 207 | A03719 | A04152 | 221 |

|        |        |     |        |        |     |
|--------|--------|-----|--------|--------|-----|
| A03719 | A04928 | 201 | A03719 | A05048 | 332 |
| A03719 | A05418 | 490 | A03719 | A05597 | 179 |
| A03719 | A05627 | 283 | A03719 | A06067 | 184 |
| A03719 | A06491 | 179 | A03719 | A06578 | 184 |
| A03719 | A06588 | 172 | A03719 | A06591 | 179 |
| A03719 | A06689 | 223 | A03719 | A06819 | 223 |
| A03719 | A06823 | 445 | A03719 | A07222 | 223 |
| A03719 | A07229 | 188 | A03719 | A07333 | 223 |
| A03719 | A07421 | 179 | A03719 | A07495 | 179 |
| A03719 | A07598 | 184 | A03719 | A07785 | 179 |
| A03719 | A07816 | 179 | A03719 | A08259 | 179 |
| A03719 | A08551 | 179 | A03719 | A08834 | 179 |
| A03719 | A08840 | 179 | A03719 | A09149 | 157 |
| A03719 | A09205 | 205 | A03719 | A09233 | 269 |
| A03719 | A09235 | 373 | A03719 | A09351 | 184 |
| A03719 | A09812 | 271 | A03719 | A09825 | 179 |
| A03719 | A10332 | 224 | A03719 | A10470 | 299 |
| A03719 | A10681 | 238 | A03719 | A10740 | 246 |
| A03719 | A11233 | 241 | A03719 | A11558 | 245 |
| A03719 | A11678 | 257 | A03719 | A11851 | 184 |
| A03719 | A11873 | 167 | A03719 | A13213 | 279 |
| A03719 | A13356 | 184 | A03719 | A13819 | 179 |
| A03719 | A13822 | 318 | A03719 | A13826 | 401 |
| A03719 | A13866 | 179 | A03719 | A13899 | 334 |
| A03719 | A13905 | 171 | A03719 | A13926 | 477 |
| A03719 | A13942 | 179 | A03719 | A14202 | 194 |
| A03719 | A14210 | 184 | A03719 | A14366 | 179 |
| A03719 | A14470 | 156 | A03719 | A14525 | 223 |
| A03719 | A14570 | 221 | A03719 | A14577 | 159 |
| A03719 | A14769 | 277 | A03719 | A14804 | 223 |
| A03719 | A15292 | 308 | A03719 | A15346 | 184 |
| A03719 | A15352 | 218 | A03719 | A15358 | 179 |
| A03719 | A15372 | 223 | A03719 | A15396 | 183 |
| A03719 | A15435 | 180 | A03719 | A15452 | 195 |
| A03719 | A15462 | 241 | A03719 | A15470 | 179 |
| A03719 | A15484 | 179 | A03719 | A15834 | 165 |
| A03719 | A16002 | 196 | A03719 | A16152 | 184 |
| A03719 | A16219 | 223 | A03719 | A16260 | 310 |
| A03719 | A16426 | 204 | A03719 | A16531 | 223 |
| A03719 | A16626 | 286 | A03719 | A16635 | 223 |
| A03719 | A16875 | 210 | A03720 | A03880 | 179 |
| A03720 | A05301 | 299 | A03720 | A05597 | 179 |
| A03720 | A05838 | 160 | A03720 | A06491 | 179 |
| A03720 | A06591 | 179 | A03720 | A07054 | 272 |
| A03720 | A07242 | 490 | A03720 | A07421 | 179 |
| A03720 | A07495 | 501 | A03720 | A07785 | 179 |

|        |        |     |        |        |     |
|--------|--------|-----|--------|--------|-----|
| A03720 | A07816 | 420 | A03720 | A08259 | 179 |
| A03720 | A08551 | 187 | A03720 | A08834 | 179 |
| A03720 | A08840 | 179 | A03720 | A08867 | 232 |
| A03720 | A08946 | 299 | A03720 | A09666 | 151 |
| A03720 | A09741 | 390 | A03720 | A09825 | 528 |
| A03720 | A09933 | 151 | A03720 | A11165 | 328 |
| A03720 | A11405 | 195 | A03720 | A11558 | 179 |
| A03720 | A11817 | 472 | A03720 | A12275 | 299 |
| A03720 | A12357 | 191 | A03720 | A13454 | 345 |
| A03720 | A13819 | 179 | A03720 | A13838 | 450 |
| A03720 | A13866 | 179 | A03720 | A13942 | 179 |
| A03720 | A14118 | 288 | A03720 | A14202 | 179 |
| A03720 | A14366 | 179 | A03720 | A15147 | 345 |
| A03720 | A15358 | 179 | A03720 | A15470 | 179 |
| A03720 | A15484 | 179 | A03720 | A16738 | 154 |
| A03720 | A17198 | 210 | A03721 | A03722 | 491 |
| A03721 | A03894 | 491 | A03721 | A04076 | 174 |
| A03721 | A05098 | 212 | A03721 | A05487 | 182 |
| A03721 | A05603 | 246 | A03721 | A06001 | 294 |
| A03721 | A06488 | 187 | A03721 | A06771 | 180 |
| A03721 | A06964 | 337 | A03721 | A07421 | 157 |
| A03721 | A08842 | 399 | A03721 | A09740 | 422 |
| A03721 | A10579 | 435 | A03721 | A10642 | 191 |
| A03721 | A11415 | 198 | A03721 | A11477 | 263 |
| A03721 | A11537 | 201 | A03721 | A11601 | 277 |
| A03721 | A13410 | 303 | A03721 | A13411 | 384 |
| A03721 | A13951 | 401 | A03721 | A13987 | 193 |
| A03721 | A14190 | 357 | A03721 | A14399 | 324 |
| A03721 | A14470 | 469 | A03721 | A14511 | 240 |
| A03721 | A15292 | 210 | A03721 | A15312 | 156 |
| A03721 | A15333 | 330 | A03721 | A15335 | 202 |
| A03721 | A15352 | 390 | A03721 | A15358 | 191 |
| A03721 | A15431 | 307 | A03721 | A15461 | 375 |
| A03721 | A15464 | 185 | A03721 | A15470 | 313 |
| A03721 | A15475 | 355 | A03721 | A15818 | 218 |
| A03721 | A16074 | 191 | A03721 | A16224 | 168 |
| A03721 | A17076 | 491 | A03722 | A03782 | 152 |
| A03722 | A03887 | 335 | A03722 | A03894 | 491 |
| A03722 | A04076 | 174 | A03722 | A04340 | 326 |
| A03722 | A05220 | 163 | A03722 | A05706 | 159 |
| A03722 | A06022 | 355 | A03722 | A08172 | 165 |
| A03722 | A08268 | 367 | A03722 | A08842 | 400 |
| A03722 | A09022 | 221 | A03722 | A09211 | 238 |
| A03722 | A09740 | 283 | A03722 | A09745 | 171 |
| A03722 | A09824 | 473 | A03722 | A09834 | 265 |
| A03722 | A10579 | 384 | A03722 | A10723 | 362 |

|        |        |     |        |        |     |
|--------|--------|-----|--------|--------|-----|
| A03722 | A12264 | 267 | A03722 | A12933 | 346 |
| A03722 | A13410 | 305 | A03722 | A13411 | 384 |
| A03722 | A13826 | 382 | A03722 | A13951 | 402 |
| A03722 | A14116 | 338 | A03722 | A14122 | 238 |
| A03722 | A14124 | 221 | A03722 | A14126 | 274 |
| A03722 | A14190 | 358 | A03722 | A14197 | 218 |
| A03722 | A14202 | 422 | A03722 | A14210 | 152 |
| A03722 | A14290 | 272 | A03722 | A14399 | 420 |
| A03722 | A14470 | 312 | A03722 | A15318 | 249 |
| A03722 | A15333 | 332 | A03722 | A15335 | 205 |
| A03722 | A15346 | 213 | A03722 | A15352 | 335 |
| A03722 | A15376 | 96  | A03722 | A15411 | 235 |
| A03722 | A15431 | 379 | A03722 | A15444 | 208 |
| A03722 | A15454 | 199 | A03722 | A15461 | 424 |
| A03722 | A15464 | 398 | A03722 | A15523 | 346 |
| A03722 | A15797 | 332 | A03722 | A15799 | 235 |
| A03722 | A15800 | 210 | A03722 | A15817 | 174 |
| A03722 | A15934 | 215 | A03722 | A16058 | 424 |
| A03722 | A16189 | 355 | A03722 | A16224 | 302 |
| A03722 | A17076 | 327 | A03723 | A04152 | 443 |
| A03723 | A04155 | 351 | A03723 | A04749 | 328 |
| A03723 | A05418 | 238 | A03723 | A06431 | 260 |
| A03723 | A06578 | 219 | A03723 | A09235 | 226 |
| A03723 | A09978 | 445 | A03723 | A14198 | 184 |
| A03723 | A15293 | 347 | A03723 | A15321 | 441 |
| A03723 | A16916 | 229 | A03724 | A03732 | 491 |
| A03724 | A03887 | 245 | A03724 | A03899 | 484 |
| A03724 | A03900 | 260 | A03724 | A03945 | 228 |
| A03724 | A04008 | 167 | A03724 | A04337 | 368 |
| A03724 | A05220 | 278 | A03724 | A05778 | 386 |
| A03724 | A06046 | 246 | A03724 | A08866 | 486 |
| A03724 | A09205 | 491 | A03724 | A09206 | 432 |
| A03724 | A09233 | 400 | A03724 | A09740 | 291 |
| A03724 | A10579 | 274 | A03724 | A10625 | 151 |
| A03724 | A11422 | 270 | A03724 | A11449 | 293 |
| A03724 | A11601 | 283 | A03724 | A13372 | 350 |
| A03724 | A13826 | 151 | A03724 | A13935 | 475 |
| A03724 | A14122 | 249 | A03724 | A14611 | 353 |
| A03724 | A15300 | 274 | A03724 | A15312 | 167 |
| A03724 | A15318 | 259 | A03724 | A15346 | 223 |
| A03724 | A15391 | 355 | A03724 | A15420 | 243 |
| A03724 | A15421 | 452 | A03724 | A15422 | 468 |
| A03724 | A15444 | 216 | A03724 | A15488 | 251 |
| A03724 | A15489 | 234 | A03724 | A15493 | 322 |
| A03724 | A15799 | 243 | A03724 | A15819 | 208 |
| A03724 | A15820 | 256 | A03724 | A16117 | 480 |

|        |        |     |        |        |     |
|--------|--------|-----|--------|--------|-----|
| A03724 | A16224 | 177 | A03724 | A16320 | 171 |
| A03725 | A03821 | 263 | A03725 | A04080 | 491 |
| A03725 | A04334 | 447 | A03725 | A04379 | 265 |
| A03725 | A04417 | 183 | A03725 | A04477 | 168 |
| A03725 | A04982 | 154 | A03725 | A05141 | 409 |
| A03725 | A05153 | 491 | A03725 | A05240 | 455 |
| A03725 | A05356 | 422 | A03725 | A05365 | 420 |
| A03725 | A05926 | 363 | A03725 | A05945 | 408 |
| A03725 | A06063 | 480 | A03725 | A06082 | 191 |
| A03725 | A06200 | 243 | A03725 | A06314 | 377 |
| A03725 | A06581 | 491 | A03725 | A06586 | 210 |
| A03725 | A06607 | 435 | A03725 | A06717 | 213 |
| A03725 | A06949 | 235 | A03725 | A07339 | 480 |
| A03725 | A07377 | 232 | A03725 | A07468 | 483 |
| A03725 | A07469 | 457 | A03725 | A07567 | 176 |
| A03725 | A07617 | 281 | A03725 | A07632 | 157 |
| A03725 | A08404 | 455 | A03725 | A08837 | 450 |
| A03725 | A08875 | 396 | A03725 | A09076 | 160 |
| A03725 | A09417 | 382 | A03725 | A09561 | 291 |
| A03725 | A10967 | 485 | A03725 | A12373 | 368 |
| A03725 | A12793 | 479 | A03725 | A13879 | 330 |
| A03725 | A14786 | 258 | A03725 | A14787 | 477 |
| A03725 | A17108 | 385 | A03726 | A03741 | 945 |
| A03726 | A03778 | 546 | A03726 | A03935 | 256 |
| A03726 | A03960 | 230 | A03726 | A04169 | 160 |
| A03726 | A04179 | 230 | A03726 | A04194 | 193 |
| A03726 | A04377 | 260 | A03726 | A04449 | 154 |
| A03726 | A04686 | 924 | A03726 | A05015 | 63  |
| A03726 | A05428 | 93  | A03726 | A05603 | 165 |
| A03726 | A05887 | 190 | A03726 | A05968 | 373 |
| A03726 | A06251 | 390 | A03726 | A06293 | 334 |
| A03726 | A06608 | 252 | A03726 | A06628 | 200 |
| A03726 | A06689 | 199 | A03726 | A06729 | 329 |
| A03726 | A06925 | 923 | A03726 | A07155 | 353 |
| A03726 | A07361 | 180 | A03726 | A07834 | 445 |
| A03726 | A08571 | 267 | A03726 | A08768 | 196 |
| A03726 | A08863 | 922 | A03726 | A09084 | 165 |
| A03726 | A09390 | 201 | A03726 | A09479 | 278 |
| A03726 | A09539 | 909 | A03726 | A09838 | 260 |
| A03726 | A09890 | 356 | A03726 | A10278 | 899 |
| A03726 | A10354 | 229 | A03726 | A10371 | 226 |
| A03726 | A10645 | 167 | A03726 | A10894 | 228 |
| A03726 | A11070 | 435 | A03726 | A11315 | 446 |
| A03726 | A11318 | 462 | A03726 | A11321 | 379 |
| A03726 | A11337 | 931 | A03726 | A11466 | 285 |
| A03726 | A11566 | 302 | A03726 | A11602 | 910 |

|        |        |     |        |        |     |
|--------|--------|-----|--------|--------|-----|
| A03726 | A11667 | 302 | A03726 | A11765 | 208 |
| A03726 | A11853 | 917 | A03726 | A11856 | 899 |
| A03726 | A11983 | 957 | A03726 | A12207 | 285 |
| A03726 | A12449 | 302 | A03726 | A12549 | 353 |
| A03726 | A12581 | 313 | A03726 | A12635 | 353 |
| A03726 | A12740 | 353 | A03726 | A12771 | 293 |
| A03726 | A12779 | 329 | A03726 | A13981 | 899 |
| A03726 | A13982 | 216 | A03726 | A14026 | 918 |
| A03726 | A14247 | 388 | A03726 | A14262 | 899 |
| A03726 | A14427 | 313 | A03726 | A14481 | 212 |
| A03726 | A14918 | 430 | A03726 | A15298 | 313 |
| A03726 | A15422 | 335 | A03726 | A15498 | 235 |
| A03726 | A15540 | 274 | A03726 | A15676 | 301 |
| A03726 | A16171 | 313 | A03726 | A16174 | 302 |
| A03726 | A16195 | 302 | A03726 | A16267 | 302 |
| A03726 | A16427 | 353 | A03727 | A06001 | 328 |
| A03728 | A03752 | 223 | A03728 | A04178 | 470 |
| A03728 | A04355 | 208 | A03728 | A04668 | 200 |
| A03728 | A05210 | 163 | A03728 | A06085 | 676 |
| A03728 | A06250 | 263 | A03728 | A06264 | 491 |
| A03728 | A06352 | 218 | A03728 | A06689 | 223 |
| A03728 | A06819 | 223 | A03728 | A06924 | 538 |
| A03728 | A06982 | 200 | A03728 | A07054 | 508 |
| A03728 | A07222 | 223 | A03728 | A07333 | 274 |
| A03728 | A07427 | 191 | A03728 | A07466 | 200 |
| A03728 | A07766 | 193 | A03728 | A07880 | 159 |
| A03728 | A07889 | 185 | A03728 | A08669 | 200 |
| A03728 | A08820 | 200 | A03728 | A08849 | 286 |
| A03728 | A08939 | 548 | A03728 | A09251 | 228 |
| A03728 | A09257 | 240 | A03728 | A09506 | 167 |
| A03728 | A09667 | 418 | A03728 | A09683 | 207 |
| A03728 | A09866 | 218 | A03728 | A10205 | 269 |
| A03728 | A10373 | 200 | A03728 | A10793 | 162 |
| A03728 | A11227 | 218 | A03728 | A11503 | 428 |
| A03728 | A11772 | 188 | A03728 | A12365 | 200 |
| A03728 | A12383 | 191 | A03728 | A12835 | 393 |
| A03728 | A13741 | 213 | A03728 | A13822 | 223 |
| A03728 | A13889 | 566 | A03728 | A14006 | 201 |
| A03728 | A14009 | 566 | A03728 | A14091 | 200 |
| A03728 | A14094 | 200 | A03728 | A14177 | 200 |
| A03728 | A14192 | 200 | A03728 | A14223 | 200 |
| A03728 | A14279 | 347 | A03728 | A14525 | 225 |
| A03728 | A14633 | 358 | A03728 | A14694 | 317 |
| A03728 | A14804 | 223 | A03728 | A15367 | 438 |
| A03728 | A15372 | 224 | A03728 | A15624 | 163 |
| A03728 | A15655 | 162 | A03728 | A15752 | 210 |



|        |        |     |        |        |     |
|--------|--------|-----|--------|--------|-----|
| A03728 | A15828 | 279 | A03728 | A15932 | 63  |
| A03728 | A16219 | 223 | A03728 | A16274 | 200 |
| A03728 | A16531 | 223 | A03728 | A17120 | 305 |
| A03729 | A03873 | 425 | A03729 | A04163 | 263 |
| A03729 | A04337 | 252 | A03729 | A04410 | 193 |
| A03729 | A05356 | 369 | A03729 | A05427 | 302 |
| A03729 | A05641 | 323 | A03729 | A05731 | 313 |
| A03729 | A05945 | 213 | A03729 | A06299 | 296 |
| A03729 | A06993 | 424 | A03729 | A07218 | 446 |
| A03729 | A07471 | 170 | A03729 | A08438 | 236 |
| A03729 | A08594 | 180 | A03729 | A09435 | 293 |
| A03729 | A10710 | 157 | A03729 | A14377 | 205 |
| A03729 | A14381 | 212 | A03729 | A15316 | 286 |
| A03730 | A04343 | 417 | A03730 | A06001 | 193 |
| A03730 | A10353 | 235 | A03730 | A14127 | 173 |
| A03730 | A15399 | 212 | A03731 | A03831 | 391 |
| A03731 | A03851 | 210 | A03731 | A06828 | 450 |
| A03731 | A09205 | 329 | A03731 | A09206 | 480 |
| A03731 | A09222 | 357 | A03731 | A09230 | 485 |
| A03731 | A09231 | 408 | A03731 | A09234 | 480 |
| A03731 | A10453 | 286 | A03731 | A11243 | 348 |
| A03731 | A11422 | 486 | A03731 | A12709 | 424 |
| A03731 | A12884 | 454 | A03731 | A13133 | 402 |
| A03731 | A13412 | 455 | A03731 | A13826 | 382 |
| A03731 | A13899 | 430 | A03731 | A15318 | 245 |
| A03731 | A16224 | 286 | A03732 | A03879 | 243 |
| A03732 | A03945 | 238 | A03732 | A04076 | 324 |
| A03732 | A04115 | 172 | A03732 | A04130 | 185 |
| A03732 | A05220 | 291 | A03732 | A07664 | 274 |
| A03732 | A07993 | 262 | A03732 | A08866 | 394 |
| A03732 | A09205 | 477 | A03732 | A09233 | 301 |
| A03732 | A09334 | 207 | A03732 | A09734 | 160 |
| A03732 | A09740 | 301 | A03732 | A10592 | 172 |
| A03732 | A12854 | 204 | A03732 | A13372 | 356 |
| A03732 | A14135 | 210 | A03732 | A14511 | 268 |
| A03732 | A14611 | 235 | A03732 | A15113 | 391 |
| A03732 | A15318 | 363 | A03732 | A15365 | 224 |
| A03732 | A15391 | 363 | A03732 | A15411 | 252 |
| A03732 | A15419 | 373 | A03732 | A15421 | 324 |
| A03732 | A15422 | 441 | A03732 | A15817 | 191 |
| A03732 | A15820 | 265 | A03732 | A15886 | 329 |
| A03732 | A15902 | 293 | A03732 | A15922 | 180 |
| A03732 | A16103 | 274 | A03732 | A16224 | 187 |
| A03732 | A17076 | 212 | A03733 | A04260 | 235 |
| A03733 | A05001 | 351 | A03733 | A05390 | 301 |
| A03733 | A06729 | 457 | A03733 | A06953 | 307 |

|        |        |     |        |        |     |
|--------|--------|-----|--------|--------|-----|
| A03733 | A07218 | 468 | A03733 | A07268 | 394 |
| A03733 | A07601 | 475 | A03733 | A07605 | 263 |
| A03733 | A07606 | 449 | A03733 | A07620 | 378 |
| A03733 | A08255 | 240 | A03733 | A09072 | 266 |
| A03733 | A10000 | 485 | A03733 | A10380 | 299 |
| A03733 | A11101 | 302 | A03733 | A11313 | 247 |
| A03733 | A11317 | 419 | A03734 | A04520 | 251 |
| A03734 | A04759 | 170 | A03734 | A05146 | 159 |
| A03734 | A06274 | 339 | A03734 | A07533 | 356 |
| A03734 | A07670 | 481 | A03734 | A07706 | 335 |
| A03734 | A08022 | 479 | A03734 | A08118 | 296 |
| A03734 | A08578 | 218 | A03734 | A08602 | 257 |
| A03734 | A09133 | 303 | A03734 | A09708 | 263 |
| A03734 | A09712 | 344 | A03734 | A11156 | 281 |
| A03734 | A11950 | 305 | A03734 | A13257 | 157 |
| A03734 | A13989 | 446 | A03734 | A14085 | 243 |
| A03734 | A14838 | 162 | A03734 | A15559 | 195 |
| A03734 | A15719 | 201 | A03734 | A15946 | 277 |
| A03734 | A16117 | 297 | A03734 | A17088 | 172 |
| A03735 | A03746 | 469 | A03735 | A03900 | 489 |
| A03735 | A04130 | 427 | A03735 | A04217 | 461 |
| A03735 | A05083 | 435 | A03735 | A05289 | 290 |
| A03735 | A06293 | 324 | A03735 | A06415 | 447 |
| A03735 | A06599 | 188 | A03735 | A07010 | 380 |
| A03735 | A07152 | 341 | A03735 | A07229 | 174 |
| A03735 | A07529 | 347 | A03735 | A07764 | 334 |
| A03735 | A09768 | 294 | A03735 | A10208 | 229 |
| A03735 | A10595 | 291 | A03735 | A10702 | 232 |
| A03735 | A12361 | 243 | A03735 | A12728 | 190 |
| A03735 | A13987 | 157 | A03735 | A14372 | 420 |
| A03735 | A14381 | 232 | A03735 | A14570 | 191 |
| A03735 | A15376 | 167 | A03735 | A15425 | 473 |
| A03735 | A15427 | 286 | A03735 | A15642 | 379 |
| A03735 | A15790 | 380 | A03735 | A15819 | 274 |
| A03735 | A16015 | 356 | A03735 | A16049 | 226 |
| A03736 | A03834 | 307 | A03736 | A03835 | 283 |
| A03736 | A03893 | 152 | A03736 | A05415 | 263 |
| A03736 | A06588 | 160 | A03736 | A12897 | 263 |
| A03737 | A03968 | 317 | A03738 | A03740 | 246 |
| A03738 | A04740 | 238 | A03738 | A05025 | 167 |
| A03738 | A05584 | 163 | A03738 | A05712 | 283 |
| A03738 | A05995 | 324 | A03738 | A06463 | 205 |
| A03738 | A06543 | 474 | A03738 | A07203 | 224 |
| A03738 | A07247 | 491 | A03738 | A08834 | 227 |
| A03738 | A08978 | 167 | A03738 | A09147 | 268 |
| A03738 | A10181 | 360 | A03738 | A10532 | 491 |

|        |        |     |        |        |     |
|--------|--------|-----|--------|--------|-----|
| A03738 | A10588 | 466 | A03738 | A10592 | 477 |
| A03738 | A10595 | 475 | A03738 | A10830 | 338 |
| A03738 | A11240 | 277 | A03738 | A11409 | 157 |
| A03738 | A11545 | 409 | A03738 | A11607 | 443 |
| A03738 | A11705 | 489 | A03738 | A11998 | 324 |
| A03738 | A12839 | 491 | A03738 | A13197 | 324 |
| A03738 | A13674 | 324 | A03738 | A13870 | 245 |
| A03738 | A13989 | 276 | A03738 | A14073 | 441 |
| A03738 | A14137 | 263 | A03738 | A14449 | 484 |
| A03738 | A15141 | 456 | A03738 | A15156 | 334 |
| A03738 | A15469 | 232 | A03738 | A15696 | 443 |
| A03738 | A15698 | 451 | A03738 | A15951 | 230 |
| A03739 | A03773 | 74  | A03739 | A03818 | 263 |
| A03739 | A04007 | 252 | A03739 | A04342 | 344 |
| A03739 | A04343 | 208 | A03739 | A04347 | 152 |
| A03739 | A04449 | 329 | A03739 | A04570 | 188 |
| A03739 | A04771 | 321 | A03739 | A04815 | 193 |
| A03739 | A05064 | 202 | A03739 | A05082 | 256 |
| A03739 | A05168 | 151 | A03739 | A06660 | 290 |
| A03739 | A07001 | 314 | A03739 | A07116 | 208 |
| A03739 | A07302 | 188 | A03739 | A07440 | 457 |
| A03739 | A08427 | 193 | A03739 | A08518 | 174 |
| A03739 | A09018 | 416 | A03739 | A09545 | 213 |
| A03739 | A09797 | 151 | A03739 | A10055 | 213 |
| A03739 | A10059 | 269 | A03739 | A10986 | 215 |
| A03739 | A11369 | 167 | A03739 | A12353 | 193 |
| A03739 | A13291 | 299 | A03739 | A13593 | 420 |
| A03739 | A13599 | 213 | A03739 | A13638 | 258 |
| A03739 | A13651 | 355 | A03739 | A13886 | 296 |
| A03739 | A13994 | 196 | A03739 | A14055 | 188 |
| A03739 | A14120 | 340 | A03739 | A14520 | 255 |
| A03739 | A14996 | 179 | A03740 | A03752 | 491 |
| A03740 | A03809 | 466 | A03740 | A03959 | 458 |
| A03740 | A05043 | 380 | A03740 | A05086 | 610 |
| A03740 | A05139 | 198 | A03740 | A05501 | 408 |
| A03740 | A05910 | 283 | A03740 | A05939 | 182 |
| A03740 | A06037 | 386 | A03740 | A06466 | 491 |
| A03740 | A06637 | 422 | A03740 | A06965 | 377 |
| A03740 | A07086 | 366 | A03740 | A07102 | 324 |
| A03740 | A07187 | 324 | A03740 | A07208 | 486 |
| A03740 | A07247 | 486 | A03740 | A07311 | 491 |
| A03740 | A07742 | 170 | A03740 | A07773 | 447 |
| A03740 | A07798 | 491 | A03740 | A08053 | 486 |
| A03740 | A08054 | 491 | A03740 | A08137 | 180 |
| A03740 | A08315 | 361 | A03740 | A08357 | 460 |
| A03740 | A08359 | 486 | A03740 | A08400 | 207 |

|        |        |     |        |        |     |
|--------|--------|-----|--------|--------|-----|
| A03740 | A08461 | 185 | A03740 | A08559 | 377 |
| A03740 | A08571 | 484 | A03740 | A08815 | 173 |
| A03740 | A08826 | 219 | A03740 | A08835 | 485 |
| A03740 | A08924 | 255 | A03740 | A08987 | 337 |
| A03740 | A09476 | 481 | A03740 | A09502 | 435 |
| A03740 | A09577 | 299 | A03740 | A09581 | 319 |
| A03740 | A09591 | 249 | A03740 | A09775 | 101 |
| A03740 | A09902 | 167 | A03740 | A10006 | 180 |
| A03740 | A10532 | 481 | A03740 | A10728 | 457 |
| A03740 | A10797 | 489 | A03740 | A10798 | 491 |
| A03740 | A10853 | 170 | A03740 | A11244 | 217 |
| A03740 | A11286 | 457 | A03740 | A11296 | 491 |
| A03740 | A11297 | 324 | A03740 | A11302 | 491 |
| A03740 | A11322 | 491 | A03740 | A11337 | 269 |
| A03740 | A11338 | 489 | A03740 | A11372 | 654 |
| A03740 | A11374 | 630 | A03740 | A11419 | 241 |
| A03740 | A11427 | 463 | A03740 | A11521 | 177 |
| A03740 | A11677 | 335 | A03740 | A11694 | 324 |
| A03740 | A11724 | 626 | A03740 | A11787 | 348 |
| A03740 | A11794 | 219 | A03740 | A11952 | 170 |
| A03740 | A11974 | 182 | A03740 | A12027 | 219 |
| A03740 | A12167 | 413 | A03740 | A12221 | 235 |
| A03740 | A12241 | 477 | A03740 | A12328 | 491 |
| A03740 | A12329 | 215 | A03740 | A12669 | 182 |
| A03740 | A12904 | 198 | A03740 | A12990 | 418 |
| A03740 | A13037 | 255 | A03740 | A13149 | 252 |
| A03740 | A13335 | 458 | A03740 | A13340 | 491 |
| A03740 | A13655 | 182 | A03740 | A13989 | 490 |
| A03740 | A13992 | 195 | A03740 | A14029 | 163 |
| A03740 | A14073 | 634 | A03740 | A14138 | 409 |
| A03740 | A14188 | 176 | A03740 | A14461 | 234 |
| A03740 | A14525 | 229 | A03740 | A14596 | 460 |
| A03740 | A14642 | 633 | A03740 | A14699 | 347 |
| A03740 | A14738 | 412 | A03740 | A14845 | 477 |
| A03740 | A14914 | 198 | A03740 | A14923 | 160 |
| A03740 | A15119 | 255 | A03740 | A15244 | 491 |
| A03740 | A15507 | 262 | A03740 | A15660 | 491 |
| A03740 | A15684 | 491 | A03740 | A15699 | 486 |
| A03740 | A15708 | 345 | A03740 | A15741 | 272 |
| A03740 | A15769 | 241 | A03740 | A15778 | 165 |
| A03740 | A15843 | 324 | A03740 | A15931 | 246 |
| A03740 | A15938 | 352 | A03740 | A16118 | 159 |
| A03740 | A16164 | 152 | A03740 | A16218 | 422 |
| A03740 | A16371 | 483 | A03740 | A16631 | 185 |
| A03740 | A16662 | 170 | A03740 | A17132 | 204 |
| A03740 | A17134 | 180 | A03740 | A17140 | 157 |

|        |        |     |        |        |     |
|--------|--------|-----|--------|--------|-----|
| A03741 | A05015 | 63  | A03741 | A05082 | 383 |
| A03741 | A07613 | 302 | A03741 | A07834 | 140 |
| A03741 | A08571 | 551 | A03741 | A08878 | 914 |
| A03741 | A10547 | 172 | A03741 | A10624 | 85  |
| A03741 | A10894 | 160 | A03741 | A11983 | 909 |
| A03741 | A14443 | 901 | A03741 | A14539 | 281 |
| A03741 | A15540 | 196 | A03742 | A03745 | 154 |
| A03742 | A04100 | 152 | A03742 | A04309 | 159 |
| A03742 | A04715 | 205 | A03742 | A04908 | 182 |
| A03742 | A05217 | 183 | A03742 | A05220 | 198 |
| A03742 | A05288 | 291 | A03742 | A05577 | 232 |
| A03742 | A05899 | 229 | A03742 | A06037 | 168 |
| A03742 | A06415 | 152 | A03742 | A06607 | 458 |
| A03742 | A06915 | 152 | A03742 | A06971 | 154 |
| A03742 | A07242 | 241 | A03742 | A08061 | 357 |
| A03742 | A08845 | 369 | A03742 | A09311 | 246 |
| A03742 | A11402 | 157 | A03742 | A12248 | 283 |
| A03742 | A12421 | 191 | A03742 | A13222 | 218 |
| A03742 | A13793 | 283 | A03742 | A14080 | 497 |
| A03742 | A14300 | 156 | A03742 | A16045 | 238 |
| A03742 | A16951 | 173 | A03743 | A07696 | 224 |
| A03744 | A03873 | 184 | A03744 | A03904 | 228 |
| A03744 | A03965 | 183 | A03744 | A04193 | 249 |
| A03744 | A04333 | 174 | A03744 | A04361 | 382 |
| A03744 | A04428 | 296 | A03744 | A04840 | 293 |
| A03744 | A04928 | 221 | A03744 | A05457 | 484 |
| A03744 | A05460 | 344 | A03744 | A05716 | 475 |
| A03744 | A05726 | 319 | A03744 | A05832 | 377 |
| A03744 | A05897 | 414 | A03744 | A06208 | 428 |
| A03744 | A06313 | 276 | A03744 | A06329 | 296 |
| A03744 | A06346 | 398 | A03744 | A06483 | 383 |
| A03744 | A06574 | 205 | A03744 | A06711 | 268 |
| A03744 | A06747 | 193 | A03744 | A07218 | 371 |
| A03744 | A07453 | 329 | A03744 | A07699 | 335 |
| A03744 | A09205 | 224 | A03744 | A09460 | 424 |
| A03744 | A09664 | 207 | A03744 | A09983 | 398 |
| A03744 | A10991 | 383 | A03744 | A11059 | 383 |
| A03744 | A11759 | 188 | A03744 | A11958 | 383 |
| A03744 | A12527 | 383 | A03744 | A12674 | 324 |
| A03744 | A12694 | 383 | A03744 | A12917 | 329 |
| A03744 | A13181 | 165 | A03744 | A13484 | 184 |
| A03744 | A13851 | 313 | A03744 | A14390 | 259 |
| A03744 | A14660 | 179 | A03744 | A15911 | 205 |
| A03744 | A15952 | 364 | A03744 | A16595 | 319 |
| A03745 | A04065 | 373 | A03745 | A04178 | 356 |
| A03745 | A14577 | 441 | A03746 | A03900 | 470 |

|        |        |     |        |        |     |
|--------|--------|-----|--------|--------|-----|
| A03746 | A03923 | 308 | A03746 | A03975 | 335 |
| A03746 | A04130 | 247 | A03746 | A05517 | 319 |
| A03746 | A06293 | 327 | A03746 | A06415 | 474 |
| A03746 | A07010 | 382 | A03746 | A07145 | 247 |
| A03746 | A07152 | 217 | A03746 | A07529 | 350 |
| A03746 | A07764 | 338 | A03746 | A07960 | 451 |
| A03746 | A08685 | 361 | A03746 | A09259 | 420 |
| A03746 | A10586 | 286 | A03746 | A12927 | 171 |
| A03746 | A13941 | 302 | A03746 | A14125 | 374 |
| A03746 | A14362 | 288 | A03746 | A14372 | 481 |
| A03746 | A14381 | 362 | A03746 | A14554 | 367 |
| A03746 | A15308 | 208 | A03746 | A15391 | 294 |
| A03746 | A15425 | 443 | A03746 | A15475 | 302 |
| A03746 | A15630 | 216 | A03746 | A15642 | 265 |
| A03746 | A15790 | 382 | A03746 | A15811 | 329 |
| A03746 | A15812 | 401 | A03747 | A04191 | 462 |
| A03747 | A04192 | 455 | A03747 | A04547 | 373 |
| A03747 | A04614 | 335 | A03747 | A04639 | 341 |
| A03747 | A05995 | 353 | A03747 | A07163 | 193 |
| A03747 | A10532 | 451 | A03747 | A10589 | 411 |
| A03747 | A12927 | 235 | A03747 | A14132 | 475 |
| A03748 | A03763 | 452 | A03748 | A03887 | 491 |
| A03748 | A03910 | 491 | A03748 | A04114 | 162 |
| A03748 | A04169 | 491 | A03748 | A04337 | 414 |
| A03748 | A04928 | 152 | A03748 | A05786 | 252 |
| A03748 | A05954 | 347 | A03748 | A06196 | 285 |
| A03748 | A06415 | 168 | A03748 | A07051 | 171 |
| A03748 | A07117 | 246 | A03748 | A07229 | 475 |
| A03748 | A07296 | 263 | A03748 | A07316 | 347 |
| A03748 | A07442 | 367 | A03748 | A08840 | 335 |
| A03748 | A08859 | 229 | A03748 | A09201 | 485 |
| A03748 | A09204 | 490 | A03748 | A09205 | 156 |
| A03748 | A09211 | 301 | A03748 | A09239 | 332 |
| A03748 | A09732 | 247 | A03748 | A09733 | 252 |
| A03748 | A09734 | 491 | A03748 | A09742 | 491 |
| A03748 | A09745 | 463 | A03748 | A10594 | 241 |
| A03748 | A11004 | 347 | A03748 | A11329 | 218 |
| A03748 | A11542 | 486 | A03748 | A12393 | 490 |
| A03748 | A13012 | 185 | A03748 | A13317 | 436 |
| A03748 | A13338 | 259 | A03748 | A13413 | 263 |
| A03748 | A13826 | 335 | A03748 | A13899 | 270 |
| A03748 | A13987 | 491 | A03748 | A14010 | 490 |
| A03748 | A14072 | 163 | A03748 | A14122 | 491 |
| A03748 | A14124 | 490 | A03748 | A14137 | 243 |
| A03748 | A14190 | 375 | A03748 | A14202 | 369 |
| A03748 | A14267 | 198 | A03748 | A14370 | 173 |

|        |        |     |        |        |     |
|--------|--------|-----|--------|--------|-----|
| A03748 | A14371 | 413 | A03748 | A14378 | 491 |
| A03748 | A14399 | 384 | A03748 | A14406 | 334 |
| A03748 | A14408 | 477 | A03748 | A14413 | 481 |
| A03748 | A14511 | 450 | A03748 | A14635 | 274 |
| A03748 | A14733 | 183 | A03748 | A15184 | 307 |
| A03748 | A15278 | 277 | A03748 | A15284 | 319 |
| A03748 | A15292 | 491 | A03748 | A15301 | 469 |
| A03748 | A15302 | 404 | A03748 | A15311 | 347 |
| A03748 | A15312 | 491 | A03748 | A15313 | 489 |
| A03748 | A15317 | 271 | A03748 | A15331 | 221 |
| A03748 | A15333 | 441 | A03748 | A15349 | 489 |
| A03748 | A15352 | 491 | A03748 | A15366 | 486 |
| A03748 | A15396 | 262 | A03748 | A15404 | 204 |
| A03748 | A15413 | 180 | A03748 | A15431 | 353 |
| A03748 | A15432 | 491 | A03748 | A15433 | 417 |
| A03748 | A15434 | 458 | A03748 | A15435 | 489 |
| A03748 | A15436 | 469 | A03748 | A15440 | 377 |
| A03748 | A15447 | 263 | A03748 | A15451 | 185 |
| A03748 | A15452 | 488 | A03748 | A15459 | 286 |
| A03748 | A15461 | 419 | A03748 | A15462 | 279 |
| A03748 | A15463 | 480 | A03748 | A15485 | 180 |
| A03748 | A15489 | 154 | A03748 | A15495 | 170 |
| A03748 | A15498 | 270 | A03748 | A15513 | 433 |
| A03748 | A15792 | 193 | A03748 | A15801 | 183 |
| A03748 | A15804 | 347 | A03748 | A15815 | 257 |
| A03748 | A15816 | 277 | A03748 | A15828 | 172 |
| A03748 | A16045 | 285 | A03748 | A16260 | 269 |
| A03748 | A16273 | 323 | A03748 | A16280 | 294 |
| A03748 | A16473 | 235 | A03748 | A16540 | 177 |
| A03748 | A16711 | 152 | A03748 | A17196 | 263 |
| A03749 | A03750 | 488 | A03749 | A03830 | 160 |
| A03749 | A04417 | 201 | A03749 | A04941 | 240 |
| A03749 | A05095 | 311 | A03749 | A05289 | 218 |
| A03749 | A06143 | 154 | A03749 | A07178 | 229 |
| A03749 | A07339 | 232 | A03749 | A08462 | 307 |
| A03749 | A09078 | 455 | A03749 | A10673 | 357 |
| A03749 | A11035 | 324 | A03749 | A11604 | 216 |
| A03749 | A11953 | 215 | A03749 | A14007 | 344 |
| A03749 | A14125 | 173 | A03749 | A14433 | 173 |
| A03749 | A15498 | 224 | A03749 | A15851 | 165 |
| A03749 | A16679 | 291 | A03750 | A03834 | 177 |
| A03750 | A04147 | 332 | A03750 | A04180 | 386 |
| A03750 | A04194 | 252 | A03750 | A04218 | 268 |
| A03750 | A07101 | 195 | A03750 | A07575 | 236 |
| A03750 | A07961 | 152 | A03750 | A08032 | 293 |
| A03750 | A08194 | 313 | A03750 | A08882 | 208 |

|        |        |     |        |        |     |
|--------|--------|-----|--------|--------|-----|
| A03750 | A09203 | 353 | A03750 | A09801 | 293 |
| A03750 | A10021 | 285 | A03750 | A10539 | 353 |
| A03750 | A10558 | 306 | A03750 | A11060 | 364 |
| A03750 | A11064 | 288 | A03750 | A11123 | 393 |
| A03750 | A12824 | 260 | A03750 | A13348 | 238 |
| A03750 | A14007 | 343 | A03750 | A15498 | 481 |
| A03751 | A10586 | 363 | A03751 | A15642 | 348 |
| A03752 | A03858 | 199 | A03752 | A03981 | 152 |
| A03752 | A04531 | 199 | A03752 | A04846 | 151 |
| A03752 | A05418 | 157 | A03752 | A05449 | 218 |
| A03752 | A06037 | 160 | A03752 | A06286 | 274 |
| A03752 | A06466 | 910 | A03752 | A06606 | 486 |
| A03752 | A06689 | 260 | A03752 | A06796 | 199 |
| A03752 | A06819 | 223 | A03752 | A06950 | 669 |
| A03752 | A07163 | 205 | A03752 | A07222 | 223 |
| A03752 | A07311 | 908 | A03752 | A07333 | 223 |
| A03752 | A07436 | 274 | A03752 | A07451 | 460 |
| A03752 | A07686 | 270 | A03752 | A07726 | 177 |
| A03752 | A07798 | 829 | A03752 | A07811 | 337 |
| A03752 | A08137 | 430 | A03752 | A08359 | 469 |
| A03752 | A08519 | 221 | A03752 | A08571 | 531 |
| A03752 | A08860 | 162 | A03752 | A08980 | 260 |
| A03752 | A09263 | 489 | A03752 | A09297 | 477 |
| A03752 | A09303 | 218 | A03752 | A09319 | 286 |
| A03752 | A09577 | 570 | A03752 | A09591 | 210 |
| A03752 | A09606 | 171 | A03752 | A09655 | 259 |
| A03752 | A09804 | 490 | A03752 | A09902 | 491 |
| A03752 | A10365 | 491 | A03752 | A10532 | 324 |
| A03752 | A10623 | 226 | A03752 | A10728 | 491 |
| A03752 | A10798 | 218 | A03752 | A11286 | 491 |
| A03752 | A11297 | 455 | A03752 | A11302 | 486 |
| A03752 | A11322 | 374 | A03752 | A11337 | 217 |
| A03752 | A11392 | 389 | A03752 | A11459 | 480 |
| A03752 | A11487 | 393 | A03752 | A11754 | 235 |
| A03752 | A11833 | 183 | A03752 | A12042 | 462 |
| A03752 | A12328 | 491 | A03752 | A12852 | 235 |
| A03752 | A12990 | 490 | A03752 | A13063 | 274 |
| A03752 | A13116 | 291 | A03752 | A13146 | 199 |
| A03752 | A13149 | 491 | A03752 | A13320 | 490 |
| A03752 | A13335 | 491 | A03752 | A13340 | 582 |
| A03752 | A13372 | 162 | A03752 | A13375 | 157 |
| A03752 | A13498 | 162 | A03752 | A13552 | 294 |
| A03752 | A13609 | 216 | A03752 | A13617 | 199 |
| A03752 | A13710 | 205 | A03752 | A13822 | 238 |
| A03752 | A13830 | 157 | A03752 | A13989 | 533 |
| A03752 | A14006 | 319 | A03752 | A14073 | 491 |



|        |        |     |        |        |     |
|--------|--------|-----|--------|--------|-----|
| A03752 | A14115 | 180 | A03752 | A14159 | 408 |
| A03752 | A14188 | 491 | A03752 | A14196 | 283 |
| A03752 | A14216 | 251 | A03752 | A14220 | 392 |
| A03752 | A14410 | 326 | A03752 | A14466 | 486 |
| A03752 | A14467 | 162 | A03752 | A14481 | 199 |
| A03752 | A14525 | 223 | A03752 | A14571 | 396 |
| A03752 | A14596 | 629 | A03752 | A14609 | 335 |
| A03752 | A14804 | 223 | A03752 | A14836 | 188 |
| A03752 | A15106 | 243 | A03752 | A15121 | 235 |
| A03752 | A15136 | 162 | A03752 | A15244 | 654 |
| A03752 | A15372 | 223 | A03752 | A15500 | 163 |
| A03752 | A15507 | 298 | A03752 | A15546 | 491 |
| A03752 | A15547 | 201 | A03752 | A15612 | 188 |
| A03752 | A15660 | 441 | A03752 | A15666 | 466 |
| A03752 | A15684 | 368 | A03752 | A15699 | 165 |
| A03752 | A15732 | 160 | A03752 | A15734 | 188 |
| A03752 | A15932 | 369 | A03752 | A15933 | 393 |
| A03752 | A16060 | 424 | A03752 | A16219 | 326 |
| A03752 | A16272 | 443 | A03752 | A16274 | 188 |
| A03752 | A16318 | 467 | A03752 | A16437 | 372 |
| A03752 | A16446 | 307 | A03752 | A16462 | 195 |
| A03752 | A16531 | 223 | A03752 | A16604 | 163 |
| A03752 | A16793 | 247 | A03752 | A17132 | 279 |
| A03753 | A03837 | 188 | A03753 | A03913 | 454 |
| A03753 | A04423 | 293 | A03753 | A04754 | 329 |
| A03753 | A04829 | 373 | A03753 | A05120 | 299 |
| A03753 | A05124 | 223 | A03753 | A05424 | 168 |
| A03753 | A06174 | 383 | A03753 | A07257 | 268 |
| A03753 | A08810 | 269 | A03753 | A08838 | 200 |
| A03753 | A08861 | 201 | A03753 | A09211 | 270 |
| A03753 | A09469 | 490 | A03753 | A11280 | 160 |
| A03753 | A13945 | 480 | A03753 | A14136 | 347 |
| A03753 | A14588 | 227 | A03753 | A14643 | 159 |
| A03753 | A14893 | 441 | A03753 | A15318 | 157 |
| A03753 | A15486 | 274 | A03753 | A16030 | 296 |
| A03753 | A16132 | 196 | A03754 | A03888 | 639 |
| A03754 | A04093 | 312 | A03754 | A04308 | 267 |
| A03754 | A04651 | 262 | A03754 | A04760 | 322 |
| A03754 | A04761 | 157 | A03754 | A05385 | 439 |
| A03754 | A05449 | 393 | A03754 | A05464 | 341 |
| A03754 | A05591 | 152 | A03754 | A06812 | 413 |
| A03754 | A06861 | 259 | A03754 | A06909 | 416 |
| A03754 | A06965 | 484 | A03754 | A06973 | 311 |
| A03754 | A07201 | 363 | A03754 | A07243 | 393 |
| A03754 | A07451 | 266 | A03754 | A08055 | 199 |
| A03754 | A08137 | 168 | A03754 | A08452 | 465 |

|        |        |     |        |        |     |
|--------|--------|-----|--------|--------|-----|
| A03754 | A08664 | 393 | A03754 | A08682 | 167 |
| A03754 | A09248 | 360 | A03754 | A09322 | 480 |
| A03754 | A10417 | 393 | A03754 | A10518 | 180 |
| A03754 | A10529 | 406 | A03754 | A11075 | 251 |
| A03754 | A11400 | 159 | A03754 | A11438 | 293 |
| A03754 | A11945 | 188 | A03754 | A12643 | 477 |
| A03754 | A12918 | 303 | A03754 | A13663 | 427 |
| A03754 | A15235 | 183 | A03754 | A15743 | 235 |
| A03754 | A16118 | 477 | A03754 | A17066 | 347 |
| A03755 | A03914 | 328 | A03755 | A03918 | 297 |
| A03755 | A04051 | 218 | A03755 | A04391 | 382 |
| A03756 | A09449 | 199 | A03756 | A13860 | 395 |
| A03757 | A04770 | 329 | A03757 | A07209 | 419 |
| A03757 | A07803 | 167 | A03757 | A09956 | 461 |
| A03757 | A11132 | 396 | A03757 | A14554 | 285 |
| A03757 | A15296 | 199 | A03757 | A15630 | 260 |
| A03758 | A05155 | 217 | A03758 | A14654 | 303 |
| A03759 | A05154 | 198 | A03759 | A05375 | 208 |
| A03759 | A06048 | 382 | A03759 | A08524 | 316 |
| A03759 | A11323 | 216 | A03759 | A13831 | 195 |
| A03759 | A15559 | 352 | A03759 | A15684 | 447 |
| A03759 | A15953 | 307 | A03760 | A03974 | 296 |
| A03760 | A04949 | 200 | A03760 | A10549 | 358 |
| A03760 | A14199 | 221 | A03760 | A16224 | 296 |
| A03761 | A03788 | 486 | A03761 | A03906 | 167 |
| A03761 | A04033 | 391 | A03761 | A04086 | 217 |
| A03761 | A04130 | 156 | A03761 | A05288 | 235 |
| A03761 | A05439 | 227 | A03761 | A06277 | 188 |
| A03761 | A07004 | 438 | A03761 | A08813 | 162 |
| A03761 | A08847 | 159 | A03761 | A08859 | 484 |
| A03761 | A08908 | 230 | A03761 | A09235 | 294 |
| A03761 | A09241 | 201 | A03761 | A09363 | 185 |
| A03761 | A09508 | 396 | A03761 | A10993 | 489 |
| A03761 | A11226 | 360 | A03761 | A11983 | 430 |
| A03761 | A13459 | 302 | A03761 | A14372 | 272 |
| A03761 | A15339 | 180 | A03761 | A15395 | 146 |
| A03761 | A16400 | 182 | A03762 | A04185 | 385 |
| A03762 | A04280 | 205 | A03762 | A04395 | 443 |
| A03762 | A04404 | 452 | A03762 | A05299 | 337 |
| A03762 | A07158 | 230 | A03762 | A09372 | 391 |
| A03762 | A10258 | 382 | A03763 | A03790 | 193 |
| A03763 | A03910 | 483 | A03763 | A04169 | 293 |
| A03763 | A04417 | 301 | A03763 | A04706 | 372 |
| A03763 | A05917 | 168 | A03763 | A07159 | 204 |
| A03763 | A07229 | 172 | A03763 | A08183 | 171 |
| A03763 | A08841 | 190 | A03763 | A09069 | 394 |

|        |        |     |        |        |     |
|--------|--------|-----|--------|--------|-----|
| A03763 | A09211 | 479 | A03763 | A09224 | 307 |
| A03763 | A09742 | 249 | A03763 | A11132 | 260 |
| A03763 | A11556 | 245 | A03763 | A11738 | 401 |
| A03763 | A11784 | 229 | A03763 | A12107 | 249 |
| A03763 | A12349 | 333 | A03763 | A13987 | 330 |
| A03763 | A14378 | 151 | A03763 | A14550 | 347 |
| A03763 | A15292 | 408 | A03763 | A15293 | 229 |
| A03763 | A15311 | 160 | A03763 | A15312 | 290 |
| A03763 | A15313 | 312 | A03763 | A15333 | 165 |
| A03763 | A15349 | 174 | A03763 | A15366 | 77  |
| A03763 | A15431 | 159 | A03763 | A15432 | 207 |
| A03763 | A15436 | 254 | A03763 | A15453 | 389 |
| A03763 | A15457 | 246 | A03763 | A15463 | 63  |
| A03763 | A15489 | 191 | A03763 | A16199 | 368 |
| A03763 | A16300 | 273 | A03763 | A17076 | 160 |
| A03763 | A17195 | 260 | A03764 | A04174 | 449 |
| A03764 | A04187 | 229 | A03764 | A05419 | 188 |
| A03764 | A06318 | 307 | A03764 | A06423 | 334 |
| A03764 | A06671 | 302 | A03764 | A09067 | 430 |
| A03764 | A09346 | 302 | A03764 | A11752 | 399 |
| A03765 | A04786 | 408 | A03766 | A03769 | 249 |
| A03766 | A04424 | 404 | A03766 | A05536 | 246 |
| A03766 | A05721 | 200 | A03766 | A05958 | 179 |
| A03766 | A05998 | 232 | A03766 | A06293 | 232 |
| A03766 | A10927 | 213 | A03766 | A13638 | 316 |
| A03766 | A14127 | 328 | A03766 | A14644 | 469 |
| A03766 | A15277 | 159 | A03767 | A03773 | 229 |
| A03767 | A04430 | 361 | A03767 | A05011 | 389 |
| A03767 | A06037 | 118 | A03767 | A07165 | 341 |
| A03767 | A07258 | 341 | A03767 | A08357 | 246 |
| A03767 | A08452 | 180 | A03767 | A08517 | 199 |
| A03767 | A09702 | 297 | A03767 | A09901 | 391 |
| A03767 | A10917 | 352 | A03767 | A14511 | 235 |
| A03767 | A16324 | 240 | A03767 | A16658 | 297 |
| A03768 | A03921 | 358 | A03768 | A04520 | 243 |
| A03768 | A05288 | 193 | A03768 | A05315 | 303 |
| A03768 | A06608 | 205 | A03769 | A14484 | 252 |
| A03770 | A03981 | 176 | A03770 | A04229 | 263 |
| A03770 | A04256 | 358 | A03770 | A06014 | 343 |
| A03770 | A07208 | 165 | A03770 | A07708 | 176 |
| A03770 | A09073 | 232 | A03770 | A09978 | 276 |
| A03770 | A11337 | 162 | A03770 | A11453 | 281 |
| A03770 | A11815 | 369 | A03770 | A12881 | 321 |
| A03770 | A14479 | 180 | A03771 | A04082 | 247 |
| A03771 | A04222 | 152 | A03771 | A05124 | 191 |
| A03771 | A05158 | 221 | A03771 | A05243 | 362 |

|        |        |     |        |        |     |
|--------|--------|-----|--------|--------|-----|
| A03771 | A05533 | 190 | A03771 | A05901 | 323 |
| A03771 | A05959 | 307 | A03771 | A06513 | 385 |
| A03771 | A06670 | 468 | A03771 | A07165 | 154 |
| A03771 | A08047 | 385 | A03771 | A08490 | 241 |
| A03771 | A08957 | 414 | A03771 | A09073 | 201 |
| A03771 | A09078 | 486 | A03771 | A09319 | 899 |
| A03771 | A09361 | 400 | A03771 | A09603 | 323 |
| A03771 | A10161 | 434 | A03771 | A11897 | 213 |
| A03771 | A12463 | 368 | A03771 | A14048 | 235 |
| A03771 | A14210 | 256 | A03771 | A14577 | 183 |
| A03771 | A15276 | 356 | A03771 | A15293 | 182 |
| A03771 | A15840 | 191 | A03771 | A15843 | 151 |
| A03771 | A16062 | 416 | A03771 | A16689 | 187 |
| A03772 | A06277 | 177 | A03773 | A03774 | 450 |
| A03773 | A03775 | 363 | A03773 | A03824 | 204 |
| A03773 | A03976 | 258 | A03773 | A04145 | 241 |
| A03773 | A04279 | 187 | A03773 | A04369 | 162 |
| A03773 | A04428 | 466 | A03773 | A04706 | 176 |
| A03773 | A04756 | 224 | A03773 | A04989 | 306 |
| A03773 | A05047 | 380 | A03773 | A05252 | 422 |
| A03773 | A05411 | 160 | A03773 | A05891 | 152 |
| A03773 | A06463 | 481 | A03773 | A08693 | 191 |
| A03773 | A09081 | 319 | A03773 | A09211 | 229 |
| A03773 | A09546 | 163 | A03773 | A09610 | 319 |
| A03773 | A10527 | 384 | A03773 | A11313 | 157 |
| A03773 | A11366 | 252 | A03773 | A11397 | 151 |
| A03773 | A11527 | 271 | A03773 | A12361 | 159 |
| A03773 | A13484 | 177 | A03773 | A13707 | 177 |
| A03773 | A13886 | 255 | A03773 | A14097 | 193 |
| A03773 | A14647 | 221 | A03773 | A15689 | 212 |
| A03773 | A15949 | 236 | A03773 | A15992 | 291 |
| A03773 | A16505 | 380 | A03773 | A17009 | 291 |
| A03774 | A15193 | 357 | A03775 | A04280 | 180 |
| A03775 | A05260 | 163 | A03775 | A05301 | 357 |
| A03775 | A06427 | 311 | A03775 | A06486 | 301 |
| A03775 | A06488 | 167 | A03775 | A06501 | 260 |
| A03775 | A06852 | 317 | A03775 | A07163 | 407 |
| A03775 | A07869 | 223 | A03775 | A08352 | 176 |
| A03775 | A08559 | 361 | A03775 | A08587 | 341 |
| A03775 | A09128 | 301 | A03775 | A09131 | 165 |
| A03775 | A09342 | 234 | A03775 | A09504 | 227 |
| A03775 | A09836 | 221 | A03775 | A09900 | 193 |
| A03775 | A10822 | 311 | A03775 | A11323 | 201 |
| A03775 | A11390 | 168 | A03775 | A11438 | 277 |
| A03775 | A11851 | 185 | A03775 | A11943 | 480 |
| A03775 | A11952 | 234 | A03775 | A13207 | 188 |

|        |        |     |        |        |     |
|--------|--------|-----|--------|--------|-----|
| A03775 | A13460 | 393 | A03775 | A13930 | 234 |
| A03775 | A14198 | 171 | A03775 | A14579 | 154 |
| A03775 | A14780 | 427 | A03775 | A15235 | 484 |
| A03775 | A15743 | 221 | A03775 | A16795 | 281 |
| A03776 | A05044 | 922 | A03776 | A07226 | 210 |
| A03776 | A08535 | 385 | A03776 | A08835 | 230 |
| A03776 | A08987 | 422 | A03776 | A10801 | 249 |
| A03776 | A11322 | 187 | A03776 | A11338 | 461 |
| A03776 | A11374 | 202 | A03776 | A11419 | 218 |
| A03776 | A11427 | 486 | A03776 | A12393 | 486 |
| A03776 | A16650 | 208 | A03777 | A04212 | 480 |
| A03777 | A04424 | 324 | A03777 | A04444 | 303 |
| A03777 | A04870 | 456 | A03777 | A05188 | 423 |
| A03777 | A05793 | 423 | A03777 | A07318 | 423 |
| A03777 | A11531 | 400 | A03777 | A12385 | 423 |
| A03777 | A12488 | 423 | A03777 | A12490 | 423 |
| A03777 | A15277 | 296 | A03778 | A03825 | 172 |
| A03778 | A03964 | 177 | A03778 | A03968 | 256 |
| A03778 | A03990 | 249 | A03778 | A04007 | 477 |
| A03778 | A04020 | 455 | A03778 | A04074 | 299 |
| A03778 | A04449 | 441 | A03778 | A05145 | 224 |
| A03778 | A05168 | 454 | A03778 | A05169 | 416 |
| A03778 | A05170 | 409 | A03778 | A05414 | 458 |
| A03778 | A05529 | 236 | A03778 | A05854 | 446 |
| A03778 | A06063 | 408 | A03778 | A06216 | 452 |
| A03778 | A06588 | 196 | A03778 | A07242 | 223 |
| A03778 | A07415 | 281 | A03778 | A07495 | 218 |
| A03778 | A08603 | 180 | A03778 | A08621 | 316 |
| A03778 | A08878 | 443 | A03778 | A09149 | 382 |
| A03778 | A09162 | 345 | A03778 | A09236 | 177 |
| A03778 | A09363 | 232 | A03778 | A10014 | 236 |
| A03778 | A10551 | 193 | A03778 | A10999 | 184 |
| A03778 | A11140 | 454 | A03778 | A11345 | 274 |
| A03778 | A11473 | 163 | A03778 | A11659 | 380 |
| A03778 | A11814 | 294 | A03778 | A11983 | 757 |
| A03778 | A13997 | 465 | A03778 | A14055 | 218 |
| A03778 | A14211 | 232 | A03778 | A14443 | 226 |
| A03778 | A14623 | 208 | A03778 | A14653 | 491 |
| A03778 | A14925 | 180 | A03778 | A15321 | 226 |
| A03778 | A15875 | 191 | A03778 | A16072 | 163 |
| A03778 | A16952 | 224 | A03779 | A04443 | 396 |
| A03779 | A04449 | 160 | A03780 | A04139 | 488 |
| A03780 | A04449 | 419 | A03780 | A04960 | 491 |
| A03780 | A10813 | 406 | A03780 | A11482 | 491 |
| A03780 | A11485 | 489 | A03780 | A13181 | 254 |
| A03780 | A13302 | 357 | A03780 | A13978 | 384 |

|        |        |     |        |        |     |
|--------|--------|-----|--------|--------|-----|
| A03780 | A14236 | 358 | A03780 | A14364 | 258 |
| A03780 | A15282 | 160 | A03782 | A03845 | 245 |
| A03782 | A03936 | 226 | A03782 | A03966 | 165 |
| A03782 | A04011 | 246 | A03782 | A04066 | 167 |
| A03782 | A04240 | 335 | A03782 | A04244 | 236 |
| A03782 | A04352 | 327 | A03782 | A04478 | 228 |
| A03782 | A04706 | 168 | A03782 | A04795 | 176 |
| A03782 | A04854 | 335 | A03782 | A04941 | 224 |
| A03782 | A04961 | 259 | A03782 | A05078 | 281 |
| A03782 | A05174 | 240 | A03782 | A05458 | 361 |
| A03782 | A05810 | 205 | A03782 | A05985 | 255 |
| A03782 | A06818 | 249 | A03782 | A07146 | 240 |
| A03782 | A07163 | 369 | A03782 | A07766 | 423 |
| A03782 | A07794 | 423 | A03782 | A08596 | 213 |
| A03782 | A08911 | 191 | A03782 | A09824 | 252 |
| A03782 | A09860 | 241 | A03782 | A10612 | 402 |
| A03782 | A13052 | 450 | A03782 | A13181 | 151 |
| A03782 | A13822 | 183 | A03782 | A13872 | 193 |
| A03782 | A14125 | 157 | A03782 | A14138 | 202 |
| A03782 | A14405 | 152 | A03782 | A14598 | 236 |
| A03782 | A14635 | 274 | A03782 | A14789 | 241 |
| A03782 | A14812 | 283 | A03782 | A14839 | 308 |
| A03782 | A14843 | 404 | A03782 | A14845 | 185 |
| A03782 | A15072 | 327 | A03782 | A15430 | 445 |
| A03782 | A15491 | 345 | A03782 | A15603 | 213 |
| A03782 | A15666 | 404 | A03782 | A15832 | 319 |
| A03782 | A16289 | 357 | A03782 | A16493 | 477 |
| A03782 | A16531 | 273 | A03782 | A16681 | 404 |
| A03782 | A16963 | 213 | A03782 | A17213 | 347 |
| A03783 | A03824 | 307 | A03783 | A03863 | 520 |
| A03783 | A04444 | 297 | A03783 | A04584 | 377 |
| A03783 | A04681 | 252 | A03783 | A04949 | 173 |
| A03783 | A05133 | 396 | A03783 | A05309 | 170 |
| A03783 | A05310 | 288 | A03783 | A06359 | 382 |
| A03783 | A06415 | 177 | A03783 | A07165 | 286 |
| A03783 | A07173 | 259 | A03783 | A08546 | 404 |
| A03783 | A08991 | 404 | A03783 | A11302 | 195 |
| A03783 | A11409 | 446 | A03783 | A12927 | 196 |
| A03783 | A13609 | 313 | A03784 | A03817 | 312 |
| A03784 | A03830 | 229 | A03784 | A04288 | 283 |
| A03784 | A04323 | 491 | A03784 | A05112 | 224 |
| A03784 | A09401 | 363 | A03784 | A10510 | 480 |
| A03784 | A11129 | 419 | A03784 | A13743 | 414 |
| A03784 | A13980 | 199 | A03784 | A14188 | 330 |
| A03784 | A14194 | 281 | A03784 | A14198 | 460 |
| A03784 | A14402 | 475 | A03784 | A14438 | 318 |

|        |        |     |        |        |     |
|--------|--------|-----|--------|--------|-----|
| A03784 | A15325 | 310 | A03784 | A16547 | 318 |
| A03785 | A04449 | 162 | A03785 | A05603 | 160 |
| A03785 | A07157 | 152 | A03785 | A08668 | 419 |
| A03785 | A08676 | 399 | A03785 | A09127 | 160 |
| A03785 | A09476 | 234 | A03785 | A10490 | 234 |
| A03785 | A10532 | 238 | A03785 | A11103 | 356 |
| A03785 | A11409 | 462 | A03785 | A12791 | 400 |
| A03785 | A16146 | 335 | A03786 | A04218 | 396 |
| A03786 | A09979 | 430 | A03786 | A09985 | 405 |
| A03787 | A11936 | 399 | A03787 | A14172 | 308 |
| A03788 | A03799 | 205 | A03788 | A03804 | 374 |
| A03788 | A03900 | 204 | A03788 | A03923 | 485 |
| A03788 | A03975 | 223 | A03788 | A04010 | 151 |
| A03788 | A04039 | 321 | A03788 | A04040 | 210 |
| A03788 | A04110 | 162 | A03788 | A04130 | 488 |
| A03788 | A04217 | 363 | A03788 | A04457 | 408 |
| A03788 | A04461 | 274 | A03788 | A05083 | 436 |
| A03788 | A05212 | 157 | A03788 | A05439 | 77  |
| A03788 | A05517 | 479 | A03788 | A05577 | 484 |
| A03788 | A05597 | 183 | A03788 | A05679 | 488 |
| A03788 | A05846 | 408 | A03788 | A05934 | 286 |
| A03788 | A06414 | 337 | A03788 | A06415 | 488 |
| A03788 | A06604 | 243 | A03788 | A07126 | 308 |
| A03788 | A07152 | 475 | A03788 | A07209 | 408 |
| A03788 | A08630 | 301 | A03788 | A08908 | 191 |
| A03788 | A09239 | 174 | A03788 | A09354 | 335 |
| A03788 | A09570 | 243 | A03788 | A09855 | 154 |
| A03788 | A09933 | 238 | A03788 | A10319 | 337 |
| A03788 | A10336 | 294 | A03788 | A10585 | 321 |
| A03788 | A10744 | 427 | A03788 | A10985 | 310 |
| A03788 | A10993 | 424 | A03788 | A13312 | 221 |
| A03788 | A13821 | 240 | A03788 | A13903 | 281 |
| A03788 | A13988 | 394 | A03788 | A14010 | 207 |
| A03788 | A14012 | 207 | A03788 | A14071 | 281 |
| A03788 | A14125 | 347 | A03788 | A14146 | 184 |
| A03788 | A14190 | 285 | A03788 | A14366 | 491 |
| A03788 | A14372 | 488 | A03788 | A14374 | 490 |
| A03788 | A14391 | 490 | A03788 | A14392 | 196 |
| A03788 | A14394 | 180 | A03788 | A14430 | 371 |
| A03788 | A14439 | 447 | A03788 | A14511 | 154 |
| A03788 | A14554 | 396 | A03788 | A14599 | 380 |
| A03788 | A15313 | 196 | A03788 | A15322 | 223 |
| A03788 | A15335 | 152 | A03788 | A15425 | 490 |
| A03788 | A15444 | 156 | A03788 | A15475 | 311 |
| A03788 | A15480 | 438 | A03788 | A15642 | 263 |
| A03788 | A15904 | 279 | A03788 | A16001 | 358 |

|        |        |     |        |        |     |
|--------|--------|-----|--------|--------|-----|
| A03789 | A06691 | 438 | A03789 | A14071 | 324 |
| A03790 | A03820 | 154 | A03790 | A03906 | 236 |
| A03790 | A04078 | 271 | A03790 | A04191 | 294 |
| A03790 | A04417 | 260 | A03790 | A04473 | 452 |
| A03790 | A04807 | 223 | A03790 | A04909 | 468 |
| A03790 | A05082 | 293 | A03790 | A05120 | 318 |
| A03790 | A06107 | 347 | A03790 | A06648 | 217 |
| A03790 | A07145 | 226 | A03790 | A07153 | 171 |
| A03790 | A09017 | 351 | A03790 | A09149 | 238 |
| A03790 | A09417 | 330 | A03790 | A09419 | 296 |
| A03790 | A10894 | 227 | A03790 | A12166 | 407 |
| A03790 | A13555 | 318 | A03790 | A14452 | 223 |
| A03790 | A14543 | 443 | A03791 | A06597 | 168 |
| A03791 | A15628 | 433 | A03792 | A03952 | 374 |
| A03792 | A03972 | 409 | A03792 | A04447 | 305 |
| A03792 | A07265 | 294 | A03792 | A07588 | 291 |
| A03792 | A09281 | 371 | A03792 | A11254 | 389 |
| A03792 | A13159 | 263 | A03792 | A13298 | 208 |
| A03792 | A14216 | 168 | A03793 | A04664 | 363 |
| A03793 | A08627 | 335 | A03793 | A15297 | 187 |
| A03794 | A03818 | 259 | A03794 | A05449 | 488 |
| A03794 | A07050 | 470 | A03794 | A12809 | 391 |
| A03794 | A14071 | 352 | A03794 | A14374 | 212 |
| A03794 | A14391 | 217 | A03794 | A15383 | 160 |
| A03794 | A15794 | 484 | A03795 | A04228 | 465 |
| A03795 | A04883 | 272 | A03795 | A05045 | 396 |
| A03795 | A05416 | 159 | A03795 | A05839 | 328 |
| A03795 | A06439 | 429 | A03795 | A07088 | 271 |
| A03795 | A07239 | 283 | A03795 | A07739 | 375 |
| A03795 | A08371 | 373 | A03795 | A10420 | 198 |
| A03795 | A10421 | 185 | A03795 | A10458 | 434 |
| A03795 | A10686 | 340 | A03795 | A10696 | 435 |
| A03795 | A15673 | 224 | A03795 | A17006 | 337 |
| A03796 | A05085 | 430 | A03796 | A06486 | 419 |
| A03797 | A05064 | 899 | A03797 | A05122 | 291 |
| A03797 | A05410 | 385 | A03797 | A06648 | 296 |
| A03797 | A07165 | 195 | A03797 | A07311 | 899 |
| A03797 | A10313 | 371 | A03797 | A10365 | 899 |
| A03797 | A12361 | 305 | A03797 | A13970 | 899 |
| A03797 | A14002 | 899 | A03798 | A04642 | 416 |
| A03798 | A04739 | 185 | A03798 | A04782 | 450 |
| A03798 | A05144 | 378 | A03798 | A06628 | 157 |
| A03798 | A09221 | 235 | A03798 | A10018 | 177 |
| A03798 | A11002 | 372 | A03798 | A11100 | 432 |
| A03798 | A11852 | 238 | A03798 | A11860 | 438 |
| A03798 | A12703 | 389 | A03798 | A14022 | 345 |



|        |        |     |        |        |     |
|--------|--------|-----|--------|--------|-----|
| A03798 | A14479 | 157 | A03798 | A16567 | 291 |
| A03799 | A03800 | 180 | A03799 | A03910 | 208 |
| A03799 | A03913 | 391 | A03799 | A03942 | 457 |
| A03799 | A03945 | 193 | A03799 | A04422 | 182 |
| A03799 | A04444 | 172 | A03799 | A04490 | 179 |
| A03799 | A04639 | 195 | A03799 | A04965 | 245 |
| A03799 | A05221 | 294 | A03799 | A05439 | 96  |
| A03799 | A06944 | 198 | A03799 | A06997 | 176 |
| A03799 | A07143 | 160 | A03799 | A07209 | 240 |
| A03799 | A07415 | 328 | A03799 | A07803 | 193 |
| A03799 | A08859 | 160 | A03799 | A09732 | 418 |
| A03799 | A09733 | 210 | A03799 | A09829 | 207 |
| A03799 | A10336 | 491 | A03799 | A10587 | 167 |
| A03799 | A10596 | 205 | A03799 | A10744 | 266 |
| A03799 | A11430 | 176 | A03799 | A11681 | 157 |
| A03799 | A12569 | 301 | A03799 | A12854 | 491 |
| A03799 | A13826 | 396 | A03799 | A13944 | 213 |
| A03799 | A14038 | 938 | A03799 | A14048 | 205 |
| A03799 | A14190 | 419 | A03799 | A14199 | 451 |
| A03799 | A14202 | 443 | A03799 | A14208 | 406 |
| A03799 | A14210 | 485 | A03799 | A14366 | 179 |
| A03799 | A14369 | 191 | A03799 | A14371 | 489 |
| A03799 | A14511 | 491 | A03799 | A15292 | 467 |
| A03799 | A15312 | 488 | A03799 | A15313 | 490 |
| A03799 | A15314 | 241 | A03799 | A15331 | 419 |
| A03799 | A15333 | 306 | A03799 | A15335 | 310 |
| A03799 | A15346 | 177 | A03799 | A15349 | 391 |
| A03799 | A15395 | 258 | A03799 | A15411 | 208 |
| A03799 | A15444 | 180 | A03799 | A15480 | 318 |
| A03799 | A15484 | 486 | A03799 | A15495 | 243 |
| A03799 | A15498 | 174 | A03799 | A15795 | 369 |
| A03799 | A15800 | 184 | A03799 | A15904 | 301 |
| A03799 | A16001 | 372 | A03799 | A16717 | 351 |
| A03800 | A03910 | 307 | A03800 | A03942 | 188 |
| A03800 | A04202 | 157 | A03800 | A04490 | 368 |
| A03800 | A05166 | 400 | A03800 | A05546 | 218 |
| A03800 | A06610 | 157 | A03800 | A07051 | 277 |
| A03800 | A07833 | 412 | A03800 | A08315 | 252 |
| A03800 | A08714 | 243 | A03800 | A09218 | 277 |
| A03800 | A09239 | 157 | A03800 | A09254 | 257 |
| A03800 | A10247 | 469 | A03800 | A10336 | 168 |
| A03800 | A10528 | 238 | A03800 | A11431 | 184 |
| A03800 | A11537 | 364 | A03800 | A11542 | 236 |
| A03800 | A13511 | 199 | A03800 | A13944 | 389 |
| A03800 | A13978 | 221 | A03800 | A13987 | 404 |
| A03800 | A13997 | 157 | A03800 | A14010 | 180 |

|        |        |     |        |        |     |
|--------|--------|-----|--------|--------|-----|
| A03800 | A14122 | 286 | A03800 | A14190 | 430 |
| A03800 | A14371 | 479 | A03800 | A14408 | 201 |
| A03800 | A14511 | 193 | A03800 | A15310 | 351 |
| A03800 | A15312 | 382 | A03800 | A15313 | 393 |
| A03800 | A15335 | 241 | A03800 | A15348 | 156 |
| A03800 | A15413 | 180 | A03800 | A15445 | 196 |
| A03800 | A15454 | 236 | A03800 | A15463 | 196 |
| A03800 | A15484 | 176 | A03800 | A15487 | 159 |
| A03800 | A15498 | 296 | A03800 | A16145 | 162 |
| A03802 | A03805 | 469 | A03802 | A03936 | 338 |
| A03802 | A04117 | 249 | A03802 | A04138 | 343 |
| A03802 | A04201 | 361 | A03802 | A04280 | 210 |
| A03802 | A05104 | 358 | A03802 | A07135 | 168 |
| A03802 | A07201 | 196 | A03802 | A07961 | 271 |
| A03802 | A09509 | 241 | A03802 | A09934 | 407 |
| A03802 | A10074 | 414 | A03803 | A04117 | 428 |
| A03803 | A04508 | 302 | A03803 | A04526 | 243 |
| A03803 | A04553 | 272 | A03803 | A04741 | 236 |
| A03803 | A04793 | 163 | A03803 | A04822 | 157 |
| A03803 | A04853 | 406 | A03803 | A04861 | 273 |
| A03803 | A04867 | 465 | A03803 | A04902 | 283 |
| A03803 | A05322 | 157 | A03803 | A05418 | 252 |
| A03803 | A05568 | 327 | A03803 | A05673 | 180 |
| A03803 | A05876 | 372 | A03803 | A05889 | 171 |
| A03803 | A05918 | 202 | A03803 | A07480 | 165 |
| A03803 | A09020 | 279 | A03803 | A09026 | 311 |
| A03803 | A09106 | 251 | A03803 | A09954 | 329 |
| A03803 | A09988 | 294 | A03803 | A10072 | 259 |
| A03803 | A10197 | 188 | A03803 | A10362 | 168 |
| A03803 | A11369 | 486 | A03803 | A11922 | 202 |
| A03803 | A13212 | 350 | A03803 | A13734 | 187 |
| A03803 | A14120 | 160 | A03803 | A14197 | 170 |
| A03803 | A14198 | 340 | A03803 | A15094 | 329 |
| A03803 | A15098 | 329 | A03803 | A15401 | 174 |
| A03803 | A15639 | 187 | A03803 | A15786 | 219 |
| A03803 | A15846 | 219 | A03803 | A15857 | 271 |
| A03804 | A03817 | 296 | A03804 | A04018 | 369 |
| A03804 | A04130 | 296 | A03804 | A04800 | 375 |
| A03804 | A05517 | 356 | A03804 | A05577 | 212 |
| A03804 | A05679 | 276 | A03804 | A07122 | 226 |
| A03804 | A10319 | 401 | A03804 | A13903 | 323 |
| A03804 | A13988 | 428 | A03804 | A14125 | 302 |
| A03804 | A14366 | 360 | A03804 | A14374 | 481 |
| A03804 | A14391 | 430 | A03804 | A14439 | 319 |
| A03804 | A15290 | 477 | A03804 | A16002 | 241 |
| A03804 | A16529 | 246 | A03805 | A04011 | 374 |

|        |        |     |        |        |     |
|--------|--------|-----|--------|--------|-----|
| A03805 | A04138 | 368 | A03805 | A04144 | 399 |
| A03805 | A04242 | 401 | A03805 | A05104 | 380 |
| A03805 | A09509 | 279 | A03806 | A10504 | 266 |
| A03806 | A10986 | 219 | A03806 | A12927 | 182 |
| A03807 | A04117 | 151 | A03807 | A04263 | 310 |
| A03807 | A04554 | 422 | A03807 | A04756 | 348 |
| A03807 | A04865 | 461 | A03807 | A04951 | 416 |
| A03807 | A05577 | 219 | A03807 | A07135 | 196 |
| A03807 | A07146 | 363 | A03807 | A07158 | 379 |
| A03807 | A07173 | 293 | A03807 | A07948 | 422 |
| A03807 | A08623 | 422 | A03807 | A13181 | 303 |
| A03808 | A04201 | 395 | A03808 | A08693 | 356 |
| A03808 | A10527 | 340 | A03808 | A14443 | 262 |
| A03808 | A15992 | 338 | A03809 | A03817 | 63  |
| A03809 | A03830 | 104 | A03809 | A03888 | 235 |
| A03809 | A03981 | 489 | A03809 | A04088 | 107 |
| A03809 | A04207 | 141 | A03809 | A04288 | 180 |
| A03809 | A04297 | 173 | A03809 | A04490 | 260 |
| A03809 | A04605 | 185 | A03809 | A04662 | 184 |
| A03809 | A04914 | 162 | A03809 | A05086 | 486 |
| A03809 | A05216 | 319 | A03809 | A05227 | 446 |
| A03809 | A05261 | 200 | A03809 | A05889 | 121 |
| A03809 | A06466 | 229 | A03809 | A06543 | 372 |
| A03809 | A06703 | 162 | A03809 | A06936 | 236 |
| A03809 | A07004 | 288 | A03809 | A07209 | 283 |
| A03809 | A07311 | 911 | A03809 | A07360 | 312 |
| A03809 | A07527 | 185 | A03809 | A07742 | 340 |
| A03809 | A07773 | 386 | A03809 | A07881 | 383 |
| A03809 | A07911 | 291 | A03809 | A08228 | 383 |
| A03809 | A08377 | 165 | A03809 | A08548 | 383 |
| A03809 | A08550 | 477 | A03809 | A08552 | 356 |
| A03809 | A08560 | 177 | A03809 | A08561 | 357 |
| A03809 | A08814 | 293 | A03809 | A09220 | 377 |
| A03809 | A09609 | 279 | A03809 | A09792 | 177 |
| A03809 | A10735 | 484 | A03809 | A11244 | 279 |
| A03809 | A11301 | 366 | A03809 | A11369 | 377 |
| A03809 | A11372 | 491 | A03809 | A11472 | 230 |
| A03809 | A11496 | 362 | A03809 | A11497 | 385 |
| A03809 | A11521 | 327 | A03809 | A11608 | 252 |
| A03809 | A11675 | 285 | A03809 | A11735 | 307 |
| A03809 | A11737 | 235 | A03809 | A11860 | 398 |
| A03809 | A11914 | 230 | A03809 | A11917 | 388 |
| A03809 | A11954 | 229 | A03809 | A12167 | 369 |
| A03809 | A12433 | 221 | A03809 | A12501 | 235 |
| A03809 | A12507 | 183 | A03809 | A12540 | 221 |
| A03809 | A12606 | 185 | A03809 | A12625 | 199 |

|        |        |     |        |        |     |
|--------|--------|-----|--------|--------|-----|
| A03809 | A12658 | 297 | A03809 | A12665 | 273 |
| A03809 | A12825 | 174 | A03809 | A12826 | 258 |
| A03809 | A12858 | 429 | A03809 | A13313 | 229 |
| A03809 | A13707 | 414 | A03809 | A13781 | 246 |
| A03809 | A13782 | 221 | A03809 | A13811 | 200 |
| A03809 | A13860 | 288 | A03809 | A13912 | 162 |
| A03809 | A14073 | 386 | A03809 | A14214 | 409 |
| A03809 | A14216 | 489 | A03809 | A14270 | 180 |
| A03809 | A14286 | 212 | A03809 | A14364 | 294 |
| A03809 | A14403 | 151 | A03809 | A14429 | 210 |
| A03809 | A14569 | 378 | A03809 | A14635 | 252 |
| A03809 | A14699 | 654 | A03809 | A14778 | 383 |
| A03809 | A14799 | 334 | A03809 | A14903 | 229 |
| A03809 | A14921 | 177 | A03809 | A15187 | 283 |
| A03809 | A15189 | 260 | A03809 | A15275 | 238 |
| A03809 | A15541 | 176 | A03809 | A15660 | 369 |
| A03809 | A15662 | 372 | A03809 | A15709 | 283 |
| A03809 | A15818 | 174 | A03809 | A15850 | 318 |
| A03809 | A15931 | 215 | A03809 | A15932 | 165 |
| A03809 | A15987 | 162 | A03809 | A16088 | 369 |
| A03809 | A16157 | 486 | A03809 | A16187 | 258 |
| A03809 | A16289 | 377 | A03809 | A16343 | 168 |
| A03809 | A16437 | 157 | A03809 | A16552 | 335 |
| A03809 | A16558 | 210 | A03809 | A16565 | 425 |
| A03809 | A16587 | 310 | A03809 | A16597 | 196 |
| A03809 | A16611 | 427 | A03809 | A16652 | 168 |
| A03809 | A16664 | 393 | A03809 | A16691 | 154 |
| A03809 | A16693 | 168 | A03809 | A16695 | 306 |
| A03809 | A16697 | 224 | A03809 | A16776 | 240 |
| A03809 | A16790 | 379 | A03809 | A16824 | 154 |
| A03809 | A16829 | 224 | A03809 | A16838 | 187 |
| A03809 | A16905 | 152 | A03809 | A16994 | 63  |
| A03810 | A05911 | 399 | A03810 | A07129 | 361 |
| A03810 | A12569 | 414 | A03810 | A13667 | 366 |
| A03811 | A04053 | 384 | A03811 | A05866 | 394 |
| A03811 | A05940 | 400 | A03811 | A16500 | 445 |
| A03812 | A03813 | 469 | A03812 | A03922 | 182 |
| A03812 | A04066 | 185 | A03812 | A04307 | 173 |
| A03812 | A05119 | 318 | A03812 | A05367 | 302 |
| A03812 | A05530 | 486 | A03812 | A06109 | 322 |
| A03812 | A07163 | 486 | A03812 | A09242 | 152 |
| A03812 | A09726 | 383 | A03812 | A10848 | 347 |
| A03812 | A10911 | 268 | A03812 | A10920 | 218 |
| A03812 | A11240 | 168 | A03812 | A11253 | 302 |
| A03812 | A11705 | 236 | A03812 | A12361 | 170 |
| A03812 | A12383 | 401 | A03812 | A12839 | 217 |

|        |        |     |        |        |     |
|--------|--------|-----|--------|--------|-----|
| A03812 | A13588 | 367 | A03812 | A15156 | 252 |
| A03812 | A15677 | 477 | A03813 | A03824 | 213 |
| A03813 | A04008 | 160 | A03813 | A04271 | 170 |
| A03813 | A04279 | 198 | A03813 | A04714 | 234 |
| A03813 | A04809 | 221 | A03813 | A04961 | 276 |
| A03813 | A05094 | 205 | A03813 | A05259 | 267 |
| A03813 | A05880 | 162 | A03813 | A06143 | 157 |
| A03813 | A06161 | 159 | A03813 | A06627 | 210 |
| A03813 | A07165 | 152 | A03813 | A07339 | 240 |
| A03813 | A07483 | 436 | A03813 | A08855 | 160 |
| A03813 | A08880 | 477 | A03813 | A09491 | 373 |
| A03813 | A12361 | 170 | A03813 | A13212 | 228 |
| A03813 | A14364 | 174 | A03813 | A14372 | 154 |
| A03813 | A14452 | 329 | A03813 | A14790 | 262 |
| A03813 | A14799 | 486 | A03814 | A04402 | 391 |
| A03814 | A04405 | 364 | A03815 | A03854 | 236 |
| A03815 | A04110 | 219 | A03815 | A04929 | 201 |
| A03815 | A06373 | 409 | A03815 | A06944 | 229 |
| A03815 | A08293 | 491 | A03815 | A08356 | 338 |
| A03815 | A08362 | 374 | A03815 | A08821 | 491 |
| A03815 | A10584 | 160 | A03815 | A11233 | 266 |
| A03815 | A11727 | 230 | A03815 | A11862 | 249 |
| A03815 | A11929 | 171 | A03815 | A12870 | 263 |
| A03815 | A13213 | 302 | A03815 | A13824 | 184 |
| A03815 | A13873 | 446 | A03815 | A13983 | 491 |
| A03815 | A14146 | 364 | A03815 | A14199 | 423 |
| A03815 | A14208 | 236 | A03815 | A14212 | 441 |
| A03815 | A14214 | 193 | A03815 | A14374 | 238 |
| A03815 | A15320 | 274 | A03815 | A16868 | 335 |
| A03817 | A04017 | 180 | A03817 | A04018 | 443 |
| A03817 | A04042 | 218 | A03817 | A04050 | 152 |
| A03817 | A04103 | 368 | A03817 | A04138 | 110 |
| A03817 | A04158 | 208 | A03817 | A04248 | 481 |
| A03817 | A04288 | 88  | A03817 | A04323 | 191 |
| A03817 | A04426 | 296 | A03817 | A04519 | 71  |
| A03817 | A04587 | 347 | A03817 | A04589 | 187 |
| A03817 | A04622 | 63  | A03817 | A04682 | 458 |
| A03817 | A04699 | 899 | A03817 | A04730 | 347 |
| A03817 | A04748 | 187 | A03817 | A04756 | 208 |
| A03817 | A05350 | 201 | A03817 | A05558 | 201 |
| A03817 | A05904 | 246 | A03817 | A05944 | 451 |
| A03817 | A05985 | 259 | A03817 | A06054 | 472 |
| A03817 | A06055 | 396 | A03817 | A06095 | 269 |
| A03817 | A06161 | 195 | A03817 | A06224 | 326 |
| A03817 | A06306 | 137 | A03817 | A06669 | 160 |
| A03817 | A06737 | 266 | A03817 | A06752 | 240 |

|        |        |     |        |        |     |
|--------|--------|-----|--------|--------|-----|
| A03817 | A06780 | 167 | A03817 | A07135 | 255 |
| A03817 | A07143 | 245 | A03817 | A07157 | 450 |
| A03817 | A07161 | 260 | A03817 | A07166 | 398 |
| A03817 | A07242 | 407 | A03817 | A07311 | 486 |
| A03817 | A07372 | 162 | A03817 | A07483 | 152 |
| A03817 | A07555 | 266 | A03817 | A07706 | 465 |
| A03817 | A07823 | 201 | A03817 | A08527 | 480 |
| A03817 | A08536 | 154 | A03817 | A08608 | 378 |
| A03817 | A08658 | 172 | A03817 | A08711 | 187 |
| A03817 | A09220 | 63  | A03817 | A09401 | 470 |
| A03817 | A09557 | 266 | A03817 | A09776 | 187 |
| A03817 | A09937 | 99  | A03817 | A10399 | 171 |
| A03817 | A10510 | 167 | A03817 | A10580 | 899 |
| A03817 | A10666 | 246 | A03817 | A10809 | 172 |
| A03817 | A11125 | 899 | A03817 | A11250 | 172 |
| A03817 | A11369 | 329 | A03817 | A11625 | 266 |
| A03817 | A11713 | 162 | A03817 | A12009 | 385 |
| A03817 | A12254 | 417 | A03817 | A12664 | 899 |
| A03817 | A13036 | 230 | A03817 | A13335 | 213 |
| A03817 | A13985 | 899 | A03817 | A14098 | 187 |
| A03817 | A14104 | 356 | A03817 | A14196 | 610 |
| A03817 | A14198 | 219 | A03817 | A14220 | 385 |
| A03817 | A14364 | 307 | A03817 | A14374 | 329 |
| A03817 | A14402 | 311 | A03817 | A14566 | 441 |
| A03817 | A14596 | 196 | A03817 | A14603 | 187 |
| A03817 | A14617 | 266 | A03817 | A14945 | 218 |
| A03817 | A15110 | 230 | A03817 | A15290 | 260 |
| A03817 | A15309 | 435 | A03817 | A15323 | 238 |
| A03817 | A15596 | 414 | A03817 | A15605 | 260 |
| A03817 | A15608 | 174 | A03817 | A15658 | 414 |
| A03817 | A15788 | 482 | A03817 | A15790 | 218 |
| A03817 | A15981 | 238 | A03817 | A16157 | 63  |
| A03817 | A16619 | 266 | A03817 | A17142 | 314 |
| A03818 | A03961 | 373 | A03818 | A04147 | 324 |
| A03818 | A04229 | 470 | A03818 | A04365 | 313 |
| A03818 | A04482 | 296 | A03818 | A05016 | 213 |
| A03818 | A07143 | 391 | A03818 | A07703 | 361 |
| A03818 | A09219 | 274 | A03818 | A09394 | 369 |
| A03818 | A09732 | 160 | A03818 | A10760 | 173 |
| A03818 | A11144 | 390 | A03818 | A12347 | 319 |
| A03818 | A15291 | 240 | A03818 | A15726 | 334 |
| A03818 | A15925 | 177 | A03818 | A15934 | 204 |
| A03818 | A16443 | 269 | A03818 | A17157 | 228 |
| A03819 | A03861 | 185 | A03819 | A04023 | 234 |
| A03819 | A04033 | 419 | A03819 | A04072 | 257 |
| A03819 | A04449 | 432 | A03819 | A04520 | 229 |

|        |        |     |        |        |     |
|--------|--------|-----|--------|--------|-----|
| A03819 | A04597 | 413 | A03819 | A04965 | 157 |
| A03819 | A05160 | 345 | A03819 | A05330 | 245 |
| A03819 | A05348 | 266 | A03819 | A05418 | 168 |
| A03819 | A05556 | 274 | A03819 | A05854 | 319 |
| A03819 | A06092 | 157 | A03819 | A06225 | 257 |
| A03819 | A06277 | 491 | A03819 | A06889 | 245 |
| A03819 | A07221 | 285 | A03819 | A08172 | 177 |
| A03819 | A08878 | 318 | A03819 | A10085 | 182 |
| A03819 | A10651 | 223 | A03819 | A10982 | 180 |
| A03819 | A11727 | 362 | A03819 | A11762 | 389 |
| A03819 | A11983 | 481 | A03819 | A13369 | 291 |
| A03819 | A13997 | 257 | A03819 | A14404 | 258 |
| A03819 | A14405 | 180 | A03819 | A14410 | 243 |
| A03819 | A14665 | 179 | A03819 | A15282 | 491 |
| A03819 | A15606 | 329 | A03819 | A16626 | 151 |
| A03820 | A03921 | 174 | A03820 | A04182 | 157 |
| A03820 | A04184 | 205 | A03820 | A04187 | 400 |
| A03820 | A04221 | 249 | A03820 | A04517 | 179 |
| A03820 | A04560 | 229 | A03820 | A04562 | 368 |
| A03820 | A04814 | 274 | A03820 | A04869 | 283 |
| A03820 | A04911 | 398 | A03820 | A04971 | 179 |
| A03820 | A05122 | 294 | A03820 | A05247 | 160 |
| A03820 | A05291 | 358 | A03820 | A05292 | 305 |
| A03820 | A05388 | 368 | A03820 | A06182 | 307 |
| A03820 | A06234 | 260 | A03820 | A06377 | 407 |
| A03820 | A06400 | 265 | A03820 | A06596 | 188 |
| A03820 | A06648 | 199 | A03820 | A06654 | 156 |
| A03820 | A07163 | 204 | A03820 | A07165 | 208 |
| A03820 | A08571 | 205 | A03820 | A09011 | 241 |
| A03820 | A09225 | 293 | A03820 | A09814 | 219 |
| A03820 | A10395 | 152 | A03820 | A10950 | 346 |
| A03820 | A11186 | 236 | A03820 | A11298 | 205 |
| A03820 | A11342 | 260 | A03820 | A12423 | 346 |
| A03820 | A13128 | 283 | A03820 | A13696 | 416 |
| A03820 | A14574 | 283 | A03820 | A15856 | 185 |
| A03820 | A16764 | 480 | A03821 | A03864 | 285 |
| A03821 | A04207 | 458 | A03821 | A04453 | 235 |
| A03821 | A04584 | 285 | A03821 | A04600 | 168 |
| A03821 | A04914 | 480 | A03821 | A05473 | 172 |
| A03821 | A05760 | 157 | A03821 | A05951 | 266 |
| A03821 | A06173 | 210 | A03821 | A06648 | 249 |
| A03821 | A07157 | 191 | A03821 | A07335 | 234 |
| A03821 | A09040 | 165 | A03821 | A09220 | 455 |
| A03821 | A09908 | 368 | A03821 | A09974 | 416 |
| A03821 | A10433 | 347 | A03821 | A10731 | 152 |
| A03821 | A10770 | 347 | A03821 | A10865 | 347 |

|        |        |     |        |        |     |
|--------|--------|-----|--------|--------|-----|
| A03821 | A11964 | 276 | A03821 | A13975 | 162 |
| A03821 | A14188 | 183 | A03821 | A14198 | 446 |
| A03821 | A15092 | 368 | A03821 | A15391 | 185 |
| A03821 | A16137 | 288 | A03822 | A04073 | 419 |
| A03822 | A04417 | 294 | A03822 | A04449 | 396 |
| A03822 | A04795 | 285 | A03822 | A04941 | 333 |
| A03822 | A05141 | 162 | A03822 | A06166 | 290 |
| A03822 | A06216 | 204 | A03822 | A06231 | 302 |
| A03822 | A06254 | 176 | A03822 | A06539 | 364 |
| A03822 | A06819 | 168 | A03822 | A06877 | 224 |
| A03822 | A07163 | 337 | A03822 | A07565 | 302 |
| A03822 | A07885 | 307 | A03822 | A08216 | 310 |
| A03822 | A08274 | 372 | A03822 | A08540 | 229 |
| A03822 | A08574 | 279 | A03822 | A08607 | 343 |
| A03822 | A08934 | 217 | A03822 | A08993 | 427 |
| A03822 | A09007 | 205 | A03822 | A09123 | 205 |
| A03822 | A09162 | 162 | A03822 | A09218 | 201 |
| A03822 | A09660 | 286 | A03822 | A09750 | 270 |
| A03822 | A10159 | 346 | A03822 | A10494 | 329 |
| A03822 | A10808 | 443 | A03822 | A10844 | 212 |
| A03822 | A11061 | 263 | A03822 | A11104 | 204 |
| A03822 | A11118 | 329 | A03822 | A11180 | 191 |
| A03822 | A11262 | 241 | A03822 | A11281 | 224 |
| A03822 | A11293 | 334 | A03822 | A11306 | 409 |
| A03822 | A11543 | 352 | A03822 | A11866 | 283 |
| A03822 | A11915 | 347 | A03822 | A11943 | 217 |
| A03822 | A12383 | 202 | A03822 | A12932 | 374 |
| A03822 | A12971 | 184 | A03822 | A13231 | 243 |
| A03822 | A13619 | 364 | A03822 | A13860 | 162 |
| A03822 | A13924 | 171 | A03822 | A14005 | 252 |
| A03822 | A14426 | 193 | A03822 | A14517 | 375 |
| A03822 | A14579 | 263 | A03822 | A15035 | 246 |
| A03822 | A15255 | 249 | A03822 | A16623 | 201 |
| A03822 | A16787 | 302 | A03822 | A17050 | 343 |
| A03824 | A03825 | 401 | A03824 | A04584 | 341 |
| A03824 | A04652 | 249 | A03824 | A04681 | 481 |
| A03824 | A04877 | 339 | A03824 | A05344 | 319 |
| A03824 | A05473 | 371 | A03824 | A06339 | 286 |
| A03824 | A06648 | 201 | A03824 | A07128 | 272 |
| A03824 | A07163 | 205 | A03824 | A07165 | 477 |
| A03824 | A08201 | 279 | A03824 | A08281 | 187 |
| A03824 | A08627 | 144 | A03824 | A08704 | 353 |
| A03824 | A09655 | 374 | A03824 | A15631 | 297 |
| A03825 | A03826 | 461 | A03825 | A03880 | 165 |
| A03825 | A04015 | 276 | A03825 | A04681 | 235 |
| A03825 | A05073 | 339 | A03825 | A05078 | 357 |



|        |        |     |        |        |     |
|--------|--------|-----|--------|--------|-----|
| A03825 | A06063 | 246 | A03825 | A06417 | 416 |
| A03825 | A06877 | 334 | A03825 | A07174 | 330 |
| A03825 | A08201 | 316 | A03825 | A09124 | 312 |
| A03825 | A09434 | 268 | A03825 | A12357 | 466 |
| A03825 | A14674 | 174 | A03826 | A03832 | 314 |
| A03826 | A03989 | 367 | A03826 | A04020 | 296 |
| A03826 | A04080 | 223 | A03826 | A04728 | 200 |
| A03826 | A05073 | 356 | A03826 | A05078 | 372 |
| A03826 | A06254 | 414 | A03826 | A06417 | 424 |
| A03826 | A06877 | 481 | A03826 | A07165 | 167 |
| A03826 | A10337 | 290 | A03826 | A14371 | 322 |
| A03826 | A16911 | 401 | A03827 | A04749 | 446 |
| A03827 | A05221 | 159 | A03827 | A07803 | 191 |
| A03827 | A14146 | 353 | A03827 | A14365 | 432 |
| A03827 | A14392 | 281 | A03827 | A15308 | 484 |
| A03827 | A15996 | 398 | A03828 | A03829 | 413 |
| A03828 | A10173 | 458 | A03829 | A04028 | 352 |
| A03829 | A05601 | 369 | A03829 | A05767 | 171 |
| A03829 | A10173 | 462 | A03829 | A10367 | 241 |
| A03829 | A10631 | 361 | A03830 | A04050 | 63  |
| A03830 | A04323 | 216 | A03830 | A04731 | 351 |
| A03830 | A04737 | 204 | A03830 | A04793 | 256 |
| A03830 | A05666 | 281 | A03830 | A07311 | 899 |
| A03830 | A09401 | 167 | A03830 | A09744 | 160 |
| A03830 | A10510 | 401 | A03830 | A11129 | 385 |
| A03830 | A11307 | 201 | A03830 | A13216 | 258 |
| A03830 | A13605 | 224 | A03830 | A13663 | 341 |
| A03830 | A14198 | 396 | A03830 | A14433 | 168 |
| A03830 | A15325 | 249 | A03830 | A15406 | 353 |
| A03830 | A15411 | 357 | A03830 | A15875 | 269 |
| A03830 | A16547 | 377 | A03830 | A16594 | 293 |
| A03831 | A03851 | 262 | A03831 | A04607 | 396 |
| A03831 | A04731 | 363 | A03831 | A05349 | 272 |
| A03831 | A09222 | 383 | A03831 | A13826 | 216 |
| A03831 | A13899 | 299 | A03831 | A14691 | 291 |
| A03831 | A16224 | 326 | A03832 | A03983 | 224 |
| A03832 | A03989 | 187 | A03832 | A04049 | 434 |
| A03832 | A04079 | 423 | A03832 | A04449 | 477 |
| A03832 | A04728 | 491 | A03832 | A04732 | 449 |
| A03832 | A04852 | 205 | A03832 | A05104 | 172 |
| A03832 | A06012 | 435 | A03832 | A06254 | 235 |
| A03832 | A06257 | 196 | A03832 | A06277 | 152 |
| A03832 | A06394 | 324 | A03832 | A06550 | 188 |
| A03832 | A06607 | 162 | A03832 | A06877 | 483 |
| A03832 | A07167 | 307 | A03832 | A07746 | 489 |
| A03832 | A08838 | 167 | A03832 | A09356 | 193 |

|        |        |     |        |        |     |
|--------|--------|-----|--------|--------|-----|
| A03832 | A10047 | 168 | A03832 | A10939 | 401 |
| A03832 | A14281 | 183 | A03832 | A14323 | 266 |
| A03832 | A14326 | 324 | A03832 | A14588 | 201 |
| A03832 | A15223 | 229 | A03832 | A15437 | 302 |
| A03832 | A15722 | 345 | A03833 | A05881 | 396 |
| A03833 | A10987 | 308 | A03834 | A03835 | 467 |
| A03834 | A03836 | 361 | A03834 | A03837 | 165 |
| A03834 | A04050 | 469 | A03834 | A04115 | 165 |
| A03834 | A04398 | 174 | A03834 | A04614 | 450 |
| A03834 | A04657 | 436 | A03834 | A04685 | 480 |
| A03834 | A05037 | 491 | A03834 | A05113 | 198 |
| A03834 | A05242 | 409 | A03834 | A05415 | 270 |
| A03834 | A05446 | 199 | A03834 | A05674 | 413 |
| A03834 | A07173 | 165 | A03834 | A08345 | 243 |
| A03834 | A09642 | 361 | A03834 | A11064 | 299 |
| A03834 | A11123 | 294 | A03834 | A11559 | 210 |
| A03834 | A14196 | 191 | A03834 | A14204 | 176 |
| A03834 | A14208 | 469 | A03834 | A14351 | 221 |
| A03834 | A14395 | 232 | A03834 | A14431 | 173 |
| A03834 | A15314 | 479 | A03834 | A15328 | 299 |
| A03834 | A15388 | 310 | A03834 | A15410 | 235 |
| A03834 | A15575 | 356 | A03834 | A15580 | 389 |
| A03834 | A15974 | 241 | A03834 | A17115 | 299 |
| A03835 | A03836 | 344 | A03835 | A03837 | 445 |
| A03835 | A03838 | 435 | A03835 | A04050 | 491 |
| A03835 | A04115 | 488 | A03835 | A04278 | 306 |
| A03835 | A04616 | 241 | A03835 | A04685 | 379 |
| A03835 | A05037 | 418 | A03835 | A05212 | 193 |
| A03835 | A05213 | 327 | A03835 | A05240 | 183 |
| A03835 | A05415 | 234 | A03835 | A05631 | 411 |
| A03835 | A05674 | 401 | A03835 | A08745 | 201 |
| A03835 | A08944 | 210 | A03835 | A09131 | 168 |
| A03835 | A09145 | 218 | A03835 | A09875 | 193 |
| A03835 | A10047 | 257 | A03835 | A10460 | 217 |
| A03835 | A10546 | 375 | A03835 | A11911 | 385 |
| A03835 | A13826 | 297 | A03835 | A13899 | 117 |
| A03835 | A14196 | 491 | A03835 | A14208 | 491 |
| A03835 | A14218 | 404 | A03835 | A14220 | 180 |
| A03835 | A14367 | 360 | A03835 | A14469 | 283 |
| A03835 | A14830 | 218 | A03835 | A15291 | 358 |
| A03835 | A15309 | 347 | A03835 | A15314 | 491 |
| A03835 | A15346 | 191 | A03835 | A15360 | 266 |
| A03835 | A15361 | 401 | A03835 | A15386 | 391 |
| A03835 | A15411 | 218 | A03835 | A15513 | 228 |
| A03835 | A15566 | 274 | A03835 | A15575 | 201 |
| A03835 | A15576 | 263 | A03835 | A15613 | 210 |

|        |        |     |        |        |     |
|--------|--------|-----|--------|--------|-----|
| A03835 | A16006 | 363 | A03835 | A16994 | 88  |
| A03836 | A03837 | 346 | A03836 | A04115 | 347 |
| A03836 | A04616 | 396 | A03836 | A04685 | 405 |
| A03836 | A05674 | 417 | A03837 | A03838 | 460 |
| A03837 | A04050 | 294 | A03837 | A04115 | 801 |
| A03837 | A04246 | 296 | A03837 | A04617 | 283 |
| A03837 | A04685 | 263 | A03837 | A04686 | 291 |
| A03837 | A05674 | 296 | A03837 | A06353 | 268 |
| A03837 | A06537 | 378 | A03837 | A07803 | 497 |
| A03837 | A08293 | 372 | A03837 | A08345 | 347 |
| A03837 | A08810 | 224 | A03837 | A09222 | 255 |
| A03837 | A09833 | 185 | A03837 | A10601 | 193 |
| A03837 | A11850 | 456 | A03837 | A12899 | 335 |
| A03837 | A13826 | 366 | A03837 | A13899 | 243 |
| A03837 | A14208 | 606 | A03837 | A14690 | 190 |
| A03837 | A15291 | 428 | A03837 | A15323 | 259 |
| A03837 | A15386 | 707 | A03837 | A15510 | 216 |
| A03837 | A16216 | 570 | A03837 | A16224 | 286 |
| A03837 | A16467 | 160 | A03837 | A16832 | 283 |
| A03838 | A03851 | 201 | A03838 | A04050 | 281 |
| A03838 | A04079 | 152 | A03838 | A04115 | 435 |
| A03838 | A04662 | 489 | A03838 | A05037 | 270 |
| A03838 | A05212 | 312 | A03838 | A05213 | 395 |
| A03838 | A08745 | 318 | A03838 | A08834 | 215 |
| A03838 | A09355 | 377 | A03838 | A09744 | 277 |
| A03838 | A13826 | 154 | A03838 | A13899 | 245 |
| A03838 | A14188 | 154 | A03838 | A14196 | 185 |
| A03838 | A14830 | 329 | A03838 | A15559 | 252 |
| A03838 | A15613 | 224 | A03838 | A16300 | 157 |
| A03839 | A04268 | 262 | A03839 | A05058 | 473 |
| A03839 | A06009 | 319 | A03839 | A06379 | 168 |
| A03839 | A07123 | 404 | A03839 | A10847 | 358 |
| A03839 | A11683 | 212 | A03839 | A15435 | 183 |
| A03840 | A03842 | 340 | A03840 | A05811 | 281 |
| A03840 | A14156 | 165 | A03840 | A14620 | 380 |
| A03840 | A14785 | 322 | A03841 | A03872 | 313 |
| A03841 | A03983 | 355 | A03841 | A05866 | 467 |
| A03841 | A06296 | 208 | A03841 | A06588 | 299 |
| A03841 | A06607 | 462 | A03841 | A06688 | 481 |
| A03841 | A07177 | 246 | A03841 | A07746 | 154 |
| A03841 | A08643 | 394 | A03841 | A10103 | 299 |
| A03841 | A13426 | 305 | A03842 | A08692 | 357 |
| A03842 | A13459 | 401 | A03842 | A14496 | 265 |
| A03842 | A14620 | 427 | A03842 | A14643 | 188 |
| A03842 | A14785 | 396 | A03843 | A04017 | 273 |
| A03843 | A04547 | 229 | A03843 | A04564 | 288 |

|        |        |     |        |        |     |
|--------|--------|-----|--------|--------|-----|
| A03843 | A04622 | 488 | A03843 | A04685 | 232 |
| A03843 | A05072 | 288 | A03843 | A05094 | 154 |
| A03843 | A06610 | 443 | A03843 | A06950 | 156 |
| A03843 | A08692 | 177 | A03843 | A09181 | 188 |
| A03843 | A09301 | 235 | A03843 | A09411 | 249 |
| A03843 | A09520 | 157 | A03843 | A09690 | 273 |
| A03843 | A09775 | 238 | A03843 | A09862 | 272 |
| A03843 | A10457 | 241 | A03843 | A10708 | 369 |
| A03843 | A11282 | 187 | A03843 | A11295 | 160 |
| A03843 | A11349 | 351 | A03843 | A11477 | 218 |
| A03843 | A12195 | 170 | A03843 | A12667 | 394 |
| A03843 | A13144 | 339 | A03843 | A13824 | 168 |
| A03843 | A13870 | 422 | A03843 | A14145 | 205 |
| A03843 | A14583 | 212 | A03843 | A14943 | 205 |
| A03843 | A15750 | 174 | A03843 | A16257 | 152 |
| A03843 | A17046 | 374 | A03844 | A04283 | 379 |
| A03844 | A06623 | 271 | A03844 | A10491 | 413 |
| A03844 | A14621 | 224 | A03845 | A04121 | 383 |
| A03845 | A05009 | 281 | A03845 | A07165 | 446 |
| A03845 | A08911 | 294 | A03845 | A09256 | 172 |
| A03845 | A14210 | 273 | A03845 | A14371 | 162 |
| A03845 | A15726 | 183 | A03846 | A03865 | 228 |
| A03846 | A04114 | 204 | A03846 | A04171 | 272 |
| A03846 | A04189 | 369 | A03846 | A04190 | 324 |
| A03846 | A04528 | 335 | A03846 | A04536 | 419 |
| A03846 | A04562 | 188 | A03846 | A05038 | 276 |
| A03846 | A05176 | 157 | A03846 | A05398 | 333 |
| A03846 | A05402 | 180 | A03846 | A05819 | 335 |
| A03846 | A06055 | 430 | A03846 | A06357 | 283 |
| A03846 | A06579 | 218 | A03846 | A06622 | 159 |
| A03846 | A06647 | 252 | A03846 | A06649 | 246 |
| A03846 | A07390 | 223 | A03846 | A08615 | 317 |
| A03846 | A09018 | 229 | A03846 | A09046 | 234 |
| A03846 | A09255 | 317 | A03846 | A09779 | 279 |
| A03846 | A10604 | 163 | A03846 | A10823 | 302 |
| A03846 | A11051 | 369 | A03846 | A11386 | 162 |
| A03846 | A11683 | 207 | A03846 | A12105 | 152 |
| A03846 | A12554 | 272 | A03846 | A13997 | 202 |
| A03846 | A14127 | 405 | A03846 | A14643 | 154 |
| A03846 | A14790 | 230 | A03846 | A14982 | 255 |
| A03847 | A03848 | 406 | A03847 | A03870 | 462 |
| A03847 | A04004 | 382 | A03847 | A04031 | 401 |
| A03847 | A04123 | 462 | A03847 | A04260 | 335 |
| A03847 | A04560 | 407 | A03847 | A04905 | 391 |
| A03847 | A05036 | 414 | A03848 | A03870 | 395 |
| A03848 | A04123 | 452 | A03848 | A04681 | 273 |

|        |        |     |        |        |     |
|--------|--------|-----|--------|--------|-----|
| A03848 | A07164 | 272 | A03848 | A07165 | 179 |
| A03850 | A09435 | 400 | A03851 | A03874 | 223 |
| A03851 | A03910 | 196 | A03851 | A03942 | 361 |
| A03851 | A04169 | 346 | A03851 | A04881 | 279 |
| A03851 | A05220 | 441 | A03851 | A05679 | 76  |
| A03851 | A06039 | 63  | A03851 | A06984 | 341 |
| A03851 | A07004 | 162 | A03851 | A08465 | 238 |
| A03851 | A08834 | 491 | A03851 | A08840 | 491 |
| A03851 | A08852 | 182 | A03851 | A08874 | 82  |
| A03851 | A09222 | 191 | A03851 | A09355 | 363 |
| A03851 | A09732 | 306 | A03851 | A09744 | 489 |
| A03851 | A09833 | 475 | A03851 | A09835 | 447 |
| A03851 | A09848 | 491 | A03851 | A09851 | 480 |
| A03851 | A09857 | 317 | A03851 | A09864 | 201 |
| A03851 | A09875 | 491 | A03851 | A10587 | 238 |
| A03851 | A10729 | 188 | A03851 | A10740 | 188 |
| A03851 | A10802 | 401 | A03851 | A11537 | 249 |
| A03851 | A11601 | 201 | A03851 | A11651 | 413 |
| A03851 | A11652 | 238 | A03851 | A11678 | 200 |
| A03851 | A11784 | 184 | A03851 | A11789 | 341 |
| A03851 | A11797 | 262 | A03851 | A11946 | 390 |
| A03851 | A11947 | 288 | A03851 | A12870 | 180 |
| A03851 | A13007 | 299 | A03851 | A13084 | 170 |
| A03851 | A13826 | 491 | A03851 | A13856 | 278 |
| A03851 | A13860 | 201 | A03851 | A13899 | 491 |
| A03851 | A14104 | 328 | A03851 | A14109 | 193 |
| A03851 | A14111 | 340 | A03851 | A14123 | 377 |
| A03851 | A14190 | 364 | A03851 | A14210 | 434 |
| A03851 | A14276 | 234 | A03851 | A14290 | 472 |
| A03851 | A14371 | 405 | A03851 | A14394 | 243 |
| A03851 | A14511 | 445 | A03851 | A15292 | 456 |
| A03851 | A15308 | 249 | A03851 | A15312 | 343 |
| A03851 | A15313 | 473 | A03851 | A15317 | 157 |
| A03851 | A15318 | 457 | A03851 | A15331 | 424 |
| A03851 | A15333 | 344 | A03851 | A15346 | 490 |
| A03851 | A15348 | 379 | A03851 | A15349 | 424 |
| A03851 | A15352 | 435 | A03851 | A15366 | 262 |
| A03851 | A15411 | 288 | A03851 | A15419 | 157 |
| A03851 | A15422 | 308 | A03851 | A15431 | 187 |
| A03851 | A15446 | 385 | A03851 | A15447 | 334 |
| A03851 | A15455 | 200 | A03851 | A15458 | 249 |
| A03851 | A15480 | 468 | A03851 | A15484 | 346 |
| A03851 | A15486 | 165 | A03851 | A15495 | 240 |
| A03851 | A15498 | 185 | A03851 | A15515 | 307 |
| A03851 | A15670 | 216 | A03851 | A15799 | 156 |
| A03851 | A15801 | 174 | A03851 | A15826 | 227 |

|        |        |     |        |        |     |
|--------|--------|-----|--------|--------|-----|
| A03851 | A16136 | 195 | A03851 | A16224 | 490 |
| A03851 | A16300 | 260 | A03851 | A16711 | 473 |
| A03851 | A16915 | 429 | A03851 | A16965 | 243 |
| A03851 | A17054 | 341 | A03851 | A17081 | 249 |
| A03851 | A17086 | 262 | A03851 | A17087 | 288 |
| A03852 | A04169 | 212 | A03852 | A06001 | 408 |
| A03852 | A14511 | 198 | A03852 | A15419 | 394 |
| A03853 | A04962 | 191 | A03853 | A05386 | 271 |
| A03853 | A05603 | 338 | A03853 | A06491 | 380 |
| A03853 | A09860 | 419 | A03853 | A10611 | 317 |
| A03853 | A13180 | 384 | A03853 | A13893 | 456 |
| A03853 | A14621 | 171 | A03853 | A15423 | 363 |
| A03853 | A15649 | 154 | A03854 | A03878 | 488 |
| A03854 | A03990 | 303 | A03854 | A04038 | 160 |
| A03854 | A04062 | 942 | A03854 | A04342 | 234 |
| A03854 | A04440 | 191 | A03854 | A04442 | 265 |
| A03854 | A04460 | 246 | A03854 | A04704 | 154 |
| A03854 | A04746 | 185 | A03854 | A04807 | 473 |
| A03854 | A05082 | 480 | A03854 | A05144 | 190 |
| A03854 | A05381 | 303 | A03854 | A05701 | 491 |
| A03854 | A05797 | 319 | A03854 | A05854 | 241 |
| A03854 | A05951 | 241 | A03854 | A06660 | 480 |
| A03854 | A06707 | 303 | A03854 | A06897 | 286 |
| A03854 | A07011 | 152 | A03854 | A07311 | 899 |
| A03854 | A08661 | 182 | A03854 | A08718 | 391 |
| A03854 | A08869 | 490 | A03854 | A09124 | 490 |
| A03854 | A09160 | 368 | A03854 | A09361 | 238 |
| A03854 | A09364 | 267 | A03854 | A09374 | 215 |
| A03854 | A09491 | 401 | A03854 | A10006 | 201 |
| A03854 | A10087 | 165 | A03854 | A10136 | 294 |
| A03854 | A10386 | 235 | A03854 | A10725 | 174 |
| A03854 | A10739 | 207 | A03854 | A11834 | 243 |
| A03854 | A14032 | 899 | A03854 | A14188 | 899 |
| A03854 | A15327 | 162 | A03855 | A04932 | 156 |
| A03855 | A05255 | 491 | A03855 | A05982 | 366 |
| A03855 | A06413 | 396 | A03855 | A06940 | 446 |
| A03855 | A07046 | 229 | A03855 | A07076 | 224 |
| A03855 | A07360 | 229 | A03855 | A07822 | 229 |
| A03855 | A07881 | 253 | A03855 | A08228 | 229 |
| A03855 | A08548 | 156 | A03855 | A08674 | 156 |
| A03855 | A08743 | 357 | A03855 | A10616 | 156 |
| A03855 | A11264 | 313 | A03855 | A11290 | 156 |
| A03855 | A11918 | 156 | A03855 | A13609 | 227 |
| A03855 | A15624 | 385 | A03855 | A15649 | 156 |
| A03855 | A15651 | 316 | A03855 | A15652 | 284 |
| A03855 | A15660 | 245 | A03855 | A15661 | 270 |

|        |        |     |        |        |     |
|--------|--------|-----|--------|--------|-----|
| A03855 | A15662 | 425 | A03855 | A15684 | 546 |
| A03855 | A15707 | 347 | A03855 | A15720 | 156 |
| A03855 | A15721 | 156 | A03855 | A15746 | 287 |
| A03855 | A15843 | 229 | A03855 | A15917 | 229 |
| A03855 | A15918 | 482 | A03855 | A15923 | 229 |
| A03855 | A15931 | 465 | A03855 | A15937 | 229 |
| A03855 | A16088 | 580 | A03855 | A16145 | 156 |
| A03855 | A16307 | 156 | A03856 | A03959 | 180 |
| A03856 | A04056 | 358 | A03856 | A05037 | 234 |
| A03856 | A07046 | 267 | A03856 | A09321 | 371 |
| A03856 | A14699 | 263 | A03856 | A14778 | 188 |
| A03856 | A15668 | 332 | A03856 | A16027 | 221 |
| A03858 | A04372 | 302 | A03858 | A04620 | 259 |
| A03858 | A04674 | 313 | A03858 | A05098 | 188 |
| A03858 | A05449 | 346 | A03858 | A05471 | 213 |
| A03858 | A05472 | 159 | A03858 | A05550 | 177 |
| A03858 | A05573 | 156 | A03858 | A05586 | 321 |
| A03858 | A05682 | 221 | A03858 | A05757 | 191 |
| A03858 | A05789 | 269 | A03858 | A06211 | 269 |
| A03858 | A06397 | 477 | A03858 | A06558 | 329 |
| A03858 | A06635 | 245 | A03858 | A06934 | 254 |
| A03858 | A06979 | 463 | A03858 | A07239 | 168 |
| A03858 | A07264 | 193 | A03858 | A07311 | 385 |
| A03858 | A07477 | 152 | A03858 | A07558 | 271 |
| A03858 | A07721 | 427 | A03858 | A07973 | 378 |
| A03858 | A08133 | 199 | A03858 | A09621 | 485 |
| A03858 | A09660 | 170 | A03858 | A10689 | 299 |
| A03858 | A11297 | 484 | A03858 | A12932 | 170 |
| A03858 | A13063 | 515 | A03858 | A13617 | 199 |
| A03858 | A13906 | 259 | A03858 | A14481 | 199 |
| A03858 | A14591 | 480 | A03858 | A14637 | 213 |
| A03858 | A14659 | 182 | A03858 | A14685 | 307 |
| A03858 | A15297 | 241 | A03858 | A15507 | 491 |
| A03858 | A15547 | 491 | A03858 | A15637 | 188 |
| A03858 | A15741 | 174 | A03858 | A15769 | 383 |
| A03858 | A16285 | 259 | A03858 | A16291 | 180 |
| A03858 | A16627 | 474 | A03858 | A16741 | 168 |
| A03858 | A16744 | 213 | A03858 | A16879 | 358 |
| A03858 | A16947 | 247 | A03858 | A17142 | 152 |
| A03858 | A17155 | 243 | A03859 | A05025 | 326 |
| A03859 | A05101 | 417 | A03859 | A05230 | 234 |
| A03859 | A05238 | 259 | A03859 | A05301 | 353 |
| A03859 | A06340 | 202 | A03859 | A06861 | 489 |
| A03859 | A06965 | 537 | A03859 | A06973 | 452 |
| A03859 | A07047 | 200 | A03859 | A07203 | 460 |
| A03859 | A07348 | 238 | A03859 | A07378 | 489 |

|        |        |     |        |        |     |
|--------|--------|-----|--------|--------|-----|
| A03859 | A07675 | 157 | A03859 | A08131 | 200 |
| A03859 | A08359 | 200 | A03859 | A08369 | 200 |
| A03859 | A08408 | 200 | A03859 | A08457 | 200 |
| A03859 | A08466 | 200 | A03859 | A08476 | 200 |
| A03859 | A08558 | 491 | A03859 | A08896 | 168 |
| A03859 | A08972 | 274 | A03859 | A09322 | 517 |
| A03859 | A09665 | 224 | A03859 | A09686 | 347 |
| A03859 | A09697 | 454 | A03859 | A09862 | 367 |
| A03859 | A10420 | 468 | A03859 | A10529 | 207 |
| A03859 | A11349 | 157 | A03859 | A11562 | 560 |
| A03859 | A11704 | 170 | A03859 | A11728 | 200 |
| A03859 | A11861 | 200 | A03859 | A11945 | 458 |
| A03859 | A12233 | 446 | A03859 | A12243 | 435 |
| A03859 | A13207 | 229 | A03859 | A13333 | 200 |
| A03859 | A13457 | 212 | A03859 | A13989 | 491 |
| A03859 | A14167 | 157 | A03859 | A14169 | 488 |
| A03859 | A14176 | 82  | A03859 | A14566 | 467 |
| A03859 | A14595 | 198 | A03859 | A15202 | 200 |
| A03859 | A15219 | 160 | A03859 | A15221 | 380 |
| A03859 | A15469 | 168 | A03859 | A15666 | 411 |
| A03859 | A15727 | 407 | A03859 | A15937 | 380 |
| A03859 | A16333 | 481 | A03859 | A16697 | 366 |
| A03859 | A17088 | 484 | A03860 | A06599 | 224 |
| A03860 | A06814 | 201 | A03860 | A07851 | 174 |
| A03860 | A09449 | 224 | A03860 | A10078 | 256 |
| A03860 | A10532 | 643 | A03860 | A10875 | 243 |
| A03860 | A15314 | 165 | A03860 | A16418 | 165 |
| A03861 | A04424 | 235 | A03861 | A04653 | 369 |
| A03861 | A04655 | 293 | A03861 | A04660 | 254 |
| A03861 | A04712 | 391 | A03861 | A04751 | 384 |
| A03861 | A04783 | 460 | A03861 | A04842 | 337 |
| A03861 | A04849 | 374 | A03861 | A04850 | 485 |
| A03861 | A05006 | 412 | A03861 | A05007 | 187 |
| A03861 | A05015 | 257 | A03861 | A05284 | 335 |
| A03861 | A05310 | 327 | A03861 | A05342 | 389 |
| A03861 | A05378 | 358 | A03861 | A05516 | 229 |
| A03861 | A05759 | 235 | A03861 | A05772 | 294 |
| A03861 | A05774 | 286 | A03861 | A06124 | 326 |
| A03861 | A06358 | 184 | A03861 | A06359 | 168 |
| A03861 | A06597 | 472 | A03861 | A06648 | 383 |
| A03861 | A06649 | 279 | A03861 | A06924 | 268 |
| A03861 | A07002 | 326 | A03861 | A07091 | 213 |
| A03861 | A07122 | 314 | A03861 | A07191 | 369 |
| A03861 | A07282 | 168 | A03861 | A07554 | 294 |
| A03861 | A08572 | 154 | A03861 | A08573 | 232 |
| A03861 | A08836 | 157 | A03861 | A09976 | 321 |



|        |        |     |        |        |     |
|--------|--------|-----|--------|--------|-----|
| A03861 | A10330 | 369 | A03861 | A10614 | 271 |
| A03861 | A12988 | 201 | A03861 | A13134 | 386 |
| A03861 | A13148 | 386 | A03861 | A13509 | 369 |
| A03861 | A13866 | 187 | A03861 | A13973 | 330 |
| A03861 | A14403 | 301 | A03861 | A15232 | 386 |
| A03861 | A17102 | 235 | A03862 | A04035 | 319 |
| A03862 | A04279 | 286 | A03862 | A04943 | 384 |
| A03862 | A05980 | 418 | A03862 | A07190 | 229 |
| A03862 | A07201 | 173 | A03863 | A04124 | 216 |
| A03863 | A04272 | 236 | A03863 | A04712 | 247 |
| A03863 | A05006 | 174 | A03863 | A05020 | 184 |
| A03863 | A05227 | 184 | A03863 | A05310 | 291 |
| A03863 | A05695 | 294 | A03863 | A06359 | 260 |
| A03863 | A07347 | 432 | A03863 | A07746 | 480 |
| A03863 | A08546 | 404 | A03863 | A08978 | 187 |
| A03863 | A08991 | 404 | A03863 | A09197 | 455 |
| A03863 | A10614 | 363 | A03863 | A13426 | 227 |
| A03863 | A13478 | 371 | A03863 | A15677 | 218 |
| A03863 | A16026 | 196 | A03863 | A16283 | 377 |
| A03863 | A16284 | 377 | A03863 | A16488 | 247 |
| A03864 | A04319 | 424 | A03864 | A04334 | 251 |
| A03864 | A04962 | 260 | A03864 | A06635 | 293 |
| A03864 | A07190 | 286 | A03864 | A07309 | 247 |
| A03864 | A07482 | 418 | A03864 | A07512 | 433 |
| A03864 | A10405 | 433 | A03864 | A12528 | 424 |
| A03864 | A12529 | 414 | A03864 | A13009 | 424 |
| A03865 | A04010 | 191 | A03865 | A04127 | 346 |
| A03865 | A04134 | 486 | A03865 | A04267 | 374 |
| A03865 | A04268 | 262 | A03865 | A04272 | 334 |
| A03865 | A04538 | 469 | A03865 | A04619 | 396 |
| A03865 | A04798 | 467 | A03865 | A06055 | 283 |
| A03865 | A06650 | 422 | A03865 | A08677 | 419 |
| A03865 | A08741 | 396 | A03865 | A10319 | 254 |
| A03865 | A10731 | 274 | A03865 | A12897 | 378 |
| A03865 | A14071 | 210 | A03865 | A14375 | 258 |
| A03865 | A14378 | 173 | A03865 | A15281 | 353 |
| A03866 | A04105 | 279 | A03866 | A04135 | 466 |
| A03866 | A04296 | 404 | A03866 | A04710 | 294 |
| A03866 | A04783 | 307 | A03866 | A05402 | 329 |
| A03866 | A05665 | 356 | A03866 | A05891 | 293 |
| A03866 | A06132 | 398 | A03866 | A06368 | 363 |
| A03866 | A07165 | 185 | A03866 | A07199 | 369 |
| A03868 | A04800 | 404 | A03868 | A14387 | 454 |
| A03869 | A03871 | 424 | A03869 | A04050 | 229 |
| A03869 | A04536 | 301 | A03869 | A10625 | 234 |
| A03869 | A14484 | 205 | A03869 | A14848 | 391 |

|        |        |     |        |        |     |
|--------|--------|-----|--------|--------|-----|
| A03870 | A04004 | 367 | A03870 | A04031 | 485 |
| A03870 | A04123 | 458 | A03870 | A04135 | 384 |
| A03870 | A04260 | 314 | A03870 | A04560 | 396 |
| A03870 | A04581 | 424 | A03870 | A04715 | 188 |
| A03870 | A04905 | 378 | A03870 | A05036 | 404 |
| A03870 | A05481 | 436 | A03870 | A05911 | 393 |
| A03870 | A06635 | 307 | A03870 | A08741 | 347 |
| A03870 | A15674 | 374 | A03871 | A04536 | 310 |
| A03872 | A03964 | 473 | A03872 | A04620 | 430 |
| A03872 | A04623 | 302 | A03872 | A04713 | 353 |
| A03872 | A04933 | 483 | A03872 | A04940 | 407 |
| A03872 | A05366 | 394 | A03872 | A05866 | 456 |
| A03872 | A06607 | 472 | A03872 | A06688 | 318 |
| A03872 | A06860 | 278 | A03872 | A07200 | 281 |
| A03872 | A09800 | 418 | A03872 | A10557 | 318 |
| A03872 | A11983 | 154 | A03872 | A13152 | 380 |
| A03872 | A14440 | 369 | A03872 | A16281 | 404 |
| A03873 | A04015 | 208 | A03873 | A04217 | 341 |
| A03873 | A04449 | 334 | A03873 | A06993 | 469 |
| A03873 | A07129 | 226 | A03873 | A07152 | 152 |
| A03873 | A07210 | 245 | A03873 | A07956 | 262 |
| A03873 | A08248 | 262 | A03873 | A08714 | 223 |
| A03873 | A08850 | 334 | A03873 | A08957 | 232 |
| A03873 | A08982 | 262 | A03873 | A09241 | 229 |
| A03873 | A09744 | 319 | A03873 | A11063 | 356 |
| A03873 | A11238 | 391 | A03873 | A11544 | 262 |
| A03873 | A11559 | 334 | A03873 | A11649 | 262 |
| A03873 | A12373 | 334 | A03873 | A13084 | 266 |
| A03873 | A13317 | 338 | A03873 | A13818 | 391 |
| A03873 | A13826 | 165 | A03873 | A13831 | 63  |
| A03873 | A13892 | 262 | A03873 | A14112 | 488 |
| A03873 | A14158 | 438 | A03873 | A14198 | 321 |
| A03873 | A14210 | 414 | A03873 | A14362 | 262 |
| A03873 | A14371 | 334 | A03873 | A14636 | 334 |
| A03873 | A15316 | 254 | A03873 | A15321 | 217 |
| A03873 | A15338 | 262 | A03873 | A15356 | 294 |
| A03873 | A15408 | 258 | A03873 | A15564 | 262 |
| A03873 | A16614 | 262 | A03874 | A05458 | 393 |
| A03874 | A10795 | 373 | A03874 | A11520 | 412 |
| A03874 | A11789 | 428 | A03874 | A13900 | 380 |
| A03874 | A14006 | 353 | A03874 | A14105 | 351 |
| A03874 | A14190 | 201 | A03874 | A17103 | 418 |
| A03876 | A14247 | 246 | A03877 | A05127 | 221 |
| A03877 | A05265 | 420 | A03877 | A16328 | 213 |
| A03878 | A06484 | 281 | A03878 | A09491 | 358 |
| A03878 | A09556 | 267 | A03879 | A03899 | 221 |

|        |        |     |        |        |     |
|--------|--------|-----|--------|--------|-----|
| A03879 | A04115 | 213 | A03879 | A08834 | 160 |
| A03879 | A09022 | 277 | A03879 | A09233 | 420 |
| A03879 | A09984 | 371 | A03879 | A10164 | 314 |
| A03879 | A10723 | 290 | A03879 | A13826 | 389 |
| A03879 | A14115 | 455 | A03879 | A15414 | 425 |
| A03879 | A15422 | 302 | A03879 | A15485 | 301 |
| A03879 | A16224 | 228 | A03879 | A16300 | 223 |
| A03880 | A03942 | 162 | A03880 | A03963 | 324 |
| A03880 | A04668 | 428 | A03880 | A05155 | 443 |
| A03880 | A05219 | 221 | A03880 | A05225 | 227 |
| A03880 | A05234 | 515 | A03880 | A05301 | 490 |
| A03880 | A05545 | 443 | A03880 | A05597 | 179 |
| A03880 | A05967 | 156 | A03880 | A06491 | 179 |
| A03880 | A06550 | 422 | A03880 | A06591 | 548 |
| A03880 | A06629 | 187 | A03880 | A06882 | 221 |
| A03880 | A06970 | 384 | A03880 | A07007 | 307 |
| A03880 | A07054 | 466 | A03880 | A07242 | 490 |
| A03880 | A07421 | 179 | A03880 | A07483 | 479 |
| A03880 | A07495 | 554 | A03880 | A07785 | 179 |
| A03880 | A07816 | 570 | A03880 | A07934 | 160 |
| A03880 | A07981 | 520 | A03880 | A08259 | 179 |
| A03880 | A08463 | 491 | A03880 | A08531 | 452 |
| A03880 | A08551 | 452 | A03880 | A08834 | 179 |
| A03880 | A08840 | 233 | A03880 | A08841 | 132 |
| A03880 | A08880 | 321 | A03880 | A08881 | 406 |
| A03880 | A08910 | 286 | A03880 | A09054 | 307 |
| A03880 | A09141 | 163 | A03880 | A09566 | 195 |
| A03880 | A09624 | 212 | A03880 | A09743 | 285 |
| A03880 | A09759 | 491 | A03880 | A09825 | 179 |
| A03880 | A10047 | 183 | A03880 | A10378 | 267 |
| A03880 | A10386 | 202 | A03880 | A10729 | 490 |
| A03880 | A10734 | 490 | A03880 | A11189 | 366 |
| A03880 | A11205 | 185 | A03880 | A11346 | 490 |
| A03880 | A11385 | 313 | A03880 | A11558 | 179 |
| A03880 | A11681 | 423 | A03880 | A11869 | 485 |
| A03880 | A11881 | 491 | A03880 | A12000 | 414 |
| A03880 | A12047 | 395 | A03880 | A12098 | 307 |
| A03880 | A12191 | 424 | A03880 | A12913 | 443 |
| A03880 | A12954 | 398 | A03880 | A12975 | 236 |
| A03880 | A13415 | 430 | A03880 | A13819 | 400 |
| A03880 | A13866 | 487 | A03880 | A13916 | 196 |
| A03880 | A13934 | 183 | A03880 | A13941 | 491 |
| A03880 | A13942 | 179 | A03880 | A14077 | 481 |
| A03880 | A14193 | 462 | A03880 | A14202 | 179 |
| A03880 | A14239 | 307 | A03880 | A14266 | 491 |
| A03880 | A14281 | 327 | A03880 | A14366 | 179 |

|        |        |     |        |        |     |
|--------|--------|-----|--------|--------|-----|
| A03880 | A14604 | 168 | A03880 | A14801 | 340 |
| A03880 | A15281 | 202 | A03880 | A15292 | 241 |
| A03880 | A15322 | 358 | A03880 | A15345 | 374 |
| A03880 | A15347 | 187 | A03880 | A15352 | 172 |
| A03880 | A15358 | 179 | A03880 | A15384 | 687 |
| A03880 | A15391 | 256 | A03880 | A15417 | 180 |
| A03880 | A15470 | 179 | A03880 | A15484 | 179 |
| A03880 | A15556 | 462 | A03880 | A15644 | 462 |
| A03880 | A15810 | 243 | A03880 | A16478 | 428 |
| A03880 | A16667 | 481 | A03880 | A16807 | 496 |
| A03881 | A06425 | 396 | A03881 | A06975 | 398 |
| A03881 | A07581 | 335 | A03881 | A07706 | 151 |
| A03881 | A08301 | 344 | A03881 | A13340 | 165 |
| A03881 | A14594 | 285 | A03881 | A15932 | 358 |
| A03881 | A15951 | 391 | A03882 | A03940 | 310 |
| A03882 | A04048 | 165 | A03882 | A04182 | 210 |
| A03882 | A04454 | 274 | A03882 | A04477 | 274 |
| A03882 | A05016 | 198 | A03882 | A05704 | 283 |
| A03882 | A05791 | 176 | A03882 | A06400 | 188 |
| A03882 | A08905 | 212 | A03882 | A09126 | 491 |
| A03882 | A09885 | 291 | A03882 | A09925 | 156 |
| A03882 | A16323 | 245 | A03882 | A16951 | 271 |
| A03884 | A05335 | 306 | A03884 | A08481 | 408 |
| A03884 | A08739 | 345 | A03884 | A14452 | 165 |
| A03884 | A15096 | 281 | A03884 | A15947 | 319 |
| A03885 | A04666 | 163 | A03885 | A05570 | 262 |
| A03885 | A06032 | 266 | A03885 | A07398 | 218 |
| A03885 | A07457 | 357 | A03885 | A07575 | 277 |
| A03885 | A08191 | 340 | A03885 | A09597 | 330 |
| A03885 | A09766 | 224 | A03885 | A10844 | 288 |
| A03885 | A11352 | 368 | A03885 | A11811 | 334 |
| A03885 | A12824 | 246 | A03885 | A13432 | 243 |
| A03885 | A15939 | 191 | A03886 | A04012 | 183 |
| A03886 | A07011 | 180 | A03886 | A07726 | 245 |
| A03886 | A08259 | 176 | A03886 | A08355 | 195 |
| A03886 | A09352 | 268 | A03886 | A10504 | 245 |
| A03886 | A14701 | 402 | A03886 | A14819 | 338 |
| A03886 | A15684 | 232 | A03886 | A15923 | 230 |
| A03887 | A03893 | 249 | A03887 | A03894 | 254 |
| A03887 | A03910 | 477 | A03887 | A04169 | 414 |
| A03887 | A05220 | 454 | A03887 | A06196 | 297 |
| A03887 | A06488 | 260 | A03887 | A07051 | 185 |
| A03887 | A07117 | 260 | A03887 | A07229 | 384 |
| A03887 | A07421 | 324 | A03887 | A07803 | 358 |
| A03887 | A08842 | 398 | A03887 | A09201 | 144 |
| A03887 | A09204 | 490 | A03887 | A09205 | 171 |

|        |        |     |        |        |     |
|--------|--------|-----|--------|--------|-----|
| A03887 | A09208 | 271 | A03887 | A09239 | 170 |
| A03887 | A09582 | 356 | A03887 | A09732 | 391 |
| A03887 | A09734 | 491 | A03887 | A09740 | 470 |
| A03887 | A09745 | 491 | A03887 | A10579 | 345 |
| A03887 | A10611 | 188 | A03887 | A11431 | 308 |
| A03887 | A11779 | 159 | A03887 | A12644 | 229 |
| A03887 | A13317 | 283 | A03887 | A13338 | 447 |
| A03887 | A13987 | 491 | A03887 | A14105 | 193 |
| A03887 | A14122 | 491 | A03887 | A14124 | 491 |
| A03887 | A14129 | 449 | A03887 | A14135 | 267 |
| A03887 | A14210 | 449 | A03887 | A14259 | 283 |
| A03887 | A14267 | 213 | A03887 | A14371 | 396 |
| A03887 | A14378 | 408 | A03887 | A14511 | 446 |
| A03887 | A14570 | 385 | A03887 | A14611 | 162 |
| A03887 | A14635 | 252 | A03887 | A15278 | 443 |
| A03887 | A15292 | 491 | A03887 | A15301 | 279 |
| A03887 | A15310 | 255 | A03887 | A15311 | 268 |
| A03887 | A15312 | 489 | A03887 | A15313 | 486 |
| A03887 | A15317 | 481 | A03887 | A15323 | 256 |
| A03887 | A15331 | 340 | A03887 | A15335 | 279 |
| A03887 | A15349 | 491 | A03887 | A15352 | 486 |
| A03887 | A15366 | 212 | A03887 | A15400 | 393 |
| A03887 | A15411 | 180 | A03887 | A15412 | 243 |
| A03887 | A15413 | 93  | A03887 | A15431 | 413 |
| A03887 | A15432 | 466 | A03887 | A15433 | 466 |
| A03887 | A15434 | 491 | A03887 | A15435 | 232 |
| A03887 | A15436 | 430 | A03887 | A15440 | 306 |
| A03887 | A15444 | 152 | A03887 | A15445 | 429 |
| A03887 | A15447 | 409 | A03887 | A15452 | 460 |
| A03887 | A15454 | 273 | A03887 | A15456 | 168 |
| A03887 | A15459 | 302 | A03887 | A15461 | 219 |
| A03887 | A15463 | 364 | A03887 | A15480 | 435 |
| A03887 | A15487 | 404 | A03887 | A15498 | 307 |
| A03887 | A15515 | 335 | A03887 | A15673 | 185 |
| A03887 | A15792 | 210 | A03887 | A15801 | 405 |
| A03887 | A15823 | 318 | A03887 | A16117 | 378 |
| A03887 | A16152 | 283 | A03887 | A16224 | 236 |
| A03887 | A16540 | 193 | A03887 | A17196 | 277 |
| A03888 | A03981 | 377 | A03888 | A05449 | 532 |
| A03888 | A06965 | 252 | A03888 | A06973 | 281 |
| A03888 | A07201 | 491 | A03888 | A07243 | 393 |
| A03888 | A08559 | 258 | A03888 | A08664 | 393 |
| A03888 | A08682 | 274 | A03888 | A10417 | 539 |
| A03888 | A11331 | 429 | A03888 | A12105 | 288 |
| A03888 | A13052 | 172 | A03888 | A13626 | 452 |
| A03888 | A14114 | 306 | A03888 | A14216 | 451 |

|        |        |     |        |        |     |
|--------|--------|-----|--------|--------|-----|
| A03888 | A15624 | 236 | A03888 | A15743 | 213 |
| A03888 | A16723 | 243 | A03888 | A17193 | 260 |
| A03889 | A04292 | 473 | A03889 | A04894 | 422 |
| A03889 | A05028 | 205 | A03889 | A05200 | 394 |
| A03889 | A05862 | 198 | A03889 | A06011 | 615 |
| A03889 | A06659 | 99  | A03889 | A06675 | 162 |
| A03889 | A06890 | 235 | A03889 | A07370 | 152 |
| A03889 | A07521 | 195 | A03889 | A07820 | 493 |
| A03889 | A07893 | 383 | A03889 | A08400 | 589 |
| A03889 | A08772 | 235 | A03889 | A08777 | 235 |
| A03889 | A08874 | 90  | A03889 | A09326 | 235 |
| A03889 | A09333 | 79  | A03889 | A10584 | 93  |
| A03889 | A10655 | 179 | A03889 | A10663 | 238 |
| A03889 | A13222 | 152 | A03889 | A13568 | 308 |
| A03889 | A13831 | 146 | A03889 | A13845 | 602 |
| A03889 | A13876 | 218 | A03889 | A13902 | 79  |
| A03889 | A14182 | 369 | A03889 | A14247 | 491 |
| A03889 | A14614 | 216 | A03889 | A14661 | 490 |
| A03889 | A14838 | 551 | A03889 | A15558 | 63  |
| A03889 | A15647 | 474 | A03889 | A15650 | 375 |
| A03889 | A15770 | 227 | A03889 | A16255 | 229 |
| A03889 | A16617 | 424 | A03889 | A16652 | 88  |
| A03890 | A03892 | 283 | A03890 | A04839 | 215 |
| A03890 | A04893 | 380 | A03890 | A04896 | 296 |
| A03890 | A05201 | 462 | A03890 | A05233 | 283 |
| A03890 | A06659 | 374 | A03890 | A06675 | 480 |
| A03890 | A07736 | 232 | A03890 | A08484 | 227 |
| A03890 | A13844 | 477 | A03890 | A13882 | 266 |
| A03890 | A14247 | 228 | A03890 | A14661 | 369 |
| A03890 | A15498 | 188 | A03891 | A03892 | 491 |
| A03891 | A04145 | 195 | A03891 | A04686 | 491 |
| A03891 | A04835 | 235 | A03891 | A04893 | 334 |
| A03891 | A04929 | 283 | A03891 | A05023 | 334 |
| A03891 | A05233 | 334 | A03891 | A05401 | 484 |
| A03891 | A06659 | 334 | A03891 | A06675 | 334 |
| A03891 | A06863 | 249 | A03891 | A07040 | 267 |
| A03891 | A09050 | 334 | A03891 | A09121 | 232 |
| A03891 | A10584 | 486 | A03891 | A10655 | 470 |
| A03891 | A10804 | 191 | A03891 | A11265 | 208 |
| A03891 | A11337 | 198 | A03891 | A11885 | 477 |
| A03891 | A12282 | 228 | A03891 | A12295 | 245 |
| A03891 | A13844 | 334 | A03891 | A13846 | 334 |
| A03891 | A13867 | 350 | A03891 | A13874 | 305 |
| A03891 | A14056 | 265 | A03891 | A14182 | 334 |
| A03891 | A14247 | 491 | A03891 | A14258 | 213 |
| A03891 | A14661 | 154 | A03891 | A15498 | 489 |

|        |        |     |        |        |     |
|--------|--------|-----|--------|--------|-----|
| A03891 | A15647 | 321 | A03892 | A04145 | 486 |
| A03892 | A04151 | 469 | A03892 | A04292 | 451 |
| A03892 | A04686 | 621 | A03892 | A04693 | 281 |
| A03892 | A04774 | 221 | A03892 | A04839 | 193 |
| A03892 | A04893 | 357 | A03892 | A04897 | 491 |
| A03892 | A04970 | 221 | A03892 | A05024 | 408 |
| A03892 | A05061 | 457 | A03892 | A05233 | 268 |
| A03892 | A05356 | 180 | A03892 | A05401 | 762 |
| A03892 | A05538 | 162 | A03892 | A06037 | 481 |
| A03892 | A06089 | 162 | A03892 | A06168 | 408 |
| A03892 | A06610 | 401 | A03892 | A06659 | 452 |
| A03892 | A06675 | 664 | A03892 | A06863 | 393 |
| A03892 | A06941 | 408 | A03892 | A07203 | 191 |
| A03892 | A07207 | 149 | A03892 | A07208 | 63  |
| A03892 | A07477 | 363 | A03892 | A07521 | 486 |
| A03892 | A07736 | 489 | A03892 | A07820 | 241 |
| A03892 | A07973 | 159 | A03892 | A08001 | 263 |
| A03892 | A08016 | 257 | A03892 | A08137 | 208 |
| A03892 | A08400 | 486 | A03892 | A08461 | 725 |
| A03892 | A08484 | 486 | A03892 | A08874 | 713 |
| A03892 | A08943 | 199 | A03892 | A09036 | 210 |
| A03892 | A09050 | 205 | A03892 | A09054 | 340 |
| A03892 | A09064 | 257 | A03892 | A09277 | 465 |
| A03892 | A09299 | 445 | A03892 | A09347 | 172 |
| A03892 | A09469 | 899 | A03892 | A09526 | 172 |
| A03892 | A09742 | 379 | A03892 | A09891 | 184 |
| A03892 | A09892 | 154 | A03892 | A10339 | 184 |
| A03892 | A10584 | 491 | A03892 | A10594 | 238 |
| A03892 | A10655 | 702 | A03892 | A10793 | 358 |
| A03892 | A10794 | 299 | A03892 | A10797 | 458 |
| A03892 | A10798 | 474 | A03892 | A10799 | 477 |
| A03892 | A10803 | 394 | A03892 | A10804 | 389 |
| A03892 | A10809 | 252 | A03892 | A10812 | 317 |
| A03892 | A11246 | 221 | A03892 | A11279 | 483 |
| A03892 | A11303 | 456 | A03892 | A11570 | 303 |
| A03892 | A11660 | 407 | A03892 | A11885 | 463 |
| A03892 | A12138 | 335 | A03892 | A12295 | 389 |
| A03892 | A13585 | 172 | A03892 | A13732 | 172 |
| A03892 | A13816 | 297 | A03892 | A13830 | 491 |
| A03892 | A13834 | 118 | A03892 | A13842 | 241 |
| A03892 | A13859 | 200 | A03892 | A13867 | 945 |
| A03892 | A13882 | 640 | A03892 | A13894 | 302 |
| A03892 | A13895 | 430 | A03892 | A13902 | 702 |
| A03892 | A13983 | 154 | A03892 | A14056 | 465 |
| A03892 | A14095 | 399 | A03892 | A14168 | 252 |
| A03892 | A14175 | 121 | A03892 | A14193 | 217 |

|        |        |     |        |        |     |
|--------|--------|-----|--------|--------|-----|
| A03892 | A14199 | 434 | A03892 | A14247 | 718 |
| A03892 | A14258 | 283 | A03892 | A14272 | 413 |
| A03892 | A14461 | 163 | A03892 | A14661 | 491 |
| A03892 | A14838 | 277 | A03892 | A14989 | 172 |
| A03892 | A15220 | 200 | A03892 | A15303 | 268 |
| A03892 | A15315 | 341 | A03892 | A15336 | 183 |
| A03892 | A15366 | 406 | A03892 | A15463 | 328 |
| A03892 | A15498 | 559 | A03892 | A15555 | 313 |
| A03892 | A15557 | 216 | A03892 | A15620 | 90  |
| A03892 | A15621 | 172 | A03892 | A15647 | 489 |
| A03892 | A16449 | 252 | A03892 | A16617 | 188 |
| A03892 | A16891 | 384 | A03892 | A16910 | 286 |
| A03892 | A17061 | 202 | A03892 | A17126 | 238 |
| A03892 | A17133 | 160 | A03892 | A17144 | 445 |
| A03893 | A03910 | 157 | A03893 | A04002 | 491 |
| A03893 | A04033 | 477 | A03893 | A04050 | 177 |
| A03893 | A04071 | 157 | A03893 | A04449 | 454 |
| A03893 | A04551 | 198 | A03893 | A04773 | 201 |
| A03893 | A06284 | 322 | A03893 | A06403 | 182 |
| A03893 | A06468 | 288 | A03893 | A06588 | 491 |
| A03893 | A06688 | 422 | A03893 | A06731 | 160 |
| A03893 | A06907 | 491 | A03893 | A07209 | 318 |
| A03893 | A07339 | 490 | A03893 | A07647 | 229 |
| A03893 | A07803 | 486 | A03893 | A08402 | 503 |
| A03893 | A08918 | 414 | A03893 | A08929 | 384 |
| A03893 | A09074 | 160 | A03893 | A09078 | 281 |
| A03893 | A09124 | 260 | A03893 | A09126 | 352 |
| A03893 | A11405 | 215 | A03893 | A11606 | 297 |
| A03893 | A11899 | 218 | A03893 | A11983 | 366 |
| A03893 | A12757 | 168 | A03893 | A12897 | 789 |
| A03893 | A12956 | 235 | A03893 | A13814 | 218 |
| A03893 | A14010 | 151 | A03893 | A14148 | 491 |
| A03893 | A14196 | 462 | A03893 | A14371 | 151 |
| A03893 | A14474 | 561 | A03893 | A14635 | 456 |
| A03893 | A14636 | 467 | A03893 | A14643 | 235 |
| A03893 | A15125 | 176 | A03893 | A15292 | 412 |
| A03893 | A15318 | 380 | A03893 | A15323 | 480 |
| A03893 | A15349 | 461 | A03893 | A15352 | 159 |
| A03893 | A15366 | 353 | A03893 | A15441 | 152 |
| A03893 | A15451 | 223 | A03893 | A15871 | 229 |
| A03893 | A15917 | 452 | A03893 | A16401 | 249 |
| A03893 | A17063 | 486 | A03893 | A17223 | 218 |
| A03894 | A03899 | 176 | A03894 | A04076 | 188 |
| A03894 | A05098 | 227 | A03894 | A05220 | 183 |
| A03894 | A06022 | 363 | A03894 | A06862 | 347 |
| A03894 | A07270 | 363 | A03894 | A08707 | 188 |



|        |        |     |        |        |     |
|--------|--------|-----|--------|--------|-----|
| A03894 | A09022 | 235 | A03894 | A09199 | 477 |
| A03894 | A09740 | 297 | A03894 | A09745 | 185 |
| A03894 | A09759 | 238 | A03894 | A09824 | 441 |
| A03894 | A09831 | 326 | A03894 | A10242 | 390 |
| A03894 | A10723 | 249 | A03894 | A11127 | 390 |
| A03894 | A11558 | 170 | A03894 | A11601 | 290 |
| A03894 | A11652 | 319 | A03894 | A11869 | 330 |
| A03894 | A11951 | 389 | A03894 | A12016 | 429 |
| A03894 | A12347 | 335 | A03894 | A12529 | 353 |
| A03894 | A12976 | 314 | A03894 | A12983 | 418 |
| A03894 | A13124 | 152 | A03894 | A13411 | 390 |
| A03894 | A13826 | 429 | A03894 | A13899 | 369 |
| A03894 | A13951 | 477 | A03894 | A13987 | 213 |
| A03894 | A14111 | 210 | A03894 | A14190 | 299 |
| A03894 | A14191 | 335 | A03894 | A14202 | 469 |
| A03894 | A14290 | 283 | A03894 | A14399 | 162 |
| A03894 | A14408 | 177 | A03894 | A14457 | 157 |
| A03894 | A15333 | 213 | A03894 | A15346 | 333 |
| A03894 | A15349 | 154 | A03894 | A15352 | 171 |
| A03894 | A15431 | 224 | A03894 | A15444 | 223 |
| A03894 | A15454 | 213 | A03894 | A15456 | 238 |
| A03894 | A15461 | 171 | A03894 | A15464 | 473 |
| A03894 | A15523 | 353 | A03894 | A15797 | 340 |
| A03894 | A15799 | 249 | A03894 | A15817 | 188 |
| A03894 | A15824 | 240 | A03894 | A16194 | 340 |
| A03894 | A16224 | 184 | A03894 | A16300 | 162 |
| A03894 | A16555 | 312 | A03895 | A09804 | 899 |
| A03897 | A13838 | 63  | A03898 | A03923 | 398 |
| A03898 | A07152 | 347 | A03898 | A07422 | 267 |
| A03898 | A13903 | 382 | A03898 | A15425 | 339 |
| A03899 | A03945 | 213 | A03899 | A06428 | 267 |
| A03899 | A07019 | 212 | A03899 | A07559 | 195 |
| A03899 | A08639 | 486 | A03899 | A08683 | 480 |
| A03899 | A08746 | 489 | A03899 | A08861 | 294 |
| A03899 | A08866 | 460 | A03899 | A09205 | 475 |
| A03899 | A09206 | 243 | A03899 | A09741 | 183 |
| A03899 | A11383 | 479 | A03899 | A11601 | 272 |
| A03899 | A12897 | 406 | A03899 | A12975 | 311 |
| A03899 | A13935 | 274 | A03899 | A13941 | 224 |
| A03899 | A14611 | 212 | A03899 | A15300 | 262 |
| A03899 | A15421 | 307 | A03899 | A16114 | 452 |
| A03899 | A16117 | 445 | A03900 | A05577 | 160 |
| A03900 | A05597 | 310 | A03900 | A05679 | 229 |
| A03900 | A06293 | 330 | A03900 | A06415 | 452 |
| A03900 | A06956 | 346 | A03900 | A07010 | 385 |
| A03900 | A07152 | 221 | A03900 | A07173 | 241 |

|        |        |     |        |        |     |
|--------|--------|-----|--------|--------|-----|
| A03900 | A07529 | 353 | A03900 | A07764 | 340 |
| A03900 | A10681 | 329 | A03900 | A10689 | 193 |
| A03900 | A12361 | 254 | A03900 | A13821 | 348 |
| A03900 | A14372 | 455 | A03900 | A14374 | 196 |
| A03900 | A14381 | 243 | A03900 | A14391 | 201 |
| A03900 | A14439 | 281 | A03900 | A14930 | 240 |
| A03900 | A15314 | 238 | A03900 | A15425 | 208 |
| A03900 | A15642 | 385 | A03900 | A15790 | 385 |
| A03900 | A15819 | 283 | A03900 | A16002 | 191 |
| A03900 | A16034 | 311 | A03901 | A03902 | 466 |
| A03901 | A05702 | 188 | A03901 | A06785 | 188 |
| A03901 | A07481 | 201 | A03901 | A07744 | 255 |
| A03901 | A07965 | 398 | A03901 | A11480 | 188 |
| A03901 | A14594 | 486 | A03901 | A14813 | 188 |
| A03901 | A15624 | 234 | A03901 | A15657 | 188 |
| A03901 | A16149 | 213 | A03901 | A16680 | 240 |
| A03902 | A04627 | 240 | A03902 | A06623 | 217 |
| A03902 | A07079 | 213 | A03902 | A08201 | 307 |
| A03902 | A08571 | 182 | A03902 | A08902 | 202 |
| A03902 | A09515 | 266 | A03902 | A09538 | 470 |
| A03902 | A09992 | 360 | A03902 | A10250 | 371 |
| A03902 | A15650 | 296 | A03903 | A05210 | 374 |
| A03904 | A04009 | 416 | A03904 | A04939 | 191 |
| A03904 | A04999 | 341 | A03904 | A05476 | 373 |
| A03904 | A07399 | 232 | A03904 | A09546 | 234 |
| A03904 | A09751 | 241 | A03904 | A10018 | 356 |
| A03904 | A10247 | 367 | A03904 | A13348 | 296 |
| A03904 | A14364 | 234 | A03905 | A08259 | 200 |
| A03905 | A14648 | 160 | A03906 | A03981 | 217 |
| A03906 | A04078 | 226 | A03906 | A04086 | 363 |
| A03906 | A04152 | 373 | A03906 | A04162 | 177 |
| A03906 | A04202 | 409 | A03906 | A04449 | 188 |
| A03906 | A04473 | 276 | A03906 | A04727 | 288 |
| A03906 | A05176 | 199 | A03906 | A05285 | 301 |
| A03906 | A05450 | 229 | A03906 | A05887 | 260 |
| A03906 | A06107 | 316 | A03906 | A06823 | 316 |
| A03906 | A08465 | 479 | A03906 | A08572 | 157 |
| A03906 | A08875 | 154 | A03906 | A08926 | 229 |
| A03906 | A09235 | 184 | A03906 | A09236 | 271 |
| A03906 | A09363 | 208 | A03906 | A09539 | 228 |
| A03906 | A09812 | 297 | A03906 | A11327 | 474 |
| A03906 | A12251 | 267 | A03906 | A12371 | 383 |
| A03906 | A12636 | 389 | A03906 | A15178 | 389 |
| A03907 | A06832 | 369 | A03909 | A04079 | 152 |
| A03909 | A04333 | 286 | A03909 | A04337 | 184 |
| A03909 | A04361 | 439 | A03909 | A04410 | 372 |

|        |        |     |        |        |     |
|--------|--------|-----|--------|--------|-----|
| A03909 | A04424 | 324 | A03909 | A05016 | 347 |
| A03909 | A05294 | 302 | A03909 | A05356 | 202 |
| A03909 | A05898 | 391 | A03909 | A06329 | 371 |
| A03909 | A06461 | 423 | A03909 | A06462 | 423 |
| A03909 | A06484 | 252 | A03909 | A06532 | 412 |
| A03909 | A06835 | 412 | A03909 | A07384 | 329 |
| A03909 | A07494 | 412 | A03909 | A10954 | 388 |
| A03909 | A11280 | 241 | A03909 | A12698 | 412 |
| A03909 | A13369 | 249 | A03909 | A15685 | 265 |
| A03910 | A03945 | 221 | A03910 | A04064 | 286 |
| A03910 | A04169 | 491 | A03910 | A04252 | 455 |
| A03910 | A04337 | 491 | A03910 | A04881 | 230 |
| A03910 | A05248 | 252 | A03910 | A05356 | 542 |
| A03910 | A05594 | 373 | A03910 | A05700 | 267 |
| A03910 | A05954 | 314 | A03910 | A06196 | 241 |
| A03910 | A06591 | 162 | A03910 | A07117 | 443 |
| A03910 | A07209 | 228 | A03910 | A07229 | 394 |
| A03910 | A07316 | 314 | A03910 | A07442 | 294 |
| A03910 | A07803 | 288 | A03910 | A08245 | 314 |
| A03910 | A08309 | 172 | A03910 | A08320 | 314 |
| A03910 | A08418 | 483 | A03910 | A08630 | 219 |
| A03910 | A08686 | 167 | A03910 | A08840 | 259 |
| A03910 | A08842 | 489 | A03910 | A08859 | 438 |
| A03910 | A08864 | 271 | A03910 | A09201 | 296 |
| A03910 | A09202 | 277 | A03910 | A09204 | 491 |
| A03910 | A09211 | 245 | A03910 | A09233 | 173 |
| A03910 | A09238 | 452 | A03910 | A09239 | 255 |
| A03910 | A09245 | 179 | A03910 | A09355 | 200 |
| A03910 | A09422 | 160 | A03910 | A09732 | 475 |
| A03910 | A09734 | 490 | A03910 | A09742 | 491 |
| A03910 | A09745 | 491 | A03910 | A09831 | 210 |
| A03910 | A09873 | 259 | A03910 | A09894 | 224 |
| A03910 | A10336 | 188 | A03910 | A10525 | 619 |
| A03910 | A10594 | 409 | A03910 | A11084 | 267 |
| A03910 | A11279 | 168 | A03910 | A11321 | 205 |
| A03910 | A11431 | 434 | A03910 | A11537 | 491 |
| A03910 | A11542 | 414 | A03910 | A11548 | 601 |
| A03910 | A11774 | 176 | A03910 | A11796 | 241 |
| A03910 | A12029 | 173 | A03910 | A12107 | 165 |
| A03910 | A12390 | 179 | A03910 | A12393 | 490 |
| A03910 | A12452 | 286 | A03910 | A12644 | 383 |
| A03910 | A12737 | 286 | A03910 | A12861 | 210 |
| A03910 | A12975 | 210 | A03910 | A13133 | 252 |
| A03910 | A13317 | 224 | A03910 | A13363 | 433 |
| A03910 | A13369 | 382 | A03910 | A13546 | 258 |
| A03910 | A13826 | 379 | A03910 | A13899 | 279 |

|        |        |     |        |        |     |
|--------|--------|-----|--------|--------|-----|
| A03910 | A13987 | 491 | A03910 | A14010 | 490 |
| A03910 | A14112 | 154 | A03910 | A14122 | 486 |
| A03910 | A14124 | 324 | A03910 | A14190 | 154 |
| A03910 | A14247 | 281 | A03910 | A14287 | 446 |
| A03910 | A14371 | 390 | A03910 | A14378 | 491 |
| A03910 | A14408 | 420 | A03910 | A14413 | 160 |
| A03910 | A14494 | 167 | A03910 | A14511 | 455 |
| A03910 | A14570 | 369 | A03910 | A14588 | 183 |
| A03910 | A14667 | 167 | A03910 | A14827 | 154 |
| A03910 | A15229 | 167 | A03910 | A15284 | 414 |
| A03910 | A15288 | 477 | A03910 | A15292 | 724 |
| A03910 | A15301 | 491 | A03910 | A15302 | 483 |
| A03910 | A15310 | 491 | A03910 | A15311 | 491 |
| A03910 | A15312 | 491 | A03910 | A15313 | 491 |
| A03910 | A15317 | 425 | A03910 | A15321 | 402 |
| A03910 | A15322 | 229 | A03910 | A15331 | 484 |
| A03910 | A15333 | 489 | A03910 | A15334 | 273 |
| A03910 | A15335 | 418 | A03910 | A15346 | 346 |
| A03910 | A15348 | 462 | A03910 | A15349 | 491 |
| A03910 | A15352 | 491 | A03910 | A15366 | 491 |
| A03910 | A15396 | 374 | A03910 | A15413 | 404 |
| A03910 | A15419 | 195 | A03910 | A15422 | 156 |
| A03910 | A15431 | 491 | A03910 | A15432 | 491 |
| A03910 | A15433 | 488 | A03910 | A15434 | 486 |
| A03910 | A15435 | 491 | A03910 | A15436 | 491 |
| A03910 | A15437 | 288 | A03910 | A15440 | 486 |
| A03910 | A15445 | 235 | A03910 | A15447 | 484 |
| A03910 | A15451 | 480 | A03910 | A15452 | 491 |
| A03910 | A15453 | 461 | A03910 | A15454 | 486 |
| A03910 | A15455 | 452 | A03910 | A15456 | 452 |
| A03910 | A15457 | 382 | A03910 | A15459 | 452 |
| A03910 | A15460 | 129 | A03910 | A15461 | 491 |
| A03910 | A15462 | 429 | A03910 | A15463 | 491 |
| A03910 | A15484 | 460 | A03910 | A15486 | 252 |
| A03910 | A15487 | 258 | A03910 | A15489 | 329 |
| A03910 | A15495 | 438 | A03910 | A15498 | 449 |
| A03910 | A15502 | 170 | A03910 | A15513 | 488 |
| A03910 | A15523 | 252 | A03910 | A15671 | 160 |
| A03910 | A15792 | 419 | A03910 | A15798 | 267 |
| A03910 | A15801 | 443 | A03910 | A15802 | 463 |
| A03910 | A15805 | 314 | A03910 | A15814 | 162 |
| A03910 | A15824 | 430 | A03910 | A15826 | 319 |
| A03910 | A15830 | 135 | A03910 | A15833 | 406 |
| A03910 | A15864 | 373 | A03910 | A15880 | 183 |
| A03910 | A16055 | 422 | A03910 | A16188 | 252 |
| A03910 | A16224 | 252 | A03910 | A16260 | 224 |

|        |        |     |        |        |     |
|--------|--------|-----|--------|--------|-----|
| A03910 | A16300 | 383 | A03910 | A16414 | 176 |
| A03910 | A16903 | 314 | A03910 | A17230 | 210 |
| A03911 | A13290 | 417 | A03912 | A17136 | 226 |
| A03913 | A04415 | 213 | A03913 | A04761 | 440 |
| A03913 | A05443 | 154 | A03913 | A05489 | 265 |
| A03913 | A05996 | 174 | A03913 | A06046 | 201 |
| A03913 | A07157 | 187 | A03913 | A08714 | 167 |
| A03913 | A08810 | 201 | A03913 | A09363 | 160 |
| A03913 | A09469 | 407 | A03913 | A12134 | 366 |
| A03913 | A12135 | 366 | A03913 | A12653 | 246 |
| A03913 | A13580 | 899 | A03913 | A13672 | 191 |
| A03913 | A13861 | 321 | A03913 | A13945 | 351 |
| A03913 | A14565 | 330 | A03913 | A14893 | 218 |
| A03913 | A14956 | 340 | A03913 | A16030 | 234 |
| A03914 | A03988 | 319 | A03914 | A04010 | 256 |
| A03914 | A04051 | 314 | A03914 | A04143 | 335 |
| A03914 | A04286 | 246 | A03914 | A04335 | 380 |
| A03914 | A04391 | 489 | A03914 | A04481 | 419 |
| A03914 | A04509 | 470 | A03914 | A04607 | 367 |
| A03914 | A04608 | 391 | A03914 | A04609 | 358 |
| A03914 | A04652 | 234 | A03914 | A04875 | 322 |
| A03914 | A04908 | 156 | A03914 | A05112 | 185 |
| A03914 | A05113 | 446 | A03914 | A05309 | 380 |
| A03914 | A05349 | 408 | A03914 | A05920 | 344 |
| A03914 | A07173 | 180 | A03914 | A08627 | 254 |
| A03914 | A10989 | 208 | A03914 | A11280 | 154 |
| A03914 | A13872 | 238 | A03914 | A14405 | 196 |
| A03914 | A14440 | 177 | A03914 | A15395 | 184 |
| A03914 | A16636 | 491 | A03915 | A03934 | 401 |
| A03915 | A04163 | 344 | A03915 | A04377 | 399 |
| A03915 | A07021 | 416 | A03915 | A14440 | 302 |
| A03915 | A15233 | 368 | A03915 | A16636 | 326 |
| A03916 | A09508 | 404 | A03917 | A04010 | 198 |
| A03917 | A04222 | 246 | A03917 | A04366 | 326 |
| A03917 | A04369 | 486 | A03917 | A04556 | 457 |
| A03917 | A04633 | 328 | A03917 | A04634 | 399 |
| A03917 | A04920 | 407 | A03917 | A04981 | 345 |
| A03917 | A05358 | 327 | A03917 | A05389 | 475 |
| A03917 | A05390 | 411 | A03917 | A06263 | 404 |
| A03917 | A06629 | 263 | A03917 | A06860 | 278 |
| A03917 | A07590 | 266 | A03917 | A07736 | 238 |
| A03917 | A09842 | 224 | A03917 | A10689 | 204 |
| A03917 | A12115 | 407 | A03917 | A13258 | 407 |
| A03918 | A04517 | 238 | A03918 | A04698 | 156 |
| A03918 | A04928 | 210 | A03918 | A05294 | 184 |
| A03918 | A05356 | 428 | A03918 | A06574 | 196 |

|        |        |     |        |        |     |
|--------|--------|-----|--------|--------|-----|
| A03918 | A06591 | 176 | A03918 | A06592 | 185 |
| A03918 | A06711 | 259 | A03918 | A07242 | 235 |
| A03918 | A08073 | 337 | A03918 | A08292 | 229 |
| A03918 | A08885 | 199 | A03918 | A08985 | 245 |
| A03918 | A09054 | 191 | A03918 | A09204 | 172 |
| A03918 | A09743 | 283 | A03918 | A09900 | 201 |
| A03918 | A11284 | 232 | A03918 | A13665 | 193 |
| A03918 | A13963 | 291 | A03918 | A14000 | 165 |
| A03918 | A14096 | 180 | A03918 | A14433 | 162 |
| A03918 | A14570 | 405 | A03918 | A14692 | 201 |
| A03918 | A15365 | 193 | A03918 | A15376 | 368 |
| A03918 | A15502 | 227 | A03918 | A16117 | 201 |
| A03919 | A04163 | 399 | A03919 | A04256 | 281 |
| A03919 | A05443 | 177 | A03919 | A05459 | 363 |
| A03919 | A05706 | 246 | A03919 | A05868 | 316 |
| A03919 | A06831 | 363 | A03919 | A06949 | 208 |
| A03919 | A07209 | 329 | A03919 | A08875 | 234 |
| A03919 | A09429 | 337 | A03919 | A09559 | 371 |
| A03919 | A10018 | 254 | A03919 | A10699 | 267 |
| A03919 | A12897 | 201 | A03919 | A14371 | 157 |
| A03919 | A14379 | 246 | A03919 | A14438 | 333 |
| A03920 | A04377 | 465 | A03921 | A03936 | 311 |
| A03921 | A04180 | 337 | A03921 | A04520 | 177 |
| A03921 | A04639 | 400 | A03921 | A09809 | 307 |
| A03921 | A14433 | 254 | A03922 | A04009 | 179 |
| A03922 | A04066 | 305 | A03922 | A04271 | 179 |
| A03922 | A04280 | 160 | A03922 | A04310 | 216 |
| A03922 | A04351 | 157 | A03922 | A04375 | 475 |
| A03922 | A04432 | 272 | A03922 | A04678 | 335 |
| A03922 | A04723 | 168 | A03922 | A04743 | 208 |
| A03922 | A04769 | 198 | A03922 | A04924 | 238 |
| A03922 | A04963 | 302 | A03922 | A05283 | 226 |
| A03922 | A05326 | 475 | A03922 | A05329 | 201 |
| A03922 | A05685 | 185 | A03922 | A05959 | 216 |
| A03922 | A06147 | 245 | A03922 | A06434 | 286 |
| A03922 | A06472 | 390 | A03922 | A06606 | 322 |
| A03922 | A06623 | 319 | A03922 | A06752 | 491 |
| A03922 | A06753 | 265 | A03922 | A06877 | 299 |
| A03922 | A07026 | 156 | A03922 | A07147 | 165 |
| A03922 | A07163 | 154 | A03922 | A07165 | 157 |
| A03922 | A07232 | 468 | A03922 | A07245 | 212 |
| A03922 | A07295 | 245 | A03922 | A07309 | 162 |
| A03922 | A08057 | 252 | A03922 | A08655 | 162 |
| A03922 | A08691 | 302 | A03922 | A08898 | 212 |
| A03922 | A09127 | 491 | A03922 | A09166 | 285 |
| A03922 | A09190 | 285 | A03922 | A09209 | 201 |

|        |        |     |        |        |     |
|--------|--------|-----|--------|--------|-----|
| A03922 | A09300 | 479 | A03922 | A09450 | 216 |
| A03922 | A09509 | 212 | A03922 | A09510 | 272 |
| A03922 | A09548 | 216 | A03922 | A09668 | 188 |
| A03922 | A10047 | 310 | A03922 | A10210 | 232 |
| A03922 | A10277 | 285 | A03922 | A10472 | 285 |
| A03922 | A10753 | 358 | A03922 | A10809 | 216 |
| A03922 | A11034 | 329 | A03922 | A11055 | 285 |
| A03922 | A11160 | 490 | A03922 | A11161 | 379 |
| A03922 | A11332 | 210 | A03922 | A11687 | 195 |
| A03922 | A11876 | 165 | A03922 | A12007 | 446 |
| A03922 | A12105 | 200 | A03922 | A12130 | 285 |
| A03922 | A12136 | 480 | A03922 | A12236 | 477 |
| A03922 | A12239 | 302 | A03922 | A12286 | 179 |
| A03922 | A12407 | 302 | A03922 | A12436 | 424 |
| A03922 | A12533 | 195 | A03922 | A12556 | 219 |
| A03922 | A12569 | 238 | A03922 | A12867 | 285 |
| A03922 | A13528 | 417 | A03922 | A13623 | 462 |
| A03922 | A13679 | 405 | A03922 | A13755 | 302 |
| A03922 | A13954 | 481 | A03922 | A14192 | 164 |
| A03922 | A14281 | 408 | A03922 | A14320 | 285 |
| A03922 | A14535 | 221 | A03922 | A14579 | 190 |
| A03922 | A14643 | 232 | A03922 | A15622 | 221 |
| A03922 | A15635 | 162 | A03922 | A16068 | 273 |
| A03922 | A16363 | 154 | A03922 | A16485 | 458 |
| A03922 | A16626 | 274 | A03922 | A16635 | 407 |
| A03922 | A17026 | 232 | A03923 | A04039 | 389 |
| A03923 | A04080 | 174 | A03923 | A04130 | 362 |
| A03923 | A04217 | 262 | A03923 | A04334 | 167 |
| A03923 | A04391 | 424 | A03923 | A04481 | 355 |
| A03923 | A04509 | 352 | A03923 | A04607 | 188 |
| A03923 | A05083 | 358 | A03923 | A05174 | 314 |
| A03923 | A05331 | 152 | A03923 | A05577 | 367 |
| A03923 | A05679 | 413 | A03923 | A06414 | 314 |
| A03923 | A06415 | 446 | A03923 | A06747 | 263 |
| A03923 | A07141 | 190 | A03923 | A07152 | 337 |
| A03923 | A07161 | 266 | A03923 | A08596 | 294 |
| A03923 | A10337 | 246 | A03923 | A10689 | 177 |
| A03923 | A13903 | 269 | A03923 | A13987 | 151 |
| A03923 | A14391 | 185 | A03923 | A14554 | 234 |
| A03923 | A15394 | 249 | A03923 | A15395 | 228 |
| A03923 | A15425 | 191 | A03923 | A15642 | 255 |
| A03923 | A16636 | 223 | A03924 | A04965 | 340 |
| A03924 | A09748 | 390 | A03925 | A03942 | 326 |
| A03925 | A04914 | 361 | A03925 | A06623 | 316 |
| A03925 | A08859 | 213 | A03925 | A09202 | 347 |
| A03925 | A09447 | 396 | A03926 | A03928 | 451 |

|        |        |     |        |        |     |
|--------|--------|-----|--------|--------|-----|
| A03926 | A04092 | 281 | A03926 | A04349 | 254 |
| A03926 | A04375 | 184 | A03926 | A04382 | 382 |
| A03926 | A04383 | 339 | A03926 | A04384 | 361 |
| A03926 | A04520 | 177 | A03926 | A04747 | 294 |
| A03926 | A04771 | 344 | A03926 | A04920 | 401 |
| A03926 | A05247 | 407 | A03926 | A05288 | 286 |
| A03926 | A05603 | 202 | A03926 | A05632 | 414 |
| A03926 | A06346 | 196 | A03926 | A06629 | 429 |
| A03926 | A07019 | 293 | A03926 | A07559 | 279 |
| A03926 | A08040 | 316 | A03926 | A08499 | 414 |
| A03926 | A09456 | 414 | A03926 | A11983 | 377 |
| A03926 | A14377 | 230 | A03926 | A16068 | 188 |
| A03926 | A16150 | 401 | A03926 | A16529 | 191 |
| A03927 | A04075 | 454 | A03927 | A04888 | 324 |
| A03927 | A05278 | 208 | A03927 | A06949 | 210 |
| A03927 | A08207 | 221 | A03927 | A14188 | 357 |
| A03927 | A14366 | 188 | A03928 | A04375 | 311 |
| A03928 | A04382 | 428 | A03928 | A04383 | 405 |
| A03928 | A04747 | 380 | A03928 | A05288 | 154 |
| A03928 | A09456 | 445 | A03928 | A11983 | 174 |
| A03928 | A16068 | 314 | A03929 | A06602 | 307 |
| A03929 | A07687 | 471 | A03929 | A08352 | 307 |
| A03929 | A08552 | 307 | A03929 | A09304 | 307 |
| A03929 | A09319 | 176 | A03929 | A10580 | 358 |
| A03929 | A10913 | 335 | A03929 | A11283 | 307 |
| A03929 | A11332 | 307 | A03929 | A11828 | 307 |
| A03929 | A11840 | 307 | A03929 | A12047 | 624 |
| A03930 | A04508 | 441 | A03931 | A08521 | 252 |
| A03932 | A03963 | 160 | A03932 | A04130 | 362 |
| A03932 | A04180 | 330 | A03932 | A05248 | 383 |
| A03932 | A05679 | 343 | A03932 | A06970 | 160 |
| A03932 | A08651 | 368 | A03932 | A08908 | 303 |
| A03932 | A10585 | 405 | A03932 | A10586 | 440 |
| A03932 | A13903 | 461 | A03932 | A13957 | 446 |
| A03932 | A14119 | 422 | A03932 | A14345 | 398 |
| A03932 | A14635 | 162 | A03932 | A15312 | 490 |
| A03932 | A15425 | 440 | A03933 | A04475 | 401 |
| A03933 | A04483 | 406 | A03933 | A05332 | 344 |
| A03934 | A04248 | 332 | A03934 | A04392 | 419 |
| A03934 | A04484 | 473 | A03934 | A04878 | 371 |
| A03934 | A06415 | 232 | A03934 | A07152 | 290 |
| A03934 | A11740 | 434 | A03934 | A13860 | 258 |
| A03934 | A14236 | 402 | A03934 | A15241 | 266 |
| A03934 | A15427 | 347 | A03935 | A03936 | 357 |
| A03935 | A03944 | 441 | A03935 | A04919 | 417 |
| A03935 | A05131 | 401 | A03935 | A05234 | 291 |



|        |        |     |        |        |     |
|--------|--------|-----|--------|--------|-----|
| A03935 | A05577 | 224 | A03935 | A05812 | 317 |
| A03935 | A06251 | 401 | A03935 | A06463 | 465 |
| A03935 | A07165 | 199 | A03935 | A07440 | 375 |
| A03935 | A08768 | 366 | A03935 | A09468 | 417 |
| A03935 | A16636 | 183 | A03936 | A03944 | 327 |
| A03936 | A04138 | 313 | A03936 | A04152 | 307 |
| A03936 | A04201 | 334 | A03936 | A05122 | 226 |
| A03936 | A05131 | 369 | A03936 | A05716 | 347 |
| A03936 | A07201 | 152 | A03936 | A10069 | 374 |
| A03936 | A10074 | 399 | A03936 | A11908 | 350 |
| A03936 | A14010 | 217 | A03936 | A14125 | 247 |
| A03936 | A14403 | 347 | A03936 | A14568 | 218 |
| A03936 | A14579 | 249 | A03936 | A15447 | 202 |
| A03936 | A16110 | 340 | A03937 | A04398 | 341 |
| A03937 | A04622 | 152 | A03937 | A10111 | 352 |
| A03937 | A15498 | 226 | A03938 | A04177 | 441 |
| A03939 | A04668 | 226 | A03939 | A10283 | 389 |
| A03939 | A13405 | 372 | A03939 | A14299 | 216 |
| A03940 | A04212 | 229 | A03940 | A07078 | 347 |
| A03940 | A08445 | 469 | A03940 | A09080 | 461 |
| A03940 | A09126 | 434 | A03941 | A05574 | 411 |
| A03941 | A09038 | 328 | A03941 | A14443 | 238 |
| A03941 | A14444 | 251 | A03941 | A16300 | 212 |
| A03942 | A04163 | 401 | A03942 | A04180 | 260 |
| A03942 | A04216 | 256 | A03942 | A04248 | 173 |
| A03942 | A04316 | 205 | A03942 | A04422 | 191 |
| A03942 | A04490 | 188 | A03942 | A04647 | 251 |
| A03942 | A04676 | 425 | A03942 | A04881 | 210 |
| A03942 | A05208 | 238 | A03942 | A05248 | 334 |
| A03942 | A05270 | 344 | A03942 | A05706 | 462 |
| A03942 | A06118 | 380 | A03942 | A07126 | 210 |
| A03942 | A07157 | 213 | A03942 | A07209 | 172 |
| A03942 | A07803 | 432 | A03942 | A07991 | 375 |
| A03942 | A08840 | 326 | A03942 | A08859 | 176 |
| A03942 | A09062 | 281 | A03942 | A09208 | 302 |
| A03942 | A09241 | 402 | A03942 | A09245 | 171 |
| A03942 | A09422 | 291 | A03942 | A09732 | 484 |
| A03942 | A09733 | 224 | A03942 | A09744 | 372 |
| A03942 | A10336 | 335 | A03942 | A10444 | 340 |
| A03942 | A10448 | 278 | A03942 | A10580 | 941 |
| A03942 | A10723 | 219 | A03942 | A11412 | 227 |
| A03942 | A11415 | 313 | A03942 | A11422 | 246 |
| A03942 | A11537 | 185 | A03942 | A11881 | 406 |
| A03942 | A11986 | 201 | A03942 | A12393 | 279 |
| A03942 | A12419 | 223 | A03942 | A13312 | 254 |
| A03942 | A13826 | 405 | A03942 | A13899 | 238 |

|        |        |     |        |        |     |
|--------|--------|-----|--------|--------|-----|
| A03942 | A14190 | 475 | A03942 | A14202 | 368 |
| A03942 | A14210 | 491 | A03942 | A14364 | 154 |
| A03942 | A14369 | 479 | A03942 | A14370 | 419 |
| A03942 | A14371 | 491 | A03942 | A14379 | 490 |
| A03942 | A14511 | 491 | A03942 | A14523 | 251 |
| A03942 | A14536 | 390 | A03942 | A14539 | 270 |
| A03942 | A14598 | 235 | A03942 | A14604 | 445 |
| A03942 | A14667 | 294 | A03942 | A14930 | 265 |
| A03942 | A15292 | 484 | A03942 | A15310 | 165 |
| A03942 | A15312 | 317 | A03942 | A15318 | 430 |
| A03942 | A15346 | 368 | A03942 | A15349 | 290 |
| A03942 | A15352 | 412 | A03942 | A15411 | 218 |
| A03942 | A15447 | 334 | A03942 | A15451 | 238 |
| A03942 | A15452 | 200 | A03942 | A15454 | 180 |
| A03942 | A15464 | 168 | A03942 | A15495 | 484 |
| A03942 | A15516 | 174 | A03942 | A15809 | 215 |
| A03942 | A16136 | 256 | A03942 | A16209 | 299 |
| A03942 | A16224 | 283 | A03942 | A16323 | 249 |
| A03942 | A16711 | 207 | A03943 | A04170 | 401 |
| A03944 | A05131 | 383 | A03944 | A06463 | 335 |
| A03944 | A07706 | 408 | A03944 | A08527 | 491 |
| A03944 | A11674 | 291 | A03944 | A11699 | 355 |
| A03944 | A15520 | 281 | A03944 | A15733 | 240 |
| A03945 | A04671 | 273 | A03945 | A04676 | 302 |
| A03945 | A06296 | 201 | A03945 | A06860 | 238 |
| A03945 | A07192 | 230 | A03945 | A07442 | 465 |
| A03945 | A08834 | 152 | A03945 | A09205 | 276 |
| A03945 | A09233 | 327 | A03945 | A09734 | 196 |
| A03945 | A09744 | 219 | A03945 | A09873 | 226 |
| A03945 | A10549 | 303 | A03945 | A11681 | 235 |
| A03945 | A13369 | 167 | A03945 | A13987 | 357 |
| A03945 | A14190 | 246 | A03945 | A14210 | 221 |
| A03945 | A14381 | 339 | A03945 | A14394 | 308 |
| A03945 | A14408 | 215 | A03945 | A15292 | 221 |
| A03945 | A15300 | 311 | A03945 | A15308 | 179 |
| A03945 | A15312 | 452 | A03945 | A15313 | 344 |
| A03945 | A15318 | 434 | A03945 | A15329 | 290 |
| A03945 | A15331 | 224 | A03945 | A15335 | 255 |
| A03945 | A15349 | 205 | A03945 | A15419 | 398 |
| A03945 | A15422 | 945 | A03945 | A15811 | 307 |
| A03945 | A15886 | 351 | A03945 | A17078 | 256 |
| A03946 | A04280 | 168 | A03946 | A05062 | 251 |
| A03946 | A08677 | 319 | A03946 | A09256 | 156 |
| A03946 | A09487 | 307 | A03946 | A14190 | 277 |
| A03946 | A15422 | 188 | A03946 | A15726 | 162 |
| A03947 | A04375 | 424 | A03947 | A06177 | 232 |

|        |        |     |        |        |     |
|--------|--------|-----|--------|--------|-----|
| A03947 | A07282 | 475 | A03947 | A07641 | 475 |
| A03947 | A07817 | 419 | A03947 | A11983 | 210 |
| A03947 | A15336 | 238 | A03947 | A16068 | 243 |
| A03947 | A16626 | 310 | A03948 | A04024 | 374 |
| A03948 | A04138 | 177 | A03948 | A04201 | 340 |
| A03948 | A04480 | 346 | A03948 | A04533 | 184 |
| A03948 | A05344 | 217 | A03948 | A05348 | 184 |
| A03948 | A05449 | 318 | A03948 | A05463 | 170 |
| A03948 | A05556 | 435 | A03948 | A05576 | 255 |
| A03948 | A05577 | 274 | A03948 | A05760 | 243 |
| A03948 | A05796 | 491 | A03948 | A05806 | 346 |
| A03948 | A06144 | 249 | A03948 | A06588 | 311 |
| A03948 | A06744 | 167 | A03948 | A07004 | 199 |
| A03948 | A07146 | 184 | A03948 | A07154 | 168 |
| A03948 | A07483 | 489 | A03948 | A08524 | 488 |
| A03948 | A08850 | 407 | A03948 | A09334 | 224 |
| A03948 | A09341 | 199 | A03948 | A09394 | 184 |
| A03948 | A09435 | 171 | A03948 | A09632 | 180 |
| A03948 | A09754 | 174 | A03948 | A09799 | 283 |
| A03948 | A10026 | 322 | A03948 | A10427 | 243 |
| A03948 | A10699 | 452 | A03948 | A11170 | 274 |
| A03948 | A13146 | 321 | A03948 | A13895 | 435 |
| A03948 | A14212 | 328 | A03948 | A14236 | 435 |
| A03948 | A14366 | 433 | A03948 | A14443 | 185 |
| A03948 | A14444 | 241 | A03948 | A14596 | 230 |
| A03948 | A14659 | 374 | A03948 | A14799 | 488 |
| A03948 | A14857 | 168 | A03948 | A15606 | 374 |
| A03948 | A15665 | 489 | A03948 | A15889 | 382 |
| A03948 | A16400 | 311 | A03948 | A16552 | 475 |
| A03948 | A16766 | 446 | A03948 | A17146 | 168 |
| A03949 | A04046 | 339 | A03949 | A04091 | 364 |
| A03949 | A04110 | 262 | A03949 | A04690 | 380 |
| A03949 | A04800 | 324 | A03949 | A05439 | 165 |
| A03949 | A05603 | 170 | A03949 | A06798 | 316 |
| A03949 | A07421 | 491 | A03949 | A08355 | 307 |
| A03949 | A09087 | 380 | A03949 | A11650 | 462 |
| A03949 | A11779 | 490 | A03949 | A14007 | 303 |
| A03949 | A14072 | 179 | A03949 | A14374 | 291 |
| A03949 | A14439 | 246 | A03949 | A15394 | 229 |
| A03949 | A15420 | 160 | A03950 | A04858 | 210 |
| A03950 | A06643 | 390 | A03950 | A07184 | 423 |
| A03950 | A07416 | 340 | A03950 | A08812 | 154 |
| A03950 | A09386 | 352 | A03950 | A13963 | 262 |
| A03950 | A13982 | 188 | A03952 | A03958 | 352 |
| A03952 | A04447 | 258 | A03952 | A05577 | 174 |
| A03952 | A07140 | 383 | A03952 | A09281 | 340 |

|        |        |     |        |        |     |
|--------|--------|-----|--------|--------|-----|
| A03952 | A11254 | 363 | A03952 | A13298 | 152 |
| A03952 | A14073 | 394 | A03952 | A14216 | 270 |
| A03952 | A14449 | 201 | A03954 | A03958 | 324 |
| A03954 | A03962 | 226 | A03954 | A03982 | 371 |
| A03954 | A07020 | 255 | A03954 | A11271 | 299 |
| A03954 | A13517 | 168 | A03954 | A15560 | 241 |
| A03954 | A16927 | 367 | A03955 | A04423 | 318 |
| A03955 | A04761 | 420 | A03955 | A05996 | 440 |
| A03955 | A06943 | 400 | A03955 | A09784 | 319 |
| A03955 | A15311 | 260 | A03956 | A07800 | 168 |
| A03957 | A05424 | 368 | A03958 | A03982 | 396 |
| A03958 | A03990 | 160 | A03958 | A06825 | 193 |
| A03958 | A07588 | 256 | A03958 | A09826 | 223 |
| A03958 | A14216 | 208 | A03958 | A14594 | 223 |
| A03958 | A15649 | 185 | A03959 | A03981 | 252 |
| A03959 | A04056 | 256 | A03959 | A04895 | 228 |
| A03959 | A04932 | 229 | A03959 | A05029 | 343 |
| A03959 | A06084 | 188 | A03959 | A06466 | 369 |
| A03959 | A06546 | 160 | A03959 | A07160 | 299 |
| A03959 | A07311 | 307 | A03959 | A07902 | 491 |
| A03959 | A08869 | 199 | A03959 | A09009 | 379 |
| A03959 | A09321 | 277 | A03959 | A11296 | 436 |
| A03959 | A11677 | 247 | A03959 | A13521 | 266 |
| A03959 | A13527 | 185 | A03959 | A14468 | 260 |
| A03959 | A14699 | 539 | A03959 | A14778 | 247 |
| A03959 | A14845 | 362 | A03959 | A15624 | 168 |
| A03959 | A15668 | 215 | A03959 | A16585 | 234 |
| A03959 | A16587 | 247 | A03959 | A17107 | 196 |
| A03960 | A04002 | 468 | A03960 | A04202 | 243 |
| A03960 | A04373 | 378 | A03960 | A04551 | 452 |
| A03960 | A07135 | 174 | A03960 | A09558 | 283 |
| A03961 | A04092 | 198 | A03961 | A04162 | 160 |
| A03961 | A04202 | 236 | A03961 | A04423 | 257 |
| A03961 | A04746 | 238 | A03961 | A04976 | 290 |
| A03961 | A04981 | 266 | A03961 | A04988 | 221 |
| A03961 | A05288 | 447 | A03961 | A05377 | 475 |
| A03961 | A05439 | 334 | A03961 | A05533 | 469 |
| A03961 | A05944 | 162 | A03961 | A06054 | 198 |
| A03961 | A07143 | 180 | A03961 | A07509 | 254 |
| A03961 | A09072 | 393 | A03961 | A09241 | 337 |
| A03961 | A09245 | 316 | A03961 | A09480 | 391 |
| A03961 | A09550 | 445 | A03961 | A10079 | 436 |
| A03961 | A10811 | 198 | A03961 | A10841 | 363 |
| A03961 | A11243 | 251 | A03961 | A11387 | 156 |
| A03961 | A11454 | 210 | A03961 | A12108 | 327 |
| A03961 | A13162 | 167 | A03961 | A13944 | 235 |

|        |        |     |        |        |     |
|--------|--------|-----|--------|--------|-----|
| A03961 | A14210 | 326 | A03961 | A14443 | 171 |
| A03961 | A14511 | 414 | A03961 | A14635 | 218 |
| A03961 | A15230 | 490 | A03961 | A15598 | 347 |
| A03961 | A15913 | 485 | A03962 | A04108 | 439 |
| A03962 | A04791 | 221 | A03962 | A05103 | 305 |
| A03962 | A05463 | 243 | A03962 | A05573 | 180 |
| A03962 | A05659 | 196 | A03962 | A06098 | 326 |
| A03962 | A06635 | 462 | A03962 | A06641 | 235 |
| A03962 | A07020 | 199 | A03962 | A07109 | 383 |
| A03962 | A08108 | 224 | A03962 | A08732 | 196 |
| A03962 | A09340 | 224 | A03962 | A09401 | 173 |
| A03962 | A09852 | 193 | A03962 | A10714 | 154 |
| A03962 | A10735 | 286 | A03962 | A11271 | 249 |
| A03962 | A13517 | 235 | A03962 | A15314 | 165 |
| A03962 | A15669 | 179 | A03962 | A15935 | 314 |
| A03962 | A16436 | 193 | A03962 | A16821 | 159 |
| A03963 | A04047 | 179 | A03963 | A04701 | 358 |
| A03963 | A05225 | 241 | A03963 | A05422 | 257 |
| A03963 | A05545 | 466 | A03963 | A05998 | 319 |
| A03963 | A06340 | 405 | A03963 | A06443 | 375 |
| A03963 | A06528 | 343 | A03963 | A06563 | 396 |
| A03963 | A06610 | 313 | A03963 | A07158 | 457 |
| A03963 | A07218 | 154 | A03963 | A07422 | 917 |
| A03963 | A07532 | 288 | A03963 | A07975 | 318 |
| A03963 | A07981 | 235 | A03963 | A08408 | 219 |
| A03963 | A09078 | 319 | A03963 | A09352 | 249 |
| A03963 | A09469 | 160 | A03963 | A09809 | 160 |
| A03963 | A10164 | 191 | A03963 | A10638 | 207 |
| A03963 | A12191 | 251 | A03963 | A13126 | 207 |
| A03963 | A13415 | 317 | A03963 | A13546 | 172 |
| A03963 | A13920 | 224 | A03963 | A13989 | 452 |
| A03963 | A14048 | 375 | A03963 | A14216 | 367 |
| A03963 | A14496 | 430 | A03963 | A15229 | 208 |
| A03963 | A15268 | 180 | A03963 | A15419 | 160 |
| A03963 | A16257 | 247 | A03963 | A16778 | 232 |
| A03963 | A17195 | 347 | A03964 | A04004 | 318 |
| A03964 | A04071 | 241 | A03964 | A04139 | 213 |
| A03964 | A04302 | 351 | A03964 | A04315 | 344 |
| A03964 | A04443 | 480 | A03964 | A04449 | 152 |
| A03964 | A04671 | 307 | A03964 | A04933 | 435 |
| A03964 | A04940 | 406 | A03964 | A04960 | 249 |
| A03964 | A05349 | 899 | A03964 | A05366 | 393 |
| A03964 | A05572 | 393 | A03964 | A05911 | 353 |
| A03964 | A06298 | 393 | A03964 | A06607 | 168 |
| A03964 | A06635 | 238 | A03964 | A06765 | 352 |
| A03964 | A07018 | 399 | A03964 | A07030 | 399 |

|        |        |     |        |        |     |
|--------|--------|-----|--------|--------|-----|
| A03964 | A07129 | 294 | A03964 | A07190 | 229 |
| A03964 | A07199 | 346 | A03964 | A07482 | 399 |
| A03964 | A09235 | 266 | A03964 | A10239 | 451 |
| A03964 | A10832 | 399 | A03964 | A11348 | 313 |
| A03964 | A13464 | 418 | A03964 | A13975 | 187 |
| A03964 | A14381 | 249 | A03964 | A15498 | 193 |
| A03964 | A16021 | 399 | A03964 | A16738 | 162 |
| A03965 | A03990 | 168 | A03965 | A04012 | 273 |
| A03965 | A04279 | 213 | A03965 | A04280 | 230 |
| A03965 | A04415 | 266 | A03965 | A04540 | 187 |
| A03965 | A04659 | 281 | A03965 | A04681 | 296 |
| A03965 | A05032 | 204 | A03965 | A05065 | 205 |
| A03965 | A05798 | 306 | A03965 | A06254 | 360 |
| A03965 | A06623 | 154 | A03965 | A07145 | 184 |
| A03965 | A07165 | 276 | A03965 | A08704 | 337 |
| A03965 | A09421 | 285 | A03965 | A09509 | 363 |
| A03965 | A09655 | 229 | A03965 | A10233 | 374 |
| A03965 | A10259 | 391 | A03965 | A10601 | 497 |
| A03965 | A10756 | 243 | A03965 | A10798 | 515 |
| A03965 | A11104 | 260 | A03965 | A12361 | 185 |
| A03965 | A13924 | 229 | A03965 | A13983 | 462 |
| A03965 | A14163 | 162 | A03965 | A14208 | 188 |
| A03965 | A14570 | 428 | A03965 | A15291 | 362 |
| A03965 | A15575 | 235 | A03965 | A15651 | 154 |
| A03965 | A16832 | 308 | A03965 | A16877 | 249 |
| A03966 | A04089 | 447 | A03966 | A04240 | 353 |
| A03966 | A04248 | 204 | A03966 | A04263 | 188 |
| A03966 | A04267 | 177 | A03966 | A04398 | 177 |
| A03966 | A04445 | 266 | A03966 | A04478 | 375 |
| A03966 | A04491 | 252 | A03966 | A04514 | 429 |
| A03966 | A04536 | 258 | A03966 | A04545 | 329 |
| A03966 | A04548 | 480 | A03966 | A04627 | 173 |
| A03966 | A04671 | 236 | A03966 | A04698 | 182 |
| A03966 | A04795 | 207 | A03966 | A04961 | 485 |
| A03966 | A05078 | 306 | A03966 | A05113 | 330 |
| A03966 | A05174 | 384 | A03966 | A05810 | 235 |
| A03966 | A05985 | 290 | A03966 | A06085 | 240 |
| A03966 | A06095 | 288 | A03966 | A07146 | 268 |
| A03966 | A07157 | 252 | A03966 | A07173 | 167 |
| A03966 | A07209 | 224 | A03966 | A07390 | 265 |
| A03966 | A07479 | 347 | A03966 | A07683 | 346 |
| A03966 | A08725 | 362 | A03966 | A09437 | 340 |
| A03966 | A09750 | 193 | A03966 | A10899 | 218 |
| A03966 | A11309 | 157 | A03966 | A14236 | 291 |
| A03966 | A15267 | 286 | A03966 | A16354 | 353 |
| A03967 | A07163 | 152 | A03968 | A04063 | 213 |

|        |        |     |        |        |     |
|--------|--------|-----|--------|--------|-----|
| A03968 | A04087 | 362 | A03968 | A04114 | 205 |
| A03968 | A04157 | 368 | A03968 | A04343 | 277 |
| A03968 | A04349 | 274 | A03968 | A04366 | 218 |
| A03968 | A04378 | 270 | A03968 | A04383 | 372 |
| A03968 | A04387 | 369 | A03968 | A04429 | 251 |
| A03968 | A04750 | 303 | A03968 | A04928 | 327 |
| A03968 | A04949 | 230 | A03968 | A04997 | 424 |
| A03968 | A05014 | 227 | A03968 | A05094 | 173 |
| A03968 | A05174 | 227 | A03968 | A05208 | 227 |
| A03968 | A05330 | 335 | A03968 | A05337 | 198 |
| A03968 | A05398 | 201 | A03968 | A05548 | 241 |
| A03968 | A05659 | 165 | A03968 | A05751 | 461 |
| A03968 | A05897 | 297 | A03968 | A06329 | 273 |
| A03968 | A06346 | 302 | A03968 | A06711 | 366 |
| A03968 | A07088 | 281 | A03968 | A07122 | 162 |
| A03968 | A07182 | 303 | A03968 | A07453 | 310 |
| A03968 | A07520 | 449 | A03968 | A07559 | 171 |
| A03968 | A07674 | 217 | A03968 | A07690 | 208 |
| A03968 | A07699 | 317 | A03968 | A07704 | 307 |
| A03968 | A07705 | 162 | A03968 | A07812 | 188 |
| A03968 | A07847 | 179 | A03968 | A07973 | 152 |
| A03968 | A08155 | 256 | A03968 | A09074 | 279 |
| A03968 | A09160 | 174 | A03968 | A09216 | 335 |
| A03968 | A09240 | 279 | A03968 | A09460 | 317 |
| A03968 | A09791 | 383 | A03968 | A09982 | 350 |
| A03968 | A10174 | 152 | A03968 | A10456 | 202 |
| A03968 | A10687 | 270 | A03968 | A10703 | 205 |
| A03968 | A11392 | 188 | A03968 | A12345 | 350 |
| A03968 | A12414 | 369 | A03968 | A13314 | 251 |
| A03968 | A13460 | 168 | A03968 | A14862 | 267 |
| A03968 | A15241 | 85  | A03968 | A15271 | 386 |
| A03968 | A15279 | 350 | A03968 | A15628 | 288 |
| A03968 | A16741 | 160 | A03970 | A04391 | 416 |
| A03970 | A04481 | 423 | A03970 | A07141 | 338 |
| A03971 | A07531 | 350 | A03971 | A14642 | 369 |
| A03972 | A07265 | 323 | A03972 | A07588 | 319 |
| A03972 | A13159 | 294 | A03972 | A13298 | 245 |
| A03973 | A07135 | 243 | A03974 | A03975 | 274 |
| A03974 | A04275 | 270 | A03974 | A04398 | 165 |
| A03974 | A04662 | 227 | A03974 | A04845 | 205 |
| A03974 | A04985 | 369 | A03974 | A05114 | 226 |
| A03974 | A05517 | 485 | A03974 | A05577 | 291 |
| A03974 | A05601 | 461 | A03974 | A05679 | 481 |
| A03974 | A06415 | 491 | A03974 | A06530 | 174 |
| A03974 | A07083 | 152 | A03974 | A07173 | 156 |
| A03974 | A07207 | 212 | A03974 | A07483 | 157 |

|        |        |     |        |        |     |
|--------|--------|-----|--------|--------|-----|
| A03974 | A08093 | 299 | A03974 | A08097 | 411 |
| A03974 | A08293 | 479 | A03974 | A08398 | 152 |
| A03974 | A08461 | 167 | A03974 | A08463 | 177 |
| A03974 | A08543 | 274 | A03974 | A08550 | 374 |
| A03974 | A08552 | 196 | A03974 | A08560 | 236 |
| A03974 | A08561 | 229 | A03974 | A08814 | 262 |
| A03974 | A08821 | 241 | A03974 | A08840 | 249 |
| A03974 | A08859 | 208 | A03974 | A09246 | 198 |
| A03974 | A09298 | 160 | A03974 | A09757 | 176 |
| A03974 | A09828 | 205 | A03974 | A09829 | 424 |
| A03974 | A10525 | 174 | A03974 | A10590 | 372 |
| A03974 | A10605 | 433 | A03974 | A10789 | 208 |
| A03974 | A11301 | 176 | A03974 | A11394 | 296 |
| A03974 | A11496 | 334 | A03974 | A11497 | 219 |
| A03974 | A11675 | 168 | A03974 | A11735 | 363 |
| A03974 | A11915 | 259 | A03974 | A11917 | 311 |
| A03974 | A11954 | 259 | A03974 | A11992 | 177 |
| A03974 | A12234 | 276 | A03974 | A12254 | 279 |
| A03974 | A12282 | 272 | A03974 | A12433 | 322 |
| A03974 | A12506 | 201 | A03974 | A12508 | 396 |
| A03974 | A12606 | 198 | A03974 | A12665 | 162 |
| A03974 | A12725 | 217 | A03974 | A12738 | 208 |
| A03974 | A12825 | 219 | A03974 | A12858 | 417 |
| A03974 | A12873 | 152 | A03974 | A12875 | 184 |
| A03974 | A13131 | 399 | A03974 | A13313 | 156 |
| A03974 | A13321 | 201 | A03974 | A13356 | 160 |
| A03974 | A13781 | 266 | A03974 | A13783 | 377 |
| A03974 | A13784 | 198 | A03974 | A13786 | 205 |
| A03974 | A13788 | 251 | A03974 | A13806 | 212 |
| A03974 | A13809 | 184 | A03974 | A13983 | 484 |
| A03974 | A13988 | 452 | A03974 | A14071 | 491 |
| A03974 | A14199 | 461 | A03974 | A14202 | 188 |
| A03974 | A14212 | 290 | A03974 | A14214 | 293 |
| A03974 | A14229 | 322 | A03974 | A14263 | 204 |
| A03974 | A14286 | 246 | A03974 | A14289 | 344 |
| A03974 | A14374 | 479 | A03974 | A14381 | 157 |
| A03974 | A14392 | 266 | A03974 | A14439 | 200 |
| A03974 | A14569 | 323 | A03974 | A14570 | 441 |
| A03974 | A14604 | 157 | A03974 | A14706 | 223 |
| A03974 | A14799 | 182 | A03974 | A14917 | 249 |
| A03974 | A15294 | 238 | A03974 | A15366 | 204 |
| A03974 | A15384 | 230 | A03974 | A15495 | 183 |
| A03974 | A15519 | 215 | A03974 | A15541 | 288 |
| A03974 | A15557 | 201 | A03974 | A15680 | 216 |
| A03974 | A15709 | 255 | A03974 | A15743 | 243 |
| A03974 | A15795 | 176 | A03974 | A15818 | 221 |



|        |        |     |        |        |     |
|--------|--------|-----|--------|--------|-----|
| A03974 | A15854 | 154 | A03974 | A15947 | 215 |
| A03974 | A16157 | 379 | A03974 | A16261 | 200 |
| A03974 | A16322 | 163 | A03974 | A16552 | 286 |
| A03974 | A16565 | 385 | A03974 | A16587 | 243 |
| A03974 | A16597 | 168 | A03974 | A16611 | 400 |
| A03974 | A16652 | 152 | A03974 | A16664 | 297 |
| A03974 | A16680 | 285 | A03974 | A16684 | 367 |
| A03974 | A16690 | 260 | A03974 | A16692 | 235 |
| A03974 | A16693 | 310 | A03974 | A16704 | 224 |
| A03974 | A16764 | 171 | A03974 | A16774 | 291 |
| A03974 | A16792 | 249 | A03974 | A16829 | 256 |
| A03974 | A16874 | 252 | A03974 | A16900 | 274 |
| A03974 | A16905 | 204 | A03974 | A16954 | 241 |
| A03974 | A17144 | 236 | A03974 | A17211 | 254 |
| A03975 | A04380 | 372 | A03975 | A05517 | 337 |
| A03975 | A05679 | 247 | A03975 | A06415 | 177 |
| A03975 | A07141 | 226 | A03975 | A09421 | 348 |
| A03975 | A14210 | 156 | A03975 | A14366 | 204 |
| A03975 | A14371 | 177 | A03975 | A15809 | 350 |
| A03975 | A15922 | 267 | A03976 | A04048 | 378 |
| A03976 | A04158 | 310 | A03976 | A04218 | 243 |
| A03976 | A04260 | 457 | A03976 | A04267 | 263 |
| A03976 | A04271 | 361 | A03976 | A04282 | 198 |
| A03976 | A04327 | 152 | A03976 | A04334 | 174 |
| A03976 | A04407 | 263 | A03976 | A04482 | 279 |
| A03976 | A04505 | 420 | A03976 | A04598 | 270 |
| A03976 | A04723 | 424 | A03976 | A04727 | 252 |
| A03976 | A04795 | 162 | A03976 | A04808 | 288 |
| A03976 | A04812 | 430 | A03976 | A04842 | 168 |
| A03976 | A04914 | 177 | A03976 | A04941 | 341 |
| A03976 | A05034 | 177 | A03976 | A05473 | 177 |
| A03976 | A05634 | 246 | A03976 | A06201 | 267 |
| A03976 | A06544 | 340 | A03976 | A06597 | 160 |
| A03976 | A06858 | 191 | A03976 | A07280 | 279 |
| A03976 | A07339 | 316 | A03976 | A08194 | 152 |
| A03976 | A08732 | 165 | A03976 | A09146 | 258 |
| A03976 | A10221 | 288 | A03976 | A10854 | 208 |
| A03976 | A10947 | 256 | A03976 | A11771 | 457 |
| A03976 | A11897 | 180 | A03976 | A11904 | 326 |
| A03976 | A12667 | 198 | A03976 | A12787 | 361 |
| A03976 | A13231 | 252 | A03976 | A13872 | 180 |
| A03976 | A13886 | 235 | A03976 | A14368 | 210 |
| A03976 | A14483 | 188 | A03976 | A14494 | 256 |
| A03976 | A14613 | 394 | A03976 | A15674 | 221 |
| A03976 | A15789 | 288 | A03976 | A16636 | 95  |
| A03977 | A04051 | 167 | A03977 | A04080 | 205 |

|        |        |     |        |        |     |
|--------|--------|-----|--------|--------|-----|
| A03977 | A04199 | 385 | A03977 | A04561 | 379 |
| A03977 | A04988 | 412 | A03977 | A05122 | 430 |
| A03977 | A05525 | 371 | A03977 | A06240 | 180 |
| A03977 | A06779 | 363 | A03977 | A06814 | 362 |
| A03977 | A06991 | 340 | A03977 | A10506 | 226 |
| A03977 | A11262 | 351 | A03977 | A16300 | 274 |
| A03978 | A04094 | 440 | A03978 | A04229 | 288 |
| A03978 | A04253 | 409 | A03978 | A04491 | 378 |
| A03978 | A05590 | 418 | A03979 | A06415 | 232 |
| A03979 | A09199 | 462 | A03979 | A10944 | 406 |
| A03979 | A12347 | 406 | A03979 | A13179 | 419 |
| A03979 | A14366 | 257 | A03979 | A14374 | 268 |
| A03979 | A14554 | 312 | A03979 | A15795 | 319 |
| A03979 | A15803 | 457 | A03980 | A13987 | 271 |
| A03981 | A04106 | 152 | A03981 | A04176 | 165 |
| A03981 | A04666 | 462 | A03981 | A04694 | 162 |
| A03981 | A05191 | 79  | A03981 | A05411 | 121 |
| A03981 | A05449 | 490 | A03981 | A05477 | 224 |
| A03981 | A05501 | 391 | A03981 | A05654 | 99  |
| A03981 | A06084 | 254 | A03981 | A06279 | 369 |
| A03981 | A06297 | 366 | A03981 | A06351 | 229 |
| A03981 | A06356 | 492 | A03981 | A06466 | 488 |
| A03981 | A06525 | 210 | A03981 | A06597 | 159 |
| A03981 | A06807 | 344 | A03981 | A06814 | 655 |
| A03981 | A06815 | 462 | A03981 | A06825 | 491 |
| A03981 | A06901 | 323 | A03981 | A06923 | 210 |
| A03981 | A06955 | 165 | A03981 | A07116 | 334 |
| A03981 | A07201 | 358 | A03981 | A07243 | 486 |
| A03981 | A07244 | 170 | A03981 | A07307 | 388 |
| A03981 | A07311 | 486 | A03981 | A07323 | 334 |
| A03981 | A07399 | 276 | A03981 | A07451 | 174 |
| A03981 | A07506 | 491 | A03981 | A07524 | 170 |
| A03981 | A07726 | 483 | A03981 | A07924 | 170 |
| A03981 | A08011 | 165 | A03981 | A08211 | 170 |
| A03981 | A08301 | 307 | A03981 | A08359 | 483 |
| A03981 | A08377 | 330 | A03981 | A08543 | 435 |
| A03981 | A08550 | 425 | A03981 | A08653 | 470 |
| A03981 | A08682 | 481 | A03981 | A08768 | 268 |
| A03981 | A08869 | 412 | A03981 | A08973 | 317 |
| A03981 | A09044 | 63  | A03981 | A09591 | 151 |
| A03981 | A09656 | 463 | A03981 | A09679 | 174 |
| A03981 | A09697 | 170 | A03981 | A10001 | 352 |
| A03981 | A10034 | 446 | A03981 | A10417 | 303 |
| A03981 | A10532 | 655 | A03981 | A10564 | 435 |
| A03981 | A10569 | 428 | A03981 | A10745 | 210 |
| A03981 | A10814 | 91  | A03981 | A10901 | 252 |

|        |        |     |        |        |     |
|--------|--------|-----|--------|--------|-----|
| A03981 | A10928 | 190 | A03981 | A11264 | 383 |
| A03981 | A11269 | 247 | A03981 | A11331 | 491 |
| A03981 | A11334 | 332 | A03981 | A11355 | 229 |
| A03981 | A11857 | 73  | A03981 | A11926 | 450 |
| A03981 | A11981 | 491 | A03981 | A11983 | 224 |
| A03981 | A12011 | 168 | A03981 | A12252 | 235 |
| A03981 | A12427 | 229 | A03981 | A12507 | 246 |
| A03981 | A12661 | 346 | A03981 | A12687 | 77  |
| A03981 | A12723 | 204 | A03981 | A12821 | 234 |
| A03981 | A13052 | 481 | A03981 | A13063 | 422 |
| A03981 | A13340 | 635 | A03981 | A13344 | 190 |
| A03981 | A13425 | 160 | A03981 | A13497 | 210 |
| A03981 | A13581 | 489 | A03981 | A13626 | 485 |
| A03981 | A13752 | 218 | A03981 | A13886 | 405 |
| A03981 | A13989 | 601 | A03981 | A14081 | 77  |
| A03981 | A14084 | 402 | A03981 | A14188 | 191 |
| A03981 | A14216 | 726 | A03981 | A14272 | 402 |
| A03981 | A14471 | 283 | A03981 | A14508 | 215 |
| A03981 | A14530 | 274 | A03981 | A14560 | 428 |
| A03981 | A14566 | 218 | A03981 | A14596 | 216 |
| A03981 | A14606 | 174 | A03981 | A14630 | 190 |
| A03981 | A14661 | 160 | A03981 | A14674 | 462 |
| A03981 | A14738 | 217 | A03981 | A15063 | 341 |
| A03981 | A15315 | 157 | A03981 | A15538 | 152 |
| A03981 | A15624 | 491 | A03981 | A15649 | 335 |
| A03981 | A15651 | 201 | A03981 | A15661 | 358 |
| A03981 | A15684 | 491 | A03981 | A15707 | 144 |
| A03981 | A15732 | 182 | A03981 | A15931 | 363 |
| A03981 | A15932 | 457 | A03981 | A16088 | 491 |
| A03981 | A16095 | 489 | A03981 | A16149 | 384 |
| A03981 | A16279 | 174 | A03981 | A16738 | 462 |
| A03983 | A04279 | 335 | A03983 | A06868 | 345 |
| A03983 | A07746 | 256 | A03983 | A13426 | 369 |
| A03984 | A03985 | 490 | A03984 | A04004 | 414 |
| A03984 | A04010 | 196 | A03984 | A04053 | 339 |
| A03984 | A04096 | 485 | A03984 | A04097 | 486 |
| A03984 | A04416 | 290 | A03984 | A04433 | 274 |
| A03984 | A04435 | 180 | A03984 | A04494 | 489 |
| A03984 | A04519 | 312 | A03984 | A04603 | 201 |
| A03984 | A05294 | 393 | A03984 | A05313 | 180 |
| A03984 | A05506 | 259 | A03984 | A05643 | 391 |
| A03984 | A05866 | 230 | A03984 | A06141 | 241 |
| A03984 | A06212 | 213 | A03984 | A06293 | 367 |
| A03984 | A06346 | 449 | A03984 | A06574 | 323 |
| A03984 | A06644 | 196 | A03984 | A06692 | 279 |
| A03984 | A07101 | 312 | A03984 | A07147 | 367 |

|        |        |     |        |        |     |
|--------|--------|-----|--------|--------|-----|
| A03984 | A07188 | 401 | A03984 | A07361 | 351 |
| A03984 | A07529 | 277 | A03984 | A07605 | 296 |
| A03984 | A07764 | 259 | A03984 | A08002 | 312 |
| A03984 | A08003 | 375 | A03984 | A08093 | 348 |
| A03984 | A08203 | 274 | A03984 | A08266 | 343 |
| A03984 | A08417 | 170 | A03984 | A08649 | 356 |
| A03984 | A08670 | 356 | A03984 | A08745 | 200 |
| A03984 | A08764 | 356 | A03984 | A09392 | 385 |
| A03984 | A09395 | 491 | A03984 | A10355 | 297 |
| A03984 | A10450 | 324 | A03984 | A11136 | 375 |
| A03984 | A11285 | 173 | A03984 | A11289 | 224 |
| A03984 | A11310 | 246 | A03984 | A11320 | 259 |
| A03984 | A11328 | 251 | A03984 | A11507 | 375 |
| A03984 | A13363 | 162 | A03984 | A14152 | 224 |
| A03984 | A14208 | 447 | A03984 | A14423 | 215 |
| A03984 | A14711 | 213 | A03984 | A14830 | 414 |
| A03984 | A15314 | 195 | A03984 | A15613 | 462 |
| A03984 | A15639 | 156 | A03984 | A15834 | 430 |
| A03984 | A16216 | 491 | A03984 | A17085 | 193 |
| A03985 | A04050 | 213 | A03985 | A04096 | 490 |
| A03985 | A04097 | 490 | A03985 | A04494 | 480 |
| A03985 | A04519 | 256 | A03985 | A05212 | 461 |
| A03985 | A06610 | 193 | A03985 | A06631 | 268 |
| A03985 | A08745 | 274 | A03985 | A09392 | 332 |
| A03985 | A09395 | 490 | A03985 | A09754 | 199 |
| A03985 | A09766 | 241 | A03985 | A10355 | 352 |
| A03985 | A11507 | 407 | A03985 | A13975 | 152 |
| A03985 | A14395 | 157 | A03985 | A15386 | 180 |
| A03985 | A15613 | 302 | A03985 | A15834 | 456 |
| A03985 | A15931 | 165 | A03985 | A16216 | 488 |
| A03986 | A04316 | 353 | A03986 | A05046 | 462 |
| A03986 | A09972 | 425 | A03986 | A10869 | 368 |
| A03986 | A14252 | 274 | A03986 | A14496 | 259 |
| A03986 | A16073 | 256 | A03987 | A07129 | 374 |
| A03987 | A11085 | 434 | A03987 | A14029 | 340 |
| A03988 | A10091 | 367 | A03988 | A13824 | 271 |
| A03988 | A16636 | 170 | A03989 | A04051 | 191 |
| A03989 | A04488 | 446 | A03989 | A04603 | 326 |
| A03989 | A04922 | 338 | A03989 | A05176 | 303 |
| A03989 | A05377 | 333 | A03989 | A13346 | 277 |
| A03989 | A14374 | 234 | A03989 | A14444 | 208 |
| A03990 | A04020 | 341 | A03990 | A04595 | 157 |
| A03990 | A04696 | 157 | A03990 | A04729 | 455 |
| A03990 | A04822 | 358 | A03990 | A04825 | 249 |
| A03990 | A04864 | 207 | A03990 | A05082 | 454 |
| A03990 | A05122 | 490 | A03990 | A05150 | 234 |

|        |        |     |        |        |     |
|--------|--------|-----|--------|--------|-----|
| A03990 | A05216 | 368 | A03990 | A05315 | 329 |
| A03990 | A05415 | 481 | A03990 | A05428 | 899 |
| A03990 | A05599 | 249 | A03990 | A05701 | 240 |
| A03990 | A05958 | 334 | A03990 | A06010 | 469 |
| A03990 | A06050 | 283 | A03990 | A06162 | 157 |
| A03990 | A06188 | 176 | A03990 | A06244 | 221 |
| A03990 | A06258 | 595 | A03990 | A06397 | 207 |
| A03990 | A06576 | 283 | A03990 | A06595 | 224 |
| A03990 | A06610 | 277 | A03990 | A06648 | 229 |
| A03990 | A06649 | 154 | A03990 | A06660 | 491 |
| A03990 | A06819 | 302 | A03990 | A06897 | 489 |
| A03990 | A07311 | 600 | A03990 | A07339 | 771 |
| A03990 | A07681 | 187 | A03990 | A08275 | 313 |
| A03990 | A08284 | 180 | A03990 | A08571 | 491 |
| A03990 | A09124 | 408 | A03990 | A09242 | 219 |
| A03990 | A09449 | 486 | A03990 | A09457 | 263 |
| A03990 | A09504 | 251 | A03990 | A09738 | 157 |
| A03990 | A09791 | 377 | A03990 | A09837 | 183 |
| A03990 | A10018 | 489 | A03990 | A10247 | 490 |
| A03990 | A10551 | 157 | A03990 | A11487 | 188 |
| A03990 | A11611 | 249 | A03990 | A11906 | 167 |
| A03990 | A12705 | 163 | A03990 | A12711 | 221 |
| A03990 | A12878 | 238 | A03990 | A13510 | 168 |
| A03990 | A13824 | 474 | A03990 | A13868 | 313 |
| A03990 | A14006 | 491 | A03990 | A14009 | 188 |
| A03990 | A14198 | 281 | A03990 | A14247 | 485 |
| A03990 | A14399 | 226 | A03990 | A14862 | 310 |
| A03990 | A15292 | 480 | A03990 | A15293 | 636 |
| A03990 | A15294 | 154 | A03990 | A15390 | 458 |
| A03990 | A16410 | 490 | A03990 | A16560 | 160 |
| A03991 | A04596 | 411 | A03991 | A05414 | 899 |
| A03991 | A13886 | 378 | A03992 | A04087 | 474 |
| A03992 | A04228 | 294 | A03992 | A04231 | 450 |
| A03992 | A05266 | 469 | A03992 | A05358 | 329 |
| A03992 | A05398 | 318 | A03992 | A05761 | 469 |
| A03992 | A06212 | 318 | A03992 | A07014 | 340 |
| A03992 | A07200 | 152 | A03992 | A09479 | 383 |
| A03992 | A11230 | 419 | A03993 | A04101 | 378 |
| A03993 | A04474 | 454 | A03993 | A06317 | 379 |
| A03993 | A11426 | 408 | A03993 | A12340 | 414 |
| A03993 | A15241 | 272 | A03993 | A15296 | 238 |
| A03994 | A04062 | 221 | A03995 | A07157 | 319 |
| A03995 | A07161 | 441 | A03995 | A07166 | 348 |
| A03996 | A03999 | 447 | A03996 | A04528 | 445 |
| A03996 | A04589 | 377 | A03997 | A04609 | 348 |
| A03998 | A04051 | 450 | A03998 | A04052 | 340 |

|        |        |     |        |        |     |
|--------|--------|-----|--------|--------|-----|
| A03998 | A04097 | 366 | A03998 | A04608 | 235 |
| A03998 | A04880 | 218 | A03998 | A06190 | 182 |
| A03998 | A06631 | 443 | A03998 | A08745 | 401 |
| A03998 | A10178 | 402 | A03998 | A14190 | 154 |
| A03998 | A14559 | 245 | A03998 | A15328 | 156 |
| A03998 | A15896 | 263 | A03999 | A04528 | 438 |
| A03999 | A04589 | 358 | A03999 | A06415 | 302 |
| A04000 | A04779 | 165 | A04000 | A06606 | 267 |
| A04000 | A06848 | 366 | A04000 | A07911 | 165 |
| A04000 | A08330 | 400 | A04001 | A04236 | 391 |
| A04001 | A04911 | 356 | A04001 | A05142 | 386 |
| A04001 | A05533 | 307 | A04001 | A06314 | 201 |
| A04001 | A15295 | 462 | A04001 | A15498 | 240 |
| A04002 | A04163 | 234 | A04002 | A04373 | 319 |
| A04002 | A04551 | 429 | A04002 | A04751 | 182 |
| A04002 | A04938 | 283 | A04002 | A05450 | 243 |
| A04002 | A06621 | 216 | A04002 | A09558 | 188 |
| A04002 | A12956 | 368 | A04002 | A13694 | 326 |
| A04002 | A14371 | 314 | A04002 | A14665 | 191 |
| A04003 | A06933 | 455 | A04003 | A14930 | 299 |
| A04004 | A04005 | 351 | A04004 | A04031 | 334 |
| A04004 | A04123 | 367 | A04004 | A04249 | 425 |
| A04004 | A04260 | 221 | A04004 | A04286 | 283 |
| A04004 | A04304 | 425 | A04004 | A04443 | 326 |
| A04004 | A04560 | 344 | A04004 | A04573 | 348 |
| A04004 | A04805 | 307 | A04004 | A04905 | 313 |
| A04004 | A05036 | 357 | A04004 | A05094 | 269 |
| A04004 | A05848 | 439 | A04004 | A07178 | 293 |
| A04004 | A07198 | 187 | A04004 | A07199 | 329 |
| A04004 | A07663 | 396 | A04004 | A08289 | 260 |
| A04004 | A09842 | 195 | A04004 | A10247 | 151 |
| A04004 | A11348 | 475 | A04005 | A04591 | 422 |
| A04005 | A07199 | 374 | A04005 | A07200 | 199 |
| A04005 | A11348 | 347 | A04005 | A12304 | 378 |
| A04005 | A14405 | 305 | A04006 | A04239 | 221 |
| A04006 | A04307 | 180 | A04006 | A04418 | 229 |
| A04006 | A04453 | 276 | A04006 | A04493 | 207 |
| A04006 | A04947 | 290 | A04006 | A05106 | 182 |
| A04006 | A05144 | 257 | A04006 | A05234 | 154 |
| A04006 | A06428 | 152 | A04006 | A06701 | 180 |
| A04006 | A06868 | 221 | A04006 | A06895 | 332 |
| A04006 | A07903 | 218 | A04006 | A08624 | 360 |
| A04006 | A08635 | 263 | A04006 | A09123 | 254 |
| A04006 | A09409 | 351 | A04006 | A10297 | 388 |
| A04006 | A10354 | 291 | A04006 | A10813 | 234 |
| A04006 | A13885 | 263 | A04006 | A14648 | 291 |

|        |        |     |        |        |     |
|--------|--------|-----|--------|--------|-----|
| A04006 | A16718 | 270 | A04007 | A04048 | 246 |
| A04007 | A04267 | 224 | A04007 | A04612 | 296 |
| A04007 | A04770 | 274 | A04007 | A04868 | 377 |
| A04007 | A04988 | 281 | A04007 | A05168 | 447 |
| A04007 | A05170 | 393 | A04007 | A09124 | 278 |
| A04007 | A09149 | 238 | A04007 | A09273 | 362 |
| A04007 | A10014 | 257 | A04007 | A13162 | 232 |
| A04007 | A13917 | 182 | A04007 | A13997 | 177 |
| A04007 | A17029 | 407 | A04008 | A04540 | 160 |
| A04008 | A04712 | 266 | A04008 | A04783 | 171 |
| A04008 | A04825 | 340 | A04008 | A05996 | 204 |
| A04008 | A07911 | 167 | A04008 | A08866 | 260 |
| A04008 | A09020 | 238 | A04008 | A09054 | 491 |
| A04008 | A09643 | 162 | A04008 | A10174 | 899 |
| A04008 | A10392 | 152 | A04008 | A10626 | 272 |
| A04008 | A10947 | 274 | A04008 | A12361 | 159 |
| A04008 | A13874 | 457 | A04008 | A14008 | 162 |
| A04008 | A14052 | 340 | A04008 | A14247 | 215 |
| A04008 | A14554 | 154 | A04008 | A14646 | 210 |
| A04008 | A14692 | 205 | A04008 | A15336 | 210 |
| A04008 | A15552 | 274 | A04009 | A04028 | 346 |
| A04009 | A04047 | 425 | A04009 | A04939 | 238 |
| A04009 | A04946 | 473 | A04009 | A04999 | 369 |
| A04009 | A05015 | 154 | A04009 | A05288 | 327 |
| A04009 | A06608 | 168 | A04009 | A07128 | 323 |
| A04009 | A08070 | 255 | A04009 | A08352 | 297 |
| A04009 | A09127 | 230 | A04009 | A12373 | 307 |
| A04009 | A15546 | 218 | A04010 | A04011 | 196 |
| A04010 | A04015 | 346 | A04010 | A04051 | 452 |
| A04010 | A04105 | 191 | A04010 | A04138 | 184 |
| A04010 | A04142 | 372 | A04010 | A04143 | 472 |
| A04010 | A04244 | 187 | A04010 | A04262 | 386 |
| A04010 | A04267 | 217 | A04010 | A04298 | 297 |
| A04010 | A04322 | 279 | A04010 | A04391 | 226 |
| A04010 | A04494 | 217 | A04010 | A04538 | 279 |
| A04010 | A04584 | 256 | A04010 | A04607 | 152 |
| A04010 | A04608 | 196 | A04010 | A04609 | 266 |
| A04010 | A04614 | 144 | A04010 | A04652 | 269 |
| A04010 | A04671 | 156 | A04010 | A04783 | 236 |
| A04010 | A04814 | 279 | A04010 | A04950 | 297 |
| A04010 | A04986 | 326 | A04010 | A04999 | 238 |
| A04010 | A05107 | 362 | A04010 | A05113 | 243 |
| A04010 | A05126 | 267 | A04010 | A05153 | 232 |
| A04010 | A05309 | 477 | A04010 | A05313 | 260 |
| A04010 | A05349 | 465 | A04010 | A05389 | 217 |
| A04010 | A05390 | 160 | A04010 | A05396 | 154 |

|        |        |     |        |        |     |
|--------|--------|-----|--------|--------|-----|
| A04010 | A05427 | 246 | A04010 | A05451 | 238 |
| A04010 | A05506 | 343 | A04010 | A05691 | 163 |
| A04010 | A05949 | 160 | A04010 | A06003 | 350 |
| A04010 | A06149 | 165 | A04010 | A06217 | 238 |
| A04010 | A06271 | 260 | A04010 | A06286 | 434 |
| A04010 | A06422 | 160 | A04010 | A06579 | 180 |
| A04010 | A06635 | 188 | A04010 | A06642 | 168 |
| A04010 | A06734 | 213 | A04010 | A06829 | 174 |
| A04010 | A06979 | 165 | A04010 | A07115 | 256 |
| A04010 | A07126 | 160 | A04010 | A07154 | 174 |
| A04010 | A07156 | 418 | A04010 | A07161 | 258 |
| A04010 | A07164 | 367 | A04010 | A07165 | 294 |
| A04010 | A07200 | 229 | A04010 | A07321 | 187 |
| A04010 | A07342 | 159 | A04010 | A08572 | 369 |
| A04010 | A08755 | 288 | A04010 | A08827 | 183 |
| A04010 | A09028 | 157 | A04010 | A09974 | 297 |
| A04010 | A10081 | 246 | A04010 | A10625 | 205 |
| A04010 | A10638 | 347 | A04010 | A10658 | 205 |
| A04010 | A10967 | 246 | A04010 | A11556 | 213 |
| A04010 | A11602 | 157 | A04010 | A12824 | 402 |
| A04010 | A13163 | 361 | A04010 | A14071 | 428 |
| A04010 | A14208 | 173 | A04010 | A14344 | 180 |
| A04010 | A14423 | 165 | A04010 | A14640 | 238 |
| A04010 | A14729 | 288 | A04010 | A15233 | 184 |
| A04010 | A15691 | 198 | A04010 | A16216 | 230 |
| A04010 | A16610 | 205 | A04010 | A16636 | 326 |
| A04010 | A17108 | 159 | A04011 | A04059 | 425 |
| A04011 | A04138 | 328 | A04011 | A04144 | 371 |
| A04011 | A04501 | 393 | A04011 | A04540 | 263 |
| A04011 | A04657 | 333 | A04011 | A04867 | 201 |
| A04011 | A05342 | 341 | A04011 | A05367 | 363 |
| A04011 | A06361 | 273 | A04011 | A07164 | 238 |
| A04011 | A08070 | 241 | A04011 | A10721 | 263 |
| A04011 | A11326 | 202 | A04011 | A15422 | 205 |
| A04012 | A04033 | 480 | A04012 | A04558 | 217 |
| A04012 | A04622 | 452 | A04012 | A05016 | 216 |
| A04012 | A05617 | 156 | A04012 | A05633 | 945 |
| A04012 | A05880 | 202 | A04012 | A06273 | 329 |
| A04012 | A06286 | 195 | A04012 | A06289 | 63  |
| A04012 | A06572 | 165 | A04012 | A06652 | 177 |
| A04012 | A07167 | 368 | A04012 | A07203 | 156 |
| A04012 | A07242 | 154 | A04012 | A07433 | 309 |
| A04012 | A07480 | 216 | A04012 | A07726 | 294 |
| A04012 | A08450 | 286 | A04012 | A08608 | 350 |
| A04012 | A09401 | 340 | A04012 | A09476 | 218 |
| A04012 | A09762 | 347 | A04012 | A10510 | 276 |



|        |        |     |        |        |     |
|--------|--------|-----|--------|--------|-----|
| A04012 | A10601 | 156 | A04012 | A10735 | 152 |
| A04012 | A10798 | 168 | A04012 | A11108 | 245 |
| A04012 | A11129 | 552 | A04012 | A11601 | 241 |
| A04012 | A11614 | 216 | A04012 | A11657 | 243 |
| A04012 | A11929 | 438 | A04012 | A11931 | 469 |
| A04012 | A12054 | 278 | A04012 | A12102 | 208 |
| A04012 | A12556 | 177 | A04012 | A12680 | 922 |
| A04012 | A12988 | 959 | A04012 | A13198 | 472 |
| A04012 | A13216 | 219 | A04012 | A13511 | 319 |
| A04012 | A13743 | 477 | A04012 | A13949 | 216 |
| A04012 | A14006 | 369 | A04012 | A14025 | 174 |
| A04012 | A14028 | 899 | A04012 | A14198 | 288 |
| A04012 | A14299 | 406 | A04012 | A14400 | 224 |
| A04012 | A14426 | 177 | A04012 | A14570 | 215 |
| A04012 | A14635 | 232 | A04012 | A15506 | 489 |
| A04012 | A15573 | 154 | A04012 | A15932 | 187 |
| A04012 | A16398 | 281 | A04012 | A16594 | 271 |
| A04012 | A16667 | 232 | A04012 | A17190 | 187 |
| A04013 | A05396 | 185 | A04013 | A06277 | 303 |
| A04013 | A06348 | 219 | A04013 | A06778 | 180 |
| A04013 | A07222 | 157 | A04013 | A07709 | 260 |
| A04013 | A07883 | 170 | A04013 | A08309 | 485 |
| A04013 | A08903 | 156 | A04013 | A09033 | 229 |
| A04013 | A10574 | 204 | A04013 | A11205 | 241 |
| A04013 | A12722 | 157 | A04013 | A14195 | 229 |
| A04013 | A14481 | 344 | A04013 | A15595 | 238 |
| A04014 | A04290 | 452 | A04014 | A06607 | 245 |
| A04015 | A04053 | 246 | A04015 | A04133 | 271 |
| A04015 | A04167 | 271 | A04015 | A04174 | 330 |
| A04015 | A04451 | 188 | A04015 | A05849 | 377 |
| A04015 | A05918 | 311 | A04015 | A06519 | 393 |
| A04015 | A06622 | 212 | A04015 | A06623 | 378 |
| A04015 | A07127 | 260 | A04015 | A07399 | 401 |
| A04015 | A08070 | 168 | A04015 | A08335 | 201 |
| A04015 | A09120 | 335 | A04015 | A09250 | 393 |
| A04015 | A09331 | 277 | A04015 | A10456 | 283 |
| A04015 | A11055 | 366 | A04015 | A11884 | 272 |
| A04015 | A11921 | 235 | A04015 | A12357 | 228 |
| A04015 | A12927 | 334 | A04015 | A14524 | 235 |
| A04015 | A14624 | 358 | A04015 | A15673 | 151 |
| A04015 | A16262 | 152 | A04016 | A04041 | 425 |
| A04016 | A05288 | 341 | A04016 | A05485 | 407 |
| A04016 | A05496 | 422 | A04016 | A05520 | 430 |
| A04016 | A06608 | 241 | A04017 | A06158 | 364 |
| A04017 | A07394 | 424 | A04017 | A08519 | 329 |
| A04017 | A09263 | 293 | A04017 | A11526 | 345 |

|        |        |     |        |        |     |
|--------|--------|-----|--------|--------|-----|
| A04017 | A11833 | 469 | A04017 | A12042 | 374 |
| A04017 | A13116 | 432 | A04017 | A13809 | 470 |
| A04017 | A15653 | 450 | A04017 | A15666 | 193 |
| A04017 | A15765 | 335 | A04017 | A16157 | 425 |
| A04017 | A16243 | 367 | A04017 | A16676 | 484 |
| A04018 | A04558 | 347 | A04018 | A05577 | 183 |
| A04018 | A08070 | 255 | A04018 | A09401 | 703 |
| A04018 | A11330 | 419 | A04018 | A12009 | 419 |
| A04018 | A13216 | 515 | A04018 | A13983 | 256 |
| A04018 | A14391 | 224 | A04018 | A15290 | 352 |
| A04018 | A15358 | 445 | A04018 | A16061 | 465 |
| A04019 | A04736 | 465 | A04019 | A06277 | 263 |
| A04019 | A08725 | 438 | A04020 | A04209 | 488 |
| A04020 | A04342 | 172 | A04020 | A04795 | 179 |
| A04020 | A04956 | 196 | A04020 | A04991 | 391 |
| A04020 | A05032 | 171 | A04020 | A05082 | 350 |
| A04020 | A05121 | 201 | A04020 | A05176 | 173 |
| A04020 | A05568 | 63  | A04020 | A05621 | 465 |
| A04020 | A05854 | 340 | A04020 | A05958 | 291 |
| A04020 | A06034 | 229 | A04020 | A06495 | 193 |
| A04020 | A06682 | 263 | A04020 | A06919 | 485 |
| A04020 | A07163 | 294 | A04020 | A07218 | 491 |
| A04020 | A07242 | 270 | A04020 | A07339 | 358 |
| A04020 | A07555 | 283 | A04020 | A07791 | 196 |
| A04020 | A08855 | 229 | A04020 | A09051 | 229 |
| A04020 | A09149 | 160 | A04020 | A09362 | 270 |
| A04020 | A09386 | 160 | A04020 | A09438 | 457 |
| A04020 | A09504 | 347 | A04020 | A09548 | 191 |
| A04020 | A09963 | 401 | A04020 | A10247 | 475 |
| A04020 | A10357 | 454 | A04020 | A11077 | 312 |
| A04020 | A11206 | 283 | A04020 | A11291 | 374 |
| A04020 | A11391 | 183 | A04020 | A11983 | 396 |
| A04020 | A12258 | 163 | A04020 | A12654 | 163 |
| A04020 | A12987 | 263 | A04020 | A13844 | 196 |
| A04020 | A13997 | 162 | A04020 | A14006 | 276 |
| A04020 | A14196 | 201 | A04020 | A14279 | 163 |
| A04020 | A14319 | 207 | A04020 | A14335 | 391 |
| A04020 | A14375 | 246 | A04020 | A14390 | 363 |
| A04020 | A14436 | 201 | A04020 | A15162 | 191 |
| A04020 | A15282 | 157 | A04020 | A15547 | 179 |
| A04020 | A15850 | 213 | A04021 | A05154 | 308 |
| A04021 | A05301 | 156 | A04021 | A08896 | 360 |
| A04021 | A09600 | 340 | A04021 | A11738 | 326 |
| A04023 | A04051 | 246 | A04023 | A04369 | 353 |
| A04023 | A04520 | 151 | A04023 | A05494 | 238 |
| A04023 | A05932 | 405 | A04023 | A06762 | 277 |

|        |        |     |        |        |     |
|--------|--------|-----|--------|--------|-----|
| A04023 | A07164 | 330 | A04023 | A07200 | 394 |
| A04023 | A07438 | 310 | A04023 | A07561 | 230 |
| A04023 | A14423 | 463 | A04023 | A15905 | 224 |
| A04024 | A05967 | 224 | A04024 | A08777 | 305 |
| A04024 | A11758 | 329 | A04025 | A06224 | 377 |
| A04025 | A07145 | 260 | A04025 | A07557 | 368 |
| A04025 | A08584 | 399 | A04025 | A08693 | 396 |
| A04025 | A10230 | 418 | A04025 | A10527 | 267 |
| A04025 | A10821 | 329 | A04025 | A15241 | 201 |
| A04025 | A15992 | 262 | A04026 | A14299 | 162 |
| A04027 | A09029 | 404 | A04027 | A09059 | 224 |
| A04027 | A14333 | 388 | A04028 | A04047 | 404 |
| A04028 | A04590 | 329 | A04028 | A04847 | 294 |
| A04028 | A04946 | 405 | A04028 | A05218 | 182 |
| A04028 | A05288 | 486 | A04028 | A05601 | 180 |
| A04028 | A07199 | 218 | A04028 | A08555 | 424 |
| A04028 | A10173 | 217 | A04028 | A10367 | 172 |
| A04028 | A10631 | 224 | A04028 | A12630 | 360 |
| A04029 | A06606 | 243 | A04029 | A14588 | 394 |
| A04030 | A04568 | 371 | A04030 | A04861 | 328 |
| A04030 | A04985 | 316 | A04030 | A05817 | 408 |
| A04030 | A06313 | 391 | A04030 | A07140 | 332 |
| A04030 | A16636 | 215 | A04031 | A04123 | 390 |
| A04031 | A04260 | 269 | A04031 | A04560 | 372 |
| A04031 | A04581 | 457 | A04031 | A04656 | 414 |
| A04031 | A04905 | 347 | A04031 | A05036 | 382 |
| A04031 | A05481 | 424 | A04031 | A06311 | 424 |
| A04031 | A07201 | 404 | A04031 | A08572 | 460 |
| A04031 | A08741 | 310 | A04031 | A14535 | 380 |
| A04031 | A14642 | 238 | A04031 | A15674 | 343 |
| A04033 | A04062 | 484 | A04033 | A04079 | 271 |
| A04033 | A04263 | 63  | A04033 | A04449 | 491 |
| A04033 | A04878 | 307 | A04033 | A04889 | 358 |
| A04033 | A05007 | 303 | A04033 | A05008 | 193 |
| A04033 | A05015 | 329 | A04033 | A05127 | 441 |
| A04033 | A05155 | 313 | A04033 | A05221 | 491 |
| A04033 | A05288 | 491 | A04033 | A05418 | 490 |
| A04033 | A05940 | 238 | A04033 | A06190 | 480 |
| A04033 | A06273 | 483 | A04033 | A06277 | 486 |
| A04033 | A06569 | 422 | A04033 | A06578 | 428 |
| A04033 | A06588 | 367 | A04033 | A06650 | 168 |
| A04033 | A07004 | 491 | A04033 | A07008 | 221 |
| A04033 | A07149 | 340 | A04033 | A07158 | 63  |
| A04033 | A07173 | 433 | A04033 | A07209 | 491 |
| A04033 | A07229 | 374 | A04033 | A07242 | 490 |
| A04033 | A07269 | 184 | A04033 | A07726 | 198 |

|        |        |     |        |        |     |
|--------|--------|-----|--------|--------|-----|
| A04033 | A07803 | 491 | A04033 | A08022 | 268 |
| A04033 | A08118 | 198 | A04033 | A08130 | 162 |
| A04033 | A08234 | 184 | A04033 | A08788 | 277 |
| A04033 | A08859 | 489 | A04033 | A08869 | 491 |
| A04033 | A08878 | 491 | A04033 | A08918 | 488 |
| A04033 | A08929 | 358 | A04033 | A09003 | 400 |
| A04033 | A09010 | 152 | A04033 | A09022 | 246 |
| A04033 | A09078 | 330 | A04033 | A09117 | 473 |
| A04033 | A09263 | 63  | A04033 | A09732 | 180 |
| A04033 | A09742 | 223 | A04033 | A10599 | 274 |
| A04033 | A11469 | 434 | A04033 | A11521 | 235 |
| A04033 | A11543 | 278 | A04033 | A11621 | 465 |
| A04033 | A11649 | 154 | A04033 | A11957 | 269 |
| A04033 | A11983 | 491 | A04033 | A12111 | 249 |
| A04033 | A12335 | 162 | A04033 | A12365 | 486 |
| A04033 | A12393 | 435 | A04033 | A12897 | 486 |
| A04033 | A12919 | 216 | A04033 | A13111 | 269 |
| A04033 | A13124 | 202 | A04033 | A14055 | 474 |
| A04033 | A14127 | 412 | A04033 | A14128 | 385 |
| A04033 | A14196 | 491 | A04033 | A14202 | 490 |
| A04033 | A14204 | 491 | A04033 | A14208 | 420 |
| A04033 | A14212 | 205 | A04033 | A14218 | 462 |
| A04033 | A14229 | 490 | A04033 | A14236 | 452 |
| A04033 | A14373 | 273 | A04033 | A14410 | 443 |
| A04033 | A14427 | 162 | A04033 | A14487 | 202 |
| A04033 | A14511 | 347 | A04033 | A14570 | 488 |
| A04033 | A14635 | 491 | A04033 | A14636 | 475 |
| A04033 | A14643 | 165 | A04033 | A14648 | 483 |
| A04033 | A14653 | 430 | A04033 | A14660 | 167 |
| A04033 | A14667 | 238 | A04033 | A14986 | 168 |
| A04033 | A15241 | 491 | A04033 | A15282 | 455 |
| A04033 | A15292 | 491 | A04033 | A15295 | 490 |
| A04033 | A15313 | 313 | A04033 | A15314 | 490 |
| A04033 | A15322 | 491 | A04033 | A15349 | 324 |
| A04033 | A15352 | 195 | A04033 | A15356 | 268 |
| A04033 | A15357 | 433 | A04033 | A15360 | 216 |
| A04033 | A15361 | 427 | A04033 | A15395 | 449 |
| A04033 | A15400 | 327 | A04033 | A15402 | 457 |
| A04033 | A15431 | 167 | A04033 | A15439 | 296 |
| A04033 | A15452 | 406 | A04033 | A15456 | 167 |
| A04033 | A15463 | 171 | A04033 | A15478 | 491 |
| A04033 | A15481 | 427 | A04033 | A15495 | 327 |
| A04033 | A15506 | 485 | A04033 | A15559 | 485 |
| A04033 | A15578 | 172 | A04033 | A15598 | 168 |
| A04033 | A15599 | 484 | A04033 | A15602 | 358 |
| A04033 | A15603 | 333 | A04033 | A15604 | 435 |

|        |        |     |        |        |     |
|--------|--------|-----|--------|--------|-----|
| A04033 | A15605 | 382 | A04033 | A15606 | 491 |
| A04033 | A15630 | 385 | A04033 | A15729 | 363 |
| A04033 | A15804 | 170 | A04033 | A16006 | 218 |
| A04033 | A16007 | 283 | A04033 | A16152 | 218 |
| A04033 | A16352 | 317 | A04033 | A16379 | 232 |
| A04033 | A16401 | 254 | A04033 | A16450 | 223 |
| A04033 | A16489 | 277 | A04033 | A16494 | 432 |
| A04033 | A16904 | 396 | A04034 | A04795 | 341 |
| A04034 | A04941 | 369 | A04034 | A05918 | 396 |
| A04034 | A11187 | 416 | A04034 | A13857 | 361 |
| A04035 | A04211 | 229 | A04035 | A05164 | 358 |
| A04035 | A06603 | 396 | A04035 | A07934 | 218 |
| A04035 | A08503 | 154 | A04035 | A08844 | 291 |
| A04035 | A14313 | 368 | A04035 | A14423 | 296 |
| A04035 | A14654 | 279 | A04035 | A15447 | 199 |
| A04036 | A04108 | 314 | A04036 | A04109 | 458 |
| A04036 | A06063 | 338 | A04036 | A09018 | 326 |
| A04037 | A04212 | 337 | A04037 | A04867 | 374 |
| A04037 | A07158 | 266 | A04037 | A14430 | 234 |
| A04037 | A14570 | 154 | A04038 | A04073 | 311 |
| A04038 | A04722 | 263 | A04038 | A05144 | 446 |
| A04038 | A05165 | 257 | A04038 | A06008 | 380 |
| A04038 | A06161 | 208 | A04038 | A06565 | 374 |
| A04038 | A07135 | 223 | A04038 | A08902 | 174 |
| A04038 | A09218 | 288 | A04038 | A09568 | 193 |
| A04038 | A09660 | 245 | A04038 | A10005 | 375 |
| A04038 | A10510 | 338 | A04038 | A11108 | 390 |
| A04038 | A11943 | 190 | A04038 | A14443 | 899 |
| A04038 | A16676 | 321 | A04039 | A04130 | 353 |
| A04040 | A04110 | 299 | A04040 | A04130 | 259 |
| A04040 | A04240 | 472 | A04040 | A04244 | 329 |
| A04040 | A04248 | 279 | A04040 | A04276 | 326 |
| A04040 | A04300 | 417 | A04040 | A04519 | 286 |
| A04040 | A04567 | 406 | A04040 | A04865 | 411 |
| A04040 | A05577 | 299 | A04040 | A05679 | 361 |
| A04040 | A05985 | 424 | A04040 | A06149 | 411 |
| A04040 | A06414 | 330 | A04040 | A06415 | 296 |
| A04040 | A06422 | 483 | A04040 | A06604 | 355 |
| A04040 | A06899 | 341 | A04040 | A06949 | 213 |
| A04040 | A07135 | 274 | A04040 | A07146 | 330 |
| A04040 | A07157 | 207 | A04040 | A07161 | 395 |
| A04040 | A07166 | 252 | A04040 | A07173 | 246 |
| A04040 | A09394 | 330 | A04040 | A10174 | 273 |
| A04040 | A14199 | 180 | A04040 | A14372 | 246 |
| A04040 | A14374 | 408 | A04040 | A14391 | 208 |
| A04040 | A14439 | 395 | A04040 | A15394 | 270 |

|        |        |     |        |        |     |
|--------|--------|-----|--------|--------|-----|
| A04040 | A15425 | 215 | A04040 | A15999 | 391 |
| A04040 | A16891 | 347 | A04041 | A05288 | 288 |
| A04042 | A04587 | 420 | A04042 | A04682 | 371 |
| A04042 | A04730 | 420 | A04042 | A06224 | 414 |
| A04043 | A16060 | 357 | A04045 | A16636 | 236 |
| A04046 | A04582 | 422 | A04046 | A05331 | 229 |
| A04046 | A07197 | 347 | A04046 | A08689 | 335 |
| A04046 | A09263 | 285 | A04046 | A14386 | 439 |
| A04046 | A15840 | 319 | A04047 | A04418 | 301 |
| A04047 | A04535 | 344 | A04047 | A04946 | 450 |
| A04047 | A05288 | 433 | A04047 | A05299 | 319 |
| A04047 | A07157 | 201 | A04047 | A11300 | 440 |
| A04048 | A04271 | 439 | A04048 | A04517 | 270 |
| A04048 | A04546 | 313 | A04048 | A04621 | 319 |
| A04048 | A04763 | 286 | A04048 | A04795 | 213 |
| A04048 | A05545 | 306 | A04048 | A06747 | 216 |
| A04048 | A06797 | 229 | A04048 | A08677 | 272 |
| A04048 | A09541 | 335 | A04048 | A09789 | 278 |
| A04048 | A09882 | 167 | A04048 | A10645 | 247 |
| A04048 | A11773 | 350 | A04048 | A14377 | 168 |
| A04048 | A14379 | 177 | A04048 | A15794 | 267 |
| A04048 | A16300 | 170 | A04049 | A04114 | 329 |
| A04049 | A04268 | 283 | A04049 | A04275 | 372 |
| A04049 | A04536 | 230 | A04049 | A04603 | 414 |
| A04049 | A04723 | 350 | A04049 | A04763 | 353 |
| A04049 | A05551 | 405 | A04049 | A05556 | 246 |
| A04049 | A09374 | 353 | A04049 | A12897 | 334 |
| A04049 | A14192 | 151 | A04050 | A04051 | 319 |
| A04050 | A04097 | 213 | A04050 | A04115 | 450 |
| A04050 | A04277 | 305 | A04050 | A04608 | 201 |
| A04050 | A04657 | 350 | A04050 | A04685 | 146 |
| A04050 | A04693 | 82  | A04050 | A04756 | 104 |
| A04050 | A04804 | 305 | A04050 | A05037 | 490 |
| A04050 | A05112 | 213 | A04050 | A05212 | 294 |
| A04050 | A05446 | 491 | A04050 | A05633 | 335 |
| A04050 | A05674 | 187 | A04050 | A05936 | 255 |
| A04050 | A06161 | 462 | A04050 | A06333 | 157 |
| A04050 | A06608 | 413 | A04050 | A06631 | 368 |
| A04050 | A06737 | 274 | A04050 | A06779 | 170 |
| A04050 | A06780 | 177 | A04050 | A06907 | 413 |
| A04050 | A07161 | 77  | A04050 | A07168 | 204 |
| A04050 | A07173 | 358 | A04050 | A07174 | 441 |
| A04050 | A07346 | 497 | A04050 | A07433 | 899 |
| A04050 | A07442 | 330 | A04050 | A07604 | 455 |
| A04050 | A07955 | 274 | A04050 | A08133 | 199 |
| A04050 | A08137 | 484 | A04050 | A08250 | 154 |

|        |        |     |        |        |     |
|--------|--------|-----|--------|--------|-----|
| A04050 | A08417 | 899 | A04050 | A08908 | 112 |
| A04050 | A09049 | 255 | A04050 | A09174 | 63  |
| A04050 | A09319 | 899 | A04050 | A09441 | 899 |
| A04050 | A09746 | 441 | A04050 | A10058 | 305 |
| A04050 | A10061 | 191 | A04050 | A10178 | 274 |
| A04050 | A10214 | 96  | A04050 | A10560 | 160 |
| A04050 | A10573 | 274 | A04050 | A10930 | 241 |
| A04050 | A11346 | 199 | A04050 | A11559 | 174 |
| A04050 | A11906 | 157 | A04050 | A12364 | 274 |
| A04050 | A13824 | 195 | A04050 | A13826 | 195 |
| A04050 | A13899 | 63  | A04050 | A13982 | 423 |
| A04050 | A14148 | 249 | A04050 | A14196 | 556 |
| A04050 | A14207 | 899 | A04050 | A14208 | 994 |
| A04050 | A14209 | 899 | A04050 | A14218 | 966 |
| A04050 | A14221 | 173 | A04050 | A14245 | 154 |
| A04050 | A14257 | 173 | A04050 | A14367 | 941 |
| A04050 | A14444 | 918 | A04050 | A14481 | 207 |
| A04050 | A14830 | 324 | A04050 | A15291 | 190 |
| A04050 | A15297 | 402 | A04050 | A15314 | 491 |
| A04050 | A15328 | 271 | A04050 | A15330 | 906 |
| A04050 | A15360 | 939 | A04050 | A15361 | 945 |
| A04050 | A15366 | 176 | A04050 | A15386 | 430 |
| A04050 | A15388 | 373 | A04050 | A15400 | 208 |
| A04050 | A15402 | 245 | A04050 | A15410 | 207 |
| A04050 | A15468 | 154 | A04050 | A15505 | 414 |
| A04050 | A15510 | 489 | A04050 | A15566 | 162 |
| A04050 | A15573 | 187 | A04050 | A15575 | 460 |
| A04050 | A15576 | 281 | A04050 | A15578 | 340 |
| A04050 | A15604 | 160 | A04050 | A15613 | 288 |
| A04050 | A15630 | 174 | A04050 | A15747 | 255 |
| A04050 | A15960 | 187 | A04050 | A15976 | 246 |
| A04050 | A16217 | 899 | A04050 | A16410 | 172 |
| A04050 | A16460 | 305 | A04050 | A17063 | 374 |
| A04050 | A17115 | 162 | A04050 | A17198 | 390 |
| A04051 | A04052 | 391 | A04051 | A04092 | 223 |
| A04051 | A04272 | 162 | A04051 | A04278 | 491 |
| A04051 | A04308 | 173 | A04051 | A04369 | 283 |
| A04051 | A04607 | 485 | A04051 | A04608 | 491 |
| A04051 | A04609 | 491 | A04051 | A04612 | 477 |
| A04051 | A04614 | 490 | A04051 | A04615 | 151 |
| A04051 | A04618 | 480 | A04051 | A04627 | 162 |
| A04051 | A04633 | 279 | A04051 | A04635 | 208 |
| A04051 | A04652 | 226 | A04051 | A04721 | 218 |
| A04051 | A04875 | 208 | A04051 | A04950 | 384 |
| A04051 | A05036 | 351 | A04051 | A05113 | 483 |
| A04051 | A05309 | 180 | A04051 | A05349 | 945 |

|        |        |     |        |        |     |
|--------|--------|-----|--------|--------|-----|
| A04051 | A05427 | 490 | A04051 | A05493 | 188 |
| A04051 | A05832 | 160 | A04051 | A05842 | 286 |
| A04051 | A05861 | 333 | A04051 | A05935 | 328 |
| A04051 | A05984 | 269 | A04051 | A06199 | 281 |
| A04051 | A06306 | 177 | A04051 | A06414 | 154 |
| A04051 | A06415 | 195 | A04051 | A06610 | 318 |
| A04051 | A07000 | 258 | A04051 | A07123 | 241 |
| A04051 | A07141 | 468 | A04051 | A07173 | 257 |
| A04051 | A07174 | 291 | A04051 | A07200 | 391 |
| A04051 | A07218 | 480 | A04051 | A07438 | 165 |
| A04051 | A07761 | 191 | A04051 | A08731 | 299 |
| A04051 | A08755 | 258 | A04051 | A10178 | 299 |
| A04051 | A11561 | 191 | A04051 | A11760 | 162 |
| A04051 | A12927 | 151 | A04051 | A13661 | 208 |
| A04051 | A13879 | 185 | A04051 | A14198 | 221 |
| A04051 | A14208 | 409 | A04051 | A14316 | 174 |
| A04051 | A14393 | 899 | A04051 | A14430 | 296 |
| A04051 | A14440 | 333 | A04051 | A15613 | 422 |
| A04051 | A15630 | 224 | A04051 | A15786 | 466 |
| A04051 | A15977 | 433 | A04051 | A16216 | 391 |
| A04051 | A16636 | 488 | A04052 | A04278 | 294 |
| A04052 | A04608 | 260 | A04052 | A04617 | 368 |
| A04052 | A04618 | 430 | A04052 | A05036 | 379 |
| A04052 | A05349 | 212 | A04052 | A06190 | 208 |
| A04052 | A07141 | 229 | A04052 | A08836 | 260 |
| A04052 | A08908 | 333 | A04052 | A09977 | 249 |
| A04052 | A13826 | 152 | A04053 | A04246 | 461 |
| A04053 | A04933 | 457 | A04053 | A05094 | 260 |
| A04053 | A05122 | 210 | A04053 | A05849 | 393 |
| A04053 | A05866 | 486 | A04053 | A05940 | 489 |
| A04053 | A06607 | 462 | A04053 | A06623 | 195 |
| A04053 | A07153 | 171 | A04053 | A07177 | 245 |
| A04053 | A07200 | 234 | A04053 | A07309 | 151 |
| A04053 | A08389 | 485 | A04053 | A09556 | 180 |
| A04053 | A10244 | 393 | A04053 | A10506 | 183 |
| A04053 | A10576 | 184 | A04053 | A11404 | 313 |
| A04053 | A11759 | 369 | A04053 | A13484 | 245 |
| A04053 | A13945 | 157 | A04053 | A13976 | 247 |
| A04053 | A14803 | 245 | A04053 | A16281 | 157 |
| A04054 | A04520 | 216 | A04054 | A04710 | 279 |
| A04054 | A06850 | 414 | A04054 | A07934 | 265 |
| A04054 | A08573 | 326 | A04054 | A10023 | 401 |
| A04054 | A13466 | 335 | A04055 | A05154 | 297 |
| A04055 | A09042 | 308 | A04056 | A09321 | 401 |
| A04056 | A14699 | 260 | A04056 | A15668 | 374 |
| A04057 | A10585 | 63  | A04057 | A13903 | 63  |



|        |        |     |        |        |     |
|--------|--------|-----|--------|--------|-----|
| A04058 | A06851 | 215 | A04058 | A09278 | 374 |
| A04058 | A11540 | 251 | A04059 | A04088 | 423 |
| A04059 | A04103 | 401 | A04059 | A04519 | 445 |
| A04059 | A04526 | 383 | A04059 | A06622 | 288 |
| A04059 | A09220 | 251 | A04059 | A10286 | 286 |
| A04059 | A16537 | 341 | A04060 | A04314 | 327 |
| A04060 | A06961 | 472 | A04060 | A07911 | 179 |
| A04060 | A08613 | 422 | A04060 | A10987 | 224 |
| A04061 | A04080 | 167 | A04061 | A04622 | 173 |
| A04061 | A07180 | 472 | A04061 | A15315 | 318 |
| A04061 | A15347 | 238 | A04062 | A04442 | 201 |
| A04062 | A04473 | 159 | A04062 | A04807 | 341 |
| A04062 | A05082 | 489 | A04062 | A05288 | 430 |
| A04062 | A05415 | 400 | A04062 | A05455 | 221 |
| A04062 | A05701 | 486 | A04062 | A05779 | 291 |
| A04062 | A05958 | 235 | A04062 | A06398 | 162 |
| A04062 | A06660 | 190 | A04062 | A06821 | 411 |
| A04062 | A07136 | 205 | A04062 | A07206 | 165 |
| A04062 | A07731 | 185 | A04062 | A09124 | 391 |
| A04062 | A09160 | 385 | A04062 | A10006 | 152 |
| A04062 | A10307 | 241 | A04062 | A10386 | 185 |
| A04062 | A11270 | 322 | A04062 | A12280 | 294 |
| A04062 | A14029 | 229 | A04062 | A14187 | 899 |
| A04062 | A14366 | 523 | A04062 | A14433 | 899 |
| A04062 | A14438 | 156 | A04062 | A14596 | 641 |
| A04062 | A14621 | 477 | A04062 | A14635 | 162 |
| A04062 | A15164 | 241 | A04062 | A15237 | 193 |
| A04062 | A15270 | 193 | A04062 | A15297 | 368 |
| A04062 | A15323 | 469 | A04062 | A15370 | 272 |
| A04062 | A16842 | 241 | A04062 | A16932 | 215 |
| A04062 | A17138 | 152 | A04063 | A04271 | 243 |
| A04063 | A04329 | 323 | A04063 | A04548 | 281 |
| A04063 | A04928 | 291 | A04063 | A05154 | 274 |
| A04063 | A05372 | 374 | A04063 | A06346 | 190 |
| A04063 | A06711 | 329 | A04063 | A06997 | 274 |
| A04063 | A07232 | 190 | A04063 | A07676 | 412 |
| A04063 | A07704 | 274 | A04063 | A07705 | 265 |
| A04063 | A08292 | 307 | A04063 | A09239 | 193 |
| A04063 | A09374 | 330 | A04063 | A09422 | 249 |
| A04063 | A09983 | 346 | A04063 | A10900 | 399 |
| A04063 | A12845 | 358 | A04063 | A12897 | 484 |
| A04063 | A14377 | 224 | A04063 | A15532 | 188 |
| A04063 | A16007 | 245 | A04064 | A04169 | 291 |
| A04064 | A15292 | 219 | A04065 | A14577 | 313 |
| A04066 | A04495 | 443 | A04066 | A04596 | 341 |
| A04066 | A04668 | 162 | A04066 | A06648 | 173 |

|        |        |     |        |        |     |
|--------|--------|-----|--------|--------|-----|
| A04066 | A07301 | 240 | A04066 | A08289 | 208 |
| A04066 | A09019 | 374 | A04066 | A09127 | 361 |
| A04066 | A09471 | 302 | A04066 | A09587 | 372 |
| A04066 | A11729 | 190 | A04066 | A13726 | 256 |
| A04066 | A17213 | 372 | A04067 | A06001 | 469 |
| A04067 | A06488 | 473 | A04067 | A06648 | 313 |
| A04067 | A11162 | 408 | A04067 | A11422 | 378 |
| A04067 | A11653 | 375 | A04067 | A12895 | 406 |
| A04067 | A13338 | 343 | A04067 | A14118 | 396 |
| A04067 | A16300 | 212 | A04068 | A04664 | 479 |
| A04069 | A04779 | 238 | A04069 | A07135 | 218 |
| A04070 | A04193 | 446 | A04071 | A04079 | 460 |
| A04071 | A04558 | 243 | A04071 | A05284 | 174 |
| A04071 | A05383 | 205 | A04071 | A06701 | 236 |
| A04071 | A09356 | 273 | A04071 | A09401 | 151 |
| A04071 | A09416 | 491 | A04071 | A11000 | 340 |
| A04071 | A13198 | 279 | A04071 | A14000 | 156 |
| A04071 | A14611 | 196 | A04071 | A15477 | 310 |
| A04071 | A15669 | 157 | A04071 | A15837 | 152 |
| A04072 | A04597 | 267 | A04072 | A04718 | 232 |
| A04072 | A04782 | 160 | A04072 | A05028 | 159 |
| A04072 | A05087 | 205 | A04072 | A05220 | 185 |
| A04072 | A05594 | 312 | A04072 | A05601 | 196 |
| A04072 | A06277 | 202 | A04072 | A06429 | 406 |
| A04072 | A06627 | 157 | A04072 | A06701 | 483 |
| A04072 | A07153 | 170 | A04072 | A07847 | 159 |
| A04072 | A08517 | 191 | A04072 | A08635 | 339 |
| A04072 | A09056 | 241 | A04072 | A09647 | 151 |
| A04072 | A10592 | 226 | A04072 | A11101 | 180 |
| A04072 | A11983 | 185 | A04072 | A13369 | 251 |
| A04072 | A13824 | 163 | A04072 | A14026 | 469 |
| A04072 | A14399 | 160 | A04072 | A14648 | 468 |
| A04072 | A15282 | 210 | A04072 | A15295 | 491 |
| A04073 | A04553 | 405 | A04073 | A04759 | 176 |
| A04073 | A05949 | 185 | A04073 | A06000 | 218 |
| A04073 | A06037 | 475 | A04073 | A06242 | 477 |
| A04073 | A06297 | 185 | A04073 | A06431 | 165 |
| A04073 | A06463 | 212 | A04073 | A06521 | 294 |
| A04073 | A06775 | 218 | A04073 | A06864 | 485 |
| A04073 | A07079 | 312 | A04073 | A07164 | 324 |
| A04073 | A07178 | 188 | A04073 | A07346 | 489 |
| A04073 | A07353 | 218 | A04073 | A07534 | 346 |
| A04073 | A07647 | 401 | A04073 | A07996 | 130 |
| A04073 | A08902 | 489 | A04073 | A09124 | 386 |
| A04073 | A09218 | 200 | A04073 | A09506 | 221 |
| A04073 | A09623 | 281 | A04073 | A09626 | 316 |

|        |        |     |        |        |     |
|--------|--------|-----|--------|--------|-----|
| A04073 | A09660 | 483 | A04073 | A10846 | 202 |
| A04073 | A11922 | 259 | A04073 | A12932 | 450 |
| A04073 | A14004 | 162 | A04073 | A14079 | 288 |
| A04073 | A14155 | 149 | A04073 | A14460 | 240 |
| A04073 | A15369 | 351 | A04073 | A16226 | 163 |
| A04073 | A16461 | 400 | A04073 | A16606 | 162 |
| A04073 | A16613 | 243 | A04074 | A04092 | 335 |
| A04074 | A04180 | 276 | A04074 | A04216 | 272 |
| A04074 | A04402 | 416 | A04074 | A05082 | 221 |
| A04074 | A05751 | 224 | A04074 | A05780 | 321 |
| A04074 | A05854 | 391 | A04074 | A09018 | 269 |
| A04074 | A09149 | 179 | A04074 | A09388 | 363 |
| A04074 | A09390 | 379 | A04074 | A10136 | 338 |
| A04074 | A11834 | 177 | A04074 | A13250 | 152 |
| A04074 | A14190 | 177 | A04074 | A14211 | 329 |
| A04074 | A15230 | 326 | A04075 | A04212 | 489 |
| A04075 | A04442 | 308 | A04075 | A04867 | 460 |
| A04075 | A05297 | 340 | A04075 | A06133 | 306 |
| A04075 | A06200 | 228 | A04075 | A06243 | 317 |
| A04075 | A06281 | 258 | A04075 | A06610 | 191 |
| A04075 | A07883 | 187 | A04075 | A08207 | 474 |
| A04075 | A09763 | 291 | A04075 | A10414 | 483 |
| A04075 | A10468 | 374 | A04075 | A12010 | 281 |
| A04075 | A13212 | 445 | A04075 | A13500 | 430 |
| A04075 | A14366 | 291 | A04075 | A14554 | 364 |
| A04075 | A14621 | 489 | A04075 | A15704 | 168 |
| A04075 | A15795 | 285 | A04075 | A16877 | 213 |
| A04076 | A04082 | 252 | A04076 | A04417 | 208 |
| A04076 | A04834 | 252 | A04076 | A05087 | 259 |
| A04076 | A05182 | 274 | A04076 | A05439 | 124 |
| A04076 | A05568 | 180 | A04076 | A05597 | 241 |
| A04076 | A06001 | 168 | A04076 | A06700 | 173 |
| A04076 | A08465 | 313 | A04076 | A08641 | 243 |
| A04076 | A08949 | 199 | A04076 | A09206 | 255 |
| A04076 | A09433 | 302 | A04076 | A09740 | 378 |
| A04076 | A09850 | 294 | A04076 | A11601 | 283 |
| A04076 | A11948 | 294 | A04076 | A13783 | 262 |
| A04076 | A13860 | 224 | A04076 | A13951 | 302 |
| A04076 | A14125 | 180 | A04076 | A14129 | 491 |
| A04076 | A14135 | 200 | A04076 | A14146 | 241 |
| A04076 | A14210 | 262 | A04076 | A14362 | 218 |
| A04076 | A14366 | 326 | A04076 | A14372 | 160 |
| A04076 | A14511 | 151 | A04076 | A14539 | 163 |
| A04076 | A14554 | 302 | A04076 | A15318 | 258 |
| A04076 | A15411 | 241 | A04076 | A15475 | 235 |
| A04076 | A15518 | 286 | A04076 | A15795 | 180 |

|        |        |     |        |        |     |
|--------|--------|-----|--------|--------|-----|
| A04076 | A15819 | 208 | A04076 | A16224 | 176 |
| A04076 | A17076 | 201 | A04077 | A09214 | 420 |
| A04077 | A16738 | 259 | A04078 | A04375 | 490 |
| A04078 | A04379 | 302 | A04078 | A04402 | 351 |
| A04078 | A04473 | 306 | A04078 | A04622 | 252 |
| A04078 | A04941 | 394 | A04078 | A05289 | 265 |
| A04078 | A05487 | 229 | A04078 | A05494 | 230 |
| A04078 | A06107 | 340 | A04078 | A06596 | 299 |
| A04078 | A06648 | 205 | A04078 | A07145 | 213 |
| A04078 | A09240 | 338 | A04078 | A11932 | 238 |
| A04078 | A15837 | 488 | A04078 | A15858 | 270 |
| A04078 | A16068 | 486 | A04078 | A16099 | 474 |
| A04078 | A16626 | 443 | A04078 | A16748 | 417 |
| A04079 | A04326 | 208 | A04079 | A04384 | 191 |
| A04079 | A04520 | 333 | A04079 | A04975 | 174 |
| A04079 | A05003 | 259 | A04079 | A05016 | 288 |
| A04079 | A05259 | 268 | A04079 | A05418 | 340 |
| A04079 | A05536 | 151 | A04079 | A05621 | 297 |
| A04079 | A06277 | 461 | A04079 | A07116 | 182 |
| A04079 | A07288 | 182 | A04079 | A07553 | 200 |
| A04079 | A07616 | 152 | A04079 | A07736 | 191 |
| A04079 | A07766 | 321 | A04079 | A08417 | 348 |
| A04079 | A08456 | 160 | A04079 | A08541 | 167 |
| A04079 | A08557 | 215 | A04079 | A08668 | 177 |
| A04079 | A08838 | 466 | A04079 | A08944 | 218 |
| A04079 | A09243 | 240 | A04079 | A09344 | 191 |
| A04079 | A09356 | 170 | A04079 | A09416 | 196 |
| A04079 | A09607 | 157 | A04079 | A09997 | 109 |
| A04079 | A10332 | 241 | A04079 | A10826 | 163 |
| A04079 | A11153 | 334 | A04079 | A11464 | 156 |
| A04079 | A11541 | 286 | A04079 | A11983 | 296 |
| A04079 | A12029 | 163 | A04079 | A12205 | 278 |
| A04079 | A12214 | 334 | A04079 | A12674 | 215 |
| A04079 | A12897 | 243 | A04079 | A13299 | 232 |
| A04079 | A13839 | 208 | A04079 | A14095 | 294 |
| A04079 | A14127 | 379 | A04079 | A14128 | 361 |
| A04079 | A14644 | 477 | A04079 | A15562 | 232 |
| A04079 | A15888 | 278 | A04079 | A16177 | 152 |
| A04079 | A16263 | 152 | A04079 | A16950 | 232 |
| A04079 | A17010 | 191 | A04080 | A04348 | 377 |
| A04080 | A04515 | 328 | A04080 | A04516 | 210 |
| A04080 | A04739 | 230 | A04080 | A04830 | 314 |
| A04080 | A04874 | 198 | A04080 | A04982 | 219 |
| A04080 | A04988 | 452 | A04080 | A05084 | 269 |
| A04080 | A05122 | 306 | A04080 | A05132 | 258 |
| A04080 | A05185 | 457 | A04080 | A05418 | 473 |

|        |        |     |        |        |     |
|--------|--------|-----|--------|--------|-----|
| A04080 | A05525 | 254 | A04080 | A05532 | 291 |
| A04080 | A06334 | 283 | A04080 | A06404 | 219 |
| A04080 | A06463 | 190 | A04080 | A06581 | 446 |
| A04080 | A06586 | 159 | A04080 | A06813 | 205 |
| A04080 | A07218 | 185 | A04080 | A07486 | 265 |
| A04080 | A07648 | 351 | A04080 | A07726 | 79  |
| A04080 | A09076 | 226 | A04080 | A09081 | 276 |
| A04080 | A09116 | 328 | A04080 | A09126 | 152 |
| A04080 | A09141 | 193 | A04080 | A09265 | 348 |
| A04080 | A09271 | 291 | A04080 | A09387 | 223 |
| A04080 | A09561 | 200 | A04080 | A09943 | 226 |
| A04080 | A10267 | 371 | A04080 | A11259 | 312 |
| A04080 | A13589 | 243 | A04080 | A13667 | 152 |
| A04080 | A14198 | 245 | A04080 | A14646 | 286 |
| A04080 | A16041 | 299 | A04080 | A16300 | 475 |
| A04081 | A04520 | 171 | A04081 | A05967 | 311 |
| A04081 | A09757 | 247 | A04081 | A11177 | 412 |
| A04081 | A12519 | 412 | A04081 | A12650 | 475 |
| A04081 | A13025 | 412 | A04081 | A14281 | 352 |
| A04081 | A14621 | 159 | A04081 | A14854 | 412 |
| A04081 | A15498 | 347 | A04082 | A04314 | 303 |
| A04082 | A04417 | 462 | A04082 | A05124 | 265 |
| A04082 | A05959 | 434 | A04082 | A06623 | 414 |
| A04082 | A08417 | 265 | A04082 | A09433 | 352 |
| A04082 | A14667 | 256 | A04085 | A04444 | 452 |
| A04085 | A06595 | 283 | A04085 | A06627 | 324 |
| A04085 | A14643 | 154 | A04086 | A04163 | 267 |
| A04086 | A04202 | 179 | A04086 | A04482 | 346 |
| A04086 | A04790 | 205 | A04086 | A05208 | 307 |
| A04086 | A05560 | 321 | A04086 | A05677 | 346 |
| A04086 | A06735 | 286 | A04086 | A07480 | 515 |
| A04086 | A07495 | 274 | A04086 | A07603 | 561 |
| A04086 | A09235 | 452 | A04086 | A09236 | 469 |
| A04086 | A09241 | 269 | A04086 | A09363 | 374 |
| A04086 | A09429 | 317 | A04086 | A09508 | 425 |
| A04086 | A09570 | 334 | A04086 | A10083 | 414 |
| A04086 | A11300 | 160 | A04086 | A11485 | 308 |
| A04086 | A12722 | 485 | A04086 | A13370 | 429 |
| A04086 | A13889 | 391 | A04086 | A14192 | 286 |
| A04086 | A14392 | 195 | A04086 | A15394 | 238 |
| A04086 | A15401 | 226 | A04086 | A15609 | 363 |
| A04087 | A04162 | 263 | A04087 | A04366 | 484 |
| A04087 | A05398 | 317 | A04087 | A05761 | 480 |
| A04087 | A09876 | 240 | A04087 | A10456 | 279 |
| A04087 | A16741 | 318 | A04088 | A04247 | 369 |
| A04088 | A04519 | 391 | A04088 | A04536 | 204 |

|        |        |     |        |        |     |
|--------|--------|-----|--------|--------|-----|
| A04088 | A04865 | 307 | A04088 | A04965 | 232 |
| A04088 | A05558 | 375 | A04088 | A06597 | 212 |
| A04088 | A08548 | 262 | A04088 | A14190 | 154 |
| A04088 | A14371 | 157 | A04089 | A04445 | 475 |
| A04089 | A04536 | 243 | A04089 | A05078 | 375 |
| A04089 | A05944 | 290 | A04089 | A06055 | 313 |
| A04089 | A08725 | 409 | A04091 | A04539 | 332 |
| A04091 | A04962 | 257 | A04091 | A06610 | 288 |
| A04091 | A07006 | 461 | A04091 | A07421 | 488 |
| A04091 | A11658 | 229 | A04091 | A11779 | 489 |
| A04091 | A14007 | 367 | A04091 | A15419 | 157 |
| A04091 | A15841 | 480 | A04092 | A04157 | 467 |
| A04092 | A04168 | 433 | A04092 | A04215 | 366 |
| A04092 | A04222 | 318 | A04092 | A04256 | 358 |
| A04092 | A04334 | 260 | A04092 | A04383 | 408 |
| A04092 | A04423 | 294 | A04092 | A04491 | 273 |
| A04092 | A04750 | 348 | A04092 | A04976 | 322 |
| A04092 | A05288 | 382 | A04092 | A05533 | 223 |
| A04092 | A05751 | 433 | A04092 | A06283 | 373 |
| A04092 | A06968 | 208 | A04092 | A09398 | 384 |
| A04092 | A09480 | 412 | A04092 | A10090 | 430 |
| A04092 | A11485 | 151 | A04092 | A12654 | 311 |
| A04092 | A14220 | 281 | A04092 | A14430 | 402 |
| A04092 | A15226 | 420 | A04092 | A15230 | 488 |
| A04092 | A15233 | 393 | A04092 | A15258 | 286 |
| A04092 | A15272 | 328 | A04092 | A15277 | 226 |
| A04092 | A16764 | 205 | A04093 | A13989 | 188 |
| A04095 | A04220 | 382 | A04095 | A04366 | 338 |
| A04095 | A04556 | 347 | A04095 | A04791 | 321 |
| A04095 | A04883 | 288 | A04095 | A04927 | 399 |
| A04095 | A05014 | 344 | A04095 | A05026 | 439 |
| A04095 | A05140 | 363 | A04095 | A05330 | 456 |
| A04095 | A05331 | 196 | A04095 | A05337 | 324 |
| A04095 | A05358 | 458 | A04095 | A05424 | 369 |
| A04095 | A05433 | 454 | A04095 | A05451 | 477 |
| A04095 | A05452 | 469 | A04095 | A05550 | 477 |
| A04095 | A05573 | 288 | A04095 | A05659 | 404 |
| A04095 | A05883 | 480 | A04095 | A05912 | 405 |
| A04095 | A06090 | 388 | A04095 | A06405 | 439 |
| A04095 | A06439 | 266 | A04095 | A06629 | 278 |
| A04095 | A06641 | 329 | A04095 | A06734 | 475 |
| A04095 | A06847 | 346 | A04095 | A06860 | 466 |
| A04095 | A06970 | 335 | A04095 | A06994 | 361 |
| A04095 | A07027 | 327 | A04095 | A07037 | 475 |
| A04095 | A07059 | 278 | A04095 | A07325 | 187 |
| A04095 | A07408 | 367 | A04095 | A07477 | 286 |

|        |        |     |        |        |     |
|--------|--------|-----|--------|--------|-----|
| A04095 | A07501 | 316 | A04095 | A07520 | 486 |
| A04095 | A07553 | 258 | A04095 | A07558 | 274 |
| A04095 | A07590 | 279 | A04095 | A07619 | 385 |
| A04095 | A07674 | 241 | A04095 | A07690 | 332 |
| A04095 | A07736 | 252 | A04095 | A08108 | 322 |
| A04095 | A08250 | 361 | A04095 | A09381 | 340 |
| A04095 | A09879 | 360 | A04095 | A10658 | 353 |
| A04095 | A10693 | 322 | A04096 | A04097 | 491 |
| A04096 | A04494 | 462 | A04096 | A04519 | 196 |
| A04096 | A05212 | 208 | A04096 | A05313 | 198 |
| A04096 | A06631 | 411 | A04096 | A06644 | 215 |
| A04096 | A08209 | 443 | A04096 | A08745 | 449 |
| A04096 | A09007 | 256 | A04096 | A09162 | 215 |
| A04096 | A09392 | 286 | A04096 | A09395 | 481 |
| A04096 | A09754 | 268 | A04096 | A10355 | 311 |
| A04096 | A10591 | 229 | A04096 | A11436 | 257 |
| A04096 | A11507 | 384 | A04096 | A13824 | 899 |
| A04096 | A14207 | 152 | A04096 | A14208 | 480 |
| A04096 | A14395 | 215 | A04096 | A14727 | 260 |
| A04096 | A15314 | 477 | A04096 | A15361 | 317 |
| A04096 | A15613 | 332 | A04096 | A15834 | 486 |
| A04096 | A15987 | 303 | A04096 | A16216 | 491 |
| A04096 | A16722 | 255 | A04097 | A04433 | 281 |
| A04097 | A04494 | 462 | A04097 | A04519 | 187 |
| A04097 | A05212 | 199 | A04097 | A06578 | 156 |
| A04097 | A06631 | 332 | A04097 | A06644 | 337 |
| A04097 | A07000 | 330 | A04097 | A08745 | 339 |
| A04097 | A09392 | 278 | A04097 | A09395 | 477 |
| A04097 | A10355 | 303 | A04097 | A10591 | 218 |
| A04097 | A11507 | 379 | A04097 | A11906 | 389 |
| A04097 | A12927 | 191 | A04097 | A13017 | 208 |
| A04097 | A13491 | 318 | A04097 | A13860 | 201 |
| A04097 | A14208 | 486 | A04097 | A15314 | 457 |
| A04097 | A15328 | 165 | A04097 | A15581 | 227 |
| A04097 | A15613 | 218 | A04097 | A15834 | 488 |
| A04097 | A15962 | 162 | A04097 | A15976 | 167 |
| A04097 | A15987 | 296 | A04097 | A16216 | 491 |
| A04099 | A04230 | 256 | A04099 | A04867 | 162 |
| A04099 | A05654 | 434 | A04099 | A06351 | 207 |
| A04099 | A06369 | 232 | A04099 | A06602 | 227 |
| A04099 | A07398 | 241 | A04099 | A07583 | 224 |
| A04099 | A07968 | 371 | A04099 | A09018 | 196 |
| A04099 | A10616 | 182 | A04099 | A13989 | 190 |
| A04099 | A13992 | 290 | A04099 | A14172 | 202 |
| A04099 | A14221 | 340 | A04099 | A14597 | 423 |
| A04100 | A04209 | 224 | A04100 | A06581 | 339 |

|        |        |     |        |        |     |
|--------|--------|-----|--------|--------|-----|
| A04100 | A06597 | 165 | A04100 | A07312 | 389 |
| A04100 | A09724 | 324 | A04100 | A10547 | 281 |
| A04100 | A12507 | 162 | A04100 | A13204 | 409 |
| A04101 | A04202 | 218 | A04101 | A04417 | 294 |
| A04101 | A04474 | 369 | A04101 | A04878 | 334 |
| A04101 | A04879 | 212 | A04101 | A06317 | 341 |
| A04101 | A07158 | 216 | A04101 | A09428 | 339 |
| A04101 | A11262 | 350 | A04101 | A11932 | 286 |
| A04101 | A15241 | 205 | A04101 | A15416 | 227 |
| A04101 | A16024 | 385 | A04103 | A04519 | 369 |
| A04103 | A04526 | 424 | A04103 | A16537 | 399 |
| A04104 | A04542 | 305 | A04104 | A04873 | 187 |
| A04104 | A05144 | 221 | A04104 | A05163 | 305 |
| A04104 | A06818 | 238 | A04104 | A07151 | 167 |
| A04104 | A08141 | 374 | A04104 | A08514 | 210 |
| A04104 | A08911 | 179 | A04104 | A09561 | 246 |
| A04104 | A09664 | 515 | A04104 | A09727 | 418 |
| A04104 | A09900 | 185 | A04104 | A10294 | 191 |
| A04104 | A11934 | 299 | A04104 | A12383 | 308 |
| A04104 | A14005 | 268 | A04104 | A14942 | 196 |
| A04104 | A14957 | 278 | A04105 | A04135 | 249 |
| A04105 | A04139 | 99  | A04105 | A04279 | 173 |
| A04105 | A04527 | 277 | A04105 | A04531 | 271 |
| A04105 | A04678 | 277 | A04105 | A04805 | 467 |
| A04105 | A04899 | 299 | A04105 | A04960 | 260 |
| A04105 | A05008 | 302 | A04105 | A05015 | 210 |
| A04105 | A05310 | 165 | A04105 | A05344 | 265 |
| A04105 | A05363 | 212 | A04105 | A05667 | 316 |
| A04105 | A05698 | 374 | A04105 | A05779 | 246 |
| A04105 | A05891 | 477 | A04105 | A05899 | 316 |
| A04105 | A05911 | 268 | A04105 | A05943 | 330 |
| A04105 | A06244 | 310 | A04105 | A06298 | 170 |
| A04105 | A06319 | 151 | A04105 | A06368 | 243 |
| A04105 | A06379 | 263 | A04105 | A06603 | 200 |
| A04105 | A07147 | 241 | A04105 | A07165 | 63  |
| A04105 | A07186 | 256 | A04105 | A08583 | 243 |
| A04105 | A09464 | 208 | A04105 | A10613 | 310 |
| A04105 | A10828 | 374 | A04105 | A12357 | 185 |
| A04105 | A12429 | 353 | A04105 | A12719 | 408 |
| A04105 | A14019 | 324 | A04105 | A14176 | 380 |
| A04105 | A15282 | 152 | A04105 | A16079 | 63  |
| A04105 | A16716 | 63  | A04105 | A16719 | 294 |
| A04106 | A05449 | 184 | A04106 | A06615 | 182 |
| A04107 | A04264 | 344 | A04107 | A04536 | 363 |
| A04107 | A06544 | 424 | A04107 | A11897 | 317 |
| A04107 | A14239 | 274 | A04108 | A04109 | 435 |



|        |        |     |        |        |     |
|--------|--------|-----|--------|--------|-----|
| A04108 | A04533 | 428 | A04108 | A04602 | 362 |
| A04108 | A04651 | 224 | A04108 | A04791 | 391 |
| A04108 | A04868 | 314 | A04108 | A05103 | 383 |
| A04108 | A05455 | 279 | A04108 | A05463 | 198 |
| A04108 | A05573 | 263 | A04108 | A05601 | 201 |
| A04108 | A06420 | 314 | A04108 | A06635 | 490 |
| A04108 | A07109 | 343 | A04108 | A09164 | 350 |
| A04108 | A09364 | 279 | A04108 | A10686 | 228 |
| A04108 | A14639 | 224 | A04108 | A14698 | 201 |
| A04108 | A16355 | 378 | A04108 | A16741 | 322 |
| A04108 | A17133 | 199 | A04109 | A07161 | 326 |
| A04109 | A09018 | 279 | A04110 | A04115 | 201 |
| A04110 | A04248 | 236 | A04110 | A04536 | 162 |
| A04110 | A04687 | 177 | A04110 | A04800 | 470 |
| A04110 | A04867 | 151 | A04110 | A05679 | 188 |
| A04110 | A05985 | 191 | A04110 | A06618 | 388 |
| A04110 | A06735 | 388 | A04110 | A06899 | 310 |
| A04110 | A07135 | 425 | A04110 | A07157 | 291 |
| A04110 | A07161 | 367 | A04110 | A07166 | 337 |
| A04110 | A08259 | 152 | A04110 | A10214 | 266 |
| A04110 | A10254 | 379 | A04110 | A11993 | 344 |
| A04110 | A13983 | 477 | A04110 | A14199 | 491 |
| A04110 | A14231 | 229 | A04110 | A14374 | 479 |
| A04110 | A14385 | 347 | A04110 | A14392 | 180 |
| A04110 | A14439 | 367 | A04110 | A15308 | 173 |
| A04110 | A15320 | 185 | A04110 | A15394 | 226 |
| A04110 | A15506 | 165 | A04110 | A15642 | 358 |
| A04110 | A15806 | 407 | A04110 | A16120 | 274 |
| A04111 | A04280 | 252 | A04111 | A06778 | 347 |
| A04111 | A14511 | 204 | A04111 | A14605 | 352 |
| A04112 | A07165 | 182 | A04114 | A04264 | 306 |
| A04114 | A04275 | 205 | A04114 | A04603 | 281 |
| A04114 | A04902 | 232 | A04114 | A05556 | 332 |
| A04114 | A07468 | 210 | A04114 | A08252 | 245 |
| A04114 | A08905 | 293 | A04114 | A10632 | 306 |
| A04114 | A10967 | 179 | A04114 | A12361 | 235 |
| A04114 | A13484 | 252 | A04114 | A14604 | 221 |
| A04114 | A15795 | 240 | A04114 | A16656 | 345 |
| A04115 | A04618 | 254 | A04115 | A04685 | 263 |
| A04115 | A05037 | 144 | A04115 | A05674 | 401 |
| A04115 | A07803 | 534 | A04115 | A08293 | 381 |
| A04115 | A08345 | 347 | A04115 | A09410 | 283 |
| A04115 | A09768 | 210 | A04115 | A09785 | 363 |
| A04115 | A10601 | 372 | A04115 | A10740 | 254 |
| A04115 | A11850 | 436 | A04115 | A11929 | 283 |
| A04115 | A13824 | 293 | A04115 | A13826 | 452 |

|        |        |     |        |        |     |
|--------|--------|-----|--------|--------|-----|
| A04115 | A13899 | 243 | A04115 | A14196 | 285 |
| A04115 | A14197 | 419 | A04115 | A14208 | 633 |
| A04115 | A15291 | 486 | A04115 | A15295 | 219 |
| A04115 | A15314 | 455 | A04115 | A15321 | 302 |
| A04115 | A15323 | 302 | A04115 | A15330 | 306 |
| A04115 | A15346 | 195 | A04115 | A15360 | 168 |
| A04115 | A15386 | 680 | A04115 | A15510 | 543 |
| A04115 | A16216 | 450 | A04115 | A16224 | 288 |
| A04115 | A17157 | 224 | A04116 | A04715 | 168 |
| A04116 | A06973 | 252 | A04116 | A07201 | 234 |
| A04116 | A07700 | 238 | A04116 | A11550 | 424 |
| A04116 | A15764 | 334 | A04116 | A16272 | 313 |
| A04117 | A04134 | 154 | A04117 | A04202 | 170 |
| A04117 | A04267 | 174 | A04117 | A04271 | 177 |
| A04117 | A04280 | 486 | A04117 | A04351 | 208 |
| A04117 | A04440 | 202 | A04117 | A04446 | 151 |
| A04117 | A04517 | 205 | A04117 | A04553 | 285 |
| A04117 | A04622 | 369 | A04117 | A04681 | 356 |
| A04117 | A04899 | 165 | A04117 | A04902 | 361 |
| A04117 | A04968 | 151 | A04117 | A04973 | 180 |
| A04117 | A05002 | 288 | A04117 | A05068 | 265 |
| A04117 | A05350 | 180 | A04117 | A05473 | 385 |
| A04117 | A05507 | 154 | A04117 | A05876 | 201 |
| A04117 | A06292 | 279 | A04117 | A06414 | 210 |
| A04117 | A06427 | 180 | A04117 | A06541 | 165 |
| A04117 | A06582 | 188 | A04117 | A06682 | 224 |
| A04117 | A06807 | 154 | A04117 | A07135 | 491 |
| A04117 | A07137 | 246 | A04117 | A07158 | 490 |
| A04117 | A07165 | 435 | A04117 | A07426 | 173 |
| A04117 | A08194 | 356 | A04117 | A08209 | 324 |
| A04117 | A08487 | 224 | A04117 | A08612 | 180 |
| A04117 | A08709 | 173 | A04117 | A08745 | 160 |
| A04117 | A09106 | 188 | A04117 | A09240 | 151 |
| A04117 | A09242 | 151 | A04117 | A09251 | 160 |
| A04117 | A09406 | 188 | A04117 | A09499 | 188 |
| A04117 | A09512 | 188 | A04117 | A09928 | 219 |
| A04117 | A09929 | 165 | A04117 | A10150 | 224 |
| A04117 | A10240 | 173 | A04117 | A10699 | 199 |
| A04117 | A10801 | 154 | A04117 | A10901 | 160 |
| A04117 | A10966 | 224 | A04117 | A11097 | 340 |
| A04117 | A11526 | 157 | A04117 | A11748 | 165 |
| A04117 | A11758 | 210 | A04117 | A12197 | 210 |
| A04117 | A12341 | 210 | A04117 | A12366 | 246 |
| A04117 | A13181 | 177 | A04117 | A13817 | 246 |
| A04117 | A13887 | 165 | A04117 | A14527 | 369 |
| A04117 | A14570 | 374 | A04117 | A14624 | 210 |

|        |        |     |        |        |     |
|--------|--------|-----|--------|--------|-----|
| A04117 | A15996 | 165 | A04117 | A16494 | 173 |
| A04117 | A16528 | 165 | A04117 | A16734 | 188 |
| A04117 | A16986 | 260 | A04118 | A04953 | 441 |
| A04118 | A11348 | 395 | A04120 | A04137 | 425 |
| A04120 | A04285 | 416 | A04120 | A05418 | 171 |
| A04120 | A05742 | 252 | A04120 | A05746 | 425 |
| A04120 | A06635 | 313 | A04120 | A07200 | 424 |
| A04120 | A14400 | 385 | A04120 | A14440 | 319 |
| A04121 | A05216 | 215 | A04122 | A04163 | 401 |
| A04122 | A04267 | 257 | A04122 | A04334 | 460 |
| A04122 | A05124 | 279 | A04122 | A05637 | 406 |
| A04122 | A07158 | 210 | A04122 | A07192 | 269 |
| A04122 | A09124 | 180 | A04122 | A09274 | 398 |
| A04122 | A10085 | 263 | A04122 | A10087 | 308 |
| A04122 | A14349 | 391 | A04122 | A14643 | 238 |
| A04122 | A15238 | 326 | A04123 | A04260 | 314 |
| A04123 | A04560 | 396 | A04123 | A04905 | 378 |
| A04123 | A05036 | 404 | A04124 | A04234 | 374 |
| A04124 | A04879 | 188 | A04124 | A05082 | 176 |
| A04124 | A05216 | 235 | A04124 | A05741 | 334 |
| A04124 | A07135 | 252 | A04124 | A09197 | 385 |
| A04124 | A09727 | 366 | A04124 | A10624 | 157 |
| A04124 | A11326 | 183 | A04124 | A14471 | 156 |
| A04125 | A04139 | 238 | A04125 | A04257 | 369 |
| A04125 | A04327 | 296 | A04125 | A04444 | 310 |
| A04125 | A04574 | 322 | A04125 | A04960 | 386 |
| A04125 | A05235 | 379 | A04125 | A05665 | 346 |
| A04125 | A05889 | 357 | A04125 | A05891 | 279 |
| A04125 | A06635 | 263 | A04125 | A09263 | 263 |
| A04125 | A10741 | 414 | A04125 | A12420 | 391 |
| A04125 | A13667 | 322 | A04125 | A14405 | 395 |
| A04126 | A06606 | 243 | A04127 | A04267 | 462 |
| A04127 | A04798 | 383 | A04127 | A06597 | 180 |
| A04127 | A07163 | 162 | A04127 | A07165 | 163 |
| A04127 | A15976 | 288 | A04128 | A04745 | 408 |
| A04128 | A16007 | 323 | A04130 | A04217 | 490 |
| A04130 | A04248 | 188 | A04130 | A04276 | 247 |
| A04130 | A04609 | 335 | A04130 | A04614 | 210 |
| A04130 | A04690 | 353 | A04130 | A04748 | 412 |
| A04130 | A04755 | 391 | A04130 | A05037 | 157 |
| A04130 | A05083 | 311 | A04130 | A05472 | 182 |
| A04130 | A05517 | 251 | A04130 | A05577 | 183 |
| A04130 | A05597 | 234 | A04130 | A05679 | 491 |
| A04130 | A05985 | 273 | A04130 | A06047 | 384 |
| A04130 | A06344 | 380 | A04130 | A06414 | 255 |
| A04130 | A06415 | 491 | A04130 | A06604 | 443 |

|        |        |     |        |        |     |
|--------|--------|-----|--------|--------|-----|
| A04130 | A06747 | 327 | A04130 | A06970 | 204 |
| A04130 | A07126 | 226 | A04130 | A07152 | 490 |
| A04130 | A07157 | 235 | A04130 | A08732 | 195 |
| A04130 | A08908 | 364 | A04130 | A09394 | 255 |
| A04130 | A10319 | 296 | A04130 | A10571 | 337 |
| A04130 | A10585 | 454 | A04130 | A10586 | 480 |
| A04130 | A10605 | 256 | A04130 | A12934 | 311 |
| A04130 | A13131 | 288 | A04130 | A13903 | 443 |
| A04130 | A13988 | 232 | A04130 | A14071 | 245 |
| A04130 | A14125 | 456 | A04130 | A14146 | 235 |
| A04130 | A14199 | 303 | A04130 | A14208 | 290 |
| A04130 | A14362 | 212 | A04130 | A14368 | 363 |
| A04130 | A14372 | 374 | A04130 | A14374 | 452 |
| A04130 | A14376 | 262 | A04130 | A14391 | 236 |
| A04130 | A14392 | 262 | A04130 | A14439 | 441 |
| A04130 | A14599 | 446 | A04130 | A15308 | 252 |
| A04130 | A15394 | 177 | A04130 | A15425 | 490 |
| A04130 | A15427 | 447 | A04130 | A15477 | 324 |
| A04130 | A15516 | 324 | A04130 | A15611 | 162 |
| A04130 | A15630 | 260 | A04130 | A15642 | 318 |
| A04130 | A15806 | 266 | A04130 | A15964 | 230 |
| A04130 | A15976 | 176 | A04130 | A16015 | 303 |
| A04133 | A04239 | 291 | A04133 | A04280 | 176 |
| A04133 | A04320 | 312 | A04133 | A04337 | 154 |
| A04133 | A04358 | 368 | A04133 | A04534 | 371 |
| A04133 | A04907 | 347 | A04133 | A04914 | 286 |
| A04133 | A05065 | 270 | A04133 | A05114 | 299 |
| A04133 | A05779 | 333 | A04133 | A06653 | 409 |
| A04133 | A06660 | 205 | A04133 | A06889 | 307 |
| A04133 | A07017 | 252 | A04133 | A07158 | 201 |
| A04133 | A09078 | 156 | A04133 | A09123 | 317 |
| A04133 | A09247 | 307 | A04133 | A09900 | 291 |
| A04133 | A10773 | 346 | A04133 | A12965 | 395 |
| A04133 | A14318 | 402 | A04133 | A14524 | 291 |
| A04133 | A14637 | 205 | A04133 | A14642 | 479 |
| A04133 | A14683 | 278 | A04133 | A14771 | 402 |
| A04133 | A15241 | 191 | A04133 | A15840 | 270 |
| A04133 | A16732 | 356 | A04133 | A16738 | 151 |
| A04134 | A04142 | 451 | A04134 | A04267 | 306 |
| A04134 | A04272 | 369 | A04134 | A04538 | 405 |
| A04134 | A04619 | 417 | A04134 | A04798 | 452 |
| A04134 | A05034 | 318 | A04134 | A05309 | 213 |
| A04134 | A06581 | 159 | A04134 | A07165 | 199 |
| A04134 | A08677 | 363 | A04134 | A08741 | 457 |
| A04134 | A14375 | 307 | A04134 | A14378 | 234 |
| A04134 | A15281 | 384 | A04135 | A04136 | 396 |

|        |        |     |        |        |     |
|--------|--------|-----|--------|--------|-----|
| A04135 | A04212 | 160 | A04135 | A04351 | 337 |
| A04135 | A05112 | 260 | A04135 | A05310 | 286 |
| A04135 | A05406 | 409 | A04135 | A05473 | 302 |
| A04135 | A05686 | 420 | A04135 | A05899 | 388 |
| A04135 | A05911 | 358 | A04135 | A06296 | 252 |
| A04135 | A06635 | 369 | A04135 | A07123 | 312 |
| A04135 | A09829 | 322 | A04135 | A14388 | 396 |
| A04135 | A15649 | 174 | A04136 | A06607 | 171 |
| A04136 | A06635 | 329 | A04136 | A07006 | 422 |
| A04136 | A08741 | 364 | A04136 | A14388 | 479 |
| A04136 | A15674 | 388 | A04137 | A05418 | 208 |
| A04137 | A05746 | 434 | A04137 | A06635 | 425 |
| A04137 | A07200 | 270 | A04137 | A14440 | 343 |
| A04138 | A04143 | 368 | A04138 | A04144 | 438 |
| A04138 | A04201 | 458 | A04138 | A04206 | 335 |
| A04138 | A04238 | 355 | A04138 | A04247 | 368 |
| A04138 | A04248 | 271 | A04138 | A04263 | 457 |
| A04138 | A04276 | 318 | A04138 | A04536 | 200 |
| A04138 | A04567 | 294 | A04138 | A04734 | 347 |
| A04138 | A04798 | 368 | A04138 | A04855 | 383 |
| A04138 | A04908 | 212 | A04138 | A04949 | 279 |
| A04138 | A04965 | 229 | A04138 | A05931 | 383 |
| A04138 | A06422 | 302 | A04138 | A06465 | 452 |
| A04138 | A07146 | 417 | A04138 | A07148 | 327 |
| A04138 | A07154 | 313 | A04138 | A07157 | 196 |
| A04138 | A07158 | 332 | A04138 | A07166 | 241 |
| A04138 | A07173 | 236 | A04138 | A07201 | 160 |
| A04138 | A09937 | 308 | A04138 | A10074 | 401 |
| A04138 | A10205 | 238 | A04138 | A10580 | 909 |
| A04138 | A10937 | 388 | A04138 | A13872 | 288 |
| A04138 | A13889 | 151 | A04138 | A14364 | 254 |
| A04138 | A14430 | 165 | A04138 | A15528 | 188 |
| A04138 | A16738 | 372 | A04139 | A04171 | 254 |
| A04139 | A04715 | 406 | A04139 | A04742 | 294 |
| A04139 | A04790 | 350 | A04139 | A04805 | 330 |
| A04139 | A04960 | 491 | A04139 | A05015 | 246 |
| A04139 | A05075 | 294 | A04139 | A05413 | 358 |
| A04139 | A05591 | 229 | A04139 | A05666 | 425 |
| A04139 | A05667 | 294 | A04139 | A05829 | 294 |
| A04139 | A05899 | 294 | A04139 | A05911 | 469 |
| A04139 | A06162 | 252 | A04139 | A06298 | 272 |
| A04139 | A06459 | 416 | A04139 | A06707 | 180 |
| A04139 | A06837 | 311 | A04139 | A07163 | 162 |
| A04139 | A07182 | 286 | A04139 | A07198 | 279 |
| A04139 | A10582 | 409 | A04139 | A10636 | 63  |
| A04139 | A10742 | 367 | A04139 | A10835 | 358 |

|        |        |     |        |        |     |
|--------|--------|-----|--------|--------|-----|
| A04139 | A10899 | 154 | A04139 | A11482 | 491 |
| A04139 | A12789 | 294 | A04139 | A13848 | 409 |
| A04139 | A14236 | 212 | A04139 | A14279 | 248 |
| A04139 | A14534 | 358 | A04139 | A14633 | 210 |
| A04139 | A16402 | 276 | A04140 | A05234 | 182 |
| A04140 | A07205 | 360 | A04140 | A09220 | 184 |
| A04140 | A14976 | 432 | A04140 | A15295 | 489 |
| A04140 | A16754 | 165 | A04142 | A04143 | 398 |
| A04142 | A04262 | 401 | A04142 | A04607 | 266 |
| A04142 | A04609 | 334 | A04142 | A04614 | 339 |
| A04142 | A05034 | 318 | A04142 | A05113 | 321 |
| A04142 | A08741 | 422 | A04143 | A04391 | 386 |
| A04144 | A04276 | 363 | A04144 | A04734 | 385 |
| A04144 | A04855 | 458 | A04144 | A08070 | 296 |
| A04144 | A15528 | 260 | A04145 | A04292 | 485 |
| A04145 | A04715 | 277 | A04145 | A04839 | 193 |
| A04145 | A04929 | 286 | A04145 | A05024 | 463 |
| A04145 | A06011 | 360 | A04145 | A06472 | 157 |
| A04145 | A06675 | 199 | A04145 | A06941 | 260 |
| A04145 | A07442 | 162 | A04145 | A07558 | 439 |
| A04145 | A08001 | 440 | A04145 | A08177 | 240 |
| A04145 | A08454 | 466 | A04145 | A08484 | 721 |
| A04145 | A08506 | 721 | A04145 | A08544 | 721 |
| A04145 | A08834 | 74  | A04145 | A10424 | 256 |
| A04145 | A10804 | 479 | A04145 | A11279 | 452 |
| A04145 | A11303 | 483 | A04145 | A13830 | 195 |
| A04145 | A13871 | 152 | A04145 | A13874 | 205 |
| A04145 | A14247 | 491 | A04145 | A14258 | 218 |
| A04145 | A14272 | 413 | A04145 | A14461 | 219 |
| A04145 | A14661 | 491 | A04145 | A14711 | 182 |
| A04145 | A14788 | 266 | A04145 | A14844 | 179 |
| A04145 | A14877 | 236 | A04145 | A15432 | 301 |
| A04145 | A15552 | 245 | A04147 | A04244 | 283 |
| A04147 | A06586 | 256 | A04147 | A07427 | 310 |
| A04147 | A09203 | 373 | A04147 | A11139 | 185 |
| A04147 | A11379 | 249 | A04147 | A11952 | 283 |
| A04147 | A13872 | 243 | A04147 | A14525 | 174 |
| A04147 | A15510 | 277 | A04147 | A15543 | 159 |
| A04147 | A17142 | 212 | A04148 | A06488 | 334 |
| A04148 | A09775 | 386 | A04148 | A15624 | 319 |
| A04148 | A15684 | 151 | A04148 | A15843 | 483 |
| A04148 | A16086 | 485 | A04149 | A04150 | 425 |
| A04150 | A04337 | 198 | A04150 | A10010 | 425 |
| A04150 | A12695 | 425 | A04150 | A15398 | 245 |
| A04151 | A05401 | 276 | A04151 | A05501 | 152 |
| A04151 | A09347 | 393 | A04151 | A10793 | 425 |

|        |        |     |        |        |     |
|--------|--------|-----|--------|--------|-----|
| A04151 | A10798 | 196 | A04151 | A12295 | 435 |
| A04151 | A13842 | 368 | A04151 | A15220 | 402 |
| A04151 | A15621 | 393 | A04151 | A15649 | 176 |
| A04152 | A05596 | 337 | A04152 | A05627 | 353 |
| A04152 | A05716 | 347 | A04152 | A07570 | 338 |
| A04152 | A09978 | 310 | A04152 | A11961 | 475 |
| A04152 | A13410 | 433 | A04152 | A14378 | 157 |
| A04152 | A15321 | 347 | A04152 | A15498 | 165 |
| A04152 | A16076 | 279 | A04152 | A16299 | 281 |
| A04154 | A04923 | 428 | A04154 | A05000 | 433 |
| A04154 | A05731 | 391 | A04154 | A07066 | 414 |
| A04154 | A07743 | 428 | A04154 | A08750 | 420 |
| A04154 | A10511 | 412 | A04154 | A10978 | 440 |
| A04154 | A12440 | 433 | A04154 | A15630 | 313 |
| A04155 | A14777 | 367 | A04155 | A15321 | 277 |
| A04157 | A04168 | 389 | A04157 | A04215 | 396 |
| A04157 | A04343 | 369 | A04157 | A04375 | 208 |
| A04157 | A04378 | 438 | A04157 | A04383 | 433 |
| A04157 | A06949 | 226 | A04157 | A10525 | 274 |
| A04157 | A15233 | 335 | A04157 | A15837 | 177 |
| A04157 | A16068 | 213 | A04158 | A07382 | 438 |
| A04158 | A14642 | 296 | A04158 | A14652 | 302 |
| A04158 | A14683 | 350 | A04159 | A04923 | 428 |
| A04159 | A04989 | 475 | A04159 | A05469 | 418 |
| A04159 | A06607 | 159 | A04159 | A07218 | 188 |
| A04160 | A09876 | 440 | A04160 | A15498 | 293 |
| A04161 | A04932 | 338 | A04161 | A07209 | 232 |
| A04161 | A07314 | 63  | A04161 | A07885 | 419 |
| A04161 | A09633 | 279 | A04161 | A09715 | 262 |
| A04161 | A10532 | 238 | A04161 | A10721 | 427 |
| A04161 | A12835 | 491 | A04161 | A13511 | 485 |
| A04161 | A13824 | 185 | A04161 | A13860 | 293 |
| A04161 | A13986 | 477 | A04161 | A14011 | 457 |
| A04161 | A14300 | 263 | A04161 | A14452 | 491 |
| A04161 | A14470 | 165 | A04161 | A15537 | 196 |
| A04161 | A15726 | 215 | A04161 | A16187 | 201 |
| A04162 | A04258 | 475 | A04162 | A04316 | 351 |
| A04162 | A04366 | 428 | A04162 | A04369 | 171 |
| A04162 | A04371 | 316 | A04162 | A04556 | 260 |
| A04162 | A04635 | 301 | A04162 | A04746 | 245 |
| A04162 | A04773 | 171 | A04162 | A04780 | 279 |
| A04162 | A04845 | 201 | A04162 | A04974 | 451 |
| A04162 | A04975 | 466 | A04162 | A04981 | 438 |
| A04162 | A05418 | 446 | A04162 | A05647 | 384 |
| A04162 | A05694 | 353 | A04162 | A05706 | 157 |
| A04162 | A05966 | 185 | A04162 | A06263 | 465 |

|        |        |     |        |        |     |
|--------|--------|-----|--------|--------|-----|
| A04162 | A06286 | 179 | A04162 | A06299 | 246 |
| A04162 | A06607 | 430 | A04162 | A06622 | 190 |
| A04162 | A06762 | 226 | A04162 | A06860 | 185 |
| A04162 | A06874 | 445 | A04162 | A07650 | 301 |
| A04162 | A07912 | 311 | A04162 | A08746 | 440 |
| A04162 | A09235 | 172 | A04162 | A10228 | 260 |
| A04162 | A10332 | 245 | A04162 | A10597 | 163 |
| A04162 | A11369 | 297 | A04162 | A11646 | 213 |
| A04162 | A12277 | 366 | A04162 | A13241 | 227 |
| A04162 | A13829 | 154 | A04162 | A14364 | 172 |
| A04162 | A15455 | 274 | A04162 | A15913 | 156 |
| A04163 | A04222 | 191 | A04163 | A04238 | 419 |
| A04163 | A04258 | 266 | A04163 | A04361 | 208 |
| A04163 | A04377 | 340 | A04163 | A04423 | 299 |
| A04163 | A04562 | 259 | A04163 | A04652 | 247 |
| A04163 | A04773 | 213 | A04163 | A04795 | 235 |
| A04163 | A04879 | 154 | A04163 | A05113 | 228 |
| A04163 | A05208 | 291 | A04163 | A05349 | 272 |
| A04163 | A05580 | 375 | A04163 | A05637 | 447 |
| A04163 | A05846 | 369 | A04163 | A06404 | 313 |
| A04163 | A06779 | 326 | A04163 | A06818 | 299 |
| A04163 | A07021 | 369 | A04163 | A07143 | 229 |
| A04163 | A07151 | 236 | A04163 | A07209 | 165 |
| A04163 | A07210 | 435 | A04163 | A07588 | 183 |
| A04163 | A07833 | 215 | A04163 | A09125 | 375 |
| A04163 | A09236 | 467 | A04163 | A09241 | 252 |
| A04163 | A09429 | 447 | A04163 | A10044 | 363 |
| A04163 | A10045 | 363 | A04163 | A10046 | 369 |
| A04163 | A10049 | 313 | A04163 | A10087 | 382 |
| A04163 | A10168 | 357 | A04163 | A14188 | 301 |
| A04163 | A14379 | 200 | A04163 | A14438 | 299 |
| A04163 | A14589 | 286 | A04163 | A15233 | 286 |
| A04164 | A04368 | 394 | A04164 | A06688 | 260 |
| A04165 | A04220 | 458 | A04165 | A04466 | 440 |
| A04165 | A08576 | 393 | A04165 | A08582 | 424 |
| A04166 | A07218 | 170 | A04166 | A08859 | 196 |
| A04166 | A09198 | 419 | A04166 | A12982 | 399 |
| A04166 | A14077 | 210 | A04166 | A15292 | 152 |
| A04166 | A15301 | 291 | A04166 | A15352 | 224 |
| A04166 | A15419 | 299 | A04166 | A15431 | 262 |
| A04166 | A15435 | 265 | A04166 | A15452 | 274 |
| A04166 | A15463 | 219 | A04166 | A15478 | 296 |
| A04167 | A06267 | 302 | A04167 | A06385 | 249 |
| A04167 | A07242 | 258 | A04167 | A07442 | 154 |
| A04167 | A07483 | 486 | A04167 | A07495 | 208 |
| A04167 | A08531 | 413 | A04167 | A08536 | 303 |



|        |        |     |        |        |     |
|--------|--------|-----|--------|--------|-----|
| A04167 | A13743 | 217 | A04167 | A13811 | 188 |
| A04167 | A14599 | 162 | A04167 | A15257 | 318 |
| A04168 | A04215 | 422 | A04169 | A04490 | 313 |
| A04169 | A04987 | 193 | A04169 | A05248 | 259 |
| A04169 | A05700 | 273 | A04169 | A05954 | 319 |
| A04169 | A06196 | 369 | A04169 | A06745 | 291 |
| A04169 | A06755 | 177 | A04169 | A06997 | 446 |
| A04169 | A07117 | 207 | A04169 | A07209 | 302 |
| A04169 | A07229 | 362 | A04169 | A07316 | 319 |
| A04169 | A07422 | 210 | A04169 | A07803 | 477 |
| A04169 | A08418 | 66  | A04169 | A08632 | 217 |
| A04169 | A08834 | 151 | A04169 | A08859 | 468 |
| A04169 | A09022 | 230 | A04169 | A09062 | 323 |
| A04169 | A09201 | 201 | A04169 | A09202 | 182 |
| A04169 | A09204 | 183 | A04169 | A09208 | 217 |
| A04169 | A09211 | 252 | A04169 | A09238 | 490 |
| A04169 | A09239 | 491 | A04169 | A09422 | 485 |
| A04169 | A09732 | 490 | A04169 | A09733 | 422 |
| A04169 | A09734 | 475 | A04169 | A09742 | 491 |
| A04169 | A09743 | 256 | A04169 | A09848 | 283 |
| A04169 | A09855 | 462 | A04169 | A09873 | 485 |
| A04169 | A09933 | 157 | A04169 | A10720 | 260 |
| A04169 | A11200 | 212 | A04169 | A11412 | 466 |
| A04169 | A11537 | 205 | A04169 | A11796 | 247 |
| A04169 | A11848 | 240 | A04169 | A11875 | 219 |
| A04169 | A12390 | 486 | A04169 | A12393 | 491 |
| A04169 | A12500 | 218 | A04169 | A12815 | 319 |
| A04169 | A13003 | 348 | A04169 | A13010 | 230 |
| A04169 | A13119 | 484 | A04169 | A13151 | 440 |
| A04169 | A13178 | 291 | A04169 | A13287 | 230 |
| A04169 | A13312 | 380 | A04169 | A13317 | 230 |
| A04169 | A13826 | 353 | A04169 | A13899 | 204 |
| A04169 | A13987 | 491 | A04169 | A14010 | 491 |
| A04169 | A14072 | 200 | A04169 | A14122 | 484 |
| A04169 | A14137 | 334 | A04169 | A14190 | 360 |
| A04169 | A14202 | 455 | A04169 | A14210 | 452 |
| A04169 | A14287 | 217 | A04169 | A14371 | 490 |
| A04169 | A14378 | 491 | A04169 | A14379 | 246 |
| A04169 | A14399 | 185 | A04169 | A14407 | 259 |
| A04169 | A14408 | 252 | A04169 | A14413 | 170 |
| A04169 | A14511 | 488 | A04169 | A15284 | 367 |
| A04169 | A15292 | 491 | A04169 | A15298 | 386 |
| A04169 | A15301 | 443 | A04169 | A15302 | 405 |
| A04169 | A15310 | 408 | A04169 | A15311 | 443 |
| A04169 | A15312 | 491 | A04169 | A15313 | 491 |
| A04169 | A15317 | 491 | A04169 | A15322 | 395 |

|        |        |     |        |        |     |
|--------|--------|-----|--------|--------|-----|
| A04169 | A15331 | 463 | A04169 | A15333 | 306 |
| A04169 | A15334 | 281 | A04169 | A15335 | 208 |
| A04169 | A15348 | 491 | A04169 | A15349 | 491 |
| A04169 | A15352 | 491 | A04169 | A15366 | 490 |
| A04169 | A15376 | 391 | A04169 | A15413 | 219 |
| A04169 | A15431 | 286 | A04169 | A15432 | 490 |
| A04169 | A15433 | 389 | A04169 | A15434 | 380 |
| A04169 | A15435 | 491 | A04169 | A15436 | 491 |
| A04169 | A15440 | 339 | A04169 | A15444 | 477 |
| A04169 | A15445 | 246 | A04169 | A15447 | 491 |
| A04169 | A15451 | 462 | A04169 | A15452 | 491 |
| A04169 | A15454 | 303 | A04169 | A15455 | 167 |
| A04169 | A15456 | 489 | A04169 | A15457 | 430 |
| A04169 | A15459 | 235 | A04169 | A15460 | 461 |
| A04169 | A15461 | 65  | A04169 | A15462 | 407 |
| A04169 | A15463 | 472 | A04169 | A15464 | 183 |
| A04169 | A15480 | 190 | A04169 | A15485 | 268 |
| A04169 | A15495 | 486 | A04169 | A15498 | 374 |
| A04169 | A15513 | 260 | A04169 | A15515 | 491 |
| A04169 | A15516 | 193 | A04169 | A15522 | 436 |
| A04169 | A15523 | 259 | A04169 | A15553 | 207 |
| A04169 | A15792 | 152 | A04169 | A15799 | 488 |
| A04169 | A15802 | 156 | A04169 | A15804 | 177 |
| A04169 | A15814 | 468 | A04169 | A15816 | 363 |
| A04169 | A15817 | 486 | A04169 | A15823 | 273 |
| A04169 | A15828 | 441 | A04169 | A15830 | 486 |
| A04169 | A16004 | 193 | A04169 | A16055 | 156 |
| A04169 | A16136 | 475 | A04169 | A16260 | 230 |
| A04169 | A16300 | 312 | A04169 | A16917 | 291 |
| A04169 | A16978 | 273 | A04169 | A17202 | 319 |
| A04171 | A04189 | 429 | A04171 | A04190 | 408 |
| A04171 | A08194 | 308 | A04171 | A16096 | 285 |
| A04172 | A04174 | 338 | A04172 | A04187 | 344 |
| A04172 | A04224 | 425 | A04172 | A04236 | 411 |
| A04172 | A04622 | 185 | A04172 | A05593 | 473 |
| A04172 | A05599 | 422 | A04173 | A05480 | 466 |
| A04173 | A06100 | 313 | A04174 | A04182 | 241 |
| A04174 | A04187 | 441 | A04174 | A04280 | 221 |
| A04174 | A04360 | 314 | A04174 | A04396 | 351 |
| A04174 | A05370 | 228 | A04174 | A05425 | 160 |
| A04174 | A05596 | 288 | A04174 | A05838 | 185 |
| A04174 | A06120 | 319 | A04174 | A06234 | 328 |
| A04174 | A06318 | 281 | A04174 | A09067 | 328 |
| A04174 | A09269 | 385 | A04174 | A09346 | 277 |
| A04174 | A10018 | 176 | A04174 | A10508 | 294 |
| A04174 | A13538 | 388 | A04174 | A14236 | 154 |

|        |        |     |        |        |     |
|--------|--------|-----|--------|--------|-----|
| A04174 | A16440 | 188 | A04175 | A04493 | 269 |
| A04175 | A04715 | 491 | A04175 | A04790 | 383 |
| A04175 | A04985 | 486 | A04175 | A05288 | 160 |
| A04175 | A05289 | 160 | A04175 | A05601 | 184 |
| A04175 | A05853 | 201 | A04175 | A05865 | 187 |
| A04175 | A06021 | 240 | A04175 | A06364 | 229 |
| A04175 | A06379 | 358 | A04175 | A06409 | 305 |
| A04175 | A06530 | 338 | A04175 | A06601 | 335 |
| A04175 | A06651 | 468 | A04175 | A06686 | 296 |
| A04175 | A07163 | 601 | A04175 | A07351 | 332 |
| A04175 | A07806 | 332 | A04175 | A07903 | 372 |
| A04175 | A07985 | 480 | A04175 | A07997 | 443 |
| A04175 | A08093 | 490 | A04175 | A08171 | 154 |
| A04175 | A08676 | 200 | A04175 | A08685 | 213 |
| A04175 | A09046 | 207 | A04175 | A09182 | 486 |
| A04175 | A09258 | 174 | A04175 | A09504 | 188 |
| A04175 | A09511 | 488 | A04175 | A09525 | 332 |
| A04175 | A09551 | 443 | A04175 | A09646 | 490 |
| A04175 | A10051 | 491 | A04175 | A10205 | 489 |
| A04175 | A10238 | 191 | A04175 | A11104 | 185 |
| A04175 | A11258 | 259 | A04175 | A11299 | 327 |
| A04175 | A11308 | 234 | A04175 | A11576 | 318 |
| A04175 | A11582 | 305 | A04175 | A11726 | 316 |
| A04175 | A12603 | 332 | A04175 | A13924 | 285 |
| A04175 | A14484 | 63  | A04175 | A14633 | 333 |
| A04175 | A14876 | 251 | A04175 | A14886 | 174 |
| A04175 | A15064 | 419 | A04175 | A15495 | 347 |
| A04175 | A15726 | 227 | A04175 | A16274 | 374 |
| A04176 | A04280 | 182 | A04176 | A04320 | 452 |
| A04176 | A04477 | 355 | A04176 | A04807 | 430 |
| A04176 | A05082 | 401 | A04176 | A05278 | 337 |
| A04176 | A05832 | 247 | A04176 | A06107 | 366 |
| A04176 | A06451 | 366 | A04176 | A06825 | 167 |
| A04176 | A07158 | 207 | A04176 | A08682 | 260 |
| A04176 | A08729 | 465 | A04176 | A09480 | 351 |
| A04176 | A10066 | 396 | A04176 | A10791 | 414 |
| A04176 | A10814 | 346 | A04176 | A10899 | 290 |
| A04176 | A10901 | 466 | A04176 | A13052 | 285 |
| A04176 | A13181 | 256 | A04176 | A14391 | 205 |
| A04178 | A06085 | 470 | A04178 | A16635 | 238 |
| A04179 | A04228 | 452 | A04179 | A04406 | 294 |
| A04179 | A06473 | 302 | A04179 | A07239 | 477 |
| A04179 | A07280 | 380 | A04179 | A07281 | 486 |
| A04179 | A07739 | 390 | A04179 | A10652 | 347 |
| A04179 | A10696 | 374 | A04179 | A11021 | 447 |
| A04179 | A13065 | 416 | A04180 | A04216 | 432 |

|        |        |     |        |        |     |
|--------|--------|-----|--------|--------|-----|
| A04180 | A04676 | 344 | A04180 | A05248 | 454 |
| A04180 | A05784 | 422 | A04180 | A08612 | 386 |
| A04180 | A10580 | 180 | A04180 | A11035 | 386 |
| A04180 | A13957 | 399 | A04180 | A14345 | 412 |
| A04181 | A05127 | 254 | A04181 | A09943 | 374 |
| A04181 | A15381 | 271 | A04182 | A04396 | 379 |
| A04182 | A06654 | 288 | A04182 | A07597 | 267 |
| A04182 | A08855 | 221 | A04182 | A09911 | 455 |
| A04182 | A10083 | 160 | A04182 | A10314 | 388 |
| A04183 | A04185 | 391 | A04183 | A04820 | 401 |
| A04183 | A05252 | 401 | A04183 | A05299 | 347 |
| A04183 | A05443 | 218 | A04183 | A09667 | 385 |
| A04183 | A10887 | 390 | A04184 | A04187 | 291 |
| A04184 | A08732 | 299 | A04184 | A08861 | 276 |
| A04184 | A15308 | 238 | A04184 | A16624 | 368 |
| A04185 | A04337 | 238 | A04185 | A04404 | 414 |
| A04185 | A05299 | 466 | A04186 | A04190 | 427 |
| A04186 | A16635 | 316 | A04187 | A04342 | 174 |
| A04187 | A04405 | 291 | A04187 | A04977 | 224 |
| A04187 | A06671 | 285 | A04187 | A08457 | 212 |
| A04187 | A09269 | 469 | A04187 | A09761 | 243 |
| A04187 | A12156 | 391 | A04188 | A10893 | 440 |
| A04189 | A04190 | 441 | A04190 | A05967 | 386 |
| A04191 | A04192 | 477 | A04191 | A04446 | 184 |
| A04191 | A04614 | 281 | A04191 | A05601 | 205 |
| A04191 | A07163 | 438 | A04191 | A08093 | 424 |
| A04191 | A09271 | 379 | A04191 | A10532 | 491 |
| A04191 | A10589 | 384 | A04191 | A10907 | 391 |
| A04191 | A11240 | 413 | A04191 | A11299 | 362 |
| A04191 | A12927 | 163 | A04191 | A14132 | 489 |
| A04191 | A15498 | 163 | A04191 | A15696 | 311 |
| A04191 | A15913 | 230 | A04192 | A04446 | 281 |
| A04192 | A05995 | 440 | A04192 | A10532 | 379 |
| A04192 | A10589 | 419 | A04192 | A10907 | 424 |
| A04192 | A11240 | 235 | A04192 | A12996 | 424 |
| A04192 | A14132 | 468 | A04192 | A15696 | 373 |
| A04193 | A04329 | 419 | A04193 | A04331 | 436 |
| A04193 | A04360 | 363 | A04193 | A04361 | 488 |
| A04193 | A04410 | 223 | A04193 | A04921 | 402 |
| A04193 | A04928 | 467 | A04193 | A05274 | 436 |
| A04193 | A05294 | 390 | A04193 | A05521 | 414 |
| A04193 | A05716 | 353 | A04193 | A06346 | 485 |
| A04193 | A06574 | 396 | A04193 | A06790 | 402 |
| A04193 | A07119 | 440 | A04193 | A07704 | 441 |
| A04193 | A07705 | 386 | A04193 | A08172 | 249 |
| A04193 | A08292 | 313 | A04193 | A08496 | 446 |

|        |        |     |        |        |     |
|--------|--------|-----|--------|--------|-----|
| A04193 | A08671 | 340 | A04193 | A09380 | 329 |
| A04193 | A09518 | 383 | A04193 | A11056 | 402 |
| A04193 | A16068 | 440 | A04194 | A06251 | 375 |
| A04194 | A06505 | 346 | A04194 | A07442 | 187 |
| A04194 | A09939 | 347 | A04194 | A11573 | 475 |
| A04194 | A11904 | 390 | A04194 | A12824 | 382 |
| A04195 | A04411 | 374 | A04195 | A05722 | 414 |
| A04195 | A05979 | 368 | A04195 | A06141 | 374 |
| A04195 | A06148 | 384 | A04195 | A06480 | 457 |
| A04195 | A09380 | 468 | A04195 | A14548 | 369 |
| A04196 | A05785 | 411 | A04196 | A08141 | 258 |
| A04198 | A14449 | 434 | A04199 | A16300 | 227 |
| A04200 | A04201 | 452 | A04200 | A04242 | 412 |
| A04200 | A04254 | 424 | A04200 | A04255 | 424 |
| A04200 | A05577 | 265 | A04200 | A17171 | 440 |
| A04201 | A04242 | 382 | A04201 | A04254 | 400 |
| A04201 | A04255 | 400 | A04201 | A04263 | 283 |
| A04201 | A06813 | 351 | A04201 | A07142 | 373 |
| A04201 | A07146 | 344 | A04201 | A07154 | 334 |
| A04201 | A07163 | 160 | A04201 | A07201 | 191 |
| A04201 | A10074 | 412 | A04201 | A13872 | 312 |
| A04201 | A14443 | 184 | A04201 | A16738 | 180 |
| A04201 | A17171 | 423 | A04202 | A04280 | 243 |
| A04202 | A04449 | 409 | A04202 | A04491 | 191 |
| A04202 | A04504 | 283 | A04202 | A04597 | 436 |
| A04202 | A04603 | 171 | A04202 | A04639 | 173 |
| A04202 | A04737 | 160 | A04202 | A04751 | 474 |
| A04202 | A04813 | 201 | A04202 | A04833 | 201 |
| A04202 | A04881 | 313 | A04202 | A04907 | 243 |
| A04202 | A05015 | 375 | A04202 | A05121 | 160 |
| A04202 | A05184 | 195 | A04202 | A05305 | 187 |
| A04202 | A05398 | 183 | A04202 | A05654 | 156 |
| A04202 | A06078 | 210 | A04202 | A06400 | 160 |
| A04202 | A06798 | 230 | A04202 | A06905 | 312 |
| A04202 | A06997 | 154 | A04202 | A07189 | 283 |
| A04202 | A07495 | 208 | A04202 | A07942 | 188 |
| A04202 | A07990 | 386 | A04202 | A08244 | 296 |
| A04202 | A09028 | 391 | A04202 | A09213 | 235 |
| A04202 | A09219 | 238 | A04202 | A09390 | 213 |
| A04202 | A09552 | 449 | A04202 | A09732 | 355 |
| A04202 | A09733 | 286 | A04202 | A10633 | 215 |
| A04202 | A11190 | 371 | A04202 | A11327 | 486 |
| A04202 | A11392 | 170 | A04202 | A11449 | 243 |
| A04202 | A11522 | 377 | A04202 | A11548 | 457 |
| A04202 | A11846 | 468 | A04202 | A11897 | 160 |
| A04202 | A11932 | 419 | A04202 | A12273 | 490 |

|        |        |     |        |        |     |
|--------|--------|-----|--------|--------|-----|
| A04202 | A12326 | 260 | A04202 | A12365 | 217 |
| A04202 | A12982 | 260 | A04202 | A13063 | 195 |
| A04202 | A13344 | 324 | A04202 | A13370 | 263 |
| A04202 | A13832 | 475 | A04202 | A13874 | 299 |
| A04202 | A13944 | 401 | A04202 | A13994 | 480 |
| A04202 | A14010 | 210 | A04202 | A14132 | 204 |
| A04202 | A14247 | 462 | A04202 | A14370 | 196 |
| A04202 | A14511 | 477 | A04202 | A14711 | 174 |
| A04202 | A15002 | 360 | A04202 | A15178 | 360 |
| A04202 | A15292 | 481 | A04202 | A15313 | 290 |
| A04202 | A15396 | 156 | A04202 | A15435 | 243 |
| A04202 | A15480 | 185 | A04202 | A15804 | 241 |
| A04202 | A15913 | 230 | A04202 | A16257 | 465 |
| A04203 | A04438 | 433 | A04203 | A09187 | 438 |
| A04204 | A07431 | 452 | A04204 | A09186 | 452 |
| A04205 | A09387 | 307 | A04205 | A10392 | 191 |
| A04205 | A11830 | 404 | A04205 | A14198 | 154 |
| A04205 | A14693 | 163 | A04205 | A15598 | 255 |
| A04206 | A04247 | 379 | A04206 | A04260 | 258 |
| A04206 | A04274 | 377 | A04206 | A04298 | 452 |
| A04206 | A04518 | 356 | A04206 | A04566 | 396 |
| A04206 | A04567 | 412 | A04206 | A04613 | 362 |
| A04206 | A06127 | 402 | A04206 | A06149 | 323 |
| A04206 | A06422 | 486 | A04206 | A07157 | 219 |
| A04206 | A14381 | 260 | A04206 | A14387 | 353 |
| A04207 | A04779 | 193 | A04207 | A05349 | 224 |
| A04207 | A05888 | 467 | A04207 | A06107 | 382 |
| A04207 | A10823 | 393 | A04207 | A13181 | 286 |
| A04207 | A13827 | 373 | A04207 | A14029 | 266 |
| A04207 | A14664 | 257 | A04207 | A16996 | 385 |
| A04208 | A05948 | 414 | A04208 | A06128 | 407 |
| A04208 | A07136 | 378 | A04208 | A09544 | 390 |
| A04208 | A09911 | 360 | A04208 | A15233 | 343 |
| A04209 | A04342 | 165 | A04209 | A04446 | 451 |
| A04209 | A04706 | 262 | A04209 | A04908 | 87  |
| A04209 | A05363 | 182 | A04209 | A05398 | 180 |
| A04209 | A05415 | 188 | A04209 | A06246 | 358 |
| A04209 | A06707 | 179 | A04209 | A06806 | 176 |
| A04209 | A07163 | 162 | A04209 | A07415 | 310 |
| A04209 | A07742 | 301 | A04209 | A08419 | 212 |
| A04209 | A08512 | 279 | A04209 | A09124 | 317 |
| A04209 | A09300 | 162 | A04209 | A09383 | 254 |
| A04209 | A09504 | 196 | A04209 | A09545 | 434 |
| A04209 | A09546 | 490 | A04209 | A09792 | 388 |
| A04209 | A09901 | 162 | A04209 | A10247 | 310 |
| A04209 | A10439 | 382 | A04209 | A10547 | 490 |

|        |        |     |        |        |     |
|--------|--------|-----|--------|--------|-----|
| A04209 | A10973 | 335 | A04209 | A11444 | 168 |
| A04209 | A11553 | 467 | A04209 | A11590 | 469 |
| A04209 | A11616 | 281 | A04209 | A11921 | 162 |
| A04209 | A12324 | 322 | A04209 | A12408 | 226 |
| A04209 | A12409 | 173 | A04209 | A12443 | 358 |
| A04209 | A12712 | 335 | A04209 | A12726 | 420 |
| A04209 | A13015 | 358 | A04209 | A13073 | 358 |
| A04209 | A13204 | 335 | A04209 | A13331 | 301 |
| A04209 | A13385 | 257 | A04209 | A14138 | 168 |
| A04209 | A14579 | 251 | A04209 | A14969 | 208 |
| A04209 | A16354 | 310 | A04209 | A16877 | 180 |
| A04210 | A04449 | 174 | A04210 | A08878 | 246 |
| A04210 | A09452 | 428 | A04210 | A11068 | 357 |
| A04211 | A04995 | 208 | A04211 | A05363 | 353 |
| A04211 | A05776 | 281 | A04211 | A05947 | 380 |
| A04211 | A06086 | 319 | A04211 | A06286 | 171 |
| A04211 | A06358 | 302 | A04211 | A06592 | 491 |
| A04211 | A06633 | 229 | A04211 | A06692 | 288 |
| A04211 | A06756 | 188 | A04211 | A06773 | 379 |
| A04211 | A07122 | 294 | A04211 | A07234 | 458 |
| A04211 | A07363 | 380 | A04211 | A07477 | 168 |
| A04211 | A07525 | 348 | A04211 | A07659 | 486 |
| A04211 | A07660 | 277 | A04211 | A07753 | 485 |
| A04211 | A07800 | 491 | A04211 | A08099 | 488 |
| A04211 | A08193 | 457 | A04211 | A08205 | 440 |
| A04211 | A10652 | 243 | A04211 | A10677 | 179 |
| A04211 | A10702 | 279 | A04211 | A11309 | 491 |
| A04211 | A12692 | 324 | A04211 | A14313 | 319 |
| A04211 | A14502 | 205 | A04211 | A15497 | 480 |
| A04211 | A16027 | 268 | A04211 | A16028 | 243 |
| A04211 | A16368 | 452 | A04211 | A16371 | 201 |
| A04211 | A16529 | 480 | A04211 | A16840 | 187 |
| A04211 | A16959 | 481 | A04212 | A04533 | 414 |
| A04212 | A04867 | 491 | A04212 | A04870 | 488 |
| A04212 | A04916 | 259 | A04212 | A05153 | 156 |
| A04212 | A05188 | 319 | A04212 | A05297 | 340 |
| A04212 | A05356 | 491 | A04212 | A05490 | 259 |
| A04212 | A05571 | 291 | A04212 | A05596 | 171 |
| A04212 | A05605 | 243 | A04212 | A05623 | 259 |
| A04212 | A05837 | 341 | A04212 | A05899 | 238 |
| A04212 | A05919 | 351 | A04212 | A05926 | 238 |
| A04212 | A06050 | 291 | A04212 | A06195 | 294 |
| A04212 | A06204 | 281 | A04212 | A06281 | 430 |
| A04212 | A07003 | 378 | A04212 | A07312 | 165 |
| A04212 | A07318 | 319 | A04212 | A07409 | 188 |
| A04212 | A07524 | 257 | A04212 | A07541 | 230 |

|        |        |     |        |        |     |
|--------|--------|-----|--------|--------|-----|
| A04212 | A07542 | 201 | A04212 | A07543 | 210 |
| A04212 | A07610 | 217 | A04212 | A07673 | 201 |
| A04212 | A07766 | 460 | A04212 | A07913 | 245 |
| A04212 | A07932 | 165 | A04212 | A08404 | 439 |
| A04212 | A08445 | 156 | A04212 | A08591 | 351 |
| A04212 | A08770 | 185 | A04212 | A09080 | 247 |
| A04212 | A09397 | 486 | A04212 | A09628 | 156 |
| A04212 | A09842 | 395 | A04212 | A09932 | 232 |
| A04212 | A10635 | 176 | A04212 | A10816 | 185 |
| A04212 | A10967 | 170 | A04212 | A12284 | 441 |
| A04212 | A12553 | 259 | A04212 | A12793 | 174 |
| A04212 | A13212 | 490 | A04212 | A14128 | 477 |
| A04212 | A14596 | 465 | A04212 | A14621 | 436 |
| A04212 | A15135 | 183 | A04212 | A15270 | 188 |
| A04212 | A15377 | 335 | A04212 | A15430 | 296 |
| A04212 | A15838 | 193 | A04212 | A16685 | 337 |
| A04212 | A17155 | 156 | A04213 | A04510 | 340 |
| A04213 | A04721 | 375 | A04213 | A05415 | 238 |
| A04213 | A07165 | 159 | A04213 | A08583 | 347 |
| A04213 | A11911 | 224 | A04213 | A16112 | 369 |
| A04214 | A04449 | 160 | A04214 | A05153 | 301 |
| A04214 | A14650 | 241 | A04215 | A04349 | 348 |
| A04215 | A04460 | 457 | A04215 | A05795 | 357 |
| A04215 | A07019 | 373 | A04215 | A07559 | 438 |
| A04215 | A10665 | 406 | A04215 | A11014 | 391 |
| A04215 | A13337 | 441 | A04216 | A04417 | 447 |
| A04216 | A04676 | 425 | A04216 | A05784 | 420 |
| A04216 | A08834 | 208 | A04216 | A09984 | 393 |
| A04216 | A10093 | 396 | A04216 | A10563 | 267 |
| A04216 | A11099 | 469 | A04216 | A14190 | 174 |
| A04216 | A14210 | 156 | A04216 | A14364 | 276 |
| A04216 | A14374 | 216 | A04216 | A14516 | 210 |
| A04216 | A14536 | 363 | A04217 | A04248 | 215 |
| A04217 | A04259 | 353 | A04217 | A04539 | 333 |
| A04217 | A05083 | 329 | A04217 | A05517 | 274 |
| A04217 | A05577 | 217 | A04217 | A05679 | 486 |
| A04217 | A05985 | 168 | A04217 | A06314 | 317 |
| A04217 | A06415 | 491 | A04217 | A06747 | 490 |
| A04217 | A06899 | 293 | A04217 | A06988 | 341 |
| A04217 | A07050 | 257 | A04217 | A07145 | 191 |
| A04217 | A07152 | 491 | A04217 | A07173 | 177 |
| A04217 | A07381 | 272 | A04217 | A07961 | 180 |
| A04217 | A08634 | 360 | A04217 | A08651 | 341 |
| A04217 | A08908 | 435 | A04217 | A10319 | 439 |
| A04217 | A10586 | 235 | A04217 | A10605 | 279 |
| A04217 | A10750 | 427 | A04217 | A13131 | 308 |



|        |        |     |        |        |     |
|--------|--------|-----|--------|--------|-----|
| A04217 | A13338 | 227 | A04217 | A13988 | 457 |
| A04217 | A14071 | 488 | A04217 | A14125 | 332 |
| A04217 | A14146 | 259 | A04217 | A14199 | 234 |
| A04217 | A14372 | 177 | A04217 | A14374 | 413 |
| A04217 | A14391 | 362 | A04217 | A14392 | 159 |
| A04217 | A14439 | 221 | A04217 | A14599 | 235 |
| A04217 | A15322 | 163 | A04217 | A15394 | 335 |
| A04217 | A15408 | 263 | A04217 | A15425 | 489 |
| A04217 | A15427 | 477 | A04217 | A15630 | 157 |
| A04217 | A15642 | 340 | A04217 | A15794 | 271 |
| A04217 | A15806 | 288 | A04217 | A16015 | 416 |
| A04218 | A04380 | 371 | A04218 | A04471 | 481 |
| A04218 | A04740 | 356 | A04218 | A04970 | 409 |
| A04218 | A05220 | 162 | A04218 | A05417 | 162 |
| A04218 | A08070 | 251 | A04218 | A09062 | 364 |
| A04218 | A09979 | 401 | A04218 | A09985 | 361 |
| A04218 | A10517 | 380 | A04218 | A11132 | 269 |
| A04218 | A14007 | 227 | A04218 | A14072 | 235 |
| A04218 | A14516 | 339 | A04218 | A15414 | 367 |
| A04219 | A07139 | 433 | A04219 | A09507 | 405 |
| A04219 | A14664 | 347 | A04220 | A04466 | 434 |
| A04220 | A05883 | 368 | A04220 | A06734 | 380 |
| A04220 | A14198 | 182 | A04220 | A14377 | 302 |
| A04220 | A14399 | 205 | A04221 | A04223 | 380 |
| A04221 | A04737 | 340 | A04221 | A05701 | 308 |
| A04221 | A10506 | 278 | A04221 | A14674 | 240 |
| A04221 | A14702 | 333 | A04221 | A16738 | 223 |
| A04222 | A04256 | 177 | A04222 | A04280 | 286 |
| A04222 | A04282 | 208 | A04222 | A04394 | 477 |
| A04222 | A04418 | 333 | A04222 | A04454 | 276 |
| A04222 | A04491 | 221 | A04222 | A04513 | 356 |
| A04222 | A04795 | 174 | A04222 | A05360 | 302 |
| A04222 | A05721 | 446 | A04222 | A06100 | 201 |
| A04222 | A06193 | 343 | A04222 | A06544 | 219 |
| A04222 | A06655 | 396 | A04222 | A06739 | 176 |
| A04222 | A07132 | 238 | A04222 | A08220 | 374 |
| A04222 | A09937 | 218 | A04222 | A11068 | 152 |
| A04222 | A11378 | 293 | A04222 | A11603 | 343 |
| A04222 | A12010 | 281 | A04222 | A14410 | 307 |
| A04222 | A14887 | 263 | A04222 | A15277 | 171 |
| A04222 | A16043 | 263 | A04222 | A16433 | 260 |
| A04222 | A16721 | 318 | A04223 | A04600 | 307 |
| A04223 | A04605 | 385 | A04223 | A05094 | 308 |
| A04223 | A05701 | 277 | A04223 | A07135 | 385 |
| A04223 | A07138 | 348 | A04223 | A07157 | 229 |
| A04223 | A07339 | 226 | A04223 | A15267 | 358 |

|        |        |     |        |        |     |
|--------|--------|-----|--------|--------|-----|
| A04224 | A04236 | 422 | A04224 | A04622 | 223 |
| A04224 | A05593 | 409 | A04224 | A05599 | 430 |
| A04224 | A10278 | 385 | A04225 | A04484 | 935 |
| A04225 | A16636 | 326 | A04226 | A04449 | 174 |
| A04226 | A05796 | 371 | A04226 | A12507 | 273 |
| A04227 | A04305 | 377 | A04227 | A05622 | 430 |
| A04227 | A14306 | 433 | A04228 | A04231 | 358 |
| A04228 | A04713 | 409 | A04228 | A04791 | 374 |
| A04228 | A05014 | 285 | A04228 | A05045 | 235 |
| A04228 | A06439 | 322 | A04228 | A06607 | 380 |
| A04228 | A06626 | 335 | A04228 | A06855 | 451 |
| A04228 | A07059 | 334 | A04228 | A07067 | 398 |
| A04228 | A07088 | 344 | A04228 | A07239 | 490 |
| A04228 | A07281 | 458 | A04228 | A07613 | 472 |
| A04228 | A07674 | 162 | A04228 | A07718 | 202 |
| A04228 | A07739 | 480 | A04228 | A07757 | 249 |
| A04228 | A08155 | 408 | A04228 | A08690 | 456 |
| A04228 | A10126 | 427 | A04228 | A10458 | 318 |
| A04228 | A10476 | 372 | A04228 | A10652 | 391 |
| A04228 | A10683 | 263 | A04228 | A10696 | 470 |
| A04228 | A10776 | 188 | A04228 | A11021 | 474 |
| A04228 | A12162 | 363 | A04228 | A13065 | 383 |
| A04228 | A14408 | 196 | A04228 | A14511 | 187 |
| A04228 | A14549 | 335 | A04228 | A14828 | 347 |
| A04228 | A17006 | 445 | A04229 | A04329 | 196 |
| A04229 | A04333 | 396 | A04229 | A04400 | 443 |
| A04229 | A04408 | 350 | A04229 | A04418 | 152 |
| A04229 | A04886 | 475 | A04229 | A04911 | 193 |
| A04229 | A04928 | 156 | A04229 | A04949 | 326 |
| A04229 | A05007 | 434 | A04229 | A05018 | 408 |
| A04229 | A05142 | 256 | A04229 | A05247 | 165 |
| A04229 | A05264 | 167 | A04229 | A05288 | 286 |
| A04229 | A05289 | 283 | A04229 | A05388 | 251 |
| A04229 | A05416 | 413 | A04229 | A06129 | 152 |
| A04229 | A06652 | 273 | A04229 | A06654 | 162 |
| A04229 | A06689 | 205 | A04229 | A06970 | 432 |
| A04229 | A07125 | 418 | A04229 | A07132 | 190 |
| A04229 | A07209 | 391 | A04229 | A07210 | 160 |
| A04229 | A07256 | 452 | A04229 | A07376 | 201 |
| A04229 | A07477 | 454 | A04229 | A07558 | 319 |
| A04229 | A07590 | 326 | A04229 | A07736 | 411 |
| A04229 | A07933 | 358 | A04229 | A07973 | 435 |
| A04229 | A08301 | 245 | A04229 | A09131 | 243 |
| A04229 | A09409 | 297 | A04229 | A09656 | 232 |
| A04229 | A10359 | 348 | A04229 | A10437 | 238 |
| A04229 | A10444 | 159 | A04229 | A10532 | 160 |

|        |        |     |        |        |     |
|--------|--------|-----|--------|--------|-----|
| A04229 | A10656 | 273 | A04229 | A10658 | 205 |
| A04229 | A10686 | 205 | A04229 | A10704 | 238 |
| A04229 | A11240 | 477 | A04229 | A11470 | 343 |
| A04229 | A12055 | 260 | A04229 | A12897 | 251 |
| A04229 | A13052 | 260 | A04229 | A14229 | 450 |
| A04229 | A14392 | 176 | A04229 | A14399 | 286 |
| A04229 | A14803 | 246 | A04229 | A15238 | 183 |
| A04229 | A15322 | 344 | A04229 | A15342 | 479 |
| A04229 | A15343 | 470 | A04229 | A15344 | 477 |
| A04229 | A15789 | 256 | A04229 | A16111 | 350 |
| A04229 | A16424 | 416 | A04229 | A16827 | 180 |
| A04230 | A04422 | 240 | A04230 | A04490 | 454 |
| A04230 | A04827 | 337 | A04230 | A05090 | 334 |
| A04230 | A05149 | 308 | A04230 | A05370 | 247 |
| A04230 | A05443 | 245 | A04230 | A05654 | 235 |
| A04230 | A06351 | 180 | A04230 | A06564 | 334 |
| A04230 | A06812 | 340 | A04230 | A06897 | 162 |
| A04230 | A07581 | 338 | A04230 | A08052 | 215 |
| A04230 | A09332 | 165 | A04230 | A09550 | 321 |
| A04230 | A09644 | 156 | A04230 | A10336 | 160 |
| A04230 | A10633 | 176 | A04230 | A10645 | 258 |
| A04230 | A11263 | 312 | A04230 | A12970 | 346 |
| A04230 | A13989 | 452 | A04230 | A13992 | 259 |
| A04230 | A14216 | 371 | A04230 | A14741 | 157 |
| A04230 | A16686 | 221 | A04231 | A06607 | 159 |
| A04231 | A15498 | 393 | A04232 | A05487 | 256 |
| A04232 | A06037 | 121 | A04232 | A09256 | 152 |
| A04232 | A09996 | 458 | A04232 | A13484 | 260 |
| A04232 | A15492 | 176 | A04232 | A15614 | 224 |
| A04234 | A05741 | 391 | A04234 | A07135 | 234 |
| A04234 | A09494 | 408 | A04234 | A11326 | 286 |
| A04235 | A06666 | 416 | A04235 | A06807 | 412 |
| A04236 | A04622 | 170 | A04236 | A04911 | 374 |
| A04236 | A05142 | 401 | A04236 | A05593 | 391 |
| A04236 | A05599 | 417 | A04236 | A06314 | 238 |
| A04236 | A10942 | 408 | A04237 | A04244 | 372 |
| A04237 | A04912 | 411 | A04237 | A06175 | 417 |
| A04237 | A06615 | 167 | A04237 | A15795 | 324 |
| A04237 | A15969 | 408 | A04237 | A16636 | 200 |
| A04238 | A04263 | 485 | A04238 | A04518 | 441 |
| A04238 | A04548 | 329 | A04238 | A04567 | 335 |
| A04238 | A05309 | 201 | A04238 | A05847 | 356 |
| A04238 | A05985 | 278 | A04238 | A06650 | 208 |
| A04238 | A07146 | 358 | A04238 | A07152 | 270 |
| A04238 | A07173 | 286 | A04238 | A09236 | 435 |
| A04238 | A13872 | 329 | A04238 | A14188 | 313 |

|        |        |     |        |        |     |
|--------|--------|-----|--------|--------|-----|
| A04238 | A15395 | 288 | A04238 | A15601 | 351 |
| A04238 | A15603 | 341 | A04238 | A15885 | 413 |
| A04239 | A04241 | 401 | A04239 | A04266 | 433 |
| A04239 | A04307 | 466 | A04239 | A04358 | 346 |
| A04239 | A04534 | 350 | A04239 | A04715 | 163 |
| A04239 | A04719 | 363 | A04239 | A04879 | 157 |
| A04239 | A05065 | 232 | A04239 | A05243 | 274 |
| A04239 | A05779 | 303 | A04239 | A05944 | 213 |
| A04239 | A06325 | 443 | A04239 | A06653 | 279 |
| A04239 | A06868 | 479 | A04239 | A09123 | 286 |
| A04239 | A09195 | 207 | A04239 | A09900 | 257 |
| A04239 | A11280 | 173 | A04239 | A11450 | 337 |
| A04239 | A11478 | 238 | A04239 | A12965 | 378 |
| A04239 | A14454 | 174 | A04239 | A15376 | 265 |
| A04239 | A15840 | 232 | A04239 | A16732 | 420 |
| A04240 | A04244 | 389 | A04240 | A04536 | 310 |
| A04240 | A04961 | 398 | A04240 | A05985 | 329 |
| A04240 | A06149 | 380 | A04240 | A07146 | 450 |
| A04240 | A07157 | 307 | A04242 | A04254 | 416 |
| A04242 | A04255 | 416 | A04242 | A04622 | 162 |
| A04242 | A17171 | 434 | A04244 | A04263 | 259 |
| A04244 | A04337 | 156 | A04244 | A04589 | 238 |
| A04244 | A04854 | 389 | A04244 | A04862 | 384 |
| A04244 | A04865 | 307 | A04244 | A05127 | 202 |
| A04244 | A05679 | 419 | A04244 | A05944 | 430 |
| A04244 | A05985 | 491 | A04244 | A06149 | 450 |
| A04244 | A06415 | 288 | A04244 | A06422 | 303 |
| A04244 | A06944 | 302 | A04244 | A07031 | 249 |
| A04244 | A07152 | 221 | A04244 | A07157 | 473 |
| A04244 | A07164 | 229 | A04244 | A08335 | 263 |
| A04244 | A08738 | 296 | A04244 | A12009 | 411 |
| A04244 | A13131 | 350 | A04244 | A13872 | 491 |
| A04244 | A14368 | 313 | A04244 | A14391 | 200 |
| A04244 | A14439 | 279 | A04244 | A14599 | 291 |
| A04244 | A15394 | 263 | A04244 | A15395 | 241 |
| A04244 | A15425 | 208 | A04244 | A15603 | 407 |
| A04244 | A15607 | 329 | A04244 | A15642 | 269 |
| A04244 | A15795 | 258 | A04244 | A15806 | 334 |
| A04244 | A15832 | 380 | A04244 | A15925 | 270 |
| A04244 | A15969 | 375 | A04245 | A05773 | 455 |
| A04245 | A07164 | 313 | A04245 | A10512 | 438 |
| A04246 | A05866 | 463 | A04246 | A05940 | 441 |
| A04246 | A06537 | 432 | A04246 | A06607 | 241 |
| A04246 | A06688 | 238 | A04246 | A07158 | 266 |
| A04246 | A07201 | 229 | A04246 | A08389 | 391 |
| A04246 | A13484 | 322 | A04246 | A13945 | 249 |

|        |        |     |        |        |     |
|--------|--------|-----|--------|--------|-----|
| A04246 | A14643 | 172 | A04247 | A04518 | 383 |
| A04247 | A04548 | 474 | A04247 | A04566 | 416 |
| A04247 | A04567 | 481 | A04247 | A04613 | 388 |
| A04247 | A04798 | 401 | A04247 | A06422 | 355 |
| A04247 | A14387 | 380 | A04248 | A04263 | 196 |
| A04248 | A04320 | 434 | A04248 | A04415 | 271 |
| A04248 | A04519 | 219 | A04248 | A04533 | 168 |
| A04248 | A04536 | 472 | A04248 | A04756 | 374 |
| A04248 | A04865 | 252 | A04248 | A05127 | 363 |
| A04248 | A05305 | 375 | A04248 | A05944 | 491 |
| A04248 | A05985 | 468 | A04248 | A06054 | 480 |
| A04248 | A06055 | 486 | A04248 | A06095 | 296 |
| A04248 | A06404 | 446 | A04248 | A06415 | 313 |
| A04248 | A06422 | 249 | A04248 | A06737 | 377 |
| A04248 | A06780 | 452 | A04248 | A06818 | 283 |
| A04248 | A07133 | 358 | A04248 | A07143 | 210 |
| A04248 | A07145 | 188 | A04248 | A07148 | 279 |
| A04248 | A07152 | 157 | A04248 | A07157 | 945 |
| A04248 | A07158 | 139 | A04248 | A07161 | 466 |
| A04248 | A07166 | 180 | A04248 | A07173 | 457 |
| A04248 | A07178 | 252 | A04248 | A07311 | 899 |
| A04248 | A07372 | 314 | A04248 | A07390 | 273 |
| A04248 | A08714 | 227 | A04248 | A09422 | 198 |
| A04248 | A10586 | 232 | A04248 | A14236 | 454 |
| A04248 | A14373 | 302 | A04248 | A14376 | 283 |
| A04248 | A14392 | 157 | A04248 | A14432 | 291 |
| A04248 | A14442 | 255 | A04248 | A15241 | 257 |
| A04248 | A15394 | 201 | A04248 | A15395 | 393 |
| A04248 | A15601 | 460 | A04248 | A15603 | 430 |
| A04248 | A15605 | 486 | A04248 | A15607 | 279 |
| A04248 | A15608 | 477 | A04249 | A04310 | 446 |
| A04249 | A04573 | 380 | A04249 | A04574 | 326 |
| A04249 | A08415 | 425 | A04249 | A08427 | 373 |
| A04249 | A09263 | 384 | A04249 | A09542 | 196 |
| A04249 | A09842 | 252 | A04249 | A10247 | 210 |
| A04249 | A14192 | 165 | A04249 | A14443 | 198 |
| A04250 | A04309 | 388 | A04250 | A06650 | 257 |
| A04252 | A04275 | 433 | A04252 | A05601 | 252 |
| A04252 | A08097 | 457 | A04252 | A10358 | 319 |
| A04252 | A10594 | 235 | A04252 | A11431 | 265 |
| A04252 | A11454 | 470 | A04252 | A13945 | 221 |
| A04252 | A14071 | 241 | A04252 | A14198 | 272 |
| A04252 | A14210 | 303 | A04252 | A14570 | 251 |
| A04252 | A15292 | 427 | A04252 | A15301 | 243 |
| A04252 | A15302 | 257 | A04252 | A15413 | 262 |
| A04252 | A15495 | 461 | A04253 | A04550 | 418 |

|        |        |     |        |        |     |
|--------|--------|-----|--------|--------|-----|
| A04253 | A05590 | 407 | A04253 | A10075 | 424 |
| A04253 | A13313 | 207 | A04253 | A15855 | 224 |
| A04254 | A04255 | 466 | A04254 | A06607 | 171 |
| A04254 | A15290 | 396 | A04254 | A17171 | 441 |
| A04255 | A04375 | 299 | A04255 | A06608 | 262 |
| A04255 | A14125 | 348 | A04255 | A15290 | 396 |
| A04255 | A17171 | 441 | A04256 | A04406 | 205 |
| A04256 | A04423 | 396 | A04256 | A04491 | 461 |
| A04256 | A04574 | 243 | A04256 | A05462 | 266 |
| A04256 | A05825 | 326 | A04256 | A06416 | 213 |
| A04256 | A06640 | 256 | A04256 | A06641 | 435 |
| A04256 | A07665 | 288 | A04256 | A09269 | 187 |
| A04256 | A11149 | 207 | A04256 | A11150 | 291 |
| A04256 | A11547 | 281 | A04256 | A11576 | 184 |
| A04256 | A11665 | 303 | A04256 | A13927 | 395 |
| A04256 | A15233 | 276 | A04256 | A16257 | 229 |
| A04256 | A16764 | 198 | A04257 | A04327 | 302 |
| A04257 | A04444 | 313 | A04257 | A04790 | 157 |
| A04257 | A05556 | 260 | A04257 | A07145 | 396 |
| A04257 | A08093 | 207 | A04257 | A08506 | 230 |
| A04257 | A11299 | 285 | A04257 | A11633 | 416 |
| A04257 | A13415 | 355 | A04257 | A14366 | 352 |
| A04257 | A14372 | 390 | A04257 | A14391 | 241 |
| A04257 | A14599 | 323 | A04257 | A15336 | 229 |
| A04257 | A15795 | 294 | A04258 | A04366 | 296 |
| A04258 | A04368 | 333 | A04258 | A04371 | 433 |
| A04258 | A04556 | 310 | A04258 | A04813 | 299 |
| A04258 | A04874 | 450 | A04258 | A04883 | 238 |
| A04258 | A04974 | 351 | A04258 | A04975 | 457 |
| A04258 | A04981 | 414 | A04258 | A05237 | 377 |
| A04258 | A05376 | 258 | A04258 | A05390 | 281 |
| A04258 | A05647 | 406 | A04258 | A05694 | 384 |
| A04258 | A05914 | 285 | A04258 | A05966 | 243 |
| A04258 | A06263 | 480 | A04258 | A06295 | 162 |
| A04258 | A06607 | 363 | A04258 | A06622 | 247 |
| A04258 | A06762 | 279 | A04258 | A06769 | 338 |
| A04258 | A07109 | 223 | A04258 | A07158 | 174 |
| A04258 | A07191 | 199 | A04258 | A07808 | 393 |
| A04258 | A07976 | 174 | A04258 | A08746 | 457 |
| A04258 | A08910 | 351 | A04258 | A09072 | 243 |
| A04258 | A10644 | 366 | A04259 | A06314 | 262 |
| A04260 | A04560 | 281 | A04260 | A04773 | 377 |
| A04260 | A04818 | 208 | A04260 | A04905 | 243 |
| A04260 | A05001 | 279 | A04260 | A05036 | 299 |
| A04260 | A05037 | 491 | A04260 | A05236 | 345 |
| A04260 | A05260 | 168 | A04260 | A05302 | 266 |

|        |        |     |        |        |     |
|--------|--------|-----|--------|--------|-----|
| A04260 | A05397 | 345 | A04260 | A05414 | 899 |
| A04260 | A05473 | 324 | A04260 | A05708 | 328 |
| A04260 | A06271 | 305 | A04260 | A06320 | 208 |
| A04260 | A06597 | 154 | A04260 | A07192 | 162 |
| A04260 | A07206 | 152 | A04260 | A07644 | 243 |
| A04260 | A08903 | 177 | A04260 | A09509 | 329 |
| A04260 | A09926 | 296 | A04260 | A10087 | 446 |
| A04260 | A10337 | 160 | A04260 | A10731 | 475 |
| A04260 | A11897 | 402 | A04260 | A14025 | 283 |
| A04260 | A14316 | 260 | A04260 | A14376 | 249 |
| A04260 | A14404 | 232 | A04261 | A06476 | 441 |
| A04262 | A04481 | 401 | A04262 | A04607 | 286 |
| A04262 | A04609 | 348 | A04262 | A04614 | 353 |
| A04262 | A05113 | 338 | A04262 | A05349 | 272 |
| A04262 | A16636 | 207 | A04263 | A04518 | 485 |
| A04263 | A04526 | 420 | A04263 | A04528 | 358 |
| A04263 | A04536 | 249 | A04263 | A04548 | 449 |
| A04263 | A04567 | 491 | A04263 | A04574 | 223 |
| A04263 | A04609 | 210 | A04263 | A04727 | 286 |
| A04263 | A04734 | 293 | A04263 | A04783 | 187 |
| A04263 | A04865 | 469 | A04263 | A04919 | 358 |
| A04263 | A04961 | 279 | A04263 | A05039 | 335 |
| A04263 | A05351 | 283 | A04263 | A05515 | 380 |
| A04263 | A05679 | 279 | A04263 | A05741 | 391 |
| A04263 | A05847 | 483 | A04263 | A05985 | 281 |
| A04263 | A06210 | 386 | A04263 | A06415 | 188 |
| A04263 | A06422 | 468 | A04263 | A06579 | 254 |
| A04263 | A07146 | 380 | A04263 | A07152 | 272 |
| A04263 | A07154 | 247 | A04263 | A07157 | 245 |
| A04263 | A07158 | 124 | A04263 | A07161 | 204 |
| A04263 | A07166 | 165 | A04263 | A07173 | 452 |
| A04263 | A07302 | 398 | A04263 | A07440 | 391 |
| A04263 | A07442 | 227 | A04263 | A07605 | 188 |
| A04263 | A09419 | 252 | A04263 | A10055 | 408 |
| A04263 | A10598 | 228 | A04263 | A10901 | 317 |
| A04263 | A12325 | 154 | A04263 | A13181 | 390 |
| A04263 | A13872 | 449 | A04263 | A14026 | 312 |
| A04263 | A14405 | 174 | A04263 | A15394 | 185 |
| A04263 | A15395 | 162 | A04264 | A04563 | 335 |
| A04264 | A05032 | 266 | A04264 | A05167 | 401 |
| A04264 | A05304 | 394 | A04264 | A05798 | 350 |
| A04264 | A06648 | 238 | A04264 | A07135 | 356 |
| A04264 | A07164 | 226 | A04264 | A07197 | 303 |
| A04264 | A08635 | 323 | A04264 | A12304 | 341 |
| A04264 | A13348 | 311 | A04264 | A16877 | 305 |
| A04265 | A04305 | 462 | A04265 | A04316 | 303 |

|        |        |     |        |        |     |
|--------|--------|-----|--------|--------|-----|
| A04265 | A04543 | 479 | A04265 | A04570 | 475 |
| A04265 | A04903 | 440 | A04265 | A05109 | 396 |
| A04265 | A09093 | 374 | A04265 | A14073 | 215 |
| A04265 | A14827 | 157 | A04266 | A07976 | 286 |
| A04266 | A08667 | 375 | A04266 | A10420 | 274 |
| A04267 | A04268 | 303 | A04267 | A04271 | 163 |
| A04267 | A04272 | 486 | A04267 | A04278 | 187 |
| A04267 | A04334 | 313 | A04267 | A04440 | 246 |
| A04267 | A04538 | 329 | A04267 | A04567 | 217 |
| A04267 | A04600 | 200 | A04267 | A04612 | 243 |
| A04267 | A04649 | 285 | A04267 | A04798 | 452 |
| A04267 | A04842 | 195 | A04267 | A04906 | 483 |
| A04267 | A05185 | 238 | A04267 | A05309 | 165 |
| A04267 | A05588 | 343 | A04267 | A05677 | 302 |
| A04267 | A05709 | 266 | A04267 | A05760 | 188 |
| A04267 | A06073 | 274 | A04267 | A06597 | 401 |
| A04267 | A08741 | 200 | A04267 | A09221 | 221 |
| A04267 | A09397 | 281 | A04267 | A10337 | 307 |
| A04267 | A10610 | 383 | A04267 | A10943 | 313 |
| A04267 | A12730 | 245 | A04267 | A13212 | 223 |
| A04267 | A15674 | 369 | A04267 | A15911 | 204 |
| A04267 | A15976 | 174 | A04268 | A04271 | 173 |
| A04268 | A04275 | 489 | A04268 | A04279 | 201 |
| A04268 | A04530 | 324 | A04268 | A04603 | 451 |
| A04268 | A04723 | 270 | A04268 | A04938 | 268 |
| A04268 | A05073 | 274 | A04268 | A05141 | 208 |
| A04268 | A05489 | 491 | A04268 | A05556 | 490 |
| A04268 | A05558 | 329 | A04268 | A05570 | 228 |
| A04268 | A06055 | 335 | A04268 | A06073 | 463 |
| A04268 | A06421 | 324 | A04268 | A07046 | 200 |
| A04268 | A07169 | 316 | A04268 | A07251 | 302 |
| A04268 | A07590 | 176 | A04268 | A08658 | 308 |
| A04268 | A08677 | 259 | A04268 | A08741 | 208 |
| A04268 | A08850 | 481 | A04268 | A09037 | 385 |
| A04268 | A09046 | 384 | A04268 | A09081 | 329 |
| A04268 | A10001 | 490 | A04268 | A10337 | 182 |
| A04268 | A10967 | 243 | A04268 | A14283 | 172 |
| A04268 | A14366 | 221 | A04268 | A16096 | 157 |
| A04268 | A16870 | 440 | A04270 | A04536 | 310 |
| A04270 | A06055 | 363 | A04270 | A07197 | 379 |
| A04270 | A14386 | 394 | A04271 | A04698 | 302 |
| A04271 | A04795 | 193 | A04271 | A04830 | 245 |
| A04271 | A04832 | 346 | A04271 | A04950 | 345 |
| A04271 | A04991 | 224 | A04271 | A05154 | 202 |
| A04271 | A05305 | 235 | A04271 | A05344 | 283 |
| A04271 | A05480 | 338 | A04271 | A07687 | 223 |



|        |        |     |        |        |     |
|--------|--------|-----|--------|--------|-----|
| A04271 | A08070 | 278 | A04271 | A08677 | 457 |
| A04271 | A08714 | 204 | A04271 | A08741 | 202 |
| A04271 | A09500 | 319 | A04271 | A10112 | 294 |
| A04271 | A10337 | 310 | A04271 | A11313 | 165 |
| A04271 | A11334 | 165 | A04271 | A11738 | 228 |
| A04271 | A13785 | 297 | A04271 | A14364 | 305 |
| A04271 | A14372 | 152 | A04271 | A14390 | 260 |
| A04271 | A14437 | 301 | A04271 | A15281 | 288 |
| A04271 | A15840 | 187 | A04271 | A15847 | 330 |
| A04271 | A16007 | 488 | A04271 | A16098 | 338 |
| A04272 | A04538 | 385 | A04272 | A04798 | 443 |
| A04272 | A04866 | 364 | A04272 | A04906 | 457 |
| A04272 | A05588 | 394 | A04272 | A05677 | 439 |
| A04272 | A07141 | 216 | A04272 | A15962 | 269 |
| A04273 | A05601 | 402 | A04273 | A14643 | 329 |
| A04273 | A15346 | 268 | A04273 | A15349 | 212 |
| A04273 | A15546 | 279 | A04274 | A04298 | 414 |
| A04274 | A05309 | 466 | A04274 | A07141 | 272 |
| A04274 | A08616 | 433 | A04274 | A08627 | 255 |
| A04274 | A16636 | 188 | A04275 | A04337 | 238 |
| A04275 | A04449 | 430 | A04275 | A04491 | 210 |
| A04275 | A04520 | 278 | A04275 | A04536 | 306 |
| A04275 | A04603 | 491 | A04275 | A04715 | 226 |
| A04275 | A04723 | 236 | A04275 | A04922 | 207 |
| A04275 | A04944 | 230 | A04275 | A04985 | 468 |
| A04275 | A05045 | 171 | A04275 | A05073 | 366 |
| A04275 | A05234 | 241 | A04275 | A05348 | 227 |
| A04275 | A05489 | 491 | A04275 | A05556 | 491 |
| A04275 | A05558 | 406 | A04275 | A05601 | 484 |
| A04275 | A05865 | 346 | A04275 | A06073 | 251 |
| A04275 | A06277 | 157 | A04275 | A06421 | 297 |
| A04275 | A06530 | 418 | A04275 | A06601 | 270 |
| A04275 | A06719 | 361 | A04275 | A06868 | 180 |
| A04275 | A07106 | 256 | A04275 | A07167 | 163 |
| A04275 | A07605 | 152 | A04275 | A07803 | 274 |
| A04275 | A08093 | 335 | A04275 | A08097 | 477 |
| A04275 | A08602 | 273 | A04275 | A08658 | 441 |
| A04275 | A08711 | 293 | A04275 | A08834 | 283 |
| A04275 | A08850 | 432 | A04275 | A09046 | 491 |
| A04275 | A09246 | 165 | A04275 | A09857 | 276 |
| A04275 | A10001 | 491 | A04275 | A10169 | 326 |
| A04275 | A10603 | 185 | A04275 | A10621 | 152 |
| A04275 | A10743 | 407 | A04275 | A11315 | 307 |
| A04275 | A11435 | 176 | A04275 | A11454 | 399 |
| A04275 | A11983 | 347 | A04275 | A13369 | 291 |
| A04275 | A13485 | 317 | A04275 | A13587 | 157 |

|        |        |     |        |        |     |
|--------|--------|-----|--------|--------|-----|
| A04275 | A14135 | 382 | A04275 | A14202 | 291 |
| A04275 | A14229 | 185 | A04275 | A14303 | 270 |
| A04275 | A14381 | 350 | A04275 | A14394 | 210 |
| A04275 | A14396 | 335 | A04275 | A14410 | 294 |
| A04275 | A14570 | 436 | A04275 | A14596 | 352 |
| A04275 | A14648 | 232 | A04275 | A15292 | 449 |
| A04275 | A15495 | 474 | A04275 | A16613 | 160 |
| A04275 | A16792 | 218 | A04275 | A16876 | 297 |
| A04276 | A04536 | 199 | A04276 | A04734 | 429 |
| A04276 | A04855 | 382 | A04276 | A04865 | 449 |
| A04276 | A05679 | 224 | A04276 | A05944 | 249 |
| A04276 | A05985 | 226 | A04276 | A06086 | 274 |
| A04276 | A06747 | 274 | A04276 | A07000 | 382 |
| A04276 | A07141 | 201 | A04276 | A07143 | 266 |
| A04276 | A07173 | 452 | A04276 | A07660 | 344 |
| A04276 | A15425 | 202 | A04276 | A15528 | 187 |
| A04276 | A15587 | 378 | A04276 | A15964 | 303 |
| A04278 | A04607 | 362 | A04278 | A04608 | 484 |
| A04278 | A04609 | 467 | A04278 | A04614 | 481 |
| A04278 | A04618 | 285 | A04278 | A04685 | 294 |
| A04278 | A04755 | 299 | A04278 | A04766 | 366 |
| A04278 | A05036 | 327 | A04278 | A05113 | 445 |
| A04278 | A05169 | 314 | A04278 | A05349 | 483 |
| A04278 | A05427 | 477 | A04278 | A05494 | 205 |
| A04278 | A05760 | 213 | A04278 | A05832 | 180 |
| A04278 | A07141 | 363 | A04278 | A11760 | 281 |
| A04278 | A13555 | 288 | A04278 | A13734 | 156 |
| A04278 | A14208 | 196 | A04278 | A14316 | 291 |
| A04278 | A14375 | 190 | A04278 | A15977 | 351 |
| A04278 | A16216 | 185 | A04279 | A04284 | 361 |
| A04279 | A04301 | 458 | A04279 | A04307 | 199 |
| A04279 | A04492 | 269 | A04279 | A04543 | 268 |
| A04279 | A04620 | 302 | A04279 | A04809 | 245 |
| A04279 | A05438 | 288 | A04279 | A05927 | 380 |
| A04279 | A06603 | 371 | A04279 | A06635 | 171 |
| A04279 | A06868 | 477 | A04279 | A07190 | 162 |
| A04279 | A07200 | 369 | A04279 | A08720 | 353 |
| A04279 | A08741 | 229 | A04279 | A10358 | 238 |
| A04279 | A10742 | 311 | A04279 | A11348 | 377 |
| A04279 | A11450 | 418 | A04279 | A11478 | 350 |
| A04279 | A11935 | 241 | A04279 | A13672 | 255 |
| A04279 | A14190 | 213 | A04279 | A14236 | 172 |
| A04279 | A14364 | 200 | A04279 | A14387 | 299 |
| A04279 | A14389 | 470 | A04279 | A14405 | 329 |
| A04279 | A14412 | 380 | A04279 | A14440 | 177 |
| A04279 | A16775 | 380 | A04280 | A04351 | 179 |

|        |        |     |        |        |     |
|--------|--------|-----|--------|--------|-----|
| A04280 | A04398 | 306 | A04280 | A04706 | 229 |
| A04280 | A04857 | 344 | A04280 | A04941 | 163 |
| A04280 | A04962 | 221 | A04280 | A04965 | 179 |
| A04280 | A05066 | 241 | A04280 | A05070 | 279 |
| A04280 | A05285 | 223 | A04280 | A05296 | 238 |
| A04280 | A05299 | 168 | A04280 | A05365 | 201 |
| A04280 | A05462 | 162 | A04280 | A05876 | 173 |
| A04280 | A06451 | 241 | A04280 | A06597 | 191 |
| A04280 | A06649 | 201 | A04280 | A07127 | 163 |
| A04280 | A07135 | 207 | A04280 | A07158 | 467 |
| A04280 | A07163 | 491 | A04280 | A07178 | 154 |
| A04280 | A07251 | 229 | A04280 | A07546 | 291 |
| A04280 | A09095 | 302 | A04280 | A09141 | 313 |
| A04280 | A09251 | 246 | A04280 | A09487 | 163 |
| A04280 | A09555 | 405 | A04280 | A10021 | 216 |
| A04280 | A10233 | 162 | A04280 | A10398 | 258 |
| A04280 | A10544 | 173 | A04280 | A10551 | 202 |
| A04280 | A10791 | 168 | A04280 | A10911 | 193 |
| A04280 | A11104 | 168 | A04280 | A11332 | 238 |
| A04280 | A11360 | 302 | A04280 | A11473 | 174 |
| A04280 | A11600 | 291 | A04280 | A11916 | 462 |
| A04280 | A12383 | 485 | A04280 | A13181 | 207 |
| A04280 | A13246 | 216 | A04280 | A13985 | 154 |
| A04280 | A14236 | 177 | A04280 | A14373 | 213 |
| A04280 | A14377 | 183 | A04280 | A14403 | 226 |
| A04280 | A14449 | 296 | A04280 | A14643 | 285 |
| A04280 | A14814 | 258 | A04280 | A15369 | 399 |
| A04280 | A15635 | 185 | A04280 | A15789 | 246 |
| A04281 | A04848 | 441 | A04281 | A05348 | 429 |
| A04281 | A07200 | 171 | A04281 | A09192 | 382 |
| A04281 | A13330 | 329 | A04281 | A13753 | 338 |
| A04282 | A04506 | 378 | A04282 | A04681 | 205 |
| A04282 | A04715 | 363 | A04282 | A04853 | 278 |
| A04282 | A05285 | 335 | A04282 | A05288 | 162 |
| A04282 | A05763 | 385 | A04282 | A06268 | 238 |
| A04282 | A07061 | 226 | A04282 | A07158 | 177 |
| A04282 | A07227 | 290 | A04282 | A11149 | 236 |
| A04282 | A11262 | 324 | A04282 | A11300 | 160 |
| A04282 | A11547 | 307 | A04282 | A11738 | 283 |
| A04282 | A11943 | 199 | A04282 | A12189 | 372 |
| A04282 | A12373 | 252 | A04282 | A14211 | 255 |
| A04282 | A16718 | 409 | A04283 | A05902 | 374 |
| A04283 | A07158 | 246 | A04283 | A09265 | 369 |
| A04284 | A07198 | 311 | A04284 | A14389 | 411 |
| A04284 | A14405 | 346 | A04284 | A15282 | 274 |
| A04286 | A04848 | 221 | A04286 | A05346 | 363 |

|        |        |     |        |        |     |
|--------|--------|-----|--------|--------|-----|
| A04286 | A05424 | 187 | A04286 | A06607 | 356 |
| A04286 | A07184 | 301 | A04286 | A07198 | 170 |
| A04286 | A07200 | 452 | A04286 | A07205 | 251 |
| A04286 | A07663 | 391 | A04286 | A08741 | 254 |
| A04286 | A14405 | 350 | A04286 | A14440 | 201 |
| A04286 | A16636 | 302 | A04287 | A04728 | 337 |
| A04287 | A08615 | 440 | A04287 | A14236 | 373 |
| A04288 | A04622 | 73  | A04288 | A04652 | 483 |
| A04288 | A05309 | 488 | A04288 | A05533 | 241 |
| A04288 | A06949 | 456 | A04288 | A07191 | 196 |
| A04288 | A08572 | 201 | A04288 | A08627 | 374 |
| A04288 | A09401 | 228 | A04288 | A10113 | 369 |
| A04288 | A10756 | 278 | A04288 | A11885 | 168 |
| A04288 | A14187 | 272 | A04288 | A14402 | 283 |
| A04288 | A14430 | 267 | A04289 | A04321 | 420 |
| A04289 | A04374 | 428 | A04289 | A04569 | 420 |
| A04289 | A04580 | 428 | A04289 | A05172 | 428 |
| A04289 | A10013 | 428 | A04289 | A10744 | 401 |
| A04289 | A10825 | 424 | A04289 | A10827 | 433 |
| A04289 | A12387 | 440 | A04289 | A13820 | 428 |
| A04289 | A14410 | 294 | A04290 | A06607 | 245 |
| A04292 | A04894 | 435 | A04292 | A05024 | 302 |
| A04292 | A05028 | 305 | A04292 | A05200 | 160 |
| A04292 | A05449 | 486 | A04292 | A05531 | 235 |
| A04292 | A05638 | 269 | A04292 | A05862 | 177 |
| A04292 | A05894 | 573 | A04292 | A06011 | 603 |
| A04292 | A06659 | 363 | A04292 | A06675 | 378 |
| A04292 | A06890 | 208 | A04292 | A07242 | 447 |
| A04292 | A07483 | 157 | A04292 | A07495 | 177 |
| A04292 | A07521 | 452 | A04292 | A08400 | 475 |
| A04292 | A08484 | 567 | A04292 | A08506 | 491 |
| A04292 | A08544 | 485 | A04292 | A08772 | 268 |
| A04292 | A09056 | 188 | A04292 | A09326 | 284 |
| A04292 | A09333 | 247 | A04292 | A10655 | 252 |
| A04292 | A10663 | 462 | A04292 | A10799 | 208 |
| A04292 | A10807 | 310 | A04292 | A11279 | 585 |
| A04292 | A13222 | 412 | A04292 | A13830 | 340 |
| A04292 | A13845 | 288 | A04292 | A13895 | 269 |
| A04292 | A14168 | 224 | A04292 | A14182 | 300 |
| A04292 | A14218 | 152 | A04292 | A14247 | 491 |
| A04292 | A14272 | 229 | A04292 | A14461 | 258 |
| A04292 | A14661 | 603 | A04292 | A14711 | 314 |
| A04292 | A14783 | 286 | A04292 | A14838 | 285 |
| A04292 | A15647 | 260 | A04292 | A15770 | 303 |
| A04292 | A16258 | 210 | A04292 | A16617 | 174 |
| A04292 | A16669 | 436 | A04292 | A16940 | 252 |

|        |        |     |        |        |     |
|--------|--------|-----|--------|--------|-----|
| A04293 | A06597 | 177 | A04293 | A11504 | 405 |
| A04293 | A14188 | 154 | A04293 | A15383 | 172 |
| A04294 | A05621 | 112 | A04294 | A09243 | 332 |
| A04294 | A14127 | 152 | A04294 | A15420 | 288 |
| A04296 | A04710 | 335 | A04296 | A04783 | 428 |
| A04296 | A05402 | 363 | A04296 | A05665 | 383 |
| A04296 | A06132 | 416 | A04296 | A07199 | 394 |
| A04297 | A05303 | 424 | A04297 | A10801 | 344 |
| A04297 | A13517 | 266 | A04297 | A14027 | 407 |
| A04297 | A14188 | 198 | A04297 | A14438 | 372 |
| A04297 | A14653 | 286 | A04298 | A04322 | 422 |
| A04298 | A05112 | 339 | A04299 | A04849 | 380 |
| A04299 | A05310 | 350 | A04299 | A09358 | 468 |
| A04299 | A10614 | 470 | A04300 | A06949 | 360 |
| A04300 | A10174 | 390 | A04301 | A04623 | 351 |
| A04301 | A05094 | 344 | A04301 | A06926 | 385 |
| A04301 | A07200 | 417 | A04301 | A14389 | 485 |
| A04301 | A14440 | 307 | A04302 | A04437 | 341 |
| A04302 | A05309 | 182 | A04302 | A05348 | 347 |
| A04302 | A06342 | 424 | A04302 | A06451 | 380 |
| A04302 | A07030 | 407 | A04302 | A07135 | 168 |
| A04302 | A07164 | 260 | A04302 | A09509 | 241 |
| A04302 | A13464 | 424 | A04303 | A06607 | 208 |
| A04304 | A04531 | 373 | A04304 | A06579 | 347 |
| A04304 | A07160 | 269 | A04304 | A07200 | 180 |
| A04304 | A14405 | 443 | A04304 | A14440 | 274 |
| A04304 | A16438 | 358 | A04305 | A04307 | 193 |
| A04305 | A04316 | 477 | A04305 | A04533 | 301 |
| A04305 | A04543 | 490 | A04305 | A04570 | 447 |
| A04305 | A04627 | 469 | A04305 | A04638 | 351 |
| A04305 | A04715 | 490 | A04305 | A04725 | 377 |
| A04305 | A04747 | 241 | A04305 | A04790 | 152 |
| A04305 | A04795 | 213 | A04305 | A04944 | 160 |
| A04305 | A05109 | 366 | A04305 | A05112 | 179 |
| A04305 | A05288 | 485 | A04305 | A05622 | 345 |
| A04305 | A05800 | 303 | A04305 | A05810 | 366 |
| A04305 | A06161 | 177 | A04305 | A06364 | 299 |
| A04305 | A06428 | 163 | A04305 | A07153 | 134 |
| A04305 | A07192 | 199 | A04305 | A08790 | 290 |
| A04305 | A09552 | 283 | A04305 | A10635 | 201 |
| A04305 | A10986 | 279 | A04305 | A13369 | 221 |
| A04305 | A14163 | 299 | A04305 | A14211 | 217 |
| A04305 | A14636 | 347 | A04305 | A14637 | 271 |
| A04305 | A14639 | 443 | A04305 | A14643 | 486 |
| A04305 | A14785 | 413 | A04305 | A15611 | 184 |
| A04305 | A15793 | 311 | A04306 | A07911 | 373 |

|        |        |     |        |        |     |
|--------|--------|-----|--------|--------|-----|
| A04306 | A11326 | 286 | A04307 | A04366 | 249 |
| A04307 | A04485 | 281 | A04307 | A04850 | 180 |
| A04307 | A04877 | 311 | A04307 | A04880 | 263 |
| A04307 | A04977 | 208 | A04307 | A05088 | 307 |
| A04307 | A05138 | 246 | A04307 | A05139 | 356 |
| A04307 | A05277 | 462 | A04307 | A05358 | 251 |
| A04307 | A05425 | 152 | A04307 | A05463 | 246 |
| A04307 | A05471 | 240 | A04307 | A05472 | 185 |
| A04307 | A05524 | 385 | A04307 | A05538 | 334 |
| A04307 | A05549 | 356 | A04307 | A05560 | 277 |
| A04307 | A05615 | 283 | A04307 | A05660 | 323 |
| A04307 | A05758 | 201 | A04307 | A05768 | 241 |
| A04307 | A05783 | 340 | A04307 | A05940 | 268 |
| A04307 | A05944 | 171 | A04307 | A06041 | 368 |
| A04307 | A06091 | 219 | A04307 | A06107 | 311 |
| A04307 | A06300 | 440 | A04307 | A06301 | 434 |
| A04307 | A06386 | 429 | A04307 | A06595 | 157 |
| A04307 | A06603 | 226 | A04307 | A06629 | 305 |
| A04307 | A06632 | 452 | A04307 | A06692 | 401 |
| A04307 | A06716 | 385 | A04307 | A06778 | 219 |
| A04307 | A06868 | 345 | A04307 | A06912 | 249 |
| A04307 | A07024 | 393 | A04307 | A07061 | 302 |
| A04307 | A07163 | 152 | A04307 | A07256 | 294 |
| A04307 | A07590 | 174 | A04307 | A07688 | 199 |
| A04307 | A07848 | 160 | A04307 | A08052 | 187 |
| A04307 | A08457 | 196 | A04307 | A09220 | 152 |
| A04307 | A09797 | 255 | A04307 | A10326 | 385 |
| A04307 | A10378 | 340 | A04307 | A10411 | 328 |
| A04307 | A11348 | 235 | A04307 | A11450 | 307 |
| A04307 | A11474 | 159 | A04307 | A12270 | 234 |
| A04307 | A13471 | 385 | A04307 | A15152 | 385 |
| A04307 | A15225 | 228 | A04307 | A15874 | 462 |
| A04307 | A15892 | 311 | A04307 | A15905 | 173 |
| A04307 | A16741 | 446 | A04307 | A16814 | 485 |
| A04308 | A04342 | 154 | A04308 | A04398 | 268 |
| A04308 | A04818 | 317 | A04308 | A05182 | 347 |
| A04308 | A06686 | 314 | A04308 | A09248 | 328 |
| A04308 | A09976 | 379 | A04308 | A11631 | 356 |
| A04308 | A14482 | 190 | A04309 | A04535 | 358 |
| A04309 | A04545 | 447 | A04309 | A04572 | 454 |
| A04309 | A05346 | 391 | A04309 | A07200 | 165 |
| A04309 | A14609 | 265 | A04310 | A04314 | 430 |
| A04310 | A04826 | 411 | A04310 | A05283 | 394 |
| A04310 | A05309 | 208 | A04310 | A05868 | 353 |
| A04310 | A06588 | 168 | A04310 | A07961 | 294 |
| A04310 | A12554 | 385 | A04310 | A14055 | 213 |

|        |        |     |        |        |     |
|--------|--------|-----|--------|--------|-----|
| A04311 | A04319 | 441 | A04311 | A04714 | 395 |
| A04311 | A06606 | 205 | A04311 | A07071 | 441 |
| A04311 | A10583 | 441 | A04314 | A04315 | 418 |
| A04314 | A04443 | 324 | A04314 | A04713 | 335 |
| A04314 | A04995 | 281 | A04314 | A05415 | 196 |
| A04314 | A05440 | 452 | A04314 | A05868 | 299 |
| A04314 | A06157 | 396 | A04314 | A06623 | 204 |
| A04314 | A06769 | 216 | A04314 | A06847 | 314 |
| A04314 | A08417 | 255 | A04314 | A09220 | 217 |
| A04314 | A10239 | 380 | A04314 | A11416 | 63  |
| A04314 | A12554 | 346 | A04314 | A14364 | 240 |
| A04314 | A14426 | 294 | A04314 | A14942 | 286 |
| A04315 | A05415 | 235 | A04315 | A06635 | 477 |
| A04315 | A10239 | 452 | A04315 | A10329 | 458 |
| A04315 | A14401 | 490 | A04315 | A14443 | 177 |
| A04315 | A15368 | 372 | A04315 | A15913 | 262 |
| A04316 | A04533 | 334 | A04316 | A04627 | 480 |
| A04316 | A04638 | 369 | A04316 | A04867 | 160 |
| A04316 | A05046 | 383 | A04316 | A05418 | 243 |
| A04316 | A05622 | 364 | A04316 | A05828 | 319 |
| A04316 | A06019 | 356 | A04316 | A06860 | 241 |
| A04316 | A07153 | 168 | A04316 | A07201 | 134 |
| A04316 | A07520 | 183 | A04316 | A08815 | 204 |
| A04316 | A09018 | 193 | A04316 | A10228 | 307 |
| A04316 | A11881 | 270 | A04316 | A13017 | 272 |
| A04316 | A13212 | 277 | A04316 | A14395 | 152 |
| A04316 | A14543 | 285 | A04316 | A14636 | 466 |
| A04316 | A14643 | 474 | A04317 | A13346 | 329 |
| A04317 | A15498 | 177 | A04318 | A04487 | 457 |
| A04318 | A05143 | 366 | A04318 | A05376 | 414 |
| A04318 | A05785 | 407 | A04318 | A06642 | 200 |
| A04318 | A06769 | 279 | A04318 | A06831 | 385 |
| A04318 | A07407 | 339 | A04318 | A09036 | 466 |
| A04318 | A09277 | 281 | A04318 | A09375 | 379 |
| A04318 | A09891 | 407 | A04318 | A09892 | 396 |
| A04318 | A13832 | 404 | A04318 | A14247 | 313 |
| A04318 | A15430 | 196 | A04319 | A07190 | 347 |
| A04319 | A13009 | 441 | A04320 | A04451 | 238 |
| A04320 | A04478 | 306 | A04320 | A04536 | 188 |
| A04320 | A04546 | 347 | A04320 | A04736 | 358 |
| A04320 | A04807 | 424 | A04320 | A05064 | 899 |
| A04320 | A05082 | 306 | A04320 | A05305 | 299 |
| A04320 | A05513 | 369 | A04320 | A05838 | 247 |
| A04320 | A05847 | 313 | A04320 | A05944 | 424 |
| A04320 | A05985 | 216 | A04320 | A06054 | 273 |
| A04320 | A06055 | 268 | A04320 | A06107 | 475 |

|        |        |     |        |        |     |
|--------|--------|-----|--------|--------|-----|
| A04320 | A06780 | 351 | A04320 | A06865 | 390 |
| A04320 | A07151 | 265 | A04320 | A07158 | 322 |
| A04320 | A07173 | 226 | A04320 | A08171 | 281 |
| A04320 | A08172 | 238 | A04320 | A08729 | 432 |
| A04320 | A09499 | 373 | A04320 | A10823 | 369 |
| A04320 | A11125 | 899 | A04320 | A11206 | 899 |
| A04320 | A11983 | 899 | A04320 | A13181 | 424 |
| A04320 | A13860 | 302 | A04320 | A13981 | 899 |
| A04320 | A14432 | 328 | A04320 | A15603 | 294 |
| A04320 | A15605 | 267 | A04320 | A15608 | 277 |
| A04320 | A15638 | 207 | A04321 | A04374 | 466 |
| A04321 | A04569 | 462 | A04321 | A04580 | 479 |
| A04321 | A05123 | 416 | A04321 | A05172 | 428 |
| A04321 | A06581 | 201 | A04321 | A07298 | 398 |
| A04321 | A07339 | 182 | A04321 | A09123 | 445 |
| A04321 | A09440 | 433 | A04321 | A10013 | 466 |
| A04321 | A10744 | 474 | A04321 | A10825 | 424 |
| A04321 | A10827 | 468 | A04321 | A11393 | 406 |
| A04321 | A12387 | 440 | A04321 | A12963 | 440 |
| A04321 | A13820 | 466 | A04321 | A14198 | 213 |
| A04322 | A05112 | 324 | A04322 | A05767 | 238 |
| A04322 | A06510 | 408 | A04322 | A07135 | 234 |
| A04322 | A07200 | 235 | A04323 | A04668 | 152 |
| A04323 | A05112 | 210 | A04323 | A06034 | 363 |
| A04323 | A09220 | 201 | A04323 | A09401 | 226 |
| A04323 | A10510 | 767 | A04323 | A11124 | 271 |
| A04323 | A11129 | 414 | A04323 | A12009 | 288 |
| A04323 | A13743 | 768 | A04323 | A14299 | 574 |
| A04323 | A14402 | 281 | A04323 | A14443 | 249 |
| A04323 | A15325 | 299 | A04323 | A16547 | 307 |
| A04323 | A16560 | 322 | A04324 | A04493 | 362 |
| A04324 | A04972 | 396 | A04324 | A05031 | 430 |
| A04325 | A14665 | 366 | A04326 | A04336 | 390 |
| A04326 | A04349 | 486 | A04326 | A04384 | 481 |
| A04326 | A04459 | 411 | A04326 | A04464 | 477 |
| A04326 | A04975 | 394 | A04326 | A04981 | 382 |
| A04326 | A06642 | 232 | A04326 | A11009 | 417 |
| A04327 | A04406 | 191 | A04327 | A04444 | 215 |
| A04327 | A04487 | 362 | A04327 | A04710 | 180 |
| A04327 | A05174 | 269 | A04327 | A06217 | 310 |
| A04327 | A07321 | 267 | A04327 | A08558 | 152 |
| A04327 | A09762 | 157 | A04327 | A09892 | 335 |
| A04327 | A10608 | 208 | A04327 | A11554 | 207 |
| A04327 | A11702 | 199 | A04327 | A12383 | 185 |
| A04327 | A13413 | 330 | A04327 | A14483 | 232 |
| A04327 | A14582 | 323 | A04327 | A14745 | 319 |



|        |        |     |        |        |     |
|--------|--------|-----|--------|--------|-----|
| A04327 | A15673 | 419 | A04328 | A04344 | 419 |
| A04328 | A04353 | 438 | A04328 | A04361 | 353 |
| A04328 | A05274 | 417 | A04328 | A06346 | 319 |
| A04329 | A04340 | 380 | A04329 | A04344 | 441 |
| A04329 | A04360 | 368 | A04329 | A04361 | 458 |
| A04329 | A04409 | 348 | A04329 | A04410 | 234 |
| A04329 | A04921 | 406 | A04329 | A04928 | 483 |
| A04329 | A05264 | 413 | A04329 | A05897 | 377 |
| A04329 | A06035 | 406 | A04329 | A06329 | 362 |
| A04329 | A06346 | 483 | A04329 | A06574 | 446 |
| A04329 | A06711 | 427 | A04329 | A06953 | 317 |
| A04329 | A07218 | 207 | A04329 | A07676 | 418 |
| A04329 | A07704 | 291 | A04329 | A07705 | 283 |
| A04329 | A07828 | 399 | A04329 | A08040 | 418 |
| A04329 | A08292 | 322 | A04329 | A08671 | 347 |
| A04329 | A09453 | 388 | A04329 | A09518 | 388 |
| A04329 | A09882 | 243 | A04329 | A10018 | 260 |
| A04329 | A10900 | 406 | A04329 | A11056 | 406 |
| A04329 | A12845 | 368 | A04329 | A12917 | 384 |
| A04329 | A13334 | 418 | A04329 | A16042 | 333 |
| A04329 | A16323 | 339 | A04330 | A11951 | 352 |
| A04330 | A13410 | 378 | A04331 | A04361 | 449 |
| A04331 | A04520 | 246 | A04331 | A04928 | 461 |
| A04331 | A05274 | 451 | A04331 | A05603 | 269 |
| A04331 | A06346 | 435 | A04331 | A07119 | 452 |
| A04331 | A07704 | 422 | A04331 | A07705 | 418 |
| A04331 | A08292 | 434 | A04331 | A08373 | 432 |
| A04331 | A08496 | 457 | A04331 | A12389 | 432 |
| A04331 | A12394 | 432 | A04331 | A12461 | 432 |
| A04331 | A12621 | 417 | A04331 | A15336 | 251 |
| A04331 | A16068 | 375 | A04332 | A14190 | 224 |
| A04333 | A04407 | 401 | A04333 | A04477 | 299 |
| A04333 | A04775 | 312 | A04333 | A05264 | 243 |
| A04333 | A06207 | 338 | A04333 | A08438 | 279 |
| A04333 | A09561 | 159 | A04333 | A10453 | 313 |
| A04333 | A11911 | 347 | A04333 | A14579 | 318 |
| A04333 | A14848 | 277 | A04333 | A15911 | 216 |
| A04334 | A04517 | 180 | A04334 | A04655 | 221 |
| A04334 | A04698 | 215 | A04334 | A04795 | 405 |
| A04334 | A04842 | 491 | A04334 | A04922 | 297 |
| A04334 | A04996 | 160 | A04334 | A05032 | 435 |
| A04334 | A05041 | 256 | A04334 | A05057 | 276 |
| A04334 | A05073 | 201 | A04334 | A05122 | 475 |
| A04334 | A05256 | 172 | A04334 | A05283 | 251 |
| A04334 | A05388 | 246 | A04334 | A06078 | 185 |
| A04334 | A06112 | 375 | A04334 | A06134 | 159 |

|        |        |     |        |        |     |
|--------|--------|-----|--------|--------|-----|
| A04334 | A06544 | 385 | A04334 | A06581 | 324 |
| A04334 | A06597 | 491 | A04334 | A06728 | 276 |
| A04334 | A06830 | 201 | A04334 | A06858 | 449 |
| A04334 | A07128 | 291 | A04334 | A07206 | 215 |
| A04334 | A07227 | 162 | A04334 | A07339 | 477 |
| A04334 | A07665 | 160 | A04334 | A08250 | 215 |
| A04334 | A09145 | 296 | A04334 | A09147 | 246 |
| A04334 | A09399 | 269 | A04334 | A09442 | 224 |
| A04334 | A09541 | 262 | A04334 | A10471 | 283 |
| A04334 | A10548 | 306 | A04334 | A10602 | 227 |
| A04334 | A11097 | 294 | A04334 | A11101 | 157 |
| A04334 | A11150 | 196 | A04334 | A11180 | 160 |
| A04334 | A11683 | 152 | A04334 | A12897 | 238 |
| A04334 | A13927 | 190 | A04334 | A14390 | 191 |
| A04334 | A14404 | 310 | A04334 | A14669 | 322 |
| A04334 | A15281 | 224 | A04334 | A15293 | 462 |
| A04334 | A15506 | 407 | A04334 | A15674 | 179 |
| A04334 | A16016 | 347 | A04334 | A16099 | 160 |
| A04334 | A16222 | 202 | A04334 | A16300 | 201 |
| A04334 | A16465 | 168 | A04334 | A16738 | 162 |
| A04334 | A16916 | 224 | A04334 | A17075 | 210 |
| A04335 | A16636 | 271 | A04336 | A04349 | 491 |
| A04336 | A04383 | 438 | A04336 | A04384 | 382 |
| A04336 | A04465 | 390 | A04336 | A04870 | 457 |
| A04336 | A05603 | 245 | A04336 | A06255 | 443 |
| A04336 | A06464 | 416 | A04336 | A06468 | 425 |
| A04336 | A07233 | 416 | A04336 | A07559 | 313 |
| A04336 | A08342 | 408 | A04336 | A09074 | 380 |
| A04336 | A09240 | 380 | A04336 | A09365 | 456 |
| A04336 | A11698 | 485 | A04336 | A11977 | 456 |
| A04336 | A12596 | 408 | A04336 | A12756 | 425 |
| A04336 | A14589 | 154 | A04336 | A15271 | 375 |
| A04336 | A15498 | 433 | A04336 | A16171 | 408 |
| A04336 | A16174 | 404 | A04336 | A16195 | 404 |
| A04337 | A04361 | 176 | A04337 | A04394 | 226 |
| A04337 | A04410 | 485 | A04337 | A04411 | 160 |
| A04337 | A04412 | 245 | A04337 | A04424 | 258 |
| A04337 | A04429 | 184 | A04337 | A04449 | 294 |
| A04337 | A04520 | 379 | A04337 | A04532 | 411 |
| A04337 | A04668 | 461 | A04337 | A04718 | 184 |
| A04337 | A05001 | 333 | A04337 | A05087 | 156 |
| A04337 | A05155 | 469 | A04337 | A05234 | 446 |
| A04337 | A05245 | 443 | A04337 | A05356 | 491 |
| A04337 | A05486 | 191 | A04337 | A05487 | 199 |
| A04337 | A05587 | 329 | A04337 | A05594 | 272 |
| A04337 | A05643 | 335 | A04337 | A05720 | 329 |

|        |        |     |        |        |     |
|--------|--------|-----|--------|--------|-----|
| A04337 | A05744 | 302 | A04337 | A05777 | 408 |
| A04337 | A05891 | 490 | A04337 | A06088 | 195 |
| A04337 | A06177 | 165 | A04337 | A06255 | 212 |
| A04337 | A06321 | 188 | A04337 | A06346 | 286 |
| A04337 | A06480 | 238 | A04337 | A06711 | 174 |
| A04337 | A06726 | 329 | A04337 | A06729 | 436 |
| A04337 | A06731 | 484 | A04337 | A06815 | 245 |
| A04337 | A06830 | 174 | A04337 | A06926 | 184 |
| A04337 | A07064 | 286 | A04337 | A07106 | 322 |
| A04337 | A07190 | 318 | A04337 | A07209 | 468 |
| A04337 | A07218 | 329 | A04337 | A07391 | 205 |
| A04337 | A07442 | 491 | A04337 | A07471 | 474 |
| A04337 | A07472 | 430 | A04337 | A07509 | 163 |
| A04337 | A07541 | 330 | A04337 | A07561 | 190 |
| A04337 | A07605 | 469 | A04337 | A07658 | 205 |
| A04337 | A07673 | 221 | A04337 | A07704 | 227 |
| A04337 | A07705 | 212 | A04337 | A07754 | 485 |
| A04337 | A07764 | 180 | A04337 | A07815 | 380 |
| A04337 | A07913 | 400 | A04337 | A07950 | 272 |
| A04337 | A07985 | 385 | A04337 | A07997 | 379 |
| A04337 | A08171 | 240 | A04337 | A08172 | 281 |
| A04337 | A08210 | 184 | A04337 | A08246 | 252 |
| A04337 | A08292 | 274 | A04337 | A08309 | 486 |
| A04337 | A08404 | 154 | A04337 | A08685 | 449 |
| A04337 | A08686 | 202 | A04337 | A08753 | 226 |
| A04337 | A08785 | 477 | A04337 | A09054 | 318 |
| A04337 | A09204 | 469 | A04337 | A09205 | 409 |
| A04337 | A09206 | 152 | A04337 | A09380 | 167 |
| A04337 | A09416 | 479 | A04337 | A09507 | 160 |
| A04337 | A09742 | 74  | A04337 | A09745 | 286 |
| A04337 | A09939 | 324 | A04337 | A10095 | 195 |
| A04337 | A10156 | 483 | A04337 | A10228 | 165 |
| A04337 | A10563 | 171 | A04337 | A10594 | 198 |
| A04337 | A10620 | 232 | A04337 | A10651 | 400 |
| A04337 | A10667 | 469 | A04337 | A10790 | 188 |
| A04337 | A10954 | 245 | A04337 | A11091 | 302 |
| A04337 | A11299 | 173 | A04337 | A11308 | 441 |
| A04337 | A11310 | 167 | A04337 | A11319 | 195 |
| A04337 | A11320 | 180 | A04337 | A11321 | 226 |
| A04337 | A11327 | 165 | A04337 | A11328 | 173 |
| A04337 | A11329 | 191 | A04337 | A11411 | 385 |
| A04337 | A11422 | 167 | A04337 | A11449 | 327 |
| A04337 | A11527 | 184 | A04337 | A11552 | 427 |
| A04337 | A11573 | 195 | A04337 | A11608 | 179 |
| A04337 | A11714 | 198 | A04337 | A11722 | 286 |
| A04337 | A11774 | 198 | A04337 | A11830 | 180 |

|        |        |     |        |        |     |
|--------|--------|-----|--------|--------|-----|
| A04337 | A12119 | 262 | A04337 | A12125 | 232 |
| A04337 | A12787 | 430 | A04337 | A13308 | 157 |
| A04337 | A13369 | 490 | A04337 | A13485 | 262 |
| A04337 | A13617 | 263 | A04337 | A13760 | 329 |
| A04337 | A13874 | 413 | A04337 | A13951 | 208 |
| A04337 | A13960 | 212 | A04337 | A13987 | 443 |
| A04337 | A14193 | 274 | A04337 | A14196 | 294 |
| A04337 | A14202 | 358 | A04337 | A14247 | 484 |
| A04337 | A14272 | 491 | A04337 | A14378 | 302 |
| A04337 | A14381 | 490 | A04337 | A14395 | 257 |
| A04337 | A14399 | 219 | A04337 | A14540 | 266 |
| A04337 | A14589 | 475 | A04337 | A14838 | 484 |
| A04337 | A15229 | 188 | A04337 | A15282 | 438 |
| A04337 | A15292 | 481 | A04337 | A15301 | 213 |
| A04337 | A15312 | 469 | A04337 | A15313 | 196 |
| A04337 | A15349 | 205 | A04337 | A15352 | 234 |
| A04337 | A15366 | 455 | A04337 | A15421 | 226 |
| A04337 | A15422 | 394 | A04337 | A15431 | 63  |
| A04337 | A15432 | 488 | A04337 | A15433 | 238 |
| A04337 | A15435 | 162 | A04337 | A15436 | 402 |
| A04337 | A15451 | 159 | A04337 | A15452 | 98  |
| A04337 | A15456 | 127 | A04337 | A15457 | 184 |
| A04337 | A15463 | 151 | A04337 | A15553 | 221 |
| A04337 | A15554 | 262 | A04337 | A15588 | 252 |
| A04337 | A15638 | 456 | A04337 | A15707 | 245 |
| A04337 | A15880 | 408 | A04337 | A15909 | 294 |
| A04337 | A15917 | 477 | A04337 | A15932 | 391 |
| A04337 | A16004 | 208 | A04337 | A16005 | 329 |
| A04337 | A16117 | 339 | A04337 | A16718 | 165 |
| A04337 | A17078 | 391 | A04338 | A04939 | 345 |
| A04339 | A08178 | 302 | A04339 | A10238 | 363 |
| A04339 | A14481 | 202 | A04340 | A09824 | 383 |
| A04342 | A04622 | 283 | A04342 | A04638 | 241 |
| A04342 | A05161 | 199 | A04342 | A05434 | 230 |
| A04342 | A05536 | 159 | A04342 | A05541 | 230 |
| A04342 | A05621 | 473 | A04342 | A05891 | 382 |
| A04342 | A05958 | 470 | A04342 | A06622 | 283 |
| A04342 | A06660 | 171 | A04342 | A06916 | 160 |
| A04342 | A07165 | 305 | A04342 | A07218 | 462 |
| A04342 | A07399 | 252 | A04342 | A08823 | 241 |
| A04342 | A08836 | 221 | A04342 | A08837 | 226 |
| A04342 | A09121 | 157 | A04342 | A09362 | 274 |
| A04342 | A09441 | 174 | A04342 | A09489 | 241 |
| A04342 | A09644 | 179 | A04342 | A10033 | 266 |
| A04342 | A10047 | 154 | A04342 | A10148 | 243 |
| A04342 | A10263 | 313 | A04342 | A10311 | 241 |

|        |        |     |        |        |     |
|--------|--------|-----|--------|--------|-----|
| A04342 | A10422 | 163 | A04342 | A10625 | 339 |
| A04342 | A10847 | 185 | A04342 | A11095 | 313 |
| A04342 | A11184 | 373 | A04342 | A11500 | 285 |
| A04342 | A11567 | 182 | A04342 | A11741 | 154 |
| A04342 | A11750 | 240 | A04342 | A11921 | 424 |
| A04342 | A12235 | 252 | A04342 | A12863 | 152 |
| A04342 | A13255 | 199 | A04342 | A13824 | 286 |
| A04342 | A13832 | 159 | A04342 | A14016 | 152 |
| A04342 | A14047 | 252 | A04342 | A14176 | 168 |
| A04342 | A14248 | 172 | A04342 | A14275 | 190 |
| A04342 | A14520 | 373 | A04342 | A15673 | 343 |
| A04342 | A16138 | 182 | A04343 | A04383 | 373 |
| A04343 | A04387 | 430 | A04343 | A07212 | 324 |
| A04343 | A09240 | 388 | A04343 | A10353 | 328 |
| A04343 | A15271 | 384 | A04343 | A15399 | 311 |
| A04344 | A04353 | 425 | A04344 | A04361 | 313 |
| A04344 | A05274 | 398 | A04345 | A09258 | 466 |
| A04345 | A09377 | 474 | A04345 | A09451 | 474 |
| A04345 | A09515 | 428 | A04345 | A09538 | 480 |
| A04345 | A10228 | 384 | A04345 | A10250 | 457 |
| A04345 | A10340 | 474 | A04346 | A06398 | 407 |
| A04346 | A06595 | 196 | A04346 | A06636 | 345 |
| A04346 | A06654 | 270 | A04346 | A08070 | 190 |
| A04346 | A09396 | 305 | A04346 | A09538 | 216 |
| A04346 | A11825 | 297 | A04347 | A06039 | 363 |
| A04347 | A06212 | 307 | A04347 | A12990 | 979 |
| A04347 | A13992 | 319 | A04347 | A16272 | 256 |
| A04348 | A04988 | 352 | A04349 | A04361 | 171 |
| A04349 | A04383 | 463 | A04349 | A04384 | 486 |
| A04349 | A04402 | 324 | A04349 | A04429 | 283 |
| A04349 | A04459 | 480 | A04349 | A04460 | 468 |
| A04349 | A04464 | 475 | A04349 | A04465 | 455 |
| A04349 | A04791 | 228 | A04349 | A04870 | 485 |
| A04349 | A04949 | 285 | A04349 | A04960 | 160 |
| A04349 | A05288 | 428 | A04349 | A05381 | 348 |
| A04349 | A05573 | 185 | A04349 | A05795 | 441 |
| A04349 | A06069 | 216 | A04349 | A06092 | 152 |
| A04349 | A06187 | 369 | A04349 | A06195 | 270 |
| A04349 | A06255 | 468 | A04349 | A06314 | 291 |
| A04349 | A06464 | 369 | A04349 | A06574 | 215 |
| A04349 | A07019 | 480 | A04349 | A07166 | 165 |
| A04349 | A07233 | 440 | A04349 | A07559 | 489 |
| A04349 | A07656 | 157 | A04349 | A07704 | 208 |
| A04349 | A07812 | 224 | A04349 | A08342 | 435 |
| A04349 | A09240 | 408 | A04349 | A09364 | 414 |
| A04349 | A09365 | 461 | A04349 | A09518 | 340 |

|        |        |     |        |        |     |
|--------|--------|-----|--------|--------|-----|
| A04349 | A10001 | 154 | A04349 | A10140 | 316 |
| A04349 | A10665 | 401 | A04349 | A11009 | 348 |
| A04349 | A11014 | 382 | A04349 | A11698 | 486 |
| A04349 | A11977 | 475 | A04349 | A12426 | 358 |
| A04349 | A12596 | 358 | A04349 | A12756 | 386 |
| A04349 | A13337 | 386 | A04349 | A13369 | 281 |
| A04349 | A14444 | 205 | A04349 | A14524 | 219 |
| A04349 | A14675 | 386 | A04349 | A15241 | 115 |
| A04349 | A15271 | 405 | A04349 | A15471 | 247 |
| A04349 | A15498 | 447 | A04349 | A16171 | 435 |
| A04349 | A16174 | 430 | A04349 | A16195 | 430 |
| A04349 | A16721 | 335 | A04351 | A04361 | 252 |
| A04351 | A04410 | 226 | A04351 | A04428 | 357 |
| A04351 | A05473 | 443 | A04351 | A05686 | 416 |
| A04351 | A06067 | 388 | A04351 | A06428 | 230 |
| A04351 | A06670 | 362 | A04351 | A07127 | 314 |
| A04351 | A07158 | 335 | A04351 | A07163 | 262 |
| A04351 | A07192 | 435 | A04351 | A09560 | 380 |
| A04351 | A12082 | 329 | A04351 | A12757 | 294 |
| A04351 | A15321 | 182 | A04352 | A05756 | 299 |
| A04352 | A06072 | 440 | A04352 | A14080 | 255 |
| A04355 | A04698 | 188 | A04355 | A04710 | 184 |
| A04355 | A04722 | 232 | A04355 | A04922 | 254 |
| A04355 | A05032 | 205 | A04355 | A05219 | 491 |
| A04355 | A05425 | 168 | A04355 | A06348 | 199 |
| A04355 | A07127 | 259 | A04355 | A07880 | 168 |
| A04355 | A08416 | 217 | A04355 | A08571 | 479 |
| A04355 | A08883 | 394 | A04355 | A08885 | 241 |
| A04355 | A09256 | 472 | A04355 | A09900 | 232 |
| A04355 | A11027 | 443 | A04355 | A11178 | 391 |
| A04355 | A11179 | 443 | A04355 | A11478 | 343 |
| A04355 | A13082 | 364 | A04355 | A13648 | 375 |
| A04355 | A14222 | 156 | A04355 | A14308 | 375 |
| A04355 | A14633 | 246 | A04355 | A14674 | 451 |
| A04355 | A14712 | 474 | A04355 | A14715 | 443 |
| A04355 | A15485 | 268 | A04355 | A15840 | 207 |
| A04356 | A05382 | 441 | A04356 | A16154 | 452 |
| A04357 | A06607 | 187 | A04357 | A13879 | 358 |
| A04357 | A14443 | 286 | A04358 | A04534 | 404 |
| A04358 | A05065 | 329 | A04358 | A05779 | 375 |
| A04358 | A06480 | 404 | A04358 | A06653 | 361 |
| A04358 | A07085 | 465 | A04358 | A09078 | 234 |
| A04358 | A09123 | 364 | A04358 | A09380 | 468 |
| A04358 | A09900 | 346 | A04358 | A10278 | 357 |
| A04358 | A12965 | 419 | A04358 | A13369 | 170 |
| A04358 | A15840 | 329 | A04358 | A16732 | 393 |

|        |        |     |        |        |     |
|--------|--------|-----|--------|--------|-----|
| A04359 | A04360 | 457 | A04359 | A04413 | 477 |
| A04359 | A04414 | 440 | A04359 | A05128 | 389 |
| A04359 | A06606 | 156 | A04359 | A09269 | 330 |
| A04359 | A09903 | 424 | A04359 | A10198 | 428 |
| A04359 | A10303 | 440 | A04359 | A10309 | 440 |
| A04359 | A10600 | 440 | A04359 | A12441 | 440 |
| A04359 | A12442 | 440 | A04360 | A04395 | 391 |
| A04360 | A04413 | 474 | A04360 | A04414 | 432 |
| A04360 | A04921 | 423 | A04360 | A05128 | 369 |
| A04360 | A06623 | 283 | A04360 | A09245 | 324 |
| A04360 | A09269 | 301 | A04360 | A09903 | 412 |
| A04360 | A10198 | 417 | A04360 | A10303 | 432 |
| A04360 | A10309 | 432 | A04360 | A10600 | 432 |
| A04360 | A12441 | 432 | A04360 | A12442 | 432 |
| A04360 | A14236 | 290 | A04360 | A14511 | 193 |
| A04360 | A15336 | 251 | A04361 | A04410 | 491 |
| A04361 | A04492 | 241 | A04361 | A04520 | 314 |
| A04361 | A04928 | 486 | A04361 | A04960 | 152 |
| A04361 | A05148 | 344 | A04361 | A05155 | 162 |
| A04361 | A05274 | 468 | A04361 | A05294 | 461 |
| A04361 | A05442 | 353 | A04361 | A05487 | 180 |
| A04361 | A05603 | 402 | A04361 | A05716 | 293 |
| A04361 | A05721 | 475 | A04361 | A05777 | 221 |
| A04361 | A05896 | 353 | A04361 | A05897 | 483 |
| A04361 | A05898 | 419 | A04361 | A06148 | 274 |
| A04361 | A06298 | 190 | A04361 | A06329 | 490 |
| A04361 | A06346 | 491 | A04361 | A06428 | 271 |
| A04361 | A06461 | 383 | A04361 | A06462 | 383 |
| A04361 | A06484 | 445 | A04361 | A06516 | 457 |
| A04361 | A06532 | 438 | A04361 | A06574 | 463 |
| A04361 | A06655 | 302 | A04361 | A06712 | 344 |
| A04361 | A06835 | 438 | A04361 | A06953 | 232 |
| A04361 | A07044 | 310 | A04361 | A07056 | 272 |
| A04361 | A07119 | 412 | A04361 | A07384 | 358 |
| A04361 | A07428 | 364 | A04361 | A07453 | 329 |
| A04361 | A07494 | 364 | A04361 | A07699 | 335 |
| A04361 | A07704 | 483 | A04361 | A07705 | 490 |
| A04361 | A07828 | 353 | A04361 | A07917 | 383 |
| A04361 | A08040 | 245 | A04361 | A08093 | 293 |
| A04361 | A08171 | 212 | A04361 | A08172 | 452 |
| A04361 | A08292 | 477 | A04361 | A08309 | 288 |
| A04361 | A08496 | 424 | A04361 | A08681 | 413 |
| A04361 | A08685 | 283 | A04361 | A08686 | 238 |
| A04361 | A08747 | 335 | A04361 | A08753 | 333 |
| A04361 | A09205 | 224 | A04361 | A09421 | 268 |
| A04361 | A09460 | 335 | A04361 | A09518 | 424 |

|        |        |     |        |        |     |
|--------|--------|-----|--------|--------|-----|
| A04361 | A10754 | 187 | A04361 | A10858 | 344 |
| A04361 | A10954 | 486 | A04361 | A10962 | 383 |
| A04361 | A11011 | 383 | A04361 | A11143 | 364 |
| A04361 | A11321 | 310 | A04361 | A11441 | 414 |
| A04361 | A11569 | 353 | A04361 | A11911 | 234 |
| A04361 | A12382 | 383 | A04361 | A12621 | 353 |
| A04361 | A12698 | 438 | A04361 | A13369 | 472 |
| A04361 | A13760 | 383 | A04361 | A13851 | 313 |
| A04361 | A14411 | 383 | A04361 | A14523 | 380 |
| A04361 | A14548 | 368 | A04361 | A14586 | 398 |
| A04361 | A14873 | 335 | A04361 | A15258 | 252 |
| A04361 | A15260 | 344 | A04361 | A15277 | 460 |
| A04361 | A15288 | 251 | A04361 | A15296 | 177 |
| A04361 | A15312 | 154 | A04361 | A15333 | 196 |
| A04361 | A15336 | 463 | A04361 | A15516 | 190 |
| A04361 | A15638 | 443 | A04361 | A16055 | 263 |
| A04361 | A16068 | 465 | A04362 | A04364 | 184 |
| A04362 | A04519 | 154 | A04362 | A06610 | 201 |
| A04362 | A07011 | 279 | A04362 | A07421 | 240 |
| A04362 | A07442 | 73  | A04362 | A08255 | 515 |
| A04362 | A08355 | 196 | A04362 | A09084 | 184 |
| A04362 | A10579 | 229 | A04362 | A10754 | 146 |
| A04362 | A11658 | 163 | A04362 | A11683 | 296 |
| A04362 | A11779 | 173 | A04362 | A12590 | 363 |
| A04362 | A13228 | 273 | A04362 | A13346 | 236 |
| A04362 | A13976 | 279 | A04362 | A14007 | 191 |
| A04362 | A14208 | 246 | A04362 | A14350 | 307 |
| A04362 | A15230 | 281 | A04362 | A15613 | 176 |
| A04362 | A15820 | 208 | A04362 | A16216 | 190 |
| A04363 | A05838 | 343 | A04363 | A15292 | 170 |
| A04364 | A04880 | 470 | A04364 | A04908 | 187 |
| A04364 | A05288 | 371 | A04364 | A07421 | 217 |
| A04364 | A08030 | 326 | A04364 | A08194 | 455 |
| A04364 | A09911 | 322 | A04364 | A15809 | 433 |
| A04365 | A04368 | 391 | A04365 | A04976 | 394 |
| A04365 | A14475 | 183 | A04366 | A04556 | 470 |
| A04366 | A05533 | 263 | A04366 | A05550 | 278 |
| A04366 | A05647 | 413 | A04366 | A05694 | 393 |
| A04366 | A06606 | 241 | A04366 | A07088 | 258 |
| A04366 | A07239 | 270 | A04366 | A07477 | 255 |
| A04366 | A07561 | 254 | A04366 | A07590 | 371 |
| A04366 | A07736 | 449 | A04366 | A08250 | 340 |
| A04366 | A09876 | 213 | A04366 | A10761 | 375 |
| A04366 | A12728 | 193 | A04366 | A14191 | 238 |
| A04366 | A15673 | 208 | A04366 | A15874 | 218 |
| A04366 | A16767 | 333 | A04366 | A17078 | 154 |



|        |        |     |        |        |     |
|--------|--------|-----|--------|--------|-----|
| A04367 | A04422 | 357 | A04367 | A04977 | 353 |
| A04367 | A08879 | 367 | A04367 | A11485 | 291 |
| A04367 | A11576 | 323 | A04367 | A15052 | 388 |
| A04368 | A04437 | 429 | A04368 | A04976 | 375 |
| A04368 | A05153 | 232 | A04368 | A05376 | 316 |
| A04368 | A06263 | 324 | A04368 | A06769 | 273 |
| A04368 | A07468 | 269 | A04368 | A07766 | 191 |
| A04368 | A08746 | 307 | A04368 | A10612 | 260 |
| A04368 | A10967 | 363 | A04368 | A12793 | 402 |
| A04368 | A14870 | 316 | A04368 | A17108 | 333 |
| A04369 | A04371 | 414 | A04369 | A04378 | 297 |
| A04369 | A04436 | 329 | A04369 | A04555 | 297 |
| A04369 | A04556 | 265 | A04369 | A04633 | 490 |
| A04369 | A04635 | 485 | A04369 | A04839 | 254 |
| A04369 | A04920 | 368 | A04369 | A04927 | 188 |
| A04369 | A04974 | 412 | A04369 | A04975 | 402 |
| A04369 | A04981 | 276 | A04369 | A05184 | 246 |
| A04369 | A05356 | 288 | A04369 | A05383 | 230 |
| A04369 | A05389 | 441 | A04369 | A05390 | 475 |
| A04369 | A05472 | 187 | A04369 | A05505 | 368 |
| A04369 | A05554 | 269 | A04369 | A05945 | 294 |
| A04369 | A06263 | 466 | A04369 | A06405 | 168 |
| A04369 | A06527 | 329 | A04369 | A06607 | 460 |
| A04369 | A06860 | 188 | A04369 | A06874 | 401 |
| A04369 | A06908 | 240 | A04369 | A07109 | 168 |
| A04369 | A07218 | 170 | A04369 | A07373 | 258 |
| A04369 | A07407 | 468 | A04369 | A07452 | 183 |
| A04369 | A07477 | 180 | A04369 | A07503 | 288 |
| A04369 | A07515 | 408 | A04369 | A07541 | 430 |
| A04369 | A07542 | 335 | A04369 | A07561 | 180 |
| A04369 | A07590 | 174 | A04369 | A07610 | 216 |
| A04369 | A07634 | 172 | A04369 | A08079 | 290 |
| A04369 | A08404 | 210 | A04369 | A08858 | 183 |
| A04369 | A09072 | 470 | A04369 | A09837 | 301 |
| A04369 | A10319 | 168 | A04369 | A10444 | 229 |
| A04369 | A10452 | 207 | A04369 | A10651 | 216 |
| A04369 | A10656 | 213 | A04369 | A10677 | 191 |
| A04369 | A10904 | 340 | A04369 | A10967 | 241 |
| A04369 | A11313 | 170 | A04369 | A11479 | 334 |
| A04369 | A12115 | 368 | A04369 | A12784 | 425 |
| A04369 | A12793 | 317 | A04369 | A13258 | 368 |
| A04369 | A13617 | 329 | A04369 | A13772 | 152 |
| A04369 | A13871 | 198 | A04369 | A14381 | 160 |
| A04369 | A14423 | 238 | A04369 | A16419 | 269 |
| A04369 | A16959 | 195 | A04369 | A17078 | 441 |
| A04369 | A17108 | 229 | A04370 | A04770 | 344 |

|        |        |     |        |        |     |
|--------|--------|-----|--------|--------|-----|
| A04370 | A14642 | 384 | A04371 | A04633 | 367 |
| A04371 | A04635 | 452 | A04371 | A04975 | 391 |
| A04371 | A04981 | 379 | A04371 | A06263 | 475 |
| A04371 | A06874 | 450 | A04371 | A09072 | 329 |
| A04371 | A17078 | 238 | A04372 | A04620 | 385 |
| A04372 | A04945 | 383 | A04372 | A05153 | 269 |
| A04372 | A05416 | 234 | A04372 | A05418 | 154 |
| A04372 | A05550 | 343 | A04372 | A05673 | 384 |
| A04372 | A06211 | 391 | A04372 | A06558 | 417 |
| A04372 | A07200 | 221 | A04372 | A07331 | 406 |
| A04372 | A07958 | 277 | A04372 | A09449 | 173 |
| A04372 | A13906 | 385 | A04372 | A14366 | 263 |
| A04372 | A14637 | 393 | A04372 | A14685 | 408 |
| A04372 | A15430 | 357 | A04372 | A17155 | 379 |
| A04373 | A09558 | 299 | A04373 | A09876 | 157 |
| A04373 | A14188 | 184 | A04373 | A14198 | 162 |
| A04374 | A04569 | 428 | A04374 | A04580 | 434 |
| A04374 | A09123 | 391 | A04374 | A10013 | 434 |
| A04374 | A10744 | 458 | A04374 | A10825 | 430 |
| A04374 | A10827 | 469 | A04374 | A12387 | 445 |
| A04374 | A13820 | 434 | A04375 | A04382 | 288 |
| A04375 | A04383 | 346 | A04375 | A04557 | 182 |
| A04375 | A04678 | 424 | A04375 | A04743 | 240 |
| A04375 | A04747 | 491 | A04375 | A04853 | 288 |
| A04375 | A05305 | 168 | A04375 | A06085 | 160 |
| A04375 | A06130 | 154 | A04375 | A06212 | 165 |
| A04375 | A06434 | 319 | A04375 | A06752 | 174 |
| A04375 | A07026 | 321 | A04375 | A07232 | 469 |
| A04375 | A07282 | 485 | A04375 | A07333 | 286 |
| A04375 | A07529 | 232 | A04375 | A07641 | 488 |
| A04375 | A07880 | 199 | A04375 | A08306 | 358 |
| A04375 | A08820 | 168 | A04375 | A09127 | 160 |
| A04375 | A09237 | 281 | A04375 | A09456 | 350 |
| A04375 | A09544 | 274 | A04375 | A09901 | 279 |
| A04375 | A10474 | 350 | A04375 | A10508 | 227 |
| A04375 | A10525 | 329 | A04375 | A10946 | 327 |
| A04375 | A11160 | 266 | A04375 | A11687 | 227 |
| A04375 | A12541 | 350 | A04375 | A12562 | 350 |
| A04375 | A12563 | 350 | A04375 | A12752 | 311 |
| A04375 | A13118 | 350 | A04375 | A14523 | 479 |
| A04375 | A15233 | 185 | A04375 | A15336 | 491 |
| A04375 | A15622 | 470 | A04375 | A15837 | 491 |
| A04375 | A15844 | 409 | A04375 | A15858 | 475 |
| A04375 | A15876 | 350 | A04375 | A16052 | 311 |
| A04375 | A16068 | 491 | A04375 | A16069 | 350 |
| A04375 | A16099 | 301 | A04375 | A16350 | 229 |

|        |        |     |        |        |     |
|--------|--------|-----|--------|--------|-----|
| A04375 | A16367 | 350 | A04375 | A16396 | 373 |
| A04375 | A16400 | 200 | A04375 | A16402 | 380 |
| A04375 | A16423 | 281 | A04375 | A16626 | 491 |
| A04375 | A16635 | 491 | A04375 | A16643 | 363 |
| A04375 | A16725 | 375 | A04375 | A16731 | 274 |
| A04375 | A16748 | 227 | A04375 | A16760 | 470 |
| A04376 | A04967 | 438 | A04376 | A05504 | 416 |
| A04376 | A05874 | 438 | A04376 | A07163 | 229 |
| A04376 | A07694 | 438 | A04376 | A08105 | 422 |
| A04376 | A09478 | 422 | A04376 | A10223 | 465 |
| A04377 | A04686 | 163 | A04377 | A05356 | 258 |
| A04377 | A05945 | 303 | A04377 | A07021 | 414 |
| A04377 | A08404 | 243 | A04377 | A11337 | 279 |
| A04377 | A15233 | 364 | A04378 | A05398 | 340 |
| A04378 | A07218 | 257 | A04378 | A08805 | 391 |
| A04378 | A11683 | 255 | A04379 | A04747 | 307 |
| A04379 | A07201 | 174 | A04379 | A07670 | 249 |
| A04379 | A07920 | 305 | A04379 | A15858 | 311 |
| A04379 | A16748 | 433 | A04380 | A09062 | 385 |
| A04380 | A09742 | 177 | A04380 | A12393 | 176 |
| A04380 | A14190 | 213 | A04380 | A14210 | 328 |
| A04380 | A14371 | 216 | A04380 | A14511 | 188 |
| A04381 | A06595 | 337 | A04381 | A07485 | 441 |
| A04382 | A04383 | 395 | A04382 | A04747 | 368 |
| A04382 | A09456 | 440 | A04382 | A16068 | 293 |
| A04383 | A04387 | 423 | A04383 | A04465 | 484 |
| A04383 | A04747 | 319 | A04383 | A04773 | 281 |
| A04383 | A06255 | 484 | A04383 | A07233 | 412 |
| A04383 | A08342 | 405 | A04383 | A09240 | 468 |
| A04383 | A09365 | 400 | A04383 | A09456 | 423 |
| A04383 | A10090 | 449 | A04383 | A10247 | 196 |
| A04383 | A10525 | 281 | A04383 | A11698 | 449 |
| A04383 | A11977 | 400 | A04383 | A15230 | 402 |
| A04383 | A15271 | 371 | A04383 | A15498 | 450 |
| A04383 | A15837 | 185 | A04383 | A16068 | 350 |
| A04384 | A04459 | 405 | A04384 | A04464 | 460 |
| A04384 | A07019 | 343 | A04384 | A07559 | 332 |
| A04385 | A04409 | 489 | A04385 | A04410 | 396 |
| A04385 | A04830 | 486 | A04385 | A04832 | 474 |
| A04385 | A06935 | 418 | A04385 | A07743 | 418 |
| A04385 | A09453 | 409 | A04385 | A11911 | 267 |
| A04385 | A14196 | 255 | A04386 | A04410 | 141 |
| A04386 | A08171 | 218 | A04386 | A08172 | 170 |
| A04386 | A09600 | 252 | A04386 | A09653 | 195 |
| A04386 | A10200 | 279 | A04386 | A10581 | 241 |
| A04386 | A13250 | 156 | A04386 | A16151 | 279 |

|        |        |     |        |        |     |
|--------|--------|-----|--------|--------|-----|
| A04387 | A09240 | 430 | A04387 | A15271 | 429 |
| A04389 | A05603 | 241 | A04389 | A08319 | 360 |
| A04389 | A09254 | 324 | A04389 | A14229 | 159 |
| A04389 | A14634 | 377 | A04389 | A16068 | 229 |
| A04389 | A16626 | 160 | A04390 | A13860 | 307 |
| A04391 | A04481 | 479 | A04391 | A04509 | 479 |
| A04391 | A07141 | 366 | A04391 | A16636 | 424 |
| A04392 | A07152 | 334 | A04393 | A04394 | 433 |
| A04394 | A04964 | 286 | A04394 | A05721 | 353 |
| A04394 | A05826 | 454 | A04394 | A06655 | 394 |
| A04394 | A06739 | 330 | A04394 | A08220 | 433 |
| A04394 | A08309 | 232 | A04394 | A14148 | 195 |
| A04394 | A14722 | 414 | A04394 | A15277 | 328 |
| A04395 | A04404 | 407 | A04395 | A04413 | 401 |
| A04395 | A08404 | 235 | A04395 | A09177 | 416 |
| A04395 | A11026 | 411 | A04395 | A13407 | 430 |
| A04397 | A05022 | 416 | A04397 | A06499 | 399 |
| A04397 | A07194 | 430 | A04398 | A04795 | 322 |
| A04398 | A04842 | 193 | A04398 | A04902 | 235 |
| A04398 | A04941 | 235 | A04398 | A05082 | 318 |
| A04398 | A05182 | 263 | A04398 | A06029 | 191 |
| A04398 | A06201 | 288 | A04398 | A08714 | 462 |
| A04398 | A09059 | 163 | A04398 | A09214 | 335 |
| A04398 | A09937 | 232 | A04398 | A10419 | 308 |
| A04398 | A11064 | 443 | A04398 | A11123 | 391 |
| A04398 | A11693 | 335 | A04398 | A12886 | 375 |
| A04398 | A14159 | 232 | A04398 | A14444 | 902 |
| A04398 | A15795 | 168 | A04398 | A15913 | 283 |
| A04398 | A16636 | 475 | A04399 | A04416 | 452 |
| A04399 | A07775 | 401 | A04400 | A04949 | 258 |
| A04400 | A11240 | 373 | A04401 | A04515 | 447 |
| A04402 | A04870 | 363 | A04402 | A06069 | 347 |
| A04402 | A06092 | 305 | A04402 | A06195 | 294 |
| A04402 | A06314 | 238 | A04402 | A07704 | 344 |
| A04402 | A09388 | 438 | A04402 | A09390 | 443 |
| A04402 | A13369 | 177 | A04402 | A15498 | 152 |
| A04403 | A13997 | 323 | A04404 | A05299 | 380 |
| A04405 | A04520 | 208 | A04405 | A04622 | 236 |
| A04405 | A05322 | 341 | A04405 | A09021 | 361 |
| A04405 | A09372 | 391 | A04405 | A09926 | 375 |
| A04405 | A11858 | 290 | A04405 | A14378 | 327 |
| A04406 | A04418 | 229 | A04406 | A04423 | 271 |
| A04406 | A04451 | 176 | A04406 | A04491 | 247 |
| A04406 | A04542 | 330 | A04406 | A05163 | 330 |
| A04406 | A05334 | 163 | A04406 | A06037 | 157 |
| A04406 | A06535 | 311 | A04406 | A06686 | 229 |

|        |        |     |        |        |     |
|--------|--------|-----|--------|--------|-----|
| A04406 | A07243 | 208 | A04406 | A07718 | 177 |
| A04406 | A08693 | 208 | A04406 | A08765 | 195 |
| A04406 | A09326 | 385 | A04406 | A09346 | 276 |
| A04406 | A09751 | 477 | A04406 | A10928 | 358 |
| A04406 | A11269 | 388 | A04406 | A13429 | 219 |
| A04406 | A14745 | 313 | A04406 | A14814 | 327 |
| A04406 | A15612 | 159 | A04406 | A17102 | 235 |
| A04407 | A05264 | 338 | A04407 | A05506 | 364 |
| A04407 | A07218 | 249 | A04407 | A10638 | 367 |
| A04408 | A08835 | 332 | A04409 | A04410 | 252 |
| A04409 | A04830 | 485 | A04409 | A04832 | 469 |
| A04409 | A05731 | 353 | A04409 | A06935 | 475 |
| A04409 | A07218 | 335 | A04409 | A07743 | 406 |
| A04409 | A09453 | 396 | A04409 | A10018 | 279 |
| A04409 | A11911 | 229 | A04409 | A14517 | 369 |
| A04409 | A16323 | 351 | A04410 | A04411 | 229 |
| A04410 | A04424 | 405 | A04410 | A04493 | 475 |
| A04410 | A04520 | 486 | A04410 | A04715 | 226 |
| A04410 | A04730 | 317 | A04410 | A04830 | 346 |
| A04410 | A04832 | 398 | A04410 | A04840 | 270 |
| A04410 | A04841 | 424 | A04410 | A04870 | 205 |
| A04410 | A04877 | 283 | A04410 | A04928 | 193 |
| A04410 | A04964 | 430 | A04410 | A05001 | 383 |
| A04410 | A05155 | 378 | A04410 | A05274 | 283 |
| A04410 | A05294 | 454 | A04410 | A05340 | 267 |
| A04410 | A05356 | 216 | A04410 | A05471 | 207 |
| A04410 | A05603 | 446 | A04410 | A05777 | 489 |
| A04410 | A05979 | 216 | A04410 | A06035 | 430 |
| A04410 | A06069 | 313 | A04410 | A06070 | 273 |
| A04410 | A06148 | 249 | A04410 | A06264 | 152 |
| A04410 | A06307 | 293 | A04410 | A06346 | 488 |
| A04410 | A06574 | 312 | A04410 | A06653 | 208 |
| A04410 | A06710 | 297 | A04410 | A06731 | 243 |
| A04410 | A06868 | 180 | A04410 | A07218 | 374 |
| A04410 | A07384 | 408 | A04410 | A07471 | 199 |
| A04410 | A07479 | 391 | A04410 | A07704 | 390 |
| A04410 | A07705 | 380 | A04410 | A07828 | 335 |
| A04410 | A08093 | 424 | A04410 | A08162 | 303 |
| A04410 | A08171 | 470 | A04410 | A08172 | 488 |
| A04410 | A08292 | 213 | A04410 | A08309 | 486 |
| A04410 | A08392 | 335 | A04410 | A08453 | 326 |
| A04410 | A08675 | 369 | A04410 | A08681 | 185 |
| A04410 | A08685 | 485 | A04410 | A08686 | 377 |
| A04410 | A08693 | 302 | A04410 | A08753 | 173 |
| A04410 | A08835 | 326 | A04410 | A09107 | 243 |
| A04410 | A09111 | 279 | A04410 | A09134 | 260 |

|        |        |     |        |        |     |
|--------|--------|-----|--------|--------|-----|
| A04410 | A09740 | 246 | A04410 | A09950 | 369 |
| A04410 | A10156 | 156 | A04410 | A11315 | 174 |
| A04410 | A11321 | 288 | A04410 | A11911 | 91  |
| A04410 | A13369 | 491 | A04410 | A13413 | 297 |
| A04410 | A13484 | 157 | A04410 | A14366 | 174 |
| A04410 | A14930 | 249 | A04410 | A15277 | 452 |
| A04410 | A15288 | 224 | A04410 | A15312 | 297 |
| A04410 | A15333 | 170 | A04410 | A15336 | 484 |
| A04410 | A15440 | 198 | A04410 | A15457 | 251 |
| A04410 | A15516 | 162 | A04410 | A15638 | 484 |
| A04410 | A15911 | 177 | A04410 | A16055 | 238 |
| A04410 | A16114 | 212 | A04411 | A05979 | 491 |
| A04411 | A07387 | 416 | A04411 | A08236 | 467 |
| A04411 | A08237 | 391 | A04411 | A09380 | 334 |
| A04411 | A11411 | 335 | A04411 | A11483 | 371 |
| A04411 | A13997 | 208 | A04411 | A15064 | 288 |
| A04412 | A05377 | 363 | A04412 | A15498 | 160 |
| A04413 | A04414 | 436 | A04413 | A05128 | 380 |
| A04413 | A09269 | 319 | A04413 | A09903 | 419 |
| A04413 | A10198 | 424 | A04413 | A10303 | 436 |
| A04413 | A10309 | 436 | A04413 | A10600 | 436 |
| A04413 | A12441 | 436 | A04413 | A12442 | 436 |
| A04415 | A04536 | 200 | A04415 | A04748 | 368 |
| A04415 | A04865 | 406 | A04415 | A04866 | 357 |
| A04415 | A05634 | 337 | A04415 | A05944 | 249 |
| A04415 | A06054 | 283 | A04415 | A06219 | 443 |
| A04415 | A06825 | 160 | A04415 | A07157 | 196 |
| A04415 | A08289 | 273 | A04415 | A08682 | 374 |
| A04415 | A10469 | 374 | A04415 | A13052 | 391 |
| A04415 | A16040 | 388 | A04416 | A04419 | 458 |
| A04416 | A05335 | 324 | A04416 | A06530 | 307 |
| A04416 | A06742 | 407 | A04416 | A08981 | 316 |
| A04416 | A11980 | 422 | A04416 | A14869 | 404 |
| A04416 | A16112 | 385 | A04417 | A04759 | 251 |
| A04417 | A04982 | 450 | A04417 | A05174 | 286 |
| A04417 | A06039 | 307 | A04417 | A06147 | 347 |
| A04417 | A06317 | 296 | A04417 | A06623 | 303 |
| A04417 | A07127 | 272 | A04417 | A07145 | 201 |
| A04417 | A07158 | 373 | A04417 | A09433 | 324 |
| A04417 | A09815 | 383 | A04417 | A10093 | 364 |
| A04417 | A10712 | 447 | A04417 | A11262 | 306 |
| A04417 | A11325 | 425 | A04417 | A11381 | 170 |
| A04417 | A14642 | 424 | A04417 | A15795 | 208 |
| A04418 | A04493 | 457 | A04418 | A04520 | 422 |
| A04418 | A04710 | 347 | A04418 | A04715 | 277 |
| A04418 | A04944 | 440 | A04418 | A04947 | 417 |

|        |        |     |        |        |     |
|--------|--------|-----|--------|--------|-----|
| A04418 | A04964 | 481 | A04418 | A04984 | 405 |
| A04418 | A04985 | 462 | A04418 | A04994 | 405 |
| A04418 | A05003 | 380 | A04418 | A05106 | 419 |
| A04418 | A05253 | 340 | A04418 | A05288 | 428 |
| A04418 | A06313 | 319 | A04418 | A06530 | 419 |
| A04418 | A06685 | 405 | A04418 | A06686 | 484 |
| A04418 | A06895 | 358 | A04418 | A07337 | 374 |
| A04418 | A07388 | 405 | A04418 | A07526 | 380 |
| A04418 | A07995 | 430 | A04418 | A08093 | 412 |
| A04418 | A08274 | 327 | A04418 | A08835 | 252 |
| A04418 | A10639 | 351 | A04418 | A11306 | 293 |
| A04418 | A11576 | 339 | A04418 | A12278 | 405 |
| A04418 | A13704 | 405 | A04418 | A13885 | 299 |
| A04418 | A14381 | 208 | A04418 | A15064 | 256 |
| A04418 | A15630 | 185 | A04418 | A15917 | 160 |
| A04418 | A17085 | 262 | A04419 | A05335 | 435 |
| A04419 | A06742 | 424 | A04420 | A07209 | 156 |
| A04420 | A08718 | 346 | A04421 | A06037 | 452 |
| A04421 | A06520 | 358 | A04421 | A06769 | 452 |
| A04421 | A13666 | 438 | A04422 | A04490 | 469 |
| A04422 | A04914 | 369 | A04422 | A05091 | 385 |
| A04422 | A05158 | 377 | A04422 | A06392 | 401 |
| A04422 | A07141 | 160 | A04422 | A07311 | 899 |
| A04422 | A07568 | 276 | A04422 | A09644 | 165 |
| A04422 | A10336 | 171 | A04422 | A10367 | 167 |
| A04422 | A10599 | 238 | A04422 | A11372 | 177 |
| A04422 | A11485 | 157 | A04422 | A14369 | 377 |
| A04422 | A14691 | 162 | A04422 | A14741 | 168 |
| A04422 | A15419 | 174 | A04422 | A15422 | 485 |
| A04422 | A15854 | 193 | A04423 | A04491 | 479 |
| A04423 | A04562 | 306 | A04423 | A05439 | 213 |
| A04423 | A09054 | 188 | A04423 | A09784 | 474 |
| A04423 | A11326 | 205 | A04423 | A12654 | 352 |
| A04423 | A13874 | 228 | A04423 | A14210 | 277 |
| A04423 | A14371 | 167 | A04423 | A14381 | 252 |
| A04423 | A15486 | 324 | A04424 | A04520 | 156 |
| A04424 | A04944 | 199 | A04424 | A05001 | 335 |
| A04424 | A05106 | 232 | A04424 | A05471 | 290 |
| A04424 | A05603 | 313 | A04424 | A05810 | 278 |
| A04424 | A06307 | 485 | A04424 | A07190 | 195 |
| A04424 | A07282 | 223 | A04424 | A07815 | 198 |
| A04424 | A08136 | 480 | A04424 | A08174 | 469 |
| A04424 | A11280 | 187 | A04424 | A11531 | 378 |
| A04424 | A12385 | 407 | A04424 | A12488 | 407 |
| A04424 | A12490 | 407 | A04424 | A12721 | 451 |
| A04424 | A14666 | 414 | A04424 | A15226 | 346 |

|        |        |     |        |        |     |
|--------|--------|-----|--------|--------|-----|
| A04424 | A15232 | 407 | A04424 | A15233 | 302 |
| A04424 | A15258 | 483 | A04424 | A15272 | 343 |
| A04424 | A15277 | 477 | A04424 | A15336 | 160 |
| A04424 | A16068 | 167 | A04425 | A04435 | 486 |
| A04425 | A04715 | 447 | A04425 | A04790 | 452 |
| A04425 | A06533 | 363 | A04425 | A10345 | 361 |
| A04425 | A11564 | 396 | A04426 | A07166 | 380 |
| A04427 | A05751 | 406 | A04427 | A07707 | 447 |
| A04428 | A04756 | 344 | A04428 | A04962 | 243 |
| A04428 | A05047 | 429 | A04428 | A05120 | 367 |
| A04428 | A05252 | 456 | A04428 | A05457 | 401 |
| A04428 | A05861 | 380 | A04428 | A06073 | 371 |
| A04428 | A06463 | 356 | A04428 | A07025 | 408 |
| A04428 | A07206 | 299 | A04428 | A15809 | 251 |
| A04428 | A17009 | 383 | A04429 | A04737 | 409 |
| A04429 | A04769 | 438 | A04429 | A04977 | 307 |
| A04429 | A06203 | 450 | A04429 | A06970 | 202 |
| A04429 | A07163 | 160 | A04429 | A07277 | 405 |
| A04429 | A08785 | 226 | A04429 | A09153 | 391 |
| A04429 | A09993 | 367 | A04430 | A04977 | 474 |
| A04430 | A06654 | 356 | A04430 | A06689 | 443 |
| A04430 | A06965 | 238 | A04430 | A08452 | 270 |
| A04430 | A09702 | 358 | A04430 | A14524 | 347 |
| A04432 | A05124 | 358 | A04432 | A07157 | 307 |
| A04432 | A07158 | 310 | A04433 | A06238 | 409 |
| A04433 | A07078 | 314 | A04433 | A10453 | 291 |
| A04433 | A13826 | 168 | A04433 | A14799 | 196 |
| A04433 | A16216 | 180 | A04433 | A16281 | 227 |
| A04434 | A06284 | 416 | A04434 | A15258 | 385 |
| A04434 | A15277 | 352 | A04435 | A04715 | 490 |
| A04435 | A04790 | 463 | A04435 | A04903 | 224 |
| A04435 | A05422 | 341 | A04435 | A06533 | 294 |
| A04435 | A06601 | 334 | A04435 | A06686 | 252 |
| A04435 | A06692 | 319 | A04435 | A07815 | 170 |
| A04435 | A07852 | 351 | A04435 | A07903 | 364 |
| A04435 | A08458 | 341 | A04435 | A09953 | 351 |
| A04435 | A10345 | 291 | A04435 | A10808 | 205 |
| A04435 | A11564 | 347 | A04435 | A15638 | 299 |
| A04435 | A15874 | 171 | A04436 | A04555 | 480 |
| A04436 | A04645 | 416 | A04437 | A04623 | 443 |
| A04437 | A05153 | 184 | A04437 | A05940 | 456 |
| A04437 | A06650 | 228 | A04437 | A07468 | 224 |
| A04437 | A07912 | 363 | A04437 | A08655 | 324 |
| A04437 | A10967 | 326 | A04437 | A12793 | 258 |
| A04438 | A06607 | 159 | A04438 | A08835 | 263 |
| A04438 | A09187 | 428 | A04438 | A09507 | 447 |



|        |        |     |        |        |     |
|--------|--------|-----|--------|--------|-----|
| A04439 | A04463 | 385 | A04439 | A04968 | 401 |
| A04440 | A04557 | 317 | A04440 | A05141 | 281 |
| A04440 | A06379 | 162 | A04440 | A08858 | 152 |
| A04440 | A09448 | 465 | A04440 | A09491 | 452 |
| A04440 | A09506 | 328 | A04440 | A10175 | 243 |
| A04440 | A10250 | 151 | A04440 | A11006 | 394 |
| A04440 | A11486 | 296 | A04440 | A13924 | 288 |
| A04440 | A14485 | 187 | A04440 | A15435 | 174 |
| A04441 | A09235 | 468 | A04442 | A04704 | 241 |
| A04442 | A04807 | 440 | A04442 | A04902 | 82  |
| A04442 | A05082 | 256 | A04442 | A05701 | 324 |
| A04442 | A05958 | 204 | A04442 | A06821 | 382 |
| A04442 | A07977 | 395 | A04442 | A09124 | 339 |
| A04442 | A10247 | 232 | A04442 | A10414 | 252 |
| A04442 | A10468 | 395 | A04442 | A10551 | 299 |
| A04442 | A13500 | 291 | A04442 | A14402 | 378 |
| A04442 | A14438 | 396 | A04442 | A14741 | 154 |
| A04443 | A04449 | 168 | A04443 | A04574 | 311 |
| A04443 | A04671 | 317 | A04443 | A06635 | 371 |
| A04443 | A07018 | 402 | A04443 | A07030 | 402 |
| A04443 | A07199 | 432 | A04443 | A07200 | 291 |
| A04443 | A10832 | 402 | A04443 | A14381 | 260 |
| A04443 | A14405 | 273 | A04443 | A14440 | 255 |
| A04444 | A04868 | 363 | A04444 | A05618 | 382 |
| A04444 | A06623 | 168 | A04444 | A08572 | 177 |
| A04444 | A10208 | 184 | A04444 | A10336 | 160 |
| A04444 | A11683 | 285 | A04444 | A14236 | 176 |
| A04444 | A15795 | 205 | A04445 | A04514 | 385 |
| A04445 | A04961 | 340 | A04445 | A05931 | 385 |
| A04446 | A04518 | 226 | A04446 | A04567 | 160 |
| A04446 | A04639 | 162 | A04446 | A04703 | 332 |
| A04446 | A04706 | 485 | A04446 | A04908 | 490 |
| A04446 | A04980 | 305 | A04446 | A04999 | 246 |
| A04446 | A05038 | 251 | A04446 | A05110 | 355 |
| A04446 | A05568 | 338 | A04446 | A05741 | 221 |
| A04446 | A05794 | 407 | A04446 | A05867 | 317 |
| A04446 | A05939 | 305 | A04446 | A06109 | 274 |
| A04446 | A06395 | 355 | A04446 | A06422 | 170 |
| A04446 | A07153 | 260 | A04446 | A07163 | 458 |
| A04446 | A07165 | 238 | A04446 | A07201 | 205 |
| A04446 | A07961 | 449 | A04446 | A08261 | 179 |
| A04446 | A08304 | 195 | A04446 | A08358 | 299 |
| A04446 | A08390 | 204 | A04446 | A08494 | 226 |
| A04446 | A08715 | 483 | A04446 | A08999 | 317 |
| A04446 | A09383 | 246 | A04446 | A09388 | 180 |
| A04446 | A09505 | 355 | A04446 | A09545 | 255 |

|        |        |     |        |        |     |
|--------|--------|-----|--------|--------|-----|
| A04446 | A09546 | 238 | A04446 | A09591 | 491 |
| A04446 | A09901 | 288 | A04446 | A09999 | 340 |
| A04446 | A10018 | 230 | A04446 | A10233 | 313 |
| A04446 | A10861 | 332 | A04446 | A10901 | 263 |
| A04446 | A12059 | 317 | A04446 | A12473 | 232 |
| A04446 | A12813 | 441 | A04446 | A13218 | 251 |
| A04446 | A13302 | 246 | A04446 | A13325 | 217 |
| A04446 | A13342 | 163 | A04446 | A13391 | 213 |
| A04446 | A13424 | 174 | A04446 | A14132 | 195 |
| A04446 | A14241 | 232 | A04446 | A14257 | 170 |
| A04446 | A14681 | 332 | A04446 | A15197 | 210 |
| A04446 | A15376 | 413 | A04446 | A15653 | 484 |
| A04446 | A15773 | 157 | A04446 | A16242 | 355 |
| A04446 | A16458 | 439 | A04446 | A16993 | 332 |
| A04447 | A04782 | 201 | A04447 | A04844 | 224 |
| A04447 | A05058 | 432 | A04447 | A06600 | 132 |
| A04447 | A07223 | 364 | A04447 | A07265 | 392 |
| A04447 | A07588 | 223 | A04447 | A07964 | 380 |
| A04447 | A08349 | 380 | A04447 | A08955 | 392 |
| A04447 | A08971 | 223 | A04447 | A09281 | 252 |
| A04447 | A10755 | 223 | A04447 | A11202 | 223 |
| A04447 | A11254 | 288 | A04447 | A11401 | 316 |
| A04447 | A13298 | 223 | A04447 | A13846 | 188 |
| A04447 | A13870 | 302 | A04447 | A14216 | 223 |
| A04447 | A15684 | 340 | A04447 | A16320 | 154 |
| A04447 | A17168 | 470 | A04448 | A07165 | 252 |
| A04449 | A04451 | 167 | A04449 | A04654 | 234 |
| A04449 | A04728 | 236 | A04449 | A04732 | 334 |
| A04449 | A04773 | 443 | A04449 | A04949 | 391 |
| A04449 | A04962 | 430 | A04449 | A05155 | 249 |
| A04449 | A05165 | 243 | A04449 | A05181 | 241 |
| A04449 | A05221 | 279 | A04449 | A05288 | 484 |
| A04449 | A05389 | 285 | A04449 | A05416 | 162 |
| A04449 | A05418 | 562 | A04449 | A05431 | 391 |
| A04449 | A05439 | 425 | A04449 | A05489 | 177 |
| A04449 | A05556 | 452 | A04449 | A05571 | 196 |
| A04449 | A05601 | 491 | A04449 | A05654 | 157 |
| A04449 | A05767 | 441 | A04449 | A05810 | 422 |
| A04449 | A05887 | 234 | A04449 | A05891 | 227 |
| A04449 | A05964 | 174 | A04449 | A06016 | 308 |
| A04449 | A06038 | 160 | A04449 | A06190 | 418 |
| A04449 | A06273 | 205 | A04449 | A06277 | 491 |
| A04449 | A06317 | 160 | A04449 | A06362 | 234 |
| A04449 | A06491 | 267 | A04449 | A06554 | 329 |
| A04449 | A06588 | 489 | A04449 | A06599 | 293 |
| A04449 | A06601 | 312 | A04449 | A06635 | 393 |

|        |        |     |        |        |     |
|--------|--------|-----|--------|--------|-----|
| A04449 | A06851 | 400 | A04449 | A06907 | 400 |
| A04449 | A06908 | 296 | A04449 | A06977 | 293 |
| A04449 | A07004 | 406 | A04449 | A07018 | 174 |
| A04449 | A07030 | 174 | A04449 | A07153 | 170 |
| A04449 | A07207 | 168 | A04449 | A07209 | 477 |
| A04449 | A07229 | 447 | A04449 | A07242 | 543 |
| A04449 | A07311 | 315 | A04449 | A07422 | 469 |
| A04449 | A07440 | 174 | A04449 | A07479 | 157 |
| A04449 | A07564 | 174 | A04449 | A07641 | 224 |
| A04449 | A07712 | 234 | A04449 | A07726 | 446 |
| A04449 | A07767 | 329 | A04449 | A07802 | 441 |
| A04449 | A07803 | 491 | A04449 | A07943 | 234 |
| A04449 | A08022 | 490 | A04449 | A08064 | 369 |
| A04449 | A08093 | 427 | A04449 | A08097 | 489 |
| A04449 | A08280 | 165 | A04449 | A08340 | 414 |
| A04449 | A08603 | 157 | A04449 | A08621 | 160 |
| A04449 | A08692 | 347 | A04449 | A08850 | 336 |
| A04449 | A08859 | 490 | A04449 | A08869 | 457 |
| A04449 | A08875 | 188 | A04449 | A08878 | 491 |
| A04449 | A08918 | 677 | A04449 | A09162 | 477 |
| A04449 | A09167 | 174 | A04449 | A09246 | 443 |
| A04449 | A09247 | 291 | A04449 | A09272 | 168 |
| A04449 | A09363 | 358 | A04449 | A09552 | 157 |
| A04449 | A09624 | 241 | A04449 | A09733 | 412 |
| A04449 | A09750 | 490 | A04449 | A10014 | 63  |
| A04449 | A10024 | 184 | A04449 | A10169 | 160 |
| A04449 | A10173 | 402 | A04449 | A10371 | 363 |
| A04449 | A10392 | 347 | A04449 | A10430 | 391 |
| A04449 | A10590 | 573 | A04449 | A10596 | 294 |
| A04449 | A10621 | 412 | A04449 | A10623 | 288 |
| A04449 | A10743 | 288 | A04449 | A10749 | 196 |
| A04449 | A10808 | 480 | A04449 | A10811 | 313 |
| A04449 | A10813 | 467 | A04449 | A10832 | 174 |
| A04449 | A10894 | 165 | A04449 | A10982 | 172 |
| A04449 | A11190 | 301 | A04449 | A11204 | 174 |
| A04449 | A11293 | 462 | A04449 | A11300 | 473 |
| A04449 | A11307 | 450 | A04449 | A11313 | 302 |
| A04449 | A11317 | 154 | A04449 | A11326 | 391 |
| A04449 | A11327 | 254 | A04449 | A11335 | 314 |
| A04449 | A11387 | 296 | A04449 | A11411 | 157 |
| A04449 | A11469 | 223 | A04449 | A11487 | 260 |
| A04449 | A11543 | 168 | A04449 | A11548 | 205 |
| A04449 | A11553 | 278 | A04449 | A11559 | 334 |
| A04449 | A11649 | 183 | A04449 | A11693 | 369 |
| A04449 | A11727 | 395 | A04449 | A11846 | 174 |
| A04449 | A11983 | 491 | A04449 | A12040 | 174 |

|        |        |     |        |        |     |
|--------|--------|-----|--------|--------|-----|
| A04449 | A12111 | 480 | A04449 | A12140 | 215 |
| A04449 | A12304 | 184 | A04449 | A12365 | 629 |
| A04449 | A12373 | 334 | A04449 | A12540 | 160 |
| A04449 | A12599 | 196 | A04449 | A12688 | 234 |
| A04449 | A12767 | 160 | A04449 | A12786 | 196 |
| A04449 | A12824 | 256 | A04449 | A12897 | 313 |
| A04449 | A12984 | 196 | A04449 | A13016 | 234 |
| A04449 | A13111 | 205 | A04449 | A13225 | 196 |
| A04449 | A13243 | 196 | A04449 | A13369 | 352 |
| A04449 | A13397 | 378 | A04449 | A13587 | 491 |
| A04449 | A13869 | 160 | A04449 | A13917 | 483 |
| A04449 | A13928 | 465 | A04449 | A13946 | 469 |
| A04449 | A13968 | 299 | A04449 | A13997 | 347 |
| A04449 | A14005 | 622 | A04449 | A14016 | 160 |
| A04449 | A14073 | 221 | A04449 | A14193 | 176 |
| A04449 | A14196 | 377 | A04449 | A14202 | 488 |
| A04449 | A14210 | 334 | A04449 | A14211 | 396 |
| A04449 | A14220 | 177 | A04449 | A14221 | 207 |
| A04449 | A14236 | 188 | A04449 | A14248 | 88  |
| A04449 | A14366 | 182 | A04449 | A14371 | 334 |
| A04449 | A14375 | 168 | A04449 | A14410 | 488 |
| A04449 | A14413 | 184 | A04449 | A14454 | 458 |
| A04449 | A14457 | 435 | A04449 | A14496 | 188 |
| A04449 | A14511 | 226 | A04449 | A14540 | 173 |
| A04449 | A14570 | 491 | A04449 | A14589 | 215 |
| A04449 | A14635 | 486 | A04449 | A14636 | 638 |
| A04449 | A14643 | 420 | A04449 | A14650 | 196 |
| A04449 | A14653 | 462 | A04449 | A14925 | 432 |
| A04449 | A15134 | 234 | A04449 | A15237 | 199 |
| A04449 | A15282 | 491 | A04449 | A15292 | 489 |
| A04449 | A15295 | 454 | A04449 | A15296 | 502 |
| A04449 | A15300 | 162 | A04449 | A15322 | 480 |
| A04449 | A15328 | 252 | A04449 | A15349 | 200 |
| A04449 | A15366 | 486 | A04449 | A15368 | 323 |
| A04449 | A15431 | 159 | A04449 | A15452 | 201 |
| A04449 | A15478 | 277 | A04449 | A15492 | 256 |
| A04449 | A15495 | 441 | A04449 | A15498 | 491 |
| A04449 | A15506 | 429 | A04449 | A15557 | 179 |
| A04449 | A15599 | 265 | A04449 | A15606 | 491 |
| A04449 | A15653 | 329 | A04449 | A15665 | 204 |
| A04449 | A15680 | 474 | A04449 | A15682 | 252 |
| A04449 | A15765 | 152 | A04449 | A15834 | 343 |
| A04449 | A15852 | 193 | A04449 | A15870 | 480 |
| A04449 | A15913 | 339 | A04449 | A16022 | 428 |
| A04449 | A16036 | 160 | A04449 | A16075 | 267 |
| A04449 | A16354 | 160 | A04449 | A16438 | 160 |

|        |        |     |        |        |     |
|--------|--------|-----|--------|--------|-----|
| A04449 | A16724 | 419 | A04449 | A16747 | 174 |
| A04449 | A16792 | 228 | A04449 | A16847 | 481 |
| A04449 | A17050 | 196 | A04449 | A17118 | 221 |
| A04450 | A05679 | 279 | A04450 | A05815 | 390 |
| A04450 | A05944 | 301 | A04450 | A06054 | 328 |
| A04450 | A07006 | 401 | A04450 | A07143 | 316 |
| A04450 | A07390 | 358 | A04450 | A14376 | 438 |
| A04450 | A14392 | 273 | A04450 | A14554 | 296 |
| A04450 | A16008 | 375 | A04450 | A16037 | 409 |
| A04451 | A05500 | 286 | A04451 | A06623 | 265 |
| A04451 | A06648 | 157 | A04451 | A07148 | 260 |
| A04451 | A07373 | 254 | A04451 | A08692 | 224 |
| A04451 | A08838 | 165 | A04451 | A10221 | 312 |
| A04451 | A10460 | 232 | A04451 | A11512 | 384 |
| A04451 | A14433 | 174 | A04451 | A15795 | 173 |
| A04452 | A07210 | 377 | A04453 | A04908 | 232 |
| A04453 | A06701 | 165 | A04453 | A07153 | 216 |
| A04454 | A05126 | 391 | A04454 | A07442 | 229 |
| A04454 | A09509 | 252 | A04454 | A15498 | 240 |
| A04455 | A05284 | 380 | A04456 | A04824 | 414 |
| A04456 | A04875 | 420 | A04456 | A08727 | 423 |
| A04457 | A05846 | 466 | A04458 | A05330 | 386 |
| A04458 | A05331 | 296 | A04458 | A13589 | 316 |
| A04458 | A13593 | 316 | A04458 | A13671 | 445 |
| A04459 | A04464 | 422 | A04459 | A14633 | 210 |
| A04460 | A05381 | 408 | A04460 | A05795 | 313 |
| A04460 | A06283 | 413 | A04460 | A06439 | 286 |
| A04460 | A07019 | 480 | A04460 | A07559 | 488 |
| A04460 | A09364 | 451 | A04460 | A10665 | 445 |
| A04460 | A11014 | 435 | A04460 | A13337 | 429 |
| A04460 | A14299 | 241 | A04460 | A14444 | 221 |
| A04460 | A15241 | 243 | A04460 | A16068 | 243 |
| A04460 | A16138 | 380 | A04461 | A05679 | 296 |
| A04461 | A06415 | 422 | A04461 | A06604 | 449 |
| A04461 | A07053 | 461 | A04461 | A10605 | 441 |
| A04461 | A13826 | 202 | A04461 | A13988 | 358 |
| A04461 | A14125 | 321 | A04461 | A14430 | 243 |
| A04461 | A14599 | 346 | A04461 | A15308 | 283 |
| A04462 | A04481 | 457 | A04462 | A16636 | 345 |
| A04462 | A16642 | 438 | A04463 | A15383 | 165 |
| A04464 | A14220 | 183 | A04465 | A05247 | 362 |
| A04465 | A06255 | 480 | A04465 | A06517 | 414 |
| A04465 | A09240 | 398 | A04465 | A11698 | 408 |
| A04465 | A12596 | 422 | A04465 | A15277 | 335 |
| A04465 | A15498 | 423 | A04467 | A07187 | 374 |
| A04467 | A09388 | 389 | A04467 | A09814 | 408 |

|        |        |     |        |        |     |
|--------|--------|-----|--------|--------|-----|
| A04468 | A04879 | 374 | A04468 | A06118 | 373 |
| A04468 | A07588 | 279 | A04468 | A09387 | 375 |
| A04468 | A09826 | 247 | A04468 | A11576 | 291 |
| A04469 | A06610 | 196 | A04470 | A07422 | 246 |
| A04470 | A08283 | 414 | A04471 | A04824 | 367 |
| A04471 | A05407 | 374 | A04471 | A06689 | 165 |
| A04471 | A07874 | 416 | A04471 | A14382 | 404 |
| A04472 | A07143 | 329 | A04472 | A07835 | 335 |
| A04472 | A08859 | 182 | A04472 | A09394 | 371 |
| A04472 | A09469 | 361 | A04472 | A09509 | 279 |
| A04472 | A09732 | 228 | A04472 | A09797 | 368 |
| A04472 | A09809 | 361 | A04472 | A10164 | 375 |
| A04473 | A05065 | 283 | A04473 | A05082 | 201 |
| A04473 | A06107 | 371 | A04473 | A06650 | 159 |
| A04473 | A07145 | 265 | A04473 | A10247 | 184 |
| A04473 | A10760 | 279 | A04473 | A10894 | 266 |
| A04473 | A12722 | 191 | A04473 | A13980 | 232 |
| A04473 | A15685 | 254 | A04474 | A06200 | 360 |
| A04474 | A06317 | 371 | A04474 | A11426 | 401 |
| A04474 | A11897 | 338 | A04474 | A12340 | 408 |
| A04474 | A15241 | 256 | A04475 | A05332 | 344 |
| A04475 | A05502 | 345 | A04475 | A06581 | 170 |
| A04475 | A06606 | 252 | A04475 | A14366 | 257 |
| A04475 | A14391 | 273 | A04476 | A07153 | 356 |
| A04476 | A14643 | 293 | A04476 | A14648 | 328 |
| A04477 | A04574 | 328 | A04477 | A05240 | 317 |
| A04477 | A05278 | 246 | A04477 | A05685 | 369 |
| A04477 | A05832 | 283 | A04477 | A06400 | 324 |
| A04477 | A07062 | 333 | A04477 | A07961 | 281 |
| A04477 | A09480 | 373 | A04477 | A10066 | 411 |
| A04477 | A10174 | 899 | A04477 | A10247 | 213 |
| A04477 | A11485 | 246 | A04477 | A13734 | 160 |
| A04477 | A14377 | 276 | A04477 | A15896 | 301 |
| A04478 | A04741 | 367 | A04478 | A05078 | 430 |
| A04478 | A05174 | 469 | A04478 | A05178 | 412 |
| A04478 | A05944 | 243 | A04478 | A05985 | 221 |
| A04478 | A06054 | 390 | A04478 | A06404 | 338 |
| A04478 | A06818 | 418 | A04478 | A06968 | 249 |
| A04478 | A07143 | 380 | A04478 | A07173 | 357 |
| A04478 | A11543 | 243 | A04478 | A13860 | 486 |
| A04478 | A14376 | 324 | A04478 | A14392 | 210 |
| A04478 | A14554 | 238 | A04478 | A14601 | 412 |
| A04478 | A15308 | 202 | A04478 | A15318 | 200 |
| A04478 | A15394 | 374 | A04478 | A15395 | 232 |
| A04478 | A15603 | 297 | A04478 | A15605 | 271 |
| A04478 | A15608 | 281 | A04478 | A15640 | 380 |

|        |        |     |        |        |     |
|--------|--------|-----|--------|--------|-----|
| A04478 | A15806 | 327 | A04478 | A16068 | 184 |
| A04478 | A16738 | 274 | A04479 | A04520 | 285 |
| A04479 | A06620 | 366 | A04479 | A10087 | 371 |
| A04479 | A10731 | 350 | A04481 | A04509 | 480 |
| A04481 | A05349 | 249 | A04481 | A07141 | 383 |
| A04481 | A16636 | 436 | A04482 | A04679 | 445 |
| A04482 | A05985 | 395 | A04482 | A06807 | 391 |
| A04482 | A06815 | 401 | A04482 | A06858 | 341 |
| A04482 | A07143 | 452 | A04482 | A11738 | 346 |
| A04482 | A16636 | 177 | A04483 | A07091 | 899 |
| A04484 | A04878 | 364 | A04484 | A07311 | 899 |
| A04484 | A11740 | 432 | A04484 | A14194 | 343 |
| A04484 | A14236 | 396 | A04484 | A15241 | 256 |
| A04484 | A16636 | 183 | A04485 | A04668 | 152 |
| A04485 | A05139 | 405 | A04485 | A05538 | 391 |
| A04485 | A05549 | 405 | A04485 | A06379 | 193 |
| A04485 | A06629 | 278 | A04485 | A06827 | 350 |
| A04485 | A07229 | 213 | A04485 | A07881 | 168 |
| A04485 | A08228 | 382 | A04485 | A08662 | 353 |
| A04485 | A11561 | 363 | A04485 | A13734 | 367 |
| A04485 | A14272 | 324 | A04485 | A14955 | 400 |
| A04485 | A15624 | 355 | A04485 | A15932 | 162 |
| A04486 | A06219 | 407 | A04486 | A06526 | 399 |
| A04486 | A07718 | 313 | A04486 | A08240 | 433 |
| A04486 | A09276 | 380 | A04486 | A10252 | 424 |
| A04486 | A11889 | 433 | A04486 | A12520 | 433 |
| A04486 | A12897 | 152 | A04486 | A14643 | 177 |
| A04486 | A14722 | 414 | A04486 | A15277 | 328 |
| A04487 | A05143 | 316 | A04487 | A05376 | 374 |
| A04487 | A05407 | 335 | A04487 | A05591 | 465 |
| A04487 | A05629 | 318 | A04487 | A05667 | 363 |
| A04487 | A05751 | 276 | A04487 | A05785 | 374 |
| A04487 | A06831 | 343 | A04487 | A07129 | 379 |
| A04487 | A07143 | 241 | A04487 | A07407 | 279 |
| A04487 | A09036 | 489 | A04487 | A09204 | 363 |
| A04487 | A09277 | 339 | A04487 | A09375 | 457 |
| A04487 | A09891 | 374 | A04487 | A09892 | 463 |
| A04487 | A10091 | 314 | A04487 | A10609 | 491 |
| A04487 | A11498 | 374 | A04487 | A11578 | 274 |
| A04487 | A13826 | 213 | A04487 | A13832 | 357 |
| A04487 | A13849 | 438 | A04487 | A14247 | 204 |
| A04487 | A15228 | 374 | A04487 | A15312 | 230 |
| A04487 | A15352 | 224 | A04487 | A15366 | 301 |
| A04487 | A16224 | 224 | A04488 | A04996 | 432 |
| A04488 | A05299 | 358 | A04488 | A05551 | 417 |
| A04488 | A06171 | 462 | A04488 | A07205 | 329 |

|        |        |     |        |        |     |
|--------|--------|-----|--------|--------|-----|
| A04488 | A07209 | 302 | A04488 | A07803 | 191 |
| A04488 | A13250 | 296 | A04488 | A14210 | 200 |
| A04488 | A14444 | 235 | A04488 | A14511 | 193 |
| A04488 | A15347 | 157 | A04489 | A10081 | 422 |
| A04489 | A14055 | 301 | A04490 | A04728 | 243 |
| A04490 | A04914 | 469 | A04490 | A05063 | 355 |
| A04490 | A05090 | 338 | A04490 | A05373 | 361 |
| A04490 | A06564 | 208 | A04490 | A06997 | 241 |
| A04490 | A07367 | 232 | A04490 | A07581 | 213 |
| A04490 | A08052 | 221 | A04490 | A08215 | 185 |
| A04490 | A09062 | 324 | A04490 | A09220 | 485 |
| A04490 | A09238 | 184 | A04490 | A09239 | 157 |
| A04490 | A09464 | 266 | A04490 | A09734 | 180 |
| A04490 | A09829 | 269 | A04490 | A10164 | 299 |
| A04490 | A10336 | 385 | A04490 | A10599 | 235 |
| A04490 | A11035 | 430 | A04490 | A11372 | 174 |
| A04490 | A11412 | 160 | A04490 | A12970 | 350 |
| A04490 | A13944 | 276 | A04490 | A13987 | 243 |
| A04490 | A14010 | 180 | A04490 | A14122 | 285 |
| A04490 | A14198 | 163 | A04490 | A14259 | 430 |
| A04490 | A14371 | 229 | A04490 | A14511 | 416 |
| A04490 | A15292 | 480 | A04490 | A15348 | 156 |
| A04490 | A15349 | 474 | A04490 | A15445 | 196 |
| A04490 | A15457 | 308 | A04490 | A15673 | 168 |
| A04491 | A07479 | 274 | A04491 | A07902 | 165 |
| A04491 | A11983 | 216 | A04491 | A14381 | 228 |
| A04491 | A15230 | 263 | A04491 | A15282 | 419 |
| A04491 | A15498 | 263 | A04491 | A16257 | 269 |
| A04492 | A04676 | 416 | A04492 | A07178 | 299 |
| A04492 | A13860 | 174 | A04492 | A14369 | 288 |
| A04492 | A14490 | 217 | A04492 | A15317 | 210 |
| A04492 | A15348 | 195 | A04492 | A15452 | 179 |
| A04492 | A15800 | 283 | A04492 | A15813 | 313 |
| A04493 | A04715 | 384 | A04493 | A04790 | 267 |
| A04493 | A04858 | 269 | A04493 | A04903 | 350 |
| A04493 | A04944 | 491 | A04493 | A04947 | 491 |
| A04493 | A04964 | 491 | A04493 | A04972 | 400 |
| A04493 | A04985 | 174 | A04493 | A05031 | 467 |
| A04493 | A05106 | 407 | A04493 | A05245 | 434 |
| A04493 | A05294 | 227 | A04493 | A05462 | 266 |
| A04493 | A05777 | 252 | A04493 | A06035 | 380 |
| A04493 | A06100 | 135 | A04493 | A06106 | 369 |
| A04493 | A06227 | 350 | A04493 | A06530 | 443 |
| A04493 | A06686 | 491 | A04493 | A06708 | 241 |
| A04493 | A06893 | 362 | A04493 | A06895 | 345 |
| A04493 | A06896 | 441 | A04493 | A07310 | 441 |



|        |        |     |        |        |     |
|--------|--------|-----|--------|--------|-----|
| A04493 | A07805 | 396 | A04493 | A07815 | 468 |
| A04493 | A07985 | 475 | A04493 | A07997 | 281 |
| A04493 | A08093 | 396 | A04493 | A10639 | 335 |
| A04493 | A10647 | 467 | A04493 | A10648 | 362 |
| A04493 | A11306 | 273 | A04493 | A11308 | 310 |
| A04493 | A13885 | 441 | A04493 | A17085 | 241 |
| A04494 | A04519 | 303 | A04494 | A05212 | 313 |
| A04494 | A05349 | 217 | A04494 | A09392 | 366 |
| A04494 | A09395 | 485 | A04494 | A14208 | 171 |
| A04494 | A14395 | 213 | A04494 | A15834 | 401 |
| A04494 | A16216 | 468 | A04495 | A05025 | 232 |
| A04495 | A06287 | 152 | A04495 | A06819 | 277 |
| A04495 | A07253 | 221 | A04495 | A07278 | 391 |
| A04495 | A07560 | 438 | A04495 | A07642 | 438 |
| A04495 | A07744 | 152 | A04495 | A08061 | 152 |
| A04495 | A08098 | 152 | A04495 | A08178 | 152 |
| A04495 | A08463 | 438 | A04495 | A08763 | 152 |
| A04495 | A08875 | 160 | A04495 | A08889 | 438 |
| A04495 | A08947 | 299 | A04495 | A09004 | 299 |
| A04495 | A10842 | 152 | A04495 | A11158 | 351 |
| A04495 | A14138 | 235 | A04495 | A14525 | 152 |
| A04495 | A14622 | 441 | A04495 | A15059 | 391 |
| A04495 | A15375 | 152 | A04495 | A15546 | 152 |
| A04496 | A11911 | 357 | A04497 | A04687 | 230 |
| A04497 | A05797 | 375 | A04497 | A06688 | 188 |
| A04497 | A07135 | 151 | A04497 | A09989 | 361 |
| A04497 | A10087 | 313 | A04497 | A10731 | 283 |
| A04498 | A07833 | 347 | A04498 | A09459 | 441 |
| A04500 | A04532 | 451 | A04501 | A06441 | 427 |
| A04501 | A07138 | 393 | A04501 | A14439 | 362 |
| A04501 | A14603 | 416 | A04502 | A04579 | 398 |
| A04502 | A04595 | 405 | A04502 | A09079 | 434 |
| A04502 | A09905 | 445 | A04503 | A09524 | 432 |
| A04503 | A14643 | 293 | A04505 | A04941 | 414 |
| A04505 | A06595 | 246 | A04505 | A06949 | 210 |
| A04505 | A07106 | 348 | A04505 | A07339 | 486 |
| A04505 | A09996 | 277 | A04505 | A15649 | 160 |
| A04505 | A15926 | 330 | A04506 | A15338 | 168 |
| A04507 | A07706 | 210 | A04507 | A08452 | 332 |
| A04507 | A09227 | 408 | A04507 | A14701 | 235 |
| A04509 | A07141 | 263 | A04509 | A07200 | 199 |
| A04509 | A16636 | 435 | A04510 | A04649 | 348 |
| A04510 | A04861 | 249 | A04510 | A04949 | 285 |
| A04510 | A05079 | 362 | A04510 | A05478 | 456 |
| A04510 | A05588 | 450 | A04510 | A05679 | 229 |
| A04510 | A07158 | 204 | A04510 | A08714 | 286 |

|        |        |     |        |        |     |
|--------|--------|-----|--------|--------|-----|
| A04510 | A09559 | 440 | A04510 | A12807 | 404 |
| A04510 | A13419 | 390 | A04510 | A13886 | 332 |
| A04510 | A16636 | 121 | A04510 | A17155 | 335 |
| A04511 | A05617 | 329 | A04512 | A04516 | 396 |
| A04512 | A04810 | 430 | A04512 | A10328 | 351 |
| A04512 | A11812 | 441 | A04512 | A11813 | 441 |
| A04513 | A05721 | 395 | A04513 | A08878 | 266 |
| A04513 | A11378 | 423 | A04514 | A07135 | 243 |
| A04516 | A04553 | 345 | A04516 | A04763 | 430 |
| A04516 | A04792 | 389 | A04516 | A04810 | 402 |
| A04516 | A05914 | 201 | A04516 | A07187 | 305 |
| A04516 | A07218 | 324 | A04516 | A08719 | 409 |
| A04516 | A08738 | 185 | A04516 | A09882 | 252 |
| A04516 | A10129 | 420 | A04516 | A14390 | 344 |
| A04517 | A06216 | 452 | A04517 | A06623 | 221 |
| A04517 | A06797 | 288 | A04517 | A07145 | 372 |
| A04517 | A07190 | 218 | A04517 | A07426 | 467 |
| A04517 | A09040 | 391 | A04517 | A14318 | 402 |
| A04517 | A14378 | 167 | A04517 | A14642 | 204 |
| A04517 | A16738 | 151 | A04518 | A04548 | 452 |
| A04518 | A04567 | 491 | A04518 | A05039 | 393 |
| A04518 | A05577 | 190 | A04518 | A05741 | 358 |
| A04518 | A05847 | 427 | A04518 | A06149 | 329 |
| A04518 | A06422 | 326 | A04518 | A06968 | 283 |
| A04518 | A07152 | 249 | A04518 | A07166 | 385 |
| A04518 | A09416 | 258 | A04518 | A10055 | 375 |
| A04518 | A10901 | 380 | A04518 | A12927 | 205 |
| A04518 | A15312 | 170 | A04519 | A04526 | 345 |
| A04519 | A04690 | 369 | A04519 | A04879 | 273 |
| A04519 | A04880 | 160 | A04519 | A05059 | 257 |
| A04519 | A05607 | 224 | A04519 | A06422 | 256 |
| A04519 | A06652 | 345 | A04519 | A07161 | 419 |
| A04519 | A07164 | 173 | A04519 | A07166 | 188 |
| A04519 | A07200 | 195 | A04519 | A08572 | 176 |
| A04519 | A09395 | 272 | A04519 | A13829 | 195 |
| A04519 | A16216 | 417 | A04519 | A16537 | 288 |
| A04520 | A04549 | 307 | A04520 | A04710 | 210 |
| A04520 | A04715 | 212 | A04520 | A04870 | 163 |
| A04520 | A04925 | 307 | A04520 | A04944 | 279 |
| A04520 | A04947 | 216 | A04520 | A04964 | 353 |
| A04520 | A05078 | 230 | A04520 | A05106 | 324 |
| A04520 | A05155 | 301 | A04520 | A05246 | 252 |
| A04520 | A05288 | 404 | A04520 | A05296 | 243 |
| A04520 | A05309 | 241 | A04520 | A05511 | 307 |
| A04520 | A05527 | 389 | A04520 | A05603 | 491 |
| A04520 | A05670 | 210 | A04520 | A05741 | 208 |

|        |        |     |        |        |     |
|--------|--------|-----|--------|--------|-----|
| A04520 | A05751 | 152 | A04520 | A05777 | 285 |
| A04520 | A05834 | 276 | A04520 | A05891 | 310 |
| A04520 | A05974 | 218 | A04520 | A06022 | 307 |
| A04520 | A06038 | 198 | A04520 | A06079 | 307 |
| A04520 | A06141 | 188 | A04520 | A06212 | 160 |
| A04520 | A06312 | 218 | A04520 | A06321 | 216 |
| A04520 | A06337 | 160 | A04520 | A06346 | 243 |
| A04520 | A06469 | 285 | A04520 | A06551 | 263 |
| A04520 | A06607 | 157 | A04520 | A06680 | 201 |
| A04520 | A07068 | 416 | A04520 | A07098 | 347 |
| A04520 | A07114 | 460 | A04520 | A07136 | 243 |
| A04520 | A07164 | 82  | A04520 | A07190 | 170 |
| A04520 | A07209 | 290 | A04520 | A07227 | 163 |
| A04520 | A07342 | 154 | A04520 | A07354 | 263 |
| A04520 | A07461 | 396 | A04520 | A07626 | 177 |
| A04520 | A07705 | 246 | A04520 | A07970 | 276 |
| A04520 | A08171 | 273 | A04520 | A08172 | 424 |
| A04520 | A08299 | 347 | A04520 | A08309 | 385 |
| A04520 | A08374 | 307 | A04520 | A08453 | 294 |
| A04520 | A08507 | 205 | A04520 | A08578 | 193 |
| A04520 | A08604 | 285 | A04520 | A08685 | 299 |
| A04520 | A08686 | 481 | A04520 | A08699 | 276 |
| A04520 | A08739 | 435 | A04520 | A08753 | 260 |
| A04520 | A08813 | 167 | A04520 | A08835 | 380 |
| A04520 | A09279 | 152 | A04520 | A09323 | 191 |
| A04520 | A09324 | 210 | A04520 | A09416 | 182 |
| A04520 | A09506 | 191 | A04520 | A09527 | 347 |
| A04520 | A10008 | 276 | A04520 | A10131 | 385 |
| A04520 | A10176 | 347 | A04520 | A10203 | 323 |
| A04520 | A10383 | 285 | A04520 | A10401 | 263 |
| A04520 | A10575 | 154 | A04520 | A10626 | 213 |
| A04520 | A10658 | 201 | A04520 | A10983 | 329 |
| A04520 | A11023 | 191 | A04520 | A11278 | 154 |
| A04520 | A11280 | 160 | A04520 | A11282 | 162 |
| A04520 | A11289 | 172 | A04520 | A11298 | 339 |
| A04520 | A11348 | 160 | A04520 | A11463 | 276 |
| A04520 | A11468 | 294 | A04520 | A11530 | 347 |
| A04520 | A11563 | 323 | A04520 | A11613 | 235 |
| A04520 | A11678 | 208 | A04520 | A11705 | 296 |
| A04520 | A11726 | 307 | A04520 | A11983 | 182 |
| A04520 | A12108 | 276 | A04520 | A12265 | 285 |
| A04520 | A12298 | 276 | A04520 | A12351 | 323 |
| A04520 | A12394 | 347 | A04520 | A12476 | 347 |
| A04520 | A12634 | 285 | A04520 | A12679 | 347 |
| A04520 | A12721 | 323 | A04520 | A12843 | 347 |
| A04520 | A12848 | 307 | A04520 | A13315 | 168 |

|        |        |     |        |        |     |
|--------|--------|-----|--------|--------|-----|
| A04520 | A13369 | 491 | A04520 | A13409 | 323 |
| A04520 | A13740 | 352 | A04520 | A13778 | 347 |
| A04520 | A14128 | 195 | A04520 | A14377 | 293 |
| A04520 | A14633 | 168 | A04520 | A14735 | 200 |
| A04520 | A14834 | 347 | A04520 | A14872 | 157 |
| A04520 | A14874 | 285 | A04520 | A15097 | 180 |
| A04520 | A15217 | 185 | A04520 | A15277 | 402 |
| A04520 | A15282 | 259 | A04520 | A15292 | 302 |
| A04520 | A15298 | 307 | A04520 | A15301 | 154 |
| A04520 | A15336 | 221 | A04520 | A15349 | 188 |
| A04520 | A15451 | 185 | A04520 | A15495 | 170 |
| A04520 | A15498 | 269 | A04520 | A15638 | 472 |
| A04520 | A15837 | 171 | A04520 | A16165 | 307 |
| A04520 | A16281 | 217 | A04520 | A16434 | 172 |
| A04520 | A16718 | 191 | A04520 | A17085 | 271 |
| A04520 | A17207 | 413 | A04521 | A06606 | 184 |
| A04521 | A10128 | 428 | A04522 | A05634 | 380 |
| A04522 | A06333 | 385 | A04522 | A07393 | 434 |
| A04522 | A07961 | 307 | A04522 | A08692 | 353 |
| A04522 | A08911 | 343 | A04522 | A14378 | 243 |
| A04522 | A14860 | 443 | A04523 | A04543 | 391 |
| A04523 | A04715 | 234 | A04523 | A04790 | 249 |
| A04525 | A04527 | 943 | A04525 | A05288 | 334 |
| A04525 | A05419 | 345 | A04525 | A06608 | 899 |
| A04525 | A06881 | 425 | A04525 | A07961 | 224 |
| A04525 | A08771 | 440 | A04525 | A09391 | 441 |
| A04525 | A10218 | 491 | A04525 | A13146 | 243 |
| A04525 | A13227 | 353 | A04525 | A15547 | 152 |
| A04526 | A04865 | 363 | A04526 | A07135 | 226 |
| A04526 | A16537 | 380 | A04527 | A05288 | 407 |
| A04527 | A06608 | 899 | A04527 | A07812 | 333 |
| A04527 | A08878 | 160 | A04527 | A09391 | 941 |
| A04527 | A10218 | 944 | A04527 | A10808 | 299 |
| A04527 | A10828 | 428 | A04528 | A04536 | 322 |
| A04528 | A04589 | 428 | A04528 | A04908 | 329 |
| A04528 | A05038 | 414 | A04528 | A06055 | 371 |
| A04528 | A07157 | 319 | A04528 | A07164 | 340 |
| A04528 | A07166 | 348 | A04528 | A09046 | 399 |
| A04529 | A05070 | 308 | A04529 | A06506 | 388 |
| A04529 | A12897 | 210 | A04530 | A04796 | 435 |
| A04530 | A04797 | 427 | A04530 | A05216 | 193 |
| A04530 | A06606 | 260 | A04530 | A07165 | 216 |
| A04531 | A06858 | 419 | A04531 | A07127 | 343 |
| A04531 | A14236 | 270 | A04532 | A04533 | 207 |
| A04532 | A05439 | 177 | A04532 | A06544 | 291 |
| A04532 | A07339 | 151 | A04532 | A07958 | 172 |

|        |        |     |        |        |     |
|--------|--------|-----|--------|--------|-----|
| A04532 | A10894 | 227 | A04532 | A11513 | 422 |
| A04533 | A04576 | 305 | A04533 | A04867 | 374 |
| A04533 | A05351 | 259 | A04533 | A05438 | 428 |
| A04533 | A05828 | 257 | A04533 | A06400 | 188 |
| A04533 | A06544 | 218 | A04533 | A06707 | 515 |
| A04533 | A07153 | 423 | A04533 | A08370 | 384 |
| A04533 | A08591 | 449 | A04533 | A08738 | 162 |
| A04533 | A08878 | 179 | A04533 | A09397 | 266 |
| A04533 | A11404 | 246 | A04533 | A13017 | 198 |
| A04533 | A13212 | 408 | A04533 | A14639 | 246 |
| A04533 | A15187 | 479 | A04533 | A16741 | 172 |
| A04534 | A05065 | 334 | A04534 | A05779 | 379 |
| A04534 | A06653 | 363 | A04534 | A09078 | 240 |
| A04534 | A09123 | 368 | A04534 | A09900 | 350 |
| A04534 | A12965 | 422 | A04534 | A15840 | 334 |
| A04534 | A16732 | 395 | A04535 | A04536 | 230 |
| A04535 | A05288 | 251 | A04535 | A05309 | 177 |
| A04535 | A05869 | 350 | A04535 | A06037 | 291 |
| A04535 | A06608 | 172 | A04535 | A06609 | 301 |
| A04535 | A06650 | 176 | A04535 | A06825 | 191 |
| A04535 | A08835 | 185 | A04535 | A12373 | 179 |
| A04536 | A04589 | 221 | A04536 | A04603 | 455 |
| A04536 | A04609 | 152 | A04536 | A04614 | 293 |
| A04536 | A04617 | 249 | A04536 | A04727 | 232 |
| A04536 | A04755 | 235 | A04536 | A04800 | 241 |
| A04536 | A04865 | 313 | A04536 | A04866 | 377 |
| A04536 | A04961 | 451 | A04536 | A05038 | 257 |
| A04536 | A05127 | 174 | A04536 | A05174 | 205 |
| A04536 | A05414 | 296 | A04536 | A05556 | 458 |
| A04536 | A05558 | 396 | A04536 | A05583 | 274 |
| A04536 | A05854 | 407 | A04536 | A05944 | 480 |
| A04536 | A05985 | 423 | A04536 | A06054 | 152 |
| A04536 | A06055 | 491 | A04536 | A06095 | 452 |
| A04536 | A06404 | 232 | A04536 | A06415 | 288 |
| A04536 | A06422 | 177 | A04536 | A06499 | 249 |
| A04536 | A06544 | 188 | A04536 | A06635 | 210 |
| A04536 | A06737 | 335 | A04536 | A06818 | 216 |
| A04536 | A07031 | 236 | A04536 | A07135 | 328 |
| A04536 | A07142 | 257 | A04536 | A07146 | 205 |
| A04536 | A07148 | 210 | A04536 | A07157 | 486 |
| A04536 | A07161 | 277 | A04536 | A07166 | 229 |
| A04536 | A07173 | 324 | A04536 | A07178 | 179 |
| A04536 | A08615 | 404 | A04536 | A08658 | 260 |
| A04536 | A08711 | 388 | A04536 | A08714 | 152 |
| A04536 | A09046 | 344 | A04536 | A10969 | 400 |
| A04536 | A11825 | 212 | A04536 | A11897 | 159 |

|        |        |     |        |        |     |
|--------|--------|-----|--------|--------|-----|
| A04536 | A13872 | 291 | A04536 | A14385 | 274 |
| A04536 | A14605 | 171 | A04536 | A15388 | 238 |
| A04536 | A15577 | 243 | A04536 | A15608 | 157 |
| A04536 | A15640 | 301 | A04536 | A15967 | 358 |
| A04536 | A15968 | 301 | A04536 | A15972 | 322 |
| A04536 | A15979 | 270 | A04536 | A15981 | 205 |
| A04536 | A15985 | 218 | A04536 | A15991 | 358 |
| A04537 | A07157 | 243 | A04537 | A11075 | 353 |
| A04538 | A04798 | 408 | A04538 | A07209 | 201 |
| A04538 | A12897 | 394 | A04539 | A04810 | 419 |
| A04539 | A04962 | 266 | A04539 | A06544 | 361 |
| A04539 | A07006 | 457 | A04539 | A07197 | 357 |
| A04539 | A15427 | 347 | A04540 | A04562 | 221 |
| A04540 | A04568 | 491 | A04540 | A04610 | 356 |
| A04540 | A05280 | 367 | A04540 | A05570 | 224 |
| A04540 | A06108 | 385 | A04540 | A06240 | 417 |
| A04540 | A06633 | 241 | A04540 | A07123 | 221 |
| A04540 | A07135 | 257 | A04540 | A07165 | 68  |
| A04540 | A07721 | 190 | A04540 | A07900 | 489 |
| A04540 | A08527 | 432 | A04540 | A09577 | 191 |
| A04540 | A09908 | 385 | A04540 | A10406 | 385 |
| A04540 | A10580 | 180 | A04540 | A10626 | 489 |
| A04540 | A11662 | 310 | A04540 | A14004 | 207 |
| A04540 | A14193 | 163 | A04540 | A14331 | 434 |
| A04540 | A15215 | 208 | A04541 | A05288 | 297 |
| A04541 | A06608 | 205 | A04541 | A09842 | 270 |
| A04541 | A09876 | 162 | A04541 | A10744 | 484 |
| A04541 | A10825 | 411 | A04541 | A13973 | 401 |
| A04542 | A05163 | 475 | A04542 | A07153 | 441 |
| A04542 | A11419 | 335 | A04542 | A11427 | 327 |
| A04543 | A04570 | 458 | A04543 | A04627 | 235 |
| A04543 | A04715 | 205 | A04543 | A04725 | 399 |
| A04543 | A04790 | 481 | A04543 | A05109 | 391 |
| A04543 | A05288 | 457 | A04543 | A05438 | 324 |
| A04543 | A05810 | 291 | A04543 | A05927 | 399 |
| A04543 | A09973 | 399 | A04543 | A10742 | 344 |
| A04543 | A14636 | 177 | A04543 | A14637 | 195 |
| A04543 | A14639 | 326 | A04543 | A14785 | 353 |
| A04543 | A15611 | 238 | A04545 | A04572 | 417 |
| A04545 | A05346 | 411 | A04545 | A07200 | 221 |
| A04546 | A05847 | 462 | A04546 | A06107 | 388 |
| A04546 | A06149 | 344 | A04546 | A06422 | 340 |
| A04546 | A08729 | 385 | A04546 | A10568 | 419 |
| A04546 | A10823 | 398 | A04547 | A04548 | 308 |
| A04547 | A04639 | 317 | A04547 | A04727 | 357 |
| A04547 | A04799 | 411 | A04547 | A05078 | 367 |

|        |        |     |        |        |     |
|--------|--------|-----|--------|--------|-----|
| A04547 | A05173 | 404 | A04547 | A06608 | 168 |
| A04547 | A13181 | 273 | A04547 | A13235 | 398 |
| A04547 | A15188 | 255 | A04548 | A04567 | 488 |
| A04548 | A04666 | 299 | A04548 | A04698 | 212 |
| A04548 | A04795 | 235 | A04548 | A04873 | 257 |
| A04548 | A04907 | 319 | A04548 | A04961 | 408 |
| A04548 | A05117 | 319 | A04548 | A05847 | 290 |
| A04548 | A06615 | 443 | A04548 | A06750 | 205 |
| A04548 | A07209 | 269 | A04548 | A08718 | 276 |
| A04548 | A09093 | 348 | A04548 | A09127 | 163 |
| A04548 | A09509 | 165 | A04548 | A10055 | 335 |
| A04548 | A10805 | 345 | A04548 | A11513 | 215 |
| A04548 | A11983 | 324 | A04548 | A12897 | 491 |
| A04548 | A14236 | 187 | A04548 | A14635 | 369 |
| A04548 | A15314 | 322 | A04548 | A15322 | 445 |
| A04548 | A16636 | 185 | A04549 | A04944 | 424 |
| A04549 | A06606 | 396 | A04549 | A08374 | 434 |
| A04549 | A08386 | 434 | A04549 | A08387 | 434 |
| A04550 | A04556 | 399 | A04551 | A14198 | 204 |
| A04551 | A15422 | 288 | A04552 | A04555 | 402 |
| A04552 | A04645 | 420 | A04552 | A04681 | 323 |
| A04552 | A04962 | 293 | A04552 | A16300 | 235 |
| A04553 | A04792 | 286 | A04553 | A04830 | 185 |
| A04553 | A04902 | 479 | A04553 | A05098 | 152 |
| A04553 | A05346 | 286 | A04553 | A05416 | 63  |
| A04553 | A05568 | 489 | A04553 | A05693 | 210 |
| A04553 | A05791 | 267 | A04553 | A08137 | 190 |
| A04553 | A08719 | 330 | A04553 | A08902 | 272 |
| A04553 | A08994 | 165 | A04553 | A09660 | 358 |
| A04553 | A09754 | 191 | A04553 | A09988 | 340 |
| A04553 | A10129 | 353 | A04553 | A10532 | 323 |
| A04553 | A10557 | 308 | A04553 | A11204 | 314 |
| A04553 | A11641 | 257 | A04553 | A12932 | 263 |
| A04553 | A13016 | 353 | A04553 | A13212 | 165 |
| A04553 | A13243 | 330 | A04553 | A14120 | 213 |
| A04553 | A16123 | 422 | A04554 | A07135 | 286 |
| A04554 | A15673 | 345 | A04555 | A04645 | 456 |
| A04555 | A11911 | 246 | A04556 | A04634 | 454 |
| A04556 | A04646 | 399 | A04556 | A04813 | 327 |
| A04556 | A05045 | 290 | A04556 | A05358 | 326 |
| A04556 | A05562 | 340 | A04556 | A05647 | 418 |
| A04556 | A05694 | 399 | A04556 | A05751 | 308 |
| A04556 | A06086 | 395 | A04556 | A06439 | 249 |
| A04556 | A06629 | 262 | A04556 | A06725 | 393 |
| A04556 | A06773 | 340 | A04556 | A06860 | 277 |
| A04556 | A06981 | 335 | A04556 | A07019 | 303 |

|        |        |     |        |        |     |
|--------|--------|-----|--------|--------|-----|
| A04556 | A07122 | 183 | A04556 | A07477 | 436 |
| A04556 | A07590 | 483 | A04556 | A07736 | 485 |
| A04556 | A08250 | 430 | A04556 | A08700 | 332 |
| A04556 | A09809 | 319 | A04556 | A09842 | 221 |
| A04556 | A10237 | 441 | A04556 | A10420 | 199 |
| A04556 | A10444 | 310 | A04556 | A10547 | 272 |
| A04556 | A10689 | 201 | A04556 | A11553 | 346 |
| A04556 | A11590 | 352 | A04556 | A13204 | 406 |
| A04556 | A13331 | 388 | A04557 | A05914 | 174 |
| A04557 | A09309 | 308 | A04557 | A10109 | 348 |
| A04557 | A10508 | 345 | A04557 | A13429 | 286 |
| A04557 | A14485 | 396 | A04557 | A15837 | 152 |
| A04558 | A06385 | 195 | A04558 | A09401 | 766 |
| A04558 | A13822 | 291 | A04560 | A04561 | 394 |
| A04560 | A04739 | 402 | A04560 | A04905 | 357 |
| A04560 | A05036 | 389 | A04560 | A05042 | 412 |
| A04560 | A09378 | 418 | A04560 | A10769 | 428 |
| A04561 | A04740 | 386 | A04561 | A05122 | 307 |
| A04561 | A06648 | 451 | A04561 | A09378 | 427 |
| A04561 | A15840 | 423 | A04562 | A04739 | 475 |
| A04562 | A05240 | 249 | A04562 | A06478 | 380 |
| A04562 | A07693 | 224 | A04562 | A09269 | 208 |
| A04562 | A10399 | 193 | A04562 | A10743 | 278 |
| A04562 | A11684 | 312 | A04562 | A11943 | 190 |
| A04562 | A12191 | 430 | A04562 | A12423 | 404 |
| A04562 | A15508 | 367 | A04563 | A04698 | 274 |
| A04563 | A04808 | 378 | A04563 | A06616 | 373 |
| A04563 | A09320 | 367 | A04563 | A09882 | 255 |
| A04563 | A11409 | 343 | A04563 | A11474 | 263 |
| A04563 | A13249 | 318 | A04563 | A13609 | 182 |
| A04563 | A15659 | 205 | A04564 | A04622 | 177 |
| A04564 | A06422 | 363 | A04564 | A06818 | 382 |
| A04564 | A07153 | 283 | A04564 | A07157 | 394 |
| A04564 | A07161 | 428 | A04564 | A07166 | 319 |
| A04565 | A13447 | 417 | A04566 | A04613 | 405 |
| A04566 | A06422 | 378 | A04566 | A14387 | 399 |
| A04566 | A14439 | 362 | A04566 | A15795 | 348 |
| A04567 | A04600 | 252 | A04567 | A04879 | 163 |
| A04567 | A04965 | 198 | A04567 | A05039 | 363 |
| A04567 | A05113 | 236 | A04567 | A05741 | 317 |
| A04567 | A05847 | 488 | A04567 | A05931 | 368 |
| A04567 | A06149 | 279 | A04567 | A06422 | 490 |
| A04567 | A06465 | 380 | A04567 | A07146 | 299 |
| A04567 | A07148 | 303 | A04567 | A07157 | 163 |
| A04567 | A07173 | 337 | A04567 | A07302 | 324 |
| A04567 | A07442 | 151 | A04567 | A09416 | 328 |



|        |        |     |        |        |     |
|--------|--------|-----|--------|--------|-----|
| A04567 | A10055 | 425 | A04567 | A10677 | 238 |
| A04567 | A10901 | 347 | A04567 | A13181 | 218 |
| A04567 | A13199 | 338 | A04567 | A15394 | 230 |
| A04567 | A15425 | 173 | A04567 | A15498 | 232 |
| A04567 | A15806 | 308 | A04568 | A05280 | 396 |
| A04568 | A05570 | 285 | A04568 | A06037 | 236 |
| A04568 | A07045 | 388 | A04568 | A07135 | 402 |
| A04568 | A07164 | 212 | A04568 | A07721 | 274 |
| A04568 | A07900 | 491 | A04568 | A08219 | 388 |
| A04568 | A10421 | 160 | A04568 | A10530 | 380 |
| A04568 | A10626 | 332 | A04568 | A12927 | 157 |
| A04568 | A15089 | 396 | A04568 | A16636 | 321 |
| A04569 | A04580 | 466 | A04569 | A05123 | 416 |
| A04569 | A05172 | 428 | A04569 | A05288 | 255 |
| A04569 | A09440 | 433 | A04569 | A10013 | 466 |
| A04569 | A10156 | 348 | A04569 | A10744 | 401 |
| A04569 | A10825 | 424 | A04569 | A10827 | 433 |
| A04569 | A12387 | 440 | A04569 | A12963 | 440 |
| A04569 | A13820 | 466 | A04569 | A15839 | 385 |
| A04570 | A04790 | 151 | A04570 | A04858 | 232 |
| A04570 | A05767 | 176 | A04570 | A05768 | 337 |
| A04570 | A06581 | 258 | A04570 | A09093 | 388 |
| A04570 | A13224 | 414 | A04570 | A15874 | 259 |
| A04572 | A05346 | 422 | A04572 | A07200 | 256 |
| A04573 | A04574 | 423 | A04573 | A04795 | 319 |
| A04573 | A07178 | 345 | A04573 | A09436 | 399 |
| A04573 | A10506 | 265 | A04573 | A13980 | 271 |
| A04574 | A06210 | 402 | A04574 | A08840 | 168 |
| A04574 | A09882 | 196 | A04574 | A13129 | 297 |
| A04574 | A16118 | 323 | A04576 | A07153 | 480 |
| A04576 | A07201 | 368 | A04576 | A09402 | 417 |
| A04576 | A11404 | 379 | A04578 | A05111 | 489 |
| A04578 | A07148 | 358 | A04578 | A07157 | 246 |
| A04578 | A07798 | 157 | A04578 | A09897 | 418 |
| A04578 | A09902 | 311 | A04578 | A14404 | 351 |
| A04578 | A15282 | 207 | A04578 | A15976 | 302 |
| A04578 | A16636 | 165 | A04579 | A04595 | 344 |
| A04579 | A05775 | 446 | A04579 | A06607 | 163 |
| A04579 | A08826 | 405 | A04579 | A09263 | 361 |
| A04579 | A09857 | 265 | A04579 | A10247 | 174 |
| A04579 | A10418 | 314 | A04579 | A11405 | 188 |
| A04579 | A11787 | 405 | A04579 | A12365 | 168 |
| A04579 | A14738 | 208 | A04579 | A15376 | 316 |
| A04580 | A05123 | 424 | A04580 | A05172 | 434 |
| A04580 | A09123 | 391 | A04580 | A09440 | 438 |
| A04580 | A10013 | 469 | A04580 | A10744 | 409 |

|        |        |     |        |        |     |
|--------|--------|-----|--------|--------|-----|
| A04580 | A10825 | 430 | A04580 | A10827 | 438 |
| A04580 | A12387 | 445 | A04580 | A12963 | 445 |
| A04580 | A13820 | 469 | A04581 | A04656 | 438 |
| A04581 | A05985 | 340 | A04582 | A07205 | 380 |
| A04582 | A14386 | 408 | A04584 | A04585 | 433 |
| A04584 | A04622 | 378 | A04584 | A05309 | 218 |
| A04584 | A06275 | 278 | A04584 | A07165 | 204 |
| A04584 | A07314 | 235 | A04584 | A08377 | 259 |
| A04584 | A08556 | 238 | A04586 | A04837 | 408 |
| A04586 | A06039 | 258 | A04587 | A04682 | 441 |
| A04587 | A04730 | 462 | A04587 | A06224 | 460 |
| A04587 | A15780 | 402 | A04589 | A05038 | 288 |
| A04589 | A05222 | 172 | A04589 | A05597 | 347 |
| A04589 | A05985 | 283 | A04589 | A06055 | 183 |
| A04589 | A06415 | 480 | A04589 | A07135 | 414 |
| A04589 | A07151 | 312 | A04589 | A07157 | 425 |
| A04589 | A07161 | 180 | A04589 | A07164 | 483 |
| A04589 | A07166 | 472 | A04589 | A08137 | 207 |
| A04589 | A08828 | 303 | A04589 | A09022 | 205 |
| A04589 | A09046 | 249 | A04589 | A11487 | 369 |
| A04589 | A13872 | 195 | A04589 | A14012 | 241 |
| A04589 | A14026 | 156 | A04589 | A14071 | 391 |
| A04589 | A14374 | 210 | A04589 | A14391 | 217 |
| A04589 | A14392 | 402 | A04589 | A14442 | 218 |
| A04589 | A14660 | 165 | A04589 | A15394 | 162 |
| A04589 | A15642 | 170 | A04589 | A15897 | 358 |
| A04589 | A16636 | 198 | A04589 | A17113 | 299 |
| A04590 | A15395 | 360 | A04593 | A04652 | 446 |
| A04593 | A05309 | 401 | A04593 | A08627 | 418 |
| A04593 | A12927 | 318 | A04593 | A16636 | 271 |
| A04594 | A04908 | 329 | A04594 | A16636 | 251 |
| A04595 | A06707 | 455 | A04595 | A10894 | 274 |
| A04596 | A05973 | 430 | A04596 | A07220 | 361 |
| A04596 | A09509 | 297 | A04597 | A06277 | 306 |
| A04597 | A11315 | 334 | A04597 | A12365 | 227 |
| A04597 | A14511 | 193 | A04598 | A04727 | 441 |
| A04598 | A04862 | 402 | A04598 | A05634 | 367 |
| A04598 | A06599 | 245 | A04598 | A07135 | 185 |
| A04598 | A07165 | 182 | A04598 | A12667 | 338 |
| A04600 | A04605 | 344 | A04600 | A04704 | 247 |
| A04600 | A04902 | 190 | A04600 | A04972 | 401 |
| A04600 | A05168 | 283 | A04600 | A05760 | 353 |
| A04600 | A06697 | 324 | A04600 | A07138 | 291 |
| A04600 | A07141 | 152 | A04600 | A07157 | 147 |
| A04600 | A07302 | 312 | A04600 | A07557 | 333 |
| A04600 | A08400 | 899 | A04600 | A09026 | 302 |

|        |        |     |        |        |     |
|--------|--------|-----|--------|--------|-----|
| A04600 | A09535 | 321 | A04600 | A10055 | 419 |
| A04600 | A13212 | 377 | A04600 | A13511 | 195 |
| A04600 | A13981 | 899 | A04600 | A13997 | 899 |
| A04600 | A14201 | 260 | A04600 | A14211 | 899 |
| A04600 | A14443 | 899 | A04600 | A15974 | 363 |
| A04601 | A06605 | 479 | A04601 | A07165 | 241 |
| A04603 | A04723 | 307 | A04603 | A04922 | 283 |
| A04603 | A04944 | 323 | A04603 | A04964 | 187 |
| A04603 | A05073 | 312 | A04603 | A05155 | 151 |
| A04603 | A05414 | 263 | A04603 | A05489 | 475 |
| A04603 | A05556 | 491 | A04603 | A05558 | 358 |
| A04603 | A06055 | 371 | A04603 | A06073 | 319 |
| A04603 | A06421 | 462 | A04603 | A07118 | 353 |
| A04603 | A07130 | 388 | A04603 | A08215 | 199 |
| A04603 | A08658 | 340 | A04603 | A08685 | 205 |
| A04603 | A09046 | 468 | A04603 | A10001 | 443 |
| A04603 | A11252 | 374 | A04603 | A14178 | 167 |
| A04603 | A14396 | 446 | A04603 | A14704 | 263 |
| A04603 | A14777 | 294 | A04603 | A14913 | 368 |
| A04603 | A17198 | 160 | A04605 | A04710 | 318 |
| A04605 | A07138 | 377 | A04605 | A07157 | 277 |
| A04605 | A09070 | 422 | A04605 | A09958 | 435 |
| A04605 | A11196 | 384 | A04606 | A04684 | 441 |
| A04607 | A04608 | 490 | A04607 | A04609 | 491 |
| A04607 | A04612 | 195 | A04607 | A04614 | 480 |
| A04607 | A04906 | 208 | A04607 | A04950 | 311 |
| A04607 | A05107 | 307 | A04607 | A05113 | 945 |
| A04607 | A05349 | 489 | A04607 | A05427 | 77  |
| A04607 | A05677 | 262 | A04607 | A05920 | 286 |
| A04607 | A06414 | 205 | A04607 | A06415 | 202 |
| A04607 | A06735 | 313 | A04607 | A06818 | 217 |
| A04607 | A07017 | 480 | A04607 | A07174 | 340 |
| A04607 | A08543 | 346 | A04607 | A08739 | 333 |
| A04607 | A08860 | 243 | A04607 | A10475 | 234 |
| A04607 | A12968 | 167 | A04607 | A13131 | 243 |
| A04607 | A13729 | 205 | A04607 | A13829 | 899 |
| A04607 | A13992 | 151 | A04607 | A14146 | 185 |
| A04607 | A14192 | 366 | A04607 | A14209 | 382 |
| A04607 | A14391 | 274 | A04607 | A14393 | 899 |
| A04607 | A15395 | 228 | A04607 | A15425 | 180 |
| A04607 | A15601 | 193 | A04607 | A15607 | 341 |
| A04607 | A16308 | 294 | A04608 | A04609 | 491 |
| A04608 | A04612 | 228 | A04608 | A04614 | 461 |
| A04608 | A04709 | 204 | A04608 | A04950 | 334 |
| A04608 | A05036 | 297 | A04608 | A05087 | 235 |
| A04608 | A05113 | 490 | A04608 | A05212 | 191 |

|        |        |     |        |        |     |
|--------|--------|-----|--------|--------|-----|
| A04608 | A05349 | 945 | A04608 | A05427 | 424 |
| A04608 | A06370 | 283 | A04608 | A06622 | 173 |
| A04608 | A06755 | 269 | A04608 | A07123 | 201 |
| A04608 | A07141 | 323 | A04608 | A08739 | 358 |
| A04608 | A08837 | 263 | A04608 | A10178 | 357 |
| A04608 | A14208 | 310 | A04608 | A14393 | 899 |
| A04608 | A15320 | 246 | A04608 | A15613 | 313 |
| A04608 | A15639 | 157 | A04608 | A15964 | 213 |
| A04608 | A16636 | 281 | A04609 | A04612 | 440 |
| A04609 | A04614 | 491 | A04609 | A04618 | 401 |
| A04609 | A04657 | 288 | A04609 | A04950 | 438 |
| A04609 | A05113 | 490 | A04609 | A05349 | 489 |
| A04609 | A05427 | 463 | A04609 | A05677 | 330 |
| A04609 | A06414 | 396 | A04609 | A06735 | 380 |
| A04609 | A06747 | 230 | A04609 | A06818 | 296 |
| A04609 | A07135 | 201 | A04609 | A07141 | 154 |
| A04609 | A07151 | 230 | A04609 | A07152 | 170 |
| A04609 | A07173 | 323 | A04609 | A08572 | 183 |
| A04609 | A08739 | 393 | A04609 | A10714 | 191 |
| A04609 | A12927 | 252 | A04609 | A13018 | 408 |
| A04609 | A13872 | 246 | A04609 | A14071 | 156 |
| A04609 | A14191 | 180 | A04609 | A14198 | 160 |
| A04609 | A14339 | 337 | A04609 | A14367 | 188 |
| A04609 | A14368 | 273 | A04609 | A14391 | 281 |
| A04609 | A15308 | 162 | A04609 | A15394 | 215 |
| A04609 | A15395 | 326 | A04609 | A15425 | 157 |
| A04609 | A15477 | 348 | A04609 | A15630 | 170 |
| A04609 | A15811 | 296 | A04609 | A15964 | 265 |
| A04609 | A15976 | 213 | A04609 | A16636 | 176 |
| A04610 | A14331 | 434 | A04611 | A04659 | 379 |
| A04611 | A07135 | 218 | A04612 | A04614 | 475 |
| A04612 | A04633 | 314 | A04612 | A04861 | 240 |
| A04612 | A04906 | 321 | A04612 | A05113 | 380 |
| A04612 | A05349 | 457 | A04612 | A05427 | 324 |
| A04612 | A05587 | 345 | A04612 | A05891 | 238 |
| A04612 | A05949 | 296 | A04612 | A06558 | 385 |
| A04612 | A06735 | 446 | A04612 | A07605 | 258 |
| A04612 | A08879 | 299 | A04612 | A09124 | 165 |
| A04612 | A10714 | 232 | A04612 | A11850 | 208 |
| A04612 | A13018 | 337 | A04612 | A14197 | 176 |
| A04613 | A04616 | 353 | A04613 | A04756 | 338 |
| A04613 | A05242 | 445 | A04613 | A06415 | 198 |
| A04613 | A06422 | 334 | A04613 | A07135 | 312 |
| A04613 | A07164 | 269 | A04613 | A10601 | 223 |
| A04613 | A11850 | 377 | A04613 | A13860 | 224 |
| A04613 | A14199 | 344 | A04613 | A14374 | 236 |

|        |        |     |        |        |     |
|--------|--------|-----|--------|--------|-----|
| A04613 | A14387 | 364 | A04613 | A14392 | 260 |
| A04613 | A14928 | 191 | A04613 | A15308 | 252 |
| A04614 | A04617 | 419 | A04614 | A04633 | 288 |
| A04614 | A04659 | 943 | A04614 | A04950 | 369 |
| A04614 | A05037 | 202 | A04614 | A05113 | 468 |
| A04614 | A05349 | 472 | A04614 | A05427 | 378 |
| A04614 | A05601 | 176 | A04614 | A05677 | 335 |
| A04614 | A05679 | 185 | A04614 | A05985 | 188 |
| A04614 | A06055 | 241 | A04614 | A06314 | 238 |
| A04614 | A06414 | 294 | A04614 | A06735 | 272 |
| A04614 | A06818 | 302 | A04614 | A07141 | 296 |
| A04614 | A07151 | 238 | A04614 | A07815 | 182 |
| A04614 | A12634 | 363 | A04614 | A12927 | 262 |
| A04614 | A13018 | 313 | A04614 | A13131 | 323 |
| A04614 | A13899 | 176 | A04614 | A13997 | 162 |
| A04614 | A14132 | 290 | A04614 | A14208 | 157 |
| A04614 | A14367 | 196 | A04614 | A14374 | 152 |
| A04614 | A14392 | 177 | A04614 | A14599 | 255 |
| A04614 | A15308 | 170 | A04614 | A15314 | 165 |
| A04614 | A15394 | 223 | A04614 | A15395 | 201 |
| A04614 | A15425 | 165 | A04614 | A15642 | 356 |
| A04614 | A15914 | 401 | A04614 | A15964 | 272 |
| A04615 | A05101 | 235 | A04615 | A06247 | 286 |
| A04615 | A07130 | 405 | A04615 | A07141 | 204 |
| A04615 | A07191 | 226 | A04615 | A08732 | 389 |
| A04615 | A08827 | 319 | A04615 | A08910 | 423 |
| A04615 | A09531 | 364 | A04615 | A10418 | 310 |
| A04615 | A10638 | 343 | A04615 | A12902 | 446 |
| A04615 | A14208 | 311 | A04615 | A15935 | 177 |
| A04616 | A04693 | 443 | A04616 | A05093 | 378 |
| A04616 | A05122 | 241 | A04616 | A05309 | 152 |
| A04616 | A05331 | 173 | A04616 | A06385 | 319 |
| A04616 | A08693 | 283 | A04616 | A08834 | 191 |
| A04616 | A13826 | 260 | A04616 | A13899 | 223 |
| A04616 | A14199 | 177 | A04616 | A15346 | 185 |
| A04616 | A15639 | 263 | A04616 | A15674 | 417 |
| A04616 | A16120 | 310 | A04617 | A04618 | 436 |
| A04617 | A05427 | 246 | A04617 | A09222 | 363 |
| A04617 | A09833 | 319 | A04617 | A13826 | 174 |
| A04617 | A13899 | 263 | A04618 | A05349 | 201 |
| A04618 | A07218 | 213 | A04618 | A11760 | 340 |
| A04618 | A13879 | 274 | A04618 | A13987 | 180 |
| A04618 | A16224 | 267 | A04619 | A05094 | 373 |
| A04619 | A10085 | 356 | A04619 | A15143 | 430 |
| A04620 | A05153 | 219 | A04620 | A05416 | 182 |
| A04620 | A05550 | 307 | A04620 | A06211 | 367 |

|        |        |     |        |        |     |
|--------|--------|-----|--------|--------|-----|
| A04620 | A06558 | 401 | A04620 | A07177 | 296 |
| A04620 | A07200 | 484 | A04620 | A13906 | 361 |
| A04620 | A14390 | 348 | A04620 | A14440 | 380 |
| A04620 | A14473 | 327 | A04620 | A14637 | 235 |
| A04620 | A14685 | 389 | A04620 | A15430 | 179 |
| A04620 | A17155 | 352 | A04622 | A04776 | 154 |
| A04622 | A04941 | 185 | A04622 | A05064 | 210 |
| A04622 | A05119 | 162 | A04622 | A05143 | 230 |
| A04622 | A05278 | 156 | A04622 | A05283 | 157 |
| A04622 | A05309 | 489 | A04622 | A05453 | 477 |
| A04622 | A05599 | 207 | A04622 | A05709 | 224 |
| A04622 | A05812 | 193 | A04622 | A05879 | 174 |
| A04622 | A06001 | 462 | A04622 | A06137 | 174 |
| A04622 | A06401 | 152 | A04622 | A06416 | 63  |
| A04622 | A06610 | 356 | A04622 | A06623 | 413 |
| A04622 | A07127 | 185 | A04622 | A07153 | 288 |
| A04622 | A07157 | 344 | A04622 | A07158 | 418 |
| A04622 | A07165 | 414 | A04622 | A07190 | 271 |
| A04622 | A07192 | 393 | A04622 | A07311 | 461 |
| A04622 | A07360 | 213 | A04622 | A07507 | 157 |
| A04622 | A07645 | 223 | A04622 | A07766 | 162 |
| A04622 | A07791 | 152 | A04622 | A07861 | 223 |
| A04622 | A07864 | 277 | A04622 | A07874 | 243 |
| A04622 | A08150 | 157 | A04622 | A08175 | 177 |
| A04622 | A08200 | 207 | A04622 | A08337 | 195 |
| A04622 | A08652 | 257 | A04622 | A08823 | 195 |
| A04622 | A08875 | 393 | A04622 | A08909 | 180 |
| A04622 | A08928 | 157 | A04622 | A08942 | 152 |
| A04622 | A09010 | 221 | A04622 | A09047 | 223 |
| A04622 | A09120 | 170 | A04622 | A09126 | 255 |
| A04622 | A09132 | 243 | A04622 | A09205 | 167 |
| A04622 | A09220 | 63  | A04622 | A09568 | 286 |
| A04622 | A09932 | 260 | A04622 | A10159 | 174 |
| A04622 | A10182 | 367 | A04622 | A10240 | 170 |
| A04622 | A10411 | 177 | A04622 | A10486 | 243 |
| A04622 | A10592 | 446 | A04622 | A10625 | 488 |
| A04622 | A10646 | 243 | A04622 | A10656 | 243 |
| A04622 | A10774 | 277 | A04622 | A10884 | 177 |
| A04622 | A11184 | 230 | A04622 | A11444 | 157 |
| A04622 | A11545 | 276 | A04622 | A11558 | 152 |
| A04622 | A11607 | 305 | A04622 | A11820 | 208 |
| A04622 | A11891 | 223 | A04622 | A11973 | 185 |
| A04622 | A11985 | 277 | A04622 | A11992 | 343 |
| A04622 | A12411 | 195 | A04622 | A12720 | 223 |
| A04622 | A12835 | 176 | A04622 | A12887 | 162 |
| A04622 | A12988 | 367 | A04622 | A13340 | 168 |

|        |        |     |        |        |     |
|--------|--------|-----|--------|--------|-----|
| A04622 | A13356 | 157 | A04622 | A13877 | 152 |
| A04622 | A14122 | 227 | A04622 | A14333 | 257 |
| A04622 | A14336 | 162 | A04622 | A14364 | 180 |
| A04622 | A14395 | 255 | A04622 | A14403 | 265 |
| A04622 | A14445 | 363 | A04622 | A14583 | 210 |
| A04622 | A14643 | 190 | A04622 | A14648 | 373 |
| A04622 | A14701 | 172 | A04622 | A14831 | 285 |
| A04622 | A14928 | 486 | A04622 | A15041 | 277 |
| A04622 | A15046 | 277 | A04622 | A15095 | 185 |
| A04622 | A15328 | 184 | A04622 | A15416 | 180 |
| A04622 | A15430 | 221 | A04622 | A15487 | 305 |
| A04622 | A15498 | 447 | A04622 | A15624 | 177 |
| A04622 | A15644 | 236 | A04622 | A16095 | 218 |
| A04622 | A16277 | 162 | A04622 | A16336 | 162 |
| A04622 | A16440 | 279 | A04622 | A16453 | 162 |
| A04622 | A16734 | 185 | A04622 | A16735 | 207 |
| A04622 | A16746 | 185 | A04622 | A17114 | 207 |
| A04622 | A17137 | 162 | A04623 | A04933 | 329 |
| A04623 | A05940 | 449 | A04623 | A06607 | 473 |
| A04623 | A06650 | 380 | A04623 | A07031 | 210 |
| A04623 | A07135 | 318 | A04623 | A07177 | 422 |
| A04623 | A07736 | 187 | A04623 | A10035 | 340 |
| A04623 | A11335 | 288 | A04623 | A11539 | 480 |
| A04623 | A11606 | 458 | A04623 | A11885 | 160 |
| A04623 | A13387 | 345 | A04623 | A14332 | 491 |
| A04623 | A14389 | 337 | A04623 | A16281 | 491 |
| A04624 | A14674 | 339 | A04625 | A04627 | 425 |
| A04625 | A05288 | 270 | A04625 | A05810 | 374 |
| A04625 | A14643 | 226 | A04625 | A14685 | 462 |
| A04626 | A04940 | 438 | A04626 | A05366 | 430 |
| A04626 | A06607 | 187 | A04626 | A06928 | 445 |
| A04626 | A09072 | 363 | A04627 | A04710 | 288 |
| A04627 | A04739 | 163 | A04627 | A04773 | 162 |
| A04627 | A04789 | 350 | A04627 | A04961 | 266 |
| A04627 | A05810 | 446 | A04627 | A06021 | 285 |
| A04627 | A06171 | 350 | A04627 | A06747 | 187 |
| A04627 | A07153 | 107 | A04627 | A07201 | 408 |
| A04627 | A09538 | 165 | A04627 | A09925 | 168 |
| A04627 | A09992 | 302 | A04627 | A10228 | 254 |
| A04627 | A10291 | 443 | A04627 | A10835 | 380 |
| A04627 | A13511 | 283 | A04627 | A14498 | 193 |
| A04627 | A14534 | 380 | A04627 | A14636 | 314 |
| A04627 | A14639 | 259 | A04627 | A14643 | 424 |
| A04627 | A14685 | 319 | A04627 | A14785 | 294 |
| A04627 | A15387 | 266 | A04628 | A10353 | 384 |
| A04629 | A05153 | 263 | A04629 | A07165 | 210 |

|        |        |     |        |        |     |
|--------|--------|-----|--------|--------|-----|
| A04629 | A07190 | 290 | A04629 | A07255 | 434 |
| A04629 | A07617 | 380 | A04629 | A07958 | 271 |
| A04629 | A10356 | 434 | A04630 | A06275 | 157 |
| A04630 | A06991 | 291 | A04630 | A07588 | 174 |
| A04630 | A14077 | 485 | A04631 | A04893 | 340 |
| A04631 | A05710 | 412 | A04631 | A11303 | 356 |
| A04632 | A08293 | 162 | A04632 | A13050 | 369 |
| A04632 | A13983 | 160 | A04632 | A14799 | 212 |
| A04633 | A04634 | 394 | A04633 | A04635 | 475 |
| A04633 | A04839 | 335 | A04633 | A04981 | 423 |
| A04633 | A05184 | 313 | A04633 | A05349 | 182 |
| A04633 | A05427 | 195 | A04633 | A05505 | 401 |
| A04633 | A05945 | 238 | A04633 | A06263 | 475 |
| A04633 | A06415 | 152 | A04633 | A06607 | 249 |
| A04633 | A06757 | 414 | A04633 | A06874 | 430 |
| A04633 | A07407 | 405 | A04633 | A07438 | 419 |
| A04633 | A07471 | 196 | A04633 | A08218 | 321 |
| A04633 | A08444 | 347 | A04633 | A08858 | 151 |
| A04633 | A09072 | 265 | A04633 | A11313 | 246 |
| A04633 | A17078 | 290 | A04635 | A04974 | 391 |
| A04635 | A04975 | 383 | A04635 | A04981 | 369 |
| A04635 | A06263 | 422 | A04635 | A06607 | 395 |
| A04635 | A06874 | 446 | A04635 | A07039 | 409 |
| A04635 | A07200 | 195 | A04635 | A07438 | 366 |
| A04635 | A14423 | 347 | A04635 | A17078 | 218 |
| A04636 | A04637 | 424 | A04637 | A05390 | 326 |
| A04637 | A05985 | 259 | A04637 | A06769 | 263 |
| A04637 | A07031 | 390 | A04637 | A07808 | 413 |
| A04637 | A10580 | 185 | A04638 | A10422 | 396 |
| A04638 | A13146 | 241 | A04638 | A14176 | 347 |
| A04638 | A14643 | 213 | A04639 | A05078 | 334 |
| A04639 | A07315 | 266 | A04639 | A09375 | 334 |
| A04639 | A09469 | 286 | A04639 | A09644 | 177 |
| A04639 | A09809 | 395 | A04639 | A10018 | 219 |
| A04639 | A10560 | 328 | A04639 | A10911 | 311 |
| A04639 | A12383 | 455 | A04639 | A13181 | 221 |
| A04639 | A13391 | 312 | A04639 | A13667 | 268 |
| A04639 | A13994 | 238 | A04639 | A13997 | 171 |
| A04639 | A14013 | 319 | A04639 | A14022 | 368 |
| A04639 | A14048 | 281 | A04639 | A14275 | 339 |
| A04639 | A14443 | 899 | A04639 | A14444 | 899 |
| A04639 | A15532 | 165 | A04639 | A17195 | 329 |
| A04642 | A04782 | 457 | A04642 | A05738 | 152 |
| A04642 | A06943 | 270 | A04642 | A07773 | 196 |
| A04642 | A08959 | 408 | A04642 | A11521 | 191 |
| A04642 | A11860 | 446 | A04642 | A12408 | 307 |



|        |        |     |        |        |     |
|--------|--------|-----|--------|--------|-----|
| A04642 | A12864 | 313 | A04642 | A15420 | 151 |
| A04643 | A04759 | 367 | A04643 | A07158 | 301 |
| A04643 | A09092 | 390 | A04646 | A05562 | 401 |
| A04647 | A05082 | 201 | A04647 | A05965 | 395 |
| A04647 | A06851 | 200 | A04647 | A09217 | 395 |
| A04647 | A14443 | 171 | A04647 | A15659 | 198 |
| A04648 | A04687 | 156 | A04648 | A05027 | 296 |
| A04648 | A05528 | 299 | A04648 | A06803 | 525 |
| A04648 | A07290 | 259 | A04648 | A07584 | 171 |
| A04648 | A07670 | 368 | A04648 | A07850 | 404 |
| A04648 | A07887 | 240 | A04648 | A08281 | 154 |
| A04648 | A08383 | 156 | A04648 | A08818 | 156 |
| A04648 | A09502 | 156 | A04648 | A09712 | 438 |
| A04648 | A10642 | 204 | A04648 | A11344 | 156 |
| A04648 | A11674 | 156 | A04648 | A15266 | 201 |
| A04648 | A16228 | 486 | A04648 | A17088 | 232 |
| A04649 | A04939 | 252 | A04649 | A05079 | 380 |
| A04649 | A07137 | 416 | A04649 | A13886 | 355 |
| A04649 | A14372 | 274 | A04649 | A14390 | 353 |
| A04650 | A10982 | 347 | A04650 | A11369 | 229 |
| A04651 | A05838 | 274 | A04651 | A13181 | 266 |
| A04651 | A13484 | 283 | A04651 | A14138 | 308 |
| A04652 | A04735 | 346 | A04652 | A05309 | 491 |
| A04652 | A06942 | 399 | A04652 | A07141 | 157 |
| A04652 | A07164 | 314 | A04652 | A07165 | 93  |
| A04652 | A08627 | 491 | A04652 | A08755 | 361 |
| A04652 | A12927 | 255 | A04652 | A14236 | 183 |
| A04652 | A16636 | 455 | A04653 | A10330 | 441 |
| A04653 | A13973 | 429 | A04653 | A14403 | 418 |
| A04654 | A06362 | 452 | A04654 | A12357 | 400 |
| A04655 | A05284 | 310 | A04655 | A06597 | 350 |
| A04655 | A06620 | 324 | A04655 | A07190 | 258 |
| A04655 | A08070 | 269 | A04655 | A08573 | 329 |
| A04655 | A14404 | 345 | A04657 | A04685 | 343 |
| A04657 | A05037 | 429 | A04657 | A05427 | 204 |
| A04657 | A05446 | 386 | A04657 | A05674 | 366 |
| A04657 | A13873 | 176 | A04657 | A14196 | 229 |
| A04657 | A14351 | 293 | A04657 | A15314 | 243 |
| A04657 | A15867 | 255 | A04657 | A16073 | 185 |
| A04658 | A05676 | 440 | A04659 | A06399 | 401 |
| A04659 | A07141 | 348 | A04659 | A07158 | 218 |
| A04659 | A07174 | 424 | A04659 | A09642 | 401 |
| A04659 | A13997 | 218 | A04659 | A15241 | 339 |
| A04659 | A15607 | 339 | A04660 | A04839 | 204 |
| A04660 | A04850 | 257 | A04660 | A04937 | 334 |
| A04660 | A05007 | 378 | A04660 | A05310 | 265 |

|        |        |     |        |        |     |
|--------|--------|-----|--------|--------|-----|
| A04660 | A05600 | 329 | A04660 | A05738 | 193 |
| A04660 | A05759 | 301 | A04660 | A05772 | 347 |
| A04660 | A05774 | 340 | A04660 | A06088 | 345 |
| A04660 | A06089 | 377 | A04660 | A06358 | 257 |
| A04660 | A06630 | 409 | A04660 | A07002 | 369 |
| A04660 | A07122 | 468 | A04660 | A07413 | 245 |
| A04660 | A07554 | 347 | A04660 | A07688 | 272 |
| A04660 | A10027 | 414 | A04660 | A14154 | 229 |
| A04660 | A14231 | 262 | A04660 | A15905 | 249 |
| A04660 | A17078 | 156 | A04661 | A04893 | 219 |
| A04661 | A04929 | 243 | A04661 | A06581 | 160 |
| A04661 | A07201 | 127 | A04661 | A08815 | 404 |
| A04661 | A09884 | 352 | A04661 | A10612 | 184 |
| A04661 | A13433 | 379 | A04661 | A15379 | 217 |
| A04662 | A07047 | 454 | A04662 | A08550 | 269 |
| A04662 | A08560 | 301 | A04662 | A08814 | 321 |
| A04662 | A08982 | 154 | A04662 | A09828 | 259 |
| A04662 | A09862 | 245 | A04662 | A11301 | 247 |
| A04662 | A11430 | 151 | A04662 | A11456 | 379 |
| A04662 | A11472 | 327 | A04662 | A11496 | 163 |
| A04662 | A11497 | 154 | A04662 | A11725 | 302 |
| A04662 | A11735 | 328 | A04662 | A11914 | 193 |
| A04662 | A11915 | 305 | A04662 | A12254 | 201 |
| A04662 | A12433 | 154 | A04662 | A12506 | 254 |
| A04662 | A12625 | 177 | A04662 | A12665 | 346 |
| A04662 | A12725 | 152 | A04662 | A12825 | 271 |
| A04662 | A12858 | 402 | A04662 | A12873 | 207 |
| A04662 | A13170 | 288 | A04662 | A13313 | 229 |
| A04662 | A13321 | 254 | A04662 | A13399 | 202 |
| A04662 | A13527 | 296 | A04662 | A13708 | 160 |
| A04662 | A13782 | 375 | A04662 | A13783 | 406 |
| A04662 | A13788 | 297 | A04662 | A13804 | 324 |
| A04662 | A13806 | 263 | A04662 | A13811 | 288 |
| A04662 | A13812 | 281 | A04662 | A13983 | 412 |
| A04662 | A14196 | 235 | A04662 | A14235 | 317 |
| A04662 | A14255 | 227 | A04662 | A14289 | 266 |
| A04662 | A14455 | 174 | A04662 | A14569 | 367 |
| A04662 | A14708 | 199 | A04662 | A14838 | 162 |
| A04662 | A14917 | 296 | A04662 | A15519 | 267 |
| A04662 | A15541 | 210 | A04662 | A15559 | 316 |
| A04662 | A15680 | 283 | A04662 | A15698 | 260 |
| A04662 | A15709 | 182 | A04662 | A15711 | 272 |
| A04662 | A15854 | 340 | A04662 | A15943 | 243 |
| A04662 | A15947 | 267 | A04662 | A16157 | 274 |
| A04662 | A16552 | 254 | A04662 | A16565 | 221 |
| A04662 | A16566 | 307 | A04662 | A16567 | 326 |

|        |        |     |        |        |     |
|--------|--------|-----|--------|--------|-----|
| A04662 | A16611 | 302 | A04662 | A16675 | 185 |
| A04662 | A16690 | 185 | A04662 | A16691 | 339 |
| A04662 | A16693 | 347 | A04662 | A16695 | 350 |
| A04662 | A16703 | 269 | A04662 | A16764 | 224 |
| A04662 | A16790 | 290 | A04662 | A16806 | 350 |
| A04662 | A16824 | 339 | A04663 | A06851 | 218 |
| A04663 | A06982 | 221 | A04663 | A07106 | 363 |
| A04663 | A07985 | 259 | A04663 | A09316 | 265 |
| A04663 | A13969 | 273 | A04663 | A14220 | 215 |
| A04663 | A14577 | 293 | A04663 | A14644 | 199 |
| A04663 | A15293 | 188 | A04666 | A05017 | 188 |
| A04666 | A05276 | 213 | A04666 | A06597 | 319 |
| A04666 | A06750 | 241 | A04666 | A06814 | 515 |
| A04666 | A06974 | 326 | A04666 | A07101 | 152 |
| A04666 | A07353 | 216 | A04666 | A07434 | 174 |
| A04666 | A07439 | 424 | A04666 | A08133 | 199 |
| A04666 | A08932 | 238 | A04666 | A09305 | 271 |
| A04666 | A09331 | 216 | A04666 | A09687 | 276 |
| A04666 | A10156 | 271 | A04666 | A10484 | 271 |
| A04666 | A10532 | 335 | A04666 | A11079 | 199 |
| A04666 | A11352 | 314 | A04666 | A12824 | 367 |
| A04666 | A13028 | 362 | A04666 | A13268 | 362 |
| A04666 | A13587 | 207 | A04666 | A14192 | 199 |
| A04666 | A14196 | 313 | A04666 | A14272 | 561 |
| A04666 | A14502 | 168 | A04666 | A14589 | 305 |
| A04666 | A14643 | 210 | A04666 | A14661 | 329 |
| A04666 | A14674 | 601 | A04666 | A15297 | 160 |
| A04666 | A16738 | 601 | A04667 | A04668 | 491 |
| A04667 | A06132 | 417 | A04667 | A07148 | 258 |
| A04667 | A07212 | 198 | A04667 | A09617 | 424 |
| A04667 | A09764 | 330 | A04667 | A10373 | 374 |
| A04667 | A13617 | 104 | A04667 | A14091 | 302 |
| A04667 | A14154 | 368 | A04667 | A14177 | 489 |
| A04667 | A14230 | 271 | A04667 | A14236 | 273 |
| A04667 | A15524 | 398 | A04667 | A15531 | 303 |
| A04667 | A16132 | 159 | A04667 | A16450 | 171 |
| A04668 | A05009 | 302 | A04668 | A05155 | 346 |
| A04668 | A05165 | 462 | A04668 | A05218 | 190 |
| A04668 | A05234 | 645 | A04668 | A05275 | 483 |
| A04668 | A05334 | 491 | A04668 | A05591 | 174 |
| A04668 | A06130 | 236 | A04668 | A06242 | 491 |
| A04668 | A06297 | 490 | A04668 | A06600 | 255 |
| A04668 | A06851 | 491 | A04668 | A06864 | 491 |
| A04668 | A06956 | 159 | A04668 | A06982 | 566 |
| A04668 | A07079 | 469 | A04668 | A07148 | 369 |
| A04668 | A07319 | 491 | A04668 | A07332 | 338 |

|        |        |     |        |        |     |
|--------|--------|-----|--------|--------|-----|
| A04668 | A07333 | 151 | A04668 | A07346 | 491 |
| A04668 | A07433 | 274 | A04668 | A07442 | 363 |
| A04668 | A07461 | 157 | A04668 | A07466 | 527 |
| A04668 | A07480 | 491 | A04668 | A07534 | 488 |
| A04668 | A07603 | 491 | A04668 | A07647 | 490 |
| A04668 | A07706 | 337 | A04668 | A07902 | 419 |
| A04668 | A07996 | 491 | A04668 | A08000 | 456 |
| A04668 | A08030 | 490 | A04668 | A08117 | 486 |
| A04668 | A08141 | 490 | A04668 | A08208 | 491 |
| A04668 | A08212 | 491 | A04668 | A08402 | 468 |
| A04668 | A08502 | 416 | A04668 | A08516 | 491 |
| A04668 | A08567 | 172 | A04668 | A08669 | 564 |
| A04668 | A08769 | 490 | A04668 | A08820 | 566 |
| A04668 | A08839 | 366 | A04668 | A08858 | 302 |
| A04668 | A09059 | 347 | A04668 | A09135 | 183 |
| A04668 | A09288 | 483 | A04668 | A09304 | 312 |
| A04668 | A09515 | 168 | A04668 | A09538 | 210 |
| A04668 | A09598 | 491 | A04668 | A09617 | 465 |
| A04668 | A09623 | 401 | A04668 | A09654 | 172 |
| A04668 | A09706 | 443 | A04668 | A09752 | 63  |
| A04668 | A09754 | 63  | A04668 | A09762 | 485 |
| A04668 | A09764 | 491 | A04668 | A09952 | 252 |
| A04668 | A10108 | 216 | A04668 | A10367 | 481 |
| A04668 | A10373 | 566 | A04668 | A10601 | 474 |
| A04668 | A10901 | 208 | A04668 | A11236 | 491 |
| A04668 | A11540 | 491 | A04668 | A11703 | 185 |
| A04668 | A11782 | 224 | A04668 | A11829 | 302 |
| A04668 | A11874 | 157 | A04668 | A11916 | 323 |
| A04668 | A12365 | 200 | A04668 | A12556 | 491 |
| A04668 | A13356 | 241 | A04668 | A13429 | 441 |
| A04668 | A13617 | 483 | A04668 | A13889 | 200 |
| A04668 | A13907 | 152 | A04668 | A13913 | 460 |
| A04668 | A13949 | 491 | A04668 | A13963 | 404 |
| A04668 | A13970 | 489 | A04668 | A14009 | 524 |
| A04668 | A14076 | 491 | A04668 | A14079 | 491 |
| A04668 | A14091 | 464 | A04668 | A14093 | 433 |
| A04668 | A14094 | 566 | A04668 | A14154 | 470 |
| A04668 | A14177 | 566 | A04668 | A14192 | 200 |
| A04668 | A14213 | 193 | A04668 | A14223 | 565 |
| A04668 | A14230 | 491 | A04668 | A14272 | 491 |
| A04668 | A14273 | 491 | A04668 | A14383 | 177 |
| A04668 | A14460 | 483 | A04668 | A14655 | 443 |
| A04668 | A14674 | 180 | A04668 | A14694 | 566 |
| A04668 | A14701 | 330 | A04668 | A14706 | 491 |
| A04668 | A14819 | 246 | A04668 | A14838 | 420 |
| A04668 | A15291 | 573 | A04668 | A15321 | 243 |

|        |        |     |        |        |     |
|--------|--------|-----|--------|--------|-----|
| A04668 | A15322 | 260 | A04668 | A15345 | 274 |
| A04668 | A15369 | 491 | A04668 | A15371 | 490 |
| A04668 | A15384 | 428 | A04668 | A15509 | 107 |
| A04668 | A15524 | 491 | A04668 | A15531 | 491 |
| A04668 | A15539 | 491 | A04668 | A15549 | 234 |
| A04668 | A15550 | 327 | A04668 | A15557 | 384 |
| A04668 | A15654 | 486 | A04668 | A15714 | 307 |
| A04668 | A15837 | 491 | A04668 | A15917 | 483 |
| A04668 | A15932 | 212 | A04668 | A15939 | 283 |
| A04668 | A15941 | 491 | A04668 | A16117 | 221 |
| A04668 | A16127 | 491 | A04668 | A16128 | 491 |
| A04668 | A16129 | 488 | A04668 | A16132 | 481 |
| A04668 | A16134 | 162 | A04668 | A16226 | 490 |
| A04668 | A16274 | 200 | A04668 | A16294 | 486 |
| A04668 | A16299 | 486 | A04668 | A16378 | 338 |
| A04668 | A16537 | 312 | A04668 | A16606 | 469 |
| A04668 | A16612 | 351 | A04668 | A16613 | 424 |
| A04668 | A16616 | 422 | A04668 | A16626 | 491 |
| A04668 | A16646 | 486 | A04668 | A16664 | 63  |
| A04668 | A16692 | 172 | A04668 | A16754 | 462 |
| A04668 | A16762 | 486 | A04668 | A16990 | 177 |
| A04669 | A06129 | 450 | A04669 | A06598 | 374 |
| A04670 | A09966 | 441 | A04671 | A06039 | 333 |
| A04671 | A06277 | 190 | A04671 | A06293 | 307 |
| A04671 | A06571 | 391 | A04671 | A06956 | 488 |
| A04671 | A07010 | 369 | A04671 | A07442 | 286 |
| A04671 | A07479 | 259 | A04671 | A07529 | 333 |
| A04671 | A07764 | 319 | A04671 | A08002 | 360 |
| A04671 | A08252 | 230 | A04671 | A09750 | 235 |
| A04671 | A10689 | 294 | A04671 | A10693 | 277 |
| A04671 | A10712 | 235 | A04671 | A14362 | 266 |
| A04671 | A14366 | 152 | A04671 | A14394 | 179 |
| A04671 | A14600 | 360 | A04671 | A14767 | 406 |
| A04671 | A15422 | 165 | A04671 | A15425 | 177 |
| A04671 | A15475 | 279 | A04671 | A16002 | 427 |
| A04671 | A16541 | 375 | A04671 | A16562 | 406 |
| A04671 | A17052 | 406 | A04672 | A06033 | 434 |
| A04672 | A07218 | 216 | A04672 | A07660 | 408 |
| A04672 | A08404 | 301 | A04672 | A08627 | 308 |
| A04673 | A05377 | 385 | A04674 | A04710 | 329 |
| A04674 | A04779 | 252 | A04674 | A05102 | 351 |
| A04674 | A05471 | 371 | A04674 | A05516 | 363 |
| A04674 | A05758 | 351 | A04674 | A06397 | 408 |
| A04674 | A06641 | 371 | A04674 | A06979 | 369 |
| A04674 | A06994 | 394 | A04674 | A07108 | 310 |
| A04674 | A07238 | 316 | A04674 | A07283 | 341 |

|        |        |     |        |        |     |
|--------|--------|-----|--------|--------|-----|
| A04674 | A07413 | 329 | A04674 | A07757 | 361 |
| A04674 | A14827 | 251 | A04674 | A16026 | 364 |
| A04675 | A05296 | 401 | A04675 | A06597 | 276 |
| A04675 | A08857 | 324 | A04675 | A14399 | 218 |
| A04676 | A05784 | 417 | A04676 | A06118 | 429 |
| A04676 | A07422 | 343 | A04676 | A08031 | 417 |
| A04676 | A10723 | 314 | A04676 | A11544 | 299 |
| A04676 | A13826 | 262 | A04676 | A14190 | 160 |
| A04676 | A14210 | 417 | A04676 | A14369 | 301 |
| A04676 | A14370 | 321 | A04676 | A14408 | 252 |
| A04676 | A14511 | 358 | A04676 | A14536 | 356 |
| A04676 | A14604 | 246 | A04676 | A15300 | 339 |
| A04676 | A15318 | 216 | A04676 | A15381 | 355 |
| A04676 | A15419 | 226 | A04676 | A15422 | 202 |
| A04676 | A15433 | 296 | A04676 | A15485 | 326 |
| A04676 | A16224 | 260 | A04677 | A05260 | 363 |
| A04678 | A04747 | 422 | A04678 | A05603 | 254 |
| A04678 | A06434 | 432 | A04678 | A07232 | 369 |
| A04678 | A07282 | 291 | A04678 | A07641 | 348 |
| A04678 | A08878 | 160 | A04678 | A09370 | 372 |
| A04678 | A12365 | 210 | A04678 | A15336 | 235 |
| A04678 | A15837 | 205 | A04678 | A16068 | 455 |
| A04678 | A16101 | 412 | A04678 | A16626 | 469 |
| A04678 | A16635 | 375 | A04679 | A05131 | 391 |
| A04679 | A05252 | 398 | A04679 | A05311 | 488 |
| A04679 | A05355 | 374 | A04679 | A05376 | 451 |
| A04679 | A05985 | 380 | A04679 | A06831 | 379 |
| A04679 | A07138 | 352 | A04679 | A07143 | 486 |
| A04679 | A09219 | 364 | A04679 | A14188 | 162 |
| A04679 | A14366 | 218 | A04679 | A14603 | 385 |
| A04679 | A14604 | 273 | A04679 | A15795 | 288 |
| A04680 | A07164 | 307 | A04680 | A07171 | 419 |
| A04680 | A13945 | 385 | A04680 | A14613 | 401 |
| A04680 | A15524 | 235 | A04681 | A04783 | 157 |
| A04681 | A04798 | 299 | A04681 | A04868 | 330 |
| A04681 | A04941 | 347 | A04681 | A04962 | 418 |
| A04681 | A05309 | 63  | A04681 | A05383 | 205 |
| A04681 | A05470 | 340 | A04681 | A05500 | 268 |
| A04681 | A06254 | 461 | A04681 | A06365 | 247 |
| A04681 | A06572 | 173 | A04681 | A07093 | 183 |
| A04681 | A07128 | 208 | A04681 | A07165 | 485 |
| A04681 | A07433 | 377 | A04681 | A07573 | 353 |
| A04681 | A08201 | 447 | A04681 | A08488 | 263 |
| A04681 | A08503 | 272 | A04681 | A08549 | 469 |
| A04681 | A08748 | 224 | A04681 | A08819 | 265 |
| A04681 | A08992 | 330 | A04681 | A09100 | 489 |

|        |        |     |        |        |     |
|--------|--------|-----|--------|--------|-----|
| A04681 | A09256 | 160 | A04681 | A09427 | 249 |
| A04681 | A09443 | 296 | A04681 | A09464 | 208 |
| A04681 | A09506 | 241 | A04681 | A09655 | 477 |
| A04681 | A09828 | 180 | A04681 | A09901 | 191 |
| A04681 | A11668 | 238 | A04681 | A11776 | 374 |
| A04681 | A11954 | 485 | A04681 | A12142 | 340 |
| A04681 | A12762 | 353 | A04681 | A13075 | 374 |
| A04681 | A14270 | 406 | A04681 | A14509 | 279 |
| A04681 | A15296 | 151 | A04681 | A15613 | 202 |
| A04681 | A17125 | 247 | A04681 | A17136 | 486 |
| A04682 | A04706 | 241 | A04682 | A04730 | 441 |
| A04682 | A06224 | 463 | A04682 | A06370 | 340 |
| A04682 | A07203 | 443 | A04682 | A10597 | 352 |
| A04682 | A10981 | 377 | A04682 | A14079 | 367 |
| A04682 | A14647 | 283 | A04682 | A15347 | 187 |
| A04683 | A05288 | 391 | A04683 | A06608 | 353 |
| A04683 | A07833 | 324 | A04683 | A14443 | 899 |
| A04685 | A05037 | 383 | A04685 | A05631 | 386 |
| A04685 | A05674 | 375 | A04685 | A09411 | 439 |
| A04685 | A14001 | 215 | A04685 | A14196 | 182 |
| A04685 | A14208 | 399 | A04685 | A14367 | 380 |
| A04685 | A15360 | 187 | A04686 | A04728 | 288 |
| A04686 | A04893 | 347 | A04686 | A05024 | 359 |
| A04686 | A05202 | 254 | A04686 | A05401 | 279 |
| A04686 | A05621 | 154 | A04686 | A05914 | 337 |
| A04686 | A06466 | 369 | A04686 | A06689 | 299 |
| A04686 | A06941 | 240 | A04686 | A07203 | 309 |
| A04686 | A07208 | 481 | A04686 | A07820 | 479 |
| A04686 | A08137 | 157 | A04686 | A08454 | 219 |
| A04686 | A08461 | 369 | A04686 | A08863 | 734 |
| A04686 | A09326 | 172 | A04686 | A09333 | 345 |
| A04686 | A09742 | 338 | A04686 | A10584 | 653 |
| A04686 | A10684 | 458 | A04686 | A10797 | 412 |
| A04686 | A10798 | 491 | A04686 | A10803 | 435 |
| A04686 | A11244 | 430 | A04686 | A11296 | 339 |
| A04686 | A11337 | 491 | A04686 | A11885 | 491 |
| A04686 | A12645 | 347 | A04686 | A12824 | 291 |
| A04686 | A13375 | 226 | A04686 | A13628 | 249 |
| A04686 | A13824 | 323 | A04686 | A13831 | 205 |
| A04686 | A13891 | 229 | A04686 | A14056 | 629 |
| A04686 | A14128 | 377 | A04686 | A14247 | 647 |
| A04686 | A14272 | 443 | A04686 | A14461 | 424 |
| A04686 | A14655 | 423 | A04686 | A14661 | 241 |
| A04686 | A14838 | 383 | A04686 | A15357 | 435 |
| A04686 | A15498 | 608 | A04686 | A15507 | 196 |
| A04686 | A16462 | 276 | A04686 | A16695 | 163 |

|        |        |     |        |        |     |
|--------|--------|-----|--------|--------|-----|
| A04686 | A16707 | 213 | A04686 | A16815 | 154 |
| A04686 | A17128 | 152 | A04687 | A05295 | 227 |
| A04687 | A05339 | 281 | A04687 | A05760 | 154 |
| A04687 | A06803 | 156 | A04687 | A06881 | 491 |
| A04687 | A07670 | 156 | A04687 | A07700 | 329 |
| A04687 | A07706 | 356 | A04687 | A07850 | 156 |
| A04687 | A07887 | 156 | A04687 | A08118 | 226 |
| A04687 | A08383 | 156 | A04687 | A08771 | 490 |
| A04687 | A08818 | 156 | A04687 | A09320 | 272 |
| A04687 | A09502 | 156 | A04687 | A09753 | 191 |
| A04687 | A11259 | 330 | A04687 | A11344 | 156 |
| A04687 | A11649 | 267 | A04687 | A11674 | 156 |
| A04687 | A13226 | 277 | A04687 | A13227 | 277 |
| A04687 | A13377 | 409 | A04687 | A16228 | 156 |
| A04687 | A17013 | 258 | A04687 | A17033 | 218 |
| A04687 | A17211 | 215 | A04688 | A04782 | 254 |
| A04688 | A05629 | 311 | A04688 | A08901 | 269 |
| A04688 | A09595 | 343 | A04688 | A09735 | 165 |
| A04688 | A14478 | 256 | A04688 | A14568 | 323 |
| A04689 | A09657 | 401 | A04689 | A10376 | 413 |
| A04690 | A12934 | 418 | A04690 | A13860 | 307 |
| A04690 | A14368 | 390 | A04690 | A15376 | 302 |
| A04691 | A05216 | 193 | A04691 | A05797 | 379 |
| A04692 | A05065 | 243 | A04692 | A09647 | 256 |
| A04692 | A12997 | 369 | A04693 | A07173 | 188 |
| A04693 | A13826 | 366 | A04693 | A13902 | 170 |
| A04693 | A14077 | 180 | A04693 | A14210 | 198 |
| A04693 | A14276 | 285 | A04693 | A15533 | 228 |
| A04693 | A15639 | 340 | A04694 | A04911 | 386 |
| A04694 | A05142 | 409 | A04694 | A07201 | 269 |
| A04695 | A15932 | 191 | A04696 | A06303 | 422 |
| A04696 | A07766 | 174 | A04696 | A08834 | 212 |
| A04696 | A09085 | 358 | A04696 | A10612 | 246 |
| A04696 | A13364 | 318 | A04696 | A14007 | 232 |
| A04696 | A14128 | 151 | A04696 | A14372 | 263 |
| A04696 | A15317 | 243 | A04696 | A15430 | 174 |
| A04697 | A13989 | 402 | A04697 | A14216 | 247 |
| A04698 | A04728 | 193 | A04698 | A04763 | 271 |
| A04698 | A04795 | 472 | A04698 | A04830 | 246 |
| A04698 | A04832 | 347 | A04698 | A04950 | 346 |
| A04698 | A04991 | 226 | A04698 | A05122 | 152 |
| A04698 | A05176 | 188 | A04698 | A05473 | 208 |
| A04698 | A05775 | 213 | A04698 | A06378 | 384 |
| A04698 | A06490 | 384 | A04698 | A07218 | 163 |
| A04698 | A07282 | 162 | A04698 | A07725 | 172 |
| A04698 | A08201 | 238 | A04698 | A08677 | 255 |



|        |        |     |        |        |     |
|--------|--------|-----|--------|--------|-----|
| A04698 | A08861 | 168 | A04698 | A09073 | 483 |
| A04698 | A09127 | 247 | A04698 | A09209 | 445 |
| A04698 | A09397 | 285 | A04698 | A09497 | 308 |
| A04698 | A09509 | 249 | A04698 | A09882 | 491 |
| A04698 | A14375 | 168 | A04698 | A14390 | 434 |
| A04698 | A14404 | 247 | A04698 | A14436 | 313 |
| A04698 | A14437 | 302 | A04698 | A14697 | 299 |
| A04698 | A15281 | 398 | A04698 | A16016 | 384 |
| A04699 | A05453 | 899 | A04699 | A06289 | 74  |
| A04699 | A06610 | 299 | A04699 | A07311 | 899 |
| A04699 | A07422 | 921 | A04699 | A08280 | 165 |
| A04699 | A09162 | 255 | A04699 | A10392 | 191 |
| A04699 | A10623 | 913 | A04699 | A10982 | 200 |
| A04699 | A11125 | 923 | A04699 | A11206 | 296 |
| A04699 | A11379 | 245 | A04699 | A11983 | 899 |
| A04699 | A12383 | 205 | A04699 | A12664 | 940 |
| A04699 | A12705 | 899 | A04699 | A12987 | 371 |
| A04699 | A13985 | 933 | A04699 | A14188 | 899 |
| A04699 | A15182 | 899 | A04699 | A15974 | 263 |
| A04700 | A06607 | 245 | A04700 | A12927 | 343 |
| A04701 | A14191 | 177 | A04701 | A14364 | 305 |
| A04702 | A04883 | 353 | A04702 | A04891 | 435 |
| A04702 | A04927 | 433 | A04702 | A05051 | 449 |
| A04702 | A05297 | 378 | A04702 | A05358 | 386 |
| A04702 | A06405 | 343 | A04702 | A06638 | 424 |
| A04702 | A06860 | 356 | A04702 | A07230 | 430 |
| A04702 | A07503 | 402 | A04702 | A07757 | 373 |
| A04704 | A04807 | 210 | A04704 | A05113 | 232 |
| A04704 | A05299 | 286 | A04704 | A05701 | 210 |
| A04704 | A05889 | 306 | A04704 | A06443 | 351 |
| A04704 | A07158 | 162 | A04704 | A07557 | 340 |
| A04704 | A09103 | 358 | A04704 | A10273 | 371 |
| A04704 | A14097 | 246 | A04704 | A15241 | 152 |
| A04704 | A16646 | 187 | A04705 | A05216 | 341 |
| A04705 | A05701 | 402 | A04705 | A06612 | 430 |
| A04705 | A06614 | 409 | A04705 | A10296 | 406 |
| A04706 | A04710 | 180 | A04706 | A04739 | 323 |
| A04706 | A04811 | 291 | A04706 | A04908 | 276 |
| A04706 | A05462 | 254 | A04706 | A05756 | 132 |
| A04706 | A05985 | 160 | A04706 | A07153 | 257 |
| A04706 | A07163 | 477 | A04706 | A07731 | 302 |
| A04706 | A07961 | 305 | A04706 | A09383 | 311 |
| A04706 | A09434 | 196 | A04706 | A09546 | 400 |
| A04706 | A09655 | 229 | A04706 | A09901 | 229 |
| A04706 | A11262 | 291 | A04706 | A13001 | 391 |
| A04706 | A13325 | 286 | A04706 | A13592 | 302 |

|        |        |     |        |        |     |
|--------|--------|-----|--------|--------|-----|
| A04706 | A14588 | 208 | A04706 | A14932 | 305 |
| A04706 | A15300 | 283 | A04706 | A15418 | 263 |
| A04706 | A15611 | 180 | A04706 | A15649 | 201 |
| A04706 | A15840 | 204 | A04706 | A16300 | 165 |
| A04707 | A06596 | 398 | A04707 | A06648 | 347 |
| A04708 | A06606 | 156 | A04708 | A09952 | 302 |
| A04708 | A14661 | 260 | A04708 | A14820 | 460 |
| A04708 | A15674 | 383 | A04709 | A04848 | 350 |
| A04709 | A04867 | 157 | A04709 | A07911 | 406 |
| A04709 | A08321 | 235 | A04709 | A08603 | 308 |
| A04709 | A09180 | 296 | A04709 | A10431 | 474 |
| A04709 | A11604 | 152 | A04710 | A04715 | 188 |
| A04710 | A04744 | 313 | A04710 | A04783 | 177 |
| A04710 | A04790 | 407 | A04710 | A04795 | 190 |
| A04710 | A04842 | 195 | A04710 | A05219 | 191 |
| A04710 | A05296 | 447 | A04710 | A05402 | 208 |
| A04710 | A05619 | 279 | A04710 | A05665 | 249 |
| A04710 | A05669 | 364 | A04710 | A05823 | 383 |
| A04710 | A06012 | 279 | A04710 | A06021 | 290 |
| A04710 | A06079 | 462 | A04710 | A06132 | 323 |
| A04710 | A06175 | 343 | A04710 | A06327 | 383 |
| A04710 | A06595 | 151 | A04710 | A06606 | 252 |
| A04710 | A06653 | 234 | A04710 | A06994 | 279 |
| A04710 | A07127 | 238 | A04710 | A07177 | 184 |
| A04710 | A07199 | 273 | A04710 | A07218 | 241 |
| A04710 | A07324 | 196 | A04710 | A07384 | 357 |
| A04710 | A07757 | 213 | A04710 | A07878 | 184 |
| A04710 | A08093 | 188 | A04710 | A08573 | 450 |
| A04710 | A08717 | 299 | A04710 | A09047 | 462 |
| A04710 | A09070 | 353 | A04710 | A09958 | 383 |
| A04710 | A10023 | 427 | A04710 | A10176 | 383 |
| A04710 | A10291 | 291 | A04710 | A10383 | 335 |
| A04710 | A11043 | 383 | A04710 | A11149 | 307 |
| A04710 | A11181 | 383 | A04710 | A11902 | 395 |
| A04710 | A13209 | 383 | A04710 | A13592 | 286 |
| A04710 | A13778 | 383 | A04710 | A13866 | 310 |
| A04710 | A14313 | 323 | A04710 | A14423 | 229 |
| A04710 | A14665 | 165 | A04710 | A15035 | 279 |
| A04711 | A08070 | 374 | A04712 | A04728 | 190 |
| A04712 | A04783 | 489 | A04712 | A04949 | 174 |
| A04712 | A05342 | 430 | A04712 | A05349 | 208 |
| A04712 | A06422 | 321 | A04712 | A07135 | 160 |
| A04712 | A07189 | 383 | A04712 | A07746 | 205 |
| A04712 | A08572 | 255 | A04713 | A04791 | 418 |
| A04713 | A05866 | 428 | A04713 | A06296 | 268 |
| A04713 | A07613 | 446 | A04713 | A08609 | 380 |

|        |        |     |        |        |     |
|--------|--------|-----|--------|--------|-----|
| A04713 | A08690 | 379 | A04713 | A09683 | 441 |
| A04713 | A09800 | 424 | A04713 | A14190 | 190 |
| A04713 | A14511 | 163 | A04713 | A15837 | 193 |
| A04714 | A04908 | 193 | A04714 | A04939 | 472 |
| A04714 | A06606 | 366 | A04714 | A07071 | 395 |
| A04714 | A09180 | 303 | A04714 | A10583 | 395 |
| A04714 | A14383 | 395 | A04715 | A04790 | 491 |
| A04715 | A04858 | 308 | A04715 | A04903 | 486 |
| A04715 | A04904 | 163 | A04715 | A04944 | 472 |
| A04715 | A04964 | 424 | A04715 | A05075 | 196 |
| A04715 | A05094 | 252 | A04715 | A05114 | 177 |
| A04715 | A05288 | 414 | A04715 | A05422 | 314 |
| A04715 | A05556 | 291 | A04715 | A05558 | 188 |
| A04715 | A06021 | 274 | A04715 | A06092 | 159 |
| A04715 | A06100 | 491 | A04715 | A06106 | 234 |
| A04715 | A06379 | 473 | A04715 | A06385 | 474 |
| A04715 | A06428 | 484 | A04715 | A06445 | 288 |
| A04715 | A06505 | 260 | A04715 | A06533 | 435 |
| A04715 | A06584 | 281 | A04715 | A06601 | 283 |
| A04715 | A06670 | 160 | A04715 | A06686 | 174 |
| A04715 | A06708 | 430 | A04715 | A06739 | 443 |
| A04715 | A06871 | 234 | A04715 | A06872 | 288 |
| A04715 | A06887 | 174 | A04715 | A07004 | 490 |
| A04715 | A07209 | 423 | A04715 | A07242 | 269 |
| A04715 | A07253 | 391 | A04715 | A07282 | 472 |
| A04715 | A07396 | 218 | A04715 | A07511 | 335 |
| A04715 | A07709 | 266 | A04715 | A07734 | 255 |
| A04715 | A07806 | 255 | A04715 | A07815 | 490 |
| A04715 | A07903 | 483 | A04715 | A07944 | 160 |
| A04715 | A08002 | 188 | A04715 | A08093 | 446 |
| A04715 | A08097 | 205 | A04715 | A08309 | 165 |
| A04715 | A08388 | 255 | A04715 | A08544 | 461 |
| A04715 | A08658 | 160 | A04715 | A08686 | 183 |
| A04715 | A08921 | 168 | A04715 | A08975 | 162 |
| A04715 | A09053 | 196 | A04715 | A09130 | 288 |
| A04715 | A09311 | 446 | A04715 | A09383 | 151 |
| A04715 | A09473 | 288 | A04715 | A09504 | 382 |
| A04715 | A09646 | 475 | A04715 | A09671 | 399 |
| A04715 | A09953 | 196 | A04715 | A09973 | 255 |
| A04715 | A09995 | 473 | A04715 | A10051 | 463 |
| A04715 | A10205 | 416 | A04715 | A10315 | 446 |
| A04715 | A10335 | 255 | A04715 | A10345 | 479 |
| A04715 | A10351 | 288 | A04715 | A10358 | 430 |
| A04715 | A10411 | 188 | A04715 | A10521 | 395 |
| A04715 | A10628 | 288 | A04715 | A10682 | 404 |
| A04715 | A10862 | 288 | A04715 | A10989 | 367 |

|        |        |     |        |        |     |
|--------|--------|-----|--------|--------|-----|
| A04715 | A11005 | 374 | A04715 | A11020 | 338 |
| A04715 | A11025 | 374 | A04715 | A11033 | 176 |
| A04715 | A11034 | 288 | A04715 | A11036 | 338 |
| A04715 | A11099 | 172 | A04715 | A11172 | 207 |
| A04715 | A11187 | 207 | A04715 | A11441 | 314 |
| A04715 | A11484 | 466 | A04715 | A11564 | 188 |
| A04715 | A11582 | 218 | A04715 | A11666 | 288 |
| A04715 | A11689 | 322 | A04715 | A11726 | 360 |
| A04715 | A11890 | 255 | A04715 | A11985 | 288 |
| A04715 | A12024 | 207 | A04715 | A12132 | 338 |
| A04715 | A12144 | 279 | A04715 | A12428 | 288 |
| A04715 | A12431 | 234 | A04715 | A12438 | 374 |
| A04715 | A12439 | 374 | A04715 | A12511 | 288 |
| A04715 | A12603 | 255 | A04715 | A12967 | 288 |
| A04715 | A13277 | 207 | A04715 | A13369 | 486 |
| A04715 | A14071 | 190 | A04715 | A14163 | 154 |
| A04715 | A14193 | 449 | A04715 | A14229 | 238 |
| A04715 | A14247 | 488 | A04715 | A14253 | 433 |
| A04715 | A14262 | 168 | A04715 | A14279 | 310 |
| A04715 | A14281 | 205 | A04715 | A14395 | 486 |
| A04715 | A14484 | 249 | A04715 | A14485 | 228 |
| A04715 | A14633 | 490 | A04715 | A14661 | 491 |
| A04715 | A14785 | 154 | A04715 | A14844 | 174 |
| A04715 | A14865 | 288 | A04715 | A15004 | 154 |
| A04715 | A15292 | 152 | A04715 | A15314 | 358 |
| A04715 | A15328 | 277 | A04715 | A15336 | 223 |
| A04715 | A15366 | 247 | A04715 | A15495 | 369 |
| A04715 | A15578 | 371 | A04715 | A15676 | 288 |
| A04715 | A15679 | 263 | A04715 | A15680 | 491 |
| A04715 | A16022 | 205 | A04715 | A16074 | 235 |
| A04715 | A16274 | 467 | A04715 | A16420 | 151 |
| A04715 | A16447 | 163 | A04715 | A16480 | 188 |
| A04715 | A17085 | 265 | A04716 | A06606 | 205 |
| A04717 | A04908 | 311 | A04717 | A07201 | 436 |
| A04718 | A10156 | 445 | A04718 | A11714 | 483 |
| A04718 | A14674 | 198 | A04721 | A05949 | 347 |
| A04722 | A05219 | 240 | A04722 | A06008 | 445 |
| A04722 | A08571 | 414 | A04722 | A09195 | 339 |
| A04722 | A10005 | 373 | A04722 | A11284 | 302 |
| A04722 | A11828 | 235 | A04722 | A12008 | 344 |
| A04722 | A13917 | 170 | A04722 | A14222 | 441 |
| A04722 | A14278 | 188 | A04722 | A15510 | 378 |
| A04723 | A05034 | 260 | A04723 | A05070 | 312 |
| A04723 | A05309 | 162 | A04723 | A06606 | 168 |
| A04724 | A05619 | 424 | A04724 | A09180 | 414 |
| A04725 | A05109 | 438 | A04726 | A07339 | 230 |

|        |        |     |        |        |     |
|--------|--------|-----|--------|--------|-----|
| A04726 | A10443 | 409 | A04727 | A04799 | 413 |
| A04727 | A05349 | 217 | A04727 | A06597 | 180 |
| A04727 | A07141 | 235 | A04727 | A14605 | 323 |
| A04728 | A04732 | 424 | A04728 | A04783 | 462 |
| A04728 | A05233 | 229 | A04728 | A08615 | 271 |
| A04728 | A09586 | 200 | A04728 | A10047 | 187 |
| A04728 | A11228 | 337 | A04728 | A13756 | 337 |
| A04728 | A14247 | 491 | A04728 | A14527 | 177 |
| A04728 | A15552 | 200 | A04728 | A17091 | 157 |
| A04729 | A04939 | 199 | A04729 | A05032 | 254 |
| A04729 | A05122 | 348 | A04729 | A05250 | 351 |
| A04729 | A05415 | 404 | A04729 | A05701 | 232 |
| A04729 | A06400 | 274 | A04729 | A06544 | 299 |
| A04729 | A07197 | 293 | A04729 | A08365 | 224 |
| A04729 | A09242 | 221 | A04729 | A09457 | 388 |
| A04729 | A10018 | 423 | A04729 | A10148 | 232 |
| A04729 | A10247 | 151 | A04729 | A12670 | 388 |
| A04729 | A13348 | 301 | A04729 | A14187 | 283 |
| A04729 | A14222 | 223 | A04729 | A14278 | 210 |
| A04729 | A14386 | 319 | A04729 | A14621 | 286 |
| A04729 | A16877 | 294 | A04730 | A06224 | 460 |
| A04730 | A06654 | 441 | A04731 | A04867 | 165 |
| A04731 | A05168 | 302 | A04731 | A05169 | 340 |
| A04731 | A07106 | 328 | A04731 | A09441 | 334 |
| A04731 | A09488 | 394 | A04731 | A10214 | 462 |
| A04731 | A11129 | 323 | A04731 | A11300 | 160 |
| A04731 | A11559 | 258 | A04731 | A14231 | 243 |
| A04731 | A14691 | 182 | A04732 | A05221 | 296 |
| A04732 | A14202 | 163 | A04733 | A07149 | 380 |
| A04734 | A04855 | 399 | A04734 | A04865 | 335 |
| A04734 | A05350 | 393 | A04734 | A05577 | 198 |
| A04734 | A05985 | 266 | A04734 | A06058 | 386 |
| A04734 | A06422 | 420 | A04734 | A07157 | 362 |
| A04734 | A07164 | 382 | A04734 | A07173 | 274 |
| A04734 | A08908 | 340 | A04734 | A12924 | 374 |
| A04734 | A13734 | 154 | A04734 | A13872 | 319 |
| A04734 | A14178 | 240 | A04734 | A14442 | 335 |
| A04734 | A15394 | 296 | A04734 | A15395 | 278 |
| A04734 | A15528 | 229 | A04735 | A05107 | 299 |
| A04735 | A05349 | 266 | A04735 | A07141 | 281 |
| A04735 | A09416 | 302 | A04735 | A13772 | 306 |
| A04735 | A13850 | 435 | A04735 | A14331 | 422 |
| A04736 | A06277 | 312 | A04736 | A08725 | 418 |
| A04736 | A13484 | 326 | A04737 | A04743 | 419 |
| A04737 | A05122 | 401 | A04737 | A05353 | 485 |
| A04737 | A05450 | 260 | A04737 | A05701 | 205 |

|        |        |     |        |        |     |
|--------|--------|-----|--------|--------|-----|
| A04737 | A05868 | 279 | A04737 | A07163 | 204 |
| A04737 | A08281 | 185 | A04737 | A09431 | 329 |
| A04737 | A09561 | 191 | A04737 | A10506 | 167 |
| A04737 | A10731 | 229 | A04737 | A11513 | 215 |
| A04737 | A14589 | 183 | A04737 | A15344 | 252 |
| A04739 | A04842 | 202 | A04739 | A04908 | 263 |
| A04739 | A04969 | 469 | A04739 | A05041 | 452 |
| A04739 | A05042 | 434 | A04739 | A05073 | 388 |
| A04739 | A05128 | 268 | A04739 | A05240 | 205 |
| A04739 | A05299 | 430 | A04739 | A05943 | 347 |
| A04739 | A06478 | 357 | A04739 | A07135 | 160 |
| A04739 | A07201 | 196 | A04739 | A09509 | 255 |
| A04739 | A11299 | 168 | A04739 | A11954 | 262 |
| A04739 | A12232 | 294 | A04739 | A12897 | 260 |
| A04739 | A13001 | 385 | A04739 | A13181 | 172 |
| A04739 | A13399 | 151 | A04739 | A13607 | 329 |
| A04739 | A14381 | 160 | A04739 | A14790 | 265 |
| A04739 | A15268 | 152 | A04739 | A15498 | 154 |
| A04739 | A16215 | 268 | A04739 | A16793 | 212 |
| A04740 | A04970 | 414 | A04740 | A06648 | 273 |
| A04740 | A08070 | 263 | A04740 | A09491 | 343 |
| A04740 | A10312 | 396 | A04740 | A13543 | 378 |
| A04740 | A15840 | 299 | A04741 | A04755 | 386 |
| A04741 | A04756 | 362 | A04741 | A06054 | 345 |
| A04741 | A14146 | 363 | A04741 | A15394 | 419 |
| A04741 | A15395 | 411 | A04741 | A15640 | 414 |
| A04741 | A15806 | 379 | A04741 | A15964 | 361 |
| A04742 | A04902 | 227 | A04742 | A04960 | 322 |
| A04742 | A05329 | 398 | A04743 | A05504 | 401 |
| A04743 | A06752 | 205 | A04743 | A06924 | 383 |
| A04743 | A09714 | 395 | A04743 | A14336 | 393 |
| A04743 | A14810 | 384 | A04744 | A15662 | 291 |
| A04744 | A15708 | 256 | A04744 | A15931 | 160 |
| A04744 | A16300 | 205 | A04745 | A08603 | 469 |
| A04745 | A14658 | 475 | A04746 | A04974 | 362 |
| A04746 | A05418 | 173 | A04746 | A06607 | 422 |
| A04746 | A06688 | 165 | A04746 | A06762 | 296 |
| A04746 | A07850 | 271 | A04746 | A08718 | 305 |
| A04746 | A09235 | 371 | A04746 | A09236 | 324 |
| A04746 | A09241 | 285 | A04746 | A09254 | 291 |
| A04746 | A09882 | 226 | A04746 | A10018 | 243 |
| A04746 | A10072 | 299 | A04746 | A10103 | 469 |
| A04746 | A10372 | 190 | A04746 | A16257 | 274 |
| A04747 | A05780 | 353 | A04747 | A06428 | 196 |
| A04747 | A07641 | 291 | A04747 | A09127 | 174 |
| A04747 | A09300 | 263 | A04747 | A09456 | 405 |

|        |        |     |        |        |     |
|--------|--------|-----|--------|--------|-----|
| A04747 | A09900 | 380 | A04747 | A14523 | 310 |
| A04747 | A14642 | 172 | A04747 | A15837 | 469 |
| A04747 | A16068 | 485 | A04747 | A16101 | 380 |
| A04747 | A16400 | 265 | A04747 | A16626 | 483 |
| A04747 | A16635 | 310 | A04747 | A16725 | 347 |
| A04747 | A16748 | 327 | A04748 | A04755 | 469 |
| A04748 | A04756 | 358 | A04748 | A04766 | 419 |
| A04748 | A05944 | 316 | A04748 | A06055 | 337 |
| A04748 | A06344 | 374 | A04748 | A07126 | 355 |
| A04748 | A08618 | 425 | A04748 | A14374 | 384 |
| A04748 | A14392 | 290 | A04748 | A15516 | 422 |
| A04748 | A16040 | 416 | A04749 | A05221 | 260 |
| A04749 | A06578 | 286 | A04749 | A09211 | 339 |
| A04749 | A09429 | 358 | A04749 | A10072 | 422 |
| A04749 | A12634 | 399 | A04749 | A14393 | 310 |
| A04749 | A15293 | 193 | A04749 | A15495 | 195 |
| A04749 | A16916 | 294 | A04750 | A05751 | 435 |
| A04750 | A07574 | 352 | A04750 | A15374 | 235 |
| A04751 | A04813 | 240 | A04751 | A04850 | 301 |
| A04751 | A04888 | 240 | A04751 | A05168 | 241 |
| A04751 | A05203 | 296 | A04751 | A05216 | 180 |
| A04751 | A05284 | 439 | A04751 | A05880 | 246 |
| A04751 | A06268 | 168 | A04751 | A07087 | 308 |
| A04751 | A07091 | 404 | A04751 | A07433 | 307 |
| A04751 | A07834 | 267 | A04751 | A09319 | 323 |
| A04751 | A10673 | 221 | A04751 | A10744 | 281 |
| A04751 | A10894 | 157 | A04751 | A11683 | 335 |
| A04751 | A11765 | 258 | A04751 | A11768 | 380 |
| A04751 | A14444 | 185 | A04751 | A15138 | 156 |
| A04751 | A15904 | 313 | A04751 | A16001 | 380 |
| A04751 | A16135 | 389 | A04752 | A04896 | 202 |
| A04752 | A08707 | 154 | A04752 | A09342 | 243 |
| A04752 | A15946 | 252 | A04753 | A10829 | 435 |
| A04754 | A04761 | 485 | A04754 | A05996 | 457 |
| A04754 | A09469 | 352 | A04754 | A11612 | 470 |
| A04754 | A13989 | 162 | A04755 | A04756 | 472 |
| A04755 | A04766 | 457 | A04755 | A05613 | 468 |
| A04755 | A05679 | 259 | A04755 | A05944 | 441 |
| A04755 | A06054 | 409 | A04755 | A06055 | 307 |
| A04755 | A06344 | 353 | A04755 | A06414 | 429 |
| A04755 | A07126 | 328 | A04755 | A07161 | 407 |
| A04755 | A07173 | 270 | A04755 | A07372 | 374 |
| A04755 | A07390 | 428 | A04755 | A08618 | 414 |
| A04755 | A14374 | 419 | A04755 | A14392 | 373 |
| A04755 | A14432 | 357 | A04755 | A15394 | 291 |
| A04755 | A15395 | 273 | A04755 | A15516 | 405 |

|        |        |     |        |        |     |
|--------|--------|-----|--------|--------|-----|
| A04755 | A15571 | 424 | A04755 | A15603 | 329 |
| A04755 | A15605 | 306 | A04755 | A15608 | 314 |
| A04755 | A15964 | 330 | A04756 | A05047 | 408 |
| A04756 | A05613 | 481 | A04756 | A05679 | 208 |
| A04756 | A06054 | 268 | A04756 | A07133 | 380 |
| A04756 | A07135 | 401 | A04756 | A07157 | 179 |
| A04756 | A07161 | 260 | A04756 | A07164 | 210 |
| A04756 | A07372 | 344 | A04756 | A12419 | 297 |
| A04756 | A13860 | 162 | A04756 | A14366 | 162 |
| A04756 | A14392 | 406 | A04756 | A14431 | 480 |
| A04756 | A14432 | 324 | A04756 | A15394 | 243 |
| A04756 | A15395 | 351 | A04756 | A15601 | 301 |
| A04756 | A15607 | 313 | A04756 | A15608 | 272 |
| A04756 | A15964 | 291 | A04756 | A15976 | 243 |
| A04757 | A07200 | 288 | A04759 | A05243 | 279 |
| A04759 | A07158 | 167 | A04759 | A07647 | 154 |
| A04759 | A09092 | 307 | A04759 | A09254 | 267 |
| A04759 | A09419 | 290 | A04759 | A09539 | 265 |
| A04759 | A09626 | 272 | A04759 | A09647 | 249 |
| A04759 | A10208 | 202 | A04759 | A10478 | 373 |
| A04759 | A14642 | 170 | A04759 | A16738 | 468 |
| A04759 | A16764 | 218 | A04759 | A16911 | 235 |
| A04760 | A07201 | 252 | A04760 | A16118 | 306 |
| A04761 | A05044 | 488 | A04761 | A05443 | 417 |
| A04761 | A05996 | 491 | A04761 | A06965 | 182 |
| A04761 | A08018 | 341 | A04761 | A10154 | 303 |
| A04761 | A11400 | 291 | A04761 | A11438 | 293 |
| A04761 | A11612 | 490 | A04761 | A12653 | 486 |
| A04761 | A12661 | 249 | A04761 | A13989 | 434 |
| A04763 | A04830 | 330 | A04763 | A07171 | 396 |
| A04763 | A09374 | 348 | A04763 | A09453 | 391 |
| A04763 | A09509 | 227 | A04763 | A09882 | 430 |
| A04763 | A12897 | 221 | A04763 | A13589 | 213 |
| A04764 | A05603 | 324 | A04764 | A08948 | 419 |
| A04764 | A09789 | 398 | A04764 | A15638 | 334 |
| A04764 | A16194 | 425 | A04766 | A05613 | 416 |
| A04766 | A08618 | 438 | A04767 | A06172 | 401 |
| A04767 | A08137 | 327 | A04767 | A08571 | 263 |
| A04767 | A09357 | 286 | A04767 | A13928 | 165 |
| A04768 | A09085 | 424 | A04769 | A04977 | 318 |
| A04769 | A06203 | 396 | A04769 | A07277 | 409 |
| A04769 | A08289 | 308 | A04769 | A12897 | 251 |
| A04769 | A14667 | 299 | A04770 | A04865 | 279 |
| A04770 | A04944 | 190 | A04770 | A05228 | 436 |
| A04770 | A05506 | 317 | A04770 | A05697 | 380 |
| A04770 | A06038 | 308 | A04770 | A06046 | 285 |



|        |        |     |        |        |     |
|--------|--------|-----|--------|--------|-----|
| A04770 | A06949 | 170 | A04770 | A07031 | 216 |
| A04770 | A07145 | 218 | A04770 | A07209 | 484 |
| A04770 | A07210 | 388 | A04770 | A08827 | 294 |
| A04770 | A09073 | 249 | A04770 | A09235 | 224 |
| A04770 | A09241 | 460 | A04770 | A09559 | 350 |
| A04770 | A09837 | 473 | A04770 | A09882 | 199 |
| A04770 | A10461 | 329 | A04770 | A10638 | 321 |
| A04770 | A11523 | 480 | A04770 | A12412 | 457 |
| A04770 | A13493 | 404 | A04770 | A13872 | 260 |
| A04770 | A14392 | 185 | A04770 | A15294 | 296 |
| A04770 | A15506 | 173 | A04771 | A04895 | 285 |
| A04771 | A05054 | 452 | A04771 | A05368 | 398 |
| A04771 | A05856 | 457 | A04771 | A08791 | 424 |
| A04772 | A04922 | 439 | A04772 | A05176 | 424 |
| A04772 | A05241 | 462 | A04772 | A05274 | 455 |
| A04772 | A05398 | 363 | A04772 | A09012 | 462 |
| A04773 | A05278 | 402 | A04773 | A05832 | 162 |
| A04773 | A06404 | 283 | A04773 | A06449 | 347 |
| A04773 | A06693 | 219 | A04773 | A06779 | 297 |
| A04773 | A06818 | 268 | A04773 | A06907 | 252 |
| A04773 | A07151 | 199 | A04773 | A10525 | 174 |
| A04773 | A10552 | 314 | A04773 | A11621 | 207 |
| A04773 | A11897 | 413 | A04773 | A12111 | 266 |
| A04773 | A12365 | 191 | A04773 | A12373 | 177 |
| A04773 | A14055 | 180 | A04773 | A14196 | 229 |
| A04773 | A14443 | 185 | A04773 | A14444 | 307 |
| A04773 | A14635 | 154 | A04773 | A14660 | 185 |
| A04773 | A15282 | 291 | A04773 | A16732 | 301 |
| A04774 | A05500 | 416 | A04775 | A05260 | 317 |
| A04775 | A09127 | 265 | A04775 | A14197 | 243 |
| A04775 | A15673 | 273 | A04776 | A04900 | 152 |
| A04776 | A05690 | 232 | A04776 | A07155 | 321 |
| A04776 | A08833 | 491 | A04776 | A09804 | 246 |
| A04776 | A13949 | 323 | A04777 | A05417 | 364 |
| A04777 | A06546 | 363 | A04778 | A05098 | 490 |
| A04778 | A05102 | 276 | A04778 | A05416 | 463 |
| A04778 | A05682 | 313 | A04778 | A05757 | 288 |
| A04778 | A06358 | 375 | A04778 | A06588 | 223 |
| A04778 | A06756 | 274 | A04778 | A06981 | 326 |
| A04778 | A07122 | 301 | A04778 | A07304 | 213 |
| A04778 | A07413 | 245 | A04778 | A07477 | 432 |
| A04778 | A07558 | 427 | A04778 | A07590 | 457 |
| A04778 | A07721 | 156 | A04778 | A07736 | 417 |
| A04778 | A07800 | 243 | A04778 | A07933 | 168 |
| A04778 | A08108 | 296 | A04778 | A08250 | 341 |
| A04778 | A08379 | 162 | A04778 | A08751 | 348 |

|        |        |     |        |        |     |
|--------|--------|-----|--------|--------|-----|
| A04778 | A09612 | 306 | A04778 | A09879 | 340 |
| A04778 | A10253 | 156 | A04778 | A10420 | 436 |
| A04778 | A10427 | 198 | A04778 | A10444 | 299 |
| A04778 | A10632 | 316 | A04778 | A10635 | 433 |
| A04778 | A10656 | 463 | A04778 | A10658 | 333 |
| A04778 | A10677 | 382 | A04778 | A10689 | 187 |
| A04778 | A10694 | 333 | A04778 | A10703 | 305 |
| A04778 | A13735 | 451 | A04778 | A14803 | 382 |
| A04778 | A14856 | 313 | A04778 | A15874 | 218 |
| A04778 | A16286 | 481 | A04778 | A16335 | 259 |
| A04778 | A16529 | 188 | A04778 | A16766 | 386 |
| A04778 | A17041 | 311 | A04779 | A04781 | 185 |
| A04779 | A04834 | 447 | A04779 | A04995 | 343 |
| A04779 | A05007 | 485 | A04779 | A05262 | 167 |
| A04779 | A05289 | 346 | A04779 | A05349 | 416 |
| A04779 | A05353 | 174 | A04779 | A05472 | 199 |
| A04779 | A05516 | 249 | A04779 | A05547 | 180 |
| A04779 | A05659 | 217 | A04779 | A05682 | 279 |
| A04779 | A05759 | 355 | A04779 | A05774 | 438 |
| A04779 | A06358 | 414 | A04779 | A06473 | 204 |
| A04779 | A06615 | 173 | A04779 | A06700 | 177 |
| A04779 | A06756 | 218 | A04779 | A06934 | 180 |
| A04779 | A07080 | 199 | A04779 | A07109 | 174 |
| A04779 | A07122 | 446 | A04779 | A07413 | 278 |
| A04779 | A07530 | 162 | A04779 | A07590 | 286 |
| A04779 | A09222 | 172 | A04779 | A09449 | 252 |
| A04779 | A09566 | 188 | A04779 | A10061 | 226 |
| A04779 | A10121 | 481 | A04779 | A10456 | 160 |
| A04779 | A10550 | 322 | A04779 | A10679 | 162 |
| A04779 | A10702 | 162 | A04779 | A10712 | 195 |
| A04779 | A10880 | 302 | A04779 | A10885 | 285 |
| A04779 | A11325 | 232 | A04779 | A11381 | 378 |
| A04779 | A12055 | 232 | A04779 | A13137 | 245 |
| A04779 | A13314 | 184 | A04779 | A14827 | 273 |
| A04779 | A14957 | 212 | A04779 | A15874 | 238 |
| A04779 | A15970 | 157 | A04779 | A15976 | 191 |
| A04779 | A16026 | 252 | A04779 | A16262 | 313 |
| A04779 | A16959 | 446 | A04780 | A07209 | 358 |
| A04780 | A07210 | 326 | A04780 | A09559 | 383 |
| A04780 | A14650 | 152 | A04780 | A16300 | 159 |
| A04781 | A04791 | 416 | A04781 | A05007 | 290 |
| A04781 | A05416 | 182 | A04781 | A05452 | 380 |
| A04781 | A05550 | 307 | A04781 | A05757 | 317 |
| A04781 | A06245 | 383 | A04781 | A06385 | 212 |
| A04781 | A06629 | 279 | A04781 | A06700 | 279 |
| A04781 | A07027 | 329 | A04781 | A07059 | 279 |

|        |        |     |        |        |     |
|--------|--------|-----|--------|--------|-----|
| A04781 | A07590 | 283 | A04781 | A07721 | 191 |
| A04781 | A07875 | 406 | A04781 | A07976 | 232 |
| A04781 | A10121 | 385 | A04781 | A10657 | 319 |
| A04781 | A10880 | 413 | A04781 | A11309 | 259 |
| A04781 | A14803 | 296 | A04781 | A14856 | 217 |
| A04782 | A06435 | 313 | A04782 | A07238 | 188 |
| A04782 | A07773 | 199 | A04782 | A07894 | 391 |
| A04782 | A09595 | 340 | A04782 | A10109 | 324 |
| A04782 | A11513 | 215 | A04782 | A11860 | 446 |
| A04782 | A12985 | 475 | A04782 | A14478 | 252 |
| A04782 | A14568 | 187 | A04782 | A15917 | 281 |
| A04783 | A04818 | 236 | A04783 | A04852 | 311 |
| A04783 | A04899 | 324 | A04783 | A04949 | 457 |
| A04783 | A05073 | 281 | A04783 | A05284 | 446 |
| A04783 | A05321 | 361 | A04783 | A05342 | 391 |
| A04783 | A05402 | 223 | A04783 | A05665 | 263 |
| A04783 | A06063 | 168 | A04783 | A06132 | 334 |
| A04783 | A06422 | 240 | A04783 | A06597 | 450 |
| A04783 | A06877 | 274 | A04783 | A07165 | 269 |
| A04783 | A07189 | 329 | A04783 | A07191 | 285 |
| A04783 | A07199 | 286 | A04783 | A07371 | 469 |
| A04783 | A07746 | 229 | A04783 | A08572 | 159 |
| A04783 | A10689 | 243 | A04783 | A11275 | 202 |
| A04783 | A13416 | 339 | A04783 | A13872 | 223 |
| A04784 | A04834 | 362 | A04784 | A04850 | 483 |
| A04784 | A04937 | 377 | A04784 | A05007 | 321 |
| A04784 | A05699 | 396 | A04784 | A05937 | 380 |
| A04784 | A06063 | 302 | A04784 | A06385 | 251 |
| A04784 | A14337 | 396 | A04784 | A16027 | 294 |
| A04786 | A12358 | 417 | A04787 | A06884 | 324 |
| A04787 | A06985 | 412 | A04787 | A08285 | 350 |
| A04787 | A10864 | 423 | A04787 | A12340 | 452 |
| A04787 | A16723 | 490 | A04788 | A06579 | 377 |
| A04788 | A07911 | 252 | A04788 | A11326 | 286 |
| A04789 | A05791 | 369 | A04790 | A04832 | 294 |
| A04790 | A04858 | 461 | A04790 | A04903 | 488 |
| A04790 | A04904 | 180 | A04790 | A04949 | 446 |
| A04790 | A04964 | 375 | A04790 | A04985 | 270 |
| A04790 | A05075 | 213 | A04790 | A05256 | 177 |
| A04790 | A06021 | 160 | A04790 | A06106 | 249 |
| A04790 | A06379 | 455 | A04790 | A06445 | 299 |
| A04790 | A06533 | 412 | A04790 | A06686 | 196 |
| A04790 | A06894 | 223 | A04790 | A07090 | 223 |
| A04790 | A07314 | 277 | A04790 | A07375 | 154 |
| A04790 | A07480 | 205 | A04790 | A07603 | 260 |
| A04790 | A07709 | 353 | A04790 | A07733 | 249 |

|        |        |     |        |        |     |
|--------|--------|-----|--------|--------|-----|
| A04790 | A07734 | 269 | A04790 | A07735 | 213 |
| A04790 | A07979 | 249 | A04790 | A08002 | 205 |
| A04790 | A08048 | 299 | A04790 | A08577 | 205 |
| A04790 | A08910 | 177 | A04790 | A09162 | 158 |
| A04790 | A09473 | 299 | A04790 | A09671 | 185 |
| A04790 | A09953 | 213 | A04790 | A09995 | 452 |
| A04790 | A10291 | 162 | A04790 | A10335 | 269 |
| A04790 | A10345 | 408 | A04790 | A10358 | 481 |
| A04790 | A10411 | 205 | A04790 | A10521 | 329 |
| A04790 | A10628 | 299 | A04790 | A10682 | 213 |
| A04790 | A10851 | 371 | A04790 | A10856 | 249 |
| A04790 | A10862 | 299 | A04790 | A11005 | 384 |
| A04790 | A11020 | 351 | A04790 | A11025 | 269 |
| A04790 | A11036 | 223 | A04790 | A11057 | 269 |
| A04790 | A11124 | 260 | A04790 | A11172 | 223 |
| A04790 | A11187 | 418 | A04790 | A11201 | 160 |
| A04790 | A11382 | 198 | A04790 | A11441 | 198 |
| A04790 | A11564 | 408 | A04790 | A11614 | 438 |
| A04790 | A11726 | 249 | A04790 | A11890 | 384 |
| A04790 | A11976 | 299 | A04790 | A12428 | 299 |
| A04790 | A12439 | 384 | A04790 | A12722 | 177 |
| A04790 | A12732 | 299 | A04790 | A12967 | 299 |
| A04790 | A13147 | 205 | A04790 | A13313 | 160 |
| A04790 | A13672 | 260 | A04790 | A14128 | 322 |
| A04790 | A14190 | 267 | A04790 | A14395 | 176 |
| A04790 | A14633 | 491 | A04790 | A15328 | 188 |
| A04790 | A15366 | 205 | A04790 | A15622 | 180 |
| A04790 | A15726 | 153 | A04790 | A17147 | 170 |
| A04791 | A04883 | 361 | A04791 | A04927 | 238 |
| A04791 | A05007 | 234 | A04791 | A05014 | 405 |
| A04791 | A05045 | 254 | A04791 | A05103 | 485 |
| A04791 | A05140 | 418 | A04791 | A05330 | 394 |
| A04791 | A05331 | 266 | A04791 | A05337 | 278 |
| A04791 | A05416 | 344 | A04791 | A05418 | 324 |
| A04791 | A05431 | 441 | A04791 | A05433 | 374 |
| A04791 | A05451 | 337 | A04791 | A05452 | 347 |
| A04791 | A05463 | 481 | A04791 | A05516 | 273 |
| A04791 | A05550 | 374 | A04791 | A05573 | 485 |
| A04791 | A05851 | 446 | A04791 | A05912 | 382 |
| A04791 | A06245 | 352 | A04791 | A06405 | 347 |
| A04791 | A06439 | 340 | A04791 | A06629 | 417 |
| A04791 | A06635 | 198 | A04791 | A06641 | 285 |
| A04791 | A06689 | 212 | A04791 | A06847 | 303 |
| A04791 | A06970 | 366 | A04791 | A06994 | 324 |
| A04791 | A07027 | 281 | A04791 | A07059 | 466 |
| A04791 | A07061 | 219 | A04791 | A07088 | 360 |

|        |        |     |        |        |     |
|--------|--------|-----|--------|--------|-----|
| A04791 | A07109 | 347 | A04791 | A07304 | 185 |
| A04791 | A07325 | 254 | A04791 | A07381 | 305 |
| A04791 | A07408 | 332 | A04791 | A07413 | 347 |
| A04791 | A07501 | 267 | A04791 | A07613 | 460 |
| A04791 | A07619 | 355 | A04791 | A07674 | 395 |
| A04791 | A07778 | 450 | A04791 | A08114 | 157 |
| A04791 | A08197 | 303 | A04791 | A08252 | 229 |
| A04791 | A10687 | 335 | A04791 | A10768 | 358 |
| A04791 | A11714 | 329 | A04791 | A14709 | 157 |
| A04791 | A15497 | 199 | A04791 | A15874 | 193 |
| A04791 | A15905 | 224 | A04791 | A16027 | 201 |
| A04791 | A16739 | 279 | A04791 | A16741 | 363 |
| A04791 | A17078 | 258 | A04792 | A05319 | 425 |
| A04792 | A05669 | 430 | A04792 | A07187 | 356 |
| A04792 | A07198 | 294 | A04792 | A08719 | 430 |
| A04792 | A08741 | 353 | A04792 | A09509 | 297 |
| A04792 | A14423 | 369 | A04792 | A15674 | 378 |
| A04793 | A04853 | 307 | A04793 | A04902 | 268 |
| A04793 | A04938 | 337 | A04793 | A05114 | 307 |
| A04793 | A05278 | 210 | A04793 | A05832 | 252 |
| A04793 | A06385 | 191 | A04793 | A06595 | 249 |
| A04793 | A07436 | 334 | A04793 | A10069 | 384 |
| A04793 | A10247 | 177 | A04793 | A11086 | 356 |
| A04795 | A04941 | 489 | A04795 | A04991 | 249 |
| A04795 | A05073 | 291 | A04795 | A05122 | 176 |
| A04795 | A05296 | 323 | A04795 | A05473 | 232 |
| A04795 | A05810 | 246 | A04795 | A06063 | 182 |
| A04795 | A06597 | 273 | A04795 | A06919 | 238 |
| A04795 | A07128 | 255 | A04795 | A07282 | 188 |
| A04795 | A08691 | 379 | A04795 | A08911 | 232 |
| A04795 | A09127 | 277 | A04795 | A09504 | 270 |
| A04795 | A09900 | 238 | A04795 | A13980 | 157 |
| A04795 | A14188 | 174 | A04795 | A14375 | 193 |
| A04795 | A14390 | 394 | A04795 | A14403 | 313 |
| A04795 | A14404 | 271 | A04795 | A14423 | 257 |
| A04795 | A14624 | 360 | A04795 | A15281 | 408 |
| A04795 | A15809 | 269 | A04795 | A15922 | 187 |
| A04795 | A16016 | 394 | A04796 | A04797 | 447 |
| A04796 | A05216 | 193 | A04797 | A05216 | 154 |
| A04798 | A04906 | 371 | A04798 | A05677 | 396 |
| A04798 | A06415 | 232 | A04798 | A06581 | 170 |
| A04800 | A05679 | 263 | A04800 | A05985 | 382 |
| A04800 | A06055 | 312 | A04800 | A06899 | 361 |
| A04800 | A07031 | 283 | A04800 | A07157 | 362 |
| A04800 | A13131 | 371 | A04800 | A13872 | 319 |
| A04800 | A13983 | 274 | A04800 | A14199 | 210 |

|        |        |     |        |        |     |
|--------|--------|-----|--------|--------|-----|
| A04800 | A14374 | 423 | A04800 | A14387 | 363 |
| A04800 | A14439 | 310 | A04800 | A15308 | 249 |
| A04800 | A15394 | 296 | A04800 | A15806 | 357 |
| A04801 | A05817 | 419 | A04801 | A07164 | 340 |
| A04801 | A08640 | 445 | A04801 | A09536 | 430 |
| A04802 | A04803 | 477 | A04802 | A06588 | 184 |
| A04802 | A06688 | 249 | A04802 | A07165 | 210 |
| A04802 | A10530 | 416 | A04804 | A08070 | 374 |
| A04805 | A05015 | 351 | A04805 | A05591 | 363 |
| A04805 | A05667 | 378 | A04805 | A06635 | 226 |
| A04805 | A07145 | 247 | A04805 | A10580 | 151 |
| A04805 | A11348 | 303 | A04805 | A14236 | 227 |
| A04805 | A14366 | 177 | A04805 | A14391 | 196 |
| A04805 | A15282 | 154 | A04806 | A05239 | 427 |
| A04806 | A10337 | 351 | A04806 | A11894 | 427 |
| A04806 | A12897 | 202 | A04807 | A04968 | 302 |
| A04807 | A05064 | 899 | A04807 | A05082 | 491 |
| A04807 | A05701 | 452 | A04807 | A05760 | 899 |
| A04807 | A05838 | 172 | A04807 | A06451 | 305 |
| A04807 | A06821 | 235 | A04807 | A07158 | 399 |
| A04807 | A07206 | 297 | A04807 | A08197 | 255 |
| A04807 | A08663 | 254 | A04807 | A08729 | 302 |
| A04807 | A09121 | 385 | A04807 | A09124 | 302 |
| A04807 | A09149 | 174 | A04807 | A09386 | 277 |
| A04807 | A09546 | 168 | A04807 | A09761 | 221 |
| A04807 | A10688 | 279 | A04807 | A10894 | 429 |
| A04807 | A11125 | 899 | A04807 | A11206 | 899 |
| A04807 | A11983 | 899 | A04807 | A13181 | 162 |
| A04807 | A13981 | 899 | A04807 | A14029 | 363 |
| A04807 | A14443 | 899 | A04807 | A15962 | 170 |
| A04808 | A04899 | 399 | A04808 | A06489 | 379 |
| A04808 | A10221 | 396 | A04808 | A15659 | 252 |
| A04809 | A13824 | 156 | A04809 | A14009 | 162 |
| A04809 | A15241 | 157 | A04809 | A16994 | 369 |
| A04810 | A06610 | 174 | A04810 | A11983 | 174 |
| A04811 | A05216 | 302 | A04811 | A05301 | 154 |
| A04811 | A05756 | 229 | A04811 | A08056 | 184 |
| A04811 | A16113 | 296 | A04813 | A05330 | 407 |
| A04813 | A05331 | 296 | A04813 | A05772 | 347 |
| A04813 | A06086 | 274 | A04813 | A06160 | 401 |
| A04813 | A06769 | 229 | A04813 | A06773 | 332 |
| A04813 | A07191 | 223 | A04813 | A09040 | 278 |
| A04814 | A08114 | 281 | A04814 | A08278 | 353 |
| A04814 | A08279 | 398 | A04814 | A08280 | 213 |
| A04814 | A08385 | 364 | A04814 | A08438 | 241 |
| A04814 | A09845 | 279 | A04814 | A09881 | 219 |

|        |        |     |        |        |     |
|--------|--------|-----|--------|--------|-----|
| A04814 | A10437 | 401 | A04814 | A10444 | 366 |
| A04814 | A10656 | 357 | A04815 | A05719 | 371 |
| A04815 | A05884 | 416 | A04815 | A06550 | 301 |
| A04815 | A08177 | 366 | A04815 | A11023 | 274 |
| A04815 | A11180 | 337 | A04815 | A11287 | 254 |
| A04815 | A11902 | 302 | A04815 | A13886 | 357 |
| A04815 | A15795 | 294 | A04816 | A09220 | 324 |
| A04816 | A09464 | 373 | A04816 | A10674 | 346 |
| A04817 | A05861 | 418 | A04817 | A12355 | 447 |
| A04818 | A04873 | 384 | A04818 | A05302 | 324 |
| A04818 | A05920 | 361 | A04818 | A06949 | 174 |
| A04818 | A07163 | 105 | A04818 | A07192 | 235 |
| A04818 | A07803 | 215 | A04818 | A11576 | 212 |
| A04818 | A12897 | 490 | A04818 | A14395 | 154 |
| A04818 | A14410 | 163 | A04818 | A14636 | 159 |
| A04818 | A14650 | 490 | A04818 | A15328 | 255 |
| A04818 | A15630 | 400 | A04818 | A15676 | 391 |
| A04819 | A05568 | 226 | A04819 | A11086 | 388 |
| A04820 | A06591 | 208 | A04820 | A06648 | 330 |
| A04820 | A07433 | 157 | A04820 | A08551 | 187 |
| A04820 | A11683 | 305 | A04822 | A04823 | 374 |
| A04822 | A04901 | 329 | A04822 | A05216 | 174 |
| A04822 | A05786 | 368 | A04822 | A06595 | 243 |
| A04822 | A06606 | 156 | A04822 | A07091 | 288 |
| A04822 | A07157 | 201 | A04822 | A07923 | 344 |
| A04822 | A09155 | 416 | A04822 | A09235 | 260 |
| A04822 | A09360 | 404 | A04822 | A09467 | 450 |
| A04822 | A10247 | 388 | A04822 | A10320 | 241 |
| A04822 | A10725 | 311 | A04822 | A10731 | 273 |
| A04822 | A10987 | 204 | A04822 | A11683 | 210 |
| A04822 | A12357 | 290 | A04822 | A14498 | 286 |
| A04822 | A14621 | 174 | A04822 | A14790 | 330 |
| A04823 | A05786 | 401 | A04823 | A07422 | 195 |
| A04824 | A04875 | 375 | A04824 | A15282 | 191 |
| A04825 | A05454 | 307 | A04826 | A05261 | 422 |
| A04826 | A05759 | 378 | A04826 | A06065 | 430 |
| A04827 | A05005 | 368 | A04827 | A06289 | 191 |
| A04827 | A07398 | 219 | A04827 | A10159 | 177 |
| A04827 | A10581 | 360 | A04827 | A10599 | 424 |
| A04827 | A11943 | 294 | A04827 | A13992 | 260 |
| A04828 | A15367 | 373 | A04829 | A06349 | 445 |
| A04829 | A07257 | 388 | A04829 | A14252 | 321 |
| A04829 | A15356 | 352 | A04830 | A04832 | 489 |
| A04830 | A04950 | 385 | A04830 | A04992 | 372 |
| A04830 | A05141 | 276 | A04830 | A05264 | 405 |
| A04830 | A05641 | 338 | A04830 | A06935 | 391 |

|        |        |     |        |        |     |
|--------|--------|-----|--------|--------|-----|
| A04830 | A07218 | 456 | A04830 | A07743 | 391 |
| A04830 | A08140 | 413 | A04830 | A08677 | 319 |
| A04830 | A08718 | 305 | A04830 | A08861 | 245 |
| A04830 | A09453 | 380 | A04830 | A09890 | 480 |
| A04830 | A10731 | 263 | A04830 | A11911 | 191 |
| A04830 | A14437 | 353 | A04831 | A06039 | 172 |
| A04831 | A07309 | 212 | A04831 | A07369 | 396 |
| A04831 | A09766 | 294 | A04831 | A10563 | 277 |
| A04831 | A13767 | 367 | A04831 | A13986 | 176 |
| A04832 | A04950 | 372 | A04832 | A05141 | 249 |
| A04832 | A05264 | 391 | A04832 | A05739 | 271 |
| A04832 | A05891 | 210 | A04832 | A06935 | 380 |
| A04832 | A07158 | 165 | A04832 | A07218 | 144 |
| A04832 | A07384 | 278 | A04832 | A07743 | 380 |
| A04832 | A07833 | 221 | A04832 | A08140 | 402 |
| A04832 | A08209 | 252 | A04832 | A08417 | 238 |
| A04832 | A08594 | 173 | A04832 | A08677 | 296 |
| A04832 | A08836 | 199 | A04832 | A09453 | 366 |
| A04832 | A09890 | 416 | A04832 | A11062 | 347 |
| A04832 | A11566 | 372 | A04832 | A11911 | 294 |
| A04832 | A12897 | 468 | A04832 | A14390 | 302 |
| A04832 | A14436 | 345 | A04832 | A14437 | 335 |
| A04832 | A15896 | 227 | A04832 | A16098 | 366 |
| A04832 | A16429 | 281 | A04832 | A16434 | 286 |
| A04833 | A05038 | 273 | A04833 | A05355 | 270 |
| A04833 | A05607 | 380 | A04833 | A05891 | 255 |
| A04833 | A05908 | 422 | A04833 | A06137 | 199 |
| A04833 | A06314 | 318 | A04833 | A06797 | 308 |
| A04833 | A06798 | 245 | A04833 | A07357 | 485 |
| A04833 | A08040 | 215 | A04833 | A08114 | 179 |
| A04833 | A08137 | 160 | A04833 | A09880 | 160 |
| A04833 | A12285 | 285 | A04833 | A14589 | 167 |
| A04834 | A04850 | 374 | A04834 | A04995 | 465 |
| A04834 | A05007 | 472 | A04834 | A05013 | 372 |
| A04834 | A05472 | 259 | A04834 | A05516 | 293 |
| A04834 | A05659 | 271 | A04834 | A05758 | 273 |
| A04834 | A05759 | 467 | A04834 | A05774 | 338 |
| A04834 | A05865 | 312 | A04834 | A05937 | 424 |
| A04834 | A06063 | 360 | A04834 | A06252 | 327 |
| A04834 | A06358 | 457 | A04834 | A06597 | 193 |
| A04834 | A06633 | 407 | A04834 | A06700 | 243 |
| A04834 | A06756 | 438 | A04834 | A07122 | 454 |
| A04834 | A07256 | 347 | A04834 | A07267 | 285 |
| A04834 | A07413 | 425 | A04834 | A07424 | 345 |
| A04834 | A07530 | 322 | A04834 | A07721 | 152 |
| A04834 | A07736 | 218 | A04834 | A07847 | 281 |



|        |        |     |        |        |     |
|--------|--------|-----|--------|--------|-----|
| A04834 | A09711 | 391 | A04834 | A09850 | 345 |
| A04834 | A12055 | 364 | A04834 | A15840 | 263 |
| A04834 | A15905 | 369 | A04834 | A16026 | 294 |
| A04834 | A16027 | 353 | A04834 | A16741 | 162 |
| A04834 | A17078 | 286 | A04835 | A05419 | 256 |
| A04835 | A06168 | 486 | A04835 | A10655 | 249 |
| A04835 | A11337 | 238 | A04835 | A12883 | 480 |
| A04835 | A13882 | 283 | A04835 | A14461 | 373 |
| A04835 | A16651 | 422 | A04836 | A06588 | 168 |
| A04836 | A07135 | 196 | A04836 | A07201 | 224 |
| A04836 | A09085 | 375 | A04836 | A14399 | 188 |
| A04837 | A06039 | 488 | A04837 | A06588 | 160 |
| A04837 | A10712 | 450 | A04837 | A11325 | 456 |
| A04837 | A15974 | 243 | A04837 | A16073 | 423 |
| A04838 | A05417 | 455 | A04838 | A09054 | 202 |
| A04838 | A09228 | 375 | A04838 | A10039 | 433 |
| A04838 | A14496 | 210 | A04838 | A16403 | 379 |
| A04839 | A05045 | 156 | A04839 | A05356 | 457 |
| A04839 | A05376 | 602 | A04839 | A05389 | 238 |
| A04839 | A05390 | 395 | A04839 | A05393 | 212 |
| A04839 | A05394 | 221 | A04839 | A05516 | 177 |
| A04839 | A05776 | 249 | A04839 | A06252 | 221 |
| A04839 | A06527 | 463 | A04839 | A06696 | 195 |
| A04839 | A06908 | 191 | A04839 | A07300 | 286 |
| A04839 | A07330 | 279 | A04839 | A07407 | 396 |
| A04839 | A07452 | 263 | A04839 | A07472 | 159 |
| A04839 | A07541 | 340 | A04839 | A07542 | 375 |
| A04839 | A07543 | 294 | A04839 | A07561 | 355 |
| A04839 | A07610 | 384 | A04839 | A07629 | 351 |
| A04839 | A07630 | 249 | A04839 | A07632 | 241 |
| A04839 | A07635 | 180 | A04839 | A07736 | 462 |
| A04839 | A07973 | 267 | A04839 | A08079 | 246 |
| A04839 | A08089 | 232 | A04839 | A08693 | 154 |
| A04839 | A08881 | 353 | A04839 | A09056 | 269 |
| A04839 | A10052 | 358 | A04839 | A10056 | 367 |
| A04839 | A10091 | 228 | A04839 | A10594 | 432 |
| A04839 | A11265 | 208 | A04839 | A11279 | 462 |
| A04839 | A11444 | 174 | A04839 | A11925 | 353 |
| A04839 | A13602 | 362 | A04839 | A13871 | 491 |
| A04839 | A14247 | 648 | A04839 | A14258 | 299 |
| A04839 | A14473 | 269 | A04839 | A14481 | 353 |
| A04839 | A14661 | 452 | A04839 | A14693 | 375 |
| A04839 | A15301 | 369 | A04839 | A15302 | 376 |
| A04839 | A15366 | 644 | A04839 | A15430 | 554 |
| A04839 | A15462 | 573 | A04839 | A15463 | 485 |
| A04839 | A17061 | 296 | A04839 | A17078 | 491 |

|        |        |     |        |        |     |
|--------|--------|-----|--------|--------|-----|
| A04840 | A05015 | 394 | A04840 | A05294 | 317 |
| A04840 | A05777 | 335 | A04840 | A06069 | 326 |
| A04840 | A06346 | 486 | A04840 | A06574 | 418 |
| A04840 | A06711 | 486 | A04840 | A06868 | 327 |
| A04840 | A07044 | 389 | A04840 | A07218 | 257 |
| A04840 | A08040 | 351 | A04840 | A08162 | 396 |
| A04840 | A08309 | 210 | A04840 | A08392 | 412 |
| A04840 | A08448 | 418 | A04840 | A08671 | 466 |
| A04840 | A09927 | 428 | A04840 | A11388 | 462 |
| A04840 | A11709 | 412 | A04841 | A05001 | 411 |
| A04841 | A05340 | 411 | A04841 | A05777 | 383 |
| A04841 | A09950 | 445 | A04841 | A13484 | 364 |
| A04841 | A16339 | 438 | A04842 | A04851 | 318 |
| A04842 | A04996 | 262 | A04842 | A05032 | 217 |
| A04842 | A05299 | 273 | A04842 | A06247 | 236 |
| A04842 | A06597 | 405 | A04842 | A07158 | 278 |
| A04842 | A07191 | 303 | A04842 | A08857 | 196 |
| A04842 | A08910 | 319 | A04842 | A08911 | 236 |
| A04842 | A09561 | 179 | A04842 | A10983 | 291 |
| A04842 | A14436 | 333 | A04842 | A14664 | 162 |
| A04842 | A16300 | 184 | A04844 | A06109 | 362 |
| A04844 | A07414 | 334 | A04844 | A07730 | 283 |
| A04844 | A11401 | 256 | A04844 | A13424 | 291 |
| A04844 | A15917 | 173 | A04845 | A05094 | 236 |
| A04845 | A05313 | 232 | A04845 | A05439 | 151 |
| A04845 | A06661 | 243 | A04845 | A07083 | 185 |
| A04845 | A07178 | 263 | A04845 | A07444 | 443 |
| A04845 | A07687 | 168 | A04845 | A07872 | 215 |
| A04845 | A07873 | 196 | A04845 | A07934 | 314 |
| A04845 | A07937 | 241 | A04845 | A08351 | 154 |
| A04845 | A09242 | 185 | A04845 | A09757 | 398 |
| A04845 | A11160 | 236 | A04845 | A11283 | 350 |
| A04845 | A11472 | 172 | A04845 | A11473 | 391 |
| A04845 | A11675 | 201 | A04845 | A11735 | 173 |
| A04845 | A11954 | 286 | A04845 | A11992 | 210 |
| A04845 | A12234 | 532 | A04845 | A12284 | 152 |
| A04845 | A12337 | 390 | A04845 | A12538 | 562 |
| A04845 | A12678 | 708 | A04845 | A12834 | 686 |
| A04845 | A12858 | 173 | A04845 | A12873 | 185 |
| A04845 | A13528 | 333 | A04845 | A13665 | 240 |
| A04845 | A14286 | 276 | A04845 | A14289 | 246 |
| A04845 | A14708 | 177 | A04845 | A15078 | 63  |
| A04845 | A15262 | 170 | A04845 | A15541 | 188 |
| A04845 | A15709 | 160 | A04845 | A15743 | 272 |
| A04845 | A15818 | 251 | A04845 | A16261 | 422 |
| A04845 | A16565 | 199 | A04845 | A16646 | 174 |

|        |        |     |        |        |     |
|--------|--------|-----|--------|--------|-----|
| A04845 | A16652 | 184 | A04845 | A16664 | 196 |
| A04845 | A16690 | 162 | A04845 | A16905 | 235 |
| A04845 | A17144 | 267 | A04846 | A05086 | 270 |
| A04846 | A05258 | 391 | A04846 | A05298 | 391 |
| A04846 | A05318 | 266 | A04846 | A05354 | 363 |
| A04846 | A05499 | 286 | A04846 | A05501 | 477 |
| A04846 | A06965 | 168 | A04846 | A07323 | 458 |
| A04846 | A07378 | 210 | A04846 | A07449 | 321 |
| A04846 | A10490 | 281 | A04846 | A13989 | 443 |
| A04846 | A13992 | 191 | A04846 | A14479 | 238 |
| A04846 | A15684 | 204 | A04846 | A16118 | 232 |
| A04846 | A16191 | 338 | A04847 | A10081 | 407 |
| A04847 | A15282 | 263 | A04848 | A05317 | 424 |
| A04848 | A05348 | 483 | A04848 | A05827 | 485 |
| A04848 | A06204 | 485 | A04848 | A06347 | 490 |
| A04848 | A06607 | 409 | A04848 | A06650 | 490 |
| A04848 | A07184 | 256 | A04848 | A08321 | 183 |
| A04848 | A08447 | 329 | A04848 | A08604 | 338 |
| A04848 | A08699 | 332 | A04848 | A09180 | 491 |
| A04848 | A09192 | 469 | A04848 | A10317 | 283 |
| A04848 | A10431 | 307 | A04848 | A10710 | 326 |
| A04848 | A10871 | 297 | A04848 | A13779 | 384 |
| A04848 | A14087 | 224 | A04848 | A14186 | 484 |
| A04848 | A15171 | 346 | A04848 | A15370 | 299 |
| A04848 | A16664 | 296 | A04848 | A16674 | 255 |
| A04849 | A04850 | 257 | A04849 | A05454 | 193 |
| A04849 | A06597 | 198 | A04849 | A07422 | 548 |
| A04849 | A09358 | 401 | A04849 | A09509 | 202 |
| A04849 | A10614 | 456 | A04849 | A11763 | 414 |
| A04850 | A04888 | 258 | A04850 | A04937 | 279 |
| A04850 | A05006 | 465 | A04850 | A05007 | 188 |
| A04850 | A05076 | 296 | A04850 | A05088 | 312 |
| A04850 | A05102 | 208 | A04850 | A05277 | 281 |
| A04850 | A05516 | 232 | A04850 | A05699 | 319 |
| A04850 | A05751 | 234 | A04850 | A05937 | 288 |
| A04850 | A06024 | 296 | A04850 | A06041 | 371 |
| A04850 | A06063 | 165 | A04850 | A06358 | 187 |
| A04850 | A06597 | 447 | A04850 | A06630 | 251 |
| A04850 | A07122 | 425 | A04850 | A07182 | 332 |
| A04850 | A07187 | 218 | A04850 | A07935 | 196 |
| A04850 | A08070 | 156 | A04850 | A15637 | 417 |
| A04850 | A15905 | 435 | A04850 | A16026 | 422 |
| A04850 | A16027 | 466 | A04850 | A16028 | 260 |
| A04851 | A05032 | 408 | A04851 | A05349 | 234 |
| A04851 | A06000 | 273 | A04851 | A06247 | 324 |
| A04851 | A07165 | 182 | A04851 | A07191 | 272 |

|        |        |     |        |        |     |
|--------|--------|-----|--------|--------|-----|
| A04851 | A07771 | 297 | A04851 | A08910 | 407 |
| A04851 | A10216 | 446 | A04852 | A07128 | 345 |
| A04852 | A07163 | 188 | A04852 | A10047 | 369 |
| A04852 | A10824 | 372 | A04852 | A11902 | 313 |
| A04852 | A14399 | 185 | A04852 | A14829 | 401 |
| A04853 | A04861 | 414 | A04853 | A04902 | 385 |
| A04853 | A04942 | 408 | A04853 | A05322 | 302 |
| A04853 | A05589 | 341 | A04853 | A05683 | 363 |
| A04853 | A05790 | 313 | A04853 | A06000 | 195 |
| A04853 | A06135 | 341 | A04853 | A07061 | 219 |
| A04853 | A07158 | 171 | A04853 | A07280 | 341 |
| A04853 | A09237 | 363 | A04853 | A09247 | 281 |
| A04853 | A09988 | 230 | A04853 | A10184 | 405 |
| A04853 | A16152 | 259 | A04854 | A05985 | 329 |
| A04854 | A13872 | 369 | A04854 | A15603 | 378 |
| A04854 | A15832 | 422 | A04855 | A15528 | 291 |
| A04856 | A05431 | 172 | A04856 | A06579 | 419 |
| A04856 | A08138 | 160 | A04856 | A13989 | 429 |
| A04856 | A15684 | 322 | A04858 | A04903 | 443 |
| A04858 | A05075 | 288 | A04858 | A06445 | 355 |
| A04858 | A06533 | 213 | A04858 | A06830 | 215 |
| A04858 | A07036 | 332 | A04858 | A07805 | 355 |
| A04858 | A07811 | 393 | A04858 | A08889 | 159 |
| A04858 | A08985 | 406 | A04858 | A09065 | 355 |
| A04858 | A09836 | 469 | A04858 | A10335 | 332 |
| A04858 | A11005 | 332 | A04858 | A11020 | 296 |
| A04858 | A11564 | 281 | A04858 | A11689 | 281 |
| A04858 | A11728 | 246 | A04858 | A11890 | 332 |
| A04858 | A12215 | 226 | A04858 | A12243 | 234 |
| A04858 | A12428 | 355 | A04858 | A12524 | 332 |
| A04858 | A12526 | 317 | A04858 | A12831 | 207 |
| A04858 | A12967 | 355 | A04858 | A13457 | 263 |
| A04858 | A13780 | 355 | A04858 | A13837 | 157 |
| A04858 | A14094 | 395 | A04858 | A14654 | 154 |
| A04858 | A14846 | 217 | A04858 | A14937 | 172 |
| A04858 | A15225 | 165 | A04858 | A15258 | 196 |
| A04858 | A15503 | 195 | A04858 | A16243 | 196 |
| A04859 | A07165 | 285 | A04860 | A06140 | 418 |
| A04860 | A07147 | 384 | A04860 | A08672 | 418 |
| A04860 | A10060 | 425 | A04861 | A04902 | 485 |
| A04861 | A04942 | 458 | A04861 | A05214 | 363 |
| A04861 | A05322 | 251 | A04861 | A05568 | 399 |
| A04861 | A05631 | 322 | A04861 | A05719 | 283 |
| A04861 | A05791 | 191 | A04861 | A05949 | 221 |
| A04861 | A06004 | 240 | A04861 | A06697 | 294 |
| A04861 | A06863 | 296 | A04861 | A06971 | 269 |

|        |        |     |        |        |     |
|--------|--------|-----|--------|--------|-----|
| A04861 | A08628 | 473 | A04861 | A08661 | 236 |
| A04861 | A08709 | 317 | A04861 | A09535 | 291 |
| A04861 | A09928 | 375 | A04861 | A09988 | 305 |
| A04861 | A10286 | 183 | A04861 | A13160 | 341 |
| A04861 | A14554 | 157 | A04861 | A15102 | 246 |
| A04861 | A15386 | 340 | A04861 | A15507 | 210 |
| A04861 | A15612 | 277 | A04861 | A15716 | 303 |
| A04861 | A15795 | 168 | A04862 | A05985 | 416 |
| A04863 | A05009 | 238 | A04863 | A07165 | 232 |
| A04865 | A04866 | 429 | A04865 | A04951 | 385 |
| A04865 | A05506 | 326 | A04865 | A05679 | 205 |
| A04865 | A05944 | 232 | A04865 | A05985 | 339 |
| A04865 | A06422 | 286 | A04865 | A07031 | 228 |
| A04865 | A07142 | 346 | A04865 | A07146 | 308 |
| A04865 | A07157 | 434 | A04865 | A07161 | 259 |
| A04865 | A07166 | 351 | A04865 | A07173 | 466 |
| A04865 | A07217 | 330 | A04865 | A07471 | 177 |
| A04865 | A07561 | 238 | A04865 | A07948 | 395 |
| A04865 | A08827 | 303 | A04865 | A09842 | 190 |
| A04865 | A10638 | 329 | A04865 | A12121 | 369 |
| A04865 | A13872 | 385 | A04865 | A14071 | 184 |
| A04865 | A14366 | 160 | A04865 | A14387 | 326 |
| A04865 | A14392 | 330 | A04865 | A15427 | 274 |
| A04865 | A15605 | 259 | A04865 | A15642 | 249 |
| A04866 | A04906 | 463 | A04866 | A05677 | 480 |
| A04866 | A06735 | 345 | A04866 | A07152 | 273 |
| A04866 | A07157 | 457 | A04866 | A07166 | 294 |
| A04866 | A13988 | 346 | A04866 | A15425 | 379 |
| A04867 | A05114 | 293 | A04867 | A05414 | 151 |
| A04867 | A05828 | 346 | A04867 | A05914 | 224 |
| A04867 | A05918 | 238 | A04867 | A05919 | 270 |
| A04867 | A06133 | 484 | A04867 | A06154 | 313 |
| A04867 | A06281 | 490 | A04867 | A06398 | 210 |
| A04867 | A06636 | 265 | A04867 | A06644 | 152 |
| A04867 | A06778 | 479 | A04867 | A07164 | 193 |
| A04867 | A08535 | 176 | A04867 | A08576 | 212 |
| A04867 | A08581 | 270 | A04867 | A08591 | 385 |
| A04867 | A09020 | 184 | A04867 | A09397 | 353 |
| A04867 | A10414 | 162 | A04867 | A10927 | 182 |
| A04867 | A12553 | 301 | A04867 | A13212 | 491 |
| A04867 | A14192 | 489 | A04867 | A14263 | 210 |
| A04867 | A14621 | 294 | A04867 | A15135 | 232 |
| A04867 | A15286 | 201 | A04867 | A15838 | 243 |
| A04867 | A16709 | 177 | A04868 | A05618 | 435 |
| A04868 | A06254 | 372 | A04870 | A05188 | 409 |
| A04870 | A05294 | 263 | A04870 | A05596 | 332 |

|        |        |     |        |        |     |
|--------|--------|-----|--------|--------|-----|
| A04870 | A05603 | 188 | A04870 | A05777 | 396 |
| A04870 | A05801 | 371 | A04870 | A05828 | 328 |
| A04870 | A05919 | 363 | A04870 | A06069 | 274 |
| A04870 | A06092 | 215 | A04870 | A06195 | 201 |
| A04870 | A06314 | 139 | A04870 | A06710 | 363 |
| A04870 | A07068 | 396 | A04870 | A07190 | 202 |
| A04870 | A07318 | 409 | A04870 | A07384 | 294 |
| A04870 | A07559 | 266 | A04870 | A07704 | 268 |
| A04870 | A08172 | 234 | A04870 | A08685 | 221 |
| A04870 | A08686 | 184 | A04870 | A09074 | 351 |
| A04870 | A11014 | 316 | A04870 | A11698 | 367 |
| A04870 | A12596 | 388 | A04870 | A13369 | 188 |
| A04870 | A15258 | 311 | A04870 | A15277 | 375 |
| A04870 | A15638 | 202 | A04870 | A16171 | 388 |
| A04870 | A16174 | 380 | A04870 | A16762 | 202 |
| A04871 | A07153 | 334 | A04871 | A11437 | 433 |
| A04871 | A15336 | 326 | A04871 | A16400 | 313 |
| A04872 | A05329 | 417 | A04873 | A05439 | 163 |
| A04873 | A05944 | 345 | A04873 | A06615 | 445 |
| A04873 | A06783 | 165 | A04873 | A07062 | 268 |
| A04873 | A07442 | 369 | A04873 | A08024 | 235 |
| A04873 | A08209 | 251 | A04873 | A08831 | 226 |
| A04873 | A09038 | 226 | A04873 | A10363 | 267 |
| A04873 | A12897 | 491 | A04873 | A13162 | 221 |
| A04873 | A14299 | 301 | A04873 | A14319 | 483 |
| A04873 | A14410 | 286 | A04873 | A14650 | 196 |
| A04873 | A15322 | 288 | A04873 | A15896 | 226 |
| A04874 | A08910 | 162 | A04875 | A05494 | 411 |
| A04875 | A05945 | 293 | A04875 | A06000 | 279 |
| A04875 | A07541 | 241 | A04875 | A07653 | 364 |
| A04875 | A08739 | 357 | A04875 | A13879 | 307 |
| A04875 | A16636 | 307 | A04876 | A04944 | 350 |
| A04876 | A07848 | 288 | A04877 | A05891 | 302 |
| A04877 | A08675 | 432 | A04877 | A11617 | 246 |
| A04877 | A14236 | 396 | A04877 | A14366 | 246 |
| A04877 | A14392 | 281 | A04878 | A04889 | 385 |
| A04878 | A05065 | 273 | A04878 | A06650 | 241 |
| A04878 | A06926 | 428 | A04878 | A07173 | 241 |
| A04878 | A09428 | 332 | A04878 | A12927 | 312 |
| A04878 | A14635 | 187 | A04878 | A15241 | 402 |
| A04878 | A15395 | 245 | A04879 | A04880 | 755 |
| A04879 | A05006 | 279 | A04879 | A05463 | 188 |
| A04879 | A05905 | 188 | A04879 | A06118 | 227 |
| A04879 | A06295 | 152 | A04879 | A06298 | 137 |
| A04879 | A06359 | 227 | A04879 | A06520 | 154 |
| A04879 | A06610 | 330 | A04879 | A06821 | 185 |

|        |        |     |        |        |     |
|--------|--------|-----|--------|--------|-----|
| A04879 | A06868 | 156 | A04879 | A06979 | 177 |
| A04879 | A07135 | 486 | A04879 | A07170 | 258 |
| A04879 | A07210 | 172 | A04879 | A07335 | 213 |
| A04879 | A08280 | 477 | A04879 | A08836 | 213 |
| A04879 | A08902 | 279 | A04879 | A09125 | 319 |
| A04879 | A09435 | 188 | A04879 | A09438 | 187 |
| A04879 | A09566 | 232 | A04879 | A09723 | 371 |
| A04879 | A09879 | 229 | A04879 | A10240 | 277 |
| A04879 | A10441 | 218 | A04879 | A10866 | 232 |
| A04879 | A11483 | 272 | A04879 | A11683 | 480 |
| A04879 | A11983 | 433 | A04879 | A12554 | 249 |
| A04879 | A13314 | 227 | A04879 | A13326 | 243 |
| A04879 | A13821 | 236 | A04879 | A13965 | 322 |
| A04879 | A14208 | 434 | A04879 | A14210 | 245 |
| A04879 | A14231 | 515 | A04879 | A14268 | 188 |
| A04879 | A14426 | 177 | A04879 | A14469 | 249 |
| A04879 | A15468 | 232 | A04879 | A15472 | 182 |
| A04879 | A15495 | 196 | A04879 | A15563 | 191 |
| A04879 | A15603 | 174 | A04879 | A15916 | 335 |
| A04879 | A16216 | 452 | A04879 | A16419 | 212 |
| A04880 | A05088 | 274 | A04880 | A05102 | 162 |
| A04880 | A05216 | 439 | A04880 | A05310 | 281 |
| A04880 | A05333 | 293 | A04880 | A06041 | 346 |
| A04880 | A06358 | 271 | A04880 | A06359 | 251 |
| A04880 | A06979 | 196 | A04880 | A07061 | 257 |
| A04880 | A07135 | 425 | A04880 | A07322 | 232 |
| A04880 | A07800 | 172 | A04880 | A08280 | 477 |
| A04880 | A08770 | 260 | A04880 | A09084 | 323 |
| A04880 | A09149 | 273 | A04880 | A09566 | 249 |
| A04880 | A09879 | 246 | A04880 | A09911 | 241 |
| A04880 | A10441 | 235 | A04880 | A10523 | 299 |
| A04880 | A10866 | 249 | A04880 | A10882 | 288 |
| A04880 | A11683 | 199 | A04880 | A11983 | 428 |
| A04880 | A13135 | 271 | A04880 | A13199 | 271 |
| A04880 | A13314 | 245 | A04880 | A13326 | 260 |
| A04880 | A14208 | 433 | A04880 | A14231 | 515 |
| A04880 | A14303 | 157 | A04880 | A14489 | 176 |
| A04880 | A14647 | 193 | A04880 | A15637 | 174 |
| A04880 | A15986 | 152 | A04880 | A16034 | 199 |
| A04880 | A16419 | 229 | A04881 | A05093 | 363 |
| A04881 | A05157 | 399 | A04881 | A07152 | 195 |
| A04881 | A07756 | 193 | A04881 | A08630 | 389 |
| A04881 | A08840 | 180 | A04881 | A09732 | 252 |
| A04881 | A09733 | 180 | A04881 | A09744 | 227 |
| A04881 | A11415 | 257 | A04881 | A11784 | 311 |
| A04881 | A13826 | 323 | A04881 | A13860 | 157 |

|        |        |     |        |        |     |
|--------|--------|-----|--------|--------|-----|
| A04881 | A13899 | 191 | A04881 | A14010 | 201 |
| A04881 | A14202 | 177 | A04881 | A14379 | 218 |
| A04881 | A15292 | 466 | A04881 | A15310 | 243 |
| A04881 | A15313 | 254 | A04881 | A15317 | 193 |
| A04881 | A15331 | 232 | A04881 | A15335 | 262 |
| A04881 | A15346 | 154 | A04881 | A15349 | 215 |
| A04881 | A15352 | 454 | A04881 | A15411 | 290 |
| A04881 | A15419 | 193 | A04881 | A15452 | 382 |
| A04881 | A15454 | 257 | A04881 | A15495 | 460 |
| A04881 | A15515 | 355 | A04882 | A05731 | 457 |
| A04882 | A07218 | 236 | A04882 | A08858 | 302 |
| A04883 | A04891 | 373 | A04883 | A04927 | 491 |
| A04883 | A05014 | 268 | A04883 | A05045 | 447 |
| A04883 | A05050 | 447 | A04883 | A05051 | 479 |
| A04883 | A05098 | 226 | A04883 | A05140 | 296 |
| A04883 | A05297 | 477 | A04883 | A05330 | 246 |
| A04883 | A05331 | 317 | A04883 | A05337 | 241 |
| A04883 | A05393 | 152 | A04883 | A05416 | 191 |
| A04883 | A05418 | 172 | A04883 | A05424 | 279 |
| A04883 | A05426 | 353 | A04883 | A05433 | 353 |
| A04883 | A05451 | 307 | A04883 | A05463 | 256 |
| A04883 | A05472 | 196 | A04883 | A05550 | 216 |
| A04883 | A05573 | 472 | A04883 | A05912 | 362 |
| A04883 | A05966 | 200 | A04883 | A06405 | 490 |
| A04883 | A06439 | 488 | A04883 | A06553 | 362 |
| A04883 | A06607 | 218 | A04883 | A06629 | 182 |
| A04883 | A06630 | 254 | A04883 | A06641 | 247 |
| A04883 | A06689 | 157 | A04883 | A06847 | 271 |
| A04883 | A06855 | 296 | A04883 | A06860 | 330 |
| A04883 | A06970 | 324 | A04883 | A06994 | 293 |
| A04883 | A07027 | 245 | A04883 | A07059 | 484 |
| A04883 | A07088 | 490 | A04883 | A07109 | 311 |
| A04883 | A07230 | 436 | A04883 | A07238 | 291 |
| A04883 | A07271 | 346 | A04883 | A07366 | 313 |
| A04883 | A07408 | 302 | A04883 | A07501 | 229 |
| A04883 | A07503 | 296 | A04883 | A07520 | 446 |
| A04883 | A07553 | 157 | A04883 | A07558 | 393 |
| A04883 | A07619 | 329 | A04883 | A07634 | 180 |
| A04883 | A07674 | 272 | A04883 | A07688 | 208 |
| A04883 | A07757 | 420 | A04883 | A07800 | 152 |
| A04883 | A08133 | 139 | A04883 | A09235 | 185 |
| A04883 | A09416 | 156 | A04883 | A10156 | 199 |
| A04883 | A10444 | 238 | A04883 | A10446 | 249 |
| A04883 | A10635 | 401 | A04883 | A10656 | 352 |
| A04883 | A10658 | 281 | A04883 | A10677 | 201 |
| A04883 | A12055 | 418 | A04883 | A14193 | 199 |



|        |        |     |        |        |     |
|--------|--------|-----|--------|--------|-----|
| A04883 | A14857 | 252 | A04883 | A15874 | 152 |
| A04883 | A16277 | 236 | A04883 | A16286 | 243 |
| A04883 | A16741 | 321 | A04883 | A17006 | 389 |
| A04883 | A17078 | 308 | A04884 | A14586 | 63  |
| A04885 | A14083 | 160 | A04886 | A05018 | 466 |
| A04886 | A16111 | 440 | A04888 | A05203 | 358 |
| A04888 | A05342 | 333 | A04888 | A06295 | 187 |
| A04888 | A06764 | 363 | A04888 | A07128 | 302 |
| A04888 | A07165 | 258 | A04888 | A07191 | 351 |
| A04888 | A09058 | 330 | A04888 | A09127 | 202 |
| A04888 | A09562 | 321 | A04888 | A09643 | 252 |
| A04888 | A10018 | 369 | A04888 | A10816 | 350 |
| A04888 | A14738 | 198 | A04889 | A15241 | 399 |
| A04891 | A04927 | 443 | A04891 | A05050 | 416 |
| A04891 | A05051 | 401 | A04891 | A06405 | 438 |
| A04891 | A06638 | 433 | A04891 | A07088 | 373 |
| A04891 | A07503 | 414 | A04891 | A07757 | 389 |
| A04893 | A04896 | 346 | A04893 | A04929 | 491 |
| A04893 | A05023 | 530 | A04893 | A05201 | 290 |
| A04893 | A05233 | 525 | A04893 | A05309 | 174 |
| A04893 | A05531 | 205 | A04893 | A05692 | 303 |
| A04893 | A05710 | 319 | A04893 | A06659 | 636 |
| A04893 | A06675 | 633 | A04893 | A07521 | 154 |
| A04893 | A07833 | 177 | A04893 | A08461 | 170 |
| A04893 | A08874 | 286 | A04893 | A09050 | 407 |
| A04893 | A09277 | 156 | A04893 | A10597 | 168 |
| A04893 | A10793 | 260 | A04893 | A11184 | 157 |
| A04893 | A11303 | 334 | A04893 | A12792 | 439 |
| A04893 | A13831 | 63  | A04893 | A13844 | 510 |
| A04893 | A13846 | 334 | A04893 | A13882 | 394 |
| A04893 | A14095 | 210 | A04893 | A14182 | 334 |
| A04893 | A14247 | 308 | A04893 | A14276 | 346 |
| A04893 | A14705 | 288 | A04893 | A15498 | 366 |
| A04893 | A15621 | 340 | A04893 | A15647 | 279 |
| A04893 | A16099 | 238 | A04893 | A17062 | 144 |
| A04894 | A06011 | 477 | A04894 | A06659 | 260 |
| A04894 | A06890 | 408 | A04894 | A07820 | 324 |
| A04894 | A08400 | 324 | A04894 | A08772 | 235 |
| A04894 | A08777 | 235 | A04894 | A09326 | 235 |
| A04894 | A11326 | 207 | A04894 | A11456 | 296 |
| A04894 | A13845 | 324 | A04894 | A14247 | 310 |
| A04894 | A14471 | 179 | A04894 | A14838 | 324 |
| A04894 | A16617 | 324 | A04895 | A05198 | 215 |
| A04895 | A05839 | 430 | A04895 | A05856 | 355 |
| A04895 | A06369 | 174 | A04895 | A06746 | 346 |
| A04895 | A06959 | 249 | A04895 | A07237 | 360 |

|        |        |     |        |        |     |
|--------|--------|-----|--------|--------|-----|
| A04895 | A07350 | 367 | A04895 | A07362 | 433 |
| A04895 | A07569 | 469 | A04895 | A07599 | 439 |
| A04895 | A07744 | 369 | A04895 | A08371 | 316 |
| A04895 | A08653 | 255 | A04895 | A09616 | 396 |
| A04895 | A10199 | 286 | A04895 | A10553 | 355 |
| A04895 | A11374 | 167 | A04895 | A14699 | 297 |
| A04895 | A15375 | 229 | A04895 | A15498 | 360 |
| A04896 | A04929 | 240 | A04896 | A05233 | 240 |
| A04896 | A06659 | 409 | A04896 | A06675 | 303 |
| A04896 | A06890 | 224 | A04896 | A09043 | 326 |
| A04896 | A13831 | 79  | A04896 | A14693 | 177 |
| A04897 | A06037 | 401 | A04897 | A09234 | 337 |
| A04897 | A11303 | 413 | A04897 | A13830 | 491 |
| A04897 | A13902 | 283 | A04897 | A14247 | 491 |
| A04897 | A14461 | 157 | A04898 | A08743 | 388 |
| A04898 | A09539 | 302 | A04898 | A14216 | 174 |
| A04898 | A15624 | 335 | A04898 | A15649 | 163 |
| A04898 | A15659 | 191 | A04898 | A16088 | 341 |
| A04899 | A05321 | 419 | A04899 | A05363 | 358 |
| A04899 | A06292 | 434 | A04899 | A09464 | 356 |
| A04899 | A14199 | 247 | A04899 | A14374 | 268 |
| A04899 | A14391 | 273 | A04900 | A05288 | 460 |
| A04900 | A06597 | 162 | A04900 | A06859 | 234 |
| A04900 | A07191 | 187 | A04900 | A07422 | 322 |
| A04900 | A08942 | 151 | A04900 | A10043 | 299 |
| A04900 | A12961 | 357 | A04900 | A13826 | 346 |
| A04900 | A13873 | 358 | A04900 | A14191 | 450 |
| A04900 | A14276 | 461 | A04900 | A14379 | 382 |
| A04900 | A14408 | 216 | A04900 | A14528 | 281 |
| A04900 | A15410 | 157 | A04900 | A15696 | 183 |
| A04900 | A15743 | 176 | A04900 | A16701 | 215 |
| A04901 | A06623 | 356 | A04901 | A09243 | 260 |
| A04901 | A16300 | 263 | A04902 | A04907 | 301 |
| A04902 | A04938 | 477 | A04902 | A04942 | 481 |
| A04902 | A04945 | 152 | A04902 | A05038 | 185 |
| A04902 | A05064 | 172 | A04902 | A05278 | 490 |
| A04902 | A05450 | 213 | A04902 | A05507 | 193 |
| A04902 | A05568 | 485 | A04902 | A05569 | 165 |
| A04902 | A05589 | 188 | A04902 | A05630 | 303 |
| A04902 | A05685 | 159 | A04902 | A05693 | 485 |
| A04902 | A05719 | 301 | A04902 | A05765 | 162 |
| A04902 | A05790 | 279 | A04902 | A05791 | 183 |
| A04902 | A05832 | 491 | A04902 | A05949 | 463 |
| A04902 | A06004 | 121 | A04902 | A06221 | 311 |
| A04902 | A06248 | 281 | A04902 | A06380 | 247 |
| A04902 | A06562 | 218 | A04902 | A06697 | 180 |

|        |        |     |        |        |     |
|--------|--------|-----|--------|--------|-----|
| A04902 | A06971 | 483 | A04902 | A07186 | 154 |
| A04902 | A08207 | 440 | A04902 | A08583 | 446 |
| A04902 | A08598 | 193 | A04902 | A08628 | 361 |
| A04902 | A08709 | 210 | A04902 | A08879 | 391 |
| A04902 | A09106 | 227 | A04902 | A09242 | 408 |
| A04902 | A09501 | 281 | A04902 | A09535 | 177 |
| A04902 | A09975 | 218 | A04902 | A09988 | 479 |
| A04902 | A10069 | 227 | A04902 | A10115 | 281 |
| A04902 | A10286 | 274 | A04902 | A10552 | 330 |
| A04902 | A10555 | 262 | A04902 | A10557 | 234 |
| A04902 | A10565 | 311 | A04902 | A10625 | 276 |
| A04902 | A10668 | 188 | A04902 | A11086 | 171 |
| A04902 | A11294 | 159 | A04902 | A11369 | 171 |
| A04902 | A11693 | 235 | A04902 | A13392 | 385 |
| A04902 | A13492 | 311 | A04902 | A13858 | 180 |
| A04902 | A14127 | 484 | A04902 | A15102 | 255 |
| A04903 | A04944 | 428 | A04903 | A04964 | 293 |
| A04903 | A05075 | 347 | A04903 | A05106 | 196 |
| A04903 | A05422 | 337 | A04903 | A06106 | 368 |
| A04903 | A06162 | 200 | A04903 | A06584 | 193 |
| A04903 | A06686 | 245 | A04903 | A07754 | 179 |
| A04903 | A09065 | 394 | A04903 | A10351 | 319 |
| A04903 | A10358 | 235 | A04903 | A11020 | 353 |
| A04903 | A12524 | 378 | A04903 | A12526 | 368 |
| A04903 | A13489 | 394 | A04903 | A14247 | 230 |
| A04903 | A14633 | 154 | A04903 | A14654 | 236 |
| A04903 | A15258 | 276 | A04903 | A15277 | 215 |
| A04904 | A05094 | 333 | A04904 | A06608 | 210 |
| A04904 | A13824 | 286 | A04904 | A15495 | 221 |
| A04905 | A05036 | 368 | A04905 | A05438 | 473 |
| A04905 | A05918 | 434 | A04905 | A06607 | 160 |
| A04905 | A08446 | 416 | A04905 | A08934 | 229 |
| A04905 | A09901 | 401 | A04905 | A11023 | 240 |
| A04905 | A11149 | 266 | A04905 | A11180 | 311 |
| A04905 | A11262 | 345 | A04905 | A11547 | 419 |
| A04905 | A11665 | 346 | A04905 | A11900 | 357 |
| A04905 | A13218 | 463 | A04905 | A13609 | 162 |
| A04906 | A05113 | 273 | A04906 | A05349 | 324 |
| A04906 | A05677 | 436 | A04906 | A05920 | 378 |
| A04906 | A06247 | 291 | A04906 | A06314 | 160 |
| A04906 | A07486 | 285 | A04906 | A08070 | 236 |
| A04906 | A08209 | 288 | A04906 | A08911 | 291 |
| A04906 | A15425 | 212 | A04906 | A15674 | 324 |
| A04906 | A15911 | 291 | A04906 | A15912 | 235 |
| A04906 | A15976 | 382 | A04907 | A05114 | 329 |
| A04907 | A06868 | 321 | A04907 | A10854 | 177 |

|        |        |     |        |        |     |
|--------|--------|-----|--------|--------|-----|
| A04907 | A14637 | 243 | A04907 | A14642 | 243 |
| A04907 | A14683 | 310 | A04908 | A04970 | 344 |
| A04908 | A05122 | 235 | A04908 | A05216 | 152 |
| A04908 | A05577 | 465 | A04908 | A05756 | 85  |
| A04908 | A05760 | 152 | A04908 | A05794 | 319 |
| A04908 | A05994 | 364 | A04908 | A06339 | 446 |
| A04908 | A07129 | 168 | A04908 | A07153 | 288 |
| A04908 | A07163 | 63  | A04908 | A07187 | 455 |
| A04908 | A07201 | 490 | A04908 | A07306 | 329 |
| A04908 | A07961 | 489 | A04908 | A08715 | 389 |
| A04908 | A08732 | 157 | A04908 | A09388 | 200 |
| A04908 | A09543 | 302 | A04908 | A09545 | 488 |
| A04908 | A10247 | 65  | A04908 | A10279 | 329 |
| A04908 | A10905 | 361 | A04908 | A11126 | 364 |
| A04908 | A11332 | 152 | A04908 | A11759 | 151 |
| A04908 | A12507 | 286 | A04908 | A13001 | 364 |
| A04908 | A14077 | 165 | A04908 | A14208 | 473 |
| A04908 | A14790 | 223 | A04908 | A14830 | 196 |
| A04908 | A16371 | 171 | A04908 | A16750 | 319 |
| A04909 | A05118 | 383 | A04909 | A05120 | 335 |
| A04909 | A05122 | 235 | A04909 | A05141 | 281 |
| A04909 | A05240 | 279 | A04909 | A05575 | 358 |
| A04909 | A09017 | 364 | A04909 | A14366 | 180 |
| A04909 | A15840 | 270 | A04909 | A16738 | 151 |
| A04910 | A05480 | 428 | A04911 | A05142 | 440 |
| A04911 | A06314 | 162 | A04911 | A07564 | 398 |
| A04911 | A09573 | 490 | A04911 | A09814 | 462 |
| A04911 | A10083 | 190 | A04911 | A10754 | 277 |
| A04912 | A05487 | 425 | A04912 | A06175 | 422 |
| A04912 | A07381 | 294 | A04912 | A07471 | 291 |
| A04912 | A07541 | 279 | A04912 | A14635 | 170 |
| A04912 | A16636 | 215 | A04913 | A12383 | 235 |
| A04913 | A15498 | 160 | A04914 | A04987 | 328 |
| A04914 | A06070 | 328 | A04914 | A08194 | 221 |
| A04914 | A09202 | 451 | A04914 | A09220 | 439 |
| A04914 | A09447 | 312 | A04914 | A09888 | 329 |
| A04914 | A10021 | 318 | A04914 | A11372 | 177 |
| A04914 | A12886 | 294 | A04914 | A14210 | 307 |
| A04914 | A14583 | 466 | A04914 | A14613 | 335 |
| A04914 | A14771 | 385 | A04915 | A06447 | 445 |
| A04916 | A05410 | 408 | A04916 | A09397 | 402 |
| A04916 | A11759 | 358 | A04917 | A05533 | 344 |
| A04919 | A07440 | 456 | A04919 | A10989 | 362 |
| A04920 | A04981 | 409 | A04920 | A05389 | 413 |
| A04920 | A05390 | 393 | A04920 | A06263 | 388 |
| A04920 | A06346 | 335 | A04920 | A08040 | 401 |

|        |        |     |        |        |     |
|--------|--------|-----|--------|--------|-----|
| A04920 | A12115 | 441 | A04920 | A13258 | 441 |
| A04921 | A05186 | 447 | A04921 | A07492 | 447 |
| A04921 | A08187 | 447 | A04922 | A04996 | 294 |
| A04922 | A05032 | 374 | A04922 | A05219 | 260 |
| A04922 | A05241 | 446 | A04922 | A05274 | 433 |
| A04922 | A05377 | 291 | A04922 | A05398 | 293 |
| A04922 | A05556 | 202 | A04922 | A05854 | 427 |
| A04922 | A06934 | 329 | A04922 | A07206 | 236 |
| A04922 | A07322 | 322 | A04922 | A08708 | 382 |
| A04922 | A09012 | 479 | A04922 | A09046 | 319 |
| A04922 | A09145 | 296 | A04922 | A09509 | 324 |
| A04922 | A11132 | 235 | A04922 | A11178 | 409 |
| A04922 | A11179 | 396 | A04922 | A12371 | 313 |
| A04922 | A15341 | 313 | A04922 | A15630 | 202 |
| A04923 | A05469 | 425 | A04923 | A05731 | 455 |
| A04923 | A07218 | 216 | A04923 | A08750 | 428 |
| A04923 | A12440 | 438 | A04924 | A07158 | 281 |
| A04924 | A09127 | 283 | A04924 | A11326 | 272 |
| A04924 | A12897 | 165 | A04924 | A13853 | 391 |
| A04925 | A05288 | 154 | A04926 | A05311 | 430 |
| A04927 | A05014 | 438 | A04927 | A05045 | 347 |
| A04927 | A05050 | 477 | A04927 | A05051 | 435 |
| A04927 | A05140 | 401 | A04927 | A05313 | 215 |
| A04927 | A05315 | 912 | A04927 | A05330 | 457 |
| A04927 | A05331 | 388 | A04927 | A05337 | 427 |
| A04927 | A05358 | 473 | A04927 | A05389 | 294 |
| A04927 | A05418 | 177 | A04927 | A05420 | 355 |
| A04927 | A05433 | 355 | A04927 | A05451 | 409 |
| A04927 | A05463 | 258 | A04927 | A05472 | 200 |
| A04927 | A05548 | 441 | A04927 | A05550 | 416 |
| A04927 | A05573 | 441 | A04927 | A05615 | 294 |
| A04927 | A05757 | 230 | A04927 | A05883 | 267 |
| A04927 | A05912 | 436 | A04927 | A06046 | 254 |
| A04927 | A06402 | 296 | A04927 | A06405 | 491 |
| A04927 | A06439 | 480 | A04927 | A06553 | 363 |
| A04927 | A06629 | 185 | A04927 | A06638 | 347 |
| A04927 | A06641 | 430 | A04927 | A06689 | 430 |
| A04927 | A06847 | 386 | A04927 | A06860 | 479 |
| A04927 | A06994 | 446 | A04927 | A07027 | 369 |
| A04927 | A07059 | 477 | A04927 | A07078 | 346 |
| A04927 | A07088 | 488 | A04927 | A07109 | 180 |
| A04927 | A07205 | 345 | A04927 | A07238 | 382 |
| A04927 | A07325 | 379 | A04927 | A07336 | 296 |
| A04927 | A07408 | 407 | A04927 | A07501 | 358 |
| A04927 | A07503 | 488 | A04927 | A07520 | 489 |
| A04927 | A07558 | 180 | A04927 | A07619 | 332 |

|        |        |     |        |        |     |
|--------|--------|-----|--------|--------|-----|
| A04927 | A07674 | 462 | A04927 | A07684 | 252 |
| A04927 | A07690 | 374 | A04927 | A07723 | 279 |
| A04927 | A07757 | 234 | A04927 | A07800 | 157 |
| A04927 | A08190 | 168 | A04927 | A08667 | 385 |
| A04927 | A09126 | 234 | A04927 | A09235 | 190 |
| A04927 | A09416 | 160 | A04927 | A09837 | 311 |
| A04927 | A09846 | 383 | A04927 | A09879 | 294 |
| A04927 | A09917 | 328 | A04927 | A10156 | 201 |
| A04927 | A10424 | 305 | A04927 | A10635 | 462 |
| A04927 | A10656 | 227 | A04927 | A10675 | 328 |
| A04927 | A10679 | 274 | A04927 | A10690 | 296 |
| A04927 | A10713 | 210 | A04927 | A15320 | 154 |
| A04927 | A15506 | 899 | A04927 | A16344 | 201 |
| A04927 | A17040 | 179 | A04928 | A05264 | 285 |
| A04928 | A05274 | 429 | A04928 | A05294 | 457 |
| A04928 | A05340 | 333 | A04928 | A05603 | 177 |
| A04928 | A06069 | 263 | A04928 | A06329 | 424 |
| A04928 | A06346 | 491 | A04928 | A06574 | 491 |
| A04928 | A06710 | 475 | A04928 | A06711 | 486 |
| A04928 | A06712 | 468 | A04928 | A06731 | 204 |
| A04928 | A06953 | 286 | A04928 | A07015 | 406 |
| A04928 | A07044 | 430 | A04928 | A07119 | 475 |
| A04928 | A07218 | 446 | A04928 | A07396 | 375 |
| A04928 | A07676 | 406 | A04928 | A07704 | 486 |
| A04928 | A07705 | 490 | A04928 | A07870 | 406 |
| A04928 | A08040 | 481 | A04928 | A08202 | 369 |
| A04928 | A08203 | 420 | A04928 | A08291 | 364 |
| A04928 | A08292 | 486 | A04928 | A08496 | 467 |
| A04928 | A08510 | 406 | A04928 | A08671 | 454 |
| A04928 | A09205 | 279 | A04928 | A09518 | 440 |
| A04928 | A10900 | 391 | A04928 | A11056 | 391 |
| A04928 | A11310 | 408 | A04928 | A11320 | 319 |
| A04928 | A11328 | 411 | A04928 | A12345 | 391 |
| A04928 | A12432 | 469 | A04928 | A12434 | 451 |
| A04928 | A12435 | 469 | A04928 | A12591 | 406 |
| A04928 | A12621 | 446 | A04928 | A12748 | 406 |
| A04928 | A12845 | 346 | A04928 | A14444 | 270 |
| A04928 | A14689 | 391 | A04928 | A15336 | 377 |
| A04928 | A16068 | 296 | A04929 | A06659 | 191 |
| A04929 | A06675 | 154 | A04929 | A06890 | 340 |
| A04929 | A08188 | 328 | A04929 | A08189 | 361 |
| A04929 | A09043 | 313 | A04929 | A09277 | 180 |
| A04929 | A10317 | 180 | A04929 | A10597 | 326 |
| A04929 | A10804 | 380 | A04929 | A10809 | 324 |
| A04929 | A11303 | 353 | A04929 | A13222 | 249 |
| A04929 | A13826 | 480 | A04929 | A13831 | 65  |

|        |        |     |        |        |     |
|--------|--------|-----|--------|--------|-----|
| A04929 | A13873 | 236 | A04929 | A14056 | 130 |
| A04929 | A14276 | 368 | A04929 | A14444 | 899 |
| A04929 | A15130 | 177 | A04929 | A15346 | 249 |
| A04929 | A15621 | 355 | A04931 | A05255 | 196 |
| A04931 | A06897 | 168 | A04931 | A07881 | 422 |
| A04931 | A08228 | 305 | A04931 | A08674 | 367 |
| A04931 | A11290 | 168 | A04931 | A11344 | 190 |
| A04931 | A11400 | 201 | A04931 | A11647 | 251 |
| A04931 | A12329 | 391 | A04931 | A14216 | 380 |
| A04931 | A15416 | 165 | A04931 | A15624 | 157 |
| A04931 | A15652 | 263 | A04931 | A15659 | 357 |
| A04931 | A15660 | 463 | A04931 | A15662 | 173 |
| A04931 | A15684 | 490 | A04931 | A15746 | 470 |
| A04931 | A15918 | 374 | A04931 | A15920 | 317 |
| A04931 | A15931 | 440 | A04931 | A15936 | 318 |
| A04931 | A15937 | 401 | A04931 | A16088 | 375 |
| A04931 | A16092 | 445 | A04931 | A16095 | 183 |
| A04931 | A16218 | 339 | A04931 | A16464 | 474 |
| A04931 | A16650 | 208 | A04931 | A16768 | 312 |
| A04931 | A17026 | 340 | A04932 | A05255 | 162 |
| A04932 | A06382 | 299 | A04932 | A07046 | 156 |
| A04932 | A07076 | 193 | A04932 | A07181 | 224 |
| A04932 | A07360 | 229 | A04932 | A07397 | 491 |
| A04932 | A07822 | 156 | A04932 | A07881 | 164 |
| A04932 | A08228 | 161 | A04932 | A08548 | 156 |
| A04932 | A08674 | 156 | A04932 | A11290 | 156 |
| A04932 | A11386 | 488 | A04932 | A11918 | 156 |
| A04932 | A13846 | 199 | A04932 | A13949 | 159 |
| A04932 | A14074 | 156 | A04932 | A15595 | 273 |
| A04932 | A15624 | 538 | A04932 | A15649 | 156 |
| A04932 | A15651 | 340 | A04932 | A15652 | 192 |
| A04932 | A15660 | 347 | A04932 | A15661 | 178 |
| A04932 | A15662 | 223 | A04932 | A15684 | 489 |
| A04932 | A15720 | 156 | A04932 | A15721 | 156 |
| A04932 | A15746 | 194 | A04932 | A15917 | 156 |
| A04932 | A15918 | 207 | A04932 | A15923 | 156 |
| A04932 | A15937 | 181 | A04932 | A16088 | 197 |
| A04932 | A16092 | 171 | A04932 | A16145 | 156 |
| A04932 | A16307 | 156 | A04933 | A04940 | 418 |
| A04933 | A05866 | 475 | A04933 | A06588 | 288 |
| A04933 | A06607 | 451 | A04933 | A06860 | 308 |
| A04933 | A07158 | 249 | A04933 | A07177 | 310 |
| A04933 | A09251 | 389 | A04933 | A09556 | 256 |
| A04933 | A13152 | 396 | A04933 | A16281 | 232 |
| A04934 | A06606 | 243 | A04937 | A05020 | 308 |
| A04937 | A05102 | 401 | A04937 | A05472 | 394 |

|        |        |     |        |        |     |
|--------|--------|-----|--------|--------|-----|
| A04937 | A05699 | 377 | A04937 | A06037 | 152 |
| A04937 | A06063 | 262 | A04937 | A06358 | 279 |
| A04937 | A06599 | 218 | A04937 | A06630 | 329 |
| A04937 | A06633 | 456 | A04937 | A06634 | 363 |
| A04937 | A06931 | 402 | A04937 | A07109 | 269 |
| A04937 | A07238 | 373 | A04937 | A07267 | 308 |
| A04937 | A07746 | 334 | A04937 | A14074 | 260 |
| A04937 | A15905 | 274 | A04937 | A16048 | 160 |
| A04937 | A16741 | 193 | A04938 | A04942 | 340 |
| A04938 | A06385 | 441 | A04938 | A06658 | 418 |
| A04938 | A07436 | 204 | A04938 | A09556 | 348 |
| A04938 | A15346 | 191 | A04938 | A16453 | 184 |
| A04939 | A04999 | 266 | A04939 | A05216 | 208 |
| A04939 | A05410 | 266 | A04939 | A05449 | 182 |
| A04939 | A05639 | 466 | A04939 | A05673 | 241 |
| A04939 | A06086 | 157 | A04939 | A06592 | 159 |
| A04939 | A06606 | 463 | A04939 | A07165 | 274 |
| A04939 | A07911 | 129 | A04939 | A08175 | 296 |
| A04939 | A10087 | 188 | A04939 | A10398 | 291 |
| A04939 | A10441 | 360 | A04939 | A13872 | 172 |
| A04939 | A15498 | 344 | A04940 | A06607 | 340 |
| A04941 | A05070 | 291 | A04941 | A05072 | 369 |
| A04941 | A05810 | 288 | A04941 | A06076 | 411 |
| A04941 | A06596 | 319 | A04941 | A06648 | 230 |
| A04941 | A07818 | 190 | A04941 | A09504 | 308 |
| A04942 | A05278 | 345 | A04942 | A05791 | 290 |
| A04942 | A06697 | 363 | A04942 | A06863 | 265 |
| A04942 | A06971 | 347 | A04942 | A07190 | 234 |
| A04942 | A08628 | 389 | A04942 | A08709 | 378 |
| A04942 | A09535 | 361 | A04942 | A10286 | 283 |
| A04942 | A14127 | 177 | A04942 | A16453 | 185 |
| A04944 | A04947 | 486 | A04944 | A04964 | 491 |
| A04944 | A04972 | 364 | A04944 | A04985 | 435 |
| A04944 | A05106 | 366 | A04944 | A05245 | 204 |
| A04944 | A05288 | 302 | A04944 | A05556 | 224 |
| A04944 | A05659 | 167 | A04944 | A06100 | 488 |
| A04944 | A06106 | 337 | A04944 | A06151 | 418 |
| A04944 | A06152 | 477 | A04944 | A06227 | 451 |
| A04944 | A06313 | 457 | A04944 | A06524 | 195 |
| A04944 | A06530 | 419 | A04944 | A06535 | 463 |
| A04944 | A06606 | 260 | A04944 | A06686 | 489 |
| A04944 | A06708 | 317 | A04944 | A06720 | 311 |
| A04944 | A06739 | 299 | A04944 | A06895 | 406 |
| A04944 | A07209 | 364 | A04944 | A07282 | 413 |
| A04944 | A07310 | 457 | A04944 | A07626 | 489 |
| A04944 | A07685 | 457 | A04944 | A07815 | 396 |



|        |        |     |        |        |     |
|--------|--------|-----|--------|--------|-----|
| A04944 | A07836 | 270 | A04944 | A07837 | 350 |
| A04944 | A07868 | 369 | A04944 | A07985 | 115 |
| A04944 | A08005 | 430 | A04944 | A08006 | 369 |
| A04944 | A08009 | 424 | A04944 | A08093 | 152 |
| A04944 | A08374 | 337 | A04944 | A08386 | 457 |
| A04944 | A08387 | 457 | A04944 | A09040 | 171 |
| A04944 | A09648 | 219 | A04944 | A10647 | 337 |
| A04944 | A13369 | 217 | A04944 | A13885 | 451 |
| A04944 | A14059 | 177 | A04944 | A15232 | 369 |
| A04944 | A15336 | 182 | A04944 | A17085 | 316 |
| A04945 | A05289 | 314 | A04945 | A05334 | 159 |
| A04945 | A07331 | 383 | A04945 | A09501 | 458 |
| A04945 | A10621 | 395 | A04945 | A12138 | 199 |
| A04945 | A13392 | 362 | A04945 | A14520 | 260 |
| A04945 | A15430 | 172 | A04946 | A05288 | 363 |
| A04946 | A06608 | 262 | A04947 | A04964 | 374 |
| A04947 | A04972 | 355 | A04947 | A06100 | 224 |
| A04947 | A06227 | 451 | A04947 | A06530 | 443 |
| A04947 | A06686 | 479 | A04947 | A06893 | 401 |
| A04947 | A06894 | 396 | A04947 | A06895 | 390 |
| A04947 | A07388 | 424 | A04947 | A07526 | 407 |
| A04947 | A07815 | 256 | A04947 | A07985 | 259 |
| A04947 | A10639 | 385 | A04947 | A10647 | 407 |
| A04947 | A10648 | 401 | A04947 | A11308 | 367 |
| A04947 | A12119 | 396 | A04947 | A13885 | 429 |
| A04947 | A15932 | 168 | A04949 | A05075 | 249 |
| A04949 | A05309 | 179 | A04949 | A05418 | 628 |
| A04949 | A05422 | 234 | A04949 | A05598 | 215 |
| A04949 | A06095 | 180 | A04949 | A06554 | 561 |
| A04949 | A06599 | 534 | A04949 | A07146 | 286 |
| A04949 | A07311 | 176 | A04949 | A07706 | 308 |
| A04949 | A07713 | 241 | A04949 | A07812 | 241 |
| A04949 | A09953 | 369 | A04949 | A10140 | 351 |
| A04949 | A10276 | 327 | A04949 | A10547 | 457 |
| A04949 | A10783 | 200 | A04949 | A11240 | 247 |
| A04949 | A11925 | 281 | A04949 | A13533 | 204 |
| A04949 | A14247 | 179 | A04949 | A15058 | 167 |
| A04949 | A15624 | 274 | A04949 | A15941 | 486 |
| A04950 | A05113 | 356 | A04950 | A06414 | 390 |
| A04950 | A06415 | 272 | A04950 | A08677 | 390 |
| A04950 | A14437 | 409 | A04951 | A06247 | 374 |
| A04951 | A07146 | 396 | A04951 | A08910 | 283 |
| A04951 | A15241 | 313 | A04952 | A10625 | 246 |
| A04952 | A14444 | 283 | A04953 | A07178 | 395 |
| A04953 | A11348 | 395 | A04954 | A15639 | 307 |
| A04955 | A05767 | 246 | A04956 | A05106 | 312 |

|        |        |     |        |        |     |
|--------|--------|-----|--------|--------|-----|
| A04956 | A07140 | 307 | A04956 | A07803 | 191 |
| A04956 | A08365 | 185 | A04956 | A08660 | 338 |
| A04956 | A08667 | 363 | A04956 | A10247 | 234 |
| A04956 | A11564 | 401 | A04956 | A13970 | 202 |
| A04956 | A15644 | 241 | A04957 | A06109 | 374 |
| A04957 | A10813 | 307 | A04957 | A12383 | 151 |
| A04957 | A13604 | 372 | A04957 | A16608 | 224 |
| A04958 | A06164 | 438 | A04960 | A05008 | 229 |
| A04960 | A05015 | 308 | A04960 | A05309 | 68  |
| A04960 | A05558 | 316 | A04960 | A05911 | 439 |
| A04960 | A06055 | 185 | A04960 | A06298 | 312 |
| A04960 | A06379 | 353 | A04960 | A06454 | 205 |
| A04960 | A06574 | 195 | A04960 | A07198 | 224 |
| A04960 | A09518 | 329 | A04960 | A10156 | 388 |
| A04960 | A10742 | 390 | A04960 | A11482 | 491 |
| A04960 | A11485 | 451 | A04960 | A13302 | 286 |
| A04960 | A13848 | 337 | A04960 | A14236 | 469 |
| A04960 | A14364 | 157 | A04960 | A14387 | 263 |
| A04960 | A14588 | 312 | A04960 | A14605 | 208 |
| A04960 | A15282 | 163 | A04961 | A05349 | 208 |
| A04961 | A05810 | 317 | A04961 | A05931 | 394 |
| A04961 | A05985 | 457 | A04961 | A06499 | 367 |
| A04961 | A07031 | 271 | A04961 | A07146 | 340 |
| A04961 | A07157 | 466 | A04961 | A07173 | 260 |
| A04961 | A07479 | 303 | A04961 | A13872 | 408 |
| A04961 | A14191 | 274 | A04961 | A16354 | 398 |
| A04962 | A04965 | 486 | A04962 | A05155 | 196 |
| A04962 | A05841 | 151 | A04962 | A05876 | 188 |
| A04962 | A06254 | 154 | A04962 | A06277 | 252 |
| A04962 | A06491 | 483 | A04962 | A06665 | 173 |
| A04962 | A07006 | 285 | A04962 | A07329 | 329 |
| A04962 | A07555 | 329 | A04962 | A07922 | 219 |
| A04962 | A08705 | 302 | A04962 | A08876 | 174 |
| A04962 | A09860 | 196 | A04962 | A10159 | 452 |
| A04962 | A11068 | 234 | A04962 | A11294 | 223 |
| A04962 | A12971 | 162 | A04962 | A13030 | 329 |
| A04962 | A13274 | 302 | A04962 | A14117 | 353 |
| A04962 | A14196 | 485 | A04962 | A14246 | 671 |
| A04962 | A14454 | 480 | A04962 | A14598 | 401 |
| A04962 | A15126 | 230 | A04962 | A15296 | 274 |
| A04962 | A15297 | 383 | A04962 | A15354 | 480 |
| A04962 | A15505 | 491 | A04962 | A15599 | 154 |
| A04962 | A15606 | 462 | A04962 | A15675 | 260 |
| A04962 | A16055 | 207 | A04963 | A09509 | 340 |
| A04964 | A04972 | 481 | A04964 | A04985 | 467 |
| A04964 | A05106 | 484 | A04964 | A05155 | 374 |

|        |        |     |        |        |     |
|--------|--------|-----|--------|--------|-----|
| A04964 | A05245 | 201 | A04964 | A05288 | 490 |
| A04964 | A05601 | 322 | A04964 | A05865 | 213 |
| A04964 | A06100 | 84  | A04964 | A06106 | 335 |
| A04964 | A06151 | 348 | A04964 | A06152 | 302 |
| A04964 | A06222 | 335 | A04964 | A06364 | 254 |
| A04964 | A06511 | 369 | A04964 | A06524 | 191 |
| A04964 | A06530 | 417 | A04964 | A06533 | 238 |
| A04964 | A06535 | 278 | A04964 | A06660 | 204 |
| A04964 | A06686 | 491 | A04964 | A06721 | 469 |
| A04964 | A06844 | 450 | A04964 | A06895 | 447 |
| A04964 | A07056 | 427 | A04964 | A07163 | 446 |
| A04964 | A07337 | 417 | A04964 | A07678 | 324 |
| A04964 | A07852 | 408 | A04964 | A07858 | 369 |
| A04964 | A07903 | 177 | A04964 | A07995 | 291 |
| A04964 | A08093 | 479 | A04964 | A08172 | 413 |
| A04964 | A08274 | 458 | A04964 | A10767 | 369 |
| A04964 | A10772 | 369 | A04964 | A10861 | 347 |
| A04964 | A11299 | 259 | A04964 | A11306 | 414 |
| A04964 | A11310 | 232 | A04964 | A11336 | 302 |
| A04964 | A11389 | 490 | A04964 | A11587 | 335 |
| A04964 | A12332 | 369 | A04964 | A12522 | 302 |
| A04964 | A12675 | 307 | A04964 | A13182 | 413 |
| A04964 | A13369 | 286 | A04964 | A13665 | 173 |
| A04964 | A13885 | 351 | A04964 | A14236 | 481 |
| A04964 | A14876 | 439 | A04964 | A14985 | 369 |
| A04964 | A15241 | 185 | A04964 | A16354 | 324 |
| A04964 | A17085 | 480 | A04965 | A04996 | 212 |
| A04965 | A05177 | 303 | A04965 | A05305 | 213 |
| A04965 | A05828 | 256 | A04965 | A05931 | 323 |
| A04965 | A06465 | 340 | A04965 | A06858 | 200 |
| A04965 | A06956 | 263 | A04965 | A07127 | 218 |
| A04965 | A07148 | 240 | A04965 | A07192 | 288 |
| A04965 | A07376 | 246 | A04965 | A07801 | 316 |
| A04965 | A08250 | 263 | A04965 | A08417 | 385 |
| A04965 | A09404 | 294 | A04965 | A09469 | 217 |
| A04965 | A09748 | 218 | A04965 | A10731 | 165 |
| A04965 | A11101 | 208 | A04965 | A13181 | 419 |
| A04965 | A14023 | 316 | A04965 | A14366 | 185 |
| A04965 | A14373 | 266 | A04965 | A14377 | 254 |
| A04965 | A14385 | 299 | A04965 | A14400 | 246 |
| A04965 | A14403 | 277 | A04965 | A14404 | 227 |
| A04965 | A14444 | 168 | A04965 | A14610 | 283 |
| A04965 | A15282 | 337 | A04965 | A15342 | 245 |
| A04965 | A15343 | 182 | A04965 | A15911 | 185 |
| A04965 | A15959 | 353 | A04965 | A16072 | 356 |
| A04965 | A16075 | 329 | A04966 | A06621 | 322 |

|        |        |     |        |        |     |
|--------|--------|-----|--------|--------|-----|
| A04966 | A07163 | 193 | A04966 | A07726 | 196 |
| A04966 | A10532 | 165 | A04967 | A05874 | 452 |
| A04967 | A07694 | 452 | A04967 | A08105 | 441 |
| A04967 | A09478 | 441 | A04967 | A10223 | 445 |
| A04968 | A08864 | 363 | A04968 | A11304 | 288 |
| A04969 | A06581 | 159 | A04969 | A07135 | 201 |
| A04969 | A16215 | 369 | A04970 | A08070 | 355 |
| A04971 | A06385 | 180 | A04971 | A09195 | 368 |
| A04971 | A09443 | 268 | A04971 | A10175 | 368 |
| A04971 | A10250 | 152 | A04971 | A10478 | 388 |
| A04971 | A14266 | 157 | A04971 | A14485 | 188 |
| A04971 | A14585 | 154 | A04972 | A05031 | 401 |
| A04972 | A06364 | 355 | A04972 | A06844 | 386 |
| A04972 | A06895 | 383 | A04972 | A07056 | 475 |
| A04972 | A07678 | 396 | A04972 | A07852 | 386 |
| A04972 | A07860 | 396 | A04972 | A08322 | 419 |
| A04973 | A05767 | 229 | A04973 | A06586 | 360 |
| A04973 | A06607 | 272 | A04973 | A10735 | 314 |
| A04974 | A04975 | 449 | A04974 | A04981 | 377 |
| A04974 | A05237 | 414 | A04974 | A05390 | 430 |
| A04974 | A06263 | 427 | A04974 | A06607 | 346 |
| A04974 | A06874 | 449 | A04974 | A07808 | 424 |
| A04974 | A09072 | 324 | A04975 | A04981 | 477 |
| A04975 | A06263 | 419 | A04975 | A06607 | 389 |
| A04975 | A06622 | 312 | A04975 | A06762 | 337 |
| A04975 | A06874 | 443 | A04975 | A07135 | 185 |
| A04975 | A08746 | 313 | A04975 | A10201 | 374 |
| A04976 | A05439 | 249 | A04976 | A05533 | 310 |
| A04976 | A05992 | 343 | A04976 | A06100 | 240 |
| A04976 | A06762 | 337 | A04976 | A07815 | 270 |
| A04976 | A09245 | 311 | A04976 | A09480 | 468 |
| A04977 | A05243 | 268 | A04977 | A05353 | 301 |
| A04977 | A05624 | 374 | A04977 | A06111 | 414 |
| A04977 | A06183 | 399 | A04977 | A06203 | 433 |
| A04977 | A06654 | 483 | A04977 | A06689 | 489 |
| A04977 | A06970 | 458 | A04977 | A07192 | 215 |
| A04977 | A07267 | 247 | A04977 | A07277 | 374 |
| A04977 | A08984 | 241 | A04977 | A09373 | 360 |
| A04977 | A09374 | 302 | A04977 | A10150 | 374 |
| A04977 | A10172 | 366 | A04977 | A12358 | 374 |
| A04977 | A13930 | 285 | A04977 | A14524 | 371 |
| A04977 | A14537 | 399 | A04977 | A14549 | 337 |
| A04977 | A14803 | 418 | A04977 | A16418 | 224 |
| A04979 | A05712 | 371 | A04979 | A07135 | 269 |
| A04980 | A04999 | 457 | A04980 | A09441 | 405 |
| A04980 | A14198 | 226 | A04981 | A05184 | 420 |

|        |        |     |        |        |     |
|--------|--------|-----|--------|--------|-----|
| A04981 | A05389 | 356 | A04981 | A05390 | 414 |
| A04981 | A06263 | 489 | A04981 | A06607 | 439 |
| A04981 | A06874 | 363 | A04981 | A08746 | 291 |
| A04981 | A09072 | 944 | A04981 | A10757 | 372 |
| A04981 | A12115 | 409 | A04981 | A13258 | 409 |
| A04981 | A14405 | 273 | A04981 | A14440 | 255 |
| A04982 | A07206 | 281 | A04982 | A09124 | 204 |
| A04982 | A09900 | 316 | A04982 | A14366 | 213 |
| A04984 | A04994 | 452 | A04985 | A05106 | 283 |
| A04985 | A05288 | 363 | A04985 | A05601 | 489 |
| A04985 | A06313 | 433 | A04985 | A06530 | 491 |
| A04985 | A06686 | 462 | A04985 | A06719 | 243 |
| A04985 | A06720 | 316 | A04985 | A06721 | 324 |
| A04985 | A06958 | 310 | A04985 | A06997 | 314 |
| A04985 | A07626 | 228 | A04985 | A07806 | 353 |
| A04985 | A08093 | 265 | A04985 | A08181 | 374 |
| A04985 | A08224 | 450 | A04985 | A08417 | 167 |
| A04985 | A08859 | 254 | A04985 | A10024 | 435 |
| A04985 | A10612 | 337 | A04985 | A11020 | 323 |
| A04985 | A11306 | 224 | A04985 | A11389 | 274 |
| A04985 | A11982 | 393 | A04985 | A12853 | 212 |
| A04985 | A13885 | 232 | A04985 | A14299 | 171 |
| A04985 | A14602 | 374 | A04985 | A14611 | 196 |
| A04985 | A15495 | 479 | A04985 | A15557 | 160 |
| A04985 | A15917 | 200 | A04985 | A16022 | 152 |
| A04986 | A14366 | 323 | A04987 | A06092 | 281 |
| A04987 | A07442 | 236 | A04987 | A14381 | 288 |
| A04987 | A14583 | 360 | A04987 | A15352 | 187 |
| A04987 | A15422 | 469 | A04987 | A15809 | 251 |
| A04987 | A16152 | 327 | A04988 | A05001 | 335 |
| A04988 | A05298 | 378 | A04988 | A05418 | 249 |
| A04988 | A05525 | 348 | A04988 | A05838 | 235 |
| A04988 | A06813 | 314 | A04988 | A06814 | 319 |
| A04988 | A07726 | 491 | A04988 | A09271 | 441 |
| A04988 | A10156 | 245 | A04988 | A10506 | 185 |
| A04988 | A12988 | 252 | A04988 | A13579 | 385 |
| A04989 | A05136 | 456 | A04989 | A07218 | 151 |
| A04989 | A13824 | 159 | A04989 | A14399 | 199 |
| A04989 | A14647 | 353 | A04990 | A06037 | 401 |
| A04990 | A08473 | 458 | A04990 | A09514 | 456 |
| A04990 | A10288 | 407 | A04990 | A11353 | 388 |
| A04990 | A12824 | 151 | A04991 | A05082 | 157 |
| A04991 | A05854 | 423 | A04991 | A09127 | 179 |
| A04991 | A09504 | 296 | A04991 | A10894 | 224 |
| A04991 | A13734 | 204 | A04991 | A13997 | 176 |
| A04991 | A14366 | 154 | A04991 | A14390 | 308 |

|        |        |     |        |        |     |
|--------|--------|-----|--------|--------|-----|
| A04991 | A14426 | 286 | A04991 | A14524 | 269 |
| A04991 | A15281 | 332 | A04992 | A07165 | 223 |
| A04992 | A07218 | 170 | A04992 | A08861 | 326 |
| A04993 | A05259 | 382 | A04993 | A12674 | 411 |
| A04993 | A14198 | 196 | A04993 | A16595 | 408 |
| A04995 | A05007 | 356 | A04995 | A05102 | 247 |
| A04995 | A05310 | 235 | A04995 | A05393 | 188 |
| A04995 | A05416 | 238 | A04995 | A05472 | 232 |
| A04995 | A05573 | 229 | A04995 | A05713 | 402 |
| A04995 | A05754 | 366 | A04995 | A05759 | 439 |
| A04995 | A05772 | 327 | A04995 | A05774 | 414 |
| A04995 | A05901 | 353 | A04995 | A06252 | 306 |
| A04995 | A06358 | 467 | A04995 | A06359 | 210 |
| A04995 | A06402 | 321 | A04995 | A06439 | 205 |
| A04995 | A06635 | 193 | A04995 | A06668 | 424 |
| A04995 | A06692 | 332 | A04995 | A06700 | 490 |
| A04995 | A06744 | 246 | A04995 | A06756 | 369 |
| A04995 | A06847 | 301 | A04995 | A06912 | 290 |
| A04995 | A06916 | 317 | A04995 | A07080 | 232 |
| A04995 | A07088 | 229 | A04995 | A07109 | 475 |
| A04995 | A07122 | 414 | A04995 | A07132 | 297 |
| A04995 | A07256 | 419 | A04995 | A07267 | 260 |
| A04995 | A07304 | 457 | A04995 | A07413 | 447 |
| A04995 | A07424 | 327 | A04995 | A07477 | 227 |
| A04995 | A07530 | 404 | A04995 | A07554 | 327 |
| A04995 | A07684 | 283 | A04995 | A07688 | 481 |
| A04995 | A07710 | 154 | A04995 | A08197 | 301 |
| A04995 | A08366 | 276 | A04995 | A08688 | 290 |
| A04995 | A08751 | 329 | A04995 | A10550 | 321 |
| A04995 | A10677 | 236 | A04995 | A13874 | 180 |
| A04995 | A14643 | 180 | A04995 | A15840 | 236 |
| A04995 | A16002 | 154 | A04995 | A16026 | 270 |
| A04995 | A16028 | 400 | A04995 | A16741 | 263 |
| A04996 | A05113 | 249 | A04996 | A05264 | 293 |
| A04996 | A05287 | 408 | A04996 | A05299 | 302 |
| A04996 | A05367 | 429 | A04996 | A05551 | 386 |
| A04996 | A05901 | 362 | A04996 | A06171 | 386 |
| A04996 | A06581 | 185 | A04996 | A06949 | 184 |
| A04996 | A07205 | 486 | A04996 | A08704 | 366 |
| A04996 | A10197 | 332 | A04996 | A11759 | 374 |
| A04996 | A13250 | 218 | A04996 | A15266 | 255 |
| A04996 | A15809 | 179 | A04996 | A17123 | 179 |
| A04997 | A05288 | 154 | A04997 | A15271 | 413 |
| A04997 | A15279 | 438 | A04998 | A05006 | 337 |
| A04998 | A05471 | 357 | A04998 | A07080 | 454 |
| A04998 | A07288 | 391 | A04998 | A15874 | 288 |

|        |        |     |        |        |     |
|--------|--------|-----|--------|--------|-----|
| A04998 | A16027 | 294 | A04999 | A05673 | 369 |
| A04999 | A09441 | 443 | A05000 | A07066 | 427 |
| A05000 | A07743 | 438 | A05000 | A10511 | 425 |
| A05000 | A15630 | 347 | A05001 | A05767 | 185 |
| A05001 | A08911 | 322 | A05001 | A09950 | 427 |
| A05001 | A11317 | 358 | A05001 | A12019 | 411 |
| A05001 | A12371 | 355 | A05001 | A13484 | 307 |
| A05002 | A05450 | 344 | A05002 | A06531 | 313 |
| A05002 | A07209 | 168 | A05002 | A09977 | 283 |
| A05002 | A12897 | 279 | A05002 | A14229 | 188 |
| A05002 | A14399 | 193 | A05002 | A15349 | 188 |
| A05003 | A05288 | 154 | A05003 | A06313 | 405 |
| A05003 | A13879 | 358 | A05004 | A05044 | 313 |
| A05004 | A06762 | 301 | A05004 | A07209 | 221 |
| A05004 | A08921 | 438 | A05004 | A09808 | 394 |
| A05004 | A10337 | 259 | A05004 | A11287 | 210 |
| A05004 | A11405 | 180 | A05004 | A14247 | 274 |
| A05004 | A14390 | 328 | A05004 | A15649 | 152 |
| A05005 | A06289 | 905 | A05005 | A06601 | 252 |
| A05005 | A07311 | 899 | A05005 | A09487 | 313 |
| A05005 | A11694 | 252 | A05005 | A11943 | 223 |
| A05005 | A16145 | 208 | A05006 | A05007 | 215 |
| A05006 | A05020 | 456 | A05006 | A05102 | 360 |
| A05006 | A05310 | 475 | A05006 | A05471 | 269 |
| A05006 | A05600 | 446 | A05006 | A05753 | 438 |
| A05006 | A05754 | 435 | A05006 | A06359 | 489 |
| A05006 | A06428 | 179 | A05006 | A06700 | 201 |
| A05006 | A07080 | 218 | A05006 | A07109 | 200 |
| A05006 | A07122 | 347 | A05006 | A07238 | 314 |
| A05006 | A07239 | 356 | A05006 | A07288 | 327 |
| A05006 | A07520 | 294 | A05006 | A07590 | 205 |
| A05006 | A07973 | 218 | A05006 | A10506 | 160 |
| A05006 | A11431 | 180 | A05006 | A13154 | 358 |
| A05006 | A14483 | 252 | A05006 | A14827 | 224 |
| A05006 | A15282 | 229 | A05006 | A15874 | 307 |
| A05006 | A15905 | 205 | A05006 | A16026 | 258 |
| A05006 | A16027 | 457 | A05006 | A16741 | 246 |
| A05007 | A05094 | 215 | A05007 | A05098 | 224 |
| A05007 | A05102 | 446 | A05007 | A05112 | 455 |
| A05007 | A05310 | 405 | A05007 | A05337 | 240 |
| A05007 | A05416 | 468 | A05007 | A05418 | 170 |
| A05007 | A05471 | 247 | A05007 | A05472 | 461 |
| A05007 | A05515 | 268 | A05007 | A05516 | 360 |
| A05007 | A05573 | 193 | A05007 | A05600 | 274 |
| A05007 | A05659 | 208 | A05007 | A05699 | 321 |
| A05007 | A05738 | 251 | A05007 | A05751 | 235 |

|        |        |     |        |        |     |
|--------|--------|-----|--------|--------|-----|
| A05007 | A05755 | 389 | A05007 | A05759 | 477 |
| A05007 | A05772 | 402 | A05007 | A05774 | 398 |
| A05007 | A05788 | 389 | A05007 | A06088 | 401 |
| A05007 | A06089 | 424 | A05007 | A06098 | 334 |
| A05007 | A06252 | 274 | A05007 | A06358 | 477 |
| A05007 | A06359 | 173 | A05007 | A06630 | 374 |
| A05007 | A06632 | 321 | A05007 | A06633 | 249 |
| A05007 | A06635 | 288 | A05007 | A06668 | 409 |
| A05007 | A06689 | 461 | A05007 | A06700 | 177 |
| A05007 | A06744 | 196 | A05007 | A06756 | 480 |
| A05007 | A06912 | 258 | A05007 | A06934 | 286 |
| A05007 | A06970 | 472 | A05007 | A06979 | 245 |
| A05007 | A07002 | 329 | A05007 | A07080 | 328 |
| A05007 | A07109 | 457 | A05007 | A07122 | 491 |
| A05007 | A07238 | 452 | A05007 | A07256 | 477 |
| A05007 | A07267 | 353 | A05007 | A07322 | 277 |
| A05007 | A07413 | 477 | A05007 | A07477 | 460 |
| A05007 | A07520 | 269 | A05007 | A07530 | 269 |
| A05007 | A07553 | 288 | A05007 | A07554 | 299 |
| A05007 | A07558 | 177 | A05007 | A07590 | 396 |
| A05007 | A07688 | 338 | A05007 | A07736 | 423 |
| A05007 | A07800 | 446 | A05007 | A07823 | 334 |
| A05007 | A07847 | 221 | A05007 | A07973 | 472 |
| A05007 | A08108 | 235 | A05007 | A08751 | 405 |
| A05007 | A09381 | 260 | A05007 | A10027 | 389 |
| A05007 | A10121 | 329 | A05007 | A10420 | 240 |
| A05007 | A10456 | 270 | A05007 | A10536 | 389 |
| A05007 | A10550 | 291 | A05007 | A10656 | 221 |
| A05007 | A10657 | 229 | A05007 | A10658 | 441 |
| A05007 | A10681 | 385 | A05007 | A10702 | 430 |
| A05007 | A10714 | 167 | A05007 | A10880 | 372 |
| A05007 | A11309 | 156 | A05007 | A13326 | 302 |
| A05007 | A14337 | 321 | A05007 | A14803 | 199 |
| A05007 | A14827 | 296 | A05007 | A15497 | 157 |
| A05007 | A15874 | 422 | A05007 | A15905 | 469 |
| A05007 | A15970 | 265 | A05007 | A16026 | 235 |
| A05007 | A16027 | 379 | A05007 | A16959 | 334 |
| A05007 | A17006 | 274 | A05007 | A17089 | 277 |
| A05008 | A05009 | 980 | A05008 | A05015 | 758 |
| A05008 | A05428 | 708 | A05008 | A05625 | 702 |
| A05008 | A05880 | 369 | A05008 | A05885 | 252 |
| A05008 | A05891 | 241 | A05008 | A05892 | 477 |
| A05008 | A06143 | 378 | A05008 | A06176 | 490 |
| A05008 | A06348 | 486 | A05008 | A06379 | 463 |
| A05008 | A06572 | 489 | A05008 | A06588 | 180 |
| A05008 | A06603 | 326 | A05008 | A06661 | 174 |



|        |        |     |        |        |     |
|--------|--------|-----|--------|--------|-----|
| A05008 | A06680 | 154 | A05008 | A06715 | 491 |
| A05008 | A06830 | 374 | A05008 | A06919 | 213 |
| A05008 | A07269 | 286 | A05008 | A07313 | 191 |
| A05008 | A07422 | 255 | A05008 | A07433 | 486 |
| A05008 | A07762 | 276 | A05008 | A08126 | 467 |
| A05008 | A08157 | 224 | A05008 | A08184 | 433 |
| A05008 | A08185 | 177 | A05008 | A08536 | 650 |
| A05008 | A08549 | 484 | A05008 | A08561 | 446 |
| A05008 | A08571 | 769 | A05008 | A08746 | 182 |
| A05008 | A08839 | 488 | A05008 | A08853 | 424 |
| A05008 | A08854 | 457 | A05008 | A08858 | 945 |
| A05008 | A08885 | 480 | A05008 | A08894 | 396 |
| A05008 | A09195 | 241 | A05008 | A09256 | 456 |
| A05008 | A09397 | 171 | A05008 | A09434 | 350 |
| A05008 | A09448 | 208 | A05008 | A09457 | 267 |
| A05008 | A09793 | 414 | A05008 | A10175 | 240 |
| A05008 | A10619 | 204 | A05008 | A11053 | 286 |
| A05008 | A11156 | 191 | A05008 | A11298 | 160 |
| A05008 | A11369 | 899 | A05008 | A11548 | 183 |
| A05008 | A11668 | 273 | A05008 | A11675 | 333 |
| A05008 | A11676 | 481 | A05008 | A12047 | 364 |
| A05008 | A12258 | 168 | A05008 | A12275 | 205 |
| A05008 | A12401 | 398 | A05008 | A12727 | 430 |
| A05008 | A13848 | 252 | A05008 | A13917 | 263 |
| A05008 | A14037 | 488 | A05008 | A14192 | 523 |
| A05008 | A14227 | 366 | A05008 | A14263 | 488 |
| A05008 | A14270 | 477 | A05008 | A14278 | 361 |
| A05008 | A14279 | 474 | A05008 | A14291 | 252 |
| A05008 | A14294 | 332 | A05008 | A14310 | 450 |
| A05008 | A14474 | 462 | A05008 | A14540 | 221 |
| A05008 | A14577 | 168 | A05008 | A14633 | 193 |
| A05008 | A14643 | 439 | A05008 | A15533 | 184 |
| A05008 | A15726 | 572 | A05008 | A16387 | 297 |
| A05009 | A05015 | 490 | A05009 | A05383 | 238 |
| A05009 | A05428 | 318 | A05009 | A05625 | 283 |
| A05009 | A05854 | 171 | A05009 | A05892 | 454 |
| A05009 | A05894 | 219 | A05009 | A06258 | 251 |
| A05009 | A06348 | 452 | A05009 | A06379 | 409 |
| A05009 | A06506 | 249 | A05009 | A06602 | 430 |
| A05009 | A06606 | 401 | A05009 | A06608 | 152 |
| A05009 | A06715 | 223 | A05009 | A06830 | 160 |
| A05009 | A06991 | 152 | A05009 | A07218 | 182 |
| A05009 | A07433 | 564 | A05009 | A07762 | 288 |
| A05009 | A08184 | 241 | A05009 | A08352 | 418 |
| A05009 | A08360 | 238 | A05009 | A08494 | 172 |
| A05009 | A08536 | 346 | A05009 | A08571 | 503 |

|        |        |     |        |        |     |
|--------|--------|-----|--------|--------|-----|
| A05009 | A08839 | 837 | A05009 | A08853 | 396 |
| A05009 | A08854 | 352 | A05009 | A08858 | 959 |
| A05009 | A08885 | 361 | A05009 | A08894 | 436 |
| A05009 | A08986 | 151 | A05009 | A09052 | 490 |
| A05009 | A09195 | 152 | A05009 | A09443 | 288 |
| A05009 | A09761 | 236 | A05009 | A10022 | 230 |
| A05009 | A10175 | 469 | A05009 | A10580 | 484 |
| A05009 | A10619 | 449 | A05009 | A10905 | 162 |
| A05009 | A11104 | 412 | A05009 | A11138 | 418 |
| A05009 | A11283 | 168 | A05009 | A11570 | 162 |
| A05009 | A11656 | 307 | A05009 | A11662 | 207 |
| A05009 | A11771 | 170 | A05009 | A11777 | 207 |
| A05009 | A12044 | 319 | A05009 | A12047 | 491 |
| A05009 | A12533 | 477 | A05009 | A12552 | 249 |
| A05009 | A12582 | 319 | A05009 | A13391 | 159 |
| A05009 | A13924 | 388 | A05009 | A14037 | 232 |
| A05009 | A14127 | 337 | A05009 | A14156 | 936 |
| A05009 | A14227 | 485 | A05009 | A14291 | 458 |
| A05009 | A14294 | 207 | A05009 | A14306 | 249 |
| A05009 | A14307 | 274 | A05009 | A14309 | 391 |
| A05009 | A14310 | 452 | A05009 | A14437 | 198 |
| A05009 | A14509 | 327 | A05009 | A14713 | 202 |
| A05009 | A15037 | 238 | A05009 | A15506 | 180 |
| A05009 | A15533 | 297 | A05009 | A15726 | 563 |
| A05009 | A16517 | 338 | A05009 | A16605 | 249 |
| A05011 | A07258 | 411 | A05011 | A08357 | 270 |
| A05011 | A10917 | 416 | A05014 | A05140 | 348 |
| A05014 | A05330 | 409 | A05014 | A05331 | 171 |
| A05014 | A05337 | 307 | A05014 | A05418 | 291 |
| A05014 | A05433 | 390 | A05014 | A05451 | 358 |
| A05014 | A05550 | 395 | A05014 | A05573 | 267 |
| A05014 | A05883 | 455 | A05014 | A05912 | 452 |
| A05014 | A06629 | 256 | A05014 | A06641 | 411 |
| A05014 | A06847 | 456 | A05014 | A06970 | 177 |
| A05014 | A06994 | 429 | A05014 | A07027 | 408 |
| A05014 | A07059 | 374 | A05014 | A07325 | 380 |
| A05014 | A07408 | 433 | A05014 | A07501 | 401 |
| A05014 | A07553 | 234 | A05014 | A07619 | 374 |
| A05014 | A07674 | 347 | A05014 | A07723 | 334 |
| A05014 | A07933 | 177 | A05014 | A08238 | 334 |
| A05014 | A08372 | 191 | A05014 | A10190 | 396 |
| A05014 | A10395 | 213 | A05014 | A16002 | 193 |
| A05014 | A16103 | 329 | A05014 | A16739 | 307 |
| A05014 | A16741 | 174 | A05015 | A05062 | 70  |
| A05015 | A05219 | 180 | A05015 | A05243 | 234 |
| A05015 | A05340 | 308 | A05015 | A05428 | 738 |

|        |        |     |        |        |     |
|--------|--------|-----|--------|--------|-----|
| A05015 | A05561 | 312 | A05015 | A05593 | 173 |
| A05015 | A05639 | 213 | A05015 | A05641 | 160 |
| A05015 | A05739 | 324 | A05015 | A05777 | 221 |
| A05015 | A05891 | 235 | A05015 | A05990 | 238 |
| A05015 | A06069 | 445 | A05015 | A06070 | 469 |
| A05015 | A06143 | 465 | A05015 | A06176 | 491 |
| A05015 | A06293 | 271 | A05015 | A06329 | 317 |
| A05015 | A06346 | 314 | A05015 | A06348 | 491 |
| A05015 | A06379 | 454 | A05015 | A06572 | 188 |
| A05015 | A06574 | 303 | A05015 | A06603 | 321 |
| A05015 | A06615 | 383 | A05015 | A06731 | 363 |
| A05015 | A06887 | 338 | A05015 | A06919 | 423 |
| A05015 | A07010 | 238 | A05015 | A07083 | 367 |
| A05015 | A07218 | 374 | A05015 | A07269 | 283 |
| A05015 | A07425 | 66  | A05015 | A07433 | 475 |
| A05015 | A07529 | 308 | A05015 | A07605 | 163 |
| A05015 | A07706 | 180 | A05015 | A07764 | 156 |
| A05015 | A07784 | 283 | A05015 | A07834 | 406 |
| A05015 | A07969 | 283 | A05015 | A08157 | 348 |
| A05015 | A08520 | 207 | A05015 | A08571 | 976 |
| A05015 | A08839 | 441 | A05015 | A08876 | 238 |
| A05015 | A08885 | 486 | A05015 | A09256 | 491 |
| A05015 | A09397 | 167 | A05015 | A09434 | 162 |
| A05015 | A09448 | 306 | A05015 | A09457 | 263 |
| A05015 | A09728 | 247 | A05015 | A09731 | 263 |
| A05015 | A09829 | 112 | A05015 | A10602 | 176 |
| A05015 | A10824 | 156 | A05015 | A10839 | 156 |
| A05015 | A10853 | 212 | A05015 | A10894 | 245 |
| A05015 | A11027 | 154 | A05015 | A11039 | 277 |
| A05015 | A11070 | 207 | A05015 | A11105 | 163 |
| A05015 | A11258 | 484 | A05015 | A11298 | 156 |
| A05015 | A11319 | 302 | A05015 | A11327 | 271 |
| A05015 | A11388 | 283 | A05015 | A11477 | 462 |
| A05015 | A11481 | 263 | A05015 | A11482 | 257 |
| A05015 | A11548 | 179 | A05015 | A11566 | 249 |
| A05015 | A11675 | 485 | A05015 | A12049 | 173 |
| A05015 | A12207 | 229 | A05015 | A12273 | 347 |
| A05015 | A12275 | 201 | A05015 | A12412 | 179 |
| A05015 | A12534 | 229 | A05015 | A12622 | 312 |
| A05015 | A12740 | 312 | A05015 | A12936 | 238 |
| A05015 | A12952 | 198 | A05015 | A13832 | 154 |
| A05015 | A13848 | 249 | A05015 | A13977 | 149 |
| A05015 | A13978 | 486 | A05015 | A14226 | 173 |
| A05015 | A14279 | 379 | A05015 | A14353 | 191 |
| A05015 | A14457 | 290 | A05015 | A14474 | 481 |
| A05015 | A14540 | 270 | A05015 | A14633 | 182 |

|        |        |     |        |        |     |
|--------|--------|-----|--------|--------|-----|
| A05015 | A14689 | 430 | A05015 | A14713 | 191 |
| A05015 | A14719 | 221 | A05015 | A14746 | 356 |
| A05015 | A15069 | 249 | A05015 | A15606 | 204 |
| A05015 | A15608 | 375 | A05015 | A15678 | 429 |
| A05015 | A15726 | 486 | A05015 | A15926 | 265 |
| A05015 | A16062 | 343 | A05015 | A16387 | 160 |
| A05015 | A17002 | 183 | A05016 | A06162 | 236 |
| A05016 | A06288 | 240 | A05016 | A07346 | 296 |
| A05016 | A08062 | 313 | A05016 | A08698 | 229 |
| A05016 | A08863 | 167 | A05016 | A08944 | 163 |
| A05016 | A09243 | 491 | A05016 | A13322 | 190 |
| A05016 | A14127 | 490 | A05016 | A14644 | 460 |
| A05016 | A16323 | 205 | A05017 | A06425 | 334 |
| A05017 | A06827 | 334 | A05017 | A07531 | 334 |
| A05017 | A07572 | 241 | A05017 | A07887 | 210 |
| A05017 | A08201 | 334 | A05017 | A15624 | 353 |
| A05017 | A15651 | 334 | A05017 | A15750 | 334 |
| A05017 | A15917 | 334 | A05017 | A15932 | 334 |
| A05017 | A15937 | 334 | A05018 | A16111 | 445 |
| A05019 | A06543 | 218 | A05019 | A10425 | 167 |
| A05019 | A14597 | 190 | A05020 | A05310 | 468 |
| A05020 | A06086 | 240 | A05020 | A06359 | 791 |
| A05020 | A06360 | 339 | A05020 | A06473 | 358 |
| A05020 | A06773 | 305 | A05020 | A07080 | 228 |
| A05020 | A07135 | 213 | A05020 | A07247 | 160 |
| A05020 | A07256 | 326 | A05020 | A07288 | 333 |
| A05020 | A07413 | 210 | A05020 | A11431 | 190 |
| A05020 | A14196 | 263 | A05020 | A16026 | 266 |
| A05021 | A05690 | 221 | A05022 | A05644 | 483 |
| A05022 | A05891 | 327 | A05022 | A06684 | 438 |
| A05022 | A07513 | 438 | A05022 | A07774 | 438 |
| A05022 | A07945 | 438 | A05022 | A08153 | 438 |
| A05022 | A10095 | 396 | A05022 | A10292 | 438 |
| A05022 | A10641 | 438 | A05022 | A11313 | 329 |
| A05023 | A05233 | 453 | A05023 | A06659 | 334 |
| A05023 | A06675 | 633 | A05023 | A07145 | 202 |
| A05023 | A07180 | 172 | A05023 | A07820 | 129 |
| A05023 | A09043 | 414 | A05023 | A09050 | 334 |
| A05023 | A09752 | 156 | A05023 | A09952 | 288 |
| A05023 | A10897 | 305 | A05023 | A11256 | 399 |
| A05023 | A11337 | 296 | A05023 | A13844 | 334 |
| A05023 | A13846 | 454 | A05023 | A13855 | 137 |
| A05023 | A13887 | 340 | A05023 | A14182 | 544 |
| A05023 | A17062 | 176 | A05024 | A05233 | 218 |
| A05024 | A05638 | 269 | A05024 | A06011 | 269 |
| A05024 | A06675 | 281 | A05024 | A06941 | 176 |

|        |        |     |        |        |     |
|--------|--------|-----|--------|--------|-----|
| A05024 | A07203 | 640 | A05024 | A07253 | 228 |
| A05024 | A08461 | 195 | A05024 | A08484 | 552 |
| A05024 | A08506 | 127 | A05024 | A09326 | 269 |
| A05024 | A10584 | 179 | A05024 | A10655 | 162 |
| A05024 | A10803 | 534 | A05024 | A11279 | 269 |
| A05024 | A11303 | 417 | A05024 | A12792 | 291 |
| A05024 | A13831 | 279 | A05024 | A13837 | 240 |
| A05024 | A13895 | 269 | A05024 | A13902 | 157 |
| A05024 | A14056 | 408 | A05024 | A14182 | 269 |
| A05024 | A14247 | 681 | A05024 | A14249 | 210 |
| A05024 | A14272 | 457 | A05024 | A14661 | 587 |
| A05024 | A14711 | 269 | A05024 | A14783 | 269 |
| A05025 | A06543 | 488 | A05025 | A07436 | 154 |
| A05025 | A07481 | 274 | A05025 | A10532 | 257 |
| A05025 | A12903 | 400 | A05025 | A15469 | 316 |
| A05026 | A05330 | 425 | A05026 | A05424 | 380 |
| A05026 | A05659 | 412 | A05026 | A06970 | 348 |
| A05027 | A06803 | 168 | A05027 | A07203 | 420 |
| A05027 | A07894 | 224 | A05027 | A08818 | 198 |
| A05027 | A09333 | 544 | A05027 | A09712 | 243 |
| A05027 | A13902 | 119 | A05027 | A14006 | 485 |
| A05027 | A14196 | 263 | A05027 | A14451 | 196 |
| A05027 | A14655 | 488 | A05027 | A15498 | 332 |
| A05027 | A16228 | 224 | A05028 | A05222 | 168 |
| A05028 | A05233 | 179 | A05028 | A06099 | 469 |
| A05028 | A07820 | 409 | A05028 | A08198 | 185 |
| A05028 | A08205 | 405 | A05028 | A08765 | 74  |
| A05028 | A08772 | 490 | A05028 | A09031 | 226 |
| A05028 | A09326 | 491 | A05028 | A09333 | 188 |
| A05028 | A09609 | 173 | A05028 | A10663 | 430 |
| A05028 | A10798 | 260 | A05028 | A11234 | 173 |
| A05028 | A11279 | 154 | A05028 | A11456 | 193 |
| A05028 | A11939 | 177 | A05028 | A13222 | 449 |
| A05028 | A13604 | 204 | A05028 | A13830 | 456 |
| A05028 | A13832 | 152 | A05028 | A13845 | 491 |
| A05028 | A13874 | 63  | A05028 | A14182 | 385 |
| A05028 | A14247 | 491 | A05028 | A14661 | 229 |
| A05028 | A14838 | 218 | A05028 | A15552 | 160 |
| A05028 | A15560 | 399 | A05028 | A15962 | 251 |
| A05028 | A16370 | 260 | A05028 | A16617 | 219 |
| A05028 | A16695 | 199 | A05028 | A16707 | 246 |
| A05028 | A16815 | 188 | A05028 | A16821 | 491 |
| A05029 | A06572 | 63  | A05029 | A07378 | 334 |
| A05029 | A07422 | 937 | A05029 | A07814 | 358 |
| A05029 | A09009 | 251 | A05029 | A09591 | 334 |
| A05029 | A09600 | 152 | A05029 | A09606 | 177 |

|        |        |     |        |        |     |
|--------|--------|-----|--------|--------|-----|
| A05029 | A09657 | 223 | A05029 | A10459 | 165 |
| A05029 | A10681 | 162 | A05029 | A11668 | 165 |
| A05029 | A13527 | 281 | A05029 | A13667 | 246 |
| A05029 | A13975 | 319 | A05029 | A13989 | 899 |
| A05029 | A14178 | 334 | A05029 | A14196 | 396 |
| A05029 | A14199 | 405 | A05029 | A14208 | 485 |
| A05029 | A14443 | 899 | A05029 | A14468 | 228 |
| A05029 | A15250 | 254 | A05029 | A15696 | 152 |
| A05029 | A16497 | 174 | A05029 | A16722 | 160 |
| A05029 | A17088 | 334 | A05030 | A09121 | 362 |
| A05030 | A16003 | 425 | A05032 | A05114 | 241 |
| A05032 | A05219 | 213 | A05032 | A05247 | 252 |
| A05032 | A05283 | 326 | A05032 | A05296 | 319 |
| A05032 | A06247 | 419 | A05032 | A06597 | 480 |
| A05032 | A06858 | 240 | A05032 | A07001 | 215 |
| A05032 | A07128 | 371 | A05032 | A07206 | 188 |
| A05032 | A07399 | 188 | A05032 | A08022 | 210 |
| A05032 | A08692 | 243 | A05032 | A08910 | 202 |
| A05032 | A09018 | 290 | A05032 | A09703 | 235 |
| A05032 | A10201 | 302 | A05032 | A11178 | 391 |
| A05032 | A11179 | 375 | A05032 | A11943 | 157 |
| A05032 | A12008 | 326 | A05032 | A13307 | 212 |
| A05032 | A14005 | 396 | A05032 | A14520 | 305 |
| A05032 | A14643 | 236 | A05034 | A05070 | 469 |
| A05034 | A05072 | 208 | A05034 | A05289 | 555 |
| A05034 | A05445 | 207 | A05034 | A05684 | 217 |
| A05034 | A05771 | 201 | A05034 | A05961 | 489 |
| A05034 | A06039 | 549 | A05034 | A06385 | 334 |
| A05034 | A06598 | 334 | A05034 | A06914 | 334 |
| A05034 | A07242 | 490 | A05034 | A07381 | 491 |
| A05034 | A07723 | 443 | A05034 | A07893 | 484 |
| A05034 | A07988 | 179 | A05034 | A08461 | 168 |
| A05034 | A08707 | 370 | A05034 | A08741 | 279 |
| A05034 | A09182 | 334 | A05034 | A09450 | 179 |
| A05034 | A09622 | 205 | A05034 | A09877 | 201 |
| A05034 | A10429 | 227 | A05034 | A10659 | 179 |
| A05034 | A10798 | 199 | A05034 | A11122 | 188 |
| A05034 | A11540 | 171 | A05034 | A12047 | 210 |
| A05034 | A13737 | 443 | A05034 | A13963 | 165 |
| A05034 | A14252 | 334 | A05034 | A14709 | 411 |
| A05034 | A14758 | 199 | A05034 | A15356 | 334 |
| A05034 | A16073 | 529 | A05035 | A10174 | 899 |
| A05036 | A05349 | 255 | A05036 | A05488 | 424 |
| A05036 | A07141 | 272 | A05036 | A15613 | 263 |
| A05036 | A16216 | 210 | A05037 | A05113 | 176 |
| A05037 | A05212 | 201 | A05037 | A05213 | 332 |

|        |        |     |        |        |     |
|--------|--------|-----|--------|--------|-----|
| A05037 | A05446 | 177 | A05037 | A05679 | 260 |
| A05037 | A06631 | 201 | A05037 | A08745 | 210 |
| A05037 | A08908 | 232 | A05037 | A10159 | 899 |
| A05037 | A10793 | 899 | A05037 | A13989 | 899 |
| A05037 | A14191 | 215 | A05037 | A14208 | 944 |
| A05037 | A14662 | 899 | A05037 | A14830 | 224 |
| A05037 | A15138 | 156 | A05037 | A15297 | 899 |
| A05037 | A15314 | 465 | A05037 | A15323 | 899 |
| A05037 | A15324 | 899 | A05037 | A15328 | 270 |
| A05037 | A15353 | 899 | A05037 | A15359 | 899 |
| A05037 | A15361 | 305 | A05037 | A15388 | 154 |
| A05037 | A15510 | 390 | A05037 | A15642 | 176 |
| A05037 | A15726 | 198 | A05037 | A15962 | 163 |
| A05037 | A17115 | 281 | A05038 | A06055 | 324 |
| A05038 | A06161 | 291 | A05038 | A07157 | 254 |
| A05038 | A07164 | 281 | A05038 | A07166 | 294 |
| A05038 | A09046 | 364 | A05038 | A10861 | 420 |
| A05038 | A14681 | 420 | A05038 | A16801 | 383 |
| A05039 | A07165 | 232 | A05039 | A12927 | 270 |
| A05041 | A05120 | 378 | A05041 | A05128 | 374 |
| A05041 | A05299 | 364 | A05041 | A14666 | 379 |
| A05042 | A05299 | 391 | A05043 | A11372 | 249 |
| A05043 | A15244 | 339 | A05044 | A05443 | 296 |
| A05044 | A05996 | 475 | A05044 | A06137 | 299 |
| A05044 | A06588 | 216 | A05044 | A06870 | 412 |
| A05044 | A07062 | 291 | A05044 | A07201 | 285 |
| A05044 | A08194 | 256 | A05044 | A11338 | 232 |
| A05044 | A11405 | 172 | A05044 | A11612 | 265 |
| A05044 | A11724 | 314 | A05044 | A12651 | 279 |
| A05044 | A12653 | 424 | A05044 | A12661 | 414 |
| A05044 | A13946 | 305 | A05044 | A14002 | 319 |
| A05044 | A15809 | 188 | A05044 | A15896 | 373 |
| A05044 | A15922 | 236 | A05045 | A05313 | 232 |
| A05045 | A05337 | 260 | A05045 | A05390 | 259 |
| A05045 | A05548 | 296 | A05045 | A05986 | 460 |
| A05045 | A06014 | 343 | A05045 | A06405 | 486 |
| A05045 | A06439 | 491 | A05045 | A06860 | 218 |
| A05045 | A06912 | 277 | A05045 | A06916 | 305 |
| A05045 | A07059 | 443 | A05045 | A07088 | 491 |
| A05045 | A07503 | 311 | A05045 | A07520 | 293 |
| A05045 | A07553 | 177 | A05045 | A07590 | 204 |
| A05045 | A07757 | 249 | A05045 | A10444 | 258 |
| A05045 | A10635 | 413 | A05045 | A12507 | 379 |
| A05045 | A13871 | 227 | A05045 | A16027 | 180 |
| A05045 | A17006 | 293 | A05046 | A05288 | 288 |
| A05046 | A05418 | 208 | A05046 | A10521 | 422 |

|        |        |     |        |        |     |
|--------|--------|-----|--------|--------|-----|
| A05048 | A06607 | 171 | A05048 | A09812 | 405 |
| A05048 | A15321 | 190 | A05049 | A07209 | 291 |
| A05050 | A05051 | 430 | A05050 | A05337 | 334 |
| A05050 | A05358 | 429 | A05050 | A05451 | 378 |
| A05050 | A05463 | 344 | A05050 | A05548 | 360 |
| A05050 | A05573 | 299 | A05050 | A05832 | 281 |
| A05050 | A06405 | 286 | A05050 | A06641 | 339 |
| A05050 | A06994 | 368 | A05050 | A07059 | 396 |
| A05050 | A07088 | 299 | A05050 | A07230 | 409 |
| A05050 | A07503 | 369 | A05050 | A07674 | 255 |
| A05050 | A07757 | 327 | A05050 | A14794 | 409 |
| A05051 | A05297 | 302 | A05051 | A05394 | 329 |
| A05051 | A05573 | 472 | A05051 | A05816 | 353 |
| A05051 | A05966 | 267 | A05051 | A06091 | 399 |
| A05051 | A06405 | 246 | A05051 | A06638 | 383 |
| A05051 | A07027 | 468 | A05051 | A07059 | 249 |
| A05051 | A07088 | 379 | A05051 | A07122 | 303 |
| A05051 | A07230 | 472 | A05051 | A07239 | 439 |
| A05051 | A07271 | 383 | A05051 | A07322 | 420 |
| A05051 | A07381 | 486 | A05051 | A07503 | 428 |
| A05051 | A07737 | 417 | A05051 | A07757 | 466 |
| A05051 | A08135 | 319 | A05051 | A08284 | 432 |
| A05051 | A08385 | 299 | A05051 | A10635 | 262 |
| A05051 | A10652 | 479 | A05051 | A10674 | 262 |
| A05051 | A10684 | 474 | A05051 | A10692 | 483 |
| A05051 | A14861 | 394 | A05052 | A05546 | 489 |
| A05052 | A07315 | 490 | A05052 | A07590 | 184 |
| A05052 | A10452 | 346 | A05052 | A10685 | 412 |
| A05052 | A10960 | 409 | A05052 | A11932 | 205 |
| A05052 | A14160 | 278 | A05054 | A15498 | 168 |
| A05055 | A14191 | 187 | A05055 | A14209 | 390 |
| A05056 | A11199 | 414 | A05056 | A11293 | 357 |
| A05057 | A08838 | 329 | A05058 | A06581 | 227 |
| A05058 | A07695 | 351 | A05058 | A08349 | 418 |
| A05058 | A10608 | 285 | A05058 | A13870 | 190 |
| A05058 | A17168 | 199 | A05059 | A08561 | 165 |
| A05059 | A09521 | 407 | A05059 | A11872 | 340 |
| A05059 | A11879 | 385 | A05060 | A07222 | 285 |
| A05060 | A09276 | 430 | A05060 | A14833 | 449 |
| A05061 | A08461 | 205 | A05061 | A13830 | 466 |
| A05062 | A05216 | 223 | A05062 | A05428 | 154 |
| A05062 | A06143 | 294 | A05062 | A07311 | 899 |
| A05062 | A08571 | 486 | A05062 | A09256 | 91  |
| A05062 | A09487 | 246 | A05062 | A10615 | 356 |
| A05062 | A10624 | 461 | A05062 | A11923 | 749 |
| A05062 | A13147 | 488 | A05062 | A14039 | 404 |



|        |        |     |        |        |     |
|--------|--------|-----|--------|--------|-----|
| A05063 | A05155 | 180 | A05063 | A07135 | 234 |
| A05063 | A09734 | 313 | A05063 | A13369 | 191 |
| A05063 | A14010 | 313 | A05063 | A14122 | 291 |
| A05063 | A15292 | 427 | A05063 | A15349 | 348 |
| A05063 | A15352 | 232 | A05063 | A15495 | 252 |
| A05064 | A05082 | 906 | A05064 | A05284 | 218 |
| A05064 | A05621 | 224 | A05064 | A05684 | 428 |
| A05064 | A05961 | 288 | A05064 | A06286 | 333 |
| A05064 | A06439 | 176 | A05064 | A06597 | 469 |
| A05064 | A07007 | 191 | A05064 | A07399 | 481 |
| A05064 | A07643 | 399 | A05064 | A07690 | 259 |
| A05064 | A08155 | 299 | A05064 | A10174 | 205 |
| A05064 | A10241 | 377 | A05064 | A10446 | 258 |
| A05064 | A10506 | 369 | A05064 | A10545 | 366 |
| A05064 | A10580 | 208 | A05064 | A11125 | 899 |
| A05064 | A11431 | 165 | A05064 | A15413 | 162 |
| A05064 | A15834 | 208 | A05065 | A05240 | 219 |
| A05065 | A05473 | 227 | A05065 | A05779 | 394 |
| A05065 | A06147 | 339 | A05065 | A06385 | 240 |
| A05065 | A06601 | 190 | A05065 | A06623 | 466 |
| A05065 | A06648 | 311 | A05065 | A06653 | 256 |
| A05065 | A06906 | 357 | A05065 | A07690 | 257 |
| A05065 | A08070 | 167 | A05065 | A09123 | 263 |
| A05065 | A09428 | 279 | A05065 | A09647 | 491 |
| A05065 | A09803 | 491 | A05065 | A09900 | 232 |
| A05065 | A10735 | 173 | A05065 | A11290 | 152 |
| A05065 | A12965 | 364 | A05065 | A12997 | 350 |
| A05065 | A13511 | 180 | A05065 | A13923 | 375 |
| A05065 | A14410 | 255 | A05065 | A14642 | 269 |
| A05065 | A15277 | 210 | A05065 | A15840 | 208 |
| A05065 | A16732 | 313 | A05066 | A06645 | 388 |
| A05066 | A09263 | 288 | A05066 | A09546 | 312 |
| A05066 | A09902 | 323 | A05066 | A10551 | 375 |
| A05066 | A12990 | 252 | A05066 | A15383 | 208 |
| A05067 | A15201 | 445 | A05068 | A06867 | 361 |
| A05068 | A10286 | 399 | A05068 | A10526 | 326 |
| A05068 | A12020 | 291 | A05070 | A05072 | 463 |
| A05070 | A06076 | 406 | A05070 | A07381 | 174 |
| A05070 | A14649 | 259 | A05070 | A15726 | 230 |
| A05070 | A16049 | 205 | A05071 | A06399 | 428 |
| A05072 | A06076 | 436 | A05072 | A14191 | 210 |
| A05073 | A05489 | 388 | A05073 | A05556 | 238 |
| A05073 | A05558 | 469 | A05073 | A06100 | 210 |
| A05073 | A06417 | 420 | A05073 | A06421 | 380 |
| A05073 | A06599 | 216 | A05073 | A06601 | 272 |
| A05073 | A06877 | 343 | A05073 | A07165 | 152 |

|        |        |     |        |        |     |
|--------|--------|-----|--------|--------|-----|
| A05073 | A08658 | 441 | A05073 | A09046 | 343 |
| A05073 | A12373 | 170 | A05073 | A15911 | 302 |
| A05073 | A16872 | 338 | A05075 | A06162 | 337 |
| A05075 | A06398 | 388 | A05075 | A06752 | 251 |
| A05075 | A08836 | 319 | A05075 | A11160 | 353 |
| A05075 | A14430 | 263 | A05075 | A14633 | 210 |
| A05076 | A05335 | 311 | A05076 | A06965 | 205 |
| A05076 | A10250 | 196 | A05076 | A11263 | 371 |
| A05076 | A12715 | 401 | A05076 | A13989 | 475 |
| A05076 | A15684 | 185 | A05076 | A15918 | 243 |
| A05076 | A15933 | 235 | A05076 | A16686 | 307 |
| A05078 | A05124 | 311 | A05078 | A05173 | 458 |
| A05078 | A05174 | 462 | A05078 | A05288 | 177 |
| A05078 | A05944 | 294 | A05078 | A06054 | 416 |
| A05078 | A06404 | 467 | A05078 | A06818 | 465 |
| A05078 | A07151 | 316 | A05078 | A07173 | 283 |
| A05078 | A07209 | 152 | A05078 | A08309 | 210 |
| A05078 | A08685 | 283 | A05078 | A08686 | 249 |
| A05078 | A08725 | 412 | A05078 | A09732 | 201 |
| A05078 | A11543 | 294 | A05078 | A12770 | 428 |
| A05078 | A13860 | 358 | A05078 | A14190 | 201 |
| A05078 | A14210 | 183 | A05079 | A05215 | 458 |
| A05079 | A05679 | 283 | A05079 | A09842 | 270 |
| A05079 | A12927 | 235 | A05079 | A13419 | 411 |
| A05079 | A13886 | 367 | A05079 | A14390 | 366 |
| A05079 | A14399 | 188 | A05079 | A15906 | 430 |
| A05080 | A05439 | 335 | A05080 | A05905 | 399 |
| A05080 | A07210 | 393 | A05082 | A05284 | 259 |
| A05082 | A05415 | 401 | A05082 | A05701 | 489 |
| A05082 | A05741 | 213 | A05082 | A06107 | 372 |
| A05082 | A06270 | 326 | A05082 | A06451 | 251 |
| A05082 | A06610 | 343 | A05082 | A06660 | 462 |
| A05082 | A06813 | 201 | A05082 | A06972 | 246 |
| A05082 | A07158 | 424 | A05082 | A07206 | 324 |
| A05082 | A07762 | 168 | A05082 | A08571 | 313 |
| A05082 | A08578 | 198 | A05082 | A08729 | 369 |
| A05082 | A09124 | 479 | A05082 | A09214 | 288 |
| A05082 | A09761 | 157 | A05082 | A10006 | 195 |
| A05082 | A10214 | 286 | A05082 | A10813 | 157 |
| A05082 | A10894 | 450 | A05082 | A11125 | 899 |
| A05082 | A11206 | 899 | A05082 | A11707 | 151 |
| A05082 | A11983 | 914 | A05082 | A12893 | 159 |
| A05082 | A13181 | 322 | A05082 | A13980 | 173 |
| A05082 | A13981 | 899 | A05082 | A14029 | 491 |
| A05082 | A14231 | 240 | A05082 | A14399 | 439 |
| A05082 | A14426 | 167 | A05082 | A14433 | 899 |

|        |        |     |        |        |     |
|--------|--------|-----|--------|--------|-----|
| A05082 | A14520 | 303 | A05082 | A15281 | 229 |
| A05082 | A15293 | 899 | A05082 | A15294 | 899 |
| A05083 | A05439 | 270 | A05083 | A06415 | 419 |
| A05083 | A07152 | 286 | A05083 | A10993 | 383 |
| A05083 | A14374 | 263 | A05083 | A15322 | 254 |
| A05083 | A15425 | 274 | A05084 | A06306 | 384 |
| A05084 | A11064 | 391 | A05086 | A05101 | 162 |
| A05086 | A05258 | 204 | A05086 | A06030 | 317 |
| A05086 | A07102 | 324 | A05086 | A07187 | 324 |
| A05086 | A07251 | 307 | A05086 | A07323 | 180 |
| A05086 | A07527 | 329 | A05086 | A07773 | 480 |
| A05086 | A09586 | 293 | A05086 | A09653 | 202 |
| A05086 | A10518 | 483 | A05086 | A11374 | 324 |
| A05086 | A11694 | 324 | A05086 | A11821 | 389 |
| A05086 | A11860 | 438 | A05086 | A12923 | 283 |
| A05086 | A12990 | 401 | A05086 | A14073 | 324 |
| A05086 | A14479 | 157 | A05086 | A14642 | 324 |
| A05086 | A14744 | 389 | A05086 | A15843 | 324 |
| A05087 | A05439 | 202 | A05087 | A05944 | 252 |
| A05087 | A14129 | 238 | A05087 | A15498 | 283 |
| A05088 | A05472 | 413 | A05088 | A05767 | 201 |
| A05088 | A05792 | 422 | A05088 | A06041 | 422 |
| A05088 | A06358 | 409 | A05088 | A06692 | 385 |
| A05088 | A06916 | 374 | A05088 | A07061 | 302 |
| A05088 | A07122 | 234 | A05088 | A15294 | 257 |
| A05088 | A15905 | 306 | A05089 | A11151 | 452 |
| A05090 | A07311 | 899 | A05090 | A07398 | 213 |
| A05090 | A07422 | 899 | A05090 | A10336 | 281 |
| A05090 | A12970 | 404 | A05091 | A06650 | 196 |
| A05091 | A07141 | 338 | A05091 | A14190 | 301 |
| A05091 | A15642 | 374 | A05092 | A05097 | 441 |
| A05092 | A14077 | 274 | A05093 | A05157 | 368 |
| A05093 | A08630 | 358 | A05093 | A08834 | 273 |
| A05093 | A09078 | 246 | A05093 | A13826 | 216 |
| A05093 | A13899 | 299 | A05093 | A14199 | 260 |
| A05093 | A16120 | 363 | A05094 | A05288 | 274 |
| A05094 | A05509 | 446 | A05094 | A05603 | 156 |
| A05094 | A05775 | 246 | A05094 | A05776 | 317 |
| A05094 | A05866 | 281 | A05094 | A05889 | 401 |
| A05094 | A05940 | 294 | A05094 | A06603 | 256 |
| A05094 | A06607 | 330 | A05094 | A06620 | 251 |
| A05094 | A06635 | 179 | A05094 | A06680 | 299 |
| A05094 | A06809 | 383 | A05094 | A06926 | 407 |
| A05094 | A07227 | 268 | A05094 | A08389 | 329 |
| A05094 | A09127 | 156 | A05094 | A09404 | 337 |
| A05094 | A09901 | 249 | A05094 | A10085 | 207 |

|        |        |     |        |        |     |
|--------|--------|-----|--------|--------|-----|
| A05094 | A10612 | 171 | A05094 | A10752 | 329 |
| A05094 | A10832 | 373 | A05094 | A11023 | 319 |
| A05094 | A11149 | 213 | A05094 | A11194 | 358 |
| A05094 | A11465 | 373 | A05094 | A12267 | 383 |
| A05094 | A12495 | 398 | A05094 | A13932 | 294 |
| A05094 | A14430 | 341 | A05094 | A14633 | 168 |
| A05094 | A14781 | 276 | A05094 | A14870 | 236 |
| A05094 | A15035 | 311 | A05094 | A15470 | 217 |
| A05094 | A15472 | 270 | A05094 | A15498 | 205 |
| A05095 | A07046 | 329 | A05095 | A12824 | 160 |
| A05095 | A13369 | 163 | A05097 | A14077 | 274 |
| A05098 | A05309 | 229 | A05098 | A05337 | 270 |
| A05098 | A05393 | 184 | A05098 | A05416 | 491 |
| A05098 | A05472 | 228 | A05098 | A05622 | 463 |
| A05098 | A05659 | 364 | A05098 | A05682 | 285 |
| A05098 | A05757 | 377 | A05098 | A05789 | 324 |
| A05098 | A06019 | 350 | A05098 | A06282 | 346 |
| A05098 | A06358 | 351 | A05098 | A06689 | 302 |
| A05098 | A06934 | 312 | A05098 | A06970 | 413 |
| A05098 | A06979 | 274 | A05098 | A07078 | 481 |
| A05098 | A07304 | 177 | A05098 | A07367 | 238 |
| A05098 | A07376 | 303 | A05098 | A07413 | 210 |
| A05098 | A07477 | 480 | A05098 | A07590 | 484 |
| A05098 | A07721 | 246 | A05098 | A07736 | 485 |
| A05098 | A07800 | 299 | A05098 | A07847 | 252 |
| A05098 | A07933 | 262 | A05098 | A07973 | 227 |
| A05098 | A08250 | 317 | A05098 | A08751 | 326 |
| A05098 | A09059 | 229 | A05098 | A10420 | 369 |
| A05098 | A10632 | 288 | A05098 | A10635 | 491 |
| A05098 | A10656 | 374 | A05098 | A10658 | 307 |
| A05098 | A10675 | 346 | A05098 | A10677 | 452 |
| A05098 | A10694 | 307 | A05098 | A13735 | 283 |
| A05098 | A14306 | 438 | A05098 | A14803 | 358 |
| A05098 | A15223 | 256 | A05098 | A15970 | 293 |
| A05098 | A16286 | 385 | A05098 | A16335 | 224 |
| A05098 | A16529 | 152 | A05098 | A16746 | 358 |
| A05098 | A16766 | 263 | A05099 | A05974 | 424 |
| A05100 | A14281 | 479 | A05101 | A07378 | 473 |
| A05101 | A08022 | 208 | A05101 | A08261 | 219 |
| A05101 | A09586 | 383 | A05101 | A09653 | 173 |
| A05101 | A13070 | 307 | A05101 | A14178 | 386 |
| A05101 | A14566 | 243 | A05101 | A14594 | 205 |
| A05101 | A15434 | 263 | A05101 | A17088 | 334 |
| A05102 | A05138 | 271 | A05102 | A05310 | 414 |
| A05102 | A05516 | 457 | A05102 | A05758 | 229 |
| A05102 | A05759 | 258 | A05102 | A05768 | 267 |

|        |        |     |        |        |     |
|--------|--------|-----|--------|--------|-----|
| A05102 | A05774 | 407 | A05102 | A06088 | 312 |
| A05102 | A06089 | 351 | A05102 | A06252 | 291 |
| A05102 | A06358 | 208 | A05102 | A06641 | 265 |
| A05102 | A06689 | 285 | A05102 | A06756 | 420 |
| A05102 | A06934 | 302 | A05102 | A07002 | 340 |
| A05102 | A07027 | 260 | A05102 | A07108 | 168 |
| A05102 | A07122 | 468 | A05102 | A07238 | 435 |
| A05102 | A07267 | 427 | A05102 | A07283 | 215 |
| A05102 | A07304 | 296 | A05102 | A07413 | 328 |
| A05102 | A07477 | 208 | A05102 | A07558 | 328 |
| A05102 | A07590 | 201 | A05102 | A07688 | 226 |
| A05102 | A07800 | 407 | A05102 | A08099 | 210 |
| A05102 | A08751 | 413 | A05102 | A09632 | 281 |
| A05102 | A10097 | 396 | A05102 | A10441 | 296 |
| A05102 | A10443 | 297 | A05102 | A10444 | 256 |
| A05102 | A10456 | 193 | A05102 | A10550 | 307 |
| A05102 | A10656 | 241 | A05102 | A10659 | 327 |
| A05102 | A10702 | 187 | A05102 | A10703 | 263 |
| A05102 | A10875 | 218 | A05102 | A12730 | 276 |
| A05102 | A13257 | 236 | A05102 | A13735 | 273 |
| A05102 | A14337 | 457 | A05102 | A14637 | 283 |
| A05102 | A14640 | 416 | A05102 | A14827 | 477 |
| A05102 | A15874 | 302 | A05102 | A15905 | 462 |
| A05102 | A16026 | 457 | A05102 | A16027 | 488 |
| A05102 | A16262 | 162 | A05103 | A05140 | 379 |
| A05103 | A05431 | 416 | A05103 | A05463 | 433 |
| A05103 | A05573 | 412 | A05103 | A06629 | 305 |
| A05103 | A06635 | 285 | A05103 | A07381 | 380 |
| A05103 | A07613 | 450 | A05103 | A16744 | 352 |
| A05104 | A09509 | 232 | A05106 | A05245 | 362 |
| A05106 | A05247 | 238 | A05106 | A05288 | 455 |
| A05106 | A05673 | 279 | A05106 | A06106 | 357 |
| A05106 | A06151 | 256 | A05106 | A06313 | 281 |
| A05106 | A06364 | 396 | A05106 | A06384 | 335 |
| A05106 | A06385 | 221 | A05106 | A06636 | 414 |
| A05106 | A06686 | 419 | A05106 | A06708 | 466 |
| A05106 | A06720 | 335 | A05106 | A06721 | 347 |
| A05106 | A06749 | 385 | A05106 | A07163 | 154 |
| A05106 | A07227 | 240 | A05106 | A07293 | 369 |
| A05106 | A07337 | 347 | A05106 | A07501 | 221 |
| A05106 | A07626 | 254 | A05106 | A07815 | 418 |
| A05106 | A07995 | 452 | A05106 | A08361 | 458 |
| A05106 | A08724 | 210 | A05106 | A10008 | 335 |
| A05106 | A10345 | 268 | A05106 | A10358 | 217 |
| A05106 | A10639 | 319 | A05106 | A11023 | 154 |
| A05106 | A11036 | 340 | A05106 | A11306 | 251 |

|        |        |     |        |        |     |
|--------|--------|-----|--------|--------|-----|
| A05106 | A11413 | 490 | A05106 | A11499 | 385 |
| A05106 | A11564 | 329 | A05106 | A11581 | 385 |
| A05106 | A14377 | 154 | A05106 | A14431 | 165 |
| A05106 | A14876 | 407 | A05106 | A15220 | 357 |
| A05106 | A15258 | 259 | A05107 | A05315 | 139 |
| A05107 | A06149 | 204 | A05107 | A06247 | 179 |
| A05107 | A06286 | 486 | A05107 | A06581 | 218 |
| A05107 | A07191 | 235 | A05107 | A07308 | 337 |
| A05107 | A08879 | 200 | A05107 | A10784 | 160 |
| A05107 | A11348 | 202 | A05107 | A11875 | 184 |
| A05107 | A13361 | 151 | A05107 | A14208 | 157 |
| A05107 | A14430 | 260 | A05107 | A14657 | 252 |
| A05107 | A15639 | 369 | A05107 | A16636 | 333 |
| A05109 | A14073 | 227 | A05110 | A06395 | 452 |
| A05111 | A07148 | 369 | A05111 | A07157 | 267 |
| A05111 | A07798 | 179 | A05111 | A09897 | 424 |
| A05111 | A09902 | 327 | A05111 | A14404 | 363 |
| A05111 | A15282 | 229 | A05111 | A15976 | 319 |
| A05111 | A16636 | 188 | A05112 | A05410 | 290 |
| A05112 | A05476 | 330 | A05112 | A05508 | 470 |
| A05112 | A05760 | 180 | A05112 | A06642 | 159 |
| A05112 | A06714 | 380 | A05112 | A07123 | 208 |
| A05112 | A07167 | 184 | A05112 | A07218 | 302 |
| A05112 | A08790 | 263 | A05112 | A09033 | 254 |
| A05112 | A09076 | 276 | A05112 | A09174 | 157 |
| A05112 | A10174 | 306 | A05112 | A10390 | 339 |
| A05112 | A10790 | 274 | A05112 | A10989 | 171 |
| A05112 | A11132 | 156 | A05112 | A11897 | 200 |
| A05112 | A11911 | 224 | A05112 | A13829 | 241 |
| A05112 | A14410 | 216 | A05112 | A15314 | 215 |
| A05112 | A15630 | 249 | A05112 | A15650 | 213 |
| A05113 | A05349 | 491 | A05113 | A05427 | 132 |
| A05113 | A05900 | 374 | A05113 | A05920 | 338 |
| A05113 | A06415 | 307 | A05113 | A06644 | 234 |
| A05113 | A07135 | 177 | A05113 | A07173 | 171 |
| A05113 | A07200 | 179 | A05113 | A07218 | 193 |
| A05113 | A07469 | 265 | A05113 | A07557 | 321 |
| A05113 | A07634 | 185 | A05113 | A08739 | 383 |
| A05113 | A08901 | 243 | A05113 | A09416 | 160 |
| A05113 | A10197 | 296 | A05113 | A10343 | 363 |
| A05113 | A11604 | 241 | A05113 | A13539 | 179 |
| A05113 | A14393 | 899 | A05113 | A14664 | 151 |
| A05113 | A15290 | 286 | A05113 | A15394 | 196 |
| A05113 | A15395 | 174 | A05113 | A15425 | 362 |
| A05113 | A15964 | 369 | A05113 | A15985 | 281 |
| A05113 | A16636 | 424 | A05114 | A05307 | 462 |

|        |        |     |        |        |     |
|--------|--------|-----|--------|--------|-----|
| A05114 | A05832 | 213 | A05114 | A06595 | 210 |
| A05114 | A06628 | 334 | A05114 | A06949 | 174 |
| A05114 | A07192 | 234 | A05114 | A08097 | 184 |
| A05114 | A08576 | 317 | A05114 | A09018 | 193 |
| A05114 | A09020 | 294 | A05114 | A09246 | 251 |
| A05114 | A11086 | 330 | A05114 | A13181 | 223 |
| A05114 | A13369 | 404 | A05114 | A14637 | 174 |
| A05114 | A14642 | 174 | A05114 | A14683 | 252 |
| A05114 | A16274 | 200 | A05117 | A05603 | 245 |
| A05117 | A06415 | 195 | A05117 | A07218 | 245 |
| A05117 | A10532 | 486 | A05117 | A10805 | 386 |
| A05117 | A16120 | 422 | A05117 | A16636 | 156 |
| A05118 | A09732 | 258 | A05118 | A10336 | 311 |
| A05119 | A05288 | 318 | A05119 | A05847 | 369 |
| A05119 | A07163 | 339 | A05120 | A05124 | 396 |
| A05120 | A05282 | 388 | A05120 | A07145 | 269 |
| A05120 | A09448 | 305 | A05120 | A09814 | 358 |
| A05120 | A14666 | 348 | A05120 | A15932 | 154 |
| A05120 | A15933 | 212 | A05120 | A16738 | 172 |
| A05121 | A06158 | 288 | A05121 | A06897 | 307 |
| A05121 | A07584 | 201 | A05121 | A08972 | 290 |
| A05121 | A09040 | 241 | A05121 | A09581 | 227 |
| A05121 | A10728 | 157 | A05121 | A11071 | 401 |
| A05121 | A11390 | 422 | A05121 | A11945 | 360 |
| A05121 | A12821 | 229 | A05121 | A13527 | 283 |
| A05121 | A14188 | 196 | A05121 | A15326 | 334 |
| A05121 | A16845 | 401 | A05122 | A05128 | 247 |
| A05122 | A05285 | 278 | A05122 | A05322 | 240 |
| A05122 | A05539 | 226 | A05122 | A05554 | 371 |
| A05122 | A06400 | 486 | A05122 | A06544 | 221 |
| A05122 | A06597 | 375 | A05122 | A06648 | 271 |
| A05122 | A06669 | 281 | A05122 | A07151 | 177 |
| A05122 | A07159 | 221 | A05122 | A07165 | 308 |
| A05122 | A08070 | 353 | A05122 | A08610 | 294 |
| A05122 | A09145 | 218 | A05122 | A09242 | 263 |
| A05122 | A09249 | 307 | A05122 | A09427 | 255 |
| A05122 | A09975 | 313 | A05122 | A10018 | 422 |
| A05122 | A10307 | 414 | A05122 | A10551 | 379 |
| A05122 | A11750 | 218 | A05122 | A11902 | 168 |
| A05122 | A11906 | 270 | A05122 | A11911 | 318 |
| A05122 | A12824 | 234 | A05122 | A13348 | 224 |
| A05122 | A14375 | 152 | A05122 | A14390 | 246 |
| A05122 | A14403 | 281 | A05122 | A14404 | 358 |
| A05122 | A14643 | 263 | A05122 | A14790 | 243 |
| A05122 | A15281 | 274 | A05122 | A16016 | 375 |
| A05122 | A16110 | 273 | A05122 | A16764 | 152 |

|        |        |     |        |        |     |
|--------|--------|-----|--------|--------|-----|
| A05122 | A16877 | 216 | A05122 | A17115 | 274 |
| A05122 | A17146 | 188 | A05123 | A05172 | 424 |
| A05123 | A06608 | 234 | A05123 | A09123 | 372 |
| A05123 | A09440 | 429 | A05123 | A10013 | 463 |
| A05123 | A10825 | 419 | A05123 | A12963 | 436 |
| A05123 | A13820 | 424 | A05123 | A14443 | 245 |
| A05124 | A05174 | 462 | A05124 | A05959 | 319 |
| A05124 | A07192 | 330 | A05124 | A08875 | 165 |
| A05124 | A09814 | 303 | A05124 | A10133 | 351 |
| A05124 | A10894 | 188 | A05124 | A12645 | 296 |
| A05124 | A14543 | 479 | A05124 | A14642 | 363 |
| A05124 | A15840 | 208 | A05124 | A16131 | 467 |
| A05124 | A16222 | 290 | A05124 | A16264 | 377 |
| A05124 | A16738 | 489 | A05126 | A07147 | 377 |
| A05126 | A12371 | 374 | A05126 | A15498 | 152 |
| A05127 | A05141 | 151 | A05127 | A05265 | 358 |
| A05127 | A05640 | 322 | A05127 | A06054 | 154 |
| A05127 | A06095 | 230 | A05127 | A06404 | 423 |
| A05127 | A06586 | 172 | A05127 | A06589 | 201 |
| A05127 | A06737 | 424 | A05127 | A06779 | 251 |
| A05127 | A06780 | 377 | A05127 | A06818 | 484 |
| A05127 | A06858 | 170 | A05127 | A07148 | 210 |
| A05127 | A07151 | 419 | A05127 | A08641 | 187 |
| A05127 | A08714 | 154 | A05127 | A09609 | 247 |
| A05127 | A09825 | 347 | A05127 | A11234 | 247 |
| A05127 | A11578 | 171 | A05127 | A11881 | 165 |
| A05127 | A13716 | 218 | A05127 | A13786 | 152 |
| A05127 | A13872 | 160 | A05127 | A14071 | 179 |
| A05127 | A14129 | 323 | A05127 | A14210 | 462 |
| A05127 | A14903 | 208 | A05127 | A14932 | 247 |
| A05127 | A15365 | 156 | A05127 | A15418 | 198 |
| A05127 | A15487 | 358 | A05127 | A15559 | 338 |
| A05127 | A16587 | 190 | A05127 | A16695 | 271 |
| A05127 | A16707 | 311 | A05127 | A16844 | 188 |
| A05128 | A05299 | 326 | A05128 | A05349 | 196 |
| A05128 | A06298 | 283 | A05128 | A06608 | 156 |
| A05128 | A06642 | 162 | A05128 | A07164 | 241 |
| A05128 | A09269 | 254 | A05128 | A09903 | 394 |
| A05128 | A10198 | 399 | A05128 | A10303 | 418 |
| A05128 | A10309 | 418 | A05128 | A10600 | 418 |
| A05128 | A10974 | 407 | A05128 | A12441 | 418 |
| A05128 | A12442 | 418 | A05128 | A14377 | 246 |
| A05128 | A14378 | 180 | A05128 | A15396 | 294 |
| A05129 | A13665 | 374 | A05129 | A14381 | 347 |
| A05131 | A05252 | 416 | A05131 | A05311 | 399 |
| A05131 | A07143 | 338 | A05131 | A09219 | 390 |



|        |        |     |        |        |     |
|--------|--------|-----|--------|--------|-----|
| A05131 | A15498 | 160 | A05135 | A05299 | 391 |
| A05135 | A11313 | 353 | A05135 | A12504 | 445 |
| A05135 | A12505 | 445 | A05135 | A12750 | 445 |
| A05136 | A09496 | 398 | A05136 | A13824 | 177 |
| A05138 | A05437 | 374 | A05138 | A05660 | 439 |
| A05138 | A05768 | 486 | A05138 | A05782 | 404 |
| A05138 | A06091 | 480 | A05138 | A06523 | 353 |
| A05138 | A07061 | 455 | A05138 | A07238 | 450 |
| A05138 | A07314 | 154 | A05138 | A07520 | 202 |
| A05138 | A07688 | 268 | A05138 | A10550 | 338 |
| A05138 | A10694 | 419 | A05138 | A14442 | 404 |
| A05138 | A15395 | 358 | A05138 | A15874 | 344 |
| A05139 | A05538 | 425 | A05139 | A05549 | 434 |
| A05139 | A06629 | 355 | A05139 | A07229 | 307 |
| A05139 | A12079 | 424 | A05139 | A14009 | 229 |
| A05139 | A14674 | 296 | A05140 | A05330 | 335 |
| A05140 | A05331 | 205 | A05140 | A05337 | 329 |
| A05140 | A05431 | 195 | A05140 | A05433 | 402 |
| A05140 | A05451 | 374 | A05140 | A05463 | 340 |
| A05140 | A05550 | 312 | A05140 | A05573 | 401 |
| A05140 | A05615 | 363 | A05140 | A05659 | 307 |
| A05140 | A05912 | 408 | A05140 | A06629 | 285 |
| A05140 | A06641 | 335 | A05140 | A06847 | 350 |
| A05140 | A06994 | 364 | A05140 | A07027 | 333 |
| A05140 | A07059 | 285 | A05140 | A07325 | 195 |
| A05140 | A07381 | 238 | A05140 | A07408 | 371 |
| A05140 | A07501 | 321 | A05140 | A07619 | 388 |
| A05140 | A07674 | 249 | A05140 | A08692 | 328 |
| A05141 | A05185 | 386 | A05141 | A05256 | 274 |
| A05141 | A05365 | 405 | A05141 | A05418 | 207 |
| A05141 | A05873 | 373 | A05141 | A07935 | 221 |
| A05141 | A09081 | 347 | A05141 | A09399 | 347 |
| A05141 | A09561 | 436 | A05141 | A09791 | 472 |
| A05141 | A11683 | 156 | A05141 | A15926 | 286 |
| A05142 | A05568 | 221 | A05142 | A06314 | 227 |
| A05142 | A09373 | 409 | A05142 | A09507 | 368 |
| A05143 | A05309 | 170 | A05143 | A05459 | 372 |
| A05143 | A05785 | 452 | A05143 | A06137 | 323 |
| A05143 | A06831 | 372 | A05143 | A08724 | 302 |
| A05143 | A09036 | 353 | A05143 | A09220 | 255 |
| A05143 | A09375 | 466 | A05143 | A09652 | 369 |
| A05143 | A09891 | 473 | A05143 | A09892 | 447 |
| A05143 | A10339 | 452 | A05143 | A13832 | 278 |
| A05143 | A14247 | 373 | A05143 | A14376 | 345 |
| A05144 | A06161 | 238 | A05144 | A07135 | 260 |
| A05144 | A07201 | 160 | A05144 | A08070 | 229 |

|        |        |     |        |        |     |
|--------|--------|-----|--------|--------|-----|
| A05144 | A08315 | 290 | A05144 | A09124 | 168 |
| A05144 | A09242 | 232 | A05144 | A09566 | 341 |
| A05144 | A11683 | 202 | A05144 | A12175 | 394 |
| A05144 | A12703 | 414 | A05144 | A14073 | 307 |
| A05144 | A14674 | 165 | A05144 | A16676 | 340 |
| A05145 | A05146 | 329 | A05145 | A14579 | 307 |
| A05146 | A08653 | 288 | A05146 | A08773 | 188 |
| A05146 | A09568 | 180 | A05146 | A11735 | 177 |
| A05146 | A12625 | 160 | A05146 | A12824 | 243 |
| A05146 | A16127 | 276 | A05148 | A05442 | 467 |
| A05148 | A05813 | 430 | A05148 | A06240 | 281 |
| A05148 | A06484 | 327 | A05148 | A06516 | 465 |
| A05148 | A12698 | 435 | A05149 | A09308 | 327 |
| A05149 | A11334 | 283 | A05149 | A14216 | 435 |
| A05149 | A14566 | 183 | A05149 | A15500 | 210 |
| A05150 | A05210 | 411 | A05150 | A05435 | 386 |
| A05150 | A08209 | 268 | A05150 | A10554 | 306 |
| A05151 | A05739 | 406 | A05153 | A05356 | 313 |
| A05153 | A05485 | 259 | A05153 | A05515 | 195 |
| A05153 | A05562 | 207 | A05153 | A05926 | 491 |
| A05153 | A05957 | 436 | A05153 | A06211 | 232 |
| A05153 | A06368 | 201 | A05153 | A06526 | 263 |
| A05153 | A06558 | 301 | A05153 | A07251 | 241 |
| A05153 | A07407 | 165 | A05153 | A07468 | 491 |
| A05153 | A07469 | 491 | A05153 | A07541 | 440 |
| A05153 | A07617 | 486 | A05153 | A07740 | 205 |
| A05153 | A07958 | 491 | A05153 | A08063 | 467 |
| A05153 | A08748 | 182 | A05153 | A08931 | 226 |
| A05153 | A09151 | 195 | A05153 | A10532 | 310 |
| A05153 | A10967 | 491 | A05153 | A11630 | 328 |
| A05153 | A11822 | 291 | A05153 | A12363 | 238 |
| A05153 | A12793 | 491 | A05153 | A12839 | 151 |
| A05153 | A13752 | 235 | A05153 | A13830 | 221 |
| A05153 | A13906 | 219 | A05153 | A14216 | 401 |
| A05153 | A14685 | 276 | A05153 | A15233 | 187 |
| A05153 | A15684 | 378 | A05153 | A16099 | 168 |
| A05153 | A16118 | 188 | A05153 | A16293 | 228 |
| A05153 | A17108 | 491 | A05153 | A17155 | 205 |
| A05154 | A07605 | 217 | A05154 | A08077 | 491 |
| A05154 | A08078 | 399 | A05154 | A08896 | 307 |
| A05154 | A09042 | 252 | A05154 | A10674 | 217 |
| A05154 | A11313 | 201 | A05154 | A11317 | 294 |
| A05154 | A11446 | 319 | A05154 | A11865 | 258 |
| A05154 | A12919 | 337 | A05154 | A13609 | 110 |
| A05154 | A15320 | 174 | A05154 | A15575 | 252 |
| A05154 | A15576 | 307 | A05154 | A16007 | 205 |

|        |        |     |        |        |     |
|--------|--------|-----|--------|--------|-----|
| A05155 | A05234 | 468 | A05155 | A05431 | 503 |
| A05155 | A05603 | 436 | A05155 | A05777 | 157 |
| A05155 | A05891 | 238 | A05155 | A06253 | 160 |
| A05155 | A06389 | 489 | A05155 | A06574 | 234 |
| A05155 | A06665 | 491 | A05155 | A07004 | 176 |
| A05155 | A07118 | 165 | A05155 | A07209 | 480 |
| A05155 | A07242 | 205 | A05155 | A07416 | 313 |
| A05155 | A07422 | 899 | A05155 | A07590 | 257 |
| A05155 | A07766 | 491 | A05155 | A07780 | 334 |
| A05155 | A07794 | 324 | A05155 | A07901 | 274 |
| A05155 | A08093 | 257 | A05155 | A08097 | 491 |
| A05155 | A08162 | 172 | A05155 | A08223 | 475 |
| A05155 | A08309 | 347 | A05155 | A08392 | 218 |
| A05155 | A08536 | 383 | A05155 | A09246 | 462 |
| A05155 | A10612 | 489 | A05155 | A10676 | 269 |
| A05155 | A11280 | 491 | A05155 | A11282 | 480 |
| A05155 | A11294 | 486 | A05155 | A11341 | 274 |
| A05155 | A11382 | 297 | A05155 | A11402 | 490 |
| A05155 | A11445 | 446 | A05155 | A11454 | 332 |
| A05155 | A11592 | 363 | A05155 | A11696 | 174 |
| A05155 | A11983 | 470 | A05155 | A12365 | 408 |
| A05155 | A13369 | 792 | A05155 | A14128 | 491 |
| A05155 | A14191 | 177 | A05155 | A14204 | 270 |
| A05155 | A14511 | 199 | A05155 | A14570 | 449 |
| A05155 | A14654 | 491 | A05155 | A14735 | 322 |
| A05155 | A15277 | 204 | A05155 | A15282 | 236 |
| A05155 | A15322 | 351 | A05155 | A15336 | 252 |
| A05155 | A15345 | 291 | A05155 | A15384 | 443 |
| A05155 | A15398 | 152 | A05155 | A15430 | 491 |
| A05155 | A15435 | 163 | A05155 | A15627 | 306 |
| A05155 | A15634 | 899 | A05155 | A15638 | 187 |
| A05155 | A15665 | 168 | A05155 | A15669 | 341 |
| A05155 | A15925 | 398 | A05155 | A15934 | 384 |
| A05155 | A16116 | 274 | A05155 | A16143 | 488 |
| A05155 | A16148 | 443 | A05155 | A16285 | 466 |
| A05155 | A16988 | 899 | A05156 | A07218 | 272 |
| A05157 | A05229 | 440 | A05157 | A05439 | 439 |
| A05157 | A06471 | 355 | A05157 | A07140 | 238 |
| A05157 | A07209 | 480 | A05157 | A07229 | 168 |
| A05157 | A07655 | 307 | A05157 | A07756 | 204 |
| A05157 | A07878 | 257 | A05157 | A08630 | 491 |
| A05157 | A08688 | 307 | A05157 | A08859 | 208 |
| A05157 | A10202 | 398 | A05157 | A13975 | 162 |
| A05157 | A14199 | 157 | A05157 | A14371 | 271 |
| A05157 | A14379 | 229 | A05157 | A14430 | 374 |
| A05157 | A14693 | 205 | A05157 | A15314 | 212 |

|        |        |     |        |        |     |
|--------|--------|-----|--------|--------|-----|
| A05157 | A15419 | 205 | A05157 | A15630 | 205 |
| A05158 | A06513 | 402 | A05158 | A07568 | 480 |
| A05158 | A10161 | 380 | A05158 | A10174 | 232 |
| A05158 | A14010 | 191 | A05158 | A14122 | 163 |
| A05160 | A05418 | 180 | A05160 | A05650 | 440 |
| A05160 | A07189 | 414 | A05160 | A07221 | 480 |
| A05160 | A07746 | 283 | A05160 | A10120 | 440 |
| A05160 | A11762 | 440 | A05160 | A13518 | 440 |
| A05161 | A07001 | 328 | A05161 | A14520 | 296 |
| A05162 | A15726 | 154 | A05163 | A07153 | 393 |
| A05163 | A08490 | 368 | A05163 | A12105 | 335 |
| A05164 | A05568 | 466 | A05164 | A05790 | 443 |
| A05164 | A05791 | 473 | A05164 | A05835 | 473 |
| A05164 | A06913 | 465 | A05164 | A07200 | 208 |
| A05164 | A08436 | 433 | A05164 | A10621 | 322 |
| A05164 | A12639 | 433 | A05164 | A15892 | 472 |
| A05165 | A05634 | 305 | A05165 | A06646 | 399 |
| A05165 | A06665 | 270 | A05165 | A06717 | 350 |
| A05165 | A06836 | 399 | A05165 | A08293 | 165 |
| A05165 | A08881 | 329 | A05165 | A10731 | 226 |
| A05165 | A10813 | 262 | A05165 | A11156 | 235 |
| A05165 | A11604 | 266 | A05165 | A11943 | 177 |
| A05165 | A14378 | 246 | A05165 | A14408 | 201 |
| A05165 | A15325 | 288 | A05165 | A15510 | 281 |
| A05165 | A16076 | 245 | A05165 | A16884 | 335 |
| A05166 | A09876 | 290 | A05167 | A07166 | 362 |
| A05168 | A05169 | 462 | A05168 | A05170 | 402 |
| A05168 | A06416 | 267 | A05168 | A07557 | 363 |
| A05168 | A09124 | 172 | A05168 | A10247 | 167 |
| A05169 | A06063 | 288 | A05169 | A11911 | 251 |
| A05171 | A06415 | 329 | A05172 | A09440 | 438 |
| A05172 | A10013 | 434 | A05172 | A12963 | 445 |
| A05172 | A13820 | 434 | A05174 | A06054 | 288 |
| A05174 | A06404 | 345 | A05174 | A06414 | 328 |
| A05174 | A06415 | 159 | A05174 | A06818 | 423 |
| A05174 | A07192 | 265 | A05174 | A08596 | 307 |
| A05174 | A09124 | 177 | A05174 | A09732 | 154 |
| A05174 | A11543 | 256 | A05174 | A13860 | 438 |
| A05174 | A14055 | 154 | A05174 | A14190 | 157 |
| A05174 | A15394 | 266 | A05174 | A15395 | 245 |
| A05174 | A15795 | 260 | A05176 | A05247 | 252 |
| A05176 | A05398 | 457 | A05176 | A05898 | 345 |
| A05176 | A07807 | 335 | A05176 | A09016 | 393 |
| A05176 | A09812 | 306 | A05176 | A10237 | 330 |
| A05176 | A10320 | 307 | A05176 | A11943 | 291 |
| A05176 | A13346 | 434 | A05176 | A13864 | 407 |

|        |        |     |        |        |     |
|--------|--------|-----|--------|--------|-----|
| A05176 | A14025 | 322 | A05176 | A15233 | 269 |
| A05177 | A14373 | 388 | A05177 | A15959 | 427 |
| A05179 | A16216 | 258 | A05181 | A05854 | 213 |
| A05181 | A07004 | 184 | A05181 | A07495 | 212 |
| A05181 | A09750 | 217 | A05181 | A11489 | 480 |
| A05181 | A13784 | 243 | A05181 | A14281 | 299 |
| A05181 | A14636 | 362 | A05182 | A10336 | 232 |
| A05182 | A11190 | 445 | A05183 | A08208 | 204 |
| A05183 | A11840 | 374 | A05184 | A05356 | 252 |
| A05184 | A05377 | 296 | A05184 | A05390 | 294 |
| A05184 | A05533 | 458 | A05184 | A05736 | 489 |
| A05184 | A05786 | 435 | A05184 | A05992 | 481 |
| A05184 | A06038 | 326 | A05184 | A06263 | 441 |
| A05184 | A06762 | 446 | A05184 | A07021 | 446 |
| A05184 | A07296 | 486 | A05184 | A07297 | 441 |
| A05184 | A07438 | 455 | A05184 | A07509 | 321 |
| A05184 | A07510 | 355 | A05184 | A07654 | 313 |
| A05184 | A07673 | 272 | A05184 | A07912 | 435 |
| A05184 | A08404 | 163 | A05184 | A08630 | 288 |
| A05184 | A09028 | 475 | A05184 | A09072 | 486 |
| A05184 | A09073 | 271 | A05184 | A10221 | 361 |
| A05184 | A10651 | 283 | A05184 | A10757 | 355 |
| A05184 | A14381 | 230 | A05184 | A15230 | 266 |
| A05184 | A15268 | 224 | A05184 | A15381 | 210 |
| A05184 | A16107 | 285 | A05185 | A05365 | 330 |
| A05185 | A05914 | 168 | A05185 | A06078 | 318 |
| A05185 | A06581 | 196 | A05185 | A08837 | 227 |
| A05185 | A09200 | 330 | A05185 | A09561 | 224 |
| A05185 | A09791 | 232 | A05185 | A10337 | 249 |
| A05185 | A13511 | 234 | A05185 | A13589 | 183 |
| A05185 | A14364 | 246 | A05185 | A15911 | 277 |
| A05185 | A16911 | 259 | A05186 | A07492 | 452 |
| A05186 | A08187 | 452 | A05187 | A14359 | 427 |
| A05188 | A07318 | 452 | A05190 | A05581 | 422 |
| A05191 | A07201 | 177 | A05191 | A15651 | 235 |
| A05192 | A05274 | 423 | A05193 | A06864 | 232 |
| A05193 | A07079 | 313 | A05193 | A07319 | 215 |
| A05193 | A07647 | 291 | A05193 | A10625 | 234 |
| A05194 | A06484 | 327 | A05194 | A11931 | 391 |
| A05194 | A14664 | 323 | A05195 | A05443 | 317 |
| A05195 | A09469 | 398 | A05196 | A14597 | 198 |
| A05197 | A14527 | 337 | A05198 | A05199 | 294 |
| A05198 | A08358 | 319 | A05198 | A08501 | 191 |
| A05198 | A09735 | 301 | A05198 | A11420 | 229 |
| A05198 | A14478 | 258 | A05198 | A14479 | 324 |
| A05198 | A16976 | 372 | A05199 | A05512 | 329 |

|        |        |     |        |        |     |
|--------|--------|-----|--------|--------|-----|
| A05199 | A05646 | 319 | A05199 | A06861 | 221 |
| A05199 | A06973 | 182 | A05199 | A09124 | 174 |
| A05199 | A09520 | 286 | A05199 | A09735 | 207 |
| A05199 | A15733 | 223 | A05200 | A06011 | 378 |
| A05200 | A07820 | 174 | A05200 | A09056 | 246 |
| A05200 | A09060 | 324 | A05200 | A11679 | 361 |
| A05200 | A13845 | 367 | A05200 | A14247 | 204 |
| A05200 | A14838 | 319 | A05200 | A15650 | 401 |
| A05201 | A06675 | 457 | A05201 | A13826 | 165 |
| A05201 | A13844 | 446 | A05202 | A07135 | 168 |
| A05202 | A09509 | 241 | A05202 | A10739 | 432 |
| A05202 | A10798 | 208 | A05202 | A10809 | 443 |
| A05202 | A11250 | 378 | A05202 | A11337 | 246 |
| A05202 | A14258 | 188 | A05203 | A05309 | 208 |
| A05203 | A07191 | 283 | A05203 | A07417 | 430 |
| A05204 | A09050 | 296 | A05204 | A12792 | 369 |
| A05204 | A13846 | 323 | A05204 | A13847 | 462 |
| A05204 | A16617 | 398 | A05206 | A05210 | 391 |
| A05206 | A15498 | 190 | A05207 | A08219 | 434 |
| A05207 | A15498 | 205 | A05208 | A05330 | 312 |
| A05208 | A05331 | 305 | A05208 | A05573 | 267 |
| A05208 | A05653 | 353 | A05208 | A06037 | 358 |
| A05208 | A06607 | 260 | A05208 | A06762 | 305 |
| A05208 | A06769 | 236 | A05208 | A07460 | 899 |
| A05208 | A07736 | 229 | A05208 | A07796 | 344 |
| A05208 | A09220 | 236 | A05208 | A11485 | 205 |
| A05208 | A13362 | 475 | A05210 | A05332 | 401 |
| A05210 | A05416 | 157 | A05210 | A05609 | 447 |
| A05210 | A05689 | 386 | A05210 | A06250 | 469 |
| A05210 | A07074 | 434 | A05210 | A07097 | 372 |
| A05210 | A09563 | 417 | A05210 | A15655 | 330 |
| A05210 | A16597 | 257 | A05210 | A16808 | 252 |
| A05211 | A10372 | 271 | A05211 | A14208 | 454 |
| A05211 | A15314 | 339 | A05212 | A05213 | 363 |
| A05212 | A08745 | 259 | A05212 | A09395 | 393 |
| A05212 | A10987 | 157 | A05212 | A11885 | 156 |
| A05212 | A12364 | 385 | A05212 | A14208 | 236 |
| A05212 | A14830 | 474 | A05212 | A15613 | 423 |
| A05212 | A16216 | 101 | A05213 | A05221 | 201 |
| A05213 | A07165 | 241 | A05213 | A08745 | 367 |
| A05213 | A14188 | 235 | A05213 | A14208 | 271 |
| A05213 | A14830 | 374 | A05213 | A15322 | 163 |
| A05213 | A15613 | 296 | A05214 | A05921 | 429 |
| A05215 | A06607 | 171 | A05215 | A07407 | 378 |
| A05215 | A12784 | 424 | A05215 | A12927 | 288 |
| A05215 | A15906 | 441 | A05216 | A05278 | 374 |

|        |        |     |        |        |     |
|--------|--------|-----|--------|--------|-----|
| A05216 | A05288 | 340 | A05216 | A05797 | 439 |
| A05216 | A05827 | 243 | A05216 | A06174 | 154 |
| A05216 | A06482 | 193 | A05216 | A06496 | 465 |
| A05216 | A06507 | 154 | A05216 | A06581 | 488 |
| A05216 | A06597 | 491 | A05216 | A06606 | 491 |
| A05216 | A06607 | 173 | A05216 | A06610 | 312 |
| A05216 | A06611 | 229 | A05216 | A06612 | 193 |
| A05216 | A06619 | 215 | A05216 | A06642 | 396 |
| A05216 | A06760 | 215 | A05216 | A06949 | 223 |
| A05216 | A07165 | 899 | A05216 | A07176 | 480 |
| A05216 | A07180 | 465 | A05216 | A07311 | 899 |
| A05216 | A07339 | 491 | A05216 | A07539 | 193 |
| A05216 | A07911 | 408 | A05216 | A08137 | 488 |
| A05216 | A08275 | 193 | A05216 | A08627 | 246 |
| A05216 | A08650 | 154 | A05216 | A08870 | 294 |
| A05216 | A08946 | 177 | A05216 | A09151 | 263 |
| A05216 | A09155 | 193 | A05216 | A09178 | 193 |
| A05216 | A09188 | 357 | A05216 | A09192 | 281 |
| A05216 | A09319 | 899 | A05216 | A09360 | 154 |
| A05216 | A09418 | 204 | A05216 | A09434 | 430 |
| A05216 | A09467 | 341 | A05216 | A09789 | 182 |
| A05216 | A09826 | 452 | A05216 | A09884 | 193 |
| A05216 | A09932 | 204 | A05216 | A10580 | 899 |
| A05216 | A11068 | 279 | A05216 | A11326 | 473 |
| A05216 | A11335 | 317 | A05216 | A11683 | 283 |
| A05216 | A12086 | 462 | A05216 | A12098 | 154 |
| A05216 | A12472 | 491 | A05216 | A12494 | 154 |
| A05216 | A12712 | 154 | A05216 | A12714 | 154 |
| A05216 | A13132 | 154 | A05216 | A13433 | 262 |
| A05216 | A13548 | 154 | A05216 | A13605 | 899 |
| A05216 | A13841 | 286 | A05216 | A13980 | 899 |
| A05216 | A13991 | 936 | A05216 | A14016 | 384 |
| A05216 | A14053 | 193 | A05216 | A14188 | 193 |
| A05216 | A14221 | 307 | A05216 | A14251 | 159 |
| A05216 | A14521 | 445 | A05216 | A14643 | 428 |
| A05216 | A14682 | 341 | A05216 | A14930 | 899 |
| A05216 | A15338 | 185 | A05216 | A15347 | 491 |
| A05216 | A15507 | 274 | A05216 | A16087 | 63  |
| A05216 | A16304 | 235 | A05216 | A17163 | 154 |
| A05217 | A05992 | 429 | A05217 | A06762 | 424 |
| A05217 | A07893 | 152 | A05218 | A06982 | 266 |
| A05218 | A07346 | 457 | A05218 | A07480 | 182 |
| A05218 | A07603 | 274 | A05218 | A12492 | 303 |
| A05218 | A13169 | 221 | A05218 | A14076 | 235 |
| A05218 | A14094 | 238 | A05218 | A14288 | 163 |
| A05218 | A14449 | 174 | A05218 | A15369 | 279 |

|        |        |     |        |        |     |
|--------|--------|-----|--------|--------|-----|
| A05218 | A15420 | 185 | A05218 | A16128 | 434 |
| A05219 | A06348 | 208 | A05219 | A06907 | 297 |
| A05219 | A07127 | 265 | A05219 | A07604 | 157 |
| A05219 | A08289 | 218 | A05219 | A08416 | 224 |
| A05219 | A08571 | 443 | A05219 | A08883 | 319 |
| A05219 | A09256 | 226 | A05219 | A09900 | 238 |
| A05219 | A11027 | 401 | A05219 | A11178 | 395 |
| A05219 | A11179 | 445 | A05219 | A11286 | 224 |
| A05219 | A11478 | 348 | A05219 | A12543 | 176 |
| A05219 | A13082 | 369 | A05219 | A13550 | 193 |
| A05219 | A14266 | 218 | A05219 | A14308 | 379 |
| A05219 | A14674 | 433 | A05219 | A14712 | 475 |
| A05219 | A14715 | 379 | A05219 | A15366 | 165 |
| A05219 | A15840 | 213 | A05220 | A05563 | 63  |
| A05220 | A06001 | 339 | A05220 | A06344 | 157 |
| A05220 | A07051 | 443 | A05220 | A07207 | 435 |
| A05220 | A07229 | 236 | A05220 | A07421 | 334 |
| A05220 | A07593 | 441 | A05220 | A08834 | 313 |
| A05220 | A08840 | 190 | A05220 | A08842 | 491 |
| A05220 | A08859 | 201 | A05220 | A09633 | 412 |
| A05220 | A09740 | 443 | A05220 | A09752 | 188 |
| A05220 | A09834 | 157 | A05220 | A09857 | 491 |
| A05220 | A09933 | 263 | A05220 | A10579 | 294 |
| A05220 | A10592 | 385 | A05220 | A10802 | 296 |
| A05220 | A10897 | 170 | A05220 | A11039 | 159 |
| A05220 | A11257 | 414 | A05220 | A11431 | 316 |
| A05220 | A11436 | 63  | A05220 | A11542 | 489 |
| A05220 | A11545 | 176 | A05220 | A11601 | 172 |
| A05220 | A11848 | 456 | A05220 | A11950 | 474 |
| A05220 | A13130 | 201 | A05220 | A13590 | 196 |
| A05220 | A13829 | 213 | A05220 | A13831 | 491 |
| A05220 | A13870 | 224 | A05220 | A13950 | 306 |
| A05220 | A14080 | 63  | A05220 | A14109 | 152 |
| A05220 | A14122 | 385 | A05220 | A14124 | 335 |
| A05220 | A14128 | 185 | A05220 | A14129 | 491 |
| A05220 | A14135 | 302 | A05220 | A14190 | 174 |
| A05220 | A14210 | 205 | A05220 | A14300 | 173 |
| A05220 | A14408 | 489 | A05220 | A14570 | 413 |
| A05220 | A14655 | 63  | A05220 | A14982 | 177 |
| A05220 | A15130 | 321 | A05220 | A15230 | 196 |
| A05220 | A15278 | 241 | A05220 | A15292 | 329 |
| A05220 | A15302 | 408 | A05220 | A15312 | 340 |
| A05220 | A15370 | 63  | A05220 | A15431 | 491 |
| A05220 | A15445 | 252 | A05220 | A15455 | 170 |
| A05220 | A15461 | 481 | A05220 | A15463 | 263 |
| A05220 | A15487 | 443 | A05220 | A15498 | 380 |



|        |        |     |        |        |     |
|--------|--------|-----|--------|--------|-----|
| A05220 | A15513 | 263 | A05220 | A15611 | 395 |
| A05220 | A15670 | 185 | A05220 | A15673 | 63  |
| A05220 | A15818 | 466 | A05220 | A15824 | 401 |
| A05220 | A15831 | 188 | A05220 | A16141 | 174 |
| A05220 | A16224 | 74  | A05220 | A16445 | 384 |
| A05220 | A17055 | 276 | A05220 | A17058 | 183 |
| A05221 | A05229 | 183 | A05221 | A05439 | 311 |
| A05221 | A06190 | 491 | A05221 | A06578 | 491 |
| A05221 | A06814 | 488 | A05221 | A06915 | 455 |
| A05221 | A07135 | 384 | A05221 | A07203 | 346 |
| A05221 | A07209 | 491 | A05221 | A07422 | 899 |
| A05221 | A07454 | 229 | A05221 | A07566 | 249 |
| A05221 | A07803 | 491 | A05221 | A07935 | 217 |
| A05221 | A08399 | 168 | A05221 | A08859 | 160 |
| A05221 | A08878 | 324 | A05221 | A08929 | 165 |
| A05221 | A08943 | 395 | A05221 | A09003 | 254 |
| A05221 | A09245 | 368 | A05221 | A09743 | 484 |
| A05221 | A09754 | 291 | A05221 | A10081 | 154 |
| A05221 | A10336 | 380 | A05221 | A10348 | 163 |
| A05221 | A10625 | 229 | A05221 | A11132 | 491 |
| A05221 | A11243 | 427 | A05221 | A11839 | 366 |
| A05221 | A11983 | 452 | A05221 | A12393 | 369 |
| A05221 | A12686 | 283 | A05221 | A12897 | 490 |
| A05221 | A13826 | 486 | A05221 | A14055 | 305 |
| A05221 | A14122 | 167 | A05221 | A14196 | 484 |
| A05221 | A14202 | 340 | A05221 | A14204 | 553 |
| A05221 | A14208 | 486 | A05221 | A14210 | 450 |
| A05221 | A14218 | 424 | A05221 | A14229 | 491 |
| A05221 | A14245 | 257 | A05221 | A14276 | 484 |
| A05221 | A14299 | 486 | A05221 | A14371 | 196 |
| A05221 | A14395 | 483 | A05221 | A14511 | 286 |
| A05221 | A14570 | 241 | A05221 | A14635 | 491 |
| A05221 | A14663 | 343 | A05221 | A14667 | 291 |
| A05221 | A14930 | 243 | A05221 | A15238 | 205 |
| A05221 | A15292 | 452 | A05221 | A15293 | 486 |
| A05221 | A15308 | 481 | A05221 | A15314 | 491 |
| A05221 | A15315 | 174 | A05221 | A15320 | 463 |
| A05221 | A15321 | 472 | A05221 | A15322 | 491 |
| A05221 | A15328 | 485 | A05221 | A15342 | 396 |
| A05221 | A15345 | 289 | A05221 | A15346 | 461 |
| A05221 | A15347 | 173 | A05221 | A15349 | 424 |
| A05221 | A15357 | 491 | A05221 | A15361 | 475 |
| A05221 | A15398 | 486 | A05221 | A15400 | 491 |
| A05221 | A15402 | 491 | A05221 | A15409 | 465 |
| A05221 | A15506 | 489 | A05221 | A15527 | 379 |
| A05221 | A15578 | 413 | A05221 | A15630 | 438 |

|        |        |     |        |        |     |
|--------|--------|-----|--------|--------|-----|
| A05221 | A15875 | 241 | A05221 | A15976 | 200 |
| A05221 | A16217 | 279 | A05221 | A16281 | 229 |
| A05221 | A16424 | 247 | A05221 | A16901 | 118 |
| A05221 | A16904 | 701 | A05221 | A16916 | 488 |
| A05222 | A05223 | 266 | A05222 | A05434 | 344 |
| A05222 | A10105 | 474 | A05223 | A06855 | 343 |
| A05223 | A10105 | 373 | A05224 | A05417 | 208 |
| A05224 | A05424 | 391 | A05224 | A05795 | 322 |
| A05224 | A07690 | 355 | A05224 | A08197 | 367 |
| A05224 | A08572 | 291 | A05224 | A10679 | 367 |
| A05224 | A12897 | 279 | A05225 | A05998 | 477 |
| A05225 | A06560 | 477 | A05225 | A07981 | 485 |
| A05227 | A06637 | 491 | A05227 | A07881 | 383 |
| A05227 | A07911 | 291 | A05227 | A08228 | 392 |
| A05227 | A08548 | 383 | A05227 | A09150 | 208 |
| A05227 | A11296 | 472 | A05227 | A14380 | 257 |
| A05227 | A14699 | 665 | A05227 | A14778 | 438 |
| A05228 | A07209 | 462 | A05228 | A07210 | 366 |
| A05228 | A09837 | 455 | A05228 | A10461 | 396 |
| A05228 | A12412 | 399 | A05228 | A15498 | 168 |
| A05229 | A05439 | 475 | A05229 | A07209 | 461 |
| A05229 | A08630 | 358 | A05229 | A09078 | 246 |
| A05229 | A09202 | 337 | A05229 | A13975 | 265 |
| A05230 | A06825 | 260 | A05230 | A06897 | 187 |
| A05230 | A07076 | 210 | A05230 | A08357 | 430 |
| A05230 | A09292 | 210 | A05230 | A10625 | 213 |
| A05230 | A11462 | 215 | A05230 | A13052 | 210 |
| A05230 | A13875 | 236 | A05230 | A13989 | 569 |
| A05230 | A14169 | 215 | A05230 | A14816 | 210 |
| A05230 | A15215 | 458 | A05230 | A15500 | 274 |
| A05231 | A05587 | 416 | A05231 | A05891 | 436 |
| A05231 | A07605 | 373 | A05232 | A13609 | 305 |
| A05233 | A05401 | 200 | A05233 | A06659 | 424 |
| A05233 | A06675 | 555 | A05233 | A06941 | 180 |
| A05233 | A07223 | 177 | A05233 | A08874 | 457 |
| A05233 | A09050 | 334 | A05233 | A11131 | 163 |
| A05233 | A13844 | 334 | A05233 | A13846 | 334 |
| A05233 | A14182 | 334 | A05233 | A15647 | 305 |
| A05234 | A05356 | 391 | A05234 | A05487 | 160 |
| A05234 | A05678 | 204 | A05234 | A05812 | 157 |
| A05234 | A05887 | 229 | A05234 | A06092 | 252 |
| A05234 | A06272 | 182 | A05234 | A06991 | 243 |
| A05234 | A07069 | 440 | A05234 | A07180 | 339 |
| A05234 | A07442 | 294 | A05234 | A07483 | 420 |
| A05234 | A07561 | 154 | A05234 | A08097 | 430 |
| A05234 | A08400 | 382 | A05234 | A08753 | 180 |

|        |        |     |        |        |     |
|--------|--------|-----|--------|--------|-----|
| A05234 | A08985 | 236 | A05234 | A09764 | 217 |
| A05234 | A10504 | 154 | A05234 | A11411 | 245 |
| A05234 | A11472 | 515 | A05234 | A11570 | 252 |
| A05234 | A11655 | 279 | A05234 | A13361 | 157 |
| A05234 | A13617 | 441 | A05234 | A13831 | 63  |
| A05234 | A13988 | 210 | A05234 | A14381 | 489 |
| A05234 | A14589 | 187 | A05234 | A14936 | 193 |
| A05234 | A15287 | 236 | A05234 | A15322 | 358 |
| A05234 | A15345 | 374 | A05234 | A15347 | 195 |
| A05234 | A15384 | 515 | A05234 | A15429 | 243 |
| A05234 | A15485 | 229 | A05234 | A15531 | 151 |
| A05234 | A15917 | 419 | A05234 | A16623 | 221 |
| A05234 | A17078 | 260 | A05235 | A05591 | 296 |
| A05235 | A05829 | 404 | A05235 | A05861 | 385 |
| A05235 | A10742 | 382 | A05235 | A11683 | 266 |
| A05235 | A14440 | 290 | A05236 | A06597 | 232 |
| A05236 | A09486 | 438 | A05237 | A05356 | 179 |
| A05237 | A05390 | 377 | A05237 | A06263 | 369 |
| A05237 | A07808 | 435 | A05239 | A05733 | 435 |
| A05240 | A05838 | 339 | A05240 | A06129 | 251 |
| A05240 | A06484 | 171 | A05240 | A06595 | 185 |
| A05240 | A06648 | 188 | A05240 | A06981 | 288 |
| A05240 | A07128 | 260 | A05240 | A08817 | 205 |
| A05240 | A08837 | 318 | A05240 | A09025 | 396 |
| A05240 | A09073 | 230 | A05240 | A09647 | 232 |
| A05240 | A09803 | 288 | A05240 | A10059 | 363 |
| A05240 | A14202 | 236 | A05240 | A14457 | 174 |
| A05240 | A15396 | 235 | A05241 | A05274 | 460 |
| A05241 | A09012 | 466 | A05241 | A09200 | 398 |
| A05242 | A05577 | 216 | A05242 | A15639 | 307 |
| A05243 | A07073 | 205 | A05243 | A09900 | 274 |
| A05243 | A13614 | 256 | A05243 | A13942 | 266 |
| A05243 | A16062 | 436 | A05243 | A16300 | 230 |
| A05243 | A16732 | 344 | A05243 | A16738 | 260 |
| A05245 | A06151 | 307 | A05245 | A06530 | 238 |
| A05245 | A06686 | 281 | A05245 | A06844 | 369 |
| A05245 | A07056 | 418 | A05245 | A07735 | 369 |
| A05245 | A07815 | 490 | A05245 | A07842 | 353 |
| A05245 | A07852 | 369 | A05245 | A07985 | 490 |
| A05245 | A07997 | 491 | A05245 | A10661 | 395 |
| A05245 | A10667 | 488 | A05245 | A11280 | 191 |
| A05245 | A11308 | 473 | A05245 | A11499 | 408 |
| A05245 | A12119 | 441 | A05245 | A14884 | 63  |
| A05246 | A06037 | 201 | A05247 | A05288 | 485 |
| A05247 | A05898 | 369 | A05247 | A06517 | 374 |
| A05247 | A06608 | 251 | A05247 | A07157 | 179 |

|        |        |     |        |        |     |
|--------|--------|-----|--------|--------|-----|
| A05247 | A09094 | 447 | A05247 | A09149 | 243 |
| A05247 | A10237 | 358 | A05247 | A15233 | 306 |
| A05247 | A15241 | 172 | A05247 | A15277 | 255 |
| A05248 | A09880 | 288 | A05248 | A13957 | 427 |
| A05248 | A14345 | 435 | A05248 | A15292 | 182 |
| A05249 | A06272 | 305 | A05250 | A06688 | 234 |
| A05250 | A07197 | 347 | A05250 | A14386 | 368 |
| A05251 | A07545 | 167 | A05252 | A05311 | 406 |
| A05252 | A05443 | 278 | A05252 | A06463 | 384 |
| A05252 | A07143 | 350 | A05252 | A09219 | 396 |
| A05252 | A09572 | 396 | A05252 | A10887 | 412 |
| A05252 | A14604 | 329 | A05252 | A17009 | 404 |
| A05253 | A07011 | 255 | A05253 | A09988 | 409 |
| A05255 | A05982 | 334 | A05255 | A06411 | 228 |
| A05255 | A06413 | 63  | A05255 | A06531 | 167 |
| A05255 | A07046 | 185 | A05255 | A14216 | 419 |
| A05255 | A15382 | 213 | A05255 | A15624 | 457 |
| A05255 | A15652 | 420 | A05255 | A15659 | 307 |
| A05255 | A15660 | 484 | A05255 | A15684 | 491 |
| A05255 | A15707 | 319 | A05255 | A15746 | 447 |
| A05255 | A15917 | 321 | A05255 | A15918 | 230 |
| A05255 | A15920 | 269 | A05255 | A15931 | 489 |
| A05255 | A15933 | 218 | A05255 | A15937 | 184 |
| A05255 | A16088 | 491 | A05255 | A16095 | 268 |
| A05256 | A05828 | 334 | A05256 | A07311 | 899 |
| A05256 | A09249 | 367 | A05256 | A11683 | 198 |
| A05256 | A13373 | 268 | A05256 | A14570 | 329 |
| A05256 | A15770 | 534 | A05257 | A05393 | 227 |
| A05257 | A10145 | 390 | A05257 | A11010 | 416 |
| A05257 | A11030 | 470 | A05257 | A11188 | 369 |
| A05257 | A14193 | 183 | A05257 | A14709 | 191 |
| A05257 | A16068 | 193 | A05258 | A05318 | 332 |
| A05258 | A05629 | 294 | A05258 | A06530 | 196 |
| A05258 | A06637 | 240 | A05258 | A06965 | 221 |
| A05258 | A07323 | 191 | A05258 | A07822 | 190 |
| A05258 | A08519 | 217 | A05258 | A08929 | 180 |
| A05258 | A09289 | 432 | A05258 | A09808 | 367 |
| A05258 | A11277 | 162 | A05258 | A11296 | 286 |
| A05258 | A11443 | 212 | A05258 | A11476 | 205 |
| A05258 | A13596 | 432 | A05258 | A14479 | 168 |
| A05258 | A14487 | 267 | A05258 | A14845 | 224 |
| A05258 | A14849 | 439 | A05259 | A05264 | 319 |
| A05259 | A05377 | 314 | A05259 | A08718 | 319 |
| A05259 | A10156 | 279 | A05259 | A11274 | 408 |
| A05259 | A11600 | 394 | A05259 | A12674 | 479 |
| A05259 | A15911 | 297 | A05259 | A16595 | 378 |

|        |        |     |        |        |     |
|--------|--------|-----|--------|--------|-----|
| A05260 | A06319 | 188 | A05260 | A07935 | 204 |
| A05260 | A08102 | 224 | A05260 | A08438 | 439 |
| A05260 | A09648 | 215 | A05260 | A09791 | 174 |
| A05260 | A11771 | 291 | A05260 | A13601 | 337 |
| A05260 | A13708 | 246 | A05261 | A12927 | 270 |
| A05261 | A14364 | 334 | A05261 | A14403 | 399 |
| A05262 | A05332 | 299 | A05262 | A06819 | 462 |
| A05262 | A06914 | 228 | A05262 | A07222 | 443 |
| A05262 | A07931 | 272 | A05262 | A14525 | 236 |
| A05262 | A16531 | 255 | A05263 | A06597 | 168 |
| A05263 | A09913 | 425 | A05264 | A06346 | 180 |
| A05264 | A06574 | 272 | A05264 | A06615 | 173 |
| A05264 | A07132 | 312 | A05264 | A07218 | 168 |
| A05264 | A08911 | 271 | A05264 | A09453 | 374 |
| A05264 | A10453 | 236 | A05264 | A10689 | 173 |
| A05264 | A12897 | 472 | A05264 | A13879 | 241 |
| A05264 | A17155 | 319 | A05265 | A16328 | 353 |
| A05266 | A06212 | 369 | A05266 | A07014 | 384 |
| A05268 | A11378 | 432 | A05269 | A07158 | 254 |
| A05269 | A07164 | 278 | A05269 | A07191 | 274 |
| A05269 | A15912 | 279 | A05270 | A09062 | 412 |
| A05270 | A14210 | 267 | A05270 | A14364 | 357 |
| A05270 | A14379 | 347 | A05270 | A15292 | 198 |
| A05271 | A05951 | 402 | A05271 | A08627 | 286 |
| A05271 | A12357 | 361 | A05273 | A05531 | 200 |
| A05273 | A05539 | 410 | A05273 | A05605 | 200 |
| A05273 | A05638 | 200 | A05273 | A06204 | 200 |
| A05273 | A06758 | 355 | A05273 | A07180 | 223 |
| A05273 | A09625 | 550 | A05273 | A09628 | 411 |
| A05273 | A13876 | 200 | A05273 | A13881 | 200 |
| A05273 | A14170 | 307 | A05273 | A14171 | 200 |
| A05273 | A14179 | 200 | A05273 | A14180 | 389 |
| A05273 | A14356 | 200 | A05273 | A15370 | 200 |
| A05273 | A15568 | 352 | A05273 | A15712 | 200 |
| A05273 | A15719 | 200 | A05273 | A15757 | 200 |
| A05273 | A16066 | 200 | A05273 | A16634 | 200 |
| A05273 | A16919 | 200 | A05274 | A06329 | 388 |
| A05274 | A06346 | 473 | A05274 | A07119 | 452 |
| A05274 | A07704 | 422 | A05274 | A07705 | 418 |
| A05274 | A08172 | 307 | A05274 | A08292 | 434 |
| A05274 | A08496 | 457 | A05274 | A08685 | 296 |
| A05274 | A08686 | 266 | A05274 | A09012 | 460 |
| A05274 | A13369 | 159 | A05274 | A15336 | 251 |
| A05274 | A15638 | 281 | A05274 | A16068 | 257 |
| A05275 | A06431 | 424 | A05275 | A06982 | 360 |
| A05275 | A07346 | 419 | A05275 | A08102 | 157 |

|        |        |     |        |        |     |
|--------|--------|-----|--------|--------|-----|
| A05275 | A08822 | 235 | A05275 | A09454 | 254 |
| A05275 | A09623 | 140 | A05275 | A14230 | 486 |
| A05275 | A14969 | 208 | A05275 | A15531 | 246 |
| A05275 | A15941 | 221 | A05275 | A16128 | 473 |
| A05276 | A07101 | 393 | A05276 | A07457 | 276 |
| A05276 | A07756 | 450 | A05276 | A07876 | 363 |
| A05276 | A08882 | 294 | A05276 | A10247 | 173 |
| A05276 | A11352 | 391 | A05276 | A12824 | 316 |
| A05276 | A15498 | 185 | A05277 | A05573 | 285 |
| A05277 | A05767 | 163 | A05277 | A05768 | 329 |
| A05277 | A06473 | 290 | A05277 | A06912 | 423 |
| A05277 | A06916 | 356 | A05277 | A07061 | 438 |
| A05277 | A07238 | 254 | A05277 | A07381 | 227 |
| A05277 | A07424 | 363 | A05277 | A07848 | 160 |
| A05277 | A08023 | 394 | A05277 | A08083 | 351 |
| A05277 | A08127 | 373 | A05277 | A08252 | 162 |
| A05277 | A08385 | 318 | A05277 | A15649 | 177 |
| A05278 | A05416 | 347 | A05278 | A05569 | 362 |
| A05278 | A05693 | 416 | A05278 | A05832 | 473 |
| A05278 | A05949 | 307 | A05278 | A06697 | 252 |
| A05278 | A07301 | 171 | A05278 | A08207 | 440 |
| A05278 | A08598 | 263 | A05278 | A08709 | 279 |
| A05278 | A09036 | 229 | A05278 | A09254 | 167 |
| A05278 | A09480 | 240 | A05278 | A09535 | 249 |
| A05278 | A10066 | 321 | A05278 | A10091 | 484 |
| A05278 | A10270 | 299 | A05278 | A10552 | 473 |
| A05278 | A10609 | 224 | A05278 | A11498 | 408 |
| A05278 | A11897 | 157 | A05278 | A14188 | 152 |
| A05279 | A06285 | 434 | A05279 | A07154 | 391 |
| A05279 | A12927 | 301 | A05280 | A07135 | 286 |
| A05280 | A07900 | 388 | A05281 | A06306 | 380 |
| A05281 | A13542 | 434 | A05282 | A07145 | 330 |
| A05282 | A09297 | 332 | A05282 | A09918 | 425 |
| A05282 | A14598 | 380 | A05283 | A06595 | 302 |
| A05283 | A14366 | 252 | A05283 | A14399 | 199 |
| A05284 | A05454 | 272 | A05284 | A05515 | 441 |
| A05284 | A06597 | 335 | A05284 | A07080 | 213 |
| A05284 | A07087 | 424 | A05284 | A07091 | 235 |
| A05284 | A07288 | 323 | A05284 | A07762 | 159 |
| A05284 | A10204 | 396 | A05284 | A10456 | 191 |
| A05284 | A10485 | 396 | A05284 | A10506 | 451 |
| A05284 | A11304 | 177 | A05284 | A11369 | 157 |
| A05284 | A11432 | 345 | A05284 | A11683 | 151 |
| A05284 | A13134 | 396 | A05284 | A13148 | 396 |
| A05284 | A13228 | 329 | A05284 | A13346 | 185 |
| A05284 | A13509 | 380 | A05284 | A13510 | 281 |

|        |        |     |        |        |     |
|--------|--------|-----|--------|--------|-----|
| A05284 | A13655 | 362 | A05285 | A07165 | 179 |
| A05286 | A07218 | 236 | A05288 | A05418 | 486 |
| A05288 | A05432 | 475 | A05288 | A05603 | 404 |
| A05288 | A05751 | 240 | A05288 | A05795 | 357 |
| A05288 | A06222 | 154 | A05288 | A06277 | 279 |
| A05288 | A06313 | 251 | A05288 | A06317 | 229 |
| A05288 | A06336 | 154 | A05288 | A06364 | 259 |
| A05288 | A06530 | 274 | A05288 | A06581 | 479 |
| A05288 | A06588 | 490 | A05288 | A06597 | 490 |
| A05288 | A06607 | 399 | A05288 | A06608 | 491 |
| A05288 | A06650 | 479 | A05288 | A06686 | 151 |
| A05288 | A06688 | 408 | A05288 | A06721 | 351 |
| A05288 | A06795 | 232 | A05288 | A06871 | 154 |
| A05288 | A06958 | 232 | A05288 | A07004 | 545 |
| A05288 | A07163 | 306 | A05288 | A07220 | 224 |
| A05288 | A07233 | 177 | A05288 | A07298 | 450 |
| A05288 | A07339 | 491 | A05288 | A07422 | 540 |
| A05288 | A07461 | 458 | A05288 | A07772 | 232 |
| A05288 | A07803 | 310 | A05288 | A07828 | 154 |
| A05288 | A08093 | 207 | A05288 | A08172 | 191 |
| A05288 | A08216 | 255 | A05288 | A08274 | 267 |
| A05288 | A08308 | 270 | A05288 | A08374 | 154 |
| A05288 | A08386 | 154 | A05288 | A08458 | 391 |
| A05288 | A08474 | 215 | A05288 | A08643 | 165 |
| A05288 | A08668 | 183 | A05288 | A08679 | 285 |
| A05288 | A08859 | 196 | A05288 | A08869 | 491 |
| A05288 | A08878 | 378 | A05288 | A09078 | 223 |
| A05288 | A09123 | 191 | A05288 | A09245 | 396 |
| A05288 | A09361 | 173 | A05288 | A09456 | 215 |
| A05288 | A09470 | 491 | A05288 | A09496 | 456 |
| A05288 | A09619 | 184 | A05288 | A10079 | 311 |
| A05288 | A10103 | 281 | A05288 | A10218 | 307 |
| A05288 | A10500 | 215 | A05288 | A10744 | 168 |
| A05288 | A10811 | 199 | A05288 | A10845 | 215 |
| A05288 | A11194 | 352 | A05288 | A11300 | 491 |
| A05288 | A11306 | 473 | A05288 | A11387 | 391 |
| A05288 | A11393 | 413 | A05288 | A11499 | 215 |
| A05288 | A11564 | 232 | A05288 | A11621 | 629 |
| A05288 | A11706 | 347 | A05288 | A11970 | 215 |
| A05288 | A11983 | 491 | A05288 | A11999 | 177 |
| A05288 | A12036 | 215 | A05288 | A12108 | 341 |
| A05288 | A12134 | 215 | A05288 | A12135 | 215 |
| A05288 | A12150 | 215 | A05288 | A12318 | 177 |
| A05288 | A12365 | 480 | A05288 | A12373 | 491 |
| A05288 | A12383 | 255 | A05288 | A12493 | 154 |
| A05288 | A12682 | 154 | A05288 | A12735 | 215 |

|        |        |     |        |        |     |
|--------|--------|-----|--------|--------|-----|
| A05288 | A12770 | 215 | A05288 | A12824 | 160 |
| A05288 | A12950 | 177 | A05288 | A13173 | 270 |
| A05288 | A13511 | 457 | A05288 | A13541 | 154 |
| A05288 | A13795 | 232 | A05288 | A13945 | 281 |
| A05288 | A13986 | 200 | A05288 | A14055 | 200 |
| A05288 | A14080 | 435 | A05288 | A14122 | 176 |
| A05288 | A14182 | 441 | A05288 | A14198 | 491 |
| A05288 | A14202 | 255 | A05288 | A14330 | 302 |
| A05288 | A14430 | 479 | A05288 | A14511 | 451 |
| A05288 | A14570 | 438 | A05288 | A14589 | 291 |
| A05288 | A14605 | 458 | A05288 | A14635 | 491 |
| A05288 | A14660 | 475 | A05288 | A14675 | 215 |
| A05288 | A15230 | 469 | A05288 | A15233 | 201 |
| A05288 | A15263 | 177 | A05288 | A15279 | 177 |
| A05288 | A15282 | 224 | A05288 | A15292 | 340 |
| A05288 | A15293 | 165 | A05288 | A15295 | 195 |
| A05288 | A15297 | 486 | A05288 | A15320 | 187 |
| A05288 | A15322 | 234 | A05288 | A15366 | 479 |
| A05288 | A15392 | 154 | A05288 | A15420 | 272 |
| A05288 | A15506 | 152 | A05288 | A15559 | 262 |
| A05288 | A15638 | 293 | A05288 | A15852 | 184 |
| A05288 | A16081 | 259 | A05288 | A16590 | 200 |
| A05288 | A17085 | 215 | A05288 | A17174 | 215 |
| A05289 | A05682 | 291 | A05289 | A05966 | 238 |
| A05289 | A06385 | 487 | A05289 | A06598 | 334 |
| A05289 | A06630 | 288 | A05289 | A06654 | 278 |
| A05289 | A06914 | 418 | A05289 | A06970 | 271 |
| A05289 | A07054 | 232 | A05289 | A07558 | 217 |
| A05289 | A07590 | 223 | A05289 | A07736 | 193 |
| A05289 | A07815 | 190 | A05289 | A07856 | 344 |
| A05289 | A07976 | 168 | A05289 | A08707 | 371 |
| A05289 | A08836 | 201 | A05289 | A08863 | 174 |
| A05289 | A09182 | 334 | A05289 | A09876 | 177 |
| A05289 | A09877 | 353 | A05289 | A10585 | 286 |
| A05289 | A12728 | 165 | A05289 | A13903 | 252 |
| A05289 | A14252 | 334 | A05289 | A14803 | 238 |
| A05289 | A15356 | 402 | A05289 | A15367 | 413 |
| A05289 | A15642 | 236 | A05290 | A06678 | 436 |
| A05291 | A05802 | 408 | A05291 | A08835 | 340 |
| A05291 | A11411 | 363 | A05291 | A13589 | 246 |
| A05291 | A13965 | 288 | A05293 | A12402 | 452 |
| A05293 | A14399 | 311 | A05294 | A05603 | 281 |
| A05294 | A05777 | 457 | A05294 | A05891 | 190 |
| A05294 | A06346 | 491 | A05294 | A06516 | 355 |
| A05294 | A06574 | 454 | A05294 | A06710 | 458 |
| A05294 | A06711 | 400 | A05294 | A06712 | 362 |



|        |        |     |        |        |     |
|--------|--------|-----|--------|--------|-----|
| A05294 | A06739 | 224 | A05294 | A07218 | 479 |
| A05294 | A07453 | 350 | A05294 | A07704 | 422 |
| A05294 | A07705 | 350 | A05294 | A07828 | 369 |
| A05294 | A08040 | 274 | A05294 | A08125 | 380 |
| A05294 | A08203 | 312 | A05294 | A08292 | 436 |
| A05294 | A08448 | 380 | A05294 | A08685 | 182 |
| A05294 | A09149 | 208 | A05294 | A09428 | 286 |
| A05294 | A09518 | 355 | A05294 | A10296 | 355 |
| A05294 | A11289 | 491 | A05294 | A11310 | 490 |
| A05294 | A11320 | 485 | A05294 | A11328 | 489 |
| A05294 | A11375 | 332 | A05294 | A11396 | 332 |
| A05294 | A11411 | 290 | A05294 | A11461 | 335 |
| A05294 | A11466 | 350 | A05294 | A12176 | 380 |
| A05294 | A12448 | 396 | A05294 | A12470 | 355 |
| A05294 | A12683 | 445 | A05294 | A14885 | 380 |
| A05294 | A15498 | 193 | A05294 | A15673 | 157 |
| A05295 | A06881 | 438 | A05295 | A06970 | 185 |
| A05295 | A10218 | 337 | A05295 | A11431 | 241 |
| A05295 | A12647 | 470 | A05295 | A14660 | 274 |
| A05295 | A15295 | 204 | A05295 | A16590 | 489 |
| A05296 | A06079 | 416 | A05296 | A06597 | 377 |
| A05296 | A08740 | 291 | A05296 | A10176 | 430 |
| A05296 | A10383 | 407 | A05296 | A13778 | 430 |
| A05297 | A05685 | 328 | A05297 | A06275 | 187 |
| A05297 | A07088 | 241 | A05297 | A07230 | 385 |
| A05297 | A07324 | 260 | A05297 | A07327 | 408 |
| A05297 | A07503 | 330 | A05297 | A07748 | 255 |
| A05297 | A07878 | 247 | A05297 | A14621 | 369 |
| A05297 | A16744 | 293 | A05298 | A05354 | 411 |
| A05299 | A06509 | 375 | A05299 | A07205 | 274 |
| A05299 | A07383 | 413 | A05299 | A08070 | 224 |
| A05299 | A08857 | 243 | A05299 | A11834 | 255 |
| A05299 | A12154 | 400 | A05299 | A13250 | 229 |
| A05299 | A16740 | 438 | A05300 | A06566 | 425 |
| A05300 | A09384 | 434 | A05300 | A14637 | 278 |
| A05300 | A14643 | 182 | A05300 | A15837 | 232 |
| A05301 | A05545 | 168 | A05301 | A06591 | 302 |
| A05301 | A06941 | 400 | A05301 | A06966 | 208 |
| A05301 | A07054 | 491 | A05301 | A07242 | 491 |
| A05301 | A07378 | 483 | A05301 | A07483 | 491 |
| A05301 | A07495 | 491 | A05301 | A07665 | 170 |
| A05301 | A07816 | 491 | A05301 | A07893 | 299 |
| A05301 | A08531 | 460 | A05301 | A08536 | 484 |
| A05301 | A08551 | 480 | A05301 | A08552 | 303 |
| A05301 | A08569 | 262 | A05301 | A09131 | 346 |
| A05301 | A09325 | 308 | A05301 | A09337 | 489 |

|        |        |     |        |        |     |
|--------|--------|-----|--------|--------|-----|
| A05301 | A09600 | 488 | A05301 | A09601 | 418 |
| A05301 | A09624 | 152 | A05301 | A10863 | 480 |
| A05301 | A11202 | 423 | A05301 | A12047 | 489 |
| A05301 | A12191 | 201 | A05301 | A12841 | 308 |
| A05301 | A12954 | 259 | A05301 | A13207 | 382 |
| A05301 | A13309 | 168 | A05301 | A13313 | 167 |
| A05301 | A13415 | 358 | A05301 | A13460 | 491 |
| A05301 | A13866 | 256 | A05301 | A13895 | 466 |
| A05301 | A14077 | 193 | A05301 | A14149 | 196 |
| A05301 | A14178 | 491 | A05301 | A14239 | 218 |
| A05301 | A14252 | 308 | A05301 | A14266 | 489 |
| A05301 | A14281 | 433 | A05301 | A14439 | 179 |
| A05301 | A14484 | 396 | A05301 | A14594 | 441 |
| A05301 | A14692 | 200 | A05301 | A15365 | 191 |
| A05301 | A15501 | 472 | A05301 | A15768 | 491 |
| A05301 | A16255 | 171 | A05301 | A16478 | 480 |
| A05301 | A16565 | 318 | A05301 | A16598 | 319 |
| A05301 | A16660 | 477 | A05301 | A16677 | 378 |
| A05301 | A16708 | 422 | A05301 | A16807 | 491 |
| A05301 | A16922 | 308 | A05302 | A06161 | 270 |
| A05302 | A07165 | 163 | A05302 | A08065 | 424 |
| A05302 | A10532 | 221 | A05304 | A07339 | 210 |
| A05304 | A08635 | 396 | A05304 | A12304 | 407 |
| A05304 | A14827 | 283 | A05305 | A05891 | 229 |
| A05305 | A05931 | 375 | A05305 | A05944 | 424 |
| A05305 | A05985 | 412 | A05305 | A07031 | 232 |
| A05305 | A07173 | 350 | A05305 | A07390 | 310 |
| A05305 | A09090 | 367 | A05305 | A09981 | 409 |
| A05305 | A12752 | 388 | A05305 | A14392 | 201 |
| A05305 | A14416 | 329 | A05305 | A14432 | 484 |
| A05305 | A14442 | 475 | A05305 | A15394 | 428 |
| A05305 | A15395 | 451 | A05305 | A15601 | 405 |
| A05305 | A15602 | 458 | A05305 | A15603 | 445 |
| A05305 | A15605 | 380 | A05305 | A15806 | 321 |
| A05305 | A15981 | 469 | A05309 | A05940 | 162 |
| A05309 | A06014 | 230 | A05309 | A06650 | 468 |
| A05309 | A06659 | 265 | A05309 | A06675 | 205 |
| A05309 | A06942 | 324 | A05309 | A07031 | 347 |
| A05309 | A07045 | 279 | A05309 | A07157 | 63  |
| A05309 | A07164 | 319 | A05309 | A07165 | 457 |
| A05309 | A07177 | 195 | A05309 | A07187 | 223 |
| A05309 | A07200 | 480 | A05309 | A07207 | 480 |
| A05309 | A07483 | 240 | A05309 | A07584 | 260 |
| A05309 | A08197 | 154 | A05309 | A08389 | 208 |
| A05309 | A08430 | 152 | A05309 | A08627 | 491 |
| A05309 | A08755 | 255 | A05309 | A08866 | 165 |

|        |        |     |        |        |     |
|--------|--------|-----|--------|--------|-----|
| A05309 | A09174 | 273 | A05309 | A09232 | 213 |
| A05309 | A09386 | 179 | A05309 | A09435 | 363 |
| A05309 | A09741 | 199 | A05309 | A09932 | 321 |
| A05309 | A09937 | 260 | A05309 | A10422 | 179 |
| A05309 | A10609 | 172 | A05309 | A10791 | 271 |
| A05309 | A11075 | 152 | A05309 | A11266 | 238 |
| A05309 | A11539 | 224 | A05309 | A11606 | 213 |
| A05309 | A11992 | 180 | A05309 | A13052 | 314 |
| A05309 | A13163 | 196 | A05309 | A13421 | 238 |
| A05309 | A13772 | 243 | A05309 | A14071 | 427 |
| A05309 | A14745 | 213 | A05309 | A14928 | 316 |
| A05309 | A15283 | 246 | A05309 | A15498 | 170 |
| A05309 | A15553 | 213 | A05309 | A15855 | 183 |
| A05309 | A16045 | 255 | A05309 | A16066 | 324 |
| A05309 | A16281 | 318 | A05309 | A16636 | 491 |
| A05310 | A05472 | 201 | A05310 | A05515 | 274 |
| A05310 | A05516 | 241 | A05310 | A05555 | 350 |
| A05310 | A05600 | 441 | A05310 | A05661 | 364 |
| A05310 | A05729 | 356 | A05310 | A05753 | 434 |
| A05310 | A05754 | 430 | A05310 | A05757 | 232 |
| A05310 | A05771 | 334 | A05310 | A05774 | 296 |
| A05310 | A05899 | 344 | A05310 | A06086 | 215 |
| A05310 | A06088 | 405 | A05310 | A06089 | 427 |
| A05310 | A06358 | 329 | A05310 | A06359 | 491 |
| A05310 | A06360 | 322 | A05310 | A06668 | 316 |
| A05310 | A06773 | 285 | A05310 | A07080 | 334 |
| A05310 | A07109 | 317 | A05310 | A07122 | 465 |
| A05310 | A07148 | 277 | A05310 | A07238 | 165 |
| A05310 | A07239 | 343 | A05310 | A07288 | 316 |
| A05310 | A07413 | 317 | A05310 | A07520 | 277 |
| A05310 | A07590 | 190 | A05310 | A07973 | 201 |
| A05310 | A08751 | 408 | A05310 | A09632 | 436 |
| A05310 | A10027 | 391 | A05310 | A10614 | 486 |
| A05310 | A11304 | 385 | A05310 | A11432 | 338 |
| A05310 | A13836 | 391 | A05310 | A14827 | 306 |
| A05310 | A15282 | 312 | A05310 | A15874 | 452 |
| A05310 | A15905 | 439 | A05310 | A16026 | 469 |
| A05310 | A16027 | 454 | A05310 | A16344 | 205 |
| A05310 | A16741 | 327 | A05311 | A05376 | 455 |
| A05311 | A05459 | 388 | A05311 | A06344 | 366 |
| A05311 | A06831 | 449 | A05311 | A07143 | 469 |
| A05311 | A09219 | 375 | A05311 | A13734 | 173 |
| A05311 | A14799 | 212 | A05311 | A15430 | 205 |
| A05312 | A11387 | 363 | A05313 | A05548 | 294 |
| A05313 | A06127 | 371 | A05313 | A06439 | 185 |
| A05313 | A06628 | 177 | A05313 | A06860 | 216 |

|        |        |     |        |        |     |
|--------|--------|-----|--------|--------|-----|
| A05313 | A07059 | 199 | A05313 | A07520 | 157 |
| A05313 | A07670 | 185 | A05313 | A08061 | 456 |
| A05313 | A08518 | 199 | A05313 | A09791 | 190 |
| A05313 | A09828 | 234 | A05313 | A11616 | 232 |
| A05313 | A11675 | 198 | A05313 | A12254 | 176 |
| A05313 | A12873 | 180 | A05313 | A13399 | 176 |
| A05313 | A13707 | 218 | A05313 | A13805 | 269 |
| A05313 | A13809 | 212 | A05313 | A13912 | 327 |
| A05313 | A14154 | 177 | A05313 | A14351 | 240 |
| A05313 | A14569 | 218 | A05313 | A14664 | 163 |
| A05313 | A14708 | 173 | A05313 | A15189 | 184 |
| A05313 | A15238 | 277 | A05313 | A15620 | 294 |
| A05313 | A15850 | 340 | A05313 | A16225 | 190 |
| A05313 | A16597 | 196 | A05313 | A16608 | 162 |
| A05313 | A16764 | 199 | A05313 | A16790 | 268 |
| A05313 | A16838 | 256 | A05313 | A16905 | 232 |
| A05313 | A16954 | 268 | A05313 | A17033 | 281 |
| A05314 | A05349 | 296 | A05314 | A08677 | 390 |
| A05314 | A14198 | 226 | A05315 | A05349 | 899 |
| A05315 | A05878 | 238 | A05315 | A05879 | 232 |
| A05315 | A06608 | 163 | A05315 | A06660 | 246 |
| A05315 | A07165 | 899 | A05315 | A08086 | 268 |
| A05315 | A08673 | 345 | A05315 | A08732 | 196 |
| A05315 | A09149 | 179 | A05315 | A09363 | 196 |
| A05315 | A10012 | 353 | A05315 | A10109 | 291 |
| A05315 | A14393 | 899 | A05315 | A14443 | 899 |
| A05315 | A14444 | 899 | A05315 | A14882 | 258 |
| A05315 | A15294 | 899 | A05315 | A15506 | 913 |
| A05315 | A15691 | 899 | A05315 | A15738 | 173 |
| A05315 | A15962 | 174 | A05315 | A16397 | 314 |
| A05316 | A06203 | 430 | A05316 | A09127 | 339 |
| A05316 | A14642 | 338 | A05317 | A05348 | 385 |
| A05317 | A06606 | 156 | A05317 | A06650 | 369 |
| A05317 | A15498 | 311 | A05318 | A05501 | 258 |
| A05318 | A05502 | 218 | A05318 | A06309 | 201 |
| A05318 | A06320 | 491 | A05318 | A06411 | 243 |
| A05318 | A06589 | 488 | A05318 | A07773 | 165 |
| A05318 | A08228 | 162 | A05318 | A08674 | 345 |
| A05318 | A08684 | 207 | A05318 | A08763 | 151 |
| A05318 | A09296 | 286 | A05318 | A09664 | 490 |
| A05318 | A09852 | 201 | A05318 | A10689 | 238 |
| A05318 | A11296 | 269 | A05318 | A14699 | 405 |
| A05318 | A14778 | 246 | A05318 | A14817 | 238 |
| A05318 | A15931 | 339 | A05318 | A15937 | 483 |
| A05318 | A16531 | 167 | A05318 | A16753 | 202 |
| A05319 | A05669 | 438 | A05319 | A06607 | 187 |

|        |        |     |        |        |     |
|--------|--------|-----|--------|--------|-----|
| A05319 | A07198 | 416 | A05319 | A08741 | 373 |
| A05319 | A14423 | 386 | A05319 | A15674 | 394 |
| A05320 | A15874 | 350 | A05320 | A16741 | 314 |
| A05321 | A14391 | 319 | A05322 | A06606 | 156 |
| A05322 | A07190 | 224 | A05322 | A07201 | 167 |
| A05322 | A07280 | 363 | A05322 | A09372 | 380 |
| A05322 | A10215 | 360 | A05322 | A10247 | 171 |
| A05322 | A14190 | 157 | A05322 | A14376 | 333 |
| A05323 | A05880 | 160 | A05323 | A14527 | 259 |
| A05323 | A14928 | 168 | A05323 | A15651 | 241 |
| A05323 | A15661 | 316 | A05323 | A16750 | 396 |
| A05324 | A06036 | 491 | A05325 | A08114 | 281 |
| A05325 | A08280 | 343 | A05326 | A06277 | 312 |
| A05326 | A06752 | 224 | A05326 | A07311 | 899 |
| A05326 | A08878 | 182 | A05326 | A12436 | 488 |
| A05326 | A14443 | 899 | A05327 | A05375 | 251 |
| A05327 | A14655 | 232 | A05328 | A08137 | 171 |
| A05329 | A05985 | 272 | A05329 | A06344 | 360 |
| A05329 | A07161 | 314 | A05329 | A15394 | 301 |
| A05329 | A15395 | 283 | A05330 | A05331 | 490 |
| A05330 | A05332 | 273 | A05330 | A05337 | 288 |
| A05330 | A05418 | 260 | A05330 | A05424 | 443 |
| A05330 | A05433 | 380 | A05330 | A05451 | 345 |
| A05330 | A05550 | 435 | A05330 | A05573 | 246 |
| A05330 | A05609 | 281 | A05330 | A05659 | 379 |
| A05330 | A05912 | 449 | A05330 | A06110 | 408 |
| A05330 | A06245 | 358 | A05330 | A06629 | 235 |
| A05330 | A06641 | 401 | A05330 | A06847 | 412 |
| A05330 | A06970 | 288 | A05330 | A06994 | 422 |
| A05330 | A07027 | 399 | A05330 | A07059 | 423 |
| A05330 | A07222 | 260 | A05330 | A07325 | 269 |
| A05330 | A07408 | 425 | A05330 | A07413 | 230 |
| A05330 | A07501 | 390 | A05330 | A07619 | 362 |
| A05330 | A07674 | 472 | A05330 | A07723 | 319 |
| A05330 | A07851 | 183 | A05330 | A07931 | 243 |
| A05330 | A08197 | 412 | A05330 | A14247 | 235 |
| A05330 | A14665 | 235 | A05330 | A14709 | 170 |
| A05331 | A05333 | 371 | A05331 | A05433 | 283 |
| A05331 | A05451 | 221 | A05331 | A05912 | 296 |
| A05331 | A06350 | 257 | A05331 | A06402 | 201 |
| A05331 | A06847 | 174 | A05331 | A06860 | 219 |
| A05331 | A06994 | 201 | A05331 | A07059 | 417 |
| A05331 | A07311 | 199 | A05331 | A07408 | 213 |
| A05331 | A07520 | 324 | A05331 | A07619 | 249 |
| A05331 | A07684 | 283 | A05331 | A07711 | 196 |
| A05331 | A07763 | 272 | A05331 | A07795 | 273 |

|        |        |     |        |        |     |
|--------|--------|-----|--------|--------|-----|
| A05331 | A07847 | 406 | A05331 | A08133 | 199 |
| A05331 | A08199 | 174 | A05331 | A08278 | 343 |
| A05331 | A08385 | 268 | A05331 | A09846 | 167 |
| A05331 | A09911 | 193 | A05331 | A10422 | 330 |
| A05331 | A10498 | 217 | A05331 | A10687 | 217 |
| A05331 | A10690 | 201 | A05331 | A10700 | 238 |
| A05331 | A13590 | 195 | A05331 | A14186 | 465 |
| A05331 | A14386 | 182 | A05331 | A15724 | 458 |
| A05331 | A17189 | 319 | A05332 | A05609 | 628 |
| A05332 | A06810 | 340 | A05332 | A06819 | 480 |
| A05332 | A07074 | 455 | A05332 | A07222 | 628 |
| A05332 | A07232 | 377 | A05332 | A07333 | 317 |
| A05332 | A07571 | 609 | A05332 | A07931 | 490 |
| A05332 | A07974 | 623 | A05332 | A08097 | 317 |
| A05332 | A09276 | 452 | A05332 | A09340 | 317 |
| A05332 | A14525 | 182 | A05332 | A14803 | 420 |
| A05332 | A14858 | 436 | A05332 | A15191 | 314 |
| A05332 | A15655 | 293 | A05332 | A16753 | 362 |
| A05333 | A07059 | 321 | A05333 | A07108 | 297 |
| A05333 | A08138 | 229 | A05333 | A10247 | 249 |
| A05333 | A10882 | 404 | A05334 | A06242 | 481 |
| A05334 | A06309 | 188 | A05334 | A06431 | 422 |
| A05334 | A06851 | 491 | A05334 | A06864 | 428 |
| A05334 | A06982 | 489 | A05334 | A07079 | 198 |
| A05334 | A07314 | 63  | A05334 | A07319 | 424 |
| A05334 | A07346 | 491 | A05334 | A07466 | 475 |
| A05334 | A07480 | 491 | A05334 | A07534 | 400 |
| A05334 | A07603 | 490 | A05334 | A07647 | 305 |
| A05334 | A07902 | 210 | A05334 | A07996 | 372 |
| A05334 | A08000 | 235 | A05334 | A08029 | 246 |
| A05334 | A08030 | 305 | A05334 | A08117 | 316 |
| A05334 | A08208 | 457 | A05334 | A08212 | 299 |
| A05334 | A08526 | 263 | A05334 | A08669 | 477 |
| A05334 | A08700 | 269 | A05334 | A08820 | 491 |
| A05334 | A08888 | 196 | A05334 | A09288 | 63  |
| A05334 | A09598 | 491 | A05334 | A09626 | 228 |
| A05334 | A09751 | 472 | A05334 | A09754 | 63  |
| A05334 | A09764 | 252 | A05334 | A10213 | 159 |
| A05334 | A10373 | 79  | A05334 | A11540 | 491 |
| A05334 | A11880 | 313 | A05334 | A12190 | 268 |
| A05334 | A12556 | 330 | A05334 | A13913 | 489 |
| A05334 | A13949 | 485 | A05334 | A14079 | 491 |
| A05334 | A14230 | 486 | A05334 | A14273 | 435 |
| A05334 | A14460 | 190 | A05334 | A14629 | 185 |
| A05334 | A14694 | 485 | A05334 | A15369 | 486 |
| A05334 | A15837 | 480 | A05334 | A15939 | 438 |

|        |        |     |        |        |     |
|--------|--------|-----|--------|--------|-----|
| A05334 | A15941 | 479 | A05334 | A16127 | 491 |
| A05334 | A16128 | 491 | A05334 | A16226 | 472 |
| A05334 | A16606 | 223 | A05334 | A16613 | 473 |
| A05334 | A16626 | 485 | A05334 | A16731 | 226 |
| A05335 | A05556 | 160 | A05335 | A05670 | 299 |
| A05335 | A06742 | 353 | A05335 | A06773 | 291 |
| A05335 | A08943 | 163 | A05335 | A09028 | 249 |
| A05335 | A09388 | 263 | A05335 | A10337 | 204 |
| A05335 | A11647 | 241 | A05335 | A11875 | 238 |
| A05335 | A11935 | 241 | A05335 | A15302 | 162 |
| A05335 | A15920 | 173 | A05336 | A10530 | 441 |
| A05337 | A05358 | 299 | A05337 | A05433 | 378 |
| A05337 | A05451 | 425 | A05337 | A05548 | 483 |
| A05337 | A05550 | 260 | A05337 | A05573 | 240 |
| A05337 | A05751 | 279 | A05337 | A05820 | 378 |
| A05337 | A05912 | 385 | A05337 | A06405 | 353 |
| A05337 | A06439 | 414 | A05337 | A06629 | 228 |
| A05337 | A06632 | 352 | A05337 | A06640 | 283 |
| A05337 | A06641 | 443 | A05337 | A06668 | 343 |
| A05337 | A06733 | 326 | A05337 | A06847 | 408 |
| A05337 | A06860 | 245 | A05337 | A06994 | 419 |
| A05337 | A07027 | 286 | A05337 | A07059 | 467 |
| A05337 | A07080 | 243 | A05337 | A07088 | 240 |
| A05337 | A07122 | 278 | A05337 | A07141 | 179 |
| A05337 | A07283 | 243 | A05337 | A07408 | 335 |
| A05337 | A07501 | 272 | A05337 | A07520 | 319 |
| A05337 | A07619 | 358 | A05337 | A07674 | 439 |
| A05337 | A07690 | 291 | A05337 | A08155 | 328 |
| A05337 | A08372 | 160 | A05337 | A09932 | 160 |
| A05337 | A10508 | 332 | A05337 | A10537 | 407 |
| A05337 | A10599 | 256 | A05337 | A10669 | 240 |
| A05337 | A10776 | 215 | A05337 | A14803 | 246 |
| A05337 | A15913 | 217 | A05337 | A17006 | 313 |
| A05338 | A05424 | 474 | A05338 | A07007 | 329 |
| A05338 | A07027 | 168 | A05338 | A07690 | 176 |
| A05338 | A07851 | 340 | A05338 | A08190 | 205 |
| A05338 | A08279 | 235 | A05338 | A09607 | 162 |
| A05338 | A09846 | 190 | A05338 | A09880 | 302 |
| A05338 | A10444 | 162 | A05338 | A10691 | 291 |
| A05338 | A10715 | 196 | A05338 | A15361 | 208 |
| A05338 | A16288 | 157 | A05339 | A11259 | 418 |
| A05339 | A13614 | 329 | A05340 | A05777 | 334 |
| A05340 | A05975 | 427 | A05340 | A05976 | 411 |
| A05340 | A05977 | 411 | A05340 | A05978 | 427 |
| A05340 | A06069 | 488 | A05340 | A06070 | 379 |
| A05340 | A06346 | 245 | A05340 | A06711 | 363 |

|        |        |     |        |        |     |
|--------|--------|-----|--------|--------|-----|
| A05340 | A07704 | 319 | A05340 | A07705 | 311 |
| A05340 | A08162 | 395 | A05340 | A08292 | 345 |
| A05340 | A09140 | 417 | A05341 | A07441 | 472 |
| A05341 | A08206 | 430 | A05341 | A08392 | 438 |
| A05341 | A08393 | 447 | A05341 | A08425 | 447 |
| A05342 | A08836 | 254 | A05343 | A14299 | 183 |
| A05343 | A14483 | 302 | A05343 | A16644 | 353 |
| A05343 | A16738 | 160 | A05344 | A05880 | 177 |
| A05344 | A07135 | 306 | A05344 | A07165 | 170 |
| A05344 | A08741 | 312 | A05344 | A10460 | 334 |
| A05344 | A14390 | 352 | A05345 | A09785 | 402 |
| A05346 | A07200 | 361 | A05347 | A06345 | 452 |
| A05348 | A05416 | 154 | A05348 | A05827 | 433 |
| A05348 | A06607 | 260 | A05348 | A06650 | 443 |
| A05348 | A07122 | 176 | A05348 | A07200 | 417 |
| A05348 | A07381 | 207 | A05348 | A08602 | 358 |
| A05348 | A08604 | 385 | A05348 | A08699 | 380 |
| A05348 | A09192 | 439 | A05348 | A14410 | 329 |
| A05348 | A15282 | 160 | A05348 | A15498 | 184 |
| A05349 | A05388 | 249 | A05349 | A05427 | 445 |
| A05349 | A05878 | 303 | A05349 | A05920 | 462 |
| A05349 | A06136 | 348 | A05349 | A06370 | 238 |
| A05349 | A06415 | 382 | A05349 | A06511 | 348 |
| A05349 | A06520 | 418 | A05349 | A06689 | 202 |
| A05349 | A06904 | 348 | A05349 | A07141 | 337 |
| A05349 | A07146 | 188 | A05349 | A07161 | 257 |
| A05349 | A07164 | 187 | A05349 | A07200 | 227 |
| A05349 | A07469 | 182 | A05349 | A07557 | 249 |
| A05349 | A08252 | 229 | A05349 | A08661 | 174 |
| A05349 | A08677 | 187 | A05349 | A08739 | 183 |
| A05349 | A09147 | 372 | A05349 | A09395 | 177 |
| A05349 | A10866 | 218 | A05349 | A12927 | 208 |
| A05349 | A14071 | 156 | A05349 | A14208 | 412 |
| A05349 | A14391 | 247 | A05349 | A14393 | 899 |
| A05349 | A14605 | 154 | A05349 | A15506 | 899 |
| A05349 | A15601 | 177 | A05349 | A15613 | 467 |
| A05349 | A15842 | 348 | A05349 | A16151 | 212 |
| A05349 | A16216 | 305 | A05349 | A16595 | 266 |
| A05349 | A16636 | 483 | A05349 | A17136 | 411 |
| A05350 | A06095 | 388 | A05350 | A07165 | 223 |
| A05350 | A07961 | 317 | A05351 | A05568 | 177 |
| A05351 | A06296 | 260 | A05351 | A14434 | 388 |
| A05352 | A14674 | 313 | A05353 | A09556 | 228 |
| A05353 | A12367 | 420 | A05353 | A12368 | 409 |
| A05353 | A12373 | 170 | A05354 | A07422 | 173 |
| A05354 | A10748 | 353 | A05354 | A11400 | 302 |



|        |        |     |        |        |     |
|--------|--------|-----|--------|--------|-----|
| A05355 | A07339 | 254 | A05355 | A14603 | 393 |
| A05356 | A05394 | 363 | A05356 | A05429 | 252 |
| A05356 | A05439 | 473 | A05356 | A05487 | 308 |
| A05356 | A05494 | 236 | A05356 | A05527 | 466 |
| A05356 | A05678 | 371 | A05356 | A05736 | 88  |
| A05356 | A05837 | 353 | A05356 | A05926 | 316 |
| A05356 | A05945 | 491 | A05356 | A06069 | 196 |
| A05356 | A06177 | 172 | A05356 | A06331 | 252 |
| A05356 | A06461 | 252 | A05356 | A06462 | 252 |
| A05356 | A06526 | 135 | A05356 | A06527 | 414 |
| A05356 | A06532 | 216 | A05356 | A06591 | 190 |
| A05356 | A06607 | 491 | A05356 | A06696 | 329 |
| A05356 | A06731 | 303 | A05356 | A07020 | 490 |
| A05356 | A07039 | 179 | A05356 | A07218 | 205 |
| A05356 | A07327 | 252 | A05356 | A07367 | 256 |
| A05356 | A07438 | 488 | A05356 | A07442 | 185 |
| A05356 | A07452 | 491 | A05356 | A07468 | 389 |
| A05356 | A07471 | 491 | A05356 | A07472 | 489 |
| A05356 | A07475 | 491 | A05356 | A07491 | 172 |
| A05356 | A07496 | 480 | A05356 | A07509 | 490 |
| A05356 | A07510 | 483 | A05356 | A07535 | 346 |
| A05356 | A07541 | 491 | A05356 | A07542 | 475 |
| A05356 | A07543 | 477 | A05356 | A07561 | 483 |
| A05356 | A07567 | 491 | A05356 | A07601 | 235 |
| A05356 | A07610 | 428 | A05356 | A07624 | 252 |
| A05356 | A07629 | 363 | A05356 | A07630 | 221 |
| A05356 | A07634 | 477 | A05356 | A07635 | 491 |
| A05356 | A07636 | 213 | A05356 | A07650 | 467 |
| A05356 | A07652 | 477 | A05356 | A07653 | 489 |
| A05356 | A07654 | 490 | A05356 | A07656 | 491 |
| A05356 | A07662 | 167 | A05356 | A07673 | 491 |
| A05356 | A07740 | 489 | A05356 | A07741 | 449 |
| A05356 | A07754 | 491 | A05356 | A07827 | 216 |
| A05356 | A07893 | 414 | A05356 | A07913 | 491 |
| A05356 | A07914 | 491 | A05356 | A07915 | 346 |
| A05356 | A07916 | 489 | A05356 | A07928 | 490 |
| A05356 | A07950 | 435 | A05356 | A07958 | 489 |
| A05356 | A07988 | 457 | A05356 | A08097 | 364 |
| A05356 | A08137 | 246 | A05356 | A08165 | 252 |
| A05356 | A08173 | 179 | A05356 | A08210 | 485 |
| A05356 | A08217 | 252 | A05356 | A08218 | 490 |
| A05356 | A08244 | 157 | A05356 | A08246 | 466 |
| A05356 | A08288 | 179 | A05356 | A08342 | 193 |
| A05356 | A08392 | 193 | A05356 | A08395 | 346 |
| A05356 | A08404 | 491 | A05356 | A08451 | 252 |
| A05356 | A08511 | 252 | A05356 | A08747 | 167 |

|        |        |     |        |        |     |
|--------|--------|-----|--------|--------|-----|
| A05356 | A08783 | 299 | A05356 | A08785 | 491 |
| A05356 | A09139 | 179 | A05356 | A09416 | 467 |
| A05356 | A10525 | 414 | A05356 | A10563 | 488 |
| A05356 | A10651 | 201 | A05356 | A10841 | 216 |
| A05356 | A10967 | 472 | A05356 | A11037 | 216 |
| A05356 | A11279 | 217 | A05356 | A11311 | 226 |
| A05356 | A11327 | 281 | A05356 | A11370 | 216 |
| A05356 | A11424 | 404 | A05356 | A11428 | 401 |
| A05356 | A11548 | 414 | A05356 | A11552 | 491 |
| A05356 | A11671 | 252 | A05356 | A11989 | 216 |
| A05356 | A11990 | 216 | A05356 | A12117 | 193 |
| A05356 | A12787 | 180 | A05356 | A12793 | 228 |
| A05356 | A13046 | 327 | A05356 | A13140 | 157 |
| A05356 | A13280 | 179 | A05356 | A13361 | 302 |
| A05356 | A13369 | 568 | A05356 | A13871 | 328 |
| A05356 | A13874 | 199 | A05356 | A13879 | 443 |
| A05356 | A14156 | 213 | A05356 | A14193 | 469 |
| A05356 | A14196 | 188 | A05356 | A14202 | 485 |
| A05356 | A14204 | 467 | A05356 | A14220 | 185 |
| A05356 | A14247 | 749 | A05356 | A14258 | 307 |
| A05356 | A14381 | 486 | A05356 | A14449 | 270 |
| A05356 | A14661 | 286 | A05356 | A15229 | 210 |
| A05356 | A15292 | 254 | A05356 | A15321 | 363 |
| A05356 | A15322 | 563 | A05356 | A15328 | 268 |
| A05356 | A15336 | 254 | A05356 | A15366 | 347 |
| A05356 | A15422 | 414 | A05356 | A15432 | 185 |
| A05356 | A15433 | 201 | A05356 | A15498 | 218 |
| A05356 | A15682 | 347 | A05356 | A15809 | 335 |
| A05356 | A15922 | 472 | A05356 | A17078 | 329 |
| A05357 | A10694 | 378 | A05357 | A11522 | 291 |
| A05358 | A05418 | 279 | A05358 | A05420 | 386 |
| A05358 | A05451 | 432 | A05358 | A05452 | 363 |
| A05358 | A05472 | 262 | A05358 | A05548 | 330 |
| A05358 | A05550 | 391 | A05358 | A05615 | 340 |
| A05358 | A05761 | 377 | A05358 | A05883 | 489 |
| A05358 | A06090 | 467 | A05358 | A06405 | 245 |
| A05358 | A06629 | 247 | A05358 | A06641 | 306 |
| A05358 | A06734 | 480 | A05358 | A06860 | 489 |
| A05358 | A06994 | 341 | A05358 | A07037 | 473 |
| A05358 | A07088 | 259 | A05358 | A07314 | 159 |
| A05358 | A07520 | 483 | A05358 | A07590 | 249 |
| A05358 | A07674 | 208 | A05358 | A07690 | 307 |
| A05358 | A07736 | 221 | A05358 | A10679 | 324 |
| A05358 | A10694 | 333 | A05358 | A16741 | 165 |
| A05359 | A05378 | 402 | A05359 | A07604 | 263 |
| A05359 | A11458 | 441 | A05359 | A11567 | 438 |

|        |        |     |        |        |     |
|--------|--------|-----|--------|--------|-----|
| A05359 | A13336 | 374 | A05359 | A13944 | 329 |
| A05359 | A14875 | 446 | A05359 | A17198 | 216 |
| A05361 | A05705 | 390 | A05361 | A07216 | 398 |
| A05361 | A14198 | 157 | A05362 | A14001 | 351 |
| A05363 | A05633 | 202 | A05363 | A05866 | 305 |
| A05363 | A06077 | 463 | A05363 | A07823 | 366 |
| A05363 | A08527 | 389 | A05363 | A08608 | 456 |
| A05363 | A09464 | 288 | A05363 | A11309 | 210 |
| A05363 | A13181 | 232 | A05363 | A14400 | 452 |
| A05363 | A14825 | 424 | A05363 | A15388 | 230 |
| A05363 | A15795 | 238 | A05364 | A05691 | 385 |
| A05364 | A13734 | 251 | A05365 | A06201 | 364 |
| A05365 | A07339 | 217 | A05365 | A09073 | 299 |
| A05365 | A09561 | 257 | A05365 | A10987 | 224 |
| A05366 | A06607 | 305 | A05366 | A07200 | 256 |
| A05366 | A09072 | 356 | A05366 | A16021 | 430 |
| A05367 | A07205 | 324 | A05368 | A10199 | 399 |
| A05368 | A11015 | 414 | A05369 | A06471 | 417 |
| A05369 | A07655 | 451 | A05369 | A07878 | 438 |
| A05369 | A10394 | 434 | A05370 | A05411 | 218 |
| A05370 | A06101 | 286 | A05370 | A06134 | 278 |
| A05370 | A06234 | 353 | A05370 | A06761 | 267 |
| A05370 | A08555 | 159 | A05370 | A14525 | 191 |
| A05370 | A16219 | 269 | A05371 | A09926 | 432 |
| A05371 | A10130 | 445 | A05372 | A05612 | 486 |
| A05372 | A05641 | 393 | A05372 | A05886 | 394 |
| A05372 | A05887 | 378 | A05372 | A07218 | 457 |
| A05372 | A12897 | 180 | A05372 | A13816 | 311 |
| A05374 | A06037 | 263 | A05375 | A06048 | 401 |
| A05375 | A07160 | 188 | A05375 | A13987 | 254 |
| A05375 | A14272 | 228 | A05376 | A05393 | 306 |
| A05376 | A05459 | 456 | A05376 | A05620 | 326 |
| A05376 | A06739 | 229 | A05376 | A06831 | 472 |
| A05376 | A06970 | 249 | A05376 | A07059 | 334 |
| A05376 | A07141 | 152 | A05376 | A07143 | 221 |
| A05376 | A07407 | 434 | A05376 | A07736 | 307 |
| A05376 | A08881 | 353 | A05376 | A09036 | 305 |
| A05376 | A09056 | 269 | A05376 | A09277 | 398 |
| A05376 | A10078 | 188 | A05376 | A10091 | 446 |
| A05376 | A10131 | 270 | A05376 | A10594 | 353 |
| A05376 | A10967 | 277 | A05376 | A11279 | 367 |
| A05376 | A11329 | 311 | A05376 | A11925 | 353 |
| A05376 | A12793 | 213 | A05376 | A13832 | 208 |
| A05376 | A14247 | 647 | A05376 | A14453 | 383 |
| A05376 | A14473 | 269 | A05376 | A14481 | 353 |
| A05376 | A14661 | 201 | A05376 | A14693 | 353 |

|        |        |     |        |        |     |
|--------|--------|-----|--------|--------|-----|
| A05376 | A15277 | 418 | A05376 | A15301 | 569 |
| A05376 | A15302 | 353 | A05376 | A15366 | 634 |
| A05376 | A15430 | 457 | A05376 | A15462 | 428 |
| A05376 | A15463 | 563 | A05376 | A15498 | 201 |
| A05376 | A15669 | 213 | A05376 | A15874 | 306 |
| A05376 | A16741 | 243 | A05377 | A06124 | 360 |
| A05377 | A06648 | 219 | A05377 | A07509 | 312 |
| A05377 | A09740 | 343 | A05377 | A11081 | 394 |
| A05377 | A11274 | 394 | A05377 | A11897 | 269 |
| A05377 | A15913 | 218 | A05378 | A07191 | 338 |
| A05379 | A07340 | 452 | A05380 | A05879 | 348 |
| A05380 | A06358 | 312 | A05380 | A09202 | 317 |
| A05381 | A06006 | 435 | A05381 | A06323 | 441 |
| A05381 | A09364 | 461 | A05381 | A15241 | 302 |
| A05381 | A15272 | 409 | A05381 | A16068 | 302 |
| A05382 | A06346 | 308 | A05382 | A07218 | 201 |
| A05382 | A08292 | 384 | A05382 | A10948 | 441 |
| A05382 | A11031 | 441 | A05382 | A16154 | 441 |
| A05383 | A05853 | 335 | A05383 | A05894 | 151 |
| A05383 | A06588 | 481 | A05383 | A06775 | 307 |
| A05383 | A08569 | 216 | A05383 | A08819 | 329 |
| A05383 | A08894 | 441 | A05383 | A09370 | 328 |
| A05383 | A09416 | 202 | A05383 | A09443 | 485 |
| A05383 | A10175 | 219 | A05383 | A11835 | 291 |
| A05383 | A14261 | 384 | A05383 | A14623 | 334 |
| A05385 | A06861 | 252 | A05385 | A13992 | 216 |
| A05385 | A16042 | 346 | A05386 | A06242 | 157 |
| A05386 | A07232 | 358 | A05386 | A07800 | 265 |
| A05388 | A08875 | 290 | A05388 | A14229 | 188 |
| A05388 | A16636 | 183 | A05389 | A05390 | 418 |
| A05389 | A06263 | 316 | A05389 | A06908 | 332 |
| A05389 | A12115 | 413 | A05389 | A13258 | 460 |
| A05389 | A17078 | 193 | A05390 | A05899 | 366 |
| A05390 | A05945 | 217 | A05390 | A05985 | 202 |
| A05390 | A06263 | 436 | A05390 | A06439 | 213 |
| A05390 | A06527 | 252 | A05390 | A07031 | 224 |
| A05390 | A07143 | 428 | A05390 | A07218 | 157 |
| A05390 | A07407 | 283 | A05390 | A07541 | 157 |
| A05390 | A07542 | 258 | A05390 | A07561 | 235 |
| A05390 | A07610 | 268 | A05390 | A07808 | 451 |
| A05390 | A08079 | 330 | A05390 | A08714 | 434 |
| A05390 | A09072 | 456 | A05390 | A12115 | 393 |
| A05390 | A13258 | 393 | A05390 | A13772 | 208 |
| A05390 | A13871 | 430 | A05390 | A14533 | 384 |
| A05390 | A14652 | 319 | A05390 | A17078 | 358 |
| A05391 | A05416 | 396 | A05391 | A11405 | 200 |

|        |        |     |        |        |     |
|--------|--------|-----|--------|--------|-----|
| A05391 | A14221 | 346 | A05391 | A14661 | 322 |
| A05392 | A06606 | 184 | A05393 | A05394 | 424 |
| A05393 | A05416 | 232 | A05393 | A05426 | 327 |
| A05393 | A05687 | 337 | A05393 | A05883 | 224 |
| A05393 | A06970 | 269 | A05393 | A07059 | 269 |
| A05393 | A07121 | 371 | A05393 | A07239 | 165 |
| A05393 | A07334 | 449 | A05393 | A07367 | 165 |
| A05393 | A07407 | 332 | A05393 | A07490 | 281 |
| A05393 | A07684 | 208 | A05393 | A07688 | 165 |
| A05393 | A07711 | 477 | A05393 | A07718 | 363 |
| A05393 | A07736 | 335 | A05393 | A07763 | 199 |
| A05393 | A07795 | 318 | A05393 | A07796 | 252 |
| A05393 | A07800 | 185 | A05393 | A07856 | 285 |
| A05393 | A07890 | 371 | A05393 | A07973 | 152 |
| A05393 | A08197 | 230 | A05393 | A09825 | 372 |
| A05393 | A14193 | 460 | A05393 | A14204 | 447 |
| A05393 | A14637 | 311 | A05393 | A15874 | 232 |
| A05393 | A16741 | 162 | A05393 | A17078 | 249 |
| A05394 | A05472 | 278 | A05394 | A05573 | 389 |
| A05394 | A05759 | 314 | A05394 | A05945 | 255 |
| A05394 | A07027 | 317 | A05394 | A07239 | 286 |
| A05394 | A07271 | 389 | A05394 | A07322 | 341 |
| A05394 | A07330 | 484 | A05394 | A07381 | 346 |
| A05394 | A07496 | 373 | A05394 | A07567 | 398 |
| A05394 | A07673 | 399 | A05394 | A07711 | 430 |
| A05394 | A07736 | 363 | A05394 | A07913 | 374 |
| A05394 | A08404 | 477 | A05395 | A05813 | 467 |
| A05395 | A06141 | 391 | A05395 | A06212 | 379 |
| A05395 | A06428 | 419 | A05395 | A07135 | 255 |
| A05396 | A08728 | 369 | A05396 | A08857 | 219 |
| A05396 | A12875 | 235 | A05396 | A14191 | 205 |
| A05396 | A14253 | 263 | A05398 | A05761 | 369 |
| A05398 | A09982 | 395 | A05398 | A10320 | 217 |
| A05398 | A10832 | 385 | A05398 | A11683 | 477 |
| A05398 | A12019 | 385 | A05398 | A14338 | 408 |
| A05401 | A07020 | 202 | A05401 | A07208 | 137 |
| A05401 | A08461 | 352 | A05401 | A08987 | 201 |
| A05401 | A09043 | 296 | A05401 | A10655 | 366 |
| A05401 | A10797 | 485 | A05401 | A10798 | 635 |
| A05401 | A10799 | 438 | A05401 | A10804 | 241 |
| A05401 | A12295 | 486 | A05401 | A13816 | 367 |
| A05401 | A13867 | 488 | A05401 | A14193 | 192 |
| A05401 | A14247 | 482 | A05401 | A15303 | 332 |
| A05401 | A15498 | 480 | A05401 | A16891 | 283 |
| A05401 | A16910 | 380 | A05402 | A05665 | 288 |
| A05402 | A06132 | 353 | A05402 | A06758 | 217 |

|        |        |     |        |        |     |
|--------|--------|-----|--------|--------|-----|
| A05402 | A07199 | 310 | A05402 | A07324 | 241 |
| A05402 | A07748 | 236 | A05402 | A09941 | 348 |
| A05403 | A07604 | 165 | A05407 | A06769 | 440 |
| A05407 | A10756 | 338 | A05407 | A11646 | 419 |
| A05407 | A14382 | 407 | A05408 | A06037 | 283 |
| A05408 | A14210 | 286 | A05409 | A05653 | 406 |
| A05409 | A06046 | 383 | A05409 | A07209 | 352 |
| A05409 | A09552 | 394 | A05409 | A12605 | 422 |
| A05410 | A07135 | 188 | A05410 | A08369 | 232 |
| A05410 | A10313 | 367 | A05410 | A12361 | 297 |
| A05410 | A14642 | 256 | A05410 | A14643 | 159 |
| A05411 | A05646 | 247 | A05411 | A06825 | 294 |
| A05411 | A06965 | 475 | A05411 | A07069 | 343 |
| A05411 | A07447 | 367 | A05411 | A08011 | 462 |
| A05411 | A08055 | 467 | A05411 | A08550 | 372 |
| A05411 | A08559 | 291 | A05411 | A08682 | 173 |
| A05411 | A08773 | 609 | A05411 | A09044 | 491 |
| A05411 | A09332 | 263 | A05411 | A11322 | 151 |
| A05411 | A11331 | 326 | A05411 | A11390 | 191 |
| A05411 | A11400 | 297 | A05411 | A11438 | 299 |
| A05411 | A11704 | 176 | A05411 | A11945 | 193 |
| A05411 | A11981 | 213 | A05411 | A13249 | 372 |
| A05411 | A13626 | 263 | A05411 | A13992 | 219 |
| A05411 | A15062 | 367 | A05411 | A15221 | 204 |
| A05411 | A15235 | 188 | A05411 | A15988 | 404 |
| A05411 | A16118 | 364 | A05412 | A05891 | 380 |
| A05412 | A06635 | 373 | A05412 | A16021 | 445 |
| A05413 | A05666 | 425 | A05413 | A10582 | 441 |
| A05414 | A05438 | 303 | A05414 | A05454 | 899 |
| A05414 | A05556 | 180 | A05414 | A05854 | 223 |
| A05414 | A07187 | 254 | A05414 | A07339 | 899 |
| A05414 | A08878 | 363 | A05414 | A09155 | 899 |
| A05414 | A09162 | 367 | A05414 | A10174 | 899 |
| A05414 | A10615 | 899 | A05414 | A11983 | 943 |
| A05414 | A12062 | 294 | A05414 | A13978 | 229 |
| A05414 | A14002 | 402 | A05414 | A14055 | 399 |
| A05414 | A14206 | 401 | A05414 | A14704 | 260 |
| A05414 | A14741 | 173 | A05414 | A14777 | 290 |
| A05414 | A14913 | 364 | A05415 | A05701 | 347 |
| A05415 | A06078 | 218 | A05415 | A06897 | 313 |
| A05415 | A08235 | 246 | A05415 | A09145 | 328 |
| A05415 | A09149 | 269 | A05415 | A09900 | 173 |
| A05415 | A10018 | 480 | A05415 | A10047 | 235 |
| A05415 | A10247 | 491 | A05415 | A11658 | 167 |
| A05415 | A11852 | 185 | A05415 | A12604 | 319 |
| A05415 | A13348 | 333 | A05415 | A13680 | 364 |

|        |        |     |        |        |     |
|--------|--------|-----|--------|--------|-----|
| A05415 | A14120 | 238 | A05415 | A14187 | 180 |
| A05415 | A14335 | 187 | A05415 | A14469 | 263 |
| A05415 | A15196 | 257 | A05415 | A15545 | 180 |
| A05415 | A15626 | 230 | A05416 | A05444 | 327 |
| A05416 | A05472 | 193 | A05416 | A05550 | 218 |
| A05416 | A05573 | 191 | A05416 | A05622 | 369 |
| A05416 | A05659 | 384 | A05416 | A05663 | 327 |
| A05416 | A05757 | 335 | A05416 | A05771 | 234 |
| A05416 | A05914 | 157 | A05416 | A06019 | 234 |
| A05416 | A06211 | 193 | A05416 | A06282 | 228 |
| A05416 | A06358 | 290 | A05416 | A06359 | 163 |
| A05416 | A06405 | 168 | A05416 | A06473 | 198 |
| A05416 | A06558 | 268 | A05416 | A06689 | 481 |
| A05416 | A06692 | 200 | A05416 | A06700 | 274 |
| A05416 | A06830 | 170 | A05416 | A06860 | 196 |
| A05416 | A06970 | 486 | A05416 | A06979 | 260 |
| A05416 | A06981 | 160 | A05416 | A07059 | 452 |
| A05416 | A07078 | 449 | A05416 | A07088 | 294 |
| A05416 | A07109 | 168 | A05416 | A07122 | 360 |
| A05416 | A07238 | 385 | A05416 | A07256 | 441 |
| A05416 | A07304 | 221 | A05416 | A07341 | 185 |
| A05416 | A07367 | 208 | A05416 | A07376 | 165 |
| A05416 | A07385 | 472 | A05416 | A07477 | 489 |
| A05416 | A07511 | 163 | A05416 | A07520 | 433 |
| A05416 | A07558 | 351 | A05416 | A07590 | 489 |
| A05416 | A07674 | 484 | A05416 | A07688 | 210 |
| A05416 | A07721 | 417 | A05416 | A07736 | 483 |
| A05416 | A07737 | 154 | A05416 | A07800 | 263 |
| A05416 | A07844 | 210 | A05416 | A07856 | 217 |
| A05416 | A07926 | 258 | A05416 | A07933 | 486 |
| A05416 | A07973 | 479 | A05416 | A07976 | 458 |
| A05416 | A08155 | 318 | A05416 | A08238 | 163 |
| A05416 | A08250 | 185 | A05416 | A08256 | 196 |
| A05416 | A08310 | 241 | A05416 | A08330 | 224 |
| A05416 | A08663 | 156 | A05416 | A08667 | 152 |
| A05416 | A08751 | 196 | A05416 | A09059 | 179 |
| A05416 | A09624 | 195 | A05416 | A09876 | 271 |
| A05416 | A09951 | 299 | A05416 | A10124 | 327 |
| A05416 | A10420 | 382 | A05416 | A10430 | 396 |
| A05416 | A10443 | 172 | A05416 | A10444 | 406 |
| A05416 | A10452 | 450 | A05416 | A10456 | 223 |
| A05416 | A10479 | 268 | A05416 | A10635 | 490 |
| A05416 | A10656 | 395 | A05416 | A10658 | 170 |
| A05416 | A10659 | 212 | A05416 | A10672 | 179 |
| A05416 | A10677 | 460 | A05416 | A10686 | 303 |
| A05416 | A10688 | 396 | A05416 | A10694 | 170 |

|        |        |     |        |        |     |
|--------|--------|-----|--------|--------|-----|
| A05416 | A11487 | 252 | A05416 | A11580 | 327 |
| A05416 | A11847 | 355 | A05416 | A11937 | 569 |
| A05416 | A12723 | 174 | A05416 | A13362 | 204 |
| A05416 | A13369 | 348 | A05416 | A13717 | 234 |
| A05416 | A13906 | 182 | A05416 | A14306 | 377 |
| A05416 | A14685 | 241 | A05416 | A14729 | 258 |
| A05416 | A14803 | 460 | A05416 | A14821 | 196 |
| A05416 | A14827 | 188 | A05416 | A14856 | 462 |
| A05416 | A14862 | 196 | A05416 | A14907 | 299 |
| A05416 | A15223 | 234 | A05416 | A15291 | 537 |
| A05416 | A15682 | 187 | A05416 | A15874 | 317 |
| A05416 | A15970 | 374 | A05416 | A16103 | 378 |
| A05416 | A16286 | 441 | A05416 | A16335 | 190 |
| A05416 | A16387 | 182 | A05416 | A16529 | 182 |
| A05416 | A16599 | 327 | A05416 | A16767 | 172 |
| A05416 | A16847 | 396 | A05416 | A17001 | 234 |
| A05416 | A17006 | 163 | A05416 | A17007 | 265 |
| A05416 | A17041 | 270 | A05416 | A17155 | 165 |
| A05417 | A05812 | 490 | A05417 | A06175 | 260 |
| A05417 | A07394 | 484 | A05417 | A07771 | 168 |
| A05417 | A08222 | 310 | A05417 | A08519 | 196 |
| A05417 | A08572 | 456 | A05417 | A09054 | 490 |
| A05417 | A09061 | 241 | A05417 | A09093 | 226 |
| A05417 | A09228 | 208 | A05417 | A09842 | 199 |
| A05417 | A10158 | 182 | A05417 | A10535 | 243 |
| A05417 | A10625 | 185 | A05417 | A11062 | 219 |
| A05417 | A11301 | 441 | A05417 | A11833 | 171 |
| A05417 | A12215 | 174 | A05417 | A13037 | 322 |
| A05417 | A13446 | 293 | A05417 | A14127 | 490 |
| A05417 | A14496 | 63  | A05417 | A14566 | 299 |
| A05417 | A15535 | 152 | A05417 | A15559 | 441 |
| A05417 | A15653 | 454 | A05417 | A15666 | 463 |
| A05417 | A15729 | 200 | A05417 | A15765 | 446 |
| A05418 | A05433 | 193 | A05418 | A05532 | 180 |
| A05418 | A05550 | 360 | A05418 | A05721 | 154 |
| A05418 | A05746 | 208 | A05418 | A05759 | 251 |
| A05418 | A05912 | 339 | A05418 | A05961 | 423 |
| A05418 | A05986 | 152 | A05418 | A06277 | 480 |
| A05418 | A06286 | 383 | A05418 | A06554 | 407 |
| A05418 | A06558 | 193 | A05418 | A06588 | 319 |
| A05418 | A06599 | 358 | A05418 | A06610 | 329 |
| A05418 | A06641 | 260 | A05418 | A06650 | 451 |
| A05418 | A06847 | 191 | A05418 | A06855 | 232 |
| A05418 | A06874 | 243 | A05418 | A06914 | 460 |
| A05418 | A06970 | 195 | A05418 | A06994 | 329 |
| A05418 | A07027 | 255 | A05418 | A07059 | 232 |



|        |        |     |        |        |     |
|--------|--------|-----|--------|--------|-----|
| A05418 | A07088 | 171 | A05418 | A07200 | 434 |
| A05418 | A07209 | 436 | A05418 | A07221 | 218 |
| A05418 | A07239 | 193 | A05418 | A07339 | 433 |
| A05418 | A07354 | 154 | A05418 | A07366 | 361 |
| A05418 | A07408 | 243 | A05418 | A07420 | 401 |
| A05418 | A07479 | 212 | A05418 | A07520 | 151 |
| A05418 | A07619 | 154 | A05418 | A07717 | 208 |
| A05418 | A07723 | 490 | A05418 | A07726 | 491 |
| A05418 | A07797 | 265 | A05418 | A07803 | 396 |
| A05418 | A08075 | 265 | A05418 | A08280 | 280 |
| A05418 | A08571 | 199 | A05418 | A08588 | 226 |
| A05418 | A08746 | 188 | A05418 | A08872 | 191 |
| A05418 | A08878 | 485 | A05418 | A08944 | 330 |
| A05418 | A09235 | 243 | A05418 | A09238 | 263 |
| A05418 | A09239 | 202 | A05418 | A09399 | 162 |
| A05418 | A09422 | 321 | A05418 | A09778 | 207 |
| A05418 | A09876 | 346 | A05418 | A10072 | 479 |
| A05418 | A10169 | 193 | A05418 | A10332 | 276 |
| A05418 | A10453 | 154 | A05418 | A10703 | 157 |
| A05418 | A10926 | 162 | A05418 | A11250 | 263 |
| A05418 | A11300 | 160 | A05418 | A11403 | 451 |
| A05418 | A11646 | 228 | A05418 | A11762 | 265 |
| A05418 | A11983 | 583 | A05418 | A12393 | 268 |
| A05418 | A12897 | 480 | A05418 | A13063 | 383 |
| A05418 | A13151 | 163 | A05418 | A13248 | 208 |
| A05418 | A13312 | 208 | A05418 | A13579 | 208 |
| A05418 | A13989 | 246 | A05418 | A14198 | 456 |
| A05418 | A14410 | 243 | A05418 | A14440 | 412 |
| A05418 | A14443 | 480 | A05418 | A14444 | 577 |
| A05418 | A14481 | 179 | A05418 | A14635 | 417 |
| A05418 | A14636 | 429 | A05418 | A14685 | 162 |
| A05418 | A15167 | 193 | A05418 | A15282 | 460 |
| A05418 | A15356 | 480 | A05418 | A15606 | 285 |
| A05418 | A15726 | 199 | A05418 | A15848 | 208 |
| A05418 | A16068 | 174 | A05418 | A16626 | 486 |
| A05419 | A06472 | 312 | A05419 | A06546 | 201 |
| A05419 | A06586 | 201 | A05419 | A06924 | 232 |
| A05419 | A07333 | 329 | A05419 | A07457 | 167 |
| A05419 | A07844 | 449 | A05419 | A07889 | 377 |
| A05419 | A08454 | 238 | A05419 | A08484 | 434 |
| A05419 | A09528 | 201 | A05419 | A09672 | 154 |
| A05419 | A09709 | 238 | A05419 | A09714 | 305 |
| A05419 | A10123 | 353 | A05419 | A10218 | 241 |
| A05419 | A10598 | 200 | A05419 | A10910 | 252 |
| A05419 | A12292 | 310 | A05419 | A12696 | 353 |
| A05419 | A12764 | 323 | A05419 | A13027 | 340 |

|        |        |     |        |        |     |
|--------|--------|-----|--------|--------|-----|
| A05419 | A13432 | 313 | A05419 | A14188 | 401 |
| A05419 | A15645 | 329 | A05419 | A16100 | 291 |
| A05419 | A16440 | 157 | A05419 | A16769 | 391 |
| A05420 | A07520 | 318 | A05422 | A09953 | 411 |
| A05422 | A10276 | 435 | A05422 | A13369 | 177 |
| A05422 | A14633 | 195 | A05423 | A15365 | 385 |
| A05424 | A05550 | 168 | A05424 | A05610 | 294 |
| A05424 | A05659 | 296 | A05424 | A05706 | 252 |
| A05424 | A05966 | 152 | A05424 | A06245 | 290 |
| A05424 | A06636 | 398 | A05424 | A06847 | 227 |
| A05424 | A06970 | 262 | A05424 | A07757 | 458 |
| A05424 | A07771 | 416 | A05424 | A07851 | 443 |
| A05424 | A08197 | 353 | A05424 | A08215 | 577 |
| A05424 | A08707 | 368 | A05424 | A09948 | 347 |
| A05424 | A10679 | 228 | A05424 | A10691 | 399 |
| A05424 | A10698 | 454 | A05424 | A15187 | 188 |
| A05424 | A16028 | 347 | A05424 | A16288 | 187 |
| A05425 | A05966 | 168 | A05425 | A06264 | 165 |
| A05425 | A07061 | 279 | A05425 | A07590 | 152 |
| A05425 | A07737 | 238 | A05425 | A08043 | 344 |
| A05425 | A08135 | 232 | A05425 | A10706 | 210 |
| A05425 | A11156 | 180 | A05425 | A12551 | 357 |
| A05425 | A14192 | 357 | A05425 | A14193 | 160 |
| A05425 | A14204 | 208 | A05425 | A14263 | 281 |
| A05426 | A08379 | 281 | A05426 | A14371 | 272 |
| A05427 | A06258 | 224 | A05427 | A06299 | 193 |
| A05427 | A07141 | 274 | A05427 | A07560 | 162 |
| A05427 | A09449 | 428 | A05427 | A12047 | 250 |
| A05427 | A12990 | 366 | A05427 | A13734 | 210 |
| A05427 | A14204 | 163 | A05427 | A14397 | 227 |
| A05427 | A15308 | 182 | A05427 | A16153 | 262 |
| A05428 | A05482 | 899 | A05428 | A05621 | 191 |
| A05428 | A06143 | 266 | A05428 | A06176 | 241 |
| A05428 | A06348 | 475 | A05428 | A06660 | 916 |
| A05428 | A06715 | 249 | A05428 | A07706 | 308 |
| A05428 | A08503 | 277 | A05428 | A08536 | 311 |
| A05428 | A08571 | 602 | A05428 | A08839 | 945 |
| A05428 | A08858 | 252 | A05428 | A09256 | 74  |
| A05428 | A10353 | 185 | A05428 | A10615 | 465 |
| A05428 | A10624 | 171 | A05428 | A10824 | 259 |
| A05428 | A10894 | 147 | A05428 | A11332 | 305 |
| A05428 | A11840 | 263 | A05428 | A11923 | 174 |
| A05428 | A12047 | 200 | A05428 | A13147 | 126 |
| A05428 | A13320 | 174 | A05428 | A14202 | 899 |
| A05428 | A14226 | 899 | A05428 | A14474 | 269 |
| A05428 | A14540 | 414 | A05428 | A14713 | 288 |

|        |        |     |        |        |     |
|--------|--------|-----|--------|--------|-----|
| A05428 | A14719 | 205 | A05428 | A15292 | 899 |
| A05428 | A15503 | 232 | A05428 | A15726 | 456 |
| A05431 | A05463 | 449 | A05431 | A05573 | 445 |
| A05431 | A05851 | 396 | A05431 | A06855 | 195 |
| A05431 | A07004 | 302 | A05431 | A07242 | 349 |
| A05431 | A09058 | 174 | A05431 | A10768 | 246 |
| A05431 | A11714 | 201 | A05431 | A12365 | 534 |
| A05431 | A13369 | 519 | A05431 | A14404 | 152 |
| A05431 | A14782 | 188 | A05431 | A15665 | 291 |
| A05432 | A06241 | 481 | A05432 | A06610 | 213 |
| A05432 | A14605 | 475 | A05432 | A16645 | 411 |
| A05433 | A05451 | 457 | A05433 | A05550 | 438 |
| A05433 | A05573 | 353 | A05433 | A05912 | 430 |
| A05433 | A06629 | 345 | A05433 | A06641 | 380 |
| A05433 | A06734 | 399 | A05433 | A06847 | 391 |
| A05433 | A06994 | 401 | A05433 | A07027 | 379 |
| A05433 | A07037 | 400 | A05433 | A07059 | 345 |
| A05433 | A07325 | 274 | A05433 | A07408 | 406 |
| A05433 | A07501 | 371 | A05433 | A07520 | 318 |
| A05433 | A07553 | 330 | A05433 | A07619 | 417 |
| A05433 | A07674 | 319 | A05433 | A08108 | 375 |
| A05433 | A09381 | 388 | A05434 | A05516 | 363 |
| A05434 | A07080 | 340 | A05434 | A07288 | 401 |
| A05434 | A14198 | 204 | A05435 | A10394 | 434 |
| A05435 | A10483 | 445 | A05436 | A06634 | 390 |
| A05436 | A06717 | 475 | A05436 | A07746 | 374 |
| A05436 | A13330 | 434 | A05436 | A13426 | 369 |
| A05437 | A07373 | 380 | A05437 | A13609 | 255 |
| A05438 | A05918 | 477 | A05438 | A05927 | 408 |
| A05438 | A06701 | 160 | A05438 | A06778 | 305 |
| A05438 | A07200 | 151 | A05438 | A08878 | 252 |
| A05438 | A09671 | 302 | A05438 | A09995 | 265 |
| A05438 | A10742 | 358 | A05438 | A11149 | 273 |
| A05438 | A11576 | 252 | A05438 | A12062 | 333 |
| A05438 | A15187 | 310 | A05439 | A05601 | 458 |
| A05439 | A05603 | 283 | A05439 | A05653 | 369 |
| A05439 | A05697 | 322 | A05439 | A05879 | 180 |
| A05439 | A05923 | 201 | A05439 | A05940 | 216 |
| A05439 | A06038 | 490 | A05439 | A06100 | 159 |
| A05439 | A06277 | 450 | A05439 | A06708 | 162 |
| A05439 | A06907 | 301 | A05439 | A06997 | 373 |
| A05439 | A07199 | 228 | A05439 | A07209 | 491 |
| A05439 | A07210 | 176 | A05439 | A07311 | 323 |
| A05439 | A07472 | 152 | A05439 | A07836 | 249 |
| A05439 | A08097 | 457 | A05439 | A08172 | 238 |
| A05439 | A08600 | 322 | A05439 | A08630 | 455 |

|        |        |     |        |        |     |
|--------|--------|-----|--------|--------|-----|
| A05439 | A08685 | 221 | A05439 | A08686 | 355 |
| A05439 | A08753 | 151 | A05439 | A08859 | 196 |
| A05439 | A09028 | 173 | A05439 | A09062 | 249 |
| A05439 | A09141 | 205 | A05439 | A09205 | 176 |
| A05439 | A09239 | 357 | A05439 | A09245 | 414 |
| A05439 | A09246 | 367 | A05439 | A09559 | 388 |
| A05439 | A10336 | 88  | A05439 | A10711 | 257 |
| A05439 | A10744 | 243 | A05439 | A10765 | 224 |
| A05439 | A10811 | 152 | A05439 | A11431 | 210 |
| A05439 | A11970 | 358 | A05439 | A11983 | 343 |
| A05439 | A12069 | 152 | A05439 | A12265 | 447 |
| A05439 | A12298 | 445 | A05439 | A12393 | 351 |
| A05439 | A12561 | 335 | A05439 | A12824 | 165 |
| A05439 | A13587 | 180 | A05439 | A14210 | 412 |
| A05439 | A14220 | 488 | A05439 | A14372 | 221 |
| A05439 | A14375 | 401 | A05439 | A14377 | 216 |
| A05439 | A14391 | 273 | A05439 | A14430 | 224 |
| A05439 | A14432 | 224 | A05439 | A14511 | 406 |
| A05439 | A14516 | 154 | A05439 | A14570 | 391 |
| A05439 | A14611 | 167 | A05439 | A14635 | 196 |
| A05439 | A14733 | 202 | A05439 | A14936 | 383 |
| A05439 | A15135 | 243 | A05439 | A15281 | 243 |
| A05439 | A15282 | 449 | A05439 | A15292 | 385 |
| A05439 | A15432 | 184 | A05439 | A15498 | 259 |
| A05439 | A15904 | 279 | A05439 | A16001 | 358 |
| A05439 | A16036 | 310 | A05440 | A06157 | 441 |
| A05440 | A09220 | 356 | A05440 | A14364 | 369 |
| A05442 | A06484 | 337 | A05442 | A06516 | 466 |
| A05442 | A11983 | 174 | A05442 | A12698 | 438 |
| A05443 | A05996 | 412 | A05443 | A06279 | 396 |
| A05443 | A06324 | 201 | A05443 | A06428 | 601 |
| A05443 | A06814 | 249 | A05443 | A06965 | 252 |
| A05443 | A07398 | 290 | A05443 | A07451 | 472 |
| A05443 | A07848 | 274 | A05443 | A08061 | 168 |
| A05443 | A08357 | 201 | A05443 | A08521 | 218 |
| A05443 | A09332 | 159 | A05443 | A09469 | 159 |
| A05443 | A09696 | 226 | A05443 | A09727 | 899 |
| A05443 | A10532 | 247 | A05443 | A10887 | 249 |
| A05443 | A11945 | 236 | A05443 | A11974 | 288 |
| A05443 | A12643 | 238 | A05443 | A13063 | 163 |
| A05443 | A13249 | 367 | A05443 | A13549 | 278 |
| A05443 | A13830 | 312 | A05443 | A13989 | 491 |
| A05443 | A13992 | 401 | A05443 | A14000 | 321 |
| A05443 | A15366 | 205 | A05443 | A15660 | 288 |
| A05443 | A15684 | 389 | A05443 | A15698 | 252 |
| A05443 | A15894 | 279 | A05443 | A16685 | 238 |

|        |        |     |        |        |     |
|--------|--------|-----|--------|--------|-----|
| A05444 | A07367 | 395 | A05444 | A09951 | 447 |
| A05445 | A05591 | 345 | A05445 | A06424 | 393 |
| A05445 | A07196 | 350 | A05445 | A07242 | 489 |
| A05445 | A07605 | 238 | A05445 | A07893 | 408 |
| A05445 | A08938 | 361 | A05445 | A11473 | 299 |
| A05445 | A11712 | 383 | A05445 | A12454 | 406 |
| A05445 | A14266 | 259 | A05446 | A06597 | 193 |
| A05446 | A07126 | 245 | A05446 | A07154 | 259 |
| A05446 | A08911 | 226 | A05446 | A09220 | 167 |
| A05446 | A10058 | 391 | A05446 | A13829 | 180 |
| A05446 | A13982 | 394 | A05446 | A14135 | 212 |
| A05446 | A14269 | 356 | A05446 | A15482 | 238 |
| A05446 | A15573 | 322 | A05446 | A15575 | 235 |
| A05446 | A15576 | 400 | A05446 | A16225 | 177 |
| A05446 | A16460 | 391 | A05447 | A06607 | 171 |
| A05447 | A07656 | 335 | A05447 | A15342 | 328 |
| A05447 | A15343 | 366 | A05447 | A16424 | 367 |
| A05448 | A06629 | 272 | A05448 | A06640 | 319 |
| A05448 | A06641 | 324 | A05448 | A06776 | 374 |
| A05448 | A15415 | 326 | A05449 | A05556 | 515 |
| A05449 | A05577 | 483 | A05449 | A06011 | 188 |
| A05449 | A06177 | 176 | A05449 | A06179 | 156 |
| A05449 | A06360 | 151 | A05449 | A06588 | 402 |
| A05449 | A07050 | 491 | A05449 | A07243 | 393 |
| A05449 | A07360 | 154 | A05449 | A07478 | 385 |
| A05449 | A07585 | 491 | A05449 | A07728 | 159 |
| A05449 | A08137 | 446 | A05449 | A08664 | 393 |
| A05449 | A08850 | 462 | A05449 | A08860 | 278 |
| A05449 | A10088 | 241 | A05449 | A10237 | 162 |
| A05449 | A10417 | 393 | A05449 | A10532 | 486 |
| A05449 | A10683 | 274 | A05449 | A11297 | 747 |
| A05449 | A11331 | 406 | A05449 | A11357 | 232 |
| A05449 | A11734 | 165 | A05449 | A11931 | 428 |
| A05449 | A11981 | 245 | A05449 | A12809 | 193 |
| A05449 | A12826 | 241 | A05449 | A13340 | 160 |
| A05449 | A13344 | 221 | A05449 | A13473 | 296 |
| A05449 | A13626 | 263 | A05449 | A13989 | 346 |
| A05449 | A14196 | 485 | A05449 | A14216 | 491 |
| A05449 | A14236 | 515 | A05449 | A14366 | 557 |
| A05449 | A14448 | 350 | A05449 | A14591 | 485 |
| A05449 | A14596 | 727 | A05449 | A14652 | 252 |
| A05449 | A14659 | 643 | A05449 | A14739 | 174 |
| A05449 | A14921 | 294 | A05449 | A15188 | 491 |
| A05449 | A15254 | 480 | A05449 | A15498 | 446 |
| A05449 | A15507 | 741 | A05449 | A15547 | 792 |
| A05449 | A15606 | 462 | A05449 | A15611 | 162 |

|        |        |     |        |        |     |
|--------|--------|-----|--------|--------|-----|
| A05449 | A15612 | 581 | A05449 | A15624 | 490 |
| A05449 | A15652 | 182 | A05449 | A15657 | 491 |
| A05449 | A15660 | 488 | A05449 | A15684 | 690 |
| A05449 | A15696 | 297 | A05449 | A15705 | 366 |
| A05449 | A15716 | 151 | A05449 | A15728 | 263 |
| A05449 | A15769 | 491 | A05449 | A15794 | 491 |
| A05449 | A15931 | 347 | A05449 | A16088 | 491 |
| A05449 | A16095 | 348 | A05449 | A16293 | 491 |
| A05449 | A16400 | 402 | A05449 | A16580 | 208 |
| A05449 | A16627 | 466 | A05449 | A16696 | 433 |
| A05449 | A16724 | 252 | A05449 | A16788 | 221 |
| A05449 | A16822 | 491 | A05449 | A16947 | 328 |
| A05449 | A16973 | 259 | A05449 | A17140 | 219 |
| A05449 | A17163 | 241 | A05450 | A05499 | 457 |
| A05450 | A06564 | 223 | A05450 | A07075 | 368 |
| A05450 | A07581 | 227 | A05450 | A08154 | 386 |
| A05450 | A08301 | 238 | A05450 | A08358 | 440 |
| A05450 | A08501 | 329 | A05450 | A09285 | 347 |
| A05450 | A13517 | 162 | A05450 | A13796 | 340 |
| A05450 | A14248 | 326 | A05451 | A05452 | 390 |
| A05451 | A05548 | 366 | A05451 | A05550 | 479 |
| A05451 | A05573 | 307 | A05451 | A05883 | 462 |
| A05451 | A05912 | 413 | A05451 | A06629 | 297 |
| A05451 | A06641 | 429 | A05451 | A06734 | 467 |
| A05451 | A06800 | 413 | A05451 | A06847 | 360 |
| A05451 | A06860 | 469 | A05451 | A06994 | 441 |
| A05451 | A07027 | 343 | A05451 | A07037 | 441 |
| A05451 | A07059 | 297 | A05451 | A07325 | 210 |
| A05451 | A07408 | 379 | A05451 | A07501 | 333 |
| A05451 | A07520 | 460 | A05451 | A07553 | 279 |
| A05451 | A07558 | 294 | A05451 | A07619 | 395 |
| A05451 | A07674 | 380 | A05451 | A08108 | 339 |
| A05451 | A08114 | 241 | A05451 | A09381 | 355 |
| A05451 | A10687 | 380 | A05452 | A05550 | 473 |
| A05452 | A05883 | 465 | A05452 | A06037 | 201 |
| A05452 | A06090 | 404 | A05452 | A06385 | 251 |
| A05452 | A06629 | 312 | A05452 | A06734 | 445 |
| A05452 | A06860 | 417 | A05452 | A07037 | 445 |
| A05452 | A07520 | 391 | A05452 | A07553 | 294 |
| A05452 | A07771 | 314 | A05453 | A06277 | 350 |
| A05453 | A06466 | 306 | A05453 | A07311 | 945 |
| A05453 | A08114 | 165 | A05453 | A08643 | 319 |
| A05453 | A10183 | 363 | A05453 | A10365 | 910 |
| A05453 | A10392 | 241 | A05453 | A10911 | 224 |
| A05453 | A11714 | 251 | A05453 | A13917 | 296 |
| A05453 | A15004 | 263 | A05453 | A15665 | 485 |

|        |        |     |        |        |     |
|--------|--------|-----|--------|--------|-----|
| A05453 | A15734 | 177 | A05453 | A15764 | 156 |
| A05453 | A15894 | 184 | A05454 | A06124 | 277 |
| A05454 | A06687 | 311 | A05454 | A08555 | 283 |
| A05454 | A08870 | 180 | A05454 | A09298 | 283 |
| A05454 | A10506 | 179 | A05454 | A10615 | 902 |
| A05454 | A14661 | 283 | A05454 | A14694 | 191 |
| A05454 | A14711 | 283 | A05454 | A15315 | 283 |
| A05454 | A15347 | 283 | A05454 | A15617 | 283 |
| A05454 | A16304 | 491 | A05454 | A16364 | 283 |
| A05456 | A05582 | 441 | A05456 | A06004 | 413 |
| A05456 | A06697 | 429 | A05456 | A06863 | 384 |
| A05456 | A09535 | 428 | A05457 | A05716 | 399 |
| A05457 | A06483 | 438 | A05457 | A07218 | 312 |
| A05457 | A12917 | 416 | A05458 | A06957 | 306 |
| A05458 | A10618 | 443 | A05458 | A10793 | 243 |
| A05458 | A10795 | 484 | A05458 | A10799 | 165 |
| A05458 | A12258 | 270 | A05458 | A12462 | 358 |
| A05458 | A14006 | 491 | A05458 | A14080 | 489 |
| A05458 | A14107 | 396 | A05458 | A14655 | 490 |
| A05458 | A15417 | 257 | A05458 | A15643 | 230 |
| A05458 | A17049 | 383 | A05458 | A17103 | 358 |
| A05458 | A17168 | 93  | A05459 | A06831 | 489 |
| A05459 | A08724 | 330 | A05459 | A09267 | 411 |
| A05459 | A14443 | 899 | A05459 | A15463 | 191 |
| A05460 | A12674 | 419 | A05460 | A15925 | 356 |
| A05460 | A16595 | 417 | A05461 | A07352 | 430 |
| A05462 | A06252 | 322 | A05462 | A06595 | 226 |
| A05462 | A06626 | 358 | A05462 | A06689 | 234 |
| A05462 | A06881 | 291 | A05462 | A07027 | 294 |
| A05462 | A07059 | 238 | A05462 | A07122 | 291 |
| A05462 | A07198 | 188 | A05462 | A07520 | 198 |
| A05462 | A07643 | 296 | A05462 | A07711 | 332 |
| A05462 | A08249 | 179 | A05462 | A08396 | 383 |
| A05462 | A08636 | 446 | A05462 | A08716 | 411 |
| A05462 | A08875 | 216 | A05462 | A10781 | 323 |
| A05462 | A11576 | 226 | A05462 | A12723 | 238 |
| A05462 | A13855 | 171 | A05462 | A15628 | 358 |
| A05463 | A05550 | 274 | A05463 | A05573 | 483 |
| A05463 | A05851 | 450 | A05463 | A06629 | 243 |
| A05463 | A06744 | 277 | A05463 | A07088 | 374 |
| A05463 | A07209 | 210 | A05463 | A07381 | 326 |
| A05463 | A07711 | 335 | A05463 | A07779 | 412 |
| A05463 | A10768 | 371 | A05463 | A11714 | 344 |
| A05464 | A10529 | 412 | A05464 | A11075 | 390 |
| A05464 | A12643 | 412 | A05466 | A16966 | 447 |
| A05467 | A06797 | 288 | A05467 | A10601 | 180 |

|        |        |     |        |        |     |
|--------|--------|-----|--------|--------|-----|
| A05468 | A14646 | 335 | A05469 | A05578 | 401 |
| A05469 | A07218 | 179 | A05469 | A07273 | 407 |
| A05469 | A15282 | 255 | A05470 | A16718 | 399 |
| A05471 | A05472 | 457 | A05471 | A05699 | 357 |
| A05471 | A05767 | 124 | A05471 | A06307 | 360 |
| A05471 | A06397 | 360 | A05471 | A06632 | 357 |
| A05471 | A06641 | 296 | A05471 | A06692 | 344 |
| A05471 | A06970 | 157 | A05471 | A06979 | 294 |
| A05471 | A07061 | 468 | A05471 | A07080 | 251 |
| A05471 | A07109 | 232 | A05471 | A07122 | 474 |
| A05471 | A07238 | 414 | A05471 | A07256 | 341 |
| A05471 | A07288 | 348 | A05471 | A07413 | 232 |
| A05471 | A15874 | 463 | A05471 | A16026 | 286 |
| A05471 | A16027 | 216 | A05471 | A16741 | 154 |
| A05472 | A05555 | 480 | A05472 | A05615 | 293 |
| A05472 | A05757 | 229 | A05472 | A05767 | 436 |
| A05472 | A05768 | 470 | A05472 | A05771 | 486 |
| A05472 | A05782 | 249 | A05472 | A05789 | 302 |
| A05472 | A05966 | 201 | A05472 | A06358 | 324 |
| A05472 | A06523 | 313 | A05472 | A06629 | 458 |
| A05472 | A06632 | 416 | A05472 | A06640 | 366 |
| A05472 | A06641 | 249 | A05472 | A06689 | 475 |
| A05472 | A06847 | 272 | A05472 | A06912 | 483 |
| A05472 | A06916 | 290 | A05472 | A07061 | 486 |
| A05472 | A07109 | 393 | A05472 | A07178 | 245 |
| A05472 | A07238 | 489 | A05472 | A07239 | 208 |
| A05472 | A07267 | 228 | A05472 | A07381 | 260 |
| A05472 | A07413 | 180 | A05472 | A07424 | 405 |
| A05472 | A07477 | 324 | A05472 | A07553 | 293 |
| A05472 | A07554 | 302 | A05472 | A07558 | 457 |
| A05472 | A07590 | 398 | A05472 | A07692 | 313 |
| A05472 | A07721 | 207 | A05472 | A07736 | 451 |
| A05472 | A07800 | 461 | A05472 | A07973 | 196 |
| A05472 | A08099 | 188 | A05472 | A08108 | 238 |
| A05472 | A08252 | 177 | A05472 | A08588 | 419 |
| A05472 | A08751 | 303 | A05472 | A09876 | 454 |
| A05472 | A10156 | 201 | A05472 | A10420 | 343 |
| A05472 | A10444 | 241 | A05472 | A10452 | 218 |
| A05472 | A10456 | 402 | A05472 | A10656 | 353 |
| A05472 | A10658 | 441 | A05472 | A10659 | 316 |
| A05472 | A10677 | 201 | A05472 | A10694 | 283 |
| A05472 | A10702 | 432 | A05472 | A10715 | 271 |
| A05472 | A10833 | 246 | A05472 | A10904 | 347 |
| A05472 | A11309 | 159 | A05472 | A12723 | 436 |
| A05472 | A15282 | 202 | A05472 | A15286 | 276 |
| A05472 | A15874 | 491 | A05472 | A15905 | 318 |



|        |        |     |        |        |     |
|--------|--------|-----|--------|--------|-----|
| A05472 | A15970 | 268 | A05472 | A16027 | 160 |
| A05472 | A16419 | 488 | A05472 | A16739 | 485 |
| A05472 | A16741 | 490 | A05472 | A16744 | 483 |
| A05472 | A16959 | 205 | A05472 | A17089 | 281 |
| A05473 | A05686 | 400 | A05473 | A06625 | 319 |
| A05473 | A07115 | 339 | A05473 | A07145 | 205 |
| A05473 | A07158 | 154 | A05473 | A07165 | 201 |
| A05473 | A07192 | 347 | A05473 | A08876 | 272 |
| A05473 | A09404 | 339 | A05473 | A09411 | 322 |
| A05473 | A09810 | 400 | A05473 | A10731 | 226 |
| A05473 | A15809 | 152 | A05473 | A15922 | 201 |
| A05473 | A16807 | 228 | A05473 | A17207 | 243 |
| A05474 | A06402 | 396 | A05475 | A07135 | 286 |
| A05475 | A07150 | 438 | A05475 | A07157 | 334 |
| A05475 | A07161 | 445 | A05475 | A07166 | 362 |
| A05476 | A07346 | 159 | A05476 | A12395 | 440 |
| A05477 | A06825 | 341 | A05477 | A07138 | 360 |
| A05478 | A05588 | 469 | A05479 | A09447 | 413 |
| A05480 | A06100 | 293 | A05480 | A06599 | 296 |
| A05483 | A07946 | 438 | A05483 | A08693 | 371 |
| A05483 | A08739 | 394 | A05483 | A10640 | 395 |
| A05483 | A11488 | 434 | A05483 | A14366 | 307 |
| A05483 | A14374 | 316 | A05483 | A14391 | 319 |
| A05483 | A14554 | 351 | A05483 | A15516 | 368 |
| A05483 | A16038 | 428 | A05485 | A05496 | 414 |
| A05485 | A05515 | 368 | A05485 | A05520 | 424 |
| A05485 | A05687 | 418 | A05485 | A07468 | 293 |
| A05485 | A07469 | 363 | A05485 | A10967 | 461 |
| A05485 | A12363 | 389 | A05485 | A12793 | 319 |
| A05486 | A05487 | 401 | A05486 | A06607 | 202 |
| A05486 | A06696 | 457 | A05486 | A07471 | 361 |
| A05486 | A07561 | 291 | A05486 | A07634 | 394 |
| A05486 | A07637 | 402 | A05486 | A07638 | 424 |
| A05486 | A08738 | 200 | A05486 | A13879 | 398 |
| A05487 | A05494 | 488 | A05487 | A05678 | 240 |
| A05487 | A05860 | 347 | A05487 | A05891 | 176 |
| A05487 | A05897 | 330 | A05487 | A06266 | 390 |
| A05487 | A06272 | 218 | A05487 | A06527 | 208 |
| A05487 | A06607 | 441 | A05487 | A06696 | 470 |
| A05487 | A06875 | 414 | A05487 | A06908 | 249 |
| A05487 | A07173 | 168 | A05487 | A07407 | 243 |
| A05487 | A07470 | 319 | A05487 | A07471 | 484 |
| A05487 | A07475 | 198 | A05487 | A07491 | 340 |
| A05487 | A07538 | 308 | A05487 | A07541 | 486 |
| A05487 | A07561 | 401 | A05487 | A07610 | 226 |
| A05487 | A07634 | 436 | A05487 | A07636 | 467 |

|        |        |     |        |        |     |
|--------|--------|-----|--------|--------|-----|
| A05487 | A07638 | 390 | A05487 | A07754 | 170 |
| A05487 | A08444 | 301 | A05487 | A08785 | 127 |
| A05487 | A10634 | 450 | A05487 | A10962 | 390 |
| A05487 | A11011 | 390 | A05487 | A11143 | 374 |
| A05487 | A11313 | 180 | A05487 | A13879 | 401 |
| A05487 | A14729 | 347 | A05487 | A15358 | 205 |
| A05487 | A17076 | 208 | A05487 | A17078 | 207 |
| A05489 | A05556 | 491 | A05489 | A05558 | 456 |
| A05489 | A05601 | 267 | A05489 | A05944 | 173 |
| A05489 | A06055 | 443 | A05489 | A06421 | 470 |
| A05489 | A06601 | 174 | A05489 | A06719 | 268 |
| A05489 | A08215 | 152 | A05489 | A08658 | 486 |
| A05489 | A08711 | 452 | A05489 | A08850 | 477 |
| A05489 | A09046 | 461 | A05489 | A10001 | 491 |
| A05489 | A10169 | 347 | A05489 | A10396 | 385 |
| A05489 | A10743 | 235 | A05489 | A13587 | 229 |
| A05489 | A14135 | 198 | A05489 | A14396 | 357 |
| A05489 | A16792 | 372 | A05490 | A07091 | 899 |
| A05490 | A07141 | 312 | A05490 | A07165 | 252 |
| A05491 | A05603 | 274 | A05491 | A05611 | 433 |
| A05491 | A05777 | 462 | A05491 | A05886 | 382 |
| A05491 | A05887 | 364 | A05491 | A06574 | 458 |
| A05491 | A06837 | 414 | A05491 | A07601 | 390 |
| A05491 | A07702 | 424 | A05491 | A07886 | 433 |
| A05491 | A07987 | 433 | A05491 | A08034 | 404 |
| A05491 | A08115 | 414 | A05491 | A08116 | 418 |
| A05491 | A08401 | 433 | A05491 | A08455 | 424 |
| A05491 | A08486 | 433 | A05491 | A11327 | 371 |
| A05491 | A14633 | 183 | A05493 | A05494 | 477 |
| A05493 | A05533 | 299 | A05493 | A06607 | 202 |
| A05493 | A07452 | 294 | A05493 | A07471 | 235 |
| A05493 | A07520 | 247 | A05493 | A07541 | 221 |
| A05493 | A07561 | 291 | A05493 | A08785 | 234 |
| A05493 | A13879 | 481 | A05493 | A14190 | 190 |
| A05493 | A14258 | 191 | A05494 | A05533 | 408 |
| A05494 | A05678 | 241 | A05494 | A05860 | 461 |
| A05494 | A05945 | 173 | A05494 | A06527 | 411 |
| A05494 | A06578 | 183 | A05494 | A06607 | 465 |
| A05494 | A06696 | 457 | A05494 | A07452 | 195 |
| A05494 | A07471 | 491 | A05494 | A07475 | 200 |
| A05494 | A07491 | 341 | A05494 | A07541 | 456 |
| A05494 | A07544 | 332 | A05494 | A07561 | 191 |
| A05494 | A07610 | 227 | A05494 | A07653 | 390 |
| A05494 | A07754 | 171 | A05494 | A07958 | 256 |
| A05494 | A08404 | 226 | A05494 | A08484 | 151 |
| A05494 | A08783 | 347 | A05494 | A08785 | 256 |

|        |        |     |        |        |     |
|--------|--------|-----|--------|--------|-----|
| A05494 | A08786 | 461 | A05494 | A08798 | 374 |
| A05494 | A09220 | 165 | A05494 | A10563 | 177 |
| A05494 | A10634 | 489 | A05494 | A11313 | 435 |
| A05494 | A11428 | 411 | A05494 | A11491 | 391 |
| A05494 | A11671 | 391 | A05494 | A13869 | 433 |
| A05494 | A13879 | 491 | A05494 | A14156 | 152 |
| A05494 | A15064 | 221 | A05494 | A15381 | 152 |
| A05494 | A15913 | 173 | A05494 | A17078 | 208 |
| A05495 | A08850 | 369 | A05495 | A10403 | 445 |
| A05496 | A05520 | 435 | A05496 | A07634 | 345 |
| A05496 | A07958 | 408 | A05497 | A09989 | 406 |
| A05499 | A05501 | 441 | A05499 | A05557 | 176 |
| A05499 | A06308 | 310 | A05499 | A06388 | 417 |
| A05499 | A06564 | 202 | A05499 | A07248 | 268 |
| A05499 | A07349 | 201 | A05499 | A07965 | 232 |
| A05499 | A08154 | 470 | A05499 | A08301 | 218 |
| A05499 | A08358 | 303 | A05499 | A08419 | 396 |
| A05499 | A08501 | 310 | A05499 | A08559 | 188 |
| A05499 | A09293 | 296 | A05499 | A09332 | 165 |
| A05499 | A09622 | 255 | A05499 | A09735 | 374 |
| A05499 | A09852 | 353 | A05499 | A11597 | 308 |
| A05499 | A11616 | 232 | A05499 | A12821 | 218 |
| A05499 | A14172 | 176 | A05499 | A14479 | 311 |
| A05499 | A14568 | 434 | A05499 | A15500 | 246 |
| A05499 | A15771 | 318 | A05499 | A16088 | 156 |
| A05500 | A06348 | 190 | A05500 | A06669 | 374 |
| A05500 | A09195 | 281 | A05500 | A14652 | 251 |
| A05500 | A16738 | 324 | A05501 | A05502 | 475 |
| A05501 | A06197 | 159 | A05501 | A06275 | 262 |
| A05501 | A06534 | 240 | A05501 | A06564 | 479 |
| A05501 | A06814 | 217 | A05501 | A06843 | 180 |
| A05501 | A06861 | 193 | A05501 | A06965 | 491 |
| A05501 | A06973 | 542 | A05501 | A07047 | 217 |
| A05501 | A07323 | 490 | A05501 | A07349 | 491 |
| A05501 | A07398 | 555 | A05501 | A07449 | 346 |
| A05501 | A07499 | 157 | A05501 | A07581 | 475 |
| A05501 | A07706 | 454 | A05501 | A07962 | 283 |
| A05501 | A07963 | 313 | A05501 | A08011 | 358 |
| A05501 | A08131 | 379 | A05501 | A08154 | 428 |
| A05501 | A08357 | 249 | A05501 | A08358 | 446 |
| A05501 | A08359 | 469 | A05501 | A08369 | 217 |
| A05501 | A08408 | 298 | A05501 | A08419 | 462 |
| A05501 | A08476 | 247 | A05501 | A08501 | 488 |
| A05501 | A08527 | 466 | A05501 | A08543 | 455 |
| A05501 | A08556 | 486 | A05501 | A08761 | 394 |
| A05501 | A08773 | 422 | A05501 | A08886 | 417 |

|        |        |     |        |        |     |
|--------|--------|-----|--------|--------|-----|
| A05501 | A09059 | 333 | A05501 | A09308 | 217 |
| A05501 | A09322 | 332 | A05501 | A09520 | 469 |
| A05501 | A09620 | 217 | A05501 | A09735 | 480 |
| A05501 | A09852 | 180 | A05501 | A09862 | 356 |
| A05501 | A10553 | 263 | A05501 | A10616 | 380 |
| A05501 | A11535 | 154 | A05501 | A11562 | 160 |
| A05501 | A11593 | 296 | A05501 | A11597 | 294 |
| A05501 | A11728 | 217 | A05501 | A12227 | 217 |
| A05501 | A13002 | 394 | A05501 | A13830 | 424 |
| A05501 | A13989 | 491 | A05501 | A14169 | 159 |
| A05501 | A14172 | 294 | A05501 | A14216 | 475 |
| A05501 | A14247 | 281 | A05501 | A14479 | 405 |
| A05501 | A14482 | 318 | A05501 | A14508 | 159 |
| A05501 | A14530 | 363 | A05501 | A14566 | 474 |
| A05501 | A14568 | 450 | A05501 | A14594 | 425 |
| A05501 | A14813 | 149 | A05501 | A15215 | 302 |
| A05501 | A15268 | 266 | A05501 | A15381 | 217 |
| A05501 | A15499 | 260 | A05501 | A15500 | 491 |
| A05501 | A15660 | 491 | A05501 | A15684 | 485 |
| A05501 | A15711 | 215 | A05501 | A15771 | 470 |
| A05501 | A15931 | 384 | A05501 | A16053 | 263 |
| A05501 | A16118 | 430 | A05501 | A16631 | 367 |
| A05501 | A16686 | 435 | A05501 | A16778 | 188 |
| A05501 | A17152 | 291 | A05502 | A06564 | 344 |
| A05502 | A07325 | 240 | A05502 | A07581 | 218 |
| A05502 | A08408 | 221 | A05502 | A08543 | 226 |
| A05502 | A08973 | 156 | A05502 | A09735 | 162 |
| A05502 | A11440 | 405 | A05502 | A11992 | 218 |
| A05502 | A12270 | 271 | A05502 | A14479 | 321 |
| A05502 | A14482 | 252 | A05502 | A15500 | 260 |
| A05502 | A15647 | 187 | A05502 | A15771 | 196 |
| A05503 | A05504 | 418 | A05503 | A05873 | 428 |
| A05503 | A06128 | 428 | A05503 | A12413 | 433 |
| A05504 | A05873 | 425 | A05504 | A06128 | 425 |
| A05504 | A09431 | 401 | A05504 | A12413 | 467 |
| A05506 | A06248 | 412 | A05506 | A06642 | 177 |
| A05506 | A07031 | 273 | A05506 | A07175 | 344 |
| A05506 | A07209 | 353 | A05506 | A07373 | 340 |
| A05506 | A08657 | 412 | A05506 | A08827 | 490 |
| A05506 | A08829 | 412 | A05506 | A09411 | 366 |
| A05506 | A09922 | 394 | A05506 | A10638 | 489 |
| A05506 | A13826 | 152 | A05506 | A13872 | 310 |
| A05506 | A13915 | 380 | A05506 | A14392 | 245 |
| A05506 | A15346 | 207 | A05507 | A05630 | 446 |
| A05508 | A06195 | 232 | A05508 | A06581 | 227 |
| A05508 | A09556 | 219 | A05508 | A10328 | 272 |

|        |        |     |        |        |     |
|--------|--------|-----|--------|--------|-----|
| A05509 | A14198 | 260 | A05511 | A08733 | 445 |
| A05511 | A11008 | 445 | A05512 | A06114 | 418 |
| A05512 | A06115 | 457 | A05512 | A09520 | 491 |
| A05512 | A10480 | 418 | A05512 | A11882 | 443 |
| A05512 | A13144 | 406 | A05512 | A16324 | 263 |
| A05513 | A14452 | 218 | A05513 | A14635 | 162 |
| A05514 | A08619 | 452 | A05515 | A05751 | 305 |
| A05515 | A05759 | 307 | A05515 | A05772 | 353 |
| A05515 | A05847 | 327 | A05515 | A06098 | 378 |
| A05515 | A06599 | 201 | A05515 | A06699 | 351 |
| A05515 | A07080 | 438 | A05515 | A07122 | 391 |
| A05515 | A07288 | 361 | A05515 | A07322 | 337 |
| A05515 | A07469 | 417 | A05515 | A07746 | 185 |
| A05515 | A11304 | 238 | A05515 | A11432 | 443 |
| A05515 | A12363 | 357 | A05515 | A14359 | 355 |
| A05515 | A14585 | 160 | A05516 | A05758 | 252 |
| A05516 | A05759 | 279 | A05516 | A05774 | 322 |
| A05516 | A05855 | 440 | A05516 | A06063 | 210 |
| A05516 | A06088 | 328 | A05516 | A06089 | 363 |
| A05516 | A06252 | 490 | A05516 | A06358 | 358 |
| A05516 | A06527 | 246 | A05516 | A06555 | 382 |
| A05516 | A06633 | 286 | A05516 | A06641 | 285 |
| A05516 | A06756 | 372 | A05516 | A06934 | 319 |
| A05516 | A06978 | 413 | A05516 | A07088 | 234 |
| A05516 | A07108 | 191 | A05516 | A07109 | 347 |
| A05516 | A07122 | 491 | A05516 | A07221 | 319 |
| A05516 | A07256 | 332 | A05516 | A07267 | 380 |
| A05516 | A07283 | 238 | A05516 | A07304 | 185 |
| A05516 | A07413 | 475 | A05516 | A07452 | 232 |
| A05516 | A07541 | 152 | A05516 | A07542 | 252 |
| A05516 | A07543 | 259 | A05516 | A07561 | 229 |
| A05516 | A07610 | 263 | A05516 | A07627 | 363 |
| A05516 | A07800 | 380 | A05516 | A08504 | 405 |
| A05516 | A09877 | 355 | A05516 | A10635 | 234 |
| A05516 | A10860 | 382 | A05516 | A11309 | 199 |
| A05516 | A12055 | 352 | A05516 | A13871 | 246 |
| A05516 | A14827 | 346 | A05516 | A15497 | 199 |
| A05516 | A15637 | 380 | A05516 | A15874 | 193 |
| A05516 | A15905 | 224 | A05516 | A16026 | 388 |
| A05516 | A16027 | 201 | A05517 | A05577 | 291 |
| A05517 | A05597 | 307 | A05517 | A05679 | 419 |
| A05517 | A06415 | 479 | A05517 | A06747 | 276 |
| A05517 | A07152 | 347 | A05517 | A07960 | 395 |
| A05517 | A08596 | 305 | A05517 | A09238 | 229 |
| A05517 | A09239 | 202 | A05517 | A09259 | 457 |
| A05517 | A09421 | 335 | A05517 | A09855 | 286 |

|        |        |     |        |        |     |
|--------|--------|-----|--------|--------|-----|
| A05517 | A10590 | 319 | A05517 | A13131 | 348 |
| A05517 | A13312 | 335 | A05517 | A13903 | 391 |
| A05517 | A14071 | 335 | A05517 | A14125 | 258 |
| A05517 | A14190 | 283 | A05517 | A14199 | 171 |
| A05517 | A14366 | 469 | A05517 | A14372 | 236 |
| A05517 | A14374 | 472 | A05517 | A14391 | 483 |
| A05517 | A14392 | 218 | A05517 | A14439 | 278 |
| A05517 | A14554 | 246 | A05517 | A14599 | 290 |
| A05517 | A14651 | 63  | A05517 | A14667 | 263 |
| A05517 | A15241 | 191 | A05517 | A15322 | 160 |
| A05517 | A15395 | 241 | A05517 | A15425 | 337 |
| A05517 | A15444 | 286 | A05517 | A16904 | 193 |
| A05518 | A05519 | 469 | A05518 | A06141 | 473 |
| A05519 | A05593 | 409 | A05519 | A06141 | 452 |
| A05523 | A06868 | 386 | A05524 | A05560 | 422 |
| A05525 | A06813 | 371 | A05525 | A07245 | 450 |
| A05525 | A07726 | 201 | A05525 | A09271 | 408 |
| A05525 | A10156 | 416 | A05525 | A14650 | 187 |
| A05526 | A05623 | 441 | A05527 | A05603 | 296 |
| A05529 | A10307 | 407 | A05529 | A10395 | 276 |
| A05529 | A13997 | 272 | A05529 | A15923 | 307 |
| A05530 | A05797 | 180 | A05530 | A06289 | 156 |
| A05530 | A10844 | 438 | A05530 | A10848 | 358 |
| A05530 | A10911 | 396 | A05530 | A12383 | 491 |
| A05530 | A15677 | 486 | A05531 | A05539 | 277 |
| A05531 | A05605 | 470 | A05531 | A05638 | 200 |
| A05531 | A06204 | 490 | A05531 | A06659 | 196 |
| A05531 | A06675 | 159 | A05531 | A07180 | 542 |
| A05531 | A07294 | 293 | A05531 | A07708 | 307 |
| A05531 | A09625 | 200 | A05531 | A09628 | 200 |
| A05531 | A10603 | 246 | A05531 | A10664 | 420 |
| A05531 | A13831 | 204 | A05531 | A13837 | 249 |
| A05531 | A13876 | 200 | A05531 | A13881 | 200 |
| A05531 | A14171 | 200 | A05531 | A14179 | 200 |
| A05531 | A14180 | 539 | A05531 | A14356 | 200 |
| A05531 | A15370 | 208 | A05531 | A15712 | 328 |
| A05531 | A15719 | 382 | A05531 | A15757 | 200 |
| A05531 | A16066 | 200 | A05531 | A16634 | 200 |
| A05531 | A16821 | 191 | A05531 | A16919 | 200 |
| A05532 | A06855 | 398 | A05532 | A06970 | 279 |
| A05532 | A07165 | 241 | A05532 | A07590 | 340 |
| A05533 | A05535 | 338 | A05533 | A05696 | 350 |
| A05533 | A05736 | 443 | A05533 | A05751 | 243 |
| A05533 | A05786 | 326 | A05533 | A05992 | 483 |
| A05533 | A06460 | 391 | A05533 | A06762 | 477 |
| A05533 | A06769 | 486 | A05533 | A06922 | 430 |

|        |        |     |        |        |     |
|--------|--------|-----|--------|--------|-----|
| A05533 | A07021 | 356 | A05533 | A07292 | 319 |
| A05533 | A07296 | 422 | A05533 | A07297 | 338 |
| A05533 | A07438 | 281 | A05533 | A07509 | 277 |
| A05533 | A08083 | 286 | A05533 | A08284 | 408 |
| A05533 | A09031 | 344 | A05533 | A09480 | 302 |
| A05533 | A10306 | 375 | A05533 | A10482 | 375 |
| A05533 | A10841 | 375 | A05533 | A11424 | 319 |
| A05533 | A13814 | 356 | A05533 | A13875 | 201 |
| A05533 | A13879 | 402 | A05533 | A14188 | 165 |
| A05533 | A14443 | 205 | A05533 | A15230 | 412 |
| A05533 | A17183 | 391 | A05534 | A05535 | 413 |
| A05534 | A07141 | 294 | A05534 | A09550 | 401 |
| A05534 | A13994 | 341 | A05535 | A06762 | 362 |
| A05535 | A07141 | 288 | A05535 | A08667 | 443 |
| A05535 | A09550 | 398 | A05536 | A07165 | 159 |
| A05536 | A07848 | 163 | A05536 | A09316 | 258 |
| A05536 | A14644 | 472 | A05538 | A05549 | 425 |
| A05538 | A06629 | 330 | A05538 | A06860 | 343 |
| A05538 | A07229 | 278 | A05538 | A07520 | 302 |
| A05538 | A14009 | 191 | A05539 | A05563 | 302 |
| A05539 | A05605 | 200 | A05539 | A05638 | 200 |
| A05539 | A06204 | 523 | A05539 | A06347 | 488 |
| A05539 | A06758 | 491 | A05539 | A07180 | 509 |
| A05539 | A07294 | 491 | A05539 | A07961 | 230 |
| A05539 | A08148 | 255 | A05539 | A08775 | 408 |
| A05539 | A09180 | 204 | A05539 | A09344 | 385 |
| A05539 | A09625 | 564 | A05539 | A09628 | 544 |
| A05539 | A10317 | 227 | A05539 | A10603 | 168 |
| A05539 | A10662 | 232 | A05539 | A10664 | 486 |
| A05539 | A11205 | 230 | A05539 | A11583 | 221 |
| A05539 | A13858 | 258 | A05539 | A13876 | 200 |
| A05539 | A13881 | 200 | A05539 | A14087 | 311 |
| A05539 | A14088 | 423 | A05539 | A14171 | 200 |
| A05539 | A14173 | 481 | A05539 | A14179 | 558 |
| A05539 | A14180 | 487 | A05539 | A14186 | 401 |
| A05539 | A14209 | 301 | A05539 | A14356 | 351 |
| A05539 | A14358 | 291 | A05539 | A14621 | 321 |
| A05539 | A14694 | 293 | A05539 | A15315 | 313 |
| A05539 | A15347 | 249 | A05539 | A15370 | 521 |
| A05539 | A15568 | 462 | A05539 | A15569 | 274 |
| A05539 | A15648 | 361 | A05539 | A15664 | 305 |
| A05539 | A15683 | 491 | A05539 | A15712 | 539 |
| A05539 | A15718 | 457 | A05539 | A15719 | 560 |
| A05539 | A15757 | 200 | A05539 | A16066 | 200 |
| A05539 | A16466 | 160 | A05539 | A16611 | 405 |
| A05539 | A16634 | 564 | A05539 | A16657 | 249 |

|        |        |     |        |        |     |
|--------|--------|-----|--------|--------|-----|
| A05539 | A16665 | 366 | A05539 | A16843 | 252 |
| A05539 | A16919 | 394 | A05539 | A17133 | 198 |
| A05539 | A17166 | 274 | A05539 | A17167 | 291 |
| A05540 | A15624 | 179 | A05541 | A06588 | 337 |
| A05541 | A06607 | 281 | A05541 | A06688 | 269 |
| A05541 | A08011 | 199 | A05543 | A07218 | 216 |
| A05544 | A07054 | 262 | A05545 | A06550 | 301 |
| A05545 | A12191 | 388 | A05545 | A13415 | 475 |
| A05545 | A16230 | 324 | A05546 | A07051 | 252 |
| A05546 | A07314 | 207 | A05546 | A07315 | 491 |
| A05546 | A08417 | 200 | A05546 | A09202 | 404 |
| A05546 | A10960 | 486 | A05546 | A11493 | 152 |
| A05546 | A11760 | 273 | A05546 | A13361 | 191 |
| A05546 | A14378 | 212 | A05546 | A15096 | 174 |
| A05546 | A15114 | 177 | A05547 | A07709 | 201 |
| A05547 | A10253 | 187 | A05547 | A11865 | 319 |
| A05547 | A14471 | 191 | A05547 | A16335 | 286 |
| A05548 | A05751 | 313 | A05548 | A06402 | 433 |
| A05548 | A06405 | 265 | A05548 | A06439 | 256 |
| A05548 | A06640 | 317 | A05548 | A06641 | 416 |
| A05548 | A06860 | 441 | A05548 | A06981 | 340 |
| A05548 | A06994 | 355 | A05548 | A07059 | 384 |
| A05548 | A07088 | 279 | A05548 | A07122 | 190 |
| A05548 | A07325 | 174 | A05548 | A07520 | 475 |
| A05548 | A07674 | 357 | A05548 | A07690 | 418 |
| A05548 | A07757 | 408 | A05548 | A07933 | 324 |
| A05548 | A08155 | 355 | A05548 | A08372 | 205 |
| A05548 | A09880 | 324 | A05548 | A10776 | 256 |
| A05548 | A17006 | 343 | A05549 | A05610 | 422 |
| A05549 | A06385 | 306 | A05549 | A06629 | 355 |
| A05549 | A07229 | 307 | A05549 | A14009 | 229 |
| A05550 | A05573 | 215 | A05550 | A05883 | 480 |
| A05550 | A05912 | 441 | A05550 | A06090 | 347 |
| A05550 | A06211 | 316 | A05550 | A06245 | 424 |
| A05550 | A06558 | 364 | A05550 | A06597 | 409 |
| A05550 | A06629 | 202 | A05550 | A06641 | 383 |
| A05550 | A06734 | 477 | A05550 | A06847 | 396 |
| A05550 | A06860 | 449 | A05550 | A06994 | 408 |
| A05550 | A07027 | 380 | A05550 | A07037 | 449 |
| A05550 | A07059 | 407 | A05550 | A07088 | 345 |
| A05550 | A07325 | 229 | A05550 | A07366 | 201 |
| A05550 | A07408 | 452 | A05550 | A07501 | 371 |
| A05550 | A07520 | 428 | A05550 | A07553 | 313 |
| A05550 | A07619 | 343 | A05550 | A07643 | 252 |
| A05550 | A07674 | 452 | A05550 | A07723 | 294 |
| A05550 | A07757 | 251 | A05550 | A07771 | 207 |



|        |        |     |        |        |     |
|--------|--------|-----|--------|--------|-----|
| A05550 | A08108 | 257 | A05550 | A09381 | 281 |
| A05550 | A10446 | 269 | A05550 | A10918 | 353 |
| A05550 | A13906 | 307 | A05550 | A14637 | 154 |
| A05550 | A14685 | 347 | A05550 | A16741 | 344 |
| A05550 | A17006 | 294 | A05550 | A17007 | 269 |
| A05550 | A17155 | 296 | A05551 | A06171 | 434 |
| A05551 | A06650 | 174 | A05552 | A06401 | 405 |
| A05552 | A06488 | 344 | A05552 | A07213 | 408 |
| A05552 | A13421 | 413 | A05552 | A14196 | 191 |
| A05553 | A06602 | 352 | A05553 | A08351 | 252 |
| A05553 | A08517 | 196 | A05553 | A08552 | 177 |
| A05553 | A09770 | 156 | A05553 | A09793 | 265 |
| A05553 | A10728 | 185 | A05553 | A10965 | 472 |
| A05553 | A11107 | 484 | A05553 | A12047 | 286 |
| A05553 | A12234 | 215 | A05553 | A12938 | 204 |
| A05553 | A13964 | 190 | A05553 | A14222 | 221 |
| A05554 | A05841 | 210 | A05554 | A13594 | 366 |
| A05554 | A15114 | 263 | A05555 | A05771 | 460 |
| A05555 | A05782 | 374 | A05555 | A06912 | 380 |
| A05555 | A15874 | 318 | A05556 | A05557 | 112 |
| A05556 | A05558 | 447 | A05556 | A05577 | 485 |
| A05556 | A05597 | 201 | A05556 | A05601 | 319 |
| A05556 | A05854 | 272 | A05556 | A05865 | 212 |
| A05556 | A06055 | 297 | A05556 | A06073 | 246 |
| A05556 | A06421 | 294 | A05556 | A06588 | 515 |
| A05556 | A06601 | 265 | A05556 | A06719 | 230 |
| A05556 | A07126 | 326 | A05556 | A08097 | 424 |
| A05556 | A08658 | 462 | A05556 | A08711 | 480 |
| A05556 | A08842 | 191 | A05556 | A08850 | 770 |
| A05556 | A09046 | 491 | A05556 | A09254 | 185 |
| A05556 | A10001 | 491 | A05556 | A10038 | 358 |
| A05556 | A10396 | 368 | A05556 | A10743 | 404 |
| A05556 | A10969 | 307 | A05556 | A11431 | 234 |
| A05556 | A11983 | 338 | A05556 | A13873 | 154 |
| A05556 | A14071 | 201 | A05556 | A14236 | 601 |
| A05556 | A14366 | 625 | A05556 | A14394 | 205 |
| A05556 | A14396 | 333 | A05556 | A14570 | 196 |
| A05556 | A14596 | 450 | A05556 | A14659 | 561 |
| A05556 | A15431 | 159 | A05556 | A15487 | 201 |
| A05556 | A15606 | 570 | A05556 | A15680 | 165 |
| A05556 | A16792 | 343 | A05557 | A06466 | 432 |
| A05557 | A08457 | 168 | A05557 | A08501 | 405 |
| A05557 | A08537 | 260 | A05557 | A08543 | 466 |
| A05557 | A08556 | 486 | A05557 | A08559 | 486 |
| A05557 | A08973 | 207 | A05557 | A08975 | 156 |
| A05557 | A09621 | 384 | A05557 | A09622 | 333 |

|        |        |     |        |        |     |
|--------|--------|-----|--------|--------|-----|
| A05557 | A09852 | 168 | A05557 | A11597 | 246 |
| A05557 | A12821 | 163 | A05557 | A13710 | 208 |
| A05557 | A14937 | 207 | A05557 | A15235 | 165 |
| A05557 | A15732 | 182 | A05557 | A16682 | 235 |
| A05557 | A16867 | 396 | A05558 | A05944 | 326 |
| A05558 | A06055 | 429 | A05558 | A06100 | 277 |
| A05558 | A06601 | 327 | A05558 | A08280 | 205 |
| A05558 | A08658 | 474 | A05558 | A08711 | 406 |
| A05558 | A09046 | 380 | A05558 | A16636 | 207 |
| A05559 | A05591 | 324 | A05559 | A05665 | 379 |
| A05559 | A05828 | 391 | A05559 | A05900 | 430 |
| A05559 | A07129 | 462 | A05559 | A08524 | 395 |
| A05560 | A07200 | 160 | A05560 | A09235 | 278 |
| A05560 | A09236 | 345 | A05560 | A14198 | 460 |
| A05560 | A14443 | 899 | A05562 | A07163 | 279 |
| A05562 | A07201 | 180 | A05562 | A07251 | 477 |
| A05562 | A08748 | 472 | A05562 | A11281 | 246 |
| A05562 | A11822 | 450 | A05562 | A11823 | 408 |
| A05562 | A13044 | 445 | A05562 | A14471 | 183 |
| A05562 | A15933 | 210 | A05563 | A05638 | 488 |
| A05563 | A06340 | 162 | A05563 | A06347 | 63  |
| A05563 | A06361 | 274 | A05563 | A08732 | 157 |
| A05563 | A10790 | 249 | A05563 | A10897 | 241 |
| A05563 | A11158 | 168 | A05563 | A13831 | 451 |
| A05563 | A13835 | 281 | A05563 | A13837 | 179 |
| A05563 | A13905 | 156 | A05563 | A14006 | 63  |
| A05563 | A14469 | 266 | A05563 | A15370 | 63  |
| A05563 | A17055 | 330 | A05565 | A14481 | 313 |
| A05566 | A06320 | 252 | A05566 | A06819 | 302 |
| A05566 | A06825 | 395 | A05566 | A08682 | 202 |
| A05566 | A09044 | 489 | A05566 | A10745 | 380 |
| A05566 | A13752 | 469 | A05566 | A14216 | 201 |
| A05566 | A14843 | 238 | A05567 | A06774 | 445 |
| A05567 | A07252 | 447 | A05568 | A05569 | 185 |
| A05568 | A05617 | 335 | A05568 | A05630 | 191 |
| A05568 | A05767 | 232 | A05568 | A05790 | 302 |
| A05568 | A05791 | 488 | A05568 | A05832 | 462 |
| A05568 | A05835 | 467 | A05568 | A05958 | 303 |
| A05568 | A06438 | 326 | A05568 | A06615 | 159 |
| A05568 | A06697 | 202 | A05568 | A06913 | 402 |
| A05568 | A07218 | 470 | A05568 | A07339 | 243 |
| A05568 | A08436 | 326 | A05568 | A08583 | 162 |
| A05568 | A08598 | 216 | A05568 | A08879 | 407 |
| A05568 | A09145 | 356 | A05568 | A09962 | 238 |
| A05568 | A09988 | 288 | A05568 | A10247 | 216 |
| A05568 | A10305 | 281 | A05568 | A10320 | 152 |

|        |        |     |        |        |     |
|--------|--------|-----|--------|--------|-----|
| A05568 | A10578 | 347 | A05568 | A12639 | 326 |
| A05568 | A12667 | 251 | A05568 | A13219 | 286 |
| A05568 | A14244 | 256 | A05568 | A15888 | 299 |
| A05568 | A15892 | 414 | A05569 | A05791 | 307 |
| A05569 | A05832 | 276 | A05569 | A06971 | 360 |
| A05569 | A09298 | 174 | A05569 | A10625 | 162 |
| A05570 | A06032 | 390 | A05570 | A06195 | 481 |
| A05570 | A07045 | 382 | A05570 | A07140 | 224 |
| A05570 | A07900 | 267 | A05570 | A09991 | 407 |
| A05570 | A10226 | 340 | A05570 | A12824 | 165 |
| A05570 | A13181 | 221 | A05570 | A15324 | 180 |
| A05570 | A15498 | 236 | A05570 | A15933 | 162 |
| A05571 | A07129 | 447 | A05571 | A13946 | 398 |
| A05572 | A06298 | 358 | A05572 | A07129 | 367 |
| A05572 | A07482 | 430 | A05572 | A07604 | 232 |
| A05572 | A13369 | 213 | A05573 | A05659 | 208 |
| A05573 | A05851 | 435 | A05573 | A05912 | 361 |
| A05573 | A06086 | 208 | A05573 | A06358 | 190 |
| A05573 | A06402 | 293 | A05573 | A06405 | 469 |
| A05573 | A06439 | 455 | A05573 | A06629 | 313 |
| A05573 | A06632 | 321 | A05573 | A06635 | 288 |
| A05573 | A06641 | 247 | A05573 | A06700 | 179 |
| A05573 | A06847 | 270 | A05573 | A06855 | 294 |
| A05573 | A06912 | 258 | A05573 | A06994 | 293 |
| A05573 | A07027 | 469 | A05573 | A07059 | 313 |
| A05573 | A07080 | 196 | A05573 | A07088 | 193 |
| A05573 | A07122 | 472 | A05573 | A07239 | 338 |
| A05573 | A07264 | 229 | A05573 | A07271 | 346 |
| A05573 | A07311 | 176 | A05573 | A07322 | 278 |
| A05573 | A07325 | 200 | A05573 | A07381 | 491 |
| A05573 | A07408 | 302 | A05573 | A07501 | 228 |
| A05573 | A07503 | 294 | A05573 | A07619 | 329 |
| A05573 | A07674 | 417 | A05573 | A07732 | 475 |
| A05573 | A07737 | 383 | A05573 | A07856 | 318 |
| A05573 | A07935 | 332 | A05573 | A08114 | 240 |
| A05573 | A08135 | 262 | A05573 | A08284 | 407 |
| A05573 | A08366 | 366 | A05573 | A08372 | 238 |
| A05573 | A08385 | 469 | A05573 | A09326 | 475 |
| A05573 | A10442 | 321 | A05573 | A10514 | 475 |
| A05573 | A10652 | 460 | A05573 | A10670 | 361 |
| A05573 | A10674 | 193 | A05573 | A10684 | 446 |
| A05573 | A10691 | 360 | A05573 | A10692 | 456 |
| A05573 | A10699 | 326 | A05573 | A10706 | 241 |
| A05573 | A10768 | 486 | A05573 | A10780 | 452 |
| A05573 | A10783 | 407 | A05573 | A10876 | 373 |
| A05573 | A11436 | 475 | A05573 | A11714 | 299 |

|        |        |     |        |        |     |
|--------|--------|-----|--------|--------|-----|
| A05573 | A13341 | 409 | A05573 | A14371 | 475 |
| A05573 | A15637 | 224 | A05573 | A17051 | 258 |
| A05573 | A17078 | 205 | A05574 | A06623 | 308 |
| A05574 | A16300 | 353 | A05575 | A10194 | 414 |
| A05575 | A11892 | 414 | A05575 | A14642 | 434 |
| A05575 | A16738 | 340 | A05576 | A05806 | 434 |
| A05576 | A06797 | 344 | A05576 | A07180 | 191 |
| A05576 | A09791 | 308 | A05576 | A10026 | 425 |
| A05576 | A10418 | 360 | A05577 | A05679 | 489 |
| A05577 | A05985 | 68  | A05577 | A06015 | 341 |
| A05577 | A06047 | 333 | A05577 | A06149 | 139 |
| A05577 | A06390 | 333 | A05577 | A06398 | 177 |
| A05577 | A06414 | 162 | A05577 | A06415 | 491 |
| A05577 | A06588 | 366 | A05577 | A06604 | 443 |
| A05577 | A06627 | 337 | A05577 | A06899 | 394 |
| A05577 | A06900 | 333 | A05577 | A07031 | 82  |
| A05577 | A07126 | 660 | A05577 | A07140 | 185 |
| A05577 | A07152 | 419 | A05577 | A07166 | 353 |
| A05577 | A07184 | 162 | A05577 | A07192 | 198 |
| A05577 | A07207 | 63  | A05577 | A07311 | 163 |
| A05577 | A07462 | 306 | A05577 | A07961 | 472 |
| A05577 | A07967 | 290 | A05577 | A08057 | 457 |
| A05577 | A08093 | 228 | A05577 | A08779 | 306 |
| A05577 | A08850 | 711 | A05577 | A08908 | 147 |
| A05577 | A09411 | 205 | A05577 | A10061 | 229 |
| A05577 | A10529 | 224 | A05577 | A10532 | 490 |
| A05577 | A10571 | 265 | A05577 | A10605 | 296 |
| A05577 | A11299 | 407 | A05577 | A13023 | 779 |
| A05577 | A13131 | 201 | A05577 | A13816 | 65  |
| A05577 | A13821 | 489 | A05577 | A13903 | 394 |
| A05577 | A13988 | 462 | A05577 | A14012 | 454 |
| A05577 | A14071 | 486 | A05577 | A14125 | 488 |
| A05577 | A14146 | 271 | A05577 | A14199 | 241 |
| A05577 | A14208 | 454 | A05577 | A14220 | 207 |
| A05577 | A14236 | 485 | A05577 | A14366 | 754 |
| A05577 | A14372 | 470 | A05577 | A14374 | 491 |
| A05577 | A14391 | 486 | A05577 | A14392 | 322 |
| A05577 | A14394 | 501 | A05577 | A14432 | 180 |
| A05577 | A14439 | 465 | A05577 | A14596 | 846 |
| A05577 | A14598 | 159 | A05577 | A14599 | 241 |
| A05577 | A14659 | 801 | A05577 | A15290 | 180 |
| A05577 | A15295 | 172 | A05577 | A15332 | 185 |
| A05577 | A15394 | 199 | A05577 | A15425 | 302 |
| A05577 | A15498 | 470 | A05577 | A15507 | 258 |
| A05577 | A15606 | 428 | A05577 | A15642 | 423 |
| A05577 | A15794 | 154 | A05578 | A11774 | 378 |

|        |        |     |        |        |     |
|--------|--------|-----|--------|--------|-----|
| A05578 | A14190 | 205 | A05578 | A15795 | 302 |
| A05580 | A10410 | 434 | A05580 | A15498 | 205 |
| A05581 | A06595 | 294 | A05581 | A10918 | 404 |
| A05582 | A06004 | 385 | A05582 | A06697 | 408 |
| A05582 | A06863 | 345 | A05582 | A09535 | 407 |
| A05583 | A14148 | 201 | A05583 | A14210 | 210 |
| A05584 | A05591 | 334 | A05584 | A06139 | 386 |
| A05584 | A08714 | 247 | A05584 | A09797 | 291 |
| A05584 | A09900 | 256 | A05584 | A09988 | 221 |
| A05584 | A10320 | 198 | A05584 | A10592 | 199 |
| A05584 | A11212 | 386 | A05584 | A11545 | 221 |
| A05584 | A14120 | 332 | A05586 | A10456 | 241 |
| A05587 | A05591 | 281 | A05587 | A05657 | 440 |
| A05587 | A05711 | 425 | A05587 | A05739 | 332 |
| A05587 | A05891 | 480 | A05587 | A05970 | 401 |
| A05587 | A06710 | 391 | A05587 | A06711 | 361 |
| A05587 | A06954 | 391 | A05587 | A07605 | 404 |
| A05587 | A10613 | 394 | A05587 | A11216 | 371 |
| A05587 | A11669 | 425 | A05587 | A11683 | 247 |
| A05587 | A14381 | 279 | A05587 | A15422 | 238 |
| A05587 | A15502 | 246 | A05588 | A05985 | 329 |
| A05589 | A05790 | 477 | A05589 | A05791 | 326 |
| A05589 | A07347 | 299 | A05589 | A13219 | 363 |
| A05590 | A14649 | 353 | A05590 | A15233 | 378 |
| A05591 | A05667 | 417 | A05591 | A05711 | 380 |
| A05591 | A05891 | 283 | A05591 | A06132 | 319 |
| A05591 | A06585 | 330 | A05591 | A06598 | 173 |
| A05591 | A07129 | 329 | A05591 | A07335 | 258 |
| A05591 | A07900 | 205 | A05591 | A08610 | 299 |
| A05591 | A08638 | 339 | A05591 | A08654 | 380 |
| A05591 | A09248 | 229 | A05591 | A09929 | 308 |
| A05591 | A10609 | 483 | A05591 | A10613 | 414 |
| A05591 | A10906 | 420 | A05591 | A11085 | 348 |
| A05591 | A11212 | 361 | A05591 | A11498 | 339 |
| A05591 | A11669 | 380 | A05591 | A11683 | 335 |
| A05591 | A11729 | 162 | A05591 | A13651 | 308 |
| A05591 | A14454 | 243 | A05591 | A15228 | 458 |
| A05592 | A07145 | 366 | A05593 | A05599 | 456 |
| A05593 | A08036 | 425 | A05593 | A10278 | 335 |
| A05593 | A10858 | 405 | A05593 | A12422 | 425 |
| A05593 | A12580 | 425 | A05594 | A06670 | 411 |
| A05594 | A07442 | 401 | A05594 | A08314 | 441 |
| A05594 | A14589 | 361 | A05596 | A05919 | 385 |
| A05596 | A06623 | 252 | A05596 | A09200 | 462 |
| A05596 | A09470 | 307 | A05596 | A09509 | 238 |
| A05597 | A05679 | 446 | A05597 | A05985 | 210 |

|        |        |     |        |        |     |
|--------|--------|-----|--------|--------|-----|
| A05597 | A06415 | 414 | A05597 | A06491 | 179 |
| A05597 | A06591 | 179 | A05597 | A06604 | 338 |
| A05597 | A06956 | 333 | A05597 | A07053 | 380 |
| A05597 | A07152 | 333 | A05597 | A07166 | 226 |
| A05597 | A07421 | 179 | A05597 | A07495 | 179 |
| A05597 | A07785 | 179 | A05597 | A07816 | 179 |
| A05597 | A08097 | 195 | A05597 | A08259 | 179 |
| A05597 | A08551 | 179 | A05597 | A08711 | 358 |
| A05597 | A08834 | 179 | A05597 | A08840 | 179 |
| A05597 | A09341 | 177 | A05597 | A09750 | 246 |
| A05597 | A09825 | 179 | A05597 | A10605 | 411 |
| A05597 | A10681 | 313 | A05597 | A10689 | 173 |
| A05597 | A11558 | 179 | A05597 | A12809 | 374 |
| A05597 | A13819 | 179 | A05597 | A13866 | 179 |
| A05597 | A13942 | 179 | A05597 | A13988 | 399 |
| A05597 | A14012 | 486 | A05597 | A14071 | 477 |
| A05597 | A14125 | 455 | A05597 | A14146 | 294 |
| A05597 | A14202 | 179 | A05597 | A14366 | 266 |
| A05597 | A14372 | 416 | A05597 | A14374 | 176 |
| A05597 | A14617 | 396 | A05597 | A14659 | 162 |
| A05597 | A15358 | 179 | A05597 | A15394 | 245 |
| A05597 | A15425 | 188 | A05597 | A15470 | 179 |
| A05597 | A15484 | 179 | A05597 | A15518 | 330 |
| A05597 | A15640 | 374 | A05597 | A15795 | 240 |
| A05597 | A16002 | 171 | A05597 | A16034 | 294 |
| A05597 | A16716 | 449 | A05598 | A06588 | 461 |
| A05598 | A06607 | 491 | A05598 | A06688 | 243 |
| A05598 | A10721 | 201 | A05598 | A13434 | 316 |
| A05599 | A08036 | 441 | A05600 | A05738 | 212 |
| A05600 | A05751 | 489 | A05600 | A05774 | 351 |
| A05600 | A05826 | 374 | A05600 | A05972 | 450 |
| A05600 | A06088 | 356 | A05600 | A06089 | 385 |
| A05600 | A06295 | 205 | A05600 | A06359 | 258 |
| A05600 | A06725 | 394 | A05600 | A07122 | 491 |
| A05600 | A07831 | 419 | A05600 | A07832 | 419 |
| A05600 | A10027 | 419 | A05600 | A11432 | 382 |
| A05600 | A13143 | 419 | A05600 | A14827 | 299 |
| A05600 | A15034 | 218 | A05600 | A15282 | 171 |
| A05600 | A15905 | 383 | A05601 | A05603 | 200 |
| A05601 | A05767 | 491 | A05601 | A05865 | 446 |
| A05601 | A06100 | 283 | A05601 | A06530 | 488 |
| A05601 | A06719 | 356 | A05601 | A06997 | 167 |
| A05601 | A07985 | 430 | A05601 | A08093 | 491 |
| A05601 | A08097 | 489 | A05601 | A08171 | 177 |
| A05601 | A08172 | 258 | A05601 | A08309 | 323 |
| A05601 | A08681 | 180 | A05601 | A08686 | 297 |

|        |        |     |        |        |     |
|--------|--------|-----|--------|--------|-----|
| A05601 | A08859 | 457 | A05601 | A09030 | 346 |
| A05601 | A09246 | 452 | A05601 | A09462 | 346 |
| A05601 | A10024 | 491 | A05601 | A10169 | 322 |
| A05601 | A10173 | 425 | A05601 | A10601 | 165 |
| A05601 | A10631 | 369 | A05601 | A10651 | 176 |
| A05601 | A11299 | 490 | A05601 | A11315 | 168 |
| A05601 | A11888 | 367 | A05601 | A11982 | 490 |
| A05601 | A12199 | 322 | A05601 | A12282 | 236 |
| A05601 | A12370 | 346 | A05601 | A12599 | 429 |
| A05601 | A12634 | 411 | A05601 | A12689 | 367 |
| A05601 | A12768 | 367 | A05601 | A12769 | 367 |
| A05601 | A12781 | 332 | A05601 | A12786 | 429 |
| A05601 | A12804 | 367 | A05601 | A13587 | 217 |
| A05601 | A13815 | 367 | A05601 | A14071 | 469 |
| A05601 | A14132 | 217 | A05601 | A14202 | 279 |
| A05601 | A14229 | 174 | A05601 | A14511 | 180 |
| A05601 | A14570 | 481 | A05601 | A14611 | 182 |
| A05601 | A14734 | 367 | A05601 | A14936 | 393 |
| A05601 | A15322 | 263 | A05601 | A15366 | 321 |
| A05601 | A15370 | 307 | A05601 | A15422 | 185 |
| A05601 | A15495 | 477 | A05601 | A15498 | 154 |
| A05601 | A15502 | 196 | A05601 | A15680 | 347 |
| A05601 | A16792 | 210 | A05601 | A17085 | 176 |
| A05603 | A05611 | 361 | A05603 | A05739 | 177 |
| A05603 | A05883 | 205 | A05603 | A05911 | 245 |
| A05603 | A06038 | 221 | A05603 | A06069 | 162 |
| A05603 | A06151 | 205 | A05603 | A06244 | 290 |
| A05603 | A06253 | 180 | A05603 | A06293 | 217 |
| A05603 | A06337 | 185 | A05603 | A06346 | 473 |
| A05603 | A06428 | 318 | A05603 | A06502 | 168 |
| A05603 | A06607 | 374 | A05603 | A06731 | 221 |
| A05603 | A06739 | 279 | A05603 | A06837 | 313 |
| A05603 | A06868 | 163 | A05603 | A07026 | 207 |
| A05603 | A07068 | 424 | A05603 | A07098 | 361 |
| A05603 | A07114 | 283 | A05603 | A07126 | 180 |
| A05603 | A07197 | 185 | A05603 | A07209 | 276 |
| A05603 | A07218 | 227 | A05603 | A07293 | 339 |
| A05603 | A07396 | 313 | A05603 | A07472 | 157 |
| A05603 | A07559 | 154 | A05603 | A07601 | 258 |
| A05603 | A07605 | 263 | A05603 | A07651 | 339 |
| A05603 | A07704 | 156 | A05603 | A07705 | 276 |
| A05603 | A07824 | 305 | A05603 | A07839 | 361 |
| A05603 | A07883 | 160 | A05603 | A07886 | 361 |
| A05603 | A08034 | 290 | A05603 | A08115 | 313 |
| A05603 | A08116 | 324 | A05603 | A08171 | 299 |
| A05603 | A08172 | 457 | A05603 | A08263 | 177 |

|        |        |     |        |        |     |
|--------|--------|-----|--------|--------|-----|
| A05603 | A08291 | 296 | A05603 | A08304 | 205 |
| A05603 | A08309 | 306 | A05603 | A08373 | 361 |
| A05603 | A08401 | 361 | A05603 | A08453 | 313 |
| A05603 | A08455 | 339 | A05603 | A08486 | 361 |
| A05603 | A08584 | 324 | A05603 | A08681 | 168 |
| A05603 | A08685 | 228 | A05603 | A08686 | 466 |
| A05603 | A08948 | 279 | A05603 | A09239 | 180 |
| A05603 | A09315 | 226 | A05603 | A09380 | 218 |
| A05603 | A09668 | 363 | A05603 | A09865 | 177 |
| A05603 | A10024 | 240 | A05603 | A10168 | 296 |
| A05603 | A10203 | 339 | A05603 | A10278 | 184 |
| A05603 | A10401 | 283 | A05603 | A10626 | 236 |
| A05603 | A10627 | 361 | A05603 | A10651 | 165 |
| A05603 | A10736 | 361 | A05603 | A10831 | 361 |
| A05603 | A10991 | 361 | A05603 | A11020 | 305 |
| A05603 | A11090 | 274 | A05603 | A11280 | 193 |
| A05603 | A11282 | 399 | A05603 | A11289 | 196 |
| A05603 | A11294 | 236 | A05603 | A11310 | 347 |
| A05603 | A11320 | 232 | A05603 | A11328 | 352 |
| A05603 | A11382 | 283 | A05603 | A11400 | 241 |
| A05603 | A11413 | 258 | A05603 | A11446 | 251 |
| A05603 | A11905 | 279 | A05603 | A11951 | 218 |
| A05603 | A11961 | 258 | A05603 | A11970 | 361 |
| A05603 | A12060 | 324 | A05603 | A12108 | 296 |
| A05603 | A12298 | 296 | A05603 | A12389 | 361 |
| A05603 | A12411 | 305 | A05603 | A12461 | 361 |
| A05603 | A12527 | 361 | A05603 | A12631 | 339 |
| A05603 | A12634 | 305 | A05603 | A12736 | 269 |
| A05603 | A12756 | 361 | A05603 | A12843 | 361 |
| A05603 | A12983 | 279 | A05603 | A13094 | 361 |
| A05603 | A13119 | 266 | A05603 | A13127 | 208 |
| A05603 | A13369 | 488 | A05603 | A14511 | 247 |
| A05603 | A14570 | 170 | A05603 | A14654 | 165 |
| A05603 | A15277 | 446 | A05603 | A15336 | 260 |
| A05603 | A15416 | 193 | A05603 | A15482 | 173 |
| A05603 | A15498 | 201 | A05603 | A15638 | 486 |
| A05603 | A16018 | 193 | A05603 | A16194 | 296 |
| A05603 | A16195 | 313 | A05603 | A16230 | 167 |
| A05603 | A16350 | 247 | A05603 | A16718 | 217 |
| A05603 | A16723 | 224 | A05603 | A17061 | 160 |
| A05604 | A07209 | 291 | A05604 | A08022 | 236 |
| A05605 | A05638 | 200 | A05605 | A06204 | 386 |
| A05605 | A06347 | 402 | A05605 | A06369 | 217 |
| A05605 | A06832 | 217 | A05605 | A07180 | 229 |
| A05605 | A08183 | 217 | A05605 | A09625 | 200 |
| A05605 | A09628 | 200 | A05605 | A09673 | 217 |



|        |        |     |        |        |     |
|--------|--------|-----|--------|--------|-----|
| A05605 | A13876 | 200 | A05605 | A13881 | 200 |
| A05605 | A14088 | 217 | A05605 | A14171 | 200 |
| A05605 | A14179 | 409 | A05605 | A14180 | 200 |
| A05605 | A14356 | 200 | A05605 | A15370 | 226 |
| A05605 | A15377 | 217 | A05605 | A15543 | 217 |
| A05605 | A15712 | 200 | A05605 | A15719 | 200 |
| A05605 | A15724 | 299 | A05605 | A15757 | 200 |
| A05605 | A16066 | 200 | A05605 | A16634 | 200 |
| A05605 | A16664 | 217 | A05605 | A16919 | 200 |
| A05606 | A07370 | 249 | A05606 | A09939 | 371 |
| A05606 | A14190 | 405 | A05606 | A14644 | 210 |
| A05606 | A15348 | 247 | A05606 | A15515 | 291 |
| A05607 | A06073 | 188 | A05607 | A06798 | 185 |
| A05607 | A08549 | 235 | A05607 | A12325 | 157 |
| A05607 | A14120 | 167 | A05607 | A14130 | 229 |
| A05607 | A14263 | 408 | A05607 | A15295 | 219 |
| A05608 | A09709 | 382 | A05608 | A14127 | 152 |
| A05609 | A06819 | 484 | A05609 | A07074 | 472 |
| A05609 | A07097 | 350 | A05609 | A07222 | 627 |
| A05609 | A07333 | 317 | A05609 | A07571 | 595 |
| A05609 | A07931 | 484 | A05609 | A07974 | 617 |
| A05609 | A08097 | 317 | A05609 | A09340 | 317 |
| A05609 | A09350 | 425 | A05609 | A10281 | 390 |
| A05609 | A10543 | 404 | A05609 | A14525 | 191 |
| A05609 | A14810 | 338 | A05609 | A14858 | 439 |
| A05609 | A15655 | 404 | A05609 | A16808 | 213 |
| A05610 | A06385 | 262 | A05611 | A06837 | 441 |
| A05611 | A07601 | 429 | A05611 | A07886 | 452 |
| A05611 | A08034 | 436 | A05611 | A08115 | 441 |
| A05611 | A08116 | 445 | A05611 | A08401 | 452 |
| A05611 | A08455 | 447 | A05611 | A08486 | 452 |
| A05611 | A14633 | 297 | A05612 | A05641 | 383 |
| A05612 | A05886 | 385 | A05612 | A05887 | 368 |
| A05612 | A06729 | 314 | A05612 | A07218 | 483 |
| A05612 | A13816 | 294 | A05613 | A05944 | 305 |
| A05613 | A07161 | 326 | A05613 | A07372 | 385 |
| A05613 | A07390 | 361 | A05613 | A09873 | 307 |
| A05613 | A12393 | 176 | A05613 | A14191 | 182 |
| A05613 | A14511 | 188 | A05613 | A15349 | 183 |
| A05613 | A15605 | 326 | A05613 | A15608 | 334 |
| A05614 | A07080 | 433 | A05615 | A08379 | 198 |
| A05615 | A15524 | 176 | A05615 | A15875 | 357 |
| A05615 | A16741 | 201 | A05617 | A05709 | 210 |
| A05617 | A05741 | 347 | A05617 | A05879 | 172 |
| A05617 | A06086 | 470 | A05617 | A06177 | 313 |
| A05617 | A06339 | 187 | A05617 | A07218 | 452 |

|        |        |     |        |        |     |
|--------|--------|-----|--------|--------|-----|
| A05617 | A08088 | 273 | A05617 | A08707 | 63  |
| A05617 | A09509 | 168 | A05617 | A09936 | 302 |
| A05617 | A09985 | 481 | A05617 | A10428 | 314 |
| A05617 | A11309 | 198 | A05617 | A12722 | 408 |
| A05617 | A14074 | 213 | A05617 | A14192 | 210 |
| A05617 | A14263 | 215 | A05617 | A14377 | 204 |
| A05617 | A15932 | 467 | A05617 | A16847 | 332 |
| A05618 | A06055 | 380 | A05619 | A06606 | 196 |
| A05619 | A06650 | 286 | A05619 | A07374 | 414 |
| A05619 | A09180 | 427 | A05619 | A11911 | 232 |
| A05619 | A12383 | 177 | A05620 | A07141 | 458 |
| A05621 | A05958 | 491 | A05621 | A06606 | 460 |
| A05621 | A06819 | 491 | A05621 | A06834 | 263 |
| A05621 | A07218 | 177 | A05621 | A07347 | 303 |
| A05621 | A07586 | 188 | A05621 | A08133 | 278 |
| A05621 | A08698 | 180 | A05621 | A09416 | 374 |
| A05621 | A10171 | 245 | A05621 | A10247 | 276 |
| A05621 | A10296 | 245 | A05621 | A10353 | 486 |
| A05621 | A10461 | 157 | A05621 | A10765 | 312 |
| A05621 | A10801 | 204 | A05621 | A12047 | 162 |
| A05621 | A12824 | 204 | A05621 | A12897 | 335 |
| A05621 | A13285 | 168 | A05621 | A13543 | 182 |
| A05621 | A13980 | 243 | A05621 | A14588 | 351 |
| A05621 | A15357 | 340 | A05621 | A15383 | 278 |
| A05621 | A15502 | 269 | A05621 | A16296 | 184 |
| A05622 | A06019 | 458 | A05622 | A07078 | 351 |
| A05622 | A10635 | 458 | A05622 | A14306 | 418 |
| A05624 | A06385 | 306 | A05624 | A06970 | 301 |
| A05624 | A10172 | 430 | A05624 | A16741 | 297 |
| A05625 | A06177 | 63  | A05625 | A06602 | 196 |
| A05625 | A06661 | 770 | A05625 | A07444 | 589 |
| A05625 | A07872 | 409 | A05625 | A07873 | 587 |
| A05625 | A08503 | 180 | A05625 | A08549 | 311 |
| A05625 | A08571 | 554 | A05625 | A10604 | 285 |
| A05625 | A10965 | 238 | A05625 | A11283 | 154 |
| A05625 | A13484 | 278 | A05625 | A14263 | 182 |
| A05625 | A14310 | 341 | A05625 | A15726 | 241 |
| A05627 | A06039 | 196 | A05627 | A09786 | 420 |
| A05627 | A16300 | 185 | A05629 | A06586 | 318 |
| A05629 | A09036 | 356 | A05629 | A09561 | 432 |
| A05629 | A09791 | 266 | A05629 | A16300 | 152 |
| A05630 | A06971 | 363 | A05630 | A08212 | 196 |
| A05630 | A09598 | 196 | A05630 | A14694 | 195 |
| A05631 | A08863 | 291 | A05631 | A15386 | 290 |
| A05632 | A08499 | 452 | A05633 | A06631 | 180 |
| A05633 | A06907 | 299 | A05633 | A07167 | 429 |

|        |        |     |        |        |     |
|--------|--------|-----|--------|--------|-----|
| A05633 | A07311 | 490 | A05633 | A07706 | 199 |
| A05633 | A08327 | 201 | A05633 | A08345 | 407 |
| A05633 | A08450 | 334 | A05633 | A09279 | 193 |
| A05633 | A11559 | 385 | A05633 | A11929 | 263 |
| A05633 | A12988 | 452 | A05633 | A13199 | 276 |
| A05633 | A13975 | 401 | A05633 | A14208 | 401 |
| A05633 | A15291 | 199 | A05633 | A15386 | 311 |
| A05633 | A15506 | 223 | A05633 | A15613 | 191 |
| A05634 | A06333 | 360 | A05634 | A06623 | 245 |
| A05634 | A06747 | 296 | A05634 | A07393 | 422 |
| A05634 | A08858 | 177 | A05634 | A09127 | 230 |
| A05634 | A12667 | 321 | A05634 | A13938 | 380 |
| A05634 | A13939 | 330 | A05634 | A14424 | 398 |
| A05634 | A14860 | 351 | A05635 | A15659 | 347 |
| A05635 | A15920 | 374 | A05636 | A06607 | 245 |
| A05638 | A06011 | 269 | A05638 | A06204 | 200 |
| A05638 | A06347 | 63  | A05638 | A06778 | 157 |
| A05638 | A07180 | 203 | A05638 | A07495 | 234 |
| A05638 | A07989 | 152 | A05638 | A08484 | 269 |
| A05638 | A09326 | 269 | A05638 | A09625 | 200 |
| A05638 | A09628 | 200 | A05638 | A10498 | 243 |
| A05638 | A10607 | 263 | A05638 | A11279 | 269 |
| A05638 | A13876 | 200 | A05638 | A13881 | 200 |
| A05638 | A13895 | 269 | A05638 | A14170 | 205 |
| A05638 | A14171 | 200 | A05638 | A14179 | 200 |
| A05638 | A14180 | 200 | A05638 | A14182 | 269 |
| A05638 | A14209 | 152 | A05638 | A14356 | 200 |
| A05638 | A14661 | 269 | A05638 | A14711 | 269 |
| A05638 | A14783 | 269 | A05638 | A15370 | 200 |
| A05638 | A15712 | 200 | A05638 | A15719 | 200 |
| A05638 | A15757 | 200 | A05638 | A16066 | 200 |
| A05638 | A16634 | 200 | A05638 | A16919 | 200 |
| A05639 | A06731 | 306 | A05639 | A14060 | 364 |
| A05640 | A07151 | 369 | A05640 | A07442 | 308 |
| A05640 | A16328 | 314 | A05641 | A05726 | 385 |
| A05641 | A06932 | 413 | A05641 | A07218 | 474 |
| A05641 | A11318 | 461 | A05641 | A12207 | 472 |
| A05641 | A13348 | 335 | A05643 | A06726 | 428 |
| A05643 | A06920 | 399 | A05643 | A07064 | 458 |
| A05643 | A07065 | 407 | A05643 | A07218 | 130 |
| A05643 | A07422 | 160 | A05643 | A07605 | 407 |
| A05643 | A07790 | 428 | A05643 | A07810 | 418 |
| A05643 | A08041 | 428 | A05643 | A08042 | 412 |
| A05643 | A10156 | 408 | A05643 | A11164 | 450 |
| A05644 | A05891 | 327 | A05644 | A06684 | 438 |
| A05644 | A07513 | 438 | A05644 | A07774 | 438 |

|        |        |     |        |        |     |
|--------|--------|-----|--------|--------|-----|
| A05644 | A07945 | 438 | A05644 | A08153 | 438 |
| A05644 | A10095 | 396 | A05644 | A10292 | 438 |
| A05644 | A10641 | 438 | A05644 | A11313 | 329 |
| A05645 | A06489 | 338 | A05645 | A06892 | 378 |
| A05645 | A16741 | 299 | A05646 | A06122 | 296 |
| A05646 | A06825 | 290 | A05646 | A06965 | 157 |
| A05646 | A07312 | 252 | A05646 | A09044 | 201 |
| A05646 | A14597 | 173 | A05646 | A16118 | 221 |
| A05647 | A05694 | 445 | A05648 | A06606 | 184 |
| A05648 | A09899 | 434 | A05648 | A13449 | 445 |
| A05649 | A06607 | 245 | A05649 | A09160 | 399 |
| A05650 | A07221 | 422 | A05650 | A13518 | 452 |
| A05651 | A05861 | 428 | A05651 | A05871 | 414 |
| A05651 | A09147 | 432 | A05652 | A08629 | 445 |
| A05652 | A14442 | 408 | A05653 | A06100 | 362 |
| A05653 | A06708 | 326 | A05653 | A07209 | 420 |
| A05653 | A07803 | 171 | A05653 | A09837 | 379 |
| A05653 | A10049 | 369 | A05653 | A14055 | 198 |
| A05653 | A14511 | 389 | A05654 | A06486 | 340 |
| A05654 | A07160 | 180 | A05654 | A07323 | 205 |
| A05654 | A07398 | 314 | A05654 | A10189 | 384 |
| A05654 | A11263 | 452 | A05654 | A11331 | 356 |
| A05654 | A12305 | 63  | A05654 | A13126 | 489 |
| A05654 | A13435 | 474 | A05654 | A13626 | 302 |
| A05654 | A13917 | 159 | A05654 | A13989 | 486 |
| A05654 | A14530 | 293 | A05654 | A15498 | 207 |
| A05654 | A16095 | 182 | A05654 | A16149 | 274 |
| A05654 | A16279 | 366 | A05657 | A05718 | 408 |
| A05657 | A05739 | 490 | A05657 | A06069 | 414 |
| A05657 | A06606 | 200 | A05657 | A07422 | 279 |
| A05657 | A09140 | 414 | A05657 | A09949 | 424 |
| A05657 | A10349 | 414 | A05658 | A05751 | 406 |
| A05659 | A05682 | 385 | A05659 | A05757 | 243 |
| A05659 | A06098 | 344 | A05659 | A06263 | 241 |
| A05659 | A06282 | 335 | A05659 | A06296 | 177 |
| A05659 | A06358 | 205 | A05659 | A06739 | 224 |
| A05659 | A06874 | 313 | A05659 | A06934 | 299 |
| A05659 | A06970 | 341 | A05659 | A07246 | 396 |
| A05659 | A07283 | 213 | A05659 | A07376 | 481 |
| A05659 | A07384 | 260 | A05659 | A07477 | 408 |
| A05659 | A07553 | 173 | A05659 | A07590 | 443 |
| A05659 | A07721 | 391 | A05659 | A07736 | 386 |
| A05659 | A07815 | 165 | A05659 | A07844 | 182 |
| A05659 | A07933 | 241 | A05659 | A07973 | 340 |
| A05659 | A08250 | 305 | A05659 | A09059 | 208 |
| A05659 | A10148 | 193 | A05659 | A10658 | 294 |

|        |        |     |        |        |     |
|--------|--------|-----|--------|--------|-----|
| A05659 | A10672 | 301 | A05659 | A10677 | 216 |
| A05659 | A14092 | 246 | A05659 | A14337 | 420 |
| A05659 | A15359 | 165 | A05659 | A15637 | 240 |
| A05659 | A15867 | 193 | A05659 | A17078 | 226 |
| A05660 | A05768 | 363 | A05660 | A05782 | 436 |
| A05660 | A06091 | 432 | A05660 | A06632 | 401 |
| A05660 | A07061 | 414 | A05660 | A14570 | 171 |
| A05660 | A15649 | 236 | A05660 | A15874 | 299 |
| A05660 | A16741 | 252 | A05663 | A10124 | 452 |
| A05663 | A14698 | 413 | A05664 | A07153 | 356 |
| A05665 | A05666 | 347 | A05665 | A05828 | 339 |
| A05665 | A05900 | 402 | A05665 | A06132 | 443 |
| A05665 | A06610 | 235 | A05665 | A07129 | 395 |
| A05665 | A07199 | 339 | A05665 | A10018 | 249 |
| A05665 | A10247 | 167 | A05665 | A13875 | 263 |
| A05666 | A06073 | 363 | A05666 | A06286 | 296 |
| A05666 | A06739 | 308 | A05666 | A07025 | 404 |
| A05666 | A07765 | 408 | A05666 | A09138 | 425 |
| A05666 | A10018 | 286 | A05666 | A10582 | 474 |
| A05666 | A10943 | 386 | A05666 | A10989 | 297 |
| A05666 | A11101 | 333 | A05666 | A12888 | 404 |
| A05666 | A14633 | 283 | A05666 | A15578 | 177 |
| A05666 | A15638 | 258 | A05667 | A07129 | 356 |
| A05667 | A07900 | 435 | A05668 | A07308 | 434 |
| A05669 | A06607 | 208 | A05669 | A07198 | 337 |
| A05669 | A08741 | 383 | A05669 | A14423 | 452 |
| A05669 | A15674 | 401 | A05670 | A10231 | 475 |
| A05671 | A10324 | 472 | A05673 | A06100 | 218 |
| A05673 | A07958 | 224 | A05673 | A14366 | 339 |
| A05673 | A14431 | 270 | A05673 | A14637 | 230 |
| A05674 | A11929 | 306 | A05674 | A13826 | 191 |
| A05674 | A15330 | 251 | A05677 | A06379 | 224 |
| A05677 | A06735 | 461 | A05677 | A07152 | 277 |
| A05677 | A07173 | 293 | A05677 | A13988 | 348 |
| A05677 | A15425 | 265 | A05678 | A06527 | 371 |
| A05678 | A06607 | 210 | A05678 | A06696 | 398 |
| A05678 | A06875 | 429 | A05678 | A06908 | 286 |
| A05678 | A07452 | 235 | A05678 | A07468 | 333 |
| A05678 | A07469 | 299 | A05678 | A07471 | 491 |
| A05678 | A07472 | 378 | A05678 | A07475 | 240 |
| A05678 | A07491 | 251 | A05678 | A07538 | 339 |
| A05678 | A07541 | 486 | A05678 | A07561 | 481 |
| A05678 | A07608 | 335 | A05678 | A07634 | 353 |
| A05678 | A07635 | 391 | A05678 | A07657 | 393 |
| A05678 | A07958 | 168 | A05678 | A08210 | 323 |
| A05678 | A08785 | 468 | A05678 | A09788 | 353 |

|        |        |     |        |        |     |
|--------|--------|-----|--------|--------|-----|
| A05678 | A10967 | 386 | A05678 | A11329 | 328 |
| A05678 | A11448 | 393 | A05678 | A11721 | 371 |
| A05678 | A13879 | 423 | A05678 | A14062 | 252 |
| A05678 | A14381 | 213 | A05678 | A15773 | 168 |
| A05679 | A05985 | 468 | A05679 | A06047 | 372 |
| A05679 | A06054 | 312 | A05679 | A06149 | 207 |
| A05679 | A06414 | 468 | A05679 | A06415 | 491 |
| A05679 | A06422 | 201 | A05679 | A06604 | 267 |
| A05679 | A06650 | 246 | A05679 | A06747 | 475 |
| A05679 | A06899 | 483 | A05679 | A06988 | 307 |
| A05679 | A07134 | 339 | A05679 | A07145 | 271 |
| A05679 | A07152 | 491 | A05679 | A07157 | 445 |
| A05679 | A07161 | 303 | A05679 | A07173 | 408 |
| A05679 | A07174 | 234 | A05679 | A07372 | 276 |
| A05679 | A07390 | 228 | A05679 | A07753 | 230 |
| A05679 | A08634 | 456 | A05679 | A08834 | 85  |
| A05679 | A08908 | 414 | A05679 | A09394 | 230 |
| A05679 | A09744 | 141 | A05679 | A10061 | 291 |
| A05679 | A10585 | 344 | A05679 | A10586 | 458 |
| A05679 | A10605 | 358 | A05679 | A10744 | 267 |
| A05679 | A12009 | 213 | A05679 | A12809 | 319 |
| A05679 | A12927 | 274 | A05679 | A13084 | 224 |
| A05679 | A13131 | 383 | A05679 | A13160 | 329 |
| A05679 | A13821 | 263 | A05679 | A13872 | 438 |
| A05679 | A13899 | 109 | A05679 | A13903 | 434 |
| A05679 | A13988 | 445 | A05679 | A14071 | 486 |
| A05679 | A14125 | 449 | A05679 | A14146 | 210 |
| A05679 | A14199 | 269 | A05679 | A14316 | 249 |
| A05679 | A14366 | 436 | A05679 | A14368 | 213 |
| A05679 | A14372 | 408 | A05679 | A14374 | 491 |
| A05679 | A14376 | 238 | A05679 | A14385 | 296 |
| A05679 | A14391 | 488 | A05679 | A14392 | 332 |
| A05679 | A14439 | 489 | A05679 | A14442 | 208 |
| A05679 | A14554 | 266 | A05679 | A14598 | 228 |
| A05679 | A14599 | 488 | A05679 | A14613 | 286 |
| A05679 | A15308 | 219 | A05679 | A15394 | 374 |
| A05679 | A15395 | 259 | A05679 | A15425 | 490 |
| A05679 | A15427 | 439 | A05679 | A15475 | 202 |
| A05679 | A15517 | 313 | A05679 | A15572 | 352 |
| A05679 | A15607 | 424 | A05679 | A15642 | 379 |
| A05679 | A15806 | 366 | A05679 | A15819 | 174 |
| A05679 | A15904 | 301 | A05679 | A15999 | 329 |
| A05679 | A16001 | 372 | A05679 | A16011 | 352 |
| A05679 | A16282 | 372 | A05680 | A05722 | 420 |
| A05680 | A06141 | 386 | A05680 | A06148 | 394 |
| A05680 | A06212 | 477 | A05680 | A08310 | 416 |

|        |        |     |        |        |     |
|--------|--------|-----|--------|--------|-----|
| A05680 | A10278 | 373 | A05680 | A12708 | 433 |
| A05680 | A14548 | 380 | A05680 | A15498 | 177 |
| A05682 | A06385 | 174 | A05682 | A06397 | 364 |
| A05682 | A06403 | 368 | A05682 | A06934 | 335 |
| A05682 | A06970 | 167 | A05682 | A06979 | 302 |
| A05682 | A07558 | 241 | A05682 | A07590 | 247 |
| A05682 | A07721 | 286 | A05682 | A07736 | 218 |
| A05682 | A07767 | 226 | A05682 | A07973 | 259 |
| A05682 | A07976 | 195 | A05682 | A10253 | 152 |
| A05682 | A10677 | 263 | A05682 | A10987 | 193 |
| A05682 | A14862 | 347 | A05682 | A15628 | 362 |
| A05682 | A15661 | 377 | A05682 | A16741 | 162 |
| A05684 | A10506 | 299 | A05685 | A05949 | 326 |
| A05685 | A06137 | 329 | A05685 | A07062 | 323 |
| A05685 | A07209 | 263 | A05685 | A08209 | 308 |
| A05685 | A08722 | 413 | A05685 | A08728 | 452 |
| A05685 | A10638 | 361 | A05685 | A15543 | 241 |
| A05685 | A15896 | 288 | A05687 | A07455 | 430 |
| A05687 | A07890 | 445 | A05688 | A06277 | 241 |
| A05688 | A14190 | 283 | A05689 | A13369 | 201 |
| A05689 | A15329 | 379 | A05689 | A15419 | 313 |
| A05689 | A15820 | 382 | A05690 | A06093 | 199 |
| A05690 | A06130 | 317 | A05690 | A06318 | 302 |
| A05690 | A06381 | 317 | A05690 | A06423 | 207 |
| A05690 | A06493 | 367 | A05690 | A06671 | 162 |
| A05690 | A06750 | 229 | A05690 | A06982 | 457 |
| A05690 | A07353 | 317 | A05690 | A07670 | 229 |
| A05690 | A08884 | 491 | A05690 | A09073 | 208 |
| A05690 | A09269 | 425 | A05690 | A09316 | 486 |
| A05690 | A09340 | 491 | A05690 | A09598 | 182 |
| A05690 | A09854 | 199 | A05690 | A10183 | 324 |
| A05690 | A10258 | 221 | A05690 | A10575 | 243 |
| A05690 | A11828 | 297 | A05690 | A11858 | 457 |
| A05690 | A12325 | 238 | A05690 | A12923 | 168 |
| A05690 | A13519 | 324 | A05690 | A13884 | 182 |
| A05690 | A13949 | 462 | A05690 | A14230 | 451 |
| A05690 | A15837 | 317 | A05690 | A16404 | 179 |
| A05690 | A16440 | 484 | A05690 | A16626 | 317 |
| A05690 | A16643 | 317 | A05691 | A08732 | 258 |
| A05691 | A09605 | 412 | A05692 | A06675 | 382 |
| A05692 | A06941 | 185 | A05692 | A11303 | 323 |
| A05693 | A05949 | 316 | A05693 | A07321 | 335 |
| A05696 | A05736 | 472 | A05696 | A05737 | 424 |
| A05696 | A05786 | 475 | A05696 | A05992 | 375 |
| A05696 | A06607 | 291 | A05696 | A06922 | 420 |
| A05696 | A07912 | 409 | A05697 | A06038 | 455 |

|        |        |     |        |        |     |
|--------|--------|-----|--------|--------|-----|
| A05699 | A06063 | 302 | A05699 | A06689 | 196 |
| A05699 | A06970 | 245 | A05699 | A07080 | 323 |
| A05699 | A07109 | 308 | A05699 | A07122 | 243 |
| A05699 | A07256 | 386 | A05699 | A07288 | 391 |
| A05699 | A07413 | 310 | A05699 | A14698 | 363 |
| A05699 | A16741 | 241 | A05699 | A16746 | 407 |
| A05700 | A05732 | 401 | A05700 | A15292 | 198 |
| A05700 | A15312 | 271 | A05700 | A15366 | 191 |
| A05701 | A05712 | 196 | A05701 | A05797 | 424 |
| A05701 | A05854 | 172 | A05701 | A05958 | 364 |
| A05701 | A06660 | 485 | A05701 | A07158 | 236 |
| A05701 | A07206 | 165 | A05701 | A08864 | 255 |
| A05701 | A08869 | 364 | A05701 | A09124 | 490 |
| A05701 | A09423 | 213 | A05701 | A09727 | 171 |
| A05701 | A09937 | 232 | A05701 | A10006 | 257 |
| A05701 | A10018 | 162 | A05701 | A10725 | 357 |
| A05701 | A11834 | 174 | A05701 | A12886 | 257 |
| A05701 | A15344 | 208 | A05702 | A06785 | 188 |
| A05702 | A07242 | 154 | A05702 | A07332 | 205 |
| A05702 | A07965 | 188 | A05702 | A08794 | 363 |
| A05702 | A10910 | 313 | A05702 | A11480 | 188 |
| A05702 | A14813 | 188 | A05702 | A15657 | 188 |
| A05702 | A15988 | 159 | A05702 | A16680 | 188 |
| A05703 | A06610 | 159 | A05703 | A14127 | 174 |
| A05704 | A05705 | 391 | A05704 | A05834 | 401 |
| A05704 | A05922 | 420 | A05704 | A06946 | 420 |
| A05704 | A07212 | 324 | A05704 | A07215 | 414 |
| A05704 | A07219 | 401 | A05704 | A08713 | 430 |
| A05705 | A05834 | 481 | A05705 | A05922 | 424 |
| A05705 | A06727 | 368 | A05705 | A06946 | 424 |
| A05705 | A07212 | 334 | A05705 | A07219 | 407 |
| A05705 | A08713 | 433 | A05705 | A09084 | 351 |
| A05705 | A15253 | 433 | A05706 | A06118 | 270 |
| A05706 | A06665 | 226 | A05706 | A07771 | 429 |
| A05706 | A08280 | 205 | A05706 | A08707 | 427 |
| A05706 | A08864 | 372 | A05706 | A09241 | 202 |
| A05706 | A09243 | 160 | A05706 | A10018 | 425 |
| A05706 | A10174 | 174 | A05706 | A11007 | 319 |
| A05706 | A14210 | 322 | A05706 | A14252 | 329 |
| A05706 | A14371 | 477 | A05706 | A14379 | 371 |
| A05706 | A14604 | 277 | A05706 | A15327 | 213 |
| A05706 | A16323 | 257 | A05707 | A06002 | 452 |
| A05707 | A07386 | 447 | A05707 | A10257 | 452 |
| A05708 | A10731 | 350 | A05708 | A13340 | 176 |
| A05709 | A06595 | 256 | A05709 | A07019 | 310 |
| A05709 | A07123 | 310 | A05709 | A07559 | 296 |



|        |        |     |        |        |     |
|--------|--------|-----|--------|--------|-----|
| A05709 | A09141 | 337 | A05709 | A15419 | 236 |
| A05709 | A15976 | 277 | A05710 | A11303 | 335 |
| A05710 | A13617 | 262 | A05711 | A05891 | 380 |
| A05711 | A10613 | 436 | A05711 | A11669 | 452 |
| A05711 | A11683 | 361 | A05712 | A05857 | 396 |
| A05712 | A06161 | 188 | A05712 | A07135 | 196 |
| A05712 | A07247 | 279 | A05712 | A07307 | 274 |
| A05712 | A08768 | 285 | A05712 | A08815 | 313 |
| A05712 | A08978 | 246 | A05712 | A10006 | 491 |
| A05712 | A10532 | 465 | A05712 | A13132 | 382 |
| A05712 | A13135 | 324 | A05712 | A13395 | 396 |
| A05713 | A05754 | 440 | A05713 | A06700 | 383 |
| A05713 | A07304 | 367 | A05714 | A06088 | 399 |
| A05714 | A06358 | 344 | A05714 | A06970 | 279 |
| A05714 | A07109 | 335 | A05715 | A07375 | 366 |
| A05715 | A08099 | 279 | A05715 | A11309 | 340 |
| A05716 | A06346 | 369 | A05716 | A06574 | 326 |
| A05716 | A09073 | 319 | A05716 | A12917 | 399 |
| A05718 | A05739 | 446 | A05718 | A06071 | 428 |
| A05718 | A14377 | 343 | A05719 | A05884 | 416 |
| A05719 | A07023 | 416 | A05719 | A07186 | 363 |
| A05719 | A08879 | 333 | A05719 | A09535 | 374 |
| A05719 | A10625 | 384 | A05721 | A05897 | 361 |
| A05721 | A05898 | 369 | A05721 | A06057 | 440 |
| A05721 | A06148 | 326 | A05721 | A06193 | 385 |
| A05721 | A06212 | 288 | A05721 | A06428 | 483 |
| A05721 | A06480 | 361 | A05721 | A06588 | 201 |
| A05721 | A06655 | 475 | A05721 | A07014 | 313 |
| A05721 | A07442 | 162 | A05721 | A11467 | 361 |
| A05721 | A12512 | 408 | A05721 | A14548 | 302 |
| A05721 | A15277 | 430 | A05721 | A16514 | 408 |
| A05722 | A06212 | 467 | A05722 | A06428 | 416 |
| A05722 | A06480 | 414 | A05722 | A07014 | 388 |
| A05722 | A09380 | 470 | A05722 | A10278 | 441 |
| A05723 | A07164 | 321 | A05723 | A07218 | 322 |
| A05723 | A09394 | 385 | A05723 | A12897 | 190 |
| A05724 | A06039 | 440 | A05724 | A07553 | 168 |
| A05724 | A09862 | 213 | A05724 | A11349 | 288 |
| A05724 | A14925 | 469 | A05724 | A16073 | 243 |
| A05724 | A17055 | 367 | A05726 | A06932 | 466 |
| A05726 | A06999 | 466 | A05726 | A07218 | 162 |
| A05726 | A12615 | 435 | A05726 | A12616 | 435 |
| A05726 | A12617 | 435 | A05726 | A12690 | 435 |
| A05729 | A07148 | 391 | A05729 | A07189 | 417 |
| A05729 | A15498 | 190 | A05730 | A07191 | 419 |
| A05731 | A07218 | 450 | A05731 | A08750 | 391 |

|        |        |     |        |        |     |
|--------|--------|-----|--------|--------|-----|
| A05731 | A08858 | 172 | A05731 | A12440 | 408 |
| A05732 | A06641 | 321 | A05732 | A06914 | 230 |
| A05732 | A07690 | 323 | A05732 | A13987 | 180 |
| A05732 | A15452 | 204 | A05734 | A09229 | 330 |
| A05734 | A09585 | 447 | A05734 | A14748 | 408 |
| A05735 | A06581 | 135 | A05735 | A07399 | 291 |
| A05735 | A08567 | 185 | A05735 | A08812 | 180 |
| A05735 | A08813 | 196 | A05735 | A08973 | 241 |
| A05735 | A09572 | 368 | A05735 | A10789 | 217 |
| A05735 | A13963 | 380 | A05735 | A15949 | 176 |
| A05736 | A05737 | 480 | A05736 | A05786 | 479 |
| A05736 | A05992 | 470 | A05736 | A06607 | 409 |
| A05736 | A06762 | 414 | A05736 | A06922 | 393 |
| A05736 | A07021 | 452 | A05736 | A07296 | 479 |
| A05736 | A07297 | 447 | A05736 | A07438 | 429 |
| A05736 | A07509 | 341 | A05736 | A07510 | 372 |
| A05736 | A07654 | 335 | A05736 | A07673 | 299 |
| A05736 | A07912 | 468 | A05736 | A09072 | 286 |
| A05737 | A06607 | 305 | A05737 | A07912 | 414 |
| A05737 | A09072 | 356 | A05738 | A05774 | 229 |
| A05738 | A06088 | 236 | A05738 | A06089 | 290 |
| A05738 | A07063 | 371 | A05738 | A07122 | 310 |
| A05738 | A07545 | 491 | A05738 | A10027 | 356 |
| A05738 | A10065 | 491 | A05738 | A11309 | 205 |
| A05738 | A11865 | 302 | A05738 | A13614 | 488 |
| A05738 | A14195 | 210 | A05738 | A15096 | 491 |
| A05738 | A15097 | 483 | A05738 | A15874 | 196 |
| A05739 | A06069 | 460 | A05739 | A06071 | 483 |
| A05739 | A06606 | 293 | A05739 | A06887 | 433 |
| A05739 | A06920 | 366 | A05739 | A06954 | 357 |
| A05739 | A07422 | 199 | A05739 | A07514 | 344 |
| A05739 | A07605 | 363 | A05739 | A07990 | 350 |
| A05739 | A09949 | 406 | A05739 | A10561 | 326 |
| A05739 | A10563 | 219 | A05739 | A11317 | 409 |
| A05739 | A11318 | 306 | A05739 | A11339 | 357 |
| A05741 | A06024 | 364 | A05741 | A06422 | 323 |
| A05741 | A07135 | 162 | A05741 | A08580 | 405 |
| A05741 | A08908 | 333 | A05741 | A09857 | 281 |
| A05741 | A09936 | 473 | A05741 | A10720 | 188 |
| A05741 | A10901 | 379 | A05741 | A11326 | 218 |
| A05741 | A11814 | 405 | A05741 | A14377 | 458 |
| A05741 | A14554 | 271 | A05741 | A14674 | 195 |
| A05741 | A15317 | 243 | A05741 | A15884 | 430 |
| A05742 | A05797 | 163 | A05742 | A05842 | 157 |
| A05742 | A06039 | 199 | A05742 | A06606 | 356 |
| A05742 | A06611 | 191 | A05742 | A06613 | 151 |

|        |        |     |        |        |     |
|--------|--------|-----|--------|--------|-----|
| A05742 | A06614 | 271 | A05742 | A07524 | 193 |
| A05742 | A08736 | 462 | A05742 | A09925 | 199 |
| A05742 | A11903 | 285 | A05742 | A13240 | 202 |
| A05742 | A14208 | 307 | A05743 | A06615 | 241 |
| A05745 | A06116 | 438 | A05746 | A06635 | 340 |
| A05746 | A07200 | 270 | A05746 | A14405 | 433 |
| A05746 | A14440 | 343 | A05747 | A15507 | 299 |
| A05748 | A14216 | 195 | A05749 | A15498 | 262 |
| A05751 | A05826 | 432 | A05751 | A05972 | 441 |
| A05751 | A06086 | 252 | A05751 | A06098 | 361 |
| A05751 | A06405 | 221 | A05751 | A06725 | 443 |
| A05751 | A07122 | 491 | A05751 | A07520 | 184 |
| A05751 | A07674 | 185 | A05751 | A07707 | 391 |
| A05751 | A07831 | 406 | A05751 | A07832 | 406 |
| A05751 | A08155 | 326 | A05751 | A13143 | 406 |
| A05751 | A15034 | 174 | A05751 | A15230 | 429 |
| A05751 | A15233 | 299 | A05752 | A06970 | 343 |
| A05753 | A05754 | 484 | A05753 | A06912 | 385 |
| A05753 | A06916 | 400 | A05753 | A07239 | 435 |
| A05753 | A07520 | 414 | A05753 | A10020 | 430 |
| A05753 | A16027 | 420 | A05754 | A06700 | 337 |
| A05754 | A06912 | 380 | A05754 | A06916 | 395 |
| A05754 | A07239 | 432 | A05754 | A07304 | 313 |
| A05754 | A07520 | 408 | A05754 | A10020 | 428 |
| A05754 | A16027 | 417 | A05755 | A07080 | 390 |
| A05756 | A08114 | 335 | A05756 | A09805 | 268 |
| A05756 | A14147 | 358 | A05756 | A14410 | 157 |
| A05756 | A17134 | 480 | A05757 | A05789 | 455 |
| A05757 | A07239 | 240 | A05757 | A07505 | 216 |
| A05757 | A07674 | 307 | A05757 | A07875 | 379 |
| A05757 | A07933 | 443 | A05757 | A08193 | 213 |
| A05757 | A08250 | 319 | A05757 | A08751 | 419 |
| A05757 | A09879 | 317 | A05757 | A10424 | 327 |
| A05757 | A10452 | 249 | A05757 | A10656 | 255 |
| A05757 | A10658 | 307 | A05757 | A10713 | 240 |
| A05757 | A11847 | 429 | A05757 | A14637 | 165 |
| A05757 | A14856 | 278 | A05757 | A15970 | 294 |
| A05757 | A16103 | 299 | A05757 | A16744 | 279 |
| A05757 | A16746 | 360 | A05757 | A17001 | 351 |
| A05758 | A06641 | 263 | A05758 | A07108 | 168 |
| A05758 | A07283 | 215 | A05758 | A07413 | 195 |
| A05758 | A08943 | 168 | A05758 | A13734 | 168 |
| A05758 | A15874 | 168 | A05758 | A16026 | 252 |
| A05759 | A05772 | 423 | A05759 | A05774 | 419 |
| A05759 | A05914 | 154 | A05759 | A06063 | 218 |
| A05759 | A06065 | 469 | A05759 | A06252 | 314 |

|        |        |     |        |        |     |
|--------|--------|-----|--------|--------|-----|
| A05759 | A06358 | 477 | A05759 | A06633 | 293 |
| A05759 | A06744 | 260 | A05759 | A06756 | 458 |
| A05759 | A07002 | 358 | A05759 | A07109 | 226 |
| A05759 | A07122 | 488 | A05759 | A07256 | 457 |
| A05759 | A07267 | 385 | A05759 | A07304 | 193 |
| A05759 | A07322 | 413 | A05759 | A07413 | 419 |
| A05759 | A07520 | 188 | A05759 | A07554 | 335 |
| A05759 | A07688 | 374 | A05759 | A07800 | 217 |
| A05759 | A07976 | 177 | A05759 | A08099 | 347 |
| A05759 | A08313 | 321 | A05759 | A08751 | 337 |
| A05759 | A10681 | 310 | A05759 | A10693 | 281 |
| A05759 | A11309 | 205 | A05759 | A12055 | 356 |
| A05759 | A13607 | 363 | A05759 | A15905 | 230 |
| A05759 | A16417 | 288 | A05759 | A16418 | 247 |
| A05759 | A16529 | 170 | A05759 | A16538 | 337 |
| A05759 | A16959 | 249 | A05760 | A05767 | 191 |
| A05760 | A05796 | 221 | A05760 | A05879 | 432 |
| A05760 | A06502 | 238 | A05760 | A07091 | 899 |
| A05760 | A07557 | 324 | A05760 | A07618 | 899 |
| A05760 | A08732 | 930 | A05760 | A08861 | 191 |
| A05760 | A09399 | 340 | A05760 | A09556 | 908 |
| A05760 | A10061 | 419 | A05760 | A10574 | 899 |
| A05760 | A10612 | 159 | A05760 | A12927 | 236 |
| A05760 | A13145 | 340 | A05760 | A14004 | 899 |
| A05760 | A14443 | 899 | A05760 | A15255 | 303 |
| A05760 | A16463 | 228 | A05760 | A16764 | 193 |
| A05761 | A06090 | 413 | A05762 | A09865 | 406 |
| A05765 | A07112 | 390 | A05765 | A07505 | 184 |
| A05765 | A10286 | 269 | A05765 | A11521 | 165 |
| A05765 | A15321 | 291 | A05765 | A15555 | 269 |
| A05765 | A16152 | 221 | A05765 | A16255 | 269 |
| A05765 | A16257 | 213 | A05766 | A15338 | 184 |
| A05766 | A15788 | 290 | A05767 | A05768 | 457 |
| A05767 | A06001 | 151 | A05767 | A06091 | 107 |
| A05767 | A06138 | 154 | A05767 | A06510 | 217 |
| A05767 | A06523 | 404 | A05767 | A06632 | 210 |
| A05767 | A06641 | 249 | A05767 | A06876 | 272 |
| A05767 | A06949 | 180 | A05767 | A07061 | 257 |
| A05767 | A07314 | 190 | A05767 | A07424 | 182 |
| A05767 | A07429 | 319 | A05767 | A07504 | 319 |
| A05767 | A08093 | 191 | A05767 | A08127 | 201 |
| A05767 | A08300 | 165 | A05767 | A08402 | 491 |
| A05767 | A08858 | 168 | A05767 | A09556 | 274 |
| A05767 | A09648 | 462 | A05767 | A09752 | 183 |
| A05767 | A09989 | 185 | A05767 | A10039 | 163 |
| A05767 | A10173 | 383 | A05767 | A11905 | 414 |

|        |        |     |        |        |     |
|--------|--------|-----|--------|--------|-----|
| A05767 | A12035 | 213 | A05767 | A12086 | 196 |
| A05767 | A12370 | 398 | A05767 | A12492 | 348 |
| A05767 | A12927 | 286 | A05767 | A13548 | 291 |
| A05767 | A13829 | 205 | A05767 | A14197 | 229 |
| A05767 | A14288 | 439 | A05767 | A14343 | 229 |
| A05767 | A14588 | 369 | A05767 | A15367 | 475 |
| A05767 | A15874 | 434 | A05767 | A16441 | 179 |
| A05767 | A16739 | 241 | A05768 | A05771 | 363 |
| A05768 | A05782 | 297 | A05768 | A06091 | 480 |
| A05768 | A06523 | 430 | A05768 | A06632 | 435 |
| A05768 | A06912 | 408 | A05768 | A07061 | 454 |
| A05768 | A07238 | 449 | A05768 | A07424 | 340 |
| A05768 | A07459 | 368 | A05768 | A07688 | 263 |
| A05768 | A08127 | 352 | A05768 | A10550 | 335 |
| A05768 | A10601 | 546 | A05768 | A10694 | 418 |
| A05768 | A11850 | 546 | A05768 | A14191 | 546 |
| A05768 | A14571 | 196 | A05768 | A15874 | 486 |
| A05768 | A16739 | 400 | A05768 | A16741 | 424 |
| A05768 | A16744 | 404 | A05770 | A14120 | 288 |
| A05771 | A06523 | 396 | A05771 | A06632 | 401 |
| A05771 | A06914 | 291 | A05771 | A07061 | 414 |
| A05771 | A07238 | 406 | A05771 | A07736 | 299 |
| A05771 | A07800 | 205 | A05771 | A07973 | 330 |
| A05771 | A08099 | 229 | A05771 | A09876 | 184 |
| A05771 | A10456 | 217 | A05771 | A10659 | 398 |
| A05771 | A10694 | 380 | A05771 | A10712 | 329 |
| A05771 | A10715 | 374 | A05771 | A11325 | 347 |
| A05771 | A12723 | 321 | A05771 | A15874 | 402 |
| A05771 | A16739 | 360 | A05771 | A16741 | 252 |
| A05771 | A16744 | 363 | A05772 | A06091 | 327 |
| A05772 | A06098 | 394 | A05772 | A06358 | 296 |
| A05772 | A06699 | 371 | A05772 | A07002 | 391 |
| A05772 | A07061 | 288 | A05772 | A07080 | 302 |
| A05772 | A07122 | 447 | A05772 | A07413 | 286 |
| A05772 | A07530 | 353 | A05772 | A07554 | 373 |
| A05772 | A09749 | 305 | A05772 | A10659 | 382 |
| A05772 | A17066 | 330 | A05773 | A07135 | 188 |
| A05773 | A07164 | 278 | A05773 | A10512 | 429 |
| A05773 | A14540 | 201 | A05773 | A15395 | 288 |
| A05773 | A15427 | 333 | A05773 | A15865 | 485 |
| A05773 | A16308 | 486 | A05774 | A06088 | 366 |
| A05774 | A06089 | 393 | A05774 | A06358 | 396 |
| A05774 | A06405 | 277 | A05774 | A06744 | 187 |
| A05774 | A06756 | 406 | A05774 | A06847 | 347 |
| A05774 | A07109 | 277 | A05774 | A07122 | 473 |
| A05774 | A07256 | 369 | A05774 | A07264 | 319 |

|        |        |     |        |        |     |
|--------|--------|-----|--------|--------|-----|
| A05774 | A07267 | 314 | A05774 | A07304 | 247 |
| A05774 | A07413 | 277 | A05774 | A07800 | 152 |
| A05774 | A08751 | 369 | A05774 | A10020 | 406 |
| A05774 | A10027 | 424 | A05774 | A14827 | 184 |
| A05774 | A15637 | 314 | A05774 | A15905 | 441 |
| A05774 | A15935 | 210 | A05774 | A16346 | 406 |
| A05774 | A17078 | 193 | A05775 | A05776 | 324 |
| A05775 | A06009 | 393 | A05775 | A10624 | 255 |
| A05775 | A11911 | 157 | A05775 | A12217 | 353 |
| A05775 | A13310 | 238 | A05775 | A13311 | 208 |
| A05775 | A13376 | 317 | A05775 | A14147 | 167 |
| A05775 | A14196 | 489 | A05775 | A14931 | 262 |
| A05775 | A15596 | 491 | A05775 | A15867 | 340 |
| A05776 | A07800 | 165 | A05776 | A13871 | 310 |
| A05777 | A05891 | 347 | A05777 | A06069 | 263 |
| A05777 | A06346 | 303 | A05777 | A06574 | 491 |
| A05777 | A06710 | 434 | A05777 | A06731 | 204 |
| A05777 | A06868 | 266 | A05777 | A07190 | 324 |
| A05777 | A07218 | 70  | A05777 | A07442 | 288 |
| A05777 | A07471 | 170 | A05777 | A07704 | 258 |
| A05777 | A08162 | 361 | A05777 | A08171 | 268 |
| A05777 | A08172 | 418 | A05777 | A08309 | 412 |
| A05777 | A08392 | 383 | A05777 | A08681 | 270 |
| A05777 | A08685 | 340 | A05777 | A08686 | 307 |
| A05777 | A11738 | 279 | A05777 | A13369 | 404 |
| A05777 | A14746 | 477 | A05777 | A14838 | 162 |
| A05777 | A15638 | 401 | A05778 | A08866 | 419 |
| A05778 | A13935 | 424 | A05779 | A06385 | 196 |
| A05779 | A06653 | 323 | A05779 | A07394 | 182 |
| A05779 | A09078 | 173 | A05779 | A09123 | 328 |
| A05779 | A09127 | 221 | A05779 | A09277 | 252 |
| A05779 | A09803 | 339 | A05779 | A09900 | 303 |
| A05779 | A10735 | 252 | A05779 | A11344 | 252 |
| A05779 | A12965 | 401 | A05779 | A13511 | 259 |
| A05779 | A15840 | 283 | A05779 | A16732 | 363 |
| A05780 | A07339 | 157 | A05780 | A09390 | 375 |
| A05780 | A14544 | 417 | A05780 | A15498 | 152 |
| A05780 | A16271 | 422 | A05780 | A16626 | 205 |
| A05781 | A08913 | 391 | A05781 | A10247 | 249 |
| A05781 | A14912 | 414 | A05782 | A06091 | 441 |
| A05782 | A07061 | 358 | A05782 | A07122 | 154 |
| A05782 | A07242 | 182 | A05782 | A07768 | 207 |
| A05782 | A09763 | 353 | A05782 | A15725 | 281 |
| A05782 | A17189 | 232 | A05783 | A07061 | 335 |
| A05783 | A07800 | 230 | A05783 | A09924 | 424 |
| A05783 | A10673 | 374 | A05783 | A15497 | 322 |

|        |        |     |        |        |     |
|--------|--------|-----|--------|--------|-----|
| A05785 | A06831 | 411 | A05785 | A09036 | 400 |
| A05785 | A09059 | 266 | A05785 | A09375 | 457 |
| A05785 | A09891 | 466 | A05785 | A09892 | 462 |
| A05785 | A13832 | 350 | A05785 | A14247 | 168 |
| A05786 | A05992 | 356 | A05786 | A06263 | 343 |
| A05786 | A06762 | 351 | A05786 | A06874 | 386 |
| A05786 | A06922 | 409 | A05786 | A07021 | 414 |
| A05786 | A07296 | 474 | A05786 | A07297 | 404 |
| A05786 | A07422 | 183 | A05786 | A07912 | 473 |
| A05786 | A13987 | 236 | A05786 | A14122 | 268 |
| A05786 | A15419 | 285 | A05786 | A15420 | 265 |
| A05787 | A10755 | 296 | A05787 | A16613 | 435 |
| A05788 | A06597 | 168 | A05789 | A06295 | 232 |
| A05789 | A06970 | 217 | A05789 | A07239 | 310 |
| A05789 | A07590 | 291 | A05789 | A07674 | 255 |
| A05789 | A07721 | 204 | A05789 | A07736 | 382 |
| A05789 | A07875 | 409 | A05789 | A07933 | 465 |
| A05789 | A08135 | 348 | A05789 | A10676 | 380 |
| A05789 | A14986 | 252 | A05789 | A16355 | 378 |
| A05789 | A16741 | 213 | A05789 | A16744 | 340 |
| A05789 | A16746 | 396 | A05790 | A05791 | 485 |
| A05790 | A05835 | 378 | A05790 | A06913 | 409 |
| A05790 | A07242 | 258 | A05790 | A07347 | 348 |
| A05790 | A08436 | 420 | A05790 | A10621 | 281 |
| A05790 | A12639 | 420 | A05790 | A15892 | 373 |
| A05791 | A05835 | 424 | A05791 | A06913 | 445 |
| A05791 | A07190 | 163 | A05791 | A07201 | 110 |
| A05791 | A07347 | 252 | A05791 | A07564 | 369 |
| A05791 | A08436 | 396 | A05791 | A08879 | 257 |
| A05791 | A09558 | 193 | A05791 | A10621 | 210 |
| A05791 | A10656 | 238 | A05791 | A12639 | 396 |
| A05791 | A13346 | 319 | A05791 | A13392 | 310 |
| A05791 | A13858 | 319 | A05791 | A14319 | 241 |
| A05791 | A15892 | 419 | A05794 | A13986 | 260 |
| A05795 | A05881 | 443 | A05795 | A06151 | 269 |
| A05795 | A06154 | 364 | A05795 | A06783 | 268 |
| A05795 | A06795 | 486 | A05795 | A07019 | 424 |
| A05795 | A07166 | 177 | A05795 | A07559 | 484 |
| A05795 | A09074 | 414 | A05795 | A09470 | 221 |
| A05795 | A10665 | 408 | A05795 | A11014 | 440 |
| A05795 | A14330 | 474 | A05795 | A15277 | 210 |
| A05795 | A16043 | 296 | A05795 | A16081 | 297 |
| A05795 | A16138 | 310 | A05795 | A16721 | 344 |
| A05795 | A17040 | 182 | A05796 | A05798 | 316 |
| A05796 | A06058 | 337 | A05796 | A13866 | 210 |
| A05796 | A14377 | 179 | A05796 | A14514 | 396 |

|        |        |     |        |        |     |
|--------|--------|-----|--------|--------|-----|
| A05796 | A14613 | 329 | A05796 | A15635 | 286 |
| A05797 | A06561 | 307 | A05797 | A06610 | 281 |
| A05797 | A06613 | 238 | A05797 | A06622 | 394 |
| A05797 | A06760 | 417 | A05797 | A08736 | 283 |
| A05797 | A09169 | 246 | A05797 | A09174 | 290 |
| A05797 | A09727 | 162 | A05797 | A09826 | 472 |
| A05797 | A09932 | 469 | A05797 | A10934 | 201 |
| A05797 | A12637 | 361 | A05797 | A13462 | 324 |
| A05797 | A14016 | 427 | A05797 | A14200 | 245 |
| A05797 | A14231 | 172 | A05797 | A15507 | 201 |
| A05798 | A06623 | 265 | A05798 | A06845 | 391 |
| A05798 | A08704 | 395 | A05798 | A14643 | 151 |
| A05798 | A15852 | 358 | A05799 | A06573 | 447 |
| A05799 | A07162 | 447 | A05799 | A11506 | 452 |
| A05801 | A07177 | 344 | A05801 | A14071 | 296 |
| A05801 | A14073 | 190 | A05801 | A15277 | 346 |
| A05802 | A13589 | 303 | A05803 | A07180 | 221 |
| A05804 | A06564 | 267 | A05804 | A08358 | 238 |
| A05804 | A14597 | 191 | A05805 | A07218 | 236 |
| A05806 | A10026 | 447 | A05809 | A06610 | 247 |
| A05809 | A09243 | 322 | A05810 | A06858 | 272 |
| A05810 | A07173 | 208 | A05810 | A08982 | 283 |
| A05810 | A09104 | 310 | A05810 | A09561 | 408 |
| A05810 | A09754 | 193 | A05810 | A10337 | 230 |
| A05810 | A10986 | 182 | A05810 | A14485 | 157 |
| A05810 | A14521 | 371 | A05810 | A14634 | 340 |
| A05810 | A14636 | 486 | A05810 | A14637 | 456 |
| A05810 | A14639 | 451 | A05810 | A14643 | 489 |
| A05810 | A14666 | 413 | A05810 | A14685 | 475 |
| A05810 | A14785 | 340 | A05811 | A05902 | 352 |
| A05811 | A06166 | 374 | A05811 | A07807 | 374 |
| A05811 | A08910 | 157 | A05811 | A09256 | 167 |
| A05811 | A09441 | 352 | A05811 | A10293 | 380 |
| A05811 | A11921 | 294 | A05811 | A14197 | 187 |
| A05811 | A14443 | 899 | A05812 | A05891 | 173 |
| A05812 | A06546 | 235 | A05812 | A06600 | 152 |
| A05812 | A10527 | 185 | A05812 | A10598 | 358 |
| A05812 | A11313 | 717 | A05812 | A12302 | 313 |
| A05812 | A14410 | 245 | A05812 | A14520 | 163 |
| A05812 | A14562 | 252 | A05812 | A14588 | 204 |
| A05812 | A15383 | 179 | A05812 | A15498 | 323 |
| A05813 | A06141 | 398 | A05813 | A06212 | 385 |
| A05813 | A06240 | 294 | A05814 | A07489 | 480 |
| A05815 | A05944 | 307 | A05815 | A06054 | 423 |
| A05815 | A07143 | 416 | A05815 | A07166 | 301 |
| A05815 | A07390 | 363 | A05815 | A08749 | 432 |



|        |        |     |        |        |     |
|--------|--------|-----|--------|--------|-----|
| A05815 | A14372 | 296 | A05815 | A14381 | 299 |
| A05815 | A14554 | 468 | A05815 | A15969 | 401 |
| A05816 | A07381 | 251 | A05816 | A08070 | 278 |
| A05816 | A08365 | 168 | A05816 | A08385 | 423 |
| A05816 | A09812 | 375 | A05816 | A10652 | 353 |
| A05816 | A10684 | 260 | A05816 | A14257 | 191 |
| A05817 | A07052 | 419 | A05817 | A07140 | 316 |
| A05817 | A07803 | 201 | A05819 | A12927 | 301 |
| A05819 | A16216 | 272 | A05820 | A07283 | 355 |
| A05820 | A14803 | 357 | A05821 | A08060 | 63  |
| A05822 | A06743 | 412 | A05822 | A06888 | 418 |
| A05822 | A06889 | 485 | A05822 | A10615 | 258 |
| A05823 | A06327 | 452 | A05823 | A11043 | 452 |
| A05823 | A13209 | 452 | A05825 | A05826 | 473 |
| A05825 | A06137 | 430 | A05825 | A07422 | 173 |
| A05825 | A07468 | 285 | A05825 | A09122 | 411 |
| A05825 | A10040 | 382 | A05825 | A14190 | 344 |
| A05825 | A16127 | 172 | A05826 | A06725 | 416 |
| A05826 | A07122 | 369 | A05826 | A10040 | 388 |
| A05826 | A13143 | 434 | A05826 | A14591 | 326 |
| A05826 | A14722 | 416 | A05826 | A15507 | 190 |
| A05826 | A16627 | 323 | A05826 | A16879 | 369 |
| A05827 | A06177 | 224 | A05827 | A06607 | 216 |
| A05827 | A06650 | 418 | A05827 | A07911 | 201 |
| A05827 | A08321 | 303 | A05827 | A08604 | 401 |
| A05827 | A08699 | 398 | A05828 | A05900 | 412 |
| A05828 | A07129 | 408 | A05828 | A08815 | 258 |
| A05828 | A13212 | 470 | A05829 | A05861 | 399 |
| A05832 | A05868 | 230 | A05832 | A05949 | 218 |
| A05832 | A06971 | 382 | A05832 | A07399 | 160 |
| A05832 | A08583 | 432 | A05832 | A09567 | 252 |
| A05832 | A10069 | 324 | A05832 | A10552 | 305 |
| A05832 | A14268 | 234 | A05832 | A14605 | 213 |
| A05834 | A05922 | 430 | A05834 | A06946 | 430 |
| A05834 | A07212 | 351 | A05834 | A07219 | 416 |
| A05834 | A08713 | 438 | A05834 | A09084 | 366 |
| A05834 | A15253 | 438 | A05835 | A06913 | 465 |
| A05835 | A07154 | 363 | A05835 | A08436 | 434 |
| A05835 | A10621 | 326 | A05835 | A12639 | 434 |
| A05835 | A15892 | 473 | A05837 | A05945 | 303 |
| A05837 | A07567 | 333 | A05837 | A07654 | 363 |
| A05837 | A07754 | 302 | A05837 | A07913 | 406 |
| A05837 | A07928 | 371 | A05837 | A08404 | 243 |
| A05837 | A09397 | 383 | A05838 | A05929 | 388 |
| A05838 | A07794 | 310 | A05838 | A08857 | 490 |
| A05838 | A08867 | 491 | A05838 | A09148 | 343 |

|        |        |     |        |        |     |
|--------|--------|-----|--------|--------|-----|
| A05838 | A11852 | 235 | A05838 | A11900 | 405 |
| A05838 | A13346 | 163 | A05838 | A13347 | 243 |
| A05838 | A16671 | 318 | A05839 | A07237 | 307 |
| A05839 | A07362 | 327 | A05839 | A07569 | 316 |
| A05839 | A07599 | 455 | A05839 | A08371 | 466 |
| A05839 | A09616 | 347 | A05839 | A09696 | 356 |
| A05841 | A05842 | 332 | A05841 | A10414 | 168 |
| A05841 | A11346 | 263 | A05841 | A12593 | 288 |
| A05841 | A13587 | 293 | A05841 | A13590 | 630 |
| A05841 | A13594 | 491 | A05841 | A13597 | 247 |
| A05841 | A14303 | 226 | A05841 | A14582 | 263 |
| A05842 | A06597 | 291 | A05842 | A06635 | 232 |
| A05842 | A08516 | 163 | A05842 | A08929 | 245 |
| A05842 | A11493 | 229 | A05842 | A11640 | 353 |
| A05842 | A13589 | 196 | A05842 | A13590 | 167 |
| A05842 | A13593 | 198 | A05842 | A13594 | 358 |
| A05842 | A14996 | 259 | A05844 | A09990 | 428 |
| A05844 | A14643 | 241 | A05845 | A07223 | 427 |
| A05845 | A07584 | 249 | A05845 | A08890 | 454 |
| A05845 | A09664 | 294 | A05845 | A10490 | 281 |
| A05847 | A06107 | 363 | A05847 | A06149 | 307 |
| A05847 | A06422 | 303 | A05847 | A07158 | 202 |
| A05847 | A07815 | 224 | A05847 | A08729 | 361 |
| A05847 | A10055 | 435 | A05847 | A10568 | 402 |
| A05847 | A10823 | 375 | A05847 | A13181 | 252 |
| A05847 | A15498 | 180 | A05849 | A07192 | 371 |
| A05849 | A11675 | 366 | A05850 | A06825 | 335 |
| A05850 | A08131 | 327 | A05850 | A13052 | 396 |
| A05851 | A10768 | 424 | A05851 | A11714 | 409 |
| A05853 | A06588 | 168 | A05853 | A06609 | 306 |
| A05853 | A09380 | 241 | A05853 | A09506 | 240 |
| A05853 | A10140 | 294 | A05853 | A10175 | 490 |
| A05853 | A10599 | 174 | A05853 | A10619 | 184 |
| A05853 | A11262 | 257 | A05853 | A11441 | 302 |
| A05853 | A11560 | 491 | A05853 | A13924 | 460 |
| A05853 | A14037 | 252 | A05853 | A14886 | 491 |
| A05854 | A06055 | 207 | A05854 | A06426 | 343 |
| A05854 | A07834 | 154 | A05854 | A08858 | 188 |
| A05854 | A09149 | 187 | A05854 | A09438 | 249 |
| A05854 | A09504 | 254 | A05854 | A10319 | 173 |
| A05854 | A10623 | 299 | A05854 | A10969 | 424 |
| A05854 | A11094 | 369 | A05854 | A11983 | 184 |
| A05854 | A13997 | 254 | A05854 | A14211 | 204 |
| A05854 | A14646 | 227 | A05854 | A15293 | 899 |
| A05854 | A15294 | 899 | A05854 | A16493 | 330 |
| A05855 | A07122 | 277 | A05855 | A07209 | 212 |

|        |        |     |        |        |     |
|--------|--------|-----|--------|--------|-----|
| A05855 | A07479 | 360 | A05856 | A09080 | 428 |
| A05856 | A10339 | 430 | A05857 | A13395 | 452 |
| A05858 | A07218 | 216 | A05858 | A07634 | 353 |
| A05858 | A17078 | 291 | A05859 | A06039 | 199 |
| A05859 | A07004 | 199 | A05859 | A07063 | 475 |
| A05859 | A07807 | 252 | A05859 | A08571 | 199 |
| A05859 | A09997 | 151 | A05859 | A10466 | 491 |
| A05859 | A11240 | 390 | A05859 | A11299 | 193 |
| A05859 | A11309 | 168 | A05859 | A11322 | 176 |
| A05859 | A12252 | 154 | A05859 | A13352 | 455 |
| A05859 | A15497 | 168 | A05859 | A15637 | 257 |
| A05859 | A16033 | 160 | A05859 | A16278 | 383 |
| A05859 | A16531 | 291 | A05860 | A06527 | 353 |
| A05860 | A07173 | 328 | A05860 | A07471 | 446 |
| A05860 | A07541 | 286 | A05860 | A08786 | 462 |
| A05860 | A13879 | 427 | A05861 | A05871 | 353 |
| A05861 | A05935 | 428 | A05861 | A06073 | 466 |
| A05861 | A07025 | 457 | A05861 | A07133 | 407 |
| A05861 | A09147 | 386 | A05861 | A11317 | 361 |
| A05861 | A11339 | 394 | A05861 | A12355 | 428 |
| A05861 | A14598 | 353 | A05861 | A15809 | 247 |
| A05862 | A06657 | 385 | A05862 | A06941 | 273 |
| A05862 | A07521 | 247 | A05862 | A14247 | 396 |
| A05864 | A06607 | 208 | A05864 | A07339 | 230 |
| A05865 | A09481 | 400 | A05865 | A10347 | 413 |
| A05865 | A11013 | 413 | A05865 | A13945 | 177 |
| A05865 | A14255 | 246 | A05865 | A14496 | 176 |
| A05865 | A15422 | 188 | A05865 | A16274 | 221 |
| A05866 | A05940 | 490 | A05866 | A06296 | 230 |
| A05866 | A06588 | 224 | A05866 | A06607 | 490 |
| A05866 | A06635 | 226 | A05866 | A06688 | 475 |
| A05866 | A06860 | 265 | A05866 | A07177 | 435 |
| A05866 | A08389 | 488 | A05866 | A08609 | 361 |
| A05866 | A08643 | 302 | A05866 | A10103 | 452 |
| A05866 | A13152 | 374 | A05866 | A13181 | 247 |
| A05866 | A13929 | 301 | A05866 | A13945 | 180 |
| A05866 | A15336 | 183 | A05866 | A16281 | 435 |
| A05867 | A06610 | 174 | A05867 | A14031 | 445 |
| A05867 | A16993 | 438 | A05868 | A06597 | 183 |
| A05868 | A07339 | 271 | A05868 | A07815 | 212 |
| A05868 | A08491 | 168 | A05868 | A09390 | 319 |
| A05868 | A09988 | 249 | A05868 | A11555 | 252 |
| A05868 | A14449 | 173 | A05868 | A14650 | 230 |
| A05868 | A15520 | 255 | A05869 | A08718 | 454 |
| A05871 | A09121 | 337 | A05871 | A09147 | 362 |
| A05871 | A10320 | 235 | A05871 | A13014 | 414 |

|        |        |     |        |        |     |
|--------|--------|-----|--------|--------|-----|
| A05871 | A14120 | 238 | A05871 | A15941 | 163 |
| A05872 | A06752 | 302 | A05873 | A06128 | 434 |
| A05873 | A06472 | 372 | A05873 | A09714 | 422 |
| A05873 | A12413 | 438 | A05874 | A07694 | 452 |
| A05874 | A08105 | 441 | A05874 | A09478 | 441 |
| A05874 | A10223 | 445 | A05875 | A08533 | 371 |
| A05875 | A08748 | 391 | A05875 | A11480 | 350 |
| A05876 | A06622 | 269 | A05876 | A07165 | 130 |
| A05876 | A11369 | 329 | A05876 | A11902 | 263 |
| A05876 | A11993 | 363 | A05878 | A05879 | 401 |
| A05878 | A06615 | 179 | A05878 | A08086 | 324 |
| A05878 | A08572 | 218 | A05878 | A08732 | 265 |
| A05878 | A10062 | 432 | A05878 | A13191 | 355 |
| A05878 | A13195 | 358 | A05878 | A13797 | 389 |
| A05879 | A06642 | 130 | A05879 | A10061 | 353 |
| A05879 | A13145 | 438 | A05879 | A13191 | 352 |
| A05879 | A13195 | 462 | A05880 | A06009 | 469 |
| A05880 | A06143 | 490 | A05880 | A06524 | 335 |
| A05880 | A06572 | 643 | A05880 | A07313 | 486 |
| A05880 | A07433 | 793 | A05880 | A07593 | 486 |
| A05880 | A07598 | 219 | A05880 | A08097 | 343 |
| A05880 | A08185 | 412 | A05880 | A08196 | 643 |
| A05880 | A08255 | 255 | A05880 | A08355 | 191 |
| A05880 | A08503 | 638 | A05880 | A08525 | 355 |
| A05880 | A08549 | 643 | A05880 | A08560 | 588 |
| A05880 | A08561 | 491 | A05880 | A08566 | 236 |
| A05880 | A08567 | 557 | A05880 | A08812 | 643 |
| A05880 | A08813 | 557 | A05880 | A08819 | 457 |
| A05880 | A08839 | 460 | A05880 | A08840 | 217 |
| A05880 | A08844 | 638 | A05880 | A08845 | 524 |
| A05880 | A08853 | 71  | A05880 | A08855 | 329 |
| A05880 | A09100 | 371 | A05880 | A09299 | 162 |
| A05880 | A09441 | 183 | A05880 | A09727 | 184 |
| A05880 | A09728 | 412 | A05880 | A09828 | 96  |
| A05880 | A10673 | 483 | A05880 | A10789 | 556 |
| A05880 | A11262 | 168 | A05880 | A11668 | 281 |
| A05880 | A11675 | 157 | A05880 | A11954 | 473 |
| A05880 | A12363 | 190 | A05880 | A12507 | 556 |
| A05880 | A13399 | 438 | A05880 | A13737 | 494 |
| A05880 | A13963 | 557 | A05880 | A14084 | 643 |
| A05880 | A14167 | 157 | A05880 | A14226 | 396 |
| A05880 | A14227 | 375 | A05880 | A14270 | 227 |
| A05880 | A14285 | 643 | A05880 | A14289 | 218 |
| A05880 | A14708 | 369 | A05880 | A15533 | 193 |
| A05880 | A15949 | 557 | A05880 | A16099 | 184 |
| A05880 | A16350 | 183 | A05880 | A16611 | 170 |

|        |        |     |        |        |     |
|--------|--------|-----|--------|--------|-----|
| A05881 | A05914 | 199 | A05881 | A10987 | 219 |
| A05883 | A06090 | 443 | A05883 | A06405 | 249 |
| A05883 | A06734 | 490 | A05883 | A06800 | 395 |
| A05883 | A06860 | 489 | A05883 | A07037 | 486 |
| A05883 | A07059 | 430 | A05883 | A07088 | 263 |
| A05883 | A07238 | 357 | A05883 | A07325 | 157 |
| A05883 | A07520 | 488 | A05883 | A07553 | 229 |
| A05883 | A07690 | 409 | A05883 | A07933 | 306 |
| A05883 | A08114 | 188 | A05883 | A08238 | 330 |
| A05883 | A08372 | 319 | A05883 | A10679 | 328 |
| A05883 | A10942 | 374 | A05883 | A14821 | 351 |
| A05883 | A15673 | 213 | A05883 | A16002 | 188 |
| A05883 | A16103 | 327 | A05885 | A05886 | 401 |
| A05885 | A05887 | 388 | A05885 | A06731 | 332 |
| A05885 | A15314 | 157 | A05886 | A05887 | 491 |
| A05886 | A06729 | 484 | A05886 | A06731 | 435 |
| A05886 | A06953 | 333 | A05886 | A07218 | 238 |
| A05886 | A07391 | 372 | A05886 | A07702 | 414 |
| A05886 | A07987 | 424 | A05886 | A08855 | 274 |
| A05886 | A09246 | 406 | A05886 | A11327 | 351 |
| A05886 | A15498 | 224 | A05887 | A06729 | 490 |
| A05887 | A06731 | 452 | A05887 | A06953 | 469 |
| A05887 | A07391 | 353 | A05887 | A07702 | 401 |
| A05887 | A07987 | 414 | A05887 | A09235 | 255 |
| A05887 | A10525 | 254 | A05887 | A11327 | 328 |
| A05887 | A12549 | 414 | A05887 | A12787 | 329 |
| A05887 | A15498 | 435 | A05887 | A16261 | 277 |
| A05888 | A13827 | 375 | A05888 | A14452 | 174 |
| A05889 | A06379 | 180 | A05889 | A07165 | 283 |
| A05889 | A12420 | 383 | A05889 | A14664 | 235 |
| A05891 | A05943 | 340 | A05891 | A05970 | 333 |
| A05891 | A06225 | 363 | A05891 | A06298 | 319 |
| A05891 | A06321 | 389 | A05891 | A06346 | 330 |
| A05891 | A06729 | 427 | A05891 | A06731 | 363 |
| A05891 | A06926 | 272 | A05891 | A06954 | 316 |
| A05891 | A07197 | 224 | A05891 | A07209 | 277 |
| A05891 | A07218 | 235 | A05891 | A07361 | 234 |
| A05891 | A07391 | 290 | A05891 | A07561 | 168 |
| A05891 | A07605 | 489 | A05891 | A07705 | 185 |
| A05891 | A07764 | 270 | A05891 | A08034 | 321 |
| A05891 | A08116 | 351 | A05891 | A08247 | 430 |
| A05891 | A08384 | 363 | A05891 | A08675 | 380 |
| A05891 | A09206 | 243 | A05891 | A09499 | 327 |
| A05891 | A09533 | 351 | A05891 | A09546 | 165 |
| A05891 | A09838 | 307 | A05891 | A10613 | 479 |
| A05891 | A11101 | 467 | A05891 | A11310 | 375 |

|        |        |     |        |        |     |
|--------|--------|-----|--------|--------|-----|
| A05891 | A11313 | 480 | A05891 | A11317 | 375 |
| A05891 | A11320 | 385 | A05891 | A11328 | 434 |
| A05891 | A11375 | 450 | A05891 | A11396 | 450 |
| A05891 | A11411 | 259 | A05891 | A11422 | 257 |
| A05891 | A11446 | 396 | A05891 | A11449 | 281 |
| A05891 | A11525 | 176 | A05891 | A11561 | 281 |
| A05891 | A11654 | 333 | A05891 | A11669 | 380 |
| A05891 | A11683 | 238 | A05891 | A11721 | 333 |
| A05891 | A12374 | 380 | A05891 | A12464 | 425 |
| A05891 | A12480 | 380 | A05891 | A12585 | 380 |
| A05891 | A12633 | 467 | A05891 | A13361 | 173 |
| A05891 | A13369 | 382 | A05891 | A14196 | 305 |
| A05891 | A14353 | 299 | A05891 | A14372 | 278 |
| A05891 | A14378 | 188 | A05891 | A14405 | 162 |
| A05891 | A14589 | 212 | A05891 | A14633 | 205 |
| A05891 | A15282 | 473 | A05891 | A15355 | 199 |
| A05891 | A15867 | 159 | A05891 | A15883 | 363 |
| A05891 | A15907 | 380 | A05891 | A16021 | 351 |
| A05891 | A16101 | 351 | A05891 | A16719 | 408 |
| A05891 | A17155 | 260 | A05892 | A06348 | 412 |
| A05892 | A06661 | 472 | A05892 | A06715 | 491 |
| A05892 | A07083 | 160 | A05892 | A08184 | 238 |
| A05892 | A08185 | 199 | A05892 | A08853 | 477 |
| A05892 | A08894 | 240 | A05892 | A09052 | 385 |
| A05892 | A09662 | 484 | A05892 | A12044 | 389 |
| A05892 | A12258 | 291 | A05892 | A14227 | 95  |
| A05892 | A14291 | 352 | A05892 | A14643 | 454 |
| A05892 | A15533 | 408 | A05892 | A16092 | 180 |
| A05894 | A06606 | 302 | A05894 | A07242 | 475 |
| A05894 | A07483 | 488 | A05894 | A07495 | 424 |
| A05894 | A07709 | 427 | A05894 | A07893 | 462 |
| A05894 | A08056 | 450 | A05894 | A08360 | 293 |
| A05894 | A08484 | 430 | A05894 | A08536 | 372 |
| A05894 | A08551 | 491 | A05894 | A08569 | 491 |
| A05894 | A08894 | 154 | A05894 | A08986 | 460 |
| A05894 | A08997 | 475 | A05894 | A09342 | 177 |
| A05894 | A09774 | 219 | A05894 | A11408 | 163 |
| A05894 | A11676 | 324 | A05894 | A12047 | 353 |
| A05894 | A12099 | 265 | A05894 | A12445 | 265 |
| A05894 | A12727 | 212 | A05894 | A13082 | 303 |
| A05894 | A13454 | 303 | A05894 | A14227 | 96  |
| A05894 | A14310 | 196 | A05894 | A14661 | 488 |
| A05894 | A14711 | 441 | A05894 | A15147 | 303 |
| A05894 | A15533 | 118 | A05895 | A05987 | 396 |
| A05896 | A05897 | 422 | A05896 | A05898 | 425 |
| A05896 | A07917 | 445 | A05896 | A10731 | 364 |

|        |        |     |        |        |     |
|--------|--------|-----|--------|--------|-----|
| A05896 | A15649 | 285 | A05897 | A05898 | 411 |
| A05897 | A06329 | 395 | A05897 | A06346 | 391 |
| A05897 | A06484 | 299 | A05897 | A07453 | 411 |
| A05897 | A07699 | 414 | A05897 | A07917 | 435 |
| A05897 | A09460 | 414 | A05897 | A10962 | 435 |
| A05897 | A11011 | 435 | A05897 | A11143 | 427 |
| A05897 | A15321 | 152 | A05898 | A06329 | 401 |
| A05898 | A06484 | 311 | A05898 | A06835 | 430 |
| A05898 | A07494 | 430 | A05898 | A10237 | 408 |
| A05898 | A10954 | 413 | A05898 | A12698 | 430 |
| A05898 | A15233 | 378 | A05898 | A15649 | 252 |
| A05899 | A06346 | 291 | A05899 | A09938 | 425 |
| A05899 | A14533 | 425 | A05899 | A15277 | 346 |
| A05900 | A07129 | 385 | A05901 | A07158 | 281 |
| A05901 | A07205 | 340 | A05901 | A08704 | 408 |
| A05901 | A11313 | 319 | A05902 | A07089 | 391 |
| A05902 | A14120 | 279 | A05904 | A05946 | 434 |
| A05904 | A08608 | 361 | A05904 | A11307 | 374 |
| A05904 | A16430 | 391 | A05905 | A06088 | 427 |
| A05905 | A06474 | 358 | A05905 | A06791 | 391 |
| A05905 | A13175 | 470 | A05905 | A13176 | 412 |
| A05905 | A15651 | 212 | A05905 | A15652 | 172 |
| A05905 | A15661 | 152 | A05905 | A16088 | 455 |
| A05907 | A08060 | 468 | A05909 | A08480 | 452 |
| A05909 | A08571 | 160 | A05909 | A14643 | 293 |
| A05911 | A06244 | 451 | A05911 | A06298 | 407 |
| A05911 | A06616 | 380 | A05911 | A06635 | 266 |
| A05911 | A11101 | 333 | A05911 | A13667 | 324 |
| A05912 | A06629 | 355 | A05912 | A06641 | 449 |
| A05912 | A06847 | 452 | A05912 | A06994 | 457 |
| A05912 | A07027 | 447 | A05912 | A07059 | 433 |
| A05912 | A07325 | 396 | A05912 | A07408 | 458 |
| A05912 | A07501 | 445 | A05912 | A07619 | 422 |
| A05912 | A07674 | 419 | A05912 | A07723 | 400 |
| A05914 | A05974 | 216 | A05914 | A06154 | 305 |
| A05914 | A06200 | 174 | A05914 | A06393 | 260 |
| A05914 | A07568 | 163 | A05914 | A07611 | 216 |
| A05914 | A08804 | 204 | A05914 | A09028 | 151 |
| A05914 | A09255 | 283 | A05914 | A09309 | 165 |
| A05914 | A09430 | 346 | A05914 | A09487 | 167 |
| A05914 | A09881 | 322 | A05914 | A09986 | 346 |
| A05914 | A10442 | 249 | A05914 | A10676 | 235 |
| A05914 | A11559 | 407 | A05914 | A13989 | 195 |
| A05914 | A14638 | 177 | A05914 | A15261 | 288 |
| A05914 | A15294 | 346 | A05914 | A15347 | 162 |
| A05914 | A15506 | 254 | A05914 | A15507 | 302 |

|        |        |     |        |        |     |
|--------|--------|-----|--------|--------|-----|
| A05914 | A16217 | 268 | A05914 | A16702 | 156 |
| A05914 | A16838 | 152 | A05916 | A08929 | 318 |
| A05916 | A14699 | 157 | A05917 | A08484 | 171 |
| A05917 | A14431 | 196 | A05917 | A16878 | 373 |
| A05918 | A06379 | 213 | A05918 | A11187 | 402 |
| A05918 | A13997 | 252 | A05919 | A08581 | 406 |
| A05920 | A08280 | 205 | A05920 | A13928 | 165 |
| A05920 | A14410 | 279 | A05920 | A14650 | 210 |
| A05920 | A15851 | 324 | A05920 | A16724 | 296 |
| A05921 | A06581 | 184 | A05921 | A10270 | 416 |
| A05922 | A06946 | 441 | A05922 | A07212 | 382 |
| A05922 | A07219 | 430 | A05922 | A08713 | 447 |
| A05923 | A07198 | 202 | A05923 | A07209 | 324 |
| A05923 | A08600 | 452 | A05923 | A09559 | 368 |
| A05923 | A09612 | 308 | A05925 | A06379 | 269 |
| A05925 | A08844 | 371 | A05926 | A05957 | 310 |
| A05926 | A06764 | 301 | A05926 | A07407 | 447 |
| A05926 | A07468 | 490 | A05926 | A07469 | 235 |
| A05926 | A07472 | 190 | A05926 | A07541 | 374 |
| A05926 | A07617 | 479 | A05926 | A07721 | 168 |
| A05926 | A07958 | 490 | A05926 | A08863 | 332 |
| A05926 | A09151 | 243 | A05926 | A09174 | 154 |
| A05926 | A09932 | 305 | A05926 | A10635 | 165 |
| A05926 | A10704 | 286 | A05926 | A10967 | 491 |
| A05926 | A12793 | 490 | A05926 | A15328 | 263 |
| A05926 | A17108 | 412 | A05927 | A06226 | 429 |
| A05927 | A06701 | 296 | A05927 | A07200 | 288 |
| A05927 | A10742 | 416 | A05927 | A14643 | 260 |
| A05929 | A08867 | 413 | A05929 | A11900 | 428 |
| A05931 | A06465 | 428 | A05931 | A07148 | 386 |
| A05931 | A07157 | 297 | A05931 | A07173 | 328 |
| A05931 | A15394 | 428 | A05931 | A15605 | 355 |
| A05931 | A15806 | 390 | A05933 | A08890 | 412 |
| A05934 | A11304 | 312 | A05934 | A15498 | 160 |
| A05934 | A16636 | 207 | A05936 | A07168 | 422 |
| A05936 | A07955 | 438 | A05936 | A08759 | 430 |
| A05936 | A10178 | 438 | A05936 | A10573 | 438 |
| A05936 | A10930 | 430 | A05936 | A15960 | 417 |
| A05937 | A06063 | 270 | A05937 | A07530 | 347 |
| A05937 | A07847 | 313 | A05937 | A09568 | 257 |
| A05937 | A11604 | 215 | A05937 | A16027 | 260 |
| A05937 | A17078 | 193 | A05940 | A06107 | 369 |
| A05940 | A06607 | 452 | A05940 | A06650 | 339 |
| A05940 | A06688 | 187 | A05940 | A07177 | 391 |
| A05940 | A08389 | 489 | A05940 | A11983 | 259 |
| A05940 | A13945 | 198 | A05940 | A14055 | 165 |



|        |        |     |        |        |     |
|--------|--------|-----|--------|--------|-----|
| A05940 | A14635 | 200 | A05940 | A14636 | 201 |
| A05940 | A16281 | 329 | A05942 | A06014 | 391 |
| A05943 | A10741 | 63  | A05943 | A11983 | 160 |
| A05944 | A05985 | 462 | A05944 | A06001 | 162 |
| A05944 | A06054 | 489 | A05944 | A06055 | 489 |
| A05944 | A06095 | 278 | A05944 | A06404 | 391 |
| A05944 | A06415 | 360 | A05944 | A06779 | 294 |
| A05944 | A06780 | 447 | A05944 | A06818 | 265 |
| A05944 | A06877 | 263 | A05944 | A07143 | 319 |
| A05944 | A07151 | 195 | A05944 | A07152 | 263 |
| A05944 | A07157 | 236 | A05944 | A07161 | 404 |
| A05944 | A07173 | 424 | A05944 | A07339 | 310 |
| A05944 | A07372 | 467 | A05944 | A07390 | 485 |
| A05944 | A07708 | 475 | A05944 | A08630 | 219 |
| A05944 | A08658 | 305 | A05944 | A08711 | 316 |
| A05944 | A08840 | 475 | A05944 | A09550 | 297 |
| A05944 | A09732 | 174 | A05944 | A10049 | 279 |
| A05944 | A10203 | 366 | A05944 | A11513 | 172 |
| A05944 | A11983 | 168 | A05944 | A12722 | 310 |
| A05944 | A12897 | 435 | A05944 | A12927 | 205 |
| A05944 | A13872 | 412 | A05944 | A13903 | 201 |
| A05944 | A13977 | 171 | A05944 | A14005 | 165 |
| A05944 | A14373 | 285 | A05944 | A14376 | 263 |
| A05944 | A14392 | 263 | A05944 | A14432 | 480 |
| A05944 | A14442 | 234 | A05944 | A14498 | 202 |
| A05944 | A14511 | 241 | A05944 | A14554 | 162 |
| A05944 | A14599 | 212 | A05944 | A15241 | 228 |
| A05944 | A15395 | 157 | A05944 | A15431 | 475 |
| A05944 | A15518 | 391 | A05944 | A15601 | 367 |
| A05944 | A15603 | 420 | A05944 | A15605 | 486 |
| A05944 | A15607 | 260 | A05944 | A15608 | 463 |
| A05944 | A15642 | 185 | A05944 | A15795 | 307 |
| A05944 | A15958 | 366 | A05944 | A16040 | 345 |
| A05945 | A05992 | 224 | A05945 | A06607 | 484 |
| A05945 | A07020 | 485 | A05945 | A07438 | 374 |
| A05945 | A07452 | 480 | A05945 | A07471 | 224 |
| A05945 | A07472 | 402 | A05945 | A07475 | 389 |
| A05945 | A07491 | 185 | A05945 | A07496 | 406 |
| A05945 | A07509 | 372 | A05945 | A07510 | 296 |
| A05945 | A07541 | 308 | A05945 | A07542 | 190 |
| A05945 | A07543 | 328 | A05945 | A07548 | 347 |
| A05945 | A07567 | 491 | A05945 | A07635 | 345 |
| A05945 | A07650 | 293 | A05945 | A07652 | 491 |
| A05945 | A07653 | 488 | A05945 | A07654 | 481 |
| A05945 | A07656 | 271 | A05945 | A07673 | 486 |
| A05945 | A07754 | 490 | A05945 | A07913 | 491 |

|        |        |     |        |        |     |
|--------|--------|-----|--------|--------|-----|
| A05945 | A07914 | 481 | A05945 | A07916 | 483 |
| A05945 | A07928 | 483 | A05945 | A07988 | 446 |
| A05945 | A08165 | 379 | A05945 | A08210 | 269 |
| A05945 | A08218 | 481 | A05945 | A08404 | 491 |
| A05945 | A08785 | 390 | A05945 | A10504 | 165 |
| A05945 | A10967 | 221 | A05945 | A11424 | 401 |
| A05946 | A11307 | 374 | A05946 | A16430 | 391 |
| A05948 | A06128 | 438 | A05949 | A06004 | 446 |
| A05949 | A06863 | 467 | A05949 | A06971 | 321 |
| A05949 | A07079 | 326 | A05949 | A07186 | 322 |
| A05949 | A07746 | 154 | A05949 | A08114 | 294 |
| A05949 | A08385 | 279 | A05949 | A08583 | 411 |
| A05949 | A08879 | 283 | A05949 | A08880 | 249 |
| A05949 | A09748 | 291 | A05949 | A09845 | 160 |
| A05949 | A09988 | 235 | A05949 | A10031 | 371 |
| A05949 | A10625 | 389 | A05949 | A11184 | 212 |
| A05949 | A12723 | 228 | A05949 | A15487 | 313 |
| A05951 | A15498 | 243 | A05951 | A16132 | 290 |
| A05952 | A05968 | 481 | A05952 | A05969 | 428 |
| A05952 | A05970 | 462 | A05952 | A05971 | 440 |
| A05952 | A07135 | 243 | A05952 | A08163 | 404 |
| A05952 | A09890 | 398 | A05952 | A10096 | 466 |
| A05952 | A11318 | 385 | A05952 | A11339 | 414 |
| A05952 | A11566 | 424 | A05952 | A12581 | 428 |
| A05953 | A06289 | 377 | A05953 | A06659 | 285 |
| A05953 | A06701 | 323 | A05953 | A07422 | 154 |
| A05953 | A09050 | 285 | A05953 | A10581 | 340 |
| A05953 | A14529 | 425 | A05953 | A16834 | 263 |
| A05954 | A06196 | 440 | A05954 | A07117 | 432 |
| A05954 | A07316 | 452 | A05954 | A09742 | 302 |
| A05954 | A14010 | 372 | A05954 | A14408 | 382 |
| A05954 | A15292 | 255 | A05954 | A15311 | 395 |
| A05954 | A15333 | 396 | A05954 | A15352 | 316 |
| A05954 | A15461 | 379 | A05954 | A15489 | 406 |
| A05955 | A12328 | 230 | A05955 | A13340 | 151 |
| A05955 | A14073 | 174 | A05956 | A06195 | 236 |
| A05956 | A09607 | 223 | A05956 | A14928 | 167 |
| A05957 | A07541 | 265 | A05957 | A07617 | 384 |
| A05957 | A07958 | 277 | A05957 | A17108 | 358 |
| A05958 | A06622 | 396 | A05958 | A06642 | 200 |
| A05958 | A06770 | 167 | A05958 | A06819 | 491 |
| A05958 | A06834 | 80  | A05958 | A07099 | 269 |
| A05958 | A07339 | 229 | A05958 | A08571 | 212 |
| A05958 | A08894 | 157 | A05958 | A09013 | 269 |
| A05958 | A09341 | 322 | A05958 | A10141 | 185 |
| A05958 | A10247 | 251 | A05958 | A10566 | 196 |

|        |        |     |        |        |     |
|--------|--------|-----|--------|--------|-----|
| A05958 | A10765 | 102 | A05958 | A11277 | 152 |
| A05958 | A11312 | 236 | A05958 | A11882 | 160 |
| A05958 | A13829 | 160 | A05958 | A14127 | 165 |
| A05958 | A14148 | 168 | A05958 | A14197 | 232 |
| A05958 | A14588 | 285 | A05958 | A14621 | 468 |
| A05958 | A14882 | 198 | A05958 | A15168 | 174 |
| A05958 | A15477 | 167 | A05958 | A16410 | 419 |
| A05958 | A16465 | 173 | A05958 | A17063 | 408 |
| A05959 | A06581 | 154 | A05959 | A09510 | 411 |
| A05959 | A14652 | 385 | A05960 | A06819 | 179 |
| A05960 | A07593 | 162 | A05961 | A07007 | 271 |
| A05961 | A07109 | 267 | A05961 | A07553 | 249 |
| A05961 | A07688 | 293 | A05961 | A07723 | 480 |
| A05961 | A07767 | 251 | A05961 | A07848 | 157 |
| A05961 | A08108 | 316 | A05961 | A10456 | 154 |
| A05961 | A10681 | 340 | A05961 | A10778 | 348 |
| A05961 | A10885 | 334 | A05961 | A14856 | 205 |
| A05961 | A14862 | 363 | A05961 | A16027 | 251 |
| A05961 | A16417 | 322 | A05962 | A09815 | 422 |
| A05962 | A16636 | 177 | A05963 | A05964 | 445 |
| A05963 | A14665 | 384 | A05963 | A15498 | 262 |
| A05964 | A14665 | 355 | A05964 | A15498 | 205 |
| A05965 | A09124 | 286 | A05965 | A14190 | 270 |
| A05965 | A14371 | 272 | A05965 | A14430 | 283 |
| A05965 | A14443 | 273 | A05966 | A06402 | 297 |
| A05966 | A06860 | 335 | A05966 | A07037 | 293 |
| A05966 | A07059 | 319 | A05966 | A07238 | 165 |
| A05966 | A07558 | 183 | A05966 | A07590 | 188 |
| A05966 | A07690 | 375 | A05966 | A07737 | 272 |
| A05966 | A07856 | 322 | A05966 | A08114 | 247 |
| A05966 | A08135 | 267 | A05966 | A10688 | 401 |
| A05966 | A10706 | 246 | A05966 | A15874 | 157 |
| A05966 | A16529 | 255 | A05967 | A10651 | 286 |
| A05967 | A11385 | 422 | A05967 | A11394 | 351 |
| A05967 | A11902 | 263 | A05967 | A14266 | 154 |
| A05968 | A05969 | 477 | A05968 | A05970 | 407 |
| A05968 | A07135 | 196 | A05968 | A07361 | 353 |
| A05968 | A08163 | 385 | A05968 | A09890 | 379 |
| A05968 | A10096 | 461 | A05968 | A11318 | 436 |
| A05968 | A11566 | 411 | A05968 | A12581 | 416 |
| A05968 | A12779 | 422 | A05969 | A05970 | 428 |
| A05969 | A10096 | 434 | A05970 | A05971 | 440 |
| A05970 | A06731 | 324 | A05970 | A10096 | 466 |
| A05970 | A11164 | 412 | A05970 | A11339 | 414 |
| A05971 | A10096 | 445 | A05971 | A11339 | 435 |
| A05972 | A06725 | 424 | A05972 | A07122 | 389 |

|        |        |     |        |        |     |
|--------|--------|-----|--------|--------|-----|
| A05973 | A07220 | 389 | A05974 | A06970 | 210 |
| A05974 | A07088 | 294 | A05974 | A07122 | 208 |
| A05974 | A07477 | 291 | A05974 | A07553 | 265 |
| A05974 | A07736 | 260 | A05974 | A10420 | 224 |
| A05974 | A10427 | 238 | A05974 | A10444 | 329 |
| A05974 | A10452 | 312 | A05974 | A10656 | 317 |
| A05974 | A13734 | 152 | A05974 | A15241 | 228 |
| A05974 | A16286 | 420 | A05975 | A05976 | 445 |
| A05975 | A05977 | 445 | A05975 | A05978 | 452 |
| A05975 | A06069 | 401 | A05976 | A05977 | 469 |
| A05976 | A05978 | 445 | A05976 | A06069 | 443 |
| A05976 | A15630 | 333 | A05977 | A05978 | 445 |
| A05977 | A06069 | 375 | A05977 | A07218 | 216 |
| A05978 | A06069 | 401 | A05979 | A06141 | 322 |
| A05979 | A06588 | 218 | A05979 | A07387 | 413 |
| A05979 | A07833 | 249 | A05979 | A08236 | 483 |
| A05979 | A08237 | 447 | A05979 | A09380 | 326 |
| A05979 | A10278 | 404 | A05979 | A11411 | 327 |
| A05979 | A11483 | 364 | A05979 | A14643 | 218 |
| A05979 | A15064 | 440 | A05979 | A15498 | 401 |
| A05980 | A07201 | 335 | A05981 | A06466 | 219 |
| A05981 | A11735 | 152 | A05981 | A12328 | 188 |
| A05981 | A13788 | 479 | A05981 | A14006 | 337 |
| A05981 | A15666 | 479 | A05981 | A15945 | 355 |
| A05982 | A06938 | 458 | A05982 | A14216 | 294 |
| A05982 | A15624 | 430 | A05982 | A15649 | 234 |
| A05982 | A15660 | 265 | A05982 | A15668 | 307 |
| A05982 | A15684 | 232 | A05982 | A15707 | 352 |
| A05982 | A16088 | 259 | A05982 | A16096 | 193 |
| A05983 | A07209 | 259 | A05984 | A06607 | 171 |
| A05985 | A06054 | 180 | A05985 | A06055 | 434 |
| A05985 | A06095 | 432 | A05985 | A06344 | 241 |
| A05985 | A06415 | 445 | A05985 | A06422 | 335 |
| A05985 | A06499 | 274 | A05985 | A06747 | 305 |
| A05985 | A06780 | 281 | A05985 | A06899 | 371 |
| A05985 | A06944 | 201 | A05985 | A07031 | 477 |
| A05985 | A07053 | 329 | A05985 | A07142 | 281 |
| A05985 | A07143 | 296 | A05985 | A07146 | 232 |
| A05985 | A07151 | 171 | A05985 | A07152 | 433 |
| A05985 | A07154 | 218 | A05985 | A07157 | 490 |
| A05985 | A07161 | 456 | A05985 | A07166 | 263 |
| A05985 | A07173 | 486 | A05985 | A07209 | 160 |
| A05985 | A07390 | 229 | A05985 | A07753 | 232 |
| A05985 | A08345 | 208 | A05985 | A08714 | 180 |
| A05985 | A09259 | 246 | A05985 | A09981 | 373 |
| A05985 | A12009 | 216 | A05985 | A12809 | 321 |

|        |        |     |        |        |     |
|--------|--------|-----|--------|--------|-----|
| A05985 | A13131 | 384 | A05985 | A13872 | 491 |
| A05985 | A14368 | 346 | A05985 | A14373 | 263 |
| A05985 | A14374 | 200 | A05985 | A14387 | 254 |
| A05985 | A14392 | 334 | A05985 | A14432 | 430 |
| A05985 | A14439 | 307 | A05985 | A14442 | 340 |
| A05985 | A14599 | 188 | A05985 | A14774 | 254 |
| A05985 | A15308 | 223 | A05985 | A15314 | 417 |
| A05985 | A15394 | 465 | A05985 | A15395 | 470 |
| A05985 | A15425 | 488 | A05985 | A15426 | 340 |
| A05985 | A15427 | 324 | A05985 | A15516 | 168 |
| A05985 | A15601 | 449 | A05985 | A15602 | 269 |
| A05985 | A15603 | 480 | A05985 | A15605 | 456 |
| A05985 | A15607 | 362 | A05985 | A15608 | 318 |
| A05985 | A15642 | 294 | A05985 | A15806 | 427 |
| A05985 | A15832 | 313 | A05985 | A15834 | 162 |
| A05985 | A15964 | 339 | A05985 | A15981 | 232 |
| A05985 | A16108 | 293 | A05986 | A06039 | 208 |
| A05986 | A06405 | 68  | A05986 | A06439 | 473 |
| A05986 | A06484 | 296 | A05986 | A09649 | 213 |
| A05986 | A10544 | 191 | A05986 | A11119 | 218 |
| A05986 | A14193 | 352 | A05986 | A14247 | 417 |
| A05986 | A14571 | 339 | A05986 | A14758 | 201 |
| A05986 | A15356 | 249 | A05986 | A15626 | 209 |
| A05987 | A11346 | 184 | A05987 | A12630 | 180 |
| A05987 | A13594 | 305 | A05988 | A08627 | 230 |
| A05989 | A14642 | 302 | A05990 | A06348 | 257 |
| A05990 | A08571 | 364 | A05990 | A09256 | 269 |
| A05990 | A11027 | 394 | A05990 | A11258 | 351 |
| A05990 | A13978 | 347 | A05992 | A06762 | 475 |
| A05992 | A06922 | 375 | A05992 | A07020 | 263 |
| A05992 | A07021 | 380 | A05992 | A07296 | 465 |
| A05992 | A07297 | 439 | A05992 | A07535 | 396 |
| A05992 | A07567 | 263 | A05992 | A07673 | 266 |
| A05992 | A08404 | 156 | A05995 | A07201 | 372 |
| A05995 | A07247 | 322 | A05995 | A07506 | 286 |
| A05995 | A10532 | 486 | A05995 | A10589 | 383 |
| A05995 | A11705 | 299 | A05995 | A14130 | 358 |
| A05995 | A14132 | 312 | A05995 | A14449 | 172 |
| A05995 | A15141 | 341 | A05995 | A15698 | 491 |
| A05996 | A06814 | 196 | A05996 | A10154 | 339 |
| A05996 | A11612 | 454 | A05996 | A12653 | 489 |
| A05996 | A13989 | 269 | A05997 | A06660 | 246 |
| A05997 | A08850 | 263 | A05997 | A09018 | 263 |
| A05997 | A09362 | 481 | A05997 | A11478 | 310 |
| A05998 | A06559 | 469 | A05998 | A06560 | 473 |
| A05998 | A06563 | 393 | A05998 | A07981 | 439 |

|        |        |     |        |        |     |
|--------|--------|-----|--------|--------|-----|
| A05998 | A08050 | 798 | A05998 | A08069 | 935 |
| A05998 | A08380 | 368 | A05998 | A08411 | 550 |
| A05998 | A10377 | 579 | A05998 | A10378 | 913 |
| A05998 | A13920 | 563 | A05998 | A13934 | 427 |
| A05998 | A14019 | 299 | A05998 | A14822 | 457 |
| A05998 | A15313 | 162 | A06000 | A06029 | 170 |
| A06000 | A06242 | 419 | A06000 | A06466 | 490 |
| A06000 | A06864 | 489 | A06000 | A07311 | 430 |
| A06000 | A07319 | 373 | A06000 | A07332 | 252 |
| A06000 | A07346 | 489 | A06000 | A07534 | 302 |
| A06000 | A07647 | 486 | A06000 | A07902 | 279 |
| A06000 | A07996 | 313 | A06000 | A08117 | 210 |
| A06000 | A08141 | 483 | A06000 | A08208 | 439 |
| A06000 | A08533 | 172 | A06000 | A09009 | 195 |
| A06000 | A09297 | 366 | A06000 | A09577 | 391 |
| A06000 | A09626 | 405 | A06000 | A10534 | 460 |
| A06000 | A11596 | 199 | A06000 | A12227 | 399 |
| A06000 | A13340 | 477 | A06000 | A13812 | 202 |
| A06000 | A13974 | 419 | A06000 | A14073 | 489 |
| A06000 | A14079 | 157 | A06000 | A14093 | 470 |
| A06000 | A14155 | 299 | A06000 | A14273 | 380 |
| A06000 | A14460 | 345 | A06000 | A15133 | 260 |
| A06000 | A15563 | 218 | A06000 | A15941 | 340 |
| A06000 | A16272 | 446 | A06000 | A16294 | 217 |
| A06000 | A16318 | 196 | A06000 | A16437 | 177 |
| A06000 | A16452 | 196 | A06000 | A16606 | 184 |
| A06001 | A06280 | 475 | A06001 | A06319 | 167 |
| A06001 | A06488 | 491 | A06001 | A06502 | 486 |
| A06001 | A06755 | 279 | A06001 | A07092 | 382 |
| A06001 | A07427 | 462 | A06001 | A08842 | 474 |
| A06001 | A08946 | 307 | A06001 | A08949 | 319 |
| A06001 | A09741 | 477 | A06001 | A09775 | 277 |
| A06001 | A09780 | 436 | A06001 | A11162 | 416 |
| A06001 | A11224 | 404 | A06001 | A11653 | 374 |
| A06001 | A11872 | 293 | A06001 | A11952 | 247 |
| A06001 | A12895 | 413 | A06001 | A12897 | 241 |
| A06001 | A13338 | 329 | A06001 | A14017 | 274 |
| A06001 | A14018 | 312 | A06001 | A14041 | 456 |
| A06001 | A14118 | 401 | A06001 | A14570 | 377 |
| A06001 | A15419 | 256 | A06001 | A15431 | 443 |
| A06001 | A15436 | 154 | A06001 | A15445 | 374 |
| A06001 | A15461 | 449 | A06001 | A16687 | 312 |
| A06002 | A07386 | 447 | A06002 | A10257 | 452 |
| A06004 | A06697 | 432 | A06004 | A06863 | 485 |
| A06004 | A06971 | 334 | A06004 | A08572 | 224 |
| A06004 | A08598 | 358 | A06004 | A08709 | 368 |

|        |        |     |        |        |     |
|--------|--------|-----|--------|--------|-----|
| A06004 | A08879 | 299 | A06004 | A09020 | 313 |
| A06004 | A09535 | 430 | A06004 | A09988 | 374 |
| A06004 | A10555 | 391 | A06004 | A10557 | 303 |
| A06004 | A10625 | 343 | A06005 | A09969 | 452 |
| A06005 | A14643 | 293 | A06006 | A06323 | 447 |
| A06006 | A09364 | 425 | A06007 | A06769 | 279 |
| A06008 | A10005 | 443 | A06008 | A14222 | 254 |
| A06008 | A14475 | 235 | A06008 | A14496 | 307 |
| A06008 | A15510 | 318 | A06009 | A06143 | 480 |
| A06009 | A06572 | 475 | A06009 | A07313 | 270 |
| A06009 | A07433 | 485 | A06009 | A08185 | 262 |
| A06009 | A08196 | 363 | A06009 | A08549 | 361 |
| A06009 | A08566 | 301 | A06009 | A08819 | 340 |
| A06009 | A08845 | 190 | A06009 | A08855 | 232 |
| A06009 | A08885 | 173 | A06009 | A09100 | 321 |
| A06009 | A09728 | 450 | A06009 | A10847 | 350 |
| A06009 | A11954 | 319 | A06009 | A14801 | 191 |
| A06010 | A06162 | 255 | A06010 | A07339 | 177 |
| A06010 | A08417 | 267 | A06010 | A09269 | 238 |
| A06010 | A15726 | 165 | A06011 | A06890 | 235 |
| A06011 | A07135 | 168 | A06011 | A07203 | 243 |
| A06011 | A07242 | 188 | A06011 | A07695 | 229 |
| A06011 | A07820 | 324 | A06011 | A08400 | 324 |
| A06011 | A08461 | 179 | A06011 | A08484 | 333 |
| A06011 | A08506 | 485 | A06011 | A08544 | 465 |
| A06011 | A08569 | 152 | A06011 | A08772 | 235 |
| A06011 | A08777 | 235 | A06011 | A09326 | 269 |
| A06011 | A10317 | 162 | A06011 | A11279 | 275 |
| A06011 | A13781 | 174 | A06011 | A13845 | 324 |
| A06011 | A13895 | 414 | A06011 | A14182 | 269 |
| A06011 | A14247 | 484 | A06011 | A14272 | 255 |
| A06011 | A14661 | 602 | A06011 | A14711 | 269 |
| A06011 | A14783 | 269 | A06011 | A14838 | 324 |
| A06011 | A15647 | 154 | A06011 | A15650 | 234 |
| A06011 | A15724 | 232 | A06011 | A16617 | 324 |
| A06011 | A16680 | 160 | A06012 | A07200 | 171 |
| A06012 | A08252 | 172 | A06012 | A09238 | 263 |
| A06012 | A09239 | 236 | A06012 | A09556 | 241 |
| A06012 | A10939 | 414 | A06014 | A06439 | 311 |
| A06014 | A07088 | 329 | A06014 | A07135 | 218 |
| A06014 | A07360 | 210 | A06014 | A07394 | 249 |
| A06014 | A10373 | 165 | A06014 | A15624 | 185 |
| A06014 | A15649 | 236 | A06015 | A06415 | 208 |
| A06015 | A10796 | 372 | A06015 | A11994 | 430 |
| A06015 | A14374 | 369 | A06017 | A06027 | 385 |
| A06017 | A06369 | 278 | A06017 | A06832 | 243 |

|        |        |     |        |        |     |
|--------|--------|-----|--------|--------|-----|
| A06017 | A06973 | 204 | A06017 | A07309 | 200 |
| A06017 | A14196 | 174 | A06017 | A15917 | 213 |
| A06017 | A16401 | 462 | A06018 | A06523 | 420 |
| A06018 | A07061 | 364 | A06019 | A07736 | 299 |
| A06019 | A07973 | 330 | A06019 | A10635 | 329 |
| A06019 | A14306 | 414 | A06020 | A10917 | 411 |
| A06021 | A07709 | 221 | A06021 | A09995 | 291 |
| A06021 | A10291 | 378 | A06021 | A14633 | 157 |
| A06022 | A08268 | 438 | A06022 | A14128 | 259 |
| A06022 | A15301 | 326 | A06023 | A06542 | 475 |
| A06023 | A14699 | 174 | A06024 | A06344 | 463 |
| A06024 | A08580 | 409 | A06024 | A14372 | 277 |
| A06025 | A07160 | 353 | A06025 | A14073 | 247 |
| A06025 | A15684 | 249 | A06029 | A06161 | 398 |
| A06029 | A06242 | 401 | A06029 | A06864 | 491 |
| A06029 | A07079 | 428 | A06029 | A07319 | 484 |
| A06029 | A07346 | 162 | A06029 | A07647 | 486 |
| A06029 | A08030 | 363 | A06029 | A08141 | 446 |
| A06029 | A08208 | 485 | A06029 | A08878 | 159 |
| A06029 | A08902 | 423 | A06029 | A09706 | 184 |
| A06029 | A10625 | 360 | A06029 | A10846 | 271 |
| A06029 | A14079 | 424 | A06029 | A14155 | 221 |
| A06029 | A14273 | 472 | A06029 | A15645 | 246 |
| A06029 | A15654 | 202 | A06029 | A16134 | 157 |
| A06030 | A07773 | 299 | A06030 | A09638 | 391 |
| A06031 | A07198 | 358 | A06032 | A06272 | 260 |
| A06032 | A06750 | 221 | A06032 | A09745 | 229 |
| A06032 | A12824 | 171 | A06032 | A13892 | 297 |
| A06032 | A15034 | 177 | A06032 | A16358 | 418 |
| A06033 | A07660 | 408 | A06033 | A08404 | 301 |
| A06033 | A08627 | 308 | A06034 | A10115 | 430 |
| A06034 | A12009 | 373 | A06035 | A08093 | 310 |
| A06036 | A06495 | 213 | A06037 | A06044 | 324 |
| A06037 | A06314 | 388 | A06037 | A06466 | 217 |
| A06037 | A06769 | 452 | A06037 | A06855 | 167 |
| A06037 | A06860 | 170 | A06037 | A06970 | 268 |
| A06037 | A07037 | 159 | A06037 | A07140 | 330 |
| A06037 | A07311 | 413 | A06037 | A07670 | 310 |
| A06037 | A07900 | 210 | A06037 | A07920 | 316 |
| A06037 | A08127 | 191 | A06037 | A08309 | 358 |
| A06037 | A08473 | 430 | A06037 | A08484 | 279 |
| A06037 | A08544 | 374 | A06037 | A08676 | 470 |
| A06037 | A08981 | 167 | A06037 | A09150 | 285 |
| A06037 | A09295 | 344 | A06037 | A09421 | 151 |
| A06037 | A09514 | 356 | A06037 | A09660 | 182 |
| A06037 | A09877 | 213 | A06037 | A09929 | 208 |



|        |        |     |        |        |     |
|--------|--------|-----|--------|--------|-----|
| A06037 | A09947 | 313 | A06037 | A09948 | 283 |
| A06037 | A10288 | 363 | A06037 | A10712 | 265 |
| A06037 | A11303 | 290 | A06037 | A11325 | 201 |
| A06037 | A11792 | 154 | A06037 | A11922 | 180 |
| A06037 | A13240 | 171 | A06037 | A13248 | 263 |
| A06037 | A13340 | 163 | A06037 | A13666 | 313 |
| A06037 | A13830 | 491 | A06037 | A13889 | 288 |
| A06037 | A13902 | 279 | A06037 | A13904 | 283 |
| A06037 | A13989 | 490 | A06037 | A14104 | 152 |
| A06037 | A14247 | 491 | A06037 | A14362 | 310 |
| A06037 | A15195 | 249 | A06037 | A15297 | 481 |
| A06037 | A15660 | 406 | A06037 | A16024 | 229 |
| A06037 | A16316 | 208 | A06037 | A17126 | 265 |
| A06037 | A17208 | 269 | A06038 | A07442 | 200 |
| A06038 | A10221 | 374 | A06038 | A12265 | 480 |
| A06038 | A12298 | 485 | A06039 | A06466 | 199 |
| A06039 | A07004 | 199 | A06039 | A07495 | 199 |
| A06039 | A07848 | 199 | A06039 | A07973 | 279 |
| A06039 | A08133 | 199 | A06039 | A08207 | 199 |
| A06039 | A08252 | 205 | A06039 | A08571 | 199 |
| A06039 | A08904 | 199 | A06039 | A09195 | 199 |
| A06039 | A10438 | 477 | A06039 | A10702 | 492 |
| A06039 | A10712 | 582 | A06039 | A10798 | 199 |
| A06039 | A11325 | 491 | A06039 | A11346 | 501 |
| A06039 | A13889 | 223 | A06039 | A14104 | 452 |
| A06039 | A14193 | 304 | A06039 | A14208 | 199 |
| A06039 | A14247 | 280 | A06039 | A14253 | 230 |
| A06039 | A14628 | 172 | A06039 | A14758 | 199 |
| A06039 | A14862 | 185 | A06039 | A15245 | 290 |
| A06039 | A15315 | 224 | A06039 | A15336 | 244 |
| A06039 | A15347 | 326 | A06039 | A15532 | 199 |
| A06039 | A15626 | 326 | A06039 | A15974 | 468 |
| A06039 | A15986 | 416 | A06039 | A16002 | 578 |
| A06039 | A16073 | 582 | A06039 | A16262 | 201 |
| A06039 | A16324 | 199 | A06039 | A16362 | 221 |
| A06039 | A16836 | 236 | A06039 | A17040 | 334 |
| A06039 | A17097 | 491 | A06041 | A11200 | 424 |
| A06041 | A15905 | 367 | A06042 | A08956 | 389 |
| A06043 | A14193 | 162 | A06043 | A14204 | 157 |
| A06043 | A14391 | 335 | A06043 | A14393 | 288 |
| A06043 | A16002 | 419 | A06045 | A08571 | 160 |
| A06046 | A06402 | 335 | A06046 | A06405 | 235 |
| A06046 | A07209 | 307 | A06046 | A07503 | 337 |
| A06046 | A09837 | 347 | A06046 | A09917 | 361 |
| A06046 | A10014 | 268 | A06046 | A10139 | 383 |
| A06046 | A15346 | 165 | A06046 | A15819 | 269 |

|        |        |     |        |        |     |
|--------|--------|-----|--------|--------|-----|
| A06047 | A06604 | 425 | A06047 | A08057 | 63  |
| A06047 | A10605 | 416 | A06047 | A14439 | 396 |
| A06047 | A14599 | 401 | A06048 | A07160 | 373 |
| A06049 | A06610 | 226 | A06049 | A14216 | 162 |
| A06049 | A15624 | 301 | A06049 | A16088 | 232 |
| A06050 | A07339 | 230 | A06050 | A10018 | 366 |
| A06050 | A11683 | 339 | A06051 | A09600 | 457 |
| A06052 | A06195 | 334 | A06052 | A07342 | 446 |
| A06052 | A09991 | 398 | A06053 | A07342 | 353 |
| A06053 | A10557 | 358 | A06053 | A14197 | 259 |
| A06053 | A14344 | 366 | A06054 | A06055 | 423 |
| A06054 | A06404 | 450 | A06054 | A06414 | 288 |
| A06054 | A06415 | 228 | A06054 | A06780 | 419 |
| A06054 | A06818 | 446 | A06054 | A06899 | 302 |
| A06054 | A07143 | 418 | A06054 | A07151 | 230 |
| A06054 | A07152 | 171 | A06054 | A07157 | 281 |
| A06054 | A07161 | 452 | A06054 | A07166 | 328 |
| A06054 | A07173 | 323 | A06054 | A07372 | 490 |
| A06054 | A07390 | 480 | A06054 | A07683 | 360 |
| A06054 | A10504 | 212 | A06054 | A11404 | 296 |
| A06054 | A11543 | 205 | A06054 | A13860 | 461 |
| A06054 | A14146 | 385 | A06054 | A14374 | 368 |
| A06054 | A14392 | 303 | A06054 | A14432 | 405 |
| A06054 | A14442 | 268 | A06054 | A14511 | 191 |
| A06054 | A14554 | 332 | A06054 | A14604 | 191 |
| A06054 | A15267 | 483 | A06054 | A15394 | 216 |
| A06054 | A15395 | 193 | A06054 | A15516 | 229 |
| A06054 | A15518 | 308 | A06054 | A15605 | 358 |
| A06054 | A15795 | 210 | A06054 | A15969 | 348 |
| A06055 | A06095 | 302 | A06055 | A06421 | 458 |
| A06055 | A06780 | 417 | A06055 | A07031 | 328 |
| A06055 | A07152 | 165 | A06055 | A07157 | 462 |
| A06055 | A07161 | 228 | A06055 | A07164 | 174 |
| A06055 | A07166 | 323 | A06055 | A07173 | 438 |
| A06055 | A07372 | 321 | A06055 | A07390 | 281 |
| A06055 | A08215 | 177 | A06055 | A08615 | 356 |
| A06055 | A08658 | 419 | A06055 | A08711 | 424 |
| A06055 | A08850 | 168 | A06055 | A09046 | 290 |
| A06055 | A09162 | 256 | A06055 | A09354 | 380 |
| A06055 | A10001 | 395 | A06055 | A10969 | 351 |
| A06055 | A13539 | 193 | A06055 | A13872 | 241 |
| A06055 | A13903 | 232 | A06055 | A14376 | 398 |
| A06055 | A14392 | 165 | A06055 | A14432 | 297 |
| A06055 | A15308 | 157 | A06055 | A15395 | 188 |
| A06055 | A15425 | 283 | A06055 | A15603 | 259 |
| A06055 | A15605 | 419 | A06055 | A15608 | 424 |

|        |        |     |        |        |     |
|--------|--------|-----|--------|--------|-----|
| A06056 | A06797 | 357 | A06056 | A08559 | 417 |
| A06056 | A08572 | 317 | A06056 | A08773 | 221 |
| A06056 | A13340 | 165 | A06056 | A14188 | 224 |
| A06057 | A06588 | 205 | A06057 | A08440 | 438 |
| A06057 | A09088 | 438 | A06057 | A12391 | 438 |
| A06058 | A09246 | 335 | A06058 | A14375 | 316 |
| A06058 | A14377 | 302 | A06058 | A14613 | 398 |
| A06058 | A15843 | 301 | A06059 | A07505 | 363 |
| A06059 | A07674 | 196 | A06059 | A10677 | 255 |
| A06059 | A11513 | 241 | A06059 | A14191 | 224 |
| A06059 | A14288 | 157 | A06059 | A14637 | 439 |
| A06059 | A14698 | 306 | A06059 | A15419 | 202 |
| A06060 | A14484 | 217 | A06061 | A15336 | 63  |
| A06063 | A06358 | 165 | A06063 | A06633 | 228 |
| A06063 | A06647 | 270 | A06063 | A06756 | 187 |
| A06063 | A07163 | 374 | A06063 | A07256 | 283 |
| A06063 | A07267 | 201 | A06063 | A07413 | 152 |
| A06063 | A07530 | 247 | A06063 | A07847 | 196 |
| A06063 | A08097 | 241 | A06063 | A08108 | 213 |
| A06063 | A08454 | 247 | A06063 | A09367 | 347 |
| A06063 | A09425 | 380 | A06063 | A11681 | 172 |
| A06063 | A11759 | 177 | A06063 | A12055 | 307 |
| A06063 | A14623 | 391 | A06063 | A14674 | 286 |
| A06063 | A14683 | 185 | A06063 | A16734 | 324 |
| A06064 | A06309 | 327 | A06064 | A06827 | 369 |
| A06064 | A08820 | 172 | A06064 | A09735 | 385 |
| A06064 | A09764 | 200 | A06065 | A13607 | 424 |
| A06067 | A06578 | 184 | A06067 | A07413 | 187 |
| A06067 | A07598 | 184 | A06067 | A09351 | 355 |
| A06067 | A11558 | 184 | A06067 | A11851 | 184 |
| A06067 | A13356 | 184 | A06067 | A14210 | 184 |
| A06067 | A15321 | 441 | A06067 | A16049 | 171 |
| A06067 | A16152 | 184 | A06067 | A16400 | 227 |
| A06069 | A06070 | 489 | A06069 | A06092 | 188 |
| A06069 | A06195 | 176 | A06069 | A06346 | 156 |
| A06069 | A06502 | 257 | A06069 | A06574 | 371 |
| A06069 | A06711 | 305 | A06069 | A06731 | 190 |
| A06069 | A06799 | 468 | A06069 | A06868 | 252 |
| A06069 | A06887 | 344 | A06069 | A06920 | 434 |
| A06069 | A07218 | 63  | A06069 | A07361 | 475 |
| A06069 | A07471 | 156 | A06069 | A07651 | 385 |
| A06069 | A07704 | 368 | A06069 | A07705 | 234 |
| A06069 | A07784 | 447 | A06069 | A07994 | 401 |
| A06069 | A08162 | 485 | A06069 | A08163 | 472 |
| A06069 | A08166 | 447 | A06069 | A08230 | 401 |
| A06069 | A08231 | 401 | A06069 | A08232 | 401 |

|        |        |     |        |        |     |
|--------|--------|-----|--------|--------|-----|
| A06069 | A08244 | 357 | A06069 | A08292 | 279 |
| A06069 | A08392 | 375 | A06069 | A08475 | 401 |
| A06069 | A08497 | 465 | A06069 | A08685 | 195 |
| A06069 | A09139 | 369 | A06069 | A09140 | 447 |
| A06069 | A09509 | 163 | A06069 | A11319 | 319 |
| A06069 | A12486 | 401 | A06069 | A13369 | 152 |
| A06069 | A15630 | 176 | A06070 | A07784 | 462 |
| A06070 | A09140 | 419 | A06070 | A10625 | 179 |
| A06070 | A14210 | 187 | A06071 | A14633 | 219 |
| A06073 | A06286 | 288 | A06073 | A07025 | 481 |
| A06073 | A08741 | 306 | A06073 | A10337 | 395 |
| A06073 | A14383 | 412 | A06073 | A14399 | 157 |
| A06073 | A15809 | 228 | A06073 | A15847 | 391 |
| A06074 | A06650 | 173 | A06074 | A07803 | 151 |
| A06074 | A09123 | 335 | A06074 | A12365 | 187 |
| A06077 | A08608 | 455 | A06077 | A14198 | 182 |
| A06077 | A14400 | 468 | A06078 | A06701 | 152 |
| A06078 | A07935 | 274 | A06078 | A09561 | 240 |
| A06078 | A11184 | 243 | A06078 | A13965 | 245 |
| A06079 | A10176 | 445 | A06079 | A10383 | 428 |
| A06079 | A13778 | 445 | A06082 | A06314 | 458 |
| A06082 | A07183 | 486 | A06082 | A07311 | 228 |
| A06082 | A09644 | 218 | A06082 | A11291 | 317 |
| A06082 | A13338 | 176 | A06082 | A14073 | 475 |
| A06082 | A14122 | 378 | A06082 | A14139 | 270 |
| A06082 | A14220 | 160 | A06082 | A14475 | 605 |
| A06082 | A14496 | 456 | A06082 | A14596 | 252 |
| A06082 | A14809 | 199 | A06083 | A07163 | 251 |
| A06084 | A06356 | 485 | A06084 | A06814 | 344 |
| A06084 | A06815 | 441 | A06084 | A06825 | 159 |
| A06084 | A06955 | 439 | A06084 | A07237 | 305 |
| A06084 | A07499 | 154 | A06084 | A08653 | 454 |
| A06084 | A08682 | 252 | A06084 | A09656 | 430 |
| A06084 | A11427 | 251 | A06084 | A11981 | 288 |
| A06084 | A13052 | 277 | A06084 | A13626 | 215 |
| A06085 | A06095 | 324 | A06085 | A06264 | 241 |
| A06085 | A06352 | 345 | A06085 | A06924 | 676 |
| A06085 | A08939 | 617 | A06085 | A09667 | 347 |
| A06085 | A13949 | 152 | A06085 | A14622 | 238 |
| A06085 | A15336 | 160 | A06085 | A15367 | 438 |
| A06085 | A15372 | 198 | A06085 | A15837 | 259 |
| A06086 | A06339 | 272 | A06086 | A06359 | 188 |
| A06086 | A06473 | 447 | A06086 | A06592 | 353 |
| A06086 | A06773 | 491 | A06086 | A07660 | 483 |
| A06086 | A07800 | 489 | A06086 | A08099 | 310 |
| A06086 | A09612 | 380 | A06086 | A09979 | 369 |

|        |        |     |        |        |     |
|--------|--------|-----|--------|--------|-----|
| A06086 | A09985 | 469 | A06086 | A10652 | 277 |
| A06086 | A10673 | 258 | A06086 | A11309 | 486 |
| A06086 | A13147 | 172 | A06086 | A13984 | 251 |
| A06086 | A15497 | 433 | A06086 | A15498 | 279 |
| A06086 | A16959 | 218 | A06087 | A13436 | 452 |
| A06088 | A06089 | 485 | A06088 | A06358 | 294 |
| A06088 | A06474 | 484 | A06088 | A06475 | 474 |
| A06088 | A06791 | 408 | A06088 | A07109 | 283 |
| A06088 | A07122 | 341 | A06088 | A07800 | 162 |
| A06088 | A10027 | 425 | A06088 | A13175 | 457 |
| A06088 | A14540 | 188 | A06088 | A14589 | 154 |
| A06088 | A14827 | 193 | A06088 | A15905 | 288 |
| A06088 | A16529 | 232 | A06089 | A06474 | 457 |
| A06089 | A06475 | 422 | A06089 | A06791 | 425 |
| A06089 | A07122 | 384 | A06089 | A10027 | 438 |
| A06089 | A14827 | 251 | A06089 | A15905 | 333 |
| A06090 | A06734 | 447 | A06090 | A06860 | 424 |
| A06090 | A07037 | 449 | A06090 | A07520 | 401 |
| A06091 | A06474 | 341 | A06091 | A06523 | 335 |
| A06091 | A06555 | 380 | A06091 | A06592 | 246 |
| A06091 | A07027 | 277 | A06091 | A07061 | 486 |
| A06091 | A07122 | 480 | A06091 | A07238 | 195 |
| A06091 | A07239 | 241 | A06091 | A07322 | 450 |
| A06091 | A07381 | 165 | A06091 | A07572 | 271 |
| A06091 | A07696 | 299 | A06091 | A07737 | 401 |
| A06091 | A07875 | 380 | A06091 | A08127 | 339 |
| A06091 | A08135 | 475 | A06091 | A09476 | 366 |
| A06091 | A09612 | 391 | A06091 | A10676 | 335 |
| A06091 | A10684 | 308 | A06091 | A10702 | 205 |
| A06091 | A14540 | 335 | A06091 | A15874 | 439 |
| A06091 | A16739 | 274 | A06091 | A16744 | 281 |
| A06092 | A06161 | 265 | A06092 | A06195 | 474 |
| A06092 | A06520 | 323 | A06092 | A06739 | 174 |
| A06092 | A07069 | 485 | A06092 | A07209 | 412 |
| A06092 | A07276 | 458 | A06092 | A07384 | 213 |
| A06092 | A07389 | 311 | A06092 | A07442 | 191 |
| A06092 | A07697 | 462 | A06092 | A07704 | 182 |
| A06092 | A07756 | 235 | A06092 | A08687 | 266 |
| A06092 | A09323 | 481 | A06092 | A10987 | 314 |
| A06092 | A11099 | 198 | A06092 | A11559 | 177 |
| A06092 | A11663 | 288 | A06092 | A12920 | 229 |
| A06092 | A13369 | 232 | A06092 | A13965 | 263 |
| A06092 | A14381 | 263 | A06092 | A14886 | 213 |
| A06093 | A15498 | 249 | A06094 | A13734 | 235 |
| A06095 | A06404 | 360 | A06095 | A06415 | 184 |
| A06095 | A06627 | 310 | A06095 | A06737 | 412 |

|        |        |     |        |        |     |
|--------|--------|-----|--------|--------|-----|
| A06095 | A07143 | 294 | A06095 | A07148 | 347 |
| A06095 | A07157 | 227 | A06095 | A07173 | 265 |
| A06095 | A08714 | 307 | A06095 | A15314 | 279 |
| A06095 | A15601 | 335 | A06095 | A15603 | 326 |
| A06095 | A15605 | 302 | A06095 | A15608 | 311 |
| A06095 | A15630 | 246 | A06095 | A15834 | 294 |
| A06096 | A09886 | 447 | A06098 | A06699 | 451 |
| A06098 | A07080 | 423 | A06098 | A07122 | 379 |
| A06098 | A07271 | 416 | A06098 | A10659 | 401 |
| A06099 | A07334 | 215 | A06099 | A07795 | 232 |
| A06099 | A07796 | 152 | A06099 | A08678 | 165 |
| A06099 | A08690 | 185 | A06099 | A11047 | 174 |
| A06099 | A11494 | 215 | A06099 | A11878 | 278 |
| A06099 | A14859 | 377 | A06100 | A06134 | 168 |
| A06100 | A06313 | 219 | A06100 | A06584 | 228 |
| A06100 | A06601 | 229 | A06100 | A06708 | 485 |
| A06100 | A06720 | 283 | A06100 | A06739 | 262 |
| A06100 | A07209 | 462 | A06100 | A07242 | 355 |
| A06100 | A07282 | 490 | A06100 | A07310 | 313 |
| A06100 | A07626 | 491 | A06100 | A07685 | 313 |
| A06100 | A07815 | 491 | A06100 | A07836 | 489 |
| A06100 | A07837 | 419 | A06100 | A08005 | 329 |
| A06100 | A08009 | 412 | A06100 | A08097 | 356 |
| A06100 | A08658 | 251 | A06100 | A09245 | 254 |
| A06100 | A09362 | 201 | A06100 | A09964 | 265 |
| A06100 | A10647 | 313 | A06100 | A10653 | 353 |
| A06100 | A10654 | 353 | A06100 | A10844 | 190 |
| A06100 | A12132 | 293 | A06100 | A13531 | 241 |
| A06100 | A13885 | 193 | A06100 | A14883 | 293 |
| A06100 | A14988 | 256 | A06100 | A15556 | 174 |
| A06100 | A15557 | 358 | A06100 | A15680 | 311 |
| A06100 | A16274 | 299 | A06100 | A16447 | 256 |
| A06101 | A06134 | 401 | A06101 | A06819 | 480 |
| A06101 | A07200 | 408 | A06101 | A07931 | 251 |
| A06101 | A10532 | 363 | A06101 | A12831 | 454 |
| A06101 | A14525 | 489 | A06101 | A15372 | 446 |
| A06101 | A16219 | 288 | A06102 | A07223 | 344 |
| A06103 | A07096 | 446 | A06103 | A07820 | 184 |
| A06103 | A12828 | 346 | A06104 | A08252 | 271 |
| A06106 | A06608 | 276 | A06106 | A06686 | 382 |
| A06107 | A07440 | 375 | A06107 | A08729 | 472 |
| A06107 | A10823 | 455 | A06107 | A13181 | 408 |
| A06107 | A13369 | 159 | A06107 | A14029 | 288 |
| A06107 | A15606 | 185 | A06107 | A16996 | 395 |
| A06109 | A06379 | 246 | A06109 | A07414 | 296 |
| A06109 | A08390 | 443 | A06109 | A09591 | 334 |

|        |        |     |        |        |     |
|--------|--------|-----|--------|--------|-----|
| A06109 | A13218 | 396 | A06109 | A13609 | 241 |
| A06111 | A06654 | 337 | A06111 | A06689 | 486 |
| A06111 | A06970 | 475 | A06111 | A07267 | 326 |
| A06111 | A10658 | 363 | A06112 | A06286 | 324 |
| A06112 | A08910 | 229 | A06113 | A06642 | 281 |
| A06113 | A07143 | 364 | A06113 | A14571 | 328 |
| A06115 | A09520 | 446 | A06115 | A10480 | 447 |
| A06117 | A06324 | 412 | A06117 | A06814 | 277 |
| A06118 | A08714 | 307 | A06118 | A09243 | 279 |
| A06118 | A09826 | 221 | A06118 | A11412 | 236 |
| A06118 | A12532 | 405 | A06118 | A12534 | 391 |
| A06118 | A13860 | 212 | A06118 | A13987 | 195 |
| A06118 | A14010 | 255 | A06118 | A14210 | 475 |
| A06118 | A14371 | 436 | A06118 | A14379 | 269 |
| A06118 | A14511 | 156 | A06118 | A15313 | 180 |
| A06118 | A15495 | 184 | A06118 | A15792 | 348 |
| A06118 | A15916 | 345 | A06118 | A16300 | 157 |
| A06118 | A16741 | 199 | A06118 | A17136 | 213 |
| A06119 | A14433 | 386 | A06119 | A15292 | 255 |
| A06119 | A15452 | 351 | A06120 | A06385 | 251 |
| A06120 | A06387 | 383 | A06120 | A11955 | 386 |
| A06120 | A12124 | 353 | A06120 | A17203 | 407 |
| A06121 | A07726 | 475 | A06121 | A07797 | 424 |
| A06121 | A10633 | 265 | A06121 | A10748 | 485 |
| A06122 | A06369 | 230 | A06122 | A06436 | 332 |
| A06122 | A06832 | 401 | A06122 | A06861 | 193 |
| A06122 | A07312 | 356 | A06122 | A07349 | 226 |
| A06122 | A08281 | 200 | A06122 | A08627 | 377 |
| A06122 | A08768 | 305 | A06122 | A08984 | 260 |
| A06122 | A12292 | 361 | A06122 | A14701 | 252 |
| A06122 | A15324 | 286 | A06122 | A15932 | 227 |
| A06122 | A16118 | 329 | A06124 | A06596 | 375 |
| A06124 | A06648 | 411 | A06124 | A07267 | 350 |
| A06124 | A08738 | 246 | A06124 | A09896 | 435 |
| A06124 | A12730 | 369 | A06124 | A14444 | 251 |
| A06125 | A07204 | 375 | A06125 | A08068 | 454 |
| A06125 | A11515 | 400 | A06125 | A13369 | 177 |
| A06125 | A14223 | 241 | A06126 | A06623 | 348 |
| A06127 | A06422 | 385 | A06128 | A12413 | 438 |
| A06129 | A06200 | 294 | A06129 | A06598 | 235 |
| A06129 | A06789 | 405 | A06129 | A07958 | 163 |
| A06129 | A09073 | 251 | A06129 | A09102 | 368 |
| A06129 | A09209 | 330 | A06129 | A10442 | 347 |
| A06129 | A10689 | 157 | A06129 | A12990 | 156 |
| A06129 | A13917 | 174 | A06129 | A14222 | 201 |
| A06129 | A14278 | 327 | A06129 | A14907 | 391 |

|        |        |     |        |        |     |
|--------|--------|-----|--------|--------|-----|
| A06130 | A06242 | 201 | A06130 | A06381 | 317 |
| A06130 | A06422 | 277 | A06130 | A06750 | 229 |
| A06130 | A07353 | 317 | A06130 | A07480 | 152 |
| A06130 | A07603 | 326 | A06130 | A07670 | 229 |
| A06130 | A08212 | 247 | A06130 | A08820 | 185 |
| A06130 | A13429 | 435 | A06130 | A14177 | 313 |
| A06130 | A15837 | 567 | A06130 | A16626 | 422 |
| A06130 | A16643 | 317 | A06131 | A07140 | 367 |
| A06132 | A07199 | 386 | A06132 | A14193 | 213 |
| A06134 | A06622 | 252 | A06134 | A07200 | 468 |
| A06134 | A14496 | 162 | A06134 | A14525 | 204 |
| A06134 | A14588 | 255 | A06134 | A15372 | 202 |
| A06134 | A16219 | 281 | A06135 | A10501 | 391 |
| A06137 | A07062 | 484 | A06137 | A07336 | 330 |
| A06137 | A07621 | 344 | A06137 | A07736 | 205 |
| A06137 | A08209 | 267 | A06137 | A09652 | 429 |
| A06137 | A10655 | 204 | A06137 | A12824 | 177 |
| A06137 | A13902 | 200 | A06137 | A14016 | 173 |
| A06137 | A14190 | 260 | A06137 | A14197 | 162 |
| A06137 | A15066 | 408 | A06137 | A15647 | 208 |
| A06137 | A15896 | 489 | A06138 | A08815 | 246 |
| A06138 | A10148 | 262 | A06138 | A14197 | 198 |
| A06138 | A16741 | 184 | A06140 | A07163 | 238 |
| A06140 | A08672 | 420 | A06140 | A09256 | 269 |
| A06140 | A10060 | 428 | A06141 | A06148 | 480 |
| A06141 | A06193 | 398 | A06141 | A06212 | 491 |
| A06141 | A06655 | 363 | A06141 | A06739 | 283 |
| A06141 | A07641 | 321 | A06141 | A10278 | 477 |
| A06141 | A10629 | 468 | A06141 | A13382 | 450 |
| A06141 | A14548 | 417 | A06142 | A06607 | 208 |
| A06143 | A06176 | 68  | A06143 | A06348 | 469 |
| A06143 | A06572 | 491 | A06143 | A06584 | 156 |
| A06143 | A06606 | 160 | A06143 | A07313 | 318 |
| A06143 | A07425 | 378 | A06143 | A07433 | 491 |
| A06143 | A07593 | 432 | A06143 | A08137 | 486 |
| A06143 | A08196 | 484 | A06143 | A08549 | 398 |
| A06143 | A08571 | 481 | A06143 | A08819 | 388 |
| A06143 | A08854 | 228 | A06143 | A08855 | 447 |
| A06143 | A08885 | 303 | A06143 | A09256 | 278 |
| A06143 | A09728 | 477 | A06143 | A09730 | 424 |
| A06143 | A10673 | 348 | A06143 | A11068 | 160 |
| A06143 | A11668 | 249 | A06143 | A13484 | 174 |
| A06143 | A13978 | 171 | A06143 | A14227 | 174 |
| A06143 | A14257 | 422 | A06143 | A14278 | 409 |
| A06143 | A14508 | 165 | A06143 | A15297 | 210 |
| A06143 | A15702 | 299 | A06143 | A15710 | 267 |



|        |        |     |        |        |     |
|--------|--------|-----|--------|--------|-----|
| A06143 | A15726 | 191 | A06143 | A15851 | 154 |
| A06143 | A16847 | 157 | A06144 | A07762 | 281 |
| A06144 | A09509 | 274 | A06144 | A15293 | 226 |
| A06145 | A09807 | 447 | A06146 | A06752 | 385 |
| A06146 | A08875 | 330 | A06146 | A09791 | 340 |
| A06146 | A12897 | 202 | A06146 | A15336 | 297 |
| A06146 | A16068 | 302 | A06146 | A16626 | 243 |
| A06147 | A06623 | 405 | A06147 | A11262 | 388 |
| A06147 | A14642 | 288 | A06148 | A06212 | 418 |
| A06148 | A06346 | 226 | A06148 | A06532 | 412 |
| A06148 | A06701 | 173 | A06148 | A06739 | 299 |
| A06148 | A07384 | 419 | A06148 | A10101 | 412 |
| A06148 | A12708 | 412 | A06148 | A14548 | 489 |
| A06148 | A14586 | 366 | A06148 | A14648 | 177 |
| A06149 | A06398 | 322 | A06149 | A06422 | 443 |
| A06149 | A07568 | 294 | A06149 | A08335 | 243 |
| A06149 | A09390 | 313 | A06149 | A10568 | 395 |
| A06149 | A13975 | 156 | A06149 | A13980 | 196 |
| A06149 | A14410 | 172 | A06149 | A15639 | 238 |
| A06151 | A06152 | 374 | A06151 | A06153 | 395 |
| A06151 | A06154 | 395 | A06151 | A06535 | 483 |
| A06151 | A06581 | 210 | A06151 | A06607 | 154 |
| A06151 | A06686 | 297 | A06151 | A06688 | 172 |
| A06151 | A10012 | 395 | A06151 | A11686 | 455 |
| A06151 | A12481 | 414 | A06151 | A13972 | 490 |
| A06151 | A14732 | 449 | A06152 | A06535 | 474 |
| A06152 | A07009 | 436 | A06152 | A11898 | 436 |
| A06153 | A06535 | 416 | A06155 | A06158 | 414 |
| A06155 | A09581 | 391 | A06155 | A11433 | 428 |
| A06156 | A15498 | 190 | A06157 | A09048 | 441 |
| A06157 | A14364 | 369 | A06158 | A07394 | 165 |
| A06158 | A08519 | 274 | A06158 | A09040 | 279 |
| A06158 | A09581 | 490 | A06158 | A11433 | 353 |
| A06158 | A11526 | 294 | A06158 | A11833 | 375 |
| A06158 | A13116 | 305 | A06158 | A13809 | 380 |
| A06158 | A13840 | 414 | A06158 | A14559 | 243 |
| A06158 | A15626 | 160 | A06158 | A15653 | 152 |
| A06158 | A15765 | 281 | A06158 | A16134 | 213 |
| A06158 | A16676 | 460 | A06159 | A06167 | 489 |
| A06159 | A06314 | 221 | A06159 | A11279 | 193 |
| A06159 | A11885 | 263 | A06159 | A14247 | 184 |
| A06159 | A14430 | 234 | A06159 | A15463 | 195 |
| A06160 | A13399 | 353 | A06161 | A06623 | 252 |
| A06161 | A07001 | 184 | A06161 | A08602 | 396 |
| A06161 | A09181 | 226 | A06161 | A09655 | 201 |
| A06161 | A10233 | 228 | A06161 | A11460 | 274 |

|        |        |     |        |        |     |
|--------|--------|-----|--------|--------|-----|
| A06161 | A13975 | 457 | A06161 | A14196 | 335 |
| A06161 | A14208 | 324 | A06161 | A14639 | 256 |
| A06161 | A14996 | 160 | A06161 | A15510 | 219 |
| A06161 | A15573 | 299 | A06161 | A16741 | 185 |
| A06162 | A06288 | 301 | A06162 | A08106 | 269 |
| A06162 | A08417 | 196 | A06162 | A09243 | 177 |
| A06162 | A09724 | 241 | A06162 | A09840 | 176 |
| A06162 | A11574 | 451 | A06162 | A14281 | 324 |
| A06165 | A06385 | 276 | A06165 | A15637 | 358 |
| A06166 | A09026 | 383 | A06166 | A14643 | 188 |
| A06167 | A06314 | 201 | A06167 | A11279 | 390 |
| A06167 | A11885 | 367 | A06167 | A13829 | 183 |
| A06167 | A14247 | 234 | A06167 | A14430 | 413 |
| A06167 | A15463 | 174 | A06168 | A07521 | 163 |
| A06168 | A08137 | 281 | A06168 | A08400 | 180 |
| A06168 | A09078 | 201 | A06168 | A10156 | 200 |
| A06168 | A10584 | 302 | A06168 | A10799 | 195 |
| A06168 | A10804 | 249 | A06168 | A12645 | 291 |
| A06168 | A12883 | 346 | A06168 | A13106 | 274 |
| A06168 | A13831 | 99  | A06168 | A14247 | 432 |
| A06168 | A14461 | 479 | A06168 | A14827 | 195 |
| A06168 | A15297 | 63  | A06168 | A15309 | 154 |
| A06169 | A15346 | 322 | A06170 | A06577 | 469 |
| A06170 | A09913 | 409 | A06170 | A15498 | 337 |
| A06172 | A09390 | 367 | A06172 | A09448 | 424 |
| A06172 | A12070 | 408 | A06172 | A12482 | 432 |
| A06172 | A12757 | 340 | A06172 | A12808 | 432 |
| A06174 | A07803 | 278 | A06174 | A09469 | 398 |
| A06174 | A15644 | 319 | A06175 | A07054 | 190 |
| A06175 | A10369 | 335 | A06175 | A16636 | 236 |
| A06176 | A06348 | 425 | A06176 | A06572 | 296 |
| A06176 | A06715 | 466 | A06176 | A07054 | 465 |
| A06176 | A07083 | 490 | A06176 | A07242 | 479 |
| A06176 | A07495 | 485 | A06176 | A07893 | 193 |
| A06176 | A07954 | 470 | A06176 | A08536 | 490 |
| A06176 | A08571 | 457 | A06176 | A08853 | 168 |
| A06176 | A08885 | 369 | A06176 | A08917 | 445 |
| A06176 | A09256 | 491 | A06176 | A10250 | 491 |
| A06176 | A11281 | 318 | A06176 | A11675 | 491 |
| A06176 | A11676 | 160 | A06176 | A11920 | 82  |
| A06176 | A11928 | 198 | A06176 | A12047 | 441 |
| A06176 | A13977 | 77  | A06176 | A13978 | 188 |
| A06176 | A14009 | 63  | A06176 | A14167 | 163 |
| A06176 | A14198 | 324 | A06176 | A14270 | 401 |
| A06176 | A14279 | 271 | A06176 | A14281 | 332 |
| A06176 | A14375 | 452 | A06176 | A14455 | 191 |

|        |        |     |        |        |     |
|--------|--------|-----|--------|--------|-----|
| A06176 | A14474 | 491 | A06176 | A14484 | 408 |
| A06176 | A14719 | 435 | A06176 | A15105 | 226 |
| A06176 | A15222 | 216 | A06176 | A15380 | 265 |
| A06176 | A15926 | 152 | A06176 | A16387 | 311 |
| A06176 | A16675 | 210 | A06177 | A07550 | 274 |
| A06177 | A08594 | 154 | A06177 | A09092 | 195 |
| A06177 | A12644 | 210 | A06177 | A14199 | 193 |
| A06177 | A14473 | 154 | A06177 | A14653 | 168 |
| A06178 | A08178 | 347 | A06181 | A10130 | 428 |
| A06181 | A14484 | 205 | A06182 | A08070 | 226 |
| A06182 | A09304 | 294 | A06182 | A11342 | 369 |
| A06182 | A15244 | 173 | A06184 | A06202 | 430 |
| A06185 | A06379 | 310 | A06186 | A14664 | 429 |
| A06187 | A06195 | 347 | A06187 | A14279 | 281 |
| A06187 | A14366 | 323 | A06187 | A14524 | 388 |
| A06187 | A15471 | 399 | A06187 | A17198 | 330 |
| A06188 | A06598 | 449 | A06188 | A06648 | 283 |
| A06188 | A08571 | 279 | A06188 | A08707 | 401 |
| A06188 | A14252 | 246 | A06189 | A11683 | 296 |
| A06190 | A06277 | 159 | A06190 | A06915 | 335 |
| A06190 | A07209 | 290 | A06190 | A07242 | 245 |
| A06190 | A07803 | 486 | A06190 | A11983 | 477 |
| A06190 | A14193 | 305 | A06190 | A14204 | 324 |
| A06190 | A14395 | 215 | A06190 | A14635 | 480 |
| A06190 | A15322 | 463 | A06190 | A15354 | 340 |
| A06190 | A15460 | 174 | A06190 | A15495 | 327 |
| A06190 | A15811 | 196 | A06190 | A16901 | 480 |
| A06190 | A16904 | 417 | A06191 | A06572 | 234 |
| A06191 | A11300 | 246 | A06191 | A14193 | 277 |
| A06191 | A16300 | 190 | A06193 | A10278 | 385 |
| A06195 | A06298 | 157 | A06195 | A06302 | 368 |
| A06195 | A06469 | 314 | A06195 | A06520 | 391 |
| A06195 | A07069 | 312 | A06195 | A07342 | 193 |
| A06195 | A07704 | 170 | A06195 | A08137 | 218 |
| A06195 | A08544 | 172 | A06195 | A09323 | 357 |
| A06195 | A09991 | 491 | A06195 | A10226 | 484 |
| A06195 | A10758 | 422 | A06195 | A11076 | 368 |
| A06195 | A11663 | 489 | A06195 | A12523 | 422 |
| A06195 | A12948 | 463 | A06195 | A13229 | 486 |
| A06195 | A14303 | 162 | A06195 | A14332 | 245 |
| A06195 | A14344 | 215 | A06195 | A14481 | 199 |
| A06195 | A14524 | 180 | A06195 | A15471 | 210 |
| A06195 | A15498 | 391 | A06195 | A16872 | 352 |
| A06196 | A07117 | 408 | A06196 | A07209 | 212 |
| A06196 | A07316 | 440 | A06196 | A07803 | 232 |
| A06196 | A08875 | 322 | A06196 | A09239 | 302 |

|        |        |     |        |        |     |
|--------|--------|-----|--------|--------|-----|
| A06196 | A09732 | 377 | A06196 | A09742 | 224 |
| A06196 | A12393 | 224 | A06196 | A13987 | 271 |
| A06196 | A14010 | 454 | A06196 | A14408 | 334 |
| A06196 | A14511 | 235 | A06196 | A15292 | 303 |
| A06196 | A15311 | 353 | A06196 | A15313 | 259 |
| A06196 | A15331 | 340 | A06196 | A15333 | 357 |
| A06196 | A15348 | 302 | A06196 | A15349 | 357 |
| A06196 | A15352 | 366 | A06196 | A15433 | 363 |
| A06196 | A15435 | 281 | A06196 | A15447 | 310 |
| A06196 | A15452 | 290 | A06196 | A15456 | 369 |
| A06196 | A15457 | 452 | A06196 | A15460 | 380 |
| A06196 | A15461 | 329 | A06196 | A15489 | 371 |
| A06196 | A15495 | 262 | A06196 | A15804 | 454 |
| A06197 | A08608 | 288 | A06197 | A09542 | 182 |
| A06197 | A09809 | 330 | A06198 | A10006 | 417 |
| A06200 | A07017 | 249 | A06200 | A07153 | 193 |
| A06200 | A09487 | 451 | A06200 | A09763 | 488 |
| A06200 | A10255 | 451 | A06201 | A08875 | 438 |
| A06201 | A09561 | 277 | A06202 | A13997 | 259 |
| A06203 | A07277 | 425 | A06203 | A09127 | 296 |
| A06204 | A06347 | 491 | A06204 | A06436 | 215 |
| A06204 | A06758 | 208 | A06204 | A07180 | 558 |
| A06204 | A07203 | 210 | A06204 | A07294 | 66  |
| A06204 | A07432 | 172 | A06204 | A08183 | 480 |
| A06204 | A08447 | 339 | A06204 | A08517 | 249 |
| A06204 | A08627 | 201 | A06204 | A08770 | 466 |
| A06204 | A08775 | 171 | A06204 | A09180 | 168 |
| A06204 | A09625 | 200 | A06204 | A09628 | 200 |
| A06204 | A10317 | 491 | A06204 | A10603 | 134 |
| A06204 | A10710 | 207 | A06204 | A12082 | 179 |
| A06204 | A12816 | 254 | A06204 | A13858 | 224 |
| A06204 | A13876 | 200 | A06204 | A13877 | 236 |
| A06204 | A13881 | 200 | A06204 | A14056 | 63  |
| A06204 | A14087 | 489 | A06204 | A14088 | 450 |
| A06204 | A14171 | 200 | A06204 | A14179 | 200 |
| A06204 | A14180 | 200 | A06204 | A14186 | 491 |
| A06204 | A14255 | 204 | A06204 | A14356 | 200 |
| A06204 | A15370 | 566 | A06204 | A15374 | 490 |
| A06204 | A15569 | 241 | A06204 | A15646 | 215 |
| A06204 | A15712 | 235 | A06204 | A15719 | 200 |
| A06204 | A15724 | 491 | A06204 | A15757 | 200 |
| A06204 | A16066 | 200 | A06204 | A16634 | 200 |
| A06204 | A16664 | 372 | A06204 | A16685 | 236 |
| A06204 | A16857 | 208 | A06204 | A16919 | 200 |
| A06206 | A10174 | 200 | A06206 | A13979 | 162 |
| A06206 | A15540 | 221 | A06207 | A14511 | 226 |

|        |        |     |        |        |     |
|--------|--------|-----|--------|--------|-----|
| A06207 | A15480 | 299 | A06209 | A10998 | 440 |
| A06209 | A12521 | 452 | A06210 | A16300 | 311 |
| A06211 | A06558 | 405 | A06211 | A07200 | 180 |
| A06211 | A13906 | 367 | A06211 | A14208 | 185 |
| A06211 | A14362 | 455 | A06211 | A14366 | 224 |
| A06211 | A14374 | 362 | A06211 | A14637 | 246 |
| A06211 | A14685 | 394 | A06211 | A15312 | 180 |
| A06211 | A15313 | 195 | A06211 | A15391 | 329 |
| A06211 | A15419 | 260 | A06211 | A15430 | 191 |
| A06211 | A15475 | 423 | A06211 | A15974 | 232 |
| A06211 | A16051 | 378 | A06211 | A16300 | 171 |
| A06211 | A17155 | 358 | A06212 | A06428 | 339 |
| A06212 | A06655 | 461 | A06212 | A07014 | 452 |
| A06212 | A07190 | 199 | A06212 | A07282 | 226 |
| A06212 | A07384 | 291 | A06212 | A07641 | 402 |
| A06212 | A08310 | 477 | A06212 | A09380 | 412 |
| A06212 | A10278 | 491 | A06212 | A10629 | 486 |
| A06212 | A12708 | 395 | A06212 | A13382 | 469 |
| A06212 | A14548 | 302 | A06212 | A15064 | 266 |
| A06212 | A15277 | 252 | A06212 | A15498 | 251 |
| A06212 | A15638 | 199 | A06212 | A16281 | 162 |
| A06213 | A08934 | 369 | A06214 | A14381 | 379 |
| A06215 | A08478 | 452 | A06216 | A06897 | 208 |
| A06216 | A07158 | 193 | A06216 | A08815 | 224 |
| A06216 | A09040 | 386 | A06216 | A12124 | 447 |
| A06216 | A12890 | 454 | A06216 | A12915 | 454 |
| A06216 | A12916 | 450 | A06216 | A12993 | 412 |
| A06216 | A17203 | 374 | A06217 | A10625 | 179 |
| A06217 | A14188 | 180 | A06217 | A14674 | 221 |
| A06219 | A12897 | 180 | A06219 | A14722 | 422 |
| A06222 | A06686 | 382 | A06222 | A06721 | 378 |
| A06222 | A07995 | 419 | A06222 | A11306 | 393 |
| A06222 | A12675 | 425 | A06222 | A17085 | 377 |
| A06223 | A06623 | 167 | A06223 | A06752 | 388 |
| A06223 | A08838 | 196 | A06223 | A11160 | 234 |
| A06223 | A11574 | 327 | A06223 | A12007 | 321 |
| A06223 | A12337 | 274 | A06223 | A14637 | 151 |
| A06224 | A09581 | 333 | A06224 | A11307 | 347 |
| A06224 | A14188 | 210 | A06224 | A14400 | 379 |
| A06224 | A16430 | 367 | A06225 | A07167 | 270 |
| A06225 | A10621 | 433 | A06225 | A11478 | 270 |
| A06225 | A15282 | 283 | A06226 | A06686 | 358 |
| A06227 | A06530 | 335 | A06227 | A06686 | 436 |
| A06229 | A14613 | 423 | A06232 | A09911 | 412 |
| A06233 | A08835 | 332 | A06234 | A06377 | 422 |
| A06234 | A09509 | 285 | A06235 | A09539 | 240 |

|        |        |     |        |        |     |
|--------|--------|-----|--------|--------|-----|
| A06235 | A14431 | 184 | A06237 | A16649 | 433 |
| A06240 | A06467 | 180 | A06240 | A07848 | 326 |
| A06240 | A08250 | 199 | A06240 | A08470 | 311 |
| A06240 | A08472 | 311 | A06240 | A09362 | 174 |
| A06240 | A10224 | 262 | A06240 | A15716 | 230 |
| A06240 | A16766 | 491 | A06241 | A14096 | 326 |
| A06241 | A14605 | 346 | A06242 | A06297 | 396 |
| A06242 | A06575 | 208 | A06242 | A06851 | 324 |
| A06242 | A06864 | 491 | A06242 | A06982 | 491 |
| A06242 | A07079 | 475 | A06242 | A07319 | 491 |
| A06242 | A07346 | 491 | A06242 | A07353 | 490 |
| A06242 | A07466 | 491 | A06242 | A07480 | 491 |
| A06242 | A07534 | 491 | A06242 | A07595 | 174 |
| A06242 | A07603 | 491 | A06242 | A07647 | 484 |
| A06242 | A07902 | 366 | A06242 | A07989 | 187 |
| A06242 | A07996 | 491 | A06242 | A08000 | 384 |
| A06242 | A08029 | 224 | A06242 | A08030 | 491 |
| A06242 | A08117 | 491 | A06242 | A08141 | 73  |
| A06242 | A08208 | 351 | A06242 | A08212 | 195 |
| A06242 | A08669 | 491 | A06242 | A08820 | 491 |
| A06242 | A08888 | 180 | A06242 | A08902 | 363 |
| A06242 | A09626 | 310 | A06242 | A09752 | 229 |
| A06242 | A09764 | 436 | A06242 | A10508 | 157 |
| A06242 | A10625 | 305 | A06242 | A10846 | 490 |
| A06242 | A11792 | 364 | A06242 | A11916 | 477 |
| A06242 | A12932 | 347 | A06242 | A13429 | 479 |
| A06242 | A13593 | 283 | A06242 | A13907 | 445 |
| A06242 | A13949 | 491 | A06242 | A13986 | 341 |
| A06242 | A14007 | 401 | A06242 | A14076 | 484 |
| A06242 | A14079 | 491 | A06242 | A14093 | 212 |
| A06242 | A14177 | 484 | A06242 | A14273 | 491 |
| A06242 | A14452 | 311 | A06242 | A14460 | 491 |
| A06242 | A14593 | 217 | A06242 | A14631 | 303 |
| A06242 | A14930 | 201 | A06242 | A14962 | 249 |
| A06242 | A15096 | 219 | A06242 | A15369 | 491 |
| A06242 | A15420 | 210 | A06242 | A15837 | 424 |
| A06242 | A15876 | 152 | A06242 | A16073 | 180 |
| A06242 | A16127 | 491 | A06242 | A16128 | 491 |
| A06242 | A16129 | 443 | A06242 | A16130 | 152 |
| A06242 | A16134 | 246 | A06242 | A16225 | 299 |
| A06242 | A16226 | 491 | A06242 | A16290 | 273 |
| A06242 | A16331 | 440 | A06242 | A16461 | 208 |
| A06242 | A16549 | 227 | A06242 | A16606 | 491 |
| A06242 | A16613 | 490 | A06242 | A16616 | 256 |
| A06242 | A16626 | 490 | A06242 | A16754 | 477 |
| A06242 | A16830 | 157 | A06243 | A09900 | 358 |

|        |        |     |        |        |     |
|--------|--------|-----|--------|--------|-----|
| A06244 | A09542 | 243 | A06245 | A07059 | 316 |
| A06245 | A07334 | 406 | A06245 | A07490 | 396 |
| A06245 | A07507 | 454 | A06245 | A07674 | 441 |
| A06245 | A12927 | 251 | A06246 | A09546 | 385 |
| A06247 | A06597 | 447 | A06247 | A07191 | 313 |
| A06247 | A08910 | 491 | A06247 | A10268 | 400 |
| A06247 | A10506 | 165 | A06247 | A11911 | 152 |
| A06247 | A14208 | 484 | A06247 | A15912 | 489 |
| A06247 | A16636 | 180 | A06248 | A10638 | 413 |
| A06250 | A16597 | 337 | A06251 | A08768 | 378 |
| A06251 | A12824 | 180 | A06252 | A06358 | 386 |
| A06252 | A06527 | 286 | A06252 | A06744 | 170 |
| A06252 | A06756 | 291 | A06252 | A06934 | 347 |
| A06252 | A07088 | 276 | A06252 | A07109 | 379 |
| A06252 | A07122 | 485 | A06252 | A07256 | 435 |
| A06252 | A07413 | 380 | A06252 | A07452 | 274 |
| A06252 | A07541 | 199 | A06252 | A07542 | 291 |
| A06252 | A07543 | 296 | A06252 | A07561 | 272 |
| A06252 | A07610 | 301 | A06252 | A07627 | 385 |
| A06252 | A07688 | 288 | A06252 | A07800 | 266 |
| A06252 | A08252 | 152 | A06252 | A09711 | 454 |
| A06252 | A09924 | 394 | A06252 | A10635 | 276 |
| A06252 | A13871 | 286 | A06252 | A14827 | 167 |
| A06252 | A15497 | 243 | A06252 | A15905 | 267 |
| A06252 | A16026 | 409 | A06252 | A16027 | 245 |
| A06252 | A17078 | 174 | A06253 | A06259 | 480 |
| A06253 | A06607 | 363 | A06253 | A06944 | 279 |
| A06253 | A07766 | 405 | A06253 | A07794 | 228 |
| A06253 | A07803 | 218 | A06253 | A09743 | 223 |
| A06253 | A11444 | 276 | A06253 | A13369 | 357 |
| A06253 | A13917 | 182 | A06253 | A14128 | 491 |
| A06253 | A14384 | 319 | A06253 | A14394 | 182 |
| A06253 | A15430 | 405 | A06254 | A06877 | 406 |
| A06254 | A07149 | 246 | A06254 | A08201 | 283 |
| A06254 | A08992 | 372 | A06254 | A09509 | 171 |
| A06254 | A11104 | 396 | A06254 | A11345 | 276 |
| A06254 | A11436 | 179 | A06254 | A12357 | 457 |
| A06254 | A13924 | 258 | A06254 | A14653 | 184 |
| A06254 | A15675 | 345 | A06254 | A16122 | 324 |
| A06255 | A07233 | 420 | A06255 | A08342 | 460 |
| A06255 | A09240 | 485 | A06255 | A09365 | 409 |
| A06255 | A11698 | 473 | A06255 | A11977 | 409 |
| A06255 | A12596 | 414 | A06255 | A15498 | 469 |
| A06256 | A10728 | 293 | A06257 | A09124 | 221 |
| A06257 | A14220 | 235 | A06257 | A15528 | 240 |
| A06257 | A15729 | 180 | A06258 | A06379 | 435 |

|        |        |     |        |        |     |
|--------|--------|-----|--------|--------|-----|
| A06258 | A06597 | 173 | A06258 | A07311 | 200 |
| A06258 | A07339 | 435 | A06258 | A14444 | 241 |
| A06258 | A15293 | 401 | A06258 | A15506 | 780 |
| A06259 | A14128 | 489 | A06260 | A06607 | 281 |
| A06260 | A14643 | 335 | A06261 | A15313 | 283 |
| A06263 | A06607 | 424 | A06263 | A06757 | 401 |
| A06263 | A06769 | 193 | A06263 | A06874 | 486 |
| A06263 | A07438 | 405 | A06263 | A07808 | 388 |
| A06263 | A08746 | 235 | A06263 | A09072 | 475 |
| A06263 | A10757 | 337 | A06263 | A11313 | 210 |
| A06263 | A11646 | 377 | A06263 | A12115 | 388 |
| A06263 | A13258 | 388 | A06264 | A06309 | 210 |
| A06264 | A10399 | 157 | A06264 | A15372 | 374 |
| A06264 | A15655 | 271 | A06265 | A06315 | 408 |
| A06266 | A07471 | 357 | A06266 | A07491 | 395 |
| A06267 | A06591 | 208 | A06267 | A09992 | 408 |
| A06268 | A10547 | 440 | A06268 | A11902 | 196 |
| A06268 | A14221 | 183 | A06269 | A09791 | 288 |
| A06269 | A14128 | 174 | A06269 | A14198 | 154 |
| A06271 | A07209 | 180 | A06271 | A15605 | 335 |
| A06271 | A16636 | 193 | A06272 | A06750 | 198 |
| A06272 | A08032 | 488 | A06272 | A08199 | 288 |
| A06272 | A12824 | 322 | A06272 | A16358 | 308 |
| A06273 | A06660 | 160 | A06273 | A07103 | 328 |
| A06273 | A07524 | 428 | A06273 | A07706 | 343 |
| A06273 | A08118 | 339 | A06273 | A08450 | 491 |
| A06273 | A09279 | 159 | A06273 | A09624 | 257 |
| A06273 | A10034 | 151 | A06273 | A11929 | 463 |
| A06273 | A12254 | 193 | A06273 | A12365 | 394 |
| A06273 | A13511 | 317 | A06273 | A14167 | 207 |
| A06273 | A14270 | 159 | A06273 | A14635 | 293 |
| A06273 | A15711 | 154 | A06275 | A07347 | 477 |
| A06275 | A07570 | 243 | A06275 | A07584 | 340 |
| A06275 | A07644 | 465 | A06275 | A07700 | 380 |
| A06275 | A08326 | 377 | A06275 | A08950 | 283 |
| A06275 | A09307 | 256 | A06275 | A10362 | 226 |
| A06275 | A10616 | 491 | A06275 | A11575 | 241 |
| A06275 | A12419 | 198 | A06275 | A13055 | 393 |
| A06275 | A13294 | 236 | A06275 | A13875 | 269 |
| A06275 | A13989 | 490 | A06275 | A14505 | 391 |
| A06275 | A14816 | 229 | A06275 | A15498 | 213 |
| A06275 | A16744 | 195 | A06277 | A06385 | 296 |
| A06277 | A06421 | 190 | A06277 | A06752 | 486 |
| A06277 | A06970 | 380 | A06277 | A07054 | 477 |
| A06277 | A07153 | 191 | A06277 | A07209 | 341 |
| A06277 | A07232 | 195 | A06277 | A07242 | 491 |



|        |        |     |        |        |     |
|--------|--------|-----|--------|--------|-----|
| A06277 | A07311 | 945 | A06277 | A07422 | 230 |
| A06277 | A07471 | 270 | A06277 | A07483 | 173 |
| A06277 | A07495 | 486 | A06277 | A07631 | 345 |
| A06277 | A07665 | 456 | A06277 | A07709 | 340 |
| A06277 | A07803 | 488 | A06277 | A08602 | 160 |
| A06277 | A08658 | 168 | A06277 | A08725 | 241 |
| A06277 | A08841 | 191 | A06277 | A08855 | 477 |
| A06277 | A08878 | 945 | A06277 | A09162 | 419 |
| A06277 | A09246 | 484 | A06277 | A09309 | 212 |
| A06277 | A09466 | 263 | A06277 | A09750 | 491 |
| A06277 | A09859 | 216 | A06277 | A10183 | 294 |
| A06277 | A10237 | 184 | A06277 | A10547 | 227 |
| A06277 | A10645 | 196 | A06277 | A10728 | 414 |
| A06277 | A10768 | 196 | A06277 | A10808 | 217 |
| A06277 | A10982 | 433 | A06277 | A11023 | 335 |
| A06277 | A11101 | 198 | A06277 | A11193 | 205 |
| A06277 | A11293 | 335 | A06277 | A11300 | 396 |
| A06277 | A11315 | 163 | A06277 | A11542 | 154 |
| A06277 | A11654 | 216 | A06277 | A11727 | 491 |
| A06277 | A11950 | 184 | A06277 | A11983 | 945 |
| A06277 | A12010 | 160 | A06277 | A12051 | 216 |
| A06277 | A12365 | 475 | A06277 | A12412 | 156 |
| A06277 | A12436 | 400 | A06277 | A12561 | 263 |
| A06277 | A12979 | 173 | A06277 | A13250 | 182 |
| A06277 | A13369 | 270 | A06277 | A13587 | 247 |
| A06277 | A13917 | 491 | A06277 | A13994 | 321 |
| A06277 | A14005 | 401 | A06277 | A14055 | 452 |
| A06277 | A14196 | 424 | A06277 | A14279 | 419 |
| A06277 | A14281 | 491 | A06277 | A14292 | 221 |
| A06277 | A14372 | 183 | A06277 | A14375 | 462 |
| A06277 | A14542 | 294 | A06277 | A14570 | 335 |
| A06277 | A14635 | 483 | A06277 | A14636 | 398 |
| A06277 | A15282 | 491 | A06277 | A15337 | 317 |
| A06277 | A15355 | 165 | A06277 | A15360 | 182 |
| A06277 | A15423 | 306 | A06277 | A15501 | 433 |
| A06277 | A15502 | 481 | A06277 | A15606 | 469 |
| A06277 | A15875 | 259 | A06277 | A16626 | 151 |
| A06277 | A16635 | 350 | A06277 | A16719 | 177 |
| A06278 | A06914 | 303 | A06278 | A07218 | 179 |
| A06278 | A10741 | 430 | A06279 | A06843 | 383 |
| A06279 | A06861 | 224 | A06279 | A06965 | 479 |
| A06279 | A07449 | 212 | A06279 | A07451 | 491 |
| A06279 | A07738 | 347 | A06279 | A08357 | 202 |
| A06279 | A08717 | 274 | A06279 | A09292 | 215 |
| A06279 | A09862 | 157 | A06279 | A10238 | 218 |
| A06279 | A11535 | 363 | A06279 | A12028 | 324 |

|        |        |     |        |        |     |
|--------|--------|-----|--------|--------|-----|
| A06279 | A13126 | 265 | A06279 | A13989 | 491 |
| A06279 | A13992 | 357 | A06279 | A15338 | 187 |
| A06279 | A15660 | 428 | A06279 | A15684 | 450 |
| A06279 | A15988 | 185 | A06279 | A16118 | 332 |
| A06279 | A16233 | 353 | A06280 | A07405 | 63  |
| A06280 | A09741 | 488 | A06280 | A09775 | 418 |
| A06280 | A09780 | 414 | A06280 | A11224 | 343 |
| A06280 | A11277 | 205 | A06280 | A12669 | 375 |
| A06280 | A12904 | 383 | A06280 | A13466 | 290 |
| A06280 | A14017 | 323 | A06280 | A14018 | 462 |
| A06280 | A14041 | 364 | A06280 | A14049 | 446 |
| A06280 | A14073 | 168 | A06280 | A14570 | 486 |
| A06280 | A14642 | 174 | A06280 | A15445 | 213 |
| A06280 | A16658 | 480 | A06280 | A16687 | 353 |
| A06281 | A06778 | 313 | A06281 | A13212 | 484 |
| A06281 | A14621 | 329 | A06281 | A16636 | 274 |
| A06282 | A06744 | 232 | A06282 | A07238 | 299 |
| A06282 | A07477 | 323 | A06282 | A07590 | 318 |
| A06282 | A07721 | 236 | A06282 | A07736 | 294 |
| A06282 | A07973 | 326 | A06282 | A09059 | 224 |
| A06282 | A15874 | 294 | A06282 | A16741 | 246 |
| A06283 | A15226 | 416 | A06283 | A15233 | 394 |
| A06283 | A15258 | 396 | A06283 | A15272 | 414 |
| A06283 | A15277 | 367 | A06284 | A11606 | 455 |
| A06284 | A15226 | 401 | A06284 | A15233 | 374 |
| A06284 | A15258 | 375 | A06286 | A06479 | 372 |
| A06286 | A06797 | 221 | A06286 | A07025 | 352 |
| A06286 | A07123 | 230 | A06286 | A07130 | 238 |
| A06286 | A07164 | 286 | A06286 | A07166 | 170 |
| A06286 | A07308 | 361 | A06286 | A08883 | 172 |
| A06286 | A10174 | 195 | A06286 | A10418 | 247 |
| A06286 | A10942 | 334 | A06286 | A11309 | 156 |
| A06286 | A11983 | 346 | A06286 | A13063 | 515 |
| A06286 | A13989 | 224 | A06286 | A14193 | 152 |
| A06286 | A14216 | 234 | A06286 | A14650 | 66  |
| A06286 | A14781 | 374 | A06286 | A15497 | 156 |
| A06286 | A15684 | 260 | A06286 | A16636 | 243 |
| A06287 | A06337 | 247 | A06287 | A06543 | 268 |
| A06287 | A07744 | 682 | A06287 | A07881 | 436 |
| A06287 | A08061 | 317 | A06287 | A08098 | 682 |
| A06287 | A08178 | 672 | A06287 | A08228 | 173 |
| A06287 | A08763 | 387 | A06287 | A08947 | 152 |
| A06287 | A09004 | 152 | A06287 | A10842 | 152 |
| A06287 | A14083 | 313 | A06287 | A14525 | 317 |
| A06287 | A14699 | 480 | A06287 | A15375 | 414 |
| A06287 | A15546 | 317 | A06287 | A15684 | 279 |

|        |        |     |        |        |     |
|--------|--------|-----|--------|--------|-----|
| A06287 | A16048 | 466 | A06288 | A08698 | 296 |
| A06288 | A09243 | 296 | A06288 | A14644 | 215 |
| A06289 | A06298 | 157 | A06289 | A06601 | 926 |
| A06289 | A06622 | 154 | A06289 | A06701 | 469 |
| A06289 | A06748 | 384 | A06289 | A06882 | 174 |
| A06289 | A07311 | 63  | A06289 | A07422 | 899 |
| A06289 | A08902 | 358 | A06289 | A09424 | 234 |
| A06289 | A09441 | 909 | A06289 | A09577 | 63  |
| A06289 | A09660 | 159 | A06289 | A09937 | 319 |
| A06289 | A10392 | 118 | A06289 | A10466 | 379 |
| A06289 | A10499 | 269 | A06289 | A10580 | 899 |
| A06289 | A10581 | 386 | A06289 | A10623 | 899 |
| A06289 | A10743 | 380 | A06289 | A10902 | 144 |
| A06289 | A10971 | 269 | A06289 | A10982 | 63  |
| A06289 | A11124 | 372 | A06289 | A11134 | 234 |
| A06289 | A11501 | 151 | A06289 | A12383 | 162 |
| A06289 | A12886 | 469 | A06289 | A12971 | 93  |
| A06289 | A14008 | 130 | A06289 | A14275 | 432 |
| A06289 | A14520 | 193 | A06289 | A14795 | 234 |
| A06289 | A15369 | 199 | A06289 | A15692 | 269 |
| A06289 | A17160 | 899 | A06290 | A11487 | 201 |
| A06290 | A14247 | 152 | A06291 | A14196 | 174 |
| A06291 | A15324 | 290 | A06292 | A14374 | 355 |
| A06293 | A06571 | 406 | A06293 | A06956 | 351 |
| A06293 | A07010 | 449 | A06293 | A07529 | 490 |
| A06293 | A07764 | 480 | A06293 | A07969 | 457 |
| A06293 | A08002 | 469 | A06293 | A08003 | 418 |
| A06293 | A11216 | 433 | A06293 | A11318 | 333 |
| A06293 | A12449 | 393 | A06293 | A12542 | 457 |
| A06293 | A12581 | 399 | A06293 | A12936 | 480 |
| A06293 | A13860 | 193 | A06293 | A14362 | 299 |
| A06293 | A14366 | 191 | A06293 | A14372 | 369 |
| A06293 | A14381 | 249 | A06293 | A14394 | 218 |
| A06293 | A14427 | 399 | A06293 | A14600 | 380 |
| A06293 | A14648 | 162 | A06293 | A14767 | 418 |
| A06293 | A14918 | 409 | A06293 | A15475 | 312 |
| A06293 | A15498 | 369 | A06293 | A15790 | 449 |
| A06293 | A16267 | 480 | A06293 | A16562 | 418 |
| A06293 | A17052 | 418 | A06295 | A06299 | 485 |
| A06295 | A06609 | 899 | A06295 | A06970 | 302 |
| A06295 | A07126 | 163 | A06295 | A07128 | 168 |
| A06295 | A07201 | 899 | A06295 | A07238 | 198 |
| A06295 | A07264 | 154 | A06295 | A07339 | 899 |
| A06295 | A07844 | 219 | A06295 | A07976 | 159 |
| A06295 | A08135 | 188 | A06295 | A08356 | 427 |
| A06295 | A09632 | 324 | A06295 | A10612 | 183 |

|        |        |     |        |        |     |
|--------|--------|-----|--------|--------|-----|
| A06295 | A10658 | 210 | A06295 | A10659 | 251 |
| A06295 | A10686 | 210 | A06295 | A11658 | 491 |
| A06295 | A12606 | 489 | A06295 | A13177 | 313 |
| A06295 | A13734 | 270 | A06295 | A14097 | 269 |
| A06295 | A14198 | 899 | A06295 | A14443 | 899 |
| A06295 | A14803 | 252 | A06295 | A15293 | 903 |
| A06295 | A15294 | 900 | A06295 | A17007 | 308 |
| A06296 | A06607 | 152 | A06296 | A06847 | 364 |
| A06297 | A06775 | 411 | A06297 | A06864 | 467 |
| A06297 | A06982 | 486 | A06297 | A07319 | 450 |
| A06297 | A07346 | 491 | A06297 | A07353 | 208 |
| A06297 | A07480 | 483 | A06297 | A07534 | 439 |
| A06297 | A07647 | 481 | A06297 | A07996 | 472 |
| A06297 | A08141 | 350 | A06297 | A08208 | 343 |
| A06297 | A08630 | 168 | A06297 | A08669 | 440 |
| A06297 | A08820 | 273 | A06297 | A09218 | 191 |
| A06297 | A09427 | 221 | A06297 | A09626 | 173 |
| A06297 | A09882 | 213 | A06297 | A13907 | 302 |
| A06297 | A13949 | 207 | A06297 | A14084 | 501 |
| A06297 | A14093 | 329 | A06297 | A14094 | 307 |
| A06297 | A14223 | 404 | A06297 | A14230 | 249 |
| A06297 | A14273 | 351 | A06297 | A14694 | 489 |
| A06297 | A14706 | 151 | A06297 | A15271 | 252 |
| A06297 | A15369 | 481 | A06297 | A15371 | 226 |
| A06297 | A16127 | 480 | A06297 | A16128 | 473 |
| A06297 | A16226 | 457 | A06297 | A16606 | 251 |
| A06298 | A07083 | 174 | A06298 | A07129 | 358 |
| A06298 | A07482 | 368 | A06298 | A08097 | 152 |
| A06298 | A09826 | 355 | A06298 | A09878 | 255 |
| A06298 | A10590 | 271 | A06298 | A10613 | 474 |
| A06298 | A10752 | 322 | A06298 | A11101 | 252 |
| A06298 | A11983 | 291 | A06298 | A12033 | 347 |
| A06298 | A12429 | 378 | A06298 | A12719 | 341 |
| A06298 | A13361 | 335 | A06298 | A14016 | 357 |
| A06298 | A14377 | 484 | A06298 | A14381 | 180 |
| A06298 | A15605 | 221 | A06298 | A15606 | 267 |
| A06298 | A15608 | 232 | A06299 | A06711 | 333 |
| A06299 | A06744 | 151 | A06299 | A06849 | 386 |
| A06299 | A06970 | 168 | A06299 | A07141 | 199 |
| A06299 | A07341 | 341 | A06300 | A06301 | 469 |
| A06300 | A06386 | 469 | A06301 | A06386 | 480 |
| A06303 | A09085 | 424 | A06306 | A08572 | 257 |
| A06306 | A10319 | 273 | A06306 | A10811 | 305 |
| A06306 | A11064 | 364 | A06306 | A12927 | 201 |
| A06306 | A15913 | 266 | A06306 | A16157 | 198 |
| A06307 | A15226 | 396 | A06307 | A15233 | 439 |

|        |        |     |        |        |     |
|--------|--------|-----|--------|--------|-----|
| A06307 | A15258 | 483 | A06307 | A15272 | 452 |
| A06307 | A15277 | 480 | A06308 | A06388 | 377 |
| A06308 | A07248 | 337 | A06308 | A09293 | 358 |
| A06308 | A14479 | 265 | A06308 | A14568 | 265 |
| A06308 | A15988 | 229 | A06309 | A07442 | 252 |
| A06309 | A09598 | 317 | A06309 | A15190 | 299 |
| A06309 | A16263 | 299 | A06309 | A16531 | 185 |
| A06309 | A16753 | 221 | A06310 | A07190 | 423 |
| A06310 | A10620 | 462 | A06310 | A13009 | 438 |
| A06312 | A06627 | 316 | A06312 | A09742 | 152 |
| A06312 | A10413 | 424 | A06312 | A15292 | 218 |
| A06312 | A15314 | 185 | A06312 | A15334 | 351 |
| A06312 | A15366 | 208 | A06312 | A15376 | 213 |
| A06312 | A15639 | 290 | A06312 | A15960 | 446 |
| A06313 | A06608 | 172 | A06313 | A06720 | 391 |
| A06313 | A07626 | 339 | A06313 | A10731 | 294 |
| A06314 | A06415 | 488 | A06314 | A06495 | 235 |
| A06314 | A06610 | 198 | A06314 | A06650 | 491 |
| A06314 | A06747 | 319 | A06314 | A07183 | 791 |
| A06314 | A07311 | 176 | A06314 | A08342 | 286 |
| A06314 | A10430 | 291 | A06314 | A11977 | 386 |
| A06314 | A14071 | 481 | A06314 | A14139 | 201 |
| A06314 | A14475 | 561 | A06314 | A14496 | 174 |
| A06314 | A14665 | 180 | A06314 | A15425 | 297 |
| A06315 | A10141 | 408 | A06315 | A10187 | 423 |
| A06315 | A10506 | 386 | A06316 | A07054 | 205 |
| A06317 | A06588 | 475 | A06317 | A06653 | 323 |
| A06317 | A08152 | 371 | A06317 | A09078 | 173 |
| A06317 | A09169 | 337 | A06317 | A09493 | 385 |
| A06317 | A14589 | 356 | A06317 | A15239 | 385 |
| A06317 | A15241 | 208 | A06318 | A08352 | 297 |
| A06318 | A08887 | 329 | A06318 | A09342 | 339 |
| A06318 | A10373 | 229 | A06318 | A13969 | 263 |
| A06318 | A14154 | 256 | A06318 | A15935 | 202 |
| A06319 | A06488 | 191 | A06319 | A06502 | 221 |
| A06319 | A06661 | 191 | A06319 | A07213 | 319 |
| A06319 | A07687 | 229 | A06319 | A07742 | 340 |
| A06319 | A10909 | 347 | A06319 | A11162 | 329 |
| A06319 | A11223 | 259 | A06319 | A12895 | 324 |
| A06319 | A13916 | 288 | A06319 | A14266 | 294 |
| A06319 | A15125 | 319 | A06319 | A15499 | 259 |
| A06320 | A06411 | 285 | A06320 | A06589 | 297 |
| A06320 | A06637 | 277 | A06320 | A08684 | 252 |
| A06320 | A10689 | 160 | A06320 | A11296 | 398 |
| A06320 | A14554 | 218 | A06320 | A14778 | 167 |
| A06321 | A07361 | 337 | A06321 | A07978 | 424 |

|        |        |     |        |        |     |
|--------|--------|-----|--------|--------|-----|
| A06321 | A08835 | 440 | A06321 | A09139 | 455 |
| A06321 | A11599 | 414 | A06321 | A12845 | 380 |
| A06321 | A13122 | 424 | A06321 | A16338 | 424 |
| A06322 | A07218 | 236 | A06322 | A08875 | 353 |
| A06322 | A12982 | 420 | A06323 | A09364 | 434 |
| A06324 | A06814 | 485 | A06324 | A07412 | 327 |
| A06324 | A07726 | 163 | A06324 | A08273 | 429 |
| A06324 | A13989 | 258 | A06324 | A14827 | 182 |
| A06325 | A06868 | 468 | A06325 | A11450 | 461 |
| A06325 | A11478 | 369 | A06327 | A11043 | 452 |
| A06327 | A13209 | 452 | A06328 | A06434 | 358 |
| A06328 | A06580 | 457 | A06328 | A07232 | 255 |
| A06328 | A07726 | 191 | A06328 | A08835 | 215 |
| A06328 | A12618 | 355 | A06328 | A13665 | 329 |
| A06328 | A16635 | 263 | A06329 | A06346 | 483 |
| A06329 | A06484 | 274 | A06329 | A06835 | 462 |
| A06329 | A07453 | 455 | A06329 | A07494 | 419 |
| A06329 | A07699 | 404 | A06329 | A07704 | 470 |
| A06329 | A07705 | 452 | A06329 | A08292 | 462 |
| A06329 | A09460 | 404 | A06329 | A10954 | 398 |
| A06329 | A11310 | 363 | A06329 | A12621 | 413 |
| A06329 | A12698 | 419 | A06329 | A16068 | 243 |
| A06329 | A16626 | 176 | A06331 | A07509 | 417 |
| A06332 | A06949 | 360 | A06332 | A09014 | 441 |
| A06332 | A13865 | 447 | A06333 | A07198 | 238 |
| A06333 | A07393 | 424 | A06333 | A14860 | 463 |
| A06334 | A06813 | 385 | A06334 | A15498 | 168 |
| A06336 | A15498 | 205 | A06337 | A06814 | 224 |
| A06337 | A07461 | 246 | A06337 | A08739 | 306 |
| A06337 | A09127 | 185 | A06337 | A10558 | 352 |
| A06337 | A10563 | 227 | A06337 | A10604 | 258 |
| A06337 | A11449 | 335 | A06337 | A13741 | 374 |
| A06337 | A15358 | 255 | A06337 | A15470 | 246 |
| A06337 | A15472 | 294 | A06337 | A17207 | 461 |
| A06338 | A12047 | 188 | A06338 | A13484 | 391 |
| A06339 | A07080 | 260 | A06339 | A07800 | 468 |
| A06339 | A07961 | 234 | A06339 | A08738 | 157 |
| A06339 | A10905 | 422 | A06339 | A14202 | 202 |
| A06339 | A14490 | 218 | A06339 | A14711 | 193 |
| A06339 | A15639 | 252 | A06340 | A08756 | 307 |
| A06340 | A09054 | 249 | A06340 | A09352 | 422 |
| A06340 | A09697 | 252 | A06340 | A13126 | 200 |
| A06340 | A13874 | 382 | A06340 | A13989 | 491 |
| A06340 | A14006 | 257 | A06340 | A14216 | 491 |
| A06340 | A15229 | 307 | A06342 | A07135 | 316 |
| A06342 | A07164 | 373 | A06343 | A07047 | 345 |

|        |        |     |        |        |     |
|--------|--------|-----|--------|--------|-----|
| A06343 | A08359 | 224 | A06343 | A08408 | 344 |
| A06343 | A14790 | 386 | A06343 | A16973 | 401 |
| A06344 | A06415 | 168 | A06344 | A06899 | 346 |
| A06344 | A07126 | 411 | A06344 | A07152 | 234 |
| A06344 | A07161 | 290 | A06344 | A10720 | 174 |
| A06344 | A11542 | 291 | A06344 | A14190 | 167 |
| A06344 | A14371 | 168 | A06344 | A14374 | 208 |
| A06344 | A14377 | 246 | A06344 | A14392 | 232 |
| A06344 | A14439 | 290 | A06344 | A14596 | 262 |
| A06344 | A14599 | 302 | A06344 | A14659 | 195 |
| A06344 | A14799 | 168 | A06344 | A15394 | 388 |
| A06344 | A15395 | 255 | A06344 | A15516 | 286 |
| A06346 | A06396 | 335 | A06346 | A06516 | 299 |
| A06346 | A06574 | 491 | A06346 | A06710 | 391 |
| A06346 | A06711 | 490 | A06346 | A06712 | 408 |
| A06346 | A06953 | 182 | A06346 | A07044 | 480 |
| A06346 | A07056 | 224 | A06346 | A07119 | 386 |
| A06346 | A07218 | 491 | A06346 | A07396 | 469 |
| A06346 | A07428 | 335 | A06346 | A07453 | 445 |
| A06346 | A07471 | 167 | A06346 | A07491 | 272 |
| A06346 | A07676 | 358 | A06346 | A07699 | 299 |
| A06346 | A07704 | 491 | A06346 | A07705 | 491 |
| A06346 | A07828 | 414 | A06346 | A08040 | 491 |
| A06346 | A08044 | 308 | A06346 | A08125 | 335 |
| A06346 | A08171 | 293 | A06346 | A08172 | 467 |
| A06346 | A08202 | 299 | A06346 | A08203 | 455 |
| A06346 | A08291 | 475 | A06346 | A08292 | 491 |
| A06346 | A08309 | 208 | A06346 | A08448 | 423 |
| A06346 | A08496 | 402 | A06346 | A08671 | 488 |
| A06346 | A08681 | 294 | A06346 | A08685 | 322 |
| A06346 | A08686 | 170 | A06346 | A08747 | 446 |
| A06346 | A08753 | 281 | A06346 | A09149 | 440 |
| A06346 | A09205 | 173 | A06346 | A09341 | 346 |
| A06346 | A09421 | 219 | A06346 | A09509 | 177 |
| A06346 | A09518 | 467 | A06346 | A10858 | 308 |
| A06346 | A10900 | 335 | A06346 | A10948 | 358 |
| A06346 | A11031 | 358 | A06346 | A11056 | 335 |
| A06346 | A11070 | 273 | A06346 | A11289 | 491 |
| A06346 | A11310 | 491 | A06346 | A11320 | 491 |
| A06346 | A11321 | 268 | A06346 | A11328 | 491 |
| A06346 | A11375 | 489 | A06346 | A11388 | 335 |
| A06346 | A11396 | 489 | A06346 | A11411 | 213 |
| A06346 | A11446 | 427 | A06346 | A11461 | 462 |
| A06346 | A11466 | 399 | A06346 | A11568 | 479 |
| A06346 | A12128 | 358 | A06346 | A12176 | 423 |
| A06346 | A12182 | 358 | A06346 | A12317 | 358 |

|        |        |     |        |        |     |
|--------|--------|-----|--------|--------|-----|
| A06346 | A12386 | 358 | A06346 | A12432 | 319 |
| A06346 | A12434 | 335 | A06346 | A12435 | 319 |
| A06346 | A12448 | 358 | A06346 | A12470 | 299 |
| A06346 | A12558 | 358 | A06346 | A12559 | 423 |
| A06346 | A12609 | 358 | A06346 | A12610 | 358 |
| A06346 | A12611 | 358 | A06346 | A12621 | 454 |
| A06346 | A12683 | 423 | A06346 | A12780 | 358 |
| A06346 | A12845 | 263 | A06346 | A12917 | 399 |
| A06346 | A12982 | 255 | A06346 | A13334 | 358 |
| A06346 | A13369 | 307 | A06346 | A13760 | 358 |
| A06346 | A13851 | 273 | A06346 | A14443 | 199 |
| A06346 | A14444 | 221 | A06346 | A14689 | 477 |
| A06346 | A14885 | 423 | A06346 | A15258 | 201 |
| A06346 | A15260 | 308 | A06346 | A15277 | 360 |
| A06346 | A15336 | 460 | A06346 | A15498 | 313 |
| A06346 | A15552 | 232 | A06346 | A15638 | 443 |
| A06346 | A16068 | 469 | A06347 | A06436 | 182 |
| A06347 | A06758 | 74  | A06347 | A07180 | 399 |
| A06347 | A07294 | 195 | A06347 | A08183 | 490 |
| A06347 | A08447 | 373 | A06347 | A08770 | 489 |
| A06347 | A09180 | 266 | A06347 | A09625 | 102 |
| A06347 | A09673 | 299 | A06347 | A10317 | 491 |
| A06347 | A10664 | 198 | A06347 | A10710 | 405 |
| A06347 | A12052 | 246 | A06347 | A13231 | 171 |
| A06347 | A13858 | 193 | A06347 | A14056 | 152 |
| A06347 | A14087 | 232 | A06347 | A14088 | 491 |
| A06347 | A14167 | 157 | A06347 | A14179 | 141 |
| A06347 | A14186 | 491 | A06347 | A14255 | 160 |
| A06347 | A14694 | 238 | A06347 | A15370 | 491 |
| A06347 | A15374 | 224 | A06347 | A15724 | 491 |
| A06347 | A16401 | 163 | A06347 | A16664 | 460 |
| A06348 | A06661 | 196 | A06348 | A06715 | 467 |
| A06348 | A06819 | 152 | A06348 | A06919 | 235 |
| A06348 | A07083 | 475 | A06348 | A07425 | 491 |
| A06348 | A07433 | 454 | A06348 | A07593 | 491 |
| A06348 | A07961 | 156 | A06348 | A08184 | 483 |
| A06348 | A08185 | 375 | A06348 | A08196 | 256 |
| A06348 | A08525 | 465 | A06348 | A08549 | 317 |
| A06348 | A08571 | 491 | A06348 | A08853 | 490 |
| A06348 | A08854 | 267 | A06348 | A08885 | 434 |
| A06348 | A09052 | 340 | A06348 | A09146 | 187 |
| A06348 | A09256 | 489 | A06348 | A09443 | 196 |
| A06348 | A09506 | 160 | A06348 | A09767 | 363 |
| A06348 | A09829 | 132 | A06348 | A10623 | 263 |
| A06348 | A11027 | 307 | A06348 | A11258 | 419 |
| A06348 | A11284 | 205 | A06348 | A11534 | 208 |



|        |        |     |        |        |     |
|--------|--------|-----|--------|--------|-----|
| A06348 | A11656 | 470 | A06348 | A11884 | 151 |
| A06348 | A12114 | 268 | A06348 | A12445 | 240 |
| A06348 | A12553 | 268 | A06348 | A12920 | 278 |
| A06348 | A13082 | 281 | A06348 | A13977 | 79  |
| A06348 | A13978 | 88  | A06348 | A14009 | 63  |
| A06348 | A14227 | 491 | A06348 | A14278 | 321 |
| A06348 | A14279 | 490 | A06348 | A14301 | 327 |
| A06348 | A14309 | 319 | A06348 | A14474 | 486 |
| A06348 | A14633 | 296 | A06348 | A15125 | 227 |
| A06348 | A15533 | 480 | A06348 | A15726 | 216 |
| A06348 | A15926 | 156 | A06348 | A16602 | 281 |
| A06351 | A06965 | 266 | A06351 | A07449 | 419 |
| A06351 | A07581 | 156 | A06351 | A08011 | 249 |
| A06351 | A08055 | 185 | A06351 | A08452 | 208 |
| A06351 | A09332 | 466 | A06351 | A09727 | 151 |
| A06351 | A09978 | 227 | A06351 | A11263 | 271 |
| A06351 | A11453 | 232 | A06351 | A11518 | 324 |
| A06351 | A11815 | 343 | A06351 | A13249 | 335 |
| A06351 | A13340 | 185 | A06351 | A13609 | 157 |
| A06351 | A13989 | 491 | A06351 | A14216 | 345 |
| A06351 | A14482 | 638 | A06351 | A15988 | 491 |
| A06352 | A08939 | 401 | A06352 | A09667 | 450 |
| A06352 | A09683 | 385 | A06353 | A06864 | 288 |
| A06353 | A07079 | 249 | A06353 | A07346 | 299 |
| A06353 | A08030 | 380 | A06353 | A08820 | 267 |
| A06353 | A10466 | 391 | A06353 | A10625 | 157 |
| A06353 | A15369 | 230 | A06353 | A16127 | 273 |
| A06353 | A16299 | 323 | A06356 | A06814 | 430 |
| A06356 | A06815 | 472 | A06356 | A06825 | 339 |
| A06356 | A06955 | 411 | A06356 | A07237 | 340 |
| A06356 | A07244 | 170 | A06356 | A07524 | 170 |
| A06356 | A07924 | 170 | A06356 | A08211 | 170 |
| A06356 | A08653 | 485 | A06356 | A08682 | 401 |
| A06356 | A09656 | 468 | A06356 | A09697 | 170 |
| A06356 | A11264 | 373 | A06356 | A11427 | 294 |
| A06356 | A11981 | 326 | A06356 | A13052 | 170 |
| A06356 | A13626 | 262 | A06356 | A13989 | 170 |
| A06357 | A14481 | 196 | A06357 | A15383 | 208 |
| A06358 | A06359 | 303 | A06358 | A06360 | 314 |
| A06358 | A06473 | 490 | A06358 | A06629 | 177 |
| A06358 | A06633 | 247 | A06358 | A06692 | 405 |
| A06358 | A06744 | 193 | A06358 | A06756 | 409 |
| A06358 | A06979 | 243 | A06358 | A07027 | 241 |
| A06358 | A07080 | 191 | A06358 | A07109 | 433 |
| A06358 | A07122 | 491 | A06358 | A07238 | 375 |
| A06358 | A07239 | 202 | A06358 | A07256 | 467 |

|        |        |     |        |        |     |
|--------|--------|-----|--------|--------|-----|
| A06358 | A07267 | 351 | A06358 | A07322 | 274 |
| A06358 | A07413 | 491 | A06358 | A07477 | 488 |
| A06358 | A07530 | 267 | A06358 | A07553 | 424 |
| A06358 | A07558 | 390 | A06358 | A07590 | 457 |
| A06358 | A07627 | 424 | A06358 | A07688 | 335 |
| A06358 | A07718 | 179 | A06358 | A07721 | 200 |
| A06358 | A07736 | 473 | A06358 | A07737 | 380 |
| A06358 | A07746 | 226 | A06358 | A07800 | 423 |
| A06358 | A07847 | 218 | A06358 | A07848 | 168 |
| A06358 | A07933 | 386 | A06358 | A07973 | 191 |
| A06358 | A08108 | 234 | A06358 | A08252 | 351 |
| A06358 | A08751 | 299 | A06358 | A08817 | 317 |
| A06358 | A09612 | 368 | A06358 | A09632 | 379 |
| A06358 | A09749 | 196 | A06358 | A10420 | 236 |
| A06358 | A10443 | 279 | A06358 | A10444 | 361 |
| A06358 | A10456 | 163 | A06358 | A10645 | 236 |
| A06358 | A10656 | 219 | A06358 | A10658 | 278 |
| A06358 | A10677 | 329 | A06358 | A10702 | 384 |
| A06358 | A10703 | 243 | A06358 | A10712 | 188 |
| A06358 | A11325 | 218 | A06358 | A12055 | 323 |
| A06358 | A13330 | 363 | A06358 | A15135 | 296 |
| A06358 | A15497 | 154 | A06358 | A15637 | 221 |
| A06358 | A15840 | 329 | A06358 | A15874 | 369 |
| A06358 | A15905 | 179 | A06358 | A16002 | 338 |
| A06358 | A16026 | 232 | A06358 | A16027 | 288 |
| A06358 | A16286 | 363 | A06358 | A17041 | 251 |
| A06358 | A17078 | 375 | A06359 | A06360 | 405 |
| A06359 | A06473 | 491 | A06359 | A06588 | 196 |
| A06359 | A06607 | 176 | A06359 | A06633 | 232 |
| A06359 | A06773 | 262 | A06359 | A07109 | 157 |
| A06359 | A07135 | 385 | A06359 | A07256 | 286 |
| A06359 | A07385 | 333 | A06359 | A07413 | 378 |
| A06359 | A07558 | 157 | A06359 | A07590 | 162 |
| A06359 | A07688 | 460 | A06359 | A07746 | 204 |
| A06359 | A07973 | 174 | A06359 | A08817 | 385 |
| A06359 | A09564 | 380 | A06359 | A09632 | 369 |
| A06359 | A10009 | 270 | A06359 | A10121 | 314 |
| A06359 | A10229 | 380 | A06359 | A10614 | 258 |
| A06359 | A11304 | 364 | A06359 | A11432 | 321 |
| A06359 | A13330 | 224 | A06359 | A14196 | 263 |
| A06359 | A15507 | 205 | A06359 | A15611 | 156 |
| A06359 | A15874 | 260 | A06359 | A15905 | 162 |
| A06359 | A16026 | 217 | A06359 | A16741 | 294 |
| A06359 | A17194 | 430 | A06360 | A06473 | 322 |
| A06360 | A10009 | 375 | A06360 | A15507 | 179 |
| A06360 | A16741 | 235 | A06361 | A07164 | 156 |

|        |        |     |        |        |     |
|--------|--------|-----|--------|--------|-----|
| A06361 | A07180 | 490 | A06361 | A07729 | 340 |
| A06361 | A08193 | 168 | A06361 | A10165 | 224 |
| A06361 | A12047 | 288 | A06361 | A15757 | 440 |
| A06362 | A12357 | 400 | A06364 | A06895 | 450 |
| A06364 | A07056 | 358 | A06364 | A07337 | 401 |
| A06364 | A07852 | 451 | A06364 | A07859 | 424 |
| A06364 | A07863 | 424 | A06364 | A08361 | 396 |
| A06364 | A12522 | 390 | A06364 | A14876 | 468 |
| A06365 | A11409 | 205 | A06365 | A13609 | 469 |
| A06365 | A14597 | 196 | A06365 | A15932 | 152 |
| A06366 | A07851 | 243 | A06368 | A10732 | 369 |
| A06369 | A06436 | 401 | A06369 | A06602 | 174 |
| A06369 | A06832 | 611 | A06369 | A07312 | 313 |
| A06369 | A08183 | 217 | A06369 | A08806 | 180 |
| A06369 | A09673 | 217 | A06369 | A09713 | 286 |
| A06369 | A09882 | 154 | A06369 | A11277 | 238 |
| A06369 | A14088 | 217 | A06369 | A14594 | 236 |
| A06369 | A14596 | 425 | A06369 | A14701 | 489 |
| A06369 | A15375 | 235 | A06369 | A15377 | 217 |
| A06369 | A15543 | 217 | A06369 | A15724 | 217 |
| A06369 | A16664 | 217 | A06370 | A06510 | 393 |
| A06370 | A08463 | 204 | A06370 | A14208 | 201 |
| A06371 | A06534 | 307 | A06371 | A09809 | 329 |
| A06371 | A11190 | 299 | A06371 | A11522 | 490 |
| A06371 | A13994 | 465 | A06371 | A14060 | 330 |
| A06371 | A14496 | 210 | A06371 | A16257 | 302 |
| A06372 | A10086 | 427 | A06372 | A14429 | 424 |
| A06373 | A08821 | 263 | A06373 | A09418 | 401 |
| A06373 | A12122 | 417 | A06373 | A13983 | 302 |
| A06373 | A14312 | 432 | A06376 | A08576 | 409 |
| A06379 | A06603 | 357 | A06379 | A07339 | 420 |
| A06379 | A07375 | 219 | A06379 | A07408 | 210 |
| A06379 | A07433 | 157 | A06379 | A07811 | 353 |
| A06379 | A08004 | 335 | A06379 | A08157 | 373 |
| A06379 | A08390 | 172 | A06379 | A08416 | 230 |
| A06379 | A08571 | 229 | A06379 | A08662 | 185 |
| A06379 | A08868 | 157 | A06379 | A09018 | 151 |
| A06379 | A09146 | 201 | A06379 | A09182 | 355 |
| A06379 | A09220 | 165 | A06379 | A09311 | 154 |
| A06379 | A09449 | 369 | A06379 | A09646 | 399 |
| A06379 | A09840 | 490 | A06379 | A09904 | 269 |
| A06379 | A10051 | 299 | A06379 | A10065 | 195 |
| A06379 | A10154 | 229 | A06379 | A10205 | 174 |
| A06379 | A10228 | 174 | A06379 | A10598 | 356 |
| A06379 | A11021 | 240 | A06379 | A11023 | 167 |
| A06379 | A11104 | 154 | A06379 | A11547 | 167 |

|        |        |     |        |        |     |
|--------|--------|-----|--------|--------|-----|
| A06379 | A13063 | 154 | A06379 | A13348 | 152 |
| A06379 | A13848 | 279 | A06379 | A13873 | 163 |
| A06379 | A14196 | 486 | A06379 | A14208 | 255 |
| A06379 | A14218 | 491 | A06379 | A14444 | 463 |
| A06379 | A14445 | 151 | A06379 | A14531 | 198 |
| A06379 | A14579 | 201 | A06379 | A15097 | 162 |
| A06379 | A15314 | 481 | A06379 | A15330 | 345 |
| A06379 | A15360 | 229 | A06379 | A15361 | 475 |
| A06379 | A15506 | 358 | A06379 | A15726 | 425 |
| A06379 | A16217 | 468 | A06379 | A17064 | 279 |
| A06381 | A06750 | 229 | A06381 | A06864 | 208 |
| A06381 | A07198 | 168 | A06381 | A07353 | 317 |
| A06381 | A07670 | 229 | A06381 | A13949 | 241 |
| A06381 | A15837 | 317 | A06381 | A16626 | 618 |
| A06381 | A16643 | 317 | A06382 | A13630 | 419 |
| A06382 | A15624 | 288 | A06382 | A15659 | 235 |
| A06382 | A15660 | 168 | A06382 | A15684 | 401 |
| A06382 | A15843 | 391 | A06382 | A15920 | 279 |
| A06382 | A15932 | 187 | A06384 | A06385 | 276 |
| A06385 | A06598 | 334 | A06385 | A06629 | 213 |
| A06385 | A06914 | 341 | A06385 | A06934 | 339 |
| A06385 | A07322 | 196 | A06385 | A07335 | 196 |
| A06385 | A08707 | 334 | A06385 | A09122 | 294 |
| A06385 | A09182 | 334 | A06385 | A09428 | 191 |
| A06385 | A09556 | 255 | A06385 | A09803 | 190 |
| A06385 | A10172 | 294 | A06385 | A10191 | 294 |
| A06385 | A11484 | 481 | A06385 | A14252 | 334 |
| A06385 | A15356 | 334 | A06385 | A15674 | 312 |
| A06385 | A15702 | 246 | A06387 | A09131 | 299 |
| A06387 | A15630 | 254 | A06388 | A07248 | 350 |
| A06388 | A08154 | 340 | A06388 | A09293 | 369 |
| A06388 | A14479 | 283 | A06388 | A14568 | 281 |
| A06388 | A15988 | 247 | A06389 | A06665 | 489 |
| A06389 | A11402 | 462 | A06389 | A13369 | 439 |
| A06389 | A14654 | 313 | A06390 | A07242 | 174 |
| A06390 | A14272 | 265 | A06390 | A15292 | 255 |
| A06393 | A14196 | 273 | A06393 | A15323 | 156 |
| A06393 | A16862 | 411 | A06396 | A07218 | 236 |
| A06396 | A07704 | 383 | A06397 | A06979 | 463 |
| A06397 | A14862 | 390 | A06398 | A06654 | 319 |
| A06398 | A13864 | 361 | A06398 | A14496 | 204 |
| A06399 | A07135 | 269 | A06399 | A07158 | 322 |
| A06399 | A07201 | 291 | A06399 | A15241 | 313 |
| A06400 | A07197 | 270 | A06400 | A08897 | 401 |
| A06400 | A11485 | 157 | A06400 | A11983 | 249 |
| A06400 | A12654 | 314 | A06400 | A15498 | 301 |

|        |        |     |        |        |     |
|--------|--------|-----|--------|--------|-----|
| A06400 | A16764 | 210 | A06401 | A06488 | 322 |
| A06401 | A07213 | 452 | A06401 | A08295 | 412 |
| A06402 | A06405 | 279 | A06402 | A06689 | 159 |
| A06402 | A06700 | 281 | A06402 | A07059 | 441 |
| A06402 | A07108 | 256 | A06402 | A07366 | 281 |
| A06402 | A07503 | 364 | A06402 | A07674 | 246 |
| A06402 | A07721 | 195 | A06402 | A07757 | 414 |
| A06402 | A09917 | 385 | A06402 | A12927 | 208 |
| A06403 | A06565 | 417 | A06403 | A06606 | 260 |
| A06403 | A06686 | 355 | A06403 | A08365 | 202 |
| A06403 | A11012 | 435 | A06403 | A12761 | 435 |
| A06404 | A06737 | 413 | A06404 | A06779 | 441 |
| A06404 | A06780 | 374 | A06404 | A06818 | 486 |
| A06404 | A06865 | 406 | A06404 | A07143 | 296 |
| A06404 | A07148 | 347 | A06404 | A07151 | 485 |
| A06404 | A07161 | 303 | A06404 | A07173 | 268 |
| A06404 | A08309 | 193 | A06404 | A08417 | 296 |
| A06404 | A08685 | 267 | A06404 | A08686 | 232 |
| A06404 | A08714 | 308 | A06404 | A11543 | 279 |
| A06404 | A13860 | 213 | A06404 | A14236 | 259 |
| A06404 | A14373 | 363 | A06405 | A06439 | 491 |
| A06405 | A06527 | 190 | A06405 | A06553 | 353 |
| A06405 | A06638 | 335 | A06405 | A06641 | 232 |
| A06405 | A06733 | 390 | A06405 | A06860 | 469 |
| A06405 | A06994 | 279 | A06405 | A07059 | 454 |
| A06405 | A07088 | 490 | A06405 | A07122 | 302 |
| A06405 | A07239 | 323 | A06405 | A07264 | 213 |
| A06405 | A07477 | 307 | A06405 | A07503 | 490 |
| A06405 | A07520 | 491 | A06405 | A07558 | 294 |
| A06405 | A07590 | 167 | A06405 | A07610 | 208 |
| A06405 | A07674 | 483 | A06405 | A07690 | 423 |
| A06405 | A07757 | 465 | A06405 | A07933 | 419 |
| A06405 | A08133 | 63  | A06405 | A08155 | 279 |
| A06405 | A08280 | 364 | A06405 | A08663 | 254 |
| A06405 | A08690 | 447 | A06405 | A09837 | 294 |
| A06405 | A09876 | 193 | A06405 | A09879 | 277 |
| A06405 | A09917 | 313 | A06405 | A10126 | 414 |
| A06405 | A10422 | 277 | A06405 | A10537 | 383 |
| A06405 | A10635 | 391 | A06405 | A10658 | 383 |
| A06405 | A10677 | 184 | A06405 | A10690 | 279 |
| A06405 | A10693 | 221 | A06405 | A10882 | 411 |
| A06405 | A12055 | 411 | A06405 | A13155 | 335 |
| A06405 | A13871 | 191 | A06405 | A14665 | 165 |
| A06405 | A14828 | 417 | A06405 | A14856 | 385 |
| A06405 | A14857 | 238 | A06405 | A15970 | 372 |
| A06405 | A16103 | 256 | A06405 | A16286 | 227 |

|        |        |     |        |        |     |
|--------|--------|-----|--------|--------|-----|
| A06405 | A16344 | 182 | A06405 | A16959 | 187 |
| A06405 | A17006 | 262 | A06407 | A13477 | 447 |
| A06408 | A06599 | 229 | A06408 | A09340 | 223 |
| A06408 | A11729 | 443 | A06409 | A07165 | 252 |
| A06409 | A08910 | 271 | A06409 | A13942 | 364 |
| A06409 | A15498 | 190 | A06411 | A06589 | 307 |
| A06411 | A08011 | 373 | A06411 | A08812 | 246 |
| A06411 | A11290 | 200 | A06411 | A14445 | 485 |
| A06411 | A14449 | 167 | A06411 | A14778 | 180 |
| A06411 | A15624 | 199 | A06411 | A15652 | 163 |
| A06411 | A15684 | 388 | A06411 | A15923 | 229 |
| A06411 | A15931 | 174 | A06411 | A16088 | 452 |
| A06413 | A06940 | 447 | A06413 | A08743 | 440 |
| A06414 | A06415 | 379 | A06414 | A06604 | 352 |
| A06414 | A06747 | 279 | A06414 | A07145 | 254 |
| A06414 | A07152 | 224 | A06414 | A07161 | 281 |
| A06414 | A07173 | 241 | A06414 | A07174 | 329 |
| A06414 | A08596 | 307 | A06414 | A08601 | 404 |
| A06414 | A08612 | 377 | A06414 | A10319 | 252 |
| A06414 | A10720 | 165 | A06414 | A12809 | 385 |
| A06414 | A13988 | 310 | A06414 | A14146 | 411 |
| A06414 | A14199 | 174 | A06414 | A14372 | 364 |
| A06414 | A14374 | 479 | A06414 | A14391 | 443 |
| A06414 | A14439 | 281 | A06414 | A14598 | 324 |
| A06414 | A14599 | 294 | A06414 | A15394 | 435 |
| A06414 | A15395 | 245 | A06414 | A15425 | 210 |
| A06414 | A15427 | 296 | A06414 | A15516 | 278 |
| A06414 | A15607 | 330 | A06414 | A15642 | 272 |
| A06414 | A15964 | 308 | A06415 | A06535 | 216 |
| A06415 | A06604 | 462 | A06415 | A06650 | 490 |
| A06415 | A06747 | 491 | A06415 | A06780 | 212 |
| A06415 | A06899 | 469 | A06415 | A06988 | 245 |
| A06415 | A07053 | 438 | A06415 | A07131 | 302 |
| A06415 | A07138 | 165 | A06415 | A07145 | 177 |
| A06415 | A07146 | 159 | A06415 | A07152 | 491 |
| A06415 | A07157 | 283 | A06415 | A07161 | 321 |
| A06415 | A07166 | 472 | A06415 | A07173 | 475 |
| A06415 | A07174 | 294 | A06415 | A07200 | 240 |
| A06415 | A07372 | 208 | A06415 | A07390 | 156 |
| A06415 | A07462 | 302 | A06415 | A07634 | 179 |
| A06415 | A07960 | 285 | A06415 | A07961 | 345 |
| A06415 | A08293 | 382 | A06415 | A08366 | 260 |
| A06415 | A08589 | 329 | A06415 | A08632 | 232 |
| A06415 | A08634 | 272 | A06415 | A08651 | 245 |
| A06415 | A08658 | 216 | A06415 | A08827 | 152 |
| A06415 | A08850 | 238 | A06415 | A08908 | 462 |

|        |        |     |        |        |     |
|--------|--------|-----|--------|--------|-----|
| A06415 | A09259 | 306 | A06415 | A09400 | 329 |
| A06415 | A09745 | 183 | A06415 | A10319 | 435 |
| A06415 | A10549 | 162 | A06415 | A10585 | 364 |
| A06415 | A10586 | 398 | A06415 | A10590 | 450 |
| A06415 | A10605 | 491 | A06415 | A10640 | 374 |
| A06415 | A10750 | 427 | A06415 | A10796 | 185 |
| A06415 | A10993 | 191 | A06415 | A11502 | 302 |
| A06415 | A11583 | 168 | A06415 | A11994 | 274 |
| A06415 | A12371 | 160 | A06415 | A12644 | 185 |
| A06415 | A12809 | 379 | A06415 | A12914 | 195 |
| A06415 | A12927 | 241 | A06415 | A13084 | 152 |
| A06415 | A13821 | 402 | A06415 | A13872 | 235 |
| A06415 | A13903 | 324 | A06415 | A13983 | 288 |
| A06415 | A13988 | 491 | A06415 | A14012 | 480 |
| A06415 | A14071 | 491 | A06415 | A14125 | 479 |
| A06415 | A14146 | 267 | A06415 | A14199 | 481 |
| A06415 | A14206 | 159 | A06415 | A14208 | 345 |
| A06415 | A14210 | 232 | A06415 | A14229 | 207 |
| A06415 | A14366 | 480 | A06415 | A14372 | 486 |
| A06415 | A14374 | 491 | A06415 | A14381 | 265 |
| A06415 | A14391 | 491 | A06415 | A14392 | 317 |
| A06415 | A14424 | 272 | A06415 | A14439 | 484 |
| A06415 | A14554 | 404 | A06415 | A14598 | 375 |
| A06415 | A14599 | 485 | A06415 | A14603 | 232 |
| A06415 | A14611 | 246 | A06415 | A14651 | 329 |
| A06415 | A15285 | 393 | A06415 | A15290 | 177 |
| A06415 | A15294 | 195 | A06415 | A15308 | 305 |
| A06415 | A15314 | 288 | A06415 | A15322 | 303 |
| A06415 | A15394 | 469 | A06415 | A15395 | 399 |
| A06415 | A15402 | 204 | A06415 | A15425 | 491 |
| A06415 | A15426 | 395 | A06415 | A15427 | 486 |
| A06415 | A15516 | 314 | A06415 | A15517 | 252 |
| A06415 | A15603 | 132 | A06415 | A15607 | 382 |
| A06415 | A15609 | 245 | A06415 | A15642 | 489 |
| A06415 | A15795 | 457 | A06415 | A15964 | 262 |
| A06415 | A15996 | 232 | A06415 | A16014 | 272 |
| A06415 | A16015 | 465 | A06415 | A16031 | 252 |
| A06415 | A16349 | 216 | A06415 | A16541 | 272 |
| A06415 | A16636 | 484 | A06415 | A16719 | 226 |
| A06416 | A12383 | 187 | A06416 | A13346 | 172 |
| A06416 | A15064 | 221 | A06416 | A15943 | 204 |
| A06416 | A17037 | 297 | A06417 | A06877 | 418 |
| A06419 | A13976 | 367 | A06420 | A07109 | 343 |
| A06420 | A10798 | 288 | A06420 | A16741 | 286 |
| A06421 | A08658 | 452 | A06421 | A09354 | 427 |
| A06421 | A10001 | 450 | A06421 | A10743 | 360 |

|        |        |     |        |        |     |
|--------|--------|-----|--------|--------|-----|
| A06421 | A11252 | 417 | A06422 | A07135 | 334 |
| A06422 | A07157 | 486 | A06422 | A07161 | 256 |
| A06422 | A07164 | 335 | A06422 | A07166 | 218 |
| A06422 | A10568 | 394 | A06422 | A10901 | 352 |
| A06422 | A12824 | 172 | A06422 | A13872 | 268 |
| A06422 | A14381 | 216 | A06422 | A14387 | 323 |
| A06422 | A15394 | 238 | A06422 | A15395 | 217 |
| A06423 | A06671 | 369 | A06423 | A06982 | 257 |
| A06424 | A07196 | 424 | A06424 | A07605 | 373 |
| A06424 | A08938 | 429 | A06424 | A09764 | 286 |
| A06424 | A11712 | 438 | A06424 | A12454 | 447 |
| A06424 | A13832 | 369 | A06424 | A14399 | 281 |
| A06424 | A14481 | 283 | A06424 | A15321 | 227 |
| A06425 | A06698 | 326 | A06425 | A06827 | 334 |
| A06425 | A07531 | 334 | A06425 | A08201 | 334 |
| A06425 | A14622 | 402 | A06425 | A15624 | 334 |
| A06425 | A15651 | 334 | A06425 | A15750 | 334 |
| A06425 | A15917 | 334 | A06425 | A15932 | 567 |
| A06425 | A15937 | 334 | A06425 | A15951 | 364 |
| A06427 | A07339 | 383 | A06428 | A06448 | 321 |
| A06428 | A06703 | 285 | A06428 | A06919 | 190 |
| A06428 | A07014 | 238 | A06428 | A07110 | 425 |
| A06428 | A07135 | 302 | A06428 | A07338 | 329 |
| A06428 | A07423 | 373 | A06428 | A07605 | 157 |
| A06428 | A07622 | 456 | A06428 | A07705 | 168 |
| A06428 | A07810 | 353 | A06428 | A07841 | 432 |
| A06428 | A07848 | 274 | A06428 | A08043 | 425 |
| A06428 | A08770 | 385 | A06428 | A09380 | 364 |
| A06428 | A09736 | 191 | A06428 | A10278 | 338 |
| A06428 | A10354 | 263 | A06428 | A10531 | 321 |
| A06428 | A10561 | 260 | A06428 | A10629 | 302 |
| A06428 | A11289 | 449 | A06428 | A11378 | 288 |
| A06428 | A11431 | 246 | A06428 | A11441 | 405 |
| A06428 | A11461 | 297 | A06428 | A11467 | 302 |
| A06428 | A12339 | 373 | A06428 | A12551 | 432 |
| A06428 | A12941 | 373 | A06428 | A13369 | 466 |
| A06428 | A14633 | 417 | A06428 | A15064 | 180 |
| A06428 | A15413 | 241 | A06428 | A17061 | 184 |
| A06429 | A08137 | 391 | A06429 | A08457 | 271 |
| A06429 | A14026 | 252 | A06429 | A14665 | 249 |
| A06429 | A15492 | 317 | A06431 | A07319 | 167 |
| A06431 | A07346 | 99  | A06431 | A16128 | 219 |
| A06431 | A16225 | 199 | A06434 | A06481 | 326 |
| A06434 | A06518 | 395 | A06434 | A07232 | 330 |
| A06434 | A15269 | 383 | A06434 | A16068 | 324 |
| A06434 | A16626 | 249 | A06434 | A16635 | 340 |



|        |        |     |        |        |     |
|--------|--------|-----|--------|--------|-----|
| A06435 | A06436 | 439 | A06435 | A09232 | 379 |
| A06435 | A10109 | 369 | A06435 | A13424 | 329 |
| A06435 | A15837 | 188 | A06435 | A16626 | 154 |
| A06436 | A06832 | 262 | A06436 | A11284 | 249 |
| A06437 | A07848 | 228 | A06437 | A14153 | 363 |
| A06437 | A14887 | 480 | A06438 | A13219 | 416 |
| A06439 | A06641 | 223 | A06439 | A06733 | 384 |
| A06439 | A06860 | 433 | A06439 | A06912 | 234 |
| A06439 | A06916 | 266 | A06439 | A07019 | 205 |
| A06439 | A07037 | 266 | A06439 | A07059 | 465 |
| A06439 | A07080 | 170 | A06439 | A07088 | 491 |
| A06439 | A07109 | 283 | A06439 | A07122 | 185 |
| A06439 | A07477 | 296 | A06439 | A07503 | 386 |
| A06439 | A07520 | 486 | A06439 | A07559 | 188 |
| A06439 | A07590 | 378 | A06439 | A07674 | 339 |
| A06439 | A07757 | 335 | A06439 | A07933 | 187 |
| A06439 | A08133 | 63  | A06439 | A08155 | 271 |
| A06439 | A10444 | 213 | A06439 | A10537 | 378 |
| A06439 | A10635 | 454 | A06439 | A10677 | 174 |
| A06439 | A10690 | 271 | A06439 | A11425 | 218 |
| A06439 | A12507 | 457 | A06439 | A13871 | 180 |
| A06439 | A14794 | 347 | A06439 | A15970 | 241 |
| A06439 | A17006 | 252 | A06439 | A17078 | 170 |
| A06441 | A07138 | 393 | A06441 | A14374 | 305 |
| A06441 | A14439 | 362 | A06441 | A14603 | 416 |
| A06443 | A06528 | 435 | A06444 | A08193 | 210 |
| A06444 | A12235 | 416 | A06445 | A06533 | 419 |
| A06445 | A10335 | 447 | A06445 | A11005 | 447 |
| A06445 | A11020 | 440 | A06445 | A12428 | 452 |
| A06445 | A12967 | 452 | A06448 | A07110 | 428 |
| A06448 | A07135 | 243 | A06448 | A07622 | 424 |
| A06450 | A08473 | 430 | A06450 | A10288 | 428 |
| A06451 | A06597 | 238 | A06451 | A07158 | 266 |
| A06451 | A09509 | 438 | A06452 | A09245 | 377 |
| A06452 | A14210 | 286 | A06452 | A14381 | 360 |
| A06452 | A14511 | 279 | A06452 | A14554 | 363 |
| A06453 | A06663 | 414 | A06454 | A07545 | 157 |
| A06454 | A09083 | 232 | A06454 | A09242 | 204 |
| A06454 | A13614 | 477 | A06454 | A13617 | 286 |
| A06454 | A14195 | 307 | A06454 | A14986 | 488 |
| A06457 | A07678 | 441 | A06459 | A10742 | 458 |
| A06459 | A12789 | 465 | A06461 | A06462 | 452 |
| A06461 | A06532 | 447 | A06461 | A07384 | 408 |
| A06462 | A06532 | 447 | A06462 | A07384 | 408 |
| A06463 | A09147 | 363 | A06463 | A10846 | 317 |
| A06463 | A14449 | 185 | A06463 | A15917 | 193 |

|        |        |     |        |        |     |
|--------|--------|-----|--------|--------|-----|
| A06463 | A16072 | 321 | A06463 | A16096 | 236 |
| A06465 | A07135 | 269 | A06465 | A07148 | 398 |
| A06465 | A07157 | 319 | A06465 | A07173 | 346 |
| A06466 | A06606 | 207 | A06466 | A06814 | 255 |
| A06466 | A06826 | 268 | A06466 | A06950 | 688 |
| A06466 | A07102 | 174 | A06466 | A07208 | 475 |
| A06466 | A07247 | 414 | A06466 | A07251 | 283 |
| A06466 | A07311 | 914 | A06466 | A07359 | 212 |
| A06466 | A07604 | 267 | A06466 | A07726 | 483 |
| A06466 | A07798 | 787 | A06466 | A07811 | 322 |
| A06466 | A08137 | 274 | A06466 | A08228 | 193 |
| A06466 | A08301 | 419 | A06466 | A08315 | 441 |
| A06466 | A08357 | 374 | A06466 | A08359 | 490 |
| A06466 | A08476 | 218 | A06466 | A08519 | 489 |
| A06466 | A08533 | 491 | A06466 | A08539 | 171 |
| A06466 | A08559 | 468 | A06466 | A08571 | 526 |
| A06466 | A08748 | 483 | A06466 | A08835 | 216 |
| A06466 | A08860 | 279 | A06466 | A08970 | 174 |
| A06466 | A09009 | 229 | A06466 | A09045 | 185 |
| A06466 | A09263 | 479 | A06466 | A09297 | 491 |
| A06466 | A09308 | 363 | A06466 | A09319 | 405 |
| A06466 | A09332 | 228 | A06466 | A09577 | 848 |
| A06466 | A09591 | 301 | A06466 | A09592 | 475 |
| A06466 | A09622 | 152 | A06466 | A09643 | 63  |
| A06466 | A09655 | 486 | A06466 | A09737 | 332 |
| A06466 | A09804 | 486 | A06466 | A09809 | 260 |
| A06466 | A09876 | 227 | A06466 | A09902 | 490 |
| A06466 | A10014 | 63  | A06466 | A10365 | 645 |
| A06466 | A10430 | 322 | A06466 | A10532 | 488 |
| A06466 | A10534 | 450 | A06466 | A10623 | 168 |
| A06466 | A10624 | 163 | A06466 | A10728 | 491 |
| A06466 | A10797 | 229 | A06466 | A10798 | 480 |
| A06466 | A11286 | 491 | A06466 | A11302 | 491 |
| A06466 | A11312 | 389 | A06466 | A11322 | 368 |
| A06466 | A11337 | 491 | A06466 | A11368 | 296 |
| A06466 | A11372 | 465 | A06466 | A11420 | 154 |
| A06466 | A11487 | 239 | A06466 | A11670 | 224 |
| A06466 | A11688 | 185 | A06466 | A12042 | 229 |
| A06466 | A12084 | 229 | A06466 | A12170 | 296 |
| A06466 | A12196 | 462 | A06466 | A12221 | 174 |
| A06466 | A12227 | 491 | A06466 | A12328 | 491 |
| A06466 | A12329 | 466 | A06466 | A12503 | 369 |
| A06466 | A12824 | 190 | A06466 | A12990 | 491 |
| A06466 | A13146 | 199 | A06466 | A13149 | 491 |
| A06466 | A13310 | 177 | A06466 | A13320 | 490 |
| A06466 | A13335 | 491 | A06466 | A13340 | 878 |

|        |        |     |        |        |     |
|--------|--------|-----|--------|--------|-----|
| A06466 | A13527 | 346 | A06466 | A13672 | 322 |
| A06466 | A13812 | 491 | A06466 | A13989 | 486 |
| A06466 | A14073 | 566 | A06466 | A14159 | 332 |
| A06466 | A14188 | 491 | A06466 | A14196 | 287 |
| A06466 | A14216 | 527 | A06466 | A14220 | 582 |
| A06466 | A14221 | 271 | A06466 | A14410 | 340 |
| A06466 | A14466 | 321 | A06466 | A14471 | 154 |
| A06466 | A14476 | 258 | A06466 | A14566 | 418 |
| A06466 | A14571 | 427 | A06466 | A14596 | 490 |
| A06466 | A14705 | 157 | A06466 | A14738 | 491 |
| A06466 | A15133 | 488 | A06466 | A15146 | 285 |
| A06466 | A15244 | 491 | A06466 | A15418 | 279 |
| A06466 | A15546 | 491 | A06466 | A15547 | 198 |
| A06466 | A15551 | 356 | A06466 | A15660 | 491 |
| A06466 | A15665 | 226 | A06466 | A15684 | 491 |
| A06466 | A15720 | 165 | A06466 | A15734 | 362 |
| A06466 | A15741 | 466 | A06466 | A15760 | 255 |
| A06466 | A15773 | 457 | A06466 | A15918 | 281 |
| A06466 | A15932 | 491 | A06466 | A15933 | 491 |
| A06466 | A16060 | 408 | A06466 | A16266 | 314 |
| A06466 | A16272 | 491 | A06466 | A16291 | 450 |
| A06466 | A16318 | 491 | A06466 | A16437 | 491 |
| A06466 | A16446 | 477 | A06466 | A16462 | 480 |
| A06466 | A16552 | 260 | A06466 | A16585 | 432 |
| A06466 | A16618 | 401 | A06466 | A16671 | 307 |
| A06466 | A16698 | 267 | A06466 | A16793 | 414 |
| A06466 | A16847 | 322 | A06466 | A16939 | 271 |
| A06466 | A17017 | 322 | A06466 | A17132 | 468 |
| A06466 | A17134 | 441 | A06466 | A17140 | 480 |
| A06466 | A17142 | 212 | A06466 | A17146 | 481 |
| A06467 | A07200 | 152 | A06467 | A07848 | 152 |
| A06467 | A17051 | 218 | A06468 | A07559 | 398 |
| A06468 | A09074 | 430 | A06469 | A07721 | 267 |
| A06470 | A07812 | 318 | A06470 | A15361 | 151 |
| A06471 | A07140 | 408 | A06471 | A07655 | 481 |
| A06471 | A07878 | 454 | A06471 | A08660 | 338 |
| A06471 | A08667 | 438 | A06471 | A08688 | 481 |
| A06471 | A14430 | 234 | A06472 | A06752 | 486 |
| A06472 | A06753 | 263 | A06472 | A06924 | 734 |
| A06472 | A07111 | 265 | A06472 | A07232 | 447 |
| A06472 | A07880 | 183 | A06472 | A07889 | 406 |
| A06472 | A08939 | 347 | A06472 | A09257 | 341 |
| A06472 | A09714 | 427 | A06472 | A11160 | 235 |
| A06472 | A12337 | 389 | A06472 | A13954 | 306 |
| A06472 | A14810 | 324 | A06472 | A15189 | 185 |
| A06472 | A15837 | 651 | A06472 | A16353 | 515 |

|        |        |     |        |        |     |
|--------|--------|-----|--------|--------|-----|
| A06472 | A16408 | 347 | A06472 | A16423 | 351 |
| A06472 | A16626 | 179 | A06472 | A16635 | 288 |
| A06473 | A06756 | 217 | A06473 | A06773 | 283 |
| A06473 | A07122 | 329 | A06473 | A07238 | 165 |
| A06473 | A07256 | 307 | A06473 | A07267 | 358 |
| A06473 | A07385 | 348 | A06473 | A07413 | 183 |
| A06473 | A07558 | 183 | A06473 | A07688 | 213 |
| A06473 | A07851 | 414 | A06473 | A08109 | 322 |
| A06473 | A09985 | 303 | A06473 | A10121 | 333 |
| A06473 | A10229 | 391 | A06473 | A11431 | 429 |
| A06473 | A14637 | 268 | A06473 | A16026 | 241 |
| A06473 | A16027 | 165 | A06473 | A16286 | 247 |
| A06473 | A16739 | 247 | A06474 | A06475 | 483 |
| A06474 | A06791 | 477 | A06474 | A07135 | 201 |
| A06474 | A13175 | 417 | A06474 | A13176 | 432 |
| A06475 | A06791 | 467 | A06475 | A14272 | 193 |
| A06480 | A06655 | 398 | A06480 | A07085 | 427 |
| A06480 | A09380 | 484 | A06480 | A12512 | 435 |
| A06480 | A14540 | 232 | A06480 | A16514 | 435 |
| A06481 | A10083 | 188 | A06481 | A14378 | 173 |
| A06482 | A09789 | 417 | A06483 | A07218 | 272 |
| A06484 | A06516 | 318 | A06484 | A06835 | 351 |
| A06484 | A07494 | 351 | A06484 | A10954 | 449 |
| A06484 | A12698 | 430 | A06484 | A14864 | 180 |
| A06484 | A14936 | 187 | A06484 | A15336 | 286 |
| A06484 | A15396 | 176 | A06486 | A06488 | 329 |
| A06486 | A09248 | 436 | A06486 | A10549 | 373 |
| A06486 | A11263 | 386 | A06486 | A11952 | 369 |
| A06486 | A13126 | 316 | A06486 | A15331 | 319 |
| A06487 | A06584 | 384 | A06487 | A06606 | 243 |
| A06487 | A07671 | 452 | A06487 | A08019 | 452 |
| A06487 | A08020 | 452 | A06487 | A08021 | 452 |
| A06487 | A12626 | 452 | A06487 | A14984 | 452 |
| A06488 | A07092 | 391 | A06488 | A09206 | 267 |
| A06488 | A09741 | 340 | A06488 | A09743 | 183 |
| A06488 | A09780 | 290 | A06488 | A10563 | 180 |
| A06488 | A10595 | 240 | A06488 | A11073 | 422 |
| A06488 | A11162 | 458 | A06488 | A11223 | 438 |
| A06488 | A11422 | 279 | A06488 | A11653 | 277 |
| A06488 | A11680 | 310 | A06488 | A11681 | 202 |
| A06488 | A11713 | 313 | A06488 | A11817 | 288 |
| A06488 | A11872 | 411 | A06488 | A11952 | 270 |
| A06488 | A12597 | 375 | A06488 | A12851 | 364 |
| A06488 | A12895 | 422 | A06488 | A12944 | 391 |
| A06488 | A13338 | 221 | A06488 | A13417 | 468 |
| A06488 | A13575 | 326 | A06488 | A13768 | 441 |

|        |        |     |        |        |     |
|--------|--------|-----|--------|--------|-----|
| A06488 | A13899 | 151 | A06488 | A14017 | 446 |
| A06488 | A14102 | 344 | A06488 | A14118 | 413 |
| A06488 | A14267 | 283 | A06488 | A14536 | 307 |
| A06488 | A14635 | 267 | A06488 | A15843 | 167 |
| A06488 | A16300 | 272 | A06489 | A06892 | 480 |
| A06489 | A10238 | 338 | A06490 | A09509 | 362 |
| A06491 | A06591 | 179 | A06491 | A07329 | 441 |
| A06491 | A07421 | 179 | A06491 | A07495 | 179 |
| A06491 | A07555 | 372 | A06491 | A07785 | 179 |
| A06491 | A07816 | 179 | A06491 | A07922 | 465 |
| A06491 | A08259 | 179 | A06491 | A08551 | 179 |
| A06491 | A08834 | 179 | A06491 | A08840 | 179 |
| A06491 | A08841 | 235 | A06491 | A08873 | 313 |
| A06491 | A08990 | 170 | A06491 | A09825 | 179 |
| A06491 | A09847 | 279 | A06491 | A09859 | 345 |
| A06491 | A09860 | 435 | A06491 | A10504 | 187 |
| A06491 | A11191 | 249 | A06491 | A11293 | 162 |
| A06491 | A11513 | 184 | A06491 | A11558 | 270 |
| A06491 | A11681 | 195 | A06491 | A11983 | 191 |
| A06491 | A12009 | 251 | A06491 | A12506 | 210 |
| A06491 | A13124 | 281 | A06491 | A13274 | 352 |
| A06491 | A13587 | 473 | A06491 | A13819 | 179 |
| A06491 | A13866 | 179 | A06491 | A13928 | 439 |
| A06491 | A13942 | 179 | A06491 | A14202 | 179 |
| A06491 | A14284 | 260 | A06491 | A14366 | 221 |
| A06491 | A14375 | 180 | A06491 | A14570 | 458 |
| A06491 | A15282 | 198 | A06491 | A15309 | 152 |
| A06491 | A15358 | 179 | A06491 | A15423 | 317 |
| A06491 | A15470 | 179 | A06491 | A15484 | 179 |
| A06491 | A15492 | 337 | A06491 | A15870 | 296 |
| A06491 | A16055 | 277 | A06491 | A17076 | 205 |
| A06492 | A06600 | 152 | A06492 | A08943 | 372 |
| A06492 | A09745 | 183 | A06492 | A10369 | 165 |
| A06492 | A11815 | 224 | A06492 | A13170 | 429 |
| A06492 | A14204 | 177 | A06492 | A15328 | 301 |
| A06492 | A15388 | 177 | A06492 | A16216 | 174 |
| A06493 | A08884 | 285 | A06494 | A08209 | 435 |
| A06494 | A12897 | 190 | A06494 | A15896 | 428 |
| A06495 | A06973 | 172 | A06495 | A10669 | 279 |
| A06495 | A11331 | 160 | A06495 | A11945 | 160 |
| A06495 | A11981 | 180 | A06495 | A14650 | 63  |
| A06495 | A15235 | 156 | A06495 | A15581 | 205 |
| A06495 | A15988 | 185 | A06496 | A12472 | 366 |
| A06498 | A06702 | 445 | A06498 | A13611 | 445 |
| A06499 | A07157 | 246 | A06499 | A07173 | 283 |
| A06499 | A07194 | 418 | A06499 | A10936 | 428 |

|        |        |     |        |        |     |
|--------|--------|-----|--------|--------|-----|
| A06499 | A10975 | 428 | A06499 | A12656 | 412 |
| A06499 | A13872 | 327 | A06499 | A14643 | 154 |
| A06500 | A09316 | 374 | A06500 | A09340 | 351 |
| A06501 | A06826 | 306 | A06502 | A06591 | 452 |
| A06502 | A06661 | 234 | A06502 | A07054 | 226 |
| A06502 | A07073 | 187 | A06502 | A07155 | 319 |
| A06502 | A07651 | 449 | A06502 | A07687 | 269 |
| A06502 | A07785 | 394 | A06502 | A09269 | 207 |
| A06502 | A09624 | 163 | A06502 | A10909 | 372 |
| A06502 | A11774 | 326 | A06502 | A14278 | 190 |
| A06502 | A15685 | 201 | A06504 | A06648 | 243 |
| A06504 | A13870 | 179 | A06504 | A14594 | 193 |
| A06505 | A07205 | 307 | A06505 | A07339 | 330 |
| A06505 | A11573 | 367 | A06505 | A13346 | 272 |
| A06505 | A14395 | 346 | A06505 | A15328 | 323 |
| A06505 | A16420 | 374 | A06505 | A16464 | 338 |
| A06506 | A07218 | 188 | A06506 | A07339 | 182 |
| A06506 | A07433 | 157 | A06508 | A08524 | 154 |
| A06508 | A08960 | 385 | A06508 | A14371 | 226 |
| A06508 | A14511 | 198 | A06508 | A15356 | 160 |
| A06508 | A15495 | 227 | A06508 | A16690 | 281 |
| A06509 | A16740 | 408 | A06510 | A06903 | 369 |
| A06510 | A07148 | 373 | A06510 | A07175 | 372 |
| A06510 | A15556 | 226 | A06510 | A15557 | 177 |
| A06510 | A15644 | 252 | A06510 | A15683 | 256 |
| A06512 | A10968 | 438 | A06513 | A09078 | 330 |
| A06513 | A10161 | 445 | A06514 | A07716 | 451 |
| A06514 | A12697 | 396 | A06514 | A13006 | 401 |
| A06516 | A12698 | 433 | A06517 | A15277 | 430 |
| A06519 | A06622 | 393 | A06520 | A06769 | 191 |
| A06520 | A07069 | 252 | A06520 | A07276 | 310 |
| A06520 | A07697 | 241 | A06520 | A09323 | 401 |
| A06520 | A10156 | 419 | A06520 | A10760 | 226 |
| A06520 | A11101 | 270 | A06520 | A11591 | 293 |
| A06520 | A12931 | 335 | A06520 | A12940 | 447 |
| A06520 | A15295 | 188 | A06521 | A13734 | 205 |
| A06522 | A16453 | 286 | A06523 | A06592 | 323 |
| A06523 | A06632 | 391 | A06523 | A06978 | 369 |
| A06523 | A07061 | 467 | A06523 | A07122 | 229 |
| A06523 | A07238 | 394 | A06523 | A07413 | 299 |
| A06523 | A07424 | 445 | A06523 | A07800 | 179 |
| A06523 | A15874 | 440 | A06523 | A16033 | 432 |
| A06523 | A16375 | 414 | A06523 | A16739 | 460 |
| A06523 | A16741 | 355 | A06523 | A16744 | 461 |
| A06524 | A07433 | 205 | A06524 | A08196 | 246 |
| A06524 | A08549 | 256 | A06524 | A08812 | 232 |

|        |        |     |        |        |     |
|--------|--------|-----|--------|--------|-----|
| A06524 | A10789 | 277 | A06524 | A14084 | 361 |
| A06524 | A14159 | 288 | A06524 | A14285 | 457 |
| A06524 | A14738 | 433 | A06524 | A16793 | 379 |
| A06524 | A17023 | 375 | A06526 | A11313 | 313 |
| A06527 | A06578 | 193 | A06527 | A06607 | 369 |
| A06527 | A06641 | 260 | A06527 | A06696 | 263 |
| A06527 | A07300 | 338 | A06527 | A07407 | 252 |
| A06527 | A07452 | 491 | A06527 | A07468 | 168 |
| A06527 | A07471 | 486 | A06527 | A07472 | 452 |
| A06527 | A07475 | 208 | A06527 | A07491 | 417 |
| A06527 | A07515 | 323 | A06527 | A07538 | 414 |
| A06527 | A07541 | 491 | A06527 | A07542 | 491 |
| A06527 | A07543 | 490 | A06527 | A07544 | 424 |
| A06527 | A07561 | 491 | A06527 | A07608 | 312 |
| A06527 | A07610 | 491 | A06527 | A07629 | 396 |
| A06527 | A07630 | 310 | A06527 | A07631 | 353 |
| A06527 | A07632 | 405 | A06527 | A07634 | 326 |
| A06527 | A07635 | 371 | A06527 | A07674 | 154 |
| A06527 | A08079 | 307 | A06527 | A08210 | 299 |
| A06527 | A08404 | 238 | A06527 | A08785 | 361 |
| A06527 | A08786 | 432 | A06527 | A10967 | 268 |
| A06527 | A12793 | 335 | A06527 | A13594 | 168 |
| A06527 | A13871 | 449 | A06527 | A17108 | 251 |
| A06530 | A06686 | 475 | A06530 | A06719 | 268 |
| A06530 | A06721 | 218 | A06530 | A06844 | 335 |
| A06530 | A06958 | 329 | A06530 | A06997 | 208 |
| A06530 | A07056 | 278 | A06530 | A07388 | 385 |
| A06530 | A07526 | 357 | A06530 | A07744 | 472 |
| A06530 | A07815 | 143 | A06530 | A07842 | 316 |
| A06530 | A07852 | 335 | A06530 | A08093 | 302 |
| A06530 | A08098 | 433 | A06530 | A08181 | 385 |
| A06530 | A08763 | 279 | A06530 | A08859 | 213 |
| A06530 | A10024 | 465 | A06530 | A10344 | 369 |
| A06530 | A11308 | 291 | A06530 | A11980 | 369 |
| A06530 | A11982 | 407 | A06530 | A12119 | 340 |
| A06530 | A12853 | 238 | A06530 | A14083 | 458 |
| A06530 | A14611 | 223 | A06530 | A14869 | 335 |
| A06530 | A15375 | 358 | A06530 | A15495 | 440 |
| A06530 | A15556 | 179 | A06530 | A15750 | 228 |
| A06531 | A07706 | 208 | A06531 | A08501 | 283 |
| A06531 | A10538 | 255 | A06531 | A11075 | 380 |
| A06531 | A12232 | 296 | A06531 | A12349 | 435 |
| A06531 | A12739 | 467 | A06531 | A13609 | 193 |
| A06531 | A17122 | 247 | A06532 | A07384 | 452 |
| A06532 | A14548 | 401 | A06532 | A14586 | 417 |
| A06533 | A07938 | 419 | A06533 | A07939 | 419 |

|        |        |     |        |        |     |
|--------|--------|-----|--------|--------|-----|
| A06533 | A09473 | 419 | A06533 | A10335 | 408 |
| A06533 | A10521 | 380 | A06533 | A10628 | 419 |
| A06533 | A10767 | 419 | A06533 | A10851 | 401 |
| A06533 | A10862 | 419 | A06533 | A11005 | 408 |
| A06533 | A11020 | 391 | A06533 | A11457 | 391 |
| A06533 | A12428 | 419 | A06533 | A12439 | 408 |
| A06533 | A12967 | 419 | A06533 | A17085 | 305 |
| A06534 | A06814 | 341 | A06534 | A06973 | 403 |
| A06534 | A07047 | 241 | A06534 | A07398 | 576 |
| A06534 | A08369 | 401 | A06534 | A08408 | 241 |
| A06534 | A08476 | 241 | A06534 | A08839 | 167 |
| A06534 | A09277 | 190 | A06534 | A09308 | 241 |
| A06534 | A09322 | 241 | A06534 | A09327 | 255 |
| A06534 | A09620 | 241 | A06534 | A10532 | 160 |
| A06534 | A10616 | 294 | A06534 | A10645 | 435 |
| A06534 | A11190 | 235 | A06534 | A11522 | 307 |
| A06534 | A11728 | 304 | A06534 | A11914 | 174 |
| A06534 | A12227 | 241 | A06534 | A12254 | 183 |
| A06534 | A12625 | 159 | A06534 | A12659 | 235 |
| A06534 | A12726 | 307 | A06534 | A12850 | 323 |
| A06534 | A13108 | 360 | A06534 | A13116 | 266 |
| A06534 | A13169 | 183 | A06534 | A13711 | 399 |
| A06534 | A13809 | 218 | A06534 | A13989 | 457 |
| A06534 | A14172 | 316 | A06534 | A14239 | 193 |
| A06534 | A14708 | 180 | A06534 | A14937 | 265 |
| A06534 | A15268 | 241 | A06534 | A15381 | 241 |
| A06534 | A15653 | 226 | A06534 | A15711 | 255 |
| A06534 | A16300 | 193 | A06534 | A16565 | 202 |
| A06534 | A16675 | 167 | A06534 | A16682 | 290 |
| A06534 | A16690 | 167 | A06534 | A16703 | 251 |
| A06534 | A16802 | 236 | A06535 | A06686 | 341 |
| A06535 | A07009 | 430 | A06535 | A11898 | 430 |
| A06535 | A14071 | 265 | A06537 | A06597 | 168 |
| A06540 | A06640 | 407 | A06541 | A14378 | 243 |
| A06541 | A15313 | 229 | A06541 | A15352 | 210 |
| A06543 | A07247 | 466 | A06543 | A07744 | 398 |
| A06543 | A07881 | 372 | A06543 | A08098 | 343 |
| A06543 | A08178 | 343 | A06543 | A08491 | 152 |
| A06543 | A10238 | 204 | A06543 | A10532 | 480 |
| A06543 | A11409 | 162 | A06543 | A12217 | 291 |
| A06543 | A12839 | 386 | A06543 | A13989 | 619 |
| A06543 | A14006 | 391 | A06543 | A14073 | 177 |
| A06543 | A14196 | 263 | A06543 | A14572 | 362 |
| A06543 | A14699 | 400 | A06543 | A14778 | 174 |
| A06543 | A15338 | 490 | A06543 | A15662 | 372 |
| A06543 | A15840 | 272 | A06543 | A15945 | 561 |



|        |        |     |        |        |     |
|--------|--------|-----|--------|--------|-----|
| A06544 | A07197 | 294 | A06544 | A08741 | 271 |
| A06544 | A09431 | 347 | A06544 | A11897 | 277 |
| A06544 | A11902 | 254 | A06544 | A15674 | 310 |
| A06544 | A16300 | 238 | A06545 | A07394 | 218 |
| A06545 | A11526 | 334 | A06546 | A07394 | 265 |
| A06546 | A09709 | 305 | A06546 | A10214 | 274 |
| A06546 | A10598 | 438 | A06546 | A11307 | 260 |
| A06546 | A16430 | 293 | A06550 | A07283 | 199 |
| A06550 | A08698 | 185 | A06550 | A10514 | 193 |
| A06550 | A10983 | 279 | A06550 | A11293 | 165 |
| A06550 | A11493 | 375 | A06550 | A16478 | 383 |
| A06550 | A16807 | 204 | A06550 | A16894 | 390 |
| A06551 | A07461 | 329 | A06552 | A09241 | 369 |
| A06554 | A06599 | 669 | A06554 | A07311 | 279 |
| A06554 | A07706 | 249 | A06554 | A10532 | 273 |
| A06555 | A07002 | 422 | A06557 | A15825 | 422 |
| A06558 | A07200 | 256 | A06558 | A13906 | 401 |
| A06558 | A14637 | 313 | A06558 | A14685 | 419 |
| A06558 | A15430 | 266 | A06558 | A15788 | 277 |
| A06558 | A17155 | 395 | A06559 | A08411 | 436 |
| A06559 | A13920 | 488 | A06559 | A14822 | 429 |
| A06559 | A14838 | 277 | A06559 | A15312 | 229 |
| A06559 | A15313 | 241 | A06560 | A07981 | 416 |
| A06561 | A15837 | 232 | A06562 | A10582 | 419 |
| A06562 | A13392 | 393 | A06563 | A13920 | 407 |
| A06564 | A06973 | 388 | A06564 | A07473 | 285 |
| A06564 | A07581 | 312 | A06564 | A08131 | 454 |
| A06564 | A08154 | 419 | A06564 | A08301 | 190 |
| A06564 | A08358 | 364 | A06564 | A08359 | 229 |
| A06564 | A08408 | 435 | A06564 | A08419 | 380 |
| A06564 | A08501 | 369 | A06564 | A08556 | 201 |
| A06564 | A08834 | 245 | A06564 | A09735 | 249 |
| A06564 | A10338 | 385 | A06564 | A10498 | 296 |
| A06564 | A11364 | 302 | A06564 | A12477 | 246 |
| A06564 | A14081 | 263 | A06564 | A14508 | 180 |
| A06564 | A14568 | 490 | A06564 | A15499 | 257 |
| A06564 | A15500 | 446 | A06564 | A15771 | 288 |
| A06564 | A16686 | 440 | A06564 | A17152 | 279 |
| A06565 | A06686 | 374 | A06565 | A11012 | 441 |
| A06565 | A12761 | 441 | A06566 | A09384 | 447 |
| A06567 | A09764 | 232 | A06567 | A14395 | 277 |
| A06567 | A15322 | 154 | A06567 | A15328 | 252 |
| A06567 | A15896 | 338 | A06567 | A16216 | 236 |
| A06569 | A06729 | 273 | A06569 | A07993 | 491 |
| A06569 | A08949 | 167 | A06569 | A08975 | 255 |
| A06569 | A10625 | 198 | A06569 | A11469 | 491 |

|        |        |     |        |        |     |
|--------|--------|-----|--------|--------|-----|
| A06569 | A11485 | 207 | A06569 | A11983 | 251 |
| A06569 | A12854 | 294 | A06569 | A14115 | 256 |
| A06569 | A15800 | 185 | A06569 | A16450 | 473 |
| A06570 | A06613 | 297 | A06571 | A06956 | 414 |
| A06571 | A07010 | 433 | A06571 | A07529 | 417 |
| A06571 | A07764 | 458 | A06571 | A08002 | 429 |
| A06571 | A14362 | 386 | A06571 | A14366 | 323 |
| A06571 | A14394 | 340 | A06571 | A14600 | 429 |
| A06571 | A14767 | 447 | A06571 | A15475 | 394 |
| A06571 | A16562 | 447 | A06571 | A17052 | 447 |
| A06572 | A07313 | 490 | A06572 | A07433 | 643 |
| A06572 | A07593 | 463 | A06572 | A08097 | 343 |
| A06572 | A08185 | 466 | A06572 | A08196 | 643 |
| A06572 | A08255 | 448 | A06572 | A08503 | 629 |
| A06572 | A08525 | 456 | A06572 | A08536 | 159 |
| A06572 | A08540 | 439 | A06572 | A08549 | 643 |
| A06572 | A08560 | 558 | A06572 | A08561 | 491 |
| A06572 | A08566 | 184 | A06572 | A08567 | 557 |
| A06572 | A08571 | 313 | A06572 | A08812 | 642 |
| A06572 | A08813 | 556 | A06572 | A08819 | 480 |
| A06572 | A08839 | 335 | A06572 | A08840 | 184 |
| A06572 | A08844 | 633 | A06572 | A08845 | 525 |
| A06572 | A08854 | 159 | A06572 | A08855 | 457 |
| A06572 | A08885 | 428 | A06572 | A09100 | 314 |
| A06572 | A09674 | 183 | A06572 | A09727 | 184 |
| A06572 | A09728 | 296 | A06572 | A09853 | 269 |
| A06572 | A10789 | 553 | A06572 | A11668 | 491 |
| A06572 | A11954 | 393 | A06572 | A12507 | 531 |
| A06572 | A13399 | 405 | A06572 | A13737 | 491 |
| A06572 | A13949 | 201 | A06572 | A13963 | 556 |
| A06572 | A13978 | 223 | A06572 | A14084 | 643 |
| A06572 | A14226 | 480 | A06572 | A14227 | 378 |
| A06572 | A14261 | 299 | A06572 | A14270 | 184 |
| A06572 | A14285 | 642 | A06572 | A14471 | 171 |
| A06572 | A14708 | 168 | A06572 | A14882 | 180 |
| A06572 | A15726 | 228 | A06572 | A15949 | 556 |
| A06572 | A16099 | 184 | A06572 | A17145 | 286 |
| A06573 | A07162 | 441 | A06573 | A11506 | 447 |
| A06574 | A06711 | 449 | A06574 | A06712 | 368 |
| A06574 | A06731 | 188 | A06574 | A06868 | 251 |
| A06574 | A07044 | 485 | A06574 | A07190 | 174 |
| A06574 | A07218 | 480 | A06574 | A07361 | 278 |
| A06574 | A07453 | 356 | A06574 | A07704 | 477 |
| A06574 | A07705 | 452 | A06574 | A08040 | 490 |
| A06574 | A08125 | 385 | A06574 | A08162 | 352 |
| A06574 | A08171 | 254 | A06574 | A08172 | 207 |

|        |        |     |        |        |     |
|--------|--------|-----|--------|--------|-----|
| A06574 | A08202 | 362 | A06574 | A08203 | 470 |
| A06574 | A08292 | 440 | A06574 | A08309 | 241 |
| A06574 | A08392 | 375 | A06574 | A08497 | 362 |
| A06574 | A08671 | 486 | A06574 | A08747 | 436 |
| A06574 | A09149 | 219 | A06574 | A09341 | 373 |
| A06574 | A09509 | 162 | A06574 | A09518 | 436 |
| A06574 | A11289 | 279 | A06574 | A12486 | 400 |
| A06574 | A12591 | 400 | A06574 | A12748 | 400 |
| A06574 | A13369 | 252 | A06574 | A14633 | 176 |
| A06574 | A14746 | 481 | A06574 | A15552 | 314 |
| A06574 | A15638 | 176 | A06574 | A16339 | 385 |
| A06576 | A08536 | 218 | A06576 | A08885 | 323 |
| A06576 | A10247 | 313 | A06577 | A09913 | 416 |
| A06577 | A15498 | 355 | A06578 | A07209 | 286 |
| A06578 | A07598 | 184 | A06578 | A07803 | 321 |
| A06578 | A07935 | 319 | A06578 | A08786 | 337 |
| A06578 | A09351 | 184 | A06578 | A11132 | 483 |
| A06578 | A11558 | 184 | A06578 | A11851 | 184 |
| A06578 | A11983 | 165 | A06578 | A12897 | 249 |
| A06578 | A13356 | 184 | A06578 | A13965 | 154 |
| A06578 | A14055 | 174 | A06578 | A14196 | 272 |
| A06578 | A14210 | 184 | A06578 | A14245 | 246 |
| A06578 | A14371 | 177 | A06578 | A14635 | 361 |
| A06578 | A14663 | 63  | A06578 | A15293 | 466 |
| A06578 | A15308 | 350 | A06578 | A15320 | 361 |
| A06578 | A15321 | 479 | A06578 | A15322 | 413 |
| A06578 | A15330 | 218 | A06578 | A15357 | 165 |
| A06578 | A15411 | 235 | A06578 | A15506 | 457 |
| A06578 | A15630 | 260 | A06578 | A15639 | 174 |
| A06578 | A16120 | 229 | A06578 | A16152 | 184 |
| A06578 | A16216 | 156 | A06578 | A16324 | 170 |
| A06578 | A16916 | 391 | A06579 | A06607 | 247 |
| A06579 | A07200 | 412 | A06579 | A11326 | 188 |
| A06579 | A11335 | 314 | A06579 | A16438 | 472 |
| A06580 | A07726 | 254 | A06580 | A12618 | 386 |
| A06581 | A06588 | 350 | A06581 | A06597 | 310 |
| A06581 | A06606 | 260 | A06581 | A06607 | 447 |
| A06581 | A06688 | 63  | A06581 | A06949 | 463 |
| A06581 | A07111 | 446 | A06581 | A07339 | 445 |
| A06581 | A08738 | 157 | A06581 | A08836 | 238 |
| A06581 | A08837 | 433 | A06581 | A09166 | 229 |
| A06581 | A09261 | 283 | A06581 | A09561 | 154 |
| A06581 | A09791 | 170 | A06581 | A09900 | 157 |
| A06581 | A10062 | 154 | A06581 | A10148 | 419 |
| A06581 | A10174 | 210 | A06581 | A10291 | 366 |
| A06581 | A11114 | 213 | A06581 | A11115 | 249 |

|        |        |     |        |        |     |
|--------|--------|-----|--------|--------|-----|
| A06581 | A11257 | 163 | A06581 | A11539 | 303 |
| A06581 | A11606 | 291 | A06581 | A11759 | 221 |
| A06581 | A12618 | 307 | A06581 | A13014 | 283 |
| A06581 | A13102 | 157 | A06581 | A13373 | 228 |
| A06581 | A13563 | 283 | A06581 | A13734 | 198 |
| A06581 | A13755 | 249 | A06581 | A13942 | 243 |
| A06581 | A14025 | 406 | A06581 | A14332 | 344 |
| A06581 | A14443 | 899 | A06581 | A14475 | 628 |
| A06581 | A14589 | 491 | A06581 | A14646 | 165 |
| A06581 | A14787 | 218 | A06581 | A14794 | 229 |
| A06581 | A14996 | 278 | A06581 | A15014 | 229 |
| A06581 | A15125 | 170 | A06581 | A16062 | 176 |
| A06581 | A16332 | 249 | A06581 | A16911 | 216 |
| A06584 | A06661 | 185 | A06584 | A07054 | 229 |
| A06584 | A07218 | 374 | A06584 | A07495 | 277 |
| A06584 | A07671 | 384 | A06584 | A08019 | 384 |
| A06584 | A08020 | 384 | A06584 | A08021 | 384 |
| A06584 | A08357 | 447 | A06584 | A08978 | 216 |
| A06584 | A10156 | 185 | A06584 | A10544 | 249 |
| A06584 | A11160 | 204 | A06584 | A11942 | 259 |
| A06584 | A12337 | 428 | A06584 | A12626 | 384 |
| A06584 | A13126 | 168 | A06584 | A13313 | 154 |
| A06584 | A13965 | 156 | A06584 | A14011 | 195 |
| A06584 | A14984 | 384 | A06584 | A15215 | 208 |
| A06584 | A15680 | 317 | A06584 | A17189 | 165 |
| A06585 | A10906 | 477 | A06586 | A09561 | 204 |
| A06586 | A17121 | 327 | A06586 | A17147 | 374 |
| A06588 | A06599 | 327 | A06588 | A06607 | 491 |
| A06588 | A06650 | 484 | A06588 | A06688 | 491 |
| A06588 | A06778 | 179 | A06588 | A06907 | 176 |
| A06588 | A07017 | 210 | A06588 | A07209 | 341 |
| A06588 | A07339 | 491 | A06588 | A07803 | 480 |
| A06588 | A08264 | 227 | A06588 | A08643 | 198 |
| A06588 | A08850 | 472 | A06588 | A08869 | 467 |
| A06588 | A08878 | 441 | A06588 | A09078 | 174 |
| A06588 | A09247 | 306 | A06588 | A09251 | 177 |
| A06588 | A09356 | 152 | A06588 | A10103 | 486 |
| A06588 | A10462 | 263 | A06588 | A10466 | 273 |
| A06588 | A10599 | 154 | A06588 | A10696 | 156 |
| A06588 | A10813 | 191 | A06588 | A11342 | 190 |
| A06588 | A11380 | 168 | A06588 | A11983 | 483 |
| A06588 | A12140 | 163 | A06588 | A12373 | 285 |
| A06588 | A12474 | 216 | A06588 | A12684 | 263 |
| A06588 | A12897 | 491 | A06588 | A13140 | 205 |
| A06588 | A13152 | 196 | A06588 | A13241 | 297 |
| A06588 | A13729 | 234 | A06588 | A14038 | 398 |

|        |        |     |        |        |     |
|--------|--------|-----|--------|--------|-----|
| A06588 | A14055 | 162 | A06588 | A14148 | 357 |
| A06588 | A14196 | 202 | A06588 | A14210 | 180 |
| A06588 | A14236 | 525 | A06588 | A14366 | 462 |
| A06588 | A14392 | 152 | A06588 | A14596 | 302 |
| A06588 | A14632 | 241 | A06588 | A14635 | 348 |
| A06588 | A14636 | 474 | A06588 | A14643 | 263 |
| A06588 | A14659 | 462 | A06588 | A15064 | 266 |
| A06588 | A15239 | 205 | A06588 | A15241 | 443 |
| A06588 | A15292 | 314 | A06588 | A15322 | 290 |
| A06588 | A15606 | 588 | A06588 | A15665 | 182 |
| A06588 | A15886 | 317 | A06588 | A15902 | 265 |
| A06588 | A16068 | 255 | A06588 | A16099 | 202 |
| A06588 | A16281 | 163 | A06588 | A16916 | 307 |
| A06588 | A16917 | 263 | A06588 | A17081 | 184 |
| A06589 | A09509 | 205 | A06589 | A09664 | 485 |
| A06589 | A14699 | 276 | A06589 | A14778 | 196 |
| A06591 | A07054 | 490 | A06591 | A07091 | 900 |
| A06591 | A07242 | 491 | A06591 | A07421 | 179 |
| A06591 | A07483 | 491 | A06591 | A07495 | 669 |
| A06591 | A07785 | 303 | A06591 | A07816 | 311 |
| A06591 | A08259 | 179 | A06591 | A08531 | 830 |
| A06591 | A08536 | 436 | A06591 | A08551 | 809 |
| A06591 | A08834 | 179 | A06591 | A08840 | 415 |
| A06591 | A08910 | 491 | A06591 | A09434 | 217 |
| A06591 | A09668 | 263 | A06591 | A09757 | 491 |
| A06591 | A09825 | 179 | A06591 | A09826 | 307 |
| A06591 | A09992 | 165 | A06591 | A10222 | 288 |
| A06591 | A10549 | 433 | A06591 | A10619 | 159 |
| A06591 | A10990 | 288 | A06591 | A11227 | 162 |
| A06591 | A11346 | 484 | A06591 | A11385 | 246 |
| A06591 | A11394 | 462 | A06591 | A11472 | 229 |
| A06591 | A11558 | 179 | A06591 | A11727 | 185 |
| A06591 | A11881 | 274 | A06591 | A12047 | 473 |
| A06591 | A12212 | 191 | A06591 | A12249 | 235 |
| A06591 | A12722 | 441 | A06591 | A12882 | 260 |
| A06591 | A12952 | 276 | A06591 | A13207 | 433 |
| A06591 | A13681 | 221 | A06591 | A13804 | 470 |
| A06591 | A13819 | 179 | A06591 | A13866 | 179 |
| A06591 | A13926 | 326 | A06591 | A13928 | 341 |
| A06591 | A13942 | 184 | A06591 | A13953 | 472 |
| A06591 | A13987 | 180 | A06591 | A14009 | 290 |
| A06591 | A14016 | 454 | A06591 | A14060 | 202 |
| A06591 | A14192 | 338 | A06591 | A14193 | 150 |
| A06591 | A14202 | 179 | A06591 | A14220 | 197 |
| A06591 | A14266 | 491 | A06591 | A14279 | 491 |
| A06591 | A14281 | 650 | A06591 | A14366 | 179 |

|        |        |     |        |        |     |
|--------|--------|-----|--------|--------|-----|
| A06591 | A14457 | 238 | A06591 | A14799 | 218 |
| A06591 | A15252 | 195 | A06591 | A15273 | 693 |
| A06591 | A15358 | 179 | A06591 | A15366 | 329 |
| A06591 | A15470 | 179 | A06591 | A15484 | 179 |
| A06591 | A15498 | 283 | A06591 | A15685 | 382 |
| A06591 | A15810 | 184 | A06591 | A16776 | 490 |
| A06591 | A16960 | 157 | A06592 | A06773 | 293 |
| A06592 | A07122 | 241 | A06592 | A07234 | 465 |
| A06592 | A07363 | 396 | A06592 | A07376 | 475 |
| A06592 | A07413 | 327 | A06592 | A07525 | 441 |
| A06592 | A07659 | 489 | A06592 | A07674 | 157 |
| A06592 | A07753 | 441 | A06592 | A07800 | 491 |
| A06592 | A08099 | 485 | A06592 | A08193 | 368 |
| A06592 | A08205 | 412 | A06592 | A09612 | 380 |
| A06592 | A10370 | 63  | A06592 | A10673 | 260 |
| A06592 | A11309 | 490 | A06592 | A14745 | 329 |
| A06592 | A15497 | 307 | A06592 | A16033 | 270 |
| A06592 | A16368 | 340 | A06592 | A16529 | 472 |
| A06592 | A16959 | 466 | A06593 | A06941 | 212 |
| A06593 | A11742 | 404 | A06593 | A13819 | 321 |
| A06593 | A14461 | 301 | A06593 | A14710 | 391 |
| A06594 | A16028 | 63  | A06595 | A06607 | 302 |
| A06595 | A06616 | 294 | A06595 | A06620 | 202 |
| A06595 | A06622 | 391 | A06595 | A06623 | 347 |
| A06595 | A06648 | 472 | A06595 | A06649 | 380 |
| A06595 | A06760 | 322 | A06595 | A07106 | 271 |
| A06595 | A07165 | 229 | A06595 | A07178 | 217 |
| A06595 | A07201 | 172 | A06595 | A07724 | 378 |
| A06595 | A08070 | 489 | A06595 | A08284 | 283 |
| A06595 | A09189 | 347 | A06595 | A09509 | 230 |
| A06595 | A09865 | 210 | A06595 | A09995 | 154 |
| A06595 | A10018 | 152 | A06595 | A10247 | 177 |
| A06595 | A11086 | 278 | A06595 | A11902 | 171 |
| A06595 | A13181 | 154 | A06595 | A13734 | 286 |
| A06595 | A14048 | 218 | A06595 | A14190 | 157 |
| A06595 | A14642 | 329 | A06595 | A14946 | 283 |
| A06595 | A15976 | 163 | A06596 | A06597 | 398 |
| A06596 | A06616 | 364 | A06596 | A06648 | 457 |
| A06596 | A06649 | 344 | A06596 | A08070 | 241 |
| A06596 | A08911 | 294 | A06596 | A09901 | 299 |
| A06596 | A11750 | 316 | A06596 | A12730 | 324 |
| A06596 | A14642 | 213 | A06597 | A06606 | 491 |
| A06597 | A06607 | 491 | A06597 | A06648 | 323 |
| A06597 | A06649 | 254 | A06597 | A06766 | 168 |
| A06597 | A06814 | 204 | A06597 | A06858 | 457 |
| A06597 | A06869 | 168 | A06597 | A06986 | 168 |

|        |        |     |        |        |     |
|--------|--------|-----|--------|--------|-----|
| A06597 | A07122 | 286 | A06597 | A07163 | 234 |
| A06597 | A07165 | 279 | A06597 | A07191 | 435 |
| A06597 | A07311 | 198 | A06597 | A07339 | 346 |
| A06597 | A08304 | 207 | A06597 | A08369 | 259 |
| A06597 | A08438 | 363 | A06597 | A08860 | 343 |
| A06597 | A08910 | 216 | A06597 | A09059 | 470 |
| A06597 | A09319 | 240 | A06597 | A09367 | 232 |
| A06597 | A09386 | 338 | A06597 | A09437 | 183 |
| A06597 | A09989 | 291 | A06597 | A10035 | 323 |
| A06597 | A10120 | 168 | A06597 | A10268 | 168 |
| A06597 | A10310 | 196 | A06597 | A10337 | 475 |
| A06597 | A10506 | 474 | A06597 | A10542 | 265 |
| A06597 | A10614 | 235 | A06597 | A11181 | 168 |
| A06597 | A11487 | 199 | A06597 | A11493 | 486 |
| A06597 | A11665 | 180 | A06597 | A11750 | 399 |
| A06597 | A11902 | 249 | A06597 | A12104 | 168 |
| A06597 | A12321 | 168 | A06597 | A12824 | 188 |
| A06597 | A12927 | 223 | A06597 | A13591 | 199 |
| A06597 | A13624 | 168 | A06597 | A13882 | 319 |
| A06597 | A13902 | 224 | A06597 | A14128 | 204 |
| A06597 | A14190 | 319 | A06597 | A14204 | 523 |
| A06597 | A14272 | 259 | A06597 | A14279 | 199 |
| A06597 | A14299 | 489 | A06597 | A14593 | 183 |
| A06597 | A14661 | 157 | A06597 | A14674 | 319 |
| A06597 | A14690 | 159 | A06597 | A14801 | 199 |
| A06597 | A15295 | 556 | A06597 | A15315 | 879 |
| A06597 | A15345 | 787 | A06597 | A15347 | 882 |
| A06597 | A15384 | 475 | A06597 | A15528 | 470 |
| A06597 | A15617 | 810 | A06597 | A15726 | 446 |
| A06597 | A16262 | 266 | A06597 | A16300 | 243 |
| A06597 | A16304 | 462 | A06597 | A16322 | 462 |
| A06597 | A16344 | 480 | A06597 | A16345 | 168 |
| A06597 | A16364 | 491 | A06597 | A16738 | 319 |
| A06597 | A16877 | 165 | A06598 | A06914 | 334 |
| A06598 | A07257 | 483 | A06598 | A07771 | 187 |
| A06598 | A08293 | 377 | A06598 | A08571 | 944 |
| A06598 | A08707 | 550 | A06598 | A08821 | 257 |
| A06598 | A09182 | 334 | A06598 | A09256 | 99  |
| A06598 | A10778 | 285 | A06598 | A11156 | 213 |
| A06598 | A11258 | 335 | A06598 | A13978 | 198 |
| A06598 | A13983 | 472 | A06598 | A14199 | 221 |
| A06598 | A14252 | 638 | A06598 | A15356 | 636 |
| A06598 | A15726 | 319 | A06599 | A06607 | 488 |
| A06599 | A07311 | 227 | A06599 | A07706 | 216 |
| A06599 | A08905 | 177 | A06599 | A09272 | 218 |
| A06599 | A09509 | 173 | A06599 | A09821 | 477 |

|        |        |     |        |        |     |
|--------|--------|-----|--------|--------|-----|
| A06599 | A10532 | 238 | A06599 | A10595 | 162 |
| A06599 | A11539 | 270 | A06599 | A11606 | 260 |
| A06599 | A11825 | 207 | A06599 | A13133 | 306 |
| A06599 | A14449 | 241 | A06599 | A14642 | 170 |
| A06599 | A15103 | 187 | A06599 | A15404 | 218 |
| A06599 | A15451 | 200 | A06599 | A15456 | 167 |
| A06599 | A15804 | 232 | A06599 | A16281 | 241 |
| A06600 | A07046 | 165 | A06600 | A07588 | 115 |
| A06600 | A07760 | 180 | A06600 | A08414 | 337 |
| A06600 | A10608 | 163 | A06600 | A11608 | 247 |
| A06600 | A15295 | 488 | A06600 | A15422 | 196 |
| A06601 | A06701 | 465 | A06601 | A07167 | 404 |
| A06601 | A07422 | 369 | A06601 | A07936 | 347 |
| A06601 | A08576 | 274 | A06601 | A08658 | 306 |
| A06601 | A09162 | 450 | A06601 | A09646 | 276 |
| A06601 | A09750 | 182 | A06601 | A09791 | 160 |
| A06601 | A09804 | 899 | A06601 | A10156 | 188 |
| A06601 | A10392 | 429 | A06601 | A10499 | 439 |
| A06601 | A10623 | 160 | A06601 | A10743 | 490 |
| A06601 | A10801 | 217 | A06601 | A10808 | 434 |
| A06601 | A10844 | 252 | A06601 | A11184 | 154 |
| A06601 | A11252 | 347 | A06601 | A11379 | 217 |
| A06601 | A11983 | 171 | A06601 | A13397 | 484 |
| A06601 | A13970 | 899 | A06601 | A13984 | 226 |
| A06601 | A14208 | 899 | A06601 | A14364 | 899 |
| A06601 | A14405 | 171 | A06601 | A14520 | 154 |
| A06601 | A14916 | 385 | A06601 | A14925 | 160 |
| A06601 | A14964 | 188 | A06601 | A16512 | 367 |
| A06601 | A16792 | 369 | A06601 | A16911 | 188 |
| A06602 | A06661 | 469 | A06602 | A06723 | 326 |
| A06602 | A06991 | 740 | A06602 | A07687 | 596 |
| A06602 | A07869 | 367 | A06602 | A08351 | 720 |
| A06602 | A08352 | 618 | A06602 | A08360 | 152 |
| A06602 | A08552 | 332 | A06602 | A08858 | 281 |
| A06602 | A09304 | 307 | A06602 | A09311 | 243 |
| A06602 | A09342 | 252 | A06602 | A09793 | 512 |
| A06602 | A09872 | 293 | A06602 | A10965 | 539 |
| A06602 | A11107 | 213 | A06602 | A11283 | 395 |
| A06602 | A11332 | 586 | A06602 | A11738 | 356 |
| A06602 | A11828 | 307 | A06602 | A11840 | 468 |
| A06602 | A11848 | 468 | A06602 | A12047 | 623 |
| A06602 | A12307 | 367 | A06602 | A12938 | 433 |
| A06602 | A13860 | 319 | A06602 | A13964 | 625 |
| A06602 | A14156 | 361 | A06602 | A14266 | 185 |
| A06602 | A14667 | 180 | A06602 | A14701 | 372 |
| A06602 | A17064 | 346 | A06603 | A06868 | 380 |



|        |        |     |        |        |     |
|--------|--------|-----|--------|--------|-----|
| A06603 | A07167 | 369 | A06603 | A09554 | 405 |
| A06603 | A11348 | 281 | A06603 | A11450 | 427 |
| A06603 | A11478 | 246 | A06603 | A15241 | 160 |
| A06604 | A07053 | 456 | A06604 | A07135 | 177 |
| A06604 | A07152 | 260 | A06604 | A10571 | 401 |
| A06604 | A10605 | 475 | A06604 | A13822 | 314 |
| A06604 | A14012 | 353 | A06604 | A14125 | 294 |
| A06604 | A14199 | 213 | A06604 | A14372 | 277 |
| A06604 | A14374 | 236 | A06604 | A14391 | 241 |
| A06604 | A14439 | 411 | A06604 | A14599 | 323 |
| A06604 | A15360 | 202 | A06604 | A15425 | 247 |
| A06604 | A15427 | 326 | A06605 | A07165 | 266 |
| A06606 | A06607 | 491 | A06606 | A06613 | 246 |
| A06606 | A06614 | 168 | A06606 | A06667 | 243 |
| A06606 | A06752 | 172 | A06606 | A07065 | 302 |
| A06606 | A07066 | 355 | A06606 | A07071 | 205 |
| A06606 | A07163 | 318 | A06606 | A07171 | 168 |
| A06606 | A07339 | 340 | A06606 | A07374 | 205 |
| A06606 | A07671 | 243 | A06606 | A07994 | 243 |
| A06606 | A08007 | 243 | A06606 | A08019 | 243 |
| A06606 | A08020 | 243 | A06606 | A08021 | 243 |
| A06606 | A08070 | 213 | A06606 | A08157 | 362 |
| A06606 | A08212 | 174 | A06606 | A08225 | 205 |
| A06606 | A08276 | 243 | A06606 | A08316 | 205 |
| A06606 | A08374 | 396 | A06606 | A08386 | 396 |
| A06606 | A08387 | 396 | A06606 | A08492 | 243 |
| A06606 | A08650 | 205 | A06606 | A08826 | 337 |
| A06606 | A08858 | 276 | A06606 | A08935 | 168 |
| A06606 | A09001 | 258 | A06606 | A09127 | 152 |
| A06606 | A09141 | 156 | A06606 | A09155 | 243 |
| A06606 | A09157 | 184 | A06606 | A09160 | 258 |
| A06606 | A09174 | 260 | A06606 | A09175 | 205 |
| A06606 | A09177 | 184 | A06606 | A09190 | 184 |
| A06606 | A09269 | 238 | A06606 | A09302 | 168 |
| A06606 | A09360 | 205 | A06606 | A09367 | 184 |
| A06606 | A09371 | 184 | A06606 | A09430 | 243 |
| A06606 | A09434 | 490 | A06606 | A09439 | 243 |
| A06606 | A09467 | 168 | A06606 | A09548 | 232 |
| A06606 | A09728 | 238 | A06606 | A09894 | 268 |
| A06606 | A09899 | 317 | A06606 | A09932 | 416 |
| A06606 | A09949 | 243 | A06606 | A10128 | 156 |
| A06606 | A10177 | 302 | A06606 | A10213 | 183 |
| A06606 | A10290 | 243 | A06606 | A10296 | 156 |
| A06606 | A10583 | 205 | A06606 | A10725 | 475 |
| A06606 | A10949 | 463 | A06606 | A11026 | 168 |
| A06606 | A11164 | 457 | A06606 | A11197 | 156 |

|        |        |     |        |        |     |
|--------|--------|-----|--------|--------|-----|
| A06606 | A11533 | 208 | A06606 | A11600 | 302 |
| A06606 | A11604 | 213 | A06606 | A11615 | 474 |
| A06606 | A11755 | 205 | A06606 | A11787 | 205 |
| A06606 | A11829 | 157 | A06606 | A12098 | 205 |
| A06606 | A12249 | 184 | A06606 | A12305 | 205 |
| A06606 | A12351 | 337 | A06606 | A12388 | 243 |
| A06606 | A12429 | 205 | A06606 | A12615 | 243 |
| A06606 | A12616 | 243 | A06606 | A12617 | 243 |
| A06606 | A12626 | 243 | A06606 | A12690 | 243 |
| A06606 | A12712 | 205 | A06606 | A12765 | 184 |
| A06606 | A12797 | 243 | A06606 | A12803 | 243 |
| A06606 | A12855 | 156 | A06606 | A12984 | 205 |
| A06606 | A13734 | 430 | A06606 | A13757 | 269 |
| A06606 | A13954 | 296 | A06606 | A14324 | 386 |
| A06606 | A14528 | 278 | A06606 | A14529 | 312 |
| A06606 | A14901 | 288 | A06606 | A14940 | 205 |
| A06606 | A14984 | 243 | A06606 | A15866 | 243 |
| A06606 | A15990 | 243 | A06606 | A16047 | 184 |
| A06606 | A16119 | 485 | A06606 | A16140 | 243 |
| A06606 | A16168 | 243 | A06606 | A16169 | 243 |
| A06606 | A16172 | 243 | A06606 | A16175 | 243 |
| A06606 | A16178 | 243 | A06606 | A16179 | 243 |
| A06606 | A16184 | 243 | A06606 | A16185 | 243 |
| A06606 | A16186 | 243 | A06606 | A16317 | 184 |
| A06606 | A16550 | 156 | A06606 | A16677 | 317 |
| A06606 | A16728 | 184 | A06606 | A16958 | 184 |
| A06607 | A06621 | 236 | A06607 | A06622 | 404 |
| A06607 | A06647 | 299 | A06607 | A06648 | 308 |
| A06607 | A06650 | 491 | A06607 | A06658 | 245 |
| A06607 | A06663 | 229 | A06607 | A06688 | 491 |
| A06607 | A06696 | 473 | A06607 | A06769 | 466 |
| A06607 | A06874 | 319 | A06607 | A06875 | 241 |
| A06607 | A06903 | 157 | A06607 | A06908 | 228 |
| A06607 | A06926 | 193 | A06607 | A06935 | 187 |
| A06607 | A06939 | 245 | A06607 | A07020 | 165 |
| A06607 | A07021 | 171 | A06607 | A07031 | 457 |
| A06607 | A07039 | 305 | A06607 | A07177 | 488 |
| A06607 | A07200 | 490 | A06607 | A07206 | 191 |
| A06607 | A07407 | 217 | A06607 | A07438 | 276 |
| A06607 | A07452 | 419 | A06607 | A07460 | 171 |
| A06607 | A07470 | 241 | A06607 | A07471 | 486 |
| A06607 | A07472 | 176 | A06607 | A07475 | 424 |
| A06607 | A07482 | 319 | A06607 | A07491 | 474 |
| A06607 | A07509 | 165 | A06607 | A07522 | 171 |
| A06607 | A07538 | 430 | A06607 | A07541 | 435 |
| A06607 | A07542 | 378 | A06607 | A07543 | 177 |

|        |        |     |        |        |     |
|--------|--------|-----|--------|--------|-----|
| A06607 | A07558 | 184 | A06607 | A07561 | 417 |
| A06607 | A07563 | 159 | A06607 | A07567 | 374 |
| A06607 | A07610 | 391 | A06607 | A07623 | 171 |
| A06607 | A07629 | 404 | A06607 | A07632 | 303 |
| A06607 | A07633 | 255 | A06607 | A07634 | 475 |
| A06607 | A07637 | 305 | A06607 | A07638 | 245 |
| A06607 | A07650 | 229 | A06607 | A07652 | 346 |
| A06607 | A07653 | 170 | A06607 | A07654 | 333 |
| A06607 | A07673 | 326 | A06607 | A07741 | 272 |
| A06607 | A07743 | 187 | A06607 | A07754 | 468 |
| A06607 | A07858 | 245 | A06607 | A07913 | 170 |
| A06607 | A07914 | 160 | A06607 | A07915 | 208 |
| A06607 | A07916 | 180 | A06607 | A07928 | 401 |
| A06607 | A07950 | 171 | A06607 | A08031 | 245 |
| A06607 | A08051 | 187 | A06607 | A08210 | 193 |
| A06607 | A08217 | 245 | A06607 | A08288 | 171 |
| A06607 | A08311 | 305 | A06607 | A08389 | 474 |
| A06607 | A08395 | 208 | A06607 | A08404 | 491 |
| A06607 | A08500 | 245 | A06607 | A08520 | 352 |
| A06607 | A08643 | 486 | A06607 | A08655 | 266 |
| A06607 | A08746 | 310 | A06607 | A08785 | 475 |
| A06607 | A08823 | 159 | A06607 | A08826 | 208 |
| A06607 | A08967 | 171 | A06607 | A08968 | 187 |
| A06607 | A09041 | 171 | A06607 | A09072 | 399 |
| A06607 | A09133 | 159 | A06607 | A09155 | 245 |
| A06607 | A09180 | 333 | A06607 | A09236 | 168 |
| A06607 | A09251 | 247 | A06607 | A09262 | 224 |
| A06607 | A09359 | 159 | A06607 | A09360 | 208 |
| A06607 | A09430 | 245 | A06607 | A09453 | 159 |
| A06607 | A09935 | 358 | A06607 | A09945 | 245 |
| A06607 | A09979 | 187 | A06607 | A10103 | 488 |
| A06607 | A10121 | 263 | A06607 | A10135 | 245 |
| A06607 | A10141 | 159 | A06607 | A10229 | 245 |
| A06607 | A10263 | 245 | A06607 | A10337 | 208 |
| A06607 | A10405 | 245 | A06607 | A10563 | 179 |
| A06607 | A10602 | 425 | A06607 | A10634 | 327 |
| A06607 | A10696 | 219 | A06607 | A10771 | 245 |
| A06607 | A10772 | 245 | A06607 | A10779 | 208 |
| A06607 | A10824 | 190 | A06607 | A10880 | 208 |
| A06607 | A11313 | 373 | A06607 | A11329 | 202 |
| A06607 | A11424 | 335 | A06607 | A11485 | 419 |
| A06607 | A11509 | 159 | A06607 | A11539 | 352 |
| A06607 | A11571 | 340 | A06607 | A11595 | 208 |
| A06607 | A11606 | 401 | A06607 | A11701 | 245 |
| A06607 | A11759 | 234 | A06607 | A11787 | 208 |
| A06607 | A11852 | 212 | A06607 | A12528 | 340 |

|        |        |     |        |        |     |
|--------|--------|-----|--------|--------|-----|
| A06607 | A12529 | 305 | A06607 | A12688 | 245 |
| A06607 | A12784 | 291 | A06607 | A13032 | 340 |
| A06607 | A13140 | 422 | A06607 | A13152 | 417 |
| A06607 | A13280 | 305 | A06607 | A13350 | 171 |
| A06607 | A13554 | 245 | A06607 | A13734 | 180 |
| A06607 | A13879 | 477 | A06607 | A14200 | 235 |
| A06607 | A14261 | 187 | A06607 | A14332 | 294 |
| A06607 | A14342 | 187 | A06607 | A14349 | 171 |
| A06607 | A14387 | 190 | A06607 | A14388 | 171 |
| A06607 | A14423 | 224 | A06607 | A14440 | 414 |
| A06607 | A14609 | 301 | A06607 | A14793 | 291 |
| A06607 | A14839 | 263 | A06607 | A14855 | 245 |
| A06607 | A15108 | 187 | A06607 | A15674 | 152 |
| A06607 | A15883 | 208 | A06607 | A16021 | 187 |
| A06607 | A16101 | 187 | A06607 | A16281 | 491 |
| A06607 | A16317 | 187 | A06607 | A16331 | 163 |
| A06607 | A16444 | 245 | A06607 | A16451 | 245 |
| A06607 | A16455 | 245 | A06607 | A16456 | 208 |
| A06607 | A16486 | 208 | A06607 | A16506 | 245 |
| A06607 | A16636 | 229 | A06607 | A17078 | 154 |
| A06608 | A06609 | 914 | A06608 | A06623 | 217 |
| A06608 | A06650 | 291 | A06608 | A06653 | 256 |
| A06608 | A06891 | 154 | A06608 | A06958 | 234 |
| A06608 | A07311 | 899 | A06608 | A07772 | 234 |
| A06608 | A07842 | 215 | A06608 | A08869 | 272 |
| A06608 | A09361 | 190 | A06608 | A09391 | 899 |
| A06608 | A09470 | 208 | A06608 | A09756 | 151 |
| A06608 | A09973 | 294 | A06608 | A10203 | 294 |
| A06608 | A10218 | 899 | A06608 | A10345 | 156 |
| A06608 | A10363 | 235 | A06608 | A10744 | 185 |
| A06608 | A10825 | 380 | A06608 | A11044 | 196 |
| A06608 | A11300 | 157 | A06608 | A11956 | 276 |
| A06608 | A12108 | 241 | A06608 | A12116 | 294 |
| A06608 | A12373 | 935 | A06608 | A12908 | 193 |
| A06608 | A13714 | 241 | A06608 | A14295 | 379 |
| A06608 | A14444 | 899 | A06608 | A14687 | 241 |
| A06608 | A14724 | 322 | A06608 | A15989 | 262 |
| A06608 | A16402 | 221 | A06609 | A06615 | 216 |
| A06609 | A07191 | 168 | A06609 | A07339 | 486 |
| A06609 | A09258 | 259 | A06609 | A10363 | 249 |
| A06609 | A10854 | 296 | A06609 | A11759 | 218 |
| A06609 | A13250 | 899 | A06609 | A14198 | 899 |
| A06609 | A14444 | 235 | A06609 | A14596 | 899 |
| A06609 | A15293 | 899 | A06609 | A15294 | 899 |
| A06610 | A06627 | 63  | A06610 | A06628 | 63  |
| A06610 | A06642 | 226 | A06610 | A07124 | 185 |

|        |        |     |        |        |     |
|--------|--------|-----|--------|--------|-----|
| A06610 | A07165 | 324 | A06610 | A07314 | 424 |
| A06610 | A07339 | 216 | A06610 | A07352 | 174 |
| A06610 | A07422 | 455 | A06610 | A07780 | 159 |
| A06610 | A07834 | 258 | A06610 | A08438 | 196 |
| A06610 | A08627 | 243 | A06610 | A09014 | 159 |
| A06610 | A09124 | 462 | A06610 | A09256 | 174 |
| A06610 | A09371 | 174 | A06610 | A09727 | 486 |
| A06610 | A09778 | 160 | A06610 | A09826 | 485 |
| A06610 | A10179 | 159 | A06610 | A10211 | 196 |
| A06610 | A10513 | 307 | A06610 | A10580 | 193 |
| A06610 | A10801 | 171 | A06610 | A10987 | 423 |
| A06610 | A11190 | 223 | A06610 | A11402 | 173 |
| A06610 | A11683 | 191 | A06610 | A11779 | 173 |
| A06610 | A11848 | 193 | A06610 | A12969 | 168 |
| A06610 | A13147 | 184 | A06610 | A13274 | 159 |
| A06610 | A13392 | 190 | A06610 | A13722 | 232 |
| A06610 | A13824 | 490 | A06610 | A13829 | 485 |
| A06610 | A13902 | 454 | A06610 | A13979 | 419 |
| A06610 | A13986 | 457 | A06610 | A13990 | 160 |
| A06610 | A13997 | 380 | A06610 | A14007 | 443 |
| A06610 | A14009 | 472 | A06610 | A14016 | 414 |
| A06610 | A14031 | 232 | A06610 | A14195 | 154 |
| A06610 | A14443 | 246 | A06610 | A14596 | 329 |
| A06610 | A14741 | 490 | A06610 | A15151 | 159 |
| A06610 | A15343 | 154 | A06610 | A15726 | 447 |
| A06610 | A16076 | 243 | A06610 | A16216 | 373 |
| A06610 | A16257 | 229 | A06610 | A16716 | 174 |
| A06610 | A16906 | 174 | A06611 | A06613 | 344 |
| A06611 | A06650 | 187 | A06611 | A15626 | 198 |
| A06611 | A15855 | 188 | A06611 | A16597 | 283 |
| A06612 | A06614 | 441 | A06613 | A07242 | 343 |
| A06613 | A07848 | 274 | A06613 | A08740 | 358 |
| A06615 | A06646 | 274 | A06615 | A07165 | 441 |
| A06615 | A07339 | 491 | A06615 | A07834 | 215 |
| A06615 | A08399 | 160 | A06615 | A08566 | 899 |
| A06615 | A08718 | 279 | A06615 | A09066 | 193 |
| A06615 | A09181 | 176 | A06615 | A09808 | 219 |
| A06615 | A10070 | 154 | A06615 | A10822 | 174 |
| A06615 | A10894 | 168 | A06615 | A11793 | 274 |
| A06615 | A11932 | 210 | A06615 | A12047 | 899 |
| A06615 | A12474 | 191 | A06615 | A12553 | 204 |
| A06615 | A12618 | 191 | A06615 | A12897 | 491 |
| A06615 | A13373 | 299 | A06615 | A13464 | 274 |
| A06615 | A13970 | 899 | A06615 | A13978 | 195 |
| A06615 | A14077 | 283 | A06615 | A14197 | 249 |
| A06615 | A14299 | 424 | A06615 | A14371 | 899 |

|        |        |     |        |        |     |
|--------|--------|-----|--------|--------|-----|
| A06615 | A14481 | 270 | A06615 | A14795 | 204 |
| A06615 | A14961 | 241 | A06615 | A14968 | 151 |
| A06615 | A15005 | 241 | A06615 | A15383 | 406 |
| A06615 | A15630 | 263 | A06615 | A15645 | 152 |
| A06615 | A15676 | 165 | A06615 | A15726 | 413 |
| A06616 | A07967 | 167 | A06616 | A16636 | 177 |
| A06617 | A15917 | 302 | A06618 | A07166 | 362 |
| A06620 | A06622 | 363 | A06620 | A06628 | 328 |
| A06620 | A06649 | 313 | A06620 | A07145 | 216 |
| A06620 | A07598 | 191 | A06620 | A15532 | 160 |
| A06621 | A06688 | 234 | A06621 | A07206 | 191 |
| A06621 | A07768 | 467 | A06621 | A08161 | 411 |
| A06621 | A09124 | 335 | A06621 | A09149 | 334 |
| A06621 | A09394 | 276 | A06621 | A09882 | 171 |
| A06621 | A09936 | 358 | A06621 | A11759 | 213 |
| A06621 | A11943 | 162 | A06621 | A14025 | 401 |
| A06621 | A14605 | 246 | A06621 | A14642 | 273 |
| A06621 | A15910 | 352 | A06622 | A06647 | 299 |
| A06622 | A06649 | 293 | A06622 | A06760 | 346 |
| A06622 | A06858 | 243 | A06622 | A07178 | 373 |
| A06622 | A08070 | 168 | A06622 | A09020 | 267 |
| A06622 | A09751 | 202 | A06622 | A10002 | 358 |
| A06622 | A10337 | 200 | A06622 | A13146 | 182 |
| A06622 | A13181 | 190 | A06622 | A14000 | 201 |
| A06622 | A14520 | 174 | A06622 | A14588 | 215 |
| A06622 | A14643 | 326 | A06623 | A06648 | 469 |
| A06623 | A06649 | 245 | A06623 | A07127 | 446 |
| A06623 | A07145 | 263 | A06623 | A07158 | 419 |
| A06623 | A07165 | 199 | A06623 | A07217 | 254 |
| A06623 | A07339 | 172 | A06623 | A08070 | 339 |
| A06623 | A08417 | 157 | A06623 | A08692 | 193 |
| A06623 | A08889 | 185 | A06623 | A08911 | 176 |
| A06623 | A09031 | 308 | A06623 | A09120 | 446 |
| A06623 | A09218 | 210 | A06623 | A09438 | 210 |
| A06623 | A09763 | 283 | A06623 | A09789 | 357 |
| A06623 | A09900 | 182 | A06623 | A10221 | 286 |
| A06623 | A10693 | 193 | A06623 | A10722 | 213 |
| A06623 | A11426 | 302 | A06623 | A11891 | 335 |
| A06623 | A12363 | 268 | A06623 | A12401 | 271 |
| A06623 | A12956 | 335 | A06623 | A13212 | 193 |
| A06623 | A13348 | 210 | A06623 | A14378 | 154 |
| A06623 | A14499 | 369 | A06623 | A14624 | 324 |
| A06623 | A14642 | 486 | A06623 | A14643 | 485 |
| A06623 | A14652 | 213 | A06623 | A14687 | 308 |
| A06623 | A16201 | 257 | A06623 | A16300 | 393 |
| A06624 | A13432 | 299 | A06624 | A16203 | 391 |

|        |        |     |        |        |     |
|--------|--------|-----|--------|--------|-----|
| A06625 | A16216 | 180 | A06626 | A07088 | 321 |
| A06626 | A07198 | 271 | A06627 | A06628 | 185 |
| A06627 | A08837 | 193 | A06627 | A09766 | 223 |
| A06627 | A13830 | 152 | A06627 | A15365 | 246 |
| A06627 | A15809 | 154 | A06628 | A06731 | 408 |
| A06628 | A08633 | 254 | A06628 | A09020 | 226 |
| A06628 | A09417 | 268 | A06628 | A10195 | 330 |
| A06628 | A11602 | 204 | A06628 | A11828 | 165 |
| A06628 | A14664 | 235 | A06628 | A15354 | 167 |
| A06628 | A15399 | 159 | A06629 | A06640 | 355 |
| A06629 | A06641 | 361 | A06629 | A06847 | 259 |
| A06629 | A06912 | 246 | A06629 | A06970 | 308 |
| A06629 | A06994 | 281 | A06629 | A07027 | 232 |
| A06629 | A07059 | 168 | A06629 | A07381 | 341 |
| A06629 | A07408 | 291 | A06629 | A07501 | 216 |
| A06629 | A07558 | 165 | A06629 | A07590 | 171 |
| A06629 | A07619 | 321 | A06629 | A08765 | 187 |
| A06629 | A10386 | 290 | A06629 | A10477 | 229 |
| A06629 | A13819 | 168 | A06629 | A14077 | 230 |
| A06629 | A15874 | 269 | A06629 | A16739 | 229 |
| A06629 | A16741 | 200 | A06629 | A16964 | 326 |
| A06630 | A06633 | 303 | A06630 | A06931 | 391 |
| A06630 | A07122 | 294 | A06630 | A13033 | 391 |
| A06630 | A15874 | 213 | A06630 | A16027 | 221 |
| A06630 | A16741 | 291 | A06631 | A06644 | 257 |
| A06631 | A08745 | 260 | A06631 | A09977 | 313 |
| A06631 | A11826 | 401 | A06631 | A14010 | 185 |
| A06631 | A14178 | 157 | A06631 | A14208 | 238 |
| A06631 | A15262 | 177 | A06631 | A15515 | 210 |
| A06631 | A15613 | 423 | A06631 | A16216 | 101 |
| A06631 | A16224 | 212 | A06631 | A16722 | 293 |
| A06631 | A17126 | 223 | A06632 | A06641 | 356 |
| A06632 | A06668 | 391 | A06632 | A06692 | 449 |
| A06632 | A06912 | 363 | A06632 | A06970 | 245 |
| A06632 | A07061 | 409 | A06632 | A07080 | 323 |
| A06632 | A07800 | 193 | A06632 | A15649 | 226 |
| A06632 | A15874 | 475 | A06632 | A16281 | 386 |
| A06632 | A16739 | 353 | A06632 | A16741 | 455 |
| A06632 | A16744 | 357 | A06633 | A06756 | 266 |
| A06633 | A06970 | 160 | A06633 | A07122 | 157 |
| A06633 | A07256 | 343 | A06633 | A07267 | 279 |
| A06633 | A07413 | 235 | A06633 | A07746 | 299 |
| A06633 | A12055 | 361 | A06633 | A15905 | 241 |
| A06633 | A16027 | 347 | A06633 | A16028 | 311 |
| A06634 | A06717 | 395 | A06634 | A07746 | 467 |
| A06634 | A13330 | 424 | A06634 | A13426 | 353 |

|        |        |     |        |        |     |
|--------|--------|-----|--------|--------|-----|
| A06635 | A07109 | 490 | A06635 | A07177 | 162 |
| A06635 | A07200 | 408 | A06635 | A07220 | 191 |
| A06635 | A07482 | 340 | A06635 | A07690 | 215 |
| A06635 | A08903 | 168 | A06635 | A09935 | 302 |
| A06635 | A10405 | 373 | A06635 | A10409 | 353 |
| A06635 | A10656 | 185 | A06635 | A10707 | 457 |
| A06635 | A10832 | 340 | A06635 | A12528 | 353 |
| A06635 | A12529 | 329 | A06635 | A13667 | 324 |
| A06635 | A13914 | 353 | A06635 | A13929 | 204 |
| A06635 | A14388 | 329 | A06635 | A14401 | 491 |
| A06635 | A14405 | 419 | A06635 | A14440 | 348 |
| A06635 | A14605 | 199 | A06635 | A15368 | 475 |
| A06635 | A15599 | 193 | A06635 | A15970 | 230 |
| A06635 | A16021 | 340 | A06635 | A16355 | 462 |
| A06635 | A16741 | 491 | A06636 | A07815 | 445 |
| A06636 | A09829 | 358 | A06636 | A10927 | 363 |
| A06637 | A07160 | 174 | A06637 | A07208 | 429 |
| A06637 | A08228 | 451 | A06637 | A09724 | 157 |
| A06637 | A10897 | 202 | A06637 | A11256 | 344 |
| A06637 | A11296 | 491 | A06637 | A13830 | 260 |
| A06637 | A14699 | 491 | A06637 | A15684 | 227 |
| A06638 | A07503 | 398 | A06638 | A07757 | 366 |
| A06640 | A06641 | 486 | A06640 | A06675 | 185 |
| A06640 | A06912 | 299 | A06640 | A07011 | 170 |
| A06640 | A07238 | 207 | A06640 | A07381 | 177 |
| A06640 | A11752 | 307 | A06640 | A11919 | 438 |
| A06640 | A14016 | 168 | A06640 | A15297 | 374 |
| A06640 | A15874 | 199 | A06640 | A16118 | 201 |
| A06640 | A16739 | 285 | A06641 | A06689 | 395 |
| A06641 | A06847 | 412 | A06641 | A06860 | 252 |
| A06641 | A06970 | 451 | A06641 | A06994 | 457 |
| A06641 | A07027 | 399 | A06641 | A07059 | 424 |
| A06641 | A07108 | 205 | A06641 | A07122 | 286 |
| A06641 | A07141 | 187 | A06641 | A07238 | 213 |
| A06641 | A07283 | 251 | A06641 | A07325 | 446 |
| A06641 | A07408 | 425 | A06641 | A07413 | 232 |
| A06641 | A07477 | 243 | A06641 | A07501 | 391 |
| A06641 | A07520 | 195 | A06641 | A07590 | 238 |
| A06641 | A07619 | 363 | A06641 | A07674 | 461 |
| A06641 | A07690 | 402 | A06641 | A07723 | 319 |
| A06641 | A07736 | 208 | A06641 | A07933 | 156 |
| A06641 | A08155 | 333 | A06641 | A08330 | 271 |
| A06641 | A08663 | 313 | A06641 | A09846 | 308 |
| A06641 | A09852 | 259 | A06641 | A09880 | 157 |
| A06641 | A10427 | 185 | A06641 | A12723 | 235 |
| A06641 | A15874 | 207 | A06641 | A16026 | 286 |



|        |        |     |        |        |     |
|--------|--------|-----|--------|--------|-----|
| A06641 | A16741 | 285 | A06642 | A06644 | 474 |
| A06642 | A06883 | 299 | A06642 | A07218 | 481 |
| A06642 | A07711 | 179 | A06642 | A08086 | 430 |
| A06642 | A08137 | 358 | A06642 | A08657 | 299 |
| A06642 | A08829 | 299 | A06642 | A09540 | 187 |
| A06642 | A09831 | 227 | A06642 | A09978 | 274 |
| A06642 | A10061 | 221 | A06642 | A10062 | 212 |
| A06642 | A11009 | 268 | A06642 | A11317 | 162 |
| A06642 | A11577 | 172 | A06642 | A11635 | 299 |
| A06642 | A12633 | 212 | A06642 | A13824 | 484 |
| A06642 | A13829 | 486 | A06642 | A14200 | 235 |
| A06642 | A14275 | 208 | A06642 | A14830 | 132 |
| A06642 | A15314 | 177 | A06643 | A07184 | 385 |
| A06644 | A07634 | 216 | A06644 | A07961 | 202 |
| A06644 | A11658 | 254 | A06644 | A14077 | 198 |
| A06644 | A14431 | 208 | A06644 | A15367 | 160 |
| A06644 | A15420 | 159 | A06644 | A15501 | 160 |
| A06644 | A15613 | 290 | A06644 | A15962 | 221 |
| A06644 | A16216 | 105 | A06645 | A07736 | 388 |
| A06645 | A08250 | 441 | A06645 | A08330 | 418 |
| A06645 | A09263 | 278 | A06645 | A09902 | 313 |
| A06645 | A13736 | 435 | A06645 | A16746 | 455 |
| A06647 | A06649 | 357 | A06647 | A08108 | 324 |
| A06647 | A10712 | 290 | A06647 | A14648 | 183 |
| A06648 | A06649 | 380 | A06648 | A07128 | 221 |
| A06648 | A07205 | 188 | A06648 | A07724 | 379 |
| A06648 | A08070 | 266 | A06648 | A08233 | 379 |
| A06648 | A08655 | 249 | A06648 | A08692 | 215 |
| A06648 | A08911 | 329 | A06648 | A10093 | 339 |
| A06648 | A10221 | 303 | A06648 | A10950 | 379 |
| A06648 | A11902 | 174 | A06648 | A12730 | 238 |
| A06648 | A13136 | 379 | A06648 | A13484 | 176 |
| A06648 | A14642 | 333 | A06648 | A14643 | 443 |
| A06648 | A14790 | 249 | A06648 | A15024 | 379 |
| A06648 | A15676 | 218 | A06648 | A15840 | 311 |
| A06649 | A08070 | 255 | A06649 | A08911 | 306 |
| A06649 | A15889 | 327 | A06650 | A06688 | 490 |
| A06650 | A06747 | 424 | A06650 | A06769 | 364 |
| A06650 | A06988 | 257 | A06650 | A07030 | 174 |
| A06650 | A07031 | 475 | A06650 | A07131 | 196 |
| A06650 | A07173 | 486 | A06650 | A07200 | 174 |
| A06650 | A07374 | 196 | A06650 | A08389 | 219 |
| A06650 | A08741 | 446 | A06650 | A08878 | 333 |
| A06650 | A09052 | 491 | A06650 | A09180 | 375 |
| A06650 | A09394 | 241 | A06650 | A09642 | 174 |
| A06650 | A09940 | 491 | A06650 | A10030 | 196 |

|        |        |     |        |        |     |
|--------|--------|-----|--------|--------|-----|
| A06650 | A10395 | 259 | A06650 | A10500 | 232 |
| A06650 | A10845 | 232 | A06650 | A11983 | 455 |
| A06650 | A12654 | 183 | A06650 | A12897 | 491 |
| A06650 | A12927 | 312 | A06650 | A14071 | 481 |
| A06650 | A14208 | 217 | A06650 | A14410 | 154 |
| A06650 | A14635 | 369 | A06650 | A14793 | 278 |
| A06650 | A15241 | 460 | A06650 | A15356 | 176 |
| A06650 | A15674 | 232 | A06650 | A15717 | 260 |
| A06650 | A15809 | 372 | A06650 | A15959 | 196 |
| A06650 | A15976 | 184 | A06650 | A16281 | 372 |
| A06650 | A16636 | 414 | A06650 | A17151 | 329 |
| A06651 | A06701 | 180 | A06651 | A09182 | 438 |
| A06651 | A09511 | 481 | A06651 | A09551 | 394 |
| A06651 | A10205 | 480 | A06652 | A07161 | 345 |
| A06652 | A07332 | 314 | A06652 | A10796 | 389 |
| A06652 | A12988 | 343 | A06652 | A15865 | 411 |
| A06652 | A16009 | 436 | A06653 | A07166 | 229 |
| A06653 | A07191 | 210 | A06653 | A09123 | 306 |
| A06653 | A09900 | 279 | A06653 | A12965 | 389 |
| A06653 | A14643 | 207 | A06653 | A15840 | 256 |
| A06653 | A16732 | 347 | A06654 | A06689 | 451 |
| A06654 | A06970 | 423 | A06654 | A07590 | 232 |
| A06654 | A07736 | 202 | A06654 | A09472 | 452 |
| A06654 | A09539 | 276 | A06654 | A10083 | 160 |
| A06654 | A10544 | 302 | A06654 | A13415 | 312 |
| A06654 | A14690 | 154 | A06654 | A14803 | 429 |
| A06655 | A10278 | 461 | A06655 | A12512 | 430 |
| A06655 | A15277 | 416 | A06655 | A16514 | 430 |
| A06657 | A07664 | 382 | A06657 | A11487 | 191 |
| A06659 | A06675 | 630 | A06659 | A06890 | 477 |
| A06659 | A07477 | 305 | A06659 | A07736 | 470 |
| A06659 | A07973 | 177 | A06659 | A08484 | 460 |
| A06659 | A09043 | 288 | A06659 | A09050 | 638 |
| A06659 | A09876 | 277 | A06659 | A10148 | 379 |
| A06659 | A10683 | 227 | A06659 | A10967 | 229 |
| A06659 | A11444 | 216 | A06659 | A13052 | 195 |
| A06659 | A13387 | 296 | A06659 | A13844 | 334 |
| A06659 | A13846 | 334 | A06659 | A13882 | 171 |
| A06659 | A13902 | 353 | A06659 | A14182 | 334 |
| A06659 | A14247 | 477 | A06659 | A14481 | 382 |
| A06659 | A14693 | 491 | A06659 | A15430 | 162 |
| A06659 | A15498 | 218 | A06659 | A15669 | 174 |
| A06659 | A16436 | 188 | A06659 | A16927 | 180 |
| A06660 | A06686 | 173 | A06660 | A06891 | 346 |
| A06660 | A07192 | 441 | A06660 | A07339 | 486 |
| A06660 | A08011 | 193 | A06660 | A08571 | 484 |

|        |        |     |        |        |     |
|--------|--------|-----|--------|--------|-----|
| A06660 | A08885 | 152 | A06660 | A09160 | 290 |
| A06660 | A09332 | 201 | A06660 | A09362 | 216 |
| A06660 | A09441 | 246 | A06660 | A09504 | 200 |
| A06660 | A09882 | 218 | A06660 | A11478 | 419 |
| A06660 | A11518 | 303 | A06660 | A13667 | 168 |
| A06660 | A13824 | 307 | A06660 | A14006 | 395 |
| A06660 | A14399 | 162 | A06660 | A15292 | 485 |
| A06660 | A16410 | 480 | A06661 | A06715 | 160 |
| A06661 | A06991 | 154 | A06661 | A07054 | 470 |
| A06661 | A07073 | 157 | A06661 | A07083 | 168 |
| A06661 | A07242 | 269 | A06661 | A07444 | 800 |
| A06661 | A07687 | 300 | A06661 | A07872 | 692 |
| A06661 | A07873 | 813 | A06661 | A08126 | 249 |
| A06661 | A08351 | 446 | A06661 | A08552 | 154 |
| A06661 | A08868 | 263 | A06661 | A09662 | 480 |
| A06661 | A09666 | 317 | A06661 | A09757 | 375 |
| A06661 | A10909 | 356 | A06661 | A10965 | 247 |
| A06661 | A11283 | 556 | A06661 | A11986 | 236 |
| A06661 | A12234 | 173 | A06661 | A12506 | 217 |
| A06661 | A12538 | 217 | A06661 | A12678 | 257 |
| A06661 | A12722 | 395 | A06661 | A12834 | 288 |
| A06661 | A13964 | 213 | A06661 | A13989 | 283 |
| A06661 | A14278 | 291 | A06661 | A14484 | 435 |
| A06661 | A14633 | 245 | A06661 | A14847 | 374 |
| A06661 | A15445 | 308 | A06662 | A07706 | 317 |
| A06662 | A07933 | 157 | A06662 | A15492 | 171 |
| A06662 | A15564 | 182 | A06662 | A15763 | 208 |
| A06662 | A15764 | 266 | A06663 | A07078 | 324 |
| A06663 | A07324 | 324 | A06663 | A07748 | 321 |
| A06663 | A15506 | 154 | A06664 | A15372 | 238 |
| A06664 | A17062 | 241 | A06665 | A07780 | 380 |
| A06665 | A09238 | 212 | A06665 | A09239 | 185 |
| A06665 | A09352 | 266 | A06665 | A10612 | 201 |
| A06665 | A11280 | 441 | A06665 | A11402 | 456 |
| A06665 | A11445 | 350 | A06665 | A11604 | 165 |
| A06665 | A13369 | 474 | A06665 | A14387 | 328 |
| A06665 | A14392 | 201 | A06665 | A15516 | 258 |
| A06668 | A07080 | 313 | A06668 | A07109 | 402 |
| A06668 | A07304 | 385 | A06668 | A07530 | 436 |
| A06668 | A07554 | 380 | A06668 | A07688 | 416 |
| A06668 | A07800 | 179 | A06668 | A15905 | 302 |
| A06668 | A16028 | 358 | A06669 | A15726 | 399 |
| A06670 | A07158 | 260 | A06670 | A08047 | 430 |
| A06670 | A08314 | 430 | A06670 | A09078 | 218 |
| A06670 | A12463 | 422 | A06670 | A13369 | 154 |
| A06671 | A09269 | 479 | A06671 | A09340 | 207 |

|        |        |     |        |        |     |
|--------|--------|-----|--------|--------|-----|
| A06673 | A08891 | 457 | A06673 | A14174 | 490 |
| A06674 | A08828 | 434 | A06674 | A10343 | 445 |
| A06674 | A13304 | 445 | A06675 | A06890 | 269 |
| A06675 | A06930 | 218 | A06675 | A06941 | 730 |
| A06675 | A08874 | 475 | A06675 | A08984 | 162 |
| A06675 | A09050 | 376 | A06675 | A11303 | 154 |
| A06675 | A13844 | 617 | A06675 | A13846 | 493 |
| A06675 | A13887 | 283 | A06675 | A13902 | 210 |
| A06675 | A14095 | 480 | A06675 | A14138 | 177 |
| A06675 | A14182 | 334 | A06675 | A14461 | 219 |
| A06675 | A14481 | 177 | A06675 | A15650 | 314 |
| A06677 | A09124 | 216 | A06677 | A15613 | 236 |
| A06678 | A16021 | 424 | A06679 | A10987 | 358 |
| A06680 | A06752 | 173 | A06680 | A07231 | 367 |
| A06680 | A07232 | 218 | A06680 | A07404 | 462 |
| A06680 | A12110 | 420 | A06680 | A13894 | 221 |
| A06680 | A13906 | 355 | A06680 | A14008 | 274 |
| A06680 | A14281 | 424 | A06683 | A10148 | 329 |
| A06684 | A07513 | 452 | A06684 | A07774 | 452 |
| A06684 | A07945 | 452 | A06684 | A08153 | 452 |
| A06684 | A10095 | 425 | A06684 | A10292 | 452 |
| A06684 | A10641 | 452 | A06686 | A06721 | 380 |
| A06686 | A06844 | 363 | A06686 | A06896 | 382 |
| A06686 | A07056 | 317 | A06686 | A07337 | 374 |
| A06686 | A07842 | 461 | A06686 | A07852 | 436 |
| A06686 | A07995 | 430 | A06686 | A10344 | 391 |
| A06686 | A10639 | 462 | A06686 | A11012 | 405 |
| A06686 | A11306 | 293 | A06686 | A12675 | 363 |
| A06686 | A12761 | 405 | A06686 | A13885 | 299 |
| A06686 | A15917 | 293 | A06686 | A17085 | 380 |
| A06687 | A07664 | 152 | A06687 | A08091 | 183 |
| A06687 | A08555 | 611 | A06687 | A08821 | 271 |
| A06687 | A08990 | 154 | A06687 | A09078 | 263 |
| A06687 | A09298 | 611 | A06687 | A09609 | 191 |
| A06687 | A12200 | 235 | A06687 | A13604 | 418 |
| A06687 | A13894 | 273 | A06687 | A13983 | 489 |
| A06687 | A14199 | 352 | A06687 | A14661 | 319 |
| A06687 | A14711 | 313 | A06687 | A14903 | 152 |
| A06687 | A14921 | 223 | A06687 | A15132 | 324 |
| A06687 | A15169 | 324 | A06687 | A15170 | 324 |
| A06687 | A15315 | 367 | A06687 | A15347 | 481 |
| A06687 | A15617 | 309 | A06687 | A16304 | 491 |
| A06687 | A16364 | 283 | A06688 | A06733 | 204 |
| A06688 | A07016 | 204 | A06688 | A07177 | 229 |
| A06688 | A07339 | 195 | A06688 | A07768 | 167 |
| A06688 | A08285 | 187 | A06688 | A08389 | 234 |

|        |        |     |        |        |     |
|--------|--------|-----|--------|--------|-----|
| A06688 | A08643 | 481 | A06688 | A09262 | 353 |
| A06688 | A09359 | 277 | A06688 | A09428 | 183 |
| A06688 | A09509 | 326 | A06688 | A09935 | 374 |
| A06688 | A10103 | 491 | A06688 | A10806 | 277 |
| A06688 | A11983 | 262 | A06688 | A12897 | 330 |
| A06688 | A13152 | 434 | A06688 | A14342 | 299 |
| A06688 | A14349 | 288 | A06688 | A16281 | 447 |
| A06689 | A06819 | 223 | A06689 | A06847 | 260 |
| A06689 | A06882 | 187 | A06689 | A06912 | 245 |
| A06689 | A06970 | 491 | A06689 | A06979 | 228 |
| A06689 | A06990 | 238 | A06689 | A07088 | 258 |
| A06689 | A07222 | 223 | A06689 | A07238 | 480 |
| A06689 | A07256 | 171 | A06689 | A07283 | 263 |
| A06689 | A07333 | 223 | A06689 | A07336 | 159 |
| A06689 | A07477 | 475 | A06689 | A07503 | 162 |
| A06689 | A07508 | 279 | A06689 | A07520 | 483 |
| A06689 | A07553 | 288 | A06689 | A07558 | 488 |
| A06689 | A07590 | 489 | A06689 | A07674 | 172 |
| A06689 | A07688 | 279 | A06689 | A07690 | 234 |
| A06689 | A07692 | 182 | A06689 | A07721 | 154 |
| A06689 | A07736 | 424 | A06689 | A07739 | 208 |
| A06689 | A07766 | 323 | A06689 | A07933 | 475 |
| A06689 | A07973 | 428 | A06689 | A07976 | 311 |
| A06689 | A08108 | 216 | A06689 | A08155 | 379 |
| A06689 | A08238 | 269 | A06689 | A08385 | 213 |
| A06689 | A08396 | 245 | A06689 | A08571 | 160 |
| A06689 | A08591 | 208 | A06689 | A08667 | 255 |
| A06689 | A08690 | 187 | A06689 | A08863 | 180 |
| A06689 | A09566 | 159 | A06689 | A09876 | 469 |
| A06689 | A09917 | 201 | A06689 | A10054 | 324 |
| A06689 | A10420 | 439 | A06689 | A10437 | 177 |
| A06689 | A10444 | 427 | A06689 | A10452 | 290 |
| A06689 | A10456 | 473 | A06689 | A10635 | 258 |
| A06689 | A10656 | 443 | A06689 | A10658 | 447 |
| A06689 | A10672 | 286 | A06689 | A10675 | 201 |
| A06689 | A10676 | 182 | A06689 | A10677 | 400 |
| A06689 | A10688 | 159 | A06689 | A10690 | 159 |
| A06689 | A10694 | 462 | A06689 | A10702 | 306 |
| A06689 | A10712 | 257 | A06689 | A10933 | 260 |
| A06689 | A13147 | 263 | A06689 | A13735 | 241 |
| A06689 | A13822 | 223 | A06689 | A14014 | 162 |
| A06689 | A14077 | 193 | A06689 | A14192 | 185 |
| A06689 | A14247 | 253 | A06689 | A14279 | 278 |
| A06689 | A14337 | 196 | A06689 | A14444 | 156 |
| A06689 | A14525 | 223 | A06689 | A14729 | 234 |
| A06689 | A14782 | 157 | A06689 | A14803 | 491 |

|        |        |     |        |        |     |
|--------|--------|-----|--------|--------|-----|
| A06689 | A14804 | 225 | A06689 | A14856 | 469 |
| A06689 | A14862 | 305 | A06689 | A14907 | 279 |
| A06689 | A15359 | 191 | A06689 | A15372 | 257 |
| A06689 | A15430 | 400 | A06689 | A15669 | 154 |
| A06689 | A15874 | 443 | A06689 | A16027 | 290 |
| A06689 | A16219 | 223 | A06689 | A16262 | 266 |
| A06689 | A16286 | 429 | A06689 | A16335 | 156 |
| A06689 | A16529 | 221 | A06689 | A16531 | 223 |
| A06689 | A16739 | 390 | A06689 | A16741 | 455 |
| A06689 | A16744 | 232 | A06689 | A16746 | 224 |
| A06689 | A17024 | 260 | A06689 | A17041 | 338 |
| A06690 | A11322 | 313 | A06691 | A14071 | 339 |
| A06692 | A07122 | 221 | A06692 | A07238 | 277 |
| A06692 | A07477 | 302 | A06692 | A10677 | 310 |
| A06692 | A15294 | 246 | A06692 | A15874 | 461 |
| A06692 | A16033 | 347 | A06692 | A16741 | 348 |
| A06693 | A07345 | 430 | A06693 | A07967 | 177 |
| A06693 | A07973 | 357 | A06693 | A09877 | 352 |
| A06693 | A10612 | 184 | A06693 | A10672 | 316 |
| A06693 | A10778 | 311 | A06693 | A11224 | 338 |
| A06693 | A12361 | 216 | A06693 | A13517 | 160 |
| A06693 | A14880 | 347 | A06693 | A15356 | 393 |
| A06693 | A16417 | 277 | A06695 | A10337 | 344 |
| A06695 | A15974 | 291 | A06696 | A06875 | 434 |
| A06696 | A07438 | 323 | A06696 | A07471 | 185 |
| A06696 | A07538 | 430 | A06696 | A07541 | 171 |
| A06696 | A07561 | 429 | A06696 | A07634 | 424 |
| A06696 | A07638 | 411 | A06696 | A07639 | 398 |
| A06696 | A07673 | 269 | A06696 | A07914 | 317 |
| A06696 | A08257 | 411 | A06696 | A08785 | 470 |
| A06696 | A09416 | 215 | A06696 | A10634 | 347 |
| A06696 | A11405 | 168 | A06696 | A13879 | 429 |
| A06696 | A13928 | 170 | A06696 | A14430 | 154 |
| A06696 | A15913 | 229 | A06697 | A06863 | 402 |
| A06697 | A08628 | 404 | A06697 | A08709 | 472 |
| A06697 | A09535 | 484 | A06697 | A10555 | 413 |
| A06698 | A07192 | 226 | A06698 | A07244 | 174 |
| A06698 | A07432 | 174 | A06698 | A07524 | 174 |
| A06698 | A07537 | 291 | A06698 | A07625 | 174 |
| A06698 | A07924 | 174 | A06698 | A09180 | 291 |
| A06698 | A11544 | 174 | A06698 | A11831 | 174 |
| A06698 | A11832 | 174 | A06698 | A12757 | 260 |
| A06699 | A07080 | 488 | A06699 | A07122 | 341 |
| A06699 | A07410 | 425 | A06699 | A07800 | 162 |
| A06699 | A07809 | 396 | A06699 | A10131 | 339 |
| A06699 | A10659 | 380 | A06700 | A07080 | 180 |

|        |        |     |        |        |     |
|--------|--------|-----|--------|--------|-----|
| A06700 | A07088 | 179 | A06700 | A07109 | 382 |
| A06700 | A07122 | 201 | A06700 | A07132 | 254 |
| A06700 | A07198 | 241 | A06700 | A07287 | 366 |
| A06700 | A07304 | 355 | A06700 | A07376 | 265 |
| A06700 | A07530 | 257 | A06700 | A07558 | 162 |
| A06700 | A07674 | 351 | A06700 | A07684 | 235 |
| A06700 | A07688 | 326 | A06700 | A08197 | 257 |
| A06700 | A08688 | 245 | A06700 | A09850 | 288 |
| A06700 | A10121 | 319 | A06700 | A10657 | 346 |
| A06700 | A10658 | 269 | A06700 | A10686 | 269 |
| A06700 | A10703 | 232 | A06700 | A10880 | 366 |
| A06700 | A15637 | 340 | A06700 | A16741 | 374 |
| A06700 | A17078 | 185 | A06701 | A06882 | 208 |
| A06701 | A07384 | 255 | A06701 | A07422 | 480 |
| A06701 | A07634 | 168 | A06701 | A07836 | 196 |
| A06701 | A07901 | 324 | A06701 | A07985 | 316 |
| A06701 | A08397 | 265 | A06701 | A08489 | 296 |
| A06701 | A08571 | 383 | A06701 | A08635 | 422 |
| A06701 | A09417 | 187 | A06701 | A09511 | 160 |
| A06701 | A10205 | 152 | A06701 | A10386 | 190 |
| A06701 | A10392 | 429 | A06701 | A10534 | 187 |
| A06701 | A10580 | 185 | A06701 | A10581 | 441 |
| A06701 | A10623 | 340 | A06701 | A10730 | 480 |
| A06701 | A10742 | 190 | A06701 | A10743 | 457 |
| A06701 | A10898 | 184 | A06701 | A10982 | 172 |
| A06701 | A11027 | 171 | A06701 | A11134 | 265 |
| A06701 | A11379 | 232 | A06701 | A13369 | 377 |
| A06701 | A14009 | 474 | A06701 | A14387 | 173 |
| A06701 | A14469 | 200 | A06701 | A14529 | 260 |
| A06701 | A14648 | 486 | A06702 | A13611 | 452 |
| A06703 | A07163 | 193 | A06703 | A08692 | 344 |
| A06703 | A09059 | 340 | A06703 | A10623 | 297 |
| A06703 | A10728 | 260 | A06704 | A07042 | 452 |
| A06704 | A07323 | 384 | A06704 | A14796 | 452 |
| A06705 | A07061 | 335 | A06706 | A10409 | 447 |
| A06707 | A09160 | 266 | A06708 | A06739 | 455 |
| A06708 | A07190 | 180 | A06708 | A07209 | 434 |
| A06708 | A07815 | 481 | A06708 | A09362 | 404 |
| A06708 | A09838 | 343 | A06708 | A10547 | 224 |
| A06708 | A11413 | 472 | A06708 | A12781 | 378 |
| A06708 | A14071 | 165 | A06708 | A15416 | 173 |
| A06709 | A14699 | 187 | A06710 | A06711 | 446 |
| A06710 | A06712 | 417 | A06710 | A07015 | 435 |
| A06711 | A07015 | 420 | A06711 | A07044 | 375 |
| A06711 | A07218 | 219 | A06711 | A07453 | 388 |
| A06711 | A07676 | 420 | A06711 | A07699 | 391 |

|        |        |     |        |        |     |
|--------|--------|-----|--------|--------|-----|
| A06711 | A07704 | 402 | A06711 | A07705 | 465 |
| A06711 | A08040 | 333 | A06711 | A08292 | 456 |
| A06711 | A09518 | 391 | A06711 | A10900 | 409 |
| A06711 | A12345 | 409 | A06711 | A12386 | 420 |
| A06711 | A12845 | 373 | A06712 | A07218 | 201 |
| A06712 | A12345 | 435 | A06712 | A14444 | 283 |
| A06713 | A08571 | 160 | A06713 | A10250 | 329 |
| A06715 | A07054 | 455 | A06715 | A07083 | 457 |
| A06715 | A07495 | 326 | A06715 | A08126 | 205 |
| A06715 | A08184 | 204 | A06715 | A08536 | 467 |
| A06715 | A08839 | 327 | A06715 | A08855 | 132 |
| A06715 | A08858 | 243 | A06715 | A08885 | 362 |
| A06715 | A09256 | 157 | A06715 | A09662 | 470 |
| A06715 | A11675 | 417 | A06715 | A12533 | 265 |
| A06715 | A14279 | 469 | A06715 | A14474 | 491 |
| A06715 | A14643 | 247 | A06715 | A17102 | 202 |
| A06716 | A10326 | 452 | A06716 | A13471 | 452 |
| A06717 | A07746 | 268 | A06717 | A11943 | 303 |
| A06717 | A12897 | 172 | A06717 | A13330 | 363 |
| A06718 | A13361 | 484 | A06718 | A14373 | 322 |
| A06718 | A15605 | 317 | A06720 | A07626 | 378 |
| A06721 | A07046 | 363 | A06721 | A07360 | 201 |
| A06721 | A07995 | 346 | A06721 | A08093 | 251 |
| A06721 | A11299 | 208 | A06721 | A11306 | 486 |
| A06721 | A12372 | 401 | A06721 | A12383 | 327 |
| A06721 | A12675 | 475 | A06721 | A15652 | 272 |
| A06721 | A15661 | 249 | A06721 | A17085 | 255 |
| A06722 | A09573 | 394 | A06722 | A10731 | 364 |
| A06723 | A10754 | 340 | A06724 | A07059 | 408 |
| A06724 | A07322 | 467 | A06724 | A07933 | 363 |
| A06724 | A09059 | 344 | A06724 | A10456 | 332 |
| A06724 | A16262 | 391 | A06725 | A06981 | 393 |
| A06725 | A07122 | 465 | A06725 | A07477 | 351 |
| A06725 | A07736 | 328 | A06725 | A13143 | 441 |
| A06726 | A07064 | 445 | A06726 | A10156 | 391 |
| A06727 | A10018 | 254 | A06727 | A16087 | 268 |
| A06728 | A08911 | 356 | A06728 | A09464 | 439 |
| A06729 | A06730 | 428 | A06729 | A06731 | 491 |
| A06729 | A06953 | 491 | A06729 | A06954 | 319 |
| A06729 | A07218 | 483 | A06729 | A07268 | 353 |
| A06729 | A07286 | 474 | A06729 | A07391 | 466 |
| A06729 | A07514 | 303 | A06729 | A07577 | 294 |
| A06729 | A07578 | 433 | A06729 | A07601 | 446 |
| A06729 | A07605 | 469 | A06729 | A07606 | 428 |
| A06729 | A07620 | 330 | A06729 | A07907 | 353 |
| A06729 | A07982 | 353 | A06729 | A08034 | 324 |



|        |        |     |        |        |     |
|--------|--------|-----|--------|--------|-----|
| A06729 | A09380 | 262 | A06729 | A09933 | 165 |
| A06729 | A10000 | 441 | A06729 | A10651 | 210 |
| A06729 | A10752 | 303 | A06729 | A11149 | 176 |
| A06729 | A11154 | 366 | A06729 | A12549 | 384 |
| A06729 | A12787 | 262 | A06729 | A13824 | 174 |
| A06729 | A14353 | 303 | A06729 | A14394 | 247 |
| A06729 | A15035 | 281 | A06729 | A15498 | 486 |
| A06729 | A15684 | 172 | A06729 | A17078 | 364 |
| A06730 | A06731 | 332 | A06730 | A07268 | 430 |
| A06730 | A07514 | 458 | A06730 | A07605 | 353 |
| A06730 | A07606 | 427 | A06730 | A07620 | 422 |
| A06730 | A07904 | 419 | A06730 | A07907 | 467 |
| A06730 | A07982 | 430 | A06730 | A11997 | 441 |
| A06730 | A15498 | 190 | A06731 | A06953 | 490 |
| A06731 | A07165 | 218 | A06731 | A07218 | 388 |
| A06731 | A07286 | 472 | A06731 | A07339 | 195 |
| A06731 | A07361 | 350 | A06731 | A07391 | 488 |
| A06731 | A07442 | 191 | A06731 | A07472 | 184 |
| A06731 | A07479 | 185 | A06731 | A07514 | 288 |
| A06731 | A07577 | 390 | A06731 | A07578 | 341 |
| A06731 | A07605 | 489 | A06731 | A07620 | 317 |
| A06731 | A07843 | 366 | A06731 | A07904 | 311 |
| A06731 | A07907 | 341 | A06731 | A07982 | 341 |
| A06731 | A08044 | 332 | A06731 | A08093 | 165 |
| A06731 | A08115 | 332 | A06731 | A08162 | 311 |
| A06731 | A08171 | 193 | A06731 | A08172 | 277 |
| A06731 | A08392 | 341 | A06731 | A09246 | 176 |
| A06731 | A11164 | 301 | A06731 | A11282 | 215 |
| A06731 | A11305 | 332 | A06731 | A11315 | 184 |
| A06731 | A11327 | 455 | A06731 | A11449 | 270 |
| A06731 | A13369 | 467 | A06731 | A14353 | 396 |
| A06731 | A15314 | 191 | A06731 | A15337 | 162 |
| A06731 | A15495 | 254 | A06731 | A15498 | 374 |
| A06732 | A07605 | 373 | A06732 | A07620 | 430 |
| A06732 | A07905 | 441 | A06733 | A10537 | 424 |
| A06733 | A12730 | 340 | A06733 | A13587 | 215 |
| A06734 | A06860 | 475 | A06734 | A07037 | 475 |
| A06734 | A07061 | 274 | A06734 | A07520 | 469 |
| A06734 | A07553 | 255 | A06734 | A08108 | 321 |
| A06734 | A09381 | 339 | A06734 | A10247 | 193 |
| A06734 | A14821 | 366 | A06734 | A16087 | 286 |
| A06734 | A16741 | 196 | A06735 | A08193 | 485 |
| A06735 | A13988 | 288 | A06735 | A14007 | 184 |
| A06735 | A14199 | 281 | A06735 | A15291 | 362 |
| A06736 | A10625 | 428 | A06737 | A06779 | 418 |
| A06737 | A06780 | 420 | A06737 | A06818 | 408 |

|        |        |     |        |        |     |
|--------|--------|-----|--------|--------|-----|
| A06737 | A07143 | 375 | A06737 | A07148 | 406 |
| A06737 | A07151 | 380 | A06737 | A08714 | 384 |
| A06737 | A14208 | 190 | A06737 | A15314 | 196 |
| A06738 | A08975 | 307 | A06739 | A07209 | 386 |
| A06739 | A07815 | 468 | A06739 | A07836 | 316 |
| A06739 | A08220 | 395 | A06739 | A10278 | 257 |
| A06739 | A11431 | 172 | A06739 | A13369 | 230 |
| A06739 | A15413 | 168 | A06739 | A15638 | 162 |
| A06739 | A16274 | 171 | A06740 | A13174 | 452 |
| A06740 | A13205 | 452 | A06740 | A13217 | 452 |
| A06742 | A15498 | 311 | A06743 | A06889 | 470 |
| A06744 | A06756 | 221 | A06744 | A06855 | 193 |
| A06744 | A07256 | 201 | A06744 | A07267 | 240 |
| A06744 | A07341 | 190 | A06744 | A07413 | 357 |
| A06744 | A07477 | 193 | A06744 | A07590 | 184 |
| A06744 | A07692 | 213 | A06744 | A07796 | 318 |
| A06744 | A07973 | 200 | A06744 | A08199 | 162 |
| A06744 | A08751 | 201 | A06744 | A10676 | 213 |
| A06744 | A13157 | 273 | A06744 | A13607 | 246 |
| A06744 | A17009 | 340 | A06744 | A17089 | 362 |
| A06745 | A15292 | 348 | A06745 | A15349 | 276 |
| A06745 | A15352 | 286 | A06745 | A15436 | 363 |
| A06745 | A15447 | 344 | A06745 | A15452 | 327 |
| A06745 | A15456 | 391 | A06745 | A15460 | 401 |
| A06745 | A15823 | 438 | A06746 | A08653 | 390 |
| A06747 | A07131 | 380 | A06747 | A07145 | 193 |
| A06747 | A07152 | 490 | A06747 | A07173 | 395 |
| A06747 | A09018 | 165 | A06747 | A10809 | 324 |
| A06747 | A12809 | 353 | A06747 | A13131 | 311 |
| A06747 | A14071 | 473 | A06747 | A14374 | 266 |
| A06747 | A14439 | 353 | A06747 | A15394 | 207 |
| A06747 | A15425 | 420 | A06747 | A15427 | 241 |
| A06747 | A15601 | 269 | A06747 | A15603 | 256 |
| A06747 | A15605 | 352 | A06747 | A15806 | 290 |
| A06747 | A15964 | 258 | A06747 | A15998 | 395 |
| A06748 | A11124 | 450 | A06750 | A07101 | 191 |
| A06750 | A07226 | 385 | A06750 | A07353 | 229 |
| A06750 | A07403 | 312 | A06750 | A07457 | 183 |
| A06750 | A07670 | 438 | A06750 | A07756 | 469 |
| A06750 | A08882 | 445 | A06750 | A09659 | 285 |
| A06750 | A09687 | 307 | A06750 | A10910 | 267 |
| A06750 | A12284 | 372 | A06750 | A12824 | 658 |
| A06750 | A14080 | 470 | A06750 | A15531 | 165 |
| A06750 | A15643 | 363 | A06750 | A15765 | 196 |
| A06750 | A15837 | 229 | A06750 | A16358 | 274 |
| A06750 | A16626 | 229 | A06750 | A16643 | 229 |

|        |        |     |        |        |     |
|--------|--------|-----|--------|--------|-----|
| A06751 | A10354 | 424 | A06751 | A10531 | 440 |
| A06752 | A06753 | 491 | A06752 | A06924 | 372 |
| A06752 | A07232 | 490 | A06752 | A07242 | 251 |
| A06752 | A08492 | 329 | A06752 | A09300 | 491 |
| A06752 | A09450 | 345 | A06752 | A09995 | 177 |
| A06752 | A10472 | 441 | A06752 | A10514 | 294 |
| A06752 | A10525 | 362 | A06752 | A10753 | 477 |
| A06752 | A10777 | 329 | A06752 | A11160 | 491 |
| A06752 | A11161 | 260 | A06752 | A11684 | 173 |
| A06752 | A12007 | 205 | A06752 | A12060 | 441 |
| A06752 | A12136 | 484 | A06752 | A12161 | 271 |
| A06752 | A12236 | 357 | A06752 | A12239 | 302 |
| A06752 | A12436 | 235 | A06752 | A12579 | 283 |
| A06752 | A12719 | 243 | A06752 | A12867 | 441 |
| A06752 | A13954 | 470 | A06752 | A14281 | 491 |
| A06752 | A15282 | 485 | A06752 | A15336 | 330 |
| A06752 | A16068 | 480 | A06752 | A16423 | 470 |
| A06752 | A16485 | 485 | A06752 | A16626 | 443 |
| A06752 | A16635 | 212 | A06752 | A16725 | 352 |
| A06753 | A06924 | 196 | A06753 | A07232 | 313 |
| A06753 | A10525 | 236 | A06753 | A10753 | 293 |
| A06753 | A11160 | 266 | A06753 | A12136 | 352 |
| A06753 | A14377 | 215 | A06753 | A16068 | 172 |
| A06753 | A16485 | 329 | A06755 | A09741 | 302 |
| A06755 | A11952 | 347 | A06755 | A13826 | 294 |
| A06755 | A14017 | 363 | A06755 | A14799 | 191 |
| A06755 | A15452 | 224 | A06755 | A16300 | 297 |
| A06756 | A06934 | 301 | A06756 | A07002 | 340 |
| A06756 | A07122 | 483 | A06756 | A07238 | 310 |
| A06756 | A07256 | 314 | A06756 | A07267 | 485 |
| A06756 | A07304 | 162 | A06756 | A07413 | 461 |
| A06756 | A07477 | 338 | A06756 | A07590 | 333 |
| A06756 | A07674 | 157 | A06756 | A07688 | 451 |
| A06756 | A07711 | 302 | A06756 | A07736 | 432 |
| A06756 | A07800 | 279 | A06756 | A07933 | 243 |
| A06756 | A08099 | 312 | A06756 | A08238 | 398 |
| A06756 | A08751 | 314 | A06756 | A09059 | 313 |
| A06756 | A10208 | 182 | A06756 | A10437 | 321 |
| A06756 | A10444 | 255 | A06756 | A10452 | 232 |
| A06756 | A10656 | 240 | A06756 | A10677 | 218 |
| A06756 | A10688 | 307 | A06756 | A10694 | 294 |
| A06756 | A11309 | 174 | A06756 | A11381 | 165 |
| A06756 | A12055 | 424 | A06756 | A12897 | 216 |
| A06756 | A13241 | 256 | A06756 | A14827 | 217 |
| A06756 | A15497 | 174 | A06756 | A15874 | 385 |
| A06756 | A15905 | 200 | A06756 | A16026 | 252 |

|        |        |     |        |        |     |
|--------|--------|-----|--------|--------|-----|
| A06756 | A16027 | 490 | A06756 | A16286 | 377 |
| A06756 | A16529 | 362 | A06756 | A16840 | 226 |
| A06757 | A07438 | 419 | A06757 | A13734 | 302 |
| A06758 | A07294 | 486 | A06758 | A07324 | 205 |
| A06758 | A07655 | 252 | A06758 | A07748 | 200 |
| A06758 | A08272 | 288 | A06758 | A08775 | 472 |
| A06758 | A09344 | 312 | A06758 | A09625 | 486 |
| A06758 | A09628 | 272 | A06758 | A10603 | 221 |
| A06758 | A10664 | 443 | A06758 | A14087 | 229 |
| A06758 | A14088 | 276 | A06758 | A14173 | 236 |
| A06758 | A14179 | 458 | A06758 | A14180 | 241 |
| A06758 | A14186 | 438 | A06758 | A14209 | 311 |
| A06758 | A14356 | 286 | A06758 | A14358 | 329 |
| A06758 | A14694 | 82  | A06758 | A15370 | 490 |
| A06758 | A15569 | 316 | A06758 | A15664 | 340 |
| A06758 | A15703 | 324 | A06758 | A15712 | 185 |
| A06758 | A15718 | 355 | A06758 | A15719 | 252 |
| A06758 | A16634 | 467 | A06758 | A16919 | 329 |
| A06761 | A07123 | 268 | A06761 | A07956 | 243 |
| A06761 | A08281 | 195 | A06761 | A08571 | 259 |
| A06761 | A11957 | 479 | A06761 | A14922 | 390 |
| A06761 | A15338 | 196 | A06761 | A15419 | 185 |
| A06762 | A07021 | 443 | A06762 | A07296 | 463 |
| A06762 | A07297 | 435 | A06762 | A07309 | 151 |
| A06762 | A07496 | 351 | A06762 | A07509 | 308 |
| A06762 | A07912 | 351 | A06762 | A13814 | 377 |
| A06762 | A15697 | 252 | A06762 | A16807 | 246 |
| A06764 | A06765 | 446 | A06764 | A07191 | 481 |
| A06764 | A07209 | 174 | A06764 | A07958 | 266 |
| A06764 | A10967 | 266 | A06764 | A12824 | 160 |
| A06765 | A07190 | 479 | A06765 | A07191 | 434 |
| A06765 | A14471 | 201 | A06765 | A16503 | 379 |
| A06767 | A06851 | 401 | A06767 | A08820 | 227 |
| A06768 | A15624 | 481 | A06768 | A15659 | 355 |
| A06768 | A15684 | 394 | A06768 | A15746 | 358 |
| A06768 | A15920 | 274 | A06768 | A15931 | 258 |
| A06768 | A15936 | 374 | A06768 | A15937 | 341 |
| A06769 | A07135 | 63  | A06769 | A07314 | 165 |
| A06769 | A07771 | 152 | A06769 | A08746 | 489 |
| A06769 | A09947 | 374 | A06769 | A10869 | 232 |
| A06769 | A10924 | 301 | A06769 | A13666 | 374 |
| A06769 | A14198 | 173 | A06769 | A17144 | 215 |
| A06771 | A07598 | 154 | A06771 | A09672 | 188 |
| A06771 | A10576 | 269 | A06771 | A12824 | 288 |
| A06771 | A13982 | 428 | A06772 | A08215 | 409 |
| A06773 | A07659 | 347 | A06773 | A07660 | 486 |

|        |        |     |        |        |     |
|--------|--------|-----|--------|--------|-----|
| A06773 | A10077 | 396 | A06773 | A11309 | 246 |
| A06773 | A15498 | 202 | A06773 | A16002 | 208 |
| A06773 | A16368 | 380 | A06774 | A07252 | 438 |
| A06775 | A07079 | 353 | A06775 | A07346 | 491 |
| A06775 | A07534 | 277 | A06775 | A08131 | 157 |
| A06775 | A08404 | 180 | A06775 | A09370 | 348 |
| A06775 | A09598 | 162 | A06775 | A11950 | 302 |
| A06775 | A14273 | 159 | A06775 | A15302 | 228 |
| A06775 | A15369 | 475 | A06775 | A15818 | 301 |
| A06775 | A16128 | 299 | A06775 | A16646 | 232 |
| A06776 | A07314 | 229 | A06776 | A14077 | 187 |
| A06778 | A07004 | 208 | A06778 | A07709 | 268 |
| A06778 | A07897 | 408 | A06778 | A07934 | 483 |
| A06778 | A09311 | 286 | A06778 | A09995 | 475 |
| A06778 | A10358 | 258 | A06778 | A11057 | 389 |
| A06778 | A14281 | 232 | A06779 | A06780 | 383 |
| A06779 | A06818 | 465 | A06779 | A07151 | 452 |
| A06779 | A07311 | 176 | A06779 | A14589 | 165 |
| A06779 | A15034 | 383 | A06780 | A06818 | 438 |
| A06780 | A07151 | 321 | A06780 | A07390 | 358 |
| A06780 | A08124 | 414 | A06780 | A15608 | 330 |
| A06781 | A11277 | 252 | A06782 | A07218 | 312 |
| A06782 | A14230 | 193 | A06783 | A06795 | 443 |
| A06783 | A11298 | 229 | A06783 | A11983 | 428 |
| A06783 | A12069 | 154 | A06783 | A14330 | 491 |
| A06783 | A14398 | 338 | A06783 | A15295 | 377 |
| A06783 | A16081 | 491 | A06784 | A14198 | 241 |
| A06785 | A07893 | 195 | A06785 | A07965 | 543 |
| A06785 | A09581 | 252 | A06785 | A09665 | 363 |
| A06785 | A09686 | 358 | A06785 | A11480 | 188 |
| A06785 | A14594 | 174 | A06785 | A14813 | 188 |
| A06785 | A15657 | 343 | A06785 | A16680 | 188 |
| A06786 | A10372 | 296 | A06789 | A09102 | 440 |
| A06791 | A13175 | 434 | A06791 | A13176 | 445 |
| A06792 | A07505 | 385 | A06793 | A07348 | 483 |
| A06794 | A14699 | 260 | A06795 | A10315 | 157 |
| A06795 | A12723 | 162 | A06795 | A14195 | 278 |
| A06795 | A14330 | 484 | A06795 | A15105 | 308 |
| A06795 | A15277 | 207 | A06795 | A16081 | 481 |
| A06795 | A16087 | 198 | A06796 | A07798 | 263 |
| A06797 | A06949 | 480 | A06797 | A07130 | 265 |
| A06797 | A07151 | 235 | A06797 | A07486 | 455 |
| A06797 | A07533 | 221 | A06797 | A09394 | 291 |
| A06797 | A09664 | 249 | A06797 | A09789 | 296 |
| A06797 | A09790 | 294 | A06797 | A10382 | 484 |
| A06797 | A10418 | 480 | A06797 | A10473 | 375 |

|        |        |     |        |        |     |
|--------|--------|-----|--------|--------|-----|
| A06797 | A11835 | 277 | A06797 | A11911 | 154 |
| A06797 | A12554 | 329 | A06797 | A13517 | 152 |
| A06797 | A14197 | 416 | A06797 | A14664 | 307 |
| A06797 | A15294 | 154 | A06798 | A09014 | 399 |
| A06798 | A10469 | 386 | A06798 | A13945 | 210 |
| A06798 | A14190 | 179 | A06798 | A14799 | 180 |
| A06798 | A15308 | 238 | A06798 | A15840 | 293 |
| A06799 | A08162 | 424 | A06799 | A08163 | 413 |
| A06799 | A08230 | 445 | A06799 | A08231 | 445 |
| A06799 | A08232 | 445 | A06800 | A06860 | 438 |
| A06800 | A07037 | 405 | A06800 | A07520 | 329 |
| A06801 | A10064 | 433 | A06803 | A07290 | 265 |
| A06803 | A07670 | 254 | A06803 | A07850 | 471 |
| A06803 | A07887 | 519 | A06803 | A07920 | 235 |
| A06803 | A08383 | 264 | A06803 | A08818 | 156 |
| A06803 | A09502 | 156 | A06803 | A09712 | 486 |
| A06803 | A10642 | 446 | A06803 | A11344 | 156 |
| A06803 | A11674 | 156 | A06803 | A16131 | 294 |
| A06803 | A16228 | 489 | A06804 | A12143 | 452 |
| A06804 | A15117 | 452 | A06804 | A15367 | 226 |
| A06805 | A15498 | 177 | A06807 | A06815 | 401 |
| A06807 | A06825 | 228 | A06807 | A06901 | 417 |
| A06807 | A08072 | 432 | A06807 | A09494 | 398 |
| A06807 | A09618 | 432 | A06807 | A10901 | 395 |
| A06807 | A11522 | 281 | A06807 | A11738 | 348 |
| A06807 | A11808 | 377 | A06807 | A14496 | 249 |
| A06807 | A14959 | 432 | A06808 | A09742 | 224 |
| A06808 | A15487 | 303 | A06810 | A07222 | 457 |
| A06810 | A07571 | 362 | A06812 | A06909 | 457 |
| A06812 | A08011 | 183 | A06813 | A08438 | 159 |
| A06813 | A09271 | 390 | A06813 | A10156 | 281 |
| A06813 | A14010 | 243 | A06813 | A14393 | 152 |
| A06813 | A15436 | 260 | A06813 | A15452 | 204 |
| A06814 | A06815 | 413 | A06814 | A06825 | 346 |
| A06814 | A06955 | 174 | A06814 | A06973 | 585 |
| A06814 | A07024 | 154 | A06814 | A07047 | 241 |
| A06814 | A07251 | 176 | A06814 | A07307 | 435 |
| A06814 | A07311 | 232 | A06814 | A07398 | 587 |
| A06814 | A07399 | 323 | A06814 | A07412 | 581 |
| A06814 | A07506 | 491 | A06814 | A07726 | 491 |
| A06814 | A07848 | 170 | A06814 | A08011 | 420 |
| A06814 | A08052 | 599 | A06814 | A08055 | 185 |
| A06814 | A08061 | 424 | A06814 | A08131 | 491 |
| A06814 | A08273 | 497 | A06814 | A08315 | 585 |
| A06814 | A08357 | 230 | A06814 | A08369 | 577 |
| A06814 | A08408 | 245 | A06814 | A08476 | 241 |

|        |        |     |        |        |     |
|--------|--------|-----|--------|--------|-----|
| A06814 | A08635 | 351 | A06814 | A08653 | 408 |
| A06814 | A08682 | 143 | A06814 | A08773 | 413 |
| A06814 | A08835 | 379 | A06814 | A08878 | 162 |
| A06814 | A09308 | 552 | A06814 | A09322 | 241 |
| A06814 | A09449 | 428 | A06814 | A09591 | 162 |
| A06814 | A09609 | 302 | A06814 | A09620 | 602 |
| A06814 | A09656 | 386 | A06814 | A09674 | 134 |
| A06814 | A09697 | 296 | A06814 | A09722 | 367 |
| A06814 | A09936 | 243 | A06814 | A10532 | 338 |
| A06814 | A10711 | 457 | A06814 | A11096 | 279 |
| A06814 | A11262 | 152 | A06814 | A11264 | 296 |
| A06814 | A11462 | 221 | A06814 | A11562 | 151 |
| A06814 | A11728 | 583 | A06814 | A11908 | 176 |
| A06814 | A11983 | 207 | A06814 | A12168 | 213 |
| A06814 | A12215 | 286 | A06814 | A12227 | 241 |
| A06814 | A12618 | 436 | A06814 | A12658 | 246 |
| A06814 | A12924 | 173 | A06814 | A12995 | 258 |
| A06814 | A13052 | 80  | A06814 | A13063 | 238 |
| A06814 | A13107 | 281 | A06814 | A13232 | 243 |
| A06814 | A13340 | 187 | A06814 | A13581 | 602 |
| A06814 | A13787 | 200 | A06814 | A13804 | 154 |
| A06814 | A13862 | 344 | A06814 | A13989 | 663 |
| A06814 | A14216 | 443 | A06814 | A14272 | 467 |
| A06814 | A14661 | 205 | A06814 | A14674 | 515 |
| A06814 | A15268 | 586 | A06814 | A15381 | 586 |
| A06814 | A15416 | 326 | A06814 | A15837 | 269 |
| A06814 | A16027 | 269 | A06814 | A16107 | 302 |
| A06814 | A16418 | 352 | A06814 | A16567 | 157 |
| A06814 | A16738 | 515 | A06814 | A16756 | 157 |
| A06814 | A16814 | 378 | A06814 | A16874 | 246 |
| A06814 | A17088 | 205 | A06815 | A06825 | 251 |
| A06815 | A06955 | 428 | A06815 | A08653 | 468 |
| A06815 | A08682 | 329 | A06815 | A09656 | 472 |
| A06815 | A11264 | 393 | A06815 | A11738 | 363 |
| A06815 | A11981 | 353 | A06815 | A13626 | 299 |
| A06818 | A06865 | 400 | A06818 | A07151 | 490 |
| A06818 | A07157 | 212 | A06818 | A07161 | 290 |
| A06818 | A07173 | 252 | A06818 | A09732 | 297 |
| A06818 | A10504 | 272 | A06818 | A11109 | 369 |
| A06818 | A11543 | 265 | A06818 | A13860 | 196 |
| A06819 | A07222 | 574 | A06819 | A07242 | 343 |
| A06819 | A07333 | 551 | A06819 | A07756 | 402 |
| A06819 | A07762 | 171 | A06819 | A07931 | 491 |
| A06819 | A07974 | 462 | A06819 | A08094 | 457 |
| A06819 | A08512 | 296 | A06819 | A08551 | 308 |
| A06819 | A08571 | 457 | A06819 | A09276 | 335 |

|        |        |     |        |        |     |
|--------|--------|-----|--------|--------|-----|
| A06819 | A09727 | 322 | A06819 | A09838 | 151 |
| A06819 | A10399 | 485 | A06819 | A10566 | 201 |
| A06819 | A11283 | 401 | A06819 | A11854 | 228 |
| A06819 | A12047 | 316 | A06819 | A12292 | 170 |
| A06819 | A12464 | 201 | A06819 | A12824 | 318 |
| A06819 | A12831 | 477 | A06819 | A12872 | 213 |
| A06819 | A12924 | 460 | A06819 | A13056 | 272 |
| A06819 | A13070 | 162 | A06819 | A13199 | 267 |
| A06819 | A13822 | 223 | A06819 | A14006 | 480 |
| A06819 | A14204 | 364 | A06819 | A14525 | 578 |
| A06819 | A14621 | 267 | A06819 | A14801 | 213 |
| A06819 | A14803 | 396 | A06819 | A14804 | 223 |
| A06819 | A14858 | 188 | A06819 | A14939 | 272 |
| A06819 | A14947 | 201 | A06819 | A15347 | 162 |
| A06819 | A15372 | 577 | A06819 | A15434 | 217 |
| A06819 | A15617 | 521 | A06819 | A15718 | 152 |
| A06819 | A16219 | 227 | A06819 | A16410 | 216 |
| A06819 | A16531 | 566 | A06819 | A16741 | 268 |
| A06819 | A16753 | 481 | A06819 | A16761 | 151 |
| A06819 | A16769 | 443 | A06821 | A07422 | 321 |
| A06821 | A11379 | 283 | A06822 | A07062 | 382 |
| A06822 | A14190 | 283 | A06822 | A15896 | 360 |
| A06823 | A13926 | 363 | A06823 | A15431 | 240 |
| A06824 | A08571 | 160 | A06825 | A06832 | 423 |
| A06825 | A07312 | 195 | A06825 | A07399 | 191 |
| A06825 | A08131 | 281 | A06825 | A08321 | 382 |
| A06825 | A08653 | 383 | A06825 | A08682 | 491 |
| A06825 | A08745 | 256 | A06825 | A08768 | 455 |
| A06825 | A09044 | 463 | A06825 | A09210 | 160 |
| A06825 | A09428 | 172 | A06825 | A09656 | 339 |
| A06825 | A09686 | 238 | A06825 | A09775 | 196 |
| A06825 | A10791 | 286 | A06825 | A10814 | 472 |
| A06825 | A10901 | 232 | A06825 | A11120 | 245 |
| A06825 | A11263 | 201 | A06825 | A11264 | 201 |
| A06825 | A11331 | 390 | A06825 | A12589 | 291 |
| A06825 | A13052 | 491 | A06825 | A13712 | 335 |
| A06825 | A13752 | 339 | A06825 | A13989 | 469 |
| A06825 | A14216 | 462 | A06825 | A14614 | 193 |
| A06825 | A14843 | 449 | A06825 | A15063 | 308 |
| A06825 | A15498 | 154 | A06825 | A15624 | 477 |
| A06825 | A15684 | 180 | A06825 | A15932 | 475 |
| A06825 | A16193 | 154 | A06826 | A07100 | 358 |
| A06826 | A07850 | 229 | A06826 | A08505 | 193 |
| A06826 | A13340 | 201 | A06826 | A14188 | 188 |
| A06826 | A16092 | 204 | A06827 | A06975 | 360 |
| A06827 | A07531 | 525 | A06827 | A08201 | 334 |



|        |        |     |        |        |     |
|--------|--------|-----|--------|--------|-----|
| A06827 | A08974 | 330 | A06827 | A13047 | 419 |
| A06827 | A15624 | 574 | A06827 | A15649 | 168 |
| A06827 | A15651 | 456 | A06827 | A15750 | 334 |
| A06827 | A15917 | 334 | A06827 | A15932 | 552 |
| A06827 | A15937 | 334 | A06828 | A09206 | 467 |
| A06828 | A10453 | 327 | A06828 | A11422 | 446 |
| A06829 | A06924 | 463 | A06829 | A09714 | 366 |
| A06829 | A10872 | 412 | A06829 | A11830 | 480 |
| A06829 | A14336 | 465 | A06829 | A14810 | 462 |
| A06829 | A16748 | 340 | A06830 | A07190 | 486 |
| A06830 | A09497 | 373 | A06830 | A10620 | 378 |
| A06830 | A10749 | 457 | A06830 | A12405 | 420 |
| A06831 | A09036 | 374 | A06831 | A09375 | 385 |
| A06831 | A09891 | 411 | A06831 | A09892 | 401 |
| A06831 | A13832 | 310 | A06831 | A15626 | 223 |
| A06832 | A06965 | 247 | A06832 | A07309 | 167 |
| A06832 | A07312 | 363 | A06832 | A07898 | 224 |
| A06832 | A08183 | 231 | A06832 | A08901 | 195 |
| A06832 | A08982 | 174 | A06832 | A08984 | 433 |
| A06832 | A08990 | 255 | A06832 | A09673 | 300 |
| A06832 | A11277 | 333 | A06832 | A13272 | 316 |
| A06832 | A14088 | 217 | A06832 | A14482 | 154 |
| A06832 | A14596 | 456 | A06832 | A14597 | 271 |
| A06832 | A14701 | 470 | A06832 | A15377 | 274 |
| A06832 | A15543 | 217 | A06832 | A15724 | 231 |
| A06832 | A16401 | 368 | A06832 | A16664 | 217 |
| A06833 | A13872 | 385 | A06833 | A14374 | 330 |
| A06833 | A14391 | 335 | A06834 | A08698 | 246 |
| A06834 | A09243 | 246 | A06834 | A10353 | 278 |
| A06834 | A10765 | 332 | A06834 | A15889 | 303 |
| A06835 | A07494 | 441 | A06835 | A10954 | 429 |
| A06835 | A12698 | 441 | A06837 | A06907 | 160 |
| A06837 | A07601 | 408 | A06837 | A07605 | 353 |
| A06837 | A07886 | 441 | A06837 | A08034 | 419 |
| A06837 | A08115 | 427 | A06837 | A08116 | 430 |
| A06837 | A08401 | 441 | A06837 | A08455 | 435 |
| A06837 | A08486 | 441 | A06837 | A14633 | 358 |
| A06838 | A06841 | 401 | A06838 | A07746 | 241 |
| A06838 | A07996 | 163 | A06838 | A13830 | 157 |
| A06838 | A16233 | 363 | A06838 | A16235 | 396 |
| A06839 | A16233 | 390 | A06839 | A16236 | 427 |
| A06842 | A07164 | 353 | A06843 | A07451 | 329 |
| A06843 | A13589 | 241 | A06843 | A13593 | 243 |
| A06843 | A14505 | 332 | A06843 | A16233 | 486 |
| A06843 | A16636 | 165 | A06844 | A07056 | 450 |
| A06844 | A07678 | 422 | A06844 | A07842 | 407 |

|        |        |     |        |        |     |
|--------|--------|-----|--------|--------|-----|
| A06844 | A07852 | 416 | A06844 | A12479 | 438 |
| A06847 | A06994 | 430 | A06847 | A07027 | 451 |
| A06847 | A07059 | 458 | A06847 | A07122 | 179 |
| A06847 | A07239 | 281 | A06847 | A07256 | 356 |
| A06847 | A07264 | 301 | A06847 | A07325 | 383 |
| A06847 | A07408 | 434 | A06847 | A07501 | 402 |
| A06847 | A07520 | 218 | A06847 | A07619 | 374 |
| A06847 | A07674 | 417 | A06847 | A07692 | 436 |
| A06847 | A07723 | 335 | A06847 | A07739 | 374 |
| A06847 | A07795 | 386 | A06847 | A07933 | 180 |
| A06847 | A08155 | 348 | A06847 | A08372 | 193 |
| A06847 | A10020 | 398 | A06847 | A10652 | 327 |
| A06847 | A10669 | 270 | A06847 | A10690 | 348 |
| A06847 | A10694 | 340 | A06847 | A10696 | 358 |
| A06847 | A14540 | 156 | A06847 | A14856 | 193 |
| A06847 | A15905 | 260 | A06847 | A17024 | 398 |
| A06851 | A06864 | 273 | A06851 | A06982 | 396 |
| A06851 | A07319 | 419 | A06851 | A07346 | 486 |
| A06851 | A07480 | 243 | A06851 | A07534 | 226 |
| A06851 | A08208 | 157 | A06851 | A08820 | 473 |
| A06851 | A09022 | 152 | A06851 | A09454 | 235 |
| A06851 | A09598 | 438 | A06851 | A10724 | 232 |
| A06851 | A11540 | 491 | A06851 | A13949 | 408 |
| A06851 | A14079 | 435 | A06851 | A14273 | 165 |
| A06851 | A14887 | 465 | A06851 | A15524 | 367 |
| A06851 | A15837 | 332 | A06851 | A16052 | 307 |
| A06851 | A16127 | 485 | A06851 | A16128 | 425 |
| A06851 | A16537 | 196 | A06852 | A13930 | 380 |
| A06852 | A15498 | 168 | A06852 | A16300 | 227 |
| A06852 | A17118 | 404 | A06854 | A08410 | 436 |
| A06855 | A06860 | 299 | A06855 | A06970 | 210 |
| A06855 | A07271 | 398 | A06855 | A07325 | 195 |
| A06855 | A07613 | 380 | A06855 | A07718 | 286 |
| A06855 | A07973 | 296 | A06855 | A08138 | 184 |
| A06855 | A08249 | 229 | A06855 | A08252 | 174 |
| A06855 | A09452 | 398 | A06855 | A10702 | 274 |
| A06855 | A14190 | 190 | A06855 | A14665 | 285 |
| A06855 | A14828 | 391 | A06855 | A16002 | 227 |
| A06856 | A06857 | 452 | A06858 | A07143 | 240 |
| A06858 | A10216 | 339 | A06858 | A12824 | 266 |
| A06858 | A14604 | 208 | A06858 | A15795 | 227 |
| A06859 | A11300 | 358 | A06859 | A11387 | 288 |
| A06859 | A14005 | 291 | A06859 | A14188 | 172 |
| A06860 | A06912 | 263 | A06860 | A06994 | 296 |
| A06860 | A07037 | 486 | A06860 | A07059 | 396 |
| A06860 | A07088 | 479 | A06860 | A07109 | 182 |

|        |        |     |        |        |     |
|--------|--------|-----|--------|--------|-----|
| A06860 | A07239 | 210 | A06860 | A07264 | 235 |
| A06860 | A07271 | 348 | A06860 | A07325 | 205 |
| A06860 | A07366 | 396 | A06860 | A07442 | 241 |
| A06860 | A07477 | 327 | A06860 | A07520 | 491 |
| A06860 | A07590 | 321 | A06860 | A07674 | 473 |
| A06860 | A07684 | 479 | A06860 | A07690 | 374 |
| A06860 | A07757 | 235 | A06860 | A07763 | 367 |
| A06860 | A08114 | 345 | A06860 | A08366 | 246 |
| A06860 | A08663 | 386 | A06860 | A09846 | 473 |
| A06860 | A09880 | 329 | A06860 | A10422 | 446 |
| A06860 | A10427 | 263 | A06860 | A10446 | 254 |
| A06860 | A10457 | 299 | A06860 | A10458 | 306 |
| A06860 | A10679 | 274 | A06860 | A10687 | 308 |
| A06860 | A10690 | 467 | A06860 | A10692 | 333 |
| A06860 | A10694 | 285 | A06860 | A10776 | 171 |
| A06860 | A10926 | 337 | A06860 | A11189 | 373 |
| A06860 | A13152 | 337 | A06860 | A13717 | 333 |
| A06860 | A14190 | 200 | A06860 | A14803 | 205 |
| A06860 | A14856 | 436 | A06860 | A14907 | 374 |
| A06860 | A16741 | 223 | A06860 | A16744 | 254 |
| A06860 | A17024 | 363 | A06860 | A17046 | 308 |
| A06860 | A17092 | 363 | A06861 | A06965 | 491 |
| A06861 | A06973 | 488 | A06861 | A07243 | 168 |
| A06861 | A07347 | 307 | A06861 | A07348 | 405 |
| A06861 | A07378 | 202 | A06861 | A07449 | 413 |
| A06861 | A07700 | 154 | A06861 | A08055 | 172 |
| A06861 | A08154 | 324 | A06861 | A08452 | 294 |
| A06861 | A08558 | 228 | A06861 | A09322 | 574 |
| A06861 | A09674 | 232 | A06861 | A10417 | 374 |
| A06861 | A10518 | 154 | A06861 | A10529 | 283 |
| A06861 | A11244 | 187 | A06861 | A11277 | 174 |
| A06861 | A11438 | 461 | A06861 | A13441 | 452 |
| A06861 | A13989 | 463 | A06861 | A13992 | 357 |
| A06861 | A14169 | 391 | A06861 | A14188 | 274 |
| A06861 | A14566 | 491 | A06861 | A14594 | 412 |
| A06861 | A15218 | 362 | A06861 | A15500 | 162 |
| A06861 | A15660 | 151 | A06861 | A15666 | 385 |
| A06861 | A15684 | 308 | A06861 | A16118 | 466 |
| A06861 | A16152 | 174 | A06861 | A16320 | 260 |
| A06861 | A16686 | 452 | A06862 | A07763 | 371 |
| A06862 | A08238 | 389 | A06862 | A08313 | 393 |
| A06862 | A08687 | 398 | A06862 | A09824 | 391 |
| A06862 | A10702 | 329 | A06862 | A12016 | 420 |
| A06863 | A06971 | 439 | A06863 | A08398 | 402 |
| A06863 | A08681 | 216 | A06863 | A09535 | 294 |
| A06863 | A09988 | 177 | A06863 | A10286 | 188 |

|        |        |     |        |        |     |
|--------|--------|-----|--------|--------|-----|
| A06863 | A10655 | 445 | A06863 | A11086 | 290 |
| A06863 | A13882 | 177 | A06863 | A15380 | 168 |
| A06864 | A06982 | 491 | A06864 | A07079 | 491 |
| A06864 | A07319 | 491 | A06864 | A07332 | 297 |
| A06864 | A07346 | 491 | A06864 | A07353 | 132 |
| A06864 | A07466 | 188 | A06864 | A07480 | 483 |
| A06864 | A07534 | 469 | A06864 | A07595 | 180 |
| A06864 | A07603 | 489 | A06864 | A07647 | 491 |
| A06864 | A07902 | 466 | A06864 | A07929 | 377 |
| A06864 | A07996 | 486 | A06864 | A08000 | 483 |
| A06864 | A08029 | 232 | A06864 | A08030 | 491 |
| A06864 | A08117 | 489 | A06864 | A08141 | 491 |
| A06864 | A08208 | 491 | A06864 | A08212 | 406 |
| A06864 | A08526 | 329 | A06864 | A08820 | 490 |
| A06864 | A08902 | 488 | A06864 | A09598 | 486 |
| A06864 | A09626 | 449 | A06864 | A09629 | 191 |
| A06864 | A09727 | 272 | A06864 | A10373 | 367 |
| A06864 | A10625 | 474 | A06864 | A10846 | 240 |
| A06864 | A10898 | 160 | A06864 | A10941 | 201 |
| A06864 | A12556 | 345 | A06864 | A12932 | 174 |
| A06864 | A13339 | 430 | A06864 | A13383 | 195 |
| A06864 | A13949 | 491 | A06864 | A14076 | 252 |
| A06864 | A14079 | 491 | A06864 | A14093 | 63  |
| A06864 | A14094 | 200 | A06864 | A14155 | 352 |
| A06864 | A14177 | 324 | A06864 | A14223 | 465 |
| A06864 | A14230 | 430 | A06864 | A14273 | 491 |
| A06864 | A14280 | 190 | A06864 | A14460 | 440 |
| A06864 | A14614 | 154 | A06864 | A14694 | 477 |
| A06864 | A15369 | 491 | A06864 | A15371 | 490 |
| A06864 | A15524 | 185 | A06864 | A15645 | 491 |
| A06864 | A15654 | 488 | A06864 | A15837 | 213 |
| A06864 | A15941 | 491 | A06864 | A15942 | 413 |
| A06864 | A16127 | 491 | A06864 | A16128 | 491 |
| A06864 | A16129 | 117 | A06864 | A16134 | 256 |
| A06864 | A16225 | 411 | A06864 | A16226 | 483 |
| A06864 | A16294 | 483 | A06864 | A16548 | 258 |
| A06864 | A16606 | 414 | A06864 | A16612 | 486 |
| A06864 | A16613 | 477 | A06864 | A16616 | 162 |
| A06864 | A16626 | 491 | A06864 | A16646 | 488 |
| A06864 | A16692 | 473 | A06864 | A16754 | 416 |
| A06865 | A07151 | 440 | A06867 | A10286 | 432 |
| A06867 | A10526 | 439 | A06867 | A14493 | 409 |
| A06868 | A07010 | 363 | A06868 | A08093 | 457 |
| A06868 | A08162 | 353 | A06868 | A08392 | 377 |
| A06868 | A08517 | 172 | A06868 | A09509 | 165 |
| A06868 | A10315 | 396 | A06868 | A11299 | 205 |

|        |        |     |        |        |     |
|--------|--------|-----|--------|--------|-----|
| A06868 | A11348 | 272 | A06868 | A11435 | 247 |
| A06868 | A11450 | 490 | A06868 | A11478 | 454 |
| A06868 | A11654 | 363 | A06868 | A11979 | 386 |
| A06868 | A12858 | 314 | A06868 | A13369 | 154 |
| A06868 | A14037 | 191 | A06868 | A14520 | 196 |
| A06868 | A14735 | 303 | A06868 | A15237 | 165 |
| A06868 | A15370 | 454 | A06871 | A06872 | 445 |
| A06871 | A08835 | 288 | A06871 | A13369 | 229 |
| A06871 | A13511 | 350 | A06871 | A15416 | 329 |
| A06874 | A09072 | 407 | A06874 | A11646 | 327 |
| A06875 | A07452 | 316 | A06875 | A07471 | 460 |
| A06875 | A07475 | 452 | A06875 | A07491 | 328 |
| A06875 | A07541 | 371 | A06875 | A07561 | 452 |
| A06875 | A07610 | 338 | A06875 | A07629 | 369 |
| A06875 | A07636 | 380 | A06875 | A07754 | 297 |
| A06875 | A08785 | 260 | A06875 | A11291 | 213 |
| A06875 | A13879 | 313 | A06875 | A17078 | 227 |
| A06877 | A07165 | 368 | A06877 | A07746 | 193 |
| A06877 | A10085 | 266 | A06877 | A14125 | 269 |
| A06878 | A07611 | 465 | A06878 | A07695 | 262 |
| A06880 | A13654 | 452 | A06881 | A06915 | 196 |
| A06881 | A07223 | 362 | A06881 | A07700 | 489 |
| A06881 | A07706 | 439 | A06881 | A08022 | 274 |
| A06881 | A08118 | 449 | A06881 | A08771 | 491 |
| A06881 | A09529 | 162 | A06881 | A09715 | 383 |
| A06881 | A10218 | 438 | A06881 | A11300 | 362 |
| A06881 | A11387 | 362 | A06881 | A11447 | 362 |
| A06881 | A12647 | 278 | A06881 | A13226 | 469 |
| A06881 | A13227 | 363 | A06881 | A13377 | 440 |
| A06881 | A15558 | 446 | A06881 | A15559 | 294 |
| A06881 | A15858 | 277 | A06881 | A16330 | 362 |
| A06881 | A16590 | 363 | A06882 | A06970 | 235 |
| A06882 | A09566 | 378 | A06882 | A09768 | 344 |
| A06882 | A09829 | 461 | A06882 | A14077 | 182 |
| A06882 | A14674 | 229 | A06884 | A08285 | 314 |
| A06884 | A10395 | 185 | A06884 | A11381 | 408 |
| A06884 | A14096 | 252 | A06887 | A09182 | 306 |
| A06887 | A09646 | 380 | A06887 | A10349 | 425 |
| A06887 | A10561 | 446 | A06888 | A06889 | 452 |
| A06889 | A07242 | 182 | A06889 | A07816 | 263 |
| A06889 | A07934 | 344 | A06889 | A10773 | 473 |
| A06889 | A12693 | 386 | A06889 | A14281 | 160 |
| A06889 | A15626 | 273 | A06890 | A06941 | 491 |
| A06890 | A07521 | 382 | A06890 | A07820 | 516 |
| A06890 | A08400 | 563 | A06890 | A08772 | 235 |
| A06890 | A08777 | 235 | A06890 | A09043 | 447 |

|        |        |     |        |        |     |
|--------|--------|-----|--------|--------|-----|
| A06890 | A09056 | 414 | A06890 | A09326 | 235 |
| A06890 | A10317 | 163 | A06890 | A11456 | 218 |
| A06890 | A13052 | 212 | A06890 | A13222 | 522 |
| A06890 | A13845 | 235 | A06890 | A13855 | 447 |
| A06890 | A13857 | 238 | A06890 | A14247 | 465 |
| A06890 | A14461 | 154 | A06890 | A14838 | 414 |
| A06890 | A15650 | 424 | A06890 | A15685 | 165 |
| A06890 | A16617 | 235 | A06890 | A16927 | 414 |
| A06890 | A16982 | 414 | A06891 | A06998 | 451 |
| A06891 | A09145 | 317 | A06891 | A13824 | 319 |
| A06891 | A13982 | 183 | A06891 | A14220 | 184 |
| A06893 | A07311 | 899 | A06893 | A14066 | 899 |
| A06893 | A15498 | 190 | A06893 | A16085 | 899 |
| A06894 | A07479 | 360 | A06894 | A10639 | 412 |
| A06895 | A07056 | 385 | A06895 | A07852 | 460 |
| A06895 | A07859 | 436 | A06895 | A07863 | 436 |
| A06895 | A12522 | 411 | A06895 | A13885 | 443 |
| A06896 | A10256 | 445 | A06896 | A12522 | 424 |
| A06896 | A14633 | 246 | A06897 | A06965 | 241 |
| A06897 | A06973 | 167 | A06897 | A07047 | 477 |
| A06897 | A08137 | 358 | A06897 | A08154 | 399 |
| A06897 | A08301 | 283 | A06897 | A08357 | 468 |
| A06897 | A08358 | 224 | A06897 | A08359 | 485 |
| A06897 | A08452 | 440 | A06897 | A09292 | 383 |
| A06897 | A09550 | 268 | A06897 | A09707 | 441 |
| A06897 | A09852 | 290 | A06897 | A09955 | 272 |
| A06897 | A10402 | 279 | A06897 | A10560 | 256 |
| A06897 | A10645 | 193 | A06897 | A11438 | 355 |
| A06897 | A11462 | 457 | A06897 | A11572 | 283 |
| A06897 | A11602 | 190 | A06897 | A11616 | 299 |
| A06897 | A11861 | 362 | A06897 | A12711 | 299 |
| A06897 | A12821 | 283 | A06897 | A13527 | 212 |
| A06897 | A13609 | 232 | A06897 | A13989 | 339 |
| A06897 | A14216 | 249 | A06897 | A14508 | 364 |
| A06897 | A14790 | 226 | A06897 | A15218 | 232 |
| A06897 | A15225 | 188 | A06897 | A15235 | 152 |
| A06897 | A15256 | 259 | A06897 | A15500 | 447 |
| A06897 | A16658 | 200 | A06899 | A07135 | 157 |
| A06899 | A07161 | 401 | A06899 | A07166 | 263 |
| A06899 | A08634 | 396 | A06899 | A10504 | 279 |
| A06899 | A14199 | 193 | A06899 | A14372 | 259 |
| A06899 | A14374 | 447 | A06899 | A14392 | 241 |
| A06899 | A14439 | 296 | A06899 | A14598 | 338 |
| A06899 | A15394 | 281 | A06899 | A15425 | 228 |
| A06899 | A15427 | 311 | A06899 | A15806 | 347 |
| A06899 | A15999 | 396 | A06900 | A13821 | 63  |

|        |        |     |        |        |     |
|--------|--------|-----|--------|--------|-----|
| A06901 | A08072 | 445 | A06901 | A09618 | 445 |
| A06901 | A11808 | 405 | A06901 | A14959 | 445 |
| A06901 | A16088 | 180 | A06901 | A16149 | 391 |
| A06903 | A07175 | 329 | A06903 | A14591 | 266 |
| A06903 | A14635 | 363 | A06903 | A15291 | 204 |
| A06903 | A15507 | 479 | A06903 | A15547 | 468 |
| A06903 | A15612 | 489 | A06903 | A16822 | 240 |
| A06905 | A10506 | 317 | A06905 | A13994 | 433 |
| A06906 | A11837 | 388 | A06906 | A13923 | 469 |
| A06907 | A07604 | 491 | A06907 | A07706 | 228 |
| A06907 | A07766 | 227 | A06907 | A08137 | 491 |
| A06907 | A08293 | 63  | A06907 | A08400 | 187 |
| A06907 | A08489 | 154 | A06907 | A08571 | 490 |
| A06907 | A08775 | 63  | A06907 | A08821 | 63  |
| A06907 | A08859 | 167 | A06907 | A08885 | 188 |
| A06907 | A09139 | 160 | A06907 | A09253 | 218 |
| A06907 | A09736 | 486 | A06907 | A09737 | 213 |
| A06907 | A09738 | 435 | A06907 | A09758 | 569 |
| A06907 | A10601 | 433 | A06907 | A10611 | 438 |
| A06907 | A10624 | 196 | A06907 | A10905 | 170 |
| A06907 | A11277 | 480 | A06907 | A11291 | 491 |
| A06907 | A11305 | 160 | A06907 | A11323 | 273 |
| A06907 | A11405 | 491 | A06907 | A11406 | 419 |
| A06907 | A11430 | 472 | A06907 | A11436 | 99  |
| A06907 | A11458 | 324 | A06907 | A11487 | 419 |
| A06907 | A11567 | 432 | A06907 | A11947 | 160 |
| A06907 | A12069 | 432 | A06907 | A12147 | 177 |
| A06907 | A12353 | 198 | A06907 | A12543 | 491 |
| A06907 | A12644 | 182 | A06907 | A13223 | 199 |
| A06907 | A13587 | 491 | A06907 | A13889 | 467 |
| A06907 | A13928 | 491 | A06907 | A13989 | 472 |
| A06907 | A14006 | 405 | A06907 | A14135 | 296 |
| A06907 | A14140 | 235 | A06907 | A14148 | 491 |
| A06907 | A14193 | 534 | A06907 | A14196 | 614 |
| A06907 | A14220 | 491 | A06907 | A14221 | 491 |
| A06907 | A14246 | 229 | A06907 | A14257 | 491 |
| A06907 | A14265 | 488 | A06907 | A14303 | 578 |
| A06907 | A14570 | 391 | A06907 | A14633 | 241 |
| A06907 | A15114 | 241 | A06907 | A15291 | 581 |
| A06907 | A15292 | 277 | A06907 | A15297 | 641 |
| A06907 | A15309 | 457 | A06907 | A15315 | 486 |
| A06907 | A15323 | 490 | A06907 | A15324 | 436 |
| A06907 | A15338 | 446 | A06907 | A15339 | 193 |
| A06907 | A15366 | 491 | A06907 | A15396 | 157 |
| A06907 | A15492 | 491 | A06907 | A15559 | 594 |
| A06907 | A15614 | 542 | A06907 | A15665 | 208 |

|        |        |     |        |        |     |
|--------|--------|-----|--------|--------|-----|
| A06907 | A15729 | 291 | A06907 | A15752 | 491 |
| A06907 | A15773 | 371 | A06907 | A15779 | 227 |
| A06907 | A15851 | 307 | A06907 | A16364 | 272 |
| A06907 | A16467 | 479 | A06907 | A16722 | 329 |
| A06907 | A16724 | 213 | A06907 | A16801 | 472 |
| A06907 | A16803 | 177 | A06907 | A16920 | 199 |
| A06907 | A16994 | 246 | A06907 | A17063 | 491 |
| A06907 | A17198 | 491 | A06908 | A07111 | 171 |
| A06908 | A07452 | 246 | A06908 | A07468 | 212 |
| A06908 | A07472 | 269 | A06908 | A07538 | 346 |
| A06908 | A07541 | 480 | A06908 | A07542 | 266 |
| A06908 | A07543 | 271 | A06908 | A07561 | 243 |
| A06908 | A07563 | 375 | A06908 | A07610 | 389 |
| A06908 | A07657 | 396 | A06908 | A13871 | 260 |
| A06908 | A13879 | 243 | A06909 | A07430 | 436 |
| A06909 | A09327 | 357 | A06909 | A15235 | 339 |
| A06910 | A14635 | 162 | A06910 | A15282 | 246 |
| A06911 | A06926 | 480 | A06911 | A07200 | 424 |
| A06911 | A08911 | 356 | A06911 | A11719 | 467 |
| A06912 | A06916 | 491 | A06912 | A07061 | 367 |
| A06912 | A07109 | 243 | A06912 | A07381 | 329 |
| A06912 | A07520 | 205 | A06912 | A07848 | 411 |
| A06912 | A08023 | 380 | A06912 | A08127 | 357 |
| A06912 | A08385 | 294 | A06912 | A08474 | 413 |
| A06912 | A10427 | 196 | A06912 | A15874 | 475 |
| A06912 | A16739 | 477 | A06912 | A16741 | 467 |
| A06912 | A16744 | 468 | A06913 | A08436 | 447 |
| A06913 | A10621 | 373 | A06913 | A12639 | 447 |
| A06913 | A15892 | 463 | A06914 | A06944 | 187 |
| A06914 | A07267 | 174 | A06914 | A07320 | 330 |
| A06914 | A07408 | 260 | A06914 | A07688 | 157 |
| A06914 | A08707 | 577 | A06914 | A09182 | 334 |
| A06914 | A10506 | 202 | A06914 | A10542 | 291 |
| A06914 | A10659 | 274 | A06914 | A10698 | 319 |
| A06914 | A14252 | 351 | A06914 | A15356 | 638 |
| A06914 | A15996 | 286 | A06915 | A08553 | 168 |
| A06915 | A14208 | 159 | A06915 | A14647 | 322 |
| A06915 | A15354 | 290 | A06915 | A15400 | 215 |
| A06916 | A07848 | 430 | A06916 | A08023 | 452 |
| A06916 | A08127 | 374 | A06916 | A08474 | 423 |
| A06919 | A08571 | 353 | A06919 | A08876 | 279 |
| A06919 | A09748 | 281 | A06920 | A06921 | 438 |
| A06920 | A08041 | 438 | A06920 | A08042 | 425 |
| A06922 | A09480 | 399 | A06922 | A14188 | 235 |
| A06923 | A09881 | 274 | A06924 | A06982 | 470 |
| A06924 | A07232 | 441 | A06924 | A07346 | 417 |



|        |        |     |        |        |     |
|--------|--------|-----|--------|--------|-----|
| A06924 | A07480 | 177 | A06924 | A07880 | 238 |
| A06924 | A07889 | 469 | A06924 | A07996 | 221 |
| A06924 | A08117 | 195 | A06924 | A08212 | 226 |
| A06924 | A08939 | 579 | A06924 | A09667 | 279 |
| A06924 | A09714 | 445 | A06924 | A10373 | 319 |
| A06924 | A10872 | 367 | A06924 | A11160 | 165 |
| A06924 | A11703 | 205 | A06924 | A11830 | 366 |
| A06924 | A11916 | 235 | A06924 | A12556 | 218 |
| A06924 | A14079 | 396 | A06924 | A14336 | 443 |
| A06924 | A14484 | 283 | A06924 | A14810 | 480 |
| A06924 | A15367 | 438 | A06924 | A15837 | 645 |
| A06924 | A15858 | 188 | A06924 | A16128 | 486 |
| A06924 | A16294 | 204 | A06924 | A16353 | 515 |
| A06924 | A16408 | 299 | A06924 | A16635 | 307 |
| A06925 | A09539 | 361 | A06925 | A15282 | 255 |
| A06926 | A07200 | 430 | A06926 | A08911 | 310 |
| A06926 | A11719 | 460 | A06926 | A12335 | 405 |
| A06926 | A14440 | 262 | A06926 | A15368 | 374 |
| A06926 | A15623 | 423 | A06930 | A08910 | 160 |
| A06930 | A15498 | 188 | A06931 | A07209 | 238 |
| A06932 | A07218 | 236 | A06934 | A07080 | 288 |
| A06934 | A07122 | 405 | A06934 | A07283 | 288 |
| A06934 | A07322 | 475 | A06934 | A07508 | 412 |
| A06934 | A07530 | 344 | A06934 | A07553 | 255 |
| A06934 | A07721 | 187 | A06934 | A07847 | 308 |
| A06934 | A14827 | 179 | A06934 | A15905 | 390 |
| A06934 | A16026 | 319 | A06934 | A16027 | 257 |
| A06934 | A16741 | 196 | A06935 | A07218 | 216 |
| A06935 | A07743 | 434 | A06935 | A09453 | 428 |
| A06936 | A11521 | 344 | A06936 | A13340 | 204 |
| A06936 | A13342 | 382 | A06936 | A13511 | 350 |
| A06937 | A07370 | 259 | A06937 | A10492 | 457 |
| A06937 | A11145 | 420 | A06938 | A07076 | 240 |
| A06938 | A07360 | 208 | A06938 | A10372 | 160 |
| A06938 | A12824 | 259 | A06938 | A15624 | 435 |
| A06938 | A15684 | 310 | A06938 | A16088 | 486 |
| A06939 | A16444 | 452 | A06940 | A08743 | 433 |
| A06941 | A07437 | 373 | A06941 | A07521 | 364 |
| A06941 | A07820 | 195 | A06941 | A08400 | 477 |
| A06941 | A08484 | 324 | A06941 | A08785 | 324 |
| A06941 | A09056 | 642 | A06941 | A09286 | 236 |
| A06941 | A09326 | 416 | A06941 | A10167 | 195 |
| A06941 | A10663 | 163 | A06941 | A11279 | 324 |
| A06941 | A11287 | 324 | A06941 | A11885 | 312 |
| A06941 | A13219 | 534 | A06941 | A13222 | 324 |
| A06941 | A13844 | 195 | A06941 | A13902 | 190 |

|        |        |     |        |        |     |
|--------|--------|-----|--------|--------|-----|
| A06941 | A14077 | 204 | A06941 | A14175 | 185 |
| A06941 | A14182 | 313 | A06941 | A14247 | 542 |
| A06941 | A14258 | 324 | A06941 | A14461 | 400 |
| A06941 | A14661 | 632 | A06941 | A14711 | 307 |
| A06941 | A14844 | 324 | A06941 | A14877 | 324 |
| A06941 | A15559 | 314 | A06941 | A15647 | 291 |
| A06941 | A15650 | 490 | A06941 | A15684 | 227 |
| A06941 | A17061 | 324 | A06943 | A09784 | 479 |
| A06943 | A09787 | 441 | A06943 | A12854 | 249 |
| A06943 | A13207 | 162 | A06943 | A13930 | 307 |
| A06943 | A15318 | 188 | A06943 | A15484 | 201 |
| A06944 | A07011 | 165 | A06944 | A07157 | 302 |
| A06944 | A07212 | 374 | A06944 | A08560 | 167 |
| A06944 | A08821 | 171 | A06944 | A12725 | 152 |
| A06944 | A13872 | 265 | A06944 | A14118 | 340 |
| A06944 | A14128 | 425 | A06944 | A15461 | 213 |
| A06945 | A15510 | 63  | A06946 | A07212 | 382 |
| A06946 | A07219 | 430 | A06946 | A08713 | 447 |
| A06948 | A16358 | 401 | A06949 | A07116 | 259 |
| A06949 | A07165 | 254 | A06949 | A07486 | 491 |
| A06949 | A07759 | 240 | A06949 | A08572 | 216 |
| A06949 | A08879 | 179 | A06949 | A09014 | 312 |
| A06949 | A09346 | 350 | A06949 | A09390 | 213 |
| A06949 | A09394 | 208 | A06949 | A09448 | 160 |
| A06949 | A09789 | 446 | A06949 | A09790 | 474 |
| A06949 | A10174 | 262 | A06949 | A10382 | 436 |
| A06949 | A10418 | 485 | A06949 | A10473 | 323 |
| A06949 | A10639 | 277 | A06949 | A10731 | 268 |
| A06949 | A11683 | 182 | A06949 | A11835 | 460 |
| A06949 | A11908 | 374 | A06949 | A12554 | 255 |
| A06949 | A13161 | 360 | A06949 | A13302 | 255 |
| A06949 | A13568 | 323 | A06949 | A13667 | 167 |
| A06949 | A13865 | 338 | A06949 | A14188 | 157 |
| A06949 | A14483 | 301 | A06949 | A14529 | 188 |
| A06949 | A14623 | 246 | A06949 | A14656 | 213 |
| A06949 | A14664 | 374 | A06949 | A15889 | 319 |
| A06949 | A15985 | 219 | A06949 | A16654 | 219 |
| A06950 | A07311 | 486 | A06950 | A07399 | 338 |
| A06950 | A07726 | 201 | A06950 | A07798 | 682 |
| A06950 | A11286 | 238 | A06950 | A11392 | 254 |
| A06950 | A12618 | 279 | A06950 | A13335 | 288 |
| A06950 | A13340 | 356 | A06950 | A14571 | 162 |
| A06950 | A16074 | 420 | A06950 | A16291 | 241 |
| A06950 | A16771 | 340 | A06951 | A11715 | 430 |
| A06952 | A06954 | 462 | A06952 | A07577 | 407 |
| A06952 | A15649 | 272 | A06953 | A07218 | 170 |

|        |        |     |        |        |     |
|--------|--------|-----|--------|--------|-----|
| A06953 | A07286 | 469 | A06953 | A07391 | 427 |
| A06953 | A07578 | 388 | A06953 | A07580 | 380 |
| A06953 | A07601 | 346 | A06953 | A07605 | 429 |
| A06953 | A07904 | 439 | A06953 | A15498 | 393 |
| A06954 | A07361 | 366 | A06954 | A07514 | 398 |
| A06954 | A07577 | 394 | A06954 | A07580 | 417 |
| A06954 | A11172 | 414 | A06954 | A12572 | 435 |
| A06954 | A14353 | 398 | A06954 | A15649 | 236 |
| A06955 | A07243 | 228 | A06955 | A08535 | 380 |
| A06955 | A08653 | 391 | A06955 | A09470 | 229 |
| A06955 | A09656 | 411 | A06955 | A11729 | 201 |
| A06955 | A11981 | 363 | A06955 | A13605 | 256 |
| A06955 | A13626 | 293 | A06955 | A14093 | 185 |
| A06955 | A14741 | 154 | A06955 | A15309 | 168 |
| A06956 | A07010 | 396 | A06956 | A07529 | 369 |
| A06956 | A07764 | 360 | A06956 | A08002 | 390 |
| A06956 | A10681 | 348 | A06956 | A10689 | 224 |
| A06956 | A14362 | 317 | A06956 | A14366 | 216 |
| A06956 | A14394 | 241 | A06956 | A14600 | 390 |
| A06956 | A14767 | 424 | A06956 | A15282 | 191 |
| A06956 | A15425 | 363 | A06956 | A15475 | 329 |
| A06956 | A16002 | 224 | A06956 | A16034 | 333 |
| A06956 | A16562 | 424 | A06956 | A17052 | 424 |
| A06957 | A10618 | 230 | A06957 | A14006 | 467 |
| A06957 | A14080 | 485 | A06957 | A14655 | 489 |
| A06957 | A15643 | 263 | A06957 | A15657 | 193 |
| A06957 | A17049 | 296 | A06959 | A07569 | 313 |
| A06959 | A09616 | 346 | A06959 | A10798 | 171 |
| A06959 | A15233 | 318 | A06959 | A15498 | 356 |
| A06959 | A15945 | 200 | A06961 | A07911 | 260 |
| A06961 | A16636 | 224 | A06962 | A14216 | 185 |
| A06963 | A08120 | 447 | A06963 | A08121 | 447 |
| A06963 | A08122 | 447 | A06963 | A11268 | 447 |
| A06963 | A14701 | 235 | A06963 | A15026 | 447 |
| A06964 | A07181 | 369 | A06965 | A06973 | 565 |
| A06965 | A07047 | 200 | A06965 | A07201 | 307 |
| A06965 | A07311 | 171 | A06965 | A07312 | 196 |
| A06965 | A07323 | 188 | A06965 | A07349 | 414 |
| A06965 | A07378 | 435 | A06965 | A07398 | 472 |
| A06965 | A07449 | 479 | A06965 | A07451 | 491 |
| A06965 | A07533 | 308 | A06965 | A07581 | 200 |
| A06965 | A08055 | 399 | A06965 | A08131 | 477 |
| A06965 | A08137 | 473 | A06965 | A08281 | 156 |
| A06965 | A08357 | 486 | A06965 | A08358 | 151 |
| A06965 | A08359 | 326 | A06965 | A08369 | 503 |
| A06965 | A08398 | 451 | A06965 | A08408 | 226 |

|        |        |     |        |        |     |
|--------|--------|-----|--------|--------|-----|
| A06965 | A08419 | 173 | A06965 | A08452 | 491 |
| A06965 | A08457 | 200 | A06965 | A08466 | 200 |
| A06965 | A08476 | 200 | A06965 | A08559 | 279 |
| A06965 | A08773 | 347 | A06965 | A08972 | 383 |
| A06965 | A09044 | 472 | A06965 | A09289 | 268 |
| A06965 | A09322 | 566 | A06965 | A09674 | 433 |
| A06965 | A09702 | 447 | A06965 | A09865 | 262 |
| A06965 | A10417 | 447 | A06965 | A10518 | 424 |
| A06965 | A10529 | 229 | A06965 | A10616 | 465 |
| A06965 | A11390 | 463 | A06965 | A11400 | 288 |
| A06965 | A11420 | 210 | A06965 | A11438 | 491 |
| A06965 | A11480 | 455 | A06965 | A11562 | 227 |
| A06965 | A11612 | 221 | A06965 | A11704 | 475 |
| A06965 | A11728 | 200 | A06965 | A11857 | 165 |
| A06965 | A11861 | 200 | A06965 | A11945 | 481 |
| A06965 | A12126 | 173 | A06965 | A12221 | 212 |
| A06965 | A12233 | 165 | A06965 | A12243 | 201 |
| A06965 | A12292 | 252 | A06965 | A12821 | 216 |
| A06965 | A12918 | 229 | A06965 | A13249 | 262 |
| A06965 | A13333 | 200 | A06965 | A13989 | 491 |
| A06965 | A13992 | 490 | A06965 | A14176 | 210 |
| A06965 | A14505 | 441 | A06965 | A14508 | 201 |
| A06965 | A15202 | 351 | A06965 | A15218 | 393 |
| A06965 | A15235 | 217 | A06965 | A15500 | 378 |
| A06965 | A15660 | 490 | A06965 | A15684 | 477 |
| A06965 | A15708 | 179 | A06965 | A15727 | 352 |
| A06965 | A15743 | 151 | A06965 | A15776 | 388 |
| A06965 | A15777 | 224 | A06965 | A15988 | 491 |
| A06965 | A16053 | 291 | A06965 | A16118 | 491 |
| A06965 | A16302 | 151 | A06965 | A16306 | 182 |
| A06965 | A16631 | 232 | A06965 | A16686 | 321 |
| A06965 | A16768 | 256 | A06966 | A14281 | 288 |
| A06968 | A14376 | 267 | A06968 | A15185 | 380 |
| A06969 | A07135 | 243 | A06969 | A08941 | 416 |
| A06969 | A14634 | 406 | A06970 | A06990 | 382 |
| A06970 | A07007 | 333 | A06970 | A07059 | 205 |
| A06970 | A07256 | 449 | A06970 | A07277 | 301 |
| A06970 | A07341 | 339 | A06970 | A07407 | 281 |
| A06970 | A07413 | 460 | A06970 | A07477 | 472 |
| A06970 | A07553 | 174 | A06970 | A07558 | 445 |
| A06970 | A07590 | 488 | A06970 | A07711 | 202 |
| A06970 | A07736 | 452 | A06970 | A07816 | 307 |
| A06970 | A07933 | 423 | A06970 | A07973 | 465 |
| A06970 | A07976 | 319 | A06970 | A07981 | 307 |
| A06970 | A08346 | 224 | A06970 | A08591 | 256 |
| A06970 | A08655 | 180 | A06970 | A08985 | 180 |

|        |        |     |        |        |     |
|--------|--------|-----|--------|--------|-----|
| A06970 | A09054 | 307 | A06970 | A09262 | 451 |
| A06970 | A09359 | 391 | A06970 | A09566 | 208 |
| A06970 | A09829 | 154 | A06970 | A09876 | 201 |
| A06970 | A09935 | 375 | A06970 | A10172 | 288 |
| A06970 | A10218 | 185 | A06970 | A10424 | 219 |
| A06970 | A10549 | 183 | A06970 | A10694 | 193 |
| A06970 | A10703 | 288 | A06970 | A10714 | 291 |
| A06970 | A10980 | 343 | A06970 | A12647 | 279 |
| A06970 | A13152 | 380 | A06970 | A13819 | 307 |
| A06970 | A13866 | 307 | A06970 | A14077 | 477 |
| A06970 | A14239 | 307 | A06970 | A14337 | 245 |
| A06970 | A14342 | 404 | A06970 | A14349 | 396 |
| A06970 | A14473 | 281 | A06970 | A14698 | 168 |
| A06970 | A14729 | 279 | A06970 | A14803 | 491 |
| A06970 | A14804 | 313 | A06970 | A14856 | 294 |
| A06970 | A14907 | 318 | A06970 | A15486 | 165 |
| A06970 | A15493 | 249 | A06970 | A15494 | 301 |
| A06970 | A15510 | 226 | A06970 | A15874 | 462 |
| A06970 | A15970 | 310 | A06970 | A16027 | 279 |
| A06970 | A16028 | 174 | A06970 | A16103 | 180 |
| A06970 | A16110 | 213 | A06970 | A16233 | 177 |
| A06970 | A16286 | 151 | A06970 | A16590 | 240 |
| A06970 | A16739 | 151 | A06970 | A16741 | 465 |
| A06970 | A16746 | 270 | A06970 | A16807 | 307 |
| A06970 | A17007 | 291 | A06970 | A17041 | 382 |
| A06971 | A08709 | 383 | A06971 | A09988 | 281 |
| A06971 | A10557 | 327 | A06971 | A14694 | 176 |
| A06972 | A08578 | 367 | A06972 | A12824 | 151 |
| A06972 | A14080 | 208 | A06973 | A07047 | 539 |
| A06973 | A07090 | 285 | A06973 | A07201 | 388 |
| A06973 | A07398 | 578 | A06973 | A07451 | 157 |
| A06973 | A07581 | 326 | A06973 | A08131 | 566 |
| A06973 | A08261 | 165 | A06973 | A08357 | 218 |
| A06973 | A08359 | 565 | A06973 | A08369 | 587 |
| A06973 | A08398 | 220 | A06973 | A08408 | 457 |
| A06973 | A08452 | 523 | A06973 | A08457 | 250 |
| A06973 | A08462 | 246 | A06973 | A08466 | 200 |
| A06973 | A08476 | 487 | A06973 | A08521 | 200 |
| A06973 | A08558 | 213 | A06973 | A08664 | 200 |
| A06973 | A09044 | 200 | A06973 | A09285 | 252 |
| A06973 | A09308 | 241 | A06973 | A09322 | 585 |
| A06973 | A09502 | 185 | A06973 | A09620 | 241 |
| A06973 | A09702 | 286 | A06973 | A09862 | 119 |
| A06973 | A10417 | 347 | A06973 | A10529 | 246 |
| A06973 | A11349 | 332 | A06973 | A11358 | 199 |
| A06973 | A11438 | 528 | A06973 | A11550 | 480 |

|        |        |     |        |        |     |
|--------|--------|-----|--------|--------|-----|
| A06973 | A11562 | 550 | A06973 | A11593 | 216 |
| A06973 | A11728 | 587 | A06973 | A11729 | 200 |
| A06973 | A11857 | 317 | A06973 | A11861 | 200 |
| A06973 | A12227 | 241 | A06973 | A12270 | 159 |
| A06973 | A13333 | 200 | A06973 | A13710 | 160 |
| A06973 | A13830 | 273 | A06973 | A13989 | 436 |
| A06973 | A13992 | 303 | A06973 | A14090 | 154 |
| A06973 | A14169 | 435 | A06973 | A14176 | 491 |
| A06973 | A14188 | 274 | A06973 | A14206 | 185 |
| A06973 | A14216 | 385 | A06973 | A14508 | 430 |
| A06973 | A15202 | 539 | A06973 | A15218 | 196 |
| A06973 | A15225 | 152 | A06973 | A15268 | 487 |
| A06973 | A15381 | 541 | A06973 | A15500 | 286 |
| A06973 | A15727 | 241 | A06973 | A15776 | 190 |
| A06973 | A16118 | 360 | A06973 | A16333 | 185 |
| A06973 | A16686 | 491 | A06974 | A07822 | 235 |
| A06974 | A14502 | 279 | A06975 | A07581 | 297 |
| A06975 | A08301 | 307 | A06975 | A08933 | 383 |
| A06975 | A14594 | 238 | A06975 | A15374 | 191 |
| A06975 | A15624 | 279 | A06975 | A15932 | 180 |
| A06978 | A07413 | 269 | A06978 | A07643 | 199 |
| A06978 | A09632 | 338 | A06978 | A14257 | 163 |
| A06978 | A16033 | 330 | A06978 | A16375 | 402 |
| A06979 | A07264 | 279 | A06979 | A07322 | 319 |
| A06979 | A07442 | 165 | A06979 | A07477 | 477 |
| A06979 | A07558 | 420 | A06979 | A07590 | 424 |
| A06979 | A07627 | 369 | A06979 | A07688 | 259 |
| A06979 | A07721 | 363 | A06979 | A07736 | 409 |
| A06979 | A07844 | 230 | A06979 | A07933 | 154 |
| A06979 | A07973 | 477 | A06979 | A07976 | 183 |
| A06979 | A08099 | 255 | A06979 | A08193 | 479 |
| A06979 | A08751 | 340 | A06979 | A09059 | 256 |
| A06979 | A09876 | 196 | A06979 | A09879 | 420 |
| A06979 | A10420 | 168 | A06979 | A10441 | 454 |
| A06979 | A10443 | 417 | A06979 | A10672 | 329 |
| A06979 | A10677 | 373 | A06979 | A10694 | 322 |
| A06979 | A10703 | 400 | A06979 | A10714 | 450 |
| A06979 | A10866 | 420 | A06979 | A13314 | 419 |
| A06979 | A13326 | 425 | A06979 | A14391 | 180 |
| A06979 | A14862 | 340 | A06979 | A15637 | 274 |
| A06979 | A16419 | 414 | A06979 | A16741 | 283 |
| A06979 | A16767 | 417 | A06981 | A07122 | 396 |
| A06981 | A07477 | 436 | A06981 | A07590 | 435 |
| A06981 | A07736 | 424 | A06981 | A08250 | 351 |
| A06981 | A10452 | 399 | A06981 | A10694 | 341 |
| A06981 | A13735 | 324 | A06981 | A15547 | 179 |

|        |        |     |        |        |     |
|--------|--------|-----|--------|--------|-----|
| A06981 | A16627 | 271 | A06982 | A07079 | 435 |
| A06982 | A07319 | 491 | A06982 | A07346 | 491 |
| A06982 | A07466 | 366 | A06982 | A07480 | 491 |
| A06982 | A07534 | 491 | A06982 | A07603 | 491 |
| A06982 | A07647 | 475 | A06982 | A07902 | 490 |
| A06982 | A07996 | 491 | A06982 | A08000 | 484 |
| A06982 | A08030 | 491 | A06982 | A08088 | 151 |
| A06982 | A08117 | 491 | A06982 | A08141 | 484 |
| A06982 | A08208 | 491 | A06982 | A08212 | 462 |
| A06982 | A08352 | 346 | A06982 | A08502 | 486 |
| A06982 | A08516 | 489 | A06982 | A08669 | 565 |
| A06982 | A08769 | 491 | A06982 | A08820 | 566 |
| A06982 | A08884 | 378 | A06982 | A08912 | 291 |
| A06982 | A08919 | 228 | A06982 | A09288 | 480 |
| A06982 | A09598 | 483 | A06982 | A09617 | 259 |
| A06982 | A09623 | 180 | A06982 | A09629 | 208 |
| A06982 | A09654 | 385 | A06982 | A09706 | 480 |
| A06982 | A09751 | 162 | A06982 | A09762 | 441 |
| A06982 | A09764 | 470 | A06982 | A09836 | 160 |
| A06982 | A10373 | 566 | A06982 | A11236 | 491 |
| A06982 | A11540 | 467 | A06982 | A11596 | 238 |
| A06982 | A11703 | 396 | A06982 | A11829 | 288 |
| A06982 | A11916 | 491 | A06982 | A12190 | 204 |
| A06982 | A12365 | 200 | A06982 | A12556 | 491 |
| A06982 | A12625 | 473 | A06982 | A13889 | 200 |
| A06982 | A13913 | 199 | A06982 | A13949 | 491 |
| A06982 | A14009 | 200 | A06982 | A14076 | 491 |
| A06982 | A14079 | 491 | A06982 | A14091 | 200 |
| A06982 | A14093 | 417 | A06982 | A14094 | 566 |
| A06982 | A14154 | 491 | A06982 | A14177 | 265 |
| A06982 | A14192 | 200 | A06982 | A14193 | 329 |
| A06982 | A14223 | 564 | A06982 | A14224 | 63  |
| A06982 | A14230 | 491 | A06982 | A14273 | 491 |
| A06982 | A14282 | 411 | A06982 | A14460 | 491 |
| A06982 | A14694 | 566 | A06982 | A14706 | 491 |
| A06982 | A15367 | 180 | A06982 | A15369 | 491 |
| A06982 | A15371 | 435 | A06982 | A15524 | 491 |
| A06982 | A15531 | 477 | A06982 | A15539 | 489 |
| A06982 | A15549 | 157 | A06982 | A15557 | 374 |
| A06982 | A15654 | 310 | A06982 | A15714 | 291 |
| A06982 | A15837 | 299 | A06982 | A15941 | 475 |
| A06982 | A16127 | 491 | A06982 | A16128 | 491 |
| A06982 | A16129 | 490 | A06982 | A16132 | 286 |
| A06982 | A16225 | 207 | A06982 | A16226 | 491 |
| A06982 | A16274 | 200 | A06982 | A16294 | 330 |
| A06982 | A16299 | 347 | A06982 | A16378 | 491 |

|        |        |     |        |        |     |
|--------|--------|-----|--------|--------|-----|
| A06982 | A16606 | 470 | A06982 | A16612 | 281 |
| A06982 | A16613 | 491 | A06982 | A16616 | 475 |
| A06982 | A16626 | 489 | A06982 | A16646 | 441 |
| A06982 | A16754 | 483 | A06982 | A16760 | 263 |
| A06982 | A16762 | 475 | A06982 | A17115 | 454 |
| A06984 | A09875 | 401 | A06984 | A13826 | 308 |
| A06985 | A10864 | 447 | A06987 | A07058 | 425 |
| A06987 | A09293 | 435 | A06987 | A14642 | 246 |
| A06988 | A10504 | 330 | A06988 | A14071 | 290 |
| A06989 | A07081 | 391 | A06989 | A07756 | 333 |
| A06990 | A07880 | 224 | A06990 | A08591 | 366 |
| A06990 | A14077 | 232 | A06990 | A14803 | 260 |
| A06991 | A07687 | 402 | A06991 | A07869 | 324 |
| A06991 | A08351 | 390 | A06991 | A08352 | 288 |
| A06991 | A11283 | 303 | A06991 | A12047 | 180 |
| A06991 | A12307 | 407 | A06991 | A12722 | 187 |
| A06991 | A12889 | 372 | A06991 | A12938 | 246 |
| A06991 | A13964 | 260 | A06992 | A08891 | 221 |
| A06992 | A14174 | 306 | A06993 | A09357 | 252 |
| A06993 | A14112 | 368 | A06994 | A07027 | 420 |
| A06994 | A07059 | 393 | A06994 | A07088 | 293 |
| A06994 | A07238 | 380 | A06994 | A07325 | 324 |
| A06994 | A07408 | 441 | A06994 | A07477 | 290 |
| A06994 | A07501 | 414 | A06994 | A07520 | 428 |
| A06994 | A07619 | 386 | A06994 | A07674 | 428 |
| A06994 | A07723 | 353 | A06994 | A07757 | 414 |
| A06994 | A10455 | 378 | A06994 | A10637 | 460 |
| A06994 | A10710 | 221 | A06994 | A10926 | 390 |
| A06994 | A14794 | 407 | A06994 | A16103 | 348 |
| A06994 | A16262 | 251 | A06994 | A16741 | 205 |
| A06996 | A07190 | 368 | A06997 | A07209 | 394 |
| A06997 | A07314 | 238 | A06997 | A07803 | 440 |
| A06997 | A09062 | 322 | A06997 | A09238 | 486 |
| A06997 | A09239 | 491 | A06997 | A09422 | 341 |
| A06997 | A09732 | 390 | A06997 | A09733 | 156 |
| A06997 | A09734 | 177 | A06997 | A09855 | 241 |
| A06997 | A10336 | 165 | A06997 | A11412 | 157 |
| A06997 | A11537 | 362 | A06997 | A12393 | 491 |
| A06997 | A12854 | 221 | A06997 | A13119 | 449 |
| A06997 | A13151 | 484 | A06997 | A13312 | 299 |
| A06997 | A14010 | 177 | A06997 | A14183 | 218 |
| A06997 | A14259 | 348 | A06997 | A14856 | 265 |
| A06997 | A14930 | 321 | A06997 | A15292 | 424 |
| A06997 | A15348 | 285 | A06997 | A15349 | 467 |
| A06997 | A15352 | 199 | A06997 | A15395 | 191 |
| A06997 | A15399 | 216 | A06997 | A15454 | 358 |



|        |        |     |        |        |     |
|--------|--------|-----|--------|--------|-----|
| A06997 | A15484 | 173 | A06997 | A15495 | 329 |
| A06998 | A07400 | 441 | A06998 | A10223 | 430 |
| A07000 | A07173 | 328 | A07000 | A07218 | 188 |
| A07000 | A13491 | 461 | A07001 | A08588 | 240 |
| A07001 | A09179 | 344 | A07001 | A09577 | 393 |
| A07001 | A09644 | 285 | A07001 | A10392 | 322 |
| A07001 | A10808 | 333 | A07001 | A11124 | 246 |
| A07001 | A11943 | 490 | A07001 | A13234 | 208 |
| A07001 | A14071 | 279 | A07002 | A07122 | 374 |
| A07002 | A07554 | 391 | A07002 | A07711 | 385 |
| A07002 | A09876 | 184 | A07002 | A10659 | 398 |
| A07002 | A10694 | 380 | A07002 | A10875 | 333 |
| A07004 | A07242 | 514 | A07004 | A07885 | 468 |
| A07004 | A07985 | 232 | A07004 | A08022 | 449 |
| A07004 | A08137 | 479 | A07004 | A08300 | 486 |
| A07004 | A08328 | 207 | A07004 | A08356 | 267 |
| A07004 | A08416 | 311 | A07004 | A08553 | 390 |
| A07004 | A08571 | 410 | A07004 | A08834 | 157 |
| A07004 | A08859 | 283 | A07004 | A08869 | 338 |
| A07004 | A08878 | 456 | A07004 | A08926 | 469 |
| A07004 | A08929 | 466 | A07004 | A08960 | 154 |
| A07004 | A08975 | 491 | A07004 | A09010 | 196 |
| A07004 | A09195 | 199 | A07004 | A09222 | 452 |
| A07004 | A09245 | 152 | A07004 | A09341 | 199 |
| A07004 | A09477 | 207 | A07004 | A09666 | 63  |
| A07004 | A09995 | 302 | A07004 | A10159 | 483 |
| A07004 | A10514 | 327 | A07004 | A10987 | 302 |
| A07004 | A11057 | 168 | A07004 | A11301 | 378 |
| A07004 | A11395 | 468 | A07004 | A11443 | 152 |
| A07004 | A11487 | 473 | A07004 | A11489 | 281 |
| A07004 | A11543 | 433 | A07004 | A11929 | 445 |
| A07004 | A11937 | 199 | A07004 | A11953 | 462 |
| A07004 | A11983 | 582 | A07004 | A12081 | 167 |
| A07004 | A12111 | 207 | A07004 | A12211 | 236 |
| A07004 | A12338 | 279 | A07004 | A12365 | 572 |
| A07004 | A12511 | 207 | A07004 | A12726 | 323 |
| A07004 | A12871 | 307 | A07004 | A12873 | 196 |
| A07004 | A12901 | 207 | A07004 | A12927 | 450 |
| A07004 | A13367 | 172 | A07004 | A13369 | 191 |
| A07004 | A13385 | 177 | A07004 | A13609 | 279 |
| A07004 | A13860 | 293 | A07004 | A13989 | 491 |
| A07004 | A14006 | 416 | A07004 | A14127 | 385 |
| A07004 | A14182 | 302 | A07004 | A14183 | 210 |
| A07004 | A14193 | 254 | A07004 | A14196 | 525 |
| A07004 | A14202 | 511 | A07004 | A14471 | 344 |
| A07004 | A14532 | 452 | A07004 | A14570 | 477 |

|        |        |     |        |        |     |
|--------|--------|-----|--------|--------|-----|
| A07004 | A14596 | 381 | A07004 | A14635 | 491 |
| A07004 | A14636 | 216 | A07004 | A14721 | 167 |
| A07004 | A14900 | 207 | A07004 | A14986 | 399 |
| A07004 | A15013 | 207 | A07004 | A15065 | 168 |
| A07004 | A15262 | 272 | A07004 | A15292 | 413 |
| A07004 | A15293 | 228 | A07004 | A15297 | 193 |
| A07004 | A15314 | 391 | A07004 | A15330 | 302 |
| A07004 | A15349 | 249 | A07004 | A15360 | 467 |
| A07004 | A15422 | 243 | A07004 | A15438 | 307 |
| A07004 | A15449 | 196 | A07004 | A15487 | 223 |
| A07004 | A15559 | 490 | A07004 | A15564 | 252 |
| A07004 | A15589 | 207 | A07004 | A15606 | 200 |
| A07004 | A15708 | 283 | A07004 | A15731 | 168 |
| A07004 | A15749 | 157 | A07004 | A15797 | 232 |
| A07004 | A15945 | 270 | A07004 | A15946 | 472 |
| A07004 | A16073 | 199 | A07004 | A16109 | 163 |
| A07004 | A16218 | 299 | A07004 | A16326 | 207 |
| A07004 | A16450 | 228 | A07004 | A16768 | 465 |
| A07004 | A16904 | 188 | A07004 | A16994 | 468 |
| A07004 | A17190 | 212 | A07005 | A07687 | 391 |
| A07005 | A08858 | 302 | A07005 | A09793 | 232 |
| A07005 | A12047 | 281 | A07006 | A15841 | 460 |
| A07006 | A16008 | 394 | A07006 | A16037 | 422 |
| A07007 | A07027 | 358 | A07007 | A07264 | 486 |
| A07007 | A07334 | 327 | A07007 | A07408 | 293 |
| A07007 | A07507 | 411 | A07007 | A07574 | 210 |
| A07007 | A07674 | 409 | A07007 | A07816 | 307 |
| A07007 | A07847 | 411 | A07007 | A07981 | 307 |
| A07007 | A09054 | 307 | A07007 | A09340 | 343 |
| A07007 | A09880 | 446 | A07007 | A10456 | 152 |
| A07007 | A10720 | 190 | A07007 | A11189 | 491 |
| A07007 | A11902 | 185 | A07007 | A13819 | 307 |
| A07007 | A13866 | 307 | A07007 | A14239 | 307 |
| A07007 | A14279 | 246 | A07007 | A14803 | 188 |
| A07007 | A15356 | 385 | A07007 | A15935 | 343 |
| A07007 | A16328 | 396 | A07007 | A16807 | 307 |
| A07008 | A09117 | 434 | A07008 | A16352 | 447 |
| A07009 | A11898 | 452 | A07010 | A07529 | 401 |
| A07010 | A07764 | 472 | A07010 | A08002 | 416 |
| A07010 | A12622 | 440 | A07010 | A14362 | 363 |
| A07010 | A14366 | 285 | A07010 | A14372 | 328 |
| A07010 | A14394 | 306 | A07010 | A14600 | 416 |
| A07010 | A14767 | 440 | A07010 | A15475 | 372 |
| A07010 | A15790 | 420 | A07010 | A16562 | 440 |
| A07010 | A17052 | 440 | A07011 | A07163 | 235 |
| A07011 | A07421 | 219 | A07011 | A07885 | 490 |

|        |        |     |        |        |     |
|--------|--------|-----|--------|--------|-----|
| A07011 | A08255 | 717 | A07011 | A08259 | 491 |
| A07011 | A08355 | 491 | A07011 | A10579 | 213 |
| A07011 | A11134 | 305 | A07011 | A11408 | 182 |
| A07011 | A11658 | 449 | A07011 | A11779 | 157 |
| A07011 | A13302 | 247 | A07011 | A13979 | 378 |
| A07011 | A14007 | 171 | A07011 | A14086 | 475 |
| A07011 | A14183 | 348 | A07011 | A14300 | 401 |
| A07012 | A07163 | 313 | A07012 | A07201 | 335 |
| A07012 | A12383 | 323 | A07014 | A07472 | 293 |
| A07014 | A08064 | 462 | A07014 | A10186 | 472 |
| A07014 | A11378 | 483 | A07014 | A11467 | 479 |
| A07014 | A12462 | 406 | A07014 | A15498 | 193 |
| A07016 | A07123 | 319 | A07017 | A13729 | 375 |
| A07017 | A14223 | 185 | A07017 | A15280 | 388 |
| A07018 | A07030 | 434 | A07018 | A07190 | 334 |
| A07018 | A14381 | 347 | A07019 | A07559 | 491 |
| A07019 | A08700 | 299 | A07019 | A08861 | 218 |
| A07019 | A09074 | 458 | A07019 | A09364 | 348 |
| A07019 | A09955 | 424 | A07019 | A10665 | 490 |
| A07019 | A11014 | 491 | A07019 | A13337 | 404 |
| A07019 | A13734 | 193 | A07019 | A14604 | 205 |
| A07019 | A16043 | 483 | A07019 | A16138 | 420 |
| A07019 | A16721 | 362 | A07020 | A07496 | 333 |
| A07020 | A07509 | 286 | A07020 | A07567 | 490 |
| A07020 | A07654 | 488 | A07020 | A07673 | 490 |
| A07020 | A07754 | 438 | A07020 | A07913 | 470 |
| A07020 | A07914 | 441 | A07020 | A07916 | 446 |
| A07020 | A07928 | 490 | A07020 | A07988 | 327 |
| A07020 | A08218 | 391 | A07020 | A08724 | 235 |
| A07020 | A08785 | 364 | A07020 | A09050 | 326 |
| A07020 | A11295 | 240 | A07020 | A14693 | 163 |
| A07020 | A15032 | 396 | A07020 | A15043 | 356 |
| A07021 | A07296 | 462 | A07021 | A07297 | 462 |
| A07021 | A07912 | 414 | A07021 | A08311 | 427 |
| A07021 | A15233 | 388 | A07023 | A08879 | 452 |
| A07023 | A10625 | 279 | A07024 | A07314 | 196 |
| A07024 | A07369 | 396 | A07024 | A08693 | 305 |
| A07024 | A14809 | 160 | A07024 | A16643 | 372 |
| A07024 | A16814 | 436 | A07025 | A15809 | 307 |
| A07026 | A07232 | 473 | A07026 | A11687 | 430 |
| A07026 | A16635 | 486 | A07027 | A07059 | 422 |
| A07027 | A07122 | 283 | A07027 | A07238 | 340 |
| A07027 | A07239 | 479 | A07027 | A07264 | 277 |
| A07027 | A07271 | 374 | A07027 | A07322 | 414 |
| A07027 | A07325 | 266 | A07027 | A07366 | 452 |
| A07027 | A07381 | 457 | A07027 | A07408 | 424 |

|        |        |     |        |        |     |
|--------|--------|-----|--------|--------|-----|
| A07027 | A07477 | 240 | A07027 | A07490 | 347 |
| A07027 | A07501 | 389 | A07027 | A07520 | 324 |
| A07027 | A07553 | 208 | A07027 | A07558 | 229 |
| A07027 | A07590 | 234 | A07027 | A07619 | 361 |
| A07027 | A07674 | 401 | A07027 | A07692 | 346 |
| A07027 | A07696 | 180 | A07027 | A07711 | 327 |
| A07027 | A07718 | 481 | A07027 | A07723 | 317 |
| A07027 | A07737 | 408 | A07027 | A07851 | 180 |
| A07027 | A07933 | 283 | A07027 | A07935 | 249 |
| A07027 | A07973 | 368 | A07027 | A07976 | 394 |
| A07027 | A08190 | 216 | A07027 | A08199 | 312 |
| A07027 | A08249 | 305 | A07027 | A08366 | 288 |
| A07027 | A08372 | 165 | A07027 | A08385 | 393 |
| A07027 | A09876 | 193 | A07027 | A09880 | 285 |
| A07027 | A10420 | 167 | A07027 | A10424 | 424 |
| A07027 | A10444 | 285 | A07027 | A10452 | 263 |
| A07027 | A10652 | 477 | A07027 | A10656 | 271 |
| A07027 | A10670 | 385 | A07027 | A10679 | 313 |
| A07027 | A10684 | 191 | A07027 | A10691 | 281 |
| A07027 | A10692 | 361 | A07027 | A10699 | 243 |
| A07027 | A10702 | 219 | A07027 | A10706 | 286 |
| A07027 | A10712 | 243 | A07027 | A10783 | 340 |
| A07027 | A10876 | 395 | A07027 | A10926 | 363 |
| A07027 | A10933 | 385 | A07027 | A11309 | 208 |
| A07027 | A11834 | 455 | A07027 | A14803 | 249 |
| A07027 | A14856 | 163 | A07027 | A15390 | 267 |
| A07027 | A15628 | 353 | A07027 | A15690 | 243 |
| A07027 | A15877 | 272 | A07028 | A07075 | 428 |
| A07030 | A14381 | 347 | A07031 | A07143 | 183 |
| A07031 | A07157 | 433 | A07031 | A07177 | 183 |
| A07031 | A08714 | 201 | A07031 | A08827 | 246 |
| A07031 | A10078 | 151 | A07031 | A10527 | 170 |
| A07031 | A10638 | 277 | A07031 | A13872 | 409 |
| A07031 | A14392 | 480 | A07031 | A14432 | 269 |
| A07031 | A15395 | 152 | A07031 | A15605 | 193 |
| A07031 | A15608 | 205 | A07033 | A14210 | 286 |
| A07037 | A07088 | 288 | A07037 | A07122 | 201 |
| A07037 | A07520 | 489 | A07037 | A07553 | 258 |
| A07037 | A07690 | 332 | A07037 | A07757 | 413 |
| A07037 | A08108 | 322 | A07037 | A09381 | 340 |
| A07037 | A10247 | 196 | A07037 | A10430 | 157 |
| A07037 | A10679 | 347 | A07037 | A15905 | 279 |
| A07039 | A07200 | 256 | A07039 | A07438 | 394 |
| A07039 | A11313 | 344 | A07040 | A07299 | 422 |
| A07040 | A11787 | 422 | A07040 | A12669 | 411 |
| A07040 | A14156 | 279 | A07041 | A07113 | 63  |

|        |        |     |        |        |     |
|--------|--------|-----|--------|--------|-----|
| A07042 | A07323 | 384 | A07042 | A14796 | 452 |
| A07044 | A07218 | 373 | A07044 | A07704 | 337 |
| A07044 | A07705 | 456 | A07044 | A08040 | 488 |
| A07044 | A08202 | 409 | A07044 | A08203 | 447 |
| A07044 | A08292 | 360 | A07044 | A08671 | 479 |
| A07044 | A08747 | 409 | A07044 | A11289 | 361 |
| A07045 | A07122 | 299 | A07045 | A15283 | 425 |
| A07046 | A07360 | 580 | A07046 | A07822 | 229 |
| A07046 | A07881 | 335 | A07046 | A08228 | 415 |
| A07046 | A08548 | 263 | A07046 | A08674 | 156 |
| A07046 | A08932 | 301 | A07046 | A09305 | 327 |
| A07046 | A11290 | 156 | A07046 | A11918 | 156 |
| A07046 | A14482 | 230 | A07046 | A15624 | 576 |
| A07046 | A15649 | 291 | A07046 | A15651 | 310 |
| A07046 | A15652 | 563 | A07046 | A15660 | 491 |
| A07046 | A15661 | 559 | A07046 | A15662 | 419 |
| A07046 | A15684 | 576 | A07046 | A15720 | 156 |
| A07046 | A15721 | 156 | A07046 | A15746 | 229 |
| A07046 | A15843 | 229 | A07046 | A15917 | 229 |
| A07046 | A15918 | 294 | A07046 | A15923 | 229 |
| A07046 | A15937 | 229 | A07046 | A16027 | 173 |
| A07046 | A16088 | 242 | A07046 | A16096 | 177 |
| A07046 | A16145 | 156 | A07046 | A16307 | 156 |
| A07047 | A07307 | 256 | A07047 | A07398 | 255 |
| A07047 | A07581 | 470 | A07047 | A08131 | 550 |
| A07047 | A08137 | 333 | A07047 | A08358 | 465 |
| A07047 | A08359 | 562 | A07047 | A08369 | 279 |
| A07047 | A08408 | 571 | A07047 | A08457 | 320 |
| A07047 | A08466 | 200 | A07047 | A08476 | 241 |
| A07047 | A09308 | 241 | A07047 | A09322 | 241 |
| A07047 | A09620 | 241 | A07047 | A10362 | 277 |
| A07047 | A11334 | 179 | A07047 | A11550 | 347 |
| A07047 | A11562 | 200 | A07047 | A11728 | 284 |
| A07047 | A11857 | 382 | A07047 | A11861 | 200 |
| A07047 | A12227 | 241 | A07047 | A12329 | 296 |
| A07047 | A13333 | 200 | A07047 | A14176 | 195 |
| A07047 | A14216 | 283 | A07047 | A14508 | 400 |
| A07047 | A15202 | 332 | A07047 | A15268 | 241 |
| A07047 | A15381 | 241 | A07047 | A15500 | 428 |
| A07047 | A16686 | 443 | A07048 | A14430 | 313 |
| A07050 | A07152 | 200 | A07050 | A11297 | 232 |
| A07050 | A12927 | 154 | A07050 | A13023 | 278 |
| A07050 | A15188 | 343 | A07050 | A15522 | 338 |
| A07050 | A15794 | 491 | A07051 | A09124 | 162 |
| A07051 | A09633 | 486 | A07051 | A09644 | 200 |
| A07051 | A12478 | 445 | A07051 | A12835 | 243 |

|        |        |     |        |        |     |
|--------|--------|-----|--------|--------|-----|
| A07051 | A14007 | 196 | A07051 | A14072 | 204 |
| A07051 | A14122 | 188 | A07051 | A14124 | 465 |
| A07051 | A14300 | 249 | A07051 | A14378 | 157 |
| A07051 | A14471 | 154 | A07051 | A15292 | 154 |
| A07051 | A15436 | 235 | A07051 | A15456 | 291 |
| A07053 | A07152 | 323 | A07053 | A10605 | 450 |
| A07053 | A12809 | 424 | A07053 | A14125 | 348 |
| A07053 | A15425 | 313 | A07054 | A07073 | 486 |
| A07054 | A07242 | 790 | A07054 | A07444 | 152 |
| A07054 | A07483 | 489 | A07054 | A07495 | 592 |
| A07054 | A07665 | 411 | A07054 | A07709 | 307 |
| A07054 | A07725 | 151 | A07054 | A07816 | 490 |
| A07054 | A07883 | 489 | A07054 | A07893 | 491 |
| A07054 | A07934 | 374 | A07054 | A07942 | 157 |
| A07054 | A07954 | 491 | A07054 | A08090 | 311 |
| A07054 | A08192 | 188 | A07054 | A08239 | 402 |
| A07054 | A08292 | 163 | A07054 | A08531 | 714 |
| A07054 | A08535 | 262 | A07054 | A08849 | 205 |
| A07054 | A08878 | 322 | A07054 | A08910 | 484 |
| A07054 | A08985 | 85  | A07054 | A09229 | 173 |
| A07054 | A09342 | 180 | A07054 | A09493 | 168 |
| A07054 | A09624 | 491 | A07054 | A09662 | 491 |
| A07054 | A09666 | 224 | A07054 | A09756 | 367 |
| A07054 | A09825 | 243 | A07054 | A09869 | 176 |
| A07054 | A09997 | 152 | A07054 | A10094 | 168 |
| A07054 | A10169 | 190 | A07054 | A10247 | 170 |
| A07054 | A10363 | 491 | A07054 | A10369 | 491 |
| A07054 | A10607 | 271 | A07054 | A10909 | 190 |
| A07054 | A10970 | 227 | A07054 | A11068 | 446 |
| A07054 | A11183 | 285 | A07054 | A11205 | 210 |
| A07054 | A11281 | 402 | A07054 | A11293 | 193 |
| A07054 | A11346 | 485 | A07054 | A11359 | 227 |
| A07054 | A11408 | 480 | A07054 | A11475 | 480 |
| A07054 | A11551 | 380 | A07054 | A11661 | 205 |
| A07054 | A11675 | 299 | A07054 | A11690 | 277 |
| A07054 | A11915 | 185 | A07054 | A11983 | 160 |
| A07054 | A11991 | 160 | A07054 | A11996 | 470 |
| A07054 | A12047 | 491 | A07054 | A12228 | 160 |
| A07054 | A12508 | 254 | A07054 | A12511 | 262 |
| A07054 | A12601 | 262 | A07054 | A12602 | 355 |
| A07054 | A12722 | 491 | A07054 | A12836 | 408 |
| A07054 | A12838 | 227 | A07054 | A12855 | 177 |
| A07054 | A12858 | 243 | A07054 | A12893 | 486 |
| A07054 | A13242 | 374 | A07054 | A13274 | 190 |
| A07054 | A13454 | 205 | A07054 | A13489 | 262 |
| A07054 | A13641 | 205 | A07054 | A13642 | 205 |

|        |        |     |        |        |     |
|--------|--------|-----|--------|--------|-----|
| A07054 | A13681 | 440 | A07054 | A13760 | 262 |
| A07054 | A13839 | 152 | A07054 | A14009 | 455 |
| A07054 | A14162 | 227 | A07054 | A14163 | 491 |
| A07054 | A14193 | 485 | A07054 | A14253 | 408 |
| A07054 | A14266 | 719 | A07054 | A14268 | 165 |
| A07054 | A14271 | 484 | A07054 | A14278 | 174 |
| A07054 | A14281 | 490 | A07054 | A14357 | 190 |
| A07054 | A14433 | 240 | A07054 | A14474 | 480 |
| A07054 | A14484 | 491 | A07054 | A14633 | 491 |
| A07054 | A14926 | 380 | A07054 | A15102 | 177 |
| A07054 | A15147 | 205 | A07054 | A15273 | 319 |
| A07054 | A15292 | 425 | A07054 | A15301 | 274 |
| A07054 | A15317 | 157 | A07054 | A15324 | 537 |
| A07054 | A15366 | 356 | A07054 | A15367 | 193 |
| A07054 | A15501 | 491 | A07054 | A15502 | 479 |
| A07054 | A15685 | 491 | A07054 | A15704 | 180 |
| A07054 | A16260 | 160 | A07054 | A16489 | 190 |
| A07054 | A16913 | 235 | A07055 | A07763 | 393 |
| A07056 | A07057 | 422 | A07056 | A07678 | 398 |
| A07056 | A07735 | 390 | A07056 | A07815 | 246 |
| A07056 | A07842 | 378 | A07056 | A07852 | 450 |
| A07056 | A07860 | 398 | A07056 | A08093 | 322 |
| A07059 | A07088 | 486 | A07059 | A07109 | 297 |
| A07059 | A07238 | 419 | A07059 | A07239 | 193 |
| A07059 | A07325 | 286 | A07059 | A07366 | 165 |
| A07059 | A07407 | 356 | A07059 | A07408 | 399 |
| A07059 | A07477 | 177 | A07059 | A07501 | 345 |
| A07059 | A07503 | 394 | A07059 | A07520 | 441 |
| A07059 | A07540 | 480 | A07059 | A07590 | 171 |
| A07059 | A07619 | 321 | A07059 | A07674 | 484 |
| A07059 | A07688 | 195 | A07059 | A07690 | 488 |
| A07059 | A07723 | 265 | A07059 | A07736 | 363 |
| A07059 | A07757 | 480 | A07059 | A07856 | 307 |
| A07059 | A07933 | 480 | A07059 | A07976 | 241 |
| A07059 | A08114 | 224 | A07059 | A08190 | 283 |
| A07059 | A08372 | 324 | A07059 | A08385 | 224 |
| A07059 | A08663 | 375 | A07059 | A09059 | 170 |
| A07059 | A09195 | 162 | A07059 | A10452 | 202 |
| A07059 | A10456 | 335 | A07059 | A10652 | 373 |
| A07059 | A10656 | 210 | A07059 | A10669 | 180 |
| A07059 | A10679 | 260 | A07059 | A10687 | 294 |
| A07059 | A10688 | 281 | A07059 | A10690 | 281 |
| A07059 | A10696 | 294 | A07059 | A10702 | 156 |
| A07059 | A10707 | 278 | A07059 | A10776 | 286 |
| A07059 | A11580 | 384 | A07059 | A12723 | 168 |
| A07059 | A13735 | 243 | A07059 | A14821 | 291 |

|        |        |     |        |        |     |
|--------|--------|-----|--------|--------|-----|
| A07059 | A14856 | 323 | A07059 | A15874 | 416 |
| A07059 | A16262 | 260 | A07059 | A16286 | 229 |
| A07059 | A16529 | 232 | A07059 | A16741 | 480 |
| A07059 | A17006 | 265 | A07059 | A17046 | 294 |
| A07059 | A17092 | 355 | A07061 | A07153 | 112 |
| A07061 | A07238 | 274 | A07061 | A07267 | 210 |
| A07061 | A07322 | 265 | A07061 | A07424 | 396 |
| A07061 | A07558 | 162 | A07061 | A07848 | 152 |
| A07061 | A07898 | 252 | A07061 | A08127 | 447 |
| A07061 | A08379 | 296 | A07061 | A09290 | 279 |
| A07061 | A15637 | 210 | A07061 | A15874 | 477 |
| A07061 | A16739 | 451 | A07061 | A16741 | 475 |
| A07061 | A16744 | 452 | A07062 | A07736 | 196 |
| A07062 | A07952 | 374 | A07062 | A07961 | 463 |
| A07062 | A08209 | 489 | A07062 | A08647 | 307 |
| A07062 | A09107 | 314 | A07062 | A09652 | 340 |
| A07062 | A09734 | 198 | A07062 | A10557 | 285 |
| A07062 | A10655 | 193 | A07062 | A10671 | 340 |
| A07062 | A10762 | 333 | A07062 | A11279 | 217 |
| A07062 | A12150 | 405 | A07062 | A13902 | 190 |
| A07062 | A14190 | 347 | A07062 | A14410 | 162 |
| A07062 | A14516 | 291 | A07062 | A15647 | 199 |
| A07062 | A15896 | 491 | A07062 | A15992 | 223 |
| A07062 | A16038 | 369 | A07062 | A16049 | 205 |
| A07063 | A08875 | 279 | A07064 | A10156 | 363 |
| A07065 | A07066 | 462 | A07065 | A07790 | 441 |
| A07065 | A07810 | 435 | A07065 | A11164 | 461 |
| A07066 | A07522 | 477 | A07066 | A07743 | 422 |
| A07066 | A10511 | 481 | A07066 | A11164 | 456 |
| A07066 | A15630 | 294 | A07067 | A07483 | 228 |
| A07067 | A08155 | 424 | A07067 | A14655 | 241 |
| A07068 | A07098 | 447 | A07069 | A07276 | 311 |
| A07069 | A07384 | 388 | A07069 | A07447 | 386 |
| A07069 | A09323 | 446 | A07069 | A11591 | 294 |
| A07069 | A13617 | 277 | A07069 | A14637 | 163 |
| A07071 | A08280 | 269 | A07071 | A10583 | 441 |
| A07073 | A07242 | 491 | A07073 | A07495 | 393 |
| A07073 | A07687 | 472 | A07073 | A07705 | 162 |
| A07073 | A07816 | 321 | A07073 | A08910 | 322 |
| A07073 | A09093 | 299 | A07073 | A09300 | 318 |
| A07073 | A09624 | 491 | A07073 | A10909 | 327 |
| A07073 | A10929 | 371 | A07073 | A11205 | 469 |
| A07073 | A11661 | 337 | A07073 | A12047 | 361 |
| A07073 | A12722 | 350 | A07073 | A13942 | 174 |
| A07073 | A14266 | 245 | A07073 | A14281 | 254 |
| A07073 | A15273 | 326 | A07073 | A15626 | 388 |



|        |        |     |        |        |     |
|--------|--------|-----|--------|--------|-----|
| A07073 | A15704 | 160 | A07073 | A16725 | 288 |
| A07074 | A07097 | 485 | A07074 | A09350 | 383 |
| A07074 | A10543 | 427 | A07074 | A16808 | 396 |
| A07075 | A07581 | 341 | A07075 | A11688 | 337 |
| A07076 | A07258 | 311 | A07076 | A07759 | 406 |
| A07076 | A07822 | 299 | A07076 | A09292 | 397 |
| A07076 | A09592 | 277 | A07076 | A09707 | 188 |
| A07076 | A09977 | 160 | A07076 | A13052 | 210 |
| A07076 | A13126 | 191 | A07076 | A13425 | 276 |
| A07076 | A13989 | 283 | A07076 | A14216 | 184 |
| A07076 | A14816 | 210 | A07076 | A14937 | 252 |
| A07076 | A15649 | 210 | A07076 | A15658 | 299 |
| A07076 | A15659 | 299 | A07076 | A15660 | 541 |
| A07076 | A15708 | 299 | A07076 | A15746 | 299 |
| A07076 | A15920 | 299 | A07076 | A15931 | 589 |
| A07076 | A15937 | 299 | A07076 | A16088 | 465 |
| A07076 | A16218 | 299 | A07076 | A16464 | 299 |
| A07077 | A07109 | 383 | A07077 | A07553 | 374 |
| A07077 | A07710 | 352 | A07077 | A16741 | 340 |
| A07078 | A07205 | 358 | A07078 | A08445 | 294 |
| A07078 | A08883 | 193 | A07078 | A09080 | 357 |
| A07078 | A09952 | 152 | A07078 | A10635 | 486 |
| A07078 | A12032 | 330 | A07079 | A07319 | 491 |
| A07079 | A07346 | 491 | A07079 | A07353 | 226 |
| A07079 | A07480 | 429 | A07079 | A07534 | 469 |
| A07079 | A07603 | 469 | A07079 | A07647 | 491 |
| A07079 | A07902 | 165 | A07079 | A07989 | 477 |
| A07079 | A07996 | 398 | A07079 | A08000 | 286 |
| A07079 | A08030 | 484 | A07079 | A08117 | 458 |
| A07079 | A08141 | 468 | A07079 | A08208 | 462 |
| A07079 | A08526 | 270 | A07079 | A08902 | 420 |
| A07079 | A09162 | 170 | A07079 | A09598 | 440 |
| A07079 | A09663 | 332 | A07079 | A10366 | 276 |
| A07079 | A10625 | 484 | A07079 | A14079 | 491 |
| A07079 | A14155 | 425 | A07079 | A14273 | 491 |
| A07079 | A14882 | 226 | A07079 | A15369 | 174 |
| A07079 | A15540 | 170 | A07079 | A16127 | 486 |
| A07079 | A16128 | 469 | A07079 | A16129 | 63  |
| A07079 | A16134 | 424 | A07079 | A16225 | 440 |
| A07079 | A16613 | 427 | A07080 | A07122 | 324 |
| A07080 | A07288 | 489 | A07080 | A07304 | 369 |
| A07080 | A07530 | 272 | A07080 | A07553 | 160 |
| A07080 | A07809 | 425 | A07080 | A10131 | 252 |
| A07080 | A10488 | 347 | A07080 | A10659 | 316 |
| A07080 | A11304 | 163 | A07080 | A15356 | 356 |
| A07080 | A15637 | 227 | A07080 | A15874 | 286 |

|        |        |     |        |        |     |
|--------|--------|-----|--------|--------|-----|
| A07080 | A15905 | 185 | A07080 | A16026 | 363 |
| A07080 | A16027 | 160 | A07081 | A07226 | 251 |
| A07081 | A07756 | 210 | A07082 | A09388 | 411 |
| A07083 | A07242 | 386 | A07083 | A07422 | 63  |
| A07083 | A07425 | 374 | A07083 | A07433 | 291 |
| A07083 | A07495 | 232 | A07083 | A07593 | 180 |
| A07083 | A07897 | 254 | A07083 | A07954 | 337 |
| A07083 | A08126 | 215 | A07083 | A08447 | 179 |
| A07083 | A08463 | 151 | A07083 | A08536 | 249 |
| A07083 | A08550 | 172 | A07083 | A08558 | 246 |
| A07083 | A08571 | 423 | A07083 | A08813 | 154 |
| A07083 | A08885 | 88  | A07083 | A08984 | 188 |
| A07083 | A09256 | 483 | A07083 | A09624 | 218 |
| A07083 | A09648 | 159 | A07083 | A09668 | 267 |
| A07083 | A10250 | 255 | A07083 | A11196 | 260 |
| A07083 | A11472 | 246 | A07083 | A11496 | 207 |
| A07083 | A11497 | 193 | A07083 | A11614 | 188 |
| A07083 | A11675 | 422 | A07083 | A11728 | 200 |
| A07083 | A11851 | 188 | A07083 | A11917 | 191 |
| A07083 | A11954 | 241 | A07083 | A11992 | 157 |
| A07083 | A12506 | 182 | A07083 | A12508 | 163 |
| A07083 | A12825 | 200 | A07083 | A12858 | 246 |
| A07083 | A13708 | 202 | A07083 | A13788 | 232 |
| A07083 | A14084 | 170 | A07083 | A14167 | 252 |
| A07083 | A14270 | 205 | A07083 | A14281 | 277 |
| A07083 | A14286 | 229 | A07083 | A14289 | 195 |
| A07083 | A14358 | 313 | A07083 | A14375 | 151 |
| A07083 | A14462 | 286 | A07083 | A14474 | 491 |
| A07083 | A14484 | 160 | A07083 | A14706 | 196 |
| A07083 | A14719 | 205 | A07083 | A15273 | 204 |
| A07083 | A15711 | 201 | A07083 | A15743 | 224 |
| A07083 | A15818 | 201 | A07083 | A16067 | 229 |
| A07083 | A16157 | 281 | A07083 | A16611 | 384 |
| A07083 | A16664 | 276 | A07083 | A16675 | 235 |
| A07083 | A16682 | 241 | A07083 | A16807 | 171 |
| A07083 | A16824 | 283 | A07083 | A16905 | 184 |
| A07083 | A17133 | 227 | A07083 | A17144 | 217 |
| A07085 | A09380 | 407 | A07086 | A08461 | 290 |
| A07086 | A10798 | 399 | A07086 | A10799 | 276 |
| A07086 | A12241 | 329 | A07086 | A14461 | 241 |
| A07086 | A14845 | 400 | A07087 | A09542 | 229 |
| A07087 | A10485 | 434 | A07088 | A07109 | 177 |
| A07088 | A07132 | 267 | A07088 | A07238 | 379 |
| A07088 | A07477 | 188 | A07088 | A07503 | 446 |
| A07088 | A07520 | 477 | A07088 | A07553 | 378 |
| A07088 | A07674 | 417 | A07088 | A07711 | 288 |

|        |        |     |        |        |     |
|--------|--------|-----|--------|--------|-----|
| A07088 | A07736 | 152 | A07088 | A07757 | 357 |
| A07088 | A07779 | 389 | A07088 | A07847 | 221 |
| A07088 | A07856 | 317 | A07088 | A07973 | 195 |
| A07088 | A08155 | 399 | A07088 | A08438 | 180 |
| A07088 | A08688 | 258 | A07088 | A10420 | 240 |
| A07088 | A10456 | 168 | A07088 | A10635 | 193 |
| A07088 | A10677 | 200 | A07088 | A10687 | 305 |
| A07088 | A10708 | 299 | A07088 | A10714 | 167 |
| A07088 | A10926 | 334 | A07088 | A14856 | 434 |
| A07088 | A15905 | 182 | A07088 | A16286 | 364 |
| A07088 | A16344 | 198 | A07088 | A16741 | 217 |
| A07088 | A16959 | 202 | A07088 | A17006 | 276 |
| A07089 | A11324 | 322 | A07091 | A07834 | 319 |
| A07091 | A07848 | 170 | A07091 | A08531 | 899 |
| A07091 | A09247 | 268 | A07091 | A09319 | 945 |
| A07091 | A09448 | 899 | A07091 | A09539 | 255 |
| A07091 | A10506 | 162 | A07091 | A10615 | 899 |
| A07091 | A10894 | 337 | A07091 | A11236 | 899 |
| A07091 | A11683 | 160 | A07091 | A13225 | 899 |
| A07091 | A13977 | 899 | A07091 | A14019 | 899 |
| A07091 | A14211 | 899 | A07091 | A14444 | 247 |
| A07091 | A15105 | 899 | A07091 | A15189 | 899 |
| A07091 | A15292 | 899 | A07091 | A15854 | 899 |
| A07091 | A16954 | 899 | A07091 | A17056 | 899 |
| A07092 | A09741 | 393 | A07092 | A11872 | 429 |
| A07093 | A08572 | 184 | A07093 | A10319 | 201 |
| A07093 | A10616 | 160 | A07093 | A14741 | 162 |
| A07093 | A16087 | 218 | A07093 | A16927 | 224 |
| A07096 | A07124 | 319 | A07096 | A07226 | 160 |
| A07096 | A08834 | 160 | A07096 | A09627 | 160 |
| A07096 | A10372 | 160 | A07096 | A11365 | 160 |
| A07096 | A11521 | 195 | A07096 | A11735 | 160 |
| A07096 | A11737 | 160 | A07096 | A11914 | 160 |
| A07096 | A12658 | 160 | A07096 | A12824 | 160 |
| A07096 | A12828 | 313 | A07096 | A13054 | 396 |
| A07096 | A14007 | 160 | A07096 | A15257 | 160 |
| A07097 | A07958 | 271 | A07097 | A16808 | 409 |
| A07101 | A08882 | 238 | A07101 | A09687 | 332 |
| A07101 | A10576 | 154 | A07101 | A12022 | 477 |
| A07101 | A12824 | 374 | A07101 | A14381 | 185 |
| A07102 | A07187 | 324 | A07102 | A11374 | 324 |
| A07102 | A11694 | 324 | A07102 | A14073 | 324 |
| A07102 | A14642 | 324 | A07102 | A15843 | 324 |
| A07103 | A13870 | 319 | A07103 | A14594 | 329 |
| A07104 | A07105 | 454 | A07104 | A08752 | 394 |
| A07104 | A10417 | 417 | A07104 | A15932 | 205 |

|        |        |     |        |        |     |
|--------|--------|-----|--------|--------|-----|
| A07105 | A07201 | 240 | A07105 | A08664 | 440 |
| A07105 | A08752 | 396 | A07105 | A10417 | 419 |
| A07105 | A11331 | 422 | A07105 | A14449 | 260 |
| A07105 | A17193 | 385 | A07106 | A07985 | 259 |
| A07106 | A08831 | 291 | A07106 | A10214 | 324 |
| A07106 | A14400 | 353 | A07106 | A15596 | 235 |
| A07107 | A07276 | 313 | A07107 | A07814 | 429 |
| A07107 | A08289 | 238 | A07107 | A08902 | 168 |
| A07107 | A15701 | 202 | A07108 | A07283 | 154 |
| A07108 | A07334 | 303 | A07108 | A07763 | 196 |
| A07108 | A07795 | 317 | A07108 | A07796 | 251 |
| A07108 | A14665 | 491 | A07108 | A16026 | 193 |
| A07109 | A07122 | 443 | A07109 | A07239 | 190 |
| A07109 | A07256 | 288 | A07109 | A07304 | 469 |
| A07109 | A07413 | 160 | A07109 | A07477 | 173 |
| A07109 | A07507 | 308 | A07109 | A07530 | 374 |
| A07109 | A07553 | 272 | A07109 | A07554 | 396 |
| A07109 | A07590 | 167 | A07109 | A07674 | 251 |
| A07109 | A07684 | 234 | A07109 | A07688 | 440 |
| A07109 | A07710 | 389 | A07109 | A07800 | 313 |
| A07109 | A07933 | 419 | A07109 | A08099 | 163 |
| A07109 | A08197 | 255 | A07109 | A08313 | 269 |
| A07109 | A08883 | 290 | A07109 | A09540 | 281 |
| A07109 | A10444 | 223 | A07109 | A10452 | 199 |
| A07109 | A10656 | 207 | A07109 | A10677 | 184 |
| A07109 | A10701 | 436 | A07109 | A10707 | 462 |
| A07109 | A10904 | 335 | A07109 | A13731 | 363 |
| A07109 | A15874 | 358 | A07109 | A15905 | 385 |
| A07109 | A16026 | 219 | A07109 | A16027 | 274 |
| A07109 | A16028 | 247 | A07109 | A16419 | 262 |
| A07109 | A16739 | 226 | A07109 | A16741 | 491 |
| A07109 | A16744 | 360 | A07109 | A16959 | 187 |
| A07109 | A17040 | 159 | A07110 | A07135 | 269 |
| A07110 | A07622 | 467 | A07110 | A07841 | 438 |
| A07111 | A07700 | 201 | A07111 | A07902 | 307 |
| A07111 | A14475 | 816 | A07111 | A14485 | 695 |
| A07111 | A14585 | 600 | A07111 | A14589 | 831 |
| A07111 | A14643 | 561 | A07114 | A10401 | 406 |
| A07115 | A07165 | 204 | A07115 | A11313 | 310 |
| A07116 | A07547 | 430 | A07116 | A08070 | 283 |
| A07116 | A10018 | 299 | A07116 | A11331 | 319 |
| A07117 | A07316 | 432 | A07117 | A07803 | 191 |
| A07117 | A08834 | 251 | A07117 | A09742 | 182 |
| A07117 | A13826 | 191 | A07117 | A13947 | 386 |
| A07117 | A14010 | 288 | A07117 | A14408 | 303 |
| A07117 | A14511 | 326 | A07117 | A15184 | 417 |

|        |        |     |        |        |     |
|--------|--------|-----|--------|--------|-----|
| A07117 | A15292 | 469 | A07117 | A15311 | 327 |
| A07117 | A15312 | 205 | A07117 | A15313 | 218 |
| A07117 | A15317 | 279 | A07117 | A15333 | 330 |
| A07117 | A15346 | 246 | A07117 | A15348 | 266 |
| A07117 | A15349 | 399 | A07117 | A15352 | 200 |
| A07117 | A15452 | 373 | A07117 | A15461 | 299 |
| A07117 | A15480 | 385 | A07117 | A15489 | 347 |
| A07117 | A15802 | 371 | A07117 | A16224 | 408 |
| A07118 | A14198 | 188 | A07118 | A14433 | 324 |
| A07118 | A15649 | 236 | A07119 | A07704 | 458 |
| A07119 | A07705 | 333 | A07119 | A08291 | 408 |
| A07119 | A08292 | 363 | A07119 | A08496 | 475 |
| A07119 | A08859 | 182 | A07119 | A09733 | 279 |
| A07119 | A13734 | 193 | A07119 | A16068 | 266 |
| A07122 | A07204 | 180 | A07122 | A07238 | 277 |
| A07122 | A07256 | 218 | A07122 | A07267 | 460 |
| A07122 | A07271 | 277 | A07122 | A07288 | 356 |
| A07122 | A07304 | 154 | A07122 | A07322 | 188 |
| A07122 | A07381 | 466 | A07122 | A07410 | 340 |
| A07122 | A07413 | 489 | A07122 | A07424 | 215 |
| A07122 | A07477 | 425 | A07122 | A07520 | 247 |
| A07122 | A07530 | 469 | A07122 | A07553 | 353 |
| A07122 | A07554 | 215 | A07122 | A07590 | 422 |
| A07122 | A07627 | 268 | A07122 | A07659 | 402 |
| A07122 | A07674 | 389 | A07122 | A07688 | 435 |
| A07122 | A07736 | 477 | A07122 | A07737 | 477 |
| A07122 | A07753 | 391 | A07122 | A07800 | 491 |
| A07122 | A07809 | 436 | A07122 | A07823 | 260 |
| A07122 | A07831 | 340 | A07122 | A07832 | 340 |
| A07122 | A07856 | 238 | A07122 | A07875 | 299 |
| A07122 | A07933 | 184 | A07122 | A08099 | 221 |
| A07122 | A08135 | 386 | A07122 | A08155 | 338 |
| A07122 | A08385 | 274 | A07122 | A08751 | 416 |
| A07122 | A09161 | 340 | A07122 | A09612 | 483 |
| A07122 | A09632 | 389 | A07122 | A09711 | 299 |
| A07122 | A10027 | 340 | A07122 | A10443 | 193 |
| A07122 | A10444 | 368 | A07122 | A10536 | 340 |
| A07122 | A10550 | 408 | A07122 | A10656 | 257 |
| A07122 | A10659 | 234 | A07122 | A10672 | 201 |
| A07122 | A10676 | 229 | A07122 | A10681 | 179 |
| A07122 | A10686 | 191 | A07122 | A10693 | 274 |
| A07122 | A10702 | 187 | A07122 | A10714 | 288 |
| A07122 | A10780 | 358 | A07122 | A11309 | 463 |
| A07122 | A11432 | 260 | A07122 | A12055 | 247 |
| A07122 | A13026 | 340 | A07122 | A13137 | 434 |
| A07122 | A13143 | 340 | A07122 | A13158 | 340 |

|        |        |     |        |        |     |
|--------|--------|-----|--------|--------|-----|
| A07122 | A13326 | 218 | A07122 | A13544 | 340 |
| A07122 | A14313 | 379 | A07122 | A14821 | 347 |
| A07122 | A14827 | 446 | A07122 | A15135 | 215 |
| A07122 | A15497 | 472 | A07122 | A15637 | 355 |
| A07122 | A15811 | 185 | A07122 | A15840 | 229 |
| A07122 | A15874 | 266 | A07122 | A15905 | 446 |
| A07122 | A16026 | 366 | A07122 | A16027 | 355 |
| A07122 | A16033 | 162 | A07122 | A16328 | 217 |
| A07122 | A16346 | 299 | A07122 | A16529 | 486 |
| A07122 | A16959 | 433 | A07122 | A17078 | 374 |
| A07123 | A15939 | 201 | A07124 | A13829 | 174 |
| A07126 | A07154 | 294 | A07126 | A08850 | 561 |
| A07126 | A10336 | 188 | A07126 | A10549 | 310 |
| A07126 | A10921 | 340 | A07126 | A14071 | 179 |
| A07126 | A14135 | 477 | A07126 | A14366 | 288 |
| A07126 | A14369 | 274 | A07126 | A14370 | 296 |
| A07126 | A14374 | 168 | A07126 | A14391 | 173 |
| A07126 | A14392 | 193 | A07126 | A14394 | 789 |
| A07126 | A14570 | 401 | A07126 | A14596 | 698 |
| A07126 | A14604 | 213 | A07126 | A14659 | 740 |
| A07126 | A15482 | 439 | A07126 | A15507 | 402 |
| A07126 | A15516 | 251 | A07126 | A15722 | 281 |
| A07126 | A15884 | 477 | A07127 | A07145 | 240 |
| A07127 | A07158 | 323 | A07127 | A07192 | 372 |
| A07127 | A07193 | 399 | A07127 | A08898 | 351 |
| A07127 | A08911 | 277 | A07127 | A09120 | 366 |
| A07127 | A09124 | 160 | A07127 | A09242 | 224 |
| A07127 | A09464 | 296 | A07127 | A09664 | 278 |
| A07127 | A09872 | 345 | A07127 | A11738 | 294 |
| A07127 | A13387 | 241 | A07127 | A14278 | 215 |
| A07127 | A14624 | 384 | A07127 | A14674 | 157 |
| A07127 | A14712 | 373 | A07128 | A07191 | 335 |
| A07128 | A07746 | 157 | A07128 | A08677 | 307 |
| A07128 | A10824 | 324 | A07128 | A11683 | 184 |
| A07128 | A12371 | 310 | A07129 | A07482 | 374 |
| A07129 | A09072 | 224 | A07129 | A09929 | 343 |
| A07129 | A11525 | 223 | A07129 | A13946 | 274 |
| A07129 | A14077 | 185 | A07130 | A07141 | 177 |
| A07130 | A07191 | 199 | A07130 | A07598 | 200 |
| A07130 | A07647 | 162 | A07130 | A08141 | 171 |
| A07130 | A09842 | 185 | A07130 | A14197 | 157 |
| A07130 | A14683 | 255 | A07130 | A15976 | 235 |
| A07131 | A07135 | 286 | A07132 | A07439 | 283 |
| A07132 | A08688 | 321 | A07132 | A12897 | 201 |
| A07132 | A13667 | 297 | A07132 | A17155 | 335 |
| A07133 | A14190 | 270 | A07133 | A14372 | 335 |

|        |        |     |        |        |     |
|--------|--------|-----|--------|--------|-----|
| A07133 | A14598 | 389 | A07133 | A15601 | 385 |
| A07133 | A15607 | 391 | A07133 | A15608 | 368 |
| A07133 | A15795 | 348 | A07134 | A07161 | 369 |
| A07134 | A07166 | 348 | A07134 | A14190 | 283 |
| A07134 | A14366 | 307 | A07134 | A14613 | 417 |
| A07134 | A15425 | 324 | A07135 | A07157 | 249 |
| A07135 | A07159 | 246 | A07135 | A07161 | 441 |
| A07135 | A07164 | 434 | A07135 | A07165 | 358 |
| A07135 | A07166 | 324 | A07135 | A07189 | 218 |
| A07135 | A07419 | 196 | A07135 | A07423 | 316 |
| A07135 | A07622 | 374 | A07135 | A07841 | 286 |
| A07135 | A07900 | 319 | A07135 | A08163 | 188 |
| A07135 | A08194 | 276 | A07135 | A08250 | 168 |
| A07135 | A08438 | 601 | A07135 | A08609 | 201 |
| A07135 | A08846 | 226 | A07135 | A08941 | 226 |
| A07135 | A09222 | 152 | A07135 | A09275 | 255 |
| A07135 | A09406 | 423 | A07135 | A09418 | 226 |
| A07135 | A09566 | 168 | A07135 | A09749 | 179 |
| A07135 | A09770 | 269 | A07135 | A09833 | 299 |
| A07135 | A09890 | 172 | A07135 | A10146 | 201 |
| A07135 | A10455 | 196 | A07135 | A10464 | 316 |
| A07135 | A10471 | 367 | A07135 | A10501 | 201 |
| A07135 | A10618 | 213 | A07135 | A10740 | 151 |
| A07135 | A10756 | 333 | A07135 | A10809 | 196 |
| A07135 | A10812 | 255 | A07135 | A10974 | 286 |
| A07135 | A11133 | 286 | A07135 | A11250 | 196 |
| A07135 | A11257 | 207 | A07135 | A11454 | 219 |
| A07135 | A11490 | 243 | A07135 | A11566 | 255 |
| A07135 | A11683 | 263 | A07135 | A11810 | 201 |
| A07135 | A12295 | 172 | A07135 | A12334 | 286 |
| A07135 | A12361 | 154 | A07135 | A12510 | 316 |
| A07135 | A12581 | 269 | A07135 | A12908 | 185 |
| A07135 | A13242 | 218 | A07135 | A13294 | 162 |
| A07135 | A13821 | 308 | A07135 | A13823 | 316 |
| A07135 | A13826 | 168 | A07135 | A13899 | 350 |
| A07135 | A14104 | 157 | A07135 | A14199 | 272 |
| A07135 | A14332 | 294 | A07135 | A14353 | 196 |
| A07135 | A14371 | 162 | A07135 | A14374 | 314 |
| A07135 | A14391 | 165 | A07135 | A14439 | 193 |
| A07135 | A14535 | 201 | A07135 | A14599 | 212 |
| A07135 | A14634 | 193 | A07135 | A14647 | 236 |
| A07135 | A15291 | 396 | A07135 | A15327 | 227 |
| A07135 | A15346 | 348 | A07135 | A15394 | 350 |
| A07135 | A15425 | 263 | A07135 | A15647 | 302 |
| A07135 | A15726 | 454 | A07135 | A15806 | 283 |
| A07135 | A15967 | 316 | A07135 | A15974 | 307 |

|        |        |     |        |        |     |
|--------|--------|-----|--------|--------|-----|
| A07135 | A15979 | 207 | A07135 | A15991 | 316 |
| A07135 | A15996 | 213 | A07135 | A16321 | 269 |
| A07135 | A16538 | 180 | A07135 | A16545 | 286 |
| A07135 | A16738 | 157 | A07135 | A16904 | 157 |
| A07136 | A09132 | 422 | A07136 | A09911 | 374 |
| A07136 | A15233 | 358 | A07137 | A07243 | 382 |
| A07137 | A10564 | 422 | A07138 | A07157 | 339 |
| A07138 | A14366 | 324 | A07138 | A14439 | 286 |
| A07138 | A14603 | 374 | A07138 | A15394 | 272 |
| A07138 | A15395 | 251 | A07138 | A15795 | 383 |
| A07139 | A14664 | 313 | A07140 | A07172 | 367 |
| A07140 | A07184 | 256 | A07140 | A07324 | 443 |
| A07140 | A07655 | 456 | A07140 | A07748 | 441 |
| A07140 | A07878 | 399 | A07140 | A08273 | 260 |
| A07140 | A08502 | 160 | A07140 | A08630 | 219 |
| A07140 | A08660 | 490 | A07140 | A08667 | 374 |
| A07140 | A08688 | 456 | A07140 | A09513 | 332 |
| A07140 | A09967 | 355 | A07140 | A10823 | 326 |
| A07140 | A11086 | 290 | A07140 | A13989 | 344 |
| A07140 | A14430 | 301 | A07140 | A15233 | 251 |
| A07140 | A15240 | 332 | A07140 | A15272 | 302 |
| A07141 | A07199 | 229 | A07141 | A09033 | 216 |
| A07141 | A09550 | 256 | A07141 | A13802 | 360 |
| A07141 | A14194 | 432 | A07141 | A14553 | 338 |
| A07141 | A14605 | 174 | A07141 | A15976 | 352 |
| A07141 | A16636 | 443 | A07142 | A07166 | 294 |
| A07142 | A07173 | 290 | A07142 | A10714 | 291 |
| A07142 | A14236 | 281 | A07142 | A14374 | 249 |
| A07142 | A14387 | 372 | A07142 | A14585 | 212 |
| A07142 | A14598 | 358 | A07142 | A15394 | 310 |
| A07142 | A15395 | 291 | A07142 | A15912 | 283 |
| A07142 | A15964 | 346 | A07143 | A07148 | 277 |
| A07143 | A07166 | 177 | A07143 | A07173 | 173 |
| A07143 | A07390 | 270 | A07143 | A08714 | 490 |
| A07143 | A09219 | 297 | A07143 | A09394 | 273 |
| A07143 | A09550 | 411 | A07143 | A10164 | 283 |
| A07143 | A10336 | 149 | A07143 | A10528 | 219 |
| A07143 | A10594 | 357 | A07143 | A11123 | 299 |
| A07143 | A11431 | 163 | A07143 | A11548 | 310 |
| A07143 | A12927 | 230 | A07143 | A13241 | 245 |
| A07143 | A13902 | 154 | A07143 | A14210 | 176 |
| A07143 | A14371 | 469 | A07143 | A14405 | 188 |
| A07143 | A14554 | 314 | A07143 | A14604 | 174 |
| A07143 | A14608 | 356 | A07143 | A15301 | 272 |
| A07143 | A15302 | 154 | A07143 | A15366 | 236 |
| A07143 | A15395 | 176 | A07143 | A15413 | 160 |



|        |        |     |        |        |     |
|--------|--------|-----|--------|--------|-----|
| A07143 | A15463 | 273 | A07143 | A15671 | 291 |
| A07145 | A07152 | 357 | A07145 | A07205 | 198 |
| A07145 | A07243 | 199 | A07145 | A07794 | 167 |
| A07145 | A07894 | 240 | A07145 | A08612 | 418 |
| A07145 | A08704 | 324 | A07145 | A09017 | 311 |
| A07145 | A09241 | 210 | A07145 | A09340 | 223 |
| A07145 | A09390 | 259 | A07145 | A09433 | 296 |
| A07145 | A09548 | 303 | A07145 | A09552 | 263 |
| A07145 | A09558 | 162 | A07145 | A09797 | 249 |
| A07145 | A09848 | 180 | A07145 | A09901 | 213 |
| A07145 | A10722 | 243 | A07145 | A10723 | 235 |
| A07145 | A11090 | 311 | A07145 | A11131 | 263 |
| A07145 | A11400 | 162 | A07145 | A12009 | 238 |
| A07145 | A12361 | 167 | A07145 | A14366 | 486 |
| A07145 | A14372 | 486 | A07145 | A14374 | 229 |
| A07145 | A14380 | 311 | A07145 | A14381 | 154 |
| A07145 | A14391 | 337 | A07145 | A14416 | 277 |
| A07145 | A14554 | 160 | A07145 | A14598 | 373 |
| A07145 | A14600 | 324 | A07145 | A14651 | 384 |
| A07145 | A15310 | 182 | A07145 | A15475 | 228 |
| A07145 | A15518 | 279 | A07145 | A15605 | 196 |
| A07145 | A15642 | 184 | A07145 | A15795 | 172 |
| A07145 | A16738 | 173 | A07145 | A16772 | 400 |
| A07146 | A07151 | 279 | A07146 | A07154 | 317 |
| A07146 | A07157 | 334 | A07146 | A07173 | 241 |
| A07146 | A07302 | 348 | A07146 | A08835 | 160 |
| A07146 | A13872 | 293 | A07146 | A14236 | 234 |
| A07146 | A15885 | 396 | A07147 | A07165 | 462 |
| A07147 | A08266 | 399 | A07147 | A09009 | 306 |
| A07147 | A13743 | 337 | A07147 | A14122 | 210 |
| A07148 | A07157 | 463 | A07148 | A07161 | 443 |
| A07148 | A07166 | 252 | A07148 | A07173 | 246 |
| A07148 | A08360 | 246 | A07148 | A08714 | 291 |
| A07148 | A09902 | 278 | A07148 | A09952 | 213 |
| A07148 | A12927 | 183 | A07148 | A13982 | 182 |
| A07148 | A14374 | 202 | A07148 | A14404 | 324 |
| A07148 | A15282 | 165 | A07149 | A07167 | 224 |
| A07149 | A07209 | 334 | A07149 | A07803 | 361 |
| A07149 | A12897 | 305 | A07149 | A14490 | 171 |
| A07149 | A14554 | 193 | A07149 | A14570 | 228 |
| A07149 | A14635 | 353 | A07149 | A15314 | 358 |
| A07149 | A15322 | 260 | A07149 | A15337 | 213 |
| A07149 | A15478 | 160 | A07149 | A15480 | 154 |
| A07149 | A15484 | 168 | A07149 | A15639 | 205 |
| A07150 | A07157 | 319 | A07150 | A07161 | 369 |
| A07151 | A07173 | 180 | A07151 | A09469 | 263 |

|        |        |     |        |        |     |
|--------|--------|-----|--------|--------|-----|
| A07151 | A09509 | 281 | A07151 | A10382 | 257 |
| A07151 | A10597 | 191 | A07151 | A10722 | 270 |
| A07151 | A11109 | 328 | A07151 | A11131 | 296 |
| A07151 | A11839 | 196 | A07151 | A13824 | 369 |
| A07151 | A14054 | 293 | A07151 | A14169 | 177 |
| A07151 | A14914 | 369 | A07151 | A16224 | 196 |
| A07152 | A07157 | 191 | A07152 | A07161 | 162 |
| A07152 | A07173 | 457 | A07152 | A07174 | 227 |
| A07152 | A07372 | 270 | A07152 | A07381 | 198 |
| A07152 | A07390 | 221 | A07152 | A08632 | 290 |
| A07152 | A08641 | 205 | A07152 | A08651 | 301 |
| A07152 | A08908 | 340 | A07152 | A09259 | 236 |
| A07152 | A09753 | 196 | A07152 | A09768 | 191 |
| A07152 | A10319 | 460 | A07152 | A10585 | 409 |
| A07152 | A10586 | 311 | A07152 | A10605 | 419 |
| A07152 | A10750 | 447 | A07152 | A12809 | 314 |
| A07152 | A12927 | 396 | A07152 | A13084 | 217 |
| A07152 | A13131 | 379 | A07152 | A13821 | 258 |
| A07152 | A13872 | 177 | A07152 | A13903 | 430 |
| A07152 | A13988 | 488 | A07152 | A14012 | 353 |
| A07152 | A14071 | 490 | A07152 | A14146 | 443 |
| A07152 | A14199 | 394 | A07152 | A14368 | 207 |
| A07152 | A14372 | 245 | A07152 | A14374 | 490 |
| A07152 | A14391 | 490 | A07152 | A14392 | 390 |
| A07152 | A14417 | 301 | A07152 | A14439 | 454 |
| A07152 | A14442 | 332 | A07152 | A14599 | 490 |
| A07152 | A15290 | 241 | A07152 | A15394 | 473 |
| A07152 | A15395 | 249 | A07152 | A15425 | 491 |
| A07152 | A15426 | 334 | A07152 | A15427 | 491 |
| A07152 | A15605 | 296 | A07152 | A15607 | 228 |
| A07152 | A15608 | 176 | A07152 | A15609 | 301 |
| A07152 | A15640 | 314 | A07152 | A15642 | 483 |
| A07152 | A15794 | 217 | A07152 | A15964 | 462 |
| A07152 | A15974 | 182 | A07152 | A15999 | 323 |
| A07152 | A16015 | 390 | A07152 | A16282 | 368 |
| A07152 | A16308 | 307 | A07152 | A17213 | 201 |
| A07153 | A07201 | 479 | A07153 | A08734 | 307 |
| A07153 | A08889 | 162 | A07153 | A09402 | 307 |
| A07153 | A09487 | 319 | A07153 | A10255 | 319 |
| A07153 | A11404 | 491 | A07153 | A11437 | 297 |
| A07153 | A12800 | 319 | A07153 | A13592 | 240 |
| A07153 | A14004 | 371 | A07153 | A15187 | 165 |
| A07153 | A15282 | 200 | A07153 | A16877 | 177 |
| A07154 | A07157 | 187 | A07154 | A07164 | 218 |
| A07154 | A07812 | 288 | A07154 | A08837 | 227 |
| A07154 | A12927 | 163 | A07154 | A13872 | 391 |

|        |        |     |        |        |     |
|--------|--------|-----|--------|--------|-----|
| A07154 | A13965 | 229 | A07154 | A14135 | 265 |
| A07154 | A15238 | 312 | A07154 | A15482 | 288 |
| A07155 | A09804 | 407 | A07155 | A11902 | 296 |
| A07155 | A13170 | 334 | A07155 | A14059 | 217 |
| A07156 | A14071 | 339 | A07157 | A07158 | 168 |
| A07157 | A07161 | 486 | A07157 | A07164 | 446 |
| A07157 | A07166 | 491 | A07157 | A07173 | 218 |
| A07157 | A07372 | 249 | A07157 | A07390 | 199 |
| A07157 | A07471 | 267 | A07157 | A07675 | 216 |
| A07157 | A08280 | 297 | A07157 | A08652 | 363 |
| A07157 | A08851 | 177 | A07157 | A08879 | 174 |
| A07157 | A08905 | 179 | A07157 | A09046 | 210 |
| A07157 | A09520 | 151 | A07157 | A09548 | 258 |
| A07157 | A10214 | 485 | A07157 | A10455 | 258 |
| A07157 | A11300 | 485 | A07157 | A11433 | 246 |
| A07157 | A11453 | 198 | A07157 | A11597 | 205 |
| A07157 | A11688 | 396 | A07157 | A11815 | 290 |
| A07157 | A11983 | 224 | A07157 | A13330 | 176 |
| A07157 | A13735 | 190 | A07157 | A13736 | 205 |
| A07157 | A13860 | 439 | A07157 | A13872 | 486 |
| A07157 | A14191 | 218 | A07157 | A14231 | 401 |
| A07157 | A14372 | 217 | A07157 | A14374 | 340 |
| A07157 | A14392 | 191 | A07157 | A14439 | 364 |
| A07157 | A14442 | 179 | A07157 | A14479 | 207 |
| A07157 | A14482 | 435 | A07157 | A14599 | 157 |
| A07157 | A14813 | 218 | A07157 | A15223 | 157 |
| A07157 | A15323 | 543 | A07157 | A15395 | 390 |
| A07157 | A15427 | 160 | A07157 | A15608 | 154 |
| A07157 | A15746 | 329 | A07157 | A15806 | 213 |
| A07157 | A15877 | 157 | A07157 | A15887 | 283 |
| A07157 | A15955 | 357 | A07157 | A16286 | 174 |
| A07157 | A17041 | 187 | A07158 | A07165 | 375 |
| A07158 | A07191 | 205 | A07158 | A07192 | 441 |
| A07158 | A08729 | 260 | A07158 | A08910 | 200 |
| A07158 | A09092 | 218 | A07158 | A09120 | 281 |
| A07158 | A09212 | 301 | A07158 | A09404 | 385 |
| A07158 | A09448 | 159 | A07158 | A09556 | 182 |
| A07158 | A09791 | 229 | A07158 | A09810 | 358 |
| A07158 | A10006 | 210 | A07158 | A10055 | 260 |
| A07158 | A10491 | 322 | A07158 | A11097 | 409 |
| A07158 | A11512 | 358 | A07158 | A11738 | 177 |
| A07158 | A11953 | 165 | A07158 | A12720 | 322 |
| A07158 | A13020 | 335 | A07158 | A13181 | 468 |
| A07158 | A13496 | 335 | A07158 | A13930 | 202 |
| A07158 | A14387 | 228 | A07158 | A14483 | 165 |
| A07158 | A14524 | 162 | A07158 | A14570 | 301 |

|        |        |     |        |        |     |
|--------|--------|-----|--------|--------|-----|
| A07158 | A14624 | 310 | A07158 | A14642 | 358 |
| A07158 | A14643 | 273 | A07158 | A15241 | 262 |
| A07158 | A15267 | 228 | A07158 | A16107 | 162 |
| A07158 | A17195 | 243 | A07159 | A11331 | 260 |
| A07159 | A13626 | 335 | A07159 | A14216 | 210 |
| A07159 | A15531 | 241 | A07159 | A15624 | 469 |
| A07159 | A15651 | 338 | A07159 | A15652 | 299 |
| A07159 | A15659 | 165 | A07159 | A15661 | 279 |
| A07159 | A15662 | 337 | A07159 | A15684 | 451 |
| A07159 | A15917 | 177 | A07159 | A16088 | 409 |
| A07159 | A16095 | 486 | A07159 | A16149 | 405 |
| A07160 | A08588 | 188 | A07160 | A09018 | 238 |
| A07160 | A09211 | 215 | A07160 | A14035 | 307 |
| A07160 | A14127 | 341 | A07160 | A14699 | 172 |
| A07160 | A15379 | 274 | A07160 | A16054 | 247 |
| A07161 | A07164 | 433 | A07161 | A07166 | 491 |
| A07161 | A07173 | 183 | A07161 | A07390 | 279 |
| A07161 | A08714 | 232 | A07161 | A10501 | 329 |
| A07161 | A14071 | 371 | A07161 | A14125 | 204 |
| A07161 | A14236 | 174 | A07161 | A14373 | 307 |
| A07161 | A14374 | 362 | A07161 | A14376 | 288 |
| A07161 | A14392 | 162 | A07161 | A14439 | 353 |
| A07161 | A14442 | 260 | A07161 | A14599 | 364 |
| A07161 | A15394 | 446 | A07161 | A15395 | 185 |
| A07161 | A15510 | 417 | A07161 | A15806 | 291 |
| A07162 | A11506 | 447 | A07163 | A07165 | 241 |
| A07163 | A07169 | 201 | A07163 | A08261 | 238 |
| A07163 | A08289 | 361 | A07163 | A08355 | 262 |
| A07163 | A08390 | 270 | A07163 | A08746 | 407 |
| A07163 | A08748 | 249 | A07163 | A08795 | 208 |
| A07163 | A09127 | 170 | A07163 | A09210 | 257 |
| A07163 | A09464 | 110 | A07163 | A09543 | 420 |
| A07163 | A09548 | 193 | A07163 | A09577 | 168 |
| A07163 | A09591 | 355 | A07163 | A09701 | 213 |
| A07163 | A09885 | 196 | A07163 | A09983 | 177 |
| A07163 | A09989 | 177 | A07163 | A10050 | 356 |
| A07163 | A10112 | 180 | A07163 | A10233 | 340 |
| A07163 | A10532 | 491 | A07163 | A10534 | 170 |
| A07163 | A10742 | 174 | A07163 | A10822 | 221 |
| A07163 | A10899 | 302 | A07163 | A11004 | 313 |
| A07163 | A11210 | 162 | A07163 | A11253 | 188 |
| A07163 | A11390 | 177 | A07163 | A11750 | 238 |
| A07163 | A11866 | 208 | A07163 | A11911 | 369 |
| A07163 | A11959 | 184 | A07163 | A12130 | 265 |
| A07163 | A12365 | 165 | A07163 | A12383 | 488 |
| A07163 | A12407 | 283 | A07163 | A12831 | 274 |

|        |        |     |        |        |     |
|--------|--------|-----|--------|--------|-----|
| A07163 | A12839 | 313 | A07163 | A12897 | 157 |
| A07163 | A12910 | 283 | A07163 | A13210 | 313 |
| A07163 | A13569 | 265 | A07163 | A13712 | 313 |
| A07163 | A13786 | 193 | A07163 | A13794 | 313 |
| A07163 | A14076 | 272 | A07163 | A14132 | 259 |
| A07163 | A14165 | 184 | A07163 | A14315 | 160 |
| A07163 | A14316 | 154 | A07163 | A14319 | 208 |
| A07163 | A14321 | 364 | A07163 | A14403 | 180 |
| A07163 | A14588 | 180 | A07163 | A14643 | 285 |
| A07163 | A15110 | 251 | A07163 | A15281 | 174 |
| A07163 | A15309 | 202 | A07163 | A15649 | 458 |
| A07163 | A15811 | 368 | A07163 | A16579 | 265 |
| A07163 | A16631 | 368 | A07163 | A16750 | 251 |
| A07163 | A16795 | 184 | A07163 | A16819 | 196 |
| A07163 | A16905 | 191 | A07163 | A16969 | 313 |
| A07163 | A16976 | 196 | A07163 | A17085 | 205 |
| A07164 | A07165 | 297 | A07164 | A07166 | 413 |
| A07164 | A07187 | 184 | A07164 | A07191 | 241 |
| A07164 | A07201 | 157 | A07164 | A07439 | 174 |
| A07164 | A07729 | 313 | A07164 | A08677 | 230 |
| A07164 | A08738 | 157 | A07164 | A09046 | 241 |
| A07164 | A09394 | 232 | A07164 | A09419 | 417 |
| A07164 | A09558 | 899 | A07164 | A09623 | 167 |
| A07164 | A09925 | 154 | A07164 | A10108 | 373 |
| A07164 | A10266 | 329 | A07164 | A10286 | 163 |
| A07164 | A10512 | 373 | A07164 | A11883 | 373 |
| A07164 | A13872 | 185 | A07164 | A14392 | 232 |
| A07164 | A14445 | 216 | A07164 | A14644 | 262 |
| A07164 | A15089 | 353 | A07164 | A15369 | 199 |
| A07164 | A15394 | 154 | A07164 | A15395 | 199 |
| A07164 | A15427 | 191 | A07164 | A15757 | 243 |
| A07164 | A15964 | 208 | A07164 | A16076 | 183 |
| A07164 | A16277 | 200 | A07164 | A16636 | 489 |
| A07165 | A07187 | 307 | A07165 | A07200 | 451 |
| A07165 | A07201 | 400 | A07165 | A07205 | 191 |
| A07165 | A07218 | 263 | A07165 | A07295 | 223 |
| A07165 | A07486 | 88  | A07165 | A07510 | 195 |
| A07165 | A07889 | 162 | A07165 | A08631 | 285 |
| A07165 | A09029 | 346 | A07165 | A09073 | 414 |
| A07165 | A09124 | 270 | A07165 | A09370 | 167 |
| A07165 | A09396 | 152 | A07165 | A09404 | 204 |
| A07165 | A09406 | 232 | A07165 | A09509 | 383 |
| A07165 | A09559 | 210 | A07165 | A10047 | 154 |
| A07165 | A10174 | 899 | A07165 | A10197 | 167 |
| A07165 | A10247 | 184 | A07165 | A10530 | 252 |
| A07165 | A10551 | 159 | A07165 | A11369 | 346 |

|        |        |     |        |        |     |
|--------|--------|-----|--------|--------|-----|
| A07165 | A11659 | 232 | A07165 | A13182 | 241 |
| A07165 | A13242 | 216 | A07165 | A13915 | 210 |
| A07165 | A13921 | 285 | A07165 | A13991 | 899 |
| A07165 | A14019 | 899 | A07165 | A14190 | 154 |
| A07165 | A14210 | 247 | A07165 | A14364 | 339 |
| A07165 | A14371 | 157 | A07165 | A14403 | 316 |
| A07165 | A14443 | 899 | A07165 | A14487 | 252 |
| A07165 | A14784 | 314 | A07165 | A15179 | 210 |
| A07165 | A15281 | 176 | A07165 | A15457 | 162 |
| A07165 | A15506 | 899 | A07165 | A15639 | 159 |
| A07165 | A15650 | 224 | A07165 | A15673 | 274 |
| A07165 | A15910 | 241 | A07165 | A16393 | 170 |
| A07165 | A16636 | 265 | A07165 | A16737 | 204 |
| A07165 | A16891 | 163 | A07165 | A16904 | 154 |
| A07165 | A17136 | 393 | A07166 | A07372 | 291 |
| A07166 | A07390 | 243 | A07166 | A07973 | 173 |
| A07166 | A08714 | 196 | A07166 | A09046 | 255 |
| A07166 | A09876 | 534 | A07166 | A10177 | 340 |
| A07166 | A10444 | 217 | A07166 | A10452 | 193 |
| A07166 | A10501 | 301 | A07166 | A10575 | 217 |
| A07166 | A10656 | 201 | A07166 | A10677 | 177 |
| A07166 | A14071 | 235 | A07166 | A14372 | 274 |
| A07166 | A14374 | 219 | A07166 | A14387 | 268 |
| A07166 | A14391 | 227 | A07166 | A14392 | 252 |
| A07166 | A14439 | 188 | A07166 | A14554 | 154 |
| A07166 | A14599 | 202 | A07166 | A14603 | 308 |
| A07166 | A15394 | 170 | A07166 | A15806 | 258 |
| A07166 | A15955 | 380 | A07166 | A15974 | 199 |
| A07167 | A07663 | 379 | A07167 | A08345 | 256 |
| A07167 | A09279 | 249 | A07167 | A09671 | 238 |
| A07167 | A09883 | 353 | A07167 | A09995 | 193 |
| A07167 | A10174 | 208 | A07167 | A10506 | 151 |
| A07167 | A11166 | 424 | A07167 | A11167 | 314 |
| A07167 | A11292 | 179 | A07167 | A11591 | 279 |
| A07167 | A11725 | 278 | A07167 | A11929 | 324 |
| A07167 | A12024 | 353 | A07167 | A12988 | 348 |
| A07167 | A13397 | 481 | A07167 | A15639 | 201 |
| A07168 | A07955 | 466 | A07168 | A08759 | 417 |
| A07168 | A10573 | 466 | A07168 | A10930 | 462 |
| A07168 | A15960 | 454 | A07168 | A16063 | 435 |
| A07169 | A09407 | 418 | A07169 | A13862 | 404 |
| A07170 | A14190 | 213 | A07170 | A14377 | 288 |
| A07171 | A07807 | 417 | A07171 | A13945 | 296 |
| A07172 | A07900 | 388 | A07173 | A07210 | 213 |
| A07173 | A08596 | 216 | A07173 | A08634 | 335 |
| A07173 | A09405 | 378 | A07173 | A09570 | 278 |

|        |        |     |        |        |     |
|--------|--------|-----|--------|--------|-----|
| A07173 | A09612 | 221 | A07173 | A09642 | 346 |
| A07173 | A10453 | 156 | A07173 | A10586 | 196 |
| A07173 | A10605 | 243 | A07173 | A10989 | 167 |
| A07173 | A12809 | 328 | A07173 | A13872 | 404 |
| A07173 | A13988 | 218 | A07173 | A14071 | 228 |
| A07173 | A14125 | 160 | A07173 | A14208 | 318 |
| A07173 | A14236 | 259 | A07173 | A14374 | 213 |
| A07173 | A14376 | 249 | A07173 | A14385 | 306 |
| A07173 | A14392 | 246 | A07173 | A14393 | 235 |
| A07173 | A14416 | 265 | A07173 | A14432 | 378 |
| A07173 | A14439 | 183 | A07173 | A14442 | 416 |
| A07173 | A14598 | 240 | A07173 | A14599 | 198 |
| A07173 | A14804 | 157 | A07173 | A15241 | 313 |
| A07173 | A15308 | 335 | A07173 | A15355 | 191 |
| A07173 | A15394 | 475 | A07173 | A15395 | 486 |
| A07173 | A15403 | 265 | A07173 | A15425 | 452 |
| A07173 | A15427 | 333 | A07173 | A15475 | 215 |
| A07173 | A15517 | 322 | A07173 | A15599 | 462 |
| A07173 | A15601 | 475 | A07173 | A15602 | 278 |
| A07173 | A15603 | 484 | A07173 | A15604 | 462 |
| A07173 | A15605 | 491 | A07173 | A15606 | 491 |
| A07173 | A15607 | 485 | A07173 | A15608 | 328 |
| A07173 | A15642 | 171 | A07173 | A15795 | 291 |
| A07173 | A15865 | 316 | A07173 | A15964 | 449 |
| A07173 | A15976 | 162 | A07173 | A15981 | 366 |
| A07173 | A16010 | 378 | A07173 | A16397 | 168 |
| A07173 | A16527 | 401 | A07174 | A09642 | 398 |
| A07174 | A10601 | 187 | A07174 | A14374 | 201 |
| A07174 | A14391 | 207 | A07174 | A14444 | 176 |
| A07174 | A15395 | 369 | A07174 | A15425 | 213 |
| A07174 | A15510 | 204 | A07174 | A15573 | 367 |
| A07174 | A15597 | 391 | A07174 | A15603 | 310 |
| A07174 | A15607 | 422 | A07174 | A15608 | 294 |
| A07174 | A15972 | 398 | A07174 | A15973 | 382 |
| A07174 | A15974 | 198 | A07174 | A15978 | 374 |
| A07174 | A16308 | 382 | A07175 | A08070 | 238 |
| A07175 | A09411 | 356 | A07175 | A09977 | 229 |
| A07175 | A14208 | 236 | A07175 | A14650 | 255 |
| A07175 | A15346 | 187 | A07175 | A15611 | 457 |
| A07175 | A15869 | 379 | A07175 | A16391 | 339 |
| A07176 | A07301 | 313 | A07176 | A08138 | 288 |
| A07176 | A08438 | 350 | A07176 | A09509 | 294 |
| A07176 | A10726 | 299 | A07177 | A07200 | 466 |
| A07177 | A08389 | 319 | A07177 | A08643 | 247 |
| A07177 | A09262 | 313 | A07177 | A09359 | 350 |
| A07177 | A09935 | 334 | A07177 | A10103 | 263 |

|        |        |     |        |        |     |
|--------|--------|-----|--------|--------|-----|
| A07177 | A11539 | 329 | A07177 | A11606 | 322 |
| A07177 | A13152 | 338 | A07177 | A14342 | 364 |
| A07177 | A14349 | 356 | A07177 | A14405 | 188 |
| A07177 | A14440 | 168 | A07177 | A15368 | 319 |
| A07177 | A16281 | 243 | A07177 | A16636 | 152 |
| A07178 | A07313 | 259 | A07178 | A08289 | 254 |
| A07178 | A08462 | 350 | A07178 | A09242 | 344 |
| A07178 | A09621 | 180 | A07178 | A11201 | 338 |
| A07178 | A13665 | 266 | A07178 | A14335 | 285 |
| A07178 | A14642 | 182 | A07178 | A16062 | 360 |
| A07178 | A16679 | 338 | A07180 | A07203 | 408 |
| A07180 | A07294 | 363 | A07180 | A08148 | 162 |
| A07180 | A08183 | 316 | A07180 | A08400 | 355 |
| A07180 | A08775 | 115 | A07180 | A09043 | 159 |
| A07180 | A09625 | 300 | A07180 | A09628 | 200 |
| A07180 | A10317 | 457 | A07180 | A10427 | 290 |
| A07180 | A10603 | 440 | A07180 | A10664 | 162 |
| A07180 | A11247 | 132 | A07180 | A11256 | 299 |
| A07180 | A13831 | 486 | A07180 | A13837 | 87  |
| A07180 | A13876 | 200 | A07180 | A13881 | 200 |
| A07180 | A14056 | 63  | A07180 | A14087 | 460 |
| A07180 | A14088 | 257 | A07180 | A14170 | 347 |
| A07180 | A14171 | 200 | A07180 | A14173 | 313 |
| A07180 | A14179 | 246 | A07180 | A14180 | 232 |
| A07180 | A14186 | 303 | A07180 | A14247 | 156 |
| A07180 | A14356 | 200 | A07180 | A15315 | 174 |
| A07180 | A15330 | 63  | A07180 | A15370 | 559 |
| A07180 | A15381 | 165 | A07180 | A15646 | 156 |
| A07180 | A15712 | 524 | A07180 | A15718 | 196 |
| A07180 | A15719 | 344 | A07180 | A15724 | 443 |
| A07180 | A15757 | 200 | A07180 | A15954 | 174 |
| A07180 | A16014 | 234 | A07180 | A16066 | 200 |
| A07180 | A16634 | 221 | A07180 | A16919 | 200 |
| A07180 | A16935 | 152 | A07181 | A07317 | 408 |
| A07181 | A07670 | 210 | A07181 | A09362 | 450 |
| A07181 | A10814 | 323 | A07182 | A10644 | 413 |
| A07182 | A15383 | 232 | A07182 | A16028 | 374 |
| A07183 | A07311 | 211 | A07183 | A09644 | 183 |
| A07183 | A14007 | 180 | A07183 | A14073 | 353 |
| A07183 | A14122 | 173 | A07183 | A14139 | 335 |
| A07183 | A14475 | 641 | A07183 | A14496 | 288 |
| A07184 | A07851 | 205 | A07184 | A08910 | 157 |
| A07184 | A11203 | 404 | A07184 | A16262 | 221 |
| A07184 | A16766 | 177 | A07185 | A07222 | 324 |
| A07185 | A08265 | 477 | A07186 | A09465 | 412 |
| A07186 | A13987 | 191 | A07187 | A07201 | 341 |



|        |        |     |        |        |     |
|--------|--------|-----|--------|--------|-----|
| A07187 | A08719 | 385 | A07187 | A09388 | 462 |
| A07187 | A09561 | 188 | A07187 | A11116 | 435 |
| A07187 | A11374 | 324 | A07187 | A11694 | 324 |
| A07187 | A13860 | 267 | A07187 | A14073 | 324 |
| A07187 | A14517 | 323 | A07187 | A14642 | 324 |
| A07187 | A14664 | 173 | A07187 | A15843 | 324 |
| A07188 | A09395 | 436 | A07189 | A07746 | 262 |
| A07189 | A10120 | 435 | A07189 | A14122 | 279 |
| A07189 | A14511 | 210 | A07190 | A07191 | 110 |
| A07190 | A07255 | 368 | A07190 | A07617 | 246 |
| A07190 | A07958 | 191 | A07190 | A08171 | 180 |
| A07190 | A08714 | 171 | A07190 | A08817 | 272 |
| A07190 | A09556 | 446 | A07190 | A09842 | 210 |
| A07190 | A10506 | 208 | A07190 | A10620 | 485 |
| A07190 | A10749 | 347 | A07190 | A13009 | 430 |
| A07190 | A13369 | 208 | A07190 | A15636 | 260 |
| A07191 | A08017 | 351 | A07191 | A08693 | 172 |
| A07191 | A08910 | 467 | A07191 | A09042 | 323 |
| A07191 | A10398 | 299 | A07191 | A12246 | 274 |
| A07191 | A12730 | 350 | A07191 | A14187 | 193 |
| A07191 | A14683 | 303 | A07191 | A16636 | 179 |
| A07192 | A08070 | 157 | A07192 | A09011 | 312 |
| A07192 | A09245 | 199 | A07192 | A09404 | 319 |
| A07192 | A09423 | 227 | A07192 | A09555 | 360 |
| A07192 | A09562 | 263 | A07192 | A10580 | 296 |
| A07192 | A11300 | 396 | A07192 | A11387 | 173 |
| A07192 | A11675 | 177 | A07192 | A12358 | 360 |
| A07192 | A12383 | 179 | A07192 | A13181 | 177 |
| A07192 | A13270 | 323 | A07192 | A14125 | 185 |
| A07192 | A14642 | 258 | A07192 | A16324 | 180 |
| A07193 | A16300 | 281 | A07196 | A07605 | 322 |
| A07196 | A08938 | 404 | A07196 | A09764 | 205 |
| A07196 | A11712 | 418 | A07196 | A12454 | 433 |
| A07197 | A09263 | 208 | A07197 | A09497 | 462 |
| A07197 | A11313 | 229 | A07197 | A14386 | 469 |
| A07197 | A16360 | 445 | A07198 | A07199 | 356 |
| A07198 | A07200 | 383 | A07198 | A07663 | 337 |
| A07198 | A08741 | 152 | A07198 | A10708 | 245 |
| A07198 | A13848 | 469 | A07198 | A14423 | 436 |
| A07198 | A14441 | 358 | A07198 | A14521 | 419 |
| A07198 | A14634 | 377 | A07198 | A14643 | 450 |
| A07198 | A14666 | 480 | A07198 | A14860 | 223 |
| A07198 | A15674 | 201 | A07199 | A12304 | 360 |
| A07199 | A14366 | 208 | A07199 | A14391 | 226 |
| A07200 | A07202 | 228 | A07200 | A07350 | 288 |
| A07200 | A07438 | 283 | A07200 | A07663 | 288 |

|        |        |     |        |        |     |
|--------|--------|-----|--------|--------|-----|
| A07200 | A07721 | 177 | A07200 | A08602 | 191 |
| A07200 | A08975 | 252 | A07200 | A09036 | 165 |
| A07200 | A09179 | 451 | A07200 | A09578 | 235 |
| A07200 | A09690 | 208 | A07200 | A10105 | 228 |
| A07200 | A10557 | 468 | A07200 | A10742 | 180 |
| A07200 | A11123 | 174 | A07200 | A11411 | 151 |
| A07200 | A11460 | 480 | A07200 | A11646 | 321 |
| A07200 | A11719 | 288 | A07200 | A12335 | 270 |
| A07200 | A12800 | 270 | A07200 | A13822 | 199 |
| A07200 | A13906 | 168 | A07200 | A14071 | 385 |
| A07200 | A14198 | 470 | A07200 | A14364 | 162 |
| A07200 | A14389 | 330 | A07200 | A14400 | 152 |
| A07200 | A14405 | 491 | A07200 | A14423 | 243 |
| A07200 | A14440 | 945 | A07200 | A14685 | 228 |
| A07200 | A14824 | 288 | A07200 | A15241 | 156 |
| A07200 | A15368 | 330 | A07200 | A15372 | 405 |
| A07200 | A15623 | 318 | A07200 | A15987 | 199 |
| A07200 | A16021 | 270 | A07200 | A16219 | 227 |
| A07200 | A16438 | 152 | A07200 | A16636 | 491 |
| A07200 | A17155 | 285 | A07201 | A07243 | 466 |
| A07201 | A07251 | 216 | A07201 | A07311 | 226 |
| A07201 | A07869 | 152 | A07201 | A07897 | 183 |
| A07201 | A07934 | 265 | A07201 | A08126 | 272 |
| A07201 | A08559 | 486 | A07201 | A08572 | 263 |
| A07201 | A08664 | 475 | A07201 | A08748 | 156 |
| A07201 | A08752 | 352 | A07201 | A08835 | 424 |
| A07201 | A09104 | 177 | A07201 | A09242 | 271 |
| A07201 | A09322 | 254 | A07201 | A09438 | 152 |
| A07201 | A09757 | 302 | A07201 | A10034 | 252 |
| A07201 | A10074 | 308 | A07201 | A10197 | 196 |
| A07201 | A10291 | 213 | A07201 | A10373 | 353 |
| A07201 | A10398 | 246 | A07201 | A10417 | 491 |
| A07201 | A10966 | 291 | A07201 | A11331 | 463 |
| A07201 | A11438 | 188 | A07201 | A11981 | 249 |
| A07201 | A12105 | 491 | A07201 | A12126 | 173 |
| A07201 | A12237 | 368 | A07201 | A12246 | 346 |
| A07201 | A12643 | 229 | A07201 | A12661 | 430 |
| A07201 | A13435 | 246 | A07201 | A13527 | 157 |
| A07201 | A13626 | 420 | A07201 | A14198 | 899 |
| A07201 | A14216 | 572 | A07201 | A14376 | 174 |
| A07201 | A14568 | 159 | A07201 | A14596 | 899 |
| A07201 | A14846 | 185 | A07201 | A15235 | 386 |
| A07201 | A15293 | 899 | A07201 | A15294 | 899 |
| A07201 | A15641 | 353 | A07201 | A15658 | 165 |
| A07201 | A15776 | 172 | A07201 | A16046 | 190 |
| A07201 | A16088 | 243 | A07201 | A16118 | 154 |

|        |        |     |        |        |     |
|--------|--------|-----|--------|--------|-----|
| A07201 | A16464 | 152 | A07201 | A17193 | 443 |
| A07203 | A07519 | 259 | A07203 | A07924 | 176 |
| A07203 | A08272 | 224 | A07203 | A09697 | 379 |
| A07203 | A10584 | 98  | A07203 | A10803 | 497 |
| A07203 | A13831 | 574 | A07203 | A13837 | 490 |
| A07203 | A13989 | 474 | A07203 | A14056 | 386 |
| A07203 | A16281 | 243 | A07203 | A17057 | 430 |
| A07204 | A07980 | 375 | A07204 | A09161 | 417 |
| A07204 | A09880 | 183 | A07204 | A11515 | 367 |
| A07204 | A13544 | 417 | A07204 | A13819 | 260 |
| A07204 | A14074 | 247 | A07204 | A14648 | 160 |
| A07205 | A08704 | 346 | A07205 | A09127 | 283 |
| A07205 | A09195 | 193 | A07205 | A10337 | 208 |
| A07205 | A10635 | 341 | A07205 | A12357 | 238 |
| A07205 | A13250 | 183 | A07205 | A14156 | 168 |
| A07205 | A14477 | 212 | A07206 | A09124 | 489 |
| A07206 | A09421 | 271 | A07206 | A11759 | 324 |
| A07206 | A12357 | 208 | A07206 | A14073 | 182 |
| A07206 | A15401 | 167 | A07206 | A15910 | 338 |
| A07206 | A16096 | 152 | A07207 | A07422 | 430 |
| A07207 | A07593 | 399 | A07207 | A07697 | 390 |
| A07207 | A08099 | 452 | A07207 | A08356 | 388 |
| A07207 | A08842 | 193 | A07207 | A08943 | 565 |
| A07207 | A09526 | 293 | A07207 | A09584 | 362 |
| A07207 | A10591 | 91  | A07207 | A10733 | 99  |
| A07207 | A11068 | 364 | A07207 | A11602 | 369 |
| A07207 | A11655 | 293 | A07207 | A12047 | 474 |
| A07207 | A12952 | 452 | A07207 | A13816 | 63  |
| A07207 | A13824 | 688 | A07207 | A13829 | 249 |
| A07207 | A13983 | 268 | A07207 | A14026 | 648 |
| A07207 | A14120 | 362 | A07207 | A14209 | 452 |
| A07207 | A14210 | 362 | A07207 | A14262 | 177 |
| A07207 | A14469 | 160 | A07207 | A15181 | 190 |
| A07207 | A15295 | 556 | A07207 | A15370 | 463 |
| A07207 | A15380 | 402 | A07207 | A15498 | 394 |
| A07207 | A15620 | 480 | A07207 | A15621 | 215 |
| A07207 | A15656 | 227 | A07207 | A16407 | 362 |
| A07207 | A16449 | 441 | A07207 | A16847 | 654 |
| A07208 | A07311 | 240 | A07208 | A08400 | 171 |
| A07208 | A08987 | 160 | A07208 | A10790 | 249 |
| A07208 | A10793 | 484 | A07208 | A10794 | 361 |
| A07208 | A10797 | 491 | A07208 | A10798 | 491 |
| A07208 | A10799 | 490 | A07208 | A10897 | 243 |
| A07208 | A11244 | 486 | A07208 | A11250 | 274 |
| A07208 | A11296 | 491 | A07208 | A11337 | 491 |
| A07208 | A11338 | 346 | A07208 | A11374 | 259 |

|        |        |     |        |        |     |
|--------|--------|-----|--------|--------|-----|
| A07208 | A11419 | 278 | A07208 | A12221 | 265 |
| A07208 | A13116 | 195 | A07208 | A13832 | 269 |
| A07208 | A13842 | 488 | A07208 | A14003 | 218 |
| A07208 | A14073 | 274 | A07208 | A14699 | 470 |
| A07208 | A14845 | 430 | A07208 | A14896 | 346 |
| A07208 | A16371 | 174 | A07208 | A16462 | 323 |
| A07208 | A16640 | 352 | A07209 | A07210 | 457 |
| A07209 | A07273 | 174 | A07209 | A07310 | 238 |
| A07209 | A07339 | 177 | A07209 | A07479 | 260 |
| A07209 | A07641 | 212 | A07209 | A07773 | 270 |
| A07209 | A07803 | 491 | A07209 | A07815 | 234 |
| A07209 | A07836 | 152 | A07209 | A08097 | 291 |
| A07209 | A08596 | 193 | A07209 | A08600 | 363 |
| A07209 | A08630 | 485 | A07209 | A08657 | 259 |
| A07209 | A08686 | 191 | A07209 | A08722 | 259 |
| A07209 | A08725 | 238 | A07209 | A08728 | 212 |
| A07209 | A08827 | 388 | A07209 | A08829 | 259 |
| A07209 | A08859 | 416 | A07209 | A08878 | 352 |
| A07209 | A08929 | 441 | A07209 | A09062 | 152 |
| A07209 | A09125 | 238 | A07209 | A09239 | 271 |
| A07209 | A09245 | 380 | A07209 | A09362 | 236 |
| A07209 | A09559 | 313 | A07209 | A09567 | 236 |
| A07209 | A09732 | 277 | A07209 | A09733 | 200 |
| A07209 | A09743 | 281 | A07209 | A09835 | 238 |
| A07209 | A09837 | 483 | A07209 | A09875 | 165 |
| A07209 | A09922 | 341 | A07209 | A09956 | 259 |
| A07209 | A10336 | 294 | A07209 | A10345 | 238 |
| A07209 | A10410 | 238 | A07209 | A10596 | 432 |
| A07209 | A10638 | 263 | A07209 | A10922 | 223 |
| A07209 | A11132 | 468 | A07209 | A11213 | 291 |
| A07209 | A11243 | 230 | A07209 | A11335 | 218 |
| A07209 | A11415 | 151 | A07209 | A11428 | 160 |
| A07209 | A11521 | 452 | A07209 | A11523 | 488 |
| A07209 | A11537 | 154 | A07209 | A11865 | 184 |
| A07209 | A11983 | 488 | A07209 | A12212 | 193 |
| A07209 | A12393 | 460 | A07209 | A12412 | 489 |
| A07209 | A12767 | 223 | A07209 | A12897 | 488 |
| A07209 | A12997 | 212 | A07209 | A13252 | 291 |
| A07209 | A13369 | 486 | A07209 | A13443 | 238 |
| A07209 | A13455 | 212 | A07209 | A13493 | 291 |
| A07209 | A13633 | 180 | A07209 | A14010 | 241 |
| A07209 | A14196 | 489 | A07209 | A14202 | 430 |
| A07209 | A14204 | 466 | A07209 | A14208 | 226 |
| A07209 | A14210 | 469 | A07209 | A14218 | 363 |
| A07209 | A14229 | 424 | A07209 | A14292 | 319 |
| A07209 | A14372 | 263 | A07209 | A14381 | 268 |

|        |        |     |        |        |     |
|--------|--------|-----|--------|--------|-----|
| A07209 | A14395 | 466 | A07209 | A14430 | 438 |
| A07209 | A14511 | 481 | A07209 | A14570 | 486 |
| A07209 | A14635 | 491 | A07209 | A14643 | 338 |
| A07209 | A14667 | 307 | A07209 | A14930 | 333 |
| A07209 | A15135 | 277 | A07209 | A15232 | 291 |
| A07209 | A15282 | 455 | A07209 | A15292 | 491 |
| A07209 | A15313 | 371 | A07209 | A15314 | 491 |
| A07209 | A15321 | 251 | A07209 | A15322 | 491 |
| A07209 | A15328 | 339 | A07209 | A15330 | 159 |
| A07209 | A15331 | 208 | A07209 | A15335 | 259 |
| A07209 | A15336 | 234 | A07209 | A15349 | 473 |
| A07209 | A15352 | 333 | A07209 | A15398 | 193 |
| A07209 | A15419 | 443 | A07209 | A15425 | 277 |
| A07209 | A15435 | 213 | A07209 | A15452 | 236 |
| A07209 | A15456 | 185 | A07209 | A15480 | 462 |
| A07209 | A15495 | 468 | A07209 | A15506 | 382 |
| A07209 | A15606 | 294 | A07209 | A15630 | 443 |
| A07209 | A15833 | 168 | A07209 | A15864 | 223 |
| A07209 | A15911 | 162 | A07209 | A15969 | 193 |
| A07209 | A15976 | 452 | A07209 | A16004 | 156 |
| A07209 | A16005 | 291 | A07209 | A16192 | 156 |
| A07209 | A16408 | 193 | A07209 | A16904 | 401 |
| A07209 | A16905 | 154 | A07209 | A17030 | 241 |
| A07209 | A17198 | 366 | A07210 | A08596 | 283 |
| A07210 | A08827 | 299 | A07210 | A09028 | 279 |
| A07210 | A09125 | 384 | A07210 | A09458 | 377 |
| A07210 | A09559 | 433 | A07210 | A09669 | 384 |
| A07210 | A10461 | 334 | A07210 | A11737 | 200 |
| A07210 | A13930 | 303 | A07210 | A14392 | 193 |
| A07210 | A16458 | 358 | A07212 | A07219 | 351 |
| A07212 | A08713 | 396 | A07212 | A09842 | 157 |
| A07212 | A14393 | 198 | A07212 | A15399 | 212 |
| A07212 | A15480 | 154 | A07213 | A15352 | 210 |
| A07213 | A15828 | 363 | A07215 | A12897 | 218 |
| A07216 | A08309 | 251 | A07217 | A07471 | 232 |
| A07217 | A07561 | 288 | A07217 | A14431 | 276 |
| A07218 | A07361 | 407 | A07218 | A07384 | 452 |
| A07218 | A07442 | 241 | A07218 | A07453 | 179 |
| A07218 | A07471 | 210 | A07218 | A07514 | 272 |
| A07218 | A07541 | 302 | A07218 | A07561 | 176 |
| A07218 | A07580 | 201 | A07218 | A07601 | 134 |
| A07218 | A07620 | 179 | A07218 | A07704 | 411 |
| A07218 | A07705 | 485 | A07218 | A07843 | 207 |
| A07218 | A07904 | 170 | A07218 | A07927 | 272 |
| A07218 | A08038 | 272 | A07218 | A08040 | 412 |
| A07218 | A08044 | 201 | A07218 | A08093 | 385 |

|        |        |     |        |        |     |
|--------|--------|-----|--------|--------|-----|
| A07218 | A08125 | 236 | A07218 | A08142 | 236 |
| A07218 | A08143 | 272 | A07218 | A08157 | 170 |
| A07218 | A08172 | 160 | A07218 | A08202 | 322 |
| A07218 | A08203 | 347 | A07218 | A08292 | 466 |
| A07218 | A08428 | 272 | A07218 | A08429 | 272 |
| A07218 | A08594 | 235 | A07218 | A08671 | 474 |
| A07218 | A08738 | 246 | A07218 | A08836 | 213 |
| A07218 | A08861 | 374 | A07218 | A09785 | 193 |
| A07218 | A09951 | 236 | A07218 | A09983 | 252 |
| A07218 | A10000 | 340 | A07218 | A10116 | 257 |
| A07218 | A10247 | 313 | A07218 | A10382 | 267 |
| A07218 | A10450 | 188 | A07218 | A10504 | 176 |
| A07218 | A10948 | 272 | A07218 | A11031 | 272 |
| A07218 | A11154 | 236 | A07218 | A11172 | 188 |
| A07218 | A11289 | 180 | A07218 | A11299 | 367 |
| A07218 | A11310 | 462 | A07218 | A11318 | 419 |
| A07218 | A11320 | 430 | A07218 | A11321 | 151 |
| A07218 | A11328 | 450 | A07218 | A11375 | 373 |
| A07218 | A11396 | 373 | A07218 | A11446 | 440 |
| A07218 | A11461 | 288 | A07218 | A11466 | 179 |
| A07218 | A11468 | 201 | A07218 | A11599 | 236 |
| A07218 | A11700 | 201 | A07218 | A11709 | 216 |
| A07218 | A11911 | 208 | A07218 | A12018 | 179 |
| A07218 | A12128 | 272 | A07218 | A12351 | 236 |
| A07218 | A12426 | 346 | A07218 | A12470 | 188 |
| A07218 | A12558 | 272 | A07218 | A12559 | 236 |
| A07218 | A12787 | 446 | A07218 | A12897 | 160 |
| A07218 | A12902 | 188 | A07218 | A12917 | 393 |
| A07218 | A12950 | 236 | A07218 | A12982 | 484 |
| A07218 | A13369 | 435 | A07218 | A13428 | 236 |
| A07218 | A13734 | 337 | A07218 | A13824 | 393 |
| A07218 | A13851 | 451 | A07218 | A14377 | 486 |
| A07218 | A14885 | 236 | A07218 | A15498 | 460 |
| A07218 | A15673 | 246 | A07218 | A15845 | 188 |
| A07218 | A16007 | 252 | A07218 | A16046 | 465 |
| A07218 | A16216 | 174 | A07219 | A08713 | 438 |
| A07220 | A09995 | 217 | A07220 | A10506 | 174 |
| A07220 | A14605 | 269 | A07220 | A14643 | 436 |
| A07221 | A07442 | 210 | A07221 | A10614 | 461 |
| A07221 | A11762 | 422 | A07221 | A13518 | 422 |
| A07221 | A14540 | 174 | A07222 | A07333 | 317 |
| A07222 | A07571 | 620 | A07222 | A07931 | 491 |
| A07222 | A07974 | 625 | A07222 | A08097 | 317 |
| A07222 | A09340 | 317 | A07222 | A09350 | 324 |
| A07222 | A10001 | 176 | A07222 | A11540 | 160 |
| A07222 | A13822 | 223 | A07222 | A14525 | 309 |

|        |        |     |        |        |     |
|--------|--------|-----|--------|--------|-----|
| A07222 | A14804 | 223 | A07222 | A14858 | 433 |
| A07222 | A15372 | 223 | A07222 | A15605 | 224 |
| A07222 | A15608 | 235 | A07222 | A15655 | 391 |
| A07222 | A16219 | 223 | A07222 | A16531 | 223 |
| A07223 | A07347 | 491 | A07223 | A07700 | 412 |
| A07223 | A07725 | 636 | A07223 | A08491 | 88  |
| A07223 | A08890 | 490 | A07223 | A09307 | 286 |
| A07223 | A09664 | 191 | A07223 | A10923 | 291 |
| A07223 | A12812 | 455 | A07223 | A14196 | 165 |
| A07226 | A07675 | 439 | A07226 | A08834 | 160 |
| A07226 | A08882 | 217 | A07226 | A08960 | 291 |
| A07226 | A09627 | 160 | A07226 | A10372 | 160 |
| A07226 | A10689 | 235 | A07226 | A11365 | 160 |
| A07226 | A11369 | 371 | A07226 | A11735 | 160 |
| A07226 | A11737 | 160 | A07226 | A11914 | 160 |
| A07226 | A12658 | 160 | A07226 | A12824 | 514 |
| A07226 | A14007 | 160 | A07226 | A15257 | 160 |
| A07226 | A16414 | 294 | A07227 | A07665 | 481 |
| A07227 | A08934 | 205 | A07227 | A09112 | 367 |
| A07227 | A10008 | 441 | A07227 | A11023 | 491 |
| A07227 | A11149 | 491 | A07227 | A11150 | 416 |
| A07227 | A11180 | 293 | A07227 | A11281 | 483 |
| A07227 | A11547 | 477 | A07227 | A12091 | 380 |
| A07227 | A12651 | 274 | A07227 | A13927 | 316 |
| A07227 | A14281 | 160 | A07227 | A14393 | 245 |
| A07227 | A15035 | 422 | A07227 | A16728 | 388 |
| A07228 | A08357 | 317 | A07229 | A07993 | 177 |
| A07229 | A08850 | 177 | A07229 | A08859 | 96  |
| A07229 | A09732 | 165 | A07229 | A09733 | 70  |
| A07229 | A09734 | 439 | A07229 | A09780 | 208 |
| A07229 | A09933 | 216 | A07229 | A11983 | 188 |
| A07229 | A13466 | 171 | A07229 | A13987 | 467 |
| A07229 | A14010 | 484 | A07229 | A14122 | 479 |
| A07229 | A14348 | 347 | A07229 | A14570 | 452 |
| A07229 | A14716 | 218 | A07229 | A15184 | 307 |
| A07229 | A15292 | 490 | A07229 | A15301 | 157 |
| A07229 | A15310 | 238 | A07229 | A15312 | 475 |
| A07229 | A15313 | 462 | A07229 | A15349 | 378 |
| A07229 | A15352 | 479 | A07229 | A15366 | 291 |
| A07229 | A15396 | 263 | A07229 | A15433 | 274 |
| A07229 | A15434 | 301 | A07229 | A15435 | 210 |
| A07229 | A15436 | 382 | A07229 | A15447 | 163 |
| A07229 | A15452 | 227 | A07229 | A15455 | 210 |
| A07229 | A15487 | 154 | A07229 | A15515 | 319 |
| A07229 | A15774 | 154 | A07229 | A15813 | 179 |
| A07229 | A16224 | 218 | A07229 | A16723 | 201 |

|        |        |     |        |        |     |
|--------|--------|-----|--------|--------|-----|
| A07229 | A16838 | 157 | A07229 | A16900 | 205 |
| A07229 | A17058 | 224 | A07230 | A07381 | 322 |
| A07230 | A10652 | 395 | A07230 | A10692 | 422 |
| A07231 | A13479 | 475 | A07231 | A13482 | 419 |
| A07231 | A13894 | 430 | A07231 | A13906 | 467 |
| A07231 | A14247 | 319 | A07232 | A07732 | 334 |
| A07232 | A07880 | 215 | A07232 | A08402 | 443 |
| A07232 | A09078 | 334 | A07232 | A09276 | 420 |
| A07232 | A09768 | 170 | A07232 | A09860 | 205 |
| A07232 | A11160 | 371 | A07232 | A11165 | 299 |
| A07232 | A11233 | 210 | A07232 | A11631 | 357 |
| A07232 | A11687 | 469 | A07232 | A11817 | 221 |
| A07232 | A12492 | 184 | A07232 | A12717 | 335 |
| A07232 | A14009 | 334 | A07232 | A14191 | 396 |
| A07232 | A14272 | 467 | A07232 | A14281 | 196 |
| A07232 | A14288 | 620 | A07232 | A14803 | 357 |
| A07232 | A15367 | 151 | A07232 | A15622 | 380 |
| A07232 | A15858 | 171 | A07232 | A15945 | 480 |
| A07232 | A16068 | 461 | A07232 | A16300 | 152 |
| A07232 | A16423 | 475 | A07232 | A16626 | 399 |
| A07232 | A16635 | 638 | A07232 | A16753 | 271 |
| A07233 | A07559 | 382 | A07233 | A08342 | 438 |
| A07233 | A09240 | 422 | A07233 | A09365 | 435 |
| A07233 | A11698 | 429 | A07233 | A11977 | 435 |
| A07233 | A14675 | 447 | A07233 | A15498 | 227 |
| A07234 | A07363 | 441 | A07234 | A07659 | 452 |
| A07234 | A07800 | 241 | A07234 | A08099 | 382 |
| A07234 | A11309 | 329 | A07234 | A16368 | 462 |
| A07236 | A13965 | 249 | A07237 | A07362 | 313 |
| A07237 | A07569 | 467 | A07237 | A07756 | 199 |
| A07237 | A07792 | 477 | A07237 | A09616 | 335 |
| A07237 | A11322 | 346 | A07237 | A11374 | 358 |
| A07237 | A11427 | 423 | A07237 | A12824 | 180 |
| A07238 | A07256 | 274 | A07238 | A07264 | 196 |
| A07238 | A07267 | 191 | A07238 | A07413 | 366 |
| A07238 | A07424 | 438 | A07238 | A07477 | 486 |
| A07238 | A07507 | 294 | A07238 | A07520 | 430 |
| A07238 | A07590 | 449 | A07238 | A07674 | 430 |
| A07238 | A07690 | 347 | A07238 | A07736 | 343 |
| A07238 | A07757 | 196 | A07238 | A07800 | 468 |
| A07238 | A07933 | 477 | A07238 | A07973 | 475 |
| A07238 | A07976 | 316 | A07238 | A08114 | 195 |
| A07238 | A08127 | 286 | A07238 | A08133 | 265 |
| A07238 | A08155 | 380 | A07238 | A08238 | 469 |
| A07238 | A08366 | 208 | A07238 | A08751 | 274 |
| A07238 | A09876 | 319 | A07238 | A10420 | 417 |



|        |        |     |        |        |     |
|--------|--------|-----|--------|--------|-----|
| A07238 | A10441 | 249 | A07238 | A10444 | 479 |
| A07238 | A10452 | 395 | A07238 | A10455 | 286 |
| A07238 | A10456 | 435 | A07238 | A10656 | 489 |
| A07238 | A10659 | 286 | A07238 | A10672 | 472 |
| A07238 | A10677 | 468 | A07238 | A10679 | 240 |
| A07238 | A10694 | 457 | A07238 | A10702 | 263 |
| A07238 | A10703 | 213 | A07238 | A10707 | 259 |
| A07238 | A10712 | 378 | A07238 | A10715 | 236 |
| A07238 | A11309 | 249 | A07238 | A13735 | 223 |
| A07238 | A14821 | 274 | A07238 | A14856 | 479 |
| A07238 | A15223 | 191 | A07238 | A15420 | 205 |
| A07238 | A15641 | 196 | A07238 | A15874 | 483 |
| A07238 | A16073 | 185 | A07238 | A16103 | 238 |
| A07238 | A16277 | 443 | A07238 | A16286 | 446 |
| A07238 | A16419 | 245 | A07238 | A16529 | 445 |
| A07238 | A16741 | 485 | A07238 | A16766 | 357 |
| A07238 | A16959 | 302 | A07239 | A07281 | 457 |
| A07239 | A07322 | 288 | A07239 | A07381 | 477 |
| A07239 | A07477 | 202 | A07239 | A07490 | 417 |
| A07239 | A07520 | 283 | A07239 | A07674 | 286 |
| A07239 | A07718 | 195 | A07239 | A07737 | 440 |
| A07239 | A07739 | 473 | A07239 | A07800 | 170 |
| A07239 | A07935 | 343 | A07239 | A08155 | 302 |
| A07239 | A08365 | 165 | A07239 | A08366 | 374 |
| A07239 | A08368 | 360 | A07239 | A08385 | 457 |
| A07239 | A08690 | 454 | A07239 | A10126 | 424 |
| A07239 | A10458 | 312 | A07239 | A10550 | 302 |
| A07239 | A10652 | 488 | A07239 | A10670 | 368 |
| A07239 | A10674 | 445 | A07239 | A10684 | 283 |
| A07239 | A10691 | 246 | A07239 | A10692 | 338 |
| A07239 | A10696 | 452 | A07239 | A10697 | 259 |
| A07239 | A10699 | 337 | A07239 | A10703 | 259 |
| A07239 | A10706 | 252 | A07239 | A10783 | 412 |
| A07239 | A10876 | 379 | A07239 | A10882 | 422 |
| A07239 | A11021 | 422 | A07239 | A11201 | 312 |
| A07239 | A13065 | 379 | A07239 | A14821 | 411 |
| A07239 | A14828 | 427 | A07239 | A16027 | 456 |
| A07239 | A16744 | 262 | A07239 | A16767 | 294 |
| A07239 | A17078 | 221 | A07241 | A08917 | 358 |
| A07241 | A12313 | 425 | A07242 | A07282 | 259 |
| A07242 | A07380 | 162 | A07242 | A07404 | 384 |
| A07242 | A07483 | 573 | A07242 | A07495 | 652 |
| A07242 | A07665 | 491 | A07242 | A07687 | 438 |
| A07242 | A07696 | 386 | A07242 | A07709 | 491 |
| A07242 | A07732 | 490 | A07242 | A07785 | 271 |
| A07242 | A07816 | 491 | A07242 | A07883 | 491 |

|        |        |     |        |        |     |
|--------|--------|-----|--------|--------|-----|
| A07242 | A07893 | 491 | A07242 | A07934 | 486 |
| A07242 | A07942 | 374 | A07242 | A07954 | 491 |
| A07242 | A07965 | 180 | A07242 | A08056 | 491 |
| A07242 | A08192 | 378 | A07242 | A08239 | 477 |
| A07242 | A08293 | 199 | A07242 | A08377 | 151 |
| A07242 | A08456 | 286 | A07242 | A08514 | 191 |
| A07242 | A08531 | 624 | A07242 | A08535 | 432 |
| A07242 | A08536 | 491 | A07242 | A08550 | 215 |
| A07242 | A08551 | 491 | A07242 | A08552 | 485 |
| A07242 | A08561 | 283 | A07242 | A08563 | 200 |
| A07242 | A08569 | 485 | A07242 | A08838 | 319 |
| A07242 | A08885 | 515 | A07242 | A08910 | 491 |
| A07242 | A08917 | 465 | A07242 | A08918 | 152 |
| A07242 | A08985 | 489 | A07242 | A09093 | 171 |
| A07242 | A09298 | 296 | A07242 | A09342 | 355 |
| A07242 | A09493 | 191 | A07242 | A09609 | 215 |
| A07242 | A09624 | 491 | A07242 | A09662 | 451 |
| A07242 | A09666 | 475 | A07242 | A09668 | 195 |
| A07242 | A09756 | 491 | A07242 | A09825 | 391 |
| A07242 | A09840 | 433 | A07242 | A09869 | 435 |
| A07242 | A10315 | 333 | A07242 | A10363 | 486 |
| A07242 | A10369 | 491 | A07242 | A10909 | 221 |
| A07242 | A11068 | 642 | A07242 | A11093 | 174 |
| A07242 | A11149 | 246 | A07242 | A11150 | 249 |
| A07242 | A11160 | 185 | A07242 | A11183 | 463 |
| A07242 | A11234 | 215 | A07242 | A11281 | 418 |
| A07242 | A11283 | 424 | A07242 | A11293 | 388 |
| A07242 | A11346 | 541 | A07242 | A11385 | 172 |
| A07242 | A11394 | 221 | A07242 | A11408 | 489 |
| A07242 | A11472 | 624 | A07242 | A11473 | 291 |
| A07242 | A11475 | 489 | A07242 | A11496 | 332 |
| A07242 | A11497 | 382 | A07242 | A11533 | 432 |
| A07242 | A11551 | 489 | A07242 | A11615 | 489 |
| A07242 | A11675 | 273 | A07242 | A11676 | 162 |
| A07242 | A11727 | 238 | A07242 | A11735 | 232 |
| A07242 | A11863 | 240 | A07242 | A11876 | 368 |
| A07242 | A11917 | 472 | A07242 | A11940 | 159 |
| A07242 | A11983 | 486 | A07242 | A11996 | 423 |
| A07242 | A12047 | 491 | A07242 | A12230 | 174 |
| A07242 | A12231 | 174 | A07242 | A12249 | 241 |
| A07242 | A12365 | 256 | A07242 | A12433 | 207 |
| A07242 | A12499 | 332 | A07242 | A12506 | 241 |
| A07242 | A12606 | 251 | A07242 | A12658 | 404 |
| A07242 | A12665 | 195 | A07242 | A12691 | 174 |
| A07242 | A12707 | 307 | A07242 | A12718 | 174 |
| A07242 | A12722 | 491 | A07242 | A12817 | 174 |

|        |        |     |        |        |     |
|--------|--------|-----|--------|--------|-----|
| A07242 | A12836 | 340 | A07242 | A12858 | 360 |
| A07242 | A12862 | 180 | A07242 | A12893 | 462 |
| A07242 | A12952 | 433 | A07242 | A13239 | 256 |
| A07242 | A13313 | 419 | A07242 | A13323 | 417 |
| A07242 | A13369 | 223 | A07242 | A13399 | 152 |
| A07242 | A13708 | 399 | A07242 | A13760 | 174 |
| A07242 | A13780 | 174 | A07242 | A13781 | 483 |
| A07242 | A13784 | 489 | A07242 | A13853 | 210 |
| A07242 | A13866 | 385 | A07242 | A13894 | 420 |
| A07242 | A13895 | 375 | A07242 | A13912 | 241 |
| A07242 | A14000 | 454 | A07242 | A14009 | 465 |
| A07242 | A14162 | 268 | A07242 | A14163 | 491 |
| A07242 | A14192 | 177 | A07242 | A14214 | 291 |
| A07242 | A14239 | 369 | A07242 | A14253 | 191 |
| A07242 | A14263 | 311 | A07242 | A14266 | 624 |
| A07242 | A14268 | 200 | A07242 | A14271 | 490 |
| A07242 | A14278 | 191 | A07242 | A14279 | 401 |
| A07242 | A14281 | 491 | A07242 | A14357 | 104 |
| A07242 | A14474 | 491 | A07242 | A14484 | 491 |
| A07242 | A14546 | 152 | A07242 | A14569 | 369 |
| A07242 | A14570 | 157 | A07242 | A14633 | 491 |
| A07242 | A14635 | 332 | A07242 | A14655 | 183 |
| A07242 | A14661 | 491 | A07242 | A14711 | 457 |
| A07242 | A14766 | 174 | A07242 | A14783 | 152 |
| A07242 | A14846 | 174 | A07242 | A14854 | 174 |
| A07242 | A14926 | 283 | A07242 | A15090 | 268 |
| A07242 | A15145 | 462 | A07242 | A15187 | 157 |
| A07242 | A15189 | 327 | A07242 | A15273 | 388 |
| A07242 | A15294 | 396 | A07242 | A15324 | 175 |
| A07242 | A15501 | 491 | A07242 | A15502 | 473 |
| A07242 | A15506 | 486 | A07242 | A15618 | 195 |
| A07242 | A15626 | 486 | A07242 | A15685 | 479 |
| A07242 | A15693 | 174 | A07242 | A15704 | 369 |
| A07242 | A15709 | 185 | A07242 | A15768 | 151 |
| A07242 | A15855 | 246 | A07242 | A15895 | 174 |
| A07242 | A15930 | 450 | A07242 | A16048 | 479 |
| A07242 | A16088 | 193 | A07242 | A16116 | 174 |
| A07242 | A16157 | 276 | A07242 | A16261 | 430 |
| A07242 | A16343 | 330 | A07242 | A16439 | 180 |
| A07242 | A16466 | 193 | A07242 | A16552 | 375 |
| A07242 | A16565 | 388 | A07242 | A16587 | 196 |
| A07242 | A16597 | 271 | A07242 | A16611 | 373 |
| A07242 | A16664 | 351 | A07242 | A16675 | 201 |
| A07242 | A16680 | 273 | A07242 | A16764 | 326 |
| A07242 | A16788 | 241 | A07242 | A16829 | 224 |
| A07242 | A16882 | 205 | A07242 | A16905 | 247 |

|        |        |     |        |        |     |
|--------|--------|-----|--------|--------|-----|
| A07242 | A16913 | 210 | A07242 | A17013 | 218 |
| A07242 | A17030 | 162 | A07242 | A17059 | 274 |
| A07243 | A07307 | 388 | A07243 | A08011 | 249 |
| A07243 | A08664 | 393 | A07243 | A08752 | 328 |
| A07243 | A09308 | 254 | A07243 | A10034 | 369 |
| A07243 | A10417 | 393 | A07243 | A10564 | 486 |
| A07243 | A10569 | 434 | A07243 | A11331 | 451 |
| A07243 | A11926 | 227 | A07243 | A11981 | 368 |
| A07243 | A12361 | 201 | A07243 | A12687 | 480 |
| A07243 | A13435 | 341 | A07243 | A13626 | 430 |
| A07243 | A14372 | 398 | A07243 | A14606 | 363 |
| A07243 | A15932 | 195 | A07244 | A07432 | 438 |
| A07244 | A07524 | 459 | A07244 | A07625 | 174 |
| A07244 | A07924 | 494 | A07244 | A08211 | 170 |
| A07244 | A09697 | 170 | A07244 | A09783 | 208 |
| A07244 | A11544 | 174 | A07244 | A11831 | 276 |
| A07244 | A11832 | 451 | A07244 | A11913 | 99  |
| A07244 | A12726 | 204 | A07244 | A13052 | 170 |
| A07244 | A13792 | 279 | A07244 | A13989 | 170 |
| A07244 | A15498 | 251 | A07244 | A15706 | 279 |
| A07245 | A07726 | 191 | A07245 | A10034 | 335 |
| A07245 | A10156 | 314 | A07246 | A14337 | 433 |
| A07247 | A07311 | 491 | A07247 | A08978 | 163 |
| A07247 | A09902 | 361 | A07247 | A10006 | 210 |
| A07247 | A10532 | 491 | A07247 | A10728 | 405 |
| A07247 | A11240 | 341 | A07247 | A11705 | 481 |
| A07247 | A12328 | 424 | A07247 | A12831 | 215 |
| A07247 | A12839 | 467 | A07247 | A13000 | 358 |
| A07247 | A13340 | 316 | A07247 | A13989 | 377 |
| A07247 | A14073 | 486 | A07247 | A14908 | 427 |
| A07247 | A15141 | 456 | A07247 | A15156 | 332 |
| A07247 | A15244 | 420 | A07247 | A15677 | 195 |
| A07247 | A15696 | 488 | A07247 | A15698 | 451 |
| A07248 | A08154 | 288 | A07248 | A09293 | 326 |
| A07248 | A09509 | 193 | A07248 | A14478 | 279 |
| A07248 | A14479 | 217 | A07248 | A14568 | 216 |
| A07248 | A15500 | 160 | A07248 | A15771 | 224 |
| A07248 | A15933 | 177 | A07248 | A15988 | 177 |
| A07249 | A07572 | 366 | A07250 | A11641 | 401 |
| A07251 | A08748 | 352 | A07251 | A11113 | 446 |
| A07251 | A11822 | 456 | A07251 | A12329 | 205 |
| A07251 | A13044 | 452 | A07251 | A13609 | 210 |
| A07251 | A15918 | 252 | A07251 | A15933 | 368 |
| A07252 | A08513 | 441 | A07253 | A08961 | 303 |
| A07253 | A09229 | 281 | A07253 | A09721 | 474 |
| A07253 | A11158 | 367 | A07253 | A11350 | 340 |

|        |        |     |        |        |     |
|--------|--------|-----|--------|--------|-----|
| A07253 | A11690 | 340 | A07253 | A12047 | 383 |
| A07253 | A14163 | 182 | A07255 | A07617 | 422 |
| A07256 | A07264 | 329 | A07256 | A07267 | 326 |
| A07256 | A07413 | 485 | A07256 | A07477 | 446 |
| A07256 | A07688 | 313 | A07256 | A07736 | 384 |
| A07256 | A07800 | 168 | A07256 | A07973 | 468 |
| A07256 | A08252 | 184 | A07256 | A10020 | 411 |
| A07256 | A12055 | 390 | A07256 | A12990 | 234 |
| A07256 | A15497 | 273 | A07256 | A15892 | 385 |
| A07256 | A15905 | 294 | A07257 | A07771 | 364 |
| A07257 | A08707 | 477 | A07257 | A11156 | 380 |
| A07257 | A14252 | 491 | A07257 | A15356 | 409 |
| A07257 | A15649 | 361 | A07258 | A08357 | 182 |
| A07260 | A09982 | 447 | A07262 | A09285 | 407 |
| A07262 | A14482 | 263 | A07264 | A07334 | 357 |
| A07264 | A07477 | 227 | A07264 | A07558 | 213 |
| A07264 | A07574 | 257 | A07264 | A07674 | 311 |
| A07264 | A07718 | 218 | A07264 | A07844 | 313 |
| A07264 | A07847 | 375 | A07264 | A07973 | 232 |
| A07264 | A09059 | 235 | A07264 | A10020 | 380 |
| A07264 | A10420 | 285 | A07264 | A10423 | 182 |
| A07264 | A10444 | 273 | A07264 | A10452 | 251 |
| A07264 | A10656 | 377 | A07264 | A10690 | 321 |
| A07264 | A11189 | 480 | A07264 | A11847 | 348 |
| A07264 | A11902 | 234 | A07264 | A14077 | 200 |
| A07264 | A14279 | 314 | A07264 | A15637 | 260 |
| A07264 | A15709 | 174 | A07264 | A15905 | 219 |
| A07264 | A16286 | 389 | A07264 | A16417 | 278 |
| A07265 | A07588 | 505 | A07265 | A08955 | 223 |
| A07265 | A08971 | 223 | A07265 | A10755 | 255 |
| A07265 | A11202 | 223 | A07265 | A13298 | 426 |
| A07265 | A14216 | 223 | A07266 | A12824 | 477 |
| A07266 | A12897 | 171 | A07266 | A14196 | 369 |
| A07266 | A15297 | 339 | A07266 | A15559 | 174 |
| A07267 | A07304 | 177 | A07267 | A07413 | 446 |
| A07267 | A07477 | 350 | A07267 | A07590 | 216 |
| A07267 | A07688 | 469 | A07267 | A07800 | 480 |
| A07267 | A07848 | 216 | A07267 | A08385 | 266 |
| A07267 | A08751 | 418 | A07267 | A09896 | 401 |
| A07267 | A10456 | 383 | A07267 | A10703 | 389 |
| A07267 | A11309 | 322 | A07267 | A11381 | 180 |
| A07267 | A12055 | 429 | A07267 | A13281 | 401 |
| A07267 | A15497 | 188 | A07267 | A15874 | 317 |
| A07267 | A16027 | 472 | A07267 | A16529 | 285 |
| A07268 | A07514 | 416 | A07268 | A07606 | 467 |
| A07268 | A07904 | 424 | A07268 | A07907 | 434 |

|        |        |     |        |        |     |
|--------|--------|-----|--------|--------|-----|
| A07269 | A15726 | 221 | A07270 | A09124 | 299 |
| A07270 | A10242 | 445 | A07270 | A11127 | 445 |
| A07270 | A11951 | 454 | A07270 | A12983 | 462 |
| A07270 | A15318 | 326 | A07271 | A07322 | 390 |
| A07271 | A07381 | 302 | A07271 | A07574 | 362 |
| A07271 | A07674 | 310 | A07271 | A09876 | 210 |
| A07271 | A10652 | 383 | A07272 | A07558 | 438 |
| A07273 | A07815 | 465 | A07273 | A15282 | 229 |
| A07276 | A07697 | 185 | A07276 | A07814 | 446 |
| A07279 | A07642 | 340 | A07279 | A08572 | 305 |
| A07279 | A12047 | 188 | A07279 | A13181 | 319 |
| A07279 | A14221 | 383 | A07280 | A08200 | 411 |
| A07280 | A10506 | 269 | A07281 | A07739 | 404 |
| A07281 | A10696 | 391 | A07281 | A11021 | 455 |
| A07281 | A13065 | 425 | A07282 | A07641 | 491 |
| A07282 | A07817 | 436 | A07282 | A07836 | 291 |
| A07282 | A07901 | 382 | A07282 | A08889 | 212 |
| A07282 | A09300 | 208 | A07282 | A11411 | 260 |
| A07282 | A12132 | 334 | A07282 | A13369 | 263 |
| A07282 | A14395 | 208 | A07282 | A15232 | 382 |
| A07282 | A15336 | 449 | A07282 | A15557 | 188 |
| A07282 | A15622 | 449 | A07282 | A15679 | 279 |
| A07282 | A15837 | 174 | A07282 | A16068 | 324 |
| A07282 | A16402 | 312 | A07282 | A16447 | 303 |
| A07282 | A16626 | 465 | A07283 | A07345 | 328 |
| A07283 | A07413 | 180 | A07283 | A07477 | 193 |
| A07283 | A07553 | 160 | A07283 | A07558 | 394 |
| A07283 | A07590 | 187 | A07283 | A07721 | 208 |
| A07283 | A07736 | 157 | A07283 | A07976 | 357 |
| A07283 | A08656 | 341 | A07283 | A08943 | 899 |
| A07283 | A10658 | 394 | A07283 | A10686 | 283 |
| A07283 | A13873 | 899 | A07283 | A14191 | 447 |
| A07283 | A14803 | 204 | A07283 | A16026 | 240 |
| A07284 | A15365 | 63  | A07286 | A07391 | 457 |
| A07286 | A07578 | 430 | A07286 | A07605 | 353 |
| A07286 | A15498 | 190 | A07287 | A08379 | 312 |
| A07288 | A07746 | 236 | A07288 | A15874 | 277 |
| A07288 | A16026 | 340 | A07288 | A16027 | 283 |
| A07289 | A15601 | 412 | A07289 | A15603 | 408 |
| A07290 | A07885 | 151 | A07290 | A09007 | 340 |
| A07290 | A09712 | 324 | A07290 | A09804 | 274 |
| A07290 | A10159 | 216 | A07290 | A10365 | 180 |
| A07290 | A10642 | 480 | A07290 | A10728 | 196 |
| A07290 | A15262 | 216 | A07290 | A16228 | 310 |
| A07290 | A17015 | 283 | A07292 | A08288 | 411 |
| A07292 | A08404 | 360 | A07292 | A14430 | 229 |

|        |        |     |        |        |     |
|--------|--------|-----|--------|--------|-----|
| A07292 | A15506 | 159 | A07293 | A11413 | 419 |
| A07294 | A08148 | 434 | A07294 | A08577 | 198 |
| A07294 | A08775 | 412 | A07294 | A09625 | 491 |
| A07294 | A09628 | 355 | A07294 | A10664 | 474 |
| A07294 | A13837 | 176 | A07294 | A14088 | 386 |
| A07294 | A14173 | 324 | A07294 | A14179 | 414 |
| A07294 | A14180 | 195 | A07294 | A14186 | 63  |
| A07294 | A14209 | 260 | A07294 | A14356 | 246 |
| A07294 | A15202 | 165 | A07294 | A15370 | 299 |
| A07294 | A15568 | 283 | A07294 | A15664 | 308 |
| A07294 | A15683 | 489 | A07294 | A15712 | 491 |
| A07294 | A15718 | 314 | A07294 | A16634 | 457 |
| A07294 | A16665 | 470 | A07294 | A16843 | 432 |
| A07296 | A07297 | 457 | A07296 | A07339 | 157 |
| A07296 | A07438 | 378 | A07296 | A07510 | 398 |
| A07296 | A07654 | 369 | A07296 | A07673 | 341 |
| A07296 | A07912 | 401 | A07296 | A13987 | 247 |
| A07296 | A14122 | 279 | A07296 | A15419 | 294 |
| A07296 | A15420 | 274 | A07297 | A07912 | 404 |
| A07298 | A09496 | 491 | A07298 | A10744 | 369 |
| A07298 | A11393 | 490 | A07300 | A07468 | 302 |
| A07300 | A07541 | 265 | A07300 | A10056 | 388 |
| A07300 | A10967 | 277 | A07300 | A12793 | 329 |
| A07300 | A17108 | 358 | A07301 | A09879 | 323 |
| A07301 | A17136 | 154 | A07302 | A07440 | 361 |
| A07304 | A07445 | 422 | A07304 | A07530 | 352 |
| A07304 | A07554 | 377 | A07304 | A07590 | 263 |
| A07304 | A07674 | 208 | A07304 | A07688 | 291 |
| A07304 | A07710 | 177 | A07304 | A08381 | 156 |
| A07304 | A08751 | 260 | A07304 | A10456 | 193 |
| A07304 | A12730 | 213 | A07304 | A13735 | 208 |
| A07304 | A14803 | 151 | A07304 | A14856 | 172 |
| A07304 | A15637 | 176 | A07304 | A15905 | 263 |
| A07304 | A15944 | 190 | A07304 | A16028 | 217 |
| A07304 | A16286 | 193 | A07305 | A15657 | 348 |
| A07306 | A08357 | 270 | A07306 | A11126 | 445 |
| A07307 | A07323 | 245 | A07307 | A07457 | 265 |
| A07307 | A07506 | 465 | A07307 | A08408 | 255 |
| A07307 | A08682 | 249 | A07307 | A08768 | 414 |
| A07307 | A10814 | 338 | A07307 | A10901 | 362 |
| A07307 | A13126 | 245 | A07307 | A13989 | 351 |
| A07307 | A15063 | 63  | A07307 | A15707 | 441 |
| A07309 | A07335 | 193 | A07309 | A08512 | 259 |
| A07309 | A08739 | 174 | A07309 | A08854 | 163 |
| A07309 | A08860 | 357 | A07309 | A09542 | 157 |
| A07309 | A09860 | 183 | A07309 | A10563 | 491 |

|        |        |     |        |        |     |
|--------|--------|-----|--------|--------|-----|
| A07309 | A10662 | 204 | A07309 | A10722 | 170 |
| A07309 | A13162 | 217 | A07309 | A13599 | 238 |
| A07309 | A13651 | 252 | A07309 | A13954 | 208 |
| A07309 | A13965 | 193 | A07309 | A14123 | 160 |
| A07309 | A14597 | 353 | A07309 | A14629 | 227 |
| A07309 | A15099 | 441 | A07309 | A15440 | 152 |
| A07309 | A15451 | 180 | A07309 | A17149 | 212 |
| A07309 | A17152 | 207 | A07310 | A07685 | 434 |
| A07310 | A07837 | 438 | A07310 | A08005 | 438 |
| A07310 | A08009 | 434 | A07311 | A07339 | 184 |
| A07311 | A07422 | 899 | A07311 | A07528 | 307 |
| A07311 | A07604 | 407 | A07311 | A07726 | 490 |
| A07311 | A07797 | 899 | A07311 | A07798 | 646 |
| A07311 | A07803 | 352 | A07311 | A07811 | 176 |
| A07311 | A07967 | 210 | A07311 | A08054 | 480 |
| A07311 | A08061 | 401 | A07311 | A08133 | 199 |
| A07311 | A08137 | 544 | A07311 | A08193 | 199 |
| A07311 | A08215 | 208 | A07311 | A08280 | 483 |
| A07311 | A08315 | 271 | A07311 | A08357 | 224 |
| A07311 | A08359 | 491 | A07311 | A08519 | 430 |
| A07311 | A08533 | 486 | A07311 | A08539 | 323 |
| A07311 | A08559 | 475 | A07311 | A08571 | 611 |
| A07311 | A08608 | 226 | A07311 | A08748 | 343 |
| A07311 | A08860 | 609 | A07311 | A08865 | 899 |
| A07311 | A08878 | 946 | A07311 | A08980 | 327 |
| A07311 | A09009 | 454 | A07311 | A09162 | 488 |
| A07311 | A09220 | 899 | A07311 | A09253 | 151 |
| A07311 | A09263 | 460 | A07311 | A09297 | 491 |
| A07311 | A09303 | 207 | A07311 | A09308 | 343 |
| A07311 | A09319 | 950 | A07311 | A09332 | 204 |
| A07311 | A09471 | 163 | A07311 | A09542 | 899 |
| A07311 | A09556 | 899 | A07311 | A09568 | 951 |
| A07311 | A09577 | 686 | A07311 | A09592 | 564 |
| A07311 | A09606 | 208 | A07311 | A09633 | 186 |
| A07311 | A09644 | 163 | A07311 | A09804 | 491 |
| A07311 | A09854 | 268 | A07311 | A09873 | 419 |
| A07311 | A09902 | 491 | A07311 | A09933 | 63  |
| A07311 | A09937 | 79  | A07311 | A10014 | 511 |
| A07311 | A10047 | 283 | A07311 | A10185 | 899 |
| A07311 | A10233 | 899 | A07311 | A10294 | 283 |
| A07311 | A10365 | 945 | A07311 | A10430 | 176 |
| A07311 | A10532 | 742 | A07311 | A10534 | 85  |
| A07311 | A10580 | 945 | A07311 | A10615 | 899 |
| A07311 | A10623 | 463 | A07311 | A10624 | 277 |
| A07311 | A10728 | 491 | A07311 | A10735 | 283 |
| A07311 | A10756 | 388 | A07311 | A10798 | 210 |



|        |        |     |        |        |     |
|--------|--------|-----|--------|--------|-----|
| A07311 | A10801 | 909 | A07311 | A10813 | 899 |
| A07311 | A10833 | 901 | A07311 | A10899 | 63  |
| A07311 | A10982 | 63  | A07311 | A11124 | 63  |
| A07311 | A11125 | 899 | A07311 | A11286 | 491 |
| A07311 | A11291 | 379 | A07311 | A11297 | 485 |
| A07311 | A11300 | 155 | A07311 | A11302 | 491 |
| A07311 | A11332 | 385 | A07311 | A11337 | 486 |
| A07311 | A11344 | 281 | A07311 | A11354 | 205 |
| A07311 | A11369 | 939 | A07311 | A11372 | 485 |
| A07311 | A11392 | 157 | A07311 | A11459 | 268 |
| A07311 | A11487 | 602 | A07311 | A11550 | 247 |
| A07311 | A11604 | 517 | A07311 | A11707 | 333 |
| A07311 | A11820 | 209 | A07311 | A11840 | 227 |
| A07311 | A11934 | 218 | A07311 | A11937 | 655 |
| A07311 | A11948 | 163 | A07311 | A11983 | 966 |
| A07311 | A12042 | 338 | A07311 | A12196 | 221 |
| A07311 | A12215 | 227 | A07311 | A12227 | 483 |
| A07311 | A12242 | 185 | A07311 | A12328 | 491 |
| A07311 | A12383 | 994 | A07311 | A12503 | 434 |
| A07311 | A12705 | 899 | A07311 | A12969 | 941 |
| A07311 | A12971 | 899 | A07311 | A12990 | 491 |
| A07311 | A13069 | 306 | A07311 | A13116 | 312 |
| A07311 | A13146 | 199 | A07311 | A13149 | 491 |
| A07311 | A13310 | 362 | A07311 | A13311 | 480 |
| A07311 | A13320 | 491 | A07311 | A13335 | 570 |
| A07311 | A13340 | 753 | A07311 | A13342 | 230 |
| A07311 | A13390 | 909 | A07311 | A13391 | 974 |
| A07311 | A13393 | 899 | A07311 | A13401 | 899 |
| A07311 | A13498 | 184 | A07311 | A13511 | 257 |
| A07311 | A13527 | 385 | A07311 | A13605 | 899 |
| A07311 | A13672 | 192 | A07311 | A13697 | 147 |
| A07311 | A13699 | 286 | A07311 | A13711 | 899 |
| A07311 | A13734 | 199 | A07311 | A13812 | 475 |
| A07311 | A13917 | 490 | A07311 | A13928 | 404 |
| A07311 | A13975 | 326 | A07311 | A13978 | 906 |
| A07311 | A13983 | 144 | A07311 | A13984 | 964 |
| A07311 | A13985 | 900 | A07311 | A13989 | 617 |
| A07311 | A13999 | 899 | A07311 | A14000 | 944 |
| A07311 | A14005 | 937 | A07311 | A14006 | 489 |
| A07311 | A14008 | 68  | A07311 | A14021 | 112 |
| A07311 | A14031 | 899 | A07311 | A14032 | 247 |
| A07311 | A14035 | 899 | A07311 | A14038 | 899 |
| A07311 | A14042 | 899 | A07311 | A14043 | 899 |
| A07311 | A14045 | 903 | A07311 | A14061 | 899 |
| A07311 | A14062 | 542 | A07311 | A14065 | 899 |
| A07311 | A14066 | 899 | A07311 | A14069 | 899 |

|        |        |     |        |        |     |
|--------|--------|-----|--------|--------|-----|
| A07311 | A14073 | 558 | A07311 | A14120 | 176 |
| A07311 | A14127 | 199 | A07311 | A14156 | 260 |
| A07311 | A14159 | 488 | A07311 | A14178 | 205 |
| A07311 | A14187 | 910 | A07311 | A14188 | 945 |
| A07311 | A14191 | 185 | A07311 | A14196 | 524 |
| A07311 | A14198 | 945 | A07311 | A14208 | 218 |
| A07311 | A14215 | 63  | A07311 | A14216 | 772 |
| A07311 | A14220 | 563 | A07311 | A14221 | 254 |
| A07311 | A14242 | 899 | A07311 | A14257 | 329 |
| A07311 | A14363 | 256 | A07311 | A14402 | 935 |
| A07311 | A14410 | 325 | A07311 | A14433 | 900 |
| A07311 | A14443 | 908 | A07311 | A14444 | 899 |
| A07311 | A14466 | 469 | A07311 | A14472 | 899 |
| A07311 | A14476 | 380 | A07311 | A14496 | 514 |
| A07311 | A14516 | 180 | A07311 | A14566 | 402 |
| A07311 | A14571 | 527 | A07311 | A14577 | 228 |
| A07311 | A14591 | 232 | A07311 | A14596 | 528 |
| A07311 | A14648 | 430 | A07311 | A14659 | 419 |
| A07311 | A14738 | 491 | A07311 | A14758 | 199 |
| A07311 | A14948 | 199 | A07311 | A15034 | 263 |
| A07311 | A15133 | 154 | A07311 | A15244 | 570 |
| A07311 | A15246 | 399 | A07311 | A15282 | 483 |
| A07311 | A15291 | 255 | A07311 | A15294 | 211 |
| A07311 | A15325 | 941 | A07311 | A15500 | 212 |
| A07311 | A15506 | 171 | A07311 | A15507 | 531 |
| A07311 | A15546 | 491 | A07311 | A15547 | 477 |
| A07311 | A15551 | 260 | A07311 | A15606 | 368 |
| A07311 | A15614 | 199 | A07311 | A15660 | 491 |
| A07311 | A15665 | 262 | A07311 | A15666 | 458 |
| A07311 | A15684 | 514 | A07311 | A15697 | 414 |
| A07311 | A15711 | 223 | A07311 | A15720 | 154 |
| A07311 | A15726 | 932 | A07311 | A15734 | 491 |
| A07311 | A15741 | 491 | A07311 | A15760 | 428 |
| A07311 | A15769 | 475 | A07311 | A15773 | 446 |
| A07311 | A15778 | 391 | A07311 | A15918 | 165 |
| A07311 | A15932 | 489 | A07311 | A15933 | 483 |
| A07311 | A16060 | 491 | A07311 | A16084 | 63  |
| A07311 | A16085 | 899 | A07311 | A16157 | 391 |
| A07311 | A16218 | 274 | A07311 | A16243 | 243 |
| A07311 | A16266 | 473 | A07311 | A16272 | 490 |
| A07311 | A16291 | 491 | A07311 | A16298 | 278 |
| A07311 | A16318 | 455 | A07311 | A16399 | 184 |
| A07311 | A16410 | 553 | A07311 | A16437 | 408 |
| A07311 | A16446 | 436 | A07311 | A16449 | 272 |
| A07311 | A16531 | 341 | A07311 | A16618 | 154 |
| A07311 | A16627 | 274 | A07311 | A16764 | 241 |

|        |        |     |        |        |     |
|--------|--------|-----|--------|--------|-----|
| A07311 | A16793 | 491 | A07311 | A16818 | 384 |
| A07311 | A16822 | 183 | A07311 | A16837 | 458 |
| A07311 | A16847 | 176 | A07311 | A16938 | 899 |
| A07311 | A16939 | 491 | A07311 | A17017 | 185 |
| A07311 | A17023 | 184 | A07311 | A17134 | 469 |
| A07311 | A17140 | 188 | A07311 | A17142 | 477 |
| A07311 | A17146 | 299 | A07311 | A17188 | 899 |
| A07312 | A07483 | 162 | A07312 | A08357 | 160 |
| A07312 | A08984 | 210 | A07312 | A09724 | 238 |
| A07312 | A10317 | 156 | A07312 | A11277 | 319 |
| A07312 | A11368 | 163 | A07312 | A11394 | 299 |
| A07312 | A13249 | 229 | A07312 | A13257 | 210 |
| A07312 | A14125 | 179 | A07312 | A14188 | 247 |
| A07312 | A14482 | 307 | A07312 | A14596 | 256 |
| A07312 | A14701 | 475 | A07312 | A15377 | 430 |
| A07313 | A07433 | 491 | A07313 | A07768 | 170 |
| A07313 | A08196 | 447 | A07313 | A08450 | 171 |
| A07313 | A08517 | 157 | A07313 | A08518 | 198 |
| A07313 | A08549 | 363 | A07313 | A08561 | 413 |
| A07313 | A08819 | 307 | A07313 | A08839 | 291 |
| A07313 | A08853 | 198 | A07313 | A08855 | 439 |
| A07313 | A08885 | 254 | A07313 | A09309 | 267 |
| A07313 | A11551 | 213 | A07313 | A11668 | 286 |
| A07313 | A11914 | 167 | A07313 | A11940 | 288 |
| A07313 | A11954 | 441 | A07313 | A12665 | 190 |
| A07313 | A12858 | 168 | A07313 | A12873 | 180 |
| A07313 | A13399 | 174 | A07313 | A13805 | 268 |
| A07313 | A14084 | 232 | A07313 | A14227 | 110 |
| A07313 | A14260 | 286 | A07313 | A14261 | 441 |
| A07313 | A15189 | 183 | A07313 | A15498 | 195 |
| A07313 | A16597 | 196 | A07313 | A16664 | 191 |
| A07313 | A16675 | 159 | A07313 | A16703 | 243 |
| A07313 | A16905 | 230 | A07314 | A07315 | 252 |
| A07314 | A07466 | 480 | A07314 | A07480 | 490 |
| A07314 | A07603 | 485 | A07314 | A08669 | 432 |
| A07314 | A08672 | 270 | A07314 | A09238 | 162 |
| A07314 | A09288 | 154 | A07314 | A09751 | 488 |
| A07314 | A09752 | 489 | A07314 | A09754 | 68  |
| A07314 | A10165 | 382 | A07314 | A10167 | 229 |
| A07314 | A10631 | 196 | A07314 | A10960 | 393 |
| A07314 | A12393 | 210 | A07314 | A13257 | 340 |
| A07314 | A13860 | 185 | A07314 | A14011 | 109 |
| A07314 | A14294 | 229 | A07314 | A14930 | 171 |
| A07314 | A14969 | 171 | A07314 | A15093 | 391 |
| A07314 | A15198 | 221 | A07314 | A15639 | 305 |
| A07314 | A15726 | 202 | A07314 | A15904 | 246 |

|        |        |     |        |        |     |
|--------|--------|-----|--------|--------|-----|
| A07314 | A16054 | 184 | A07314 | A16951 | 207 |
| A07314 | A17075 | 477 | A07315 | A10960 | 491 |
| A07315 | A14969 | 446 | A07315 | A15512 | 278 |
| A07316 | A09742 | 302 | A07316 | A14010 | 372 |
| A07316 | A14408 | 382 | A07316 | A15292 | 255 |
| A07316 | A15311 | 395 | A07316 | A15333 | 396 |
| A07316 | A15352 | 316 | A07316 | A15461 | 379 |
| A07316 | A15489 | 406 | A07317 | A07670 | 246 |
| A07317 | A08927 | 332 | A07317 | A09672 | 267 |
| A07317 | A10200 | 345 | A07319 | A07346 | 491 |
| A07319 | A07466 | 475 | A07319 | A07480 | 491 |
| A07319 | A07497 | 188 | A07319 | A07534 | 491 |
| A07319 | A07595 | 162 | A07319 | A07603 | 491 |
| A07319 | A07647 | 491 | A07319 | A07902 | 491 |
| A07319 | A07989 | 490 | A07319 | A07996 | 491 |
| A07319 | A08000 | 491 | A07319 | A08029 | 423 |
| A07319 | A08030 | 491 | A07319 | A08117 | 491 |
| A07319 | A08141 | 491 | A07319 | A08208 | 491 |
| A07319 | A08212 | 454 | A07319 | A08669 | 491 |
| A07319 | A08820 | 475 | A07319 | A08902 | 480 |
| A07319 | A08919 | 182 | A07319 | A08924 | 294 |
| A07319 | A09288 | 483 | A07319 | A09598 | 293 |
| A07319 | A09663 | 490 | A07319 | A09706 | 271 |
| A07319 | A10373 | 400 | A07319 | A10625 | 489 |
| A07319 | A11236 | 176 | A07319 | A11540 | 151 |
| A07319 | A11880 | 152 | A07319 | A11916 | 465 |
| A07319 | A12061 | 474 | A07319 | A12190 | 241 |
| A07319 | A12556 | 486 | A07319 | A13163 | 154 |
| A07319 | A13257 | 267 | A07319 | A13429 | 172 |
| A07319 | A13949 | 491 | A07319 | A14076 | 489 |
| A07319 | A14079 | 491 | A07319 | A14094 | 466 |
| A07319 | A14154 | 329 | A07319 | A14230 | 352 |
| A07319 | A14273 | 491 | A07319 | A14460 | 491 |
| A07319 | A14694 | 483 | A07319 | A15356 | 198 |
| A07319 | A15369 | 491 | A07319 | A15371 | 391 |
| A07319 | A15645 | 286 | A07319 | A15654 | 470 |
| A07319 | A15714 | 238 | A07319 | A15837 | 430 |
| A07319 | A15939 | 463 | A07319 | A15941 | 472 |
| A07319 | A16127 | 491 | A07319 | A16128 | 491 |
| A07319 | A16129 | 491 | A07319 | A16134 | 355 |
| A07319 | A16225 | 483 | A07319 | A16226 | 491 |
| A07319 | A16294 | 213 | A07319 | A16378 | 469 |
| A07319 | A16606 | 486 | A07319 | A16612 | 191 |
| A07319 | A16613 | 491 | A07319 | A16616 | 477 |
| A07319 | A16626 | 490 | A07319 | A16646 | 408 |
| A07319 | A16754 | 491 | A07319 | A16830 | 368 |

|        |        |     |        |        |     |
|--------|--------|-----|--------|--------|-----|
| A07321 | A15011 | 395 | A07322 | A07381 | 218 |
| A07322 | A07477 | 274 | A07322 | A07508 | 408 |
| A07322 | A07553 | 245 | A07322 | A07737 | 335 |
| A07322 | A08099 | 162 | A07322 | A08135 | 332 |
| A07322 | A09059 | 163 | A07322 | A10441 | 346 |
| A07322 | A10443 | 347 | A07322 | A10684 | 228 |
| A07322 | A10702 | 256 | A07322 | A10703 | 319 |
| A07322 | A10714 | 255 | A07322 | A14190 | 168 |
| A07322 | A14371 | 170 | A07322 | A15294 | 213 |
| A07322 | A16419 | 341 | A07322 | A16767 | 347 |
| A07323 | A07398 | 470 | A07323 | A07449 | 243 |
| A07323 | A07581 | 174 | A07323 | A08357 | 425 |
| A07323 | A09852 | 193 | A07323 | A10814 | 279 |
| A07323 | A13002 | 401 | A07323 | A13126 | 430 |
| A07323 | A13989 | 491 | A07323 | A14172 | 446 |
| A07323 | A14530 | 472 | A07323 | A14796 | 384 |
| A07323 | A16053 | 353 | A07324 | A07336 | 477 |
| A07324 | A07655 | 276 | A07324 | A07748 | 491 |
| A07324 | A07878 | 491 | A07324 | A08660 | 469 |
| A07324 | A08667 | 393 | A07324 | A08688 | 389 |
| A07324 | A10823 | 347 | A07324 | A12451 | 446 |
| A07324 | A12842 | 396 | A07324 | A14366 | 256 |
| A07324 | A14554 | 195 | A07325 | A07408 | 335 |
| A07325 | A07501 | 246 | A07325 | A07619 | 241 |
| A07325 | A07690 | 366 | A07325 | A07723 | 172 |
| A07325 | A07795 | 263 | A07325 | A08190 | 160 |
| A07325 | A08238 | 305 | A07325 | A08368 | 274 |
| A07325 | A08663 | 162 | A07325 | A08687 | 195 |
| A07325 | A10776 | 267 | A07325 | A11395 | 491 |
| A07325 | A15373 | 171 | A07325 | A15946 | 262 |
| A07325 | A16103 | 165 | A07327 | A07503 | 424 |
| A07328 | A14196 | 174 | A07328 | A15297 | 184 |
| A07328 | A15323 | 265 | A07328 | A17213 | 409 |
| A07329 | A07922 | 460 | A07329 | A13274 | 435 |
| A07330 | A07711 | 382 | A07330 | A07736 | 294 |
| A07330 | A14589 | 193 | A07331 | A09449 | 173 |
| A07331 | A15430 | 230 | A07332 | A07346 | 491 |
| A07332 | A08141 | 217 | A07332 | A08208 | 66  |
| A07332 | A09626 | 411 | A07332 | A09629 | 477 |
| A07332 | A12988 | 177 | A07332 | A13949 | 462 |
| A07332 | A14093 | 490 | A07332 | A14155 | 391 |
| A07332 | A14177 | 232 | A07332 | A15369 | 212 |
| A07332 | A15563 | 229 | A07332 | A15654 | 157 |
| A07332 | A16294 | 232 | A07332 | A16626 | 208 |
| A07333 | A07571 | 317 | A07333 | A07974 | 317 |
| A07333 | A08097 | 508 | A07333 | A08289 | 243 |

|        |        |     |        |        |     |
|--------|--------|-----|--------|--------|-----|
| A07333 | A09276 | 321 | A07333 | A09340 | 438 |
| A07333 | A13822 | 223 | A07333 | A14525 | 329 |
| A07333 | A14804 | 223 | A07333 | A15372 | 328 |
| A07333 | A15622 | 344 | A07333 | A15837 | 249 |
| A07333 | A16219 | 223 | A07333 | A16350 | 329 |
| A07333 | A16531 | 454 | A07333 | A16626 | 205 |
| A07333 | A16635 | 308 | A07333 | A16761 | 347 |
| A07333 | A16769 | 473 | A07334 | A07490 | 455 |
| A07334 | A07674 | 296 | A07334 | A07763 | 362 |
| A07334 | A07795 | 416 | A07334 | A07796 | 388 |
| A07334 | A07847 | 352 | A07334 | A11189 | 367 |
| A07334 | A11902 | 337 | A07335 | A15331 | 271 |
| A07335 | A15335 | 296 | A07335 | A15383 | 159 |
| A07336 | A07520 | 245 | A07336 | A07621 | 374 |
| A07336 | A07748 | 468 | A07336 | A07878 | 297 |
| A07336 | A08646 | 424 | A07336 | A08667 | 346 |
| A07336 | A10635 | 293 | A07337 | A07995 | 416 |
| A07337 | A08274 | 404 | A07337 | A10639 | 416 |
| A07337 | A12522 | 419 | A07338 | A10629 | 462 |
| A07338 | A10852 | 435 | A07339 | A07433 | 318 |
| A07339 | A07576 | 266 | A07339 | A07935 | 271 |
| A07339 | A08070 | 193 | A07339 | A08175 | 163 |
| A07339 | A08309 | 163 | A07339 | A08415 | 266 |
| A07339 | A08427 | 489 | A07339 | A08512 | 157 |
| A07339 | A08571 | 430 | A07339 | A08710 | 210 |
| A07339 | A08732 | 899 | A07339 | A08875 | 190 |
| A07339 | A09020 | 176 | A07339 | A09052 | 469 |
| A07339 | A09078 | 480 | A07339 | A09249 | 157 |
| A07339 | A09493 | 172 | A07339 | A09642 | 210 |
| A07339 | A09883 | 182 | A07339 | A10090 | 163 |
| A07339 | A10174 | 903 | A07339 | A10247 | 379 |
| A07339 | A10296 | 182 | A07339 | A10471 | 182 |
| A07339 | A10551 | 219 | A07339 | A10839 | 322 |
| A07339 | A10986 | 154 | A07339 | A11173 | 157 |
| A07339 | A11487 | 479 | A07339 | A11576 | 286 |
| A07339 | A11586 | 389 | A07339 | A11611 | 193 |
| A07339 | A11759 | 423 | A07339 | A12361 | 235 |
| A07339 | A12373 | 340 | A07339 | A12399 | 266 |
| A07339 | A12469 | 266 | A07339 | A12513 | 210 |
| A07339 | A12684 | 230 | A07339 | A12805 | 266 |
| A07339 | A12806 | 210 | A07339 | A12897 | 491 |
| A07339 | A13853 | 241 | A07339 | A13986 | 419 |
| A07339 | A13997 | 899 | A07339 | A14006 | 490 |
| A07339 | A14009 | 266 | A07339 | A14063 | 163 |
| A07339 | A14148 | 458 | A07339 | A14198 | 378 |
| A07339 | A14202 | 899 | A07339 | A14443 | 909 |

|        |        |     |        |        |     |
|--------|--------|-----|--------|--------|-----|
| A07339 | A14444 | 899 | A07339 | A14490 | 899 |
| A07339 | A14589 | 351 | A07339 | A14643 | 457 |
| A07339 | A14650 | 333 | A07339 | A14687 | 172 |
| A07339 | A15292 | 909 | A07339 | A15293 | 580 |
| A07339 | A15318 | 283 | A07339 | A15325 | 187 |
| A07339 | A15420 | 480 | A07339 | A15504 | 223 |
| A07339 | A15600 | 182 | A07339 | A15790 | 182 |
| A07339 | A16041 | 193 | A07339 | A16300 | 383 |
| A07339 | A16341 | 266 | A07339 | A16410 | 433 |
| A07339 | A16519 | 210 | A07339 | A16968 | 899 |
| A07339 | A16990 | 230 | A07339 | A17063 | 380 |
| A07341 | A07590 | 285 | A07341 | A07721 | 195 |
| A07341 | A07933 | 208 | A07341 | A07973 | 294 |
| A07341 | A10253 | 193 | A07341 | A10420 | 223 |
| A07341 | A10714 | 271 | A07341 | A14803 | 297 |
| A07341 | A14856 | 219 | A07341 | A16277 | 324 |
| A07341 | A16286 | 329 | A07341 | A16335 | 291 |
| A07342 | A07373 | 449 | A07342 | A07389 | 435 |
| A07342 | A07608 | 335 | A07342 | A09526 | 170 |
| A07342 | A09991 | 307 | A07342 | A10226 | 341 |
| A07342 | A10527 | 232 | A07342 | A10689 | 163 |
| A07342 | A14344 | 491 | A07342 | A15611 | 221 |
| A07342 | A15992 | 226 | A07343 | A08524 | 274 |
| A07344 | A12897 | 172 | A07345 | A07558 | 313 |
| A07345 | A07721 | 236 | A07345 | A07973 | 418 |
| A07345 | A08943 | 293 | A07345 | A10160 | 398 |
| A07345 | A10672 | 382 | A07345 | A14191 | 441 |
| A07346 | A07353 | 74  | A07346 | A07466 | 151 |
| A07346 | A07480 | 491 | A07346 | A07534 | 491 |
| A07346 | A07603 | 491 | A07346 | A07647 | 491 |
| A07346 | A07902 | 441 | A07346 | A07996 | 491 |
| A07346 | A08000 | 441 | A07346 | A08030 | 491 |
| A07346 | A08117 | 483 | A07346 | A08141 | 491 |
| A07346 | A08208 | 491 | A07346 | A08212 | 490 |
| A07346 | A08221 | 174 | A07346 | A08516 | 491 |
| A07346 | A08526 | 436 | A07346 | A08669 | 491 |
| A07346 | A08769 | 491 | A07346 | A08820 | 490 |
| A07346 | A08822 | 91  | A07346 | A08918 | 230 |
| A07346 | A08957 | 424 | A07346 | A09304 | 357 |
| A07346 | A09598 | 491 | A07346 | A09623 | 235 |
| A07346 | A09626 | 469 | A07346 | A09629 | 475 |
| A07346 | A09653 | 152 | A07346 | A09706 | 393 |
| A07346 | A09762 | 474 | A07346 | A09836 | 235 |
| A07346 | A10083 | 489 | A07346 | A10373 | 491 |
| A07346 | A10846 | 65  | A07346 | A11236 | 491 |
| A07346 | A11540 | 489 | A07346 | A11916 | 491 |

|        |        |     |        |        |     |
|--------|--------|-----|--------|--------|-----|
| A07346 | A12052 | 159 | A07346 | A12556 | 491 |
| A07346 | A12625 | 441 | A07346 | A12932 | 157 |
| A07346 | A13339 | 210 | A07346 | A13907 | 401 |
| A07346 | A13913 | 170 | A07346 | A13949 | 491 |
| A07346 | A14076 | 491 | A07346 | A14079 | 491 |
| A07346 | A14088 | 201 | A07346 | A14093 | 491 |
| A07346 | A14094 | 489 | A07346 | A14155 | 458 |
| A07346 | A14167 | 177 | A07346 | A14177 | 477 |
| A07346 | A14223 | 299 | A07346 | A14230 | 491 |
| A07346 | A14273 | 491 | A07346 | A14460 | 491 |
| A07346 | A14694 | 489 | A07346 | A14701 | 491 |
| A07346 | A14706 | 491 | A07346 | A14962 | 263 |
| A07346 | A15369 | 491 | A07346 | A15371 | 491 |
| A07346 | A15524 | 486 | A07346 | A15531 | 414 |
| A07346 | A15534 | 454 | A07346 | A15535 | 173 |
| A07346 | A15539 | 319 | A07346 | A15540 | 332 |
| A07346 | A15645 | 446 | A07346 | A15654 | 491 |
| A07346 | A15714 | 165 | A07346 | A15837 | 491 |
| A07346 | A15876 | 418 | A07346 | A15939 | 227 |
| A07346 | A15941 | 491 | A07346 | A16073 | 154 |
| A07346 | A16127 | 491 | A07346 | A16128 | 491 |
| A07346 | A16129 | 491 | A07346 | A16226 | 491 |
| A07346 | A16294 | 491 | A07346 | A16299 | 252 |
| A07346 | A16378 | 424 | A07346 | A16452 | 358 |
| A07346 | A16606 | 486 | A07346 | A16612 | 491 |
| A07346 | A16613 | 477 | A07346 | A16626 | 491 |
| A07346 | A16646 | 491 | A07346 | A16670 | 187 |
| A07346 | A16754 | 179 | A07346 | A16762 | 467 |
| A07347 | A07464 | 154 | A07347 | A07584 | 480 |
| A07347 | A07625 | 236 | A07347 | A07644 | 396 |
| A07347 | A07700 | 491 | A07347 | A07725 | 491 |
| A07347 | A07961 | 183 | A07347 | A07968 | 213 |
| A07347 | A08024 | 321 | A07347 | A08112 | 213 |
| A07347 | A08137 | 443 | A07347 | A08326 | 154 |
| A07347 | A08357 | 343 | A07347 | A08377 | 310 |
| A07347 | A08543 | 208 | A07347 | A08550 | 260 |
| A07347 | A08552 | 257 | A07347 | A08560 | 259 |
| A07347 | A08561 | 311 | A07347 | A08814 | 224 |
| A07347 | A08952 | 256 | A07347 | A08995 | 151 |
| A07347 | A09609 | 281 | A07347 | A09664 | 401 |
| A07347 | A09686 | 180 | A07347 | A09705 | 486 |
| A07347 | A10465 | 254 | A07347 | A10616 | 469 |
| A07347 | A10923 | 165 | A07347 | A11301 | 330 |
| A07347 | A11472 | 235 | A07347 | A11497 | 230 |
| A07347 | A11675 | 288 | A07347 | A11735 | 238 |
| A07347 | A11737 | 157 | A07347 | A11914 | 404 |



|        |        |     |        |        |     |
|--------|--------|-----|--------|--------|-----|
| A07347 | A11917 | 283 | A07347 | A12215 | 265 |
| A07347 | A12433 | 294 | A07347 | A12507 | 191 |
| A07347 | A12606 | 363 | A07347 | A12659 | 152 |
| A07347 | A12725 | 224 | A07347 | A12858 | 368 |
| A07347 | A13055 | 180 | A07347 | A13313 | 177 |
| A07347 | A13781 | 255 | A07347 | A13784 | 191 |
| A07347 | A13858 | 157 | A07347 | A13912 | 165 |
| A07347 | A13989 | 491 | A07347 | A14188 | 481 |
| A07347 | A14214 | 302 | A07347 | A14569 | 236 |
| A07347 | A14718 | 238 | A07347 | A14799 | 229 |
| A07347 | A14817 | 196 | A07347 | A14921 | 180 |
| A07347 | A15187 | 184 | A07347 | A15262 | 232 |
| A07347 | A15525 | 460 | A07347 | A15541 | 491 |
| A07347 | A15666 | 379 | A07347 | A15683 | 152 |
| A07347 | A15709 | 491 | A07347 | A15735 | 491 |
| A07347 | A15739 | 489 | A07347 | A16157 | 425 |
| A07347 | A16187 | 160 | A07347 | A16343 | 170 |
| A07347 | A16552 | 229 | A07347 | A16565 | 398 |
| A07347 | A16587 | 210 | A07347 | A16597 | 355 |
| A07347 | A16611 | 373 | A07347 | A16664 | 350 |
| A07347 | A16699 | 183 | A07347 | A16704 | 288 |
| A07347 | A16707 | 224 | A07347 | A16815 | 165 |
| A07347 | A16838 | 191 | A07347 | A16848 | 224 |
| A07347 | A16905 | 258 | A07347 | A17019 | 180 |
| A07348 | A07487 | 163 | A07348 | A07677 | 243 |
| A07348 | A08211 | 438 | A07348 | A08357 | 377 |
| A07348 | A08461 | 327 | A07348 | A11562 | 382 |
| A07348 | A11772 | 267 | A07348 | A12138 | 689 |
| A07348 | A13875 | 299 | A07348 | A13989 | 486 |
| A07348 | A15326 | 291 | A07349 | A07602 | 363 |
| A07349 | A07706 | 196 | A07349 | A08154 | 353 |
| A07349 | A08301 | 188 | A07349 | A08403 | 458 |
| A07349 | A08419 | 380 | A07349 | A08527 | 229 |
| A07349 | A08554 | 243 | A07349 | A08559 | 159 |
| A07349 | A08761 | 229 | A07349 | A08762 | 277 |
| A07349 | A08886 | 455 | A07349 | A09009 | 418 |
| A07349 | A09530 | 385 | A07349 | A09852 | 195 |
| A07349 | A11452 | 347 | A07349 | A11593 | 283 |
| A07349 | A14257 | 165 | A07349 | A14479 | 278 |
| A07349 | A14566 | 433 | A07349 | A14568 | 447 |
| A07349 | A14594 | 330 | A07349 | A15500 | 380 |
| A07349 | A15771 | 286 | A07350 | A07569 | 400 |
| A07350 | A08572 | 355 | A07350 | A14405 | 367 |
| A07350 | A14440 | 356 | A07351 | A12023 | 447 |
| A07353 | A07466 | 185 | A07353 | A07534 | 277 |
| A07353 | A07670 | 229 | A07353 | A10846 | 321 |

|        |        |     |        |        |     |
|--------|--------|-----|--------|--------|-----|
| A07353 | A11841 | 328 | A07353 | A13907 | 303 |
| A07353 | A14460 | 176 | A07353 | A14694 | 159 |
| A07353 | A15837 | 317 | A07353 | A16606 | 440 |
| A07353 | A16626 | 317 | A07353 | A16643 | 317 |
| A07354 | A09195 | 316 | A07354 | A09449 | 173 |
| A07354 | A09506 | 377 | A07354 | A14585 | 363 |
| A07355 | A14196 | 182 | A07357 | A14633 | 201 |
| A07358 | A17004 | 385 | A07360 | A07394 | 243 |
| A07360 | A07802 | 243 | A07360 | A07822 | 229 |
| A07360 | A07881 | 576 | A07360 | A08011 | 451 |
| A07360 | A08228 | 577 | A07360 | A08548 | 536 |
| A07360 | A08550 | 486 | A07360 | A08674 | 156 |
| A07360 | A08773 | 418 | A07360 | A08774 | 63  |
| A07360 | A08814 | 180 | A07360 | A08972 | 409 |
| A07360 | A09328 | 466 | A07360 | A10498 | 310 |
| A07360 | A10755 | 372 | A07360 | A10935 | 199 |
| A07360 | A11290 | 156 | A07360 | A11496 | 297 |
| A07360 | A11497 | 279 | A07360 | A11616 | 291 |
| A07360 | A11735 | 279 | A07360 | A11737 | 446 |
| A07360 | A11851 | 191 | A07360 | A11918 | 156 |
| A07360 | A11992 | 152 | A07360 | A12195 | 491 |
| A07360 | A12254 | 204 | A07360 | A12606 | 243 |
| A07360 | A12658 | 152 | A07360 | A12824 | 322 |
| A07360 | A13298 | 480 | A07360 | A13516 | 491 |
| A07360 | A13595 | 310 | A07360 | A13809 | 262 |
| A07360 | A13989 | 488 | A07360 | A14214 | 157 |
| A07360 | A14482 | 172 | A07360 | A14489 | 377 |
| A07360 | A14596 | 455 | A07360 | A14751 | 210 |
| A07360 | A14917 | 246 | A07360 | A15068 | 434 |
| A07360 | A15187 | 215 | A07360 | A15624 | 581 |
| A07360 | A15649 | 538 | A07360 | A15651 | 578 |
| A07360 | A15652 | 576 | A07360 | A15660 | 491 |
| A07360 | A15661 | 581 | A07360 | A15662 | 403 |
| A07360 | A15666 | 416 | A07360 | A15684 | 581 |
| A07360 | A15720 | 156 | A07360 | A15721 | 156 |
| A07360 | A15746 | 580 | A07360 | A15843 | 229 |
| A07360 | A15850 | 210 | A07360 | A15917 | 239 |
| A07360 | A15918 | 305 | A07360 | A15923 | 287 |
| A07360 | A15931 | 152 | A07360 | A15932 | 473 |
| A07360 | A15937 | 567 | A07360 | A16088 | 379 |
| A07360 | A16095 | 205 | A07360 | A16145 | 156 |
| A07360 | A16157 | 491 | A07360 | A16187 | 294 |
| A07360 | A16276 | 246 | A07360 | A16307 | 156 |
| A07360 | A16343 | 326 | A07360 | A16565 | 236 |
| A07360 | A16585 | 170 | A07360 | A16611 | 230 |
| A07360 | A16664 | 232 | A07360 | A16695 | 199 |

|        |        |     |        |        |     |
|--------|--------|-----|--------|--------|-----|
| A07360 | A16774 | 170 | A07360 | A16815 | 188 |
| A07360 | A16824 | 180 | A07360 | A16838 | 390 |
| A07360 | A16858 | 226 | A07360 | A16913 | 170 |
| A07360 | A17131 | 156 | A07361 | A07580 | 384 |
| A07361 | A07605 | 254 | A07361 | A08093 | 152 |
| A07361 | A08162 | 369 | A07361 | A08392 | 390 |
| A07361 | A09139 | 384 | A07361 | A11172 | 378 |
| A07361 | A11318 | 317 | A07361 | A11319 | 425 |
| A07361 | A11391 | 475 | A07361 | A11418 | 411 |
| A07361 | A11557 | 450 | A07361 | A12572 | 411 |
| A07361 | A12787 | 322 | A07361 | A12845 | 356 |
| A07361 | A12876 | 399 | A07361 | A12877 | 411 |
| A07361 | A12964 | 399 | A07361 | A14322 | 411 |
| A07361 | A17209 | 399 | A07362 | A07569 | 416 |
| A07362 | A09616 | 352 | A07364 | A14484 | 232 |
| A07366 | A07674 | 254 | A07366 | A07718 | 385 |
| A07366 | A07757 | 216 | A07366 | A07967 | 430 |
| A07366 | A08820 | 449 | A07366 | A10669 | 179 |
| A07366 | A10690 | 281 | A07366 | A10692 | 319 |
| A07366 | A10698 | 344 | A07366 | A10778 | 385 |
| A07366 | A11189 | 360 | A07366 | A12393 | 306 |
| A07366 | A14229 | 317 | A07366 | A14245 | 438 |
| A07366 | A15322 | 413 | A07366 | A15342 | 491 |
| A07366 | A15343 | 473 | A07366 | A15356 | 485 |
| A07366 | A15357 | 347 | A07366 | A15390 | 205 |
| A07366 | A15510 | 333 | A07366 | A16424 | 445 |
| A07367 | A07737 | 279 | A07367 | A09612 | 260 |
| A07367 | A09951 | 379 | A07367 | A10208 | 177 |
| A07367 | A11792 | 296 | A07367 | A14743 | 347 |
| A07367 | A15561 | 190 | A07367 | A16257 | 226 |
| A07367 | A17082 | 395 | A07368 | A08738 | 335 |
| A07369 | A14809 | 236 | A07369 | A15386 | 305 |
| A07370 | A09600 | 201 | A07370 | A13207 | 491 |
| A07370 | A15559 | 341 | A07371 | A07394 | 358 |
| A07371 | A08519 | 418 | A07371 | A15653 | 347 |
| A07371 | A15666 | 321 | A07371 | A15765 | 422 |
| A07371 | A16403 | 395 | A07372 | A07390 | 434 |
| A07372 | A10504 | 303 | A07372 | A13860 | 235 |
| A07372 | A15605 | 319 | A07372 | A15608 | 329 |
| A07373 | A10226 | 358 | A07373 | A12723 | 255 |
| A07373 | A14258 | 157 | A07373 | A14344 | 414 |
| A07373 | A14799 | 157 | A07373 | A15735 | 170 |
| A07373 | A15962 | 260 | A07375 | A08160 | 307 |
| A07375 | A16738 | 379 | A07375 | A16763 | 399 |
| A07376 | A07674 | 229 | A07376 | A07718 | 268 |
| A07376 | A07736 | 241 | A07376 | A07933 | 188 |

|        |        |     |        |        |     |
|--------|--------|-----|--------|--------|-----|
| A07376 | A09643 | 270 | A07376 | A09829 | 319 |
| A07376 | A10781 | 427 | A07376 | A13781 | 157 |
| A07378 | A07773 | 229 | A07378 | A09591 | 334 |
| A07378 | A09600 | 333 | A07378 | A09606 | 226 |
| A07378 | A09865 | 307 | A07378 | A10420 | 159 |
| A07378 | A10517 | 393 | A07378 | A11562 | 258 |
| A07378 | A11855 | 205 | A07378 | A13207 | 151 |
| A07378 | A13228 | 268 | A07378 | A13614 | 274 |
| A07378 | A13989 | 427 | A07378 | A13992 | 152 |
| A07378 | A14169 | 243 | A07378 | A14178 | 631 |
| A07378 | A14351 | 160 | A07378 | A14566 | 424 |
| A07378 | A14594 | 470 | A07378 | A14816 | 224 |
| A07378 | A16088 | 199 | A07378 | A16333 | 339 |
| A07378 | A16686 | 270 | A07378 | A17088 | 612 |
| A07379 | A16139 | 479 | A07380 | A07697 | 235 |
| A07380 | A07893 | 176 | A07380 | A08821 | 273 |
| A07380 | A11983 | 241 | A07380 | A12722 | 251 |
| A07380 | A14443 | 358 | A07380 | A15506 | 308 |
| A07381 | A07711 | 230 | A07381 | A07737 | 409 |
| A07381 | A08114 | 258 | A07381 | A08252 | 333 |
| A07381 | A08366 | 179 | A07381 | A08372 | 337 |
| A07381 | A08385 | 475 | A07381 | A10442 | 271 |
| A07381 | A10652 | 443 | A07381 | A10670 | 322 |
| A07381 | A10684 | 440 | A07381 | A10690 | 235 |
| A07381 | A10691 | 171 | A07381 | A10692 | 441 |
| A07381 | A10697 | 184 | A07381 | A10706 | 177 |
| A07381 | A10780 | 380 | A07381 | A10783 | 251 |
| A07381 | A10876 | 337 | A07381 | A12286 | 227 |
| A07381 | A13313 | 171 | A07381 | A13341 | 258 |
| A07381 | A13988 | 182 | A07381 | A15391 | 170 |
| A07381 | A15425 | 180 | A07381 | A15874 | 204 |
| A07381 | A16739 | 179 | A07381 | A17207 | 154 |
| A07382 | A14683 | 396 | A07383 | A13369 | 283 |
| A07384 | A08309 | 272 | A07384 | A08426 | 374 |
| A07384 | A08685 | 218 | A07384 | A13369 | 288 |
| A07384 | A13866 | 245 | A07384 | A14377 | 215 |
| A07384 | A14548 | 449 | A07384 | A14586 | 340 |
| A07384 | A15258 | 310 | A07384 | A15277 | 255 |
| A07384 | A15416 | 193 | A07386 | A10257 | 447 |
| A07388 | A07526 | 445 | A07390 | A07683 | 480 |
| A07390 | A08124 | 395 | A07390 | A08725 | 395 |
| A07390 | A10501 | 363 | A07390 | A10813 | 302 |
| A07390 | A14190 | 154 | A07390 | A14346 | 402 |
| A07390 | A14442 | 308 | A07390 | A14554 | 247 |
| A07390 | A15267 | 425 | A07390 | A15395 | 241 |
| A07390 | A15605 | 391 | A07390 | A15608 | 288 |

|        |        |     |        |        |     |
|--------|--------|-----|--------|--------|-----|
| A07390 | A15726 | 435 | A07391 | A07578 | 412 |
| A07391 | A07605 | 468 | A07391 | A07913 | 286 |
| A07391 | A11313 | 293 | A07393 | A14860 | 420 |
| A07394 | A08222 | 200 | A07394 | A08365 | 152 |
| A07394 | A08519 | 486 | A07394 | A08543 | 208 |
| A07394 | A08550 | 162 | A07394 | A08556 | 165 |
| A07394 | A09581 | 218 | A07394 | A09709 | 307 |
| A07394 | A10748 | 154 | A07394 | A11526 | 491 |
| A07394 | A11728 | 198 | A07394 | A11833 | 469 |
| A07394 | A12042 | 184 | A07394 | A12126 | 176 |
| A07394 | A12140 | 352 | A07394 | A12170 | 171 |
| A07394 | A12238 | 190 | A07394 | A12326 | 450 |
| A07394 | A12408 | 190 | A07394 | A13116 | 367 |
| A07394 | A13398 | 212 | A07394 | A13524 | 281 |
| A07394 | A13809 | 485 | A07394 | A14089 | 312 |
| A07394 | A14167 | 184 | A07394 | A14178 | 219 |
| A07394 | A14566 | 207 | A07394 | A14845 | 400 |
| A07394 | A15653 | 491 | A07394 | A15661 | 313 |
| A07394 | A15666 | 491 | A07394 | A15760 | 200 |
| A07394 | A15765 | 489 | A07394 | A16060 | 215 |
| A07394 | A16157 | 491 | A07394 | A16243 | 385 |
| A07394 | A16403 | 362 | A07394 | A16430 | 157 |
| A07394 | A16676 | 473 | A07394 | A17133 | 157 |
| A07395 | A08832 | 399 | A07396 | A07704 | 465 |
| A07396 | A07705 | 463 | A07396 | A08291 | 477 |
| A07396 | A08292 | 384 | A07397 | A12329 | 162 |
| A07397 | A15624 | 235 | A07397 | A15660 | 202 |
| A07397 | A15684 | 210 | A07398 | A08011 | 247 |
| A07398 | A08053 | 146 | A07398 | A08054 | 74  |
| A07398 | A08131 | 488 | A07398 | A08369 | 560 |
| A07398 | A08408 | 241 | A07398 | A08476 | 278 |
| A07398 | A08521 | 177 | A07398 | A09308 | 241 |
| A07398 | A09322 | 369 | A07398 | A09332 | 212 |
| A07398 | A09620 | 241 | A07398 | A10599 | 93  |
| A07398 | A10616 | 395 | A07398 | A10645 | 243 |
| A07398 | A10748 | 259 | A07398 | A11392 | 432 |
| A07398 | A11438 | 160 | A07398 | A11728 | 577 |
| A07398 | A11853 | 180 | A07398 | A11861 | 162 |
| A07398 | A12042 | 160 | A07398 | A12227 | 241 |
| A07398 | A12726 | 172 | A07398 | A12850 | 191 |
| A07398 | A13108 | 372 | A07398 | A13126 | 74  |
| A07398 | A13711 | 322 | A07398 | A13989 | 490 |
| A07398 | A13992 | 491 | A07398 | A14025 | 74  |
| A07398 | A14090 | 241 | A07398 | A14172 | 489 |
| A07398 | A14216 | 180 | A07398 | A15229 | 391 |
| A07398 | A15268 | 587 | A07398 | A15381 | 588 |

|        |        |     |        |        |     |
|--------|--------|-----|--------|--------|-----|
| A07398 | A15500 | 291 | A07398 | A15660 | 235 |
| A07398 | A16053 | 274 | A07398 | A16107 | 486 |
| A07398 | A16118 | 224 | A07398 | A16306 | 162 |
| A07398 | A16686 | 457 | A07398 | A16778 | 443 |
| A07398 | A16839 | 200 | A07399 | A08669 | 162 |
| A07399 | A09297 | 171 | A07399 | A10373 | 171 |
| A07399 | A10645 | 229 | A07399 | A11331 | 195 |
| A07399 | A12304 | 394 | A07399 | A12383 | 168 |
| A07399 | A12711 | 327 | A07399 | A12969 | 215 |
| A07399 | A12988 | 196 | A07399 | A13982 | 205 |
| A07399 | A14230 | 279 | A07399 | A16467 | 176 |
| A07400 | A10223 | 445 | A07402 | A17166 | 399 |
| A07403 | A08882 | 345 | A07403 | A12824 | 299 |
| A07404 | A07495 | 485 | A07404 | A07893 | 406 |
| A07404 | A07944 | 313 | A07404 | A07954 | 296 |
| A07404 | A08056 | 371 | A07404 | A09311 | 252 |
| A07404 | A11150 | 276 | A07404 | A12047 | 441 |
| A07404 | A13894 | 441 | A07404 | A13895 | 347 |
| A07404 | A14281 | 171 | A07404 | A14661 | 388 |
| A07404 | A16048 | 172 | A07407 | A07468 | 205 |
| A07407 | A07541 | 380 | A07407 | A07542 | 378 |
| A07407 | A07561 | 236 | A07407 | A07610 | 269 |
| A07407 | A07736 | 334 | A07407 | A07958 | 433 |
| A07407 | A08079 | 333 | A07407 | A09036 | 324 |
| A07407 | A09277 | 213 | A07407 | A10967 | 389 |
| A07407 | A11479 | 367 | A07407 | A12784 | 483 |
| A07407 | A12793 | 240 | A07407 | A13832 | 235 |
| A07407 | A13871 | 254 | A07407 | A15685 | 215 |
| A07407 | A15874 | 332 | A07407 | A15917 | 168 |
| A07407 | A16741 | 277 | A07407 | A17078 | 414 |
| A07407 | A17108 | 281 | A07408 | A07501 | 419 |
| A07408 | A07507 | 386 | A07408 | A07619 | 391 |
| A07408 | A07674 | 433 | A07408 | A07723 | 360 |
| A07408 | A07847 | 323 | A07408 | A11189 | 340 |
| A07408 | A16741 | 217 | A07409 | A07674 | 99  |
| A07409 | A09636 | 201 | A07409 | A09766 | 165 |
| A07409 | A09879 | 160 | A07409 | A10424 | 176 |
| A07410 | A07800 | 307 | A07412 | A07442 | 162 |
| A07412 | A08052 | 600 | A07412 | A08055 | 265 |
| A07412 | A08273 | 601 | A07412 | A08315 | 269 |
| A07412 | A09332 | 198 | A07412 | A09620 | 269 |
| A07412 | A09697 | 269 | A07412 | A09901 | 274 |
| A07412 | A10878 | 369 | A07412 | A12159 | 385 |
| A07412 | A13107 | 326 | A07412 | A13581 | 269 |
| A07412 | A13989 | 205 | A07412 | A15257 | 208 |
| A07412 | A15837 | 269 | A07412 | A15932 | 236 |

|        |        |     |        |        |     |
|--------|--------|-----|--------|--------|-----|
| A07412 | A16027 | 269 | A07413 | A07477 | 390 |
| A07413 | A07558 | 160 | A07413 | A07590 | 301 |
| A07413 | A07627 | 419 | A07413 | A07688 | 472 |
| A07413 | A07737 | 252 | A07413 | A07753 | 252 |
| A07413 | A07796 | 388 | A07413 | A07800 | 477 |
| A07413 | A07848 | 252 | A07413 | A08197 | 256 |
| A07413 | A08238 | 262 | A07413 | A08751 | 396 |
| A07413 | A09612 | 422 | A07413 | A09632 | 430 |
| A07413 | A09749 | 184 | A07413 | A09833 | 196 |
| A07413 | A10441 | 267 | A07413 | A10444 | 351 |
| A07413 | A10452 | 200 | A07413 | A10656 | 338 |
| A07413 | A10659 | 302 | A07413 | A10676 | 299 |
| A07413 | A10693 | 221 | A07413 | A10702 | 450 |
| A07413 | A10703 | 230 | A07413 | A10712 | 176 |
| A07413 | A10763 | 383 | A07413 | A11309 | 363 |
| A07413 | A12055 | 313 | A07413 | A13607 | 323 |
| A07413 | A13735 | 241 | A07413 | A14384 | 269 |
| A07413 | A14394 | 245 | A07413 | A14654 | 210 |
| A07413 | A15223 | 210 | A07413 | A15497 | 364 |
| A07413 | A15637 | 463 | A07413 | A15905 | 167 |
| A07413 | A16002 | 429 | A07413 | A16026 | 221 |
| A07413 | A16033 | 363 | A07413 | A16103 | 256 |
| A07413 | A16529 | 486 | A07413 | A16741 | 196 |
| A07414 | A07695 | 470 | A07414 | A07700 | 152 |
| A07414 | A07730 | 323 | A07414 | A08144 | 491 |
| A07414 | A08164 | 347 | A07414 | A08269 | 246 |
| A07414 | A08477 | 205 | A07414 | A08491 | 274 |
| A07414 | A08820 | 152 | A07414 | A08892 | 301 |
| A07414 | A08971 | 221 | A07414 | A09621 | 201 |
| A07414 | A11401 | 491 | A07414 | A13484 | 154 |
| A07414 | A13870 | 270 | A07414 | A14614 | 251 |
| A07414 | A14655 | 450 | A07416 | A07766 | 452 |
| A07416 | A10612 | 452 | A07416 | A10689 | 201 |
| A07416 | A11696 | 319 | A07416 | A14097 | 491 |
| A07416 | A14128 | 358 | A07416 | A14654 | 299 |
| A07416 | A15390 | 466 | A07416 | A15430 | 425 |
| A07416 | A15925 | 491 | A07416 | A15934 | 491 |
| A07418 | A14266 | 63  | A07419 | A10421 | 238 |
| A07419 | A15974 | 251 | A07421 | A07495 | 179 |
| A07421 | A07785 | 179 | A07421 | A07816 | 179 |
| A07421 | A08259 | 179 | A07421 | A08551 | 179 |
| A07421 | A08834 | 208 | A07421 | A08840 | 179 |
| A07421 | A09825 | 179 | A07421 | A10514 | 168 |
| A07421 | A10579 | 378 | A07421 | A10721 | 160 |
| A07421 | A11542 | 188 | A07421 | A11558 | 179 |
| A07421 | A11650 | 414 | A07421 | A11765 | 258 |

|        |        |     |        |        |     |
|--------|--------|-----|--------|--------|-----|
| A07421 | A11779 | 491 | A07421 | A13338 | 193 |
| A07421 | A13819 | 179 | A07421 | A13866 | 179 |
| A07421 | A13870 | 196 | A07421 | A13942 | 179 |
| A07421 | A13986 | 249 | A07421 | A14007 | 491 |
| A07421 | A14019 | 204 | A07421 | A14072 | 485 |
| A07421 | A14124 | 212 | A07421 | A14129 | 272 |
| A07421 | A14197 | 95  | A07421 | A14202 | 179 |
| A07421 | A14366 | 179 | A07421 | A14408 | 152 |
| A07421 | A14452 | 313 | A07421 | A14470 | 302 |
| A07421 | A15278 | 324 | A07421 | A15358 | 179 |
| A07421 | A15399 | 171 | A07421 | A15420 | 477 |
| A07421 | A15470 | 179 | A07421 | A15484 | 179 |
| A07421 | A15726 | 460 | A07421 | A17076 | 184 |
| A07422 | A08133 | 199 | A07422 | A08283 | 168 |
| A07422 | A08571 | 952 | A07422 | A08858 | 212 |
| A07422 | A08878 | 919 | A07422 | A08899 | 899 |
| A07422 | A09111 | 173 | A07422 | A09122 | 232 |
| A07422 | A09182 | 477 | A07422 | A09423 | 291 |
| A07422 | A09592 | 221 | A07422 | A09609 | 157 |
| A07422 | A09747 | 173 | A07422 | A09767 | 221 |
| A07422 | A09801 | 160 | A07422 | A09992 | 177 |
| A07422 | A10365 | 177 | A07422 | A10392 | 899 |
| A07422 | A10519 | 899 | A07422 | A10532 | 899 |
| A07422 | A10580 | 934 | A07422 | A10623 | 944 |
| A07422 | A11125 | 899 | A07422 | A11258 | 409 |
| A07422 | A11379 | 411 | A07422 | A11381 | 199 |
| A07422 | A11402 | 899 | A07422 | A11472 | 165 |
| A07422 | A11496 | 191 | A07422 | A11544 | 185 |
| A07422 | A11604 | 173 | A07422 | A11621 | 300 |
| A07422 | A11675 | 63  | A07422 | A11834 | 907 |
| A07422 | A11954 | 118 | A07422 | A11983 | 940 |
| A07422 | A12086 | 302 | A07422 | A12506 | 266 |
| A07422 | A12508 | 238 | A07422 | A12826 | 267 |
| A07422 | A12850 | 160 | A07422 | A13242 | 195 |
| A07422 | A13250 | 899 | A07422 | A13274 | 232 |
| A07422 | A13278 | 173 | A07422 | A13707 | 246 |
| A07422 | A13788 | 230 | A07422 | A13977 | 945 |
| A07422 | A13978 | 944 | A07422 | A13981 | 899 |
| A07422 | A13985 | 899 | A07422 | A13987 | 899 |
| A07422 | A13989 | 899 | A07422 | A14009 | 899 |
| A07422 | A14017 | 899 | A07422 | A14018 | 188 |
| A07422 | A14026 | 223 | A07422 | A14032 | 899 |
| A07422 | A14037 | 184 | A07422 | A14041 | 210 |
| A07422 | A14049 | 246 | A07422 | A14055 | 899 |
| A07422 | A14163 | 263 | A07422 | A14187 | 902 |
| A07422 | A14191 | 216 | A07422 | A14208 | 899 |



|        |        |     |        |        |     |
|--------|--------|-----|--------|--------|-----|
| A07422 | A14209 | 899 | A07422 | A14210 | 920 |
| A07422 | A14267 | 255 | A07422 | A14358 | 201 |
| A07422 | A14380 | 317 | A07422 | A14408 | 207 |
| A07422 | A14413 | 899 | A07422 | A14443 | 166 |
| A07422 | A14484 | 944 | A07422 | A14506 | 899 |
| A07422 | A14511 | 945 | A07422 | A14539 | 286 |
| A07422 | A14595 | 168 | A07422 | A14633 | 296 |
| A07422 | A14648 | 348 | A07422 | A14654 | 899 |
| A07422 | A14713 | 173 | A07422 | A14719 | 91  |
| A07422 | A14752 | 246 | A07422 | A15229 | 277 |
| A07422 | A15268 | 929 | A07422 | A15293 | 899 |
| A07422 | A15294 | 899 | A07422 | A15299 | 899 |
| A07422 | A15300 | 899 | A07422 | A15301 | 899 |
| A07422 | A15302 | 162 | A07422 | A15312 | 899 |
| A07422 | A15320 | 899 | A07422 | A15321 | 899 |
| A07422 | A15340 | 899 | A07422 | A15350 | 899 |
| A07422 | A15366 | 899 | A07422 | A15381 | 162 |
| A07422 | A15419 | 159 | A07422 | A15486 | 899 |
| A07422 | A15506 | 899 | A07422 | A15634 | 899 |
| A07422 | A15680 | 165 | A07422 | A15691 | 899 |
| A07422 | A15692 | 267 | A07422 | A15726 | 954 |
| A07422 | A15841 | 201 | A07422 | A16107 | 899 |
| A07422 | A16148 | 899 | A07422 | A16587 | 219 |
| A07422 | A16593 | 246 | A07422 | A16664 | 208 |
| A07422 | A16682 | 241 | A07422 | A16695 | 183 |
| A07422 | A16707 | 232 | A07422 | A16824 | 165 |
| A07422 | A16847 | 218 | A07422 | A16913 | 154 |
| A07422 | A16916 | 899 | A07422 | A16988 | 899 |
| A07422 | A17060 | 899 | A07422 | A17160 | 899 |
| A07422 | A17215 | 899 | A07422 | A17216 | 899 |
| A07422 | A17217 | 899 | A07423 | A07622 | 441 |
| A07423 | A07841 | 447 | A07424 | A07558 | 286 |
| A07424 | A07933 | 216 | A07424 | A08127 | 382 |
| A07424 | A08252 | 180 | A07424 | A10659 | 382 |
| A07424 | A11718 | 425 | A07424 | A14891 | 425 |
| A07424 | A15874 | 263 | A07424 | A16739 | 335 |
| A07424 | A16741 | 343 | A07424 | A16744 | 340 |
| A07425 | A07433 | 191 | A07425 | A07593 | 294 |
| A07425 | A08184 | 230 | A07425 | A08549 | 167 |
| A07425 | A08571 | 129 | A07425 | A08853 | 386 |
| A07425 | A09256 | 416 | A07425 | A11027 | 276 |
| A07425 | A11656 | 283 | A07425 | A12553 | 347 |
| A07425 | A14227 | 193 | A07425 | A14474 | 368 |
| A07426 | A10148 | 318 | A07426 | A10265 | 400 |
| A07427 | A09741 | 446 | A07427 | A11224 | 443 |
| A07427 | A11277 | 152 | A07427 | A14041 | 394 |

|        |        |     |        |        |     |
|--------|--------|-----|--------|--------|-----|
| A07427 | A14109 | 274 | A07427 | A14525 | 258 |
| A07428 | A09421 | 409 | A07428 | A13851 | 425 |
| A07429 | A08402 | 270 | A07431 | A09186 | 452 |
| A07432 | A07524 | 174 | A07432 | A07537 | 321 |
| A07432 | A07625 | 174 | A07432 | A07924 | 174 |
| A07432 | A11544 | 174 | A07432 | A11831 | 174 |
| A07432 | A11832 | 174 | A07432 | A15724 | 185 |
| A07433 | A07593 | 491 | A07433 | A07598 | 328 |
| A07433 | A07603 | 152 | A07433 | A07902 | 201 |
| A07433 | A07996 | 235 | A07433 | A08013 | 193 |
| A07433 | A08030 | 188 | A07433 | A08097 | 343 |
| A07433 | A08117 | 391 | A07433 | A08185 | 457 |
| A07433 | A08196 | 643 | A07433 | A08255 | 393 |
| A07433 | A08355 | 427 | A07433 | A08503 | 643 |
| A07433 | A08525 | 527 | A07433 | A08540 | 435 |
| A07433 | A08549 | 643 | A07433 | A08560 | 617 |
| A07433 | A08561 | 491 | A07433 | A08566 | 543 |
| A07433 | A08567 | 557 | A07433 | A08571 | 470 |
| A07433 | A08812 | 643 | A07433 | A08813 | 557 |
| A07433 | A08814 | 177 | A07433 | A08819 | 460 |
| A07433 | A08839 | 639 | A07433 | A08840 | 184 |
| A07433 | A08843 | 379 | A07433 | A08844 | 641 |
| A07433 | A08845 | 544 | A07433 | A08853 | 187 |
| A07433 | A08855 | 481 | A07433 | A08858 | 277 |
| A07433 | A08885 | 716 | A07433 | A08894 | 63  |
| A07433 | A09049 | 185 | A07433 | A09052 | 63  |
| A07433 | A09100 | 483 | A07433 | A09256 | 263 |
| A07433 | A09727 | 184 | A07433 | A09728 | 419 |
| A07433 | A09828 | 63  | A07433 | A10250 | 282 |
| A07433 | A10373 | 165 | A07433 | A10789 | 556 |
| A07433 | A10998 | 290 | A07433 | A11668 | 470 |
| A07433 | A11954 | 488 | A07433 | A12507 | 552 |
| A07433 | A12871 | 174 | A07433 | A13159 | 187 |
| A07433 | A13399 | 474 | A07433 | A13737 | 527 |
| A07433 | A13861 | 168 | A07433 | A13949 | 469 |
| A07433 | A13963 | 557 | A07433 | A14056 | 398 |
| A07433 | A14084 | 643 | A07433 | A14167 | 174 |
| A07433 | A14226 | 312 | A07433 | A14227 | 348 |
| A07433 | A14261 | 185 | A07433 | A14270 | 184 |
| A07433 | A14272 | 251 | A07433 | A14285 | 643 |
| A07433 | A14708 | 462 | A07433 | A15144 | 185 |
| A07433 | A15498 | 489 | A07433 | A15508 | 290 |
| A07433 | A15533 | 235 | A07433 | A15949 | 557 |
| A07433 | A16099 | 184 | A07433 | A16135 | 486 |
| A07433 | A16226 | 491 | A07433 | A16616 | 396 |
| A07433 | A17145 | 168 | A07434 | A07729 | 223 |

|        |        |     |        |        |     |
|--------|--------|-----|--------|--------|-----|
| A07434 | A09314 | 338 | A07434 | A10372 | 162 |
| A07434 | A14614 | 321 | A07435 | A09682 | 411 |
| A07436 | A08438 | 165 | A07436 | A08739 | 190 |
| A07436 | A10131 | 177 | A07436 | A13172 | 302 |
| A07436 | A13340 | 379 | A07436 | A13394 | 302 |
| A07436 | A13625 | 353 | A07436 | A13718 | 353 |
| A07437 | A13568 | 402 | A07437 | A15650 | 317 |
| A07438 | A07509 | 457 | A07438 | A07510 | 368 |
| A07438 | A07561 | 385 | A07438 | A07650 | 438 |
| A07438 | A07654 | 329 | A07438 | A07673 | 399 |
| A07438 | A07754 | 374 | A07438 | A07913 | 255 |
| A07438 | A15422 | 210 | A07439 | A07575 | 268 |
| A07439 | A07756 | 163 | A07439 | A11795 | 302 |
| A07439 | A12824 | 316 | A07439 | A15377 | 326 |
| A07439 | A15543 | 288 | A07440 | A10055 | 374 |
| A07440 | A10527 | 281 | A07441 | A08206 | 430 |
| A07441 | A08392 | 438 | A07441 | A08393 | 447 |
| A07441 | A08425 | 447 | A07442 | A07471 | 246 |
| A07442 | A07605 | 399 | A07442 | A08172 | 216 |
| A07442 | A08635 | 188 | A07442 | A08949 | 347 |
| A07442 | A09416 | 185 | A07442 | A09734 | 288 |
| A07442 | A09879 | 216 | A07442 | A10441 | 204 |
| A07442 | A10731 | 243 | A07442 | A10866 | 218 |
| A07442 | A11453 | 184 | A07442 | A11513 | 430 |
| A07442 | A11573 | 224 | A07442 | A13314 | 213 |
| A07442 | A13326 | 229 | A07442 | A13369 | 274 |
| A07442 | A13987 | 278 | A07442 | A14122 | 246 |
| A07442 | A14272 | 285 | A07442 | A14381 | 306 |
| A07442 | A14611 | 281 | A07442 | A14648 | 167 |
| A07442 | A14701 | 171 | A07442 | A15316 | 168 |
| A07442 | A15318 | 159 | A07442 | A15329 | 174 |
| A07442 | A15419 | 77  | A07442 | A15422 | 491 |
| A07442 | A15433 | 274 | A07442 | A15434 | 198 |
| A07442 | A15498 | 485 | A07442 | A15505 | 425 |
| A07442 | A15917 | 491 | A07442 | A15932 | 294 |
| A07442 | A16718 | 195 | A07442 | A17078 | 441 |
| A07442 | A17155 | 200 | A07443 | A10574 | 411 |
| A07444 | A07872 | 891 | A07444 | A07873 | 881 |
| A07444 | A08351 | 252 | A07444 | A09169 | 374 |
| A07444 | A09793 | 341 | A07444 | A11283 | 419 |
| A07444 | A12234 | 201 | A07444 | A12538 | 156 |
| A07444 | A12678 | 299 | A07444 | A12834 | 185 |
| A07444 | A12938 | 422 | A07444 | A14281 | 157 |
| A07444 | A15626 | 243 | A07445 | A07530 | 398 |
| A07445 | A16033 | 391 | A07446 | A12891 | 483 |
| A07446 | A15282 | 293 | A07446 | A15498 | 182 |

|        |        |     |        |        |     |
|--------|--------|-----|--------|--------|-----|
| A07447 | A14208 | 190 | A07448 | A16033 | 63  |
| A07448 | A16361 | 63  | A07449 | A09674 | 324 |
| A07449 | A11438 | 241 | A07449 | A13249 | 293 |
| A07449 | A13989 | 385 | A07449 | A13992 | 457 |
| A07449 | A14482 | 427 | A07449 | A14597 | 170 |
| A07449 | A15988 | 396 | A07449 | A16118 | 218 |
| A07449 | A16306 | 329 | A07450 | A08405 | 452 |
| A07451 | A07533 | 187 | A07451 | A07581 | 180 |
| A07451 | A07798 | 157 | A07451 | A08011 | 488 |
| A07451 | A08055 | 218 | A07451 | A08357 | 414 |
| A07451 | A08359 | 414 | A07451 | A08398 | 445 |
| A07451 | A08452 | 481 | A07451 | A08521 | 185 |
| A07451 | A08717 | 205 | A07451 | A08773 | 319 |
| A07451 | A09044 | 286 | A07451 | A09190 | 279 |
| A07451 | A09313 | 402 | A07451 | A09322 | 414 |
| A07451 | A09674 | 159 | A07451 | A10417 | 193 |
| A07451 | A10616 | 290 | A07451 | A11390 | 200 |
| A07451 | A11438 | 168 | A07451 | A11535 | 177 |
| A07451 | A11733 | 165 | A07451 | A11945 | 307 |
| A07451 | A12126 | 159 | A07451 | A12918 | 215 |
| A07451 | A13340 | 168 | A07451 | A13525 | 386 |
| A07451 | A13597 | 334 | A07451 | A13989 | 491 |
| A07451 | A13992 | 474 | A07451 | A14150 | 190 |
| A07451 | A14505 | 399 | A07451 | A14530 | 291 |
| A07451 | A14596 | 278 | A07451 | A14996 | 174 |
| A07451 | A15014 | 279 | A07451 | A15660 | 449 |
| A07451 | A15684 | 485 | A07451 | A15776 | 157 |
| A07451 | A15988 | 417 | A07451 | A16118 | 318 |
| A07451 | A16306 | 168 | A07451 | A16631 | 213 |
| A07452 | A07468 | 154 | A07452 | A07471 | 490 |
| A07452 | A07472 | 491 | A07452 | A07475 | 486 |
| A07452 | A07491 | 337 | A07452 | A07541 | 491 |
| A07452 | A07542 | 491 | A07452 | A07543 | 490 |
| A07452 | A07544 | 456 | A07452 | A07561 | 490 |
| A07452 | A07563 | 345 | A07452 | A07567 | 208 |
| A07452 | A07610 | 491 | A07452 | A07629 | 388 |
| A07452 | A07630 | 481 | A07452 | A07634 | 457 |
| A07452 | A07635 | 491 | A07452 | A07636 | 294 |
| A07452 | A07652 | 268 | A07452 | A07653 | 386 |
| A07452 | A07662 | 345 | A07452 | A07673 | 480 |
| A07452 | A07754 | 468 | A07452 | A07913 | 491 |
| A07452 | A07914 | 383 | A07452 | A07928 | 385 |
| A07452 | A07958 | 249 | A07452 | A07988 | 313 |
| A07452 | A08210 | 396 | A07452 | A08218 | 263 |
| A07452 | A08404 | 427 | A07452 | A08785 | 491 |
| A07452 | A08881 | 170 | A07452 | A09152 | 268 |

|        |        |     |        |        |     |
|--------|--------|-----|--------|--------|-----|
| A07452 | A09174 | 179 | A07452 | A10967 | 347 |
| A07452 | A11279 | 157 | A07452 | A11313 | 176 |
| A07452 | A11448 | 372 | A07452 | A11552 | 267 |
| A07452 | A12793 | 323 | A07452 | A13327 | 324 |
| A07452 | A13871 | 335 | A07452 | A13879 | 187 |
| A07452 | A17078 | 306 | A07452 | A17108 | 236 |
| A07453 | A07699 | 477 | A07453 | A07704 | 353 |
| A07453 | A07705 | 347 | A07453 | A08125 | 430 |
| A07453 | A08292 | 374 | A07453 | A09149 | 338 |
| A07453 | A09460 | 418 | A07453 | A09518 | 418 |
| A07453 | A09882 | 317 | A07453 | A12386 | 438 |
| A07453 | A15234 | 438 | A07454 | A12897 | 218 |
| A07456 | A07588 | 411 | A07457 | A07756 | 154 |
| A07457 | A09242 | 173 | A07457 | A09332 | 154 |
| A07457 | A12824 | 488 | A07457 | A14170 | 279 |
| A07458 | A08974 | 402 | A07459 | A07800 | 213 |
| A07459 | A10456 | 224 | A07459 | A10681 | 379 |
| A07459 | A15282 | 246 | A07459 | A15874 | 303 |
| A07460 | A10482 | 435 | A07460 | A11983 | 160 |
| A07461 | A08739 | 435 | A07461 | A09764 | 168 |
| A07461 | A10131 | 470 | A07461 | A10630 | 302 |
| A07461 | A10983 | 278 | A07461 | A13740 | 299 |
| A07461 | A13882 | 190 | A07461 | A15524 | 363 |
| A07461 | A15539 | 310 | A07461 | A17207 | 475 |
| A07464 | A09332 | 266 | A07466 | A07480 | 491 |
| A07466 | A07534 | 480 | A07466 | A07603 | 491 |
| A07466 | A07902 | 205 | A07466 | A07996 | 480 |
| A07466 | A08030 | 339 | A07466 | A08117 | 419 |
| A07466 | A08212 | 247 | A07466 | A08669 | 566 |
| A07466 | A08820 | 338 | A07466 | A08888 | 455 |
| A07466 | A09288 | 406 | A07466 | A09751 | 110 |
| A07466 | A09752 | 479 | A07466 | A09753 | 474 |
| A07466 | A09754 | 452 | A07466 | A09755 | 240 |
| A07466 | A09764 | 63  | A07466 | A10373 | 200 |
| A07466 | A11841 | 180 | A07466 | A12365 | 200 |
| A07466 | A13257 | 470 | A07466 | A13550 | 383 |
| A07466 | A13889 | 200 | A07466 | A13949 | 279 |
| A07466 | A14009 | 200 | A07466 | A14079 | 412 |
| A07466 | A14091 | 200 | A07466 | A14094 | 200 |
| A07466 | A14177 | 365 | A07466 | A14192 | 200 |
| A07466 | A14223 | 225 | A07466 | A14273 | 317 |
| A07466 | A14460 | 490 | A07466 | A14694 | 220 |
| A07466 | A15939 | 413 | A07466 | A16127 | 355 |
| A07466 | A16226 | 326 | A07466 | A16274 | 200 |
| A07466 | A16606 | 491 | A07466 | A16613 | 347 |
| A07466 | A16754 | 263 | A07467 | A13870 | 313 |

|        |        |     |        |        |     |
|--------|--------|-----|--------|--------|-----|
| A07467 | A14481 | 262 | A07468 | A07469 | 490 |
| A07468 | A07541 | 481 | A07468 | A07542 | 308 |
| A07468 | A07543 | 314 | A07468 | A07561 | 423 |
| A07468 | A07610 | 439 | A07468 | A07617 | 374 |
| A07468 | A07741 | 307 | A07468 | A07958 | 461 |
| A07468 | A08785 | 202 | A07468 | A08878 | 174 |
| A07468 | A09122 | 329 | A07468 | A10967 | 491 |
| A07468 | A11630 | 353 | A07468 | A12793 | 491 |
| A07468 | A17108 | 491 | A07469 | A07541 | 180 |
| A07469 | A07958 | 193 | A07469 | A08063 | 470 |
| A07469 | A09083 | 379 | A07469 | A10967 | 441 |
| A07469 | A12363 | 352 | A07469 | A12793 | 433 |
| A07469 | A17108 | 446 | A07470 | A07541 | 371 |
| A07470 | A07629 | 467 | A07470 | A07634 | 307 |
| A07470 | A07635 | 347 | A07470 | A08210 | 377 |
| A07470 | A08785 | 379 | A07470 | A10649 | 423 |
| A07471 | A07472 | 491 | A07471 | A07475 | 491 |
| A07471 | A07491 | 484 | A07471 | A07509 | 208 |
| A07471 | A07515 | 378 | A07471 | A07538 | 251 |
| A07471 | A07541 | 491 | A07471 | A07542 | 277 |
| A07471 | A07543 | 283 | A07471 | A07545 | 154 |
| A07471 | A07561 | 491 | A07471 | A07562 | 414 |
| A07471 | A07608 | 367 | A07471 | A07610 | 378 |
| A07471 | A07629 | 413 | A07471 | A07632 | 232 |
| A07471 | A07633 | 273 | A07471 | A07634 | 399 |
| A07471 | A07635 | 488 | A07471 | A07636 | 361 |
| A07471 | A07637 | 307 | A07471 | A07638 | 357 |
| A07471 | A07652 | 338 | A07471 | A07653 | 446 |
| A07471 | A07662 | 299 | A07471 | A07673 | 447 |
| A07471 | A07740 | 215 | A07471 | A07754 | 491 |
| A07471 | A07913 | 477 | A07471 | A07914 | 445 |
| A07471 | A07916 | 347 | A07471 | A07928 | 210 |
| A07471 | A07958 | 430 | A07471 | A07988 | 378 |
| A07471 | A08210 | 484 | A07471 | A08218 | 201 |
| A07471 | A08246 | 291 | A07471 | A08395 | 335 |
| A07471 | A08404 | 465 | A07471 | A08783 | 299 |
| A07471 | A08785 | 491 | A07471 | A08786 | 446 |
| A07471 | A09152 | 205 | A07471 | A09374 | 221 |
| A07471 | A09416 | 205 | A07471 | A09788 | 273 |
| A07471 | A10056 | 235 | A07471 | A10634 | 457 |
| A07471 | A11311 | 367 | A07471 | A11329 | 424 |
| A07471 | A11343 | 268 | A07471 | A11414 | 398 |
| A07471 | A11428 | 432 | A07471 | A11433 | 429 |
| A07471 | A11442 | 335 | A07471 | A11448 | 335 |
| A07471 | A11513 | 243 | A07471 | A11552 | 205 |
| A07471 | A11664 | 357 | A07471 | A13879 | 480 |

|        |        |     |        |        |     |
|--------|--------|-----|--------|--------|-----|
| A07471 | A14062 | 272 | A07471 | A14063 | 394 |
| A07471 | A14204 | 477 | A07471 | A14247 | 394 |
| A07471 | A14381 | 390 | A07471 | A14693 | 457 |
| A07471 | A15328 | 477 | A07471 | A17078 | 208 |
| A07472 | A07475 | 486 | A07472 | A07515 | 330 |
| A07472 | A07541 | 488 | A07472 | A07542 | 477 |
| A07472 | A07543 | 366 | A07472 | A07544 | 345 |
| A07472 | A07561 | 465 | A07472 | A07610 | 369 |
| A07472 | A07630 | 318 | A07472 | A07634 | 204 |
| A07472 | A07635 | 490 | A07472 | A07653 | 400 |
| A07472 | A07662 | 463 | A07472 | A07673 | 454 |
| A07472 | A07754 | 461 | A07472 | A07913 | 477 |
| A07472 | A07914 | 465 | A07472 | A07988 | 330 |
| A07472 | A08172 | 202 | A07472 | A08210 | 450 |
| A07472 | A08404 | 348 | A07472 | A08738 | 238 |
| A07472 | A08785 | 491 | A07472 | A09416 | 180 |
| A07472 | A11313 | 201 | A07472 | A11448 | 384 |
| A07472 | A11664 | 399 | A07472 | A13871 | 230 |
| A07472 | A13879 | 213 | A07472 | A14204 | 160 |
| A07473 | A10498 | 372 | A07473 | A14568 | 262 |
| A07474 | A07744 | 404 | A07474 | A08567 | 227 |
| A07474 | A14006 | 217 | A07474 | A14083 | 243 |
| A07474 | A14664 | 294 | A07475 | A07477 | 324 |
| A07475 | A07491 | 340 | A07475 | A07541 | 490 |
| A07475 | A07542 | 414 | A07475 | A07543 | 350 |
| A07475 | A07561 | 460 | A07475 | A07567 | 213 |
| A07475 | A07590 | 185 | A07475 | A07610 | 353 |
| A07475 | A07629 | 390 | A07475 | A07632 | 294 |
| A07475 | A07633 | 327 | A07475 | A07635 | 488 |
| A07475 | A07636 | 401 | A07475 | A07652 | 272 |
| A07475 | A07653 | 462 | A07475 | A07654 | 263 |
| A07475 | A07662 | 429 | A07475 | A07673 | 414 |
| A07475 | A07736 | 288 | A07475 | A07754 | 490 |
| A07475 | A07913 | 480 | A07475 | A07914 | 480 |
| A07475 | A07958 | 351 | A07475 | A07988 | 316 |
| A07475 | A08210 | 489 | A07475 | A08246 | 340 |
| A07475 | A08250 | 294 | A07475 | A08347 | 391 |
| A07475 | A08395 | 374 | A07475 | A08404 | 430 |
| A07475 | A08785 | 491 | A07475 | A10563 | 177 |
| A07475 | A11311 | 303 | A07475 | A11414 | 340 |
| A07475 | A11433 | 307 | A07475 | A11664 | 391 |
| A07475 | A13879 | 191 | A07475 | A14381 | 305 |
| A07477 | A07530 | 267 | A07477 | A07543 | 216 |
| A07477 | A07553 | 154 | A07477 | A07558 | 433 |
| A07477 | A07590 | 491 | A07477 | A07627 | 337 |
| A07477 | A07690 | 246 | A07477 | A07721 | 469 |

|        |        |     |        |        |     |
|--------|--------|-----|--------|--------|-----|
| A07477 | A07736 | 491 | A07477 | A07737 | 263 |
| A07477 | A07757 | 475 | A07477 | A07800 | 388 |
| A07477 | A07844 | 393 | A07477 | A07926 | 344 |
| A07477 | A07933 | 490 | A07477 | A07973 | 490 |
| A07477 | A07976 | 408 | A07477 | A08155 | 290 |
| A07477 | A08238 | 480 | A07477 | A08250 | 480 |
| A07477 | A08330 | 216 | A07477 | A08366 | 238 |
| A07477 | A08461 | 406 | A07477 | A08751 | 299 |
| A07477 | A09059 | 456 | A07477 | A09876 | 475 |
| A07477 | A10420 | 467 | A07477 | A10421 | 221 |
| A07477 | A10437 | 407 | A07477 | A10444 | 486 |
| A07477 | A10452 | 483 | A07477 | A10456 | 162 |
| A07477 | A10656 | 491 | A07477 | A10658 | 390 |
| A07477 | A10659 | 311 | A07477 | A10672 | 486 |
| A07477 | A10677 | 489 | A07477 | A10686 | 278 |
| A07477 | A10688 | 290 | A07477 | A10694 | 390 |
| A07477 | A10702 | 299 | A07477 | A10707 | 286 |
| A07477 | A10712 | 399 | A07477 | A10714 | 163 |
| A07477 | A10781 | 274 | A07477 | A10904 | 344 |
| A07477 | A11279 | 154 | A07477 | A11309 | 152 |
| A07477 | A13735 | 373 | A07477 | A14344 | 256 |
| A07477 | A14794 | 360 | A07477 | A14803 | 329 |
| A07477 | A14856 | 466 | A07477 | A14907 | 371 |
| A07477 | A15637 | 221 | A07477 | A16277 | 232 |
| A07477 | A16286 | 454 | A07477 | A16419 | 273 |
| A07477 | A16529 | 243 | A07477 | A16959 | 200 |
| A07478 | A07603 | 157 | A07479 | A08093 | 435 |
| A07479 | A08309 | 236 | A07479 | A08894 | 265 |
| A07479 | A09259 | 402 | A07479 | A11204 | 468 |
| A07479 | A11232 | 399 | A07479 | A11267 | 446 |
| A07479 | A12753 | 446 | A07479 | A12754 | 399 |
| A07479 | A12755 | 399 | A07479 | A12782 | 446 |
| A07479 | A13016 | 399 | A07479 | A13060 | 399 |
| A07479 | A13243 | 446 | A07479 | A13748 | 384 |
| A07479 | A13816 | 176 | A07479 | A13940 | 446 |
| A07479 | A14540 | 221 | A07479 | A14736 | 446 |
| A07479 | A15282 | 333 | A07480 | A07495 | 274 |
| A07480 | A07534 | 491 | A07480 | A07603 | 771 |
| A07480 | A07647 | 479 | A07480 | A07902 | 443 |
| A07480 | A07996 | 491 | A07480 | A08000 | 472 |
| A07480 | A08029 | 176 | A07480 | A08030 | 491 |
| A07480 | A08117 | 491 | A07480 | A08208 | 383 |
| A07480 | A08212 | 490 | A07480 | A08669 | 491 |
| A07480 | A08700 | 200 | A07480 | A08769 | 348 |
| A07480 | A08820 | 488 | A07480 | A08888 | 418 |
| A07480 | A09288 | 491 | A07480 | A09598 | 227 |



|        |        |     |        |        |     |
|--------|--------|-----|--------|--------|-----|
| A07480 | A09653 | 204 | A07480 | A09706 | 457 |
| A07480 | A09751 | 486 | A07480 | A09752 | 490 |
| A07480 | A09753 | 163 | A07480 | A09754 | 379 |
| A07480 | A09755 | 366 | A07480 | A09764 | 76  |
| A07480 | A10083 | 424 | A07480 | A10373 | 484 |
| A07480 | A11236 | 385 | A07480 | A11852 | 159 |
| A07480 | A11916 | 491 | A07480 | A12556 | 490 |
| A07480 | A12625 | 157 | A07480 | A12722 | 485 |
| A07480 | A13083 | 273 | A07480 | A13257 | 414 |
| A07480 | A13429 | 322 | A07480 | A13438 | 273 |
| A07480 | A13889 | 391 | A07480 | A13949 | 491 |
| A07480 | A14076 | 491 | A07480 | A14079 | 491 |
| A07480 | A14094 | 441 | A07480 | A14154 | 469 |
| A07480 | A14177 | 99  | A07480 | A14192 | 286 |
| A07480 | A14223 | 377 | A07480 | A14230 | 480 |
| A07480 | A14273 | 491 | A07480 | A14460 | 491 |
| A07480 | A14694 | 490 | A07480 | A14764 | 273 |
| A07480 | A15356 | 351 | A07480 | A15367 | 489 |
| A07480 | A15369 | 491 | A07480 | A15524 | 196 |
| A07480 | A15714 | 310 | A07480 | A15941 | 259 |
| A07480 | A16071 | 172 | A07480 | A16127 | 491 |
| A07480 | A16128 | 491 | A07480 | A16129 | 491 |
| A07480 | A16134 | 441 | A07480 | A16225 | 363 |
| A07480 | A16226 | 491 | A07480 | A16378 | 486 |
| A07480 | A16606 | 491 | A07480 | A16613 | 490 |
| A07480 | A16616 | 480 | A07480 | A16626 | 489 |
| A07480 | A16754 | 475 | A07480 | A16857 | 402 |
| A07480 | A17075 | 232 | A07481 | A07773 | 416 |
| A07481 | A08929 | 348 | A07481 | A08955 | 324 |
| A07481 | A09024 | 249 | A07481 | A13989 | 360 |
| A07481 | A14478 | 272 | A07482 | A10405 | 445 |
| A07482 | A12528 | 469 | A07482 | A12529 | 467 |
| A07482 | A13369 | 229 | A07483 | A07495 | 491 |
| A07483 | A07665 | 252 | A07483 | A07732 | 221 |
| A07483 | A07799 | 183 | A07483 | A07816 | 486 |
| A07483 | A07893 | 491 | A07483 | A07954 | 167 |
| A07483 | A08056 | 490 | A07483 | A08377 | 241 |
| A07483 | A08379 | 473 | A07483 | A08450 | 162 |
| A07483 | A08467 | 213 | A07483 | A08518 | 347 |
| A07483 | A08524 | 440 | A07483 | A08531 | 491 |
| A07483 | A08536 | 491 | A07483 | A08543 | 380 |
| A07483 | A08550 | 379 | A07483 | A08551 | 491 |
| A07483 | A08552 | 491 | A07483 | A08560 | 312 |
| A07483 | A08561 | 338 | A07483 | A08569 | 491 |
| A07483 | A08594 | 477 | A07483 | A08880 | 491 |
| A07483 | A08996 | 201 | A07483 | A09054 | 486 |

|        |        |     |        |        |     |
|--------|--------|-----|--------|--------|-----|
| A07483 | A09298 | 467 | A07483 | A09309 | 291 |
| A07483 | A09488 | 190 | A07483 | A09624 | 468 |
| A07483 | A09757 | 306 | A07483 | A09952 | 286 |
| A07483 | A10315 | 378 | A07483 | A10369 | 396 |
| A07483 | A10428 | 168 | A07483 | A10699 | 456 |
| A07483 | A11168 | 174 | A07483 | A11234 | 191 |
| A07483 | A11279 | 240 | A07483 | A11283 | 425 |
| A07483 | A11293 | 185 | A07483 | A11301 | 363 |
| A07483 | A11430 | 154 | A07483 | A11471 | 170 |
| A07483 | A11472 | 801 | A07483 | A11496 | 252 |
| A07483 | A11497 | 441 | A07483 | A11551 | 466 |
| A07483 | A11648 | 360 | A07483 | A11675 | 345 |
| A07483 | A11863 | 243 | A07483 | A11914 | 332 |
| A07483 | A11917 | 762 | A07483 | A11940 | 458 |
| A07483 | A11954 | 235 | A07483 | A12047 | 491 |
| A07483 | A12200 | 168 | A07483 | A12215 | 171 |
| A07483 | A12234 | 263 | A07483 | A12433 | 356 |
| A07483 | A12499 | 291 | A07483 | A12506 | 463 |
| A07483 | A12508 | 486 | A07483 | A12606 | 445 |
| A07483 | A12658 | 241 | A07483 | A12665 | 406 |
| A07483 | A12725 | 212 | A07483 | A12737 | 190 |
| A07483 | A12826 | 190 | A07483 | A12858 | 480 |
| A07483 | A12873 | 418 | A07483 | A13183 | 240 |
| A07483 | A13309 | 435 | A07483 | A13313 | 778 |
| A07483 | A13399 | 174 | A07483 | A13415 | 240 |
| A07483 | A13587 | 430 | A07483 | A13708 | 491 |
| A07483 | A13737 | 163 | A07483 | A13781 | 489 |
| A07483 | A13784 | 347 | A07483 | A13788 | 307 |
| A07483 | A13811 | 286 | A07483 | A13894 | 486 |
| A07483 | A13895 | 491 | A07483 | A13912 | 314 |
| A07483 | A14052 | 168 | A07483 | A14167 | 154 |
| A07483 | A14213 | 285 | A07483 | A14214 | 456 |
| A07483 | A14239 | 491 | A07483 | A14253 | 162 |
| A07483 | A14255 | 296 | A07483 | A14263 | 234 |
| A07483 | A14266 | 483 | A07483 | A14270 | 333 |
| A07483 | A14272 | 324 | A07483 | A14281 | 486 |
| A07483 | A14286 | 407 | A07483 | A14455 | 285 |
| A07483 | A14569 | 411 | A07483 | A14570 | 276 |
| A07483 | A14655 | 301 | A07483 | A14661 | 491 |
| A07483 | A14701 | 391 | A07483 | A14711 | 443 |
| A07483 | A14799 | 491 | A07483 | A14903 | 319 |
| A07483 | A14921 | 232 | A07483 | A15105 | 443 |
| A07483 | A15189 | 472 | A07483 | A15212 | 324 |
| A07483 | A15245 | 190 | A07483 | A15261 | 433 |
| A07483 | A15262 | 213 | A07483 | A15292 | 325 |
| A07483 | A15297 | 156 | A07483 | A15366 | 414 |

|        |        |     |        |        |     |
|--------|--------|-----|--------|--------|-----|
| A07483 | A15501 | 491 | A07483 | A15541 | 193 |
| A07483 | A15665 | 491 | A07483 | A15680 | 462 |
| A07483 | A15711 | 168 | A07483 | A15774 | 177 |
| A07483 | A15854 | 258 | A07483 | A15855 | 412 |
| A07483 | A15857 | 152 | A07483 | A15930 | 259 |
| A07483 | A16088 | 314 | A07483 | A16157 | 468 |
| A07483 | A16261 | 288 | A07483 | A16343 | 218 |
| A07483 | A16552 | 491 | A07483 | A16565 | 491 |
| A07483 | A16597 | 470 | A07483 | A16608 | 447 |
| A07483 | A16611 | 460 | A07483 | A16664 | 463 |
| A07483 | A16675 | 446 | A07483 | A16680 | 393 |
| A07483 | A16684 | 190 | A07483 | A16690 | 432 |
| A07483 | A16691 | 375 | A07483 | A16693 | 427 |
| A07483 | A16695 | 107 | A07483 | A16703 | 319 |
| A07483 | A16704 | 417 | A07483 | A16706 | 333 |
| A07483 | A16708 | 430 | A07483 | A16709 | 357 |
| A07483 | A16712 | 224 | A07483 | A16724 | 191 |
| A07483 | A16766 | 430 | A07483 | A16774 | 187 |
| A07483 | A16790 | 204 | A07483 | A16806 | 224 |
| A07483 | A16807 | 434 | A07483 | A16824 | 201 |
| A07483 | A16829 | 229 | A07483 | A16838 | 339 |
| A07483 | A16866 | 176 | A07483 | A16874 | 223 |
| A07483 | A16878 | 168 | A07483 | A16900 | 341 |
| A07483 | A16905 | 465 | A07483 | A16944 | 341 |
| A07483 | A17018 | 457 | A07486 | A08836 | 182 |
| A07486 | A09790 | 286 | A07486 | A10382 | 483 |
| A07486 | A10418 | 435 | A07486 | A10473 | 372 |
| A07486 | A11683 | 152 | A07486 | A13832 | 207 |
| A07486 | A14656 | 288 | A07486 | A14683 | 229 |
| A07486 | A15889 | 266 | A07487 | A07524 | 252 |
| A07487 | A07956 | 205 | A07487 | A08118 | 299 |
| A07487 | A08357 | 452 | A07487 | A08571 | 212 |
| A07487 | A08952 | 283 | A07487 | A09004 | 252 |
| A07487 | A09327 | 229 | A07487 | A09707 | 391 |
| A07487 | A12254 | 157 | A07487 | A13066 | 345 |
| A07487 | A15215 | 218 | A07488 | A14633 | 297 |
| A07490 | A07674 | 385 | A07490 | A07718 | 306 |
| A07491 | A07538 | 414 | A07491 | A07541 | 475 |
| A07491 | A07542 | 353 | A07491 | A07543 | 232 |
| A07491 | A07561 | 443 | A07491 | A07608 | 313 |
| A07491 | A07610 | 363 | A07491 | A07634 | 402 |
| A07491 | A07673 | 227 | A07491 | A07913 | 185 |
| A07491 | A07958 | 269 | A07491 | A08210 | 299 |
| A07491 | A08218 | 278 | A07491 | A08785 | 416 |
| A07491 | A10634 | 319 | A07491 | A11313 | 193 |
| A07491 | A12730 | 272 | A07491 | A13879 | 408 |

|        |        |     |        |        |     |
|--------|--------|-----|--------|--------|-----|
| A07491 | A15462 | 165 | A07492 | A08187 | 452 |
| A07493 | A14548 | 414 | A07494 | A10954 | 429 |
| A07494 | A12698 | 441 | A07495 | A07603 | 337 |
| A07495 | A07665 | 491 | A07495 | A07696 | 491 |
| A07495 | A07709 | 491 | A07495 | A07732 | 358 |
| A07495 | A07785 | 179 | A07495 | A07816 | 554 |
| A07495 | A07893 | 491 | A07495 | A07934 | 441 |
| A07495 | A07954 | 491 | A07495 | A07965 | 281 |
| A07495 | A07967 | 157 | A07495 | A08056 | 321 |
| A07495 | A08133 | 199 | A07495 | A08192 | 375 |
| A07495 | A08259 | 179 | A07495 | A08379 | 283 |
| A07495 | A08456 | 168 | A07495 | A08531 | 491 |
| A07495 | A08536 | 491 | A07495 | A08551 | 554 |
| A07495 | A08552 | 355 | A07495 | A08563 | 271 |
| A07495 | A08594 | 491 | A07495 | A08834 | 179 |
| A07495 | A08840 | 358 | A07495 | A08910 | 491 |
| A07495 | A08934 | 316 | A07495 | A08985 | 63  |
| A07495 | A09624 | 490 | A07495 | A09662 | 488 |
| A07495 | A09666 | 491 | A07495 | A09668 | 267 |
| A07495 | A09757 | 344 | A07495 | A09759 | 63  |
| A07495 | A09825 | 179 | A07495 | A09826 | 224 |
| A07495 | A09869 | 63  | A07495 | A10083 | 179 |
| A07495 | A10369 | 66  | A07495 | A10651 | 399 |
| A07495 | A10729 | 63  | A07495 | A10734 | 276 |
| A07495 | A11068 | 340 | A07495 | A11149 | 229 |
| A07495 | A11184 | 201 | A07495 | A11281 | 480 |
| A07495 | A11292 | 463 | A07495 | A11346 | 540 |
| A07495 | A11359 | 183 | A07495 | A11385 | 385 |
| A07495 | A11394 | 185 | A07495 | A11408 | 63  |
| A07495 | A11472 | 260 | A07495 | A11473 | 210 |
| A07495 | A11551 | 481 | A07495 | A11558 | 179 |
| A07495 | A11661 | 294 | A07495 | A11675 | 273 |
| A07495 | A11881 | 491 | A07495 | A11917 | 407 |
| A07495 | A12047 | 541 | A07495 | A12064 | 183 |
| A07495 | A12098 | 183 | A07495 | A12249 | 294 |
| A07495 | A12258 | 267 | A07495 | A12722 | 603 |
| A07495 | A12858 | 201 | A07495 | A12913 | 160 |
| A07495 | A12952 | 229 | A07495 | A12954 | 294 |
| A07495 | A12975 | 105 | A07495 | A13323 | 196 |
| A07495 | A13819 | 179 | A07495 | A13866 | 467 |
| A07495 | A13889 | 299 | A07495 | A13894 | 473 |
| A07495 | A13895 | 490 | A07495 | A13928 | 445 |
| A07495 | A13941 | 262 | A07495 | A13942 | 237 |
| A07495 | A13983 | 170 | A07495 | A14016 | 443 |
| A07495 | A14163 | 98  | A07495 | A14192 | 486 |
| A07495 | A14193 | 249 | A07495 | A14202 | 300 |

|        |        |     |        |        |     |
|--------|--------|-----|--------|--------|-----|
| A07495 | A14220 | 547 | A07495 | A14221 | 369 |
| A07495 | A14253 | 187 | A07495 | A14266 | 739 |
| A07495 | A14271 | 63  | A07495 | A14279 | 490 |
| A07495 | A14281 | 491 | A07495 | A14366 | 179 |
| A07495 | A14457 | 272 | A07495 | A14474 | 491 |
| A07495 | A14484 | 491 | A07495 | A14570 | 188 |
| A07495 | A14633 | 491 | A07495 | A14661 | 472 |
| A07495 | A15273 | 491 | A07495 | A15292 | 234 |
| A07495 | A15324 | 245 | A07495 | A15358 | 179 |
| A07495 | A15366 | 473 | A07495 | A15470 | 179 |
| A07495 | A15484 | 179 | A07495 | A15492 | 154 |
| A07495 | A15501 | 491 | A07495 | A15502 | 466 |
| A07495 | A15626 | 340 | A07495 | A15702 | 208 |
| A07495 | A15768 | 406 | A07495 | A15930 | 461 |
| A07495 | A16048 | 293 | A07495 | A16116 | 219 |
| A07495 | A16261 | 198 | A07495 | A16667 | 332 |
| A07495 | A16727 | 160 | A07495 | A16851 | 332 |
| A07495 | A16951 | 176 | A07495 | A17013 | 428 |
| A07495 | A17156 | 218 | A07496 | A07509 | 467 |
| A07496 | A07510 | 394 | A07496 | A07541 | 254 |
| A07496 | A07754 | 302 | A07496 | A07913 | 303 |
| A07496 | A08404 | 243 | A07496 | A08785 | 266 |
| A07497 | A15624 | 319 | A07498 | A07549 | 452 |
| A07498 | A07781 | 447 | A07498 | A08289 | 394 |
| A07498 | A11175 | 452 | A07498 | A11176 | 452 |
| A07498 | A14978 | 452 | A07499 | A10465 | 179 |
| A07499 | A13830 | 474 | A07499 | A14247 | 485 |
| A07499 | A15097 | 154 | A07499 | A15560 | 469 |
| A07499 | A17126 | 374 | A07501 | A07507 | 344 |
| A07501 | A07619 | 351 | A07501 | A07674 | 434 |
| A07501 | A07723 | 305 | A07501 | A14216 | 440 |
| A07501 | A16636 | 457 | A07502 | A14073 | 281 |
| A07503 | A07520 | 247 | A07503 | A07757 | 323 |
| A07503 | A07844 | 165 | A07503 | A09837 | 374 |
| A07503 | A09917 | 385 | A07505 | A09050 | 297 |
| A07505 | A11366 | 262 | A07505 | A11401 | 193 |
| A07505 | A11429 | 218 | A07505 | A11438 | 168 |
| A07505 | A11929 | 167 | A07505 | A13617 | 224 |
| A07505 | A14498 | 204 | A07505 | A14504 | 367 |
| A07505 | A15917 | 452 | A07505 | A16877 | 234 |
| A07506 | A07726 | 221 | A07506 | A08052 | 235 |
| A07506 | A08070 | 198 | A07506 | A08768 | 301 |
| A07506 | A09620 | 262 | A07506 | A10711 | 338 |
| A07506 | A11331 | 243 | A07506 | A13581 | 446 |
| A07506 | A14216 | 173 | A07506 | A15141 | 328 |
| A07506 | A16814 | 322 | A07507 | A07674 | 480 |

|        |        |     |        |        |     |
|--------|--------|-----|--------|--------|-----|
| A07507 | A07847 | 425 | A07507 | A07933 | 367 |
| A07507 | A12927 | 245 | A07508 | A11189 | 396 |
| A07509 | A07510 | 364 | A07509 | A07567 | 286 |
| A07509 | A07650 | 477 | A07509 | A07673 | 288 |
| A07509 | A07754 | 247 | A07509 | A07827 | 406 |
| A07509 | A07950 | 391 | A07509 | A09758 | 299 |
| A07509 | A10841 | 406 | A07509 | A14207 | 246 |
| A07510 | A07654 | 358 | A07510 | A07673 | 484 |
| A07510 | A07754 | 475 | A07510 | A07913 | 446 |
| A07510 | A07914 | 483 | A07510 | A10563 | 299 |
| A07510 | A11552 | 363 | A07513 | A07774 | 452 |
| A07513 | A07945 | 452 | A07513 | A08153 | 452 |
| A07513 | A10095 | 425 | A07513 | A10292 | 452 |
| A07513 | A10641 | 452 | A07514 | A07605 | 314 |
| A07514 | A07606 | 411 | A07514 | A07904 | 455 |
| A07514 | A07907 | 461 | A07514 | A07982 | 416 |
| A07514 | A08040 | 358 | A07514 | A09380 | 367 |
| A07514 | A14377 | 288 | A07515 | A07541 | 428 |
| A07515 | A07561 | 311 | A07515 | A07632 | 378 |
| A07515 | A07635 | 344 | A07515 | A07958 | 257 |
| A07515 | A08738 | 224 | A07515 | A08783 | 407 |
| A07515 | A08784 | 430 | A07515 | A10649 | 422 |
| A07515 | A10680 | 430 | A07515 | A11313 | 302 |
| A07515 | A13879 | 311 | A07516 | A15297 | 184 |
| A07516 | A15559 | 216 | A07517 | A13989 | 208 |
| A07518 | A08118 | 462 | A07518 | A10162 | 424 |
| A07519 | A12163 | 424 | A07519 | A13871 | 486 |
| A07519 | A14440 | 401 | A07520 | A07553 | 327 |
| A07520 | A07558 | 347 | A07520 | A07674 | 486 |
| A07520 | A07684 | 404 | A07520 | A07688 | 154 |
| A07520 | A07690 | 488 | A07520 | A07692 | 267 |
| A07520 | A07711 | 241 | A07520 | A07739 | 288 |
| A07520 | A07757 | 310 | A07520 | A07763 | 458 |
| A07520 | A07800 | 249 | A07520 | A07933 | 446 |
| A07520 | A08108 | 184 | A07520 | A08114 | 351 |
| A07520 | A08133 | 229 | A07520 | A08155 | 469 |
| A07520 | A08280 | 404 | A07520 | A08663 | 347 |
| A07520 | A08667 | 345 | A07520 | A09381 | 210 |
| A07520 | A09846 | 474 | A07520 | A09880 | 251 |
| A07520 | A10420 | 351 | A07520 | A10422 | 366 |
| A07520 | A10424 | 257 | A07520 | A10427 | 188 |
| A07520 | A10456 | 466 | A07520 | A10457 | 369 |
| A07520 | A10458 | 257 | A07520 | A10635 | 269 |
| A07520 | A10652 | 212 | A07520 | A10656 | 385 |
| A07520 | A10675 | 283 | A07520 | A10687 | 378 |
| A07520 | A10690 | 485 | A07520 | A10693 | 184 |

|        |        |     |        |        |     |
|--------|--------|-----|--------|--------|-----|
| A07520 | A10926 | 294 | A07520 | A12055 | 283 |
| A07520 | A13362 | 263 | A07520 | A14794 | 329 |
| A07520 | A14821 | 257 | A07520 | A14856 | 400 |
| A07520 | A14859 | 329 | A07520 | A15034 | 319 |
| A07520 | A15628 | 279 | A07520 | A15877 | 171 |
| A07520 | A15970 | 414 | A07520 | A16027 | 227 |
| A07520 | A16103 | 218 | A07520 | A16286 | 322 |
| A07520 | A16741 | 245 | A07520 | A16744 | 196 |
| A07520 | A17006 | 353 | A07520 | A17024 | 419 |
| A07521 | A07820 | 185 | A07521 | A08400 | 491 |
| A07521 | A08766 | 357 | A07521 | A09013 | 375 |
| A07521 | A09333 | 241 | A07521 | A10663 | 491 |
| A07521 | A10798 | 285 | A07521 | A10799 | 162 |
| A07521 | A11287 | 396 | A07521 | A11456 | 188 |
| A07521 | A11660 | 290 | A07521 | A13830 | 316 |
| A07521 | A13855 | 196 | A07521 | A13882 | 159 |
| A07521 | A13902 | 491 | A07521 | A14182 | 485 |
| A07521 | A14247 | 491 | A07521 | A14258 | 339 |
| A07521 | A14393 | 132 | A07521 | A14461 | 347 |
| A07521 | A14661 | 405 | A07521 | A14838 | 307 |
| A07521 | A15650 | 205 | A07521 | A15770 | 424 |
| A07521 | A16617 | 360 | A07521 | A17061 | 460 |
| A07521 | A17091 | 228 | A07522 | A10511 | 477 |
| A07524 | A07625 | 534 | A07524 | A07706 | 403 |
| A07524 | A07744 | 256 | A07524 | A07924 | 752 |
| A07524 | A08022 | 319 | A07524 | A08137 | 486 |
| A07524 | A08211 | 170 | A07524 | A08327 | 491 |
| A07524 | A08491 | 490 | A07524 | A08542 | 412 |
| A07524 | A08571 | 491 | A07524 | A08807 | 544 |
| A07524 | A09295 | 154 | A07524 | A09697 | 170 |
| A07524 | A09952 | 490 | A07524 | A10380 | 408 |
| A07524 | A10465 | 210 | A07524 | A11544 | 234 |
| A07524 | A11555 | 256 | A07524 | A11831 | 282 |
| A07524 | A11832 | 181 | A07524 | A11937 | 204 |
| A07524 | A11938 | 319 | A07524 | A12284 | 269 |
| A07524 | A12829 | 279 | A07524 | A13052 | 170 |
| A07524 | A13989 | 613 | A07524 | A14184 | 456 |
| A07524 | A14443 | 243 | A07524 | A14655 | 485 |
| A07524 | A14778 | 449 | A07524 | A14826 | 491 |
| A07524 | A14953 | 191 | A07524 | A15266 | 185 |
| A07524 | A15338 | 406 | A07524 | A15614 | 205 |
| A07524 | A15665 | 168 | A07524 | A15764 | 353 |
| A07524 | A16048 | 470 | A07524 | A16193 | 77  |
| A07524 | A16302 | 430 | A07524 | A16802 | 408 |
| A07525 | A07800 | 257 | A07525 | A08099 | 391 |
| A07525 | A08193 | 267 | A07525 | A08205 | 380 |

|        |        |     |        |        |     |
|--------|--------|-----|--------|--------|-----|
| A07525 | A11309 | 340 | A07525 | A12927 | 404 |
| A07525 | A15497 | 340 | A07526 | A07842 | 418 |
| A07526 | A07995 | 419 | A07526 | A08302 | 445 |
| A07526 | A08303 | 445 | A07527 | A09902 | 335 |
| A07529 | A07764 | 477 | A07529 | A07969 | 462 |
| A07529 | A08002 | 485 | A07529 | A08003 | 427 |
| A07529 | A08453 | 406 | A07529 | A11216 | 441 |
| A07529 | A12542 | 462 | A07529 | A12936 | 481 |
| A07529 | A14362 | 326 | A07529 | A14366 | 227 |
| A07529 | A14372 | 391 | A07529 | A14381 | 281 |
| A07529 | A14394 | 252 | A07529 | A14600 | 395 |
| A07529 | A14767 | 427 | A07529 | A15336 | 232 |
| A07529 | A15475 | 337 | A07529 | A15498 | 240 |
| A07529 | A15790 | 401 | A07529 | A16267 | 406 |
| A07529 | A16562 | 427 | A07529 | A17052 | 427 |
| A07530 | A07554 | 433 | A07530 | A07558 | 256 |
| A07530 | A07688 | 484 | A07530 | A07736 | 232 |
| A07530 | A07847 | 294 | A07530 | A08108 | 306 |
| A07530 | A08379 | 173 | A07530 | A09632 | 328 |
| A07530 | A10658 | 340 | A07530 | A10659 | 438 |
| A07530 | A10681 | 332 | A07530 | A10702 | 429 |
| A07530 | A10703 | 313 | A07530 | A10714 | 246 |
| A07530 | A10875 | 274 | A07530 | A13026 | 417 |
| A07530 | A14871 | 382 | A07530 | A15673 | 221 |
| A07530 | A15874 | 230 | A07530 | A16028 | 327 |
| A07530 | A16033 | 319 | A07530 | A17078 | 168 |
| A07531 | A08201 | 334 | A07531 | A08838 | 251 |
| A07531 | A13047 | 414 | A07531 | A14594 | 193 |
| A07531 | A15624 | 520 | A07531 | A15651 | 334 |
| A07531 | A15746 | 187 | A07531 | A15750 | 334 |
| A07531 | A15917 | 426 | A07531 | A15920 | 232 |
| A07531 | A15932 | 604 | A07531 | A15937 | 334 |
| A07533 | A07584 | 456 | A07533 | A07625 | 200 |
| A07533 | A07700 | 477 | A07533 | A08024 | 200 |
| A07533 | A08452 | 347 | A07533 | A08521 | 323 |
| A07533 | A08547 | 396 | A07533 | A08559 | 170 |
| A07533 | A09322 | 152 | A07533 | A09664 | 350 |
| A07533 | A11344 | 165 | A07533 | A11420 | 328 |
| A07533 | A12849 | 317 | A07533 | A13055 | 324 |
| A07533 | A13333 | 299 | A07533 | A13989 | 399 |
| A07533 | A16302 | 252 | A07534 | A07595 | 196 |
| A07534 | A07603 | 491 | A07534 | A07647 | 446 |
| A07534 | A07902 | 469 | A07534 | A07989 | 213 |
| A07534 | A07996 | 491 | A07534 | A08000 | 432 |
| A07534 | A08029 | 251 | A07534 | A08030 | 491 |
| A07534 | A08117 | 491 | A07534 | A08141 | 168 |



|        |        |     |        |        |     |
|--------|--------|-----|--------|--------|-----|
| A07534 | A08208 | 414 | A07534 | A08212 | 469 |
| A07534 | A08516 | 180 | A07534 | A08669 | 491 |
| A07534 | A08769 | 424 | A07534 | A08820 | 190 |
| A07534 | A09598 | 396 | A07534 | A09626 | 396 |
| A07534 | A11880 | 184 | A07534 | A11916 | 491 |
| A07534 | A12165 | 205 | A07534 | A12556 | 465 |
| A07534 | A12625 | 388 | A07534 | A13767 | 177 |
| A07534 | A13907 | 229 | A07534 | A13949 | 491 |
| A07534 | A14076 | 491 | A07534 | A14079 | 491 |
| A07534 | A14093 | 144 | A07534 | A14230 | 394 |
| A07534 | A14273 | 491 | A07534 | A14460 | 491 |
| A07534 | A14694 | 452 | A07534 | A15367 | 279 |
| A07534 | A15369 | 491 | A07534 | A15654 | 347 |
| A07534 | A15941 | 266 | A07534 | A16127 | 491 |
| A07534 | A16128 | 491 | A07534 | A16129 | 491 |
| A07534 | A16130 | 172 | A07534 | A16134 | 350 |
| A07534 | A16226 | 491 | A07534 | A16294 | 188 |
| A07534 | A16378 | 484 | A07534 | A16431 | 486 |
| A07534 | A16606 | 491 | A07534 | A16613 | 491 |
| A07534 | A16616 | 456 | A07534 | A16626 | 486 |
| A07534 | A16646 | 215 | A07534 | A16754 | 427 |
| A07535 | A07741 | 429 | A07535 | A15498 | 227 |
| A07536 | A07719 | 422 | A07536 | A07726 | 159 |
| A07536 | A10633 | 489 | A07536 | A11190 | 297 |
| A07536 | A15500 | 198 | A07538 | A07542 | 322 |
| A07538 | A07543 | 326 | A07538 | A07561 | 303 |
| A07538 | A07563 | 404 | A07538 | A07608 | 379 |
| A07538 | A07610 | 329 | A07538 | A07634 | 297 |
| A07538 | A08210 | 371 | A07538 | A08785 | 249 |
| A07541 | A07542 | 491 | A07541 | A07543 | 491 |
| A07541 | A07544 | 473 | A07541 | A07561 | 491 |
| A07541 | A07563 | 443 | A07541 | A07610 | 491 |
| A07541 | A07629 | 462 | A07541 | A07630 | 484 |
| A07541 | A07632 | 416 | A07541 | A07633 | 378 |
| A07541 | A07634 | 489 | A07541 | A07635 | 491 |
| A07541 | A07636 | 484 | A07541 | A07673 | 469 |
| A07541 | A07754 | 419 | A07541 | A07913 | 489 |
| A07541 | A07928 | 328 | A07541 | A07958 | 477 |
| A07541 | A08079 | 224 | A07541 | A08210 | 213 |
| A07541 | A08404 | 205 | A07541 | A08783 | 286 |
| A07541 | A08785 | 491 | A07541 | A08786 | 396 |
| A07541 | A09152 | 191 | A07541 | A09932 | 224 |
| A07541 | A10649 | 324 | A07541 | A10967 | 491 |
| A07541 | A11157 | 205 | A07541 | A11313 | 216 |
| A07541 | A11329 | 221 | A07541 | A11428 | 241 |
| A07541 | A11448 | 324 | A07541 | A12793 | 486 |

|        |        |     |        |        |     |
|--------|--------|-----|--------|--------|-----|
| A07541 | A13327 | 260 | A07541 | A13869 | 446 |
| A07541 | A13871 | 350 | A07541 | A13879 | 486 |
| A07541 | A14204 | 207 | A07541 | A14381 | 202 |
| A07541 | A15328 | 260 | A07541 | A16042 | 190 |
| A07541 | A17078 | 420 | A07541 | A17108 | 452 |
| A07542 | A07543 | 491 | A07542 | A07544 | 460 |
| A07542 | A07561 | 491 | A07542 | A07563 | 434 |
| A07542 | A07608 | 317 | A07542 | A07610 | 491 |
| A07542 | A07630 | 469 | A07542 | A07634 | 473 |
| A07542 | A07635 | 479 | A07542 | A07673 | 232 |
| A07542 | A07754 | 187 | A07542 | A07913 | 190 |
| A07542 | A07928 | 288 | A07542 | A08079 | 312 |
| A07542 | A08785 | 419 | A07542 | A09152 | 286 |
| A07542 | A09174 | 200 | A07542 | A10651 | 243 |
| A07542 | A10967 | 446 | A07542 | A12793 | 341 |
| A07542 | A13871 | 419 | A07542 | A17078 | 330 |
| A07542 | A17108 | 375 | A07543 | A07544 | 474 |
| A07543 | A07561 | 491 | A07543 | A07563 | 463 |
| A07543 | A07608 | 321 | A07543 | A07610 | 491 |
| A07543 | A07629 | 296 | A07543 | A07630 | 479 |
| A07543 | A07631 | 361 | A07543 | A07632 | 313 |
| A07543 | A07633 | 341 | A07543 | A07634 | 337 |
| A07543 | A07635 | 472 | A07543 | A07636 | 314 |
| A07543 | A07736 | 179 | A07543 | A07958 | 281 |
| A07543 | A08785 | 281 | A07543 | A08786 | 361 |
| A07543 | A09152 | 291 | A07543 | A09174 | 207 |
| A07543 | A10078 | 193 | A07543 | A10967 | 449 |
| A07543 | A11157 | 329 | A07543 | A12793 | 347 |
| A07543 | A13699 | 257 | A07543 | A13871 | 358 |
| A07543 | A13879 | 215 | A07543 | A17078 | 338 |
| A07543 | A17108 | 263 | A07544 | A07563 | 414 |
| A07544 | A07610 | 430 | A07544 | A07629 | 378 |
| A07544 | A07630 | 450 | A07544 | A07634 | 319 |
| A07544 | A07635 | 434 | A07544 | A08783 | 414 |
| A07545 | A10065 | 396 | A07545 | A10870 | 157 |
| A07545 | A11380 | 251 | A07545 | A13614 | 486 |
| A07545 | A14195 | 335 | A07545 | A15023 | 251 |
| A07545 | A15440 | 165 | A07545 | A15559 | 446 |
| A07545 | A16488 | 215 | A07546 | A14093 | 340 |
| A07547 | A08070 | 374 | A07548 | A12909 | 445 |
| A07549 | A07781 | 447 | A07549 | A08289 | 394 |
| A07549 | A11175 | 452 | A07549 | A11176 | 452 |
| A07549 | A14978 | 452 | A07552 | A15347 | 238 |
| A07553 | A07558 | 272 | A07553 | A07688 | 433 |
| A07553 | A07692 | 283 | A07553 | A07800 | 396 |
| A07553 | A07933 | 173 | A07553 | A07973 | 159 |

|        |        |     |        |        |     |
|--------|--------|-----|--------|--------|-----|
| A07553 | A07976 | 212 | A07553 | A08108 | 491 |
| A07553 | A08133 | 440 | A07553 | A08238 | 243 |
| A07553 | A08252 | 463 | A07553 | A08379 | 163 |
| A07553 | A09381 | 490 | A07553 | A09612 | 213 |
| A07553 | A09879 | 378 | A07553 | A10424 | 386 |
| A07553 | A10456 | 215 | A07553 | A10481 | 353 |
| A07553 | A10652 | 229 | A07553 | A10658 | 249 |
| A07553 | A10681 | 486 | A07553 | A10689 | 486 |
| A07553 | A10693 | 491 | A07553 | A10702 | 490 |
| A07553 | A10703 | 212 | A07553 | A10710 | 490 |
| A07553 | A10712 | 480 | A07553 | A10764 | 353 |
| A07553 | A10885 | 484 | A07553 | A10989 | 159 |
| A07553 | A11325 | 470 | A07553 | A11381 | 335 |
| A07553 | A11434 | 322 | A07553 | A13976 | 168 |
| A07553 | A14628 | 262 | A07553 | A14862 | 273 |
| A07553 | A15637 | 400 | A07553 | A15874 | 240 |
| A07553 | A15877 | 188 | A07553 | A16002 | 491 |
| A07553 | A16027 | 249 | A07553 | A16034 | 446 |
| A07553 | A16103 | 236 | A07553 | A16263 | 258 |
| A07553 | A16959 | 385 | A07553 | A17078 | 340 |
| A07553 | A17089 | 223 | A07554 | A07688 | 477 |
| A07554 | A07800 | 165 | A07554 | A09509 | 249 |
| A07554 | A10875 | 303 | A07554 | A10880 | 416 |
| A07554 | A15673 | 256 | A07554 | A16027 | 271 |
| A07555 | A12009 | 398 | A07555 | A14222 | 273 |
| A07557 | A09476 | 327 | A07557 | A10230 | 432 |
| A07557 | A14366 | 246 | A07557 | A14391 | 263 |
| A07558 | A07590 | 475 | A07558 | A07684 | 234 |
| A07558 | A07692 | 299 | A07558 | A07721 | 456 |
| A07558 | A07736 | 361 | A07558 | A07763 | 224 |
| A07558 | A07844 | 441 | A07558 | A07856 | 306 |
| A07558 | A07933 | 200 | A07558 | A07973 | 477 |
| A07558 | A07976 | 486 | A07558 | A08108 | 221 |
| A07558 | A08238 | 262 | A07558 | A08402 | 481 |
| A07558 | A09612 | 232 | A07558 | A09846 | 249 |
| A07558 | A09876 | 490 | A07558 | A09879 | 277 |
| A07558 | A10121 | 318 | A07558 | A10420 | 477 |
| A07558 | A10421 | 308 | A07558 | A10424 | 396 |
| A07558 | A10427 | 338 | A07558 | A10441 | 267 |
| A07558 | A10443 | 384 | A07558 | A10444 | 450 |
| A07558 | A10452 | 462 | A07558 | A10456 | 246 |
| A07558 | A10652 | 249 | A07558 | A10656 | 486 |
| A07558 | A10658 | 480 | A07558 | A10659 | 302 |
| A07558 | A10677 | 396 | A07558 | A10681 | 256 |
| A07558 | A10686 | 267 | A07558 | A10694 | 267 |
| A07558 | A10702 | 374 | A07558 | A10703 | 230 |

|        |        |     |        |        |     |
|--------|--------|-----|--------|--------|-----|
| A07558 | A10710 | 218 | A07558 | A10714 | 152 |
| A07558 | A10715 | 254 | A07558 | A11235 | 262 |
| A07558 | A11444 | 217 | A07558 | A12055 | 411 |
| A07558 | A13735 | 364 | A07558 | A13871 | 191 |
| A07558 | A13873 | 196 | A07558 | A14077 | 454 |
| A07558 | A14191 | 311 | A07558 | A14193 | 216 |
| A07558 | A14272 | 486 | A07558 | A14803 | 436 |
| A07558 | A14856 | 462 | A07558 | A14857 | 238 |
| A07558 | A15223 | 210 | A07558 | A15637 | 208 |
| A07558 | A15669 | 176 | A07558 | A15874 | 358 |
| A07558 | A15877 | 208 | A07558 | A16103 | 256 |
| A07558 | A16286 | 227 | A07558 | A16335 | 310 |
| A07558 | A16417 | 229 | A07558 | A16418 | 317 |
| A07558 | A16436 | 191 | A07558 | A16741 | 417 |
| A07558 | A17041 | 238 | A07558 | A17089 | 152 |
| A07559 | A07812 | 251 | A07559 | A08861 | 201 |
| A07559 | A09074 | 480 | A07559 | A09364 | 339 |
| A07559 | A09955 | 418 | A07559 | A10665 | 491 |
| A07559 | A10894 | 201 | A07559 | A11014 | 491 |
| A07559 | A13337 | 398 | A07559 | A13734 | 171 |
| A07559 | A14604 | 188 | A07559 | A14675 | 398 |
| A07559 | A14676 | 372 | A07559 | A15271 | 323 |
| A07559 | A16043 | 486 | A07559 | A16138 | 486 |
| A07559 | A16174 | 363 | A07559 | A16721 | 352 |
| A07560 | A07642 | 438 | A07560 | A08463 | 438 |
| A07560 | A08889 | 438 | A07560 | A09977 | 188 |
| A07561 | A07608 | 402 | A07561 | A07610 | 491 |
| A07561 | A07629 | 272 | A07561 | A07631 | 343 |
| A07561 | A07632 | 288 | A07561 | A07634 | 434 |
| A07561 | A07635 | 358 | A07561 | A07636 | 291 |
| A07561 | A07639 | 369 | A07561 | A07662 | 343 |
| A07561 | A07754 | 296 | A07561 | A07914 | 263 |
| A07561 | A07958 | 246 | A07561 | A08079 | 294 |
| A07561 | A08210 | 285 | A07561 | A08785 | 480 |
| A07561 | A10967 | 246 | A07561 | A11313 | 433 |
| A07561 | A11664 | 388 | A07561 | A11721 | 474 |
| A07561 | A12793 | 319 | A07561 | A13871 | 462 |
| A07561 | A13879 | 436 | A07561 | A14381 | 163 |
| A07561 | A17078 | 302 | A07561 | A17108 | 234 |
| A07562 | A07958 | 318 | A07562 | A08785 | 318 |
| A07562 | A11311 | 458 | A07562 | A11428 | 414 |
| A07562 | A15328 | 286 | A07563 | A07608 | 401 |
| A07563 | A07610 | 363 | A07563 | A07630 | 401 |
| A07563 | A07635 | 371 | A07564 | A09573 | 394 |
| A07565 | A11118 | 465 | A07566 | A14204 | 157 |
| A07566 | A17076 | 379 | A07566 | A17207 | 384 |

|        |        |     |        |        |     |
|--------|--------|-----|--------|--------|-----|
| A07567 | A07652 | 491 | A07567 | A07653 | 396 |
| A07567 | A07654 | 489 | A07567 | A07673 | 491 |
| A07567 | A07754 | 477 | A07567 | A07913 | 490 |
| A07567 | A07914 | 475 | A07567 | A07916 | 466 |
| A07567 | A07928 | 486 | A07567 | A07988 | 418 |
| A07567 | A08218 | 391 | A07567 | A08404 | 475 |
| A07567 | A08785 | 417 | A07568 | A09487 | 302 |
| A07568 | A12111 | 202 | A07568 | A14636 | 172 |
| A07569 | A07792 | 469 | A07569 | A07902 | 303 |
| A07569 | A08572 | 224 | A07569 | A09616 | 427 |
| A07569 | A11322 | 355 | A07569 | A11374 | 366 |
| A07570 | A07700 | 201 | A07570 | A10616 | 241 |
| A07570 | A14449 | 218 | A07571 | A07931 | 374 |
| A07571 | A07974 | 597 | A07571 | A08097 | 317 |
| A07571 | A09340 | 317 | A07571 | A09350 | 356 |
| A07571 | A10281 | 454 | A07571 | A14006 | 184 |
| A07571 | A14525 | 218 | A07571 | A14858 | 380 |
| A07571 | A14986 | 204 | A07571 | A15655 | 414 |
| A07572 | A08884 | 382 | A07572 | A09340 | 294 |
| A07572 | A14230 | 176 | A07572 | A16440 | 235 |
| A07574 | A07674 | 168 | A07574 | A08137 | 274 |
| A07574 | A10652 | 288 | A07574 | A11189 | 274 |
| A07574 | A13295 | 430 | A07574 | A14152 | 162 |
| A07574 | A14996 | 413 | A07575 | A12824 | 291 |
| A07577 | A07578 | 412 | A07577 | A07605 | 483 |
| A07577 | A07905 | 418 | A07577 | A07982 | 412 |
| A07577 | A11313 | 293 | A07577 | A11317 | 361 |
| A07577 | A14353 | 385 | A07578 | A07605 | 436 |
| A07579 | A07580 | 441 | A07580 | A07904 | 419 |
| A07580 | A11172 | 424 | A07580 | A12572 | 441 |
| A07581 | A07965 | 208 | A07581 | A08137 | 199 |
| A07581 | A08301 | 327 | A07581 | A08358 | 369 |
| A07581 | A08359 | 488 | A07581 | A08408 | 185 |
| A07581 | A08457 | 200 | A07581 | A09726 | 271 |
| A07581 | A11440 | 162 | A07581 | A11562 | 185 |
| A07581 | A11688 | 173 | A07581 | A11857 | 379 |
| A07581 | A12270 | 238 | A07581 | A12821 | 195 |
| A07581 | A13340 | 238 | A07581 | A13875 | 188 |
| A07581 | A13989 | 409 | A07581 | A14169 | 152 |
| A07581 | A14478 | 219 | A07581 | A14508 | 485 |
| A07581 | A15499 | 434 | A07581 | A15500 | 489 |
| A07581 | A15660 | 313 | A07581 | A15920 | 154 |
| A07581 | A15932 | 160 | A07581 | A16118 | 473 |
| A07581 | A16686 | 196 | A07583 | A09423 | 465 |
| A07583 | A10402 | 307 | A07583 | A11277 | 224 |
| A07583 | A13989 | 257 | A07583 | A14597 | 491 |

|        |        |     |        |        |     |
|--------|--------|-----|--------|--------|-----|
| A07583 | A14701 | 489 | A07583 | A15270 | 445 |
| A07583 | A15338 | 182 | A07584 | A07700 | 411 |
| A07584 | A08011 | 269 | A07584 | A08452 | 221 |
| A07584 | A08491 | 93  | A07584 | A08972 | 246 |
| A07584 | A09307 | 162 | A07584 | A09322 | 260 |
| A07584 | A09328 | 187 | A07584 | A09619 | 110 |
| A07584 | A09664 | 333 | A07584 | A09674 | 254 |
| A07584 | A10616 | 117 | A07584 | A11480 | 152 |
| A07584 | A11704 | 165 | A07584 | A12419 | 230 |
| A07584 | A13055 | 483 | A07584 | A13249 | 215 |
| A07584 | A14080 | 157 | A07584 | A14505 | 210 |
| A07584 | A14816 | 262 | A07584 | A15249 | 332 |
| A07586 | A08838 | 249 | A07586 | A11334 | 251 |
| A07586 | A14013 | 340 | A07587 | A14196 | 240 |
| A07588 | A08955 | 223 | A07588 | A08971 | 223 |
| A07588 | A10071 | 328 | A07588 | A10463 | 372 |
| A07588 | A10755 | 252 | A07588 | A11202 | 223 |
| A07588 | A13298 | 560 | A07588 | A14216 | 313 |
| A07588 | A15661 | 154 | A07590 | A07627 | 333 |
| A07590 | A07688 | 198 | A07590 | A07690 | 241 |
| A07590 | A07718 | 306 | A07590 | A07721 | 481 |
| A07590 | A07736 | 491 | A07590 | A07737 | 258 |
| A07590 | A07796 | 279 | A07590 | A07800 | 238 |
| A07590 | A07844 | 423 | A07590 | A07875 | 356 |
| A07590 | A07926 | 340 | A07590 | A07933 | 488 |
| A07590 | A07973 | 477 | A07590 | A07976 | 468 |
| A07590 | A08099 | 172 | A07590 | A08135 | 430 |
| A07590 | A08155 | 285 | A07590 | A08238 | 461 |
| A07590 | A08250 | 480 | A07590 | A08366 | 232 |
| A07590 | A08751 | 294 | A07590 | A09059 | 435 |
| A07590 | A09876 | 469 | A07590 | A10420 | 465 |
| A07590 | A10421 | 317 | A07590 | A10437 | 447 |
| A07590 | A10441 | 273 | A07590 | A10443 | 439 |
| A07590 | A10444 | 491 | A07590 | A10452 | 491 |
| A07590 | A10547 | 182 | A07590 | A10612 | 268 |
| A07590 | A10656 | 490 | A07590 | A10658 | 386 |
| A07590 | A10672 | 441 | A07590 | A10676 | 406 |
| A07590 | A10677 | 485 | A07590 | A10681 | 260 |
| A07590 | A10685 | 307 | A07590 | A10686 | 273 |
| A07590 | A10688 | 285 | A07590 | A10690 | 285 |
| A07590 | A10694 | 438 | A07590 | A10702 | 159 |
| A07590 | A10706 | 232 | A07590 | A10707 | 279 |
| A07590 | A10712 | 182 | A07590 | A10714 | 291 |
| A07590 | A10904 | 340 | A07590 | A11309 | 369 |
| A07590 | A11381 | 416 | A07590 | A12723 | 171 |
| A07590 | A13204 | 368 | A07590 | A13734 | 227 |

|        |        |     |        |        |     |
|--------|--------|-----|--------|--------|-----|
| A07590 | A13735 | 428 | A07590 | A14654 | 216 |
| A07590 | A14803 | 486 | A07590 | A14856 | 486 |
| A07590 | A14870 | 205 | A07590 | A14872 | 232 |
| A07590 | A14907 | 368 | A07590 | A15223 | 216 |
| A07590 | A15970 | 257 | A07590 | A16103 | 260 |
| A07590 | A16286 | 468 | A07590 | A16335 | 396 |
| A07590 | A16419 | 267 | A07590 | A16529 | 398 |
| A07590 | A16959 | 193 | A07590 | A17007 | 240 |
| A07590 | A17040 | 165 | A07590 | A17041 | 456 |
| A07590 | A17089 | 160 | A07591 | A08910 | 283 |
| A07591 | A14335 | 384 | A07591 | A14650 | 255 |
| A07593 | A07880 | 319 | A07593 | A08196 | 491 |
| A07593 | A08255 | 269 | A07593 | A08355 | 196 |
| A07593 | A08416 | 422 | A07593 | A08503 | 490 |
| A07593 | A08525 | 489 | A07593 | A08543 | 201 |
| A07593 | A08549 | 491 | A07593 | A08550 | 152 |
| A07593 | A08557 | 486 | A07593 | A08560 | 454 |
| A07593 | A08561 | 450 | A07593 | A08814 | 210 |
| A07593 | A08847 | 489 | A07593 | A09256 | 465 |
| A07593 | A09609 | 232 | A07593 | A09767 | 447 |
| A07593 | A09793 | 466 | A07593 | A09828 | 195 |
| A07593 | A09829 | 328 | A07593 | A10789 | 420 |
| A07593 | A10931 | 477 | A07593 | A11027 | 202 |
| A07593 | A11284 | 483 | A07593 | A11301 | 160 |
| A07593 | A11496 | 283 | A07593 | A11497 | 311 |
| A07593 | A11534 | 345 | A07593 | A11629 | 199 |
| A07593 | A11675 | 288 | A07593 | A11884 | 274 |
| A07593 | A11914 | 226 | A07593 | A11954 | 177 |
| A07593 | A12208 | 440 | A07593 | A12215 | 213 |
| A07593 | A12401 | 241 | A07593 | A12445 | 374 |
| A07593 | A12606 | 265 | A07593 | A12725 | 461 |
| A07593 | A12727 | 216 | A07593 | A12858 | 388 |
| A07593 | A12873 | 180 | A07593 | A13082 | 199 |
| A07593 | A13788 | 165 | A07593 | A13912 | 251 |
| A07593 | A13963 | 286 | A07593 | A14084 | 441 |
| A07593 | A14209 | 217 | A07593 | A14212 | 180 |
| A07593 | A14214 | 188 | A07593 | A14222 | 491 |
| A07593 | A14227 | 406 | A07593 | A14260 | 491 |
| A07593 | A14278 | 491 | A07593 | A14280 | 477 |
| A07593 | A14285 | 473 | A07593 | A14286 | 160 |
| A07593 | A14289 | 208 | A07593 | A14301 | 257 |
| A07593 | A14358 | 154 | A07593 | A14484 | 383 |
| A07593 | A14569 | 168 | A07593 | A14718 | 491 |
| A07593 | A14903 | 177 | A07593 | A15187 | 311 |
| A07593 | A15262 | 221 | A07593 | A15295 | 154 |
| A07593 | A15380 | 423 | A07593 | A15541 | 188 |

|        |        |     |        |        |     |
|--------|--------|-----|--------|--------|-----|
| A07593 | A16157 | 279 | A07593 | A16343 | 257 |
| A07593 | A16418 | 352 | A07593 | A16565 | 208 |
| A07593 | A16597 | 212 | A07593 | A16611 | 291 |
| A07593 | A16664 | 204 | A07593 | A16790 | 254 |
| A07593 | A16797 | 257 | A07593 | A16829 | 174 |
| A07593 | A16882 | 172 | A07593 | A17125 | 475 |
| A07594 | A10847 | 460 | A07595 | A07996 | 159 |
| A07595 | A08000 | 246 | A07595 | A08212 | 210 |
| A07595 | A08738 | 219 | A07597 | A08773 | 187 |
| A07597 | A09332 | 305 | A07597 | A10535 | 380 |
| A07597 | A11427 | 208 | A07597 | A14825 | 319 |
| A07598 | A08503 | 266 | A07598 | A09351 | 184 |
| A07598 | A09673 | 168 | A07598 | A09767 | 346 |
| A07598 | A09793 | 173 | A07598 | A11534 | 279 |
| A07598 | A11558 | 184 | A07598 | A11851 | 184 |
| A07598 | A11884 | 228 | A07598 | A12445 | 307 |
| A07598 | A13356 | 184 | A07598 | A14210 | 184 |
| A07598 | A14227 | 257 | A07598 | A15533 | 299 |
| A07598 | A15730 | 262 | A07598 | A16152 | 184 |
| A07601 | A07606 | 408 | A07601 | A07886 | 429 |
| A07601 | A08034 | 452 | A07601 | A08115 | 457 |
| A07601 | A08116 | 460 | A07601 | A08401 | 429 |
| A07601 | A08455 | 419 | A07601 | A08486 | 429 |
| A07601 | A10000 | 443 | A07601 | A14633 | 165 |
| A07602 | A08277 | 358 | A07602 | A08556 | 154 |
| A07602 | A08761 | 488 | A07602 | A08762 | 456 |
| A07602 | A16583 | 332 | A07603 | A07647 | 486 |
| A07603 | A07902 | 489 | A07603 | A07996 | 491 |
| A07603 | A08000 | 486 | A07603 | A08029 | 462 |
| A07603 | A08030 | 491 | A07603 | A08117 | 491 |
| A07603 | A08208 | 454 | A07603 | A08212 | 491 |
| A07603 | A08516 | 491 | A07603 | A08526 | 163 |
| A07603 | A08669 | 491 | A07603 | A08769 | 334 |
| A07603 | A08820 | 490 | A07603 | A08888 | 414 |
| A07603 | A08919 | 419 | A07603 | A09000 | 285 |
| A07603 | A09102 | 182 | A07603 | A09288 | 491 |
| A07603 | A09598 | 486 | A07603 | A09653 | 394 |
| A07603 | A09706 | 419 | A07603 | A09751 | 382 |
| A07603 | A09752 | 484 | A07603 | A09753 | 68  |
| A07603 | A09754 | 368 | A07603 | A09755 | 358 |
| A07603 | A10083 | 512 | A07603 | A10373 | 491 |
| A07603 | A11236 | 486 | A07603 | A11540 | 310 |
| A07603 | A11841 | 185 | A07603 | A11870 | 358 |
| A07603 | A11916 | 491 | A07603 | A12190 | 210 |
| A07603 | A12556 | 491 | A07603 | A12625 | 486 |
| A07603 | A12722 | 534 | A07603 | A13241 | 490 |



|        |        |     |        |        |     |
|--------|--------|-----|--------|--------|-----|
| A07603 | A13257 | 479 | A07603 | A13429 | 224 |
| A07603 | A13889 | 452 | A07603 | A13949 | 491 |
| A07603 | A14076 | 491 | A07603 | A14079 | 491 |
| A07603 | A14094 | 491 | A07603 | A14154 | 273 |
| A07603 | A14155 | 193 | A07603 | A14192 | 348 |
| A07603 | A14223 | 322 | A07603 | A14230 | 489 |
| A07603 | A14273 | 491 | A07603 | A14460 | 491 |
| A07603 | A14477 | 481 | A07603 | A14528 | 306 |
| A07603 | A14674 | 489 | A07603 | A14694 | 490 |
| A07603 | A15356 | 455 | A07603 | A15367 | 473 |
| A07603 | A15369 | 491 | A07603 | A15420 | 188 |
| A07603 | A15714 | 301 | A07603 | A15837 | 443 |
| A07603 | A15941 | 483 | A07603 | A16071 | 163 |
| A07603 | A16073 | 330 | A07603 | A16127 | 491 |
| A07603 | A16128 | 491 | A07603 | A16129 | 491 |
| A07603 | A16134 | 480 | A07603 | A16225 | 218 |
| A07603 | A16226 | 491 | A07603 | A16299 | 159 |
| A07603 | A16378 | 491 | A07603 | A16606 | 491 |
| A07603 | A16613 | 491 | A07603 | A16616 | 489 |
| A07603 | A16626 | 491 | A07603 | A16754 | 489 |
| A07603 | A17075 | 429 | A07604 | A07706 | 217 |
| A07604 | A07798 | 470 | A07604 | A08137 | 491 |
| A07604 | A08571 | 480 | A07604 | A09337 | 246 |
| A07604 | A09736 | 413 | A07604 | A09737 | 486 |
| A07604 | A09738 | 472 | A07604 | A09758 | 411 |
| A07604 | A10601 | 241 | A07604 | A11286 | 402 |
| A07604 | A11291 | 462 | A07604 | A11323 | 481 |
| A07604 | A11405 | 485 | A07604 | A11406 | 235 |
| A07604 | A11458 | 390 | A07604 | A11567 | 294 |
| A07604 | A12069 | 452 | A07604 | A12146 | 212 |
| A07604 | A12543 | 491 | A07604 | A12943 | 196 |
| A07604 | A13074 | 455 | A07604 | A13609 | 316 |
| A07604 | A13928 | 348 | A07604 | A13989 | 491 |
| A07604 | A14006 | 483 | A07604 | A14148 | 332 |
| A07604 | A14184 | 294 | A07604 | A14196 | 491 |
| A07604 | A14220 | 490 | A07604 | A14221 | 490 |
| A07604 | A14257 | 477 | A07604 | A14265 | 491 |
| A07604 | A14303 | 490 | A07604 | A14596 | 436 |
| A07604 | A14661 | 151 | A07604 | A14875 | 329 |
| A07604 | A15116 | 224 | A07604 | A15291 | 491 |
| A07604 | A15297 | 466 | A07604 | A15323 | 213 |
| A07604 | A15338 | 427 | A07604 | A15366 | 483 |
| A07604 | A15492 | 465 | A07604 | A15559 | 368 |
| A07604 | A15695 | 268 | A07604 | A15752 | 484 |
| A07604 | A15773 | 277 | A07604 | A15851 | 216 |
| A07604 | A15878 | 170 | A07604 | A16490 | 184 |

|        |        |     |        |        |     |
|--------|--------|-----|--------|--------|-----|
| A07604 | A16722 | 118 | A07604 | A17063 | 488 |
| A07604 | A17198 | 491 | A07605 | A07666 | 346 |
| A07605 | A07905 | 373 | A07605 | A07907 | 362 |
| A07605 | A07982 | 362 | A07605 | A08077 | 350 |
| A07605 | A08162 | 335 | A07605 | A08229 | 390 |
| A07605 | A08392 | 362 | A07605 | A08714 | 218 |
| A07605 | A08938 | 335 | A07605 | A09204 | 199 |
| A07605 | A09238 | 159 | A07605 | A09581 | 330 |
| A07605 | A09745 | 184 | A07605 | A10156 | 200 |
| A07605 | A10561 | 400 | A07605 | A10590 | 262 |
| A07605 | A11101 | 488 | A07605 | A11282 | 247 |
| A07605 | A11313 | 469 | A07605 | A11317 | 480 |
| A07605 | A11339 | 420 | A07605 | A11446 | 447 |
| A07605 | A11449 | 297 | A07605 | A11712 | 362 |
| A07605 | A12021 | 373 | A07605 | A12454 | 390 |
| A07605 | A12464 | 353 | A07605 | A12578 | 390 |
| A07605 | A12633 | 469 | A07605 | A13351 | 461 |
| A07605 | A13361 | 401 | A07605 | A13369 | 208 |
| A07605 | A14010 | 156 | A07605 | A14378 | 215 |
| A07605 | A14892 | 390 | A07605 | A15433 | 226 |
| A07605 | A15451 | 268 | A07605 | A15456 | 238 |
| A07605 | A15457 | 290 | A07605 | A15498 | 254 |
| A07605 | A16719 | 322 | A07606 | A07904 | 419 |
| A07606 | A07907 | 430 | A07606 | A10000 | 402 |
| A07607 | A07672 | 63  | A07608 | A07635 | 335 |
| A07609 | A14430 | 339 | A07610 | A07629 | 447 |
| A07610 | A07630 | 323 | A07610 | A07632 | 452 |
| A07610 | A07633 | 428 | A07610 | A07634 | 210 |
| A07610 | A07635 | 383 | A07610 | A07636 | 318 |
| A07610 | A07754 | 199 | A07610 | A08079 | 321 |
| A07610 | A08785 | 424 | A07610 | A10967 | 288 |
| A07610 | A12793 | 223 | A07610 | A13871 | 424 |
| A07610 | A17108 | 267 | A07613 | A07778 | 423 |
| A07613 | A10683 | 351 | A07613 | A10882 | 398 |
| A07613 | A14511 | 193 | A07613 | A15313 | 218 |
| A07613 | A15462 | 283 | A07616 | A09768 | 479 |
| A07616 | A11291 | 176 | A07616 | A11579 | 395 |
| A07616 | A13096 | 423 | A07616 | A14257 | 171 |
| A07616 | A14596 | 438 | A07616 | A14659 | 463 |
| A07616 | A15507 | 272 | A07616 | A15722 | 479 |
| A07616 | A17105 | 377 | A07617 | A07958 | 475 |
| A07617 | A10967 | 467 | A07617 | A11630 | 412 |
| A07617 | A12793 | 285 | A07619 | A07674 | 290 |
| A07621 | A08182 | 484 | A07621 | A14191 | 173 |
| A07621 | A14272 | 350 | A07622 | A07841 | 469 |
| A07623 | A08500 | 441 | A07623 | A12600 | 441 |

|        |        |     |        |        |     |
|--------|--------|-----|--------|--------|-----|
| A07625 | A07924 | 514 | A07625 | A07968 | 350 |
| A07625 | A08112 | 350 | A07625 | A08137 | 472 |
| A07625 | A08211 | 215 | A07625 | A09324 | 294 |
| A07625 | A10465 | 443 | A07625 | A10616 | 366 |
| A07625 | A10923 | 319 | A07625 | A11544 | 174 |
| A07625 | A11831 | 174 | A07625 | A11832 | 174 |
| A07625 | A13989 | 491 | A07625 | A15309 | 380 |
| A07625 | A15764 | 219 | A07625 | A16302 | 259 |
| A07626 | A07685 | 394 | A07626 | A07836 | 475 |
| A07626 | A07837 | 401 | A07626 | A07868 | 414 |
| A07626 | A08009 | 394 | A07626 | A08266 | 394 |
| A07626 | A08386 | 394 | A07626 | A10653 | 414 |
| A07626 | A10654 | 414 | A07626 | A14883 | 382 |
| A07627 | A07721 | 258 | A07627 | A08751 | 398 |
| A07628 | A16626 | 307 | A07629 | A07630 | 358 |
| A07629 | A07632 | 486 | A07629 | A07633 | 468 |
| A07629 | A07636 | 433 | A07629 | A07754 | 252 |
| A07629 | A08785 | 483 | A07629 | A14220 | 188 |
| A07629 | A15665 | 167 | A07630 | A07634 | 443 |
| A07630 | A07635 | 480 | A07630 | A08785 | 363 |
| A07630 | A14188 | 168 | A07630 | A17078 | 335 |
| A07631 | A08785 | 296 | A07631 | A17078 | 267 |
| A07632 | A07633 | 486 | A07632 | A08785 | 357 |
| A07632 | A10967 | 230 | A07632 | A13879 | 288 |
| A07633 | A08785 | 271 | A07633 | A13879 | 322 |
| A07634 | A07635 | 353 | A07634 | A07657 | 366 |
| A07634 | A07754 | 154 | A07634 | A07914 | 375 |
| A07634 | A08404 | 307 | A07634 | A08785 | 454 |
| A07634 | A13871 | 193 | A07634 | A13879 | 174 |
| A07634 | A17078 | 366 | A07635 | A07653 | 409 |
| A07635 | A07662 | 441 | A07635 | A07673 | 479 |
| A07635 | A07754 | 465 | A07635 | A07913 | 480 |
| A07635 | A07914 | 449 | A07635 | A07928 | 308 |
| A07635 | A07958 | 168 | A07635 | A08210 | 454 |
| A07635 | A08218 | 302 | A07635 | A08404 | 419 |
| A07635 | A08783 | 371 | A07635 | A08784 | 406 |
| A07635 | A08785 | 491 | A07635 | A10649 | 451 |
| A07635 | A10680 | 406 | A07635 | A11313 | 223 |
| A07635 | A11448 | 393 | A07635 | A13871 | 251 |
| A07636 | A07754 | 386 | A07636 | A08785 | 234 |
| A07636 | A11157 | 277 | A07636 | A11313 | 283 |
| A07637 | A13879 | 350 | A07639 | A09837 | 419 |
| A07640 | A13027 | 422 | A07641 | A07782 | 391 |
| A07641 | A07783 | 412 | A07641 | A07817 | 454 |
| A07641 | A11411 | 326 | A07641 | A12613 | 412 |
| A07641 | A13064 | 412 | A07641 | A13503 | 412 |

|        |        |     |        |        |     |
|--------|--------|-----|--------|--------|-----|
| A07641 | A14475 | 208 | A07641 | A14589 | 229 |
| A07641 | A15336 | 311 | A07641 | A16068 | 317 |
| A07641 | A16400 | 160 | A07641 | A16626 | 338 |
| A07642 | A08331 | 363 | A07642 | A08463 | 438 |
| A07642 | A08889 | 438 | A07642 | A09334 | 218 |
| A07642 | A11158 | 424 | A07642 | A12208 | 255 |
| A07643 | A08109 | 241 | A07643 | A08667 | 179 |
| A07643 | A09678 | 252 | A07643 | A09846 | 176 |
| A07643 | A10700 | 246 | A07643 | A10715 | 182 |
| A07643 | A15685 | 294 | A07643 | A16013 | 165 |
| A07643 | A17006 | 191 | A07643 | A17007 | 160 |
| A07644 | A10616 | 413 | A07644 | A13870 | 183 |
| A07644 | A14006 | 291 | A07645 | A10646 | 469 |
| A07647 | A07902 | 369 | A07647 | A07989 | 146 |
| A07647 | A07996 | 419 | A07647 | A08000 | 324 |
| A07647 | A08029 | 174 | A07647 | A08030 | 490 |
| A07647 | A08117 | 401 | A07647 | A08141 | 491 |
| A07647 | A08208 | 491 | A07647 | A08212 | 179 |
| A07647 | A08669 | 430 | A07647 | A08820 | 454 |
| A07647 | A08902 | 266 | A07647 | A09626 | 427 |
| A07647 | A09663 | 303 | A07647 | A09727 | 263 |
| A07647 | A10625 | 488 | A07647 | A13949 | 477 |
| A07647 | A14079 | 491 | A07647 | A14177 | 168 |
| A07647 | A14273 | 491 | A07647 | A14460 | 290 |
| A07647 | A14694 | 383 | A07647 | A14882 | 196 |
| A07647 | A15369 | 305 | A07647 | A15371 | 312 |
| A07647 | A15645 | 479 | A07647 | A15654 | 232 |
| A07647 | A15714 | 198 | A07647 | A15941 | 489 |
| A07647 | A16127 | 491 | A07647 | A16128 | 490 |
| A07647 | A16129 | 85  | A07647 | A16134 | 274 |
| A07647 | A16225 | 213 | A07647 | A16226 | 438 |
| A07647 | A16294 | 432 | A07647 | A16612 | 314 |
| A07647 | A16613 | 450 | A07647 | A16626 | 480 |
| A07647 | A16646 | 188 | A07647 | A16754 | 79  |
| A07650 | A07754 | 398 | A07650 | A11287 | 267 |
| A07650 | A11424 | 388 | A07650 | A13140 | 401 |
| A07652 | A07653 | 457 | A07652 | A07654 | 418 |
| A07652 | A07673 | 396 | A07652 | A07754 | 469 |
| A07652 | A07913 | 488 | A07652 | A07914 | 330 |
| A07652 | A07916 | 485 | A07652 | A07928 | 473 |
| A07652 | A07988 | 477 | A07652 | A08218 | 472 |
| A07652 | A08404 | 477 | A07652 | A08785 | 204 |
| A07653 | A07673 | 475 | A07653 | A07740 | 340 |
| A07653 | A07754 | 489 | A07653 | A07913 | 485 |
| A07653 | A07914 | 484 | A07653 | A07916 | 343 |
| A07653 | A07958 | 210 | A07653 | A08165 | 418 |

|        |        |     |        |        |     |
|--------|--------|-----|--------|--------|-----|
| A07653 | A08210 | 348 | A07653 | A08404 | 470 |
| A07653 | A08785 | 446 | A07654 | A07673 | 489 |
| A07654 | A07754 | 454 | A07654 | A07911 | 151 |
| A07654 | A07913 | 454 | A07654 | A07914 | 324 |
| A07654 | A07916 | 333 | A07654 | A07928 | 480 |
| A07654 | A08218 | 321 | A07654 | A08404 | 468 |
| A07654 | A09164 | 329 | A07654 | A10563 | 243 |
| A07654 | A13517 | 193 | A07654 | A15044 | 401 |
| A07654 | A15049 | 414 | A07654 | A15296 | 152 |
| A07654 | A15328 | 152 | A07655 | A07748 | 385 |
| A07655 | A07878 | 473 | A07655 | A08660 | 475 |
| A07655 | A08667 | 319 | A07655 | A08688 | 491 |
| A07655 | A08775 | 317 | A07655 | A10394 | 393 |
| A07655 | A10823 | 372 | A07655 | A11885 | 326 |
| A07655 | A12092 | 401 | A07655 | A14391 | 193 |
| A07655 | A14430 | 162 | A07655 | A14554 | 241 |
| A07655 | A14860 | 332 | A07655 | A15241 | 185 |
| A07655 | A15282 | 152 | A07656 | A08207 | 235 |
| A07658 | A11688 | 475 | A07658 | A15932 | 184 |
| A07659 | A07660 | 358 | A07659 | A07753 | 339 |
| A07659 | A07800 | 484 | A07659 | A07848 | 159 |
| A07659 | A08099 | 468 | A07659 | A08193 | 156 |
| A07659 | A08205 | 374 | A07659 | A09612 | 324 |
| A07659 | A10702 | 262 | A07659 | A10875 | 288 |
| A07659 | A11309 | 457 | A07659 | A16033 | 330 |
| A07659 | A16368 | 469 | A07659 | A16529 | 346 |
| A07659 | A16596 | 396 | A07659 | A16959 | 445 |
| A07660 | A07800 | 379 | A07660 | A08099 | 183 |
| A07660 | A08404 | 210 | A07660 | A08627 | 221 |
| A07660 | A10077 | 402 | A07660 | A11309 | 263 |
| A07660 | A11683 | 243 | A07660 | A15241 | 228 |
| A07660 | A16368 | 388 | A07662 | A08210 | 395 |
| A07662 | A08785 | 296 | A07664 | A09078 | 383 |
| A07664 | A14247 | 435 | A07664 | A15817 | 263 |
| A07665 | A07893 | 205 | A07665 | A08445 | 228 |
| A07665 | A08934 | 319 | A07665 | A11023 | 491 |
| A07665 | A11149 | 491 | A07665 | A11150 | 484 |
| A07665 | A11180 | 191 | A07665 | A11201 | 257 |
| A07665 | A11281 | 490 | A07665 | A11293 | 396 |
| A07665 | A11346 | 179 | A07665 | A11471 | 179 |
| A07665 | A11684 | 232 | A07665 | A12047 | 412 |
| A07665 | A12051 | 408 | A07665 | A12651 | 168 |
| A07665 | A13927 | 417 | A07665 | A13936 | 405 |
| A07665 | A14281 | 491 | A07665 | A15035 | 246 |
| A07665 | A15102 | 212 | A07666 | A11313 | 335 |
| A07667 | A08008 | 438 | A07667 | A11564 | 413 |

|        |        |     |        |        |     |
|--------|--------|-----|--------|--------|-----|
| A07669 | A16134 | 184 | A07670 | A07756 | 343 |
| A07670 | A07850 | 382 | A07670 | A07887 | 332 |
| A07670 | A07920 | 486 | A07670 | A08011 | 174 |
| A07670 | A08383 | 156 | A07670 | A08495 | 398 |
| A07670 | A08818 | 156 | A07670 | A09502 | 156 |
| A07670 | A09712 | 246 | A07670 | A11344 | 156 |
| A07670 | A11674 | 156 | A07670 | A12284 | 372 |
| A07670 | A12824 | 386 | A07670 | A15837 | 229 |
| A07670 | A15858 | 212 | A07670 | A16228 | 419 |
| A07670 | A16626 | 229 | A07670 | A16643 | 229 |
| A07670 | A16862 | 322 | A07671 | A08019 | 452 |
| A07671 | A08020 | 452 | A07671 | A08021 | 452 |
| A07671 | A12626 | 452 | A07671 | A14984 | 452 |
| A07673 | A07740 | 446 | A07673 | A07741 | 347 |
| A07673 | A07754 | 491 | A07673 | A07913 | 491 |
| A07673 | A07914 | 491 | A07673 | A07916 | 467 |
| A07673 | A07928 | 490 | A07673 | A07950 | 363 |
| A07673 | A07988 | 456 | A07673 | A08218 | 475 |
| A07673 | A08404 | 491 | A07673 | A08511 | 396 |
| A07673 | A08785 | 491 | A07673 | A10563 | 193 |
| A07673 | A11552 | 395 | A07674 | A07690 | 330 |
| A07674 | A07718 | 409 | A07674 | A07723 | 227 |
| A07674 | A07736 | 221 | A07674 | A07757 | 311 |
| A07674 | A07763 | 187 | A07674 | A07847 | 302 |
| A07674 | A07856 | 276 | A07674 | A07933 | 446 |
| A07674 | A07976 | 293 | A07674 | A08155 | 456 |
| A07674 | A08197 | 219 | A07674 | A08238 | 227 |
| A07674 | A08280 | 236 | A07674 | A08663 | 347 |
| A07674 | A09364 | 285 | A07674 | A09846 | 213 |
| A07674 | A09879 | 243 | A07674 | A09880 | 252 |
| A07674 | A09881 | 249 | A07674 | A10420 | 274 |
| A07674 | A10422 | 243 | A07674 | A10423 | 210 |
| A07674 | A10424 | 258 | A07674 | A10427 | 188 |
| A07674 | A10456 | 273 | A07674 | A10458 | 258 |
| A07674 | A10652 | 413 | A07674 | A10656 | 170 |
| A07674 | A10672 | 241 | A07674 | A10686 | 232 |
| A07674 | A10687 | 260 | A07674 | A10690 | 369 |
| A07674 | A10692 | 290 | A07674 | A10713 | 154 |
| A07674 | A10781 | 229 | A07674 | A11189 | 328 |
| A07674 | A14328 | 364 | A07674 | A14821 | 258 |
| A07674 | A14856 | 270 | A07674 | A16286 | 323 |
| A07674 | A17024 | 329 | A07674 | A17046 | 260 |
| A07674 | A17078 | 232 | A07674 | A17092 | 329 |
| A07676 | A07704 | 398 | A07676 | A07705 | 394 |
| A07676 | A08292 | 412 | A07676 | A10900 | 447 |
| A07676 | A12845 | 432 | A07677 | A07695 | 281 |

|        |        |     |        |        |     |
|--------|--------|-----|--------|--------|-----|
| A07677 | A08022 | 152 | A07677 | A13989 | 407 |
| A07679 | A16002 | 63  | A07680 | A07706 | 188 |
| A07680 | A14594 | 314 | A07682 | A15498 | 160 |
| A07683 | A15267 | 394 | A07683 | A15726 | 306 |
| A07684 | A07688 | 263 | A07684 | A07763 | 491 |
| A07684 | A07976 | 187 | A07684 | A08114 | 456 |
| A07684 | A08197 | 489 | A07684 | A08279 | 341 |
| A07684 | A10422 | 457 | A07684 | A10423 | 202 |
| A07684 | A10679 | 483 | A07684 | A13717 | 438 |
| A07684 | A14821 | 427 | A07684 | A17024 | 389 |
| A07685 | A07837 | 438 | A07685 | A07868 | 445 |
| A07685 | A08005 | 438 | A07685 | A08009 | 434 |
| A07686 | A08935 | 422 | A07686 | A12408 | 390 |
| A07686 | A12409 | 364 | A07687 | A07934 | 204 |
| A07687 | A08351 | 398 | A07687 | A08352 | 307 |
| A07687 | A08552 | 307 | A07687 | A09304 | 307 |
| A07687 | A09624 | 172 | A07687 | A09793 | 152 |
| A07687 | A10377 | 196 | A07687 | A10909 | 375 |
| A07687 | A11283 | 361 | A07687 | A11332 | 307 |
| A07687 | A11828 | 307 | A07687 | A11840 | 307 |
| A07687 | A12047 | 609 | A07687 | A12938 | 825 |
| A07687 | A13964 | 162 | A07687 | A14266 | 257 |
| A07687 | A14278 | 196 | A07687 | A16807 | 243 |
| A07688 | A07736 | 168 | A07688 | A07763 | 252 |
| A07688 | A07800 | 477 | A07688 | A07848 | 191 |
| A07688 | A08099 | 205 | A07688 | A08108 | 372 |
| A07688 | A08197 | 281 | A07688 | A08238 | 288 |
| A07688 | A08252 | 193 | A07688 | A08368 | 361 |
| A07688 | A08687 | 306 | A07688 | A08817 | 201 |
| A07688 | A10456 | 291 | A07688 | A10550 | 406 |
| A07688 | A10652 | 276 | A07688 | A10677 | 215 |
| A07688 | A10681 | 441 | A07688 | A10693 | 372 |
| A07688 | A10702 | 396 | A07688 | A10712 | 338 |
| A07688 | A10714 | 182 | A07688 | A10875 | 213 |
| A07688 | A10885 | 274 | A07688 | A11309 | 388 |
| A07688 | A11325 | 235 | A07688 | A11381 | 162 |
| A07688 | A12055 | 335 | A07688 | A13026 | 395 |
| A07688 | A13330 | 256 | A07688 | A13871 | 221 |
| A07688 | A14527 | 182 | A07688 | A14862 | 313 |
| A07688 | A14871 | 347 | A07688 | A15497 | 172 |
| A07688 | A15611 | 190 | A07688 | A15673 | 156 |
| A07688 | A15874 | 384 | A07688 | A15974 | 356 |
| A07688 | A16026 | 249 | A07688 | A16027 | 469 |
| A07688 | A16028 | 389 | A07688 | A16529 | 360 |
| A07688 | A16741 | 235 | A07688 | A16959 | 218 |
| A07689 | A07752 | 466 | A07689 | A07785 | 446 |

|        |        |     |        |        |     |
|--------|--------|-----|--------|--------|-----|
| A07689 | A09206 | 386 | A07689 | A11422 | 394 |
| A07690 | A07696 | 188 | A07690 | A07757 | 283 |
| A07690 | A07933 | 427 | A07690 | A07976 | 321 |
| A07690 | A08114 | 174 | A07690 | A08135 | 310 |
| A07690 | A08155 | 457 | A07690 | A08190 | 223 |
| A07690 | A08372 | 306 | A07690 | A08663 | 413 |
| A07690 | A09879 | 334 | A07690 | A09880 | 160 |
| A07690 | A10658 | 326 | A07690 | A10687 | 345 |
| A07690 | A10688 | 423 | A07690 | A10690 | 335 |
| A07690 | A10693 | 288 | A07690 | A10776 | 353 |
| A07690 | A16529 | 313 | A07690 | A16741 | 156 |
| A07690 | A17006 | 416 | A07690 | A17046 | 345 |
| A07690 | A17092 | 449 | A07691 | A14208 | 190 |
| A07691 | A15314 | 196 | A07691 | A15606 | 388 |
| A07692 | A07721 | 218 | A07692 | A07736 | 279 |
| A07692 | A07973 | 411 | A07692 | A07976 | 258 |
| A07692 | A08193 | 401 | A07692 | A08252 | 195 |
| A07692 | A08656 | 401 | A07692 | A09876 | 157 |
| A07692 | A10421 | 235 | A07692 | A10424 | 380 |
| A07692 | A10441 | 466 | A07692 | A10652 | 358 |
| A07692 | A10693 | 458 | A07692 | A10694 | 369 |
| A07692 | A10702 | 445 | A07692 | A15497 | 281 |
| A07692 | A15626 | 218 | A07692 | A15877 | 333 |
| A07692 | A16277 | 340 | A07692 | A16286 | 344 |
| A07692 | A16419 | 366 | A07692 | A16529 | 249 |
| A07693 | A08113 | 249 | A07693 | A08161 | 191 |
| A07693 | A08182 | 291 | A07693 | A08263 | 230 |
| A07693 | A08346 | 477 | A07693 | A08402 | 488 |
| A07693 | A08975 | 195 | A07693 | A09135 | 243 |
| A07693 | A09164 | 270 | A07693 | A09648 | 285 |
| A07693 | A09653 | 196 | A07693 | A14077 | 457 |
| A07693 | A14092 | 353 | A07693 | A14272 | 488 |
| A07693 | A14279 | 254 | A07693 | A15367 | 235 |
| A07693 | A15877 | 466 | A07694 | A08105 | 441 |
| A07694 | A09478 | 441 | A07694 | A10223 | 445 |
| A07695 | A08144 | 744 | A07695 | A08269 | 236 |
| A07695 | A08363 | 366 | A07695 | A08892 | 378 |
| A07695 | A09280 | 283 | A07695 | A09320 | 235 |
| A07695 | A12447 | 393 | A07695 | A14074 | 235 |
| A07695 | A14449 | 265 | A07695 | A15498 | 213 |
| A07695 | A16320 | 246 | A07696 | A07737 | 205 |
| A07696 | A07875 | 322 | A07696 | A07893 | 185 |
| A07696 | A07933 | 234 | A07696 | A08135 | 200 |
| A07696 | A08385 | 306 | A07696 | A09612 | 185 |
| A07696 | A10420 | 156 | A07696 | A10660 | 322 |
| A07696 | A10676 | 258 | A07696 | A10691 | 171 |



|        |        |     |        |        |     |
|--------|--------|-----|--------|--------|-----|
| A07696 | A10899 | 154 | A07696 | A10933 | 322 |
| A07696 | A11281 | 382 | A07696 | A11346 | 246 |
| A07696 | A12047 | 201 | A07696 | A12824 | 165 |
| A07696 | A13341 | 258 | A07696 | A14265 | 288 |
| A07696 | A14281 | 491 | A07696 | A14464 | 258 |
| A07696 | A14474 | 345 | A07696 | A14864 | 157 |
| A07697 | A07826 | 307 | A07697 | A08235 | 326 |
| A07697 | A08251 | 221 | A07697 | A08293 | 491 |
| A07697 | A08356 | 491 | A07697 | A08362 | 491 |
| A07697 | A08553 | 196 | A07697 | A08831 | 486 |
| A07697 | A08956 | 480 | A07697 | A09392 | 199 |
| A07697 | A09659 | 201 | A07697 | A10159 | 552 |
| A07697 | A10373 | 299 | A07697 | A11559 | 227 |
| A07697 | A11591 | 162 | A07697 | A11929 | 182 |
| A07697 | A12211 | 267 | A07697 | A12606 | 307 |
| A07697 | A12662 | 188 | A07697 | A12824 | 490 |
| A07697 | A13070 | 366 | A07697 | A13231 | 191 |
| A07697 | A14208 | 324 | A07697 | A14212 | 490 |
| A07697 | A14213 | 363 | A07697 | A14235 | 314 |
| A07697 | A14701 | 286 | A07697 | A14843 | 154 |
| A07697 | A15224 | 165 | A07697 | A15314 | 260 |
| A07697 | A15328 | 213 | A07697 | A15701 | 452 |
| A07697 | A16006 | 162 | A07697 | A16449 | 286 |
| A07697 | A16802 | 430 | A07697 | A16831 | 210 |
| A07699 | A07705 | 353 | A07699 | A09460 | 420 |
| A07699 | A09518 | 420 | A07699 | A12386 | 440 |
| A07699 | A15234 | 440 | A07700 | A07706 | 470 |
| A07700 | A07725 | 432 | A07700 | A07924 | 246 |
| A07700 | A08022 | 419 | A07700 | A08024 | 324 |
| A07700 | A08326 | 347 | A07700 | A08400 | 385 |
| A07700 | A08491 | 393 | A07700 | A09619 | 224 |
| A07700 | A09664 | 251 | A07700 | A09705 | 101 |
| A07700 | A09715 | 440 | A07700 | A10616 | 441 |
| A07700 | A11832 | 485 | A07700 | A13220 | 238 |
| A07700 | A13294 | 193 | A07700 | A13989 | 488 |
| A07700 | A14006 | 200 | A07700 | A14165 | 221 |
| A07700 | A14614 | 199 | A07700 | A14655 | 319 |
| A07700 | A15764 | 479 | A07700 | A16302 | 156 |
| A07701 | A07877 | 452 | A07702 | A07987 | 447 |
| A07702 | A11327 | 406 | A07703 | A08834 | 326 |
| A07703 | A08840 | 339 | A07703 | A15346 | 322 |
| A07703 | A15352 | 286 | A07704 | A07705 | 491 |
| A07704 | A07870 | 398 | A07704 | A08040 | 391 |
| A07704 | A08125 | 383 | A07704 | A08172 | 201 |
| A07704 | A08291 | 475 | A07704 | A08292 | 491 |
| A07704 | A08496 | 358 | A07704 | A08671 | 450 |

|        |        |     |        |        |     |
|--------|--------|-----|--------|--------|-----|
| A07704 | A08685 | 322 | A07704 | A08686 | 283 |
| A07704 | A08747 | 358 | A07704 | A09149 | 344 |
| A07704 | A09341 | 278 | A07704 | A09509 | 157 |
| A07704 | A09733 | 156 | A07704 | A10619 | 241 |
| A07704 | A10900 | 383 | A07704 | A11289 | 474 |
| A07704 | A11298 | 305 | A07704 | A11310 | 445 |
| A07704 | A11320 | 305 | A07704 | A11328 | 297 |
| A07704 | A11461 | 458 | A07704 | A11463 | 353 |
| A07704 | A11568 | 490 | A07704 | A12414 | 398 |
| A07704 | A12621 | 467 | A07704 | A12845 | 333 |
| A07704 | A13369 | 385 | A07704 | A13760 | 398 |
| A07704 | A14633 | 272 | A07704 | A15336 | 266 |
| A07704 | A15638 | 170 | A07704 | A16068 | 364 |
| A07705 | A08040 | 461 | A07705 | A08172 | 460 |
| A07705 | A08202 | 353 | A07705 | A08203 | 308 |
| A07705 | A08291 | 475 | A07705 | A08292 | 491 |
| A07705 | A08309 | 219 | A07705 | A08496 | 353 |
| A07705 | A08671 | 481 | A07705 | A08685 | 311 |
| A07705 | A08686 | 271 | A07705 | A09518 | 353 |
| A07705 | A10450 | 353 | A07705 | A10900 | 378 |
| A07705 | A11289 | 473 | A07705 | A11298 | 296 |
| A07705 | A11310 | 475 | A07705 | A11320 | 446 |
| A07705 | A11321 | 329 | A07705 | A11328 | 475 |
| A07705 | A11375 | 329 | A07705 | A11396 | 329 |
| A07705 | A11446 | 311 | A07705 | A11461 | 486 |
| A07705 | A11463 | 347 | A07705 | A11466 | 480 |
| A07705 | A11568 | 470 | A07705 | A11569 | 368 |
| A07705 | A12386 | 394 | A07705 | A12432 | 368 |
| A07705 | A12434 | 378 | A07705 | A12435 | 368 |
| A07705 | A12621 | 439 | A07705 | A12845 | 326 |
| A07705 | A13760 | 394 | A07705 | A14873 | 353 |
| A07705 | A15336 | 408 | A07705 | A15416 | 152 |
| A07705 | A15638 | 291 | A07705 | A16068 | 355 |
| A07706 | A07744 | 422 | A07706 | A08022 | 490 |
| A07706 | A08118 | 491 | A07706 | A08133 | 382 |
| A07706 | A08137 | 385 | A07706 | A08293 | 270 |
| A07706 | A08304 | 488 | A07706 | A08356 | 467 |
| A07706 | A08357 | 177 | A07706 | A08362 | 268 |
| A07706 | A08382 | 165 | A07706 | A08402 | 230 |
| A07706 | A08450 | 407 | A07706 | A08477 | 230 |
| A07706 | A08491 | 468 | A07706 | A08527 | 491 |
| A07706 | A08571 | 522 | A07706 | A08788 | 199 |
| A07706 | A08917 | 249 | A07706 | A08982 | 327 |
| A07706 | A09220 | 216 | A07706 | A09319 | 180 |
| A07706 | A09327 | 399 | A07706 | A09339 | 221 |
| A07706 | A09401 | 168 | A07706 | A09621 | 281 |

|        |        |     |        |        |     |
|--------|--------|-----|--------|--------|-----|
| A07706 | A09825 | 414 | A07706 | A10373 | 223 |
| A07706 | A10380 | 216 | A07706 | A10538 | 469 |
| A07706 | A11291 | 490 | A07706 | A11346 | 199 |
| A07706 | A11406 | 154 | A07706 | A11452 | 468 |
| A07706 | A11672 | 347 | A07706 | A11674 | 451 |
| A07706 | A11699 | 201 | A07706 | A11930 | 467 |
| A07706 | A12557 | 151 | A07706 | A12871 | 180 |
| A07706 | A13059 | 246 | A07706 | A13216 | 195 |
| A07706 | A13340 | 305 | A07706 | A13406 | 243 |
| A07706 | A13870 | 208 | A07706 | A13963 | 151 |
| A07706 | A13989 | 491 | A07706 | A14006 | 489 |
| A07706 | A14148 | 216 | A07706 | A14169 | 479 |
| A07706 | A14193 | 254 | A07706 | A14209 | 243 |
| A07706 | A14220 | 491 | A07706 | A14272 | 473 |
| A07706 | A14355 | 151 | A07706 | A14566 | 491 |
| A07706 | A14594 | 491 | A07706 | A14655 | 491 |
| A07706 | A14809 | 199 | A07706 | A15128 | 246 |
| A07706 | A15204 | 188 | A07706 | A15205 | 306 |
| A07706 | A15206 | 306 | A07706 | A15207 | 306 |
| A07706 | A15208 | 210 | A07706 | A15209 | 246 |
| A07706 | A15210 | 188 | A07706 | A15338 | 196 |
| A07706 | A15353 | 224 | A07706 | A15556 | 363 |
| A07706 | A15559 | 485 | A07706 | A15644 | 308 |
| A07706 | A15733 | 488 | A07706 | A15946 | 156 |
| A07706 | A16060 | 205 | A07706 | A16067 | 236 |
| A07706 | A16144 | 173 | A07706 | A16320 | 183 |
| A07706 | A16394 | 263 | A07706 | A16499 | 236 |
| A07706 | A16547 | 249 | A07706 | A16802 | 216 |
| A07706 | A16912 | 168 | A07706 | A17063 | 452 |
| A07706 | A17142 | 212 | A07708 | A08262 | 296 |
| A07708 | A08840 | 475 | A07708 | A08982 | 180 |
| A07708 | A09598 | 443 | A07708 | A10466 | 313 |
| A07708 | A10784 | 162 | A07708 | A11140 | 170 |
| A07708 | A11540 | 230 | A07708 | A13135 | 279 |
| A07708 | A14196 | 332 | A07708 | A15297 | 427 |
| A07708 | A15431 | 475 | A07708 | A15559 | 432 |
| A07708 | A15560 | 157 | A07708 | A15937 | 428 |
| A07709 | A07816 | 484 | A07709 | A07897 | 196 |
| A07709 | A08409 | 281 | A07709 | A08551 | 423 |
| A07709 | A09311 | 384 | A07709 | A09662 | 375 |
| A07709 | A09666 | 491 | A07709 | A09774 | 218 |
| A07709 | A09995 | 490 | A07709 | A11057 | 319 |
| A07709 | A11150 | 191 | A07709 | A11281 | 174 |
| A07709 | A11292 | 187 | A07709 | A11576 | 190 |
| A07709 | A11615 | 205 | A07709 | A12002 | 200 |
| A07709 | A12047 | 491 | A07709 | A12722 | 467 |

|        |        |     |        |        |     |
|--------|--------|-----|--------|--------|-----|
| A07709 | A14266 | 474 | A07709 | A14281 | 477 |
| A07709 | A14464 | 232 | A07709 | A14484 | 364 |
| A07709 | A14633 | 229 | A07709 | A14661 | 213 |
| A07710 | A10701 | 188 | A07710 | A13159 | 329 |
| A07710 | A16667 | 210 | A07710 | A16741 | 294 |
| A07711 | A07718 | 441 | A07711 | A07779 | 423 |
| A07711 | A08324 | 405 | A07711 | A08385 | 322 |
| A07711 | A08687 | 363 | A07711 | A09509 | 235 |
| A07711 | A10690 | 361 | A07711 | A10694 | 353 |
| A07711 | A10776 | 266 | A07711 | A10781 | 351 |
| A07711 | A12723 | 278 | A07711 | A15628 | 380 |
| A07713 | A08135 | 374 | A07713 | A08385 | 360 |
| A07713 | A10670 | 424 | A07713 | A10684 | 294 |
| A07713 | A10699 | 334 | A07713 | A10783 | 396 |
| A07715 | A12824 | 241 | A07716 | A12697 | 424 |
| A07716 | A13006 | 428 | A07717 | A08249 | 314 |
| A07717 | A10072 | 385 | A07718 | A07847 | 210 |
| A07718 | A08099 | 170 | A07718 | A08199 | 260 |
| A07718 | A08324 | 355 | A07718 | A08687 | 286 |
| A07718 | A09829 | 235 | A07718 | A10420 | 226 |
| A07718 | A10443 | 386 | A07718 | A10679 | 260 |
| A07718 | A10776 | 154 | A07718 | A10781 | 268 |
| A07718 | A11381 | 266 | A07718 | A11834 | 313 |
| A07718 | A13788 | 249 | A07718 | A14803 | 322 |
| A07718 | A16335 | 314 | A07718 | A17089 | 159 |
| A07719 | A07726 | 316 | A07720 | A14208 | 190 |
| A07720 | A14276 | 337 | A07721 | A07736 | 481 |
| A07721 | A07757 | 252 | A07721 | A07844 | 491 |
| A07721 | A07856 | 227 | A07721 | A07933 | 322 |
| A07721 | A07970 | 258 | A07721 | A07973 | 480 |
| A07721 | A07976 | 491 | A07721 | A08155 | 195 |
| A07721 | A08250 | 195 | A07721 | A08330 | 238 |
| A07721 | A08656 | 258 | A07721 | A08751 | 207 |
| A07721 | A09059 | 481 | A07721 | A09152 | 168 |
| A07721 | A09876 | 383 | A07721 | A09879 | 191 |
| A07721 | A10157 | 290 | A07721 | A10253 | 299 |
| A07721 | A10420 | 483 | A07721 | A10421 | 484 |
| A07721 | A10424 | 409 | A07721 | A10427 | 299 |
| A07721 | A10429 | 267 | A07721 | A10452 | 334 |
| A07721 | A10456 | 172 | A07721 | A10656 | 436 |
| A07721 | A10658 | 469 | A07721 | A10672 | 323 |
| A07721 | A10677 | 485 | A07721 | A10686 | 477 |
| A07721 | A10904 | 267 | A07721 | A11309 | 154 |
| A07721 | A14191 | 215 | A07721 | A14193 | 174 |
| A07721 | A14803 | 316 | A07721 | A15970 | 162 |
| A07721 | A16418 | 470 | A07721 | A16419 | 174 |

|        |        |     |        |        |     |
|--------|--------|-----|--------|--------|-----|
| A07723 | A08075 | 419 | A07723 | A08098 | 156 |
| A07723 | A14083 | 174 | A07725 | A07961 | 157 |
| A07725 | A08024 | 191 | A07725 | A09209 | 294 |
| A07725 | A09705 | 184 | A07725 | A09882 | 151 |
| A07725 | A15735 | 375 | A07725 | A15739 | 419 |
| A07725 | A16228 | 243 | A07725 | A16857 | 288 |
| A07726 | A07797 | 316 | A07726 | A08315 | 213 |
| A07726 | A08662 | 157 | A07726 | A08835 | 484 |
| A07726 | A08859 | 177 | A07726 | A08869 | 402 |
| A07726 | A09246 | 190 | A07726 | A09308 | 328 |
| A07726 | A10001 | 372 | A07726 | A10319 | 247 |
| A07726 | A10532 | 251 | A07726 | A10575 | 899 |
| A07726 | A10633 | 408 | A07726 | A10711 | 440 |
| A07726 | A10748 | 475 | A07726 | A11096 | 159 |
| A07726 | A11688 | 389 | A07726 | A11728 | 445 |
| A07726 | A11983 | 366 | A07726 | A12618 | 491 |
| A07726 | A12871 | 152 | A07726 | A13063 | 252 |
| A07726 | A13340 | 486 | A07726 | A13621 | 316 |
| A07726 | A13649 | 316 | A07726 | A13989 | 945 |
| A07726 | A14055 | 294 | A07726 | A14188 | 168 |
| A07726 | A14216 | 456 | A07726 | A14410 | 154 |
| A07726 | A14457 | 212 | A07726 | A15416 | 344 |
| A07726 | A15484 | 204 | A07726 | A15487 | 174 |
| A07726 | A15492 | 226 | A07726 | A15506 | 462 |
| A07726 | A15760 | 168 | A07728 | A08549 | 151 |
| A07728 | A09050 | 154 | A07728 | A15096 | 157 |
| A07729 | A10317 | 319 | A07729 | A15757 | 480 |
| A07730 | A08929 | 210 | A07730 | A11401 | 245 |
| A07730 | A13989 | 179 | A07730 | A14622 | 360 |
| A07730 | A16193 | 399 | A07731 | A08055 | 317 |
| A07731 | A10630 | 374 | A07731 | A12327 | 425 |
| A07731 | A12894 | 425 | A07731 | A14915 | 425 |
| A07732 | A07816 | 379 | A07732 | A07893 | 490 |
| A07732 | A08192 | 163 | A07732 | A08840 | 380 |
| A07732 | A09078 | 334 | A07732 | A09286 | 318 |
| A07732 | A09326 | 475 | A07732 | A10514 | 523 |
| A07732 | A11188 | 445 | A07732 | A11436 | 475 |
| A07732 | A13599 | 281 | A07732 | A14009 | 334 |
| A07732 | A14266 | 243 | A07732 | A14281 | 401 |
| A07732 | A14288 | 334 | A07732 | A14371 | 475 |
| A07732 | A15545 | 190 | A07732 | A16635 | 334 |
| A07732 | A16817 | 252 | A07733 | A07735 | 465 |
| A07733 | A10358 | 377 | A07733 | A11564 | 424 |
| A07734 | A07735 | 430 | A07735 | A10358 | 358 |
| A07735 | A11564 | 413 | A07736 | A07763 | 332 |
| A07736 | A07796 | 252 | A07736 | A07800 | 188 |

|        |        |     |        |        |     |
|--------|--------|-----|--------|--------|-----|
| A07736 | A07844 | 352 | A07736 | A07926 | 414 |
| A07736 | A07933 | 489 | A07736 | A07973 | 491 |
| A07736 | A07976 | 475 | A07736 | A08099 | 229 |
| A07736 | A08155 | 258 | A07736 | A08238 | 454 |
| A07736 | A08250 | 486 | A07736 | A08313 | 246 |
| A07736 | A08330 | 393 | A07736 | A08368 | 328 |
| A07736 | A08461 | 412 | A07736 | A08484 | 330 |
| A07736 | A08687 | 379 | A07736 | A09059 | 455 |
| A07736 | A09648 | 424 | A07736 | A09876 | 484 |
| A07736 | A10056 | 260 | A07736 | A10420 | 440 |
| A07736 | A10421 | 173 | A07736 | A10437 | 388 |
| A07736 | A10444 | 443 | A07736 | A10452 | 457 |
| A07736 | A10547 | 152 | A07736 | A10550 | 258 |
| A07736 | A10655 | 673 | A07736 | A10656 | 477 |
| A07736 | A10658 | 245 | A07736 | A10659 | 281 |
| A07736 | A10672 | 457 | A07736 | A10677 | 490 |
| A07736 | A10688 | 258 | A07736 | A10694 | 245 |
| A07736 | A10707 | 252 | A07736 | A10715 | 358 |
| A07736 | A10904 | 319 | A07736 | A11570 | 425 |
| A07736 | A13735 | 347 | A07736 | A13736 | 358 |
| A07736 | A13871 | 167 | A07736 | A14182 | 425 |
| A07736 | A14191 | 185 | A07736 | A14247 | 475 |
| A07736 | A14272 | 443 | A07736 | A14344 | 221 |
| A07736 | A14803 | 452 | A07736 | A14856 | 363 |
| A07736 | A15223 | 319 | A07736 | A15366 | 339 |
| A07736 | A15647 | 460 | A07736 | A15874 | 335 |
| A07736 | A15896 | 151 | A07736 | A16103 | 232 |
| A07736 | A16286 | 443 | A07736 | A16335 | 152 |
| A07736 | A16419 | 238 | A07736 | A16529 | 299 |
| A07736 | A16741 | 346 | A07736 | A16746 | 411 |
| A07736 | A16959 | 162 | A07736 | A17041 | 215 |
| A07736 | A17078 | 252 | A07737 | A07875 | 396 |
| A07737 | A07933 | 177 | A07737 | A08135 | 470 |
| A07737 | A08284 | 434 | A07737 | A08693 | 283 |
| A07737 | A09059 | 152 | A07737 | A09612 | 411 |
| A07737 | A10652 | 455 | A07737 | A10674 | 383 |
| A07737 | A10676 | 360 | A07737 | A10684 | 216 |
| A07737 | A10706 | 307 | A07737 | A14276 | 408 |
| A07737 | A14821 | 353 | A07738 | A08011 | 257 |
| A07739 | A07973 | 330 | A07739 | A08099 | 229 |
| A07739 | A08155 | 449 | A07739 | A08372 | 267 |
| A07739 | A09881 | 204 | A07739 | A10458 | 391 |
| A07739 | A10652 | 371 | A07739 | A10674 | 329 |
| A07739 | A10690 | 386 | A07739 | A10696 | 451 |
| A07739 | A14856 | 266 | A07739 | A17024 | 422 |
| A07740 | A07754 | 432 | A07740 | A07913 | 375 |

|        |        |     |        |        |     |
|--------|--------|-----|--------|--------|-----|
| A07740 | A07914 | 337 | A07740 | A07958 | 343 |
| A07740 | A08173 | 472 | A07740 | A08511 | 419 |
| A07740 | A10436 | 419 | A07740 | A11428 | 367 |
| A07740 | A11442 | 457 | A07741 | A07950 | 419 |
| A07741 | A08217 | 436 | A07741 | A10563 | 322 |
| A07741 | A13046 | 424 | A07741 | A15498 | 160 |
| A07742 | A09054 | 279 | A07742 | A09792 | 412 |
| A07742 | A13620 | 260 | A07743 | A09453 | 428 |
| A07743 | A10511 | 419 | A07743 | A15630 | 333 |
| A07744 | A07881 | 491 | A07744 | A07911 | 486 |
| A07744 | A08061 | 317 | A07744 | A08098 | 682 |
| A07744 | A08118 | 360 | A07744 | A08178 | 682 |
| A07744 | A08228 | 491 | A07744 | A08491 | 441 |
| A07744 | A08548 | 490 | A07744 | A08763 | 628 |
| A07744 | A08947 | 152 | A07744 | A09004 | 152 |
| A07744 | A10842 | 152 | A07744 | A11381 | 249 |
| A07744 | A11555 | 324 | A07744 | A13298 | 469 |
| A07744 | A13353 | 299 | A07744 | A13354 | 423 |
| A07744 | A13855 | 402 | A07744 | A13989 | 435 |
| A07744 | A14083 | 491 | A07744 | A14525 | 317 |
| A07744 | A14699 | 491 | A07744 | A14701 | 283 |
| A07744 | A14778 | 491 | A07744 | A15338 | 396 |
| A07744 | A15375 | 672 | A07744 | A15546 | 317 |
| A07744 | A15684 | 456 | A07744 | A16048 | 324 |
| A07745 | A16453 | 340 | A07746 | A08518 | 213 |
| A07746 | A08817 | 491 | A07746 | A09587 | 296 |
| A07746 | A09622 | 152 | A07746 | A10120 | 346 |
| A07746 | A10122 | 322 | A07746 | A10506 | 156 |
| A07746 | A10548 | 306 | A07746 | A10614 | 327 |
| A07746 | A11209 | 188 | A07746 | A11234 | 226 |
| A07746 | A11261 | 388 | A07746 | A11501 | 217 |
| A07746 | A11597 | 180 | A07746 | A11683 | 252 |
| A07746 | A12727 | 213 | A07746 | A13309 | 243 |
| A07746 | A13330 | 491 | A07746 | A13416 | 388 |
| A07746 | A13426 | 491 | A07746 | A13509 | 322 |
| A07746 | A13609 | 171 | A07746 | A13706 | 196 |
| A07746 | A13783 | 184 | A07746 | A14245 | 484 |
| A07746 | A14917 | 174 | A07746 | A14921 | 256 |
| A07746 | A15357 | 446 | A07746 | A15402 | 262 |
| A07746 | A15774 | 152 | A07746 | A15792 | 193 |
| A07746 | A16233 | 184 | A07746 | A16325 | 368 |
| A07746 | A16328 | 229 | A07746 | A16597 | 210 |
| A07746 | A16675 | 162 | A07746 | A16690 | 160 |
| A07746 | A16702 | 157 | A07746 | A16764 | 213 |
| A07746 | A16799 | 213 | A07746 | A16858 | 274 |
| A07746 | A16944 | 201 | A07746 | A17012 | 174 |

|        |        |     |        |        |     |
|--------|--------|-----|--------|--------|-----|
| A07746 | A17190 | 180 | A07748 | A07878 | 491 |
| A07748 | A08660 | 477 | A07748 | A08667 | 440 |
| A07748 | A08688 | 438 | A07748 | A09328 | 223 |
| A07748 | A10823 | 343 | A07748 | A12451 | 445 |
| A07748 | A14366 | 249 | A07748 | A14554 | 188 |
| A07748 | A14674 | 232 | A07749 | A09326 | 386 |
| A07749 | A12645 | 361 | A07749 | A13878 | 475 |
| A07750 | A10973 | 447 | A07750 | A12824 | 279 |
| A07752 | A07785 | 480 | A07753 | A07800 | 350 |
| A07753 | A08099 | 151 | A07753 | A08193 | 267 |
| A07753 | A08205 | 135 | A07753 | A09059 | 152 |
| A07753 | A11309 | 468 | A07753 | A14190 | 157 |
| A07753 | A14258 | 159 | A07753 | A14366 | 185 |
| A07753 | A15285 | 340 | A07753 | A15518 | 345 |
| A07753 | A16002 | 193 | A07753 | A16368 | 467 |
| A07753 | A16529 | 329 | A07753 | A16959 | 276 |
| A07754 | A07913 | 491 | A07754 | A07914 | 491 |
| A07754 | A07916 | 433 | A07754 | A07928 | 485 |
| A07754 | A07950 | 337 | A07754 | A07988 | 400 |
| A07754 | A08173 | 337 | A07754 | A08210 | 383 |
| A07754 | A08218 | 455 | A07754 | A08246 | 484 |
| A07754 | A08347 | 378 | A07754 | A08395 | 435 |
| A07754 | A08404 | 491 | A07754 | A08785 | 491 |
| A07754 | A10358 | 199 | A07754 | A10436 | 378 |
| A07754 | A10563 | 371 | A07754 | A11311 | 281 |
| A07754 | A11428 | 291 | A07754 | A11442 | 358 |
| A07754 | A11552 | 456 | A07754 | A11573 | 276 |
| A07754 | A12787 | 372 | A07754 | A13879 | 162 |
| A07754 | A16847 | 156 | A07755 | A09331 | 63  |
| A07756 | A07920 | 182 | A07756 | A07956 | 657 |
| A07756 | A07986 | 446 | A07756 | A08517 | 414 |
| A07756 | A08630 | 185 | A07756 | A08882 | 457 |
| A07756 | A09141 | 221 | A07756 | A09290 | 251 |
| A07756 | A09302 | 322 | A07756 | A09331 | 475 |
| A07756 | A09368 | 333 | A07756 | A09627 | 414 |
| A07756 | A09669 | 333 | A07756 | A12824 | 490 |
| A07756 | A14196 | 488 | A07756 | A15297 | 294 |
| A07756 | A15323 | 461 | A07756 | A15339 | 332 |
| A07756 | A15498 | 417 | A07756 | A15667 | 341 |
| A07756 | A15788 | 238 | A07756 | A16311 | 168 |
| A07756 | A16458 | 294 | A07756 | A16463 | 414 |
| A07756 | A16556 | 347 | A07756 | A17063 | 335 |
| A07757 | A07851 | 454 | A07757 | A07976 | 165 |
| A07757 | A08109 | 341 | A07757 | A08155 | 321 |
| A07757 | A08365 | 198 | A07757 | A10710 | 152 |
| A07757 | A10989 | 230 | A07757 | A14665 | 218 |



|        |        |     |        |        |     |
|--------|--------|-----|--------|--------|-----|
| A07757 | A14787 | 299 | A07757 | A14794 | 380 |
| A07758 | A11048 | 436 | A07758 | A11329 | 424 |
| A07759 | A08357 | 173 | A07760 | A08559 | 198 |
| A07760 | A11390 | 229 | A07760 | A13074 | 286 |
| A07760 | A15014 | 374 | A07760 | A15388 | 205 |
| A07760 | A15510 | 151 | A07760 | A15578 | 212 |
| A07762 | A08409 | 188 | A07762 | A08839 | 208 |
| A07762 | A08894 | 324 | A07762 | A09736 | 177 |
| A07762 | A09804 | 159 | A07762 | A10506 | 201 |
| A07762 | A10619 | 168 | A07762 | A10725 | 195 |
| A07762 | A10833 | 402 | A07762 | A11283 | 180 |
| A07762 | A12047 | 490 | A07762 | A12215 | 245 |
| A07762 | A13783 | 218 | A07762 | A13917 | 469 |
| A07762 | A14633 | 151 | A07762 | A14749 | 303 |
| A07762 | A16587 | 202 | A07762 | A16707 | 319 |
| A07762 | A16741 | 475 | A07762 | A16942 | 256 |
| A07763 | A07795 | 441 | A07763 | A07796 | 324 |
| A07763 | A07976 | 176 | A07763 | A08114 | 467 |
| A07763 | A08197 | 307 | A07763 | A08199 | 307 |
| A07763 | A08238 | 452 | A07763 | A08278 | 262 |
| A07763 | A08280 | 204 | A07763 | A08313 | 414 |
| A07763 | A08368 | 377 | A07763 | A08656 | 366 |
| A07763 | A08687 | 456 | A07763 | A10420 | 162 |
| A07763 | A10550 | 328 | A07763 | A10679 | 310 |
| A07763 | A10702 | 216 | A07763 | A12723 | 228 |
| A07763 | A13341 | 343 | A07763 | A14821 | 457 |
| A07763 | A14863 | 433 | A07764 | A08002 | 480 |
| A07764 | A08003 | 422 | A07764 | A09219 | 435 |
| A07764 | A11216 | 363 | A07764 | A12542 | 412 |
| A07764 | A12622 | 422 | A07764 | A12936 | 394 |
| A07764 | A14362 | 312 | A07764 | A14366 | 208 |
| A07764 | A14372 | 473 | A07764 | A14394 | 234 |
| A07764 | A14600 | 386 | A07764 | A14767 | 422 |
| A07764 | A15475 | 324 | A07764 | A15498 | 385 |
| A07764 | A15790 | 452 | A07764 | A16562 | 422 |
| A07764 | A17052 | 422 | A07765 | A10943 | 477 |
| A07765 | A11101 | 385 | A07766 | A07794 | 491 |
| A07766 | A07801 | 246 | A07766 | A09298 | 156 |
| A07766 | A09824 | 165 | A07766 | A10420 | 379 |
| A07766 | A10429 | 374 | A07766 | A10612 | 491 |
| A07766 | A11444 | 435 | A07766 | A11696 | 491 |
| A07766 | A13127 | 422 | A07766 | A13369 | 491 |
| A07766 | A13889 | 324 | A07766 | A14097 | 318 |
| A07766 | A14128 | 491 | A07766 | A14191 | 475 |
| A07766 | A14222 | 182 | A07766 | A14654 | 432 |
| A07766 | A14693 | 368 | A07766 | A14870 | 491 |

|        |        |     |        |        |     |
|--------|--------|-----|--------|--------|-----|
| A07766 | A14872 | 491 | A07766 | A14880 | 353 |
| A07766 | A14881 | 266 | A07766 | A15430 | 491 |
| A07766 | A15498 | 441 | A07766 | A15669 | 491 |
| A07766 | A15925 | 475 | A07766 | A15934 | 452 |
| A07766 | A16436 | 491 | A07766 | A16950 | 255 |
| A07766 | A16963 | 491 | A07767 | A08789 | 374 |
| A07767 | A08982 | 188 | A07767 | A11525 | 162 |
| A07767 | A13809 | 160 | A07767 | A14073 | 414 |
| A07767 | A15653 | 515 | A07767 | A16463 | 317 |
| A07768 | A08161 | 291 | A07768 | A08185 | 160 |
| A07768 | A09124 | 165 | A07768 | A10387 | 404 |
| A07768 | A11612 | 163 | A07768 | A14792 | 249 |
| A07768 | A15001 | 424 | A07768 | A15004 | 279 |
| A07769 | A07811 | 329 | A07770 | A13343 | 452 |
| A07771 | A07849 | 434 | A07771 | A08707 | 491 |
| A07771 | A08724 | 208 | A07771 | A09182 | 159 |
| A07771 | A09740 | 154 | A07771 | A10528 | 205 |
| A07771 | A10869 | 457 | A07771 | A14252 | 490 |
| A07771 | A14372 | 157 | A07771 | A15413 | 277 |
| A07772 | A07865 | 436 | A07772 | A14633 | 201 |
| A07773 | A09293 | 260 | A07773 | A09332 | 249 |
| A07773 | A11521 | 363 | A07773 | A11836 | 483 |
| A07773 | A11860 | 430 | A07773 | A14073 | 247 |
| A07773 | A14642 | 466 | A07773 | A15988 | 213 |
| A07774 | A07945 | 452 | A07774 | A08153 | 452 |
| A07774 | A10095 | 425 | A07774 | A10292 | 452 |
| A07774 | A10641 | 452 | A07776 | A09876 | 200 |
| A07776 | A15369 | 176 | A07777 | A07789 | 63  |
| A07777 | A08666 | 63  | A07780 | A11402 | 399 |
| A07780 | A13369 | 213 | A07781 | A08289 | 378 |
| A07781 | A11175 | 447 | A07781 | A11176 | 447 |
| A07781 | A14978 | 447 | A07782 | A07783 | 445 |
| A07782 | A10278 | 385 | A07782 | A12613 | 445 |
| A07782 | A12743 | 445 | A07782 | A12860 | 445 |
| A07782 | A13064 | 445 | A07782 | A13503 | 445 |
| A07783 | A12613 | 452 | A07783 | A13064 | 452 |
| A07783 | A13503 | 452 | A07785 | A07816 | 179 |
| A07785 | A08259 | 179 | A07785 | A08551 | 179 |
| A07785 | A08834 | 179 | A07785 | A08840 | 179 |
| A07785 | A09825 | 179 | A07785 | A11558 | 179 |
| A07785 | A12722 | 429 | A07785 | A13819 | 179 |
| A07785 | A13866 | 179 | A07785 | A13942 | 363 |
| A07785 | A14202 | 179 | A07785 | A14366 | 179 |
| A07785 | A15358 | 179 | A07785 | A15470 | 179 |
| A07785 | A15484 | 179 | A07786 | A12897 | 273 |
| A07786 | A15314 | 232 | A07787 | A07930 | 418 |

|        |        |     |        |        |     |
|--------|--------|-----|--------|--------|-----|
| A07787 | A09727 | 301 | A07787 | A14200 | 291 |
| A07788 | A12047 | 172 | A07789 | A07800 | 307 |
| A07789 | A08666 | 63  | A07790 | A07810 | 447 |
| A07791 | A07874 | 423 | A07792 | A11322 | 363 |
| A07792 | A11374 | 374 | A07793 | A09600 | 344 |
| A07793 | A15431 | 210 | A07794 | A07801 | 332 |
| A07794 | A10224 | 332 | A07794 | A10612 | 486 |
| A07794 | A11444 | 221 | A07794 | A13369 | 341 |
| A07794 | A13928 | 407 | A07794 | A14077 | 232 |
| A07794 | A14097 | 201 | A07794 | A14128 | 485 |
| A07794 | A14870 | 479 | A07794 | A14872 | 420 |
| A07794 | A14881 | 346 | A07794 | A15430 | 491 |
| A07794 | A15467 | 430 | A07794 | A15925 | 187 |
| A07794 | A16285 | 288 | A07794 | A16436 | 195 |
| A07794 | A16950 | 424 | A07794 | A16963 | 230 |
| A07795 | A07796 | 395 | A07795 | A11313 | 335 |
| A07795 | A12723 | 338 | A07795 | A15498 | 177 |
| A07796 | A10506 | 238 | A07796 | A10676 | 373 |
| A07796 | A13607 | 388 | A07796 | A14654 | 313 |
| A07796 | A16049 | 262 | A07797 | A10580 | 899 |
| A07798 | A08137 | 479 | A07798 | A08424 | 191 |
| A07798 | A08571 | 193 | A07798 | A08835 | 246 |
| A07798 | A09045 | 165 | A07798 | A09162 | 236 |
| A07798 | A09263 | 490 | A07798 | A09297 | 299 |
| A07798 | A09303 | 213 | A07798 | A09319 | 489 |
| A07798 | A09393 | 217 | A07798 | A09577 | 488 |
| A07798 | A09606 | 353 | A07798 | A09655 | 357 |
| A07798 | A09804 | 490 | A07798 | A09902 | 491 |
| A07798 | A10208 | 491 | A07798 | A10365 | 491 |
| A07798 | A10427 | 204 | A07798 | A10449 | 191 |
| A07798 | A10623 | 350 | A07798 | A10728 | 491 |
| A07798 | A11286 | 491 | A07798 | A11302 | 281 |
| A07798 | A11392 | 185 | A07798 | A11459 | 160 |
| A07798 | A12328 | 491 | A07798 | A12990 | 490 |
| A07798 | A13069 | 273 | A07798 | A13149 | 491 |
| A07798 | A13320 | 491 | A07798 | A13335 | 491 |
| A07798 | A13340 | 491 | A07798 | A13498 | 229 |
| A07798 | A13522 | 185 | A07798 | A13989 | 479 |
| A07798 | A14006 | 256 | A07798 | A14073 | 491 |
| A07798 | A14159 | 210 | A07798 | A14188 | 486 |
| A07798 | A14196 | 207 | A07798 | A14216 | 293 |
| A07798 | A14220 | 243 | A07798 | A14571 | 483 |
| A07798 | A14738 | 481 | A07798 | A15106 | 470 |
| A07798 | A15244 | 491 | A07798 | A15545 | 185 |
| A07798 | A15546 | 491 | A07798 | A15741 | 341 |
| A07798 | A15932 | 245 | A07798 | A15933 | 322 |

|        |        |     |        |        |     |
|--------|--------|-----|--------|--------|-----|
| A07798 | A16060 | 270 | A07798 | A16272 | 215 |
| A07798 | A16291 | 348 | A07798 | A16318 | 190 |
| A07798 | A16446 | 154 | A07798 | A16462 | 441 |
| A07798 | A16939 | 427 | A07798 | A17000 | 263 |
| A07800 | A07823 | 213 | A07800 | A07831 | 307 |
| A07800 | A07832 | 307 | A07800 | A07848 | 379 |
| A07800 | A07970 | 221 | A07800 | A08099 | 491 |
| A07800 | A08104 | 307 | A07800 | A08133 | 208 |
| A07800 | A08193 | 477 | A07800 | A08205 | 436 |
| A07800 | A08332 | 276 | A07800 | A08666 | 307 |
| A07800 | A08751 | 168 | A07800 | A09612 | 477 |
| A07800 | A09879 | 152 | A07800 | A09925 | 199 |
| A07800 | A09985 | 165 | A07800 | A10370 | 221 |
| A07800 | A10420 | 204 | A07800 | A10456 | 484 |
| A07800 | A10475 | 152 | A07800 | A10536 | 307 |
| A07800 | A10550 | 156 | A07800 | A10659 | 184 |
| A07800 | A10673 | 323 | A07800 | A10681 | 353 |
| A07800 | A10693 | 314 | A07800 | A10702 | 213 |
| A07800 | A10712 | 424 | A07800 | A10714 | 433 |
| A07800 | A10885 | 344 | A07800 | A10904 | 230 |
| A07800 | A11309 | 491 | A07800 | A11325 | 188 |
| A07800 | A11381 | 465 | A07800 | A12723 | 234 |
| A07800 | A13341 | 179 | A07800 | A13870 | 258 |
| A07800 | A14380 | 193 | A07800 | A14628 | 156 |
| A07800 | A14862 | 168 | A07800 | A15189 | 208 |
| A07800 | A15190 | 151 | A07800 | A15497 | 491 |
| A07800 | A15626 | 199 | A07800 | A15752 | 210 |
| A07800 | A15773 | 219 | A07800 | A15874 | 472 |
| A07800 | A16027 | 477 | A07800 | A16033 | 335 |
| A07800 | A16262 | 174 | A07800 | A16368 | 337 |
| A07800 | A16418 | 237 | A07800 | A16419 | 480 |
| A07800 | A16528 | 330 | A07800 | A16529 | 491 |
| A07800 | A16596 | 366 | A07800 | A16636 | 174 |
| A07800 | A16757 | 276 | A07800 | A16767 | 274 |
| A07800 | A16959 | 491 | A07800 | A16968 | 193 |
| A07800 | A17040 | 224 | A07800 | A17078 | 288 |
| A07801 | A13369 | 191 | A07801 | A14077 | 219 |
| A07801 | A14128 | 352 | A07801 | A14222 | 218 |
| A07801 | A15925 | 427 | A07802 | A07961 | 157 |
| A07802 | A08505 | 160 | A07802 | A08518 | 170 |
| A07802 | A08535 | 240 | A07802 | A08550 | 443 |
| A07802 | A08552 | 373 | A07802 | A08553 | 172 |
| A07802 | A08560 | 399 | A07802 | A08561 | 329 |
| A07802 | A08814 | 260 | A07802 | A08818 | 217 |
| A07802 | A08844 | 228 | A07802 | A09009 | 223 |
| A07802 | A09298 | 160 | A07802 | A09622 | 226 |

|        |        |     |        |        |     |
|--------|--------|-----|--------|--------|-----|
| A07802 | A09757 | 176 | A07802 | A10159 | 201 |
| A07802 | A10316 | 297 | A07802 | A10789 | 208 |
| A07802 | A11234 | 294 | A07802 | A11301 | 473 |
| A07802 | A11471 | 221 | A07802 | A11475 | 170 |
| A07802 | A11496 | 232 | A07802 | A11497 | 389 |
| A07802 | A11555 | 183 | A07802 | A11616 | 202 |
| A07802 | A11675 | 302 | A07802 | A11735 | 270 |
| A07802 | A11737 | 272 | A07802 | A11851 | 338 |
| A07802 | A11917 | 310 | A07802 | A11992 | 177 |
| A07802 | A12011 | 262 | A07802 | A12138 | 207 |
| A07802 | A12215 | 281 | A07802 | A12254 | 369 |
| A07802 | A12255 | 353 | A07802 | A12433 | 218 |
| A07802 | A12499 | 241 | A07802 | A12501 | 191 |
| A07802 | A12506 | 333 | A07802 | A12507 | 345 |
| A07802 | A12508 | 183 | A07802 | A12606 | 443 |
| A07802 | A12658 | 310 | A07802 | A12659 | 200 |
| A07802 | A12665 | 294 | A07802 | A12725 | 216 |
| A07802 | A12825 | 218 | A07802 | A12826 | 367 |
| A07802 | A12834 | 313 | A07802 | A12850 | 296 |
| A07802 | A12858 | 270 | A07802 | A12873 | 152 |
| A07802 | A13170 | 238 | A07802 | A13313 | 154 |
| A07802 | A13315 | 241 | A07802 | A13356 | 160 |
| A07802 | A13706 | 290 | A07802 | A13707 | 322 |
| A07802 | A13783 | 257 | A07802 | A13786 | 205 |
| A07802 | A13787 | 317 | A07802 | A13788 | 251 |
| A07802 | A13804 | 281 | A07802 | A13805 | 366 |
| A07802 | A13969 | 379 | A07802 | A14084 | 196 |
| A07802 | A14183 | 184 | A07802 | A14209 | 162 |
| A07802 | A14214 | 293 | A07802 | A14222 | 230 |
| A07802 | A14235 | 273 | A07802 | A14239 | 157 |
| A07802 | A14255 | 456 | A07802 | A14263 | 204 |
| A07802 | A14270 | 419 | A07802 | A14375 | 170 |
| A07802 | A14462 | 173 | A07802 | A14569 | 190 |
| A07802 | A14719 | 224 | A07802 | A14799 | 180 |
| A07802 | A14826 | 224 | A07802 | A14903 | 259 |
| A07802 | A14917 | 429 | A07802 | A14937 | 230 |
| A07802 | A15187 | 224 | A07802 | A15189 | 286 |
| A07802 | A15217 | 257 | A07802 | A15519 | 213 |
| A07802 | A15541 | 156 | A07802 | A15653 | 177 |
| A07802 | A15667 | 246 | A07802 | A15774 | 226 |
| A07802 | A15854 | 154 | A07802 | A15943 | 188 |
| A07802 | A16157 | 420 | A07802 | A16187 | 338 |
| A07802 | A16261 | 199 | A07802 | A16552 | 182 |
| A07802 | A16565 | 385 | A07802 | A16567 | 283 |
| A07802 | A16585 | 291 | A07802 | A16587 | 241 |
| A07802 | A16597 | 168 | A07802 | A16611 | 337 |

|        |        |     |        |        |     |
|--------|--------|-----|--------|--------|-----|
| A07802 | A16663 | 184 | A07802 | A16664 | 296 |
| A07802 | A16675 | 260 | A07802 | A16690 | 259 |
| A07802 | A16695 | 313 | A07802 | A16704 | 224 |
| A07802 | A16764 | 170 | A07802 | A16774 | 398 |
| A07802 | A16815 | 407 | A07802 | A16866 | 313 |
| A07802 | A16905 | 202 | A07802 | A17125 | 270 |
| A07802 | A17133 | 368 | A07803 | A08293 | 467 |
| A07803 | A08596 | 221 | A07803 | A08630 | 312 |
| A07803 | A08859 | 486 | A07803 | A08869 | 297 |
| A07803 | A08875 | 428 | A07803 | A08878 | 396 |
| A07803 | A08929 | 490 | A07803 | A09003 | 159 |
| A07803 | A09208 | 201 | A07803 | A09238 | 429 |
| A07803 | A09239 | 473 | A07803 | A09363 | 473 |
| A07803 | A09422 | 389 | A07803 | A09469 | 234 |
| A07803 | A09493 | 224 | A07803 | A09732 | 490 |
| A07803 | A09733 | 371 | A07803 | A09750 | 154 |
| A07803 | A09855 | 369 | A07803 | A09864 | 154 |
| A07803 | A10249 | 224 | A07803 | A10296 | 232 |
| A07803 | A10336 | 260 | A07803 | A10455 | 185 |
| A07803 | A10993 | 160 | A07803 | A11090 | 196 |
| A07803 | A11132 | 486 | A07803 | A11311 | 171 |
| A07803 | A11400 | 317 | A07803 | A11412 | 450 |
| A07803 | A11464 | 156 | A07803 | A11598 | 201 |
| A07803 | A11875 | 303 | A07803 | A11891 | 259 |
| A07803 | A11983 | 491 | A07803 | A12365 | 480 |
| A07803 | A12393 | 491 | A07803 | A12704 | 278 |
| A07803 | A12897 | 488 | A07803 | A13119 | 396 |
| A07803 | A13151 | 234 | A07803 | A13241 | 218 |
| A07803 | A13340 | 288 | A07803 | A13968 | 167 |
| A07803 | A13987 | 473 | A07803 | A13997 | 154 |
| A07803 | A14010 | 458 | A07803 | A14122 | 306 |
| A07803 | A14190 | 274 | A07803 | A14196 | 411 |
| A07803 | A14202 | 486 | A07803 | A14204 | 327 |
| A07803 | A14208 | 418 | A07803 | A14210 | 491 |
| A07803 | A14212 | 285 | A07803 | A14229 | 479 |
| A07803 | A14299 | 313 | A07803 | A14369 | 422 |
| A07803 | A14370 | 241 | A07803 | A14371 | 489 |
| A07803 | A14379 | 435 | A07803 | A14410 | 469 |
| A07803 | A14413 | 249 | A07803 | A14511 | 491 |
| A07803 | A14570 | 436 | A07803 | A14635 | 491 |
| A07803 | A14636 | 388 | A07803 | A14643 | 317 |
| A07803 | A14650 | 353 | A07803 | A14667 | 479 |
| A07803 | A14925 | 307 | A07803 | A14930 | 475 |
| A07803 | A15241 | 215 | A07803 | A15282 | 382 |
| A07803 | A15292 | 491 | A07803 | A15295 | 457 |
| A07803 | A15296 | 338 | A07803 | A15308 | 436 |

|        |        |     |        |        |     |
|--------|--------|-----|--------|--------|-----|
| A07803 | A15309 | 279 | A07803 | A15310 | 159 |
| A07803 | A15312 | 412 | A07803 | A15313 | 486 |
| A07803 | A15314 | 491 | A07803 | A15317 | 441 |
| A07803 | A15322 | 491 | A07803 | A15335 | 187 |
| A07803 | A15348 | 458 | A07803 | A15349 | 490 |
| A07803 | A15352 | 489 | A07803 | A15357 | 317 |
| A07803 | A15366 | 240 | A07803 | A15386 | 601 |
| A07803 | A15398 | 312 | A07803 | A15399 | 257 |
| A07803 | A15402 | 388 | A07803 | A15431 | 180 |
| A07803 | A15433 | 199 | A07803 | A15447 | 257 |
| A07803 | A15452 | 483 | A07803 | A15454 | 179 |
| A07803 | A15457 | 154 | A07803 | A15459 | 216 |
| A07803 | A15464 | 162 | A07803 | A15478 | 173 |
| A07803 | A15480 | 469 | A07803 | A15484 | 422 |
| A07803 | A15495 | 488 | A07803 | A15506 | 456 |
| A07803 | A15515 | 321 | A07803 | A15522 | 167 |
| A07803 | A15606 | 429 | A07803 | A15630 | 480 |
| A07803 | A15797 | 224 | A07803 | A15830 | 252 |
| A07803 | A15833 | 324 | A07803 | A16216 | 519 |
| A07803 | A16904 | 296 | A07803 | A16916 | 249 |
| A07807 | A10466 | 229 | A07807 | A14374 | 274 |
| A07809 | A10131 | 372 | A07810 | A13369 | 249 |
| A07810 | A16274 | 353 | A07811 | A09577 | 472 |
| A07814 | A14208 | 232 | A07815 | A07985 | 491 |
| A07815 | A07997 | 490 | A07815 | A08093 | 152 |
| A07815 | A08686 | 306 | A07815 | A09245 | 159 |
| A07815 | A09362 | 358 | A07815 | A09829 | 335 |
| A07815 | A10334 | 350 | A07815 | A10647 | 424 |
| A07815 | A10667 | 486 | A07815 | A11033 | 191 |
| A07815 | A11308 | 483 | A07815 | A11499 | 369 |
| A07815 | A11530 | 369 | A07815 | A11726 | 335 |
| A07815 | A12119 | 414 | A07815 | A12634 | 317 |
| A07815 | A12781 | 335 | A07815 | A13277 | 317 |
| A07815 | A14475 | 400 | A07815 | A14643 | 406 |
| A07815 | A14883 | 317 | A07815 | A14884 | 369 |
| A07815 | A16466 | 177 | A07815 | A16534 | 297 |
| A07816 | A07893 | 491 | A07816 | A07954 | 193 |
| A07816 | A07981 | 307 | A07816 | A08259 | 179 |
| A07816 | A08531 | 288 | A07816 | A08536 | 489 |
| A07816 | A08551 | 549 | A07816 | A08834 | 179 |
| A07816 | A08840 | 179 | A07816 | A09054 | 307 |
| A07816 | A09605 | 165 | A07816 | A09662 | 401 |
| A07816 | A09666 | 477 | A07816 | A09825 | 179 |
| A07816 | A10863 | 205 | A07816 | A11292 | 481 |
| A07816 | A11346 | 412 | A07816 | A11473 | 283 |
| A07816 | A11558 | 179 | A07816 | A12047 | 491 |

|        |        |     |        |        |     |
|--------|--------|-----|--------|--------|-----|
| A07816 | A12722 | 430 | A07816 | A13460 | 386 |
| A07816 | A13819 | 307 | A07816 | A13866 | 307 |
| A07816 | A13927 | 160 | A07816 | A13942 | 179 |
| A07816 | A14202 | 179 | A07816 | A14239 | 307 |
| A07816 | A14266 | 489 | A07816 | A14281 | 490 |
| A07816 | A14366 | 179 | A07816 | A14484 | 480 |
| A07816 | A14633 | 302 | A07816 | A14661 | 174 |
| A07816 | A15358 | 179 | A07816 | A15470 | 179 |
| A07816 | A15484 | 179 | A07816 | A15626 | 286 |
| A07816 | A15657 | 185 | A07816 | A15768 | 468 |
| A07816 | A16807 | 331 | A07816 | A17224 | 243 |
| A07817 | A15336 | 326 | A07817 | A16626 | 277 |
| A07818 | A08635 | 205 | A07818 | A09877 | 281 |
| A07818 | A14437 | 258 | A07818 | A15356 | 163 |
| A07820 | A08400 | 479 | A07820 | A08765 | 396 |
| A07820 | A08772 | 306 | A07820 | A08777 | 235 |
| A07820 | A08874 | 411 | A07820 | A09056 | 435 |
| A07820 | A09326 | 575 | A07820 | A09333 | 491 |
| A07820 | A10663 | 329 | A07820 | A11456 | 353 |
| A07820 | A12011 | 185 | A07820 | A12834 | 247 |
| A07820 | A13106 | 400 | A07820 | A13222 | 414 |
| A07820 | A13845 | 582 | A07820 | A13855 | 669 |
| A07820 | A14216 | 395 | A07820 | A14247 | 491 |
| A07820 | A14838 | 682 | A07820 | A15647 | 407 |
| A07820 | A15685 | 190 | A07820 | A16617 | 634 |
| A07820 | A16652 | 488 | A07820 | A16927 | 414 |
| A07820 | A16982 | 414 | A07820 | A17133 | 168 |
| A07822 | A07881 | 229 | A07822 | A07956 | 191 |
| A07822 | A08228 | 229 | A07822 | A08548 | 156 |
| A07822 | A08674 | 156 | A07822 | A11290 | 217 |
| A07822 | A11918 | 156 | A07822 | A15624 | 267 |
| A07822 | A15649 | 156 | A07822 | A15651 | 229 |
| A07822 | A15652 | 229 | A07822 | A15658 | 299 |
| A07822 | A15659 | 327 | A07822 | A15660 | 616 |
| A07822 | A15661 | 229 | A07822 | A15662 | 229 |
| A07822 | A15684 | 580 | A07822 | A15708 | 299 |
| A07822 | A15720 | 156 | A07822 | A15721 | 156 |
| A07822 | A15746 | 589 | A07822 | A15843 | 229 |
| A07822 | A15917 | 229 | A07822 | A15918 | 373 |
| A07822 | A15920 | 361 | A07822 | A15923 | 229 |
| A07822 | A15931 | 299 | A07822 | A15937 | 474 |
| A07822 | A16088 | 229 | A07822 | A16145 | 156 |
| A07822 | A16218 | 299 | A07822 | A16307 | 156 |
| A07822 | A16464 | 299 | A07822 | A16650 | 170 |
| A07822 | A16768 | 446 | A07823 | A10536 | 436 |
| A07823 | A16002 | 276 | A07824 | A07825 | 440 |



|        |        |     |        |        |     |
|--------|--------|-----|--------|--------|-----|
| A07826 | A08572 | 245 | A07826 | A08956 | 306 |
| A07826 | A10563 | 259 | A07826 | A14801 | 213 |
| A07831 | A07832 | 452 | A07833 | A09108 | 385 |
| A07833 | A09277 | 157 | A07833 | A10714 | 160 |
| A07833 | A12526 | 357 | A07833 | A13181 | 172 |
| A07833 | A15233 | 374 | A07833 | A16257 | 205 |
| A07833 | A16453 | 208 | A07834 | A08503 | 171 |
| A07834 | A08571 | 491 | A07834 | A09149 | 157 |
| A07834 | A09209 | 274 | A07834 | A09256 | 266 |
| A07834 | A09539 | 472 | A07834 | A10624 | 168 |
| A07834 | A10894 | 491 | A07834 | A11315 | 184 |
| A07834 | A11575 | 262 | A07834 | A11602 | 205 |
| A07834 | A12667 | 208 | A07834 | A13977 | 149 |
| A07834 | A14649 | 458 | A07834 | A15726 | 475 |
| A07834 | A15926 | 238 | A07834 | A16304 | 160 |
| A07835 | A07885 | 428 | A07835 | A09007 | 491 |
| A07835 | A10159 | 423 | A07835 | A10642 | 350 |
| A07835 | A14086 | 465 | A07835 | A14183 | 343 |
| A07835 | A14931 | 247 | A07836 | A07837 | 418 |
| A07836 | A10653 | 428 | A07836 | A14648 | 201 |
| A07836 | A14883 | 402 | A07837 | A08005 | 441 |
| A07837 | A08009 | 438 | A07838 | A15498 | 262 |
| A07839 | A08584 | 445 | A07839 | A15992 | 384 |
| A07840 | A09024 | 366 | A07842 | A07852 | 407 |
| A07842 | A08302 | 433 | A07842 | A08303 | 433 |
| A07843 | A08044 | 63  | A07843 | A11184 | 246 |
| A07843 | A11610 | 406 | A07843 | A11983 | 900 |
| A07843 | A15282 | 168 | A07844 | A07849 | 262 |
| A07844 | A07856 | 193 | A07844 | A07933 | 260 |
| A07844 | A07973 | 470 | A07844 | A07976 | 449 |
| A07844 | A08155 | 162 | A07844 | A08250 | 162 |
| A07844 | A09059 | 462 | A07844 | A09822 | 247 |
| A07844 | A10253 | 159 | A07844 | A10420 | 483 |
| A07844 | A10421 | 411 | A07844 | A10424 | 307 |
| A07844 | A10427 | 243 | A07844 | A10437 | 180 |
| A07844 | A10444 | 428 | A07844 | A10452 | 414 |
| A07844 | A10656 | 475 | A07844 | A10658 | 420 |
| A07844 | A10672 | 288 | A07844 | A10677 | 472 |
| A07844 | A10686 | 279 | A07844 | A10688 | 162 |
| A07844 | A10904 | 235 | A07844 | A13784 | 171 |
| A07844 | A14856 | 389 | A07844 | A16286 | 328 |
| A07844 | A16417 | 229 | A07844 | A16418 | 433 |
| A07844 | A17020 | 168 | A07845 | A07846 | 452 |
| A07845 | A10598 | 405 | A07846 | A10598 | 405 |
| A07847 | A08737 | 400 | A07847 | A10422 | 411 |
| A07847 | A10658 | 303 | A07847 | A10702 | 196 |

|        |        |     |        |        |     |
|--------|--------|-----|--------|--------|-----|
| A07847 | A11189 | 273 | A07847 | A11902 | 224 |
| A07847 | A11914 | 312 | A07847 | A14652 | 168 |
| A07847 | A15510 | 152 | A07847 | A15677 | 281 |
| A07848 | A08127 | 443 | A07848 | A08133 | 210 |
| A07848 | A08155 | 171 | A07848 | A08367 | 152 |
| A07848 | A08379 | 328 | A07848 | A09195 | 199 |
| A07848 | A09243 | 157 | A07848 | A09449 | 188 |
| A07848 | A09612 | 344 | A07848 | A10430 | 289 |
| A07848 | A10441 | 157 | A07848 | A10875 | 283 |
| A07848 | A10924 | 213 | A07848 | A11124 | 274 |
| A07848 | A11346 | 199 | A07848 | A11487 | 166 |
| A07848 | A13511 | 218 | A07848 | A13864 | 180 |
| A07848 | A13882 | 274 | A07848 | A13902 | 188 |
| A07848 | A14265 | 188 | A07848 | A14395 | 170 |
| A07848 | A14650 | 170 | A07848 | A14862 | 183 |
| A07848 | A15105 | 188 | A07848 | A15626 | 199 |
| A07848 | A16027 | 308 | A07848 | A16262 | 199 |
| A07848 | A16419 | 283 | A07848 | A16529 | 243 |
| A07848 | A16847 | 274 | A07849 | A17089 | 272 |
| A07850 | A07887 | 489 | A07850 | A07920 | 456 |
| A07850 | A08383 | 156 | A07850 | A08818 | 156 |
| A07850 | A09502 | 156 | A07850 | A10103 | 272 |
| A07850 | A11344 | 156 | A07850 | A11674 | 156 |
| A07850 | A14006 | 172 | A07850 | A15641 | 246 |
| A07850 | A16228 | 491 | A07850 | A16257 | 227 |
| A07851 | A08109 | 486 | A07851 | A08190 | 322 |
| A07851 | A08249 | 160 | A07851 | A08372 | 254 |
| A07851 | A08385 | 306 | A07851 | A09881 | 712 |
| A07851 | A10444 | 174 | A07851 | A10452 | 151 |
| A07851 | A10454 | 358 | A07851 | A10691 | 170 |
| A07851 | A13341 | 257 | A07851 | A13989 | 223 |
| A07851 | A14220 | 235 | A07852 | A07859 | 438 |
| A07852 | A07863 | 438 | A07852 | A12522 | 413 |
| A07853 | A15498 | 240 | A07855 | A10072 | 313 |
| A07855 | A10657 | 302 | A07856 | A07973 | 319 |
| A07856 | A08197 | 367 | A07856 | A08438 | 208 |
| A07856 | A09612 | 432 | A07856 | A10456 | 200 |
| A07856 | A10712 | 317 | A07856 | A10776 | 296 |
| A07856 | A11235 | 369 | A07856 | A11279 | 193 |
| A07856 | A11529 | 385 | A07856 | A13882 | 314 |
| A07856 | A16739 | 350 | A07857 | A07860 | 435 |
| A07857 | A07862 | 469 | A07858 | A10772 | 452 |
| A07859 | A07863 | 452 | A07859 | A12522 | 436 |
| A07860 | A07862 | 430 | A07861 | A07864 | 445 |
| A07861 | A08668 | 413 | A07861 | A12716 | 445 |
| A07861 | A12811 | 445 | A07862 | A14876 | 414 |

|        |        |     |        |        |     |
|--------|--------|-----|--------|--------|-----|
| A07863 | A12522 | 436 | A07869 | A08552 | 156 |
| A07869 | A11283 | 458 | A07869 | A11332 | 380 |
| A07869 | A11828 | 434 | A07869 | A12047 | 481 |
| A07869 | A14156 | 213 | A07871 | A08242 | 469 |
| A07871 | A15905 | 367 | A07872 | A07873 | 917 |
| A07872 | A08351 | 329 | A07872 | A11283 | 218 |
| A07872 | A12234 | 213 | A07872 | A12678 | 254 |
| A07873 | A08351 | 218 | A07873 | A09757 | 168 |
| A07873 | A11283 | 425 | A07873 | A12234 | 230 |
| A07873 | A12678 | 335 | A07873 | A12834 | 152 |
| A07875 | A07933 | 299 | A07875 | A08135 | 452 |
| A07875 | A09612 | 388 | A07875 | A10676 | 460 |
| A07876 | A12824 | 283 | A07878 | A08660 | 420 |
| A07878 | A08688 | 380 | A07878 | A08717 | 316 |
| A07878 | A10394 | 364 | A07878 | A11885 | 262 |
| A07878 | A12451 | 443 | A07878 | A12842 | 391 |
| A07878 | A14430 | 221 | A07878 | A14554 | 182 |
| A07878 | A15179 | 329 | A07878 | A16014 | 357 |
| A07878 | A16281 | 341 | A07879 | A11879 | 445 |
| A07880 | A09340 | 305 | A07880 | A09417 | 272 |
| A07880 | A09667 | 294 | A07880 | A09742 | 193 |
| A07880 | A11386 | 176 | A07880 | A12835 | 152 |
| A07880 | A12872 | 251 | A07880 | A13707 | 168 |
| A07880 | A13949 | 281 | A07880 | A14230 | 408 |
| A07880 | A14569 | 171 | A07880 | A14694 | 152 |
| A07880 | A14718 | 305 | A07880 | A15667 | 229 |
| A07880 | A15837 | 449 | A07880 | A16440 | 160 |
| A07881 | A07911 | 608 | A07881 | A08098 | 486 |
| A07881 | A08178 | 383 | A07881 | A08228 | 665 |
| A07881 | A08534 | 258 | A07881 | A08548 | 665 |
| A07881 | A08662 | 427 | A07881 | A08674 | 537 |
| A07881 | A09328 | 372 | A07881 | A10362 | 154 |
| A07881 | A10755 | 491 | A07881 | A11290 | 459 |
| A07881 | A11344 | 321 | A07881 | A11694 | 160 |
| A07881 | A11918 | 539 | A07881 | A11935 | 323 |
| A07881 | A12329 | 489 | A07881 | A13298 | 491 |
| A07881 | A13989 | 229 | A07881 | A14083 | 429 |
| A07881 | A14699 | 664 | A07881 | A14778 | 383 |
| A07881 | A14955 | 258 | A07881 | A15023 | 200 |
| A07881 | A15624 | 568 | A07881 | A15649 | 318 |
| A07881 | A15651 | 274 | A07881 | A15652 | 578 |
| A07881 | A15659 | 223 | A07881 | A15660 | 491 |
| A07881 | A15661 | 530 | A07881 | A15662 | 599 |
| A07881 | A15684 | 581 | A07881 | A15708 | 443 |
| A07881 | A15720 | 156 | A07881 | A15721 | 156 |
| A07881 | A15746 | 578 | A07881 | A15843 | 285 |

|        |        |     |        |        |     |
|--------|--------|-----|--------|--------|-----|
| A07881 | A15917 | 229 | A07881 | A15918 | 520 |
| A07881 | A15923 | 382 | A07881 | A15931 | 477 |
| A07881 | A15933 | 243 | A07881 | A15937 | 568 |
| A07881 | A16048 | 405 | A07881 | A16088 | 229 |
| A07881 | A16092 | 160 | A07881 | A16095 | 224 |
| A07881 | A16096 | 378 | A07881 | A16145 | 156 |
| A07881 | A16156 | 191 | A07881 | A16218 | 373 |
| A07881 | A16307 | 156 | A07881 | A16650 | 346 |
| A07881 | A16811 | 229 | A07883 | A07893 | 447 |
| A07883 | A08239 | 281 | A07883 | A08536 | 195 |
| A07883 | A08838 | 205 | A07883 | A09869 | 488 |
| A07883 | A10369 | 324 | A07883 | A11183 | 346 |
| A07883 | A11408 | 439 | A07883 | A12722 | 458 |
| A07883 | A12817 | 400 | A07883 | A12858 | 177 |
| A07883 | A14163 | 396 | A07883 | A14271 | 491 |
| A07883 | A15685 | 193 | A07883 | A16261 | 235 |
| A07884 | A16772 | 407 | A07885 | A08362 | 362 |
| A07885 | A08553 | 265 | A07885 | A09007 | 491 |
| A07885 | A09675 | 303 | A07885 | A10159 | 489 |
| A07885 | A10579 | 174 | A07885 | A10642 | 213 |
| A07885 | A12606 | 227 | A07885 | A12835 | 182 |
| A07885 | A13979 | 151 | A07885 | A13986 | 177 |
| A07885 | A14078 | 63  | A07885 | A14086 | 491 |
| A07885 | A14160 | 475 | A07885 | A14183 | 491 |
| A07885 | A14197 | 382 | A07885 | A14300 | 468 |
| A07885 | A14452 | 221 | A07885 | A14655 | 180 |
| A07885 | A14690 | 409 | A07885 | A14716 | 190 |
| A07885 | A14808 | 238 | A07885 | A14827 | 200 |
| A07885 | A14843 | 491 | A07885 | A14946 | 205 |
| A07885 | A15060 | 262 | A07885 | A15946 | 457 |
| A07885 | A17117 | 246 | A07886 | A08034 | 436 |
| A07886 | A08115 | 441 | A07886 | A08116 | 445 |
| A07886 | A08401 | 452 | A07886 | A08455 | 447 |
| A07886 | A08486 | 452 | A07886 | A14633 | 297 |
| A07887 | A08248 | 479 | A07887 | A08383 | 227 |
| A07887 | A08603 | 243 | A07887 | A08818 | 156 |
| A07887 | A09502 | 156 | A07887 | A09712 | 238 |
| A07887 | A11344 | 156 | A07887 | A11674 | 156 |
| A07887 | A11795 | 255 | A07887 | A12026 | 340 |
| A07887 | A14196 | 302 | A07887 | A15686 | 238 |
| A07887 | A15763 | 435 | A07887 | A15775 | 462 |
| A07887 | A16228 | 412 | A07888 | A13870 | 345 |
| A07888 | A14006 | 210 | A07889 | A09714 | 447 |
| A07889 | A12433 | 210 | A07889 | A15837 | 185 |
| A07891 | A09309 | 346 | A07891 | A14252 | 249 |
| A07893 | A07934 | 160 | A07893 | A07954 | 491 |

|        |        |     |        |        |     |
|--------|--------|-----|--------|--------|-----|
| A07893 | A07965 | 249 | A07893 | A08056 | 491 |
| A07893 | A08152 | 165 | A07893 | A08239 | 210 |
| A07893 | A08531 | 477 | A07893 | A08536 | 491 |
| A07893 | A08551 | 490 | A07893 | A08552 | 177 |
| A07893 | A08569 | 491 | A07893 | A08724 | 154 |
| A07893 | A08910 | 366 | A07893 | A08985 | 226 |
| A07893 | A09342 | 480 | A07893 | A09624 | 491 |
| A07893 | A09721 | 182 | A07893 | A09756 | 430 |
| A07893 | A10363 | 177 | A07893 | A10369 | 490 |
| A07893 | A10747 | 182 | A07893 | A10919 | 188 |
| A07893 | A11183 | 395 | A07893 | A11281 | 238 |
| A07893 | A11283 | 361 | A07893 | A11346 | 409 |
| A07893 | A11408 | 375 | A07893 | A11475 | 474 |
| A07893 | A11551 | 221 | A07893 | A11615 | 255 |
| A07893 | A12047 | 491 | A07893 | A12722 | 491 |
| A07893 | A13641 | 235 | A07893 | A13642 | 235 |
| A07893 | A13894 | 369 | A07893 | A13895 | 366 |
| A07893 | A14163 | 447 | A07893 | A14266 | 425 |
| A07893 | A14271 | 425 | A07893 | A14281 | 452 |
| A07893 | A14357 | 219 | A07893 | A14474 | 201 |
| A07893 | A14661 | 491 | A07893 | A15295 | 208 |
| A07893 | A15321 | 402 | A07893 | A15441 | 152 |
| A07893 | A15498 | 413 | A07893 | A15501 | 317 |
| A07893 | A15685 | 63  | A07893 | A16336 | 176 |
| A07894 | A08178 | 229 | A07894 | A12927 | 162 |
| A07894 | A13387 | 241 | A07894 | A14381 | 229 |
| A07894 | A14801 | 399 | A07894 | A15295 | 321 |
| A07894 | A15917 | 180 | A07896 | A13983 | 260 |
| A07897 | A07934 | 430 | A07897 | A08126 | 321 |
| A07897 | A08418 | 262 | A07897 | A09311 | 329 |
| A07897 | A09668 | 356 | A07897 | A10358 | 306 |
| A07897 | A11196 | 352 | A07897 | A12087 | 420 |
| A07897 | A13115 | 409 | A07897 | A14278 | 246 |
| A07897 | A14281 | 210 | A07897 | A15157 | 409 |
| A07897 | A15273 | 313 | A07897 | A15626 | 180 |
| A07898 | A08201 | 156 | A07898 | A08327 | 156 |
| A07898 | A08431 | 156 | A07898 | A08542 | 156 |
| A07898 | A08571 | 196 | A07898 | A11496 | 156 |
| A07898 | A11497 | 156 | A07898 | A12240 | 396 |
| A07898 | A12279 | 396 | A07898 | A12757 | 156 |
| A07898 | A13928 | 156 | A07898 | A14178 | 156 |
| A07898 | A15559 | 210 | A07898 | A16699 | 156 |
| A07900 | A08219 | 379 | A07900 | A09842 | 173 |
| A07900 | A11546 | 486 | A07900 | A12927 | 266 |
| A07900 | A15498 | 224 | A07901 | A13369 | 283 |
| A07902 | A07989 | 266 | A07902 | A07996 | 491 |

|        |        |     |        |        |     |
|--------|--------|-----|--------|--------|-----|
| A07902 | A08000 | 491 | A07902 | A08030 | 491 |
| A07902 | A08117 | 491 | A07902 | A08141 | 63  |
| A07902 | A08208 | 477 | A07902 | A08669 | 395 |
| A07902 | A08760 | 433 | A07902 | A08820 | 291 |
| A07902 | A08888 | 240 | A07902 | A08902 | 68  |
| A07902 | A09288 | 480 | A07902 | A09706 | 193 |
| A07902 | A10498 | 228 | A07902 | A10607 | 249 |
| A07902 | A10625 | 63  | A07902 | A11351 | 281 |
| A07902 | A11596 | 283 | A07902 | A11880 | 224 |
| A07902 | A11916 | 438 | A07902 | A12061 | 488 |
| A07902 | A13257 | 411 | A07902 | A14076 | 445 |
| A07902 | A14079 | 491 | A07902 | A14273 | 491 |
| A07902 | A14460 | 391 | A07902 | A14589 | 171 |
| A07902 | A15282 | 326 | A07902 | A15356 | 308 |
| A07902 | A15369 | 489 | A07902 | A15371 | 299 |
| A07902 | A15563 | 171 | A07902 | A15654 | 218 |
| A07902 | A15939 | 440 | A07902 | A15941 | 419 |
| A07902 | A15942 | 188 | A07902 | A16127 | 488 |
| A07902 | A16128 | 488 | A07902 | A16129 | 479 |
| A07902 | A16225 | 91  | A07902 | A16226 | 489 |
| A07902 | A16378 | 398 | A07902 | A16612 | 302 |
| A07902 | A16613 | 491 | A07902 | A16616 | 479 |
| A07902 | A16646 | 278 | A07902 | A16754 | 491 |
| A07902 | A16830 | 218 | A07903 | A07910 | 401 |
| A07903 | A07944 | 423 | A07903 | A08093 | 488 |
| A07903 | A08129 | 385 | A07903 | A08130 | 375 |
| A07903 | A08167 | 401 | A07903 | A08418 | 201 |
| A07903 | A11299 | 204 | A07903 | A11308 | 319 |
| A07903 | A11666 | 401 | A07903 | A11732 | 488 |
| A07903 | A12603 | 385 | A07904 | A07906 | 436 |
| A07904 | A07907 | 463 | A07905 | A11313 | 364 |
| A07906 | A07907 | 445 | A07907 | A07982 | 434 |
| A07910 | A08129 | 447 | A07910 | A08130 | 445 |
| A07911 | A08098 | 469 | A07911 | A08228 | 574 |
| A07911 | A08491 | 469 | A07911 | A08548 | 616 |
| A07911 | A08763 | 458 | A07911 | A09164 | 168 |
| A07911 | A11326 | 489 | A07911 | A13298 | 305 |
| A07911 | A14083 | 489 | A07911 | A14516 | 266 |
| A07911 | A14699 | 614 | A07911 | A14778 | 326 |
| A07911 | A14827 | 196 | A07912 | A08785 | 266 |
| A07912 | A10967 | 266 | A07913 | A07914 | 491 |
| A07913 | A07916 | 491 | A07913 | A07928 | 490 |
| A07913 | A07950 | 339 | A07913 | A07988 | 486 |
| A07913 | A08173 | 339 | A07913 | A08210 | 269 |
| A07913 | A08218 | 491 | A07913 | A08246 | 479 |
| A07913 | A08347 | 379 | A07913 | A08395 | 435 |

|        |        |     |        |        |     |
|--------|--------|-----|--------|--------|-----|
| A07913 | A08404 | 491 | A07913 | A08785 | 491 |
| A07913 | A10436 | 379 | A07913 | A10563 | 152 |
| A07913 | A11428 | 293 | A07913 | A11442 | 361 |
| A07913 | A11552 | 246 | A07913 | A12730 | 238 |
| A07913 | A13879 | 165 | A07914 | A07916 | 458 |
| A07914 | A07928 | 422 | A07914 | A07958 | 202 |
| A07914 | A07988 | 477 | A07914 | A08210 | 345 |
| A07914 | A08218 | 480 | A07914 | A08246 | 382 |
| A07914 | A08347 | 416 | A07914 | A08404 | 486 |
| A07914 | A08785 | 479 | A07914 | A10563 | 252 |
| A07914 | A11552 | 329 | A07916 | A07928 | 486 |
| A07916 | A07988 | 486 | A07916 | A08165 | 420 |
| A07916 | A08218 | 491 | A07916 | A08404 | 477 |
| A07916 | A08785 | 414 | A07918 | A08724 | 399 |
| A07920 | A08495 | 424 | A07920 | A13248 | 469 |
| A07920 | A14006 | 291 | A07920 | A14801 | 163 |
| A07920 | A15498 | 228 | A07920 | A16228 | 395 |
| A07921 | A14568 | 373 | A07922 | A09316 | 260 |
| A07922 | A13274 | 454 | A07922 | A15282 | 185 |
| A07923 | A09149 | 286 | A07923 | A09467 | 400 |
| A07923 | A10731 | 294 | A07924 | A08211 | 170 |
| A07924 | A08327 | 193 | A07924 | A09295 | 291 |
| A07924 | A09697 | 170 | A07924 | A10465 | 238 |
| A07924 | A10616 | 201 | A07924 | A11544 | 174 |
| A07924 | A11575 | 246 | A07924 | A11831 | 312 |
| A07924 | A11832 | 174 | A07924 | A12849 | 278 |
| A07924 | A13052 | 170 | A07924 | A13076 | 330 |
| A07924 | A13989 | 549 | A07924 | A14655 | 301 |
| A07924 | A16302 | 335 | A07926 | A07933 | 278 |
| A07926 | A07951 | 433 | A07926 | A08238 | 389 |
| A07926 | A08250 | 396 | A07926 | A08330 | 361 |
| A07926 | A10437 | 404 | A07926 | A10444 | 371 |
| A07926 | A10656 | 436 | A07926 | A10672 | 395 |
| A07926 | A10708 | 401 | A07927 | A14353 | 430 |
| A07928 | A07988 | 466 | A07928 | A08218 | 484 |
| A07928 | A08404 | 470 | A07928 | A08785 | 446 |
| A07930 | A09727 | 473 | A07930 | A14200 | 190 |
| A07930 | A14621 | 348 | A07931 | A07974 | 485 |
| A07931 | A09050 | 173 | A07931 | A12276 | 371 |
| A07931 | A12277 | 371 | A07931 | A12831 | 272 |
| A07931 | A14525 | 372 | A07931 | A14803 | 329 |
| A07931 | A14858 | 344 | A07931 | A15655 | 266 |
| A07931 | A16531 | 168 | A07931 | A16753 | 205 |
| A07932 | A08738 | 190 | A07932 | A09591 | 291 |
| A07932 | A14969 | 344 | A07933 | A07973 | 484 |
| A07933 | A07976 | 378 | A07933 | A08135 | 171 |

|        |        |     |        |        |     |
|--------|--------|-----|--------|--------|-----|
| A07933 | A08155 | 339 | A07933 | A08238 | 488 |
| A07933 | A08250 | 208 | A07933 | A08313 | 196 |
| A07933 | A08330 | 408 | A07933 | A08368 | 288 |
| A07933 | A08687 | 210 | A07933 | A09059 | 299 |
| A07933 | A09612 | 156 | A07933 | A10420 | 405 |
| A07933 | A10437 | 353 | A07933 | A10441 | 193 |
| A07933 | A10443 | 328 | A07933 | A10444 | 485 |
| A07933 | A10452 | 475 | A07933 | A10456 | 196 |
| A07933 | A10652 | 173 | A07933 | A10656 | 486 |
| A07933 | A10658 | 193 | A07933 | A10672 | 443 |
| A07933 | A10676 | 230 | A07933 | A10677 | 491 |
| A07933 | A10681 | 180 | A07933 | A10688 | 339 |
| A07933 | A10694 | 326 | A07933 | A10695 | 160 |
| A07933 | A10712 | 389 | A07933 | A10904 | 278 |
| A07933 | A11580 | 341 | A07933 | A11847 | 457 |
| A07933 | A13159 | 221 | A07933 | A13735 | 165 |
| A07933 | A13736 | 180 | A07933 | A14803 | 395 |
| A07933 | A14821 | 219 | A07933 | A14856 | 486 |
| A07933 | A14907 | 317 | A07933 | A15177 | 341 |
| A07933 | A15223 | 262 | A07933 | A15497 | 276 |
| A07933 | A15970 | 480 | A07933 | A16103 | 484 |
| A07933 | A16262 | 156 | A07933 | A16286 | 372 |
| A07933 | A16417 | 152 | A07933 | A16419 | 321 |
| A07933 | A16852 | 278 | A07933 | A16968 | 243 |
| A07933 | A17001 | 374 | A07933 | A17007 | 486 |
| A07933 | A17040 | 196 | A07933 | A17041 | 382 |
| A07934 | A07954 | 249 | A07934 | A08126 | 212 |
| A07934 | A08458 | 306 | A07934 | A08507 | 256 |
| A07934 | A09051 | 317 | A07934 | A09311 | 351 |
| A07934 | A09442 | 272 | A07934 | A09668 | 265 |
| A07934 | A09671 | 193 | A07934 | A09995 | 369 |
| A07934 | A10358 | 191 | A07934 | A10525 | 283 |
| A07934 | A10773 | 267 | A07934 | A10987 | 470 |
| A07934 | A11281 | 347 | A07934 | A11408 | 348 |
| A07934 | A11851 | 185 | A07934 | A12047 | 379 |
| A07934 | A12722 | 179 | A07934 | A13965 | 477 |
| A07934 | A14163 | 251 | A07934 | A14167 | 249 |
| A07934 | A14266 | 340 | A07934 | A14270 | 202 |
| A07934 | A14281 | 196 | A07934 | A14654 | 193 |
| A07934 | A15626 | 343 | A07934 | A15711 | 199 |
| A07934 | A16261 | 469 | A07935 | A08365 | 157 |
| A07935 | A08366 | 369 | A07935 | A08385 | 366 |
| A07935 | A09561 | 168 | A07935 | A10652 | 269 |
| A07935 | A10670 | 364 | A07935 | A10684 | 277 |
| A07935 | A10692 | 334 | A07935 | A10699 | 332 |
| A07935 | A10706 | 247 | A07935 | A10783 | 408 |



|        |        |     |        |        |     |
|--------|--------|-----|--------|--------|-----|
| A07935 | A10876 | 375 | A07935 | A12897 | 199 |
| A07935 | A16300 | 168 | A07936 | A08094 | 386 |
| A07937 | A09757 | 299 | A07937 | A11283 | 210 |
| A07937 | A12234 | 296 | A07937 | A12538 | 389 |
| A07937 | A12834 | 207 | A07938 | A07939 | 452 |
| A07940 | A13879 | 313 | A07941 | A09526 | 468 |
| A07942 | A10651 | 277 | A07942 | A12538 | 152 |
| A07942 | A12678 | 303 | A07942 | A12834 | 202 |
| A07942 | A13323 | 475 | A07942 | A14683 | 263 |
| A07942 | A15002 | 409 | A07942 | A15498 | 340 |
| A07944 | A08056 | 216 | A07944 | A09311 | 355 |
| A07944 | A11487 | 154 | A07945 | A08153 | 452 |
| A07945 | A10095 | 425 | A07945 | A10292 | 452 |
| A07945 | A10641 | 452 | A07946 | A08693 | 380 |
| A07946 | A10640 | 402 | A07946 | A11488 | 438 |
| A07946 | A14366 | 323 | A07946 | A14374 | 330 |
| A07946 | A14391 | 335 | A07946 | A14554 | 363 |
| A07946 | A15516 | 378 | A07947 | A08420 | 430 |
| A07947 | A08421 | 414 | A07947 | A08422 | 428 |
| A07947 | A08424 | 422 | A07950 | A08217 | 441 |
| A07950 | A10563 | 341 | A07951 | A08330 | 385 |
| A07951 | A10708 | 416 | A07951 | A17078 | 307 |
| A07952 | A08209 | 466 | A07952 | A10527 | 348 |
| A07952 | A14190 | 270 | A07952 | A15896 | 352 |
| A07952 | A15992 | 345 | A07953 | A11385 | 420 |
| A07953 | A11394 | 428 | A07953 | A12834 | 433 |
| A07954 | A08192 | 210 | A07954 | A08531 | 457 |
| A07954 | A08536 | 159 | A07954 | A08910 | 434 |
| A07954 | A08917 | 156 | A07954 | A08985 | 291 |
| A07954 | A09624 | 488 | A07954 | A09662 | 463 |
| A07954 | A09756 | 160 | A07954 | A10250 | 334 |
| A07954 | A10363 | 247 | A07954 | A10369 | 484 |
| A07954 | A10607 | 224 | A07954 | A11293 | 154 |
| A07954 | A11346 | 343 | A07954 | A11408 | 446 |
| A07954 | A11475 | 473 | A07954 | A11551 | 199 |
| A07954 | A12047 | 408 | A07954 | A12665 | 165 |
| A07954 | A12722 | 490 | A07954 | A13804 | 185 |
| A07954 | A14163 | 484 | A07954 | A14193 | 491 |
| A07954 | A14266 | 474 | A07954 | A14270 | 406 |
| A07954 | A14278 | 241 | A07954 | A14281 | 480 |
| A07954 | A14304 | 238 | A07954 | A14474 | 491 |
| A07954 | A14484 | 446 | A07954 | A14633 | 477 |
| A07954 | A15501 | 485 | A07954 | A15685 | 71  |
| A07954 | A16851 | 174 | A07954 | A17033 | 154 |
| A07955 | A08759 | 435 | A07955 | A10573 | 472 |
| A07955 | A10930 | 469 | A07955 | A14193 | 162 |

|        |        |     |        |        |     |
|--------|--------|-----|--------|--------|-----|
| A07955 | A15960 | 463 | A07956 | A08118 | 213 |
| A07956 | A08248 | 473 | A07956 | A08281 | 455 |
| A07956 | A08383 | 190 | A07956 | A08517 | 414 |
| A07956 | A08929 | 182 | A07956 | A08982 | 262 |
| A07956 | A09627 | 414 | A07956 | A09725 | 368 |
| A07956 | A11544 | 262 | A07956 | A11649 | 262 |
| A07956 | A13892 | 262 | A07956 | A14196 | 491 |
| A07956 | A14362 | 262 | A07956 | A14511 | 279 |
| A07956 | A15103 | 266 | A07956 | A15292 | 260 |
| A07956 | A15297 | 449 | A07956 | A15321 | 217 |
| A07956 | A15323 | 467 | A07956 | A15324 | 443 |
| A07956 | A15338 | 276 | A07956 | A15339 | 228 |
| A07956 | A15419 | 157 | A07956 | A15559 | 491 |
| A07956 | A15564 | 262 | A07956 | A15729 | 438 |
| A07956 | A15788 | 218 | A07956 | A16463 | 414 |
| A07956 | A16614 | 262 | A07957 | A08485 | 452 |
| A07957 | A08493 | 452 | A07957 | A14293 | 452 |
| A07958 | A08094 | 193 | A07958 | A08146 | 318 |
| A07958 | A08173 | 408 | A07958 | A08200 | 307 |
| A07958 | A08210 | 226 | A07958 | A08404 | 312 |
| A07958 | A08785 | 160 | A07958 | A10967 | 490 |
| A07958 | A10983 | 213 | A07958 | A11282 | 312 |
| A07958 | A11311 | 485 | A07958 | A11414 | 396 |
| A07958 | A11428 | 470 | A07958 | A11448 | 422 |
| A07958 | A12374 | 356 | A07958 | A12793 | 439 |
| A07958 | A16569 | 356 | A07958 | A17108 | 303 |
| A07959 | A08341 | 213 | A07959 | A08991 | 238 |
| A07959 | A12284 | 515 | A07959 | A15295 | 480 |
| A07960 | A09259 | 455 | A07960 | A09434 | 361 |
| A07960 | A15425 | 324 | A07960 | A15812 | 438 |
| A07961 | A08535 | 226 | A07961 | A08715 | 297 |
| A07961 | A08732 | 183 | A07961 | A08842 | 221 |
| A07961 | A08861 | 154 | A07961 | A09757 | 160 |
| A07961 | A10440 | 267 | A07961 | A10905 | 260 |
| A07961 | A11471 | 207 | A07961 | A11675 | 154 |
| A07961 | A11964 | 400 | A07961 | A12215 | 269 |
| A07961 | A12506 | 185 | A07961 | A12508 | 168 |
| A07961 | A12659 | 185 | A07961 | A12824 | 157 |
| A07961 | A12826 | 358 | A07961 | A12850 | 285 |
| A07961 | A13315 | 227 | A07961 | A13363 | 168 |
| A07961 | A13707 | 174 | A07961 | A13788 | 236 |
| A07961 | A14071 | 432 | A07961 | A14179 | 241 |
| A07961 | A14208 | 490 | A07961 | A14227 | 173 |
| A07961 | A14235 | 260 | A07961 | A14255 | 157 |
| A07961 | A14270 | 210 | A07961 | A14439 | 185 |
| A07961 | A14719 | 210 | A07961 | A14830 | 221 |

|        |        |     |        |        |     |
|--------|--------|-----|--------|--------|-----|
| A07961 | A14937 | 217 | A07961 | A15639 | 380 |
| A07961 | A15718 | 210 | A07961 | A16567 | 271 |
| A07961 | A17133 | 232 | A07962 | A07963 | 447 |
| A07965 | A08131 | 217 | A07965 | A09613 | 363 |
| A07965 | A09726 | 293 | A07965 | A11480 | 188 |
| A07965 | A12821 | 417 | A07965 | A14813 | 188 |
| A07965 | A15657 | 427 | A07965 | A16680 | 188 |
| A07967 | A08860 | 204 | A07967 | A10532 | 156 |
| A07967 | A10698 | 226 | A07967 | A11184 | 299 |
| A07967 | A13928 | 204 | A07967 | A13983 | 259 |
| A07967 | A14202 | 299 | A07967 | A14208 | 201 |
| A07967 | A15292 | 270 | A07967 | A15356 | 491 |
| A07967 | A15366 | 383 | A07967 | A15614 | 160 |
| A07967 | A15665 | 257 | A07968 | A08112 | 420 |
| A07968 | A15498 | 311 | A07969 | A11216 | 416 |
| A07969 | A12542 | 441 | A07969 | A12936 | 468 |
| A07969 | A16267 | 435 | A07971 | A14324 | 389 |
| A07972 | A08242 | 435 | A07973 | A07976 | 484 |
| A07973 | A08238 | 462 | A07973 | A08250 | 294 |
| A07973 | A08330 | 221 | A07973 | A08484 | 371 |
| A07973 | A09059 | 441 | A07973 | A09876 | 486 |
| A07973 | A09877 | 330 | A07973 | A10160 | 319 |
| A07973 | A10420 | 436 | A07973 | A10421 | 229 |
| A07973 | A10424 | 468 | A07973 | A10427 | 355 |
| A07973 | A10438 | 306 | A07973 | A10444 | 240 |
| A07973 | A10452 | 347 | A07973 | A10652 | 265 |
| A07973 | A10656 | 467 | A07973 | A10658 | 441 |
| A07973 | A10659 | 314 | A07973 | A10672 | 489 |
| A07973 | A10677 | 489 | A07973 | A10702 | 170 |
| A07973 | A10703 | 247 | A07973 | A10712 | 441 |
| A07973 | A10714 | 168 | A07973 | A12723 | 183 |
| A07973 | A13871 | 208 | A07973 | A13882 | 191 |
| A07973 | A14191 | 152 | A07973 | A14247 | 297 |
| A07973 | A14856 | 435 | A07973 | A15223 | 355 |
| A07973 | A15637 | 226 | A07973 | A15690 | 193 |
| A07973 | A15874 | 152 | A07973 | A15877 | 226 |
| A07973 | A16277 | 424 | A07973 | A16335 | 193 |
| A07973 | A16419 | 277 | A07973 | A17040 | 177 |
| A07973 | A17041 | 255 | A07974 | A08097 | 317 |
| A07974 | A09340 | 317 | A07974 | A14525 | 335 |
| A07974 | A14858 | 441 | A07974 | A15655 | 311 |
| A07975 | A10420 | 328 | A07976 | A08108 | 173 |
| A07976 | A08135 | 332 | A07976 | A08238 | 216 |
| A07976 | A08250 | 235 | A07976 | A08330 | 154 |
| A07976 | A08402 | 279 | A07976 | A08667 | 205 |
| A07976 | A09059 | 485 | A07976 | A09876 | 466 |

|        |        |     |        |        |     |
|--------|--------|-----|--------|--------|-----|
| A07976 | A09877 | 281 | A07976 | A10253 | 363 |
| A07976 | A10420 | 491 | A07976 | A10421 | 467 |
| A07976 | A10424 | 477 | A07976 | A10427 | 477 |
| A07976 | A10429 | 447 | A07976 | A10444 | 391 |
| A07976 | A10452 | 152 | A07976 | A10652 | 334 |
| A07976 | A10656 | 159 | A07976 | A10658 | 480 |
| A07976 | A10672 | 452 | A07976 | A10677 | 488 |
| A07976 | A10686 | 351 | A07976 | A10695 | 190 |
| A07976 | A10703 | 184 | A07976 | A11309 | 210 |
| A07976 | A13717 | 281 | A07976 | A13735 | 327 |
| A07976 | A13873 | 229 | A07976 | A14191 | 427 |
| A07976 | A14272 | 468 | A07976 | A14594 | 343 |
| A07976 | A14803 | 360 | A07976 | A14856 | 486 |
| A07976 | A15223 | 162 | A07976 | A15877 | 160 |
| A07976 | A16277 | 173 | A07976 | A16335 | 441 |
| A07976 | A16417 | 314 | A07976 | A16418 | 477 |
| A07976 | A17007 | 438 | A07976 | A17041 | 191 |
| A07976 | A17078 | 213 | A07978 | A08835 | 332 |
| A07979 | A08048 | 445 | A07979 | A10358 | 377 |
| A07979 | A10411 | 424 | A07979 | A10851 | 434 |
| A07979 | A10856 | 434 | A07981 | A09054 | 436 |
| A07981 | A11302 | 234 | A07981 | A13415 | 364 |
| A07981 | A13819 | 307 | A07981 | A13866 | 307 |
| A07981 | A14239 | 307 | A07981 | A16807 | 307 |
| A07984 | A10319 | 364 | A07985 | A07997 | 491 |
| A07985 | A08093 | 259 | A07985 | A08097 | 223 |
| A07985 | A08681 | 323 | A07985 | A08686 | 207 |
| A07985 | A08753 | 176 | A07985 | A08975 | 152 |
| A07985 | A09246 | 170 | A07985 | A09504 | 221 |
| A07985 | A10024 | 378 | A07985 | A10667 | 485 |
| A07985 | A11308 | 489 | A07985 | A11417 | 407 |
| A07985 | A11530 | 372 | A07985 | A11649 | 281 |
| A07985 | A11726 | 424 | A07985 | A11982 | 279 |
| A07985 | A12119 | 414 | A07985 | A12603 | 352 |
| A07985 | A14152 | 317 | A07985 | A14633 | 172 |
| A07985 | A15420 | 199 | A07985 | A15679 | 380 |
| A07985 | A15680 | 177 | A07985 | A16447 | 286 |
| A07985 | A16480 | 307 | A07985 | A17189 | 472 |
| A07986 | A15323 | 156 | A07987 | A11327 | 418 |
| A07988 | A08218 | 483 | A07988 | A08404 | 423 |
| A07988 | A08785 | 257 | A07989 | A07996 | 165 |
| A07989 | A08000 | 371 | A07989 | A08030 | 475 |
| A07989 | A08117 | 477 | A07989 | A08141 | 156 |
| A07989 | A08208 | 107 | A07989 | A14079 | 490 |
| A07989 | A14132 | 232 | A07989 | A14273 | 491 |
| A07989 | A16127 | 477 | A07989 | A16128 | 477 |

|        |        |     |        |        |     |
|--------|--------|-----|--------|--------|-----|
| A07989 | A16225 | 334 | A07989 | A16226 | 193 |
| A07989 | A16613 | 458 | A07989 | A16754 | 389 |
| A07990 | A08158 | 465 | A07993 | A11131 | 213 |
| A07993 | A11233 | 324 | A07993 | A11469 | 491 |
| A07993 | A11983 | 226 | A07993 | A12870 | 322 |
| A07993 | A13124 | 216 | A07993 | A13899 | 210 |
| A07993 | A14072 | 208 | A07993 | A15318 | 201 |
| A07993 | A15420 | 188 | A07993 | A15445 | 235 |
| A07993 | A16450 | 372 | A07995 | A10345 | 374 |
| A07995 | A10639 | 401 | A07995 | A11036 | 412 |
| A07995 | A12675 | 457 | A07995 | A17085 | 346 |
| A07996 | A08000 | 491 | A07996 | A08029 | 378 |
| A07996 | A08030 | 491 | A07996 | A08117 | 491 |
| A07996 | A08141 | 259 | A07996 | A08208 | 480 |
| A07996 | A08212 | 490 | A07996 | A08516 | 446 |
| A07996 | A08669 | 491 | A07996 | A08769 | 489 |
| A07996 | A08820 | 297 | A07996 | A08919 | 358 |
| A07996 | A09000 | 243 | A07996 | A09288 | 486 |
| A07996 | A09454 | 154 | A07996 | A09598 | 335 |
| A07996 | A09654 | 441 | A07996 | A09660 | 65  |
| A07996 | A09663 | 198 | A07996 | A09706 | 491 |
| A07996 | A10373 | 462 | A07996 | A10788 | 326 |
| A07996 | A11236 | 486 | A07996 | A11596 | 290 |
| A07996 | A11703 | 380 | A07996 | A11916 | 491 |
| A07996 | A12052 | 210 | A07996 | A12165 | 302 |
| A07996 | A12190 | 238 | A07996 | A12556 | 491 |
| A07996 | A12625 | 491 | A07996 | A13246 | 272 |
| A07996 | A13257 | 159 | A07996 | A13913 | 154 |
| A07996 | A13949 | 491 | A07996 | A14076 | 491 |
| A07996 | A14079 | 491 | A07996 | A14093 | 272 |
| A07996 | A14094 | 479 | A07996 | A14155 | 63  |
| A07996 | A14167 | 246 | A07996 | A14230 | 417 |
| A07996 | A14273 | 491 | A07996 | A14460 | 491 |
| A07996 | A14694 | 481 | A07996 | A14962 | 395 |
| A07996 | A15356 | 322 | A07996 | A15367 | 439 |
| A07996 | A15369 | 491 | A07996 | A15371 | 99  |
| A07996 | A15420 | 179 | A07996 | A15939 | 414 |
| A07996 | A15941 | 480 | A07996 | A16127 | 491 |
| A07996 | A16128 | 491 | A07996 | A16129 | 491 |
| A07996 | A16130 | 360 | A07996 | A16134 | 462 |
| A07996 | A16225 | 185 | A07996 | A16226 | 491 |
| A07996 | A16378 | 491 | A07996 | A16606 | 491 |
| A07996 | A16613 | 491 | A07996 | A16616 | 491 |
| A07996 | A16626 | 486 | A07996 | A16646 | 430 |
| A07996 | A16754 | 491 | A07996 | A16781 | 223 |
| A07997 | A08328 | 416 | A07997 | A08329 | 313 |

|        |        |     |        |        |     |
|--------|--------|-----|--------|--------|-----|
| A07997 | A10667 | 477 | A07997 | A11308 | 430 |
| A07997 | A12119 | 447 | A07997 | A14884 | 416 |
| A07998 | A10712 | 389 | A08000 | A08029 | 177 |
| A08000 | A08030 | 491 | A08000 | A08117 | 491 |
| A08000 | A08141 | 255 | A08000 | A08208 | 491 |
| A08000 | A08669 | 408 | A08000 | A08902 | 74  |
| A08000 | A08919 | 157 | A08000 | A09288 | 491 |
| A08000 | A09663 | 306 | A08000 | A09706 | 480 |
| A08000 | A10373 | 452 | A08000 | A10625 | 216 |
| A08000 | A11916 | 395 | A08000 | A12556 | 462 |
| A08000 | A13348 | 179 | A08000 | A13767 | 230 |
| A08000 | A14076 | 469 | A08000 | A14079 | 491 |
| A08000 | A14273 | 491 | A08000 | A14282 | 152 |
| A08000 | A14460 | 402 | A08000 | A15356 | 486 |
| A08000 | A15369 | 466 | A08000 | A15371 | 99  |
| A08000 | A15939 | 446 | A08000 | A15941 | 489 |
| A08000 | A16127 | 491 | A08000 | A16128 | 490 |
| A08000 | A16129 | 374 | A08000 | A16134 | 174 |
| A08000 | A16226 | 486 | A08000 | A16294 | 170 |
| A08000 | A16331 | 198 | A08000 | A16378 | 452 |
| A08000 | A16452 | 294 | A08000 | A16612 | 425 |
| A08000 | A16613 | 491 | A08000 | A16616 | 491 |
| A08000 | A16646 | 479 | A08000 | A16754 | 491 |
| A08000 | A16830 | 230 | A08001 | A11303 | 333 |
| A08001 | A14247 | 193 | A08002 | A08003 | 436 |
| A08002 | A11172 | 416 | A08002 | A14362 | 353 |
| A08002 | A14366 | 269 | A08002 | A14394 | 291 |
| A08002 | A14600 | 411 | A08002 | A14767 | 436 |
| A08002 | A15475 | 363 | A08002 | A15498 | 160 |
| A08002 | A16562 | 436 | A08002 | A17052 | 436 |
| A08003 | A15498 | 262 | A08005 | A08006 | 447 |
| A08005 | A08009 | 469 | A08005 | A15498 | 227 |
| A08006 | A08009 | 445 | A08006 | A15498 | 262 |
| A08008 | A11564 | 436 | A08009 | A10654 | 445 |
| A08009 | A15498 | 205 | A08010 | A10590 | 439 |
| A08011 | A08052 | 308 | A08011 | A08055 | 650 |
| A08011 | A08357 | 285 | A08011 | A08362 | 271 |
| A08011 | A08377 | 438 | A08011 | A08398 | 324 |
| A08011 | A08452 | 443 | A08011 | A08501 | 241 |
| A08011 | A08543 | 455 | A08011 | A08547 | 257 |
| A08011 | A08550 | 658 | A08011 | A08556 | 312 |
| A08011 | A08559 | 180 | A08011 | A08773 | 860 |
| A08011 | A08812 | 174 | A08011 | A08973 | 791 |
| A08011 | A09044 | 412 | A08011 | A09308 | 283 |
| A08011 | A09322 | 151 | A08011 | A09332 | 490 |
| A08011 | A09657 | 299 | A08011 | A09686 | 177 |

|        |        |     |        |        |     |
|--------|--------|-----|--------|--------|-----|
| A08011 | A09735 | 333 | A08011 | A09852 | 238 |
| A08011 | A09882 | 162 | A08011 | A10316 | 443 |
| A08011 | A10532 | 335 | A08011 | A10569 | 208 |
| A08011 | A10572 | 288 | A08011 | A10798 | 369 |
| A08011 | A10799 | 218 | A08011 | A10924 | 311 |
| A08011 | A11334 | 446 | A08011 | A11390 | 486 |
| A08011 | A11480 | 390 | A08011 | A11496 | 308 |
| A08011 | A11597 | 432 | A08011 | A11728 | 232 |
| A08011 | A11945 | 382 | A08011 | A11992 | 488 |
| A08011 | A12168 | 191 | A08011 | A12252 | 200 |
| A08011 | A12433 | 491 | A08011 | A12525 | 420 |
| A08011 | A12918 | 165 | A08011 | A13042 | 221 |
| A08011 | A13249 | 656 | A08011 | A13399 | 160 |
| A08011 | A13698 | 171 | A08011 | A13963 | 326 |
| A08011 | A13989 | 626 | A08011 | A14172 | 569 |
| A08011 | A14216 | 628 | A08011 | A14272 | 385 |
| A08011 | A14445 | 202 | A08011 | A14449 | 466 |
| A08011 | A14482 | 489 | A08011 | A14708 | 154 |
| A08011 | A14729 | 208 | A08011 | A15221 | 154 |
| A08011 | A15624 | 228 | A08011 | A15666 | 240 |
| A08011 | A15684 | 322 | A08011 | A15727 | 162 |
| A08011 | A15771 | 172 | A08011 | A15932 | 481 |
| A08011 | A15933 | 167 | A08011 | A15949 | 219 |
| A08011 | A15988 | 654 | A08011 | A16157 | 452 |
| A08011 | A16611 | 177 | A08011 | A16679 | 369 |
| A08011 | A16680 | 167 | A08011 | A17133 | 208 |
| A08012 | A11626 | 404 | A08012 | A11646 | 344 |
| A08012 | A14570 | 428 | A08012 | A17013 | 312 |
| A08013 | A08503 | 201 | A08013 | A08543 | 177 |
| A08013 | A08552 | 196 | A08013 | A08560 | 227 |
| A08013 | A08561 | 221 | A08013 | A08883 | 920 |
| A08013 | A09000 | 302 | A08013 | A11279 | 159 |
| A08013 | A11301 | 182 | A08013 | A11376 | 273 |
| A08013 | A11497 | 215 | A08013 | A11551 | 294 |
| A08013 | A11675 | 279 | A08013 | A11915 | 346 |
| A08013 | A12499 | 335 | A08013 | A12606 | 198 |
| A08013 | A12725 | 212 | A08013 | A13313 | 181 |
| A08013 | A13781 | 172 | A08013 | A13784 | 198 |
| A08013 | A14255 | 281 | A08013 | A14718 | 296 |
| A08013 | A15189 | 267 | A08013 | A15541 | 268 |
| A08013 | A15653 | 184 | A08013 | A16552 | 185 |
| A08013 | A16565 | 278 | A08013 | A16597 | 279 |
| A08013 | A16608 | 247 | A08013 | A16664 | 274 |
| A08013 | A16709 | 335 | A08013 | A16905 | 307 |
| A08013 | A17030 | 351 | A08015 | A14303 | 319 |
| A08017 | A15367 | 188 | A08019 | A08020 | 452 |

|        |        |     |        |        |     |
|--------|--------|-----|--------|--------|-----|
| A08019 | A08021 | 452 | A08019 | A12626 | 452 |
| A08019 | A14984 | 452 | A08020 | A08021 | 452 |
| A08020 | A12626 | 452 | A08020 | A14984 | 452 |
| A08021 | A12626 | 452 | A08021 | A14984 | 452 |
| A08022 | A08327 | 249 | A08022 | A08362 | 361 |
| A08022 | A08381 | 542 | A08022 | A08382 | 596 |
| A08022 | A08383 | 396 | A08022 | A08439 | 595 |
| A08022 | A08522 | 165 | A08022 | A08553 | 491 |
| A08022 | A09002 | 424 | A08022 | A09010 | 506 |
| A08022 | A09292 | 373 | A08022 | A09611 | 592 |
| A08022 | A09644 | 273 | A08022 | A09703 | 594 |
| A08022 | A09708 | 592 | A08022 | A09727 | 491 |
| A08022 | A10420 | 486 | A08022 | A10856 | 177 |
| A08022 | A10934 | 416 | A08022 | A11253 | 218 |
| A08022 | A11316 | 329 | A08022 | A11368 | 229 |
| A08022 | A11386 | 357 | A08022 | A11395 | 596 |
| A08022 | A11439 | 593 | A08022 | A11476 | 276 |
| A08022 | A12052 | 151 | A08022 | A12152 | 485 |
| A08022 | A13042 | 162 | A08022 | A13105 | 177 |
| A08022 | A13989 | 491 | A08022 | A14005 | 63  |
| A08022 | A14009 | 375 | A08022 | A14150 | 246 |
| A08022 | A14166 | 255 | A08022 | A14200 | 491 |
| A08022 | A14283 | 398 | A08022 | A14462 | 582 |
| A08022 | A14596 | 489 | A08022 | A14655 | 491 |
| A08022 | A14925 | 152 | A08022 | A15266 | 293 |
| A08022 | A15297 | 491 | A08022 | A15373 | 227 |
| A08022 | A15559 | 491 | A08022 | A15660 | 470 |
| A08022 | A15725 | 340 | A08022 | A15729 | 167 |
| A08022 | A15749 | 475 | A08022 | A15762 | 588 |
| A08022 | A15943 | 594 | A08022 | A15944 | 520 |
| A08022 | A15945 | 594 | A08022 | A15946 | 596 |
| A08022 | A16067 | 595 | A08022 | A16089 | 221 |
| A08022 | A16093 | 594 | A08022 | A16109 | 590 |
| A08022 | A16144 | 594 | A08022 | A16145 | 208 |
| A08022 | A16161 | 271 | A08022 | A16212 | 152 |
| A08022 | A16463 | 246 | A08022 | A17123 | 180 |
| A08022 | A17140 | 350 | A08023 | A08474 | 440 |
| A08024 | A09307 | 191 | A08024 | A09619 | 361 |
| A08024 | A09664 | 229 | A08024 | A14355 | 485 |
| A08024 | A14505 | 238 | A08024 | A14944 | 323 |
| A08024 | A15762 | 208 | A08026 | A13046 | 445 |
| A08027 | A08127 | 430 | A08027 | A08379 | 338 |
| A08027 | A09612 | 409 | A08027 | A10253 | 334 |
| A08027 | A10420 | 351 | A08027 | A10424 | 427 |
| A08027 | A10441 | 420 | A08027 | A10443 | 420 |
| A08027 | A10456 | 314 | A08027 | A10703 | 408 |



|        |        |     |        |        |     |
|--------|--------|-----|--------|--------|-----|
| A08027 | A10712 | 389 | A08027 | A11381 | 369 |
| A08027 | A13735 | 412 | A08027 | A14856 | 348 |
| A08027 | A16103 | 417 | A08027 | A16286 | 408 |
| A08027 | A16767 | 420 | A08027 | A17041 | 412 |
| A08027 | A17089 | 319 | A08029 | A08030 | 489 |
| A08029 | A08117 | 405 | A08029 | A08141 | 317 |
| A08029 | A08208 | 132 | A08029 | A08212 | 270 |
| A08029 | A08526 | 245 | A08029 | A08669 | 408 |
| A08029 | A09598 | 271 | A08029 | A10625 | 113 |
| A08029 | A11841 | 312 | A08029 | A11916 | 276 |
| A08029 | A14076 | 229 | A08029 | A14079 | 446 |
| A08029 | A14460 | 286 | A08029 | A16127 | 216 |
| A08029 | A16128 | 432 | A08029 | A16129 | 129 |
| A08029 | A16134 | 443 | A08029 | A16226 | 396 |
| A08029 | A16606 | 432 | A08029 | A16626 | 230 |
| A08030 | A08117 | 491 | A08030 | A08141 | 484 |
| A08030 | A08208 | 485 | A08030 | A08212 | 479 |
| A08030 | A08669 | 491 | A08030 | A08769 | 207 |
| A08030 | A08820 | 419 | A08030 | A08902 | 93  |
| A08030 | A08919 | 215 | A08030 | A08995 | 185 |
| A08030 | A09000 | 286 | A08030 | A09288 | 477 |
| A08030 | A09598 | 152 | A08030 | A09654 | 278 |
| A08030 | A09663 | 434 | A08030 | A09706 | 480 |
| A08030 | A10373 | 263 | A08030 | A10607 | 201 |
| A08030 | A10625 | 99  | A08030 | A11351 | 238 |
| A08030 | A11596 | 324 | A08030 | A11729 | 254 |
| A08030 | A11880 | 176 | A08030 | A11916 | 491 |
| A08030 | A12061 | 386 | A08030 | A12165 | 196 |
| A08030 | A12556 | 413 | A08030 | A13257 | 196 |
| A08030 | A13767 | 170 | A08030 | A13913 | 191 |
| A08030 | A13949 | 489 | A08030 | A14076 | 491 |
| A08030 | A14079 | 491 | A08030 | A14093 | 316 |
| A08030 | A14230 | 251 | A08030 | A14273 | 491 |
| A08030 | A14460 | 491 | A08030 | A14694 | 285 |
| A08030 | A15321 | 483 | A08030 | A15367 | 348 |
| A08030 | A15369 | 491 | A08030 | A15371 | 227 |
| A08030 | A15645 | 101 | A08030 | A15837 | 228 |
| A08030 | A15939 | 480 | A08030 | A15941 | 469 |
| A08030 | A16127 | 491 | A08030 | A16128 | 491 |
| A08030 | A16129 | 491 | A08030 | A16130 | 296 |
| A08030 | A16134 | 419 | A08030 | A16225 | 480 |
| A08030 | A16226 | 491 | A08030 | A16294 | 174 |
| A08030 | A16378 | 475 | A08030 | A16606 | 491 |
| A08030 | A16613 | 491 | A08030 | A16616 | 490 |
| A08030 | A16626 | 399 | A08030 | A16646 | 201 |
| A08030 | A16754 | 491 | A08030 | A16830 | 170 |

|        |        |     |        |        |     |
|--------|--------|-----|--------|--------|-----|
| A08033 | A08034 | 436 | A08034 | A08115 | 462 |
| A08034 | A08116 | 477 | A08034 | A08247 | 424 |
| A08034 | A08401 | 436 | A08034 | A08455 | 467 |
| A08034 | A08486 | 436 | A08034 | A14633 | 334 |
| A08039 | A08298 | 440 | A08040 | A08202 | 446 |
| A08040 | A08203 | 475 | A08040 | A08292 | 311 |
| A08040 | A08671 | 473 | A08040 | A08747 | 469 |
| A08040 | A11289 | 312 | A08040 | A11700 | 447 |
| A08040 | A12642 | 414 | A08040 | A12917 | 377 |
| A08040 | A14353 | 358 | A08041 | A08042 | 445 |
| A08043 | A08348 | 445 | A08043 | A12551 | 469 |
| A08043 | A12941 | 445 | A08045 | A08588 | 246 |
| A08045 | A08689 | 245 | A08046 | A08508 | 445 |
| A08046 | A08509 | 445 | A08046 | A12524 | 438 |
| A08046 | A12526 | 434 | A08047 | A09078 | 330 |
| A08048 | A10358 | 401 | A08048 | A10411 | 436 |
| A08048 | A10851 | 445 | A08048 | A10856 | 445 |
| A08050 | A08069 | 813 | A08050 | A08351 | 386 |
| A08050 | A08380 | 334 | A08050 | A10377 | 190 |
| A08050 | A10378 | 889 | A08052 | A08273 | 599 |
| A08052 | A08315 | 269 | A08052 | A08773 | 259 |
| A08052 | A09620 | 397 | A08052 | A09697 | 269 |
| A08052 | A13107 | 288 | A08052 | A13581 | 269 |
| A08052 | A13992 | 238 | A08052 | A14479 | 160 |
| A08052 | A15174 | 363 | A08052 | A15287 | 271 |
| A08052 | A15429 | 277 | A08052 | A15837 | 269 |
| A08052 | A16027 | 269 | A08053 | A08054 | 491 |
| A08053 | A10365 | 188 | A08053 | A11302 | 434 |
| A08053 | A11372 | 419 | A08053 | A12167 | 408 |
| A08053 | A13149 | 274 | A08053 | A15988 | 196 |
| A08054 | A08137 | 255 | A08054 | A10504 | 177 |
| A08054 | A11302 | 422 | A08054 | A11372 | 491 |
| A08054 | A11438 | 168 | A08054 | A12167 | 422 |
| A08054 | A13149 | 191 | A08054 | A13655 | 347 |
| A08054 | A14073 | 341 | A08054 | A14197 | 221 |
| A08054 | A14241 | 396 | A08054 | A14508 | 180 |
| A08054 | A15699 | 271 | A08054 | A17142 | 180 |
| A08055 | A08398 | 185 | A08055 | A08452 | 278 |
| A08055 | A08550 | 410 | A08055 | A08773 | 605 |
| A08055 | A09322 | 434 | A08055 | A09722 | 366 |
| A08055 | A11438 | 201 | A08055 | A13249 | 582 |
| A08055 | A13626 | 168 | A08055 | A13989 | 472 |
| A08055 | A13992 | 265 | A08055 | A15660 | 177 |
| A08055 | A15769 | 152 | A08055 | A15988 | 656 |
| A08055 | A16306 | 299 | A08056 | A08192 | 213 |
| A08056 | A08379 | 299 | A08056 | A08569 | 443 |

|        |        |     |        |        |     |
|--------|--------|-----|--------|--------|-----|
| A08056 | A08917 | 395 | A08056 | A09567 | 165 |
| A08056 | A11640 | 201 | A08056 | A11641 | 221 |
| A08056 | A12047 | 491 | A08056 | A13834 | 208 |
| A08056 | A14247 | 417 | A08056 | A14281 | 484 |
| A08056 | A14661 | 491 | A08056 | A14711 | 352 |
| A08056 | A17190 | 156 | A08057 | A13821 | 396 |
| A08058 | A08359 | 302 | A08061 | A08098 | 317 |
| A08061 | A08178 | 317 | A08061 | A08763 | 317 |
| A08061 | A08947 | 152 | A08061 | A08991 | 241 |
| A08061 | A09004 | 152 | A08061 | A09591 | 294 |
| A08061 | A10532 | 404 | A08061 | A10842 | 152 |
| A08061 | A10847 | 276 | A08061 | A11409 | 293 |
| A08061 | A13340 | 172 | A08061 | A13424 | 409 |
| A08061 | A13552 | 456 | A08061 | A13989 | 435 |
| A08061 | A14351 | 183 | A08061 | A14525 | 317 |
| A08061 | A15268 | 247 | A08061 | A15375 | 317 |
| A08061 | A15546 | 317 | A08062 | A15367 | 167 |
| A08064 | A15498 | 396 | A08066 | A17150 | 399 |
| A08068 | A14223 | 224 | A08069 | A08351 | 174 |
| A08069 | A10377 | 629 | A08069 | A10378 | 891 |
| A08069 | A13920 | 152 | A08070 | A08911 | 438 |
| A08070 | A09026 | 255 | A08070 | A09121 | 255 |
| A08070 | A09160 | 317 | A08070 | A09911 | 257 |
| A08070 | A10160 | 291 | A08070 | A10215 | 283 |
| A08070 | A10247 | 271 | A08070 | A10293 | 317 |
| A08070 | A10731 | 165 | A08070 | A11253 | 283 |
| A08070 | A11334 | 277 | A08070 | A11840 | 262 |
| A08070 | A12825 | 196 | A08070 | A13270 | 299 |
| A08070 | A13403 | 341 | A08070 | A14364 | 151 |
| A08070 | A14642 | 218 | A08070 | A15383 | 232 |
| A08070 | A15704 | 168 | A08070 | A16450 | 152 |
| A08072 | A09618 | 452 | A08072 | A11808 | 423 |
| A08072 | A14959 | 452 | A08074 | A12300 | 395 |
| A08077 | A08078 | 446 | A08077 | A08335 | 219 |
| A08077 | A08714 | 243 | A08077 | A09042 | 256 |
| A08077 | A10408 | 367 | A08077 | A10674 | 221 |
| A08077 | A10709 | 200 | A08077 | A11304 | 188 |
| A08077 | A11313 | 205 | A08077 | A11317 | 296 |
| A08077 | A11392 | 257 | A08077 | A11446 | 322 |
| A08077 | A11683 | 160 | A08077 | A11865 | 260 |
| A08077 | A13980 | 171 | A08077 | A14247 | 162 |
| A08077 | A14371 | 232 | A08077 | A14511 | 195 |
| A08077 | A15480 | 162 | A08078 | A11300 | 196 |
| A08078 | A11865 | 450 | A08078 | A13517 | 207 |
| A08078 | A14443 | 165 | A08078 | A15012 | 393 |
| A08079 | A13871 | 307 | A08080 | A08284 | 407 |

|        |        |     |        |        |     |
|--------|--------|-----|--------|--------|-----|
| A08080 | A08739 | 388 | A08080 | A10983 | 395 |
| A08080 | A11640 | 406 | A08081 | A08086 | 480 |
| A08082 | A08083 | 367 | A08082 | A14870 | 324 |
| A08082 | A15430 | 201 | A08082 | A17149 | 477 |
| A08083 | A11487 | 236 | A08083 | A17149 | 434 |
| A08085 | A08859 | 413 | A08085 | A16216 | 246 |
| A08086 | A08732 | 291 | A08086 | A14997 | 369 |
| A08087 | A08088 | 408 | A08088 | A11937 | 283 |
| A08088 | A14371 | 238 | A08088 | A14482 | 249 |
| A08089 | A08647 | 491 | A08089 | A08693 | 477 |
| A08089 | A09107 | 351 | A08089 | A09134 | 362 |
| A08089 | A10527 | 491 | A08089 | A10640 | 338 |
| A08089 | A10678 | 456 | A08089 | A10762 | 491 |
| A08089 | A15992 | 491 | A08090 | A08838 | 335 |
| A08091 | A08821 | 235 | A08091 | A15345 | 177 |
| A08091 | A16304 | 199 | A08093 | A08309 | 234 |
| A08093 | A08668 | 414 | A08093 | A08676 | 170 |
| A08093 | A08679 | 452 | A08093 | A08686 | 435 |
| A08093 | A08859 | 419 | A08093 | A09030 | 409 |
| A08093 | A09341 | 210 | A08093 | A09552 | 312 |
| A08093 | A09630 | 226 | A08093 | A09939 | 201 |
| A08093 | A10024 | 483 | A08093 | A10169 | 279 |
| A08093 | A10532 | 491 | A08093 | A10605 | 170 |
| A08093 | A11240 | 491 | A08093 | A11267 | 409 |
| A08093 | A11299 | 491 | A08093 | A11306 | 157 |
| A08093 | A11336 | 483 | A08093 | A11573 | 204 |
| A08093 | A11582 | 463 | A08093 | A11587 | 293 |
| A08093 | A11732 | 490 | A08093 | A11888 | 335 |
| A08093 | A11904 | 279 | A08093 | A11982 | 475 |
| A08093 | A12599 | 409 | A08093 | A12675 | 260 |
| A08093 | A12689 | 335 | A08093 | A12753 | 409 |
| A08093 | A12754 | 335 | A08093 | A12755 | 335 |
| A08093 | A12768 | 335 | A08093 | A12769 | 335 |
| A08093 | A12782 | 409 | A08093 | A12786 | 409 |
| A08093 | A12804 | 335 | A08093 | A13369 | 441 |
| A08093 | A13815 | 335 | A08093 | A13940 | 409 |
| A08093 | A14071 | 412 | A08093 | A14132 | 429 |
| A08093 | A14381 | 176 | A08093 | A14734 | 335 |
| A08093 | A14736 | 409 | A08093 | A15237 | 313 |
| A08093 | A15317 | 245 | A08093 | A15322 | 288 |
| A08093 | A15349 | 227 | A08093 | A15419 | 329 |
| A08093 | A15495 | 456 | A08093 | A15498 | 491 |
| A08093 | A15913 | 177 | A08093 | A16493 | 254 |
| A08093 | A17085 | 491 | A08094 | A09727 | 449 |
| A08094 | A12324 | 394 | A08094 | A14621 | 299 |
| A08095 | A08096 | 447 | A08096 | A13282 | 447 |

|        |        |     |        |        |     |
|--------|--------|-----|--------|--------|-----|
| A08097 | A08196 | 343 | A08097 | A08461 | 447 |
| A08097 | A08503 | 343 | A08097 | A08549 | 343 |
| A08097 | A08560 | 343 | A08097 | A08812 | 343 |
| A08097 | A08844 | 343 | A08097 | A08855 | 486 |
| A08097 | A09040 | 160 | A08097 | A09141 | 449 |
| A08097 | A09205 | 188 | A08097 | A09246 | 491 |
| A08097 | A09340 | 438 | A08097 | A09469 | 200 |
| A08097 | A09857 | 360 | A08097 | A10603 | 176 |
| A08097 | A11454 | 393 | A08097 | A11983 | 368 |
| A08097 | A12282 | 452 | A08097 | A12968 | 177 |
| A08097 | A13369 | 491 | A08097 | A14071 | 297 |
| A08097 | A14084 | 343 | A08097 | A14111 | 157 |
| A08097 | A14193 | 173 | A08097 | A14198 | 219 |
| A08097 | A14202 | 272 | A08097 | A14229 | 168 |
| A08097 | A14253 | 324 | A08097 | A14285 | 343 |
| A08097 | A14372 | 238 | A08097 | A14375 | 353 |
| A08097 | A14570 | 479 | A08097 | A14611 | 179 |
| A08097 | A14661 | 435 | A08097 | A14735 | 230 |
| A08097 | A14936 | 176 | A08097 | A15311 | 154 |
| A08097 | A15322 | 458 | A08097 | A15366 | 394 |
| A08097 | A15433 | 173 | A08097 | A15495 | 412 |
| A08097 | A15557 | 390 | A08097 | A15680 | 485 |
| A08097 | A16022 | 414 | A08097 | A16261 | 157 |
| A08097 | A16274 | 224 | A08097 | A16445 | 163 |
| A08097 | A16450 | 263 | A08097 | A16792 | 208 |
| A08097 | A16915 | 205 | A08098 | A08178 | 682 |
| A08098 | A08228 | 491 | A08098 | A08491 | 229 |
| A08098 | A08548 | 480 | A08098 | A08763 | 629 |
| A08098 | A08947 | 152 | A08098 | A09004 | 152 |
| A08098 | A09328 | 200 | A08098 | A10842 | 152 |
| A08098 | A13354 | 379 | A08098 | A14083 | 491 |
| A08098 | A14525 | 317 | A08098 | A14699 | 491 |
| A08098 | A14701 | 180 | A08098 | A15375 | 667 |
| A08098 | A15546 | 317 | A08098 | A15684 | 283 |
| A08098 | A15746 | 238 | A08098 | A16048 | 430 |
| A08099 | A08193 | 457 | A08099 | A08205 | 373 |
| A08099 | A08313 | 168 | A08099 | A09612 | 130 |
| A08099 | A10441 | 299 | A08099 | A10443 | 302 |
| A08099 | A10444 | 246 | A08099 | A10452 | 215 |
| A08099 | A10456 | 446 | A08099 | A10475 | 177 |
| A08099 | A10550 | 180 | A08099 | A10659 | 208 |
| A08099 | A10702 | 335 | A08099 | A10703 | 353 |
| A08099 | A10714 | 252 | A08099 | A10904 | 254 |
| A08099 | A11309 | 491 | A08099 | A11325 | 324 |
| A08099 | A11381 | 369 | A08099 | A12952 | 601 |
| A08099 | A14112 | 168 | A08099 | A15497 | 486 |

|        |        |     |        |        |     |
|--------|--------|-----|--------|--------|-----|
| A08099 | A15874 | 438 | A08099 | A16262 | 452 |
| A08099 | A16335 | 288 | A08099 | A16368 | 357 |
| A08099 | A16419 | 452 | A08099 | A16529 | 490 |
| A08099 | A16767 | 302 | A08099 | A16959 | 491 |
| A08100 | A08101 | 63  | A08102 | A11435 | 246 |
| A08102 | A15478 | 170 | A08105 | A09478 | 427 |
| A08105 | A10223 | 430 | A08106 | A09328 | 286 |
| A08107 | A11956 | 63  | A08108 | A08133 | 196 |
| A08108 | A08252 | 333 | A08108 | A09381 | 490 |
| A08108 | A09612 | 286 | A08108 | A09879 | 324 |
| A08108 | A10353 | 259 | A08108 | A10420 | 293 |
| A08108 | A10427 | 174 | A08108 | A10456 | 328 |
| A08108 | A10658 | 316 | A08108 | A10677 | 243 |
| A08108 | A10681 | 483 | A08108 | A10689 | 485 |
| A08108 | A10693 | 490 | A08108 | A10702 | 413 |
| A08108 | A10703 | 286 | A08108 | A10710 | 489 |
| A08108 | A10712 | 235 | A08108 | A10714 | 212 |
| A08108 | A10885 | 446 | A08108 | A11309 | 201 |
| A08108 | A11325 | 263 | A08108 | A12728 | 170 |
| A08108 | A14856 | 157 | A08108 | A14862 | 334 |
| A08108 | A15874 | 195 | A08108 | A16002 | 428 |
| A08108 | A16027 | 202 | A08108 | A16034 | 286 |
| A08108 | A16286 | 281 | A08108 | A16959 | 246 |
| A08108 | A17041 | 291 | A08110 | A13360 | 452 |
| A08110 | A13986 | 321 | A08111 | A08268 | 447 |
| A08111 | A12648 | 445 | A08113 | A08263 | 466 |
| A08113 | A08400 | 406 | A08113 | A08402 | 358 |
| A08113 | A08694 | 379 | A08113 | A08975 | 151 |
| A08113 | A13873 | 160 | A08113 | A14092 | 485 |
| A08113 | A14272 | 402 | A08113 | A14840 | 355 |
| A08113 | A15367 | 294 | A08113 | A15770 | 249 |
| A08113 | A15877 | 441 | A08114 | A08190 | 202 |
| A08114 | A08197 | 328 | A08114 | A08199 | 196 |
| A08114 | A08278 | 486 | A08114 | A08279 | 360 |
| A08114 | A08280 | 490 | A08114 | A08345 | 167 |
| A08114 | A08365 | 450 | A08114 | A08366 | 384 |
| A08114 | A08385 | 485 | A08114 | A08438 | 461 |
| A08114 | A08583 | 202 | A08114 | A09845 | 377 |
| A08114 | A09846 | 470 | A08114 | A09880 | 299 |
| A08114 | A09881 | 477 | A08114 | A10423 | 177 |
| A08114 | A10442 | 258 | A08114 | A10456 | 358 |
| A08114 | A10457 | 224 | A08114 | A10652 | 188 |
| A08114 | A10679 | 404 | A08114 | A10687 | 469 |
| A08114 | A10700 | 433 | A08114 | A10705 | 384 |
| A08114 | A10715 | 441 | A08114 | A10780 | 371 |
| A08114 | A10783 | 362 | A08114 | A10881 | 446 |

|        |        |     |        |        |     |
|--------|--------|-----|--------|--------|-----|
| A08114 | A10884 | 388 | A08114 | A11235 | 202 |
| A08114 | A12723 | 486 | A08114 | A13717 | 269 |
| A08114 | A14443 | 899 | A08114 | A14863 | 435 |
| A08114 | A16288 | 156 | A08114 | A17024 | 312 |
| A08115 | A08116 | 467 | A08115 | A08401 | 441 |
| A08115 | A08455 | 435 | A08115 | A08486 | 441 |
| A08115 | A13369 | 213 | A08115 | A14633 | 232 |
| A08116 | A08247 | 434 | A08116 | A08401 | 445 |
| A08116 | A08455 | 438 | A08116 | A08486 | 445 |
| A08116 | A14633 | 369 | A08117 | A08141 | 435 |
| A08117 | A08208 | 489 | A08117 | A08212 | 234 |
| A08117 | A08669 | 490 | A08117 | A08820 | 297 |
| A08117 | A08919 | 324 | A08117 | A09288 | 462 |
| A08117 | A09302 | 255 | A08117 | A09663 | 456 |
| A08117 | A11792 | 159 | A08117 | A11916 | 474 |
| A08117 | A12061 | 429 | A08117 | A13228 | 201 |
| A08117 | A13949 | 488 | A08117 | A14076 | 467 |
| A08117 | A14079 | 491 | A08117 | A14093 | 240 |
| A08117 | A14154 | 307 | A08117 | A14273 | 491 |
| A08117 | A14460 | 491 | A08117 | A15321 | 491 |
| A08117 | A15369 | 491 | A08117 | A15939 | 454 |
| A08117 | A15941 | 446 | A08117 | A16127 | 491 |
| A08117 | A16128 | 491 | A08117 | A16129 | 488 |
| A08117 | A16130 | 302 | A08117 | A16134 | 467 |
| A08117 | A16225 | 480 | A08117 | A16226 | 491 |
| A08117 | A16378 | 474 | A08117 | A16606 | 491 |
| A08117 | A16613 | 491 | A08117 | A16616 | 490 |
| A08117 | A16626 | 227 | A08117 | A16754 | 491 |
| A08117 | A16830 | 174 | A08118 | A08450 | 422 |
| A08118 | A08528 | 469 | A08118 | A08571 | 489 |
| A08118 | A08971 | 154 | A08118 | A09059 | 190 |
| A08118 | A09621 | 548 | A08118 | A09705 | 302 |
| A08118 | A10162 | 262 | A08118 | A10218 | 165 |
| A08118 | A10547 | 299 | A08118 | A11139 | 157 |
| A08118 | A11608 | 180 | A08118 | A11983 | 152 |
| A08118 | A12254 | 333 | A08118 | A12507 | 472 |
| A08118 | A13250 | 291 | A08118 | A13989 | 622 |
| A08118 | A14169 | 382 | A08118 | A14299 | 291 |
| A08118 | A14639 | 171 | A08118 | A14704 | 291 |
| A08118 | A15173 | 330 | A08118 | A16257 | 223 |
| A08120 | A08121 | 452 | A08120 | A08122 | 452 |
| A08120 | A11268 | 452 | A08120 | A15026 | 452 |
| A08121 | A08122 | 452 | A08121 | A11268 | 452 |
| A08121 | A15026 | 452 | A08122 | A11268 | 452 |
| A08122 | A15026 | 452 | A08123 | A08413 | 447 |
| A08125 | A08292 | 399 | A08125 | A08891 | 313 |

|        |        |     |        |        |     |
|--------|--------|-----|--------|--------|-----|
| A08125 | A09149 | 372 | A08125 | A14174 | 273 |
| A08126 | A08418 | 223 | A08126 | A08507 | 324 |
| A08126 | A09051 | 369 | A08126 | A09375 | 425 |
| A08126 | A09668 | 420 | A08126 | A09793 | 260 |
| A08126 | A10773 | 333 | A08126 | A11196 | 326 |
| A08126 | A14263 | 281 | A08126 | A14278 | 337 |
| A08126 | A15273 | 281 | A08127 | A08252 | 200 |
| A08127 | A08379 | 467 | A08127 | A09612 | 351 |
| A08127 | A10253 | 221 | A08127 | A10420 | 249 |
| A08127 | A10424 | 383 | A08127 | A10441 | 371 |
| A08127 | A10443 | 372 | A08127 | A10456 | 196 |
| A08127 | A10703 | 350 | A08127 | A10712 | 313 |
| A08127 | A10883 | 422 | A08127 | A11381 | 278 |
| A08127 | A13735 | 356 | A08127 | A14828 | 401 |
| A08127 | A14856 | 246 | A08127 | A15874 | 281 |
| A08127 | A16103 | 363 | A08127 | A16286 | 347 |
| A08127 | A16739 | 347 | A08127 | A16741 | 232 |
| A08127 | A16744 | 352 | A08127 | A16767 | 372 |
| A08127 | A17041 | 353 | A08127 | A17089 | 200 |
| A08129 | A08130 | 438 | A08131 | A08357 | 228 |
| A08131 | A08358 | 232 | A08131 | A08359 | 565 |
| A08131 | A08369 | 566 | A08131 | A08408 | 559 |
| A08131 | A08430 | 154 | A08131 | A08457 | 469 |
| A08131 | A08462 | 216 | A08131 | A08466 | 200 |
| A08131 | A08476 | 486 | A08131 | A08877 | 172 |
| A08131 | A09044 | 201 | A08131 | A09322 | 556 |
| A08131 | A09590 | 281 | A08131 | A09726 | 163 |
| A08131 | A09865 | 121 | A08131 | A09991 | 157 |
| A08131 | A09999 | 163 | A08131 | A10362 | 165 |
| A08131 | A11334 | 171 | A08131 | A11358 | 168 |
| A08131 | A11550 | 451 | A08131 | A11562 | 544 |
| A08131 | A11728 | 566 | A08131 | A11857 | 374 |
| A08131 | A11861 | 291 | A08131 | A11876 | 160 |
| A08131 | A12011 | 159 | A08131 | A12109 | 299 |
| A08131 | A12821 | 443 | A08131 | A13052 | 385 |
| A08131 | A13333 | 200 | A08131 | A13899 | 219 |
| A08131 | A13989 | 199 | A08131 | A14167 | 168 |
| A08131 | A14176 | 484 | A08131 | A14206 | 154 |
| A08131 | A14216 | 411 | A08131 | A14508 | 288 |
| A08131 | A15183 | 212 | A08131 | A15202 | 543 |
| A08131 | A15218 | 165 | A08131 | A15268 | 479 |
| A08131 | A15381 | 480 | A08131 | A15499 | 152 |
| A08131 | A15500 | 466 | A08131 | A15660 | 307 |
| A08131 | A15684 | 394 | A08131 | A16035 | 207 |
| A08131 | A16104 | 299 | A08131 | A16523 | 227 |
| A08131 | A16686 | 490 | A08131 | A16973 | 196 |



|        |        |     |        |        |     |
|--------|--------|-----|--------|--------|-----|
| A08131 | A17131 | 179 | A08131 | A17132 | 176 |
| A08132 | A10250 | 385 | A08133 | A08193 | 199 |
| A08133 | A08280 | 199 | A08133 | A08788 | 199 |
| A08133 | A09195 | 199 | A08133 | A09925 | 199 |
| A08133 | A10054 | 219 | A08133 | A10253 | 191 |
| A08133 | A10444 | 374 | A08133 | A10456 | 477 |
| A08133 | A10576 | 199 | A08133 | A10656 | 279 |
| A08133 | A10763 | 297 | A08133 | A11079 | 199 |
| A08133 | A11346 | 199 | A08133 | A11487 | 199 |
| A08133 | A11604 | 199 | A08133 | A11621 | 199 |
| A08133 | A11983 | 199 | A08133 | A13099 | 199 |
| A08133 | A13587 | 196 | A08133 | A13617 | 209 |
| A08133 | A13772 | 199 | A08133 | A13947 | 160 |
| A08133 | A13989 | 199 | A08133 | A14002 | 899 |
| A08133 | A14009 | 199 | A08133 | A14192 | 195 |
| A08133 | A14206 | 899 | A08133 | A14216 | 199 |
| A08133 | A14472 | 199 | A08133 | A14481 | 199 |
| A08133 | A14570 | 199 | A08133 | A14758 | 199 |
| A08133 | A14801 | 199 | A08133 | A14948 | 199 |
| A08133 | A15291 | 199 | A08133 | A15556 | 443 |
| A08133 | A15614 | 199 | A08133 | A15626 | 199 |
| A08133 | A16002 | 184 | A08133 | A16207 | 199 |
| A08133 | A16277 | 299 | A08133 | A16410 | 199 |
| A08133 | A16418 | 199 | A08133 | A16763 | 199 |
| A08135 | A08284 | 353 | A08135 | A09612 | 307 |
| A08135 | A10427 | 201 | A08135 | A10652 | 319 |
| A08135 | A10676 | 434 | A08135 | A10684 | 446 |
| A08135 | A10702 | 238 | A08135 | A10706 | 302 |
| A08135 | A13362 | 433 | A08135 | A14856 | 317 |
| A08135 | A16335 | 260 | A08135 | A16741 | 302 |
| A08136 | A08174 | 416 | A08137 | A08280 | 218 |
| A08137 | A08327 | 440 | A08137 | A08357 | 402 |
| A08137 | A08359 | 491 | A08137 | A08398 | 262 |
| A08137 | A08400 | 475 | A08137 | A08431 | 256 |
| A08137 | A08452 | 484 | A08137 | A08543 | 154 |
| A08137 | A08547 | 241 | A08137 | A08571 | 671 |
| A08137 | A08756 | 249 | A08137 | A08885 | 395 |
| A08137 | A09055 | 208 | A08137 | A09319 | 445 |
| A08137 | A09322 | 291 | A08137 | A09341 | 255 |
| A08137 | A09707 | 241 | A08137 | A10174 | 899 |
| A08137 | A10250 | 491 | A08137 | A10321 | 488 |
| A08137 | A10532 | 243 | A08137 | A10584 | 228 |
| A08137 | A10615 | 191 | A08137 | A10616 | 185 |
| A08137 | A10624 | 327 | A08137 | A10853 | 486 |
| A08137 | A10905 | 316 | A08137 | A11139 | 434 |
| A08137 | A11168 | 373 | A08137 | A11286 | 490 |

|        |        |     |        |        |     |
|--------|--------|-----|--------|--------|-----|
| A08137 | A11287 | 196 | A08137 | A11290 | 389 |
| A08137 | A11291 | 491 | A08137 | A11297 | 477 |
| A08137 | A11390 | 160 | A08137 | A11405 | 488 |
| A08137 | A11406 | 193 | A08137 | A11409 | 485 |
| A08137 | A11462 | 227 | A08137 | A11487 | 355 |
| A08137 | A11612 | 452 | A08137 | A11702 | 218 |
| A08137 | A11704 | 267 | A08137 | A11920 | 477 |
| A08137 | A11928 | 391 | A08137 | A11930 | 207 |
| A08137 | A11935 | 345 | A08137 | A11945 | 440 |
| A08137 | A12069 | 187 | A08137 | A12073 | 170 |
| A08137 | A12167 | 156 | A08137 | A12233 | 199 |
| A08137 | A12329 | 483 | A08137 | A12543 | 463 |
| A08137 | A12757 | 286 | A08137 | A12821 | 386 |
| A08137 | A13074 | 63  | A08137 | A13310 | 441 |
| A08137 | A13311 | 299 | A08137 | A13320 | 422 |
| A08137 | A13328 | 331 | A08137 | A13335 | 491 |
| A08137 | A13510 | 394 | A08137 | A13511 | 252 |
| A08137 | A13522 | 311 | A08137 | A13587 | 294 |
| A08137 | A13609 | 401 | A08137 | A13710 | 449 |
| A08137 | A13740 | 160 | A08137 | A13889 | 458 |
| A08137 | A13928 | 491 | A08137 | A13989 | 529 |
| A08137 | A14006 | 491 | A08137 | A14147 | 180 |
| A08137 | A14178 | 408 | A08137 | A14184 | 491 |
| A08137 | A14193 | 490 | A08137 | A14196 | 527 |
| A08137 | A14220 | 491 | A08137 | A14221 | 491 |
| A08137 | A14246 | 472 | A08137 | A14247 | 449 |
| A08137 | A14257 | 491 | A08137 | A14258 | 207 |
| A08137 | A14265 | 452 | A08137 | A14303 | 491 |
| A08137 | A14399 | 262 | A08137 | A14461 | 405 |
| A08137 | A14476 | 490 | A08137 | A14508 | 443 |
| A08137 | A14589 | 327 | A08137 | A14596 | 266 |
| A08137 | A14617 | 171 | A08137 | A14661 | 272 |
| A08137 | A14728 | 173 | A08137 | A14879 | 208 |
| A08137 | A14937 | 156 | A08137 | A15188 | 195 |
| A08137 | A15256 | 263 | A08137 | A15275 | 215 |
| A08137 | A15291 | 479 | A08137 | A15297 | 530 |
| A08137 | A15309 | 236 | A08137 | A15315 | 527 |
| A08137 | A15324 | 171 | A08137 | A15336 | 172 |
| A08137 | A15338 | 491 | A08137 | A15353 | 185 |
| A08137 | A15366 | 491 | A08137 | A15370 | 313 |
| A08137 | A15463 | 190 | A08137 | A15492 | 221 |
| A08137 | A15507 | 484 | A08137 | A15545 | 353 |
| A08137 | A15559 | 491 | A08137 | A15561 | 412 |
| A08137 | A15614 | 465 | A08137 | A15617 | 187 |
| A08137 | A15660 | 484 | A08137 | A15684 | 481 |
| A08137 | A15695 | 171 | A08137 | A15697 | 360 |

|        |        |     |        |        |     |
|--------|--------|-----|--------|--------|-----|
| A08137 | A15702 | 296 | A08137 | A15710 | 490 |
| A08137 | A15716 | 193 | A08137 | A15720 | 271 |
| A08137 | A15729 | 491 | A08137 | A15732 | 191 |
| A08137 | A15738 | 193 | A08137 | A15748 | 160 |
| A08137 | A15752 | 490 | A08137 | A15753 | 323 |
| A08137 | A15754 | 364 | A08137 | A15764 | 427 |
| A08137 | A15769 | 409 | A08137 | A15773 | 477 |
| A08137 | A15779 | 491 | A08137 | A15851 | 353 |
| A08137 | A16060 | 260 | A08137 | A16092 | 311 |
| A08137 | A16218 | 308 | A08137 | A16302 | 260 |
| A08137 | A16324 | 313 | A08137 | A16364 | 286 |
| A08137 | A16453 | 165 | A08137 | A16713 | 171 |
| A08137 | A16722 | 63  | A08137 | A16822 | 480 |
| A08137 | A16844 | 438 | A08137 | A16994 | 340 |
| A08137 | A17063 | 491 | A08137 | A17134 | 480 |
| A08137 | A17140 | 160 | A08137 | A17142 | 404 |
| A08137 | A17189 | 176 | A08137 | A17198 | 369 |
| A08138 | A08238 | 160 | A08138 | A08293 | 326 |
| A08138 | A08313 | 168 | A08138 | A08368 | 265 |
| A08138 | A08687 | 184 | A08138 | A10422 | 312 |
| A08138 | A10442 | 218 | A08138 | A10882 | 224 |
| A08138 | A12215 | 177 | A08138 | A13341 | 204 |
| A08138 | A13783 | 151 | A08138 | A13855 | 160 |
| A08138 | A14828 | 362 | A08138 | A15223 | 329 |
| A08138 | A15421 | 218 | A08138 | A16707 | 265 |
| A08138 | A16942 | 190 | A08139 | A15031 | 452 |
| A08141 | A08208 | 491 | A08141 | A08212 | 281 |
| A08141 | A08669 | 171 | A08141 | A08902 | 176 |
| A08141 | A09629 | 285 | A08141 | A09727 | 279 |
| A08141 | A10083 | 243 | A08141 | A10373 | 408 |
| A08141 | A10625 | 79  | A08141 | A11703 | 185 |
| A08141 | A11934 | 446 | A08141 | A13339 | 364 |
| A08141 | A13949 | 481 | A08141 | A14079 | 430 |
| A08141 | A14093 | 327 | A08141 | A14230 | 308 |
| A08141 | A14273 | 445 | A08141 | A14460 | 218 |
| A08141 | A15369 | 490 | A08141 | A15371 | 486 |
| A08141 | A15524 | 179 | A08141 | A15645 | 467 |
| A08141 | A15654 | 488 | A08141 | A15939 | 213 |
| A08141 | A15941 | 491 | A08141 | A16127 | 491 |
| A08141 | A16128 | 486 | A08141 | A16129 | 174 |
| A08141 | A16134 | 288 | A08141 | A16225 | 327 |
| A08141 | A16294 | 488 | A08141 | A16452 | 168 |
| A08141 | A16612 | 452 | A08141 | A16613 | 63  |
| A08141 | A16626 | 224 | A08141 | A16646 | 375 |
| A08141 | A16754 | 185 | A08142 | A08143 | 447 |
| A08142 | A11610 | 441 | A08144 | A08269 | 245 |

|        |        |     |        |        |     |
|--------|--------|-----|--------|--------|-----|
| A08144 | A08363 | 491 | A08144 | A08364 | 454 |
| A08144 | A08414 | 422 | A08144 | A08477 | 334 |
| A08144 | A08491 | 351 | A08144 | A08537 | 246 |
| A08144 | A08892 | 384 | A08144 | A08971 | 218 |
| A08144 | A09280 | 288 | A08144 | A09621 | 302 |
| A08144 | A09965 | 294 | A08144 | A13870 | 267 |
| A08144 | A14006 | 363 | A08144 | A14449 | 807 |
| A08144 | A14655 | 307 | A08144 | A14835 | 193 |
| A08144 | A14936 | 561 | A08144 | A15498 | 402 |
| A08144 | A15624 | 692 | A08144 | A15651 | 561 |
| A08144 | A15652 | 561 | A08144 | A15661 | 561 |
| A08144 | A15662 | 561 | A08144 | A15684 | 484 |
| A08144 | A15932 | 698 | A08145 | A15004 | 420 |
| A08145 | A15012 | 435 | A08148 | A08701 | 347 |
| A08148 | A15202 | 324 | A08148 | A15644 | 353 |
| A08148 | A15683 | 468 | A08148 | A15712 | 468 |
| A08148 | A16322 | 290 | A08148 | A16466 | 324 |
| A08148 | A16665 | 488 | A08149 | A09078 | 286 |
| A08149 | A14127 | 191 | A08149 | A14999 | 445 |
| A08149 | A15011 | 434 | A08149 | A15040 | 445 |
| A08150 | A11376 | 306 | A08150 | A14410 | 262 |
| A08150 | A15948 | 286 | A08151 | A14222 | 190 |
| A08151 | A15380 | 154 | A08153 | A10095 | 425 |
| A08153 | A10292 | 452 | A08153 | A10641 | 452 |
| A08154 | A08301 | 366 | A08154 | A08358 | 328 |
| A08154 | A08359 | 202 | A08154 | A08419 | 469 |
| A08154 | A08476 | 269 | A08154 | A08501 | 406 |
| A08154 | A08556 | 416 | A08154 | A08559 | 213 |
| A08154 | A09322 | 196 | A08154 | A09852 | 470 |
| A08154 | A12821 | 243 | A08154 | A14478 | 266 |
| A08154 | A14479 | 333 | A08154 | A14568 | 406 |
| A08154 | A15215 | 260 | A08154 | A15500 | 462 |
| A08154 | A15771 | 208 | A08154 | A15988 | 162 |
| A08154 | A16118 | 196 | A08155 | A08372 | 221 |
| A08155 | A08687 | 364 | A08155 | A09881 | 154 |
| A08155 | A10420 | 351 | A08155 | A10455 | 378 |
| A08155 | A10652 | 344 | A08155 | A10690 | 363 |
| A08155 | A10696 | 372 | A08155 | A14399 | 162 |
| A08155 | A14856 | 416 | A08155 | A16286 | 419 |
| A08155 | A16741 | 205 | A08155 | A17024 | 407 |
| A08155 | A17078 | 195 | A08157 | A12065 | 436 |
| A08157 | A12066 | 436 | A08160 | A08740 | 461 |
| A08160 | A14009 | 157 | A08160 | A14490 | 249 |
| A08160 | A15504 | 263 | A08161 | A09804 | 345 |
| A08161 | A14272 | 180 | A08161 | A16897 | 384 |
| A08162 | A08163 | 452 | A08162 | A08166 | 467 |

|        |        |     |        |        |     |
|--------|--------|-----|--------|--------|-----|
| A08162 | A08230 | 436 | A08162 | A08231 | 436 |
| A08162 | A08232 | 436 | A08162 | A08309 | 251 |
| A08162 | A08392 | 463 | A08162 | A13369 | 184 |
| A08163 | A08166 | 419 | A08163 | A08230 | 429 |
| A08163 | A08231 | 429 | A08163 | A08232 | 429 |
| A08163 | A08475 | 429 | A08163 | A09890 | 374 |
| A08163 | A11318 | 435 | A08163 | A11566 | 457 |
| A08163 | A12581 | 413 | A08165 | A14204 | 193 |
| A08169 | A15315 | 199 | A08169 | A15345 | 291 |
| A08169 | A15347 | 277 | A08171 | A08172 | 491 |
| A08171 | A08299 | 401 | A08171 | A08309 | 490 |
| A08171 | A08453 | 371 | A08171 | A08681 | 479 |
| A08171 | A08685 | 491 | A08171 | A08686 | 491 |
| A08171 | A08753 | 490 | A08171 | A08835 | 475 |
| A08171 | A09740 | 329 | A08171 | A10024 | 318 |
| A08171 | A11278 | 385 | A08171 | A11298 | 483 |
| A08171 | A11321 | 343 | A08171 | A11333 | 419 |
| A08171 | A11342 | 430 | A08171 | A11463 | 435 |
| A08171 | A11569 | 378 | A08171 | A11723 | 388 |
| A08171 | A12684 | 388 | A08171 | A13369 | 395 |
| A08171 | A15277 | 235 | A08171 | A15416 | 475 |
| A08171 | A15638 | 491 | A08171 | A16147 | 378 |
| A08171 | A16274 | 190 | A08172 | A08292 | 240 |
| A08172 | A08299 | 383 | A08172 | A08309 | 491 |
| A08172 | A08453 | 344 | A08172 | A08681 | 486 |
| A08172 | A08685 | 491 | A08172 | A08686 | 491 |
| A08172 | A08693 | 196 | A08172 | A08753 | 490 |
| A08172 | A08835 | 473 | A08172 | A10651 | 210 |
| A08172 | A11278 | 352 | A08172 | A11298 | 480 |
| A08172 | A11315 | 335 | A08172 | A11321 | 477 |
| A08172 | A11333 | 398 | A08172 | A11342 | 452 |
| A08172 | A11463 | 329 | A08172 | A11569 | 353 |
| A08172 | A11585 | 364 | A08172 | A12634 | 424 |
| A08172 | A12781 | 353 | A08172 | A13317 | 324 |
| A08172 | A13369 | 486 | A08172 | A13879 | 174 |
| A08172 | A14381 | 154 | A08172 | A14570 | 173 |
| A08172 | A15277 | 188 | A08172 | A15331 | 171 |
| A08172 | A15336 | 388 | A08172 | A15416 | 475 |
| A08172 | A15638 | 491 | A08172 | A16281 | 216 |
| A08173 | A10436 | 441 | A08173 | A11442 | 435 |
| A08174 | A12721 | 438 | A08174 | A15258 | 396 |
| A08175 | A11586 | 475 | A08175 | A12489 | 467 |
| A08175 | A12491 | 436 | A08175 | A12745 | 424 |
| A08176 | A08930 | 418 | A08176 | A10759 | 425 |
| A08176 | A12899 | 435 | A08176 | A16540 | 401 |
| A08177 | A08484 | 247 | A08177 | A11279 | 157 |

|        |        |     |        |        |     |
|--------|--------|-----|--------|--------|-----|
| A08177 | A11287 | 425 | A08177 | A14247 | 435 |
| A08177 | A14258 | 317 | A08177 | A14661 | 488 |
| A08177 | A14711 | 355 | A08178 | A08763 | 571 |
| A08178 | A08947 | 152 | A08178 | A09004 | 152 |
| A08178 | A10842 | 152 | A08178 | A12839 | 204 |
| A08178 | A14083 | 491 | A08178 | A14525 | 317 |
| A08178 | A14699 | 460 | A08178 | A15375 | 665 |
| A08178 | A15546 | 317 | A08178 | A16048 | 241 |
| A08178 | A16067 | 236 | A08178 | A17189 | 154 |
| A08182 | A13784 | 205 | A08182 | A14272 | 399 |
| A08182 | A15877 | 321 | A08183 | A08447 | 254 |
| A08183 | A08517 | 268 | A08183 | A08571 | 185 |
| A08183 | A08982 | 408 | A08183 | A08990 | 205 |
| A08183 | A09673 | 217 | A08183 | A10317 | 443 |
| A08183 | A11277 | 479 | A08183 | A14088 | 232 |
| A08183 | A14186 | 412 | A08183 | A14246 | 434 |
| A08183 | A15323 | 452 | A08183 | A15324 | 466 |
| A08183 | A15339 | 191 | A08183 | A15370 | 490 |
| A08183 | A15374 | 460 | A08183 | A15377 | 518 |
| A08183 | A15543 | 217 | A08183 | A15724 | 506 |
| A08183 | A16664 | 217 | A08183 | A16857 | 219 |
| A08183 | A17063 | 322 | A08184 | A08185 | 491 |
| A08184 | A08525 | 394 | A08184 | A08853 | 475 |
| A08184 | A09443 | 428 | A08184 | A11884 | 305 |
| A08184 | A12533 | 333 | A08184 | A14227 | 486 |
| A08184 | A15533 | 373 | A08184 | A16602 | 385 |
| A08185 | A08196 | 418 | A08185 | A08525 | 356 |
| A08185 | A08536 | 63  | A08185 | A08549 | 396 |
| A08185 | A08560 | 259 | A08185 | A08839 | 281 |
| A08185 | A08853 | 188 | A08185 | A08855 | 177 |
| A08185 | A08885 | 241 | A08185 | A09443 | 408 |
| A08185 | A09728 | 263 | A08185 | A09828 | 224 |
| A08185 | A12658 | 195 | A08185 | A13924 | 230 |
| A08185 | A14227 | 472 | A08185 | A15008 | 329 |
| A08185 | A15533 | 213 | A08186 | A08305 | 445 |
| A08186 | A08306 | 458 | A08186 | A08307 | 445 |
| A08186 | A11326 | 314 | A08188 | A15130 | 466 |
| A08189 | A15130 | 333 | A08190 | A10444 | 210 |
| A08190 | A10452 | 187 | A08190 | A10679 | 428 |
| A08190 | A10691 | 205 | A08190 | A11395 | 491 |
| A08190 | A11708 | 319 | A08190 | A12659 | 182 |
| A08190 | A13362 | 285 | A08190 | A13805 | 451 |
| A08190 | A17046 | 281 | A08191 | A11352 | 414 |
| A08191 | A13432 | 335 | A08192 | A08370 | 307 |
| A08192 | A08531 | 182 | A08192 | A08576 | 294 |
| A08192 | A09668 | 302 | A08192 | A10369 | 179 |

|        |        |     |        |        |     |
|--------|--------|-----|--------|--------|-----|
| A08192 | A13484 | 213 | A08192 | A13932 | 488 |
| A08192 | A14266 | 218 | A08193 | A08205 | 446 |
| A08193 | A10441 | 424 | A08193 | A10693 | 328 |
| A08193 | A10702 | 232 | A08193 | A11309 | 486 |
| A08193 | A11604 | 199 | A08193 | A14174 | 212 |
| A08193 | A14481 | 199 | A08193 | A15291 | 208 |
| A08193 | A15497 | 434 | A08193 | A16419 | 279 |
| A08193 | A16529 | 447 | A08193 | A16959 | 408 |
| A08194 | A08817 | 188 | A08194 | A13348 | 254 |
| A08194 | A14613 | 319 | A08194 | A15809 | 491 |
| A08194 | A15922 | 490 | A08194 | A16738 | 193 |
| A08194 | A17040 | 177 | A08196 | A08255 | 265 |
| A08196 | A08293 | 154 | A08196 | A08402 | 348 |
| A08196 | A08503 | 636 | A08196 | A08525 | 421 |
| A08196 | A08549 | 643 | A08196 | A08560 | 594 |
| A08196 | A08561 | 491 | A08196 | A08566 | 184 |
| A08196 | A08567 | 557 | A08196 | A08812 | 643 |
| A08196 | A08813 | 557 | A08196 | A08814 | 124 |
| A08196 | A08840 | 184 | A08196 | A08844 | 635 |
| A08196 | A08845 | 498 | A08196 | A09100 | 157 |
| A08196 | A09256 | 283 | A08196 | A09727 | 184 |
| A08196 | A09728 | 363 | A08196 | A10373 | 156 |
| A08196 | A10789 | 556 | A08196 | A11668 | 157 |
| A08196 | A11675 | 170 | A08196 | A11954 | 451 |
| A08196 | A12507 | 554 | A08196 | A13399 | 457 |
| A08196 | A13737 | 516 | A08196 | A13949 | 302 |
| A08196 | A13963 | 557 | A08196 | A14084 | 643 |
| A08196 | A14167 | 167 | A08196 | A14198 | 278 |
| A08196 | A14226 | 191 | A08196 | A14227 | 208 |
| A08196 | A14270 | 234 | A08196 | A14272 | 371 |
| A08196 | A14285 | 643 | A08196 | A14289 | 229 |
| A08196 | A14295 | 165 | A08196 | A14708 | 380 |
| A08196 | A15949 | 557 | A08196 | A16099 | 184 |
| A08196 | A17145 | 267 | A08197 | A09386 | 347 |
| A08197 | A09612 | 314 | A08197 | A10422 | 429 |
| A08197 | A10679 | 486 | A08197 | A10712 | 269 |
| A08197 | A10776 | 246 | A08197 | A11235 | 335 |
| A08197 | A13717 | 443 | A08197 | A13975 | 184 |
| A08197 | A14709 | 195 | A08197 | A15510 | 335 |
| A08198 | A09542 | 534 | A08199 | A08249 | 406 |
| A08199 | A08313 | 458 | A08199 | A09357 | 208 |
| A08199 | A10428 | 398 | A08199 | A10679 | 490 |
| A08199 | A10695 | 414 | A08199 | A14821 | 63  |
| A08199 | A17078 | 168 | A08201 | A08327 | 156 |
| A08201 | A08431 | 156 | A08201 | A08542 | 156 |
| A08201 | A08571 | 162 | A08201 | A08992 | 383 |

|        |        |     |        |        |     |
|--------|--------|-----|--------|--------|-----|
| A08201 | A09427 | 326 | A08201 | A10250 | 484 |
| A08201 | A11496 | 156 | A08201 | A11497 | 156 |
| A08201 | A12757 | 156 | A08201 | A13928 | 156 |
| A08201 | A14178 | 156 | A08201 | A14826 | 173 |
| A08201 | A15624 | 334 | A08201 | A15651 | 334 |
| A08201 | A15750 | 334 | A08201 | A15917 | 334 |
| A08201 | A15932 | 334 | A08201 | A15937 | 334 |
| A08201 | A16699 | 156 | A08202 | A08203 | 454 |
| A08202 | A08292 | 379 | A08202 | A08428 | 440 |
| A08202 | A08429 | 440 | A08202 | A08671 | 395 |
| A08203 | A08292 | 343 | A08203 | A08671 | 438 |
| A08203 | A08747 | 401 | A08203 | A10450 | 401 |
| A08203 | A11700 | 405 | A08203 | A12470 | 454 |
| A08203 | A12591 | 425 | A08203 | A12642 | 425 |
| A08203 | A12748 | 425 | A08203 | A14353 | 382 |
| A08205 | A09612 | 115 | A08205 | A10673 | 112 |
| A08205 | A11309 | 469 | A08205 | A12660 | 467 |
| A08205 | A13617 | 199 | A08205 | A14221 | 199 |
| A08205 | A15034 | 319 | A08205 | A15403 | 159 |
| A08205 | A15497 | 208 | A08205 | A16529 | 305 |
| A08205 | A16959 | 357 | A08206 | A08392 | 425 |
| A08206 | A08393 | 438 | A08206 | A08425 | 438 |
| A08206 | A15510 | 288 | A08207 | A13090 | 276 |
| A08207 | A16073 | 199 | A08208 | A08212 | 183 |
| A08208 | A08516 | 271 | A08208 | A08669 | 347 |
| A08208 | A08769 | 154 | A08208 | A08822 | 180 |
| A08208 | A08902 | 63  | A08208 | A09288 | 439 |
| A08208 | A09663 | 129 | A08208 | A09762 | 414 |
| A08208 | A10083 | 156 | A08208 | A10373 | 491 |
| A08208 | A10461 | 188 | A08208 | A10625 | 193 |
| A08208 | A11703 | 263 | A08208 | A12556 | 486 |
| A08208 | A13339 | 470 | A08208 | A13913 | 213 |
| A08208 | A13949 | 491 | A08208 | A14076 | 470 |
| A08208 | A14079 | 491 | A08208 | A14093 | 447 |
| A08208 | A14094 | 190 | A08208 | A14177 | 356 |
| A08208 | A14230 | 491 | A08208 | A14273 | 491 |
| A08208 | A14460 | 390 | A08208 | A14614 | 177 |
| A08208 | A14694 | 463 | A08208 | A14706 | 246 |
| A08208 | A14962 | 152 | A08208 | A15369 | 491 |
| A08208 | A15371 | 491 | A08208 | A15524 | 468 |
| A08208 | A15531 | 452 | A08208 | A15539 | 430 |
| A08208 | A15563 | 362 | A08208 | A15645 | 481 |
| A08208 | A15654 | 491 | A08208 | A15714 | 154 |
| A08208 | A15876 | 180 | A08208 | A15941 | 491 |
| A08208 | A15942 | 424 | A08208 | A16127 | 491 |
| A08208 | A16128 | 491 | A08208 | A16129 | 390 |



|        |        |     |        |        |     |
|--------|--------|-----|--------|--------|-----|
| A08208 | A16134 | 117 | A08208 | A16225 | 257 |
| A08208 | A16226 | 489 | A08208 | A16294 | 491 |
| A08208 | A16452 | 456 | A08208 | A16606 | 243 |
| A08208 | A16612 | 491 | A08208 | A16613 | 483 |
| A08208 | A16616 | 457 | A08208 | A16626 | 470 |
| A08208 | A16646 | 491 | A08208 | A16754 | 362 |
| A08208 | A16762 | 218 | A08208 | A16830 | 185 |
| A08209 | A08745 | 374 | A08209 | A09357 | 152 |
| A08209 | A09652 | 328 | A08209 | A10527 | 210 |
| A08209 | A10671 | 456 | A08209 | A12365 | 235 |
| A08209 | A12897 | 227 | A08209 | A14190 | 391 |
| A08209 | A14376 | 294 | A08209 | A14650 | 286 |
| A08209 | A15896 | 491 | A08209 | A15960 | 334 |
| A08209 | A15992 | 205 | A08209 | A16038 | 360 |
| A08210 | A08785 | 488 | A08210 | A09054 | 205 |
| A08210 | A10456 | 162 | A08210 | A10649 | 412 |
| A08210 | A13832 | 283 | A08210 | A13879 | 285 |
| A08210 | A14247 | 200 | A08210 | A15626 | 190 |
| A08210 | A15649 | 183 | A08211 | A09292 | 156 |
| A08211 | A09619 | 486 | A08211 | A09697 | 170 |
| A08211 | A09793 | 227 | A08211 | A10316 | 191 |
| A08211 | A11832 | 260 | A08211 | A11833 | 201 |
| A08211 | A11914 | 165 | A08211 | A11920 | 205 |
| A08211 | A11992 | 335 | A08211 | A12138 | 438 |
| A08211 | A12255 | 249 | A08211 | A12738 | 232 |
| A08211 | A12858 | 165 | A08211 | A13052 | 170 |
| A08211 | A13809 | 208 | A08211 | A13989 | 453 |
| A08211 | A14455 | 277 | A08211 | A14655 | 154 |
| A08211 | A14921 | 335 | A08211 | A15187 | 249 |
| A08211 | A15266 | 218 | A08211 | A15533 | 219 |
| A08211 | A15541 | 182 | A08211 | A15940 | 273 |
| A08211 | A16597 | 193 | A08211 | A16692 | 259 |
| A08211 | A16709 | 265 | A08211 | A16799 | 305 |
| A08211 | A16866 | 207 | A08211 | A17012 | 272 |
| A08211 | A17033 | 279 | A08212 | A08516 | 491 |
| A08212 | A08526 | 457 | A08212 | A08669 | 491 |
| A08212 | A08769 | 490 | A08212 | A08820 | 443 |
| A08212 | A08964 | 420 | A08212 | A08995 | 386 |
| A08212 | A09001 | 109 | A08212 | A09085 | 185 |
| A08212 | A09598 | 490 | A08212 | A09762 | 477 |
| A08212 | A10228 | 163 | A08212 | A10373 | 463 |
| A08212 | A11236 | 480 | A08212 | A11703 | 273 |
| A08212 | A11829 | 475 | A08212 | A11841 | 154 |
| A08212 | A12190 | 285 | A08212 | A12556 | 490 |
| A08212 | A13103 | 285 | A08212 | A13913 | 490 |
| A08212 | A13949 | 490 | A08212 | A14079 | 338 |

|        |        |     |        |        |     |
|--------|--------|-----|--------|--------|-----|
| A08212 | A14230 | 317 | A08212 | A14273 | 411 |
| A08212 | A14282 | 401 | A08212 | A14460 | 479 |
| A08212 | A14477 | 196 | A08212 | A14614 | 185 |
| A08212 | A14694 | 477 | A08212 | A15369 | 470 |
| A08212 | A15524 | 368 | A08212 | A15714 | 162 |
| A08212 | A15858 | 254 | A08212 | A15941 | 221 |
| A08212 | A16127 | 480 | A08212 | A16128 | 491 |
| A08212 | A16226 | 477 | A08212 | A16606 | 438 |
| A08212 | A16613 | 429 | A08212 | A16616 | 202 |
| A08212 | A16626 | 373 | A08213 | A14830 | 353 |
| A08213 | A15559 | 201 | A08214 | A09621 | 236 |
| A08214 | A09825 | 229 | A08214 | A12597 | 414 |
| A08214 | A12885 | 335 | A08214 | A15244 | 213 |
| A08215 | A11577 | 252 | A08215 | A14439 | 176 |
| A08215 | A15534 | 213 | A08216 | A11306 | 484 |
| A08217 | A10563 | 380 | A08218 | A08404 | 489 |
| A08218 | A13879 | 262 | A08219 | A16636 | 251 |
| A08222 | A08315 | 318 | A08222 | A08319 | 435 |
| A08222 | A08460 | 424 | A08222 | A09431 | 374 |
| A08222 | A12179 | 486 | A08222 | A14566 | 180 |
| A08222 | A14845 | 308 | A08222 | A15666 | 154 |
| A08222 | A15765 | 310 | A08222 | A15877 | 317 |
| A08222 | A15917 | 226 | A08222 | A16403 | 382 |
| A08223 | A11402 | 480 | A08225 | A08226 | 447 |
| A08225 | A08276 | 447 | A08228 | A08491 | 475 |
| A08228 | A08530 | 404 | A08228 | A08534 | 374 |
| A08228 | A08539 | 241 | A08228 | A08548 | 665 |
| A08228 | A08662 | 288 | A08228 | A08674 | 514 |
| A08228 | A11290 | 156 | A08228 | A11647 | 213 |
| A08228 | A11918 | 535 | A08228 | A12329 | 386 |
| A08228 | A13298 | 259 | A08228 | A14083 | 491 |
| A08228 | A14699 | 665 | A08228 | A14778 | 586 |
| A08228 | A15375 | 333 | A08228 | A15531 | 157 |
| A08228 | A15624 | 566 | A08228 | A15649 | 242 |
| A08228 | A15651 | 229 | A08228 | A15652 | 465 |
| A08228 | A15660 | 491 | A08228 | A15661 | 551 |
| A08228 | A15662 | 341 | A08228 | A15684 | 581 |
| A08228 | A15720 | 156 | A08228 | A15721 | 156 |
| A08228 | A15746 | 581 | A08228 | A15843 | 229 |
| A08228 | A15917 | 229 | A08228 | A15918 | 385 |
| A08228 | A15923 | 230 | A08228 | A15931 | 414 |
| A08228 | A15933 | 152 | A08228 | A15937 | 530 |
| A08228 | A16088 | 436 | A08228 | A16095 | 217 |
| A08228 | A16145 | 156 | A08228 | A16218 | 455 |
| A08228 | A16307 | 156 | A08228 | A16464 | 457 |
| A08228 | A16811 | 224 | A08228 | A16912 | 266 |

|        |        |     |        |        |     |
|--------|--------|-----|--------|--------|-----|
| A08228 | A16955 | 171 | A08229 | A13351 | 440 |
| A08229 | A14633 | 297 | A08230 | A08231 | 452 |
| A08230 | A08232 | 452 | A08231 | A08232 | 452 |
| A08234 | A08235 | 460 | A08234 | A11313 | 364 |
| A08234 | A15498 | 227 | A08235 | A10018 | 281 |
| A08235 | A11313 | 279 | A08235 | A15498 | 391 |
| A08236 | A08237 | 461 | A08236 | A10278 | 357 |
| A08236 | A11483 | 401 | A08237 | A11289 | 446 |
| A08237 | A14633 | 232 | A08238 | A08250 | 353 |
| A08238 | A08313 | 461 | A08238 | A08368 | 452 |
| A08238 | A08372 | 201 | A08238 | A08687 | 475 |
| A08238 | A09059 | 294 | A08238 | A09876 | 240 |
| A08238 | A10174 | 278 | A08238 | A10253 | 174 |
| A08238 | A10420 | 335 | A08238 | A10421 | 191 |
| A08238 | A10437 | 436 | A08238 | A10444 | 451 |
| A08238 | A10452 | 294 | A08238 | A10455 | 368 |
| A08238 | A10550 | 353 | A08238 | A10656 | 481 |
| A08238 | A10672 | 481 | A08238 | A10677 | 475 |
| A08238 | A10688 | 353 | A08238 | A10702 | 254 |
| A08238 | A10712 | 439 | A08238 | A10904 | 389 |
| A08238 | A11847 | 374 | A08238 | A13734 | 258 |
| A08238 | A13736 | 335 | A08238 | A14803 | 281 |
| A08238 | A14856 | 473 | A08238 | A16002 | 204 |
| A08238 | A16103 | 335 | A08238 | A16286 | 314 |
| A08238 | A16335 | 389 | A08238 | A16417 | 318 |
| A08238 | A16852 | 389 | A08238 | A16968 | 373 |
| A08238 | A17007 | 416 | A08238 | A17041 | 324 |
| A08238 | A17089 | 152 | A08239 | A09624 | 196 |
| A08239 | A11473 | 316 | A08239 | A11551 | 380 |
| A08239 | A11615 | 424 | A08239 | A12707 | 479 |
| A08239 | A12722 | 168 | A08239 | A14271 | 316 |
| A08239 | A14357 | 385 | A08239 | A15685 | 486 |
| A08240 | A11889 | 452 | A08240 | A12520 | 452 |
| A08240 | A15277 | 393 | A08241 | A11128 | 452 |
| A08242 | A10451 | 441 | A08242 | A10886 | 441 |
| A08242 | A15905 | 347 | A08244 | A08309 | 258 |
| A08244 | A11327 | 384 | A08244 | A11449 | 396 |
| A08244 | A13874 | 305 | A08246 | A08395 | 467 |
| A08246 | A08404 | 269 | A08246 | A08785 | 443 |
| A08246 | A10563 | 327 | A08247 | A14633 | 246 |
| A08248 | A08281 | 490 | A08248 | A08982 | 568 |
| A08248 | A08990 | 299 | A08248 | A10156 | 191 |
| A08248 | A11544 | 262 | A08248 | A11649 | 262 |
| A08248 | A11695 | 269 | A08248 | A11842 | 358 |
| A08248 | A13147 | 151 | A08248 | A13892 | 262 |
| A08248 | A14196 | 490 | A08248 | A14246 | 455 |

|        |        |     |        |        |     |
|--------|--------|-----|--------|--------|-----|
| A08248 | A14362 | 262 | A08248 | A14566 | 177 |
| A08248 | A15297 | 417 | A08248 | A15321 | 217 |
| A08248 | A15324 | 405 | A08248 | A15338 | 309 |
| A08248 | A15419 | 446 | A08248 | A15559 | 488 |
| A08248 | A15564 | 572 | A08248 | A15631 | 266 |
| A08248 | A15729 | 475 | A08248 | A15747 | 190 |
| A08248 | A15763 | 463 | A08248 | A15775 | 404 |
| A08248 | A15947 | 480 | A08248 | A16093 | 196 |
| A08248 | A16293 | 177 | A08248 | A16311 | 463 |
| A08248 | A16463 | 210 | A08248 | A16614 | 262 |
| A08249 | A08324 | 314 | A08249 | A08663 | 199 |
| A08249 | A08687 | 229 | A08249 | A10238 | 190 |
| A08249 | A10679 | 201 | A08249 | A10688 | 227 |
| A08249 | A11834 | 243 | A08249 | A16288 | 160 |
| A08250 | A08330 | 411 | A08250 | A08365 | 152 |
| A08250 | A08461 | 177 | A08250 | A08751 | 369 |
| A08250 | A09059 | 182 | A08250 | A09577 | 329 |
| A08250 | A09746 | 385 | A08250 | A10421 | 212 |
| A08250 | A10437 | 374 | A08250 | A10444 | 327 |
| A08250 | A10656 | 314 | A08250 | A10658 | 434 |
| A08250 | A10672 | 435 | A08250 | A10677 | 297 |
| A08250 | A13736 | 430 | A08250 | A16746 | 451 |
| A08251 | A14246 | 210 | A08252 | A10441 | 157 |
| A08252 | A10689 | 369 | A08252 | A10693 | 232 |
| A08252 | A10702 | 491 | A08252 | A10710 | 307 |
| A08252 | A10712 | 404 | A08252 | A11325 | 383 |
| A08252 | A11381 | 293 | A08252 | A14197 | 358 |
| A08252 | A15673 | 196 | A08252 | A15753 | 163 |
| A08252 | A15986 | 185 | A08252 | A16002 | 486 |
| A08252 | A16034 | 475 | A08252 | A16073 | 294 |
| A08252 | A16230 | 218 | A08252 | A16362 | 417 |
| A08253 | A08254 | 447 | A08253 | A13431 | 452 |
| A08254 | A13431 | 447 | A08255 | A08259 | 213 |
| A08255 | A08355 | 455 | A08255 | A08377 | 313 |
| A08255 | A08525 | 184 | A08255 | A08543 | 255 |
| A08255 | A08545 | 361 | A08255 | A08549 | 184 |
| A08255 | A08550 | 408 | A08255 | A08552 | 408 |
| A08255 | A08560 | 219 | A08255 | A08566 | 184 |
| A08255 | A08567 | 188 | A08255 | A08812 | 184 |
| A08255 | A08813 | 184 | A08255 | A08840 | 184 |
| A08255 | A08845 | 222 | A08255 | A08996 | 314 |
| A08255 | A09333 | 251 | A08255 | A09609 | 283 |
| A08255 | A09622 | 213 | A08255 | A09727 | 184 |
| A08255 | A09757 | 162 | A08255 | A09828 | 193 |
| A08255 | A10315 | 258 | A08255 | A10490 | 184 |
| A08255 | A10789 | 295 | A08255 | A11301 | 341 |

|        |        |     |        |        |     |
|--------|--------|-----|--------|--------|-----|
| A08255 | A11430 | 196 | A08255 | A11472 | 351 |
| A08255 | A11496 | 385 | A08255 | A11497 | 419 |
| A08255 | A11555 | 170 | A08255 | A11616 | 190 |
| A08255 | A11649 | 163 | A08255 | A11658 | 329 |
| A08255 | A11675 | 288 | A08255 | A11735 | 255 |
| A08255 | A11737 | 257 | A08255 | A11833 | 162 |
| A08255 | A11914 | 254 | A08255 | A11917 | 356 |
| A08255 | A11940 | 374 | A08255 | A11992 | 165 |
| A08255 | A12254 | 358 | A08255 | A12255 | 213 |
| A08255 | A12433 | 377 | A08255 | A12501 | 179 |
| A08255 | A12507 | 342 | A08255 | A12606 | 408 |
| A08255 | A12655 | 227 | A08255 | A12658 | 383 |
| A08255 | A12738 | 195 | A08255 | A12826 | 361 |
| A08255 | A12858 | 255 | A08255 | A13231 | 271 |
| A08255 | A13309 | 179 | A08255 | A13313 | 321 |
| A08255 | A13323 | 291 | A08255 | A13399 | 263 |
| A08255 | A13708 | 314 | A08255 | A13737 | 327 |
| A08255 | A13781 | 246 | A08255 | A13784 | 283 |
| A08255 | A13786 | 191 | A08255 | A13805 | 229 |
| A08255 | A13809 | 303 | A08255 | A13912 | 401 |
| A08255 | A13963 | 184 | A08255 | A14084 | 199 |
| A08255 | A14086 | 433 | A08255 | A14214 | 274 |
| A08255 | A14239 | 276 | A08255 | A14255 | 159 |
| A08255 | A14263 | 187 | A08255 | A14270 | 184 |
| A08255 | A14285 | 184 | A08255 | A14288 | 294 |
| A08255 | A14305 | 484 | A08255 | A14375 | 157 |
| A08255 | A14462 | 160 | A08255 | A14569 | 177 |
| A08255 | A14718 | 177 | A08255 | A14719 | 213 |
| A08255 | A14799 | 163 | A08255 | A14921 | 307 |
| A08255 | A15105 | 191 | A08255 | A15187 | 341 |
| A08255 | A15189 | 273 | A08255 | A15262 | 251 |
| A08255 | A15291 | 238 | A08255 | A15519 | 201 |
| A08255 | A15680 | 198 | A08255 | A15765 | 191 |
| A08255 | A15818 | 208 | A08255 | A15949 | 184 |
| A08255 | A16099 | 184 | A08255 | A16157 | 366 |
| A08255 | A16187 | 193 | A08255 | A16343 | 299 |
| A08255 | A16387 | 271 | A08255 | A16552 | 347 |
| A08255 | A16565 | 286 | A08255 | A16597 | 424 |
| A08255 | A16611 | 323 | A08255 | A16664 | 283 |
| A08255 | A16675 | 343 | A08255 | A16682 | 246 |
| A08255 | A16703 | 408 | A08255 | A16709 | 229 |
| A08255 | A16764 | 157 | A08255 | A16776 | 255 |
| A08255 | A16790 | 229 | A08255 | A16824 | 288 |
| A08255 | A16829 | 243 | A08255 | A16838 | 216 |
| A08255 | A16905 | 190 | A08255 | A16908 | 318 |
| A08255 | A16913 | 391 | A08255 | A16954 | 229 |

|        |        |     |        |        |     |
|--------|--------|-----|--------|--------|-----|
| A08255 | A17018 | 369 | A08255 | A17030 | 255 |
| A08255 | A17033 | 243 | A08255 | A17035 | 193 |
| A08255 | A17190 | 243 | A08255 | A17211 | 241 |
| A08256 | A11720 | 486 | A08259 | A08355 | 491 |
| A08259 | A08551 | 179 | A08259 | A08834 | 179 |
| A08259 | A08840 | 179 | A08259 | A09825 | 179 |
| A08259 | A10588 | 204 | A08259 | A11079 | 159 |
| A08259 | A11393 | 247 | A08259 | A11408 | 177 |
| A08259 | A11558 | 179 | A08259 | A11725 | 193 |
| A08259 | A11767 | 200 | A08259 | A11959 | 427 |
| A08259 | A12238 | 216 | A08259 | A12969 | 372 |
| A08259 | A13116 | 168 | A08259 | A13819 | 179 |
| A08259 | A13866 | 179 | A08259 | A13942 | 179 |
| A08259 | A14130 | 260 | A08259 | A14202 | 179 |
| A08259 | A14366 | 179 | A08259 | A14423 | 172 |
| A08259 | A14595 | 247 | A08259 | A15358 | 238 |
| A08259 | A15470 | 229 | A08259 | A15484 | 179 |
| A08259 | A16566 | 200 | A08259 | A16587 | 179 |
| A08259 | A16682 | 196 | A08259 | A16695 | 260 |
| A08259 | A16704 | 160 | A08259 | A16707 | 302 |
| A08259 | A16913 | 234 | A08261 | A08978 | 279 |
| A08261 | A09591 | 432 | A08261 | A09691 | 382 |
| A08261 | A10490 | 260 | A08261 | A13819 | 236 |
| A08261 | A14178 | 318 | A08261 | A15653 | 135 |
| A08262 | A12658 | 321 | A08263 | A08402 | 391 |
| A08263 | A08975 | 262 | A08263 | A14092 | 386 |
| A08263 | A14272 | 468 | A08263 | A14840 | 344 |
| A08263 | A15877 | 267 | A08264 | A14127 | 174 |
| A08268 | A12648 | 438 | A08269 | A08491 | 208 |
| A08269 | A08892 | 302 | A08269 | A08971 | 339 |
| A08269 | A14074 | 263 | A08270 | A08271 | 452 |
| A08272 | A08775 | 346 | A08272 | A14088 | 259 |
| A08272 | A14186 | 188 | A08272 | A15719 | 427 |
| A08272 | A16634 | 491 | A08273 | A08315 | 269 |
| A08273 | A09620 | 269 | A08273 | A09697 | 269 |
| A08273 | A09722 | 391 | A08273 | A12159 | 473 |
| A08273 | A13581 | 269 | A08273 | A14827 | 160 |
| A08273 | A15837 | 269 | A08273 | A16027 | 269 |
| A08274 | A11306 | 486 | A08274 | A12383 | 184 |
| A08276 | A13967 | 400 | A08276 | A15860 | 369 |
| A08277 | A08543 | 263 | A08277 | A08556 | 190 |
| A08277 | A08761 | 352 | A08277 | A08762 | 271 |
| A08277 | A11688 | 480 | A08277 | A12477 | 238 |
| A08277 | A14216 | 63  | A08277 | A15500 | 198 |
| A08277 | A16092 | 163 | A08277 | A16583 | 438 |
| A08278 | A08279 | 486 | A08278 | A08280 | 477 |

|        |        |     |        |        |     |
|--------|--------|-----|--------|--------|-----|
| A08278 | A08365 | 283 | A08278 | A08385 | 472 |
| A08278 | A08438 | 314 | A08278 | A08902 | 159 |
| A08278 | A09607 | 157 | A08278 | A09845 | 414 |
| A08278 | A09881 | 438 | A08278 | A10700 | 337 |
| A08278 | A10715 | 288 | A08278 | A10881 | 366 |
| A08278 | A12723 | 445 | A08278 | A14043 | 899 |
| A08278 | A14443 | 899 | A08278 | A14863 | 340 |
| A08279 | A08280 | 160 | A08279 | A08365 | 165 |
| A08279 | A08385 | 333 | A08279 | A08438 | 188 |
| A08279 | A09845 | 358 | A08279 | A09881 | 167 |
| A08279 | A10423 | 262 | A08279 | A10457 | 371 |
| A08279 | A10625 | 172 | A08279 | A10679 | 357 |
| A08279 | A13717 | 391 | A08279 | A13733 | 417 |
| A08279 | A17024 | 411 | A08280 | A08366 | 208 |
| A08280 | A08372 | 184 | A08280 | A08385 | 486 |
| A08280 | A08438 | 461 | A08280 | A08571 | 482 |
| A08280 | A08658 | 176 | A08280 | A08711 | 191 |
| A08280 | A09845 | 405 | A08280 | A09846 | 455 |
| A08280 | A09881 | 462 | A08280 | A09939 | 151 |
| A08280 | A10018 | 218 | A08280 | A10214 | 477 |
| A08280 | A10442 | 185 | A08280 | A10457 | 151 |
| A08280 | A10458 | 160 | A08280 | A10679 | 249 |
| A08280 | A10687 | 467 | A08280 | A10691 | 418 |
| A08280 | A10699 | 241 | A08280 | A10700 | 396 |
| A08280 | A10705 | 405 | A08280 | A10715 | 475 |
| A08280 | A10781 | 258 | A08280 | A10783 | 163 |
| A08280 | A10881 | 360 | A08280 | A10884 | 335 |
| A08280 | A11138 | 198 | A08280 | A11235 | 256 |
| A08280 | A11300 | 496 | A08280 | A11369 | 246 |
| A08280 | A11983 | 728 | A08280 | A12723 | 488 |
| A08280 | A12987 | 249 | A08280 | A13023 | 190 |
| A08280 | A13340 | 201 | A08280 | A13341 | 305 |
| A08280 | A13362 | 167 | A08280 | A13860 | 435 |
| A08280 | A13989 | 199 | A08280 | A14006 | 430 |
| A08280 | A14132 | 338 | A08280 | A14196 | 240 |
| A08280 | A14198 | 177 | A08280 | A14208 | 397 |
| A08280 | A14215 | 154 | A08280 | A14220 | 226 |
| A08280 | A14231 | 540 | A08280 | A14443 | 899 |
| A08280 | A14481 | 199 | A08280 | A14661 | 358 |
| A08280 | A15323 | 202 | A08280 | A15626 | 199 |
| A08280 | A15726 | 208 | A08280 | A16281 | 229 |
| A08280 | A17024 | 249 | A08281 | A08431 | 213 |
| A08281 | A08810 | 213 | A08281 | A08982 | 409 |
| A08281 | A09445 | 339 | A08281 | A12020 | 385 |
| A08281 | A12292 | 307 | A08281 | A13484 | 162 |
| A08281 | A14196 | 491 | A08281 | A14246 | 319 |

|        |        |     |        |        |     |
|--------|--------|-----|--------|--------|-----|
| A08281 | A14728 | 215 | A08281 | A15297 | 490 |
| A08281 | A15323 | 259 | A08281 | A15324 | 157 |
| A08281 | A15353 | 302 | A08281 | A15355 | 180 |
| A08281 | A15363 | 288 | A08281 | A15419 | 230 |
| A08281 | A15502 | 313 | A08281 | A15559 | 491 |
| A08281 | A15564 | 461 | A08281 | A15631 | 454 |
| A08281 | A15725 | 193 | A08281 | A15729 | 402 |
| A08281 | A15747 | 291 | A08281 | A15763 | 485 |
| A08281 | A15788 | 152 | A08281 | A15947 | 477 |
| A08281 | A16311 | 457 | A08283 | A16028 | 358 |
| A08284 | A08739 | 353 | A08284 | A10652 | 432 |
| A08284 | A10674 | 305 | A08284 | A10684 | 378 |
| A08284 | A10692 | 394 | A08284 | A10983 | 465 |
| A08286 | A12573 | 452 | A08287 | A08738 | 269 |
| A08288 | A08404 | 396 | A08289 | A09051 | 347 |
| A08289 | A09485 | 278 | A08289 | A09713 | 299 |
| A08289 | A09840 | 193 | A08289 | A10034 | 240 |
| A08289 | A10221 | 456 | A08289 | A11175 | 394 |
| A08289 | A11176 | 394 | A08289 | A11496 | 260 |
| A08289 | A11745 | 276 | A08289 | A14163 | 168 |
| A08289 | A14978 | 394 | A08289 | A15366 | 374 |
| A08291 | A08292 | 441 | A08291 | A13369 | 191 |
| A08292 | A08496 | 379 | A08292 | A08671 | 423 |
| A08292 | A08685 | 355 | A08292 | A08686 | 324 |
| A08292 | A09149 | 373 | A08292 | A10858 | 384 |
| A08292 | A10900 | 399 | A08292 | A10948 | 412 |
| A08292 | A11031 | 412 | A08292 | A11289 | 307 |
| A08292 | A11298 | 333 | A08292 | A11310 | 470 |
| A08292 | A11320 | 333 | A08292 | A11328 | 419 |
| A08292 | A11461 | 436 | A08292 | A11463 | 374 |
| A08292 | A11568 | 462 | A08292 | A12621 | 450 |
| A08292 | A12845 | 357 | A08292 | A13760 | 412 |
| A08292 | A15258 | 316 | A08292 | A15260 | 384 |
| A08292 | A15277 | 263 | A08292 | A15336 | 308 |
| A08292 | A15638 | 210 | A08292 | A16068 | 314 |
| A08293 | A08356 | 802 | A08293 | A08362 | 841 |
| A08293 | A08372 | 168 | A08293 | A08402 | 447 |
| A08293 | A08527 | 177 | A08293 | A08567 | 362 |
| A08293 | A08821 | 708 | A08293 | A08831 | 327 |
| A08293 | A08943 | 406 | A08293 | A08956 | 276 |
| A08293 | A09743 | 276 | A08293 | A09996 | 336 |
| A08293 | A10275 | 241 | A08293 | A10596 | 196 |
| A08293 | A10854 | 302 | A08293 | A11529 | 152 |
| A08293 | A11839 | 208 | A08293 | A11917 | 180 |
| A08293 | A12081 | 154 | A08293 | A12250 | 301 |
| A08293 | A12508 | 229 | A08293 | A12606 | 713 |



|        |        |     |        |        |     |
|--------|--------|-----|--------|--------|-----|
| A08293 | A12858 | 369 | A08293 | A13106 | 243 |
| A08293 | A13267 | 196 | A08293 | A13824 | 330 |
| A08293 | A13826 | 572 | A08293 | A13873 | 454 |
| A08293 | A13963 | 340 | A08293 | A13983 | 756 |
| A08293 | A14001 | 462 | A08293 | A14071 | 205 |
| A08293 | A14122 | 411 | A08293 | A14191 | 683 |
| A08293 | A14199 | 491 | A08293 | A14208 | 249 |
| A08293 | A14212 | 821 | A08293 | A14213 | 708 |
| A08293 | A14214 | 707 | A08293 | A14252 | 196 |
| A08293 | A14272 | 430 | A08293 | A14276 | 348 |
| A08293 | A14279 | 435 | A08293 | A14303 | 63  |
| A08293 | A14374 | 405 | A08293 | A14457 | 162 |
| A08293 | A14461 | 162 | A08293 | A14655 | 249 |
| A08293 | A15293 | 167 | A08293 | A15294 | 328 |
| A08293 | A15320 | 157 | A08293 | A15346 | 366 |
| A08293 | A15366 | 201 | A08293 | A15386 | 462 |
| A08293 | A15506 | 409 | A08293 | A15508 | 447 |
| A08293 | A15510 | 263 | A08293 | A15701 | 188 |
| A08293 | A16216 | 346 | A08293 | A16356 | 167 |
| A08293 | A16449 | 558 | A08293 | A16504 | 294 |
| A08293 | A16702 | 276 | A08294 | A11481 | 63  |
| A08296 | A12038 | 424 | A08300 | A08926 | 486 |
| A08300 | A09004 | 246 | A08300 | A10496 | 899 |
| A08300 | A11543 | 173 | A08300 | A12927 | 316 |
| A08300 | A13110 | 348 | A08300 | A13385 | 449 |
| A08300 | A14674 | 205 | A08300 | A15292 | 297 |
| A08300 | A15360 | 193 | A08300 | A15605 | 407 |
| A08301 | A08358 | 425 | A08301 | A08359 | 255 |
| A08301 | A08408 | 472 | A08301 | A08419 | 390 |
| A08301 | A08533 | 414 | A08301 | A08559 | 177 |
| A08301 | A08773 | 162 | A08301 | A09297 | 188 |
| A08301 | A09655 | 358 | A08301 | A09852 | 212 |
| A08301 | A10001 | 168 | A08301 | A11334 | 398 |
| A08301 | A11688 | 185 | A08301 | A12329 | 201 |
| A08301 | A12361 | 319 | A08301 | A13340 | 475 |
| A08301 | A13375 | 484 | A08301 | A13989 | 329 |
| A08301 | A14188 | 348 | A08301 | A14216 | 481 |
| A08301 | A14479 | 163 | A08301 | A14659 | 238 |
| A08301 | A14911 | 375 | A08301 | A15535 | 177 |
| A08301 | A15540 | 224 | A08301 | A15649 | 204 |
| A08301 | A15651 | 154 | A08301 | A15660 | 281 |
| A08301 | A15708 | 238 | A08301 | A15932 | 486 |
| A08301 | A16272 | 190 | A08301 | A16462 | 427 |
| A08301 | A16768 | 294 | A08302 | A08303 | 452 |
| A08304 | A09825 | 195 | A08305 | A08306 | 427 |
| A08305 | A08307 | 452 | A08306 | A08307 | 427 |

|        |        |     |        |        |     |
|--------|--------|-----|--------|--------|-----|
| A08306 | A08412 | 427 | A08306 | A11326 | 363 |
| A08306 | A12562 | 427 | A08306 | A12563 | 427 |
| A08308 | A12036 | 441 | A08308 | A12361 | 345 |
| A08309 | A08392 | 291 | A08309 | A08681 | 486 |
| A08309 | A08685 | 491 | A08309 | A08686 | 491 |
| A08309 | A08753 | 490 | A08309 | A08835 | 294 |
| A08309 | A09740 | 163 | A08309 | A10165 | 168 |
| A08309 | A10789 | 324 | A08309 | A11069 | 334 |
| A08309 | A11278 | 486 | A08309 | A11298 | 470 |
| A08309 | A11315 | 486 | A08309 | A11321 | 232 |
| A08309 | A11333 | 338 | A08309 | A11342 | 367 |
| A08309 | A11463 | 433 | A08309 | A11542 | 481 |
| A08309 | A11569 | 291 | A08309 | A11585 | 307 |
| A08309 | A11586 | 377 | A08309 | A11594 | 398 |
| A08309 | A11983 | 308 | A08309 | A12003 | 278 |
| A08309 | A12058 | 223 | A08309 | A12624 | 334 |
| A08309 | A12745 | 291 | A08309 | A13317 | 251 |
| A08309 | A13369 | 488 | A08309 | A13456 | 243 |
| A08309 | A13830 | 491 | A08309 | A13963 | 278 |
| A08309 | A14247 | 462 | A08309 | A14413 | 374 |
| A08309 | A14873 | 383 | A08309 | A15288 | 162 |
| A08309 | A15292 | 243 | A08309 | A15336 | 187 |
| A08309 | A15416 | 317 | A08309 | A15498 | 412 |
| A08309 | A15638 | 491 | A08309 | A16055 | 177 |
| A08309 | A16274 | 154 | A08309 | A16281 | 472 |
| A08309 | A16450 | 195 | A08309 | A16635 | 224 |
| A08310 | A10278 | 363 | A08310 | A12708 | 429 |
| A08311 | A15498 | 190 | A08313 | A08367 | 168 |
| A08313 | A08368 | 396 | A08313 | A08687 | 463 |
| A08313 | A09059 | 170 | A08313 | A10420 | 210 |
| A08313 | A10550 | 357 | A08313 | A10679 | 427 |
| A08313 | A10695 | 419 | A08313 | A10702 | 262 |
| A08313 | A14619 | 63  | A08313 | A14821 | 363 |
| A08313 | A15370 | 259 | A08313 | A17089 | 160 |
| A08315 | A08417 | 235 | A08315 | A08533 | 367 |
| A08315 | A09502 | 294 | A08315 | A09620 | 269 |
| A08315 | A09697 | 269 | A08315 | A12215 | 316 |
| A08315 | A12652 | 329 | A08315 | A13232 | 371 |
| A08315 | A13340 | 409 | A08315 | A13581 | 269 |
| A08315 | A14073 | 461 | A08315 | A14400 | 305 |
| A08315 | A14642 | 165 | A08315 | A14845 | 246 |
| A08315 | A15133 | 319 | A08315 | A15765 | 246 |
| A08315 | A15837 | 269 | A08315 | A16027 | 269 |
| A08315 | A16243 | 294 | A08315 | A16318 | 266 |
| A08315 | A16403 | 343 | A08315 | A16437 | 249 |
| A08317 | A13949 | 165 | A08318 | A11405 | 224 |

|        |        |     |        |        |     |
|--------|--------|-----|--------|--------|-----|
| A08318 | A15682 | 172 | A08319 | A08460 | 422 |
| A08319 | A09254 | 314 | A08319 | A14634 | 371 |
| A08319 | A14642 | 229 | A08319 | A16068 | 216 |
| A08320 | A15453 | 430 | A08321 | A08806 | 190 |
| A08321 | A09174 | 183 | A08321 | A09180 | 263 |
| A08321 | A10710 | 243 | A08321 | A14508 | 191 |
| A08323 | A16281 | 278 | A08324 | A08687 | 457 |
| A08324 | A10776 | 346 | A08327 | A08431 | 533 |
| A08327 | A08491 | 385 | A08327 | A08542 | 156 |
| A08327 | A09699 | 266 | A08327 | A09703 | 165 |
| A08327 | A11496 | 156 | A08327 | A11497 | 156 |
| A08327 | A12146 | 293 | A08327 | A12757 | 246 |
| A08327 | A13510 | 436 | A08327 | A13928 | 156 |
| A08327 | A13989 | 475 | A08327 | A14178 | 156 |
| A08327 | A14184 | 167 | A08327 | A14655 | 435 |
| A08327 | A14728 | 322 | A08327 | A14826 | 481 |
| A08327 | A14986 | 185 | A08327 | A15629 | 210 |
| A08327 | A16048 | 174 | A08327 | A16699 | 156 |
| A08328 | A08329 | 409 | A08330 | A09018 | 176 |
| A08330 | A10656 | 247 | A08330 | A10658 | 302 |
| A08330 | A11604 | 477 | A08330 | A13736 | 399 |
| A08330 | A14367 | 191 | A08330 | A14803 | 226 |
| A08330 | A15510 | 561 | A08330 | A15970 | 288 |
| A08330 | A16103 | 291 | A08330 | A16746 | 433 |
| A08335 | A08354 | 372 | A08335 | A08738 | 491 |
| A08335 | A09745 | 182 | A08335 | A10373 | 274 |
| A08335 | A10662 | 286 | A08335 | A10899 | 218 |
| A08335 | A11273 | 266 | A08335 | A11431 | 157 |
| A08335 | A11470 | 329 | A08335 | A11862 | 256 |
| A08335 | A11929 | 177 | A08335 | A12211 | 241 |
| A08335 | A12319 | 422 | A08335 | A13363 | 193 |
| A08335 | A13979 | 157 | A08335 | A14212 | 302 |
| A08335 | A14969 | 269 | A08335 | A15187 | 234 |
| A08335 | A15459 | 236 | A08335 | A15463 | 160 |
| A08335 | A15488 | 255 | A08335 | A15489 | 238 |
| A08335 | A15498 | 251 | A08335 | A15534 | 246 |
| A08335 | A15565 | 296 | A08335 | A15878 | 310 |
| A08337 | A14655 | 156 | A08337 | A15041 | 440 |
| A08337 | A15046 | 440 | A08340 | A08918 | 414 |
| A08340 | A10590 | 414 | A08341 | A14152 | 198 |
| A08342 | A09240 | 416 | A08342 | A09365 | 430 |
| A08342 | A11698 | 424 | A08342 | A11977 | 467 |
| A08342 | A15498 | 337 | A08343 | A14621 | 232 |
| A08343 | A15297 | 255 | A08344 | A09509 | 362 |
| A08345 | A08450 | 205 | A08345 | A08608 | 243 |
| A08345 | A11559 | 260 | A08345 | A14208 | 277 |

|        |        |     |        |        |     |
|--------|--------|-----|--------|--------|-----|
| A08346 | A08402 | 491 | A08346 | A09648 | 363 |
| A08346 | A14077 | 486 | A08346 | A14092 | 468 |
| A08346 | A14191 | 481 | A08346 | A14222 | 151 |
| A08346 | A14272 | 491 | A08346 | A14288 | 224 |
| A08346 | A14707 | 379 | A08346 | A15367 | 480 |
| A08346 | A15510 | 252 | A08346 | A15562 | 429 |
| A08346 | A15877 | 484 | A08349 | A13870 | 345 |
| A08349 | A17168 | 350 | A08351 | A08352 | 467 |
| A08351 | A09793 | 246 | A08351 | A10378 | 172 |
| A08351 | A10965 | 235 | A08351 | A11283 | 188 |
| A08351 | A12047 | 257 | A08351 | A12234 | 205 |
| A08351 | A12938 | 558 | A08351 | A13964 | 469 |
| A08352 | A08536 | 263 | A08352 | A08552 | 553 |
| A08352 | A08858 | 216 | A08352 | A09169 | 281 |
| A08352 | A09304 | 307 | A08352 | A09342 | 278 |
| A08352 | A09760 | 307 | A08352 | A10580 | 386 |
| A08352 | A11283 | 528 | A08352 | A11332 | 612 |
| A08352 | A11828 | 307 | A08352 | A11840 | 485 |
| A08352 | A12047 | 624 | A08352 | A12508 | 210 |
| A08352 | A12858 | 167 | A08352 | A14154 | 176 |
| A08352 | A14156 | 165 | A08355 | A08841 | 180 |
| A08355 | A11134 | 316 | A08355 | A11650 | 445 |
| A08355 | A11658 | 382 | A08355 | A11779 | 305 |
| A08355 | A13979 | 429 | A08355 | A14009 | 263 |
| A08355 | A14305 | 249 | A08356 | A08362 | 901 |
| A08356 | A08402 | 473 | A08356 | A08450 | 283 |
| A08356 | A08524 | 414 | A08356 | A08527 | 330 |
| A08356 | A08553 | 446 | A08356 | A08567 | 314 |
| A08356 | A08812 | 341 | A08356 | A08813 | 340 |
| A08356 | A08821 | 707 | A08356 | A08831 | 571 |
| A08356 | A08943 | 490 | A08356 | A08956 | 276 |
| A08356 | A09007 | 371 | A08356 | A09333 | 63  |
| A08356 | A09351 | 184 | A08356 | A09743 | 276 |
| A08356 | A09996 | 276 | A08356 | A10159 | 417 |
| A08356 | A10373 | 413 | A08356 | A10784 | 208 |
| A08356 | A11301 | 229 | A08356 | A11497 | 188 |
| A08356 | A11621 | 338 | A08356 | A11675 | 257 |
| A08356 | A11839 | 454 | A08356 | A12052 | 195 |
| A08356 | A12606 | 607 | A08356 | A12858 | 278 |
| A08356 | A13106 | 218 | A08356 | A13826 | 154 |
| A08356 | A13915 | 162 | A08356 | A13928 | 246 |
| A08356 | A13963 | 408 | A08356 | A13983 | 491 |
| A08356 | A14167 | 327 | A08356 | A14199 | 485 |
| A08356 | A14209 | 180 | A08356 | A14212 | 896 |
| A08356 | A14213 | 708 | A08356 | A14214 | 708 |
| A08356 | A14272 | 473 | A08356 | A14655 | 440 |

|        |        |     |        |        |     |
|--------|--------|-----|--------|--------|-----|
| A08356 | A15262 | 334 | A08356 | A15295 | 199 |
| A08356 | A15297 | 190 | A08356 | A15506 | 466 |
| A08356 | A15508 | 195 | A08356 | A15541 | 234 |
| A08356 | A15613 | 63  | A08356 | A15617 | 268 |
| A08356 | A15665 | 172 | A08356 | A15701 | 405 |
| A08356 | A15946 | 357 | A08356 | A15949 | 232 |
| A08356 | A16449 | 377 | A08356 | A16504 | 277 |
| A08356 | A16552 | 180 | A08356 | A16611 | 219 |
| A08356 | A16702 | 286 | A08356 | A16709 | 184 |
| A08356 | A16905 | 229 | A08356 | A17030 | 219 |
| A08356 | A17133 | 190 | A08357 | A08359 | 480 |
| A08357 | A08377 | 151 | A08357 | A08398 | 413 |
| A08357 | A08452 | 488 | A08357 | A08521 | 272 |
| A08357 | A08550 | 190 | A08357 | A08559 | 324 |
| A08357 | A08571 | 274 | A08357 | A08952 | 160 |
| A08357 | A08973 | 413 | A08357 | A08978 | 321 |
| A08357 | A09292 | 491 | A08357 | A09313 | 182 |
| A08357 | A09322 | 433 | A08357 | A09327 | 481 |
| A08357 | A09707 | 491 | A08357 | A09852 | 188 |
| A08357 | A10156 | 177 | A08357 | A10518 | 466 |
| A08357 | A10529 | 202 | A08357 | A10532 | 185 |
| A08357 | A10616 | 270 | A08357 | A10624 | 409 |
| A08357 | A11316 | 188 | A08357 | A11390 | 288 |
| A08357 | A11400 | 249 | A08357 | A11420 | 357 |
| A08357 | A11438 | 335 | A08357 | A11462 | 491 |
| A08357 | A11475 | 154 | A08357 | A11550 | 205 |
| A08357 | A11572 | 208 | A08357 | A11942 | 488 |
| A08357 | A11945 | 291 | A08357 | A12089 | 317 |
| A08357 | A12233 | 269 | A08357 | A12238 | 427 |
| A08357 | A12329 | 232 | A08357 | A12821 | 180 |
| A08357 | A13066 | 243 | A08357 | A13126 | 486 |
| A08357 | A13340 | 362 | A08357 | A13752 | 182 |
| A08357 | A13830 | 156 | A08357 | A13875 | 404 |
| A08357 | A13989 | 491 | A08357 | A14172 | 218 |
| A08357 | A14176 | 278 | A08357 | A14211 | 191 |
| A08357 | A14216 | 489 | A08357 | A14476 | 273 |
| A08357 | A14505 | 390 | A08357 | A14508 | 167 |
| A08357 | A14596 | 398 | A08357 | A15215 | 461 |
| A08357 | A15219 | 156 | A08357 | A15256 | 313 |
| A08357 | A15416 | 191 | A08357 | A15500 | 202 |
| A08357 | A15660 | 491 | A08357 | A15684 | 486 |
| A08357 | A15755 | 235 | A08357 | A15931 | 333 |
| A08357 | A16035 | 193 | A08357 | A16118 | 299 |
| A08357 | A16159 | 235 | A08357 | A16272 | 260 |
| A08357 | A16318 | 228 | A08357 | A16650 | 160 |
| A08357 | A17152 | 165 | A08358 | A08359 | 490 |

|        |        |     |        |        |     |
|--------|--------|-----|--------|--------|-----|
| A08358 | A08377 | 188 | A08358 | A08419 | 360 |
| A08358 | A08457 | 162 | A08358 | A08501 | 486 |
| A08358 | A08533 | 170 | A08358 | A08543 | 313 |
| A08358 | A08556 | 429 | A08358 | A08559 | 409 |
| A08358 | A09622 | 329 | A08358 | A09674 | 235 |
| A08358 | A09852 | 429 | A08358 | A09999 | 238 |
| A08358 | A10445 | 262 | A08358 | A11420 | 424 |
| A08358 | A11440 | 254 | A08358 | A11728 | 185 |
| A08358 | A11861 | 243 | A08358 | A12270 | 201 |
| A08358 | A12821 | 379 | A08358 | A13340 | 167 |
| A08358 | A13710 | 335 | A08358 | A14176 | 154 |
| A08358 | A14216 | 274 | A08358 | A14508 | 279 |
| A08358 | A15225 | 329 | A08358 | A15235 | 160 |
| A08358 | A15500 | 269 | A08358 | A15732 | 311 |
| A08358 | A15743 | 213 | A08358 | A15988 | 191 |
| A08358 | A16053 | 337 | A08358 | A16233 | 229 |
| A08358 | A16234 | 327 | A08358 | A17193 | 260 |
| A08359 | A08369 | 358 | A08359 | A08377 | 195 |
| A08359 | A08408 | 524 | A08359 | A08457 | 565 |
| A08359 | A08462 | 316 | A08359 | A08466 | 200 |
| A08359 | A08476 | 565 | A08359 | A08543 | 469 |
| A08359 | A08556 | 224 | A08359 | A08571 | 457 |
| A08359 | A08983 | 216 | A08359 | A09292 | 243 |
| A08359 | A09322 | 229 | A08359 | A09613 | 362 |
| A08359 | A09741 | 157 | A08359 | A10208 | 285 |
| A08359 | A10362 | 356 | A08359 | A10498 | 165 |
| A08359 | A10532 | 406 | A08359 | A11105 | 281 |
| A08359 | A11254 | 165 | A08359 | A11297 | 445 |
| A08359 | A11334 | 371 | A08359 | A11344 | 468 |
| A08359 | A11420 | 484 | A08359 | A11462 | 296 |
| A08359 | A11550 | 491 | A08359 | A11562 | 200 |
| A08359 | A11572 | 188 | A08359 | A11593 | 151 |
| A08359 | A11728 | 562 | A08359 | A11857 | 436 |
| A08359 | A11861 | 525 | A08359 | A11924 | 473 |
| A08359 | A12068 | 193 | A08359 | A12269 | 366 |
| A08359 | A12270 | 488 | A08359 | A12328 | 457 |
| A08359 | A12329 | 436 | A08359 | A12821 | 490 |
| A08359 | A13311 | 452 | A08359 | A13333 | 200 |
| A08359 | A13340 | 491 | A08359 | A13622 | 271 |
| A08359 | A13710 | 424 | A08359 | A13830 | 154 |
| A08359 | A13989 | 490 | A08359 | A14176 | 490 |
| A08359 | A14188 | 408 | A08359 | A14216 | 491 |
| A08359 | A14257 | 428 | A08359 | A14447 | 236 |
| A08359 | A14476 | 235 | A08359 | A14505 | 195 |
| A08359 | A14508 | 491 | A08359 | A14923 | 345 |
| A08359 | A14937 | 447 | A08359 | A15202 | 215 |

|        |        |     |        |        |     |
|--------|--------|-----|--------|--------|-----|
| A08359 | A15225 | 488 | A08359 | A15235 | 154 |
| A08359 | A15244 | 174 | A08359 | A15500 | 488 |
| A08359 | A15507 | 265 | A08359 | A15660 | 447 |
| A08359 | A15684 | 472 | A08359 | A15732 | 489 |
| A08359 | A15751 | 271 | A08359 | A15769 | 219 |
| A08359 | A15931 | 221 | A08359 | A16118 | 180 |
| A08359 | A16437 | 177 | A08359 | A16462 | 205 |
| A08359 | A16682 | 247 | A08359 | A16686 | 258 |
| A08359 | A16822 | 353 | A08359 | A16839 | 307 |
| A08360 | A08551 | 483 | A08360 | A08986 | 247 |
| A08360 | A09872 | 279 | A08360 | A10174 | 168 |
| A08360 | A10580 | 699 | A08360 | A10905 | 377 |
| A08360 | A11271 | 235 | A08360 | A11332 | 176 |
| A08360 | A12047 | 668 | A08360 | A12341 | 63  |
| A08361 | A11306 | 380 | A08361 | A14876 | 406 |
| A08362 | A08402 | 286 | A08362 | A08524 | 343 |
| A08362 | A08527 | 270 | A08362 | A08553 | 469 |
| A08362 | A08567 | 227 | A08362 | A08586 | 301 |
| A08362 | A08812 | 212 | A08362 | A08813 | 252 |
| A08362 | A08821 | 708 | A08362 | A08831 | 476 |
| A08362 | A08943 | 486 | A08362 | A08956 | 276 |
| A08362 | A09007 | 156 | A08362 | A09010 | 151 |
| A08362 | A09743 | 276 | A08362 | A09996 | 276 |
| A08362 | A10159 | 167 | A08362 | A10425 | 491 |
| A08362 | A10497 | 301 | A08362 | A11068 | 313 |
| A08362 | A11301 | 303 | A08362 | A11839 | 221 |
| A08362 | A12052 | 223 | A08362 | A12250 | 176 |
| A08362 | A12606 | 605 | A08362 | A13070 | 198 |
| A08362 | A13309 | 154 | A08362 | A13824 | 433 |
| A08362 | A13826 | 424 | A08362 | A13963 | 391 |
| A08362 | A13983 | 491 | A08362 | A14084 | 281 |
| A08362 | A14167 | 260 | A08362 | A14199 | 467 |
| A08362 | A14209 | 270 | A08362 | A14212 | 878 |
| A08362 | A14213 | 708 | A08362 | A14214 | 708 |
| A08362 | A14223 | 63  | A08362 | A14655 | 455 |
| A08362 | A14843 | 412 | A08362 | A15373 | 205 |
| A08362 | A15380 | 306 | A08362 | A15498 | 297 |
| A08362 | A15503 | 115 | A08362 | A15506 | 263 |
| A08362 | A15508 | 223 | A08362 | A15617 | 197 |
| A08362 | A15701 | 356 | A08362 | A15946 | 228 |
| A08362 | A15949 | 260 | A08362 | A16449 | 314 |
| A08362 | A16611 | 205 | A08362 | A16702 | 691 |
| A08362 | A16831 | 424 | A08362 | A16854 | 205 |
| A08362 | A17133 | 228 | A08363 | A08364 | 474 |
| A08363 | A08414 | 457 | A08363 | A09280 | 383 |
| A08363 | A14449 | 216 | A08364 | A08414 | 430 |

|        |        |     |        |        |     |
|--------|--------|-----|--------|--------|-----|
| A08364 | A08491 | 294 | A08365 | A08366 | 491 |
| A08365 | A08367 | 63  | A08365 | A08385 | 205 |
| A08365 | A08551 | 210 | A08365 | A08564 | 172 |
| A08365 | A08565 | 254 | A08365 | A09812 | 162 |
| A08365 | A10287 | 274 | A08365 | A10423 | 469 |
| A08365 | A10456 | 481 | A08365 | A10670 | 254 |
| A08365 | A10687 | 168 | A08365 | A10692 | 202 |
| A08365 | A10783 | 302 | A08365 | A10876 | 274 |
| A08365 | A12858 | 179 | A08365 | A13169 | 191 |
| A08365 | A14288 | 168 | A08365 | A14827 | 193 |
| A08365 | A14863 | 441 | A08365 | A15367 | 228 |
| A08365 | A15678 | 238 | A08365 | A17114 | 238 |
| A08366 | A08367 | 124 | A08366 | A08385 | 391 |
| A08366 | A10420 | 165 | A08366 | A10423 | 479 |
| A08366 | A10444 | 283 | A08366 | A10446 | 399 |
| A08366 | A10456 | 490 | A08366 | A10457 | 330 |
| A08366 | A10652 | 305 | A08366 | A10670 | 385 |
| A08366 | A10684 | 322 | A08366 | A10692 | 360 |
| A08366 | A10699 | 364 | A08366 | A10706 | 285 |
| A08366 | A10783 | 424 | A08366 | A10876 | 394 |
| A08366 | A14863 | 462 | A08367 | A09943 | 317 |
| A08367 | A10423 | 63  | A08367 | A10715 | 152 |
| A08367 | A13415 | 156 | A08367 | A14821 | 193 |
| A08368 | A08687 | 455 | A08368 | A10652 | 388 |
| A08368 | A17089 | 258 | A08369 | A08408 | 241 |
| A08369 | A08430 | 185 | A08369 | A08457 | 200 |
| A08369 | A08461 | 229 | A08369 | A08466 | 200 |
| A08369 | A08476 | 305 | A08369 | A08775 | 179 |
| A08369 | A08983 | 274 | A08369 | A09044 | 251 |
| A08369 | A09308 | 310 | A08369 | A09322 | 253 |
| A08369 | A09620 | 241 | A08369 | A11562 | 543 |
| A08369 | A11728 | 588 | A08369 | A11861 | 200 |
| A08369 | A12011 | 188 | A08369 | A12227 | 241 |
| A08369 | A12508 | 230 | A08369 | A12858 | 173 |
| A08369 | A13333 | 200 | A08369 | A14167 | 329 |
| A08369 | A14169 | 63  | A08369 | A14176 | 479 |
| A08369 | A14247 | 415 | A08369 | A14249 | 483 |
| A08369 | A14272 | 398 | A08369 | A14937 | 156 |
| A08369 | A15202 | 566 | A08369 | A15218 | 196 |
| A08369 | A15268 | 568 | A08369 | A15347 | 187 |
| A08369 | A15381 | 572 | A08369 | A15551 | 229 |
| A08369 | A15709 | 154 | A08369 | A15743 | 301 |
| A08369 | A16686 | 118 | A08369 | A17122 | 167 |
| A08370 | A11028 | 461 | A08370 | A14279 | 168 |
| A08372 | A08385 | 425 | A08372 | A08663 | 191 |
| A08372 | A08889 | 151 | A08372 | A09881 | 196 |



|        |        |     |        |        |     |
|--------|--------|-----|--------|--------|-----|
| A08372 | A10443 | 411 | A08372 | A10690 | 348 |
| A08372 | A10691 | 451 | A08372 | A10699 | 238 |
| A08372 | A10709 | 212 | A08372 | A10776 | 202 |
| A08372 | A10933 | 311 | A08372 | A11189 | 168 |
| A08372 | A13341 | 367 | A08372 | A13983 | 302 |
| A08372 | A15546 | 241 | A08372 | A16103 | 193 |
| A08372 | A16371 | 274 | A08372 | A16896 | 369 |
| A08372 | A17006 | 201 | A08372 | A17024 | 311 |
| A08372 | A17046 | 235 | A08372 | A17092 | 311 |
| A08373 | A12389 | 452 | A08373 | A12461 | 452 |
| A08374 | A08386 | 434 | A08377 | A08398 | 375 |
| A08377 | A08450 | 294 | A08377 | A08517 | 173 |
| A08377 | A08518 | 328 | A08377 | A08532 | 210 |
| A08377 | A08543 | 491 | A08377 | A08549 | 188 |
| A08377 | A08550 | 628 | A08377 | A08552 | 485 |
| A08377 | A08556 | 401 | A08377 | A08560 | 460 |
| A08377 | A08561 | 486 | A08377 | A08773 | 452 |
| A08377 | A08814 | 454 | A08377 | A08818 | 283 |
| A08377 | A08845 | 391 | A08377 | A08973 | 596 |
| A08377 | A09010 | 358 | A08377 | A09298 | 238 |
| A08377 | A09299 | 212 | A08377 | A09309 | 176 |
| A08377 | A09326 | 216 | A08377 | A09333 | 286 |
| A08377 | A09609 | 423 | A08377 | A09622 | 160 |
| A08377 | A09648 | 458 | A08377 | A09828 | 271 |
| A08377 | A10159 | 163 | A08377 | A10362 | 205 |
| A08377 | A10755 | 160 | A08377 | A10789 | 469 |
| A08377 | A11209 | 199 | A08377 | A11234 | 235 |
| A08377 | A11279 | 394 | A08377 | A11297 | 396 |
| A08377 | A11301 | 486 | A08377 | A11420 | 246 |
| A08377 | A11430 | 308 | A08377 | A11472 | 439 |
| A08377 | A11496 | 484 | A08377 | A11497 | 490 |
| A08377 | A11555 | 243 | A08377 | A11597 | 297 |
| A08377 | A11616 | 414 | A08377 | A11649 | 235 |
| A08377 | A11675 | 452 | A08377 | A11705 | 306 |
| A08377 | A11735 | 486 | A08377 | A11737 | 441 |
| A08377 | A11914 | 489 | A08377 | A11917 | 475 |
| A08377 | A11940 | 201 | A08377 | A11954 | 195 |
| A08377 | A11992 | 398 | A08377 | A12011 | 199 |
| A08377 | A12167 | 165 | A08377 | A12215 | 417 |
| A08377 | A12238 | 213 | A08377 | A12254 | 458 |
| A08377 | A12255 | 380 | A08377 | A12284 | 160 |
| A08377 | A12433 | 490 | A08377 | A12501 | 351 |
| A08377 | A12506 | 358 | A08377 | A12507 | 468 |
| A08377 | A12508 | 243 | A08377 | A12606 | 488 |
| A08377 | A12625 | 462 | A08377 | A12658 | 479 |
| A08377 | A12659 | 263 | A08377 | A12665 | 318 |

|        |        |     |        |        |     |
|--------|--------|-----|--------|--------|-----|
| A08377 | A12725 | 454 | A08377 | A12726 | 218 |
| A08377 | A12727 | 224 | A08377 | A12792 | 212 |
| A08377 | A12834 | 259 | A08377 | A12850 | 238 |
| A08377 | A12858 | 481 | A08377 | A12873 | 377 |
| A08377 | A13116 | 301 | A08377 | A13169 | 373 |
| A08377 | A13249 | 160 | A08377 | A13313 | 467 |
| A08377 | A13321 | 265 | A08377 | A13323 | 246 |
| A08377 | A13342 | 159 | A08377 | A13356 | 213 |
| A08377 | A13399 | 373 | A08377 | A13527 | 184 |
| A08377 | A13706 | 313 | A08377 | A13707 | 406 |
| A08377 | A13708 | 324 | A08377 | A13711 | 352 |
| A08377 | A13737 | 449 | A08377 | A13752 | 235 |
| A08377 | A13781 | 468 | A08377 | A13783 | 193 |
| A08377 | A13784 | 460 | A08377 | A13786 | 416 |
| A08377 | A13787 | 263 | A08377 | A13788 | 185 |
| A08377 | A13804 | 221 | A08377 | A13805 | 391 |
| A08377 | A13809 | 468 | A08377 | A13811 | 173 |
| A08377 | A13912 | 372 | A08377 | A13989 | 491 |
| A08377 | A14074 | 380 | A08377 | A14084 | 399 |
| A08377 | A14087 | 293 | A08377 | A14154 | 199 |
| A08377 | A14214 | 486 | A08377 | A14216 | 463 |
| A08377 | A14222 | 382 | A08377 | A14227 | 283 |
| A08377 | A14239 | 313 | A08377 | A14255 | 228 |
| A08377 | A14263 | 432 | A08377 | A14270 | 291 |
| A08377 | A14286 | 182 | A08377 | A14288 | 451 |
| A08377 | A14289 | 279 | A08377 | A14455 | 160 |
| A08377 | A14462 | 432 | A08377 | A14569 | 486 |
| A08377 | A14706 | 456 | A08377 | A14708 | 369 |
| A08377 | A14719 | 293 | A08377 | A14739 | 276 |
| A08377 | A14799 | 472 | A08377 | A14826 | 319 |
| A08377 | A14838 | 324 | A08377 | A14903 | 328 |
| A08377 | A14917 | 184 | A08377 | A15105 | 408 |
| A08377 | A15187 | 425 | A08377 | A15189 | 380 |
| A08377 | A15262 | 286 | A08377 | A15501 | 152 |
| A08377 | A15536 | 210 | A08377 | A15541 | 423 |
| A08377 | A15653 | 418 | A08377 | A15665 | 369 |
| A08377 | A15666 | 279 | A08377 | A15680 | 224 |
| A08377 | A15683 | 454 | A08377 | A15709 | 351 |
| A08377 | A15711 | 375 | A08377 | A15735 | 202 |
| A08377 | A15743 | 177 | A08377 | A15818 | 154 |
| A08377 | A15932 | 361 | A08377 | A15940 | 185 |
| A08377 | A16157 | 490 | A08377 | A16187 | 363 |
| A08377 | A16215 | 201 | A08377 | A16243 | 191 |
| A08377 | A16261 | 358 | A08377 | A16343 | 374 |
| A08377 | A16387 | 221 | A08377 | A16552 | 441 |
| A08377 | A16565 | 484 | A08377 | A16566 | 199 |

|        |        |     |        |        |     |
|--------|--------|-----|--------|--------|-----|
| A08377 | A16567 | 224 | A08377 | A16587 | 480 |
| A08377 | A16597 | 473 | A08377 | A16608 | 177 |
| A08377 | A16611 | 488 | A08377 | A16652 | 375 |
| A08377 | A16664 | 488 | A08377 | A16675 | 465 |
| A08377 | A16680 | 445 | A08377 | A16682 | 195 |
| A08377 | A16690 | 452 | A08377 | A16691 | 366 |
| A08377 | A16692 | 168 | A08377 | A16695 | 259 |
| A08377 | A16699 | 157 | A08377 | A16701 | 216 |
| A08377 | A16702 | 165 | A08377 | A16703 | 373 |
| A08377 | A16704 | 379 | A08377 | A16706 | 263 |
| A08377 | A16707 | 404 | A08377 | A16708 | 213 |
| A08377 | A16764 | 393 | A08377 | A16774 | 232 |
| A08377 | A16788 | 313 | A08377 | A16790 | 434 |
| A08377 | A16797 | 352 | A08377 | A16815 | 372 |
| A08377 | A16824 | 241 | A08377 | A16829 | 191 |
| A08377 | A16838 | 467 | A08377 | A16866 | 340 |
| A08377 | A16874 | 399 | A08377 | A16882 | 291 |
| A08377 | A16905 | 361 | A08377 | A16908 | 276 |
| A08377 | A16913 | 232 | A08377 | A16942 | 232 |
| A08377 | A16944 | 212 | A08377 | A16954 | 310 |
| A08377 | A17015 | 274 | A08377 | A17018 | 196 |
| A08377 | A17033 | 191 | A08377 | A17035 | 477 |
| A08377 | A17133 | 180 | A08377 | A17144 | 171 |
| A08377 | A17211 | 188 | A08378 | A10373 | 401 |
| A08378 | A14076 | 229 | A08378 | A14223 | 265 |
| A08378 | A14230 | 204 | A08378 | A14694 | 378 |
| A08379 | A08531 | 252 | A08379 | A08536 | 483 |
| A08379 | A08551 | 385 | A08379 | A10424 | 212 |
| A08379 | A10441 | 185 | A08379 | A10443 | 188 |
| A08379 | A10632 | 162 | A08379 | A10693 | 267 |
| A08379 | A13735 | 157 | A08379 | A14661 | 379 |
| A08379 | A15065 | 312 | A08379 | A16103 | 173 |
| A08379 | A16744 | 151 | A08379 | A16767 | 188 |
| A08379 | A17041 | 154 | A08380 | A10378 | 212 |
| A08381 | A08382 | 588 | A08381 | A08439 | 559 |
| A08381 | A09010 | 255 | A08381 | A09611 | 255 |
| A08381 | A09703 | 255 | A08381 | A09708 | 255 |
| A08381 | A11395 | 542 | A08381 | A11439 | 561 |
| A08381 | A14166 | 255 | A08381 | A14462 | 255 |
| A08381 | A15733 | 160 | A08381 | A15762 | 574 |
| A08381 | A15943 | 373 | A08381 | A15944 | 255 |
| A08381 | A15945 | 573 | A08381 | A15946 | 577 |
| A08381 | A16067 | 255 | A08381 | A16093 | 255 |
| A08381 | A16109 | 459 | A08381 | A16144 | 561 |
| A08382 | A08439 | 593 | A08382 | A08553 | 449 |
| A08382 | A09010 | 291 | A08382 | A09611 | 255 |

|        |        |     |        |        |     |
|--------|--------|-----|--------|--------|-----|
| A08382 | A09703 | 499 | A08382 | A09708 | 521 |
| A08382 | A10208 | 373 | A08382 | A11395 | 595 |
| A08382 | A11439 | 596 | A08382 | A12111 | 170 |
| A08382 | A13383 | 252 | A08382 | A13915 | 259 |
| A08382 | A14147 | 156 | A08382 | A14166 | 255 |
| A08382 | A14462 | 289 | A08382 | A14655 | 269 |
| A08382 | A15257 | 187 | A08382 | A15559 | 386 |
| A08382 | A15645 | 281 | A08382 | A15762 | 577 |
| A08382 | A15943 | 398 | A08382 | A15944 | 328 |
| A08382 | A15945 | 593 | A08382 | A15946 | 594 |
| A08382 | A15964 | 162 | A08382 | A16067 | 412 |
| A08382 | A16093 | 255 | A08382 | A16109 | 509 |
| A08382 | A16144 | 593 | A08383 | A08818 | 156 |
| A08383 | A09502 | 156 | A08383 | A11344 | 156 |
| A08383 | A11395 | 176 | A08383 | A11674 | 156 |
| A08383 | A13989 | 461 | A08383 | A14196 | 356 |
| A08383 | A15297 | 424 | A08383 | A15559 | 491 |
| A08383 | A16228 | 156 | A08383 | A16525 | 364 |
| A08384 | A08392 | 63  | A08385 | A08438 | 467 |
| A08385 | A09845 | 451 | A08385 | A09846 | 299 |
| A08385 | A09881 | 446 | A08385 | A10420 | 159 |
| A08385 | A10423 | 322 | A08385 | A10442 | 348 |
| A08385 | A10456 | 226 | A08385 | A10652 | 446 |
| A08385 | A10670 | 446 | A08385 | A10684 | 457 |
| A08385 | A10687 | 335 | A08385 | A10690 | 324 |
| A08385 | A10691 | 474 | A08385 | A10692 | 356 |
| A08385 | A10699 | 481 | A08385 | A10700 | 430 |
| A08385 | A10706 | 279 | A08385 | A10709 | 217 |
| A08385 | A10715 | 303 | A08385 | A10780 | 427 |
| A08385 | A10783 | 473 | A08385 | A10876 | 391 |
| A08385 | A10881 | 443 | A08385 | A10884 | 360 |
| A08385 | A10933 | 383 | A08385 | A12723 | 467 |
| A08385 | A13281 | 406 | A08385 | A13341 | 340 |
| A08385 | A17003 | 406 | A08385 | A17051 | 173 |
| A08388 | A08921 | 424 | A08388 | A14247 | 218 |
| A08389 | A13945 | 245 | A08389 | A16281 | 368 |
| A08390 | A09127 | 215 | A08390 | A09691 | 391 |
| A08390 | A10490 | 283 | A08390 | A12383 | 152 |
| A08390 | A13609 | 385 | A08390 | A15653 | 160 |
| A08391 | A09311 | 294 | A08391 | A10460 | 465 |
| A08391 | A12069 | 259 | A08391 | A12228 | 463 |
| A08391 | A12229 | 438 | A08391 | A12492 | 288 |
| A08391 | A12501 | 428 | A08391 | A13309 | 246 |
| A08391 | A14272 | 246 | A08391 | A15986 | 246 |
| A08391 | A16497 | 314 | A08391 | A16829 | 302 |
| A08392 | A08393 | 445 | A08392 | A08425 | 445 |

|        |        |     |        |        |     |
|--------|--------|-----|--------|--------|-----|
| A08392 | A13369 | 229 | A08393 | A08425 | 452 |
| A08394 | A09228 | 408 | A08394 | A13824 | 196 |
| A08394 | A13975 | 281 | A08395 | A08785 | 333 |
| A08397 | A16792 | 385 | A08398 | A08419 | 245 |
| A08398 | A08452 | 566 | A08398 | A08521 | 565 |
| A08398 | A08543 | 385 | A08398 | A08547 | 380 |
| A08398 | A08550 | 434 | A08398 | A08552 | 272 |
| A08398 | A08558 | 200 | A08398 | A08560 | 210 |
| A08398 | A08561 | 201 | A08398 | A08664 | 200 |
| A08398 | A08773 | 291 | A08398 | A08814 | 335 |
| A08398 | A08845 | 215 | A08398 | A09044 | 200 |
| A08398 | A09298 | 375 | A08398 | A09299 | 255 |
| A08398 | A09322 | 247 | A08398 | A09609 | 440 |
| A08398 | A09702 | 332 | A08398 | A09757 | 156 |
| A08398 | A09852 | 174 | A08398 | A10417 | 200 |
| A08398 | A10518 | 491 | A08398 | A10525 | 286 |
| A08398 | A10789 | 285 | A08398 | A11301 | 332 |
| A08398 | A11394 | 279 | A08398 | A11419 | 163 |
| A08398 | A11427 | 151 | A08398 | A11430 | 291 |
| A08398 | A11438 | 462 | A08398 | A11472 | 245 |
| A08398 | A11480 | 364 | A08398 | A11496 | 205 |
| A08398 | A11497 | 296 | A08398 | A11729 | 200 |
| A08398 | A11735 | 404 | A08398 | A11737 | 346 |
| A08398 | A11914 | 402 | A08398 | A11917 | 277 |
| A08398 | A12215 | 263 | A08398 | A12255 | 205 |
| A08398 | A12433 | 414 | A08398 | A12506 | 180 |
| A08398 | A12508 | 162 | A08398 | A12606 | 352 |
| A08398 | A12625 | 224 | A08398 | A12658 | 288 |
| A08398 | A12725 | 188 | A08398 | A12726 | 262 |
| A08398 | A12821 | 302 | A08398 | A12858 | 246 |
| A08398 | A13313 | 224 | A08398 | A13333 | 200 |
| A08398 | A13707 | 302 | A08398 | A13708 | 201 |
| A08398 | A13783 | 238 | A08398 | A13787 | 302 |
| A08398 | A13788 | 358 | A08398 | A13804 | 263 |
| A08398 | A13809 | 162 | A08398 | A13992 | 195 |
| A08398 | A14153 | 212 | A08398 | A14214 | 162 |
| A08398 | A14255 | 152 | A08398 | A14263 | 177 |
| A08398 | A14270 | 205 | A08398 | A14505 | 332 |
| A08398 | A14569 | 170 | A08398 | A14706 | 196 |
| A08398 | A14799 | 154 | A08398 | A14903 | 240 |
| A08398 | A14917 | 229 | A08398 | A15532 | 212 |
| A08398 | A15541 | 266 | A08398 | A15653 | 252 |
| A08398 | A15684 | 221 | A08398 | A15709 | 229 |
| A08398 | A15743 | 223 | A08398 | A15988 | 204 |
| A08398 | A16157 | 435 | A08398 | A16552 | 154 |
| A08398 | A16565 | 278 | A08398 | A16566 | 243 |

|        |        |     |        |        |     |
|--------|--------|-----|--------|--------|-----|
| A08398 | A16567 | 266 | A08398 | A16587 | 223 |
| A08398 | A16611 | 313 | A08398 | A16675 | 235 |
| A08398 | A16680 | 260 | A08398 | A16693 | 294 |
| A08398 | A16701 | 260 | A08398 | A16704 | 205 |
| A08398 | A16707 | 334 | A08398 | A16774 | 274 |
| A08398 | A16776 | 247 | A08398 | A16807 | 171 |
| A08398 | A16829 | 236 | A08398 | A16874 | 232 |
| A08398 | A16942 | 274 | A08399 | A12897 | 379 |
| A08399 | A13213 | 393 | A08399 | A14229 | 200 |
| A08399 | A15398 | 276 | A08400 | A08461 | 180 |
| A08400 | A08766 | 234 | A08400 | A08772 | 309 |
| A08400 | A08777 | 235 | A08400 | A09326 | 430 |
| A08400 | A10655 | 489 | A08400 | A10663 | 269 |
| A08400 | A10797 | 219 | A08400 | A10798 | 447 |
| A08400 | A10799 | 266 | A08400 | A11279 | 491 |
| A08400 | A11287 | 483 | A08400 | A11730 | 343 |
| A08400 | A11968 | 269 | A08400 | A12047 | 692 |
| A08400 | A13106 | 490 | A08400 | A13129 | 443 |
| A08400 | A13328 | 185 | A08400 | A13380 | 213 |
| A08400 | A13798 | 213 | A08400 | A13830 | 488 |
| A08400 | A13831 | 509 | A08400 | A13845 | 387 |
| A08400 | A13855 | 296 | A08400 | A13889 | 266 |
| A08400 | A14056 | 350 | A08400 | A14109 | 425 |
| A08400 | A14182 | 167 | A08400 | A14202 | 346 |
| A08400 | A14247 | 704 | A08400 | A14258 | 484 |
| A08400 | A14272 | 401 | A08400 | A14461 | 756 |
| A08400 | A14495 | 167 | A08400 | A14661 | 571 |
| A08400 | A14838 | 603 | A08400 | A15009 | 185 |
| A08400 | A15033 | 269 | A08400 | A15130 | 416 |
| A08400 | A15297 | 488 | A08400 | A15338 | 433 |
| A08400 | A15366 | 281 | A08400 | A15370 | 413 |
| A08400 | A15558 | 695 | A08400 | A15560 | 438 |
| A08400 | A15591 | 688 | A08400 | A15647 | 270 |
| A08400 | A15660 | 157 | A08400 | A15684 | 232 |
| A08400 | A15770 | 491 | A08400 | A15779 | 768 |
| A08400 | A16617 | 435 | A08400 | A17065 | 269 |
| A08400 | A17091 | 491 | A08400 | A17126 | 177 |
| A08400 | A17138 | 224 | A08401 | A08455 | 447 |
| A08401 | A08486 | 452 | A08401 | A14633 | 297 |
| A08402 | A08567 | 455 | A08402 | A08694 | 185 |
| A08402 | A08812 | 165 | A08402 | A08813 | 156 |
| A08402 | A08975 | 174 | A08402 | A09135 | 353 |
| A08402 | A09556 | 449 | A08402 | A09648 | 491 |
| A08402 | A09653 | 488 | A08402 | A10373 | 481 |
| A08402 | A10429 | 185 | A08402 | A12492 | 491 |
| A08402 | A12897 | 497 | A08402 | A12952 | 218 |

|        |        |     |        |        |     |
|--------|--------|-----|--------|--------|-----|
| A08402 | A12990 | 346 | A08402 | A13169 | 491 |
| A08402 | A13873 | 490 | A08402 | A13949 | 458 |
| A08402 | A13963 | 457 | A08402 | A14077 | 491 |
| A08402 | A14092 | 484 | A08402 | A14191 | 491 |
| A08402 | A14209 | 484 | A08402 | A14212 | 367 |
| A08402 | A14213 | 380 | A08402 | A14230 | 208 |
| A08402 | A14272 | 491 | A08402 | A14288 | 491 |
| A08402 | A14474 | 443 | A08402 | A14594 | 314 |
| A08402 | A14655 | 477 | A08402 | A14707 | 288 |
| A08402 | A14827 | 152 | A08402 | A15367 | 691 |
| A08402 | A15383 | 433 | A08402 | A15562 | 319 |
| A08402 | A15644 | 151 | A08402 | A15877 | 473 |
| A08402 | A15949 | 306 | A08402 | A16635 | 296 |
| A08402 | A16694 | 489 | A08402 | A17007 | 170 |
| A08403 | A08527 | 199 | A08403 | A08554 | 319 |
| A08403 | A09009 | 406 | A08403 | A09485 | 329 |
| A08403 | A11452 | 299 | A08403 | A14220 | 179 |
| A08403 | A14566 | 489 | A08403 | A14594 | 443 |
| A08404 | A08785 | 490 | A08404 | A10563 | 373 |
| A08404 | A10967 | 227 | A08404 | A11424 | 235 |
| A08404 | A12730 | 168 | A08404 | A12793 | 218 |
| A08404 | A13879 | 385 | A08407 | A08746 | 378 |
| A08408 | A08457 | 200 | A08408 | A08466 | 200 |
| A08408 | A08476 | 373 | A08408 | A08501 | 154 |
| A08408 | A08533 | 208 | A08408 | A08539 | 245 |
| A08408 | A08748 | 255 | A08408 | A08761 | 238 |
| A08408 | A09308 | 241 | A08408 | A09322 | 241 |
| A08408 | A09620 | 241 | A08408 | A11562 | 200 |
| A08408 | A11728 | 381 | A08408 | A11861 | 200 |
| A08408 | A12193 | 360 | A08408 | A12227 | 241 |
| A08408 | A12821 | 198 | A08408 | A13333 | 200 |
| A08408 | A13340 | 160 | A08408 | A13710 | 241 |
| A08408 | A14176 | 326 | A08408 | A14188 | 154 |
| A08408 | A14216 | 369 | A08408 | A14508 | 439 |
| A08408 | A14568 | 286 | A08408 | A15202 | 200 |
| A08408 | A15268 | 241 | A08408 | A15381 | 241 |
| A08408 | A15499 | 263 | A08408 | A15500 | 321 |
| A08408 | A15932 | 399 | A08408 | A16686 | 332 |
| A08409 | A09592 | 180 | A08409 | A09671 | 270 |
| A08409 | A09995 | 227 | A08409 | A11160 | 260 |
| A08409 | A11292 | 213 | A08409 | A13895 | 172 |
| A08409 | A15348 | 310 | A08411 | A10378 | 232 |
| A08411 | A13920 | 430 | A08411 | A14822 | 447 |
| A08414 | A11288 | 339 | A08415 | A08427 | 425 |
| A08416 | A08827 | 276 | A08416 | A08889 | 246 |
| A08416 | A09256 | 230 | A08416 | A09470 | 232 |

|        |        |     |        |        |     |
|--------|--------|-----|--------|--------|-----|
| A08416 | A09544 | 345 | A08416 | A09767 | 270 |
| A08416 | A09793 | 356 | A08416 | A09829 | 262 |
| A08416 | A11534 | 417 | A08416 | A11543 | 491 |
| A08416 | A12445 | 345 | A08416 | A12992 | 265 |
| A08416 | A13082 | 371 | A08416 | A13860 | 255 |
| A08416 | A14278 | 171 | A08416 | A14695 | 396 |
| A08416 | A15447 | 157 | A08417 | A08649 | 377 |
| A08417 | A08670 | 377 | A08417 | A08764 | 377 |
| A08417 | A08949 | 213 | A08417 | A09446 | 345 |
| A08417 | A09720 | 327 | A08417 | A10131 | 377 |
| A08417 | A10251 | 366 | A08417 | A10714 | 176 |
| A08417 | A11131 | 157 | A08417 | A11136 | 393 |
| A08417 | A11389 | 308 | A08417 | A12029 | 449 |
| A08417 | A13898 | 335 | A08417 | A14163 | 165 |
| A08417 | A14364 | 193 | A08417 | A14378 | 327 |
| A08417 | A14423 | 254 | A08417 | A14556 | 424 |
| A08417 | A15554 | 351 | A08418 | A09668 | 274 |
| A08418 | A11196 | 268 | A08418 | A11202 | 268 |
| A08418 | A11475 | 159 | A08418 | A11940 | 457 |
| A08418 | A14546 | 210 | A08418 | A15273 | 213 |
| A08418 | A15498 | 389 | A08418 | A16261 | 322 |
| A08418 | A16807 | 180 | A08419 | A08452 | 337 |
| A08419 | A08501 | 424 | A08419 | A08543 | 290 |
| A08419 | A08556 | 435 | A08419 | A08559 | 252 |
| A08419 | A09852 | 441 | A08419 | A11616 | 290 |
| A08419 | A12821 | 391 | A08419 | A13710 | 412 |
| A08419 | A14479 | 241 | A08419 | A14568 | 240 |
| A08419 | A15771 | 247 | A08419 | A16682 | 422 |
| A08420 | A08421 | 409 | A08420 | A08422 | 424 |
| A08420 | A08424 | 417 | A08421 | A08422 | 406 |
| A08421 | A08424 | 396 | A08421 | A10601 | 236 |
| A08421 | A11850 | 270 | A08421 | A14172 | 281 |
| A08421 | A15291 | 274 | A08422 | A08424 | 414 |
| A08423 | A09308 | 382 | A08426 | A13297 | 479 |
| A08426 | A15498 | 177 | A08427 | A12469 | 425 |
| A08427 | A12805 | 425 | A08427 | A12806 | 409 |
| A08428 | A08429 | 452 | A08430 | A08553 | 152 |
| A08430 | A08775 | 326 | A08430 | A08813 | 159 |
| A08430 | A08874 | 241 | A08430 | A10316 | 252 |
| A08430 | A11496 | 199 | A08430 | A11497 | 188 |
| A08430 | A11728 | 193 | A08430 | A11735 | 229 |
| A08430 | A12138 | 180 | A08430 | A12508 | 270 |
| A08430 | A12658 | 263 | A08430 | A12858 | 229 |
| A08430 | A13894 | 207 | A08430 | A14167 | 338 |
| A08430 | A14186 | 157 | A08430 | A14462 | 260 |
| A08430 | A15945 | 208 | A08430 | A16067 | 216 |



|        |        |     |        |        |     |
|--------|--------|-----|--------|--------|-----|
| A08431 | A08542 | 156 | A08431 | A11496 | 156 |
| A08431 | A11497 | 156 | A08431 | A11938 | 443 |
| A08431 | A12757 | 156 | A08431 | A13510 | 191 |
| A08431 | A13928 | 156 | A08431 | A14178 | 156 |
| A08431 | A14378 | 154 | A08431 | A14728 | 488 |
| A08431 | A14826 | 173 | A08431 | A14986 | 196 |
| A08431 | A15629 | 483 | A08431 | A15701 | 228 |
| A08431 | A15905 | 241 | A08431 | A16699 | 156 |
| A08434 | A15363 | 321 | A08434 | A15559 | 208 |
| A08434 | A16311 | 335 | A08435 | A08891 | 477 |
| A08435 | A13087 | 404 | A08435 | A14174 | 199 |
| A08436 | A10621 | 390 | A08436 | A12639 | 452 |
| A08436 | A15892 | 432 | A08437 | A12069 | 288 |
| A08437 | A13989 | 273 | A08438 | A09243 | 400 |
| A08438 | A09429 | 160 | A08438 | A09586 | 177 |
| A08438 | A09845 | 238 | A08438 | A09885 | 208 |
| A08438 | A10442 | 213 | A08438 | A10687 | 401 |
| A08438 | A10699 | 82  | A08438 | A10700 | 344 |
| A08438 | A10715 | 279 | A08438 | A10783 | 191 |
| A08438 | A10881 | 434 | A08438 | A10884 | 232 |
| A08438 | A11235 | 288 | A08438 | A11296 | 207 |
| A08438 | A12723 | 266 | A08438 | A13981 | 899 |
| A08438 | A14443 | 899 | A08438 | A14804 | 272 |
| A08438 | A14934 | 293 | A08438 | A15403 | 172 |
| A08439 | A08527 | 429 | A08439 | A08553 | 393 |
| A08439 | A09010 | 255 | A08439 | A09611 | 255 |
| A08439 | A09703 | 511 | A08439 | A09708 | 309 |
| A08439 | A11301 | 350 | A08439 | A11395 | 590 |
| A08439 | A11439 | 318 | A08439 | A13989 | 297 |
| A08439 | A14166 | 255 | A08439 | A14462 | 255 |
| A08439 | A15762 | 584 | A08439 | A15943 | 571 |
| A08439 | A15944 | 449 | A08439 | A15945 | 592 |
| A08439 | A15946 | 594 | A08439 | A16067 | 352 |
| A08439 | A16089 | 440 | A08439 | A16093 | 255 |
| A08439 | A16109 | 472 | A08439 | A16144 | 554 |
| A08440 | A12391 | 452 | A08442 | A15624 | 291 |
| A08443 | A17063 | 246 | A08444 | A16127 | 154 |
| A08445 | A09080 | 450 | A08445 | A09112 | 446 |
| A08445 | A13795 | 383 | A08445 | A14193 | 469 |
| A08445 | A14204 | 352 | A08445 | A14391 | 215 |
| A08445 | A14393 | 285 | A08445 | A15917 | 208 |
| A08446 | A13218 | 430 | A08447 | A08450 | 170 |
| A08447 | A09333 | 163 | A08447 | A10317 | 180 |
| A08447 | A11472 | 165 | A08447 | A11614 | 232 |
| A08447 | A12508 | 210 | A08447 | A12665 | 188 |
| A08447 | A12825 | 245 | A08447 | A12858 | 167 |

|        |        |     |        |        |     |
|--------|--------|-----|--------|--------|-----|
| A08447 | A13788 | 274 | A08447 | A14186 | 489 |
| A08447 | A14358 | 344 | A08447 | A14375 | 196 |
| A08447 | A14462 | 200 | A08447 | A15189 | 182 |
| A08447 | A15480 | 152 | A08447 | A16067 | 152 |
| A08447 | A16597 | 195 | A08447 | A16664 | 191 |
| A08447 | A16682 | 281 | A08447 | A16807 | 218 |
| A08447 | A16824 | 319 | A08448 | A08671 | 412 |
| A08448 | A11310 | 407 | A08448 | A11320 | 412 |
| A08448 | A11328 | 408 | A08449 | A09929 | 425 |
| A08450 | A08518 | 364 | A08450 | A08537 | 256 |
| A08450 | A08543 | 314 | A08450 | A08550 | 429 |
| A08450 | A08552 | 340 | A08450 | A08560 | 443 |
| A08450 | A08561 | 369 | A08450 | A08814 | 224 |
| A08450 | A08844 | 332 | A08450 | A08995 | 171 |
| A08450 | A09059 | 317 | A08450 | A09279 | 196 |
| A08450 | A09298 | 216 | A08450 | A09309 | 213 |
| A08450 | A09333 | 332 | A08450 | A09621 | 312 |
| A08450 | A09648 | 224 | A08450 | A09828 | 311 |
| A08450 | A10372 | 374 | A08450 | A11279 | 198 |
| A08450 | A11301 | 441 | A08450 | A11496 | 299 |
| A08450 | A11497 | 408 | A08450 | A11551 | 157 |
| A08450 | A11614 | 177 | A08450 | A11735 | 398 |
| A08450 | A11737 | 337 | A08450 | A11851 | 312 |
| A08450 | A11914 | 396 | A08450 | A11917 | 384 |
| A08450 | A11929 | 445 | A08450 | A11940 | 363 |
| A08450 | A11954 | 232 | A08450 | A12052 | 319 |
| A08450 | A12254 | 483 | A08450 | A12284 | 208 |
| A08450 | A12433 | 361 | A08450 | A12499 | 213 |
| A08450 | A12506 | 172 | A08450 | A12507 | 306 |
| A08450 | A12508 | 154 | A08450 | A12606 | 341 |
| A08450 | A12625 | 384 | A08450 | A12658 | 420 |
| A08450 | A12659 | 305 | A08450 | A12665 | 413 |
| A08450 | A12725 | 436 | A08450 | A12792 | 247 |
| A08450 | A12825 | 324 | A08450 | A12858 | 454 |
| A08450 | A12873 | 249 | A08450 | A13231 | 256 |
| A08450 | A13313 | 405 | A08450 | A13321 | 389 |
| A08450 | A13342 | 328 | A08450 | A13356 | 260 |
| A08450 | A13706 | 441 | A08450 | A13707 | 160 |
| A08450 | A13708 | 368 | A08450 | A13781 | 307 |
| A08450 | A13788 | 223 | A08450 | A13805 | 215 |
| A08450 | A13809 | 286 | A08450 | A13912 | 283 |
| A08450 | A14084 | 260 | A08450 | A14167 | 243 |
| A08450 | A14214 | 446 | A08450 | A14222 | 340 |
| A08450 | A14239 | 257 | A08450 | A14260 | 235 |
| A08450 | A14263 | 165 | A08450 | A14270 | 329 |
| A08450 | A14288 | 168 | A08450 | A14358 | 306 |

|        |        |     |        |        |     |
|--------|--------|-----|--------|--------|-----|
| A08450 | A14462 | 367 | A08450 | A14569 | 380 |
| A08450 | A14706 | 185 | A08450 | A14719 | 196 |
| A08450 | A14799 | 326 | A08450 | A14903 | 358 |
| A08450 | A14917 | 221 | A08450 | A14921 | 296 |
| A08450 | A15105 | 274 | A08450 | A15187 | 195 |
| A08450 | A15189 | 408 | A08450 | A15653 | 238 |
| A08450 | A15683 | 177 | A08450 | A15698 | 177 |
| A08450 | A15709 | 218 | A08450 | A15765 | 174 |
| A08450 | A15773 | 199 | A08450 | A15940 | 221 |
| A08450 | A16157 | 451 | A08450 | A16187 | 311 |
| A08450 | A16215 | 238 | A08450 | A16261 | 171 |
| A08450 | A16552 | 243 | A08450 | A16585 | 267 |
| A08450 | A16587 | 344 | A08450 | A16597 | 416 |
| A08450 | A16611 | 460 | A08450 | A16663 | 154 |
| A08450 | A16664 | 470 | A08450 | A16675 | 326 |
| A08450 | A16680 | 406 | A08450 | A16682 | 232 |
| A08450 | A16695 | 291 | A08450 | A16699 | 195 |
| A08450 | A16703 | 188 | A08450 | A16774 | 267 |
| A08450 | A16807 | 162 | A08450 | A16815 | 283 |
| A08450 | A16824 | 276 | A08450 | A16866 | 152 |
| A08450 | A16874 | 224 | A08450 | A16905 | 174 |
| A08452 | A08521 | 564 | A08452 | A08547 | 451 |
| A08452 | A08558 | 200 | A08452 | A08664 | 200 |
| A08452 | A09044 | 200 | A08452 | A09227 | 212 |
| A08452 | A09322 | 486 | A08452 | A09332 | 188 |
| A08452 | A09702 | 563 | A08452 | A09852 | 265 |
| A08452 | A10316 | 228 | A08452 | A10417 | 200 |
| A08452 | A10504 | 243 | A08452 | A10518 | 491 |
| A08452 | A10616 | 278 | A08452 | A10719 | 243 |
| A08452 | A11390 | 260 | A08452 | A11427 | 235 |
| A08452 | A11438 | 555 | A08452 | A11452 | 157 |
| A08452 | A11480 | 452 | A08452 | A11729 | 200 |
| A08452 | A11945 | 265 | A08452 | A12126 | 337 |
| A08452 | A12233 | 329 | A08452 | A12821 | 258 |
| A08452 | A13333 | 509 | A08452 | A13340 | 241 |
| A08452 | A13527 | 400 | A08452 | A13709 | 446 |
| A08452 | A13989 | 462 | A08452 | A13992 | 383 |
| A08452 | A14270 | 165 | A08452 | A14505 | 485 |
| A08452 | A14719 | 165 | A08452 | A15187 | 163 |
| A08452 | A15215 | 281 | A08452 | A15677 | 188 |
| A08452 | A15988 | 390 | A08452 | A16118 | 198 |
| A08454 | A08461 | 281 | A08454 | A08484 | 467 |
| A08454 | A08506 | 402 | A08454 | A08544 | 445 |
| A08454 | A09333 | 355 | A08454 | A13845 | 254 |
| A08454 | A14168 | 363 | A08454 | A14247 | 475 |
| A08454 | A14661 | 221 | A08454 | A14711 | 445 |

|        |        |     |        |        |     |
|--------|--------|-----|--------|--------|-----|
| A08454 | A14838 | 329 | A08454 | A15770 | 380 |
| A08454 | A17091 | 416 | A08455 | A08486 | 447 |
| A08455 | A14633 | 267 | A08456 | A12004 | 480 |
| A08456 | A13146 | 305 | A08456 | A14266 | 195 |
| A08457 | A08466 | 200 | A08457 | A08476 | 509 |
| A08457 | A09322 | 200 | A08457 | A11297 | 281 |
| A08457 | A11420 | 446 | A08457 | A11462 | 184 |
| A08457 | A11562 | 200 | A08457 | A11572 | 329 |
| A08457 | A11728 | 522 | A08457 | A11857 | 276 |
| A08457 | A11861 | 200 | A08457 | A12269 | 296 |
| A08457 | A12270 | 483 | A08457 | A12821 | 341 |
| A08457 | A13311 | 321 | A08457 | A13333 | 200 |
| A08457 | A13710 | 255 | A08457 | A14176 | 207 |
| A08457 | A14216 | 458 | A08457 | A14508 | 201 |
| A08457 | A14937 | 457 | A08457 | A15183 | 322 |
| A08457 | A15202 | 200 | A08457 | A15225 | 486 |
| A08457 | A15732 | 452 | A08457 | A16682 | 279 |
| A08458 | A08835 | 240 | A08458 | A12493 | 422 |
| A08458 | A13945 | 435 | A08459 | A12619 | 472 |
| A08459 | A12620 | 447 | A08459 | A15684 | 249 |
| A08461 | A08484 | 469 | A08461 | A09299 | 724 |
| A08461 | A09326 | 154 | A08461 | A09857 | 174 |
| A08461 | A09985 | 185 | A08461 | A10655 | 452 |
| A08461 | A10797 | 490 | A08461 | A10798 | 491 |
| A08461 | A10799 | 408 | A08461 | A10809 | 408 |
| A08461 | A11244 | 479 | A08461 | A11337 | 202 |
| A08461 | A11496 | 168 | A08461 | A11497 | 366 |
| A08461 | A11570 | 299 | A08461 | A12138 | 491 |
| A08461 | A12241 | 364 | A08461 | A12282 | 382 |
| A08461 | A13867 | 156 | A08461 | A13882 | 279 |
| A08461 | A14167 | 160 | A08461 | A14199 | 492 |
| A08461 | A14229 | 416 | A08461 | A14247 | 396 |
| A08461 | A14272 | 473 | A08461 | A14461 | 465 |
| A08461 | A14661 | 468 | A08461 | A14838 | 163 |
| A08461 | A15498 | 405 | A08461 | A15557 | 252 |
| A08461 | A15647 | 313 | A08461 | A15680 | 303 |
| A08461 | A16022 | 173 | A08461 | A16466 | 216 |
| A08461 | A16591 | 262 | A08461 | A16940 | 234 |
| A08461 | A17128 | 322 | A08461 | A17144 | 252 |
| A08462 | A13989 | 414 | A08462 | A16679 | 385 |
| A08463 | A08502 | 163 | A08463 | A08525 | 475 |
| A08463 | A08857 | 352 | A08463 | A08889 | 544 |
| A08463 | A10315 | 321 | A08463 | A11292 | 391 |
| A08463 | A12875 | 977 | A08463 | A14167 | 168 |
| A08463 | A14209 | 343 | A08463 | A15373 | 160 |
| A08463 | A15644 | 364 | A08463 | A16467 | 182 |

|        |        |     |        |        |     |
|--------|--------|-----|--------|--------|-----|
| A08463 | A16611 | 423 | A08463 | A17133 | 273 |
| A08464 | A09671 | 353 | A08464 | A11201 | 452 |
| A08464 | A12623 | 436 | A08464 | A13300 | 436 |
| A08465 | A14129 | 294 | A08465 | A14133 | 373 |
| A08465 | A15352 | 200 | A08465 | A15452 | 252 |
| A08465 | A15495 | 221 | A08466 | A08476 | 200 |
| A08466 | A09322 | 200 | A08466 | A11562 | 200 |
| A08466 | A11728 | 343 | A08466 | A11861 | 200 |
| A08466 | A13333 | 200 | A08466 | A15202 | 200 |
| A08467 | A09673 | 224 | A08467 | A09698 | 272 |
| A08467 | A11316 | 156 | A08467 | A12251 | 283 |
| A08467 | A12810 | 340 | A08467 | A14304 | 243 |
| A08467 | A15212 | 286 | A08467 | A15543 | 479 |
| A08467 | A16680 | 180 | A08467 | A17063 | 313 |
| A08468 | A08469 | 452 | A08470 | A08472 | 441 |
| A08473 | A09514 | 463 | A08473 | A10288 | 465 |
| A08473 | A14190 | 270 | A08476 | A09308 | 241 |
| A08476 | A09322 | 241 | A08476 | A09620 | 241 |
| A08476 | A10362 | 307 | A08476 | A10853 | 195 |
| A08476 | A11334 | 215 | A08476 | A11420 | 232 |
| A08476 | A11550 | 470 | A08476 | A11562 | 200 |
| A08476 | A11728 | 241 | A08476 | A11857 | 296 |
| A08476 | A11861 | 410 | A08476 | A12227 | 241 |
| A08476 | A13311 | 341 | A08476 | A13333 | 200 |
| A08476 | A13340 | 308 | A08476 | A14216 | 167 |
| A08476 | A14508 | 353 | A08476 | A15202 | 200 |
| A08476 | A15268 | 241 | A08476 | A15381 | 241 |
| A08477 | A08491 | 165 | A08477 | A08537 | 480 |
| A08477 | A09059 | 356 | A08477 | A09621 | 491 |
| A08477 | A09852 | 260 | A08477 | A11132 | 235 |
| A08477 | A11280 | 196 | A08477 | A13706 | 224 |
| A08477 | A14835 | 396 | A08479 | A08517 | 281 |
| A08479 | A09921 | 433 | A08479 | A10959 | 433 |
| A08479 | A11225 | 433 | A08479 | A12398 | 433 |
| A08480 | A08571 | 160 | A08480 | A14643 | 293 |
| A08481 | A08739 | 394 | A08483 | A13631 | 452 |
| A08484 | A08506 | 702 | A08484 | A08544 | 719 |
| A08484 | A08785 | 324 | A08484 | A09326 | 269 |
| A08484 | A09876 | 443 | A08484 | A10804 | 335 |
| A08484 | A11279 | 584 | A08484 | A11287 | 324 |
| A08484 | A11303 | 467 | A08484 | A13222 | 324 |
| A08484 | A13484 | 154 | A08484 | A13830 | 213 |
| A08484 | A13874 | 216 | A08484 | A13895 | 269 |
| A08484 | A14182 | 307 | A08484 | A14247 | 491 |
| A08484 | A14258 | 324 | A08484 | A14272 | 474 |
| A08484 | A14661 | 633 | A08484 | A14711 | 481 |

|        |        |     |        |        |     |
|--------|--------|-----|--------|--------|-----|
| A08484 | A14783 | 269 | A08484 | A14844 | 324 |
| A08484 | A14877 | 324 | A08484 | A15552 | 252 |
| A08484 | A17061 | 324 | A08485 | A08493 | 452 |
| A08485 | A14293 | 452 | A08486 | A14633 | 297 |
| A08488 | A08987 | 305 | A08488 | A11419 | 294 |
| A08488 | A13787 | 385 | A08489 | A08505 | 485 |
| A08489 | A10441 | 234 | A08489 | A11734 | 188 |
| A08489 | A14152 | 491 | A08489 | A14208 | 257 |
| A08489 | A14596 | 440 | A08489 | A15500 | 152 |
| A08489 | A16834 | 319 | A08489 | A17127 | 205 |
| A08490 | A08517 | 462 | A08490 | A12824 | 412 |
| A08490 | A15237 | 402 | A08490 | A15323 | 430 |
| A08490 | A15324 | 202 | A08490 | A15502 | 188 |
| A08490 | A15945 | 188 | A08491 | A08528 | 154 |
| A08491 | A08548 | 484 | A08491 | A08571 | 215 |
| A08491 | A08892 | 255 | A08491 | A08971 | 180 |
| A08491 | A09619 | 464 | A08491 | A09952 | 249 |
| A08491 | A11555 | 490 | A08491 | A13753 | 172 |
| A08491 | A13989 | 390 | A08491 | A14655 | 452 |
| A08491 | A14699 | 484 | A08491 | A17122 | 168 |
| A08492 | A10753 | 408 | A08493 | A14293 | 452 |
| A08494 | A08892 | 306 | A08494 | A09621 | 235 |
| A08496 | A16068 | 293 | A08497 | A12486 | 440 |
| A08498 | A13636 | 435 | A08498 | A15660 | 208 |
| A08501 | A08543 | 488 | A08501 | A08550 | 267 |
| A08501 | A08556 | 491 | A08501 | A08559 | 461 |
| A08501 | A08561 | 195 | A08501 | A08844 | 202 |
| A08501 | A09059 | 380 | A08501 | A09621 | 213 |
| A08501 | A09622 | 407 | A08501 | A09735 | 425 |
| A08501 | A09762 | 243 | A08501 | A09852 | 455 |
| A08501 | A11420 | 160 | A08501 | A11440 | 260 |
| A08501 | A11572 | 294 | A08501 | A11597 | 345 |
| A08501 | A11616 | 177 | A08501 | A11648 | 152 |
| A08501 | A11820 | 235 | A08501 | A11992 | 152 |
| A08501 | A12011 | 238 | A08501 | A12503 | 205 |
| A08501 | A12658 | 152 | A08501 | A12725 | 182 |
| A08501 | A13309 | 167 | A08501 | A13342 | 199 |
| A08501 | A13399 | 249 | A08501 | A14176 | 291 |
| A08501 | A14482 | 165 | A08501 | A14568 | 247 |
| A08501 | A14569 | 165 | A08501 | A14706 | 188 |
| A08501 | A15732 | 316 | A08501 | A15743 | 218 |
| A08501 | A15771 | 258 | A08501 | A15778 | 355 |
| A08501 | A16157 | 170 | A08501 | A16611 | 205 |
| A08501 | A16675 | 228 | A08501 | A16703 | 191 |
| A08501 | A16866 | 156 | A08501 | A16867 | 290 |
| A08501 | A16874 | 228 | A08501 | A17152 | 257 |

|        |        |     |        |        |     |
|--------|--------|-----|--------|--------|-----|
| A08502 | A08996 | 185 | A08502 | A09622 | 217 |
| A08502 | A10315 | 358 | A08502 | A11675 | 159 |
| A08502 | A11940 | 256 | A08502 | A12501 | 183 |
| A08502 | A13309 | 183 | A08502 | A13912 | 299 |
| A08502 | A14154 | 271 | A08502 | A14193 | 491 |
| A08502 | A14204 | 352 | A08502 | A14233 | 269 |
| A08502 | A14253 | 411 | A08502 | A14393 | 385 |
| A08502 | A15557 | 491 | A08502 | A15644 | 418 |
| A08502 | A16113 | 184 | A08502 | A16292 | 262 |
| A08502 | A16393 | 174 | A08502 | A16597 | 159 |
| A08502 | A16692 | 224 | A08502 | A16709 | 232 |
| A08502 | A16776 | 258 | A08502 | A16829 | 246 |
| A08502 | A16891 | 274 | A08502 | A16905 | 193 |
| A08502 | A16913 | 283 | A08502 | A17018 | 252 |
| A08502 | A17030 | 258 | A08502 | A17190 | 246 |
| A08503 | A08518 | 200 | A08503 | A08525 | 491 |
| A08503 | A08543 | 215 | A08503 | A08549 | 643 |
| A08503 | A08550 | 168 | A08503 | A08552 | 252 |
| A08503 | A08560 | 643 | A08503 | A08561 | 491 |
| A08503 | A08567 | 469 | A08503 | A08812 | 640 |
| A08503 | A08813 | 427 | A08503 | A08819 | 205 |
| A08503 | A08844 | 555 | A08503 | A08845 | 223 |
| A08503 | A09100 | 312 | A08503 | A09448 | 127 |
| A08503 | A09728 | 160 | A08503 | A09767 | 291 |
| A08503 | A09793 | 240 | A08503 | A09828 | 491 |
| A08503 | A09829 | 372 | A08503 | A09853 | 266 |
| A08503 | A10789 | 465 | A08503 | A11376 | 188 |
| A08503 | A11497 | 196 | A08503 | A11675 | 198 |
| A08503 | A11820 | 174 | A08503 | A11884 | 432 |
| A08503 | A11915 | 174 | A08503 | A11954 | 174 |
| A08503 | A12433 | 281 | A08503 | A12499 | 156 |
| A08503 | A12507 | 340 | A08503 | A12606 | 252 |
| A08503 | A12725 | 491 | A08503 | A12920 | 165 |
| A08503 | A13399 | 272 | A08503 | A13737 | 374 |
| A08503 | A13781 | 204 | A08503 | A13784 | 252 |
| A08503 | A13805 | 157 | A08503 | A13889 | 391 |
| A08503 | A13912 | 230 | A08503 | A13963 | 472 |
| A08503 | A14009 | 428 | A08503 | A14084 | 642 |
| A08503 | A14214 | 157 | A08503 | A14219 | 313 |
| A08503 | A14222 | 232 | A08503 | A14227 | 483 |
| A08503 | A14285 | 643 | A08503 | A14484 | 494 |
| A08503 | A14569 | 327 | A08503 | A14633 | 391 |
| A08503 | A14708 | 267 | A08503 | A14718 | 226 |
| A08503 | A15105 | 270 | A08503 | A15189 | 179 |
| A08503 | A15502 | 229 | A08503 | A15533 | 332 |
| A08503 | A15683 | 191 | A08503 | A15940 | 165 |

|        |        |     |        |        |     |
|--------|--------|-----|--------|--------|-----|
| A08503 | A15949 | 485 | A08503 | A16157 | 262 |
| A08503 | A16215 | 182 | A08503 | A16597 | 417 |
| A08503 | A16608 | 151 | A08503 | A16611 | 218 |
| A08503 | A16664 | 296 | A08503 | A16680 | 174 |
| A08503 | A16709 | 156 | A08503 | A16764 | 303 |
| A08503 | A16774 | 212 | A08503 | A16790 | 156 |
| A08503 | A16815 | 230 | A08503 | A16838 | 274 |
| A08503 | A16900 | 191 | A08503 | A16905 | 243 |
| A08503 | A16954 | 156 | A08503 | A17030 | 183 |
| A08503 | A17033 | 172 | A08503 | A17125 | 321 |
| A08505 | A08518 | 160 | A08505 | A09009 | 213 |
| A08505 | A09040 | 191 | A08505 | A09717 | 216 |
| A08505 | A11832 | 227 | A08505 | A12255 | 215 |
| A08505 | A14152 | 485 | A08505 | A14208 | 205 |
| A08505 | A14255 | 160 | A08505 | A14596 | 386 |
| A08505 | A15295 | 271 | A08505 | A15519 | 204 |
| A08505 | A15535 | 151 | A08505 | A16834 | 408 |
| A08506 | A08544 | 719 | A08506 | A08569 | 281 |
| A08506 | A09298 | 404 | A08506 | A09734 | 191 |
| A08506 | A11279 | 491 | A08506 | A13249 | 159 |
| A08506 | A14247 | 491 | A08506 | A14661 | 491 |
| A08506 | A14711 | 484 | A08506 | A14844 | 424 |
| A08506 | A14877 | 215 | A08506 | A15552 | 223 |
| A08506 | A15677 | 180 | A08506 | A15856 | 193 |
| A08507 | A09051 | 390 | A08507 | A09668 | 358 |
| A08507 | A10773 | 360 | A08507 | A14843 | 193 |
| A08508 | A08509 | 452 | A08508 | A12524 | 447 |
| A08508 | A12526 | 445 | A08509 | A12524 | 447 |
| A08509 | A12526 | 445 | A08510 | A12432 | 445 |
| A08510 | A12435 | 445 | A08512 | A12063 | 435 |
| A08512 | A12824 | 173 | A08514 | A14281 | 165 |
| A08516 | A08526 | 372 | A08516 | A08769 | 491 |
| A08516 | A08995 | 473 | A08516 | A09000 | 642 |
| A08516 | A09001 | 474 | A08516 | A09059 | 274 |
| A08516 | A09288 | 251 | A08516 | A09598 | 486 |
| A08516 | A09654 | 215 | A08516 | A09706 | 272 |
| A08516 | A09762 | 491 | A08516 | A09765 | 290 |
| A08516 | A10373 | 491 | A08516 | A11236 | 491 |
| A08516 | A11703 | 490 | A08516 | A11880 | 338 |
| A08516 | A11916 | 396 | A08516 | A12190 | 290 |
| A08516 | A12556 | 491 | A08516 | A12749 | 221 |
| A08516 | A13103 | 290 | A08516 | A13332 | 205 |
| A08516 | A13911 | 334 | A08516 | A13949 | 484 |
| A08516 | A14076 | 477 | A08516 | A14079 | 446 |
| A08516 | A14094 | 223 | A08516 | A14223 | 219 |
| A08516 | A14230 | 491 | A08516 | A14282 | 491 |



|        |        |     |        |        |     |
|--------|--------|-----|--------|--------|-----|
| A08516 | A14477 | 365 | A08516 | A14498 | 343 |
| A08516 | A14528 | 377 | A08516 | A14674 | 621 |
| A08516 | A14694 | 207 | A08516 | A14702 | 343 |
| A08516 | A14706 | 271 | A08516 | A15369 | 480 |
| A08516 | A15371 | 402 | A08516 | A15498 | 151 |
| A08516 | A15539 | 361 | A08516 | A15941 | 151 |
| A08516 | A15942 | 171 | A08516 | A16127 | 484 |
| A08516 | A16128 | 417 | A08516 | A16129 | 407 |
| A08516 | A16132 | 177 | A08516 | A16299 | 396 |
| A08516 | A16378 | 167 | A08516 | A16470 | 249 |
| A08516 | A16612 | 174 | A08516 | A16613 | 245 |
| A08516 | A16646 | 333 | A08516 | A16738 | 347 |
| A08516 | A16762 | 491 | A08517 | A08518 | 257 |
| A08517 | A08543 | 361 | A08517 | A08550 | 243 |
| A08517 | A08552 | 240 | A08517 | A08560 | 182 |
| A08517 | A08818 | 176 | A08517 | A08982 | 399 |
| A08517 | A08996 | 152 | A08517 | A09309 | 201 |
| A08517 | A09333 | 215 | A08517 | A09512 | 302 |
| A08517 | A09609 | 258 | A08517 | A09627 | 414 |
| A08517 | A09630 | 480 | A08517 | A09831 | 286 |
| A08517 | A10490 | 154 | A08517 | A11234 | 258 |
| A08517 | A11301 | 408 | A08517 | A11496 | 358 |
| A08517 | A11497 | 399 | A08517 | A11584 | 255 |
| A08517 | A11598 | 174 | A08517 | A11725 | 217 |
| A08517 | A11735 | 218 | A08517 | A11737 | 221 |
| A08517 | A11914 | 218 | A08517 | A11917 | 368 |
| A08517 | A11933 | 152 | A08517 | A11940 | 226 |
| A08517 | A11954 | 219 | A08517 | A12238 | 238 |
| A08517 | A12253 | 265 | A08517 | A12255 | 318 |
| A08517 | A12284 | 193 | A08517 | A12433 | 430 |
| A08517 | A12499 | 201 | A08517 | A12501 | 151 |
| A08517 | A12506 | 160 | A08517 | A12606 | 241 |
| A08517 | A12658 | 360 | A08517 | A12665 | 246 |
| A08517 | A12725 | 263 | A08517 | A12824 | 432 |
| A08517 | A12826 | 344 | A08517 | A12858 | 218 |
| A08517 | A12873 | 234 | A08517 | A13116 | 191 |
| A08517 | A13309 | 151 | A08517 | A13313 | 277 |
| A08517 | A13708 | 174 | A08517 | A13786 | 429 |
| A08517 | A13805 | 201 | A08517 | A14196 | 491 |
| A08517 | A14214 | 230 | A08517 | A14246 | 212 |
| A08517 | A14260 | 223 | A08517 | A14375 | 257 |
| A08517 | A14569 | 371 | A08517 | A14595 | 268 |
| A08517 | A14687 | 302 | A08517 | A14706 | 168 |
| A08517 | A14719 | 185 | A08517 | A14799 | 411 |
| A08517 | A14825 | 255 | A08517 | A14838 | 174 |
| A08517 | A14903 | 348 | A08517 | A14921 | 286 |

|        |        |     |        |        |     |
|--------|--------|-----|--------|--------|-----|
| A08517 | A15187 | 183 | A08517 | A15189 | 238 |
| A08517 | A15212 | 223 | A08517 | A15237 | 491 |
| A08517 | A15297 | 462 | A08517 | A15323 | 491 |
| A08517 | A15324 | 486 | A08517 | A15339 | 474 |
| A08517 | A15341 | 218 | A08517 | A15353 | 490 |
| A08517 | A15370 | 228 | A08517 | A15374 | 694 |
| A08517 | A15431 | 335 | A08517 | A15502 | 693 |
| A08517 | A15680 | 262 | A08517 | A15683 | 263 |
| A08517 | A15818 | 179 | A08517 | A15868 | 205 |
| A08517 | A15871 | 351 | A08517 | A15947 | 173 |
| A08517 | A16261 | 157 | A08517 | A16311 | 163 |
| A08517 | A16463 | 672 | A08517 | A16495 | 272 |
| A08517 | A16566 | 223 | A08517 | A16587 | 407 |
| A08517 | A16597 | 351 | A08517 | A16611 | 439 |
| A08517 | A16664 | 439 | A08517 | A16675 | 207 |
| A08517 | A16680 | 234 | A08517 | A16682 | 219 |
| A08517 | A16693 | 276 | A08517 | A16695 | 391 |
| A08517 | A16702 | 191 | A08517 | A16703 | 391 |
| A08517 | A16704 | 184 | A08517 | A16706 | 286 |
| A08517 | A16707 | 414 | A08517 | A16774 | 255 |
| A08517 | A16790 | 201 | A08517 | A16861 | 319 |
| A08517 | A16905 | 162 | A08517 | A16913 | 255 |
| A08517 | A16944 | 235 | A08517 | A17012 | 208 |
| A08517 | A17016 | 364 | A08517 | A17017 | 201 |
| A08517 | A17063 | 328 | A08518 | A08543 | 452 |
| A08518 | A08549 | 163 | A08518 | A08550 | 458 |
| A08518 | A08552 | 475 | A08518 | A08553 | 489 |
| A08518 | A08560 | 479 | A08518 | A08561 | 393 |
| A08518 | A08807 | 290 | A08518 | A08812 | 157 |
| A08518 | A08818 | 346 | A08518 | A08995 | 329 |
| A08518 | A08996 | 324 | A08518 | A09000 | 195 |
| A08518 | A09009 | 221 | A08518 | A09010 | 303 |
| A08518 | A09054 | 208 | A08518 | A09298 | 260 |
| A08518 | A09309 | 363 | A08518 | A09622 | 224 |
| A08518 | A09828 | 408 | A08518 | A11180 | 232 |
| A08518 | A11234 | 293 | A08518 | A11279 | 243 |
| A08518 | A11297 | 246 | A08518 | A11301 | 405 |
| A08518 | A11395 | 285 | A08518 | A11471 | 219 |
| A08518 | A11496 | 230 | A08518 | A11497 | 450 |
| A08518 | A11551 | 318 | A08518 | A11616 | 334 |
| A08518 | A11675 | 301 | A08518 | A11737 | 271 |
| A08518 | A11833 | 307 | A08518 | A11914 | 362 |
| A08518 | A11917 | 452 | A08518 | A11940 | 380 |
| A08518 | A11954 | 258 | A08518 | A11992 | 310 |
| A08518 | A12215 | 391 | A08518 | A12254 | 368 |
| A08518 | A12255 | 224 | A08518 | A12433 | 450 |

|        |        |     |        |        |     |
|--------|--------|-----|--------|--------|-----|
| A08518 | A12499 | 363 | A08518 | A12501 | 191 |
| A08518 | A12507 | 450 | A08518 | A12606 | 475 |
| A08518 | A12658 | 391 | A08518 | A12659 | 199 |
| A08518 | A12665 | 293 | A08518 | A12725 | 472 |
| A08518 | A12738 | 205 | A08518 | A12858 | 362 |
| A08518 | A12873 | 449 | A08518 | A13069 | 283 |
| A08518 | A13309 | 401 | A08518 | A13313 | 461 |
| A08518 | A13399 | 277 | A08518 | A13706 | 288 |
| A08518 | A13707 | 187 | A08518 | A13708 | 430 |
| A08518 | A13737 | 341 | A08518 | A13781 | 480 |
| A08518 | A13783 | 256 | A08518 | A13784 | 443 |
| A08518 | A13805 | 425 | A08518 | A13809 | 395 |
| A08518 | A13912 | 406 | A08518 | A13963 | 227 |
| A08518 | A14084 | 297 | A08518 | A14183 | 183 |
| A08518 | A14214 | 484 | A08518 | A14222 | 313 |
| A08518 | A14239 | 156 | A08518 | A14255 | 432 |
| A08518 | A14260 | 379 | A08518 | A14263 | 201 |
| A08518 | A14455 | 245 | A08518 | A14569 | 399 |
| A08518 | A14718 | 400 | A08518 | A14719 | 224 |
| A08518 | A14799 | 436 | A08518 | A14903 | 258 |
| A08518 | A14917 | 246 | A08518 | A14921 | 316 |
| A08518 | A15105 | 446 | A08518 | A15187 | 223 |
| A08518 | A15189 | 374 | A08518 | A15519 | 213 |
| A08518 | A15520 | 184 | A08518 | A15541 | 375 |
| A08518 | A15698 | 205 | A08518 | A15711 | 348 |
| A08518 | A15733 | 414 | A08518 | A15735 | 301 |
| A08518 | A15765 | 202 | A08518 | A15774 | 224 |
| A08518 | A15940 | 247 | A08518 | A15945 | 486 |
| A08518 | A15946 | 165 | A08518 | A16109 | 162 |
| A08518 | A16157 | 469 | A08518 | A16187 | 205 |
| A08518 | A16215 | 263 | A08518 | A16261 | 198 |
| A08518 | A16343 | 307 | A08518 | A16552 | 473 |
| A08518 | A16565 | 299 | A08518 | A16597 | 475 |
| A08518 | A16608 | 262 | A08518 | A16611 | 455 |
| A08518 | A16664 | 428 | A08518 | A16675 | 411 |
| A08518 | A16680 | 281 | A08518 | A16690 | 353 |
| A08518 | A16693 | 307 | A08518 | A16699 | 350 |
| A08518 | A16702 | 357 | A08518 | A16703 | 414 |
| A08518 | A16704 | 352 | A08518 | A16706 | 316 |
| A08518 | A16709 | 240 | A08518 | A16764 | 386 |
| A08518 | A16774 | 398 | A08518 | A16790 | 240 |
| A08518 | A16799 | 283 | A08518 | A16806 | 312 |
| A08518 | A16815 | 305 | A08518 | A16838 | 355 |
| A08518 | A16858 | 420 | A08518 | A16859 | 355 |
| A08518 | A16905 | 407 | A08518 | A16913 | 290 |
| A08518 | A16944 | 438 | A08518 | A16954 | 240 |

|        |        |     |        |        |     |
|--------|--------|-----|--------|--------|-----|
| A08518 | A17012 | 369 | A08518 | A17017 | 240 |
| A08518 | A17019 | 316 | A08518 | A17033 | 255 |
| A08518 | A17043 | 307 | A08518 | A17190 | 252 |
| A08518 | A17211 | 252 | A08519 | A08533 | 223 |
| A08519 | A09297 | 193 | A08519 | A09308 | 369 |
| A08519 | A09581 | 210 | A08519 | A09655 | 236 |
| A08519 | A11833 | 443 | A08519 | A12042 | 288 |
| A08519 | A12170 | 441 | A08519 | A12227 | 240 |
| A08519 | A12328 | 202 | A08519 | A13116 | 254 |
| A08519 | A13340 | 486 | A08519 | A13398 | 312 |
| A08519 | A13524 | 463 | A08519 | A13809 | 337 |
| A08519 | A14566 | 375 | A08519 | A14845 | 353 |
| A08519 | A15506 | 441 | A08519 | A15653 | 486 |
| A08519 | A15666 | 486 | A08519 | A15765 | 488 |
| A08519 | A15932 | 185 | A08519 | A16157 | 433 |
| A08519 | A16243 | 276 | A08519 | A16403 | 329 |
| A08519 | A16676 | 404 | A08519 | A16840 | 221 |
| A08520 | A08571 | 243 | A08520 | A10602 | 486 |
| A08520 | A11571 | 425 | A08520 | A11595 | 425 |
| A08521 | A08547 | 286 | A08521 | A08558 | 200 |
| A08521 | A08664 | 200 | A08521 | A09044 | 200 |
| A08521 | A09620 | 223 | A08521 | A09702 | 356 |
| A08521 | A10417 | 200 | A08521 | A10518 | 486 |
| A08521 | A10642 | 202 | A08521 | A11420 | 193 |
| A08521 | A11438 | 200 | A08521 | A11480 | 171 |
| A08521 | A11588 | 391 | A08521 | A11616 | 446 |
| A08521 | A11688 | 177 | A08521 | A11704 | 185 |
| A08521 | A11729 | 416 | A08521 | A12821 | 198 |
| A08521 | A13246 | 296 | A08521 | A13333 | 200 |
| A08521 | A13525 | 441 | A08521 | A13707 | 198 |
| A08521 | A14172 | 154 | A08521 | A14272 | 254 |
| A08521 | A15535 | 170 | A08521 | A16682 | 267 |
| A08522 | A11386 | 398 | A08522 | A11395 | 307 |
| A08522 | A14462 | 385 | A08522 | A15211 | 457 |
| A08522 | A15717 | 307 | A08523 | A08889 | 380 |
| A08524 | A08570 | 319 | A08524 | A08571 | 517 |
| A08524 | A08812 | 182 | A08524 | A08847 | 327 |
| A08524 | A09010 | 367 | A08524 | A10699 | 188 |
| A08524 | A10926 | 173 | A08524 | A11139 | 383 |
| A08524 | A11222 | 240 | A08524 | A11301 | 219 |
| A08524 | A11395 | 174 | A08524 | A11496 | 328 |
| A08524 | A11497 | 307 | A08524 | A11649 | 267 |
| A08524 | A11675 | 165 | A08524 | A11735 | 272 |
| A08524 | A11851 | 229 | A08524 | A11917 | 210 |
| A08524 | A12254 | 418 | A08524 | A12606 | 361 |
| A08524 | A12625 | 162 | A08524 | A12858 | 334 |

|        |        |     |        |        |     |
|--------|--------|-----|--------|--------|-----|
| A08524 | A13183 | 165 | A08524 | A13313 | 174 |
| A08524 | A13330 | 167 | A08524 | A13356 | 404 |
| A08524 | A13711 | 274 | A08524 | A13720 | 218 |
| A08524 | A13805 | 383 | A08524 | A13915 | 160 |
| A08524 | A14167 | 221 | A08524 | A14196 | 424 |
| A08524 | A14212 | 240 | A08524 | A14214 | 452 |
| A08524 | A14270 | 157 | A08524 | A14462 | 174 |
| A08524 | A14706 | 185 | A08524 | A14709 | 490 |
| A08524 | A14799 | 400 | A08524 | A15321 | 486 |
| A08524 | A15559 | 187 | A08524 | A15561 | 162 |
| A08524 | A15665 | 483 | A08524 | A15711 | 441 |
| A08524 | A16157 | 369 | A08524 | A16552 | 173 |
| A08524 | A16565 | 321 | A08524 | A16587 | 180 |
| A08524 | A16597 | 165 | A08524 | A16611 | 335 |
| A08524 | A16664 | 243 | A08524 | A16675 | 318 |
| A08524 | A16690 | 878 | A08524 | A16695 | 154 |
| A08524 | A16866 | 745 | A08524 | A17019 | 293 |
| A08524 | A17133 | 185 | A08525 | A08549 | 430 |
| A08525 | A08557 | 358 | A08525 | A08560 | 486 |
| A08525 | A08561 | 357 | A08525 | A08566 | 184 |
| A08525 | A08567 | 184 | A08525 | A08812 | 235 |
| A08525 | A08813 | 208 | A08525 | A08814 | 491 |
| A08525 | A08840 | 184 | A08525 | A08845 | 340 |
| A08525 | A08847 | 285 | A08525 | A08853 | 247 |
| A08525 | A09727 | 184 | A08525 | A09767 | 246 |
| A08525 | A09793 | 367 | A08525 | A09829 | 235 |
| A08525 | A10789 | 297 | A08525 | A11884 | 491 |
| A08525 | A12032 | 196 | A08525 | A12507 | 184 |
| A08525 | A12875 | 348 | A08525 | A13737 | 184 |
| A08525 | A13963 | 205 | A08525 | A14001 | 456 |
| A08525 | A14084 | 347 | A08525 | A14203 | 334 |
| A08525 | A14222 | 204 | A08525 | A14227 | 491 |
| A08525 | A14270 | 184 | A08525 | A14285 | 555 |
| A08525 | A14289 | 489 | A08525 | A14309 | 168 |
| A08525 | A15123 | 313 | A08525 | A15380 | 160 |
| A08525 | A15533 | 477 | A08525 | A15949 | 282 |
| A08525 | A16099 | 228 | A08525 | A16602 | 265 |
| A08526 | A08820 | 217 | A08526 | A09000 | 201 |
| A08526 | A09598 | 491 | A08526 | A09762 | 147 |
| A08526 | A11236 | 159 | A08526 | A11540 | 272 |
| A08526 | A12556 | 404 | A08526 | A15369 | 413 |
| A08526 | A16129 | 171 | A08527 | A09009 | 160 |
| A08527 | A10982 | 332 | A08527 | A11291 | 173 |
| A08527 | A11301 | 263 | A08527 | A11471 | 157 |
| A08527 | A11674 | 486 | A08527 | A11699 | 226 |
| A08527 | A13323 | 247 | A08527 | A13805 | 180 |

|        |        |     |        |        |     |
|--------|--------|-----|--------|--------|-----|
| A08527 | A14212 | 277 | A08527 | A14213 | 265 |
| A08527 | A14220 | 400 | A08527 | A14257 | 165 |
| A08527 | A14566 | 436 | A08527 | A14655 | 236 |
| A08527 | A15519 | 151 | A08527 | A15520 | 346 |
| A08527 | A15733 | 440 | A08527 | A16117 | 152 |
| A08527 | A16387 | 223 | A08527 | A16682 | 196 |
| A08527 | A16908 | 278 | A08528 | A08571 | 204 |
| A08528 | A09004 | 291 | A08528 | A09307 | 228 |
| A08528 | A09661 | 383 | A08528 | A09757 | 230 |
| A08528 | A11497 | 154 | A08528 | A12501 | 246 |
| A08528 | A12508 | 238 | A08528 | A12625 | 179 |
| A08528 | A12858 | 196 | A08528 | A13708 | 162 |
| A08528 | A14074 | 213 | A08528 | A15189 | 210 |
| A08528 | A15596 | 174 | A08528 | A15709 | 183 |
| A08528 | A15729 | 224 | A08528 | A15850 | 357 |
| A08528 | A15867 | 418 | A08528 | A16243 | 302 |
| A08528 | A16328 | 297 | A08528 | A16611 | 168 |
| A08528 | A16764 | 226 | A08528 | A16824 | 339 |
| A08530 | A09977 | 279 | A08530 | A11290 | 274 |
| A08530 | A15684 | 435 | A08530 | A15708 | 241 |
| A08530 | A15746 | 369 | A08530 | A15931 | 473 |
| A08530 | A15937 | 227 | A08530 | A16092 | 306 |
| A08530 | A16218 | 224 | A08530 | A16768 | 283 |
| A08531 | A08536 | 491 | A08531 | A08551 | 745 |
| A08531 | A08552 | 443 | A08531 | A08563 | 168 |
| A08531 | A08569 | 152 | A08531 | A08910 | 491 |
| A08531 | A08917 | 221 | A08531 | A09757 | 491 |
| A08531 | A11283 | 307 | A08531 | A11394 | 462 |
| A08531 | A11551 | 483 | A08531 | A11648 | 157 |
| A08531 | A11917 | 486 | A08531 | A12047 | 472 |
| A08531 | A12506 | 293 | A08531 | A12825 | 213 |
| A08531 | A13313 | 355 | A08531 | A13804 | 480 |
| A08531 | A13811 | 238 | A08531 | A13953 | 450 |
| A08531 | A14263 | 374 | A08531 | A14266 | 490 |
| A08531 | A14270 | 323 | A08531 | A14279 | 343 |
| A08531 | A14281 | 486 | A08531 | A14474 | 470 |
| A08531 | A14661 | 205 | A08531 | A14846 | 285 |
| A08531 | A15004 | 321 | A08531 | A15039 | 238 |
| A08531 | A15273 | 610 | A08531 | A15417 | 151 |
| A08531 | A15501 | 157 | A08531 | A15793 | 180 |
| A08531 | A15810 | 213 | A08531 | A15857 | 251 |
| A08531 | A16387 | 162 | A08531 | A16776 | 485 |
| A08531 | A16913 | 174 | A08532 | A08543 | 167 |
| A08532 | A08552 | 185 | A08532 | A08560 | 216 |
| A08532 | A08741 | 299 | A08532 | A08815 | 252 |
| A08532 | A08845 | 219 | A08532 | A09010 | 190 |

|        |        |     |        |        |     |
|--------|--------|-----|--------|--------|-----|
| A08532 | A09842 | 230 | A08532 | A10789 | 193 |
| A08532 | A11301 | 170 | A08532 | A11456 | 302 |
| A08532 | A11735 | 243 | A08532 | A11737 | 245 |
| A08532 | A11914 | 241 | A08532 | A12215 | 355 |
| A08532 | A12255 | 314 | A08532 | A12284 | 224 |
| A08532 | A12508 | 281 | A08532 | A12606 | 185 |
| A08532 | A12725 | 200 | A08532 | A12858 | 243 |
| A08532 | A13313 | 154 | A08532 | A13811 | 324 |
| A08532 | A14214 | 180 | A08532 | A14288 | 193 |
| A08532 | A14462 | 273 | A08532 | A15187 | 313 |
| A08532 | A15541 | 258 | A08532 | A15683 | 200 |
| A08532 | A15709 | 229 | A08532 | A15711 | 312 |
| A08532 | A16343 | 373 | A08532 | A16552 | 174 |
| A08532 | A16565 | 267 | A08532 | A16611 | 217 |
| A08532 | A16764 | 271 | A08532 | A16829 | 337 |
| A08532 | A16874 | 334 | A08533 | A08748 | 386 |
| A08533 | A09009 | 430 | A08533 | A09297 | 542 |
| A08533 | A09308 | 373 | A08533 | A09902 | 160 |
| A08533 | A11550 | 235 | A08533 | A12042 | 294 |
| A08533 | A12043 | 160 | A08533 | A12084 | 346 |
| A08533 | A12170 | 283 | A08533 | A12227 | 323 |
| A08533 | A13340 | 542 | A08533 | A13812 | 458 |
| A08533 | A14073 | 232 | A08533 | A14738 | 160 |
| A08533 | A15133 | 450 | A08533 | A15244 | 217 |
| A08533 | A15932 | 536 | A08533 | A15933 | 518 |
| A08533 | A16272 | 533 | A08533 | A16318 | 330 |
| A08533 | A16437 | 538 | A08533 | A16446 | 160 |
| A08533 | A16462 | 255 | A08533 | A16585 | 472 |
| A08533 | A17142 | 208 | A08534 | A08548 | 251 |
| A08534 | A16768 | 329 | A08535 | A08550 | 152 |
| A08535 | A08552 | 151 | A08535 | A09054 | 162 |
| A08535 | A09757 | 243 | A08535 | A10316 | 234 |
| A08535 | A11471 | 285 | A08535 | A11472 | 208 |
| A08535 | A11675 | 238 | A08535 | A12215 | 334 |
| A08535 | A12393 | 390 | A08535 | A12506 | 267 |
| A08535 | A12508 | 252 | A08535 | A12659 | 266 |
| A08535 | A12826 | 398 | A08535 | A12850 | 345 |
| A08535 | A12858 | 210 | A08535 | A13169 | 217 |
| A08535 | A13315 | 302 | A08535 | A13356 | 229 |
| A08535 | A13707 | 256 | A08535 | A13788 | 308 |
| A08535 | A14213 | 190 | A08535 | A14235 | 328 |
| A08535 | A14255 | 241 | A08535 | A14263 | 290 |
| A08535 | A14270 | 288 | A08535 | A14719 | 288 |
| A08535 | A14937 | 294 | A08535 | A15658 | 348 |
| A08535 | A15680 | 165 | A08535 | A16157 | 157 |
| A08535 | A16567 | 335 | A08535 | A16675 | 201 |

|        |        |     |        |        |     |
|--------|--------|-----|--------|--------|-----|
| A08535 | A17013 | 238 | A08535 | A17133 | 305 |
| A08536 | A08551 | 491 | A08536 | A08552 | 491 |
| A08536 | A08569 | 491 | A08536 | A08885 | 246 |
| A08536 | A08917 | 401 | A08536 | A09298 | 163 |
| A08536 | A09309 | 249 | A08536 | A09793 | 339 |
| A08536 | A10315 | 388 | A08536 | A11168 | 361 |
| A08536 | A11283 | 490 | A08536 | A11472 | 490 |
| A08536 | A11488 | 196 | A08536 | A11551 | 407 |
| A08536 | A11648 | 443 | A08536 | A11675 | 462 |
| A08536 | A11676 | 440 | A08536 | A11915 | 405 |
| A08536 | A11917 | 491 | A08536 | A12047 | 491 |
| A08536 | A12258 | 212 | A08536 | A12499 | 446 |
| A08536 | A12508 | 473 | A08536 | A12665 | 193 |
| A08536 | A12727 | 212 | A08536 | A12825 | 213 |
| A08536 | A12858 | 483 | A08536 | A13309 | 452 |
| A08536 | A13313 | 491 | A08536 | A13315 | 249 |
| A08536 | A13565 | 168 | A08536 | A13632 | 168 |
| A08536 | A13708 | 463 | A08536 | A13781 | 479 |
| A08536 | A13784 | 199 | A08536 | A13811 | 245 |
| A08536 | A14167 | 191 | A08536 | A14192 | 154 |
| A08536 | A14239 | 406 | A08536 | A14263 | 156 |
| A08536 | A14266 | 363 | A08536 | A14270 | 480 |
| A08536 | A14281 | 291 | A08536 | A14286 | 259 |
| A08536 | A14358 | 151 | A08536 | A14474 | 489 |
| A08536 | A14570 | 379 | A08536 | A15189 | 402 |
| A08536 | A15854 | 254 | A08536 | A15855 | 423 |
| A08536 | A16115 | 226 | A08536 | A16261 | 266 |
| A08536 | A16387 | 208 | A08536 | A16552 | 272 |
| A08536 | A16565 | 385 | A08536 | A16578 | 159 |
| A08536 | A16764 | 462 | A08536 | A16807 | 165 |
| A08537 | A08892 | 187 | A08537 | A09059 | 152 |
| A08537 | A09621 | 491 | A08537 | A11132 | 154 |
| A08537 | A11280 | 338 | A08537 | A11401 | 179 |
| A08537 | A13706 | 486 | A08537 | A14655 | 157 |
| A08537 | A14835 | 414 | A08539 | A11344 | 221 |
| A08539 | A11647 | 390 | A08539 | A12257 | 463 |
| A08539 | A12329 | 489 | A08539 | A13340 | 154 |
| A08539 | A15658 | 217 | A08539 | A15659 | 163 |
| A08539 | A15660 | 480 | A08539 | A15684 | 480 |
| A08539 | A15708 | 382 | A08539 | A15746 | 302 |
| A08539 | A15918 | 184 | A08539 | A15931 | 356 |
| A08539 | A15937 | 279 | A08539 | A16060 | 180 |
| A08539 | A16218 | 419 | A08539 | A17134 | 160 |
| A08540 | A08566 | 319 | A08540 | A08567 | 452 |
| A08540 | A15949 | 371 | A08542 | A09621 | 208 |
| A08542 | A09952 | 208 | A08542 | A11496 | 156 |



|        |        |     |        |        |     |
|--------|--------|-----|--------|--------|-----|
| A08542 | A11497 | 156 | A08542 | A12146 | 380 |
| A08542 | A12757 | 156 | A08542 | A13928 | 156 |
| A08542 | A14178 | 156 | A08542 | A14826 | 191 |
| A08542 | A16699 | 156 | A08543 | A08549 | 307 |
| A08543 | A08550 | 491 | A08543 | A08552 | 490 |
| A08543 | A08553 | 311 | A08543 | A08556 | 491 |
| A08543 | A08559 | 154 | A08543 | A08560 | 485 |
| A08543 | A08561 | 490 | A08543 | A08773 | 467 |
| A08543 | A08814 | 462 | A08543 | A08818 | 333 |
| A08543 | A08845 | 422 | A08543 | A08973 | 340 |
| A08543 | A08995 | 208 | A08543 | A08996 | 375 |
| A08543 | A09000 | 204 | A08543 | A09010 | 393 |
| A08543 | A09298 | 449 | A08543 | A09299 | 168 |
| A08543 | A09309 | 358 | A08543 | A09326 | 260 |
| A08543 | A09333 | 306 | A08543 | A09609 | 461 |
| A08543 | A09622 | 436 | A08543 | A09648 | 470 |
| A08543 | A09757 | 177 | A08543 | A09828 | 462 |
| A08543 | A10159 | 200 | A08543 | A10315 | 229 |
| A08543 | A10316 | 162 | A08543 | A10525 | 174 |
| A08543 | A10789 | 475 | A08543 | A11209 | 154 |
| A08543 | A11234 | 401 | A08543 | A11279 | 441 |
| A08543 | A11297 | 404 | A08543 | A11301 | 490 |
| A08543 | A11376 | 157 | A08543 | A11394 | 196 |
| A08543 | A11430 | 402 | A08543 | A11456 | 219 |
| A08543 | A11471 | 236 | A08543 | A11472 | 472 |
| A08543 | A11496 | 489 | A08543 | A11497 | 491 |
| A08543 | A11551 | 414 | A08543 | A11555 | 364 |
| A08543 | A11597 | 489 | A08543 | A11616 | 488 |
| A08543 | A11649 | 177 | A08543 | A11675 | 480 |
| A08543 | A11728 | 324 | A08543 | A11735 | 486 |
| A08543 | A11737 | 414 | A08543 | A11820 | 152 |
| A08543 | A11833 | 358 | A08543 | A11914 | 489 |
| A08543 | A11915 | 423 | A08543 | A11917 | 489 |
| A08543 | A11920 | 182 | A08543 | A11940 | 427 |
| A08543 | A11954 | 283 | A08543 | A11992 | 473 |
| A08543 | A12011 | 424 | A08543 | A12126 | 157 |
| A08543 | A12215 | 457 | A08543 | A12234 | 171 |
| A08543 | A12237 | 229 | A08543 | A12238 | 303 |
| A08543 | A12254 | 457 | A08543 | A12255 | 401 |
| A08543 | A12270 | 251 | A08543 | A12284 | 395 |
| A08543 | A12433 | 491 | A08543 | A12499 | 413 |
| A08543 | A12501 | 302 | A08543 | A12506 | 313 |
| A08543 | A12507 | 475 | A08543 | A12508 | 412 |
| A08543 | A12606 | 491 | A08543 | A12625 | 427 |
| A08543 | A12658 | 488 | A08543 | A12659 | 312 |
| A08543 | A12665 | 469 | A08543 | A12725 | 486 |

|        |        |     |        |        |     |
|--------|--------|-----|--------|--------|-----|
| A08543 | A12726 | 308 | A08543 | A12727 | 180 |
| A08543 | A12738 | 388 | A08543 | A12821 | 479 |
| A08543 | A12825 | 235 | A08543 | A12834 | 218 |
| A08543 | A12850 | 196 | A08543 | A12858 | 488 |
| A08543 | A12873 | 468 | A08543 | A12968 | 335 |
| A08543 | A13116 | 348 | A08543 | A13169 | 380 |
| A08543 | A13231 | 177 | A08543 | A13309 | 374 |
| A08543 | A13313 | 488 | A08543 | A13340 | 271 |
| A08543 | A13399 | 467 | A08543 | A13527 | 271 |
| A08543 | A13706 | 391 | A08543 | A13707 | 469 |
| A08543 | A13708 | 475 | A08543 | A13710 | 491 |
| A08543 | A13711 | 324 | A08543 | A13737 | 467 |
| A08543 | A13781 | 489 | A08543 | A13782 | 265 |
| A08543 | A13783 | 281 | A08543 | A13784 | 483 |
| A08543 | A13786 | 462 | A08543 | A13787 | 224 |
| A08543 | A13788 | 446 | A08543 | A13804 | 312 |
| A08543 | A13805 | 443 | A08543 | A13809 | 481 |
| A08543 | A13811 | 259 | A08543 | A13912 | 446 |
| A08543 | A14074 | 252 | A08543 | A14084 | 452 |
| A08543 | A14087 | 241 | A08543 | A14176 | 441 |
| A08543 | A14214 | 490 | A08543 | A14216 | 417 |
| A08543 | A14222 | 457 | A08543 | A14227 | 279 |
| A08543 | A14235 | 168 | A08543 | A14239 | 424 |
| A08543 | A14255 | 402 | A08543 | A14260 | 288 |
| A08543 | A14263 | 480 | A08543 | A14288 | 475 |
| A08543 | A14289 | 227 | A08543 | A14358 | 236 |
| A08543 | A14375 | 272 | A08543 | A14455 | 445 |
| A08543 | A14462 | 277 | A08543 | A14569 | 490 |
| A08543 | A14595 | 204 | A08543 | A14706 | 461 |
| A08543 | A14708 | 466 | A08543 | A14718 | 417 |
| A08543 | A14719 | 241 | A08543 | A14739 | 236 |
| A08543 | A14799 | 486 | A08543 | A14826 | 163 |
| A08543 | A14838 | 255 | A08543 | A14903 | 423 |
| A08543 | A14921 | 224 | A08543 | A14937 | 406 |
| A08543 | A15105 | 475 | A08543 | A15187 | 456 |
| A08543 | A15189 | 460 | A08543 | A15262 | 409 |
| A08543 | A15500 | 224 | A08543 | A15501 | 184 |
| A08543 | A15536 | 167 | A08543 | A15541 | 469 |
| A08543 | A15653 | 445 | A08543 | A15665 | 439 |
| A08543 | A15666 | 458 | A08543 | A15680 | 364 |
| A08543 | A15683 | 458 | A08543 | A15709 | 469 |
| A08543 | A15711 | 399 | A08543 | A15771 | 388 |
| A08543 | A15774 | 243 | A08543 | A15850 | 229 |
| A08543 | A15931 | 212 | A08543 | A15940 | 273 |
| A08543 | A16157 | 491 | A08543 | A16187 | 319 |
| A08543 | A16261 | 380 | A08543 | A16343 | 413 |

|        |        |     |        |        |     |
|--------|--------|-----|--------|--------|-----|
| A08543 | A16552 | 486 | A08543 | A16565 | 488 |
| A08543 | A16566 | 424 | A08543 | A16567 | 313 |
| A08543 | A16587 | 484 | A08543 | A16597 | 490 |
| A08543 | A16608 | 366 | A08543 | A16611 | 490 |
| A08543 | A16652 | 243 | A08543 | A16664 | 490 |
| A08543 | A16675 | 484 | A08543 | A16680 | 474 |
| A08543 | A16682 | 489 | A08543 | A16684 | 296 |
| A08543 | A16690 | 469 | A08543 | A16691 | 406 |
| A08543 | A16692 | 254 | A08543 | A16693 | 413 |
| A08543 | A16695 | 414 | A08543 | A16701 | 173 |
| A08543 | A16702 | 249 | A08543 | A16703 | 466 |
| A08543 | A16704 | 475 | A08543 | A16706 | 352 |
| A08543 | A16707 | 435 | A08543 | A16708 | 171 |
| A08543 | A16709 | 263 | A08543 | A16764 | 463 |
| A08543 | A16774 | 323 | A08543 | A16776 | 294 |
| A08543 | A16788 | 391 | A08543 | A16790 | 443 |
| A08543 | A16797 | 324 | A08543 | A16799 | 180 |
| A08543 | A16802 | 210 | A08543 | A16806 | 218 |
| A08543 | A16807 | 196 | A08543 | A16815 | 208 |
| A08543 | A16818 | 236 | A08543 | A16824 | 332 |
| A08543 | A16829 | 422 | A08543 | A16838 | 468 |
| A08543 | A16858 | 368 | A08543 | A16859 | 279 |
| A08543 | A16866 | 363 | A08543 | A16874 | 462 |
| A08543 | A16882 | 254 | A08543 | A16900 | 302 |
| A08543 | A16905 | 424 | A08543 | A16913 | 400 |
| A08543 | A16942 | 190 | A08543 | A16944 | 302 |
| A08543 | A16954 | 413 | A08543 | A17012 | 271 |
| A08543 | A17015 | 221 | A08543 | A17018 | 286 |
| A08543 | A17019 | 224 | A08543 | A17030 | 294 |
| A08543 | A17033 | 371 | A08543 | A17035 | 321 |
| A08543 | A17211 | 277 | A08544 | A09648 | 424 |
| A08544 | A10315 | 179 | A08544 | A11303 | 235 |
| A08544 | A13874 | 168 | A08544 | A14247 | 486 |
| A08544 | A14661 | 489 | A08544 | A14711 | 152 |
| A08544 | A14844 | 258 | A08544 | A15432 | 296 |
| A08544 | A15552 | 312 | A08544 | A15596 | 154 |
| A08544 | A15867 | 202 | A08544 | A16669 | 483 |
| A08546 | A08978 | 257 | A08546 | A08991 | 404 |
| A08546 | A10490 | 469 | A08546 | A10532 | 372 |
| A08546 | A11240 | 372 | A08546 | A14351 | 252 |
| A08546 | A15698 | 372 | A08546 | A16756 | 479 |
| A08547 | A09852 | 299 | A08547 | A10247 | 196 |
| A08547 | A10616 | 236 | A08547 | A10642 | 297 |
| A08547 | A11480 | 272 | A08547 | A11704 | 283 |
| A08547 | A13333 | 366 | A08547 | A14152 | 235 |
| A08548 | A08662 | 152 | A08548 | A08674 | 156 |

|        |        |     |        |        |     |
|--------|--------|-----|--------|--------|-----|
| A08548 | A08763 | 489 | A08548 | A09328 | 288 |
| A08548 | A10755 | 167 | A08548 | A11290 | 156 |
| A08548 | A11555 | 165 | A08548 | A11918 | 156 |
| A08548 | A13298 | 470 | A08548 | A14083 | 491 |
| A08548 | A14699 | 658 | A08548 | A14778 | 396 |
| A08548 | A15624 | 347 | A08548 | A15649 | 181 |
| A08548 | A15651 | 156 | A08548 | A15652 | 163 |
| A08548 | A15660 | 420 | A08548 | A15661 | 192 |
| A08548 | A15662 | 156 | A08548 | A15684 | 541 |
| A08548 | A15720 | 156 | A08548 | A15721 | 156 |
| A08548 | A15746 | 293 | A08548 | A15917 | 156 |
| A08548 | A15918 | 156 | A08548 | A15923 | 156 |
| A08548 | A15937 | 156 | A08548 | A16088 | 156 |
| A08548 | A16145 | 156 | A08548 | A16307 | 156 |
| A08549 | A08550 | 414 | A08549 | A08560 | 643 |
| A08549 | A08561 | 491 | A08549 | A08566 | 276 |
| A08549 | A08567 | 557 | A08549 | A08812 | 643 |
| A08549 | A08813 | 557 | A08549 | A08814 | 249 |
| A08549 | A08819 | 118 | A08549 | A08840 | 184 |
| A08549 | A08844 | 638 | A08549 | A08845 | 503 |
| A08549 | A09100 | 469 | A08549 | A09727 | 184 |
| A08549 | A09728 | 286 | A08549 | A09828 | 491 |
| A08549 | A09853 | 469 | A08549 | A10789 | 557 |
| A08549 | A11301 | 210 | A08549 | A11496 | 322 |
| A08549 | A11497 | 385 | A08549 | A11545 | 265 |
| A08549 | A11668 | 379 | A08549 | A11675 | 246 |
| A08549 | A11954 | 475 | A08549 | A12052 | 188 |
| A08549 | A12433 | 412 | A08549 | A12507 | 556 |
| A08549 | A12606 | 257 | A08549 | A12658 | 174 |
| A08549 | A12725 | 491 | A08549 | A12858 | 408 |
| A08549 | A12873 | 290 | A08549 | A13231 | 235 |
| A08549 | A13313 | 165 | A08549 | A13399 | 483 |
| A08549 | A13707 | 195 | A08549 | A13708 | 188 |
| A08549 | A13737 | 550 | A08549 | A13781 | 238 |
| A08549 | A13784 | 195 | A08549 | A13809 | 185 |
| A08549 | A13912 | 272 | A08549 | A13963 | 557 |
| A08549 | A14084 | 643 | A08549 | A14167 | 217 |
| A08549 | A14209 | 279 | A08549 | A14214 | 440 |
| A08549 | A14222 | 216 | A08549 | A14270 | 421 |
| A08549 | A14285 | 643 | A08549 | A14289 | 236 |
| A08549 | A14298 | 201 | A08549 | A14358 | 170 |
| A08549 | A14569 | 396 | A08549 | A14708 | 468 |
| A08549 | A14718 | 198 | A08549 | A14921 | 157 |
| A08549 | A15105 | 156 | A08549 | A15187 | 152 |
| A08549 | A15295 | 435 | A08549 | A15380 | 293 |
| A08549 | A15550 | 162 | A08549 | A15940 | 187 |

|        |        |     |        |        |     |
|--------|--------|-----|--------|--------|-----|
| A08549 | A15949 | 557 | A08549 | A16099 | 184 |
| A08549 | A16157 | 364 | A08549 | A16565 | 157 |
| A08549 | A16597 | 408 | A08549 | A16611 | 405 |
| A08549 | A16664 | 238 | A08549 | A16703 | 241 |
| A08549 | A16704 | 152 | A08549 | A16838 | 159 |
| A08549 | A16954 | 176 | A08549 | A17033 | 196 |
| A08549 | A17125 | 450 | A08550 | A08552 | 490 |
| A08550 | A08553 | 347 | A08550 | A08556 | 462 |
| A08550 | A08560 | 489 | A08550 | A08561 | 490 |
| A08550 | A08773 | 658 | A08550 | A08807 | 210 |
| A08550 | A08814 | 485 | A08550 | A08844 | 271 |
| A08550 | A08845 | 452 | A08550 | A08973 | 623 |
| A08550 | A08995 | 235 | A08550 | A08996 | 394 |
| A08550 | A09010 | 414 | A08550 | A09298 | 458 |
| A08550 | A09299 | 188 | A08550 | A09309 | 286 |
| A08550 | A09326 | 185 | A08550 | A09333 | 460 |
| A08550 | A09609 | 480 | A08550 | A09622 | 269 |
| A08550 | A09648 | 469 | A08550 | A09757 | 307 |
| A08550 | A09828 | 436 | A08550 | A10315 | 262 |
| A08550 | A10316 | 475 | A08550 | A10789 | 484 |
| A08550 | A11209 | 176 | A08550 | A11234 | 446 |
| A08550 | A11279 | 363 | A08550 | A11297 | 425 |
| A08550 | A11301 | 491 | A08550 | A11394 | 217 |
| A08550 | A11430 | 272 | A08550 | A11456 | 246 |
| A08550 | A11471 | 263 | A08550 | A11472 | 484 |
| A08550 | A11496 | 491 | A08550 | A11497 | 491 |
| A08550 | A11551 | 218 | A08550 | A11555 | 317 |
| A08550 | A11597 | 346 | A08550 | A11616 | 435 |
| A08550 | A11649 | 308 | A08550 | A11675 | 485 |
| A08550 | A11706 | 160 | A08550 | A11728 | 286 |
| A08550 | A11735 | 489 | A08550 | A11737 | 480 |
| A08550 | A11820 | 173 | A08550 | A11833 | 204 |
| A08550 | A11851 | 245 | A08550 | A11914 | 488 |
| A08550 | A11915 | 306 | A08550 | A11917 | 491 |
| A08550 | A11920 | 210 | A08550 | A11940 | 313 |
| A08550 | A11954 | 173 | A08550 | A11992 | 488 |
| A08550 | A12011 | 176 | A08550 | A12126 | 177 |
| A08550 | A12138 | 177 | A08550 | A12167 | 274 |
| A08550 | A12215 | 405 | A08550 | A12234 | 191 |
| A08550 | A12254 | 483 | A08550 | A12255 | 445 |
| A08550 | A12284 | 374 | A08550 | A12433 | 491 |
| A08550 | A12499 | 154 | A08550 | A12501 | 327 |
| A08550 | A12506 | 474 | A08550 | A12507 | 486 |
| A08550 | A12508 | 385 | A08550 | A12606 | 491 |
| A08550 | A12625 | 473 | A08550 | A12655 | 152 |
| A08550 | A12658 | 490 | A08550 | A12659 | 434 |

|        |        |     |        |        |     |
|--------|--------|-----|--------|--------|-----|
| A08550 | A12665 | 481 | A08550 | A12725 | 486 |
| A08550 | A12726 | 404 | A08550 | A12738 | 404 |
| A08550 | A12792 | 188 | A08550 | A12825 | 412 |
| A08550 | A12826 | 411 | A08550 | A12834 | 238 |
| A08550 | A12850 | 346 | A08550 | A12858 | 490 |
| A08550 | A12873 | 472 | A08550 | A12927 | 177 |
| A08550 | A13116 | 368 | A08550 | A13169 | 432 |
| A08550 | A13170 | 283 | A08550 | A13231 | 199 |
| A08550 | A13249 | 372 | A08550 | A13309 | 391 |
| A08550 | A13313 | 486 | A08550 | A13315 | 154 |
| A08550 | A13321 | 337 | A08550 | A13323 | 224 |
| A08550 | A13342 | 266 | A08550 | A13356 | 286 |
| A08550 | A13399 | 470 | A08550 | A13527 | 294 |
| A08550 | A13706 | 360 | A08550 | A13707 | 477 |
| A08550 | A13708 | 469 | A08550 | A13711 | 338 |
| A08550 | A13737 | 480 | A08550 | A13781 | 488 |
| A08550 | A13782 | 283 | A08550 | A13783 | 388 |
| A08550 | A13784 | 480 | A08550 | A13785 | 221 |
| A08550 | A13786 | 468 | A08550 | A13787 | 427 |
| A08550 | A13788 | 467 | A08550 | A13804 | 405 |
| A08550 | A13805 | 474 | A08550 | A13809 | 488 |
| A08550 | A13811 | 283 | A08550 | A13912 | 356 |
| A08550 | A13963 | 345 | A08550 | A13989 | 491 |
| A08550 | A14074 | 358 | A08550 | A14084 | 474 |
| A08550 | A14094 | 305 | A08550 | A14154 | 168 |
| A08550 | A14167 | 185 | A08550 | A14214 | 490 |
| A08550 | A14216 | 425 | A08550 | A14222 | 472 |
| A08550 | A14227 | 159 | A08550 | A14235 | 322 |
| A08550 | A14239 | 455 | A08550 | A14255 | 475 |
| A08550 | A14263 | 479 | A08550 | A14270 | 445 |
| A08550 | A14286 | 380 | A08550 | A14288 | 475 |
| A08550 | A14289 | 350 | A08550 | A14358 | 256 |
| A08550 | A14375 | 417 | A08550 | A14455 | 438 |
| A08550 | A14462 | 419 | A08550 | A14482 | 165 |
| A08550 | A14569 | 490 | A08550 | A14596 | 339 |
| A08550 | A14706 | 474 | A08550 | A14708 | 462 |
| A08550 | A14718 | 223 | A08550 | A14719 | 361 |
| A08550 | A14739 | 256 | A08550 | A14799 | 488 |
| A08550 | A14826 | 285 | A08550 | A14838 | 357 |
| A08550 | A14903 | 389 | A08550 | A14917 | 452 |
| A08550 | A14921 | 367 | A08550 | A15105 | 470 |
| A08550 | A15156 | 165 | A08550 | A15187 | 443 |
| A08550 | A15189 | 465 | A08550 | A15262 | 252 |
| A08550 | A15501 | 218 | A08550 | A15519 | 351 |
| A08550 | A15541 | 473 | A08550 | A15653 | 443 |
| A08550 | A15661 | 408 | A08550 | A15665 | 383 |

|        |        |     |        |        |     |
|--------|--------|-----|--------|--------|-----|
| A08550 | A15666 | 232 | A08550 | A15667 | 160 |
| A08550 | A15680 | 390 | A08550 | A15683 | 472 |
| A08550 | A15684 | 418 | A08550 | A15698 | 245 |
| A08550 | A15709 | 467 | A08550 | A15711 | 262 |
| A08550 | A15735 | 165 | A08550 | A15743 | 154 |
| A08550 | A15818 | 260 | A08550 | A15850 | 371 |
| A08550 | A15854 | 174 | A08550 | A15855 | 221 |
| A08550 | A15932 | 324 | A08550 | A15940 | 382 |
| A08550 | A15988 | 407 | A08550 | A16157 | 491 |
| A08550 | A16187 | 457 | A08550 | A16215 | 179 |
| A08550 | A16243 | 170 | A08550 | A16261 | 398 |
| A08550 | A16343 | 358 | A08550 | A16387 | 199 |
| A08550 | A16552 | 489 | A08550 | A16565 | 489 |
| A08550 | A16566 | 308 | A08550 | A16567 | 407 |
| A08550 | A16585 | 210 | A08550 | A16587 | 485 |
| A08550 | A16597 | 489 | A08550 | A16608 | 388 |
| A08550 | A16611 | 491 | A08550 | A16652 | 353 |
| A08550 | A16655 | 296 | A08550 | A16664 | 491 |
| A08550 | A16675 | 486 | A08550 | A16680 | 480 |
| A08550 | A16682 | 306 | A08550 | A16684 | 312 |
| A08550 | A16690 | 477 | A08550 | A16691 | 417 |
| A08550 | A16692 | 278 | A08550 | A16693 | 358 |
| A08550 | A16695 | 424 | A08550 | A16697 | 302 |
| A08550 | A16699 | 265 | A08550 | A16701 | 193 |
| A08550 | A16703 | 469 | A08550 | A16704 | 361 |
| A08550 | A16706 | 243 | A08550 | A16707 | 283 |
| A08550 | A16708 | 191 | A08550 | A16709 | 154 |
| A08550 | A16720 | 238 | A08550 | A16762 | 152 |
| A08550 | A16764 | 458 | A08550 | A16774 | 446 |
| A08550 | A16776 | 395 | A08550 | A16788 | 296 |
| A08550 | A16790 | 424 | A08550 | A16797 | 338 |
| A08550 | A16799 | 201 | A08550 | A16806 | 363 |
| A08550 | A16807 | 224 | A08550 | A16815 | 452 |
| A08550 | A16824 | 348 | A08550 | A16829 | 302 |
| A08550 | A16838 | 446 | A08550 | A16858 | 380 |
| A08550 | A16859 | 296 | A08550 | A16862 | 263 |
| A08550 | A16866 | 383 | A08550 | A16874 | 454 |
| A08550 | A16882 | 273 | A08550 | A16900 | 188 |
| A08550 | A16905 | 339 | A08550 | A16908 | 256 |
| A08550 | A16913 | 340 | A08550 | A16954 | 424 |
| A08550 | A17012 | 160 | A08550 | A17015 | 247 |
| A08550 | A17018 | 307 | A08550 | A17030 | 180 |
| A08550 | A17033 | 386 | A08550 | A17035 | 343 |
| A08550 | A17133 | 291 | A08550 | A17144 | 279 |
| A08550 | A17190 | 168 | A08550 | A17211 | 385 |
| A08551 | A08552 | 491 | A08551 | A08569 | 491 |

|        |        |     |        |        |     |
|--------|--------|-----|--------|--------|-----|
| A08551 | A08594 | 299 | A08551 | A08834 | 179 |
| A08551 | A08840 | 179 | A08551 | A08910 | 489 |
| A08551 | A08986 | 420 | A08551 | A09434 | 180 |
| A08551 | A09757 | 491 | A08551 | A09825 | 179 |
| A08551 | A11283 | 491 | A08551 | A11386 | 291 |
| A08551 | A11394 | 462 | A08551 | A11472 | 260 |
| A08551 | A11551 | 491 | A08551 | A11558 | 179 |
| A08551 | A11648 | 329 | A08551 | A11917 | 491 |
| A08551 | A12047 | 481 | A08551 | A12234 | 224 |
| A08551 | A12506 | 363 | A08551 | A12508 | 184 |
| A08551 | A12665 | 472 | A08551 | A12825 | 327 |
| A08551 | A12858 | 374 | A08551 | A13313 | 490 |
| A08551 | A13698 | 321 | A08551 | A13708 | 418 |
| A08551 | A13781 | 234 | A08551 | A13788 | 291 |
| A08551 | A13804 | 474 | A08551 | A13819 | 179 |
| A08551 | A13866 | 179 | A08551 | A13939 | 174 |
| A08551 | A13942 | 179 | A08551 | A13953 | 302 |
| A08551 | A13963 | 255 | A08551 | A14202 | 179 |
| A08551 | A14216 | 168 | A08551 | A14255 | 163 |
| A08551 | A14266 | 486 | A08551 | A14281 | 241 |
| A08551 | A14358 | 168 | A08551 | A14366 | 179 |
| A08551 | A14484 | 472 | A08551 | A15004 | 358 |
| A08551 | A15039 | 187 | A08551 | A15189 | 351 |
| A08551 | A15273 | 462 | A08551 | A15295 | 457 |
| A08551 | A15358 | 179 | A08551 | A15376 | 217 |
| A08551 | A15470 | 179 | A08551 | A15484 | 179 |
| A08551 | A15498 | 475 | A08551 | A15810 | 162 |
| A08551 | A15854 | 350 | A08551 | A15855 | 430 |
| A08551 | A15949 | 307 | A08551 | A16088 | 346 |
| A08551 | A16565 | 468 | A08551 | A16566 | 307 |
| A08551 | A16587 | 174 | A08551 | A16684 | 235 |
| A08551 | A16704 | 151 | A08551 | A16776 | 447 |
| A08551 | A16807 | 196 | A08551 | A16905 | 216 |
| A08551 | A16944 | 221 | A08552 | A08553 | 439 |
| A08552 | A08556 | 249 | A08552 | A08560 | 484 |
| A08552 | A08561 | 486 | A08552 | A08569 | 486 |
| A08552 | A08807 | 208 | A08552 | A08814 | 468 |
| A08552 | A08818 | 352 | A08552 | A08845 | 367 |
| A08552 | A08858 | 355 | A08552 | A08995 | 232 |
| A08552 | A08996 | 430 | A08552 | A09000 | 229 |
| A08552 | A09010 | 412 | A08552 | A09298 | 432 |
| A08552 | A09304 | 307 | A08552 | A09309 | 285 |
| A08552 | A09326 | 184 | A08552 | A09333 | 251 |
| A08552 | A09609 | 465 | A08552 | A09648 | 443 |
| A08552 | A09757 | 377 | A08552 | A09828 | 456 |
| A08552 | A10315 | 340 | A08552 | A10316 | 291 |



|        |        |     |        |        |     |
|--------|--------|-----|--------|--------|-----|
| A08552 | A10525 | 199 | A08552 | A10580 | 356 |
| A08552 | A10789 | 439 | A08552 | A11209 | 174 |
| A08552 | A11234 | 412 | A08552 | A11279 | 441 |
| A08552 | A11283 | 740 | A08552 | A11297 | 246 |
| A08552 | A11301 | 490 | A08552 | A11332 | 622 |
| A08552 | A11376 | 183 | A08552 | A11394 | 215 |
| A08552 | A11430 | 388 | A08552 | A11456 | 343 |
| A08552 | A11471 | 260 | A08552 | A11472 | 479 |
| A08552 | A11496 | 484 | A08552 | A11497 | 490 |
| A08552 | A11551 | 472 | A08552 | A11555 | 212 |
| A08552 | A11597 | 430 | A08552 | A11616 | 338 |
| A08552 | A11648 | 307 | A08552 | A11649 | 307 |
| A08552 | A11675 | 479 | A08552 | A11706 | 157 |
| A08552 | A11735 | 447 | A08552 | A11737 | 447 |
| A08552 | A11820 | 171 | A08552 | A11828 | 307 |
| A08552 | A11833 | 306 | A08552 | A11840 | 307 |
| A08552 | A11914 | 481 | A08552 | A11915 | 388 |
| A08552 | A11917 | 491 | A08552 | A11940 | 457 |
| A08552 | A11954 | 171 | A08552 | A11992 | 420 |
| A08552 | A12047 | 624 | A08552 | A12215 | 472 |
| A08552 | A12234 | 190 | A08552 | A12238 | 190 |
| A08552 | A12254 | 470 | A08552 | A12255 | 414 |
| A08552 | A12284 | 310 | A08552 | A12433 | 489 |
| A08552 | A12499 | 465 | A08552 | A12501 | 451 |
| A08552 | A12506 | 454 | A08552 | A12507 | 460 |
| A08552 | A12508 | 447 | A08552 | A12606 | 491 |
| A08552 | A12625 | 439 | A08552 | A12658 | 480 |
| A08552 | A12659 | 234 | A08552 | A12665 | 477 |
| A08552 | A12725 | 484 | A08552 | A12726 | 195 |
| A08552 | A12727 | 200 | A08552 | A12738 | 402 |
| A08552 | A12825 | 258 | A08552 | A12826 | 409 |
| A08552 | A12850 | 345 | A08552 | A12858 | 488 |
| A08552 | A12873 | 452 | A08552 | A12952 | 180 |
| A08552 | A13116 | 274 | A08552 | A13169 | 346 |
| A08552 | A13231 | 196 | A08552 | A13309 | 490 |
| A08552 | A13313 | 491 | A08552 | A13315 | 152 |
| A08552 | A13356 | 180 | A08552 | A13399 | 430 |
| A08552 | A13527 | 293 | A08552 | A13706 | 407 |
| A08552 | A13707 | 450 | A08552 | A13708 | 480 |
| A08552 | A13711 | 337 | A08552 | A13737 | 436 |
| A08552 | A13781 | 490 | A08552 | A13782 | 281 |
| A08552 | A13783 | 302 | A08552 | A13784 | 483 |
| A08552 | A13785 | 218 | A08552 | A13786 | 401 |
| A08552 | A13787 | 366 | A08552 | A13788 | 428 |
| A08552 | A13804 | 329 | A08552 | A13805 | 424 |
| A08552 | A13809 | 477 | A08552 | A13811 | 281 |

|        |        |     |        |        |     |
|--------|--------|-----|--------|--------|-----|
| A08552 | A13912 | 467 | A08552 | A14074 | 357 |
| A08552 | A14084 | 372 | A08552 | A14087 | 266 |
| A08552 | A14154 | 167 | A08552 | A14156 | 460 |
| A08552 | A14214 | 490 | A08552 | A14222 | 475 |
| A08552 | A14227 | 156 | A08552 | A14235 | 321 |
| A08552 | A14239 | 436 | A08552 | A14255 | 458 |
| A08552 | A14260 | 307 | A08552 | A14263 | 480 |
| A08552 | A14270 | 414 | A08552 | A14286 | 157 |
| A08552 | A14288 | 479 | A08552 | A14375 | 193 |
| A08552 | A14455 | 454 | A08552 | A14569 | 489 |
| A08552 | A14706 | 425 | A08552 | A14708 | 449 |
| A08552 | A14718 | 390 | A08552 | A14719 | 414 |
| A08552 | A14799 | 479 | A08552 | A14838 | 288 |
| A08552 | A14903 | 475 | A08552 | A14917 | 293 |
| A08552 | A14921 | 425 | A08552 | A15105 | 484 |
| A08552 | A15187 | 477 | A08552 | A15189 | 490 |
| A08552 | A15217 | 168 | A08552 | A15262 | 389 |
| A08552 | A15501 | 302 | A08552 | A15536 | 185 |
| A08552 | A15541 | 435 | A08552 | A15653 | 218 |
| A08552 | A15661 | 156 | A08552 | A15665 | 422 |
| A08552 | A15680 | 340 | A08552 | A15683 | 420 |
| A08552 | A15709 | 417 | A08552 | A15711 | 356 |
| A08552 | A15735 | 162 | A08552 | A15774 | 267 |
| A08552 | A15850 | 247 | A08552 | A15854 | 355 |
| A08552 | A15855 | 353 | A08552 | A15932 | 182 |
| A08552 | A15940 | 160 | A08552 | A16157 | 491 |
| A08552 | A16187 | 401 | A08552 | A16243 | 168 |
| A08552 | A16261 | 396 | A08552 | A16343 | 422 |
| A08552 | A16552 | 490 | A08552 | A16565 | 489 |
| A08552 | A16566 | 307 | A08552 | A16567 | 406 |
| A08552 | A16585 | 208 | A08552 | A16587 | 474 |
| A08552 | A16597 | 490 | A08552 | A16608 | 385 |
| A08552 | A16611 | 490 | A08552 | A16652 | 168 |
| A08552 | A16664 | 489 | A08552 | A16675 | 488 |
| A08552 | A16680 | 402 | A08552 | A16684 | 311 |
| A08552 | A16690 | 474 | A08552 | A16691 | 347 |
| A08552 | A16692 | 368 | A08552 | A16693 | 358 |
| A08552 | A16695 | 424 | A08552 | A16701 | 191 |
| A08552 | A16703 | 469 | A08552 | A16704 | 443 |
| A08552 | A16706 | 241 | A08552 | A16707 | 391 |
| A08552 | A16708 | 190 | A08552 | A16709 | 374 |
| A08552 | A16764 | 479 | A08552 | A16774 | 208 |
| A08552 | A16776 | 394 | A08552 | A16790 | 465 |
| A08552 | A16797 | 337 | A08552 | A16799 | 200 |
| A08552 | A16806 | 362 | A08552 | A16824 | 347 |
| A08552 | A16829 | 430 | A08552 | A16838 | 472 |

|        |        |     |        |        |     |
|--------|--------|-----|--------|--------|-----|
| A08552 | A16858 | 380 | A08552 | A16859 | 294 |
| A08552 | A16866 | 446 | A08552 | A16874 | 429 |
| A08552 | A16882 | 271 | A08552 | A16900 | 399 |
| A08552 | A16905 | 474 | A08552 | A16913 | 411 |
| A08552 | A16942 | 208 | A08552 | A16944 | 321 |
| A08552 | A16954 | 423 | A08552 | A17018 | 389 |
| A08552 | A17019 | 241 | A08552 | A17030 | 435 |
| A08552 | A17033 | 301 | A08552 | A17043 | 232 |
| A08552 | A17133 | 157 | A08552 | A17190 | 299 |
| A08552 | A17211 | 384 | A08553 | A08560 | 386 |
| A08553 | A08561 | 170 | A08553 | A08564 | 658 |
| A08553 | A08565 | 626 | A08553 | A08807 | 190 |
| A08553 | A08812 | 154 | A08553 | A08996 | 201 |
| A08553 | A09010 | 688 | A08553 | A09609 | 193 |
| A08553 | A09619 | 278 | A08553 | A09828 | 319 |
| A08553 | A10159 | 416 | A08553 | A10420 | 452 |
| A08553 | A10497 | 324 | A08553 | A11234 | 326 |
| A08553 | A11301 | 443 | A08553 | A11395 | 472 |
| A08553 | A11496 | 383 | A08553 | A11497 | 408 |
| A08553 | A11616 | 213 | A08553 | A11675 | 168 |
| A08553 | A11833 | 177 | A08553 | A11917 | 346 |
| A08553 | A11940 | 160 | A08553 | A12138 | 226 |
| A08553 | A12215 | 312 | A08553 | A12254 | 236 |
| A08553 | A12365 | 473 | A08553 | A12433 | 314 |
| A08553 | A12501 | 199 | A08553 | A12507 | 297 |
| A08553 | A12606 | 439 | A08553 | A12658 | 358 |
| A08553 | A12665 | 159 | A08553 | A12725 | 430 |
| A08553 | A12858 | 227 | A08553 | A12873 | 246 |
| A08553 | A13069 | 180 | A08553 | A13309 | 199 |
| A08553 | A13313 | 412 | A08553 | A13706 | 154 |
| A08553 | A13708 | 256 | A08553 | A13781 | 451 |
| A08553 | A13783 | 151 | A08553 | A13784 | 346 |
| A08553 | A13805 | 265 | A08553 | A13809 | 291 |
| A08553 | A13912 | 340 | A08553 | A14084 | 285 |
| A08553 | A14167 | 165 | A08553 | A14212 | 481 |
| A08553 | A14214 | 481 | A08553 | A14255 | 274 |
| A08553 | A14260 | 156 | A08553 | A14454 | 297 |
| A08553 | A14455 | 193 | A08553 | A14462 | 277 |
| A08553 | A14569 | 299 | A08553 | A14718 | 301 |
| A08553 | A14799 | 187 | A08553 | A14843 | 215 |
| A08553 | A14903 | 152 | A08553 | A14921 | 224 |
| A08553 | A15105 | 360 | A08553 | A15189 | 249 |
| A08553 | A15373 | 676 | A08553 | A15520 | 294 |
| A08553 | A15541 | 252 | A08553 | A15711 | 236 |
| A08553 | A15733 | 224 | A08553 | A15749 | 491 |
| A08553 | A15774 | 243 | A08553 | A15943 | 196 |

|        |        |     |        |        |     |
|--------|--------|-----|--------|--------|-----|
| A08553 | A15945 | 491 | A08553 | A15946 | 491 |
| A08553 | A16144 | 430 | A08553 | A16157 | 424 |
| A08553 | A16212 | 491 | A08553 | A16343 | 213 |
| A08553 | A16552 | 430 | A08553 | A16565 | 165 |
| A08553 | A16597 | 432 | A08553 | A16611 | 388 |
| A08553 | A16664 | 162 | A08553 | A16675 | 299 |
| A08553 | A16690 | 297 | A08553 | A16695 | 218 |
| A08553 | A16701 | 174 | A08553 | A16704 | 340 |
| A08553 | A16707 | 266 | A08553 | A16764 | 274 |
| A08553 | A16799 | 180 | A08553 | A16806 | 218 |
| A08553 | A16838 | 247 | A08553 | A16858 | 368 |
| A08553 | A16859 | 279 | A08553 | A16905 | 213 |
| A08553 | A16913 | 190 | A08553 | A16944 | 302 |
| A08553 | A17019 | 224 | A08553 | A17043 | 213 |
| A08553 | A17125 | 165 | A08553 | A17133 | 269 |
| A08554 | A08571 | 491 | A08554 | A08885 | 489 |
| A08554 | A08976 | 182 | A08554 | A09256 | 424 |
| A08554 | A13311 | 238 | A08555 | A08821 | 160 |
| A08555 | A09141 | 330 | A08555 | A09298 | 611 |
| A08555 | A09592 | 171 | A08555 | A12200 | 427 |
| A08555 | A12430 | 355 | A08555 | A12459 | 286 |
| A08555 | A12738 | 419 | A08555 | A13322 | 193 |
| A08555 | A13786 | 274 | A08555 | A13983 | 486 |
| A08555 | A14182 | 380 | A08555 | A14199 | 303 |
| A08555 | A14247 | 299 | A08555 | A14569 | 257 |
| A08555 | A14661 | 283 | A08555 | A14711 | 283 |
| A08555 | A14917 | 188 | A08555 | A15102 | 193 |
| A08555 | A15315 | 290 | A08555 | A15347 | 607 |
| A08555 | A15617 | 283 | A08555 | A15667 | 187 |
| A08555 | A16364 | 283 | A08555 | A16581 | 191 |
| A08556 | A08559 | 467 | A08556 | A08560 | 302 |
| A08556 | A08561 | 358 | A08556 | A08762 | 195 |
| A08556 | A08773 | 394 | A08556 | A08845 | 221 |
| A08556 | A08973 | 307 | A08556 | A08996 | 229 |
| A08556 | A09059 | 350 | A08556 | A09309 | 154 |
| A08556 | A09609 | 344 | A08556 | A09622 | 490 |
| A08556 | A09828 | 343 | A08556 | A09852 | 432 |
| A08556 | A10789 | 179 | A08556 | A11209 | 177 |
| A08556 | A11234 | 344 | A08556 | A11279 | 174 |
| A08556 | A11301 | 296 | A08556 | A11471 | 263 |
| A08556 | A11472 | 258 | A08556 | A11496 | 362 |
| A08556 | A11497 | 395 | A08556 | A11572 | 238 |
| A08556 | A11597 | 489 | A08556 | A11616 | 480 |
| A08556 | A11675 | 373 | A08556 | A11735 | 260 |
| A08556 | A11914 | 340 | A08556 | A11915 | 174 |
| A08556 | A11940 | 180 | A08556 | A11992 | 208 |

|        |        |     |        |        |     |
|--------|--------|-----|--------|--------|-----|
| A08556 | A12011 | 311 | A08556 | A12254 | 269 |
| A08556 | A12433 | 457 | A08556 | A12501 | 329 |
| A08556 | A12506 | 238 | A08556 | A12507 | 338 |
| A08556 | A12606 | 412 | A08556 | A12658 | 207 |
| A08556 | A12665 | 291 | A08556 | A12725 | 188 |
| A08556 | A12821 | 481 | A08556 | A12834 | 238 |
| A08556 | A12858 | 428 | A08556 | A12968 | 260 |
| A08556 | A13069 | 202 | A08556 | A13116 | 277 |
| A08556 | A13169 | 167 | A08556 | A13309 | 329 |
| A08556 | A13313 | 265 | A08556 | A13399 | 168 |
| A08556 | A13527 | 294 | A08556 | A13706 | 285 |
| A08556 | A13707 | 324 | A08556 | A13708 | 291 |
| A08556 | A13710 | 490 | A08556 | A13781 | 278 |
| A08556 | A13783 | 306 | A08556 | A13784 | 251 |
| A08556 | A13787 | 245 | A08556 | A13788 | 165 |
| A08556 | A13804 | 200 | A08556 | A13809 | 215 |
| A08556 | A13912 | 229 | A08556 | A13930 | 168 |
| A08556 | A14084 | 165 | A08556 | A14176 | 319 |
| A08556 | A14214 | 368 | A08556 | A14263 | 174 |
| A08556 | A14288 | 265 | A08556 | A14479 | 167 |
| A08556 | A14482 | 168 | A08556 | A14505 | 262 |
| A08556 | A14568 | 269 | A08556 | A14569 | 391 |
| A08556 | A14706 | 198 | A08556 | A14819 | 156 |
| A08556 | A14917 | 382 | A08556 | A14921 | 245 |
| A08556 | A14937 | 276 | A08556 | A15105 | 180 |
| A08556 | A15499 | 171 | A08556 | A15500 | 418 |
| A08556 | A15501 | 219 | A08556 | A15519 | 255 |
| A08556 | A15541 | 179 | A08556 | A15653 | 224 |
| A08556 | A15666 | 301 | A08556 | A15711 | 263 |
| A08556 | A15732 | 246 | A08556 | A15771 | 454 |
| A08556 | A15776 | 177 | A08556 | A15850 | 372 |
| A08556 | A16157 | 463 | A08556 | A16552 | 303 |
| A08556 | A16565 | 441 | A08556 | A16566 | 177 |
| A08556 | A16567 | 202 | A08556 | A16583 | 196 |
| A08556 | A16587 | 288 | A08556 | A16611 | 302 |
| A08556 | A16664 | 294 | A08556 | A16675 | 246 |
| A08556 | A16680 | 174 | A08556 | A16682 | 484 |
| A08556 | A16701 | 195 | A08556 | A16702 | 276 |
| A08556 | A16703 | 258 | A08556 | A16709 | 288 |
| A08556 | A16750 | 283 | A08556 | A16776 | 182 |
| A08556 | A16790 | 154 | A08556 | A16806 | 238 |
| A08556 | A16829 | 303 | A08556 | A16874 | 299 |
| A08556 | A16905 | 340 | A08556 | A16913 | 210 |
| A08556 | A16944 | 190 | A08556 | A17012 | 162 |
| A08556 | A17018 | 174 | A08556 | A17030 | 182 |
| A08556 | A17035 | 246 | A08556 | A17133 | 160 |

|        |        |     |        |        |     |
|--------|--------|-----|--------|--------|-----|
| A08556 | A17190 | 168 | A08557 | A08560 | 252 |
| A08557 | A08561 | 243 | A08557 | A08567 | 324 |
| A08557 | A08812 | 157 | A08557 | A08813 | 184 |
| A08557 | A08814 | 358 | A08557 | A08844 | 163 |
| A08557 | A08845 | 156 | A08557 | A08847 | 491 |
| A08557 | A11954 | 196 | A08557 | A12208 | 296 |
| A08557 | A13963 | 201 | A08557 | A14084 | 202 |
| A08557 | A14260 | 200 | A08557 | A14289 | 281 |
| A08557 | A14963 | 228 | A08557 | A16099 | 172 |
| A08557 | A16827 | 187 | A08557 | A17133 | 183 |
| A08558 | A08664 | 200 | A08558 | A08972 | 224 |
| A08558 | A08974 | 223 | A08558 | A08984 | 174 |
| A08558 | A09044 | 323 | A08558 | A09702 | 200 |
| A08558 | A09766 | 152 | A08558 | A10417 | 200 |
| A08558 | A11390 | 427 | A08558 | A11438 | 200 |
| A08558 | A11728 | 183 | A08558 | A11729 | 200 |
| A08558 | A11851 | 174 | A08558 | A11914 | 229 |
| A08558 | A11945 | 296 | A08558 | A12233 | 451 |
| A08558 | A12243 | 379 | A08558 | A12824 | 207 |
| A08558 | A13333 | 200 | A08558 | A13457 | 396 |
| A08558 | A14167 | 240 | A08558 | A14270 | 193 |
| A08558 | A14566 | 412 | A08558 | A14595 | 389 |
| A08558 | A15221 | 469 | A08558 | A15666 | 338 |
| A08558 | A15711 | 188 | A08558 | A15727 | 441 |
| A08558 | A15937 | 154 | A08558 | A16157 | 160 |
| A08558 | A16611 | 195 | A08558 | A16675 | 218 |
| A08558 | A16697 | 224 | A08558 | A17133 | 215 |
| A08559 | A09322 | 441 | A08559 | A09622 | 215 |
| A08559 | A09674 | 373 | A08559 | A09852 | 486 |
| A08559 | A10417 | 174 | A08559 | A11390 | 469 |
| A08559 | A11420 | 307 | A08559 | A11438 | 451 |
| A08559 | A11572 | 303 | A08559 | A11704 | 165 |
| A08559 | A11924 | 313 | A08559 | A11945 | 183 |
| A08559 | A12503 | 218 | A08559 | A12661 | 246 |
| A08559 | A13340 | 480 | A08559 | A13527 | 469 |
| A08559 | A13989 | 221 | A08559 | A14176 | 306 |
| A08559 | A14198 | 188 | A08559 | A14216 | 221 |
| A08559 | A14569 | 177 | A08559 | A15221 | 401 |
| A08559 | A15235 | 491 | A08559 | A15732 | 402 |
| A08559 | A15743 | 230 | A08559 | A15776 | 372 |
| A08559 | A15778 | 241 | A08559 | A16437 | 195 |
| A08559 | A16631 | 188 | A08559 | A17193 | 276 |
| A08560 | A08561 | 491 | A08560 | A08567 | 416 |
| A08560 | A08812 | 643 | A08560 | A08813 | 473 |
| A08560 | A08814 | 467 | A08560 | A08818 | 291 |
| A08560 | A08844 | 626 | A08560 | A08845 | 430 |

|        |        |     |        |        |     |
|--------|--------|-----|--------|--------|-----|
| A08560 | A08847 | 187 | A08560 | A08995 | 271 |
| A08560 | A09000 | 267 | A08560 | A09009 | 163 |
| A08560 | A09010 | 303 | A08560 | A09298 | 435 |
| A08560 | A09309 | 183 | A08560 | A09333 | 191 |
| A08560 | A09609 | 469 | A08560 | A09622 | 301 |
| A08560 | A09648 | 356 | A08560 | A09767 | 185 |
| A08560 | A09828 | 490 | A08560 | A09829 | 177 |
| A08560 | A10315 | 302 | A08560 | A10789 | 480 |
| A08560 | A11180 | 176 | A08560 | A11209 | 205 |
| A08560 | A11279 | 361 | A08560 | A11301 | 488 |
| A08560 | A11430 | 232 | A08560 | A11456 | 281 |
| A08560 | A11471 | 162 | A08560 | A11472 | 441 |
| A08560 | A11496 | 479 | A08560 | A11497 | 485 |
| A08560 | A11551 | 408 | A08560 | A11555 | 251 |
| A08560 | A11616 | 367 | A08560 | A11675 | 454 |
| A08560 | A11735 | 480 | A08560 | A11737 | 475 |
| A08560 | A11833 | 340 | A08560 | A11851 | 369 |
| A08560 | A11884 | 329 | A08560 | A11914 | 479 |
| A08560 | A11915 | 407 | A08560 | A11917 | 484 |
| A08560 | A11940 | 409 | A08560 | A11954 | 333 |
| A08560 | A12011 | 205 | A08560 | A12167 | 173 |
| A08560 | A12215 | 419 | A08560 | A12234 | 219 |
| A08560 | A12254 | 469 | A08560 | A12255 | 299 |
| A08560 | A12284 | 351 | A08560 | A12433 | 483 |
| A08560 | A12499 | 396 | A08560 | A12501 | 262 |
| A08560 | A12506 | 364 | A08560 | A12507 | 485 |
| A08560 | A12508 | 252 | A08560 | A12606 | 490 |
| A08560 | A12625 | 404 | A08560 | A12655 | 180 |
| A08560 | A12658 | 480 | A08560 | A12659 | 271 |
| A08560 | A12665 | 451 | A08560 | A12725 | 491 |
| A08560 | A12726 | 224 | A08560 | A12738 | 279 |
| A08560 | A12825 | 293 | A08560 | A12834 | 265 |
| A08560 | A12858 | 488 | A08560 | A12873 | 480 |
| A08560 | A12927 | 226 | A08560 | A13069 | 229 |
| A08560 | A13116 | 174 | A08560 | A13170 | 313 |
| A08560 | A13231 | 227 | A08560 | A13309 | 262 |
| A08560 | A13313 | 480 | A08560 | A13323 | 252 |
| A08560 | A13342 | 165 | A08560 | A13356 | 221 |
| A08560 | A13388 | 179 | A08560 | A13399 | 379 |
| A08560 | A13527 | 190 | A08560 | A13706 | 218 |
| A08560 | A13707 | 409 | A08560 | A13708 | 389 |
| A08560 | A13737 | 400 | A08560 | A13781 | 483 |
| A08560 | A13782 | 306 | A08560 | A13783 | 443 |
| A08560 | A13784 | 469 | A08560 | A13786 | 277 |
| A08560 | A13788 | 401 | A08560 | A13804 | 227 |
| A08560 | A13805 | 458 | A08560 | A13806 | 152 |

|        |        |     |        |        |     |
|--------|--------|-----|--------|--------|-----|
| A08560 | A13809 | 469 | A08560 | A13811 | 394 |
| A08560 | A13812 | 173 | A08560 | A13912 | 432 |
| A08560 | A13963 | 469 | A08560 | A14084 | 643 |
| A08560 | A14214 | 486 | A08560 | A14222 | 419 |
| A08560 | A14235 | 218 | A08560 | A14239 | 427 |
| A08560 | A14255 | 467 | A08560 | A14260 | 335 |
| A08560 | A14263 | 369 | A08560 | A14270 | 165 |
| A08560 | A14285 | 643 | A08560 | A14286 | 188 |
| A08560 | A14288 | 412 | A08560 | A14289 | 286 |
| A08560 | A14375 | 235 | A08560 | A14455 | 401 |
| A08560 | A14462 | 338 | A08560 | A14569 | 477 |
| A08560 | A14706 | 243 | A08560 | A14708 | 303 |
| A08560 | A14718 | 412 | A08560 | A14719 | 167 |
| A08560 | A14799 | 477 | A08560 | A14903 | 443 |
| A08560 | A14917 | 440 | A08560 | A14921 | 270 |
| A08560 | A15105 | 439 | A08560 | A15187 | 429 |
| A08560 | A15189 | 449 | A08560 | A15262 | 294 |
| A08560 | A15502 | 168 | A08560 | A15519 | 375 |
| A08560 | A15532 | 160 | A08560 | A15541 | 480 |
| A08560 | A15653 | 344 | A08560 | A15680 | 234 |
| A08560 | A15683 | 319 | A08560 | A15709 | 477 |
| A08560 | A15711 | 428 | A08560 | A15735 | 213 |
| A08560 | A15765 | 276 | A08560 | A15850 | 276 |
| A08560 | A15854 | 213 | A08560 | A15940 | 191 |
| A08560 | A15947 | 154 | A08560 | A15949 | 477 |
| A08560 | A16099 | 177 | A08560 | A16157 | 489 |
| A08560 | A16187 | 369 | A08560 | A16215 | 208 |
| A08560 | A16261 | 417 | A08560 | A16343 | 434 |
| A08560 | A16387 | 227 | A08560 | A16552 | 486 |
| A08560 | A16565 | 484 | A08560 | A16566 | 205 |
| A08560 | A16567 | 229 | A08560 | A16585 | 238 |
| A08560 | A16587 | 470 | A08560 | A16597 | 466 |
| A08560 | A16608 | 187 | A08560 | A16611 | 489 |
| A08560 | A16664 | 484 | A08560 | A16675 | 456 |
| A08560 | A16680 | 447 | A08560 | A16682 | 201 |
| A08560 | A16684 | 333 | A08560 | A16690 | 438 |
| A08560 | A16691 | 369 | A08560 | A16692 | 308 |
| A08560 | A16693 | 379 | A08560 | A16695 | 382 |
| A08560 | A16697 | 330 | A08560 | A16699 | 383 |
| A08560 | A16702 | 306 | A08560 | A16703 | 378 |
| A08560 | A16704 | 299 | A08560 | A16706 | 385 |
| A08560 | A16708 | 219 | A08560 | A16709 | 183 |
| A08560 | A16764 | 454 | A08560 | A16774 | 424 |
| A08560 | A16776 | 210 | A08560 | A16788 | 318 |
| A08560 | A16790 | 316 | A08560 | A16797 | 356 |
| A08560 | A16815 | 375 | A08560 | A16829 | 330 |



|        |        |     |        |        |     |
|--------|--------|-----|--------|--------|-----|
| A08560 | A16838 | 302 | A08560 | A16874 | 441 |
| A08560 | A16882 | 296 | A08560 | A16900 | 218 |
| A08560 | A16905 | 419 | A08560 | A16908 | 281 |
| A08560 | A16944 | 414 | A08560 | A16954 | 316 |
| A08560 | A17012 | 323 | A08560 | A17015 | 151 |
| A08560 | A17017 | 183 | A08560 | A17019 | 270 |
| A08560 | A17030 | 210 | A08560 | A17033 | 330 |
| A08560 | A17125 | 213 | A08560 | A17133 | 188 |
| A08560 | A17211 | 196 | A08561 | A08567 | 490 |
| A08561 | A08807 | 232 | A08561 | A08812 | 491 |
| A08561 | A08813 | 490 | A08561 | A08814 | 480 |
| A08561 | A08818 | 152 | A08561 | A08840 | 162 |
| A08561 | A08844 | 483 | A08561 | A08845 | 475 |
| A08561 | A08847 | 176 | A08561 | A08995 | 263 |
| A08561 | A09010 | 360 | A08561 | A09298 | 313 |
| A08561 | A09299 | 212 | A08561 | A09309 | 177 |
| A08561 | A09326 | 319 | A08561 | A09333 | 183 |
| A08561 | A09609 | 454 | A08561 | A09622 | 160 |
| A08561 | A09648 | 472 | A08561 | A09828 | 491 |
| A08561 | A09829 | 170 | A08561 | A09853 | 394 |
| A08561 | A10159 | 305 | A08561 | A10315 | 294 |
| A08561 | A10316 | 219 | A08561 | A10789 | 491 |
| A08561 | A11209 | 199 | A08561 | A11234 | 361 |
| A08561 | A11279 | 423 | A08561 | A11301 | 485 |
| A08561 | A11376 | 216 | A08561 | A11471 | 288 |
| A08561 | A11472 | 457 | A08561 | A11496 | 484 |
| A08561 | A11497 | 489 | A08561 | A11551 | 346 |
| A08561 | A11555 | 341 | A08561 | A11597 | 193 |
| A08561 | A11616 | 414 | A08561 | A11649 | 235 |
| A08561 | A11675 | 473 | A08561 | A11706 | 183 |
| A08561 | A11735 | 484 | A08561 | A11737 | 475 |
| A08561 | A11820 | 196 | A08561 | A11833 | 234 |
| A08561 | A11851 | 364 | A08561 | A11914 | 486 |
| A08561 | A11915 | 402 | A08561 | A11917 | 486 |
| A08561 | A11940 | 334 | A08561 | A11954 | 489 |
| A08561 | A11992 | 335 | A08561 | A12011 | 199 |
| A08561 | A12167 | 299 | A08561 | A12215 | 350 |
| A08561 | A12234 | 213 | A08561 | A12238 | 213 |
| A08561 | A12254 | 458 | A08561 | A12284 | 263 |
| A08561 | A12433 | 489 | A08561 | A12499 | 177 |
| A08561 | A12501 | 351 | A08561 | A12506 | 360 |
| A08561 | A12507 | 491 | A08561 | A12606 | 490 |
| A08561 | A12625 | 430 | A08561 | A12655 | 174 |
| A08561 | A12658 | 486 | A08561 | A12659 | 414 |
| A08561 | A12665 | 472 | A08561 | A12725 | 491 |
| A08561 | A12726 | 218 | A08561 | A12727 | 224 |

|        |        |     |        |        |     |
|--------|--------|-----|--------|--------|-----|
| A08561 | A12738 | 273 | A08561 | A12825 | 286 |
| A08561 | A12834 | 260 | A08561 | A12850 | 238 |
| A08561 | A12858 | 488 | A08561 | A12873 | 419 |
| A08561 | A13116 | 385 | A08561 | A13169 | 373 |
| A08561 | A13170 | 174 | A08561 | A13231 | 221 |
| A08561 | A13309 | 255 | A08561 | A13313 | 484 |
| A08561 | A13342 | 159 | A08561 | A13399 | 490 |
| A08561 | A13706 | 313 | A08561 | A13707 | 439 |
| A08561 | A13708 | 443 | A08561 | A13711 | 352 |
| A08561 | A13737 | 491 | A08561 | A13781 | 486 |
| A08561 | A13783 | 402 | A08561 | A13784 | 485 |
| A08561 | A13785 | 243 | A08561 | A13786 | 462 |
| A08561 | A13787 | 265 | A08561 | A13788 | 187 |
| A08561 | A13805 | 393 | A08561 | A13809 | 475 |
| A08561 | A13912 | 430 | A08561 | A13963 | 491 |
| A08561 | A14074 | 312 | A08561 | A14084 | 491 |
| A08561 | A14087 | 160 | A08561 | A14154 | 200 |
| A08561 | A14198 | 363 | A08561 | A14214 | 490 |
| A08561 | A14222 | 468 | A08561 | A14227 | 351 |
| A08561 | A14239 | 447 | A08561 | A14255 | 430 |
| A08561 | A14263 | 479 | A08561 | A14270 | 160 |
| A08561 | A14285 | 491 | A08561 | A14286 | 396 |
| A08561 | A14288 | 469 | A08561 | A14289 | 420 |
| A08561 | A14455 | 396 | A08561 | A14569 | 488 |
| A08561 | A14706 | 466 | A08561 | A14708 | 486 |
| A08561 | A14718 | 408 | A08561 | A14739 | 277 |
| A08561 | A14799 | 475 | A08561 | A14838 | 324 |
| A08561 | A14903 | 441 | A08561 | A14917 | 317 |
| A08561 | A14921 | 265 | A08561 | A15105 | 470 |
| A08561 | A15187 | 427 | A08561 | A15189 | 461 |
| A08561 | A15262 | 363 | A08561 | A15501 | 152 |
| A08561 | A15536 | 210 | A08561 | A15541 | 462 |
| A08561 | A15653 | 385 | A08561 | A15665 | 435 |
| A08561 | A15680 | 224 | A08561 | A15683 | 454 |
| A08561 | A15696 | 185 | A08561 | A15709 | 472 |
| A08561 | A15711 | 288 | A08561 | A15735 | 204 |
| A08561 | A15743 | 177 | A08561 | A15774 | 294 |
| A08561 | A15818 | 154 | A08561 | A15850 | 385 |
| A08561 | A15940 | 319 | A08561 | A15949 | 490 |
| A08561 | A16099 | 170 | A08561 | A16157 | 491 |
| A08561 | A16187 | 417 | A08561 | A16215 | 201 |
| A08561 | A16243 | 191 | A08561 | A16261 | 413 |
| A08561 | A16322 | 218 | A08561 | A16343 | 255 |
| A08561 | A16552 | 484 | A08561 | A16565 | 486 |
| A08561 | A16566 | 199 | A08561 | A16585 | 232 |
| A08561 | A16587 | 480 | A08561 | A16597 | 481 |

|        |        |     |        |        |     |
|--------|--------|-----|--------|--------|-----|
| A08561 | A16608 | 358 | A08561 | A16611 | 490 |
| A08561 | A16652 | 305 | A08561 | A16664 | 488 |
| A08561 | A16675 | 435 | A08561 | A16680 | 461 |
| A08561 | A16684 | 329 | A08561 | A16690 | 465 |
| A08561 | A16691 | 366 | A08561 | A16692 | 302 |
| A08561 | A16695 | 378 | A08561 | A16697 | 191 |
| A08561 | A16699 | 157 | A08561 | A16702 | 167 |
| A08561 | A16703 | 423 | A08561 | A16704 | 452 |
| A08561 | A16706 | 265 | A08561 | A16707 | 404 |
| A08561 | A16708 | 213 | A08561 | A16709 | 310 |
| A08561 | A16764 | 393 | A08561 | A16774 | 358 |
| A08561 | A16776 | 408 | A08561 | A16788 | 411 |
| A08561 | A16790 | 391 | A08561 | A16797 | 352 |
| A08561 | A16802 | 265 | A08561 | A16815 | 430 |
| A08561 | A16829 | 441 | A08561 | A16838 | 467 |
| A08561 | A16866 | 340 | A08561 | A16874 | 460 |
| A08561 | A16882 | 291 | A08561 | A16900 | 341 |
| A08561 | A16905 | 414 | A08561 | A16942 | 232 |
| A08561 | A16954 | 391 | A08561 | A17014 | 232 |
| A08561 | A17015 | 368 | A08561 | A17030 | 335 |
| A08561 | A17033 | 324 | A08561 | A17035 | 272 |
| A08561 | A17125 | 208 | A08561 | A17133 | 182 |
| A08561 | A17144 | 305 | A08561 | A17211 | 323 |
| A08562 | A10159 | 306 | A08562 | A16304 | 232 |
| A08564 | A08565 | 669 | A08564 | A09010 | 643 |
| A08564 | A15373 | 659 | A08565 | A09010 | 633 |
| A08565 | A15373 | 637 | A08566 | A08567 | 685 |
| A08566 | A08812 | 184 | A08566 | A08813 | 559 |
| A08566 | A08840 | 184 | A08566 | A08845 | 184 |
| A08566 | A09727 | 184 | A08566 | A10789 | 438 |
| A08566 | A12507 | 438 | A08566 | A13737 | 438 |
| A08566 | A13963 | 688 | A08566 | A14084 | 184 |
| A08566 | A14270 | 184 | A08566 | A14285 | 184 |
| A08566 | A15949 | 680 | A08566 | A16099 | 184 |
| A08567 | A08812 | 557 | A08567 | A08813 | 695 |
| A08567 | A08840 | 184 | A08567 | A08844 | 468 |
| A08567 | A08845 | 494 | A08567 | A08847 | 246 |
| A08567 | A09299 | 165 | A08567 | A09607 | 561 |
| A08567 | A09727 | 184 | A08567 | A10373 | 406 |
| A08567 | A10789 | 695 | A08567 | A11668 | 152 |
| A08567 | A11954 | 281 | A08567 | A12140 | 201 |
| A08567 | A12326 | 201 | A08567 | A12507 | 695 |
| A08567 | A13399 | 485 | A08567 | A13737 | 695 |
| A08567 | A13762 | 210 | A08567 | A13963 | 695 |
| A08567 | A14083 | 268 | A08567 | A14084 | 556 |
| A08567 | A14270 | 184 | A08567 | A14272 | 488 |

|        |        |     |        |        |     |
|--------|--------|-----|--------|--------|-----|
| A08567 | A14285 | 555 | A08567 | A14655 | 385 |
| A08567 | A14708 | 455 | A08567 | A15501 | 455 |
| A08567 | A15502 | 457 | A08567 | A15949 | 695 |
| A08567 | A16099 | 184 | A08568 | A11554 | 490 |
| A08568 | A11702 | 488 | A08568 | A12253 | 326 |
| A08568 | A12659 | 481 | A08568 | A16020 | 195 |
| A08568 | A16886 | 484 | A08569 | A08986 | 470 |
| A08569 | A08997 | 232 | A08569 | A09884 | 207 |
| A08569 | A10919 | 213 | A08569 | A11283 | 491 |
| A08569 | A11917 | 469 | A08569 | A12047 | 281 |
| A08569 | A12506 | 179 | A08569 | A12665 | 221 |
| A08569 | A12858 | 273 | A08569 | A13069 | 157 |
| A08569 | A13309 | 270 | A08569 | A13313 | 491 |
| A08569 | A13708 | 491 | A08569 | A13781 | 433 |
| A08569 | A13788 | 246 | A08569 | A14239 | 490 |
| A08569 | A14661 | 347 | A08569 | A14711 | 302 |
| A08569 | A15855 | 441 | A08569 | A16387 | 154 |
| A08569 | A16552 | 333 | A08569 | A16565 | 491 |
| A08569 | A16675 | 171 | A08569 | A16690 | 170 |
| A08569 | A16712 | 472 | A08569 | A16806 | 195 |
| A08569 | A17018 | 469 | A08570 | A14709 | 201 |
| A08571 | A08756 | 171 | A08571 | A08818 | 491 |
| A08571 | A08828 | 240 | A08571 | A08839 | 909 |
| A08571 | A08865 | 63  | A08571 | A08876 | 485 |
| A08571 | A08883 | 208 | A08571 | A08885 | 675 |
| A08571 | A09146 | 262 | A08571 | A09182 | 330 |
| A08571 | A09195 | 199 | A08571 | A09256 | 491 |
| A08571 | A09319 | 899 | A08571 | A09446 | 172 |
| A08571 | A09448 | 294 | A08571 | A09558 | 899 |
| A08571 | A09728 | 63  | A08571 | A09730 | 93  |
| A08571 | A09739 | 63  | A08571 | A09767 | 488 |
| A08571 | A09829 | 91  | A08571 | A10183 | 160 |
| A08571 | A10250 | 491 | A08571 | A10328 | 313 |
| A08571 | A10395 | 162 | A08571 | A10399 | 245 |
| A08571 | A10580 | 899 | A08571 | A10602 | 191 |
| A08571 | A10615 | 945 | A08571 | A10623 | 945 |
| A08571 | A10624 | 491 | A08571 | A10657 | 240 |
| A08571 | A10824 | 159 | A08571 | A10853 | 491 |
| A08571 | A10894 | 490 | A08571 | A10998 | 185 |
| A08571 | A11027 | 477 | A08571 | A11105 | 486 |
| A08571 | A11139 | 491 | A08571 | A11168 | 385 |
| A08571 | A11258 | 602 | A08571 | A11277 | 461 |
| A08571 | A11284 | 407 | A08571 | A11286 | 477 |
| A08571 | A11291 | 460 | A08571 | A11379 | 490 |
| A08571 | A11478 | 486 | A08571 | A11487 | 473 |
| A08571 | A11534 | 63  | A08571 | A11920 | 491 |

|        |        |     |        |        |     |
|--------|--------|-----|--------|--------|-----|
| A08571 | A11923 | 491 | A08571 | A11928 | 491 |
| A08571 | A12069 | 217 | A08571 | A12104 | 160 |
| A08571 | A12328 | 265 | A08571 | A12416 | 483 |
| A08571 | A12445 | 263 | A08571 | A12850 | 396 |
| A08571 | A12861 | 243 | A08571 | A12920 | 184 |
| A08571 | A13019 | 420 | A08571 | A13082 | 105 |
| A08571 | A13147 | 491 | A08571 | A13225 | 899 |
| A08571 | A13250 | 899 | A08571 | A13310 | 491 |
| A08571 | A13311 | 491 | A08571 | A13335 | 157 |
| A08571 | A13340 | 163 | A08571 | A13510 | 291 |
| A08571 | A13511 | 188 | A08571 | A13609 | 191 |
| A08571 | A13805 | 485 | A08571 | A13824 | 899 |
| A08571 | A13829 | 906 | A08571 | A13928 | 472 |
| A08571 | A13977 | 446 | A08571 | A13978 | 489 |
| A08571 | A13989 | 949 | A08571 | A14006 | 491 |
| A08571 | A14009 | 446 | A08571 | A14039 | 396 |
| A08571 | A14127 | 199 | A08571 | A14148 | 944 |
| A08571 | A14196 | 556 | A08571 | A14220 | 561 |
| A08571 | A14221 | 447 | A08571 | A14222 | 380 |
| A08571 | A14246 | 941 | A08571 | A14252 | 228 |
| A08571 | A14257 | 491 | A08571 | A14278 | 447 |
| A08571 | A14301 | 160 | A08571 | A14443 | 935 |
| A08571 | A14474 | 427 | A08571 | A14476 | 491 |
| A08571 | A14540 | 165 | A08571 | A14570 | 179 |
| A08571 | A14594 | 196 | A08571 | A14596 | 486 |
| A08571 | A14621 | 188 | A08571 | A14655 | 440 |
| A08571 | A14719 | 63  | A08571 | A14728 | 163 |
| A08571 | A14758 | 199 | A08571 | A14801 | 263 |
| A08571 | A14826 | 347 | A08571 | A14839 | 152 |
| A08571 | A14899 | 263 | A08571 | A14931 | 191 |
| A08571 | A14986 | 344 | A08571 | A15244 | 507 |
| A08571 | A15297 | 949 | A08571 | A15324 | 921 |
| A08571 | A15338 | 491 | A08571 | A15353 | 899 |
| A08571 | A15359 | 899 | A08571 | A15366 | 208 |
| A08571 | A15506 | 193 | A08571 | A15547 | 899 |
| A08571 | A15559 | 950 | A08571 | A15614 | 899 |
| A08571 | A15660 | 177 | A08571 | A15711 | 490 |
| A08571 | A15726 | 968 | A08571 | A15729 | 485 |
| A08571 | A15752 | 219 | A08571 | A15766 | 249 |
| A08571 | A16410 | 215 | A08571 | A16453 | 163 |
| A08571 | A16490 | 456 | A08571 | A16491 | 477 |
| A08571 | A16552 | 188 | A08571 | A16568 | 384 |
| A08571 | A16577 | 160 | A08571 | A16678 | 204 |
| A08571 | A16690 | 334 | A08571 | A16774 | 273 |
| A08571 | A16866 | 152 | A08571 | A16912 | 490 |
| A08571 | A16937 | 318 | A08571 | A17063 | 479 |

|        |        |     |        |        |     |
|--------|--------|-----|--------|--------|-----|
| A08571 | A17160 | 899 | A08572 | A08596 | 208 |
| A08572 | A08714 | 183 | A08572 | A10319 | 274 |
| A08572 | A10557 | 215 | A08572 | A10601 | 185 |
| A08572 | A12725 | 185 | A08572 | A12927 | 177 |
| A08572 | A13410 | 288 | A08572 | A14371 | 251 |
| A08572 | A14604 | 263 | A08572 | A15327 | 201 |
| A08572 | A15399 | 159 | A08572 | A15795 | 152 |
| A08572 | A15976 | 156 | A08572 | A16099 | 213 |
| A08573 | A13866 | 236 | A08573 | A14313 | 361 |
| A08574 | A08610 | 395 | A08574 | A09438 | 360 |
| A08576 | A08582 | 396 | A08576 | A09020 | 457 |
| A08576 | A09127 | 228 | A08576 | A09668 | 357 |
| A08576 | A13772 | 374 | A08577 | A13147 | 515 |
| A08577 | A14520 | 224 | A08578 | A09587 | 318 |
| A08578 | A15241 | 204 | A08578 | A16738 | 163 |
| A08578 | A16741 | 183 | A08580 | A14366 | 307 |
| A08580 | A14372 | 346 | A08580 | A14392 | 334 |
| A08580 | A15518 | 406 | A08580 | A15795 | 358 |
| A08580 | A16540 | 394 | A08580 | A17105 | 417 |
| A08582 | A09242 | 335 | A08583 | A09988 | 273 |
| A08583 | A15430 | 162 | A08584 | A08693 | 371 |
| A08584 | A10527 | 358 | A08584 | A14661 | 157 |
| A08584 | A15992 | 433 | A08584 | A16636 | 251 |
| A08585 | A15613 | 317 | A08587 | A15238 | 394 |
| A08588 | A14073 | 391 | A08588 | A15286 | 301 |
| A08588 | A15874 | 184 | A08588 | A16027 | 191 |
| A08589 | A10605 | 416 | A08590 | A08851 | 293 |
| A08590 | A14643 | 196 | A08591 | A08738 | 246 |
| A08591 | A13212 | 357 | A08594 | A11425 | 188 |
| A08594 | A13348 | 198 | A08594 | A13899 | 95  |
| A08594 | A15930 | 393 | A08596 | A09201 | 260 |
| A08596 | A11431 | 338 | A08596 | A13410 | 347 |
| A08596 | A14366 | 378 | A08596 | A14391 | 176 |
| A08596 | A14392 | 329 | A08596 | A15357 | 347 |
| A08596 | A15394 | 241 | A08596 | A15395 | 347 |
| A08596 | A15399 | 491 | A08596 | A15809 | 176 |
| A08598 | A12824 | 154 | A08598 | A15682 | 195 |
| A08600 | A09559 | 419 | A08601 | A14374 | 330 |
| A08602 | A14381 | 288 | A08603 | A14410 | 207 |
| A08603 | A14658 | 469 | A08603 | A15749 | 216 |
| A08604 | A08699 | 486 | A08608 | A08694 | 345 |
| A08608 | A08818 | 227 | A08608 | A09394 | 266 |
| A08608 | A09568 | 374 | A08608 | A09581 | 196 |
| A08608 | A11307 | 475 | A08608 | A11433 | 303 |
| A08608 | A13917 | 263 | A08608 | A14188 | 157 |
| A08608 | A14364 | 317 | A08608 | A14400 | 480 |

|        |        |     |        |        |     |
|--------|--------|-----|--------|--------|-----|
| A08609 | A14371 | 221 | A08609 | A14643 | 305 |
| A08610 | A09438 | 357 | A08610 | A10247 | 234 |
| A08610 | A14643 | 172 | A08614 | A14222 | 218 |
| A08614 | A15380 | 182 | A08615 | A14236 | 322 |
| A08620 | A09650 | 363 | A08620 | A14484 | 187 |
| A08621 | A09273 | 383 | A08621 | A10808 | 271 |
| A08621 | A11345 | 317 | A08621 | A13111 | 452 |
| A08621 | A13997 | 218 | A08621 | A14653 | 488 |
| A08621 | A15186 | 408 | A08623 | A16300 | 281 |
| A08624 | A09409 | 430 | A08624 | A10297 | 445 |
| A08627 | A09124 | 204 | A08627 | A09401 | 226 |
| A08627 | A09826 | 491 | A08627 | A13500 | 202 |
| A08627 | A13884 | 221 | A08627 | A14016 | 486 |
| A08627 | A14246 | 474 | A08627 | A15324 | 458 |
| A08627 | A15370 | 243 | A08627 | A15498 | 277 |
| A08627 | A16636 | 457 | A08628 | A08709 | 414 |
| A08628 | A09535 | 402 | A08629 | A14442 | 386 |
| A08630 | A08660 | 260 | A08630 | A08688 | 291 |
| A08630 | A09028 | 273 | A08630 | A09235 | 224 |
| A08630 | A10202 | 390 | A08630 | A10327 | 390 |
| A08630 | A11683 | 173 | A08630 | A14430 | 263 |
| A08630 | A14511 | 210 | A08630 | A14856 | 152 |
| A08630 | A15230 | 243 | A08630 | A15268 | 200 |
| A08630 | A15292 | 306 | A08630 | A15313 | 243 |
| A08630 | A15381 | 187 | A08630 | A15419 | 185 |
| A08630 | A15630 | 185 | A08630 | A16107 | 263 |
| A08631 | A09020 | 401 | A08632 | A08834 | 260 |
| A08632 | A13826 | 202 | A08632 | A14374 | 268 |
| A08632 | A15314 | 238 | A08632 | A15425 | 279 |
| A08632 | A15642 | 419 | A08632 | A16540 | 367 |
| A08633 | A14642 | 229 | A08634 | A14374 | 305 |
| A08634 | A14439 | 362 | A08634 | A15314 | 157 |
| A08634 | A15394 | 352 | A08635 | A12304 | 347 |
| A08635 | A14648 | 288 | A08635 | A15282 | 160 |
| A08635 | A15422 | 199 | A08637 | A08726 | 441 |
| A08639 | A08683 | 438 | A08639 | A08746 | 477 |
| A08639 | A11383 | 350 | A08640 | A09536 | 441 |
| A08641 | A10674 | 249 | A08641 | A10977 | 389 |
| A08641 | A14129 | 350 | A08641 | A14210 | 456 |
| A08641 | A14392 | 204 | A08641 | A15394 | 247 |
| A08641 | A15605 | 265 | A08641 | A15819 | 490 |
| A08641 | A15922 | 232 | A08643 | A10103 | 485 |
| A08643 | A10817 | 317 | A08643 | A13831 | 330 |
| A08643 | A14633 | 352 | A08643 | A16281 | 160 |
| A08644 | A14475 | 221 | A08647 | A08693 | 485 |
| A08647 | A09107 | 460 | A08647 | A09134 | 433 |

|        |        |     |        |        |     |
|--------|--------|-----|--------|--------|-----|
| A08647 | A10527 | 491 | A08647 | A10678 | 454 |
| A08647 | A10762 | 491 | A08647 | A15502 | 213 |
| A08647 | A15896 | 271 | A08647 | A15992 | 491 |
| A08649 | A08670 | 441 | A08649 | A08764 | 441 |
| A08649 | A11136 | 447 | A08649 | A14423 | 396 |
| A08651 | A10585 | 369 | A08651 | A13903 | 347 |
| A08651 | A15425 | 290 | A08651 | A15427 | 356 |
| A08652 | A11918 | 346 | A08653 | A08682 | 377 |
| A08653 | A08773 | 252 | A08653 | A09044 | 340 |
| A08653 | A09526 | 200 | A08653 | A09656 | 462 |
| A08653 | A11264 | 348 | A08653 | A11981 | 293 |
| A08653 | A13626 | 221 | A08653 | A14843 | 432 |
| A08653 | A15666 | 249 | A08655 | A09262 | 360 |
| A08655 | A09359 | 386 | A08655 | A09434 | 269 |
| A08655 | A09561 | 241 | A08655 | A09935 | 374 |
| A08655 | A10165 | 183 | A08655 | A13152 | 379 |
| A08655 | A14342 | 398 | A08655 | A14349 | 391 |
| A08655 | A14643 | 235 | A08656 | A14191 | 218 |
| A08656 | A14272 | 171 | A08657 | A08827 | 455 |
| A08657 | A08829 | 441 | A08658 | A08711 | 473 |
| A08658 | A08850 | 391 | A08658 | A09046 | 367 |
| A08658 | A10001 | 398 | A08660 | A08667 | 466 |
| A08660 | A08688 | 480 | A08660 | A08857 | 208 |
| A08660 | A10640 | 288 | A08660 | A14554 | 205 |
| A08661 | A11304 | 223 | A08662 | A08674 | 449 |
| A08662 | A11918 | 333 | A08662 | A11981 | 308 |
| A08662 | A12661 | 339 | A08662 | A14955 | 396 |
| A08662 | A15684 | 307 | A08662 | A17193 | 358 |
| A08663 | A09880 | 313 | A08663 | A10422 | 346 |
| A08663 | A10458 | 355 | A08663 | A10688 | 430 |
| A08663 | A10690 | 430 | A08663 | A10776 | 243 |
| A08663 | A12723 | 258 | A08663 | A13987 | 171 |
| A08663 | A14122 | 205 | A08663 | A16529 | 200 |
| A08663 | A17024 | 396 | A08663 | A17046 | 357 |
| A08663 | A17092 | 396 | A08664 | A08752 | 361 |
| A08664 | A09044 | 200 | A08664 | A09322 | 451 |
| A08664 | A09702 | 200 | A08664 | A10417 | 665 |
| A08664 | A11331 | 388 | A08664 | A11438 | 463 |
| A08664 | A11729 | 200 | A08664 | A13333 | 200 |
| A08664 | A14216 | 243 | A08664 | A16118 | 228 |
| A08667 | A08688 | 319 | A08667 | A10420 | 191 |
| A08667 | A10635 | 435 | A08667 | A10640 | 323 |
| A08667 | A10675 | 440 | A08668 | A08676 | 488 |
| A08668 | A10532 | 154 | A08668 | A11103 | 486 |
| A08668 | A11299 | 294 | A08668 | A11999 | 419 |
| A08669 | A08820 | 477 | A08669 | A08888 | 407 |



|        |        |     |        |        |     |
|--------|--------|-----|--------|--------|-----|
| A08669 | A08919 | 329 | A08669 | A09288 | 490 |
| A08669 | A09751 | 406 | A08669 | A09752 | 270 |
| A08669 | A09753 | 241 | A08669 | A09754 | 63  |
| A08669 | A09755 | 201 | A08669 | A10373 | 221 |
| A08669 | A11829 | 276 | A08669 | A11916 | 488 |
| A08669 | A12365 | 200 | A08669 | A12556 | 379 |
| A08669 | A13257 | 423 | A08669 | A13889 | 200 |
| A08669 | A13949 | 769 | A08669 | A14009 | 200 |
| A08669 | A14076 | 490 | A08669 | A14079 | 489 |
| A08669 | A14091 | 200 | A08669 | A14094 | 200 |
| A08669 | A14177 | 200 | A08669 | A14192 | 200 |
| A08669 | A14223 | 239 | A08669 | A14273 | 490 |
| A08669 | A14460 | 491 | A08669 | A14694 | 561 |
| A08669 | A15369 | 490 | A08669 | A15524 | 151 |
| A08669 | A15837 | 314 | A08669 | A16127 | 491 |
| A08669 | A16128 | 771 | A08669 | A16129 | 488 |
| A08669 | A16134 | 352 | A08669 | A16225 | 247 |
| A08669 | A16226 | 491 | A08669 | A16274 | 200 |
| A08669 | A16378 | 454 | A08669 | A16606 | 491 |
| A08669 | A16613 | 486 | A08669 | A16616 | 288 |
| A08669 | A16626 | 469 | A08669 | A16754 | 286 |
| A08669 | A17075 | 168 | A08670 | A08764 | 441 |
| A08670 | A11136 | 447 | A08670 | A14423 | 396 |
| A08671 | A09341 | 353 | A08671 | A09518 | 395 |
| A08671 | A11056 | 412 | A08671 | A11289 | 335 |
| A08671 | A11310 | 348 | A08671 | A11328 | 352 |
| A08671 | A11709 | 475 | A08671 | A12982 | 373 |
| A08672 | A10060 | 466 | A08674 | A08684 | 238 |
| A08674 | A10689 | 276 | A08674 | A11290 | 156 |
| A08674 | A11344 | 191 | A08674 | A11918 | 496 |
| A08674 | A12329 | 534 | A08674 | A14216 | 300 |
| A08674 | A15624 | 156 | A08674 | A15649 | 156 |
| A08674 | A15651 | 156 | A08674 | A15652 | 156 |
| A08674 | A15658 | 188 | A08674 | A15660 | 722 |
| A08674 | A15661 | 156 | A08674 | A15662 | 156 |
| A08674 | A15684 | 514 | A08674 | A15720 | 156 |
| A08674 | A15721 | 156 | A08674 | A15746 | 156 |
| A08674 | A15771 | 191 | A08674 | A15917 | 156 |
| A08674 | A15918 | 238 | A08674 | A15923 | 156 |
| A08674 | A15931 | 491 | A08674 | A15937 | 319 |
| A08674 | A16088 | 536 | A08674 | A16092 | 208 |
| A08674 | A16145 | 156 | A08674 | A16218 | 579 |
| A08674 | A16307 | 156 | A08674 | A16650 | 210 |
| A08675 | A14236 | 373 | A08675 | A14366 | 347 |
| A08676 | A11103 | 486 | A08676 | A12763 | 416 |
| A08677 | A08714 | 286 | A08677 | A08741 | 285 |

|        |        |     |        |        |     |
|--------|--------|-----|--------|--------|-----|
| A08677 | A13979 | 234 | A08677 | A14190 | 286 |
| A08677 | A14300 | 260 | A08677 | A14375 | 255 |
| A08677 | A14378 | 170 | A08677 | A14430 | 468 |
| A08677 | A14437 | 463 | A08677 | A14610 | 358 |
| A08677 | A15281 | 351 | A08677 | A15847 | 380 |
| A08678 | A10199 | 207 | A08678 | A10208 | 174 |
| A08678 | A10701 | 235 | A08678 | A14709 | 429 |
| A08678 | A16049 | 402 | A08679 | A10165 | 290 |
| A08679 | A10532 | 283 | A08679 | A11299 | 279 |
| A08679 | A13989 | 380 | A08679 | A14096 | 177 |
| A08679 | A16272 | 154 | A08679 | A17085 | 196 |
| A08681 | A08685 | 489 | A08681 | A08686 | 491 |
| A08681 | A08753 | 491 | A08681 | A08835 | 485 |
| A08681 | A09666 | 213 | A08681 | A11278 | 438 |
| A08681 | A11298 | 477 | A08681 | A11333 | 456 |
| A08681 | A11585 | 389 | A08681 | A15288 | 294 |
| A08681 | A15333 | 246 | A08681 | A15416 | 486 |
| A08681 | A15638 | 491 | A08681 | A16055 | 307 |
| A08681 | A16281 | 419 | A08682 | A09656 | 296 |
| A08682 | A10532 | 154 | A08682 | A10569 | 340 |
| A08682 | A10814 | 441 | A08682 | A11264 | 290 |
| A08682 | A11331 | 329 | A08682 | A11334 | 171 |
| A08682 | A11400 | 168 | A08682 | A11926 | 198 |
| A08682 | A11981 | 217 | A08682 | A12105 | 187 |
| A08682 | A12329 | 180 | A08682 | A12589 | 434 |
| A08682 | A13052 | 491 | A08682 | A13581 | 259 |
| A08682 | A13712 | 385 | A08682 | A13752 | 296 |
| A08682 | A13989 | 184 | A08682 | A14215 | 195 |
| A08682 | A14216 | 488 | A08682 | A14377 | 152 |
| A08682 | A15063 | 368 | A08682 | A17193 | 288 |
| A08683 | A08746 | 488 | A08684 | A09292 | 160 |
| A08684 | A13426 | 281 | A08684 | A16238 | 363 |
| A08684 | A16330 | 427 | A08685 | A08686 | 491 |
| A08685 | A08700 | 241 | A08685 | A08753 | 491 |
| A08685 | A08835 | 470 | A08685 | A09046 | 249 |
| A08685 | A09246 | 180 | A08685 | A09745 | 156 |
| A08685 | A11278 | 489 | A08685 | A11298 | 490 |
| A08685 | A11315 | 190 | A08685 | A11333 | 462 |
| A08685 | A11342 | 408 | A08685 | A11463 | 454 |
| A08685 | A11569 | 346 | A08685 | A11585 | 358 |
| A08685 | A12632 | 377 | A08685 | A12684 | 358 |
| A08685 | A12685 | 377 | A08685 | A13317 | 314 |
| A08685 | A13369 | 483 | A08685 | A14366 | 195 |
| A08685 | A14873 | 328 | A08685 | A15277 | 176 |
| A08685 | A15288 | 238 | A08685 | A15292 | 183 |
| A08685 | A15331 | 157 | A08685 | A15333 | 185 |

|        |        |     |        |        |     |
|--------|--------|-----|--------|--------|-----|
| A08685 | A15336 | 445 | A08685 | A15416 | 481 |
| A08685 | A15495 | 160 | A08685 | A15638 | 491 |
| A08685 | A16055 | 252 | A08685 | A16281 | 460 |
| A08686 | A08700 | 205 | A08686 | A08753 | 491 |
| A08686 | A08835 | 490 | A08686 | A09341 | 269 |
| A08686 | A10024 | 235 | A08686 | A11191 | 187 |
| A08686 | A11278 | 491 | A08686 | A11298 | 491 |
| A08686 | A11315 | 485 | A08686 | A11321 | 270 |
| A08686 | A11333 | 489 | A08686 | A11342 | 441 |
| A08686 | A11431 | 210 | A08686 | A11463 | 466 |
| A08686 | A11569 | 322 | A08686 | A11585 | 335 |
| A08686 | A11594 | 322 | A08686 | A12632 | 358 |
| A08686 | A12634 | 301 | A08686 | A12684 | 335 |
| A08686 | A12685 | 358 | A08686 | A12736 | 266 |
| A08686 | A12781 | 322 | A08686 | A13317 | 286 |
| A08686 | A13369 | 469 | A08686 | A14111 | 276 |
| A08686 | A14210 | 252 | A08686 | A14381 | 226 |
| A08686 | A14511 | 156 | A08686 | A14570 | 162 |
| A08686 | A14611 | 167 | A08686 | A14873 | 301 |
| A08686 | A15288 | 202 | A08686 | A15292 | 174 |
| A08686 | A15336 | 335 | A08686 | A15349 | 229 |
| A08686 | A15416 | 491 | A08686 | A15480 | 286 |
| A08686 | A15498 | 479 | A08686 | A15638 | 491 |
| A08686 | A16055 | 218 | A08686 | A16281 | 491 |
| A08686 | A16904 | 163 | A08686 | A16951 | 243 |
| A08687 | A09059 | 185 | A08687 | A09742 | 283 |
| A08687 | A10420 | 224 | A08687 | A10455 | 379 |
| A08687 | A10456 | 171 | A08687 | A10550 | 364 |
| A08687 | A10702 | 274 | A08687 | A10776 | 273 |
| A08687 | A12897 | 243 | A08687 | A14378 | 205 |
| A08687 | A15302 | 257 | A08687 | A15463 | 165 |
| A08687 | A17089 | 174 | A08688 | A14430 | 162 |
| A08688 | A15241 | 185 | A08688 | A15795 | 252 |
| A08689 | A14246 | 340 | A08689 | A14265 | 428 |
| A08689 | A14386 | 301 | A08690 | A10126 | 480 |
| A08690 | A10882 | 452 | A08690 | A14190 | 344 |
| A08690 | A14828 | 455 | A08692 | A08969 | 357 |
| A08692 | A09127 | 179 | A08692 | A09706 | 213 |
| A08692 | A10221 | 350 | A08692 | A10623 | 217 |
| A08692 | A10694 | 316 | A08692 | A10728 | 174 |
| A08692 | A11983 | 278 | A08692 | A12625 | 179 |
| A08692 | A14076 | 313 | A08692 | A14211 | 252 |
| A08692 | A14643 | 190 | A08692 | A14860 | 316 |
| A08692 | A15369 | 152 | A08692 | A16129 | 338 |
| A08693 | A09107 | 491 | A08693 | A09134 | 491 |
| A08693 | A10527 | 491 | A08693 | A10640 | 279 |

|        |        |     |        |        |     |
|--------|--------|-----|--------|--------|-----|
| A08693 | A10678 | 371 | A08693 | A10762 | 316 |
| A08693 | A11488 | 371 | A08693 | A14381 | 187 |
| A08693 | A14554 | 193 | A08693 | A15516 | 224 |
| A08693 | A15992 | 491 | A08693 | A16636 | 272 |
| A08694 | A09394 | 385 | A08694 | A09598 | 434 |
| A08694 | A14092 | 367 | A08694 | A14272 | 180 |
| A08694 | A15877 | 363 | A08697 | A13828 | 452 |
| A08697 | A14364 | 385 | A08697 | A15994 | 447 |
| A08698 | A11079 | 224 | A08698 | A13819 | 171 |
| A08700 | A09151 | 329 | A08700 | A09269 | 246 |
| A08700 | A11981 | 294 | A08700 | A13946 | 314 |
| A08700 | A14482 | 171 | A08700 | A14621 | 174 |
| A08701 | A12204 | 243 | A08701 | A14193 | 374 |
| A08701 | A15644 | 165 | A08701 | A15683 | 303 |
| A08701 | A16665 | 340 | A08705 | A09440 | 435 |
| A08705 | A14598 | 449 | A08707 | A08859 | 601 |
| A08707 | A09152 | 152 | A08707 | A09169 | 152 |
| A08707 | A09182 | 590 | A08707 | A09508 | 200 |
| A08707 | A09511 | 160 | A08707 | A10167 | 213 |
| A08707 | A10869 | 446 | A08707 | A12952 | 147 |
| A08707 | A13989 | 283 | A08707 | A14123 | 258 |
| A08707 | A14252 | 638 | A08707 | A14443 | 899 |
| A08707 | A15356 | 638 | A08707 | A15480 | 353 |
| A08707 | A15684 | 322 | A08707 | A15987 | 208 |
| A08707 | A16719 | 218 | A08707 | A16904 | 561 |
| A08707 | A17013 | 168 | A08709 | A09535 | 472 |
| A08709 | A10555 | 422 | A08711 | A08850 | 293 |
| A08711 | A09046 | 443 | A08711 | A14071 | 390 |
| A08711 | A14135 | 334 | A08711 | A14391 | 273 |
| A08711 | A14570 | 165 | A08711 | A15425 | 279 |
| A08712 | A10644 | 438 | A08714 | A09238 | 182 |
| A08714 | A09239 | 154 | A08714 | A09422 | 343 |
| A08714 | A09855 | 243 | A08714 | A09939 | 469 |
| A08714 | A10025 | 374 | A08714 | A11313 | 407 |
| A08714 | A12393 | 406 | A08714 | A12578 | 399 |
| A08714 | A13119 | 348 | A08714 | A13151 | 272 |
| A08714 | A14188 | 190 | A08714 | A14190 | 391 |
| A08714 | A14210 | 480 | A08714 | A14371 | 945 |
| A08714 | A14379 | 327 | A08714 | A14413 | 213 |
| A08714 | A14511 | 457 | A08714 | A14554 | 200 |
| A08714 | A14604 | 324 | A08714 | A14892 | 399 |
| A08714 | A15327 | 258 | A08714 | A15498 | 294 |
| A08714 | A15916 | 288 | A08715 | A15639 | 313 |
| A08715 | A16242 | 432 | A08715 | A16618 | 405 |
| A08716 | A09881 | 305 | A08716 | A10430 | 312 |
| A08716 | A10781 | 419 | A08716 | A12723 | 384 |

|        |        |     |        |        |     |
|--------|--------|-----|--------|--------|-----|
| A08717 | A11023 | 286 | A08718 | A09509 | 440 |
| A08718 | A09513 | 371 | A08718 | A09890 | 335 |
| A08718 | A10731 | 255 | A08718 | A12897 | 277 |
| A08718 | A14196 | 185 | A08718 | A14381 | 224 |
| A08718 | A14410 | 176 | A08720 | A13652 | 440 |
| A08720 | A14190 | 260 | A08720 | A14236 | 322 |
| A08720 | A14364 | 340 | A08720 | A14366 | 285 |
| A08720 | A14387 | 394 | A08720 | A15840 | 350 |
| A08720 | A16775 | 468 | A08722 | A08728 | 433 |
| A08722 | A10638 | 413 | A08723 | A13609 | 263 |
| A08724 | A09145 | 270 | A08724 | A10148 | 334 |
| A08724 | A14236 | 182 | A08724 | A14372 | 190 |
| A08726 | A16232 | 462 | A08728 | A10638 | 396 |
| A08728 | A15328 | 262 | A08729 | A10823 | 401 |
| A08729 | A10899 | 332 | A08729 | A13181 | 406 |
| A08729 | A13860 | 243 | A08729 | A15267 | 374 |
| A08732 | A08839 | 899 | A08732 | A08855 | 899 |
| A08732 | A09644 | 899 | A08732 | A09727 | 899 |
| A08732 | A10174 | 899 | A08732 | A11668 | 899 |
| A08732 | A12383 | 899 | A08732 | A12902 | 355 |
| A08732 | A13773 | 899 | A08732 | A13981 | 899 |
| A08732 | A14004 | 899 | A08732 | A14059 | 899 |
| A08732 | A14208 | 907 | A08732 | A14226 | 899 |
| A08732 | A14243 | 899 | A08732 | A14443 | 904 |
| A08732 | A14785 | 322 | A08732 | A14974 | 899 |
| A08732 | A15463 | 182 | A08732 | A15962 | 201 |
| A08732 | A16297 | 899 | A08734 | A09487 | 384 |
| A08736 | A11903 | 411 | A08738 | A09447 | 195 |
| A08738 | A09485 | 167 | A08738 | A09591 | 216 |
| A08738 | A09696 | 216 | A08738 | A09999 | 177 |
| A08738 | A11273 | 167 | A08738 | A11313 | 187 |
| A08738 | A11470 | 215 | A08738 | A11844 | 179 |
| A08738 | A11862 | 156 | A08738 | A12094 | 260 |
| A08738 | A12189 | 269 | A08738 | A12211 | 271 |
| A08738 | A12638 | 252 | A08738 | A12835 | 191 |
| A08738 | A13415 | 172 | A08738 | A13500 | 180 |
| A08738 | A14165 | 216 | A08738 | A14802 | 269 |
| A08738 | A14969 | 432 | A08738 | A15441 | 216 |
| A08738 | A15488 | 154 | A08738 | A15498 | 391 |
| A08738 | A15624 | 303 | A08738 | A15684 | 391 |
| A08738 | A15878 | 219 | A08738 | A16096 | 271 |
| A08738 | A16636 | 335 | A08738 | A17051 | 303 |
| A08738 | A17156 | 163 | A08739 | A09587 | 307 |
| A08739 | A10131 | 451 | A08739 | A10983 | 420 |
| A08739 | A13740 | 348 | A08739 | A14120 | 238 |
| A08739 | A16038 | 383 | A08739 | A17207 | 441 |

|        |        |     |        |        |     |
|--------|--------|-----|--------|--------|-----|
| A08740 | A15185 | 243 | A08740 | A17113 | 299 |
| A08741 | A09842 | 160 | A08741 | A10337 | 212 |
| A08741 | A10477 | 263 | A08741 | A13510 | 156 |
| A08741 | A14383 | 383 | A08741 | A14387 | 303 |
| A08741 | A14388 | 364 | A08741 | A14390 | 291 |
| A08741 | A14423 | 266 | A08741 | A15565 | 313 |
| A08741 | A15674 | 491 | A08741 | A15840 | 223 |
| A08741 | A15847 | 462 | A08741 | A15976 | 212 |
| A08743 | A09539 | 366 | A08743 | A10504 | 343 |
| A08743 | A15923 | 334 | A08745 | A09392 | 326 |
| A08745 | A09395 | 291 | A08745 | A10355 | 346 |
| A08745 | A10372 | 162 | A08745 | A11507 | 404 |
| A08745 | A11953 | 265 | A08745 | A14204 | 188 |
| A08745 | A14476 | 176 | A08745 | A14830 | 281 |
| A08745 | A15328 | 247 | A08745 | A15477 | 358 |
| A08745 | A15613 | 160 | A08745 | A15834 | 238 |
| A08745 | A16216 | 107 | A08746 | A11383 | 462 |
| A08746 | A12365 | 427 | A08746 | A12897 | 291 |
| A08746 | A14315 | 296 | A08746 | A14319 | 235 |
| A08746 | A14321 | 480 | A08746 | A14335 | 249 |
| A08746 | A14633 | 252 | A08746 | A16117 | 235 |
| A08748 | A09045 | 353 | A08748 | A09297 | 246 |
| A08748 | A09655 | 463 | A08748 | A10365 | 177 |
| A08748 | A11822 | 380 | A08748 | A13340 | 432 |
| A08748 | A14188 | 436 | A08748 | A15933 | 318 |
| A08748 | A16741 | 162 | A08750 | A12440 | 468 |
| A08751 | A10420 | 234 | A08751 | A10456 | 180 |
| A08751 | A10658 | 363 | A08751 | A10701 | 205 |
| A08751 | A10702 | 283 | A08751 | A14827 | 199 |
| A08751 | A15905 | 400 | A08751 | A16026 | 333 |
| A08751 | A16027 | 388 | A08751 | A16529 | 240 |
| A08752 | A10417 | 413 | A08752 | A11331 | 322 |
| A08752 | A12687 | 364 | A08752 | A15932 | 196 |
| A08753 | A08835 | 491 | A08753 | A08929 | 191 |
| A08753 | A11184 | 188 | A08753 | A11278 | 472 |
| A08753 | A11298 | 486 | A08753 | A11315 | 238 |
| A08753 | A11333 | 469 | A08753 | A11400 | 199 |
| A08753 | A11463 | 353 | A08753 | A11723 | 383 |
| A08753 | A14381 | 191 | A08753 | A15416 | 491 |
| A08753 | A15638 | 491 | A08753 | A16147 | 373 |
| A08753 | A16274 | 177 | A08753 | A16281 | 486 |
| A08754 | A15238 | 401 | A08755 | A16636 | 224 |
| A08756 | A09699 | 380 | A08756 | A12082 | 348 |
| A08756 | A12757 | 319 | A08756 | A13989 | 193 |
| A08756 | A14255 | 283 | A08758 | A09878 | 347 |
| A08758 | A11101 | 347 | A08758 | A12464 | 411 |

|        |        |     |        |        |     |
|--------|--------|-----|--------|--------|-----|
| A08758 | A13338 | 329 | A08758 | A13873 | 232 |
| A08758 | A16441 | 380 | A08759 | A10573 | 435 |
| A08759 | A10930 | 427 | A08759 | A15960 | 412 |
| A08760 | A08761 | 301 | A08760 | A09332 | 345 |
| A08760 | A09592 | 202 | A08760 | A09735 | 443 |
| A08760 | A11597 | 224 | A08760 | A15771 | 232 |
| A08760 | A15933 | 187 | A08760 | A16035 | 355 |
| A08761 | A08762 | 324 | A08761 | A09735 | 457 |
| A08761 | A10695 | 294 | A08761 | A15500 | 422 |
| A08762 | A15500 | 201 | A08762 | A15771 | 262 |
| A08762 | A16583 | 357 | A08763 | A08947 | 152 |
| A08763 | A09004 | 152 | A08763 | A10842 | 152 |
| A08763 | A14083 | 491 | A08763 | A14525 | 317 |
| A08763 | A14699 | 474 | A08763 | A15375 | 608 |
| A08763 | A15546 | 317 | A08764 | A11136 | 447 |
| A08764 | A14423 | 396 | A08765 | A08772 | 245 |
| A08765 | A08777 | 257 | A08765 | A09528 | 241 |
| A08765 | A10372 | 441 | A08765 | A13845 | 314 |
| A08765 | A13855 | 243 | A08765 | A14247 | 483 |
| A08765 | A14299 | 165 | A08765 | A16617 | 173 |
| A08766 | A17091 | 400 | A08767 | A11565 | 477 |
| A08768 | A10791 | 321 | A08768 | A10814 | 346 |
| A08768 | A11277 | 251 | A08768 | A12589 | 396 |
| A08769 | A09000 | 249 | A08769 | A09464 | 291 |
| A08769 | A09623 | 246 | A08769 | A09762 | 491 |
| A08769 | A09836 | 170 | A08769 | A10373 | 491 |
| A08769 | A11236 | 491 | A08769 | A11703 | 386 |
| A08769 | A11880 | 228 | A08769 | A11916 | 485 |
| A08769 | A12556 | 491 | A08769 | A12625 | 255 |
| A08769 | A13949 | 472 | A08769 | A14076 | 490 |
| A08769 | A14079 | 489 | A08769 | A14094 | 485 |
| A08769 | A14230 | 491 | A08769 | A14282 | 486 |
| A08769 | A14706 | 480 | A08769 | A15369 | 490 |
| A08769 | A15371 | 375 | A08769 | A15531 | 324 |
| A08769 | A15941 | 274 | A08769 | A16127 | 477 |
| A08769 | A16128 | 491 | A08769 | A16129 | 472 |
| A08769 | A16294 | 340 | A08769 | A16378 | 290 |
| A08769 | A16613 | 196 | A08769 | A16762 | 491 |
| A08770 | A10317 | 279 | A08770 | A13858 | 379 |
| A08770 | A14088 | 383 | A08770 | A14186 | 462 |
| A08770 | A15370 | 451 | A08771 | A10218 | 402 |
| A08771 | A13226 | 480 | A08771 | A13227 | 424 |
| A08771 | A13377 | 465 | A08772 | A08777 | 438 |
| A08772 | A09326 | 235 | A08772 | A10663 | 241 |
| A08772 | A13845 | 584 | A08772 | A13855 | 159 |
| A08772 | A14247 | 466 | A08772 | A14394 | 182 |

|        |        |     |        |        |     |
|--------|--------|-----|--------|--------|-----|
| A08772 | A14838 | 317 | A08772 | A15779 | 168 |
| A08772 | A16617 | 464 | A08772 | A16652 | 340 |
| A08773 | A08812 | 168 | A08773 | A08973 | 791 |
| A08773 | A09044 | 460 | A08773 | A09209 | 168 |
| A08773 | A09232 | 188 | A08773 | A09332 | 488 |
| A08773 | A09735 | 156 | A08773 | A10316 | 374 |
| A08773 | A10532 | 335 | A08773 | A10798 | 316 |
| A08773 | A10799 | 154 | A08773 | A11496 | 350 |
| A08773 | A11497 | 271 | A08773 | A11728 | 436 |
| A08773 | A11992 | 481 | A08773 | A12052 | 232 |
| A08773 | A12433 | 491 | A08773 | A12525 | 436 |
| A08773 | A13231 | 154 | A08773 | A13249 | 586 |
| A08773 | A13626 | 177 | A08773 | A13963 | 241 |
| A08773 | A13989 | 625 | A08773 | A14084 | 160 |
| A08773 | A14167 | 271 | A08773 | A14172 | 572 |
| A08773 | A14216 | 605 | A08773 | A14241 | 160 |
| A08773 | A14272 | 254 | A08773 | A14449 | 274 |
| A08773 | A14462 | 240 | A08773 | A14479 | 285 |
| A08773 | A14482 | 484 | A08773 | A14655 | 245 |
| A08773 | A14843 | 165 | A08773 | A15062 | 277 |
| A08773 | A15235 | 163 | A08773 | A15666 | 429 |
| A08773 | A15684 | 322 | A08773 | A15771 | 210 |
| A08773 | A15931 | 335 | A08773 | A15932 | 441 |
| A08773 | A15949 | 157 | A08773 | A15988 | 640 |
| A08773 | A16157 | 311 | A08773 | A16159 | 350 |
| A08773 | A16462 | 213 | A08773 | A16583 | 152 |
| A08775 | A08813 | 152 | A08775 | A08874 | 235 |
| A08775 | A09333 | 219 | A08775 | A10315 | 226 |
| A08775 | A10316 | 246 | A08775 | A10664 | 440 |
| A08775 | A11496 | 193 | A08775 | A11497 | 183 |
| A08775 | A11728 | 188 | A08775 | A11735 | 223 |
| A08775 | A12138 | 174 | A08775 | A12508 | 263 |
| A08775 | A12658 | 258 | A08775 | A12858 | 223 |
| A08775 | A13894 | 201 | A08775 | A14087 | 299 |
| A08775 | A14088 | 450 | A08775 | A14167 | 334 |
| A08775 | A14186 | 373 | A08775 | A14356 | 344 |
| A08775 | A14462 | 255 | A08775 | A15359 | 221 |
| A08775 | A15370 | 332 | A08775 | A15569 | 364 |
| A08775 | A16611 | 196 | A08775 | A16634 | 446 |
| A08775 | A17018 | 327 | A08775 | A17198 | 193 |
| A08777 | A09056 | 332 | A08777 | A09326 | 235 |
| A08777 | A13159 | 257 | A08777 | A13845 | 235 |
| A08777 | A14838 | 235 | A08777 | A15444 | 151 |
| A08777 | A15809 | 483 | A08777 | A16617 | 235 |
| A08777 | A17120 | 333 | A08778 | A09326 | 363 |
| A08778 | A13830 | 252 | A08781 | A08782 | 447 |



|        |        |     |        |        |     |
|--------|--------|-----|--------|--------|-----|
| A08783 | A08784 | 440 | A08783 | A08785 | 296 |
| A08783 | A10649 | 433 | A08783 | A10680 | 440 |
| A08784 | A10649 | 447 | A08784 | A10680 | 452 |
| A08785 | A09416 | 202 | A08785 | A10967 | 430 |
| A08785 | A11279 | 386 | A08785 | A11287 | 324 |
| A08785 | A11311 | 243 | A08785 | A11329 | 234 |
| A08785 | A11370 | 333 | A08785 | A11371 | 333 |
| A08785 | A11399 | 333 | A08785 | A11428 | 374 |
| A08785 | A11552 | 334 | A08785 | A11664 | 356 |
| A08785 | A12111 | 188 | A08785 | A12409 | 168 |
| A08785 | A12730 | 193 | A08785 | A13222 | 324 |
| A08785 | A13879 | 344 | A08785 | A14182 | 307 |
| A08785 | A14247 | 419 | A08785 | A14258 | 324 |
| A08785 | A14661 | 324 | A08785 | A14711 | 307 |
| A08785 | A14844 | 324 | A08785 | A14877 | 324 |
| A08785 | A15809 | 266 | A08785 | A15880 | 246 |
| A08785 | A17061 | 324 | A08786 | A13879 | 427 |
| A08788 | A11346 | 199 | A08788 | A14193 | 199 |
| A08788 | A15606 | 240 | A08790 | A10854 | 159 |
| A08790 | A11640 | 363 | A08790 | A12927 | 196 |
| A08790 | A14319 | 408 | A08790 | A14664 | 240 |
| A08793 | A14648 | 269 | A08798 | A11313 | 364 |
| A08799 | A16230 | 364 | A08799 | A16388 | 440 |
| A08802 | A15506 | 234 | A08804 | A08805 | 380 |
| A08806 | A09328 | 202 | A08806 | A11542 | 205 |
| A08806 | A12525 | 167 | A08806 | A14408 | 168 |
| A08807 | A10247 | 210 | A08807 | A11737 | 266 |
| A08807 | A11917 | 157 | A08807 | A12361 | 290 |
| A08807 | A12507 | 183 | A08807 | A12665 | 283 |
| A08807 | A13313 | 177 | A08807 | A13781 | 184 |
| A08807 | A13963 | 160 | A08807 | A13989 | 294 |
| A08807 | A14094 | 165 | A08807 | A14214 | 202 |
| A08807 | A15105 | 218 | A08807 | A15370 | 151 |
| A08807 | A16157 | 213 | A08807 | A16552 | 198 |
| A08807 | A16703 | 484 | A08807 | A16838 | 334 |
| A08807 | A17211 | 348 | A08808 | A15507 | 212 |
| A08810 | A08910 | 268 | A08810 | A08949 | 260 |
| A08810 | A09471 | 340 | A08810 | A09744 | 236 |
| A08810 | A09764 | 343 | A08810 | A10443 | 327 |
| A08810 | A12943 | 363 | A08810 | A13899 | 201 |
| A08810 | A15809 | 184 | A08810 | A15922 | 232 |
| A08812 | A08813 | 557 | A08812 | A08840 | 184 |
| A08812 | A08844 | 640 | A08812 | A08845 | 414 |
| A08812 | A09299 | 160 | A08812 | A09727 | 184 |
| A08812 | A10456 | 193 | A08812 | A10789 | 557 |
| A08812 | A11301 | 160 | A08812 | A11475 | 157 |

|        |        |     |        |        |     |
|--------|--------|-----|--------|--------|-----|
| A08812 | A11954 | 419 | A08812 | A12507 | 557 |
| A08812 | A12725 | 395 | A08812 | A13069 | 172 |
| A08812 | A13399 | 491 | A08812 | A13737 | 555 |
| A08812 | A13963 | 557 | A08812 | A14084 | 643 |
| A08812 | A14198 | 187 | A08812 | A14214 | 368 |
| A08812 | A14219 | 290 | A08812 | A14226 | 180 |
| A08812 | A14270 | 184 | A08812 | A14285 | 643 |
| A08812 | A14289 | 216 | A08812 | A14445 | 252 |
| A08812 | A14708 | 490 | A08812 | A15541 | 236 |
| A08812 | A15949 | 557 | A08812 | A16099 | 184 |
| A08812 | A16565 | 152 | A08812 | A16611 | 252 |
| A08812 | A16652 | 229 | A08812 | A16944 | 160 |
| A08812 | A17133 | 258 | A08813 | A08840 | 184 |
| A08813 | A08844 | 480 | A08813 | A08845 | 500 |
| A08813 | A08847 | 193 | A08813 | A09727 | 184 |
| A08813 | A10373 | 285 | A08813 | A10789 | 695 |
| A08813 | A10808 | 185 | A08813 | A11496 | 273 |
| A08813 | A11497 | 256 | A08813 | A11675 | 177 |
| A08813 | A11954 | 379 | A08813 | A12507 | 695 |
| A08813 | A12606 | 224 | A08813 | A12658 | 188 |
| A08813 | A12725 | 165 | A08813 | A12858 | 236 |
| A08813 | A12873 | 154 | A08813 | A13322 | 152 |
| A08813 | A13399 | 469 | A08813 | A13737 | 694 |
| A08813 | A13963 | 695 | A08813 | A14084 | 557 |
| A08813 | A14167 | 305 | A08813 | A14209 | 277 |
| A08813 | A14214 | 210 | A08813 | A14270 | 237 |
| A08813 | A14272 | 439 | A08813 | A14285 | 554 |
| A08813 | A14286 | 278 | A08813 | A14289 | 236 |
| A08813 | A14706 | 174 | A08813 | A14708 | 385 |
| A08813 | A15541 | 262 | A08813 | A15850 | 236 |
| A08813 | A15949 | 695 | A08813 | A16099 | 184 |
| A08813 | A16343 | 219 | A08813 | A16565 | 174 |
| A08813 | A16611 | 279 | A08813 | A16697 | 156 |
| A08813 | A16829 | 156 | A08814 | A08844 | 188 |
| A08814 | A08845 | 294 | A08814 | A08847 | 306 |
| A08814 | A09298 | 199 | A08814 | A09609 | 458 |
| A08814 | A09648 | 385 | A08814 | A09828 | 299 |
| A08814 | A10525 | 263 | A08814 | A10789 | 393 |
| A08814 | A11158 | 170 | A08814 | A11209 | 224 |
| A08814 | A11234 | 260 | A08814 | A11279 | 180 |
| A08814 | A11297 | 271 | A08814 | A11301 | 481 |
| A08814 | A11394 | 263 | A08814 | A11430 | 345 |
| A08814 | A11456 | 168 | A08814 | A11472 | 323 |
| A08814 | A11496 | 466 | A08814 | A11497 | 477 |
| A08814 | A11555 | 274 | A08814 | A11616 | 383 |
| A08814 | A11649 | 268 | A08814 | A11735 | 477 |

|        |        |     |        |        |     |
|--------|--------|-----|--------|--------|-----|
| A08814 | A11737 | 465 | A08814 | A11820 | 221 |
| A08814 | A11851 | 301 | A08814 | A11884 | 347 |
| A08814 | A11914 | 472 | A08814 | A11915 | 221 |
| A08814 | A11917 | 474 | A08814 | A11954 | 221 |
| A08814 | A12167 | 326 | A08814 | A12215 | 246 |
| A08814 | A12254 | 452 | A08814 | A12433 | 451 |
| A08814 | A12501 | 152 | A08814 | A12506 | 452 |
| A08814 | A12507 | 356 | A08814 | A12508 | 276 |
| A08814 | A12606 | 484 | A08814 | A12625 | 418 |
| A08814 | A12658 | 445 | A08814 | A12665 | 406 |
| A08814 | A12725 | 430 | A08814 | A12726 | 243 |
| A08814 | A12825 | 313 | A08814 | A12858 | 480 |
| A08814 | A12927 | 156 | A08814 | A13116 | 193 |
| A08814 | A13169 | 230 | A08814 | A13170 | 332 |
| A08814 | A13309 | 152 | A08814 | A13313 | 395 |
| A08814 | A13321 | 380 | A08814 | A13399 | 230 |
| A08814 | A13527 | 210 | A08814 | A13706 | 243 |
| A08814 | A13707 | 372 | A08814 | A13708 | 176 |
| A08814 | A13737 | 369 | A08814 | A13781 | 357 |
| A08814 | A13782 | 321 | A08814 | A13783 | 416 |
| A08814 | A13784 | 328 | A08814 | A13786 | 299 |
| A08814 | A13788 | 343 | A08814 | A13804 | 246 |
| A08814 | A13805 | 204 | A08814 | A13806 | 173 |
| A08814 | A13809 | 419 | A08814 | A13811 | 200 |
| A08814 | A13812 | 193 | A08814 | A14074 | 401 |
| A08814 | A14084 | 243 | A08814 | A14167 | 234 |
| A08814 | A14209 | 364 | A08814 | A14214 | 473 |
| A08814 | A14222 | 451 | A08814 | A14227 | 419 |
| A08814 | A14235 | 238 | A08814 | A14239 | 243 |
| A08814 | A14255 | 412 | A08814 | A14263 | 390 |
| A08814 | A14270 | 319 | A08814 | A14280 | 278 |
| A08814 | A14286 | 208 | A08814 | A14288 | 256 |
| A08814 | A14289 | 488 | A08814 | A14474 | 152 |
| A08814 | A14569 | 465 | A08814 | A14706 | 434 |
| A08814 | A14719 | 187 | A08814 | A14739 | 297 |
| A08814 | A14799 | 465 | A08814 | A14838 | 177 |
| A08814 | A14903 | 417 | A08814 | A14917 | 411 |
| A08814 | A15105 | 259 | A08814 | A15187 | 318 |
| A08814 | A15189 | 241 | A08814 | A15380 | 480 |
| A08814 | A15519 | 174 | A08814 | A15541 | 435 |
| A08814 | A15665 | 347 | A08814 | A15680 | 265 |
| A08814 | A15683 | 346 | A08814 | A15709 | 446 |
| A08814 | A15711 | 314 | A08814 | A15850 | 291 |
| A08814 | A15854 | 240 | A08814 | A15932 | 279 |
| A08814 | A15947 | 174 | A08814 | A16157 | 484 |
| A08814 | A16187 | 301 | A08814 | A16243 | 218 |

|        |        |     |        |        |     |
|--------|--------|-----|--------|--------|-----|
| A08814 | A16261 | 160 | A08814 | A16322 | 252 |
| A08814 | A16343 | 278 | A08814 | A16552 | 472 |
| A08814 | A16565 | 469 | A08814 | A16566 | 224 |
| A08814 | A16567 | 249 | A08814 | A16585 | 257 |
| A08814 | A16587 | 462 | A08814 | A16597 | 257 |
| A08814 | A16611 | 479 | A08814 | A16664 | 469 |
| A08814 | A16675 | 382 | A08814 | A16680 | 236 |
| A08814 | A16690 | 208 | A08814 | A16691 | 383 |
| A08814 | A16692 | 196 | A08814 | A16693 | 390 |
| A08814 | A16695 | 441 | A08814 | A16697 | 218 |
| A08814 | A16703 | 177 | A08814 | A16707 | 414 |
| A08814 | A16764 | 356 | A08814 | A16774 | 375 |
| A08814 | A16776 | 357 | A08814 | A16788 | 330 |
| A08814 | A16790 | 202 | A08814 | A16807 | 152 |
| A08814 | A16815 | 388 | A08814 | A16829 | 416 |
| A08814 | A16838 | 190 | A08814 | A16866 | 364 |
| A08814 | A16874 | 213 | A08814 | A16942 | 257 |
| A08815 | A08837 | 262 | A08815 | A11525 | 162 |
| A08815 | A13218 | 285 | A08815 | A13433 | 343 |
| A08815 | A13903 | 180 | A08815 | A14211 | 176 |
| A08815 | A14895 | 306 | A08815 | A15699 | 249 |
| A08815 | A16075 | 199 | A08817 | A08882 | 347 |
| A08817 | A09149 | 185 | A08817 | A10506 | 356 |
| A08817 | A13330 | 488 | A08817 | A13426 | 260 |
| A08817 | A15840 | 327 | A08817 | A16325 | 411 |
| A08817 | A16328 | 238 | A08818 | A08845 | 162 |
| A08818 | A08857 | 213 | A08818 | A08976 | 154 |
| A08818 | A09326 | 208 | A08818 | A09502 | 156 |
| A08818 | A09622 | 269 | A08818 | A09648 | 162 |
| A08818 | A09654 | 361 | A08818 | A10250 | 118 |
| A08818 | A10316 | 210 | A08818 | A11139 | 198 |
| A08818 | A11234 | 328 | A08818 | A11279 | 310 |
| A08818 | A11301 | 235 | A08818 | A11344 | 156 |
| A08818 | A11471 | 265 | A08818 | A11496 | 154 |
| A08818 | A11497 | 277 | A08818 | A11597 | 324 |
| A08818 | A11674 | 156 | A08818 | A11675 | 215 |
| A08818 | A11914 | 318 | A08818 | A11917 | 293 |
| A08818 | A11928 | 236 | A08818 | A11992 | 418 |
| A08818 | A12238 | 312 | A08818 | A12254 | 193 |
| A08818 | A12499 | 393 | A08818 | A12501 | 424 |
| A08818 | A12507 | 324 | A08818 | A12606 | 409 |
| A08818 | A12665 | 339 | A08818 | A12727 | 319 |
| A08818 | A12858 | 185 | A08818 | A12873 | 329 |
| A08818 | A13309 | 236 | A08818 | A13706 | 335 |
| A08818 | A13708 | 152 | A08818 | A13781 | 326 |
| A08818 | A13783 | 296 | A08818 | A13784 | 353 |

|        |        |     |        |        |     |
|--------|--------|-----|--------|--------|-----|
| A08818 | A13912 | 338 | A08818 | A14087 | 384 |
| A08818 | A14094 | 201 | A08818 | A14214 | 347 |
| A08818 | A14222 | 195 | A08818 | A14375 | 216 |
| A08818 | A14476 | 306 | A08818 | A14569 | 361 |
| A08818 | A14718 | 235 | A08818 | A14719 | 268 |
| A08818 | A14799 | 241 | A08818 | A14903 | 401 |
| A08818 | A14917 | 288 | A08818 | A15105 | 267 |
| A08818 | A15187 | 435 | A08818 | A15189 | 333 |
| A08818 | A15217 | 296 | A08818 | A15262 | 316 |
| A08818 | A15536 | 308 | A08818 | A15651 | 184 |
| A08818 | A15711 | 380 | A08818 | A15854 | 200 |
| A08818 | A15943 | 235 | A08818 | A16067 | 172 |
| A08818 | A16157 | 263 | A08818 | A16187 | 251 |
| A08818 | A16228 | 156 | A08818 | A16261 | 243 |
| A08818 | A16378 | 267 | A08818 | A16552 | 340 |
| A08818 | A16565 | 413 | A08818 | A16597 | 344 |
| A08818 | A16611 | 291 | A08818 | A16652 | 196 |
| A08818 | A16664 | 210 | A08818 | A16675 | 177 |
| A08818 | A16690 | 310 | A08818 | A16693 | 340 |
| A08818 | A16699 | 266 | A08818 | A16702 | 388 |
| A08818 | A16703 | 260 | A08818 | A16704 | 384 |
| A08818 | A16706 | 347 | A08818 | A16764 | 346 |
| A08818 | A16774 | 326 | A08818 | A16790 | 393 |
| A08818 | A16838 | 385 | A08818 | A16866 | 353 |
| A08818 | A16905 | 429 | A08818 | A16944 | 451 |
| A08818 | A17012 | 396 | A08818 | A17017 | 283 |
| A08819 | A08855 | 276 | A08819 | A14261 | 408 |
| A08820 | A09598 | 491 | A08820 | A09617 | 208 |
| A08820 | A09764 | 491 | A08820 | A10373 | 515 |
| A08820 | A11540 | 481 | A08820 | A11782 | 322 |
| A08820 | A11852 | 191 | A08820 | A11874 | 241 |
| A08820 | A12365 | 200 | A08820 | A13429 | 404 |
| A08820 | A13809 | 477 | A08820 | A13889 | 341 |
| A08820 | A13949 | 469 | A08820 | A14007 | 208 |
| A08820 | A14009 | 538 | A08820 | A14079 | 434 |
| A08820 | A14091 | 200 | A08820 | A14094 | 450 |
| A08820 | A14127 | 196 | A08820 | A14154 | 470 |
| A08820 | A14177 | 555 | A08820 | A14192 | 200 |
| A08820 | A14223 | 297 | A08820 | A14230 | 317 |
| A08820 | A14273 | 224 | A08820 | A14694 | 564 |
| A08820 | A15369 | 446 | A08820 | A15497 | 168 |
| A08820 | A15524 | 490 | A08820 | A15531 | 301 |
| A08820 | A15549 | 196 | A08820 | A15837 | 456 |
| A08820 | A15935 | 434 | A08820 | A16068 | 177 |
| A08820 | A16127 | 412 | A08820 | A16128 | 355 |
| A08820 | A16274 | 200 | A08820 | A16299 | 388 |

|        |        |     |        |        |     |
|--------|--------|-----|--------|--------|-----|
| A08820 | A16537 | 243 | A08820 | A16626 | 479 |
| A08820 | A16659 | 414 | A08820 | A16731 | 196 |
| A08820 | A16754 | 224 | A08821 | A08831 | 276 |
| A08821 | A08956 | 276 | A08821 | A09298 | 380 |
| A08821 | A09743 | 276 | A08821 | A09996 | 331 |
| A08821 | A10897 | 226 | A08821 | A11131 | 196 |
| A08821 | A11596 | 172 | A08821 | A12606 | 276 |
| A08821 | A13106 | 212 | A08821 | A13266 | 335 |
| A08821 | A13267 | 485 | A08821 | A13983 | 491 |
| A08821 | A14146 | 182 | A08821 | A14199 | 454 |
| A08821 | A14201 | 307 | A08821 | A14212 | 704 |
| A08821 | A14213 | 584 | A08821 | A14214 | 594 |
| A08821 | A14238 | 232 | A08821 | A14252 | 168 |
| A08821 | A14279 | 156 | A08821 | A14467 | 152 |
| A08821 | A15366 | 154 | A08821 | A16449 | 276 |
| A08821 | A16702 | 276 | A08821 | A16949 | 226 |
| A08822 | A09394 | 347 | A08823 | A15372 | 318 |
| A08825 | A08828 | 434 | A08825 | A10640 | 414 |
| A08825 | A14311 | 447 | A08826 | A11787 | 441 |
| A08827 | A08829 | 401 | A08827 | A09922 | 382 |
| A08827 | A10638 | 490 | A08827 | A11911 | 328 |
| A08827 | A13872 | 286 | A08827 | A14392 | 216 |
| A08828 | A10343 | 419 | A08828 | A10640 | 368 |
| A08828 | A13304 | 419 | A08828 | A14311 | 425 |
| A08830 | A13589 | 316 | A08831 | A08956 | 276 |
| A08831 | A09294 | 480 | A08831 | A09743 | 276 |
| A08831 | A09996 | 276 | A08831 | A10159 | 367 |
| A08831 | A11559 | 340 | A08831 | A11706 | 255 |
| A08831 | A12606 | 388 | A08831 | A13170 | 246 |
| A08831 | A14212 | 297 | A08831 | A14213 | 328 |
| A08831 | A14214 | 600 | A08831 | A15224 | 267 |
| A08831 | A15498 | 374 | A08831 | A16449 | 276 |
| A08831 | A16623 | 252 | A08831 | A16702 | 276 |
| A08832 | A13949 | 223 | A08833 | A13949 | 419 |
| A08834 | A08840 | 554 | A08834 | A08850 | 283 |
| A08834 | A08876 | 168 | A08834 | A09199 | 160 |
| A08834 | A09222 | 204 | A08834 | A09627 | 160 |
| A08834 | A09732 | 255 | A08834 | A09744 | 490 |
| A08834 | A09825 | 179 | A08834 | A09833 | 488 |
| A08834 | A09835 | 408 | A08834 | A09848 | 400 |
| A08834 | A09850 | 355 | A08834 | A09857 | 330 |
| A08834 | A09863 | 260 | A08834 | A09864 | 345 |
| A08834 | A09875 | 491 | A08834 | A09984 | 288 |
| A08834 | A10164 | 201 | A08834 | A10372 | 160 |
| A08834 | A10587 | 254 | A08834 | A10723 | 302 |
| A08834 | A10740 | 443 | A08834 | A10796 | 217 |

|        |        |     |        |        |     |
|--------|--------|-----|--------|--------|-----|
| A08834 | A10935 | 256 | A08834 | A11131 | 177 |
| A08834 | A11191 | 170 | A08834 | A11365 | 160 |
| A08834 | A11412 | 160 | A08834 | A11537 | 263 |
| A08834 | A11558 | 179 | A08834 | A11651 | 477 |
| A08834 | A11735 | 160 | A08834 | A11737 | 160 |
| A08834 | A11784 | 329 | A08834 | A11797 | 273 |
| A08834 | A11914 | 160 | A08834 | A11946 | 288 |
| A08834 | A12658 | 160 | A08834 | A12824 | 160 |
| A08834 | A13269 | 350 | A08834 | A13367 | 238 |
| A08834 | A13819 | 179 | A08834 | A13826 | 491 |
| A08834 | A13866 | 179 | A08834 | A13899 | 491 |
| A08834 | A13903 | 263 | A08834 | A13942 | 179 |
| A08834 | A13947 | 235 | A08834 | A13987 | 193 |
| A08834 | A14007 | 160 | A08834 | A14111 | 469 |
| A08834 | A14126 | 210 | A08834 | A14135 | 350 |
| A08834 | A14190 | 172 | A08834 | A14199 | 202 |
| A08834 | A14202 | 453 | A08834 | A14210 | 424 |
| A08834 | A14229 | 199 | A08834 | A14276 | 252 |
| A08834 | A14290 | 486 | A08834 | A14366 | 179 |
| A08834 | A14371 | 417 | A08834 | A14391 | 249 |
| A08834 | A14394 | 160 | A08834 | A14511 | 452 |
| A08834 | A14570 | 265 | A08834 | A14635 | 159 |
| A08834 | A14888 | 217 | A08834 | A15237 | 160 |
| A08834 | A15257 | 160 | A08834 | A15284 | 190 |
| A08834 | A15289 | 350 | A08834 | A15291 | 63  |
| A08834 | A15292 | 484 | A08834 | A15297 | 63  |
| A08834 | A15308 | 267 | A08834 | A15311 | 254 |
| A08834 | A15312 | 457 | A08834 | A15313 | 483 |
| A08834 | A15314 | 63  | A08834 | A15318 | 343 |
| A08834 | A15331 | 430 | A08834 | A15346 | 490 |
| A08834 | A15348 | 391 | A08834 | A15349 | 468 |
| A08834 | A15352 | 456 | A08834 | A15358 | 179 |
| A08834 | A15425 | 157 | A08834 | A15432 | 162 |
| A08834 | A15438 | 260 | A08834 | A15440 | 160 |
| A08834 | A15444 | 271 | A08834 | A15454 | 259 |
| A08834 | A15458 | 260 | A08834 | A15470 | 179 |
| A08834 | A15478 | 168 | A08834 | A15480 | 489 |
| A08834 | A15484 | 280 | A08834 | A15485 | 184 |
| A08834 | A15495 | 454 | A08834 | A15515 | 450 |
| A08834 | A15818 | 151 | A08834 | A15824 | 157 |
| A08834 | A15884 | 200 | A08834 | A16120 | 162 |
| A08834 | A16192 | 238 | A08834 | A16224 | 489 |
| A08834 | A16300 | 439 | A08834 | A16540 | 182 |
| A08834 | A16711 | 491 | A08834 | A16829 | 188 |
| A08834 | A16915 | 177 | A08834 | A17104 | 350 |
| A08835 | A08987 | 491 | A08835 | A09293 | 177 |

|        |        |     |        |        |     |
|--------|--------|-----|--------|--------|-----|
| A08835 | A09507 | 162 | A08835 | A09707 | 436 |
| A08835 | A09778 | 174 | A08835 | A09797 | 157 |
| A08835 | A10417 | 205 | A08835 | A10441 | 177 |
| A08835 | A10469 | 246 | A08835 | A10626 | 188 |
| A08835 | A10633 | 152 | A08835 | A11090 | 468 |
| A08835 | A11227 | 218 | A08835 | A11244 | 249 |
| A08835 | A11278 | 355 | A08835 | A11298 | 436 |
| A08835 | A11322 | 491 | A08835 | A11333 | 408 |
| A08835 | A11338 | 491 | A08835 | A11374 | 491 |
| A08835 | A11400 | 491 | A08835 | A11419 | 483 |
| A08835 | A11427 | 467 | A08835 | A11463 | 374 |
| A08835 | A11677 | 276 | A08835 | A11723 | 407 |
| A08835 | A11724 | 288 | A08835 | A11777 | 224 |
| A08835 | A11860 | 168 | A08835 | A11975 | 391 |
| A08835 | A12618 | 152 | A08835 | A12918 | 224 |
| A08835 | A12934 | 419 | A08835 | A13207 | 383 |
| A08835 | A13261 | 234 | A08835 | A14073 | 316 |
| A08835 | A14845 | 430 | A08835 | A15256 | 200 |
| A08835 | A15292 | 177 | A08835 | A15416 | 491 |
| A08835 | A15638 | 490 | A08835 | A16042 | 162 |
| A08835 | A16044 | 274 | A08835 | A16147 | 396 |
| A08835 | A16281 | 418 | A08835 | A17128 | 338 |
| A08836 | A08837 | 490 | A08836 | A09561 | 355 |
| A08836 | A09790 | 241 | A08836 | A10148 | 369 |
| A08836 | A10506 | 229 | A08836 | A11044 | 393 |
| A08836 | A13373 | 488 | A08837 | A08845 | 490 |
| A08837 | A09162 | 196 | A08837 | A10148 | 281 |
| A08837 | A10382 | 217 | A08837 | A12373 | 254 |
| A08837 | A13373 | 469 | A08837 | A15911 | 191 |
| A08837 | A16087 | 165 | A08838 | A09235 | 171 |
| A08838 | A09791 | 157 | A08838 | A10982 | 168 |
| A08838 | A11159 | 383 | A08838 | A11295 | 207 |
| A08838 | A11408 | 238 | A08838 | A12722 | 204 |
| A08838 | A12817 | 383 | A08838 | A13965 | 152 |
| A08838 | A14202 | 182 | A08838 | A15366 | 195 |
| A08838 | A15839 | 252 | A08838 | A16488 | 272 |
| A08839 | A08849 | 330 | A08839 | A08853 | 130 |
| A08839 | A08854 | 201 | A08839 | A08855 | 436 |
| A08839 | A08858 | 962 | A08839 | A08894 | 191 |
| A08839 | A09506 | 224 | A08839 | A09628 | 230 |
| A08839 | A10593 | 234 | A08839 | A10645 | 190 |
| A08839 | A11283 | 285 | A08839 | A11668 | 352 |
| A08839 | A12047 | 460 | A08839 | A12288 | 345 |
| A08839 | A13225 | 899 | A08839 | A13939 | 202 |
| A08839 | A13978 | 899 | A08839 | A13997 | 899 |
| A08839 | A14179 | 217 | A08839 | A14226 | 899 |



|        |        |     |        |        |     |
|--------|--------|-----|--------|--------|-----|
| A08839 | A14227 | 322 | A08839 | A14279 | 338 |
| A08839 | A14633 | 235 | A08839 | A14886 | 195 |
| A08839 | A14887 | 245 | A08839 | A15703 | 291 |
| A08839 | A15726 | 380 | A08839 | A16634 | 180 |
| A08840 | A08841 | 311 | A08840 | A08844 | 179 |
| A08840 | A08845 | 440 | A08840 | A09022 | 307 |
| A08840 | A09222 | 224 | A08840 | A09241 | 163 |
| A08840 | A09355 | 269 | A08840 | A09727 | 184 |
| A08840 | A09732 | 401 | A08840 | A09744 | 491 |
| A08840 | A09776 | 278 | A08840 | A09825 | 179 |
| A08840 | A09833 | 465 | A08840 | A09848 | 135 |
| A08840 | A09850 | 247 | A08840 | A09863 | 278 |
| A08840 | A09875 | 485 | A08840 | A10611 | 196 |
| A08840 | A10723 | 439 | A08840 | A10789 | 185 |
| A08840 | A11537 | 286 | A08840 | A11558 | 179 |
| A08840 | A11651 | 384 | A08840 | A11797 | 290 |
| A08840 | A11954 | 210 | A08840 | A12507 | 184 |
| A08840 | A12870 | 213 | A08840 | A13338 | 154 |
| A08840 | A13367 | 257 | A08840 | A13737 | 184 |
| A08840 | A13819 | 179 | A08840 | A13826 | 491 |
| A08840 | A13856 | 406 | A08840 | A13866 | 179 |
| A08840 | A13899 | 491 | A08840 | A13942 | 179 |
| A08840 | A13963 | 184 | A08840 | A14048 | 185 |
| A08840 | A14084 | 184 | A08840 | A14112 | 228 |
| A08840 | A14190 | 205 | A08840 | A14202 | 281 |
| A08840 | A14210 | 173 | A08840 | A14270 | 184 |
| A08840 | A14276 | 179 | A08840 | A14285 | 184 |
| A08840 | A14290 | 355 | A08840 | A14366 | 179 |
| A08840 | A14371 | 360 | A08840 | A14511 | 319 |
| A08840 | A14570 | 396 | A08840 | A14611 | 171 |
| A08840 | A15292 | 310 | A08840 | A15310 | 265 |
| A08840 | A15314 | 82  | A08840 | A15318 | 187 |
| A08840 | A15346 | 489 | A08840 | A15348 | 283 |
| A08840 | A15349 | 311 | A08840 | A15352 | 174 |
| A08840 | A15358 | 179 | A08840 | A15419 | 201 |
| A08840 | A15431 | 475 | A08840 | A15433 | 297 |
| A08840 | A15441 | 257 | A08840 | A15454 | 281 |
| A08840 | A15455 | 358 | A08840 | A15458 | 278 |
| A08840 | A15470 | 179 | A08840 | A15480 | 291 |
| A08840 | A15484 | 179 | A08840 | A15495 | 405 |
| A08840 | A15800 | 162 | A08840 | A15818 | 171 |
| A08840 | A15899 | 303 | A08840 | A15949 | 184 |
| A08840 | A16099 | 291 | A08840 | A16136 | 228 |
| A08840 | A16224 | 457 | A08840 | A16300 | 322 |
| A08840 | A16711 | 469 | A08840 | A16829 | 208 |
| A08840 | A16915 | 196 | A08840 | A17081 | 278 |

|        |        |     |        |        |     |
|--------|--------|-----|--------|--------|-----|
| A08840 | A17180 | 361 | A08841 | A08881 | 414 |
| A08841 | A09241 | 266 | A08841 | A09743 | 348 |
| A08841 | A11191 | 491 | A08841 | A11422 | 310 |
| A08841 | A11681 | 491 | A08841 | A13826 | 319 |
| A08841 | A13899 | 322 | A08841 | A13941 | 283 |
| A08841 | A14511 | 218 | A08841 | A15288 | 302 |
| A08841 | A15312 | 232 | A08841 | A15313 | 249 |
| A08841 | A15346 | 423 | A08841 | A15440 | 279 |
| A08841 | A15451 | 303 | A08841 | A15480 | 180 |
| A08841 | A16224 | 226 | A08841 | A16985 | 364 |
| A08842 | A08866 | 217 | A08842 | A09208 | 272 |
| A08842 | A09729 | 180 | A08842 | A09734 | 204 |
| A08842 | A09740 | 213 | A08842 | A09825 | 160 |
| A08842 | A10395 | 177 | A08842 | A10592 | 218 |
| A08842 | A11431 | 461 | A08842 | A11542 | 462 |
| A08842 | A11545 | 249 | A08842 | A11875 | 159 |
| A08842 | A12975 | 272 | A08842 | A13363 | 458 |
| A08842 | A13824 | 154 | A08842 | A13941 | 176 |
| A08842 | A14072 | 185 | A08842 | A14109 | 227 |
| A08842 | A14120 | 221 | A08842 | A14122 | 451 |
| A08842 | A14124 | 299 | A08842 | A14129 | 425 |
| A08842 | A14210 | 319 | A08842 | A14287 | 272 |
| A08842 | A14408 | 229 | A08842 | A14511 | 363 |
| A08842 | A14570 | 227 | A08842 | A15130 | 212 |
| A08842 | A15278 | 398 | A08842 | A15292 | 486 |
| A08842 | A15312 | 469 | A08842 | A15313 | 445 |
| A08842 | A15317 | 294 | A08842 | A15331 | 243 |
| A08842 | A15349 | 486 | A08842 | A15352 | 319 |
| A08842 | A15366 | 216 | A08842 | A15411 | 180 |
| A08842 | A15412 | 243 | A08842 | A15413 | 306 |
| A08842 | A15431 | 491 | A08842 | A15432 | 477 |
| A08842 | A15436 | 228 | A08842 | A15444 | 152 |
| A08842 | A15445 | 224 | A08842 | A15447 | 184 |
| A08842 | A15452 | 334 | A08842 | A15453 | 258 |
| A08842 | A15456 | 170 | A08842 | A15459 | 303 |
| A08842 | A15461 | 491 | A08842 | A15463 | 405 |
| A08842 | A15482 | 297 | A08842 | A15484 | 301 |
| A08842 | A15487 | 488 | A08842 | A15498 | 475 |
| A08842 | A15799 | 180 | A08842 | A15817 | 245 |
| A08842 | A15824 | 491 | A08842 | A15864 | 307 |
| A08844 | A08845 | 433 | A08844 | A08911 | 263 |
| A08844 | A09443 | 243 | A08844 | A09728 | 294 |
| A08844 | A09828 | 260 | A08844 | A10789 | 463 |
| A08844 | A11648 | 234 | A08844 | A11735 | 329 |
| A08844 | A11737 | 330 | A08844 | A11851 | 379 |
| A08844 | A11914 | 196 | A08844 | A11917 | 204 |

|        |        |     |        |        |     |
|--------|--------|-----|--------|--------|-----|
| A08844 | A11940 | 311 | A08844 | A12254 | 335 |
| A08844 | A12284 | 177 | A08844 | A12506 | 256 |
| A08844 | A12507 | 338 | A08844 | A12658 | 358 |
| A08844 | A12665 | 416 | A08844 | A12725 | 424 |
| A08844 | A12858 | 196 | A08844 | A13170 | 288 |
| A08844 | A13342 | 277 | A08844 | A13356 | 217 |
| A08844 | A13399 | 445 | A08844 | A13708 | 162 |
| A08844 | A13737 | 174 | A08844 | A13783 | 305 |
| A08844 | A13805 | 293 | A08844 | A13809 | 238 |
| A08844 | A13963 | 462 | A08844 | A14084 | 633 |
| A08844 | A14198 | 191 | A08844 | A14219 | 393 |
| A08844 | A14239 | 213 | A08844 | A14255 | 228 |
| A08844 | A14285 | 476 | A08844 | A14289 | 268 |
| A08844 | A14462 | 229 | A08844 | A14485 | 162 |
| A08844 | A14643 | 414 | A08844 | A14706 | 159 |
| A08844 | A14785 | 341 | A08844 | A14838 | 162 |
| A08844 | A14903 | 306 | A08844 | A14917 | 296 |
| A08844 | A15709 | 184 | A08844 | A15795 | 232 |
| A08844 | A15854 | 210 | A08844 | A15949 | 473 |
| A08844 | A16157 | 274 | A08844 | A16322 | 219 |
| A08844 | A16587 | 293 | A08844 | A16611 | 386 |
| A08844 | A16664 | 350 | A08844 | A16675 | 188 |
| A08844 | A16680 | 340 | A08844 | A16774 | 333 |
| A08844 | A16815 | 345 | A08844 | A16874 | 301 |
| A08845 | A09298 | 257 | A08845 | A09326 | 229 |
| A08845 | A09333 | 195 | A08845 | A09609 | 245 |
| A08845 | A09622 | 303 | A08845 | A09648 | 362 |
| A08845 | A09727 | 184 | A08845 | A09829 | 180 |
| A08845 | A10316 | 232 | A08845 | A10789 | 541 |
| A08845 | A10934 | 157 | A08845 | A11158 | 152 |
| A08845 | A11234 | 368 | A08845 | A11279 | 154 |
| A08845 | A11297 | 240 | A08845 | A11301 | 457 |
| A08845 | A11394 | 247 | A08845 | A11430 | 324 |
| A08845 | A11456 | 152 | A08845 | A11472 | 374 |
| A08845 | A11496 | 429 | A08845 | A11497 | 468 |
| A08845 | A11555 | 255 | A08845 | A11616 | 369 |
| A08845 | A11675 | 399 | A08845 | A11725 | 201 |
| A08845 | A11735 | 443 | A08845 | A11737 | 445 |
| A08845 | A11914 | 374 | A08845 | A11917 | 469 |
| A08845 | A11940 | 212 | A08845 | A11954 | 205 |
| A08845 | A11992 | 247 | A08845 | A12167 | 310 |
| A08845 | A12215 | 357 | A08845 | A12238 | 352 |
| A08845 | A12254 | 380 | A08845 | A12255 | 170 |
| A08845 | A12284 | 355 | A08845 | A12433 | 385 |
| A08845 | A12501 | 360 | A08845 | A12507 | 524 |
| A08845 | A12508 | 352 | A08845 | A12606 | 452 |

|        |        |     |        |        |     |
|--------|--------|-----|--------|--------|-----|
| A08845 | A12625 | 279 | A08845 | A12658 | 405 |
| A08845 | A12665 | 228 | A08845 | A12725 | 383 |
| A08845 | A12727 | 232 | A08845 | A12792 | 221 |
| A08845 | A12858 | 475 | A08845 | A13003 | 184 |
| A08845 | A13116 | 311 | A08845 | A13169 | 208 |
| A08845 | A13309 | 360 | A08845 | A13313 | 412 |
| A08845 | A13342 | 168 | A08845 | A13399 | 423 |
| A08845 | A13706 | 223 | A08845 | A13707 | 262 |
| A08845 | A13708 | 154 | A08845 | A13737 | 278 |
| A08845 | A13781 | 384 | A08845 | A13784 | 435 |
| A08845 | A13786 | 281 | A08845 | A13805 | 321 |
| A08845 | A13809 | 441 | A08845 | A13811 | 183 |
| A08845 | A13912 | 458 | A08845 | A13928 | 269 |
| A08845 | A13963 | 471 | A08845 | A14016 | 159 |
| A08845 | A14084 | 507 | A08845 | A14087 | 170 |
| A08845 | A14094 | 303 | A08845 | A14214 | 469 |
| A08845 | A14222 | 218 | A08845 | A14227 | 363 |
| A08845 | A14239 | 223 | A08845 | A14263 | 312 |
| A08845 | A14270 | 184 | A08845 | A14285 | 434 |
| A08845 | A14286 | 193 | A08845 | A14288 | 414 |
| A08845 | A14289 | 291 | A08845 | A14375 | 339 |
| A08845 | A14455 | 277 | A08845 | A14462 | 243 |
| A08845 | A14569 | 470 | A08845 | A14595 | 255 |
| A08845 | A14706 | 332 | A08845 | A14708 | 461 |
| A08845 | A14739 | 285 | A08845 | A14799 | 198 |
| A08845 | A14903 | 205 | A08845 | A14921 | 273 |
| A08845 | A15105 | 416 | A08845 | A15187 | 430 |
| A08845 | A15189 | 388 | A08845 | A15262 | 196 |
| A08845 | A15536 | 219 | A08845 | A15541 | 390 |
| A08845 | A15665 | 193 | A08845 | A15680 | 324 |
| A08845 | A15683 | 324 | A08845 | A15698 | 151 |
| A08845 | A15709 | 286 | A08845 | A15711 | 299 |
| A08845 | A15850 | 391 | A08845 | A15853 | 156 |
| A08845 | A15949 | 486 | A08845 | A16099 | 285 |
| A08845 | A16115 | 172 | A08845 | A16157 | 454 |
| A08845 | A16187 | 151 | A08845 | A16243 | 201 |
| A08845 | A16343 | 380 | A08845 | A16552 | 428 |
| A08845 | A16565 | 454 | A08845 | A16566 | 208 |
| A08845 | A16587 | 321 | A08845 | A16597 | 434 |
| A08845 | A16608 | 191 | A08845 | A16611 | 470 |
| A08845 | A16652 | 213 | A08845 | A16664 | 232 |
| A08845 | A16675 | 188 | A08845 | A16680 | 425 |
| A08845 | A16682 | 205 | A08845 | A16690 | 187 |
| A08845 | A16691 | 252 | A08845 | A16693 | 263 |
| A08845 | A16695 | 268 | A08845 | A16697 | 201 |
| A08845 | A16703 | 160 | A08845 | A16704 | 302 |

|        |        |     |        |        |     |
|--------|--------|-----|--------|--------|-----|
| A08845 | A16707 | 308 | A08845 | A16709 | 319 |
| A08845 | A16764 | 339 | A08845 | A16774 | 366 |
| A08845 | A16776 | 213 | A08845 | A16788 | 319 |
| A08845 | A16790 | 319 | A08845 | A16806 | 268 |
| A08845 | A16815 | 259 | A08845 | A16829 | 462 |
| A08845 | A16838 | 307 | A08845 | A16868 | 291 |
| A08845 | A16874 | 329 | A08845 | A16905 | 447 |
| A08845 | A16913 | 366 | A08845 | A16944 | 221 |
| A08845 | A16954 | 187 | A08845 | A17018 | 207 |
| A08845 | A17030 | 213 | A08845 | A17033 | 201 |
| A08845 | A17035 | 151 | A08845 | A17190 | 201 |
| A08847 | A11376 | 266 | A08847 | A11954 | 157 |
| A08847 | A12052 | 258 | A08847 | A12208 | 469 |
| A08847 | A12726 | 180 | A08847 | A13231 | 183 |
| A08847 | A14084 | 216 | A08847 | A14167 | 168 |
| A08847 | A14260 | 293 | A08847 | A14289 | 232 |
| A08847 | A14716 | 185 | A08847 | A14963 | 188 |
| A08848 | A15649 | 285 | A08849 | A15495 | 286 |
| A08850 | A09046 | 469 | A08850 | A10001 | 246 |
| A08850 | A10396 | 369 | A08850 | A10403 | 424 |
| A08850 | A10448 | 267 | A08850 | A10969 | 310 |
| A08850 | A11559 | 334 | A08850 | A11873 | 159 |
| A08850 | A11983 | 238 | A08850 | A12373 | 334 |
| A08850 | A13023 | 331 | A08850 | A13873 | 262 |
| A08850 | A14135 | 429 | A08850 | A14191 | 267 |
| A08850 | A14202 | 350 | A08850 | A14210 | 334 |
| A08850 | A14229 | 185 | A08850 | A14236 | 561 |
| A08850 | A14366 | 768 | A08850 | A14371 | 334 |
| A08850 | A14394 | 561 | A08850 | A14396 | 335 |
| A08850 | A14570 | 341 | A08850 | A14591 | 151 |
| A08850 | A14596 | 803 | A08850 | A14636 | 334 |
| A08850 | A14646 | 188 | A08850 | A14659 | 704 |
| A08850 | A15287 | 229 | A08850 | A15292 | 291 |
| A08850 | A15367 | 329 | A08850 | A15376 | 167 |
| A08850 | A15396 | 174 | A08850 | A15495 | 238 |
| A08850 | A15507 | 384 | A08850 | A15606 | 526 |
| A08850 | A15630 | 327 | A08850 | A16099 | 204 |
| A08850 | A16792 | 414 | A08850 | A16870 | 350 |
| A08851 | A13855 | 160 | A08851 | A17038 | 182 |
| A08852 | A09848 | 484 | A08852 | A11848 | 469 |
| A08852 | A15312 | 278 | A08853 | A08854 | 455 |
| A08853 | A09256 | 294 | A08853 | A09443 | 185 |
| A08853 | A11656 | 441 | A08853 | A11884 | 252 |
| A08853 | A12533 | 286 | A08853 | A14193 | 224 |
| A08853 | A14204 | 490 | A08853 | A14227 | 490 |
| A08853 | A14278 | 272 | A08853 | A14279 | 443 |

|        |        |     |        |        |     |
|--------|--------|-----|--------|--------|-----|
| A08853 | A14309 | 285 | A08853 | A14393 | 156 |
| A08853 | A14395 | 217 | A08853 | A15303 | 328 |
| A08853 | A15322 | 201 | A08853 | A15328 | 438 |
| A08853 | A15533 | 485 | A08853 | A15726 | 393 |
| A08853 | A16393 | 316 | A08853 | A16602 | 355 |
| A08853 | A16605 | 338 | A08853 | A17213 | 235 |
| A08854 | A08894 | 294 | A08854 | A09052 | 228 |
| A08854 | A12533 | 340 | A08854 | A14037 | 221 |
| A08854 | A14227 | 463 | A08854 | A14278 | 213 |
| A08854 | A14306 | 378 | A08854 | A14307 | 390 |
| A08854 | A14309 | 338 | A08855 | A09040 | 190 |
| A08855 | A09246 | 491 | A08855 | A09911 | 267 |
| A08855 | A10174 | 899 | A08855 | A11668 | 251 |
| A08855 | A11983 | 411 | A08855 | A12550 | 339 |
| A08855 | A12726 | 269 | A08855 | A13225 | 899 |
| A08855 | A13667 | 207 | A08855 | A14226 | 923 |
| A08855 | A14261 | 347 | A08855 | A14279 | 491 |
| A08855 | A14887 | 271 | A08855 | A15273 | 210 |
| A08855 | A15533 | 182 | A08855 | A15606 | 462 |
| A08855 | A16261 | 399 | A08857 | A08867 | 485 |
| A08857 | A09326 | 157 | A08857 | A11675 | 163 |
| A08857 | A11992 | 173 | A08857 | A12238 | 272 |
| A08857 | A12501 | 188 | A08857 | A12727 | 279 |
| A08857 | A12875 | 313 | A08857 | A13912 | 302 |
| A08857 | A14087 | 221 | A08857 | A14180 | 232 |
| A08857 | A14569 | 185 | A08857 | A14903 | 255 |
| A08857 | A15187 | 219 | A08857 | A15189 | 151 |
| A08857 | A15377 | 160 | A08857 | A15536 | 268 |
| A08857 | A16565 | 162 | A08857 | A16597 | 163 |
| A08857 | A16611 | 232 | A08857 | A16704 | 221 |
| A08857 | A16790 | 236 | A08857 | A16838 | 224 |
| A08857 | A16866 | 177 | A08857 | A16905 | 199 |
| A08858 | A10175 | 401 | A08858 | A10185 | 899 |
| A08858 | A10580 | 945 | A08858 | A11138 | 236 |
| A08858 | A11283 | 945 | A08858 | A11828 | 899 |
| A08858 | A11840 | 319 | A08858 | A12047 | 954 |
| A08858 | A12552 | 260 | A08858 | A13225 | 925 |
| A08858 | A13879 | 188 | A08858 | A13981 | 899 |
| A08858 | A13997 | 899 | A08858 | A14156 | 945 |
| A08858 | A14216 | 199 | A08858 | A14443 | 990 |
| A08858 | A16532 | 353 | A08859 | A09204 | 234 |
| A08859 | A09238 | 324 | A08859 | A09239 | 276 |
| A08859 | A09245 | 324 | A08859 | A09622 | 188 |
| A08859 | A09732 | 491 | A08859 | A09733 | 491 |
| A08859 | A09734 | 411 | A08859 | A09742 | 417 |
| A08859 | A09745 | 210 | A08859 | A09843 | 196 |

|        |        |     |        |        |     |
|--------|--------|-----|--------|--------|-----|
| A08859 | A10921 | 157 | A08859 | A11412 | 469 |
| A08859 | A11415 | 491 | A08859 | A11471 | 182 |
| A08859 | A11537 | 159 | A08859 | A11873 | 240 |
| A08859 | A11875 | 277 | A08859 | A11940 | 241 |
| A08859 | A11983 | 455 | A08859 | A12501 | 241 |
| A08859 | A13003 | 96  | A08859 | A13546 | 491 |
| A08859 | A13587 | 484 | A08859 | A13706 | 185 |
| A08859 | A13811 | 420 | A08859 | A13912 | 299 |
| A08859 | A13987 | 480 | A08859 | A13989 | 283 |
| A08859 | A14000 | 488 | A08859 | A14010 | 373 |
| A08859 | A14122 | 268 | A08859 | A14202 | 491 |
| A08859 | A14210 | 423 | A08859 | A14221 | 263 |
| A08859 | A14229 | 441 | A08859 | A14371 | 165 |
| A08859 | A14413 | 435 | A08859 | A14443 | 207 |
| A08859 | A14490 | 369 | A08859 | A14511 | 472 |
| A08859 | A14570 | 491 | A08859 | A14635 | 413 |
| A08859 | A14661 | 388 | A08859 | A14733 | 491 |
| A08859 | A14921 | 182 | A08859 | A14930 | 180 |
| A08859 | A15292 | 491 | A08859 | A15312 | 486 |
| A08859 | A15313 | 484 | A08859 | A15322 | 396 |
| A08859 | A15348 | 199 | A08859 | A15349 | 483 |
| A08859 | A15352 | 484 | A08859 | A15366 | 491 |
| A08859 | A15419 | 230 | A08859 | A15431 | 429 |
| A08859 | A15432 | 454 | A08859 | A15433 | 172 |
| A08859 | A15435 | 477 | A08859 | A15436 | 281 |
| A08859 | A15445 | 276 | A08859 | A15452 | 490 |
| A08859 | A15454 | 152 | A08859 | A15456 | 188 |
| A08859 | A15463 | 327 | A08859 | A15478 | 296 |
| A08859 | A15495 | 490 | A08859 | A15498 | 302 |
| A08859 | A15510 | 185 | A08859 | A15578 | 305 |
| A08859 | A15606 | 193 | A08859 | A15641 | 285 |
| A08859 | A15680 | 224 | A08859 | A15684 | 322 |
| A08859 | A15726 | 199 | A08859 | A16349 | 165 |
| A08859 | A16588 | 196 | A08859 | A16709 | 208 |
| A08859 | A16776 | 245 | A08859 | A16829 | 229 |
| A08859 | A16868 | 204 | A08859 | A16904 | 599 |
| A08859 | A16905 | 259 | A08859 | A16944 | 255 |
| A08859 | A17030 | 245 | A08860 | A09526 | 243 |
| A08860 | A09568 | 465 | A08860 | A10365 | 63  |
| A08860 | A10813 | 118 | A08860 | A11147 | 364 |
| A08860 | A11184 | 259 | A08860 | A11931 | 302 |
| A08860 | A13340 | 258 | A08860 | A13391 | 160 |
| A08860 | A13946 | 130 | A08860 | A13983 | 219 |
| A08860 | A14247 | 165 | A08860 | A14248 | 183 |
| A08860 | A14540 | 180 | A08860 | A15291 | 479 |
| A08860 | A15345 | 196 | A08860 | A15347 | 154 |

|        |        |     |        |        |     |
|--------|--------|-----|--------|--------|-----|
| A08860 | A16400 | 504 | A08860 | A16818 | 232 |
| A08860 | A16939 | 470 | A08861 | A09882 | 279 |
| A08861 | A10158 | 475 | A08861 | A12009 | 240 |
| A08861 | A12897 | 475 | A08861 | A14299 | 241 |
| A08861 | A15376 | 207 | A08861 | A15485 | 249 |
| A08863 | A11337 | 488 | A08863 | A11376 | 276 |
| A08863 | A11591 | 212 | A08863 | A11839 | 347 |
| A08863 | A11843 | 276 | A08863 | A11851 | 276 |
| A08863 | A13356 | 276 | A08863 | A14193 | 436 |
| A08863 | A14208 | 240 | A08863 | A14316 | 232 |
| A08863 | A14647 | 438 | A08863 | A15291 | 474 |
| A08863 | A15367 | 479 | A08863 | A15480 | 276 |
| A08863 | A16808 | 241 | A08863 | A17157 | 193 |
| A08864 | A09124 | 180 | A08864 | A10336 | 221 |
| A08864 | A11134 | 391 | A08864 | A11683 | 213 |
| A08864 | A13982 | 899 | A08864 | A14007 | 465 |
| A08864 | A14072 | 466 | A08864 | A14197 | 191 |
| A08864 | A15313 | 159 | A08864 | A15420 | 202 |
| A08865 | A09793 | 297 | A08866 | A09205 | 316 |
| A08866 | A09741 | 286 | A08866 | A11558 | 257 |
| A08866 | A12975 | 377 | A08866 | A13935 | 433 |
| A08866 | A13941 | 319 | A08866 | A14122 | 218 |
| A08866 | A14374 | 212 | A08866 | A14928 | 167 |
| A08866 | A15300 | 486 | A08866 | A15318 | 226 |
| A08866 | A15419 | 236 | A08866 | A15649 | 172 |
| A08866 | A16117 | 306 | A08867 | A11900 | 350 |
| A08868 | A09195 | 240 | A08868 | A09506 | 324 |
| A08868 | A11156 | 273 | A08868 | A11258 | 266 |
| A08868 | A14006 | 185 | A08868 | A14263 | 299 |
| A08868 | A14633 | 329 | A08869 | A09010 | 162 |
| A08869 | A09562 | 165 | A08869 | A09732 | 288 |
| A08869 | A10599 | 479 | A08869 | A11184 | 170 |
| A08869 | A11300 | 346 | A08869 | A11501 | 200 |
| A08869 | A11621 | 167 | A08869 | A11733 | 180 |
| A08869 | A11983 | 358 | A08869 | A12365 | 457 |
| A08869 | A12373 | 346 | A08869 | A14025 | 414 |
| A08869 | A14443 | 899 | A08869 | A14520 | 170 |
| A08869 | A14635 | 328 | A08869 | A15606 | 491 |
| A08869 | A15763 | 337 | A08870 | A15420 | 177 |
| A08872 | A10574 | 263 | A08873 | A09847 | 371 |
| A08873 | A11579 | 407 | A08873 | A15383 | 205 |
| A08874 | A10804 | 218 | A08874 | A11456 | 188 |
| A08874 | A11496 | 310 | A08874 | A12508 | 163 |
| A08874 | A12658 | 157 | A08874 | A12792 | 457 |
| A08874 | A13845 | 462 | A08874 | A13855 | 485 |
| A08874 | A14095 | 322 | A08874 | A14167 | 252 |



|        |        |     |        |        |     |
|--------|--------|-----|--------|--------|-----|
| A08874 | A14462 | 154 | A08874 | A14661 | 286 |
| A08874 | A16398 | 290 | A08874 | A16652 | 443 |
| A08875 | A09141 | 360 | A08875 | A09552 | 243 |
| A08875 | A09733 | 217 | A08875 | A09791 | 443 |
| A08875 | A10412 | 374 | A08875 | A10624 | 165 |
| A08875 | A11300 | 479 | A08875 | A11327 | 240 |
| A08875 | A12897 | 343 | A08875 | A12982 | 283 |
| A08875 | A13373 | 171 | A08875 | A13987 | 265 |
| A08875 | A14010 | 245 | A08875 | A14055 | 243 |
| A08875 | A14122 | 312 | A08875 | A14494 | 262 |
| A08875 | A14511 | 291 | A08875 | A14636 | 193 |
| A08875 | A14643 | 413 | A08875 | A15292 | 395 |
| A08875 | A15312 | 221 | A08875 | A15313 | 245 |
| A08875 | A15349 | 281 | A08875 | A15352 | 215 |
| A08875 | A15433 | 190 | A08875 | A15435 | 436 |
| A08875 | A15436 | 268 | A08875 | A15452 | 296 |
| A08875 | A15456 | 201 | A08875 | A15457 | 258 |
| A08875 | A15460 | 224 | A08875 | A15804 | 265 |
| A08875 | A16911 | 162 | A08876 | A08885 | 165 |
| A08876 | A09256 | 146 | A08876 | A09767 | 405 |
| A08876 | A10623 | 228 | A08876 | A11156 | 263 |
| A08876 | A11258 | 257 | A08876 | A11959 | 346 |
| A08876 | A13978 | 251 | A08876 | A15726 | 249 |
| A08876 | A15851 | 235 | A08877 | A13949 | 217 |
| A08878 | A09072 | 900 | A08878 | A09162 | 441 |
| A08878 | A09209 | 157 | A08878 | A09750 | 319 |
| A08878 | A10216 | 168 | A08878 | A10272 | 297 |
| A08878 | A10540 | 188 | A08878 | A10982 | 218 |
| A08878 | A11068 | 470 | A08878 | A11193 | 210 |
| A08878 | A11300 | 484 | A08878 | A11714 | 152 |
| A08878 | A11727 | 198 | A08878 | A11943 | 165 |
| A08878 | A11983 | 996 | A08878 | A12111 | 156 |
| A08878 | A12436 | 193 | A08878 | A13110 | 230 |
| A08878 | A13111 | 480 | A08878 | A13213 | 163 |
| A08878 | A13917 | 465 | A08878 | A13997 | 475 |
| A08878 | A14005 | 433 | A08878 | A14055 | 945 |
| A08878 | A14211 | 157 | A08878 | A14326 | 297 |
| A08878 | A14411 | 297 | A08878 | A14443 | 991 |
| A08878 | A14586 | 157 | A08878 | A14635 | 491 |
| A08878 | A14636 | 179 | A08878 | A14653 | 449 |
| A08878 | A14925 | 198 | A08878 | A15282 | 486 |
| A08878 | A15322 | 224 | A08878 | A15324 | 156 |
| A08878 | A15502 | 469 | A08878 | A15606 | 443 |
| A08878 | A16626 | 324 | A08879 | A10625 | 484 |
| A08879 | A11086 | 335 | A08879 | A15317 | 193 |
| A08880 | A13181 | 191 | A08880 | A13183 | 337 |

|        |        |     |        |        |     |
|--------|--------|-----|--------|--------|-----|
| A08880 | A13983 | 241 | A08880 | A14598 | 274 |
| A08880 | A14652 | 151 | A08880 | A14660 | 205 |
| A08880 | A14799 | 491 | A08880 | A16934 | 337 |
| A08881 | A09056 | 269 | A08881 | A09742 | 450 |
| A08881 | A09743 | 375 | A08881 | A09933 | 157 |
| A08881 | A10528 | 472 | A08881 | A10594 | 690 |
| A08881 | A10869 | 241 | A08881 | A10989 | 173 |
| A08881 | A11191 | 229 | A08881 | A11681 | 491 |
| A08881 | A11925 | 450 | A08881 | A12009 | 230 |
| A08881 | A13003 | 229 | A08881 | A14190 | 165 |
| A08881 | A14210 | 238 | A08881 | A14247 | 458 |
| A08881 | A14266 | 173 | A08881 | A14371 | 167 |
| A08881 | A14413 | 167 | A08881 | A14473 | 269 |
| A08881 | A14481 | 353 | A08881 | A14604 | 447 |
| A08881 | A14693 | 353 | A08881 | A14799 | 167 |
| A08881 | A15301 | 687 | A08881 | A15302 | 696 |
| A08881 | A15318 | 238 | A08881 | A15335 | 196 |
| A08881 | A15361 | 219 | A08881 | A15366 | 700 |
| A08881 | A15430 | 353 | A08881 | A15462 | 695 |
| A08881 | A15463 | 700 | A08881 | A15515 | 159 |
| A08881 | A15635 | 252 | A08881 | A15800 | 201 |
| A08881 | A16538 | 285 | A08881 | A16934 | 314 |
| A08881 | A17191 | 380 | A08882 | A08903 | 235 |
| A08882 | A12107 | 313 | A08882 | A12824 | 249 |
| A08882 | A14208 | 238 | A08883 | A09162 | 205 |
| A08883 | A09558 | 157 | A08883 | A12501 | 183 |
| A08883 | A13928 | 398 | A08883 | A13978 | 176 |
| A08883 | A16875 | 353 | A08884 | A09269 | 385 |
| A08884 | A09316 | 485 | A08884 | A09340 | 486 |
| A08884 | A09680 | 293 | A08884 | A10575 | 382 |
| A08884 | A11828 | 440 | A08884 | A11858 | 249 |
| A08884 | A13949 | 417 | A08884 | A14230 | 154 |
| A08884 | A16404 | 224 | A08884 | A16440 | 456 |
| A08885 | A09256 | 490 | A08885 | A09464 | 159 |
| A08885 | A09793 | 256 | A08885 | A10250 | 252 |
| A08885 | A10615 | 71  | A08885 | A10624 | 394 |
| A08885 | A10824 | 208 | A08885 | A10853 | 367 |
| A08885 | A11139 | 475 | A08885 | A11258 | 243 |
| A08885 | A11284 | 257 | A08885 | A11379 | 276 |
| A08885 | A11478 | 124 | A08885 | A11920 | 330 |
| A08885 | A11928 | 402 | A08885 | A12047 | 218 |
| A08885 | A12533 | 221 | A08885 | A13310 | 457 |
| A08885 | A13978 | 235 | A08885 | A14006 | 372 |
| A08885 | A14474 | 102 | A08885 | A14476 | 483 |
| A08885 | A14484 | 333 | A08885 | A14633 | 170 |
| A08885 | A15102 | 182 | A08885 | A15726 | 311 |

|        |        |     |        |        |     |
|--------|--------|-----|--------|--------|-----|
| A08885 | A16491 | 224 | A08885 | A16532 | 252 |
| A08885 | A16912 | 109 | A08887 | A09278 | 475 |
| A08887 | A09304 | 396 | A08887 | A09342 | 312 |
| A08887 | A13949 | 401 | A08888 | A11880 | 446 |
| A08889 | A09309 | 283 | A08889 | A11313 | 215 |
| A08889 | A12875 | 232 | A08889 | A14278 | 191 |
| A08890 | A11277 | 232 | A08890 | A14196 | 201 |
| A08891 | A09008 | 483 | A08891 | A10918 | 263 |
| A08891 | A14174 | 491 | A08891 | A15080 | 338 |
| A08892 | A08971 | 475 | A08892 | A09320 | 319 |
| A08892 | A12447 | 338 | A08892 | A13706 | 188 |
| A08892 | A15370 | 160 | A08892 | A16320 | 195 |
| A08892 | A17156 | 180 | A08894 | A09052 | 449 |
| A08894 | A10175 | 223 | A08894 | A10619 | 267 |
| A08894 | A12533 | 333 | A08894 | A14291 | 443 |
| A08894 | A14485 | 165 | A08895 | A15322 | 154 |
| A08896 | A10532 | 217 | A08896 | A11409 | 217 |
| A08896 | A13609 | 187 | A08896 | A13989 | 183 |
| A08896 | A14216 | 205 | A08896 | A15659 | 210 |
| A08899 | A10346 | 377 | A08899 | A12328 | 177 |
| A08899 | A13977 | 899 | A08900 | A14986 | 230 |
| A08901 | A09520 | 380 | A08901 | A09735 | 179 |
| A08901 | A14479 | 204 | A08902 | A09162 | 154 |
| A08902 | A09341 | 174 | A08902 | A09506 | 218 |
| A08902 | A09643 | 254 | A08902 | A09660 | 491 |
| A08902 | A10625 | 88  | A08902 | A12932 | 491 |
| A08902 | A12969 | 167 | A08902 | A13233 | 425 |
| A08902 | A13397 | 165 | A08902 | A14079 | 436 |
| A08902 | A14273 | 207 | A08902 | A15369 | 151 |
| A08902 | A15930 | 176 | A08902 | A15976 | 260 |
| A08902 | A16127 | 219 | A08902 | A16129 | 63  |
| A08902 | A16226 | 243 | A08902 | A16294 | 88  |
| A08902 | A16331 | 215 | A08902 | A16613 | 140 |
| A08903 | A10810 | 489 | A08903 | A11168 | 201 |
| A08903 | A11288 | 165 | A08903 | A11337 | 152 |
| A08903 | A11363 | 313 | A08903 | A11508 | 368 |
| A08903 | A14025 | 191 | A08903 | A14202 | 226 |
| A08903 | A14399 | 176 | A08903 | A14475 | 235 |
| A08903 | A16082 | 393 | A08904 | A09880 | 184 |
| A08904 | A10712 | 199 | A08904 | A13889 | 199 |
| A08904 | A15626 | 199 | A08904 | A16073 | 199 |
| A08905 | A09821 | 427 | A08905 | A15295 | 151 |
| A08905 | A15840 | 252 | A08907 | A09517 | 384 |
| A08907 | A11811 | 422 | A08908 | A09003 | 338 |
| A08908 | A10586 | 281 | A08908 | A10605 | 318 |
| A08908 | A14119 | 334 | A08908 | A14199 | 160 |

|        |        |     |        |        |     |
|--------|--------|-----|--------|--------|-----|
| A08908 | A14374 | 183 | A08908 | A14442 | 299 |
| A08908 | A14471 | 154 | A08908 | A15312 | 255 |
| A08908 | A15346 | 168 | A08908 | A15394 | 252 |
| A08908 | A15395 | 358 | A08908 | A15425 | 404 |
| A08908 | A15630 | 208 | A08908 | A15642 | 258 |
| A08909 | A08942 | 490 | A08909 | A11131 | 445 |
| A08909 | A11227 | 481 | A08909 | A13826 | 234 |
| A08909 | A14143 | 491 | A08909 | A16060 | 183 |
| A08910 | A08985 | 159 | A08910 | A09243 | 179 |
| A08910 | A09624 | 460 | A08910 | A09668 | 187 |
| A08910 | A09757 | 411 | A08910 | A09974 | 271 |
| A08910 | A10187 | 302 | A08910 | A10216 | 210 |
| A08910 | A10268 | 329 | A08910 | A10501 | 218 |
| A08910 | A11168 | 191 | A08910 | A11234 | 199 |
| A08910 | A11293 | 255 | A08910 | A11346 | 457 |
| A08910 | A11661 | 283 | A08910 | A11954 | 159 |
| A08910 | A12722 | 473 | A08910 | A13681 | 271 |
| A08910 | A14208 | 340 | A08910 | A14266 | 491 |
| A08910 | A14279 | 382 | A08910 | A14281 | 200 |
| A08910 | A14335 | 255 | A08910 | A14846 | 174 |
| A08910 | A15217 | 425 | A08910 | A15273 | 483 |
| A08910 | A15452 | 176 | A08910 | A15671 | 180 |
| A08910 | A15912 | 246 | A08910 | A16441 | 193 |
| A08910 | A16473 | 207 | A08910 | A16851 | 174 |
| A08911 | A09127 | 160 | A08911 | A09242 | 191 |
| A08911 | A10148 | 204 | A08911 | A10215 | 329 |
| A08911 | A13607 | 351 | A08911 | A15621 | 361 |
| A08912 | A16760 | 455 | A08913 | A14912 | 401 |
| A08917 | A08934 | 249 | A08917 | A10250 | 447 |
| A08917 | A11551 | 168 | A08917 | A11675 | 373 |
| A08917 | A12313 | 477 | A08917 | A12501 | 174 |
| A08917 | A13784 | 491 | A08917 | A14270 | 207 |
| A08917 | A14281 | 340 | A08917 | A14474 | 490 |
| A08917 | A14719 | 208 | A08917 | A15187 | 205 |
| A08917 | A15930 | 205 | A08917 | A16048 | 319 |
| A08917 | A16552 | 157 | A08917 | A16675 | 399 |
| A08917 | A16840 | 180 | A08917 | A17033 | 238 |
| A08917 | A17211 | 454 | A08918 | A10590 | 542 |
| A08918 | A11379 | 235 | A08918 | A12304 | 446 |
| A08918 | A12409 | 245 | A08918 | A13397 | 232 |
| A08918 | A14127 | 238 | A08918 | A14202 | 219 |
| A08918 | A14410 | 408 | A08918 | A14570 | 297 |
| A08918 | A14635 | 183 | A08918 | A14925 | 179 |
| A08918 | A15930 | 241 | A08919 | A11916 | 350 |
| A08919 | A12165 | 427 | A08919 | A13092 | 362 |
| A08919 | A14076 | 377 | A08919 | A14079 | 283 |

|        |        |     |        |        |     |
|--------|--------|-----|--------|--------|-----|
| A08919 | A14273 | 241 | A08919 | A15369 | 243 |
| A08919 | A15524 | 232 | A08919 | A16127 | 367 |
| A08919 | A16128 | 380 | A08919 | A16226 | 420 |
| A08919 | A16378 | 417 | A08919 | A16616 | 362 |
| A08919 | A16646 | 324 | A08919 | A16754 | 180 |
| A08920 | A09614 | 472 | A08921 | A14247 | 279 |
| A08921 | A14661 | 314 | A08921 | A14711 | 268 |
| A08923 | A14222 | 196 | A08924 | A10532 | 193 |
| A08924 | A14073 | 281 | A08924 | A14699 | 260 |
| A08925 | A11649 | 383 | A08925 | A11919 | 394 |
| A08925 | A15606 | 383 | A08925 | A15682 | 383 |
| A08925 | A16410 | 163 | A08926 | A10336 | 180 |
| A08926 | A10369 | 204 | A08926 | A13110 | 477 |
| A08926 | A13455 | 367 | A08926 | A13555 | 312 |
| A08927 | A09672 | 380 | A08927 | A16398 | 363 |
| A08928 | A14596 | 337 | A08929 | A09902 | 177 |
| A08929 | A11132 | 156 | A08929 | A11400 | 152 |
| A08929 | A11513 | 160 | A08929 | A13185 | 379 |
| A08929 | A14178 | 226 | A08929 | A14635 | 419 |
| A08929 | A14667 | 168 | A08929 | A15241 | 213 |
| A08929 | A16401 | 380 | A08930 | A08938 | 480 |
| A08930 | A10759 | 485 | A08930 | A12899 | 457 |
| A08930 | A13997 | 252 | A08930 | A15317 | 265 |
| A08930 | A15348 | 251 | A08930 | A15349 | 171 |
| A08930 | A16540 | 352 | A08931 | A14573 | 402 |
| A08931 | A14763 | 398 | A08931 | A15684 | 174 |
| A08932 | A09305 | 379 | A08932 | A15684 | 412 |
| A08932 | A15932 | 165 | A08932 | A16191 | 352 |
| A08933 | A09685 | 416 | A08933 | A15624 | 429 |
| A08933 | A15684 | 302 | A08933 | A16105 | 455 |
| A08934 | A08962 | 310 | A08934 | A09901 | 184 |
| A08934 | A11023 | 468 | A08934 | A11149 | 279 |
| A08934 | A11150 | 454 | A08934 | A11180 | 443 |
| A08934 | A11281 | 455 | A08934 | A11472 | 330 |
| A08934 | A11547 | 419 | A08934 | A11665 | 374 |
| A08934 | A11902 | 375 | A08934 | A11915 | 468 |
| A08934 | A12651 | 180 | A08934 | A13927 | 422 |
| A08934 | A14527 | 252 | A08934 | A16787 | 310 |
| A08936 | A09341 | 281 | A08938 | A09764 | 224 |
| A08938 | A10759 | 406 | A08938 | A11712 | 424 |
| A08938 | A12454 | 436 | A08938 | A12899 | 419 |
| A08938 | A15321 | 160 | A08939 | A09667 | 474 |
| A08939 | A15367 | 438 | A08939 | A15858 | 361 |
| A08941 | A13484 | 338 | A08941 | A14634 | 399 |
| A08941 | A16726 | 436 | A08942 | A09752 | 168 |
| A08942 | A09855 | 254 | A08942 | A10722 | 288 |

|        |        |     |        |        |     |
|--------|--------|-----|--------|--------|-----|
| A08942 | A11131 | 318 | A08942 | A11227 | 488 |
| A08942 | A14143 | 491 | A08942 | A14191 | 198 |
| A08942 | A15346 | 274 | A08942 | A16060 | 160 |
| A08943 | A09526 | 366 | A08943 | A09843 | 302 |
| A08943 | A10591 | 200 | A08943 | A10596 | 93  |
| A08943 | A10597 | 135 | A08943 | A10733 | 411 |
| A08943 | A11525 | 152 | A08943 | A11839 | 688 |
| A08943 | A12606 | 391 | A08943 | A12961 | 380 |
| A08943 | A13824 | 202 | A08943 | A13826 | 491 |
| A08943 | A13873 | 491 | A08943 | A13983 | 653 |
| A08943 | A14003 | 917 | A08943 | A14104 | 243 |
| A08943 | A14191 | 441 | A08943 | A14204 | 172 |
| A08943 | A14276 | 201 | A08943 | A14661 | 899 |
| A08943 | A15295 | 260 | A08943 | A15314 | 168 |
| A08943 | A15315 | 201 | A08943 | A15345 | 311 |
| A08943 | A15346 | 480 | A08943 | A15361 | 63  |
| A08943 | A15386 | 96  | A08943 | A15410 | 401 |
| A08943 | A16449 | 677 | A08944 | A09243 | 229 |
| A08944 | A09997 | 490 | A08944 | A12897 | 160 |
| A08944 | A14644 | 486 | A08944 | A14925 | 217 |
| A08944 | A16764 | 228 | A08946 | A09943 | 383 |
| A08946 | A13734 | 187 | A08947 | A09004 | 299 |
| A08947 | A10842 | 152 | A08947 | A14525 | 152 |
| A08947 | A15375 | 152 | A08947 | A15546 | 152 |
| A08948 | A09199 | 485 | A08948 | A15638 | 291 |
| A08948 | A16194 | 475 | A08949 | A09206 | 271 |
| A08949 | A09743 | 188 | A08949 | A11422 | 283 |
| A08949 | A11681 | 208 | A08949 | A12458 | 347 |
| A08949 | A13338 | 475 | A08949 | A13899 | 156 |
| A08949 | A14115 | 297 | A08949 | A14272 | 191 |
| A08949 | A14561 | 358 | A08949 | A14596 | 455 |
| A08949 | A14659 | 480 | A08950 | A10616 | 281 |
| A08951 | A14452 | 212 | A08952 | A13066 | 394 |
| A08952 | A14597 | 201 | A08954 | A14190 | 205 |
| A08954 | A16636 | 170 | A08955 | A08971 | 223 |
| A08955 | A10755 | 223 | A08955 | A11202 | 223 |
| A08955 | A13298 | 223 | A08955 | A14216 | 223 |
| A08956 | A09743 | 276 | A08956 | A09996 | 276 |
| A08956 | A12606 | 276 | A08956 | A13975 | 271 |
| A08956 | A14212 | 276 | A08956 | A14213 | 276 |
| A08956 | A14214 | 276 | A08956 | A16449 | 276 |
| A08956 | A16702 | 276 | A08957 | A10373 | 385 |
| A08957 | A15297 | 353 | A08957 | A15529 | 266 |
| A08957 | A15534 | 277 | A08957 | A15535 | 338 |
| A08959 | A15025 | 422 | A08960 | A14196 | 479 |
| A08960 | A15297 | 369 | A08960 | A15559 | 348 |

|        |        |     |        |        |     |
|--------|--------|-----|--------|--------|-----|
| A08961 | A09283 | 380 | A08961 | A11033 | 479 |
| A08961 | A11350 | 380 | A08961 | A11434 | 394 |
| A08961 | A14163 | 252 | A08962 | A11281 | 313 |
| A08962 | A11547 | 380 | A08963 | A09485 | 380 |
| A08963 | A10250 | 372 | A08964 | A11829 | 371 |
| A08964 | A14694 | 229 | A08967 | A08968 | 467 |
| A08969 | A11376 | 314 | A08969 | A12284 | 281 |
| A08971 | A10755 | 223 | A08971 | A11202 | 223 |
| A08971 | A13298 | 223 | A08971 | A14216 | 223 |
| A08971 | A14481 | 259 | A08972 | A11480 | 247 |
| A08972 | A11945 | 389 | A08972 | A12233 | 324 |
| A08972 | A14505 | 297 | A08972 | A15624 | 226 |
| A08972 | A15661 | 165 | A08972 | A15727 | 362 |
| A08973 | A09009 | 167 | A08973 | A09308 | 168 |
| A08973 | A09332 | 479 | A08973 | A09425 | 223 |
| A08973 | A09735 | 174 | A08973 | A10532 | 345 |
| A08973 | A11462 | 227 | A08973 | A11728 | 151 |
| A08973 | A11815 | 157 | A08973 | A11832 | 182 |
| A08973 | A11992 | 469 | A08973 | A12052 | 402 |
| A08973 | A12138 | 314 | A08973 | A12255 | 170 |
| A08973 | A12433 | 474 | A08973 | A13989 | 626 |
| A08973 | A14172 | 642 | A08973 | A14216 | 322 |
| A08973 | A14482 | 306 | A08973 | A14729 | 299 |
| A08973 | A14819 | 301 | A08973 | A14843 | 221 |
| A08973 | A15500 | 229 | A08973 | A15519 | 157 |
| A08973 | A15666 | 223 | A08973 | A15684 | 322 |
| A08973 | A15698 | 151 | A08973 | A15756 | 398 |
| A08973 | A15771 | 218 | A08974 | A08993 | 343 |
| A08974 | A14122 | 199 | A08974 | A14596 | 382 |
| A08974 | A15624 | 473 | A08974 | A15649 | 286 |
| A08974 | A15651 | 221 | A08974 | A15932 | 358 |
| A08975 | A09118 | 307 | A08975 | A09257 | 243 |
| A08975 | A11830 | 187 | A08975 | A12319 | 249 |
| A08975 | A12507 | 625 | A08975 | A12511 | 334 |
| A08975 | A14092 | 254 | A08975 | A14272 | 393 |
| A08975 | A15039 | 267 | A08975 | A15551 | 210 |
| A08975 | A17076 | 221 | A08976 | A08996 | 132 |
| A08976 | A13566 | 353 | A08976 | A14087 | 163 |
| A08976 | A15520 | 124 | A08976 | A15733 | 491 |
| A08976 | A15737 | 229 | A08976 | A16067 | 173 |
| A08976 | A16704 | 162 | A08976 | A16790 | 180 |
| A08976 | A16838 | 167 | A08976 | A16944 | 215 |
| A08977 | A15323 | 258 | A08978 | A10490 | 364 |
| A08978 | A12839 | 260 | A08978 | A14074 | 201 |
| A08978 | A14351 | 255 | A08978 | A16756 | 319 |
| A08978 | A16784 | 402 | A08979 | A09615 | 473 |

|        |        |     |        |        |     |
|--------|--------|-----|--------|--------|-----|
| A08980 | A13340 | 291 | A08981 | A11535 | 188 |
| A08981 | A11617 | 334 | A08981 | A15310 | 198 |
| A08981 | A15320 | 154 | A08981 | A15575 | 358 |
| A08982 | A08989 | 405 | A08982 | A08990 | 491 |
| A08982 | A09006 | 270 | A08982 | A09717 | 154 |
| A08982 | A09785 | 183 | A08982 | A10156 | 238 |
| A08982 | A11277 | 260 | A08982 | A11291 | 157 |
| A08982 | A11316 | 263 | A08982 | A11368 | 205 |
| A08982 | A11397 | 307 | A08982 | A11474 | 486 |
| A08982 | A11544 | 262 | A08982 | A11649 | 262 |
| A08982 | A12020 | 228 | A08982 | A12093 | 347 |
| A08982 | A12101 | 258 | A08982 | A12142 | 307 |
| A08982 | A12158 | 469 | A08982 | A12253 | 235 |
| A08982 | A12557 | 440 | A08982 | A13783 | 185 |
| A08982 | A13892 | 262 | A08982 | A14148 | 379 |
| A08982 | A14196 | 490 | A08982 | A14246 | 317 |
| A08982 | A14362 | 262 | A08982 | A14662 | 465 |
| A08982 | A14836 | 465 | A08982 | A14894 | 373 |
| A08982 | A14917 | 176 | A08982 | A15237 | 480 |
| A08982 | A15297 | 432 | A08982 | A15321 | 217 |
| A08982 | A15323 | 491 | A08982 | A15324 | 479 |
| A08982 | A15338 | 262 | A08982 | A15339 | 277 |
| A08982 | A15353 | 475 | A08982 | A15359 | 174 |
| A08982 | A15366 | 232 | A08982 | A15419 | 170 |
| A08982 | A15502 | 460 | A08982 | A15559 | 424 |
| A08982 | A15564 | 573 | A08982 | A15631 | 191 |
| A08982 | A15729 | 210 | A08982 | A15747 | 235 |
| A08982 | A15851 | 215 | A08982 | A16311 | 260 |
| A08982 | A16463 | 470 | A08982 | A16614 | 262 |
| A08982 | A17063 | 364 | A08984 | A11737 | 177 |
| A08984 | A11914 | 174 | A08984 | A14088 | 176 |
| A08984 | A14462 | 208 | A08984 | A15323 | 299 |
| A08984 | A15324 | 157 | A08984 | A15373 | 196 |
| A08984 | A15377 | 438 | A08984 | A15381 | 173 |
| A08984 | A16067 | 162 | A08984 | A16675 | 167 |
| A08984 | A17133 | 278 | A08985 | A09757 | 263 |
| A08985 | A09764 | 269 | A08985 | A11576 | 245 |
| A08985 | A13617 | 191 | A08985 | A14281 | 191 |
| A08985 | A14928 | 154 | A08985 | A15501 | 204 |
| A08985 | A15502 | 208 | A08986 | A10580 | 165 |
| A08986 | A15533 | 283 | A08987 | A10797 | 185 |
| A08987 | A11244 | 428 | A08987 | A11296 | 160 |
| A08987 | A11322 | 457 | A08987 | A11374 | 402 |
| A08987 | A11419 | 491 | A08987 | A11427 | 329 |
| A08987 | A11677 | 488 | A08987 | A13787 | 423 |
| A08987 | A14825 | 312 | A08987 | A14845 | 229 |



|        |        |     |        |        |     |
|--------|--------|-----|--------|--------|-----|
| A08987 | A14888 | 447 | A08989 | A11933 | 288 |
| A08989 | A14196 | 411 | A08989 | A14597 | 193 |
| A08989 | A15237 | 224 | A08989 | A15297 | 267 |
| A08989 | A15559 | 377 | A08989 | A15564 | 475 |
| A08989 | A15631 | 424 | A08989 | A15747 | 480 |
| A08989 | A16463 | 296 | A08990 | A11474 | 369 |
| A08990 | A13956 | 252 | A08990 | A14196 | 435 |
| A08990 | A14836 | 212 | A08990 | A14894 | 305 |
| A08990 | A15237 | 399 | A08990 | A15297 | 363 |
| A08990 | A15323 | 441 | A08990 | A15324 | 270 |
| A08990 | A15419 | 348 | A08990 | A15502 | 396 |
| A08990 | A15559 | 302 | A08990 | A16463 | 195 |
| A08991 | A11409 | 335 | A08991 | A13609 | 174 |
| A08991 | A13992 | 201 | A08991 | A14351 | 301 |
| A08992 | A10250 | 385 | A08992 | A15324 | 221 |
| A08993 | A13807 | 424 | A08993 | A13808 | 424 |
| A08993 | A14596 | 456 | A08993 | A15624 | 443 |
| A08993 | A15649 | 438 | A08993 | A15932 | 430 |
| A08994 | A09083 | 236 | A08995 | A08996 | 221 |
| A08995 | A09000 | 475 | A08995 | A09333 | 297 |
| A08995 | A09706 | 318 | A08995 | A09762 | 171 |
| A08995 | A09828 | 358 | A08995 | A11236 | 457 |
| A08995 | A11301 | 213 | A08995 | A11471 | 247 |
| A08995 | A11472 | 167 | A08995 | A11497 | 255 |
| A08995 | A11551 | 344 | A08995 | A11649 | 205 |
| A08995 | A11703 | 268 | A08995 | A11735 | 168 |
| A08995 | A11737 | 170 | A08995 | A11914 | 167 |
| A08995 | A11917 | 165 | A08995 | A11940 | 396 |
| A08995 | A12215 | 303 | A08995 | A12433 | 351 |
| A08995 | A12507 | 200 | A08995 | A12556 | 490 |
| A08995 | A12606 | 234 | A08995 | A12625 | 151 |
| A08995 | A12658 | 408 | A08995 | A12659 | 228 |
| A08995 | A12665 | 190 | A08995 | A12725 | 252 |
| A08995 | A12825 | 246 | A08995 | A12858 | 168 |
| A08995 | A13313 | 193 | A08995 | A13707 | 217 |
| A08995 | A13737 | 278 | A08995 | A13781 | 201 |
| A08995 | A13784 | 234 | A08995 | A14076 | 355 |
| A08995 | A14084 | 232 | A08995 | A14214 | 327 |
| A08995 | A14222 | 274 | A08995 | A14255 | 200 |
| A08995 | A14260 | 286 | A08995 | A14569 | 414 |
| A08995 | A14570 | 226 | A08995 | A14718 | 218 |
| A08995 | A14799 | 321 | A08995 | A15262 | 165 |
| A08995 | A15498 | 195 | A08995 | A15541 | 184 |
| A08995 | A15709 | 154 | A08995 | A15711 | 247 |
| A08995 | A15735 | 235 | A08995 | A15940 | 388 |
| A08995 | A16129 | 201 | A08995 | A16157 | 340 |

|        |        |     |        |        |     |
|--------|--------|-----|--------|--------|-----|
| A08995 | A16187 | 360 | A08995 | A16215 | 288 |
| A08995 | A16226 | 176 | A08995 | A16261 | 227 |
| A08995 | A16343 | 329 | A08995 | A16597 | 328 |
| A08995 | A16608 | 162 | A08995 | A16611 | 363 |
| A08995 | A16646 | 170 | A08995 | A16664 | 191 |
| A08995 | A16675 | 159 | A08995 | A16680 | 180 |
| A08995 | A16690 | 159 | A08995 | A16699 | 249 |
| A08995 | A16704 | 251 | A08995 | A16774 | 313 |
| A08995 | A16776 | 290 | A08995 | A16815 | 326 |
| A08995 | A16954 | 267 | A08995 | A17019 | 335 |
| A08995 | A17030 | 290 | A08996 | A09000 | 218 |
| A08996 | A09309 | 380 | A08996 | A09333 | 291 |
| A08996 | A09622 | 247 | A08996 | A09648 | 228 |
| A08996 | A09828 | 228 | A08996 | A10315 | 165 |
| A08996 | A10490 | 218 | A08996 | A11301 | 380 |
| A08996 | A11430 | 243 | A08996 | A11472 | 294 |
| A08996 | A11497 | 439 | A08996 | A11521 | 174 |
| A08996 | A11551 | 208 | A08996 | A11616 | 224 |
| A08996 | A11649 | 200 | A08996 | A11674 | 475 |
| A08996 | A11675 | 191 | A08996 | A11737 | 163 |
| A08996 | A11917 | 395 | A08996 | A11940 | 394 |
| A08996 | A11992 | 200 | A08996 | A12215 | 404 |
| A08996 | A12254 | 302 | A08996 | A12433 | 346 |
| A08996 | A12501 | 345 | A08996 | A12507 | 296 |
| A08996 | A12606 | 393 | A08996 | A12658 | 330 |
| A08996 | A12725 | 245 | A08996 | A12826 | 378 |
| A08996 | A12858 | 162 | A08996 | A12873 | 174 |
| A08996 | A13309 | 215 | A08996 | A13313 | 364 |
| A08996 | A13706 | 313 | A08996 | A13707 | 210 |
| A08996 | A13708 | 409 | A08996 | A13781 | 416 |
| A08996 | A13784 | 393 | A08996 | A13786 | 227 |
| A08996 | A13805 | 263 | A08996 | A13809 | 205 |
| A08996 | A13912 | 322 | A08996 | A14214 | 427 |
| A08996 | A14222 | 162 | A08996 | A14255 | 402 |
| A08996 | A14260 | 281 | A08996 | A14288 | 236 |
| A08996 | A14321 | 283 | A08996 | A14375 | 193 |
| A08996 | A14569 | 343 | A08996 | A14708 | 167 |
| A08996 | A14718 | 343 | A08996 | A14799 | 210 |
| A08996 | A14921 | 333 | A08996 | A15105 | 338 |
| A08996 | A15189 | 177 | A08996 | A15262 | 291 |
| A08996 | A15296 | 213 | A08996 | A15520 | 474 |
| A08996 | A15541 | 179 | A08996 | A15677 | 435 |
| A08996 | A15711 | 243 | A08996 | A15818 | 241 |
| A08996 | A16157 | 234 | A08996 | A16343 | 326 |
| A08996 | A16394 | 277 | A08996 | A16552 | 424 |
| A08996 | A16565 | 188 | A08996 | A16597 | 401 |

|        |        |     |        |        |     |
|--------|--------|-----|--------|--------|-----|
| A08996 | A16608 | 288 | A08996 | A16611 | 360 |
| A08996 | A16652 | 174 | A08996 | A16664 | 319 |
| A08996 | A16675 | 374 | A08996 | A16680 | 174 |
| A08996 | A16690 | 152 | A08996 | A16702 | 252 |
| A08996 | A16703 | 363 | A08996 | A16704 | 246 |
| A08996 | A16709 | 262 | A08996 | A16776 | 286 |
| A08996 | A16790 | 262 | A08996 | A16806 | 329 |
| A08996 | A16829 | 276 | A08996 | A16838 | 249 |
| A08996 | A16858 | 347 | A08996 | A16859 | 368 |
| A08996 | A16905 | 224 | A08996 | A16913 | 408 |
| A08996 | A17015 | 232 | A08996 | A17018 | 391 |
| A08996 | A17019 | 333 | A08996 | A17030 | 286 |
| A08996 | A17035 | 229 | A08996 | A17190 | 388 |
| A08998 | A14566 | 196 | A09000 | A09001 | 422 |
| A09000 | A09288 | 430 | A09000 | A09654 | 414 |
| A09000 | A09706 | 457 | A09000 | A09762 | 385 |
| A09000 | A09828 | 229 | A09000 | A10373 | 299 |
| A09000 | A11236 | 185 | A09000 | A11301 | 208 |
| A09000 | A11376 | 438 | A09000 | A11472 | 163 |
| A09000 | A11551 | 341 | A09000 | A11596 | 251 |
| A09000 | A11675 | 193 | A09000 | A11915 | 281 |
| A09000 | A11916 | 221 | A09000 | A11917 | 160 |
| A09000 | A11940 | 286 | A09000 | A12215 | 302 |
| A09000 | A12499 | 263 | A09000 | A12556 | 486 |
| A09000 | A12606 | 229 | A09000 | A12658 | 201 |
| A09000 | A12725 | 247 | A09000 | A13313 | 188 |
| A09000 | A13781 | 196 | A09000 | A13784 | 229 |
| A09000 | A14076 | 483 | A09000 | A14222 | 167 |
| A09000 | A14255 | 329 | A09000 | A14260 | 283 |
| A09000 | A14282 | 241 | A09000 | A14477 | 343 |
| A09000 | A14498 | 343 | A09000 | A14569 | 215 |
| A09000 | A14674 | 343 | A09000 | A14702 | 343 |
| A09000 | A14718 | 345 | A09000 | A15189 | 180 |
| A09000 | A15262 | 162 | A09000 | A15356 | 221 |
| A09000 | A15541 | 313 | A09000 | A15709 | 152 |
| A09000 | A15711 | 245 | A09000 | A16128 | 198 |
| A09000 | A16129 | 198 | A09000 | A16226 | 172 |
| A09000 | A16343 | 327 | A09000 | A16378 | 401 |
| A09000 | A16552 | 215 | A09000 | A16565 | 191 |
| A09000 | A16597 | 193 | A09000 | A16608 | 159 |
| A09000 | A16646 | 167 | A09000 | A16664 | 188 |
| A09000 | A16704 | 249 | A09000 | A16709 | 263 |
| A09000 | A16738 | 343 | A09000 | A16905 | 228 |
| A09000 | A17019 | 335 | A09000 | A17030 | 288 |
| A09001 | A09598 | 110 | A09001 | A09762 | 393 |
| A09001 | A11236 | 303 | A09001 | A12556 | 394 |

|        |        |     |        |        |     |
|--------|--------|-----|--------|--------|-----|
| A09001 | A14278 | 179 | A09001 | A14282 | 251 |
| A09001 | A15320 | 176 | A09001 | A15348 | 154 |
| A09001 | A16762 | 306 | A09001 | A16809 | 293 |
| A09003 | A09078 | 324 | A09003 | A10590 | 341 |
| A09003 | A11983 | 288 | A09004 | A09127 | 195 |
| A09004 | A10842 | 152 | A09004 | A14220 | 154 |
| A09004 | A14525 | 152 | A09004 | A14655 | 230 |
| A09004 | A15375 | 152 | A09004 | A15546 | 152 |
| A09004 | A16994 | 171 | A09006 | A12158 | 401 |
| A09006 | A14836 | 435 | A09007 | A09644 | 377 |
| A09007 | A10159 | 491 | A09007 | A10642 | 465 |
| A09007 | A12052 | 311 | A09007 | A12873 | 235 |
| A09007 | A13231 | 245 | A09007 | A13321 | 160 |
| A09007 | A14086 | 486 | A09007 | A14167 | 232 |
| A09007 | A14183 | 367 | A09007 | A14213 | 296 |
| A09007 | A14843 | 385 | A09007 | A14931 | 180 |
| A09007 | A15262 | 318 | A09007 | A17015 | 302 |
| A09008 | A09977 | 207 | A09008 | A10165 | 159 |
| A09009 | A09297 | 351 | A09009 | A11452 | 267 |
| A09009 | A11497 | 151 | A09009 | A12255 | 274 |
| A09009 | A12873 | 204 | A09009 | A13340 | 232 |
| A09009 | A13812 | 279 | A09009 | A14255 | 223 |
| A09009 | A14566 | 238 | A09009 | A14594 | 160 |
| A09009 | A15519 | 263 | A09009 | A15541 | 208 |
| A09009 | A16437 | 257 | A09009 | A16585 | 329 |
| A09010 | A09299 | 191 | A09010 | A09309 | 156 |
| A09010 | A09609 | 216 | A09010 | A09611 | 255 |
| A09010 | A09619 | 313 | A09010 | A09703 | 255 |
| A09010 | A09708 | 255 | A09010 | A09828 | 246 |
| A09010 | A10159 | 475 | A09010 | A10315 | 162 |
| A09010 | A10789 | 180 | A09010 | A11209 | 177 |
| A09010 | A11297 | 180 | A09010 | A11301 | 396 |
| A09010 | A11395 | 586 | A09010 | A11439 | 255 |
| A09010 | A11496 | 363 | A09010 | A11497 | 446 |
| A09010 | A11551 | 221 | A09010 | A11555 | 217 |
| A09010 | A11616 | 341 | A09010 | A11621 | 263 |
| A09010 | A11735 | 343 | A09010 | A11737 | 162 |
| A09010 | A11914 | 340 | A09010 | A11915 | 174 |
| A09010 | A11917 | 290 | A09010 | A11940 | 314 |
| A09010 | A11992 | 208 | A09010 | A12111 | 152 |
| A09010 | A12215 | 333 | A09010 | A12234 | 193 |
| A09010 | A12254 | 350 | A09010 | A12255 | 270 |
| A09010 | A12433 | 396 | A09010 | A12508 | 319 |
| A09010 | A12606 | 435 | A09010 | A12658 | 208 |
| A09010 | A12725 | 347 | A09010 | A12858 | 343 |
| A09010 | A13069 | 204 | A09010 | A13313 | 378 |

|        |        |     |        |        |     |
|--------|--------|-----|--------|--------|-----|
| A09010 | A13399 | 168 | A09010 | A13706 | 183 |
| A09010 | A13708 | 294 | A09010 | A13737 | 228 |
| A09010 | A13781 | 385 | A09010 | A13783 | 173 |
| A09010 | A13784 | 167 | A09010 | A13788 | 165 |
| A09010 | A13805 | 157 | A09010 | A13809 | 217 |
| A09010 | A13811 | 152 | A09010 | A14074 | 182 |
| A09010 | A14084 | 167 | A09010 | A14166 | 255 |
| A09010 | A14212 | 152 | A09010 | A14214 | 480 |
| A09010 | A14222 | 352 | A09010 | A14255 | 201 |
| A09010 | A14288 | 337 | A09010 | A14454 | 489 |
| A09010 | A14455 | 230 | A09010 | A14462 | 280 |
| A09010 | A14799 | 230 | A09010 | A14843 | 172 |
| A09010 | A15105 | 340 | A09010 | A15187 | 268 |
| A09010 | A15189 | 179 | A09010 | A15262 | 257 |
| A09010 | A15373 | 676 | A09010 | A15541 | 180 |
| A09010 | A15667 | 162 | A09010 | A15711 | 265 |
| A09010 | A15749 | 413 | A09010 | A15762 | 385 |
| A09010 | A15850 | 252 | A09010 | A15940 | 165 |
| A09010 | A15943 | 255 | A09010 | A15944 | 255 |
| A09010 | A15945 | 455 | A09010 | A15946 | 596 |
| A09010 | A16067 | 255 | A09010 | A16093 | 255 |
| A09010 | A16109 | 255 | A09010 | A16144 | 397 |
| A09010 | A16157 | 440 | A09010 | A16187 | 246 |
| A09010 | A16212 | 243 | A09010 | A16243 | 172 |
| A09010 | A16261 | 238 | A09010 | A16343 | 361 |
| A09010 | A16552 | 401 | A09010 | A16565 | 416 |
| A09010 | A16587 | 290 | A09010 | A16597 | 443 |
| A09010 | A16608 | 151 | A09010 | A16611 | 435 |
| A09010 | A16664 | 369 | A09010 | A16675 | 330 |
| A09010 | A16680 | 279 | A09010 | A16684 | 313 |
| A09010 | A16690 | 329 | A09010 | A16692 | 281 |
| A09010 | A16704 | 363 | A09010 | A16764 | 303 |
| A09010 | A16776 | 184 | A09010 | A16790 | 156 |
| A09010 | A16806 | 240 | A09010 | A16824 | 351 |
| A09010 | A16829 | 172 | A09010 | A16858 | 266 |
| A09010 | A16859 | 296 | A09010 | A16866 | 213 |
| A09010 | A16874 | 301 | A09010 | A16900 | 191 |
| A09010 | A16913 | 343 | A09010 | A16944 | 191 |
| A09010 | A16954 | 377 | A09010 | A17018 | 177 |
| A09010 | A17030 | 184 | A09010 | A17125 | 187 |
| A09010 | A17133 | 160 | A09010 | A17190 | 170 |
| A09010 | A17211 | 302 | A09011 | A14574 | 407 |
| A09011 | A14636 | 247 | A09011 | A14643 | 167 |
| A09011 | A16300 | 190 | A09013 | A09277 | 377 |
| A09013 | A10798 | 341 | A09013 | A11337 | 364 |
| A09014 | A11169 | 400 | A09014 | A13865 | 435 |

|        |        |     |        |        |     |
|--------|--------|-----|--------|--------|-----|
| A09014 | A13945 | 296 | A09016 | A11983 | 234 |
| A09017 | A09548 | 394 | A09018 | A09124 | 162 |
| A09018 | A09644 | 213 | A09018 | A09660 | 163 |
| A09018 | A10459 | 232 | A09018 | A10824 | 249 |
| A09018 | A11604 | 358 | A09018 | A12457 | 310 |
| A09018 | A13127 | 226 | A09018 | A13997 | 205 |
| A09018 | A14236 | 238 | A09018 | A14248 | 260 |
| A09019 | A09298 | 290 | A09019 | A14459 | 447 |
| A09020 | A09136 | 369 | A09020 | A09221 | 294 |
| A09020 | A10148 | 243 | A09020 | A12446 | 401 |
| A09020 | A13212 | 296 | A09020 | A13373 | 270 |
| A09020 | A16300 | 247 | A09021 | A09926 | 380 |
| A09021 | A14148 | 160 | A09021 | A14303 | 213 |
| A09021 | A15851 | 283 | A09022 | A11537 | 254 |
| A09022 | A13003 | 395 | A09022 | A13826 | 212 |
| A09022 | A13899 | 185 | A09022 | A14072 | 396 |
| A09022 | A14202 | 271 | A09022 | A14290 | 314 |
| A09022 | A14667 | 358 | A09022 | A15241 | 160 |
| A09022 | A15292 | 221 | A09022 | A15310 | 235 |
| A09022 | A15317 | 319 | A09022 | A15346 | 279 |
| A09022 | A15348 | 303 | A09022 | A15349 | 205 |
| A09022 | A15352 | 429 | A09022 | A15411 | 283 |
| A09022 | A15452 | 156 | A09022 | A15454 | 249 |
| A09022 | A15495 | 249 | A09022 | A15799 | 283 |
| A09023 | A10591 | 474 | A09023 | A10597 | 399 |
| A09023 | A10733 | 346 | A09023 | A12961 | 375 |
| A09023 | A13826 | 308 | A09023 | A13873 | 348 |
| A09023 | A14191 | 170 | A09023 | A15346 | 229 |
| A09024 | A09056 | 185 | A09024 | A09425 | 291 |
| A09024 | A09576 | 469 | A09024 | A10399 | 162 |
| A09024 | A11683 | 272 | A09024 | A13135 | 479 |
| A09024 | A16939 | 262 | A09026 | A10506 | 234 |
| A09026 | A12425 | 422 | A09026 | A14197 | 208 |
| A09026 | A15846 | 374 | A09028 | A09073 | 254 |
| A09028 | A09559 | 353 | A09028 | A09561 | 205 |
| A09028 | A11132 | 223 | A09028 | A13373 | 249 |
| A09028 | A14638 | 299 | A09028 | A16300 | 322 |
| A09029 | A14664 | 400 | A09030 | A10169 | 435 |
| A09030 | A12599 | 441 | A09030 | A12768 | 447 |
| A09030 | A12769 | 447 | A09030 | A12786 | 441 |
| A09030 | A13815 | 447 | A09031 | A14652 | 302 |
| A09032 | A10532 | 193 | A09033 | A09059 | 160 |
| A09033 | A10574 | 321 | A09033 | A15653 | 163 |
| A09036 | A09277 | 263 | A09036 | A09375 | 369 |
| A09036 | A09891 | 400 | A09036 | A09892 | 449 |
| A09036 | A13832 | 394 | A09036 | A13849 | 391 |

|        |        |     |        |        |     |
|--------|--------|-----|--------|--------|-----|
| A09036 | A15430 | 177 | A09038 | A12897 | 340 |
| A09038 | A14299 | 688 | A09038 | A14443 | 673 |
| A09038 | A14444 | 710 | A09038 | A16636 | 240 |
| A09040 | A09246 | 228 | A09040 | A09581 | 218 |
| A09040 | A10456 | 193 | A09040 | A16738 | 218 |
| A09042 | A14297 | 353 | A09043 | A13857 | 335 |
| A09043 | A14080 | 193 | A09043 | A15650 | 333 |
| A09043 | A17168 | 232 | A09044 | A09702 | 200 |
| A09044 | A10417 | 200 | A09044 | A11297 | 254 |
| A09044 | A11438 | 200 | A09044 | A11729 | 200 |
| A09044 | A13333 | 200 | A09044 | A13989 | 420 |
| A09044 | A14843 | 489 | A09044 | A16681 | 179 |
| A09044 | A16793 | 293 | A09045 | A09127 | 262 |
| A09045 | A09655 | 490 | A09045 | A13340 | 348 |
| A09045 | A13609 | 215 | A09045 | A14188 | 184 |
| A09045 | A15624 | 159 | A09045 | A15660 | 173 |
| A09045 | A15928 | 374 | A09046 | A16281 | 196 |
| A09047 | A10023 | 430 | A09047 | A11181 | 445 |
| A09050 | A10989 | 310 | A09050 | A11444 | 216 |
| A09050 | A13387 | 383 | A09050 | A13672 | 224 |
| A09050 | A13830 | 484 | A09050 | A13844 | 334 |
| A09050 | A13846 | 334 | A09050 | A13902 | 130 |
| A09050 | A14182 | 334 | A09050 | A14247 | 352 |
| A09050 | A14693 | 491 | A09050 | A15015 | 382 |
| A09050 | A15043 | 423 | A09050 | A15045 | 351 |
| A09050 | A15430 | 162 | A09050 | A15669 | 174 |
| A09050 | A16436 | 188 | A09051 | A09624 | 293 |
| A09051 | A09668 | 394 | A09051 | A10773 | 395 |
| A09051 | A15649 | 252 | A09052 | A09940 | 491 |
| A09052 | A10619 | 196 | A09052 | A11656 | 385 |
| A09052 | A12533 | 474 | A09052 | A12907 | 224 |
| A09052 | A14227 | 473 | A09052 | A14291 | 424 |
| A09052 | A14306 | 419 | A09052 | A14307 | 429 |
| A09052 | A14309 | 439 | A09052 | A15533 | 180 |
| A09053 | A14711 | 291 | A09053 | A17061 | 63  |
| A09054 | A09055 | 344 | A09054 | A09093 | 258 |
| A09054 | A09277 | 187 | A09054 | A09309 | 162 |
| A09054 | A09792 | 373 | A09054 | A10655 | 168 |
| A09054 | A10705 | 258 | A09054 | A11180 | 156 |
| A09054 | A11279 | 472 | A09054 | A11287 | 68  |
| A09054 | A11301 | 152 | A09054 | A11322 | 185 |
| A09054 | A11366 | 185 | A09054 | A11471 | 273 |
| A09054 | A11527 | 205 | A09054 | A11940 | 188 |
| A09054 | A11954 | 182 | A09054 | A12215 | 208 |
| A09054 | A12682 | 302 | A09054 | A12826 | 319 |
| A09054 | A12850 | 226 | A09054 | A12858 | 271 |

|        |        |     |        |        |     |
|--------|--------|-----|--------|--------|-----|
| A09054 | A13037 | 344 | A09054 | A13069 | 210 |
| A09054 | A13315 | 162 | A09054 | A13415 | 185 |
| A09054 | A13587 | 296 | A09054 | A13784 | 177 |
| A09054 | A13788 | 173 | A09054 | A13805 | 163 |
| A09054 | A13819 | 307 | A09054 | A13832 | 217 |
| A09054 | A13866 | 307 | A09054 | A13874 | 491 |
| A09054 | A13895 | 63  | A09054 | A13902 | 163 |
| A09054 | A13989 | 232 | A09054 | A14052 | 491 |
| A09054 | A14235 | 198 | A09054 | A14239 | 533 |
| A09054 | A14247 | 551 | A09054 | A14258 | 318 |
| A09054 | A14260 | 185 | A09054 | A14661 | 163 |
| A09054 | A14692 | 266 | A09054 | A14937 | 152 |
| A09054 | A15189 | 188 | A09054 | A15229 | 210 |
| A09054 | A15292 | 373 | A09054 | A15366 | 213 |
| A09054 | A15552 | 210 | A09054 | A16567 | 210 |
| A09054 | A16597 | 205 | A09054 | A16675 | 258 |
| A09054 | A16804 | 454 | A09054 | A16807 | 307 |
| A09054 | A16944 | 198 | A09054 | A17033 | 177 |
| A09054 | A17034 | 302 | A09054 | A17133 | 168 |
| A09056 | A09060 | 486 | A09056 | A09576 | 401 |
| A09056 | A10594 | 269 | A09056 | A11925 | 269 |
| A09056 | A13222 | 513 | A09056 | A13830 | 63  |
| A09056 | A13855 | 414 | A09056 | A14247 | 639 |
| A09056 | A14473 | 269 | A09056 | A14481 | 269 |
| A09056 | A14693 | 269 | A09056 | A14838 | 442 |
| A09056 | A15301 | 269 | A09056 | A15302 | 269 |
| A09056 | A15366 | 269 | A09056 | A15430 | 269 |
| A09056 | A15462 | 269 | A09056 | A15463 | 269 |
| A09056 | A15650 | 221 | A09056 | A15684 | 260 |
| A09056 | A16927 | 414 | A09056 | A16982 | 414 |
| A09057 | A10208 | 321 | A09058 | A09124 | 188 |
| A09058 | A09457 | 401 | A09058 | A12625 | 223 |
| A09058 | A14516 | 204 | A09058 | A15578 | 286 |
| A09058 | A15840 | 283 | A09059 | A09375 | 196 |
| A09059 | A09621 | 486 | A09059 | A09762 | 318 |
| A09059 | A10253 | 414 | A09059 | A10373 | 152 |
| A09059 | A10420 | 488 | A09059 | A10421 | 473 |
| A09059 | A10424 | 327 | A09059 | A10427 | 424 |
| A09059 | A10437 | 201 | A09059 | A10444 | 405 |
| A09059 | A10452 | 425 | A09059 | A10547 | 185 |
| A09059 | A10550 | 182 | A09059 | A10656 | 430 |
| A09059 | A10658 | 385 | A09059 | A10672 | 310 |
| A09059 | A10677 | 489 | A09059 | A10686 | 468 |
| A09059 | A10688 | 182 | A09059 | A10694 | 168 |
| A09059 | A11236 | 216 | A09059 | A12285 | 218 |
| A09059 | A14074 | 152 | A09059 | A14705 | 185 |



|        |        |     |        |        |     |
|--------|--------|-----|--------|--------|-----|
| A09059 | A14835 | 346 | A09059 | A14856 | 321 |
| A09059 | A14989 | 255 | A09059 | A15825 | 246 |
| A09059 | A16233 | 152 | A09059 | A16286 | 348 |
| A09059 | A16417 | 352 | A09059 | A16418 | 475 |
| A09060 | A13222 | 303 | A09060 | A14178 | 208 |
| A09060 | A14247 | 388 | A09062 | A09239 | 373 |
| A09062 | A12393 | 297 | A09062 | A14210 | 183 |
| A09062 | A14364 | 299 | A09062 | A14379 | 286 |
| A09062 | A15292 | 398 | A09062 | A15349 | 388 |
| A09062 | A15445 | 286 | A09065 | A12524 | 447 |
| A09065 | A12526 | 445 | A09065 | A14654 | 401 |
| A09065 | A15258 | 416 | A09065 | A15277 | 393 |
| A09066 | A10580 | 151 | A09066 | A15383 | 270 |
| A09068 | A09417 | 456 | A09070 | A09958 | 445 |
| A09071 | A13226 | 423 | A09072 | A09073 | 346 |
| A09072 | A10757 | 318 | A09072 | A11983 | 899 |
| A09072 | A13617 | 344 | A09072 | A14381 | 173 |
| A09072 | A14444 | 221 | A09072 | A14652 | 473 |
| A09073 | A09124 | 243 | A09073 | A09136 | 340 |
| A09073 | A09209 | 413 | A09073 | A09561 | 180 |
| A09073 | A09882 | 490 | A09073 | A09997 | 263 |
| A09073 | A10453 | 201 | A09073 | A14819 | 168 |
| A09073 | A16041 | 363 | A09073 | A16067 | 156 |
| A09073 | A16225 | 190 | A09074 | A10665 | 469 |
| A09074 | A11014 | 486 | A09074 | A16043 | 375 |
| A09074 | A16138 | 385 | A09074 | A16721 | 404 |
| A09075 | A13734 | 251 | A09076 | A12225 | 391 |
| A09077 | A12824 | 154 | A09078 | A09263 | 251 |
| A09078 | A09319 | 899 | A09078 | A09603 | 363 |
| A09078 | A09742 | 195 | A09078 | A10161 | 286 |
| A09078 | A10688 | 191 | A09078 | A11945 | 216 |
| A09078 | A12965 | 286 | A09078 | A13617 | 419 |
| A09078 | A13736 | 163 | A09078 | A13830 | 324 |
| A09078 | A13948 | 183 | A09078 | A13975 | 411 |
| A09078 | A13989 | 435 | A09078 | A14009 | 334 |
| A09078 | A14247 | 486 | A09078 | A14288 | 334 |
| A09078 | A14856 | 335 | A09078 | A15293 | 385 |
| A09078 | A15314 | 152 | A09078 | A15315 | 212 |
| A09078 | A15419 | 234 | A09078 | A16286 | 413 |
| A09078 | A16363 | 156 | A09078 | A16635 | 334 |
| A09078 | A16732 | 210 | A09078 | A17041 | 277 |
| A09079 | A09905 | 445 | A09080 | A10339 | 424 |
| A09081 | A16636 | 207 | A09082 | A09526 | 356 |
| A09082 | A09648 | 285 | A09083 | A09994 | 491 |
| A09083 | A11493 | 152 | A09083 | A12543 | 162 |
| A09084 | A11470 | 243 | A09084 | A11683 | 180 |

|        |        |     |        |        |     |
|--------|--------|-----|--------|--------|-----|
| A09084 | A13734 | 205 | A09084 | A15253 | 406 |
| A09084 | A15809 | 172 | A09084 | A16532 | 351 |
| A09084 | A16735 | 377 | A09085 | A09979 | 406 |
| A09085 | A14197 | 215 | A09092 | A09212 | 390 |
| A09092 | A09727 | 168 | A09092 | A14190 | 168 |
| A09092 | A14366 | 196 | A09092 | A16410 | 190 |
| A09093 | A09624 | 441 | A09093 | A12897 | 165 |
| A09093 | A14577 | 329 | A09093 | A14635 | 154 |
| A09095 | A10710 | 312 | A09095 | A15789 | 418 |
| A09096 | A09832 | 417 | A09096 | A15372 | 285 |
| A09096 | A16753 | 328 | A09097 | A14643 | 293 |
| A09098 | A09742 | 224 | A09098 | A11683 | 305 |
| A09098 | A14007 | 305 | A09100 | A09256 | 306 |
| A09100 | A11954 | 491 | A09100 | A14084 | 390 |
| A09100 | A14285 | 294 | A09104 | A09237 | 385 |
| A09107 | A09134 | 491 | A09107 | A10527 | 388 |
| A09107 | A10762 | 363 | A09107 | A15896 | 279 |
| A09107 | A15992 | 491 | A09107 | A16636 | 266 |
| A09110 | A15241 | 236 | A09110 | A15259 | 427 |
| A09111 | A14267 | 369 | A09111 | A14642 | 263 |
| A09111 | A15493 | 396 | A09112 | A11023 | 313 |
| A09112 | A11281 | 307 | A09117 | A14635 | 463 |
| A09117 | A16352 | 425 | A09118 | A14191 | 274 |
| A09118 | A14281 | 230 | A09120 | A14624 | 462 |
| A09120 | A14643 | 188 | A09121 | A11104 | 333 |
| A09121 | A13860 | 207 | A09121 | A13986 | 165 |
| A09121 | A15398 | 355 | A09121 | A16121 | 454 |
| A09122 | A14188 | 246 | A09122 | A16127 | 232 |
| A09123 | A09900 | 286 | A09123 | A10013 | 391 |
| A09123 | A10411 | 372 | A09123 | A10744 | 345 |
| A09123 | A10827 | 400 | A09123 | A11300 | 179 |
| A09123 | A11318 | 321 | A09123 | A12965 | 391 |
| A09123 | A14377 | 227 | A09123 | A14660 | 258 |
| A09123 | A15838 | 432 | A09123 | A15840 | 473 |
| A09123 | A15881 | 391 | A09123 | A16112 | 352 |
| A09123 | A16718 | 324 | A09123 | A16732 | 475 |
| A09124 | A09218 | 162 | A09124 | A09480 | 213 |
| A09124 | A09826 | 216 | A09124 | A10006 | 180 |
| A09124 | A10081 | 360 | A09124 | A10733 | 160 |
| A09124 | A10949 | 154 | A09124 | A11678 | 199 |
| A09124 | A11745 | 174 | A09124 | A11759 | 474 |
| A09124 | A12306 | 238 | A09124 | A12726 | 201 |
| A09124 | A12983 | 249 | A09124 | A13102 | 262 |
| A09124 | A13824 | 899 | A09124 | A14197 | 288 |
| A09124 | A14300 | 213 | A09124 | A14629 | 221 |
| A09124 | A14819 | 162 | A09124 | A15910 | 277 |

|        |        |     |        |        |     |
|--------|--------|-----|--------|--------|-----|
| A09124 | A16257 | 245 | A09124 | A16428 | 234 |
| A09125 | A16911 | 363 | A09126 | A09598 | 243 |
| A09126 | A11485 | 165 | A09126 | A16068 | 156 |
| A09126 | A17040 | 343 | A09127 | A09900 | 165 |
| A09127 | A10081 | 265 | A09127 | A10087 | 179 |
| A09127 | A10748 | 195 | A09127 | A11219 | 339 |
| A09127 | A11323 | 307 | A09127 | A11880 | 251 |
| A09127 | A11897 | 162 | A09127 | A12383 | 154 |
| A09127 | A12533 | 245 | A09127 | A13466 | 193 |
| A09127 | A13744 | 361 | A09127 | A13855 | 157 |
| A09127 | A14390 | 217 | A09127 | A14650 | 152 |
| A09127 | A14991 | 361 | A09127 | A15281 | 247 |
| A09127 | A16606 | 157 | A09127 | A16794 | 361 |
| A09127 | A17213 | 322 | A09131 | A09388 | 256 |
| A09131 | A09416 | 160 | A09131 | A09556 | 271 |
| A09131 | A09882 | 165 | A09131 | A10040 | 449 |
| A09131 | A11603 | 363 | A09131 | A13965 | 173 |
| A09131 | A14235 | 396 | A09131 | A14568 | 162 |
| A09132 | A10325 | 447 | A09134 | A10527 | 291 |
| A09134 | A15992 | 486 | A09134 | A16636 | 156 |
| A09135 | A14223 | 274 | A09135 | A14272 | 267 |
| A09135 | A14694 | 267 | A09135 | A15179 | 435 |
| A09136 | A14272 | 156 | A09136 | A15315 | 251 |
| A09136 | A15617 | 297 | A09136 | A16364 | 271 |
| A09137 | A12973 | 445 | A09138 | A12888 | 441 |
| A09139 | A11599 | 435 | A09139 | A12845 | 412 |
| A09139 | A13122 | 441 | A09139 | A16338 | 441 |
| A09141 | A11600 | 390 | A09141 | A17074 | 404 |
| A09143 | A12956 | 445 | A09145 | A10047 | 324 |
| A09145 | A10453 | 238 | A09145 | A12990 | 303 |
| A09145 | A14469 | 346 | A09145 | A14588 | 258 |
| A09145 | A15626 | 477 | A09146 | A09256 | 333 |
| A09147 | A14449 | 249 | A09147 | A14664 | 279 |
| A09147 | A15674 | 362 | A09148 | A11453 | 383 |
| A09148 | A11815 | 363 | A09149 | A09539 | 228 |
| A09149 | A11369 | 229 | A09149 | A11387 | 174 |
| A09149 | A11983 | 188 | A09149 | A13997 | 409 |
| A09149 | A14211 | 207 | A09149 | A14443 | 193 |
| A09149 | A16042 | 267 | A09150 | A14699 | 205 |
| A09151 | A09152 | 486 | A09151 | A09173 | 396 |
| A09151 | A09174 | 490 | A09151 | A09435 | 414 |
| A09151 | A09461 | 455 | A09151 | A09932 | 491 |
| A09151 | A10419 | 368 | A09151 | A11753 | 374 |
| A09152 | A09174 | 490 | A09152 | A09426 | 391 |
| A09152 | A09435 | 416 | A09152 | A09461 | 455 |
| A09152 | A09932 | 491 | A09152 | A11753 | 443 |

|        |        |     |        |        |     |
|--------|--------|-----|--------|--------|-----|
| A09153 | A09993 | 398 | A09154 | A12117 | 445 |
| A09155 | A09360 | 447 | A09155 | A10987 | 358 |
| A09156 | A14443 | 213 | A09157 | A13879 | 358 |
| A09158 | A14073 | 174 | A09159 | A11277 | 303 |
| A09160 | A09184 | 374 | A09160 | A09434 | 347 |
| A09160 | A10395 | 160 | A09160 | A13930 | 286 |
| A09160 | A15324 | 157 | A09161 | A09880 | 343 |
| A09161 | A13544 | 452 | A09162 | A09660 | 249 |
| A09162 | A09750 | 232 | A09162 | A10392 | 422 |
| A09162 | A10499 | 323 | A09162 | A10623 | 461 |
| A09162 | A10728 | 481 | A09162 | A10743 | 293 |
| A09162 | A10808 | 486 | A09162 | A10811 | 357 |
| A09162 | A10982 | 388 | A09162 | A11379 | 274 |
| A09162 | A11696 | 167 | A09162 | A11983 | 486 |
| A09162 | A12383 | 473 | A09162 | A13146 | 351 |
| A09162 | A13729 | 319 | A09162 | A14000 | 229 |
| A09162 | A14055 | 374 | A09162 | A14206 | 185 |
| A09162 | A14653 | 274 | A09162 | A15106 | 258 |
| A09162 | A15282 | 463 | A09162 | A15734 | 151 |
| A09162 | A15875 | 207 | A09162 | A16305 | 258 |
| A09162 | A16835 | 457 | A09164 | A13240 | 281 |
| A09164 | A13517 | 210 | A09164 | A15877 | 302 |
| A09165 | A14229 | 257 | A09166 | A13755 | 438 |
| A09167 | A09184 | 434 | A09167 | A11892 | 434 |
| A09169 | A12938 | 396 | A09169 | A15535 | 249 |
| A09173 | A09932 | 310 | A09174 | A09426 | 428 |
| A09174 | A09435 | 486 | A09174 | A09461 | 488 |
| A09174 | A09932 | 491 | A09174 | A11753 | 321 |
| A09174 | A12977 | 366 | A09174 | A13195 | 312 |
| A09174 | A14502 | 213 | A09177 | A09371 | 434 |
| A09177 | A11026 | 430 | A09177 | A13407 | 445 |
| A09178 | A11513 | 385 | A09179 | A09578 | 413 |
| A09179 | A10735 | 314 | A09179 | A11369 | 200 |
| A09179 | A11460 | 391 | A09179 | A14009 | 183 |
| A09179 | A14071 | 396 | A09179 | A14648 | 241 |
| A09180 | A15171 | 386 | A09181 | A09195 | 229 |
| A09181 | A09542 | 480 | A09181 | A11369 | 313 |
| A09181 | A13050 | 324 | A09181 | A15528 | 174 |
| A09181 | A16994 | 165 | A09182 | A09448 | 196 |
| A09182 | A09511 | 373 | A09182 | A09551 | 322 |
| A09182 | A09646 | 380 | A09182 | A10175 | 420 |
| A09182 | A10205 | 462 | A09182 | A10619 | 193 |
| A09182 | A10989 | 168 | A09182 | A11258 | 469 |
| A09182 | A11379 | 201 | A09182 | A11863 | 249 |
| A09182 | A14252 | 567 | A09182 | A15356 | 334 |
| A09182 | A15726 | 266 | A09183 | A14643 | 260 |

|        |        |     |        |        |     |
|--------|--------|-----|--------|--------|-----|
| A09184 | A11892 | 434 | A09188 | A13433 | 469 |
| A09188 | A13841 | 469 | A09189 | A09509 | 326 |
| A09192 | A14682 | 460 | A09193 | A14188 | 260 |
| A09194 | A13484 | 319 | A09194 | A16300 | 190 |
| A09195 | A09443 | 179 | A09195 | A09506 | 489 |
| A09195 | A09996 | 182 | A09195 | A10175 | 154 |
| A09195 | A10250 | 532 | A09195 | A12651 | 202 |
| A09195 | A12897 | 238 | A09195 | A14009 | 174 |
| A09195 | A14222 | 475 | A09195 | A14529 | 230 |
| A09195 | A14583 | 252 | A09195 | A14585 | 434 |
| A09195 | A15726 | 279 | A09195 | A16073 | 199 |
| A09199 | A09831 | 355 | A09199 | A10944 | 465 |
| A09199 | A11144 | 480 | A09199 | A12347 | 465 |
| A09199 | A14191 | 213 | A09199 | A15803 | 477 |
| A09199 | A15825 | 477 | A09199 | A16057 | 443 |
| A09199 | A16194 | 466 | A09200 | A09434 | 283 |
| A09200 | A09470 | 302 | A09200 | A11748 | 380 |
| A09201 | A09204 | 217 | A09201 | A09565 | 297 |
| A09201 | A09732 | 102 | A09201 | A09734 | 390 |
| A09201 | A11287 | 291 | A09201 | A11872 | 322 |
| A09201 | A11949 | 462 | A09201 | A12316 | 382 |
| A09201 | A13987 | 491 | A09201 | A14010 | 174 |
| A09201 | A14190 | 477 | A09201 | A14371 | 480 |
| A09201 | A14378 | 338 | A09201 | A14399 | 364 |
| A09201 | A14406 | 296 | A09201 | A14511 | 486 |
| A09201 | A14539 | 188 | A09201 | A15292 | 486 |
| A09201 | A15306 | 371 | A09201 | A15311 | 480 |
| A09201 | A15312 | 486 | A09201 | A15313 | 472 |
| A09201 | A15316 | 382 | A09201 | A15317 | 165 |
| A09201 | A15333 | 358 | A09201 | A15334 | 288 |
| A09201 | A15349 | 177 | A09201 | A15352 | 486 |
| A09201 | A15432 | 491 | A09201 | A15436 | 491 |
| A09201 | A15440 | 377 | A09201 | A15447 | 159 |
| A09201 | A15451 | 394 | A09201 | A15452 | 443 |
| A09201 | A15461 | 188 | A09201 | A15478 | 380 |
| A09201 | A15515 | 199 | A09201 | A15638 | 165 |
| A09201 | A15824 | 256 | A09201 | A15828 | 385 |
| A09201 | A16049 | 180 | A09201 | A16224 | 201 |
| A09202 | A09447 | 446 | A09202 | A11431 | 162 |
| A09202 | A11537 | 218 | A09202 | A14210 | 174 |
| A09202 | A14220 | 434 | A09202 | A14379 | 174 |
| A09202 | A14413 | 193 | A09202 | A14583 | 462 |
| A09202 | A15311 | 212 | A09202 | A15352 | 174 |
| A09202 | A15413 | 157 | A09202 | A15454 | 215 |
| A09202 | A15464 | 202 | A09202 | A15626 | 210 |
| A09204 | A09238 | 162 | A09204 | A09307 | 188 |

|        |        |     |        |        |     |
|--------|--------|-----|--------|--------|-----|
| A09204 | A09681 | 333 | A09204 | A09734 | 488 |
| A09204 | A09745 | 491 | A09204 | A12644 | 490 |
| A09204 | A12975 | 328 | A09204 | A13369 | 434 |
| A09204 | A13987 | 489 | A09204 | A14010 | 475 |
| A09204 | A14122 | 489 | A09204 | A14124 | 363 |
| A09204 | A14210 | 174 | A09204 | A14257 | 185 |
| A09204 | A14378 | 219 | A09204 | A14413 | 326 |
| A09204 | A14611 | 423 | A09204 | A14661 | 243 |
| A09204 | A15292 | 491 | A09204 | A15311 | 212 |
| A09204 | A15312 | 486 | A09204 | A15313 | 469 |
| A09204 | A15349 | 428 | A09204 | A15352 | 465 |
| A09204 | A15366 | 307 | A09204 | A15400 | 252 |
| A09204 | A15431 | 228 | A09204 | A15432 | 486 |
| A09204 | A15433 | 420 | A09204 | A15434 | 302 |
| A09204 | A15435 | 474 | A09204 | A15436 | 393 |
| A09204 | A15451 | 271 | A09204 | A15452 | 468 |
| A09204 | A15456 | 241 | A09204 | A15457 | 291 |
| A09204 | A15459 | 241 | A09204 | A15460 | 263 |
| A09204 | A15461 | 174 | A09204 | A15485 | 266 |
| A09204 | A15516 | 210 | A09204 | A15819 | 218 |
| A09204 | A15828 | 259 | A09204 | A16117 | 420 |
| A09205 | A09230 | 355 | A09205 | A09233 | 330 |
| A09205 | A11422 | 312 | A09205 | A11449 | 330 |
| A09205 | A12458 | 366 | A09205 | A13338 | 260 |
| A09205 | A14611 | 388 | A09205 | A14642 | 179 |
| A09205 | A15310 | 241 | A09205 | A15421 | 351 |
| A09205 | A15422 | 455 | A09205 | A15819 | 258 |
| A09205 | A16117 | 484 | A09205 | A16224 | 228 |
| A09206 | A09230 | 439 | A09206 | A09231 | 394 |
| A09206 | A10453 | 251 | A09206 | A11313 | 246 |
| A09206 | A11422 | 490 | A09206 | A11653 | 418 |
| A09206 | A11948 | 480 | A09206 | A12121 | 378 |
| A09206 | A12884 | 446 | A09206 | A13133 | 449 |
| A09206 | A13412 | 449 | A09206 | A13935 | 340 |
| A09206 | A14449 | 180 | A09206 | A14611 | 293 |
| A09206 | A15422 | 324 | A09206 | A15493 | 439 |
| A09206 | A16155 | 401 | A09207 | A09651 | 405 |
| A09208 | A09239 | 389 | A09208 | A09570 | 388 |
| A09208 | A09970 | 419 | A09208 | A10336 | 286 |
| A09208 | A10985 | 416 | A09208 | A11431 | 299 |
| A09208 | A12393 | 440 | A09208 | A13312 | 378 |
| A09208 | A14122 | 273 | A09208 | A14378 | 243 |
| A09208 | A15278 | 408 | A09208 | A15292 | 269 |
| A09208 | A15349 | 199 | A09208 | A15487 | 278 |
| A09209 | A09882 | 439 | A09209 | A10894 | 291 |
| A09209 | A14198 | 151 | A09209 | A14721 | 378 |

|        |        |     |        |        |     |
|--------|--------|-----|--------|--------|-----|
| A09210 | A10532 | 945 | A09210 | A11240 | 273 |
| A09210 | A13344 | 394 | A09210 | A15498 | 279 |
| A09211 | A09241 | 279 | A09211 | A11132 | 424 |
| A09211 | A11556 | 330 | A09211 | A12284 | 190 |
| A09211 | A13861 | 383 | A09211 | A14136 | 368 |
| A09211 | A14364 | 243 | A09211 | A14378 | 154 |
| A09211 | A14539 | 229 | A09211 | A15460 | 307 |
| A09211 | A15515 | 238 | A09211 | A15635 | 318 |
| A09211 | A15934 | 279 | A09213 | A12728 | 229 |
| A09213 | A14621 | 201 | A09215 | A14132 | 414 |
| A09218 | A09220 | 223 | A09218 | A10510 | 352 |
| A09218 | A10639 | 363 | A09218 | A10735 | 355 |
| A09218 | A10756 | 294 | A09218 | A11108 | 399 |
| A09218 | A13511 | 452 | A09218 | A14433 | 247 |
| A09218 | A15498 | 430 | A09219 | A09552 | 432 |
| A09219 | A09572 | 363 | A09219 | A14371 | 188 |
| A09219 | A14372 | 385 | A09219 | A14380 | 382 |
| A09219 | A14416 | 361 | A09219 | A14511 | 160 |
| A09219 | A14554 | 462 | A09219 | A14604 | 438 |
| A09219 | A15480 | 241 | A09219 | A15790 | 396 |
| A09220 | A09401 | 785 | A09220 | A09464 | 210 |
| A09220 | A09652 | 286 | A09220 | A10339 | 333 |
| A09220 | A10411 | 312 | A09220 | A10801 | 195 |
| A09220 | A10913 | 270 | A09220 | A11108 | 356 |
| A09220 | A11124 | 333 | A09220 | A11608 | 257 |
| A09220 | A11834 | 159 | A09220 | A12990 | 198 |
| A09220 | A13216 | 795 | A09220 | A13980 | 335 |
| A09220 | A14027 | 318 | A09220 | A14062 | 310 |
| A09220 | A14198 | 259 | A09220 | A14402 | 215 |
| A09220 | A14438 | 245 | A09220 | A14649 | 185 |
| A09220 | A15320 | 245 | A09220 | A15551 | 279 |
| A09220 | A16467 | 154 | A09220 | A16547 | 712 |
| A09220 | A16911 | 167 | A09221 | A09242 | 208 |
| A09221 | A10034 | 268 | A09221 | A10853 | 202 |
| A09221 | A16328 | 162 | A09222 | A09355 | 372 |
| A09222 | A09833 | 400 | A09222 | A13826 | 462 |
| A09222 | A13899 | 423 | A09222 | A14371 | 172 |
| A09222 | A15292 | 193 | A09222 | A15346 | 405 |
| A09222 | A15348 | 221 | A09222 | A15395 | 258 |
| A09222 | A15425 | 224 | A09222 | A15834 | 285 |
| A09222 | A16224 | 269 | A09224 | A09742 | 215 |
| A09224 | A10747 | 411 | A09224 | A11122 | 407 |
| A09224 | A11421 | 435 | A09224 | A11556 | 470 |
| A09224 | A14136 | 413 | A09225 | A09881 | 241 |
| A09228 | A09727 | 218 | A09228 | A14009 | 159 |
| A09228 | A14496 | 249 | A09229 | A11229 | 373 |

|        |        |     |        |        |     |
|--------|--------|-----|--------|--------|-----|
| A09229 | A14484 | 208 | A09230 | A09231 | 419 |
| A09230 | A09234 | 475 | A09230 | A11422 | 374 |
| A09230 | A13826 | 202 | A09230 | A15425 | 279 |
| A09231 | A11243 | 396 | A09231 | A11422 | 399 |
| A09231 | A12121 | 425 | A09231 | A12884 | 428 |
| A09231 | A13412 | 430 | A09231 | A15422 | 317 |
| A09231 | A15493 | 419 | A09231 | A16155 | 438 |
| A09232 | A13855 | 249 | A09233 | A13372 | 404 |
| A09233 | A16300 | 168 | A09234 | A12709 | 436 |
| A09234 | A13826 | 216 | A09234 | A13830 | 185 |
| A09234 | A13899 | 299 | A09235 | A09236 | 383 |
| A09235 | A09241 | 414 | A09235 | A09363 | 489 |
| A09235 | A09374 | 276 | A09235 | A09508 | 468 |
| A09235 | A09791 | 296 | A09235 | A13965 | 160 |
| A09235 | A13975 | 215 | A09235 | A14443 | 913 |
| A09235 | A14444 | 205 | A09235 | A14539 | 162 |
| A09235 | A14644 | 302 | A09235 | A14848 | 273 |
| A09235 | A15293 | 474 | A09235 | A15294 | 435 |
| A09235 | A15321 | 311 | A09235 | A15343 | 208 |
| A09235 | A15506 | 447 | A09235 | A16626 | 243 |
| A09236 | A09241 | 467 | A09236 | A09363 | 396 |
| A09236 | A09429 | 458 | A09236 | A09508 | 362 |
| A09236 | A10264 | 388 | A09236 | A10540 | 441 |
| A09236 | A11300 | 196 | A09236 | A11485 | 210 |
| A09236 | A12371 | 333 | A09236 | A13997 | 213 |
| A09236 | A14188 | 266 | A09236 | A15293 | 297 |
| A09238 | A09239 | 491 | A09238 | A09422 | 491 |
| A09238 | A09732 | 468 | A09238 | A09733 | 450 |
| A09238 | A09734 | 345 | A09238 | A09855 | 491 |
| A09238 | A10167 | 290 | A09238 | A11412 | 221 |
| A09238 | A11415 | 176 | A09238 | A12393 | 491 |
| A09238 | A13119 | 491 | A09238 | A13151 | 490 |
| A09238 | A13312 | 483 | A09238 | A13546 | 355 |
| A09238 | A13987 | 430 | A09238 | A14010 | 245 |
| A09238 | A14190 | 246 | A09238 | A14202 | 361 |
| A09238 | A14215 | 168 | A09238 | A14371 | 469 |
| A09238 | A14376 | 241 | A09238 | A14378 | 269 |
| A09238 | A15292 | 491 | A09238 | A15312 | 472 |
| A09238 | A15313 | 385 | A09238 | A15335 | 180 |
| A09238 | A15348 | 316 | A09238 | A15349 | 350 |
| A09238 | A15352 | 489 | A09238 | A15433 | 190 |
| A09238 | A15435 | 408 | A09238 | A15444 | 185 |
| A09238 | A15447 | 329 | A09238 | A15451 | 234 |
| A09238 | A15452 | 490 | A09238 | A15456 | 201 |
| A09238 | A15457 | 377 | A09238 | A15463 | 208 |
| A09238 | A15495 | 333 | A09238 | A15726 | 171 |



|        |        |     |        |        |     |
|--------|--------|-----|--------|--------|-----|
| A09238 | A15830 | 230 | A09238 | A16414 | 270 |
| A09238 | A16786 | 210 | A09239 | A09422 | 491 |
| A09239 | A09732 | 489 | A09239 | A09733 | 466 |
| A09239 | A09734 | 424 | A09239 | A09742 | 221 |
| A09239 | A09855 | 491 | A09239 | A10167 | 267 |
| A09239 | A11412 | 288 | A09239 | A11560 | 193 |
| A09239 | A12393 | 491 | A09239 | A12824 | 168 |
| A09239 | A12897 | 152 | A09239 | A13119 | 491 |
| A09239 | A13151 | 489 | A09239 | A13312 | 475 |
| A09239 | A13546 | 200 | A09239 | A13987 | 463 |
| A09239 | A14010 | 462 | A09239 | A14190 | 288 |
| A09239 | A14210 | 436 | A09239 | A14371 | 486 |
| A09239 | A14376 | 216 | A09239 | A14378 | 227 |
| A09239 | A14379 | 452 | A09239 | A14511 | 460 |
| A09239 | A14930 | 326 | A09239 | A15292 | 491 |
| A09239 | A15312 | 475 | A09239 | A15313 | 468 |
| A09239 | A15348 | 477 | A09239 | A15349 | 446 |
| A09239 | A15352 | 490 | A09239 | A15444 | 291 |
| A09239 | A15447 | 468 | A09239 | A15452 | 490 |
| A09239 | A15459 | 176 | A09239 | A15463 | 319 |
| A09239 | A15476 | 168 | A09239 | A15480 | 288 |
| A09239 | A15495 | 485 | A09239 | A15515 | 341 |
| A09239 | A15726 | 249 | A09239 | A15804 | 240 |
| A09239 | A15830 | 335 | A09240 | A09365 | 458 |
| A09240 | A11698 | 401 | A09240 | A11977 | 411 |
| A09240 | A14375 | 305 | A09240 | A15271 | 385 |
| A09240 | A15498 | 259 | A09241 | A09363 | 364 |
| A09241 | A09508 | 329 | A09241 | A09743 | 208 |
| A09241 | A09875 | 252 | A09241 | A11007 | 433 |
| A09241 | A11063 | 369 | A09241 | A11226 | 386 |
| A09241 | A13899 | 176 | A09241 | A14122 | 157 |
| A09241 | A14190 | 235 | A09241 | A14210 | 210 |
| A09241 | A14379 | 333 | A09241 | A15417 | 306 |
| A09241 | A15422 | 154 | A09241 | A15800 | 252 |
| A09241 | A15813 | 286 | A09242 | A09311 | 227 |
| A09242 | A09975 | 313 | A09242 | A09988 | 160 |
| A09242 | A10018 | 281 | A09242 | A10247 | 356 |
| A09242 | A10285 | 377 | A09242 | A10313 | 255 |
| A09242 | A10894 | 151 | A09242 | A12246 | 285 |
| A09242 | A12361 | 152 | A09242 | A13665 | 188 |
| A09242 | A14008 | 156 | A09242 | A14278 | 252 |
| A09242 | A14588 | 308 | A09243 | A10018 | 168 |
| A09243 | A10353 | 205 | A09243 | A14127 | 339 |
| A09243 | A14644 | 372 | A09243 | A15420 | 455 |
| A09243 | A17088 | 221 | A09245 | A09363 | 218 |
| A09245 | A09480 | 303 | A09245 | A09570 | 306 |

|        |        |     |        |        |     |
|--------|--------|-----|--------|--------|-----|
| A09245 | A09743 | 486 | A09245 | A10611 | 263 |
| A09245 | A11243 | 490 | A09245 | A11983 | 346 |
| A09245 | A13525 | 290 | A09245 | A14010 | 296 |
| A09245 | A14135 | 213 | A09245 | A14210 | 436 |
| A09245 | A14381 | 435 | A09245 | A14511 | 485 |
| A09245 | A14539 | 179 | A09245 | A14554 | 317 |
| A09245 | A14570 | 212 | A09245 | A14635 | 340 |
| A09245 | A15402 | 162 | A09245 | A15419 | 286 |
| A09245 | A15435 | 236 | A09245 | A15495 | 423 |
| A09245 | A15498 | 180 | A09246 | A11983 | 465 |
| A09246 | A12361 | 196 | A09246 | A13369 | 440 |
| A09246 | A14375 | 404 | A09246 | A15281 | 312 |
| A09246 | A15478 | 157 | A09246 | A15606 | 472 |
| A09246 | A16261 | 353 | A09247 | A09539 | 278 |
| A09247 | A10392 | 226 | A09247 | A13994 | 249 |
| A09247 | A14002 | 312 | A09248 | A09748 | 302 |
| A09248 | A09749 | 377 | A09248 | A11190 | 267 |
| A09248 | A11808 | 333 | A09248 | A13207 | 168 |
| A09248 | A15331 | 243 | A09248 | A15652 | 168 |
| A09248 | A15662 | 208 | A09249 | A10057 | 385 |
| A09249 | A12897 | 165 | A09253 | A11285 | 216 |
| A09253 | A11302 | 235 | A09253 | A14073 | 369 |
| A09254 | A09776 | 350 | A09254 | A09834 | 483 |
| A09254 | A09847 | 411 | A09254 | A09859 | 368 |
| A09254 | A09860 | 301 | A09254 | A11929 | 218 |
| A09254 | A14554 | 215 | A09254 | A14634 | 338 |
| A09254 | A15423 | 344 | A09254 | A15510 | 162 |
| A09254 | A16068 | 157 | A09256 | A09728 | 288 |
| A09256 | A09767 | 285 | A09256 | A09792 | 240 |
| A09256 | A10250 | 694 | A09256 | A10530 | 279 |
| A09256 | A10580 | 218 | A09256 | A10739 | 177 |
| A09256 | A10824 | 323 | A09256 | A11027 | 439 |
| A09256 | A11139 | 271 | A09256 | A11258 | 389 |
| A09256 | A11284 | 313 | A09256 | A11675 | 491 |
| A09256 | A11928 | 104 | A09256 | A12553 | 279 |
| A09256 | A12727 | 198 | A09256 | A12858 | 252 |
| A09256 | A13315 | 151 | A09256 | A13784 | 241 |
| A09256 | A13977 | 195 | A09256 | A13978 | 424 |
| A09256 | A13981 | 293 | A09256 | A14009 | 63  |
| A09256 | A14227 | 235 | A09256 | A14278 | 257 |
| A09256 | A14474 | 491 | A09256 | A14476 | 230 |
| A09256 | A14484 | 429 | A09256 | A14633 | 654 |
| A09256 | A14719 | 486 | A09256 | A15163 | 252 |
| A09256 | A15726 | 944 | A09256 | A16912 | 63  |
| A09257 | A14073 | 174 | A09257 | A14570 | 171 |
| A09257 | A15624 | 185 | A09257 | A15837 | 238 |

|        |        |     |        |        |     |
|--------|--------|-----|--------|--------|-----|
| A09257 | A16626 | 205 | A09258 | A09377 | 945 |
| A09258 | A09451 | 485 | A09258 | A09515 | 483 |
| A09258 | A09538 | 491 | A09258 | A10205 | 221 |
| A09258 | A10228 | 452 | A09258 | A10250 | 490 |
| A09258 | A10340 | 490 | A09258 | A10342 | 353 |
| A09258 | A10853 | 212 | A09258 | A11099 | 279 |
| A09258 | A11486 | 393 | A09258 | A11492 | 445 |
| A09258 | A14064 | 395 | A09258 | A15400 | 172 |
| A09258 | A15401 | 357 | A09259 | A14374 | 212 |
| A09259 | A14391 | 347 | A09259 | A15425 | 418 |
| A09259 | A15812 | 408 | A09262 | A09359 | 481 |
| A09262 | A09935 | 480 | A09262 | A13152 | 480 |
| A09262 | A14342 | 475 | A09262 | A14349 | 475 |
| A09262 | A14839 | 395 | A09263 | A09390 | 238 |
| A09263 | A09474 | 353 | A09263 | A09902 | 383 |
| A09263 | A11286 | 462 | A09263 | A12508 | 157 |
| A09263 | A12661 | 232 | A09263 | A13207 | 363 |
| A09263 | A13320 | 386 | A09263 | A13335 | 318 |
| A09263 | A13340 | 366 | A09263 | A13425 | 232 |
| A09263 | A13989 | 162 | A09263 | A14014 | 263 |
| A09263 | A14540 | 414 | A09263 | A14543 | 210 |
| A09263 | A15064 | 180 | A09263 | A15476 | 328 |
| A09263 | A15811 | 243 | A09263 | A16320 | 269 |
| A09263 | A16393 | 159 | A09263 | A16792 | 224 |
| A09265 | A16300 | 159 | A09267 | A15463 | 249 |
| A09269 | A09903 | 339 | A09269 | A10198 | 348 |
| A09269 | A10258 | 308 | A09269 | A10289 | 293 |
| A09269 | A10303 | 380 | A09269 | A10309 | 380 |
| A09269 | A10389 | 290 | A09269 | A10421 | 196 |
| A09269 | A10600 | 380 | A09269 | A11828 | 177 |
| A09269 | A11858 | 390 | A09269 | A12441 | 380 |
| A09269 | A12442 | 380 | A09269 | A13484 | 311 |
| A09269 | A13726 | 230 | A09269 | A15748 | 281 |
| A09269 | A16410 | 191 | A09269 | A16738 | 162 |
| A09271 | A10156 | 348 | A09271 | A14132 | 383 |
| A09272 | A13299 | 451 | A09272 | A13917 | 229 |
| A09272 | A14073 | 236 | A09272 | A14589 | 267 |
| A09272 | A15498 | 208 | A09274 | A10085 | 356 |
| A09276 | A10252 | 413 | A09276 | A14525 | 255 |
| A09276 | A14803 | 446 | A09276 | A16753 | 405 |
| A09277 | A10624 | 176 | A09277 | A10799 | 165 |
| A09277 | A10804 | 221 | A09277 | A11265 | 236 |
| A09277 | A11279 | 491 | A09277 | A11287 | 335 |
| A09277 | A13116 | 215 | A09277 | A13830 | 246 |
| A09277 | A13832 | 486 | A09277 | A13874 | 339 |
| A09277 | A14052 | 408 | A09277 | A14247 | 491 |

|        |        |     |        |        |     |
|--------|--------|-----|--------|--------|-----|
| A09277 | A14258 | 395 | A09277 | A14661 | 491 |
| A09277 | A14741 | 234 | A09277 | A14838 | 310 |
| A09277 | A14937 | 215 | A09277 | A15116 | 228 |
| A09277 | A15366 | 441 | A09277 | A15430 | 249 |
| A09277 | A15552 | 269 | A09277 | A15669 | 162 |
| A09277 | A15711 | 204 | A09277 | A16621 | 63  |
| A09277 | A16682 | 243 | A09277 | A16798 | 188 |
| A09277 | A17061 | 193 | A09278 | A09304 | 474 |
| A09279 | A10514 | 234 | A09279 | A11487 | 274 |
| A09279 | A11929 | 350 | A09279 | A13830 | 174 |
| A09279 | A14596 | 191 | A09279 | A15510 | 167 |
| A09280 | A13870 | 254 | A09281 | A11254 | 360 |
| A09283 | A11038 | 391 | A09283 | A14009 | 170 |
| A09283 | A14163 | 299 | A09283 | A14524 | 347 |
| A09285 | A13207 | 252 | A09285 | A14508 | 319 |
| A09285 | A16686 | 327 | A09288 | A09654 | 294 |
| A09288 | A09706 | 489 | A09288 | A09751 | 152 |
| A09288 | A09752 | 98  | A09288 | A10373 | 382 |
| A09288 | A11596 | 198 | A09288 | A12556 | 480 |
| A09288 | A13257 | 312 | A09288 | A13448 | 371 |
| A09288 | A14076 | 488 | A09288 | A14094 | 467 |
| A09288 | A14223 | 330 | A09288 | A14230 | 63  |
| A09288 | A15356 | 491 | A09288 | A15941 | 481 |
| A09288 | A16071 | 306 | A09288 | A16129 | 307 |
| A09288 | A16226 | 391 | A09288 | A16378 | 472 |
| A09288 | A16616 | 491 | A09288 | A16754 | 490 |
| A09288 | A16830 | 263 | A09290 | A12824 | 249 |
| A09290 | A14366 | 216 | A09290 | A15673 | 247 |
| A09291 | A14471 | 215 | A09292 | A09707 | 491 |
| A09292 | A11462 | 488 | A09292 | A11942 | 450 |
| A09292 | A13052 | 210 | A09292 | A13126 | 477 |
| A09292 | A13989 | 568 | A09292 | A14816 | 210 |
| A09292 | A15256 | 255 | A09292 | A15266 | 151 |
| A09292 | A15416 | 307 | A09292 | A15441 | 265 |
| A09293 | A12923 | 485 | A09293 | A12925 | 443 |
| A09293 | A13989 | 165 | A09293 | A14479 | 249 |
| A09293 | A14482 | 321 | A09293 | A14568 | 249 |
| A09293 | A14642 | 224 | A09293 | A15988 | 412 |
| A09294 | A15498 | 311 | A09295 | A09664 | 347 |
| A09295 | A14198 | 399 | A09296 | A12824 | 246 |
| A09296 | A14817 | 328 | A09297 | A09577 | 414 |
| A09297 | A09587 | 236 | A09297 | A09655 | 344 |
| A09297 | A09902 | 160 | A09297 | A10534 | 288 |
| A09297 | A12043 | 160 | A09297 | A12126 | 263 |
| A09297 | A12227 | 476 | A09297 | A12328 | 477 |
| A09297 | A12990 | 226 | A09297 | A13320 | 328 |

|        |        |     |        |        |     |
|--------|--------|-----|--------|--------|-----|
| A09297 | A13340 | 545 | A09297 | A13527 | 247 |
| A09297 | A13812 | 230 | A09297 | A14073 | 456 |
| A09297 | A14159 | 238 | A09297 | A14188 | 420 |
| A09297 | A14566 | 168 | A09297 | A14738 | 160 |
| A09297 | A15133 | 475 | A09297 | A15244 | 296 |
| A09297 | A15741 | 201 | A09297 | A15932 | 524 |
| A09297 | A15933 | 536 | A09297 | A16272 | 543 |
| A09297 | A16318 | 478 | A09297 | A16437 | 534 |
| A09297 | A16446 | 462 | A09297 | A16585 | 365 |
| A09297 | A16671 | 411 | A09298 | A09299 | 160 |
| A09298 | A09609 | 458 | A09298 | A09757 | 165 |
| A09298 | A09828 | 379 | A09298 | A10789 | 345 |
| A09298 | A11234 | 184 | A09298 | A11279 | 247 |
| A09298 | A11301 | 438 | A09298 | A11394 | 188 |
| A09298 | A11472 | 296 | A09298 | A11496 | 433 |
| A09298 | A11497 | 457 | A09298 | A11555 | 174 |
| A09298 | A11597 | 221 | A09298 | A11616 | 201 |
| A09298 | A11675 | 393 | A09298 | A11735 | 363 |
| A09298 | A11737 | 215 | A09298 | A11833 | 347 |
| A09298 | A11914 | 432 | A09298 | A11917 | 466 |
| A09298 | A11940 | 372 | A09298 | A11992 | 271 |
| A09298 | A12200 | 473 | A09298 | A12238 | 162 |
| A09298 | A12254 | 308 | A09298 | A12255 | 396 |
| A09298 | A12284 | 179 | A09298 | A12433 | 456 |
| A09298 | A12506 | 199 | A09298 | A12507 | 334 |
| A09298 | A12508 | 279 | A09298 | A12606 | 447 |
| A09298 | A12658 | 401 | A09298 | A12665 | 423 |
| A09298 | A12725 | 443 | A09298 | A12726 | 167 |
| A09298 | A12727 | 172 | A09298 | A12738 | 470 |
| A09298 | A12858 | 462 | A09298 | A12873 | 377 |
| A09298 | A13231 | 170 | A09298 | A13309 | 187 |
| A09298 | A13313 | 452 | A09298 | A13399 | 224 |
| A09298 | A13708 | 430 | A09298 | A13737 | 176 |
| A09298 | A13781 | 430 | A09298 | A13784 | 330 |
| A09298 | A13786 | 204 | A09298 | A13787 | 216 |
| A09298 | A13788 | 263 | A09298 | A13804 | 170 |
| A09298 | A13809 | 406 | A09298 | A13894 | 174 |
| A09298 | A13895 | 168 | A09298 | A13912 | 406 |
| A09298 | A13983 | 491 | A09298 | A14084 | 191 |
| A09298 | A14182 | 358 | A09298 | A14199 | 340 |
| A09298 | A14212 | 249 | A09298 | A14214 | 470 |
| A09298 | A14222 | 160 | A09298 | A14247 | 308 |
| A09298 | A14255 | 160 | A09298 | A14263 | 278 |
| A09298 | A14288 | 283 | A09298 | A14455 | 335 |
| A09298 | A14459 | 319 | A09298 | A14569 | 439 |
| A09298 | A14661 | 577 | A09298 | A14711 | 366 |

|        |        |     |        |        |     |
|--------|--------|-----|--------|--------|-----|
| A09298 | A14799 | 168 | A09298 | A14903 | 419 |
| A09298 | A14917 | 357 | A09298 | A14921 | 414 |
| A09298 | A15105 | 346 | A09298 | A15187 | 432 |
| A09298 | A15189 | 235 | A09298 | A15262 | 294 |
| A09298 | A15315 | 283 | A09298 | A15347 | 607 |
| A09298 | A15430 | 347 | A09298 | A15519 | 217 |
| A09298 | A15536 | 157 | A09298 | A15541 | 322 |
| A09298 | A15617 | 283 | A09298 | A15653 | 303 |
| A09298 | A15669 | 353 | A09298 | A15709 | 190 |
| A09298 | A16157 | 477 | A09298 | A16263 | 167 |
| A09298 | A16304 | 184 | A09298 | A16343 | 205 |
| A09298 | A16364 | 283 | A09298 | A16552 | 454 |
| A09298 | A16565 | 337 | A09298 | A16567 | 172 |
| A09298 | A16597 | 447 | A09298 | A16611 | 435 |
| A09298 | A16664 | 333 | A09298 | A16675 | 396 |
| A09298 | A16680 | 230 | A09298 | A16693 | 205 |
| A09298 | A16701 | 165 | A09298 | A16703 | 322 |
| A09298 | A16704 | 332 | A09298 | A16774 | 180 |
| A09298 | A16776 | 152 | A09298 | A16790 | 252 |
| A09298 | A16824 | 191 | A09298 | A16829 | 271 |
| A09298 | A16850 | 260 | A09298 | A16860 | 180 |
| A09298 | A16866 | 276 | A09298 | A16874 | 266 |
| A09298 | A16905 | 201 | A09298 | A16913 | 180 |
| A09298 | A16963 | 241 | A09298 | A17018 | 277 |
| A09298 | A17033 | 271 | A09298 | A17035 | 207 |
| A09298 | A17125 | 156 | A09299 | A09619 | 224 |
| A09299 | A09621 | 226 | A09299 | A10789 | 196 |
| A09299 | A11497 | 205 | A09299 | A11735 | 245 |
| A09299 | A11914 | 243 | A09299 | A12138 | 196 |
| A09299 | A12433 | 205 | A09299 | A13313 | 157 |
| A09299 | A13855 | 208 | A09299 | A14084 | 188 |
| A09299 | A14214 | 182 | A09299 | A15653 | 174 |
| A09299 | A15949 | 154 | A09299 | A16157 | 193 |
| A09299 | A16611 | 218 | A09299 | A16652 | 255 |
| A09299 | A16704 | 316 | A09300 | A10929 | 401 |
| A09300 | A12408 | 311 | A09300 | A12409 | 267 |
| A09300 | A16725 | 427 | A09301 | A09598 | 319 |
| A09301 | A11540 | 251 | A09301 | A15837 | 188 |
| A09301 | A16626 | 154 | A09302 | A12824 | 210 |
| A09303 | A09319 | 182 | A09303 | A09643 | 243 |
| A09303 | A09804 | 383 | A09303 | A10294 | 286 |
| A09303 | A10728 | 188 | A09303 | A14644 | 152 |
| A09304 | A09342 | 402 | A09304 | A09825 | 163 |
| A09304 | A11283 | 307 | A09304 | A11332 | 307 |
| A09304 | A11540 | 188 | A09304 | A11828 | 307 |
| A09304 | A11840 | 307 | A09304 | A12047 | 343 |

|        |        |     |        |        |     |
|--------|--------|-----|--------|--------|-----|
| A09304 | A15933 | 160 | A09304 | A16616 | 240 |
| A09307 | A09351 | 241 | A09307 | A09664 | 212 |
| A09307 | A09745 | 173 | A09307 | A12254 | 279 |
| A09307 | A13987 | 374 | A09307 | A14122 | 456 |
| A09307 | A14611 | 221 | A09307 | A14655 | 447 |
| A09307 | A15268 | 151 | A09307 | A15667 | 247 |
| A09307 | A15762 | 191 | A09307 | A15830 | 256 |
| A09307 | A15949 | 154 | A09307 | A16117 | 414 |
| A09308 | A09322 | 241 | A09308 | A09620 | 241 |
| A09308 | A10569 | 369 | A09308 | A11728 | 317 |
| A09308 | A12227 | 241 | A09308 | A14449 | 286 |
| A09308 | A14729 | 369 | A09308 | A15268 | 241 |
| A09308 | A15381 | 452 | A09308 | A15651 | 324 |
| A09308 | A15652 | 283 | A09308 | A15917 | 162 |
| A09308 | A15932 | 224 | A09308 | A16272 | 353 |
| A09309 | A10789 | 160 | A09309 | A11301 | 267 |
| A09309 | A11497 | 386 | A09309 | A11551 | 255 |
| A09309 | A11914 | 210 | A09309 | A11917 | 221 |
| A09309 | A11940 | 321 | A09309 | A11954 | 317 |
| A09309 | A11992 | 246 | A09309 | A12215 | 335 |
| A09309 | A12254 | 217 | A09309 | A12284 | 191 |
| A09309 | A12433 | 302 | A09309 | A12501 | 260 |
| A09309 | A12606 | 285 | A09309 | A12665 | 232 |
| A09309 | A12725 | 301 | A09309 | A12858 | 340 |
| A09309 | A12873 | 223 | A09309 | A13706 | 228 |
| A09309 | A13707 | 257 | A09309 | A13708 | 391 |
| A09309 | A13737 | 188 | A09309 | A13781 | 352 |
| A09309 | A13784 | 285 | A09309 | A13805 | 406 |
| A09309 | A13809 | 252 | A09309 | A14084 | 152 |
| A09309 | A14214 | 369 | A09309 | A14255 | 241 |
| A09309 | A14260 | 319 | A09309 | A14288 | 160 |
| A09309 | A14569 | 259 | A09309 | A14718 | 259 |
| A09309 | A15105 | 162 | A09309 | A15189 | 224 |
| A09309 | A16157 | 157 | A09309 | A16552 | 364 |
| A09309 | A16565 | 236 | A09309 | A16597 | 363 |
| A09309 | A16608 | 335 | A09309 | A16611 | 184 |
| A09309 | A16664 | 360 | A09309 | A16675 | 201 |
| A09309 | A16702 | 294 | A09309 | A16703 | 393 |
| A09309 | A16806 | 358 | A09309 | A16838 | 291 |
| A09309 | A16858 | 373 | A09309 | A16859 | 390 |
| A09309 | A16905 | 270 | A09309 | A16913 | 341 |
| A09309 | A17015 | 276 | A09309 | A17035 | 274 |
| A09309 | A17190 | 313 | A09310 | A14489 | 358 |
| A09311 | A10358 | 283 | A09311 | A11281 | 218 |
| A09311 | A12584 | 454 | A09311 | A13513 | 470 |
| A09312 | A14930 | 377 | A09315 | A10986 | 452 |

|        |        |     |        |        |     |
|--------|--------|-----|--------|--------|-----|
| A09316 | A09340 | 491 | A09316 | A09741 | 168 |
| A09316 | A11858 | 163 | A09316 | A12500 | 191 |
| A09316 | A12912 | 281 | A09316 | A13822 | 180 |
| A09316 | A15649 | 152 | A09316 | A15792 | 245 |
| A09316 | A16404 | 460 | A09317 | A15543 | 460 |
| A09319 | A09577 | 943 | A09319 | A09737 | 180 |
| A09319 | A09804 | 363 | A09319 | A09871 | 229 |
| A09319 | A10174 | 899 | A09319 | A10580 | 899 |
| A09319 | A10728 | 165 | A09319 | A10913 | 235 |
| A09319 | A11286 | 486 | A09319 | A11943 | 297 |
| A09319 | A12664 | 198 | A09319 | A13225 | 899 |
| A09319 | A13250 | 899 | A09319 | A13320 | 470 |
| A09319 | A13335 | 737 | A09319 | A13975 | 228 |
| A09319 | A13977 | 899 | A09319 | A14159 | 180 |
| A09319 | A14221 | 204 | A09319 | A14240 | 899 |
| A09319 | A14257 | 899 | A09319 | A14571 | 407 |
| A09319 | A14738 | 451 | A09319 | A15116 | 899 |
| A09319 | A15246 | 332 | A09319 | A15292 | 899 |
| A09319 | A15741 | 446 | A09319 | A15760 | 229 |
| A09319 | A16291 | 279 | A09319 | A16296 | 324 |
| A09319 | A17213 | 899 | A09320 | A14223 | 208 |
| A09321 | A14699 | 157 | A09321 | A15668 | 385 |
| A09322 | A09328 | 168 | A09322 | A09620 | 241 |
| A09322 | A09674 | 235 | A09322 | A09702 | 409 |
| A09322 | A09852 | 165 | A09322 | A10417 | 288 |
| A09322 | A10518 | 157 | A09322 | A10616 | 385 |
| A09322 | A11244 | 191 | A09322 | A11390 | 467 |
| A09322 | A11420 | 156 | A09322 | A11438 | 481 |
| A09322 | A11480 | 262 | A09322 | A11562 | 200 |
| A09322 | A11704 | 485 | A09322 | A11728 | 241 |
| A09322 | A11861 | 200 | A09322 | A11945 | 467 |
| A09322 | A12227 | 241 | A09322 | A12233 | 451 |
| A09322 | A12667 | 200 | A09322 | A13249 | 196 |
| A09322 | A13333 | 200 | A09322 | A14188 | 193 |
| A09322 | A14505 | 191 | A09322 | A15202 | 298 |
| A09322 | A15218 | 425 | A09322 | A15221 | 391 |
| A09322 | A15235 | 380 | A09322 | A15268 | 241 |
| A09322 | A15381 | 241 | A09322 | A15743 | 344 |
| A09322 | A15776 | 423 | A09322 | A15777 | 393 |
| A09322 | A16118 | 479 | A09322 | A16631 | 469 |
| A09322 | A16686 | 294 | A09322 | A16823 | 286 |
| A09322 | A17127 | 217 | A09324 | A09341 | 224 |
| A09324 | A10465 | 353 | A09324 | A10651 | 411 |
| A09324 | A11998 | 405 | A09324 | A14266 | 187 |
| A09326 | A09333 | 490 | A09326 | A09609 | 286 |
| A09326 | A10316 | 156 | A09326 | A10514 | 475 |



|        |        |     |        |        |     |
|--------|--------|-----|--------|--------|-----|
| A09326 | A10663 | 486 | A09326 | A11234 | 395 |
| A09326 | A11279 | 324 | A09326 | A11301 | 163 |
| A09326 | A11436 | 475 | A09326 | A11456 | 483 |
| A09326 | A11496 | 221 | A09326 | A11497 | 208 |
| A09326 | A11675 | 291 | A09326 | A11724 | 245 |
| A09326 | A11917 | 208 | A09326 | A11992 | 168 |
| A09326 | A12238 | 267 | A09326 | A12433 | 207 |
| A09326 | A12501 | 317 | A09326 | A12606 | 185 |
| A09326 | A12658 | 168 | A09326 | A12659 | 191 |
| A09326 | A12665 | 152 | A09326 | A12727 | 276 |
| A09326 | A12858 | 355 | A09326 | A13309 | 183 |
| A09326 | A13313 | 243 | A09326 | A13484 | 180 |
| A09326 | A13781 | 252 | A09326 | A13784 | 288 |
| A09326 | A13786 | 196 | A09326 | A13845 | 235 |
| A09326 | A13895 | 269 | A09326 | A13912 | 299 |
| A09326 | A14084 | 184 | A09326 | A14087 | 217 |
| A09326 | A14182 | 382 | A09326 | A14214 | 279 |
| A09326 | A14216 | 229 | A09326 | A14247 | 488 |
| A09326 | A14263 | 296 | A09326 | A14371 | 475 |
| A09326 | A14569 | 395 | A09326 | A14661 | 269 |
| A09326 | A14711 | 269 | A09326 | A14783 | 269 |
| A09326 | A14838 | 581 | A09326 | A14903 | 372 |
| A09326 | A15105 | 196 | A09326 | A15187 | 345 |
| A09326 | A15189 | 277 | A09326 | A15297 | 63  |
| A09326 | A15536 | 263 | A09326 | A15647 | 137 |
| A09326 | A16565 | 157 | A09326 | A16587 | 234 |
| A09326 | A16597 | 159 | A09326 | A16611 | 226 |
| A09326 | A16617 | 562 | A09326 | A16652 | 364 |
| A09326 | A16664 | 154 | A09326 | A16695 | 307 |
| A09326 | A16704 | 216 | A09326 | A16707 | 340 |
| A09326 | A16709 | 232 | A09326 | A16790 | 232 |
| A09326 | A16838 | 219 | A09326 | A16866 | 172 |
| A09326 | A16874 | 243 | A09326 | A16905 | 193 |
| A09326 | A17035 | 198 | A09327 | A09707 | 216 |
| A09327 | A10156 | 235 | A09327 | A10532 | 185 |
| A09327 | A10616 | 174 | A09327 | A13989 | 479 |
| A09327 | A14172 | 195 | A09327 | A14215 | 240 |
| A09328 | A09910 | 369 | A09328 | A11737 | 301 |
| A09328 | A13298 | 441 | A09328 | A15684 | 485 |
| A09328 | A15746 | 409 | A09329 | A11182 | 430 |
| A09329 | A11691 | 417 | A09329 | A12929 | 438 |
| A09329 | A13041 | 438 | A09331 | A12824 | 318 |
| A09331 | A14151 | 328 | A09331 | A15498 | 413 |
| A09331 | A15788 | 167 | A09331 | A16228 | 414 |
| A09332 | A09735 | 202 | A09332 | A10870 | 185 |
| A09332 | A11815 | 343 | A09332 | A12433 | 171 |

|        |        |     |        |        |     |
|--------|--------|-----|--------|--------|-----|
| A09332 | A12923 | 243 | A09332 | A13249 | 190 |
| A09332 | A13388 | 201 | A09332 | A13989 | 391 |
| A09332 | A13992 | 277 | A09332 | A14482 | 343 |
| A09332 | A15221 | 168 | A09332 | A15776 | 228 |
| A09332 | A16766 | 262 | A09333 | A09609 | 263 |
| A09333 | A09622 | 191 | A09333 | A09648 | 348 |
| A09333 | A09828 | 171 | A09333 | A10490 | 162 |
| A09333 | A10663 | 488 | A09333 | A11301 | 413 |
| A09333 | A11430 | 168 | A09333 | A11456 | 484 |
| A09333 | A11471 | 187 | A09333 | A11472 | 226 |
| A09333 | A11496 | 440 | A09333 | A11497 | 465 |
| A09333 | A11551 | 152 | A09333 | A11614 | 172 |
| A09333 | A11675 | 263 | A09333 | A11735 | 329 |
| A09333 | A11737 | 229 | A09333 | A11914 | 226 |
| A09333 | A11917 | 412 | A09333 | A11940 | 358 |
| A09333 | A12433 | 434 | A09333 | A12501 | 157 |
| A09333 | A12506 | 299 | A09333 | A12507 | 210 |
| A09333 | A12606 | 252 | A09333 | A12625 | 308 |
| A09333 | A12658 | 446 | A09333 | A12659 | 165 |
| A09333 | A12665 | 255 | A09333 | A12725 | 170 |
| A09333 | A12726 | 247 | A09333 | A12792 | 241 |
| A09333 | A12825 | 318 | A09333 | A12826 | 347 |
| A09333 | A12858 | 394 | A09333 | A13309 | 157 |
| A09333 | A13313 | 355 | A09333 | A13321 | 165 |
| A09333 | A13342 | 190 | A09333 | A13707 | 286 |
| A09333 | A13708 | 362 | A09333 | A13737 | 199 |
| A09333 | A13784 | 151 | A09333 | A13786 | 302 |
| A09333 | A13788 | 347 | A09333 | A13845 | 130 |
| A09333 | A13855 | 79  | A09333 | A13912 | 278 |
| A09333 | A14084 | 251 | A09333 | A14168 | 278 |
| A09333 | A14182 | 174 | A09333 | A14214 | 326 |
| A09333 | A14216 | 435 | A09333 | A14222 | 259 |
| A09333 | A14247 | 490 | A09333 | A14255 | 267 |
| A09333 | A14288 | 263 | A09333 | A14358 | 302 |
| A09333 | A14375 | 265 | A09333 | A14462 | 269 |
| A09333 | A14569 | 424 | A09333 | A14706 | 279 |
| A09333 | A14799 | 378 | A09333 | A14838 | 490 |
| A09333 | A14903 | 226 | A09333 | A14921 | 291 |
| A09333 | A15105 | 162 | A09333 | A15189 | 345 |
| A09333 | A15262 | 224 | A09333 | A15647 | 335 |
| A09333 | A15680 | 168 | A09333 | A15683 | 168 |
| A09333 | A15698 | 172 | A09333 | A15770 | 272 |
| A09333 | A15818 | 185 | A09333 | A15940 | 346 |
| A09333 | A16128 | 171 | A09333 | A16157 | 340 |
| A09333 | A16187 | 305 | A09333 | A16215 | 232 |
| A09333 | A16261 | 165 | A09333 | A16587 | 208 |

|        |        |     |        |        |     |
|--------|--------|-----|--------|--------|-----|
| A09333 | A16597 | 461 | A09333 | A16611 | 457 |
| A09333 | A16617 | 485 | A09333 | A16652 | 456 |
| A09333 | A16664 | 460 | A09333 | A16675 | 319 |
| A09333 | A16680 | 401 | A09333 | A16682 | 226 |
| A09333 | A16699 | 188 | A09333 | A16703 | 182 |
| A09333 | A16709 | 208 | A09333 | A16774 | 260 |
| A09333 | A16776 | 423 | A09333 | A16790 | 208 |
| A09333 | A16807 | 288 | A09333 | A16815 | 278 |
| A09333 | A16824 | 271 | A09333 | A16829 | 223 |
| A09333 | A16905 | 168 | A09333 | A16913 | 260 |
| A09333 | A16954 | 208 | A09333 | A17018 | 355 |
| A09333 | A17030 | 360 | A09333 | A17091 | 344 |
| A09333 | A17190 | 221 | A09334 | A09869 | 338 |
| A09334 | A12409 | 245 | A09334 | A14196 | 369 |
| A09334 | A15291 | 168 | A09334 | A15559 | 245 |
| A09334 | A15820 | 268 | A09334 | A15886 | 330 |
| A09334 | A15902 | 294 | A09334 | A16400 | 311 |
| A09337 | A13609 | 454 | A09337 | A14178 | 411 |
| A09338 | A14621 | 314 | A09339 | A09562 | 307 |
| A09339 | A11930 | 386 | A09339 | A12871 | 414 |
| A09340 | A10508 | 228 | A09340 | A10575 | 294 |
| A09340 | A11565 | 177 | A09340 | A11858 | 485 |
| A09340 | A14230 | 221 | A09340 | A15329 | 179 |
| A09340 | A15935 | 343 | A09340 | A16404 | 418 |
| A09340 | A16440 | 491 | A09341 | A09758 | 157 |
| A09341 | A14193 | 221 | A09341 | A14430 | 215 |
| A09341 | A15138 | 230 | A09341 | A15416 | 180 |
| A09341 | A16891 | 228 | A09341 | A17198 | 156 |
| A09343 | A09933 | 274 | A09343 | A14196 | 419 |
| A09343 | A15559 | 249 | A09344 | A16634 | 474 |
| A09345 | A11277 | 201 | A09345 | A15323 | 288 |
| A09345 | A15718 | 433 | A09347 | A10793 | 385 |
| A09347 | A11296 | 63  | A09347 | A13842 | 404 |
| A09348 | A11405 | 246 | A09348 | A15291 | 152 |
| A09349 | A14996 | 323 | A09350 | A14590 | 461 |
| A09350 | A14810 | 388 | A09350 | A15655 | 436 |
| A09351 | A11558 | 184 | A09351 | A11851 | 184 |
| A09351 | A12254 | 217 | A09351 | A13356 | 184 |
| A09351 | A14182 | 171 | A09351 | A14210 | 184 |
| A09351 | A15321 | 480 | A09351 | A15561 | 235 |
| A09351 | A16067 | 196 | A09351 | A16152 | 184 |
| A09352 | A11402 | 302 | A09352 | A11445 | 329 |
| A09352 | A13012 | 393 | A09352 | A13989 | 177 |
| A09352 | A14216 | 207 | A09352 | A15425 | 154 |
| A09353 | A09709 | 446 | A09353 | A14643 | 204 |
| A09354 | A14366 | 323 | A09354 | A15642 | 374 |

|        |        |     |        |        |     |
|--------|--------|-----|--------|--------|-----|
| A09355 | A09744 | 307 | A09355 | A13826 | 324 |
| A09355 | A14202 | 159 | A09355 | A14371 | 221 |
| A09355 | A15348 | 266 | A09355 | A15639 | 313 |
| A09357 | A09425 | 226 | A09357 | A14460 | 224 |
| A09357 | A16606 | 251 | A09358 | A10614 | 457 |
| A09359 | A09935 | 475 | A09359 | A13152 | 477 |
| A09359 | A14332 | 394 | A09359 | A14342 | 479 |
| A09359 | A14349 | 479 | A09360 | A10987 | 335 |
| A09361 | A11387 | 396 | A09361 | A12365 | 207 |
| A09361 | A12373 | 196 | A09361 | A13376 | 369 |
| A09362 | A11478 | 283 | A09362 | A13277 | 388 |
| A09362 | A14431 | 255 | A09363 | A09373 | 355 |
| A09363 | A09508 | 452 | A09363 | A09791 | 188 |
| A09363 | A10813 | 252 | A09363 | A11100 | 362 |
| A09363 | A11834 | 207 | A09363 | A13980 | 899 |
| A09363 | A14010 | 171 | A09363 | A15293 | 477 |
| A09363 | A15294 | 462 | A09363 | A15322 | 328 |
| A09363 | A15398 | 419 | A09363 | A15506 | 490 |
| A09363 | A15630 | 162 | A09363 | A16916 | 205 |
| A09364 | A15241 | 266 | A09365 | A11698 | 462 |
| A09365 | A11977 | 466 | A09365 | A15498 | 323 |
| A09370 | A09443 | 296 | A09370 | A09491 | 343 |
| A09370 | A13924 | 316 | A09370 | A14585 | 188 |
| A09371 | A13408 | 445 | A09373 | A09374 | 393 |
| A09374 | A12897 | 224 | A09375 | A09891 | 475 |
| A09375 | A09892 | 452 | A09375 | A10339 | 407 |
| A09375 | A13667 | 330 | A09375 | A13832 | 301 |
| A09375 | A14247 | 156 | A09375 | A15077 | 428 |
| A09377 | A09451 | 469 | A09377 | A09515 | 469 |
| A09377 | A09538 | 488 | A09377 | A10228 | 363 |
| A09377 | A10250 | 446 | A09377 | A10340 | 489 |
| A09377 | A11492 | 457 | A09380 | A10278 | 477 |
| A09380 | A12962 | 407 | A09380 | A14540 | 160 |
| A09381 | A10681 | 418 | A09381 | A10689 | 470 |
| A09381 | A10693 | 485 | A09381 | A10710 | 481 |
| A09381 | A10712 | 260 | A09381 | A11325 | 286 |
| A09381 | A15673 | 213 | A09381 | A15905 | 252 |
| A09381 | A16263 | 340 | A09382 | A10163 | 418 |
| A09382 | A15258 | 380 | A09383 | A09546 | 302 |
| A09383 | A09901 | 332 | A09383 | A11119 | 334 |
| A09383 | A13517 | 249 | A09383 | A14485 | 241 |
| A09383 | A14589 | 168 | A09383 | A14639 | 363 |
| A09385 | A14374 | 279 | A09386 | A13982 | 204 |
| A09386 | A15510 | 228 | A09387 | A10267 | 378 |
| A09387 | A13613 | 424 | A09387 | A14650 | 154 |
| A09388 | A09390 | 414 | A09388 | A10986 | 199 |

|        |        |     |        |        |     |
|--------|--------|-----|--------|--------|-----|
| A09388 | A15547 | 154 | A09390 | A14060 | 319 |
| A09390 | A14443 | 163 | A09390 | A14650 | 353 |
| A09390 | A15809 | 208 | A09391 | A10218 | 934 |
| A09392 | A09395 | 344 | A09392 | A10355 | 385 |
| A09392 | A11507 | 425 | A09392 | A12927 | 215 |
| A09392 | A15834 | 302 | A09392 | A16216 | 177 |
| A09394 | A09732 | 286 | A09394 | A10164 | 335 |
| A09394 | A11412 | 212 | A09394 | A12897 | 201 |
| A09394 | A14197 | 187 | A09394 | A14380 | 368 |
| A09394 | A14554 | 251 | A09394 | A15441 | 358 |
| A09395 | A10355 | 362 | A09395 | A11507 | 413 |
| A09395 | A14152 | 200 | A09395 | A14208 | 213 |
| A09395 | A14395 | 174 | A09395 | A15314 | 223 |
| A09395 | A15613 | 321 | A09395 | A15834 | 473 |
| A09395 | A16216 | 486 | A09396 | A09619 | 351 |
| A09396 | A15918 | 221 | A09396 | A15928 | 355 |
| A09396 | A16904 | 215 | A09397 | A13212 | 328 |
| A09398 | A10040 | 416 | A09399 | A09403 | 424 |
| A09400 | A15314 | 232 | A09401 | A10701 | 191 |
| A09401 | A11425 | 236 | A09401 | A12263 | 369 |
| A09401 | A13216 | 870 | A09401 | A13384 | 154 |
| A09401 | A13983 | 63  | A09401 | A14218 | 276 |
| A09401 | A14402 | 238 | A09401 | A14433 | 180 |
| A09401 | A15498 | 154 | A09401 | A15578 | 163 |
| A09401 | A16547 | 428 | A09404 | A09810 | 433 |
| A09404 | A12711 | 404 | A09404 | A16877 | 353 |
| A09407 | A09464 | 385 | A09409 | A10297 | 441 |
| A09410 | A14208 | 196 | A09410 | A15291 | 461 |
| A09411 | A13734 | 160 | A09411 | A13826 | 172 |
| A09411 | A14007 | 252 | A09411 | A14371 | 201 |
| A09411 | A15346 | 226 | A09411 | A15611 | 288 |
| A09411 | A15630 | 263 | A09413 | A13741 | 274 |
| A09413 | A14266 | 160 | A09416 | A10218 | 238 |
| A09416 | A11454 | 193 | A09416 | A14553 | 353 |
| A09416 | A14829 | 412 | A09416 | A15422 | 200 |
| A09416 | A16117 | 188 | A09417 | A10728 | 241 |
| A09417 | A14543 | 335 | A09417 | A15507 | 152 |
| A09418 | A09509 | 291 | A09418 | A12361 | 326 |
| A09418 | A14190 | 243 | A09418 | A14503 | 416 |
| A09419 | A13181 | 245 | A09421 | A09890 | 358 |
| A09421 | A10084 | 388 | A09421 | A10148 | 267 |
| A09421 | A11835 | 327 | A09421 | A13371 | 388 |
| A09421 | A13851 | 378 | A09421 | A14366 | 201 |
| A09421 | A14471 | 185 | A09421 | A16738 | 305 |
| A09422 | A09732 | 474 | A09422 | A09733 | 256 |
| A09422 | A09734 | 372 | A09422 | A09742 | 235 |

|        |        |     |        |        |     |
|--------|--------|-----|--------|--------|-----|
| A09422 | A09855 | 491 | A09422 | A11412 | 355 |
| A09422 | A11415 | 205 | A09422 | A12393 | 491 |
| A09422 | A13119 | 491 | A09422 | A13151 | 456 |
| A09422 | A13312 | 440 | A09422 | A13546 | 256 |
| A09422 | A13987 | 307 | A09422 | A14190 | 187 |
| A09422 | A14202 | 398 | A09422 | A14210 | 263 |
| A09422 | A14371 | 441 | A09422 | A14376 | 270 |
| A09422 | A14378 | 311 | A09422 | A14511 | 391 |
| A09422 | A15292 | 488 | A09422 | A15312 | 350 |
| A09422 | A15313 | 290 | A09422 | A15348 | 252 |
| A09422 | A15352 | 462 | A09422 | A15447 | 265 |
| A09422 | A15452 | 474 | A09422 | A15463 | 338 |
| A09422 | A15495 | 369 | A09422 | A15515 | 174 |
| A09422 | A15726 | 363 | A09422 | A16424 | 215 |
| A09423 | A11277 | 299 | A09423 | A14246 | 235 |
| A09423 | A14597 | 418 | A09425 | A16400 | 193 |
| A09426 | A09435 | 447 | A09426 | A09932 | 401 |
| A09427 | A11683 | 226 | A09427 | A11984 | 443 |
| A09427 | A14449 | 205 | A09427 | A14594 | 212 |
| A09427 | A14622 | 279 | A09427 | A15367 | 154 |
| A09428 | A10103 | 324 | A09429 | A10072 | 318 |
| A09429 | A11485 | 218 | A09429 | A12366 | 408 |
| A09429 | A14393 | 154 | A09429 | A14438 | 341 |
| A09429 | A14449 | 202 | A09429 | A15492 | 205 |
| A09431 | A09561 | 283 | A09431 | A12361 | 297 |
| A09431 | A12413 | 419 | A09431 | A13983 | 157 |
| A09433 | A15322 | 230 | A09434 | A09438 | 252 |
| A09434 | A09491 | 260 | A09434 | A11478 | 205 |
| A09434 | A12098 | 372 | A09434 | A12357 | 218 |
| A09434 | A12361 | 180 | A09434 | A13804 | 290 |
| A09434 | A14324 | 305 | A09434 | A14566 | 409 |
| A09434 | A14570 | 196 | A09434 | A14594 | 436 |
| A09434 | A16434 | 254 | A09435 | A09932 | 457 |
| A09435 | A10710 | 179 | A09435 | A15498 | 168 |
| A09437 | A14625 | 356 | A09437 | A15532 | 290 |
| A09438 | A09988 | 249 | A09438 | A10247 | 157 |
| A09438 | A15721 | 218 | A09438 | A16092 | 243 |
| A09438 | A16145 | 330 | A09438 | A16741 | 160 |
| A09438 | A17140 | 293 | A09440 | A10013 | 438 |
| A09440 | A12963 | 447 | A09440 | A13820 | 438 |
| A09441 | A13734 | 157 | A09442 | A11485 | 243 |
| A09443 | A09506 | 277 | A09443 | A10604 | 343 |
| A09443 | A10899 | 224 | A09443 | A11258 | 207 |
| A09443 | A14443 | 899 | A09443 | A14444 | 899 |
| A09443 | A14455 | 266 | A09443 | A14509 | 409 |
| A09443 | A15533 | 210 | A09443 | A17213 | 252 |

|        |        |     |        |        |     |
|--------|--------|-----|--------|--------|-----|
| A09445 | A15559 | 156 | A09447 | A14210 | 165 |
| A09447 | A15432 | 241 | A09448 | A09646 | 408 |
| A09448 | A10051 | 291 | A09448 | A12482 | 401 |
| A09448 | A12808 | 401 | A09448 | A15324 | 163 |
| A09449 | A10968 | 226 | A09449 | A11272 | 180 |
| A09449 | A11660 | 152 | A09449 | A11825 | 221 |
| A09449 | A12213 | 199 | A09449 | A12300 | 160 |
| A09449 | A12638 | 180 | A09449 | A13517 | 229 |
| A09449 | A14196 | 484 | A09449 | A14207 | 405 |
| A09449 | A14208 | 461 | A09449 | A14218 | 491 |
| A09449 | A15129 | 281 | A09449 | A15293 | 308 |
| A09449 | A15297 | 443 | A09449 | A15314 | 490 |
| A09449 | A15330 | 441 | A09449 | A15360 | 418 |
| A09449 | A15361 | 475 | A09449 | A15388 | 454 |
| A09449 | A15578 | 470 | A09449 | A16216 | 263 |
| A09449 | A16217 | 274 | A09449 | A16418 | 378 |
| A09449 | A16482 | 199 | A09449 | A16483 | 281 |
| A09451 | A09515 | 491 | A09451 | A09538 | 491 |
| A09451 | A09673 | 216 | A09451 | A10228 | 462 |
| A09451 | A10250 | 491 | A09451 | A10340 | 319 |
| A09451 | A11486 | 490 | A09451 | A11992 | 196 |
| A09451 | A14370 | 263 | A09453 | A14511 | 235 |
| A09454 | A16636 | 170 | A09456 | A11983 | 234 |
| A09456 | A16068 | 353 | A09457 | A14621 | 297 |
| A09458 | A12730 | 386 | A09461 | A09932 | 491 |
| A09461 | A10151 | 432 | A09463 | A09542 | 187 |
| A09464 | A10009 | 324 | A09464 | A10633 | 207 |
| A09464 | A11387 | 224 | A09464 | A11825 | 313 |
| A09464 | A14081 | 313 | A09464 | A14366 | 157 |
| A09464 | A15241 | 168 | A09464 | A15559 | 252 |
| A09464 | A16272 | 232 | A09466 | A11654 | 468 |
| A09467 | A10725 | 380 | A09467 | A10731 | 357 |
| A09468 | A16636 | 251 | A09469 | A09809 | 467 |
| A09469 | A13250 | 223 | A09469 | A13945 | 432 |
| A09469 | A13980 | 202 | A09469 | A14048 | 296 |
| A09469 | A14635 | 162 | A09469 | A15318 | 193 |
| A09469 | A15406 | 294 | A09469 | A15408 | 302 |
| A09469 | A15498 | 160 | A09469 | A15644 | 160 |
| A09469 | A17195 | 340 | A09470 | A10336 | 162 |
| A09470 | A11300 | 263 | A09470 | A11454 | 249 |
| A09470 | A11543 | 334 | A09470 | A11707 | 372 |
| A09470 | A13361 | 213 | A09470 | A14490 | 307 |
| A09470 | A14511 | 291 | A09470 | A14660 | 215 |
| A09470 | A15230 | 226 | A09471 | A10518 | 303 |
| A09471 | A12227 | 326 | A09471 | A12503 | 473 |
| A09471 | A13071 | 416 | A09473 | A10521 | 435 |

|        |        |     |        |        |     |
|--------|--------|-----|--------|--------|-----|
| A09473 | A10628 | 452 | A09473 | A10862 | 452 |
| A09473 | A12439 | 447 | A09476 | A11302 | 338 |
| A09476 | A12988 | 219 | A09476 | A15500 | 238 |
| A09478 | A10223 | 430 | A09480 | A10066 | 408 |
| A09480 | A11007 | 393 | A09480 | A11243 | 351 |
| A09480 | A14188 | 165 | A09480 | A14210 | 307 |
| A09480 | A15230 | 307 | A09480 | A15682 | 168 |
| A09482 | A13826 | 279 | A09483 | A13162 | 348 |
| A09484 | A11316 | 363 | A09484 | A16680 | 375 |
| A09485 | A10034 | 296 | A09485 | A10221 | 368 |
| A09485 | A11647 | 296 | A09485 | A11935 | 401 |
| A09485 | A13162 | 260 | A09485 | A14449 | 188 |
| A09485 | A14566 | 422 | A09485 | A14594 | 404 |
| A09485 | A16218 | 167 | A09485 | A16394 | 328 |
| A09486 | A14198 | 260 | A09487 | A10255 | 450 |
| A09487 | A10811 | 386 | A09487 | A13737 | 190 |
| A09487 | A14653 | 208 | A09487 | A15726 | 156 |
| A09488 | A14208 | 190 | A09488 | A15295 | 165 |
| A09489 | A11773 | 420 | A09491 | A11006 | 394 |
| A09491 | A14485 | 398 | A09493 | A14589 | 215 |
| A09494 | A11190 | 335 | A09494 | A11808 | 382 |
| A09496 | A11393 | 484 | A09497 | A12405 | 432 |
| A09497 | A13396 | 408 | A09497 | A16360 | 460 |
| A09499 | A09533 | 479 | A09499 | A09534 | 467 |
| A09499 | A14236 | 314 | A09499 | A14373 | 395 |
| A09499 | A15395 | 324 | A09499 | A15601 | 374 |
| A09500 | A14387 | 384 | A09502 | A10623 | 247 |
| A09502 | A11344 | 156 | A09502 | A11487 | 216 |
| A09502 | A11674 | 156 | A09502 | A13992 | 188 |
| A09502 | A16228 | 156 | A09504 | A09545 | 357 |
| A09504 | A09860 | 322 | A09504 | A10357 | 340 |
| A09504 | A11378 | 360 | A09504 | A11544 | 288 |
| A09504 | A11726 | 393 | A09504 | A12603 | 401 |
| A09504 | A13335 | 200 | A09504 | A13997 | 198 |
| A09504 | A14211 | 272 | A09504 | A14674 | 162 |
| A09504 | A14780 | 393 | A09504 | A15309 | 219 |
| A09504 | A15720 | 213 | A09504 | A15721 | 224 |
| A09504 | A16410 | 168 | A09506 | A10175 | 255 |
| A09506 | A11279 | 241 | A09506 | A11560 | 322 |
| A09506 | A12651 | 296 | A09506 | A13924 | 299 |
| A09506 | A14475 | 274 | A09507 | A15338 | 340 |
| A09507 | A15363 | 269 | A09507 | A15505 | 255 |
| A09507 | A15917 | 198 | A09507 | A17078 | 299 |
| A09508 | A11300 | 238 | A09508 | A15320 | 274 |
| A09509 | A09513 | 446 | A09509 | A09797 | 207 |
| A09509 | A09834 | 221 | A09509 | A09875 | 163 |



|        |        |     |        |        |     |
|--------|--------|-----|--------|--------|-----|
| A09509 | A09946 | 291 | A09509 | A10087 | 180 |
| A09509 | A10731 | 486 | A09509 | A11104 | 199 |
| A09509 | A11289 | 198 | A09509 | A11303 | 152 |
| A09509 | A11319 | 246 | A09509 | A11328 | 224 |
| A09509 | A11375 | 274 | A09509 | A11396 | 274 |
| A09509 | A11461 | 279 | A09509 | A11523 | 252 |
| A09509 | A11568 | 266 | A09509 | A11899 | 314 |
| A09509 | A13369 | 184 | A09509 | A13484 | 272 |
| A09509 | A13886 | 219 | A09509 | A13924 | 165 |
| A09509 | A13935 | 238 | A09509 | A14100 | 266 |
| A09509 | A14132 | 207 | A09509 | A14388 | 314 |
| A09509 | A14517 | 252 | A09509 | A14625 | 162 |
| A09509 | A15296 | 213 | A09509 | A15605 | 151 |
| A09509 | A15608 | 163 | A09509 | A15750 | 177 |
| A09509 | A15911 | 160 | A09509 | A16064 | 256 |
| A09509 | A16339 | 340 | A09509 | A16341 | 362 |
| A09509 | A16476 | 256 | A09509 | A16711 | 179 |
| A09509 | A17213 | 190 | A09510 | A10133 | 424 |
| A09511 | A09538 | 270 | A09511 | A09551 | 447 |
| A09511 | A10205 | 485 | A09511 | A14633 | 252 |
| A09512 | A10150 | 425 | A09514 | A09588 | 422 |
| A09514 | A10288 | 418 | A09515 | A09538 | 491 |
| A09515 | A09673 | 215 | A09515 | A09992 | 322 |
| A09515 | A10228 | 484 | A09515 | A10250 | 491 |
| A09515 | A10340 | 452 | A09515 | A11387 | 182 |
| A09515 | A11492 | 434 | A09515 | A13484 | 205 |
| A09515 | A14381 | 174 | A09515 | A14735 | 285 |
| A09516 | A11332 | 358 | A09516 | A12047 | 337 |
| A09517 | A09671 | 247 | A09517 | A09687 | 337 |
| A09517 | A14674 | 245 | A09517 | A14702 | 234 |
| A09518 | A11056 | 433 | A09518 | A12386 | 440 |
| A09520 | A09735 | 427 | A09520 | A10137 | 399 |
| A09520 | A10480 | 399 | A09520 | A11737 | 312 |
| A09520 | A11882 | 429 | A09520 | A13144 | 446 |
| A09520 | A16324 | 208 | A09524 | A09785 | 363 |
| A09524 | A10580 | 221 | A09524 | A14299 | 409 |
| A09524 | A14643 | 172 | A09526 | A09648 | 484 |
| A09526 | A13983 | 302 | A09526 | A14247 | 168 |
| A09526 | A14540 | 254 | A09526 | A14827 | 218 |
| A09526 | A15292 | 454 | A09526 | A16049 | 480 |
| A09526 | A16400 | 366 | A09526 | A16449 | 428 |
| A09527 | A10008 | 438 | A09528 | A10109 | 333 |
| A09528 | A15054 | 356 | A09528 | A16617 | 446 |
| A09529 | A10250 | 273 | A09529 | A13510 | 195 |
| A09529 | A14986 | 200 | A09531 | A12897 | 152 |
| A09533 | A09534 | 469 | A09533 | A14236 | 340 |

|        |        |     |        |        |     |
|--------|--------|-----|--------|--------|-----|
| A09533 | A14373 | 408 | A09533 | A15395 | 347 |
| A09533 | A15601 | 391 | A09534 | A14236 | 353 |
| A09534 | A14373 | 414 | A09534 | A15395 | 360 |
| A09534 | A15601 | 400 | A09535 | A10555 | 412 |
| A09535 | A10625 | 174 | A09538 | A09992 | 312 |
| A09538 | A10228 | 461 | A09538 | A10250 | 491 |
| A09538 | A10340 | 486 | A09538 | A10342 | 316 |
| A09538 | A10853 | 152 | A09538 | A13800 | 440 |
| A09538 | A14381 | 160 | A09538 | A14584 | 316 |
| A09538 | A15379 | 174 | A09539 | A10790 | 321 |
| A09539 | A13994 | 234 | A09539 | A14016 | 157 |
| A09539 | A14056 | 152 | A09540 | A10625 | 162 |
| A09540 | A14830 | 335 | A09541 | A10214 | 355 |
| A09541 | A14379 | 313 | A09542 | A10078 | 429 |
| A09542 | A10218 | 296 | A09542 | A10466 | 402 |
| A09542 | A11369 | 236 | A09542 | A11983 | 899 |
| A09542 | A12353 | 196 | A09542 | A12705 | 899 |
| A09542 | A13918 | 329 | A09542 | A13985 | 907 |
| A09542 | A14055 | 452 | A09542 | A15182 | 899 |
| A09542 | A15292 | 270 | A09542 | A16994 | 485 |
| A09543 | A10532 | 425 | A09544 | A11543 | 455 |
| A09544 | A14701 | 168 | A09546 | A09901 | 218 |
| A09546 | A10247 | 93  | A09546 | A10547 | 184 |
| A09546 | A10593 | 388 | A09546 | A11080 | 385 |
| A09546 | A11266 | 419 | A09546 | A11313 | 170 |
| A09546 | A11400 | 168 | A09546 | A11724 | 256 |
| A09546 | A12252 | 241 | A09546 | A13181 | 172 |
| A09546 | A13852 | 324 | A09546 | A14097 | 338 |
| A09546 | A14138 | 224 | A09546 | A14579 | 313 |
| A09546 | A14970 | 369 | A09546 | A15611 | 168 |
| A09547 | A11521 | 375 | A09547 | A12897 | 273 |
| A09548 | A12383 | 205 | A09548 | A14366 | 241 |
| A09548 | A16300 | 190 | A09549 | A11307 | 361 |
| A09549 | A15498 | 177 | A09550 | A09732 | 205 |
| A09550 | A09733 | 257 | A09550 | A10645 | 340 |
| A09550 | A14511 | 435 | A09551 | A10205 | 417 |
| A09551 | A11258 | 345 | A09552 | A11983 | 157 |
| A09552 | A12605 | 385 | A09552 | A14372 | 251 |
| A09552 | A14381 | 254 | A09552 | A14554 | 260 |
| A09552 | A14636 | 201 | A09552 | A15282 | 171 |
| A09552 | A15322 | 283 | A09556 | A09842 | 443 |
| A09556 | A10174 | 445 | A09556 | A10255 | 326 |
| A09556 | A10399 | 425 | A09556 | A10615 | 899 |
| A09556 | A10791 | 201 | A09556 | A12334 | 340 |
| A09556 | A12932 | 281 | A09556 | A14272 | 281 |
| A09556 | A15367 | 457 | A09556 | A16694 | 201 |

|        |        |     |        |        |     |
|--------|--------|-----|--------|--------|-----|
| A09558 | A09804 | 899 | A09558 | A10174 | 180 |
| A09558 | A10365 | 899 | A09558 | A10808 | 899 |
| A09558 | A11704 | 172 | A09558 | A11983 | 899 |
| A09558 | A14008 | 899 | A09558 | A14443 | 899 |
| A09558 | A14444 | 899 | A09559 | A12897 | 159 |
| A09559 | A13252 | 434 | A09559 | A14190 | 229 |
| A09559 | A14210 | 210 | A09559 | A14511 | 204 |
| A09561 | A09791 | 270 | A09561 | A10114 | 243 |
| A09561 | A10174 | 163 | A09561 | A10310 | 324 |
| A09561 | A10382 | 213 | A09561 | A12373 | 458 |
| A09561 | A13373 | 307 | A09561 | A13614 | 173 |
| A09561 | A14636 | 198 | A09561 | A14643 | 332 |
| A09562 | A11300 | 188 | A09562 | A12383 | 278 |
| A09562 | A12871 | 423 | A09562 | A14643 | 229 |
| A09564 | A11432 | 436 | A09564 | A11683 | 361 |
| A09565 | A13993 | 234 | A09566 | A09768 | 326 |
| A09566 | A09829 | 332 | A09566 | A11253 | 375 |
| A09566 | A12383 | 177 | A09566 | A13089 | 394 |
| A09566 | A14016 | 355 | A09566 | A14077 | 154 |
| A09566 | A14200 | 307 | A09566 | A17002 | 374 |
| A09567 | A11640 | 435 | A09567 | A11641 | 368 |
| A09567 | A11642 | 388 | A09567 | A11645 | 366 |
| A09567 | A12047 | 334 | A09567 | A13589 | 204 |
| A09567 | A13593 | 205 | A09567 | A14661 | 313 |
| A09567 | A17140 | 313 | A09568 | A10813 | 200 |
| A09568 | A11147 | 313 | A09568 | A11820 | 728 |
| A09568 | A11923 | 167 | A09568 | A12383 | 63  |
| A09568 | A13390 | 899 | A09568 | A13391 | 899 |
| A09568 | A13393 | 899 | A09568 | A13511 | 263 |
| A09568 | A13946 | 213 | A09568 | A13984 | 944 |
| A09568 | A14039 | 274 | A09568 | A14042 | 932 |
| A09568 | A14275 | 279 | A09568 | A14475 | 236 |
| A09569 | A10091 | 420 | A09570 | A09970 | 409 |
| A09570 | A10985 | 456 | A09570 | A13370 | 469 |
| A09570 | A14077 | 162 | A09570 | A14366 | 224 |
| A09570 | A14393 | 180 | A09570 | A15606 | 294 |
| A09572 | A11435 | 411 | A09572 | A14511 | 294 |
| A09572 | A14554 | 278 | A09572 | A14596 | 486 |
| A09572 | A14604 | 385 | A09572 | A15510 | 229 |
| A09572 | A15722 | 327 | A09573 | A09814 | 429 |
| A09573 | A14197 | 180 | A09573 | A15673 | 212 |
| A09575 | A15241 | 293 | A09576 | A10506 | 262 |
| A09576 | A11683 | 258 | A09577 | A09643 | 944 |
| A09577 | A09644 | 942 | A09577 | A09752 | 221 |
| A09577 | A10073 | 899 | A09577 | A10332 | 154 |
| A09577 | A10365 | 945 | A09577 | A10392 | 945 |

|        |        |     |        |        |     |
|--------|--------|-----|--------|--------|-----|
| A09577 | A10534 | 462 | A09577 | A10560 | 993 |
| A09577 | A10728 | 302 | A09577 | A10808 | 945 |
| A09577 | A10913 | 407 | A09577 | A11125 | 925 |
| A09577 | A11273 | 165 | A09577 | A11670 | 208 |
| A09577 | A11871 | 212 | A09577 | A11943 | 251 |
| A09577 | A12084 | 252 | A09577 | A12328 | 486 |
| A09577 | A12383 | 467 | A09577 | A12902 | 899 |
| A09577 | A12990 | 395 | A09577 | A13340 | 761 |
| A09577 | A13804 | 193 | A09577 | A13809 | 311 |
| A09577 | A13946 | 147 | A09577 | A13980 | 240 |
| A09577 | A14008 | 945 | A09577 | A14013 | 191 |
| A09577 | A14022 | 268 | A09577 | A14073 | 491 |
| A09577 | A14157 | 308 | A09577 | A14188 | 461 |
| A09577 | A14443 | 217 | A09577 | A14452 | 63  |
| A09577 | A14471 | 154 | A09577 | A14785 | 219 |
| A09577 | A14903 | 168 | A09577 | A14917 | 157 |
| A09577 | A14921 | 238 | A09577 | A14969 | 170 |
| A09577 | A15146 | 291 | A09577 | A15244 | 418 |
| A09577 | A16272 | 371 | A09577 | A16296 | 159 |
| A09577 | A16406 | 191 | A09577 | A16446 | 411 |
| A09577 | A16565 | 185 | A09577 | A16585 | 205 |
| A09577 | A16587 | 151 | A09577 | A16704 | 260 |
| A09577 | A16944 | 185 | A09577 | A17014 | 205 |
| A09578 | A11460 | 395 | A09578 | A14198 | 204 |
| A09581 | A09665 | 333 | A09581 | A09686 | 328 |
| A09581 | A10174 | 899 | A09581 | A11041 | 374 |
| A09581 | A11307 | 467 | A09581 | A11338 | 174 |
| A09581 | A11374 | 184 | A09581 | A11427 | 187 |
| A09581 | A11433 | 408 | A09581 | A11438 | 183 |
| A09581 | A11724 | 267 | A09581 | A12692 | 343 |
| A09581 | A13840 | 391 | A09581 | A14192 | 395 |
| A09581 | A14400 | 281 | A09581 | A15765 | 219 |
| A09581 | A16430 | 434 | A09581 | A16676 | 294 |
| A09583 | A14589 | 205 | A09584 | A14026 | 362 |
| A09584 | A14120 | 362 | A09584 | A14210 | 362 |
| A09584 | A16407 | 362 | A09584 | A16847 | 362 |
| A09585 | A14748 | 430 | A09586 | A09653 | 301 |
| A09586 | A11521 | 267 | A09586 | A12473 | 364 |
| A09587 | A11419 | 249 | A09587 | A12741 | 409 |
| A09587 | A13855 | 168 | A09587 | A16741 | 152 |
| A09590 | A13989 | 177 | A09590 | A16686 | 366 |
| A09591 | A09691 | 357 | A09591 | A11374 | 185 |
| A09591 | A11705 | 254 | A09591 | A12813 | 424 |
| A09591 | A14178 | 334 | A09591 | A14471 | 322 |
| A09591 | A14566 | 193 | A09591 | A14969 | 439 |
| A09591 | A15653 | 201 | A09591 | A15732 | 224 |

|        |        |     |        |        |     |
|--------|--------|-----|--------|--------|-----|
| A09591 | A15741 | 218 | A09591 | A16392 | 281 |
| A09591 | A17088 | 334 | A09592 | A11431 | 544 |
| A09592 | A13340 | 201 | A09592 | A13425 | 210 |
| A09592 | A13812 | 184 | A09592 | A14216 | 213 |
| A09592 | A14247 | 179 | A09592 | A14569 | 273 |
| A09592 | A14738 | 180 | A09592 | A14937 | 317 |
| A09592 | A15382 | 174 | A09592 | A15658 | 326 |
| A09592 | A15660 | 319 | A09592 | A15666 | 489 |
| A09592 | A15667 | 200 | A09592 | A15684 | 254 |
| A09592 | A15931 | 491 | A09592 | A16793 | 294 |
| A09595 | A14478 | 341 | A09595 | A14482 | 238 |
| A09595 | A14568 | 294 | A09597 | A16626 | 180 |
| A09598 | A09762 | 243 | A09598 | A10221 | 226 |
| A09598 | A10366 | 216 | A09598 | A10373 | 230 |
| A09598 | A11184 | 157 | A09598 | A11236 | 417 |
| A09598 | A11540 | 491 | A09598 | A11829 | 160 |
| A09598 | A11880 | 201 | A09598 | A12556 | 486 |
| A09598 | A12749 | 346 | A09598 | A13949 | 484 |
| A09598 | A14230 | 446 | A09598 | A14694 | 196 |
| A09598 | A15369 | 491 | A09598 | A15549 | 243 |
| A09598 | A15837 | 462 | A09598 | A16128 | 353 |
| A09598 | A16626 | 428 | A09598 | A16656 | 208 |
| A09600 | A10253 | 157 | A09600 | A13207 | 179 |
| A09600 | A14073 | 202 | A09600 | A14178 | 198 |
| A09600 | A14594 | 188 | A09600 | A17088 | 294 |
| A09601 | A11487 | 191 | A09601 | A12841 | 438 |
| A09601 | A14178 | 445 | A09603 | A09819 | 435 |
| A09603 | A16026 | 356 | A09604 | A14842 | 409 |
| A09604 | A15085 | 63  | A09605 | A11281 | 241 |
| A09605 | A14278 | 238 | A09606 | A10728 | 224 |
| A09606 | A13928 | 217 | A09606 | A14801 | 221 |
| A09607 | A12474 | 303 | A09607 | A13924 | 163 |
| A09607 | A14174 | 306 | A09607 | A15410 | 174 |
| A09607 | A15974 | 398 | A09607 | A16109 | 240 |
| A09607 | A16257 | 152 | A09607 | A16392 | 219 |
| A09609 | A09648 | 271 | A09609 | A09757 | 296 |
| A09609 | A09828 | 414 | A09609 | A10315 | 269 |
| A09609 | A10316 | 288 | A09609 | A10789 | 449 |
| A09609 | A11209 | 357 | A09609 | A11234 | 375 |
| A09609 | A11279 | 390 | A09609 | A11301 | 479 |
| A09609 | A11430 | 224 | A09609 | A11472 | 461 |
| A09609 | A11496 | 477 | A09609 | A11497 | 468 |
| A09609 | A11551 | 305 | A09609 | A11555 | 405 |
| A09609 | A11597 | 272 | A09609 | A11616 | 318 |
| A09609 | A11649 | 297 | A09609 | A11675 | 466 |
| A09609 | A11735 | 435 | A09609 | A11737 | 384 |

|        |        |     |        |        |     |
|--------|--------|-----|--------|--------|-----|
| A09609 | A11833 | 401 | A09609 | A11914 | 473 |
| A09609 | A11917 | 483 | A09609 | A11954 | 355 |
| A09609 | A12254 | 273 | A09609 | A12255 | 333 |
| A09609 | A12284 | 371 | A09609 | A12433 | 467 |
| A09609 | A12501 | 408 | A09609 | A12506 | 413 |
| A09609 | A12507 | 458 | A09609 | A12606 | 474 |
| A09609 | A12655 | 341 | A09609 | A12658 | 477 |
| A09609 | A12659 | 314 | A09609 | A12665 | 465 |
| A09609 | A12725 | 467 | A09609 | A12726 | 367 |
| A09609 | A12738 | 321 | A09609 | A12858 | 473 |
| A09609 | A12873 | 440 | A09609 | A12927 | 221 |
| A09609 | A13116 | 338 | A09609 | A13169 | 386 |
| A09609 | A13231 | 369 | A09609 | A13313 | 469 |
| A09609 | A13321 | 316 | A09609 | A13388 | 340 |
| A09609 | A13399 | 274 | A09609 | A13706 | 281 |
| A09609 | A13707 | 408 | A09609 | A13708 | 361 |
| A09609 | A13737 | 369 | A09609 | A13781 | 460 |
| A09609 | A13784 | 446 | A09609 | A13786 | 319 |
| A09609 | A13787 | 390 | A09609 | A13788 | 430 |
| A09609 | A13804 | 369 | A09609 | A13809 | 405 |
| A09609 | A13811 | 341 | A09609 | A13912 | 383 |
| A09609 | A13963 | 162 | A09609 | A14074 | 391 |
| A09609 | A14084 | 341 | A09609 | A14154 | 274 |
| A09609 | A14214 | 474 | A09609 | A14222 | 383 |
| A09609 | A14227 | 208 | A09609 | A14239 | 281 |
| A09609 | A14255 | 294 | A09609 | A14263 | 347 |
| A09609 | A14270 | 333 | A09609 | A14288 | 416 |
| A09609 | A14375 | 399 | A09609 | A14455 | 371 |
| A09609 | A14569 | 450 | A09609 | A14706 | 232 |
| A09609 | A14708 | 271 | A09609 | A14718 | 308 |
| A09609 | A14799 | 443 | A09609 | A14826 | 358 |
| A09609 | A14838 | 361 | A09609 | A14903 | 462 |
| A09609 | A14917 | 347 | A09609 | A14921 | 390 |
| A09609 | A15105 | 350 | A09609 | A15187 | 422 |
| A09609 | A15189 | 391 | A09609 | A15262 | 380 |
| A09609 | A15292 | 229 | A09609 | A15432 | 255 |
| A09609 | A15501 | 243 | A09609 | A15532 | 243 |
| A09609 | A15541 | 391 | A09609 | A15653 | 330 |
| A09609 | A15665 | 210 | A09609 | A15680 | 226 |
| A09609 | A15683 | 419 | A09609 | A15684 | 191 |
| A09609 | A15709 | 457 | A09609 | A15711 | 329 |
| A09609 | A15855 | 198 | A09609 | A15932 | 313 |
| A09609 | A16157 | 484 | A09609 | A16187 | 319 |
| A09609 | A16261 | 314 | A09609 | A16322 | 286 |
| A09609 | A16552 | 407 | A09609 | A16565 | 443 |
| A09609 | A16566 | 357 | A09609 | A16567 | 369 |

|        |        |     |        |        |     |
|--------|--------|-----|--------|--------|-----|
| A09609 | A16587 | 460 | A09609 | A16597 | 398 |
| A09609 | A16611 | 425 | A09609 | A16664 | 475 |
| A09609 | A16675 | 433 | A09609 | A16680 | 390 |
| A09609 | A16690 | 433 | A09609 | A16692 | 339 |
| A09609 | A16695 | 386 | A09609 | A16697 | 353 |
| A09609 | A16699 | 332 | A09609 | A16701 | 366 |
| A09609 | A16703 | 327 | A09609 | A16707 | 406 |
| A09609 | A16762 | 263 | A09609 | A16764 | 293 |
| A09609 | A16776 | 435 | A09609 | A16790 | 428 |
| A09609 | A16807 | 308 | A09609 | A16829 | 432 |
| A09609 | A16866 | 301 | A09609 | A16874 | 430 |
| A09609 | A17033 | 353 | A09610 | A15771 | 412 |
| A09611 | A09703 | 454 | A09611 | A09708 | 255 |
| A09611 | A09727 | 310 | A09611 | A10844 | 424 |
| A09611 | A11395 | 255 | A09611 | A11439 | 255 |
| A09611 | A13829 | 160 | A09611 | A14166 | 255 |
| A09611 | A14200 | 163 | A09611 | A14462 | 255 |
| A09611 | A15762 | 255 | A09611 | A15941 | 190 |
| A09611 | A15943 | 255 | A09611 | A15944 | 255 |
| A09611 | A15945 | 255 | A09611 | A15946 | 255 |
| A09611 | A16067 | 592 | A09611 | A16093 | 437 |
| A09611 | A16109 | 255 | A09611 | A16144 | 255 |
| A09611 | A16378 | 199 | A09612 | A10253 | 274 |
| A09612 | A10420 | 305 | A09612 | A10424 | 340 |
| A09612 | A10427 | 185 | A09612 | A10441 | 324 |
| A09612 | A10443 | 418 | A09612 | A10673 | 399 |
| A09612 | A10676 | 347 | A09612 | A10677 | 254 |
| A09612 | A10681 | 314 | A09612 | A10689 | 174 |
| A09612 | A10702 | 352 | A09612 | A10703 | 401 |
| A09612 | A10712 | 369 | A09612 | A10776 | 221 |
| A09612 | A10875 | 252 | A09612 | A11235 | 319 |
| A09612 | A11309 | 480 | A09612 | A11381 | 202 |
| A09612 | A13735 | 302 | A09612 | A14856 | 168 |
| A09612 | A15497 | 446 | A09612 | A15874 | 207 |
| A09612 | A16033 | 302 | A09612 | A16103 | 314 |
| A09612 | A16286 | 398 | A09612 | A16529 | 434 |
| A09612 | A16739 | 291 | A09612 | A16767 | 324 |
| A09612 | A17041 | 404 | A09613 | A11857 | 390 |
| A09613 | A14508 | 351 | A09613 | A15500 | 288 |
| A09615 | A11731 | 360 | A09615 | A15660 | 179 |
| A09615 | A15684 | 217 | A09616 | A11271 | 347 |
| A09616 | A15649 | 193 | A09617 | A09764 | 245 |
| A09617 | A14091 | 352 | A09617 | A14177 | 329 |
| A09617 | A14273 | 361 | A09617 | A15524 | 258 |
| A09618 | A11808 | 423 | A09618 | A14959 | 452 |
| A09619 | A09621 | 176 | A09619 | A09664 | 291 |

|        |        |     |        |        |     |
|--------|--------|-----|--------|--------|-----|
| A09619 | A11395 | 205 | A09619 | A11621 | 232 |
| A09619 | A11832 | 185 | A09619 | A12254 | 212 |
| A09619 | A13321 | 279 | A09619 | A13381 | 486 |
| A09619 | A15733 | 201 | A09619 | A15764 | 371 |
| A09619 | A15940 | 198 | A09619 | A16187 | 154 |
| A09619 | A16212 | 188 | A09619 | A16704 | 172 |
| A09620 | A09697 | 269 | A09620 | A11724 | 291 |
| A09620 | A11728 | 309 | A09620 | A12227 | 241 |
| A09620 | A12995 | 378 | A09620 | A13581 | 269 |
| A09620 | A13989 | 212 | A09620 | A15268 | 454 |
| A09620 | A15381 | 241 | A09620 | A15416 | 172 |
| A09620 | A15837 | 269 | A09620 | A16027 | 269 |
| A09621 | A11132 | 241 | A09621 | A11280 | 294 |
| A09621 | A11324 | 502 | A09621 | A12243 | 243 |
| A09621 | A12507 | 378 | A09621 | A13706 | 488 |
| A09621 | A13870 | 243 | A09621 | A13989 | 195 |
| A09621 | A14451 | 163 | A09621 | A14655 | 449 |
| A09621 | A14835 | 486 | A09621 | A16704 | 173 |
| A09622 | A09648 | 174 | A09622 | A09852 | 371 |
| A09622 | A11234 | 334 | A09622 | A11283 | 165 |
| A09622 | A11297 | 221 | A09622 | A11430 | 151 |
| A09622 | A11471 | 273 | A09622 | A11472 | 193 |
| A09622 | A11497 | 375 | A09622 | A11597 | 406 |
| A09622 | A11616 | 375 | A09622 | A11675 | 224 |
| A09622 | A11940 | 310 | A09622 | A12011 | 307 |
| A09622 | A12254 | 201 | A09622 | A12284 | 174 |
| A09622 | A12433 | 154 | A09622 | A12501 | 369 |
| A09622 | A12507 | 335 | A09622 | A12606 | 414 |
| A09622 | A12658 | 232 | A09622 | A12665 | 217 |
| A09622 | A12725 | 152 | A09622 | A12821 | 367 |
| A09622 | A12834 | 350 | A09622 | A12858 | 195 |
| A09622 | A12873 | 207 | A09622 | A13116 | 283 |
| A09622 | A13117 | 322 | A09622 | A13309 | 369 |
| A09622 | A13399 | 202 | A09622 | A13706 | 343 |
| A09622 | A13708 | 294 | A09622 | A13710 | 283 |
| A09622 | A13781 | 235 | A09622 | A13783 | 303 |
| A09622 | A13784 | 267 | A09622 | A13786 | 258 |
| A09622 | A13912 | 344 | A09622 | A14094 | 213 |
| A09622 | A14183 | 238 | A09622 | A14214 | 260 |
| A09622 | A14239 | 213 | A09622 | A14255 | 227 |
| A09622 | A14718 | 245 | A09622 | A14826 | 157 |
| A09622 | A14917 | 296 | A09622 | A14921 | 353 |
| A09622 | A15189 | 210 | A09622 | A15262 | 191 |
| A09622 | A15501 | 170 | A09622 | A15680 | 283 |
| A09622 | A15683 | 152 | A09622 | A15711 | 272 |
| A09622 | A15850 | 357 | A09622 | A16157 | 274 |



|        |        |     |        |        |     |
|--------|--------|-----|--------|--------|-----|
| A09622 | A16552 | 351 | A09622 | A16565 | 417 |
| A09622 | A16597 | 223 | A09622 | A16608 | 188 |
| A09622 | A16611 | 385 | A09622 | A16675 | 185 |
| A09622 | A16680 | 207 | A09622 | A16690 | 185 |
| A09622 | A16699 | 274 | A09622 | A16702 | 281 |
| A09622 | A16703 | 269 | A09622 | A16709 | 290 |
| A09622 | A16764 | 224 | A09622 | A16776 | 312 |
| A09622 | A16806 | 350 | A09622 | A16829 | 302 |
| A09622 | A16905 | 432 | A09622 | A16913 | 332 |
| A09622 | A16944 | 317 | A09622 | A17012 | 296 |
| A09622 | A17018 | 306 | A09622 | A17030 | 312 |
| A09622 | A17133 | 294 | A09622 | A17190 | 302 |
| A09623 | A09629 | 230 | A09623 | A14460 | 110 |
| A09623 | A14664 | 157 | A09623 | A15539 | 187 |
| A09623 | A16606 | 249 | A09624 | A09820 | 293 |
| A09624 | A10369 | 221 | A09624 | A10439 | 265 |
| A09624 | A10909 | 310 | A09624 | A10997 | 424 |
| A09624 | A11205 | 353 | A09624 | A11615 | 229 |
| A09624 | A11851 | 152 | A09624 | A11881 | 165 |
| A09624 | A12722 | 473 | A09624 | A14167 | 219 |
| A09624 | A14266 | 462 | A09624 | A14270 | 305 |
| A09624 | A14357 | 310 | A09624 | A14719 | 172 |
| A09624 | A15187 | 170 | A09624 | A15273 | 486 |
| A09624 | A15501 | 168 | A09624 | A15711 | 167 |
| A09624 | A16647 | 270 | A09624 | A16764 | 241 |
| A09625 | A09628 | 200 | A09625 | A10664 | 238 |
| A09625 | A11739 | 358 | A09625 | A13876 | 200 |
| A09625 | A13881 | 200 | A09625 | A14171 | 200 |
| A09625 | A14173 | 271 | A09625 | A14179 | 200 |
| A09625 | A14180 | 200 | A09625 | A14186 | 112 |
| A09625 | A14272 | 307 | A09625 | A14356 | 498 |
| A09625 | A14694 | 433 | A09625 | A15370 | 213 |
| A09625 | A15683 | 267 | A09625 | A15703 | 430 |
| A09625 | A15712 | 336 | A09625 | A15718 | 263 |
| A09625 | A15719 | 200 | A09625 | A15757 | 200 |
| A09625 | A16066 | 200 | A09625 | A16634 | 200 |
| A09625 | A16843 | 324 | A09625 | A16919 | 200 |
| A09626 | A14093 | 216 | A09626 | A14155 | 247 |
| A09626 | A16606 | 377 | A09627 | A10372 | 160 |
| A09627 | A11365 | 160 | A09627 | A11735 | 160 |
| A09627 | A11737 | 160 | A09627 | A11914 | 160 |
| A09627 | A12658 | 160 | A09627 | A12824 | 160 |
| A09627 | A14007 | 160 | A09627 | A14570 | 281 |
| A09627 | A15257 | 160 | A09627 | A16463 | 414 |
| A09628 | A13835 | 374 | A09628 | A13876 | 200 |
| A09628 | A13881 | 200 | A09628 | A14171 | 200 |

|        |        |     |        |        |     |
|--------|--------|-----|--------|--------|-----|
| A09628 | A14179 | 432 | A09628 | A14180 | 200 |
| A09628 | A14356 | 200 | A09628 | A15370 | 200 |
| A09628 | A15712 | 383 | A09628 | A15719 | 200 |
| A09628 | A15757 | 200 | A09628 | A16066 | 200 |
| A09628 | A16634 | 410 | A09628 | A16685 | 371 |
| A09628 | A16919 | 200 | A09629 | A14014 | 316 |
| A09629 | A14093 | 486 | A09630 | A12253 | 385 |
| A09630 | A14196 | 240 | A09630 | A15237 | 383 |
| A09630 | A15297 | 337 | A09630 | A15323 | 413 |
| A09630 | A15339 | 229 | A09630 | A17063 | 151 |
| A09631 | A10664 | 350 | A09631 | A15683 | 388 |
| A09632 | A15637 | 291 | A09632 | A15874 | 475 |
| A09632 | A15985 | 334 | A09632 | A16033 | 316 |
| A09632 | A16344 | 269 | A09632 | A17040 | 247 |
| A09633 | A09644 | 272 | A09633 | A09766 | 200 |
| A09633 | A12383 | 291 | A09633 | A12835 | 319 |
| A09633 | A13986 | 84  | A09633 | A14124 | 238 |
| A09633 | A14300 | 324 | A09634 | A11811 | 488 |
| A09634 | A15624 | 201 | A09636 | A09638 | 394 |
| A09639 | A09640 | 440 | A09642 | A15532 | 319 |
| A09642 | A15607 | 398 | A09643 | A09644 | 945 |
| A09643 | A09660 | 330 | A09643 | A09937 | 241 |
| A09643 | A10005 | 212 | A09643 | A10073 | 899 |
| A09643 | A10365 | 899 | A09643 | A10392 | 945 |
| A09643 | A10580 | 899 | A09643 | A10808 | 912 |
| A09643 | A10902 | 283 | A09643 | A12383 | 402 |
| A09643 | A14008 | 945 | A09643 | A14013 | 441 |
| A09643 | A14022 | 340 | A09643 | A14275 | 406 |
| A09643 | A14581 | 369 | A09643 | A16686 | 193 |
| A09643 | A16877 | 236 | A09643 | A16994 | 105 |
| A09644 | A09675 | 341 | A09644 | A09727 | 363 |
| A09644 | A10014 | 156 | A09644 | A10073 | 899 |
| A09644 | A10277 | 328 | A09644 | A10365 | 901 |
| A09644 | A10392 | 945 | A09644 | A10470 | 281 |
| A09644 | A10560 | 371 | A09644 | A10581 | 193 |
| A09644 | A10599 | 375 | A09644 | A10808 | 931 |
| A09644 | A11604 | 262 | A09644 | A12383 | 468 |
| A09644 | A12651 | 165 | A09644 | A14008 | 945 |
| A09644 | A14013 | 424 | A09644 | A14022 | 307 |
| A09644 | A14124 | 177 | A09644 | A14190 | 213 |
| A09644 | A14275 | 460 | A09644 | A14369 | 174 |
| A09644 | A14410 | 172 | A09644 | A14529 | 195 |
| A09644 | A14532 | 353 | A09644 | A14581 | 341 |
| A09644 | A15660 | 486 | A09644 | A15684 | 446 |
| A09644 | A16201 | 246 | A09646 | A10051 | 489 |
| A09646 | A10205 | 486 | A09646 | A16283 | 358 |

|        |        |     |        |        |     |
|--------|--------|-----|--------|--------|-----|
| A09647 | A09803 | 491 | A09647 | A10278 | 899 |
| A09647 | A11288 | 174 | A09647 | A11486 | 899 |
| A09647 | A12997 | 358 | A09647 | A13382 | 899 |
| A09647 | A14366 | 257 | A09647 | A14477 | 213 |
| A09647 | A16644 | 313 | A09648 | A09653 | 489 |
| A09648 | A10429 | 204 | A09648 | A10789 | 313 |
| A09648 | A11279 | 187 | A09648 | A11301 | 472 |
| A09648 | A11430 | 199 | A09648 | A11471 | 168 |
| A09648 | A11472 | 218 | A09648 | A11496 | 460 |
| A09648 | A11497 | 484 | A09648 | A11675 | 273 |
| A09648 | A11735 | 463 | A09648 | A11737 | 396 |
| A09648 | A11851 | 249 | A09648 | A11914 | 470 |
| A09648 | A11915 | 219 | A09648 | A11917 | 454 |
| A09648 | A11940 | 229 | A09648 | A11992 | 201 |
| A09648 | A12167 | 182 | A09648 | A12215 | 254 |
| A09648 | A12238 | 245 | A09648 | A12254 | 401 |
| A09648 | A12284 | 180 | A09648 | A12433 | 443 |
| A09648 | A12492 | 479 | A09648 | A12501 | 373 |
| A09648 | A12507 | 396 | A09648 | A12508 | 405 |
| A09648 | A12606 | 477 | A09648 | A12625 | 407 |
| A09648 | A12658 | 468 | A09648 | A12665 | 383 |
| A09648 | A12725 | 327 | A09648 | A12726 | 249 |
| A09648 | A12825 | 268 | A09648 | A12826 | 252 |
| A09648 | A12834 | 165 | A09648 | A12858 | 479 |
| A09648 | A13169 | 491 | A09648 | A13313 | 412 |
| A09648 | A13342 | 172 | A09648 | A13399 | 151 |
| A09648 | A13707 | 409 | A09648 | A13708 | 385 |
| A09648 | A13711 | 285 | A09648 | A13737 | 177 |
| A09648 | A13781 | 330 | A09648 | A13783 | 218 |
| A09648 | A13784 | 294 | A09648 | A13786 | 422 |
| A09648 | A13788 | 312 | A09648 | A13809 | 362 |
| A09648 | A13873 | 177 | A09648 | A13912 | 288 |
| A09648 | A13963 | 156 | A09648 | A14059 | 443 |
| A09648 | A14074 | 165 | A09648 | A14077 | 273 |
| A09648 | A14084 | 294 | A09648 | A14087 | 174 |
| A09648 | A14094 | 230 | A09648 | A14191 | 489 |
| A09648 | A14209 | 468 | A09648 | A14214 | 460 |
| A09648 | A14222 | 383 | A09648 | A14227 | 227 |
| A09648 | A14239 | 168 | A09648 | A14255 | 278 |
| A09648 | A14263 | 307 | A09648 | A14270 | 173 |
| A09648 | A14272 | 722 | A09648 | A14286 | 204 |
| A09648 | A14288 | 491 | A09648 | A14289 | 157 |
| A09648 | A14358 | 185 | A09648 | A14375 | 276 |
| A09648 | A14462 | 281 | A09648 | A14569 | 463 |
| A09648 | A14595 | 152 | A09648 | A14706 | 465 |
| A09648 | A14739 | 185 | A09648 | A14799 | 435 |

|        |        |     |        |        |     |
|--------|--------|-----|--------|--------|-----|
| A09648 | A14903 | 389 | A09648 | A14921 | 305 |
| A09648 | A15105 | 190 | A09648 | A15187 | 274 |
| A09648 | A15189 | 409 | A09648 | A15262 | 288 |
| A09648 | A15367 | 491 | A09648 | A15383 | 401 |
| A09648 | A15541 | 375 | A09648 | A15665 | 296 |
| A09648 | A15683 | 269 | A09648 | A15709 | 411 |
| A09648 | A15711 | 270 | A09648 | A15818 | 165 |
| A09648 | A15850 | 393 | A09648 | A16157 | 481 |
| A09648 | A16187 | 247 | A09648 | A16243 | 216 |
| A09648 | A16343 | 294 | A09648 | A16552 | 435 |
| A09648 | A16565 | 465 | A09648 | A16587 | 443 |
| A09648 | A16597 | 443 | A09648 | A16611 | 485 |
| A09648 | A16652 | 241 | A09648 | A16664 | 480 |
| A09648 | A16675 | 340 | A09648 | A16680 | 371 |
| A09648 | A16682 | 219 | A09648 | A16684 | 252 |
| A09648 | A16690 | 277 | A09648 | A16694 | 491 |
| A09648 | A16695 | 384 | A09648 | A16703 | 263 |
| A09648 | A16704 | 404 | A09648 | A16707 | 414 |
| A09648 | A16764 | 188 | A09648 | A16776 | 332 |
| A09648 | A16788 | 230 | A09648 | A16790 | 299 |
| A09648 | A16815 | 156 | A09648 | A16824 | 279 |
| A09648 | A16829 | 386 | A09648 | A16838 | 281 |
| A09648 | A16874 | 313 | A09648 | A16905 | 243 |
| A09648 | A16913 | 267 | A09648 | A16954 | 196 |
| A09648 | A17018 | 223 | A09648 | A17030 | 232 |
| A09648 | A17220 | 157 | A09649 | A09727 | 229 |
| A09649 | A11119 | 430 | A09649 | A14758 | 452 |
| A09649 | A14809 | 205 | A09649 | A17004 | 385 |
| A09652 | A10339 | 409 | A09652 | A10671 | 447 |
| A09652 | A14190 | 210 | A09652 | A14366 | 238 |
| A09652 | A14374 | 249 | A09652 | A14554 | 296 |
| A09652 | A15795 | 305 | A09652 | A15896 | 308 |
| A09652 | A16038 | 406 | A09653 | A12556 | 235 |
| A09653 | A13169 | 468 | A09653 | A14076 | 163 |
| A09653 | A14094 | 271 | A09653 | A14288 | 481 |
| A09653 | A15367 | 484 | A09653 | A15369 | 196 |
| A09653 | A16127 | 151 | A09653 | A16129 | 193 |
| A09653 | A16694 | 266 | A09654 | A09706 | 491 |
| A09654 | A11376 | 180 | A09654 | A11596 | 491 |
| A09654 | A11916 | 213 | A09654 | A12577 | 366 |
| A09654 | A12625 | 273 | A09654 | A14076 | 490 |
| A09654 | A14471 | 221 | A09654 | A16128 | 391 |
| A09654 | A16129 | 190 | A09654 | A16378 | 490 |
| A09655 | A10853 | 191 | A09655 | A13340 | 488 |
| A09655 | A14188 | 305 | A09655 | A15624 | 168 |
| A09655 | A15660 | 379 | A09655 | A15684 | 412 |

|        |        |     |        |        |     |
|--------|--------|-----|--------|--------|-----|
| A09655 | A15918 | 428 | A09655 | A15920 | 191 |
| A09655 | A15928 | 412 | A09655 | A15932 | 383 |
| A09655 | A15933 | 479 | A09655 | A15936 | 324 |
| A09655 | A15951 | 312 | A09655 | A16764 | 213 |
| A09656 | A11264 | 373 | A09656 | A11981 | 326 |
| A09656 | A13626 | 262 | A09657 | A10376 | 405 |
| A09660 | A09754 | 297 | A09660 | A09791 | 185 |
| A09660 | A10078 | 313 | A09660 | A10392 | 187 |
| A09660 | A12932 | 945 | A09660 | A12969 | 238 |
| A09660 | A13397 | 236 | A09660 | A15369 | 201 |
| A09660 | A16952 | 321 | A09662 | A09666 | 452 |
| A09662 | A12047 | 296 | A09662 | A12722 | 491 |
| A09662 | A14193 | 449 | A09662 | A14464 | 296 |
| A09662 | A14484 | 491 | A09662 | A15367 | 210 |
| A09663 | A10625 | 330 | A09663 | A14079 | 303 |
| A09663 | A14273 | 357 | A09663 | A14460 | 372 |
| A09663 | A14819 | 204 | A09663 | A15939 | 217 |
| A09663 | A16127 | 424 | A09663 | A16128 | 160 |
| A09663 | A16606 | 299 | A09663 | A16613 | 285 |
| A09664 | A10616 | 297 | A09664 | A11274 | 385 |
| A09664 | A12849 | 337 | A09664 | A13993 | 168 |
| A09664 | A14693 | 174 | A09664 | A16927 | 228 |
| A09665 | A09686 | 486 | A09666 | A11346 | 327 |
| A09666 | A11473 | 249 | A09666 | A11689 | 324 |
| A09666 | A11986 | 217 | A09666 | A12047 | 305 |
| A09666 | A12258 | 281 | A09666 | A12286 | 272 |
| A09666 | A12722 | 204 | A09666 | A14281 | 490 |
| A09666 | A14464 | 299 | A09666 | A14484 | 391 |
| A09667 | A15858 | 347 | A09668 | A10773 | 364 |
| A09668 | A11196 | 360 | A09668 | A14278 | 259 |
| A09668 | A15273 | 324 | A09668 | A15626 | 195 |
| A09669 | A12824 | 226 | A09669 | A15297 | 252 |
| A09669 | A15323 | 208 | A09669 | A16458 | 422 |
| A09670 | A15297 | 296 | A09670 | A15534 | 366 |
| A09671 | A09995 | 344 | A09671 | A11201 | 418 |
| A09671 | A11576 | 443 | A09672 | A11628 | 473 |
| A09672 | A11914 | 276 | A09672 | A12255 | 230 |
| A09672 | A12824 | 488 | A09672 | A14489 | 219 |
| A09672 | A14622 | 188 | A09672 | A15052 | 277 |
| A09672 | A15257 | 152 | A09672 | A15641 | 227 |
| A09672 | A15962 | 182 | A09673 | A11933 | 219 |
| A09673 | A12082 | 281 | A09673 | A14088 | 217 |
| A09673 | A15377 | 217 | A09673 | A15543 | 217 |
| A09673 | A15724 | 270 | A09673 | A16664 | 217 |
| A09674 | A11438 | 260 | A09674 | A12328 | 157 |
| A09674 | A13992 | 328 | A09674 | A15218 | 424 |

|        |        |     |        |        |     |
|--------|--------|-----|--------|--------|-----|
| A09674 | A15235 | 391 | A09674 | A15727 | 366 |
| A09674 | A15988 | 334 | A09674 | A16118 | 236 |
| A09674 | A16631 | 288 | A09675 | A14183 | 374 |
| A09677 | A15221 | 364 | A09678 | A13883 | 434 |
| A09678 | A15649 | 230 | A09680 | A11828 | 462 |
| A09683 | A15837 | 205 | A09685 | A15506 | 234 |
| A09685 | A15624 | 238 | A09685 | A16105 | 424 |
| A09686 | A13298 | 213 | A09686 | A15649 | 230 |
| A09687 | A14196 | 154 | A09689 | A15297 | 319 |
| A09689 | A15738 | 340 | A09690 | A14943 | 364 |
| A09691 | A15653 | 270 | A09696 | A09778 | 366 |
| A09697 | A13052 | 170 | A09697 | A13581 | 269 |
| A09697 | A13989 | 543 | A09697 | A14216 | 402 |
| A09697 | A15837 | 269 | A09697 | A16027 | 269 |
| A09698 | A11636 | 413 | A09698 | A12810 | 368 |
| A09698 | A14622 | 256 | A09698 | A15659 | 307 |
| A09698 | A15684 | 316 | A09698 | A16191 | 456 |
| A09698 | A16205 | 380 | A09698 | A16244 | 391 |
| A09698 | A16811 | 372 | A09699 | A13510 | 269 |
| A09699 | A14728 | 356 | A09699 | A14986 | 273 |
| A09700 | A14174 | 303 | A09702 | A10417 | 200 |
| A09702 | A10439 | 353 | A09702 | A11390 | 375 |
| A09702 | A11438 | 453 | A09702 | A11729 | 200 |
| A09702 | A11945 | 433 | A09702 | A13333 | 200 |
| A09702 | A15221 | 384 | A09702 | A16118 | 446 |
| A09703 | A09708 | 255 | A09703 | A09809 | 283 |
| A09703 | A10596 | 165 | A09703 | A11395 | 400 |
| A09703 | A11439 | 255 | A09703 | A12247 | 460 |
| A09703 | A13989 | 283 | A09703 | A14074 | 205 |
| A09703 | A14166 | 255 | A09703 | A14462 | 255 |
| A09703 | A15762 | 493 | A09703 | A15943 | 565 |
| A09703 | A15944 | 255 | A09703 | A15945 | 444 |
| A09703 | A15946 | 519 | A09703 | A16067 | 255 |
| A09703 | A16093 | 255 | A09703 | A16109 | 533 |
| A09703 | A16144 | 255 | A09704 | A14176 | 347 |
| A09705 | A10586 | 224 | A09705 | A12320 | 475 |
| A09705 | A13989 | 419 | A09705 | A15735 | 424 |
| A09705 | A16048 | 174 | A09705 | A16394 | 267 |
| A09706 | A10373 | 445 | A09706 | A11068 | 159 |
| A09706 | A11596 | 491 | A09706 | A11916 | 350 |
| A09706 | A12556 | 481 | A09706 | A12625 | 432 |
| A09706 | A14076 | 491 | A09706 | A14230 | 324 |
| A09706 | A15356 | 406 | A09706 | A15498 | 201 |
| A09706 | A15654 | 160 | A09706 | A15941 | 176 |
| A09706 | A16128 | 488 | A09706 | A16129 | 474 |
| A09706 | A16226 | 469 | A09706 | A16378 | 490 |

|        |        |     |        |        |     |
|--------|--------|-----|--------|--------|-----|
| A09706 | A16616 | 433 | A09706 | A16646 | 408 |
| A09706 | A16754 | 340 | A09706 | A16830 | 389 |
| A09707 | A11462 | 491 | A09707 | A11942 | 457 |
| A09707 | A13126 | 384 | A09707 | A13989 | 475 |
| A09707 | A15215 | 335 | A09707 | A15256 | 491 |
| A09707 | A15416 | 469 | A09707 | A15660 | 288 |
| A09708 | A11395 | 596 | A09708 | A11439 | 586 |
| A09708 | A14085 | 467 | A09708 | A14166 | 255 |
| A09708 | A14200 | 177 | A09708 | A14462 | 255 |
| A09708 | A15257 | 159 | A09708 | A15498 | 378 |
| A09708 | A15762 | 255 | A09708 | A15943 | 255 |
| A09708 | A15944 | 255 | A09708 | A15945 | 255 |
| A09708 | A15946 | 433 | A09708 | A16067 | 255 |
| A09708 | A16093 | 255 | A09708 | A16109 | 255 |
| A09708 | A16144 | 418 | A09709 | A10598 | 303 |
| A09709 | A15653 | 159 | A09711 | A16026 | 446 |
| A09712 | A10642 | 463 | A09712 | A16228 | 452 |
| A09713 | A13894 | 232 | A09714 | A14810 | 396 |
| A09715 | A12659 | 151 | A09715 | A13989 | 468 |
| A09715 | A17189 | 402 | A09716 | A16635 | 363 |
| A09717 | A11832 | 286 | A09717 | A12062 | 302 |
| A09717 | A14074 | 247 | A09717 | A14622 | 235 |
| A09718 | A14192 | 154 | A09718 | A14974 | 290 |
| A09720 | A11322 | 299 | A09720 | A11374 | 311 |
| A09720 | A11427 | 313 | A09724 | A11277 | 321 |
| A09724 | A14470 | 243 | A09726 | A12821 | 281 |
| A09726 | A13992 | 199 | A09726 | A15500 | 321 |
| A09727 | A09771 | 160 | A09727 | A09826 | 441 |
| A09727 | A10449 | 235 | A09727 | A10754 | 204 |
| A09727 | A10789 | 184 | A09727 | A10934 | 485 |
| A09727 | A11290 | 310 | A09727 | A11316 | 216 |
| A09727 | A11386 | 424 | A09727 | A11694 | 177 |
| A09727 | A11857 | 154 | A09727 | A11866 | 356 |
| A09727 | A11876 | 296 | A09727 | A11884 | 152 |
| A09727 | A11934 | 213 | A09727 | A12014 | 259 |
| A09727 | A12507 | 184 | A09727 | A12722 | 367 |
| A09727 | A13295 | 235 | A09727 | A13737 | 184 |
| A09727 | A13963 | 184 | A09727 | A14009 | 491 |
| A09727 | A14016 | 456 | A09727 | A14038 | 157 |
| A09727 | A14084 | 184 | A09727 | A14150 | 458 |
| A09727 | A14200 | 491 | A09727 | A14244 | 259 |
| A09727 | A14270 | 184 | A09727 | A14271 | 151 |
| A09727 | A14283 | 465 | A09727 | A14285 | 184 |
| A09727 | A14295 | 302 | A09727 | A14596 | 411 |
| A09727 | A14621 | 228 | A09727 | A14758 | 218 |
| A09727 | A15151 | 270 | A09727 | A15323 | 481 |

|        |        |     |        |        |     |
|--------|--------|-----|--------|--------|-----|
| A09727 | A15660 | 491 | A09727 | A15684 | 386 |
| A09727 | A15708 | 162 | A09727 | A15931 | 229 |
| A09727 | A15944 | 252 | A09727 | A15949 | 184 |
| A09727 | A16092 | 281 | A09727 | A16096 | 154 |
| A09727 | A16099 | 184 | A09727 | A16145 | 210 |
| A09727 | A16201 | 188 | A09727 | A16218 | 288 |
| A09727 | A16378 | 447 | A09727 | A16819 | 218 |
| A09727 | A16925 | 205 | A09727 | A16998 | 328 |
| A09727 | A17140 | 481 | A09728 | A09731 | 472 |
| A09728 | A10789 | 299 | A09728 | A10824 | 423 |
| A09728 | A13963 | 232 | A09728 | A13978 | 258 |
| A09728 | A14084 | 157 | A09728 | A14219 | 400 |
| A09728 | A14278 | 218 | A09729 | A14621 | 152 |
| A09729 | A15323 | 160 | A09729 | A15432 | 193 |
| A09729 | A16932 | 356 | A09732 | A09733 | 491 |
| A09732 | A09734 | 486 | A09732 | A09744 | 173 |
| A09732 | A09855 | 329 | A09732 | A09875 | 330 |
| A09732 | A10164 | 299 | A09732 | A10167 | 218 |
| A09732 | A11412 | 491 | A09732 | A11415 | 491 |
| A09732 | A11537 | 219 | A09732 | A11784 | 162 |
| A09732 | A11875 | 491 | A09732 | A11946 | 458 |
| A09732 | A11983 | 322 | A09732 | A12185 | 258 |
| A09732 | A12393 | 491 | A09732 | A13003 | 135 |
| A09732 | A13119 | 417 | A09732 | A13546 | 491 |
| A09732 | A13826 | 373 | A09732 | A13899 | 307 |
| A09732 | A13987 | 491 | A09732 | A14000 | 413 |
| A09732 | A14010 | 467 | A09732 | A14122 | 279 |
| A09732 | A14190 | 408 | A09732 | A14202 | 491 |
| A09732 | A14210 | 489 | A09732 | A14290 | 173 |
| A09732 | A14369 | 340 | A09732 | A14371 | 488 |
| A09732 | A14399 | 210 | A09732 | A14413 | 411 |
| A09732 | A14490 | 319 | A09732 | A14511 | 491 |
| A09732 | A14570 | 339 | A09732 | A14635 | 294 |
| A09732 | A14667 | 294 | A09732 | A14733 | 450 |
| A09732 | A14799 | 193 | A09732 | A14930 | 337 |
| A09732 | A15229 | 185 | A09732 | A15292 | 491 |
| A09732 | A15310 | 469 | A09732 | A15312 | 490 |
| A09732 | A15313 | 489 | A09732 | A15314 | 180 |
| A09732 | A15317 | 480 | A09732 | A15322 | 293 |
| A09732 | A15331 | 180 | A09732 | A15348 | 489 |
| A09732 | A15349 | 491 | A09732 | A15352 | 491 |
| A09732 | A15366 | 441 | A09732 | A15412 | 196 |
| A09732 | A15431 | 446 | A09732 | A15432 | 485 |
| A09732 | A15435 | 483 | A09732 | A15436 | 470 |
| A09732 | A15437 | 173 | A09732 | A15444 | 465 |
| A09732 | A15445 | 263 | A09732 | A15447 | 462 |



|        |        |     |        |        |     |
|--------|--------|-----|--------|--------|-----|
| A09732 | A15452 | 491 | A09732 | A15454 | 215 |
| A09732 | A15457 | 180 | A09732 | A15463 | 379 |
| A09732 | A15464 | 198 | A09732 | A15480 | 360 |
| A09732 | A15487 | 201 | A09732 | A15495 | 490 |
| A09732 | A15498 | 483 | A09732 | A15515 | 355 |
| A09732 | A15630 | 412 | A09732 | A15641 | 435 |
| A09732 | A15672 | 191 | A09732 | A15799 | 263 |
| A09732 | A15804 | 321 | A09732 | A15814 | 435 |
| A09732 | A15828 | 272 | A09732 | A15830 | 152 |
| A09732 | A16224 | 279 | A09732 | A16711 | 249 |
| A09732 | A16916 | 185 | A09732 | A16978 | 281 |
| A09732 | A17120 | 299 | A09733 | A09734 | 101 |
| A09733 | A09855 | 293 | A09733 | A10747 | 283 |
| A09733 | A11412 | 490 | A09733 | A11415 | 491 |
| A09733 | A11537 | 154 | A09733 | A11875 | 384 |
| A09733 | A12393 | 486 | A09733 | A12854 | 268 |
| A09733 | A13003 | 191 | A09733 | A13119 | 266 |
| A09733 | A13151 | 191 | A09733 | A13312 | 226 |
| A09733 | A13546 | 491 | A09733 | A13987 | 374 |
| A09733 | A14000 | 460 | A09733 | A14010 | 316 |
| A09733 | A14122 | 176 | A09733 | A14190 | 205 |
| A09733 | A14202 | 428 | A09733 | A14210 | 174 |
| A09733 | A14371 | 361 | A09733 | A14511 | 485 |
| A09733 | A14570 | 423 | A09733 | A14733 | 474 |
| A09733 | A15292 | 491 | A09733 | A15312 | 441 |
| A09733 | A15313 | 430 | A09733 | A15317 | 201 |
| A09733 | A15322 | 296 | A09733 | A15348 | 455 |
| A09733 | A15349 | 430 | A09733 | A15352 | 485 |
| A09733 | A15432 | 414 | A09733 | A15435 | 329 |
| A09733 | A15436 | 238 | A09733 | A15452 | 480 |
| A09733 | A15454 | 151 | A09733 | A15495 | 450 |
| A09733 | A15502 | 180 | A09733 | A15515 | 246 |
| A09733 | A15641 | 305 | A09733 | A15799 | 188 |
| A09733 | A15814 | 234 | A09733 | A15828 | 196 |
| A09733 | A16711 | 177 | A09733 | A16916 | 256 |
| A09734 | A09742 | 268 | A09734 | A09745 | 485 |
| A09734 | A09855 | 316 | A09734 | A10164 | 243 |
| A09734 | A10528 | 308 | A09734 | A11628 | 234 |
| A09734 | A12393 | 180 | A09734 | A13119 | 379 |
| A09734 | A13317 | 307 | A09734 | A13338 | 177 |
| A09734 | A13546 | 224 | A09734 | A13944 | 216 |
| A09734 | A13987 | 491 | A09734 | A14010 | 489 |
| A09734 | A14111 | 171 | A09734 | A14122 | 491 |
| A09734 | A14124 | 489 | A09734 | A14190 | 241 |
| A09734 | A14202 | 398 | A09734 | A14210 | 297 |
| A09734 | A14370 | 219 | A09734 | A14378 | 346 |

|        |        |     |        |        |     |
|--------|--------|-----|--------|--------|-----|
| A09734 | A14399 | 201 | A09734 | A14511 | 428 |
| A09734 | A14570 | 215 | A09734 | A14611 | 193 |
| A09734 | A14667 | 154 | A09734 | A15278 | 452 |
| A09734 | A15292 | 491 | A09734 | A15301 | 427 |
| A09734 | A15311 | 302 | A09734 | A15312 | 491 |
| A09734 | A15313 | 491 | A09734 | A15317 | 395 |
| A09734 | A15331 | 369 | A09734 | A15333 | 174 |
| A09734 | A15348 | 210 | A09734 | A15349 | 491 |
| A09734 | A15352 | 491 | A09734 | A15365 | 314 |
| A09734 | A15366 | 485 | A09734 | A15396 | 179 |
| A09734 | A15399 | 156 | A09734 | A15431 | 472 |
| A09734 | A15432 | 491 | A09734 | A15433 | 488 |
| A09734 | A15434 | 255 | A09734 | A15435 | 490 |
| A09734 | A15436 | 480 | A09734 | A15440 | 202 |
| A09734 | A15445 | 262 | A09734 | A15447 | 477 |
| A09734 | A15452 | 489 | A09734 | A15456 | 332 |
| A09734 | A15459 | 333 | A09734 | A15460 | 450 |
| A09734 | A15463 | 489 | A09734 | A15480 | 218 |
| A09734 | A15486 | 219 | A09734 | A15487 | 213 |
| A09734 | A15498 | 252 | A09734 | A15516 | 168 |
| A09734 | A15804 | 263 | A09734 | A16006 | 230 |
| A09734 | A16117 | 188 | A09735 | A10228 | 217 |
| A09735 | A10338 | 361 | A09735 | A10535 | 182 |
| A09735 | A11453 | 205 | A09735 | A11526 | 170 |
| A09735 | A11597 | 216 | A09735 | A11616 | 154 |
| A09735 | A11815 | 165 | A09735 | A12011 | 215 |
| A09735 | A12821 | 270 | A09735 | A14449 | 258 |
| A09735 | A14478 | 384 | A09735 | A14479 | 486 |
| A09735 | A14482 | 316 | A09735 | A14568 | 217 |
| A09735 | A14699 | 195 | A09735 | A14813 | 226 |
| A09735 | A15500 | 467 | A09735 | A15624 | 199 |
| A09735 | A15673 | 299 | A09735 | A15684 | 475 |
| A09735 | A15743 | 193 | A09735 | A15771 | 477 |
| A09735 | A15932 | 260 | A09735 | A16976 | 157 |
| A09735 | A17152 | 360 | A09736 | A09737 | 393 |
| A09736 | A09738 | 452 | A09736 | A09842 | 174 |
| A09736 | A10603 | 380 | A09736 | A10611 | 465 |
| A09736 | A14193 | 271 | A09736 | A14265 | 468 |
| A09736 | A14303 | 363 | A09736 | A17063 | 428 |
| A09736 | A17198 | 491 | A09737 | A09738 | 484 |
| A09737 | A09758 | 279 | A09737 | A10611 | 305 |
| A09737 | A11286 | 279 | A09737 | A11405 | 299 |
| A09737 | A11406 | 409 | A09737 | A13074 | 311 |
| A09737 | A13363 | 249 | A09737 | A14220 | 149 |
| A09737 | A14265 | 462 | A09737 | A14303 | 452 |
| A09737 | A14875 | 363 | A09737 | A15244 | 163 |

|        |        |     |        |        |     |
|--------|--------|-----|--------|--------|-----|
| A09737 | A17063 | 185 | A09737 | A17198 | 469 |
| A09738 | A09758 | 313 | A09738 | A10611 | 423 |
| A09738 | A11323 | 318 | A09738 | A11567 | 368 |
| A09738 | A14265 | 394 | A09738 | A14303 | 462 |
| A09738 | A14596 | 177 | A09738 | A14621 | 196 |
| A09738 | A14659 | 208 | A09738 | A17198 | 484 |
| A09739 | A14009 | 146 | A09740 | A09834 | 249 |
| A09740 | A09873 | 154 | A09740 | A10579 | 373 |
| A09740 | A10586 | 401 | A09740 | A10642 | 174 |
| A09740 | A11542 | 394 | A09740 | A11578 | 205 |
| A09740 | A11601 | 263 | A09740 | A11704 | 157 |
| A09740 | A12854 | 168 | A09740 | A13987 | 170 |
| A09740 | A14115 | 263 | A09740 | A14122 | 425 |
| A09740 | A14124 | 204 | A09740 | A14129 | 263 |
| A09740 | A14135 | 391 | A09740 | A14190 | 152 |
| A09740 | A14202 | 156 | A09740 | A15323 | 274 |
| A09740 | A15324 | 170 | A09740 | A15411 | 218 |
| A09740 | A15431 | 438 | A09740 | A15461 | 416 |
| A09740 | A15487 | 223 | A09740 | A15800 | 441 |
| A09740 | A15824 | 339 | A09740 | A15834 | 168 |
| A09740 | A15852 | 196 | A09740 | A16540 | 232 |
| A09740 | A17076 | 176 | A09741 | A09825 | 355 |
| A09741 | A10208 | 307 | A09741 | A10625 | 168 |
| A09741 | A11223 | 274 | A09741 | A11224 | 470 |
| A09741 | A11558 | 177 | A09741 | A11653 | 279 |
| A09741 | A11872 | 314 | A09741 | A11952 | 272 |
| A09741 | A12975 | 330 | A09741 | A13338 | 224 |
| A09741 | A13421 | 340 | A09741 | A13838 | 457 |
| A09741 | A13941 | 251 | A09741 | A14041 | 428 |
| A09741 | A14109 | 180 | A09741 | A14143 | 213 |
| A09741 | A14559 | 180 | A09741 | A15817 | 195 |
| A09741 | A15922 | 184 | A09741 | A16658 | 486 |
| A09742 | A10528 | 491 | A09742 | A10594 | 491 |
| A09742 | A10619 | 180 | A09742 | A11279 | 486 |
| A09742 | A11431 | 491 | A09742 | A11542 | 401 |
| A09742 | A11556 | 273 | A09742 | A11681 | 468 |
| A09742 | A11848 | 207 | A09742 | A11949 | 224 |
| A09742 | A11950 | 299 | A09742 | A12393 | 480 |
| A09742 | A13811 | 490 | A09742 | A13826 | 243 |
| A09742 | A13874 | 160 | A09742 | A13959 | 235 |
| A09742 | A13987 | 489 | A09742 | A14010 | 266 |
| A09742 | A14136 | 337 | A09742 | A14137 | 177 |
| A09742 | A14190 | 252 | A09742 | A14202 | 299 |
| A09742 | A14229 | 234 | A09742 | A14247 | 491 |
| A09742 | A14371 | 190 | A09742 | A14378 | 490 |
| A09742 | A14408 | 451 | A09742 | A14413 | 235 |

|        |        |     |        |        |     |
|--------|--------|-----|--------|--------|-----|
| A09742 | A14635 | 171 | A09742 | A14661 | 467 |
| A09742 | A15292 | 491 | A09742 | A15301 | 491 |
| A09742 | A15302 | 491 | A09742 | A15311 | 345 |
| A09742 | A15312 | 490 | A09742 | A15313 | 475 |
| A09742 | A15348 | 395 | A09742 | A15349 | 436 |
| A09742 | A15352 | 491 | A09742 | A15366 | 491 |
| A09742 | A15413 | 491 | A09742 | A15430 | 301 |
| A09742 | A15431 | 301 | A09742 | A15432 | 446 |
| A09742 | A15433 | 187 | A09742 | A15435 | 396 |
| A09742 | A15436 | 405 | A09742 | A15451 | 245 |
| A09742 | A15452 | 472 | A09742 | A15462 | 491 |
| A09742 | A15463 | 491 | A09742 | A15485 | 483 |
| A09742 | A15486 | 490 | A09742 | A15487 | 491 |
| A09742 | A15488 | 466 | A09742 | A15489 | 486 |
| A09742 | A15498 | 474 | A09742 | A15513 | 432 |
| A09742 | A15515 | 221 | A09742 | A15670 | 483 |
| A09742 | A15671 | 472 | A09742 | A15816 | 344 |
| A09742 | A16004 | 168 | A09742 | A16045 | 224 |
| A09742 | A16114 | 224 | A09742 | A16188 | 235 |
| A09742 | A16209 | 319 | A09742 | A16213 | 302 |
| A09742 | A16260 | 205 | A09742 | A16300 | 408 |
| A09743 | A09873 | 168 | A09743 | A09996 | 276 |
| A09743 | A11132 | 162 | A09743 | A11243 | 491 |
| A09743 | A11422 | 378 | A09743 | A11469 | 191 |
| A09743 | A11631 | 389 | A09743 | A11681 | 435 |
| A09743 | A12121 | 329 | A09743 | A12458 | 456 |
| A09743 | A12606 | 276 | A09743 | A13364 | 217 |
| A09743 | A13826 | 440 | A09743 | A13899 | 441 |
| A09743 | A14196 | 452 | A09743 | A14212 | 276 |
| A09743 | A14213 | 276 | A09743 | A14214 | 276 |
| A09743 | A14218 | 330 | A09743 | A14384 | 384 |
| A09743 | A14394 | 402 | A09743 | A14570 | 327 |
| A09743 | A14604 | 151 | A09743 | A14635 | 356 |
| A09743 | A15297 | 234 | A09743 | A15311 | 191 |
| A09743 | A15312 | 152 | A09743 | A15314 | 417 |
| A09743 | A15316 | 232 | A09743 | A15330 | 477 |
| A09743 | A15333 | 196 | A09743 | A15346 | 311 |
| A09743 | A15361 | 414 | A09743 | A15391 | 217 |
| A09743 | A15444 | 204 | A09743 | A15460 | 243 |
| A09743 | A15578 | 252 | A09743 | A15642 | 182 |
| A09743 | A15800 | 207 | A09743 | A15811 | 460 |
| A09743 | A15813 | 243 | A09743 | A15827 | 279 |
| A09743 | A16224 | 297 | A09743 | A16449 | 276 |
| A09743 | A16702 | 276 | A09743 | A16831 | 182 |
| A09743 | A16832 | 291 | A09743 | A16904 | 227 |
| A09743 | A17191 | 382 | A09744 | A09833 | 443 |

|        |        |     |        |        |     |
|--------|--------|-----|--------|--------|-----|
| A09744 | A09857 | 307 | A09744 | A09875 | 208 |
| A09744 | A10087 | 226 | A09744 | A10175 | 160 |
| A09744 | A10611 | 243 | A09744 | A10723 | 424 |
| A09744 | A11537 | 201 | A09744 | A11681 | 183 |
| A09744 | A11797 | 324 | A09744 | A13181 | 165 |
| A09744 | A13826 | 491 | A09744 | A13856 | 424 |
| A09744 | A13899 | 491 | A09744 | A14112 | 385 |
| A09744 | A14276 | 118 | A09744 | A14290 | 271 |
| A09744 | A14408 | 294 | A09744 | A15310 | 183 |
| A09744 | A15316 | 235 | A09744 | A15346 | 462 |
| A09744 | A15352 | 151 | A09744 | A15399 | 180 |
| A09744 | A15404 | 271 | A09744 | A15433 | 212 |
| A09744 | A15454 | 196 | A09744 | A15458 | 316 |
| A09744 | A15495 | 283 | A09744 | A15800 | 210 |
| A09744 | A15922 | 160 | A09744 | A16044 | 345 |
| A09744 | A16136 | 271 | A09744 | A16224 | 385 |
| A09744 | A16300 | 326 | A09744 | A16711 | 418 |
| A09745 | A12325 | 151 | A09745 | A12644 | 491 |
| A09745 | A12975 | 318 | A09745 | A13338 | 335 |
| A09745 | A13346 | 157 | A09745 | A13369 | 190 |
| A09745 | A13860 | 219 | A09745 | A13987 | 475 |
| A09745 | A14010 | 419 | A09745 | A14122 | 485 |
| A09745 | A14124 | 418 | A09745 | A14202 | 276 |
| A09745 | A14257 | 165 | A09745 | A14408 | 165 |
| A09745 | A14570 | 180 | A09745 | A14611 | 488 |
| A09745 | A15292 | 488 | A09745 | A15311 | 196 |
| A09745 | A15312 | 450 | A09745 | A15313 | 455 |
| A09745 | A15336 | 224 | A09745 | A15349 | 235 |
| A09745 | A15352 | 393 | A09745 | A15400 | 232 |
| A09745 | A15431 | 208 | A09745 | A15432 | 458 |
| A09745 | A15433 | 215 | A09745 | A15435 | 424 |
| A09745 | A15436 | 296 | A09745 | A15444 | 210 |
| A09745 | A15451 | 258 | A09745 | A15452 | 393 |
| A09745 | A15456 | 227 | A09745 | A15457 | 279 |
| A09745 | A15459 | 228 | A09745 | A15461 | 291 |
| A09745 | A15805 | 385 | A09745 | A15828 | 245 |
| A09745 | A16117 | 447 | A09747 | A12533 | 380 |
| A09747 | A14713 | 390 | A09748 | A09749 | 486 |
| A09748 | A09866 | 353 | A09748 | A12882 | 423 |
| A09748 | A13741 | 260 | A09748 | A13889 | 270 |
| A09748 | A14009 | 296 | A09748 | A14161 | 465 |
| A09748 | A15396 | 273 | A09749 | A09866 | 319 |
| A09749 | A10087 | 245 | A09749 | A11195 | 329 |
| A09749 | A12882 | 466 | A09749 | A13741 | 210 |
| A09749 | A13889 | 202 | A09749 | A14161 | 480 |
| A09749 | A15349 | 160 | A09749 | A15396 | 224 |

|        |        |     |        |        |     |
|--------|--------|-----|--------|--------|-----|
| A09749 | A15992 | 187 | A09749 | A16074 | 213 |
| A09750 | A10453 | 182 | A09750 | A10623 | 171 |
| A09750 | A10808 | 185 | A09750 | A10844 | 263 |
| A09750 | A11727 | 238 | A09750 | A11983 | 484 |
| A09750 | A12126 | 273 | A09750 | A13116 | 243 |
| A09750 | A13225 | 373 | A09750 | A14005 | 179 |
| A09750 | A15282 | 302 | A09750 | A15399 | 193 |
| A09751 | A09752 | 460 | A09751 | A09754 | 151 |
| A09751 | A13257 | 218 | A09751 | A13429 | 224 |
| A09751 | A13438 | 389 | A09751 | A14364 | 185 |
| A09751 | A17075 | 480 | A09752 | A09754 | 208 |
| A09752 | A09764 | 63  | A09752 | A10508 | 243 |
| A09752 | A11837 | 335 | A09752 | A12980 | 452 |
| A09752 | A13257 | 157 | A09752 | A13922 | 361 |
| A09752 | A14289 | 163 | A09752 | A15417 | 224 |
| A09752 | A17075 | 452 | A09752 | A17231 | 339 |
| A09753 | A09754 | 443 | A09753 | A09755 | 461 |
| A09753 | A13257 | 473 | A09753 | A15425 | 183 |
| A09754 | A09755 | 441 | A09754 | A10373 | 63  |
| A09754 | A10699 | 151 | A09754 | A13257 | 486 |
| A09754 | A13826 | 278 | A09754 | A14208 | 477 |
| A09754 | A14276 | 204 | A09754 | A14284 | 418 |
| A09754 | A15314 | 456 | A09754 | A15834 | 474 |
| A09754 | A15889 | 207 | A09754 | A16060 | 198 |
| A09754 | A16216 | 299 | A09755 | A13257 | 332 |
| A09756 | A10363 | 477 | A09756 | A10369 | 491 |
| A09756 | A11475 | 259 | A09756 | A11615 | 346 |
| A09756 | A12722 | 182 | A09756 | A12893 | 408 |
| A09756 | A13242 | 374 | A09756 | A14271 | 326 |
| A09756 | A15673 | 221 | A09756 | A15691 | 335 |
| A09757 | A09828 | 210 | A09757 | A09840 | 168 |
| A09757 | A10316 | 168 | A09757 | A10392 | 167 |
| A09757 | A10525 | 177 | A09757 | A10789 | 213 |
| A09757 | A11283 | 183 | A09757 | A11301 | 182 |
| A09757 | A11394 | 299 | A09757 | A11430 | 219 |
| A09757 | A11456 | 213 | A09757 | A11471 | 226 |
| A09757 | A11472 | 274 | A09757 | A11496 | 238 |
| A09757 | A11497 | 327 | A09757 | A11555 | 187 |
| A09757 | A11675 | 306 | A09757 | A11833 | 180 |
| A09757 | A11917 | 230 | A09757 | A12203 | 63  |
| A09757 | A12215 | 285 | A09757 | A12254 | 151 |
| A09757 | A12433 | 224 | A09757 | A12501 | 196 |
| A09757 | A12506 | 205 | A09757 | A12508 | 399 |
| A09757 | A12538 | 690 | A09757 | A12606 | 202 |
| A09757 | A12625 | 255 | A09757 | A12655 | 243 |
| A09757 | A12658 | 180 | A09757 | A12659 | 204 |

|        |        |     |        |        |     |
|--------|--------|-----|--------|--------|-----|
| A09757 | A12665 | 299 | A09757 | A12678 | 324 |
| A09757 | A12738 | 212 | A09757 | A12826 | 369 |
| A09757 | A12834 | 601 | A09757 | A12850 | 299 |
| A09757 | A12858 | 419 | A09757 | A12873 | 156 |
| A09757 | A13169 | 152 | A09757 | A13231 | 285 |
| A09757 | A13315 | 245 | A09757 | A13321 | 205 |
| A09757 | A13356 | 296 | A09757 | A13388 | 241 |
| A09757 | A13399 | 152 | A09757 | A13707 | 193 |
| A09757 | A13708 | 234 | A09757 | A13781 | 272 |
| A09757 | A13784 | 202 | A09757 | A13788 | 255 |
| A09757 | A13804 | 443 | A09757 | A13809 | 321 |
| A09757 | A13912 | 308 | A09757 | A13953 | 419 |
| A09757 | A14074 | 160 | A09757 | A14213 | 252 |
| A09757 | A14214 | 195 | A09757 | A14235 | 277 |
| A09757 | A14239 | 162 | A09757 | A14255 | 308 |
| A09757 | A14263 | 313 | A09757 | A14270 | 229 |
| A09757 | A14455 | 252 | A09757 | A14569 | 327 |
| A09757 | A14718 | 195 | A09757 | A14719 | 229 |
| A09757 | A14903 | 263 | A09757 | A14917 | 252 |
| A09757 | A14937 | 235 | A09757 | A15004 | 306 |
| A09757 | A15187 | 228 | A09757 | A15189 | 291 |
| A09757 | A15417 | 274 | A09757 | A15498 | 447 |
| A09757 | A15680 | 221 | A09757 | A15810 | 324 |
| A09757 | A15850 | 324 | A09757 | A16157 | 382 |
| A09757 | A16243 | 260 | A09757 | A16322 | 168 |
| A09757 | A16552 | 188 | A09757 | A16565 | 303 |
| A09757 | A16567 | 286 | A09757 | A16587 | 246 |
| A09757 | A16597 | 172 | A09757 | A16611 | 243 |
| A09757 | A16675 | 265 | A09757 | A16680 | 156 |
| A09757 | A16690 | 263 | A09757 | A16693 | 313 |
| A09757 | A16703 | 350 | A09757 | A16704 | 229 |
| A09757 | A16764 | 174 | A09757 | A16774 | 294 |
| A09757 | A16824 | 302 | A09757 | A16829 | 260 |
| A09757 | A16905 | 207 | A09757 | A16944 | 277 |
| A09757 | A17033 | 260 | A09757 | A17133 | 249 |
| A09758 | A10001 | 196 | A09758 | A11323 | 486 |
| A09758 | A11567 | 199 | A09758 | A13207 | 446 |
| A09758 | A14303 | 474 | A09758 | A17198 | 483 |
| A09759 | A10729 | 477 | A09759 | A10734 | 472 |
| A09759 | A11346 | 105 | A09759 | A11869 | 481 |
| A09759 | A11881 | 385 | A09759 | A13941 | 475 |
| A09759 | A14266 | 258 | A09759 | A15391 | 274 |
| A09760 | A12047 | 484 | A09760 | A12383 | 180 |
| A09760 | A14827 | 323 | A09761 | A11858 | 241 |
| A09761 | A14481 | 452 | A09761 | A15217 | 449 |
| A09761 | A15861 | 406 | A09762 | A10373 | 489 |

|        |        |     |        |        |     |
|--------|--------|-----|--------|--------|-----|
| A09762 | A11068 | 277 | A09762 | A11236 | 491 |
| A09762 | A11554 | 165 | A09762 | A11702 | 157 |
| A09762 | A11703 | 447 | A09762 | A11880 | 270 |
| A09762 | A12556 | 491 | A09762 | A13949 | 408 |
| A09762 | A14094 | 347 | A09762 | A14230 | 488 |
| A09762 | A14282 | 485 | A09762 | A15369 | 329 |
| A09762 | A15371 | 258 | A09762 | A15502 | 208 |
| A09762 | A15941 | 469 | A09762 | A16127 | 462 |
| A09762 | A16128 | 184 | A09762 | A16132 | 265 |
| A09762 | A16762 | 491 | A09764 | A09797 | 262 |
| A09764 | A10152 | 314 | A09764 | A10336 | 276 |
| A09764 | A10367 | 63  | A09764 | A10369 | 455 |
| A09764 | A10373 | 475 | A09764 | A11320 | 160 |
| A09764 | A11328 | 151 | A09764 | A11712 | 267 |
| A09764 | A12242 | 274 | A09764 | A12329 | 226 |
| A09764 | A12432 | 267 | A09764 | A12434 | 286 |
| A09764 | A12435 | 267 | A09764 | A12454 | 314 |
| A09764 | A12986 | 224 | A09764 | A13270 | 210 |
| A09764 | A13429 | 312 | A09764 | A13617 | 299 |
| A09764 | A14091 | 195 | A09764 | A14177 | 489 |
| A09764 | A14208 | 435 | A09764 | A14230 | 452 |
| A09764 | A14410 | 151 | A09764 | A14517 | 180 |
| A09764 | A14918 | 229 | A09764 | A15524 | 491 |
| A09764 | A15531 | 394 | A09764 | A15539 | 481 |
| A09764 | A15549 | 224 | A09764 | A15720 | 195 |
| A09764 | A15721 | 299 | A09764 | A15837 | 355 |
| A09764 | A16052 | 267 | A09764 | A16132 | 65  |
| A09764 | A16201 | 170 | A09764 | A16261 | 190 |
| A09764 | A16537 | 277 | A09764 | A16626 | 283 |
| A09764 | A16643 | 187 | A09764 | A17137 | 210 |
| A09765 | A10373 | 218 | A09765 | A11236 | 267 |
| A09765 | A12556 | 236 | A09765 | A14230 | 230 |
| A09765 | A14706 | 310 | A09765 | A16299 | 288 |
| A09766 | A10563 | 176 | A09766 | A13162 | 188 |
| A09766 | A13767 | 402 | A09766 | A14093 | 307 |
| A09766 | A15531 | 187 | A09766 | A15684 | 160 |
| A09766 | A16612 | 173 | A09767 | A09793 | 385 |
| A09767 | A09829 | 402 | A09767 | A10623 | 358 |
| A09767 | A11027 | 330 | A09767 | A11258 | 262 |
| A09767 | A11534 | 352 | A09767 | A11884 | 314 |
| A09767 | A12445 | 467 | A09767 | A12920 | 312 |
| A09767 | A14227 | 152 | A09767 | A14278 | 216 |
| A09767 | A14301 | 412 | A09768 | A09829 | 285 |
| A09768 | A11316 | 184 | A09768 | A11476 | 238 |
| A09768 | A11579 | 369 | A09768 | A13096 | 406 |
| A09768 | A13826 | 216 | A09768 | A13899 | 188 |



|        |        |     |        |        |     |
|--------|--------|-----|--------|--------|-----|
| A09768 | A14010 | 199 | A09768 | A14122 | 171 |
| A09768 | A14190 | 251 | A09768 | A14363 | 483 |
| A09768 | A14372 | 474 | A09768 | A14430 | 269 |
| A09768 | A14486 | 391 | A09768 | A14591 | 238 |
| A09768 | A14596 | 347 | A09768 | A14659 | 152 |
| A09768 | A15346 | 152 | A09768 | A15394 | 235 |
| A09768 | A15425 | 177 | A09768 | A16635 | 180 |
| A09768 | A17105 | 347 | A09771 | A10155 | 457 |
| A09771 | A10651 | 486 | A09771 | A11121 | 465 |
| A09771 | A11876 | 335 | A09771 | A13346 | 249 |
| A09771 | A14266 | 167 | A09771 | A14271 | 327 |
| A09772 | A09782 | 445 | A09772 | A11111 | 440 |
| A09774 | A14471 | 208 | A09775 | A11680 | 372 |
| A09775 | A11818 | 401 | A09775 | A11952 | 345 |
| A09775 | A12904 | 457 | A09775 | A13417 | 369 |
| A09775 | A13461 | 375 | A09775 | A13466 | 335 |
| A09775 | A13575 | 382 | A09775 | A15624 | 461 |
| A09775 | A15684 | 380 | A09775 | A15750 | 324 |
| A09775 | A15843 | 480 | A09775 | A16086 | 414 |
| A09776 | A09834 | 443 | A09778 | A09978 | 329 |
| A09778 | A11129 | 351 | A09778 | A12383 | 162 |
| A09778 | A13511 | 260 | A09778 | A14526 | 401 |
| A09779 | A14642 | 263 | A09779 | A15241 | 252 |
| A09779 | A15606 | 180 | A09781 | A12415 | 452 |
| A09782 | A11111 | 466 | A09782 | A15322 | 191 |
| A09782 | A15402 | 256 | A09785 | A09977 | 224 |
| A09785 | A10580 | 154 | A09785 | A10601 | 395 |
| A09785 | A11906 | 347 | A09789 | A09790 | 333 |
| A09789 | A13684 | 386 | A09789 | A15935 | 321 |
| A09790 | A10382 | 409 | A09790 | A10417 | 273 |
| A09790 | A10418 | 314 | A09791 | A10114 | 252 |
| A09791 | A10808 | 163 | A09791 | A11168 | 168 |
| A09791 | A12897 | 151 | A09791 | A12932 | 185 |
| A09791 | A13181 | 157 | A09791 | A14426 | 224 |
| A09791 | A14494 | 388 | A09791 | A15292 | 193 |
| A09791 | A16087 | 172 | A09792 | A11302 | 249 |
| A09792 | A13620 | 232 | A09793 | A10965 | 188 |
| A09793 | A11534 | 324 | A09793 | A11884 | 281 |
| A09793 | A12445 | 346 | A09793 | A13315 | 268 |
| A09793 | A13817 | 380 | A09793 | A13964 | 319 |
| A09793 | A14222 | 276 | A09793 | A14278 | 306 |
| A09793 | A15533 | 224 | A09795 | A11637 | 391 |
| A09796 | A10511 | 483 | A09797 | A09900 | 291 |
| A09797 | A12379 | 402 | A09797 | A15438 | 368 |
| A09797 | A15439 | 356 | A09797 | A15441 | 356 |
| A09797 | A15442 | 371 | A09797 | A15443 | 371 |

|        |        |     |        |        |     |
|--------|--------|-----|--------|--------|-----|
| A09797 | A15445 | 241 | A09797 | A16166 | 414 |
| A09797 | A16167 | 388 | A09797 | A16190 | 388 |
| A09801 | A15498 | 436 | A09803 | A10735 | 246 |
| A09803 | A13511 | 252 | A09803 | A14366 | 190 |
| A09804 | A09902 | 218 | A09804 | A10174 | 899 |
| A09804 | A10365 | 491 | A09804 | A10623 | 945 |
| A09804 | A10728 | 491 | A09804 | A10808 | 407 |
| A09804 | A11337 | 157 | A09804 | A11943 | 168 |
| A09804 | A13149 | 218 | A09804 | A13340 | 347 |
| A09804 | A13391 | 899 | A09804 | A13397 | 240 |
| A09804 | A13824 | 899 | A09804 | A14002 | 899 |
| A09804 | A14025 | 196 | A09804 | A14059 | 458 |
| A09804 | A14443 | 899 | A09804 | A16939 | 270 |
| A09806 | A11735 | 294 | A09806 | A13788 | 439 |
| A09806 | A15666 | 330 | A09807 | A10021 | 416 |
| A09809 | A11400 | 234 | A09809 | A11522 | 205 |
| A09809 | A13181 | 236 | A09809 | A14048 | 294 |
| A09809 | A14073 | 412 | A09809 | A16109 | 232 |
| A09809 | A16698 | 382 | A09809 | A17195 | 340 |
| A09812 | A13937 | 425 | A09814 | A10083 | 223 |
| A09814 | A10289 | 378 | A09814 | A10311 | 399 |
| A09814 | A10754 | 303 | A09818 | A09964 | 416 |
| A09818 | A14319 | 369 | A09818 | A14650 | 241 |
| A09818 | A16764 | 346 | A09819 | A10532 | 193 |
| A09819 | A16026 | 406 | A09822 | A14266 | 274 |
| A09823 | A13207 | 347 | A09824 | A10723 | 323 |
| A09824 | A12016 | 480 | A09824 | A13899 | 235 |
| A09824 | A15346 | 198 | A09824 | A15376 | 193 |
| A09824 | A16058 | 450 | A09825 | A10592 | 213 |
| A09825 | A11324 | 398 | A09825 | A11544 | 157 |
| A09825 | A11558 | 179 | A09825 | A11601 | 224 |
| A09825 | A11817 | 447 | A09825 | A12885 | 436 |
| A09825 | A13819 | 179 | A09825 | A13866 | 179 |
| A09825 | A13942 | 179 | A09825 | A13989 | 257 |
| A09825 | A14006 | 200 | A09825 | A14112 | 217 |
| A09825 | A14118 | 251 | A09825 | A14202 | 179 |
| A09825 | A14220 | 475 | A09825 | A14277 | 63  |
| A09825 | A14366 | 179 | A09825 | A14594 | 252 |
| A09825 | A14932 | 241 | A09825 | A15358 | 179 |
| A09825 | A15418 | 190 | A09825 | A15470 | 179 |
| A09825 | A15484 | 179 | A09826 | A11291 | 259 |
| A09826 | A11710 | 221 | A09826 | A11919 | 152 |
| A09826 | A13315 | 179 | A09826 | A13462 | 285 |
| A09826 | A14009 | 223 | A09826 | A14016 | 491 |
| A09826 | A14200 | 408 | A09826 | A14457 | 297 |
| A09826 | A14725 | 278 | A09826 | A15366 | 313 |

|        |        |     |        |        |     |
|--------|--------|-----|--------|--------|-----|
| A09826 | A15870 | 208 | A09826 | A17063 | 216 |
| A09828 | A09853 | 353 | A09828 | A10315 | 311 |
| A09828 | A11209 | 291 | A09828 | A11279 | 369 |
| A09828 | A11301 | 463 | A09828 | A11471 | 374 |
| A09828 | A11472 | 173 | A09828 | A11496 | 462 |
| A09828 | A11497 | 413 | A09828 | A11551 | 417 |
| A09828 | A11555 | 347 | A09828 | A11616 | 362 |
| A09828 | A11649 | 212 | A09828 | A11675 | 443 |
| A09828 | A11702 | 219 | A09828 | A11735 | 390 |
| A09828 | A11737 | 310 | A09828 | A11833 | 340 |
| A09828 | A11851 | 241 | A09828 | A11914 | 390 |
| A09828 | A11915 | 288 | A09828 | A11917 | 405 |
| A09828 | A11940 | 446 | A09828 | A11954 | 288 |
| A09828 | A12215 | 308 | A09828 | A12254 | 435 |
| A09828 | A12284 | 154 | A09828 | A12433 | 461 |
| A09828 | A12499 | 273 | A09828 | A12506 | 235 |
| A09828 | A12507 | 423 | A09828 | A12606 | 401 |
| A09828 | A12655 | 271 | A09828 | A12658 | 446 |
| A09828 | A12660 | 172 | A09828 | A12665 | 441 |
| A09828 | A12725 | 491 | A09828 | A12738 | 241 |
| A09828 | A12825 | 373 | A09828 | A12858 | 434 |
| A09828 | A12873 | 319 | A09828 | A13116 | 265 |
| A09828 | A13169 | 182 | A09828 | A13231 | 308 |
| A09828 | A13313 | 469 | A09828 | A13321 | 235 |
| A09828 | A13356 | 193 | A09828 | A13399 | 314 |
| A09828 | A13706 | 191 | A09828 | A13707 | 351 |
| A09828 | A13708 | 271 | A09828 | A13737 | 374 |
| A09828 | A13781 | 423 | A09828 | A13783 | 286 |
| A09828 | A13784 | 340 | A09828 | A13805 | 274 |
| A09828 | A13806 | 245 | A09828 | A13809 | 466 |
| A09828 | A13912 | 456 | A09828 | A14074 | 191 |
| A09828 | A14084 | 340 | A09828 | A14154 | 184 |
| A09828 | A14213 | 154 | A09828 | A14214 | 466 |
| A09828 | A14222 | 408 | A09828 | A14227 | 115 |
| A09828 | A14239 | 191 | A09828 | A14255 | 205 |
| A09828 | A14260 | 291 | A09828 | A14263 | 439 |
| A09828 | A14285 | 489 | A09828 | A14288 | 348 |
| A09828 | A14289 | 369 | A09828 | A14455 | 424 |
| A09828 | A14569 | 467 | A09828 | A14706 | 266 |
| A09828 | A14708 | 312 | A09828 | A14718 | 353 |
| A09828 | A14799 | 328 | A09828 | A14838 | 271 |
| A09828 | A14903 | 288 | A09828 | A14917 | 279 |
| A09828 | A14921 | 340 | A09828 | A15105 | 408 |
| A09828 | A15187 | 257 | A09828 | A15189 | 322 |
| A09828 | A15262 | 305 | A09828 | A15432 | 160 |
| A09828 | A15519 | 369 | A09828 | A15541 | 400 |

|        |        |     |        |        |     |
|--------|--------|-----|--------|--------|-----|
| A09828 | A15653 | 326 | A09828 | A15665 | 167 |
| A09828 | A15709 | 380 | A09828 | A15711 | 374 |
| A09828 | A15765 | 238 | A09828 | A15850 | 345 |
| A09828 | A15854 | 188 | A09828 | A15940 | 279 |
| A09828 | A15947 | 247 | A09828 | A16157 | 480 |
| A09828 | A16187 | 240 | A09828 | A16261 | 232 |
| A09828 | A16322 | 198 | A09828 | A16343 | 334 |
| A09828 | A16552 | 393 | A09828 | A16565 | 201 |
| A09828 | A16587 | 386 | A09828 | A16597 | 407 |
| A09828 | A16608 | 302 | A09828 | A16611 | 447 |
| A09828 | A16664 | 199 | A09828 | A16675 | 165 |
| A09828 | A16680 | 185 | A09828 | A16690 | 297 |
| A09828 | A16692 | 266 | A09828 | A16703 | 249 |
| A09828 | A16704 | 377 | A09828 | A16764 | 205 |
| A09828 | A16776 | 296 | A09828 | A16790 | 386 |
| A09828 | A16829 | 286 | A09828 | A16838 | 260 |
| A09828 | A16866 | 215 | A09828 | A16905 | 236 |
| A09828 | A16954 | 386 | A09828 | A17019 | 340 |
| A09828 | A17030 | 296 | A09828 | A17033 | 395 |
| A09828 | A17125 | 299 | A09829 | A10336 | 196 |
| A09829 | A11534 | 486 | A09829 | A12920 | 407 |
| A09829 | A13845 | 229 | A09829 | A14071 | 185 |
| A09829 | A14227 | 274 | A09829 | A14263 | 152 |
| A09829 | A14285 | 263 | A09829 | A15230 | 257 |
| A09830 | A12847 | 412 | A09830 | A15318 | 271 |
| A09830 | A16300 | 193 | A09831 | A15431 | 249 |
| A09831 | A15825 | 408 | A09831 | A16300 | 205 |
| A09833 | A09875 | 241 | A09833 | A09913 | 313 |
| A09833 | A10723 | 460 | A09833 | A10740 | 485 |
| A09833 | A11651 | 367 | A09833 | A11784 | 288 |
| A09833 | A12961 | 313 | A09833 | A13084 | 277 |
| A09833 | A13826 | 491 | A09833 | A13873 | 241 |
| A09833 | A13899 | 491 | A09833 | A14112 | 297 |
| A09833 | A14190 | 427 | A09833 | A14191 | 79  |
| A09833 | A14686 | 316 | A09833 | A15257 | 176 |
| A09833 | A15288 | 281 | A09833 | A15292 | 185 |
| A09833 | A15308 | 157 | A09833 | A15312 | 302 |
| A09833 | A15313 | 319 | A09833 | A15314 | 399 |
| A09833 | A15317 | 163 | A09833 | A15318 | 154 |
| A09833 | A15346 | 489 | A09833 | A15348 | 279 |
| A09833 | A15349 | 279 | A09833 | A15360 | 109 |
| A09833 | A15410 | 252 | A09833 | A15422 | 272 |
| A09833 | A15425 | 152 | A09833 | A15440 | 258 |
| A09833 | A15458 | 337 | A09833 | A15460 | 274 |
| A09833 | A15484 | 168 | A09833 | A15612 | 182 |
| A09833 | A15615 | 351 | A09833 | A15802 | 293 |

|        |        |     |        |        |     |
|--------|--------|-----|--------|--------|-----|
| A09833 | A16224 | 443 | A09833 | A16711 | 254 |
| A09833 | A17095 | 340 | A09834 | A12933 | 394 |
| A09834 | A14116 | 450 | A09834 | A15312 | 152 |
| A09834 | A15800 | 301 | A09834 | A16224 | 266 |
| A09835 | A09875 | 375 | A09835 | A13826 | 434 |
| A09835 | A14290 | 474 | A09835 | A15346 | 306 |
| A09835 | A16711 | 383 | A09836 | A11576 | 228 |
| A09836 | A14094 | 491 | A09836 | A14674 | 288 |
| A09836 | A15369 | 173 | A09836 | A15371 | 229 |
| A09836 | A15840 | 259 | A09836 | A16646 | 213 |
| A09837 | A11523 | 445 | A09837 | A12412 | 380 |
| A09837 | A15293 | 208 | A09838 | A12464 | 414 |
| A09838 | A12633 | 394 | A09840 | A12234 | 205 |
| A09840 | A12487 | 338 | A09840 | A13484 | 187 |
| A09840 | A14281 | 404 | A09840 | A14846 | 462 |
| A09840 | A15704 | 399 | A09840 | A16439 | 455 |
| A09841 | A12897 | 273 | A09842 | A10875 | 199 |
| A09842 | A12651 | 168 | A09842 | A13667 | 174 |
| A09842 | A13973 | 294 | A09843 | A13983 | 193 |
| A09843 | A14221 | 432 | A09843 | A14735 | 383 |
| A09843 | A15301 | 291 | A09843 | A15557 | 191 |
| A09843 | A16445 | 348 | A09845 | A09846 | 318 |
| A09845 | A09881 | 380 | A09845 | A10423 | 173 |
| A09845 | A10442 | 256 | A09845 | A10456 | 221 |
| A09845 | A10457 | 223 | A09845 | A10458 | 232 |
| A09845 | A10691 | 154 | A09845 | A10700 | 256 |
| A09845 | A10705 | 266 | A09845 | A10708 | 228 |
| A09845 | A10715 | 477 | A09845 | A12723 | 463 |
| A09845 | A14650 | 334 | A09845 | A16589 | 310 |
| A09845 | A17046 | 235 | A09846 | A09881 | 246 |
| A09846 | A10423 | 218 | A09846 | A10427 | 201 |
| A09846 | A10691 | 297 | A09846 | A10700 | 438 |
| A09846 | A10715 | 484 | A09846 | A10780 | 360 |
| A09846 | A10781 | 333 | A09846 | A10881 | 388 |
| A09846 | A10884 | 374 | A09846 | A11156 | 278 |
| A09846 | A11235 | 420 | A09846 | A12723 | 430 |
| A09847 | A15346 | 200 | A09847 | A16224 | 271 |
| A09848 | A09851 | 430 | A09848 | A09857 | 190 |
| A09848 | A09875 | 224 | A09848 | A10729 | 279 |
| A09848 | A10802 | 480 | A09848 | A11651 | 228 |
| A09848 | A13826 | 160 | A09848 | A13979 | 160 |
| A09848 | A15292 | 241 | A09848 | A15297 | 63  |
| A09848 | A15313 | 195 | A09848 | A15333 | 213 |
| A09848 | A15346 | 112 | A09848 | A15348 | 260 |
| A09848 | A15352 | 171 | A09848 | A15447 | 273 |
| A09848 | A15515 | 182 | A09848 | A16224 | 184 |

|        |        |     |        |        |     |
|--------|--------|-----|--------|--------|-----|
| A09849 | A12383 | 323 | A09849 | A13974 | 63  |
| A09850 | A13826 | 168 | A09850 | A13986 | 184 |
| A09850 | A15352 | 177 | A09850 | A15642 | 303 |
| A09850 | A16711 | 332 | A09851 | A10802 | 327 |
| A09851 | A15114 | 238 | A09852 | A10578 | 252 |
| A09852 | A11438 | 401 | A09852 | A11480 | 185 |
| A09852 | A12821 | 213 | A09852 | A14216 | 395 |
| A09852 | A14479 | 171 | A09852 | A14505 | 243 |
| A09852 | A14568 | 170 | A09852 | A15500 | 338 |
| A09852 | A15732 | 230 | A09852 | A15931 | 363 |
| A09852 | A16272 | 196 | A09852 | A16320 | 188 |
| A09852 | A16793 | 232 | A09853 | A12725 | 274 |
| A09854 | A10580 | 208 | A09854 | A12047 | 66  |
| A09854 | A14062 | 319 | A09855 | A11415 | 238 |
| A09855 | A12393 | 491 | A09855 | A13119 | 491 |
| A09855 | A13151 | 484 | A09855 | A13312 | 477 |
| A09855 | A13546 | 283 | A09855 | A13987 | 246 |
| A09855 | A14190 | 229 | A09855 | A14372 | 193 |
| A09855 | A14376 | 296 | A09855 | A15292 | 477 |
| A09855 | A15312 | 210 | A09855 | A15313 | 228 |
| A09855 | A15317 | 173 | A09855 | A15342 | 180 |
| A09855 | A15348 | 290 | A09855 | A15352 | 461 |
| A09855 | A15444 | 369 | A09855 | A15447 | 385 |
| A09855 | A15452 | 462 | A09855 | A15462 | 177 |
| A09855 | A15463 | 198 | A09855 | A15495 | 232 |
| A09855 | A15630 | 173 | A09855 | A15726 | 288 |
| A09855 | A15830 | 288 | A09855 | A16424 | 246 |
| A09856 | A14073 | 481 | A09856 | A14589 | 173 |
| A09857 | A09936 | 350 | A09857 | A10321 | 204 |
| A09857 | A10603 | 223 | A09857 | A11291 | 179 |
| A09857 | A11297 | 393 | A09857 | A11397 | 167 |
| A09857 | A11542 | 205 | A09857 | A11651 | 221 |
| A09857 | A12252 | 245 | A09857 | A12282 | 389 |
| A09857 | A13826 | 149 | A09857 | A14006 | 369 |
| A09857 | A14196 | 77  | A09857 | A14220 | 445 |
| A09857 | A14377 | 156 | A09857 | A14408 | 170 |
| A09857 | A14596 | 373 | A09857 | A14659 | 326 |
| A09857 | A15297 | 63  | A09857 | A15399 | 188 |
| A09857 | A15507 | 414 | A09857 | A15559 | 215 |
| A09857 | A15611 | 455 | A09857 | A15734 | 229 |
| A09857 | A15867 | 173 | A09857 | A16022 | 182 |
| A09857 | A16293 | 311 | A09857 | A16627 | 185 |
| A09857 | A16697 | 260 | A09857 | A16822 | 160 |
| A09858 | A13983 | 165 | A09858 | A16975 | 411 |
| A09860 | A13180 | 385 | A09860 | A15423 | 438 |
| A09860 | A15440 | 307 | A09861 | A12986 | 401 |

|        |        |     |        |        |     |
|--------|--------|-----|--------|--------|-----|
| A09862 | A09865 | 245 | A09862 | A10612 | 157 |
| A09862 | A11295 | 484 | A09862 | A11349 | 490 |
| A09862 | A11444 | 241 | A09862 | A11562 | 200 |
| A09862 | A12543 | 171 | A09862 | A13472 | 366 |
| A09862 | A13819 | 190 | A09862 | A14169 | 491 |
| A09862 | A14176 | 205 | A09862 | A14693 | 154 |
| A09862 | A14925 | 179 | A09862 | A15669 | 201 |
| A09862 | A15925 | 208 | A09862 | A15934 | 235 |
| A09862 | A16146 | 417 | A09862 | A16686 | 446 |
| A09863 | A13899 | 288 | A09863 | A15444 | 343 |
| A09864 | A10587 | 446 | A09864 | A13826 | 286 |
| A09864 | A14120 | 267 | A09864 | A15312 | 167 |
| A09864 | A15313 | 180 | A09864 | A15352 | 162 |
| A09864 | A15484 | 372 | A09864 | A15495 | 318 |
| A09864 | A15515 | 277 | A09864 | A16192 | 441 |
| A09864 | A17058 | 363 | A09865 | A09867 | 406 |
| A09865 | A11295 | 263 | A09865 | A11324 | 226 |
| A09865 | A11349 | 411 | A09865 | A12640 | 406 |
| A09865 | A13086 | 406 | A09865 | A13094 | 406 |
| A09865 | A13207 | 152 | A09865 | A14070 | 375 |
| A09865 | A14114 | 435 | A09865 | A14169 | 449 |
| A09865 | A14176 | 363 | A09865 | A16146 | 346 |
| A09865 | A16686 | 368 | A09866 | A10612 | 278 |
| A09866 | A13889 | 345 | A09866 | A14009 | 154 |
| A09866 | A14161 | 398 | A09866 | A14694 | 213 |
| A09869 | A10369 | 305 | A09869 | A12722 | 110 |
| A09869 | A14163 | 162 | A09869 | A14266 | 96  |
| A09869 | A14271 | 461 | A09869 | A15685 | 172 |
| A09870 | A09901 | 334 | A09870 | A15360 | 217 |
| A09871 | A10580 | 188 | A09871 | A11125 | 348 |
| A09871 | A13127 | 346 | A09871 | A14128 | 291 |
| A09871 | A14642 | 238 | A09871 | A15692 | 414 |
| A09872 | A10580 | 201 | A09872 | A12047 | 380 |
| A09872 | A14156 | 266 | A09872 | A15649 | 200 |
| A09873 | A10076 | 305 | A09873 | A11307 | 213 |
| A09873 | A11578 | 227 | A09873 | A12854 | 191 |
| A09873 | A13287 | 456 | A09873 | A15284 | 260 |
| A09873 | A15292 | 491 | A09873 | A15317 | 268 |
| A09873 | A15348 | 249 | A09873 | A15349 | 419 |
| A09873 | A15352 | 491 | A09873 | A15447 | 490 |
| A09873 | A15460 | 251 | A09873 | A15515 | 172 |
| A09874 | A11423 | 347 | A09874 | A14134 | 63  |
| A09874 | A15358 | 290 | A09874 | A15465 | 446 |
| A09874 | A15470 | 281 | A09875 | A11651 | 430 |
| A09875 | A13826 | 480 | A09875 | A13899 | 307 |
| A09875 | A14048 | 272 | A09875 | A14276 | 159 |

|        |        |     |        |        |     |
|--------|--------|-----|--------|--------|-----|
| A09875 | A14290 | 486 | A09875 | A14394 | 165 |
| A09875 | A15308 | 168 | A09875 | A15311 | 235 |
| A09875 | A15314 | 63  | A09875 | A15346 | 267 |
| A09875 | A15348 | 160 | A09875 | A15352 | 208 |
| A09875 | A15480 | 165 | A09875 | A15495 | 335 |
| A09875 | A15515 | 208 | A09875 | A15612 | 193 |
| A09875 | A16192 | 329 | A09875 | A16224 | 446 |
| A09875 | A16711 | 489 | A09875 | A17081 | 344 |
| A09876 | A09877 | 184 | A09876 | A09881 | 185 |
| A09876 | A10420 | 461 | A09876 | A10421 | 210 |
| A09876 | A10424 | 369 | A09876 | A10427 | 328 |
| A09876 | A10441 | 246 | A09876 | A10444 | 288 |
| A09876 | A10455 | 296 | A09876 | A10652 | 221 |
| A09876 | A10658 | 345 | A09876 | A10659 | 428 |
| A09876 | A10684 | 477 | A09876 | A10686 | 405 |
| A09876 | A12055 | 177 | A09876 | A12723 | 286 |
| A09876 | A12824 | 408 | A09876 | A13340 | 391 |
| A09876 | A13842 | 154 | A09876 | A14006 | 334 |
| A09876 | A14220 | 308 | A09876 | A14272 | 213 |
| A09876 | A14462 | 357 | A09876 | A14803 | 316 |
| A09876 | A14856 | 348 | A09876 | A16277 | 182 |
| A09876 | A16286 | 190 | A09876 | A17041 | 207 |
| A09877 | A16277 | 356 | A09877 | A16529 | 274 |
| A09878 | A10778 | 323 | A09878 | A10853 | 210 |
| A09878 | A11101 | 443 | A09878 | A11513 | 235 |
| A09878 | A12464 | 379 | A09878 | A13338 | 263 |
| A09878 | A13361 | 243 | A09878 | A16441 | 335 |
| A09879 | A10424 | 369 | A09879 | A10427 | 234 |
| A09879 | A10441 | 355 | A09879 | A10455 | 375 |
| A09879 | A10656 | 411 | A09879 | A10658 | 355 |
| A09879 | A10693 | 324 | A09879 | A10703 | 472 |
| A09879 | A10710 | 218 | A09879 | A10713 | 301 |
| A09879 | A10714 | 384 | A09879 | A10866 | 465 |
| A09879 | A12728 | 229 | A09879 | A13314 | 463 |
| A09879 | A13326 | 477 | A09879 | A14637 | 235 |
| A09879 | A14856 | 217 | A09879 | A15282 | 188 |
| A09879 | A16335 | 290 | A09879 | A16529 | 224 |
| A09879 | A16767 | 356 | A09879 | A17089 | 432 |
| A09880 | A10422 | 205 | A09880 | A10458 | 219 |
| A09880 | A10690 | 339 | A09880 | A10692 | 256 |
| A09880 | A11189 | 157 | A09880 | A13544 | 343 |
| A09880 | A13734 | 353 | A09880 | A17024 | 301 |
| A09880 | A17046 | 224 | A09880 | A17092 | 301 |
| A09881 | A10421 | 319 | A09881 | A10442 | 191 |
| A09881 | A10457 | 157 | A09881 | A10690 | 286 |
| A09881 | A10700 | 324 | A09881 | A10705 | 408 |



|        |        |     |        |        |     |
|--------|--------|-----|--------|--------|-----|
| A09881 | A10715 | 458 | A09881 | A10881 | 364 |
| A09881 | A12723 | 483 | A09881 | A12845 | 187 |
| A09881 | A14220 | 308 | A09881 | A14650 | 182 |
| A09881 | A15665 | 201 | A09881 | A17024 | 255 |
| A09881 | A17046 | 170 | A09881 | A17092 | 255 |
| A09882 | A10103 | 227 | A09882 | A11331 | 171 |
| A09882 | A14594 | 201 | A09882 | A15249 | 324 |
| A09882 | A16225 | 269 | A09883 | A13734 | 224 |
| A09884 | A12086 | 452 | A09887 | A14587 | 441 |
| A09888 | A13980 | 271 | A09889 | A10421 | 291 |
| A09889 | A12556 | 221 | A09890 | A10731 | 299 |
| A09890 | A11318 | 485 | A09890 | A11566 | 402 |
| A09890 | A11667 | 455 | A09890 | A12449 | 474 |
| A09890 | A12581 | 457 | A09890 | A12635 | 424 |
| A09890 | A16300 | 165 | A09891 | A09892 | 462 |
| A09891 | A10339 | 427 | A09891 | A13832 | 350 |
| A09891 | A14247 | 272 | A09892 | A13832 | 330 |
| A09892 | A14247 | 224 | A09893 | A10080 | 424 |
| A09893 | A11331 | 353 | A09893 | A11981 | 363 |
| A09894 | A09987 | 436 | A09895 | A10216 | 430 |
| A09900 | A09970 | 378 | A09900 | A12965 | 378 |
| A09900 | A14642 | 165 | A09900 | A14652 | 475 |
| A09900 | A15840 | 232 | A09900 | A16732 | 330 |
| A09901 | A11023 | 196 | A09901 | A11125 | 297 |
| A09901 | A11149 | 224 | A09901 | A11547 | 294 |
| A09901 | A12007 | 332 | A09901 | A13511 | 205 |
| A09901 | A13517 | 157 | A09901 | A14781 | 285 |
| A09901 | A15035 | 318 | A09901 | A15174 | 378 |
| A09901 | A15837 | 241 | A09902 | A10018 | 187 |
| A09902 | A10365 | 469 | A09902 | A10728 | 484 |
| A09902 | A11688 | 187 | A09902 | A12043 | 160 |
| A09902 | A12227 | 160 | A09902 | A12275 | 327 |
| A09902 | A12328 | 443 | A09902 | A13149 | 489 |
| A09902 | A13340 | 263 | A09902 | A13342 | 241 |
| A09902 | A14404 | 267 | A09902 | A14738 | 160 |
| A09902 | A15244 | 318 | A09902 | A15932 | 177 |
| A09902 | A15933 | 160 | A09902 | A16272 | 160 |
| A09902 | A16318 | 160 | A09902 | A16324 | 191 |
| A09902 | A16437 | 160 | A09902 | A16446 | 160 |
| A09902 | A16585 | 160 | A09903 | A10198 | 430 |
| A09903 | A10303 | 441 | A09903 | A10309 | 441 |
| A09903 | A10600 | 441 | A09903 | A12441 | 441 |
| A09903 | A12442 | 441 | A09904 | A14579 | 427 |
| A09904 | A14588 | 353 | A09904 | A16300 | 235 |
| A09906 | A12990 | 274 | A09910 | A10071 | 430 |
| A09910 | A13298 | 270 | A09911 | A15233 | 339 |

|        |        |     |        |        |     |
|--------|--------|-----|--------|--------|-----|
| A09912 | A15726 | 257 | A09913 | A13146 | 899 |
| A09913 | A14686 | 374 | A09914 | A12771 | 428 |
| A09914 | A13860 | 408 | A09918 | A14598 | 395 |
| A09921 | A10959 | 452 | A09921 | A11225 | 452 |
| A09921 | A12398 | 452 | A09922 | A10638 | 452 |
| A09925 | A12501 | 201 | A09925 | A15626 | 199 |
| A09925 | A16418 | 199 | A09925 | A16951 | 297 |
| A09926 | A10130 | 417 | A09927 | A11388 | 447 |
| A09927 | A15498 | 262 | A09932 | A10151 | 423 |
| A09932 | A10419 | 255 | A09932 | A10506 | 162 |
| A09932 | A10967 | 422 | A09932 | A11753 | 480 |
| A09933 | A10576 | 407 | A09933 | A11651 | 412 |
| A09933 | A11983 | 305 | A09933 | A13759 | 277 |
| A09933 | A13982 | 305 | A09933 | A14394 | 346 |
| A09933 | A14570 | 174 | A09933 | A14635 | 302 |
| A09933 | A14648 | 173 | A09933 | A14799 | 177 |
| A09933 | A15295 | 428 | A09933 | A15310 | 182 |
| A09933 | A15338 | 322 | A09933 | A15391 | 347 |
| A09933 | A15444 | 207 | A09933 | A15455 | 274 |
| A09933 | A15461 | 154 | A09933 | A15476 | 218 |
| A09933 | A15484 | 360 | A09933 | A15515 | 165 |
| A09933 | A15828 | 241 | A09933 | A16114 | 240 |
| A09933 | A16224 | 168 | A09933 | A16450 | 172 |
| A09933 | A16934 | 319 | A09933 | A16965 | 409 |
| A09933 | A16978 | 353 | A09935 | A13152 | 486 |
| A09935 | A14342 | 477 | A09935 | A14349 | 477 |
| A09936 | A14377 | 457 | A09936 | A14554 | 341 |
| A09936 | A14570 | 208 | A09936 | A15317 | 322 |
| A09936 | A15884 | 452 | A09937 | A11369 | 210 |
| A09937 | A12383 | 129 | A09937 | A12886 | 490 |
| A09937 | A13127 | 312 | A09937 | A13181 | 235 |
| A09937 | A14197 | 167 | A09937 | A14433 | 243 |
| A09937 | A16083 | 388 | A09939 | A11573 | 440 |
| A09939 | A11904 | 474 | A09940 | A14055 | 160 |
| A09941 | A14637 | 283 | A09941 | A14640 | 395 |
| A09941 | A14643 | 188 | A09943 | A15545 | 324 |
| A09943 | A16636 | 152 | A09945 | A10824 | 422 |
| A09945 | A14633 | 297 | A09946 | A14399 | 218 |
| A09948 | A10288 | 433 | A09950 | A13484 | 391 |
| A09952 | A10949 | 185 | A09952 | A12651 | 160 |
| A09952 | A12653 | 235 | A09952 | A14177 | 368 |
| A09952 | A14471 | 224 | A09952 | A14481 | 167 |
| A09952 | A14826 | 157 | A09952 | A15775 | 252 |
| A09952 | A15894 | 180 | A09952 | A16552 | 484 |
| A09953 | A14633 | 210 | A09954 | A14198 | 293 |
| A09954 | A15846 | 432 | A09955 | A10665 | 380 |

|        |        |     |        |        |     |
|--------|--------|-----|--------|--------|-----|
| A09955 | A11014 | 477 | A09955 | A13032 | 420 |
| A09955 | A13870 | 361 | A09955 | A16043 | 374 |
| A09963 | A10525 | 307 | A09963 | A13917 | 267 |
| A09964 | A14319 | 346 | A09964 | A14650 | 198 |
| A09964 | A16764 | 317 | A09967 | A10506 | 328 |
| A09967 | A11086 | 409 | A09967 | A14511 | 260 |
| A09968 | A10159 | 236 | A09969 | A14643 | 293 |
| A09970 | A10985 | 430 | A09971 | A14072 | 311 |
| A09972 | A12556 | 257 | A09972 | A14496 | 324 |
| A09974 | A10215 | 409 | A09976 | A11411 | 374 |
| A09977 | A11132 | 266 | A09977 | A12352 | 326 |
| A09977 | A12501 | 160 | A09977 | A14208 | 218 |
| A09977 | A15367 | 151 | A09977 | A15935 | 452 |
| A09978 | A11411 | 327 | A09978 | A11453 | 483 |
| A09978 | A11513 | 249 | A09978 | A11815 | 443 |
| A09978 | A12881 | 462 | A09978 | A13987 | 157 |
| A09978 | A14482 | 293 | A09978 | A14498 | 276 |
| A09978 | A14589 | 230 | A09978 | A15988 | 318 |
| A09979 | A09985 | 458 | A09982 | A11683 | 339 |
| A09983 | A10456 | 180 | A09983 | A11326 | 238 |
| A09983 | A12917 | 398 | A09983 | A15532 | 243 |
| A09984 | A10164 | 390 | A09984 | A13826 | 234 |
| A09984 | A15485 | 383 | A09985 | A11309 | 269 |
| A09985 | A16529 | 235 | A09985 | A16959 | 408 |
| A09986 | A14524 | 401 | A09986 | A14674 | 339 |
| A09986 | A16300 | 311 | A09988 | A10557 | 243 |
| A09988 | A14188 | 152 | A09989 | A12878 | 401 |
| A09989 | A13548 | 417 | A09989 | A14664 | 263 |
| A09989 | A15110 | 406 | A09991 | A10226 | 362 |
| A09991 | A10758 | 473 | A09991 | A11663 | 363 |
| A09991 | A12948 | 439 | A09991 | A13229 | 372 |
| A09991 | A14344 | 324 | A09992 | A10228 | 368 |
| A09992 | A11387 | 303 | A09992 | A16636 | 183 |
| A09993 | A15430 | 193 | A09993 | A16575 | 276 |
| A09994 | A12543 | 177 | A09994 | A14750 | 344 |
| A09995 | A10358 | 212 | A09995 | A11155 | 366 |
| A09995 | A11187 | 338 | A09995 | A11201 | 399 |
| A09995 | A11209 | 483 | A09995 | A11292 | 489 |
| A09995 | A11576 | 154 | A09995 | A11725 | 488 |
| A09995 | A12062 | 374 | A09995 | A14281 | 310 |
| A09995 | A15495 | 180 | A09996 | A11777 | 323 |
| A09996 | A12606 | 276 | A09996 | A13346 | 176 |
| A09996 | A13983 | 321 | A09996 | A14212 | 276 |
| A09996 | A14213 | 276 | A09996 | A14214 | 276 |
| A09996 | A15926 | 388 | A09996 | A16449 | 276 |
| A09996 | A16702 | 276 | A09997 | A14366 | 162 |

|        |        |     |        |        |     |
|--------|--------|-----|--------|--------|-----|
| A09997 | A14644 | 462 | A09997 | A16230 | 276 |
| A09998 | A14399 | 281 | A09998 | A15911 | 385 |
| A09999 | A11099 | 307 | A09999 | A11440 | 374 |
| A09999 | A11576 | 252 | A09999 | A14257 | 156 |
| A09999 | A15773 | 210 | A10000 | A15498 | 228 |
| A10001 | A10748 | 223 | A10001 | A11096 | 258 |
| A10001 | A11323 | 202 | A10001 | A11334 | 279 |
| A10001 | A13587 | 182 | A10001 | A13989 | 188 |
| A10001 | A14216 | 580 | A10001 | A14221 | 215 |
| A10001 | A15752 | 157 | A10001 | A16615 | 344 |
| A10005 | A10392 | 332 | A10005 | A13978 | 221 |
| A10005 | A14008 | 212 | A10005 | A14222 | 183 |
| A10006 | A10532 | 340 | A10008 | A10100 | 438 |
| A10008 | A11023 | 469 | A10008 | A11149 | 424 |
| A10008 | A11547 | 380 | A10008 | A11902 | 341 |
| A10009 | A15342 | 252 | A10009 | A15534 | 328 |
| A10009 | A16479 | 372 | A10009 | A16581 | 338 |
| A10013 | A10744 | 409 | A10013 | A10825 | 430 |
| A10013 | A10827 | 438 | A10013 | A12387 | 445 |
| A10013 | A12963 | 445 | A10013 | A13820 | 469 |
| A10014 | A12383 | 477 | A10014 | A13917 | 154 |
| A10018 | A10247 | 443 | A10018 | A10844 | 249 |
| A10018 | A11109 | 307 | A10018 | A11130 | 337 |
| A10018 | A11683 | 246 | A10018 | A11902 | 183 |
| A10018 | A12275 | 311 | A10018 | A12383 | 162 |
| A10018 | A12670 | 353 | A10018 | A13348 | 469 |
| A10018 | A13826 | 236 | A10018 | A14210 | 424 |
| A10018 | A14283 | 299 | A10018 | A14371 | 358 |
| A10018 | A14379 | 288 | A10018 | A14621 | 198 |
| A10018 | A14790 | 378 | A10018 | A15809 | 235 |
| A10018 | A16323 | 490 | A10018 | A16877 | 230 |
| A10020 | A15905 | 356 | A10021 | A10539 | 408 |
| A10021 | A10558 | 382 | A10021 | A13772 | 270 |
| A10021 | A14583 | 352 | A10022 | A10625 | 216 |
| A10022 | A10737 | 461 | A10022 | A12556 | 191 |
| A10023 | A11181 | 441 | A10024 | A10651 | 317 |
| A10024 | A11299 | 278 | A10024 | A11982 | 490 |
| A10024 | A14734 | 424 | A10024 | A15495 | 400 |
| A10024 | A15638 | 252 | A10027 | A14827 | 329 |
| A10027 | A15905 | 385 | A10029 | A13801 | 420 |
| A10030 | A10031 | 433 | A10033 | A14073 | 227 |
| A10033 | A16088 | 180 | A10034 | A10221 | 344 |
| A10034 | A10506 | 172 | A10034 | A10564 | 338 |
| A10034 | A10924 | 430 | A10034 | A11981 | 258 |
| A10034 | A12687 | 404 | A10034 | A14216 | 420 |
| A10034 | A15624 | 274 | A10034 | A15649 | 241 |

|        |        |     |        |        |     |
|--------|--------|-----|--------|--------|-----|
| A10034 | A16095 | 193 | A10034 | A17193 | 321 |
| A10038 | A14692 | 481 | A10039 | A14279 | 154 |
| A10040 | A14722 | 405 | A10041 | A10042 | 447 |
| A10041 | A11531 | 435 | A10041 | A12164 | 441 |
| A10042 | A11531 | 441 | A10044 | A10045 | 484 |
| A10044 | A10046 | 465 | A10045 | A10046 | 465 |
| A10047 | A11332 | 291 | A10047 | A12007 | 368 |
| A10047 | A12047 | 427 | A10047 | A13348 | 329 |
| A10047 | A13697 | 420 | A10047 | A14320 | 402 |
| A10047 | A14469 | 368 | A10047 | A14790 | 341 |
| A10047 | A15626 | 183 | A10048 | A12047 | 188 |
| A10049 | A10203 | 413 | A10049 | A12383 | 176 |
| A10049 | A14055 | 183 | A10050 | A11583 | 385 |
| A10050 | A13589 | 286 | A10051 | A10205 | 469 |
| A10051 | A17156 | 361 | A10052 | A11279 | 373 |
| A10052 | A11329 | 435 | A10052 | A11343 | 468 |
| A10052 | A13987 | 400 | A10052 | A14202 | 401 |
| A10052 | A14247 | 481 | A10052 | A14258 | 393 |
| A10052 | A15336 | 210 | A10052 | A15498 | 210 |
| A10055 | A13181 | 406 | A10057 | A10148 | 388 |
| A10061 | A13145 | 404 | A10061 | A15510 | 265 |
| A10062 | A13797 | 416 | A10062 | A15349 | 183 |
| A10063 | A14247 | 435 | A10063 | A14393 | 235 |
| A10063 | A17061 | 382 | A10065 | A11304 | 152 |
| A10065 | A13614 | 402 | A10065 | A15096 | 491 |
| A10065 | A15097 | 483 | A10065 | A15367 | 485 |
| A10066 | A14188 | 260 | A10067 | A10089 | 441 |
| A10067 | A10887 | 416 | A10067 | A11040 | 480 |
| A10067 | A11143 | 435 | A10067 | A12676 | 441 |
| A10067 | A14354 | 441 | A10067 | A16180 | 441 |
| A10067 | A16181 | 441 | A10067 | A16182 | 441 |
| A10067 | A16183 | 441 | A10071 | A12376 | 435 |
| A10072 | A10290 | 408 | A10072 | A10332 | 299 |
| A10072 | A12388 | 408 | A10072 | A12797 | 408 |
| A10072 | A12803 | 408 | A10072 | A12984 | 394 |
| A10072 | A14393 | 238 | A10072 | A16140 | 408 |
| A10072 | A16168 | 408 | A10072 | A16169 | 408 |
| A10072 | A16172 | 408 | A10072 | A16175 | 408 |
| A10072 | A16178 | 408 | A10072 | A16179 | 408 |
| A10072 | A16184 | 408 | A10072 | A16185 | 408 |
| A10072 | A16186 | 408 | A10073 | A10365 | 899 |
| A10073 | A10392 | 899 | A10073 | A10808 | 899 |
| A10073 | A10902 | 63  | A10073 | A11124 | 63  |
| A10073 | A14008 | 899 | A10074 | A11017 | 435 |
| A10074 | A12361 | 366 | A10077 | A14399 | 247 |
| A10078 | A12932 | 435 | A10078 | A13882 | 296 |

|        |        |     |        |        |     |
|--------|--------|-----|--------|--------|-----|
| A10078 | A14968 | 205 | A10079 | A14589 | 271 |
| A10079 | A15230 | 443 | A10081 | A14055 | 446 |
| A10081 | A16904 | 255 | A10082 | A13924 | 348 |
| A10083 | A10098 | 226 | A10083 | A10754 | 491 |
| A10083 | A11792 | 207 | A10083 | A12417 | 296 |
| A10083 | A12722 | 434 | A10083 | A13889 | 279 |
| A10083 | A13924 | 271 | A10083 | A13949 | 229 |
| A10083 | A14179 | 185 | A10083 | A14192 | 198 |
| A10083 | A15256 | 226 | A10083 | A15369 | 489 |
| A10083 | A15941 | 276 | A10083 | A16127 | 245 |
| A10083 | A16262 | 414 | A10084 | A14272 | 171 |
| A10084 | A15931 | 183 | A10085 | A11469 | 199 |
| A10085 | A11983 | 247 | A10085 | A15295 | 174 |
| A10085 | A15639 | 177 | A10085 | A15976 | 180 |
| A10086 | A10265 | 460 | A10086 | A13860 | 446 |
| A10087 | A10731 | 488 | A10087 | A11899 | 377 |
| A10087 | A14554 | 221 | A10089 | A10887 | 434 |
| A10089 | A11040 | 445 | A10089 | A14354 | 452 |
| A10089 | A16180 | 452 | A10089 | A16181 | 452 |
| A10089 | A16182 | 452 | A10089 | A16183 | 452 |
| A10090 | A11435 | 350 | A10090 | A14511 | 218 |
| A10090 | A15230 | 427 | A10090 | A15292 | 152 |
| A10090 | A15419 | 299 | A10091 | A11498 | 396 |
| A10091 | A14247 | 182 | A10093 | A14077 | 241 |
| A10094 | A14484 | 195 | A10094 | A16378 | 271 |
| A10095 | A10292 | 425 | A10095 | A10641 | 425 |
| A10095 | A15649 | 193 | A10096 | A11339 | 422 |
| A10099 | A10786 | 452 | A10100 | A11902 | 391 |
| A10101 | A14586 | 417 | A10103 | A14701 | 183 |
| A10103 | A16257 | 274 | A10103 | A16281 | 177 |
| A10109 | A15837 | 334 | A10109 | A16626 | 168 |
| A10111 | A13609 | 469 | A10112 | A10985 | 407 |
| A10112 | A13484 | 310 | A10112 | A14643 | 154 |
| A10112 | A15507 | 162 | A10114 | A13589 | 335 |
| A10114 | A16257 | 288 | A10116 | A16046 | 466 |
| A10121 | A10657 | 353 | A10121 | A10880 | 427 |
| A10121 | A15976 | 327 | A10121 | A16087 | 329 |
| A10124 | A14698 | 413 | A10126 | A10652 | 371 |
| A10126 | A10882 | 456 | A10126 | A14828 | 457 |
| A10126 | A17006 | 378 | A10127 | A14500 | 412 |
| A10128 | A10854 | 245 | A10131 | A10983 | 323 |
| A10131 | A13740 | 340 | A10131 | A14556 | 440 |
| A10131 | A15726 | 152 | A10131 | A17207 | 438 |
| A10133 | A14399 | 235 | A10134 | A10141 | 433 |
| A10140 | A10619 | 339 | A10140 | A11240 | 216 |
| A10140 | A14886 | 355 | A10146 | A14182 | 249 |

|        |        |     |        |        |     |
|--------|--------|-----|--------|--------|-----|
| A10146 | A14191 | 187 | A10146 | A14272 | 269 |
| A10146 | A15822 | 405 | A10148 | A10334 | 363 |
| A10148 | A13373 | 400 | A10148 | A14996 | 167 |
| A10148 | A15103 | 240 | A10148 | A16300 | 322 |
| A10150 | A12358 | 434 | A10151 | A10693 | 335 |
| A10154 | A12653 | 379 | A10156 | A11096 | 288 |
| A10156 | A11101 | 246 | A10156 | A11264 | 301 |
| A10156 | A11460 | 402 | A10156 | A11714 | 449 |
| A10156 | A11933 | 210 | A10156 | A12674 | 338 |
| A10156 | A12883 | 348 | A10156 | A13361 | 196 |
| A10156 | A13397 | 229 | A10156 | A13761 | 356 |
| A10156 | A14196 | 447 | A10156 | A14231 | 201 |
| A10156 | A14236 | 294 | A10156 | A14496 | 241 |
| A10156 | A14498 | 219 | A10156 | A14521 | 213 |
| A10156 | A14589 | 475 | A10156 | A14643 | 235 |
| A10156 | A15295 | 208 | A10156 | A15297 | 293 |
| A10156 | A15358 | 210 | A10156 | A15363 | 199 |
| A10156 | A15559 | 356 | A10156 | A15839 | 270 |
| A10156 | A15932 | 174 | A10156 | A16311 | 417 |
| A10156 | A16739 | 246 | A10156 | A16741 | 224 |
| A10156 | A16792 | 263 | A10159 | A10315 | 367 |
| A10159 | A10383 | 210 | A10159 | A10642 | 222 |
| A10159 | A11279 | 302 | A10159 | A11297 | 212 |
| A10159 | A11301 | 210 | A10159 | A11496 | 246 |
| A10159 | A11497 | 291 | A10159 | A11559 | 249 |
| A10159 | A11735 | 232 | A10159 | A11851 | 157 |
| A10159 | A11914 | 230 | A10159 | A12052 | 210 |
| A10159 | A12433 | 288 | A10159 | A12508 | 221 |
| A10159 | A12606 | 418 | A10159 | A12658 | 210 |
| A10159 | A12662 | 353 | A10159 | A12665 | 185 |
| A10159 | A12729 | 236 | A10159 | A12834 | 173 |
| A10159 | A13170 | 200 | A10159 | A13204 | 258 |
| A10159 | A13231 | 664 | A10159 | A13647 | 484 |
| A10159 | A13783 | 227 | A10159 | A13786 | 154 |
| A10159 | A13968 | 274 | A10159 | A13989 | 899 |
| A10159 | A14084 | 183 | A10159 | A14086 | 438 |
| A10159 | A14167 | 402 | A10159 | A14183 | 412 |
| A10159 | A14193 | 474 | A10159 | A14208 | 908 |
| A10159 | A14216 | 151 | A10159 | A14235 | 406 |
| A10159 | A14238 | 278 | A10159 | A14246 | 300 |
| A10159 | A14253 | 466 | A10159 | A14358 | 191 |
| A10159 | A14454 | 491 | A10159 | A14462 | 291 |
| A10159 | A14570 | 254 | A10159 | A14662 | 899 |
| A10159 | A14843 | 472 | A10159 | A15224 | 394 |
| A10159 | A15262 | 484 | A10159 | A15293 | 235 |
| A10159 | A15297 | 899 | A10159 | A15314 | 311 |

|        |        |     |        |        |     |
|--------|--------|-----|--------|--------|-----|
| A10159 | A15323 | 899 | A10159 | A15324 | 899 |
| A10159 | A15336 | 229 | A10159 | A15353 | 899 |
| A10159 | A15359 | 899 | A10159 | A15366 | 259 |
| A10159 | A15680 | 504 | A10159 | A15684 | 168 |
| A10159 | A15946 | 489 | A10159 | A16157 | 263 |
| A10159 | A16587 | 205 | A10159 | A16597 | 196 |
| A10159 | A16611 | 319 | A10159 | A16623 | 480 |
| A10159 | A16664 | 277 | A10159 | A16704 | 180 |
| A10159 | A16707 | 221 | A10159 | A16788 | 236 |
| A10159 | A16802 | 479 | A10159 | A16815 | 162 |
| A10159 | A16824 | 154 | A10159 | A16898 | 290 |
| A10159 | A17015 | 396 | A10160 | A14191 | 187 |
| A10164 | A13987 | 180 | A10164 | A14080 | 162 |
| A10164 | A14370 | 327 | A10164 | A14539 | 257 |
| A10164 | A14667 | 277 | A10164 | A15292 | 190 |
| A10164 | A15447 | 229 | A10164 | A15485 | 332 |
| A10164 | A15495 | 305 | A10164 | A15918 | 218 |
| A10164 | A16177 | 351 | A10165 | A10789 | 191 |
| A10165 | A11704 | 319 | A10165 | A11729 | 317 |
| A10165 | A11831 | 179 | A10165 | A11937 | 243 |
| A10165 | A12234 | 200 | A10165 | A13399 | 358 |
| A10165 | A13737 | 236 | A10165 | A13963 | 243 |
| A10165 | A14084 | 177 | A10165 | A14543 | 157 |
| A10165 | A14589 | 238 | A10166 | A14924 | 452 |
| A10167 | A12393 | 395 | A10167 | A13151 | 355 |
| A10169 | A11727 | 377 | A10169 | A11983 | 160 |
| A10169 | A12599 | 435 | A10169 | A12768 | 441 |
| A10169 | A12769 | 441 | A10169 | A12786 | 435 |
| A10169 | A13815 | 441 | A10169 | A14135 | 360 |
| A10169 | A14202 | 213 | A10169 | A14570 | 208 |
| A10169 | A14596 | 162 | A10170 | A14272 | 340 |
| A10172 | A15425 | 313 | A10172 | A16741 | 286 |
| A10173 | A10367 | 452 | A10173 | A11983 | 171 |
| A10173 | A15394 | 283 | A10173 | A16349 | 373 |
| A10174 | A10399 | 290 | A10174 | A10580 | 199 |
| A10174 | A10625 | 160 | A10174 | A10836 | 899 |
| A10174 | A10960 | 208 | A10174 | A11068 | 899 |
| A10174 | A11300 | 899 | A10174 | A11668 | 899 |
| A10174 | A11983 | 899 | A10174 | A12652 | 899 |
| A10174 | A13146 | 899 | A10174 | A13391 | 899 |
| A10174 | A13396 | 899 | A10174 | A13981 | 899 |
| A10174 | A14010 | 899 | A10174 | A14019 | 899 |
| A10174 | A14191 | 899 | A10174 | A14211 | 210 |
| A10174 | A14226 | 899 | A10174 | A14370 | 258 |
| A10174 | A14443 | 899 | A10174 | A14444 | 899 |
| A10174 | A14494 | 899 | A10174 | A15292 | 899 |



|        |        |     |        |        |     |
|--------|--------|-----|--------|--------|-----|
| A10174 | A15322 | 899 | A10174 | A16320 | 177 |
| A10174 | A17007 | 252 | A10174 | A17213 | 899 |
| A10175 | A10619 | 491 | A10175 | A11104 | 362 |
| A10175 | A11560 | 481 | A10175 | A11855 | 246 |
| A10175 | A12474 | 422 | A10175 | A13378 | 380 |
| A10175 | A13924 | 491 | A10175 | A14886 | 226 |
| A10175 | A15065 | 362 | A10175 | A16418 | 414 |
| A10176 | A10383 | 440 | A10176 | A13778 | 452 |
| A10179 | A12666 | 414 | A10179 | A14068 | 462 |
| A10179 | A16300 | 247 | A10180 | A10407 | 440 |
| A10183 | A14299 | 257 | A10183 | A15726 | 257 |
| A10185 | A10580 | 899 | A10186 | A11378 | 460 |
| A10186 | A11467 | 417 | A10186 | A12462 | 435 |
| A10186 | A15498 | 190 | A10187 | A10506 | 341 |
| A10187 | A14208 | 190 | A10188 | A13798 | 428 |
| A10189 | A13435 | 427 | A10189 | A15498 | 227 |
| A10193 | A16738 | 328 | A10196 | A16636 | 271 |
| A10197 | A11369 | 143 | A10198 | A10303 | 445 |
| A10198 | A10309 | 445 | A10198 | A10600 | 445 |
| A10198 | A12441 | 445 | A10198 | A12442 | 445 |
| A10199 | A10535 | 333 | A10199 | A11015 | 490 |
| A10201 | A13307 | 200 | A10201 | A13313 | 174 |
| A10201 | A13997 | 243 | A10201 | A14520 | 274 |
| A10201 | A15974 | 357 | A10202 | A14199 | 316 |
| A10202 | A15292 | 219 | A10203 | A12108 | 430 |
| A10205 | A12952 | 193 | A10205 | A15851 | 154 |
| A10205 | A16283 | 272 | A10208 | A11992 | 160 |
| A10208 | A15202 | 191 | A10208 | A15292 | 486 |
| A10208 | A15317 | 241 | A10208 | A15824 | 210 |
| A10208 | A16049 | 491 | A10208 | A17142 | 162 |
| A10209 | A11617 | 306 | A10209 | A13627 | 438 |
| A10209 | A15022 | 445 | A10210 | A10871 | 393 |
| A10210 | A11767 | 373 | A10213 | A15649 | 177 |
| A10214 | A11300 | 700 | A10214 | A11983 | 428 |
| A10214 | A13860 | 523 | A10214 | A14231 | 743 |
| A10214 | A15323 | 424 | A10217 | A11906 | 414 |
| A10217 | A14208 | 190 | A10217 | A16216 | 290 |
| A10218 | A11431 | 240 | A10218 | A12647 | 388 |
| A10218 | A16590 | 368 | A10221 | A11496 | 380 |
| A10221 | A11497 | 252 | A10222 | A14016 | 353 |
| A10224 | A14299 | 294 | A10228 | A10250 | 480 |
| A10228 | A10340 | 366 | A10228 | A11387 | 257 |
| A10228 | A11435 | 294 | A10228 | A11486 | 307 |
| A10228 | A13617 | 196 | A10228 | A13816 | 235 |
| A10228 | A15293 | 899 | A10228 | A15294 | 899 |
| A10233 | A11304 | 219 | A10233 | A12383 | 258 |

|        |        |     |        |        |     |
|--------|--------|-----|--------|--------|-----|
| A10233 | A12625 | 193 | A10233 | A14076 | 229 |
| A10234 | A12952 | 291 | A10234 | A14596 | 162 |
| A10236 | A12455 | 447 | A10236 | A13453 | 452 |
| A10237 | A14443 | 232 | A10237 | A14589 | 193 |
| A10237 | A15233 | 368 | A10237 | A15729 | 208 |
| A10238 | A13364 | 294 | A10238 | A13609 | 154 |
| A10238 | A15840 | 267 | A10239 | A15498 | 190 |
| A10240 | A13861 | 417 | A10240 | A16027 | 305 |
| A10242 | A11127 | 452 | A10242 | A11951 | 418 |
| A10242 | A12983 | 434 | A10243 | A14449 | 324 |
| A10244 | A11621 | 316 | A10246 | A14523 | 401 |
| A10247 | A10320 | 357 | A10247 | A10517 | 249 |
| A10247 | A10580 | 227 | A10247 | A10871 | 221 |
| A10247 | A11332 | 227 | A10247 | A11683 | 230 |
| A10247 | A12047 | 486 | A10247 | A13250 | 174 |
| A10247 | A13348 | 156 | A10247 | A14156 | 154 |
| A10247 | A14163 | 165 | A10247 | A15196 | 213 |
| A10247 | A15832 | 263 | A10249 | A14190 | 251 |
| A10249 | A14366 | 276 | A10249 | A14368 | 373 |
| A10249 | A14418 | 401 | A10249 | A14659 | 276 |
| A10249 | A14930 | 321 | A10250 | A10340 | 345 |
| A10250 | A10342 | 224 | A10250 | A10853 | 475 |
| A10250 | A10953 | 302 | A10250 | A11139 | 70  |
| A10250 | A11374 | 174 | A10250 | A11486 | 491 |
| A10250 | A11487 | 311 | A10250 | A11675 | 176 |
| A10250 | A11954 | 159 | A10250 | A12952 | 160 |
| A10250 | A13784 | 221 | A10250 | A13989 | 288 |
| A10250 | A14006 | 247 | A10250 | A14304 | 435 |
| A10250 | A14381 | 160 | A10250 | A14449 | 346 |
| A10250 | A14474 | 491 | A10250 | A14484 | 393 |
| A10250 | A14633 | 846 | A10250 | A14990 | 202 |
| A10250 | A15297 | 400 | A10250 | A15338 | 319 |
| A10250 | A15710 | 152 | A10250 | A16294 | 428 |
| A10250 | A16685 | 219 | A10252 | A12535 | 441 |
| A10252 | A12778 | 447 | A10252 | A13138 | 447 |
| A10252 | A14643 | 260 | A10252 | A15277 | 377 |
| A10253 | A10420 | 457 | A10253 | A10421 | 438 |
| A10253 | A10424 | 408 | A10253 | A10427 | 299 |
| A10253 | A10429 | 266 | A10253 | A10437 | 413 |
| A10253 | A10441 | 313 | A10253 | A10443 | 182 |
| A10253 | A10444 | 262 | A10253 | A10452 | 232 |
| A10253 | A10656 | 401 | A10253 | A10658 | 180 |
| A10253 | A10677 | 447 | A10253 | A10686 | 394 |
| A10253 | A10688 | 327 | A10253 | A10703 | 272 |
| A10253 | A13735 | 152 | A10253 | A14856 | 340 |
| A10253 | A15970 | 162 | A10253 | A16103 | 301 |

|        |        |     |        |        |     |
|--------|--------|-----|--------|--------|-----|
| A10253 | A16286 | 470 | A10253 | A16335 | 202 |
| A10253 | A16418 | 424 | A10253 | A16767 | 182 |
| A10253 | A17041 | 281 | A10256 | A12522 | 436 |
| A10258 | A10421 | 252 | A10260 | A11180 | 358 |
| A10260 | A11665 | 446 | A10260 | A13927 | 441 |
| A10260 | A14525 | 294 | A10263 | A11983 | 234 |
| A10264 | A10540 | 483 | A10264 | A15282 | 263 |
| A10265 | A12771 | 408 | A10265 | A13860 | 481 |
| A10265 | A16300 | 193 | A10272 | A14644 | 337 |
| A10275 | A13975 | 302 | A10277 | A14366 | 307 |
| A10278 | A10629 | 463 | A10278 | A11315 | 265 |
| A10278 | A11323 | 279 | A10278 | A11483 | 357 |
| A10278 | A11486 | 899 | A10278 | A12422 | 408 |
| A10278 | A12580 | 408 | A10278 | A12708 | 395 |
| A10278 | A12743 | 408 | A10278 | A12860 | 408 |
| A10278 | A13382 | 943 | A10278 | A15064 | 382 |
| A10278 | A15498 | 332 | A10280 | A11326 | 294 |
| A10282 | A10493 | 424 | A10282 | A14596 | 177 |
| A10284 | A11576 | 443 | A10284 | A15018 | 484 |
| A10286 | A10526 | 339 | A10286 | A10813 | 245 |
| A10286 | A15321 | 269 | A10286 | A15555 | 269 |
| A10286 | A16255 | 269 | A10289 | A10293 | 401 |
| A10289 | A10311 | 406 | A10289 | A10866 | 375 |
| A10290 | A12388 | 452 | A10290 | A12797 | 452 |
| A10290 | A12803 | 452 | A10290 | A12984 | 447 |
| A10290 | A16140 | 452 | A10290 | A16168 | 452 |
| A10290 | A16169 | 452 | A10290 | A16172 | 452 |
| A10290 | A16175 | 452 | A10290 | A16178 | 452 |
| A10290 | A16179 | 452 | A10290 | A16184 | 452 |
| A10290 | A16185 | 452 | A10290 | A16186 | 452 |
| A10291 | A16050 | 396 | A10292 | A10641 | 452 |
| A10294 | A13829 | 224 | A10294 | A13917 | 390 |
| A10294 | A14188 | 210 | A10294 | A15324 | 279 |
| A10294 | A15353 | 221 | A10294 | A16438 | 308 |
| A10294 | A16840 | 246 | A10299 | A10493 | 416 |
| A10300 | A12383 | 323 | A10300 | A15347 | 183 |
| A10303 | A10309 | 452 | A10303 | A10600 | 452 |
| A10303 | A12441 | 452 | A10303 | A12442 | 452 |
| A10306 | A10482 | 441 | A10309 | A10600 | 452 |
| A10309 | A12441 | 452 | A10309 | A12442 | 452 |
| A10311 | A13255 | 475 | A10313 | A11683 | 226 |
| A10313 | A12361 | 270 | A10313 | A15274 | 340 |
| A10313 | A15846 | 373 | A10314 | A15416 | 174 |
| A10314 | A16851 | 310 | A10315 | A10490 | 168 |
| A10315 | A11180 | 205 | A10315 | A11301 | 235 |
| A10315 | A11471 | 193 | A10315 | A11496 | 299 |

|        |        |     |        |        |     |
|--------|--------|-----|--------|--------|-----|
| A10315 | A11497 | 180 | A10315 | A11555 | 154 |
| A10315 | A11702 | 157 | A10315 | A11833 | 279 |
| A10315 | A11915 | 358 | A10315 | A11917 | 454 |
| A10315 | A12047 | 329 | A10315 | A12234 | 249 |
| A10315 | A12433 | 283 | A10315 | A12499 | 344 |
| A10315 | A12508 | 154 | A10315 | A12606 | 260 |
| A10315 | A12655 | 210 | A10315 | A12658 | 279 |
| A10315 | A12725 | 177 | A10315 | A12738 | 312 |
| A10315 | A12826 | 352 | A10315 | A12858 | 335 |
| A10315 | A13069 | 259 | A10315 | A13170 | 210 |
| A10315 | A13231 | 256 | A10315 | A13309 | 162 |
| A10315 | A13313 | 450 | A10315 | A13708 | 294 |
| A10315 | A13781 | 307 | A10315 | A13783 | 229 |
| A10315 | A13784 | 395 | A10315 | A13786 | 308 |
| A10315 | A13788 | 223 | A10315 | A13809 | 154 |
| A10315 | A13912 | 283 | A10315 | A14193 | 486 |
| A10315 | A14204 | 424 | A10315 | A14214 | 151 |
| A10315 | A14239 | 257 | A10315 | A14253 | 490 |
| A10315 | A14263 | 268 | A10315 | A14288 | 168 |
| A10315 | A14455 | 208 | A10315 | A14569 | 160 |
| A10315 | A14661 | 463 | A10315 | A14706 | 185 |
| A10315 | A14718 | 162 | A10315 | A14921 | 296 |
| A10315 | A15105 | 274 | A10315 | A15187 | 195 |
| A10315 | A15189 | 254 | A10315 | A15519 | 185 |
| A10315 | A15541 | 255 | A10315 | A15556 | 234 |
| A10315 | A15557 | 467 | A10315 | A15644 | 465 |
| A10315 | A15680 | 435 | A10315 | A15690 | 485 |
| A10315 | A15818 | 191 | A10315 | A15850 | 301 |
| A10315 | A16157 | 268 | A10315 | A16261 | 171 |
| A10315 | A16292 | 243 | A10315 | A16552 | 243 |
| A10315 | A16565 | 268 | A10315 | A16587 | 215 |
| A10315 | A16597 | 363 | A10315 | A16611 | 200 |
| A10315 | A16664 | 265 | A10315 | A16675 | 224 |
| A10315 | A16680 | 249 | A10315 | A16684 | 352 |
| A10315 | A16690 | 324 | A10315 | A16692 | 205 |
| A10315 | A16703 | 321 | A10315 | A16704 | 329 |
| A10315 | A16790 | 213 | A10315 | A16829 | 229 |
| A10315 | A16874 | 224 | A10315 | A16900 | 247 |
| A10315 | A16944 | 247 | A10315 | A16954 | 213 |
| A10315 | A17033 | 229 | A10315 | A17211 | 226 |
| A10316 | A10525 | 167 | A10316 | A10789 | 302 |
| A10316 | A11209 | 256 | A10316 | A11234 | 396 |
| A10316 | A11471 | 215 | A10316 | A11472 | 357 |
| A10316 | A11496 | 326 | A10316 | A11497 | 210 |
| A10316 | A11597 | 269 | A10316 | A11612 | 438 |
| A10316 | A11649 | 171 | A10316 | A11675 | 294 |

|        |        |     |        |        |     |
|--------|--------|-----|--------|--------|-----|
| A10316 | A11735 | 358 | A10316 | A11851 | 201 |
| A10316 | A11914 | 262 | A10316 | A11917 | 299 |
| A10316 | A11954 | 252 | A10316 | A11992 | 468 |
| A10316 | A12073 | 481 | A10316 | A12215 | 389 |
| A10316 | A12499 | 235 | A10316 | A12501 | 398 |
| A10316 | A12506 | 402 | A10316 | A12507 | 337 |
| A10316 | A12508 | 391 | A10316 | A12658 | 303 |
| A10316 | A12659 | 326 | A10316 | A12665 | 424 |
| A10316 | A12727 | 278 | A10316 | A12824 | 63  |
| A10316 | A12826 | 363 | A10316 | A12850 | 291 |
| A10316 | A12858 | 461 | A10316 | A13309 | 398 |
| A10316 | A13315 | 235 | A10316 | A13321 | 327 |
| A10316 | A13356 | 286 | A10316 | A13706 | 373 |
| A10316 | A13707 | 490 | A10316 | A13737 | 335 |
| A10316 | A13784 | 291 | A10316 | A13788 | 245 |
| A10316 | A13805 | 235 | A10316 | A13809 | 310 |
| A10316 | A13912 | 301 | A10316 | A13989 | 358 |
| A10316 | A14167 | 263 | A10316 | A14214 | 283 |
| A10316 | A14235 | 268 | A10316 | A14239 | 151 |
| A10316 | A14255 | 165 | A10316 | A14263 | 195 |
| A10316 | A14270 | 218 | A10316 | A14375 | 163 |
| A10316 | A14455 | 400 | A10316 | A14462 | 299 |
| A10316 | A14569 | 317 | A10316 | A14719 | 218 |
| A10316 | A14921 | 411 | A10316 | A14937 | 224 |
| A10316 | A15105 | 201 | A10316 | A15187 | 466 |
| A10316 | A15217 | 251 | A10316 | A15235 | 184 |
| A10316 | A15533 | 188 | A10316 | A15680 | 310 |
| A10316 | A15853 | 205 | A10316 | A15943 | 183 |
| A10316 | A16115 | 221 | A10316 | A16157 | 195 |
| A10316 | A16187 | 200 | A10316 | A16261 | 193 |
| A10316 | A16322 | 157 | A10316 | A16565 | 293 |
| A10316 | A16567 | 278 | A10316 | A16587 | 235 |
| A10316 | A16597 | 162 | A10316 | A16664 | 157 |
| A10316 | A16675 | 348 | A10316 | A16690 | 348 |
| A10316 | A16692 | 355 | A10316 | A16709 | 361 |
| A10316 | A16764 | 163 | A10316 | A16774 | 286 |
| A10316 | A16776 | 260 | A10316 | A16799 | 278 |
| A10316 | A16806 | 308 | A10316 | A16829 | 371 |
| A10316 | A16866 | 390 | A10316 | A16868 | 328 |
| A10316 | A16874 | 369 | A10316 | A16905 | 404 |
| A10316 | A16944 | 268 | A10316 | A17030 | 260 |
| A10316 | A17035 | 201 | A10316 | A17133 | 240 |
| A10316 | A17190 | 249 | A10317 | A13222 | 205 |
| A10317 | A14087 | 339 | A10317 | A14088 | 483 |
| A10317 | A14173 | 216 | A10317 | A14186 | 491 |
| A10317 | A15370 | 491 | A10317 | A15718 | 205 |

|        |        |     |        |        |     |
|--------|--------|-----|--------|--------|-----|
| A10317 | A15724 | 483 | A10317 | A15757 | 252 |
| A10317 | A16664 | 146 | A10319 | A10750 | 417 |
| A10319 | A13988 | 468 | A10319 | A14071 | 435 |
| A10319 | A14366 | 210 | A10319 | A14368 | 236 |
| A10319 | A14374 | 393 | A10319 | A14439 | 193 |
| A10319 | A15425 | 341 | A10319 | A15427 | 212 |
| A10319 | A16092 | 165 | A10321 | A11132 | 195 |
| A10321 | A11324 | 405 | A10321 | A11833 | 201 |
| A10321 | A11930 | 502 | A10321 | A14006 | 363 |
| A10321 | A14112 | 296 | A10321 | A14220 | 419 |
| A10321 | A14467 | 234 | A10321 | A15309 | 168 |
| A10321 | A15315 | 502 | A10321 | A15355 | 234 |
| A10321 | A15524 | 202 | A10321 | A15763 | 168 |
| A10321 | A16291 | 234 | A10323 | A10352 | 452 |
| A10326 | A13471 | 452 | A10328 | A11470 | 196 |
| A10328 | A11812 | 388 | A10328 | A11813 | 388 |
| A10328 | A14159 | 246 | A10328 | A14246 | 184 |
| A10328 | A14335 | 454 | A10328 | A16293 | 180 |
| A10328 | A16627 | 188 | A10328 | A16844 | 249 |
| A10329 | A14443 | 302 | A10330 | A13973 | 429 |
| A10330 | A14403 | 418 | A10330 | A14483 | 389 |
| A10332 | A14644 | 157 | A10332 | A15510 | 188 |
| A10335 | A11005 | 441 | A10335 | A11020 | 433 |
| A10335 | A12428 | 447 | A10335 | A12967 | 447 |
| A10336 | A10596 | 294 | A10336 | A10633 | 229 |
| A10336 | A10744 | 256 | A10336 | A11190 | 427 |
| A10336 | A12854 | 369 | A10336 | A12970 | 296 |
| A10336 | A13944 | 335 | A10336 | A14135 | 154 |
| A10336 | A14190 | 221 | A10336 | A14202 | 473 |
| A10336 | A14208 | 475 | A10336 | A14210 | 424 |
| A10336 | A14369 | 180 | A10336 | A14371 | 477 |
| A10336 | A14379 | 245 | A10336 | A14511 | 491 |
| A10336 | A15292 | 405 | A10336 | A15312 | 485 |
| A10336 | A15313 | 490 | A10336 | A15314 | 368 |
| A10336 | A15335 | 165 | A10336 | A15349 | 326 |
| A10336 | A15480 | 200 | A10336 | A15484 | 490 |
| A10336 | A15498 | 466 | A10336 | A15904 | 291 |
| A10336 | A16001 | 366 | A10336 | A16177 | 243 |
| A10337 | A11894 | 351 | A10337 | A13346 | 165 |
| A10337 | A13978 | 191 | A10337 | A15674 | 259 |
| A10337 | A15911 | 216 | A10337 | A16300 | 156 |
| A10338 | A14568 | 373 | A10340 | A11492 | 458 |
| A10342 | A14484 | 167 | A10343 | A13304 | 434 |
| A10345 | A11036 | 470 | A10345 | A11564 | 380 |
| A10345 | A12045 | 449 | A10345 | A12046 | 449 |
| A10345 | A12759 | 407 | A10345 | A14964 | 279 |

|        |        |     |        |        |     |
|--------|--------|-----|--------|--------|-----|
| A10345 | A15400 | 205 | A10346 | A11304 | 293 |
| A10348 | A11158 | 339 | A10348 | A16472 | 418 |
| A10350 | A10988 | 445 | A10351 | A10515 | 430 |
| A10351 | A15336 | 243 | A10353 | A10456 | 200 |
| A10353 | A10765 | 302 | A10353 | A14127 | 267 |
| A10353 | A14333 | 317 | A10353 | A17118 | 330 |
| A10354 | A10531 | 473 | A10354 | A13725 | 414 |
| A10355 | A11507 | 433 | A10355 | A15834 | 326 |
| A10355 | A16216 | 210 | A10357 | A15752 | 191 |
| A10358 | A10411 | 353 | A10358 | A10851 | 377 |
| A10358 | A10856 | 377 | A10358 | A11025 | 386 |
| A10358 | A11564 | 433 | A10358 | A11976 | 401 |
| A10358 | A12169 | 401 | A10359 | A15917 | 226 |
| A10362 | A10616 | 224 | A10362 | A11334 | 460 |
| A10362 | A11420 | 279 | A10362 | A11550 | 297 |
| A10362 | A14216 | 490 | A10363 | A10369 | 207 |
| A10363 | A11183 | 355 | A10363 | A11408 | 288 |
| A10363 | A11759 | 427 | A10363 | A11996 | 345 |
| A10363 | A12722 | 274 | A10363 | A12893 | 488 |
| A10363 | A12908 | 457 | A10363 | A13242 | 475 |
| A10363 | A13274 | 374 | A10363 | A14163 | 462 |
| A10363 | A15685 | 208 | A10363 | A15691 | 307 |
| A10364 | A13250 | 299 | A10364 | A15641 | 429 |
| A10365 | A10392 | 915 | A10365 | A10728 | 486 |
| A10365 | A10808 | 904 | A10365 | A11286 | 391 |
| A10365 | A11369 | 63  | A10365 | A11392 | 151 |
| A10365 | A12328 | 374 | A10365 | A13335 | 340 |
| A10365 | A13340 | 470 | A10365 | A13605 | 294 |
| A10365 | A13917 | 343 | A10365 | A13983 | 63  |
| A10365 | A14006 | 420 | A10365 | A14008 | 917 |
| A10365 | A14021 | 326 | A10365 | A14073 | 272 |
| A10365 | A14188 | 907 | A10365 | A14198 | 899 |
| A10365 | A14471 | 193 | A10365 | A15244 | 366 |
| A10365 | A15254 | 157 | A10365 | A15492 | 229 |
| A10365 | A15734 | 374 | A10365 | A15769 | 152 |
| A10367 | A10373 | 168 | A10367 | A11552 | 216 |
| A10367 | A12869 | 252 | A10367 | A14230 | 193 |
| A10367 | A14247 | 488 | A10367 | A15524 | 63  |
| A10367 | A15552 | 243 | A10367 | A16897 | 210 |
| A10369 | A11475 | 424 | A10369 | A12722 | 85  |
| A10369 | A14266 | 74  | A10369 | A14928 | 152 |
| A10369 | A15295 | 385 | A10369 | A15501 | 218 |
| A10369 | A16260 | 314 | A10369 | A16691 | 286 |
| A10371 | A13917 | 241 | A10371 | A15498 | 224 |
| A10372 | A10421 | 489 | A10372 | A10498 | 368 |
| A10372 | A11365 | 160 | A10372 | A11735 | 160 |

|        |        |     |        |        |     |
|--------|--------|-----|--------|--------|-----|
| A10372 | A11737 | 281 | A10372 | A11842 | 168 |
| A10372 | A11914 | 185 | A10372 | A12655 | 481 |
| A10372 | A12658 | 160 | A10372 | A12824 | 533 |
| A10372 | A14007 | 160 | A10372 | A14170 | 207 |
| A10372 | A15185 | 204 | A10372 | A15257 | 160 |
| A10372 | A15297 | 168 | A10372 | A15377 | 228 |
| A10372 | A15624 | 465 | A10372 | A15651 | 369 |
| A10372 | A15662 | 191 | A10372 | A15684 | 489 |
| A10372 | A15757 | 343 | A10372 | A17121 | 358 |
| A10372 | A17133 | 188 | A10373 | A10875 | 167 |
| A10373 | A11236 | 491 | A10373 | A11703 | 180 |
| A10373 | A11916 | 184 | A10373 | A11950 | 152 |
| A10373 | A12365 | 200 | A10373 | A12556 | 491 |
| A10373 | A12625 | 234 | A10373 | A13617 | 63  |
| A10373 | A13889 | 200 | A10373 | A13949 | 491 |
| A10373 | A13963 | 480 | A10373 | A14009 | 200 |
| A10373 | A14076 | 490 | A10373 | A14079 | 485 |
| A10373 | A14091 | 200 | A10373 | A14094 | 564 |
| A10373 | A14177 | 233 | A10373 | A14192 | 200 |
| A10373 | A14209 | 157 | A10373 | A14223 | 212 |
| A10373 | A14230 | 491 | A10373 | A14272 | 477 |
| A10373 | A14358 | 173 | A10373 | A14477 | 424 |
| A10373 | A14502 | 243 | A10373 | A14528 | 180 |
| A10373 | A14655 | 483 | A10373 | A14674 | 469 |
| A10373 | A14694 | 550 | A10373 | A14701 | 489 |
| A10373 | A14706 | 491 | A10373 | A14819 | 409 |
| A10373 | A15369 | 491 | A10373 | A15371 | 491 |
| A10373 | A15524 | 491 | A10373 | A15531 | 490 |
| A10373 | A15534 | 434 | A10373 | A15539 | 491 |
| A10373 | A15540 | 374 | A10373 | A15550 | 299 |
| A10373 | A15654 | 486 | A10373 | A15837 | 488 |
| A10373 | A15941 | 491 | A10373 | A15949 | 358 |
| A10373 | A16071 | 173 | A10373 | A16127 | 491 |
| A10373 | A16128 | 491 | A10373 | A16129 | 484 |
| A10373 | A16132 | 484 | A10373 | A16274 | 200 |
| A10373 | A16294 | 491 | A10373 | A16299 | 486 |
| A10373 | A16378 | 467 | A10373 | A16452 | 156 |
| A10373 | A16612 | 404 | A10373 | A16616 | 353 |
| A10373 | A16626 | 412 | A10373 | A16646 | 491 |
| A10373 | A16754 | 177 | A10373 | A16762 | 490 |
| A10373 | A17133 | 185 | A10375 | A11716 | 465 |
| A10376 | A11995 | 411 | A10377 | A10378 | 788 |
| A10377 | A13920 | 306 | A10380 | A14443 | 288 |
| A10380 | A14462 | 228 | A10380 | A15222 | 259 |
| A10380 | A15506 | 179 | A10380 | A15520 | 240 |
| A10380 | A16802 | 452 | A10381 | A14589 | 193 |



|        |        |     |        |        |     |
|--------|--------|-----|--------|--------|-----|
| A10382 | A10418 | 475 | A10382 | A10473 | 385 |
| A10382 | A14405 | 232 | A10383 | A11496 | 294 |
| A10383 | A13778 | 440 | A10383 | A14235 | 393 |
| A10386 | A10894 | 288 | A10386 | A13819 | 290 |
| A10386 | A14062 | 311 | A10387 | A15932 | 218 |
| A10387 | A15933 | 272 | A10387 | A15941 | 247 |
| A10389 | A11917 | 168 | A10389 | A15189 | 286 |
| A10389 | A15748 | 378 | A10389 | A16724 | 263 |
| A10392 | A10623 | 909 | A10392 | A10808 | 943 |
| A10392 | A10902 | 274 | A10392 | A11369 | 201 |
| A10392 | A11456 | 200 | A10392 | A11834 | 899 |
| A10392 | A11852 | 219 | A10392 | A12383 | 339 |
| A10392 | A12665 | 152 | A10392 | A13250 | 899 |
| A10392 | A13321 | 191 | A10392 | A13388 | 229 |
| A10392 | A13741 | 185 | A10392 | A13804 | 274 |
| A10392 | A13977 | 163 | A10392 | A13978 | 899 |
| A10392 | A14008 | 945 | A10392 | A14013 | 438 |
| A10392 | A14022 | 333 | A10392 | A14248 | 281 |
| A10392 | A14255 | 162 | A10392 | A14275 | 475 |
| A10392 | A14581 | 363 | A10392 | A14903 | 251 |
| A10392 | A14917 | 240 | A10392 | A16145 | 401 |
| A10392 | A16463 | 198 | A10392 | A16565 | 157 |
| A10392 | A16587 | 234 | A10392 | A16703 | 208 |
| A10392 | A16704 | 216 | A10392 | A16905 | 195 |
| A10392 | A16944 | 266 | A10392 | A17160 | 899 |
| A10393 | A11114 | 441 | A10395 | A11346 | 263 |
| A10395 | A14443 | 302 | A10395 | A16450 | 581 |
| A10398 | A10576 | 288 | A10398 | A12897 | 165 |
| A10398 | A13982 | 255 | A10399 | A11684 | 246 |
| A10399 | A13310 | 302 | A10399 | A14672 | 468 |
| A10401 | A15064 | 345 | A10402 | A14597 | 243 |
| A10402 | A14643 | 172 | A10402 | A14701 | 274 |
| A10405 | A12528 | 447 | A10405 | A12529 | 441 |
| A10408 | A14210 | 252 | A10408 | A14371 | 272 |
| A10408 | A14511 | 246 | A10408 | A15498 | 190 |
| A10410 | A16503 | 416 | A10411 | A10851 | 424 |
| A10411 | A10856 | 424 | A10411 | A11985 | 436 |
| A10411 | A12393 | 205 | A10411 | A14378 | 257 |
| A10413 | A15314 | 232 | A10414 | A10468 | 406 |
| A10414 | A10888 | 383 | A10414 | A13500 | 483 |
| A10414 | A16189 | 383 | A10414 | A17198 | 165 |
| A10415 | A11741 | 402 | A10415 | A13039 | 445 |
| A10415 | A13040 | 445 | A10417 | A11331 | 340 |
| A10417 | A11438 | 200 | A10417 | A11480 | 177 |
| A10417 | A11729 | 200 | A10417 | A11981 | 356 |
| A10417 | A12105 | 200 | A10417 | A13333 | 200 |

|        |        |     |        |        |     |
|--------|--------|-----|--------|--------|-----|
| A10417 | A13435 | 332 | A10417 | A14216 | 232 |
| A10417 | A15235 | 408 | A10417 | A15743 | 457 |
| A10417 | A16118 | 452 | A10417 | A17193 | 467 |
| A10418 | A10473 | 388 | A10418 | A14623 | 340 |
| A10418 | A14664 | 407 | A10418 | A15935 | 162 |
| A10419 | A11369 | 394 | A10420 | A10421 | 475 |
| A10420 | A10424 | 452 | A10420 | A10425 | 180 |
| A10420 | A10427 | 486 | A10420 | A10429 | 475 |
| A10420 | A10441 | 340 | A10420 | A10443 | 446 |
| A10420 | A10444 | 486 | A10420 | A10452 | 481 |
| A10420 | A10455 | 249 | A10420 | A10456 | 400 |
| A10420 | A10550 | 223 | A10420 | A10656 | 486 |
| A10420 | A10658 | 446 | A10420 | A10677 | 483 |
| A10420 | A10681 | 196 | A10420 | A10685 | 249 |
| A10420 | A10686 | 480 | A10420 | A10691 | 157 |
| A10420 | A10694 | 208 | A10420 | A10702 | 208 |
| A10420 | A10703 | 386 | A10420 | A10710 | 235 |
| A10420 | A10714 | 207 | A10420 | A10904 | 291 |
| A10420 | A10989 | 241 | A10420 | A11157 | 212 |
| A10420 | A12663 | 230 | A10420 | A13326 | 234 |
| A10420 | A13735 | 313 | A10420 | A14191 | 201 |
| A10420 | A14272 | 296 | A10420 | A14799 | 267 |
| A10420 | A14803 | 347 | A10420 | A14856 | 486 |
| A10420 | A15970 | 191 | A10420 | A16088 | 491 |
| A10420 | A16103 | 196 | A10420 | A16277 | 159 |
| A10420 | A16286 | 486 | A10420 | A16335 | 339 |
| A10420 | A16417 | 430 | A10420 | A16418 | 485 |
| A10420 | A16419 | 335 | A10420 | A16767 | 210 |
| A10420 | A17007 | 307 | A10420 | A17041 | 469 |
| A10420 | A17089 | 311 | A10421 | A10424 | 224 |
| A10421 | A10427 | 324 | A10421 | A10429 | 281 |
| A10421 | A10437 | 230 | A10421 | A10441 | 329 |
| A10421 | A10444 | 151 | A10421 | A10452 | 255 |
| A10421 | A10656 | 263 | A10421 | A10658 | 441 |
| A10421 | A10672 | 207 | A10421 | A10677 | 467 |
| A10421 | A10686 | 405 | A10421 | A10688 | 212 |
| A10421 | A10702 | 297 | A10421 | A11107 | 303 |
| A10421 | A11281 | 177 | A10421 | A11293 | 187 |
| A10421 | A16277 | 279 | A10421 | A16286 | 424 |
| A10421 | A16418 | 398 | A10421 | A16419 | 401 |
| A10421 | A17148 | 238 | A10422 | A10458 | 369 |
| A10422 | A10679 | 347 | A10422 | A10690 | 363 |
| A10422 | A10696 | 371 | A10422 | A13146 | 165 |
| A10422 | A13717 | 385 | A10422 | A14176 | 293 |
| A10422 | A14231 | 293 | A10422 | A14828 | 389 |
| A10422 | A17024 | 406 | A10423 | A10456 | 473 |

|        |        |     |        |        |     |
|--------|--------|-----|--------|--------|-----|
| A10423 | A10679 | 227 | A10423 | A10687 | 265 |
| A10423 | A10691 | 187 | A10423 | A10715 | 224 |
| A10423 | A10783 | 265 | A10423 | A13717 | 294 |
| A10423 | A14863 | 465 | A10423 | A17024 | 333 |
| A10423 | A17046 | 265 | A10424 | A10427 | 369 |
| A10424 | A10441 | 363 | A10424 | A10443 | 363 |
| A10424 | A10456 | 180 | A10424 | A10652 | 351 |
| A10424 | A10656 | 324 | A10424 | A10677 | 307 |
| A10424 | A10686 | 363 | A10424 | A10703 | 425 |
| A10424 | A10712 | 302 | A10424 | A10713 | 313 |
| A10424 | A10714 | 281 | A10424 | A11381 | 263 |
| A10424 | A13734 | 160 | A10424 | A13735 | 429 |
| A10424 | A14191 | 165 | A10424 | A14637 | 249 |
| A10424 | A14856 | 230 | A10424 | A15626 | 207 |
| A10424 | A15690 | 302 | A10424 | A15877 | 324 |
| A10424 | A16103 | 356 | A10424 | A16286 | 337 |
| A10424 | A16335 | 302 | A10424 | A16418 | 307 |
| A10424 | A16767 | 363 | A10424 | A17041 | 345 |
| A10424 | A17078 | 207 | A10424 | A17089 | 185 |
| A10425 | A11728 | 180 | A10425 | A14481 | 154 |
| A10425 | A17041 | 274 | A10427 | A10603 | 163 |
| A10427 | A10656 | 159 | A10427 | A10658 | 221 |
| A10427 | A10677 | 461 | A10427 | A10681 | 210 |
| A10427 | A10686 | 351 | A10427 | A10699 | 353 |
| A10427 | A10703 | 184 | A10427 | A13326 | 247 |
| A10427 | A14799 | 202 | A10427 | A14856 | 391 |
| A10427 | A16277 | 173 | A10427 | A16286 | 313 |
| A10427 | A16335 | 257 | A10427 | A16418 | 414 |
| A10427 | A17007 | 319 | A10427 | A17041 | 191 |
| A10429 | A10677 | 350 | A10429 | A14288 | 278 |
| A10429 | A14856 | 288 | A10430 | A10550 | 162 |
| A10430 | A10670 | 263 | A10430 | A10692 | 213 |
| A10430 | A10783 | 177 | A10430 | A10876 | 281 |
| A10430 | A11487 | 497 | A10430 | A11937 | 340 |
| A10430 | A13314 | 157 | A10430 | A14846 | 151 |
| A10430 | A15665 | 291 | A10430 | A15682 | 428 |
| A10430 | A16335 | 160 | A10430 | A16847 | 601 |
| A10431 | A14215 | 324 | A10432 | A10447 | 445 |
| A10432 | A10782 | 430 | A10433 | A10770 | 472 |
| A10433 | A10865 | 472 | A10433 | A17078 | 307 |
| A10434 | A10557 | 396 | A10436 | A11442 | 447 |
| A10437 | A10444 | 480 | A10437 | A10452 | 455 |
| A10437 | A10656 | 480 | A10437 | A10672 | 371 |
| A10437 | A10677 | 313 | A10437 | A10688 | 441 |
| A10437 | A14856 | 424 | A10437 | A15309 | 274 |
| A10437 | A16286 | 427 | A10437 | A16335 | 307 |

|        |        |     |        |        |     |
|--------|--------|-----|--------|--------|-----|
| A10438 | A10712 | 303 | A10439 | A10449 | 400 |
| A10439 | A11945 | 326 | A10439 | A14650 | 187 |
| A10439 | A14969 | 367 | A10439 | A15498 | 265 |
| A10439 | A15932 | 200 | A10440 | A12328 | 177 |
| A10440 | A14653 | 247 | A10440 | A15498 | 319 |
| A10441 | A10443 | 485 | A10441 | A10444 | 413 |
| A10441 | A10456 | 374 | A10441 | A10689 | 210 |
| A10441 | A10693 | 452 | A10441 | A10702 | 479 |
| A10441 | A10703 | 488 | A10441 | A10710 | 208 |
| A10441 | A10712 | 279 | A10441 | A10714 | 433 |
| A10441 | A10866 | 356 | A10441 | A11381 | 363 |
| A10441 | A12728 | 218 | A10441 | A13314 | 432 |
| A10441 | A13326 | 363 | A10441 | A13735 | 419 |
| A10441 | A14152 | 227 | A10441 | A14856 | 408 |
| A10441 | A15282 | 177 | A10441 | A16103 | 340 |
| A10441 | A16277 | 412 | A10441 | A16286 | 452 |
| A10441 | A16419 | 474 | A10441 | A16529 | 344 |
| A10441 | A16767 | 486 | A10441 | A17041 | 328 |
| A10441 | A17089 | 291 | A10442 | A10691 | 347 |
| A10442 | A10699 | 321 | A10442 | A10715 | 368 |
| A10442 | A10783 | 389 | A10442 | A10884 | 404 |
| A10442 | A12723 | 411 | A10442 | A13341 | 391 |
| A10442 | A14856 | 255 | A10443 | A10444 | 414 |
| A10443 | A10452 | 301 | A10443 | A10456 | 156 |
| A10443 | A10677 | 288 | A10443 | A10702 | 262 |
| A10443 | A10703 | 488 | A10443 | A10710 | 210 |
| A10443 | A10712 | 281 | A10443 | A10714 | 379 |
| A10443 | A11381 | 366 | A10443 | A11421 | 308 |
| A10443 | A13735 | 420 | A10443 | A14803 | 396 |
| A10443 | A14856 | 339 | A10443 | A15282 | 179 |
| A10443 | A16103 | 340 | A10443 | A16286 | 321 |
| A10443 | A16371 | 407 | A10443 | A16419 | 429 |
| A10443 | A16529 | 216 | A10443 | A16767 | 486 |
| A10443 | A16896 | 441 | A10443 | A17041 | 329 |
| A10443 | A17089 | 427 | A10444 | A10452 | 491 |
| A10444 | A10456 | 229 | A10444 | A10656 | 491 |
| A10444 | A10672 | 417 | A10444 | A10677 | 486 |
| A10444 | A10685 | 345 | A10444 | A10688 | 327 |
| A10444 | A10702 | 345 | A10444 | A10710 | 160 |
| A10444 | A10712 | 238 | A10444 | A10904 | 371 |
| A10444 | A11309 | 407 | A10444 | A11381 | 401 |
| A10444 | A13734 | 205 | A10444 | A13735 | 475 |
| A10444 | A14128 | 217 | A10444 | A14856 | 490 |
| A10444 | A15223 | 473 | A10444 | A15874 | 329 |
| A10444 | A16103 | 307 | A10444 | A16277 | 440 |
| A10444 | A16286 | 441 | A10444 | A16335 | 424 |

|        |        |     |        |        |     |
|--------|--------|-----|--------|--------|-----|
| A10444 | A16419 | 313 | A10444 | A16529 | 299 |
| A10444 | A16766 | 279 | A10444 | A16959 | 247 |
| A10444 | A17040 | 221 | A10444 | A17041 | 400 |
| A10444 | A17089 | 235 | A10445 | A11571 | 416 |
| A10445 | A11595 | 416 | A10445 | A11701 | 425 |
| A10445 | A12798 | 425 | A10445 | A16132 | 281 |
| A10446 | A10457 | 337 | A10446 | A10708 | 425 |
| A10446 | A10781 | 323 | A10446 | A11431 | 215 |
| A10446 | A15413 | 212 | A10447 | A10782 | 441 |
| A10448 | A14372 | 279 | A10448 | A14457 | 270 |
| A10448 | A15606 | 165 | A10448 | A16792 | 347 |
| A10449 | A11312 | 398 | A10449 | A11316 | 288 |
| A10449 | A11368 | 314 | A10450 | A14484 | 205 |
| A10451 | A10886 | 452 | A10452 | A10656 | 491 |
| A10452 | A10658 | 402 | A10452 | A10677 | 486 |
| A10452 | A10685 | 456 | A10452 | A10686 | 299 |
| A10452 | A10688 | 310 | A10452 | A10694 | 299 |
| A10452 | A10702 | 440 | A10452 | A10707 | 306 |
| A10452 | A10712 | 215 | A10452 | A10781 | 296 |
| A10452 | A10904 | 358 | A10452 | A11309 | 313 |
| A10452 | A11381 | 386 | A10452 | A11847 | 340 |
| A10452 | A13734 | 173 | A10452 | A13735 | 484 |
| A10452 | A13736 | 288 | A10452 | A14128 | 185 |
| A10452 | A14160 | 296 | A10452 | A14856 | 486 |
| A10452 | A15223 | 477 | A10452 | A15874 | 173 |
| A10452 | A16103 | 288 | A10452 | A16286 | 435 |
| A10452 | A16335 | 414 | A10452 | A16419 | 400 |
| A10452 | A16529 | 366 | A10452 | A16959 | 224 |
| A10452 | A17007 | 385 | A10452 | A17040 | 198 |
| A10452 | A17041 | 386 | A10453 | A10456 | 154 |
| A10453 | A10632 | 430 | A10453 | A10960 | 196 |
| A10453 | A11422 | 265 | A10453 | A13735 | 246 |
| A10453 | A15356 | 419 | A10453 | A17041 | 243 |
| A10454 | A13341 | 430 | A10455 | A10656 | 335 |
| A10455 | A10904 | 407 | A10455 | A11847 | 396 |
| A10455 | A13734 | 177 | A10455 | A13735 | 462 |
| A10455 | A13736 | 486 | A10455 | A15223 | 457 |
| A10455 | A16103 | 363 | A10455 | A16262 | 274 |
| A10455 | A16286 | 461 | A10455 | A16335 | 313 |
| A10455 | A16741 | 232 | A10455 | A16852 | 407 |
| A10455 | A16968 | 394 | A10455 | A17041 | 485 |
| A10456 | A10475 | 165 | A10456 | A10532 | 462 |
| A10456 | A10658 | 374 | A10456 | A10691 | 224 |
| A10456 | A10694 | 154 | A10456 | A10702 | 489 |
| A10456 | A10703 | 401 | A10456 | A10707 | 162 |
| A10456 | A10708 | 177 | A10456 | A10712 | 463 |

|        |        |     |        |        |     |
|--------|--------|-----|--------|--------|-----|
| A10456 | A10714 | 456 | A10456 | A10715 | 269 |
| A10456 | A10885 | 412 | A10456 | A11309 | 486 |
| A10456 | A11325 | 420 | A10456 | A11381 | 483 |
| A10456 | A13314 | 296 | A10456 | A14708 | 405 |
| A10456 | A14803 | 281 | A10456 | A14814 | 480 |
| A10456 | A14821 | 180 | A10456 | A14857 | 491 |
| A10456 | A14862 | 435 | A10456 | A14863 | 446 |
| A10456 | A15094 | 314 | A10456 | A15098 | 314 |
| A10456 | A15497 | 215 | A10456 | A15874 | 475 |
| A10456 | A15970 | 266 | A10456 | A16002 | 229 |
| A10456 | A16026 | 327 | A10456 | A16027 | 218 |
| A10456 | A16103 | 271 | A10456 | A16262 | 491 |
| A10456 | A16285 | 232 | A10456 | A16286 | 234 |
| A10456 | A16362 | 217 | A10456 | A16529 | 458 |
| A10456 | A16741 | 329 | A10456 | A16766 | 468 |
| A10456 | A16767 | 156 | A10456 | A16836 | 232 |
| A10456 | A16896 | 328 | A10456 | A16959 | 466 |
| A10456 | A17003 | 314 | A10456 | A17007 | 343 |
| A10456 | A17036 | 419 | A10456 | A17040 | 327 |
| A10456 | A17041 | 249 | A10456 | A17089 | 195 |
| A10457 | A10705 | 388 | A10457 | A10715 | 348 |
| A10457 | A12723 | 285 | A10458 | A10690 | 369 |
| A10458 | A10696 | 443 | A10458 | A14861 | 411 |
| A10458 | A16589 | 411 | A10458 | A17024 | 411 |
| A10459 | A10615 | 218 | A10459 | A14196 | 235 |
| A10459 | A17136 | 191 | A10460 | A11474 | 221 |
| A10460 | A12228 | 366 | A10460 | A12229 | 369 |
| A10460 | A14196 | 402 | A10460 | A14367 | 218 |
| A10460 | A15314 | 290 | A10460 | A15388 | 230 |
| A10465 | A13989 | 168 | A10465 | A14597 | 332 |
| A10466 | A11765 | 160 | A10466 | A14247 | 179 |
| A10466 | A15420 | 177 | A10466 | A15560 | 367 |
| A10467 | A13633 | 434 | A10468 | A13500 | 419 |
| A10470 | A12983 | 401 | A10470 | A13181 | 316 |
| A10470 | A14281 | 151 | A10473 | A15935 | 305 |
| A10475 | A14245 | 363 | A10475 | A15357 | 311 |
| A10475 | A15402 | 374 | A10475 | A15874 | 254 |
| A10475 | A16959 | 299 | A10476 | A15498 | 205 |
| A10477 | A11184 | 215 | A10478 | A14642 | 313 |
| A10478 | A14649 | 366 | A10478 | A16738 | 269 |
| A10479 | A12853 | 445 | A10481 | A10689 | 329 |
| A10484 | A14596 | 229 | A10487 | A15081 | 452 |
| A10490 | A10532 | 455 | A10490 | A10642 | 218 |
| A10490 | A11374 | 193 | A10490 | A11409 | 460 |
| A10490 | A11521 | 177 | A10490 | A11649 | 201 |
| A10490 | A11737 | 167 | A10490 | A12658 | 201 |

|        |        |     |        |        |     |
|--------|--------|-----|--------|--------|-----|
| A10490 | A12821 | 213 | A10490 | A12826 | 379 |
| A10490 | A12839 | 241 | A10490 | A13484 | 213 |
| A10490 | A13786 | 229 | A10490 | A14255 | 196 |
| A10490 | A14351 | 235 | A10490 | A14375 | 195 |
| A10490 | A14921 | 335 | A10490 | A15818 | 243 |
| A10490 | A16652 | 176 | A10490 | A16664 | 188 |
| A10490 | A16675 | 156 | A10490 | A16703 | 241 |
| A10490 | A16756 | 449 | A10490 | A16790 | 263 |
| A10490 | A17135 | 247 | A10492 | A14655 | 168 |
| A10493 | A13977 | 328 | A10495 | A14405 | 384 |
| A10495 | A14440 | 375 | A10496 | A10801 | 899 |
| A10496 | A12235 | 63  | A10497 | A14212 | 332 |
| A10497 | A14214 | 334 | A10497 | A15498 | 262 |
| A10498 | A10607 | 389 | A10498 | A14568 | 276 |
| A10498 | A15652 | 230 | A10498 | A15684 | 196 |
| A10499 | A10743 | 452 | A10500 | A10845 | 452 |
| A10504 | A10633 | 152 | A10504 | A11285 | 443 |
| A10504 | A13003 | 245 | A10504 | A13402 | 343 |
| A10504 | A14074 | 162 | A10504 | A14125 | 182 |
| A10504 | A15287 | 491 | A10504 | A15428 | 455 |
| A10504 | A15429 | 491 | A10504 | A15649 | 293 |
| A10504 | A15660 | 470 | A10504 | A15684 | 473 |
| A10504 | A15699 | 274 | A10504 | A15899 | 343 |
| A10504 | A15923 | 491 | A10504 | A16074 | 201 |
| A10504 | A16092 | 177 | A10504 | A16096 | 291 |
| A10504 | A16650 | 484 | A10504 | A16948 | 463 |
| A10506 | A10542 | 288 | A10506 | A11078 | 328 |
| A10506 | A13050 | 229 | A10506 | A13335 | 190 |
| A10506 | A13426 | 213 | A10506 | A13607 | 294 |
| A10506 | A14197 | 160 | A10506 | A14250 | 249 |
| A10506 | A15637 | 168 | A10506 | A16191 | 226 |
| A10506 | A16939 | 201 | A10506 | A17213 | 193 |
| A10508 | A13429 | 321 | A10508 | A16404 | 439 |
| A10508 | A16626 | 162 | A10509 | A14588 | 368 |
| A10509 | A14643 | 241 | A10510 | A11108 | 420 |
| A10510 | A11129 | 477 | A10510 | A13216 | 364 |
| A10510 | A13743 | 769 | A10510 | A14198 | 162 |
| A10510 | A14299 | 461 | A10510 | A14443 | 213 |
| A10510 | A16547 | 438 | A10511 | A15630 | 290 |
| A10514 | A10721 | 180 | A10514 | A11436 | 475 |
| A10514 | A11487 | 474 | A10514 | A13146 | 165 |
| A10514 | A13982 | 218 | A10514 | A14371 | 475 |
| A10514 | A14452 | 395 | A10514 | A16994 | 332 |
| A10516 | A11516 | 447 | A10518 | A11438 | 184 |
| A10518 | A11480 | 177 | A10518 | A11942 | 274 |
| A10518 | A13348 | 257 | A10518 | A13525 | 396 |

|        |        |     |        |        |     |
|--------|--------|-----|--------|--------|-----|
| A10518 | A13989 | 283 | A10518 | A14272 | 337 |
| A10518 | A14505 | 235 | A10518 | A15215 | 224 |
| A10519 | A10532 | 942 | A10519 | A12818 | 463 |
| A10520 | A16300 | 281 | A10521 | A10628 | 435 |
| A10521 | A10682 | 475 | A10521 | A10862 | 435 |
| A10521 | A12439 | 466 | A10521 | A14637 | 283 |
| A10523 | A15905 | 327 | A10525 | A11023 | 286 |
| A10525 | A11160 | 409 | A10525 | A11209 | 263 |
| A10525 | A11297 | 151 | A10525 | A11301 | 179 |
| A10525 | A11394 | 297 | A10525 | A11430 | 319 |
| A10525 | A11548 | 601 | A10525 | A11735 | 273 |
| A10525 | A11737 | 274 | A10525 | A12215 | 283 |
| A10525 | A12433 | 221 | A10525 | A12508 | 185 |
| A10525 | A12606 | 200 | A10525 | A12625 | 252 |
| A10525 | A12727 | 286 | A10525 | A12858 | 273 |
| A10525 | A13309 | 193 | A10525 | A13321 | 202 |
| A10525 | A13356 | 162 | A10525 | A13706 | 293 |
| A10525 | A13707 | 191 | A10525 | A13783 | 259 |
| A10525 | A13809 | 185 | A10525 | A14247 | 179 |
| A10525 | A14263 | 205 | A10525 | A14281 | 317 |
| A10525 | A14319 | 217 | A10525 | A14443 | 899 |
| A10525 | A14444 | 903 | A10525 | A14569 | 191 |
| A10525 | A14706 | 224 | A10525 | A14921 | 319 |
| A10525 | A15138 | 168 | A10525 | A15187 | 226 |
| A10525 | A15233 | 254 | A10525 | A15292 | 480 |
| A10525 | A15321 | 402 | A10525 | A15541 | 157 |
| A10525 | A15837 | 187 | A10525 | A16068 | 474 |
| A10525 | A16157 | 207 | A10525 | A16261 | 443 |
| A10525 | A16322 | 165 | A10525 | A16552 | 185 |
| A10525 | A16565 | 168 | A10525 | A16587 | 243 |
| A10525 | A16597 | 170 | A10525 | A16611 | 240 |
| A10525 | A16675 | 262 | A10525 | A16680 | 154 |
| A10525 | A16693 | 311 | A10525 | A16707 | 347 |
| A10525 | A16774 | 293 | A10525 | A16829 | 258 |
| A10525 | A16866 | 183 | A10525 | A16942 | 293 |
| A10525 | A17190 | 256 | A10525 | A17203 | 334 |
| A10526 | A16636 | 207 | A10527 | A10635 | 185 |
| A10527 | A10678 | 463 | A10527 | A10762 | 491 |
| A10527 | A11488 | 358 | A10527 | A12824 | 477 |
| A10527 | A13181 | 173 | A10527 | A15896 | 318 |
| A10527 | A15992 | 491 | A10528 | A10594 | 491 |
| A10528 | A11431 | 435 | A10528 | A11537 | 235 |
| A10528 | A11681 | 490 | A10528 | A13902 | 168 |
| A10528 | A13987 | 337 | A10528 | A14010 | 174 |
| A10528 | A14195 | 291 | A10528 | A14247 | 407 |
| A10528 | A14413 | 208 | A10528 | A15301 | 466 |



|        |        |     |        |        |     |
|--------|--------|-----|--------|--------|-----|
| A10528 | A15302 | 455 | A10528 | A15310 | 216 |
| A10528 | A15313 | 218 | A10528 | A15366 | 491 |
| A10528 | A15413 | 456 | A10528 | A15445 | 191 |
| A10528 | A15462 | 480 | A10528 | A15463 | 491 |
| A10528 | A15487 | 152 | A10528 | A15498 | 200 |
| A10528 | A15671 | 302 | A10528 | A16177 | 305 |
| A10529 | A11075 | 364 | A10529 | A11852 | 347 |
| A10529 | A12643 | 393 | A10532 | A10589 | 936 |
| A10532 | A10624 | 423 | A10532 | A10830 | 924 |
| A10532 | A10907 | 358 | A10532 | A11240 | 752 |
| A10532 | A11297 | 490 | A10532 | A11299 | 491 |
| A10532 | A11409 | 450 | A10532 | A11496 | 423 |
| A10532 | A11587 | 358 | A10532 | A11705 | 491 |
| A10532 | A12327 | 193 | A10532 | A12329 | 230 |
| A10532 | A12675 | 216 | A10532 | A12818 | 358 |
| A10532 | A12831 | 188 | A10532 | A12839 | 491 |
| A10532 | A12894 | 193 | A10532 | A13000 | 193 |
| A10532 | A13150 | 193 | A10532 | A13340 | 479 |
| A10532 | A13344 | 931 | A10532 | A13511 | 273 |
| A10532 | A13609 | 461 | A10532 | A13662 | 193 |
| A10532 | A13870 | 177 | A10532 | A13989 | 599 |
| A10532 | A14073 | 491 | A10532 | A14132 | 489 |
| A10532 | A14150 | 216 | A10532 | A14172 | 273 |
| A10532 | A14216 | 555 | A10532 | A14229 | 310 |
| A10532 | A14272 | 273 | A10532 | A14449 | 345 |
| A10532 | A14487 | 157 | A10532 | A14525 | 401 |
| A10532 | A14557 | 936 | A10532 | A14591 | 177 |
| A10532 | A14596 | 490 | A10532 | A14661 | 904 |
| A10532 | A14674 | 335 | A10532 | A14738 | 469 |
| A10532 | A14857 | 428 | A10532 | A14908 | 477 |
| A10532 | A14915 | 193 | A10532 | A15141 | 474 |
| A10532 | A15156 | 475 | A10532 | A15275 | 188 |
| A10532 | A15344 | 313 | A10532 | A15422 | 344 |
| A10532 | A15498 | 419 | A10532 | A15507 | 213 |
| A10532 | A15559 | 217 | A10532 | A15624 | 438 |
| A10532 | A15660 | 489 | A10532 | A15684 | 567 |
| A10532 | A15696 | 491 | A10532 | A15698 | 729 |
| A10532 | A15931 | 488 | A10532 | A15932 | 313 |
| A10532 | A16060 | 430 | A10532 | A16088 | 491 |
| A10532 | A16095 | 263 | A10532 | A16120 | 477 |
| A10532 | A16128 | 273 | A10532 | A16418 | 177 |
| A10532 | A16633 | 217 | A10532 | A16738 | 335 |
| A10532 | A16788 | 263 | A10532 | A16824 | 338 |
| A10532 | A17085 | 488 | A10534 | A12328 | 321 |
| A10534 | A14073 | 355 | A10534 | A14827 | 193 |
| A10535 | A11015 | 358 | A10535 | A14272 | 151 |

|        |        |     |        |        |     |
|--------|--------|-----|--------|--------|-----|
| A10535 | A15765 | 379 | A10538 | A12722 | 170 |
| A10538 | A12871 | 420 | A10538 | A14566 | 272 |
| A10538 | A14594 | 187 | A10538 | A15128 | 414 |
| A10538 | A15685 | 234 | A10538 | A15935 | 174 |
| A10539 | A10558 | 417 | A10540 | A13997 | 276 |
| A10540 | A15282 | 234 | A10544 | A10721 | 485 |
| A10544 | A10899 | 283 | A10544 | A13980 | 344 |
| A10544 | A14011 | 273 | A10544 | A15726 | 167 |
| A10544 | A16994 | 179 | A10544 | A16996 | 363 |
| A10547 | A11313 | 177 | A10547 | A11553 | 491 |
| A10547 | A11590 | 491 | A10547 | A12712 | 441 |
| A10547 | A13204 | 372 | A10547 | A13221 | 389 |
| A10547 | A13331 | 480 | A10547 | A13946 | 249 |
| A10547 | A15282 | 198 | A10547 | A15498 | 323 |
| A10549 | A15422 | 204 | A10549 | A15495 | 163 |
| A10549 | A15884 | 337 | A10550 | A10703 | 333 |
| A10550 | A12055 | 446 | A10550 | A14857 | 337 |
| A10550 | A15874 | 256 | A10553 | A14778 | 319 |
| A10556 | A11994 | 472 | A10556 | A13034 | 490 |
| A10557 | A14229 | 227 | A10557 | A14440 | 486 |
| A10557 | A15835 | 375 | A10558 | A12663 | 384 |
| A10558 | A15498 | 265 | A10560 | A10902 | 366 |
| A10560 | A11125 | 939 | A10560 | A12383 | 184 |
| A10560 | A14008 | 291 | A10563 | A10891 | 293 |
| A10563 | A11552 | 430 | A10563 | A13651 | 312 |
| A10563 | A13767 | 281 | A10563 | A14123 | 230 |
| A10563 | A15383 | 154 | A10563 | A15445 | 152 |
| A10564 | A11355 | 385 | A10564 | A11981 | 335 |
| A10564 | A12687 | 364 | A10566 | A12047 | 337 |
| A10567 | A10568 | 441 | A10569 | A13626 | 313 |
| A10569 | A14449 | 286 | A10569 | A15932 | 366 |
| A10570 | A13980 | 367 | A10571 | A10585 | 378 |
| A10571 | A13826 | 234 | A10571 | A13903 | 358 |
| A10571 | A15346 | 283 | A10571 | A15360 | 266 |
| A10571 | A15427 | 364 | A10573 | A10930 | 469 |
| A10573 | A14193 | 162 | A10573 | A15960 | 463 |
| A10575 | A13989 | 899 | A10575 | A14074 | 63  |
| A10576 | A13982 | 490 | A10576 | A14036 | 318 |
| A10576 | A14481 | 199 | A10576 | A14704 | 173 |
| A10576 | A15291 | 251 | A10576 | A15530 | 262 |
| A10577 | A14490 | 286 | A10577 | A14756 | 462 |
| A10578 | A13831 | 171 | A10578 | A14056 | 294 |
| A10578 | A15528 | 165 | A10578 | A15683 | 154 |
| A10578 | A15933 | 167 | A10579 | A14007 | 352 |
| A10579 | A14122 | 218 | A10579 | A14197 | 201 |
| A10579 | A14470 | 491 | A10579 | A15420 | 213 |

|        |        |     |        |        |     |
|--------|--------|-----|--------|--------|-----|
| A10579 | A17076 | 398 | A10580 | A10615 | 916 |
| A10580 | A10623 | 899 | A10580 | A10905 | 434 |
| A10580 | A10913 | 441 | A10580 | A11100 | 272 |
| A10580 | A11125 | 294 | A10580 | A11283 | 393 |
| A10580 | A11332 | 485 | A10580 | A11604 | 171 |
| A10580 | A11684 | 174 | A10580 | A12047 | 652 |
| A10580 | A12341 | 272 | A10580 | A12643 | 221 |
| A10580 | A13977 | 182 | A10580 | A14198 | 899 |
| A10580 | A14310 | 174 | A10580 | A14443 | 900 |
| A10581 | A10599 | 263 | A10581 | A14169 | 232 |
| A10581 | A14529 | 297 | A10581 | A15894 | 290 |
| A10582 | A14633 | 232 | A10584 | A10794 | 257 |
| A10584 | A10798 | 188 | A10584 | A10803 | 408 |
| A10584 | A10821 | 455 | A10584 | A11247 | 257 |
| A10584 | A11250 | 294 | A10584 | A11337 | 456 |
| A10584 | A11374 | 154 | A10584 | A11885 | 324 |
| A10584 | A13873 | 82  | A10584 | A14056 | 491 |
| A10584 | A14247 | 496 | A10584 | A14461 | 441 |
| A10584 | A15649 | 160 | A10584 | A15650 | 210 |
| A10584 | A17128 | 329 | A10585 | A13826 | 235 |
| A10585 | A13903 | 491 | A10585 | A14111 | 266 |
| A10585 | A14125 | 246 | A10585 | A14199 | 291 |
| A10585 | A14391 | 185 | A10585 | A15308 | 199 |
| A10585 | A15346 | 167 | A10585 | A15409 | 319 |
| A10585 | A15425 | 472 | A10585 | A15475 | 294 |
| A10585 | A15480 | 196 | A10585 | A15642 | 256 |
| A10585 | A15904 | 364 | A10585 | A17213 | 299 |
| A10586 | A13822 | 241 | A10586 | A13826 | 198 |
| A10586 | A13899 | 174 | A10586 | A13957 | 369 |
| A10586 | A14119 | 312 | A10586 | A14146 | 274 |
| A10586 | A14374 | 152 | A10586 | A14599 | 252 |
| A10586 | A15312 | 213 | A10586 | A15346 | 267 |
| A10586 | A15425 | 480 | A10586 | A15427 | 257 |
| A10586 | A15518 | 313 | A10586 | A15642 | 228 |
| A10586 | A15800 | 252 | A10586 | A16224 | 212 |
| A10587 | A11431 | 171 | A10587 | A11796 | 353 |
| A10587 | A11797 | 343 | A10587 | A12854 | 212 |
| A10587 | A13826 | 279 | A10587 | A14072 | 288 |
| A10587 | A14120 | 314 | A10587 | A14123 | 260 |
| A10587 | A14210 | 290 | A10587 | A14371 | 317 |
| A10587 | A14511 | 177 | A10587 | A15312 | 191 |
| A10587 | A15313 | 383 | A10587 | A15434 | 177 |
| A10587 | A15454 | 224 | A10587 | A15484 | 489 |
| A10587 | A15800 | 235 | A10587 | A15801 | 276 |
| A10587 | A15802 | 288 | A10587 | A15807 | 343 |
| A10587 | A15826 | 318 | A10587 | A15964 | 256 |

|        |        |     |        |        |     |
|--------|--------|-----|--------|--------|-----|
| A10587 | A16224 | 195 | A10588 | A10592 | 249 |
| A10588 | A10595 | 408 | A10588 | A12996 | 454 |
| A10588 | A14449 | 404 | A10588 | A15358 | 283 |
| A10588 | A15470 | 274 | A10589 | A10830 | 899 |
| A10589 | A14132 | 388 | A10590 | A14071 | 334 |
| A10591 | A10597 | 353 | A10591 | A10733 | 488 |
| A10591 | A11131 | 198 | A10591 | A13824 | 274 |
| A10591 | A13826 | 477 | A10591 | A13873 | 419 |
| A10591 | A14191 | 385 | A10591 | A15346 | 485 |
| A10591 | A15410 | 279 | A10591 | A15435 | 154 |
| A10591 | A15987 | 347 | A10591 | A16216 | 240 |
| A10592 | A11469 | 180 | A10592 | A11545 | 491 |
| A10592 | A11607 | 491 | A10592 | A14137 | 293 |
| A10592 | A14449 | 93  | A10592 | A15365 | 193 |
| A10593 | A13852 | 380 | A10593 | A14694 | 172 |
| A10593 | A15685 | 257 | A10594 | A11279 | 430 |
| A10594 | A11431 | 490 | A10594 | A11454 | 162 |
| A10594 | A11681 | 489 | A10594 | A11925 | 450 |
| A10594 | A13811 | 436 | A10594 | A13830 | 171 |
| A10594 | A13959 | 469 | A10594 | A13987 | 452 |
| A10594 | A14182 | 246 | A10594 | A14195 | 412 |
| A10594 | A14202 | 241 | A10594 | A14247 | 649 |
| A10594 | A14258 | 398 | A10594 | A14473 | 269 |
| A10594 | A14481 | 353 | A10594 | A14661 | 434 |
| A10594 | A14693 | 442 | A10594 | A15292 | 455 |
| A10594 | A15301 | 701 | A10594 | A15302 | 701 |
| A10594 | A15312 | 436 | A10594 | A15316 | 183 |
| A10594 | A15352 | 435 | A10594 | A15366 | 701 |
| A10594 | A15413 | 489 | A10594 | A15430 | 498 |
| A10594 | A15432 | 180 | A10594 | A15462 | 701 |
| A10594 | A15463 | 701 | A10594 | A15486 | 191 |
| A10594 | A15487 | 355 | A10594 | A15488 | 191 |
| A10594 | A15489 | 172 | A10594 | A15498 | 185 |
| A10594 | A15513 | 191 | A10594 | A15671 | 353 |
| A10594 | A15878 | 255 | A10594 | A16177 | 228 |
| A10595 | A13197 | 446 | A10595 | A13768 | 307 |
| A10595 | A14130 | 347 | A10595 | A14449 | 491 |
| A10595 | A15358 | 243 | A10595 | A15916 | 302 |
| A10596 | A10597 | 434 | A10596 | A10606 | 452 |
| A10596 | A11464 | 477 | A10596 | A11839 | 483 |
| A10596 | A11950 | 167 | A10596 | A12069 | 151 |
| A10596 | A13317 | 286 | A10596 | A13824 | 159 |
| A10596 | A13826 | 364 | A10596 | A13839 | 441 |
| A10596 | A13873 | 63  | A10596 | A13983 | 458 |
| A10596 | A14054 | 221 | A10596 | A14191 | 77  |
| A10596 | A14196 | 356 | A10596 | A14229 | 229 |

|        |        |     |        |        |     |
|--------|--------|-----|--------|--------|-----|
| A10596 | A14238 | 234 | A10596 | A14276 | 77  |
| A10596 | A14292 | 491 | A10596 | A14635 | 193 |
| A10596 | A14647 | 177 | A10596 | A15314 | 291 |
| A10596 | A15322 | 221 | A10596 | A15346 | 65  |
| A10596 | A15606 | 297 | A10597 | A10733 | 481 |
| A10597 | A11653 | 257 | A10597 | A11839 | 165 |
| A10597 | A13824 | 256 | A10597 | A13826 | 456 |
| A10597 | A13873 | 469 | A10597 | A14191 | 311 |
| A10597 | A14276 | 238 | A10597 | A14647 | 355 |
| A10597 | A15181 | 319 | A10597 | A15346 | 313 |
| A10597 | A15650 | 221 | A10598 | A10829 | 374 |
| A10598 | A11313 | 347 | A10598 | A11992 | 229 |
| A10598 | A13273 | 405 | A10598 | A14410 | 294 |
| A10598 | A14449 | 152 | A10599 | A11543 | 198 |
| A10599 | A13992 | 257 | A10600 | A12441 | 452 |
| A10600 | A12442 | 452 | A10601 | A10798 | 383 |
| A10601 | A11430 | 358 | A10601 | A11850 | 974 |
| A10601 | A13983 | 319 | A10601 | A14030 | 945 |
| A10601 | A14148 | 190 | A10601 | A14191 | 552 |
| A10601 | A14193 | 162 | A10601 | A14208 | 156 |
| A10601 | A14279 | 63  | A10601 | A14456 | 945 |
| A10601 | A14546 | 473 | A10601 | A14570 | 283 |
| A10601 | A15291 | 982 | A10601 | A15430 | 238 |
| A10601 | A15614 | 780 | A10601 | A15649 | 508 |
| A10601 | A15680 | 294 | A10601 | A16467 | 490 |
| A10601 | A16610 | 200 | A10601 | A16950 | 283 |
| A10601 | A17157 | 165 | A10602 | A11595 | 417 |
| A10602 | A12688 | 427 | A10602 | A14633 | 157 |
| A10602 | A14839 | 451 | A10603 | A10664 | 243 |
| A10603 | A13837 | 262 | A10603 | A14087 | 268 |
| A10603 | A14088 | 187 | A10603 | A14180 | 279 |
| A10603 | A14196 | 281 | A10603 | A15297 | 235 |
| A10603 | A16843 | 328 | A10603 | A17063 | 154 |
| A10603 | A17198 | 156 | A10604 | A10875 | 213 |
| A10605 | A13988 | 451 | A10605 | A14012 | 472 |
| A10605 | A14071 | 480 | A10605 | A14082 | 63  |
| A10605 | A14125 | 380 | A10605 | A14199 | 177 |
| A10605 | A14391 | 205 | A10605 | A14439 | 283 |
| A10605 | A14599 | 294 | A10605 | A15425 | 212 |
| A10605 | A16719 | 368 | A10606 | A11464 | 361 |
| A10606 | A14229 | 154 | A10606 | A14292 | 339 |
| A10607 | A15367 | 324 | A10607 | A16226 | 193 |
| A10608 | A12500 | 362 | A10608 | A14074 | 313 |
| A10609 | A11498 | 452 | A10609 | A15228 | 398 |
| A10610 | A10943 | 434 | A10611 | A14193 | 323 |
| A10611 | A14196 | 339 | A10611 | A14303 | 167 |

|        |        |     |        |        |     |
|--------|--------|-----|--------|--------|-----|
| A10611 | A14395 | 174 | A10611 | A14621 | 294 |
| A10611 | A15434 | 229 | A10611 | A15935 | 170 |
| A10611 | A16141 | 338 | A10611 | A17198 | 490 |
| A10612 | A11444 | 188 | A10612 | A11696 | 479 |
| A10612 | A12802 | 369 | A10612 | A13127 | 223 |
| A10612 | A13369 | 486 | A10612 | A14097 | 430 |
| A10612 | A14128 | 491 | A10612 | A14430 | 152 |
| A10612 | A14654 | 394 | A10612 | A14693 | 221 |
| A10612 | A14694 | 63  | A10612 | A14803 | 286 |
| A10612 | A14870 | 491 | A10612 | A14872 | 491 |
| A10612 | A14874 | 314 | A10612 | A14880 | 398 |
| A10612 | A14881 | 470 | A10612 | A15430 | 491 |
| A10612 | A15636 | 260 | A10612 | A15669 | 447 |
| A10612 | A15925 | 451 | A10612 | A15934 | 435 |
| A10612 | A16436 | 486 | A10612 | A16963 | 489 |
| A10613 | A11669 | 436 | A10613 | A11683 | 398 |
| A10613 | A12429 | 429 | A10613 | A12719 | 411 |
| A10613 | A14633 | 201 | A10614 | A14404 | 329 |
| A10614 | A15282 | 305 | A10615 | A10624 | 491 |
| A10615 | A10824 | 236 | A10615 | A10853 | 107 |
| A10615 | A10894 | 126 | A10615 | A11068 | 353 |
| A10615 | A11920 | 135 | A10615 | A11923 | 372 |
| A10615 | A13147 | 221 | A10615 | A13989 | 439 |
| A10615 | A14004 | 899 | A10615 | A14220 | 942 |
| A10615 | A14476 | 301 | A10615 | A15366 | 246 |
| A10615 | A15586 | 262 | A10615 | A15726 | 369 |
| A10615 | A16304 | 314 | A10616 | A11832 | 324 |
| A10616 | A11945 | 279 | A10616 | A12126 | 218 |
| A10616 | A12556 | 339 | A10616 | A12849 | 385 |
| A10616 | A13294 | 452 | A10616 | A13875 | 445 |
| A10616 | A13989 | 491 | A10616 | A14151 | 210 |
| A10616 | A14172 | 219 | A10616 | A14426 | 188 |
| A10616 | A14505 | 486 | A10616 | A15215 | 162 |
| A10616 | A15764 | 286 | A10616 | A16086 | 168 |
| A10618 | A14006 | 484 | A10618 | A14080 | 491 |
| A10618 | A14105 | 286 | A10618 | A14655 | 491 |
| A10619 | A10986 | 167 | A10619 | A11104 | 475 |
| A10619 | A11656 | 313 | A10619 | A12513 | 468 |
| A10619 | A12533 | 318 | A10619 | A13924 | 249 |
| A10619 | A14291 | 367 | A10619 | A14633 | 278 |
| A10619 | A14886 | 480 | A10619 | A15463 | 198 |
| A10619 | A15478 | 302 | A10619 | A16517 | 335 |
| A10619 | A17198 | 279 | A10620 | A13009 | 425 |
| A10620 | A15282 | 234 | A10621 | A12639 | 390 |
| A10621 | A14520 | 299 | A10621 | A14588 | 205 |
| A10621 | A15892 | 318 | A10623 | A10728 | 491 |

|        |        |     |        |        |     |
|--------|--------|-----|--------|--------|-----|
| A10623 | A10743 | 221 | A10623 | A10808 | 475 |
| A10623 | A10811 | 441 | A10623 | A10894 | 157 |
| A10623 | A10982 | 160 | A10623 | A11027 | 266 |
| A10623 | A11125 | 919 | A10623 | A11258 | 313 |
| A10623 | A11379 | 474 | A10623 | A11621 | 190 |
| A10623 | A11902 | 176 | A10623 | A12664 | 932 |
| A10623 | A12920 | 241 | A10623 | A13181 | 157 |
| A10623 | A13827 | 899 | A10623 | A13977 | 162 |
| A10623 | A13978 | 174 | A10623 | A13985 | 899 |
| A10623 | A14005 | 157 | A10623 | A15241 | 217 |
| A10623 | A15726 | 274 | A10623 | A17160 | 899 |
| A10624 | A10824 | 195 | A10624 | A10853 | 168 |
| A10624 | A11139 | 174 | A10624 | A11258 | 107 |
| A10624 | A11291 | 440 | A10624 | A11920 | 99  |
| A10624 | A11923 | 484 | A10624 | A12251 | 173 |
| A10624 | A12328 | 350 | A10624 | A13147 | 400 |
| A10624 | A13874 | 899 | A10624 | A13989 | 491 |
| A10624 | A14220 | 481 | A10624 | A14224 | 899 |
| A10624 | A14444 | 899 | A10624 | A14476 | 238 |
| A10624 | A14596 | 490 | A10624 | A15740 | 152 |
| A10624 | A15766 | 313 | A10624 | A16298 | 156 |
| A10624 | A16912 | 93  | A10624 | A17197 | 440 |
| A10625 | A10700 | 196 | A10625 | A11460 | 162 |
| A10625 | A11469 | 177 | A10625 | A11786 | 224 |
| A10625 | A12061 | 99  | A10625 | A12138 | 405 |
| A10625 | A12507 | 472 | A10625 | A13373 | 174 |
| A10625 | A13392 | 384 | A10625 | A13989 | 489 |
| A10625 | A14014 | 162 | A10625 | A14079 | 355 |
| A10625 | A14273 | 443 | A10625 | A14643 | 480 |
| A10625 | A14916 | 308 | A10625 | A15507 | 402 |
| A10625 | A15645 | 98  | A10625 | A16127 | 113 |
| A10625 | A16294 | 91  | A10625 | A16453 | 401 |
| A10625 | A16479 | 183 | A10625 | A16512 | 279 |
| A10625 | A16612 | 63  | A10625 | A16613 | 107 |
| A10625 | A16754 | 96  | A10625 | A16904 | 223 |
| A10626 | A11546 | 385 | A10626 | A12365 | 191 |
| A10626 | A14236 | 259 | A10626 | A15241 | 223 |
| A10627 | A10736 | 452 | A10628 | A10862 | 452 |
| A10628 | A12439 | 447 | A10629 | A13382 | 462 |
| A10629 | A14633 | 195 | A10630 | A11313 | 290 |
| A10630 | A12327 | 427 | A10630 | A12894 | 427 |
| A10630 | A13784 | 212 | A10630 | A13895 | 243 |
| A10630 | A14915 | 427 | A10630 | A15524 | 190 |
| A10632 | A15356 | 200 | A10632 | A16766 | 171 |
| A10633 | A10645 | 205 | A10633 | A10748 | 347 |
| A10633 | A11096 | 430 | A10633 | A11190 | 174 |

|        |        |     |        |        |     |
|--------|--------|-----|--------|--------|-----|
| A10633 | A11400 | 272 | A10633 | A11544 | 193 |
| A10633 | A11808 | 258 | A10633 | A13063 | 221 |
| A10633 | A13340 | 63  | A10633 | A13989 | 480 |
| A10633 | A15416 | 226 | A10633 | A15660 | 423 |
| A10634 | A11313 | 401 | A10634 | A13879 | 303 |
| A10634 | A15294 | 249 | A10634 | A15913 | 288 |
| A10635 | A10675 | 455 | A10635 | A13871 | 207 |
| A10635 | A14306 | 428 | A10638 | A13872 | 313 |
| A10638 | A14392 | 249 | A10640 | A11488 | 395 |
| A10640 | A14199 | 468 | A10640 | A14311 | 402 |
| A10640 | A14366 | 435 | A10640 | A14374 | 441 |
| A10640 | A14391 | 483 | A10640 | A14554 | 456 |
| A10640 | A15285 | 424 | A10640 | A15516 | 439 |
| A10640 | A15795 | 432 | A10640 | A16014 | 388 |
| A10642 | A12329 | 311 | A10642 | A15262 | 160 |
| A10642 | A16228 | 263 | A10642 | A17015 | 232 |
| A10642 | A17135 | 368 | A10643 | A10810 | 371 |
| A10643 | A14475 | 256 | A10645 | A11190 | 256 |
| A10645 | A12643 | 348 | A10645 | A13989 | 486 |
| A10645 | A13997 | 312 | A10645 | A14210 | 230 |
| A10645 | A14496 | 291 | A10649 | A10680 | 447 |
| A10650 | A11064 | 405 | A10650 | A11123 | 402 |
| A10650 | A16636 | 236 | A10651 | A11121 | 423 |
| A10651 | A11299 | 207 | A10651 | A11385 | 306 |
| A10651 | A11722 | 468 | A10651 | A11982 | 333 |
| A10651 | A13318 | 401 | A10651 | A14266 | 241 |
| A10651 | A14381 | 200 | A10651 | A15498 | 305 |
| A10651 | A15917 | 151 | A10652 | A10670 | 395 |
| A10652 | A10674 | 380 | A10652 | A10684 | 446 |
| A10652 | A10687 | 353 | A10652 | A10692 | 486 |
| A10652 | A10696 | 353 | A10652 | A10697 | 307 |
| A10652 | A10699 | 263 | A10652 | A10706 | 303 |
| A10652 | A10712 | 262 | A10652 | A10780 | 435 |
| A10652 | A10783 | 353 | A10652 | A10876 | 402 |
| A10652 | A11309 | 229 | A10652 | A11580 | 414 |
| A10652 | A14861 | 395 | A10652 | A15626 | 160 |
| A10652 | A15877 | 290 | A10653 | A14883 | 440 |
| A10655 | A11279 | 348 | A10655 | A11303 | 168 |
| A10655 | A11570 | 425 | A10655 | A11937 | 243 |
| A10655 | A13106 | 235 | A10655 | A13665 | 176 |
| A10655 | A13871 | 165 | A10655 | A13882 | 488 |
| A10655 | A13895 | 198 | A10655 | A13902 | 703 |
| A10655 | A14182 | 437 | A10655 | A14247 | 489 |
| A10655 | A14661 | 355 | A10655 | A15336 | 391 |
| A10655 | A15506 | 254 | A10655 | A15647 | 594 |
| A10656 | A10658 | 305 | A10656 | A10672 | 483 |



|        |        |     |        |        |     |
|--------|--------|-----|--------|--------|-----|
| A10656 | A10677 | 489 | A10656 | A10681 | 294 |
| A10656 | A10686 | 305 | A10656 | A10688 | 314 |
| A10656 | A10694 | 406 | A10656 | A10702 | 198 |
| A10656 | A10707 | 312 | A10656 | A10712 | 450 |
| A10656 | A10713 | 235 | A10656 | A10781 | 302 |
| A10656 | A10904 | 363 | A10656 | A11309 | 185 |
| A10656 | A11381 | 311 | A10656 | A13734 | 183 |
| A10656 | A13735 | 486 | A10656 | A14637 | 162 |
| A10656 | A14803 | 356 | A10656 | A14856 | 488 |
| A10656 | A15223 | 470 | A10656 | A15874 | 180 |
| A10656 | A15970 | 445 | A10656 | A16103 | 446 |
| A10656 | A16277 | 460 | A10656 | A16286 | 489 |
| A10656 | A16335 | 417 | A10656 | A16419 | 299 |
| A10656 | A16529 | 283 | A10656 | A16959 | 232 |
| A10656 | A17007 | 276 | A10656 | A17040 | 205 |
| A10656 | A17041 | 279 | A10657 | A10880 | 389 |
| A10657 | A13159 | 159 | A10658 | A10672 | 353 |
| A10658 | A10677 | 443 | A10658 | A10686 | 475 |
| A10658 | A10689 | 210 | A10658 | A10693 | 316 |
| A10658 | A10702 | 458 | A10658 | A10703 | 417 |
| A10658 | A10710 | 208 | A10658 | A12055 | 378 |
| A10658 | A14856 | 205 | A10658 | A14857 | 328 |
| A10658 | A15311 | 293 | A10658 | A16418 | 286 |
| A10658 | A16419 | 344 | A10658 | A17007 | 324 |
| A10658 | A17089 | 291 | A10659 | A10676 | 388 |
| A10659 | A10681 | 363 | A10659 | A10685 | 390 |
| A10659 | A10686 | 467 | A10659 | A10702 | 401 |
| A10659 | A10714 | 294 | A10659 | A12723 | 305 |
| A10659 | A14247 | 176 | A10659 | A15874 | 281 |
| A10660 | A10780 | 416 | A10660 | A13734 | 251 |
| A10660 | A16103 | 398 | A10660 | A16767 | 402 |
| A10661 | A12072 | 441 | A10661 | A17083 | 447 |
| A10663 | A11456 | 491 | A10663 | A13845 | 177 |
| A10663 | A14182 | 488 | A10663 | A14247 | 491 |
| A10663 | A14258 | 303 | A10663 | A14838 | 344 |
| A10663 | A15647 | 159 | A10663 | A15685 | 168 |
| A10663 | A16617 | 430 | A10663 | A16652 | 486 |
| A10663 | A17061 | 223 | A10664 | A11739 | 350 |
| A10664 | A14087 | 252 | A10664 | A14173 | 259 |
| A10664 | A14180 | 435 | A10664 | A14186 | 99  |
| A10664 | A14481 | 185 | A10664 | A14609 | 182 |
| A10664 | A15377 | 191 | A10664 | A15569 | 332 |
| A10664 | A15712 | 210 | A10664 | A15719 | 388 |
| A10664 | A16634 | 246 | A10664 | A16665 | 307 |
| A10664 | A16843 | 314 | A10664 | A17167 | 345 |
| A10665 | A11014 | 491 | A10665 | A13337 | 427 |

|        |        |     |        |        |     |
|--------|--------|-----|--------|--------|-----|
| A10665 | A14604 | 281 | A10665 | A16043 | 440 |
| A10665 | A16138 | 443 | A10665 | A16721 | 398 |
| A10666 | A14128 | 340 | A10666 | A14299 | 430 |
| A10666 | A15294 | 481 | A10666 | A15506 | 180 |
| A10667 | A11308 | 480 | A10667 | A12119 | 460 |
| A10668 | A12863 | 371 | A10670 | A10684 | 329 |
| A10670 | A10692 | 422 | A10670 | A10699 | 435 |
| A10670 | A10706 | 385 | A10670 | A10783 | 412 |
| A10670 | A10876 | 438 | A10671 | A14190 | 210 |
| A10671 | A15896 | 408 | A10671 | A16038 | 406 |
| A10672 | A10677 | 485 | A10672 | A10712 | 443 |
| A10672 | A10778 | 353 | A10672 | A14856 | 414 |
| A10672 | A14986 | 238 | A10673 | A11309 | 208 |
| A10673 | A13012 | 208 | A10673 | A14227 | 418 |
| A10673 | A14278 | 205 | A10673 | A15497 | 340 |
| A10673 | A15910 | 374 | A10674 | A10692 | 329 |
| A10674 | A10697 | 246 | A10674 | A14609 | 165 |
| A10674 | A14821 | 302 | A10676 | A10685 | 388 |
| A10676 | A13369 | 281 | A10676 | A14191 | 311 |
| A10676 | A14654 | 334 | A10676 | A15614 | 171 |
| A10677 | A10681 | 276 | A10677 | A10686 | 396 |
| A10677 | A10688 | 297 | A10677 | A10694 | 286 |
| A10677 | A10703 | 252 | A10677 | A10712 | 443 |
| A10677 | A10904 | 350 | A10677 | A11309 | 163 |
| A10677 | A11381 | 286 | A10677 | A13735 | 262 |
| A10677 | A13871 | 213 | A10677 | A14856 | 485 |
| A10677 | A15223 | 468 | A10677 | A15970 | 385 |
| A10677 | A16277 | 243 | A10677 | A16286 | 369 |
| A10677 | A16335 | 332 | A10677 | A16418 | 463 |
| A10677 | A16419 | 281 | A10677 | A16529 | 256 |
| A10677 | A16959 | 210 | A10677 | A17007 | 375 |
| A10677 | A17040 | 182 | A10677 | A17041 | 378 |
| A10678 | A10762 | 458 | A10679 | A10695 | 414 |
| A10679 | A11708 | 383 | A10679 | A13362 | 361 |
| A10679 | A13717 | 468 | A10679 | A14821 | 357 |
| A10679 | A17024 | 398 | A10681 | A10689 | 462 |
| A10681 | A10693 | 483 | A10681 | A10702 | 456 |
| A10681 | A10710 | 472 | A10681 | A10712 | 269 |
| A10681 | A10714 | 369 | A10681 | A10885 | 455 |
| A10681 | A11325 | 293 | A10681 | A11545 | 267 |
| A10681 | A13326 | 356 | A10681 | A13956 | 334 |
| A10681 | A14856 | 324 | A10681 | A14862 | 356 |
| A10681 | A15497 | 236 | A10681 | A15874 | 420 |
| A10681 | A16002 | 329 | A10681 | A16027 | 363 |
| A10681 | A16034 | 314 | A10681 | A16262 | 353 |
| A10681 | A16741 | 177 | A10681 | A17040 | 254 |

|        |        |     |        |        |     |
|--------|--------|-----|--------|--------|-----|
| A10682 | A12439 | 430 | A10682 | A12567 | 438 |
| A10683 | A13902 | 199 | A10683 | A14216 | 199 |
| A10684 | A10692 | 465 | A10684 | A10699 | 269 |
| A10684 | A10706 | 188 | A10684 | A10783 | 433 |
| A10684 | A10876 | 343 | A10684 | A11189 | 195 |
| A10684 | A14247 | 488 | A10684 | A16575 | 229 |
| A10685 | A14160 | 369 | A10685 | A14202 | 154 |
| A10685 | A14589 | 177 | A10685 | A17041 | 353 |
| A10686 | A10702 | 260 | A10686 | A14191 | 270 |
| A10686 | A14856 | 205 | A10686 | A16417 | 322 |
| A10686 | A16418 | 475 | A10686 | A16419 | 344 |
| A10686 | A17078 | 180 | A10687 | A10881 | 407 |
| A10688 | A14856 | 449 | A10688 | A15970 | 346 |
| A10688 | A16103 | 348 | A10688 | A16286 | 456 |
| A10688 | A16529 | 419 | A10688 | A16852 | 396 |
| A10688 | A17007 | 335 | A10689 | A10693 | 475 |
| A10689 | A10702 | 424 | A10689 | A10703 | 173 |
| A10689 | A10710 | 467 | A10689 | A10712 | 243 |
| A10689 | A10850 | 243 | A10689 | A10885 | 400 |
| A10689 | A11696 | 176 | A10689 | A11953 | 154 |
| A10689 | A12728 | 154 | A10689 | A13003 | 176 |
| A10689 | A13884 | 228 | A10689 | A14115 | 219 |
| A10689 | A14344 | 187 | A10689 | A15818 | 156 |
| A10689 | A16002 | 420 | A10689 | A16034 | 174 |
| A10689 | A16099 | 172 | A10689 | A16286 | 301 |
| A10689 | A17041 | 313 | A10690 | A10776 | 270 |
| A10690 | A14856 | 348 | A10690 | A15970 | 346 |
| A10690 | A17024 | 457 | A10690 | A17046 | 372 |
| A10690 | A17092 | 407 | A10691 | A10698 | 374 |
| A10691 | A10699 | 360 | A10691 | A10715 | 302 |
| A10691 | A12111 | 187 | A10691 | A13341 | 458 |
| A10691 | A15266 | 243 | A10691 | A15356 | 162 |
| A10691 | A15370 | 441 | A10691 | A16288 | 272 |
| A10692 | A10699 | 329 | A10692 | A10706 | 358 |
| A10692 | A10783 | 394 | A10692 | A10876 | 427 |
| A10692 | A11189 | 363 | A10692 | A14861 | 422 |
| A10693 | A10702 | 474 | A10693 | A10710 | 485 |
| A10693 | A10712 | 454 | A10693 | A10885 | 402 |
| A10693 | A11325 | 263 | A10693 | A16002 | 380 |
| A10693 | A16277 | 277 | A10693 | A16286 | 281 |
| A10693 | A16419 | 312 | A10693 | A16529 | 299 |
| A10693 | A17040 | 218 | A10693 | A17089 | 232 |
| A10694 | A10714 | 259 | A10694 | A10715 | 339 |
| A10694 | A13735 | 329 | A10694 | A14803 | 396 |
| A10694 | A16335 | 279 | A10694 | A16419 | 344 |
| A10695 | A12604 | 384 | A10696 | A10882 | 450 |

|        |        |     |        |        |     |
|--------|--------|-----|--------|--------|-----|
| A10696 | A14828 | 396 | A10696 | A17092 | 63  |
| A10698 | A12824 | 210 | A10698 | A15356 | 340 |
| A10699 | A10706 | 241 | A10699 | A10709 | 173 |
| A10699 | A10783 | 468 | A10699 | A10876 | 373 |
| A10699 | A10884 | 334 | A10699 | A12255 | 235 |
| A10699 | A12723 | 180 | A10699 | A13341 | 409 |
| A10699 | A14120 | 167 | A10699 | A14128 | 154 |
| A10699 | A14209 | 324 | A10699 | A14799 | 486 |
| A10699 | A15665 | 491 | A10699 | A16552 | 373 |
| A10699 | A16860 | 198 | A10700 | A10715 | 440 |
| A10700 | A10881 | 460 | A10700 | A12723 | 411 |
| A10700 | A16453 | 243 | A10701 | A10707 | 321 |
| A10701 | A14709 | 422 | A10701 | A16529 | 283 |
| A10702 | A10703 | 223 | A10702 | A10707 | 268 |
| A10702 | A10710 | 446 | A10702 | A10712 | 475 |
| A10702 | A10714 | 274 | A10702 | A10885 | 481 |
| A10702 | A10989 | 170 | A10702 | A11309 | 357 |
| A10702 | A11325 | 441 | A10702 | A11381 | 469 |
| A10702 | A13735 | 358 | A10702 | A14856 | 205 |
| A10702 | A14862 | 441 | A10702 | A15497 | 262 |
| A10702 | A15532 | 199 | A10702 | A15874 | 351 |
| A10702 | A15986 | 393 | A10702 | A16002 | 581 |
| A10702 | A16034 | 418 | A10702 | A16073 | 555 |
| A10702 | A16262 | 480 | A10702 | A16277 | 343 |
| A10702 | A16286 | 416 | A10702 | A16362 | 451 |
| A10702 | A16419 | 430 | A10702 | A16529 | 449 |
| A10702 | A16766 | 190 | A10702 | A16836 | 417 |
| A10702 | A16959 | 393 | A10702 | A17007 | 226 |
| A10702 | A17040 | 373 | A10702 | A17089 | 241 |
| A10703 | A10712 | 246 | A10703 | A10714 | 475 |
| A10703 | A10735 | 219 | A10703 | A10866 | 333 |
| A10703 | A11122 | 356 | A10703 | A11381 | 334 |
| A10703 | A11421 | 389 | A10703 | A11556 | 328 |
| A10703 | A12728 | 180 | A10703 | A13314 | 456 |
| A10703 | A13326 | 458 | A10703 | A13735 | 302 |
| A10703 | A14856 | 167 | A10703 | A14862 | 425 |
| A10703 | A15223 | 276 | A10703 | A16103 | 313 |
| A10703 | A16277 | 285 | A10703 | A16286 | 443 |
| A10703 | A16419 | 452 | A10703 | A16529 | 174 |
| A10703 | A16767 | 490 | A10703 | A16847 | 235 |
| A10703 | A16959 | 256 | A10703 | A17041 | 447 |
| A10703 | A17089 | 404 | A10704 | A13399 | 279 |
| A10704 | A13737 | 254 | A10704 | A13963 | 171 |
| A10704 | A14229 | 176 | A10704 | A15342 | 389 |
| A10704 | A15343 | 324 | A10704 | A15344 | 329 |
| A10704 | A16424 | 327 | A10705 | A10715 | 374 |

|        |        |     |        |        |     |
|--------|--------|-----|--------|--------|-----|
| A10705 | A12723 | 416 | A10706 | A10783 | 339 |
| A10706 | A10876 | 394 | A10707 | A11381 | 249 |
| A10707 | A13735 | 335 | A10707 | A14856 | 215 |
| A10707 | A16286 | 326 | A10707 | A16529 | 223 |
| A10707 | A16741 | 443 | A10707 | A17007 | 330 |
| A10708 | A17046 | 479 | A10709 | A14650 | 218 |
| A10709 | A17003 | 380 | A10710 | A10712 | 338 |
| A10710 | A10885 | 319 | A10710 | A11325 | 366 |
| A10710 | A13326 | 234 | A10710 | A13735 | 179 |
| A10710 | A13956 | 330 | A10710 | A14186 | 173 |
| A10710 | A14794 | 312 | A10710 | A14803 | 247 |
| A10710 | A15370 | 364 | A10710 | A15970 | 190 |
| A10710 | A16002 | 236 | A10710 | A16103 | 328 |
| A10710 | A16286 | 163 | A10710 | A16836 | 281 |
| A10710 | A17089 | 235 | A10711 | A12168 | 454 |
| A10711 | A13989 | 154 | A10712 | A10714 | 475 |
| A10712 | A10776 | 165 | A10712 | A10885 | 379 |
| A10712 | A10989 | 193 | A10712 | A11235 | 274 |
| A10712 | A11309 | 288 | A10712 | A11325 | 491 |
| A10712 | A11381 | 488 | A10712 | A13735 | 255 |
| A10712 | A13889 | 199 | A10712 | A14856 | 434 |
| A10712 | A14862 | 302 | A10712 | A15223 | 224 |
| A10712 | A15282 | 198 | A10712 | A15874 | 281 |
| A10712 | A16002 | 241 | A10712 | A16073 | 580 |
| A10712 | A16103 | 269 | A10712 | A16286 | 241 |
| A10712 | A16335 | 191 | A10712 | A16529 | 246 |
| A10712 | A16767 | 281 | A10712 | A16959 | 334 |
| A10712 | A17040 | 475 | A10712 | A17041 | 373 |
| A10713 | A10778 | 294 | A10713 | A16763 | 191 |
| A10714 | A10866 | 385 | A10714 | A11309 | 355 |
| A10714 | A11325 | 402 | A10714 | A11381 | 480 |
| A10714 | A13314 | 435 | A10714 | A13326 | 441 |
| A10714 | A14598 | 241 | A10714 | A14856 | 378 |
| A10714 | A14862 | 391 | A10714 | A15223 | 201 |
| A10714 | A15282 | 268 | A10714 | A15394 | 165 |
| A10714 | A15603 | 217 | A10714 | A15811 | 252 |
| A10714 | A15874 | 252 | A10714 | A15964 | 218 |
| A10714 | A16112 | 288 | A10714 | A16262 | 457 |
| A10714 | A16419 | 374 | A10714 | A16529 | 317 |
| A10714 | A16767 | 379 | A10714 | A16959 | 177 |
| A10714 | A17040 | 463 | A10715 | A10781 | 337 |
| A10715 | A10881 | 391 | A10715 | A10884 | 443 |
| A10715 | A11235 | 423 | A10715 | A12723 | 486 |
| A10715 | A14856 | 191 | A10716 | A14220 | 256 |
| A10718 | A14637 | 303 | A10719 | A17190 | 353 |
| A10720 | A11617 | 475 | A10720 | A12393 | 329 |

|        |        |     |        |        |     |
|--------|--------|-----|--------|--------|-----|
| A10720 | A15106 | 238 | A10720 | A15356 | 483 |
| A10720 | A16238 | 278 | A10720 | A16417 | 271 |
| A10721 | A10899 | 208 | A10721 | A12383 | 168 |
| A10721 | A12835 | 172 | A10721 | A13980 | 263 |
| A10721 | A13986 | 268 | A10721 | A14007 | 347 |
| A10721 | A14011 | 196 | A10721 | A14197 | 221 |
| A10721 | A14452 | 445 | A10721 | A15726 | 443 |
| A10721 | A16951 | 291 | A10721 | A16994 | 322 |
| A10721 | A16996 | 412 | A10721 | A17212 | 323 |
| A10722 | A11131 | 489 | A10722 | A11140 | 272 |
| A10722 | A14143 | 268 | A10722 | A15346 | 173 |
| A10722 | A15445 | 235 | A10723 | A13826 | 486 |
| A10723 | A13899 | 479 | A10723 | A14126 | 328 |
| A10723 | A15308 | 195 | A10723 | A15314 | 63  |
| A10723 | A15318 | 401 | A10723 | A15346 | 454 |
| A10723 | A15349 | 227 | A10723 | A15411 | 296 |
| A10723 | A15445 | 227 | A10723 | A15630 | 202 |
| A10723 | A15800 | 276 | A10723 | A15828 | 302 |
| A10723 | A16224 | 362 | A10723 | A16300 | 235 |
| A10725 | A10949 | 400 | A10726 | A11951 | 385 |
| A10726 | A12935 | 477 | A10726 | A12960 | 407 |
| A10726 | A12976 | 456 | A10726 | A13410 | 404 |
| A10726 | A15498 | 168 | A10727 | A13826 | 246 |
| A10727 | A15346 | 294 | A10727 | A15409 | 393 |
| A10728 | A10808 | 346 | A10728 | A11296 | 193 |
| A10728 | A11302 | 232 | A10728 | A11379 | 163 |
| A10728 | A11392 | 168 | A10728 | A11550 | 154 |
| A10728 | A12328 | 467 | A10728 | A12990 | 447 |
| A10728 | A13149 | 462 | A10728 | A13335 | 179 |
| A10728 | A13340 | 472 | A10728 | A13917 | 182 |
| A10728 | A13989 | 224 | A10728 | A14073 | 307 |
| A10728 | A14399 | 157 | A10728 | A15106 | 274 |
| A10728 | A15244 | 468 | A10728 | A15545 | 168 |
| A10728 | A15546 | 398 | A10728 | A15697 | 274 |
| A10728 | A16060 | 168 | A10728 | A16437 | 154 |
| A10729 | A10734 | 490 | A10729 | A11346 | 146 |
| A10729 | A11869 | 445 | A10729 | A11881 | 307 |
| A10729 | A12975 | 375 | A10729 | A13941 | 486 |
| A10729 | A14266 | 307 | A10729 | A14604 | 255 |
| A10729 | A15292 | 190 | A10731 | A11101 | 247 |
| A10731 | A11899 | 357 | A10731 | A14381 | 174 |
| A10731 | A14384 | 288 | A10731 | A14399 | 272 |
| A10731 | A14545 | 375 | A10731 | A15911 | 419 |
| A10731 | A16503 | 319 | A10732 | A14174 | 319 |
| A10733 | A11131 | 208 | A10733 | A12927 | 160 |
| A10733 | A13824 | 440 | A10733 | A13826 | 399 |

|        |        |     |        |        |     |
|--------|--------|-----|--------|--------|-----|
| A10733 | A15056 | 411 | A10733 | A15181 | 364 |
| A10733 | A15346 | 299 | A10733 | A15435 | 163 |
| A10734 | A11346 | 170 | A10734 | A11869 | 470 |
| A10734 | A11881 | 324 | A10734 | A13941 | 334 |
| A10734 | A14077 | 160 | A10734 | A14266 | 405 |
| A10734 | A15292 | 221 | A10735 | A11369 | 477 |
| A10735 | A13511 | 419 | A10735 | A13980 | 118 |
| A10735 | A14426 | 347 | A10735 | A15570 | 328 |
| A10735 | A16840 | 182 | A10735 | A16847 | 154 |
| A10739 | A10809 | 368 | A10739 | A11250 | 439 |
| A10739 | A15647 | 243 | A10739 | A16299 | 173 |
| A10739 | A16617 | 252 | A10739 | A16738 | 165 |
| A10740 | A13007 | 401 | A10740 | A13826 | 472 |
| A10740 | A13899 | 490 | A10740 | A14190 | 302 |
| A10740 | A14496 | 200 | A10740 | A15284 | 335 |
| A10740 | A15312 | 154 | A10740 | A15346 | 441 |
| A10740 | A15419 | 235 | A10740 | A15424 | 419 |
| A10740 | A15460 | 329 | A10740 | A15834 | 283 |
| A10740 | A16137 | 375 | A10740 | A16300 | 367 |
| A10742 | A12789 | 485 | A10743 | A11252 | 379 |
| A10743 | A11379 | 274 | A10743 | A11943 | 201 |
| A10743 | A13928 | 199 | A10743 | A14037 | 210 |
| A10743 | A14209 | 199 | A10743 | A15665 | 223 |
| A10743 | A16792 | 404 | A10744 | A10825 | 456 |
| A10744 | A10827 | 461 | A10744 | A11393 | 380 |
| A10744 | A12387 | 425 | A10744 | A13820 | 409 |
| A10744 | A15313 | 195 | A10744 | A15904 | 391 |
| A10744 | A16001 | 425 | A10745 | A13752 | 417 |
| A10747 | A11122 | 401 | A10747 | A11556 | 446 |
| A10747 | A15302 | 296 | A10747 | A15352 | 218 |
| A10747 | A15432 | 288 | A10748 | A11096 | 480 |
| A10748 | A11400 | 236 | A10748 | A13340 | 160 |
| A10748 | A14216 | 218 | A10748 | A16157 | 159 |
| A10750 | A13988 | 438 | A10750 | A14071 | 396 |
| A10751 | A11088 | 462 | A10751 | A12303 | 434 |
| A10751 | A12957 | 434 | A10751 | A14410 | 267 |
| A10752 | A11465 | 416 | A10752 | A11525 | 316 |
| A10752 | A12267 | 422 | A10752 | A13369 | 154 |
| A10752 | A14781 | 356 | A10754 | A11044 | 313 |
| A10754 | A11759 | 210 | A10754 | A13734 | 154 |
| A10754 | A14200 | 188 | A10754 | A14583 | 277 |
| A10754 | A15262 | 156 | A10755 | A11202 | 223 |
| A10755 | A11635 | 424 | A10755 | A11735 | 205 |
| A10755 | A11851 | 156 | A10755 | A11914 | 205 |
| A10755 | A13294 | 230 | A10755 | A13298 | 578 |
| A10755 | A13323 | 260 | A10755 | A13356 | 232 |

|        |        |     |        |        |     |
|--------|--------|-----|--------|--------|-----|
| A10755 | A13805 | 193 | A10755 | A13809 | 260 |
| A10755 | A14216 | 223 | A10755 | A14462 | 249 |
| A10755 | A15519 | 163 | A10755 | A15684 | 473 |
| A10755 | A15765 | 152 | A10755 | A16387 | 235 |
| A10755 | A16682 | 210 | A10755 | A16908 | 288 |
| A10756 | A13162 | 468 | A10756 | A14187 | 274 |
| A10756 | A14198 | 191 | A10757 | A12543 | 290 |
| A10757 | A13826 | 187 | A10757 | A15834 | 319 |
| A10757 | A16216 | 200 | A10758 | A12948 | 417 |
| A10759 | A12899 | 461 | A10759 | A15317 | 288 |
| A10759 | A15348 | 276 | A10759 | A15349 | 199 |
| A10760 | A11299 | 177 | A10760 | A12940 | 374 |
| A10760 | A13555 | 283 | A10760 | A14036 | 241 |
| A10760 | A14055 | 90  | A10760 | A15295 | 201 |
| A10760 | A15498 | 414 | A10760 | A17228 | 436 |
| A10762 | A15896 | 301 | A10762 | A15992 | 490 |
| A10763 | A11381 | 369 | A10768 | A11714 | 394 |
| A10770 | A10865 | 472 | A10770 | A17078 | 307 |
| A10773 | A14188 | 162 | A10773 | A14846 | 358 |
| A10775 | A12583 | 452 | A10775 | A12628 | 452 |
| A10776 | A11235 | 252 | A10776 | A17006 | 252 |
| A10776 | A17046 | 283 | A10776 | A17092 | 346 |
| A10778 | A11513 | 276 | A10778 | A14190 | 307 |
| A10778 | A14371 | 177 | A10778 | A15356 | 433 |
| A10778 | A16417 | 417 | A10778 | A16448 | 409 |
| A10780 | A13734 | 177 | A10780 | A16103 | 363 |
| A10780 | A16767 | 372 | A10781 | A12723 | 435 |
| A10783 | A10876 | 418 | A10783 | A10884 | 396 |
| A10783 | A12723 | 294 | A10787 | A15498 | 168 |
| A10788 | A11916 | 429 | A10788 | A13250 | 314 |
| A10788 | A15369 | 167 | A10788 | A16129 | 358 |
| A10788 | A16378 | 263 | A10789 | A11234 | 221 |
| A10789 | A11301 | 457 | A10789 | A11394 | 224 |
| A10789 | A11430 | 198 | A10789 | A11472 | 470 |
| A10789 | A11496 | 475 | A10789 | A11497 | 479 |
| A10789 | A11555 | 324 | A10789 | A11616 | 249 |
| A10789 | A11675 | 446 | A10789 | A11725 | 177 |
| A10789 | A11735 | 470 | A10789 | A11737 | 433 |
| A10789 | A11914 | 480 | A10789 | A11917 | 468 |
| A10789 | A11954 | 457 | A10789 | A11992 | 216 |
| A10789 | A12167 | 283 | A10789 | A12215 | 337 |
| A10789 | A12238 | 199 | A10789 | A12254 | 356 |
| A10789 | A12255 | 419 | A10789 | A12284 | 382 |
| A10789 | A12433 | 477 | A10789 | A12501 | 235 |
| A10789 | A12507 | 695 | A10789 | A12508 | 391 |
| A10789 | A12606 | 479 | A10789 | A12625 | 326 |



|        |        |     |        |        |     |
|--------|--------|-----|--------|--------|-----|
| A10789 | A12655 | 159 | A10789 | A12658 | 472 |
| A10789 | A12659 | 245 | A10789 | A12665 | 299 |
| A10789 | A12725 | 428 | A10789 | A12858 | 483 |
| A10789 | A12873 | 438 | A10789 | A13116 | 152 |
| A10789 | A13231 | 205 | A10789 | A13313 | 414 |
| A10789 | A13323 | 230 | A10789 | A13356 | 296 |
| A10789 | A13388 | 157 | A10789 | A13399 | 490 |
| A10789 | A13707 | 332 | A10789 | A13708 | 364 |
| A10789 | A13737 | 695 | A10789 | A13781 | 420 |
| A10789 | A13784 | 463 | A10789 | A13786 | 251 |
| A10789 | A13787 | 372 | A10789 | A13788 | 171 |
| A10789 | A13804 | 337 | A10789 | A13805 | 382 |
| A10789 | A13809 | 473 | A10789 | A13811 | 291 |
| A10789 | A13912 | 235 | A10789 | A13963 | 695 |
| A10789 | A14059 | 357 | A10789 | A14084 | 556 |
| A10789 | A14094 | 254 | A10789 | A14214 | 486 |
| A10789 | A14222 | 168 | A10789 | A14227 | 256 |
| A10789 | A14239 | 188 | A10789 | A14263 | 184 |
| A10789 | A14270 | 368 | A10789 | A14285 | 557 |
| A10789 | A14286 | 299 | A10789 | A14288 | 344 |
| A10789 | A14289 | 357 | A10789 | A14375 | 310 |
| A10789 | A14462 | 313 | A10789 | A14569 | 474 |
| A10789 | A14595 | 230 | A10789 | A14706 | 360 |
| A10789 | A14708 | 486 | A10789 | A14718 | 232 |
| A10789 | A14739 | 263 | A10789 | A14799 | 313 |
| A10789 | A14826 | 296 | A10789 | A14917 | 302 |
| A10789 | A14921 | 249 | A10789 | A15105 | 278 |
| A10789 | A15187 | 418 | A10789 | A15262 | 263 |
| A10789 | A15519 | 263 | A10789 | A15541 | 457 |
| A10789 | A15653 | 364 | A10789 | A15680 | 285 |
| A10789 | A15683 | 428 | A10789 | A15709 | 446 |
| A10789 | A15711 | 270 | A10789 | A15743 | 162 |
| A10789 | A15774 | 277 | A10789 | A15850 | 256 |
| A10789 | A15855 | 152 | A10789 | A15949 | 695 |
| A10789 | A16099 | 264 | A10789 | A16157 | 486 |
| A10789 | A16187 | 252 | A10789 | A16243 | 177 |
| A10789 | A16261 | 243 | A10789 | A16322 | 196 |
| A10789 | A16343 | 363 | A10789 | A16387 | 205 |
| A10789 | A16552 | 460 | A10789 | A16565 | 475 |
| A10789 | A16566 | 317 | A10789 | A16567 | 208 |
| A10789 | A16587 | 428 | A10789 | A16597 | 378 |
| A10789 | A16611 | 472 | A10789 | A16652 | 180 |
| A10789 | A16664 | 460 | A10789 | A16675 | 255 |
| A10789 | A16680 | 438 | A10789 | A16682 | 313 |
| A10789 | A16690 | 254 | A10789 | A16691 | 355 |
| A10789 | A16693 | 240 | A10789 | A16695 | 245 |

|        |        |     |        |        |     |
|--------|--------|-----|--------|--------|-----|
| A10789 | A16697 | 310 | A10789 | A16701 | 201 |
| A10789 | A16702 | 151 | A10789 | A16703 | 265 |
| A10789 | A16704 | 367 | A10789 | A16706 | 249 |
| A10789 | A16707 | 288 | A10789 | A16708 | 199 |
| A10789 | A16709 | 160 | A10789 | A16764 | 207 |
| A10789 | A16774 | 347 | A10789 | A16776 | 188 |
| A10789 | A16788 | 301 | A10789 | A16797 | 343 |
| A10789 | A16815 | 361 | A10789 | A16829 | 435 |
| A10789 | A16838 | 371 | A10789 | A16874 | 456 |
| A10789 | A16882 | 279 | A10789 | A16900 | 196 |
| A10789 | A16908 | 263 | A10789 | A16913 | 217 |
| A10789 | A17014 | 217 | A10789 | A17015 | 353 |
| A10789 | A17033 | 177 | A10789 | A17035 | 254 |
| A10789 | A17144 | 156 | A10790 | A10897 | 435 |
| A10790 | A11247 | 63  | A10790 | A11759 | 299 |
| A10790 | A13873 | 204 | A10790 | A14272 | 229 |
| A10790 | A16640 | 348 | A10791 | A10901 | 436 |
| A10793 | A10797 | 428 | A10793 | A10798 | 480 |
| A10793 | A10799 | 491 | A10793 | A11244 | 404 |
| A10793 | A11296 | 221 | A10793 | A11337 | 347 |
| A10793 | A13842 | 435 | A10793 | A15220 | 396 |
| A10793 | A15621 | 385 | A10794 | A10798 | 191 |
| A10794 | A10799 | 279 | A10794 | A11373 | 383 |
| A10794 | A13842 | 366 | A10794 | A16640 | 339 |
| A10795 | A11801 | 424 | A10795 | A12854 | 299 |
| A10795 | A13900 | 374 | A10795 | A14006 | 256 |
| A10795 | A14105 | 343 | A10795 | A14655 | 91  |
| A10795 | A15261 | 63  | A10795 | A15312 | 174 |
| A10795 | A15313 | 188 | A10796 | A11617 | 343 |
| A10796 | A14374 | 226 | A10796 | A15395 | 270 |
| A10796 | A15427 | 317 | A10796 | A15649 | 185 |
| A10796 | A15865 | 389 | A10796 | A16009 | 424 |
| A10797 | A10798 | 491 | A10797 | A10799 | 491 |
| A10797 | A11244 | 490 | A10797 | A11296 | 438 |
| A10797 | A11337 | 480 | A10797 | A11419 | 171 |
| A10797 | A11427 | 157 | A10797 | A12241 | 477 |
| A10797 | A13568 | 347 | A10797 | A13830 | 462 |
| A10797 | A13842 | 480 | A10797 | A14247 | 205 |
| A10797 | A14461 | 355 | A10797 | A14845 | 400 |
| A10797 | A16640 | 470 | A10797 | A17126 | 168 |
| A10798 | A10799 | 491 | A10798 | A11244 | 491 |
| A10798 | A11296 | 486 | A10798 | A11322 | 182 |
| A10798 | A11337 | 491 | A10798 | A11677 | 162 |
| A10798 | A12221 | 223 | A10798 | A12241 | 433 |
| A10798 | A13601 | 262 | A10798 | A13830 | 187 |
| A10798 | A13842 | 480 | A10798 | A13983 | 340 |

|        |        |     |        |        |     |
|--------|--------|-----|--------|--------|-----|
| A10798 | A14208 | 297 | A10798 | A14247 | 497 |
| A10798 | A14461 | 402 | A10798 | A14570 | 532 |
| A10798 | A14845 | 439 | A10798 | A15220 | 301 |
| A10798 | A15224 | 179 | A10798 | A15291 | 457 |
| A10798 | A15618 | 208 | A10798 | A15621 | 278 |
| A10798 | A16073 | 199 | A10798 | A16640 | 395 |
| A10798 | A16891 | 205 | A10799 | A11244 | 358 |
| A10799 | A11337 | 363 | A10799 | A12375 | 390 |
| A10799 | A13568 | 362 | A10799 | A13816 | 152 |
| A10799 | A13832 | 321 | A10799 | A13842 | 408 |
| A10799 | A14247 | 443 | A10799 | A14461 | 154 |
| A10799 | A15462 | 151 | A10799 | A16591 | 353 |
| A10799 | A16640 | 461 | A10799 | A17126 | 193 |
| A10801 | A11369 | 82  | A10801 | A12383 | 228 |
| A10801 | A13605 | 480 | A10801 | A13980 | 312 |
| A10801 | A14004 | 249 | A10801 | A14007 | 168 |
| A10801 | A14019 | 258 | A10801 | A14027 | 463 |
| A10801 | A14032 | 319 | A10801 | A14047 | 371 |
| A10801 | A14072 | 176 | A10801 | A14188 | 944 |
| A10801 | A14198 | 993 | A10801 | A14207 | 899 |
| A10801 | A14438 | 468 | A10801 | A14452 | 96  |
| A10801 | A14930 | 200 | A10801 | A15293 | 899 |
| A10801 | A15294 | 899 | A10801 | A15361 | 899 |
| A10801 | A15503 | 291 | A10801 | A16084 | 286 |
| A10802 | A15447 | 232 | A10803 | A13831 | 429 |
| A10803 | A14056 | 497 | A10803 | A14247 | 179 |
| A10804 | A13846 | 263 | A10804 | A14247 | 348 |
| A10804 | A14461 | 210 | A10805 | A11184 | 305 |
| A10805 | A16636 | 193 | A10807 | A15620 | 408 |
| A10808 | A10811 | 943 | A10808 | A10913 | 291 |
| A10808 | A10982 | 308 | A10808 | A11300 | 228 |
| A10808 | A11345 | 235 | A10808 | A11369 | 63  |
| A10808 | A11983 | 317 | A10808 | A12383 | 172 |
| A10808 | A12988 | 199 | A10808 | A13980 | 137 |
| A10808 | A14005 | 305 | A10808 | A14008 | 912 |
| A10808 | A14013 | 281 | A10808 | A14157 | 369 |
| A10809 | A11250 | 390 | A10809 | A13882 | 311 |
| A10809 | A16857 | 379 | A10810 | A11363 | 485 |
| A10810 | A11508 | 360 | A10810 | A13520 | 388 |
| A10810 | A14025 | 310 | A10810 | A14475 | 479 |
| A10810 | A15986 | 199 | A10810 | A16082 | 488 |
| A10811 | A11290 | 301 | A10811 | A11902 | 221 |
| A10811 | A13321 | 235 | A10811 | A14005 | 202 |
| A10812 | A11885 | 307 | A10813 | A11147 | 366 |
| A10813 | A11482 | 301 | A10813 | A11485 | 173 |
| A10813 | A11543 | 226 | A10813 | A12969 | 267 |

|        |        |     |        |        |     |
|--------|--------|-----|--------|--------|-----|
| A10813 | A13181 | 224 | A10813 | A13946 | 290 |
| A10813 | A14516 | 160 | A10813 | A15294 | 170 |
| A10813 | A15422 | 168 | A10814 | A12589 | 406 |
| A10814 | A13052 | 407 | A10816 | A14344 | 348 |
| A10817 | A12606 | 182 | A10819 | A12315 | 438 |
| A10823 | A13181 | 324 | A10823 | A14029 | 307 |
| A10823 | A16996 | 404 | A10824 | A11478 | 297 |
| A10824 | A15649 | 180 | A10825 | A10827 | 435 |
| A10825 | A12387 | 441 | A10825 | A13820 | 430 |
| A10825 | A14299 | 184 | A10825 | A14443 | 273 |
| A10826 | A15360 | 200 | A10826 | A15361 | 162 |
| A10827 | A12387 | 447 | A10827 | A13820 | 438 |
| A10830 | A12839 | 449 | A10832 | A14338 | 445 |
| A10833 | A11326 | 172 | A10833 | A13917 | 188 |
| A10833 | A13990 | 319 | A10833 | A14577 | 523 |
| A10833 | A15293 | 899 | A10833 | A15294 | 899 |
| A10833 | A15649 | 263 | A10835 | A14534 | 452 |
| A10838 | A13589 | 413 | A10840 | A16300 | 311 |
| A10842 | A14148 | 180 | A10842 | A14525 | 152 |
| A10842 | A15375 | 152 | A10842 | A15546 | 152 |
| A10844 | A11306 | 317 | A10844 | A11694 | 252 |
| A10844 | A11866 | 368 | A10844 | A12383 | 477 |
| A10844 | A13501 | 63  | A10844 | A14527 | 240 |
| A10844 | A15721 | 229 | A10846 | A14093 | 235 |
| A10848 | A12383 | 263 | A10848 | A14073 | 212 |
| A10848 | A15677 | 385 | A10851 | A10856 | 434 |
| A10853 | A11258 | 385 | A10853 | A11920 | 378 |
| A10853 | A11928 | 302 | A10853 | A13340 | 183 |
| A10853 | A13989 | 422 | A10853 | A14476 | 391 |
| A10853 | A15543 | 224 | A10853 | A15935 | 183 |
| A10853 | A16912 | 171 | A10854 | A11199 | 174 |
| A10854 | A11369 | 605 | A10854 | A11510 | 318 |
| A10854 | A13983 | 705 | A10854 | A15905 | 486 |
| A10854 | A17189 | 152 | A10858 | A15258 | 470 |
| A10858 | A15260 | 479 | A10858 | A15277 | 463 |
| A10858 | A15495 | 273 | A10861 | A14681 | 441 |
| A10861 | A14985 | 447 | A10862 | A12439 | 447 |
| A10863 | A16660 | 447 | A10865 | A17078 | 307 |
| A10866 | A12728 | 422 | A10866 | A13314 | 488 |
| A10866 | A13326 | 477 | A10866 | A14862 | 369 |
| A10866 | A15282 | 191 | A10866 | A16767 | 357 |
| A10866 | A16896 | 378 | A10866 | A17089 | 173 |
| A10869 | A13346 | 238 | A10869 | A14252 | 332 |
| A10869 | A14443 | 899 | A10870 | A12138 | 270 |
| A10870 | A14198 | 180 | A10870 | A14449 | 151 |
| A10870 | A14457 | 193 | A10870 | A15023 | 340 |

|        |        |     |        |        |     |
|--------|--------|-----|--------|--------|-----|
| A10873 | A10874 | 452 | A10873 | A11326 | 353 |
| A10874 | A11326 | 353 | A10875 | A13928 | 162 |
| A10875 | A15507 | 162 | A10875 | A16157 | 246 |
| A10877 | A14597 | 319 | A10878 | A16840 | 348 |
| A10881 | A12723 | 346 | A10882 | A14210 | 210 |
| A10882 | A14828 | 457 | A10882 | A15312 | 216 |
| A10882 | A15313 | 356 | A10882 | A15333 | 338 |
| A10882 | A15462 | 293 | A10883 | A14828 | 429 |
| A10884 | A12723 | 326 | A10884 | A16103 | 379 |
| A10885 | A11325 | 286 | A10885 | A11381 | 449 |
| A10885 | A14856 | 184 | A10885 | A14862 | 430 |
| A10885 | A15874 | 221 | A10885 | A16002 | 399 |
| A10885 | A16027 | 229 | A10885 | A16262 | 465 |
| A10885 | A16528 | 368 | A10885 | A16529 | 191 |
| A10885 | A16766 | 172 | A10885 | A16959 | 385 |
| A10885 | A17040 | 428 | A10887 | A11040 | 419 |
| A10887 | A11326 | 267 | A10887 | A12674 | 406 |
| A10887 | A14220 | 270 | A10887 | A14354 | 434 |
| A10887 | A14391 | 273 | A10887 | A16180 | 434 |
| A10887 | A16181 | 434 | A10887 | A16182 | 434 |
| A10887 | A16183 | 434 | A10889 | A14198 | 425 |
| A10891 | A15277 | 314 | A10894 | A11923 | 191 |
| A10894 | A13311 | 162 | A10894 | A13977 | 170 |
| A10894 | A14636 | 221 | A10894 | A14649 | 204 |
| A10894 | A14864 | 208 | A10894 | A15726 | 483 |
| A10894 | A15926 | 256 | A10894 | A16626 | 232 |
| A10897 | A11247 | 351 | A10897 | A11256 | 422 |
| A10897 | A11939 | 368 | A10897 | A13831 | 393 |
| A10897 | A13873 | 196 | A10897 | A14056 | 213 |
| A10897 | A14119 | 357 | A10898 | A11326 | 229 |
| A10898 | A13250 | 438 | A10899 | A11543 | 337 |
| A10899 | A13605 | 265 | A10899 | A13980 | 168 |
| A10899 | A14055 | 430 | A10899 | A14452 | 88  |
| A10899 | A14686 | 321 | A10899 | A15575 | 254 |
| A10899 | A15726 | 488 | A10899 | A16994 | 135 |
| A10899 | A16996 | 338 | A10900 | A12845 | 423 |
| A10901 | A14188 | 198 | A10902 | A11124 | 454 |
| A10902 | A14008 | 394 | A10902 | A14013 | 360 |
| A10904 | A11309 | 322 | A10904 | A11847 | 412 |
| A10904 | A13734 | 224 | A10904 | A13736 | 386 |
| A10904 | A16335 | 345 | A10904 | A16419 | 389 |
| A10904 | A16529 | 294 | A10904 | A16852 | 420 |
| A10904 | A16959 | 352 | A10904 | A16968 | 409 |
| A10904 | A17041 | 379 | A10905 | A11271 | 335 |
| A10905 | A11291 | 168 | A10905 | A15639 | 278 |
| A10905 | A15649 | 176 | A10906 | A11085 | 428 |

|        |        |     |        |        |     |
|--------|--------|-----|--------|--------|-----|
| A10906 | A12424 | 63  | A10906 | A12565 | 440 |
| A10906 | A12566 | 440 | A10906 | A12892 | 63  |
| A10906 | A13085 | 440 | A10906 | A13285 | 433 |
| A10907 | A11240 | 277 | A10907 | A15696 | 451 |
| A10908 | A15974 | 283 | A10909 | A11346 | 249 |
| A10909 | A12722 | 288 | A10909 | A14009 | 213 |
| A10909 | A14222 | 238 | A10909 | A14266 | 274 |
| A10909 | A14278 | 328 | A10909 | A14281 | 193 |
| A10909 | A14633 | 232 | A10911 | A12041 | 347 |
| A10911 | A12383 | 452 | A10911 | A12990 | 204 |
| A10911 | A14013 | 351 | A10911 | A14022 | 390 |
| A10911 | A14275 | 367 | A10911 | A14443 | 171 |
| A10911 | A16328 | 208 | A10912 | A14655 | 317 |
| A10913 | A13980 | 255 | A10913 | A14157 | 416 |
| A10913 | A15726 | 107 | A10917 | A13989 | 162 |
| A10917 | A14597 | 238 | A10920 | A16573 | 486 |
| A10920 | A17147 | 490 | A10921 | A13193 | 388 |
| A10921 | A13749 | 429 | A10921 | A14135 | 483 |
| A10921 | A14570 | 363 | A10921 | A15482 | 335 |
| A10923 | A14449 | 246 | A10927 | A15912 | 221 |
| A10927 | A16377 | 347 | A10928 | A11269 | 445 |
| A10929 | A16725 | 433 | A10930 | A15960 | 460 |
| A10934 | A11368 | 335 | A10934 | A11694 | 213 |
| A10934 | A12417 | 467 | A10934 | A14009 | 338 |
| A10934 | A14016 | 152 | A10934 | A14200 | 480 |
| A10934 | A15262 | 502 | A10934 | A15708 | 269 |
| A10934 | A15720 | 469 | A10934 | A15721 | 481 |
| A10934 | A16768 | 319 | A10934 | A16936 | 502 |
| A10934 | A17015 | 502 | A10934 | A17028 | 502 |
| A10935 | A13826 | 329 | A10935 | A14073 | 162 |
| A10935 | A15346 | 249 | A10936 | A10975 | 452 |
| A10938 | A11184 | 358 | A10938 | A15498 | 227 |
| A10940 | A12824 | 173 | A10940 | A16400 | 251 |
| A10942 | A13397 | 353 | A10943 | A11101 | 356 |
| A10944 | A12347 | 458 | A10944 | A13179 | 463 |
| A10944 | A14701 | 168 | A10944 | A15323 | 162 |
| A10944 | A15825 | 413 | A10944 | A16057 | 419 |
| A10945 | A12437 | 447 | A10945 | A15276 | 438 |
| A10947 | A14650 | 154 | A10948 | A11031 | 452 |
| A10949 | A12651 | 462 | A10949 | A12653 | 330 |
| A10949 | A13992 | 165 | A10949 | A14151 | 308 |
| A10949 | A14204 | 221 | A10949 | A14393 | 243 |
| A10949 | A14496 | 165 | A10949 | A15894 | 475 |
| A10951 | A12641 | 447 | A10952 | A11683 | 361 |
| A10953 | A14633 | 267 | A10954 | A12698 | 429 |
| A10959 | A11225 | 452 | A10959 | A12398 | 452 |

|        |        |     |        |        |     |
|--------|--------|-----|--------|--------|-----|
| A10960 | A11760 | 486 | A10960 | A13437 | 368 |
| A10960 | A14969 | 441 | A10961 | A13024 | 465 |
| A10961 | A16351 | 425 | A10961 | A16457 | 458 |
| A10962 | A11011 | 452 | A10962 | A11143 | 447 |
| A10963 | A15295 | 165 | A10965 | A11107 | 544 |
| A10965 | A13964 | 452 | A10966 | A16626 | 257 |
| A10967 | A11630 | 334 | A10967 | A12793 | 491 |
| A10967 | A13327 | 385 | A10967 | A15992 | 235 |
| A10967 | A17108 | 491 | A10969 | A14396 | 425 |
| A10970 | A13681 | 435 | A10971 | A11124 | 391 |
| A10973 | A12824 | 246 | A10974 | A12510 | 447 |
| A10974 | A14642 | 338 | A10974 | A16738 | 301 |
| A10976 | A14378 | 283 | A10976 | A14399 | 247 |
| A10979 | A15559 | 216 | A10981 | A14215 | 63  |
| A10982 | A11252 | 347 | A10982 | A11983 | 246 |
| A10982 | A12353 | 445 | A10982 | A12664 | 472 |
| A10982 | A14931 | 221 | A10982 | A15282 | 364 |
| A10982 | A15870 | 286 | A10982 | A15875 | 276 |
| A10982 | A16792 | 249 | A10983 | A11311 | 361 |
| A10983 | A11428 | 367 | A10983 | A13740 | 435 |
| A10983 | A16766 | 190 | A10985 | A14366 | 294 |
| A10986 | A11926 | 286 | A10986 | A15667 | 205 |
| A10986 | A17078 | 232 | A10986 | A17147 | 294 |
| A10987 | A11412 | 360 | A10987 | A11911 | 270 |
| A10987 | A13589 | 160 | A10987 | A13617 | 252 |
| A10987 | A14010 | 205 | A10987 | A14389 | 260 |
| A10987 | A14483 | 165 | A10989 | A15388 | 179 |
| A10989 | A15578 | 176 | A10989 | A15605 | 210 |
| A10991 | A12527 | 452 | A10993 | A13987 | 202 |
| A10993 | A14010 | 262 | A10993 | A14071 | 241 |
| A10993 | A14430 | 205 | A10993 | A14511 | 163 |
| A10993 | A15292 | 388 | A10993 | A15312 | 308 |
| A10993 | A15313 | 322 | A10993 | A15317 | 254 |
| A10993 | A15333 | 310 | A10993 | A15349 | 157 |
| A10993 | A15352 | 171 | A10993 | A15383 | 313 |
| A10993 | A15433 | 319 | A10993 | A15480 | 368 |
| A10993 | A16300 | 165 | A10995 | A16328 | 294 |
| A10998 | A12521 | 440 | A11005 | A11020 | 433 |
| A11005 | A11890 | 441 | A11005 | A12428 | 447 |
| A11005 | A12967 | 447 | A11006 | A14485 | 312 |
| A11006 | A14585 | 286 | A11007 | A16224 | 326 |
| A11011 | A11143 | 447 | A11012 | A12761 | 452 |
| A11014 | A13337 | 417 | A11014 | A14604 | 247 |
| A11014 | A16043 | 475 | A11014 | A16138 | 463 |
| A11014 | A16721 | 383 | A11016 | A12408 | 390 |
| A11017 | A12361 | 345 | A11017 | A15315 | 160 |

|        |        |     |        |        |     |
|--------|--------|-----|--------|--------|-----|
| A11018 | A14719 | 63  | A11020 | A12428 | 440 |
| A11020 | A12967 | 440 | A11021 | A13065 | 465 |
| A11022 | A11023 | 455 | A11022 | A11149 | 344 |
| A11022 | A11185 | 428 | A11022 | A11902 | 347 |
| A11023 | A11149 | 491 | A11023 | A11150 | 457 |
| A11023 | A11152 | 375 | A11023 | A11180 | 486 |
| A11023 | A11185 | 428 | A11023 | A11281 | 490 |
| A11023 | A11547 | 454 | A11023 | A11665 | 263 |
| A11023 | A11684 | 254 | A11023 | A11716 | 446 |
| A11023 | A11902 | 491 | A11023 | A12051 | 479 |
| A11023 | A12161 | 334 | A11023 | A12651 | 191 |
| A11023 | A12911 | 375 | A11023 | A13927 | 427 |
| A11023 | A14060 | 221 | A11023 | A14281 | 477 |
| A11023 | A15035 | 484 | A11023 | A15122 | 375 |
| A11026 | A11600 | 466 | A11026 | A13407 | 441 |
| A11027 | A11258 | 399 | A11027 | A11478 | 401 |
| A11027 | A13978 | 286 | A11027 | A15726 | 307 |
| A11033 | A11229 | 435 | A11033 | A11434 | 369 |
| A11033 | A11493 | 195 | A11037 | A14399 | 281 |
| A11039 | A11477 | 460 | A11039 | A11713 | 438 |
| A11039 | A12518 | 469 | A11039 | A12532 | 455 |
| A11039 | A12534 | 447 | A11039 | A12991 | 408 |
| A11039 | A13178 | 408 | A11039 | A14371 | 170 |
| A11039 | A14384 | 347 | A11039 | A17076 | 288 |
| A11040 | A11143 | 438 | A11040 | A12676 | 445 |
| A11040 | A14354 | 445 | A11040 | A16180 | 445 |
| A11040 | A16181 | 445 | A11040 | A16182 | 445 |
| A11040 | A16183 | 445 | A11041 | A11307 | 385 |
| A11041 | A12692 | 430 | A11041 | A16430 | 400 |
| A11043 | A13209 | 452 | A11046 | A11074 | 452 |
| A11047 | A14210 | 183 | A11047 | A14452 | 177 |
| A11048 | A11329 | 391 | A11049 | A14633 | 297 |
| A11053 | A14222 | 273 | A11058 | A15649 | 329 |
| A11061 | A12381 | 393 | A11061 | A13619 | 429 |
| A11061 | A14198 | 157 | A11062 | A12897 | 159 |
| A11062 | A13997 | 276 | A11064 | A11123 | 467 |
| A11064 | A15913 | 279 | A11064 | A16636 | 466 |
| A11064 | A17136 | 226 | A11068 | A11359 | 369 |
| A11068 | A11602 | 229 | A11068 | A11983 | 940 |
| A11068 | A12047 | 418 | A11068 | A13824 | 270 |
| A11068 | A13997 | 249 | A11068 | A14005 | 171 |
| A11068 | A14026 | 457 | A11068 | A14406 | 274 |
| A11068 | A15324 | 490 | A11068 | A15352 | 157 |
| A11068 | A15353 | 262 | A11068 | A15354 | 193 |
| A11068 | A15395 | 160 | A11068 | A15396 | 208 |
| A11068 | A15436 | 165 | A11068 | A15498 | 477 |



|        |        |     |        |        |     |
|--------|--------|-----|--------|--------|-----|
| A11068 | A15501 | 341 | A11068 | A15502 | 475 |
| A11068 | A15505 | 170 | A11068 | A15586 | 302 |
| A11068 | A15606 | 380 | A11068 | A15943 | 191 |
| A11068 | A16004 | 302 | A11068 | A16109 | 167 |
| A11068 | A16678 | 302 | A11068 | A16847 | 307 |
| A11069 | A14856 | 348 | A11070 | A11318 | 477 |
| A11070 | A11566 | 416 | A11070 | A12207 | 457 |
| A11070 | A12740 | 434 | A11070 | A13851 | 401 |
| A11073 | A11872 | 452 | A11073 | A14378 | 249 |
| A11073 | A15828 | 367 | A11075 | A12643 | 364 |
| A11075 | A12739 | 491 | A11075 | A13141 | 416 |
| A11075 | A13609 | 160 | A11075 | A13617 | 191 |
| A11075 | A14471 | 386 | A11075 | A15153 | 416 |
| A11075 | A15154 | 416 | A11075 | A15155 | 416 |
| A11079 | A12408 | 199 | A11079 | A13587 | 285 |
| A11079 | A15870 | 205 | A11079 | A16488 | 317 |
| A11082 | A11465 | 445 | A11082 | A11712 | 445 |
| A11082 | A12702 | 452 | A11082 | A12807 | 447 |
| A11082 | A12879 | 452 | A11085 | A14029 | 340 |
| A11086 | A15945 | 245 | A11088 | A12303 | 445 |
| A11088 | A14410 | 314 | A11090 | A11400 | 477 |
| A11090 | A15416 | 462 | A11092 | A12431 | 445 |
| A11095 | A15291 | 277 | A11097 | A14570 | 208 |
| A11098 | A16216 | 290 | A11099 | A14279 | 213 |
| A11100 | A15312 | 257 | A11100 | A15352 | 252 |
| A11100 | A15366 | 176 | A11101 | A11317 | 313 |
| A11101 | A12464 | 443 | A11101 | A12633 | 347 |
| A11101 | A13338 | 262 | A11101 | A13361 | 489 |
| A11101 | A14378 | 274 | A11101 | A14399 | 473 |
| A11101 | A15672 | 333 | A11101 | A15911 | 488 |
| A11101 | A16002 | 165 | A11101 | A16220 | 408 |
| A11101 | A16441 | 333 | A11101 | A16719 | 353 |
| A11101 | A17155 | 317 | A11103 | A12763 | 438 |
| A11104 | A12513 | 472 | A11104 | A13378 | 412 |
| A11104 | A13924 | 490 | A11104 | A14037 | 224 |
| A11104 | A14674 | 160 | A11104 | A14886 | 467 |
| A11105 | A14476 | 456 | A11106 | A13587 | 173 |
| A11107 | A11828 | 366 | A11107 | A13964 | 270 |
| A11108 | A14188 | 279 | A11108 | A14198 | 260 |
| A11109 | A12383 | 210 | A11111 | A15322 | 163 |
| A11111 | A15402 | 229 | A11112 | A12047 | 151 |
| A11112 | A14163 | 353 | A11113 | A11411 | 366 |
| A11113 | A12222 | 420 | A11113 | A12927 | 232 |
| A11113 | A13044 | 485 | A11113 | A14381 | 291 |
| A11119 | A14758 | 341 | A11120 | A15321 | 285 |
| A11120 | A15506 | 314 | A11120 | A15682 | 213 |

|        |        |     |        |        |     |
|--------|--------|-----|--------|--------|-----|
| A11120 | A17078 | 243 | A11121 | A14266 | 219 |
| A11122 | A11421 | 474 | A11122 | A11556 | 479 |
| A11122 | A14202 | 163 | A11123 | A16636 | 474 |
| A11124 | A12383 | 113 | A11124 | A14067 | 405 |
| A11125 | A11206 | 899 | A11125 | A11983 | 899 |
| A11125 | A12664 | 899 | A11125 | A12705 | 899 |
| A11125 | A13981 | 899 | A11125 | A13985 | 899 |
| A11125 | A14188 | 899 | A11127 | A11951 | 418 |
| A11127 | A12983 | 434 | A11129 | A13216 | 429 |
| A11129 | A14299 | 310 | A11129 | A14443 | 182 |
| A11129 | A14526 | 405 | A11129 | A15653 | 179 |
| A11129 | A15780 | 440 | A11129 | A16547 | 429 |
| A11129 | A16594 | 489 | A11131 | A11140 | 165 |
| A11131 | A11233 | 232 | A11131 | A11279 | 190 |
| A11131 | A11444 | 188 | A11131 | A12870 | 229 |
| A11131 | A12961 | 262 | A11131 | A13587 | 154 |
| A11131 | A13826 | 477 | A11131 | A13873 | 157 |
| A11131 | A13899 | 219 | A11131 | A13982 | 160 |
| A11131 | A14135 | 160 | A11131 | A14143 | 485 |
| A11131 | A14191 | 177 | A11131 | A15346 | 434 |
| A11131 | A15409 | 232 | A11131 | A16640 | 229 |
| A11131 | A17181 | 369 | A11132 | A11326 | 228 |
| A11132 | A12686 | 384 | A11132 | A12897 | 163 |
| A11132 | A13338 | 201 | A11132 | A13706 | 154 |
| A11132 | A13812 | 229 | A11132 | A14124 | 219 |
| A11132 | A14467 | 205 | A11132 | A15293 | 279 |
| A11132 | A15308 | 483 | A11132 | A15314 | 235 |
| A11132 | A15321 | 224 | A11132 | A15414 | 296 |
| A11132 | A15459 | 224 | A11132 | A15506 | 191 |
| A11132 | A15630 | 477 | A11132 | A16904 | 484 |
| A11132 | A16916 | 174 | A11132 | A17196 | 319 |
| A11133 | A14647 | 395 | A11133 | A15345 | 291 |
| A11133 | A15347 | 146 | A11134 | A13982 | 899 |
| A11134 | A14197 | 296 | A11134 | A14452 | 247 |
| A11135 | A11211 | 404 | A11135 | A14498 | 485 |
| A11135 | A14589 | 338 | A11135 | A14643 | 196 |
| A11135 | A14648 | 241 | A11135 | A14674 | 258 |
| A11136 | A14423 | 408 | A11137 | A11141 | 452 |
| A11139 | A11379 | 198 | A11139 | A11476 | 163 |
| A11139 | A11920 | 452 | A11139 | A11923 | 308 |
| A11139 | A11928 | 469 | A11139 | A12047 | 205 |
| A11139 | A13147 | 254 | A11139 | A13310 | 391 |
| A11139 | A13311 | 419 | A11139 | A13805 | 544 |
| A11139 | A13889 | 154 | A11139 | A14115 | 263 |
| A11139 | A14146 | 218 | A11139 | A14476 | 491 |
| A11139 | A15559 | 157 | A11139 | A15660 | 350 |

|        |        |     |        |        |     |
|--------|--------|-----|--------|--------|-----|
| A11139 | A15684 | 318 | A11139 | A15711 | 675 |
| A11139 | A15766 | 357 | A11139 | A16678 | 283 |
| A11139 | A16690 | 383 | A11139 | A16866 | 383 |
| A11139 | A16912 | 466 | A11139 | A17142 | 160 |
| A11140 | A11445 | 326 | A11140 | A15295 | 301 |
| A11140 | A15430 | 208 | A11142 | A15495 | 252 |
| A11143 | A12676 | 447 | A11144 | A12347 | 393 |
| A11144 | A15322 | 213 | A11147 | A13946 | 372 |
| A11149 | A11150 | 388 | A11149 | A11180 | 364 |
| A11149 | A11281 | 483 | A11149 | A11547 | 435 |
| A11149 | A11665 | 288 | A11149 | A11716 | 319 |
| A11149 | A11902 | 402 | A11149 | A12051 | 344 |
| A11149 | A12091 | 430 | A11149 | A12161 | 462 |
| A11149 | A12651 | 218 | A11149 | A13927 | 461 |
| A11149 | A14281 | 168 | A11149 | A15035 | 491 |
| A11149 | A15122 | 388 | A11149 | A17033 | 263 |
| A11149 | A17176 | 351 | A11150 | A11180 | 414 |
| A11150 | A11281 | 456 | A11150 | A11293 | 251 |
| A11150 | A12047 | 185 | A11150 | A13927 | 458 |
| A11150 | A14281 | 380 | A11153 | A11541 | 484 |
| A11154 | A11317 | 407 | A11156 | A11258 | 218 |
| A11156 | A11675 | 196 | A11156 | A12727 | 306 |
| A11156 | A14192 | 356 | A11156 | A14252 | 277 |
| A11156 | A14263 | 490 | A11156 | A14270 | 251 |
| A11156 | A14531 | 306 | A11156 | A14554 | 191 |
| A11156 | A14643 | 254 | A11156 | A14719 | 252 |
| A11156 | A15884 | 290 | A11157 | A14804 | 296 |
| A11158 | A11472 | 176 | A11158 | A11521 | 188 |
| A11158 | A11555 | 219 | A11158 | A11616 | 240 |
| A11158 | A11648 | 213 | A11158 | A11649 | 213 |
| A11158 | A11735 | 177 | A11158 | A11737 | 179 |
| A11158 | A11914 | 176 | A11158 | A12167 | 266 |
| A11158 | A12208 | 262 | A11158 | A12254 | 184 |
| A11158 | A12658 | 213 | A11158 | A12858 | 177 |
| A11158 | A13169 | 185 | A11158 | A13786 | 241 |
| A11158 | A13806 | 247 | A11158 | A13809 | 219 |
| A11158 | A14074 | 193 | A11158 | A14096 | 230 |
| A11158 | A14253 | 245 | A11158 | A14289 | 249 |
| A11158 | A14375 | 208 | A11158 | A14569 | 227 |
| A11158 | A14739 | 351 | A11158 | A15541 | 193 |
| A11158 | A15709 | 163 | A11158 | A15711 | 256 |
| A11158 | A15854 | 495 | A11158 | A15855 | 414 |
| A11158 | A16187 | 243 | A11158 | A16243 | 288 |
| A11158 | A16565 | 204 | A11158 | A16587 | 276 |
| A11158 | A16611 | 151 | A11158 | A16680 | 188 |
| A11158 | A16691 | 327 | A11158 | A16788 | 374 |

|        |        |     |        |        |     |
|--------|--------|-----|--------|--------|-----|
| A11158 | A16815 | 332 | A11160 | A11161 | 481 |
| A11160 | A12007 | 484 | A11160 | A12337 | 278 |
| A11160 | A12500 | 246 | A11160 | A12579 | 441 |
| A11160 | A13528 | 333 | A11160 | A14281 | 210 |
| A11160 | A16261 | 232 | A11161 | A14266 | 265 |
| A11162 | A12895 | 457 | A11162 | A14118 | 399 |
| A11163 | A16626 | 307 | A11165 | A11817 | 451 |
| A11166 | A11167 | 486 | A11166 | A12062 | 373 |
| A11166 | A14621 | 252 | A11166 | A15498 | 152 |
| A11167 | A12062 | 475 | A11167 | A14621 | 348 |
| A11168 | A11575 | 288 | A11168 | A13587 | 154 |
| A11168 | A14193 | 310 | A11168 | A14253 | 208 |
| A11168 | A14278 | 465 | A11169 | A14481 | 160 |
| A11170 | A14570 | 319 | A11170 | A14635 | 170 |
| A11172 | A12572 | 440 | A11175 | A11176 | 452 |
| A11175 | A14978 | 452 | A11176 | A14978 | 452 |
| A11177 | A12519 | 452 | A11178 | A11179 | 447 |
| A11179 | A14715 | 441 | A11180 | A11281 | 339 |
| A11180 | A11547 | 486 | A11180 | A11665 | 488 |
| A11180 | A11833 | 238 | A11180 | A11902 | 429 |
| A11180 | A11915 | 486 | A11180 | A12254 | 210 |
| A11180 | A12858 | 204 | A11180 | A13069 | 330 |
| A11180 | A13309 | 254 | A11180 | A13708 | 168 |
| A11180 | A13927 | 486 | A11180 | A14239 | 221 |
| A11180 | A15105 | 154 | A11180 | A15189 | 218 |
| A11180 | A15541 | 218 | A11180 | A16565 | 229 |
| A11180 | A16597 | 230 | A11180 | A16675 | 195 |
| A11180 | A16680 | 215 | A11180 | A16690 | 193 |
| A11180 | A16787 | 369 | A11180 | A16944 | 323 |
| A11182 | A11691 | 460 | A11182 | A13041 | 469 |
| A11183 | A14163 | 303 | A11183 | A14271 | 371 |
| A11183 | A14633 | 195 | A11184 | A13181 | 152 |
| A11184 | A13983 | 319 | A11184 | A14283 | 151 |
| A11184 | A14583 | 243 | A11184 | A15333 | 184 |
| A11184 | A15447 | 235 | A11184 | A15456 | 208 |
| A11184 | A15606 | 204 | A11184 | A15624 | 174 |
| A11184 | A15649 | 157 | A11184 | A15814 | 263 |
| A11184 | A16072 | 235 | A11184 | A16075 | 204 |
| A11184 | A16086 | 199 | A11185 | A11547 | 396 |
| A11185 | A11716 | 418 | A11189 | A11902 | 372 |
| A11189 | A14077 | 224 | A11189 | A15935 | 160 |
| A11190 | A11522 | 429 | A11190 | A11808 | 477 |
| A11190 | A13063 | 385 | A11190 | A13989 | 356 |
| A11190 | A13994 | 344 | A11190 | A14496 | 458 |
| A11190 | A14604 | 184 | A11190 | A14643 | 252 |
| A11191 | A11681 | 485 | A11191 | A14303 | 160 |

|        |        |     |        |        |     |
|--------|--------|-----|--------|--------|-----|
| A11191 | A14408 | 232 | A11191 | A14511 | 235 |
| A11191 | A15288 | 312 | A11191 | A15313 | 266 |
| A11191 | A15317 | 202 | A11191 | A15346 | 165 |
| A11191 | A15348 | 188 | A11191 | A15349 | 228 |
| A11191 | A15451 | 313 | A11191 | A15484 | 207 |
| A11191 | A15800 | 277 | A11191 | A15801 | 312 |
| A11191 | A16224 | 238 | A11191 | A16985 | 372 |
| A11193 | A12540 | 422 | A11193 | A13917 | 402 |
| A11194 | A14430 | 474 | A11194 | A14443 | 262 |
| A11194 | A14444 | 274 | A11196 | A14278 | 252 |
| A11196 | A15273 | 318 | A11196 | A15626 | 187 |
| A11197 | A16329 | 433 | A11199 | A11293 | 436 |
| A11200 | A14378 | 238 | A11202 | A11475 | 276 |
| A11202 | A13298 | 223 | A11202 | A14216 | 223 |
| A11202 | A16261 | 299 | A11204 | A11326 | 314 |
| A11204 | A13016 | 445 | A11204 | A13243 | 438 |
| A11204 | A13748 | 438 | A11204 | A13816 | 337 |
| A11206 | A11323 | 314 | A11206 | A12343 | 447 |
| A11206 | A12987 | 402 | A11207 | A15626 | 199 |
| A11207 | A16073 | 199 | A11208 | A11987 | 412 |
| A11208 | A12262 | 479 | A11209 | A11301 | 159 |
| A11209 | A11430 | 188 | A11209 | A11496 | 201 |
| A11209 | A11497 | 191 | A11209 | A11551 | 274 |
| A11209 | A11555 | 272 | A11209 | A11597 | 238 |
| A11209 | A11616 | 288 | A11209 | A11649 | 267 |
| A11209 | A11675 | 259 | A11209 | A11735 | 232 |
| A11209 | A11737 | 234 | A11209 | A11914 | 230 |
| A11209 | A12254 | 238 | A11209 | A12433 | 191 |
| A11209 | A12606 | 174 | A11209 | A12725 | 188 |
| A11209 | A12727 | 350 | A11209 | A12858 | 358 |
| A11209 | A13116 | 312 | A11209 | A13309 | 279 |
| A11209 | A13321 | 286 | A11209 | A13706 | 371 |
| A11209 | A13809 | 272 | A11209 | A14006 | 210 |
| A11209 | A14074 | 247 | A11209 | A14214 | 168 |
| A11209 | A14288 | 183 | A11209 | A14455 | 343 |
| A11209 | A14706 | 193 | A11209 | A14799 | 162 |
| A11209 | A14827 | 380 | A11209 | A14838 | 199 |
| A11209 | A14921 | 373 | A11209 | A15105 | 184 |
| A11209 | A15187 | 306 | A11209 | A15432 | 218 |
| A11209 | A15501 | 208 | A11209 | A15711 | 302 |
| A11209 | A16157 | 180 | A11209 | A16261 | 286 |
| A11209 | A16565 | 257 | A11209 | A16587 | 319 |
| A11209 | A16597 | 259 | A11209 | A16608 | 226 |
| A11209 | A16664 | 255 | A11209 | A16675 | 352 |
| A11209 | A16690 | 351 | A11209 | A16692 | 313 |
| A11209 | A16790 | 319 | A11209 | A16866 | 385 |

|        |        |     |        |        |     |
|--------|--------|-----|--------|--------|-----|
| A11209 | A17190 | 329 | A11210 | A12357 | 311 |
| A11210 | A15316 | 332 | A11210 | A16300 | 159 |
| A11210 | A17042 | 489 | A11211 | A14498 | 423 |
| A11211 | A14589 | 187 | A11211 | A14648 | 484 |
| A11211 | A14674 | 240 | A11212 | A16425 | 447 |
| A11213 | A14635 | 263 | A11213 | A15322 | 249 |
| A11213 | A15425 | 361 | A11215 | A11290 | 346 |
| A11215 | A16145 | 340 | A11215 | A16931 | 419 |
| A11216 | A12542 | 461 | A11216 | A12936 | 454 |
| A11216 | A14372 | 274 | A11216 | A15790 | 399 |
| A11216 | A16267 | 404 | A11219 | A12047 | 151 |
| A11221 | A11756 | 467 | A11222 | A16690 | 344 |
| A11223 | A11680 | 433 | A11223 | A11817 | 338 |
| A11223 | A12575 | 416 | A11223 | A13422 | 390 |
| A11223 | A14072 | 217 | A11223 | A14246 | 151 |
| A11224 | A11277 | 180 | A11224 | A14041 | 456 |
| A11225 | A12398 | 452 | A11227 | A13207 | 243 |
| A11227 | A14143 | 484 | A11227 | A16060 | 258 |
| A11228 | A13756 | 452 | A11233 | A11873 | 462 |
| A11233 | A12870 | 490 | A11233 | A13826 | 360 |
| A11233 | A13899 | 228 | A11233 | A13987 | 176 |
| A11233 | A14072 | 224 | A11233 | A15318 | 218 |
| A11233 | A15349 | 260 | A11233 | A15420 | 205 |
| A11233 | A15445 | 373 | A11233 | A16635 | 219 |
| A11234 | A11279 | 307 | A11234 | A11297 | 308 |
| A11234 | A11301 | 196 | A11234 | A11472 | 266 |
| A11234 | A11496 | 424 | A11234 | A11497 | 356 |
| A11234 | A11597 | 272 | A11234 | A11675 | 291 |
| A11234 | A11914 | 266 | A11234 | A11917 | 427 |
| A11234 | A11992 | 297 | A11234 | A12284 | 249 |
| A11234 | A12433 | 419 | A11234 | A12499 | 344 |
| A11234 | A12501 | 408 | A11234 | A12507 | 185 |
| A11234 | A12606 | 413 | A11234 | A12658 | 401 |
| A11234 | A12659 | 314 | A11234 | A12665 | 443 |
| A11234 | A12725 | 226 | A11234 | A12858 | 435 |
| A11234 | A13116 | 338 | A11234 | A13169 | 273 |
| A11234 | A13309 | 450 | A11234 | A13313 | 395 |
| A11234 | A13399 | 386 | A11234 | A13706 | 281 |
| A11234 | A13708 | 361 | A11234 | A13737 | 246 |
| A11234 | A13781 | 398 | A11234 | A13784 | 413 |
| A11234 | A13786 | 319 | A11234 | A14074 | 281 |
| A11234 | A14084 | 341 | A11234 | A14094 | 170 |
| A11234 | A14154 | 274 | A11234 | A14214 | 408 |
| A11234 | A14222 | 297 | A11234 | A14227 | 208 |
| A11234 | A14239 | 281 | A11234 | A14263 | 414 |
| A11234 | A14375 | 293 | A11234 | A14455 | 249 |

|        |        |     |        |        |     |
|--------|--------|-----|--------|--------|-----|
| A11234 | A14474 | 157 | A11234 | A14569 | 408 |
| A11234 | A14708 | 271 | A11234 | A14799 | 333 |
| A11234 | A14838 | 235 | A11234 | A14903 | 355 |
| A11234 | A14921 | 390 | A11234 | A15105 | 221 |
| A11234 | A15187 | 422 | A11234 | A15189 | 391 |
| A11234 | A15217 | 353 | A11234 | A15376 | 221 |
| A11234 | A15501 | 243 | A11234 | A15665 | 210 |
| A11234 | A15680 | 226 | A11234 | A15683 | 353 |
| A11234 | A15698 | 321 | A11234 | A15774 | 334 |
| A11234 | A15850 | 391 | A11234 | A15854 | 279 |
| A11234 | A15932 | 180 | A11234 | A15943 | 307 |
| A11234 | A16157 | 347 | A11234 | A16187 | 319 |
| A11234 | A16261 | 314 | A11234 | A16552 | 333 |
| A11234 | A16565 | 398 | A11234 | A16587 | 345 |
| A11234 | A16597 | 291 | A11234 | A16608 | 262 |
| A11234 | A16611 | 425 | A11234 | A16664 | 396 |
| A11234 | A16675 | 259 | A11234 | A16690 | 458 |
| A11234 | A16695 | 386 | A11234 | A16703 | 327 |
| A11234 | A16704 | 333 | A11234 | A16707 | 406 |
| A11234 | A16709 | 344 | A11234 | A16764 | 399 |
| A11234 | A16799 | 369 | A11234 | A16806 | 386 |
| A11234 | A16858 | 398 | A11234 | A16866 | 301 |
| A11234 | A16874 | 351 | A11234 | A16905 | 414 |
| A11234 | A17035 | 321 | A11235 | A12723 | 265 |
| A11236 | A11703 | 480 | A11236 | A11916 | 486 |
| A11236 | A12556 | 491 | A11236 | A12625 | 490 |
| A11236 | A13069 | 167 | A11236 | A13949 | 488 |
| A11236 | A14076 | 491 | A11236 | A14079 | 469 |
| A11236 | A14094 | 491 | A11236 | A14223 | 306 |
| A11236 | A14230 | 491 | A11236 | A14282 | 317 |
| A11236 | A14477 | 271 | A11236 | A14674 | 457 |
| A11236 | A14694 | 458 | A11236 | A14706 | 491 |
| A11236 | A15369 | 491 | A11236 | A15371 | 232 |
| A11236 | A15531 | 156 | A11236 | A15941 | 180 |
| A11236 | A16127 | 491 | A11236 | A16128 | 491 |
| A11236 | A16129 | 483 | A11236 | A16294 | 441 |
| A11236 | A16299 | 422 | A11236 | A16601 | 346 |
| A11236 | A16626 | 157 | A11236 | A16646 | 205 |
| A11236 | A16656 | 187 | A11236 | A16762 | 491 |
| A11236 | A16944 | 154 | A11237 | A12361 | 384 |
| A11237 | A14933 | 452 | A11237 | A15971 | 436 |
| A11240 | A11299 | 486 | A11240 | A11587 | 389 |
| A11240 | A12675 | 243 | A11240 | A12839 | 229 |
| A11240 | A14709 | 162 | A11240 | A15141 | 188 |
| A11240 | A15322 | 221 | A11240 | A15698 | 502 |
| A11240 | A17085 | 481 | A11243 | A11422 | 334 |

|        |        |     |        |        |     |
|--------|--------|-----|--------|--------|-----|
| A11243 | A13412 | 391 | A11243 | A14635 | 188 |
| A11243 | A15498 | 185 | A11244 | A11296 | 469 |
| A11244 | A11337 | 486 | A11244 | A11338 | 208 |
| A11244 | A13601 | 357 | A11244 | A14056 | 152 |
| A11244 | A16587 | 286 | A11244 | A16591 | 373 |
| A11247 | A12645 | 353 | A11247 | A13831 | 326 |
| A11247 | A14056 | 445 | A11247 | A15180 | 446 |
| A11249 | A12978 | 418 | A11250 | A14896 | 422 |
| A11250 | A16582 | 422 | A11252 | A16792 | 447 |
| A11253 | A11683 | 262 | A11253 | A13089 | 401 |
| A11254 | A11334 | 446 | A11254 | A13989 | 224 |
| A11254 | A14216 | 483 | A11254 | A14447 | 457 |
| A11258 | A12318 | 377 | A11258 | A13310 | 217 |
| A11258 | A13978 | 335 | A11258 | A15726 | 258 |
| A11258 | A17156 | 170 | A11260 | A14193 | 199 |
| A11261 | A14430 | 263 | A11262 | A13980 | 245 |
| A11262 | A14642 | 232 | A11263 | A13126 | 286 |
| A11263 | A13989 | 341 | A11263 | A16686 | 303 |
| A11264 | A14381 | 277 | A11264 | A16095 | 268 |
| A11265 | A11279 | 486 | A11265 | A14247 | 485 |
| A11265 | A14258 | 154 | A11265 | A14661 | 296 |
| A11265 | A15116 | 314 | A11265 | A15366 | 260 |
| A11265 | A16798 | 283 | A11267 | A13940 | 472 |
| A11267 | A14736 | 472 | A11268 | A15026 | 452 |
| A11269 | A14216 | 185 | A11271 | A14433 | 256 |
| A11271 | A15328 | 154 | A11271 | A15649 | 152 |
| A11272 | A14218 | 180 | A11273 | A11275 | 462 |
| A11273 | A13061 | 469 | A11273 | A14213 | 339 |
| A11273 | A14969 | 419 | A11275 | A13012 | 168 |
| A11275 | A14647 | 252 | A11277 | A11291 | 180 |
| A11277 | A11429 | 299 | A11277 | A11487 | 154 |
| A11277 | A11542 | 171 | A11277 | A11584 | 160 |
| A11277 | A11670 | 251 | A11277 | A11969 | 303 |
| A11277 | A12816 | 201 | A11277 | A13048 | 252 |
| A11277 | A13441 | 355 | A11277 | A13467 | 303 |
| A11277 | A13505 | 238 | A11277 | A13989 | 168 |
| A11277 | A14006 | 213 | A11277 | A14148 | 184 |
| A11277 | A14196 | 488 | A11277 | A14220 | 445 |
| A11277 | A14246 | 477 | A11277 | A14471 | 221 |
| A11277 | A14596 | 491 | A11277 | A14597 | 486 |
| A11277 | A14635 | 278 | A11277 | A14644 | 470 |
| A11277 | A14701 | 458 | A11277 | A15237 | 404 |
| A11277 | A15292 | 433 | A11277 | A15297 | 446 |
| A11277 | A15312 | 224 | A11277 | A15313 | 258 |
| A11277 | A15323 | 435 | A11277 | A15324 | 480 |
| A11277 | A15338 | 435 | A11277 | A15353 | 371 |



|        |        |     |        |        |     |
|--------|--------|-----|--------|--------|-----|
| A11277 | A15441 | 172 | A11277 | A15535 | 213 |
| A11277 | A15543 | 368 | A11277 | A15624 | 180 |
| A11277 | A15660 | 401 | A11277 | A15684 | 446 |
| A11277 | A15725 | 198 | A11277 | A15935 | 456 |
| A11277 | A16212 | 160 | A11277 | A16376 | 201 |
| A11277 | A16463 | 283 | A11277 | A16490 | 190 |
| A11277 | A16912 | 232 | A11277 | A16973 | 165 |
| A11277 | A17063 | 491 | A11278 | A11298 | 454 |
| A11278 | A11333 | 473 | A11278 | A13860 | 156 |
| A11278 | A15416 | 398 | A11278 | A15638 | 401 |
| A11278 | A16281 | 474 | A11278 | A16904 | 168 |
| A11279 | A11287 | 633 | A11279 | A11291 | 371 |
| A11279 | A11301 | 429 | A11279 | A11329 | 163 |
| A11279 | A11343 | 330 | A11279 | A11444 | 213 |
| A11279 | A11471 | 213 | A11279 | A11496 | 398 |
| A11279 | A11497 | 436 | A11279 | A11551 | 165 |
| A11279 | A11597 | 356 | A11279 | A11616 | 188 |
| A11279 | A11675 | 324 | A11279 | A11730 | 380 |
| A11279 | A11735 | 281 | A11279 | A11833 | 151 |
| A11279 | A11914 | 347 | A11279 | A11915 | 357 |
| A11279 | A11917 | 490 | A11279 | A11940 | 270 |
| A11279 | A11992 | 152 | A11279 | A12069 | 294 |
| A11279 | A12199 | 247 | A11279 | A12234 | 152 |
| A11279 | A12238 | 152 | A11279 | A12254 | 291 |
| A11279 | A12433 | 385 | A11279 | A12499 | 238 |
| A11279 | A12501 | 355 | A11279 | A12507 | 312 |
| A11279 | A12508 | 160 | A11279 | A12606 | 454 |
| A11279 | A12658 | 391 | A11279 | A12665 | 229 |
| A11279 | A12725 | 382 | A11279 | A12727 | 162 |
| A11279 | A12738 | 297 | A11279 | A12858 | 458 |
| A11279 | A13021 | 262 | A11279 | A13129 | 413 |
| A11279 | A13153 | 281 | A11279 | A13222 | 324 |
| A11279 | A13313 | 446 | A11279 | A13587 | 424 |
| A11279 | A13708 | 394 | A11279 | A13781 | 450 |
| A11279 | A13783 | 260 | A11279 | A13784 | 361 |
| A11279 | A13786 | 414 | A11279 | A13809 | 263 |
| A11279 | A13830 | 468 | A11279 | A13871 | 177 |
| A11279 | A13874 | 455 | A11279 | A13882 | 154 |
| A11279 | A13895 | 269 | A11279 | A13912 | 322 |
| A11279 | A13928 | 480 | A11279 | A13987 | 243 |
| A11279 | A14009 | 492 | A11279 | A14052 | 212 |
| A11279 | A14087 | 218 | A11279 | A14109 | 229 |
| A11279 | A14182 | 356 | A11279 | A14202 | 484 |
| A11279 | A14214 | 450 | A11279 | A14220 | 383 |
| A11279 | A14222 | 312 | A11279 | A14247 | 491 |
| A11279 | A14257 | 258 | A11279 | A14258 | 634 |

|        |        |     |        |        |     |
|--------|--------|-----|--------|--------|-----|
| A11279 | A14263 | 319 | A11279 | A14288 | 324 |
| A11279 | A14455 | 160 | A11279 | A14569 | 434 |
| A11279 | A14661 | 745 | A11279 | A14711 | 624 |
| A11279 | A14718 | 171 | A11279 | A14783 | 269 |
| A11279 | A14799 | 286 | A11279 | A14838 | 294 |
| A11279 | A14844 | 631 | A11279 | A14877 | 390 |
| A11279 | A14903 | 413 | A11279 | A14917 | 346 |
| A11279 | A14921 | 335 | A11279 | A15105 | 265 |
| A11279 | A15130 | 210 | A11279 | A15187 | 318 |
| A11279 | A15189 | 408 | A11279 | A15229 | 162 |
| A11279 | A15292 | 353 | A11279 | A15301 | 413 |
| A11279 | A15302 | 345 | A11279 | A15336 | 439 |
| A11279 | A15352 | 170 | A11279 | A15366 | 491 |
| A11279 | A15430 | 371 | A11279 | A15432 | 171 |
| A11279 | A15451 | 260 | A11279 | A15462 | 480 |
| A11279 | A15463 | 491 | A11279 | A15487 | 246 |
| A11279 | A15541 | 221 | A11279 | A15552 | 294 |
| A11279 | A15653 | 213 | A11279 | A15665 | 260 |
| A11279 | A15669 | 340 | A11279 | A15698 | 193 |
| A11279 | A15711 | 212 | A11279 | A15741 | 185 |
| A11279 | A15770 | 469 | A11279 | A15817 | 151 |
| A11279 | A15850 | 210 | A11279 | A15896 | 157 |
| A11279 | A16157 | 465 | A11279 | A16261 | 183 |
| A11279 | A16343 | 193 | A11279 | A16552 | 433 |
| A11279 | A16565 | 441 | A11279 | A16587 | 401 |
| A11279 | A16597 | 457 | A11279 | A16611 | 428 |
| A11279 | A16664 | 473 | A11279 | A16675 | 385 |
| A11279 | A16680 | 213 | A11279 | A16684 | 281 |
| A11279 | A16690 | 335 | A11279 | A16692 | 229 |
| A11279 | A16695 | 199 | A11279 | A16702 | 226 |
| A11279 | A16703 | 205 | A11279 | A16704 | 425 |
| A11279 | A16707 | 247 | A11279 | A16764 | 243 |
| A11279 | A16790 | 400 | A11279 | A16799 | 162 |
| A11279 | A16824 | 180 | A11279 | A16829 | 258 |
| A11279 | A16838 | 324 | A11279 | A16858 | 227 |
| A11279 | A16866 | 157 | A11279 | A16900 | 281 |
| A11279 | A16905 | 291 | A11279 | A16913 | 170 |
| A11279 | A16944 | 281 | A11279 | A16954 | 339 |
| A11279 | A17035 | 193 | A11279 | A17061 | 345 |
| A11279 | A17087 | 247 | A11279 | A17126 | 341 |
| A11279 | A17211 | 255 | A11279 | A17218 | 262 |
| A11280 | A11282 | 489 | A11280 | A11294 | 455 |
| A11280 | A11592 | 343 | A11280 | A12679 | 364 |
| A11280 | A13369 | 491 | A11280 | A13706 | 339 |
| A11280 | A14128 | 255 | A11280 | A14654 | 433 |
| A11280 | A14655 | 165 | A11280 | A14733 | 213 |

|        |        |     |        |        |     |
|--------|--------|-----|--------|--------|-----|
| A11280 | A14812 | 263 | A11280 | A15430 | 208 |
| A11280 | A15456 | 184 | A11280 | A15498 | 285 |
| A11280 | A15516 | 152 | A11280 | A16143 | 428 |
| A11281 | A11292 | 257 | A11281 | A11357 | 252 |
| A11281 | A11915 | 452 | A11281 | A12047 | 240 |
| A11281 | A13927 | 236 | A11281 | A13936 | 412 |
| A11281 | A14266 | 151 | A11281 | A14281 | 483 |
| A11281 | A14474 | 382 | A11281 | A14484 | 232 |
| A11281 | A14633 | 260 | A11281 | A15035 | 434 |
| A11281 | A16787 | 313 | A11282 | A11294 | 420 |
| A11282 | A11605 | 347 | A11282 | A13369 | 491 |
| A11282 | A13617 | 302 | A11282 | A14654 | 276 |
| A11282 | A14733 | 308 | A11282 | A14838 | 172 |
| A11282 | A15461 | 223 | A11282 | A16143 | 486 |
| A11283 | A11332 | 624 | A11283 | A11828 | 307 |
| A11283 | A11840 | 570 | A11283 | A12011 | 204 |
| A11283 | A12047 | 624 | A11283 | A12499 | 182 |
| A11283 | A12538 | 210 | A11283 | A12834 | 348 |
| A11283 | A12938 | 230 | A11283 | A13225 | 899 |
| A11283 | A13565 | 296 | A11283 | A14156 | 490 |
| A11283 | A14846 | 217 | A11283 | A16532 | 435 |
| A11283 | A17068 | 269 | A11283 | A17133 | 185 |
| A11284 | A11430 | 252 | A11284 | A12047 | 404 |
| A11284 | A14209 | 491 | A11284 | A14222 | 491 |
| A11284 | A14289 | 167 | A11284 | A14484 | 329 |
| A11284 | A15380 | 491 | A11284 | A15665 | 485 |
| A11284 | A17008 | 274 | A11285 | A11330 | 486 |
| A11285 | A11387 | 319 | A11285 | A11717 | 367 |
| A11285 | A14005 | 190 | A11285 | A15358 | 216 |
| A11285 | A15465 | 337 | A11285 | A15470 | 337 |
| A11285 | A15471 | 265 | A11285 | A15472 | 260 |
| A11285 | A15559 | 252 | A11285 | A16536 | 466 |
| A11286 | A11291 | 204 | A11286 | A11354 | 399 |
| A11286 | A11908 | 216 | A11286 | A12328 | 491 |
| A11286 | A12813 | 252 | A11286 | A13320 | 491 |
| A11286 | A13335 | 491 | A11286 | A13340 | 489 |
| A11286 | A13372 | 279 | A11286 | A13522 | 238 |
| A11286 | A13989 | 255 | A11286 | A14159 | 369 |
| A11286 | A14188 | 353 | A11286 | A14196 | 382 |
| A11286 | A14220 | 481 | A11286 | A14571 | 486 |
| A11286 | A14738 | 451 | A11286 | A15244 | 486 |
| A11286 | A15246 | 167 | A11286 | A15546 | 201 |
| A11286 | A15697 | 452 | A11286 | A15741 | 333 |
| A11286 | A16291 | 339 | A11286 | A16826 | 335 |
| A11286 | A16939 | 152 | A11286 | A16994 | 63  |
| A11286 | A17142 | 202 | A11286 | A17146 | 208 |

|        |        |     |        |        |     |
|--------|--------|-----|--------|--------|-----|
| A11287 | A11730 | 329 | A11287 | A12199 | 414 |
| A11287 | A13106 | 451 | A11287 | A13222 | 324 |
| A11287 | A14182 | 457 | A11287 | A14193 | 277 |
| A11287 | A14247 | 491 | A11287 | A14258 | 634 |
| A11287 | A14661 | 634 | A11287 | A14711 | 474 |
| A11287 | A14838 | 274 | A11287 | A14844 | 409 |
| A11287 | A14877 | 324 | A11287 | A15336 | 167 |
| A11287 | A15366 | 251 | A11287 | A15432 | 199 |
| A11287 | A15436 | 246 | A11287 | A15462 | 216 |
| A11287 | A15463 | 177 | A11287 | A15686 | 221 |
| A11287 | A15770 | 357 | A11287 | A15858 | 185 |
| A11287 | A16436 | 152 | A11287 | A17061 | 496 |
| A11288 | A13706 | 353 | A11288 | A14655 | 269 |
| A11288 | A14835 | 201 | A11289 | A11310 | 417 |
| A11289 | A11320 | 422 | A11289 | A11328 | 472 |
| A11289 | A11461 | 436 | A11289 | A11466 | 374 |
| A11289 | A11568 | 475 | A11289 | A14633 | 221 |
| A11289 | A14885 | 399 | A11290 | A11344 | 489 |
| A11290 | A11386 | 157 | A11290 | A11647 | 179 |
| A11290 | A11694 | 134 | A11290 | A11918 | 290 |
| A11290 | A12227 | 313 | A11290 | A12329 | 491 |
| A11290 | A13425 | 348 | A11290 | A14216 | 196 |
| A11290 | A14596 | 339 | A11290 | A15624 | 225 |
| A11290 | A15649 | 217 | A11290 | A15651 | 156 |
| A11290 | A15652 | 167 | A11290 | A15659 | 270 |
| A11290 | A15660 | 491 | A11290 | A15661 | 156 |
| A11290 | A15662 | 192 | A11290 | A15684 | 542 |
| A11290 | A15708 | 491 | A11290 | A15720 | 386 |
| A11290 | A15721 | 398 | A11290 | A15746 | 254 |
| A11290 | A15767 | 283 | A11290 | A15917 | 156 |
| A11290 | A15918 | 367 | A11290 | A15923 | 327 |
| A11290 | A15931 | 483 | A11290 | A15937 | 156 |
| A11290 | A16072 | 216 | A11290 | A16088 | 196 |
| A11290 | A16092 | 491 | A11290 | A16095 | 333 |
| A11290 | A16096 | 340 | A11290 | A16145 | 500 |
| A11290 | A16218 | 491 | A11290 | A16307 | 156 |
| A11290 | A16650 | 414 | A11290 | A16768 | 486 |
| A11290 | A16925 | 384 | A11290 | A16931 | 384 |
| A11290 | A17137 | 288 | A11290 | A17140 | 460 |
| A11290 | A17208 | 226 | A11291 | A11297 | 205 |
| A11291 | A11405 | 314 | A11291 | A11487 | 241 |
| A11291 | A11767 | 424 | A11291 | A11831 | 151 |
| A11291 | A12069 | 319 | A11291 | A12329 | 257 |
| A11291 | A12543 | 245 | A11291 | A13311 | 163 |
| A11291 | A13335 | 196 | A11291 | A13375 | 160 |
| A11291 | A13587 | 210 | A11291 | A13763 | 279 |

|        |        |     |        |        |     |
|--------|--------|-----|--------|--------|-----|
| A11291 | A13928 | 491 | A11291 | A13989 | 235 |
| A11291 | A14016 | 177 | A11291 | A14147 | 468 |
| A11291 | A14148 | 363 | A11291 | A14196 | 486 |
| A11291 | A14220 | 491 | A11291 | A14257 | 486 |
| A11291 | A14490 | 229 | A11291 | A14546 | 338 |
| A11291 | A14570 | 165 | A11291 | A14659 | 240 |
| A11291 | A14661 | 241 | A11291 | A15188 | 241 |
| A11291 | A15218 | 162 | A11291 | A15237 | 288 |
| A11291 | A15291 | 462 | A11291 | A15309 | 488 |
| A11291 | A15366 | 491 | A11291 | A15492 | 485 |
| A11291 | A15507 | 408 | A11291 | A15547 | 350 |
| A11291 | A15614 | 483 | A11291 | A15697 | 205 |
| A11291 | A15706 | 255 | A11291 | A15722 | 246 |
| A11291 | A15741 | 314 | A11291 | A15749 | 277 |
| A11291 | A15752 | 191 | A11291 | A15773 | 465 |
| A11291 | A15779 | 179 | A11291 | A15852 | 321 |
| A11291 | A15870 | 249 | A11291 | A15932 | 63  |
| A11291 | A16115 | 246 | A11291 | A16301 | 255 |
| A11291 | A16892 | 246 | A11291 | A17038 | 344 |
| A11292 | A11293 | 360 | A11292 | A11725 | 363 |
| A11292 | A13397 | 196 | A11292 | A14281 | 417 |
| A11292 | A14661 | 344 | A11292 | A17013 | 152 |
| A11293 | A14206 | 240 | A11294 | A11341 | 424 |
| A11294 | A11382 | 385 | A11294 | A13369 | 489 |
| A11294 | A14654 | 452 | A11294 | A16143 | 363 |
| A11295 | A11324 | 212 | A11295 | A11349 | 302 |
| A11295 | A14114 | 462 | A11295 | A14169 | 489 |
| A11296 | A11302 | 154 | A11296 | A11337 | 480 |
| A11296 | A11427 | 357 | A11296 | A14073 | 413 |
| A11296 | A14487 | 210 | A11296 | A14699 | 490 |
| A11296 | A14845 | 454 | A11296 | A16371 | 173 |
| A11296 | A16587 | 205 | A11296 | A16640 | 352 |
| A11297 | A11301 | 335 | A11297 | A11316 | 335 |
| A11297 | A11344 | 221 | A11297 | A11394 | 179 |
| A11297 | A11496 | 302 | A11297 | A11497 | 388 |
| A11297 | A11616 | 190 | A11297 | A11735 | 427 |
| A11297 | A11737 | 353 | A11297 | A11906 | 165 |
| A11297 | A11914 | 350 | A11297 | A11917 | 188 |
| A11297 | A11920 | 159 | A11297 | A11992 | 156 |
| A11297 | A12215 | 294 | A11297 | A12254 | 294 |
| A11297 | A12255 | 322 | A11297 | A12433 | 343 |
| A11297 | A12508 | 163 | A11297 | A12606 | 477 |
| A11297 | A12625 | 168 | A11297 | A12658 | 256 |
| A11297 | A12858 | 351 | A11297 | A13309 | 174 |
| A11297 | A13340 | 260 | A11297 | A13399 | 208 |
| A11297 | A13484 | 171 | A11297 | A13781 | 191 |

|        |        |     |        |        |     |
|--------|--------|-----|--------|--------|-----|
| A11297 | A13783 | 262 | A11297 | A13784 | 174 |
| A11297 | A13786 | 191 | A11297 | A13809 | 266 |
| A11297 | A13989 | 432 | A11297 | A14196 | 466 |
| A11297 | A14214 | 391 | A11297 | A14216 | 477 |
| A11297 | A14569 | 276 | A11297 | A14591 | 491 |
| A11297 | A14596 | 701 | A11297 | A14659 | 491 |
| A11297 | A14738 | 408 | A11297 | A14739 | 219 |
| A11297 | A14799 | 384 | A11297 | A14843 | 491 |
| A11297 | A14921 | 207 | A11297 | A15187 | 218 |
| A11297 | A15188 | 491 | A11297 | A15254 | 490 |
| A11297 | A15262 | 394 | A11297 | A15500 | 188 |
| A11297 | A15507 | 688 | A11297 | A15541 | 308 |
| A11297 | A15547 | 738 | A11297 | A15611 | 480 |
| A11297 | A15612 | 701 | A11297 | A15657 | 461 |
| A11297 | A15660 | 491 | A11297 | A15666 | 269 |
| A11297 | A15683 | 201 | A11297 | A15684 | 642 |
| A11297 | A15698 | 195 | A11297 | A15705 | 393 |
| A11297 | A15711 | 385 | A11297 | A15716 | 441 |
| A11297 | A15717 | 210 | A11297 | A15722 | 223 |
| A11297 | A15728 | 393 | A11297 | A15748 | 172 |
| A11297 | A15769 | 491 | A11297 | A15850 | 213 |
| A11297 | A15931 | 352 | A11297 | A16088 | 435 |
| A11297 | A16157 | 430 | A11297 | A16187 | 193 |
| A11297 | A16291 | 196 | A11297 | A16293 | 491 |
| A11297 | A16298 | 436 | A11297 | A16343 | 328 |
| A11297 | A16552 | 385 | A11297 | A16565 | 443 |
| A11297 | A16580 | 445 | A11297 | A16587 | 341 |
| A11297 | A16597 | 384 | A11297 | A16611 | 430 |
| A11297 | A16627 | 491 | A11297 | A16632 | 183 |
| A11297 | A16664 | 380 | A11297 | A16675 | 182 |
| A11297 | A16680 | 302 | A11297 | A16681 | 221 |
| A11297 | A16691 | 183 | A11297 | A16693 | 196 |
| A11297 | A16696 | 486 | A11297 | A16703 | 208 |
| A11297 | A16707 | 249 | A11297 | A16724 | 177 |
| A11297 | A16764 | 246 | A11297 | A16774 | 172 |
| A11297 | A16788 | 263 | A11297 | A16799 | 162 |
| A11297 | A16806 | 201 | A11297 | A16815 | 191 |
| A11297 | A16822 | 491 | A11297 | A16824 | 183 |
| A11297 | A16829 | 260 | A11297 | A16858 | 228 |
| A11297 | A16879 | 480 | A11297 | A16905 | 190 |
| A11297 | A16913 | 172 | A11297 | A16941 | 312 |
| A11297 | A16942 | 172 | A11297 | A16944 | 152 |
| A11297 | A16947 | 449 | A11297 | A16970 | 219 |
| A11297 | A16973 | 434 | A11297 | A17012 | 490 |
| A11297 | A17031 | 238 | A11297 | A17142 | 157 |
| A11298 | A11333 | 466 | A11298 | A11342 | 384 |

|        |        |     |        |        |     |
|--------|--------|-----|--------|--------|-----|
| A11298 | A11463 | 470 | A11298 | A12383 | 171 |
| A11298 | A13860 | 208 | A11298 | A15416 | 454 |
| A11298 | A15638 | 485 | A11298 | A16281 | 340 |
| A11299 | A11306 | 241 | A11299 | A11336 | 484 |
| A11299 | A11587 | 351 | A11299 | A11732 | 283 |
| A11299 | A11982 | 296 | A11299 | A14381 | 151 |
| A11299 | A15317 | 256 | A11299 | A15399 | 174 |
| A11299 | A15498 | 491 | A11299 | A15913 | 283 |
| A11299 | A17085 | 445 | A11300 | A11387 | 648 |
| A11300 | A11447 | 362 | A11300 | A11983 | 688 |
| A11300 | A12152 | 343 | A11300 | A12373 | 480 |
| A11300 | A13376 | 348 | A11300 | A13391 | 204 |
| A11300 | A13860 | 523 | A11300 | A13917 | 475 |
| A11300 | A14005 | 388 | A11300 | A14231 | 882 |
| A11300 | A14246 | 402 | A11300 | A14660 | 475 |
| A11300 | A15282 | 180 | A11300 | A15292 | 625 |
| A11300 | A15323 | 401 | A11300 | A15795 | 561 |
| A11300 | A16330 | 362 | A11300 | A16732 | 238 |
| A11300 | A16798 | 266 | A11300 | A17146 | 299 |
| A11301 | A11357 | 174 | A11301 | A11376 | 162 |
| A11301 | A11394 | 200 | A11301 | A11397 | 491 |
| A11301 | A11430 | 407 | A11301 | A11443 | 489 |
| A11301 | A11456 | 224 | A11301 | A11472 | 440 |
| A11301 | A11496 | 490 | A11301 | A11497 | 491 |
| A11301 | A11551 | 417 | A11301 | A11555 | 369 |
| A11301 | A11597 | 383 | A11301 | A11616 | 427 |
| A11301 | A11649 | 286 | A11301 | A11675 | 477 |
| A11301 | A11725 | 152 | A11301 | A11735 | 485 |
| A11301 | A11737 | 477 | A11301 | A11820 | 156 |
| A11301 | A11833 | 362 | A11301 | A11914 | 486 |
| A11301 | A11915 | 288 | A11301 | A11917 | 490 |
| A11301 | A11933 | 207 | A11301 | A11940 | 428 |
| A11301 | A11954 | 156 | A11301 | A11992 | 184 |
| A11301 | A12011 | 159 | A11301 | A12052 | 257 |
| A11301 | A12126 | 160 | A11301 | A12167 | 255 |
| A11301 | A12215 | 395 | A11301 | A12238 | 307 |
| A11301 | A12243 | 190 | A11301 | A12254 | 477 |
| A11301 | A12255 | 345 | A11301 | A12284 | 446 |
| A11301 | A12433 | 490 | A11301 | A12499 | 361 |
| A11301 | A12501 | 378 | A11301 | A12506 | 425 |
| A11301 | A12507 | 468 | A11301 | A12508 | 369 |
| A11301 | A12606 | 491 | A11301 | A12625 | 461 |
| A11301 | A12658 | 486 | A11301 | A12659 | 317 |
| A11301 | A12665 | 470 | A11301 | A12725 | 484 |
| A11301 | A12726 | 313 | A11301 | A12727 | 185 |
| A11301 | A12738 | 224 | A11301 | A12792 | 172 |

|        |        |     |        |        |     |
|--------|--------|-----|--------|--------|-----|
| A11301 | A12825 | 400 | A11301 | A12826 | 299 |
| A11301 | A12834 | 221 | A11301 | A12850 | 200 |
| A11301 | A12858 | 489 | A11301 | A12873 | 491 |
| A11301 | A13069 | 185 | A11301 | A13116 | 256 |
| A11301 | A13169 | 384 | A11301 | A13231 | 314 |
| A11301 | A13309 | 204 | A11301 | A13313 | 489 |
| A11301 | A13321 | 477 | A11301 | A13356 | 160 |
| A11301 | A13399 | 385 | A11301 | A13527 | 276 |
| A11301 | A13706 | 259 | A11301 | A13707 | 475 |
| A11301 | A13708 | 454 | A11301 | A13711 | 327 |
| A11301 | A13737 | 427 | A11301 | A13781 | 486 |
| A11301 | A13782 | 268 | A11301 | A13783 | 286 |
| A11301 | A13784 | 469 | A11301 | A13786 | 450 |
| A11301 | A13787 | 227 | A11301 | A13788 | 369 |
| A11301 | A13804 | 314 | A11301 | A13805 | 445 |
| A11301 | A13809 | 479 | A11301 | A13811 | 358 |
| A11301 | A13912 | 446 | A11301 | A13989 | 374 |
| A11301 | A14074 | 339 | A11301 | A14084 | 454 |
| A11301 | A14087 | 246 | A11301 | A14094 | 200 |
| A11301 | A14147 | 491 | A11301 | A14167 | 168 |
| A11301 | A14200 | 473 | A11301 | A14214 | 490 |
| A11301 | A14222 | 466 | A11301 | A14227 | 286 |
| A11301 | A14235 | 172 | A11301 | A14239 | 394 |
| A11301 | A14255 | 435 | A11301 | A14260 | 291 |
| A11301 | A14263 | 457 | A11301 | A14270 | 345 |
| A11301 | A14288 | 480 | A11301 | A14289 | 232 |
| A11301 | A14358 | 241 | A11301 | A14375 | 435 |
| A11301 | A14455 | 353 | A11301 | A14462 | 436 |
| A11301 | A14569 | 490 | A11301 | A14595 | 208 |
| A11301 | A14655 | 345 | A11301 | A14706 | 462 |
| A11301 | A14708 | 380 | A11301 | A14718 | 305 |
| A11301 | A14719 | 246 | A11301 | A14739 | 241 |
| A11301 | A14799 | 486 | A11301 | A14826 | 170 |
| A11301 | A14838 | 262 | A11301 | A14903 | 451 |
| A11301 | A14917 | 367 | A11301 | A14921 | 419 |
| A11301 | A15105 | 467 | A11301 | A15187 | 468 |
| A11301 | A15189 | 479 | A11301 | A15262 | 374 |
| A11301 | A15532 | 188 | A11301 | A15536 | 170 |
| A11301 | A15541 | 475 | A11301 | A15559 | 491 |
| A11301 | A15561 | 485 | A11301 | A15653 | 374 |
| A11301 | A15665 | 372 | A11301 | A15680 | 241 |
| A11301 | A15683 | 460 | A11301 | A15700 | 452 |
| A11301 | A15709 | 450 | A11301 | A15711 | 401 |
| A11301 | A15729 | 491 | A11301 | A15850 | 234 |
| A11301 | A15854 | 152 | A11301 | A15932 | 152 |
| A11301 | A16067 | 208 | A11301 | A16157 | 491 |



|        |        |     |        |        |     |
|--------|--------|-----|--------|--------|-----|
| A11301 | A16187 | 429 | A11301 | A16243 | 152 |
| A11301 | A16261 | 316 | A11301 | A16343 | 447 |
| A11301 | A16552 | 488 | A11301 | A16565 | 489 |
| A11301 | A16566 | 291 | A11301 | A16567 | 185 |
| A11301 | A16585 | 193 | A11301 | A16587 | 481 |
| A11301 | A16597 | 489 | A11301 | A16608 | 307 |
| A11301 | A16611 | 490 | A11301 | A16652 | 249 |
| A11301 | A16663 | 491 | A11301 | A16664 | 490 |
| A11301 | A16675 | 481 | A11301 | A16680 | 460 |
| A11301 | A16682 | 288 | A11301 | A16690 | 435 |
| A11301 | A16691 | 335 | A11301 | A16693 | 346 |
| A11301 | A16695 | 450 | A11301 | A16697 | 285 |
| A11301 | A16703 | 467 | A11301 | A16704 | 404 |
| A11301 | A16707 | 436 | A11301 | A16764 | 435 |
| A11301 | A16774 | 326 | A11301 | A16776 | 297 |
| A11301 | A16788 | 281 | A11301 | A16790 | 470 |
| A11301 | A16807 | 201 | A11301 | A16815 | 341 |
| A11301 | A16824 | 335 | A11301 | A16829 | 424 |
| A11301 | A16838 | 457 | A11301 | A16866 | 367 |
| A11301 | A16874 | 279 | A11301 | A16905 | 388 |
| A11301 | A16913 | 326 | A11301 | A16942 | 193 |
| A11301 | A16944 | 306 | A11301 | A16954 | 361 |
| A11301 | A17015 | 227 | A11301 | A17018 | 290 |
| A11301 | A17019 | 227 | A11301 | A17030 | 297 |
| A11301 | A17033 | 285 | A11301 | A17035 | 223 |
| A11301 | A17133 | 273 | A11302 | A11322 | 283 |
| A11302 | A11372 | 470 | A11302 | A11724 | 389 |
| A11302 | A12328 | 479 | A11302 | A12990 | 432 |
| A11302 | A13340 | 341 | A11302 | A14073 | 491 |
| A11302 | A15244 | 480 | A11302 | A15677 | 165 |
| A11302 | A16830 | 213 | A11302 | A17069 | 341 |
| A11303 | A13830 | 467 | A11303 | A14095 | 235 |
| A11303 | A14247 | 491 | A11303 | A14661 | 378 |
| A11304 | A11432 | 312 | A11304 | A12306 | 293 |
| A11304 | A13609 | 259 | A11304 | A13978 | 163 |
| A11304 | A15697 | 174 | A11304 | A16781 | 333 |
| A11306 | A12383 | 416 | A11306 | A12675 | 375 |
| A11307 | A11313 | 205 | A11307 | A11662 | 457 |
| A11307 | A12692 | 356 | A11307 | A14400 | 299 |
| A11307 | A15447 | 168 | A11307 | A15498 | 462 |
| A11307 | A15765 | 241 | A11307 | A16430 | 491 |
| A11308 | A12119 | 454 | A11308 | A12603 | 416 |
| A11309 | A11381 | 398 | A11309 | A14071 | 215 |
| A11309 | A14176 | 159 | A11309 | A14628 | 262 |
| A11309 | A14650 | 191 | A11309 | A14803 | 163 |
| A11309 | A15497 | 491 | A11309 | A15637 | 321 |

|        |        |     |        |        |     |
|--------|--------|-----|--------|--------|-----|
| A11309 | A15874 | 455 | A11309 | A16026 | 406 |
| A11309 | A16033 | 449 | A11309 | A16034 | 212 |
| A11309 | A16262 | 452 | A11309 | A16368 | 405 |
| A11309 | A16417 | 208 | A11309 | A16418 | 163 |
| A11309 | A16419 | 366 | A11309 | A16528 | 446 |
| A11309 | A16529 | 491 | A11309 | A16596 | 329 |
| A11309 | A16766 | 174 | A11309 | A16959 | 491 |
| A11310 | A11320 | 491 | A11310 | A11328 | 491 |
| A11310 | A11375 | 477 | A11310 | A11396 | 477 |
| A11310 | A11446 | 463 | A11310 | A12176 | 407 |
| A11310 | A12182 | 418 | A11310 | A12432 | 399 |
| A11310 | A12434 | 407 | A11310 | A12435 | 399 |
| A11310 | A12609 | 418 | A11310 | A12610 | 418 |
| A11310 | A12611 | 418 | A11310 | A12621 | 454 |
| A11310 | A12683 | 457 | A11310 | A12780 | 418 |
| A11310 | A14885 | 407 | A11311 | A11428 | 479 |
| A11311 | A14204 | 329 | A11311 | A15296 | 201 |
| A11311 | A15328 | 407 | A11311 | A16429 | 341 |
| A11312 | A11316 | 491 | A11312 | A11368 | 491 |
| A11312 | A11429 | 469 | A11312 | A11476 | 484 |
| A11312 | A11670 | 491 | A11312 | A11733 | 452 |
| A11312 | A11944 | 457 | A11312 | A12083 | 391 |
| A11312 | A12252 | 199 | A11312 | A12328 | 210 |
| A11312 | A12853 | 193 | A11312 | A13340 | 339 |
| A11312 | A14200 | 485 | A11312 | A14596 | 491 |
| A11312 | A14636 | 170 | A11312 | A14659 | 396 |
| A11312 | A15502 | 191 | A11312 | A15684 | 418 |
| A11312 | A15717 | 310 | A11312 | A17127 | 462 |
| A11313 | A11317 | 472 | A11313 | A11446 | 443 |
| A11313 | A11721 | 335 | A11313 | A11983 | 302 |
| A11313 | A12302 | 302 | A11313 | A12464 | 344 |
| A11313 | A12480 | 383 | A11313 | A12504 | 383 |
| A11313 | A12505 | 383 | A11313 | A12531 | 383 |
| A11313 | A12578 | 383 | A11313 | A12633 | 302 |
| A11313 | A12662 | 276 | A11313 | A12712 | 364 |
| A11313 | A12750 | 383 | A11313 | A13879 | 307 |
| A11313 | A13946 | 235 | A11313 | A14378 | 193 |
| A11313 | A14405 | 165 | A11313 | A14410 | 226 |
| A11313 | A14511 | 236 | A11313 | A14892 | 383 |
| A11313 | A15052 | 268 | A11313 | A15282 | 179 |
| A11313 | A15498 | 356 | A11313 | A15598 | 351 |
| A11313 | A15765 | 200 | A11313 | A15902 | 276 |
| A11313 | A15913 | 424 | A11315 | A12003 | 439 |
| A11315 | A12745 | 374 | A11315 | A15498 | 485 |
| A11316 | A11368 | 491 | A11316 | A11429 | 488 |
| A11316 | A11476 | 491 | A11316 | A11670 | 491 |

|        |        |     |        |        |     |
|--------|--------|-----|--------|--------|-----|
| A11316 | A11733 | 357 | A11316 | A11944 | 477 |
| A11316 | A12083 | 279 | A11316 | A12251 | 466 |
| A11316 | A13340 | 281 | A11316 | A14200 | 490 |
| A11316 | A14363 | 302 | A11316 | A14591 | 271 |
| A11316 | A14596 | 491 | A11316 | A14659 | 489 |
| A11316 | A14944 | 274 | A11316 | A15212 | 417 |
| A11316 | A15254 | 184 | A11316 | A15353 | 188 |
| A11316 | A15436 | 246 | A11316 | A15502 | 190 |
| A11316 | A15564 | 409 | A11316 | A15660 | 433 |
| A11316 | A15717 | 491 | A11316 | A15759 | 441 |
| A11316 | A16301 | 308 | A11316 | A16463 | 162 |
| A11316 | A16624 | 434 | A11316 | A16661 | 302 |
| A11316 | A16680 | 333 | A11316 | A16842 | 302 |
| A11316 | A16886 | 200 | A11316 | A16945 | 63  |
| A11316 | A17127 | 485 | A11317 | A11339 | 443 |
| A11317 | A11446 | 435 | A11317 | A12019 | 454 |
| A11317 | A12594 | 418 | A11317 | A14377 | 368 |
| A11318 | A11566 | 470 | A11318 | A11667 | 470 |
| A11318 | A12207 | 486 | A11318 | A12449 | 480 |
| A11318 | A12581 | 473 | A11318 | A12635 | 416 |
| A11318 | A12740 | 416 | A11318 | A13348 | 317 |
| A11318 | A13860 | 188 | A11319 | A11340 | 475 |
| A11319 | A11391 | 375 | A11319 | A11557 | 457 |
| A11319 | A12876 | 461 | A11320 | A11328 | 491 |
| A11320 | A11375 | 469 | A11320 | A11396 | 469 |
| A11320 | A11446 | 466 | A11320 | A12182 | 422 |
| A11320 | A12432 | 405 | A11320 | A12434 | 412 |
| A11320 | A12435 | 405 | A11320 | A12609 | 422 |
| A11320 | A12610 | 422 | A11320 | A12611 | 422 |
| A11320 | A12621 | 405 | A11320 | A12780 | 422 |
| A11320 | A14885 | 412 | A11321 | A13830 | 165 |
| A11321 | A15638 | 395 | A11322 | A11338 | 491 |
| A11322 | A11374 | 491 | A11322 | A11419 | 480 |
| A11322 | A11427 | 479 | A11322 | A11724 | 361 |
| A11322 | A11975 | 430 | A11322 | A13521 | 302 |
| A11322 | A14073 | 467 | A11322 | A14138 | 202 |
| A11322 | A14152 | 226 | A11322 | A14845 | 470 |
| A11322 | A15235 | 171 | A11322 | A17128 | 401 |
| A11323 | A11567 | 423 | A11323 | A12543 | 202 |
| A11323 | A13207 | 373 | A11323 | A14221 | 152 |
| A11323 | A15291 | 157 | A11323 | A15419 | 187 |
| A11323 | A15492 | 154 | A11323 | A16877 | 281 |
| A11323 | A17198 | 467 | A11324 | A13207 | 218 |
| A11324 | A14112 | 274 | A11324 | A14114 | 327 |
| A11324 | A14202 | 188 | A11324 | A14238 | 165 |
| A11324 | A14247 | 150 | A11324 | A14467 | 208 |

|        |        |     |        |        |     |
|--------|--------|-----|--------|--------|-----|
| A11324 | A14931 | 350 | A11324 | A15195 | 347 |
| A11324 | A15390 | 208 | A11324 | A15478 | 260 |
| A11324 | A15596 | 243 | A11324 | A16230 | 216 |
| A11324 | A16798 | 205 | A11325 | A11346 | 419 |
| A11325 | A11381 | 488 | A11325 | A14628 | 313 |
| A11325 | A14803 | 228 | A11325 | A15497 | 185 |
| A11325 | A15874 | 179 | A11325 | A16034 | 273 |
| A11325 | A16073 | 480 | A11325 | A16103 | 293 |
| A11325 | A16262 | 433 | A11325 | A16529 | 371 |
| A11325 | A16959 | 357 | A11325 | A17040 | 202 |
| A11326 | A11385 | 213 | A11326 | A12049 | 235 |
| A11326 | A12201 | 353 | A11326 | A12561 | 329 |
| A11326 | A13342 | 160 | A11326 | A13748 | 329 |
| A11326 | A13831 | 226 | A11326 | A13917 | 168 |
| A11326 | A13990 | 210 | A11326 | A14286 | 185 |
| A11326 | A14936 | 154 | A11326 | A15374 | 257 |
| A11326 | A15498 | 170 | A11326 | A15519 | 152 |
| A11326 | A15583 | 241 | A11326 | A15772 | 267 |
| A11326 | A17161 | 353 | A11328 | A11375 | 484 |
| A11328 | A11396 | 484 | A11328 | A11446 | 465 |
| A11328 | A12182 | 419 | A11328 | A12432 | 401 |
| A11328 | A12434 | 408 | A11328 | A12435 | 401 |
| A11328 | A12609 | 419 | A11328 | A12610 | 419 |
| A11328 | A12611 | 419 | A11328 | A12780 | 419 |
| A11328 | A14885 | 408 | A11329 | A11343 | 486 |
| A11329 | A13987 | 407 | A11329 | A14202 | 353 |
| A11329 | A14247 | 454 | A11329 | A15301 | 243 |
| A11329 | A15302 | 257 | A11329 | A15312 | 174 |
| A11329 | A15336 | 223 | A11329 | A15352 | 171 |
| A11329 | A15430 | 185 | A11329 | A15432 | 246 |
| A11329 | A15462 | 258 | A11329 | A15463 | 165 |
| A11330 | A11717 | 449 | A11330 | A12530 | 409 |
| A11330 | A12570 | 409 | A11330 | A12571 | 452 |
| A11330 | A13215 | 389 | A11330 | A13369 | 191 |
| A11330 | A14005 | 235 | A11330 | A14815 | 409 |
| A11330 | A15358 | 479 | A11330 | A15465 | 363 |
| A11330 | A15470 | 477 | A11330 | A15471 | 485 |
| A11330 | A15472 | 402 | A11330 | A16061 | 424 |
| A11330 | A16522 | 463 | A11330 | A16536 | 389 |
| A11331 | A11400 | 188 | A11331 | A11926 | 347 |
| A11331 | A11981 | 490 | A11331 | A12687 | 391 |
| A11331 | A13581 | 277 | A11331 | A13626 | 491 |
| A11331 | A14216 | 435 | A11331 | A15028 | 378 |
| A11331 | A15624 | 457 | A11331 | A15649 | 210 |
| A11331 | A15651 | 293 | A11331 | A15661 | 223 |
| A11331 | A15662 | 160 | A11331 | A15684 | 428 |

|        |        |     |        |        |     |
|--------|--------|-----|--------|--------|-----|
| A11331 | A16088 | 224 | A11331 | A16095 | 386 |
| A11331 | A16118 | 165 | A11331 | A16279 | 358 |
| A11332 | A11472 | 160 | A11332 | A11828 | 307 |
| A11332 | A11840 | 482 | A11332 | A11914 | 160 |
| A11332 | A11920 | 201 | A11332 | A12047 | 755 |
| A11332 | A12215 | 299 | A11332 | A12341 | 358 |
| A11332 | A12873 | 173 | A11332 | A13977 | 326 |
| A11332 | A14156 | 483 | A11332 | A14239 | 179 |
| A11332 | A14320 | 367 | A11332 | A14708 | 165 |
| A11332 | A15541 | 177 | A11332 | A16587 | 262 |
| A11332 | A16675 | 152 | A11332 | A16690 | 152 |
| A11332 | A16691 | 314 | A11332 | A16706 | 332 |
| A11332 | A16708 | 293 | A11332 | A16797 | 394 |
| A11332 | A16882 | 352 | A11333 | A15416 | 458 |
| A11333 | A15638 | 380 | A11333 | A16281 | 420 |
| A11334 | A11420 | 183 | A11334 | A11480 | 160 |
| A11334 | A11550 | 335 | A11334 | A13375 | 262 |
| A11334 | A13989 | 483 | A11334 | A14216 | 491 |
| A11334 | A14447 | 428 | A11334 | A14508 | 176 |
| A11334 | A14940 | 366 | A11334 | A15499 | 252 |
| A11335 | A12171 | 414 | A11335 | A12494 | 401 |
| A11335 | A12765 | 393 | A11335 | A16438 | 329 |
| A11335 | A16792 | 314 | A11336 | A17085 | 353 |
| A11337 | A11363 | 260 | A11337 | A11577 | 235 |
| A11337 | A11724 | 213 | A11337 | A11885 | 467 |
| A11337 | A12241 | 341 | A11337 | A12328 | 210 |
| A11337 | A13340 | 283 | A11337 | A13375 | 226 |
| A11337 | A13842 | 263 | A11337 | A14461 | 429 |
| A11337 | A14845 | 294 | A11337 | A15297 | 308 |
| A11337 | A16082 | 224 | A11337 | A16437 | 165 |
| A11337 | A16462 | 319 | A11337 | A17128 | 430 |
| A11338 | A11374 | 491 | A11338 | A11400 | 424 |
| A11338 | A11419 | 389 | A11338 | A11427 | 490 |
| A11338 | A11724 | 241 | A11338 | A11975 | 433 |
| A11338 | A12059 | 347 | A11338 | A13261 | 477 |
| A11338 | A14073 | 163 | A11338 | A14845 | 324 |
| A11338 | A15416 | 436 | A11338 | A15988 | 215 |
| A11338 | A16371 | 200 | A11339 | A13351 | 414 |
| A11340 | A11557 | 434 | A11340 | A12876 | 438 |
| A11341 | A13369 | 283 | A11342 | A15638 | 466 |
| A11343 | A13987 | 362 | A11343 | A14202 | 429 |
| A11343 | A14247 | 424 | A11343 | A14258 | 226 |
| A11343 | A15336 | 375 | A11344 | A11476 | 165 |
| A11344 | A11674 | 156 | A11344 | A11935 | 332 |
| A11344 | A12080 | 301 | A11344 | A12105 | 468 |
| A11344 | A12257 | 305 | A11344 | A12329 | 491 |

|        |        |     |        |        |     |
|--------|--------|-----|--------|--------|-----|
| A11344 | A14216 | 486 | A11344 | A14508 | 162 |
| A11344 | A14596 | 212 | A11344 | A15660 | 491 |
| A11344 | A15684 | 491 | A11344 | A15708 | 416 |
| A11344 | A15720 | 436 | A11344 | A15746 | 303 |
| A11344 | A15769 | 223 | A11344 | A15931 | 466 |
| A11344 | A15937 | 405 | A11344 | A16086 | 199 |
| A11344 | A16092 | 465 | A11344 | A16145 | 232 |
| A11344 | A16187 | 190 | A11344 | A16218 | 485 |
| A11344 | A16228 | 156 | A11344 | A16464 | 228 |
| A11344 | A16650 | 157 | A11344 | A16768 | 351 |
| A11344 | A17064 | 63  | A11344 | A17134 | 369 |
| A11344 | A17140 | 486 | A11345 | A13111 | 290 |
| A11345 | A13917 | 185 | A11345 | A14653 | 462 |
| A11345 | A15186 | 395 | A11346 | A11357 | 286 |
| A11346 | A11533 | 173 | A11346 | A11604 | 199 |
| A11346 | A11661 | 263 | A11346 | A11881 | 447 |
| A11346 | A11983 | 199 | A11346 | A12047 | 488 |
| A11346 | A12722 | 269 | A11346 | A12913 | 380 |
| A11346 | A13147 | 208 | A11346 | A13686 | 176 |
| A11346 | A13772 | 199 | A11346 | A14073 | 196 |
| A11346 | A14192 | 478 | A11346 | A14193 | 219 |
| A11346 | A14266 | 491 | A11346 | A14281 | 480 |
| A11346 | A14472 | 199 | A11346 | A14633 | 345 |
| A11346 | A14661 | 205 | A11346 | A14864 | 199 |
| A11346 | A15336 | 626 | A11346 | A15501 | 156 |
| A11346 | A15502 | 163 | A11346 | A15626 | 577 |
| A11346 | A16073 | 211 | A11346 | A16207 | 199 |
| A11346 | A16324 | 199 | A11346 | A16667 | 152 |
| A11347 | A11380 | 391 | A11348 | A11450 | 347 |
| A11348 | A11478 | 256 | A11349 | A11562 | 390 |
| A11349 | A12651 | 302 | A11349 | A14169 | 486 |
| A11349 | A14431 | 262 | A11349 | A16146 | 441 |
| A11350 | A14163 | 299 | A11352 | A13432 | 364 |
| A11355 | A11359 | 419 | A11357 | A11358 | 430 |
| A11357 | A13517 | 350 | A11357 | A13753 | 332 |
| A11357 | A14147 | 230 | A11358 | A13313 | 152 |
| A11358 | A13517 | 215 | A11358 | A14430 | 185 |
| A11358 | A14741 | 229 | A11358 | A15913 | 258 |
| A11363 | A14475 | 281 | A11363 | A16082 | 360 |
| A11364 | A12477 | 432 | A11364 | A14568 | 281 |
| A11365 | A11735 | 160 | A11365 | A11737 | 160 |
| A11365 | A11914 | 160 | A11365 | A12658 | 160 |
| A11365 | A12824 | 160 | A11365 | A14007 | 160 |
| A11365 | A15257 | 160 | A11366 | A11527 | 491 |
| A11366 | A12820 | 484 | A11366 | A13387 | 379 |
| A11366 | A14247 | 490 | A11366 | A14258 | 163 |

|        |        |     |        |        |     |
|--------|--------|-----|--------|--------|-----|
| A11366 | A14399 | 360 | A11366 | A14504 | 406 |
| A11366 | A14710 | 355 | A11366 | A14798 | 398 |
| A11366 | A15336 | 195 | A11366 | A15909 | 422 |
| A11367 | A11576 | 323 | A11368 | A11429 | 411 |
| A11368 | A11476 | 480 | A11368 | A11670 | 491 |
| A11368 | A11733 | 379 | A11368 | A11944 | 462 |
| A11368 | A12252 | 356 | A11368 | A13340 | 388 |
| A11368 | A14200 | 446 | A11368 | A14596 | 491 |
| A11368 | A14659 | 475 | A11368 | A15212 | 252 |
| A11368 | A15684 | 303 | A11368 | A15715 | 310 |
| A11368 | A15717 | 339 | A11368 | A16298 | 232 |
| A11368 | A16463 | 196 | A11368 | A16624 | 288 |
| A11368 | A17127 | 489 | A11369 | A11983 | 899 |
| A11369 | A12383 | 909 | A11369 | A12421 | 171 |
| A11369 | A13163 | 159 | A11369 | A13734 | 251 |
| A11369 | A13975 | 227 | A11369 | A13980 | 473 |
| A11369 | A13981 | 899 | A11369 | A13983 | 462 |
| A11369 | A14008 | 63  | A11369 | A14019 | 80  |
| A11369 | A14190 | 171 | A11369 | A14198 | 425 |
| A11369 | A14364 | 219 | A11369 | A14399 | 286 |
| A11369 | A14426 | 446 | A11369 | A14440 | 180 |
| A11369 | A14452 | 63  | A11369 | A14644 | 199 |
| A11369 | A14827 | 236 | A11369 | A15675 | 180 |
| A11369 | A15726 | 63  | A11369 | A16042 | 238 |
| A11369 | A16994 | 422 | A11370 | A11371 | 441 |
| A11370 | A11399 | 441 | A11371 | A11399 | 441 |
| A11372 | A11724 | 362 | A11372 | A11944 | 260 |
| A11372 | A12167 | 650 | A11372 | A12328 | 438 |
| A11372 | A12607 | 308 | A11372 | A13340 | 162 |
| A11372 | A14073 | 469 | A11372 | A14476 | 212 |
| A11372 | A14596 | 301 | A11372 | A15244 | 434 |
| A11372 | A15275 | 234 | A11372 | A15660 | 475 |
| A11372 | A15684 | 375 | A11372 | A15694 | 279 |
| A11372 | A16230 | 183 | A11372 | A16289 | 348 |
| A11373 | A14056 | 274 | A11374 | A11400 | 162 |
| A11374 | A11419 | 435 | A11374 | A11427 | 489 |
| A11374 | A11677 | 240 | A11374 | A11694 | 324 |
| A11374 | A11705 | 234 | A11374 | A11724 | 249 |
| A11374 | A11857 | 252 | A11374 | A11922 | 294 |
| A11374 | A11975 | 267 | A11374 | A14073 | 470 |
| A11374 | A14642 | 324 | A11374 | A14888 | 279 |
| A11374 | A15843 | 324 | A11374 | A17128 | 208 |
| A11375 | A11396 | 491 | A11375 | A11446 | 449 |
| A11376 | A11551 | 177 | A11376 | A11675 | 159 |
| A11376 | A11820 | 249 | A11376 | A11843 | 276 |
| A11376 | A11851 | 276 | A11376 | A11915 | 249 |

|        |        |     |        |        |     |
|--------|--------|-----|--------|--------|-----|
| A11376 | A12499 | 232 | A11376 | A12606 | 184 |
| A11376 | A12725 | 202 | A11376 | A13309 | 183 |
| A11376 | A13356 | 276 | A11376 | A13781 | 151 |
| A11376 | A14255 | 162 | A11376 | A14718 | 180 |
| A11376 | A15323 | 218 | A11376 | A15480 | 276 |
| A11376 | A15559 | 179 | A11376 | A15729 | 235 |
| A11376 | A16552 | 168 | A11376 | A16565 | 157 |
| A11376 | A16597 | 291 | A11376 | A16664 | 154 |
| A11376 | A16703 | 207 | A11376 | A16709 | 232 |
| A11376 | A16764 | 160 | A11376 | A16866 | 171 |
| A11376 | A16905 | 193 | A11376 | A17030 | 258 |
| A11378 | A11467 | 481 | A11378 | A12462 | 423 |
| A11380 | A13369 | 154 | A11380 | A14430 | 229 |
| A11381 | A11451 | 408 | A11381 | A13314 | 249 |
| A11381 | A13735 | 343 | A11381 | A14478 | 180 |
| A11381 | A14699 | 417 | A11381 | A14856 | 358 |
| A11381 | A14862 | 460 | A11381 | A15223 | 180 |
| A11381 | A15497 | 398 | A11381 | A15726 | 208 |
| A11381 | A15874 | 430 | A11381 | A16026 | 324 |
| A11381 | A16103 | 228 | A11381 | A16262 | 484 |
| A11381 | A16286 | 329 | A11381 | A16335 | 420 |
| A11381 | A16528 | 291 | A11381 | A16529 | 474 |
| A11381 | A16767 | 241 | A11381 | A16959 | 474 |
| A11381 | A16968 | 286 | A11381 | A17036 | 357 |
| A11381 | A17040 | 480 | A11381 | A17041 | 340 |
| A11382 | A13369 | 469 | A11382 | A14633 | 195 |
| A11382 | A14654 | 350 | A11383 | A14430 | 176 |
| A11383 | A15339 | 176 | A11384 | A14672 | 335 |
| A11385 | A11394 | 438 | A11385 | A12129 | 373 |
| A11385 | A12834 | 375 | A11385 | A14266 | 393 |
| A11386 | A11462 | 185 | A11386 | A11857 | 277 |
| A11386 | A12175 | 440 | A11386 | A12304 | 302 |
| A11386 | A15211 | 379 | A11386 | A15660 | 489 |
| A11386 | A15684 | 443 | A11386 | A16218 | 224 |
| A11387 | A11447 | 362 | A11387 | A11932 | 187 |
| A11387 | A12365 | 285 | A11387 | A12373 | 270 |
| A11387 | A13321 | 193 | A11387 | A13376 | 278 |
| A11387 | A15598 | 221 | A11387 | A16330 | 362 |
| A11387 | A16798 | 330 | A11388 | A15498 | 227 |
| A11389 | A13182 | 455 | A11389 | A14236 | 488 |
| A11389 | A15241 | 236 | A11390 | A11438 | 188 |
| A11390 | A11462 | 182 | A11390 | A11588 | 291 |
| A11390 | A11704 | 441 | A11390 | A11945 | 486 |
| A11390 | A12233 | 439 | A11390 | A13333 | 307 |
| A11390 | A13457 | 419 | A11390 | A13527 | 267 |
| A11390 | A14216 | 180 | A11390 | A15218 | 286 |



|        |        |     |        |        |     |
|--------|--------|-----|--------|--------|-----|
| A11390 | A15219 | 486 | A11390 | A15221 | 491 |
| A11390 | A15235 | 446 | A11390 | A15727 | 454 |
| A11390 | A16159 | 345 | A11390 | A16631 | 480 |
| A11391 | A11557 | 413 | A11391 | A12787 | 363 |
| A11391 | A12877 | 429 | A11391 | A12964 | 462 |
| A11391 | A14322 | 429 | A11391 | A15649 | 208 |
| A11391 | A17209 | 419 | A11392 | A11932 | 490 |
| A11392 | A13989 | 473 | A11392 | A13994 | 361 |
| A11392 | A15452 | 154 | A11392 | A15546 | 159 |
| A11393 | A14198 | 162 | A11394 | A11430 | 229 |
| A11394 | A11496 | 241 | A11394 | A11497 | 232 |
| A11394 | A11735 | 270 | A11394 | A11737 | 272 |
| A11394 | A11917 | 163 | A11394 | A12254 | 276 |
| A11394 | A12433 | 232 | A11394 | A12508 | 306 |
| A11394 | A12606 | 216 | A11394 | A12625 | 255 |
| A11394 | A12834 | 389 | A11394 | A12858 | 270 |
| A11394 | A13356 | 286 | A11394 | A13781 | 191 |
| A11394 | A13784 | 216 | A11394 | A13809 | 306 |
| A11394 | A14094 | 173 | A11394 | A14213 | 252 |
| A11394 | A14214 | 210 | A11394 | A14263 | 221 |
| A11394 | A14569 | 311 | A11394 | A14589 | 165 |
| A11394 | A14633 | 160 | A11394 | A14706 | 235 |
| A11394 | A15273 | 530 | A11394 | A15653 | 201 |
| A11394 | A15855 | 201 | A11394 | A16157 | 221 |
| A11394 | A16322 | 290 | A11394 | A16552 | 205 |
| A11394 | A16565 | 293 | A11394 | A16611 | 246 |
| A11394 | A16675 | 262 | A11394 | A16680 | 279 |
| A11394 | A16693 | 386 | A11394 | A16774 | 375 |
| A11394 | A16829 | 355 | A11395 | A11439 | 511 |
| A11395 | A11621 | 154 | A11395 | A12217 | 246 |
| A11395 | A13915 | 232 | A11395 | A13989 | 281 |
| A11395 | A14085 | 490 | A11395 | A14166 | 255 |
| A11395 | A14462 | 255 | A11395 | A15373 | 168 |
| A11395 | A15498 | 195 | A11395 | A15733 | 238 |
| A11395 | A15762 | 579 | A11395 | A15943 | 369 |
| A11395 | A15944 | 255 | A11395 | A15945 | 589 |
| A11395 | A15946 | 595 | A11395 | A16067 | 378 |
| A11395 | A16093 | 255 | A11395 | A16109 | 343 |
| A11395 | A16144 | 595 | A11396 | A11446 | 449 |
| A11397 | A11443 | 490 | A11397 | A11476 | 173 |
| A11397 | A12256 | 302 | A11397 | A12873 | 272 |
| A11397 | A13989 | 374 | A11397 | A14147 | 489 |
| A11397 | A14200 | 458 | A11397 | A15700 | 201 |
| A11397 | A15747 | 174 | A11397 | A17141 | 488 |
| A11399 | A11479 | 430 | A11400 | A11932 | 188 |
| A11400 | A12918 | 488 | A11400 | A13989 | 154 |

|        |        |     |        |        |     |
|--------|--------|-----|--------|--------|-----|
| A11400 | A14588 | 188 | A11400 | A15416 | 490 |
| A11401 | A11836 | 294 | A11401 | A13706 | 180 |
| A11401 | A13870 | 241 | A11402 | A11445 | 484 |
| A11402 | A13369 | 344 | A11402 | A16148 | 899 |
| A11404 | A13860 | 199 | A11404 | A15267 | 350 |
| A11405 | A12069 | 356 | A11405 | A12543 | 369 |
| A11405 | A13074 | 180 | A11405 | A13928 | 441 |
| A11405 | A14148 | 433 | A11405 | A14196 | 472 |
| A11405 | A14220 | 454 | A11405 | A14221 | 432 |
| A11405 | A14265 | 435 | A11405 | A14303 | 475 |
| A11405 | A14490 | 177 | A11405 | A14728 | 168 |
| A11405 | A14875 | 263 | A11405 | A15291 | 393 |
| A11405 | A15297 | 246 | A11405 | A15312 | 223 |
| A11405 | A15323 | 330 | A11405 | A15366 | 477 |
| A11405 | A15492 | 371 | A11405 | A15752 | 329 |
| A11405 | A16122 | 221 | A11405 | A16296 | 179 |
| A11405 | A16722 | 185 | A11405 | A17063 | 467 |
| A11405 | A17198 | 417 | A11406 | A13989 | 439 |
| A11406 | A14006 | 195 | A11406 | A14220 | 168 |
| A11406 | A14303 | 308 | A11406 | A15752 | 156 |
| A11406 | A16545 | 402 | A11406 | A17198 | 327 |
| A11408 | A12722 | 491 | A11408 | A12817 | 411 |
| A11408 | A12908 | 346 | A11408 | A14163 | 486 |
| A11408 | A14278 | 213 | A11408 | A14484 | 196 |
| A11408 | A14633 | 319 | A11409 | A11544 | 151 |
| A11409 | A12251 | 193 | A11409 | A13609 | 491 |
| A11409 | A13870 | 218 | A11409 | A13989 | 434 |
| A11409 | A15667 | 180 | A11411 | A14381 | 374 |
| A11411 | A14444 | 316 | A11411 | A14589 | 409 |
| A11411 | A15241 | 205 | A11411 | A15342 | 241 |
| A11412 | A11415 | 154 | A11412 | A11537 | 157 |
| A11412 | A11875 | 491 | A11412 | A11946 | 407 |
| A11412 | A12185 | 306 | A11412 | A12393 | 490 |
| A11412 | A12704 | 340 | A11412 | A13546 | 205 |
| A11412 | A13987 | 377 | A11412 | A14010 | 319 |
| A11412 | A14072 | 374 | A11412 | A14202 | 457 |
| A11412 | A14210 | 385 | A11412 | A14371 | 433 |
| A11412 | A14511 | 377 | A11412 | A15292 | 486 |
| A11412 | A15310 | 362 | A11412 | A15312 | 273 |
| A11412 | A15313 | 208 | A11412 | A15317 | 204 |
| A11412 | A15349 | 460 | A11412 | A15352 | 419 |
| A11412 | A15444 | 382 | A11412 | A15447 | 196 |
| A11412 | A15452 | 398 | A11412 | A15454 | 152 |
| A11412 | A15495 | 486 | A11412 | A15498 | 207 |
| A11412 | A15799 | 191 | A11412 | A16080 | 291 |
| A11412 | A16414 | 371 | A11412 | A17124 | 326 |

|        |        |     |        |        |     |
|--------|--------|-----|--------|--------|-----|
| A11413 | A15220 | 413 | A11414 | A11433 | 454 |
| A11415 | A11875 | 367 | A11415 | A12393 | 167 |
| A11415 | A12704 | 380 | A11415 | A13003 | 266 |
| A11415 | A13119 | 213 | A11415 | A13546 | 488 |
| A11415 | A14000 | 210 | A11415 | A14010 | 389 |
| A11415 | A14370 | 272 | A11415 | A14371 | 219 |
| A11415 | A14399 | 184 | A11415 | A14490 | 170 |
| A11415 | A14511 | 363 | A11415 | A14733 | 279 |
| A11415 | A14827 | 217 | A11415 | A15292 | 420 |
| A11415 | A15452 | 262 | A11415 | A15456 | 254 |
| A11415 | A15480 | 154 | A11415 | A15484 | 168 |
| A11415 | A15495 | 323 | A11415 | A15641 | 249 |
| A11416 | A13340 | 226 | A11416 | A14190 | 301 |
| A11417 | A16616 | 338 | A11419 | A11427 | 486 |
| A11419 | A11677 | 490 | A11419 | A11975 | 281 |
| A11419 | A13787 | 455 | A11419 | A14825 | 301 |
| A11419 | A14845 | 414 | A11419 | A14888 | 486 |
| A11420 | A11550 | 417 | A11420 | A11572 | 417 |
| A11420 | A12227 | 230 | A11420 | A12269 | 465 |
| A11420 | A12270 | 246 | A11420 | A12821 | 408 |
| A11420 | A13752 | 305 | A11420 | A14216 | 490 |
| A11420 | A14508 | 326 | A11420 | A15225 | 240 |
| A11420 | A15500 | 430 | A11420 | A15684 | 221 |
| A11420 | A15711 | 235 | A11420 | A15732 | 417 |
| A11420 | A15751 | 374 | A11421 | A11556 | 491 |
| A11421 | A13928 | 317 | A11421 | A14136 | 475 |
| A11421 | A14202 | 259 | A11421 | A14369 | 262 |
| A11421 | A14408 | 208 | A11421 | A14893 | 400 |
| A11421 | A16608 | 177 | A11422 | A11653 | 335 |
| A11422 | A11681 | 277 | A11422 | A12458 | 446 |
| A11422 | A12884 | 389 | A11422 | A13133 | 451 |
| A11422 | A13338 | 293 | A11422 | A13412 | 451 |
| A11422 | A13826 | 361 | A11422 | A13899 | 420 |
| A11422 | A14120 | 251 | A11422 | A15318 | 221 |
| A11422 | A15346 | 191 | A11423 | A11455 | 446 |
| A11423 | A14134 | 472 | A11423 | A15358 | 443 |
| A11423 | A15466 | 484 | A11423 | A15469 | 432 |
| A11423 | A15470 | 393 | A11423 | A15471 | 419 |
| A11423 | A15472 | 418 | A11423 | A15473 | 388 |
| A11423 | A16921 | 401 | A11424 | A13140 | 486 |
| A11424 | A13280 | 483 | A11424 | A13879 | 311 |
| A11425 | A17006 | 317 | A11426 | A12340 | 416 |
| A11427 | A11438 | 168 | A11427 | A11677 | 366 |
| A11427 | A11975 | 270 | A11427 | A13069 | 394 |
| A11427 | A13787 | 317 | A11427 | A14251 | 302 |
| A11427 | A14825 | 398 | A11427 | A14845 | 335 |

|        |        |     |        |        |     |
|--------|--------|-----|--------|--------|-----|
| A11427 | A14888 | 391 | A11427 | A16118 | 274 |
| A11427 | A16371 | 212 | A11428 | A14381 | 291 |
| A11429 | A11476 | 420 | A11429 | A11670 | 358 |
| A11429 | A12853 | 278 | A11429 | A14200 | 465 |
| A11429 | A14596 | 489 | A11429 | A15212 | 302 |
| A11429 | A15564 | 294 | A11429 | A15717 | 435 |
| A11429 | A15759 | 347 | A11430 | A11456 | 260 |
| A11430 | A11472 | 402 | A11430 | A11496 | 374 |
| A11430 | A11497 | 406 | A11430 | A11597 | 283 |
| A11430 | A11675 | 210 | A11430 | A11725 | 314 |
| A11430 | A11735 | 353 | A11430 | A11737 | 356 |
| A11430 | A11850 | 345 | A11430 | A11914 | 402 |
| A11430 | A11917 | 361 | A11430 | A11940 | 324 |
| A11430 | A12215 | 340 | A11430 | A12238 | 335 |
| A11430 | A12254 | 285 | A11430 | A12433 | 362 |
| A11430 | A12501 | 241 | A11430 | A12506 | 348 |
| A11430 | A12507 | 296 | A11430 | A12508 | 330 |
| A11430 | A12606 | 441 | A11430 | A12658 | 324 |
| A11430 | A12665 | 305 | A11430 | A12725 | 208 |
| A11430 | A12726 | 208 | A11430 | A12727 | 344 |
| A11430 | A12858 | 452 | A11430 | A12873 | 188 |
| A11430 | A13116 | 157 | A11430 | A13309 | 340 |
| A11430 | A13313 | 288 | A11430 | A13321 | 252 |
| A11430 | A13323 | 235 | A11430 | A13356 | 199 |
| A11430 | A13388 | 162 | A11430 | A13399 | 182 |
| A11430 | A13527 | 173 | A11430 | A13706 | 299 |
| A11430 | A13707 | 399 | A11430 | A13708 | 308 |
| A11430 | A13781 | 224 | A11430 | A13783 | 317 |
| A11430 | A13784 | 340 | A11430 | A13788 | 310 |
| A11430 | A13804 | 210 | A11430 | A13805 | 167 |
| A11430 | A13809 | 395 | A11430 | A13912 | 364 |
| A11430 | A14094 | 188 | A11430 | A14167 | 196 |
| A11430 | A14209 | 489 | A11430 | A14214 | 330 |
| A11430 | A14221 | 165 | A11430 | A14222 | 475 |
| A11430 | A14255 | 385 | A11430 | A14260 | 188 |
| A11430 | A14263 | 279 | A11430 | A14288 | 283 |
| A11430 | A14455 | 329 | A11430 | A14456 | 470 |
| A11430 | A14546 | 369 | A11430 | A14569 | 435 |
| A11430 | A14595 | 235 | A11430 | A14706 | 217 |
| A11430 | A14799 | 374 | A11430 | A14903 | 396 |
| A11430 | A14917 | 173 | A11430 | A14921 | 255 |
| A11430 | A15105 | 286 | A11430 | A15187 | 279 |
| A11430 | A15189 | 191 | A11430 | A15262 | 351 |
| A11430 | A15291 | 667 | A11430 | A15380 | 486 |
| A11430 | A15536 | 199 | A11430 | A15541 | 297 |
| A11430 | A15614 | 657 | A11430 | A15651 | 170 |

|        |        |     |        |        |     |
|--------|--------|-----|--------|--------|-----|
| A11430 | A15665 | 490 | A11430 | A15680 | 358 |
| A11430 | A15709 | 256 | A11430 | A15711 | 276 |
| A11430 | A15735 | 185 | A11430 | A15761 | 446 |
| A11430 | A15940 | 174 | A11430 | A16157 | 445 |
| A11430 | A16343 | 245 | A11430 | A16387 | 210 |
| A11430 | A16467 | 791 | A11430 | A16552 | 490 |
| A11430 | A16565 | 312 | A11430 | A16566 | 188 |
| A11430 | A16587 | 430 | A11430 | A16597 | 382 |
| A11430 | A16611 | 379 | A11430 | A16664 | 307 |
| A11430 | A16675 | 263 | A11430 | A16680 | 291 |
| A11430 | A16682 | 318 | A11430 | A16690 | 262 |
| A11430 | A16693 | 245 | A11430 | A16695 | 249 |
| A11430 | A16703 | 271 | A11430 | A16704 | 422 |
| A11430 | A16707 | 399 | A11430 | A16709 | 165 |
| A11430 | A16714 | 346 | A11430 | A16774 | 221 |
| A11430 | A16776 | 326 | A11430 | A16790 | 299 |
| A11430 | A16806 | 249 | A11430 | A16824 | 358 |
| A11430 | A16829 | 314 | A11430 | A16838 | 152 |
| A11430 | A16866 | 227 | A11430 | A16905 | 408 |
| A11430 | A16908 | 267 | A11430 | A16913 | 351 |
| A11430 | A16942 | 221 | A11430 | A16944 | 333 |
| A11430 | A17008 | 429 | A11430 | A17018 | 185 |
| A11430 | A17019 | 255 | A11430 | A17030 | 193 |
| A11430 | A17190 | 313 | A11431 | A11454 | 195 |
| A11431 | A11537 | 179 | A11431 | A12647 | 322 |
| A11431 | A13425 | 232 | A11431 | A13987 | 430 |
| A11431 | A14007 | 218 | A11431 | A14122 | 208 |
| A11431 | A14190 | 329 | A11431 | A14210 | 213 |
| A11431 | A14247 | 246 | A11431 | A14570 | 218 |
| A11431 | A15278 | 314 | A11431 | A15292 | 484 |
| A11431 | A15301 | 491 | A11431 | A15302 | 491 |
| A11431 | A15310 | 160 | A11431 | A15312 | 463 |
| A11431 | A15313 | 328 | A11431 | A15335 | 313 |
| A11431 | A15348 | 316 | A11431 | A15349 | 348 |
| A11431 | A15352 | 407 | A11431 | A15366 | 491 |
| A11431 | A15413 | 491 | A11431 | A15431 | 355 |
| A11431 | A15432 | 221 | A11431 | A15462 | 339 |
| A11431 | A15463 | 491 | A11431 | A15486 | 450 |
| A11431 | A15487 | 491 | A11431 | A15488 | 221 |
| A11431 | A15489 | 335 | A11431 | A15513 | 221 |
| A11431 | A15515 | 274 | A11431 | A15670 | 270 |
| A11431 | A15802 | 245 | A11431 | A15817 | 151 |
| A11431 | A15826 | 279 | A11431 | A15830 | 420 |
| A11431 | A16590 | 290 | A11432 | A11683 | 398 |
| A11433 | A11833 | 299 | A11433 | A13809 | 306 |
| A11433 | A16676 | 371 | A11435 | A14245 | 160 |

|        |        |     |        |        |     |
|--------|--------|-----|--------|--------|-----|
| A11435 | A14379 | 195 | A11435 | A14596 | 491 |
| A11435 | A15317 | 171 | A11435 | A15398 | 154 |
| A11435 | A15506 | 154 | A11435 | A15722 | 380 |
| A11436 | A11873 | 423 | A11436 | A11914 | 218 |
| A11436 | A13916 | 490 | A11436 | A14209 | 363 |
| A11436 | A14371 | 475 | A11436 | A15396 | 165 |
| A11436 | A15870 | 238 | A11437 | A12224 | 479 |
| A11437 | A15336 | 288 | A11437 | A16400 | 439 |
| A11438 | A11480 | 159 | A11438 | A11704 | 307 |
| A11438 | A11729 | 200 | A11438 | A12233 | 252 |
| A11438 | A13333 | 200 | A11438 | A13992 | 425 |
| A11438 | A14025 | 165 | A11438 | A14188 | 380 |
| A11438 | A14198 | 201 | A11438 | A14216 | 452 |
| A11438 | A14505 | 346 | A11438 | A15218 | 460 |
| A11438 | A15235 | 486 | A11438 | A15660 | 165 |
| A11438 | A15684 | 224 | A11438 | A15743 | 363 |
| A11438 | A15988 | 328 | A11438 | A16118 | 472 |
| A11438 | A16306 | 268 | A11438 | A16686 | 188 |
| A11439 | A14166 | 255 | A11439 | A14462 | 362 |
| A11439 | A15762 | 375 | A11439 | A15943 | 255 |
| A11439 | A15944 | 404 | A11439 | A15945 | 423 |
| A11439 | A15946 | 363 | A11439 | A16067 | 324 |
| A11439 | A16093 | 255 | A11439 | A16109 | 355 |
| A11439 | A16144 | 430 | A11440 | A12145 | 467 |
| A11440 | A13622 | 435 | A11440 | A13992 | 601 |
| A11440 | A14265 | 534 | A11440 | A15202 | 193 |
| A11441 | A11560 | 366 | A11441 | A14006 | 217 |
| A11441 | A14633 | 195 | A11443 | A12873 | 303 |
| A11443 | A14147 | 477 | A11444 | A14128 | 208 |
| A11444 | A14247 | 356 | A11444 | A14481 | 319 |
| A11444 | A14693 | 491 | A11444 | A15301 | 391 |
| A11444 | A15366 | 210 | A11444 | A15430 | 491 |
| A11444 | A15462 | 191 | A11444 | A15463 | 318 |
| A11444 | A15498 | 232 | A11444 | A15669 | 491 |
| A11444 | A15925 | 238 | A11444 | A15934 | 263 |
| A11444 | A16436 | 491 | A11445 | A13369 | 154 |
| A11447 | A16330 | 362 | A11449 | A14246 | 188 |
| A11449 | A16117 | 322 | A11450 | A11478 | 455 |
| A11450 | A11654 | 407 | A11450 | A11979 | 422 |
| A11450 | A14735 | 369 | A11451 | A13870 | 273 |
| A11452 | A12660 | 317 | A11452 | A14006 | 485 |
| A11452 | A14566 | 489 | A11452 | A14594 | 286 |
| A11452 | A15215 | 254 | A11452 | A16060 | 294 |
| A11452 | A16302 | 283 | A11453 | A11815 | 491 |
| A11453 | A12881 | 462 | A11453 | A13609 | 157 |
| A11453 | A13987 | 165 | A11453 | A14449 | 184 |

|        |        |     |        |        |     |
|--------|--------|-----|--------|--------|-----|
| A11453 | A15498 | 281 | A11454 | A13369 | 398 |
| A11454 | A15292 | 216 | A11454 | A15301 | 172 |
| A11454 | A15302 | 185 | A11454 | A15413 | 191 |
| A11454 | A15638 | 185 | A11455 | A14134 | 416 |
| A11455 | A15349 | 212 | A11455 | A15358 | 340 |
| A11455 | A15469 | 388 | A11456 | A11472 | 434 |
| A11456 | A11597 | 182 | A11456 | A11675 | 205 |
| A11456 | A11691 | 335 | A11456 | A11706 | 279 |
| A11456 | A11725 | 288 | A11456 | A11735 | 310 |
| A11456 | A11737 | 177 | A11456 | A11914 | 176 |
| A11456 | A11915 | 290 | A11456 | A11917 | 177 |
| A11456 | A12215 | 311 | A11456 | A12255 | 260 |
| A11456 | A12284 | 157 | A11456 | A12506 | 236 |
| A11456 | A12508 | 219 | A11456 | A12606 | 245 |
| A11456 | A12625 | 160 | A11456 | A12658 | 213 |
| A11456 | A12665 | 330 | A11456 | A12858 | 391 |
| A11456 | A12873 | 188 | A11456 | A13116 | 267 |
| A11456 | A13170 | 272 | A11456 | A13313 | 204 |
| A11456 | A13321 | 236 | A11456 | A13388 | 271 |
| A11456 | A13399 | 184 | A11456 | A13527 | 281 |
| A11456 | A13708 | 274 | A11456 | A13782 | 367 |
| A11456 | A13783 | 288 | A11456 | A13785 | 326 |
| A11456 | A13786 | 241 | A11456 | A13787 | 341 |
| A11456 | A13788 | 283 | A11456 | A13804 | 409 |
| A11456 | A13811 | 385 | A11456 | A13812 | 266 |
| A11456 | A13969 | 196 | A11456 | A14175 | 329 |
| A11456 | A14235 | 303 | A11456 | A14247 | 432 |
| A11456 | A14255 | 339 | A11456 | A14286 | 279 |
| A11456 | A14455 | 290 | A11456 | A14462 | 210 |
| A11456 | A14569 | 353 | A11456 | A14708 | 180 |
| A11456 | A14838 | 419 | A11456 | A14903 | 290 |
| A11456 | A14917 | 281 | A11456 | A15187 | 259 |
| A11456 | A15189 | 191 | A11456 | A15541 | 193 |
| A11456 | A15680 | 357 | A11456 | A15698 | 243 |
| A11456 | A15709 | 163 | A11456 | A15711 | 375 |
| A11456 | A15854 | 191 | A11456 | A15943 | 226 |
| A11456 | A16157 | 251 | A11456 | A16343 | 335 |
| A11456 | A16552 | 332 | A11456 | A16565 | 408 |
| A11456 | A16566 | 293 | A11456 | A16567 | 313 |
| A11456 | A16587 | 276 | A11456 | A16611 | 281 |
| A11456 | A16617 | 401 | A11456 | A16652 | 488 |
| A11456 | A16664 | 201 | A11456 | A16675 | 168 |
| A11456 | A16690 | 301 | A11456 | A16691 | 326 |
| A11456 | A16693 | 335 | A11456 | A16695 | 338 |
| A11456 | A16703 | 373 | A11456 | A16704 | 260 |
| A11456 | A16764 | 338 | A11456 | A16776 | 296 |

|        |        |     |        |        |     |
|--------|--------|-----|--------|--------|-----|
| A11456 | A16790 | 274 | A11456 | A16806 | 338 |
| A11456 | A16824 | 326 | A11456 | A16829 | 288 |
| A11456 | A16874 | 283 | A11456 | A16905 | 238 |
| A11456 | A16944 | 303 | A11456 | A17144 | 270 |
| A11458 | A11567 | 480 | A11458 | A14809 | 191 |
| A11458 | A14875 | 398 | A11458 | A17063 | 151 |
| A11458 | A17198 | 254 | A11459 | A12852 | 429 |
| A11459 | A13335 | 257 | A11459 | A15244 | 232 |
| A11459 | A15546 | 469 | A11460 | A13917 | 243 |
| A11460 | A14589 | 283 | A11460 | A16438 | 356 |
| A11460 | A16512 | 414 | A11460 | A16792 | 343 |
| A11461 | A11466 | 408 | A11461 | A11568 | 485 |
| A11462 | A11704 | 167 | A11462 | A11832 | 228 |
| A11462 | A11942 | 372 | A11462 | A13126 | 160 |
| A11462 | A13875 | 173 | A11462 | A13989 | 491 |
| A11462 | A15215 | 330 | A11462 | A15931 | 156 |
| A11462 | A16631 | 191 | A11463 | A15416 | 405 |
| A11463 | A15638 | 450 | A11463 | A16281 | 278 |
| A11464 | A11548 | 371 | A11464 | A13839 | 469 |
| A11465 | A11712 | 469 | A11465 | A12267 | 438 |
| A11465 | A12702 | 445 | A11465 | A12807 | 438 |
| A11465 | A12879 | 445 | A11465 | A14781 | 391 |
| A11466 | A16068 | 285 | A11467 | A12462 | 427 |
| A11468 | A11563 | 469 | A11469 | A11983 | 489 |
| A11469 | A13181 | 195 | A11469 | A15318 | 151 |
| A11469 | A16450 | 473 | A11470 | A14193 | 491 |
| A11470 | A14204 | 460 | A11470 | A14253 | 427 |
| A11470 | A15315 | 207 | A11470 | A15557 | 313 |
| A11470 | A15690 | 405 | A11470 | A16113 | 210 |
| A11470 | A16534 | 480 | A11471 | A11472 | 188 |
| A11471 | A11496 | 291 | A11471 | A11551 | 235 |
| A11471 | A11675 | 218 | A11471 | A11702 | 235 |
| A11471 | A11735 | 190 | A11471 | A11914 | 188 |
| A11471 | A11915 | 301 | A11471 | A11940 | 307 |
| A11471 | A12215 | 321 | A11471 | A12501 | 241 |
| A11471 | A12506 | 249 | A11471 | A12508 | 232 |
| A11471 | A12606 | 262 | A11471 | A12658 | 227 |
| A11471 | A12659 | 249 | A11471 | A12660 | 188 |
| A11471 | A12665 | 212 | A11471 | A12825 | 267 |
| A11471 | A12826 | 390 | A11471 | A12850 | 333 |
| A11471 | A12858 | 323 | A11471 | A12873 | 201 |
| A11471 | A13169 | 329 | A11471 | A13315 | 286 |
| A11471 | A13356 | 210 | A11471 | A13706 | 208 |
| A11471 | A13707 | 363 | A11471 | A13737 | 168 |
| A11471 | A13783 | 299 | A11471 | A13784 | 262 |
| A11471 | A13788 | 294 | A11471 | A14196 | 345 |



|        |        |     |        |        |     |
|--------|--------|-----|--------|--------|-----|
| A11471 | A14213 | 303 | A11471 | A14214 | 254 |
| A11471 | A14220 | 307 | A11471 | A14235 | 313 |
| A11471 | A14255 | 221 | A11471 | A14263 | 361 |
| A11471 | A14270 | 272 | A11471 | A14569 | 240 |
| A11471 | A14706 | 152 | A11471 | A14718 | 240 |
| A11471 | A14719 | 272 | A11471 | A14799 | 246 |
| A11471 | A14917 | 291 | A11471 | A14937 | 278 |
| A11471 | A15519 | 262 | A11471 | A15541 | 205 |
| A11471 | A15709 | 177 | A11471 | A15711 | 268 |
| A11471 | A15850 | 353 | A11471 | A15854 | 205 |
| A11471 | A15940 | 293 | A11471 | A15948 | 321 |
| A11471 | A16157 | 362 | A11471 | A16187 | 255 |
| A11471 | A16565 | 217 | A11471 | A16567 | 323 |
| A11471 | A16597 | 218 | A11471 | A16608 | 184 |
| A11471 | A16611 | 162 | A11471 | A16675 | 180 |
| A11471 | A16699 | 270 | A11471 | A16702 | 278 |
| A11471 | A16704 | 272 | A11471 | A16764 | 221 |
| A11471 | A16776 | 307 | A11471 | A16829 | 299 |
| A11471 | A16905 | 252 | A11471 | A16944 | 313 |
| A11471 | A16954 | 286 | A11471 | A17012 | 291 |
| A11471 | A17030 | 307 | A11471 | A17133 | 290 |
| A11472 | A11496 | 468 | A11472 | A11497 | 454 |
| A11472 | A11551 | 154 | A11472 | A11555 | 151 |
| A11472 | A11597 | 236 | A11472 | A11614 | 174 |
| A11472 | A11616 | 303 | A11472 | A11675 | 477 |
| A11472 | A11706 | 216 | A11472 | A11725 | 224 |
| A11472 | A11735 | 466 | A11472 | A11737 | 333 |
| A11472 | A11914 | 452 | A11472 | A11915 | 228 |
| A11472 | A11917 | 480 | A11472 | A11940 | 423 |
| A11472 | A11954 | 355 | A11472 | A11992 | 368 |
| A11472 | A12167 | 199 | A11472 | A12215 | 430 |
| A11472 | A12254 | 400 | A11472 | A12255 | 326 |
| A11472 | A12433 | 465 | A11472 | A12501 | 293 |
| A11472 | A12506 | 455 | A11472 | A12507 | 469 |
| A11472 | A12508 | 283 | A11472 | A12606 | 469 |
| A11472 | A12625 | 208 | A11472 | A12658 | 462 |
| A11472 | A12659 | 385 | A11472 | A12665 | 460 |
| A11472 | A12725 | 172 | A11472 | A12825 | 187 |
| A11472 | A12826 | 348 | A11472 | A12850 | 269 |
| A11472 | A12858 | 479 | A11472 | A12873 | 404 |
| A11472 | A13116 | 200 | A11472 | A13169 | 339 |
| A11472 | A13170 | 205 | A11472 | A13309 | 293 |
| A11472 | A13313 | 461 | A11472 | A13315 | 210 |
| A11472 | A13321 | 302 | A11472 | A13323 | 276 |
| A11472 | A13356 | 255 | A11472 | A13388 | 337 |
| A11472 | A13399 | 401 | A11472 | A13527 | 217 |

|        |        |     |        |        |     |
|--------|--------|-----|--------|--------|-----|
| A11472 | A13707 | 288 | A11472 | A13708 | 474 |
| A11472 | A13737 | 377 | A11472 | A13781 | 434 |
| A11472 | A13782 | 324 | A11472 | A13783 | 227 |
| A11472 | A13784 | 461 | A11472 | A13785 | 272 |
| A11472 | A13786 | 306 | A11472 | A13787 | 399 |
| A11472 | A13788 | 449 | A11472 | A13804 | 430 |
| A11472 | A13805 | 210 | A11472 | A13809 | 283 |
| A11472 | A13811 | 338 | A11472 | A13812 | 199 |
| A11472 | A13912 | 279 | A11472 | A14084 | 152 |
| A11472 | A14214 | 474 | A11472 | A14222 | 177 |
| A11472 | A14235 | 367 | A11472 | A14239 | 350 |
| A11472 | A14255 | 416 | A11472 | A14260 | 230 |
| A11472 | A14263 | 160 | A11472 | A14270 | 324 |
| A11472 | A14281 | 174 | A11472 | A14286 | 345 |
| A11472 | A14288 | 346 | A11472 | A14289 | 314 |
| A11472 | A14358 | 302 | A11472 | A14375 | 414 |
| A11472 | A14455 | 307 | A11472 | A14462 | 271 |
| A11472 | A14569 | 466 | A11472 | A14655 | 414 |
| A11472 | A14706 | 180 | A11472 | A14708 | 434 |
| A11472 | A14718 | 157 | A11472 | A14719 | 401 |
| A11472 | A14739 | 302 | A11472 | A14799 | 418 |
| A11472 | A14826 | 285 | A11472 | A14838 | 290 |
| A11472 | A14903 | 228 | A11472 | A14917 | 346 |
| A11472 | A14937 | 199 | A11472 | A15105 | 347 |
| A11472 | A15187 | 324 | A11472 | A15189 | 347 |
| A11472 | A15262 | 328 | A11472 | A15295 | 151 |
| A11472 | A15501 | 301 | A11472 | A15519 | 182 |
| A11472 | A15532 | 196 | A11472 | A15541 | 457 |
| A11472 | A15653 | 232 | A11472 | A15665 | 187 |
| A11472 | A15680 | 465 | A11472 | A15683 | 353 |
| A11472 | A15698 | 307 | A11472 | A15704 | 157 |
| A11472 | A15709 | 470 | A11472 | A15711 | 399 |
| A11472 | A15735 | 154 | A11472 | A15743 | 210 |
| A11472 | A15765 | 172 | A11472 | A15774 | 193 |
| A11472 | A15818 | 188 | A11472 | A15854 | 247 |
| A11472 | A15855 | 378 | A11472 | A15943 | 157 |
| A11472 | A16088 | 428 | A11472 | A16157 | 486 |
| A11472 | A16187 | 390 | A11472 | A16243 | 224 |
| A11472 | A16343 | 394 | A11472 | A16387 | 252 |
| A11472 | A16552 | 480 | A11472 | A16565 | 484 |
| A11472 | A16566 | 358 | A11472 | A16567 | 432 |
| A11472 | A16587 | 446 | A11472 | A16597 | 414 |
| A11472 | A16611 | 475 | A11472 | A16664 | 460 |
| A11472 | A16675 | 472 | A11472 | A16680 | 438 |
| A11472 | A16682 | 355 | A11472 | A16690 | 388 |
| A11472 | A16691 | 438 | A11472 | A16693 | 283 |

|        |        |     |        |        |     |
|--------|--------|-----|--------|--------|-----|
| A11472 | A16695 | 288 | A11472 | A16697 | 224 |
| A11472 | A16699 | 191 | A11472 | A16701 | 247 |
| A11472 | A16703 | 396 | A11472 | A16704 | 324 |
| A11472 | A16706 | 293 | A11472 | A16708 | 369 |
| A11472 | A16709 | 340 | A11472 | A16764 | 362 |
| A11472 | A16776 | 424 | A11472 | A16788 | 335 |
| A11472 | A16790 | 210 | A11472 | A16797 | 369 |
| A11472 | A16806 | 288 | A11472 | A16807 | 475 |
| A11472 | A16810 | 283 | A11472 | A16815 | 279 |
| A11472 | A16824 | 438 | A11472 | A16829 | 353 |
| A11472 | A16838 | 196 | A11472 | A16874 | 417 |
| A11472 | A16882 | 317 | A11472 | A16900 | 243 |
| A11472 | A16905 | 388 | A11472 | A16908 | 302 |
| A11472 | A16913 | 380 | A11472 | A16944 | 243 |
| A11472 | A16954 | 210 | A11472 | A17018 | 356 |
| A11472 | A17019 | 293 | A11472 | A17030 | 235 |
| A11472 | A17035 | 307 | A11472 | A17133 | 213 |
| A11472 | A17144 | 335 | A11472 | A17190 | 224 |
| A11472 | A17211 | 221 | A11473 | A11551 | 265 |
| A11473 | A12357 | 285 | A11473 | A12365 | 159 |
| A11473 | A14471 | 162 | A11473 | A14969 | 486 |
| A11473 | A16261 | 277 | A11474 | A11559 | 187 |
| A11474 | A14196 | 486 | A11474 | A14662 | 490 |
| A11474 | A14836 | 411 | A11474 | A15297 | 388 |
| A11474 | A15341 | 243 | A11474 | A15501 | 221 |
| A11474 | A15559 | 382 | A11474 | A16741 | 184 |
| A11474 | A17063 | 433 | A11475 | A11555 | 182 |
| A11475 | A11616 | 201 | A11475 | A11705 | 235 |
| A11475 | A12722 | 207 | A11475 | A12891 | 235 |
| A11475 | A13784 | 195 | A11475 | A14281 | 236 |
| A11475 | A14844 | 221 | A11475 | A15090 | 367 |
| A11475 | A15667 | 246 | A11475 | A15696 | 247 |
| A11475 | A15698 | 205 | A11475 | A15774 | 224 |
| A11475 | A16261 | 198 | A11475 | A16597 | 167 |
| A11475 | A16704 | 224 | A11475 | A16866 | 180 |
| A11475 | A17125 | 269 | A11476 | A11584 | 299 |
| A11476 | A11670 | 489 | A11476 | A11733 | 279 |
| A11476 | A11944 | 297 | A11476 | A14200 | 477 |
| A11476 | A14363 | 340 | A11476 | A14489 | 226 |
| A11476 | A14596 | 490 | A11476 | A14659 | 333 |
| A11476 | A15436 | 174 | A11476 | A15564 | 350 |
| A11476 | A15660 | 326 | A11476 | A15715 | 326 |
| A11476 | A15717 | 420 | A11476 | A15747 | 196 |
| A11476 | A16266 | 279 | A11476 | A16661 | 340 |
| A11476 | A17127 | 375 | A11477 | A11713 | 436 |
| A11477 | A12518 | 447 | A11477 | A12534 | 447 |

|        |        |     |        |        |     |
|--------|--------|-----|--------|--------|-----|
| A11477 | A12991 | 408 | A11477 | A15358 | 285 |
| A11477 | A15470 | 277 | A11477 | A15475 | 314 |
| A11477 | A16074 | 286 | A11478 | A15726 | 180 |
| A11479 | A12784 | 418 | A11480 | A11704 | 488 |
| A11480 | A11729 | 468 | A11480 | A11945 | 185 |
| A11480 | A12221 | 288 | A11480 | A12821 | 180 |
| A11480 | A13992 | 208 | A11480 | A14152 | 238 |
| A11480 | A14216 | 371 | A11480 | A14737 | 363 |
| A11480 | A14813 | 188 | A11480 | A15657 | 188 |
| A11480 | A15988 | 321 | A11480 | A16680 | 188 |
| A11480 | A16805 | 314 | A11482 | A11485 | 332 |
| A11482 | A13302 | 356 | A11482 | A14236 | 356 |
| A11482 | A14633 | 234 | A11482 | A15282 | 157 |
| A11484 | A11895 | 416 | A11485 | A11808 | 229 |
| A11485 | A15242 | 358 | A11485 | A15682 | 329 |
| A11485 | A16450 | 489 | A11485 | A17002 | 252 |
| A11486 | A13382 | 899 | A11486 | A14064 | 391 |
| A11486 | A15932 | 224 | A11486 | A15933 | 294 |
| A11487 | A11579 | 201 | A11487 | A11767 | 221 |
| A11487 | A11929 | 338 | A11487 | A11937 | 204 |
| A11487 | A12084 | 184 | A11487 | A12196 | 170 |
| A11487 | A12377 | 371 | A11487 | A12886 | 105 |
| A11487 | A13340 | 396 | A11487 | A13928 | 728 |
| A11487 | A13982 | 416 | A11487 | A13989 | 427 |
| A11487 | A14006 | 480 | A11487 | A14055 | 252 |
| A11487 | A14174 | 208 | A11487 | A14303 | 185 |
| A11487 | A14452 | 291 | A11487 | A14629 | 273 |
| A11487 | A14986 | 266 | A11487 | A15250 | 191 |
| A11487 | A15366 | 180 | A11487 | A15665 | 294 |
| A11487 | A15682 | 283 | A11487 | A15726 | 450 |
| A11487 | A16157 | 63  | A11487 | A16328 | 227 |
| A11487 | A16847 | 497 | A11487 | A16994 | 491 |
| A11487 | A17063 | 446 | A11488 | A14366 | 307 |
| A11488 | A14374 | 316 | A11488 | A14391 | 319 |
| A11488 | A14554 | 351 | A11488 | A15516 | 368 |
| A11488 | A15992 | 353 | A11489 | A14827 | 340 |
| A11490 | A11987 | 412 | A11491 | A13879 | 388 |
| A11493 | A15096 | 266 | A11494 | A14170 | 380 |
| A11495 | A14392 | 368 | A11496 | A11497 | 895 |
| A11496 | A11551 | 251 | A11496 | A11555 | 405 |
| A11496 | A11597 | 302 | A11496 | A11616 | 446 |
| A11496 | A11649 | 240 | A11496 | A11675 | 466 |
| A11496 | A11725 | 196 | A11496 | A11735 | 486 |
| A11496 | A11737 | 457 | A11496 | A11833 | 238 |
| A11496 | A11914 | 486 | A11496 | A11915 | 199 |
| A11496 | A11917 | 486 | A11496 | A11920 | 243 |

|        |        |     |        |        |     |
|--------|--------|-----|--------|--------|-----|
| A11496 | A11937 | 340 | A11496 | A11940 | 337 |
| A11496 | A11954 | 330 | A11496 | A11992 | 340 |
| A11496 | A12138 | 463 | A11496 | A12167 | 170 |
| A11496 | A12215 | 224 | A11496 | A12238 | 217 |
| A11496 | A12254 | 469 | A11496 | A12255 | 296 |
| A11496 | A12284 | 267 | A11496 | A12433 | 490 |
| A11496 | A12501 | 258 | A11496 | A12506 | 445 |
| A11496 | A12507 | 477 | A11496 | A12508 | 405 |
| A11496 | A12606 | 486 | A11496 | A12625 | 452 |
| A11496 | A12655 | 177 | A11496 | A12658 | 488 |
| A11496 | A12659 | 268 | A11496 | A12665 | 463 |
| A11496 | A12725 | 466 | A11496 | A12726 | 221 |
| A11496 | A12738 | 368 | A11496 | A12757 | 156 |
| A11496 | A12792 | 215 | A11496 | A12825 | 425 |
| A11496 | A12826 | 330 | A11496 | A12858 | 489 |
| A11496 | A12873 | 461 | A11496 | A13116 | 303 |
| A11496 | A13169 | 303 | A11496 | A13231 | 224 |
| A11496 | A13309 | 258 | A11496 | A13313 | 484 |
| A11496 | A13321 | 362 | A11496 | A13323 | 249 |
| A11496 | A13342 | 162 | A11496 | A13356 | 319 |
| A11496 | A13388 | 176 | A11496 | A13399 | 419 |
| A11496 | A13527 | 187 | A11496 | A13669 | 227 |
| A11496 | A13706 | 215 | A11496 | A13707 | 469 |
| A11496 | A13708 | 385 | A11496 | A13737 | 450 |
| A11496 | A13781 | 480 | A11496 | A13783 | 196 |
| A11496 | A13784 | 461 | A11496 | A13786 | 418 |
| A11496 | A13788 | 323 | A11496 | A13805 | 395 |
| A11496 | A13809 | 480 | A11496 | A13811 | 177 |
| A11496 | A13894 | 160 | A11496 | A13912 | 374 |
| A11496 | A13928 | 156 | A11496 | A14074 | 213 |
| A11496 | A14084 | 430 | A11496 | A14087 | 163 |
| A11496 | A14154 | 204 | A11496 | A14167 | 210 |
| A11496 | A14178 | 156 | A11496 | A14212 | 191 |
| A11496 | A14213 | 165 | A11496 | A14214 | 490 |
| A11496 | A14222 | 438 | A11496 | A14239 | 317 |
| A11496 | A14255 | 333 | A11496 | A14263 | 475 |
| A11496 | A14270 | 162 | A11496 | A14285 | 185 |
| A11496 | A14286 | 319 | A11496 | A14288 | 452 |
| A11496 | A14289 | 283 | A11496 | A14358 | 279 |
| A11496 | A14375 | 395 | A11496 | A14455 | 430 |
| A11496 | A14462 | 434 | A11496 | A14569 | 489 |
| A11496 | A14595 | 249 | A11496 | A14706 | 457 |
| A11496 | A14708 | 443 | A11496 | A14719 | 163 |
| A11496 | A14799 | 484 | A11496 | A14826 | 241 |
| A11496 | A14838 | 329 | A11496 | A14903 | 405 |
| A11496 | A14917 | 319 | A11496 | A14921 | 267 |

|        |        |     |        |        |     |
|--------|--------|-----|--------|--------|-----|
| A11496 | A14931 | 160 | A11496 | A15105 | 436 |
| A11496 | A15187 | 428 | A11496 | A15189 | 447 |
| A11496 | A15225 | 163 | A11496 | A15262 | 412 |
| A11496 | A15338 | 441 | A11496 | A15501 | 157 |
| A11496 | A15519 | 374 | A11496 | A15541 | 462 |
| A11496 | A15653 | 389 | A11496 | A15665 | 293 |
| A11496 | A15667 | 185 | A11496 | A15680 | 314 |
| A11496 | A15683 | 414 | A11496 | A15698 | 276 |
| A11496 | A15709 | 465 | A11496 | A15711 | 159 |
| A11496 | A15743 | 180 | A11496 | A15774 | 297 |
| A11496 | A15818 | 291 | A11496 | A15850 | 386 |
| A11496 | A15855 | 184 | A11496 | A15940 | 322 |
| A11496 | A15947 | 152 | A11496 | A16067 | 173 |
| A11496 | A16157 | 490 | A11496 | A16187 | 419 |
| A11496 | A16261 | 361 | A11496 | A16322 | 221 |
| A11496 | A16343 | 377 | A11496 | A16387 | 224 |
| A11496 | A16552 | 480 | A11496 | A16565 | 465 |
| A11496 | A16566 | 201 | A11496 | A16585 | 235 |
| A11496 | A16587 | 484 | A11496 | A16597 | 486 |
| A11496 | A16608 | 183 | A11496 | A16611 | 489 |
| A11496 | A16652 | 308 | A11496 | A16663 | 247 |
| A11496 | A16664 | 489 | A11496 | A16675 | 473 |
| A11496 | A16680 | 461 | A11496 | A16682 | 405 |
| A11496 | A16690 | 466 | A11496 | A16691 | 246 |
| A11496 | A16692 | 173 | A11496 | A16693 | 258 |
| A11496 | A16695 | 434 | A11496 | A16697 | 328 |
| A11496 | A16699 | 732 | A11496 | A16703 | 375 |
| A11496 | A16704 | 452 | A11496 | A16706 | 267 |
| A11496 | A16707 | 406 | A11496 | A16708 | 217 |
| A11496 | A16709 | 180 | A11496 | A16762 | 185 |
| A11496 | A16764 | 230 | A11496 | A16774 | 235 |
| A11496 | A16776 | 409 | A11496 | A16790 | 435 |
| A11496 | A16797 | 353 | A11496 | A16799 | 227 |
| A11496 | A16807 | 257 | A11496 | A16824 | 368 |
| A11496 | A16829 | 441 | A11496 | A16838 | 385 |
| A11496 | A16858 | 395 | A11496 | A16866 | 343 |
| A11496 | A16874 | 401 | A11496 | A16882 | 294 |
| A11496 | A16905 | 271 | A11496 | A16908 | 279 |
| A11496 | A16913 | 361 | A11496 | A16944 | 215 |
| A11496 | A16954 | 394 | A11496 | A17012 | 187 |
| A11496 | A17018 | 200 | A11496 | A17030 | 207 |
| A11496 | A17033 | 402 | A11496 | A17035 | 276 |
| A11496 | A17125 | 210 | A11496 | A17133 | 185 |
| A11496 | A17144 | 174 | A11496 | A17211 | 193 |
| A11497 | A11551 | 400 | A11497 | A11555 | 434 |
| A11497 | A11597 | 363 | A11497 | A11616 | 460 |

|        |        |     |        |        |     |
|--------|--------|-----|--------|--------|-----|
| A11497 | A11649 | 329 | A11497 | A11675 | 472 |
| A11497 | A11725 | 185 | A11497 | A11735 | 488 |
| A11497 | A11737 | 466 | A11497 | A11833 | 224 |
| A11497 | A11851 | 263 | A11497 | A11914 | 486 |
| A11497 | A11915 | 322 | A11497 | A11917 | 490 |
| A11497 | A11937 | 340 | A11497 | A11940 | 441 |
| A11497 | A11954 | 322 | A11497 | A11992 | 393 |
| A11497 | A12011 | 191 | A11497 | A12138 | 485 |
| A11497 | A12167 | 293 | A11497 | A12215 | 345 |
| A11497 | A12238 | 339 | A11497 | A12254 | 479 |
| A11497 | A12255 | 286 | A11497 | A12284 | 424 |
| A11497 | A12433 | 490 | A11497 | A12499 | 170 |
| A11497 | A12501 | 438 | A11497 | A12506 | 353 |
| A11497 | A12507 | 485 | A11497 | A12508 | 454 |
| A11497 | A12606 | 491 | A11497 | A12625 | 481 |
| A11497 | A12655 | 168 | A11497 | A12658 | 489 |
| A11497 | A12659 | 256 | A11497 | A12665 | 461 |
| A11497 | A12725 | 484 | A11497 | A12726 | 343 |
| A11497 | A12727 | 217 | A11497 | A12738 | 265 |
| A11497 | A12757 | 156 | A11497 | A12792 | 205 |
| A11497 | A12825 | 369 | A11497 | A12826 | 324 |
| A11497 | A12834 | 252 | A11497 | A12850 | 232 |
| A11497 | A12858 | 490 | A11497 | A12873 | 479 |
| A11497 | A13116 | 380 | A11497 | A13169 | 366 |
| A11497 | A13170 | 167 | A11497 | A13231 | 215 |
| A11497 | A13309 | 246 | A11497 | A13313 | 488 |
| A11497 | A13342 | 152 | A11497 | A13356 | 204 |
| A11497 | A13399 | 440 | A11497 | A13527 | 311 |
| A11497 | A13706 | 377 | A11497 | A13707 | 468 |
| A11497 | A13708 | 477 | A11497 | A13711 | 347 |
| A11497 | A13737 | 469 | A11497 | A13781 | 489 |
| A11497 | A13782 | 296 | A11497 | A13784 | 483 |
| A11497 | A13786 | 460 | A11497 | A13788 | 394 |
| A11497 | A13804 | 215 | A11497 | A13805 | 432 |
| A11497 | A13809 | 485 | A11497 | A13811 | 167 |
| A11497 | A13812 | 160 | A11497 | A13912 | 456 |
| A11497 | A13928 | 156 | A11497 | A13963 | 372 |
| A11497 | A14074 | 374 | A11497 | A14084 | 467 |
| A11497 | A14087 | 286 | A11497 | A14094 | 335 |
| A11497 | A14154 | 191 | A11497 | A14167 | 201 |
| A11497 | A14178 | 159 | A11497 | A14186 | 165 |
| A11497 | A14212 | 176 | A11497 | A14214 | 491 |
| A11497 | A14222 | 480 | A11497 | A14227 | 272 |
| A11497 | A14235 | 205 | A11497 | A14239 | 445 |
| A11497 | A14255 | 472 | A11497 | A14260 | 191 |
| A11497 | A14263 | 468 | A11497 | A14270 | 152 |

|        |        |     |        |        |     |
|--------|--------|-----|--------|--------|-----|
| A11497 | A14285 | 168 | A11497 | A14286 | 310 |
| A11497 | A14288 | 477 | A11497 | A14289 | 273 |
| A11497 | A14358 | 271 | A11497 | A14375 | 388 |
| A11497 | A14455 | 390 | A11497 | A14462 | 429 |
| A11497 | A14569 | 490 | A11497 | A14595 | 240 |
| A11497 | A14706 | 472 | A11497 | A14708 | 439 |
| A11497 | A14718 | 343 | A11497 | A14719 | 154 |
| A11497 | A14739 | 271 | A11497 | A14799 | 485 |
| A11497 | A14838 | 316 | A11497 | A14903 | 460 |
| A11497 | A14917 | 177 | A11497 | A14921 | 433 |
| A11497 | A15105 | 475 | A11497 | A15187 | 450 |
| A11497 | A15189 | 483 | A11497 | A15262 | 452 |
| A11497 | A15338 | 430 | A11497 | A15501 | 243 |
| A11497 | A15536 | 202 | A11497 | A15541 | 443 |
| A11497 | A15559 | 386 | A11497 | A15561 | 314 |
| A11497 | A15653 | 324 | A11497 | A15665 | 452 |
| A11497 | A15667 | 176 | A11497 | A15680 | 363 |
| A11497 | A15683 | 462 | A11497 | A15709 | 429 |
| A11497 | A15711 | 281 | A11497 | A15729 | 212 |
| A11497 | A15735 | 279 | A11497 | A15743 | 171 |
| A11497 | A15774 | 286 | A11497 | A15818 | 279 |
| A11497 | A15850 | 435 | A11497 | A15932 | 218 |
| A11497 | A15940 | 312 | A11497 | A16067 | 159 |
| A11497 | A16157 | 491 | A11497 | A16187 | 443 |
| A11497 | A16215 | 196 | A11497 | A16243 | 319 |
| A11497 | A16261 | 408 | A11497 | A16343 | 369 |
| A11497 | A16552 | 488 | A11497 | A16565 | 488 |
| A11497 | A16566 | 324 | A11497 | A16567 | 217 |
| A11497 | A16585 | 226 | A11497 | A16587 | 484 |
| A11497 | A16597 | 490 | A11497 | A16608 | 433 |
| A11497 | A16611 | 491 | A11497 | A16652 | 414 |
| A11497 | A16663 | 434 | A11497 | A16664 | 491 |
| A11497 | A16675 | 486 | A11497 | A16680 | 469 |
| A11497 | A16682 | 322 | A11497 | A16690 | 480 |
| A11497 | A16691 | 424 | A11497 | A16692 | 162 |
| A11497 | A16693 | 369 | A11497 | A16695 | 457 |
| A11497 | A16697 | 185 | A11497 | A16699 | 724 |
| A11497 | A16702 | 160 | A11497 | A16703 | 473 |
| A11497 | A16704 | 450 | A11497 | A16706 | 259 |
| A11497 | A16707 | 401 | A11497 | A16708 | 208 |
| A11497 | A16709 | 303 | A11497 | A16762 | 173 |
| A11497 | A16764 | 388 | A11497 | A16774 | 353 |
| A11497 | A16776 | 404 | A11497 | A16788 | 307 |
| A11497 | A16790 | 468 | A11497 | A16797 | 347 |
| A11497 | A16798 | 263 | A11497 | A16806 | 374 |
| A11497 | A16807 | 245 | A11497 | A16815 | 367 |



|        |        |     |        |        |     |
|--------|--------|-----|--------|--------|-----|
| A11497 | A16824 | 424 | A11497 | A16829 | 438 |
| A11497 | A16838 | 466 | A11497 | A16858 | 390 |
| A11497 | A16859 | 307 | A11497 | A16866 | 333 |
| A11497 | A16874 | 180 | A11497 | A16882 | 286 |
| A11497 | A16905 | 469 | A11497 | A16913 | 451 |
| A11497 | A16944 | 205 | A11497 | A16954 | 386 |
| A11497 | A17015 | 268 | A11497 | A17018 | 400 |
| A11497 | A17030 | 404 | A11497 | A17033 | 319 |
| A11497 | A17035 | 263 | A11497 | A17125 | 201 |
| A11497 | A17133 | 174 | A11497 | A17144 | 165 |
| A11497 | A17190 | 318 | A11497 | A17211 | 183 |
| A11498 | A15228 | 427 | A11500 | A15673 | 345 |
| A11501 | A14430 | 205 | A11501 | A17102 | 329 |
| A11502 | A14374 | 330 | A11502 | A14392 | 347 |
| A11502 | A14599 | 386 | A11502 | A15516 | 378 |
| A11503 | A12961 | 353 | A11503 | A13873 | 176 |
| A11503 | A16816 | 366 | A11507 | A15834 | 391 |
| A11507 | A16216 | 319 | A11509 | A11628 | 469 |
| A11509 | A15052 | 472 | A11509 | A15053 | 428 |
| A11511 | A12972 | 435 | A11513 | A11983 | 176 |
| A11513 | A13824 | 270 | A11513 | A13829 | 160 |
| A11513 | A14125 | 179 | A11513 | A14377 | 152 |
| A11513 | A14698 | 251 | A11513 | A15395 | 160 |
| A11513 | A15599 | 221 | A11515 | A13369 | 159 |
| A11520 | A17168 | 311 | A11521 | A11649 | 157 |
| A11521 | A11855 | 424 | A11521 | A11931 | 168 |
| A11521 | A12473 | 436 | A11521 | A12658 | 157 |
| A11521 | A12826 | 357 | A11521 | A13342 | 408 |
| A11521 | A13786 | 185 | A11521 | A14255 | 152 |
| A11521 | A14375 | 151 | A11521 | A14921 | 302 |
| A11521 | A15818 | 201 | A11521 | A16703 | 196 |
| A11521 | A16790 | 223 | A11522 | A13278 | 278 |
| A11522 | A13994 | 486 | A11522 | A14048 | 200 |
| A11522 | A14060 | 943 | A11522 | A14496 | 174 |
| A11522 | A17195 | 977 | A11523 | A12412 | 443 |
| A11523 | A13493 | 427 | A11525 | A11561 | 477 |
| A11525 | A11693 | 347 | A11525 | A11983 | 198 |
| A11525 | A13772 | 162 | A11525 | A13826 | 160 |
| A11525 | A13986 | 182 | A11525 | A14321 | 274 |
| A11525 | A15314 | 195 | A11525 | A15361 | 156 |
| A11525 | A15386 | 480 | A11525 | A15387 | 286 |
| A11525 | A15410 | 238 | A11525 | A15577 | 302 |
| A11525 | A15783 | 452 | A11526 | A11833 | 223 |
| A11526 | A12140 | 480 | A11526 | A12326 | 484 |
| A11526 | A13116 | 276 | A11526 | A13809 | 229 |
| A11526 | A15653 | 340 | A11526 | A15666 | 374 |

|        |        |     |        |        |     |
|--------|--------|-----|--------|--------|-----|
| A11526 | A16676 | 319 | A11527 | A12820 | 485 |
| A11527 | A13387 | 279 | A11527 | A13832 | 394 |
| A11527 | A13874 | 243 | A11527 | A14247 | 488 |
| A11527 | A14399 | 466 | A11527 | A15336 | 215 |
| A11527 | A15909 | 461 | A11527 | A17061 | 409 |
| A11528 | A13239 | 418 | A11528 | A13803 | 445 |
| A11528 | A14871 | 425 | A11529 | A12951 | 475 |
| A11530 | A11726 | 445 | A11531 | A12385 | 441 |
| A11531 | A12410 | 441 | A11531 | A12488 | 441 |
| A11531 | A12490 | 441 | A11531 | A15277 | 358 |
| A11532 | A14193 | 162 | A11532 | A14199 | 316 |
| A11532 | A14204 | 157 | A11532 | A14210 | 286 |
| A11532 | A14229 | 277 | A11532 | A15349 | 276 |
| A11533 | A11615 | 366 | A11534 | A12445 | 399 |
| A11534 | A12920 | 356 | A11535 | A13126 | 433 |
| A11535 | A13989 | 489 | A11537 | A13826 | 185 |
| A11537 | A13899 | 299 | A11537 | A13944 | 272 |
| A11537 | A14010 | 176 | A11537 | A14123 | 384 |
| A11537 | A14187 | 252 | A11537 | A14371 | 430 |
| A11537 | A14511 | 291 | A11537 | A15292 | 443 |
| A11537 | A15310 | 491 | A11537 | A15312 | 475 |
| A11537 | A15313 | 490 | A11537 | A15317 | 167 |
| A11537 | A15329 | 274 | A11537 | A15331 | 463 |
| A11537 | A15333 | 234 | A11537 | A15334 | 398 |
| A11537 | A15335 | 363 | A11537 | A15348 | 483 |
| A11537 | A15349 | 486 | A11537 | A15352 | 301 |
| A11537 | A15363 | 215 | A11537 | A15413 | 176 |
| A11537 | A15416 | 162 | A11537 | A15417 | 299 |
| A11537 | A15438 | 340 | A11537 | A15439 | 324 |
| A11537 | A15445 | 472 | A11537 | A15446 | 353 |
| A11537 | A15449 | 335 | A11537 | A15450 | 358 |
| A11537 | A15454 | 491 | A11537 | A15457 | 306 |
| A11537 | A15487 | 154 | A11537 | A15515 | 201 |
| A11537 | A15864 | 364 | A11537 | A16167 | 364 |
| A11537 | A16711 | 257 | A11537 | A17076 | 228 |
| A11538 | A11683 | 339 | A11538 | A12334 | 441 |
| A11538 | A12361 | 366 | A11539 | A11606 | 488 |
| A11539 | A14332 | 484 | A11539 | A16281 | 486 |
| A11540 | A13949 | 424 | A11540 | A14019 | 180 |
| A11540 | A14706 | 279 | A11540 | A15369 | 463 |
| A11540 | A15935 | 167 | A11540 | A16128 | 311 |
| A11540 | A16626 | 385 | A11542 | A11950 | 249 |
| A11542 | A13772 | 177 | A11542 | A13987 | 474 |
| A11542 | A14010 | 306 | A11542 | A14122 | 144 |
| A11542 | A14124 | 249 | A11542 | A14129 | 436 |
| A11542 | A14190 | 217 | A11542 | A14378 | 474 |

|        |        |     |        |        |     |
|--------|--------|-----|--------|--------|-----|
| A11542 | A14408 | 945 | A11542 | A15301 | 152 |
| A11542 | A15302 | 486 | A11542 | A15310 | 213 |
| A11542 | A15312 | 198 | A11542 | A15313 | 425 |
| A11542 | A15331 | 202 | A11542 | A15333 | 229 |
| A11542 | A15366 | 329 | A11542 | A15396 | 360 |
| A11542 | A15404 | 401 | A11542 | A15413 | 171 |
| A11542 | A15431 | 485 | A11542 | A15435 | 247 |
| A11542 | A15461 | 481 | A11542 | A15462 | 301 |
| A11542 | A15463 | 456 | A11542 | A15498 | 283 |
| A11542 | A15513 | 490 | A11542 | A15543 | 154 |
| A11542 | A15804 | 308 | A11542 | A15818 | 456 |
| A11542 | A15824 | 486 | A11542 | A15833 | 419 |
| A11542 | A16450 | 335 | A11543 | A12992 | 362 |
| A11543 | A13361 | 180 | A11543 | A13860 | 462 |
| A11543 | A14055 | 174 | A11543 | A14517 | 399 |
| A11543 | A14559 | 160 | A11543 | A14667 | 180 |
| A11543 | A14686 | 291 | A11543 | A15599 | 218 |
| A11543 | A15606 | 374 | A11543 | A16476 | 294 |
| A11544 | A11649 | 262 | A11544 | A11831 | 174 |
| A11544 | A11832 | 174 | A11544 | A13417 | 419 |
| A11544 | A13870 | 417 | A11544 | A13892 | 262 |
| A11544 | A14017 | 318 | A11544 | A14038 | 489 |
| A11544 | A14362 | 262 | A11544 | A15321 | 217 |
| A11544 | A15338 | 262 | A11544 | A15376 | 269 |
| A11544 | A15564 | 262 | A11544 | A15624 | 276 |
| A11544 | A15684 | 356 | A11544 | A15843 | 196 |
| A11544 | A16075 | 382 | A11544 | A16614 | 262 |
| A11545 | A11607 | 489 | A11545 | A14137 | 311 |
| A11545 | A15445 | 167 | A11545 | A15461 | 299 |
| A11545 | A15824 | 234 | A11545 | A16450 | 182 |
| A11547 | A11665 | 491 | A11547 | A11716 | 368 |
| A11547 | A13927 | 488 | A11548 | A13874 | 263 |
| A11548 | A14247 | 551 | A11548 | A14399 | 177 |
| A11548 | A15292 | 472 | A11548 | A15321 | 402 |
| A11550 | A11857 | 443 | A11550 | A12269 | 307 |
| A11550 | A12821 | 451 | A11550 | A13875 | 219 |
| A11550 | A14508 | 345 | A11550 | A15720 | 171 |
| A11550 | A15721 | 182 | A11550 | A15732 | 243 |
| A11550 | A16272 | 411 | A11550 | A16686 | 227 |
| A11551 | A11555 | 198 | A11551 | A11615 | 399 |
| A11551 | A11616 | 218 | A11551 | A11649 | 191 |
| A11551 | A11675 | 317 | A11551 | A11735 | 154 |
| A11551 | A11737 | 157 | A11551 | A11914 | 286 |
| A11551 | A11915 | 272 | A11551 | A11917 | 468 |
| A11551 | A11940 | 440 | A11551 | A11954 | 272 |
| A11551 | A12215 | 294 | A11551 | A12254 | 160 |

|        |        |     |        |        |     |
|--------|--------|-----|--------|--------|-----|
| A11551 | A12433 | 400 | A11551 | A12499 | 255 |
| A11551 | A12507 | 182 | A11551 | A12606 | 386 |
| A11551 | A12658 | 324 | A11551 | A12665 | 310 |
| A11551 | A12725 | 398 | A11551 | A12825 | 234 |
| A11551 | A12858 | 286 | A11551 | A12873 | 167 |
| A11551 | A13116 | 246 | A11551 | A13313 | 435 |
| A11551 | A13706 | 172 | A11551 | A13707 | 204 |
| A11551 | A13781 | 363 | A11551 | A13784 | 217 |
| A11551 | A13805 | 256 | A11551 | A13809 | 198 |
| A11551 | A14074 | 171 | A11551 | A14214 | 380 |
| A11551 | A14222 | 335 | A11551 | A14255 | 319 |
| A11551 | A14260 | 388 | A11551 | A14288 | 227 |
| A11551 | A14569 | 335 | A11551 | A14718 | 337 |
| A11551 | A14799 | 375 | A11551 | A15105 | 229 |
| A11551 | A15189 | 302 | A11551 | A15262 | 152 |
| A11551 | A15541 | 303 | A11551 | A15711 | 361 |
| A11551 | A15940 | 263 | A11551 | A16157 | 324 |
| A11551 | A16187 | 221 | A11551 | A16261 | 213 |
| A11551 | A16343 | 319 | A11551 | A16552 | 305 |
| A11551 | A16565 | 314 | A11551 | A16587 | 256 |
| A11551 | A16597 | 396 | A11551 | A16608 | 279 |
| A11551 | A16611 | 352 | A11551 | A16664 | 393 |
| A11551 | A16675 | 277 | A11551 | A16692 | 247 |
| A11551 | A16703 | 230 | A11551 | A16704 | 238 |
| A11551 | A16709 | 255 | A11551 | A16776 | 279 |
| A11551 | A16790 | 255 | A11551 | A16866 | 196 |
| A11551 | A16905 | 347 | A11551 | A16954 | 255 |
| A11551 | A17019 | 328 | A11551 | A17030 | 391 |
| A11552 | A14247 | 385 | A11552 | A14661 | 305 |
| A11552 | A15432 | 216 | A11553 | A11590 | 491 |
| A11553 | A13331 | 472 | A11553 | A13917 | 234 |
| A11553 | A13946 | 330 | A11553 | A15498 | 317 |
| A11554 | A11702 | 491 | A11554 | A12659 | 450 |
| A11554 | A16886 | 435 | A11555 | A11616 | 414 |
| A11555 | A11649 | 322 | A11555 | A11675 | 313 |
| A11555 | A11725 | 266 | A11555 | A11735 | 373 |
| A11555 | A11737 | 374 | A11555 | A11833 | 187 |
| A11555 | A11914 | 373 | A11555 | A11917 | 327 |
| A11555 | A12167 | 243 | A11555 | A12238 | 285 |
| A11555 | A12254 | 291 | A11555 | A12284 | 260 |
| A11555 | A12433 | 396 | A11555 | A12507 | 358 |
| A11555 | A12508 | 195 | A11555 | A12606 | 384 |
| A11555 | A12655 | 249 | A11555 | A12658 | 399 |
| A11555 | A12665 | 173 | A11555 | A12725 | 396 |
| A11555 | A12738 | 218 | A11555 | A12858 | 373 |
| A11555 | A12873 | 163 | A11555 | A13116 | 367 |

|        |        |     |        |        |     |
|--------|--------|-----|--------|--------|-----|
| A11555 | A13169 | 159 | A11555 | A13231 | 291 |
| A11555 | A13298 | 173 | A11555 | A13313 | 353 |
| A11555 | A13399 | 159 | A11555 | A13706 | 168 |
| A11555 | A13707 | 201 | A11555 | A13781 | 283 |
| A11555 | A13784 | 212 | A11555 | A13786 | 346 |
| A11555 | A13809 | 441 | A11555 | A13912 | 314 |
| A11555 | A14074 | 302 | A11555 | A14094 | 156 |
| A11555 | A14214 | 420 | A11555 | A14222 | 249 |
| A11555 | A14227 | 208 | A11555 | A14239 | 168 |
| A11555 | A14288 | 324 | A11555 | A14289 | 224 |
| A11555 | A14375 | 314 | A11555 | A14455 | 356 |
| A11555 | A14569 | 407 | A11555 | A14595 | 311 |
| A11555 | A14699 | 162 | A11555 | A14706 | 238 |
| A11555 | A14708 | 156 | A11555 | A14718 | 201 |
| A11555 | A14739 | 335 | A11555 | A14778 | 252 |
| A11555 | A14799 | 301 | A11555 | A15105 | 391 |
| A11555 | A15187 | 235 | A11555 | A15189 | 165 |
| A11555 | A15262 | 279 | A11555 | A15338 | 212 |
| A11555 | A15541 | 168 | A11555 | A15667 | 258 |
| A11555 | A15683 | 332 | A11555 | A15711 | 358 |
| A11555 | A15774 | 238 | A11555 | A15932 | 168 |
| A11555 | A16157 | 428 | A11555 | A16187 | 218 |
| A11555 | A16243 | 266 | A11555 | A16261 | 341 |
| A11555 | A16552 | 301 | A11555 | A16565 | 312 |
| A11555 | A16566 | 272 | A11555 | A16587 | 430 |
| A11555 | A16597 | 394 | A11555 | A16664 | 308 |
| A11555 | A16675 | 274 | A11555 | A16680 | 296 |
| A11555 | A16682 | 269 | A11555 | A16690 | 366 |
| A11555 | A16691 | 307 | A11555 | A16692 | 246 |
| A11555 | A16695 | 322 | A11555 | A16703 | 228 |
| A11555 | A16704 | 361 | A11555 | A16707 | 353 |
| A11555 | A16788 | 362 | A11555 | A16790 | 252 |
| A11555 | A16815 | 314 | A11555 | A16866 | 324 |
| A11555 | A16913 | 299 | A11555 | A17033 | 266 |
| A11555 | A17125 | 279 | A11556 | A15352 | 160 |
| A11557 | A12876 | 469 | A11558 | A11851 | 184 |
| A11558 | A12975 | 307 | A11558 | A13124 | 491 |
| A11558 | A13336 | 297 | A11558 | A13356 | 184 |
| A11558 | A13819 | 179 | A11558 | A13866 | 179 |
| A11558 | A13926 | 241 | A11558 | A13941 | 218 |
| A11558 | A13942 | 179 | A11558 | A14202 | 179 |
| A11558 | A14210 | 184 | A11558 | A14215 | 177 |
| A11558 | A14366 | 179 | A11558 | A14470 | 165 |
| A11558 | A14511 | 307 | A11558 | A15358 | 179 |
| A11558 | A15470 | 179 | A11558 | A15480 | 433 |
| A11558 | A15481 | 420 | A11558 | A15484 | 179 |

|        |        |     |        |        |     |
|--------|--------|-----|--------|--------|-----|
| A11558 | A15487 | 229 | A11558 | A15800 | 198 |
| A11558 | A16152 | 184 | A11558 | A16555 | 291 |
| A11559 | A11929 | 329 | A11559 | A12373 | 334 |
| A11559 | A14196 | 174 | A11559 | A14207 | 184 |
| A11559 | A14208 | 420 | A11559 | A14210 | 334 |
| A11559 | A14218 | 466 | A11559 | A14371 | 334 |
| A11559 | A14454 | 160 | A11559 | A14636 | 334 |
| A11559 | A15224 | 283 | A11559 | A15361 | 177 |
| A11559 | A16623 | 270 | A11559 | A16802 | 229 |
| A11560 | A13924 | 281 | A11560 | A15452 | 177 |
| A11561 | A15809 | 238 | A11561 | A16636 | 156 |
| A11562 | A11728 | 517 | A11562 | A11857 | 263 |
| A11562 | A11861 | 200 | A11562 | A13333 | 200 |
| A11562 | A13875 | 401 | A11562 | A13989 | 465 |
| A11562 | A14151 | 263 | A11562 | A14169 | 156 |
| A11562 | A14176 | 193 | A11562 | A15202 | 331 |
| A11562 | A15268 | 159 | A11562 | A15381 | 278 |
| A11562 | A16333 | 382 | A11562 | A16686 | 406 |
| A11564 | A11890 | 429 | A11565 | A13045 | 486 |
| A11565 | A13698 | 183 | A11565 | A14449 | 307 |
| A11565 | A15422 | 185 | A11565 | A15932 | 249 |
| A11565 | A15933 | 314 | A11566 | A12207 | 422 |
| A11566 | A12581 | 430 | A11566 | A12740 | 441 |
| A11567 | A14303 | 199 | A11567 | A14809 | 177 |
| A11567 | A14875 | 394 | A11567 | A17198 | 427 |
| A11569 | A12624 | 445 | A11569 | A14873 | 466 |
| A11569 | A15638 | 334 | A11570 | A14182 | 425 |
| A11570 | A14461 | 247 | A11570 | A15647 | 425 |
| A11570 | A16940 | 385 | A11571 | A11595 | 441 |
| A11571 | A11701 | 447 | A11572 | A11728 | 258 |
| A11572 | A12270 | 432 | A11572 | A14937 | 353 |
| A11572 | A15225 | 350 | A11572 | A15732 | 458 |
| A11573 | A11904 | 456 | A11573 | A12426 | 408 |
| A11573 | A12787 | 475 | A11573 | A14381 | 440 |
| A11575 | A13882 | 286 | A11575 | A14257 | 174 |
| A11576 | A12035 | 196 | A11576 | A12189 | 329 |
| A11576 | A15018 | 288 | A11577 | A11604 | 205 |
| A11577 | A12316 | 409 | A11577 | A12329 | 174 |
| A11577 | A13829 | 159 | A11577 | A16906 | 402 |
| A11578 | A12854 | 240 | A11578 | A13826 | 213 |
| A11578 | A16224 | 418 | A11582 | A14132 | 388 |
| A11583 | A12824 | 224 | A11583 | A14071 | 219 |
| A11584 | A14489 | 324 | A11584 | A15324 | 419 |
| A11584 | A15353 | 477 | A11584 | A15747 | 302 |
| A11585 | A15638 | 347 | A11586 | A12489 | 467 |
| A11586 | A12491 | 438 | A11586 | A12745 | 465 |

|        |        |     |        |        |     |
|--------|--------|-----|--------|--------|-----|
| A11586 | A15064 | 353 | A11587 | A12675 | 425 |
| A11588 | A11688 | 270 | A11588 | A11704 | 278 |
| A11588 | A15988 | 213 | A11588 | A16628 | 63  |
| A11588 | A16631 | 402 | A11590 | A13331 | 473 |
| A11590 | A13917 | 243 | A11590 | A15498 | 228 |
| A11591 | A11929 | 254 | A11591 | A14208 | 440 |
| A11591 | A14212 | 294 | A11591 | A14238 | 251 |
| A11591 | A14827 | 157 | A11591 | A15510 | 406 |
| A11591 | A16871 | 380 | A11592 | A13369 | 372 |
| A11593 | A12477 | 424 | A11594 | A15498 | 205 |
| A11595 | A11701 | 447 | A11596 | A11916 | 260 |
| A11596 | A14076 | 483 | A11596 | A14471 | 267 |
| A11596 | A15563 | 296 | A11596 | A15939 | 208 |
| A11596 | A16128 | 388 | A11596 | A16378 | 479 |
| A11596 | A16452 | 277 | A11596 | A16830 | 329 |
| A11597 | A11616 | 311 | A11597 | A11820 | 234 |
| A11597 | A11914 | 337 | A11597 | A11917 | 338 |
| A11597 | A11940 | 241 | A11597 | A11992 | 283 |
| A11597 | A12238 | 252 | A11597 | A12254 | 246 |
| A11597 | A12255 | 200 | A11597 | A12433 | 363 |
| A11597 | A12501 | 165 | A11597 | A12606 | 430 |
| A11597 | A12658 | 283 | A11597 | A12665 | 265 |
| A11597 | A12727 | 379 | A11597 | A12821 | 296 |
| A11597 | A12858 | 238 | A11597 | A13309 | 384 |
| A11597 | A13313 | 302 | A11597 | A13321 | 307 |
| A11597 | A13388 | 212 | A11597 | A13399 | 247 |
| A11597 | A13708 | 297 | A11597 | A13710 | 339 |
| A11597 | A13737 | 210 | A11597 | A13781 | 413 |
| A11597 | A13784 | 162 | A11597 | A13804 | 259 |
| A11597 | A13912 | 285 | A11597 | A14087 | 332 |
| A11597 | A14214 | 391 | A11597 | A14222 | 274 |
| A11597 | A14263 | 272 | A11597 | A14288 | 276 |
| A11597 | A14455 | 213 | A11597 | A14569 | 383 |
| A11597 | A14719 | 200 | A11597 | A14799 | 246 |
| A11597 | A14903 | 423 | A11597 | A14917 | 223 |
| A11597 | A14921 | 401 | A11597 | A15105 | 356 |
| A11597 | A15187 | 443 | A11597 | A15262 | 235 |
| A11597 | A15500 | 276 | A11597 | A15536 | 247 |
| A11597 | A15698 | 180 | A11597 | A15774 | 201 |
| A11597 | A15932 | 213 | A11597 | A16157 | 433 |
| A11597 | A16187 | 180 | A11597 | A16343 | 288 |
| A11597 | A16552 | 386 | A11597 | A16565 | 363 |
| A11597 | A16587 | 217 | A11597 | A16597 | 472 |
| A11597 | A16611 | 420 | A11597 | A16664 | 416 |
| A11597 | A16675 | 452 | A11597 | A16690 | 393 |
| A11597 | A16703 | 401 | A11597 | A16704 | 443 |

|        |        |     |        |        |     |
|--------|--------|-----|--------|--------|-----|
| A11597 | A16764 | 276 | A11597 | A16790 | 414 |
| A11597 | A16799 | 260 | A11597 | A16824 | 278 |
| A11597 | A16829 | 230 | A11597 | A16838 | 335 |
| A11597 | A16858 | 314 | A11597 | A16866 | 375 |
| A11597 | A16905 | 311 | A11597 | A16913 | 269 |
| A11597 | A16944 | 372 | A11597 | A16954 | 216 |
| A11597 | A17018 | 235 | A11597 | A17035 | 180 |
| A11597 | A17190 | 229 | A11597 | A17211 | 229 |
| A11598 | A12325 | 402 | A11598 | A14196 | 485 |
| A11598 | A14246 | 334 | A11598 | A15257 | 481 |
| A11598 | A15297 | 491 | A11598 | A15323 | 229 |
| A11598 | A15363 | 227 | A11598 | A15559 | 223 |
| A11598 | A15710 | 196 | A11598 | A16860 | 422 |
| A11599 | A13122 | 447 | A11599 | A16338 | 447 |
| A11601 | A12383 | 899 | A11601 | A13826 | 154 |
| A11601 | A14394 | 236 | A11601 | A14925 | 269 |
| A11601 | A15346 | 208 | A11601 | A16224 | 279 |
| A11602 | A13824 | 477 | A11602 | A14026 | 484 |
| A11602 | A15498 | 324 | A11604 | A11793 | 347 |
| A11604 | A12018 | 278 | A11604 | A12630 | 353 |
| A11604 | A13213 | 235 | A11604 | A14044 | 945 |
| A11604 | A14864 | 199 | A11604 | A15290 | 205 |
| A11604 | A16627 | 332 | A11604 | A16906 | 307 |
| A11605 | A13369 | 151 | A11605 | A14208 | 308 |
| A11605 | A15834 | 316 | A11605 | A15976 | 307 |
| A11606 | A14332 | 468 | A11606 | A16281 | 477 |
| A11608 | A13298 | 475 | A11608 | A14778 | 221 |
| A11611 | A14678 | 412 | A11612 | A11704 | 199 |
| A11612 | A12073 | 313 | A11612 | A14443 | 899 |
| A11612 | A15247 | 486 | A11612 | A15255 | 449 |
| A11613 | A12047 | 330 | A11613 | A12331 | 475 |
| A11614 | A12508 | 218 | A11614 | A12665 | 196 |
| A11614 | A12825 | 252 | A11614 | A12858 | 176 |
| A11614 | A13788 | 281 | A11614 | A14358 | 350 |
| A11614 | A14375 | 205 | A11614 | A14462 | 208 |
| A11614 | A15189 | 190 | A11614 | A16067 | 162 |
| A11614 | A16597 | 204 | A11614 | A16664 | 200 |
| A11614 | A16682 | 288 | A11614 | A16807 | 226 |
| A11614 | A16824 | 326 | A11615 | A12722 | 204 |
| A11615 | A14357 | 400 | A11616 | A11649 | 340 |
| A11616 | A11675 | 332 | A11616 | A11735 | 388 |
| A11616 | A11737 | 389 | A11616 | A11914 | 303 |
| A11616 | A11917 | 401 | A11616 | A11940 | 291 |
| A11616 | A11992 | 208 | A11616 | A12011 | 396 |
| A11616 | A12167 | 379 | A11616 | A12254 | 435 |
| A11616 | A12255 | 256 | A11616 | A12433 | 411 |



|        |        |     |        |        |     |
|--------|--------|-----|--------|--------|-----|
| A11616 | A12507 | 307 | A11616 | A12606 | 435 |
| A11616 | A12625 | 154 | A11616 | A12658 | 409 |
| A11616 | A12725 | 353 | A11616 | A12821 | 466 |
| A11616 | A12858 | 388 | A11616 | A12873 | 183 |
| A11616 | A12875 | 216 | A11616 | A12968 | 249 |
| A11616 | A13116 | 262 | A11616 | A13169 | 179 |
| A11616 | A13313 | 374 | A11616 | A13399 | 312 |
| A11616 | A13706 | 188 | A11616 | A13707 | 219 |
| A11616 | A13710 | 263 | A11616 | A13737 | 281 |
| A11616 | A13781 | 379 | A11616 | A13784 | 238 |
| A11616 | A13786 | 235 | A11616 | A13805 | 271 |
| A11616 | A13809 | 447 | A11616 | A13912 | 329 |
| A11616 | A14074 | 321 | A11616 | A14154 | 180 |
| A11616 | A14214 | 452 | A11616 | A14222 | 174 |
| A11616 | A14286 | 274 | A11616 | A14288 | 247 |
| A11616 | A14289 | 245 | A11616 | A14375 | 201 |
| A11616 | A14455 | 373 | A11616 | A14569 | 350 |
| A11616 | A14706 | 358 | A11616 | A14708 | 176 |
| A11616 | A14719 | 256 | A11616 | A14739 | 347 |
| A11616 | A14799 | 391 | A11616 | A14813 | 297 |
| A11616 | A14838 | 268 | A11616 | A15105 | 347 |
| A11616 | A15187 | 374 | A11616 | A15189 | 185 |
| A11616 | A15262 | 168 | A11616 | A15292 | 188 |
| A11616 | A15432 | 157 | A11616 | A15541 | 321 |
| A11616 | A15665 | 162 | A11616 | A15667 | 274 |
| A11616 | A15709 | 157 | A11616 | A15711 | 372 |
| A11616 | A15774 | 256 | A11616 | A15850 | 343 |
| A11616 | A15932 | 196 | A11616 | A16157 | 436 |
| A11616 | A16187 | 362 | A11616 | A16243 | 283 |
| A11616 | A16261 | 230 | A11616 | A16343 | 420 |
| A11616 | A16552 | 326 | A11616 | A16565 | 443 |
| A11616 | A16587 | 385 | A11616 | A16597 | 406 |
| A11616 | A16608 | 165 | A11616 | A16611 | 419 |
| A11616 | A16664 | 328 | A11616 | A16675 | 382 |
| A11616 | A16680 | 183 | A11616 | A16690 | 294 |
| A11616 | A16691 | 323 | A11616 | A16692 | 263 |
| A11616 | A16697 | 283 | A11616 | A16703 | 246 |
| A11616 | A16704 | 255 | A11616 | A16764 | 201 |
| A11616 | A16788 | 372 | A11616 | A16790 | 385 |
| A11616 | A16815 | 329 | A11616 | A16824 | 323 |
| A11616 | A16829 | 283 | A11616 | A16838 | 259 |
| A11616 | A16866 | 343 | A11616 | A16905 | 234 |
| A11616 | A16913 | 314 | A11616 | A16954 | 385 |
| A11616 | A17018 | 288 | A11616 | A17033 | 283 |
| A11616 | A17035 | 238 | A11616 | A17125 | 296 |
| A11616 | A17211 | 281 | A11617 | A12329 | 247 |

|        |        |     |        |        |     |
|--------|--------|-----|--------|--------|-----|
| A11617 | A13627 | 322 | A11617 | A14540 | 157 |
| A11617 | A15022 | 347 | A11617 | A15191 | 215 |
| A11617 | A16002 | 373 | A11619 | A12556 | 290 |
| A11620 | A12810 | 427 | A11620 | A15338 | 205 |
| A11621 | A12111 | 338 | A11621 | A12365 | 162 |
| A11621 | A12885 | 159 | A11621 | A14214 | 160 |
| A11621 | A14247 | 193 | A11621 | A14589 | 362 |
| A11621 | A15439 | 353 | A11621 | A15682 | 309 |
| A11621 | A16064 | 350 | A11624 | A13734 | 302 |
| A11624 | A13970 | 317 | A11626 | A13617 | 274 |
| A11626 | A14218 | 180 | A11628 | A12654 | 430 |
| A11628 | A15052 | 491 | A11628 | A15433 | 296 |
| A11628 | A15498 | 290 | A11628 | A15933 | 329 |
| A11628 | A17118 | 436 | A11629 | A15726 | 200 |
| A11631 | A13826 | 157 | A11640 | A11641 | 385 |
| A11640 | A13589 | 238 | A11640 | A13593 | 240 |
| A11640 | A14661 | 358 | A11641 | A11863 | 440 |
| A11642 | A11645 | 457 | A11642 | A13829 | 245 |
| A11642 | A15292 | 170 | A11643 | A11863 | 406 |
| A11643 | A16018 | 399 | A11646 | A14198 | 406 |
| A11646 | A14364 | 218 | A11646 | A14440 | 196 |
| A11647 | A11918 | 288 | A11647 | A11935 | 486 |
| A11647 | A12329 | 481 | A11647 | A14216 | 356 |
| A11647 | A14931 | 263 | A11647 | A15257 | 191 |
| A11647 | A15659 | 418 | A11647 | A15660 | 460 |
| A11647 | A15684 | 488 | A11647 | A15708 | 472 |
| A11647 | A15746 | 481 | A11647 | A15767 | 344 |
| A11647 | A15920 | 441 | A11647 | A15931 | 386 |
| A11647 | A15937 | 458 | A11647 | A16218 | 491 |
| A11647 | A16464 | 394 | A11647 | A16925 | 332 |
| A11647 | A17150 | 344 | A11648 | A12508 | 188 |
| A11648 | A12658 | 182 | A11648 | A12665 | 167 |
| A11648 | A12858 | 277 | A11648 | A13342 | 229 |
| A11648 | A13399 | 152 | A11648 | A14239 | 162 |
| A11648 | A14286 | 483 | A11648 | A15189 | 293 |
| A11648 | A15854 | 427 | A11648 | A15948 | 491 |
| A11648 | A16664 | 170 | A11648 | A16680 | 157 |
| A11648 | A16808 | 302 | A11648 | A16874 | 257 |
| A11649 | A11675 | 174 | A11649 | A11706 | 373 |
| A11649 | A11735 | 277 | A11649 | A11737 | 369 |
| A11649 | A11914 | 276 | A11649 | A11917 | 232 |
| A11649 | A12167 | 236 | A11649 | A12254 | 283 |
| A11649 | A12433 | 226 | A11649 | A12501 | 198 |
| A11649 | A12506 | 207 | A11649 | A12507 | 170 |
| A11649 | A12606 | 205 | A11649 | A12658 | 316 |
| A11649 | A12665 | 167 | A11649 | A12824 | 191 |

|        |        |     |        |        |     |
|--------|--------|-----|--------|--------|-----|
| A11649 | A12826 | 369 | A11649 | A12858 | 277 |
| A11649 | A13116 | 238 | A11649 | A13169 | 152 |
| A11649 | A13309 | 198 | A11649 | A13313 | 162 |
| A11649 | A13706 | 162 | A11649 | A13786 | 340 |
| A11649 | A13809 | 399 | A11649 | A13892 | 262 |
| A11649 | A14074 | 294 | A11649 | A14214 | 196 |
| A11649 | A14255 | 177 | A11649 | A14289 | 218 |
| A11649 | A14362 | 262 | A11649 | A14375 | 308 |
| A11649 | A14455 | 252 | A11649 | A14569 | 196 |
| A11649 | A14706 | 330 | A11649 | A14739 | 330 |
| A11649 | A14799 | 293 | A11649 | A14921 | 321 |
| A11649 | A15187 | 229 | A11649 | A15257 | 285 |
| A11649 | A15297 | 266 | A11649 | A15321 | 217 |
| A11649 | A15338 | 262 | A11649 | A15501 | 246 |
| A11649 | A15541 | 162 | A11649 | A15559 | 215 |
| A11649 | A15564 | 262 | A11649 | A15606 | 435 |
| A11649 | A15612 | 157 | A11649 | A15682 | 383 |
| A11649 | A15711 | 353 | A11649 | A15818 | 226 |
| A11649 | A15932 | 160 | A11649 | A16157 | 210 |
| A11649 | A16187 | 212 | A11649 | A16243 | 260 |
| A11649 | A16261 | 205 | A11649 | A16565 | 389 |
| A11649 | A16587 | 369 | A11649 | A16611 | 245 |
| A11649 | A16614 | 262 | A11649 | A16652 | 157 |
| A11649 | A16664 | 302 | A11649 | A16675 | 361 |
| A11649 | A16680 | 157 | A11649 | A16690 | 360 |
| A11649 | A16691 | 303 | A11649 | A16692 | 363 |
| A11649 | A16700 | 441 | A11649 | A16703 | 221 |
| A11649 | A16788 | 358 | A11649 | A16790 | 369 |
| A11649 | A16806 | 317 | A11649 | A16815 | 310 |
| A11649 | A16866 | 398 | A11649 | A16874 | 375 |
| A11649 | A16905 | 208 | A11649 | A17030 | 271 |
| A11650 | A11779 | 481 | A11651 | A13826 | 201 |
| A11651 | A14457 | 187 | A11651 | A15292 | 294 |
| A11651 | A15348 | 162 | A11651 | A15480 | 168 |
| A11651 | A15515 | 213 | A11651 | A16224 | 215 |
| A11651 | A16711 | 484 | A11651 | A17173 | 401 |
| A11652 | A14129 | 294 | A11652 | A14222 | 185 |
| A11652 | A14430 | 234 | A11652 | A16300 | 193 |
| A11652 | A16365 | 483 | A11653 | A11948 | 475 |
| A11653 | A13338 | 491 | A11653 | A13987 | 174 |
| A11653 | A14122 | 208 | A11653 | A17196 | 443 |
| A11654 | A11979 | 433 | A11655 | A16847 | 485 |
| A11656 | A14227 | 196 | A11657 | A13609 | 188 |
| A11658 | A14305 | 317 | A11658 | A15291 | 380 |
| A11659 | A14653 | 450 | A11660 | A12857 | 422 |
| A11660 | A14484 | 378 | A11661 | A12722 | 302 |

|        |        |     |        |        |     |
|--------|--------|-----|--------|--------|-----|
| A11661 | A14266 | 288 | A11661 | A15366 | 191 |
| A11661 | A15726 | 200 | A11662 | A16430 | 463 |
| A11663 | A12523 | 416 | A11663 | A12948 | 450 |
| A11663 | A13229 | 489 | A11665 | A13511 | 273 |
| A11665 | A13927 | 489 | A11667 | A12449 | 466 |
| A11667 | A12581 | 430 | A11667 | A12635 | 441 |
| A11668 | A13975 | 185 | A11668 | A14226 | 899 |
| A11668 | A14471 | 174 | A11669 | A11683 | 361 |
| A11670 | A11733 | 441 | A11670 | A14200 | 455 |
| A11670 | A14596 | 468 | A11670 | A15096 | 177 |
| A11670 | A15212 | 386 | A11670 | A15717 | 468 |
| A11670 | A16463 | 218 | A11670 | A17127 | 483 |
| A11672 | A13989 | 179 | A11673 | A14524 | 327 |
| A11673 | A16410 | 219 | A11674 | A13099 | 491 |
| A11674 | A14566 | 308 | A11674 | A15520 | 486 |
| A11674 | A15733 | 165 | A11674 | A16228 | 156 |
| A11674 | A16394 | 281 | A11675 | A11676 | 380 |
| A11675 | A11706 | 243 | A11675 | A11735 | 414 |
| A11675 | A11833 | 306 | A11675 | A11851 | 204 |
| A11675 | A11914 | 414 | A11675 | A11915 | 256 |
| A11675 | A11917 | 481 | A11675 | A11940 | 262 |
| A11675 | A11954 | 256 | A11675 | A11992 | 307 |
| A11675 | A12126 | 260 | A11675 | A12215 | 279 |
| A11675 | A12238 | 273 | A11675 | A12254 | 419 |
| A11675 | A12255 | 351 | A11675 | A12284 | 341 |
| A11675 | A12433 | 462 | A11675 | A12499 | 454 |
| A11675 | A12501 | 400 | A11675 | A12506 | 405 |
| A11675 | A12507 | 480 | A11675 | A12508 | 313 |
| A11675 | A12606 | 469 | A11675 | A12625 | 246 |
| A11675 | A12655 | 236 | A11675 | A12658 | 433 |
| A11675 | A12659 | 404 | A11675 | A12665 | 379 |
| A11675 | A12725 | 424 | A11675 | A12727 | 480 |
| A11675 | A12738 | 205 | A11675 | A12826 | 366 |
| A11675 | A12850 | 294 | A11675 | A12858 | 489 |
| A11675 | A12873 | 422 | A11675 | A13116 | 357 |
| A11675 | A13231 | 279 | A11675 | A13309 | 322 |
| A11675 | A13313 | 475 | A11675 | A13315 | 454 |
| A11675 | A13356 | 157 | A11675 | A13388 | 235 |
| A11675 | A13399 | 368 | A11675 | A13706 | 375 |
| A11675 | A13707 | 398 | A11675 | A13708 | 391 |
| A11675 | A13737 | 340 | A11675 | A13781 | 483 |
| A11675 | A13784 | 484 | A11675 | A13785 | 296 |
| A11675 | A13786 | 334 | A11675 | A13787 | 452 |
| A11675 | A13788 | 369 | A11675 | A13804 | 391 |
| A11675 | A13805 | 424 | A11675 | A13809 | 435 |
| A11675 | A13811 | 235 | A11675 | A13912 | 477 |

|        |        |     |        |        |     |
|--------|--------|-----|--------|--------|-----|
| A11675 | A13969 | 156 | A11675 | A14074 | 154 |
| A11675 | A14084 | 296 | A11675 | A14087 | 223 |
| A11675 | A14167 | 267 | A11675 | A14209 | 230 |
| A11675 | A14214 | 479 | A11675 | A14222 | 413 |
| A11675 | A14235 | 271 | A11675 | A14239 | 154 |
| A11675 | A14255 | 302 | A11675 | A14263 | 489 |
| A11675 | A14270 | 490 | A11675 | A14286 | 367 |
| A11675 | A14288 | 378 | A11675 | A14289 | 210 |
| A11675 | A14375 | 167 | A11675 | A14455 | 436 |
| A11675 | A14474 | 491 | A11675 | A14484 | 188 |
| A11675 | A14569 | 470 | A11675 | A14706 | 322 |
| A11675 | A14708 | 417 | A11675 | A14718 | 321 |
| A11675 | A14719 | 491 | A11675 | A14799 | 407 |
| A11675 | A14826 | 221 | A11675 | A14838 | 327 |
| A11675 | A14903 | 256 | A11675 | A14917 | 368 |
| A11675 | A14921 | 314 | A11675 | A14937 | 229 |
| A11675 | A15105 | 469 | A11675 | A15187 | 484 |
| A11675 | A15189 | 474 | A11675 | A15262 | 413 |
| A11675 | A15370 | 208 | A11675 | A15501 | 235 |
| A11675 | A15536 | 269 | A11675 | A15541 | 374 |
| A11675 | A15653 | 356 | A11675 | A15665 | 443 |
| A11675 | A15680 | 313 | A11675 | A15683 | 384 |
| A11675 | A15709 | 251 | A11675 | A15711 | 347 |
| A11675 | A15735 | 195 | A11675 | A15743 | 240 |
| A11675 | A15765 | 201 | A11675 | A15818 | 217 |
| A11675 | A15854 | 152 | A11675 | A15855 | 174 |
| A11675 | A16157 | 486 | A11675 | A16187 | 204 |
| A11675 | A16261 | 196 | A11675 | A16387 | 441 |
| A11675 | A16552 | 455 | A11675 | A16565 | 475 |
| A11675 | A16566 | 259 | A11675 | A16567 | 391 |
| A11675 | A16587 | 424 | A11675 | A16597 | 475 |
| A11675 | A16608 | 260 | A11675 | A16611 | 466 |
| A11675 | A16652 | 279 | A11675 | A16664 | 475 |
| A11675 | A16675 | 458 | A11675 | A16680 | 449 |
| A11675 | A16690 | 352 | A11675 | A16692 | 232 |
| A11675 | A16697 | 252 | A11675 | A16699 | 219 |
| A11675 | A16701 | 274 | A11675 | A16703 | 213 |
| A11675 | A16704 | 221 | A11675 | A16709 | 454 |
| A11675 | A16764 | 168 | A11675 | A16774 | 288 |
| A11675 | A16776 | 380 | A11675 | A16790 | 454 |
| A11675 | A16815 | 303 | A11675 | A16829 | 252 |
| A11675 | A16838 | 353 | A11675 | A16866 | 312 |
| A11675 | A16874 | 371 | A11675 | A16905 | 462 |
| A11675 | A16913 | 396 | A11675 | A16954 | 238 |
| A11675 | A17018 | 258 | A11675 | A17030 | 380 |
| A11675 | A17033 | 374 | A11675 | A17035 | 204 |

|        |        |     |        |        |     |
|--------|--------|-----|--------|--------|-----|
| A11675 | A17133 | 243 | A11675 | A17144 | 358 |
| A11675 | A17190 | 252 | A11676 | A12727 | 481 |
| A11676 | A12952 | 191 | A11676 | A13315 | 470 |
| A11676 | A14263 | 319 | A11676 | A14270 | 451 |
| A11676 | A14719 | 311 | A11676 | A16387 | 430 |
| A11677 | A13787 | 362 | A11677 | A14699 | 255 |
| A11677 | A14778 | 247 | A11677 | A14825 | 343 |
| A11677 | A14888 | 457 | A11677 | A16587 | 247 |
| A11678 | A14399 | 286 | A11678 | A15543 | 235 |
| A11679 | A14694 | 218 | A11680 | A11818 | 457 |
| A11680 | A12575 | 428 | A11680 | A13417 | 378 |
| A11680 | A13421 | 396 | A11680 | A13422 | 407 |
| A11680 | A13461 | 446 | A11680 | A13575 | 449 |
| A11680 | A15843 | 278 | A11681 | A11960 | 341 |
| A11681 | A12458 | 341 | A11681 | A13826 | 160 |
| A11681 | A13899 | 279 | A11681 | A13966 | 430 |
| A11681 | A14052 | 235 | A11681 | A14247 | 256 |
| A11681 | A14266 | 205 | A11681 | A14413 | 191 |
| A11681 | A14604 | 432 | A11681 | A15288 | 267 |
| A11681 | A15301 | 481 | A11681 | A15302 | 488 |
| A11681 | A15311 | 210 | A11681 | A15312 | 177 |
| A11681 | A15316 | 251 | A11681 | A15329 | 258 |
| A11681 | A15366 | 491 | A11681 | A15440 | 243 |
| A11681 | A15462 | 485 | A11681 | A15463 | 491 |
| A11681 | A16224 | 185 | A11681 | A16985 | 341 |
| A11683 | A11922 | 255 | A11683 | A12334 | 339 |
| A11683 | A12361 | 346 | A11683 | A12586 | 361 |
| A11683 | A13102 | 165 | A11683 | A13346 | 396 |
| A11683 | A13416 | 296 | A11683 | A13426 | 208 |
| A11683 | A13979 | 218 | A11683 | A14197 | 154 |
| A11683 | A14210 | 383 | A11683 | A14379 | 234 |
| A11683 | A14483 | 303 | A11683 | A14487 | 199 |
| A11683 | A14591 | 263 | A11683 | A14638 | 205 |
| A11683 | A15193 | 185 | A11683 | A15547 | 232 |
| A11683 | A15916 | 341 | A11683 | A16503 | 266 |
| A11683 | A16973 | 251 | A11683 | A17213 | 188 |
| A11686 | A11983 | 196 | A11686 | A13972 | 465 |
| A11687 | A12717 | 461 | A11687 | A16635 | 457 |
| A11688 | A12227 | 213 | A11688 | A12270 | 229 |
| A11688 | A12329 | 173 | A11688 | A13146 | 249 |
| A11688 | A13311 | 162 | A11688 | A14813 | 268 |
| A11688 | A15697 | 193 | A11688 | A15932 | 389 |
| A11690 | A14281 | 151 | A11691 | A12929 | 423 |
| A11691 | A13041 | 423 | A11691 | A14175 | 390 |
| A11691 | A15297 | 160 | A11694 | A11838 | 246 |
| A11694 | A12244 | 434 | A11694 | A12329 | 454 |

|        |        |     |        |        |     |
|--------|--------|-----|--------|--------|-----|
| A11694 | A13974 | 346 | A11694 | A14073 | 324 |
| A11694 | A14150 | 241 | A11694 | A14283 | 301 |
| A11694 | A14642 | 324 | A11694 | A15660 | 491 |
| A11694 | A15684 | 491 | A11694 | A15708 | 425 |
| A11694 | A15720 | 461 | A11694 | A15721 | 486 |
| A11694 | A15843 | 324 | A11694 | A15918 | 341 |
| A11694 | A15923 | 428 | A11694 | A15931 | 414 |
| A11694 | A15933 | 230 | A11694 | A15936 | 291 |
| A11694 | A16092 | 303 | A11694 | A16096 | 374 |
| A11694 | A16145 | 469 | A11694 | A16218 | 191 |
| A11694 | A16650 | 475 | A11694 | A17140 | 475 |
| A11695 | A11842 | 490 | A11695 | A11933 | 285 |
| A11695 | A14246 | 489 | A11695 | A15297 | 481 |
| A11695 | A15338 | 270 | A11695 | A15559 | 465 |
| A11695 | A15561 | 260 | A11695 | A15710 | 428 |
| A11695 | A15729 | 446 | A11695 | A15737 | 432 |
| A11695 | A15779 | 474 | A11695 | A16463 | 294 |
| A11695 | A16661 | 385 | A11695 | A16844 | 416 |
| A11696 | A14128 | 333 | A11696 | A14654 | 279 |
| A11696 | A14693 | 204 | A11696 | A14741 | 196 |
| A11696 | A14870 | 436 | A11696 | A14872 | 466 |
| A11696 | A15430 | 412 | A11696 | A15498 | 428 |
| A11696 | A15669 | 369 | A11696 | A15917 | 177 |
| A11696 | A15925 | 255 | A11696 | A16436 | 380 |
| A11696 | A16963 | 445 | A11698 | A11977 | 462 |
| A11698 | A15498 | 452 | A11700 | A12470 | 424 |
| A11700 | A14633 | 232 | A11702 | A11735 | 154 |
| A11702 | A11914 | 154 | A11702 | A11915 | 272 |
| A11702 | A12659 | 465 | A11702 | A12660 | 152 |
| A11702 | A12858 | 154 | A11702 | A13169 | 162 |
| A11702 | A14257 | 184 | A11702 | A15519 | 229 |
| A11702 | A15541 | 170 | A11702 | A15850 | 332 |
| A11702 | A16704 | 238 | A11702 | A16829 | 269 |
| A11702 | A16886 | 375 | A11703 | A12556 | 379 |
| A11703 | A12897 | 180 | A11703 | A13949 | 274 |
| A11703 | A14079 | 312 | A11703 | A14230 | 196 |
| A11703 | A14282 | 283 | A11703 | A15371 | 229 |
| A11703 | A15376 | 163 | A11703 | A15654 | 246 |
| A11703 | A15941 | 154 | A11703 | A16127 | 321 |
| A11704 | A11729 | 488 | A11704 | A11945 | 201 |
| A11704 | A14152 | 257 | A11704 | A14188 | 334 |
| A11704 | A15218 | 438 | A11704 | A15221 | 412 |
| A11704 | A15255 | 291 | A11704 | A15717 | 224 |
| A11704 | A15776 | 383 | A11704 | A16118 | 279 |
| A11704 | A16631 | 463 | A11704 | A16805 | 326 |
| A11705 | A12839 | 279 | A11705 | A13698 | 176 |

|        |        |     |        |        |     |
|--------|--------|-----|--------|--------|-----|
| A11705 | A14498 | 267 | A11705 | A15156 | 307 |
| A11705 | A15696 | 306 | A11705 | A15698 | 484 |
| A11705 | A16824 | 346 | A11706 | A12506 | 274 |
| A11706 | A12658 | 252 | A11706 | A13116 | 299 |
| A11706 | A13785 | 352 | A11706 | A13786 | 277 |
| A11706 | A13787 | 364 | A11706 | A13969 | 235 |
| A11706 | A14286 | 312 | A11706 | A14569 | 263 |
| A11706 | A14838 | 183 | A11706 | A15189 | 230 |
| A11706 | A15297 | 224 | A11706 | A16157 | 163 |
| A11706 | A16664 | 240 | A11706 | A16700 | 473 |
| A11706 | A16776 | 327 | A11706 | A16874 | 413 |
| A11706 | A17144 | 302 | A11707 | A14956 | 291 |
| A11707 | A15608 | 258 | A11708 | A13362 | 474 |
| A11708 | A17046 | 399 | A11709 | A12982 | 414 |
| A11710 | A14148 | 374 | A11711 | A15417 | 396 |
| A11711 | A17198 | 406 | A11712 | A12454 | 445 |
| A11712 | A12702 | 445 | A11712 | A12807 | 438 |
| A11712 | A12879 | 445 | A11712 | A15321 | 205 |
| A11713 | A12518 | 455 | A11713 | A12534 | 401 |
| A11713 | A12944 | 429 | A11713 | A12991 | 419 |
| A11713 | A13178 | 419 | A11713 | A13826 | 179 |
| A11713 | A14371 | 339 | A11715 | A14281 | 172 |
| A11717 | A12530 | 445 | A11717 | A12571 | 438 |
| A11717 | A13215 | 434 | A11717 | A15470 | 362 |
| A11718 | A14891 | 452 | A11723 | A15416 | 427 |
| A11723 | A15638 | 347 | A11723 | A16147 | 469 |
| A11724 | A12167 | 362 | A11724 | A13894 | 201 |
| A11724 | A14073 | 446 | A11724 | A14088 | 224 |
| A11724 | A14138 | 401 | A11724 | A14461 | 227 |
| A11724 | A15843 | 232 | A11724 | A16371 | 288 |
| A11725 | A11735 | 226 | A11725 | A11737 | 228 |
| A11725 | A11914 | 224 | A11725 | A12024 | 469 |
| A11725 | A12062 | 324 | A11725 | A12238 | 340 |
| A11725 | A12284 | 207 | A11725 | A12433 | 185 |
| A11725 | A12508 | 267 | A11725 | A12658 | 260 |
| A11725 | A12665 | 246 | A11725 | A12725 | 183 |
| A11725 | A12858 | 226 | A11725 | A12873 | 238 |
| A11725 | A13116 | 307 | A11725 | A13399 | 232 |
| A11725 | A13707 | 271 | A11725 | A13708 | 191 |
| A11725 | A13783 | 326 | A11725 | A13786 | 285 |
| A11725 | A13809 | 266 | A11725 | A14214 | 162 |
| A11725 | A14227 | 165 | A11725 | A14255 | 256 |
| A11725 | A14288 | 176 | A11725 | A14375 | 255 |
| A11725 | A14455 | 207 | A11725 | A14569 | 272 |
| A11725 | A14595 | 358 | A11725 | A14708 | 229 |
| A11725 | A14799 | 157 | A11725 | A14838 | 193 |



|        |        |     |        |        |     |
|--------|--------|-----|--------|--------|-----|
| A11725 | A15105 | 177 | A11725 | A15680 | 314 |
| A11725 | A15683 | 182 | A11725 | A15698 | 286 |
| A11725 | A15711 | 297 | A11725 | A15943 | 272 |
| A11725 | A16157 | 174 | A11725 | A16261 | 281 |
| A11725 | A16552 | 157 | A11725 | A16566 | 329 |
| A11725 | A16587 | 314 | A11725 | A16597 | 252 |
| A11725 | A16664 | 249 | A11725 | A16680 | 238 |
| A11725 | A16682 | 328 | A11725 | A16690 | 217 |
| A11725 | A16695 | 367 | A11725 | A16703 | 294 |
| A11725 | A16704 | 301 | A11725 | A16707 | 390 |
| A11725 | A16790 | 313 | A11725 | A16806 | 367 |
| A11725 | A16824 | 357 | A11725 | A16913 | 351 |
| A11726 | A12603 | 438 | A11727 | A11983 | 424 |
| A11727 | A14281 | 249 | A11727 | A14375 | 227 |
| A11727 | A14636 | 160 | A11727 | A15282 | 411 |
| A11727 | A16911 | 243 | A11728 | A11857 | 191 |
| A11728 | A11861 | 200 | A11728 | A11924 | 384 |
| A11728 | A12011 | 196 | A11728 | A12193 | 409 |
| A11728 | A12227 | 241 | A11728 | A12270 | 475 |
| A11728 | A12508 | 241 | A11728 | A12858 | 184 |
| A11728 | A13333 | 200 | A11728 | A13375 | 200 |
| A11728 | A13707 | 247 | A11728 | A13710 | 299 |
| A11728 | A14167 | 408 | A11728 | A14176 | 456 |
| A11728 | A14216 | 235 | A11728 | A14270 | 157 |
| A11728 | A14462 | 228 | A11728 | A15202 | 266 |
| A11728 | A15225 | 466 | A11728 | A15268 | 578 |
| A11728 | A15381 | 584 | A11728 | A15661 | 193 |
| A11728 | A15666 | 201 | A11728 | A15711 | 154 |
| A11728 | A15732 | 271 | A11728 | A16157 | 430 |
| A11728 | A16675 | 172 | A11728 | A16682 | 193 |
| A11728 | A17133 | 180 | A11729 | A12138 | 316 |
| A11729 | A13333 | 200 | A11729 | A15519 | 218 |
| A11729 | A15535 | 165 | A11729 | A15717 | 221 |
| A11729 | A15939 | 156 | A11730 | A13129 | 452 |
| A11730 | A14258 | 286 | A11730 | A14661 | 291 |
| A11731 | A13521 | 368 | A11732 | A14279 | 168 |
| A11733 | A11944 | 358 | A11733 | A14596 | 347 |
| A11733 | A17127 | 480 | A11734 | A14152 | 435 |
| A11734 | A15660 | 490 | A11734 | A15684 | 490 |
| A11734 | A15708 | 374 | A11734 | A16218 | 490 |
| A11735 | A11737 | 722 | A11735 | A11851 | 391 |
| A11735 | A11914 | 722 | A11735 | A11915 | 356 |
| A11735 | A11917 | 485 | A11735 | A11940 | 235 |
| A11735 | A11954 | 356 | A11735 | A11992 | 277 |
| A11735 | A12126 | 234 | A11735 | A12138 | 165 |
| A11735 | A12167 | 201 | A11735 | A12215 | 374 |

|        |        |     |        |        |     |
|--------|--------|-----|--------|--------|-----|
| A11735 | A12238 | 246 | A11735 | A12254 | 475 |
| A11735 | A12255 | 327 | A11735 | A12284 | 380 |
| A11735 | A12433 | 484 | A11735 | A12499 | 210 |
| A11735 | A12506 | 430 | A11735 | A12507 | 479 |
| A11735 | A12508 | 450 | A11735 | A12606 | 488 |
| A11735 | A12625 | 477 | A11735 | A12658 | 722 |
| A11735 | A12659 | 302 | A11735 | A12665 | 441 |
| A11735 | A12725 | 473 | A11735 | A12792 | 245 |
| A11735 | A12824 | 544 | A11735 | A12825 | 321 |
| A11735 | A12858 | 489 | A11735 | A12971 | 195 |
| A11735 | A13116 | 407 | A11735 | A13169 | 340 |
| A11735 | A13170 | 339 | A11735 | A13313 | 475 |
| A11735 | A13321 | 386 | A11735 | A13323 | 277 |
| A11735 | A13342 | 326 | A11735 | A13356 | 353 |
| A11735 | A13399 | 340 | A11735 | A13527 | 218 |
| A11735 | A13706 | 408 | A11735 | A13707 | 378 |
| A11735 | A13708 | 291 | A11735 | A13737 | 420 |
| A11735 | A13781 | 470 | A11735 | A13782 | 326 |
| A11735 | A13783 | 419 | A11735 | A13784 | 393 |
| A11735 | A13786 | 433 | A11735 | A13788 | 348 |
| A11735 | A13804 | 254 | A11735 | A13805 | 412 |
| A11735 | A13806 | 180 | A11735 | A13809 | 465 |
| A11735 | A13811 | 339 | A11735 | A13812 | 201 |
| A11735 | A13894 | 201 | A11735 | A13963 | 177 |
| A11735 | A14007 | 160 | A11735 | A14074 | 252 |
| A11735 | A14084 | 154 | A11735 | A14094 | 274 |
| A11735 | A14167 | 241 | A11735 | A14196 | 408 |
| A11735 | A14213 | 205 | A11735 | A14214 | 488 |
| A11735 | A14222 | 385 | A11735 | A14227 | 252 |
| A11735 | A14235 | 245 | A11735 | A14239 | 351 |
| A11735 | A14255 | 271 | A11735 | A14263 | 430 |
| A11735 | A14270 | 193 | A11735 | A14286 | 217 |
| A11735 | A14288 | 451 | A11735 | A14289 | 396 |
| A11735 | A14375 | 362 | A11735 | A14462 | 472 |
| A11735 | A14569 | 485 | A11735 | A14595 | 277 |
| A11735 | A14706 | 474 | A11735 | A14718 | 159 |
| A11735 | A14719 | 193 | A11735 | A14739 | 303 |
| A11735 | A14799 | 477 | A11735 | A14826 | 183 |
| A11735 | A14838 | 291 | A11735 | A14903 | 229 |
| A11735 | A14917 | 414 | A11735 | A15105 | 270 |
| A11735 | A15187 | 326 | A11735 | A15189 | 347 |
| A11735 | A15257 | 409 | A11735 | A15292 | 154 |
| A11735 | A15297 | 312 | A11735 | A15498 | 168 |
| A11735 | A15519 | 396 | A11735 | A15532 | 198 |
| A11735 | A15541 | 469 | A11735 | A15559 | 384 |
| A11735 | A15653 | 417 | A11735 | A15661 | 252 |

|        |        |     |        |        |     |
|--------|--------|-----|--------|--------|-----|
| A11735 | A15666 | 340 | A11735 | A15680 | 435 |
| A11735 | A15683 | 435 | A11735 | A15684 | 352 |
| A11735 | A15696 | 218 | A11735 | A15698 | 176 |
| A11735 | A15709 | 480 | A11735 | A15711 | 400 |
| A11735 | A15735 | 157 | A11735 | A15743 | 212 |
| A11735 | A15765 | 173 | A11735 | A15818 | 188 |
| A11735 | A15850 | 299 | A11735 | A15854 | 249 |
| A11735 | A15940 | 218 | A11735 | A15947 | 183 |
| A11735 | A16157 | 490 | A11735 | A16187 | 434 |
| A11735 | A16215 | 235 | A11735 | A16243 | 226 |
| A11735 | A16261 | 385 | A11735 | A16322 | 260 |
| A11735 | A16343 | 394 | A11735 | A16387 | 254 |
| A11735 | A16552 | 467 | A11735 | A16565 | 480 |
| A11735 | A16566 | 422 | A11735 | A16567 | 256 |
| A11735 | A16585 | 263 | A11735 | A16587 | 480 |
| A11735 | A16597 | 461 | A11735 | A16611 | 489 |
| A11735 | A16652 | 344 | A11735 | A16663 | 152 |
| A11735 | A16664 | 486 | A11735 | A16675 | 463 |
| A11735 | A16680 | 480 | A11735 | A16682 | 356 |
| A11735 | A16690 | 322 | A11735 | A16691 | 386 |
| A11735 | A16692 | 204 | A11735 | A16693 | 394 |
| A11735 | A16695 | 443 | A11735 | A16699 | 191 |
| A11735 | A16703 | 185 | A11735 | A16704 | 401 |
| A11735 | A16707 | 418 | A11735 | A16764 | 363 |
| A11735 | A16774 | 435 | A11735 | A16776 | 238 |
| A11735 | A16788 | 424 | A11735 | A16790 | 340 |
| A11735 | A16802 | 170 | A11735 | A16815 | 441 |
| A11735 | A16824 | 274 | A11735 | A16829 | 467 |
| A11735 | A16874 | 417 | A11735 | A16905 | 172 |
| A11735 | A16908 | 303 | A11735 | A16913 | 380 |
| A11735 | A16942 | 263 | A11735 | A16954 | 210 |
| A11735 | A17018 | 230 | A11735 | A17035 | 176 |
| A11735 | A17144 | 205 | A11735 | A17211 | 223 |
| A11737 | A11804 | 338 | A11737 | A11851 | 391 |
| A11737 | A11914 | 721 | A11737 | A11917 | 470 |
| A11737 | A11940 | 236 | A11737 | A12167 | 334 |
| A11737 | A12215 | 374 | A11737 | A12238 | 249 |
| A11737 | A12254 | 468 | A11737 | A12255 | 196 |
| A11737 | A12284 | 208 | A11737 | A12433 | 436 |
| A11737 | A12506 | 171 | A11737 | A12507 | 452 |
| A11737 | A12508 | 374 | A11737 | A12606 | 480 |
| A11737 | A12625 | 424 | A11737 | A12658 | 721 |
| A11737 | A12659 | 170 | A11737 | A12665 | 356 |
| A11737 | A12725 | 435 | A11737 | A12824 | 498 |
| A11737 | A12825 | 190 | A11737 | A12826 | 351 |
| A11737 | A12858 | 474 | A11737 | A12875 | 154 |

|        |        |     |        |        |     |
|--------|--------|-----|--------|--------|-----|
| A11737 | A13116 | 335 | A11737 | A13169 | 243 |
| A11737 | A13170 | 208 | A11737 | A13313 | 450 |
| A11737 | A13323 | 278 | A11737 | A13356 | 353 |
| A11737 | A13706 | 256 | A11737 | A13707 | 379 |
| A11737 | A13708 | 188 | A11737 | A13737 | 205 |
| A11737 | A13781 | 305 | A11737 | A13783 | 356 |
| A11737 | A13784 | 340 | A11737 | A13786 | 391 |
| A11737 | A13805 | 344 | A11737 | A13809 | 474 |
| A11737 | A13811 | 208 | A11737 | A13963 | 179 |
| A11737 | A14007 | 160 | A11737 | A14074 | 255 |
| A11737 | A14084 | 157 | A11737 | A14094 | 277 |
| A11737 | A14214 | 469 | A11737 | A14222 | 180 |
| A11737 | A14227 | 254 | A11737 | A14255 | 364 |
| A11737 | A14263 | 347 | A11737 | A14270 | 195 |
| A11737 | A14286 | 218 | A11737 | A14288 | 401 |
| A11737 | A14289 | 184 | A11737 | A14375 | 417 |
| A11737 | A14462 | 419 | A11737 | A14569 | 452 |
| A11737 | A14595 | 278 | A11737 | A14706 | 439 |
| A11737 | A14739 | 305 | A11737 | A14799 | 467 |
| A11737 | A14838 | 188 | A11737 | A14903 | 357 |
| A11737 | A14917 | 348 | A11737 | A14921 | 294 |
| A11737 | A15105 | 352 | A11737 | A15187 | 327 |
| A11737 | A15257 | 410 | A11737 | A15297 | 162 |
| A11737 | A15519 | 185 | A11737 | A15532 | 200 |
| A11737 | A15541 | 441 | A11737 | A15653 | 322 |
| A11737 | A15680 | 174 | A11737 | A15683 | 357 |
| A11737 | A15684 | 480 | A11737 | A15709 | 386 |
| A11737 | A15711 | 401 | A11737 | A15765 | 174 |
| A11737 | A15818 | 191 | A11737 | A15850 | 299 |
| A11737 | A15940 | 221 | A11737 | A16157 | 483 |
| A11737 | A16187 | 391 | A11737 | A16215 | 236 |
| A11737 | A16243 | 228 | A11737 | A16261 | 386 |
| A11737 | A16322 | 263 | A11737 | A16343 | 395 |
| A11737 | A16387 | 255 | A11737 | A16552 | 457 |
| A11737 | A16565 | 462 | A11737 | A16566 | 234 |
| A11737 | A16585 | 266 | A11737 | A16587 | 475 |
| A11737 | A16597 | 268 | A11737 | A16611 | 483 |
| A11737 | A16663 | 154 | A11737 | A16664 | 461 |
| A11737 | A16675 | 429 | A11737 | A16680 | 439 |
| A11737 | A16682 | 357 | A11737 | A16690 | 221 |
| A11737 | A16691 | 274 | A11737 | A16692 | 205 |
| A11737 | A16693 | 286 | A11737 | A16695 | 398 |
| A11737 | A16697 | 228 | A11737 | A16699 | 193 |
| A11737 | A16703 | 187 | A11737 | A16704 | 195 |
| A11737 | A16707 | 419 | A11737 | A16764 | 271 |
| A11737 | A16774 | 435 | A11737 | A16788 | 338 |

|        |        |     |        |        |     |
|--------|--------|-----|--------|--------|-----|
| A11737 | A16790 | 343 | A11737 | A16815 | 441 |
| A11737 | A16829 | 419 | A11737 | A16838 | 200 |
| A11737 | A16866 | 151 | A11737 | A16874 | 224 |
| A11737 | A16908 | 305 | A11737 | A16913 | 266 |
| A11737 | A16942 | 266 | A11737 | A17133 | 217 |
| A11737 | A17211 | 224 | A11738 | A13860 | 157 |
| A11738 | A13980 | 191 | A11738 | A14080 | 249 |
| A11738 | A14391 | 174 | A11738 | A15267 | 323 |
| A11738 | A15425 | 180 | A11739 | A17167 | 475 |
| A11742 | A14399 | 205 | A11743 | A15365 | 355 |
| A11750 | A12730 | 306 | A11752 | A11919 | 296 |
| A11756 | A12706 | 441 | A11757 | A13414 | 424 |
| A11757 | A14571 | 307 | A11758 | A13246 | 404 |
| A11758 | A14198 | 226 | A11758 | A14674 | 283 |
| A11759 | A12361 | 190 | A11759 | A13347 | 256 |
| A11759 | A13484 | 208 | A11759 | A14452 | 173 |
| A11759 | A16371 | 232 | A11760 | A13437 | 399 |
| A11765 | A12715 | 390 | A11765 | A14007 | 223 |
| A11765 | A14120 | 255 | A11765 | A15420 | 212 |
| A11765 | A15488 | 327 | A11765 | A15489 | 313 |
| A11767 | A12383 | 152 | A11767 | A13928 | 374 |
| A11767 | A15366 | 480 | A11767 | A15851 | 259 |
| A11769 | A13172 | 422 | A11772 | A15649 | 185 |
| A11774 | A15649 | 196 | A11776 | A13075 | 452 |
| A11779 | A13338 | 249 | A11779 | A14007 | 480 |
| A11779 | A14072 | 391 | A11779 | A14122 | 162 |
| A11779 | A14124 | 266 | A11779 | A14129 | 199 |
| A11779 | A14210 | 215 | A11779 | A15317 | 180 |
| A11779 | A15331 | 219 | A11779 | A15348 | 165 |
| A11779 | A15407 | 430 | A11779 | A15420 | 291 |
| A11779 | A15433 | 258 | A11779 | A15801 | 294 |
| A11779 | A15841 | 356 | A11779 | A16224 | 217 |
| A11779 | A16983 | 347 | A11781 | A14131 | 419 |
| A11782 | A14694 | 423 | A11784 | A13207 | 401 |
| A11784 | A13826 | 266 | A11784 | A16224 | 263 |
| A11784 | A16960 | 363 | A11785 | A14371 | 272 |
| A11787 | A11794 | 63  | A11787 | A12669 | 435 |
| A11788 | A14072 | 330 | A11789 | A14006 | 210 |
| A11789 | A14190 | 329 | A11791 | A13207 | 252 |
| A11791 | A15365 | 339 | A11792 | A15649 | 177 |
| A11792 | A16461 | 385 | A11794 | A11952 | 402 |
| A11795 | A13190 | 458 | A11795 | A14227 | 190 |
| A11796 | A13826 | 234 | A11796 | A14190 | 260 |
| A11796 | A14511 | 235 | A11796 | A15292 | 170 |
| A11796 | A15313 | 378 | A11796 | A15331 | 340 |
| A11796 | A15440 | 372 | A11796 | A15484 | 317 |

|        |        |     |        |        |     |
|--------|--------|-----|--------|--------|-----|
| A11796 | A15802 | 390 | A11796 | A15807 | 461 |
| A11796 | A16224 | 338 | A11797 | A12284 | 288 |
| A11797 | A14121 | 63  | A11797 | A14210 | 224 |
| A11797 | A15433 | 353 | A11797 | A15458 | 406 |
| A11799 | A17168 | 326 | A11801 | A15261 | 63  |
| A11803 | A16738 | 328 | A11807 | A11983 | 899 |
| A11808 | A14959 | 423 | A11808 | A15463 | 157 |
| A11811 | A15624 | 162 | A11812 | A11813 | 452 |
| A11815 | A11992 | 348 | A11815 | A12881 | 486 |
| A11815 | A14449 | 419 | A11815 | A14482 | 343 |
| A11815 | A15498 | 369 | A11816 | A11824 | 447 |
| A11816 | A13574 | 452 | A11816 | A14777 | 414 |
| A11817 | A13458 | 449 | A11817 | A14118 | 369 |
| A11818 | A13417 | 406 | A11818 | A13461 | 409 |
| A11818 | A13575 | 414 | A11818 | A15843 | 332 |
| A11820 | A12433 | 188 | A11820 | A12606 | 172 |
| A11820 | A12725 | 185 | A11820 | A13309 | 277 |
| A11820 | A13399 | 235 | A11820 | A13708 | 195 |
| A11820 | A13737 | 208 | A11820 | A14084 | 171 |
| A11820 | A14288 | 179 | A11820 | A14706 | 191 |
| A11820 | A14708 | 232 | A11820 | A15105 | 180 |
| A11820 | A15683 | 185 | A11820 | A16157 | 177 |
| A11820 | A16552 | 160 | A11820 | A16597 | 256 |
| A11820 | A16611 | 202 | A11820 | A16675 | 219 |
| A11820 | A16703 | 296 | A11820 | A16741 | 176 |
| A11820 | A16764 | 258 | A11820 | A16866 | 267 |
| A11822 | A13044 | 414 | A11822 | A15933 | 293 |
| A11823 | A13044 | 427 | A11824 | A13574 | 447 |
| A11824 | A14777 | 455 | A11825 | A14218 | 428 |
| A11825 | A15314 | 151 | A11825 | A15361 | 262 |
| A11825 | A15575 | 302 | A11825 | A15578 | 463 |
| A11826 | A17126 | 389 | A11827 | A14511 | 279 |
| A11827 | A14720 | 429 | A11828 | A11840 | 307 |
| A11828 | A12047 | 394 | A11828 | A16069 | 393 |
| A11829 | A11880 | 355 | A11829 | A14694 | 157 |
| A11830 | A14336 | 469 | A11830 | A14810 | 372 |
| A11831 | A11832 | 393 | A11831 | A12849 | 438 |
| A11831 | A13989 | 402 | A11831 | A15764 | 394 |
| A11831 | A16302 | 316 | A11832 | A12849 | 432 |
| A11832 | A13989 | 422 | A11832 | A15764 | 489 |
| A11832 | A16302 | 299 | A11833 | A11914 | 274 |
| A11833 | A11917 | 230 | A11833 | A11920 | 184 |
| A11833 | A11992 | 182 | A11833 | A12042 | 274 |
| A11833 | A12167 | 235 | A11833 | A12170 | 380 |
| A11833 | A12254 | 151 | A11833 | A12255 | 229 |
| A11833 | A12284 | 252 | A11833 | A12433 | 326 |

|        |        |     |        |        |     |
|--------|--------|-----|--------|--------|-----|
| A11833 | A12499 | 245 | A11833 | A12507 | 271 |
| A11833 | A12606 | 307 | A11833 | A12655 | 243 |
| A11833 | A12658 | 313 | A11833 | A12659 | 204 |
| A11833 | A12665 | 165 | A11833 | A12725 | 324 |
| A11833 | A12738 | 341 | A11833 | A12858 | 276 |
| A11833 | A12873 | 156 | A11833 | A13069 | 286 |
| A11833 | A13116 | 485 | A11833 | A13231 | 285 |
| A11833 | A13309 | 196 | A11833 | A13313 | 396 |
| A11833 | A13398 | 467 | A11833 | A13399 | 283 |
| A11833 | A13524 | 461 | A11833 | A13706 | 162 |
| A11833 | A13708 | 334 | A11833 | A13757 | 484 |
| A11833 | A13781 | 401 | A11833 | A13784 | 377 |
| A11833 | A13786 | 208 | A11833 | A13809 | 491 |
| A11833 | A13912 | 408 | A11833 | A14112 | 277 |
| A11833 | A14214 | 416 | A11833 | A14239 | 380 |
| A11833 | A14263 | 208 | A11833 | A14455 | 348 |
| A11833 | A14467 | 491 | A11833 | A14468 | 413 |
| A11833 | A14559 | 165 | A11833 | A14569 | 327 |
| A11833 | A14718 | 327 | A11833 | A14903 | 263 |
| A11833 | A14921 | 414 | A11833 | A15105 | 318 |
| A11833 | A15187 | 355 | A11833 | A15189 | 291 |
| A11833 | A15261 | 152 | A11833 | A15541 | 293 |
| A11833 | A15653 | 490 | A11833 | A15666 | 474 |
| A11833 | A15696 | 252 | A11833 | A15765 | 463 |
| A11833 | A15940 | 252 | A11833 | A16157 | 489 |
| A11833 | A16243 | 479 | A11833 | A16552 | 188 |
| A11833 | A16565 | 171 | A11833 | A16566 | 266 |
| A11833 | A16597 | 433 | A11833 | A16611 | 243 |
| A11833 | A16664 | 168 | A11833 | A16675 | 265 |
| A11833 | A16676 | 489 | A11833 | A16680 | 156 |
| A11833 | A16690 | 263 | A11833 | A16703 | 221 |
| A11833 | A16788 | 358 | A11833 | A16790 | 245 |
| A11833 | A16802 | 205 | A11833 | A16829 | 378 |
| A11833 | A16866 | 185 | A11833 | A16944 | 277 |
| A11833 | A17012 | 252 | A11833 | A17033 | 378 |
| A11833 | A17146 | 340 | A11834 | A13978 | 899 |
| A11834 | A14062 | 205 | A11834 | A14063 | 422 |
| A11834 | A14198 | 307 | A11834 | A14443 | 932 |
| A11834 | A14444 | 212 | A11834 | A14964 | 196 |
| A11834 | A15342 | 283 | A11835 | A13371 | 373 |
| A11835 | A13816 | 212 | A11835 | A14221 | 279 |
| A11837 | A11855 | 322 | A11838 | A15660 | 416 |
| A11838 | A17140 | 162 | A11839 | A13826 | 240 |
| A11839 | A13873 | 419 | A11839 | A14054 | 271 |
| A11839 | A14204 | 163 | A11839 | A14238 | 429 |
| A11839 | A15315 | 201 | A11839 | A15345 | 311 |

|        |        |     |        |        |     |
|--------|--------|-----|--------|--------|-----|
| A11840 | A12047 | 482 | A11840 | A14156 | 430 |
| A11841 | A14177 | 212 | A11841 | A16606 | 185 |
| A11842 | A11933 | 429 | A11842 | A12252 | 288 |
| A11842 | A13311 | 221 | A11842 | A14246 | 491 |
| A11842 | A14558 | 357 | A11842 | A15297 | 490 |
| A11842 | A15338 | 461 | A11842 | A15558 | 481 |
| A11842 | A15559 | 468 | A11842 | A15561 | 221 |
| A11842 | A15710 | 483 | A11842 | A15729 | 486 |
| A11842 | A15737 | 419 | A11842 | A15738 | 356 |
| A11842 | A15779 | 486 | A11842 | A15868 | 293 |
| A11842 | A16463 | 259 | A11842 | A16844 | 290 |
| A11843 | A11851 | 276 | A11843 | A13356 | 276 |
| A11843 | A14200 | 177 | A11843 | A15374 | 182 |
| A11843 | A15480 | 276 | A11844 | A12638 | 383 |
| A11846 | A14511 | 152 | A11847 | A13734 | 193 |
| A11847 | A13736 | 372 | A11847 | A14856 | 379 |
| A11847 | A15970 | 369 | A11847 | A16103 | 441 |
| A11847 | A16335 | 324 | A11847 | A16852 | 412 |
| A11847 | A16968 | 454 | A11847 | A17001 | 404 |
| A11847 | A17041 | 363 | A11848 | A14096 | 252 |
| A11848 | A15312 | 236 | A11848 | A15352 | 232 |
| A11848 | A15498 | 329 | A11848 | A16224 | 229 |
| A11850 | A13837 | 180 | A11850 | A14030 | 944 |
| A11850 | A14180 | 199 | A11850 | A14191 | 685 |
| A11850 | A14456 | 941 | A11850 | A14690 | 429 |
| A11850 | A15138 | 256 | A11850 | A15291 | 491 |
| A11850 | A15314 | 152 | A11850 | A15356 | 191 |
| A11850 | A15614 | 489 | A11850 | A16467 | 361 |
| A11850 | A16634 | 182 | A11850 | A16990 | 346 |
| A11850 | A17157 | 443 | A11851 | A11914 | 174 |
| A11851 | A11917 | 279 | A11851 | A11940 | 294 |
| A11851 | A12254 | 395 | A11851 | A12506 | 235 |
| A11851 | A12507 | 382 | A11851 | A12508 | 218 |
| A11851 | A12606 | 402 | A11851 | A12625 | 379 |
| A11851 | A12658 | 212 | A11851 | A12665 | 329 |
| A11851 | A12825 | 252 | A11851 | A12858 | 176 |
| A11851 | A13170 | 271 | A11851 | A13313 | 202 |
| A11851 | A13356 | 583 | A11851 | A13707 | 224 |
| A11851 | A13737 | 286 | A11851 | A13783 | 288 |
| A11851 | A13805 | 274 | A11851 | A13809 | 347 |
| A11851 | A14167 | 299 | A11851 | A14210 | 184 |
| A11851 | A14214 | 235 | A11851 | A14222 | 180 |
| A11851 | A14239 | 193 | A11851 | A14255 | 338 |
| A11851 | A14263 | 249 | A11851 | A14270 | 377 |
| A11851 | A14462 | 340 | A11851 | A14569 | 224 |
| A11851 | A14706 | 267 | A11851 | A14799 | 228 |



|        |        |     |        |        |     |
|--------|--------|-----|--------|--------|-----|
| A11851 | A14903 | 396 | A11851 | A14917 | 391 |
| A11851 | A15189 | 190 | A11851 | A15321 | 360 |
| A11851 | A15480 | 276 | A11851 | A15709 | 162 |
| A11851 | A15711 | 255 | A11851 | A15854 | 190 |
| A11851 | A16152 | 184 | A11851 | A16157 | 347 |
| A11851 | A16187 | 241 | A11851 | A16215 | 475 |
| A11851 | A16294 | 162 | A11851 | A16322 | 199 |
| A11851 | A16552 | 229 | A11851 | A16565 | 201 |
| A11851 | A16585 | 318 | A11851 | A16587 | 388 |
| A11851 | A16611 | 420 | A11851 | A16663 | 218 |
| A11851 | A16664 | 406 | A11851 | A16675 | 167 |
| A11851 | A16680 | 187 | A11851 | A16695 | 338 |
| A11851 | A16774 | 318 | A11851 | A16815 | 330 |
| A11851 | A16887 | 350 | A11852 | A14790 | 308 |
| A11853 | A11936 | 490 | A11853 | A13989 | 199 |
| A11854 | A12013 | 462 | A11855 | A16304 | 162 |
| A11856 | A14475 | 405 | A11857 | A11922 | 355 |
| A11857 | A14508 | 263 | A11857 | A15500 | 310 |
| A11857 | A16686 | 462 | A11858 | A12035 | 353 |
| A11858 | A12912 | 311 | A11858 | A16440 | 485 |
| A11859 | A14247 | 346 | A11859 | A14741 | 245 |
| A11859 | A15498 | 326 | A11860 | A14642 | 215 |
| A11861 | A13333 | 200 | A11861 | A15202 | 200 |
| A11862 | A11929 | 243 | A11862 | A12214 | 364 |
| A11862 | A12250 | 356 | A11862 | A13734 | 332 |
| A11862 | A15733 | 215 | A11863 | A11986 | 305 |
| A11863 | A13708 | 200 | A11863 | A16018 | 321 |
| A11865 | A13589 | 163 | A11865 | A13593 | 163 |
| A11865 | A15096 | 348 | A11866 | A12383 | 221 |
| A11866 | A13089 | 457 | A11866 | A16093 | 330 |
| A11867 | A12556 | 332 | A11867 | A15241 | 285 |
| A11869 | A11881 | 432 | A11869 | A12975 | 404 |
| A11869 | A13826 | 208 | A11869 | A13941 | 435 |
| A11869 | A14077 | 204 | A11869 | A15352 | 347 |
| A11872 | A11879 | 413 | A11872 | A13422 | 408 |
| A11872 | A13826 | 179 | A11873 | A12870 | 488 |
| A11873 | A13899 | 152 | A11873 | A13905 | 344 |
| A11873 | A13916 | 405 | A11873 | A15396 | 226 |
| A11873 | A15682 | 355 | A11873 | A16608 | 152 |
| A11873 | A16915 | 263 | A11875 | A11946 | 465 |
| A11875 | A12185 | 363 | A11875 | A12393 | 440 |
| A11875 | A13151 | 279 | A11875 | A13312 | 307 |
| A11875 | A13546 | 288 | A11875 | A14010 | 187 |
| A11875 | A14202 | 259 | A11875 | A14511 | 202 |
| A11875 | A14667 | 224 | A11875 | A15292 | 432 |
| A11875 | A15310 | 229 | A11875 | A15313 | 235 |

|        |        |     |        |        |     |
|--------|--------|-----|--------|--------|-----|
| A11875 | A15317 | 177 | A11875 | A15348 | 428 |
| A11875 | A15349 | 372 | A11875 | A15376 | 414 |
| A11875 | A15431 | 263 | A11875 | A15444 | 252 |
| A11875 | A15461 | 201 | A11875 | A15515 | 213 |
| A11875 | A15641 | 380 | A11875 | A15830 | 291 |
| A11876 | A11996 | 368 | A11876 | A12130 | 399 |
| A11876 | A12275 | 371 | A11876 | A12407 | 406 |
| A11876 | A12677 | 457 | A11876 | A12722 | 470 |
| A11876 | A14271 | 328 | A11876 | A14295 | 340 |
| A11876 | A14846 | 344 | A11876 | A15415 | 318 |
| A11876 | A15704 | 489 | A11880 | A12190 | 411 |
| A11880 | A13949 | 247 | A11880 | A16073 | 227 |
| A11880 | A16226 | 168 | A11881 | A12047 | 246 |
| A11881 | A12913 | 469 | A11881 | A13484 | 235 |
| A11881 | A13726 | 285 | A11881 | A13941 | 389 |
| A11881 | A14266 | 490 | A11884 | A14222 | 245 |
| A11884 | A14227 | 163 | A11884 | A14278 | 228 |
| A11884 | A14285 | 154 | A11884 | A15533 | 274 |
| A11884 | A16602 | 395 | A11885 | A13628 | 335 |
| A11885 | A14052 | 165 | A11885 | A14056 | 333 |
| A11885 | A14247 | 481 | A11885 | A14430 | 480 |
| A11885 | A15472 | 184 | A11885 | A15498 | 312 |
| A11885 | A16217 | 294 | A11888 | A12689 | 452 |
| A11888 | A12804 | 452 | A11889 | A12520 | 452 |
| A11889 | A15277 | 393 | A11893 | A15498 | 168 |
| A11896 | A15498 | 227 | A11897 | A14410 | 281 |
| A11900 | A14650 | 170 | A11902 | A12161 | 355 |
| A11902 | A13170 | 252 | A11902 | A13927 | 274 |
| A11902 | A14163 | 160 | A11905 | A13587 | 272 |
| A11906 | A12364 | 414 | A11906 | A14196 | 199 |
| A11906 | A14208 | 408 | A11906 | A15507 | 372 |
| A11906 | A15547 | 462 | A11906 | A15611 | 281 |
| A11906 | A15612 | 270 | A11906 | A15613 | 422 |
| A11906 | A16216 | 174 | A11906 | A16300 | 165 |
| A11908 | A14827 | 205 | A11911 | A12897 | 408 |
| A11911 | A13734 | 486 | A11911 | A17155 | 215 |
| A11912 | A12733 | 452 | A11913 | A13294 | 391 |
| A11914 | A11915 | 228 | A11914 | A11917 | 486 |
| A11914 | A11920 | 279 | A11914 | A11940 | 235 |
| A11914 | A11954 | 355 | A11914 | A11992 | 276 |
| A11914 | A12167 | 200 | A11914 | A12215 | 430 |
| A11914 | A12238 | 369 | A11914 | A12254 | 455 |
| A11914 | A12255 | 401 | A11914 | A12284 | 420 |
| A11914 | A12433 | 489 | A11914 | A12501 | 293 |
| A11914 | A12506 | 430 | A11914 | A12507 | 479 |
| A11914 | A12508 | 373 | A11914 | A12606 | 489 |

|        |        |     |        |        |     |
|--------|--------|-----|--------|--------|-----|
| A11914 | A12625 | 446 | A11914 | A12658 | 722 |
| A11914 | A12659 | 430 | A11914 | A12665 | 460 |
| A11914 | A12725 | 483 | A11914 | A12726 | 372 |
| A11914 | A12727 | 255 | A11914 | A12738 | 174 |
| A11914 | A12824 | 543 | A11914 | A12825 | 187 |
| A11914 | A12850 | 269 | A11914 | A12858 | 486 |
| A11914 | A12873 | 404 | A11914 | A12927 | 165 |
| A11914 | A12971 | 193 | A11914 | A13116 | 406 |
| A11914 | A13169 | 339 | A11914 | A13309 | 160 |
| A11914 | A13313 | 484 | A11914 | A13321 | 385 |
| A11914 | A13323 | 276 | A11914 | A13342 | 191 |
| A11914 | A13356 | 255 | A11914 | A13388 | 205 |
| A11914 | A13399 | 339 | A11914 | A13706 | 408 |
| A11914 | A13707 | 424 | A11914 | A13708 | 411 |
| A11914 | A13711 | 369 | A11914 | A13737 | 306 |
| A11914 | A13781 | 475 | A11914 | A13783 | 353 |
| A11914 | A13784 | 469 | A11914 | A13786 | 389 |
| A11914 | A13787 | 293 | A11914 | A13788 | 348 |
| A11914 | A13804 | 252 | A11914 | A13805 | 340 |
| A11914 | A13806 | 180 | A11914 | A13809 | 479 |
| A11914 | A13811 | 338 | A11914 | A13912 | 279 |
| A11914 | A13963 | 174 | A11914 | A14007 | 160 |
| A11914 | A14074 | 348 | A11914 | A14084 | 335 |
| A11914 | A14087 | 326 | A11914 | A14094 | 273 |
| A11914 | A14214 | 489 | A11914 | A14222 | 418 |
| A11914 | A14227 | 389 | A11914 | A14239 | 440 |
| A11914 | A14260 | 230 | A11914 | A14263 | 450 |
| A11914 | A14270 | 324 | A11914 | A14288 | 399 |
| A11914 | A14289 | 314 | A11914 | A14375 | 362 |
| A11914 | A14455 | 204 | A11914 | A14462 | 446 |
| A11914 | A14569 | 474 | A11914 | A14595 | 276 |
| A11914 | A14706 | 455 | A11914 | A14708 | 235 |
| A11914 | A14718 | 291 | A11914 | A14719 | 193 |
| A11914 | A14739 | 302 | A11914 | A14799 | 480 |
| A11914 | A14826 | 361 | A11914 | A14838 | 185 |
| A11914 | A14903 | 355 | A11914 | A14917 | 346 |
| A11914 | A14921 | 293 | A11914 | A15105 | 432 |
| A11914 | A15187 | 401 | A11914 | A15189 | 249 |
| A11914 | A15257 | 318 | A11914 | A15262 | 393 |
| A11914 | A15519 | 395 | A11914 | A15536 | 241 |
| A11914 | A15541 | 475 | A11914 | A15559 | 185 |
| A11914 | A15653 | 441 | A11914 | A15665 | 313 |
| A11914 | A15680 | 404 | A11914 | A15683 | 452 |
| A11914 | A15684 | 313 | A11914 | A15696 | 218 |
| A11914 | A15698 | 174 | A11914 | A15709 | 480 |
| A11914 | A15711 | 399 | A11914 | A15735 | 154 |

|        |        |     |        |        |     |
|--------|--------|-----|--------|--------|-----|
| A11914 | A15765 | 172 | A11914 | A15774 | 327 |
| A11914 | A15850 | 297 | A11914 | A15932 | 202 |
| A11914 | A15940 | 347 | A11914 | A15947 | 182 |
| A11914 | A16067 | 212 | A11914 | A16157 | 491 |
| A11914 | A16187 | 390 | A11914 | A16215 | 235 |
| A11914 | A16243 | 224 | A11914 | A16261 | 385 |
| A11914 | A16343 | 283 | A11914 | A16387 | 252 |
| A11914 | A16552 | 480 | A11914 | A16565 | 480 |
| A11914 | A16566 | 422 | A11914 | A16567 | 255 |
| A11914 | A16587 | 480 | A11914 | A16597 | 480 |
| A11914 | A16611 | 489 | A11914 | A16652 | 245 |
| A11914 | A16664 | 486 | A11914 | A16675 | 484 |
| A11914 | A16680 | 468 | A11914 | A16682 | 355 |
| A11914 | A16690 | 450 | A11914 | A16691 | 386 |
| A11914 | A16692 | 202 | A11914 | A16695 | 288 |
| A11914 | A16697 | 224 | A11914 | A16699 | 324 |
| A11914 | A16701 | 247 | A11914 | A16703 | 318 |
| A11914 | A16704 | 477 | A11914 | A16706 | 293 |
| A11914 | A16707 | 418 | A11914 | A16708 | 246 |
| A11914 | A16762 | 226 | A11914 | A16764 | 362 |
| A11914 | A16774 | 263 | A11914 | A16776 | 362 |
| A11914 | A16788 | 424 | A11914 | A16790 | 411 |
| A11914 | A16797 | 369 | A11914 | A16799 | 255 |
| A11914 | A16802 | 302 | A11914 | A16807 | 159 |
| A11914 | A16815 | 391 | A11914 | A16829 | 451 |
| A11914 | A16838 | 404 | A11914 | A16858 | 310 |
| A11914 | A16866 | 420 | A11914 | A16874 | 450 |
| A11914 | A16882 | 317 | A11914 | A16905 | 303 |
| A11914 | A16908 | 302 | A11914 | A16913 | 263 |
| A11914 | A16942 | 263 | A11914 | A16944 | 243 |
| A11914 | A17012 | 217 | A11914 | A17014 | 263 |
| A11914 | A17015 | 177 | A11914 | A17033 | 224 |
| A11914 | A17133 | 215 | A11915 | A11917 | 344 |
| A11915 | A12234 | 341 | A11915 | A12433 | 188 |
| A11915 | A12499 | 317 | A11915 | A12508 | 270 |
| A11915 | A12606 | 432 | A11915 | A12625 | 212 |
| A11915 | A12660 | 227 | A11915 | A12725 | 319 |
| A11915 | A12738 | 290 | A11915 | A12858 | 356 |
| A11915 | A12952 | 183 | A11915 | A13169 | 235 |
| A11915 | A13170 | 313 | A11915 | A13313 | 271 |
| A11915 | A13527 | 322 | A11915 | A13781 | 369 |
| A11915 | A13782 | 391 | A11915 | A13783 | 329 |
| A11915 | A13784 | 305 | A11915 | A13786 | 288 |
| A11915 | A13788 | 417 | A11915 | A13804 | 346 |
| A11915 | A13811 | 313 | A11915 | A13812 | 308 |
| A11915 | A14213 | 210 | A11915 | A14222 | 251 |

|        |        |     |        |        |     |
|--------|--------|-----|--------|--------|-----|
| A11915 | A14235 | 340 | A11915 | A14255 | 259 |
| A11915 | A14263 | 310 | A11915 | A14288 | 179 |
| A11915 | A14455 | 210 | A11915 | A14569 | 274 |
| A11915 | A14706 | 191 | A11915 | A14718 | 276 |
| A11915 | A14799 | 160 | A11915 | A15105 | 180 |
| A11915 | A15189 | 243 | A11915 | A15431 | 179 |
| A11915 | A15519 | 296 | A11915 | A15541 | 367 |
| A11915 | A15653 | 290 | A11915 | A15665 | 154 |
| A11915 | A15680 | 185 | A11915 | A15709 | 216 |
| A11915 | A15850 | 374 | A11915 | A15854 | 243 |
| A11915 | A16157 | 391 | A11915 | A16261 | 283 |
| A11915 | A16552 | 380 | A11915 | A16565 | 430 |
| A11915 | A16566 | 332 | A11915 | A16567 | 347 |
| A11915 | A16587 | 317 | A11915 | A16597 | 374 |
| A11915 | A16608 | 223 | A11915 | A16611 | 334 |
| A11915 | A16664 | 373 | A11915 | A16675 | 219 |
| A11915 | A16680 | 241 | A11915 | A16684 | 405 |
| A11915 | A16690 | 219 | A11915 | A16691 | 358 |
| A11915 | A16692 | 311 | A11915 | A16693 | 366 |
| A11915 | A16695 | 368 | A11915 | A16704 | 406 |
| A11915 | A16709 | 317 | A11915 | A16764 | 377 |
| A11915 | A16787 | 382 | A11915 | A16829 | 328 |
| A11915 | A16874 | 324 | A11915 | A16900 | 340 |
| A11915 | A16905 | 286 | A11915 | A16954 | 317 |
| A11915 | A17030 | 335 | A11915 | A17211 | 326 |
| A11916 | A12052 | 266 | A11916 | A12165 | 226 |
| A11916 | A12556 | 491 | A11916 | A12625 | 491 |
| A11916 | A13231 | 191 | A11916 | A13246 | 406 |
| A11916 | A13949 | 490 | A11916 | A14076 | 491 |
| A11916 | A14079 | 491 | A11916 | A14094 | 470 |
| A11916 | A14167 | 311 | A11916 | A14230 | 330 |
| A11916 | A14273 | 281 | A11916 | A14460 | 447 |
| A11916 | A14694 | 205 | A11916 | A14962 | 454 |
| A11916 | A15367 | 184 | A11916 | A15369 | 491 |
| A11916 | A15939 | 263 | A11916 | A16127 | 490 |
| A11916 | A16128 | 491 | A11916 | A16129 | 491 |
| A11916 | A16226 | 491 | A11916 | A16378 | 475 |
| A11916 | A16606 | 388 | A11916 | A16613 | 486 |
| A11916 | A16616 | 447 | A11916 | A16626 | 382 |
| A11916 | A16646 | 332 | A11917 | A11940 | 458 |
| A11917 | A11954 | 344 | A11917 | A11992 | 417 |
| A11917 | A12167 | 208 | A11917 | A12215 | 277 |
| A11917 | A12238 | 269 | A11917 | A12254 | 475 |
| A11917 | A12255 | 303 | A11917 | A12284 | 395 |
| A11917 | A12433 | 488 | A11917 | A12499 | 390 |
| A11917 | A12501 | 427 | A11917 | A12506 | 401 |

|        |        |     |        |        |     |
|--------|--------|-----|--------|--------|-----|
| A11917 | A12507 | 485 | A11917 | A12508 | 468 |
| A11917 | A12606 | 490 | A11917 | A12625 | 424 |
| A11917 | A12658 | 486 | A11917 | A12659 | 268 |
| A11917 | A12665 | 633 | A11917 | A12725 | 477 |
| A11917 | A12726 | 274 | A11917 | A12738 | 176 |
| A11917 | A12825 | 491 | A11917 | A12826 | 270 |
| A11917 | A12850 | 163 | A11917 | A12858 | 491 |
| A11917 | A12873 | 457 | A11917 | A12952 | 453 |
| A11917 | A13116 | 210 | A11917 | A13169 | 270 |
| A11917 | A13170 | 218 | A11917 | A13309 | 481 |
| A11917 | A13313 | 888 | A11917 | A13321 | 348 |
| A11917 | A13342 | 198 | A11917 | A13388 | 216 |
| A11917 | A13399 | 389 | A11917 | A13706 | 355 |
| A11917 | A13707 | 424 | A11917 | A13708 | 634 |
| A11917 | A13711 | 301 | A11917 | A13737 | 422 |
| A11917 | A13781 | 634 | A11917 | A13782 | 235 |
| A11917 | A13783 | 243 | A11917 | A13784 | 481 |
| A11917 | A13786 | 434 | A11917 | A13787 | 324 |
| A11917 | A13788 | 434 | A11917 | A13804 | 447 |
| A11917 | A13805 | 451 | A11917 | A13809 | 477 |
| A11917 | A13811 | 218 | A11917 | A13912 | 434 |
| A11917 | A13928 | 324 | A11917 | A14074 | 286 |
| A11917 | A14084 | 379 | A11917 | A14094 | 290 |
| A11917 | A14214 | 490 | A11917 | A14222 | 468 |
| A11917 | A14239 | 429 | A11917 | A14247 | 159 |
| A11917 | A14255 | 454 | A11917 | A14260 | 249 |
| A11917 | A14263 | 458 | A11917 | A14270 | 374 |
| A11917 | A14286 | 229 | A11917 | A14288 | 460 |
| A11917 | A14289 | 184 | A11917 | A14358 | 205 |
| A11917 | A14375 | 436 | A11917 | A14455 | 475 |
| A11917 | A14462 | 374 | A11917 | A14569 | 486 |
| A11917 | A14570 | 229 | A11917 | A14595 | 172 |
| A11917 | A14661 | 568 | A11917 | A14706 | 445 |
| A11917 | A14708 | 385 | A11917 | A14718 | 391 |
| A11917 | A14719 | 303 | A11917 | A14739 | 205 |
| A11917 | A14799 | 486 | A11917 | A14838 | 191 |
| A11917 | A14903 | 468 | A11917 | A14917 | 432 |
| A11917 | A14921 | 401 | A11917 | A15105 | 632 |
| A11917 | A15187 | 475 | A11917 | A15189 | 491 |
| A11917 | A15262 | 412 | A11917 | A15292 | 364 |
| A11917 | A15297 | 163 | A11917 | A15366 | 592 |
| A11917 | A15541 | 446 | A11917 | A15653 | 307 |
| A11917 | A15665 | 480 | A11917 | A15680 | 398 |
| A11917 | A15683 | 424 | A11917 | A15698 | 174 |
| A11917 | A15709 | 446 | A11917 | A15711 | 297 |
| A11917 | A15773 | 324 | A11917 | A15774 | 201 |

|        |        |     |        |        |     |
|--------|--------|-----|--------|--------|-----|
| A11917 | A15818 | 193 | A11917 | A15850 | 198 |
| A11917 | A15853 | 285 | A11917 | A15854 | 621 |
| A11917 | A15855 | 491 | A11917 | A16157 | 490 |
| A11917 | A16187 | 435 | A11917 | A16261 | 347 |
| A11917 | A16343 | 394 | A11917 | A16552 | 491 |
| A11917 | A16565 | 489 | A11917 | A16566 | 490 |
| A11917 | A16567 | 371 | A11917 | A16585 | 157 |
| A11917 | A16587 | 477 | A11917 | A16597 | 491 |
| A11917 | A16608 | 450 | A11917 | A16611 | 490 |
| A11917 | A16652 | 277 | A11917 | A16664 | 490 |
| A11917 | A16675 | 490 | A11917 | A16680 | 485 |
| A11917 | A16682 | 246 | A11917 | A16684 | 270 |
| A11917 | A16689 | 423 | A11917 | A16690 | 468 |
| A11917 | A16691 | 301 | A11917 | A16692 | 212 |
| A11917 | A16693 | 394 | A11917 | A16695 | 438 |
| A11917 | A16697 | 241 | A11917 | A16703 | 457 |
| A11917 | A16704 | 460 | A11917 | A16706 | 191 |
| A11917 | A16707 | 360 | A11917 | A16709 | 324 |
| A11917 | A16724 | 154 | A11917 | A16764 | 436 |
| A11917 | A16774 | 425 | A11917 | A16776 | 409 |
| A11917 | A16788 | 249 | A11917 | A16790 | 451 |
| A11917 | A16806 | 185 | A11917 | A16807 | 154 |
| A11917 | A16815 | 391 | A11917 | A16824 | 301 |
| A11917 | A16829 | 456 | A11917 | A16838 | 379 |
| A11917 | A16858 | 344 | A11917 | A16859 | 249 |
| A11917 | A16866 | 324 | A11917 | A16874 | 434 |
| A11917 | A16875 | 384 | A11917 | A16900 | 266 |
| A11917 | A16905 | 489 | A11917 | A16913 | 452 |
| A11917 | A16944 | 486 | A11917 | A16954 | 473 |
| A11917 | A16979 | 277 | A11917 | A17014 | 157 |
| A11917 | A17018 | 346 | A11917 | A17019 | 191 |
| A11917 | A17030 | 353 | A11917 | A17033 | 241 |
| A11917 | A17035 | 174 | A11917 | A17190 | 240 |
| A11917 | A17211 | 338 | A11918 | A14596 | 316 |
| A11918 | A14955 | 385 | A11918 | A15624 | 156 |
| A11918 | A15649 | 156 | A11918 | A15651 | 156 |
| A11918 | A15652 | 156 | A11918 | A15660 | 481 |
| A11918 | A15661 | 156 | A11918 | A15662 | 156 |
| A11918 | A15684 | 499 | A11918 | A15708 | 174 |
| A11918 | A15720 | 156 | A11918 | A15721 | 156 |
| A11918 | A15746 | 261 | A11918 | A15917 | 156 |
| A11918 | A15918 | 275 | A11918 | A15923 | 315 |
| A11918 | A15937 | 156 | A11918 | A16088 | 156 |
| A11918 | A16145 | 156 | A11918 | A16218 | 157 |
| A11918 | A16307 | 156 | A11918 | A16650 | 249 |
| A11918 | A17134 | 306 | A11918 | A17140 | 297 |

|        |        |     |        |        |     |
|--------|--------|-----|--------|--------|-----|
| A11919 | A13928 | 232 | A11919 | A14150 | 160 |
| A11919 | A17063 | 152 | A11920 | A11928 | 486 |
| A11920 | A11992 | 185 | A11920 | A12215 | 288 |
| A11920 | A12255 | 234 | A11920 | A12433 | 229 |
| A11920 | A12738 | 216 | A11920 | A12873 | 160 |
| A11920 | A13310 | 488 | A11920 | A13311 | 456 |
| A11920 | A13784 | 208 | A11920 | A13809 | 191 |
| A11920 | A13928 | 329 | A11920 | A14239 | 165 |
| A11920 | A14476 | 490 | A11920 | A14708 | 152 |
| A11920 | A15541 | 297 | A11920 | A15726 | 236 |
| A11920 | A15940 | 257 | A11920 | A16157 | 215 |
| A11920 | A16490 | 319 | A11920 | A16587 | 249 |
| A11920 | A16597 | 176 | A11920 | A16691 | 306 |
| A11920 | A16706 | 323 | A11920 | A16708 | 283 |
| A11920 | A16797 | 388 | A11920 | A16866 | 188 |
| A11920 | A16882 | 344 | A11920 | A16912 | 447 |
| A11920 | A17012 | 256 | A11920 | A17033 | 263 |
| A11921 | A14490 | 185 | A11922 | A13997 | 252 |
| A11922 | A16216 | 321 | A11923 | A13147 | 491 |
| A11923 | A14039 | 313 | A11924 | A13340 | 151 |
| A11924 | A14216 | 288 | A11925 | A14247 | 353 |
| A11925 | A14473 | 269 | A11925 | A14481 | 353 |
| A11925 | A14693 | 353 | A11925 | A15301 | 450 |
| A11925 | A15302 | 450 | A11925 | A15366 | 450 |
| A11925 | A15430 | 353 | A11925 | A15462 | 450 |
| A11925 | A15463 | 450 | A11926 | A13581 | 279 |
| A11926 | A14274 | 353 | A11926 | A15624 | 327 |
| A11926 | A16095 | 388 | A11927 | A13870 | 317 |
| A11928 | A13310 | 217 | A11928 | A13311 | 470 |
| A11928 | A14304 | 235 | A11928 | A14476 | 447 |
| A11928 | A14899 | 425 | A11928 | A15697 | 217 |
| A11928 | A16437 | 227 | A11928 | A16491 | 408 |
| A11928 | A16912 | 394 | A11929 | A13364 | 218 |
| A11929 | A14208 | 486 | A11929 | A14218 | 177 |
| A11929 | A14238 | 160 | A11929 | A15224 | 255 |
| A11929 | A15510 | 396 | A11929 | A15701 | 286 |
| A11929 | A16802 | 196 | A11929 | A17013 | 165 |
| A11930 | A13989 | 271 | A11930 | A14566 | 329 |
| A11930 | A14594 | 283 | A11930 | A15315 | 502 |
| A11931 | A12988 | 391 | A11931 | A13277 | 269 |
| A11931 | A13772 | 267 | A11931 | A16400 | 428 |
| A11932 | A13994 | 411 | A11933 | A14196 | 467 |
| A11933 | A14246 | 489 | A11933 | A14597 | 243 |
| A11933 | A15353 | 366 | A11933 | A15377 | 187 |
| A11933 | A15559 | 254 | A11933 | A15564 | 361 |
| A11933 | A15710 | 174 | A11933 | A15729 | 361 |



|        |        |     |        |        |     |
|--------|--------|-----|--------|--------|-----|
| A11933 | A15763 | 454 | A11933 | A15779 | 413 |
| A11933 | A15868 | 266 | A11933 | A15947 | 236 |
| A11933 | A16463 | 229 | A11934 | A11937 | 490 |
| A11934 | A12300 | 330 | A11934 | A14005 | 193 |
| A11934 | A15684 | 195 | A11935 | A12069 | 249 |
| A11935 | A12329 | 485 | A11935 | A13023 | 262 |
| A11935 | A14150 | 162 | A11935 | A14216 | 163 |
| A11935 | A15660 | 460 | A11935 | A15684 | 486 |
| A11935 | A15720 | 313 | A11935 | A15721 | 191 |
| A11935 | A15769 | 163 | A11935 | A15931 | 458 |
| A11935 | A16092 | 216 | A11935 | A16218 | 491 |
| A11935 | A16724 | 174 | A11935 | A16768 | 188 |
| A11936 | A13989 | 154 | A11937 | A11983 | 529 |
| A11937 | A12300 | 272 | A11937 | A13889 | 165 |
| A11937 | A13902 | 243 | A11937 | A14215 | 272 |
| A11937 | A14957 | 260 | A11937 | A15336 | 191 |
| A11937 | A15416 | 191 | A11937 | A15665 | 486 |
| A11937 | A16847 | 340 | A11938 | A12146 | 363 |
| A11938 | A13510 | 173 | A11938 | A14826 | 474 |
| A11938 | A14986 | 177 | A11938 | A15629 | 303 |
| A11939 | A13831 | 85  | A11939 | A14119 | 369 |
| A11940 | A11954 | 334 | A11940 | A11992 | 270 |
| A11940 | A12215 | 350 | A11940 | A12254 | 425 |
| A11940 | A12255 | 310 | A11940 | A12284 | 216 |
| A11940 | A12433 | 441 | A11940 | A12501 | 283 |
| A11940 | A12507 | 374 | A11940 | A12606 | 435 |
| A11940 | A12658 | 461 | A11940 | A12665 | 432 |
| A11940 | A12725 | 401 | A11940 | A12825 | 305 |
| A11940 | A12858 | 235 | A11940 | A12873 | 246 |
| A11940 | A13309 | 283 | A11940 | A13313 | 473 |
| A11940 | A13356 | 254 | A11940 | A13399 | 243 |
| A11940 | A13706 | 252 | A11940 | A13707 | 279 |
| A11940 | A13708 | 443 | A11940 | A13737 | 344 |
| A11940 | A13781 | 474 | A11940 | A13784 | 312 |
| A11940 | A13805 | 322 | A11940 | A13809 | 274 |
| A11940 | A13912 | 367 | A11940 | A14084 | 177 |
| A11940 | A14214 | 456 | A11940 | A14222 | 259 |
| A11940 | A14255 | 265 | A11940 | A14260 | 424 |
| A11940 | A14263 | 317 | A11940 | A14288 | 398 |
| A11940 | A14569 | 391 | A11940 | A14570 | 219 |
| A11940 | A14718 | 281 | A11940 | A14719 | 310 |
| A11940 | A14799 | 430 | A11940 | A14838 | 334 |
| A11940 | A14903 | 423 | A11940 | A15105 | 188 |
| A11940 | A15187 | 307 | A11940 | A15189 | 457 |
| A11940 | A15262 | 358 | A11940 | A15357 | 157 |
| A11940 | A15532 | 210 | A11940 | A15541 | 251 |

|        |        |     |        |        |     |
|--------|--------|-----|--------|--------|-----|
| A11940 | A15653 | 163 | A11940 | A15680 | 191 |
| A11940 | A15709 | 223 | A11940 | A15711 | 306 |
| A11940 | A15735 | 180 | A11940 | A15855 | 383 |
| A11940 | A15940 | 327 | A11940 | A16157 | 436 |
| A11940 | A16187 | 400 | A11940 | A16322 | 258 |
| A11940 | A16343 | 440 | A11940 | A16552 | 468 |
| A11940 | A16565 | 260 | A11940 | A16587 | 322 |
| A11940 | A16597 | 460 | A11940 | A16608 | 229 |
| A11940 | A16611 | 474 | A11940 | A16664 | 377 |
| A11940 | A16675 | 419 | A11940 | A16680 | 369 |
| A11940 | A16703 | 405 | A11940 | A16704 | 308 |
| A11940 | A16709 | 321 | A11940 | A16776 | 424 |
| A11940 | A16824 | 363 | A11940 | A16829 | 332 |
| A11940 | A16905 | 399 | A11940 | A16913 | 434 |
| A11940 | A16954 | 416 | A11940 | A17018 | 423 |
| A11940 | A17019 | 374 | A11940 | A17030 | 424 |
| A11940 | A17035 | 294 | A11940 | A17190 | 330 |
| A11940 | A17211 | 329 | A11942 | A13126 | 259 |
| A11942 | A13870 | 185 | A11942 | A13989 | 443 |
| A11942 | A15215 | 291 | A11942 | A16925 | 360 |
| A11943 | A12032 | 285 | A11943 | A12862 | 449 |
| A11943 | A13146 | 291 | A11943 | A13234 | 152 |
| A11943 | A14022 | 899 | A11943 | A14025 | 445 |
| A11943 | A14190 | 235 | A11943 | A14520 | 439 |
| A11943 | A14588 | 162 | A11943 | A14964 | 157 |
| A11943 | A15196 | 383 | A11943 | A15689 | 191 |
| A11944 | A14246 | 188 | A11944 | A14596 | 195 |
| A11944 | A17127 | 343 | A11945 | A12233 | 462 |
| A11945 | A12243 | 450 | A11945 | A12667 | 252 |
| A11945 | A13055 | 334 | A11945 | A13989 | 259 |
| A11945 | A14216 | 313 | A11945 | A14505 | 366 |
| A11945 | A15219 | 481 | A11945 | A15221 | 486 |
| A11945 | A15727 | 323 | A11945 | A16159 | 347 |
| A11946 | A14202 | 201 | A11946 | A15348 | 302 |
| A11946 | A15452 | 290 | A11947 | A14303 | 290 |
| A11948 | A13338 | 452 | A11949 | A13987 | 271 |
| A11949 | A14399 | 235 | A11949 | A15348 | 302 |
| A11949 | A15436 | 333 | A11949 | A15515 | 337 |
| A11950 | A13963 | 199 | A11950 | A14125 | 353 |
| A11950 | A14202 | 165 | A11950 | A14229 | 205 |
| A11950 | A14247 | 195 | A11950 | A14292 | 291 |
| A11950 | A14408 | 475 | A11950 | A14635 | 417 |
| A11950 | A14661 | 154 | A11950 | A14838 | 288 |
| A11950 | A15114 | 218 | A11950 | A15292 | 306 |
| A11950 | A15302 | 439 | A11950 | A15322 | 208 |
| A11950 | A15348 | 168 | A11950 | A15416 | 180 |

|        |        |     |        |        |     |
|--------|--------|-----|--------|--------|-----|
| A11950 | A15466 | 350 | A11950 | A15480 | 174 |
| A11950 | A15818 | 473 | A11950 | A16117 | 435 |
| A11951 | A11961 | 363 | A11951 | A11983 | 154 |
| A11951 | A12576 | 418 | A11951 | A12631 | 407 |
| A11951 | A12935 | 449 | A11951 | A12959 | 480 |
| A11951 | A12976 | 477 | A11951 | A12983 | 477 |
| A11951 | A13410 | 439 | A11951 | A13745 | 418 |
| A11951 | A13826 | 268 | A11951 | A13899 | 229 |
| A11951 | A13926 | 332 | A11951 | A15312 | 151 |
| A11951 | A15313 | 163 | A11951 | A15318 | 221 |
| A11951 | A15331 | 267 | A11951 | A15404 | 345 |
| A11951 | A15435 | 190 | A11951 | A15809 | 210 |
| A11951 | A15922 | 258 | A11952 | A12897 | 196 |
| A11952 | A12904 | 395 | A11952 | A13207 | 184 |
| A11952 | A13466 | 411 | A11952 | A15649 | 154 |
| A11953 | A11983 | 383 | A11953 | A13181 | 216 |
| A11953 | A14210 | 215 | A11953 | A14471 | 256 |
| A11953 | A14554 | 210 | A11953 | A14570 | 491 |
| A11953 | A14635 | 439 | A11953 | A15401 | 213 |
| A11953 | A15498 | 413 | A11953 | A15502 | 165 |
| A11953 | A15606 | 196 | A11954 | A11992 | 263 |
| A11954 | A12284 | 340 | A11954 | A12365 | 165 |
| A11954 | A12433 | 188 | A11954 | A12506 | 283 |
| A11954 | A12507 | 481 | A11954 | A12606 | 172 |
| A11954 | A12658 | 263 | A11954 | A12665 | 371 |
| A11954 | A12725 | 185 | A11954 | A12858 | 356 |
| A11954 | A12873 | 364 | A11954 | A13321 | 283 |
| A11954 | A13399 | 424 | A11954 | A13708 | 328 |
| A11954 | A13737 | 409 | A11954 | A13781 | 278 |
| A11954 | A13784 | 172 | A11954 | A13805 | 317 |
| A11954 | A13894 | 207 | A11954 | A13963 | 347 |
| A11954 | A14084 | 475 | A11954 | A14186 | 157 |
| A11954 | A14212 | 162 | A11954 | A14214 | 384 |
| A11954 | A14260 | 332 | A11954 | A14285 | 452 |
| A11954 | A14286 | 321 | A11954 | A14289 | 294 |
| A11954 | A14706 | 191 | A11954 | A14708 | 232 |
| A11954 | A14799 | 293 | A11954 | A14826 | 191 |
| A11954 | A15189 | 243 | A11954 | A15262 | 226 |
| A11954 | A15541 | 243 | A11954 | A15653 | 157 |
| A11954 | A15680 | 185 | A11954 | A15683 | 185 |
| A11954 | A15709 | 346 | A11954 | A15735 | 173 |
| A11954 | A15743 | 317 | A11954 | A15818 | 299 |
| A11954 | A15949 | 269 | A11954 | A16099 | 312 |
| A11954 | A16157 | 310 | A11954 | A16322 | 251 |
| A11954 | A16552 | 160 | A11954 | A16565 | 254 |
| A11954 | A16597 | 256 | A11954 | A16611 | 334 |

|        |        |     |        |        |     |
|--------|--------|-----|--------|--------|-----|
| A11954 | A16646 | 230 | A11954 | A16652 | 240 |
| A11954 | A16664 | 373 | A11954 | A16675 | 219 |
| A11954 | A16690 | 219 | A11954 | A16703 | 296 |
| A11954 | A16776 | 335 | A11954 | A16829 | 328 |
| A11954 | A16874 | 324 | A11954 | A16905 | 395 |
| A11954 | A17144 | 313 | A11955 | A12124 | 339 |
| A11955 | A13683 | 391 | A11955 | A17203 | 398 |
| A11957 | A16048 | 306 | A11959 | A15431 | 227 |
| A11960 | A15329 | 374 | A11960 | A17198 | 396 |
| A11961 | A12631 | 419 | A11961 | A12983 | 393 |
| A11961 | A13410 | 447 | A11961 | A15318 | 260 |
| A11963 | A12194 | 452 | A11964 | A13388 | 351 |
| A11964 | A15338 | 232 | A11964 | A15639 | 310 |
| A11964 | A16007 | 307 | A11965 | A14148 | 290 |
| A11965 | A14174 | 152 | A11967 | A15316 | 409 |
| A11968 | A13106 | 418 | A11968 | A13380 | 445 |
| A11970 | A12298 | 438 | A11971 | A11972 | 447 |
| A11971 | A12131 | 452 | A11971 | A12343 | 436 |
| A11971 | A12360 | 452 | A11972 | A12131 | 447 |
| A11972 | A12343 | 429 | A11972 | A12360 | 447 |
| A11975 | A15312 | 156 | A11975 | A15333 | 294 |
| A11975 | A15416 | 230 | A11975 | A15484 | 240 |
| A11977 | A15498 | 323 | A11978 | A12796 | 447 |
| A11980 | A14869 | 467 | A11981 | A12661 | 446 |
| A11981 | A12687 | 402 | A11981 | A13626 | 490 |
| A11981 | A14216 | 436 | A11981 | A15624 | 168 |
| A11981 | A15684 | 173 | A11981 | A16095 | 191 |
| A11981 | A16149 | 281 | A11981 | A17193 | 319 |
| A11982 | A14589 | 173 | A11982 | A14734 | 430 |
| A11982 | A15495 | 343 | A11983 | A12003 | 160 |
| A11983 | A12010 | 210 | A11983 | A12111 | 286 |
| A11983 | A12133 | 174 | A11983 | A12365 | 270 |
| A11983 | A12705 | 899 | A11983 | A12767 | 160 |
| A11983 | A12779 | 196 | A11983 | A12897 | 486 |
| A11983 | A12988 | 294 | A11983 | A13063 | 368 |
| A11983 | A13111 | 401 | A11983 | A13369 | 486 |
| A11983 | A13390 | 899 | A11983 | A13623 | 160 |
| A11983 | A13679 | 196 | A11983 | A13772 | 207 |
| A11983 | A13860 | 353 | A11983 | A13917 | 475 |
| A11983 | A13981 | 899 | A11983 | A13984 | 899 |
| A11983 | A13985 | 899 | A11983 | A13987 | 286 |
| A11983 | A13989 | 922 | A11983 | A13997 | 461 |
| A11983 | A14005 | 942 | A11983 | A14055 | 945 |
| A11983 | A14122 | 374 | A11983 | A14192 | 199 |
| A11983 | A14196 | 534 | A11983 | A14202 | 481 |
| A11983 | A14204 | 479 | A11983 | A14208 | 294 |

|        |        |     |        |        |     |
|--------|--------|-----|--------|--------|-----|
| A11983 | A14210 | 385 | A11983 | A14211 | 396 |
| A11983 | A14229 | 439 | A11983 | A14231 | 955 |
| A11983 | A14236 | 360 | A11983 | A14246 | 224 |
| A11983 | A14299 | 374 | A11983 | A14394 | 198 |
| A11983 | A14410 | 414 | A11983 | A14443 | 993 |
| A11983 | A14444 | 899 | A11983 | A14511 | 180 |
| A11983 | A14570 | 490 | A11983 | A14635 | 491 |
| A11983 | A14636 | 407 | A11983 | A14643 | 368 |
| A11983 | A14648 | 235 | A11983 | A14653 | 428 |
| A11983 | A14679 | 196 | A11983 | A14925 | 411 |
| A11983 | A15052 | 165 | A11983 | A15237 | 318 |
| A11983 | A15243 | 196 | A11983 | A15282 | 491 |
| A11983 | A15292 | 489 | A11983 | A15293 | 332 |
| A11983 | A15294 | 170 | A11983 | A15295 | 542 |
| A11983 | A15297 | 420 | A11983 | A15304 | 899 |
| A11983 | A15305 | 899 | A11983 | A15313 | 283 |
| A11983 | A15314 | 371 | A11983 | A15320 | 240 |
| A11983 | A15322 | 491 | A11983 | A15323 | 245 |
| A11983 | A15324 | 965 | A11983 | A15337 | 196 |
| A11983 | A15341 | 899 | A11983 | A15349 | 319 |
| A11983 | A15353 | 307 | A11983 | A15440 | 196 |
| A11983 | A15452 | 201 | A11983 | A15478 | 277 |
| A11983 | A15495 | 413 | A11983 | A15498 | 262 |
| A11983 | A15502 | 408 | A11983 | A15506 | 473 |
| A11983 | A15543 | 899 | A11983 | A15598 | 191 |
| A11983 | A15606 | 491 | A11983 | A15626 | 199 |
| A11983 | A15665 | 188 | A11983 | A15682 | 439 |
| A11983 | A15726 | 249 | A11983 | A15788 | 167 |
| A11983 | A15875 | 171 | A11983 | A16207 | 199 |
| A11983 | A16450 | 177 | A11983 | A16476 | 205 |
| A11983 | A16582 | 196 | A11983 | A16626 | 288 |
| A11983 | A16904 | 162 | A11983 | A16916 | 259 |
| A11983 | A17055 | 174 | A11983 | A17187 | 899 |
| A11984 | A14622 | 470 | A11986 | A11995 | 462 |
| A11986 | A12419 | 395 | A11986 | A14379 | 208 |
| A11987 | A11988 | 434 | A11987 | A12262 | 416 |
| A11989 | A11990 | 472 | A11991 | A13873 | 259 |
| A11991 | A13983 | 327 | A11992 | A12215 | 396 |
| A11992 | A12238 | 281 | A11992 | A12254 | 285 |
| A11992 | A12255 | 358 | A11992 | A12284 | 254 |
| A11992 | A12433 | 484 | A11992 | A12499 | 369 |
| A11992 | A12501 | 405 | A11992 | A12507 | 402 |
| A11992 | A12606 | 420 | A11992 | A12658 | 183 |
| A11992 | A12665 | 301 | A11992 | A12727 | 288 |
| A11992 | A12738 | 344 | A11992 | A12858 | 419 |
| A11992 | A12873 | 291 | A11992 | A13309 | 198 |

|        |        |     |        |        |     |
|--------|--------|-----|--------|--------|-----|
| A11992 | A13313 | 162 | A11992 | A13399 | 374 |
| A11992 | A13706 | 383 | A11992 | A13708 | 434 |
| A11992 | A13737 | 252 | A11992 | A13781 | 353 |
| A11992 | A13784 | 420 | A11992 | A13805 | 369 |
| A11992 | A13809 | 322 | A11992 | A13912 | 409 |
| A11992 | A13989 | 488 | A11992 | A14074 | 162 |
| A11992 | A14087 | 230 | A11992 | A14214 | 417 |
| A11992 | A14239 | 162 | A11992 | A14255 | 177 |
| A11992 | A14286 | 252 | A11992 | A14288 | 318 |
| A11992 | A14289 | 219 | A11992 | A14375 | 176 |
| A11992 | A14455 | 254 | A11992 | A14479 | 152 |
| A11992 | A14482 | 207 | A11992 | A14569 | 328 |
| A11992 | A14708 | 281 | A11992 | A14718 | 196 |
| A11992 | A14719 | 358 | A11992 | A14799 | 368 |
| A11992 | A14903 | 380 | A11992 | A14921 | 322 |
| A11992 | A15105 | 386 | A11992 | A15187 | 468 |
| A11992 | A15189 | 294 | A11992 | A15217 | 263 |
| A11992 | A15262 | 274 | A11992 | A15533 | 201 |
| A11992 | A15536 | 277 | A11992 | A15541 | 294 |
| A11992 | A15661 | 201 | A11992 | A15680 | 324 |
| A11992 | A15683 | 223 | A11992 | A15709 | 262 |
| A11992 | A15735 | 207 | A11992 | A15743 | 247 |
| A11992 | A15771 | 160 | A11992 | A15774 | 232 |
| A11992 | A15818 | 226 | A11992 | A15853 | 218 |
| A11992 | A15854 | 160 | A11992 | A15940 | 255 |
| A11992 | A15943 | 196 | A11992 | A16115 | 232 |
| A11992 | A16157 | 447 | A11992 | A16187 | 343 |
| A11992 | A16261 | 205 | A11992 | A16343 | 313 |
| A11992 | A16552 | 368 | A11992 | A16565 | 433 |
| A11992 | A16597 | 456 | A11992 | A16611 | 404 |
| A11992 | A16652 | 290 | A11992 | A16664 | 386 |
| A11992 | A16680 | 157 | A11992 | A16690 | 360 |
| A11992 | A16692 | 240 | A11992 | A16693 | 313 |
| A11992 | A16702 | 236 | A11992 | A16703 | 351 |
| A11992 | A16704 | 230 | A11992 | A16706 | 322 |
| A11992 | A16709 | 246 | A11992 | A16764 | 310 |
| A11992 | A16774 | 401 | A11992 | A16790 | 246 |
| A11992 | A16799 | 288 | A11992 | A16806 | 318 |
| A11992 | A16824 | 303 | A11992 | A16829 | 260 |
| A11992 | A16838 | 360 | A11992 | A16858 | 335 |
| A11992 | A16859 | 358 | A11992 | A16866 | 398 |
| A11992 | A16868 | 335 | A11992 | A16900 | 279 |
| A11992 | A16905 | 446 | A11992 | A16913 | 401 |
| A11992 | A16944 | 391 | A11992 | A16954 | 246 |
| A11992 | A17012 | 374 | A11992 | A17017 | 246 |
| A11992 | A17018 | 266 | A11992 | A17033 | 260 |

|        |        |     |        |        |     |
|--------|--------|-----|--------|--------|-----|
| A11992 | A17035 | 213 | A11992 | A17144 | 241 |
| A11992 | A17190 | 260 | A11992 | A17211 | 259 |
| A11993 | A13983 | 391 | A11995 | A14484 | 179 |
| A11995 | A14633 | 195 | A11996 | A12722 | 425 |
| A11996 | A12838 | 423 | A11996 | A12893 | 347 |
| A11996 | A14163 | 290 | A11996 | A15383 | 208 |
| A11997 | A15498 | 262 | A12000 | A13708 | 414 |
| A12000 | A14801 | 230 | A12000 | A15034 | 213 |
| A12000 | A15187 | 230 | A12000 | A15321 | 246 |
| A12000 | A15384 | 414 | A12000 | A16088 | 314 |
| A12001 | A14073 | 247 | A12002 | A14701 | 223 |
| A12003 | A12745 | 430 | A12004 | A15498 | 152 |
| A12007 | A12337 | 352 | A12007 | A13313 | 188 |
| A12007 | A13528 | 388 | A12009 | A12734 | 398 |
| A12009 | A12897 | 177 | A12009 | A13822 | 269 |
| A12009 | A14198 | 313 | A12009 | A14364 | 456 |
| A12009 | A14374 | 180 | A12009 | A14387 | 330 |
| A12009 | A14598 | 313 | A12009 | A15393 | 411 |
| A12009 | A15485 | 311 | A12009 | A15630 | 205 |
| A12009 | A15642 | 256 | A12009 | A15976 | 249 |
| A12010 | A12365 | 213 | A12010 | A13949 | 130 |
| A12010 | A15282 | 210 | A12011 | A12433 | 191 |
| A12011 | A12606 | 174 | A12011 | A12658 | 266 |
| A12011 | A12821 | 277 | A12011 | A12834 | 369 |
| A12011 | A12927 | 183 | A12011 | A13786 | 290 |
| A12011 | A14084 | 174 | A12011 | A14183 | 273 |
| A12011 | A14255 | 262 | A12011 | A14813 | 340 |
| A12011 | A14826 | 196 | A12011 | A15653 | 160 |
| A12011 | A16060 | 207 | A12011 | A16157 | 180 |
| A12011 | A16565 | 257 | A12011 | A16611 | 205 |
| A12011 | A17133 | 322 | A12012 | A15425 | 305 |
| A12012 | A16108 | 409 | A12013 | A12219 | 417 |
| A12014 | A12383 | 252 | A12015 | A14148 | 466 |
| A12019 | A12594 | 445 | A12020 | A14196 | 407 |
| A12020 | A15323 | 243 | A12020 | A15324 | 279 |
| A12020 | A15353 | 314 | A12020 | A15559 | 278 |
| A12021 | A16719 | 465 | A12024 | A12062 | 385 |
| A12025 | A14006 | 210 | A12025 | A14633 | 297 |
| A12027 | A14073 | 247 | A12029 | A14378 | 480 |
| A12029 | A15455 | 436 | A12031 | A12928 | 445 |
| A12031 | A15684 | 221 | A12031 | A16096 | 345 |
| A12033 | A12034 | 430 | A12034 | A13450 | 447 |
| A12034 | A13451 | 447 | A12035 | A12361 | 210 |
| A12035 | A14371 | 234 | A12037 | A13942 | 479 |
| A12037 | A14267 | 358 | A12037 | A15445 | 281 |
| A12039 | A15660 | 202 | A12039 | A15684 | 160 |

|        |        |     |        |        |     |
|--------|--------|-----|--------|--------|-----|
| A12040 | A12494 | 438 | A12040 | A12765 | 434 |
| A12040 | A13917 | 326 | A12041 | A12383 | 299 |
| A12041 | A13609 | 180 | A12041 | A15649 | 176 |
| A12042 | A13116 | 452 | A12042 | A13340 | 305 |
| A12042 | A13809 | 279 | A12042 | A14466 | 347 |
| A12042 | A15546 | 212 | A12042 | A15653 | 170 |
| A12042 | A15711 | 310 | A12042 | A16157 | 188 |
| A12042 | A16676 | 353 | A12043 | A12227 | 160 |
| A12043 | A13340 | 160 | A12043 | A14738 | 160 |
| A12043 | A15244 | 160 | A12043 | A15932 | 160 |
| A12043 | A15933 | 160 | A12043 | A16272 | 160 |
| A12043 | A16318 | 160 | A12043 | A16437 | 160 |
| A12043 | A16446 | 160 | A12043 | A16585 | 160 |
| A12045 | A12046 | 484 | A12045 | A12759 | 468 |
| A12046 | A12759 | 468 | A12047 | A12264 | 341 |
| A12047 | A12307 | 151 | A12047 | A12341 | 236 |
| A12047 | A12499 | 463 | A12047 | A12722 | 372 |
| A12047 | A12824 | 469 | A12047 | A12840 | 188 |
| A12047 | A13384 | 202 | A12047 | A13489 | 188 |
| A12047 | A13697 | 188 | A12047 | A13766 | 337 |
| A12047 | A13780 | 188 | A12047 | A13866 | 425 |
| A12047 | A13894 | 390 | A12047 | A13949 | 424 |
| A12047 | A14156 | 945 | A12047 | A14163 | 296 |
| A12047 | A14209 | 491 | A12047 | A14222 | 481 |
| A12047 | A14266 | 636 | A12047 | A14278 | 232 |
| A12047 | A14279 | 461 | A12047 | A14281 | 491 |
| A12047 | A14461 | 438 | A12047 | A14474 | 491 |
| A12047 | A14484 | 706 | A12047 | A14577 | 366 |
| A12047 | A14633 | 642 | A12047 | A14655 | 200 |
| A12047 | A14661 | 491 | A12047 | A15370 | 473 |
| A12047 | A15380 | 491 | A12047 | A15383 | 191 |
| A12047 | A15502 | 340 | A12047 | A15505 | 249 |
| A12047 | A15556 | 593 | A12047 | A15557 | 173 |
| A12047 | A15558 | 714 | A12047 | A15560 | 475 |
| A12047 | A15591 | 475 | A12047 | A15626 | 475 |
| A12047 | A15644 | 491 | A12047 | A15665 | 258 |
| A12047 | A15683 | 489 | A12047 | A15693 | 188 |
| A12047 | A15779 | 475 | A12047 | A15930 | 428 |
| A12047 | A16465 | 221 | A12047 | A16611 | 230 |
| A12047 | A16678 | 484 | A12047 | A17156 | 243 |
| A12048 | A12102 | 479 | A12048 | A16787 | 63  |
| A12049 | A12273 | 345 | A12049 | A13727 | 405 |
| A12052 | A12606 | 272 | A12052 | A12625 | 305 |
| A12052 | A12873 | 326 | A12052 | A13231 | 396 |
| A12052 | A13321 | 356 | A12052 | A13356 | 330 |
| A12052 | A13982 | 277 | A12052 | A14084 | 271 |



|        |        |     |        |        |     |
|--------|--------|-----|--------|--------|-----|
| A12052 | A14167 | 391 | A12052 | A14182 | 286 |
| A12052 | A14186 | 258 | A12052 | A14213 | 302 |
| A12052 | A14214 | 266 | A12052 | A14462 | 340 |
| A12052 | A14655 | 156 | A12052 | A14729 | 420 |
| A12052 | A15756 | 63  | A12052 | A16128 | 183 |
| A12055 | A14198 | 182 | A12055 | A14856 | 260 |
| A12055 | A14857 | 436 | A12055 | A16027 | 299 |
| A12056 | A14699 | 260 | A12056 | A15109 | 441 |
| A12057 | A13129 | 416 | A12058 | A12731 | 463 |
| A12058 | A13456 | 485 | A12058 | A13830 | 157 |
| A12060 | A16068 | 314 | A12061 | A14079 | 180 |
| A12061 | A14273 | 121 | A12061 | A15942 | 306 |
| A12061 | A16129 | 232 | A12061 | A16132 | 215 |
| A12061 | A16294 | 177 | A12061 | A16612 | 212 |
| A12061 | A16754 | 182 | A12062 | A14496 | 185 |
| A12062 | A14621 | 173 | A12062 | A14622 | 265 |
| A12065 | A12066 | 452 | A12068 | A14188 | 335 |
| A12069 | A12501 | 226 | A12069 | A12825 | 252 |
| A12069 | A13309 | 226 | A12069 | A13762 | 333 |
| A12069 | A13763 | 441 | A12069 | A13928 | 434 |
| A12069 | A14257 | 424 | A12069 | A15366 | 268 |
| A12069 | A15480 | 159 | A12069 | A15492 | 361 |
| A12069 | A15720 | 168 | A12069 | A15721 | 179 |
| A12069 | A15760 | 311 | A12069 | A15870 | 321 |
| A12069 | A16829 | 286 | A12070 | A12757 | 364 |
| A12070 | A13510 | 305 | A12072 | A17083 | 447 |
| A12074 | A14216 | 185 | A12075 | A12076 | 452 |
| A12079 | A14674 | 258 | A12080 | A12329 | 418 |
| A12080 | A15660 | 441 | A12080 | A15684 | 318 |
| A12080 | A15708 | 372 | A12080 | A15931 | 154 |
| A12080 | A16218 | 468 | A12080 | A16462 | 350 |
| A12080 | A16464 | 435 | A12080 | A16768 | 399 |
| A12081 | A15257 | 276 | A12081 | A17111 | 428 |
| A12082 | A12757 | 490 | A12082 | A14241 | 430 |
| A12082 | A14255 | 260 | A12082 | A14408 | 252 |
| A12082 | A15131 | 457 | A12082 | A16685 | 439 |
| A12083 | A12329 | 223 | A12083 | A15684 | 232 |
| A12084 | A13340 | 157 | A12084 | A14471 | 255 |
| A12084 | A15133 | 391 | A12084 | A16437 | 430 |
| A12086 | A17212 | 396 | A12088 | A15297 | 184 |
| A12090 | A13826 | 246 | A12090 | A15383 | 262 |
| A12091 | A15035 | 474 | A12096 | A16892 | 438 |
| A12100 | A12281 | 440 | A12100 | A13163 | 402 |
| A12100 | A15127 | 428 | A12101 | A15324 | 393 |
| A12101 | A15353 | 413 | A12101 | A15540 | 340 |
| A12102 | A17098 | 63  | A12103 | A13270 | 408 |

|        |        |     |        |        |     |
|--------|--------|-----|--------|--------|-----|
| A12105 | A12329 | 475 | A12105 | A14114 | 335 |
| A12105 | A15651 | 152 | A12105 | A15658 | 383 |
| A12105 | A15684 | 162 | A12105 | A16218 | 313 |
| A12105 | A17026 | 486 | A12105 | A17140 | 221 |
| A12105 | A17193 | 296 | A12107 | A17017 | 335 |
| A12108 | A12744 | 438 | A12110 | A13894 | 358 |
| A12111 | A12365 | 491 | A12111 | A12722 | 160 |
| A12111 | A12927 | 159 | A12111 | A13370 | 276 |
| A12111 | A13869 | 416 | A12111 | A15116 | 208 |
| A12111 | A15292 | 213 | A12111 | A15431 | 157 |
| A12111 | A15481 | 208 | A12111 | A15596 | 372 |
| A12111 | A15606 | 380 | A12111 | A16093 | 154 |
| A12113 | A14473 | 394 | A12115 | A13258 | 441 |
| A12121 | A12884 | 418 | A12121 | A15422 | 288 |
| A12121 | A15493 | 408 | A12121 | A15811 | 385 |
| A12121 | A16155 | 430 | A12124 | A12890 | 452 |
| A12124 | A12915 | 452 | A12124 | A12916 | 447 |
| A12124 | A12993 | 408 | A12124 | A13706 | 350 |
| A12124 | A14451 | 484 | A12124 | A17203 | 369 |
| A12125 | A13963 | 195 | A12125 | A14272 | 281 |
| A12126 | A12167 | 313 | A12126 | A12499 | 319 |
| A12126 | A12503 | 311 | A12126 | A12606 | 177 |
| A12126 | A12665 | 254 | A12126 | A12858 | 234 |
| A12126 | A13116 | 313 | A12126 | A13527 | 324 |
| A12126 | A13781 | 152 | A12126 | A13805 | 321 |
| A12126 | A14214 | 170 | A12126 | A14799 | 165 |
| A12126 | A15189 | 247 | A12126 | A15366 | 174 |
| A12126 | A16157 | 182 | A12126 | A16552 | 165 |
| A12126 | A16565 | 259 | A12126 | A16597 | 260 |
| A12126 | A16664 | 257 | A12126 | A16680 | 245 |
| A12126 | A16790 | 319 | A12130 | A12407 | 469 |
| A12131 | A12343 | 436 | A12131 | A12360 | 452 |
| A12132 | A15498 | 177 | A12133 | A15324 | 362 |
| A12133 | A15353 | 384 | A12134 | A12135 | 452 |
| A12136 | A12867 | 462 | A12136 | A13954 | 486 |
| A12136 | A16485 | 484 | A12138 | A12606 | 176 |
| A12138 | A12873 | 180 | A12138 | A13989 | 483 |
| A12138 | A14167 | 191 | A12138 | A14214 | 249 |
| A12138 | A14218 | 302 | A12138 | A14539 | 191 |
| A12138 | A15361 | 469 | A12138 | A15667 | 167 |
| A12138 | A15774 | 490 | A12138 | A16217 | 395 |
| A12138 | A16597 | 202 | A12138 | A16675 | 154 |
| A12138 | A16690 | 152 | A12138 | A16704 | 274 |
| A12138 | A17018 | 180 | A12138 | A17125 | 191 |
| A12140 | A12326 | 490 | A12141 | A12359 | 452 |
| A12142 | A12557 | 465 | A12143 | A15117 | 452 |

|        |        |     |        |        |     |
|--------|--------|-----|--------|--------|-----|
| A12143 | A15367 | 226 | A12145 | A13589 | 258 |
| A12146 | A14184 | 362 | A12147 | A13826 | 260 |
| A12147 | A15292 | 198 | A12147 | A15352 | 268 |
| A12148 | A12149 | 452 | A12148 | A12151 | 447 |
| A12148 | A16230 | 401 | A12149 | A12151 | 447 |
| A12149 | A16230 | 401 | A12151 | A16230 | 388 |
| A12158 | A14836 | 341 | A12160 | A14188 | 224 |
| A12161 | A14281 | 193 | A12162 | A14174 | 363 |
| A12165 | A14079 | 302 | A12165 | A14273 | 218 |
| A12165 | A14460 | 235 | A12165 | A16127 | 177 |
| A12165 | A16226 | 400 | A12165 | A16606 | 249 |
| A12165 | A16613 | 236 | A12165 | A16616 | 322 |
| A12167 | A12254 | 207 | A12167 | A12503 | 285 |
| A12167 | A12606 | 274 | A12167 | A12625 | 183 |
| A12167 | A12658 | 362 | A12167 | A12858 | 333 |
| A12167 | A12875 | 243 | A12167 | A13116 | 286 |
| A12167 | A13169 | 208 | A12167 | A13786 | 263 |
| A12167 | A13809 | 366 | A12167 | A14059 | 160 |
| A12167 | A14074 | 217 | A12167 | A14214 | 266 |
| A12167 | A14286 | 299 | A12167 | A14289 | 271 |
| A12167 | A14375 | 229 | A12167 | A14569 | 249 |
| A12167 | A14596 | 201 | A12167 | A14690 | 154 |
| A12167 | A14706 | 294 | A12167 | A14739 | 363 |
| A12167 | A14799 | 260 | A12167 | A15187 | 279 |
| A12167 | A15275 | 313 | A12167 | A15541 | 346 |
| A12167 | A15683 | 157 | A12167 | A15694 | 347 |
| A12167 | A15709 | 187 | A12167 | A15711 | 277 |
| A12167 | A15753 | 324 | A12167 | A15754 | 347 |
| A12167 | A15850 | 360 | A12167 | A16157 | 279 |
| A12167 | A16187 | 263 | A12167 | A16243 | 307 |
| A12167 | A16343 | 350 | A12167 | A16565 | 353 |
| A12167 | A16587 | 296 | A12167 | A16611 | 307 |
| A12167 | A16633 | 326 | A12167 | A16680 | 212 |
| A12167 | A16691 | 341 | A12167 | A16697 | 307 |
| A12167 | A16788 | 385 | A12167 | A16815 | 347 |
| A12167 | A16829 | 307 | A12168 | A13989 | 433 |
| A12170 | A12227 | 297 | A12170 | A13340 | 184 |
| A12170 | A13524 | 450 | A12170 | A15261 | 236 |
| A12170 | A15653 | 290 | A12170 | A15933 | 198 |
| A12170 | A16157 | 310 | A12171 | A12494 | 447 |
| A12171 | A12765 | 445 | A12172 | A12946 | 447 |
| A12173 | A16403 | 433 | A12174 | A13112 | 447 |
| A12174 | A13113 | 447 | A12174 | A13114 | 447 |
| A12176 | A12683 | 441 | A12177 | A13992 | 296 |
| A12179 | A15917 | 286 | A12182 | A12609 | 452 |
| A12182 | A12610 | 452 | A12182 | A12611 | 452 |

|        |        |     |        |        |     |
|--------|--------|-----|--------|--------|-----|
| A12182 | A12780 | 452 | A12185 | A14007 | 305 |
| A12185 | A15292 | 170 | A12185 | A16224 | 338 |
| A12188 | A12800 | 467 | A12188 | A13095 | 441 |
| A12188 | A13100 | 469 | A12188 | A13101 | 469 |
| A12188 | A15277 | 358 | A12189 | A12757 | 364 |
| A12189 | A14246 | 256 | A12190 | A14079 | 238 |
| A12190 | A16226 | 257 | A12191 | A14644 | 241 |
| A12191 | A16478 | 440 | A12191 | A16807 | 420 |
| A12195 | A13516 | 491 | A12195 | A13595 | 404 |
| A12195 | A13989 | 285 | A12195 | A14936 | 263 |
| A12195 | A15068 | 469 | A12195 | A15624 | 357 |
| A12195 | A15651 | 187 | A12195 | A15660 | 281 |
| A12195 | A15684 | 360 | A12195 | A15923 | 212 |
| A12195 | A16095 | 196 | A12196 | A13340 | 446 |
| A12197 | A13167 | 463 | A12197 | A13207 | 296 |
| A12197 | A15630 | 323 | A12199 | A14570 | 208 |
| A12199 | A14661 | 366 | A12199 | A15366 | 176 |
| A12200 | A12738 | 255 | A12200 | A13786 | 252 |
| A12200 | A13983 | 408 | A12200 | A14199 | 267 |
| A12200 | A14917 | 291 | A12202 | A12757 | 321 |
| A12202 | A13510 | 366 | A12202 | A14257 | 179 |
| A12202 | A15297 | 216 | A12206 | A13830 | 230 |
| A12207 | A12740 | 438 | A12207 | A13348 | 373 |
| A12211 | A15852 | 162 | A12213 | A16482 | 420 |
| A12215 | A12254 | 260 | A12215 | A12255 | 323 |
| A12215 | A12284 | 361 | A12215 | A12433 | 413 |
| A12215 | A12501 | 299 | A12215 | A12506 | 305 |
| A12215 | A12507 | 172 | A12215 | A12508 | 399 |
| A12215 | A12606 | 462 | A12215 | A12625 | 363 |
| A12215 | A12658 | 286 | A12215 | A12659 | 305 |
| A12215 | A12665 | 273 | A12215 | A12725 | 412 |
| A12215 | A12826 | 413 | A12215 | A12850 | 371 |
| A12215 | A12858 | 430 | A12215 | A12873 | 265 |
| A12215 | A13169 | 260 | A12215 | A13313 | 385 |
| A12215 | A13315 | 335 | A12215 | A13340 | 218 |
| A12215 | A13356 | 272 | A12215 | A13706 | 436 |
| A12215 | A13707 | 401 | A12215 | A13708 | 221 |
| A12215 | A13781 | 306 | A12215 | A13783 | 345 |
| A12215 | A13784 | 405 | A12215 | A13788 | 340 |
| A12215 | A13805 | 423 | A12215 | A13809 | 291 |
| A12215 | A13811 | 332 | A12215 | A13912 | 375 |
| A12215 | A14213 | 235 | A12215 | A14214 | 440 |
| A12215 | A14222 | 281 | A12215 | A14227 | 195 |
| A12215 | A14235 | 356 | A12215 | A14239 | 385 |
| A12215 | A14255 | 441 | A12215 | A14260 | 347 |
| A12215 | A14263 | 335 | A12215 | A14270 | 323 |

|        |        |     |        |        |     |
|--------|--------|-----|--------|--------|-----|
| A12215 | A14288 | 205 | A12215 | A14462 | 283 |
| A12215 | A14569 | 296 | A12215 | A14706 | 217 |
| A12215 | A14708 | 257 | A12215 | A14718 | 401 |
| A12215 | A14719 | 323 | A12215 | A14799 | 319 |
| A12215 | A14937 | 328 | A12215 | A15105 | 207 |
| A12215 | A15187 | 322 | A12215 | A15262 | 251 |
| A12215 | A15532 | 356 | A12215 | A15541 | 461 |
| A12215 | A15661 | 327 | A12215 | A15680 | 341 |
| A12215 | A15683 | 212 | A12215 | A15684 | 252 |
| A12215 | A15709 | 425 | A12215 | A15711 | 414 |
| A12215 | A15735 | 199 | A12215 | A15853 | 313 |
| A12215 | A16060 | 229 | A12215 | A16115 | 324 |
| A12215 | A16157 | 443 | A12215 | A16243 | 428 |
| A12215 | A16272 | 283 | A12215 | A16343 | 445 |
| A12215 | A16552 | 398 | A12215 | A16565 | 278 |
| A12215 | A16567 | 363 | A12215 | A16587 | 423 |
| A12215 | A16597 | 279 | A12215 | A16608 | 247 |
| A12215 | A16611 | 452 | A12215 | A16675 | 368 |
| A12215 | A16690 | 368 | A12215 | A16691 | 372 |
| A12215 | A16704 | 323 | A12215 | A16706 | 383 |
| A12215 | A16707 | 401 | A12215 | A16708 | 357 |
| A12215 | A16764 | 281 | A12215 | A16774 | 367 |
| A12215 | A16797 | 424 | A12215 | A16806 | 380 |
| A12215 | A16829 | 428 | A12215 | A16858 | 393 |
| A12215 | A16859 | 406 | A12215 | A16868 | 393 |
| A12215 | A16874 | 341 | A12215 | A16882 | 396 |
| A12215 | A16905 | 307 | A12215 | A16913 | 367 |
| A12215 | A16942 | 367 | A12215 | A16944 | 356 |
| A12215 | A17019 | 383 | A12215 | A17133 | 338 |
| A12215 | A17190 | 343 | A12217 | A15596 | 286 |
| A12218 | A15282 | 305 | A12221 | A14659 | 230 |
| A12221 | A15482 | 333 | A12222 | A13831 | 183 |
| A12222 | A15660 | 299 | A12222 | A15923 | 363 |
| A12224 | A16400 | 394 | A12225 | A12226 | 477 |
| A12225 | A14471 | 255 | A12226 | A14471 | 281 |
| A12227 | A12503 | 272 | A12227 | A13023 | 262 |
| A12227 | A13116 | 274 | A12227 | A13335 | 168 |
| A12227 | A13340 | 544 | A12227 | A14073 | 340 |
| A12227 | A14216 | 238 | A12227 | A14466 | 311 |
| A12227 | A14738 | 369 | A12227 | A15133 | 416 |
| A12227 | A15244 | 231 | A12227 | A15268 | 241 |
| A12227 | A15381 | 241 | A12227 | A15660 | 200 |
| A12227 | A15684 | 484 | A12227 | A15741 | 369 |
| A12227 | A15918 | 163 | A12227 | A15932 | 527 |
| A12227 | A15933 | 440 | A12227 | A15937 | 256 |
| A12227 | A16272 | 299 | A12227 | A16318 | 160 |

|        |        |     |        |        |     |
|--------|--------|-----|--------|--------|-----|
| A12227 | A16437 | 160 | A12227 | A16446 | 160 |
| A12227 | A16464 | 285 | A12227 | A16585 | 160 |
| A12227 | A16618 | 360 | A12228 | A12229 | 488 |
| A12228 | A12230 | 436 | A12228 | A12231 | 436 |
| A12228 | A14836 | 358 | A12229 | A12230 | 438 |
| A12229 | A12231 | 438 | A12229 | A14836 | 363 |
| A12230 | A12231 | 452 | A12232 | A14200 | 183 |
| A12233 | A12243 | 348 | A12233 | A14505 | 297 |
| A12233 | A15219 | 424 | A12233 | A15221 | 485 |
| A12233 | A15727 | 362 | A12233 | A17142 | 263 |
| A12234 | A12433 | 207 | A12234 | A12508 | 286 |
| A12234 | A12538 | 262 | A12234 | A12606 | 191 |
| A12234 | A12678 | 629 | A12234 | A12725 | 205 |
| A12234 | A12738 | 305 | A12234 | A12834 | 595 |
| A12234 | A13781 | 165 | A12234 | A13783 | 340 |
| A12234 | A13784 | 190 | A12234 | A13786 | 302 |
| A12234 | A13788 | 335 | A12234 | A14263 | 196 |
| A12234 | A14288 | 198 | A12234 | A14455 | 228 |
| A12234 | A14799 | 179 | A12234 | A15105 | 200 |
| A12234 | A16157 | 196 | A12234 | A16261 | 297 |
| A12234 | A16552 | 179 | A12234 | A16565 | 271 |
| A12234 | A16587 | 330 | A12234 | A16597 | 272 |
| A12234 | A16611 | 221 | A12234 | A16664 | 269 |
| A12234 | A16680 | 258 | A12234 | A16684 | 411 |
| A12234 | A16690 | 238 | A12234 | A16692 | 324 |
| A12234 | A16704 | 318 | A12234 | A16764 | 274 |
| A12234 | A16874 | 337 | A12234 | A16900 | 352 |
| A12234 | A16954 | 329 | A12234 | A17211 | 338 |
| A12236 | A13623 | 461 | A12236 | A13679 | 465 |
| A12236 | A13954 | 383 | A12237 | A12259 | 408 |
| A12238 | A12284 | 228 | A12238 | A12433 | 207 |
| A12238 | A12501 | 293 | A12238 | A12507 | 297 |
| A12238 | A12508 | 286 | A12238 | A12606 | 191 |
| A12238 | A12658 | 279 | A12238 | A12725 | 205 |
| A12238 | A12727 | 358 | A12238 | A12858 | 246 |
| A12238 | A13116 | 323 | A12238 | A13313 | 291 |
| A12238 | A13707 | 290 | A12238 | A13781 | 165 |
| A12238 | A13784 | 190 | A12238 | A13786 | 302 |
| A12238 | A13809 | 285 | A12238 | A13912 | 373 |
| A12238 | A14087 | 318 | A12238 | A14094 | 279 |
| A12238 | A14214 | 318 | A12238 | A14227 | 188 |
| A12238 | A14263 | 196 | A12238 | A14288 | 329 |
| A12238 | A14375 | 274 | A12238 | A14569 | 398 |
| A12238 | A14595 | 371 | A12238 | A14745 | 374 |
| A12238 | A14799 | 179 | A12238 | A14903 | 341 |
| A12238 | A15105 | 332 | A12238 | A15187 | 317 |

|        |        |     |        |        |     |
|--------|--------|-----|--------|--------|-----|
| A12238 | A15189 | 260 | A12238 | A15262 | 243 |
| A12238 | A15536 | 351 | A12238 | A15651 | 245 |
| A12238 | A15665 | 180 | A12238 | A15680 | 204 |
| A12238 | A15683 | 204 | A12238 | A15735 | 191 |
| A12238 | A16157 | 328 | A12238 | A16261 | 297 |
| A12238 | A16552 | 313 | A12238 | A16565 | 271 |
| A12238 | A16566 | 344 | A12238 | A16587 | 330 |
| A12238 | A16597 | 386 | A12238 | A16611 | 221 |
| A12238 | A16652 | 257 | A12238 | A16664 | 269 |
| A12238 | A16680 | 258 | A12238 | A16682 | 341 |
| A12238 | A16695 | 378 | A12238 | A16704 | 414 |
| A12238 | A16707 | 398 | A12238 | A16790 | 329 |
| A12238 | A16838 | 321 | A12238 | A16866 | 283 |
| A12238 | A16905 | 301 | A12238 | A16913 | 363 |
| A12240 | A15559 | 156 | A12241 | A13830 | 210 |
| A12241 | A13889 | 151 | A12241 | A14461 | 475 |
| A12244 | A12329 | 160 | A12244 | A15660 | 353 |
| A12244 | A15684 | 469 | A12244 | A15708 | 322 |
| A12244 | A15720 | 484 | A12244 | A15721 | 481 |
| A12244 | A16768 | 452 | A12247 | A15749 | 265 |
| A12247 | A15773 | 260 | A12247 | A16109 | 406 |
| A12249 | A14266 | 288 | A12250 | A12606 | 467 |
| A12250 | A14212 | 218 | A12251 | A12252 | 412 |
| A12251 | A13310 | 281 | A12251 | A14394 | 213 |
| A12251 | A14596 | 424 | A12251 | A14636 | 326 |
| A12251 | A14659 | 187 | A12251 | A15377 | 252 |
| A12251 | A16624 | 357 | A12252 | A13812 | 293 |
| A12252 | A14596 | 452 | A12252 | A14659 | 299 |
| A12252 | A14738 | 185 | A12252 | A15212 | 317 |
| A12252 | A15717 | 281 | A12252 | A15931 | 177 |
| A12252 | A16291 | 272 | A12252 | A16680 | 219 |
| A12252 | A16697 | 313 | A12253 | A14196 | 312 |
| A12253 | A15237 | 433 | A12253 | A15309 | 274 |
| A12253 | A15323 | 408 | A12253 | A15324 | 154 |
| A12253 | A15337 | 308 | A12253 | A15339 | 219 |
| A12253 | A15353 | 188 | A12253 | A15502 | 255 |
| A12253 | A15564 | 249 | A12253 | A16463 | 418 |
| A12254 | A12255 | 333 | A12254 | A12433 | 440 |
| A12254 | A12501 | 167 | A12254 | A12506 | 310 |
| A12254 | A12507 | 454 | A12254 | A12508 | 159 |
| A12254 | A12606 | 483 | A12254 | A12625 | 319 |
| A12254 | A12658 | 423 | A12254 | A12659 | 174 |
| A12254 | A12665 | 414 | A12254 | A12725 | 439 |
| A12254 | A12726 | 258 | A12254 | A12825 | 327 |
| A12254 | A12850 | 276 | A12254 | A12858 | 467 |
| A12254 | A13069 | 262 | A12254 | A13116 | 208 |

|        |        |     |        |        |     |
|--------|--------|-----|--------|--------|-----|
| A12254 | A13169 | 249 | A12254 | A13170 | 213 |
| A12254 | A13309 | 301 | A12254 | A13313 | 462 |
| A12254 | A13321 | 176 | A12254 | A13323 | 283 |
| A12254 | A13356 | 358 | A12254 | A13381 | 290 |
| A12254 | A13399 | 249 | A12254 | A13706 | 413 |
| A12254 | A13707 | 296 | A12254 | A13708 | 417 |
| A12254 | A13711 | 374 | A12254 | A13737 | 314 |
| A12254 | A13781 | 455 | A12254 | A13783 | 360 |
| A12254 | A13784 | 462 | A12254 | A13786 | 180 |
| A12254 | A13787 | 299 | A12254 | A13804 | 260 |
| A12254 | A13805 | 466 | A12254 | A13806 | 187 |
| A12254 | A13809 | 480 | A12254 | A13912 | 395 |
| A12254 | A14074 | 260 | A12254 | A14087 | 201 |
| A12254 | A14094 | 198 | A12254 | A14214 | 484 |
| A12254 | A14222 | 277 | A12254 | A14239 | 357 |
| A12254 | A14255 | 369 | A12254 | A14263 | 352 |
| A12254 | A14270 | 332 | A12254 | A14288 | 405 |
| A12254 | A14289 | 322 | A12254 | A14455 | 213 |
| A12254 | A14462 | 279 | A12254 | A14569 | 467 |
| A12254 | A14706 | 368 | A12254 | A14708 | 245 |
| A12254 | A14718 | 165 | A12254 | A14719 | 201 |
| A12254 | A14739 | 308 | A12254 | A14799 | 423 |
| A12254 | A14826 | 294 | A12254 | A14838 | 299 |
| A12254 | A14903 | 361 | A12254 | A14917 | 451 |
| A12254 | A15105 | 435 | A12254 | A15187 | 199 |
| A12254 | A15189 | 411 | A12254 | A15262 | 235 |
| A12254 | A15519 | 323 | A12254 | A15541 | 356 |
| A12254 | A15653 | 328 | A12254 | A15665 | 205 |
| A12254 | A15680 | 182 | A12254 | A15683 | 182 |
| A12254 | A15709 | 324 | A12254 | A15711 | 329 |
| A12254 | A15765 | 179 | A12254 | A15947 | 190 |
| A12254 | A16157 | 483 | A12254 | A16187 | 395 |
| A12254 | A16243 | 232 | A12254 | A16261 | 174 |
| A12254 | A16322 | 269 | A12254 | A16343 | 290 |
| A12254 | A16387 | 260 | A12254 | A16552 | 481 |
| A12254 | A16565 | 472 | A12254 | A16585 | 270 |
| A12254 | A16587 | 449 | A12254 | A16597 | 462 |
| A12254 | A16608 | 232 | A12254 | A16611 | 480 |
| A12254 | A16663 | 291 | A12254 | A16664 | 446 |
| A12254 | A16675 | 466 | A12254 | A16680 | 441 |
| A12254 | A16682 | 235 | A12254 | A16690 | 430 |
| A12254 | A16691 | 279 | A12254 | A16692 | 210 |
| A12254 | A16693 | 290 | A12254 | A16695 | 294 |
| A12254 | A16703 | 324 | A12254 | A16704 | 200 |
| A12254 | A16709 | 217 | A12254 | A16774 | 436 |
| A12254 | A16776 | 243 | A12254 | A16788 | 340 |



|        |        |     |        |        |     |
|--------|--------|-----|--------|--------|-----|
| A12254 | A16790 | 414 | A12254 | A16802 | 176 |
| A12254 | A16806 | 294 | A12254 | A16815 | 443 |
| A12254 | A16824 | 279 | A12254 | A16829 | 358 |
| A12254 | A16838 | 335 | A12254 | A16858 | 314 |
| A12254 | A16859 | 340 | A12254 | A16866 | 377 |
| A12254 | A16905 | 312 | A12254 | A16908 | 308 |
| A12254 | A16913 | 436 | A12254 | A16944 | 372 |
| A12254 | A16954 | 347 | A12254 | A17018 | 362 |
| A12254 | A17030 | 243 | A12254 | A17033 | 232 |
| A12254 | A17035 | 182 | A12254 | A17190 | 358 |
| A12254 | A17211 | 229 | A12255 | A12284 | 307 |
| A12255 | A12433 | 374 | A12255 | A12507 | 335 |
| A12255 | A12508 | 236 | A12255 | A12606 | 414 |
| A12255 | A12658 | 420 | A12255 | A12665 | 216 |
| A12255 | A12725 | 283 | A12255 | A12738 | 260 |
| A12255 | A12824 | 348 | A12255 | A12858 | 193 |
| A12255 | A12873 | 205 | A12255 | A13313 | 329 |
| A12255 | A13399 | 201 | A12255 | A13706 | 212 |
| A12255 | A13708 | 293 | A12255 | A13737 | 173 |
| A12255 | A13787 | 432 | A12255 | A13788 | 297 |
| A12255 | A13804 | 417 | A12255 | A13805 | 291 |
| A12255 | A13809 | 236 | A12255 | A13811 | 286 |
| A12255 | A14196 | 473 | A12255 | A14214 | 355 |
| A12255 | A14255 | 226 | A12255 | A14270 | 388 |
| A12255 | A14288 | 274 | A12255 | A14455 | 174 |
| A12255 | A14462 | 227 | A12255 | A14719 | 276 |
| A12255 | A14799 | 252 | A12255 | A14826 | 290 |
| A12255 | A14838 | 160 | A12255 | A14917 | 401 |
| A12255 | A15187 | 388 | A12255 | A15237 | 179 |
| A12255 | A15323 | 385 | A12255 | A15359 | 193 |
| A12255 | A15519 | 266 | A12255 | A15541 | 412 |
| A12255 | A15653 | 347 | A12255 | A15683 | 151 |
| A12255 | A15709 | 180 | A12255 | A15711 | 272 |
| A12255 | A15940 | 296 | A12255 | A16157 | 418 |
| A12255 | A16187 | 259 | A12255 | A16343 | 429 |
| A12255 | A16552 | 252 | A12255 | A16565 | 417 |
| A12255 | A16566 | 307 | A12255 | A16567 | 324 |
| A12255 | A16597 | 351 | A12255 | A16611 | 301 |
| A12255 | A16664 | 218 | A12255 | A16675 | 319 |
| A12255 | A16680 | 205 | A12255 | A16701 | 319 |
| A12255 | A16703 | 268 | A12255 | A16764 | 224 |
| A12255 | A16774 | 330 | A12255 | A16815 | 343 |
| A12255 | A16824 | 338 | A12255 | A16829 | 302 |
| A12255 | A16860 | 241 | A12255 | A16866 | 235 |
| A12255 | A16874 | 402 | A12255 | A16913 | 330 |
| A12255 | A16954 | 290 | A12255 | A17012 | 294 |

|        |        |     |        |        |     |
|--------|--------|-----|--------|--------|-----|
| A12255 | A17018 | 306 | A12255 | A17033 | 302 |
| A12255 | A17035 | 259 | A12255 | A17211 | 299 |
| A12256 | A14200 | 338 | A12257 | A12329 | 356 |
| A12257 | A15660 | 303 | A12257 | A15684 | 241 |
| A12257 | A15937 | 241 | A12260 | A13826 | 246 |
| A12260 | A14208 | 152 | A12265 | A12298 | 477 |
| A12267 | A14781 | 400 | A12268 | A14188 | 310 |
| A12269 | A12821 | 291 | A12269 | A14216 | 288 |
| A12270 | A13710 | 288 | A12270 | A14176 | 368 |
| A12270 | A14216 | 335 | A12270 | A14937 | 286 |
| A12270 | A15225 | 480 | A12270 | A15235 | 249 |
| A12270 | A15611 | 226 | A12270 | A15732 | 489 |
| A12270 | A16631 | 260 | A12273 | A13741 | 267 |
| A12273 | A13832 | 491 | A12273 | A14247 | 491 |
| A12273 | A14918 | 296 | A12273 | A15282 | 281 |
| A12273 | A15552 | 340 | A12274 | A15345 | 291 |
| A12275 | A12722 | 246 | A12275 | A15415 | 357 |
| A12276 | A12277 | 441 | A12276 | A12383 | 294 |
| A12281 | A13163 | 428 | A12281 | A15127 | 445 |
| A12282 | A14253 | 185 | A12282 | A14570 | 229 |
| A12282 | A14661 | 241 | A12282 | A15322 | 291 |
| A12282 | A15328 | 174 | A12282 | A15366 | 187 |
| A12282 | A15495 | 174 | A12282 | A15557 | 246 |
| A12282 | A15680 | 406 | A12282 | A16022 | 276 |
| A12282 | A16792 | 332 | A12283 | A15096 | 363 |
| A12284 | A12433 | 251 | A12284 | A12500 | 162 |
| A12284 | A12507 | 388 | A12284 | A12508 | 260 |
| A12284 | A12606 | 413 | A12284 | A12655 | 188 |
| A12284 | A12658 | 408 | A12284 | A12665 | 433 |
| A12284 | A12725 | 388 | A12284 | A12738 | 157 |
| A12284 | A12824 | 372 | A12284 | A12858 | 461 |
| A12284 | A12873 | 324 | A12284 | A13098 | 294 |
| A12284 | A13116 | 314 | A12284 | A13231 | 235 |
| A12284 | A13313 | 330 | A12284 | A13342 | 173 |
| A12284 | A13399 | 318 | A12284 | A13706 | 229 |
| A12284 | A13708 | 262 | A12284 | A13738 | 252 |
| A12284 | A13781 | 340 | A12284 | A13786 | 154 |
| A12284 | A13787 | 277 | A12284 | A13804 | 235 |
| A12284 | A13805 | 401 | A12284 | A13809 | 356 |
| A12284 | A13811 | 188 | A12284 | A13912 | 380 |
| A12284 | A14094 | 154 | A12284 | A14214 | 407 |
| A12284 | A14239 | 394 | A12284 | A14260 | 213 |
| A12284 | A14270 | 174 | A12284 | A14286 | 196 |
| A12284 | A14288 | 238 | A12284 | A14289 | 162 |
| A12284 | A14443 | 899 | A12284 | A14569 | 363 |
| A12284 | A14595 | 260 | A12284 | A14706 | 154 |

|        |        |     |        |        |     |
|--------|--------|-----|--------|--------|-----|
| A12284 | A14708 | 210 | A12284 | A14799 | 205 |
| A12284 | A14903 | 210 | A12284 | A14917 | 198 |
| A12284 | A14921 | 390 | A12284 | A15187 | 389 |
| A12284 | A15189 | 224 | A12284 | A15262 | 201 |
| A12284 | A15315 | 352 | A12284 | A15347 | 385 |
| A12284 | A15541 | 227 | A12284 | A15680 | 246 |
| A12284 | A15683 | 386 | A12284 | A15709 | 291 |
| A12284 | A15711 | 170 | A12284 | A15743 | 191 |
| A12284 | A15818 | 168 | A12284 | A15850 | 281 |
| A12284 | A15853 | 160 | A12284 | A16115 | 176 |
| A12284 | A16157 | 441 | A12284 | A16343 | 268 |
| A12284 | A16552 | 358 | A12284 | A16565 | 340 |
| A12284 | A16566 | 213 | A12284 | A16587 | 191 |
| A12284 | A16597 | 401 | A12284 | A16611 | 433 |
| A12284 | A16664 | 435 | A12284 | A16675 | 297 |
| A12284 | A16680 | 221 | A12284 | A16682 | 210 |
| A12284 | A16690 | 371 | A12284 | A16695 | 272 |
| A12284 | A16703 | 384 | A12284 | A16704 | 174 |
| A12284 | A16707 | 312 | A12284 | A16774 | 369 |
| A12284 | A16790 | 191 | A12284 | A16806 | 272 |
| A12284 | A16815 | 263 | A12284 | A16829 | 409 |
| A12284 | A16868 | 294 | A12284 | A16874 | 334 |
| A12284 | A16905 | 423 | A12284 | A16913 | 246 |
| A12284 | A16944 | 226 | A12284 | A17033 | 207 |
| A12284 | A17144 | 185 | A12286 | A14865 | 422 |
| A12287 | A14694 | 270 | A12288 | A15729 | 283 |
| A12292 | A14196 | 360 | A12292 | A14701 | 168 |
| A12292 | A15323 | 162 | A12292 | A16118 | 306 |
| A12292 | A16463 | 348 | A12295 | A13816 | 458 |
| A12295 | A13867 | 63  | A12295 | A14741 | 247 |
| A12297 | A12308 | 63  | A12299 | A14169 | 226 |
| A12304 | A14410 | 227 | A12304 | A14928 | 183 |
| A12305 | A14216 | 279 | A12306 | A12990 | 252 |
| A12306 | A14200 | 463 | A12311 | A14957 | 63  |
| A12313 | A14484 | 173 | A12316 | A15352 | 286 |
| A12316 | A15436 | 363 | A12322 | A12947 | 441 |
| A12325 | A12927 | 179 | A12325 | A14169 | 360 |
| A12325 | A14196 | 382 | A12325 | A14246 | 243 |
| A12325 | A15297 | 419 | A12325 | A15338 | 380 |
| A12325 | A15363 | 160 | A12325 | A15559 | 151 |
| A12325 | A15725 | 199 | A12325 | A15763 | 246 |
| A12325 | A16860 | 384 | A12327 | A12894 | 452 |
| A12327 | A14915 | 452 | A12328 | A12990 | 488 |
| A12328 | A13149 | 480 | A12328 | A13320 | 488 |
| A12328 | A13335 | 490 | A12328 | A13340 | 491 |
| A12328 | A13812 | 252 | A12328 | A13889 | 260 |

|        |        |     |        |        |     |
|--------|--------|-----|--------|--------|-----|
| A12328 | A14073 | 491 | A12328 | A14188 | 486 |
| A12328 | A14220 | 344 | A12328 | A14400 | 163 |
| A12328 | A14571 | 475 | A12328 | A14596 | 352 |
| A12328 | A14738 | 190 | A12328 | A15106 | 353 |
| A12328 | A15219 | 168 | A12328 | A15244 | 491 |
| A12328 | A15546 | 335 | A12328 | A15660 | 177 |
| A12328 | A15684 | 195 | A12328 | A15717 | 234 |
| A12328 | A15773 | 339 | A12328 | A15932 | 432 |
| A12328 | A15933 | 463 | A12328 | A16272 | 405 |
| A12328 | A16318 | 341 | A12328 | A16324 | 174 |
| A12328 | A16437 | 322 | A12328 | A16446 | 193 |
| A12328 | A16630 | 279 | A12328 | A16818 | 238 |
| A12328 | A17134 | 152 | A12328 | A17142 | 183 |
| A12329 | A13023 | 240 | A12329 | A13340 | 485 |
| A12329 | A13989 | 328 | A12329 | A14150 | 196 |
| A12329 | A14216 | 685 | A12329 | A14596 | 363 |
| A12329 | A15500 | 234 | A12329 | A15652 | 249 |
| A12329 | A15658 | 151 | A12329 | A15659 | 491 |
| A12329 | A15660 | 850 | A12329 | A15684 | 793 |
| A12329 | A15708 | 491 | A12329 | A15720 | 454 |
| A12329 | A15721 | 384 | A12329 | A15746 | 491 |
| A12329 | A15769 | 286 | A12329 | A15918 | 490 |
| A12329 | A15920 | 423 | A12329 | A15923 | 432 |
| A12329 | A15931 | 491 | A12329 | A15932 | 294 |
| A12329 | A15933 | 472 | A12329 | A15936 | 195 |
| A12329 | A15937 | 491 | A12329 | A16072 | 281 |
| A12329 | A16086 | 337 | A12329 | A16088 | 629 |
| A12329 | A16092 | 473 | A12329 | A16096 | 484 |
| A12329 | A16145 | 432 | A12329 | A16218 | 861 |
| A12329 | A16464 | 462 | A12329 | A16650 | 466 |
| A12329 | A16768 | 474 | A12329 | A17134 | 461 |
| A12329 | A17140 | 491 | A12329 | A17193 | 188 |
| A12329 | A17208 | 427 | A12330 | A13302 | 401 |
| A12332 | A14876 | 430 | A12335 | A15368 | 416 |
| A12335 | A15623 | 445 | A12336 | A13411 | 63  |
| A12337 | A13313 | 490 | A12337 | A13528 | 360 |
| A12337 | A15189 | 232 | A12337 | A16261 | 273 |
| A12340 | A16723 | 391 | A12341 | A14443 | 899 |
| A12341 | A14444 | 899 | A12341 | A14543 | 380 |
| A12343 | A12360 | 436 | A12344 | A13976 | 394 |
| A12346 | A12348 | 452 | A12347 | A15323 | 162 |
| A12353 | A14196 | 208 | A12353 | A14520 | 277 |
| A12353 | A15366 | 386 | A12354 | A15496 | 430 |
| A12356 | A14809 | 312 | A12357 | A12828 | 308 |
| A12357 | A13454 | 468 | A12357 | A15147 | 468 |
| A12357 | A16122 | 317 | A12361 | A12363 | 401 |

|        |        |     |        |        |     |
|--------|--------|-----|--------|--------|-----|
| A12361 | A12399 | 384 | A12361 | A13181 | 167 |
| A12361 | A13347 | 424 | A12361 | A13976 | 191 |
| A12361 | A14498 | 202 | A12361 | A14542 | 384 |
| A12361 | A14933 | 384 | A12361 | A15535 | 291 |
| A12361 | A15540 | 335 | A12361 | A15971 | 326 |
| A12361 | A16293 | 171 | A12363 | A13181 | 294 |
| A12363 | A16300 | 177 | A12364 | A14208 | 190 |
| A12364 | A15314 | 196 | A12365 | A12390 | 207 |
| A12365 | A12873 | 266 | A12365 | A13369 | 428 |
| A12365 | A13607 | 249 | A12365 | A13889 | 200 |
| A12365 | A13989 | 420 | A12365 | A14009 | 200 |
| A12365 | A14055 | 208 | A12365 | A14091 | 200 |
| A12365 | A14094 | 200 | A12365 | A14177 | 200 |
| A12365 | A14192 | 200 | A12365 | A14196 | 218 |
| A12365 | A14223 | 200 | A12365 | A14286 | 154 |
| A12365 | A14315 | 440 | A12365 | A14319 | 480 |
| A12365 | A14321 | 432 | A12365 | A14335 | 488 |
| A12365 | A14410 | 712 | A12365 | A14487 | 154 |
| A12365 | A14635 | 391 | A12365 | A14636 | 276 |
| A12365 | A14650 | 491 | A12365 | A14668 | 334 |
| A12365 | A14694 | 200 | A12365 | A15257 | 157 |
| A12365 | A15606 | 213 | A12365 | A15665 | 201 |
| A12365 | A15700 | 243 | A12365 | A15741 | 229 |
| A12365 | A15763 | 446 | A12365 | A15880 | 210 |
| A12365 | A16020 | 173 | A12365 | A16261 | 227 |
| A12365 | A16274 | 200 | A12365 | A16798 | 235 |
| A12367 | A12368 | 447 | A12371 | A13873 | 176 |
| A12371 | A14199 | 177 | A12371 | A16002 | 195 |
| A12371 | A16034 | 313 | A12373 | A12897 | 216 |
| A12373 | A13614 | 205 | A12373 | A14210 | 334 |
| A12373 | A14371 | 334 | A12373 | A14443 | 900 |
| A12373 | A14444 | 899 | A12373 | A14636 | 334 |
| A12374 | A14633 | 297 | A12379 | A15438 | 425 |
| A12379 | A15439 | 419 | A12379 | A15441 | 419 |
| A12379 | A15442 | 427 | A12379 | A15443 | 427 |
| A12379 | A15445 | 361 | A12379 | A16166 | 447 |
| A12379 | A16167 | 435 | A12379 | A16190 | 435 |
| A12380 | A15684 | 290 | A12380 | A15779 | 247 |
| A12380 | A16218 | 216 | A12383 | A12791 | 323 |
| A12383 | A13391 | 910 | A12383 | A13393 | 899 |
| A12383 | A13440 | 294 | A12383 | A13982 | 293 |
| A12383 | A14008 | 472 | A12383 | A14013 | 173 |
| A12383 | A14022 | 252 | A12383 | A14073 | 224 |
| A12383 | A14197 | 154 | A12383 | A14198 | 319 |
| A12383 | A14275 | 201 | A12383 | A14433 | 174 |
| A12383 | A14438 | 156 | A12383 | A14443 | 990 |

|        |        |     |        |        |     |
|--------|--------|-----|--------|--------|-----|
| A12383 | A14452 | 366 | A12383 | A14495 | 235 |
| A12383 | A14774 | 171 | A12383 | A15635 | 285 |
| A12383 | A15677 | 414 | A12383 | A16840 | 202 |
| A12383 | A16877 | 251 | A12383 | A16994 | 458 |
| A12383 | A17212 | 228 | A12385 | A12488 | 452 |
| A12385 | A12490 | 452 | A12385 | A15277 | 393 |
| A12387 | A13820 | 445 | A12388 | A12797 | 452 |
| A12388 | A12803 | 452 | A12388 | A12984 | 447 |
| A12388 | A16140 | 452 | A12388 | A16168 | 452 |
| A12388 | A16169 | 452 | A12388 | A16172 | 452 |
| A12388 | A16175 | 452 | A12388 | A16178 | 452 |
| A12388 | A16179 | 452 | A12388 | A16184 | 452 |
| A12388 | A16185 | 452 | A12388 | A16186 | 452 |
| A12389 | A12461 | 452 | A12390 | A15292 | 229 |
| A12390 | A15312 | 184 | A12390 | A15313 | 198 |
| A12390 | A15432 | 255 | A12390 | A15435 | 223 |
| A12392 | A17171 | 199 | A12393 | A12500 | 185 |
| A12393 | A13003 | 219 | A12393 | A13119 | 491 |
| A12393 | A13151 | 491 | A12393 | A13312 | 490 |
| A12393 | A13546 | 235 | A12393 | A13987 | 486 |
| A12393 | A14010 | 486 | A12393 | A14190 | 449 |
| A12393 | A14202 | 477 | A12393 | A14210 | 477 |
| A12393 | A14229 | 232 | A12393 | A14245 | 399 |
| A12393 | A14259 | 205 | A12393 | A14369 | 193 |
| A12393 | A14371 | 491 | A12393 | A14378 | 491 |
| A12393 | A14379 | 449 | A12393 | A14399 | 347 |
| A12393 | A14511 | 486 | A12393 | A14580 | 301 |
| A12393 | A14635 | 168 | A12393 | A14667 | 324 |
| A12393 | A14690 | 167 | A12393 | A14856 | 259 |
| A12393 | A14930 | 477 | A12393 | A15292 | 491 |
| A12393 | A15312 | 470 | A12393 | A15313 | 475 |
| A12393 | A15322 | 441 | A12393 | A15342 | 177 |
| A12393 | A15348 | 479 | A12393 | A15349 | 484 |
| A12393 | A15352 | 491 | A12393 | A15356 | 486 |
| A12393 | A15357 | 294 | A12393 | A15366 | 380 |
| A12393 | A15402 | 369 | A12393 | A15444 | 283 |
| A12393 | A15447 | 473 | A12393 | A15452 | 491 |
| A12393 | A15454 | 348 | A12393 | A15456 | 201 |
| A12393 | A15462 | 172 | A12393 | A15463 | 409 |
| A12393 | A15495 | 490 | A12393 | A15498 | 210 |
| A12393 | A15515 | 369 | A12393 | A15641 | 297 |
| A12393 | A15804 | 152 | A12393 | A15830 | 340 |
| A12393 | A16004 | 168 | A12393 | A16414 | 157 |
| A12402 | A14399 | 311 | A12403 | A14566 | 196 |
| A12403 | A14594 | 469 | A12406 | A12766 | 452 |
| A12406 | A12772 | 452 | A12406 | A12773 | 452 |

|        |        |     |        |        |     |
|--------|--------|-----|--------|--------|-----|
| A12406 | A12774 | 452 | A12406 | A12775 | 452 |
| A12406 | A12776 | 452 | A12408 | A12409 | 479 |
| A12408 | A13831 | 152 | A12408 | A14741 | 235 |
| A12409 | A13978 | 240 | A12409 | A14969 | 306 |
| A12412 | A13493 | 428 | A12412 | A15282 | 207 |
| A12416 | A14257 | 188 | A12416 | A14476 | 432 |
| A12419 | A14122 | 187 | A12419 | A14379 | 229 |
| A12419 | A15828 | 305 | A12420 | A12421 | 474 |
| A12420 | A13667 | 356 | A12421 | A13667 | 424 |
| A12422 | A12580 | 452 | A12424 | A12892 | 445 |
| A12426 | A12787 | 454 | A12428 | A12967 | 452 |
| A12429 | A12719 | 429 | A12430 | A12459 | 438 |
| A12432 | A12434 | 469 | A12432 | A12435 | 480 |
| A12433 | A12499 | 168 | A12433 | A12501 | 344 |
| A12433 | A12506 | 352 | A12433 | A12507 | 481 |
| A12433 | A12508 | 396 | A12433 | A12525 | 205 |
| A12433 | A12606 | 490 | A12433 | A12625 | 461 |
| A12433 | A12655 | 167 | A12433 | A12658 | 489 |
| A12433 | A12659 | 441 | A12433 | A12665 | 461 |
| A12433 | A12725 | 485 | A12433 | A12726 | 210 |
| A12433 | A12738 | 414 | A12433 | A12792 | 205 |
| A12433 | A12825 | 369 | A12433 | A12826 | 323 |
| A12433 | A12834 | 252 | A12433 | A12850 | 232 |
| A12433 | A12858 | 486 | A12433 | A12873 | 457 |
| A12433 | A13116 | 380 | A12433 | A13169 | 290 |
| A12433 | A13231 | 213 | A12433 | A13309 | 404 |
| A12433 | A13313 | 489 | A12433 | A13321 | 256 |
| A12433 | A13342 | 151 | A12433 | A13388 | 165 |
| A12433 | A13399 | 474 | A12433 | A13527 | 176 |
| A12433 | A13706 | 375 | A12433 | A13707 | 468 |
| A12433 | A13708 | 472 | A12433 | A13711 | 347 |
| A12433 | A13737 | 475 | A12433 | A13781 | 488 |
| A12433 | A13783 | 398 | A12433 | A13784 | 483 |
| A12433 | A13786 | 470 | A12433 | A13787 | 258 |
| A12433 | A13788 | 393 | A12433 | A13804 | 213 |
| A12433 | A13805 | 386 | A12433 | A13809 | 479 |
| A12433 | A13811 | 165 | A12433 | A13912 | 367 |
| A12433 | A13963 | 258 | A12433 | A13989 | 483 |
| A12433 | A14074 | 199 | A12433 | A14084 | 477 |
| A12433 | A14154 | 188 | A12433 | A14214 | 490 |
| A12433 | A14222 | 466 | A12433 | A14227 | 271 |
| A12433 | A14239 | 419 | A12433 | A14255 | 321 |
| A12433 | A14260 | 324 | A12433 | A14263 | 480 |
| A12433 | A14270 | 152 | A12433 | A14288 | 480 |
| A12433 | A14358 | 270 | A12433 | A14375 | 386 |
| A12433 | A14455 | 446 | A12433 | A14462 | 323 |

|        |        |     |        |        |     |
|--------|--------|-----|--------|--------|-----|
| A12433 | A14569 | 490 | A12433 | A14595 | 238 |
| A12433 | A14706 | 452 | A12433 | A14708 | 456 |
| A12433 | A14718 | 401 | A12433 | A14719 | 285 |
| A12433 | A14799 | 486 | A12433 | A14838 | 314 |
| A12433 | A14903 | 321 | A12433 | A14917 | 310 |
| A12433 | A14921 | 377 | A12433 | A15105 | 469 |
| A12433 | A15187 | 423 | A12433 | A15189 | 443 |
| A12433 | A15262 | 353 | A12433 | A15501 | 243 |
| A12433 | A15541 | 443 | A12433 | A15653 | 435 |
| A12433 | A15661 | 184 | A12433 | A15665 | 409 |
| A12433 | A15667 | 174 | A12433 | A15680 | 363 |
| A12433 | A15683 | 462 | A12433 | A15696 | 177 |
| A12433 | A15698 | 263 | A12433 | A15709 | 429 |
| A12433 | A15711 | 279 | A12433 | A15774 | 424 |
| A12433 | A15940 | 391 | A12433 | A16157 | 491 |
| A12433 | A16187 | 413 | A12433 | A16215 | 195 |
| A12433 | A16261 | 441 | A12433 | A16343 | 369 |
| A12433 | A16552 | 485 | A12433 | A16565 | 483 |
| A12433 | A16566 | 401 | A12433 | A16567 | 217 |
| A12433 | A16587 | 486 | A12433 | A16597 | 490 |
| A12433 | A16608 | 271 | A12433 | A16611 | 491 |
| A12433 | A16652 | 294 | A12433 | A16664 | 489 |
| A12433 | A16675 | 485 | A12433 | A16680 | 479 |
| A12433 | A16682 | 321 | A12433 | A16684 | 323 |
| A12433 | A16690 | 470 | A12433 | A16691 | 235 |
| A12433 | A16692 | 294 | A12433 | A16693 | 369 |
| A12433 | A16695 | 373 | A12433 | A16697 | 185 |
| A12433 | A16699 | 281 | A12433 | A16701 | 208 |
| A12433 | A16702 | 291 | A12433 | A16703 | 477 |
| A12433 | A16704 | 474 | A12433 | A16706 | 377 |
| A12433 | A16707 | 446 | A12433 | A16708 | 207 |
| A12433 | A16709 | 168 | A12433 | A16764 | 450 |
| A12433 | A16774 | 419 | A12433 | A16776 | 196 |
| A12433 | A16788 | 307 | A12433 | A16790 | 386 |
| A12433 | A16797 | 347 | A12433 | A16799 | 217 |
| A12433 | A16802 | 256 | A12433 | A16815 | 243 |
| A12433 | A16824 | 361 | A12433 | A16829 | 318 |
| A12433 | A16838 | 451 | A12433 | A16858 | 277 |
| A12433 | A16866 | 396 | A12433 | A16874 | 435 |
| A12433 | A16882 | 286 | A12433 | A16900 | 335 |
| A12433 | A16905 | 259 | A12433 | A16913 | 353 |
| A12433 | A16942 | 224 | A12433 | A16944 | 205 |
| A12433 | A16954 | 430 | A12433 | A17012 | 310 |
| A12433 | A17014 | 224 | A12433 | A17015 | 361 |
| A12433 | A17017 | 168 | A12433 | A17018 | 190 |
| A12433 | A17019 | 258 | A12433 | A17030 | 196 |



|        |        |     |        |        |     |
|--------|--------|-----|--------|--------|-----|
| A12433 | A17033 | 396 | A12433 | A17035 | 358 |
| A12433 | A17125 | 200 | A12433 | A17133 | 307 |
| A12433 | A17211 | 314 | A12434 | A12435 | 469 |
| A12436 | A14281 | 157 | A12437 | A15276 | 445 |
| A12441 | A12442 | 452 | A12445 | A13082 | 424 |
| A12445 | A14301 | 436 | A12445 | A15447 | 296 |
| A12447 | A13870 | 254 | A12447 | A14006 | 208 |
| A12447 | A16320 | 451 | A12449 | A12581 | 467 |
| A12449 | A12635 | 441 | A12449 | A13860 | 294 |
| A12450 | A15559 | 216 | A12452 | A15366 | 213 |
| A12454 | A15321 | 262 | A12455 | A13453 | 447 |
| A12458 | A13826 | 224 | A12458 | A13899 | 306 |
| A12458 | A15811 | 385 | A12459 | A15498 | 168 |
| A12464 | A12633 | 458 | A12464 | A13338 | 364 |
| A12464 | A13873 | 285 | A12464 | A14378 | 394 |
| A12464 | A16220 | 441 | A12464 | A16441 | 404 |
| A12467 | A14221 | 273 | A12468 | A12469 | 63  |
| A12469 | A12806 | 445 | A12470 | A14222 | 227 |
| A12470 | A15380 | 191 | A12473 | A13342 | 418 |
| A12473 | A13424 | 333 | A12473 | A14410 | 229 |
| A12474 | A13924 | 436 | A12474 | A15606 | 228 |
| A12476 | A13409 | 447 | A12477 | A14568 | 221 |
| A12478 | A15292 | 170 | A12478 | A15436 | 333 |
| A12478 | A15456 | 369 | A12481 | A13972 | 434 |
| A12482 | A12808 | 452 | A12483 | A12484 | 452 |
| A12483 | A12777 | 452 | A12484 | A12777 | 452 |
| A12485 | A12897 | 238 | A12485 | A14279 | 281 |
| A12488 | A12490 | 452 | A12488 | A15277 | 393 |
| A12489 | A12491 | 447 | A12489 | A12745 | 438 |
| A12490 | A15277 | 393 | A12491 | A12745 | 445 |
| A12492 | A13169 | 216 | A12492 | A13873 | 154 |
| A12492 | A14191 | 227 | A12492 | A14272 | 398 |
| A12492 | A14288 | 491 | A12492 | A15367 | 483 |
| A12492 | A16635 | 193 | A12493 | A13945 | 308 |
| A12494 | A12765 | 469 | A12495 | A14633 | 297 |
| A12497 | A12935 | 63  | A12498 | A13986 | 401 |
| A12498 | A16170 | 412 | A12499 | A12501 | 260 |
| A12499 | A12606 | 374 | A12499 | A12665 | 358 |
| A12499 | A12725 | 301 | A12499 | A12858 | 210 |
| A12499 | A12873 | 223 | A12499 | A13309 | 260 |
| A12499 | A13313 | 346 | A12499 | A13706 | 228 |
| A12499 | A13708 | 310 | A12499 | A13781 | 352 |
| A12499 | A13784 | 474 | A12499 | A13805 | 303 |
| A12499 | A13809 | 252 | A12499 | A13912 | 353 |
| A12499 | A14214 | 278 | A12499 | A14222 | 227 |
| A12499 | A14255 | 241 | A12499 | A14375 | 240 |

|        |        |     |        |        |     |
|--------|--------|-----|--------|--------|-----|
| A12499 | A14455 | 191 | A12499 | A14718 | 259 |
| A12499 | A14719 | 290 | A12499 | A14799 | 272 |
| A12499 | A14903 | 317 | A12499 | A14921 | 362 |
| A12499 | A15105 | 162 | A12499 | A15187 | 396 |
| A12499 | A15189 | 419 | A12499 | A15217 | 314 |
| A12499 | A15541 | 227 | A12499 | A15653 | 269 |
| A12499 | A15665 | 227 | A12499 | A15680 | 165 |
| A12499 | A15765 | 271 | A12499 | A15854 | 224 |
| A12499 | A15943 | 258 | A12499 | A16157 | 291 |
| A12499 | A16187 | 273 | A12499 | A16261 | 267 |
| A12499 | A16552 | 272 | A12499 | A16565 | 424 |
| A12499 | A16597 | 363 | A12499 | A16608 | 205 |
| A12499 | A16611 | 184 | A12499 | A16664 | 360 |
| A12499 | A16680 | 223 | A12499 | A16690 | 201 |
| A12499 | A16693 | 356 | A12499 | A16702 | 294 |
| A12499 | A16703 | 281 | A12499 | A16706 | 362 |
| A12499 | A16709 | 447 | A12499 | A16764 | 240 |
| A12499 | A16774 | 341 | A12499 | A16790 | 302 |
| A12499 | A16866 | 249 | A12499 | A16905 | 385 |
| A12499 | A16944 | 328 | A12499 | A17012 | 307 |
| A12499 | A17013 | 240 | A12499 | A17017 | 302 |
| A12499 | A17030 | 323 | A12499 | A17211 | 312 |
| A12500 | A13985 | 385 | A12500 | A14010 | 481 |
| A12500 | A15292 | 205 | A12500 | A15400 | 151 |
| A12501 | A12506 | 221 | A12501 | A12507 | 414 |
| A12501 | A12508 | 204 | A12501 | A12606 | 391 |
| A12501 | A12658 | 198 | A12501 | A12659 | 221 |
| A12501 | A12665 | 436 | A12501 | A12725 | 243 |
| A12501 | A12727 | 301 | A12501 | A12858 | 467 |
| A12501 | A12873 | 306 | A12501 | A12952 | 339 |
| A12501 | A13169 | 168 | A12501 | A13309 | 446 |
| A12501 | A13313 | 363 | A12501 | A13388 | 257 |
| A12501 | A13706 | 435 | A12501 | A13707 | 340 |
| A12501 | A13708 | 408 | A12501 | A13781 | 457 |
| A12501 | A13783 | 276 | A12501 | A13784 | 484 |
| A12501 | A13786 | 224 | A12501 | A13805 | 262 |
| A12501 | A13809 | 204 | A12501 | A13811 | 258 |
| A12501 | A13912 | 454 | A12501 | A14074 | 311 |
| A12501 | A14084 | 224 | A12501 | A14087 | 246 |
| A12501 | A14094 | 168 | A12501 | A14154 | 170 |
| A12501 | A14214 | 449 | A12501 | A14222 | 160 |
| A12501 | A14239 | 177 | A12501 | A14263 | 230 |
| A12501 | A14288 | 335 | A12501 | A14375 | 324 |
| A12501 | A14569 | 412 | A12501 | A14718 | 210 |
| A12501 | A14799 | 312 | A12501 | A14903 | 390 |
| A12501 | A14917 | 267 | A12501 | A15105 | 235 |

|        |        |     |        |        |     |
|--------|--------|-----|--------|--------|-----|
| A12501 | A15187 | 427 | A12501 | A15189 | 457 |
| A12501 | A15217 | 276 | A12501 | A15262 | 290 |
| A12501 | A15536 | 288 | A12501 | A15541 | 177 |
| A12501 | A15651 | 159 | A12501 | A15665 | 457 |
| A12501 | A15680 | 241 | A12501 | A15683 | 241 |
| A12501 | A15709 | 279 | A12501 | A15711 | 241 |
| A12501 | A15850 | 335 | A12501 | A15853 | 232 |
| A12501 | A15854 | 174 | A12501 | A15932 | 180 |
| A12501 | A15943 | 210 | A12501 | A16115 | 246 |
| A12501 | A16157 | 396 | A12501 | A16187 | 353 |
| A12501 | A16243 | 274 | A12501 | A16261 | 219 |
| A12501 | A16497 | 465 | A12501 | A16552 | 485 |
| A12501 | A16565 | 470 | A12501 | A16587 | 379 |
| A12501 | A16597 | 322 | A12501 | A16608 | 154 |
| A12501 | A16611 | 443 | A12501 | A16652 | 172 |
| A12501 | A16664 | 396 | A12501 | A16675 | 465 |
| A12501 | A16680 | 306 | A12501 | A16689 | 207 |
| A12501 | A16690 | 373 | A12501 | A16692 | 254 |
| A12501 | A16695 | 328 | A12501 | A16697 | 274 |
| A12501 | A16699 | 367 | A12501 | A16702 | 372 |
| A12501 | A16703 | 236 | A12501 | A16704 | 245 |
| A12501 | A16707 | 358 | A12501 | A16709 | 260 |
| A12501 | A16724 | 281 | A12501 | A16764 | 401 |
| A12501 | A16774 | 307 | A12501 | A16776 | 283 |
| A12501 | A16790 | 260 | A12501 | A16806 | 328 |
| A12501 | A16824 | 314 | A12501 | A16829 | 439 |
| A12501 | A16838 | 371 | A12501 | A16866 | 407 |
| A12501 | A16868 | 346 | A12501 | A16905 | 475 |
| A12501 | A16913 | 307 | A12501 | A16944 | 398 |
| A12501 | A17012 | 267 | A12501 | A17015 | 229 |
| A12501 | A17018 | 278 | A12501 | A17030 | 394 |
| A12501 | A17035 | 228 | A12501 | A17190 | 273 |
| A12502 | A15217 | 404 | A12502 | A15861 | 63  |
| A12503 | A13855 | 160 | A12503 | A15250 | 367 |
| A12504 | A12505 | 452 | A12504 | A12750 | 452 |
| A12505 | A12750 | 452 | A12506 | A12507 | 305 |
| A12506 | A12508 | 213 | A12506 | A12606 | 335 |
| A12506 | A12625 | 152 | A12506 | A12658 | 408 |
| A12506 | A12659 | 229 | A12506 | A12665 | 440 |
| A12506 | A12725 | 351 | A12506 | A12726 | 302 |
| A12506 | A12738 | 236 | A12506 | A12825 | 247 |
| A12506 | A12826 | 380 | A12506 | A12850 | 319 |
| A12506 | A12858 | 386 | A12506 | A12873 | 180 |
| A12506 | A12927 | 246 | A12506 | A12952 | 249 |
| A12506 | A13116 | 260 | A12506 | A13129 | 283 |
| A12506 | A13169 | 310 | A12506 | A13170 | 265 |

|        |        |     |        |        |     |
|--------|--------|-----|--------|--------|-----|
| A12506 | A13309 | 350 | A12506 | A13313 | 195 |
| A12506 | A13315 | 268 | A12506 | A13321 | 420 |
| A12506 | A13356 | 188 | A12506 | A13399 | 177 |
| A12506 | A13415 | 286 | A12506 | A13527 | 274 |
| A12506 | A13707 | 414 | A12506 | A13737 | 279 |
| A12506 | A13783 | 393 | A12506 | A13785 | 321 |
| A12506 | A13786 | 360 | A12506 | A13787 | 337 |
| A12506 | A13788 | 440 | A12506 | A13805 | 269 |
| A12506 | A13806 | 241 | A12506 | A13809 | 343 |
| A12506 | A13938 | 337 | A12506 | A13939 | 491 |
| A12506 | A13969 | 188 | A12506 | A14074 | 185 |
| A12506 | A14214 | 329 | A12506 | A14235 | 297 |
| A12506 | A14239 | 187 | A12506 | A14255 | 407 |
| A12506 | A14263 | 241 | A12506 | A14270 | 373 |
| A12506 | A14286 | 274 | A12506 | A14289 | 241 |
| A12506 | A14462 | 202 | A12506 | A14569 | 449 |
| A12506 | A14719 | 374 | A12506 | A14799 | 428 |
| A12506 | A14838 | 266 | A12506 | A14903 | 283 |
| A12506 | A14917 | 388 | A12506 | A14937 | 259 |
| A12506 | A15069 | 363 | A12506 | A15187 | 373 |
| A12506 | A15189 | 184 | A12506 | A15262 | 165 |
| A12506 | A15501 | 274 | A12506 | A15519 | 243 |
| A12506 | A15541 | 185 | A12506 | A15680 | 408 |
| A12506 | A15683 | 252 | A12506 | A15709 | 377 |
| A12506 | A15854 | 184 | A12506 | A15940 | 276 |
| A12506 | A15947 | 243 | A12506 | A16157 | 468 |
| A12506 | A16322 | 193 | A12506 | A16552 | 390 |
| A12506 | A16565 | 196 | A12506 | A16567 | 307 |
| A12506 | A16587 | 385 | A12506 | A16597 | 198 |
| A12506 | A16611 | 366 | A12506 | A16664 | 472 |
| A12506 | A16675 | 294 | A12506 | A16680 | 180 |
| A12506 | A16692 | 262 | A12506 | A16714 | 396 |
| A12506 | A16762 | 165 | A12506 | A16774 | 313 |
| A12506 | A16776 | 445 | A12506 | A16806 | 334 |
| A12506 | A16807 | 219 | A12506 | A16815 | 327 |
| A12506 | A16824 | 321 | A12506 | A16829 | 281 |
| A12506 | A16866 | 340 | A12506 | A16874 | 278 |
| A12506 | A16905 | 358 | A12506 | A16944 | 297 |
| A12506 | A17030 | 291 | A12506 | A17133 | 273 |
| A12506 | A17144 | 263 | A12507 | A12508 | 281 |
| A12507 | A12606 | 486 | A12507 | A12625 | 273 |
| A12507 | A12658 | 485 | A12507 | A12659 | 303 |
| A12507 | A12665 | 424 | A12507 | A12725 | 475 |
| A12507 | A12727 | 174 | A12507 | A12738 | 210 |
| A12507 | A12792 | 162 | A12507 | A12834 | 212 |
| A12507 | A12858 | 484 | A12507 | A12873 | 441 |

|        |        |     |        |        |     |
|--------|--------|-----|--------|--------|-----|
| A12507 | A13116 | 341 | A12507 | A13231 | 172 |
| A12507 | A13309 | 294 | A12507 | A13313 | 469 |
| A12507 | A13321 | 201 | A12507 | A13323 | 198 |
| A12507 | A13342 | 232 | A12507 | A13356 | 246 |
| A12507 | A13399 | 490 | A12507 | A13706 | 327 |
| A12507 | A13707 | 364 | A12507 | A13708 | 369 |
| A12507 | A13737 | 695 | A12507 | A13781 | 477 |
| A12507 | A13783 | 274 | A12507 | A13784 | 481 |
| A12507 | A13785 | 193 | A12507 | A13786 | 380 |
| A12507 | A13787 | 347 | A12507 | A13804 | 172 |
| A12507 | A13805 | 409 | A12507 | A13809 | 477 |
| A12507 | A13912 | 443 | A12507 | A13963 | 695 |
| A12507 | A14084 | 556 | A12507 | A14094 | 302 |
| A12507 | A14167 | 291 | A12507 | A14214 | 489 |
| A12507 | A14222 | 407 | A12507 | A14255 | 345 |
| A12507 | A14263 | 281 | A12507 | A14270 | 332 |
| A12507 | A14285 | 557 | A12507 | A14286 | 262 |
| A12507 | A14288 | 440 | A12507 | A14289 | 218 |
| A12507 | A14375 | 263 | A12507 | A14455 | 339 |
| A12507 | A14462 | 399 | A12507 | A14560 | 326 |
| A12507 | A14569 | 486 | A12507 | A14595 | 198 |
| A12507 | A14706 | 402 | A12507 | A14708 | 486 |
| A12507 | A14718 | 366 | A12507 | A14739 | 230 |
| A12507 | A14799 | 462 | A12507 | A14826 | 236 |
| A12507 | A14838 | 159 | A12507 | A14903 | 419 |
| A12507 | A14917 | 358 | A12507 | A14921 | 347 |
| A12507 | A15030 | 466 | A12507 | A15105 | 454 |
| A12507 | A15187 | 433 | A12507 | A15189 | 419 |
| A12507 | A15262 | 405 | A12507 | A15295 | 425 |
| A12507 | A15501 | 173 | A12507 | A15507 | 230 |
| A12507 | A15519 | 219 | A12507 | A15536 | 160 |
| A12507 | A15541 | 419 | A12507 | A15653 | 358 |
| A12507 | A15665 | 308 | A12507 | A15680 | 356 |
| A12507 | A15683 | 396 | A12507 | A15709 | 424 |
| A12507 | A15711 | 430 | A12507 | A15735 | 274 |
| A12507 | A15774 | 235 | A12507 | A15940 | 265 |
| A12507 | A15949 | 695 | A12507 | A16099 | 236 |
| A12507 | A16133 | 224 | A12507 | A16157 | 490 |
| A12507 | A16187 | 312 | A12507 | A16215 | 152 |
| A12507 | A16261 | 302 | A12507 | A16322 | 152 |
| A12507 | A16343 | 207 | A12507 | A16387 | 172 |
| A12507 | A16552 | 474 | A12507 | A16565 | 469 |
| A12507 | A16587 | 441 | A12507 | A16597 | 480 |
| A12507 | A16611 | 486 | A12507 | A16652 | 232 |
| A12507 | A16664 | 484 | A12507 | A16675 | 399 |
| A12507 | A16680 | 473 | A12507 | A16682 | 277 |

|        |        |     |        |        |     |
|--------|--------|-----|--------|--------|-----|
| A12507 | A16690 | 286 | A12507 | A16691 | 193 |
| A12507 | A16693 | 207 | A12507 | A16695 | 212 |
| A12507 | A16699 | 332 | A12507 | A16702 | 340 |
| A12507 | A16703 | 324 | A12507 | A16704 | 396 |
| A12507 | A16706 | 218 | A12507 | A16707 | 259 |
| A12507 | A16709 | 255 | A12507 | A16764 | 263 |
| A12507 | A16774 | 436 | A12507 | A16776 | 374 |
| A12507 | A16788 | 273 | A12507 | A16790 | 408 |
| A12507 | A16808 | 446 | A12507 | A16815 | 443 |
| A12507 | A16829 | 366 | A12507 | A16838 | 435 |
| A12507 | A16866 | 278 | A12507 | A16874 | 362 |
| A12507 | A16900 | 162 | A12507 | A16905 | 420 |
| A12507 | A16908 | 230 | A12507 | A16913 | 317 |
| A12507 | A16944 | 294 | A12507 | A17012 | 358 |
| A12507 | A17014 | 183 | A12507 | A17015 | 213 |
| A12507 | A17019 | 218 | A12507 | A17030 | 154 |
| A12507 | A17033 | 366 | A12507 | A17035 | 210 |
| A12507 | A17133 | 260 | A12507 | A17144 | 346 |
| A12508 | A12606 | 385 | A12508 | A12625 | 358 |
| A12508 | A12658 | 322 | A12508 | A12659 | 212 |
| A12508 | A12665 | 307 | A12508 | A12725 | 333 |
| A12508 | A12727 | 294 | A12508 | A12738 | 219 |
| A12508 | A12825 | 230 | A12508 | A12826 | 373 |
| A12508 | A12850 | 306 | A12508 | A12858 | 491 |
| A12508 | A13116 | 243 | A12508 | A13169 | 159 |
| A12508 | A13309 | 204 | A12508 | A13313 | 434 |
| A12508 | A13315 | 252 | A12508 | A13356 | 389 |
| A12508 | A13707 | 333 | A12508 | A13708 | 243 |
| A12508 | A13781 | 360 | A12508 | A13783 | 268 |
| A12508 | A13784 | 316 | A12508 | A13786 | 346 |
| A12508 | A13788 | 434 | A12508 | A13809 | 402 |
| A12508 | A13811 | 249 | A12508 | A13983 | 226 |
| A12508 | A14074 | 168 | A12508 | A14094 | 258 |
| A12508 | A14167 | 391 | A12508 | A14213 | 260 |
| A12508 | A14214 | 379 | A12508 | A14222 | 333 |
| A12508 | A14235 | 283 | A12508 | A14255 | 184 |
| A12508 | A14263 | 428 | A12508 | A14270 | 362 |
| A12508 | A14288 | 324 | A12508 | A14358 | 335 |
| A12508 | A14375 | 316 | A12508 | A14455 | 260 |
| A12508 | A14462 | 438 | A12508 | A14569 | 334 |
| A12508 | A14595 | 312 | A12508 | A14706 | 238 |
| A12508 | A14719 | 236 | A12508 | A14799 | 198 |
| A12508 | A14937 | 243 | A12508 | A15105 | 224 |
| A12508 | A15187 | 235 | A12508 | A15189 | 299 |
| A12508 | A15377 | 176 | A12508 | A15380 | 191 |
| A12508 | A15541 | 302 | A12508 | A15665 | 389 |

|        |        |     |        |        |     |
|--------|--------|-----|--------|--------|-----|
| A12508 | A15666 | 152 | A12508 | A15680 | 230 |
| A12508 | A15683 | 230 | A12508 | A15709 | 363 |
| A12508 | A15711 | 232 | A12508 | A15850 | 329 |
| A12508 | A15854 | 165 | A12508 | A16157 | 428 |
| A12508 | A16243 | 267 | A12508 | A16261 | 341 |
| A12508 | A16322 | 174 | A12508 | A16343 | 318 |
| A12508 | A16552 | 418 | A12508 | A16565 | 393 |
| A12508 | A16566 | 272 | A12508 | A16567 | 294 |
| A12508 | A16587 | 374 | A12508 | A16597 | 394 |
| A12508 | A16611 | 440 | A12508 | A16664 | 434 |
| A12508 | A16675 | 274 | A12508 | A16680 | 383 |
| A12508 | A16682 | 385 | A12508 | A16684 | 373 |
| A12508 | A16689 | 329 | A12508 | A16692 | 246 |
| A12508 | A16693 | 318 | A12508 | A16695 | 322 |
| A12508 | A16704 | 362 | A12508 | A16707 | 353 |
| A12508 | A16764 | 396 | A12508 | A16774 | 301 |
| A12508 | A16807 | 202 | A12508 | A16824 | 408 |
| A12508 | A16829 | 383 | A12508 | A16874 | 380 |
| A12508 | A16900 | 283 | A12508 | A16913 | 301 |
| A12508 | A16954 | 252 | A12508 | A17133 | 257 |
| A12508 | A17211 | 263 | A12509 | A16680 | 446 |
| A12510 | A14642 | 360 | A12510 | A16738 | 328 |
| A12512 | A16514 | 452 | A12513 | A14886 | 386 |
| A12514 | A12515 | 447 | A12514 | A12516 | 447 |
| A12514 | A12517 | 447 | A12515 | A12516 | 452 |
| A12515 | A12517 | 452 | A12516 | A12517 | 452 |
| A12518 | A12534 | 461 | A12518 | A13178 | 430 |
| A12518 | A13826 | 224 | A12518 | A14371 | 252 |
| A12518 | A15383 | 241 | A12520 | A15277 | 393 |
| A12523 | A13229 | 462 | A12524 | A12526 | 469 |
| A12524 | A14654 | 388 | A12524 | A15258 | 404 |
| A12524 | A15277 | 377 | A12525 | A12793 | 171 |
| A12526 | A14654 | 378 | A12526 | A15258 | 396 |
| A12526 | A15277 | 367 | A12528 | A12529 | 469 |
| A12530 | A12571 | 447 | A12532 | A12534 | 425 |
| A12532 | A14210 | 267 | A12532 | A14371 | 285 |
| A12532 | A15916 | 396 | A12533 | A14227 | 335 |
| A12533 | A14291 | 474 | A12533 | A16517 | 446 |
| A12534 | A14210 | 232 | A12534 | A14371 | 252 |
| A12534 | A15916 | 382 | A12535 | A12778 | 447 |
| A12535 | A13138 | 447 | A12535 | A15277 | 377 |
| A12535 | A15945 | 337 | A12536 | A12548 | 63  |
| A12537 | A12538 | 452 | A12537 | A12834 | 433 |
| A12538 | A12678 | 623 | A12538 | A12834 | 935 |
| A12539 | A14399 | 235 | A12541 | A13118 | 452 |
| A12542 | A12936 | 468 | A12542 | A14372 | 358 |

|        |        |     |        |        |     |
|--------|--------|-----|--------|--------|-----|
| A12542 | A15790 | 433 | A12542 | A16267 | 435 |
| A12543 | A13074 | 452 | A12543 | A14148 | 205 |
| A12543 | A14196 | 463 | A12543 | A14220 | 366 |
| A12543 | A14221 | 213 | A12543 | A14265 | 152 |
| A12543 | A14303 | 183 | A12543 | A15291 | 443 |
| A12543 | A15323 | 198 | A12543 | A15355 | 187 |
| A12543 | A15492 | 198 | A12543 | A15613 | 96  |
| A12543 | A16722 | 477 | A12543 | A17063 | 457 |
| A12543 | A17198 | 483 | A12544 | A12546 | 452 |
| A12544 | A12547 | 452 | A12546 | A12547 | 452 |
| A12548 | A12556 | 385 | A12549 | A15498 | 262 |
| A12551 | A12941 | 447 | A12554 | A14188 | 180 |
| A12556 | A12625 | 486 | A12556 | A13665 | 157 |
| A12556 | A13949 | 491 | A12556 | A14076 | 491 |
| A12556 | A14079 | 463 | A12556 | A14094 | 491 |
| A12556 | A14223 | 340 | A12556 | A14230 | 491 |
| A12556 | A14282 | 491 | A12556 | A14481 | 157 |
| A12556 | A14674 | 460 | A12556 | A14694 | 420 |
| A12556 | A14706 | 491 | A12556 | A15369 | 491 |
| A12556 | A15371 | 455 | A12556 | A15539 | 393 |
| A12556 | A15654 | 294 | A12556 | A15837 | 461 |
| A12556 | A15941 | 486 | A12556 | A16127 | 491 |
| A12556 | A16128 | 491 | A12556 | A16129 | 491 |
| A12556 | A16226 | 490 | A12556 | A16294 | 483 |
| A12556 | A16299 | 408 | A12556 | A16378 | 462 |
| A12556 | A16470 | 191 | A12556 | A16626 | 469 |
| A12556 | A16646 | 490 | A12556 | A16754 | 350 |
| A12556 | A16762 | 491 | A12557 | A15323 | 171 |
| A12558 | A12559 | 447 | A12558 | A12917 | 438 |
| A12558 | A12982 | 430 | A12558 | A14885 | 447 |
| A12559 | A12917 | 430 | A12559 | A12982 | 420 |
| A12559 | A14885 | 441 | A12560 | A14026 | 368 |
| A12562 | A12563 | 452 | A12564 | A15338 | 63  |
| A12565 | A12566 | 452 | A12565 | A13085 | 452 |
| A12565 | A13285 | 447 | A12566 | A13085 | 452 |
| A12566 | A13285 | 447 | A12568 | A14193 | 199 |
| A12568 | A14204 | 193 | A12568 | A14395 | 347 |
| A12569 | A13865 | 427 | A12570 | A12571 | 447 |
| A12576 | A13926 | 416 | A12578 | A14892 | 452 |
| A12579 | A14281 | 210 | A12581 | A12635 | 445 |
| A12581 | A13860 | 307 | A12583 | A12628 | 452 |
| A12584 | A13513 | 469 | A12587 | A16300 | 311 |
| A12590 | A13228 | 432 | A12591 | A12748 | 452 |
| A12592 | A15704 | 366 | A12595 | A12608 | 420 |
| A12596 | A16171 | 434 | A12596 | A16174 | 430 |
| A12597 | A16300 | 281 | A12598 | A13062 | 441 |



|        |        |     |        |        |     |
|--------|--------|-----|--------|--------|-----|
| A12598 | A15367 | 151 | A12599 | A12768 | 447 |
| A12599 | A12769 | 447 | A12599 | A12786 | 472 |
| A12599 | A13815 | 447 | A12601 | A12602 | 447 |
| A12601 | A12722 | 343 | A12602 | A12722 | 414 |
| A12605 | A12889 | 475 | A12606 | A12625 | 477 |
| A12606 | A12655 | 151 | A12606 | A12658 | 486 |
| A12606 | A12659 | 335 | A12606 | A12665 | 456 |
| A12606 | A12725 | 488 | A12606 | A12726 | 328 |
| A12606 | A12727 | 201 | A12606 | A12738 | 343 |
| A12606 | A12834 | 236 | A12606 | A12850 | 216 |
| A12606 | A12858 | 489 | A12606 | A12873 | 477 |
| A12606 | A13116 | 367 | A12606 | A13169 | 430 |
| A12606 | A13170 | 481 | A12606 | A13231 | 329 |
| A12606 | A13309 | 430 | A12606 | A13313 | 486 |
| A12606 | A13323 | 224 | A12606 | A13356 | 438 |
| A12606 | A13399 | 470 | A12606 | A13527 | 293 |
| A12606 | A13706 | 455 | A12606 | A13707 | 389 |
| A12606 | A13708 | 469 | A12606 | A13711 | 338 |
| A12606 | A13737 | 463 | A12606 | A13781 | 490 |
| A12606 | A13782 | 281 | A12606 | A13783 | 432 |
| A12606 | A13784 | 486 | A12606 | A13786 | 435 |
| A12606 | A13787 | 243 | A12606 | A13788 | 382 |
| A12606 | A13804 | 329 | A12606 | A13805 | 474 |
| A12606 | A13809 | 483 | A12606 | A13811 | 281 |
| A12606 | A13826 | 876 | A12606 | A13912 | 419 |
| A12606 | A14074 | 281 | A12606 | A14084 | 450 |
| A12606 | A14087 | 267 | A12606 | A14094 | 355 |
| A12606 | A14167 | 318 | A12606 | A14183 | 213 |
| A12606 | A14209 | 176 | A12606 | A14212 | 603 |
| A12606 | A14213 | 401 | A12606 | A14214 | 607 |
| A12606 | A14222 | 483 | A12606 | A14227 | 241 |
| A12606 | A14235 | 188 | A12606 | A14237 | 428 |
| A12606 | A14239 | 455 | A12606 | A14253 | 314 |
| A12606 | A14255 | 475 | A12606 | A14260 | 308 |
| A12606 | A14263 | 475 | A12606 | A14270 | 360 |
| A12606 | A14276 | 863 | A12606 | A14286 | 159 |
| A12606 | A14288 | 479 | A12606 | A14375 | 196 |
| A12606 | A14455 | 373 | A12606 | A14462 | 419 |
| A12606 | A14569 | 488 | A12606 | A14706 | 473 |
| A12606 | A14708 | 429 | A12606 | A14718 | 463 |
| A12606 | A14719 | 267 | A12606 | A14739 | 256 |
| A12606 | A14799 | 486 | A12606 | A14826 | 351 |
| A12606 | A14838 | 202 | A12606 | A14843 | 475 |
| A12606 | A14903 | 469 | A12606 | A14917 | 427 |
| A12606 | A14921 | 427 | A12606 | A15105 | 475 |
| A12606 | A15187 | 470 | A12606 | A15189 | 465 |

|        |        |     |        |        |     |
|--------|--------|-----|--------|--------|-----|
| A12606 | A15262 | 460 | A12606 | A15346 | 779 |
| A12606 | A15409 | 485 | A12606 | A15486 | 157 |
| A12606 | A15498 | 632 | A12606 | A15501 | 366 |
| A12606 | A15506 | 177 | A12606 | A15519 | 350 |
| A12606 | A15532 | 215 | A12606 | A15536 | 185 |
| A12606 | A15541 | 477 | A12606 | A15553 | 232 |
| A12606 | A15653 | 353 | A12606 | A15661 | 157 |
| A12606 | A15665 | 468 | A12606 | A15667 | 159 |
| A12606 | A15680 | 422 | A12606 | A15683 | 457 |
| A12606 | A15696 | 162 | A12606 | A15709 | 473 |
| A12606 | A15711 | 460 | A12606 | A15735 | 249 |
| A12606 | A15774 | 414 | A12606 | A15850 | 429 |
| A12606 | A15854 | 174 | A12606 | A15940 | 162 |
| A12606 | A16157 | 491 | A12606 | A16187 | 401 |
| A12606 | A16215 | 179 | A12606 | A16243 | 168 |
| A12606 | A16261 | 396 | A12606 | A16343 | 452 |
| A12606 | A16387 | 198 | A12606 | A16449 | 276 |
| A12606 | A16552 | 490 | A12606 | A16565 | 490 |
| A12606 | A16566 | 308 | A12606 | A16567 | 201 |
| A12606 | A16585 | 208 | A12606 | A16587 | 479 |
| A12606 | A16597 | 490 | A12606 | A16608 | 246 |
| A12606 | A16611 | 491 | A12606 | A16664 | 490 |
| A12606 | A16675 | 486 | A12606 | A16680 | 465 |
| A12606 | A16682 | 172 | A12606 | A16684 | 312 |
| A12606 | A16690 | 480 | A12606 | A16691 | 416 |
| A12606 | A16692 | 277 | A12606 | A16693 | 422 |
| A12606 | A16695 | 424 | A12606 | A16697 | 168 |
| A12606 | A16699 | 263 | A12606 | A16702 | 510 |
| A12606 | A16703 | 469 | A12606 | A16704 | 477 |
| A12606 | A16706 | 366 | A12606 | A16707 | 393 |
| A12606 | A16708 | 191 | A12606 | A16709 | 285 |
| A12606 | A16764 | 475 | A12606 | A16774 | 463 |
| A12606 | A16776 | 313 | A12606 | A16788 | 401 |
| A12606 | A16790 | 450 | A12606 | A16797 | 338 |
| A12606 | A16799 | 201 | A12606 | A16802 | 235 |
| A12606 | A16806 | 362 | A12606 | A16815 | 451 |
| A12606 | A16824 | 219 | A12606 | A16829 | 475 |
| A12606 | A16838 | 446 | A12606 | A16858 | 380 |
| A12606 | A16859 | 294 | A12606 | A16866 | 382 |
| A12606 | A16874 | 383 | A12606 | A16882 | 272 |
| A12606 | A16900 | 322 | A12606 | A16905 | 455 |
| A12606 | A16907 | 281 | A12606 | A16908 | 256 |
| A12606 | A16913 | 411 | A12606 | A16942 | 208 |
| A12606 | A16944 | 399 | A12606 | A16954 | 285 |
| A12606 | A17012 | 293 | A12606 | A17014 | 208 |
| A12606 | A17015 | 247 | A12606 | A17017 | 152 |

|        |        |     |        |        |     |
|--------|--------|-----|--------|--------|-----|
| A12606 | A17018 | 390 | A12606 | A17019 | 243 |
| A12606 | A17030 | 313 | A12606 | A17033 | 168 |
| A12606 | A17125 | 184 | A12606 | A17133 | 291 |
| A12606 | A17190 | 301 | A12606 | A17211 | 299 |
| A12609 | A12610 | 452 | A12609 | A12611 | 452 |
| A12609 | A12780 | 452 | A12610 | A12611 | 452 |
| A12610 | A12780 | 452 | A12611 | A12780 | 452 |
| A12613 | A13064 | 452 | A12613 | A13503 | 452 |
| A12615 | A12616 | 452 | A12615 | A12617 | 452 |
| A12615 | A12690 | 452 | A12616 | A12617 | 452 |
| A12616 | A12690 | 452 | A12617 | A12690 | 452 |
| A12618 | A14498 | 279 | A12618 | A15320 | 218 |
| A12619 | A12620 | 447 | A12619 | A15684 | 249 |
| A12620 | A15684 | 160 | A12621 | A15336 | 310 |
| A12621 | A16068 | 314 | A12623 | A13300 | 452 |
| A12624 | A14873 | 440 | A12625 | A12658 | 409 |
| A12625 | A12659 | 283 | A12625 | A12725 | 252 |
| A12625 | A12726 | 235 | A12625 | A12792 | 229 |
| A12625 | A12825 | 171 | A12625 | A12850 | 255 |
| A12625 | A12858 | 462 | A12625 | A12873 | 224 |
| A12625 | A13170 | 190 | A12625 | A13231 | 238 |
| A12625 | A13313 | 335 | A12625 | A13321 | 283 |
| A12625 | A13342 | 176 | A12625 | A13356 | 335 |
| A12625 | A13527 | 201 | A12625 | A13706 | 232 |
| A12625 | A13707 | 271 | A12625 | A13711 | 361 |
| A12625 | A13737 | 180 | A12625 | A13781 | 344 |
| A12625 | A13782 | 313 | A12625 | A13783 | 210 |
| A12625 | A13784 | 314 | A12625 | A13786 | 156 |
| A12625 | A13788 | 204 | A12625 | A13804 | 238 |
| A12625 | A13809 | 414 | A12625 | A13811 | 190 |
| A12625 | A13812 | 183 | A12625 | A13949 | 286 |
| A12625 | A14076 | 491 | A12625 | A14079 | 486 |
| A12625 | A14094 | 490 | A12625 | A14167 | 352 |
| A12625 | A14213 | 183 | A12625 | A14214 | 452 |
| A12625 | A14222 | 307 | A12625 | A14230 | 373 |
| A12625 | A14235 | 229 | A12625 | A14239 | 333 |
| A12625 | A14263 | 322 | A12625 | A14270 | 310 |
| A12625 | A14286 | 200 | A12625 | A14288 | 241 |
| A12625 | A14462 | 407 | A12625 | A14569 | 472 |
| A12625 | A14706 | 488 | A12625 | A14708 | 213 |
| A12625 | A14799 | 405 | A12625 | A14903 | 212 |
| A12625 | A14917 | 201 | A12625 | A15187 | 176 |
| A12625 | A15189 | 329 | A12625 | A15369 | 483 |
| A12625 | A15541 | 330 | A12625 | A15683 | 251 |
| A12625 | A15698 | 157 | A12625 | A15709 | 296 |
| A12625 | A15711 | 172 | A12625 | A15850 | 394 |

|        |        |     |        |        |     |
|--------|--------|-----|--------|--------|-----|
| A12625 | A15854 | 228 | A12625 | A15940 | 201 |
| A12625 | A16127 | 293 | A12625 | A16128 | 491 |
| A12625 | A16129 | 491 | A12625 | A16157 | 473 |
| A12625 | A16187 | 291 | A12625 | A16215 | 218 |
| A12625 | A16226 | 369 | A12625 | A16243 | 208 |
| A12625 | A16261 | 151 | A12625 | A16294 | 191 |
| A12625 | A16343 | 270 | A12625 | A16378 | 480 |
| A12625 | A16552 | 362 | A12625 | A16565 | 436 |
| A12625 | A16566 | 216 | A12625 | A16567 | 240 |
| A12625 | A16585 | 249 | A12625 | A16587 | 461 |
| A12625 | A16597 | 344 | A12625 | A16611 | 483 |
| A12625 | A16646 | 212 | A12625 | A16664 | 435 |
| A12625 | A16675 | 458 | A12625 | A16680 | 430 |
| A12625 | A16690 | 301 | A12625 | A16691 | 377 |
| A12625 | A16693 | 385 | A12625 | A16695 | 388 |
| A12625 | A16697 | 208 | A12625 | A16699 | 174 |
| A12625 | A16703 | 168 | A12625 | A16706 | 279 |
| A12625 | A16707 | 313 | A12625 | A16708 | 230 |
| A12625 | A16762 | 461 | A12625 | A16764 | 247 |
| A12625 | A16774 | 369 | A12625 | A16797 | 361 |
| A12625 | A16802 | 152 | A12625 | A16815 | 266 |
| A12625 | A16824 | 258 | A12625 | A16829 | 340 |
| A12625 | A16882 | 305 | A12625 | A16942 | 249 |
| A12626 | A14984 | 452 | A12629 | A15228 | 441 |
| A12631 | A12983 | 425 | A12632 | A12685 | 452 |
| A12633 | A14196 | 240 | A12633 | A14246 | 210 |
| A12633 | A14378 | 229 | A12633 | A15297 | 154 |
| A12633 | A15867 | 477 | A12633 | A16719 | 394 |
| A12634 | A12781 | 428 | A12634 | A14071 | 303 |
| A12634 | A15322 | 163 | A12634 | A15495 | 262 |
| A12638 | A14309 | 391 | A12638 | A15649 | 243 |
| A12639 | A15892 | 432 | A12640 | A13086 | 452 |
| A12641 | A12758 | 447 | A12642 | A14353 | 430 |
| A12644 | A13860 | 413 | A12644 | A14611 | 319 |
| A12644 | A15292 | 210 | A12644 | A15313 | 183 |
| A12644 | A15349 | 152 | A12644 | A15352 | 165 |
| A12644 | A15828 | 337 | A12644 | A16117 | 316 |
| A12645 | A14827 | 436 | A12647 | A16590 | 483 |
| A12651 | A12653 | 313 | A12651 | A13983 | 165 |
| A12651 | A15894 | 473 | A12652 | A14199 | 221 |
| A12652 | A15507 | 294 | A12652 | A15612 | 281 |
| A12653 | A15894 | 418 | A12654 | A13917 | 241 |
| A12654 | A15052 | 434 | A12654 | A15293 | 188 |
| A12655 | A12658 | 243 | A12655 | A12665 | 229 |
| A12655 | A12725 | 165 | A12655 | A12738 | 272 |
| A12655 | A12858 | 208 | A12655 | A12873 | 219 |

|        |        |     |        |        |     |
|--------|--------|-----|--------|--------|-----|
| A12655 | A13231 | 333 | A12655 | A13399 | 216 |
| A12655 | A13707 | 255 | A12655 | A13737 | 187 |
| A12655 | A13784 | 151 | A12655 | A13809 | 249 |
| A12655 | A13912 | 352 | A12655 | A14239 | 226 |
| A12655 | A14263 | 156 | A12655 | A14288 | 159 |
| A12655 | A14455 | 188 | A12655 | A14569 | 257 |
| A12655 | A14708 | 213 | A12655 | A14718 | 257 |
| A12655 | A15105 | 160 | A12655 | A15187 | 286 |
| A12655 | A15189 | 223 | A12655 | A15262 | 205 |
| A12655 | A15297 | 207 | A12655 | A15683 | 165 |
| A12655 | A16157 | 156 | A12655 | A16597 | 235 |
| A12655 | A16690 | 199 | A12655 | A16703 | 279 |
| A12655 | A17033 | 313 | A12656 | A14029 | 340 |
| A12657 | A12905 | 475 | A12658 | A12659 | 337 |
| A12658 | A12665 | 475 | A12658 | A12725 | 481 |
| A12658 | A12726 | 283 | A12658 | A12738 | 213 |
| A12658 | A12792 | 278 | A12658 | A12824 | 543 |
| A12658 | A12825 | 224 | A12658 | A12826 | 369 |
| A12658 | A12834 | 317 | A12658 | A12858 | 485 |
| A12658 | A12873 | 378 | A12658 | A12875 | 188 |
| A12658 | A12927 | 215 | A12658 | A13116 | 424 |
| A12658 | A13169 | 285 | A12658 | A13231 | 286 |
| A12658 | A13309 | 198 | A12658 | A13313 | 483 |
| A12658 | A13321 | 337 | A12658 | A13342 | 356 |
| A12658 | A13356 | 165 | A12658 | A13399 | 450 |
| A12658 | A13706 | 382 | A12658 | A13707 | 402 |
| A12658 | A13708 | 454 | A12658 | A13737 | 457 |
| A12658 | A13781 | 477 | A12658 | A13784 | 446 |
| A12658 | A13785 | 303 | A12658 | A13786 | 480 |
| A12658 | A13787 | 454 | A12658 | A13788 | 374 |
| A12658 | A13804 | 395 | A12658 | A13805 | 369 |
| A12658 | A13809 | 460 | A12658 | A13912 | 310 |
| A12658 | A13969 | 163 | A12658 | A14007 | 160 |
| A12658 | A14074 | 294 | A12658 | A14084 | 419 |
| A12658 | A14094 | 246 | A12658 | A14154 | 154 |
| A12658 | A14167 | 274 | A12658 | A14183 | 190 |
| A12658 | A14214 | 486 | A12658 | A14222 | 382 |
| A12658 | A14227 | 303 | A12658 | A14239 | 382 |
| A12658 | A14255 | 435 | A12658 | A14260 | 266 |
| A12658 | A14263 | 462 | A12658 | A14270 | 357 |
| A12658 | A14286 | 373 | A12658 | A14288 | 424 |
| A12658 | A14289 | 218 | A12658 | A14375 | 391 |
| A12658 | A14462 | 393 | A12658 | A14569 | 488 |
| A12658 | A14570 | 188 | A12658 | A14595 | 307 |
| A12658 | A14706 | 432 | A12658 | A14718 | 404 |
| A12658 | A14719 | 230 | A12658 | A14739 | 330 |

|        |        |     |        |        |     |
|--------|--------|-----|--------|--------|-----|
| A12658 | A14799 | 481 | A12658 | A14826 | 396 |
| A12658 | A14838 | 398 | A12658 | A14903 | 435 |
| A12658 | A14917 | 374 | A12658 | A14921 | 321 |
| A12658 | A15105 | 319 | A12658 | A15187 | 420 |
| A12658 | A15189 | 427 | A12658 | A15257 | 358 |
| A12658 | A15262 | 364 | A12658 | A15292 | 227 |
| A12658 | A15541 | 380 | A12658 | A15653 | 439 |
| A12658 | A15680 | 324 | A12658 | A15683 | 429 |
| A12658 | A15684 | 196 | A12658 | A15696 | 254 |
| A12658 | A15698 | 343 | A12658 | A15709 | 460 |
| A12658 | A15711 | 353 | A12658 | A15735 | 205 |
| A12658 | A15774 | 232 | A12658 | A15818 | 224 |
| A12658 | A15850 | 326 | A12658 | A15855 | 185 |
| A12658 | A15932 | 160 | A12658 | A15940 | 374 |
| A12658 | A16157 | 490 | A12658 | A16187 | 446 |
| A12658 | A16215 | 270 | A12658 | A16243 | 260 |
| A12658 | A16261 | 408 | A12658 | A16322 | 302 |
| A12658 | A16343 | 452 | A12658 | A16552 | 474 |
| A12658 | A16565 | 456 | A12658 | A16566 | 435 |
| A12658 | A16567 | 288 | A12658 | A16587 | 469 |
| A12658 | A16597 | 475 | A12658 | A16611 | 489 |
| A12658 | A16652 | 288 | A12658 | A16664 | 486 |
| A12658 | A16675 | 470 | A12658 | A16680 | 480 |
| A12658 | A16682 | 263 | A12658 | A16690 | 414 |
| A12658 | A16691 | 303 | A12658 | A16695 | 413 |
| A12658 | A16697 | 260 | A12658 | A16699 | 228 |
| A12658 | A16701 | 281 | A12658 | A16703 | 417 |
| A12658 | A16704 | 420 | A12658 | A16707 | 430 |
| A12658 | A16762 | 273 | A12658 | A16764 | 176 |
| A12658 | A16774 | 401 | A12658 | A16776 | 462 |
| A12658 | A16788 | 435 | A12658 | A16790 | 246 |
| A12658 | A16799 | 288 | A12658 | A16802 | 205 |
| A12658 | A16807 | 196 | A12658 | A16815 | 451 |
| A12658 | A16824 | 303 | A12658 | A16829 | 434 |
| A12658 | A16838 | 234 | A12658 | A16858 | 335 |
| A12658 | A16874 | 458 | A12658 | A16913 | 401 |
| A12658 | A16954 | 369 | A12658 | A17015 | 215 |
| A12658 | A17018 | 265 | A12658 | A17019 | 321 |
| A12658 | A17030 | 271 | A12658 | A17033 | 260 |
| A12658 | A17035 | 212 | A12658 | A17133 | 251 |
| A12658 | A17144 | 241 | A12658 | A17211 | 258 |
| A12659 | A12725 | 348 | A12659 | A12726 | 302 |
| A12659 | A12826 | 380 | A12659 | A12850 | 414 |
| A12659 | A12858 | 430 | A12659 | A12873 | 180 |
| A12659 | A13116 | 259 | A12659 | A13169 | 308 |
| A12659 | A13309 | 221 | A12659 | A13313 | 371 |

|        |        |     |        |        |     |
|--------|--------|-----|--------|--------|-----|
| A12659 | A13315 | 267 | A12659 | A13356 | 188 |
| A12659 | A13388 | 263 | A12659 | A13399 | 308 |
| A12659 | A13706 | 185 | A12659 | A13707 | 347 |
| A12659 | A13711 | 396 | A12659 | A13737 | 278 |
| A12659 | A13781 | 375 | A12659 | A13784 | 335 |
| A12659 | A13786 | 232 | A12659 | A13788 | 276 |
| A12659 | A13809 | 212 | A12659 | A13811 | 265 |
| A12659 | A14084 | 234 | A12659 | A14214 | 393 |
| A12659 | A14222 | 171 | A12659 | A14235 | 296 |
| A12659 | A14239 | 319 | A12659 | A14255 | 200 |
| A12659 | A14263 | 340 | A12659 | A14270 | 252 |
| A12659 | A14375 | 199 | A12659 | A14569 | 347 |
| A12659 | A14708 | 306 | A12659 | A14718 | 218 |
| A12659 | A14719 | 252 | A12659 | A14799 | 322 |
| A12659 | A14937 | 258 | A12659 | A15105 | 246 |
| A12659 | A15187 | 251 | A12659 | A15541 | 184 |
| A12659 | A15680 | 251 | A12659 | A15683 | 348 |
| A12659 | A15696 | 274 | A12659 | A15709 | 288 |
| A12659 | A15940 | 274 | A12659 | A16157 | 401 |
| A12659 | A16187 | 360 | A12659 | A16215 | 288 |
| A12659 | A16261 | 228 | A12659 | A16552 | 219 |
| A12659 | A16565 | 328 | A12659 | A16566 | 286 |
| A12659 | A16567 | 307 | A12659 | A16587 | 268 |
| A12659 | A16597 | 329 | A12659 | A16611 | 418 |
| A12659 | A16664 | 324 | A12659 | A16675 | 380 |
| A12659 | A16680 | 313 | A12659 | A16690 | 291 |
| A12659 | A16697 | 281 | A12659 | A16699 | 372 |
| A12659 | A16703 | 243 | A12659 | A16709 | 267 |
| A12659 | A16774 | 313 | A12659 | A16788 | 371 |
| A12659 | A16802 | 356 | A12659 | A16815 | 326 |
| A12659 | A16829 | 281 | A12659 | A16874 | 277 |
| A12659 | A16886 | 384 | A12659 | A17035 | 235 |
| A12659 | A17133 | 272 | A12660 | A14220 | 288 |
| A12660 | A14451 | 314 | A12660 | A15519 | 180 |
| A12660 | A15850 | 296 | A12660 | A16410 | 162 |
| A12660 | A16704 | 191 | A12660 | A16829 | 224 |
| A12661 | A14216 | 162 | A12661 | A17193 | 430 |
| A12662 | A13647 | 361 | A12662 | A14235 | 353 |
| A12662 | A14928 | 177 | A12663 | A13740 | 373 |
| A12663 | A17207 | 414 | A12664 | A12705 | 346 |
| A12664 | A13985 | 899 | A12664 | A15182 | 899 |
| A12664 | A15726 | 174 | A12665 | A12725 | 445 |
| A12665 | A12738 | 329 | A12665 | A12825 | 486 |
| A12665 | A12858 | 489 | A12665 | A12873 | 364 |
| A12665 | A12952 | 422 | A12665 | A13116 | 223 |
| A12665 | A13170 | 229 | A12665 | A13231 | 273 |

|        |        |     |        |        |     |
|--------|--------|-----|--------|--------|-----|
| A12665 | A13309 | 469 | A12665 | A13313 | 633 |
| A12665 | A13321 | 401 | A12665 | A13342 | 213 |
| A12665 | A13388 | 228 | A12665 | A13399 | 414 |
| A12665 | A13706 | 279 | A12665 | A13707 | 179 |
| A12665 | A13708 | 631 | A12665 | A13737 | 396 |
| A12665 | A13781 | 633 | A12665 | A13783 | 429 |
| A12665 | A13784 | 439 | A12665 | A13786 | 195 |
| A12665 | A13787 | 310 | A12665 | A13788 | 364 |
| A12665 | A13804 | 438 | A12665 | A13805 | 452 |
| A12665 | A13806 | 201 | A12665 | A13809 | 389 |
| A12665 | A13912 | 402 | A12665 | A13928 | 324 |
| A12665 | A14084 | 363 | A12665 | A14087 | 216 |
| A12665 | A14094 | 223 | A12665 | A14214 | 473 |
| A12665 | A14222 | 407 | A12665 | A14239 | 463 |
| A12665 | A14255 | 380 | A12665 | A14260 | 252 |
| A12665 | A14263 | 369 | A12665 | A14270 | 215 |
| A12665 | A14288 | 297 | A12665 | A14289 | 204 |
| A12665 | A14358 | 319 | A12665 | A14375 | 293 |
| A12665 | A14455 | 454 | A12665 | A14462 | 296 |
| A12665 | A14569 | 457 | A12665 | A14570 | 247 |
| A12665 | A14708 | 263 | A12665 | A14718 | 180 |
| A12665 | A14799 | 433 | A12665 | A14826 | 314 |
| A12665 | A14838 | 319 | A12665 | A14903 | 429 |
| A12665 | A14917 | 454 | A12665 | A14921 | 409 |
| A12665 | A15105 | 610 | A12665 | A15187 | 414 |
| A12665 | A15189 | 491 | A12665 | A15217 | 247 |
| A12665 | A15262 | 255 | A12665 | A15366 | 324 |
| A12665 | A15501 | 227 | A12665 | A15519 | 205 |
| A12665 | A15653 | 268 | A12665 | A15665 | 420 |
| A12665 | A15680 | 419 | A12665 | A15683 | 306 |
| A12665 | A15698 | 196 | A12665 | A15709 | 341 |
| A12665 | A15711 | 210 | A12665 | A15773 | 324 |
| A12665 | A15850 | 314 | A12665 | A15853 | 201 |
| A12665 | A15854 | 629 | A12665 | A15855 | 491 |
| A12665 | A15940 | 240 | A12665 | A15943 | 313 |
| A12665 | A15947 | 205 | A12665 | A16067 | 241 |
| A12665 | A16115 | 218 | A12665 | A16157 | 481 |
| A12665 | A16187 | 329 | A12665 | A16261 | 190 |
| A12665 | A16322 | 286 | A12665 | A16552 | 489 |
| A12665 | A16565 | 466 | A12665 | A16566 | 373 |
| A12665 | A16567 | 274 | A12665 | A16587 | 422 |
| A12665 | A16597 | 489 | A12665 | A16608 | 348 |
| A12665 | A16611 | 477 | A12665 | A16664 | 474 |
| A12665 | A16675 | 480 | A12665 | A16680 | 418 |
| A12665 | A16682 | 249 | A12665 | A16689 | 176 |
| A12665 | A16690 | 475 | A12665 | A16692 | 224 |



|        |        |     |        |        |     |
|--------|--------|-----|--------|--------|-----|
| A12665 | A16695 | 306 | A12665 | A16701 | 269 |
| A12665 | A16703 | 463 | A12665 | A16704 | 345 |
| A12665 | A16707 | 340 | A12665 | A16764 | 160 |
| A12665 | A16774 | 393 | A12665 | A16776 | 377 |
| A12665 | A16790 | 422 | A12665 | A16806 | 449 |
| A12665 | A16807 | 180 | A12665 | A16808 | 154 |
| A12665 | A16815 | 297 | A12665 | A16824 | 399 |
| A12665 | A16829 | 456 | A12665 | A16838 | 347 |
| A12665 | A16866 | 305 | A12665 | A16868 | 326 |
| A12665 | A16874 | 427 | A12665 | A16905 | 486 |
| A12665 | A16944 | 435 | A12665 | A16954 | 232 |
| A12665 | A17018 | 251 | A12665 | A17030 | 377 |
| A12665 | A17033 | 246 | A12665 | A17211 | 243 |
| A12666 | A14068 | 455 | A12667 | A14520 | 213 |
| A12667 | A14625 | 266 | A12673 | A14169 | 310 |
| A12674 | A16595 | 457 | A12675 | A17085 | 358 |
| A12677 | A15704 | 443 | A12678 | A12834 | 889 |
| A12680 | A12988 | 899 | A12682 | A13874 | 330 |
| A12684 | A14633 | 267 | A12684 | A15638 | 347 |
| A12687 | A13626 | 227 | A12687 | A14606 | 391 |
| A12689 | A12804 | 452 | A12692 | A13345 | 430 |
| A12692 | A16430 | 374 | A12697 | A13006 | 430 |
| A12700 | A12701 | 452 | A12702 | A12807 | 447 |
| A12702 | A12879 | 452 | A12703 | A14073 | 281 |
| A12705 | A13985 | 944 | A12705 | A14188 | 899 |
| A12705 | A15182 | 899 | A12707 | A13920 | 202 |
| A12707 | A15685 | 480 | A12709 | A13826 | 308 |
| A12709 | A13899 | 367 | A12711 | A16877 | 364 |
| A12714 | A14596 | 199 | A12716 | A12811 | 452 |
| A12717 | A16635 | 340 | A12719 | A12734 | 63  |
| A12721 | A15258 | 404 | A12722 | A12790 | 343 |
| A12722 | A12817 | 343 | A12722 | A12893 | 491 |
| A12722 | A13889 | 356 | A12722 | A14009 | 184 |
| A12722 | A14163 | 488 | A12722 | A14192 | 632 |
| A12722 | A14193 | 418 | A12722 | A14266 | 483 |
| A12722 | A14271 | 456 | A12722 | A14278 | 274 |
| A12722 | A14281 | 391 | A12722 | A14295 | 324 |
| A12722 | A14457 | 172 | A12722 | A14484 | 486 |
| A12722 | A14633 | 475 | A12722 | A14926 | 263 |
| A12722 | A15273 | 481 | A12722 | A15415 | 159 |
| A12722 | A15685 | 486 | A12723 | A13340 | 224 |
| A12723 | A13356 | 425 | A12723 | A14397 | 160 |
| A12723 | A14443 | 899 | A12723 | A14709 | 224 |
| A12723 | A16809 | 195 | A12725 | A12726 | 340 |
| A12725 | A12738 | 262 | A12725 | A12850 | 229 |
| A12725 | A12858 | 473 | A12725 | A12873 | 441 |

|        |        |     |        |        |     |
|--------|--------|-----|--------|--------|-----|
| A12725 | A13116 | 378 | A12725 | A13169 | 288 |
| A12725 | A13231 | 212 | A12725 | A13313 | 480 |
| A12725 | A13321 | 254 | A12725 | A13399 | 481 |
| A12725 | A13706 | 418 | A12725 | A13707 | 338 |
| A12725 | A13708 | 438 | A12725 | A13711 | 346 |
| A12725 | A13737 | 443 | A12725 | A13781 | 485 |
| A12725 | A13783 | 396 | A12725 | A13784 | 466 |
| A12725 | A13786 | 411 | A12725 | A13788 | 311 |
| A12725 | A13805 | 385 | A12725 | A13809 | 474 |
| A12725 | A13811 | 163 | A12725 | A13912 | 425 |
| A12725 | A13963 | 318 | A12725 | A14074 | 299 |
| A12725 | A14084 | 456 | A12725 | A14154 | 187 |
| A12725 | A14214 | 486 | A12725 | A14222 | 465 |
| A12725 | A14227 | 267 | A12725 | A14239 | 374 |
| A12725 | A14255 | 425 | A12725 | A14260 | 322 |
| A12725 | A14263 | 425 | A12725 | A14285 | 491 |
| A12725 | A14288 | 446 | A12725 | A14289 | 269 |
| A12725 | A14375 | 213 | A12725 | A14455 | 423 |
| A12725 | A14462 | 218 | A12725 | A14569 | 475 |
| A12725 | A14595 | 236 | A12725 | A14706 | 305 |
| A12725 | A14708 | 408 | A12725 | A14718 | 467 |
| A12725 | A14719 | 151 | A12725 | A14799 | 469 |
| A12725 | A14838 | 226 | A12725 | A14903 | 398 |
| A12725 | A14917 | 307 | A12725 | A14921 | 256 |
| A12725 | A15105 | 474 | A12725 | A15187 | 371 |
| A12725 | A15189 | 416 | A12725 | A15262 | 352 |
| A12725 | A15519 | 270 | A12725 | A15541 | 443 |
| A12725 | A15653 | 162 | A12725 | A15665 | 307 |
| A12725 | A15667 | 173 | A12725 | A15680 | 208 |
| A12725 | A15683 | 450 | A12725 | A15696 | 176 |
| A12725 | A15709 | 447 | A12725 | A15711 | 419 |
| A12725 | A15735 | 188 | A12725 | A15774 | 152 |
| A12725 | A15940 | 176 | A12725 | A16125 | 236 |
| A12725 | A16157 | 486 | A12725 | A16215 | 193 |
| A12725 | A16261 | 407 | A12725 | A16343 | 368 |
| A12725 | A16552 | 483 | A12725 | A16565 | 446 |
| A12725 | A16566 | 322 | A12725 | A16587 | 468 |
| A12725 | A16597 | 480 | A12725 | A16608 | 268 |
| A12725 | A16611 | 483 | A12725 | A16664 | 480 |
| A12725 | A16675 | 462 | A12725 | A16680 | 441 |
| A12725 | A16682 | 185 | A12725 | A16684 | 322 |
| A12725 | A16690 | 450 | A12725 | A16692 | 293 |
| A12725 | A16695 | 372 | A12725 | A16699 | 279 |
| A12725 | A16702 | 157 | A12725 | A16703 | 418 |
| A12725 | A16704 | 422 | A12725 | A16707 | 400 |
| A12725 | A16709 | 167 | A12725 | A16762 | 168 |

|        |        |     |        |        |     |
|--------|--------|-----|--------|--------|-----|
| A12725 | A16764 | 449 | A12725 | A16774 | 223 |
| A12725 | A16776 | 195 | A12725 | A16788 | 306 |
| A12725 | A16790 | 301 | A12725 | A16802 | 254 |
| A12725 | A16806 | 251 | A12725 | A16815 | 241 |
| A12725 | A16829 | 316 | A12725 | A16838 | 154 |
| A12725 | A16858 | 274 | A12725 | A16859 | 306 |
| A12725 | A16866 | 394 | A12725 | A16874 | 393 |
| A12725 | A16900 | 202 | A12725 | A16905 | 409 |
| A12725 | A16913 | 351 | A12725 | A16944 | 202 |
| A12725 | A16954 | 301 | A12725 | A17012 | 174 |
| A12725 | A17019 | 256 | A12725 | A17030 | 195 |
| A12725 | A17033 | 316 | A12725 | A17125 | 330 |
| A12725 | A17190 | 180 | A12725 | A17211 | 180 |
| A12726 | A12850 | 369 | A12726 | A12858 | 252 |
| A12726 | A12873 | 262 | A12726 | A12927 | 204 |
| A12726 | A13169 | 258 | A12726 | A13313 | 163 |
| A12726 | A13707 | 294 | A12726 | A13708 | 218 |
| A12726 | A13711 | 423 | A12726 | A13784 | 195 |
| A12726 | A13788 | 339 | A12726 | A13809 | 288 |
| A12726 | A14239 | 267 | A12726 | A14255 | 279 |
| A12726 | A14288 | 202 | A12726 | A14706 | 215 |
| A12726 | A14708 | 255 | A12726 | A14799 | 317 |
| A12726 | A14903 | 345 | A12726 | A15262 | 369 |
| A12726 | A15683 | 208 | A12726 | A15709 | 238 |
| A12726 | A16157 | 406 | A12726 | A16552 | 317 |
| A12726 | A16565 | 274 | A12726 | A16611 | 226 |
| A12726 | A16664 | 273 | A12726 | A16675 | 243 |
| A12726 | A16690 | 243 | A12726 | A16703 | 314 |
| A12726 | A16762 | 247 | A12726 | A16776 | 350 |
| A12726 | A16802 | 302 | A12726 | A16807 | 294 |
| A12726 | A16914 | 63  | A12727 | A12858 | 472 |
| A12727 | A12952 | 212 | A12727 | A13309 | 301 |
| A12727 | A13313 | 168 | A12727 | A13315 | 335 |
| A12727 | A13321 | 307 | A12727 | A13706 | 272 |
| A12727 | A13781 | 308 | A12727 | A13784 | 406 |
| A12727 | A13912 | 378 | A12727 | A14087 | 324 |
| A12727 | A14094 | 157 | A12727 | A14214 | 193 |
| A12727 | A14222 | 152 | A12727 | A14263 | 462 |
| A12727 | A14270 | 455 | A12727 | A14288 | 208 |
| A12727 | A14455 | 238 | A12727 | A14569 | 299 |
| A12727 | A14719 | 418 | A12727 | A14903 | 347 |
| A12727 | A14921 | 385 | A12727 | A15105 | 210 |
| A12727 | A15187 | 417 | A12727 | A15189 | 269 |
| A12727 | A15262 | 252 | A12727 | A15501 | 232 |
| A12727 | A15536 | 356 | A12727 | A15651 | 254 |
| A12727 | A15735 | 201 | A12727 | A16157 | 205 |

|        |        |     |        |        |     |
|--------|--------|-----|--------|--------|-----|
| A12727 | A16552 | 188 | A12727 | A16565 | 279 |
| A12727 | A16597 | 391 | A12727 | A16608 | 251 |
| A12727 | A16611 | 230 | A12727 | A16635 | 243 |
| A12727 | A16652 | 266 | A12727 | A16675 | 247 |
| A12727 | A16690 | 247 | A12727 | A16704 | 324 |
| A12727 | A16790 | 335 | A12727 | A16838 | 328 |
| A12727 | A16866 | 399 | A12727 | A16905 | 308 |
| A12727 | A16913 | 368 | A12727 | A17190 | 345 |
| A12728 | A13314 | 451 | A12728 | A13326 | 367 |
| A12728 | A14368 | 185 | A12728 | A14862 | 243 |
| A12728 | A16767 | 417 | A12728 | A16896 | 258 |
| A12730 | A15905 | 249 | A12731 | A13456 | 427 |
| A12738 | A12858 | 176 | A12738 | A12873 | 188 |
| A12738 | A13169 | 183 | A12738 | A13231 | 310 |
| A12738 | A13309 | 228 | A12738 | A13313 | 204 |
| A12738 | A13399 | 184 | A12738 | A13527 | 279 |
| A12738 | A13707 | 224 | A12738 | A13708 | 273 |
| A12738 | A13737 | 154 | A12738 | A13781 | 314 |
| A12738 | A13783 | 288 | A12738 | A13784 | 343 |
| A12738 | A13786 | 491 | A12738 | A13788 | 283 |
| A12738 | A13809 | 416 | A12738 | A13832 | 213 |
| A12738 | A13912 | 332 | A12738 | A14182 | 266 |
| A12738 | A14222 | 285 | A12738 | A14239 | 193 |
| A12738 | A14247 | 490 | A12738 | A14263 | 347 |
| A12738 | A14288 | 408 | A12738 | A14455 | 377 |
| A12738 | A14569 | 353 | A12738 | A14661 | 462 |
| A12738 | A14708 | 180 | A12738 | A14711 | 423 |
| A12738 | A14718 | 226 | A12738 | A14799 | 329 |
| A12738 | A14844 | 433 | A12738 | A14917 | 489 |
| A12738 | A14921 | 341 | A12738 | A15105 | 256 |
| A12738 | A15187 | 258 | A12738 | A15189 | 191 |
| A12738 | A15262 | 173 | A12738 | A15501 | 151 |
| A12738 | A15541 | 191 | A12738 | A15940 | 281 |
| A12738 | A16157 | 439 | A12738 | A16261 | 235 |
| A12738 | A16552 | 330 | A12738 | A16565 | 202 |
| A12738 | A16587 | 388 | A12738 | A16597 | 443 |
| A12738 | A16608 | 170 | A12738 | A16664 | 332 |
| A12738 | A16680 | 188 | A12738 | A16684 | 384 |
| A12738 | A16690 | 299 | A12738 | A16692 | 268 |
| A12738 | A16703 | 372 | A12738 | A16704 | 259 |
| A12738 | A16709 | 274 | A12738 | A16764 | 207 |
| A12738 | A16866 | 217 | A12738 | A16874 | 283 |
| A12738 | A16900 | 302 | A12738 | A16954 | 274 |
| A12738 | A17012 | 279 | A12738 | A17018 | 291 |
| A12738 | A17033 | 396 | A12738 | A17043 | 335 |
| A12738 | A17211 | 285 | A12739 | A15154 | 427 |

|        |        |     |        |        |     |
|--------|--------|-----|--------|--------|-----|
| A12739 | A15155 | 427 | A12743 | A12860 | 452 |
| A12745 | A15064 | 374 | A12753 | A12754 | 447 |
| A12753 | A12755 | 447 | A12753 | A12782 | 472 |
| A12754 | A12755 | 452 | A12754 | A12782 | 447 |
| A12755 | A12782 | 447 | A12756 | A16195 | 441 |
| A12757 | A13225 | 899 | A12757 | A13928 | 156 |
| A12757 | A14148 | 305 | A12757 | A14178 | 156 |
| A12757 | A14255 | 484 | A12757 | A15131 | 388 |
| A12757 | A15297 | 391 | A12757 | A15764 | 246 |
| A12757 | A16291 | 252 | A12757 | A16685 | 474 |
| A12757 | A16699 | 156 | A12762 | A15323 | 229 |
| A12765 | A14483 | 380 | A12766 | A12772 | 452 |
| A12766 | A12773 | 452 | A12766 | A12774 | 452 |
| A12766 | A12775 | 452 | A12766 | A12776 | 452 |
| A12767 | A14635 | 191 | A12768 | A12769 | 452 |
| A12768 | A12786 | 447 | A12768 | A13815 | 452 |
| A12769 | A12786 | 447 | A12769 | A13815 | 452 |
| A12771 | A13860 | 475 | A12772 | A12773 | 452 |
| A12772 | A12774 | 452 | A12772 | A12775 | 452 |
| A12772 | A12776 | 452 | A12773 | A12774 | 452 |
| A12773 | A12775 | 452 | A12773 | A12776 | 452 |
| A12774 | A12775 | 452 | A12774 | A12776 | 452 |
| A12775 | A12776 | 452 | A12778 | A13138 | 452 |
| A12778 | A15277 | 393 | A12781 | A14071 | 324 |
| A12781 | A14570 | 224 | A12781 | A15322 | 191 |
| A12783 | A14272 | 229 | A12786 | A13815 | 447 |
| A12787 | A14494 | 352 | A12787 | A17209 | 407 |
| A12788 | A13237 | 452 | A12792 | A12858 | 245 |
| A12792 | A13313 | 157 | A12792 | A13321 | 297 |
| A12792 | A13342 | 316 | A12792 | A13830 | 241 |
| A12792 | A13846 | 296 | A12792 | A14095 | 449 |
| A12792 | A14182 | 205 | A12792 | A14214 | 182 |
| A12792 | A14288 | 196 | A12792 | A14462 | 274 |
| A12792 | A14569 | 288 | A12792 | A14706 | 208 |
| A12792 | A15189 | 259 | A12792 | A15500 | 196 |
| A12792 | A15653 | 174 | A12792 | A15698 | 302 |
| A12792 | A16157 | 193 | A12792 | A16597 | 271 |
| A12792 | A16611 | 218 | A12792 | A16652 | 457 |
| A12792 | A16664 | 267 | A12792 | A16680 | 256 |
| A12793 | A13012 | 157 | A12793 | A13327 | 324 |
| A12793 | A15992 | 312 | A12793 | A17108 | 491 |
| A12797 | A12803 | 452 | A12797 | A12984 | 447 |
| A12797 | A16140 | 452 | A12797 | A16168 | 452 |
| A12797 | A16169 | 452 | A12797 | A16172 | 452 |
| A12797 | A16175 | 452 | A12797 | A16178 | 452 |
| A12797 | A16179 | 452 | A12797 | A16184 | 452 |

|        |        |     |        |        |     |
|--------|--------|-----|--------|--------|-----|
| A12797 | A16185 | 452 | A12797 | A16186 | 452 |
| A12799 | A12801 | 452 | A12799 | A15226 | 430 |
| A12799 | A15233 | 414 | A12799 | A15240 | 438 |
| A12799 | A15249 | 440 | A12799 | A15272 | 430 |
| A12799 | A15279 | 447 | A12800 | A13095 | 445 |
| A12800 | A13100 | 469 | A12800 | A13101 | 469 |
| A12800 | A15277 | 367 | A12800 | A15638 | 334 |
| A12801 | A15226 | 430 | A12801 | A15233 | 414 |
| A12801 | A15240 | 438 | A12801 | A15249 | 440 |
| A12801 | A15272 | 430 | A12801 | A15279 | 447 |
| A12803 | A12984 | 447 | A12803 | A16140 | 452 |
| A12803 | A16168 | 452 | A12803 | A16169 | 452 |
| A12803 | A16172 | 452 | A12803 | A16175 | 452 |
| A12803 | A16178 | 452 | A12803 | A16179 | 452 |
| A12803 | A16184 | 452 | A12803 | A16185 | 452 |
| A12803 | A16186 | 452 | A12806 | A14197 | 307 |
| A12807 | A12879 | 447 | A12807 | A13419 | 435 |
| A12809 | A14071 | 303 | A12809 | A15425 | 305 |
| A12810 | A12824 | 173 | A12814 | A13050 | 473 |
| A12814 | A13256 | 480 | A12818 | A13344 | 899 |
| A12818 | A14557 | 899 | A12819 | A13276 | 447 |
| A12820 | A13832 | 335 | A12820 | A14247 | 419 |
| A12820 | A14258 | 252 | A12820 | A14399 | 227 |
| A12820 | A14710 | 396 | A12820 | A17061 | 356 |
| A12821 | A13340 | 383 | A12821 | A13710 | 488 |
| A12821 | A14176 | 407 | A12821 | A14216 | 174 |
| A12821 | A14505 | 236 | A12821 | A14508 | 462 |
| A12821 | A14813 | 286 | A12821 | A15500 | 452 |
| A12821 | A15732 | 224 | A12821 | A15743 | 259 |
| A12821 | A15771 | 172 | A12821 | A16035 | 316 |
| A12821 | A16682 | 484 | A12822 | A13207 | 401 |
| A12822 | A13826 | 246 | A12822 | A15346 | 294 |
| A12824 | A13008 | 411 | A12824 | A13211 | 63  |
| A12824 | A13340 | 346 | A12824 | A14005 | 408 |
| A12824 | A14007 | 160 | A12824 | A14167 | 229 |
| A12824 | A14196 | 491 | A12824 | A14220 | 263 |
| A12824 | A14247 | 183 | A12824 | A14393 | 256 |
| A12824 | A14489 | 252 | A12824 | A14502 | 254 |
| A12824 | A14566 | 281 | A12824 | A14701 | 454 |
| A12824 | A14827 | 239 | A12824 | A15257 | 501 |
| A12824 | A15297 | 569 | A12824 | A15323 | 447 |
| A12824 | A15338 | 241 | A12824 | A15357 | 497 |
| A12824 | A15419 | 199 | A12824 | A15498 | 481 |
| A12824 | A15558 | 485 | A12824 | A15559 | 474 |
| A12824 | A15624 | 480 | A12824 | A15661 | 212 |
| A12824 | A15666 | 151 | A12824 | A15684 | 213 |

|        |        |     |        |        |     |
|--------|--------|-----|--------|--------|-----|
| A12824 | A15992 | 440 | A12824 | A16157 | 234 |
| A12824 | A16358 | 246 | A12824 | A16496 | 394 |
| A12824 | A16764 | 180 | A12824 | A16833 | 321 |
| A12824 | A16838 | 171 | A12824 | A16860 | 208 |
| A12824 | A16874 | 490 | A12824 | A16964 | 180 |
| A12824 | A17118 | 151 | A12825 | A12858 | 399 |
| A12825 | A13313 | 491 | A12825 | A13321 | 247 |
| A12825 | A13707 | 361 | A12825 | A13708 | 489 |
| A12825 | A13737 | 165 | A12825 | A13781 | 430 |
| A12825 | A13783 | 297 | A12825 | A13788 | 293 |
| A12825 | A13804 | 319 | A12825 | A13806 | 258 |
| A12825 | A14084 | 258 | A12825 | A14214 | 348 |
| A12825 | A14222 | 301 | A12825 | A14239 | 205 |
| A12825 | A14255 | 219 | A12825 | A14263 | 265 |
| A12825 | A14270 | 270 | A12825 | A14288 | 268 |
| A12825 | A14289 | 260 | A12825 | A14358 | 357 |
| A12825 | A14375 | 218 | A12825 | A14455 | 302 |
| A12825 | A14462 | 221 | A12825 | A14569 | 424 |
| A12825 | A14799 | 243 | A12825 | A14903 | 299 |
| A12825 | A14917 | 398 | A12825 | A15105 | 417 |
| A12825 | A15189 | 485 | A12825 | A15519 | 260 |
| A12825 | A15541 | 204 | A12825 | A15709 | 307 |
| A12825 | A15854 | 443 | A12825 | A15855 | 456 |
| A12825 | A15940 | 291 | A12825 | A15947 | 260 |
| A12825 | A16067 | 174 | A12825 | A16157 | 360 |
| A12825 | A16187 | 373 | A12825 | A16552 | 245 |
| A12825 | A16565 | 215 | A12825 | A16566 | 488 |
| A12825 | A16585 | 327 | A12825 | A16587 | 285 |
| A12825 | A16597 | 475 | A12825 | A16608 | 182 |
| A12825 | A16611 | 428 | A12825 | A16663 | 232 |
| A12825 | A16664 | 343 | A12825 | A16682 | 299 |
| A12825 | A16695 | 346 | A12825 | A16776 | 306 |
| A12825 | A16807 | 238 | A12825 | A16824 | 334 |
| A12825 | A16829 | 296 | A12825 | A16913 | 327 |
| A12825 | A16954 | 283 | A12825 | A17030 | 306 |
| A12826 | A12850 | 418 | A12826 | A12858 | 350 |
| A12826 | A13169 | 353 | A12826 | A13313 | 286 |
| A12826 | A13315 | 398 | A12826 | A13356 | 361 |
| A12826 | A13707 | 375 | A12826 | A13708 | 329 |
| A12826 | A13786 | 383 | A12826 | A13788 | 401 |
| A12826 | A14202 | 249 | A12826 | A14213 | 338 |
| A12826 | A14235 | 409 | A12826 | A14255 | 439 |
| A12826 | A14263 | 314 | A12826 | A14270 | 391 |
| A12826 | A14375 | 367 | A12826 | A14706 | 326 |
| A12826 | A14719 | 391 | A12826 | A14799 | 302 |
| A12826 | A14921 | 425 | A12826 | A14937 | 394 |

|        |        |     |        |        |     |
|--------|--------|-----|--------|--------|-----|
| A12826 | A15366 | 213 | A12826 | A15680 | 321 |
| A12826 | A15818 | 390 | A12826 | A16157 | 316 |
| A12826 | A16567 | 414 | A12826 | A16611 | 333 |
| A12826 | A16652 | 356 | A12826 | A16664 | 363 |
| A12826 | A16675 | 428 | A12826 | A16703 | 388 |
| A12826 | A16790 | 398 | A12826 | A17133 | 400 |
| A12828 | A13054 | 338 | A12829 | A13870 | 254 |
| A12829 | A14006 | 380 | A12831 | A14525 | 424 |
| A12831 | A16531 | 255 | A12834 | A12927 | 245 |
| A12834 | A13786 | 335 | A12834 | A14084 | 236 |
| A12834 | A14183 | 323 | A12834 | A14255 | 313 |
| A12834 | A14826 | 257 | A12834 | A15653 | 224 |
| A12834 | A16157 | 241 | A12834 | A16565 | 310 |
| A12834 | A16611 | 266 | A12834 | A17133 | 361 |
| A12835 | A14011 | 196 | A12835 | A14300 | 490 |
| A12835 | A15202 | 208 | A12835 | A16831 | 188 |
| A12836 | A14162 | 438 | A12837 | A13855 | 260 |
| A12839 | A13674 | 379 | A12839 | A15141 | 326 |
| A12839 | A17085 | 258 | A12843 | A15626 | 334 |
| A12847 | A14126 | 398 | A12847 | A16300 | 247 |
| A12848 | A15626 | 443 | A12849 | A13989 | 256 |
| A12849 | A15764 | 457 | A12850 | A12858 | 270 |
| A12850 | A13169 | 389 | A12850 | A13313 | 185 |
| A12850 | A13315 | 346 | A12850 | A13356 | 286 |
| A12850 | A13707 | 310 | A12850 | A13711 | 428 |
| A12850 | A13784 | 216 | A12850 | A13788 | 352 |
| A12850 | A13805 | 347 | A12850 | A13809 | 306 |
| A12850 | A14213 | 252 | A12850 | A14235 | 366 |
| A12850 | A14239 | 285 | A12850 | A14255 | 296 |
| A12850 | A14263 | 221 | A12850 | A14270 | 335 |
| A12850 | A14288 | 223 | A12850 | A14706 | 235 |
| A12850 | A14708 | 274 | A12850 | A14719 | 335 |
| A12850 | A14799 | 204 | A12850 | A14937 | 340 |
| A12850 | A15680 | 229 | A12850 | A15683 | 229 |
| A12850 | A16157 | 350 | A12850 | A16552 | 205 |
| A12850 | A16565 | 293 | A12850 | A16567 | 372 |
| A12850 | A16611 | 246 | A12850 | A16675 | 380 |
| A12850 | A16690 | 262 | A12850 | A16703 | 329 |
| A12850 | A16774 | 375 | A12850 | A16802 | 319 |
| A12850 | A16937 | 389 | A12850 | A17133 | 348 |
| A12852 | A15546 | 353 | A12853 | A14196 | 180 |
| A12853 | A15297 | 450 | A12853 | A15725 | 279 |
| A12854 | A13826 | 267 | A12854 | A14007 | 363 |
| A12854 | A14010 | 160 | A12854 | A14072 | 279 |
| A12854 | A14190 | 303 | A12854 | A14366 | 238 |
| A12854 | A14371 | 306 | A12854 | A14604 | 173 |



|        |        |     |        |        |     |
|--------|--------|-----|--------|--------|-----|
| A12854 | A15312 | 285 | A12854 | A15313 | 199 |
| A12854 | A15352 | 279 | A12854 | A15476 | 362 |
| A12854 | A15484 | 451 | A12854 | A15795 | 460 |
| A12854 | A15800 | 419 | A12854 | A15801 | 269 |
| A12854 | A16224 | 398 | A12856 | A14127 | 152 |
| A12858 | A12873 | 475 | A12858 | A12875 | 152 |
| A12858 | A12927 | 165 | A12858 | A13069 | 256 |
| A12858 | A13106 | 235 | A12858 | A13116 | 333 |
| A12858 | A13169 | 401 | A12858 | A13170 | 208 |
| A12858 | A13231 | 254 | A12858 | A13309 | 428 |
| A12858 | A13313 | 489 | A12858 | A13315 | 210 |
| A12858 | A13321 | 386 | A12858 | A13323 | 277 |
| A12858 | A13342 | 326 | A12858 | A13356 | 353 |
| A12858 | A13388 | 207 | A12858 | A13399 | 468 |
| A12858 | A13527 | 218 | A12858 | A13706 | 351 |
| A12858 | A13707 | 452 | A12858 | A13708 | 481 |
| A12858 | A13737 | 420 | A12858 | A13781 | 491 |
| A12858 | A13782 | 326 | A12858 | A13783 | 355 |
| A12858 | A13784 | 489 | A12858 | A13786 | 307 |
| A12858 | A13788 | 449 | A12858 | A13804 | 254 |
| A12858 | A13805 | 465 | A12858 | A13806 | 180 |
| A12858 | A13809 | 474 | A12858 | A13811 | 409 |
| A12858 | A13812 | 201 | A12858 | A13894 | 201 |
| A12858 | A13912 | 441 | A12858 | A13963 | 177 |
| A12858 | A13983 | 154 | A12858 | A14074 | 408 |
| A12858 | A14084 | 447 | A12858 | A14087 | 193 |
| A12858 | A14094 | 274 | A12858 | A14167 | 364 |
| A12858 | A14186 | 232 | A12858 | A14199 | 263 |
| A12858 | A14213 | 308 | A12858 | A14214 | 490 |
| A12858 | A14222 | 475 | A12858 | A14227 | 151 |
| A12858 | A14235 | 368 | A12858 | A14239 | 458 |
| A12858 | A14255 | 417 | A12858 | A14260 | 232 |
| A12858 | A14263 | 489 | A12858 | A14270 | 401 |
| A12858 | A14286 | 346 | A12858 | A14288 | 451 |
| A12858 | A14289 | 396 | A12858 | A14358 | 303 |
| A12858 | A14375 | 362 | A12858 | A14455 | 446 |
| A12858 | A14462 | 446 | A12858 | A14474 | 249 |
| A12858 | A14569 | 489 | A12858 | A14570 | 205 |
| A12858 | A14661 | 311 | A12858 | A14706 | 466 |
| A12858 | A14708 | 399 | A12858 | A14718 | 291 |
| A12858 | A14719 | 193 | A12858 | A14739 | 303 |
| A12858 | A14799 | 477 | A12858 | A14838 | 291 |
| A12858 | A14903 | 452 | A12858 | A14917 | 347 |
| A12858 | A14921 | 466 | A12858 | A14937 | 201 |
| A12858 | A15105 | 463 | A12858 | A15187 | 481 |
| A12858 | A15189 | 483 | A12858 | A15262 | 430 |

|        |        |     |        |        |     |
|--------|--------|-----|--------|--------|-----|
| A12858 | A15370 | 319 | A12858 | A15380 | 196 |
| A12858 | A15501 | 302 | A12858 | A15519 | 396 |
| A12858 | A15533 | 162 | A12858 | A15536 | 243 |
| A12858 | A15541 | 480 | A12858 | A15651 | 229 |
| A12858 | A15653 | 319 | A12858 | A15665 | 451 |
| A12858 | A15680 | 435 | A12858 | A15683 | 465 |
| A12858 | A15698 | 308 | A12858 | A15709 | 484 |
| A12858 | A15711 | 440 | A12858 | A15735 | 340 |
| A12858 | A15743 | 212 | A12858 | A15765 | 173 |
| A12858 | A15774 | 195 | A12858 | A15818 | 188 |
| A12858 | A15850 | 467 | A12858 | A15853 | 180 |
| A12858 | A15854 | 347 | A12858 | A15855 | 319 |
| A12858 | A15932 | 291 | A12858 | A15940 | 218 |
| A12858 | A15943 | 157 | A12858 | A15947 | 183 |
| A12858 | A16115 | 196 | A12858 | A16157 | 490 |
| A12858 | A16187 | 434 | A12858 | A16215 | 235 |
| A12858 | A16243 | 353 | A12858 | A16261 | 385 |
| A12858 | A16343 | 394 | A12858 | A16387 | 254 |
| A12858 | A16552 | 489 | A12858 | A16565 | 489 |
| A12858 | A16566 | 232 | A12858 | A16567 | 375 |
| A12858 | A16585 | 263 | A12858 | A16587 | 465 |
| A12858 | A16597 | 484 | A12858 | A16608 | 391 |
| A12858 | A16611 | 490 | A12858 | A16652 | 344 |
| A12858 | A16663 | 152 | A12858 | A16664 | 489 |
| A12858 | A16675 | 484 | A12858 | A16680 | 475 |
| A12858 | A16682 | 356 | A12858 | A16689 | 286 |
| A12858 | A16690 | 480 | A12858 | A16691 | 386 |
| A12858 | A16692 | 335 | A12858 | A16693 | 394 |
| A12858 | A16695 | 443 | A12858 | A16697 | 353 |
| A12858 | A16699 | 324 | A12858 | A16702 | 201 |
| A12858 | A16703 | 458 | A12858 | A16704 | 401 |
| A12858 | A16707 | 326 | A12858 | A16709 | 340 |
| A12858 | A16764 | 363 | A12858 | A16774 | 435 |
| A12858 | A16776 | 238 | A12858 | A16788 | 337 |
| A12858 | A16790 | 446 | A12858 | A16799 | 256 |
| A12858 | A16806 | 396 | A12858 | A16807 | 291 |
| A12858 | A16815 | 391 | A12858 | A16824 | 439 |
| A12858 | A16827 | 218 | A12858 | A16829 | 467 |
| A12858 | A16838 | 405 | A12858 | A16866 | 372 |
| A12858 | A16868 | 311 | A12858 | A16874 | 450 |
| A12858 | A16905 | 456 | A12858 | A16908 | 303 |
| A12858 | A16913 | 263 | A12858 | A16944 | 368 |
| A12858 | A17014 | 263 | A12858 | A17015 | 393 |
| A12858 | A17033 | 226 | A12858 | A17035 | 308 |
| A12858 | A17133 | 216 | A12858 | A17144 | 205 |
| A12858 | A17190 | 224 | A12859 | A16779 | 452 |

|        |        |     |        |        |     |
|--------|--------|-----|--------|--------|-----|
| A12861 | A15311 | 423 | A12861 | A15312 | 216 |
| A12861 | A15313 | 229 | A12861 | A15318 | 281 |
| A12861 | A15331 | 319 | A12861 | A15335 | 340 |
| A12863 | A14176 | 463 | A12866 | A15660 | 165 |
| A12867 | A13954 | 457 | A12867 | A16485 | 457 |
| A12869 | A14247 | 425 | A12869 | A14661 | 355 |
| A12869 | A16300 | 171 | A12870 | A13826 | 262 |
| A12870 | A13899 | 418 | A12870 | A14072 | 221 |
| A12870 | A14098 | 372 | A12870 | A15318 | 216 |
| A12870 | A15349 | 256 | A12870 | A15420 | 202 |
| A12870 | A15445 | 249 | A12870 | A15547 | 174 |
| A12870 | A16915 | 321 | A12872 | A14525 | 241 |
| A12872 | A14674 | 185 | A12872 | A15372 | 238 |
| A12872 | A16531 | 259 | A12873 | A13231 | 380 |
| A12873 | A13309 | 173 | A12873 | A13313 | 413 |
| A12873 | A13321 | 435 | A12873 | A13388 | 218 |
| A12873 | A13399 | 408 | A12873 | A13707 | 386 |
| A12873 | A13708 | 377 | A12873 | A13737 | 321 |
| A12873 | A13781 | 457 | A12873 | A13783 | 363 |
| A12873 | A13784 | 353 | A12873 | A13788 | 232 |
| A12873 | A13805 | 418 | A12873 | A13809 | 296 |
| A12873 | A13811 | 218 | A12873 | A13895 | 213 |
| A12873 | A13912 | 398 | A12873 | A13963 | 196 |
| A12873 | A13989 | 235 | A12873 | A14084 | 352 |
| A12873 | A14147 | 226 | A12873 | A14167 | 252 |
| A12873 | A14186 | 151 | A12873 | A14212 | 260 |
| A12873 | A14214 | 475 | A12873 | A14239 | 268 |
| A12873 | A14255 | 374 | A12873 | A14260 | 243 |
| A12873 | A14263 | 177 | A12873 | A14286 | 228 |
| A12873 | A14289 | 193 | A12873 | A14375 | 151 |
| A12873 | A14455 | 390 | A12873 | A14462 | 154 |
| A12873 | A14569 | 386 | A12873 | A14708 | 457 |
| A12873 | A14718 | 303 | A12873 | A14719 | 205 |
| A12873 | A14799 | 427 | A12873 | A14903 | 425 |
| A12873 | A14917 | 229 | A12873 | A15105 | 286 |
| A12873 | A15187 | 335 | A12873 | A15189 | 358 |
| A12873 | A15262 | 341 | A12873 | A15519 | 195 |
| A12873 | A15541 | 414 | A12873 | A15680 | 188 |
| A12873 | A15683 | 293 | A12873 | A15698 | 187 |
| A12873 | A15700 | 491 | A12873 | A15709 | 395 |
| A12873 | A15711 | 333 | A12873 | A15735 | 172 |
| A12873 | A15743 | 224 | A12873 | A15818 | 201 |
| A12873 | A15943 | 170 | A12873 | A15947 | 195 |
| A12873 | A16157 | 455 | A12873 | A16187 | 187 |
| A12873 | A16261 | 180 | A12873 | A16552 | 427 |
| A12873 | A16565 | 420 | A12873 | A16587 | 352 |

|        |        |     |        |        |     |
|--------|--------|-----|--------|--------|-----|
| A12873 | A16597 | 420 | A12873 | A16611 | 462 |
| A12873 | A16664 | 446 | A12873 | A16675 | 335 |
| A12873 | A16690 | 434 | A12873 | A16691 | 283 |
| A12873 | A16693 | 294 | A12873 | A16697 | 238 |
| A12873 | A16699 | 335 | A12873 | A16702 | 343 |
| A12873 | A16703 | 441 | A12873 | A16706 | 405 |
| A12873 | A16708 | 258 | A12873 | A16764 | 283 |
| A12873 | A16774 | 274 | A12873 | A16776 | 249 |
| A12873 | A16790 | 351 | A12873 | A16797 | 375 |
| A12873 | A16806 | 297 | A12873 | A16807 | 171 |
| A12873 | A16824 | 283 | A12873 | A16838 | 340 |
| A12873 | A16874 | 232 | A12873 | A16882 | 326 |
| A12873 | A16900 | 375 | A12873 | A16905 | 436 |
| A12873 | A16944 | 375 | A12873 | A16954 | 223 |
| A12873 | A17012 | 356 | A12873 | A17015 | 190 |
| A12873 | A17017 | 223 | A12873 | A17018 | 241 |
| A12873 | A17030 | 369 | A12873 | A17033 | 362 |
| A12873 | A17141 | 210 | A12873 | A17144 | 217 |
| A12874 | A14299 | 172 | A12874 | A14739 | 375 |
| A12875 | A13809 | 196 | A12875 | A14286 | 259 |
| A12875 | A15187 | 235 | A12875 | A15541 | 168 |
| A12875 | A15850 | 330 | A12875 | A16343 | 319 |
| A12875 | A16565 | 179 | A12875 | A16611 | 252 |
| A12875 | A16697 | 267 | A12875 | A16829 | 267 |
| A12877 | A12964 | 447 | A12877 | A14322 | 452 |
| A12877 | A15649 | 329 | A12880 | A13414 | 419 |
| A12882 | A14161 | 385 | A12882 | A15810 | 385 |
| A12882 | A15922 | 388 | A12882 | A16074 | 301 |
| A12883 | A14056 | 288 | A12884 | A13826 | 234 |
| A12884 | A15422 | 296 | A12884 | A15493 | 412 |
| A12884 | A16155 | 433 | A12885 | A13575 | 358 |
| A12886 | A12932 | 283 | A12886 | A14190 | 160 |
| A12886 | A14275 | 363 | A12886 | A15524 | 152 |
| A12887 | A15498 | 278 | A12890 | A12915 | 472 |
| A12890 | A12916 | 469 | A12890 | A12993 | 447 |
| A12893 | A12908 | 457 | A12893 | A13242 | 358 |
| A12893 | A14163 | 202 | A12893 | A14443 | 907 |
| A12893 | A14926 | 362 | A12893 | A15685 | 212 |
| A12894 | A14915 | 452 | A12895 | A14118 | 396 |
| A12897 | A12959 | 180 | A12897 | A13175 | 218 |
| A12897 | A13181 | 165 | A12897 | A13241 | 396 |
| A12897 | A14202 | 218 | A12897 | A14229 | 490 |
| A12897 | A14245 | 353 | A12897 | A14265 | 165 |
| A12897 | A14299 | 491 | A12897 | A14319 | 419 |
| A12897 | A14410 | 441 | A12897 | A14444 | 207 |
| A12897 | A14474 | 561 | A12897 | A14538 | 306 |

|        |        |     |        |        |     |
|--------|--------|-----|--------|--------|-----|
| A12897 | A14570 | 151 | A12897 | A14635 | 488 |
| A12897 | A14636 | 188 | A12897 | A14643 | 269 |
| A12897 | A14650 | 468 | A12897 | A14925 | 363 |
| A12897 | A15292 | 235 | A12897 | A15295 | 388 |
| A12897 | A15296 | 335 | A12897 | A15314 | 485 |
| A12897 | A15322 | 491 | A12897 | A15342 | 276 |
| A12897 | A15349 | 232 | A12897 | A15357 | 489 |
| A12897 | A15361 | 182 | A12897 | A15376 | 491 |
| A12897 | A15398 | 466 | A12897 | A15402 | 486 |
| A12897 | A15403 | 234 | A12897 | A15600 | 190 |
| A12897 | A15630 | 465 | A12897 | A15676 | 266 |
| A12897 | A16121 | 346 | A12897 | A16424 | 230 |
| A12897 | A16519 | 218 | A12897 | A16911 | 490 |
| A12897 | A16916 | 180 | A12902 | A14444 | 899 |
| A12903 | A13659 | 389 | A12907 | A16529 | 176 |
| A12908 | A13242 | 394 | A12908 | A14163 | 276 |
| A12913 | A14266 | 443 | A12914 | A14199 | 210 |
| A12914 | A14374 | 234 | A12914 | A14439 | 310 |
| A12915 | A12916 | 469 | A12915 | A12993 | 447 |
| A12916 | A12993 | 445 | A12917 | A12982 | 401 |
| A12917 | A14885 | 430 | A12919 | A15506 | 168 |
| A12920 | A15314 | 375 | A12921 | A12933 | 441 |
| A12921 | A13822 | 396 | A12922 | A15647 | 302 |
| A12923 | A12925 | 378 | A12923 | A14478 | 310 |
| A12926 | A15498 | 168 | A12927 | A13044 | 256 |
| A12927 | A13385 | 422 | A12927 | A13783 | 179 |
| A12927 | A13788 | 171 | A12927 | A14132 | 174 |
| A12927 | A14255 | 208 | A12927 | A14385 | 251 |
| A12927 | A14430 | 265 | A12927 | A14903 | 180 |
| A12927 | A14917 | 168 | A12927 | A15316 | 157 |
| A12927 | A15425 | 243 | A12927 | A15426 | 301 |
| A12927 | A15607 | 317 | A12927 | A15794 | 171 |
| A12927 | A15906 | 343 | A12927 | A16114 | 162 |
| A12927 | A16157 | 185 | A12927 | A16636 | 420 |
| A12927 | A16776 | 188 | A12927 | A17133 | 165 |
| A12930 | A12978 | 433 | A12932 | A13397 | 238 |
| A12932 | A13907 | 428 | A12933 | A13822 | 363 |
| A12933 | A13826 | 246 | A12933 | A14072 | 319 |
| A12933 | A14116 | 424 | A12933 | A15630 | 323 |
| A12933 | A15800 | 369 | A12934 | A14368 | 358 |
| A12934 | A15376 | 246 | A12934 | A15416 | 279 |
| A12934 | A15463 | 201 | A12935 | A12960 | 409 |
| A12935 | A12976 | 457 | A12935 | A13410 | 407 |
| A12935 | A13745 | 440 | A12936 | A14372 | 328 |
| A12936 | A15498 | 177 | A12936 | A15790 | 420 |
| A12936 | A16267 | 424 | A12938 | A13964 | 185 |

|        |        |     |        |        |     |
|--------|--------|-----|--------|--------|-----|
| A12939 | A15510 | 204 | A12943 | A13767 | 390 |
| A12943 | A14257 | 226 | A12943 | A15498 | 152 |
| A12944 | A14371 | 329 | A12948 | A13229 | 452 |
| A12948 | A13983 | 170 | A12949 | A14196 | 294 |
| A12949 | A15323 | 305 | A12949 | A15339 | 263 |
| A12949 | A15788 | 257 | A12949 | A17063 | 188 |
| A12950 | A15292 | 219 | A12951 | A14272 | 208 |
| A12952 | A13170 | 160 | A12952 | A13309 | 238 |
| A12952 | A13313 | 373 | A12952 | A13399 | 180 |
| A12952 | A13527 | 172 | A12952 | A13708 | 324 |
| A12952 | A13781 | 438 | A12952 | A13782 | 291 |
| A12952 | A13788 | 390 | A12952 | A13804 | 340 |
| A12952 | A13805 | 165 | A12952 | A13809 | 228 |
| A12952 | A13811 | 160 | A12952 | A13812 | 154 |
| A12952 | A13912 | 238 | A12952 | A13928 | 567 |
| A12952 | A14048 | 290 | A12952 | A14084 | 63  |
| A12952 | A14221 | 427 | A12952 | A14235 | 200 |
| A12952 | A14272 | 205 | A12952 | A14279 | 335 |
| A12952 | A14474 | 232 | A12952 | A14569 | 235 |
| A12952 | A15105 | 421 | A12952 | A15189 | 190 |
| A12952 | A15274 | 458 | A12952 | A15366 | 356 |
| A12952 | A15665 | 422 | A12952 | A15752 | 249 |
| A12952 | A15773 | 376 | A12952 | A15854 | 415 |
| A12952 | A15856 | 317 | A12952 | A15922 | 377 |
| A12952 | A15940 | 173 | A12952 | A16565 | 205 |
| A12952 | A16566 | 185 | A12952 | A16567 | 212 |
| A12952 | A16615 | 303 | A12952 | A16675 | 159 |
| A12952 | A16691 | 230 | A12952 | A16692 | 157 |
| A12952 | A16693 | 243 | A12952 | A16695 | 247 |
| A12952 | A16714 | 345 | A12952 | A16764 | 210 |
| A12952 | A16790 | 163 | A12952 | A16806 | 247 |
| A12952 | A16824 | 230 | A12952 | A16827 | 173 |
| A12952 | A16838 | 152 | A12952 | A16851 | 200 |
| A12952 | A16875 | 157 | A12952 | A16905 | 408 |
| A12952 | A16944 | 200 | A12952 | A16954 | 163 |
| A12952 | A17013 | 313 | A12952 | A17030 | 191 |
| A12952 | A17033 | 180 | A12955 | A13120 | 472 |
| A12958 | A14073 | 414 | A12958 | A16912 | 216 |
| A12959 | A12976 | 404 | A12960 | A12976 | 451 |
| A12961 | A13826 | 468 | A12961 | A13873 | 465 |
| A12961 | A13899 | 258 | A12961 | A14143 | 308 |
| A12961 | A14276 | 243 | A12961 | A15346 | 223 |
| A12961 | A15409 | 356 | A12961 | A15513 | 345 |
| A12963 | A13820 | 445 | A12964 | A14322 | 447 |
| A12964 | A15649 | 302 | A12965 | A15840 | 364 |
| A12965 | A16732 | 413 | A12968 | A15292 | 216 |

|        |        |     |        |        |     |
|--------|--------|-----|--------|--------|-----|
| A12969 | A12971 | 942 | A12971 | A14462 | 228 |
| A12971 | A15241 | 162 | A12975 | A13826 | 202 |
| A12975 | A13941 | 462 | A12975 | A14122 | 273 |
| A12975 | A15349 | 199 | A12975 | A15352 | 210 |
| A12975 | A15383 | 219 | A12976 | A12983 | 480 |
| A12976 | A13826 | 187 | A12979 | A13985 | 430 |
| A12980 | A13922 | 63  | A12980 | A14223 | 183 |
| A12982 | A14885 | 420 | A12982 | A15419 | 273 |
| A12984 | A16140 | 447 | A12984 | A16168 | 447 |
| A12984 | A16169 | 447 | A12984 | A16172 | 447 |
| A12984 | A16175 | 447 | A12984 | A16178 | 447 |
| A12984 | A16179 | 447 | A12984 | A16184 | 447 |
| A12984 | A16185 | 447 | A12984 | A16186 | 447 |
| A12988 | A13743 | 286 | A12988 | A14006 | 243 |
| A12990 | A13125 | 213 | A12990 | A13149 | 347 |
| A12990 | A13335 | 160 | A12990 | A13340 | 374 |
| A12990 | A13992 | 229 | A12990 | A14073 | 477 |
| A12990 | A14472 | 152 | A12990 | A14495 | 274 |
| A12990 | A14642 | 260 | A12990 | A15244 | 452 |
| A12990 | A15551 | 362 | A12990 | A15892 | 252 |
| A12990 | A15894 | 296 | A12990 | A16493 | 274 |
| A12992 | A13980 | 899 | A12992 | A14452 | 115 |
| A12995 | A15498 | 205 | A12999 | A13005 | 63  |
| A13002 | A13989 | 443 | A13003 | A13207 | 167 |
| A13003 | A13987 | 372 | A13003 | A14010 | 341 |
| A13003 | A14202 | 368 | A13003 | A15317 | 335 |
| A13003 | A15348 | 188 | A13003 | A15352 | 243 |
| A13003 | A15452 | 456 | A13007 | A13826 | 260 |
| A13007 | A13899 | 332 | A13007 | A14210 | 267 |
| A13007 | A15284 | 396 | A13007 | A15318 | 326 |
| A13007 | A15346 | 306 | A13007 | A15352 | 268 |
| A13007 | A16137 | 419 | A13007 | A16300 | 262 |
| A13007 | A17198 | 316 | A13010 | A15452 | 388 |
| A13010 | A17073 | 424 | A13012 | A13889 | 452 |
| A13012 | A14122 | 208 | A13012 | A14124 | 330 |
| A13012 | A17108 | 204 | A13015 | A13073 | 452 |
| A13016 | A13243 | 447 | A13016 | A13816 | 371 |
| A13017 | A13326 | 329 | A13017 | A16371 | 259 |
| A13018 | A14339 | 489 | A13021 | A14247 | 190 |
| A13021 | A14661 | 291 | A13023 | A14366 | 480 |
| A13023 | A14374 | 290 | A13023 | A14596 | 751 |
| A13023 | A14659 | 485 | A13023 | A15507 | 188 |
| A13023 | A15769 | 165 | A13023 | A15794 | 291 |
| A13023 | A16075 | 382 | A13024 | A16351 | 461 |
| A13024 | A16457 | 473 | A13025 | A15498 | 262 |
| A13029 | A16048 | 236 | A13031 | A13637 | 438 |

|        |        |     |        |        |     |
|--------|--------|-----|--------|--------|-----|
| A13031 | A14970 | 430 | A13036 | A13824 | 208 |
| A13036 | A14120 | 337 | A13036 | A15498 | 190 |
| A13037 | A14073 | 281 | A13039 | A13040 | 452 |
| A13043 | A14585 | 302 | A13045 | A14272 | 162 |
| A13047 | A15624 | 291 | A13047 | A15684 | 160 |
| A13050 | A13256 | 455 | A13050 | A13983 | 457 |
| A13051 | A14111 | 369 | A13051 | A14208 | 168 |
| A13051 | A14279 | 263 | A13052 | A13752 | 317 |
| A13052 | A13989 | 210 | A13052 | A14816 | 210 |
| A13052 | A14843 | 404 | A13052 | A15666 | 404 |
| A13052 | A15920 | 177 | A13052 | A16681 | 404 |
| A13053 | A15467 | 395 | A13054 | A14177 | 207 |
| A13055 | A14505 | 348 | A13058 | A14199 | 260 |
| A13058 | A15659 | 269 | A13058 | A15660 | 218 |
| A13058 | A16300 | 218 | A13063 | A13989 | 224 |
| A13063 | A14496 | 174 | A13063 | A14639 | 326 |
| A13063 | A15297 | 241 | A13064 | A13503 | 452 |
| A13066 | A14597 | 281 | A13067 | A16453 | 316 |
| A13069 | A13309 | 301 | A13069 | A13313 | 168 |
| A13069 | A13708 | 224 | A13069 | A13781 | 174 |
| A13069 | A13784 | 200 | A13069 | A14214 | 193 |
| A13069 | A14239 | 272 | A13069 | A14738 | 469 |
| A13069 | A15105 | 210 | A13069 | A15189 | 269 |
| A13069 | A15541 | 271 | A13069 | A15666 | 154 |
| A13069 | A15715 | 385 | A13069 | A16552 | 188 |
| A13069 | A16565 | 279 | A13069 | A16597 | 281 |
| A13069 | A16675 | 247 | A13069 | A16680 | 267 |
| A13069 | A16690 | 247 | A13069 | A16750 | 401 |
| A13069 | A16793 | 411 | A13069 | A16837 | 378 |
| A13069 | A16944 | 357 | A13072 | A15660 | 202 |
| A13074 | A14196 | 218 | A13074 | A14843 | 168 |
| A13074 | A15291 | 200 | A13074 | A15477 | 374 |
| A13074 | A15788 | 159 | A13074 | A16281 | 183 |
| A13074 | A17198 | 193 | A13076 | A13165 | 445 |
| A13078 | A14273 | 213 | A13079 | A13080 | 472 |
| A13082 | A15447 | 329 | A13084 | A13822 | 278 |
| A13084 | A13826 | 249 | A13084 | A13944 | 311 |
| A13084 | A14112 | 335 | A13084 | A14371 | 151 |
| A13084 | A15308 | 208 | A13084 | A15420 | 193 |
| A13084 | A15425 | 202 | A13084 | A15468 | 341 |
| A13084 | A15480 | 205 | A13084 | A17085 | 288 |
| A13085 | A13285 | 447 | A13095 | A13100 | 447 |
| A13095 | A13101 | 447 | A13096 | A17105 | 432 |
| A13097 | A14596 | 294 | A13098 | A14196 | 369 |
| A13098 | A14836 | 363 | A13098 | A15339 | 263 |
| A13098 | A15788 | 257 | A13100 | A13101 | 472 |



|        |        |     |        |        |     |
|--------|--------|-----|--------|--------|-----|
| A13100 | A15277 | 377 | A13101 | A15277 | 377 |
| A13102 | A15535 | 205 | A13102 | A16176 | 469 |
| A13104 | A13444 | 447 | A13106 | A13380 | 399 |
| A13106 | A14182 | 329 | A13106 | A14199 | 184 |
| A13106 | A14258 | 301 | A13106 | A14838 | 334 |
| A13106 | A15770 | 461 | A13107 | A13989 | 177 |
| A13108 | A16300 | 235 | A13109 | A15871 | 417 |
| A13109 | A16463 | 399 | A13110 | A14635 | 191 |
| A13111 | A14635 | 481 | A13111 | A14653 | 491 |
| A13112 | A13113 | 452 | A13112 | A13114 | 452 |
| A13113 | A13114 | 452 | A13116 | A13309 | 252 |
| A13116 | A13313 | 399 | A13116 | A13398 | 473 |
| A13116 | A13399 | 340 | A13116 | A13524 | 379 |
| A13116 | A13706 | 347 | A13116 | A13707 | 249 |
| A13116 | A13708 | 301 | A13116 | A13781 | 243 |
| A13116 | A13785 | 343 | A13116 | A13786 | 435 |
| A13116 | A13787 | 357 | A13116 | A13809 | 486 |
| A13116 | A13969 | 219 | A13116 | A14074 | 218 |
| A13116 | A14094 | 221 | A13116 | A14214 | 361 |
| A13116 | A14222 | 215 | A13116 | A14239 | 347 |
| A13116 | A14286 | 299 | A13116 | A14288 | 283 |
| A13116 | A14375 | 230 | A13116 | A14455 | 182 |
| A13116 | A14569 | 371 | A13116 | A14595 | 345 |
| A13116 | A14706 | 162 | A13116 | A14718 | 249 |
| A13116 | A14799 | 260 | A13116 | A14838 | 301 |
| A13116 | A14921 | 357 | A13116 | A14937 | 286 |
| A13116 | A15105 | 285 | A13116 | A15189 | 216 |
| A13116 | A15432 | 188 | A13116 | A15501 | 310 |
| A13116 | A15506 | 188 | A13116 | A15653 | 441 |
| A13116 | A15665 | 212 | A13116 | A15666 | 321 |
| A13116 | A15680 | 378 | A13116 | A15683 | 290 |
| A13116 | A15696 | 302 | A13116 | A15709 | 188 |
| A13116 | A15711 | 462 | A13116 | A15765 | 380 |
| A13116 | A15850 | 360 | A13116 | A16157 | 485 |
| A13116 | A16243 | 468 | A13116 | A16261 | 377 |
| A13116 | A16552 | 357 | A13116 | A16565 | 355 |
| A13116 | A16566 | 411 | A13116 | A16587 | 401 |
| A13116 | A16597 | 229 | A13116 | A16608 | 195 |
| A13116 | A16611 | 307 | A13116 | A16664 | 419 |
| A13116 | A16675 | 324 | A13116 | A16676 | 486 |
| A13116 | A16680 | 213 | A13116 | A16682 | 450 |
| A13116 | A16690 | 324 | A13116 | A16692 | 288 |
| A13116 | A16695 | 353 | A13116 | A16703 | 274 |
| A13116 | A16704 | 281 | A13116 | A16707 | 379 |
| A13116 | A16766 | 152 | A13116 | A16776 | 316 |
| A13116 | A16788 | 385 | A13116 | A16790 | 294 |

|        |        |     |        |        |     |
|--------|--------|-----|--------|--------|-----|
| A13116 | A16802 | 260 | A13116 | A16806 | 353 |
| A13116 | A16829 | 307 | A13116 | A16866 | 241 |
| A13116 | A16905 | 262 | A13116 | A16913 | 335 |
| A13116 | A17144 | 291 | A13116 | A17146 | 382 |
| A13117 | A15377 | 386 | A13119 | A13151 | 479 |
| A13119 | A13312 | 463 | A13119 | A13546 | 263 |
| A13119 | A13987 | 215 | A13119 | A14190 | 198 |
| A13119 | A14210 | 404 | A13119 | A14371 | 475 |
| A13119 | A14511 | 346 | A13119 | A14690 | 229 |
| A13119 | A15292 | 488 | A13119 | A15312 | 358 |
| A13119 | A15313 | 373 | A13119 | A15333 | 215 |
| A13119 | A15348 | 413 | A13119 | A15349 | 257 |
| A13119 | A15352 | 452 | A13119 | A15444 | 224 |
| A13119 | A15447 | 472 | A13119 | A15452 | 480 |
| A13119 | A15462 | 154 | A13119 | A15463 | 268 |
| A13119 | A15495 | 305 | A13119 | A15515 | 183 |
| A13119 | A15638 | 151 | A13119 | A15726 | 246 |
| A13122 | A16338 | 452 | A13124 | A13587 | 232 |
| A13124 | A13928 | 180 | A13124 | A14109 | 258 |
| A13124 | A14215 | 160 | A13124 | A14511 | 279 |
| A13124 | A14570 | 281 | A13124 | A15480 | 384 |
| A13124 | A15481 | 413 | A13124 | A16555 | 277 |
| A13125 | A13241 | 321 | A13126 | A13989 | 491 |
| A13126 | A14216 | 409 | A13126 | A14530 | 262 |
| A13126 | A15215 | 207 | A13127 | A15430 | 372 |
| A13127 | A15510 | 199 | A13127 | A15692 | 404 |
| A13127 | A15925 | 385 | A13127 | A15934 | 294 |
| A13128 | A13696 | 433 | A13129 | A14247 | 152 |
| A13129 | A14257 | 279 | A13129 | A14661 | 305 |
| A13129 | A15770 | 263 | A13130 | A13384 | 396 |
| A13130 | A13589 | 249 | A13130 | A13831 | 372 |
| A13130 | A15338 | 515 | A13131 | A13903 | 314 |
| A13131 | A14374 | 236 | A13131 | A15394 | 299 |
| A13131 | A15425 | 247 | A13131 | A15806 | 358 |
| A13133 | A13412 | 427 | A13134 | A13148 | 452 |
| A13134 | A13509 | 447 | A13138 | A15277 | 393 |
| A13140 | A13280 | 484 | A13141 | A14471 | 337 |
| A13141 | A15153 | 452 | A13144 | A16324 | 368 |
| A13145 | A13191 | 401 | A13145 | A13195 | 404 |
| A13146 | A13162 | 160 | A13146 | A13225 | 899 |
| A13146 | A13246 | 174 | A13146 | A13340 | 199 |
| A13146 | A14216 | 204 | A13146 | A14443 | 899 |
| A13146 | A15374 | 456 | A13146 | A16450 | 159 |
| A13147 | A14039 | 274 | A13147 | A14192 | 286 |
| A13147 | A14279 | 366 | A13147 | A14443 | 66  |
| A13147 | A14691 | 218 | A13148 | A13509 | 447 |

|        |        |     |        |        |     |
|--------|--------|-----|--------|--------|-----|
| A13149 | A13340 | 177 | A13149 | A14073 | 302 |
| A13149 | A14188 | 168 | A13149 | A14559 | 180 |
| A13149 | A15244 | 339 | A13149 | A15660 | 218 |
| A13149 | A15734 | 243 | A13149 | A16060 | 263 |
| A13150 | A13870 | 345 | A13150 | A14080 | 324 |
| A13150 | A14655 | 241 | A13151 | A13312 | 491 |
| A13151 | A14010 | 213 | A13151 | A15292 | 333 |
| A13151 | A15335 | 272 | A13151 | A15348 | 470 |
| A13151 | A15349 | 330 | A13151 | A15435 | 162 |
| A13151 | A15452 | 390 | A13151 | A15464 | 255 |
| A13151 | A15515 | 424 | A13151 | A16300 | 238 |
| A13152 | A14342 | 477 | A13152 | A14349 | 477 |
| A13154 | A15498 | 177 | A13157 | A15929 | 435 |
| A13159 | A16277 | 165 | A13162 | A14566 | 279 |
| A13162 | A14594 | 486 | A13162 | A15230 | 199 |
| A13162 | A16224 | 174 | A13163 | A14071 | 254 |
| A13163 | A15127 | 412 | A13166 | A15920 | 341 |
| A13167 | A13262 | 438 | A13167 | A15630 | 307 |
| A13169 | A13315 | 218 | A13169 | A13527 | 224 |
| A13169 | A13707 | 297 | A13169 | A13711 | 374 |
| A13169 | A13784 | 267 | A13169 | A13786 | 313 |
| A13169 | A13788 | 228 | A13169 | A13809 | 379 |
| A13169 | A14074 | 260 | A13169 | A14191 | 279 |
| A13169 | A14209 | 307 | A13169 | A14213 | 215 |
| A13169 | A14214 | 156 | A13169 | A14227 | 160 |
| A13169 | A14235 | 252 | A13169 | A14263 | 353 |
| A13169 | A14270 | 201 | A13169 | A14288 | 491 |
| A13169 | A14289 | 190 | A13169 | A14375 | 277 |
| A13169 | A14569 | 384 | A13169 | A14706 | 369 |
| A13169 | A14719 | 201 | A13169 | A14739 | 310 |
| A13169 | A14799 | 332 | A13169 | A14903 | 235 |
| A13169 | A14937 | 208 | A13169 | A15367 | 491 |
| A13169 | A15519 | 190 | A13169 | A15541 | 356 |
| A13169 | A15683 | 286 | A13169 | A15709 | 326 |
| A13169 | A15711 | 196 | A13169 | A15850 | 303 |
| A13169 | A16157 | 434 | A13169 | A16187 | 182 |
| A13169 | A16243 | 232 | A13169 | A16565 | 273 |
| A13169 | A16567 | 263 | A13169 | A16587 | 416 |
| A13169 | A16611 | 308 | A13169 | A16664 | 270 |
| A13169 | A16675 | 229 | A13169 | A16690 | 229 |
| A13169 | A16691 | 279 | A13169 | A16694 | 475 |
| A13169 | A16695 | 294 | A13169 | A16703 | 191 |
| A13169 | A16704 | 201 | A13169 | A16707 | 330 |
| A13169 | A16788 | 340 | A13169 | A16802 | 177 |
| A13169 | A16815 | 286 | A13169 | A16829 | 232 |
| A13169 | A17133 | 223 | A13170 | A13527 | 306 |

|        |        |     |        |        |     |
|--------|--------|-----|--------|--------|-----|
| A13170 | A13737 | 185 | A13170 | A13782 | 382 |
| A13170 | A13783 | 313 | A13170 | A13788 | 307 |
| A13170 | A13804 | 332 | A13170 | A13805 | 301 |
| A13170 | A13811 | 297 | A13170 | A13812 | 291 |
| A13170 | A14214 | 446 | A13170 | A14235 | 326 |
| A13170 | A14238 | 232 | A13170 | A14255 | 238 |
| A13170 | A14462 | 240 | A13170 | A14569 | 256 |
| A13170 | A14917 | 306 | A13170 | A15680 | 162 |
| A13170 | A15854 | 221 | A13170 | A16157 | 154 |
| A13170 | A16565 | 234 | A13170 | A16566 | 317 |
| A13170 | A16567 | 334 | A13170 | A16611 | 313 |
| A13170 | A16664 | 230 | A13170 | A16675 | 199 |
| A13170 | A16691 | 346 | A13170 | A16693 | 353 |
| A13170 | A16695 | 357 | A13170 | A16764 | 236 |
| A13170 | A16774 | 340 | A13170 | A16815 | 351 |
| A13172 | A13394 | 427 | A13172 | A13625 | 441 |
| A13172 | A13718 | 441 | A13174 | A13205 | 452 |
| A13174 | A13217 | 452 | A13175 | A13176 | 445 |
| A13178 | A13826 | 279 | A13178 | A14371 | 302 |
| A13180 | A13826 | 234 | A13180 | A15312 | 246 |
| A13180 | A15313 | 259 | A13181 | A13235 | 345 |
| A13181 | A13607 | 324 | A13181 | A14183 | 182 |
| A13181 | A14351 | 208 | A13181 | A14570 | 454 |
| A13181 | A15126 | 286 | A13181 | A15992 | 167 |
| A13181 | A16531 | 159 | A13181 | A16996 | 311 |
| A13182 | A14236 | 479 | A13183 | A14799 | 481 |
| A13183 | A16934 | 406 | A13188 | A17199 | 445 |
| A13189 | A13196 | 465 | A13190 | A15498 | 227 |
| A13191 | A13797 | 417 | A13192 | A13193 | 488 |
| A13192 | A14135 | 485 | A13192 | A15482 | 475 |
| A13192 | A15498 | 160 | A13193 | A13749 | 432 |
| A13193 | A14135 | 486 | A13193 | A15482 | 486 |
| A13197 | A14449 | 408 | A13198 | A13743 | 465 |
| A13199 | A14198 | 162 | A13199 | A14303 | 232 |
| A13200 | A15034 | 338 | A13203 | A13606 | 440 |
| A13205 | A13217 | 452 | A13207 | A13425 | 485 |
| A13207 | A13460 | 491 | A13207 | A13866 | 232 |
| A13207 | A14123 | 165 | A13207 | A14149 | 373 |
| A13207 | A14216 | 388 | A13207 | A14374 | 457 |
| A13207 | A14927 | 385 | A13207 | A14932 | 468 |
| A13207 | A14941 | 430 | A13207 | A15365 | 266 |
| A13207 | A15418 | 435 | A13207 | A15567 | 258 |
| A13207 | A15684 | 179 | A13207 | A16030 | 333 |
| A13207 | A16960 | 454 | A13207 | A17198 | 235 |
| A13212 | A14621 | 366 | A13212 | A15564 | 170 |
| A13212 | A15747 | 240 | A13212 | A16636 | 308 |

|        |        |     |        |        |     |
|--------|--------|-----|--------|--------|-----|
| A13213 | A14443 | 208 | A13215 | A15470 | 362 |
| A13216 | A16547 | 634 | A13218 | A13609 | 345 |
| A13219 | A13824 | 313 | A13219 | A15559 | 414 |
| A13220 | A13870 | 247 | A13222 | A13845 | 217 |
| A13222 | A13855 | 471 | A13222 | A14182 | 307 |
| A13222 | A14247 | 317 | A13222 | A14258 | 324 |
| A13222 | A14661 | 324 | A13222 | A14711 | 307 |
| A13222 | A14838 | 414 | A13222 | A14844 | 324 |
| A13222 | A14877 | 324 | A13222 | A16927 | 414 |
| A13222 | A16982 | 414 | A13222 | A17061 | 324 |
| A13225 | A14226 | 899 | A13225 | A14241 | 899 |
| A13225 | A14254 | 899 | A13225 | A14255 | 899 |
| A13225 | A14443 | 899 | A13225 | A15366 | 899 |
| A13225 | A15675 | 899 | A13225 | A15948 | 899 |
| A13225 | A17047 | 899 | A13226 | A13227 | 451 |
| A13226 | A13377 | 408 | A13227 | A13377 | 457 |
| A13228 | A16226 | 188 | A13229 | A15498 | 278 |
| A13230 | A15295 | 201 | A13231 | A13313 | 167 |
| A13231 | A13321 | 305 | A13231 | A13356 | 272 |
| A13231 | A13399 | 260 | A13231 | A13737 | 232 |
| A13231 | A13781 | 172 | A13231 | A13784 | 198 |
| A13231 | A13809 | 291 | A13231 | A13912 | 375 |
| A13231 | A13982 | 204 | A13231 | A14084 | 329 |
| A13231 | A14167 | 353 | A13231 | A14182 | 215 |
| A13231 | A14186 | 183 | A13231 | A14193 | 928 |
| A13231 | A14213 | 235 | A13231 | A14214 | 324 |
| A13231 | A14235 | 356 | A13231 | A14239 | 270 |
| A13231 | A14246 | 402 | A13231 | A14253 | 516 |
| A13231 | A14263 | 202 | A13231 | A14288 | 205 |
| A13231 | A14454 | 368 | A13231 | A14455 | 235 |
| A13231 | A14462 | 283 | A13231 | A14569 | 296 |
| A13231 | A14661 | 260 | A13231 | A14708 | 257 |
| A13231 | A14718 | 296 | A13231 | A15105 | 207 |
| A13231 | A15187 | 322 | A13231 | A15189 | 267 |
| A13231 | A15262 | 251 | A13231 | A15293 | 346 |
| A13231 | A15314 | 447 | A13231 | A15336 | 218 |
| A13231 | A15683 | 212 | A13231 | A16157 | 202 |
| A13231 | A16552 | 185 | A13231 | A16597 | 279 |
| A13231 | A16690 | 245 | A13231 | A16703 | 317 |
| A13231 | A16802 | 305 | A13231 | A16865 | 424 |
| A13231 | A17033 | 344 | A13234 | A15528 | 436 |
| A13236 | A13487 | 435 | A13236 | A13870 | 291 |
| A13236 | A14655 | 168 | A13236 | A14965 | 469 |
| A13236 | A14966 | 469 | A13238 | A14362 | 378 |
| A13238 | A14372 | 461 | A13238 | A14600 | 424 |
| A13239 | A13803 | 433 | A13240 | A14037 | 165 |

|        |        |     |        |        |     |
|--------|--------|-----|--------|--------|-----|
| A13240 | A15388 | 183 | A13241 | A14202 | 176 |
| A13242 | A13274 | 462 | A13242 | A14163 | 477 |
| A13243 | A13816 | 350 | A13245 | A17079 | 440 |
| A13249 | A14482 | 268 | A13249 | A15499 | 302 |
| A13249 | A15988 | 616 | A13250 | A13978 | 899 |
| A13250 | A14015 | 899 | A13250 | A14299 | 440 |
| A13250 | A14704 | 291 | A13250 | A15540 | 188 |
| A13253 | A13275 | 441 | A13253 | A13286 | 445 |
| A13253 | A13303 | 447 | A13253 | A15051 | 452 |
| A13257 | A14079 | 160 | A13257 | A16225 | 196 |
| A13257 | A16754 | 167 | A13257 | A17075 | 307 |
| A13259 | A14653 | 369 | A13261 | A15416 | 285 |
| A13263 | A14263 | 314 | A13264 | A15624 | 351 |
| A13266 | A13267 | 429 | A13269 | A13826 | 308 |
| A13269 | A14210 | 314 | A13269 | A15292 | 255 |
| A13269 | A15349 | 306 | A13270 | A17075 | 382 |
| A13271 | A15684 | 160 | A13272 | A13506 | 466 |
| A13274 | A14163 | 420 | A13275 | A13286 | 480 |
| A13275 | A13303 | 469 | A13275 | A15051 | 441 |
| A13277 | A14084 | 271 | A13278 | A14988 | 450 |
| A13278 | A14989 | 407 | A13278 | A14990 | 385 |
| A13279 | A15935 | 305 | A13286 | A13303 | 469 |
| A13286 | A15051 | 445 | A13288 | A16921 | 445 |
| A13289 | A15353 | 317 | A13289 | A17063 | 279 |
| A13294 | A14505 | 413 | A13297 | A15498 | 205 |
| A13298 | A14216 | 223 | A13298 | A14699 | 179 |
| A13298 | A14778 | 249 | A13298 | A14827 | 160 |
| A13298 | A15661 | 257 | A13298 | A15684 | 491 |
| A13298 | A15746 | 227 | A13299 | A13917 | 306 |
| A13299 | A15498 | 177 | A13302 | A15519 | 330 |
| A13302 | A15639 | 303 | A13303 | A15051 | 447 |
| A13306 | A15704 | 393 | A13307 | A14520 | 165 |
| A13307 | A15667 | 152 | A13307 | A16495 | 221 |
| A13308 | A13928 | 191 | A13308 | A14931 | 299 |
| A13308 | A15252 | 486 | A13308 | A15366 | 162 |
| A13308 | A15492 | 188 | A13308 | A15852 | 188 |
| A13308 | A17150 | 439 | A13309 | A13313 | 484 |
| A13309 | A13321 | 221 | A13309 | A13399 | 430 |
| A13309 | A13706 | 312 | A13309 | A13708 | 441 |
| A13309 | A13737 | 269 | A13309 | A13781 | 479 |
| A13309 | A13784 | 465 | A13309 | A13788 | 269 |
| A13309 | A13809 | 204 | A13309 | A13912 | 321 |
| A13309 | A14084 | 224 | A13309 | A14214 | 386 |
| A13309 | A14222 | 263 | A13309 | A14239 | 312 |
| A13309 | A14263 | 230 | A13309 | A14288 | 335 |
| A13309 | A14455 | 363 | A13309 | A14474 | 251 |

|        |        |     |        |        |     |
|--------|--------|-----|--------|--------|-----|
| A13309 | A14569 | 210 | A13309 | A14708 | 297 |
| A13309 | A14719 | 246 | A13309 | A14799 | 208 |
| A13309 | A14903 | 277 | A13309 | A14921 | 457 |
| A13309 | A15105 | 434 | A13309 | A15187 | 456 |
| A13309 | A15189 | 434 | A13309 | A15262 | 157 |
| A13309 | A15501 | 265 | A13309 | A15541 | 177 |
| A13309 | A15680 | 340 | A13309 | A15683 | 241 |
| A13309 | A15698 | 228 | A13309 | A15774 | 246 |
| A13309 | A15850 | 335 | A13309 | A15855 | 308 |
| A13309 | A15940 | 268 | A13309 | A16157 | 332 |
| A13309 | A16552 | 486 | A13309 | A16565 | 399 |
| A13309 | A16597 | 460 | A13309 | A16608 | 424 |
| A13309 | A16611 | 443 | A13309 | A16664 | 185 |
| A13309 | A16675 | 486 | A13309 | A16680 | 306 |
| A13309 | A16690 | 423 | A13309 | A16692 | 254 |
| A13309 | A16693 | 324 | A13309 | A16702 | 251 |
| A13309 | A16703 | 424 | A13309 | A16704 | 245 |
| A13309 | A16706 | 332 | A13309 | A16709 | 379 |
| A13309 | A16714 | 393 | A13309 | A16764 | 324 |
| A13309 | A16774 | 307 | A13309 | A16776 | 283 |
| A13309 | A16799 | 301 | A13309 | A16806 | 419 |
| A13309 | A16824 | 314 | A13309 | A16829 | 439 |
| A13309 | A16858 | 346 | A13309 | A16866 | 407 |
| A13309 | A16874 | 271 | A13309 | A16905 | 467 |
| A13309 | A16913 | 307 | A13309 | A16944 | 445 |
| A13309 | A17012 | 267 | A13309 | A17017 | 260 |
| A13309 | A17018 | 390 | A13309 | A17030 | 394 |
| A13309 | A17035 | 228 | A13309 | A17043 | 324 |
| A13309 | A17190 | 386 | A13310 | A13311 | 490 |
| A13310 | A13805 | 266 | A13310 | A14257 | 443 |
| A13310 | A14476 | 486 | A13310 | A15711 | 428 |
| A13310 | A16490 | 330 | A13310 | A16912 | 335 |
| A13311 | A13340 | 291 | A13311 | A14257 | 157 |
| A13311 | A14476 | 246 | A13311 | A14738 | 235 |
| A13311 | A15711 | 480 | A13311 | A16437 | 201 |
| A13311 | A16793 | 202 | A13311 | A16912 | 193 |
| A13311 | A16937 | 408 | A13312 | A14190 | 173 |
| A13312 | A14366 | 201 | A13312 | A14371 | 174 |
| A13312 | A14372 | 257 | A13312 | A15292 | 372 |
| A13312 | A15348 | 467 | A13312 | A15349 | 364 |
| A13312 | A15352 | 154 | A13312 | A15435 | 196 |
| A13312 | A15444 | 302 | A13312 | A15452 | 339 |
| A13312 | A15464 | 285 | A13312 | A15515 | 436 |
| A13313 | A13321 | 195 | A13313 | A13399 | 435 |
| A13313 | A13706 | 319 | A13313 | A13707 | 436 |
| A13313 | A13708 | 634 | A13313 | A13711 | 316 |

|        |        |     |        |        |     |
|--------|--------|-----|--------|--------|-----|
| A13313 | A13737 | 328 | A13313 | A13781 | 797 |
| A13313 | A13782 | 255 | A13313 | A13783 | 269 |
| A13313 | A13784 | 466 | A13313 | A13786 | 374 |
| A13313 | A13787 | 212 | A13313 | A13788 | 356 |
| A13313 | A13804 | 299 | A13313 | A13805 | 249 |
| A13313 | A13809 | 465 | A13313 | A13811 | 343 |
| A13313 | A13912 | 462 | A13313 | A13928 | 324 |
| A13313 | A14084 | 406 | A13313 | A14214 | 490 |
| A13313 | A14222 | 458 | A13313 | A14235 | 157 |
| A13313 | A14239 | 417 | A13313 | A14255 | 339 |
| A13313 | A14260 | 274 | A13313 | A14263 | 460 |
| A13313 | A14270 | 227 | A13313 | A14288 | 461 |
| A13313 | A14358 | 226 | A13313 | A14375 | 337 |
| A13313 | A14455 | 481 | A13313 | A14462 | 259 |
| A13313 | A14569 | 485 | A13313 | A14595 | 193 |
| A13313 | A14706 | 299 | A13313 | A14708 | 363 |
| A13313 | A14718 | 408 | A13313 | A14799 | 468 |
| A13313 | A14838 | 234 | A13313 | A14903 | 446 |
| A13313 | A14917 | 353 | A13313 | A14921 | 446 |
| A13313 | A15034 | 259 | A13313 | A15105 | 633 |
| A13313 | A15187 | 452 | A13313 | A15189 | 491 |
| A13313 | A15262 | 429 | A13313 | A15292 | 359 |
| A13313 | A15297 | 190 | A13313 | A15366 | 628 |
| A13313 | A15536 | 154 | A13313 | A15541 | 440 |
| A13313 | A15653 | 296 | A13313 | A15665 | 485 |
| A13313 | A15680 | 213 | A13313 | A15683 | 348 |
| A13313 | A15698 | 202 | A13313 | A15709 | 389 |
| A13313 | A15711 | 324 | A13313 | A15773 | 324 |
| A13313 | A15774 | 329 | A13313 | A15854 | 596 |
| A13313 | A15855 | 491 | A13313 | A16157 | 489 |
| A13313 | A16187 | 377 | A13313 | A16261 | 193 |
| A13313 | A16343 | 407 | A13313 | A16552 | 491 |
| A13313 | A16565 | 481 | A13313 | A16566 | 490 |
| A13313 | A16567 | 302 | A13313 | A16585 | 177 |
| A13313 | A16587 | 469 | A13313 | A16597 | 491 |
| A13313 | A16608 | 196 | A13313 | A16611 | 490 |
| A13313 | A16652 | 310 | A13313 | A16664 | 484 |
| A13313 | A16675 | 491 | A13313 | A16680 | 483 |
| A13313 | A16682 | 271 | A13313 | A16689 | 278 |
| A13313 | A16690 | 443 | A13313 | A16691 | 188 |
| A13313 | A16693 | 201 | A13313 | A16695 | 445 |
| A13313 | A16701 | 162 | A13313 | A16703 | 449 |
| A13313 | A16704 | 465 | A13313 | A16707 | 430 |
| A13313 | A16709 | 405 | A13313 | A16764 | 337 |
| A13313 | A16776 | 281 | A13313 | A16788 | 269 |
| A13313 | A16790 | 439 | A13313 | A16799 | 168 |



|        |        |     |        |        |     |
|--------|--------|-----|--------|--------|-----|
| A13313 | A16802 | 195 | A13313 | A16824 | 322 |
| A13313 | A16829 | 445 | A13313 | A16838 | 333 |
| A13313 | A16858 | 234 | A13313 | A16866 | 271 |
| A13313 | A16874 | 357 | A13313 | A16875 | 238 |
| A13313 | A16905 | 480 | A13313 | A16913 | 435 |
| A13313 | A16942 | 177 | A13313 | A16944 | 483 |
| A13313 | A16954 | 405 | A13313 | A16979 | 167 |
| A13313 | A17014 | 393 | A13313 | A17018 | 364 |
| A13313 | A17019 | 212 | A13313 | A17030 | 422 |
| A13313 | A17033 | 267 | A13313 | A17035 | 202 |
| A13313 | A17043 | 201 | A13313 | A17125 | 152 |
| A13313 | A17190 | 360 | A13313 | A17211 | 263 |
| A13314 | A13326 | 483 | A13314 | A14862 | 439 |
| A13314 | A15223 | 313 | A13314 | A15282 | 185 |
| A13314 | A15874 | 252 | A13314 | A15970 | 343 |
| A13314 | A16766 | 202 | A13314 | A16767 | 433 |
| A13314 | A16896 | 374 | A13314 | A17007 | 330 |
| A13314 | A17041 | 334 | A13314 | A17089 | 301 |
| A13315 | A13356 | 229 | A13315 | A13707 | 257 |
| A13315 | A13788 | 310 | A13315 | A14016 | 180 |
| A13315 | A14213 | 191 | A13315 | A14235 | 328 |
| A13315 | A14255 | 241 | A13315 | A14263 | 378 |
| A13315 | A14270 | 465 | A13315 | A14719 | 443 |
| A13315 | A14937 | 294 | A13315 | A15680 | 165 |
| A13315 | A16157 | 157 | A13315 | A16387 | 423 |
| A13315 | A16567 | 335 | A13315 | A16675 | 201 |
| A13315 | A17133 | 306 | A13316 | A15445 | 380 |
| A13317 | A13987 | 255 | A13317 | A14122 | 285 |
| A13317 | A14366 | 269 | A13317 | A14378 | 257 |
| A13317 | A15292 | 152 | A13317 | A15301 | 399 |
| A13317 | A15313 | 241 | A13317 | A15331 | 329 |
| A13317 | A15352 | 224 | A13317 | A15435 | 265 |
| A13317 | A15462 | 303 | A13317 | A15638 | 301 |
| A13317 | A15673 | 296 | A13319 | A15312 | 257 |
| A13320 | A13335 | 491 | A13320 | A13340 | 489 |
| A13320 | A13522 | 334 | A13320 | A14188 | 406 |
| A13320 | A14228 | 63  | A13320 | A14571 | 465 |
| A13320 | A15244 | 468 | A13320 | A15246 | 278 |
| A13320 | A15546 | 263 | A13320 | A15741 | 224 |
| A13321 | A13342 | 252 | A13321 | A13356 | 188 |
| A13321 | A13388 | 265 | A13321 | A13706 | 187 |
| A13321 | A13783 | 283 | A13321 | A13804 | 305 |
| A13321 | A13806 | 241 | A13321 | A13969 | 188 |
| A13321 | A14074 | 185 | A13321 | A14147 | 152 |
| A13321 | A14167 | 294 | A13321 | A14214 | 430 |
| A13321 | A14222 | 173 | A13321 | A14255 | 201 |

|        |        |     |        |        |     |
|--------|--------|-----|--------|--------|-----|
| A13321 | A14270 | 252 | A13321 | A14289 | 241 |
| A13321 | A14455 | 281 | A13321 | A14462 | 334 |
| A13321 | A14569 | 347 | A13321 | A14719 | 254 |
| A13321 | A14799 | 221 | A13321 | A14903 | 283 |
| A13321 | A14917 | 388 | A13321 | A14921 | 337 |
| A13321 | A15187 | 373 | A13321 | A15189 | 184 |
| A13321 | A15519 | 243 | A13321 | A15541 | 185 |
| A13321 | A15653 | 217 | A13321 | A15680 | 350 |
| A13321 | A15698 | 235 | A13321 | A15709 | 288 |
| A13321 | A15854 | 184 | A13321 | A15947 | 243 |
| A13321 | A16144 | 424 | A13321 | A16157 | 401 |
| A13321 | A16212 | 291 | A13321 | A16277 | 254 |
| A13321 | A16322 | 193 | A13321 | A16565 | 196 |
| A13321 | A16587 | 269 | A13321 | A16597 | 329 |
| A13321 | A16608 | 162 | A13321 | A16611 | 273 |
| A13321 | A16652 | 180 | A13321 | A16664 | 326 |
| A13321 | A16675 | 160 | A13321 | A16680 | 180 |
| A13321 | A16690 | 293 | A13321 | A16703 | 245 |
| A13321 | A16704 | 252 | A13321 | A16776 | 291 |
| A13321 | A16829 | 281 | A13321 | A16866 | 340 |
| A13321 | A16874 | 278 | A13321 | A16905 | 232 |
| A13321 | A16944 | 297 | A13321 | A17190 | 281 |
| A13322 | A14193 | 491 | A13322 | A14204 | 255 |
| A13322 | A14253 | 384 | A13322 | A15557 | 451 |
| A13322 | A15680 | 393 | A13322 | A15690 | 486 |
| A13322 | A16314 | 402 | A13322 | A16432 | 311 |
| A13322 | A16459 | 469 | A13322 | A16546 | 484 |
| A13322 | A16799 | 344 | A13323 | A13356 | 293 |
| A13323 | A13784 | 223 | A13323 | A13805 | 351 |
| A13323 | A13809 | 311 | A13323 | A14462 | 303 |
| A13323 | A14826 | 243 | A13323 | A15519 | 333 |
| A13323 | A15653 | 210 | A13323 | A15680 | 236 |
| A13323 | A15765 | 326 | A13323 | A16157 | 229 |
| A13323 | A16387 | 374 | A13323 | A16552 | 212 |
| A13323 | A16682 | 361 | A13323 | A16908 | 399 |
| A13325 | A14596 | 274 | A13325 | A16873 | 486 |
| A13326 | A14856 | 230 | A13326 | A14862 | 375 |
| A13326 | A15282 | 204 | A13326 | A15497 | 273 |
| A13326 | A16371 | 324 | A13326 | A17089 | 318 |
| A13327 | A13329 | 475 | A13328 | A14176 | 200 |
| A13328 | A15715 | 328 | A13328 | A16876 | 332 |
| A13328 | A16899 | 408 | A13328 | A17138 | 491 |
| A13330 | A13426 | 408 | A13330 | A13783 | 308 |
| A13330 | A16702 | 286 | A13331 | A15498 | 177 |
| A13332 | A15498 | 240 | A13333 | A13527 | 346 |
| A13333 | A15202 | 200 | A13335 | A13340 | 452 |

|        |        |     |        |        |     |
|--------|--------|-----|--------|--------|-----|
| A13335 | A13522 | 278 | A13335 | A14073 | 443 |
| A13335 | A14159 | 460 | A13335 | A14184 | 171 |
| A13335 | A14257 | 188 | A13335 | A14466 | 228 |
| A13335 | A14571 | 191 | A13335 | A14596 | 259 |
| A13335 | A14738 | 490 | A13335 | A15106 | 440 |
| A13335 | A15244 | 445 | A13335 | A15246 | 488 |
| A13335 | A15697 | 369 | A13335 | A15741 | 450 |
| A13335 | A15760 | 363 | A13335 | A16266 | 450 |
| A13335 | A16291 | 480 | A13335 | A16939 | 196 |
| A13335 | A17142 | 353 | A13336 | A13944 | 356 |
| A13336 | A14511 | 441 | A13336 | A15480 | 480 |
| A13338 | A13987 | 339 | A13338 | A14007 | 156 |
| A13338 | A14122 | 449 | A13338 | A14124 | 430 |
| A13338 | A14611 | 251 | A13338 | A15310 | 218 |
| A13338 | A15312 | 202 | A13338 | A15322 | 180 |
| A13338 | A15349 | 180 | A13338 | A15421 | 335 |
| A13338 | A15445 | 193 | A13338 | A15459 | 258 |
| A13338 | A15800 | 243 | A13338 | A16117 | 246 |
| A13338 | A16224 | 202 | A13338 | A16441 | 313 |
| A13338 | A17196 | 480 | A13339 | A14273 | 193 |
| A13339 | A15371 | 279 | A13339 | A15941 | 208 |
| A13339 | A16127 | 286 | A13339 | A16646 | 266 |
| A13340 | A13527 | 433 | A13340 | A13689 | 260 |
| A13340 | A13739 | 165 | A13340 | A13812 | 445 |
| A13340 | A13889 | 182 | A13340 | A13989 | 204 |
| A13340 | A14073 | 491 | A13340 | A14188 | 491 |
| A13340 | A14216 | 491 | A13340 | A14220 | 636 |
| A13340 | A14410 | 343 | A13340 | A14466 | 205 |
| A13340 | A14471 | 218 | A13340 | A14566 | 484 |
| A13340 | A14571 | 445 | A13340 | A14596 | 489 |
| A13340 | A14738 | 541 | A13340 | A15225 | 236 |
| A13340 | A15235 | 334 | A13340 | A15244 | 545 |
| A13340 | A15546 | 486 | A13340 | A15660 | 491 |
| A13340 | A15684 | 491 | A13340 | A15717 | 308 |
| A13340 | A15734 | 232 | A13340 | A15741 | 427 |
| A13340 | A15743 | 160 | A13340 | A15769 | 257 |
| A13340 | A15773 | 351 | A13340 | A15776 | 188 |
| A13340 | A15931 | 369 | A13340 | A15932 | 545 |
| A13340 | A15933 | 544 | A13340 | A16218 | 152 |
| A13340 | A16272 | 545 | A13340 | A16318 | 542 |
| A13340 | A16437 | 544 | A13340 | A16446 | 407 |
| A13340 | A16585 | 205 | A13340 | A16618 | 385 |
| A13340 | A16698 | 188 | A13340 | A16724 | 281 |
| A13340 | A16793 | 360 | A13340 | A16826 | 260 |
| A13340 | A16939 | 163 | A13340 | A17023 | 188 |
| A13340 | A17134 | 258 | A13340 | A17140 | 479 |

|        |        |     |        |        |     |
|--------|--------|-----|--------|--------|-----|
| A13340 | A17146 | 357 | A13341 | A14821 | 380 |
| A13341 | A14856 | 241 | A13341 | A17051 | 258 |
| A13342 | A13399 | 200 | A13342 | A13424 | 281 |
| A13342 | A14178 | 170 | A13342 | A14239 | 210 |
| A13342 | A14462 | 226 | A13342 | A14569 | 241 |
| A13342 | A14706 | 286 | A13342 | A15189 | 207 |
| A13342 | A15698 | 258 | A13342 | A15709 | 180 |
| A13342 | A16157 | 271 | A13342 | A16597 | 221 |
| A13342 | A16611 | 299 | A13342 | A16652 | 204 |
| A13342 | A16664 | 346 | A13342 | A16675 | 184 |
| A13342 | A16680 | 335 | A13342 | A16874 | 296 |
| A13344 | A14132 | 452 | A13344 | A14557 | 899 |
| A13344 | A16088 | 180 | A13344 | A16812 | 899 |
| A13344 | A17214 | 899 | A13346 | A16374 | 241 |
| A13348 | A14790 | 319 | A13348 | A16613 | 159 |
| A13348 | A16646 | 213 | A13348 | A16830 | 340 |
| A13348 | A16877 | 485 | A13349 | A13397 | 363 |
| A13351 | A14633 | 219 | A13352 | A17063 | 160 |
| A13356 | A13707 | 177 | A13356 | A13784 | 180 |
| A13356 | A13788 | 240 | A13356 | A13805 | 230 |
| A13356 | A13809 | 432 | A13356 | A14084 | 180 |
| A13356 | A14167 | 260 | A13356 | A14210 | 184 |
| A13356 | A14213 | 333 | A13356 | A14214 | 355 |
| A13356 | A14235 | 263 | A13356 | A14255 | 160 |
| A13356 | A14263 | 291 | A13356 | A14270 | 213 |
| A13356 | A14462 | 380 | A13356 | A14569 | 177 |
| A13356 | A14706 | 208 | A13356 | A14719 | 213 |
| A13356 | A14903 | 247 | A13356 | A14937 | 219 |
| A13356 | A15321 | 488 | A13356 | A15377 | 152 |
| A13356 | A15480 | 276 | A13356 | A15519 | 202 |
| A13356 | A15653 | 265 | A13356 | A15680 | 200 |
| A13356 | A15765 | 193 | A13356 | A16152 | 184 |
| A13356 | A16157 | 367 | A13356 | A16322 | 283 |
| A13356 | A16387 | 272 | A13356 | A16552 | 269 |
| A13356 | A16565 | 154 | A13356 | A16567 | 274 |
| A13356 | A16587 | 230 | A13356 | A16611 | 324 |
| A13356 | A16664 | 152 | A13356 | A16675 | 246 |
| A13356 | A16680 | 363 | A13356 | A16682 | 247 |
| A13356 | A16693 | 301 | A13356 | A16774 | 281 |
| A13356 | A16829 | 245 | A13356 | A16908 | 319 |
| A13356 | A17133 | 360 | A13357 | A14596 | 208 |
| A13357 | A15202 | 455 | A13359 | A15932 | 358 |
| A13360 | A13986 | 321 | A13361 | A14377 | 293 |
| A13361 | A14381 | 301 | A13361 | A14399 | 428 |
| A13361 | A14490 | 151 | A13361 | A15911 | 347 |
| A13361 | A16335 | 191 | A13361 | A16719 | 319 |

|        |        |     |        |        |     |
|--------|--------|-----|--------|--------|-----|
| A13362 | A17006 | 436 | A13363 | A13987 | 314 |
| A13363 | A14511 | 429 | A13363 | A15292 | 63  |
| A13363 | A15311 | 208 | A13363 | A15312 | 484 |
| A13363 | A15313 | 469 | A13363 | A15317 | 146 |
| A13363 | A15331 | 185 | A13363 | A15349 | 254 |
| A13363 | A15352 | 273 | A13363 | A15431 | 463 |
| A13363 | A15440 | 364 | A13363 | A15459 | 490 |
| A13363 | A15461 | 468 | A13363 | A15480 | 361 |
| A13363 | A15498 | 252 | A13363 | A15802 | 278 |
| A13364 | A15294 | 165 | A13364 | A15506 | 174 |
| A13364 | A15578 | 329 | A13366 | A16300 | 218 |
| A13367 | A13826 | 312 | A13367 | A14202 | 463 |
| A13367 | A14399 | 395 | A13367 | A15464 | 409 |
| A13367 | A16555 | 384 | A13368 | A13980 | 268 |
| A13368 | A13991 | 939 | A13369 | A13935 | 126 |
| A13369 | A14077 | 268 | A13369 | A14097 | 383 |
| A13369 | A14128 | 491 | A13369 | A14204 | 452 |
| A13369 | A14377 | 311 | A13369 | A14381 | 412 |
| A13369 | A14395 | 328 | A13369 | A14418 | 151 |
| A13369 | A14511 | 235 | A13369 | A14633 | 457 |
| A13369 | A14648 | 307 | A13369 | A14654 | 491 |
| A13369 | A14735 | 335 | A13369 | A14812 | 278 |
| A13369 | A14901 | 201 | A13369 | A15232 | 283 |
| A13369 | A15277 | 436 | A13369 | A15282 | 477 |
| A13369 | A15292 | 428 | A13369 | A15322 | 553 |
| A13369 | A15328 | 201 | A13369 | A15336 | 463 |
| A13369 | A15398 | 174 | A13369 | A15399 | 207 |
| A13369 | A15430 | 491 | A13369 | A15435 | 363 |
| A13369 | A15467 | 212 | A13369 | A15470 | 208 |
| A13369 | A15495 | 416 | A13369 | A15498 | 430 |
| A13369 | A15627 | 317 | A13369 | A15638 | 491 |
| A13369 | A15665 | 182 | A13369 | A15669 | 291 |
| A13369 | A15858 | 435 | A13369 | A15917 | 226 |
| A13369 | A15925 | 217 | A13369 | A15934 | 159 |
| A13369 | A16121 | 281 | A13369 | A16143 | 490 |
| A13369 | A16274 | 443 | A13369 | A16450 | 195 |
| A13369 | A17078 | 329 | A13370 | A14077 | 182 |
| A13371 | A14221 | 180 | A13372 | A14366 | 294 |
| A13372 | A14596 | 162 | A13372 | A14611 | 373 |
| A13372 | A15349 | 241 | A13374 | A15660 | 202 |
| A13375 | A14220 | 185 | A13375 | A14508 | 272 |
| A13375 | A15376 | 188 | A13375 | A15932 | 447 |
| A13375 | A15933 | 408 | A13375 | A16324 | 266 |
| A13376 | A14220 | 215 | A13376 | A15596 | 235 |
| A13378 | A13924 | 401 | A13379 | A15800 | 401 |
| A13381 | A15373 | 301 | A13382 | A15064 | 439 |

|        |        |     |        |        |     |
|--------|--------|-----|--------|--------|-----|
| A13383 | A15943 | 326 | A13383 | A15945 | 271 |
| A13383 | A15946 | 216 | A13384 | A13831 | 380 |
| A13384 | A13837 | 199 | A13384 | A14186 | 251 |
| A13384 | A14621 | 176 | A13384 | A15370 | 267 |
| A13385 | A16994 | 240 | A13387 | A14247 | 489 |
| A13387 | A14399 | 385 | A13387 | A14473 | 229 |
| A13387 | A14481 | 149 | A13387 | A14661 | 205 |
| A13387 | A14693 | 414 | A13387 | A14710 | 291 |
| A13387 | A14783 | 165 | A13387 | A14798 | 355 |
| A13387 | A15909 | 378 | A13388 | A13484 | 254 |
| A13388 | A13609 | 417 | A13388 | A13655 | 380 |
| A13388 | A13707 | 254 | A13388 | A13708 | 172 |
| A13388 | A13804 | 332 | A13388 | A13811 | 296 |
| A13388 | A14255 | 236 | A13388 | A14375 | 235 |
| A13388 | A14455 | 187 | A13388 | A14799 | 267 |
| A13388 | A14816 | 324 | A13388 | A14827 | 265 |
| A13388 | A14903 | 313 | A13388 | A14917 | 305 |
| A13388 | A15221 | 268 | A13388 | A15541 | 221 |
| A13388 | A15680 | 162 | A13388 | A15683 | 162 |
| A13388 | A15709 | 193 | A13388 | A15776 | 316 |
| A13388 | A16157 | 154 | A13388 | A16187 | 269 |
| A13388 | A16565 | 358 | A13388 | A16587 | 404 |
| A13388 | A16611 | 180 | A13388 | A16664 | 229 |
| A13388 | A16680 | 218 | A13388 | A16690 | 196 |
| A13388 | A16697 | 311 | A13388 | A16699 | 283 |
| A13388 | A16703 | 278 | A13388 | A16704 | 285 |
| A13388 | A16814 | 333 | A13388 | A16905 | 266 |
| A13388 | A16944 | 324 | A13389 | A15935 | 345 |
| A13390 | A13393 | 899 | A13390 | A13984 | 932 |
| A13390 | A14042 | 899 | A13390 | A14045 | 425 |
| A13390 | A14472 | 899 | A13391 | A13393 | 899 |
| A13391 | A13984 | 899 | A13391 | A14443 | 899 |
| A13391 | A14496 | 477 | A13393 | A13984 | 899 |
| A13394 | A13625 | 441 | A13394 | A13718 | 441 |
| A13397 | A13946 | 278 | A13397 | A14258 | 899 |
| A13398 | A13524 | 406 | A13398 | A13809 | 468 |
| A13398 | A15653 | 405 | A13398 | A15666 | 301 |
| A13398 | A15765 | 319 | A13398 | A16157 | 449 |
| A13398 | A16243 | 475 | A13398 | A16676 | 477 |
| A13398 | A17146 | 414 | A13399 | A13707 | 165 |
| A13399 | A13708 | 458 | A13399 | A13737 | 491 |
| A13399 | A13781 | 465 | A13399 | A13783 | 235 |
| A13399 | A13784 | 399 | A13399 | A13786 | 180 |
| A13399 | A13788 | 228 | A13399 | A13805 | 347 |
| A13399 | A13809 | 379 | A13399 | A13912 | 396 |
| A13399 | A13963 | 491 | A13399 | A14084 | 483 |

|        |        |     |        |        |     |
|--------|--------|-----|--------|--------|-----|
| A13399 | A14214 | 461 | A13399 | A14222 | 346 |
| A13399 | A14239 | 413 | A13399 | A14255 | 279 |
| A13399 | A14263 | 353 | A13399 | A14285 | 481 |
| A13399 | A14288 | 356 | A13399 | A14445 | 218 |
| A13399 | A14455 | 385 | A13399 | A14569 | 454 |
| A13399 | A14706 | 191 | A13399 | A14708 | 491 |
| A13399 | A14718 | 385 | A13399 | A14719 | 201 |
| A13399 | A14838 | 196 | A13399 | A14921 | 402 |
| A13399 | A15105 | 407 | A13399 | A15187 | 406 |
| A13399 | A15189 | 259 | A13399 | A15262 | 337 |
| A13399 | A15501 | 208 | A13399 | A15665 | 207 |
| A13399 | A15680 | 363 | A13399 | A15683 | 363 |
| A13399 | A15696 | 226 | A13399 | A15698 | 183 |
| A13399 | A15709 | 326 | A13399 | A15711 | 196 |
| A13399 | A15774 | 334 | A13399 | A15850 | 303 |
| A13399 | A15940 | 226 | A13399 | A15943 | 165 |
| A13399 | A15949 | 462 | A13399 | A16157 | 480 |
| A13399 | A16187 | 182 | A13399 | A16261 | 174 |
| A13399 | A16343 | 291 | A13399 | A16552 | 446 |
| A13399 | A16565 | 366 | A13399 | A16566 | 238 |
| A13399 | A16597 | 462 | A13399 | A16608 | 232 |
| A13399 | A16611 | 469 | A13399 | A16664 | 446 |
| A13399 | A16675 | 330 | A13399 | A16680 | 256 |
| A13399 | A16690 | 329 | A13399 | A16703 | 461 |
| A13399 | A16704 | 201 | A13399 | A16709 | 218 |
| A13399 | A16714 | 374 | A13399 | A16764 | 369 |
| A13399 | A16788 | 340 | A13399 | A16790 | 347 |
| A13399 | A16802 | 177 | A13399 | A16806 | 401 |
| A13399 | A16824 | 441 | A13399 | A16829 | 232 |
| A13399 | A16838 | 408 | A13399 | A16866 | 157 |
| A13399 | A16874 | 420 | A13399 | A16900 | 252 |
| A13399 | A16905 | 393 | A13399 | A16913 | 271 |
| A13399 | A16944 | 252 | A13399 | A16954 | 347 |
| A13399 | A17014 | 271 | A13399 | A17015 | 319 |
| A13399 | A17018 | 238 | A13399 | A17033 | 358 |
| A13399 | A17035 | 316 | A13399 | A17211 | 229 |
| A13400 | A16216 | 236 | A13401 | A14031 | 899 |
| A13402 | A15287 | 385 | A13406 | A14202 | 466 |
| A13406 | A14399 | 461 | A13406 | A14490 | 286 |
| A13406 | A15464 | 321 | A13410 | A15312 | 200 |
| A13410 | A15313 | 213 | A13410 | A15352 | 196 |
| A13410 | A15399 | 313 | A13410 | A15456 | 344 |
| A13410 | A15809 | 377 | A13410 | A15922 | 299 |
| A13415 | A16230 | 299 | A13416 | A13426 | 445 |
| A13417 | A13461 | 380 | A13417 | A13575 | 386 |
| A13417 | A13992 | 229 | A13417 | A15843 | 274 |

|        |        |     |        |        |     |
|--------|--------|-----|--------|--------|-----|
| A13421 | A13461 | 454 | A13421 | A15843 | 311 |
| A13421 | A16086 | 355 | A13423 | A13698 | 174 |
| A13425 | A14216 | 450 | A13425 | A14937 | 307 |
| A13425 | A15487 | 208 | A13425 | A15684 | 271 |
| A13426 | A14804 | 258 | A13429 | A14008 | 216 |
| A13429 | A14177 | 486 | A13429 | A15837 | 339 |
| A13429 | A16626 | 195 | A13433 | A13841 | 469 |
| A13435 | A15498 | 152 | A13437 | A13526 | 438 |
| A13447 | A13667 | 341 | A13447 | A15136 | 483 |
| A13450 | A13451 | 452 | A13454 | A15147 | 480 |
| A13456 | A13830 | 177 | A13457 | A15221 | 337 |
| A13457 | A15727 | 394 | A13459 | A13822 | 334 |
| A13459 | A14198 | 176 | A13460 | A14149 | 484 |
| A13460 | A14374 | 363 | A13460 | A15768 | 249 |
| A13460 | A16677 | 371 | A13461 | A13575 | 391 |
| A13461 | A14198 | 162 | A13461 | A15383 | 200 |
| A13461 | A15624 | 159 | A13461 | A15843 | 394 |
| A13461 | A16086 | 334 | A13466 | A13819 | 240 |
| A13470 | A13870 | 273 | A13473 | A13672 | 446 |
| A13473 | A13673 | 428 | A13473 | A14220 | 162 |
| A13473 | A14633 | 227 | A13479 | A13906 | 475 |
| A13483 | A15511 | 488 | A13484 | A13665 | 224 |
| A13484 | A15286 | 279 | A13484 | A15503 | 269 |
| A13484 | A15928 | 296 | A13485 | A14210 | 241 |
| A13485 | A14380 | 409 | A13485 | A14381 | 329 |
| A13485 | A14554 | 334 | A13485 | A14603 | 412 |
| A13485 | A15498 | 177 | A13486 | A14009 | 249 |
| A13486 | A14529 | 396 | A13489 | A14484 | 286 |
| A13490 | A15624 | 258 | A13490 | A15920 | 355 |
| A13490 | A15932 | 395 | A13510 | A14178 | 436 |
| A13510 | A14728 | 481 | A13510 | A14812 | 258 |
| A13510 | A14986 | 491 | A13510 | A15629 | 465 |
| A13510 | A16331 | 213 | A13511 | A14026 | 163 |
| A13511 | A14196 | 207 | A13511 | A14198 | 480 |
| A13511 | A14298 | 340 | A13511 | A14402 | 226 |
| A13511 | A14570 | 366 | A13515 | A15441 | 419 |
| A13515 | A15445 | 361 | A13515 | A15515 | 366 |
| A13516 | A13595 | 424 | A13516 | A14482 | 201 |
| A13516 | A14936 | 319 | A13516 | A15068 | 457 |
| A13517 | A13549 | 296 | A13517 | A13992 | 327 |
| A13517 | A14207 | 215 | A13517 | A14247 | 279 |
| A13517 | A15578 | 324 | A13517 | A16026 | 167 |
| A13517 | A16821 | 429 | A13517 | A16927 | 441 |
| A13520 | A16082 | 418 | A13524 | A13809 | 353 |
| A13524 | A15653 | 385 | A13524 | A15666 | 241 |
| A13524 | A15765 | 364 | A13524 | A16157 | 443 |



|        |        |     |        |        |     |
|--------|--------|-----|--------|--------|-----|
| A13524 | A16243 | 390 | A13524 | A16676 | 401 |
| A13527 | A13707 | 263 | A13527 | A13782 | 385 |
| A13527 | A13788 | 314 | A13527 | A13804 | 339 |
| A13527 | A13809 | 259 | A13527 | A13811 | 306 |
| A13527 | A13812 | 299 | A13527 | A14235 | 333 |
| A13527 | A14263 | 165 | A13527 | A14288 | 168 |
| A13527 | A14468 | 363 | A13527 | A14516 | 182 |
| A13527 | A14569 | 382 | A13527 | A14706 | 180 |
| A13527 | A15235 | 435 | A13527 | A15501 | 193 |
| A13527 | A15658 | 229 | A13527 | A15680 | 174 |
| A13527 | A15732 | 279 | A13527 | A15854 | 232 |
| A13527 | A16157 | 299 | A13527 | A16565 | 243 |
| A13527 | A16566 | 324 | A13527 | A16567 | 340 |
| A13527 | A16587 | 308 | A13527 | A16611 | 191 |
| A13527 | A16664 | 241 | A13527 | A16675 | 208 |
| A13527 | A16691 | 352 | A13527 | A16693 | 360 |
| A13527 | A16695 | 363 | A13527 | A16764 | 246 |
| A13529 | A14299 | 200 | A13532 | A13700 | 374 |
| A13533 | A13699 | 335 | A13533 | A16300 | 180 |
| A13537 | A14281 | 182 | A13539 | A14432 | 266 |
| A13539 | A16358 | 274 | A13546 | A13987 | 294 |
| A13546 | A14369 | 293 | A13546 | A14511 | 249 |
| A13546 | A15292 | 451 | A13546 | A15313 | 279 |
| A13546 | A15452 | 185 | A13547 | A14073 | 281 |
| A13549 | A13992 | 396 | A13549 | A15988 | 293 |
| A13550 | A15685 | 283 | A13558 | A16786 | 312 |
| A13559 | A13640 | 413 | A13567 | A14265 | 235 |
| A13568 | A15650 | 383 | A13570 | A14757 | 393 |
| A13574 | A14777 | 414 | A13575 | A14017 | 380 |
| A13575 | A15843 | 296 | A13575 | A16300 | 200 |
| A13581 | A15837 | 269 | A13581 | A16027 | 269 |
| A13583 | A15659 | 323 | A13586 | A13824 | 154 |
| A13587 | A13594 | 396 | A13587 | A13889 | 491 |
| A13587 | A13928 | 491 | A13587 | A14016 | 162 |
| A13587 | A14148 | 348 | A13587 | A14192 | 307 |
| A13587 | A14193 | 363 | A13587 | A14196 | 480 |
| A13587 | A14202 | 433 | A13587 | A14220 | 344 |
| A13587 | A14221 | 441 | A13587 | A14257 | 430 |
| A13587 | A14258 | 179 | A13587 | A14352 | 205 |
| A13587 | A14454 | 210 | A13587 | A14457 | 306 |
| A13587 | A14481 | 199 | A13587 | A14490 | 438 |
| A13587 | A14570 | 490 | A13587 | A14758 | 199 |
| A13587 | A15274 | 184 | A13587 | A15291 | 339 |
| A13587 | A15292 | 461 | A13587 | A15297 | 484 |
| A13587 | A15309 | 163 | A13587 | A15312 | 323 |
| A13587 | A15313 | 277 | A13587 | A15366 | 491 |

|        |        |     |        |        |     |
|--------|--------|-----|--------|--------|-----|
| A13587 | A15431 | 235 | A13587 | A15478 | 279 |
| A13587 | A15492 | 488 | A13587 | A15606 | 210 |
| A13587 | A15614 | 485 | A13587 | A15665 | 408 |
| A13587 | A15682 | 364 | A13587 | A15710 | 183 |
| A13587 | A15752 | 183 | A13587 | A15773 | 294 |
| A13587 | A15852 | 488 | A13587 | A15870 | 466 |
| A13587 | A16293 | 299 | A13587 | A16608 | 286 |
| A13587 | A16724 | 489 | A13587 | A16853 | 162 |
| A13587 | A16949 | 208 | A13587 | A17107 | 283 |
| A13589 | A13593 | 491 | A13589 | A13597 | 246 |
| A13589 | A13695 | 241 | A13589 | A14661 | 490 |
| A13589 | A14670 | 263 | A13589 | A14741 | 279 |
| A13589 | A14996 | 486 | A13589 | A15096 | 490 |
| A13589 | A15552 | 227 | A13589 | A15699 | 210 |
| A13589 | A15845 | 294 | A13589 | A15932 | 154 |
| A13590 | A13593 | 63  | A13590 | A13594 | 491 |
| A13590 | A13597 | 414 | A13590 | A13700 | 235 |
| A13590 | A13977 | 329 | A13590 | A14263 | 475 |
| A13590 | A14996 | 299 | A13590 | A16809 | 202 |
| A13590 | A17189 | 268 | A13592 | A17198 | 236 |
| A13593 | A13638 | 294 | A13593 | A14305 | 358 |
| A13593 | A14457 | 196 | A13593 | A14522 | 420 |
| A13593 | A14560 | 157 | A13593 | A14607 | 420 |
| A13593 | A14661 | 224 | A13593 | A14741 | 279 |
| A13593 | A14996 | 491 | A13593 | A15096 | 491 |
| A13593 | A15099 | 210 | A13593 | A15552 | 228 |
| A13593 | A15726 | 160 | A13594 | A14996 | 278 |
| A13594 | A15639 | 151 | A13594 | A15880 | 274 |
| A13595 | A15068 | 445 | A13596 | A14849 | 466 |
| A13597 | A14996 | 404 | A13597 | A15096 | 294 |
| A13603 | A15091 | 452 | A13604 | A16304 | 454 |
| A13605 | A13980 | 441 | A13605 | A14019 | 385 |
| A13605 | A14032 | 329 | A13605 | A14188 | 928 |
| A13605 | A14198 | 299 | A13605 | A14438 | 313 |
| A13605 | A14452 | 109 | A13605 | A14686 | 337 |
| A13605 | A15503 | 305 | A13605 | A15726 | 63  |
| A13609 | A13989 | 364 | A13609 | A15667 | 151 |
| A13612 | A14947 | 435 | A13614 | A14986 | 372 |
| A13614 | A15096 | 188 | A13614 | A15097 | 272 |
| A13614 | A16798 | 228 | A13617 | A14091 | 247 |
| A13617 | A14177 | 165 | A13617 | A14202 | 221 |
| A13617 | A14221 | 199 | A13617 | A14272 | 229 |
| A13617 | A14481 | 199 | A13617 | A14589 | 221 |
| A13617 | A14690 | 188 | A13617 | A14838 | 235 |
| A13617 | A15293 | 440 | A13617 | A15345 | 168 |
| A13617 | A15917 | 382 | A13617 | A16363 | 481 |

|        |        |     |        |        |     |
|--------|--------|-----|--------|--------|-----|
| A13617 | A16392 | 201 | A13617 | A16465 | 174 |
| A13617 | A16510 | 268 | A13620 | A15034 | 283 |
| A13620 | A15297 | 340 | A13620 | A15710 | 257 |
| A13620 | A15779 | 191 | A13620 | A17033 | 157 |
| A13623 | A13679 | 469 | A13625 | A13718 | 452 |
| A13626 | A14216 | 373 | A13626 | A15028 | 347 |
| A13626 | A15624 | 223 | A13626 | A15649 | 229 |
| A13626 | A16088 | 171 | A13626 | A16095 | 335 |
| A13626 | A16149 | 208 | A13626 | A16279 | 322 |
| A13627 | A15022 | 447 | A13629 | A14838 | 235 |
| A13632 | A15103 | 445 | A13632 | A15726 | 172 |
| A13634 | A14571 | 288 | A13635 | A14701 | 270 |
| A13637 | A14970 | 447 | A13638 | A15726 | 172 |
| A13639 | A13640 | 436 | A13641 | A13642 | 480 |
| A13645 | A16237 | 422 | A13647 | A14454 | 456 |
| A13647 | A16802 | 307 | A13648 | A14308 | 441 |
| A13648 | A14674 | 313 | A13648 | A14712 | 430 |
| A13648 | A14715 | 441 | A13650 | A14471 | 337 |
| A13657 | A17168 | 288 | A13660 | A15653 | 270 |
| A13665 | A14381 | 193 | A13665 | A15309 | 177 |
| A13665 | A15877 | 249 | A13665 | A16762 | 173 |
| A13667 | A14405 | 347 | A13667 | A14646 | 382 |
| A13672 | A13673 | 473 | A13672 | A13753 | 296 |
| A13672 | A14220 | 441 | A13672 | A15741 | 259 |
| A13672 | A16400 | 477 | A13675 | A13676 | 452 |
| A13677 | A16529 | 353 | A13683 | A13684 | 414 |
| A13686 | A13687 | 489 | A13686 | A15524 | 443 |
| A13692 | A13693 | 63  | A13694 | A13695 | 447 |
| A13694 | A14221 | 278 | A13694 | A15512 | 353 |
| A13695 | A14221 | 259 | A13695 | A15512 | 343 |
| A13698 | A15166 | 254 | A13700 | A15624 | 173 |
| A13700 | A15649 | 226 | A13706 | A13707 | 174 |
| A13706 | A13708 | 383 | A13706 | A13781 | 422 |
| A13706 | A13783 | 368 | A13706 | A13784 | 358 |
| A13706 | A13786 | 191 | A13706 | A13787 | 307 |
| A13706 | A13804 | 270 | A13706 | A13805 | 420 |
| A13706 | A13809 | 302 | A13706 | A13912 | 401 |
| A13706 | A14214 | 402 | A13706 | A14239 | 274 |
| A13706 | A14255 | 157 | A13706 | A14263 | 288 |
| A13706 | A14270 | 210 | A13706 | A14288 | 188 |
| A13706 | A14375 | 156 | A13706 | A14451 | 333 |
| A13706 | A14455 | 229 | A13706 | A14462 | 159 |
| A13706 | A14569 | 176 | A13706 | A14706 | 205 |
| A13706 | A14718 | 391 | A13706 | A14799 | 265 |
| A13706 | A14835 | 215 | A13706 | A14917 | 361 |
| A13706 | A14921 | 307 | A13706 | A15105 | 294 |

|        |        |     |        |        |     |
|--------|--------|-----|--------|--------|-----|
| A13706 | A15187 | 340 | A13706 | A15189 | 272 |
| A13706 | A15217 | 245 | A13706 | A15680 | 301 |
| A13706 | A15696 | 235 | A13706 | A15711 | 338 |
| A13706 | A15853 | 198 | A13706 | A15943 | 176 |
| A13706 | A16115 | 213 | A13706 | A16157 | 290 |
| A13706 | A16187 | 193 | A13706 | A16261 | 319 |
| A13706 | A16552 | 266 | A13706 | A16565 | 374 |
| A13706 | A16566 | 249 | A13706 | A16587 | 420 |
| A13706 | A16597 | 374 | A13706 | A16608 | 246 |
| A13706 | A16611 | 322 | A13706 | A16664 | 151 |
| A13706 | A16675 | 401 | A13706 | A16680 | 268 |
| A13706 | A16690 | 435 | A13706 | A16692 | 221 |
| A13706 | A16699 | 210 | A13706 | A16702 | 218 |
| A13706 | A16707 | 338 | A13706 | A16709 | 228 |
| A13706 | A16764 | 288 | A13706 | A16774 | 391 |
| A13706 | A16776 | 254 | A13706 | A16788 | 347 |
| A13706 | A16790 | 228 | A13706 | A16802 | 187 |
| A13706 | A16806 | 302 | A13706 | A16815 | 294 |
| A13706 | A16829 | 427 | A13706 | A16858 | 323 |
| A13706 | A16859 | 347 | A13706 | A16866 | 385 |
| A13706 | A16867 | 402 | A13706 | A16868 | 323 |
| A13706 | A16905 | 439 | A13706 | A16913 | 391 |
| A13706 | A16942 | 279 | A13706 | A16944 | 379 |
| A13706 | A17012 | 235 | A13706 | A17015 | 196 |
| A13706 | A17018 | 247 | A13706 | A17030 | 254 |
| A13706 | A17190 | 425 | A13707 | A13708 | 249 |
| A13707 | A13737 | 360 | A13707 | A13781 | 290 |
| A13707 | A13783 | 273 | A13707 | A13784 | 219 |
| A13707 | A13786 | 221 | A13707 | A13788 | 383 |
| A13707 | A13805 | 259 | A13707 | A13809 | 406 |
| A13707 | A13811 | 254 | A13707 | A13912 | 319 |
| A13707 | A14084 | 322 | A13707 | A14154 | 167 |
| A13707 | A14214 | 447 | A13707 | A14222 | 156 |
| A13707 | A14227 | 216 | A13707 | A14235 | 288 |
| A13707 | A14239 | 174 | A13707 | A14255 | 400 |
| A13707 | A14263 | 452 | A13707 | A14270 | 364 |
| A13707 | A14288 | 432 | A13707 | A14375 | 321 |
| A13707 | A14569 | 491 | A13707 | A14595 | 316 |
| A13707 | A14706 | 245 | A13707 | A14708 | 160 |
| A13707 | A14719 | 241 | A13707 | A14799 | 461 |
| A13707 | A14903 | 388 | A13707 | A14917 | 263 |
| A13707 | A14937 | 247 | A13707 | A15105 | 232 |
| A13707 | A15189 | 305 | A13707 | A15262 | 154 |
| A13707 | A15541 | 307 | A13707 | A15667 | 263 |
| A13707 | A15680 | 236 | A13707 | A15683 | 238 |
| A13707 | A15709 | 367 | A13707 | A15940 | 265 |

|        |        |     |        |        |     |
|--------|--------|-----|--------|--------|-----|
| A13707 | A16157 | 484 | A13707 | A16187 | 418 |
| A13707 | A16261 | 217 | A13707 | A16552 | 420 |
| A13707 | A16565 | 396 | A13707 | A16566 | 277 |
| A13707 | A16567 | 297 | A13707 | A16585 | 305 |
| A13707 | A16587 | 486 | A13707 | A16597 | 396 |
| A13707 | A16608 | 373 | A13707 | A16611 | 441 |
| A13707 | A16663 | 201 | A13707 | A16664 | 469 |
| A13707 | A16680 | 302 | A13707 | A16682 | 274 |
| A13707 | A16695 | 418 | A13707 | A16697 | 271 |
| A13707 | A16699 | 240 | A13707 | A16702 | 247 |
| A13707 | A16703 | 232 | A13707 | A16704 | 241 |
| A13707 | A16707 | 434 | A13707 | A16762 | 154 |
| A13707 | A16764 | 188 | A13707 | A16776 | 391 |
| A13707 | A16790 | 257 | A13707 | A16807 | 208 |
| A13707 | A16838 | 368 | A13707 | A16905 | 219 |
| A13707 | A16913 | 305 | A13707 | A16942 | 305 |
| A13707 | A16954 | 377 | A13707 | A17015 | 227 |
| A13707 | A17030 | 281 | A13707 | A17033 | 271 |
| A13707 | A17035 | 224 | A13707 | A17133 | 262 |
| A13708 | A13737 | 340 | A13708 | A13781 | 633 |
| A13708 | A13783 | 193 | A13708 | A13784 | 468 |
| A13708 | A13786 | 269 | A13708 | A13787 | 263 |
| A13708 | A13788 | 398 | A13708 | A13804 | 350 |
| A13708 | A13805 | 311 | A13708 | A13809 | 402 |
| A13708 | A13912 | 372 | A13708 | A13928 | 324 |
| A13708 | A14084 | 288 | A13708 | A14193 | 152 |
| A13708 | A14214 | 473 | A13708 | A14222 | 383 |
| A13708 | A14239 | 423 | A13708 | A14255 | 430 |
| A13708 | A14260 | 199 | A13708 | A14270 | 159 |
| A13708 | A14286 | 183 | A13708 | A14288 | 407 |
| A13708 | A14358 | 276 | A13708 | A14375 | 328 |
| A13708 | A14455 | 470 | A13708 | A14569 | 252 |
| A13708 | A14661 | 423 | A13708 | A14706 | 234 |
| A13708 | A14708 | 369 | A13708 | A14718 | 350 |
| A13708 | A14719 | 160 | A13708 | A14799 | 388 |
| A13708 | A14838 | 241 | A13708 | A14903 | 402 |
| A13708 | A14917 | 317 | A13708 | A14921 | 473 |
| A13708 | A15034 | 319 | A13708 | A15105 | 631 |
| A13708 | A15187 | 291 | A13708 | A15189 | 488 |
| A13708 | A15217 | 193 | A13708 | A15262 | 362 |
| A13708 | A15366 | 324 | A13708 | A15501 | 152 |
| A13708 | A15524 | 485 | A13708 | A15541 | 208 |
| A13708 | A15653 | 177 | A13708 | A15665 | 447 |
| A13708 | A15680 | 412 | A13708 | A15683 | 310 |
| A13708 | A15696 | 185 | A13708 | A15709 | 401 |
| A13708 | A15711 | 156 | A13708 | A15743 | 177 |

|        |        |     |        |        |     |
|--------|--------|-----|--------|--------|-----|
| A13708 | A15773 | 324 | A13708 | A15774 | 294 |
| A13708 | A15818 | 286 | A13708 | A15850 | 385 |
| A13708 | A15854 | 502 | A13708 | A15855 | 490 |
| A13708 | A15943 | 251 | A13708 | A16157 | 481 |
| A13708 | A16187 | 272 | A13708 | A16243 | 191 |
| A13708 | A16343 | 255 | A13708 | A16552 | 489 |
| A13708 | A16565 | 488 | A13708 | A16566 | 473 |
| A13708 | A16567 | 224 | A13708 | A16587 | 311 |
| A13708 | A16597 | 490 | A13708 | A16608 | 436 |
| A13708 | A16611 | 481 | A13708 | A16652 | 201 |
| A13708 | A16664 | 472 | A13708 | A16675 | 488 |
| A13708 | A16680 | 419 | A13708 | A16682 | 195 |
| A13708 | A16690 | 435 | A13708 | A16701 | 216 |
| A13708 | A16702 | 165 | A13708 | A16703 | 483 |
| A13708 | A16704 | 291 | A13708 | A16709 | 310 |
| A13708 | A16764 | 393 | A13708 | A16776 | 335 |
| A13708 | A16788 | 313 | A13708 | A16790 | 310 |
| A13708 | A16806 | 433 | A13708 | A16807 | 252 |
| A13708 | A16824 | 455 | A13708 | A16829 | 401 |
| A13708 | A16838 | 296 | A13708 | A16858 | 283 |
| A13708 | A16859 | 313 | A13708 | A16866 | 240 |
| A13708 | A16874 | 188 | A13708 | A16900 | 212 |
| A13708 | A16905 | 462 | A13708 | A16913 | 422 |
| A13708 | A16944 | 412 | A13708 | A16954 | 177 |
| A13708 | A17014 | 232 | A13708 | A17015 | 276 |
| A13708 | A17018 | 404 | A13708 | A17030 | 204 |
| A13708 | A17035 | 364 | A13708 | A17043 | 255 |
| A13708 | A17071 | 391 | A13708 | A17144 | 171 |
| A13708 | A17190 | 440 | A13708 | A17211 | 188 |
| A13708 | A17218 | 313 | A13709 | A14188 | 235 |
| A13709 | A14198 | 213 | A13710 | A14176 | 456 |
| A13710 | A14505 | 278 | A13710 | A14801 | 179 |
| A13710 | A14937 | 443 | A13710 | A15732 | 267 |
| A13710 | A16682 | 490 | A13711 | A13784 | 338 |
| A13711 | A13809 | 390 | A13711 | A14216 | 185 |
| A13711 | A14239 | 379 | A13711 | A14288 | 341 |
| A13711 | A14706 | 350 | A13711 | A14708 | 372 |
| A13711 | A14799 | 329 | A13711 | A15665 | 241 |
| A13711 | A15683 | 346 | A13711 | A16157 | 340 |
| A13711 | A16552 | 329 | A13711 | A16565 | 383 |
| A13711 | A16611 | 356 | A13711 | A16675 | 366 |
| A13711 | A16690 | 366 | A13711 | A16703 | 401 |
| A13711 | A16802 | 396 | A13715 | A14552 | 452 |
| A13715 | A15057 | 452 | A13716 | A14223 | 174 |
| A13716 | A14621 | 185 | A13717 | A17024 | 422 |
| A13719 | A14006 | 172 | A13720 | A14272 | 208 |

|        |        |     |        |        |     |
|--------|--------|-----|--------|--------|-----|
| A13720 | A15374 | 278 | A13721 | A14073 | 281 |
| A13726 | A13855 | 173 | A13726 | A14770 | 362 |
| A13728 | A15121 | 477 | A13729 | A16847 | 257 |
| A13731 | A16739 | 394 | A13731 | A16741 | 314 |
| A13731 | A16744 | 396 | A13732 | A14258 | 262 |
| A13732 | A16320 | 335 | A13734 | A13735 | 395 |
| A13734 | A14244 | 224 | A13734 | A14856 | 260 |
| A13734 | A15223 | 187 | A13734 | A15394 | 241 |
| A13734 | A15893 | 485 | A13734 | A16286 | 313 |
| A13734 | A16335 | 480 | A13734 | A16433 | 462 |
| A13734 | A16852 | 224 | A13734 | A16968 | 187 |
| A13734 | A17041 | 226 | A13735 | A13736 | 470 |
| A13735 | A14191 | 235 | A13735 | A14803 | 262 |
| A13735 | A14856 | 477 | A13735 | A15223 | 475 |
| A13735 | A15874 | 216 | A13735 | A16103 | 416 |
| A13735 | A16286 | 486 | A13735 | A16335 | 374 |
| A13735 | A16529 | 185 | A13735 | A16767 | 330 |
| A13735 | A17007 | 305 | A13735 | A17041 | 477 |
| A13735 | A17089 | 353 | A13736 | A14856 | 461 |
| A13736 | A15223 | 446 | A13736 | A15293 | 294 |
| A13736 | A15970 | 456 | A13736 | A16103 | 332 |
| A13736 | A16286 | 469 | A13736 | A16335 | 385 |
| A13736 | A16746 | 446 | A13736 | A16852 | 386 |
| A13736 | A16968 | 483 | A13736 | A17001 | 374 |
| A13736 | A17041 | 490 | A13737 | A13781 | 441 |
| A13737 | A13783 | 205 | A13737 | A13784 | 436 |
| A13737 | A13805 | 400 | A13737 | A13809 | 355 |
| A13737 | A13912 | 380 | A13737 | A13963 | 695 |
| A13737 | A14084 | 554 | A13737 | A14214 | 475 |
| A13737 | A14222 | 357 | A13737 | A14255 | 243 |
| A13737 | A14263 | 316 | A13737 | A14270 | 184 |
| A13737 | A14285 | 554 | A13737 | A14288 | 441 |
| A13737 | A14455 | 279 | A13737 | A14462 | 246 |
| A13737 | A14569 | 477 | A13737 | A14706 | 152 |
| A13737 | A14708 | 491 | A13737 | A14719 | 173 |
| A13737 | A14799 | 356 | A13737 | A14917 | 196 |
| A13737 | A15105 | 418 | A13737 | A15187 | 388 |
| A13737 | A15189 | 223 | A13737 | A15501 | 170 |
| A13737 | A15683 | 328 | A13737 | A15709 | 185 |
| A13737 | A15774 | 174 | A13737 | A15940 | 329 |
| A13737 | A15949 | 694 | A13737 | A16099 | 184 |
| A13737 | A16157 | 477 | A13737 | A16187 | 374 |
| A13737 | A16215 | 215 | A13737 | A16261 | 278 |
| A13737 | A16343 | 266 | A13737 | A16552 | 401 |
| A13737 | A16565 | 238 | A13737 | A16597 | 467 |
| A13737 | A16608 | 299 | A13737 | A16611 | 452 |

|        |        |     |        |        |     |
|--------|--------|-----|--------|--------|-----|
| A13737 | A16664 | 474 | A13737 | A16675 | 296 |
| A13737 | A16680 | 218 | A13737 | A16690 | 191 |
| A13737 | A16699 | 170 | A13737 | A16702 | 179 |
| A13737 | A16703 | 429 | A13737 | A16709 | 188 |
| A13737 | A16764 | 341 | A13737 | A16774 | 367 |
| A13737 | A16776 | 346 | A13737 | A16790 | 188 |
| A13737 | A16792 | 196 | A13737 | A16815 | 380 |
| A13737 | A16824 | 254 | A13737 | A16829 | 205 |
| A13737 | A16838 | 434 | A13737 | A16874 | 406 |
| A13737 | A16900 | 224 | A13737 | A16913 | 243 |
| A13737 | A16954 | 400 | A13737 | A17015 | 290 |
| A13737 | A17018 | 210 | A13737 | A17030 | 216 |
| A13737 | A17033 | 335 | A13737 | A17035 | 374 |
| A13737 | A17211 | 201 | A13738 | A14827 | 201 |
| A13738 | A15543 | 258 | A13739 | A15606 | 218 |
| A13739 | A17176 | 422 | A13741 | A13832 | 198 |
| A13741 | A14009 | 308 | A13741 | A14161 | 337 |
| A13741 | A16849 | 394 | A13741 | A17207 | 229 |
| A13742 | A13743 | 63  | A13743 | A14299 | 501 |
| A13743 | A14443 | 167 | A13743 | A16547 | 338 |
| A13746 | A15079 | 452 | A13746 | A16048 | 319 |
| A13746 | A16283 | 424 | A13746 | A16284 | 424 |
| A13752 | A14216 | 318 | A13752 | A14566 | 191 |
| A13752 | A17140 | 346 | A13757 | A14467 | 466 |
| A13757 | A14468 | 490 | A13759 | A15099 | 491 |
| A13762 | A13928 | 272 | A13762 | A13963 | 184 |
| A13762 | A14303 | 241 | A13762 | A14490 | 395 |
| A13762 | A15949 | 200 | A13767 | A14799 | 193 |
| A13767 | A15524 | 184 | A13767 | A16613 | 210 |
| A13768 | A13781 | 154 | A13768 | A14449 | 199 |
| A13768 | A15318 | 223 | A13770 | A13771 | 63  |
| A13772 | A13811 | 217 | A13772 | A16207 | 199 |
| A13775 | A13870 | 345 | A13776 | A13885 | 416 |
| A13777 | A15415 | 470 | A13781 | A13782 | 260 |
| A13781 | A13783 | 276 | A13781 | A13784 | 489 |
| A13781 | A13786 | 311 | A13781 | A13788 | 268 |
| A13781 | A13804 | 172 | A13781 | A13805 | 441 |
| A13781 | A13809 | 455 | A13781 | A13811 | 252 |
| A13781 | A13912 | 462 | A13781 | A13928 | 324 |
| A13781 | A14074 | 243 | A13781 | A14084 | 412 |
| A13781 | A14087 | 235 | A13781 | A14214 | 490 |
| A13781 | A14222 | 475 | A13781 | A14235 | 162 |
| A13781 | A14239 | 328 | A13781 | A14249 | 187 |
| A13781 | A14255 | 266 | A13781 | A14260 | 281 |
| A13781 | A14263 | 462 | A13781 | A14286 | 263 |
| A13781 | A14288 | 419 | A13781 | A14455 | 491 |



|        |        |     |        |        |     |
|--------|--------|-----|--------|--------|-----|
| A13781 | A14569 | 486 | A13781 | A14706 | 310 |
| A13781 | A14708 | 411 | A13781 | A14718 | 457 |
| A13781 | A14719 | 235 | A13781 | A14799 | 462 |
| A13781 | A14838 | 160 | A13781 | A14903 | 369 |
| A13781 | A14921 | 414 | A13781 | A15034 | 319 |
| A13781 | A15105 | 633 | A13781 | A15187 | 433 |
| A13781 | A15189 | 491 | A13781 | A15262 | 450 |
| A13781 | A15366 | 324 | A13781 | A15536 | 160 |
| A13781 | A15541 | 384 | A13781 | A15665 | 489 |
| A13781 | A15683 | 358 | A13781 | A15709 | 396 |
| A13781 | A15711 | 329 | A13781 | A15735 | 200 |
| A13781 | A15773 | 324 | A13781 | A15774 | 335 |
| A13781 | A15850 | 224 | A13781 | A15854 | 554 |
| A13781 | A15855 | 491 | A13781 | A16115 | 236 |
| A13781 | A16157 | 490 | A13781 | A16187 | 313 |
| A13781 | A16215 | 152 | A13781 | A16261 | 375 |
| A13781 | A16343 | 339 | A13781 | A16552 | 491 |
| A13781 | A16565 | 486 | A13781 | A16566 | 372 |
| A13781 | A16567 | 174 | A13781 | A16587 | 441 |
| A13781 | A16597 | 491 | A13781 | A16608 | 430 |
| A13781 | A16611 | 489 | A13781 | A16664 | 488 |
| A13781 | A16675 | 491 | A13781 | A16680 | 466 |
| A13781 | A16684 | 291 | A13781 | A16689 | 409 |
| A13781 | A16690 | 474 | A13781 | A16691 | 193 |
| A13781 | A16692 | 246 | A13781 | A16693 | 339 |
| A13781 | A16695 | 343 | A13781 | A16699 | 333 |
| A13781 | A16702 | 243 | A13781 | A16703 | 451 |
| A13781 | A16704 | 466 | A13781 | A16707 | 260 |
| A13781 | A16709 | 408 | A13781 | A16724 | 198 |
| A13781 | A16764 | 450 | A13781 | A16774 | 317 |
| A13781 | A16776 | 154 | A13781 | A16788 | 274 |
| A13781 | A16790 | 458 | A13781 | A16799 | 174 |
| A13781 | A16806 | 213 | A13781 | A16808 | 152 |
| A13781 | A16815 | 202 | A13781 | A16824 | 327 |
| A13781 | A16827 | 443 | A13781 | A16829 | 481 |
| A13781 | A16838 | 455 | A13781 | A16858 | 363 |
| A13781 | A16859 | 274 | A13781 | A16866 | 357 |
| A13781 | A16874 | 416 | A13781 | A16875 | 246 |
| A13781 | A16900 | 162 | A13781 | A16905 | 490 |
| A13781 | A16913 | 436 | A13781 | A16944 | 382 |
| A13781 | A16954 | 352 | A13781 | A17013 | 450 |
| A13781 | A17014 | 436 | A13781 | A17015 | 318 |
| A13781 | A17018 | 369 | A13781 | A17019 | 218 |
| A13781 | A17030 | 466 | A13781 | A17033 | 274 |
| A13781 | A17035 | 313 | A13781 | A17043 | 208 |
| A13781 | A17125 | 159 | A13781 | A17190 | 273 |

|        |        |     |        |        |     |
|--------|--------|-----|--------|--------|-----|
| A13781 | A17211 | 363 | A13782 | A13788 | 386 |
| A13782 | A13804 | 401 | A13782 | A13811 | 382 |
| A13782 | A13812 | 378 | A13782 | A14235 | 396 |
| A13782 | A14569 | 357 | A13782 | A15315 | 160 |
| A13782 | A15680 | 293 | A13782 | A15854 | 335 |
| A13782 | A16157 | 286 | A13782 | A16552 | 272 |
| A13782 | A16565 | 343 | A13782 | A16566 | 391 |
| A13782 | A16567 | 401 | A13782 | A16611 | 307 |
| A13782 | A16675 | 319 | A13782 | A16691 | 408 |
| A13782 | A16693 | 412 | A13782 | A16695 | 414 |
| A13782 | A16764 | 346 | A13783 | A13784 | 302 |
| A13783 | A13786 | 286 | A13783 | A13788 | 323 |
| A13783 | A13805 | 316 | A13783 | A13806 | 291 |
| A13783 | A14214 | 296 | A13783 | A14227 | 167 |
| A13783 | A14255 | 377 | A13783 | A14263 | 308 |
| A13783 | A14288 | 177 | A13783 | A14289 | 294 |
| A13783 | A14455 | 339 | A13783 | A14462 | 259 |
| A13783 | A14569 | 274 | A13783 | A14706 | 190 |
| A13783 | A14708 | 230 | A13783 | A14718 | 274 |
| A13783 | A14799 | 425 | A13783 | A14838 | 193 |
| A13783 | A14917 | 454 | A13783 | A15105 | 179 |
| A13783 | A15292 | 174 | A13783 | A15519 | 294 |
| A13783 | A15532 | 201 | A13783 | A15541 | 366 |
| A13783 | A15680 | 184 | A13783 | A15698 | 288 |
| A13783 | A15709 | 215 | A13783 | A15711 | 402 |
| A13783 | A15854 | 241 | A13783 | A15943 | 273 |
| A13783 | A15947 | 294 | A13783 | A16157 | 391 |
| A13783 | A16261 | 281 | A13783 | A16552 | 379 |
| A13783 | A16565 | 373 | A13783 | A16587 | 413 |
| A13783 | A16597 | 254 | A13783 | A16611 | 443 |
| A13783 | A16664 | 372 | A13783 | A16680 | 238 |
| A13783 | A16684 | 404 | A13783 | A16690 | 347 |
| A13783 | A16692 | 310 | A13783 | A16699 | 301 |
| A13783 | A16702 | 408 | A13783 | A16703 | 296 |
| A13783 | A16704 | 302 | A13783 | A16707 | 390 |
| A13783 | A16764 | 375 | A13783 | A16774 | 352 |
| A13783 | A16790 | 314 | A13783 | A16806 | 368 |
| A13783 | A16815 | 363 | A13783 | A16824 | 358 |
| A13783 | A16874 | 323 | A13783 | A16900 | 339 |
| A13783 | A16905 | 285 | A13783 | A16942 | 352 |
| A13783 | A16944 | 339 | A13783 | A16954 | 314 |
| A13783 | A17012 | 321 | A13783 | A17211 | 324 |
| A13784 | A13785 | 219 | A13784 | A13786 | 340 |
| A13784 | A13788 | 162 | A13784 | A13805 | 374 |
| A13784 | A13809 | 477 | A13784 | A13912 | 451 |
| A13784 | A14074 | 177 | A13784 | A14084 | 408 |

|        |        |     |        |        |     |
|--------|--------|-----|--------|--------|-----|
| A13784 | A14094 | 162 | A13784 | A14154 | 168 |
| A13784 | A14214 | 486 | A13784 | A14222 | 434 |
| A13784 | A14239 | 358 | A13784 | A14255 | 301 |
| A13784 | A14260 | 174 | A13784 | A14263 | 491 |
| A13784 | A14281 | 491 | A13784 | A14286 | 159 |
| A13784 | A14288 | 417 | A13784 | A14375 | 195 |
| A13784 | A14455 | 438 | A13784 | A14474 | 490 |
| A13784 | A14569 | 486 | A13784 | A14706 | 193 |
| A13784 | A14708 | 429 | A13784 | A14718 | 451 |
| A13784 | A14739 | 255 | A13784 | A14799 | 424 |
| A13784 | A14903 | 388 | A13784 | A14917 | 160 |
| A13784 | A14921 | 366 | A13784 | A15105 | 475 |
| A13784 | A15187 | 443 | A13784 | A15189 | 465 |
| A13784 | A15217 | 170 | A13784 | A15262 | 390 |
| A13784 | A15536 | 185 | A13784 | A15541 | 435 |
| A13784 | A15653 | 294 | A13784 | A15661 | 157 |
| A13784 | A15665 | 436 | A13784 | A15680 | 271 |
| A13784 | A15683 | 390 | A13784 | A15709 | 380 |
| A13784 | A15711 | 356 | A13784 | A15735 | 163 |
| A13784 | A15774 | 267 | A13784 | A15854 | 355 |
| A13784 | A15855 | 353 | A13784 | A15940 | 294 |
| A13784 | A16157 | 486 | A13784 | A16187 | 341 |
| A13784 | A16215 | 177 | A13784 | A16243 | 168 |
| A13784 | A16261 | 334 | A13784 | A16322 | 185 |
| A13784 | A16343 | 232 | A13784 | A16387 | 198 |
| A13784 | A16552 | 485 | A13784 | A16565 | 481 |
| A13784 | A16587 | 424 | A13784 | A16597 | 488 |
| A13784 | A16608 | 329 | A13784 | A16611 | 481 |
| A13784 | A16664 | 457 | A13784 | A16675 | 486 |
| A13784 | A16680 | 452 | A13784 | A16682 | 172 |
| A13784 | A16684 | 312 | A13784 | A16690 | 457 |
| A13784 | A16691 | 347 | A13784 | A16693 | 232 |
| A13784 | A16695 | 236 | A13784 | A16699 | 263 |
| A13784 | A16702 | 274 | A13784 | A16703 | 352 |
| A13784 | A16704 | 414 | A13784 | A16706 | 243 |
| A13784 | A16707 | 281 | A13784 | A16708 | 190 |
| A13784 | A16709 | 450 | A13784 | A16764 | 417 |
| A13784 | A16774 | 340 | A13784 | A16776 | 313 |
| A13784 | A16788 | 294 | A13784 | A16790 | 374 |
| A13784 | A16797 | 338 | A13784 | A16806 | 236 |
| A13784 | A16815 | 355 | A13784 | A16829 | 430 |
| A13784 | A16838 | 417 | A13784 | A16858 | 263 |
| A13784 | A16859 | 294 | A13784 | A16866 | 313 |
| A13784 | A16874 | 383 | A13784 | A16882 | 272 |
| A13784 | A16900 | 321 | A13784 | A16905 | 455 |
| A13784 | A16908 | 255 | A13784 | A16913 | 411 |

|        |        |     |        |        |     |
|--------|--------|-----|--------|--------|-----|
| A13784 | A16944 | 321 | A13784 | A16954 | 285 |
| A13784 | A17012 | 293 | A13784 | A17014 | 208 |
| A13784 | A17015 | 246 | A13784 | A17018 | 173 |
| A13784 | A17019 | 243 | A13784 | A17030 | 313 |
| A13784 | A17033 | 475 | A13784 | A17035 | 243 |
| A13784 | A17043 | 232 | A13784 | A17190 | 299 |
| A13784 | A17211 | 475 | A13785 | A13786 | 324 |
| A13785 | A13787 | 393 | A13785 | A13969 | 288 |
| A13785 | A14263 | 224 | A13785 | A14286 | 352 |
| A13785 | A14569 | 313 | A13785 | A14838 | 243 |
| A13785 | A15189 | 286 | A13785 | A15855 | 205 |
| A13785 | A16157 | 224 | A13785 | A16552 | 208 |
| A13785 | A16664 | 294 | A13785 | A16776 | 363 |
| A13785 | A17144 | 345 | A13786 | A13787 | 340 |
| A13786 | A13788 | 279 | A13786 | A13809 | 346 |
| A13786 | A13969 | 191 | A13786 | A14074 | 323 |
| A13786 | A14084 | 240 | A13786 | A14094 | 184 |
| A13786 | A14154 | 183 | A13786 | A14183 | 218 |
| A13786 | A14214 | 396 | A13786 | A14227 | 337 |
| A13786 | A14239 | 191 | A13786 | A14247 | 486 |
| A13786 | A14255 | 335 | A13786 | A14263 | 345 |
| A13786 | A14286 | 277 | A13786 | A14288 | 249 |
| A13786 | A14289 | 246 | A13786 | A14375 | 408 |
| A13786 | A14455 | 154 | A13786 | A14569 | 467 |
| A13786 | A14595 | 327 | A13786 | A14661 | 488 |
| A13786 | A14706 | 265 | A13786 | A14711 | 479 |
| A13786 | A14718 | 224 | A13786 | A14739 | 347 |
| A13786 | A14799 | 452 | A13786 | A14838 | 363 |
| A13786 | A14844 | 479 | A13786 | A14903 | 288 |
| A13786 | A14917 | 489 | A13786 | A14921 | 340 |
| A13786 | A14990 | 321 | A13786 | A15105 | 252 |
| A13786 | A15189 | 321 | A13786 | A15498 | 204 |
| A13786 | A15541 | 188 | A13786 | A15665 | 165 |
| A13786 | A15680 | 353 | A13786 | A15683 | 409 |
| A13786 | A15696 | 279 | A13786 | A15709 | 293 |
| A13786 | A15711 | 252 | A13786 | A15818 | 252 |
| A13786 | A15932 | 198 | A13786 | A16157 | 438 |
| A13786 | A16187 | 238 | A13786 | A16243 | 285 |
| A13786 | A16261 | 358 | A13786 | A16552 | 328 |
| A13786 | A16565 | 406 | A13786 | A16566 | 398 |
| A13786 | A16587 | 474 | A13786 | A16597 | 407 |
| A13786 | A16611 | 473 | A13786 | A16652 | 184 |
| A13786 | A16664 | 473 | A13786 | A16675 | 163 |
| A13786 | A16680 | 438 | A13786 | A16682 | 288 |
| A13786 | A16684 | 383 | A13786 | A16690 | 296 |
| A13786 | A16691 | 324 | A13786 | A16692 | 265 |

|        |        |     |        |        |     |
|--------|--------|-----|--------|--------|-----|
| A13786 | A16695 | 424 | A13786 | A16703 | 249 |
| A13786 | A16704 | 375 | A13786 | A16707 | 438 |
| A13786 | A16764 | 204 | A13786 | A16776 | 294 |
| A13786 | A16788 | 441 | A13786 | A16790 | 272 |
| A13786 | A16802 | 234 | A13786 | A16815 | 329 |
| A13786 | A16829 | 285 | A13786 | A16874 | 281 |
| A13786 | A16900 | 301 | A13786 | A16913 | 317 |
| A13786 | A16954 | 272 | A13786 | A17133 | 276 |
| A13786 | A17144 | 267 | A13786 | A17211 | 283 |
| A13787 | A13788 | 367 | A13787 | A13804 | 446 |
| A13787 | A13805 | 362 | A13787 | A13969 | 307 |
| A13787 | A14094 | 201 | A13787 | A14270 | 432 |
| A13787 | A14286 | 364 | A13787 | A14569 | 329 |
| A13787 | A14826 | 380 | A13787 | A14838 | 265 |
| A13787 | A14917 | 438 | A13787 | A15189 | 305 |
| A13787 | A15653 | 356 | A13787 | A15855 | 229 |
| A13787 | A16157 | 429 | A13787 | A16552 | 232 |
| A13787 | A16565 | 313 | A13787 | A16566 | 373 |
| A13787 | A16567 | 385 | A13787 | A16664 | 312 |
| A13787 | A16675 | 286 | A13787 | A16680 | 302 |
| A13787 | A16701 | 380 | A13787 | A16774 | 388 |
| A13787 | A16776 | 374 | A13787 | A16815 | 396 |
| A13787 | A16874 | 368 | A13787 | A17144 | 358 |
| A13788 | A13804 | 425 | A13788 | A13811 | 307 |
| A13788 | A13812 | 302 | A13788 | A14084 | 162 |
| A13788 | A14213 | 201 | A13788 | A14222 | 240 |
| A13788 | A14235 | 423 | A13788 | A14255 | 372 |
| A13788 | A14263 | 301 | A13788 | A14270 | 401 |
| A13788 | A14281 | 180 | A13788 | A14288 | 171 |
| A13788 | A14358 | 374 | A13788 | A14375 | 249 |
| A13788 | A14455 | 201 | A13788 | A14462 | 252 |
| A13788 | A14569 | 267 | A13788 | A14719 | 297 |
| A13788 | A14799 | 283 | A13788 | A14826 | 184 |
| A13788 | A14903 | 324 | A13788 | A14917 | 314 |
| A13788 | A14937 | 302 | A13788 | A15105 | 172 |
| A13788 | A15189 | 235 | A13788 | A15262 | 218 |
| A13788 | A15292 | 163 | A13788 | A15666 | 480 |
| A13788 | A15680 | 310 | A13788 | A15709 | 208 |
| A13788 | A15854 | 234 | A13788 | A15856 | 324 |
| A13788 | A15940 | 316 | A13788 | A16067 | 207 |
| A13788 | A16157 | 455 | A13788 | A16261 | 276 |
| A13788 | A16552 | 373 | A13788 | A16565 | 428 |
| A13788 | A16566 | 418 | A13788 | A16567 | 460 |
| A13788 | A16587 | 311 | A13788 | A16597 | 369 |
| A13788 | A16611 | 401 | A13788 | A16664 | 427 |
| A13788 | A16675 | 412 | A13788 | A16680 | 358 |

|        |        |     |        |        |     |
|--------|--------|-----|--------|--------|-----|
| A13788 | A16682 | 324 | A13788 | A16684 | 401 |
| A13788 | A16690 | 210 | A13788 | A16691 | 353 |
| A13788 | A16692 | 305 | A13788 | A16693 | 361 |
| A13788 | A16695 | 363 | A13788 | A16701 | 338 |
| A13788 | A16704 | 296 | A13788 | A16714 | 414 |
| A13788 | A16762 | 217 | A13788 | A16764 | 371 |
| A13788 | A16776 | 329 | A13788 | A16807 | 384 |
| A13788 | A16824 | 433 | A13788 | A16874 | 414 |
| A13788 | A16900 | 335 | A13788 | A16905 | 279 |
| A13788 | A16944 | 335 | A13788 | A16954 | 310 |
| A13788 | A17133 | 313 | A13788 | A17211 | 319 |
| A13789 | A15624 | 291 | A13798 | A16724 | 329 |
| A13798 | A16822 | 345 | A13804 | A13805 | 335 |
| A13804 | A13811 | 332 | A13804 | A13812 | 328 |
| A13804 | A14094 | 288 | A13804 | A14235 | 356 |
| A13804 | A14239 | 270 | A13804 | A14255 | 281 |
| A13804 | A14270 | 417 | A13804 | A14455 | 235 |
| A13804 | A14569 | 296 | A13804 | A14799 | 185 |
| A13804 | A14826 | 347 | A13804 | A14903 | 346 |
| A13804 | A14917 | 458 | A13804 | A15189 | 267 |
| A13804 | A15653 | 317 | A13804 | A15680 | 341 |
| A13804 | A15854 | 267 | A13804 | A16157 | 408 |
| A13804 | A16552 | 185 | A13804 | A16565 | 440 |
| A13804 | A16566 | 430 | A13804 | A16567 | 436 |
| A13804 | A16587 | 335 | A13804 | A16611 | 228 |
| A13804 | A16675 | 368 | A13804 | A16680 | 265 |
| A13804 | A16690 | 245 | A13804 | A16691 | 372 |
| A13804 | A16693 | 379 | A13804 | A16695 | 380 |
| A13804 | A16701 | 358 | A13804 | A16703 | 317 |
| A13804 | A16704 | 323 | A13804 | A16764 | 281 |
| A13804 | A16774 | 367 | A13804 | A16776 | 351 |
| A13804 | A16815 | 375 | A13804 | A16874 | 341 |
| A13804 | A16905 | 408 | A13804 | A16944 | 356 |
| A13805 | A13809 | 430 | A13805 | A13912 | 433 |
| A13805 | A14084 | 154 | A13805 | A14154 | 221 |
| A13805 | A14214 | 420 | A13805 | A14222 | 229 |
| A13805 | A14239 | 229 | A13805 | A14255 | 366 |
| A13805 | A14260 | 319 | A13805 | A14263 | 159 |
| A13805 | A14270 | 290 | A13805 | A14455 | 191 |
| A13805 | A14462 | 367 | A13805 | A14569 | 378 |
| A13805 | A14570 | 188 | A13805 | A14708 | 216 |
| A13805 | A14718 | 260 | A13805 | A14799 | 366 |
| A13805 | A14826 | 307 | A13805 | A14917 | 408 |
| A13805 | A15105 | 296 | A13805 | A15189 | 419 |
| A13805 | A15519 | 281 | A13805 | A15653 | 270 |
| A13805 | A15661 | 151 | A13805 | A15680 | 301 |

|        |        |     |        |        |     |
|--------|--------|-----|--------|--------|-----|
| A13805 | A15711 | 544 | A13805 | A15765 | 272 |
| A13805 | A15853 | 279 | A13805 | A16115 | 291 |
| A13805 | A16157 | 452 | A13805 | A16261 | 268 |
| A13805 | A16387 | 335 | A13805 | A16552 | 418 |
| A13805 | A16565 | 238 | A13805 | A16597 | 454 |
| A13805 | A16608 | 337 | A13805 | A16611 | 438 |
| A13805 | A16664 | 452 | A13805 | A16675 | 202 |
| A13805 | A16680 | 224 | A13805 | A16682 | 317 |
| A13805 | A16690 | 475 | A13805 | A16703 | 283 |
| A13805 | A16764 | 241 | A13805 | A16774 | 485 |
| A13805 | A16790 | 406 | A13805 | A16806 | 358 |
| A13805 | A16815 | 433 | A13805 | A16829 | 314 |
| A13805 | A16838 | 400 | A13805 | A16858 | 373 |
| A13805 | A16859 | 390 | A13805 | A16866 | 383 |
| A13805 | A16868 | 373 | A13805 | A16874 | 312 |
| A13805 | A16905 | 438 | A13805 | A16908 | 369 |
| A13805 | A16913 | 343 | A13805 | A16937 | 358 |
| A13805 | A16944 | 329 | A13805 | A16954 | 303 |
| A13805 | A17015 | 277 | A13805 | A17033 | 314 |
| A13805 | A17190 | 313 | A13806 | A14289 | 252 |
| A13806 | A14569 | 229 | A13806 | A14917 | 283 |
| A13806 | A15519 | 252 | A13806 | A15541 | 196 |
| A13806 | A15709 | 167 | A13806 | A15854 | 195 |
| A13806 | A15947 | 252 | A13806 | A16611 | 154 |
| A13807 | A13808 | 452 | A13809 | A13912 | 452 |
| A13809 | A14074 | 302 | A13809 | A14084 | 314 |
| A13809 | A14094 | 339 | A13809 | A14154 | 160 |
| A13809 | A14214 | 483 | A13809 | A14222 | 389 |
| A13809 | A14227 | 208 | A13809 | A14239 | 302 |
| A13809 | A14255 | 183 | A13809 | A14263 | 427 |
| A13809 | A14286 | 258 | A13809 | A14288 | 429 |
| A13809 | A14289 | 224 | A13809 | A14375 | 314 |
| A13809 | A14455 | 460 | A13809 | A14462 | 318 |
| A13809 | A14559 | 173 | A13809 | A14569 | 473 |
| A13809 | A14595 | 311 | A13809 | A14706 | 467 |
| A13809 | A14708 | 377 | A13809 | A14718 | 407 |
| A13809 | A14739 | 335 | A13809 | A14799 | 458 |
| A13809 | A14838 | 243 | A13809 | A14903 | 269 |
| A13809 | A14921 | 418 | A13809 | A15105 | 452 |
| A13809 | A15187 | 423 | A13809 | A15189 | 299 |
| A13809 | A15262 | 279 | A13809 | A15501 | 351 |
| A13809 | A15519 | 226 | A13809 | A15541 | 385 |
| A13809 | A15653 | 491 | A13809 | A15661 | 208 |
| A13809 | A15665 | 345 | A13809 | A15666 | 484 |
| A13809 | A15680 | 229 | A13809 | A15683 | 395 |
| A13809 | A15684 | 321 | A13809 | A15711 | 358 |

|        |        |     |        |        |     |
|--------|--------|-----|--------|--------|-----|
| A13809 | A15765 | 484 | A13809 | A15774 | 238 |
| A13809 | A15850 | 329 | A13809 | A15855 | 193 |
| A13809 | A15932 | 168 | A13809 | A15940 | 260 |
| A13809 | A16157 | 491 | A13809 | A16187 | 218 |
| A13809 | A16243 | 486 | A13809 | A16261 | 341 |
| A13809 | A16322 | 308 | A13809 | A16343 | 318 |
| A13809 | A16387 | 291 | A13809 | A16552 | 480 |
| A13809 | A16565 | 477 | A13809 | A16566 | 272 |
| A13809 | A16587 | 470 | A13809 | A16597 | 469 |
| A13809 | A16608 | 277 | A13809 | A16611 | 469 |
| A13809 | A16664 | 434 | A13809 | A16675 | 418 |
| A13809 | A16676 | 489 | A13809 | A16680 | 429 |
| A13809 | A16682 | 384 | A13809 | A16690 | 366 |
| A13809 | A16691 | 307 | A13809 | A16692 | 368 |
| A13809 | A16693 | 318 | A13809 | A16695 | 322 |
| A13809 | A16697 | 266 | A13809 | A16703 | 355 |
| A13809 | A16704 | 361 | A13809 | A16707 | 353 |
| A13809 | A16764 | 182 | A13809 | A16774 | 299 |
| A13809 | A16788 | 362 | A13809 | A16790 | 373 |
| A13809 | A16802 | 213 | A13809 | A16806 | 416 |
| A13809 | A16815 | 314 | A13809 | A16829 | 383 |
| A13809 | A16838 | 240 | A13809 | A16858 | 340 |
| A13809 | A16859 | 362 | A13809 | A16866 | 401 |
| A13809 | A16905 | 345 | A13809 | A16908 | 335 |
| A13809 | A16913 | 404 | A13809 | A16954 | 252 |
| A13809 | A17012 | 259 | A13809 | A17014 | 299 |
| A13809 | A17015 | 221 | A13809 | A17030 | 277 |
| A13809 | A17033 | 435 | A13809 | A17146 | 347 |
| A13809 | A17190 | 265 | A13810 | A16680 | 485 |
| A13811 | A13812 | 291 | A13811 | A14214 | 274 |
| A13811 | A14235 | 326 | A13811 | A14288 | 157 |
| A13811 | A14375 | 236 | A13811 | A14462 | 240 |
| A13811 | A14569 | 256 | A13811 | A15187 | 286 |
| A13811 | A15293 | 268 | A13811 | A15294 | 180 |
| A13811 | A15301 | 191 | A13811 | A15302 | 205 |
| A13811 | A15366 | 477 | A13811 | A15463 | 434 |
| A13811 | A15541 | 352 | A13811 | A15614 | 319 |
| A13811 | A15680 | 162 | A13811 | A15683 | 296 |
| A13811 | A15709 | 327 | A13811 | A15711 | 283 |
| A13811 | A15854 | 221 | A13811 | A16157 | 286 |
| A13811 | A16187 | 270 | A13811 | A16343 | 353 |
| A13811 | A16552 | 362 | A13811 | A16565 | 423 |
| A13811 | A16566 | 317 | A13811 | A16567 | 334 |
| A13811 | A16587 | 301 | A13811 | A16611 | 394 |
| A13811 | A16664 | 230 | A13811 | A16675 | 199 |
| A13811 | A16680 | 218 | A13811 | A16691 | 346 |



|        |        |     |        |        |     |
|--------|--------|-----|--------|--------|-----|
| A13811 | A16693 | 353 | A13811 | A16695 | 357 |
| A13811 | A16697 | 312 | A13811 | A16699 | 285 |
| A13811 | A16764 | 362 | A13811 | A16829 | 312 |
| A13811 | A16874 | 308 | A13812 | A14235 | 321 |
| A13812 | A14569 | 249 | A13812 | A14738 | 311 |
| A13812 | A15680 | 156 | A13812 | A15734 | 279 |
| A13812 | A15854 | 215 | A13812 | A16272 | 232 |
| A13812 | A16291 | 265 | A13812 | A16437 | 265 |
| A13812 | A16565 | 227 | A13812 | A16566 | 312 |
| A13812 | A16567 | 329 | A13812 | A16611 | 174 |
| A13812 | A16618 | 368 | A13812 | A16675 | 191 |
| A13812 | A16691 | 341 | A13812 | A16693 | 350 |
| A13812 | A16695 | 353 | A13812 | A16764 | 230 |
| A13812 | A17134 | 154 | A13814 | A14299 | 184 |
| A13814 | A14444 | 283 | A13816 | A13824 | 63  |
| A13816 | A13829 | 63  | A13816 | A14247 | 389 |
| A13816 | A15498 | 310 | A13819 | A13866 | 394 |
| A13819 | A13934 | 273 | A13819 | A13942 | 179 |
| A13819 | A14202 | 179 | A13819 | A14239 | 307 |
| A13819 | A14281 | 154 | A13819 | A14366 | 179 |
| A13819 | A14710 | 290 | A13819 | A15358 | 179 |
| A13819 | A15470 | 179 | A13819 | A15484 | 179 |
| A13819 | A16807 | 307 | A13821 | A14071 | 243 |
| A13821 | A14125 | 293 | A13821 | A14374 | 360 |
| A13821 | A14391 | 238 | A13821 | A14439 | 310 |
| A13821 | A15425 | 245 | A13822 | A14394 | 154 |
| A13822 | A14525 | 424 | A13822 | A14804 | 223 |
| A13822 | A15372 | 223 | A13822 | A15484 | 168 |
| A13822 | A16219 | 223 | A13822 | A16531 | 223 |
| A13822 | A16753 | 227 | A13824 | A13826 | 583 |
| A13824 | A13829 | 945 | A13824 | A13899 | 268 |
| A13824 | A13983 | 99  | A13824 | A13989 | 899 |
| A13824 | A14006 | 447 | A13824 | A14026 | 481 |
| A13824 | A14054 | 229 | A13824 | A14208 | 472 |
| A13824 | A14246 | 899 | A13824 | A14258 | 899 |
| A13824 | A14262 | 291 | A13824 | A14276 | 235 |
| A13824 | A14399 | 273 | A13824 | A14443 | 164 |
| A13824 | A14585 | 480 | A13824 | A14690 | 212 |
| A13824 | A14827 | 158 | A13824 | A14882 | 213 |
| A13824 | A15181 | 388 | A13824 | A15237 | 293 |
| A13824 | A15295 | 673 | A13824 | A15297 | 899 |
| A13824 | A15314 | 205 | A13824 | A15321 | 165 |
| A13824 | A15323 | 165 | A13824 | A15328 | 187 |
| A13824 | A15339 | 329 | A13824 | A15353 | 585 |
| A13824 | A15359 | 249 | A13824 | A15498 | 385 |
| A13824 | A15505 | 414 | A13824 | A15508 | 196 |

|        |        |     |        |        |     |
|--------|--------|-----|--------|--------|-----|
| A13824 | A15559 | 899 | A13824 | A15620 | 484 |
| A13824 | A16216 | 406 | A13824 | A16449 | 196 |
| A13824 | A16595 | 388 | A13824 | A16847 | 486 |
| A13825 | A14643 | 204 | A13826 | A13860 | 274 |
| A13826 | A13873 | 491 | A13826 | A13896 | 191 |
| A13826 | A13899 | 491 | A13826 | A13900 | 179 |
| A13826 | A13935 | 157 | A13826 | A13947 | 174 |
| A13826 | A13983 | 483 | A13826 | A13987 | 394 |
| A13826 | A14041 | 224 | A13826 | A14072 | 176 |
| A13826 | A14110 | 246 | A13826 | A14112 | 279 |
| A13826 | A14116 | 234 | A13826 | A14123 | 232 |
| A13826 | A14137 | 187 | A13826 | A14143 | 173 |
| A13826 | A14190 | 333 | A13826 | A14191 | 491 |
| A13826 | A14202 | 230 | A13826 | A14208 | 490 |
| A13826 | A14210 | 475 | A13826 | A14237 | 625 |
| A13826 | A14253 | 309 | A13826 | A14276 | 881 |
| A13826 | A14290 | 463 | A13826 | A14292 | 121 |
| A13826 | A14371 | 430 | A13826 | A14378 | 310 |
| A13826 | A14394 | 163 | A13826 | A14399 | 151 |
| A13826 | A14424 | 246 | A13826 | A14511 | 420 |
| A13826 | A14582 | 196 | A13826 | A14647 | 326 |
| A13826 | A15288 | 254 | A13826 | A15291 | 207 |
| A13826 | A15292 | 490 | A13826 | A15301 | 322 |
| A13826 | A15302 | 273 | A13826 | A15308 | 475 |
| A13826 | A15310 | 429 | A13826 | A15311 | 279 |
| A13826 | A15312 | 477 | A13826 | A15313 | 462 |
| A13826 | A15314 | 489 | A13826 | A15317 | 455 |
| A13826 | A15318 | 490 | A13826 | A15322 | 465 |
| A13826 | A15331 | 246 | A13826 | A15333 | 286 |
| A13826 | A15345 | 63  | A13826 | A15346 | 987 |
| A13826 | A15347 | 124 | A13826 | A15348 | 468 |
| A13826 | A15349 | 469 | A13826 | A15352 | 485 |
| A13826 | A15357 | 63  | A13826 | A15366 | 326 |
| A13826 | A15386 | 63  | A13826 | A15400 | 63  |
| A13826 | A15402 | 390 | A13826 | A15409 | 970 |
| A13826 | A15410 | 491 | A13826 | A15411 | 474 |
| A13826 | A15419 | 269 | A13826 | A15422 | 457 |
| A13826 | A15425 | 319 | A13826 | A15444 | 371 |
| A13826 | A15445 | 308 | A13826 | A15446 | 224 |
| A13826 | A15452 | 286 | A13826 | A15454 | 283 |
| A13826 | A15455 | 423 | A13826 | A15458 | 202 |
| A13826 | A15462 | 190 | A13826 | A15484 | 457 |
| A13826 | A15485 | 251 | A13826 | A15486 | 241 |
| A13826 | A15495 | 430 | A13826 | A15515 | 477 |
| A13826 | A15615 | 352 | A13826 | A15630 | 182 |
| A13826 | A15639 | 68  | A13826 | A15799 | 332 |

|        |        |     |        |        |     |
|--------|--------|-----|--------|--------|-----|
| A13826 | A15801 | 254 | A13826 | A15807 | 216 |
| A13826 | A15811 | 270 | A13826 | A15814 | 154 |
| A13826 | A15827 | 160 | A13826 | A15829 | 308 |
| A13826 | A15834 | 400 | A13826 | A15864 | 246 |
| A13826 | A16044 | 246 | A13826 | A16074 | 174 |
| A13826 | A16120 | 224 | A13826 | A16137 | 202 |
| A13826 | A16190 | 246 | A13826 | A16216 | 243 |
| A13826 | A16217 | 63  | A13826 | A16224 | 491 |
| A13826 | A16300 | 484 | A13826 | A16449 | 246 |
| A13826 | A16711 | 425 | A13826 | A16771 | 335 |
| A13826 | A16904 | 424 | A13826 | A16960 | 316 |
| A13826 | A17081 | 202 | A13826 | A17120 | 279 |
| A13827 | A14443 | 899 | A13827 | A14452 | 174 |
| A13827 | A16994 | 229 | A13828 | A14364 | 385 |
| A13828 | A15994 | 447 | A13829 | A13989 | 899 |
| A13829 | A13997 | 174 | A13829 | A14208 | 398 |
| A13829 | A14246 | 899 | A13829 | A14431 | 146 |
| A13829 | A14882 | 367 | A13829 | A14986 | 188 |
| A13829 | A14988 | 202 | A13829 | A14989 | 245 |
| A13829 | A15297 | 899 | A13829 | A15367 | 490 |
| A13829 | A15559 | 899 | A13829 | A15572 | 288 |
| A13829 | A15613 | 408 | A13829 | A16216 | 402 |
| A13830 | A13874 | 417 | A13830 | A13889 | 262 |
| A13830 | A13894 | 63  | A13830 | A13902 | 288 |
| A13830 | A13948 | 438 | A13830 | A13989 | 483 |
| A13830 | A14095 | 335 | A13830 | A14152 | 188 |
| A13830 | A14247 | 491 | A13830 | A14530 | 227 |
| A13830 | A14661 | 491 | A13830 | A14693 | 462 |
| A13830 | A14709 | 341 | A13830 | A14783 | 184 |
| A13830 | A15366 | 419 | A13830 | A15430 | 185 |
| A13830 | A15560 | 408 | A13830 | A15660 | 486 |
| A13830 | A15684 | 286 | A13830 | A15770 | 286 |
| A13830 | A15988 | 156 | A13830 | A16248 | 157 |
| A13830 | A16672 | 285 | A13830 | A16821 | 382 |
| A13830 | A16927 | 219 | A13830 | A17061 | 335 |
| A13830 | A17126 | 296 | A13830 | A17129 | 216 |
| A13831 | A14056 | 714 | A13831 | A14633 | 163 |
| A13831 | A14753 | 316 | A13831 | A15297 | 112 |
| A13831 | A15710 | 63  | A13831 | A16066 | 219 |
| A13831 | A16096 | 345 | A13831 | A16556 | 183 |
| A13832 | A14195 | 270 | A13832 | A14247 | 491 |
| A13832 | A14399 | 152 | A13832 | A14481 | 157 |
| A13832 | A14788 | 490 | A13832 | A14804 | 179 |
| A13832 | A14838 | 235 | A13832 | A15430 | 179 |
| A13832 | A15462 | 276 | A13832 | A15498 | 407 |
| A13832 | A15552 | 288 | A13832 | A15909 | 265 |

|        |        |     |        |        |     |
|--------|--------|-----|--------|--------|-----|
| A13832 | A16821 | 165 | A13832 | A17061 | 215 |
| A13833 | A14788 | 63  | A13834 | A13846 | 319 |
| A13835 | A13837 | 345 | A13837 | A14180 | 441 |
| A13837 | A14760 | 389 | A13837 | A16067 | 173 |
| A13837 | A17057 | 485 | A13842 | A15647 | 278 |
| A13844 | A13846 | 334 | A13844 | A13902 | 281 |
| A13844 | A14182 | 334 | A13845 | A14168 | 301 |
| A13845 | A14247 | 486 | A13845 | A14838 | 587 |
| A13845 | A15770 | 168 | A13845 | A16617 | 583 |
| A13845 | A16652 | 274 | A13845 | A17091 | 241 |
| A13846 | A14182 | 334 | A13848 | A15282 | 274 |
| A13850 | A14331 | 445 | A13851 | A14399 | 205 |
| A13853 | A13960 | 479 | A13853 | A13967 | 467 |
| A13853 | A14661 | 173 | A13854 | A16145 | 316 |
| A13855 | A14168 | 246 | A13855 | A14175 | 241 |
| A13855 | A14182 | 454 | A13855 | A14247 | 457 |
| A13855 | A14838 | 414 | A13855 | A14942 | 156 |
| A13855 | A15250 | 279 | A13855 | A16652 | 485 |
| A13855 | A16927 | 414 | A13855 | A16982 | 414 |
| A13857 | A14928 | 246 | A13858 | A14088 | 274 |
| A13860 | A14129 | 299 | A13860 | A14231 | 491 |
| A13860 | A14368 | 168 | A13860 | A14371 | 170 |
| A13860 | A14379 | 201 | A13860 | A14517 | 419 |
| A13860 | A14635 | 486 | A13860 | A14657 | 212 |
| A13860 | A14664 | 352 | A13860 | A14988 | 247 |
| A13860 | A14989 | 286 | A13860 | A15241 | 230 |
| A13860 | A15267 | 486 | A13860 | A15313 | 165 |
| A13860 | A15323 | 501 | A13860 | A15444 | 267 |
| A13860 | A15447 | 162 | A13860 | A15484 | 174 |
| A13860 | A15495 | 171 | A13860 | A15605 | 254 |
| A13860 | A15726 | 430 | A13860 | A15795 | 507 |
| A13860 | A15813 | 177 | A13860 | A16687 | 258 |
| A13860 | A16965 | 252 | A13861 | A14364 | 347 |
| A13861 | A15949 | 252 | A13864 | A14496 | 226 |
| A13866 | A13942 | 179 | A13866 | A14202 | 179 |
| A13866 | A14239 | 307 | A13866 | A14281 | 329 |
| A13866 | A14366 | 179 | A13866 | A15358 | 179 |
| A13866 | A15470 | 179 | A13866 | A15484 | 179 |
| A13866 | A16807 | 307 | A13867 | A13874 | 228 |
| A13867 | A13902 | 232 | A13870 | A13901 | 386 |
| A13870 | A14006 | 491 | A13870 | A14073 | 358 |
| A13870 | A14099 | 406 | A13870 | A14100 | 424 |
| A13870 | A14102 | 386 | A13870 | A14129 | 188 |
| A13870 | A14216 | 63  | A13870 | A14655 | 252 |
| A13870 | A14927 | 266 | A13870 | A14932 | 224 |
| A13870 | A14941 | 247 | A13870 | A14965 | 319 |

|        |        |     |        |        |     |
|--------|--------|-----|--------|--------|-----|
| A13870 | A14966 | 319 | A13870 | A15418 | 173 |
| A13870 | A16060 | 441 | A13870 | A16822 | 190 |
| A13870 | A16986 | 221 | A13870 | A17134 | 290 |
| A13870 | A17168 | 481 | A13870 | A17177 | 345 |
| A13871 | A14247 | 462 | A13871 | A14440 | 308 |
| A13871 | A14661 | 185 | A13871 | A15366 | 251 |
| A13871 | A15462 | 429 | A13871 | A15669 | 205 |
| A13871 | A17078 | 489 | A13872 | A14128 | 196 |
| A13872 | A14191 | 294 | A13872 | A14374 | 152 |
| A13872 | A14391 | 157 | A13872 | A14392 | 310 |
| A13872 | A14439 | 240 | A13872 | A14599 | 252 |
| A13872 | A15394 | 221 | A13872 | A15395 | 406 |
| A13872 | A15425 | 163 | A13872 | A15601 | 283 |
| A13872 | A15603 | 385 | A13872 | A15607 | 296 |
| A13872 | A15642 | 228 | A13872 | A15645 | 260 |
| A13872 | A15832 | 358 | A13873 | A13899 | 335 |
| A13873 | A13983 | 491 | A13873 | A14092 | 360 |
| A13873 | A14098 | 63  | A13873 | A14143 | 232 |
| A13873 | A14191 | 644 | A13873 | A14199 | 463 |
| A13873 | A14208 | 407 | A13873 | A14272 | 755 |
| A13873 | A14276 | 414 | A13873 | A14374 | 216 |
| A13873 | A14397 | 899 | A13873 | A14647 | 279 |
| A13873 | A14663 | 285 | A13873 | A15346 | 490 |
| A13873 | A15367 | 353 | A13873 | A15409 | 180 |
| A13873 | A15410 | 417 | A13873 | A15639 | 98  |
| A13873 | A15996 | 246 | A13873 | A16418 | 327 |
| A13873 | A16441 | 210 | A13873 | A16449 | 299 |
| A13874 | A13989 | 416 | A13874 | A14051 | 345 |
| A13874 | A14052 | 491 | A13874 | A14215 | 152 |
| A13874 | A14247 | 491 | A13874 | A14258 | 413 |
| A13874 | A14399 | 338 | A13874 | A14661 | 450 |
| A13874 | A14827 | 223 | A13874 | A15292 | 428 |
| A13874 | A15366 | 260 | A13874 | A15462 | 221 |
| A13874 | A15463 | 183 | A13874 | A15552 | 485 |
| A13874 | A15880 | 263 | A13874 | A15909 | 418 |
| A13874 | A17061 | 388 | A13875 | A13989 | 491 |
| A13875 | A14508 | 191 | A13875 | A15354 | 202 |
| A13875 | A16302 | 254 | A13876 | A13881 | 200 |
| A13876 | A14171 | 200 | A13876 | A14179 | 200 |
| A13876 | A14180 | 200 | A13876 | A14356 | 200 |
| A13876 | A15370 | 200 | A13876 | A15712 | 200 |
| A13876 | A15719 | 200 | A13876 | A15757 | 200 |
| A13876 | A16066 | 200 | A13876 | A16634 | 200 |
| A13876 | A16919 | 200 | A13877 | A15180 | 401 |
| A13879 | A14381 | 163 | A13880 | A15366 | 249 |
| A13881 | A14171 | 200 | A13881 | A14179 | 200 |

|        |        |     |        |        |     |
|--------|--------|-----|--------|--------|-----|
| A13881 | A14180 | 200 | A13881 | A14356 | 200 |
| A13881 | A15370 | 200 | A13881 | A15712 | 200 |
| A13881 | A15719 | 200 | A13881 | A15757 | 200 |
| A13881 | A16066 | 200 | A13881 | A16634 | 200 |
| A13881 | A16919 | 200 | A13882 | A13902 | 756 |
| A13882 | A14095 | 216 | A13882 | A14247 | 551 |
| A13882 | A14258 | 191 | A13882 | A15770 | 183 |
| A13885 | A16074 | 277 | A13885 | A16821 | 246 |
| A13886 | A14190 | 165 | A13886 | A14362 | 301 |
| A13886 | A14366 | 193 | A13886 | A14372 | 249 |
| A13886 | A14377 | 246 | A13886 | A14399 | 270 |
| A13886 | A14554 | 377 | A13886 | A15795 | 384 |
| A13886 | A15884 | 340 | A13887 | A17062 | 294 |
| A13888 | A14220 | 221 | A13889 | A13928 | 428 |
| A13889 | A14009 | 685 | A13889 | A14091 | 200 |
| A13889 | A14094 | 200 | A13889 | A14161 | 235 |
| A13889 | A14177 | 200 | A13889 | A14192 | 330 |
| A13889 | A14220 | 451 | A13889 | A14221 | 486 |
| A13889 | A14223 | 200 | A13889 | A14273 | 191 |
| A13889 | A14279 | 218 | A13889 | A14570 | 180 |
| A13889 | A14694 | 201 | A13889 | A15665 | 485 |
| A13889 | A15752 | 384 | A13889 | A15912 | 391 |
| A13889 | A16073 | 382 | A13889 | A16127 | 302 |
| A13889 | A16274 | 200 | A13889 | A16724 | 408 |
| A13891 | A14655 | 184 | A13892 | A14362 | 262 |
| A13892 | A15321 | 217 | A13892 | A15338 | 262 |
| A13892 | A15564 | 262 | A13892 | A16614 | 262 |
| A13894 | A13895 | 491 | A13894 | A14167 | 218 |
| A13894 | A14239 | 224 | A13894 | A14247 | 491 |
| A13894 | A14268 | 191 | A13894 | A14286 | 193 |
| A13894 | A14289 | 160 | A13894 | A14783 | 486 |
| A13894 | A14877 | 228 | A13894 | A15743 | 188 |
| A13894 | A15818 | 165 | A13894 | A16565 | 236 |
| A13894 | A16850 | 195 | A13894 | A17144 | 183 |
| A13895 | A14182 | 269 | A13895 | A14247 | 463 |
| A13895 | A14272 | 438 | A13895 | A14661 | 269 |
| A13895 | A14711 | 269 | A13895 | A14783 | 401 |
| A13895 | A15261 | 208 | A13896 | A13898 | 400 |
| A13896 | A13900 | 449 | A13896 | A14006 | 193 |
| A13896 | A14106 | 390 | A13898 | A13900 | 472 |
| A13898 | A14006 | 386 | A13898 | A14080 | 357 |
| A13898 | A17066 | 462 | A13899 | A13905 | 157 |
| A13899 | A14111 | 160 | A13899 | A14122 | 191 |
| A13899 | A14137 | 274 | A13899 | A14190 | 224 |
| A13899 | A14210 | 193 | A13899 | A14276 | 458 |
| A13899 | A14363 | 306 | A13899 | A14378 | 332 |

|        |        |     |        |        |     |
|--------|--------|-----|--------|--------|-----|
| A13899 | A14511 | 182 | A13899 | A15277 | 154 |
| A13899 | A15284 | 221 | A13899 | A15292 | 429 |
| A13899 | A15308 | 207 | A13899 | A15310 | 420 |
| A13899 | A15318 | 445 | A13899 | A15322 | 196 |
| A13899 | A15346 | 491 | A13899 | A15348 | 195 |
| A13899 | A15349 | 258 | A13899 | A15352 | 281 |
| A13899 | A15404 | 238 | A13899 | A15410 | 187 |
| A13899 | A15411 | 200 | A13899 | A15419 | 217 |
| A13899 | A15440 | 191 | A13899 | A15444 | 172 |
| A13899 | A15445 | 249 | A13899 | A15454 | 162 |
| A13899 | A15495 | 314 | A13899 | A15513 | 208 |
| A13899 | A15515 | 260 | A13899 | A15813 | 213 |
| A13899 | A15815 | 288 | A13899 | A15824 | 190 |
| A13899 | A15834 | 151 | A13899 | A16044 | 322 |
| A13899 | A16120 | 195 | A13899 | A16137 | 288 |
| A13899 | A16224 | 477 | A13899 | A16300 | 465 |
| A13899 | A16915 | 208 | A13899 | A17095 | 400 |
| A13900 | A14006 | 279 | A13900 | A14080 | 201 |
| A13900 | A14105 | 353 | A13900 | A14655 | 221 |
| A13900 | A17066 | 480 | A13901 | A14006 | 236 |
| A13902 | A14052 | 185 | A13902 | A14247 | 541 |
| A13902 | A14661 | 246 | A13902 | A15336 | 391 |
| A13902 | A15506 | 254 | A13902 | A15650 | 191 |
| A13902 | A15671 | 246 | A13902 | A17061 | 308 |
| A13903 | A14111 | 229 | A13903 | A14125 | 339 |
| A13903 | A14199 | 344 | A13903 | A14372 | 185 |
| A13903 | A14374 | 273 | A13903 | A14391 | 279 |
| A13903 | A14392 | 167 | A13903 | A14432 | 299 |
| A13903 | A14598 | 281 | A13903 | A15425 | 489 |
| A13903 | A15480 | 288 | A13903 | A15605 | 229 |
| A13903 | A15642 | 218 | A13903 | A15716 | 332 |
| A13903 | A15792 | 291 | A13903 | A17213 | 266 |
| A13905 | A15452 | 311 | A13906 | A14637 | 235 |
| A13906 | A14685 | 389 | A13906 | A15430 | 179 |
| A13906 | A17155 | 352 | A13908 | A14623 | 405 |
| A13908 | A14646 | 373 | A13912 | A13963 | 179 |
| A13912 | A14084 | 355 | A13912 | A14087 | 343 |
| A13912 | A14094 | 185 | A13912 | A14154 | 288 |
| A13912 | A14214 | 466 | A13912 | A14216 | 156 |
| A13912 | A14222 | 313 | A13912 | A14239 | 401 |
| A13912 | A14263 | 422 | A13912 | A14288 | 423 |
| A13912 | A14455 | 460 | A13912 | A14569 | 452 |
| A13912 | A14708 | 394 | A13912 | A14718 | 319 |
| A13912 | A14903 | 363 | A13912 | A14921 | 396 |
| A13912 | A15105 | 481 | A13912 | A15187 | 427 |
| A13912 | A15189 | 466 | A13912 | A15262 | 440 |

|        |        |     |        |        |     |
|--------|--------|-----|--------|--------|-----|
| A13912 | A15357 | 208 | A13912 | A15370 | 170 |
| A13912 | A15402 | 183 | A13912 | A15463 | 191 |
| A13912 | A15536 | 371 | A13912 | A15651 | 279 |
| A13912 | A15653 | 213 | A13912 | A15665 | 395 |
| A13912 | A15666 | 183 | A13912 | A15680 | 364 |
| A13912 | A15683 | 241 | A13912 | A15735 | 229 |
| A13912 | A15765 | 329 | A13912 | A15853 | 335 |
| A13912 | A16115 | 344 | A13912 | A16157 | 452 |
| A13912 | A16552 | 414 | A13912 | A16565 | 302 |
| A13912 | A16597 | 468 | A13912 | A16608 | 274 |
| A13912 | A16611 | 432 | A13912 | A16652 | 290 |
| A13912 | A16675 | 273 | A13912 | A16680 | 290 |
| A13912 | A16690 | 386 | A13912 | A16703 | 338 |
| A13912 | A16704 | 343 | A13912 | A16709 | 353 |
| A13912 | A16764 | 305 | A13912 | A16774 | 382 |
| A13912 | A16776 | 368 | A13912 | A16790 | 432 |
| A13912 | A16829 | 436 | A13912 | A16838 | 428 |
| A13912 | A16866 | 313 | A13912 | A16868 | 404 |
| A13912 | A16905 | 472 | A13912 | A16913 | 382 |
| A13912 | A16944 | 372 | A13912 | A16954 | 353 |
| A13912 | A17018 | 363 | A13912 | A17030 | 368 |
| A13912 | A17033 | 436 | A13912 | A17190 | 361 |
| A13913 | A13949 | 299 | A13913 | A14079 | 447 |
| A13913 | A15657 | 208 | A13913 | A15858 | 258 |
| A13913 | A16127 | 432 | A13913 | A16128 | 361 |
| A13914 | A14435 | 63  | A13915 | A15729 | 208 |
| A13916 | A14266 | 195 | A13916 | A17198 | 230 |
| A13917 | A13942 | 157 | A13917 | A14005 | 480 |
| A13917 | A14222 | 152 | A13917 | A14278 | 480 |
| A13917 | A14633 | 221 | A13917 | A15004 | 263 |
| A13917 | A15282 | 452 | A13917 | A15324 | 485 |
| A13917 | A15353 | 480 | A13917 | A15581 | 193 |
| A13917 | A16438 | 352 | A13917 | A16840 | 151 |
| A13917 | A16887 | 291 | A13920 | A14822 | 418 |
| A13920 | A14838 | 238 | A13920 | A15312 | 188 |
| A13920 | A15313 | 201 | A13924 | A14509 | 329 |
| A13924 | A15533 | 235 | A13924 | A16738 | 333 |
| A13926 | A14470 | 263 | A13926 | A14925 | 245 |
| A13926 | A15294 | 200 | A13926 | A15376 | 177 |
| A13926 | A15506 | 221 | A13928 | A14016 | 188 |
| A13928 | A14148 | 480 | A13928 | A14178 | 156 |
| A13928 | A14196 | 463 | A13928 | A14202 | 268 |
| A13928 | A14209 | 298 | A13928 | A14220 | 491 |
| A13928 | A14221 | 491 | A13928 | A14257 | 491 |
| A13928 | A14303 | 270 | A13928 | A14490 | 486 |
| A13928 | A14570 | 212 | A13928 | A14660 | 177 |



|        |        |     |        |        |     |
|--------|--------|-----|--------|--------|-----|
| A13928 | A14870 | 213 | A13928 | A14931 | 384 |
| A13928 | A15105 | 324 | A13928 | A15163 | 165 |
| A13928 | A15291 | 321 | A13928 | A15292 | 538 |
| A13928 | A15309 | 185 | A13928 | A15312 | 268 |
| A13928 | A15366 | 752 | A13928 | A15430 | 246 |
| A13928 | A15463 | 184 | A13928 | A15492 | 485 |
| A13928 | A15614 | 542 | A13928 | A15618 | 232 |
| A13928 | A15665 | 787 | A13928 | A15682 | 441 |
| A13928 | A15749 | 329 | A13928 | A15752 | 467 |
| A13928 | A15763 | 185 | A13928 | A15773 | 628 |
| A13928 | A15817 | 165 | A13928 | A15851 | 430 |
| A13928 | A15852 | 491 | A13928 | A15854 | 324 |
| A13928 | A15867 | 152 | A13928 | A15870 | 346 |
| A13928 | A16077 | 184 | A13928 | A16328 | 185 |
| A13928 | A16410 | 447 | A13928 | A16467 | 541 |
| A13928 | A16604 | 286 | A13928 | A16666 | 436 |
| A13928 | A16689 | 388 | A13928 | A16699 | 156 |
| A13928 | A16724 | 436 | A13928 | A16822 | 285 |
| A13928 | A16851 | 450 | A13928 | A16875 | 470 |
| A13928 | A16895 | 272 | A13928 | A16897 | 457 |
| A13928 | A17150 | 278 | A13929 | A15336 | 160 |
| A13929 | A16699 | 277 | A13930 | A14780 | 395 |
| A13930 | A15854 | 363 | A13930 | A15855 | 285 |
| A13930 | A15922 | 246 | A13932 | A13933 | 419 |
| A13932 | A16300 | 273 | A13935 | A14115 | 360 |
| A13935 | A14122 | 230 | A13935 | A14136 | 389 |
| A13935 | A14190 | 184 | A13935 | A14408 | 274 |
| A13935 | A15318 | 363 | A13935 | A15333 | 306 |
| A13935 | A15420 | 227 | A13935 | A15422 | 419 |
| A13935 | A15649 | 185 | A13935 | A16224 | 281 |
| A13935 | A16300 | 159 | A13938 | A13939 | 477 |
| A13938 | A15809 | 273 | A13939 | A15809 | 187 |
| A13940 | A14736 | 472 | A13941 | A14122 | 177 |
| A13941 | A14266 | 265 | A13941 | A14604 | 218 |
| A13941 | A15331 | 235 | A13941 | A15352 | 235 |
| A13941 | A15391 | 391 | A13942 | A14202 | 179 |
| A13942 | A14267 | 488 | A13942 | A14366 | 179 |
| A13942 | A14377 | 184 | A13942 | A15358 | 179 |
| A13942 | A15470 | 179 | A13942 | A15484 | 179 |
| A13942 | A15649 | 224 | A13943 | A14360 | 441 |
| A13944 | A14210 | 480 | A13944 | A14370 | 307 |
| A13944 | A14371 | 273 | A13944 | A14379 | 230 |
| A13944 | A14511 | 945 | A13944 | A14539 | 420 |
| A13944 | A14610 | 351 | A13944 | A15292 | 152 |
| A13944 | A15312 | 254 | A13944 | A15313 | 417 |
| A13944 | A15331 | 245 | A13944 | A15420 | 184 |

|        |        |     |        |        |     |
|--------|--------|-----|--------|--------|-----|
| A13944 | A15480 | 329 | A13944 | A15484 | 210 |
| A13944 | A15498 | 346 | A13944 | A15649 | 273 |
| A13944 | A17085 | 281 | A13945 | A14390 | 195 |
| A13945 | A14893 | 187 | A13945 | A16030 | 945 |
| A13945 | A16042 | 190 | A13947 | A14511 | 176 |
| A13947 | A15310 | 307 | A13947 | A15480 | 257 |
| A13947 | A16224 | 296 | A13947 | A16636 | 165 |
| A13948 | A14247 | 333 | A13948 | A14366 | 208 |
| A13948 | A15105 | 201 | A13948 | A15817 | 281 |
| A13949 | A14076 | 491 | A13949 | A14079 | 491 |
| A13949 | A14093 | 221 | A13949 | A14094 | 491 |
| A13949 | A14177 | 156 | A13949 | A14223 | 475 |
| A13949 | A14230 | 491 | A13949 | A14272 | 438 |
| A13949 | A14273 | 489 | A13949 | A14279 | 366 |
| A13949 | A14460 | 480 | A13949 | A14694 | 490 |
| A13949 | A14706 | 479 | A13949 | A15367 | 467 |
| A13949 | A15369 | 491 | A13949 | A15371 | 483 |
| A13949 | A15420 | 260 | A13949 | A15539 | 232 |
| A13949 | A15654 | 462 | A13949 | A15714 | 302 |
| A13949 | A15837 | 491 | A13949 | A15858 | 446 |
| A13949 | A15941 | 491 | A13949 | A16127 | 491 |
| A13949 | A16128 | 747 | A13949 | A16129 | 490 |
| A13949 | A16226 | 491 | A13949 | A16294 | 475 |
| A13949 | A16606 | 469 | A13949 | A16613 | 484 |
| A13949 | A16626 | 491 | A13949 | A16646 | 446 |
| A13949 | A16754 | 238 | A13949 | A16762 | 364 |
| A13950 | A14570 | 241 | A13950 | A15317 | 246 |
| A13950 | A15495 | 318 | A13950 | A15501 | 228 |
| A13951 | A14202 | 277 | A13951 | A15313 | 205 |
| A13951 | A15464 | 312 | A13951 | A15974 | 243 |
| A13952 | A14277 | 452 | A13953 | A14279 | 219 |
| A13953 | A17198 | 279 | A13954 | A16485 | 477 |
| A13955 | A13956 | 418 | A13956 | A15419 | 229 |
| A13957 | A14345 | 435 | A13957 | A15425 | 313 |
| A13958 | A14010 | 899 | A13959 | A15366 | 308 |
| A13959 | A15463 | 429 | A13960 | A13967 | 486 |
| A13961 | A13967 | 585 | A13963 | A14084 | 557 |
| A13963 | A14209 | 348 | A13963 | A14214 | 455 |
| A13963 | A14270 | 184 | A13963 | A14272 | 490 |
| A13963 | A14285 | 557 | A13963 | A14289 | 188 |
| A13963 | A14445 | 226 | A13963 | A14569 | 156 |
| A13963 | A14655 | 443 | A13963 | A14708 | 488 |
| A13963 | A14718 | 157 | A13963 | A14838 | 198 |
| A13963 | A15262 | 172 | A13963 | A15297 | 241 |
| A13963 | A15347 | 187 | A13963 | A15498 | 172 |
| A13963 | A15501 | 441 | A13963 | A15502 | 299 |

|        |        |     |        |        |     |
|--------|--------|-----|--------|--------|-----|
| A13963 | A15724 | 486 | A13963 | A15949 | 848 |
| A13963 | A16099 | 184 | A13963 | A16117 | 294 |
| A13963 | A16133 | 201 | A13963 | A16157 | 299 |
| A13963 | A16611 | 212 | A13963 | A16690 | 160 |
| A13963 | A16774 | 160 | A13963 | A16815 | 179 |
| A13965 | A14109 | 479 | A13965 | A14375 | 156 |
| A13965 | A14443 | 899 | A13965 | A15130 | 491 |
| A13965 | A15498 | 340 | A13965 | A15665 | 388 |
| A13965 | A16261 | 396 | A13965 | A17123 | 221 |
| A13966 | A15316 | 375 | A13968 | A16915 | 485 |
| A13969 | A14286 | 235 | A13969 | A14569 | 177 |
| A13969 | A14648 | 343 | A13969 | A15431 | 190 |
| A13969 | A15837 | 270 | A13969 | A15935 | 490 |
| A13969 | A16664 | 152 | A13969 | A16776 | 255 |
| A13969 | A17144 | 224 | A13970 | A15138 | 424 |
| A13970 | A15478 | 281 | A13972 | A14732 | 461 |
| A13973 | A14403 | 396 | A13974 | A16145 | 316 |
| A13975 | A13980 | 160 | A13975 | A13991 | 899 |
| A13975 | A14183 | 228 | A13975 | A14198 | 475 |
| A13975 | A14208 | 574 | A13975 | A14443 | 899 |
| A13975 | A15293 | 910 | A13975 | A15294 | 933 |
| A13975 | A15506 | 268 | A13975 | A16082 | 187 |
| A13975 | A16363 | 310 | A13975 | A16915 | 168 |
| A13976 | A13982 | 334 | A13976 | A14625 | 230 |
| A13977 | A13978 | 458 | A13977 | A14055 | 899 |
| A13977 | A15726 | 221 | A13977 | A16083 | 356 |
| A13978 | A14029 | 159 | A13978 | A15726 | 246 |
| A13979 | A13986 | 472 | A13979 | A14011 | 489 |
| A13979 | A14300 | 485 | A13979 | A14452 | 294 |
| A13980 | A13991 | 940 | A13980 | A14008 | 137 |
| A13980 | A14032 | 249 | A13980 | A14157 | 346 |
| A13980 | A14198 | 399 | A13980 | A14209 | 243 |
| A13980 | A14402 | 198 | A13980 | A14433 | 268 |
| A13980 | A14438 | 229 | A13980 | A14452 | 101 |
| A13980 | A14511 | 180 | A13980 | A14625 | 172 |
| A13980 | A14650 | 171 | A13980 | A14686 | 379 |
| A13980 | A14930 | 905 | A13980 | A15406 | 195 |
| A13980 | A15408 | 205 | A13980 | A15613 | 185 |
| A13980 | A15726 | 85  | A13981 | A13997 | 899 |
| A13981 | A14002 | 899 | A13981 | A14206 | 899 |
| A13981 | A14211 | 899 | A13981 | A14443 | 899 |
| A13981 | A14444 | 899 | A13981 | A15321 | 899 |
| A13982 | A14036 | 491 | A13982 | A14096 | 235 |
| A13982 | A14167 | 324 | A13982 | A14452 | 465 |
| A13982 | A14741 | 247 | A13982 | A14920 | 899 |
| A13982 | A15726 | 168 | A13982 | A16994 | 429 |

|        |        |     |        |        |     |
|--------|--------|-----|--------|--------|-----|
| A13983 | A14001 | 945 | A13983 | A14071 | 414 |
| A13983 | A14146 | 201 | A13983 | A14191 | 760 |
| A13983 | A14199 | 728 | A13983 | A14208 | 268 |
| A13983 | A14212 | 491 | A13983 | A14213 | 491 |
| A13983 | A14214 | 489 | A13983 | A14229 | 473 |
| A13983 | A14252 | 378 | A13983 | A14276 | 333 |
| A13983 | A14374 | 491 | A13983 | A14392 | 427 |
| A13983 | A14439 | 251 | A13983 | A14457 | 160 |
| A13983 | A14570 | 253 | A13983 | A14608 | 224 |
| A13983 | A14799 | 339 | A13983 | A15291 | 196 |
| A13983 | A15294 | 457 | A13983 | A15295 | 154 |
| A13983 | A15308 | 489 | A13983 | A15320 | 430 |
| A13983 | A15322 | 475 | A13983 | A15342 | 480 |
| A13983 | A15343 | 260 | A13983 | A15344 | 352 |
| A13983 | A15346 | 457 | A13983 | A15356 | 360 |
| A13983 | A15409 | 238 | A13983 | A15506 | 571 |
| A13983 | A15626 | 290 | A13983 | A15642 | 477 |
| A13983 | A16120 | 195 | A13983 | A16424 | 162 |
| A13983 | A16449 | 450 | A13983 | A16538 | 463 |
| A13983 | A16581 | 323 | A13983 | A16868 | 202 |
| A13983 | A16904 | 456 | A13984 | A13985 | 281 |
| A13984 | A14042 | 899 | A13984 | A14045 | 446 |
| A13984 | A14472 | 922 | A13984 | A15369 | 249 |
| A13985 | A14198 | 301 | A13985 | A15182 | 899 |
| A13985 | A15241 | 168 | A13986 | A14006 | 218 |
| A13986 | A14007 | 491 | A13986 | A14011 | 374 |
| A13986 | A14072 | 356 | A13986 | A14197 | 63  |
| A13986 | A14300 | 434 | A13986 | A14315 | 170 |
| A13986 | A14371 | 174 | A13986 | A14432 | 163 |
| A13986 | A14452 | 490 | A13986 | A14930 | 324 |
| A13986 | A15093 | 260 | A13986 | A15356 | 210 |
| A13986 | A15420 | 491 | A13986 | A15726 | 491 |
| A13986 | A15930 | 285 | A13987 | A14010 | 491 |
| A13987 | A14122 | 491 | A13987 | A14124 | 484 |
| A13987 | A14190 | 483 | A13987 | A14202 | 490 |
| A13987 | A14210 | 428 | A13987 | A14229 | 390 |
| A13987 | A14247 | 463 | A13987 | A14259 | 255 |
| A13987 | A14272 | 337 | A13987 | A14370 | 157 |
| A13987 | A14371 | 490 | A13987 | A14378 | 490 |
| A13987 | A14379 | 283 | A13987 | A14381 | 177 |
| A13987 | A14399 | 454 | A13987 | A14408 | 484 |
| A13987 | A14413 | 461 | A13987 | A14490 | 156 |
| A13987 | A14511 | 491 | A13987 | A14570 | 399 |
| A13987 | A14604 | 176 | A13987 | A14611 | 259 |
| A13987 | A14635 | 371 | A13987 | A14828 | 255 |
| A13987 | A15198 | 223 | A13987 | A15278 | 434 |

|        |        |     |        |        |     |
|--------|--------|-----|--------|--------|-----|
| A13987 | A15292 | 491 | A13987 | A15301 | 489 |
| A13987 | A15302 | 390 | A13987 | A15311 | 466 |
| A13987 | A15312 | 945 | A13987 | A15313 | 491 |
| A13987 | A15318 | 440 | A13987 | A15322 | 291 |
| A13987 | A15329 | 156 | A13987 | A15331 | 419 |
| A13987 | A15333 | 434 | A13987 | A15335 | 468 |
| A13987 | A15346 | 184 | A13987 | A15348 | 486 |
| A13987 | A15349 | 491 | A13987 | A15352 | 491 |
| A13987 | A15366 | 945 | A13987 | A15396 | 340 |
| A13987 | A15404 | 188 | A13987 | A15413 | 480 |
| A13987 | A15419 | 247 | A13987 | A15422 | 432 |
| A13987 | A15430 | 210 | A13987 | A15431 | 486 |
| A13987 | A15432 | 491 | A13987 | A15433 | 480 |
| A13987 | A15434 | 435 | A13987 | A15435 | 491 |
| A13987 | A15436 | 491 | A13987 | A15440 | 271 |
| A13987 | A15444 | 246 | A13987 | A15447 | 489 |
| A13987 | A15451 | 455 | A13987 | A15452 | 491 |
| A13987 | A15456 | 445 | A13987 | A15457 | 441 |
| A13987 | A15459 | 268 | A13987 | A15460 | 466 |
| A13987 | A15461 | 407 | A13987 | A15462 | 486 |
| A13987 | A15463 | 491 | A13987 | A15480 | 440 |
| A13987 | A15486 | 157 | A13987 | A15487 | 312 |
| A13987 | A15495 | 424 | A13987 | A15498 | 367 |
| A13987 | A15513 | 290 | A13987 | A15515 | 468 |
| A13987 | A15553 | 232 | A13987 | A15669 | 208 |
| A13987 | A15804 | 202 | A13987 | A15814 | 195 |
| A13987 | A15830 | 385 | A13987 | A15886 | 241 |
| A13987 | A15899 | 271 | A13987 | A16006 | 168 |
| A13987 | A16117 | 485 | A13987 | A16209 | 236 |
| A13987 | A16300 | 310 | A13987 | A16771 | 241 |
| A13987 | A17196 | 247 | A13988 | A14012 | 477 |
| A13988 | A14071 | 489 | A13988 | A14146 | 445 |
| A13988 | A14366 | 294 | A13988 | A14374 | 469 |
| A13988 | A14381 | 221 | A13988 | A14392 | 199 |
| A13988 | A15395 | 221 | A13988 | A15425 | 185 |
| A13988 | A15603 | 288 | A13989 | A13992 | 460 |
| A13989 | A14006 | 536 | A13989 | A14055 | 899 |
| A13989 | A14073 | 419 | A13989 | A14090 | 454 |
| A13989 | A14148 | 899 | A13989 | A14150 | 467 |
| A13989 | A14151 | 423 | A13989 | A14169 | 462 |
| A13989 | A14172 | 595 | A13989 | A14184 | 435 |
| A13989 | A14196 | 524 | A13989 | A14208 | 899 |
| A13989 | A14216 | 570 | A13989 | A14220 | 474 |
| A13989 | A14246 | 899 | A13989 | A14257 | 402 |
| A13989 | A14443 | 899 | A13989 | A14447 | 157 |
| A13989 | A14476 | 337 | A13989 | A14481 | 199 |

|        |        |     |        |        |     |
|--------|--------|-----|--------|--------|-----|
| A13989 | A14482 | 409 | A13989 | A14505 | 285 |
| A13989 | A14506 | 899 | A13989 | A14508 | 204 |
| A13989 | A14530 | 480 | A13989 | A14566 | 467 |
| A13989 | A14594 | 303 | A13989 | A14596 | 491 |
| A13989 | A14597 | 490 | A13989 | A14655 | 208 |
| A13989 | A14662 | 899 | A13989 | A14699 | 483 |
| A13989 | A14778 | 198 | A13989 | A14816 | 210 |
| A13989 | A14843 | 424 | A13989 | A15146 | 177 |
| A13989 | A15204 | 177 | A13989 | A15205 | 259 |
| A13989 | A15206 | 259 | A13989 | A15207 | 259 |
| A13989 | A15210 | 177 | A13989 | A15215 | 491 |
| A13989 | A15266 | 249 | A13989 | A15268 | 224 |
| A13989 | A15297 | 945 | A13989 | A15323 | 899 |
| A13989 | A15324 | 899 | A13989 | A15338 | 491 |
| A13989 | A15353 | 908 | A13989 | A15359 | 899 |
| A13989 | A15373 | 414 | A13989 | A15376 | 229 |
| A13989 | A15500 | 477 | A13989 | A15520 | 479 |
| A13989 | A15547 | 899 | A13989 | A15559 | 945 |
| A13989 | A15564 | 274 | A13989 | A15596 | 393 |
| A13989 | A15614 | 899 | A13989 | A15660 | 491 |
| A13989 | A15684 | 590 | A13989 | A15729 | 461 |
| A13989 | A15747 | 224 | A13989 | A15749 | 374 |
| A13989 | A15763 | 467 | A13989 | A15764 | 469 |
| A13989 | A15769 | 355 | A13989 | A15778 | 255 |
| A13989 | A15779 | 406 | A13989 | A15918 | 221 |
| A13989 | A15935 | 360 | A13989 | A15945 | 224 |
| A13989 | A15946 | 409 | A13989 | A15988 | 491 |
| A13989 | A16020 | 174 | A13989 | A16048 | 455 |
| A13989 | A16053 | 177 | A13989 | A16060 | 480 |
| A13989 | A16067 | 335 | A13989 | A16093 | 246 |
| A13989 | A16096 | 462 | A13989 | A16118 | 371 |
| A13989 | A16157 | 486 | A13989 | A16302 | 428 |
| A13989 | A16306 | 165 | A13989 | A16320 | 151 |
| A13989 | A16394 | 201 | A13989 | A16686 | 193 |
| A13989 | A16838 | 462 | A13989 | A16904 | 224 |
| A13989 | A17063 | 484 | A13989 | A17123 | 481 |
| A13991 | A14443 | 899 | A13992 | A14036 | 157 |
| A13992 | A14172 | 413 | A13992 | A14265 | 534 |
| A13992 | A14482 | 195 | A13992 | A14495 | 385 |
| A13992 | A15174 | 308 | A13992 | A15988 | 319 |
| A13992 | A16118 | 477 | A13993 | A14169 | 666 |
| A13993 | A14449 | 393 | A13993 | A15297 | 657 |
| A13993 | A15338 | 168 | A13993 | A15558 | 609 |
| A13993 | A15560 | 530 | A13994 | A14060 | 374 |
| A13994 | A14496 | 240 | A13994 | A14585 | 419 |
| A13994 | A14792 | 288 | A13994 | A16257 | 414 |

|        |        |     |        |        |     |
|--------|--------|-----|--------|--------|-----|
| A13997 | A14002 | 210 | A13997 | A14206 | 899 |
| A13997 | A14211 | 922 | A13997 | A14444 | 899 |
| A13997 | A14543 | 185 | A13997 | A14653 | 303 |
| A13997 | A15282 | 210 | A13997 | A15293 | 204 |
| A13997 | A15325 | 205 | A13997 | A15875 | 355 |
| A13999 | A14035 | 899 | A14000 | A14591 | 191 |
| A14000 | A14733 | 263 | A14000 | A16627 | 188 |
| A14002 | A14206 | 928 | A14002 | A15321 | 899 |
| A14003 | A14191 | 457 | A14003 | A14272 | 185 |
| A14003 | A15315 | 383 | A14003 | A15322 | 73  |
| A14003 | A15345 | 272 | A14003 | A15346 | 180 |
| A14003 | A15347 | 944 | A14003 | A15360 | 160 |
| A14003 | A15617 | 417 | A14004 | A14433 | 210 |
| A14005 | A15353 | 335 | A14005 | A15354 | 187 |
| A14005 | A15606 | 227 | A14006 | A14055 | 223 |
| A14006 | A14080 | 491 | A14006 | A14105 | 480 |
| A14006 | A14106 | 362 | A14006 | A14107 | 408 |
| A14006 | A14196 | 351 | A14006 | A14220 | 488 |
| A14006 | A14221 | 388 | A14006 | A14257 | 302 |
| A14006 | A14399 | 490 | A14006 | A14451 | 668 |
| A14006 | A14481 | 245 | A14006 | A14566 | 347 |
| A14006 | A14633 | 568 | A14006 | A14655 | 594 |
| A14006 | A14827 | 184 | A14006 | A14967 | 210 |
| A14006 | A15292 | 379 | A14006 | A15297 | 257 |
| A14006 | A15338 | 461 | A14006 | A15366 | 205 |
| A14006 | A15367 | 483 | A14006 | A15503 | 63  |
| A14006 | A15524 | 188 | A14006 | A15559 | 228 |
| A14006 | A15596 | 274 | A14006 | A15643 | 184 |
| A14006 | A15649 | 491 | A14006 | A15752 | 418 |
| A14006 | A15935 | 329 | A14006 | A15945 | 329 |
| A14006 | A15986 | 160 | A14006 | A16060 | 490 |
| A14006 | A16410 | 480 | A14006 | A16994 | 486 |
| A14006 | A17063 | 475 | A14006 | A17066 | 427 |
| A14006 | A17168 | 486 | A14007 | A14072 | 491 |
| A14007 | A14122 | 177 | A14007 | A14368 | 193 |
| A14007 | A14452 | 486 | A14007 | A14470 | 260 |
| A14007 | A14930 | 394 | A14007 | A15257 | 160 |
| A14007 | A15413 | 213 | A14007 | A15420 | 491 |
| A14007 | A15726 | 490 | A14007 | A15800 | 163 |
| A14007 | A15813 | 201 | A14007 | A15941 | 229 |
| A14007 | A16224 | 249 | A14008 | A14013 | 441 |
| A14008 | A14022 | 340 | A14008 | A14034 | 406 |
| A14008 | A14275 | 406 | A14008 | A14281 | 243 |
| A14008 | A14283 | 171 | A14008 | A14471 | 199 |
| A14008 | A14581 | 369 | A14008 | A15660 | 306 |
| A14008 | A15923 | 165 | A14008 | A16331 | 263 |

|        |        |     |        |        |     |
|--------|--------|-----|--------|--------|-----|
| A14008 | A16650 | 176 | A14008 | A16994 | 429 |
| A14009 | A14091 | 200 | A14009 | A14094 | 200 |
| A14009 | A14161 | 176 | A14009 | A14177 | 200 |
| A14009 | A14192 | 200 | A14009 | A14200 | 432 |
| A14009 | A14221 | 212 | A14009 | A14223 | 200 |
| A14009 | A14279 | 185 | A14009 | A14288 | 334 |
| A14009 | A14529 | 368 | A14009 | A14661 | 186 |
| A14009 | A14694 | 552 | A14009 | A14897 | 154 |
| A14009 | A15685 | 160 | A14009 | A15917 | 152 |
| A14009 | A16274 | 200 | A14009 | A16635 | 334 |
| A14009 | A17063 | 201 | A14010 | A14122 | 483 |
| A14010 | A14210 | 450 | A14010 | A14371 | 385 |
| A14010 | A14378 | 430 | A14010 | A14408 | 266 |
| A14010 | A14511 | 460 | A14010 | A14604 | 409 |
| A14010 | A14635 | 254 | A14010 | A15292 | 491 |
| A14010 | A15301 | 216 | A14010 | A15310 | 157 |
| A14010 | A15311 | 430 | A14010 | A15312 | 491 |
| A14010 | A15313 | 491 | A14010 | A15317 | 229 |
| A14010 | A15331 | 369 | A14010 | A15333 | 390 |
| A14010 | A15335 | 312 | A14010 | A15348 | 470 |
| A14010 | A15349 | 491 | A14010 | A15352 | 491 |
| A14010 | A15366 | 432 | A14010 | A15396 | 312 |
| A14010 | A15404 | 247 | A14010 | A15411 | 210 |
| A14010 | A15431 | 273 | A14010 | A15432 | 472 |
| A14010 | A15433 | 398 | A14010 | A15435 | 491 |
| A14010 | A15436 | 484 | A14010 | A15444 | 182 |
| A14010 | A15447 | 477 | A14010 | A15451 | 422 |
| A14010 | A15452 | 491 | A14010 | A15454 | 172 |
| A14010 | A15456 | 473 | A14010 | A15457 | 457 |
| A14010 | A15459 | 200 | A14010 | A15460 | 475 |
| A14010 | A15462 | 235 | A14010 | A15463 | 400 |
| A14010 | A15464 | 160 | A14010 | A15478 | 224 |
| A14010 | A15480 | 386 | A14010 | A15489 | 201 |
| A14010 | A15495 | 385 | A14010 | A15515 | 417 |
| A14010 | A15516 | 167 | A14010 | A15799 | 210 |
| A14010 | A15804 | 479 | A14010 | A15830 | 228 |
| A14010 | A15833 | 288 | A14010 | A16006 | 229 |
| A14010 | A16260 | 307 | A14011 | A14300 | 485 |
| A14011 | A14452 | 179 | A14011 | A15726 | 180 |
| A14012 | A14071 | 446 | A14012 | A14125 | 380 |
| A14012 | A14146 | 411 | A14012 | A14374 | 332 |
| A14012 | A14659 | 187 | A14012 | A15425 | 212 |
| A14012 | A15532 | 204 | A14013 | A14022 | 395 |
| A14013 | A14275 | 467 | A14014 | A14093 | 277 |
| A14014 | A15352 | 171 | A14016 | A14200 | 477 |
| A14016 | A14457 | 417 | A14016 | A14725 | 279 |



|        |        |     |        |        |     |
|--------|--------|-----|--------|--------|-----|
| A14016 | A15066 | 353 | A14016 | A15366 | 263 |
| A14016 | A15486 | 185 | A14016 | A15851 | 229 |
| A14016 | A15870 | 313 | A14016 | A17063 | 219 |
| A14016 | A17198 | 152 | A14017 | A14018 | 469 |
| A14017 | A14050 | 451 | A14017 | A14443 | 899 |
| A14017 | A15624 | 413 | A14017 | A15684 | 451 |
| A14017 | A15843 | 380 | A14017 | A16075 | 319 |
| A14017 | A16086 | 413 | A14018 | A14041 | 457 |
| A14018 | A14049 | 477 | A14018 | A14443 | 899 |
| A14018 | A16075 | 350 | A14019 | A14198 | 355 |
| A14019 | A14239 | 201 | A14019 | A15564 | 157 |
| A14019 | A16641 | 388 | A14022 | A14275 | 406 |
| A14025 | A14090 | 353 | A14025 | A14444 | 989 |
| A14025 | A14475 | 351 | A14025 | A14496 | 319 |
| A14025 | A14589 | 308 | A14025 | A16082 | 434 |
| A14025 | A16306 | 270 | A14026 | A14120 | 362 |
| A14026 | A14210 | 362 | A14026 | A14262 | 314 |
| A14026 | A14882 | 262 | A14026 | A15295 | 446 |
| A14026 | A15331 | 176 | A14026 | A15498 | 235 |
| A14026 | A16407 | 362 | A14026 | A16847 | 638 |
| A14027 | A14188 | 419 | A14027 | A14402 | 943 |
| A14027 | A14438 | 480 | A14029 | A14073 | 223 |
| A14029 | A15387 | 252 | A14029 | A16996 | 400 |
| A14030 | A14456 | 899 | A14030 | A15291 | 484 |
| A14031 | A14035 | 899 | A14032 | A14187 | 899 |
| A14032 | A14433 | 899 | A14032 | A15325 | 346 |
| A14035 | A14196 | 180 | A14036 | A14741 | 185 |
| A14037 | A14263 | 174 | A14037 | A14886 | 213 |
| A14038 | A14443 | 899 | A14038 | A14485 | 193 |
| A14038 | A14561 | 391 | A14038 | A14843 | 174 |
| A14038 | A15376 | 180 | A14038 | A15624 | 229 |
| A14041 | A14049 | 425 | A14041 | A14570 | 187 |
| A14044 | A14444 | 918 | A14047 | A14198 | 226 |
| A14048 | A14279 | 433 | A14048 | A14496 | 296 |
| A14048 | A15922 | 227 | A14048 | A17081 | 358 |
| A14048 | A17195 | 424 | A14050 | A15624 | 333 |
| A14050 | A15684 | 274 | A14050 | A15843 | 413 |
| A14050 | A16072 | 378 | A14050 | A16075 | 362 |
| A14050 | A16086 | 435 | A14051 | A14052 | 390 |
| A14051 | A14247 | 218 | A14052 | A14247 | 490 |
| A14052 | A14661 | 152 | A14052 | A14741 | 177 |
| A14052 | A15229 | 322 | A14052 | A15336 | 152 |
| A14052 | A15498 | 230 | A14052 | A16022 | 226 |
| A14052 | A16804 | 340 | A14054 | A14461 | 246 |
| A14054 | A15346 | 200 | A14054 | A16364 | 210 |
| A14055 | A14210 | 152 | A14055 | A14299 | 218 |

|        |        |     |        |        |     |
|--------|--------|-----|--------|--------|-----|
| A14055 | A14387 | 177 | A14055 | A14635 | 296 |
| A14055 | A15241 | 455 | A14055 | A15282 | 414 |
| A14055 | A15292 | 449 | A14055 | A15322 | 395 |
| A14055 | A15400 | 182 | A14055 | A15452 | 174 |
| A14055 | A16994 | 701 | A14056 | A14272 | 454 |
| A14056 | A14461 | 367 | A14056 | A14699 | 215 |
| A14056 | A15338 | 63  | A14056 | A15498 | 157 |
| A14056 | A15650 | 157 | A14058 | A14247 | 272 |
| A14058 | A15498 | 190 | A14059 | A16048 | 224 |
| A14060 | A15532 | 185 | A14060 | A16261 | 480 |
| A14062 | A14063 | 977 | A14062 | A14191 | 201 |
| A14066 | A16085 | 899 | A14068 | A16300 | 212 |
| A14070 | A14188 | 246 | A14071 | A14122 | 174 |
| A14071 | A14125 | 351 | A14071 | A14146 | 188 |
| A14071 | A14229 | 154 | A14071 | A14366 | 252 |
| A14071 | A14368 | 191 | A14071 | A14374 | 485 |
| A14071 | A14391 | 480 | A14071 | A14392 | 377 |
| A14071 | A14439 | 372 | A14071 | A14599 | 163 |
| A14071 | A15322 | 344 | A14071 | A15394 | 260 |
| A14071 | A15395 | 232 | A14071 | A15425 | 467 |
| A14071 | A15427 | 455 | A14071 | A15477 | 290 |
| A14071 | A15605 | 149 | A14071 | A15642 | 472 |
| A14071 | A15794 | 201 | A14071 | A15806 | 221 |
| A14071 | A16445 | 156 | A14071 | A16636 | 399 |
| A14072 | A14111 | 157 | A14072 | A14210 | 276 |
| A14072 | A14371 | 224 | A14072 | A14452 | 385 |
| A14072 | A14511 | 177 | A14072 | A14667 | 364 |
| A14072 | A14716 | 247 | A14072 | A15292 | 273 |
| A14072 | A15311 | 156 | A14072 | A15312 | 196 |
| A14072 | A15313 | 306 | A14072 | A15333 | 160 |
| A14072 | A15348 | 296 | A14072 | A15349 | 254 |
| A14072 | A15352 | 190 | A14072 | A15420 | 486 |
| A14072 | A15447 | 310 | A14072 | A15452 | 172 |
| A14072 | A15456 | 185 | A14072 | A15464 | 146 |
| A14072 | A15495 | 226 | A14072 | A15498 | 223 |
| A14072 | A15630 | 213 | A14072 | A15670 | 256 |
| A14072 | A15671 | 241 | A14072 | A15799 | 198 |
| A14072 | A15800 | 172 | A14072 | A15828 | 205 |
| A14073 | A14138 | 430 | A14073 | A14188 | 390 |
| A14073 | A14216 | 364 | A14073 | A14449 | 327 |
| A14073 | A14525 | 290 | A14073 | A14642 | 631 |
| A14073 | A14655 | 281 | A14073 | A14699 | 224 |
| A14073 | A15133 | 408 | A14073 | A15244 | 488 |
| A14073 | A15624 | 388 | A14073 | A15653 | 414 |
| A14073 | A15660 | 477 | A14073 | A15684 | 490 |
| A14073 | A15745 | 341 | A14073 | A15843 | 445 |

|        |        |     |        |        |     |
|--------|--------|-----|--------|--------|-----|
| A14073 | A15932 | 449 | A14073 | A15933 | 286 |
| A14073 | A15938 | 157 | A14073 | A16060 | 232 |
| A14073 | A16091 | 152 | A14073 | A16149 | 296 |
| A14073 | A16272 | 457 | A14073 | A16318 | 167 |
| A14073 | A16371 | 424 | A14073 | A16403 | 162 |
| A14073 | A16446 | 266 | A14073 | A16531 | 167 |
| A14073 | A16585 | 697 | A14073 | A16683 | 200 |
| A14073 | A16741 | 168 | A14073 | A17000 | 247 |
| A14074 | A14214 | 351 | A14074 | A14222 | 205 |
| A14074 | A14227 | 173 | A14074 | A14270 | 210 |
| A14074 | A14272 | 208 | A14074 | A14289 | 199 |
| A14074 | A14375 | 154 | A14074 | A14569 | 308 |
| A14074 | A14655 | 479 | A14074 | A14706 | 202 |
| A14074 | A14719 | 210 | A14074 | A14739 | 316 |
| A14074 | A14799 | 344 | A14074 | A14838 | 208 |
| A14074 | A14903 | 245 | A14074 | A15105 | 188 |
| A14074 | A15187 | 208 | A14074 | A15189 | 270 |
| A14074 | A15649 | 160 | A14074 | A15683 | 299 |
| A14074 | A15709 | 235 | A14074 | A15711 | 337 |
| A14074 | A15850 | 311 | A14074 | A15923 | 279 |
| A14074 | A15932 | 456 | A14074 | A16157 | 363 |
| A14074 | A16187 | 191 | A14074 | A16243 | 366 |
| A14074 | A16261 | 184 | A14074 | A16565 | 283 |
| A14074 | A16587 | 419 | A14074 | A16611 | 321 |
| A14074 | A16664 | 371 | A14074 | A16690 | 241 |
| A14074 | A16691 | 286 | A14074 | A16692 | 219 |
| A14074 | A16695 | 302 | A14074 | A16707 | 337 |
| A14074 | A16764 | 156 | A14074 | A16788 | 347 |
| A14074 | A16790 | 227 | A14074 | A16815 | 294 |
| A14074 | A16824 | 286 | A14074 | A16866 | 299 |
| A14076 | A14079 | 491 | A14076 | A14094 | 491 |
| A14076 | A14230 | 480 | A14076 | A14273 | 195 |
| A14076 | A14460 | 353 | A14076 | A14694 | 367 |
| A14076 | A14962 | 351 | A14076 | A15356 | 374 |
| A14076 | A15369 | 491 | A14076 | A15371 | 363 |
| A14076 | A15941 | 480 | A14076 | A16073 | 185 |
| A14076 | A16127 | 491 | A14076 | A16128 | 491 |
| A14076 | A16129 | 491 | A14076 | A16134 | 435 |
| A14076 | A16226 | 491 | A14076 | A16378 | 491 |
| A14076 | A16606 | 411 | A14076 | A16613 | 452 |
| A14076 | A16616 | 486 | A14076 | A16626 | 249 |
| A14076 | A16646 | 422 | A14076 | A16656 | 174 |
| A14076 | A16754 | 413 | A14076 | A16762 | 263 |
| A14076 | A16830 | 160 | A14077 | A14097 | 179 |
| A14077 | A14128 | 385 | A14077 | A14191 | 241 |
| A14077 | A14272 | 491 | A14077 | A14473 | 318 |

|        |        |     |        |        |     |
|--------|--------|-----|--------|--------|-----|
| A14077 | A14648 | 262 | A14077 | A14789 | 252 |
| A14077 | A14812 | 307 | A14077 | A15232 | 305 |
| A14077 | A15367 | 489 | A14077 | A15383 | 241 |
| A14077 | A15430 | 185 | A14077 | A15627 | 210 |
| A14077 | A15877 | 369 | A14079 | A14093 | 343 |
| A14079 | A14094 | 408 | A14079 | A14154 | 327 |
| A14079 | A14230 | 401 | A14079 | A14273 | 491 |
| A14079 | A14282 | 174 | A14079 | A14460 | 491 |
| A14079 | A14694 | 488 | A14079 | A15369 | 491 |
| A14079 | A15371 | 63  | A14079 | A15654 | 213 |
| A14079 | A15714 | 335 | A14079 | A15939 | 438 |
| A14079 | A15941 | 450 | A14079 | A16127 | 491 |
| A14079 | A16128 | 491 | A14079 | A16129 | 491 |
| A14079 | A16130 | 268 | A14079 | A16134 | 394 |
| A14079 | A16225 | 488 | A14079 | A16226 | 491 |
| A14079 | A16294 | 63  | A14079 | A16378 | 456 |
| A14079 | A16606 | 491 | A14079 | A16613 | 491 |
| A14079 | A16616 | 466 | A14079 | A16626 | 486 |
| A14079 | A16646 | 157 | A14079 | A16754 | 491 |
| A14080 | A14105 | 462 | A14080 | A14106 | 205 |
| A14080 | A14107 | 335 | A14080 | A14655 | 491 |
| A14080 | A15643 | 481 | A14080 | A15649 | 185 |
| A14080 | A15673 | 63  | A14080 | A16177 | 176 |
| A14080 | A17066 | 436 | A14080 | A17077 | 279 |
| A14080 | A17168 | 480 | A14081 | A14443 | 165 |
| A14083 | A14699 | 491 | A14083 | A15375 | 477 |
| A14084 | A14154 | 167 | A14084 | A14167 | 184 |
| A14084 | A14198 | 259 | A14084 | A14209 | 173 |
| A14084 | A14214 | 473 | A14084 | A14219 | 311 |
| A14084 | A14222 | 470 | A14084 | A14227 | 156 |
| A14084 | A14255 | 196 | A14084 | A14263 | 327 |
| A14084 | A14270 | 184 | A14084 | A14285 | 643 |
| A14084 | A14288 | 260 | A14084 | A14358 | 255 |
| A14084 | A14455 | 224 | A14084 | A14462 | 302 |
| A14084 | A14569 | 463 | A14084 | A14708 | 462 |
| A14084 | A14718 | 324 | A14084 | A14903 | 171 |
| A14084 | A14921 | 241 | A14084 | A15105 | 334 |
| A14084 | A15187 | 263 | A14084 | A15189 | 355 |
| A14084 | A15373 | 180 | A14084 | A15380 | 263 |
| A14084 | A15683 | 271 | A14084 | A15940 | 294 |
| A14084 | A15949 | 557 | A14084 | A16099 | 184 |
| A14084 | A16157 | 462 | A14084 | A16187 | 241 |
| A14084 | A16215 | 177 | A14084 | A16552 | 224 |
| A14084 | A16565 | 294 | A14084 | A16587 | 154 |
| A14084 | A16597 | 457 | A14084 | A16608 | 246 |
| A14084 | A16611 | 475 | A14084 | A16664 | 366 |

|        |        |     |        |        |     |
|--------|--------|-----|--------|--------|-----|
| A14084 | A16675 | 241 | A14084 | A16680 | 170 |
| A14084 | A16682 | 171 | A14084 | A16690 | 241 |
| A14084 | A16695 | 236 | A14084 | A16703 | 351 |
| A14084 | A16704 | 265 | A14084 | A16707 | 281 |
| A14084 | A16709 | 152 | A14084 | A16764 | 195 |
| A14084 | A16774 | 208 | A14084 | A16776 | 180 |
| A14084 | A16790 | 152 | A14084 | A16815 | 227 |
| A14084 | A16824 | 218 | A14084 | A16838 | 270 |
| A14084 | A16874 | 163 | A14084 | A16946 | 337 |
| A14084 | A16954 | 285 | A14084 | A17014 | 208 |
| A14084 | A17015 | 246 | A14084 | A17030 | 180 |
| A14084 | A17033 | 301 | A14084 | A17035 | 243 |
| A14084 | A17133 | 378 | A14086 | A14183 | 489 |
| A14086 | A15262 | 283 | A14087 | A14088 | 489 |
| A14087 | A14186 | 475 | A14087 | A14209 | 269 |
| A14087 | A14214 | 259 | A14087 | A14222 | 205 |
| A14087 | A14569 | 367 | A14087 | A14826 | 157 |
| A14087 | A14903 | 303 | A14087 | A15105 | 277 |
| A14087 | A15187 | 274 | A14087 | A15189 | 208 |
| A14087 | A15262 | 324 | A14087 | A15370 | 481 |
| A14087 | A15374 | 401 | A14087 | A15536 | 314 |
| A14087 | A15569 | 348 | A14087 | A15651 | 191 |
| A14087 | A15683 | 151 | A14087 | A15724 | 485 |
| A14087 | A16067 | 180 | A14087 | A16157 | 273 |
| A14087 | A16552 | 252 | A14087 | A16565 | 221 |
| A14087 | A16597 | 351 | A14087 | A16611 | 385 |
| A14087 | A16652 | 205 | A14087 | A16664 | 416 |
| A14087 | A16675 | 185 | A14087 | A16690 | 185 |
| A14087 | A16704 | 388 | A14087 | A16790 | 396 |
| A14087 | A16838 | 391 | A14087 | A16866 | 235 |
| A14087 | A16905 | 256 | A14087 | A16944 | 317 |
| A14088 | A14186 | 491 | A14088 | A14209 | 230 |
| A14088 | A14356 | 257 | A14088 | A15370 | 491 |
| A14088 | A15377 | 383 | A14088 | A15543 | 217 |
| A14088 | A15569 | 288 | A14088 | A15642 | 157 |
| A14088 | A15683 | 278 | A14088 | A15719 | 219 |
| A14088 | A15724 | 400 | A14088 | A16634 | 440 |
| A14088 | A16664 | 534 | A14088 | A16703 | 185 |
| A14089 | A15653 | 63  | A14089 | A15666 | 274 |
| A14091 | A14094 | 200 | A14091 | A14177 | 474 |
| A14091 | A14192 | 200 | A14091 | A14223 | 200 |
| A14091 | A14694 | 200 | A14091 | A16274 | 200 |
| A14092 | A14191 | 377 | A14092 | A14272 | 488 |
| A14092 | A14278 | 193 | A14092 | A14840 | 340 |
| A14092 | A15367 | 375 | A14092 | A15877 | 472 |
| A14092 | A16694 | 291 | A14093 | A14273 | 162 |

|        |        |     |        |        |     |
|--------|--------|-----|--------|--------|-----|
| A14093 | A14460 | 288 | A14093 | A15369 | 357 |
| A14093 | A15654 | 165 | A14093 | A16277 | 215 |
| A14093 | A16294 | 401 | A14093 | A16606 | 207 |
| A14094 | A14177 | 200 | A14094 | A14192 | 200 |
| A14094 | A14214 | 344 | A14094 | A14223 | 562 |
| A14094 | A14230 | 483 | A14094 | A14288 | 177 |
| A14094 | A14477 | 257 | A14094 | A14569 | 347 |
| A14094 | A14595 | 180 | A14094 | A14674 | 396 |
| A14094 | A14694 | 565 | A14094 | A14706 | 491 |
| A14094 | A14739 | 215 | A14094 | A14903 | 257 |
| A14094 | A14917 | 341 | A14094 | A14921 | 201 |
| A14094 | A15369 | 474 | A14094 | A15654 | 246 |
| A14094 | A15711 | 205 | A14094 | A15850 | 207 |
| A14094 | A15932 | 160 | A14094 | A16127 | 462 |
| A14094 | A16128 | 490 | A14094 | A16129 | 490 |
| A14094 | A16157 | 363 | A14094 | A16163 | 258 |
| A14094 | A16226 | 455 | A14094 | A16274 | 200 |
| A14094 | A16552 | 278 | A14094 | A16565 | 440 |
| A14094 | A16587 | 335 | A14094 | A16611 | 224 |
| A14094 | A16626 | 483 | A14094 | A16656 | 177 |
| A14094 | A16680 | 207 | A14094 | A16691 | 177 |
| A14094 | A16692 | 224 | A14094 | A16693 | 190 |
| A14094 | A16695 | 195 | A14094 | A16703 | 200 |
| A14094 | A16704 | 314 | A14094 | A16707 | 243 |
| A14094 | A16762 | 485 | A14094 | A16774 | 299 |
| A14094 | A16788 | 258 | A14094 | A16806 | 195 |
| A14094 | A16815 | 319 | A14094 | A16838 | 217 |
| A14094 | A16905 | 362 | A14094 | A16913 | 165 |
| A14094 | A16944 | 277 | A14095 | A14247 | 324 |
| A14096 | A14159 | 899 | A14096 | A14443 | 899 |
| A14096 | A15726 | 263 | A14096 | A16228 | 263 |
| A14096 | A16429 | 260 | A14096 | A16434 | 266 |
| A14097 | A14128 | 439 | A14097 | A14222 | 176 |
| A14097 | A14803 | 350 | A14097 | A14812 | 323 |
| A14097 | A14870 | 235 | A14097 | A14872 | 260 |
| A14097 | A15241 | 270 | A14097 | A15390 | 424 |
| A14097 | A15430 | 425 | A14097 | A15925 | 491 |
| A14097 | A15934 | 491 | A14098 | A14570 | 165 |
| A14098 | A15547 | 245 | A14100 | A14101 | 404 |
| A14103 | A16300 | 247 | A14104 | A16073 | 443 |
| A14104 | A17097 | 432 | A14105 | A14122 | 195 |
| A14105 | A14124 | 294 | A14105 | A14655 | 420 |
| A14105 | A15335 | 279 | A14105 | A17077 | 393 |
| A14105 | A17168 | 484 | A14106 | A14655 | 226 |
| A14107 | A14655 | 393 | A14107 | A17202 | 63  |
| A14109 | A14120 | 278 | A14109 | A14190 | 165 |

|        |        |     |        |        |     |
|--------|--------|-----|--------|--------|-----|
| A14109 | A14215 | 182 | A14109 | A14655 | 63  |
| A14109 | A15130 | 491 | A14109 | A15431 | 193 |
| A14109 | A15482 | 212 | A14109 | A15487 | 235 |
| A14109 | A15817 | 165 | A14109 | A17054 | 380 |
| A14109 | A17086 | 319 | A14109 | A17087 | 340 |
| A14109 | A17230 | 310 | A14110 | A14191 | 241 |
| A14110 | A16224 | 346 | A14111 | A14122 | 274 |
| A14111 | A14245 | 151 | A14111 | A14394 | 151 |
| A14111 | A14511 | 408 | A14111 | A14570 | 224 |
| A14111 | A14667 | 208 | A14111 | A15313 | 317 |
| A14111 | A15416 | 156 | A14111 | A15440 | 374 |
| A14111 | A15452 | 260 | A14111 | A15462 | 165 |
| A14111 | A15480 | 491 | A14111 | A15630 | 162 |
| A14111 | A15802 | 398 | A14111 | A15976 | 205 |
| A14112 | A14258 | 177 | A14112 | A14276 | 224 |
| A14112 | A15224 | 340 | A14112 | A16635 | 230 |
| A14113 | A14709 | 351 | A14114 | A14169 | 414 |
| A14115 | A14190 | 182 | A14116 | A15800 | 363 |
| A14116 | A16224 | 338 | A14116 | A16300 | 235 |
| A14119 | A14374 | 223 | A14119 | A15312 | 475 |
| A14120 | A14123 | 224 | A14120 | A14210 | 362 |
| A14120 | A15278 | 323 | A14120 | A15399 | 301 |
| A14120 | A15431 | 188 | A14120 | A15559 | 63  |
| A14120 | A16407 | 362 | A14120 | A16847 | 362 |
| A14122 | A14124 | 491 | A14122 | A14129 | 450 |
| A14122 | A14210 | 374 | A14122 | A14221 | 430 |
| A14122 | A14229 | 227 | A14122 | A14245 | 177 |
| A14122 | A14363 | 291 | A14122 | A14371 | 199 |
| A14122 | A14378 | 307 | A14122 | A14413 | 347 |
| A14122 | A14511 | 485 | A14122 | A14611 | 165 |
| A14122 | A14635 | 318 | A14122 | A15278 | 399 |
| A14122 | A15292 | 491 | A14122 | A15301 | 466 |
| A14122 | A15302 | 373 | A14122 | A15311 | 363 |
| A14122 | A15312 | 491 | A14122 | A15313 | 488 |
| A14122 | A15317 | 414 | A14122 | A15322 | 219 |
| A14122 | A15335 | 151 | A14122 | A15348 | 274 |
| A14122 | A15349 | 491 | A14122 | A15352 | 491 |
| A14122 | A15366 | 488 | A14122 | A15413 | 461 |
| A14122 | A15419 | 193 | A14122 | A15420 | 265 |
| A14122 | A15431 | 455 | A14122 | A15432 | 488 |
| A14122 | A15433 | 379 | A14122 | A15434 | 480 |
| A14122 | A15435 | 477 | A14122 | A15436 | 452 |
| A14122 | A15437 | 221 | A14122 | A15440 | 307 |
| A14122 | A15447 | 185 | A14122 | A15452 | 489 |
| A14122 | A15456 | 305 | A14122 | A15457 | 229 |
| A14122 | A15459 | 306 | A14122 | A15461 | 224 |

|        |        |     |        |        |     |
|--------|--------|-----|--------|--------|-----|
| A14122 | A15463 | 460 | A14122 | A15480 | 283 |
| A14122 | A15487 | 174 | A14122 | A15495 | 200 |
| A14122 | A15498 | 188 | A14122 | A15513 | 191 |
| A14122 | A15515 | 238 | A14122 | A15553 | 263 |
| A14122 | A15673 | 188 | A14122 | A15752 | 288 |
| A14122 | A15801 | 201 | A14122 | A15813 | 195 |
| A14122 | A15824 | 172 | A14122 | A15828 | 190 |
| A14122 | A15830 | 333 | A14122 | A16117 | 489 |
| A14122 | A16152 | 152 | A14123 | A14374 | 177 |
| A14123 | A15352 | 243 | A14123 | A15422 | 179 |
| A14123 | A15442 | 363 | A14123 | A15443 | 363 |
| A14123 | A15445 | 475 | A14123 | A15446 | 371 |
| A14123 | A16224 | 238 | A14124 | A14129 | 337 |
| A14124 | A14210 | 221 | A14124 | A14245 | 174 |
| A14124 | A14430 | 265 | A14124 | A15292 | 369 |
| A14124 | A15301 | 176 | A14124 | A15312 | 329 |
| A14124 | A15313 | 246 | A14124 | A15317 | 187 |
| A14124 | A15335 | 256 | A14124 | A15349 | 475 |
| A14124 | A15352 | 429 | A14124 | A15400 | 160 |
| A14124 | A15431 | 273 | A14124 | A15432 | 177 |
| A14124 | A15434 | 205 | A14124 | A15456 | 274 |
| A14124 | A15457 | 319 | A14124 | A15459 | 388 |
| A14124 | A15461 | 340 | A14124 | A15487 | 173 |
| A14124 | A15673 | 316 | A14124 | A15824 | 274 |
| A14124 | A16117 | 435 | A14124 | A17196 | 355 |
| A14125 | A14146 | 241 | A14125 | A14202 | 196 |
| A14125 | A14372 | 452 | A14125 | A14374 | 340 |
| A14125 | A14391 | 345 | A14125 | A14439 | 204 |
| A14125 | A14554 | 168 | A14125 | A15268 | 154 |
| A14125 | A15290 | 278 | A14125 | A15425 | 256 |
| A14125 | A15466 | 321 | A14125 | A15475 | 235 |
| A14125 | A15518 | 286 | A14125 | A15795 | 180 |
| A14125 | A16117 | 219 | A14125 | A16342 | 386 |
| A14126 | A14700 | 404 | A14126 | A15318 | 452 |
| A14126 | A15813 | 335 | A14126 | A16300 | 152 |
| A14127 | A14644 | 491 | A14127 | A14683 | 327 |
| A14127 | A15171 | 174 | A14127 | A15420 | 363 |
| A14127 | A16082 | 173 | A14127 | A16636 | 418 |
| A14128 | A14190 | 515 | A14128 | A14191 | 252 |
| A14128 | A14202 | 172 | A14128 | A14222 | 443 |
| A14128 | A14418 | 182 | A14128 | A14654 | 475 |
| A14128 | A14789 | 460 | A14128 | A14812 | 435 |
| A14128 | A14870 | 363 | A14128 | A14872 | 428 |
| A14128 | A14897 | 185 | A14128 | A15125 | 201 |
| A14128 | A15324 | 302 | A14128 | A15430 | 491 |
| A14128 | A15498 | 393 | A14128 | A15627 | 215 |



|        |        |     |        |        |     |
|--------|--------|-----|--------|--------|-----|
| A14128 | A15669 | 391 | A14128 | A15925 | 480 |
| A14128 | A15934 | 460 | A14128 | A16436 | 355 |
| A14128 | A16963 | 223 | A14129 | A14135 | 310 |
| A14129 | A14190 | 338 | A14129 | A14210 | 480 |
| A14129 | A14366 | 296 | A14129 | A14408 | 369 |
| A14129 | A14476 | 232 | A14129 | A15302 | 404 |
| A14129 | A15431 | 363 | A14129 | A15461 | 363 |
| A14129 | A15487 | 224 | A14129 | A15513 | 229 |
| A14129 | A15819 | 396 | A14129 | A15824 | 411 |
| A14129 | A16060 | 318 | A14129 | A16224 | 152 |
| A14129 | A17058 | 386 | A14130 | A14131 | 390 |
| A14130 | A14449 | 255 | A14131 | A15389 | 380 |
| A14132 | A15318 | 339 | A14132 | A16120 | 407 |
| A14132 | A17085 | 443 | A14133 | A15162 | 371 |
| A14133 | A15495 | 434 | A14135 | A14190 | 210 |
| A14135 | A14202 | 439 | A14135 | A14229 | 273 |
| A14135 | A14511 | 176 | A14135 | A14570 | 486 |
| A14135 | A14596 | 443 | A14135 | A14659 | 246 |
| A14135 | A15366 | 163 | A14135 | A15372 | 163 |
| A14135 | A15411 | 259 | A14135 | A15419 | 159 |
| A14135 | A15480 | 279 | A14135 | A15482 | 491 |
| A14135 | A15495 | 385 | A14135 | A15498 | 188 |
| A14135 | A15519 | 236 | A14135 | A15884 | 286 |
| A14135 | A17076 | 218 | A14136 | A14190 | 243 |
| A14136 | A14408 | 322 | A14136 | A15322 | 277 |
| A14136 | A15333 | 346 | A14137 | A14210 | 195 |
| A14137 | A14378 | 229 | A14137 | A14379 | 296 |
| A14137 | A14413 | 409 | A14137 | A15302 | 440 |
| A14137 | A15422 | 256 | A14137 | A15513 | 356 |
| A14137 | A15816 | 456 | A14138 | A14525 | 191 |
| A14138 | A15699 | 311 | A14138 | A15843 | 200 |
| A14139 | A14413 | 299 | A14139 | A14496 | 229 |
| A14140 | A14196 | 174 | A14142 | A16060 | 277 |
| A14143 | A15346 | 343 | A14143 | A15409 | 283 |
| A14145 | A17051 | 201 | A14146 | A14368 | 299 |
| A14146 | A14374 | 435 | A14146 | A14391 | 182 |
| A14146 | A14392 | 407 | A14146 | A14417 | 367 |
| A14146 | A15308 | 193 | A14146 | A15394 | 469 |
| A14146 | A15395 | 353 | A14146 | A15425 | 188 |
| A14146 | A15518 | 332 | A14146 | A15795 | 241 |
| A14146 | A15964 | 399 | A14147 | A14200 | 490 |
| A14147 | A14220 | 395 | A14147 | A15237 | 368 |
| A14147 | A15297 | 157 | A14147 | A15559 | 258 |
| A14147 | A15700 | 297 | A14147 | A15739 | 177 |
| A14147 | A15749 | 180 | A14147 | A16949 | 358 |
| A14147 | A17141 | 491 | A14148 | A14193 | 255 |

|        |        |     |        |        |     |
|--------|--------|-----|--------|--------|-----|
| A14148 | A14196 | 572 | A14148 | A14220 | 489 |
| A14148 | A14221 | 327 | A14148 | A14246 | 899 |
| A14148 | A14257 | 246 | A14148 | A14303 | 180 |
| A14148 | A14352 | 279 | A14148 | A14378 | 165 |
| A14148 | A15131 | 277 | A14148 | A15297 | 943 |
| A14148 | A15309 | 191 | A14148 | A15318 | 160 |
| A14148 | A15323 | 491 | A14148 | A15324 | 944 |
| A14148 | A15338 | 402 | A14148 | A15339 | 468 |
| A14148 | A15353 | 933 | A14148 | A15359 | 944 |
| A14148 | A15366 | 188 | A14148 | A15441 | 177 |
| A14148 | A15547 | 899 | A14148 | A15614 | 899 |
| A14148 | A15752 | 456 | A14148 | A15947 | 196 |
| A14148 | A17063 | 491 | A14149 | A16478 | 367 |
| A14150 | A14200 | 439 | A14150 | A14283 | 491 |
| A14150 | A15660 | 491 | A14150 | A15684 | 484 |
| A14150 | A15720 | 88  | A14150 | A15931 | 447 |
| A14150 | A16086 | 160 | A14150 | A16218 | 363 |
| A14150 | A17137 | 274 | A14150 | A17140 | 488 |
| A14151 | A14190 | 154 | A14151 | A15894 | 303 |
| A14152 | A14208 | 439 | A14152 | A14596 | 479 |
| A14152 | A14609 | 395 | A14152 | A15660 | 457 |
| A14152 | A15684 | 483 | A14152 | A16218 | 372 |
| A14152 | A16462 | 394 | A14152 | A16834 | 311 |
| A14152 | A17127 | 330 | A14153 | A15502 | 180 |
| A14154 | A14179 | 235 | A14154 | A14193 | 484 |
| A14154 | A14214 | 160 | A14154 | A14263 | 174 |
| A14154 | A14569 | 302 | A14154 | A14903 | 238 |
| A14154 | A15189 | 262 | A14154 | A15557 | 165 |
| A14154 | A15718 | 201 | A14154 | A16226 | 288 |
| A14154 | A16587 | 221 | A14154 | A16611 | 208 |
| A14154 | A16613 | 278 | A14154 | A16695 | 296 |
| A14154 | A16707 | 333 | A14154 | A16790 | 219 |
| A14154 | A16838 | 207 | A14154 | A16905 | 180 |
| A14154 | A16954 | 219 | A14154 | A17033 | 235 |
| A14154 | A17115 | 386 | A14159 | A14221 | 174 |
| A14159 | A14378 | 152 | A14159 | A14443 | 899 |
| A14159 | A14738 | 477 | A14159 | A15546 | 177 |
| A14159 | A15734 | 286 | A14159 | A15741 | 461 |
| A14159 | A15760 | 335 | A14159 | A16291 | 462 |
| A14159 | A16793 | 273 | A14160 | A14183 | 279 |
| A14160 | A17027 | 899 | A14163 | A14271 | 419 |
| A14163 | A14785 | 281 | A14163 | A15383 | 229 |
| A14163 | A15626 | 427 | A14163 | A15685 | 259 |
| A14165 | A15945 | 255 | A14166 | A14462 | 255 |
| A14166 | A15762 | 255 | A14166 | A15943 | 255 |
| A14166 | A15944 | 255 | A14166 | A15945 | 255 |

|        |        |     |        |        |     |
|--------|--------|-----|--------|--------|-----|
| A14166 | A15946 | 255 | A14166 | A16067 | 255 |
| A14166 | A16093 | 255 | A14166 | A16109 | 255 |
| A14166 | A16144 | 255 | A14167 | A14182 | 201 |
| A14167 | A14186 | 302 | A14167 | A14209 | 157 |
| A14167 | A14213 | 221 | A14167 | A14214 | 177 |
| A14167 | A14270 | 313 | A14167 | A14462 | 385 |
| A14167 | A14655 | 174 | A14167 | A14706 | 204 |
| A14167 | A15377 | 263 | A14167 | A15380 | 221 |
| A14167 | A15541 | 256 | A14167 | A15651 | 238 |
| A14167 | A15661 | 180 | A14167 | A15666 | 269 |
| A14167 | A15709 | 228 | A14167 | A15711 | 310 |
| A14167 | A15735 | 185 | A14167 | A15854 | 254 |
| A14167 | A16128 | 208 | A14167 | A16157 | 188 |
| A14167 | A16294 | 228 | A14167 | A16552 | 173 |
| A14167 | A16611 | 215 | A14167 | A16675 | 232 |
| A14168 | A14838 | 251 | A14168 | A15770 | 308 |
| A14168 | A17091 | 356 | A14169 | A14188 | 274 |
| A14169 | A14449 | 534 | A14169 | A15281 | 168 |
| A14169 | A15297 | 662 | A14169 | A15500 | 323 |
| A14169 | A15558 | 622 | A14169 | A15560 | 458 |
| A14169 | A15779 | 358 | A14169 | A16146 | 486 |
| A14169 | A16686 | 463 | A14169 | A16823 | 193 |
| A14171 | A14179 | 200 | A14171 | A14180 | 200 |
| A14171 | A14356 | 200 | A14171 | A15370 | 200 |
| A14171 | A15712 | 200 | A14171 | A15719 | 200 |
| A14171 | A15757 | 200 | A14171 | A16066 | 200 |
| A14171 | A16634 | 200 | A14171 | A16919 | 200 |
| A14172 | A14216 | 241 | A14172 | A14530 | 240 |
| A14172 | A15684 | 268 | A14173 | A14179 | 450 |
| A14173 | A15370 | 93  | A14173 | A15712 | 243 |
| A14173 | A15718 | 391 | A14173 | A15719 | 302 |
| A14173 | A15724 | 162 | A14173 | A16657 | 337 |
| A14174 | A15080 | 303 | A14174 | A15324 | 180 |
| A14176 | A14216 | 290 | A14176 | A14937 | 243 |
| A14176 | A15202 | 350 | A14176 | A15235 | 202 |
| A14176 | A15732 | 348 | A14177 | A14192 | 200 |
| A14177 | A14223 | 410 | A14177 | A14230 | 119 |
| A14177 | A14694 | 200 | A14177 | A15367 | 63  |
| A14177 | A15371 | 238 | A14177 | A15511 | 188 |
| A14177 | A15524 | 286 | A14177 | A15531 | 130 |
| A14177 | A15837 | 452 | A14177 | A16068 | 172 |
| A14177 | A16274 | 200 | A14177 | A16626 | 374 |
| A14177 | A16643 | 262 | A14178 | A14471 | 218 |
| A14178 | A14478 | 160 | A14178 | A14566 | 341 |
| A14178 | A14594 | 395 | A14178 | A14728 | 321 |
| A14178 | A14801 | 352 | A14178 | A14830 | 182 |

|        |        |     |        |        |     |
|--------|--------|-----|--------|--------|-----|
| A14178 | A16243 | 202 | A14178 | A16699 | 156 |
| A14178 | A16922 | 358 | A14178 | A17088 | 334 |
| A14178 | A17168 | 335 | A14179 | A14180 | 411 |
| A14179 | A14356 | 200 | A14179 | A14358 | 375 |
| A14179 | A14430 | 170 | A14179 | A14694 | 154 |
| A14179 | A15370 | 550 | A14179 | A15712 | 200 |
| A14179 | A15718 | 404 | A14179 | A15719 | 200 |
| A14179 | A15724 | 185 | A14179 | A15757 | 200 |
| A14179 | A16066 | 200 | A14179 | A16634 | 527 |
| A14179 | A16919 | 200 | A14180 | A14356 | 200 |
| A14180 | A15370 | 200 | A14180 | A15568 | 358 |
| A14180 | A15712 | 200 | A14180 | A15719 | 407 |
| A14180 | A15757 | 200 | A14180 | A16066 | 200 |
| A14180 | A16634 | 386 | A14180 | A16919 | 200 |
| A14182 | A14247 | 571 | A14182 | A14258 | 505 |
| A14182 | A14661 | 621 | A14182 | A14711 | 307 |
| A14182 | A14783 | 269 | A14182 | A14838 | 135 |
| A14182 | A14844 | 307 | A14182 | A14877 | 307 |
| A14182 | A14917 | 177 | A14182 | A15347 | 204 |
| A14182 | A15647 | 425 | A14182 | A17061 | 307 |
| A14183 | A14255 | 184 | A14183 | A14690 | 329 |
| A14183 | A15262 | 463 | A14183 | A16257 | 213 |
| A14183 | A16565 | 179 | A14183 | A16936 | 378 |
| A14183 | A17028 | 430 | A14183 | A17133 | 258 |
| A14184 | A14257 | 229 | A14184 | A15697 | 243 |
| A14184 | A15974 | 154 | A14184 | A15986 | 240 |
| A14184 | A16144 | 176 | A14185 | A16664 | 63  |
| A14186 | A14255 | 177 | A14186 | A14356 | 185 |
| A14186 | A14462 | 179 | A14186 | A15370 | 491 |
| A14186 | A15374 | 491 | A14186 | A15377 | 167 |
| A14186 | A15569 | 223 | A14186 | A15724 | 491 |
| A14186 | A16565 | 171 | A14186 | A16634 | 241 |
| A14186 | A16657 | 193 | A14186 | A16664 | 491 |
| A14186 | A16674 | 286 | A14187 | A14188 | 934 |
| A14187 | A14198 | 456 | A14187 | A14402 | 391 |
| A14187 | A14433 | 491 | A14187 | A14539 | 210 |
| A14187 | A15182 | 347 | A14187 | A15320 | 191 |
| A14187 | A15325 | 299 | A14187 | A16084 | 290 |
| A14188 | A14194 | 313 | A14188 | A14198 | 945 |
| A14188 | A14216 | 257 | A14188 | A14364 | 386 |
| A14188 | A14375 | 324 | A14188 | A14402 | 229 |
| A14188 | A14404 | 346 | A14188 | A14433 | 928 |
| A14188 | A14438 | 481 | A14188 | A14443 | 899 |
| A14188 | A14471 | 306 | A14188 | A14738 | 236 |
| A14188 | A14908 | 168 | A14188 | A15218 | 273 |
| A14188 | A15225 | 217 | A14188 | A15230 | 174 |

|        |        |     |        |        |     |
|--------|--------|-----|--------|--------|-----|
| A14188 | A15236 | 423 | A14188 | A15244 | 472 |
| A14188 | A15281 | 168 | A14188 | A15325 | 257 |
| A14188 | A15660 | 393 | A14188 | A15684 | 279 |
| A14188 | A15732 | 296 | A14188 | A15855 | 277 |
| A14188 | A15913 | 369 | A14188 | A15932 | 429 |
| A14188 | A15933 | 395 | A14188 | A16067 | 378 |
| A14188 | A16265 | 310 | A14188 | A16272 | 328 |
| A14188 | A16318 | 385 | A14188 | A16437 | 191 |
| A14188 | A16446 | 306 | A14188 | A16523 | 204 |
| A14188 | A16925 | 180 | A14188 | A17132 | 152 |
| A14190 | A14197 | 254 | A14190 | A14198 | 286 |
| A14190 | A14202 | 412 | A14190 | A14210 | 491 |
| A14190 | A14364 | 456 | A14190 | A14366 | 945 |
| A14190 | A14368 | 486 | A14190 | A14369 | 944 |
| A14190 | A14370 | 485 | A14190 | A14371 | 945 |
| A14190 | A14376 | 480 | A14190 | A14377 | 334 |
| A14190 | A14378 | 424 | A14190 | A14379 | 490 |
| A14190 | A14382 | 385 | A14190 | A14387 | 179 |
| A14190 | A14399 | 446 | A14190 | A14404 | 449 |
| A14190 | A14417 | 243 | A14190 | A14418 | 411 |
| A14190 | A14419 | 436 | A14190 | A14426 | 262 |
| A14190 | A14430 | 465 | A14190 | A14443 | 899 |
| A14190 | A14511 | 491 | A14190 | A14516 | 485 |
| A14190 | A14518 | 329 | A14190 | A14523 | 168 |
| A14190 | A14526 | 283 | A14190 | A14528 | 372 |
| A14190 | A14536 | 405 | A14190 | A14539 | 345 |
| A14190 | A14544 | 436 | A14190 | A14553 | 301 |
| A14190 | A14570 | 296 | A14190 | A14599 | 235 |
| A14190 | A14604 | 429 | A14190 | A14613 | 218 |
| A14190 | A14616 | 260 | A14190 | A14667 | 369 |
| A14190 | A14774 | 179 | A14190 | A15267 | 179 |
| A14190 | A15285 | 310 | A14190 | A15286 | 383 |
| A14190 | A15292 | 486 | A14190 | A15312 | 462 |
| A14190 | A15313 | 433 | A14190 | A15318 | 296 |
| A14190 | A15333 | 218 | A14190 | A15335 | 224 |
| A14190 | A15346 | 162 | A14190 | A15348 | 201 |
| A14190 | A15349 | 462 | A14190 | A15352 | 480 |
| A14190 | A15422 | 274 | A14190 | A15432 | 434 |
| A14190 | A15435 | 316 | A14190 | A15436 | 270 |
| A14190 | A15437 | 174 | A14190 | A15439 | 205 |
| A14190 | A15452 | 439 | A14190 | A15457 | 182 |
| A14190 | A15459 | 252 | A14190 | A15478 | 219 |
| A14190 | A15480 | 475 | A14190 | A15484 | 378 |
| A14190 | A15495 | 382 | A14190 | A15510 | 277 |
| A14190 | A15518 | 318 | A14190 | A15607 | 160 |
| A14190 | A15795 | 491 | A14190 | A15808 | 243 |

|        |        |     |        |        |     |
|--------|--------|-----|--------|--------|-----|
| A14190 | A15884 | 167 | A14190 | A15896 | 468 |
| A14190 | A15916 | 378 | A14190 | A16024 | 251 |
| A14190 | A16036 | 270 | A14190 | A16038 | 378 |
| A14190 | A16047 | 283 | A14190 | A16775 | 301 |
| A14190 | A17076 | 210 | A14190 | A17112 | 199 |
| A14190 | A17182 | 329 | A14190 | A17195 | 196 |
| A14191 | A14199 | 473 | A14191 | A14208 | 490 |
| A14191 | A14272 | 644 | A14191 | A14276 | 400 |
| A14191 | A14288 | 486 | A14191 | A14292 | 117 |
| A14191 | A14374 | 288 | A14191 | A14647 | 319 |
| A14191 | A14707 | 240 | A14191 | A14812 | 173 |
| A14191 | A15314 | 422 | A14191 | A15320 | 268 |
| A14191 | A15322 | 412 | A14191 | A15342 | 187 |
| A14191 | A15345 | 490 | A14191 | A15346 | 491 |
| A14191 | A15347 | 411 | A14191 | A15367 | 491 |
| A14191 | A15383 | 432 | A14191 | A15409 | 132 |
| A14191 | A15410 | 490 | A14191 | A15430 | 418 |
| A14191 | A15510 | 422 | A14191 | A15550 | 204 |
| A14191 | A15562 | 229 | A14191 | A15615 | 347 |
| A14191 | A15617 | 63  | A14191 | A15783 | 187 |
| A14191 | A15877 | 191 | A14191 | A15934 | 195 |
| A14191 | A16194 | 218 | A14191 | A16356 | 182 |
| A14191 | A16635 | 241 | A14191 | A17060 | 204 |
| A14192 | A14193 | 525 | A14192 | A14221 | 177 |
| A14192 | A14223 | 200 | A14192 | A14247 | 265 |
| A14192 | A14263 | 588 | A14192 | A14279 | 181 |
| A14192 | A14570 | 201 | A14192 | A14694 | 200 |
| A14192 | A15315 | 165 | A14192 | A15336 | 274 |
| A14192 | A15626 | 208 | A14192 | A16274 | 200 |
| A14192 | A16709 | 466 | A14192 | A16853 | 221 |
| A14193 | A14196 | 205 | A14193 | A14204 | 896 |
| A14193 | A14208 | 385 | A14193 | A14216 | 360 |
| A14193 | A14221 | 456 | A14193 | A14229 | 341 |
| A14193 | A14233 | 490 | A14193 | A14237 | 152 |
| A14193 | A14246 | 287 | A14193 | A14247 | 536 |
| A14193 | A14253 | 710 | A14193 | A14258 | 369 |
| A14193 | A14263 | 306 | A14193 | A14272 | 467 |
| A14193 | A14278 | 389 | A14193 | A14279 | 290 |
| A14193 | A14303 | 477 | A14193 | A14391 | 491 |
| A14193 | A14392 | 462 | A14193 | A14393 | 958 |
| A14193 | A14395 | 542 | A14193 | A14454 | 935 |
| A14193 | A14484 | 262 | A14193 | A14560 | 152 |
| A14193 | A14633 | 279 | A14193 | A14661 | 505 |
| A14193 | A15297 | 296 | A14193 | A15303 | 577 |
| A14193 | A15308 | 165 | A14193 | A15315 | 537 |
| A14193 | A15322 | 491 | A14193 | A15323 | 63  |

|        |        |     |        |        |     |
|--------|--------|-----|--------|--------|-----|
| A14193 | A15328 | 491 | A14193 | A15336 | 491 |
| A14193 | A15345 | 125 | A14193 | A15347 | 781 |
| A14193 | A15357 | 63  | A14193 | A15359 | 63  |
| A14193 | A15366 | 168 | A14193 | A15398 | 473 |
| A14193 | A15399 | 257 | A14193 | A15400 | 77  |
| A14193 | A15498 | 486 | A14193 | A15527 | 455 |
| A14193 | A15556 | 708 | A14193 | A15557 | 549 |
| A14193 | A15626 | 444 | A14193 | A15644 | 708 |
| A14193 | A15676 | 463 | A14193 | A15679 | 467 |
| A14193 | A15680 | 491 | A14193 | A15683 | 439 |
| A14193 | A15686 | 425 | A14193 | A15688 | 294 |
| A14193 | A15690 | 491 | A14193 | A15712 | 190 |
| A14193 | A15918 | 257 | A14193 | A16002 | 293 |
| A14193 | A16022 | 491 | A14193 | A16054 | 489 |
| A14193 | A16056 | 294 | A14193 | A16113 | 491 |
| A14193 | A16121 | 219 | A14193 | A16292 | 486 |
| A14193 | A16314 | 294 | A14193 | A16322 | 208 |
| A14193 | A16362 | 93  | A14193 | A16364 | 63  |
| A14193 | A16373 | 294 | A14193 | A16381 | 474 |
| A14193 | A16393 | 490 | A14193 | A16395 | 199 |
| A14193 | A16397 | 555 | A14193 | A16420 | 346 |
| A14193 | A16429 | 491 | A14193 | A16432 | 490 |
| A14193 | A16434 | 490 | A14193 | A16445 | 490 |
| A14193 | A16447 | 283 | A14193 | A16451 | 199 |
| A14193 | A16455 | 199 | A14193 | A16456 | 294 |
| A14193 | A16459 | 434 | A14193 | A16466 | 364 |
| A14193 | A16480 | 213 | A14193 | A16481 | 199 |
| A14193 | A16486 | 162 | A14193 | A16505 | 199 |
| A14193 | A16506 | 199 | A14193 | A16509 | 294 |
| A14193 | A16521 | 270 | A14193 | A16530 | 199 |
| A14193 | A16534 | 419 | A14193 | A16546 | 429 |
| A14193 | A16607 | 199 | A14193 | A16609 | 199 |
| A14193 | A16799 | 480 | A14193 | A16891 | 558 |
| A14193 | A16910 | 577 | A14193 | A17198 | 490 |
| A14194 | A14198 | 945 | A14194 | A14364 | 224 |
| A14194 | A14539 | 208 | A14194 | A15325 | 297 |
| A14194 | A16636 | 475 | A14195 | A14258 | 167 |
| A14195 | A14788 | 364 | A14195 | A15312 | 151 |
| A14195 | A15366 | 176 | A14195 | A15462 | 235 |
| A14195 | A15463 | 363 | A14196 | A14202 | 293 |
| A14196 | A14207 | 491 | A14196 | A14208 | 535 |
| A14196 | A14218 | 964 | A14196 | A14220 | 573 |
| A14196 | A14221 | 463 | A14196 | A14246 | 951 |
| A14196 | A14257 | 456 | A14196 | A14272 | 483 |
| A14196 | A14303 | 447 | A14196 | A14367 | 480 |
| A14196 | A14454 | 246 | A14196 | A14511 | 490 |

|        |        |     |        |        |     |
|--------|--------|-----|--------|--------|-----|
| A14196 | A14512 | 174 | A14196 | A14570 | 507 |
| A14196 | A14589 | 219 | A14196 | A14596 | 376 |
| A14196 | A14635 | 491 | A14196 | A14636 | 229 |
| A14196 | A14647 | 247 | A14196 | A14659 | 200 |
| A14196 | A14731 | 219 | A14196 | A14827 | 199 |
| A14196 | A14836 | 386 | A14196 | A14993 | 174 |
| A14196 | A15114 | 454 | A14196 | A15188 | 310 |
| A14196 | A15237 | 759 | A14196 | A15257 | 490 |
| A14196 | A15291 | 490 | A14196 | A15292 | 485 |
| A14196 | A15297 | 980 | A14196 | A15307 | 899 |
| A14196 | A15309 | 491 | A14196 | A15312 | 227 |
| A14196 | A15314 | 958 | A14196 | A15323 | 821 |
| A14196 | A15324 | 538 | A14196 | A15330 | 491 |
| A14196 | A15337 | 484 | A14196 | A15338 | 491 |
| A14196 | A15339 | 586 | A14196 | A15341 | 945 |
| A14196 | A15353 | 606 | A14196 | A15354 | 399 |
| A14196 | A15355 | 945 | A14196 | A15359 | 555 |
| A14196 | A15360 | 491 | A14196 | A15361 | 955 |
| A14196 | A15363 | 475 | A14196 | A15364 | 391 |
| A14196 | A15366 | 490 | A14196 | A15374 | 449 |
| A14196 | A15386 | 462 | A14196 | A15388 | 208 |
| A14196 | A15419 | 491 | A14196 | A15431 | 491 |
| A14196 | A15502 | 333 | A14196 | A15505 | 389 |
| A14196 | A15507 | 969 | A14196 | A15547 | 952 |
| A14196 | A15559 | 726 | A14196 | A15561 | 428 |
| A14196 | A15564 | 491 | A14196 | A15566 | 450 |
| A14196 | A15578 | 490 | A14196 | A15581 | 491 |
| A14196 | A15582 | 240 | A14196 | A15583 | 221 |
| A14196 | A15584 | 104 | A14196 | A15596 | 586 |
| A14196 | A15606 | 584 | A14196 | A15611 | 260 |
| A14196 | A15612 | 165 | A14196 | A15614 | 267 |
| A14196 | A15630 | 346 | A14196 | A15631 | 446 |
| A14196 | A15632 | 219 | A14196 | A15710 | 329 |
| A14196 | A15716 | 330 | A14196 | A15729 | 491 |
| A14196 | A15747 | 486 | A14196 | A15752 | 193 |
| A14196 | A15763 | 491 | A14196 | A15773 | 307 |
| A14196 | A15775 | 307 | A14196 | A15779 | 172 |
| A14196 | A15782 | 219 | A14196 | A15783 | 66  |
| A14196 | A15788 | 615 | A14196 | A15867 | 491 |
| A14196 | A15868 | 489 | A14196 | A15871 | 152 |
| A14196 | A15875 | 265 | A14196 | A15886 | 162 |
| A14196 | A15909 | 232 | A14196 | A15945 | 207 |
| A14196 | A15947 | 474 | A14196 | A16006 | 479 |
| A14196 | A16008 | 107 | A14196 | A16216 | 159 |
| A14196 | A16217 | 615 | A14196 | A16293 | 475 |
| A14196 | A16311 | 486 | A14196 | A16433 | 422 |



|        |        |     |        |        |     |
|--------|--------|-----|--------|--------|-----|
| A14196 | A16458 | 170 | A14196 | A16463 | 489 |
| A14196 | A16474 | 174 | A14196 | A16496 | 283 |
| A14196 | A16520 | 383 | A14196 | A16586 | 118 |
| A14196 | A16627 | 428 | A14196 | A16801 | 263 |
| A14196 | A16822 | 390 | A14196 | A16831 | 488 |
| A14196 | A16860 | 363 | A14196 | A16947 | 329 |
| A14196 | A17063 | 491 | A14196 | A17159 | 174 |
| A14196 | A17198 | 460 | A14197 | A14368 | 170 |
| A14197 | A14399 | 281 | A14197 | A14969 | 191 |
| A14197 | A15338 | 475 | A14197 | A15673 | 491 |
| A14197 | A16151 | 210 | A14197 | A16465 | 432 |
| A14198 | A14285 | 484 | A14198 | A14364 | 490 |
| A14198 | A14375 | 491 | A14198 | A14382 | 226 |
| A14198 | A14402 | 483 | A14198 | A14404 | 428 |
| A14198 | A14430 | 196 | A14198 | A14433 | 488 |
| A14198 | A14438 | 243 | A14198 | A14440 | 332 |
| A14198 | A14443 | 993 | A14198 | A14444 | 901 |
| A14198 | A14539 | 344 | A14198 | A14544 | 226 |
| A14198 | A14577 | 485 | A14198 | A14992 | 293 |
| A14198 | A15087 | 241 | A14198 | A15167 | 226 |
| A14198 | A15182 | 176 | A14198 | A15218 | 246 |
| A14198 | A15235 | 382 | A14198 | A15293 | 917 |
| A14198 | A15294 | 899 | A14198 | A15304 | 899 |
| A14198 | A15305 | 899 | A14198 | A15320 | 157 |
| A14198 | A15325 | 330 | A14198 | A15567 | 182 |
| A14198 | A15665 | 157 | A14198 | A15683 | 152 |
| A14198 | A15726 | 375 | A14198 | A15846 | 305 |
| A14198 | A15862 | 226 | A14198 | A15913 | 63  |
| A14198 | A16017 | 419 | A14198 | A16137 | 182 |
| A14198 | A16636 | 184 | A14198 | A16985 | 204 |
| A14199 | A14212 | 477 | A14199 | A14213 | 417 |
| A14199 | A14253 | 170 | A14199 | A14366 | 196 |
| A14199 | A14374 | 491 | A14199 | A14376 | 184 |
| A14199 | A14391 | 465 | A14199 | A14392 | 258 |
| A14199 | A14439 | 435 | A14199 | A14554 | 299 |
| A14199 | A14599 | 411 | A14199 | A14628 | 337 |
| A14199 | A15285 | 404 | A14199 | A15295 | 219 |
| A14199 | A15308 | 484 | A14199 | A15312 | 278 |
| A14199 | A15320 | 162 | A14199 | A15394 | 217 |
| A14199 | A15425 | 322 | A14199 | A15506 | 314 |
| A14199 | A15516 | 234 | A14199 | A15530 | 353 |
| A14199 | A15534 | 152 | A14199 | A15535 | 87  |
| A14199 | A15626 | 378 | A14199 | A15639 | 210 |
| A14199 | A15642 | 491 | A14199 | A15795 | 312 |
| A14199 | A15904 | 252 | A14199 | A15912 | 171 |
| A14199 | A15914 | 340 | A14199 | A15986 | 432 |

|        |        |     |        |        |     |
|--------|--------|-----|--------|--------|-----|
| A14199 | A15996 | 369 | A14199 | A15999 | 286 |
| A14199 | A16002 | 432 | A14199 | A16014 | 286 |
| A14199 | A16034 | 154 | A14199 | A16120 | 479 |
| A14199 | A16282 | 340 | A14199 | A16581 | 301 |
| A14199 | A16901 | 196 | A14199 | A16904 | 303 |
| A14200 | A14283 | 340 | A14200 | A14462 | 163 |
| A14200 | A14596 | 491 | A14200 | A15559 | 316 |
| A14200 | A15660 | 463 | A14200 | A15684 | 270 |
| A14200 | A15717 | 224 | A14200 | A15725 | 328 |
| A14200 | A15763 | 217 | A14200 | A16093 | 291 |
| A14200 | A17123 | 416 | A14200 | A17127 | 356 |
| A14200 | A17139 | 238 | A14200 | A17140 | 416 |
| A14201 | A15394 | 238 | A14201 | A15974 | 163 |
| A14202 | A14210 | 469 | A14202 | A14229 | 486 |
| A14202 | A14247 | 572 | A14202 | A14258 | 200 |
| A14202 | A14287 | 170 | A14202 | A14366 | 179 |
| A14202 | A14371 | 475 | A14202 | A14378 | 469 |
| A14202 | A14394 | 185 | A14202 | A14399 | 491 |
| A14202 | A14408 | 176 | A14202 | A14410 | 154 |
| A14202 | A14413 | 286 | A14202 | A14427 | 229 |
| A14202 | A14429 | 201 | A14202 | A14443 | 899 |
| A14202 | A14490 | 491 | A14202 | A14511 | 489 |
| A14202 | A14554 | 63  | A14202 | A14570 | 491 |
| A14202 | A14596 | 223 | A14202 | A14604 | 63  |
| A14202 | A14635 | 467 | A14202 | A14661 | 335 |
| A14202 | A14733 | 384 | A14202 | A14893 | 424 |
| A14202 | A14921 | 170 | A14202 | A14930 | 243 |
| A14202 | A15292 | 651 | A14202 | A15293 | 263 |
| A14202 | A15301 | 260 | A14202 | A15312 | 488 |
| A14202 | A15313 | 430 | A14202 | A15314 | 165 |
| A14202 | A15316 | 489 | A14202 | A15317 | 205 |
| A14202 | A15322 | 382 | A14202 | A15348 | 249 |
| A14202 | A15349 | 489 | A14202 | A15352 | 489 |
| A14202 | A15358 | 179 | A14202 | A15366 | 709 |
| A14202 | A15396 | 329 | A14202 | A15419 | 207 |
| A14202 | A15431 | 417 | A14202 | A15432 | 475 |
| A14202 | A15435 | 451 | A14202 | A15436 | 173 |
| A14202 | A15445 | 168 | A14202 | A15452 | 491 |
| A14202 | A15462 | 475 | A14202 | A15463 | 486 |
| A14202 | A15464 | 491 | A14202 | A15466 | 170 |
| A14202 | A15470 | 179 | A14202 | A15478 | 274 |
| A14202 | A15480 | 373 | A14202 | A15484 | 242 |
| A14202 | A15488 | 200 | A14202 | A15489 | 174 |
| A14202 | A15495 | 490 | A14202 | A15498 | 461 |
| A14202 | A15502 | 176 | A14202 | A15513 | 200 |
| A14202 | A15553 | 159 | A14202 | A15606 | 350 |

|        |        |     |        |        |     |
|--------|--------|-----|--------|--------|-----|
| A14202 | A15614 | 205 | A14202 | A15665 | 586 |
| A14202 | A15672 | 477 | A14202 | A15797 | 324 |
| A14202 | A15833 | 159 | A14202 | A15870 | 159 |
| A14202 | A15880 | 418 | A14202 | A16064 | 489 |
| A14202 | A16114 | 195 | A14202 | A16177 | 247 |
| A14202 | A16572 | 283 | A14202 | A17042 | 159 |
| A14202 | A17081 | 170 | A14202 | A17224 | 317 |
| A14204 | A14208 | 486 | A14204 | A14229 | 491 |
| A14204 | A14233 | 486 | A14204 | A14245 | 243 |
| A14204 | A14253 | 549 | A14204 | A14299 | 491 |
| A14204 | A14391 | 490 | A14204 | A14392 | 490 |
| A14204 | A14393 | 986 | A14204 | A14395 | 650 |
| A14204 | A14452 | 180 | A14204 | A14481 | 199 |
| A14204 | A14635 | 401 | A14204 | A15285 | 297 |
| A14204 | A15303 | 728 | A14204 | A15308 | 401 |
| A14204 | A15314 | 486 | A14204 | A15315 | 253 |
| A14204 | A15321 | 490 | A14204 | A15322 | 735 |
| A14204 | A15328 | 491 | A14204 | A15342 | 347 |
| A14204 | A15343 | 299 | A14204 | A15344 | 249 |
| A14204 | A15345 | 535 | A14204 | A15347 | 704 |
| A14204 | A15357 | 491 | A14204 | A15398 | 491 |
| A14204 | A15400 | 491 | A14204 | A15402 | 616 |
| A14204 | A15498 | 457 | A14204 | A15506 | 411 |
| A14204 | A15556 | 491 | A14204 | A15557 | 741 |
| A14204 | A15578 | 74  | A14204 | A15613 | 185 |
| A14204 | A15617 | 621 | A14204 | A15644 | 491 |
| A14204 | A15676 | 491 | A14204 | A15679 | 377 |
| A14204 | A15680 | 616 | A14204 | A15686 | 456 |
| A14204 | A15690 | 489 | A14204 | A16013 | 404 |
| A14204 | A16022 | 486 | A14204 | A16037 | 121 |
| A14204 | A16054 | 480 | A14204 | A16056 | 157 |
| A14204 | A16113 | 486 | A14204 | A16121 | 439 |
| A14204 | A16216 | 472 | A14204 | A16292 | 288 |
| A14204 | A16364 | 63  | A14204 | A16373 | 157 |
| A14204 | A16393 | 491 | A14204 | A16397 | 585 |
| A14204 | A16420 | 481 | A14204 | A16424 | 357 |
| A14204 | A16429 | 490 | A14204 | A16432 | 481 |
| A14204 | A16434 | 484 | A14204 | A16445 | 473 |
| A14204 | A16447 | 79  | A14204 | A16451 | 193 |
| A14204 | A16455 | 193 | A14204 | A16456 | 290 |
| A14204 | A16471 | 386 | A14204 | A16481 | 193 |
| A14204 | A16486 | 157 | A14204 | A16506 | 193 |
| A14204 | A16509 | 157 | A14204 | A16521 | 263 |
| A14204 | A16530 | 193 | A14204 | A16546 | 217 |
| A14204 | A16609 | 193 | A14204 | A16891 | 614 |
| A14204 | A16904 | 196 | A14204 | A16910 | 490 |

|        |        |     |        |        |     |
|--------|--------|-----|--------|--------|-----|
| A14205 | A14209 | 335 | A14206 | A14211 | 899 |
| A14206 | A14220 | 278 | A14207 | A14208 | 944 |
| A14207 | A14218 | 945 | A14207 | A14367 | 908 |
| A14207 | A15314 | 491 | A14207 | A15330 | 933 |
| A14207 | A15360 | 944 | A14207 | A15361 | 994 |
| A14207 | A15410 | 208 | A14207 | A15581 | 418 |
| A14207 | A15582 | 345 | A14207 | A15583 | 463 |
| A14207 | A15584 | 457 | A14207 | A15608 | 193 |
| A14207 | A15868 | 228 | A14207 | A15872 | 63  |
| A14207 | A15962 | 159 | A14207 | A16217 | 945 |
| A14207 | A16586 | 345 | A14207 | A17063 | 236 |
| A14208 | A14218 | 945 | A14208 | A14231 | 305 |
| A14208 | A14253 | 222 | A14208 | A14276 | 396 |
| A14208 | A14364 | 903 | A14208 | A14367 | 945 |
| A14208 | A14369 | 167 | A14208 | A14374 | 256 |
| A14208 | A14395 | 272 | A14208 | A14431 | 491 |
| A14208 | A14570 | 195 | A14208 | A14635 | 254 |
| A14208 | A14662 | 899 | A14208 | A14702 | 215 |
| A14208 | A14830 | 350 | A14208 | A14843 | 423 |
| A14208 | A15012 | 152 | A14208 | A15192 | 227 |
| A14208 | A15224 | 319 | A14208 | A15291 | 551 |
| A14208 | A15297 | 941 | A14208 | A15314 | 714 |
| A14208 | A15322 | 466 | A14208 | A15323 | 918 |
| A14208 | A15324 | 899 | A14208 | A15328 | 479 |
| A14208 | A15330 | 945 | A14208 | A15332 | 267 |
| A14208 | A15338 | 63  | A14208 | A15346 | 472 |
| A14208 | A15353 | 899 | A14208 | A15359 | 899 |
| A14208 | A15360 | 945 | A14208 | A15361 | 945 |
| A14208 | A15385 | 251 | A14208 | A15386 | 691 |
| A14208 | A15387 | 162 | A14208 | A15388 | 491 |
| A14208 | A15402 | 351 | A14208 | A15409 | 420 |
| A14208 | A15507 | 165 | A14208 | A15510 | 486 |
| A14208 | A15566 | 412 | A14208 | A15572 | 190 |
| A14208 | A15575 | 324 | A14208 | A15576 | 168 |
| A14208 | A15577 | 364 | A14208 | A15578 | 491 |
| A14208 | A15579 | 236 | A14208 | A15580 | 227 |
| A14208 | A15581 | 446 | A14208 | A15611 | 945 |
| A14208 | A15612 | 358 | A14208 | A15613 | 491 |
| A14208 | A15617 | 899 | A14208 | A15620 | 152 |
| A14208 | A15630 | 469 | A14208 | A15639 | 491 |
| A14208 | A15834 | 447 | A14208 | A15869 | 406 |
| A14208 | A15887 | 249 | A14208 | A15893 | 385 |
| A14208 | A15903 | 227 | A14208 | A15912 | 491 |
| A14208 | A15962 | 489 | A14208 | A15976 | 491 |
| A14208 | A15987 | 314 | A14208 | A16006 | 314 |
| A14208 | A16073 | 199 | A14208 | A16216 | 626 |

|        |        |     |        |        |     |
|--------|--------|-----|--------|--------|-----|
| A14208 | A16217 | 945 | A14208 | A16674 | 229 |
| A14208 | A16722 | 232 | A14208 | A16831 | 329 |
| A14208 | A16904 | 458 | A14208 | A17146 | 151 |
| A14209 | A14220 | 433 | A14209 | A14221 | 489 |
| A14209 | A14222 | 491 | A14209 | A14272 | 475 |
| A14209 | A14281 | 414 | A14209 | A14356 | 283 |
| A14209 | A14474 | 491 | A14209 | A14484 | 488 |
| A14209 | A14760 | 193 | A14209 | A15295 | 389 |
| A14209 | A15370 | 468 | A14209 | A15380 | 491 |
| A14209 | A15416 | 191 | A14209 | A15498 | 466 |
| A14209 | A15501 | 395 | A14209 | A15512 | 655 |
| A14209 | A15644 | 152 | A14209 | A15665 | 921 |
| A14209 | A15682 | 363 | A14209 | A15683 | 358 |
| A14209 | A15712 | 446 | A14209 | A15752 | 470 |
| A14209 | A15949 | 348 | A14209 | A16552 | 491 |
| A14209 | A16611 | 491 | A14209 | A17133 | 218 |
| A14210 | A14276 | 435 | A14210 | A14366 | 288 |
| A14210 | A14368 | 121 | A14210 | A14369 | 490 |
| A14210 | A14370 | 490 | A14210 | A14371 | 638 |
| A14210 | A14372 | 228 | A14210 | A14379 | 491 |
| A14210 | A14380 | 205 | A14210 | A14381 | 135 |
| A14210 | A14413 | 162 | A14210 | A14424 | 374 |
| A14210 | A14433 | 160 | A14210 | A14511 | 945 |
| A14210 | A14516 | 443 | A14210 | A14536 | 313 |
| A14210 | A14539 | 945 | A14210 | A14554 | 480 |
| A14210 | A14570 | 491 | A14210 | A14598 | 263 |
| A14210 | A14603 | 210 | A14210 | A14604 | 491 |
| A14210 | A14635 | 390 | A14210 | A14636 | 334 |
| A14210 | A14667 | 401 | A14210 | A14930 | 313 |
| A14210 | A15292 | 491 | A14210 | A15300 | 283 |
| A14210 | A15302 | 428 | A14210 | A15312 | 480 |
| A14210 | A15313 | 486 | A14210 | A15314 | 432 |
| A14210 | A15317 | 396 | A14210 | A15318 | 481 |
| A14210 | A15322 | 443 | A14210 | A15327 | 430 |
| A14210 | A15331 | 259 | A14210 | A15333 | 193 |
| A14210 | A15335 | 302 | A14210 | A15337 | 170 |
| A14210 | A15346 | 389 | A14210 | A15348 | 326 |
| A14210 | A15349 | 491 | A14210 | A15352 | 489 |
| A14210 | A15357 | 213 | A14210 | A15400 | 152 |
| A14210 | A15402 | 279 | A14210 | A15420 | 157 |
| A14210 | A15421 | 205 | A14210 | A15422 | 432 |
| A14210 | A15433 | 313 | A14210 | A15435 | 281 |
| A14210 | A15452 | 443 | A14210 | A15458 | 210 |
| A14210 | A15460 | 255 | A14210 | A15478 | 344 |
| A14210 | A15480 | 484 | A14210 | A15487 | 172 |
| A14210 | A15495 | 490 | A14210 | A15498 | 425 |

|        |        |     |        |        |     |
|--------|--------|-----|--------|--------|-----|
| A14210 | A15522 | 176 | A14210 | A15630 | 283 |
| A14210 | A15639 | 160 | A14210 | A15726 | 490 |
| A14210 | A15795 | 157 | A14210 | A15798 | 267 |
| A14210 | A15819 | 490 | A14210 | A15916 | 490 |
| A14210 | A16043 | 165 | A14210 | A16138 | 183 |
| A14210 | A16152 | 184 | A14210 | A16285 | 317 |
| A14210 | A16369 | 314 | A14210 | A16407 | 362 |
| A14210 | A16643 | 187 | A14210 | A16847 | 362 |
| A14210 | A16904 | 406 | A14210 | A17076 | 185 |
| A14211 | A14653 | 162 | A14211 | A16335 | 208 |
| A14212 | A14213 | 708 | A14212 | A14214 | 707 |
| A14212 | A14272 | 152 | A14212 | A14655 | 329 |
| A14212 | A14843 | 152 | A14212 | A15138 | 180 |
| A14212 | A15508 | 263 | A14212 | A15541 | 165 |
| A14212 | A15617 | 329 | A14212 | A16109 | 176 |
| A14212 | A16449 | 276 | A14212 | A16702 | 276 |
| A14213 | A14214 | 707 | A14213 | A14235 | 226 |
| A14213 | A14263 | 232 | A14213 | A14270 | 174 |
| A14213 | A14400 | 219 | A14213 | A14655 | 271 |
| A14213 | A14706 | 154 | A14213 | A14719 | 174 |
| A14213 | A14937 | 180 | A14213 | A15498 | 367 |
| A14213 | A15508 | 302 | A14213 | A15519 | 162 |
| A14213 | A15850 | 281 | A14213 | A16157 | 234 |
| A14213 | A16449 | 276 | A14213 | A16567 | 238 |
| A14213 | A16675 | 193 | A14213 | A16693 | 268 |
| A14213 | A16702 | 276 | A14213 | A16704 | 174 |
| A14213 | A16774 | 246 | A14213 | A16829 | 338 |
| A14213 | A16868 | 294 | A14213 | A17133 | 196 |
| A14214 | A14222 | 480 | A14214 | A14239 | 402 |
| A14214 | A14255 | 413 | A14214 | A14260 | 302 |
| A14214 | A14263 | 461 | A14214 | A14270 | 258 |
| A14214 | A14286 | 285 | A14214 | A14288 | 477 |
| A14214 | A14289 | 343 | A14214 | A14375 | 291 |
| A14214 | A14455 | 434 | A14214 | A14462 | 369 |
| A14214 | A14569 | 490 | A14214 | A14595 | 217 |
| A14214 | A14706 | 420 | A14214 | A14708 | 446 |
| A14214 | A14718 | 449 | A14214 | A14719 | 259 |
| A14214 | A14739 | 249 | A14214 | A14799 | 485 |
| A14214 | A14826 | 185 | A14214 | A14838 | 191 |
| A14214 | A14903 | 430 | A14214 | A14917 | 374 |
| A14214 | A14921 | 424 | A14214 | A15105 | 486 |
| A14214 | A15187 | 477 | A14214 | A15189 | 477 |
| A14214 | A15262 | 457 | A14214 | A15506 | 339 |
| A14214 | A15508 | 266 | A14214 | A15519 | 245 |
| A14214 | A15536 | 180 | A14214 | A15541 | 477 |
| A14214 | A15653 | 283 | A14214 | A15665 | 452 |

|        |        |     |        |        |     |
|--------|--------|-----|--------|--------|-----|
| A14214 | A15667 | 152 | A14214 | A15680 | 382 |
| A14214 | A15683 | 463 | A14214 | A15696 | 154 |
| A14214 | A15698 | 235 | A14214 | A15709 | 477 |
| A14214 | A15711 | 440 | A14214 | A15735 | 311 |
| A14214 | A15774 | 412 | A14214 | A15850 | 243 |
| A14214 | A15932 | 245 | A14214 | A15940 | 288 |
| A14214 | A16157 | 491 | A14214 | A16187 | 454 |
| A14214 | A16215 | 172 | A14214 | A16243 | 162 |
| A14214 | A16261 | 327 | A14214 | A16322 | 177 |
| A14214 | A16343 | 451 | A14214 | A16449 | 276 |
| A14214 | A16552 | 490 | A14214 | A16565 | 488 |
| A14214 | A16566 | 302 | A14214 | A16585 | 202 |
| A14214 | A16587 | 473 | A14214 | A16597 | 490 |
| A14214 | A16608 | 322 | A14214 | A16611 | 490 |
| A14214 | A16652 | 344 | A14214 | A16664 | 490 |
| A14214 | A16675 | 483 | A14214 | A16680 | 480 |
| A14214 | A16682 | 165 | A14214 | A16690 | 480 |
| A14214 | A16691 | 344 | A14214 | A16693 | 226 |
| A14214 | A16695 | 422 | A14214 | A16697 | 294 |
| A14214 | A16699 | 353 | A14214 | A16702 | 506 |
| A14214 | A16703 | 405 | A14214 | A16704 | 477 |
| A14214 | A16706 | 236 | A14214 | A16707 | 389 |
| A14214 | A16708 | 184 | A14214 | A16709 | 278 |
| A14214 | A16764 | 412 | A14214 | A16774 | 335 |
| A14214 | A16776 | 390 | A14214 | A16788 | 398 |
| A14214 | A16790 | 463 | A14214 | A16797 | 334 |
| A14214 | A16799 | 193 | A14214 | A16806 | 230 |
| A14214 | A16815 | 350 | A14214 | A16824 | 213 |
| A14214 | A16829 | 475 | A14214 | A16838 | 461 |
| A14214 | A16858 | 377 | A14214 | A16859 | 290 |
| A14214 | A16866 | 419 | A14214 | A16874 | 378 |
| A14214 | A16882 | 266 | A14214 | A16900 | 182 |
| A14214 | A16905 | 452 | A14214 | A16913 | 443 |
| A14214 | A16944 | 395 | A14214 | A16954 | 369 |
| A14214 | A17012 | 154 | A14214 | A17014 | 202 |
| A14214 | A17015 | 238 | A14214 | A17018 | 385 |
| A14214 | A17019 | 236 | A14214 | A17030 | 307 |
| A14214 | A17033 | 294 | A14214 | A17035 | 335 |
| A14214 | A17125 | 177 | A14214 | A17133 | 283 |
| A14214 | A17190 | 294 | A14214 | A17211 | 291 |
| A14215 | A15130 | 171 | A14216 | A14446 | 185 |
| A14216 | A14447 | 398 | A14216 | A14482 | 188 |
| A14216 | A14508 | 151 | A14216 | A14566 | 160 |
| A14216 | A14738 | 455 | A14216 | A14758 | 199 |
| A14216 | A14838 | 198 | A14216 | A14937 | 628 |
| A14216 | A14948 | 199 | A14216 | A15133 | 218 |

|        |        |     |        |        |     |
|--------|--------|-----|--------|--------|-----|
| A14216 | A15225 | 429 | A14216 | A15235 | 414 |
| A14216 | A15244 | 332 | A14216 | A15275 | 384 |
| A14216 | A15500 | 486 | A14216 | A15532 | 274 |
| A14216 | A15624 | 491 | A14216 | A15626 | 151 |
| A14216 | A15649 | 465 | A14216 | A15651 | 462 |
| A14216 | A15652 | 406 | A14216 | A15659 | 329 |
| A14216 | A15660 | 643 | A14216 | A15661 | 481 |
| A14216 | A15666 | 363 | A14216 | A15684 | 848 |
| A14216 | A15694 | 156 | A14216 | A15746 | 456 |
| A14216 | A15769 | 245 | A14216 | A15917 | 205 |
| A14216 | A15928 | 296 | A14216 | A15931 | 491 |
| A14216 | A15932 | 433 | A14216 | A15933 | 205 |
| A14216 | A15937 | 263 | A14216 | A15988 | 294 |
| A14216 | A16088 | 737 | A14216 | A16092 | 193 |
| A14216 | A16095 | 491 | A14216 | A16149 | 441 |
| A14216 | A16218 | 677 | A14216 | A16410 | 207 |
| A14216 | A16462 | 260 | A14216 | A16618 | 205 |
| A14216 | A16633 | 358 | A14216 | A16793 | 286 |
| A14216 | A16939 | 355 | A14216 | A17134 | 283 |
| A14216 | A17193 | 218 | A14218 | A14238 | 173 |
| A14218 | A14367 | 899 | A14218 | A14454 | 268 |
| A14218 | A14619 | 227 | A14218 | A14635 | 477 |
| A14218 | A15297 | 491 | A14218 | A15309 | 216 |
| A14218 | A15314 | 945 | A14218 | A15323 | 491 |
| A14218 | A15324 | 481 | A14218 | A15330 | 945 |
| A14218 | A15338 | 481 | A14218 | A15339 | 485 |
| A14218 | A15341 | 316 | A14218 | A15353 | 380 |
| A14218 | A15354 | 63  | A14218 | A15355 | 327 |
| A14218 | A15359 | 345 | A14218 | A15360 | 945 |
| A14218 | A15361 | 945 | A14218 | A15363 | 201 |
| A14218 | A15364 | 380 | A14218 | A15388 | 417 |
| A14218 | A15410 | 270 | A14218 | A15419 | 384 |
| A14218 | A15507 | 63  | A14218 | A15510 | 156 |
| A14218 | A15547 | 63  | A14218 | A15559 | 491 |
| A14218 | A15578 | 489 | A14218 | A15581 | 467 |
| A14218 | A15582 | 227 | A14218 | A15596 | 99  |
| A14218 | A15608 | 332 | A14218 | A15630 | 124 |
| A14218 | A15783 | 288 | A14218 | A15784 | 281 |
| A14218 | A15788 | 481 | A14218 | A15867 | 177 |
| A14218 | A15868 | 193 | A14218 | A16006 | 447 |
| A14218 | A16008 | 126 | A14218 | A16217 | 945 |
| A14218 | A16520 | 235 | A14218 | A16586 | 353 |
| A14218 | A16831 | 491 | A14218 | A16832 | 472 |
| A14218 | A17063 | 481 | A14218 | A17116 | 353 |
| A14220 | A14221 | 491 | A14220 | A14257 | 490 |
| A14220 | A14303 | 290 | A14220 | A14352 | 201 |



|        |        |     |        |        |     |
|--------|--------|-----|--------|--------|-----|
| A14220 | A14451 | 432 | A14220 | A14516 | 490 |
| A14220 | A14566 | 418 | A14220 | A14580 | 256 |
| A14220 | A14596 | 226 | A14220 | A14659 | 443 |
| A14220 | A15230 | 174 | A14220 | A15237 | 363 |
| A14220 | A15274 | 180 | A14220 | A15291 | 474 |
| A14220 | A15297 | 338 | A14220 | A15309 | 352 |
| A14220 | A15366 | 491 | A14220 | A15431 | 228 |
| A14220 | A15463 | 324 | A14220 | A15492 | 361 |
| A14220 | A15504 | 423 | A14220 | A15545 | 307 |
| A14220 | A15559 | 283 | A14220 | A15614 | 486 |
| A14220 | A15665 | 364 | A14220 | A15752 | 491 |
| A14220 | A15773 | 490 | A14220 | A15851 | 288 |
| A14220 | A16410 | 435 | A14220 | A16552 | 199 |
| A14220 | A16578 | 160 | A14220 | A16847 | 216 |
| A14220 | A17038 | 314 | A14220 | A17063 | 690 |
| A14220 | A17197 | 199 | A14220 | A17198 | 157 |
| A14221 | A14257 | 491 | A14221 | A14303 | 283 |
| A14221 | A14576 | 188 | A14221 | A15019 | 180 |
| A14221 | A15261 | 469 | A14221 | A15291 | 452 |
| A14221 | A15309 | 272 | A14221 | A15356 | 440 |
| A14221 | A15366 | 491 | A14221 | A15503 | 193 |
| A14221 | A15512 | 274 | A14221 | A15546 | 489 |
| A14221 | A15665 | 480 | A14221 | A15682 | 302 |
| A14221 | A15749 | 218 | A14221 | A15752 | 491 |
| A14221 | A15773 | 484 | A14221 | A15851 | 247 |
| A14221 | A15852 | 307 | A14221 | A16298 | 80  |
| A14221 | A16328 | 324 | A14221 | A16488 | 328 |
| A14221 | A16763 | 208 | A14221 | A16986 | 406 |
| A14221 | A16987 | 422 | A14221 | A17063 | 430 |
| A14221 | A17198 | 462 | A14222 | A14239 | 208 |
| A14222 | A14255 | 316 | A14222 | A14260 | 255 |
| A14222 | A14263 | 302 | A14222 | A14270 | 205 |
| A14222 | A14278 | 491 | A14222 | A14288 | 396 |
| A14222 | A14358 | 208 | A14222 | A14455 | 302 |
| A14222 | A14462 | 234 | A14222 | A14474 | 466 |
| A14222 | A14484 | 463 | A14222 | A14569 | 475 |
| A14222 | A14584 | 190 | A14222 | A14633 | 267 |
| A14222 | A14706 | 191 | A14222 | A14708 | 185 |
| A14222 | A14718 | 395 | A14222 | A14789 | 251 |
| A14222 | A14799 | 368 | A14222 | A14807 | 201 |
| A14222 | A14812 | 305 | A14222 | A14903 | 348 |
| A14222 | A14921 | 404 | A14222 | A15105 | 454 |
| A14222 | A15187 | 420 | A14222 | A15189 | 447 |
| A14222 | A15262 | 382 | A14222 | A15380 | 491 |
| A14222 | A15430 | 247 | A14222 | A15498 | 491 |
| A14222 | A15665 | 491 | A14222 | A15683 | 255 |

|        |        |     |        |        |     |
|--------|--------|-----|--------|--------|-----|
| A14222 | A15709 | 157 | A14222 | A15711 | 199 |
| A14222 | A15774 | 207 | A14222 | A15850 | 334 |
| A14222 | A15925 | 258 | A14222 | A15934 | 296 |
| A14222 | A15940 | 238 | A14222 | A16157 | 485 |
| A14222 | A16187 | 283 | A14222 | A16261 | 274 |
| A14222 | A16343 | 185 | A14222 | A16552 | 491 |
| A14222 | A16565 | 454 | A14222 | A16585 | 160 |
| A14222 | A16587 | 329 | A14222 | A16597 | 486 |
| A14222 | A16608 | 254 | A14222 | A16611 | 475 |
| A14222 | A16664 | 480 | A14222 | A16675 | 374 |
| A14222 | A16680 | 286 | A14222 | A16684 | 273 |
| A14222 | A16690 | 409 | A14222 | A16692 | 218 |
| A14222 | A16695 | 190 | A14222 | A16703 | 371 |
| A14222 | A16704 | 446 | A14222 | A16709 | 329 |
| A14222 | A16764 | 229 | A14222 | A16774 | 160 |
| A14222 | A16790 | 430 | A14222 | A16806 | 323 |
| A14222 | A16815 | 180 | A14222 | A16824 | 305 |
| A14222 | A16838 | 210 | A14222 | A16858 | 218 |
| A14222 | A16859 | 254 | A14222 | A16866 | 385 |
| A14222 | A16874 | 241 | A14222 | A16905 | 279 |
| A14222 | A16913 | 160 | A14222 | A16954 | 227 |
| A14222 | A17008 | 323 | A14222 | A17014 | 160 |
| A14222 | A17019 | 196 | A14222 | A17030 | 262 |
| A14222 | A17043 | 185 | A14222 | A17058 | 157 |
| A14223 | A14230 | 215 | A14223 | A14694 | 566 |
| A14223 | A15369 | 226 | A14223 | A16068 | 445 |
| A14223 | A16274 | 200 | A14223 | A16626 | 216 |
| A14223 | A16692 | 486 | A14225 | A15295 | 201 |
| A14226 | A14471 | 339 | A14227 | A14263 | 165 |
| A14227 | A14285 | 216 | A14227 | A14289 | 346 |
| A14227 | A14291 | 279 | A14227 | A14306 | 384 |
| A14227 | A14307 | 399 | A14227 | A14309 | 483 |
| A14227 | A14375 | 191 | A14227 | A14509 | 475 |
| A14227 | A14569 | 319 | A14227 | A14595 | 221 |
| A14227 | A14739 | 252 | A14227 | A14799 | 218 |
| A14227 | A14903 | 168 | A14227 | A15070 | 335 |
| A14227 | A15533 | 491 | A14227 | A15541 | 172 |
| A14227 | A15683 | 180 | A14227 | A16157 | 251 |
| A14227 | A16243 | 165 | A14227 | A16516 | 335 |
| A14227 | A16517 | 420 | A14227 | A16532 | 468 |
| A14227 | A16565 | 187 | A14227 | A16566 | 172 |
| A14227 | A16587 | 423 | A14227 | A16597 | 188 |
| A14227 | A16602 | 399 | A14227 | A16605 | 461 |
| A14227 | A16611 | 208 | A14227 | A16664 | 183 |
| A14227 | A16680 | 167 | A14227 | A16682 | 168 |
| A14227 | A16691 | 217 | A14227 | A16695 | 360 |

|        |        |     |        |        |     |
|--------|--------|-----|--------|--------|-----|
| A14227 | A16707 | 441 | A14227 | A16788 | 291 |
| A14227 | A16815 | 224 | A14227 | A16913 | 205 |
| A14227 | A16942 | 205 | A14229 | A14245 | 486 |
| A14229 | A14276 | 232 | A14229 | A14392 | 789 |
| A14229 | A14393 | 63  | A14229 | A14395 | 467 |
| A14229 | A14570 | 475 | A14229 | A14626 | 417 |
| A14229 | A14635 | 427 | A14229 | A15292 | 447 |
| A14229 | A15293 | 205 | A14229 | A15314 | 318 |
| A14229 | A15322 | 967 | A14229 | A15328 | 486 |
| A14229 | A15342 | 491 | A14229 | A15343 | 945 |
| A14229 | A15344 | 945 | A14229 | A15347 | 391 |
| A14229 | A15349 | 461 | A14229 | A15352 | 157 |
| A14229 | A15357 | 491 | A14229 | A15366 | 450 |
| A14229 | A15398 | 491 | A14229 | A15399 | 335 |
| A14229 | A15400 | 491 | A14229 | A15401 | 377 |
| A14229 | A15402 | 491 | A14229 | A15403 | 283 |
| A14229 | A15495 | 443 | A14229 | A15506 | 433 |
| A14229 | A15516 | 351 | A14229 | A16013 | 398 |
| A14229 | A16040 | 243 | A14229 | A16121 | 477 |
| A14229 | A16393 | 156 | A14229 | A16424 | 491 |
| A14229 | A16904 | 441 | A14229 | A16916 | 485 |
| A14230 | A14272 | 230 | A14230 | A14694 | 473 |
| A14230 | A14706 | 491 | A14230 | A15369 | 491 |
| A14230 | A15371 | 491 | A14230 | A15524 | 491 |
| A14230 | A15531 | 488 | A14230 | A15539 | 491 |
| A14230 | A15654 | 486 | A14230 | A15837 | 364 |
| A14230 | A15939 | 371 | A14230 | A15941 | 491 |
| A14230 | A16127 | 491 | A14230 | A16128 | 491 |
| A14230 | A16129 | 469 | A14230 | A16132 | 470 |
| A14230 | A16226 | 452 | A14230 | A16294 | 489 |
| A14230 | A16299 | 475 | A14230 | A16612 | 259 |
| A14230 | A16613 | 180 | A14230 | A16626 | 391 |
| A14230 | A16646 | 489 | A14230 | A16762 | 490 |
| A14231 | A14828 | 335 | A14231 | A15292 | 472 |
| A14231 | A15323 | 274 | A14231 | A15795 | 601 |
| A14231 | A17146 | 362 | A14233 | A14253 | 324 |
| A14233 | A14272 | 218 | A14233 | A14391 | 226 |
| A14233 | A14393 | 162 | A14233 | A15328 | 182 |
| A14233 | A15345 | 167 | A14233 | A15357 | 173 |
| A14233 | A15398 | 229 | A14233 | A15556 | 176 |
| A14233 | A15557 | 441 | A14233 | A15644 | 334 |
| A14233 | A15683 | 207 | A14233 | A15686 | 345 |
| A14233 | A15690 | 286 | A14233 | A16113 | 294 |
| A14233 | A16393 | 491 | A14233 | A16429 | 419 |
| A14233 | A16891 | 358 | A14235 | A14255 | 274 |
| A14235 | A14263 | 193 | A14235 | A14270 | 316 |

|        |        |     |        |        |     |
|--------|--------|-----|--------|--------|-----|
| A14235 | A14569 | 288 | A14235 | A14719 | 317 |
| A14235 | A14937 | 321 | A14235 | A15680 | 334 |
| A14235 | A15854 | 258 | A14235 | A16157 | 326 |
| A14235 | A16552 | 177 | A14235 | A16565 | 269 |
| A14235 | A16566 | 341 | A14235 | A16567 | 434 |
| A14235 | A16611 | 218 | A14235 | A16675 | 362 |
| A14235 | A16691 | 368 | A14235 | A16693 | 374 |
| A14235 | A16695 | 377 | A14235 | A16764 | 273 |
| A14235 | A16880 | 393 | A14235 | A17133 | 330 |
| A14236 | A14364 | 281 | A14236 | A14366 | 768 |
| A14236 | A14373 | 460 | A14236 | A14387 | 483 |
| A14236 | A14391 | 422 | A14236 | A14430 | 165 |
| A14236 | A14432 | 372 | A14236 | A14539 | 263 |
| A14236 | A14570 | 218 | A14236 | A14596 | 433 |
| A14236 | A14659 | 587 | A14236 | A15241 | 475 |
| A14236 | A15337 | 159 | A14236 | A15358 | 168 |
| A14236 | A15395 | 490 | A14236 | A15598 | 443 |
| A14236 | A15599 | 402 | A14236 | A15601 | 480 |
| A14236 | A15605 | 307 | A14236 | A15606 | 770 |
| A14236 | A15607 | 238 | A14236 | A15608 | 185 |
| A14236 | A15832 | 412 | A14236 | A15952 | 353 |
| A14236 | A15981 | 488 | A14236 | A16513 | 270 |
| A14236 | A16775 | 353 | A14236 | A16916 | 152 |
| A14236 | A17207 | 182 | A14237 | A14238 | 491 |
| A14237 | A14253 | 414 | A14237 | A14276 | 443 |
| A14237 | A15336 | 165 | A14237 | A15346 | 443 |
| A14237 | A15712 | 245 | A14238 | A14253 | 457 |
| A14238 | A14408 | 157 | A14238 | A15410 | 218 |
| A14239 | A14255 | 157 | A14239 | A14263 | 363 |
| A14239 | A14270 | 210 | A14239 | A14288 | 293 |
| A14239 | A14569 | 310 | A14239 | A14706 | 204 |
| A14239 | A14708 | 353 | A14239 | A14718 | 310 |
| A14239 | A14799 | 162 | A14239 | A14903 | 246 |
| A14239 | A14917 | 235 | A14239 | A14921 | 307 |
| A14239 | A15105 | 191 | A14239 | A15187 | 210 |
| A14239 | A15189 | 417 | A14239 | A15541 | 273 |
| A14239 | A15680 | 299 | A14239 | A15683 | 301 |
| A14239 | A15696 | 235 | A14239 | A15709 | 399 |
| A14239 | A15850 | 312 | A14239 | A15853 | 198 |
| A14239 | A16115 | 213 | A14239 | A16157 | 456 |
| A14239 | A16187 | 191 | A14239 | A16478 | 243 |
| A14239 | A16552 | 462 | A14239 | A16565 | 491 |
| A14239 | A16566 | 249 | A14239 | A16585 | 279 |
| A14239 | A16587 | 356 | A14239 | A16597 | 374 |
| A14239 | A16611 | 450 | A14239 | A16663 | 170 |
| A14239 | A16664 | 281 | A14239 | A16675 | 401 |

|        |        |     |        |        |     |
|--------|--------|-----|--------|--------|-----|
| A14239 | A16680 | 268 | A14239 | A16690 | 456 |
| A14239 | A16691 | 396 | A14239 | A16695 | 302 |
| A14239 | A16703 | 407 | A14239 | A16706 | 408 |
| A14239 | A16708 | 380 | A14239 | A16712 | 488 |
| A14239 | A16764 | 156 | A14239 | A16774 | 279 |
| A14239 | A16776 | 254 | A14239 | A16788 | 347 |
| A14239 | A16797 | 379 | A14239 | A16802 | 319 |
| A14239 | A16806 | 302 | A14239 | A16807 | 490 |
| A14239 | A16829 | 366 | A14239 | A16838 | 215 |
| A14239 | A16868 | 323 | A14239 | A16874 | 238 |
| A14239 | A16882 | 329 | A14239 | A16884 | 299 |
| A14239 | A16905 | 400 | A14239 | A16944 | 379 |
| A14239 | A17018 | 490 | A14239 | A17033 | 243 |
| A14241 | A14378 | 205 | A14241 | A15353 | 173 |
| A14245 | A14392 | 307 | A14245 | A15322 | 491 |
| A14245 | A15342 | 485 | A14245 | A15343 | 483 |
| A14245 | A15344 | 384 | A14245 | A15356 | 488 |
| A14245 | A15357 | 491 | A14245 | A15398 | 456 |
| A14245 | A15400 | 491 | A14245 | A15401 | 480 |
| A14245 | A15402 | 491 | A14245 | A15440 | 182 |
| A14245 | A15457 | 235 | A14245 | A16013 | 196 |
| A14245 | A16121 | 316 | A14245 | A16424 | 480 |
| A14246 | A14393 | 152 | A14246 | A14454 | 213 |
| A14246 | A14558 | 232 | A14246 | A15237 | 201 |
| A14246 | A15281 | 191 | A14246 | A15292 | 297 |
| A14246 | A15293 | 224 | A14246 | A15297 | 952 |
| A14246 | A15314 | 290 | A14246 | A15323 | 491 |
| A14246 | A15324 | 945 | A14246 | A15338 | 491 |
| A14246 | A15339 | 480 | A14246 | A15353 | 945 |
| A14246 | A15354 | 302 | A14246 | A15359 | 899 |
| A14246 | A15362 | 383 | A14246 | A15363 | 366 |
| A14246 | A15505 | 401 | A14246 | A15547 | 899 |
| A14246 | A15558 | 334 | A14246 | A15559 | 945 |
| A14246 | A15564 | 422 | A14246 | A15594 | 297 |
| A14246 | A15614 | 899 | A14246 | A15710 | 468 |
| A14246 | A15729 | 715 | A14246 | A15737 | 185 |
| A14246 | A15747 | 294 | A14246 | A15763 | 414 |
| A14246 | A15779 | 455 | A14246 | A15788 | 450 |
| A14246 | A16380 | 401 | A14246 | A16465 | 137 |
| A14246 | A16661 | 246 | A14246 | A16801 | 198 |
| A14246 | A17063 | 486 | A14247 | A14258 | 584 |
| A14247 | A14399 | 488 | A14247 | A14473 | 592 |
| A14247 | A14481 | 647 | A14247 | A14490 | 73  |
| A14247 | A14504 | 104 | A14247 | A14661 | 886 |
| A14247 | A14693 | 648 | A14247 | A14710 | 457 |
| A14247 | A14711 | 491 | A14247 | A14783 | 491 |

|        |        |     |        |        |     |
|--------|--------|-----|--------|--------|-----|
| A14247 | A14786 | 294 | A14247 | A14788 | 436 |
| A14247 | A14798 | 190 | A14247 | A14799 | 63  |
| A14247 | A14838 | 491 | A14247 | A14844 | 485 |
| A14247 | A14877 | 412 | A14247 | A14901 | 391 |
| A14247 | A14909 | 335 | A14247 | A14917 | 424 |
| A14247 | A15229 | 389 | A14247 | A15292 | 436 |
| A14247 | A15297 | 165 | A14247 | A15301 | 647 |
| A14247 | A15302 | 638 | A14247 | A15315 | 548 |
| A14247 | A15336 | 565 | A14247 | A15347 | 588 |
| A14247 | A15352 | 294 | A14247 | A15357 | 179 |
| A14247 | A15366 | 649 | A14247 | A15413 | 346 |
| A14247 | A15430 | 648 | A14247 | A15432 | 236 |
| A14247 | A15462 | 649 | A14247 | A15463 | 649 |
| A14247 | A15498 | 486 | A14247 | A15528 | 243 |
| A14247 | A15552 | 480 | A14247 | A15553 | 101 |
| A14247 | A15617 | 164 | A14247 | A15626 | 475 |
| A14247 | A15647 | 467 | A14247 | A15650 | 435 |
| A14247 | A15665 | 212 | A14247 | A15669 | 240 |
| A14247 | A15672 | 76  | A14247 | A15680 | 174 |
| A14247 | A15770 | 484 | A14247 | A15909 | 490 |
| A14247 | A16258 | 234 | A14247 | A16400 | 202 |
| A14247 | A16608 | 179 | A14247 | A16617 | 491 |
| A14247 | A16649 | 218 | A14247 | A16652 | 369 |
| A14247 | A16669 | 152 | A14247 | A16777 | 162 |
| A14247 | A16927 | 405 | A14247 | A17061 | 491 |
| A14247 | A17126 | 291 | A14249 | A15202 | 226 |
| A14249 | A15855 | 377 | A14249 | A16552 | 420 |
| A14249 | A17189 | 185 | A14252 | A14443 | 899 |
| A14252 | A15314 | 402 | A14252 | A15356 | 638 |
| A14252 | A15430 | 277 | A14252 | A15440 | 176 |
| A14252 | A15578 | 490 | A14252 | A15579 | 208 |
| A14252 | A15649 | 399 | A14252 | A16042 | 207 |
| A14252 | A16417 | 180 | A14253 | A14266 | 414 |
| A14253 | A14272 | 503 | A14253 | A14276 | 332 |
| A14253 | A14391 | 302 | A14253 | A14393 | 533 |
| A14253 | A14395 | 188 | A14253 | A14661 | 514 |
| A14253 | A15303 | 230 | A14253 | A15315 | 491 |
| A14253 | A15322 | 455 | A14253 | A15323 | 63  |
| A14253 | A15324 | 254 | A14253 | A15328 | 77  |
| A14253 | A15336 | 490 | A14253 | A15345 | 63  |
| A14253 | A15346 | 332 | A14253 | A15347 | 491 |
| A14253 | A15527 | 232 | A14253 | A15557 | 491 |
| A14253 | A15617 | 63  | A14253 | A15644 | 440 |
| A14253 | A15680 | 491 | A14253 | A15683 | 185 |
| A14253 | A15688 | 311 | A14253 | A15690 | 491 |
| A14253 | A16022 | 475 | A14253 | A16073 | 199 |

|        |        |     |        |        |     |
|--------|--------|-----|--------|--------|-----|
| A14253 | A16113 | 477 | A14253 | A16292 | 184 |
| A14253 | A16322 | 185 | A14253 | A16393 | 101 |
| A14253 | A16397 | 489 | A14253 | A16420 | 218 |
| A14253 | A16429 | 281 | A14253 | A16432 | 151 |
| A14253 | A16434 | 288 | A14253 | A16445 | 475 |
| A14253 | A16466 | 245 | A14253 | A16910 | 434 |
| A14255 | A14260 | 262 | A14255 | A14263 | 204 |
| A14255 | A14270 | 353 | A14255 | A14375 | 170 |
| A14255 | A14455 | 246 | A14255 | A14462 | 173 |
| A14255 | A14569 | 323 | A14255 | A14718 | 401 |
| A14255 | A14719 | 226 | A14255 | A14799 | 438 |
| A14255 | A14903 | 433 | A14255 | A14917 | 429 |
| A14255 | A14921 | 318 | A14255 | A14937 | 232 |
| A14255 | A15189 | 286 | A14255 | A15262 | 267 |
| A14255 | A15374 | 168 | A14255 | A15519 | 215 |
| A14255 | A15541 | 377 | A14255 | A15653 | 177 |
| A14255 | A15680 | 318 | A14255 | A15698 | 207 |
| A14255 | A15709 | 352 | A14255 | A15711 | 350 |
| A14255 | A15735 | 199 | A14255 | A15818 | 219 |
| A14255 | A15943 | 190 | A14255 | A16157 | 446 |
| A14255 | A16187 | 207 | A14255 | A16343 | 310 |
| A14255 | A16552 | 438 | A14255 | A16565 | 430 |
| A14255 | A16567 | 283 | A14255 | A16585 | 291 |
| A14255 | A16587 | 366 | A14255 | A16597 | 302 |
| A14255 | A16608 | 263 | A14255 | A16611 | 435 |
| A14255 | A16652 | 151 | A14255 | A16663 | 184 |
| A14255 | A16664 | 467 | A14255 | A16675 | 260 |
| A14255 | A16685 | 408 | A14255 | A16690 | 259 |
| A14255 | A16695 | 313 | A14255 | A16703 | 466 |
| A14255 | A16704 | 353 | A14255 | A16709 | 241 |
| A14255 | A16774 | 291 | A14255 | A16776 | 267 |
| A14255 | A16790 | 364 | A14255 | A16806 | 411 |
| A14255 | A16807 | 191 | A14255 | A16815 | 306 |
| A14255 | A16824 | 299 | A14255 | A16858 | 333 |
| A14255 | A16859 | 356 | A14255 | A16905 | 335 |
| A14255 | A16913 | 291 | A14255 | A16944 | 274 |
| A14255 | A17019 | 318 | A14255 | A17030 | 267 |
| A14255 | A17133 | 369 | A14255 | A17190 | 255 |
| A14257 | A14303 | 218 | A14257 | A14770 | 219 |
| A14257 | A14906 | 249 | A14257 | A15219 | 294 |
| A14257 | A15274 | 151 | A14257 | A15291 | 260 |
| A14257 | A15297 | 491 | A14257 | A15309 | 436 |
| A14257 | A15338 | 281 | A14257 | A15366 | 491 |
| A14257 | A15463 | 193 | A14257 | A15492 | 407 |
| A14257 | A15559 | 291 | A14257 | A15596 | 268 |
| A14257 | A15629 | 151 | A14257 | A15665 | 228 |

|        |        |     |        |        |     |
|--------|--------|-----|--------|--------|-----|
| A14257 | A15702 | 208 | A14257 | A15710 | 483 |
| A14257 | A15729 | 267 | A14257 | A15742 | 191 |
| A14257 | A15752 | 486 | A14257 | A15764 | 308 |
| A14257 | A15773 | 490 | A14257 | A15779 | 438 |
| A14257 | A15851 | 396 | A14257 | A15867 | 160 |
| A14257 | A16610 | 162 | A14257 | A16724 | 428 |
| A14257 | A16844 | 353 | A14258 | A14284 | 152 |
| A14258 | A14661 | 701 | A14258 | A14710 | 198 |
| A14258 | A14711 | 616 | A14258 | A14799 | 468 |
| A14258 | A14832 | 329 | A14258 | A14844 | 595 |
| A14258 | A14877 | 593 | A14258 | A14903 | 160 |
| A14258 | A14910 | 363 | A14258 | A14917 | 281 |
| A14258 | A14918 | 491 | A14258 | A15301 | 299 |
| A14258 | A15336 | 664 | A14258 | A15366 | 489 |
| A14258 | A15430 | 263 | A14258 | A15462 | 380 |
| A14258 | A15463 | 434 | A14258 | A15626 | 290 |
| A14258 | A15770 | 188 | A14258 | A16368 | 238 |
| A14258 | A16585 | 198 | A14258 | A16695 | 226 |
| A14258 | A16981 | 456 | A14258 | A17061 | 591 |
| A14259 | A14379 | 318 | A14259 | A14511 | 218 |
| A14259 | A14539 | 414 | A14259 | A15292 | 283 |
| A14259 | A15352 | 224 | A14260 | A14280 | 466 |
| A14260 | A14569 | 278 | A14260 | A14718 | 278 |
| A14260 | A14799 | 296 | A14260 | A15189 | 246 |
| A14260 | A15262 | 229 | A14260 | A15532 | 207 |
| A14260 | A15541 | 247 | A14260 | A15709 | 218 |
| A14260 | A15711 | 302 | A14260 | A15735 | 176 |
| A14260 | A16157 | 180 | A14260 | A16343 | 367 |
| A14260 | A16552 | 296 | A14260 | A16597 | 259 |
| A14260 | A16611 | 337 | A14260 | A16664 | 255 |
| A14260 | A16675 | 224 | A14260 | A16703 | 299 |
| A14260 | A16704 | 306 | A14260 | A16905 | 288 |
| A14260 | A17019 | 373 | A14260 | A17125 | 340 |
| A14263 | A14270 | 477 | A14263 | A14288 | 389 |
| A14263 | A14455 | 318 | A14263 | A14474 | 285 |
| A14263 | A14569 | 481 | A14263 | A14706 | 290 |
| A14263 | A14708 | 270 | A14263 | A14718 | 229 |
| A14263 | A14719 | 364 | A14263 | A14799 | 402 |
| A14263 | A14903 | 435 | A14263 | A14917 | 165 |
| A14263 | A15105 | 390 | A14263 | A15187 | 363 |
| A14263 | A15189 | 408 | A14263 | A15262 | 157 |
| A14263 | A15295 | 183 | A14263 | A15536 | 191 |
| A14263 | A15541 | 183 | A14263 | A15665 | 279 |
| A14263 | A15696 | 167 | A14263 | A15709 | 243 |
| A14263 | A15850 | 252 | A14263 | A15940 | 167 |
| A14263 | A16157 | 481 | A14263 | A16187 | 249 |



|        |        |     |        |        |     |
|--------|--------|-----|--------|--------|-----|
| A14263 | A16322 | 193 | A14263 | A16387 | 335 |
| A14263 | A16552 | 404 | A14263 | A16565 | 418 |
| A14263 | A16566 | 180 | A14263 | A16567 | 205 |
| A14263 | A16585 | 213 | A14263 | A16587 | 475 |
| A14263 | A16597 | 460 | A14263 | A16608 | 154 |
| A14263 | A16611 | 475 | A14263 | A16664 | 416 |
| A14263 | A16675 | 333 | A14263 | A16680 | 358 |
| A14263 | A16684 | 314 | A14263 | A16690 | 333 |
| A14263 | A16692 | 151 | A14263 | A16693 | 236 |
| A14263 | A16695 | 366 | A14263 | A16704 | 417 |
| A14263 | A16707 | 395 | A14263 | A16709 | 378 |
| A14263 | A16764 | 377 | A14263 | A16774 | 213 |
| A14263 | A16776 | 185 | A14263 | A16788 | 299 |
| A14263 | A16790 | 291 | A14263 | A16799 | 205 |
| A14263 | A16809 | 308 | A14263 | A16829 | 390 |
| A14263 | A16838 | 368 | A14263 | A16858 | 267 |
| A14263 | A16874 | 302 | A14263 | A16900 | 193 |
| A14263 | A16905 | 245 | A14263 | A16913 | 213 |
| A14263 | A16942 | 213 | A14263 | A16954 | 378 |
| A14263 | A17030 | 185 | A14263 | A17033 | 307 |
| A14263 | A17133 | 162 | A14263 | A17211 | 171 |
| A14265 | A14303 | 473 | A14265 | A14875 | 235 |
| A14265 | A15376 | 369 | A14265 | A15559 | 63  |
| A14265 | A15665 | 185 | A14265 | A17063 | 185 |
| A14265 | A17198 | 489 | A14266 | A14271 | 156 |
| A14266 | A14279 | 450 | A14266 | A14281 | 488 |
| A14266 | A14484 | 486 | A14266 | A14633 | 483 |
| A14266 | A15217 | 162 | A14266 | A15273 | 490 |
| A14266 | A15324 | 366 | A14266 | A15626 | 296 |
| A14266 | A15684 | 260 | A14266 | A15930 | 254 |
| A14266 | A16566 | 167 | A14266 | A16913 | 201 |
| A14266 | A17156 | 462 | A14267 | A14367 | 252 |
| A14267 | A15493 | 443 | A14267 | A15494 | 401 |
| A14268 | A14596 | 224 | A14270 | A14285 | 184 |
| A14270 | A14474 | 371 | A14270 | A14569 | 243 |
| A14270 | A14706 | 154 | A14270 | A14719 | 480 |
| A14270 | A14799 | 251 | A14270 | A14826 | 288 |
| A14270 | A14903 | 303 | A14270 | A14917 | 446 |
| A14270 | A14937 | 279 | A14270 | A15187 | 274 |
| A14270 | A15189 | 208 | A14270 | A15501 | 168 |
| A14270 | A15653 | 247 | A14270 | A15680 | 281 |
| A14270 | A15709 | 180 | A14270 | A15711 | 271 |
| A14270 | A15854 | 208 | A14270 | A15949 | 184 |
| A14270 | A16099 | 184 | A14270 | A16157 | 462 |
| A14270 | A16187 | 258 | A14270 | A16294 | 180 |
| A14270 | A16387 | 454 | A14270 | A16565 | 348 |

|        |        |     |        |        |     |
|--------|--------|-----|--------|--------|-----|
| A14270 | A16566 | 306 | A14270 | A16567 | 418 |
| A14270 | A16585 | 330 | A14270 | A16587 | 290 |
| A14270 | A16611 | 299 | A14270 | A16663 | 236 |
| A14270 | A16664 | 347 | A14270 | A16675 | 396 |
| A14270 | A16680 | 205 | A14270 | A16695 | 348 |
| A14270 | A16701 | 319 | A14270 | A16774 | 330 |
| A14270 | A16815 | 343 | A14270 | A16866 | 234 |
| A14270 | A16874 | 297 | A14270 | A17133 | 293 |
| A14271 | A15685 | 236 | A14272 | A14288 | 488 |
| A14272 | A14381 | 210 | A14272 | A14461 | 470 |
| A14272 | A14589 | 226 | A14272 | A14594 | 243 |
| A14272 | A14655 | 480 | A14272 | A14661 | 474 |
| A14272 | A14674 | 565 | A14272 | A14694 | 377 |
| A14272 | A14701 | 191 | A14272 | A14707 | 281 |
| A14272 | A14814 | 156 | A14272 | A14819 | 172 |
| A14272 | A14820 | 156 | A14272 | A14827 | 346 |
| A14272 | A14838 | 469 | A14272 | A14840 | 263 |
| A14272 | A15054 | 156 | A14272 | A15287 | 191 |
| A14272 | A15292 | 463 | A14272 | A15315 | 486 |
| A14272 | A15347 | 466 | A14272 | A15367 | 491 |
| A14272 | A15383 | 483 | A14272 | A15501 | 396 |
| A14272 | A15510 | 187 | A14272 | A15554 | 180 |
| A14272 | A15557 | 257 | A14272 | A15562 | 314 |
| A14272 | A15617 | 396 | A14272 | A15647 | 262 |
| A14272 | A15718 | 241 | A14272 | A15867 | 466 |
| A14272 | A15877 | 488 | A14272 | A15932 | 489 |
| A14272 | A15949 | 477 | A14272 | A16406 | 221 |
| A14272 | A16429 | 160 | A14272 | A16449 | 177 |
| A14272 | A16635 | 457 | A14272 | A16692 | 156 |
| A14272 | A16738 | 561 | A14272 | A16811 | 162 |
| A14273 | A14460 | 491 | A14273 | A14694 | 479 |
| A14273 | A15321 | 369 | A14273 | A15369 | 491 |
| A14273 | A15371 | 260 | A14273 | A15524 | 174 |
| A14273 | A15654 | 183 | A14273 | A15939 | 252 |
| A14273 | A15941 | 422 | A14273 | A16127 | 491 |
| A14273 | A16128 | 491 | A14273 | A16129 | 360 |
| A14273 | A16134 | 367 | A14273 | A16225 | 475 |
| A14273 | A16226 | 491 | A14273 | A16378 | 235 |
| A14273 | A16606 | 491 | A14273 | A16613 | 491 |
| A14273 | A16616 | 200 | A14273 | A16646 | 63  |
| A14273 | A16754 | 491 | A14275 | A14581 | 420 |
| A14275 | A15524 | 201 | A14275 | A15726 | 123 |
| A14276 | A14882 | 210 | A14276 | A15291 | 63  |
| A14276 | A15308 | 187 | A14276 | A15314 | 296 |
| A14276 | A15322 | 338 | A14276 | A15346 | 883 |
| A14276 | A15386 | 82  | A14276 | A15387 | 227 |

|        |        |     |        |        |     |
|--------|--------|-----|--------|--------|-----|
| A14276 | A15400 | 73  | A14276 | A15409 | 697 |
| A14276 | A15410 | 389 | A14276 | A15411 | 318 |
| A14276 | A15444 | 157 | A14276 | A15609 | 286 |
| A14276 | A15630 | 91  | A14276 | A15639 | 126 |
| A14276 | A15981 | 205 | A14276 | A16711 | 174 |
| A14276 | A16904 | 347 | A14278 | A14474 | 170 |
| A14278 | A14633 | 257 | A14278 | A14661 | 202 |
| A14278 | A15125 | 296 | A14278 | A15273 | 195 |
| A14278 | A15292 | 299 | A14278 | A15366 | 285 |
| A14278 | A15626 | 252 | A14278 | A15726 | 355 |
| A14279 | A14281 | 323 | A14279 | A14474 | 179 |
| A14279 | A14633 | 180 | A14279 | A14801 | 199 |
| A14279 | A15108 | 263 | A14279 | A15273 | 217 |
| A14279 | A15366 | 163 | A14279 | A15665 | 221 |
| A14280 | A15110 | 412 | A14280 | A17125 | 372 |
| A14281 | A14358 | 163 | A14281 | A14407 | 193 |
| A14281 | A14474 | 491 | A14281 | A14484 | 480 |
| A14281 | A14633 | 462 | A14281 | A14661 | 358 |
| A14281 | A14846 | 449 | A14281 | A15039 | 182 |
| A14281 | A15102 | 184 | A14281 | A15380 | 362 |
| A14281 | A15626 | 223 | A14281 | A16122 | 236 |
| A14281 | A16423 | 389 | A14281 | A17013 | 235 |
| A14282 | A14481 | 383 | A14282 | A16378 | 267 |
| A14282 | A16470 | 356 | A14282 | A16762 | 183 |
| A14283 | A15660 | 480 | A14283 | A15684 | 361 |
| A14283 | A16096 | 281 | A14283 | A16145 | 406 |
| A14283 | A16218 | 188 | A14283 | A16650 | 170 |
| A14283 | A17137 | 314 | A14283 | A17140 | 488 |
| A14284 | A14472 | 293 | A14284 | A14511 | 348 |
| A14284 | A16650 | 254 | A14284 | A16689 | 265 |
| A14285 | A14708 | 468 | A14285 | A15949 | 555 |
| A14285 | A16099 | 184 | A14285 | A16135 | 190 |
| A14285 | A16664 | 170 | A14285 | A16944 | 174 |
| A14286 | A14289 | 285 | A14286 | A14569 | 263 |
| A14286 | A14706 | 312 | A14286 | A14708 | 221 |
| A14286 | A14799 | 279 | A14286 | A14838 | 183 |
| A14286 | A15187 | 293 | A14286 | A15189 | 422 |
| A14286 | A15262 | 213 | A14286 | A15541 | 358 |
| A14286 | A15683 | 173 | A14286 | A15709 | 204 |
| A14286 | A15735 | 160 | A14286 | A15743 | 307 |
| A14286 | A15818 | 290 | A14286 | A15850 | 368 |
| A14286 | A15854 | 452 | A14286 | A15855 | 368 |
| A14286 | A15948 | 213 | A14286 | A16157 | 296 |
| A14286 | A16343 | 358 | A14286 | A16552 | 279 |
| A14286 | A16565 | 366 | A14286 | A16611 | 323 |
| A14286 | A16646 | 218 | A14286 | A16652 | 228 |

|        |        |     |        |        |     |
|--------|--------|-----|--------|--------|-----|
| A14286 | A16664 | 363 | A14286 | A16690 | 207 |
| A14286 | A16697 | 319 | A14286 | A16776 | 327 |
| A14286 | A16808 | 363 | A14286 | A16829 | 319 |
| A14286 | A16905 | 274 | A14286 | A17144 | 405 |
| A14287 | A15292 | 139 | A14287 | A15312 | 216 |
| A14287 | A15331 | 319 | A14287 | A15348 | 276 |
| A14287 | A15431 | 249 | A14287 | A15432 | 393 |
| A14287 | A15461 | 307 | A14287 | A15513 | 477 |
| A14288 | A14375 | 205 | A14288 | A14455 | 238 |
| A14288 | A14462 | 210 | A14288 | A14569 | 479 |
| A14288 | A14595 | 230 | A14288 | A14706 | 360 |
| A14288 | A14708 | 352 | A14288 | A14799 | 430 |
| A14288 | A14903 | 313 | A14288 | A14917 | 168 |
| A14288 | A14921 | 249 | A14288 | A15105 | 443 |
| A14288 | A15187 | 418 | A14288 | A15189 | 411 |
| A14288 | A15262 | 263 | A14288 | A15367 | 491 |
| A14288 | A15501 | 229 | A14288 | A15536 | 193 |
| A14288 | A15541 | 187 | A14288 | A15665 | 417 |
| A14288 | A15680 | 196 | A14288 | A15683 | 398 |
| A14288 | A15709 | 330 | A14288 | A15711 | 270 |
| A14288 | A15940 | 168 | A14288 | A16157 | 486 |
| A14288 | A16187 | 350 | A14288 | A16261 | 341 |
| A14288 | A16343 | 363 | A14288 | A16531 | 193 |
| A14288 | A16552 | 480 | A14288 | A16565 | 469 |
| A14288 | A16566 | 183 | A14288 | A16585 | 217 |
| A14288 | A16587 | 452 | A14288 | A16597 | 480 |
| A14288 | A16608 | 259 | A14288 | A16611 | 472 |
| A14288 | A16635 | 589 | A14288 | A16652 | 180 |
| A14288 | A16664 | 475 | A14288 | A16675 | 391 |
| A14288 | A16680 | 408 | A14288 | A16682 | 179 |
| A14288 | A16684 | 317 | A14288 | A16690 | 335 |
| A14288 | A16692 | 286 | A14288 | A16694 | 491 |
| A14288 | A16695 | 368 | A14288 | A16702 | 151 |
| A14288 | A16703 | 443 | A14288 | A16704 | 367 |
| A14288 | A16707 | 288 | A14288 | A16709 | 160 |
| A14288 | A16764 | 422 | A14288 | A16776 | 321 |
| A14288 | A16790 | 294 | A14288 | A16824 | 227 |
| A14288 | A16829 | 310 | A14288 | A16838 | 369 |
| A14288 | A16866 | 322 | A14288 | A16874 | 305 |
| A14288 | A16900 | 329 | A14288 | A16905 | 247 |
| A14288 | A16913 | 414 | A14288 | A16954 | 380 |
| A14288 | A17007 | 159 | A14288 | A17018 | 395 |
| A14288 | A17030 | 321 | A14288 | A17033 | 176 |
| A14288 | A17035 | 252 | A14288 | A17133 | 165 |
| A14288 | A17190 | 174 | A14288 | A17211 | 307 |
| A14289 | A14375 | 213 | A14289 | A14569 | 358 |

|        |        |     |        |        |     |
|--------|--------|-----|--------|--------|-----|
| A14289 | A14706 | 274 | A14289 | A14708 | 185 |
| A14289 | A14718 | 232 | A14289 | A14739 | 353 |
| A14289 | A14799 | 236 | A14289 | A14917 | 286 |
| A14289 | A15262 | 179 | A14289 | A15519 | 255 |
| A14289 | A15541 | 405 | A14289 | A15683 | 269 |
| A14289 | A15709 | 386 | A14289 | A15711 | 260 |
| A14289 | A15743 | 281 | A14289 | A15818 | 260 |
| A14289 | A15854 | 196 | A14289 | A15932 | 210 |
| A14289 | A15947 | 255 | A14289 | A16157 | 353 |
| A14289 | A16187 | 247 | A14289 | A16243 | 293 |
| A14289 | A16565 | 340 | A14289 | A16587 | 281 |
| A14289 | A16611 | 375 | A14289 | A16646 | 184 |
| A14289 | A16652 | 193 | A14289 | A16664 | 207 |
| A14289 | A16680 | 193 | A14289 | A16690 | 173 |
| A14289 | A16691 | 329 | A14289 | A16788 | 377 |
| A14289 | A16815 | 335 | A14289 | A16905 | 245 |
| A14289 | A17144 | 274 | A14290 | A15292 | 302 |
| A14290 | A15312 | 160 | A14290 | A15317 | 240 |
| A14290 | A15335 | 302 | A14290 | A15346 | 201 |
| A14290 | A15348 | 224 | A14290 | A15352 | 288 |
| A14290 | A15480 | 230 | A14290 | A15495 | 177 |
| A14290 | A15799 | 324 | A14290 | A15802 | 347 |
| A14290 | A16192 | 368 | A14290 | A16224 | 273 |
| A14290 | A16300 | 281 | A14290 | A16711 | 452 |
| A14291 | A16517 | 460 | A14292 | A14652 | 207 |
| A14292 | A15314 | 413 | A14292 | A15337 | 260 |
| A14292 | A15361 | 118 | A14295 | A15704 | 283 |
| A14295 | A15851 | 382 | A14297 | A16453 | 254 |
| A14299 | A14443 | 977 | A14299 | A14444 | 997 |
| A14299 | A14704 | 335 | A14299 | A14739 | 286 |
| A14299 | A15292 | 242 | A14299 | A15294 | 410 |
| A14299 | A15295 | 213 | A14299 | A15314 | 238 |
| A14299 | A15321 | 367 | A14299 | A15322 | 491 |
| A14299 | A15328 | 176 | A14299 | A15347 | 489 |
| A14299 | A15448 | 184 | A14299 | A15506 | 621 |
| A14299 | A15726 | 344 | A14299 | A16022 | 361 |
| A14299 | A16524 | 184 | A14299 | A16636 | 353 |
| A14299 | A17229 | 899 | A14300 | A14372 | 160 |
| A14300 | A14452 | 254 | A14303 | A14875 | 257 |
| A14303 | A15140 | 218 | A14303 | A15291 | 345 |
| A14303 | A15297 | 462 | A14303 | A15338 | 341 |
| A14303 | A15366 | 413 | A14303 | A15457 | 205 |
| A14303 | A15559 | 63  | A14303 | A17063 | 474 |
| A14303 | A17198 | 490 | A14304 | A15314 | 256 |
| A14304 | A15361 | 196 | A14304 | A16467 | 219 |
| A14305 | A15096 | 394 | A14305 | A15292 | 221 |

|        |        |     |        |        |     |
|--------|--------|-----|--------|--------|-----|
| A14305 | A15348 | 366 | A14305 | A15830 | 347 |
| A14306 | A14307 | 466 | A14306 | A14309 | 454 |
| A14307 | A14309 | 457 | A14308 | A14674 | 313 |
| A14308 | A14712 | 430 | A14308 | A14715 | 441 |
| A14309 | A15533 | 305 | A14309 | A16605 | 398 |
| A14310 | A14643 | 252 | A14315 | A14319 | 452 |
| A14315 | A14321 | 430 | A14315 | A14335 | 455 |
| A14315 | A14650 | 281 | A14315 | A14668 | 423 |
| A14316 | A14399 | 152 | A14316 | A14410 | 217 |
| A14316 | A14650 | 276 | A14318 | A14378 | 313 |
| A14318 | A14642 | 424 | A14318 | A14643 | 260 |
| A14318 | A16738 | 301 | A14319 | A14321 | 299 |
| A14319 | A14335 | 436 | A14319 | A14650 | 479 |
| A14319 | A15293 | 238 | A14319 | A16764 | 213 |
| A14320 | A15662 | 335 | A14320 | A15931 | 219 |
| A14321 | A14335 | 311 | A14321 | A14650 | 355 |
| A14322 | A15649 | 329 | A14327 | A15425 | 305 |
| A14329 | A17105 | 63  | A14330 | A16081 | 491 |
| A14332 | A16281 | 480 | A14335 | A14650 | 488 |
| A14336 | A14810 | 452 | A14337 | A16027 | 446 |
| A14342 | A14349 | 480 | A14343 | A14679 | 429 |
| A14344 | A15366 | 255 | A14344 | A16337 | 455 |
| A14351 | A16764 | 210 | A14352 | A17063 | 238 |
| A14354 | A16180 | 452 | A14354 | A16181 | 452 |
| A14354 | A16182 | 452 | A14354 | A16183 | 452 |
| A14356 | A15370 | 268 | A14356 | A15703 | 486 |
| A14356 | A15712 | 200 | A14356 | A15718 | 324 |
| A14356 | A15719 | 200 | A14356 | A15757 | 200 |
| A14356 | A16066 | 200 | A14356 | A16634 | 421 |
| A14356 | A16919 | 200 | A14357 | A14711 | 308 |
| A14358 | A14375 | 326 | A14358 | A14462 | 328 |
| A14358 | A15189 | 314 | A14358 | A15370 | 330 |
| A14358 | A15374 | 235 | A14358 | A15380 | 173 |
| A14358 | A16067 | 293 | A14358 | A16597 | 324 |
| A14358 | A16611 | 283 | A14358 | A16664 | 322 |
| A14358 | A16682 | 378 | A14358 | A16807 | 340 |
| A14358 | A16824 | 398 | A14361 | A14394 | 362 |
| A14362 | A14372 | 441 | A14362 | A14374 | 286 |
| A14362 | A14381 | 201 | A14362 | A14394 | 167 |
| A14362 | A14554 | 208 | A14362 | A14600 | 353 |
| A14362 | A14767 | 401 | A14362 | A15321 | 217 |
| A14362 | A15338 | 262 | A14362 | A15425 | 165 |
| A14362 | A15447 | 173 | A14362 | A15475 | 491 |
| A14362 | A15564 | 262 | A14362 | A15962 | 218 |
| A14362 | A16300 | 202 | A14362 | A16562 | 401 |
| A14362 | A16614 | 262 | A14362 | A17052 | 401 |

|        |        |     |        |        |     |
|--------|--------|-----|--------|--------|-----|
| A14363 | A14596 | 270 | A14363 | A14659 | 276 |
| A14363 | A15292 | 160 | A14363 | A15349 | 219 |
| A14363 | A15366 | 154 | A14364 | A14379 | 162 |
| A14364 | A14382 | 347 | A14364 | A14387 | 391 |
| A14364 | A14400 | 270 | A14364 | A14402 | 363 |
| A14364 | A14403 | 446 | A14364 | A14430 | 306 |
| A14364 | A14438 | 267 | A14364 | A14440 | 154 |
| A14364 | A14516 | 229 | A14364 | A14544 | 347 |
| A14364 | A15325 | 258 | A14364 | A15628 | 314 |
| A14364 | A15658 | 286 | A14364 | A15699 | 272 |
| A14364 | A15913 | 160 | A14364 | A15981 | 260 |
| A14364 | A15994 | 440 | A14364 | A16000 | 385 |
| A14364 | A16265 | 385 | A14364 | A16533 | 311 |
| A14364 | A16775 | 369 | A14365 | A15308 | 363 |
| A14365 | A15996 | 434 | A14366 | A14368 | 468 |
| A14366 | A14371 | 91  | A14366 | A14372 | 475 |
| A14366 | A14374 | 490 | A14366 | A14376 | 193 |
| A14366 | A14377 | 293 | A14366 | A14378 | 190 |
| A14366 | A14385 | 257 | A14366 | A14387 | 208 |
| A14366 | A14391 | 491 | A14366 | A14392 | 273 |
| A14366 | A14394 | 391 | A14366 | A14404 | 469 |
| A14366 | A14417 | 436 | A14366 | A14418 | 477 |
| A14366 | A14419 | 446 | A14366 | A14430 | 190 |
| A14366 | A14501 | 347 | A14366 | A14511 | 200 |
| A14366 | A14554 | 491 | A14366 | A14570 | 419 |
| A14366 | A14596 | 822 | A14366 | A14599 | 270 |
| A14366 | A14600 | 269 | A14366 | A14604 | 418 |
| A14366 | A14613 | 369 | A14366 | A14621 | 281 |
| A14366 | A14659 | 682 | A14366 | A14767 | 347 |
| A14366 | A15285 | 445 | A14366 | A15286 | 326 |
| A14366 | A15292 | 187 | A14366 | A15313 | 163 |
| A14366 | A15327 | 283 | A14366 | A15336 | 221 |
| A14366 | A15358 | 179 | A14366 | A15395 | 374 |
| A14366 | A15425 | 335 | A14366 | A15470 | 179 |
| A14366 | A15471 | 172 | A14366 | A15475 | 157 |
| A14366 | A15478 | 162 | A14366 | A15484 | 179 |
| A14366 | A15516 | 345 | A14366 | A15518 | 486 |
| A14366 | A15603 | 157 | A14366 | A15606 | 593 |
| A14366 | A15607 | 190 | A14366 | A15641 | 146 |
| A14366 | A15642 | 238 | A14366 | A15795 | 945 |
| A14366 | A15808 | 461 | A14366 | A15832 | 276 |
| A14366 | A15884 | 196 | A14366 | A16014 | 294 |
| A14366 | A16031 | 276 | A14366 | A16036 | 446 |
| A14366 | A16222 | 204 | A14366 | A16562 | 347 |
| A14366 | A16775 | 323 | A14366 | A17052 | 347 |
| A14367 | A15314 | 491 | A14367 | A15330 | 899 |

|        |        |     |        |        |     |
|--------|--------|-----|--------|--------|-----|
| A14367 | A15360 | 910 | A14367 | A15361 | 915 |
| A14367 | A15386 | 394 | A14367 | A15388 | 490 |
| A14367 | A15493 | 305 | A14367 | A15494 | 345 |
| A14367 | A15566 | 480 | A14367 | A15573 | 296 |
| A14367 | A15577 | 389 | A14367 | A15578 | 319 |
| A14367 | A15579 | 243 | A14367 | A15611 | 279 |
| A14367 | A15639 | 160 | A14367 | A15976 | 294 |
| A14367 | A16092 | 154 | A14367 | A16217 | 899 |
| A14368 | A14371 | 272 | A14368 | A14374 | 180 |
| A14368 | A14375 | 240 | A14368 | A14376 | 454 |
| A14368 | A14377 | 417 | A14368 | A14391 | 319 |
| A14368 | A14403 | 346 | A14368 | A14417 | 369 |
| A14368 | A14418 | 351 | A14368 | A14419 | 383 |
| A14368 | A14511 | 115 | A14368 | A14613 | 356 |
| A14368 | A14616 | 378 | A14368 | A15285 | 329 |
| A14368 | A15286 | 321 | A14368 | A15376 | 162 |
| A14368 | A15425 | 326 | A14368 | A15479 | 373 |
| A14368 | A15795 | 245 | A14368 | A15916 | 413 |
| A14368 | A16036 | 383 | A14369 | A14370 | 490 |
| A14369 | A14371 | 491 | A14369 | A14379 | 446 |
| A14369 | A14408 | 213 | A14369 | A14429 | 367 |
| A14369 | A14444 | 899 | A14369 | A14511 | 490 |
| A14369 | A14516 | 152 | A14369 | A14539 | 208 |
| A14369 | A14893 | 297 | A14369 | A15292 | 217 |
| A14369 | A15331 | 223 | A14369 | A15333 | 249 |
| A14369 | A15335 | 252 | A14369 | A15349 | 419 |
| A14369 | A15419 | 317 | A14369 | A15422 | 427 |
| A14369 | A15452 | 152 | A14369 | A15639 | 224 |
| A14370 | A14371 | 490 | A14370 | A14379 | 468 |
| A14370 | A14511 | 491 | A14370 | A14516 | 394 |
| A14370 | A14536 | 347 | A14370 | A14539 | 360 |
| A14370 | A14604 | 232 | A14370 | A15292 | 340 |
| A14370 | A15312 | 411 | A14370 | A15313 | 367 |
| A14370 | A15317 | 210 | A14370 | A15349 | 337 |
| A14370 | A15352 | 350 | A14370 | A15447 | 205 |
| A14370 | A15452 | 179 | A14370 | A15459 | 294 |
| A14370 | A15480 | 333 | A14370 | A15639 | 251 |
| A14371 | A14377 | 152 | A14371 | A14378 | 302 |
| A14371 | A14379 | 491 | A14371 | A14382 | 272 |
| A14371 | A14399 | 457 | A14371 | A14408 | 899 |
| A14371 | A14427 | 285 | A14371 | A14511 | 945 |
| A14371 | A14516 | 419 | A14371 | A14536 | 201 |
| A14371 | A14539 | 462 | A14371 | A14544 | 272 |
| A14371 | A14598 | 154 | A14371 | A14604 | 470 |
| A14371 | A14636 | 334 | A14371 | A14667 | 195 |
| A14371 | A14930 | 260 | A14371 | A15292 | 491 |



|        |        |     |        |        |     |
|--------|--------|-----|--------|--------|-----|
| A14371 | A15310 | 443 | A14371 | A15312 | 488 |
| A14371 | A15313 | 490 | A14371 | A15314 | 361 |
| A14371 | A15317 | 414 | A14371 | A15318 | 406 |
| A14371 | A15322 | 344 | A14371 | A15327 | 480 |
| A14371 | A15331 | 288 | A14371 | A15335 | 328 |
| A14371 | A15346 | 165 | A14371 | A15348 | 469 |
| A14371 | A15349 | 490 | A14371 | A15352 | 491 |
| A14371 | A15396 | 228 | A14371 | A15404 | 310 |
| A14371 | A15419 | 229 | A14371 | A15422 | 347 |
| A14371 | A15431 | 154 | A14371 | A15432 | 435 |
| A14371 | A15436 | 433 | A14371 | A15444 | 333 |
| A14371 | A15447 | 475 | A14371 | A15451 | 157 |
| A14371 | A15452 | 470 | A14371 | A15454 | 450 |
| A14371 | A15480 | 475 | A14371 | A15483 | 252 |
| A14371 | A15484 | 321 | A14371 | A15485 | 152 |
| A14371 | A15495 | 490 | A14371 | A15498 | 401 |
| A14371 | A15515 | 466 | A14371 | A15522 | 329 |
| A14371 | A15726 | 470 | A14371 | A15801 | 154 |
| A14371 | A15804 | 324 | A14371 | A15820 | 151 |
| A14371 | A15886 | 230 | A14371 | A15902 | 183 |
| A14371 | A15916 | 480 | A14371 | A16038 | 260 |
| A14371 | A16136 | 177 | A14371 | A16192 | 208 |
| A14371 | A16227 | 329 | A14371 | A17060 | 238 |
| A14372 | A14373 | 272 | A14372 | A14374 | 447 |
| A14372 | A14380 | 447 | A14372 | A14381 | 486 |
| A14372 | A14391 | 388 | A14372 | A14392 | 245 |
| A14372 | A14430 | 177 | A14372 | A14439 | 396 |
| A14372 | A14473 | 213 | A14372 | A14539 | 143 |
| A14372 | A14554 | 486 | A14372 | A14570 | 364 |
| A14372 | A14596 | 212 | A14372 | A14598 | 363 |
| A14372 | A14599 | 196 | A14372 | A14600 | 483 |
| A14372 | A15425 | 329 | A14372 | A15444 | 193 |
| A14372 | A15475 | 414 | A14372 | A15518 | 383 |
| A14372 | A15642 | 171 | A14372 | A15790 | 419 |
| A14372 | A15795 | 379 | A14372 | A16015 | 293 |
| A14372 | A16719 | 301 | A14373 | A14391 | 235 |
| A14373 | A15395 | 462 | A14373 | A15601 | 425 |
| A14373 | A15602 | 369 | A14373 | A15605 | 408 |
| A14373 | A15606 | 288 | A14373 | A15959 | 414 |
| A14373 | A15981 | 348 | A14374 | A14376 | 207 |
| A14374 | A14391 | 491 | A14374 | A14392 | 457 |
| A14374 | A14432 | 216 | A14374 | A14439 | 491 |
| A14374 | A14554 | 490 | A14374 | A14598 | 328 |
| A14374 | A14599 | 491 | A14374 | A14651 | 355 |
| A14374 | A14930 | 384 | A14374 | A15285 | 449 |
| A14374 | A15290 | 486 | A14374 | A15308 | 435 |

|        |        |     |        |        |     |
|--------|--------|-----|--------|--------|-----|
| A14374 | A15394 | 483 | A14374 | A15395 | 462 |
| A14374 | A15425 | 472 | A14374 | A15427 | 156 |
| A14374 | A15516 | 443 | A14374 | A15517 | 396 |
| A14374 | A15529 | 162 | A14374 | A15607 | 202 |
| A14374 | A15642 | 475 | A14374 | A15794 | 191 |
| A14374 | A15795 | 491 | A14374 | A15806 | 411 |
| A14374 | A15903 | 355 | A14374 | A15904 | 274 |
| A14374 | A15964 | 389 | A14374 | A15983 | 330 |
| A14374 | A15999 | 406 | A14374 | A16011 | 330 |
| A14374 | A16014 | 406 | A14374 | A16031 | 286 |
| A14374 | A16108 | 263 | A14374 | A16120 | 305 |
| A14374 | A16282 | 355 | A14374 | A16319 | 355 |
| A14374 | A16363 | 193 | A14374 | A16581 | 191 |
| A14374 | A16901 | 218 | A14375 | A14390 | 434 |
| A14375 | A14404 | 369 | A14375 | A14462 | 172 |
| A14375 | A14472 | 217 | A14375 | A14569 | 322 |
| A14375 | A14595 | 302 | A14375 | A14706 | 221 |
| A14375 | A14739 | 326 | A14375 | A14799 | 360 |
| A14375 | A14921 | 316 | A14375 | A15187 | 223 |
| A14375 | A15189 | 286 | A14375 | A15217 | 256 |
| A14375 | A15281 | 480 | A14375 | A15282 | 84  |
| A14375 | A15541 | 375 | A14375 | A15683 | 385 |
| A14375 | A15709 | 350 | A14375 | A15711 | 219 |
| A14375 | A15818 | 218 | A14375 | A15854 | 152 |
| A14375 | A15943 | 188 | A14375 | A16016 | 384 |
| A14375 | A16017 | 429 | A14375 | A16157 | 377 |
| A14375 | A16187 | 408 | A14375 | A16243 | 255 |
| A14375 | A16261 | 329 | A14375 | A16552 | 180 |
| A14375 | A16565 | 384 | A14375 | A16566 | 260 |
| A14375 | A16587 | 425 | A14375 | A16597 | 299 |
| A14375 | A16611 | 398 | A14375 | A16664 | 428 |
| A14375 | A16680 | 372 | A14375 | A16682 | 377 |
| A14375 | A16691 | 297 | A14375 | A16695 | 312 |
| A14375 | A16697 | 255 | A14375 | A16699 | 221 |
| A14375 | A16703 | 215 | A14375 | A16704 | 224 |
| A14375 | A16707 | 346 | A14375 | A16764 | 302 |
| A14375 | A16788 | 355 | A14375 | A16790 | 240 |
| A14375 | A16807 | 190 | A14375 | A16815 | 305 |
| A14375 | A16824 | 297 | A14375 | A16866 | 180 |
| A14375 | A16905 | 201 | A14375 | A16913 | 290 |
| A14376 | A14392 | 232 | A14376 | A14417 | 380 |
| A14376 | A14419 | 394 | A14376 | A14516 | 201 |
| A14376 | A14599 | 299 | A14376 | A14613 | 369 |
| A14376 | A15605 | 396 | A14376 | A15608 | 297 |
| A14376 | A15642 | 279 | A14376 | A15896 | 273 |
| A14376 | A15916 | 334 | A14376 | A16036 | 394 |

|        |        |     |        |        |     |
|--------|--------|-----|--------|--------|-----|
| A14376 | A16216 | 151 | A14377 | A14378 | 452 |
| A14377 | A14381 | 266 | A14377 | A14399 | 119 |
| A14377 | A14403 | 279 | A14377 | A14404 | 229 |
| A14377 | A14554 | 274 | A14377 | A14613 | 293 |
| A14377 | A14782 | 263 | A14377 | A15277 | 171 |
| A14377 | A15286 | 246 | A14377 | A15317 | 238 |
| A14377 | A15433 | 193 | A14377 | A15553 | 293 |
| A14377 | A15554 | 324 | A14377 | A15605 | 177 |
| A14377 | A15606 | 196 | A14377 | A15608 | 190 |
| A14377 | A15884 | 429 | A14377 | A15896 | 159 |
| A14377 | A16004 | 281 | A14377 | A16527 | 293 |
| A14378 | A14399 | 489 | A14378 | A14406 | 481 |
| A14378 | A14408 | 491 | A14378 | A14413 | 491 |
| A14378 | A14421 | 339 | A14378 | A14496 | 193 |
| A14378 | A14511 | 441 | A14378 | A14544 | 394 |
| A14378 | A14570 | 219 | A14378 | A14642 | 374 |
| A14378 | A14733 | 168 | A14378 | A14828 | 257 |
| A14378 | A15281 | 210 | A14378 | A15287 | 173 |
| A14378 | A15292 | 490 | A14378 | A15301 | 441 |
| A14378 | A15302 | 425 | A14378 | A15312 | 467 |
| A14378 | A15313 | 470 | A14378 | A15316 | 151 |
| A14378 | A15331 | 202 | A14378 | A15334 | 310 |
| A14378 | A15352 | 479 | A14378 | A15366 | 472 |
| A14378 | A15396 | 491 | A14378 | A15404 | 323 |
| A14378 | A15432 | 238 | A14378 | A15435 | 420 |
| A14378 | A15436 | 187 | A14378 | A15451 | 172 |
| A14378 | A15452 | 201 | A14378 | A15455 | 327 |
| A14378 | A15462 | 157 | A14378 | A15463 | 401 |
| A14378 | A15485 | 165 | A14378 | A15510 | 215 |
| A14378 | A15513 | 379 | A14378 | A15516 | 229 |
| A14378 | A15540 | 457 | A14378 | A15553 | 423 |
| A14378 | A15554 | 386 | A14378 | A15670 | 210 |
| A14378 | A15804 | 205 | A14378 | A15816 | 263 |
| A14378 | A15818 | 489 | A14378 | A15826 | 221 |
| A14378 | A15828 | 157 | A14378 | A15833 | 360 |
| A14378 | A15884 | 182 | A14378 | A15899 | 386 |
| A14378 | A15907 | 339 | A14378 | A15915 | 401 |
| A14378 | A16004 | 466 | A14378 | A16005 | 339 |
| A14378 | A16047 | 446 | A14378 | A16065 | 339 |
| A14378 | A16189 | 296 | A14378 | A16220 | 339 |
| A14378 | A16260 | 458 | A14378 | A16300 | 313 |
| A14378 | A16473 | 475 | A14378 | A16534 | 249 |
| A14378 | A17124 | 296 | A14379 | A14413 | 165 |
| A14379 | A14511 | 491 | A14379 | A14516 | 98  |
| A14379 | A14536 | 283 | A14379 | A14539 | 369 |
| A14379 | A14604 | 367 | A14379 | A15292 | 458 |

|        |        |     |        |        |     |
|--------|--------|-----|--------|--------|-----|
| A14379 | A15302 | 252 | A14379 | A15313 | 160 |
| A14379 | A15314 | 338 | A14379 | A15318 | 115 |
| A14379 | A15322 | 254 | A14379 | A15327 | 474 |
| A14379 | A15349 | 215 | A14379 | A15352 | 473 |
| A14379 | A15422 | 104 | A14379 | A15452 | 210 |
| A14379 | A15464 | 174 | A14379 | A15480 | 337 |
| A14379 | A15495 | 269 | A14379 | A15639 | 163 |
| A14379 | A15800 | 200 | A14379 | A15916 | 456 |
| A14380 | A14381 | 302 | A14380 | A14511 | 330 |
| A14380 | A14554 | 483 | A14380 | A14598 | 366 |
| A14380 | A14600 | 404 | A14380 | A14603 | 399 |
| A14380 | A15475 | 352 | A14381 | A14392 | 247 |
| A14381 | A14394 | 113 | A14381 | A14498 | 190 |
| A14381 | A14554 | 465 | A14381 | A14602 | 379 |
| A14381 | A14603 | 307 | A14381 | A14838 | 313 |
| A14381 | A15475 | 414 | A14381 | A15485 | 238 |
| A14381 | A15531 | 160 | A14381 | A15795 | 160 |
| A14381 | A16117 | 201 | A14382 | A14516 | 299 |
| A14382 | A14518 | 441 | A14382 | A14544 | 427 |
| A14383 | A15847 | 430 | A14384 | A14394 | 489 |
| A14384 | A14536 | 363 | A14384 | A14570 | 232 |
| A14384 | A15649 | 176 | A14384 | A15811 | 346 |
| A14384 | A15827 | 463 | A14385 | A14391 | 273 |
| A14385 | A14444 | 245 | A14385 | A15394 | 324 |
| A14385 | A15607 | 373 | A14385 | A16072 | 368 |
| A14386 | A14434 | 446 | A14386 | A14483 | 306 |
| A14386 | A14613 | 369 | A14386 | A15971 | 484 |
| A14386 | A16360 | 452 | A14387 | A16775 | 412 |
| A14388 | A15674 | 388 | A14389 | A14405 | 468 |
| A14389 | A14440 | 290 | A14390 | A14404 | 326 |
| A14390 | A14436 | 441 | A14390 | A14473 | 312 |
| A14390 | A15281 | 434 | A14390 | A16016 | 418 |
| A14391 | A14392 | 458 | A14391 | A14393 | 462 |
| A14391 | A14416 | 228 | A14391 | A14430 | 219 |
| A14391 | A14439 | 491 | A14391 | A14472 | 162 |
| A14391 | A14554 | 484 | A14391 | A14599 | 466 |
| A14391 | A14603 | 386 | A14391 | A14611 | 163 |
| A14391 | A14626 | 398 | A14391 | A14651 | 357 |
| A14391 | A15285 | 418 | A14391 | A15290 | 943 |
| A14391 | A15322 | 154 | A14391 | A15328 | 200 |
| A14391 | A15395 | 391 | A14391 | A15425 | 473 |
| A14391 | A15427 | 160 | A14391 | A15516 | 462 |
| A14391 | A15517 | 291 | A14391 | A15606 | 63  |
| A14391 | A15607 | 409 | A14391 | A15642 | 412 |
| A14391 | A15795 | 436 | A14391 | A15969 | 283 |
| A14391 | A15981 | 202 | A14391 | A15996 | 273 |

|        |        |     |        |        |     |
|--------|--------|-----|--------|--------|-----|
| A14391 | A16002 | 154 | A14391 | A16014 | 308 |
| A14391 | A16120 | 177 | A14391 | A16121 | 174 |
| A14391 | A16397 | 352 | A14391 | A16429 | 183 |
| A14391 | A16891 | 230 | A14392 | A14393 | 469 |
| A14392 | A14395 | 171 | A14392 | A14417 | 301 |
| A14392 | A14432 | 425 | A14392 | A14626 | 468 |
| A14392 | A15277 | 157 | A14392 | A15308 | 424 |
| A14392 | A15322 | 697 | A14392 | A15328 | 318 |
| A14392 | A15342 | 432 | A14392 | A15343 | 170 |
| A14392 | A15344 | 177 | A14392 | A15357 | 475 |
| A14392 | A15394 | 419 | A14392 | A15395 | 249 |
| A14392 | A15398 | 418 | A14392 | A15400 | 456 |
| A14392 | A15402 | 475 | A14392 | A15425 | 202 |
| A14392 | A15426 | 334 | A14392 | A15516 | 491 |
| A14392 | A15518 | 249 | A14392 | A15553 | 281 |
| A14392 | A15578 | 63  | A14392 | A15602 | 260 |
| A14392 | A15605 | 296 | A14392 | A15607 | 355 |
| A14392 | A15608 | 176 | A14392 | A15609 | 301 |
| A14392 | A15642 | 152 | A14392 | A15676 | 328 |
| A14392 | A15679 | 255 | A14392 | A15806 | 235 |
| A14392 | A15818 | 185 | A14392 | A15964 | 198 |
| A14392 | A15969 | 301 | A14392 | A15981 | 224 |
| A14392 | A16013 | 208 | A14392 | A16040 | 323 |
| A14392 | A16054 | 238 | A14392 | A16121 | 479 |
| A14392 | A16397 | 449 | A14392 | A16424 | 173 |
| A14392 | A16429 | 335 | A14392 | A16530 | 368 |
| A14393 | A14395 | 564 | A14393 | A15303 | 811 |
| A14393 | A15322 | 944 | A14393 | A15328 | 481 |
| A14393 | A15357 | 63  | A14393 | A15400 | 63  |
| A14393 | A15516 | 293 | A14393 | A15557 | 599 |
| A14393 | A15606 | 283 | A14393 | A15644 | 208 |
| A14393 | A15676 | 337 | A14393 | A15686 | 146 |
| A14393 | A16054 | 157 | A14393 | A16121 | 236 |
| A14393 | A16292 | 154 | A14393 | A16393 | 357 |
| A14393 | A16397 | 598 | A14393 | A16429 | 246 |
| A14393 | A16471 | 235 | A14393 | A16891 | 603 |
| A14393 | A16910 | 473 | A14394 | A14406 | 228 |
| A14394 | A14536 | 252 | A14394 | A14570 | 491 |
| A14394 | A14596 | 701 | A14394 | A14600 | 291 |
| A14394 | A14659 | 757 | A14394 | A14767 | 362 |
| A14394 | A15287 | 213 | A14394 | A15292 | 361 |
| A14394 | A15429 | 219 | A14394 | A15475 | 184 |
| A14394 | A15507 | 413 | A14394 | A15553 | 271 |
| A14394 | A15722 | 314 | A14394 | A15811 | 486 |
| A14394 | A15827 | 489 | A14394 | A15884 | 221 |
| A14394 | A16004 | 260 | A14394 | A16114 | 196 |

|        |        |     |        |        |     |
|--------|--------|-----|--------|--------|-----|
| A14394 | A16117 | 168 | A14394 | A16225 | 238 |
| A14394 | A16562 | 362 | A14394 | A16580 | 215 |
| A14394 | A17052 | 362 | A14394 | A17135 | 177 |
| A14395 | A14635 | 152 | A14395 | A14661 | 238 |
| A14395 | A15282 | 174 | A14395 | A15297 | 198 |
| A14395 | A15303 | 383 | A14395 | A15308 | 160 |
| A14395 | A15322 | 491 | A14395 | A15328 | 491 |
| A14395 | A15345 | 445 | A14395 | A15357 | 63  |
| A14395 | A15398 | 249 | A14395 | A15399 | 232 |
| A14395 | A15400 | 135 | A14395 | A15402 | 191 |
| A14395 | A15556 | 434 | A14395 | A15557 | 491 |
| A14395 | A15630 | 171 | A14395 | A15644 | 358 |
| A14395 | A15676 | 480 | A14395 | A15679 | 348 |
| A14395 | A15680 | 488 | A14395 | A15690 | 232 |
| A14395 | A16022 | 393 | A14395 | A16054 | 202 |
| A14395 | A16113 | 405 | A14395 | A16393 | 335 |
| A14395 | A16397 | 577 | A14395 | A16420 | 454 |
| A14395 | A16429 | 385 | A14395 | A16432 | 385 |
| A14395 | A16434 | 307 | A14395 | A16471 | 390 |
| A14395 | A16480 | 270 | A14395 | A16607 | 347 |
| A14395 | A16891 | 213 | A14397 | A14443 | 899 |
| A14397 | A16581 | 899 | A14399 | A14408 | 318 |
| A14399 | A14414 | 177 | A14399 | A14426 | 230 |
| A14399 | A14427 | 262 | A14399 | A14429 | 235 |
| A14399 | A14481 | 428 | A14399 | A14490 | 491 |
| A14399 | A14504 | 281 | A14399 | A14511 | 154 |
| A14399 | A14544 | 247 | A14399 | A14586 | 174 |
| A14399 | A14661 | 191 | A14399 | A14693 | 341 |
| A14399 | A14710 | 170 | A14399 | A14774 | 154 |
| A14399 | A14909 | 235 | A14399 | A15198 | 185 |
| A14399 | A15292 | 475 | A14399 | A15311 | 179 |
| A14399 | A15313 | 213 | A14399 | A15316 | 490 |
| A14399 | A15352 | 236 | A14399 | A15436 | 230 |
| A14399 | A15452 | 213 | A14399 | A15463 | 224 |
| A14399 | A15464 | 491 | A14399 | A15545 | 488 |
| A14399 | A15672 | 430 | A14399 | A15795 | 151 |
| A14399 | A15797 | 419 | A14399 | A15833 | 193 |
| A14399 | A15880 | 469 | A14399 | A15909 | 358 |
| A14399 | A15911 | 491 | A14399 | A16047 | 262 |
| A14399 | A16050 | 347 | A14399 | A16064 | 391 |
| A14399 | A16224 | 243 | A14399 | A16300 | 281 |
| A14399 | A16555 | 470 | A14399 | A16572 | 311 |
| A14399 | A16708 | 152 | A14399 | A16882 | 235 |
| A14399 | A17081 | 205 | A14400 | A16430 | 327 |
| A14400 | A16446 | 361 | A14401 | A15368 | 371 |
| A14401 | A15913 | 260 | A14402 | A14438 | 944 |

|        |        |     |        |        |     |
|--------|--------|-----|--------|--------|-----|
| A14402 | A14443 | 899 | A14402 | A14577 | 245 |
| A14402 | A15320 | 205 | A14402 | A15913 | 223 |
| A14403 | A16110 | 374 | A14404 | A14430 | 162 |
| A14404 | A15281 | 429 | A14404 | A15282 | 450 |
| A14404 | A16016 | 414 | A14405 | A14423 | 234 |
| A14405 | A14440 | 491 | A14405 | A14956 | 246 |
| A14405 | A15368 | 305 | A14405 | A15839 | 255 |
| A14406 | A14408 | 382 | A14406 | A15292 | 299 |
| A14406 | A15312 | 157 | A14406 | A15396 | 477 |
| A14406 | A15478 | 234 | A14406 | A15553 | 477 |
| A14406 | A15554 | 391 | A14406 | A15915 | 474 |
| A14406 | A16004 | 486 | A14407 | A15435 | 398 |
| A14408 | A14413 | 170 | A14408 | A14471 | 185 |
| A14408 | A14511 | 317 | A14408 | A14828 | 322 |
| A14408 | A14893 | 249 | A14408 | A15292 | 451 |
| A14408 | A15300 | 263 | A14408 | A15301 | 340 |
| A14408 | A15302 | 488 | A14408 | A15311 | 188 |
| A14408 | A15312 | 424 | A14408 | A15313 | 350 |
| A14408 | A15331 | 167 | A14408 | A15333 | 441 |
| A14408 | A15352 | 443 | A14408 | A15366 | 479 |
| A14408 | A15396 | 490 | A14408 | A15404 | 480 |
| A14408 | A15431 | 417 | A14408 | A15435 | 306 |
| A14408 | A15451 | 249 | A14408 | A15456 | 218 |
| A14408 | A15461 | 422 | A14408 | A15462 | 412 |
| A14408 | A15463 | 466 | A14408 | A15464 | 180 |
| A14408 | A15489 | 221 | A14408 | A15513 | 477 |
| A14408 | A15553 | 449 | A14408 | A15554 | 334 |
| A14408 | A15670 | 285 | A14408 | A15671 | 271 |
| A14408 | A15696 | 241 | A14408 | A15801 | 247 |
| A14408 | A15804 | 391 | A14408 | A15818 | 465 |
| A14408 | A15824 | 348 | A14408 | A15833 | 406 |
| A14408 | A15915 | 351 | A14408 | A15922 | 156 |
| A14408 | A16004 | 293 | A14408 | A16032 | 382 |
| A14408 | A16045 | 334 | A14408 | A16075 | 344 |
| A14408 | A16221 | 382 | A14408 | A16224 | 162 |
| A14408 | A16454 | 382 | A14408 | A16473 | 293 |
| A14410 | A14472 | 156 | A14410 | A14511 | 221 |
| A14410 | A14635 | 350 | A14410 | A14636 | 383 |
| A14410 | A14835 | 165 | A14410 | A14836 | 160 |
| A14410 | A15137 | 420 | A14410 | A15150 | 353 |
| A14410 | A15241 | 246 | A14410 | A15282 | 278 |
| A14410 | A15606 | 283 | A14410 | A15948 | 291 |
| A14410 | A16786 | 173 | A14411 | A14548 | 414 |
| A14411 | A14586 | 427 | A14413 | A15292 | 457 |
| A14413 | A15302 | 367 | A14413 | A15349 | 329 |
| A14413 | A15366 | 351 | A14413 | A15396 | 213 |

|        |        |     |        |        |     |
|--------|--------|-----|--------|--------|-----|
| A14413 | A15413 | 281 | A14413 | A15432 | 357 |
| A14413 | A15452 | 334 | A14413 | A15463 | 156 |
| A14413 | A15816 | 424 | A14413 | A15818 | 226 |
| A14413 | A15819 | 208 | A14414 | A14548 | 475 |
| A14414 | A14586 | 443 | A14414 | A14612 | 458 |
| A14414 | A15911 | 324 | A14415 | A14423 | 369 |
| A14416 | A14430 | 196 | A14416 | A14432 | 353 |
| A14416 | A14442 | 329 | A14416 | A14471 | 193 |
| A14416 | A14610 | 373 | A14416 | A15394 | 396 |
| A14416 | A15395 | 436 | A14416 | A15601 | 335 |
| A14416 | A15603 | 326 | A14416 | A15605 | 302 |
| A14416 | A15640 | 395 | A14416 | A15806 | 351 |
| A14416 | A15981 | 344 | A14417 | A14419 | 419 |
| A14417 | A14613 | 401 | A14417 | A15394 | 333 |
| A14417 | A15425 | 290 | A14417 | A15795 | 329 |
| A14417 | A15964 | 363 | A14417 | A16036 | 419 |
| A14418 | A15478 | 269 | A14418 | A15795 | 305 |
| A14418 | A15808 | 399 | A14419 | A14613 | 412 |
| A14419 | A15518 | 401 | A14419 | A16036 | 427 |
| A14422 | A15498 | 190 | A14423 | A14441 | 408 |
| A14423 | A15674 | 306 | A14423 | A16341 | 63  |
| A14424 | A15819 | 363 | A14425 | A14442 | 408 |
| A14425 | A15394 | 389 | A14425 | A15395 | 379 |
| A14426 | A16994 | 162 | A14427 | A15498 | 205 |
| A14427 | A16267 | 430 | A14429 | A15316 | 375 |
| A14430 | A14610 | 475 | A14430 | A15383 | 416 |
| A14430 | A15570 | 386 | A14430 | A15598 | 140 |
| A14430 | A15835 | 273 | A14430 | A15913 | 466 |
| A14430 | A16561 | 339 | A14430 | A16819 | 234 |
| A14430 | A17112 | 344 | A14431 | A14596 | 157 |
| A14431 | A15297 | 112 | A14431 | A15314 | 485 |
| A14431 | A15330 | 99  | A14431 | A15337 | 174 |
| A14431 | A15338 | 246 | A14431 | A15360 | 79  |
| A14431 | A15361 | 127 | A14431 | A15385 | 260 |
| A14431 | A15386 | 238 | A14431 | A15388 | 157 |
| A14431 | A15578 | 249 | A14431 | A15630 | 127 |
| A14431 | A15639 | 168 | A14431 | A15722 | 218 |
| A14431 | A15976 | 170 | A14431 | A16216 | 249 |
| A14431 | A16722 | 249 | A14432 | A14442 | 417 |
| A14432 | A15395 | 434 | A14432 | A15601 | 330 |
| A14432 | A15602 | 465 | A14432 | A15603 | 454 |
| A14432 | A15605 | 488 | A14432 | A15608 | 306 |
| A14432 | A15981 | 339 | A14433 | A14539 | 297 |
| A14433 | A15182 | 469 | A14433 | A15325 | 260 |
| A14433 | A15333 | 205 | A14433 | A16084 | 249 |
| A14434 | A15990 | 436 | A14438 | A15503 | 329 |



|        |        |     |        |        |     |
|--------|--------|-----|--------|--------|-----|
| A14438 | A15913 | 252 | A14438 | A16084 | 324 |
| A14439 | A14554 | 191 | A14439 | A14598 | 279 |
| A14439 | A14599 | 477 | A14439 | A14603 | 335 |
| A14439 | A14604 | 184 | A14439 | A15290 | 446 |
| A14439 | A15331 | 201 | A14439 | A15335 | 232 |
| A14439 | A15394 | 340 | A14439 | A15395 | 185 |
| A14439 | A15425 | 449 | A14439 | A15427 | 243 |
| A14439 | A15480 | 152 | A14439 | A15517 | 350 |
| A14439 | A15642 | 215 | A14439 | A15795 | 408 |
| A14439 | A15806 | 291 | A14439 | A15957 | 380 |
| A14439 | A15998 | 396 | A14439 | A16108 | 422 |
| A14440 | A15368 | 290 | A14440 | A15911 | 188 |
| A14442 | A14554 | 229 | A14442 | A15314 | 290 |
| A14442 | A15361 | 326 | A14442 | A15394 | 489 |
| A14442 | A15395 | 491 | A14442 | A15425 | 319 |
| A14442 | A15427 | 440 | A14442 | A15518 | 329 |
| A14442 | A15599 | 441 | A14442 | A15601 | 301 |
| A14442 | A15603 | 396 | A14442 | A15605 | 260 |
| A14442 | A15795 | 238 | A14442 | A15806 | 319 |
| A14442 | A15964 | 486 | A14442 | A15981 | 409 |
| A14442 | A16015 | 348 | A14442 | A16511 | 334 |
| A14443 | A14444 | 997 | A14443 | A14484 | 899 |
| A14443 | A14498 | 327 | A14443 | A14554 | 899 |
| A14443 | A14661 | 899 | A14443 | A14886 | 265 |
| A14443 | A15140 | 899 | A14443 | A15230 | 316 |
| A14443 | A15265 | 899 | A14443 | A15294 | 904 |
| A14443 | A15506 | 276 | A14443 | A15579 | 899 |
| A14443 | A15681 | 899 | A14443 | A15689 | 899 |
| A14443 | A15726 | 211 | A14443 | A15786 | 899 |
| A14443 | A15875 | 179 | A14443 | A16080 | 899 |
| A14443 | A16581 | 899 | A14443 | A16802 | 515 |
| A14443 | A16952 | 213 | A14444 | A14494 | 899 |
| A14444 | A14539 | 288 | A14444 | A14577 | 462 |
| A14444 | A15233 | 167 | A14444 | A15258 | 171 |
| A14444 | A15506 | 306 | A14444 | A15875 | 193 |
| A14444 | A16043 | 201 | A14444 | A16068 | 915 |
| A14444 | A16072 | 167 | A14444 | A16138 | 218 |
| A14444 | A16174 | 283 | A14444 | A16590 | 235 |
| A14444 | A17146 | 180 | A14445 | A15684 | 303 |
| A14445 | A17156 | 219 | A14448 | A15188 | 341 |
| A14449 | A14475 | 308 | A14449 | A14496 | 443 |
| A14449 | A14643 | 443 | A14449 | A14936 | 497 |
| A14449 | A15297 | 393 | A14449 | A15322 | 276 |
| A14449 | A15422 | 497 | A14449 | A15498 | 330 |
| A14449 | A15558 | 393 | A14449 | A15560 | 393 |
| A14449 | A15624 | 810 | A14449 | A15651 | 497 |

|        |        |     |        |        |     |
|--------|--------|-----|--------|--------|-----|
| A14449 | A15652 | 497 | A14449 | A15661 | 497 |
| A14449 | A15662 | 497 | A14449 | A15684 | 536 |
| A14449 | A15843 | 191 | A14449 | A15932 | 801 |
| A14449 | A15933 | 319 | A14449 | A16086 | 277 |
| A14451 | A14516 | 279 | A14451 | A15773 | 156 |
| A14452 | A14929 | 311 | A14452 | A14930 | 368 |
| A14452 | A15195 | 247 | A14452 | A15420 | 428 |
| A14452 | A15726 | 491 | A14452 | A16216 | 249 |
| A14452 | A16994 | 770 | A14452 | A16996 | 200 |
| A14452 | A17075 | 290 | A14454 | A14457 | 224 |
| A14454 | A14591 | 273 | A14454 | A15224 | 219 |
| A14454 | A15237 | 443 | A14454 | A15297 | 180 |
| A14454 | A15314 | 324 | A14454 | A15373 | 245 |
| A14454 | A15502 | 191 | A14454 | A15505 | 254 |
| A14454 | A15507 | 236 | A14454 | A15578 | 351 |
| A14454 | A15710 | 234 | A14454 | A16623 | 408 |
| A14454 | A16663 | 274 | A14454 | A16802 | 380 |
| A14454 | A16907 | 198 | A14454 | A16915 | 205 |
| A14454 | A16979 | 245 | A14455 | A14569 | 362 |
| A14455 | A14708 | 424 | A14455 | A14799 | 293 |
| A14455 | A14838 | 160 | A14455 | A14903 | 340 |
| A14455 | A14917 | 198 | A14455 | A14921 | 440 |
| A14455 | A15102 | 204 | A14455 | A15105 | 491 |
| A14455 | A15187 | 456 | A14455 | A15189 | 327 |
| A14455 | A15262 | 201 | A14455 | A15501 | 274 |
| A14455 | A15665 | 435 | A14455 | A15667 | 196 |
| A14455 | A15698 | 156 | A14455 | A15711 | 302 |
| A14455 | A15765 | 152 | A14455 | A15774 | 174 |
| A14455 | A15853 | 491 | A14455 | A15855 | 489 |
| A14455 | A15940 | 200 | A14455 | A16157 | 441 |
| A14455 | A16261 | 279 | A14455 | A16552 | 449 |
| A14455 | A16565 | 401 | A14455 | A16587 | 401 |
| A14455 | A16597 | 485 | A14455 | A16608 | 301 |
| A14455 | A16611 | 170 | A14455 | A16664 | 236 |
| A14455 | A16675 | 441 | A14455 | A16684 | 338 |
| A14455 | A16690 | 468 | A14455 | A16692 | 436 |
| A14455 | A16703 | 384 | A14455 | A16704 | 390 |
| A14455 | A16709 | 324 | A14455 | A16764 | 344 |
| A14455 | A16790 | 401 | A14455 | A16799 | 238 |
| A14455 | A16806 | 385 | A14455 | A16824 | 256 |
| A14455 | A16827 | 200 | A14455 | A16829 | 338 |
| A14455 | A16838 | 177 | A14455 | A16866 | 441 |
| A14455 | A16874 | 334 | A14455 | A16900 | 226 |
| A14455 | A16905 | 373 | A14455 | A16944 | 226 |
| A14455 | A16954 | 324 | A14455 | A17012 | 198 |
| A14455 | A17018 | 210 | A14455 | A17030 | 218 |

|        |        |     |        |        |     |
|--------|--------|-----|--------|--------|-----|
| A14455 | A17033 | 408 | A14455 | A17035 | 156 |
| A14455 | A17125 | 221 | A14455 | A17190 | 205 |
| A14455 | A17211 | 204 | A14456 | A14546 | 260 |
| A14456 | A15291 | 945 | A14456 | A15502 | 160 |
| A14456 | A15614 | 491 | A14456 | A15649 | 335 |
| A14456 | A15761 | 313 | A14456 | A16467 | 346 |
| A14457 | A15431 | 170 | A14457 | A15435 | 174 |
| A14457 | A15461 | 259 | A14457 | A16667 | 247 |
| A14457 | A16792 | 221 | A14457 | A16902 | 352 |
| A14457 | A16911 | 160 | A14458 | A15167 | 422 |
| A14460 | A14694 | 396 | A14460 | A15369 | 491 |
| A14460 | A15524 | 208 | A14460 | A15714 | 177 |
| A14460 | A15941 | 165 | A14460 | A16127 | 491 |
| A14460 | A16128 | 491 | A14460 | A16129 | 461 |
| A14460 | A16225 | 412 | A14460 | A16226 | 491 |
| A14460 | A16331 | 176 | A14460 | A16378 | 180 |
| A14460 | A16606 | 491 | A14460 | A16613 | 491 |
| A14460 | A16616 | 324 | A14460 | A16626 | 357 |
| A14460 | A16754 | 458 | A14461 | A14661 | 319 |
| A14461 | A15558 | 438 | A14461 | A15560 | 438 |
| A14461 | A15591 | 438 | A14461 | A15650 | 198 |
| A14461 | A15770 | 279 | A14461 | A15779 | 438 |
| A14461 | A17126 | 374 | A14461 | A17128 | 317 |
| A14462 | A14569 | 324 | A14462 | A14706 | 224 |
| A14462 | A14826 | 227 | A14462 | A14917 | 249 |
| A14462 | A15187 | 226 | A14462 | A15189 | 288 |
| A14462 | A15373 | 162 | A14462 | A15380 | 174 |
| A14462 | A15519 | 216 | A14462 | A15541 | 157 |
| A14462 | A15653 | 283 | A14462 | A15698 | 208 |
| A14462 | A15711 | 223 | A14462 | A15717 | 219 |
| A14462 | A15762 | 255 | A14462 | A15765 | 205 |
| A14462 | A15943 | 255 | A14462 | A15944 | 255 |
| A14462 | A15945 | 302 | A14462 | A15946 | 340 |
| A14462 | A16067 | 408 | A14462 | A16093 | 255 |
| A14462 | A16109 | 255 | A14462 | A16144 | 255 |
| A14462 | A16157 | 310 | A14462 | A16303 | 314 |
| A14462 | A16343 | 311 | A14462 | A16387 | 283 |
| A14462 | A16552 | 184 | A14462 | A16565 | 168 |
| A14462 | A16587 | 243 | A14462 | A16597 | 302 |
| A14462 | A16611 | 435 | A14462 | A16652 | 152 |
| A14462 | A16664 | 430 | A14462 | A16675 | 262 |
| A14462 | A16680 | 286 | A14462 | A16682 | 379 |
| A14462 | A16764 | 172 | A14462 | A16774 | 291 |
| A14462 | A16807 | 193 | A14462 | A16815 | 307 |
| A14462 | A16824 | 301 | A14462 | A16829 | 257 |
| A14462 | A16874 | 254 | A14462 | A16908 | 328 |

|        |        |     |        |        |     |
|--------|--------|-----|--------|--------|-----|
| A14462 | A17133 | 246 | A14464 | A15626 | 63  |
| A14466 | A14738 | 223 | A14466 | A15653 | 174 |
| A14466 | A15741 | 297 | A14467 | A14468 | 338 |
| A14467 | A14738 | 154 | A14467 | A15261 | 185 |
| A14467 | A15741 | 238 | A14467 | A17126 | 218 |
| A14468 | A15658 | 297 | A14469 | A15626 | 213 |
| A14470 | A15297 | 326 | A14470 | A15376 | 221 |
| A14470 | A17076 | 335 | A14471 | A14635 | 435 |
| A14471 | A14902 | 337 | A14471 | A15153 | 337 |
| A14471 | A15190 | 193 | A14471 | A15312 | 190 |
| A14471 | A15606 | 385 | A14471 | A15684 | 200 |
| A14471 | A15708 | 340 | A14471 | A16218 | 312 |
| A14471 | A16452 | 263 | A14471 | A16495 | 227 |
| A14471 | A16612 | 180 | A14471 | A16646 | 157 |
| A14471 | A16768 | 157 | A14471 | A17000 | 409 |
| A14472 | A14758 | 199 | A14472 | A14801 | 163 |
| A14472 | A15325 | 296 | A14473 | A14481 | 305 |
| A14473 | A14661 | 63  | A14473 | A14693 | 269 |
| A14473 | A14783 | 419 | A14473 | A15301 | 269 |
| A14473 | A15302 | 269 | A14473 | A15366 | 269 |
| A14473 | A15430 | 317 | A14473 | A15462 | 375 |
| A14473 | A15463 | 269 | A14473 | A15647 | 205 |
| A14473 | A17061 | 267 | A14474 | A14484 | 414 |
| A14474 | A14569 | 246 | A14474 | A14633 | 337 |
| A14474 | A14719 | 479 | A14474 | A14801 | 385 |
| A14474 | A15023 | 172 | A14474 | A15105 | 347 |
| A14474 | A15187 | 193 | A14474 | A15380 | 491 |
| A14474 | A15501 | 277 | A14474 | A15852 | 249 |
| A14474 | A16048 | 417 | A14474 | A16585 | 152 |
| A14474 | A16695 | 182 | A14474 | A16764 | 216 |
| A14474 | A16806 | 182 | A14474 | A16858 | 210 |
| A14474 | A16859 | 246 | A14474 | A16875 | 207 |
| A14474 | A16913 | 152 | A14474 | A17043 | 177 |
| A14474 | A17211 | 433 | A14475 | A14485 | 721 |
| A14475 | A14487 | 313 | A14475 | A14496 | 682 |
| A14475 | A14522 | 375 | A14475 | A14524 | 270 |
| A14475 | A14585 | 721 | A14475 | A14589 | 722 |
| A14475 | A14607 | 375 | A14475 | A14637 | 409 |
| A14475 | A14640 | 374 | A14475 | A14643 | 681 |
| A14475 | A14674 | 312 | A14475 | A14986 | 204 |
| A14475 | A15498 | 193 | A14476 | A15660 | 363 |
| A14476 | A15684 | 221 | A14476 | A16491 | 373 |
| A14476 | A16912 | 480 | A14477 | A14483 | 230 |
| A14477 | A14498 | 343 | A14477 | A14641 | 432 |
| A14477 | A14674 | 643 | A14477 | A14702 | 447 |
| A14477 | A14703 | 278 | A14477 | A16738 | 608 |

|        |        |     |        |        |     |
|--------|--------|-----|--------|--------|-----|
| A14478 | A14479 | 490 | A14478 | A14568 | 190 |
| A14478 | A15500 | 357 | A14478 | A15771 | 405 |
| A14478 | A16976 | 429 | A14479 | A14482 | 477 |
| A14479 | A14568 | 475 | A14479 | A14699 | 252 |
| A14479 | A15500 | 489 | A14479 | A15771 | 486 |
| A14479 | A16583 | 258 | A14479 | A16976 | 316 |
| A14479 | A17152 | 258 | A14480 | A14482 | 411 |
| A14481 | A14540 | 314 | A14481 | A14693 | 631 |
| A14481 | A14710 | 307 | A14481 | A14801 | 302 |
| A14481 | A14901 | 363 | A14481 | A15301 | 353 |
| A14481 | A15302 | 353 | A14481 | A15366 | 353 |
| A14481 | A15430 | 501 | A14481 | A15462 | 446 |
| A14481 | A15463 | 353 | A14481 | A15626 | 199 |
| A14481 | A15669 | 162 | A14481 | A15909 | 416 |
| A14481 | A16320 | 240 | A14481 | A16403 | 202 |
| A14481 | A16436 | 182 | A14481 | A16568 | 208 |
| A14482 | A14568 | 165 | A14482 | A14701 | 308 |
| A14482 | A15377 | 188 | A14482 | A15500 | 418 |
| A14482 | A15624 | 256 | A14482 | A15771 | 454 |
| A14482 | A15988 | 486 | A14482 | A16306 | 188 |
| A14482 | A16654 | 184 | A14482 | A16814 | 201 |
| A14482 | A17152 | 196 | A14483 | A14674 | 357 |
| A14483 | A14702 | 246 | A14484 | A14584 | 167 |
| A14484 | A14633 | 814 | A14484 | A15370 | 490 |
| A14484 | A15380 | 443 | A14484 | A16418 | 332 |
| A14484 | A16782 | 217 | A14485 | A14487 | 180 |
| A14485 | A14524 | 371 | A14485 | A14531 | 351 |
| A14485 | A14585 | 721 | A14485 | A14589 | 718 |
| A14485 | A14623 | 230 | A14485 | A14639 | 335 |
| A14485 | A14643 | 398 | A14485 | A15930 | 157 |
| A14487 | A14585 | 369 | A14487 | A14699 | 165 |
| A14487 | A14778 | 190 | A14488 | A14510 | 441 |
| A14489 | A15241 | 151 | A14489 | A16218 | 247 |
| A14489 | A16700 | 312 | A14490 | A14511 | 107 |
| A14490 | A14570 | 283 | A14490 | A14909 | 319 |
| A14490 | A15292 | 467 | A14490 | A15316 | 340 |
| A14490 | A15317 | 226 | A14490 | A15366 | 489 |
| A14490 | A15396 | 391 | A14490 | A15419 | 227 |
| A14490 | A15431 | 167 | A14490 | A15435 | 172 |
| A14490 | A15459 | 196 | A14490 | A15464 | 466 |
| A14490 | A15495 | 326 | A14490 | A15672 | 263 |
| A14490 | A15797 | 409 | A14490 | A15851 | 416 |
| A14490 | A15852 | 486 | A14490 | A15878 | 278 |
| A14490 | A15911 | 179 | A14490 | A16064 | 438 |
| A14490 | A16260 | 305 | A14491 | A14556 | 436 |
| A14492 | A15366 | 191 | A14492 | A15635 | 398 |

|        |        |     |        |        |     |
|--------|--------|-----|--------|--------|-----|
| A14496 | A14521 | 351 | A14496 | A14524 | 144 |
| A14496 | A14540 | 319 | A14496 | A14555 | 324 |
| A14496 | A14589 | 180 | A14496 | A14620 | 417 |
| A14496 | A14637 | 152 | A14496 | A14639 | 200 |
| A14496 | A14643 | 746 | A14496 | A14785 | 425 |
| A14497 | A14596 | 447 | A14497 | A14659 | 423 |
| A14497 | A15507 | 299 | A14497 | A16298 | 348 |
| A14497 | A16580 | 360 | A14497 | A16822 | 285 |
| A14498 | A14540 | 386 | A14498 | A14542 | 398 |
| A14498 | A14589 | 486 | A14498 | A14637 | 154 |
| A14498 | A14641 | 364 | A14498 | A14643 | 429 |
| A14498 | A14648 | 451 | A14498 | A14665 | 334 |
| A14498 | A14674 | 605 | A14498 | A14702 | 343 |
| A14498 | A14869 | 353 | A14498 | A15266 | 224 |
| A14498 | A16636 | 174 | A14498 | A16738 | 372 |
| A14505 | A15235 | 238 | A14505 | A15988 | 157 |
| A14505 | A16118 | 191 | A14505 | A16682 | 299 |
| A14507 | A14547 | 486 | A14508 | A15225 | 234 |
| A14508 | A15499 | 263 | A14508 | A15500 | 427 |
| A14508 | A15721 | 152 | A14508 | A15732 | 215 |
| A14508 | A16118 | 372 | A14508 | A16686 | 330 |
| A14509 | A15533 | 479 | A14509 | A15649 | 208 |
| A14511 | A14516 | 348 | A14511 | A14536 | 173 |
| A14511 | A14539 | 490 | A14511 | A14554 | 378 |
| A14511 | A14570 | 480 | A14511 | A14604 | 463 |
| A14511 | A14616 | 235 | A14511 | A14635 | 307 |
| A14511 | A14667 | 449 | A14511 | A14720 | 218 |
| A14511 | A14828 | 218 | A14511 | A14930 | 366 |
| A14511 | A15237 | 412 | A14511 | A15285 | 283 |
| A14511 | A15292 | 491 | A14511 | A15297 | 215 |
| A14511 | A15310 | 162 | A14511 | A15311 | 281 |
| A14511 | A15312 | 491 | A14511 | A15313 | 491 |
| A14511 | A15314 | 457 | A14511 | A15317 | 480 |
| A14511 | A15318 | 488 | A14511 | A15322 | 466 |
| A14511 | A15323 | 469 | A14511 | A15324 | 408 |
| A14511 | A15327 | 216 | A14511 | A15329 | 118 |
| A14511 | A15331 | 491 | A14511 | A15333 | 288 |
| A14511 | A15334 | 265 | A14511 | A15335 | 457 |
| A14511 | A15337 | 160 | A14511 | A15339 | 311 |
| A14511 | A15346 | 196 | A14511 | A15348 | 488 |
| A14511 | A15349 | 491 | A14511 | A15352 | 491 |
| A14511 | A15387 | 151 | A14511 | A15411 | 232 |
| A14511 | A15412 | 173 | A14511 | A15418 | 249 |
| A14511 | A15419 | 491 | A14511 | A15420 | 400 |
| A14511 | A15422 | 399 | A14511 | A15431 | 429 |
| A14511 | A15432 | 489 | A14511 | A15433 | 377 |

|        |        |     |        |        |     |
|--------|--------|-----|--------|--------|-----|
| A14511 | A15434 | 302 | A14511 | A15435 | 432 |
| A14511 | A15436 | 486 | A14511 | A15440 | 390 |
| A14511 | A15444 | 299 | A14511 | A15447 | 463 |
| A14511 | A15452 | 488 | A14511 | A15454 | 182 |
| A14511 | A15459 | 218 | A14511 | A15476 | 470 |
| A14511 | A15478 | 491 | A14511 | A15479 | 226 |
| A14511 | A15480 | 491 | A14511 | A15481 | 435 |
| A14511 | A15484 | 488 | A14511 | A15495 | 491 |
| A14511 | A15498 | 371 | A14511 | A15515 | 443 |
| A14511 | A15522 | 170 | A14511 | A15630 | 185 |
| A14511 | A15632 | 369 | A14511 | A15671 | 152 |
| A14511 | A15788 | 229 | A14511 | A15795 | 333 |
| A14511 | A15800 | 374 | A14511 | A15801 | 352 |
| A14511 | A15807 | 218 | A14511 | A15820 | 249 |
| A14511 | A15823 | 260 | A14511 | A15826 | 180 |
| A14511 | A15886 | 204 | A14511 | A15902 | 156 |
| A14511 | A15916 | 356 | A14511 | A16192 | 180 |
| A14511 | A16224 | 327 | A14511 | A16300 | 401 |
| A14511 | A16443 | 156 | A14511 | A16711 | 218 |
| A14511 | A17076 | 358 | A14511 | A17223 | 246 |
| A14515 | A14643 | 260 | A14515 | A14852 | 447 |
| A14516 | A14536 | 360 | A14516 | A14539 | 210 |
| A14516 | A14544 | 299 | A14516 | A15347 | 269 |
| A14516 | A15795 | 230 | A14516 | A15896 | 435 |
| A14520 | A14521 | 180 | A14520 | A14562 | 226 |
| A14520 | A14588 | 457 | A14520 | A15689 | 205 |
| A14521 | A14632 | 369 | A14521 | A14634 | 454 |
| A14521 | A14636 | 355 | A14521 | A14637 | 369 |
| A14521 | A14643 | 469 | A14521 | A14666 | 466 |
| A14521 | A14685 | 344 | A14521 | A14702 | 227 |
| A14521 | A14703 | 466 | A14521 | A16925 | 319 |
| A14522 | A14607 | 472 | A14522 | A14643 | 379 |
| A14523 | A15336 | 201 | A14523 | A17204 | 419 |
| A14524 | A14585 | 401 | A14524 | A14589 | 413 |
| A14524 | A14637 | 384 | A14524 | A14640 | 332 |
| A14524 | A14642 | 165 | A14524 | A14643 | 278 |
| A14524 | A14671 | 388 | A14524 | A14674 | 258 |
| A14524 | A14867 | 388 | A14524 | A15471 | 283 |
| A14524 | A17198 | 154 | A14525 | A14804 | 290 |
| A14525 | A14858 | 319 | A14525 | A15372 | 578 |
| A14525 | A15375 | 317 | A14525 | A15546 | 502 |
| A14525 | A16219 | 331 | A14525 | A16371 | 316 |
| A14525 | A16531 | 512 | A14525 | A16753 | 488 |
| A14527 | A14528 | 323 | A14527 | A14529 | 224 |
| A14527 | A14716 | 271 | A14527 | A15297 | 411 |
| A14527 | A16808 | 449 | A14527 | A16927 | 307 |

|        |        |     |        |        |     |
|--------|--------|-----|--------|--------|-----|
| A14528 | A15510 | 396 | A14529 | A16475 | 372 |
| A14530 | A14643 | 241 | A14531 | A14583 | 348 |
| A14531 | A14585 | 400 | A14531 | A14623 | 368 |
| A14531 | A14633 | 277 | A14533 | A14643 | 241 |
| A14535 | A14618 | 432 | A14535 | A14642 | 473 |
| A14535 | A16738 | 414 | A14536 | A14539 | 283 |
| A14536 | A15365 | 416 | A14539 | A14554 | 152 |
| A14539 | A15313 | 162 | A14539 | A15331 | 162 |
| A14539 | A15432 | 238 | A14539 | A15436 | 151 |
| A14539 | A15456 | 215 | A14539 | A15460 | 236 |
| A14539 | A15481 | 232 | A14539 | A15515 | 157 |
| A14539 | A15916 | 247 | A14539 | A16840 | 185 |
| A14540 | A14643 | 423 | A14540 | A14779 | 165 |
| A14540 | A14869 | 246 | A14540 | A15323 | 180 |
| A14540 | A15359 | 270 | A14540 | A16400 | 290 |
| A14541 | A14637 | 338 | A14543 | A14643 | 306 |
| A14543 | A14674 | 372 | A14544 | A15422 | 306 |
| A14544 | A16047 | 430 | A14546 | A15291 | 490 |
| A14546 | A15612 | 202 | A14546 | A15614 | 491 |
| A14546 | A15649 | 246 | A14546 | A15680 | 277 |
| A14546 | A16467 | 226 | A14548 | A14586 | 430 |
| A14548 | A15911 | 283 | A14548 | A16281 | 179 |
| A14548 | A16416 | 414 | A14548 | A16515 | 451 |
| A14549 | A14648 | 223 | A14552 | A15057 | 452 |
| A14554 | A14565 | 430 | A14554 | A14570 | 452 |
| A14554 | A14599 | 207 | A14554 | A14601 | 382 |
| A14554 | A14603 | 469 | A14554 | A14604 | 488 |
| A14554 | A14621 | 193 | A14554 | A14638 | 245 |
| A14554 | A15285 | 436 | A14554 | A15425 | 401 |
| A14554 | A15427 | 210 | A14554 | A15516 | 399 |
| A14554 | A15605 | 191 | A14554 | A15608 | 335 |
| A14554 | A15795 | 491 | A14554 | A15884 | 486 |
| A14554 | A15969 | 322 | A14554 | A15981 | 251 |
| A14554 | A16004 | 294 | A14554 | A16014 | 427 |
| A14554 | A16031 | 328 | A14556 | A14643 | 196 |
| A14557 | A16812 | 899 | A14557 | A17214 | 899 |
| A14558 | A15141 | 63  | A14558 | A15558 | 191 |
| A14558 | A15779 | 274 | A14559 | A14762 | 333 |
| A14559 | A15555 | 260 | A14559 | A15863 | 230 |
| A14559 | A16090 | 283 | A14559 | A16658 | 228 |
| A14562 | A14588 | 263 | A14562 | A14589 | 224 |
| A14562 | A14652 | 483 | A14565 | A14603 | 419 |
| A14566 | A14594 | 491 | A14566 | A14845 | 314 |
| A14566 | A15520 | 188 | A14566 | A15561 | 162 |
| A14566 | A15666 | 490 | A14566 | A15765 | 385 |
| A14566 | A15932 | 213 | A14566 | A16060 | 338 |



|        |        |     |        |        |     |
|--------|--------|-----|--------|--------|-----|
| A14566 | A16403 | 218 | A14567 | A14568 | 353 |
| A14568 | A15500 | 473 | A14568 | A15771 | 460 |
| A14569 | A14595 | 316 | A14569 | A14706 | 438 |
| A14569 | A14708 | 428 | A14569 | A14718 | 340 |
| A14569 | A14739 | 339 | A14569 | A14799 | 475 |
| A14569 | A14838 | 350 | A14569 | A14903 | 462 |
| A14569 | A14917 | 382 | A14569 | A14921 | 329 |
| A14569 | A15105 | 474 | A14569 | A15187 | 455 |
| A14569 | A15189 | 475 | A14569 | A15262 | 424 |
| A14569 | A15366 | 156 | A14569 | A15501 | 263 |
| A14569 | A15519 | 232 | A14569 | A15536 | 286 |
| A14569 | A15541 | 390 | A14569 | A15651 | 156 |
| A14569 | A15653 | 202 | A14569 | A15665 | 424 |
| A14569 | A15667 | 263 | A14569 | A15680 | 400 |
| A14569 | A15683 | 467 | A14569 | A15698 | 224 |
| A14569 | A15709 | 447 | A14569 | A15711 | 363 |
| A14569 | A15735 | 324 | A14569 | A15774 | 243 |
| A14569 | A15854 | 306 | A14569 | A15855 | 202 |
| A14569 | A15932 | 179 | A14569 | A15940 | 383 |
| A14569 | A15947 | 232 | A14569 | A16157 | 491 |
| A14569 | A16187 | 451 | A14569 | A16215 | 281 |
| A14569 | A16243 | 272 | A14569 | A16261 | 414 |
| A14569 | A16322 | 182 | A14569 | A16343 | 323 |
| A14569 | A16552 | 485 | A14569 | A16565 | 470 |
| A14569 | A16566 | 390 | A14569 | A16567 | 299 |
| A14569 | A16585 | 306 | A14569 | A16587 | 489 |
| A14569 | A16597 | 488 | A14569 | A16608 | 374 |
| A14569 | A16611 | 489 | A14569 | A16652 | 302 |
| A14569 | A16663 | 202 | A14569 | A16664 | 489 |
| A14569 | A16675 | 463 | A14569 | A16680 | 480 |
| A14569 | A16682 | 274 | A14569 | A16690 | 422 |
| A14569 | A16691 | 411 | A14569 | A16693 | 417 |
| A14569 | A16695 | 472 | A14569 | A16699 | 241 |
| A14569 | A16702 | 249 | A14569 | A16703 | 360 |
| A14569 | A16704 | 455 | A14569 | A16707 | 434 |
| A14569 | A16709 | 259 | A14569 | A16762 | 154 |
| A14569 | A16764 | 400 | A14569 | A16774 | 407 |
| A14569 | A16776 | 393 | A14569 | A16788 | 366 |
| A14569 | A16790 | 458 | A14569 | A16815 | 414 |
| A14569 | A16829 | 386 | A14569 | A16838 | 477 |
| A14569 | A16855 | 350 | A14569 | A16866 | 200 |
| A14569 | A16874 | 384 | A14569 | A16900 | 288 |
| A14569 | A16905 | 350 | A14569 | A16913 | 306 |
| A14569 | A16944 | 288 | A14569 | A16954 | 377 |
| A14569 | A17015 | 355 | A14569 | A17019 | 329 |
| A14569 | A17030 | 283 | A14569 | A17033 | 386 |

|        |        |     |        |        |     |
|--------|--------|-----|--------|--------|-----|
| A14569 | A17035 | 353 | A14569 | A17144 | 254 |
| A14570 | A14596 | 490 | A14570 | A14604 | 63  |
| A14570 | A14635 | 480 | A14570 | A14733 | 205 |
| A14570 | A14799 | 185 | A14570 | A14903 | 313 |
| A14570 | A15287 | 210 | A14570 | A15291 | 334 |
| A14570 | A15292 | 491 | A14570 | A15296 | 188 |
| A14570 | A15297 | 332 | A14570 | A15312 | 489 |
| A14570 | A15313 | 424 | A14570 | A15314 | 243 |
| A14570 | A15322 | 475 | A14570 | A15339 | 218 |
| A14570 | A15349 | 479 | A14570 | A15352 | 419 |
| A14570 | A15366 | 491 | A14570 | A15419 | 196 |
| A14570 | A15431 | 430 | A14570 | A15432 | 402 |
| A14570 | A15435 | 389 | A14570 | A15436 | 249 |
| A14570 | A15452 | 371 | A14570 | A15456 | 268 |
| A14570 | A15477 | 177 | A14570 | A15478 | 483 |
| A14570 | A15480 | 477 | A14570 | A15482 | 260 |
| A14570 | A15487 | 241 | A14570 | A15492 | 441 |
| A14570 | A15495 | 491 | A14570 | A15498 | 266 |
| A14570 | A15606 | 443 | A14570 | A15632 | 339 |
| A14570 | A15680 | 417 | A14570 | A15770 | 473 |
| A14570 | A15793 | 488 | A14570 | A15808 | 177 |
| A14570 | A15810 | 171 | A14570 | A15833 | 154 |
| A14570 | A15852 | 400 | A14570 | A15870 | 307 |
| A14570 | A15884 | 481 | A14570 | A15922 | 165 |
| A14570 | A16498 | 279 | A14570 | A16597 | 174 |
| A14570 | A16611 | 152 | A14570 | A16664 | 167 |
| A14570 | A16693 | 154 | A14570 | A16703 | 252 |
| A14570 | A16706 | 165 | A14570 | A16774 | 259 |
| A14570 | A16776 | 221 | A14570 | A16853 | 187 |
| A14570 | A16868 | 187 | A14570 | A16905 | 232 |
| A14570 | A16944 | 333 | A14570 | A16965 | 480 |
| A14571 | A15106 | 283 | A14571 | A15244 | 427 |
| A14571 | A16318 | 180 | A14573 | A14763 | 465 |
| A14577 | A15506 | 213 | A14577 | A15649 | 195 |
| A14579 | A14588 | 443 | A14579 | A14683 | 491 |
| A14582 | A16224 | 313 | A14583 | A14585 | 162 |
| A14585 | A14589 | 720 | A14585 | A14623 | 485 |
| A14585 | A14643 | 489 | A14585 | A14671 | 302 |
| A14585 | A14792 | 469 | A14585 | A16258 | 333 |
| A14586 | A14612 | 411 | A14588 | A14643 | 385 |
| A14588 | A14652 | 152 | A14588 | A14787 | 279 |
| A14589 | A14636 | 63  | A14589 | A14637 | 357 |
| A14589 | A14638 | 238 | A14589 | A14639 | 356 |
| A14589 | A14640 | 168 | A14589 | A14643 | 708 |
| A14589 | A14648 | 417 | A14589 | A14674 | 458 |
| A14589 | A14925 | 358 | A14589 | A15567 | 193 |

|        |        |     |        |        |     |
|--------|--------|-----|--------|--------|-----|
| A14589 | A16792 | 396 | A14591 | A14596 | 382 |
| A14591 | A14659 | 486 | A14591 | A14843 | 319 |
| A14591 | A15188 | 485 | A14591 | A15254 | 238 |
| A14591 | A15507 | 491 | A14591 | A15547 | 491 |
| A14591 | A15612 | 454 | A14591 | A15660 | 268 |
| A14591 | A15722 | 238 | A14591 | A15769 | 441 |
| A14591 | A16293 | 484 | A14591 | A16298 | 252 |
| A14591 | A16580 | 271 | A14591 | A16627 | 491 |
| A14591 | A16632 | 408 | A14591 | A16822 | 384 |
| A14591 | A16879 | 473 | A14591 | A16947 | 463 |
| A14591 | A16970 | 335 | A14591 | A16973 | 477 |
| A14593 | A14631 | 438 | A14594 | A15440 | 167 |
| A14594 | A15543 | 274 | A14594 | A16060 | 154 |
| A14594 | A17088 | 157 | A14595 | A14596 | 477 |
| A14595 | A14659 | 238 | A14595 | A14799 | 212 |
| A14595 | A15105 | 232 | A14595 | A15680 | 236 |
| A14595 | A15683 | 236 | A14595 | A15937 | 223 |
| A14595 | A16157 | 229 | A14595 | A16261 | 323 |
| A14595 | A16552 | 212 | A14595 | A16566 | 363 |
| A14595 | A16587 | 351 | A14595 | A16597 | 299 |
| A14595 | A16664 | 296 | A14595 | A16680 | 286 |
| A14595 | A16682 | 361 | A14595 | A16695 | 391 |
| A14595 | A16704 | 340 | A14595 | A16707 | 409 |
| A14595 | A16913 | 380 | A14596 | A14609 | 279 |
| A14596 | A14636 | 428 | A14596 | A14659 | 785 |
| A14596 | A14851 | 235 | A14596 | A15143 | 162 |
| A14596 | A15188 | 486 | A14596 | A15212 | 152 |
| A14596 | A15254 | 193 | A14596 | A15293 | 899 |
| A14596 | A15294 | 899 | A14596 | A15297 | 491 |
| A14596 | A15324 | 152 | A14596 | A15338 | 170 |
| A14596 | A15353 | 182 | A14596 | A15355 | 319 |
| A14596 | A15482 | 272 | A14596 | A15507 | 768 |
| A14596 | A15519 | 488 | A14596 | A15547 | 516 |
| A14596 | A15564 | 236 | A14596 | A15606 | 380 |
| A14596 | A15612 | 570 | A14596 | A15624 | 463 |
| A14596 | A15660 | 491 | A14596 | A15661 | 327 |
| A14596 | A15684 | 551 | A14596 | A15708 | 371 |
| A14596 | A15717 | 488 | A14596 | A15720 | 230 |
| A14596 | A15722 | 491 | A14596 | A15723 | 330 |
| A14596 | A15725 | 183 | A14596 | A15730 | 294 |
| A14596 | A15769 | 475 | A14596 | A15900 | 235 |
| A14596 | A15931 | 335 | A14596 | A15932 | 455 |
| A14596 | A16060 | 177 | A14596 | A16119 | 430 |
| A14596 | A16157 | 485 | A14596 | A16218 | 475 |
| A14596 | A16259 | 470 | A14596 | A16291 | 246 |
| A14596 | A16293 | 483 | A14596 | A16298 | 491 |

|        |        |     |        |        |     |
|--------|--------|-----|--------|--------|-----|
| A14596 | A16463 | 317 | A14596 | A16492 | 235 |
| A14596 | A16580 | 489 | A14596 | A16627 | 481 |
| A14596 | A16632 | 213 | A14596 | A16636 | 228 |
| A14596 | A16696 | 288 | A14596 | A16697 | 328 |
| A14596 | A16720 | 474 | A14596 | A16768 | 252 |
| A14596 | A16788 | 177 | A14596 | A16822 | 456 |
| A14596 | A16841 | 199 | A14596 | A16879 | 422 |
| A14596 | A16885 | 177 | A14596 | A16923 | 162 |
| A14596 | A17089 | 193 | A14596 | A17112 | 445 |
| A14596 | A17127 | 472 | A14596 | A17134 | 470 |
| A14596 | A17140 | 308 | A14596 | A17197 | 171 |
| A14597 | A14701 | 664 | A14597 | A14819 | 391 |
| A14597 | A15237 | 251 | A14597 | A15297 | 469 |
| A14597 | A15338 | 469 | A14597 | A15437 | 200 |
| A14597 | A15519 | 383 | A14597 | A15660 | 217 |
| A14598 | A14600 | 375 | A14598 | A14799 | 154 |
| A14598 | A15308 | 213 | A14598 | A15318 | 210 |
| A14598 | A15394 | 263 | A14598 | A15395 | 241 |
| A14598 | A15425 | 339 | A14598 | A15427 | 294 |
| A14598 | A15603 | 306 | A14598 | A15607 | 329 |
| A14598 | A15642 | 269 | A14598 | A15912 | 230 |
| A14598 | A15964 | 307 | A14599 | A14930 | 404 |
| A14599 | A15285 | 310 | A14599 | A15290 | 307 |
| A14599 | A15308 | 303 | A14599 | A15394 | 351 |
| A14599 | A15425 | 486 | A14599 | A15516 | 235 |
| A14599 | A15517 | 435 | A14599 | A15608 | 252 |
| A14599 | A15610 | 401 | A14599 | A15642 | 420 |
| A14599 | A15795 | 218 | A14599 | A15819 | 243 |
| A14599 | A15964 | 272 | A14599 | A15999 | 369 |
| A14599 | A16282 | 401 | A14600 | A14767 | 436 |
| A14600 | A15425 | 290 | A14600 | A15475 | 363 |
| A14600 | A16562 | 436 | A14600 | A17052 | 436 |
| A14604 | A14667 | 167 | A14604 | A15198 | 291 |
| A14604 | A15316 | 224 | A14604 | A15318 | 232 |
| A14604 | A15327 | 491 | A14604 | A15451 | 243 |
| A14604 | A15460 | 234 | A14604 | A15795 | 486 |
| A14604 | A15800 | 198 | A14604 | A15916 | 245 |
| A14604 | A15997 | 899 | A14605 | A14639 | 312 |
| A14605 | A14642 | 390 | A14605 | A14643 | 366 |
| A14605 | A14785 | 340 | A14605 | A14856 | 154 |
| A14606 | A15635 | 391 | A14607 | A14643 | 379 |
| A14609 | A15768 | 205 | A14609 | A15916 | 243 |
| A14610 | A15835 | 406 | A14610 | A15913 | 291 |
| A14610 | A16636 | 174 | A14611 | A15422 | 467 |
| A14611 | A16117 | 460 | A14611 | A16724 | 177 |
| A14613 | A15425 | 270 | A14613 | A16036 | 412 |

|        |        |     |        |        |     |
|--------|--------|-----|--------|--------|-----|
| A14614 | A14701 | 232 | A14614 | A15286 | 462 |
| A14614 | A15524 | 176 | A14614 | A15531 | 283 |
| A14614 | A15564 | 229 | A14614 | A15863 | 334 |
| A14615 | A14621 | 297 | A14616 | A15285 | 451 |
| A14618 | A14642 | 360 | A14620 | A14639 | 408 |
| A14620 | A14643 | 379 | A14620 | A14785 | 462 |
| A14621 | A14790 | 179 | A14621 | A14886 | 151 |
| A14621 | A15212 | 179 | A14621 | A15278 | 266 |
| A14621 | A15377 | 369 | A14621 | A15712 | 217 |
| A14621 | A15718 | 363 | A14621 | A15939 | 176 |
| A14621 | A16665 | 207 | A14622 | A15858 | 424 |
| A14622 | A15932 | 167 | A14622 | A16673 | 352 |
| A14623 | A14646 | 328 | A14626 | A15322 | 286 |
| A14626 | A15342 | 313 | A14626 | A15516 | 347 |
| A14626 | A16397 | 340 | A14626 | A16530 | 438 |
| A14628 | A15394 | 399 | A14628 | A15964 | 330 |
| A14632 | A14643 | 364 | A14633 | A15125 | 188 |
| A14633 | A15222 | 168 | A14633 | A15336 | 177 |
| A14633 | A15557 | 210 | A14633 | A15626 | 399 |
| A14633 | A15638 | 160 | A14633 | A15644 | 157 |
| A14633 | A16294 | 352 | A14633 | A17078 | 196 |
| A14634 | A14636 | 243 | A14634 | A14637 | 379 |
| A14634 | A14643 | 428 | A14634 | A14666 | 477 |
| A14634 | A14685 | 399 | A14634 | A16068 | 247 |
| A14634 | A16626 | 180 | A14635 | A14636 | 340 |
| A14635 | A14642 | 202 | A14635 | A14643 | 373 |
| A14635 | A14648 | 187 | A14635 | A14653 | 462 |
| A14635 | A14667 | 378 | A14635 | A14699 | 385 |
| A14635 | A14778 | 470 | A14635 | A15241 | 481 |
| A14635 | A15273 | 380 | A14635 | A15282 | 385 |
| A14635 | A15289 | 263 | A14635 | A15292 | 491 |
| A14635 | A15294 | 252 | A14635 | A15295 | 481 |
| A14635 | A15313 | 296 | A14635 | A15314 | 491 |
| A14635 | A15320 | 173 | A14635 | A15322 | 491 |
| A14635 | A15349 | 480 | A14635 | A15352 | 238 |
| A14635 | A15357 | 227 | A14635 | A15360 | 443 |
| A14635 | A15361 | 330 | A14635 | A15395 | 345 |
| A14635 | A15398 | 267 | A14635 | A15402 | 193 |
| A14635 | A15452 | 229 | A14635 | A15480 | 279 |
| A14635 | A15495 | 407 | A14635 | A15506 | 440 |
| A14635 | A15535 | 348 | A14635 | A15559 | 247 |
| A14635 | A15578 | 400 | A14635 | A15598 | 420 |
| A14635 | A15600 | 180 | A14635 | A15606 | 488 |
| A14635 | A15630 | 419 | A14635 | A16260 | 162 |
| A14635 | A16519 | 207 | A14635 | A16904 | 246 |
| A14636 | A14637 | 341 | A14636 | A14639 | 443 |

|        |        |     |        |        |     |
|--------|--------|-----|--------|--------|-----|
| A14636 | A14643 | 491 | A14636 | A14650 | 274 |
| A14636 | A14666 | 210 | A14636 | A14685 | 274 |
| A14636 | A14785 | 243 | A14636 | A14931 | 154 |
| A14636 | A15282 | 270 | A14636 | A15356 | 328 |
| A14636 | A15366 | 187 | A14637 | A14638 | 202 |
| A14637 | A14639 | 417 | A14637 | A14640 | 488 |
| A14637 | A14643 | 486 | A14637 | A14648 | 201 |
| A14637 | A14666 | 419 | A14637 | A14673 | 361 |
| A14637 | A14685 | 396 | A14637 | A14698 | 479 |
| A14637 | A14785 | 260 | A14637 | A14793 | 468 |
| A14637 | A17007 | 190 | A14637 | A17155 | 221 |
| A14638 | A14674 | 167 | A14639 | A14643 | 469 |
| A14639 | A14785 | 466 | A14639 | A15280 | 430 |
| A14640 | A14643 | 159 | A14640 | A14674 | 221 |
| A14640 | A14698 | 352 | A14641 | A14674 | 441 |
| A14641 | A16738 | 269 | A14642 | A14643 | 488 |
| A14642 | A14645 | 338 | A14642 | A14652 | 457 |
| A14642 | A15272 | 260 | A14642 | A15286 | 217 |
| A14642 | A15725 | 170 | A14642 | A15772 | 390 |
| A14642 | A15843 | 324 | A14642 | A16062 | 393 |
| A14642 | A16131 | 235 | A14642 | A16201 | 241 |
| A14642 | A16222 | 227 | A14642 | A16256 | 406 |
| A14642 | A16328 | 470 | A14642 | A16738 | 491 |
| A14643 | A14648 | 480 | A14643 | A14652 | 63  |
| A14643 | A14656 | 340 | A14643 | A14659 | 156 |
| A14643 | A14666 | 483 | A14643 | A14670 | 310 |
| A14643 | A14674 | 473 | A14643 | A14683 | 152 |
| A14643 | A14685 | 404 | A14643 | A14687 | 204 |
| A14643 | A14692 | 174 | A14643 | A14702 | 446 |
| A14643 | A14703 | 247 | A14643 | A14709 | 243 |
| A14643 | A14785 | 475 | A14643 | A14806 | 293 |
| A14643 | A14852 | 293 | A14643 | A14862 | 283 |
| A14643 | A14893 | 229 | A14643 | A15270 | 154 |
| A14643 | A15475 | 195 | A14643 | A15534 | 202 |
| A14643 | A16738 | 335 | A14643 | A16885 | 241 |
| A14645 | A16738 | 301 | A14646 | A14660 | 232 |
| A14647 | A15346 | 290 | A14647 | A15361 | 219 |
| A14647 | A15630 | 196 | A14647 | A15976 | 240 |
| A14648 | A14795 | 269 | A14648 | A14889 | 258 |
| A14648 | A15295 | 470 | A14648 | A15728 | 201 |
| A14648 | A15917 | 180 | A14648 | A16840 | 212 |
| A14649 | A15233 | 283 | A14650 | A15630 | 174 |
| A14650 | A15676 | 215 | A14650 | A16404 | 154 |
| A14652 | A17146 | 163 | A14653 | A15186 | 347 |
| A14654 | A15258 | 294 | A14654 | A15277 | 235 |
| A14654 | A15430 | 479 | A14654 | A15925 | 232 |

|        |        |     |        |        |     |
|--------|--------|-----|--------|--------|-----|
| A14654 | A15934 | 258 | A14655 | A14701 | 307 |
| A14655 | A14801 | 230 | A14655 | A14826 | 223 |
| A14655 | A14965 | 205 | A14655 | A14966 | 205 |
| A14655 | A15266 | 427 | A14655 | A15297 | 312 |
| A14655 | A15376 | 297 | A14655 | A15501 | 462 |
| A14655 | A15502 | 419 | A14655 | A15643 | 238 |
| A14655 | A15649 | 276 | A14655 | A15946 | 286 |
| A14655 | A15949 | 472 | A14655 | A16088 | 314 |
| A14655 | A17049 | 457 | A14655 | A17066 | 356 |
| A14655 | A17168 | 486 | A14655 | A17230 | 126 |
| A14656 | A14683 | 286 | A14656 | A14709 | 479 |
| A14659 | A15134 | 347 | A14659 | A15188 | 491 |
| A14659 | A15254 | 285 | A14659 | A15297 | 401 |
| A14659 | A15355 | 358 | A14659 | A15431 | 200 |
| A14659 | A15482 | 279 | A14659 | A15507 | 655 |
| A14659 | A15519 | 417 | A14659 | A15547 | 483 |
| A14659 | A15559 | 173 | A14659 | A15606 | 515 |
| A14659 | A15612 | 191 | A14659 | A15660 | 352 |
| A14659 | A15717 | 419 | A14659 | A15722 | 491 |
| A14659 | A15728 | 230 | A14659 | A15759 | 257 |
| A14659 | A15769 | 468 | A14659 | A16293 | 491 |
| A14659 | A16298 | 491 | A14659 | A16301 | 285 |
| A14659 | A16580 | 485 | A14659 | A16627 | 491 |
| A14659 | A16632 | 360 | A14659 | A16697 | 184 |
| A14659 | A16720 | 372 | A14659 | A16822 | 458 |
| A14659 | A16879 | 396 | A14659 | A16947 | 333 |
| A14659 | A16970 | 269 | A14659 | A16973 | 227 |
| A14659 | A17197 | 202 | A14660 | A14799 | 196 |
| A14660 | A15349 | 254 | A14660 | A15840 | 201 |
| A14660 | A16732 | 307 | A14661 | A14674 | 322 |
| A14661 | A14693 | 344 | A14661 | A14711 | 745 |
| A14661 | A14783 | 269 | A14661 | A14799 | 488 |
| A14661 | A14820 | 394 | A14661 | A14832 | 218 |
| A14661 | A14838 | 157 | A14661 | A14844 | 633 |
| A14661 | A14877 | 626 | A14661 | A14910 | 473 |
| A14661 | A14917 | 488 | A14661 | A14918 | 491 |
| A14661 | A15055 | 180 | A14661 | A15292 | 435 |
| A14661 | A15301 | 152 | A14661 | A15315 | 283 |
| A14661 | A15336 | 564 | A14661 | A15347 | 283 |
| A14661 | A15366 | 491 | A14661 | A15462 | 472 |
| A14661 | A15463 | 477 | A14661 | A15557 | 430 |
| A14661 | A15617 | 283 | A14661 | A15626 | 334 |
| A14661 | A15647 | 396 | A14661 | A15680 | 491 |
| A14661 | A15734 | 157 | A14661 | A15770 | 465 |
| A14661 | A15909 | 369 | A14661 | A16022 | 382 |
| A14661 | A16113 | 110 | A14661 | A16115 | 247 |

|        |        |     |        |        |     |
|--------|--------|-----|--------|--------|-----|
| A14661 | A16364 | 283 | A14661 | A16669 | 355 |
| A14661 | A16672 | 218 | A14661 | A16738 | 322 |
| A14661 | A16954 | 344 | A14661 | A16981 | 467 |
| A14661 | A17061 | 597 | A14661 | A17190 | 227 |
| A14662 | A15297 | 899 | A14662 | A15323 | 905 |
| A14662 | A15324 | 907 | A14662 | A15353 | 899 |
| A14662 | A15359 | 899 | A14664 | A15349 | 174 |
| A14666 | A14685 | 385 | A14666 | A14785 | 369 |
| A14667 | A14930 | 297 | A14667 | A15292 | 477 |
| A14667 | A15310 | 328 | A14667 | A15311 | 207 |
| A14667 | A15312 | 173 | A14667 | A15313 | 296 |
| A14667 | A15314 | 483 | A14667 | A15322 | 224 |
| A14667 | A15348 | 460 | A14667 | A15349 | 390 |
| A14667 | A15352 | 432 | A14667 | A15401 | 177 |
| A14667 | A15420 | 249 | A14667 | A15436 | 173 |
| A14667 | A15447 | 270 | A14667 | A15451 | 266 |
| A14667 | A15454 | 210 | A14667 | A15460 | 258 |
| A14667 | A15461 | 168 | A14667 | A15480 | 265 |
| A14667 | A15495 | 373 | A14667 | A15515 | 179 |
| A14667 | A15802 | 277 | A14667 | A15816 | 339 |
| A14667 | A15820 | 260 | A14667 | A15916 | 268 |
| A14667 | A16055 | 277 | A14667 | A16555 | 310 |
| A14670 | A16300 | 200 | A14672 | A16738 | 285 |
| A14674 | A14697 | 221 | A14674 | A14702 | 634 |
| A14674 | A14703 | 185 | A14674 | A14712 | 460 |
| A14674 | A14715 | 313 | A14674 | A14780 | 296 |
| A14674 | A15510 | 544 | A14674 | A16299 | 311 |
| A14674 | A16600 | 296 | A14674 | A16733 | 339 |
| A14674 | A16738 | 853 | A14676 | A14677 | 438 |
| A14677 | A16296 | 401 | A14678 | A15296 | 223 |
| A14679 | A15314 | 196 | A14680 | A16222 | 420 |
| A14680 | A16738 | 328 | A14685 | A15430 | 238 |
| A14685 | A17155 | 383 | A14690 | A14739 | 265 |
| A14690 | A15291 | 485 | A14690 | A15315 | 157 |
| A14690 | A15345 | 251 | A14690 | A15353 | 278 |
| A14690 | A16243 | 180 | A14690 | A16587 | 165 |
| A14690 | A16691 | 229 | A14690 | A16788 | 302 |
| A14690 | A16815 | 238 | A14693 | A14804 | 267 |
| A14693 | A14872 | 195 | A14693 | A15301 | 571 |
| A14693 | A15302 | 533 | A14693 | A15366 | 586 |
| A14693 | A15430 | 649 | A14693 | A15462 | 639 |
| A14693 | A15463 | 499 | A14693 | A15498 | 297 |
| A14693 | A15552 | 252 | A14693 | A15669 | 491 |
| A14693 | A15925 | 152 | A14693 | A15934 | 180 |
| A14693 | A15962 | 270 | A14693 | A16436 | 491 |
| A14693 | A16963 | 196 | A14694 | A15369 | 474 |



|        |        |     |        |        |     |
|--------|--------|-----|--------|--------|-----|
| A14694 | A15524 | 174 | A14694 | A15536 | 305 |
| A14694 | A15654 | 439 | A14694 | A15714 | 160 |
| A14694 | A15837 | 200 | A14694 | A16051 | 205 |
| A14694 | A16127 | 486 | A14694 | A16128 | 405 |
| A14694 | A16129 | 398 | A14694 | A16226 | 477 |
| A14694 | A16274 | 200 | A14694 | A16299 | 436 |
| A14694 | A16612 | 265 | A14694 | A16626 | 490 |
| A14694 | A16646 | 236 | A14694 | A16692 | 486 |
| A14694 | A16810 | 218 | A14698 | A16741 | 163 |
| A14698 | A16746 | 375 | A14698 | A17078 | 154 |
| A14699 | A14778 | 664 | A14699 | A14779 | 417 |
| A14699 | A14823 | 260 | A14699 | A14850 | 352 |
| A14699 | A15109 | 187 | A14699 | A15375 | 240 |
| A14699 | A15660 | 467 | A14699 | A15661 | 208 |
| A14699 | A15662 | 350 | A14699 | A15684 | 491 |
| A14699 | A15746 | 449 | A14699 | A15937 | 477 |
| A14699 | A16048 | 363 | A14699 | A16548 | 202 |
| A14699 | A16587 | 247 | A14701 | A14819 | 665 |
| A14701 | A14831 | 486 | A14701 | A15297 | 475 |
| A14701 | A15338 | 450 | A14701 | A15519 | 591 |
| A14701 | A15529 | 332 | A14701 | A15534 | 165 |
| A14701 | A15558 | 491 | A14701 | A15565 | 341 |
| A14701 | A15738 | 491 | A14701 | A15837 | 223 |
| A14701 | A16376 | 160 | A14701 | A16401 | 223 |
| A14701 | A16654 | 212 | A14702 | A14703 | 399 |
| A14702 | A16738 | 629 | A14703 | A16738 | 455 |
| A14704 | A14777 | 465 | A14704 | A14913 | 438 |
| A14706 | A14708 | 290 | A14706 | A14739 | 273 |
| A14706 | A14799 | 439 | A14706 | A14921 | 260 |
| A14706 | A15187 | 154 | A14706 | A15369 | 477 |
| A14706 | A15371 | 308 | A14706 | A15524 | 407 |
| A14706 | A15539 | 385 | A14706 | A15541 | 419 |
| A14706 | A15653 | 171 | A14706 | A15683 | 303 |
| A14706 | A15709 | 346 | A14706 | A15711 | 373 |
| A14706 | A15743 | 174 | A14706 | A15818 | 283 |
| A14706 | A15850 | 383 | A14706 | A16127 | 425 |
| A14706 | A16128 | 486 | A14706 | A16129 | 312 |
| A14706 | A16157 | 477 | A14706 | A16243 | 188 |
| A14706 | A16294 | 470 | A14706 | A16343 | 251 |
| A14706 | A16452 | 154 | A14706 | A16552 | 262 |
| A14706 | A16565 | 449 | A14706 | A16587 | 433 |
| A14706 | A16597 | 218 | A14706 | A16611 | 479 |
| A14706 | A16646 | 456 | A14706 | A16652 | 299 |
| A14706 | A16664 | 462 | A14706 | A16675 | 452 |
| A14706 | A16680 | 373 | A14706 | A16690 | 271 |
| A14706 | A16691 | 238 | A14706 | A16692 | 165 |

|        |        |     |        |        |     |
|--------|--------|-----|--------|--------|-----|
| A14706 | A16693 | 251 | A14706 | A16697 | 188 |
| A14706 | A16703 | 369 | A14706 | A16704 | 154 |
| A14706 | A16707 | 297 | A14706 | A16762 | 489 |
| A14706 | A16774 | 228 | A14706 | A16788 | 310 |
| A14706 | A16790 | 306 | A14706 | A16815 | 246 |
| A14706 | A16829 | 399 | A14706 | A16866 | 235 |
| A14706 | A16874 | 184 | A14706 | A16942 | 228 |
| A14706 | A17144 | 167 | A14707 | A15562 | 380 |
| A14708 | A14718 | 162 | A14708 | A15105 | 452 |
| A14708 | A15187 | 329 | A14708 | A15189 | 255 |
| A14708 | A15262 | 232 | A14708 | A15541 | 257 |
| A14708 | A15661 | 156 | A14708 | A15665 | 424 |
| A14708 | A15680 | 177 | A14708 | A15683 | 408 |
| A14708 | A15698 | 180 | A14708 | A15709 | 322 |
| A14708 | A15711 | 193 | A14708 | A15743 | 216 |
| A14708 | A15774 | 199 | A14708 | A15818 | 193 |
| A14708 | A15943 | 162 | A14708 | A15949 | 404 |
| A14708 | A16133 | 447 | A14708 | A16157 | 452 |
| A14708 | A16552 | 385 | A14708 | A16565 | 363 |
| A14708 | A16587 | 216 | A14708 | A16597 | 446 |
| A14708 | A16611 | 419 | A14708 | A16664 | 267 |
| A14708 | A16675 | 391 | A14708 | A16680 | 252 |
| A14708 | A16690 | 452 | A14708 | A16691 | 277 |
| A14708 | A16703 | 439 | A14708 | A16706 | 296 |
| A14708 | A16708 | 251 | A14708 | A16709 | 215 |
| A14708 | A16764 | 366 | A14708 | A16790 | 345 |
| A14708 | A16797 | 372 | A14708 | A16802 | 173 |
| A14708 | A16806 | 291 | A14708 | A16824 | 277 |
| A14708 | A16838 | 334 | A14708 | A16866 | 154 |
| A14708 | A16874 | 226 | A14708 | A16882 | 321 |
| A14708 | A16900 | 249 | A14708 | A16905 | 308 |
| A14708 | A16954 | 215 | A14708 | A17018 | 235 |
| A14708 | A17033 | 357 | A14708 | A17035 | 180 |
| A14708 | A17144 | 208 | A14710 | A14901 | 401 |
| A14710 | A15462 | 263 | A14710 | A15909 | 433 |
| A14711 | A14783 | 269 | A14711 | A14838 | 154 |
| A14711 | A14844 | 624 | A14711 | A14877 | 570 |
| A14711 | A14917 | 486 | A14711 | A14918 | 469 |
| A14711 | A15055 | 423 | A14711 | A15315 | 283 |
| A14711 | A15347 | 283 | A14711 | A15617 | 283 |
| A14711 | A15647 | 207 | A14711 | A15856 | 205 |
| A14711 | A16364 | 283 | A14711 | A17061 | 307 |
| A14712 | A14715 | 430 | A14713 | A15926 | 363 |
| A14718 | A14799 | 207 | A14718 | A14917 | 266 |
| A14718 | A14921 | 330 | A14718 | A15105 | 234 |
| A14718 | A15187 | 241 | A14718 | A15189 | 307 |

|        |        |     |        |        |     |
|--------|--------|-----|--------|--------|-----|
| A14718 | A15262 | 377 | A14718 | A15541 | 308 |
| A14718 | A15696 | 267 | A14718 | A15709 | 277 |
| A14718 | A15711 | 363 | A14718 | A15774 | 245 |
| A14718 | A16157 | 329 | A14718 | A16343 | 323 |
| A14718 | A16552 | 446 | A14718 | A16565 | 398 |
| A14718 | A16566 | 278 | A14718 | A16597 | 439 |
| A14718 | A16608 | 285 | A14718 | A16611 | 356 |
| A14718 | A16664 | 183 | A14718 | A16699 | 241 |
| A14718 | A16702 | 249 | A14718 | A16703 | 235 |
| A14718 | A16704 | 366 | A14718 | A16709 | 259 |
| A14718 | A16764 | 188 | A14718 | A16788 | 366 |
| A14718 | A16802 | 219 | A14718 | A16806 | 327 |
| A14718 | A16829 | 273 | A14718 | A16858 | 345 |
| A14718 | A16859 | 366 | A14718 | A16905 | 350 |
| A14718 | A16913 | 306 | A14718 | A16944 | 290 |
| A14718 | A17012 | 266 | A14718 | A17014 | 306 |
| A14718 | A17015 | 229 | A14718 | A17019 | 330 |
| A14718 | A17030 | 283 | A14718 | A17033 | 273 |
| A14718 | A17190 | 272 | A14719 | A14799 | 348 |
| A14719 | A14838 | 160 | A14719 | A14903 | 406 |
| A14719 | A14937 | 281 | A14719 | A15187 | 439 |
| A14719 | A15680 | 372 | A14719 | A15683 | 151 |
| A14719 | A16157 | 364 | A14719 | A16187 | 259 |
| A14719 | A16343 | 346 | A14719 | A16387 | 323 |
| A14719 | A16565 | 221 | A14719 | A16567 | 324 |
| A14719 | A16597 | 221 | A14719 | A16611 | 301 |
| A14719 | A16664 | 347 | A14719 | A16675 | 319 |
| A14719 | A16693 | 346 | A14719 | A16702 | 281 |
| A14719 | A16703 | 384 | A14719 | A16706 | 353 |
| A14719 | A16774 | 330 | A14719 | A16824 | 338 |
| A14719 | A16866 | 235 | A14719 | A16913 | 330 |
| A14719 | A16944 | 317 | A14719 | A16954 | 290 |
| A14719 | A17012 | 294 | A14719 | A17017 | 290 |
| A14719 | A17018 | 306 | A14719 | A17035 | 259 |
| A14719 | A17133 | 293 | A14719 | A17211 | 299 |
| A14727 | A15261 | 241 | A14727 | A15613 | 490 |
| A14728 | A14826 | 174 | A14728 | A14986 | 405 |
| A14728 | A15629 | 452 | A14728 | A15905 | 241 |
| A14729 | A15756 | 63  | A14733 | A15292 | 273 |
| A14733 | A15322 | 162 | A14735 | A15301 | 226 |
| A14735 | A16445 | 299 | A14738 | A15225 | 172 |
| A14738 | A15244 | 162 | A14738 | A15684 | 424 |
| A14738 | A15697 | 446 | A14738 | A15711 | 167 |
| A14738 | A15734 | 170 | A14738 | A15741 | 491 |
| A14738 | A15760 | 489 | A14738 | A15769 | 173 |
| A14738 | A15778 | 199 | A14738 | A15932 | 160 |

|        |        |     |        |        |     |
|--------|--------|-----|--------|--------|-----|
| A14738 | A15933 | 160 | A14738 | A16266 | 416 |
| A14738 | A16272 | 160 | A14738 | A16291 | 491 |
| A14738 | A16318 | 257 | A14738 | A16437 | 359 |
| A14738 | A16446 | 160 | A14738 | A16585 | 160 |
| A14738 | A16587 | 188 | A14738 | A16793 | 491 |
| A14738 | A16837 | 260 | A14738 | A16886 | 188 |
| A14738 | A17023 | 310 | A14738 | A17127 | 193 |
| A14739 | A14799 | 243 | A14739 | A15292 | 152 |
| A14739 | A15498 | 160 | A14739 | A15541 | 316 |
| A14739 | A15683 | 268 | A14739 | A15709 | 294 |
| A14739 | A15711 | 358 | A14739 | A15932 | 224 |
| A14739 | A16157 | 260 | A14739 | A16187 | 348 |
| A14739 | A16243 | 375 | A14739 | A16565 | 324 |
| A14739 | A16587 | 369 | A14739 | A16611 | 283 |
| A14739 | A16680 | 313 | A14739 | A16691 | 398 |
| A14739 | A16738 | 241 | A14739 | A16788 | 424 |
| A14739 | A16815 | 401 | A14741 | A14996 | 353 |
| A14741 | A15291 | 367 | A14741 | A15464 | 274 |
| A14741 | A17157 | 196 | A14753 | A16635 | 340 |
| A14757 | A16274 | 278 | A14758 | A14948 | 199 |
| A14758 | A16410 | 199 | A14760 | A16680 | 357 |
| A14767 | A15475 | 407 | A14767 | A16562 | 452 |
| A14767 | A17052 | 452 | A14769 | A14974 | 443 |
| A14775 | A17070 | 460 | A14776 | A16231 | 433 |
| A14777 | A14913 | 382 | A14778 | A14850 | 334 |
| A14778 | A15662 | 296 | A14778 | A15684 | 291 |
| A14778 | A15937 | 451 | A14778 | A16587 | 247 |
| A14788 | A15498 | 441 | A14789 | A14812 | 491 |
| A14789 | A15430 | 285 | A14789 | A15627 | 378 |
| A14790 | A16877 | 452 | A14798 | A15909 | 398 |
| A14799 | A14832 | 329 | A14799 | A14838 | 269 |
| A14799 | A14903 | 452 | A14799 | A14917 | 420 |
| A14799 | A14921 | 230 | A14799 | A15105 | 316 |
| A14799 | A15187 | 406 | A14799 | A15189 | 341 |
| A14799 | A15262 | 232 | A14799 | A15284 | 291 |
| A14799 | A15541 | 450 | A14799 | A15665 | 491 |
| A14799 | A15680 | 323 | A14799 | A15683 | 451 |
| A14799 | A15709 | 408 | A14799 | A15711 | 404 |
| A14799 | A15810 | 238 | A14799 | A15818 | 245 |
| A14799 | A15850 | 238 | A14799 | A15932 | 160 |
| A14799 | A15940 | 372 | A14799 | A16137 | 230 |
| A14799 | A16157 | 486 | A14799 | A16187 | 452 |
| A14799 | A16215 | 167 | A14799 | A16243 | 157 |
| A14799 | A16261 | 388 | A14799 | A16300 | 218 |
| A14799 | A16343 | 417 | A14799 | A16552 | 491 |
| A14799 | A16565 | 484 | A14799 | A16566 | 162 |

|        |        |     |        |        |     |
|--------|--------|-----|--------|--------|-----|
| A14799 | A16585 | 196 | A14799 | A16587 | 486 |
| A14799 | A16597 | 477 | A14799 | A16611 | 488 |
| A14799 | A16652 | 154 | A14799 | A16664 | 489 |
| A14799 | A16675 | 436 | A14799 | A16680 | 447 |
| A14799 | A16682 | 160 | A14799 | A16684 | 302 |
| A14799 | A16690 | 454 | A14799 | A16691 | 208 |
| A14799 | A16692 | 263 | A14799 | A16693 | 221 |
| A14799 | A16695 | 419 | A14799 | A16697 | 288 |
| A14799 | A16699 | 347 | A14799 | A16702 | 260 |
| A14799 | A16703 | 456 | A14799 | A16704 | 440 |
| A14799 | A16706 | 230 | A14799 | A16707 | 438 |
| A14799 | A16764 | 283 | A14799 | A16766 | 477 |
| A14799 | A16774 | 405 | A14799 | A16776 | 302 |
| A14799 | A16788 | 285 | A14799 | A16790 | 364 |
| A14799 | A16799 | 188 | A14799 | A16815 | 414 |
| A14799 | A16824 | 208 | A14799 | A16829 | 157 |
| A14799 | A16858 | 252 | A14799 | A16866 | 297 |
| A14799 | A16874 | 152 | A14799 | A16900 | 177 |
| A14799 | A16905 | 391 | A14799 | A16913 | 329 |
| A14799 | A16934 | 485 | A14799 | A16942 | 196 |
| A14799 | A16944 | 391 | A14799 | A16954 | 364 |
| A14799 | A17012 | 371 | A14799 | A17018 | 162 |
| A14799 | A17019 | 230 | A14799 | A17030 | 168 |
| A14799 | A17033 | 157 | A14799 | A17211 | 286 |
| A14801 | A15034 | 174 | A14801 | A15384 | 340 |
| A14801 | A15390 | 152 | A14801 | A15954 | 260 |
| A14803 | A14804 | 324 | A14803 | A14856 | 404 |
| A14803 | A14858 | 350 | A14803 | A14907 | 375 |
| A14803 | A16103 | 389 | A14803 | A16262 | 152 |
| A14803 | A16286 | 369 | A14803 | A16335 | 332 |
| A14803 | A16753 | 344 | A14803 | A17041 | 260 |
| A14803 | A17089 | 184 | A14804 | A15372 | 223 |
| A14804 | A16219 | 223 | A14804 | A16531 | 223 |
| A14809 | A15378 | 154 | A14809 | A15609 | 219 |
| A14809 | A16864 | 205 | A14810 | A16408 | 399 |
| A14812 | A15430 | 333 | A14812 | A15925 | 313 |
| A14813 | A15657 | 188 | A14813 | A16680 | 188 |
| A14814 | A14857 | 466 | A14814 | A15874 | 299 |
| A14814 | A15985 | 379 | A14814 | A16262 | 445 |
| A14815 | A15358 | 394 | A14815 | A15465 | 435 |
| A14819 | A14843 | 394 | A14819 | A15519 | 461 |
| A14819 | A15558 | 369 | A14819 | A15666 | 386 |
| A14819 | A16654 | 238 | A14819 | A17133 | 213 |
| A14821 | A15312 | 184 | A14821 | A15628 | 449 |
| A14826 | A14835 | 160 | A14826 | A14917 | 313 |
| A14826 | A15653 | 329 | A14826 | A15729 | 218 |

|        |        |     |        |        |     |
|--------|--------|-----|--------|--------|-----|
| A14826 | A16157 | 401 | A14826 | A16387 | 218 |
| A14826 | A16565 | 218 | A14826 | A16566 | 196 |
| A14826 | A16567 | 221 | A14826 | A16675 | 171 |
| A14826 | A16682 | 191 | A14826 | A16701 | 213 |
| A14826 | A16704 | 157 | A14826 | A16774 | 229 |
| A14826 | A16776 | 201 | A14826 | A16790 | 174 |
| A14826 | A16815 | 247 | A14826 | A16829 | 188 |
| A14826 | A16838 | 160 | A14826 | A16874 | 318 |
| A14826 | A16908 | 274 | A14826 | A16944 | 208 |
| A14826 | A17133 | 177 | A14827 | A15237 | 548 |
| A14827 | A15297 | 188 | A14827 | A15312 | 238 |
| A14827 | A15323 | 154 | A14827 | A15339 | 311 |
| A14827 | A15353 | 196 | A14827 | A15359 | 232 |
| A14827 | A15435 | 316 | A14827 | A15557 | 170 |
| A14827 | A15645 | 243 | A14827 | A15874 | 235 |
| A14827 | A15905 | 480 | A14827 | A16026 | 457 |
| A14827 | A16027 | 481 | A14827 | A16028 | 152 |
| A14827 | A16103 | 160 | A14827 | A16151 | 179 |
| A14827 | A16994 | 167 | A14827 | A17078 | 210 |
| A14830 | A15613 | 391 | A14833 | A16740 | 412 |
| A14836 | A15237 | 310 | A14836 | A15323 | 324 |
| A14836 | A15852 | 154 | A14838 | A14903 | 328 |
| A14838 | A15187 | 159 | A14838 | A15189 | 207 |
| A14838 | A15358 | 257 | A14838 | A15647 | 372 |
| A14838 | A15650 | 160 | A14838 | A15685 | 311 |
| A14838 | A15711 | 288 | A14838 | A15770 | 398 |
| A14838 | A15932 | 230 | A14838 | A16061 | 229 |
| A14838 | A16117 | 281 | A14838 | A16157 | 297 |
| A14838 | A16343 | 255 | A14838 | A16552 | 183 |
| A14838 | A16565 | 223 | A14838 | A16587 | 435 |
| A14838 | A16597 | 224 | A14838 | A16611 | 335 |
| A14838 | A16617 | 634 | A14838 | A16652 | 460 |
| A14838 | A16664 | 428 | A14838 | A16675 | 174 |
| A14838 | A16680 | 202 | A14838 | A16690 | 278 |
| A14838 | A16692 | 170 | A14838 | A16695 | 260 |
| A14838 | A16703 | 283 | A14838 | A16707 | 302 |
| A14838 | A16776 | 204 | A14838 | A16790 | 311 |
| A14838 | A16806 | 260 | A14838 | A16824 | 366 |
| A14838 | A16913 | 232 | A14838 | A16927 | 414 |
| A14838 | A16954 | 177 | A14838 | A16982 | 414 |
| A14838 | A17018 | 196 | A14838 | A17091 | 396 |
| A14838 | A17144 | 172 | A14838 | A17211 | 190 |
| A14840 | A15877 | 335 | A14842 | A15085 | 433 |
| A14843 | A15262 | 256 | A14843 | A15507 | 340 |
| A14843 | A15510 | 367 | A14843 | A15547 | 483 |
| A14843 | A15613 | 301 | A14843 | A15666 | 671 |

|        |        |     |        |        |     |
|--------|--------|-----|--------|--------|-----|
| A14843 | A15946 | 418 | A14843 | A16216 | 477 |
| A14843 | A16681 | 404 | A14843 | A16871 | 265 |
| A14843 | A17012 | 162 | A14844 | A14877 | 324 |
| A14844 | A14917 | 445 | A14844 | A14918 | 389 |
| A14844 | A17061 | 324 | A14844 | A17148 | 341 |
| A14845 | A15666 | 436 | A14845 | A15765 | 481 |
| A14845 | A16403 | 335 | A14845 | A16540 | 279 |
| A14845 | A16640 | 288 | A14846 | A15704 | 290 |
| A14846 | A16261 | 296 | A14846 | A16439 | 385 |
| A14848 | A14853 | 348 | A14855 | A14864 | 401 |
| A14856 | A14857 | 173 | A14856 | A14862 | 230 |
| A14856 | A15223 | 419 | A14856 | A15874 | 180 |
| A14856 | A15970 | 460 | A14856 | A16027 | 191 |
| A14856 | A16103 | 441 | A14856 | A16286 | 491 |
| A14856 | A16335 | 481 | A14856 | A16418 | 245 |
| A14856 | A16419 | 200 | A14856 | A16767 | 208 |
| A14856 | A16836 | 279 | A14856 | A16959 | 249 |
| A14856 | A16968 | 457 | A14856 | A17001 | 383 |
| A14856 | A17007 | 468 | A14856 | A17024 | 310 |
| A14856 | A17041 | 490 | A14856 | A17089 | 230 |
| A14857 | A15156 | 312 | A14857 | A15190 | 422 |
| A14857 | A16262 | 490 | A14858 | A15655 | 385 |
| A14862 | A15874 | 267 | A14862 | A16027 | 388 |
| A14862 | A16262 | 262 | A14862 | A16766 | 219 |
| A14862 | A17040 | 396 | A14867 | A15726 | 221 |
| A14870 | A14872 | 491 | A14870 | A14874 | 463 |
| A14870 | A14881 | 364 | A14870 | A14960 | 329 |
| A14870 | A15430 | 490 | A14870 | A15498 | 356 |
| A14870 | A16436 | 419 | A14870 | A16963 | 479 |
| A14872 | A14874 | 467 | A14872 | A14881 | 378 |
| A14872 | A15430 | 488 | A14872 | A15498 | 329 |
| A14872 | A15669 | 240 | A14872 | A16436 | 457 |
| A14872 | A16963 | 485 | A14874 | A15498 | 177 |
| A14875 | A15291 | 168 | A14877 | A16766 | 201 |
| A14877 | A17061 | 324 | A14881 | A15430 | 266 |
| A14881 | A16436 | 360 | A14882 | A15295 | 196 |
| A14882 | A16134 | 221 | A14886 | A17198 | 174 |
| A14888 | A15292 | 210 | A14888 | A15313 | 317 |
| A14888 | A15480 | 240 | A14890 | A15660 | 208 |
| A14890 | A15684 | 335 | A14893 | A16030 | 423 |
| A14896 | A15498 | 227 | A14899 | A16491 | 451 |
| A14903 | A14917 | 416 | A14903 | A14921 | 371 |
| A14903 | A15105 | 313 | A14903 | A15187 | 447 |
| A14903 | A15189 | 427 | A14903 | A15262 | 353 |
| A14903 | A15536 | 339 | A14903 | A15651 | 227 |
| A14903 | A15653 | 157 | A14903 | A15665 | 257 |

|        |        |     |        |        |     |
|--------|--------|-----|--------|--------|-----|
| A14903 | A15680 | 318 | A14903 | A15683 | 185 |
| A14903 | A15709 | 346 | A14903 | A15735 | 173 |
| A14903 | A16157 | 457 | A14903 | A16187 | 288 |
| A14903 | A16322 | 251 | A14903 | A16552 | 427 |
| A14903 | A16565 | 430 | A14903 | A16585 | 353 |
| A14903 | A16587 | 469 | A14903 | A16597 | 374 |
| A14903 | A16611 | 473 | A14903 | A16652 | 240 |
| A14903 | A16663 | 270 | A14903 | A16664 | 457 |
| A14903 | A16675 | 219 | A14903 | A16680 | 241 |
| A14903 | A16690 | 348 | A14903 | A16693 | 366 |
| A14903 | A16695 | 440 | A14903 | A16702 | 308 |
| A14903 | A16703 | 401 | A14903 | A16704 | 406 |
| A14903 | A16706 | 371 | A14903 | A16707 | 391 |
| A14903 | A16762 | 226 | A14903 | A16774 | 353 |
| A14903 | A16776 | 335 | A14903 | A16790 | 413 |
| A14903 | A16807 | 276 | A14903 | A16829 | 328 |
| A14903 | A16838 | 307 | A14903 | A16866 | 267 |
| A14903 | A16905 | 395 | A14903 | A16944 | 425 |
| A14903 | A17012 | 322 | A14903 | A17013 | 257 |
| A14903 | A17017 | 317 | A14903 | A17030 | 335 |
| A14904 | A16484 | 452 | A14906 | A15366 | 163 |
| A14910 | A14918 | 475 | A14910 | A16981 | 408 |
| A14911 | A15932 | 286 | A14916 | A16512 | 447 |
| A14917 | A15189 | 232 | A14917 | A15519 | 286 |
| A14917 | A15541 | 234 | A14917 | A15653 | 277 |
| A14917 | A15680 | 174 | A14917 | A15709 | 335 |
| A14917 | A15711 | 291 | A14917 | A15854 | 232 |
| A14917 | A15947 | 286 | A14917 | A16157 | 430 |
| A14917 | A16187 | 279 | A14917 | A16552 | 371 |
| A14917 | A16565 | 455 | A14917 | A16566 | 324 |
| A14917 | A16567 | 340 | A14917 | A16585 | 346 |
| A14917 | A16587 | 408 | A14917 | A16611 | 401 |
| A14917 | A16663 | 260 | A14917 | A16664 | 364 |
| A14917 | A16675 | 208 | A14917 | A16680 | 229 |
| A14917 | A16690 | 208 | A14917 | A16695 | 363 |
| A14917 | A16699 | 293 | A14917 | A16701 | 335 |
| A14917 | A16702 | 299 | A14917 | A16703 | 288 |
| A14917 | A16704 | 294 | A14917 | A16764 | 246 |
| A14917 | A16774 | 429 | A14917 | A16815 | 434 |
| A14917 | A16874 | 316 | A14917 | A16905 | 389 |
| A14917 | A16944 | 422 | A14917 | A17012 | 313 |
| A14918 | A16981 | 486 | A14921 | A15105 | 372 |
| A14921 | A15187 | 462 | A14921 | A15262 | 291 |
| A14921 | A15501 | 272 | A14921 | A15533 | 333 |
| A14921 | A15653 | 229 | A14921 | A15665 | 249 |
| A14921 | A15680 | 255 | A14921 | A15683 | 256 |



|        |        |     |        |        |     |
|--------|--------|-----|--------|--------|-----|
| A14921 | A15765 | 340 | A14921 | A15774 | 353 |
| A14921 | A15818 | 348 | A14921 | A15850 | 404 |
| A14921 | A16157 | 456 | A14921 | A16552 | 358 |
| A14921 | A16565 | 412 | A14921 | A16597 | 452 |
| A14921 | A16608 | 443 | A14921 | A16611 | 462 |
| A14921 | A16652 | 302 | A14921 | A16664 | 411 |
| A14921 | A16675 | 443 | A14921 | A16690 | 395 |
| A14921 | A16692 | 358 | A14921 | A16703 | 429 |
| A14921 | A16704 | 352 | A14921 | A16709 | 362 |
| A14921 | A16790 | 436 | A14921 | A16799 | 385 |
| A14921 | A16806 | 399 | A14921 | A16829 | 369 |
| A14921 | A16866 | 324 | A14921 | A16905 | 339 |
| A14921 | A17014 | 388 | A14921 | A17015 | 343 |
| A14921 | A17018 | 372 | A14921 | A17190 | 369 |
| A14923 | A15931 | 316 | A14925 | A16840 | 185 |
| A14927 | A14932 | 486 | A14927 | A14941 | 404 |
| A14927 | A15418 | 467 | A14927 | A15649 | 243 |
| A14928 | A15435 | 473 | A14928 | A16887 | 238 |
| A14929 | A16994 | 63  | A14930 | A15292 | 486 |
| A14930 | A15313 | 257 | A14930 | A15314 | 271 |
| A14930 | A15322 | 423 | A14930 | A15331 | 157 |
| A14930 | A15335 | 188 | A14930 | A15348 | 324 |
| A14930 | A15349 | 461 | A14930 | A15352 | 414 |
| A14930 | A15420 | 317 | A14930 | A15452 | 202 |
| A14930 | A15495 | 449 | A14930 | A15630 | 243 |
| A14930 | A15726 | 63  | A14930 | A15814 | 265 |
| A14930 | A16177 | 265 | A14930 | A16641 | 63  |
| A14931 | A15492 | 154 | A14931 | A15596 | 168 |
| A14931 | A15867 | 218 | A14931 | A16020 | 340 |
| A14931 | A17150 | 347 | A14932 | A14941 | 449 |
| A14932 | A15418 | 481 | A14932 | A15649 | 200 |
| A14933 | A15971 | 436 | A14936 | A15391 | 266 |
| A14936 | A15624 | 561 | A14936 | A15650 | 268 |
| A14936 | A15651 | 601 | A14936 | A15652 | 601 |
| A14936 | A15661 | 601 | A14936 | A15662 | 601 |
| A14936 | A15684 | 322 | A14936 | A15932 | 534 |
| A14937 | A15225 | 475 | A14937 | A15500 | 151 |
| A14937 | A15680 | 156 | A14937 | A15684 | 213 |
| A14937 | A15711 | 277 | A14937 | A15732 | 265 |
| A14937 | A15746 | 162 | A14937 | A16567 | 329 |
| A14937 | A16675 | 191 | A14937 | A16682 | 408 |
| A14937 | A17133 | 297 | A14941 | A15418 | 363 |
| A14942 | A17121 | 327 | A14944 | A15614 | 180 |
| A14948 | A16410 | 199 | A14953 | A15764 | 363 |
| A14961 | A16331 | 457 | A14962 | A15369 | 475 |
| A14962 | A15654 | 263 | A14962 | A15941 | 171 |

|        |        |     |        |        |     |
|--------|--------|-----|--------|--------|-----|
| A14962 | A16129 | 447 | A14962 | A16226 | 480 |
| A14962 | A16616 | 274 | A14964 | A15058 | 182 |
| A14964 | A16352 | 375 | A14965 | A14966 | 472 |
| A14968 | A14969 | 467 | A14971 | A15659 | 347 |
| A14971 | A15931 | 274 | A14973 | A16188 | 441 |
| A14973 | A16247 | 452 | A14974 | A17007 | 338 |
| A14979 | A15028 | 447 | A14986 | A15346 | 156 |
| A14986 | A15605 | 154 | A14986 | A15629 | 348 |
| A14987 | A15557 | 191 | A14988 | A14989 | 457 |
| A14993 | A15297 | 184 | A14994 | A15200 | 452 |
| A14996 | A15096 | 489 | A14999 | A15011 | 445 |
| A14999 | A15040 | 452 | A15000 | A15003 | 441 |
| A15000 | A15006 | 447 | A15000 | A15017 | 435 |
| A15000 | A15048 | 447 | A15001 | A15004 | 414 |
| A15003 | A15006 | 447 | A15003 | A15048 | 447 |
| A15004 | A15008 | 394 | A15004 | A15010 | 396 |
| A15004 | A15039 | 457 | A15004 | A15187 | 340 |
| A15006 | A15048 | 452 | A15007 | A15361 | 307 |
| A15008 | A15010 | 474 | A15009 | A15033 | 440 |
| A15010 | A15045 | 422 | A15011 | A15040 | 445 |
| A15012 | A15037 | 422 | A15015 | A15043 | 440 |
| A15017 | A15314 | 157 | A15019 | A15338 | 369 |
| A15020 | A16453 | 440 | A15021 | A15684 | 160 |
| A15023 | A16643 | 385 | A15023 | A17168 | 246 |
| A15023 | A17207 | 332 | A15029 | A15931 | 183 |
| A15029 | A15988 | 395 | A15032 | A15043 | 440 |
| A15034 | A15036 | 338 | A15034 | A15500 | 199 |
| A15041 | A15046 | 452 | A15042 | A15295 | 201 |
| A15044 | A15049 | 447 | A15052 | A15053 | 455 |
| A15052 | A15498 | 205 | A15052 | A17118 | 441 |
| A15067 | A15074 | 416 | A15075 | A15076 | 452 |
| A15077 | A15498 | 262 | A15079 | A16048 | 319 |
| A15079 | A16283 | 424 | A15079 | A16284 | 424 |
| A15089 | A16636 | 271 | A15094 | A15098 | 452 |
| A15096 | A15097 | 477 | A15096 | A15114 | 162 |
| A15096 | A17207 | 201 | A15099 | A15383 | 159 |
| A15099 | A16018 | 324 | A15100 | A15370 | 199 |
| A15102 | A16552 | 154 | A15102 | A16710 | 388 |
| A15102 | A17071 | 311 | A15103 | A15726 | 159 |
| A15104 | A15124 | 452 | A15104 | A15726 | 257 |
| A15105 | A15187 | 446 | A15105 | A15189 | 479 |
| A15105 | A15262 | 398 | A15105 | A15366 | 324 |
| A15105 | A15408 | 162 | A15105 | A15501 | 317 |
| A15105 | A15536 | 196 | A15105 | A15665 | 468 |
| A15105 | A15667 | 168 | A15105 | A15680 | 286 |
| A15105 | A15683 | 399 | A15105 | A15773 | 324 |

|        |        |     |        |        |     |
|--------|--------|-----|--------|--------|-----|
| A15105 | A15774 | 278 | A15105 | A15853 | 491 |
| A15105 | A15854 | 340 | A15105 | A15855 | 491 |
| A15105 | A15856 | 180 | A15105 | A15940 | 171 |
| A15105 | A16157 | 481 | A15105 | A16215 | 188 |
| A15105 | A16261 | 404 | A15105 | A16552 | 486 |
| A15105 | A16565 | 419 | A15105 | A16566 | 318 |
| A15105 | A16587 | 382 | A15105 | A16597 | 490 |
| A15105 | A16608 | 429 | A15105 | A16611 | 414 |
| A15105 | A16664 | 460 | A15105 | A16675 | 484 |
| A15105 | A16680 | 439 | A15105 | A16682 | 180 |
| A15105 | A16684 | 318 | A15105 | A16690 | 461 |
| A15105 | A16692 | 375 | A15105 | A16695 | 246 |
| A15105 | A16703 | 267 | A15105 | A16704 | 447 |
| A15105 | A16707 | 290 | A15105 | A16709 | 382 |
| A15105 | A16764 | 423 | A15105 | A16774 | 218 |
| A15105 | A16776 | 190 | A15105 | A16790 | 428 |
| A15105 | A16799 | 210 | A15105 | A16806 | 246 |
| A15105 | A16815 | 236 | A15105 | A16827 | 303 |
| A15105 | A16829 | 457 | A15105 | A16838 | 449 |
| A15105 | A16858 | 271 | A15105 | A16859 | 302 |
| A15105 | A16866 | 429 | A15105 | A16874 | 307 |
| A15105 | A16900 | 405 | A15105 | A16905 | 406 |
| A15105 | A16913 | 416 | A15105 | A16944 | 329 |
| A15105 | A16954 | 485 | A15105 | A16979 | 338 |
| A15105 | A17018 | 316 | A15105 | A17030 | 190 |
| A15105 | A17033 | 311 | A15105 | A17125 | 193 |
| A15105 | A17190 | 391 | A15105 | A17211 | 307 |
| A15107 | A15216 | 63  | A15109 | A15917 | 302 |
| A15114 | A15355 | 204 | A15116 | A15564 | 322 |
| A15116 | A16798 | 276 | A15117 | A15367 | 226 |
| A15124 | A15726 | 257 | A15125 | A15126 | 386 |
| A15130 | A15431 | 179 | A15130 | A15461 | 267 |
| A15130 | A15817 | 154 | A15130 | A16610 | 252 |
| A15131 | A15323 | 229 | A15132 | A15169 | 452 |
| A15132 | A15170 | 452 | A15133 | A15684 | 262 |
| A15133 | A15932 | 171 | A15133 | A15933 | 229 |
| A15133 | A16272 | 465 | A15133 | A16437 | 483 |
| A15135 | A17078 | 204 | A15137 | A15150 | 447 |
| A15138 | A15291 | 254 | A15140 | A15318 | 249 |
| A15145 | A15498 | 447 | A15148 | A15353 | 288 |
| A15154 | A15155 | 452 | A15156 | A15660 | 182 |
| A15156 | A15684 | 446 | A15156 | A15696 | 317 |
| A15156 | A15698 | 283 | A15156 | A15931 | 196 |
| A15156 | A16824 | 355 | A15159 | A15160 | 445 |
| A15162 | A15415 | 430 | A15162 | A15495 | 217 |
| A15163 | A15164 | 413 | A15169 | A15170 | 452 |

|        |        |     |        |        |     |
|--------|--------|-----|--------|--------|-----|
| A15176 | A16401 | 422 | A15184 | A15292 | 198 |
| A15184 | A15312 | 271 | A15184 | A15313 | 393 |
| A15184 | A15436 | 350 | A15184 | A15454 | 371 |
| A15184 | A15495 | 286 | A15185 | A15297 | 251 |
| A15185 | A15339 | 390 | A15185 | A15624 | 232 |
| A15187 | A15189 | 409 | A15187 | A15217 | 302 |
| A15187 | A15262 | 323 | A15187 | A15501 | 167 |
| A15187 | A15533 | 246 | A15187 | A15536 | 313 |
| A15187 | A15541 | 340 | A15187 | A15651 | 191 |
| A15187 | A15680 | 279 | A15187 | A15683 | 371 |
| A15187 | A15709 | 180 | A15187 | A15711 | 270 |
| A15187 | A15850 | 355 | A15187 | A15854 | 207 |
| A15187 | A15943 | 241 | A15187 | A16157 | 446 |
| A15187 | A16187 | 375 | A15187 | A16261 | 251 |
| A15187 | A16343 | 460 | A15187 | A16552 | 457 |
| A15187 | A16565 | 475 | A15187 | A16597 | 466 |
| A15187 | A16608 | 187 | A15187 | A16611 | 468 |
| A15187 | A16652 | 204 | A15187 | A16664 | 414 |
| A15187 | A16675 | 436 | A15187 | A16690 | 396 |
| A15187 | A16692 | 393 | A15187 | A16693 | 345 |
| A15187 | A16697 | 301 | A15187 | A16702 | 279 |
| A15187 | A16703 | 435 | A15187 | A16704 | 274 |
| A15187 | A16706 | 352 | A15187 | A16709 | 396 |
| A15187 | A16764 | 351 | A15187 | A16774 | 329 |
| A15187 | A16790 | 396 | A15187 | A16799 | 324 |
| A15187 | A16806 | 347 | A15187 | A16824 | 337 |
| A15187 | A16829 | 447 | A15187 | A16838 | 277 |
| A15187 | A16866 | 468 | A15187 | A16874 | 401 |
| A15187 | A16905 | 430 | A15187 | A16913 | 329 |
| A15187 | A16944 | 316 | A15187 | A16954 | 288 |
| A15187 | A17012 | 294 | A15187 | A17017 | 288 |
| A15187 | A17018 | 303 | A15187 | A17030 | 310 |
| A15187 | A17033 | 301 | A15187 | A17035 | 377 |
| A15187 | A17190 | 299 | A15187 | A17211 | 297 |
| A15188 | A15254 | 491 | A15188 | A15507 | 491 |
| A15188 | A15547 | 491 | A15188 | A15611 | 273 |
| A15188 | A15612 | 353 | A15188 | A15657 | 374 |
| A15188 | A15660 | 424 | A15188 | A15705 | 433 |
| A15188 | A15716 | 291 | A15188 | A15717 | 196 |
| A15188 | A15722 | 205 | A15188 | A15728 | 440 |
| A15188 | A15769 | 491 | A15188 | A16293 | 491 |
| A15188 | A16298 | 348 | A15188 | A16580 | 238 |
| A15188 | A16627 | 483 | A15188 | A16696 | 490 |
| A15188 | A16822 | 491 | A15188 | A16860 | 165 |
| A15188 | A16879 | 235 | A15188 | A16941 | 374 |
| A15188 | A16947 | 430 | A15188 | A16973 | 388 |

|        |        |     |        |        |     |
|--------|--------|-----|--------|--------|-----|
| A15188 | A17031 | 324 | A15189 | A15217 | 241 |
| A15189 | A15262 | 345 | A15189 | A15536 | 257 |
| A15189 | A15541 | 270 | A15189 | A15653 | 156 |
| A15189 | A15665 | 345 | A15189 | A15683 | 193 |
| A15189 | A15698 | 190 | A15189 | A15709 | 234 |
| A15189 | A15850 | 310 | A15189 | A15853 | 195 |
| A15189 | A15854 | 484 | A15189 | A15855 | 491 |
| A15189 | A15943 | 173 | A15189 | A16157 | 466 |
| A15189 | A16187 | 323 | A15189 | A16243 | 240 |
| A15189 | A16261 | 183 | A15189 | A16552 | 485 |
| A15189 | A16565 | 463 | A15189 | A16566 | 428 |
| A15189 | A16585 | 277 | A15189 | A16587 | 353 |
| A15189 | A16597 | 490 | A15189 | A16608 | 243 |
| A15189 | A16611 | 477 | A15189 | A16652 | 263 |
| A15189 | A16663 | 167 | A15189 | A16664 | 479 |
| A15189 | A16675 | 435 | A15189 | A16680 | 414 |
| A15189 | A16682 | 243 | A15189 | A16690 | 400 |
| A15189 | A16695 | 404 | A15189 | A16703 | 332 |
| A15189 | A16704 | 208 | A15189 | A16707 | 335 |
| A15189 | A16709 | 353 | A15189 | A16764 | 374 |
| A15189 | A16776 | 372 | A15189 | A16790 | 419 |
| A15189 | A16807 | 174 | A15189 | A16808 | 369 |
| A15189 | A16824 | 395 | A15189 | A16829 | 425 |
| A15189 | A16838 | 343 | A15189 | A16860 | 171 |
| A15189 | A16866 | 296 | A15189 | A16905 | 491 |
| A15189 | A16913 | 277 | A15189 | A16944 | 259 |
| A15189 | A16954 | 353 | A15189 | A17014 | 277 |
| A15189 | A17018 | 245 | A15189 | A17030 | 372 |
| A15189 | A17033 | 363 | A15189 | A17144 | 219 |
| A15189 | A17190 | 238 | A15190 | A15497 | 257 |
| A15198 | A15310 | 313 | A15198 | A15312 | 196 |
| A15198 | A16967 | 406 | A15198 | A17022 | 430 |
| A15202 | A15712 | 218 | A15202 | A16665 | 314 |
| A15202 | A16686 | 228 | A15202 | A17189 | 204 |
| A15204 | A15205 | 480 | A15204 | A15206 | 480 |
| A15204 | A15207 | 480 | A15204 | A15208 | 438 |
| A15204 | A15210 | 480 | A15205 | A15206 | 485 |
| A15205 | A15207 | 485 | A15205 | A15208 | 469 |
| A15205 | A15209 | 441 | A15205 | A15210 | 480 |
| A15206 | A15207 | 485 | A15206 | A15208 | 469 |
| A15206 | A15209 | 441 | A15206 | A15210 | 480 |
| A15207 | A15208 | 469 | A15207 | A15209 | 441 |
| A15207 | A15210 | 480 | A15208 | A15209 | 447 |
| A15208 | A15210 | 438 | A15212 | A15374 | 154 |
| A15213 | A15434 | 345 | A15217 | A15854 | 241 |
| A15217 | A15861 | 416 | A15217 | A15943 | 273 |

|        |        |     |        |        |     |
|--------|--------|-----|--------|--------|-----|
| A15217 | A16187 | 288 | A15217 | A16261 | 281 |
| A15217 | A16565 | 252 | A15217 | A16690 | 218 |
| A15217 | A16764 | 256 | A15217 | A16866 | 266 |
| A15217 | A16905 | 285 | A15218 | A15221 | 401 |
| A15218 | A15235 | 463 | A15218 | A15743 | 324 |
| A15218 | A15773 | 213 | A15218 | A15776 | 339 |
| A15218 | A15988 | 208 | A15218 | A16118 | 455 |
| A15218 | A16631 | 400 | A15219 | A15221 | 299 |
| A15219 | A15244 | 199 | A15219 | A15727 | 371 |
| A15219 | A15777 | 371 | A15220 | A15621 | 428 |
| A15220 | A16786 | 386 | A15221 | A15235 | 480 |
| A15221 | A15727 | 472 | A15221 | A15743 | 438 |
| A15221 | A15776 | 398 | A15221 | A16159 | 353 |
| A15221 | A16631 | 477 | A15223 | A15874 | 184 |
| A15223 | A15970 | 294 | A15223 | A16103 | 296 |
| A15223 | A16286 | 438 | A15223 | A16335 | 419 |
| A15223 | A17007 | 279 | A15223 | A17040 | 208 |
| A15223 | A17041 | 475 | A15223 | A17089 | 218 |
| A15224 | A15237 | 213 | A15224 | A15612 | 425 |
| A15224 | A15626 | 165 | A15224 | A16623 | 452 |
| A15224 | A16802 | 463 | A15224 | A16907 | 313 |
| A15225 | A15732 | 379 | A15225 | A15746 | 157 |
| A15225 | A16092 | 226 | A15226 | A15233 | 488 |
| A15226 | A15240 | 456 | A15226 | A15249 | 457 |
| A15226 | A15258 | 477 | A15226 | A15272 | 480 |
| A15226 | A15277 | 416 | A15226 | A15279 | 422 |
| A15227 | A15248 | 452 | A15229 | A15268 | 265 |
| A15229 | A15381 | 430 | A15229 | A15432 | 243 |
| A15229 | A16107 | 479 | A15230 | A15233 | 273 |
| A15230 | A15268 | 389 | A15230 | A15337 | 207 |
| A15230 | A15381 | 380 | A15230 | A15419 | 157 |
| A15230 | A15498 | 343 | A15230 | A15913 | 180 |
| A15230 | A16107 | 363 | A15232 | A15336 | 350 |
| A15232 | A15624 | 291 | A15232 | A16068 | 353 |
| A15233 | A15240 | 469 | A15233 | A15249 | 446 |
| A15233 | A15258 | 470 | A15233 | A15272 | 489 |
| A15233 | A15277 | 438 | A15233 | A15279 | 401 |
| A15233 | A16068 | 190 | A15235 | A15611 | 184 |
| A15235 | A15743 | 490 | A15235 | A15776 | 278 |
| A15235 | A16631 | 416 | A15236 | A15732 | 463 |
| A15237 | A15257 | 219 | A15237 | A15297 | 480 |
| A15237 | A15309 | 449 | A15237 | A15314 | 353 |
| A15237 | A15323 | 636 | A15237 | A15324 | 649 |
| A15237 | A15339 | 727 | A15237 | A15353 | 785 |
| A15237 | A15359 | 451 | A15237 | A15374 | 198 |
| A15237 | A15376 | 246 | A15237 | A15419 | 446 |

|        |        |     |        |        |     |
|--------|--------|-----|--------|--------|-----|
| A15237 | A15431 | 474 | A15237 | A15502 | 491 |
| A15237 | A15507 | 224 | A15237 | A15510 | 174 |
| A15237 | A15564 | 177 | A15237 | A15606 | 312 |
| A15237 | A15612 | 329 | A15237 | A15763 | 213 |
| A15237 | A15788 | 369 | A15237 | A15868 | 199 |
| A15237 | A15871 | 346 | A15237 | A16463 | 485 |
| A15237 | A16495 | 267 | A15237 | A16623 | 196 |
| A15237 | A16861 | 314 | A15237 | A16949 | 360 |
| A15237 | A17063 | 443 | A15238 | A15282 | 154 |
| A15240 | A15249 | 462 | A15240 | A15272 | 474 |
| A15240 | A15279 | 430 | A15241 | A15395 | 213 |
| A15241 | A15598 | 163 | A15241 | A15599 | 156 |
| A15241 | A15601 | 317 | A15241 | A15603 | 168 |
| A15241 | A15606 | 488 | A15241 | A15981 | 328 |
| A15241 | A16120 | 168 | A15241 | A16513 | 234 |
| A15241 | A16636 | 199 | A15244 | A15546 | 486 |
| A15244 | A15660 | 221 | A15244 | A15741 | 252 |
| A15244 | A15932 | 452 | A15244 | A15933 | 221 |
| A15244 | A16272 | 195 | A15244 | A16318 | 160 |
| A15244 | A16437 | 160 | A15244 | A16446 | 160 |
| A15244 | A16585 | 160 | A15244 | A17141 | 152 |
| A15246 | A15741 | 283 | A15246 | A16291 | 396 |
| A15247 | A15255 | 443 | A15249 | A15272 | 457 |
| A15249 | A15279 | 433 | A15250 | A15268 | 317 |
| A15252 | A16689 | 249 | A15252 | A16724 | 193 |
| A15254 | A15507 | 489 | A15254 | A15547 | 417 |
| A15254 | A15705 | 451 | A15254 | A15769 | 488 |
| A15254 | A16293 | 486 | A15254 | A16696 | 463 |
| A15254 | A16822 | 446 | A15254 | A16879 | 302 |
| A15256 | A15416 | 254 | A15257 | A15297 | 491 |
| A15257 | A15309 | 341 | A15257 | A15329 | 221 |
| A15257 | A15363 | 157 | A15257 | A15419 | 234 |
| A15257 | A15431 | 278 | A15257 | A15559 | 489 |
| A15257 | A15564 | 380 | A15257 | A15702 | 290 |
| A15257 | A15710 | 408 | A15257 | A15729 | 212 |
| A15257 | A15763 | 456 | A15257 | A15775 | 276 |
| A15257 | A15779 | 307 | A15257 | A15868 | 221 |
| A15257 | A16860 | 491 | A15258 | A15260 | 480 |
| A15258 | A15272 | 463 | A15258 | A15277 | 491 |
| A15258 | A15495 | 157 | A15260 | A15277 | 475 |
| A15260 | A15495 | 273 | A15261 | A16706 | 299 |
| A15262 | A15536 | 240 | A15262 | A15541 | 247 |
| A15262 | A15665 | 249 | A15262 | A15667 | 213 |
| A15262 | A15683 | 168 | A15262 | A15709 | 313 |
| A15262 | A15711 | 187 | A15262 | A15735 | 254 |
| A15262 | A15743 | 208 | A15262 | A15774 | 324 |

|        |        |     |        |        |     |
|--------|--------|-----|--------|--------|-----|
| A15262 | A15818 | 185 | A15262 | A16157 | 462 |
| A15262 | A16343 | 281 | A15262 | A16552 | 456 |
| A15262 | A16565 | 356 | A15262 | A16597 | 461 |
| A15262 | A16611 | 414 | A15262 | A16652 | 241 |
| A15262 | A16664 | 353 | A15262 | A16675 | 319 |
| A15262 | A16690 | 385 | A15262 | A16701 | 428 |
| A15262 | A16703 | 182 | A15262 | A16704 | 460 |
| A15262 | A16709 | 208 | A15262 | A16776 | 360 |
| A15262 | A16790 | 339 | A15262 | A16807 | 156 |
| A15262 | A16829 | 223 | A15262 | A16838 | 327 |
| A15262 | A16866 | 278 | A15262 | A16905 | 385 |
| A15262 | A16913 | 260 | A15262 | A16936 | 715 |
| A15262 | A16944 | 241 | A15262 | A17014 | 260 |
| A15262 | A17015 | 730 | A15262 | A17018 | 228 |
| A15262 | A17019 | 291 | A15262 | A17028 | 728 |
| A15262 | A17030 | 234 | A15262 | A17033 | 223 |
| A15262 | A17114 | 324 | A15262 | A17125 | 238 |
| A15262 | A17144 | 201 | A15262 | A17190 | 221 |
| A15267 | A15726 | 422 | A15268 | A15295 | 320 |
| A15268 | A15318 | 601 | A15268 | A15381 | 831 |
| A15268 | A16089 | 221 | A15268 | A16107 | 481 |
| A15268 | A16778 | 480 | A15271 | A15279 | 419 |
| A15272 | A15277 | 452 | A15272 | A15279 | 420 |
| A15272 | A16068 | 247 | A15274 | A15922 | 255 |
| A15274 | A16552 | 163 | A15275 | A16088 | 160 |
| A15275 | A16633 | 486 | A15277 | A15349 | 165 |
| A15277 | A15516 | 215 | A15277 | A15638 | 157 |
| A15278 | A15292 | 293 | A15278 | A15301 | 297 |
| A15278 | A15302 | 308 | A15278 | A15311 | 347 |
| A15278 | A15312 | 236 | A15278 | A15349 | 219 |
| A15278 | A15366 | 154 | A15278 | A15399 | 340 |
| A15278 | A15431 | 270 | A15278 | A15433 | 358 |
| A15278 | A15463 | 355 | A15278 | A15487 | 401 |
| A15281 | A16016 | 425 | A15282 | A15504 | 185 |
| A15282 | A15606 | 274 | A15282 | A15875 | 182 |
| A15282 | A16072 | 288 | A15282 | A16419 | 305 |
| A15282 | A16719 | 229 | A15282 | A16767 | 179 |
| A15284 | A15292 | 465 | A15284 | A15311 | 279 |
| A15284 | A15312 | 418 | A15284 | A15349 | 252 |
| A15284 | A15352 | 362 | A15284 | A15447 | 217 |
| A15284 | A15452 | 191 | A15284 | A16137 | 483 |
| A15284 | A16808 | 249 | A15285 | A15479 | 390 |
| A15285 | A15516 | 400 | A15285 | A15518 | 357 |
| A15285 | A15795 | 440 | A15285 | A16014 | 398 |
| A15286 | A15301 | 219 | A15286 | A15318 | 221 |
| A15286 | A17112 | 358 | A15287 | A15428 | 468 |



|        |        |     |        |        |     |
|--------|--------|-----|--------|--------|-----|
| A15287 | A15429 | 491 | A15287 | A15432 | 216 |
| A15287 | A16948 | 473 | A15288 | A15312 | 416 |
| A15288 | A15313 | 285 | A15288 | A15333 | 281 |
| A15288 | A15336 | 187 | A15288 | A15346 | 180 |
| A15288 | A15419 | 219 | A15288 | A15422 | 329 |
| A15288 | A15431 | 174 | A15288 | A15432 | 210 |
| A15288 | A15440 | 406 | A15288 | A15498 | 180 |
| A15288 | A15638 | 221 | A15288 | A15802 | 422 |
| A15288 | A15826 | 434 | A15288 | A16055 | 484 |
| A15288 | A16224 | 254 | A15290 | A15985 | 347 |
| A15290 | A16319 | 420 | A15290 | A16445 | 302 |
| A15291 | A15314 | 297 | A15291 | A15346 | 63  |
| A15291 | A15366 | 480 | A15291 | A15492 | 196 |
| A15291 | A15612 | 778 | A15291 | A15613 | 215 |
| A15291 | A15614 | 990 | A15291 | A15639 | 102 |
| A15291 | A15649 | 701 | A15291 | A15752 | 380 |
| A15291 | A15761 | 468 | A15291 | A15816 | 185 |
| A15291 | A15851 | 171 | A15291 | A15912 | 135 |
| A15291 | A16467 | 666 | A15291 | A16603 | 221 |
| A15291 | A16950 | 195 | A15291 | A16990 | 243 |
| A15291 | A17063 | 438 | A15291 | A17157 | 438 |
| A15291 | A17198 | 281 | A15292 | A15297 | 160 |
| A15292 | A15298 | 914 | A15292 | A15301 | 491 |
| A15292 | A15302 | 470 | A15292 | A15310 | 489 |
| A15292 | A15311 | 634 | A15292 | A15312 | 638 |
| A15292 | A15313 | 651 | A15292 | A15314 | 488 |
| A15292 | A15316 | 246 | A15292 | A15317 | 491 |
| A15292 | A15318 | 480 | A15292 | A15321 | 230 |
| A15292 | A15322 | 491 | A15292 | A15331 | 490 |
| A15292 | A15333 | 490 | A15292 | A15334 | 486 |
| A15292 | A15335 | 491 | A15292 | A15346 | 460 |
| A15292 | A15348 | 491 | A15292 | A15349 | 491 |
| A15292 | A15352 | 590 | A15292 | A15366 | 694 |
| A15292 | A15376 | 491 | A15292 | A15396 | 489 |
| A15292 | A15399 | 154 | A15292 | A15402 | 334 |
| A15292 | A15404 | 374 | A15292 | A15411 | 245 |
| A15292 | A15413 | 489 | A15292 | A15419 | 489 |
| A15292 | A15420 | 224 | A15292 | A15422 | 441 |
| A15292 | A15431 | 491 | A15292 | A15432 | 650 |
| A15292 | A15433 | 490 | A15292 | A15434 | 470 |
| A15292 | A15435 | 491 | A15292 | A15436 | 491 |
| A15292 | A15437 | 374 | A15292 | A15440 | 318 |
| A15292 | A15444 | 491 | A15292 | A15445 | 433 |
| A15292 | A15447 | 491 | A15292 | A15451 | 485 |
| A15292 | A15452 | 491 | A15292 | A15453 | 124 |
| A15292 | A15454 | 388 | A15292 | A15456 | 491 |

|        |        |     |        |        |     |
|--------|--------|-----|--------|--------|-----|
| A15292 | A15457 | 488 | A15292 | A15459 | 455 |
| A15292 | A15460 | 491 | A15292 | A15461 | 479 |
| A15292 | A15462 | 486 | A15292 | A15463 | 491 |
| A15292 | A15464 | 319 | A15292 | A15478 | 454 |
| A15292 | A15480 | 488 | A15292 | A15484 | 385 |
| A15292 | A15485 | 269 | A15292 | A15486 | 428 |
| A15292 | A15487 | 477 | A15292 | A15489 | 229 |
| A15292 | A15492 | 317 | A15292 | A15495 | 491 |
| A15292 | A15498 | 490 | A15292 | A15502 | 389 |
| A15292 | A15513 | 157 | A15292 | A15515 | 491 |
| A15292 | A15516 | 174 | A15292 | A15522 | 391 |
| A15292 | A15523 | 182 | A15292 | A15535 | 195 |
| A15292 | A15554 | 170 | A15292 | A15606 | 151 |
| A15292 | A15614 | 183 | A15292 | A15630 | 446 |
| A15292 | A15632 | 182 | A15292 | A15638 | 340 |
| A15292 | A15671 | 307 | A15292 | A15788 | 185 |
| A15292 | A15792 | 84  | A15292 | A15795 | 472 |
| A15292 | A15799 | 491 | A15292 | A15801 | 77  |
| A15292 | A15802 | 294 | A15292 | A15804 | 427 |
| A15292 | A15814 | 480 | A15292 | A15817 | 224 |
| A15292 | A15823 | 198 | A15292 | A15824 | 63  |
| A15292 | A15826 | 117 | A15292 | A15828 | 480 |
| A15292 | A15830 | 491 | A15292 | A15833 | 129 |
| A15292 | A15916 | 279 | A15292 | A15935 | 180 |
| A15292 | A16004 | 400 | A15292 | A16049 | 491 |
| A15292 | A16117 | 294 | A15292 | A16136 | 483 |
| A15292 | A16152 | 398 | A15292 | A16187 | 193 |
| A15292 | A16192 | 238 | A15292 | A16224 | 290 |
| A15292 | A16260 | 283 | A15292 | A16300 | 402 |
| A15292 | A16565 | 207 | A15292 | A16714 | 255 |
| A15292 | A16788 | 198 | A15292 | A16824 | 238 |
| A15292 | A16905 | 188 | A15292 | A16944 | 198 |
| A15292 | A16978 | 198 | A15292 | A17063 | 235 |
| A15292 | A17076 | 262 | A15292 | A17146 | 196 |
| A15292 | A17173 | 255 | A15293 | A15294 | 955 |
| A15293 | A15314 | 243 | A15293 | A15320 | 467 |
| A15293 | A15322 | 255 | A15293 | A15506 | 554 |
| A15293 | A15630 | 314 | A15293 | A16363 | 483 |
| A15293 | A16604 | 151 | A15293 | A16916 | 491 |
| A15293 | A17215 | 899 | A15293 | A17217 | 899 |
| A15294 | A15320 | 490 | A15294 | A15506 | 983 |
| A15294 | A15704 | 262 | A15294 | A15818 | 162 |
| A15294 | A16120 | 174 | A15294 | A16363 | 196 |
| A15294 | A16904 | 157 | A15294 | A16916 | 345 |
| A15294 | A17060 | 440 | A15295 | A15296 | 976 |
| A15295 | A15318 | 313 | A15295 | A15321 | 412 |

|        |        |     |        |        |     |
|--------|--------|-----|--------|--------|-----|
| A15295 | A15322 | 308 | A15295 | A15324 | 157 |
| A15295 | A15353 | 154 | A15295 | A15381 | 313 |
| A15295 | A15498 | 733 | A15295 | A15626 | 328 |
| A15295 | A15726 | 172 | A15295 | A16128 | 210 |
| A15295 | A16269 | 172 | A15295 | A16299 | 177 |
| A15295 | A16415 | 362 | A15295 | A16741 | 182 |
| A15295 | A16847 | 294 | A15295 | A16916 | 449 |
| A15295 | A17100 | 165 | A15295 | A17101 | 201 |
| A15296 | A15596 | 204 | A15296 | A16872 | 160 |
| A15297 | A15309 | 489 | A15297 | A15314 | 491 |
| A15297 | A15315 | 491 | A15297 | A15323 | 951 |
| A15297 | A15324 | 951 | A15297 | A15326 | 391 |
| A15297 | A15330 | 491 | A15297 | A15338 | 954 |
| A15297 | A15339 | 491 | A15297 | A15353 | 945 |
| A15297 | A15354 | 489 | A15297 | A15359 | 953 |
| A15297 | A15360 | 488 | A15297 | A15361 | 466 |
| A15297 | A15363 | 490 | A15297 | A15364 | 167 |
| A15297 | A15366 | 589 | A15297 | A15378 | 468 |
| A15297 | A15406 | 63  | A15297 | A15419 | 460 |
| A15297 | A15431 | 418 | A15297 | A15461 | 358 |
| A15297 | A15488 | 221 | A15297 | A15489 | 184 |
| A15297 | A15505 | 240 | A15297 | A15534 | 201 |
| A15297 | A15537 | 391 | A15297 | A15540 | 474 |
| A15297 | A15547 | 904 | A15297 | A15558 | 670 |
| A15297 | A15559 | 951 | A15297 | A15560 | 615 |
| A15297 | A15561 | 374 | A15297 | A15564 | 490 |
| A15297 | A15578 | 405 | A15297 | A15588 | 446 |
| A15297 | A15590 | 232 | A15297 | A15591 | 480 |
| A15297 | A15592 | 184 | A15297 | A15593 | 307 |
| A15297 | A15594 | 278 | A15297 | A15595 | 63  |
| A15297 | A15596 | 281 | A15297 | A15614 | 905 |
| A15297 | A15660 | 168 | A15297 | A15702 | 475 |
| A15297 | A15710 | 635 | A15297 | A15729 | 635 |
| A15297 | A15735 | 334 | A15297 | A15736 | 217 |
| A15297 | A15737 | 486 | A15297 | A15738 | 491 |
| A15297 | A15739 | 107 | A15297 | A15740 | 207 |
| A15297 | A15747 | 468 | A15297 | A15763 | 485 |
| A15297 | A15770 | 201 | A15297 | A15779 | 491 |
| A15297 | A15788 | 491 | A15297 | A15867 | 340 |
| A15297 | A15947 | 417 | A15297 | A15949 | 241 |
| A15297 | A16217 | 294 | A15297 | A16311 | 486 |
| A15297 | A16312 | 184 | A15297 | A16364 | 241 |
| A15297 | A16392 | 63  | A15297 | A16458 | 363 |
| A15297 | A16463 | 445 | A15297 | A16465 | 213 |
| A15297 | A16495 | 154 | A15297 | A16496 | 441 |
| A15297 | A16510 | 467 | A15297 | A16544 | 184 |

|        |        |     |        |        |     |
|--------|--------|-----|--------|--------|-----|
| A15297 | A16654 | 481 | A15297 | A16801 | 555 |
| A15297 | A16831 | 344 | A15297 | A16844 | 491 |
| A15297 | A16860 | 486 | A15297 | A16874 | 151 |
| A15297 | A17019 | 278 | A15297 | A17063 | 491 |
| A15297 | A17091 | 224 | A15297 | A17198 | 390 |
| A15298 | A15456 | 383 | A15298 | A16165 | 434 |
| A15300 | A15346 | 198 | A15300 | A15419 | 236 |
| A15300 | A15422 | 344 | A15300 | A15649 | 172 |
| A15300 | A16117 | 490 | A15301 | A15302 | 701 |
| A15301 | A15311 | 463 | A15301 | A15312 | 491 |
| A15301 | A15313 | 484 | A15301 | A15317 | 307 |
| A15301 | A15331 | 255 | A15301 | A15349 | 473 |
| A15301 | A15352 | 491 | A15301 | A15366 | 945 |
| A15301 | A15413 | 491 | A15301 | A15430 | 643 |
| A15301 | A15431 | 443 | A15301 | A15432 | 489 |
| A15301 | A15433 | 430 | A15301 | A15434 | 229 |
| A15301 | A15435 | 475 | A15301 | A15436 | 401 |
| A15301 | A15451 | 412 | A15301 | A15452 | 265 |
| A15301 | A15462 | 701 | A15301 | A15463 | 701 |
| A15301 | A15485 | 337 | A15301 | A15486 | 491 |
| A15301 | A15487 | 484 | A15301 | A15488 | 406 |
| A15301 | A15489 | 457 | A15301 | A15498 | 274 |
| A15301 | A15513 | 406 | A15301 | A15671 | 423 |
| A15301 | A15878 | 263 | A15301 | A16114 | 196 |
| A15301 | A16209 | 276 | A15301 | A16300 | 168 |
| A15301 | A16436 | 279 | A15301 | A16445 | 159 |
| A15302 | A15311 | 382 | A15302 | A15312 | 461 |
| A15302 | A15346 | 170 | A15302 | A15352 | 477 |
| A15302 | A15366 | 701 | A15302 | A15396 | 306 |
| A15302 | A15404 | 243 | A15302 | A15413 | 491 |
| A15302 | A15422 | 191 | A15302 | A15430 | 629 |
| A15302 | A15432 | 424 | A15302 | A15436 | 130 |
| A15302 | A15444 | 176 | A15302 | A15447 | 215 |
| A15302 | A15452 | 180 | A15302 | A15462 | 701 |
| A15302 | A15463 | 701 | A15302 | A15485 | 347 |
| A15302 | A15486 | 491 | A15302 | A15487 | 469 |
| A15302 | A15489 | 402 | A15302 | A15498 | 163 |
| A15302 | A15513 | 484 | A15302 | A15671 | 369 |
| A15302 | A15816 | 308 | A15302 | A15818 | 185 |
| A15302 | A15819 | 455 | A15302 | A15829 | 369 |
| A15302 | A15833 | 283 | A15302 | A16045 | 316 |
| A15302 | A16436 | 294 | A15303 | A15328 | 477 |
| A15303 | A15557 | 144 | A15303 | A16393 | 210 |
| A15303 | A16397 | 812 | A15303 | A16891 | 730 |
| A15303 | A16910 | 737 | A15304 | A15305 | 899 |
| A15306 | A15447 | 329 | A15307 | A15559 | 63  |

|        |        |     |        |        |     |
|--------|--------|-----|--------|--------|-----|
| A15308 | A15321 | 446 | A15308 | A15322 | 391 |
| A15308 | A15342 | 219 | A15308 | A15344 | 170 |
| A15308 | A15346 | 475 | A15308 | A15352 | 184 |
| A15308 | A15361 | 163 | A15308 | A15402 | 321 |
| A15308 | A15409 | 221 | A15308 | A15425 | 296 |
| A15308 | A15440 | 185 | A15308 | A15468 | 245 |
| A15308 | A15480 | 196 | A15308 | A15515 | 252 |
| A15308 | A15555 | 319 | A15308 | A15603 | 188 |
| A15308 | A15607 | 219 | A15308 | A15642 | 274 |
| A15308 | A15811 | 226 | A15308 | A15828 | 201 |
| A15308 | A15996 | 394 | A15308 | A16120 | 188 |
| A15308 | A16224 | 255 | A15308 | A16904 | 279 |
| A15309 | A15314 | 63  | A15309 | A15323 | 319 |
| A15309 | A15324 | 154 | A15309 | A15355 | 177 |
| A15309 | A15360 | 68  | A15309 | A15366 | 430 |
| A15309 | A15431 | 168 | A15309 | A15507 | 479 |
| A15309 | A15547 | 263 | A15309 | A15559 | 256 |
| A15309 | A15596 | 96  | A15309 | A15612 | 249 |
| A15309 | A15773 | 199 | A15309 | A15871 | 235 |
| A15309 | A16293 | 144 | A15309 | A16463 | 177 |
| A15309 | A16627 | 283 | A15309 | A17063 | 288 |
| A15310 | A15311 | 340 | A15310 | A15312 | 491 |
| A15310 | A15313 | 489 | A15310 | A15317 | 371 |
| A15310 | A15331 | 439 | A15310 | A15333 | 447 |
| A15310 | A15334 | 274 | A15310 | A15335 | 218 |
| A15310 | A15346 | 232 | A15310 | A15348 | 480 |
| A15310 | A15349 | 491 | A15310 | A15352 | 477 |
| A15310 | A15413 | 157 | A15310 | A15429 | 277 |
| A15310 | A15444 | 352 | A15310 | A15445 | 173 |
| A15310 | A15447 | 366 | A15310 | A15452 | 243 |
| A15310 | A15454 | 491 | A15310 | A15455 | 288 |
| A15310 | A15487 | 135 | A15310 | A15495 | 305 |
| A15310 | A15515 | 183 | A15310 | A15792 | 277 |
| A15310 | A15814 | 291 | A15310 | A15830 | 267 |
| A15310 | A15864 | 353 | A15310 | A16224 | 396 |
| A15310 | A17022 | 391 | A15311 | A15312 | 776 |
| A15311 | A15313 | 764 | A15311 | A15317 | 380 |
| A15311 | A15331 | 443 | A15311 | A15333 | 419 |
| A15311 | A15335 | 420 | A15311 | A15348 | 274 |
| A15311 | A15349 | 472 | A15311 | A15352 | 646 |
| A15311 | A15366 | 462 | A15311 | A15396 | 230 |
| A15311 | A15416 | 268 | A15311 | A15422 | 266 |
| A15311 | A15431 | 435 | A15311 | A15432 | 781 |
| A15311 | A15433 | 469 | A15311 | A15434 | 312 |
| A15311 | A15435 | 402 | A15311 | A15436 | 485 |
| A15311 | A15440 | 374 | A15311 | A15444 | 234 |

|        |        |     |        |        |     |
|--------|--------|-----|--------|--------|-----|
| A15311 | A15447 | 286 | A15311 | A15451 | 462 |
| A15311 | A15452 | 469 | A15311 | A15453 | 417 |
| A15311 | A15456 | 457 | A15311 | A15459 | 372 |
| A15311 | A15460 | 385 | A15311 | A15461 | 316 |
| A15311 | A15463 | 361 | A15311 | A15476 | 245 |
| A15311 | A15478 | 288 | A15311 | A15484 | 163 |
| A15311 | A15486 | 269 | A15311 | A15489 | 252 |
| A15311 | A15513 | 269 | A15311 | A15515 | 193 |
| A15311 | A15554 | 353 | A15311 | A15799 | 260 |
| A15311 | A15801 | 480 | A15311 | A15817 | 200 |
| A15311 | A15880 | 314 | A15311 | A16224 | 196 |
| A15311 | A16300 | 283 | A15312 | A15313 | 797 |
| A15312 | A15317 | 489 | A15312 | A15318 | 457 |
| A15312 | A15331 | 491 | A15312 | A15333 | 491 |
| A15312 | A15334 | 278 | A15312 | A15335 | 491 |
| A15312 | A15346 | 463 | A15312 | A15348 | 488 |
| A15312 | A15349 | 491 | A15312 | A15352 | 610 |
| A15312 | A15366 | 945 | A15312 | A15396 | 380 |
| A15312 | A15404 | 293 | A15312 | A15413 | 475 |
| A15312 | A15417 | 157 | A15312 | A15419 | 204 |
| A15312 | A15422 | 451 | A15312 | A15431 | 491 |
| A15312 | A15432 | 800 | A15312 | A15433 | 491 |
| A15312 | A15434 | 456 | A15312 | A15435 | 491 |
| A15312 | A15436 | 491 | A15312 | A15440 | 481 |
| A15312 | A15444 | 313 | A15312 | A15446 | 236 |
| A15312 | A15447 | 491 | A15312 | A15451 | 481 |
| A15312 | A15452 | 491 | A15312 | A15453 | 200 |
| A15312 | A15454 | 485 | A15312 | A15456 | 486 |
| A15312 | A15457 | 454 | A15312 | A15459 | 489 |
| A15312 | A15460 | 470 | A15312 | A15461 | 486 |
| A15312 | A15462 | 469 | A15312 | A15463 | 491 |
| A15312 | A15480 | 486 | A15312 | A15484 | 485 |
| A15312 | A15486 | 460 | A15312 | A15487 | 386 |
| A15312 | A15489 | 235 | A15312 | A15495 | 469 |
| A15312 | A15498 | 396 | A15312 | A15513 | 477 |
| A15312 | A15515 | 475 | A15312 | A15523 | 257 |
| A15312 | A15553 | 205 | A15312 | A15671 | 297 |
| A15312 | A15792 | 372 | A15312 | A15799 | 123 |
| A15312 | A15801 | 462 | A15312 | A15802 | 374 |
| A15312 | A15804 | 174 | A15312 | A15807 | 229 |
| A15312 | A15809 | 328 | A15312 | A15814 | 167 |
| A15312 | A15817 | 267 | A15312 | A15824 | 234 |
| A15312 | A15826 | 324 | A15312 | A15830 | 140 |
| A15312 | A15864 | 377 | A15312 | A15922 | 333 |
| A15312 | A16004 | 191 | A15312 | A16055 | 424 |
| A15312 | A16224 | 449 | A15312 | A16300 | 247 |

|        |        |     |        |        |     |
|--------|--------|-----|--------|--------|-----|
| A15312 | A17022 | 319 | A15312 | A17196 | 221 |
| A15313 | A15314 | 183 | A15313 | A15317 | 490 |
| A15313 | A15318 | 450 | A15313 | A15322 | 466 |
| A15313 | A15329 | 273 | A15313 | A15331 | 491 |
| A15313 | A15333 | 491 | A15313 | A15334 | 483 |
| A15313 | A15335 | 491 | A15313 | A15346 | 408 |
| A15313 | A15348 | 491 | A15313 | A15349 | 491 |
| A15313 | A15352 | 636 | A15313 | A15366 | 491 |
| A15313 | A15376 | 154 | A15313 | A15387 | 176 |
| A15313 | A15396 | 477 | A15313 | A15404 | 307 |
| A15313 | A15413 | 419 | A15313 | A15417 | 305 |
| A15313 | A15419 | 438 | A15313 | A15422 | 457 |
| A15313 | A15431 | 491 | A15313 | A15432 | 792 |
| A15313 | A15433 | 491 | A15313 | A15434 | 479 |
| A15313 | A15435 | 491 | A15313 | A15436 | 491 |
| A15313 | A15437 | 174 | A15313 | A15440 | 488 |
| A15313 | A15444 | 229 | A15313 | A15445 | 162 |
| A15313 | A15447 | 491 | A15313 | A15451 | 424 |
| A15313 | A15452 | 491 | A15313 | A15454 | 489 |
| A15313 | A15456 | 489 | A15313 | A15457 | 457 |
| A15313 | A15459 | 485 | A15313 | A15460 | 463 |
| A15313 | A15461 | 483 | A15313 | A15462 | 473 |
| A15313 | A15463 | 491 | A15313 | A15480 | 491 |
| A15313 | A15484 | 489 | A15313 | A15487 | 356 |
| A15313 | A15495 | 486 | A15313 | A15498 | 434 |
| A15313 | A15513 | 472 | A15313 | A15515 | 486 |
| A15313 | A15523 | 270 | A15313 | A15792 | 454 |
| A15313 | A15799 | 413 | A15313 | A15801 | 479 |
| A15313 | A15802 | 486 | A15313 | A15804 | 322 |
| A15313 | A15807 | 241 | A15313 | A15809 | 395 |
| A15313 | A15814 | 180 | A15313 | A15816 | 249 |
| A15313 | A15817 | 363 | A15313 | A15824 | 251 |
| A15313 | A15826 | 337 | A15313 | A15830 | 285 |
| A15313 | A15833 | 347 | A15313 | A15864 | 270 |
| A15313 | A15904 | 235 | A15313 | A15922 | 350 |
| A15313 | A16001 | 328 | A15313 | A16006 | 154 |
| A15313 | A16055 | 385 | A15313 | A16136 | 307 |
| A15313 | A16224 | 466 | A15313 | A17081 | 229 |
| A15313 | A17223 | 270 | A15314 | A15322 | 491 |
| A15314 | A15323 | 490 | A15314 | A15328 | 363 |
| A15314 | A15330 | 491 | A15314 | A15332 | 404 |
| A15314 | A15336 | 326 | A15314 | A15337 | 945 |
| A15314 | A15338 | 486 | A15314 | A15339 | 486 |
| A15314 | A15341 | 324 | A15314 | A15346 | 430 |
| A15314 | A15348 | 296 | A15314 | A15349 | 393 |
| A15314 | A15352 | 160 | A15314 | A15355 | 240 |

|        |        |     |        |        |     |
|--------|--------|-----|--------|--------|-----|
| A15314 | A15360 | 491 | A15314 | A15361 | 945 |
| A15314 | A15363 | 63  | A15314 | A15385 | 462 |
| A15314 | A15386 | 491 | A15314 | A15387 | 401 |
| A15314 | A15388 | 491 | A15314 | A15391 | 180 |
| A15314 | A15395 | 213 | A15314 | A15402 | 409 |
| A15314 | A15409 | 390 | A15314 | A15410 | 63  |
| A15314 | A15411 | 115 | A15314 | A15419 | 479 |
| A15314 | A15425 | 409 | A15314 | A15444 | 160 |
| A15314 | A15547 | 63  | A15314 | A15559 | 491 |
| A15314 | A15566 | 481 | A15314 | A15576 | 176 |
| A15314 | A15577 | 297 | A15314 | A15578 | 491 |
| A15314 | A15579 | 479 | A15314 | A15580 | 232 |
| A15314 | A15581 | 489 | A15314 | A15583 | 378 |
| A15314 | A15584 | 157 | A15314 | A15585 | 196 |
| A15314 | A15586 | 485 | A15314 | A15596 | 238 |
| A15314 | A15601 | 369 | A15314 | A15602 | 193 |
| A15314 | A15603 | 351 | A15314 | A15605 | 396 |
| A15314 | A15606 | 485 | A15314 | A15608 | 483 |
| A15314 | A15611 | 93  | A15314 | A15612 | 329 |
| A15314 | A15630 | 491 | A15314 | A15639 | 319 |
| A15314 | A15783 | 107 | A15314 | A15787 | 232 |
| A15314 | A15788 | 491 | A15314 | A15821 | 232 |
| A15314 | A15834 | 491 | A15314 | A15867 | 63  |
| A15314 | A15962 | 425 | A15314 | A15974 | 63  |
| A15314 | A15976 | 480 | A15314 | A15981 | 241 |
| A15314 | A16006 | 443 | A15314 | A16008 | 182 |
| A15314 | A16216 | 490 | A15314 | A16217 | 491 |
| A15314 | A16433 | 454 | A15314 | A16463 | 430 |
| A15314 | A16511 | 412 | A15314 | A16540 | 63  |
| A15314 | A16579 | 174 | A15314 | A16586 | 307 |
| A15314 | A16722 | 241 | A15314 | A16831 | 126 |
| A15314 | A16904 | 472 | A15314 | A17063 | 457 |
| A15315 | A15321 | 329 | A15315 | A15336 | 451 |
| A15315 | A15345 | 873 | A15315 | A15347 | 989 |
| A15315 | A15384 | 491 | A15315 | A15400 | 63  |
| A15315 | A15527 | 229 | A15315 | A15528 | 491 |
| A15315 | A15532 | 469 | A15315 | A15555 | 434 |
| A15315 | A15557 | 329 | A15315 | A15617 | 986 |
| A15315 | A15618 | 486 | A15315 | A15644 | 322 |
| A15315 | A15683 | 491 | A15315 | A16262 | 256 |
| A15315 | A16304 | 358 | A15315 | A16322 | 491 |
| A15315 | A16364 | 792 | A15315 | A16449 | 232 |
| A15315 | A16466 | 491 | A15315 | A17063 | 379 |
| A15316 | A15346 | 163 | A15316 | A15432 | 193 |
| A15316 | A15436 | 357 | A15316 | A15672 | 338 |
| A15316 | A15673 | 330 | A15316 | A15809 | 183 |



|        |        |     |        |        |     |
|--------|--------|-----|--------|--------|-----|
| A15316 | A15922 | 230 | A15316 | A17042 | 353 |
| A15317 | A15318 | 307 | A15317 | A15322 | 266 |
| A15317 | A15331 | 414 | A15317 | A15334 | 353 |
| A15317 | A15335 | 475 | A15317 | A15348 | 491 |
| A15317 | A15349 | 491 | A15317 | A15352 | 491 |
| A15317 | A15366 | 368 | A15317 | A15376 | 490 |
| A15317 | A15413 | 452 | A15317 | A15431 | 260 |
| A15317 | A15432 | 422 | A15317 | A15433 | 391 |
| A15317 | A15434 | 118 | A15317 | A15435 | 345 |
| A15317 | A15436 | 440 | A15317 | A15444 | 490 |
| A15317 | A15447 | 485 | A15317 | A15452 | 491 |
| A15317 | A15454 | 162 | A15317 | A15456 | 440 |
| A15317 | A15459 | 191 | A15317 | A15460 | 343 |
| A15317 | A15463 | 187 | A15317 | A15487 | 200 |
| A15317 | A15488 | 210 | A15317 | A15495 | 466 |
| A15317 | A15515 | 489 | A15317 | A15799 | 491 |
| A15317 | A15801 | 218 | A15317 | A15814 | 246 |
| A15317 | A15817 | 139 | A15317 | A15828 | 463 |
| A15317 | A15830 | 347 | A15317 | A16136 | 240 |
| A15317 | A16152 | 172 | A15317 | A16224 | 263 |
| A15317 | A16255 | 262 | A15317 | A16300 | 185 |
| A15318 | A15329 | 443 | A15318 | A15331 | 256 |
| A15318 | A15333 | 154 | A15318 | A15346 | 481 |
| A15318 | A15348 | 286 | A15318 | A15349 | 488 |
| A15318 | A15352 | 440 | A15318 | A15381 | 746 |
| A15318 | A15391 | 457 | A15318 | A15411 | 401 |
| A15318 | A15412 | 374 | A15318 | A15417 | 228 |
| A15318 | A15419 | 945 | A15318 | A15420 | 483 |
| A15318 | A15422 | 491 | A15318 | A15444 | 296 |
| A15318 | A15456 | 180 | A15318 | A15460 | 202 |
| A15318 | A15481 | 198 | A15318 | A15486 | 200 |
| A15318 | A15495 | 364 | A15318 | A15813 | 462 |
| A15318 | A15815 | 281 | A15318 | A15819 | 156 |
| A15318 | A15828 | 199 | A15318 | A15886 | 281 |
| A15318 | A16055 | 352 | A15318 | A16120 | 398 |
| A15318 | A16224 | 440 | A15318 | A16300 | 326 |
| A15318 | A16960 | 263 | A15319 | A16076 | 473 |
| A15319 | A16299 | 419 | A15319 | A16426 | 475 |
| A15320 | A15321 | 243 | A15320 | A15506 | 491 |
| A15320 | A15575 | 321 | A15320 | A15691 | 424 |
| A15320 | A16120 | 201 | A15320 | A16916 | 447 |
| A15321 | A15322 | 455 | A15321 | A15328 | 251 |
| A15321 | A15338 | 217 | A15321 | A15347 | 491 |
| A15321 | A15357 | 165 | A15321 | A15506 | 477 |
| A15321 | A15555 | 757 | A15321 | A15564 | 217 |
| A15321 | A15617 | 479 | A15321 | A15663 | 63  |

|        |        |     |        |        |     |
|--------|--------|-----|--------|--------|-----|
| A15321 | A15691 | 195 | A15321 | A16088 | 243 |
| A15321 | A16120 | 332 | A15321 | A16215 | 299 |
| A15321 | A16255 | 269 | A15321 | A16614 | 217 |
| A15321 | A16887 | 160 | A15322 | A15328 | 491 |
| A15322 | A15342 | 491 | A15322 | A15343 | 491 |
| A15322 | A15344 | 490 | A15322 | A15345 | 280 |
| A15322 | A15347 | 513 | A15322 | A15349 | 481 |
| A15322 | A15352 | 469 | A15322 | A15356 | 159 |
| A15322 | A15357 | 945 | A15322 | A15361 | 467 |
| A15322 | A15384 | 358 | A15322 | A15398 | 491 |
| A15322 | A15399 | 425 | A15322 | A15400 | 945 |
| A15322 | A15401 | 490 | A15322 | A15402 | 698 |
| A15322 | A15403 | 199 | A15322 | A15422 | 426 |
| A15322 | A15425 | 296 | A15322 | A15452 | 348 |
| A15322 | A15480 | 243 | A15322 | A15495 | 475 |
| A15322 | A15506 | 488 | A15322 | A15516 | 469 |
| A15322 | A15557 | 491 | A15322 | A15578 | 63  |
| A15322 | A15617 | 200 | A15322 | A15630 | 369 |
| A15322 | A15663 | 899 | A15322 | A15680 | 419 |
| A15322 | A16013 | 445 | A15322 | A16022 | 348 |
| A15322 | A16121 | 491 | A15322 | A16393 | 401 |
| A15322 | A16424 | 491 | A15322 | A16429 | 139 |
| A15322 | A16445 | 269 | A15322 | A16471 | 154 |
| A15322 | A16904 | 485 | A15322 | A16910 | 172 |
| A15322 | A16916 | 490 | A15323 | A15324 | 954 |
| A15323 | A15330 | 483 | A15323 | A15338 | 490 |
| A15323 | A15339 | 655 | A15323 | A15341 | 937 |
| A15323 | A15353 | 968 | A15323 | A15355 | 451 |
| A15323 | A15359 | 984 | A15323 | A15360 | 468 |
| A15323 | A15361 | 368 | A15323 | A15363 | 329 |
| A15323 | A15370 | 243 | A15323 | A15419 | 480 |
| A15323 | A15431 | 413 | A15323 | A15434 | 340 |
| A15323 | A15502 | 483 | A15323 | A15505 | 303 |
| A15323 | A15557 | 63  | A15323 | A15558 | 193 |
| A15323 | A15559 | 572 | A15323 | A15564 | 438 |
| A15323 | A15581 | 162 | A15323 | A15596 | 457 |
| A15323 | A15649 | 479 | A15323 | A15729 | 361 |
| A15323 | A15788 | 688 | A15323 | A15795 | 510 |
| A15323 | A15851 | 306 | A15323 | A15867 | 229 |
| A15323 | A15868 | 486 | A15323 | A15871 | 372 |
| A15323 | A15875 | 216 | A15323 | A16217 | 421 |
| A15323 | A16259 | 162 | A15323 | A16311 | 450 |
| A15323 | A16405 | 156 | A15323 | A16433 | 221 |
| A15323 | A16458 | 377 | A15323 | A16463 | 490 |
| A15323 | A16495 | 413 | A15323 | A16496 | 296 |
| A15323 | A16581 | 179 | A15323 | A16831 | 441 |

|        |        |     |        |        |     |
|--------|--------|-----|--------|--------|-----|
| A15323 | A16861 | 401 | A15323 | A16917 | 229 |
| A15323 | A17063 | 491 | A15323 | A17094 | 63  |
| A15324 | A15338 | 480 | A15324 | A15339 | 491 |
| A15324 | A15341 | 904 | A15324 | A15353 | 986 |
| A15324 | A15355 | 395 | A15324 | A15359 | 945 |
| A15324 | A15363 | 306 | A15324 | A15364 | 173 |
| A15324 | A15374 | 780 | A15324 | A15419 | 356 |
| A15324 | A15431 | 441 | A15324 | A15458 | 177 |
| A15324 | A15498 | 245 | A15324 | A15501 | 371 |
| A15324 | A15502 | 491 | A15324 | A15543 | 452 |
| A15324 | A15547 | 899 | A15324 | A15559 | 491 |
| A15324 | A15564 | 488 | A15324 | A15614 | 909 |
| A15324 | A15729 | 445 | A15324 | A15740 | 201 |
| A15324 | A15747 | 310 | A15324 | A15788 | 491 |
| A15324 | A16311 | 447 | A15324 | A16405 | 185 |
| A15324 | A16463 | 340 | A15324 | A16495 | 162 |
| A15324 | A17063 | 491 | A15325 | A15862 | 390 |
| A15326 | A15338 | 333 | A15326 | A15559 | 90  |
| A15327 | A15447 | 183 | A15327 | A15795 | 467 |
| A15327 | A15800 | 380 | A15328 | A15345 | 249 |
| A15328 | A15357 | 480 | A15328 | A15398 | 479 |
| A15328 | A15399 | 196 | A15328 | A15400 | 486 |
| A15328 | A15402 | 489 | A15328 | A15556 | 378 |
| A15328 | A15557 | 491 | A15328 | A15578 | 63  |
| A15328 | A15630 | 317 | A15328 | A15644 | 318 |
| A15328 | A15676 | 488 | A15328 | A15680 | 252 |
| A15328 | A15690 | 196 | A15328 | A15691 | 168 |
| A15328 | A15896 | 297 | A15328 | A16113 | 314 |
| A15328 | A16216 | 469 | A15328 | A16292 | 173 |
| A15328 | A16393 | 303 | A15328 | A16420 | 208 |
| A15328 | A16429 | 446 | A15328 | A16434 | 277 |
| A15328 | A16891 | 187 | A15329 | A15335 | 276 |
| A15329 | A15339 | 157 | A15329 | A15417 | 329 |
| A15329 | A15419 | 483 | A15329 | A15420 | 438 |
| A15329 | A15422 | 477 | A15329 | A15431 | 163 |
| A15329 | A15454 | 271 | A15329 | A15813 | 312 |
| A15329 | A15820 | 411 | A15329 | A15886 | 363 |
| A15329 | A16224 | 243 | A15330 | A15338 | 491 |
| A15330 | A15339 | 196 | A15330 | A15360 | 945 |
| A15330 | A15361 | 945 | A15330 | A15362 | 297 |
| A15330 | A15363 | 236 | A15330 | A15386 | 260 |
| A15330 | A15559 | 486 | A15330 | A15578 | 230 |
| A15330 | A15581 | 432 | A15330 | A15582 | 310 |
| A15330 | A15788 | 271 | A15330 | A16006 | 188 |
| A15330 | A16217 | 945 | A15330 | A16831 | 343 |
| A15330 | A17063 | 269 | A15331 | A15333 | 485 |

|        |        |     |        |        |     |
|--------|--------|-----|--------|--------|-----|
| A15331 | A15335 | 491 | A15331 | A15337 | 187 |
| A15331 | A15348 | 489 | A15331 | A15349 | 491 |
| A15331 | A15352 | 481 | A15331 | A15396 | 208 |
| A15331 | A15404 | 276 | A15331 | A15422 | 238 |
| A15331 | A15431 | 99  | A15331 | A15432 | 130 |
| A15331 | A15433 | 475 | A15331 | A15434 | 288 |
| A15331 | A15435 | 319 | A15331 | A15440 | 452 |
| A15331 | A15446 | 335 | A15331 | A15447 | 357 |
| A15331 | A15452 | 330 | A15331 | A15454 | 443 |
| A15331 | A15456 | 229 | A15331 | A15457 | 281 |
| A15331 | A15460 | 251 | A15331 | A15461 | 160 |
| A15331 | A15463 | 151 | A15331 | A15464 | 191 |
| A15331 | A15480 | 486 | A15331 | A15484 | 446 |
| A15331 | A15486 | 249 | A15331 | A15495 | 366 |
| A15331 | A15513 | 369 | A15331 | A15515 | 433 |
| A15331 | A15516 | 198 | A15331 | A15522 | 293 |
| A15331 | A15523 | 347 | A15331 | A15798 | 357 |
| A15331 | A15800 | 216 | A15331 | A15801 | 458 |
| A15331 | A15802 | 271 | A15331 | A15807 | 329 |
| A15331 | A15830 | 257 | A15331 | A15922 | 167 |
| A15331 | A16224 | 174 | A15332 | A15388 | 438 |
| A15332 | A15578 | 486 | A15332 | A15579 | 344 |
| A15333 | A15335 | 481 | A15333 | A15348 | 371 |
| A15333 | A15349 | 407 | A15333 | A15352 | 485 |
| A15333 | A15366 | 174 | A15333 | A15381 | 167 |
| A15333 | A15396 | 235 | A15333 | A15404 | 297 |
| A15333 | A15431 | 121 | A15333 | A15432 | 424 |
| A15333 | A15433 | 481 | A15333 | A15434 | 184 |
| A15333 | A15435 | 249 | A15333 | A15436 | 193 |
| A15333 | A15440 | 258 | A15333 | A15447 | 485 |
| A15333 | A15451 | 283 | A15333 | A15452 | 135 |
| A15333 | A15454 | 468 | A15333 | A15456 | 255 |
| A15333 | A15457 | 303 | A15333 | A15459 | 256 |
| A15333 | A15460 | 274 | A15333 | A15461 | 188 |
| A15333 | A15476 | 249 | A15333 | A15480 | 154 |
| A15333 | A15484 | 468 | A15333 | A15489 | 256 |
| A15333 | A15513 | 386 | A15333 | A15515 | 443 |
| A15333 | A15638 | 165 | A15333 | A15802 | 293 |
| A15333 | A15804 | 310 | A15333 | A15826 | 322 |
| A15333 | A15833 | 330 | A15333 | A15922 | 193 |
| A15333 | A16055 | 445 | A15333 | A16136 | 297 |
| A15333 | A16224 | 333 | A15333 | A16300 | 185 |
| A15333 | A17223 | 363 | A15334 | A15348 | 341 |
| A15334 | A15349 | 130 | A15334 | A15352 | 366 |
| A15334 | A15432 | 218 | A15334 | A15436 | 254 |
| A15334 | A15452 | 329 | A15334 | A15454 | 286 |

|        |        |     |        |        |     |
|--------|--------|-----|--------|--------|-----|
| A15334 | A15799 | 316 | A15334 | A15828 | 321 |
| A15335 | A15348 | 479 | A15335 | A15349 | 490 |
| A15335 | A15352 | 488 | A15335 | A15376 | 254 |
| A15335 | A15413 | 391 | A15335 | A15417 | 299 |
| A15335 | A15422 | 277 | A15335 | A15431 | 126 |
| A15335 | A15433 | 247 | A15335 | A15434 | 188 |
| A15335 | A15440 | 262 | A15335 | A15447 | 163 |
| A15335 | A15454 | 360 | A15335 | A15476 | 254 |
| A15335 | A15480 | 427 | A15335 | A15484 | 475 |
| A15335 | A15495 | 329 | A15335 | A15515 | 483 |
| A15335 | A15523 | 366 | A15335 | A15801 | 441 |
| A15335 | A15830 | 394 | A15335 | A17076 | 229 |
| A15336 | A15347 | 479 | A15336 | A15455 | 213 |
| A15336 | A15489 | 159 | A15336 | A15506 | 200 |
| A15336 | A15612 | 329 | A15336 | A15622 | 372 |
| A15336 | A15626 | 484 | A15336 | A15638 | 473 |
| A15336 | A15671 | 213 | A15336 | A15815 | 260 |
| A15336 | A16055 | 201 | A15336 | A16068 | 457 |
| A15336 | A16073 | 199 | A15336 | A16324 | 266 |
| A15336 | A16367 | 350 | A15336 | A16535 | 418 |
| A15336 | A16717 | 326 | A15337 | A15339 | 215 |
| A15337 | A15355 | 449 | A15337 | A15360 | 205 |
| A15337 | A15586 | 408 | A15337 | A15606 | 252 |
| A15337 | A15608 | 224 | A15337 | A15630 | 279 |
| A15337 | A15788 | 420 | A15337 | A15834 | 201 |
| A15337 | A15867 | 180 | A15337 | A16463 | 218 |
| A15337 | A16511 | 296 | A15338 | A15339 | 427 |
| A15338 | A15353 | 474 | A15338 | A15354 | 425 |
| A15338 | A15360 | 491 | A15338 | A15361 | 63  |
| A15338 | A15362 | 302 | A15338 | A15363 | 486 |
| A15338 | A15364 | 245 | A15338 | A15378 | 364 |
| A15338 | A15505 | 486 | A15338 | A15521 | 416 |
| A15338 | A15537 | 474 | A15338 | A15540 | 257 |
| A15338 | A15544 | 483 | A15338 | A15558 | 491 |
| A15338 | A15559 | 491 | A15338 | A15560 | 63  |
| A15338 | A15561 | 475 | A15338 | A15564 | 414 |
| A15338 | A15588 | 447 | A15338 | A15590 | 385 |
| A15338 | A15591 | 340 | A15338 | A15629 | 162 |
| A15338 | A15630 | 63  | A15338 | A15660 | 460 |
| A15338 | A15684 | 430 | A15338 | A15706 | 157 |
| A15338 | A15710 | 491 | A15338 | A15729 | 491 |
| A15338 | A15737 | 483 | A15338 | A15738 | 473 |
| A15338 | A15740 | 313 | A15338 | A15747 | 216 |
| A15338 | A15763 | 323 | A15338 | A15779 | 491 |
| A15338 | A15788 | 338 | A15338 | A16392 | 433 |
| A15338 | A16465 | 491 | A15338 | A16545 | 205 |

|        |        |     |        |        |     |
|--------|--------|-----|--------|--------|-----|
| A15338 | A16563 | 337 | A15338 | A16614 | 262 |
| A15338 | A16654 | 77  | A15338 | A16844 | 229 |
| A15338 | A17063 | 469 | A15339 | A15341 | 484 |
| A15339 | A15353 | 688 | A15339 | A15355 | 457 |
| A15339 | A15359 | 703 | A15339 | A15360 | 236 |
| A15339 | A15419 | 389 | A15339 | A15431 | 333 |
| A15339 | A15559 | 486 | A15339 | A15578 | 65  |
| A15339 | A15596 | 452 | A15339 | A15788 | 491 |
| A15339 | A15813 | 162 | A15339 | A15867 | 457 |
| A15339 | A15868 | 491 | A15339 | A15871 | 176 |
| A15339 | A15875 | 324 | A15339 | A16217 | 66  |
| A15339 | A16831 | 219 | A15339 | A17063 | 491 |
| A15340 | A15350 | 899 | A15340 | A17060 | 899 |
| A15340 | A17216 | 899 | A15341 | A15355 | 288 |
| A15341 | A15360 | 163 | A15341 | A15581 | 313 |
| A15341 | A15868 | 318 | A15341 | A16379 | 374 |
| A15342 | A15343 | 491 | A15342 | A15344 | 491 |
| A15342 | A15356 | 419 | A15342 | A15357 | 489 |
| A15342 | A15398 | 470 | A15342 | A15399 | 154 |
| A15342 | A15400 | 481 | A15342 | A15401 | 363 |
| A15342 | A15402 | 491 | A15342 | A15516 | 299 |
| A15342 | A15996 | 296 | A15342 | A16013 | 216 |
| A15342 | A16393 | 157 | A15342 | A16424 | 945 |
| A15342 | A16581 | 224 | A15343 | A15344 | 945 |
| A15343 | A15357 | 477 | A15343 | A15398 | 424 |
| A15343 | A15400 | 484 | A15343 | A15401 | 201 |
| A15343 | A15402 | 486 | A15343 | A15516 | 229 |
| A15343 | A16013 | 388 | A15343 | A16121 | 263 |
| A15343 | A16424 | 945 | A15344 | A15357 | 393 |
| A15344 | A15398 | 294 | A15344 | A15400 | 283 |
| A15344 | A15402 | 416 | A15344 | A15516 | 235 |
| A15344 | A16013 | 391 | A15344 | A16424 | 945 |
| A15345 | A15347 | 884 | A15345 | A15357 | 63  |
| A15345 | A15384 | 637 | A15345 | A15528 | 474 |
| A15345 | A15555 | 218 | A15345 | A15557 | 63  |
| A15345 | A15617 | 873 | A15345 | A15618 | 307 |
| A15345 | A15683 | 475 | A15345 | A16322 | 252 |
| A15345 | A16364 | 672 | A15345 | A16466 | 99  |
| A15346 | A15349 | 260 | A15346 | A15352 | 462 |
| A15346 | A15387 | 205 | A15346 | A15395 | 198 |
| A15346 | A15409 | 735 | A15346 | A15410 | 491 |
| A15346 | A15411 | 382 | A15346 | A15419 | 167 |
| A15346 | A15422 | 234 | A15346 | A15424 | 346 |
| A15346 | A15425 | 68  | A15346 | A15440 | 154 |
| A15346 | A15451 | 184 | A15346 | A15454 | 252 |
| A15346 | A15462 | 173 | A15346 | A15486 | 172 |

|        |        |     |        |        |     |
|--------|--------|-----|--------|--------|-----|
| A15346 | A15488 | 172 | A15346 | A15495 | 252 |
| A15346 | A15515 | 212 | A15346 | A15615 | 274 |
| A15346 | A15630 | 76  | A15346 | A15783 | 246 |
| A15346 | A15801 | 314 | A15346 | A15802 | 329 |
| A15346 | A15811 | 193 | A15346 | A15814 | 208 |
| A15346 | A15827 | 213 | A15346 | A15829 | 346 |
| A15346 | A15864 | 294 | A15346 | A16189 | 306 |
| A15346 | A16224 | 490 | A15346 | A16300 | 382 |
| A15346 | A16711 | 152 | A15346 | A16771 | 256 |
| A15346 | A16904 | 318 | A15346 | A16965 | 249 |
| A15346 | A17081 | 256 | A15347 | A15357 | 63  |
| A15347 | A15383 | 187 | A15347 | A15384 | 575 |
| A15347 | A15400 | 107 | A15347 | A15410 | 63  |
| A15347 | A15528 | 602 | A15347 | A15532 | 428 |
| A15347 | A15555 | 424 | A15347 | A15557 | 63  |
| A15347 | A15617 | 988 | A15347 | A15618 | 481 |
| A15347 | A15619 | 395 | A15347 | A15626 | 172 |
| A15347 | A15644 | 294 | A15347 | A15683 | 491 |
| A15347 | A15690 | 398 | A15347 | A15918 | 162 |
| A15347 | A15949 | 187 | A15347 | A16304 | 460 |
| A15347 | A16322 | 491 | A15347 | A16364 | 750 |
| A15347 | A16449 | 285 | A15347 | A16466 | 491 |
| A15348 | A15349 | 491 | A15348 | A15352 | 491 |
| A15348 | A15366 | 227 | A15348 | A15376 | 485 |
| A15348 | A15411 | 185 | A15348 | A15413 | 462 |
| A15348 | A15419 | 302 | A15348 | A15420 | 167 |
| A15348 | A15425 | 180 | A15348 | A15433 | 380 |
| A15348 | A15435 | 419 | A15348 | A15437 | 224 |
| A15348 | A15440 | 177 | A15348 | A15444 | 491 |
| A15348 | A15447 | 491 | A15348 | A15451 | 207 |
| A15348 | A15452 | 491 | A15348 | A15454 | 473 |
| A15348 | A15456 | 390 | A15348 | A15457 | 232 |
| A15348 | A15459 | 174 | A15348 | A15460 | 462 |
| A15348 | A15484 | 306 | A15348 | A15486 | 327 |
| A15348 | A15495 | 479 | A15348 | A15513 | 195 |
| A15348 | A15515 | 491 | A15348 | A15522 | 245 |
| A15348 | A15641 | 168 | A15348 | A15799 | 491 |
| A15348 | A15801 | 204 | A15348 | A15802 | 347 |
| A15348 | A15814 | 484 | A15348 | A15817 | 124 |
| A15348 | A15828 | 326 | A15348 | A15830 | 490 |
| A15348 | A16136 | 484 | A15348 | A16192 | 255 |
| A15348 | A16248 | 262 | A15348 | A16300 | 159 |
| A15348 | A16711 | 174 | A15348 | A16978 | 322 |
| A15348 | A17173 | 358 | A15349 | A15352 | 491 |
| A15349 | A15366 | 491 | A15349 | A15376 | 490 |
| A15349 | A15402 | 187 | A15349 | A15411 | 224 |

|        |        |     |        |        |     |
|--------|--------|-----|--------|--------|-----|
| A15349 | A15413 | 480 | A15349 | A15419 | 454 |
| A15349 | A15420 | 441 | A15349 | A15422 | 291 |
| A15349 | A15431 | 481 | A15349 | A15432 | 491 |
| A15349 | A15433 | 458 | A15349 | A15434 | 486 |
| A15349 | A15435 | 491 | A15349 | A15436 | 488 |
| A15349 | A15437 | 144 | A15349 | A15440 | 425 |
| A15349 | A15444 | 481 | A15349 | A15447 | 491 |
| A15349 | A15451 | 408 | A15349 | A15452 | 491 |
| A15349 | A15454 | 488 | A15349 | A15456 | 462 |
| A15349 | A15457 | 422 | A15349 | A15459 | 212 |
| A15349 | A15460 | 467 | A15349 | A15461 | 299 |
| A15349 | A15463 | 485 | A15349 | A15480 | 477 |
| A15349 | A15484 | 480 | A15349 | A15487 | 477 |
| A15349 | A15495 | 491 | A15349 | A15515 | 491 |
| A15349 | A15544 | 163 | A15349 | A15630 | 260 |
| A15349 | A15671 | 279 | A15349 | A15792 | 134 |
| A15349 | A15799 | 473 | A15349 | A15800 | 369 |
| A15349 | A15801 | 406 | A15349 | A15802 | 267 |
| A15349 | A15814 | 149 | A15349 | A15817 | 143 |
| A15349 | A15828 | 398 | A15349 | A15830 | 485 |
| A15349 | A15886 | 199 | A15349 | A16055 | 138 |
| A15349 | A16136 | 488 | A15349 | A16152 | 484 |
| A15349 | A16224 | 319 | A15349 | A16414 | 163 |
| A15349 | A17076 | 168 | A15349 | A17196 | 205 |
| A15350 | A17215 | 899 | A15350 | A17216 | 899 |
| A15352 | A15366 | 491 | A15352 | A15376 | 414 |
| A15352 | A15396 | 445 | A15352 | A15402 | 333 |
| A15352 | A15404 | 377 | A15352 | A15413 | 481 |
| A15352 | A15419 | 427 | A15352 | A15422 | 314 |
| A15352 | A15431 | 490 | A15352 | A15432 | 595 |
| A15352 | A15433 | 470 | A15352 | A15434 | 227 |
| A15352 | A15435 | 491 | A15352 | A15436 | 491 |
| A15352 | A15440 | 333 | A15352 | A15444 | 475 |
| A15352 | A15447 | 491 | A15352 | A15451 | 486 |
| A15352 | A15452 | 491 | A15352 | A15454 | 369 |
| A15352 | A15456 | 490 | A15352 | A15457 | 480 |
| A15352 | A15459 | 452 | A15352 | A15460 | 490 |
| A15352 | A15461 | 466 | A15352 | A15462 | 474 |
| A15352 | A15463 | 491 | A15352 | A15464 | 174 |
| A15352 | A15478 | 276 | A15352 | A15480 | 385 |
| A15352 | A15485 | 132 | A15352 | A15486 | 440 |
| A15352 | A15487 | 382 | A15352 | A15495 | 491 |
| A15352 | A15498 | 180 | A15352 | A15513 | 408 |
| A15352 | A15515 | 491 | A15352 | A15522 | 480 |
| A15352 | A15523 | 374 | A15352 | A15638 | 353 |
| A15352 | A15671 | 160 | A15352 | A15799 | 491 |



|        |        |     |        |        |     |
|--------|--------|-----|--------|--------|-----|
| A15352 | A15801 | 135 | A15352 | A15802 | 422 |
| A15352 | A15804 | 388 | A15352 | A15807 | 224 |
| A15352 | A15809 | 162 | A15352 | A15814 | 480 |
| A15352 | A15817 | 159 | A15352 | A15823 | 383 |
| A15352 | A15824 | 110 | A15352 | A15826 | 187 |
| A15352 | A15828 | 486 | A15352 | A15830 | 461 |
| A15352 | A15833 | 200 | A15352 | A15876 | 168 |
| A15352 | A16045 | 241 | A15352 | A16117 | 314 |
| A15352 | A16136 | 479 | A15352 | A16137 | 210 |
| A15352 | A16152 | 204 | A15352 | A16192 | 321 |
| A15352 | A16224 | 391 | A15352 | A16300 | 445 |
| A15352 | A16711 | 227 | A15352 | A17076 | 290 |
| A15352 | A17173 | 316 | A15352 | A17196 | 218 |
| A15353 | A15359 | 961 | A15353 | A15374 | 799 |
| A15353 | A15501 | 165 | A15353 | A15502 | 491 |
| A15353 | A15543 | 340 | A15353 | A15547 | 899 |
| A15353 | A15559 | 490 | A15353 | A15564 | 477 |
| A15353 | A15614 | 911 | A15353 | A15717 | 218 |
| A15353 | A15747 | 356 | A15353 | A15788 | 490 |
| A15353 | A16311 | 419 | A15353 | A16405 | 416 |
| A15353 | A17063 | 491 | A15354 | A15360 | 101 |
| A15354 | A15363 | 201 | A15354 | A15505 | 319 |
| A15354 | A15560 | 205 | A15355 | A15419 | 305 |
| A15355 | A15431 | 408 | A15355 | A15584 | 367 |
| A15355 | A15605 | 235 | A15355 | A15788 | 491 |
| A15355 | A15875 | 305 | A15355 | A16298 | 274 |
| A15355 | A16463 | 241 | A15356 | A15357 | 475 |
| A15356 | A15402 | 255 | A15356 | A15587 | 187 |
| A15356 | A15941 | 369 | A15356 | A16225 | 246 |
| A15356 | A16378 | 348 | A15356 | A16417 | 484 |
| A15356 | A16616 | 484 | A15356 | A16719 | 160 |
| A15356 | A16754 | 466 | A15357 | A15398 | 491 |
| A15357 | A15399 | 411 | A15357 | A15400 | 945 |
| A15357 | A15401 | 489 | A15357 | A15402 | 491 |
| A15357 | A15403 | 174 | A15357 | A15516 | 305 |
| A15357 | A15617 | 63  | A15357 | A15686 | 154 |
| A15357 | A16013 | 477 | A15357 | A16121 | 475 |
| A15357 | A16285 | 151 | A15357 | A16424 | 477 |
| A15357 | A16776 | 160 | A15357 | A16904 | 383 |
| A15357 | A16913 | 188 | A15357 | A17018 | 152 |
| A15357 | A17030 | 160 | A15358 | A15395 | 180 |
| A15358 | A15465 | 473 | A15358 | A15468 | 491 |
| A15358 | A15469 | 446 | A15358 | A15470 | 554 |
| A15358 | A15471 | 480 | A15358 | A15472 | 491 |
| A15358 | A15473 | 429 | A15358 | A15474 | 484 |
| A15358 | A15475 | 252 | A15358 | A15484 | 179 |

|        |        |     |        |        |     |
|--------|--------|-----|--------|--------|-----|
| A15358 | A15599 | 477 | A15358 | A16061 | 491 |
| A15358 | A16074 | 217 | A15358 | A16522 | 422 |
| A15359 | A15374 | 221 | A15359 | A15419 | 224 |
| A15359 | A15505 | 263 | A15359 | A15547 | 899 |
| A15359 | A15614 | 899 | A15359 | A15788 | 486 |
| A15359 | A15867 | 263 | A15359 | A16463 | 174 |
| A15359 | A16581 | 347 | A15359 | A16860 | 154 |
| A15359 | A16874 | 221 | A15359 | A17063 | 462 |
| A15359 | A17198 | 191 | A15360 | A15361 | 945 |
| A15360 | A15364 | 230 | A15360 | A15386 | 408 |
| A15360 | A15387 | 184 | A15360 | A15422 | 201 |
| A15360 | A15507 | 63  | A15360 | A15510 | 201 |
| A15360 | A15559 | 382 | A15360 | A15566 | 202 |
| A15360 | A15578 | 484 | A15360 | A15581 | 144 |
| A15360 | A15583 | 210 | A15360 | A15596 | 63  |
| A15360 | A15630 | 63  | A15360 | A15782 | 277 |
| A15360 | A15813 | 154 | A15360 | A15834 | 212 |
| A15360 | A15867 | 82  | A15360 | A16054 | 180 |
| A15360 | A16217 | 943 | A15360 | A16520 | 182 |
| A15360 | A16586 | 396 | A15360 | A16831 | 210 |
| A15361 | A15363 | 152 | A15361 | A15385 | 362 |
| A15361 | A15386 | 473 | A15361 | A15387 | 278 |
| A15361 | A15388 | 374 | A15361 | A15402 | 188 |
| A15361 | A15410 | 313 | A15361 | A15559 | 229 |
| A15361 | A15576 | 151 | A15361 | A15578 | 490 |
| A15361 | A15581 | 329 | A15361 | A15583 | 172 |
| A15361 | A15584 | 241 | A15361 | A15585 | 276 |
| A15361 | A15630 | 440 | A15361 | A15639 | 65  |
| A15361 | A15814 | 151 | A15361 | A15962 | 327 |
| A15361 | A15976 | 388 | A15361 | A16008 | 377 |
| A15361 | A16216 | 168 | A15361 | A16217 | 945 |
| A15361 | A16443 | 151 | A15361 | A16511 | 427 |
| A15361 | A16579 | 257 | A15361 | A16586 | 257 |
| A15361 | A16831 | 160 | A15361 | A16904 | 217 |
| A15362 | A15363 | 353 | A15363 | A15364 | 321 |
| A15363 | A15505 | 312 | A15363 | A15559 | 491 |
| A15363 | A15561 | 310 | A15363 | A15564 | 350 |
| A15363 | A15729 | 74  | A15364 | A15788 | 230 |
| A15364 | A16821 | 305 | A15364 | A17063 | 294 |
| A15365 | A15419 | 173 | A15365 | A15538 | 475 |
| A15366 | A15396 | 420 | A15366 | A15413 | 491 |
| A15366 | A15430 | 647 | A15366 | A15431 | 489 |
| A15366 | A15432 | 491 | A15366 | A15433 | 458 |
| A15366 | A15434 | 307 | A15366 | A15435 | 485 |
| A15366 | A15436 | 483 | A15366 | A15447 | 312 |
| A15366 | A15451 | 400 | A15366 | A15452 | 489 |

|        |        |     |        |        |     |
|--------|--------|-----|--------|--------|-----|
| A15366 | A15456 | 302 | A15366 | A15460 | 252 |
| A15366 | A15462 | 701 | A15366 | A15463 | 701 |
| A15366 | A15485 | 491 | A15366 | A15486 | 945 |
| A15366 | A15487 | 491 | A15366 | A15488 | 460 |
| A15366 | A15489 | 486 | A15366 | A15492 | 452 |
| A15366 | A15495 | 477 | A15366 | A15498 | 479 |
| A15366 | A15501 | 152 | A15366 | A15502 | 454 |
| A15366 | A15513 | 332 | A15366 | A15515 | 274 |
| A15366 | A15614 | 405 | A15366 | A15665 | 568 |
| A15366 | A15669 | 221 | A15366 | A15670 | 462 |
| A15366 | A15671 | 485 | A15366 | A15680 | 224 |
| A15366 | A15682 | 368 | A15366 | A15749 | 424 |
| A15366 | A15752 | 490 | A15366 | A15773 | 594 |
| A15366 | A15804 | 208 | A15366 | A15817 | 210 |
| A15366 | A15830 | 263 | A15366 | A15851 | 491 |
| A15366 | A15852 | 491 | A15366 | A15854 | 324 |
| A15366 | A15870 | 243 | A15366 | A15878 | 474 |
| A15366 | A16022 | 288 | A15366 | A16188 | 176 |
| A15366 | A16209 | 458 | A15366 | A16253 | 899 |
| A15366 | A16724 | 252 | A15366 | A17054 | 249 |
| A15366 | A17063 | 449 | A15366 | A17087 | 176 |
| A15367 | A15383 | 491 | A15367 | A15524 | 63  |
| A15367 | A15536 | 446 | A15367 | A15539 | 63  |
| A15367 | A15877 | 154 | A15367 | A16110 | 180 |
| A15367 | A16128 | 344 | A15367 | A16129 | 361 |
| A15367 | A16226 | 165 | A15367 | A16245 | 283 |
| A15367 | A16531 | 63  | A15367 | A16606 | 274 |
| A15367 | A16635 | 238 | A15367 | A16694 | 485 |
| A15367 | A16707 | 151 | A15367 | A17136 | 216 |
| A15368 | A15623 | 430 | A15369 | A15371 | 491 |
| A15369 | A15395 | 199 | A15369 | A15524 | 183 |
| A15369 | A15654 | 491 | A15369 | A15837 | 219 |
| A15369 | A15876 | 234 | A15369 | A15939 | 388 |
| A15369 | A15941 | 491 | A15369 | A15942 | 202 |
| A15369 | A16127 | 491 | A15369 | A16128 | 491 |
| A15369 | A16129 | 491 | A15369 | A16134 | 302 |
| A15369 | A16226 | 491 | A15369 | A16294 | 491 |
| A15369 | A16331 | 199 | A15369 | A16378 | 486 |
| A15369 | A16431 | 480 | A15369 | A16452 | 249 |
| A15369 | A16549 | 185 | A15369 | A16606 | 489 |
| A15369 | A16612 | 488 | A15369 | A16613 | 491 |
| A15369 | A16616 | 424 | A15369 | A16626 | 491 |
| A15369 | A16646 | 491 | A15369 | A16754 | 462 |
| A15369 | A16762 | 455 | A15369 | A16952 | 443 |
| A15369 | A17133 | 177 | A15370 | A15374 | 491 |
| A15370 | A15380 | 455 | A15370 | A15712 | 200 |

|        |        |     |        |        |     |
|--------|--------|-----|--------|--------|-----|
| A15370 | A15718 | 441 | A15370 | A15719 | 200 |
| A15370 | A15724 | 491 | A15370 | A15757 | 200 |
| A15370 | A16066 | 200 | A15370 | A16611 | 193 |
| A15370 | A16634 | 305 | A15370 | A16657 | 283 |
| A15370 | A16664 | 490 | A15370 | A16674 | 396 |
| A15370 | A16703 | 180 | A15370 | A16857 | 144 |
| A15370 | A16905 | 162 | A15370 | A16908 | 330 |
| A15370 | A16913 | 151 | A15370 | A16919 | 200 |
| A15370 | A17089 | 259 | A15371 | A15645 | 208 |
| A15371 | A15654 | 491 | A15371 | A15941 | 491 |
| A15371 | A16127 | 491 | A15371 | A16128 | 490 |
| A15371 | A16129 | 468 | A15371 | A16294 | 490 |
| A15371 | A16612 | 485 | A15371 | A16646 | 491 |
| A15372 | A15482 | 190 | A15372 | A16219 | 223 |
| A15372 | A16371 | 180 | A15372 | A16531 | 511 |
| A15372 | A16753 | 490 | A15373 | A15377 | 152 |
| A15373 | A15749 | 329 | A15373 | A16109 | 152 |
| A15373 | A16611 | 223 | A15373 | A17133 | 361 |
| A15374 | A15502 | 683 | A15374 | A15672 | 185 |
| A15374 | A15724 | 491 | A15374 | A16405 | 229 |
| A15374 | A16661 | 243 | A15374 | A16664 | 260 |
| A15374 | A16682 | 151 | A15374 | A16824 | 199 |
| A15375 | A15546 | 317 | A15376 | A15447 | 255 |
| A15376 | A15511 | 152 | A15376 | A15949 | 338 |
| A15376 | A16099 | 156 | A15376 | A16121 | 152 |
| A15376 | A16799 | 210 | A15376 | A16858 | 272 |
| A15377 | A15519 | 207 | A15377 | A15543 | 450 |
| A15377 | A15677 | 424 | A15377 | A15724 | 340 |
| A15377 | A16664 | 217 | A15377 | A16857 | 279 |
| A15377 | A17133 | 238 | A15377 | A17164 | 423 |
| A15378 | A15591 | 460 | A15378 | A15779 | 221 |
| A15379 | A15867 | 165 | A15380 | A15498 | 491 |
| A15380 | A15665 | 491 | A15380 | A16552 | 491 |
| A15380 | A16611 | 213 | A15380 | A17008 | 154 |
| A15381 | A15422 | 190 | A15381 | A15433 | 180 |
| A15381 | A15498 | 162 | A15381 | A16107 | 491 |
| A15381 | A16254 | 369 | A15381 | A16778 | 486 |
| A15381 | A17133 | 213 | A15382 | A15528 | 157 |
| A15382 | A15624 | 80  | A15382 | A15649 | 123 |
| A15382 | A15660 | 484 | A15382 | A15661 | 259 |
| A15382 | A15684 | 260 | A15382 | A15931 | 338 |
| A15382 | A16088 | 424 | A15382 | A17035 | 256 |
| A15383 | A15477 | 232 | A15383 | A15518 | 174 |
| A15383 | A15526 | 279 | A15383 | A15536 | 428 |
| A15383 | A15617 | 329 | A15383 | A15633 | 322 |
| A15383 | A15792 | 154 | A15384 | A15528 | 486 |

|        |        |     |        |        |     |
|--------|--------|-----|--------|--------|-----|
| A15384 | A15532 | 433 | A15384 | A15617 | 162 |
| A15384 | A15683 | 156 | A15384 | A16322 | 489 |
| A15385 | A15386 | 223 | A15385 | A15387 | 475 |
| A15385 | A15578 | 451 | A15386 | A15400 | 167 |
| A15386 | A15410 | 176 | A15386 | A15575 | 171 |
| A15386 | A15577 | 490 | A15386 | A15607 | 215 |
| A15386 | A15608 | 162 | A15386 | A15630 | 93  |
| A15386 | A15783 | 480 | A15386 | A15962 | 127 |
| A15386 | A15975 | 361 | A15386 | A15976 | 132 |
| A15386 | A16216 | 733 | A15386 | A16217 | 93  |
| A15387 | A15495 | 180 | A15387 | A15578 | 296 |
| A15387 | A15788 | 184 | A15387 | A16904 | 218 |
| A15388 | A15409 | 259 | A15388 | A15566 | 396 |
| A15388 | A15575 | 414 | A15388 | A15578 | 491 |
| A15388 | A15579 | 256 | A15388 | A15834 | 184 |
| A15388 | A16092 | 165 | A15388 | A16217 | 353 |
| A15389 | A15391 | 422 | A15390 | A15925 | 419 |
| A15390 | A15934 | 457 | A15390 | A16877 | 268 |
| A15391 | A15392 | 469 | A15391 | A15419 | 185 |
| A15391 | A15422 | 296 | A15391 | A15642 | 238 |
| A15391 | A15819 | 252 | A15391 | A16224 | 221 |
| A15394 | A15395 | 491 | A15394 | A15425 | 480 |
| A15394 | A15427 | 467 | A15394 | A15516 | 335 |
| A15394 | A15601 | 255 | A15394 | A15605 | 339 |
| A15394 | A15607 | 270 | A15394 | A15640 | 460 |
| A15394 | A15642 | 196 | A15394 | A15795 | 185 |
| A15394 | A15800 | 221 | A15394 | A15806 | 491 |
| A15394 | A15826 | 307 | A15394 | A15912 | 156 |
| A15394 | A15964 | 491 | A15394 | A15981 | 266 |
| A15394 | A16015 | 313 | A15394 | A16511 | 294 |
| A15395 | A15425 | 474 | A15395 | A15427 | 204 |
| A15395 | A15516 | 314 | A15395 | A15598 | 213 |
| A15395 | A15599 | 445 | A15395 | A15600 | 329 |
| A15395 | A15601 | 490 | A15395 | A15602 | 462 |
| A15395 | A15603 | 491 | A15395 | A15604 | 390 |
| A15395 | A15605 | 490 | A15395 | A15606 | 485 |
| A15395 | A15607 | 249 | A15395 | A15608 | 485 |
| A15395 | A15640 | 329 | A15395 | A15642 | 307 |
| A15395 | A15795 | 162 | A15395 | A15806 | 486 |
| A15395 | A15832 | 324 | A15395 | A15834 | 176 |
| A15395 | A15865 | 318 | A15395 | A15964 | 488 |
| A15395 | A15981 | 490 | A15395 | A16308 | 324 |
| A15395 | A16511 | 388 | A15395 | A16518 | 360 |
| A15395 | A16527 | 299 | A15396 | A15398 | 154 |
| A15396 | A15404 | 490 | A15396 | A15435 | 488 |
| A15396 | A15447 | 163 | A15396 | A15451 | 288 |

|        |        |     |        |        |     |
|--------|--------|-----|--------|--------|-----|
| A15396 | A15456 | 259 | A15396 | A15459 | 378 |
| A15396 | A15464 | 221 | A15396 | A15495 | 229 |
| A15396 | A15515 | 335 | A15396 | A15553 | 423 |
| A15396 | A15554 | 360 | A15396 | A15804 | 489 |
| A15396 | A15818 | 254 | A15396 | A15833 | 334 |
| A15396 | A15870 | 188 | A15396 | A15915 | 374 |
| A15396 | A15922 | 199 | A15396 | A16004 | 470 |
| A15396 | A16032 | 399 | A15396 | A16221 | 399 |
| A15396 | A16260 | 430 | A15396 | A16454 | 399 |
| A15396 | A16473 | 324 | A15398 | A15400 | 491 |
| A15398 | A15401 | 340 | A15398 | A15402 | 491 |
| A15398 | A15506 | 260 | A15398 | A15557 | 447 |
| A15398 | A15630 | 198 | A15398 | A15686 | 212 |
| A15398 | A16013 | 191 | A15398 | A16022 | 126 |
| A15398 | A16121 | 491 | A15398 | A16292 | 221 |
| A15398 | A16393 | 262 | A15398 | A16424 | 425 |
| A15398 | A16429 | 438 | A15398 | A16434 | 193 |
| A15398 | A16493 | 288 | A15398 | A16904 | 165 |
| A15399 | A15400 | 246 | A15399 | A15401 | 179 |
| A15399 | A15402 | 152 | A15399 | A15557 | 63  |
| A15399 | A15809 | 351 | A15399 | A16121 | 241 |
| A15399 | A16324 | 183 | A15400 | A15401 | 452 |
| A15400 | A15402 | 491 | A15400 | A15457 | 221 |
| A15400 | A15617 | 63  | A15400 | A15691 | 205 |
| A15400 | A16013 | 182 | A15400 | A16121 | 455 |
| A15400 | A16424 | 485 | A15400 | A16904 | 252 |
| A15400 | A16916 | 340 | A15401 | A15402 | 485 |
| A15401 | A16424 | 205 | A15402 | A15516 | 401 |
| A15402 | A15617 | 63  | A15402 | A16013 | 454 |
| A15402 | A16121 | 484 | A15402 | A16137 | 199 |
| A15402 | A16393 | 427 | A15402 | A16424 | 486 |
| A15402 | A16904 | 454 | A15402 | A16913 | 163 |
| A15403 | A16121 | 324 | A15403 | A16951 | 366 |
| A15404 | A15435 | 486 | A15404 | A15447 | 235 |
| A15404 | A15451 | 339 | A15404 | A15456 | 317 |
| A15404 | A15495 | 177 | A15404 | A15515 | 385 |
| A15404 | A15804 | 490 | A15404 | A15809 | 350 |
| A15404 | A15833 | 374 | A15404 | A15922 | 383 |
| A15405 | A15406 | 408 | A15406 | A15408 | 466 |
| A15406 | A15411 | 445 | A15406 | A15959 | 395 |
| A15406 | A16073 | 291 | A15406 | A16983 | 357 |
| A15407 | A15495 | 232 | A15407 | A15649 | 230 |
| A15407 | A16983 | 481 | A15408 | A15852 | 307 |
| A15409 | A15410 | 450 | A15409 | A16904 | 205 |
| A15410 | A15615 | 438 | A15410 | A15893 | 308 |
| A15410 | A16217 | 188 | A15410 | A16449 | 296 |

|        |        |     |        |        |     |
|--------|--------|-----|--------|--------|-----|
| A15411 | A15412 | 340 | A15411 | A15419 | 201 |
| A15411 | A15425 | 188 | A15411 | A15431 | 156 |
| A15411 | A15461 | 224 | A15411 | A15487 | 188 |
| A15411 | A15834 | 254 | A15411 | A16224 | 362 |
| A15411 | A17076 | 260 | A15412 | A15431 | 219 |
| A15412 | A15461 | 283 | A15412 | A15487 | 249 |
| A15413 | A15431 | 168 | A15413 | A15433 | 319 |
| A15413 | A15434 | 252 | A15413 | A15444 | 182 |
| A15413 | A15462 | 335 | A15413 | A15463 | 491 |
| A15413 | A15485 | 451 | A15413 | A15486 | 484 |
| A15413 | A15487 | 491 | A15413 | A15488 | 416 |
| A15413 | A15489 | 462 | A15413 | A15498 | 174 |
| A15413 | A15515 | 417 | A15413 | A15830 | 467 |
| A15413 | A15852 | 185 | A15413 | A17142 | 151 |
| A15416 | A15454 | 157 | A15416 | A15638 | 490 |
| A15416 | A16044 | 452 | A15416 | A16147 | 419 |
| A15416 | A16281 | 451 | A15416 | A16802 | 391 |
| A15417 | A15422 | 345 | A15417 | A15454 | 294 |
| A15417 | A15493 | 378 | A15417 | A15515 | 269 |
| A15417 | A15810 | 380 | A15417 | A15813 | 333 |
| A15417 | A17198 | 344 | A15418 | A15487 | 201 |
| A15419 | A15420 | 491 | A15419 | A15422 | 945 |
| A15419 | A15431 | 483 | A15419 | A15435 | 162 |
| A15419 | A15486 | 210 | A15419 | A15487 | 201 |
| A15419 | A15495 | 377 | A15419 | A15680 | 167 |
| A15419 | A15788 | 486 | A15419 | A15813 | 344 |
| A15419 | A15820 | 480 | A15419 | A15826 | 269 |
| A15419 | A15886 | 396 | A15419 | A15902 | 246 |
| A15419 | A16257 | 165 | A15419 | A17076 | 160 |
| A15420 | A15422 | 475 | A15420 | A15554 | 296 |
| A15420 | A15726 | 484 | A15420 | A15813 | 324 |
| A15420 | A15820 | 324 | A15420 | A16226 | 219 |
| A15420 | A17085 | 154 | A15421 | A15422 | 263 |
| A15421 | A16117 | 343 | A15422 | A15432 | 279 |
| A15422 | A15440 | 170 | A15422 | A15456 | 167 |
| A15422 | A15486 | 187 | A15422 | A15493 | 269 |
| A15422 | A15498 | 491 | A15422 | A15513 | 187 |
| A15422 | A15802 | 212 | A15422 | A15813 | 324 |
| A15422 | A15820 | 461 | A15422 | A15826 | 247 |
| A15422 | A15886 | 385 | A15422 | A15902 | 224 |
| A15422 | A15932 | 241 | A15422 | A15933 | 152 |
| A15422 | A16155 | 332 | A15422 | A16224 | 454 |
| A15422 | A17078 | 288 | A15422 | A17118 | 256 |
| A15425 | A15426 | 324 | A15425 | A15427 | 490 |
| A15425 | A15475 | 182 | A15425 | A15480 | 188 |
| A15425 | A15518 | 362 | A15425 | A15601 | 198 |

|        |        |     |        |        |     |
|--------|--------|-----|--------|--------|-----|
| A15425 | A15608 | 162 | A15425 | A15630 | 306 |
| A15425 | A15642 | 486 | A15425 | A15841 | 290 |
| A15425 | A15904 | 283 | A15425 | A15957 | 339 |
| A15425 | A15964 | 438 | A15425 | A15981 | 210 |
| A15425 | A15996 | 279 | A15425 | A15999 | 313 |
| A15425 | A16008 | 240 | A15425 | A16282 | 361 |
| A15425 | A16308 | 296 | A15425 | A16540 | 202 |
| A15426 | A15607 | 398 | A15427 | A15642 | 358 |
| A15427 | A15865 | 356 | A15427 | A15964 | 488 |
| A15427 | A15974 | 152 | A15427 | A16015 | 338 |
| A15427 | A16308 | 360 | A15428 | A15429 | 468 |
| A15428 | A15432 | 288 | A15428 | A16948 | 477 |
| A15429 | A15432 | 223 | A15429 | A15447 | 224 |
| A15429 | A15899 | 389 | A15429 | A16948 | 473 |
| A15430 | A15462 | 648 | A15430 | A15463 | 644 |
| A15430 | A15467 | 371 | A15430 | A15498 | 361 |
| A15430 | A15669 | 491 | A15430 | A15925 | 469 |
| A15430 | A15934 | 452 | A15430 | A16436 | 491 |
| A15430 | A16963 | 491 | A15430 | A17061 | 224 |
| A15430 | A17155 | 163 | A15431 | A15432 | 491 |
| A15431 | A15433 | 262 | A15431 | A15434 | 288 |
| A15431 | A15435 | 483 | A15431 | A15436 | 481 |
| A15431 | A15440 | 149 | A15431 | A15447 | 151 |
| A15431 | A15451 | 177 | A15431 | A15452 | 490 |
| A15431 | A15453 | 423 | A15431 | A15456 | 276 |
| A15431 | A15457 | 335 | A15431 | A15459 | 477 |
| A15431 | A15461 | 491 | A15431 | A15463 | 481 |
| A15431 | A15482 | 271 | A15431 | A15484 | 399 |
| A15431 | A15487 | 457 | A15431 | A15489 | 146 |
| A15431 | A15498 | 441 | A15431 | A15513 | 165 |
| A15431 | A15596 | 456 | A15431 | A15763 | 270 |
| A15431 | A15788 | 491 | A15431 | A15802 | 190 |
| A15431 | A15824 | 491 | A15431 | A15826 | 227 |
| A15431 | A15850 | 256 | A15431 | A15864 | 288 |
| A15431 | A15871 | 183 | A15431 | A16055 | 190 |
| A15431 | A16188 | 288 | A15431 | A16298 | 162 |
| A15431 | A16829 | 176 | A15431 | A17039 | 223 |
| A15432 | A15433 | 480 | A15432 | A15434 | 454 |
| A15432 | A15435 | 491 | A15432 | A15436 | 491 |
| A15432 | A15437 | 358 | A15432 | A15440 | 396 |
| A15432 | A15447 | 475 | A15432 | A15451 | 447 |
| A15432 | A15452 | 491 | A15432 | A15456 | 182 |
| A15432 | A15457 | 238 | A15432 | A15459 | 436 |
| A15432 | A15460 | 204 | A15432 | A15461 | 486 |
| A15432 | A15462 | 477 | A15432 | A15463 | 486 |
| A15432 | A15478 | 201 | A15432 | A15487 | 188 |



|        |        |     |        |        |     |
|--------|--------|-----|--------|--------|-----|
| A15432 | A15495 | 367 | A15432 | A15502 | 291 |
| A15432 | A15513 | 443 | A15432 | A15515 | 251 |
| A15432 | A15711 | 176 | A15432 | A15799 | 193 |
| A15432 | A15802 | 226 | A15432 | A15824 | 316 |
| A15432 | A15826 | 260 | A15432 | A15828 | 201 |
| A15432 | A16004 | 260 | A15432 | A16045 | 307 |
| A15432 | A16055 | 226 | A15432 | A16136 | 232 |
| A15432 | A16224 | 252 | A15432 | A16261 | 154 |
| A15432 | A16587 | 198 | A15432 | A16692 | 190 |
| A15432 | A16790 | 196 | A15432 | A16948 | 328 |
| A15433 | A15434 | 491 | A15433 | A15435 | 470 |
| A15433 | A15444 | 252 | A15433 | A15447 | 389 |
| A15433 | A15451 | 294 | A15433 | A15452 | 463 |
| A15433 | A15454 | 366 | A15433 | A15456 | 383 |
| A15433 | A15457 | 411 | A15433 | A15458 | 346 |
| A15433 | A15459 | 383 | A15433 | A15460 | 286 |
| A15433 | A15461 | 201 | A15433 | A15463 | 379 |
| A15433 | A15480 | 385 | A15433 | A15484 | 182 |
| A15433 | A15485 | 290 | A15433 | A15486 | 283 |
| A15433 | A15502 | 162 | A15433 | A15513 | 394 |
| A15433 | A15515 | 341 | A15433 | A15801 | 291 |
| A15433 | A15830 | 291 | A15433 | A15833 | 339 |
| A15433 | A16055 | 303 | A15433 | A16224 | 213 |
| A15434 | A15435 | 188 | A15434 | A15436 | 276 |
| A15434 | A15437 | 258 | A15434 | A15440 | 213 |
| A15434 | A15452 | 377 | A15434 | A15480 | 395 |
| A15434 | A15484 | 247 | A15434 | A15801 | 454 |
| A15434 | A15830 | 238 | A15434 | A16152 | 191 |
| A15435 | A15436 | 491 | A15435 | A15437 | 199 |
| A15435 | A15444 | 132 | A15435 | A15447 | 461 |
| A15435 | A15451 | 395 | A15435 | A15452 | 491 |
| A15435 | A15456 | 481 | A15435 | A15457 | 463 |
| A15435 | A15459 | 372 | A15435 | A15460 | 456 |
| A15435 | A15461 | 297 | A15435 | A15462 | 272 |
| A15435 | A15463 | 412 | A15435 | A15485 | 174 |
| A15435 | A15486 | 168 | A15435 | A15495 | 321 |
| A15435 | A15513 | 168 | A15435 | A15515 | 96  |
| A15435 | A15671 | 204 | A15435 | A15804 | 484 |
| A15435 | A15922 | 201 | A15435 | A16006 | 180 |
| A15435 | A16260 | 382 | A15435 | A16414 | 219 |
| A15436 | A15440 | 221 | A15436 | A15444 | 201 |
| A15436 | A15447 | 438 | A15436 | A15451 | 470 |
| A15436 | A15452 | 491 | A15436 | A15456 | 475 |
| A15436 | A15457 | 385 | A15436 | A15459 | 347 |
| A15436 | A15460 | 455 | A15436 | A15461 | 149 |
| A15436 | A15463 | 378 | A15436 | A15478 | 457 |

|        |        |     |        |        |     |
|--------|--------|-----|--------|--------|-----|
| A15436 | A15486 | 236 | A15436 | A15495 | 171 |
| A15436 | A15799 | 229 | A15436 | A15823 | 350 |
| A15436 | A15828 | 235 | A15436 | A15880 | 288 |
| A15436 | A16117 | 338 | A15436 | A16414 | 283 |
| A15437 | A15457 | 353 | A15437 | A15684 | 234 |
| A15438 | A15439 | 472 | A15438 | A15441 | 393 |
| A15438 | A15442 | 404 | A15438 | A15443 | 404 |
| A15438 | A15445 | 408 | A15438 | A15446 | 457 |
| A15438 | A15448 | 416 | A15438 | A15449 | 454 |
| A15438 | A16166 | 434 | A15438 | A16167 | 483 |
| A15438 | A16190 | 416 | A15439 | A15441 | 446 |
| A15439 | A15442 | 395 | A15439 | A15443 | 395 |
| A15439 | A15445 | 443 | A15439 | A15448 | 408 |
| A15439 | A15450 | 404 | A15439 | A16166 | 429 |
| A15439 | A16167 | 475 | A15439 | A16190 | 408 |
| A15440 | A15447 | 188 | A15440 | A15456 | 279 |
| A15440 | A15458 | 355 | A15440 | A15459 | 463 |
| A15440 | A15461 | 217 | A15440 | A15480 | 436 |
| A15440 | A15515 | 227 | A15440 | A15642 | 245 |
| A15440 | A15800 | 268 | A15440 | A15801 | 303 |
| A15440 | A15802 | 490 | A15440 | A15807 | 363 |
| A15440 | A15824 | 281 | A15440 | A15826 | 340 |
| A15440 | A16049 | 210 | A15440 | A16055 | 486 |
| A15440 | A16224 | 229 | A15441 | A15442 | 452 |
| A15441 | A15443 | 395 | A15441 | A15445 | 398 |
| A15441 | A16166 | 429 | A15441 | A16167 | 408 |
| A15441 | A16190 | 408 | A15442 | A15443 | 481 |
| A15442 | A15445 | 313 | A15442 | A16166 | 435 |
| A15442 | A16167 | 417 | A15442 | A16190 | 417 |
| A15443 | A15445 | 411 | A15443 | A16166 | 435 |
| A15443 | A16167 | 417 | A15443 | A16190 | 417 |
| A15444 | A15447 | 385 | A15444 | A15452 | 366 |
| A15444 | A15456 | 380 | A15444 | A15464 | 226 |
| A15444 | A15488 | 279 | A15444 | A15489 | 263 |
| A15444 | A15495 | 433 | A15444 | A15515 | 463 |
| A15444 | A15799 | 438 | A15444 | A15813 | 283 |
| A15444 | A15817 | 344 | A15444 | A15828 | 279 |
| A15444 | A16192 | 328 | A15444 | A16224 | 340 |
| A15444 | A16978 | 374 | A15444 | A17120 | 385 |
| A15445 | A15446 | 324 | A15445 | A15449 | 406 |
| A15445 | A15450 | 330 | A15445 | A15454 | 188 |
| A15445 | A15456 | 215 | A15445 | A15461 | 278 |
| A15445 | A15485 | 241 | A15445 | A15487 | 232 |
| A15445 | A15488 | 235 | A15445 | A15489 | 217 |
| A15445 | A15495 | 167 | A15445 | A15515 | 290 |
| A15445 | A15800 | 201 | A15445 | A16107 | 205 |

|        |        |     |        |        |     |
|--------|--------|-----|--------|--------|-----|
| A15445 | A16166 | 380 | A15445 | A16167 | 424 |
| A15445 | A16190 | 339 | A15445 | A16687 | 489 |
| A15446 | A15448 | 422 | A15446 | A15449 | 407 |
| A15446 | A15450 | 418 | A15446 | A16167 | 422 |
| A15446 | A16224 | 332 | A15447 | A15451 | 414 |
| A15447 | A15452 | 491 | A15447 | A15455 | 238 |
| A15447 | A15456 | 491 | A15447 | A15457 | 364 |
| A15447 | A15459 | 185 | A15447 | A15460 | 491 |
| A15447 | A15463 | 385 | A15447 | A15486 | 205 |
| A15447 | A15498 | 340 | A15447 | A15515 | 489 |
| A15447 | A15522 | 374 | A15447 | A15523 | 319 |
| A15447 | A15799 | 461 | A15447 | A15800 | 303 |
| A15447 | A15802 | 229 | A15447 | A15804 | 249 |
| A15447 | A15814 | 489 | A15447 | A15823 | 419 |
| A15447 | A15826 | 263 | A15447 | A15830 | 484 |
| A15447 | A16136 | 489 | A15447 | A16165 | 419 |
| A15447 | A16300 | 177 | A15448 | A15449 | 414 |
| A15449 | A16167 | 414 | A15451 | A15452 | 401 |
| A15451 | A15456 | 481 | A15451 | A15457 | 428 |
| A15451 | A15460 | 470 | A15451 | A15462 | 227 |
| A15451 | A15463 | 262 | A15451 | A15495 | 159 |
| A15451 | A15515 | 255 | A15451 | A15669 | 266 |
| A15451 | A15799 | 312 | A15451 | A15804 | 348 |
| A15451 | A15809 | 202 | A15451 | A15830 | 324 |
| A15451 | A15916 | 329 | A15451 | A15922 | 249 |
| A15452 | A15456 | 483 | A15452 | A15457 | 488 |
| A15452 | A15460 | 477 | A15452 | A15461 | 96  |
| A15452 | A15463 | 485 | A15452 | A15478 | 172 |
| A15452 | A15480 | 451 | A15452 | A15486 | 313 |
| A15452 | A15495 | 490 | A15452 | A15515 | 477 |
| A15452 | A15630 | 281 | A15452 | A15638 | 179 |
| A15452 | A15671 | 215 | A15452 | A15799 | 475 |
| A15452 | A15802 | 204 | A15452 | A15823 | 312 |
| A15452 | A15828 | 177 | A15452 | A15899 | 290 |
| A15452 | A16414 | 230 | A15453 | A15456 | 344 |
| A15453 | A15457 | 374 | A15453 | A15461 | 446 |
| A15453 | A15484 | 279 | A15453 | A15506 | 159 |
| A15453 | A15817 | 308 | A15453 | A15824 | 344 |
| A15454 | A15457 | 302 | A15454 | A15495 | 323 |
| A15454 | A15523 | 363 | A15454 | A15792 | 288 |
| A15454 | A15830 | 279 | A15454 | A15864 | 363 |
| A15454 | A16224 | 330 | A15454 | A16711 | 252 |
| A15455 | A15792 | 347 | A15455 | A15815 | 469 |
| A15455 | A16224 | 440 | A15455 | A16300 | 154 |
| A15455 | A16410 | 201 | A15456 | A15457 | 470 |
| A15456 | A15459 | 278 | A15456 | A15460 | 446 |

|        |        |     |        |        |     |
|--------|--------|-----|--------|--------|-----|
| A15456 | A15495 | 351 | A15456 | A15515 | 224 |
| A15456 | A15799 | 443 | A15456 | A15804 | 328 |
| A15456 | A15809 | 303 | A15456 | A15814 | 322 |
| A15456 | A15823 | 383 | A15456 | A15830 | 302 |
| A15456 | A15922 | 347 | A15456 | A16006 | 302 |
| A15456 | A16049 | 205 | A15457 | A15460 | 338 |
| A15457 | A15495 | 318 | A15457 | A15804 | 363 |
| A15458 | A16224 | 317 | A15459 | A15461 | 475 |
| A15459 | A15480 | 180 | A15459 | A15513 | 401 |
| A15459 | A15630 | 191 | A15459 | A15671 | 321 |
| A15459 | A15800 | 266 | A15459 | A15802 | 313 |
| A15459 | A15804 | 328 | A15459 | A15826 | 339 |
| A15459 | A17196 | 357 | A15460 | A15485 | 316 |
| A15460 | A15823 | 393 | A15460 | A15830 | 414 |
| A15460 | A15916 | 322 | A15460 | A16136 | 333 |
| A15461 | A15463 | 373 | A15461 | A15484 | 252 |
| A15461 | A15487 | 230 | A15461 | A15489 | 414 |
| A15461 | A15498 | 279 | A15461 | A15513 | 232 |
| A15461 | A15824 | 491 | A15461 | A15864 | 338 |
| A15461 | A16188 | 338 | A15461 | A16224 | 290 |
| A15462 | A15463 | 701 | A15462 | A15486 | 345 |
| A15462 | A15489 | 196 | A15462 | A15513 | 215 |
| A15462 | A15669 | 371 | A15462 | A15671 | 249 |
| A15462 | A16248 | 279 | A15462 | A16260 | 303 |
| A15462 | A16436 | 296 | A15462 | A17061 | 177 |
| A15463 | A15485 | 469 | A15463 | A15486 | 491 |
| A15463 | A15487 | 491 | A15463 | A15488 | 246 |
| A15463 | A15489 | 429 | A15463 | A15495 | 152 |
| A15463 | A15498 | 483 | A15463 | A15513 | 404 |
| A15463 | A15670 | 486 | A15463 | A15671 | 490 |
| A15463 | A15810 | 213 | A15463 | A15816 | 228 |
| A15463 | A15817 | 252 | A15463 | A15851 | 420 |
| A15463 | A15852 | 390 | A15463 | A15878 | 185 |
| A15463 | A16045 | 236 | A15463 | A16177 | 291 |
| A15463 | A16188 | 249 | A15463 | A16209 | 443 |
| A15463 | A16248 | 191 | A15463 | A16436 | 180 |
| A15463 | A16900 | 151 | A15464 | A15797 | 343 |
| A15464 | A16572 | 391 | A15465 | A15468 | 386 |
| A15465 | A15469 | 385 | A15465 | A15470 | 419 |
| A15465 | A15472 | 363 | A15465 | A16536 | 422 |
| A15466 | A15469 | 382 | A15466 | A15471 | 363 |
| A15466 | A15473 | 408 | A15467 | A17004 | 345 |
| A15468 | A15469 | 361 | A15468 | A15470 | 489 |
| A15468 | A15471 | 338 | A15468 | A15472 | 484 |
| A15468 | A15473 | 451 | A15468 | A15474 | 484 |
| A15468 | A16061 | 439 | A15468 | A16522 | 385 |

|        |        |     |        |        |     |
|--------|--------|-----|--------|--------|-----|
| A15469 | A15470 | 288 | A15469 | A15472 | 472 |
| A15469 | A15473 | 391 | A15470 | A15471 | 489 |
| A15470 | A15472 | 491 | A15470 | A15473 | 425 |
| A15470 | A15474 | 470 | A15470 | A15475 | 366 |
| A15470 | A15484 | 179 | A15470 | A16061 | 401 |
| A15470 | A16074 | 207 | A15470 | A16522 | 470 |
| A15470 | A16536 | 362 | A15471 | A15472 | 485 |
| A15471 | A16061 | 341 | A15471 | A16522 | 490 |
| A15471 | A17198 | 185 | A15472 | A15474 | 434 |
| A15472 | A16061 | 424 | A15472 | A16522 | 435 |
| A15473 | A15474 | 407 | A15474 | A16061 | 385 |
| A15475 | A15607 | 311 | A15475 | A15795 | 234 |
| A15475 | A16074 | 252 | A15475 | A16562 | 407 |
| A15475 | A17052 | 407 | A15476 | A15480 | 390 |
| A15476 | A15484 | 491 | A15476 | A15487 | 171 |
| A15476 | A15801 | 296 | A15476 | A17146 | 254 |
| A15478 | A15480 | 303 | A15478 | A15870 | 400 |
| A15478 | A15930 | 183 | A15480 | A15481 | 485 |
| A15480 | A15495 | 462 | A15480 | A15515 | 406 |
| A15480 | A15802 | 224 | A15480 | A15828 | 330 |
| A15480 | A15833 | 272 | A15480 | A16224 | 251 |
| A15480 | A16300 | 168 | A15480 | A16711 | 180 |
| A15484 | A15515 | 414 | A15484 | A15796 | 317 |
| A15484 | A15800 | 435 | A15484 | A15801 | 418 |
| A15484 | A15802 | 363 | A15484 | A15807 | 302 |
| A15484 | A15826 | 386 | A15484 | A15828 | 213 |
| A15484 | A16224 | 362 | A15484 | A16300 | 279 |
| A15484 | A17146 | 174 | A15485 | A15486 | 314 |
| A15485 | A15495 | 154 | A15485 | A15649 | 152 |
| A15485 | A15670 | 461 | A15485 | A15671 | 458 |
| A15485 | A15878 | 462 | A15485 | A16136 | 335 |
| A15485 | A16209 | 364 | A15485 | A16224 | 251 |
| A15486 | A15487 | 196 | A15486 | A15498 | 168 |
| A15486 | A15515 | 243 | A15486 | A15671 | 334 |
| A15487 | A15488 | 329 | A15487 | A15489 | 393 |
| A15487 | A15513 | 196 | A15487 | A15800 | 162 |
| A15487 | A15962 | 252 | A15487 | A16152 | 159 |
| A15487 | A16209 | 273 | A15488 | A15489 | 491 |
| A15488 | A15878 | 353 | A15488 | A16224 | 245 |
| A15488 | A16724 | 205 | A15489 | A15824 | 279 |
| A15489 | A15878 | 341 | A15489 | A16188 | 468 |
| A15489 | A16224 | 227 | A15492 | A15614 | 406 |
| A15492 | A15749 | 254 | A15492 | A16724 | 168 |
| A15492 | A16867 | 252 | A15492 | A16895 | 252 |
| A15492 | A16897 | 187 | A15493 | A15494 | 477 |
| A15493 | A16155 | 425 | A15495 | A15498 | 404 |

|        |        |     |        |        |     |
|--------|--------|-----|--------|--------|-----|
| A15495 | A15515 | 360 | A15495 | A15552 | 190 |
| A15495 | A15638 | 234 | A15495 | A15799 | 268 |
| A15495 | A15804 | 324 | A15495 | A15809 | 199 |
| A15495 | A15922 | 172 | A15495 | A16177 | 490 |
| A15495 | A16192 | 488 | A15495 | A16224 | 182 |
| A15495 | A16260 | 245 | A15495 | A16711 | 255 |
| A15495 | A16831 | 205 | A15495 | A17081 | 232 |
| A15495 | A17120 | 303 | A15497 | A15637 | 188 |
| A15497 | A15874 | 240 | A15497 | A16262 | 232 |
| A15497 | A16528 | 297 | A15497 | A16529 | 486 |
| A15497 | A16753 | 172 | A15497 | A16896 | 286 |
| A15497 | A16959 | 430 | A15498 | A15502 | 468 |
| A15498 | A15557 | 430 | A15498 | A15598 | 241 |
| A15498 | A15624 | 686 | A15498 | A15649 | 457 |
| A15498 | A15651 | 163 | A15498 | A15652 | 208 |
| A15498 | A15658 | 266 | A15498 | A15669 | 374 |
| A15498 | A15680 | 318 | A15498 | A15684 | 562 |
| A15498 | A15824 | 241 | A15498 | A15830 | 283 |
| A15498 | A15913 | 469 | A15498 | A15917 | 235 |
| A15498 | A15923 | 215 | A15498 | A15931 | 246 |
| A15498 | A15932 | 500 | A15498 | A15933 | 235 |
| A15498 | A15940 | 173 | A15498 | A15946 | 213 |
| A15498 | A16022 | 407 | A15498 | A16054 | 205 |
| A15498 | A16088 | 193 | A15498 | A16095 | 371 |
| A15498 | A16096 | 481 | A15498 | A16143 | 326 |
| A15498 | A16177 | 472 | A15498 | A16187 | 207 |
| A15498 | A16243 | 182 | A15498 | A16254 | 262 |
| A15498 | A16255 | 240 | A15498 | A16267 | 190 |
| A15498 | A16404 | 224 | A15498 | A16429 | 394 |
| A15498 | A16434 | 347 | A15498 | A16436 | 276 |
| A15498 | A16521 | 205 | A15498 | A16653 | 227 |
| A15498 | A16718 | 193 | A15498 | A16747 | 205 |
| A15498 | A16788 | 205 | A15498 | A16815 | 259 |
| A15498 | A16862 | 168 | A15498 | A16880 | 177 |
| A15498 | A16887 | 160 | A15498 | A16905 | 201 |
| A15498 | A17044 | 168 | A15498 | A17118 | 480 |
| A15498 | A17156 | 491 | A15499 | A15500 | 491 |
| A15499 | A15771 | 240 | A15499 | A17152 | 343 |
| A15500 | A15660 | 435 | A15500 | A15684 | 371 |
| A15500 | A15751 | 317 | A15500 | A15771 | 491 |
| A15500 | A16088 | 228 | A15500 | A16118 | 433 |
| A15500 | A16583 | 202 | A15500 | A16686 | 232 |
| A15500 | A16879 | 176 | A15500 | A16971 | 288 |
| A15501 | A15502 | 491 | A15501 | A15512 | 180 |
| A15501 | A15665 | 411 | A15501 | A15680 | 238 |
| A15501 | A15711 | 163 | A15501 | A15774 | 170 |

|        |        |     |        |        |     |
|--------|--------|-----|--------|--------|-----|
| A15501 | A15850 | 278 | A15501 | A15949 | 319 |
| A15501 | A16157 | 311 | A15501 | A16552 | 196 |
| A15501 | A16565 | 334 | A15501 | A16587 | 319 |
| A15501 | A16650 | 340 | A15501 | A16664 | 330 |
| A15501 | A16675 | 187 | A15501 | A16690 | 185 |
| A15501 | A16692 | 312 | A15501 | A16703 | 160 |
| A15501 | A16776 | 213 | A15501 | A16790 | 319 |
| A15501 | A16806 | 383 | A15501 | A16838 | 173 |
| A15501 | A16866 | 252 | A15501 | A16900 | 221 |
| A15501 | A16905 | 278 | A15501 | A17030 | 213 |
| A15502 | A15717 | 165 | A15502 | A15725 | 168 |
| A15502 | A15839 | 205 | A15502 | A16117 | 163 |
| A15502 | A16861 | 312 | A15503 | A15680 | 179 |
| A15503 | A15852 | 185 | A15503 | A16410 | 174 |
| A15506 | A15555 | 229 | A15506 | A15691 | 334 |
| A15506 | A16120 | 722 | A15506 | A16904 | 168 |
| A15506 | A16916 | 945 | A15506 | A17060 | 739 |
| A15507 | A15547 | 971 | A15507 | A15596 | 132 |
| A15507 | A15611 | 655 | A15507 | A15612 | 605 |
| A15507 | A15657 | 374 | A15507 | A15660 | 382 |
| A15507 | A15684 | 527 | A15507 | A15709 | 361 |
| A15507 | A15716 | 435 | A15507 | A15722 | 490 |
| A15507 | A15728 | 294 | A15507 | A15769 | 491 |
| A15507 | A15867 | 301 | A15507 | A15869 | 204 |
| A15507 | A16293 | 491 | A15507 | A16298 | 488 |
| A15507 | A16580 | 491 | A15507 | A16627 | 491 |
| A15507 | A16632 | 488 | A15507 | A16696 | 488 |
| A15507 | A16720 | 318 | A15507 | A16822 | 491 |
| A15507 | A16879 | 491 | A15507 | A16885 | 429 |
| A15507 | A16947 | 491 | A15507 | A16970 | 479 |
| A15507 | A16973 | 485 | A15507 | A17031 | 417 |
| A15507 | A17163 | 268 | A15510 | A15575 | 160 |
| A15510 | A15576 | 224 | A15510 | A15934 | 157 |
| A15510 | A16371 | 152 | A15510 | A16426 | 168 |
| A15510 | A16531 | 223 | A15510 | A16871 | 396 |
| A15510 | A16915 | 188 | A15512 | A15665 | 625 |
| A15513 | A15671 | 334 | A15513 | A15833 | 435 |
| A15514 | A16539 | 441 | A15515 | A15516 | 191 |
| A15515 | A15522 | 443 | A15515 | A15523 | 345 |
| A15515 | A15641 | 218 | A15515 | A15799 | 488 |
| A15515 | A15800 | 210 | A15515 | A15802 | 266 |
| A15515 | A15804 | 394 | A15515 | A15814 | 390 |
| A15515 | A15823 | 353 | A15515 | A15828 | 469 |
| A15515 | A15830 | 252 | A15515 | A16136 | 438 |
| A15515 | A16224 | 430 | A15515 | A16300 | 384 |
| A15515 | A17173 | 384 | A15516 | A15602 | 308 |

|        |        |     |        |        |     |
|--------|--------|-----|--------|--------|-----|
| A15516 | A15795 | 329 | A15516 | A15806 | 288 |
| A15516 | A15969 | 427 | A15516 | A15981 | 278 |
| A15516 | A16014 | 360 | A15516 | A16031 | 347 |
| A15516 | A16121 | 252 | A15516 | A16397 | 338 |
| A15516 | A16424 | 230 | A15517 | A15795 | 335 |
| A15517 | A16011 | 430 | A15518 | A15795 | 463 |
| A15518 | A15808 | 389 | A15519 | A15541 | 406 |
| A15519 | A15653 | 235 | A15519 | A15709 | 302 |
| A15519 | A15765 | 246 | A15519 | A15850 | 350 |
| A15519 | A15854 | 196 | A15519 | A15947 | 256 |
| A15519 | A16157 | 355 | A15519 | A16387 | 314 |
| A15519 | A16552 | 238 | A15519 | A16611 | 156 |
| A15519 | A16682 | 296 | A15519 | A16704 | 265 |
| A15519 | A16829 | 293 | A15519 | A16908 | 353 |
| A15520 | A15733 | 152 | A15520 | A16394 | 385 |
| A15520 | A17142 | 193 | A15521 | A15559 | 433 |
| A15521 | A15729 | 351 | A15522 | A15523 | 405 |
| A15522 | A15794 | 347 | A15522 | A15800 | 322 |
| A15523 | A15800 | 369 | A15524 | A15531 | 491 |
| A15524 | A15539 | 491 | A15524 | A15549 | 423 |
| A15524 | A16071 | 235 | A15524 | A16132 | 447 |
| A15524 | A16548 | 276 | A15524 | A16996 | 216 |
| A15525 | A15541 | 450 | A15525 | A15709 | 461 |
| A15525 | A15735 | 486 | A15525 | A15739 | 490 |
| A15528 | A15532 | 425 | A15528 | A15555 | 441 |
| A15528 | A15617 | 670 | A15528 | A15683 | 226 |
| A15528 | A16322 | 486 | A15528 | A16364 | 65  |
| A15528 | A16466 | 144 | A15529 | A15534 | 283 |
| A15529 | A15535 | 475 | A15529 | A15540 | 375 |
| A15529 | A16890 | 391 | A15531 | A15539 | 491 |
| A15531 | A15645 | 224 | A15531 | A15765 | 207 |
| A15531 | A16548 | 434 | A15531 | A16762 | 270 |
| A15532 | A15541 | 321 | A15532 | A15617 | 84  |
| A15532 | A15709 | 283 | A15532 | A15711 | 163 |
| A15532 | A16002 | 199 | A15532 | A16073 | 199 |
| A15532 | A16157 | 224 | A15532 | A16322 | 473 |
| A15532 | A16343 | 262 | A15532 | A16466 | 152 |
| A15532 | A16587 | 185 | A15532 | A16611 | 162 |
| A15532 | A16704 | 168 | A15532 | A16707 | 307 |
| A15532 | A16942 | 240 | A15532 | A16986 | 363 |
| A15532 | A17019 | 272 | A15533 | A16602 | 368 |
| A15533 | A16692 | 256 | A15533 | A16709 | 263 |
| A15533 | A16799 | 302 | A15534 | A15535 | 419 |
| A15534 | A15540 | 269 | A15534 | A15642 | 251 |
| A15535 | A15540 | 472 | A15535 | A15555 | 260 |
| A15535 | A15738 | 163 | A15535 | A16120 | 221 |



|        |        |     |        |        |     |
|--------|--------|-----|--------|--------|-----|
| A15536 | A15651 | 241 | A15536 | A15735 | 187 |
| A15536 | A15962 | 274 | A15536 | A16157 | 191 |
| A15536 | A16356 | 441 | A15536 | A16552 | 174 |
| A15536 | A16565 | 267 | A15536 | A16597 | 269 |
| A15536 | A16611 | 217 | A15536 | A16652 | 252 |
| A15536 | A16704 | 314 | A15536 | A16790 | 327 |
| A15536 | A16838 | 318 | A15536 | A16866 | 279 |
| A15536 | A16905 | 297 | A15537 | A16465 | 353 |
| A15539 | A15549 | 454 | A15539 | A15550 | 479 |
| A15539 | A15645 | 215 | A15539 | A15941 | 188 |
| A15539 | A16127 | 207 | A15539 | A16128 | 360 |
| A15539 | A16132 | 452 | A15539 | A16646 | 414 |
| A15540 | A15543 | 160 | A15541 | A15653 | 259 |
| A15541 | A15661 | 172 | A15541 | A15683 | 372 |
| A15541 | A15709 | 491 | A15541 | A15711 | 408 |
| A15541 | A15735 | 491 | A15541 | A15738 | 159 |
| A15541 | A15739 | 488 | A15541 | A15743 | 228 |
| A15541 | A15779 | 215 | A15541 | A15818 | 205 |
| A15541 | A15850 | 409 | A15541 | A15855 | 157 |
| A15541 | A15940 | 235 | A15541 | A15947 | 199 |
| A15541 | A16157 | 477 | A15541 | A16187 | 324 |
| A15541 | A16243 | 241 | A15541 | A16343 | 446 |
| A15541 | A16552 | 462 | A15541 | A16565 | 474 |
| A15541 | A16587 | 451 | A15541 | A16597 | 374 |
| A15541 | A16611 | 477 | A15541 | A16664 | 371 |
| A15541 | A16675 | 241 | A15541 | A16680 | 360 |
| A15541 | A16690 | 340 | A15541 | A16691 | 396 |
| A15541 | A16697 | 364 | A15541 | A16699 | 208 |
| A15541 | A16704 | 340 | A15541 | A16706 | 306 |
| A15541 | A16707 | 337 | A15541 | A16708 | 262 |
| A15541 | A16709 | 227 | A15541 | A16764 | 286 |
| A15541 | A16788 | 347 | A15541 | A16797 | 378 |
| A15541 | A16815 | 294 | A15541 | A16829 | 425 |
| A15541 | A16866 | 165 | A15541 | A16874 | 236 |
| A15541 | A16882 | 329 | A15541 | A16905 | 321 |
| A15541 | A16942 | 278 | A15541 | A16944 | 260 |
| A15541 | A17012 | 234 | A15541 | A17019 | 306 |
| A15541 | A17030 | 252 | A15541 | A17033 | 241 |
| A15541 | A17144 | 221 | A15543 | A15564 | 179 |
| A15543 | A15724 | 217 | A15543 | A15935 | 152 |
| A15543 | A16398 | 268 | A15543 | A16664 | 217 |
| A15543 | A17063 | 180 | A15544 | A15564 | 240 |
| A15544 | A16831 | 303 | A15545 | A15734 | 271 |
| A15546 | A16446 | 238 | A15547 | A15611 | 489 |
| A15547 | A15612 | 657 | A15547 | A15614 | 899 |
| A15547 | A15684 | 387 | A15547 | A15716 | 360 |

|        |        |     |        |        |     |
|--------|--------|-----|--------|--------|-----|
| A15547 | A15722 | 364 | A15547 | A15728 | 449 |
| A15547 | A15769 | 488 | A15547 | A15867 | 88  |
| A15547 | A16293 | 489 | A15547 | A16580 | 308 |
| A15547 | A16627 | 490 | A15547 | A16632 | 417 |
| A15547 | A16696 | 485 | A15547 | A16822 | 491 |
| A15547 | A16879 | 484 | A15547 | A16947 | 322 |
| A15547 | A16970 | 377 | A15547 | A16973 | 345 |
| A15547 | A17012 | 296 | A15547 | A17031 | 386 |
| A15550 | A15843 | 306 | A15552 | A15606 | 154 |
| A15552 | A15770 | 288 | A15553 | A15554 | 457 |
| A15553 | A15818 | 343 | A15553 | A15915 | 417 |
| A15553 | A16004 | 480 | A15554 | A15915 | 428 |
| A15554 | A16004 | 404 | A15555 | A15617 | 272 |
| A15555 | A16255 | 269 | A15556 | A15557 | 491 |
| A15556 | A15622 | 216 | A15556 | A15644 | 849 |
| A15556 | A15679 | 185 | A15556 | A15680 | 369 |
| A15556 | A15683 | 460 | A15556 | A15690 | 479 |
| A15556 | A16054 | 168 | A15556 | A16113 | 491 |
| A15556 | A16292 | 488 | A15556 | A16373 | 299 |
| A15556 | A16381 | 458 | A15556 | A16393 | 191 |
| A15556 | A16429 | 262 | A15556 | A16432 | 490 |
| A15556 | A16445 | 322 | A15556 | A16451 | 326 |
| A15556 | A16455 | 326 | A15556 | A16456 | 299 |
| A15556 | A16481 | 326 | A15556 | A16486 | 402 |
| A15556 | A16501 | 326 | A15556 | A16506 | 326 |
| A15556 | A16546 | 246 | A15557 | A15644 | 491 |
| A15557 | A15679 | 477 | A15557 | A15680 | 491 |
| A15557 | A15683 | 85  | A15557 | A15690 | 491 |
| A15557 | A16022 | 486 | A15557 | A16054 | 246 |
| A15557 | A16056 | 257 | A15557 | A16113 | 491 |
| A15557 | A16292 | 457 | A15557 | A16381 | 472 |
| A15557 | A16393 | 454 | A15557 | A16397 | 369 |
| A15557 | A16420 | 154 | A15557 | A16429 | 491 |
| A15557 | A16432 | 489 | A15557 | A16434 | 491 |
| A15557 | A16445 | 257 | A15557 | A16447 | 454 |
| A15557 | A16459 | 210 | A15557 | A16480 | 191 |
| A15557 | A16521 | 236 | A15557 | A16534 | 184 |
| A15557 | A16546 | 406 | A15557 | A16607 | 290 |
| A15557 | A16611 | 177 | A15557 | A16891 | 356 |
| A15557 | A16910 | 333 | A15558 | A15559 | 446 |
| A15558 | A15560 | 475 | A15558 | A15561 | 202 |
| A15558 | A15591 | 572 | A15558 | A15710 | 491 |
| A15558 | A15729 | 490 | A15558 | A15737 | 473 |
| A15558 | A15738 | 490 | A15558 | A15779 | 715 |
| A15558 | A16654 | 407 | A15559 | A15561 | 491 |
| A15559 | A15564 | 491 | A15559 | A15581 | 180 |

|        |        |     |        |        |     |
|--------|--------|-----|--------|--------|-----|
| A15559 | A15582 | 156 | A15559 | A15594 | 177 |
| A15559 | A15710 | 489 | A15559 | A15729 | 491 |
| A15559 | A15737 | 430 | A15559 | A15740 | 491 |
| A15559 | A15747 | 486 | A15559 | A15763 | 488 |
| A15559 | A15775 | 408 | A15559 | A15779 | 491 |
| A15559 | A15788 | 491 | A15559 | A15867 | 191 |
| A15559 | A15946 | 361 | A15559 | A15947 | 480 |
| A15559 | A16006 | 296 | A15559 | A16217 | 443 |
| A15559 | A16311 | 490 | A15559 | A16392 | 486 |
| A15559 | A16465 | 273 | A15559 | A16525 | 177 |
| A15559 | A16663 | 491 | A15559 | A16755 | 156 |
| A15559 | A16844 | 184 | A15559 | A16860 | 452 |
| A15559 | A17063 | 491 | A15560 | A15591 | 475 |
| A15560 | A15779 | 511 | A15560 | A16821 | 391 |
| A15560 | A16927 | 335 | A15561 | A15710 | 419 |
| A15561 | A15729 | 491 | A15561 | A15740 | 234 |
| A15561 | A15747 | 179 | A15561 | A15779 | 228 |
| A15561 | A16311 | 199 | A15561 | A16663 | 491 |
| A15561 | A16831 | 183 | A15563 | A15941 | 157 |
| A15563 | A15942 | 324 | A15563 | A16128 | 174 |
| A15563 | A16452 | 400 | A15563 | A16612 | 362 |
| A15563 | A16646 | 218 | A15564 | A15631 | 483 |
| A15564 | A15717 | 452 | A15564 | A15747 | 491 |
| A15564 | A15763 | 475 | A15564 | A15947 | 290 |
| A15564 | A16093 | 263 | A15564 | A16311 | 473 |
| A15564 | A16392 | 341 | A15564 | A16495 | 258 |
| A15564 | A16614 | 262 | A15565 | A15674 | 347 |
| A15566 | A15788 | 202 | A15566 | A15834 | 305 |
| A15568 | A15718 | 352 | A15571 | A15780 | 63  |
| A15573 | A15575 | 427 | A15575 | A15576 | 469 |
| A15575 | A15726 | 218 | A15577 | A15783 | 384 |
| A15578 | A15579 | 486 | A15578 | A16217 | 113 |
| A15581 | A15582 | 389 | A15581 | A15962 | 243 |
| A15581 | A16006 | 313 | A15583 | A15584 | 407 |
| A15583 | A15788 | 210 | A15583 | A16217 | 382 |
| A15584 | A15788 | 277 | A15584 | A16217 | 63  |
| A15589 | A17187 | 63  | A15591 | A15779 | 687 |
| A15592 | A15593 | 63  | A15594 | A15710 | 434 |
| A15594 | A15779 | 332 | A15594 | A16465 | 399 |
| A15594 | A16801 | 418 | A15595 | A15709 | 232 |
| A15596 | A15700 | 159 | A15596 | A15763 | 446 |
| A15596 | A15788 | 485 | A15596 | A15853 | 157 |
| A15596 | A15867 | 490 | A15596 | A16217 | 90  |
| A15596 | A16406 | 229 | A15596 | A16566 | 210 |
| A15596 | A16732 | 374 | A15597 | A15972 | 430 |
| A15597 | A15973 | 422 | A15597 | A15974 | 467 |

|        |        |     |        |        |     |
|--------|--------|-----|--------|--------|-----|
| A15597 | A15978 | 417 | A15598 | A15600 | 483 |
| A15598 | A15913 | 491 | A15598 | A15917 | 163 |
| A15598 | A16518 | 451 | A15598 | A16519 | 446 |
| A15599 | A15602 | 327 | A15599 | A15604 | 486 |
| A15599 | A15605 | 428 | A15599 | A15606 | 491 |
| A15599 | A15870 | 201 | A15599 | A16357 | 402 |
| A15599 | A16513 | 327 | A15599 | A16527 | 460 |
| A15600 | A15913 | 420 | A15600 | A16518 | 468 |
| A15600 | A16519 | 466 | A15601 | A15602 | 428 |
| A15601 | A15603 | 491 | A15601 | A15605 | 490 |
| A15601 | A15606 | 335 | A15601 | A15607 | 454 |
| A15601 | A15608 | 475 | A15601 | A15806 | 327 |
| A15601 | A15834 | 380 | A15601 | A15981 | 490 |
| A15602 | A15603 | 473 | A15602 | A15604 | 371 |
| A15602 | A15605 | 411 | A15602 | A15606 | 382 |
| A15602 | A15608 | 484 | A15602 | A15981 | 432 |
| A15603 | A15605 | 491 | A15603 | A15606 | 425 |
| A15603 | A15607 | 477 | A15603 | A15608 | 491 |
| A15603 | A15630 | 328 | A15603 | A15806 | 317 |
| A15603 | A15832 | 368 | A15603 | A15834 | 369 |
| A15603 | A15981 | 477 | A15604 | A15605 | 469 |
| A15604 | A15606 | 490 | A15604 | A15981 | 350 |
| A15604 | A16513 | 371 | A15604 | A16527 | 488 |
| A15605 | A15606 | 491 | A15605 | A15607 | 463 |
| A15605 | A15608 | 491 | A15605 | A15981 | 441 |
| A15605 | A16527 | 419 | A15605 | A16953 | 369 |
| A15606 | A15607 | 129 | A15606 | A15608 | 457 |
| A15606 | A15682 | 383 | A15606 | A15851 | 228 |
| A15606 | A15981 | 439 | A15606 | A16008 | 154 |
| A15606 | A16357 | 305 | A15606 | A16379 | 473 |
| A15606 | A16513 | 382 | A15606 | A16527 | 481 |
| A15606 | A16792 | 338 | A15606 | A16891 | 151 |
| A15606 | A17176 | 240 | A15607 | A15608 | 485 |
| A15607 | A15609 | 445 | A15607 | A15795 | 265 |
| A15607 | A15981 | 330 | A15608 | A15630 | 391 |
| A15608 | A15821 | 401 | A15608 | A15834 | 228 |
| A15608 | A15981 | 291 | A15608 | A16216 | 213 |
| A15608 | A16586 | 375 | A15611 | A15612 | 629 |
| A15611 | A15630 | 130 | A15611 | A15639 | 303 |
| A15611 | A15722 | 221 | A15611 | A15867 | 160 |
| A15611 | A15869 | 486 | A15611 | A15912 | 141 |
| A15611 | A15976 | 173 | A15611 | A15987 | 301 |
| A15611 | A16293 | 165 | A15611 | A16627 | 307 |
| A15611 | A16822 | 369 | A15611 | A16973 | 396 |
| A15612 | A15614 | 650 | A15612 | A15684 | 177 |
| A15612 | A15722 | 208 | A15612 | A16022 | 157 |

|        |        |     |        |        |     |
|--------|--------|-----|--------|--------|-----|
| A15612 | A16293 | 152 | A15612 | A16298 | 224 |
| A15612 | A16627 | 428 | A15612 | A16632 | 394 |
| A15612 | A16711 | 208 | A15612 | A16802 | 182 |
| A15612 | A16822 | 414 | A15612 | A16879 | 238 |
| A15612 | A16947 | 255 | A15612 | A16970 | 411 |
| A15613 | A15639 | 241 | A15613 | A15960 | 259 |
| A15613 | A16216 | 852 | A15613 | A16722 | 330 |
| A15613 | A17136 | 486 | A15614 | A15649 | 861 |
| A15614 | A15665 | 170 | A15614 | A15761 | 368 |
| A15614 | A16467 | 655 | A15614 | A16990 | 269 |
| A15614 | A17008 | 477 | A15617 | A15619 | 334 |
| A15617 | A15683 | 296 | A15617 | A16322 | 313 |
| A15617 | A16364 | 732 | A15617 | A16466 | 134 |
| A15619 | A15673 | 319 | A15619 | A16364 | 63  |
| A15622 | A16635 | 385 | A15624 | A15649 | 542 |
| A15624 | A15651 | 837 | A15624 | A15652 | 811 |
| A15624 | A15659 | 491 | A15624 | A15660 | 491 |
| A15624 | A15661 | 811 | A15624 | A15662 | 811 |
| A15624 | A15684 | 778 | A15624 | A15708 | 146 |
| A15624 | A15720 | 156 | A15624 | A15721 | 156 |
| A15624 | A15730 | 269 | A15624 | A15746 | 579 |
| A15624 | A15750 | 638 | A15624 | A15842 | 291 |
| A15624 | A15843 | 581 | A15624 | A15898 | 258 |
| A15624 | A15917 | 638 | A15624 | A15918 | 581 |
| A15624 | A15919 | 265 | A15624 | A15920 | 488 |
| A15624 | A15923 | 577 | A15624 | A15928 | 262 |
| A15624 | A15931 | 489 | A15624 | A15932 | 877 |
| A15624 | A15933 | 481 | A15624 | A15936 | 276 |
| A15624 | A15937 | 635 | A15624 | A15950 | 379 |
| A15624 | A15951 | 441 | A15624 | A15953 | 173 |
| A15624 | A16072 | 488 | A15624 | A16075 | 491 |
| A15624 | A16086 | 490 | A15624 | A16088 | 581 |
| A15624 | A16094 | 291 | A15624 | A16095 | 491 |
| A15624 | A16096 | 491 | A15624 | A16105 | 441 |
| A15624 | A16106 | 377 | A15624 | A16145 | 156 |
| A15624 | A16149 | 491 | A15624 | A16151 | 353 |
| A15624 | A16164 | 193 | A15624 | A16191 | 119 |
| A15624 | A16202 | 351 | A15624 | A16205 | 210 |
| A15624 | A16218 | 68  | A15624 | A16307 | 156 |
| A15624 | A16768 | 63  | A15624 | A16811 | 193 |
| A15624 | A16841 | 258 | A15624 | A16962 | 301 |
| A15624 | A17156 | 486 | A15626 | A16073 | 199 |
| A15626 | A16418 | 199 | A15626 | A16453 | 329 |
| A15627 | A16148 | 419 | A15630 | A15639 | 141 |
| A15630 | A15676 | 441 | A15630 | A15802 | 235 |
| A15630 | A15834 | 450 | A15630 | A15976 | 491 |

|        |        |     |        |        |     |
|--------|--------|-----|--------|--------|-----|
| A15630 | A16008 | 252 | A15630 | A16904 | 187 |
| A15630 | A16916 | 272 | A15631 | A15747 | 274 |
| A15631 | A16311 | 290 | A15631 | A16614 | 63  |
| A15632 | A15680 | 293 | A15634 | A16988 | 899 |
| A15635 | A17155 | 339 | A15637 | A15874 | 183 |
| A15637 | A15905 | 344 | A15637 | A16028 | 443 |
| A15637 | A16048 | 216 | A15637 | A16263 | 63  |
| A15637 | A16371 | 252 | A15637 | A16529 | 285 |
| A15638 | A16055 | 235 | A15638 | A16147 | 334 |
| A15638 | A16194 | 307 | A15638 | A16274 | 234 |
| A15638 | A16281 | 355 | A15639 | A15912 | 283 |
| A15639 | A15976 | 486 | A15639 | A15977 | 341 |
| A15639 | A16216 | 463 | A15639 | A16334 | 440 |
| A15640 | A15806 | 450 | A15642 | A15914 | 391 |
| A15642 | A15964 | 369 | A15642 | A15996 | 419 |
| A15642 | A16115 | 243 | A15642 | A16581 | 265 |
| A15643 | A17049 | 424 | A15644 | A15679 | 213 |
| A15644 | A15680 | 286 | A15644 | A15683 | 491 |
| A15644 | A15690 | 489 | A15644 | A16113 | 488 |
| A15644 | A16292 | 481 | A15644 | A16381 | 474 |
| A15644 | A16393 | 393 | A15644 | A16429 | 291 |
| A15644 | A16432 | 485 | A15644 | A16434 | 165 |
| A15644 | A16445 | 351 | A15644 | A16451 | 344 |
| A15644 | A16455 | 344 | A15644 | A16456 | 319 |
| A15644 | A16486 | 414 | A15644 | A16501 | 344 |
| A15644 | A16506 | 344 | A15644 | A16546 | 271 |
| A15644 | A16665 | 213 | A15644 | A16891 | 207 |
| A15645 | A15654 | 224 | A15645 | A15941 | 412 |
| A15645 | A16067 | 176 | A15645 | A16144 | 177 |
| A15645 | A16294 | 176 | A15645 | A16612 | 340 |
| A15645 | A16646 | 324 | A15645 | A16754 | 180 |
| A15647 | A15896 | 154 | A15647 | A16617 | 355 |
| A15647 | A17122 | 217 | A15649 | A15651 | 540 |
| A15649 | A15652 | 534 | A15649 | A15659 | 167 |
| A15649 | A15660 | 429 | A15649 | A15661 | 538 |
| A15649 | A15662 | 525 | A15649 | A15684 | 542 |
| A15649 | A15691 | 165 | A15649 | A15720 | 156 |
| A15649 | A15721 | 156 | A15649 | A15746 | 184 |
| A15649 | A15750 | 439 | A15649 | A15761 | 319 |
| A15649 | A15788 | 210 | A15649 | A15843 | 335 |
| A15649 | A15868 | 274 | A15649 | A15917 | 524 |
| A15649 | A15918 | 200 | A15649 | A15923 | 541 |
| A15649 | A15931 | 63  | A15649 | A15932 | 481 |
| A15649 | A15937 | 156 | A15649 | A16015 | 216 |
| A15649 | A16072 | 283 | A15649 | A16075 | 344 |
| A15649 | A16088 | 538 | A15649 | A16095 | 486 |

|        |        |     |        |        |     |
|--------|--------|-----|--------|--------|-----|
| A15649 | A16096 | 427 | A15649 | A16105 | 243 |
| A15649 | A16108 | 226 | A15649 | A16145 | 156 |
| A15649 | A16149 | 366 | A15649 | A16284 | 188 |
| A15649 | A16307 | 156 | A15649 | A16461 | 367 |
| A15649 | A16467 | 187 | A15649 | A16768 | 144 |
| A15649 | A16811 | 243 | A15649 | A17156 | 152 |
| A15651 | A15652 | 828 | A15651 | A15659 | 172 |
| A15651 | A15660 | 386 | A15651 | A15661 | 828 |
| A15651 | A15662 | 828 | A15651 | A15684 | 709 |
| A15651 | A15708 | 77  | A15651 | A15720 | 156 |
| A15651 | A15721 | 156 | A15651 | A15730 | 257 |
| A15651 | A15735 | 154 | A15651 | A15746 | 323 |
| A15651 | A15750 | 424 | A15651 | A15842 | 369 |
| A15651 | A15843 | 552 | A15651 | A15898 | 348 |
| A15651 | A15917 | 549 | A15651 | A15918 | 340 |
| A15651 | A15923 | 514 | A15651 | A15931 | 411 |
| A15651 | A15932 | 806 | A15651 | A15937 | 338 |
| A15651 | A16072 | 449 | A15651 | A16075 | 486 |
| A15651 | A16088 | 575 | A15651 | A16095 | 491 |
| A15651 | A16104 | 348 | A15651 | A16145 | 156 |
| A15651 | A16149 | 210 | A15651 | A16151 | 246 |
| A15651 | A16201 | 257 | A15651 | A16307 | 156 |
| A15651 | A16464 | 210 | A15651 | A16704 | 191 |
| A15651 | A16790 | 208 | A15651 | A16838 | 196 |
| A15651 | A16905 | 168 | A15651 | A17134 | 168 |
| A15652 | A15658 | 87  | A15652 | A15659 | 469 |
| A15652 | A15660 | 491 | A15652 | A15661 | 828 |
| A15652 | A15662 | 828 | A15652 | A15684 | 709 |
| A15652 | A15708 | 63  | A15652 | A15720 | 156 |
| A15652 | A15721 | 156 | A15652 | A15746 | 579 |
| A15652 | A15750 | 152 | A15652 | A15843 | 540 |
| A15652 | A15917 | 367 | A15652 | A15918 | 577 |
| A15652 | A15919 | 346 | A15652 | A15923 | 577 |
| A15652 | A15931 | 480 | A15652 | A15932 | 661 |
| A15652 | A15933 | 230 | A15652 | A15937 | 579 |
| A15652 | A15940 | 177 | A15652 | A16072 | 457 |
| A15652 | A16075 | 369 | A15652 | A16088 | 581 |
| A15652 | A16095 | 490 | A15652 | A16096 | 371 |
| A15652 | A16104 | 323 | A15652 | A16145 | 156 |
| A15652 | A16191 | 198 | A15652 | A16218 | 182 |
| A15652 | A16244 | 307 | A15652 | A16307 | 156 |
| A15652 | A16464 | 303 | A15652 | A16768 | 82  |
| A15652 | A16811 | 473 | A15652 | A17156 | 413 |
| A15653 | A15666 | 491 | A15653 | A15765 | 489 |
| A15653 | A15850 | 235 | A15653 | A16157 | 491 |
| A15653 | A16243 | 375 | A15653 | A16322 | 270 |

|        |        |     |        |        |     |
|--------|--------|-----|--------|--------|-----|
| A15653 | A16387 | 184 | A15653 | A16403 | 224 |
| A15653 | A16552 | 196 | A15653 | A16565 | 353 |
| A15653 | A16566 | 160 | A15653 | A16567 | 185 |
| A15653 | A16597 | 277 | A15653 | A16611 | 393 |
| A15653 | A16652 | 151 | A15653 | A16664 | 168 |
| A15653 | A16675 | 219 | A15653 | A16676 | 470 |
| A15653 | A16680 | 335 | A15653 | A16682 | 290 |
| A15653 | A16693 | 218 | A15653 | A16701 | 179 |
| A15653 | A16704 | 247 | A15653 | A16774 | 328 |
| A15653 | A16776 | 165 | A15653 | A16815 | 213 |
| A15653 | A16829 | 375 | A15653 | A16874 | 281 |
| A15653 | A16908 | 241 | A15653 | A17030 | 165 |
| A15653 | A17033 | 154 | A15653 | A17133 | 274 |
| A15654 | A15941 | 491 | A15654 | A16127 | 491 |
| A15654 | A16128 | 451 | A15654 | A16129 | 273 |
| A15654 | A16226 | 385 | A15654 | A16294 | 480 |
| A15654 | A16612 | 480 | A15654 | A16626 | 422 |
| A15654 | A16646 | 479 | A15657 | A15711 | 224 |
| A15657 | A15769 | 406 | A15657 | A15794 | 374 |
| A15657 | A16096 | 290 | A15657 | A16293 | 176 |
| A15657 | A16680 | 384 | A15657 | A16682 | 263 |
| A15657 | A17012 | 252 | A15658 | A15659 | 394 |
| A15658 | A15660 | 619 | A15658 | A15662 | 118 |
| A15658 | A15684 | 480 | A15658 | A15708 | 393 |
| A15658 | A15746 | 399 | A15658 | A15920 | 299 |
| A15658 | A15931 | 619 | A15658 | A15937 | 379 |
| A15658 | A15940 | 229 | A15658 | A16218 | 376 |
| A15658 | A16464 | 299 | A15658 | A16783 | 375 |
| A15658 | A17026 | 302 | A15659 | A15660 | 620 |
| A15659 | A15661 | 388 | A15659 | A15662 | 465 |
| A15659 | A15684 | 491 | A15659 | A15708 | 618 |
| A15659 | A15746 | 619 | A15659 | A15750 | 283 |
| A15659 | A15843 | 413 | A15659 | A15917 | 375 |
| A15659 | A15918 | 491 | A15659 | A15919 | 216 |
| A15659 | A15920 | 620 | A15659 | A15923 | 380 |
| A15659 | A15928 | 213 | A15659 | A15931 | 620 |
| A15659 | A15933 | 488 | A15659 | A15936 | 450 |
| A15659 | A15937 | 619 | A15659 | A15950 | 454 |
| A15659 | A15953 | 252 | A15659 | A16072 | 180 |
| A15659 | A16086 | 273 | A15659 | A16088 | 486 |
| A15659 | A16092 | 217 | A15659 | A16095 | 288 |
| A15659 | A16096 | 479 | A15659 | A16149 | 303 |
| A15659 | A16191 | 462 | A15659 | A16197 | 307 |
| A15659 | A16206 | 347 | A15659 | A16218 | 566 |
| A15659 | A16244 | 307 | A15659 | A16464 | 299 |
| A15659 | A16650 | 219 | A15659 | A16658 | 163 |



|        |        |     |        |        |     |
|--------|--------|-----|--------|--------|-----|
| A15659 | A16768 | 180 | A15659 | A16811 | 384 |
| A15659 | A17140 | 350 | A15659 | A17208 | 190 |
| A15660 | A15661 | 491 | A15660 | A15662 | 491 |
| A15660 | A15684 | 818 | A15660 | A15708 | 620 |
| A15660 | A15720 | 491 | A15660 | A15721 | 491 |
| A15660 | A15730 | 329 | A15660 | A15746 | 620 |
| A15660 | A15767 | 296 | A15660 | A15769 | 467 |
| A15660 | A15843 | 475 | A15660 | A15917 | 121 |
| A15660 | A15918 | 491 | A15660 | A15920 | 620 |
| A15660 | A15923 | 491 | A15660 | A15928 | 322 |
| A15660 | A15931 | 620 | A15660 | A15932 | 489 |
| A15660 | A15933 | 491 | A15660 | A15936 | 391 |
| A15660 | A15937 | 620 | A15660 | A15940 | 263 |
| A15660 | A15950 | 355 | A15660 | A15951 | 375 |
| A15660 | A15988 | 168 | A15660 | A16060 | 366 |
| A15660 | A16072 | 419 | A15660 | A16075 | 344 |
| A15660 | A16086 | 435 | A15660 | A16088 | 768 |
| A15660 | A16092 | 491 | A15660 | A16095 | 291 |
| A15660 | A16096 | 491 | A15660 | A16118 | 456 |
| A15660 | A16145 | 491 | A15660 | A16156 | 271 |
| A15660 | A16187 | 456 | A15660 | A16191 | 433 |
| A15660 | A16196 | 202 | A15660 | A16197 | 367 |
| A15660 | A16201 | 422 | A15660 | A16204 | 202 |
| A15660 | A16218 | 888 | A15660 | A16246 | 202 |
| A15660 | A16249 | 202 | A15660 | A16250 | 202 |
| A15660 | A16251 | 165 | A15660 | A16252 | 202 |
| A15660 | A16437 | 179 | A15660 | A16464 | 561 |
| A15660 | A16650 | 491 | A15660 | A16700 | 314 |
| A15660 | A16724 | 238 | A15660 | A16768 | 491 |
| A15660 | A16811 | 218 | A15660 | A16822 | 193 |
| A15660 | A16838 | 396 | A15660 | A16856 | 202 |
| A15660 | A16925 | 271 | A15660 | A16933 | 202 |
| A15660 | A16941 | 202 | A15660 | A17134 | 491 |
| A15660 | A17135 | 213 | A15660 | A17137 | 375 |
| A15660 | A17140 | 491 | A15660 | A17156 | 452 |
| A15660 | A17208 | 486 | A15661 | A15662 | 828 |
| A15661 | A15666 | 223 | A15661 | A15684 | 709 |
| A15661 | A15708 | 266 | A15661 | A15709 | 230 |
| A15661 | A15720 | 156 | A15661 | A15721 | 156 |
| A15661 | A15746 | 499 | A15661 | A15750 | 262 |
| A15661 | A15842 | 335 | A15661 | A15843 | 558 |
| A15661 | A15917 | 413 | A15661 | A15918 | 568 |
| A15661 | A15919 | 479 | A15661 | A15923 | 475 |
| A15661 | A15931 | 486 | A15661 | A15932 | 697 |
| A15661 | A15937 | 435 | A15661 | A15940 | 157 |
| A15661 | A16072 | 160 | A15661 | A16075 | 353 |

|        |        |     |        |        |     |
|--------|--------|-----|--------|--------|-----|
| A15661 | A16086 | 124 | A15661 | A16088 | 581 |
| A15661 | A16095 | 490 | A15661 | A16096 | 168 |
| A15661 | A16104 | 308 | A15661 | A16145 | 156 |
| A15661 | A16151 | 190 | A15661 | A16157 | 488 |
| A15661 | A16164 | 252 | A15661 | A16191 | 179 |
| A15661 | A16202 | 279 | A15661 | A16218 | 151 |
| A15661 | A16307 | 156 | A15661 | A16464 | 283 |
| A15661 | A16587 | 151 | A15661 | A16597 | 188 |
| A15661 | A16691 | 216 | A15661 | A16706 | 240 |
| A15661 | A16708 | 187 | A15661 | A16768 | 257 |
| A15661 | A16797 | 335 | A15661 | A16806 | 234 |
| A15661 | A16811 | 252 | A15661 | A16838 | 490 |
| A15661 | A16858 | 260 | A15661 | A16859 | 291 |
| A15661 | A16882 | 269 | A15661 | A16900 | 185 |
| A15661 | A16913 | 205 | A15661 | A17190 | 163 |
| A15662 | A15684 | 709 | A15662 | A15708 | 352 |
| A15662 | A15720 | 156 | A15662 | A15721 | 156 |
| A15662 | A15746 | 577 | A15662 | A15843 | 535 |
| A15662 | A15917 | 247 | A15662 | A15918 | 578 |
| A15662 | A15919 | 374 | A15662 | A15920 | 455 |
| A15662 | A15923 | 569 | A15662 | A15931 | 491 |
| A15662 | A15932 | 576 | A15662 | A15933 | 440 |
| A15662 | A15937 | 580 | A15662 | A15953 | 286 |
| A15662 | A16072 | 347 | A15662 | A16086 | 182 |
| A15662 | A16088 | 533 | A15662 | A16095 | 486 |
| A15662 | A16096 | 436 | A15662 | A16104 | 347 |
| A15662 | A16145 | 156 | A15662 | A16156 | 385 |
| A15662 | A16164 | 302 | A15662 | A16191 | 362 |
| A15662 | A16202 | 324 | A15662 | A16204 | 369 |
| A15662 | A16218 | 423 | A15662 | A16244 | 335 |
| A15662 | A16307 | 156 | A15662 | A16768 | 232 |
| A15662 | A16811 | 302 | A15665 | A15682 | 259 |
| A15665 | A15752 | 457 | A15665 | A15774 | 201 |
| A15665 | A15852 | 454 | A15665 | A15855 | 377 |
| A15665 | A15863 | 632 | A15665 | A16077 | 154 |
| A15665 | A16157 | 452 | A15665 | A16261 | 156 |
| A15665 | A16410 | 180 | A15665 | A16552 | 670 |
| A15665 | A16560 | 190 | A15665 | A16565 | 455 |
| A15665 | A16587 | 374 | A15665 | A16597 | 469 |
| A15665 | A16608 | 350 | A15665 | A16611 | 428 |
| A15665 | A16664 | 454 | A15665 | A16675 | 491 |
| A15665 | A16680 | 217 | A15665 | A16684 | 204 |
| A15665 | A16689 | 462 | A15665 | A16690 | 408 |
| A15665 | A16695 | 243 | A15665 | A16703 | 185 |
| A15665 | A16704 | 428 | A15665 | A16707 | 299 |
| A15665 | A16709 | 227 | A15665 | A16724 | 379 |

|        |        |     |        |        |     |
|--------|--------|-----|--------|--------|-----|
| A15665 | A16738 | 540 | A15665 | A16764 | 183 |
| A15665 | A16766 | 467 | A15665 | A16790 | 374 |
| A15665 | A16827 | 383 | A15665 | A16838 | 402 |
| A15665 | A16847 | 291 | A15665 | A16866 | 204 |
| A15665 | A16875 | 489 | A15665 | A16900 | 177 |
| A15665 | A16905 | 409 | A15665 | A16913 | 205 |
| A15665 | A16944 | 177 | A15665 | A16954 | 227 |
| A15665 | A17018 | 157 | A15665 | A17030 | 270 |
| A15665 | A17039 | 213 | A15665 | A17071 | 483 |
| A15665 | A17150 | 243 | A15665 | A17211 | 247 |
| A15666 | A15765 | 490 | A15666 | A15931 | 490 |
| A15666 | A16157 | 491 | A15666 | A16243 | 249 |
| A15666 | A16403 | 324 | A15666 | A16676 | 374 |
| A15666 | A16681 | 404 | A15666 | A16750 | 241 |
| A15667 | A15774 | 294 | A15667 | A16157 | 296 |
| A15667 | A16597 | 243 | A15667 | A16675 | 208 |
| A15667 | A16690 | 207 | A15667 | A16704 | 445 |
| A15667 | A16866 | 256 | A15667 | A17125 | 329 |
| A15669 | A15925 | 198 | A15669 | A15934 | 224 |
| A15669 | A16436 | 491 | A15669 | A16963 | 241 |
| A15670 | A15671 | 486 | A15670 | A16045 | 401 |
| A15670 | A16300 | 303 | A15671 | A16209 | 469 |
| A15671 | A16300 | 154 | A15672 | A15911 | 317 |
| A15673 | A16152 | 168 | A15674 | A15847 | 378 |
| A15676 | A15680 | 154 | A15676 | A15686 | 311 |
| A15676 | A15769 | 177 | A15676 | A16445 | 263 |
| A15676 | A16891 | 327 | A15677 | A15724 | 177 |
| A15678 | A15726 | 184 | A15678 | A16102 | 427 |
| A15679 | A15680 | 480 | A15679 | A16022 | 290 |
| A15679 | A16054 | 358 | A15679 | A16056 | 414 |
| A15679 | A16447 | 484 | A15679 | A16480 | 450 |
| A15679 | A16607 | 424 | A15680 | A15683 | 360 |
| A15680 | A15686 | 188 | A15680 | A15690 | 394 |
| A15680 | A15696 | 174 | A15680 | A15709 | 257 |
| A15680 | A15774 | 151 | A15680 | A15850 | 260 |
| A15680 | A16022 | 491 | A15680 | A16056 | 321 |
| A15680 | A16113 | 475 | A15680 | A16115 | 152 |
| A15680 | A16157 | 445 | A15680 | A16387 | 210 |
| A15680 | A16420 | 232 | A15680 | A16432 | 163 |
| A15680 | A16467 | 323 | A15680 | A16480 | 267 |
| A15680 | A16521 | 63  | A15680 | A16552 | 375 |
| A15680 | A16565 | 312 | A15680 | A16566 | 399 |
| A15680 | A16567 | 344 | A15680 | A16587 | 385 |
| A15680 | A16597 | 383 | A15680 | A16607 | 346 |
| A15680 | A16609 | 346 | A15680 | A16611 | 418 |
| A15680 | A16664 | 379 | A15680 | A16675 | 263 |

|        |        |     |        |        |     |
|--------|--------|-----|--------|--------|-----|
| A15680 | A16680 | 367 | A15680 | A16682 | 318 |
| A15680 | A16690 | 343 | A15680 | A16691 | 232 |
| A15680 | A16693 | 368 | A15680 | A16695 | 371 |
| A15680 | A16702 | 156 | A15680 | A16703 | 417 |
| A15680 | A16704 | 281 | A15680 | A16706 | 255 |
| A15680 | A16707 | 293 | A15680 | A16709 | 165 |
| A15680 | A16764 | 213 | A15680 | A16774 | 351 |
| A15680 | A16776 | 326 | A15680 | A16788 | 305 |
| A15680 | A16790 | 165 | A15680 | A16792 | 174 |
| A15680 | A16806 | 371 | A15680 | A16824 | 232 |
| A15680 | A16829 | 436 | A15680 | A16838 | 154 |
| A15680 | A16868 | 274 | A15680 | A16874 | 177 |
| A15680 | A16900 | 201 | A15680 | A16905 | 408 |
| A15680 | A16908 | 267 | A15680 | A16913 | 351 |
| A15680 | A16944 | 407 | A15680 | A17012 | 174 |
| A15680 | A17017 | 165 | A15680 | A17018 | 187 |
| A15680 | A17030 | 193 | A15680 | A17133 | 171 |
| A15680 | A17190 | 180 | A15682 | A16299 | 297 |
| A15682 | A16400 | 302 | A15682 | A16560 | 160 |
| A15682 | A16608 | 701 | A15682 | A16689 | 165 |
| A15682 | A16724 | 335 | A15682 | A16806 | 201 |
| A15682 | A16847 | 428 | A15683 | A15709 | 394 |
| A15683 | A15711 | 277 | A15683 | A15712 | 484 |
| A15683 | A15719 | 174 | A15683 | A15743 | 168 |
| A15683 | A15774 | 152 | A15683 | A15850 | 260 |
| A15683 | A15940 | 174 | A15683 | A16157 | 473 |
| A15683 | A16187 | 355 | A15683 | A16215 | 191 |
| A15683 | A16243 | 182 | A15683 | A16261 | 251 |
| A15683 | A16322 | 490 | A15683 | A16343 | 246 |
| A15683 | A16466 | 461 | A15683 | A16552 | 435 |
| A15683 | A16565 | 446 | A15683 | A16566 | 188 |
| A15683 | A16587 | 455 | A15683 | A16597 | 447 |
| A15683 | A16611 | 486 | A15683 | A16646 | 176 |
| A15683 | A16664 | 469 | A15683 | A16665 | 414 |
| A15683 | A16675 | 263 | A15683 | A16680 | 441 |
| A15683 | A16682 | 185 | A15683 | A16690 | 430 |
| A15683 | A16691 | 232 | A15683 | A16695 | 372 |
| A15683 | A16697 | 182 | A15683 | A16699 | 279 |
| A15683 | A16703 | 418 | A15683 | A16707 | 400 |
| A15683 | A16764 | 317 | A15683 | A16774 | 223 |
| A15683 | A16788 | 306 | A15683 | A16806 | 249 |
| A15683 | A16815 | 364 | A15683 | A16829 | 182 |
| A15683 | A16838 | 154 | A15683 | A16866 | 228 |
| A15683 | A16874 | 177 | A15683 | A16900 | 201 |
| A15683 | A16905 | 256 | A15683 | A16913 | 223 |
| A15683 | A17033 | 182 | A15683 | A17144 | 162 |

|        |        |     |        |        |     |
|--------|--------|-----|--------|--------|-----|
| A15684 | A15708 | 491 | A15684 | A15720 | 541 |
| A15684 | A15721 | 541 | A15684 | A15742 | 196 |
| A15684 | A15746 | 581 | A15684 | A15750 | 490 |
| A15684 | A15769 | 480 | A15684 | A15842 | 160 |
| A15684 | A15843 | 581 | A15684 | A15850 | 151 |
| A15684 | A15917 | 581 | A15684 | A15918 | 581 |
| A15684 | A15919 | 414 | A15684 | A15920 | 491 |
| A15684 | A15923 | 581 | A15684 | A15924 | 160 |
| A15684 | A15928 | 462 | A15684 | A15931 | 491 |
| A15684 | A15932 | 707 | A15684 | A15933 | 491 |
| A15684 | A15936 | 390 | A15684 | A15937 | 581 |
| A15684 | A15940 | 404 | A15684 | A15950 | 479 |
| A15684 | A15951 | 369 | A15684 | A15953 | 441 |
| A15684 | A15962 | 301 | A15684 | A15988 | 266 |
| A15684 | A16006 | 271 | A15684 | A16008 | 171 |
| A15684 | A16072 | 945 | A15684 | A16075 | 491 |
| A15684 | A16086 | 491 | A15684 | A16088 | 724 |
| A15684 | A16092 | 491 | A15684 | A16094 | 160 |
| A15684 | A16095 | 491 | A15684 | A16096 | 491 |
| A15684 | A16104 | 249 | A15684 | A16105 | 160 |
| A15684 | A16106 | 124 | A15684 | A16118 | 360 |
| A15684 | A16145 | 541 | A15684 | A16149 | 491 |
| A15684 | A16151 | 489 | A15684 | A16156 | 469 |
| A15684 | A16157 | 486 | A15684 | A16164 | 429 |
| A15684 | A16187 | 440 | A15684 | A16191 | 486 |
| A15684 | A16196 | 160 | A15684 | A16197 | 324 |
| A15684 | A16200 | 160 | A15684 | A16201 | 383 |
| A15684 | A16202 | 201 | A15684 | A16205 | 288 |
| A15684 | A16206 | 160 | A15684 | A16208 | 305 |
| A15684 | A16210 | 160 | A15684 | A16218 | 793 |
| A15684 | A16244 | 221 | A15684 | A16251 | 249 |
| A15684 | A16252 | 160 | A15684 | A16276 | 201 |
| A15684 | A16307 | 156 | A15684 | A16437 | 373 |
| A15684 | A16464 | 489 | A15684 | A16565 | 165 |
| A15684 | A16587 | 165 | A15684 | A16650 | 491 |
| A15684 | A16724 | 232 | A15684 | A16768 | 491 |
| A15684 | A16783 | 160 | A15684 | A16797 | 160 |
| A15684 | A16811 | 344 | A15684 | A16815 | 217 |
| A15684 | A16822 | 279 | A15684 | A16838 | 406 |
| A15684 | A16904 | 260 | A15684 | A16925 | 290 |
| A15684 | A16930 | 172 | A15684 | A16941 | 160 |
| A15684 | A17026 | 326 | A15684 | A17134 | 491 |
| A15684 | A17135 | 196 | A15684 | A17140 | 491 |
| A15684 | A17156 | 585 | A15684 | A17208 | 469 |
| A15685 | A16617 | 491 | A15685 | A16658 | 221 |
| A15686 | A16393 | 273 | A15686 | A16429 | 469 |

|        |        |     |        |        |     |
|--------|--------|-----|--------|--------|-----|
| A15688 | A15690 | 372 | A15690 | A15911 | 218 |
| A15690 | A16022 | 319 | A15690 | A16113 | 491 |
| A15690 | A16373 | 372 | A15690 | A16381 | 466 |
| A15690 | A16393 | 402 | A15690 | A16432 | 488 |
| A15690 | A16456 | 372 | A15690 | A16459 | 345 |
| A15690 | A16481 | 389 | A15690 | A16546 | 424 |
| A15691 | A16916 | 270 | A15694 | A15695 | 422 |
| A15696 | A15698 | 281 | A15696 | A15709 | 205 |
| A15696 | A16566 | 324 | A15696 | A16611 | 191 |
| A15696 | A16766 | 170 | A15696 | A16788 | 393 |
| A15696 | A16802 | 276 | A15696 | A16829 | 321 |
| A15697 | A15725 | 243 | A15697 | A15741 | 353 |
| A15697 | A16291 | 358 | A15697 | A16793 | 232 |
| A15697 | A16818 | 343 | A15698 | A15711 | 255 |
| A15698 | A15774 | 260 | A15698 | A15943 | 224 |
| A15698 | A16157 | 249 | A15698 | A16597 | 335 |
| A15698 | A16611 | 279 | A15698 | A16652 | 187 |
| A15698 | A16664 | 332 | A15698 | A16675 | 167 |
| A15698 | A16680 | 187 | A15698 | A16690 | 299 |
| A15698 | A16703 | 251 | A15698 | A16704 | 258 |
| A15698 | A16708 | 303 | A15698 | A16764 | 205 |
| A15698 | A16790 | 274 | A15698 | A16799 | 312 |
| A15698 | A16806 | 338 | A15698 | A16807 | 226 |
| A15698 | A16824 | 326 | A15698 | A16858 | 353 |
| A15700 | A15763 | 183 | A15700 | A17141 | 267 |
| A15702 | A15710 | 446 | A15702 | A15729 | 198 |
| A15702 | A15738 | 312 | A15702 | A15779 | 433 |
| A15703 | A15718 | 355 | A15704 | A16834 | 157 |
| A15708 | A15720 | 491 | A15708 | A15721 | 491 |
| A15708 | A15746 | 604 | A15708 | A15918 | 420 |
| A15708 | A15919 | 213 | A15708 | A15920 | 390 |
| A15708 | A15923 | 95  | A15708 | A15924 | 346 |
| A15708 | A15928 | 341 | A15708 | A15931 | 620 |
| A15708 | A15933 | 228 | A15708 | A15937 | 616 |
| A15708 | A16072 | 177 | A15708 | A16088 | 422 |
| A15708 | A16092 | 462 | A15708 | A16096 | 441 |
| A15708 | A16145 | 461 | A15708 | A16164 | 384 |
| A15708 | A16218 | 620 | A15708 | A16464 | 479 |
| A15708 | A16650 | 218 | A15708 | A16768 | 491 |
| A15708 | A16933 | 346 | A15708 | A17134 | 205 |
| A15708 | A17135 | 281 | A15708 | A17140 | 489 |
| A15708 | A17156 | 85  | A15708 | A17208 | 188 |
| A15709 | A15710 | 330 | A15709 | A15711 | 391 |
| A15709 | A15735 | 491 | A15709 | A15739 | 484 |
| A15709 | A15743 | 199 | A15709 | A15774 | 182 |
| A15709 | A15818 | 176 | A15709 | A15850 | 396 |

|        |        |     |        |        |     |
|--------|--------|-----|--------|--------|-----|
| A15709 | A15947 | 170 | A15709 | A16157 | 485 |
| A15709 | A16187 | 380 | A15709 | A16243 | 343 |
| A15709 | A16343 | 386 | A15709 | A16552 | 452 |
| A15709 | A16565 | 439 | A15709 | A16566 | 218 |
| A15709 | A16585 | 252 | A15709 | A16587 | 443 |
| A15709 | A16611 | 480 | A15709 | A16664 | 457 |
| A15709 | A16675 | 202 | A15709 | A16680 | 395 |
| A15709 | A16690 | 201 | A15709 | A16691 | 380 |
| A15709 | A16695 | 278 | A15709 | A16697 | 213 |
| A15709 | A16699 | 179 | A15709 | A16704 | 313 |
| A15709 | A16706 | 283 | A15709 | A16708 | 235 |
| A15709 | A16764 | 408 | A15709 | A16776 | 353 |
| A15709 | A16788 | 419 | A15709 | A16797 | 363 |
| A15709 | A16802 | 156 | A15709 | A16815 | 269 |
| A15709 | A16824 | 262 | A15709 | A16829 | 446 |
| A15709 | A16838 | 185 | A15709 | A16857 | 246 |
| A15709 | A16874 | 411 | A15709 | A16882 | 307 |
| A15709 | A16900 | 232 | A15709 | A16905 | 157 |
| A15709 | A17019 | 283 | A15709 | A17144 | 191 |
| A15710 | A15729 | 491 | A15710 | A15737 | 489 |
| A15710 | A15738 | 451 | A15710 | A15763 | 346 |
| A15710 | A15779 | 491 | A15710 | A16465 | 352 |
| A15710 | A16801 | 279 | A15710 | A16844 | 475 |
| A15710 | A16860 | 168 | A15711 | A15854 | 204 |
| A15711 | A15932 | 219 | A15711 | A15943 | 238 |
| A15711 | A16157 | 414 | A15711 | A16187 | 254 |
| A15711 | A16243 | 297 | A15711 | A16261 | 247 |
| A15711 | A16294 | 176 | A15711 | A16343 | 427 |
| A15711 | A16552 | 345 | A15711 | A16565 | 447 |
| A15711 | A16587 | 396 | A15711 | A16611 | 428 |
| A15711 | A16664 | 213 | A15711 | A16675 | 313 |
| A15711 | A16680 | 201 | A15711 | A16682 | 447 |
| A15711 | A16690 | 548 | A15711 | A16691 | 335 |
| A15711 | A16692 | 279 | A15711 | A16699 | 270 |
| A15711 | A16702 | 277 | A15711 | A16703 | 263 |
| A15711 | A16704 | 271 | A15711 | A16764 | 348 |
| A15711 | A16788 | 380 | A15711 | A16790 | 395 |
| A15711 | A16806 | 346 | A15711 | A16815 | 340 |
| A15711 | A16824 | 335 | A15711 | A16829 | 297 |
| A15711 | A16866 | 492 | A15711 | A16874 | 294 |
| A15711 | A16905 | 251 | A15711 | A16937 | 346 |
| A15711 | A16944 | 313 | A15711 | A17012 | 291 |
| A15711 | A17019 | 350 | A15712 | A15719 | 200 |
| A15712 | A15724 | 113 | A15712 | A15757 | 200 |
| A15712 | A16066 | 200 | A15712 | A16611 | 407 |
| A15712 | A16634 | 200 | A15712 | A16665 | 401 |

|        |        |     |        |        |     |
|--------|--------|-----|--------|--------|-----|
| A15712 | A16802 | 212 | A15712 | A16919 | 200 |
| A15714 | A15837 | 165 | A15714 | A15941 | 174 |
| A15714 | A16073 | 188 | A15714 | A16127 | 245 |
| A15714 | A16226 | 260 | A15714 | A16263 | 347 |
| A15714 | A16613 | 180 | A15714 | A16626 | 443 |
| A15715 | A16793 | 341 | A15715 | A16876 | 404 |
| A15715 | A16899 | 391 | A15717 | A15747 | 230 |
| A15717 | A15759 | 461 | A15717 | A16324 | 218 |
| A15717 | A16680 | 199 | A15717 | A17156 | 196 |
| A15718 | A16843 | 332 | A15719 | A15757 | 200 |
| A15719 | A16066 | 200 | A15719 | A16634 | 526 |
| A15719 | A16919 | 200 | A15720 | A15721 | 542 |
| A15720 | A15746 | 170 | A15720 | A15748 | 259 |
| A15720 | A15917 | 156 | A15720 | A15918 | 180 |
| A15720 | A15923 | 156 | A15720 | A15931 | 466 |
| A15720 | A15937 | 156 | A15720 | A16088 | 156 |
| A15720 | A16092 | 443 | A15720 | A16145 | 185 |
| A15720 | A16187 | 170 | A15720 | A16218 | 491 |
| A15720 | A16307 | 156 | A15720 | A16650 | 137 |
| A15720 | A16768 | 491 | A15720 | A17134 | 489 |
| A15720 | A17140 | 461 | A15720 | A17208 | 227 |
| A15721 | A15746 | 176 | A15721 | A15917 | 156 |
| A15721 | A15918 | 156 | A15721 | A15923 | 156 |
| A15721 | A15931 | 419 | A15721 | A15937 | 156 |
| A15721 | A16088 | 156 | A15721 | A16092 | 419 |
| A15721 | A16145 | 156 | A15721 | A16218 | 489 |
| A15721 | A16307 | 156 | A15721 | A16650 | 147 |
| A15721 | A16768 | 491 | A15721 | A16933 | 373 |
| A15721 | A17134 | 360 | A15721 | A17135 | 198 |
| A15721 | A17140 | 463 | A15721 | A17206 | 63  |
| A15721 | A17208 | 238 | A15722 | A16259 | 465 |
| A15722 | A16293 | 229 | A15722 | A16298 | 445 |
| A15722 | A16580 | 489 | A15722 | A16627 | 485 |
| A15722 | A16879 | 303 | A15724 | A16664 | 572 |
| A15724 | A16674 | 319 | A15724 | A16703 | 276 |
| A15725 | A15772 | 348 | A15726 | A15926 | 179 |
| A15726 | A16073 | 306 | A15726 | A16285 | 267 |
| A15726 | A16515 | 200 | A15726 | A17086 | 154 |
| A15728 | A16627 | 302 | A15728 | A16696 | 340 |
| A15728 | A16822 | 281 | A15728 | A16947 | 364 |
| A15729 | A15737 | 455 | A15729 | A15738 | 469 |
| A15729 | A15740 | 486 | A15729 | A15763 | 290 |
| A15729 | A15779 | 491 | A15729 | A15788 | 165 |
| A15729 | A15867 | 243 | A15729 | A16392 | 146 |
| A15729 | A16463 | 373 | A15729 | A16465 | 245 |
| A15729 | A16557 | 313 | A15729 | A16663 | 491 |



|        |        |     |        |        |     |
|--------|--------|-----|--------|--------|-----|
| A15729 | A16844 | 343 | A15729 | A17019 | 208 |
| A15729 | A17063 | 290 | A15730 | A15931 | 345 |
| A15730 | A15932 | 171 | A15730 | A16841 | 414 |
| A15730 | A17134 | 489 | A15730 | A17140 | 208 |
| A15731 | A15931 | 241 | A15731 | A16218 | 308 |
| A15733 | A15946 | 218 | A15734 | A15741 | 373 |
| A15734 | A16291 | 258 | A15735 | A15739 | 491 |
| A15735 | A15743 | 154 | A15735 | A15940 | 162 |
| A15735 | A16157 | 259 | A15735 | A16215 | 180 |
| A15735 | A16343 | 232 | A15735 | A16565 | 191 |
| A15735 | A16597 | 193 | A15735 | A16611 | 302 |
| A15735 | A16652 | 171 | A15735 | A16664 | 188 |
| A15735 | A16704 | 267 | A15735 | A16774 | 210 |
| A15735 | A16790 | 154 | A15735 | A16815 | 229 |
| A15735 | A16863 | 401 | A15735 | A16905 | 240 |
| A15735 | A17019 | 243 | A15735 | A17127 | 159 |
| A15737 | A15779 | 490 | A15738 | A15779 | 467 |
| A15738 | A16654 | 474 | A15740 | A15779 | 313 |
| A15741 | A15760 | 450 | A15741 | A16291 | 489 |
| A15741 | A16587 | 270 | A15741 | A16793 | 454 |
| A15743 | A15759 | 362 | A15743 | A15776 | 319 |
| A15743 | A15818 | 286 | A15743 | A16157 | 159 |
| A15743 | A16565 | 238 | A15743 | A16611 | 185 |
| A15743 | A16631 | 436 | A15743 | A16646 | 213 |
| A15743 | A16652 | 223 | A15743 | A16664 | 235 |
| A15743 | A16680 | 224 | A15743 | A16690 | 202 |
| A15743 | A16905 | 271 | A15743 | A17144 | 299 |
| A15743 | A17193 | 458 | A15746 | A15843 | 336 |
| A15746 | A15917 | 291 | A15746 | A15918 | 577 |
| A15746 | A15919 | 219 | A15746 | A15920 | 618 |
| A15746 | A15923 | 258 | A15746 | A15928 | 217 |
| A15746 | A15931 | 619 | A15746 | A15932 | 221 |
| A15746 | A15933 | 236 | A15746 | A15936 | 452 |
| A15746 | A15937 | 620 | A15746 | A15940 | 180 |
| A15746 | A15951 | 212 | A15746 | A16088 | 560 |
| A15746 | A16095 | 88  | A15746 | A16096 | 199 |
| A15746 | A16145 | 156 | A15746 | A16218 | 609 |
| A15746 | A16307 | 156 | A15746 | A16464 | 594 |
| A15746 | A16811 | 273 | A15747 | A15763 | 466 |
| A15747 | A16311 | 218 | A15748 | A16930 | 396 |
| A15748 | A17134 | 488 | A15749 | A15852 | 252 |
| A15750 | A15843 | 335 | A15750 | A15917 | 636 |
| A15750 | A15920 | 201 | A15750 | A15932 | 594 |
| A15750 | A15937 | 334 | A15750 | A16075 | 271 |
| A15750 | A16086 | 266 | A15750 | A16088 | 350 |
| A15750 | A16095 | 201 | A15750 | A16096 | 207 |

|        |        |     |        |        |     |
|--------|--------|-----|--------|--------|-----|
| A15752 | A15773 | 446 | A15752 | A15878 | 213 |
| A15752 | A16328 | 393 | A15752 | A16467 | 190 |
| A15752 | A16488 | 180 | A15752 | A17063 | 388 |
| A15753 | A15754 | 489 | A15753 | A15755 | 391 |
| A15753 | A17189 | 274 | A15757 | A16066 | 200 |
| A15757 | A16634 | 200 | A15757 | A16919 | 200 |
| A15759 | A16680 | 302 | A15760 | A16291 | 411 |
| A15760 | A16793 | 313 | A15762 | A15943 | 475 |
| A15762 | A15944 | 255 | A15762 | A15945 | 580 |
| A15762 | A15946 | 582 | A15762 | A16067 | 255 |
| A15762 | A16093 | 371 | A15762 | A16109 | 456 |
| A15762 | A16144 | 580 | A15763 | A15775 | 385 |
| A15763 | A15779 | 443 | A15763 | A15867 | 267 |
| A15763 | A15868 | 216 | A15763 | A15947 | 185 |
| A15763 | A16661 | 312 | A15763 | A16844 | 212 |
| A15763 | A16860 | 157 | A15764 | A16302 | 436 |
| A15765 | A16157 | 475 | A15765 | A16243 | 394 |
| A15765 | A16387 | 307 | A15765 | A16403 | 423 |
| A15765 | A16570 | 398 | A15765 | A16676 | 450 |
| A15765 | A16682 | 286 | A15765 | A16908 | 347 |
| A15767 | A15931 | 154 | A15767 | A16145 | 277 |
| A15767 | A16218 | 234 | A15768 | A17224 | 63  |
| A15769 | A15779 | 165 | A15769 | A16096 | 221 |
| A15769 | A16291 | 154 | A15769 | A16293 | 491 |
| A15769 | A16627 | 469 | A15769 | A16696 | 477 |
| A15769 | A16822 | 491 | A15769 | A16879 | 335 |
| A15769 | A16947 | 221 | A15769 | A17142 | 254 |
| A15770 | A15923 | 168 | A15770 | A17091 | 489 |
| A15770 | A17126 | 185 | A15771 | A16035 | 489 |
| A15771 | A16583 | 490 | A15773 | A15854 | 324 |
| A15773 | A16298 | 184 | A15773 | A16724 | 285 |
| A15773 | A17063 | 226 | A15774 | A16157 | 418 |
| A15774 | A16552 | 408 | A15774 | A16565 | 221 |
| A15774 | A16597 | 450 | A15774 | A16611 | 302 |
| A15774 | A16664 | 347 | A15774 | A16675 | 319 |
| A15774 | A16680 | 207 | A15774 | A16690 | 319 |
| A15774 | A16704 | 462 | A15774 | A16764 | 353 |
| A15774 | A16799 | 326 | A15774 | A16838 | 279 |
| A15774 | A16858 | 364 | A15774 | A16866 | 235 |
| A15774 | A16900 | 317 | A15774 | A17014 | 332 |
| A15774 | A17015 | 263 | A15774 | A17125 | 313 |
| A15776 | A15778 | 488 | A15776 | A16631 | 288 |
| A15776 | A16713 | 406 | A15777 | A15778 | 358 |
| A15777 | A16631 | 472 | A15778 | A16631 | 279 |
| A15778 | A16713 | 401 | A15779 | A16465 | 317 |
| A15779 | A16801 | 243 | A15779 | A16844 | 481 |

|        |        |     |        |        |     |
|--------|--------|-----|--------|--------|-----|
| A15779 | A17019 | 385 | A15779 | A17091 | 439 |
| A15780 | A15781 | 462 | A15780 | A15782 | 457 |
| A15780 | A16594 | 380 | A15781 | A15782 | 469 |
| A15788 | A15867 | 467 | A15788 | A15868 | 149 |
| A15788 | A15871 | 168 | A15788 | A15875 | 318 |
| A15788 | A16217 | 238 | A15788 | A16433 | 188 |
| A15788 | A16463 | 335 | A15788 | A16555 | 217 |
| A15788 | A17063 | 491 | A15795 | A15800 | 216 |
| A15795 | A15808 | 329 | A15795 | A15964 | 236 |
| A15795 | A15969 | 329 | A15795 | A16014 | 348 |
| A15795 | A16031 | 335 | A15795 | A16224 | 174 |
| A15795 | A17146 | 362 | A15799 | A15828 | 405 |
| A15799 | A16045 | 375 | A15799 | A16136 | 324 |
| A15799 | A16165 | 388 | A15799 | A16192 | 346 |
| A15799 | A16224 | 236 | A15799 | A16300 | 234 |
| A15800 | A15813 | 485 | A15800 | A15826 | 329 |
| A15800 | A16055 | 302 | A15800 | A16224 | 212 |
| A15801 | A16540 | 414 | A15802 | A15807 | 383 |
| A15802 | A15826 | 465 | A15802 | A16055 | 474 |
| A15802 | A16224 | 383 | A15804 | A15809 | 235 |
| A15804 | A15922 | 279 | A15804 | A16724 | 249 |
| A15806 | A15964 | 318 | A15807 | A16224 | 326 |
| A15809 | A15922 | 491 | A15809 | A17040 | 474 |
| A15810 | A15922 | 452 | A15811 | A15827 | 462 |
| A15813 | A15815 | 366 | A15814 | A16136 | 353 |
| A15815 | A16300 | 205 | A15817 | A16248 | 477 |
| A15818 | A15823 | 380 | A15818 | A16565 | 215 |
| A15818 | A16611 | 294 | A15818 | A16646 | 191 |
| A15818 | A16652 | 332 | A15818 | A16664 | 343 |
| A15818 | A16675 | 180 | A15818 | A16690 | 179 |
| A15818 | A16703 | 263 | A15818 | A16790 | 285 |
| A15818 | A16905 | 249 | A15818 | A17144 | 281 |
| A15820 | A15886 | 439 | A15820 | A15902 | 424 |
| A15823 | A16300 | 262 | A15824 | A16188 | 375 |
| A15824 | A16224 | 227 | A15825 | A16057 | 422 |
| A15826 | A16055 | 363 | A15828 | A16300 | 243 |
| A15831 | A16141 | 369 | A15831 | A16636 | 162 |
| A15833 | A16300 | 193 | A15834 | A15976 | 196 |
| A15834 | A16216 | 491 | A15835 | A15913 | 329 |
| A15837 | A15858 | 353 | A15837 | A15876 | 324 |
| A15837 | A15935 | 252 | A15837 | A16027 | 269 |
| A15837 | A16052 | 443 | A15837 | A16068 | 491 |
| A15837 | A16069 | 330 | A15837 | A16101 | 396 |
| A15837 | A16128 | 317 | A15837 | A16226 | 279 |
| A15837 | A16353 | 515 | A15837 | A16394 | 160 |
| A15837 | A16396 | 223 | A15837 | A16535 | 303 |

|        |        |     |        |        |     |
|--------|--------|-----|--------|--------|-----|
| A15837 | A16537 | 168 | A15837 | A16626 | 629 |
| A15837 | A16635 | 435 | A15837 | A16643 | 424 |
| A15837 | A16731 | 428 | A15837 | A16740 | 358 |
| A15837 | A16748 | 329 | A15837 | A16761 | 228 |
| A15837 | A16769 | 210 | A15838 | A15840 | 411 |
| A15838 | A15881 | 413 | A15839 | A15840 | 385 |
| A15840 | A15841 | 339 | A15840 | A15845 | 350 |
| A15840 | A15881 | 364 | A15840 | A16030 | 395 |
| A15840 | A16112 | 313 | A15840 | A16636 | 154 |
| A15840 | A16732 | 469 | A15840 | A16775 | 375 |
| A15840 | A16887 | 339 | A15842 | A16151 | 422 |
| A15843 | A15898 | 355 | A15843 | A15917 | 487 |
| A15843 | A15918 | 493 | A15843 | A15923 | 294 |
| A15843 | A15931 | 291 | A15843 | A15932 | 219 |
| A15843 | A15933 | 201 | A15843 | A15937 | 229 |
| A15843 | A16072 | 468 | A15843 | A16075 | 490 |
| A15843 | A16086 | 491 | A15843 | A16088 | 573 |
| A15843 | A16094 | 374 | A15843 | A16095 | 475 |
| A15843 | A16096 | 411 | A15843 | A16105 | 311 |
| A15843 | A16149 | 475 | A15843 | A16151 | 258 |
| A15843 | A16202 | 457 | A15843 | A16208 | 332 |
| A15843 | A16218 | 162 | A15843 | A16257 | 179 |
| A15843 | A16811 | 311 | A15850 | A15855 | 235 |
| A15850 | A15932 | 218 | A15850 | A16157 | 430 |
| A15850 | A16243 | 373 | A15850 | A16343 | 400 |
| A15850 | A16552 | 363 | A15850 | A16565 | 414 |
| A15850 | A16608 | 294 | A15850 | A16611 | 440 |
| A15850 | A16690 | 291 | A15850 | A16697 | 373 |
| A15850 | A16703 | 351 | A15850 | A16704 | 356 |
| A15850 | A16764 | 321 | A15850 | A16806 | 401 |
| A15850 | A16824 | 395 | A15850 | A16829 | 441 |
| A15850 | A16905 | 343 | A15851 | A15852 | 321 |
| A15851 | A15878 | 299 | A15852 | A15854 | 200 |
| A15852 | A16696 | 162 | A15852 | A17150 | 255 |
| A15853 | A15855 | 232 | A15853 | A16115 | 265 |
| A15853 | A16566 | 401 | A15853 | A16608 | 174 |
| A15853 | A16690 | 171 | A15853 | A16774 | 322 |
| A15853 | A16829 | 291 | A15853 | A16868 | 357 |
| A15853 | A16905 | 366 | A15853 | A16944 | 307 |
| A15853 | A16954 | 474 | A15853 | A17211 | 288 |
| A15854 | A15855 | 663 | A15854 | A15943 | 172 |
| A15854 | A15947 | 196 | A15854 | A16064 | 281 |
| A15854 | A16157 | 285 | A15854 | A16187 | 188 |
| A15854 | A16261 | 182 | A15854 | A16552 | 159 |
| A15854 | A16565 | 281 | A15854 | A16566 | 246 |
| A15854 | A16567 | 269 | A15854 | A16597 | 373 |

|        |        |     |        |        |     |
|--------|--------|-----|--------|--------|-----|
| A15854 | A16611 | 318 | A15854 | A16675 | 238 |
| A15854 | A16691 | 286 | A15854 | A16693 | 296 |
| A15854 | A16695 | 299 | A15854 | A16764 | 285 |
| A15854 | A16807 | 174 | A15854 | A16808 | 278 |
| A15854 | A16829 | 240 | A15854 | A16866 | 163 |
| A15854 | A16905 | 185 | A15855 | A16343 | 218 |
| A15855 | A16552 | 491 | A15855 | A16565 | 404 |
| A15855 | A16566 | 294 | A15855 | A16597 | 491 |
| A15855 | A16611 | 190 | A15855 | A16664 | 168 |
| A15855 | A16675 | 491 | A15855 | A16680 | 152 |
| A15855 | A16693 | 218 | A15855 | A16697 | 286 |
| A15855 | A16774 | 195 | A15855 | A16776 | 165 |
| A15855 | A16829 | 451 | A15855 | A16905 | 486 |
| A15855 | A17014 | 328 | A15855 | A17030 | 299 |
| A15855 | A17190 | 374 | A15858 | A16068 | 454 |
| A15858 | A16402 | 353 | A15858 | A16626 | 462 |
| A15858 | A16635 | 180 | A15858 | A16748 | 329 |
| A15858 | A16760 | 461 | A15858 | A16761 | 350 |
| A15860 | A16116 | 281 | A15862 | A16989 | 441 |
| A15863 | A16724 | 199 | A15865 | A16009 | 436 |
| A15865 | A16308 | 483 | A15867 | A16218 | 187 |
| A15871 | A16405 | 375 | A15871 | A16463 | 445 |
| A15871 | A16579 | 398 | A15873 | A16831 | 391 |
| A15874 | A15905 | 446 | A15874 | A15970 | 353 |
| A15874 | A15985 | 363 | A15874 | A16026 | 327 |
| A15874 | A16027 | 456 | A15874 | A16033 | 213 |
| A15874 | A16262 | 326 | A15874 | A16286 | 201 |
| A15874 | A16344 | 156 | A15874 | A16529 | 479 |
| A15874 | A16739 | 489 | A15874 | A16741 | 491 |
| A15874 | A16744 | 490 | A15874 | A16757 | 350 |
| A15874 | A16959 | 475 | A15874 | A17036 | 234 |
| A15874 | A17040 | 413 | A15876 | A16068 | 226 |
| A15876 | A16127 | 276 | A15876 | A16626 | 157 |
| A15876 | A16748 | 367 | A15883 | A16101 | 438 |
| A15884 | A16004 | 363 | A15884 | A16287 | 408 |
| A15886 | A15902 | 479 | A15887 | A16216 | 229 |
| A15892 | A16027 | 291 | A15892 | A16566 | 367 |
| A15893 | A16433 | 481 | A15896 | A15960 | 413 |
| A15896 | A15992 | 312 | A15896 | A16038 | 344 |
| A15898 | A16075 | 390 | A15904 | A15957 | 427 |
| A15904 | A15999 | 462 | A15904 | A16001 | 435 |
| A15904 | A16310 | 477 | A15905 | A16026 | 480 |
| A15905 | A16027 | 488 | A15905 | A16028 | 252 |
| A15905 | A16048 | 160 | A15905 | A16103 | 260 |
| A15905 | A16346 | 434 | A15905 | A16741 | 202 |
| A15907 | A17078 | 334 | A15909 | A17061 | 400 |

|        |        |     |        |        |     |
|--------|--------|-----|--------|--------|-----|
| A15911 | A16005 | 400 | A15911 | A16113 | 229 |
| A15912 | A15962 | 151 | A15912 | A15964 | 208 |
| A15912 | A15976 | 286 | A15913 | A16518 | 435 |
| A15913 | A16519 | 430 | A15913 | A16636 | 401 |
| A15915 | A16004 | 413 | A15917 | A15918 | 236 |
| A15917 | A15923 | 442 | A15917 | A15931 | 80  |
| A15917 | A15932 | 621 | A15917 | A15937 | 334 |
| A15917 | A16072 | 460 | A15917 | A16086 | 285 |
| A15917 | A16088 | 563 | A15917 | A16095 | 475 |
| A15917 | A16096 | 483 | A15917 | A16145 | 156 |
| A15917 | A16149 | 180 | A15917 | A16151 | 218 |
| A15917 | A16307 | 156 | A15917 | A17078 | 458 |
| A15917 | A17156 | 202 | A15918 | A15920 | 491 |
| A15918 | A15923 | 567 | A15918 | A15928 | 452 |
| A15918 | A15931 | 491 | A15918 | A15932 | 490 |
| A15918 | A15933 | 491 | A15918 | A15936 | 243 |
| A15918 | A15937 | 577 | A15918 | A15950 | 257 |
| A15918 | A15951 | 475 | A15918 | A16072 | 200 |
| A15918 | A16088 | 568 | A15918 | A16095 | 384 |
| A15918 | A16096 | 480 | A15918 | A16145 | 156 |
| A15918 | A16307 | 156 | A15918 | A16768 | 310 |
| A15918 | A16811 | 286 | A15918 | A17208 | 340 |
| A15919 | A15923 | 277 | A15919 | A15952 | 414 |
| A15919 | A16088 | 87  | A15920 | A15931 | 617 |
| A15920 | A15932 | 452 | A15920 | A15933 | 490 |
| A15920 | A15936 | 438 | A15920 | A15937 | 618 |
| A15920 | A16088 | 270 | A15920 | A16197 | 458 |
| A15920 | A16218 | 574 | A15920 | A16464 | 299 |
| A15920 | A17140 | 172 | A15920 | A17208 | 240 |
| A15922 | A17030 | 259 | A15922 | A17040 | 156 |
| A15923 | A15924 | 380 | A15923 | A15931 | 449 |
| A15923 | A15933 | 428 | A15923 | A15937 | 247 |
| A15923 | A16072 | 427 | A15923 | A16086 | 208 |
| A15923 | A16088 | 312 | A15923 | A16092 | 296 |
| A15923 | A16095 | 269 | A15923 | A16096 | 473 |
| A15923 | A16145 | 207 | A15923 | A16164 | 321 |
| A15923 | A16307 | 156 | A15923 | A16650 | 483 |
| A15923 | A16768 | 358 | A15923 | A16811 | 479 |
| A15923 | A17140 | 191 | A15924 | A16088 | 238 |
| A15924 | A16164 | 436 | A15924 | A16768 | 372 |
| A15925 | A15934 | 491 | A15925 | A16418 | 205 |
| A15928 | A15931 | 401 | A15928 | A15932 | 165 |
| A15928 | A15933 | 352 | A15928 | A15936 | 367 |
| A15928 | A15937 | 329 | A15928 | A15951 | 358 |
| A15930 | A16281 | 152 | A15931 | A15932 | 430 |
| A15931 | A15933 | 491 | A15931 | A15936 | 351 |

|        |        |     |        |        |     |
|--------|--------|-----|--------|--------|-----|
| A15931 | A15937 | 619 | A15931 | A15940 | 475 |
| A15931 | A15950 | 272 | A15931 | A15951 | 234 |
| A15931 | A16072 | 90  | A15931 | A16086 | 246 |
| A15931 | A16088 | 491 | A15931 | A16092 | 484 |
| A15931 | A16095 | 347 | A15931 | A16096 | 424 |
| A15931 | A16156 | 267 | A15931 | A16164 | 307 |
| A15931 | A16191 | 104 | A15931 | A16204 | 274 |
| A15931 | A16218 | 620 | A15931 | A16246 | 274 |
| A15931 | A16249 | 274 | A15931 | A16250 | 274 |
| A15931 | A16464 | 607 | A15931 | A16650 | 262 |
| A15931 | A16764 | 171 | A15931 | A16768 | 491 |
| A15931 | A16783 | 274 | A15931 | A16811 | 174 |
| A15931 | A16841 | 241 | A15931 | A16930 | 183 |
| A15931 | A16973 | 258 | A15931 | A17026 | 160 |
| A15931 | A17134 | 432 | A15931 | A17140 | 330 |
| A15931 | A17208 | 424 | A15932 | A15933 | 545 |
| A15932 | A15936 | 177 | A15932 | A15937 | 419 |
| A15932 | A15951 | 490 | A15932 | A16088 | 314 |
| A15932 | A16096 | 226 | A15932 | A16097 | 241 |
| A15932 | A16105 | 224 | A15932 | A16157 | 332 |
| A15932 | A16202 | 252 | A15932 | A16243 | 266 |
| A15932 | A16272 | 456 | A15932 | A16318 | 160 |
| A15932 | A16437 | 284 | A15932 | A16446 | 160 |
| A15932 | A16585 | 160 | A15932 | A16587 | 346 |
| A15932 | A16611 | 160 | A15932 | A16664 | 243 |
| A15932 | A16691 | 187 | A15932 | A16695 | 205 |
| A15932 | A16707 | 252 | A15932 | A16788 | 268 |
| A15932 | A16815 | 196 | A15932 | A16823 | 200 |
| A15932 | A16824 | 187 | A15932 | A16866 | 165 |
| A15933 | A15936 | 235 | A15933 | A15937 | 205 |
| A15933 | A15951 | 943 | A15933 | A16072 | 190 |
| A15933 | A16088 | 330 | A15933 | A16096 | 380 |
| A15933 | A16097 | 293 | A15933 | A16272 | 460 |
| A15933 | A16318 | 249 | A15933 | A16437 | 160 |
| A15933 | A16446 | 160 | A15933 | A16585 | 160 |
| A15933 | A16811 | 278 | A15933 | A17140 | 213 |
| A15933 | A17208 | 333 | A15935 | A16537 | 191 |
| A15936 | A15937 | 483 | A15936 | A15951 | 364 |
| A15936 | A16252 | 425 | A15937 | A15951 | 324 |
| A15937 | A16088 | 229 | A15937 | A16096 | 172 |
| A15937 | A16145 | 156 | A15937 | A16218 | 614 |
| A15937 | A16307 | 156 | A15937 | A16464 | 368 |
| A15937 | A16671 | 362 | A15939 | A15941 | 352 |
| A15939 | A16127 | 481 | A15939 | A16128 | 491 |
| A15939 | A16129 | 321 | A15939 | A16225 | 141 |
| A15939 | A16226 | 358 | A15939 | A16294 | 110 |

|        |        |     |        |        |     |
|--------|--------|-----|--------|--------|-----|
| A15939 | A16378 | 183 | A15939 | A16613 | 480 |
| A15939 | A16616 | 302 | A15939 | A16646 | 124 |
| A15939 | A16754 | 335 | A15940 | A16157 | 385 |
| A15940 | A16187 | 475 | A15940 | A16215 | 327 |
| A15940 | A16218 | 157 | A15940 | A16261 | 274 |
| A15940 | A16597 | 428 | A15940 | A16608 | 213 |
| A15940 | A16611 | 324 | A15940 | A16664 | 243 |
| A15940 | A16675 | 210 | A15940 | A16680 | 230 |
| A15940 | A16690 | 210 | A15940 | A16699 | 294 |
| A15940 | A16714 | 414 | A15940 | A16774 | 347 |
| A15940 | A16776 | 329 | A15940 | A16815 | 358 |
| A15940 | A16824 | 353 | A15940 | A16866 | 258 |
| A15940 | A16905 | 278 | A15940 | A16944 | 334 |
| A15940 | A16954 | 308 | A15940 | A17012 | 314 |
| A15940 | A17030 | 329 | A15940 | A17033 | 321 |
| A15940 | A17156 | 229 | A15941 | A16127 | 491 |
| A15941 | A16128 | 491 | A15941 | A16129 | 480 |
| A15941 | A16225 | 286 | A15941 | A16226 | 489 |
| A15941 | A16294 | 491 | A15941 | A16452 | 414 |
| A15941 | A16606 | 347 | A15941 | A16612 | 491 |
| A15941 | A16613 | 488 | A15941 | A16616 | 490 |
| A15941 | A16626 | 391 | A15941 | A16646 | 491 |
| A15941 | A16754 | 486 | A15942 | A16132 | 256 |
| A15942 | A16294 | 221 | A15942 | A16452 | 307 |
| A15942 | A16612 | 374 | A15942 | A16613 | 182 |
| A15942 | A16646 | 361 | A15943 | A15944 | 255 |
| A15943 | A15945 | 534 | A15943 | A15946 | 534 |
| A15943 | A16067 | 255 | A15943 | A16093 | 255 |
| A15943 | A16109 | 552 | A15943 | A16144 | 320 |
| A15943 | A16187 | 224 | A15943 | A16261 | 217 |
| A15943 | A16565 | 185 | A15943 | A16690 | 279 |
| A15943 | A16703 | 234 | A15943 | A16764 | 188 |
| A15943 | A16790 | 258 | A15943 | A16806 | 326 |
| A15943 | A16824 | 313 | A15943 | A16866 | 199 |
| A15943 | A16905 | 221 | A15944 | A15945 | 450 |
| A15944 | A15946 | 396 | A15944 | A16067 | 569 |
| A15944 | A16089 | 291 | A15944 | A16093 | 578 |
| A15944 | A16109 | 255 | A15944 | A16144 | 255 |
| A15945 | A15946 | 594 | A15945 | A16067 | 554 |
| A15945 | A16093 | 255 | A15945 | A16109 | 576 |
| A15945 | A16144 | 585 | A15945 | A16635 | 185 |
| A15946 | A16067 | 569 | A15946 | A16093 | 275 |
| A15946 | A16109 | 518 | A15946 | A16144 | 595 |
| A15946 | A16212 | 491 | A15946 | A16215 | 156 |
| A15946 | A16774 | 187 | A15946 | A16815 | 205 |
| A15947 | A16311 | 246 | A15947 | A16463 | 247 |



|        |        |     |        |        |     |
|--------|--------|-----|--------|--------|-----|
| A15947 | A16611 | 156 | A15948 | A16872 | 224 |
| A15949 | A16099 | 184 | A15949 | A16123 | 561 |
| A15951 | A16105 | 386 | A15953 | A16088 | 117 |
| A15953 | A16095 | 401 | A15953 | A16096 | 402 |
| A15953 | A16151 | 479 | A15957 | A16310 | 435 |
| A15959 | A16073 | 322 | A15960 | A15962 | 313 |
| A15962 | A16006 | 488 | A15962 | A16008 | 475 |
| A15962 | A16216 | 462 | A15962 | A16520 | 440 |
| A15962 | A16831 | 193 | A15966 | A15979 | 399 |
| A15970 | A16103 | 486 | A15970 | A16286 | 307 |
| A15970 | A16766 | 177 | A15970 | A16968 | 439 |
| A15970 | A17001 | 441 | A15970 | A17007 | 411 |
| A15970 | A17041 | 413 | A15971 | A16360 | 63  |
| A15972 | A15973 | 425 | A15972 | A15974 | 313 |
| A15972 | A15978 | 422 | A15973 | A15974 | 463 |
| A15973 | A15978 | 475 | A15973 | A15979 | 407 |
| A15974 | A15978 | 480 | A15974 | A15979 | 260 |
| A15974 | A15986 | 441 | A15974 | A16002 | 324 |
| A15974 | A16073 | 312 | A15976 | A15985 | 274 |
| A15976 | A16216 | 477 | A15976 | A16334 | 441 |
| A15976 | A16579 | 360 | A15981 | A16527 | 364 |
| A15981 | A16904 | 199 | A15983 | A16511 | 414 |
| A15986 | A16002 | 483 | A15986 | A16034 | 479 |
| A15986 | A16073 | 576 | A15986 | A16362 | 335 |
| A15986 | A16441 | 305 | A15987 | A16023 | 63  |
| A15987 | A16216 | 200 | A15988 | A16118 | 369 |
| A15988 | A16306 | 212 | A15992 | A16636 | 224 |
| A15998 | A16282 | 63  | A15999 | A16282 | 441 |
| A15999 | A16310 | 466 | A16002 | A16034 | 491 |
| A16002 | A16073 | 578 | A16002 | A16099 | 170 |
| A16002 | A16103 | 196 | A16002 | A16362 | 436 |
| A16002 | A16441 | 356 | A16002 | A16571 | 352 |
| A16002 | A17036 | 200 | A16006 | A16008 | 485 |
| A16006 | A16831 | 271 | A16008 | A16037 | 401 |
| A16013 | A16121 | 296 | A16013 | A16424 | 390 |
| A16022 | A16113 | 405 | A16022 | A16445 | 210 |
| A16022 | A16447 | 411 | A16022 | A16467 | 180 |
| A16022 | A16521 | 358 | A16024 | A16316 | 457 |
| A16026 | A16027 | 488 | A16026 | A16028 | 402 |
| A16026 | A16262 | 399 | A16026 | A16325 | 346 |
| A16026 | A16328 | 162 | A16026 | A16529 | 163 |
| A16026 | A17040 | 218 | A16027 | A16028 | 358 |
| A16027 | A16477 | 463 | A16027 | A16529 | 307 |
| A16027 | A16533 | 466 | A16027 | A16741 | 434 |
| A16027 | A16959 | 168 | A16027 | A17006 | 245 |
| A16027 | A17078 | 260 | A16028 | A16371 | 288 |

|        |        |     |        |        |     |
|--------|--------|-----|--------|--------|-----|
| A16032 | A16221 | 452 | A16032 | A16454 | 452 |
| A16033 | A16361 | 412 | A16033 | A16375 | 450 |
| A16034 | A16073 | 382 | A16034 | A16362 | 465 |
| A16034 | A16571 | 409 | A16041 | A16300 | 247 |
| A16042 | A17195 | 353 | A16043 | A16138 | 491 |
| A16043 | A16174 | 401 | A16043 | A16721 | 480 |
| A16044 | A16224 | 346 | A16048 | A16283 | 306 |
| A16048 | A16284 | 389 | A16048 | A17123 | 436 |
| A16050 | A16268 | 436 | A16052 | A16396 | 417 |
| A16052 | A16537 | 399 | A16052 | A16626 | 257 |
| A16060 | A16291 | 151 | A16061 | A16522 | 386 |
| A16062 | A16738 | 360 | A16066 | A16634 | 200 |
| A16066 | A16919 | 200 | A16067 | A16093 | 584 |
| A16067 | A16109 | 478 | A16067 | A16144 | 277 |
| A16067 | A16597 | 249 | A16067 | A16611 | 177 |
| A16067 | A16664 | 245 | A16067 | A16675 | 201 |
| A16067 | A16682 | 216 | A16067 | A16704 | 180 |
| A16067 | A16790 | 196 | A16067 | A16824 | 260 |
| A16067 | A16838 | 184 | A16067 | A16944 | 232 |
| A16067 | A17133 | 201 | A16068 | A16069 | 353 |
| A16068 | A16099 | 456 | A16068 | A16101 | 412 |
| A16068 | A16400 | 208 | A16068 | A16402 | 266 |
| A16068 | A16423 | 285 | A16068 | A16626 | 491 |
| A16068 | A16635 | 483 | A16068 | A16725 | 260 |
| A16068 | A16731 | 278 | A16068 | A16740 | 266 |
| A16068 | A16748 | 232 | A16069 | A16626 | 307 |
| A16069 | A16635 | 363 | A16072 | A16075 | 490 |
| A16072 | A16086 | 398 | A16072 | A16088 | 143 |
| A16072 | A16096 | 468 | A16072 | A16464 | 313 |
| A16073 | A16324 | 199 | A16073 | A16400 | 277 |
| A16073 | A17097 | 480 | A16074 | A16274 | 489 |
| A16074 | A16771 | 457 | A16075 | A16086 | 460 |
| A16075 | A16092 | 348 | A16075 | A16094 | 404 |
| A16075 | A16202 | 373 | A16075 | A16464 | 396 |
| A16076 | A16299 | 491 | A16076 | A16426 | 490 |
| A16076 | A16469 | 294 | A16079 | A16716 | 63  |
| A16080 | A16764 | 326 | A16086 | A16088 | 98  |
| A16086 | A16094 | 401 | A16086 | A16096 | 198 |
| A16086 | A16151 | 411 | A16086 | A16196 | 401 |
| A16086 | A16202 | 441 | A16086 | A17134 | 270 |
| A16088 | A16095 | 491 | A16088 | A16096 | 477 |
| A16088 | A16104 | 201 | A16088 | A16106 | 201 |
| A16088 | A16145 | 156 | A16088 | A16149 | 491 |
| A16088 | A16164 | 443 | A16088 | A16218 | 775 |
| A16088 | A16302 | 373 | A16088 | A16307 | 156 |
| A16088 | A16464 | 227 | A16088 | A16633 | 183 |

|        |        |     |        |        |     |
|--------|--------|-----|--------|--------|-----|
| A16088 | A16768 | 318 | A16088 | A17088 | 276 |
| A16088 | A17156 | 486 | A16090 | A16091 | 382 |
| A16092 | A16145 | 408 | A16092 | A16156 | 402 |
| A16092 | A16218 | 296 | A16092 | A16464 | 455 |
| A16092 | A16650 | 307 | A16092 | A17137 | 317 |
| A16093 | A16109 | 255 | A16093 | A16144 | 321 |
| A16094 | A16202 | 441 | A16095 | A16096 | 484 |
| A16095 | A16149 | 490 | A16095 | A16151 | 256 |
| A16095 | A16164 | 310 | A16095 | A16218 | 343 |
| A16095 | A16811 | 310 | A16095 | A17156 | 469 |
| A16096 | A16151 | 260 | A16096 | A16293 | 154 |
| A16096 | A16650 | 451 | A16096 | A17140 | 436 |
| A16096 | A17156 | 489 | A16101 | A16626 | 377 |
| A16103 | A16262 | 353 | A16103 | A16286 | 409 |
| A16103 | A16741 | 177 | A16103 | A16767 | 425 |
| A16103 | A16852 | 386 | A16103 | A17001 | 443 |
| A16103 | A17007 | 316 | A16103 | A17041 | 414 |
| A16104 | A16208 | 435 | A16107 | A16778 | 335 |
| A16109 | A16144 | 479 | A16110 | A16126 | 425 |
| A16112 | A16718 | 362 | A16113 | A16292 | 396 |
| A16113 | A16373 | 443 | A16113 | A16381 | 486 |
| A16113 | A16393 | 205 | A16113 | A16432 | 491 |
| A16113 | A16481 | 394 | A16115 | A16690 | 187 |
| A16115 | A16774 | 332 | A16115 | A16829 | 302 |
| A16115 | A16868 | 366 | A16115 | A16905 | 257 |
| A16115 | A16944 | 318 | A16118 | A16631 | 173 |
| A16118 | A16686 | 162 | A16120 | A16904 | 172 |
| A16121 | A16424 | 266 | A16127 | A16128 | 491 |
| A16127 | A16129 | 491 | A16127 | A16130 | 144 |
| A16127 | A16134 | 477 | A16127 | A16225 | 477 |
| A16127 | A16226 | 491 | A16127 | A16294 | 491 |
| A16127 | A16452 | 88  | A16127 | A16606 | 480 |
| A16127 | A16612 | 483 | A16127 | A16613 | 491 |
| A16127 | A16616 | 245 | A16127 | A16626 | 491 |
| A16127 | A16646 | 491 | A16127 | A16754 | 489 |
| A16127 | A16762 | 483 | A16128 | A16129 | 491 |
| A16128 | A16130 | 330 | A16128 | A16134 | 479 |
| A16128 | A16225 | 463 | A16128 | A16226 | 491 |
| A16128 | A16294 | 491 | A16128 | A16378 | 484 |
| A16128 | A16452 | 243 | A16128 | A16606 | 491 |
| A16128 | A16612 | 479 | A16128 | A16613 | 491 |
| A16128 | A16616 | 481 | A16128 | A16626 | 483 |
| A16128 | A16646 | 488 | A16128 | A16656 | 255 |
| A16128 | A16754 | 491 | A16128 | A16762 | 485 |
| A16128 | A16830 | 115 | A16129 | A16130 | 176 |
| A16129 | A16134 | 429 | A16129 | A16225 | 149 |

|        |        |     |        |        |     |
|--------|--------|-----|--------|--------|-----|
| A16129 | A16226 | 491 | A16129 | A16294 | 107 |
| A16129 | A16378 | 422 | A16129 | A16606 | 235 |
| A16129 | A16613 | 480 | A16129 | A16616 | 467 |
| A16129 | A16626 | 388 | A16129 | A16646 | 463 |
| A16129 | A16656 | 195 | A16129 | A16754 | 290 |
| A16129 | A16762 | 433 | A16129 | A16830 | 457 |
| A16130 | A16226 | 377 | A16131 | A16214 | 424 |
| A16131 | A16738 | 486 | A16131 | A16764 | 281 |
| A16132 | A16612 | 152 | A16134 | A16225 | 468 |
| A16134 | A16226 | 413 | A16134 | A16606 | 348 |
| A16134 | A16613 | 330 | A16134 | A16754 | 96  |
| A16137 | A16300 | 205 | A16138 | A16174 | 407 |
| A16138 | A16721 | 454 | A16140 | A16168 | 452 |
| A16140 | A16169 | 452 | A16140 | A16172 | 452 |
| A16140 | A16175 | 452 | A16140 | A16178 | 452 |
| A16140 | A16179 | 452 | A16140 | A16184 | 452 |
| A16140 | A16185 | 452 | A16140 | A16186 | 452 |
| A16142 | A16264 | 447 | A16145 | A16218 | 483 |
| A16145 | A16307 | 156 | A16145 | A16768 | 488 |
| A16145 | A16931 | 458 | A16145 | A17140 | 443 |
| A16149 | A17156 | 223 | A16152 | A16875 | 269 |
| A16156 | A16164 | 398 | A16157 | A16187 | 457 |
| A16157 | A16215 | 184 | A16157 | A16243 | 475 |
| A16157 | A16261 | 435 | A16157 | A16322 | 296 |
| A16157 | A16343 | 362 | A16157 | A16387 | 202 |
| A16157 | A16552 | 490 | A16157 | A16565 | 490 |
| A16157 | A16566 | 394 | A16157 | A16567 | 408 |
| A16157 | A16585 | 213 | A16157 | A16587 | 485 |
| A16157 | A16597 | 490 | A16157 | A16608 | 337 |
| A16157 | A16611 | 491 | A16157 | A16652 | 358 |
| A16157 | A16664 | 491 | A16157 | A16675 | 488 |
| A16157 | A16676 | 483 | A16157 | A16680 | 485 |
| A16157 | A16682 | 310 | A16157 | A16684 | 316 |
| A16157 | A16690 | 479 | A16157 | A16691 | 419 |
| A16157 | A16692 | 283 | A16157 | A16693 | 362 |
| A16157 | A16695 | 425 | A16157 | A16697 | 174 |
| A16157 | A16699 | 270 | A16157 | A16701 | 198 |
| A16157 | A16703 | 470 | A16157 | A16704 | 484 |
| A16157 | A16706 | 247 | A16157 | A16707 | 395 |
| A16157 | A16708 | 196 | A16157 | A16709 | 157 |
| A16157 | A16764 | 475 | A16157 | A16774 | 414 |
| A16157 | A16776 | 438 | A16157 | A16788 | 299 |
| A16157 | A16790 | 466 | A16157 | A16797 | 340 |
| A16157 | A16799 | 205 | A16157 | A16806 | 241 |
| A16157 | A16815 | 422 | A16157 | A16824 | 353 |
| A16157 | A16829 | 433 | A16157 | A16838 | 485 |

|        |        |     |        |        |     |
|--------|--------|-----|--------|--------|-----|
| A16157 | A16858 | 268 | A16157 | A16866 | 449 |
| A16157 | A16874 | 455 | A16157 | A16882 | 276 |
| A16157 | A16900 | 326 | A16157 | A16905 | 404 |
| A16157 | A16908 | 260 | A16157 | A16913 | 344 |
| A16157 | A16942 | 213 | A16157 | A16944 | 193 |
| A16157 | A16954 | 425 | A16157 | A17012 | 165 |
| A16157 | A17014 | 213 | A16157 | A17015 | 351 |
| A16157 | A17018 | 177 | A16157 | A17019 | 247 |
| A16157 | A17030 | 185 | A16157 | A17033 | 390 |
| A16157 | A17035 | 249 | A16157 | A17043 | 236 |
| A16157 | A17125 | 188 | A16157 | A17133 | 429 |
| A16157 | A17144 | 285 | A16157 | A17146 | 249 |
| A16157 | A17211 | 388 | A16162 | A16274 | 425 |
| A16163 | A16732 | 413 | A16164 | A16218 | 252 |
| A16164 | A16768 | 408 | A16166 | A16167 | 441 |
| A16166 | A16190 | 441 | A16167 | A16190 | 427 |
| A16168 | A16169 | 452 | A16168 | A16172 | 452 |
| A16168 | A16175 | 452 | A16168 | A16178 | 452 |
| A16168 | A16179 | 452 | A16168 | A16184 | 452 |
| A16168 | A16185 | 452 | A16168 | A16186 | 452 |
| A16169 | A16172 | 452 | A16169 | A16175 | 452 |
| A16169 | A16178 | 452 | A16169 | A16179 | 452 |
| A16169 | A16184 | 452 | A16169 | A16185 | 452 |
| A16169 | A16186 | 452 | A16171 | A16174 | 480 |
| A16171 | A16195 | 467 | A16171 | A16721 | 425 |
| A16172 | A16175 | 452 | A16172 | A16178 | 452 |
| A16172 | A16179 | 452 | A16172 | A16184 | 452 |
| A16172 | A16185 | 452 | A16172 | A16186 | 452 |
| A16174 | A16195 | 466 | A16174 | A16721 | 422 |
| A16175 | A16178 | 452 | A16175 | A16179 | 452 |
| A16175 | A16184 | 452 | A16175 | A16185 | 452 |
| A16175 | A16186 | 452 | A16178 | A16179 | 452 |
| A16178 | A16184 | 452 | A16178 | A16185 | 452 |
| A16178 | A16186 | 452 | A16179 | A16184 | 452 |
| A16179 | A16185 | 452 | A16179 | A16186 | 452 |
| A16180 | A16181 | 452 | A16180 | A16182 | 452 |
| A16180 | A16183 | 452 | A16181 | A16182 | 452 |
| A16181 | A16183 | 452 | A16182 | A16183 | 452 |
| A16184 | A16185 | 452 | A16184 | A16186 | 452 |
| A16185 | A16186 | 452 | A16187 | A16215 | 294 |
| A16187 | A16243 | 286 | A16187 | A16261 | 360 |
| A16187 | A16343 | 334 | A16187 | A16552 | 329 |
| A16187 | A16565 | 462 | A16187 | A16585 | 318 |
| A16187 | A16587 | 439 | A16187 | A16597 | 408 |
| A16187 | A16608 | 168 | A16187 | A16611 | 463 |
| A16187 | A16663 | 218 | A16187 | A16664 | 443 |

|        |        |     |        |        |     |
|--------|--------|-----|--------|--------|-----|
| A16187 | A16675 | 299 | A16187 | A16680 | 398 |
| A16187 | A16690 | 299 | A16187 | A16691 | 324 |
| A16187 | A16695 | 337 | A16187 | A16697 | 286 |
| A16187 | A16699 | 375 | A16187 | A16703 | 249 |
| A16187 | A16764 | 205 | A16187 | A16774 | 318 |
| A16187 | A16776 | 296 | A16187 | A16788 | 374 |
| A16187 | A16815 | 420 | A16187 | A16824 | 324 |
| A16187 | A16838 | 380 | A16187 | A16866 | 216 |
| A16187 | A16905 | 236 | A16187 | A16913 | 318 |
| A16187 | A16954 | 386 | A16187 | A17018 | 290 |
| A16187 | A17030 | 296 | A16187 | A17035 | 241 |
| A16187 | A17211 | 283 | A16188 | A16247 | 441 |
| A16191 | A16205 | 485 | A16191 | A16244 | 474 |
| A16191 | A16811 | 383 | A16192 | A16224 | 299 |
| A16192 | A16711 | 339 | A16195 | A16721 | 422 |
| A16201 | A16218 | 200 | A16211 | A17041 | 63  |
| A16212 | A16829 | 215 | A16214 | A16738 | 328 |
| A16215 | A16261 | 288 | A16215 | A16597 | 262 |
| A16215 | A16611 | 208 | A16215 | A16664 | 258 |
| A16215 | A16675 | 227 | A16215 | A16680 | 246 |
| A16215 | A16690 | 419 | A16215 | A16699 | 307 |
| A16215 | A16774 | 357 | A16215 | A16815 | 367 |
| A16215 | A16866 | 273 | A16215 | A16887 | 380 |
| A16216 | A16334 | 398 | A16216 | A16433 | 167 |
| A16216 | A16722 | 143 | A16216 | A16904 | 434 |
| A16216 | A17078 | 369 | A16217 | A16520 | 240 |
| A16217 | A16831 | 474 | A16218 | A16301 | 269 |
| A16218 | A16464 | 600 | A16218 | A16768 | 491 |
| A16218 | A16925 | 447 | A16218 | A16933 | 335 |
| A16218 | A16992 | 335 | A16218 | A17134 | 418 |
| A16218 | A17135 | 260 | A16218 | A17140 | 489 |
| A16218 | A17208 | 305 | A16219 | A16531 | 223 |
| A16221 | A16454 | 452 | A16222 | A16738 | 489 |
| A16224 | A16711 | 353 | A16225 | A16294 | 241 |
| A16225 | A16331 | 249 | A16225 | A16606 | 311 |
| A16225 | A16612 | 149 | A16225 | A16613 | 293 |
| A16225 | A16754 | 123 | A16226 | A16331 | 258 |
| A16226 | A16378 | 488 | A16226 | A16606 | 491 |
| A16226 | A16613 | 491 | A16226 | A16616 | 491 |
| A16226 | A16626 | 486 | A16226 | A16646 | 457 |
| A16226 | A16754 | 489 | A16226 | A16830 | 162 |
| A16228 | A16269 | 351 | A16232 | A16233 | 441 |
| A16232 | A16235 | 404 | A16232 | A16238 | 417 |
| A16233 | A16234 | 390 | A16235 | A16236 | 416 |
| A16235 | A16237 | 457 | A16235 | A16238 | 416 |
| A16235 | A16239 | 425 | A16237 | A16239 | 430 |

|        |        |     |        |        |     |
|--------|--------|-----|--------|--------|-----|
| A16240 | A16241 | 447 | A16243 | A16565 | 251 |
| A16243 | A16587 | 314 | A16243 | A16611 | 332 |
| A16243 | A16676 | 480 | A16243 | A16680 | 238 |
| A16243 | A16691 | 357 | A16243 | A16738 | 154 |
| A16243 | A16764 | 255 | A16243 | A16788 | 396 |
| A16243 | A16815 | 362 | A16243 | A16824 | 357 |
| A16243 | A17146 | 395 | A16244 | A16811 | 424 |
| A16246 | A16249 | 452 | A16246 | A16250 | 452 |
| A16249 | A16250 | 452 | A16256 | A16328 | 294 |
| A16256 | A16738 | 377 | A16257 | A16635 | 154 |
| A16259 | A16492 | 436 | A16261 | A16552 | 218 |
| A16261 | A16565 | 402 | A16261 | A16566 | 286 |
| A16261 | A16587 | 436 | A16261 | A16597 | 404 |
| A16261 | A16611 | 363 | A16261 | A16664 | 461 |
| A16261 | A16675 | 291 | A16261 | A16680 | 394 |
| A16261 | A16682 | 283 | A16261 | A16684 | 380 |
| A16261 | A16690 | 425 | A16261 | A16692 | 379 |
| A16261 | A16695 | 333 | A16261 | A16699 | 249 |
| A16261 | A16704 | 372 | A16261 | A16707 | 362 |
| A16261 | A16764 | 330 | A16261 | A16774 | 313 |
| A16261 | A16790 | 267 | A16261 | A16815 | 326 |
| A16261 | A16838 | 255 | A16261 | A16866 | 340 |
| A16261 | A16874 | 389 | A16261 | A16900 | 296 |
| A16261 | A16905 | 230 | A16261 | A16913 | 313 |
| A16261 | A16954 | 267 | A16261 | A17015 | 236 |
| A16261 | A17211 | 278 | A16262 | A16529 | 467 |
| A16262 | A16741 | 152 | A16262 | A16766 | 428 |
| A16262 | A16836 | 306 | A16262 | A16959 | 465 |
| A16262 | A17007 | 201 | A16262 | A17040 | 351 |
| A16266 | A16291 | 299 | A16266 | A17227 | 63  |
| A16269 | A16834 | 274 | A16269 | A16893 | 63  |
| A16270 | A16738 | 328 | A16272 | A16318 | 544 |
| A16272 | A16437 | 539 | A16272 | A16446 | 160 |
| A16272 | A16585 | 160 | A16272 | A16629 | 63  |
| A16273 | A16280 | 469 | A16273 | A16473 | 419 |
| A16274 | A16445 | 179 | A16277 | A16286 | 391 |
| A16277 | A16419 | 409 | A16277 | A16529 | 383 |
| A16280 | A16473 | 408 | A16281 | A16416 | 347 |
| A16281 | A16515 | 308 | A16283 | A16284 | 486 |
| A16286 | A16335 | 477 | A16286 | A16419 | 452 |
| A16286 | A16529 | 432 | A16286 | A16739 | 286 |
| A16286 | A16766 | 151 | A16286 | A16767 | 321 |
| A16286 | A16968 | 353 | A16286 | A17041 | 491 |
| A16291 | A16696 | 265 | A16291 | A16793 | 367 |
| A16292 | A16381 | 357 | A16292 | A16429 | 323 |
| A16292 | A16432 | 324 | A16292 | A16451 | 419 |

|        |        |     |        |        |     |
|--------|--------|-----|--------|--------|-----|
| A16292 | A16455 | 419 | A16292 | A16456 | 408 |
| A16292 | A16486 | 408 | A16292 | A16506 | 419 |
| A16293 | A16298 | 243 | A16293 | A16580 | 379 |
| A16293 | A16627 | 486 | A16293 | A16696 | 468 |
| A16293 | A16822 | 485 | A16293 | A16860 | 188 |
| A16293 | A16879 | 257 | A16293 | A16947 | 272 |
| A16293 | A16973 | 294 | A16294 | A16452 | 313 |
| A16294 | A16612 | 491 | A16294 | A16613 | 144 |
| A16294 | A16626 | 162 | A16294 | A16646 | 486 |
| A16298 | A16580 | 319 | A16298 | A16627 | 249 |
| A16298 | A16822 | 226 | A16299 | A16426 | 491 |
| A16299 | A16469 | 484 | A16299 | A16470 | 369 |
| A16299 | A16600 | 288 | A16300 | A16443 | 157 |
| A16300 | A16864 | 205 | A16300 | A16960 | 185 |
| A16300 | A17081 | 205 | A16300 | A17082 | 311 |
| A16300 | A17120 | 281 | A16314 | A16459 | 468 |
| A16314 | A16546 | 430 | A16318 | A16437 | 335 |
| A16318 | A16446 | 402 | A16318 | A16585 | 160 |
| A16322 | A16364 | 104 | A16322 | A16466 | 485 |
| A16322 | A16552 | 171 | A16322 | A16565 | 159 |
| A16322 | A16587 | 235 | A16322 | A16611 | 227 |
| A16322 | A16665 | 279 | A16322 | A16680 | 274 |
| A16322 | A16693 | 302 | A16322 | A16774 | 283 |
| A16322 | A16776 | 259 | A16322 | A16829 | 369 |
| A16322 | A16874 | 243 | A16325 | A16328 | 483 |
| A16327 | A16331 | 63  | A16331 | A16606 | 191 |
| A16333 | A17088 | 404 | A16335 | A16746 | 339 |
| A16335 | A16852 | 345 | A16335 | A16968 | 470 |
| A16335 | A17007 | 249 | A16335 | A17040 | 174 |
| A16335 | A17041 | 485 | A16343 | A16552 | 450 |
| A16343 | A16565 | 449 | A16343 | A16597 | 307 |
| A16343 | A16611 | 460 | A16343 | A16664 | 303 |
| A16343 | A16675 | 277 | A16343 | A16697 | 363 |
| A16343 | A16703 | 340 | A16343 | A16704 | 346 |
| A16343 | A16764 | 308 | A16343 | A16824 | 388 |
| A16343 | A16829 | 438 | A16343 | A16874 | 362 |
| A16343 | A16913 | 384 | A16343 | A16954 | 356 |
| A16343 | A17018 | 367 | A16343 | A17019 | 398 |
| A16343 | A17035 | 334 | A16343 | A17211 | 363 |
| A16351 | A16457 | 480 | A16355 | A16741 | 224 |
| A16362 | A16441 | 390 | A16362 | A16571 | 435 |
| A16364 | A16466 | 144 | A16368 | A16529 | 274 |
| A16370 | A16821 | 348 | A16371 | A16531 | 407 |
| A16371 | A16896 | 423 | A16373 | A16381 | 414 |
| A16373 | A16432 | 396 | A16373 | A16481 | 447 |
| A16378 | A16606 | 208 | A16378 | A16613 | 422 |



|        |        |     |        |        |     |
|--------|--------|-----|--------|--------|-----|
| A16378 | A16754 | 338 | A16381 | A16432 | 473 |
| A16382 | A16476 | 63  | A16385 | A16386 | 447 |
| A16385 | A16413 | 63  | A16387 | A16552 | 185 |
| A16387 | A16682 | 346 | A16387 | A16764 | 391 |
| A16387 | A16908 | 389 | A16391 | A16573 | 302 |
| A16393 | A16429 | 251 | A16393 | A16434 | 375 |
| A16393 | A16891 | 399 | A16393 | A16910 | 439 |
| A16397 | A16429 | 249 | A16397 | A16530 | 390 |
| A16397 | A16891 | 291 | A16397 | A16910 | 769 |
| A16400 | A16626 | 484 | A16401 | A17063 | 238 |
| A16402 | A16626 | 200 | A16407 | A16847 | 362 |
| A16409 | A16962 | 398 | A16410 | A16560 | 337 |
| A16415 | A16575 | 429 | A16416 | A16515 | 445 |
| A16417 | A16418 | 486 | A16417 | A16422 | 63  |
| A16418 | A17007 | 375 | A16419 | A16529 | 446 |
| A16419 | A16767 | 429 | A16419 | A16959 | 394 |
| A16423 | A16626 | 221 | A16424 | A16916 | 215 |
| A16426 | A16600 | 383 | A16429 | A16434 | 491 |
| A16429 | A16451 | 409 | A16429 | A16455 | 409 |
| A16429 | A16456 | 396 | A16429 | A16486 | 396 |
| A16429 | A16506 | 409 | A16432 | A16459 | 377 |
| A16432 | A16481 | 409 | A16432 | A16546 | 372 |
| A16435 | A16444 | 63  | A16436 | A16963 | 479 |
| A16437 | A16446 | 160 | A16437 | A16585 | 160 |
| A16437 | A17146 | 241 | A16445 | A16567 | 311 |
| A16446 | A16585 | 160 | A16446 | A16671 | 386 |
| A16449 | A16702 | 276 | A16450 | A16810 | 477 |
| A16451 | A16455 | 452 | A16451 | A16456 | 447 |
| A16451 | A16486 | 447 | A16451 | A16506 | 452 |
| A16452 | A16612 | 480 | A16452 | A16646 | 483 |
| A16455 | A16456 | 447 | A16455 | A16486 | 447 |
| A16455 | A16506 | 452 | A16456 | A16486 | 441 |
| A16456 | A16506 | 447 | A16458 | A17063 | 173 |
| A16459 | A16546 | 477 | A16463 | A17063 | 240 |
| A16465 | A16801 | 347 | A16466 | A16665 | 314 |
| A16477 | A16533 | 485 | A16478 | A16807 | 491 |
| A16480 | A16607 | 436 | A16482 | A16483 | 440 |
| A16486 | A16506 | 447 | A16487 | A16975 | 430 |
| A16489 | A16503 | 458 | A16489 | A17096 | 441 |
| A16503 | A17096 | 430 | A16507 | A17078 | 278 |
| A16513 | A16527 | 446 | A16518 | A16519 | 438 |
| A16520 | A16831 | 443 | A16523 | A16823 | 398 |
| A16528 | A16529 | 461 | A16529 | A16766 | 221 |
| A16529 | A16959 | 491 | A16529 | A17040 | 224 |
| A16531 | A16753 | 438 | A16531 | A16761 | 306 |
| A16531 | A16769 | 398 | A16537 | A16659 | 449 |

|        |        |     |        |        |     |
|--------|--------|-----|--------|--------|-----|
| A16540 | A16541 | 449 | A16540 | A17105 | 361 |
| A16552 | A16565 | 490 | A16552 | A16566 | 296 |
| A16552 | A16567 | 188 | A16552 | A16585 | 198 |
| A16552 | A16587 | 446 | A16552 | A16597 | 490 |
| A16552 | A16608 | 374 | A16552 | A16611 | 488 |
| A16552 | A16664 | 486 | A16552 | A16675 | 491 |
| A16552 | A16680 | 469 | A16552 | A16682 | 293 |
| A16552 | A16684 | 302 | A16552 | A16690 | 463 |
| A16552 | A16691 | 208 | A16552 | A16692 | 263 |
| A16552 | A16693 | 350 | A16552 | A16695 | 419 |
| A16552 | A16697 | 290 | A16552 | A16699 | 249 |
| A16552 | A16702 | 260 | A16552 | A16703 | 475 |
| A16552 | A16704 | 475 | A16552 | A16707 | 272 |
| A16552 | A16709 | 364 | A16552 | A16764 | 455 |
| A16552 | A16766 | 432 | A16552 | A16774 | 198 |
| A16552 | A16776 | 385 | A16552 | A16790 | 364 |
| A16552 | A16799 | 188 | A16552 | A16806 | 419 |
| A16552 | A16824 | 208 | A16552 | A16829 | 452 |
| A16552 | A16838 | 441 | A16552 | A16858 | 373 |
| A16552 | A16859 | 286 | A16552 | A16866 | 416 |
| A16552 | A16874 | 285 | A16552 | A16875 | 263 |
| A16552 | A16897 | 286 | A16552 | A16900 | 310 |
| A16552 | A16905 | 481 | A16552 | A16908 | 245 |
| A16552 | A16913 | 441 | A16552 | A16944 | 391 |
| A16552 | A16954 | 364 | A16552 | A17014 | 329 |
| A16552 | A17015 | 232 | A16552 | A17018 | 380 |
| A16552 | A17019 | 232 | A16552 | A17030 | 430 |
| A16552 | A17033 | 157 | A16552 | A17035 | 229 |
| A16552 | A17043 | 350 | A16552 | A17071 | 462 |
| A16552 | A17125 | 173 | A16552 | A17190 | 424 |
| A16552 | A17211 | 374 | A16562 | A17052 | 452 |
| A16565 | A16566 | 377 | A16565 | A16567 | 391 |
| A16565 | A16585 | 286 | A16565 | A16587 | 477 |
| A16565 | A16597 | 480 | A16565 | A16608 | 353 |
| A16565 | A16611 | 489 | A16565 | A16652 | 278 |
| A16565 | A16663 | 179 | A16565 | A16664 | 483 |
| A16565 | A16675 | 483 | A16565 | A16680 | 473 |
| A16565 | A16684 | 364 | A16565 | A16690 | 475 |
| A16565 | A16691 | 401 | A16565 | A16692 | 420 |
| A16565 | A16693 | 407 | A16565 | A16695 | 408 |
| A16565 | A16697 | 372 | A16565 | A16699 | 347 |
| A16565 | A16701 | 273 | A16565 | A16702 | 353 |
| A16565 | A16703 | 465 | A16565 | A16704 | 449 |
| A16565 | A16709 | 236 | A16565 | A16712 | 489 |
| A16565 | A16764 | 468 | A16565 | A16774 | 286 |
| A16565 | A16776 | 262 | A16565 | A16788 | 353 |

|        |        |     |        |        |     |
|--------|--------|-----|--------|--------|-----|
| A16565 | A16790 | 424 | A16565 | A16802 | 196 |
| A16565 | A16806 | 408 | A16565 | A16815 | 302 |
| A16565 | A16824 | 296 | A16565 | A16829 | 430 |
| A16565 | A16838 | 418 | A16565 | A16866 | 434 |
| A16565 | A16874 | 429 | A16565 | A16900 | 269 |
| A16565 | A16905 | 483 | A16565 | A16913 | 286 |
| A16565 | A16944 | 436 | A16565 | A16954 | 362 |
| A16565 | A17012 | 243 | A16565 | A17014 | 286 |
| A16565 | A17015 | 337 | A16565 | A17018 | 490 |
| A16565 | A17030 | 380 | A16565 | A17035 | 334 |
| A16565 | A17133 | 241 | A16565 | A17144 | 232 |
| A16565 | A17211 | 371 | A16566 | A16567 | 430 |
| A16566 | A16587 | 319 | A16566 | A16597 | 259 |
| A16566 | A16611 | 337 | A16566 | A16664 | 255 |
| A16566 | A16675 | 352 | A16566 | A16680 | 367 |
| A16566 | A16682 | 332 | A16566 | A16691 | 361 |
| A16566 | A16693 | 367 | A16566 | A16695 | 441 |
| A16566 | A16701 | 345 | A16566 | A16704 | 306 |
| A16566 | A16707 | 391 | A16566 | A16764 | 260 |
| A16566 | A16766 | 183 | A16566 | A16788 | 398 |
| A16566 | A16802 | 286 | A16566 | A16829 | 329 |
| A16566 | A16874 | 327 | A16566 | A16913 | 433 |
| A16567 | A16611 | 230 | A16567 | A16675 | 429 |
| A16567 | A16680 | 267 | A16567 | A16691 | 374 |
| A16567 | A16693 | 380 | A16567 | A16695 | 382 |
| A16567 | A16701 | 360 | A16567 | A16764 | 283 |
| A16567 | A16874 | 343 | A16567 | A17133 | 339 |
| A16573 | A17147 | 490 | A16574 | A16576 | 63  |
| A16575 | A17208 | 241 | A16580 | A16627 | 480 |
| A16580 | A16632 | 435 | A16580 | A16879 | 456 |
| A16580 | A16885 | 398 | A16580 | A16947 | 340 |
| A16585 | A16587 | 343 | A16585 | A16611 | 238 |
| A16585 | A16663 | 301 | A16585 | A16664 | 285 |
| A16585 | A16695 | 385 | A16587 | A16597 | 424 |
| A16587 | A16611 | 485 | A16587 | A16663 | 254 |
| A16587 | A16664 | 485 | A16587 | A16675 | 408 |
| A16587 | A16680 | 480 | A16587 | A16682 | 317 |
| A16587 | A16684 | 399 | A16587 | A16690 | 462 |
| A16587 | A16691 | 430 | A16587 | A16692 | 401 |
| A16587 | A16695 | 463 | A16587 | A16697 | 314 |
| A16587 | A16699 | 288 | A16587 | A16703 | 283 |
| A16587 | A16704 | 443 | A16587 | A16706 | 362 |
| A16587 | A16707 | 469 | A16587 | A16708 | 330 |
| A16587 | A16762 | 208 | A16587 | A16764 | 241 |
| A16587 | A16788 | 390 | A16587 | A16790 | 303 |
| A16587 | A16797 | 411 | A16587 | A16815 | 353 |

|        |        |     |        |        |     |
|--------|--------|-----|--------|--------|-----|
| A16587 | A16866 | 251 | A16587 | A16874 | 312 |
| A16587 | A16882 | 378 | A16587 | A16900 | 329 |
| A16587 | A16905 | 271 | A16587 | A16913 | 343 |
| A16587 | A16942 | 343 | A16587 | A16944 | 329 |
| A16587 | A16954 | 303 | A16587 | A17211 | 313 |
| A16597 | A16608 | 441 | A16597 | A16611 | 489 |
| A16597 | A16652 | 279 | A16597 | A16664 | 489 |
| A16597 | A16675 | 491 | A16597 | A16680 | 481 |
| A16597 | A16682 | 374 | A16597 | A16684 | 366 |
| A16597 | A16690 | 480 | A16597 | A16692 | 230 |
| A16597 | A16695 | 311 | A16597 | A16699 | 219 |
| A16597 | A16703 | 465 | A16597 | A16704 | 480 |
| A16597 | A16707 | 344 | A16597 | A16709 | 424 |
| A16597 | A16764 | 468 | A16597 | A16774 | 288 |
| A16597 | A16776 | 380 | A16597 | A16790 | 469 |
| A16597 | A16799 | 281 | A16597 | A16806 | 311 |
| A16597 | A16807 | 187 | A16597 | A16808 | 160 |
| A16597 | A16815 | 302 | A16597 | A16824 | 401 |
| A16597 | A16829 | 373 | A16597 | A16838 | 467 |
| A16597 | A16858 | 420 | A16597 | A16859 | 353 |
| A16597 | A16866 | 457 | A16597 | A16874 | 249 |
| A16597 | A16900 | 385 | A16597 | A16905 | 479 |
| A16597 | A16913 | 465 | A16597 | A16944 | 385 |
| A16597 | A16954 | 454 | A16597 | A17012 | 245 |
| A16597 | A17014 | 288 | A16597 | A17015 | 207 |
| A16597 | A17018 | 432 | A16597 | A17030 | 435 |
| A16597 | A17033 | 430 | A16597 | A17035 | 204 |
| A16597 | A17043 | 307 | A16597 | A17125 | 267 |
| A16597 | A17190 | 430 | A16597 | A17211 | 371 |
| A16601 | A16738 | 235 | A16606 | A16613 | 489 |
| A16606 | A16616 | 243 | A16606 | A16626 | 413 |
| A16606 | A16754 | 401 | A16608 | A16611 | 291 |
| A16608 | A16664 | 254 | A16608 | A16675 | 314 |
| A16608 | A16689 | 279 | A16608 | A16690 | 210 |
| A16608 | A16702 | 193 | A16608 | A16703 | 313 |
| A16608 | A16709 | 205 | A16608 | A16724 | 208 |
| A16608 | A16776 | 230 | A16608 | A16790 | 205 |
| A16608 | A16806 | 441 | A16608 | A16827 | 343 |
| A16608 | A16838 | 324 | A16608 | A16858 | 306 |
| A16608 | A16859 | 332 | A16608 | A16875 | 196 |
| A16608 | A16905 | 384 | A16608 | A16913 | 259 |
| A16608 | A16954 | 335 | A16608 | A17015 | 172 |
| A16608 | A17018 | 224 | A16608 | A17030 | 358 |
| A16608 | A17033 | 348 | A16608 | A17035 | 168 |
| A16608 | A17190 | 416 | A16611 | A16652 | 424 |
| A16611 | A16664 | 490 | A16611 | A16675 | 488 |

|        |        |     |        |        |     |
|--------|--------|-----|--------|--------|-----|
| A16611 | A16680 | 483 | A16611 | A16682 | 202 |
| A16611 | A16684 | 333 | A16611 | A16690 | 467 |
| A16611 | A16691 | 429 | A16611 | A16692 | 176 |
| A16611 | A16693 | 434 | A16611 | A16695 | 435 |
| A16611 | A16697 | 332 | A16611 | A16699 | 297 |
| A16611 | A16702 | 174 | A16611 | A16703 | 475 |
| A16611 | A16704 | 468 | A16611 | A16706 | 385 |
| A16611 | A16707 | 408 | A16611 | A16708 | 221 |
| A16611 | A16709 | 184 | A16611 | A16764 | 467 |
| A16611 | A16774 | 454 | A16611 | A16776 | 341 |
| A16611 | A16788 | 414 | A16611 | A16790 | 436 |
| A16611 | A16797 | 356 | A16611 | A16799 | 230 |
| A16611 | A16802 | 273 | A16611 | A16806 | 266 |
| A16611 | A16815 | 432 | A16611 | A16824 | 429 |
| A16611 | A16829 | 473 | A16611 | A16838 | 388 |
| A16611 | A16858 | 288 | A16611 | A16866 | 249 |
| A16611 | A16874 | 441 | A16611 | A16882 | 296 |
| A16611 | A16900 | 218 | A16611 | A16905 | 462 |
| A16611 | A16913 | 363 | A16611 | A16942 | 238 |
| A16611 | A16944 | 218 | A16611 | A16954 | 436 |
| A16611 | A17012 | 191 | A16611 | A17014 | 238 |
| A16611 | A17015 | 283 | A16611 | A17017 | 184 |
| A16611 | A17018 | 335 | A16611 | A17019 | 271 |
| A16611 | A17030 | 341 | A16611 | A17033 | 199 |
| A16611 | A17133 | 399 | A16611 | A17144 | 177 |
| A16611 | A17190 | 198 | A16611 | A17211 | 329 |
| A16612 | A16613 | 85  | A16612 | A16616 | 177 |
| A16612 | A16646 | 490 | A16613 | A16616 | 465 |
| A16613 | A16626 | 245 | A16613 | A16646 | 430 |
| A16613 | A16754 | 491 | A16613 | A16830 | 210 |
| A16616 | A16646 | 159 | A16616 | A16754 | 491 |
| A16617 | A16652 | 266 | A16623 | A16802 | 480 |
| A16623 | A16907 | 302 | A16626 | A16635 | 477 |
| A16626 | A16643 | 317 | A16626 | A16646 | 188 |
| A16626 | A16725 | 327 | A16626 | A16736 | 205 |
| A16626 | A16760 | 188 | A16626 | A16761 | 472 |
| A16626 | A16769 | 176 | A16626 | A16770 | 307 |
| A16627 | A16632 | 468 | A16627 | A16696 | 240 |
| A16627 | A16768 | 152 | A16627 | A16822 | 382 |
| A16627 | A16879 | 491 | A16627 | A16947 | 488 |
| A16627 | A16970 | 333 | A16627 | A16973 | 299 |
| A16632 | A16879 | 489 | A16632 | A16947 | 483 |
| A16632 | A16970 | 480 | A16634 | A16843 | 329 |
| A16634 | A16919 | 200 | A16635 | A16761 | 277 |
| A16635 | A16769 | 260 | A16635 | A16964 | 293 |
| A16636 | A17079 | 224 | A16636 | A17155 | 356 |

|        |        |     |        |        |     |
|--------|--------|-----|--------|--------|-----|
| A16636 | A17230 | 193 | A16638 | A16869 | 63  |
| A16646 | A16670 | 338 | A16646 | A16754 | 105 |
| A16646 | A16830 | 263 | A16646 | A16905 | 174 |
| A16646 | A17144 | 207 | A16650 | A16768 | 277 |
| A16650 | A17140 | 446 | A16652 | A16664 | 367 |
| A16652 | A16703 | 196 | A16652 | A16704 | 335 |
| A16652 | A16790 | 350 | A16652 | A16838 | 208 |
| A16652 | A16866 | 160 | A16652 | A16905 | 316 |
| A16652 | A17144 | 216 | A16656 | A16762 | 270 |
| A16663 | A16664 | 177 | A16663 | A16695 | 322 |
| A16664 | A16674 | 491 | A16664 | A16675 | 480 |
| A16664 | A16680 | 481 | A16664 | A16682 | 373 |
| A16664 | A16684 | 363 | A16664 | A16690 | 469 |
| A16664 | A16692 | 355 | A16664 | A16695 | 450 |
| A16664 | A16697 | 249 | A16664 | A16699 | 346 |
| A16664 | A16702 | 224 | A16664 | A16703 | 446 |
| A16664 | A16704 | 449 | A16664 | A16707 | 427 |
| A16664 | A16709 | 234 | A16664 | A16764 | 382 |
| A16664 | A16774 | 395 | A16664 | A16776 | 378 |
| A16664 | A16790 | 468 | A16664 | A16799 | 278 |
| A16664 | A16807 | 317 | A16664 | A16815 | 404 |
| A16664 | A16824 | 400 | A16664 | A16829 | 249 |
| A16664 | A16838 | 450 | A16664 | A16858 | 328 |
| A16664 | A16866 | 307 | A16664 | A16874 | 428 |
| A16664 | A16900 | 383 | A16664 | A16905 | 404 |
| A16664 | A16913 | 395 | A16664 | A16944 | 267 |
| A16664 | A16954 | 360 | A16664 | A17015 | 335 |
| A16664 | A17018 | 254 | A16664 | A17030 | 260 |
| A16664 | A17035 | 332 | A16664 | A17144 | 356 |
| A16664 | A17211 | 369 | A16675 | A16680 | 467 |
| A16675 | A16690 | 480 | A16675 | A16691 | 382 |
| A16675 | A16692 | 327 | A16675 | A16693 | 390 |
| A16675 | A16695 | 281 | A16675 | A16699 | 183 |
| A16675 | A16701 | 241 | A16675 | A16703 | 457 |
| A16675 | A16704 | 396 | A16675 | A16706 | 286 |
| A16675 | A16708 | 238 | A16675 | A16709 | 201 |
| A16675 | A16764 | 355 | A16675 | A16774 | 375 |
| A16675 | A16776 | 229 | A16675 | A16790 | 443 |
| A16675 | A16797 | 366 | A16675 | A16799 | 247 |
| A16675 | A16802 | 160 | A16675 | A16806 | 281 |
| A16675 | A16815 | 273 | A16675 | A16824 | 266 |
| A16675 | A16827 | 210 | A16675 | A16829 | 449 |
| A16675 | A16838 | 188 | A16675 | A16858 | 303 |
| A16675 | A16866 | 446 | A16675 | A16874 | 343 |
| A16675 | A16882 | 311 | A16675 | A16905 | 452 |
| A16675 | A16913 | 375 | A16675 | A16944 | 362 |

|        |        |     |        |        |     |
|--------|--------|-----|--------|--------|-----|
| A16675 | A16954 | 201 | A16675 | A17018 | 417 |
| A16675 | A17030 | 356 | A16675 | A17035 | 167 |
| A16675 | A17043 | 277 | A16675 | A17125 | 232 |
| A16675 | A17133 | 338 | A16675 | A17190 | 346 |
| A16675 | A17211 | 215 | A16676 | A17146 | 408 |
| A16680 | A16682 | 241 | A16680 | A16684 | 357 |
| A16680 | A16690 | 335 | A16680 | A16691 | 283 |
| A16680 | A16692 | 215 | A16680 | A16693 | 294 |
| A16680 | A16695 | 297 | A16680 | A16697 | 238 |
| A16680 | A16699 | 335 | A16680 | A16701 | 260 |
| A16680 | A16704 | 337 | A16680 | A16707 | 334 |
| A16680 | A16709 | 223 | A16680 | A16762 | 241 |
| A16680 | A16764 | 283 | A16680 | A16774 | 388 |
| A16680 | A16776 | 249 | A16680 | A16788 | 344 |
| A16680 | A16790 | 223 | A16680 | A16815 | 398 |
| A16680 | A16829 | 362 | A16680 | A16838 | 210 |
| A16680 | A16874 | 423 | A16680 | A16900 | 375 |
| A16680 | A16905 | 183 | A16680 | A16913 | 388 |
| A16680 | A16944 | 256 | A16680 | A16954 | 223 |
| A16680 | A17018 | 241 | A16680 | A17030 | 249 |
| A16680 | A17133 | 227 | A16680 | A17190 | 235 |
| A16680 | A17211 | 235 | A16682 | A16695 | 368 |
| A16682 | A16704 | 303 | A16682 | A16707 | 391 |
| A16682 | A16807 | 276 | A16682 | A16824 | 358 |
| A16682 | A16908 | 378 | A16682 | A16913 | 353 |
| A16684 | A16690 | 344 | A16684 | A16692 | 395 |
| A16684 | A16704 | 391 | A16684 | A16764 | 367 |
| A16684 | A16874 | 401 | A16684 | A16900 | 409 |
| A16684 | A16954 | 398 | A16684 | A17211 | 402 |
| A16689 | A16724 | 489 | A16689 | A16827 | 483 |
| A16689 | A16875 | 247 | A16690 | A16691 | 265 |
| A16690 | A16692 | 327 | A16690 | A16695 | 281 |
| A16690 | A16699 | 182 | A16690 | A16703 | 457 |
| A16690 | A16704 | 458 | A16690 | A16706 | 286 |
| A16690 | A16707 | 319 | A16690 | A16708 | 238 |
| A16690 | A16764 | 353 | A16690 | A16774 | 374 |
| A16690 | A16790 | 407 | A16690 | A16797 | 366 |
| A16690 | A16799 | 247 | A16690 | A16802 | 160 |
| A16690 | A16806 | 391 | A16690 | A16815 | 272 |
| A16690 | A16824 | 265 | A16690 | A16829 | 217 |
| A16690 | A16838 | 188 | A16690 | A16858 | 302 |
| A16690 | A16866 | 745 | A16690 | A16868 | 302 |
| A16690 | A16874 | 213 | A16690 | A16882 | 311 |
| A16690 | A16900 | 235 | A16690 | A16905 | 452 |
| A16690 | A16944 | 454 | A16690 | A16954 | 201 |
| A16690 | A17015 | 168 | A16690 | A17018 | 221 |

|        |        |     |        |        |     |
|--------|--------|-----|--------|--------|-----|
| A16690 | A17019 | 286 | A16690 | A17033 | 217 |
| A16690 | A17125 | 232 | A16690 | A17144 | 196 |
| A16690 | A17190 | 215 | A16690 | A17211 | 213 |
| A16691 | A16693 | 388 | A16691 | A16695 | 470 |
| A16691 | A16706 | 393 | A16691 | A16708 | 369 |
| A16691 | A16738 | 205 | A16691 | A16764 | 299 |
| A16691 | A16788 | 413 | A16691 | A16797 | 429 |
| A16691 | A16815 | 385 | A16691 | A16882 | 404 |
| A16692 | A16704 | 283 | A16692 | A16709 | 296 |
| A16692 | A16764 | 232 | A16692 | A16790 | 296 |
| A16692 | A16799 | 330 | A16692 | A16806 | 353 |
| A16692 | A16866 | 367 | A16692 | A16874 | 306 |
| A16692 | A16900 | 323 | A16692 | A16905 | 263 |
| A16692 | A16954 | 296 | A16692 | A17030 | 318 |
| A16692 | A17211 | 307 | A16693 | A16695 | 395 |
| A16693 | A16702 | 350 | A16693 | A16703 | 340 |
| A16693 | A16706 | 398 | A16693 | A16764 | 308 |
| A16693 | A16774 | 446 | A16693 | A16829 | 363 |
| A16693 | A16944 | 374 | A16693 | A17012 | 360 |
| A16693 | A17017 | 356 | A16694 | A16707 | 385 |
| A16695 | A16704 | 348 | A16695 | A16707 | 460 |
| A16695 | A16764 | 313 | A16695 | A16913 | 385 |
| A16696 | A16822 | 465 | A16697 | A16699 | 299 |
| A16697 | A16829 | 324 | A16699 | A16702 | 279 |
| A16699 | A16764 | 221 | A16699 | A16774 | 329 |
| A16699 | A16815 | 341 | A16699 | A16905 | 252 |
| A16699 | A16944 | 314 | A16699 | A17012 | 293 |
| A16701 | A16795 | 440 | A16701 | A16874 | 339 |
| A16701 | A17015 | 408 | A16702 | A16703 | 386 |
| A16702 | A16706 | 356 | A16702 | A16764 | 230 |
| A16702 | A16774 | 335 | A16702 | A16838 | 283 |
| A16702 | A16905 | 260 | A16702 | A16944 | 416 |
| A16702 | A17012 | 404 | A16702 | A17015 | 267 |
| A16702 | A17017 | 294 | A16702 | A17035 | 265 |
| A16703 | A16704 | 267 | A16703 | A16706 | 347 |
| A16703 | A16709 | 281 | A16703 | A16764 | 216 |
| A16703 | A16774 | 324 | A16703 | A16790 | 393 |
| A16703 | A16802 | 245 | A16703 | A16806 | 428 |
| A16703 | A16824 | 422 | A16703 | A16838 | 271 |
| A16703 | A16866 | 226 | A16703 | A16905 | 428 |
| A16703 | A16913 | 324 | A16703 | A16944 | 408 |
| A16703 | A16954 | 281 | A16703 | A17012 | 288 |
| A16703 | A17015 | 254 | A16703 | A17017 | 281 |
| A16703 | A17018 | 299 | A16703 | A17033 | 294 |
| A16703 | A17035 | 372 | A16703 | A17043 | 340 |
| A16703 | A17211 | 291 | A16704 | A16707 | 374 |



|        |        |     |        |        |     |
|--------|--------|-----|--------|--------|-----|
| A16704 | A16764 | 352 | A16704 | A16790 | 396 |
| A16704 | A16799 | 324 | A16704 | A16829 | 301 |
| A16704 | A16838 | 390 | A16704 | A16858 | 363 |
| A16704 | A16866 | 360 | A16704 | A16874 | 297 |
| A16704 | A16900 | 316 | A16704 | A16905 | 374 |
| A16704 | A16913 | 330 | A16704 | A16944 | 413 |
| A16704 | A16954 | 288 | A16704 | A17014 | 330 |
| A16704 | A17015 | 260 | A16704 | A17019 | 352 |
| A16704 | A17125 | 313 | A16704 | A17211 | 299 |
| A16706 | A16708 | 469 | A16706 | A16774 | 388 |
| A16706 | A16797 | 434 | A16706 | A16807 | 330 |
| A16706 | A16882 | 412 | A16706 | A16944 | 379 |
| A16706 | A17012 | 366 | A16706 | A17017 | 362 |
| A16707 | A16913 | 405 | A16707 | A16942 | 405 |
| A16708 | A16797 | 422 | A16708 | A16807 | 475 |
| A16708 | A16882 | 394 | A16709 | A16776 | 323 |
| A16709 | A16799 | 335 | A16709 | A16829 | 313 |
| A16709 | A16874 | 311 | A16709 | A16905 | 385 |
| A16709 | A16913 | 341 | A16709 | A17018 | 318 |
| A16709 | A17030 | 416 | A16709 | A17035 | 274 |
| A16709 | A17043 | 356 | A16709 | A17190 | 313 |
| A16711 | A17104 | 406 | A16711 | A17110 | 63  |
| A16712 | A17018 | 490 | A16714 | A16824 | 429 |
| A16714 | A16905 | 398 | A16714 | A16944 | 420 |
| A16722 | A17198 | 198 | A16724 | A16827 | 208 |
| A16724 | A17102 | 188 | A16727 | A16728 | 63  |
| A16729 | A16738 | 301 | A16731 | A16742 | 413 |
| A16734 | A16735 | 422 | A16735 | A16738 | 269 |
| A16738 | A16745 | 328 | A16738 | A16763 | 276 |
| A16738 | A16764 | 491 | A16738 | A16788 | 283 |
| A16738 | A16815 | 213 | A16739 | A16741 | 491 |
| A16739 | A16743 | 408 | A16739 | A16744 | 491 |
| A16739 | A16757 | 394 | A16741 | A16743 | 340 |
| A16741 | A16744 | 491 | A16741 | A16746 | 267 |
| A16741 | A16887 | 259 | A16741 | A17007 | 286 |
| A16744 | A16757 | 396 | A16746 | A17041 | 374 |
| A16749 | A16780 | 435 | A16760 | A16761 | 395 |
| A16761 | A16769 | 390 | A16762 | A16776 | 234 |
| A16762 | A16807 | 156 | A16764 | A16790 | 240 |
| A16764 | A16799 | 283 | A16764 | A16824 | 299 |
| A16764 | A16829 | 255 | A16764 | A16838 | 419 |
| A16764 | A16858 | 332 | A16764 | A16866 | 313 |
| A16764 | A16874 | 372 | A16764 | A16900 | 386 |
| A16764 | A16905 | 407 | A16764 | A16944 | 273 |
| A16764 | A16954 | 364 | A16764 | A17012 | 246 |
| A16764 | A17033 | 255 | A16764 | A17211 | 252 |

|        |        |     |        |        |     |
|--------|--------|-----|--------|--------|-----|
| A16766 | A16788 | 301 | A16766 | A16829 | 177 |
| A16766 | A16836 | 270 | A16766 | A17007 | 159 |
| A16766 | A17041 | 162 | A16767 | A16896 | 372 |
| A16767 | A17041 | 329 | A16767 | A17089 | 293 |
| A16768 | A16925 | 276 | A16768 | A16933 | 372 |
| A16768 | A17140 | 347 | A16768 | A17208 | 235 |
| A16774 | A16815 | 469 | A16774 | A16829 | 430 |
| A16774 | A16868 | 396 | A16774 | A16905 | 314 |
| A16774 | A16937 | 385 | A16774 | A16944 | 436 |
| A16774 | A17012 | 346 | A16774 | A17017 | 341 |
| A16776 | A16807 | 283 | A16776 | A16829 | 422 |
| A16776 | A16874 | 329 | A16776 | A16905 | 293 |
| A16776 | A16913 | 358 | A16776 | A16954 | 323 |
| A16776 | A17018 | 335 | A16776 | A17030 | 425 |
| A16776 | A17144 | 319 | A16776 | A17190 | 332 |
| A16788 | A16802 | 371 | A16788 | A16815 | 416 |
| A16788 | A16829 | 396 | A16790 | A16806 | 358 |
| A16790 | A16824 | 347 | A16790 | A16829 | 313 |
| A16790 | A16838 | 445 | A16790 | A16866 | 372 |
| A16790 | A16905 | 385 | A16790 | A16944 | 328 |
| A16790 | A16954 | 302 | A16790 | A17033 | 313 |
| A16793 | A16837 | 332 | A16797 | A16882 | 440 |
| A16798 | A17005 | 441 | A16799 | A16858 | 394 |
| A16800 | A16957 | 63  | A16802 | A16829 | 281 |
| A16802 | A16865 | 396 | A16802 | A16907 | 484 |
| A16803 | A16920 | 469 | A16804 | A17034 | 416 |
| A16806 | A16824 | 390 | A16806 | A16858 | 407 |
| A16806 | A16859 | 418 | A16806 | A16866 | 319 |
| A16806 | A16905 | 423 | A16806 | A16913 | 385 |
| A16806 | A17030 | 373 | A16806 | A17190 | 366 |
| A16807 | A16824 | 313 | A16808 | A16821 | 152 |
| A16808 | A16905 | 195 | A16820 | A16928 | 63  |
| A16821 | A16927 | 177 | A16822 | A16879 | 240 |
| A16822 | A16947 | 256 | A16824 | A16905 | 323 |
| A16824 | A16913 | 378 | A16824 | A16944 | 368 |
| A16824 | A16954 | 347 | A16824 | A17018 | 360 |
| A16824 | A17035 | 326 | A16824 | A17211 | 356 |
| A16827 | A16875 | 406 | A16827 | A17071 | 307 |
| A16828 | A17036 | 63  | A16829 | A16868 | 380 |
| A16829 | A16874 | 416 | A16829 | A16905 | 394 |
| A16829 | A16913 | 351 | A16829 | A16944 | 338 |
| A16829 | A17018 | 329 | A16829 | A17030 | 333 |
| A16829 | A17190 | 324 | A16831 | A16832 | 477 |
| A16836 | A17007 | 372 | A16838 | A16866 | 238 |
| A16838 | A16874 | 301 | A16838 | A16900 | 319 |
| A16838 | A16905 | 377 | A16838 | A16944 | 319 |

|        |        |     |        |        |     |
|--------|--------|-----|--------|--------|-----|
| A16838 | A16954 | 291 | A16838 | A17015 | 382 |
| A16838 | A17033 | 305 | A16838 | A17035 | 262 |
| A16838 | A17211 | 302 | A16840 | A16994 | 408 |
| A16841 | A17134 | 321 | A16843 | A17167 | 395 |
| A16844 | A17019 | 362 | A16846 | A17045 | 63  |
| A16852 | A16968 | 409 | A16852 | A17041 | 379 |
| A16858 | A16859 | 425 | A16858 | A16913 | 396 |
| A16858 | A17190 | 380 | A16859 | A16907 | 388 |
| A16859 | A16913 | 409 | A16859 | A17190 | 395 |
| A16866 | A16905 | 413 | A16866 | A17012 | 257 |
| A16866 | A17019 | 324 | A16866 | A17030 | 274 |
| A16866 | A17033 | 263 | A16866 | A17125 | 278 |
| A16866 | A17190 | 263 | A16868 | A16905 | 352 |
| A16868 | A16944 | 389 | A16874 | A16900 | 335 |
| A16874 | A16954 | 311 | A16874 | A17015 | 286 |
| A16874 | A17035 | 283 | A16874 | A17211 | 319 |
| A16875 | A16895 | 352 | A16875 | A16897 | 407 |
| A16875 | A16944 | 323 | A16875 | A17039 | 340 |
| A16875 | A17071 | 466 | A16876 | A16899 | 451 |
| A16876 | A17138 | 313 | A16878 | A16928 | 438 |
| A16879 | A16947 | 486 | A16879 | A16970 | 468 |
| A16881 | A17184 | 63  | A16886 | A16899 | 347 |
| A16891 | A16910 | 461 | A16895 | A16897 | 488 |
| A16895 | A17039 | 386 | A16895 | A17071 | 355 |
| A16897 | A17039 | 353 | A16897 | A17071 | 311 |
| A16900 | A16954 | 328 | A16900 | A17211 | 337 |
| A16905 | A16913 | 314 | A16905 | A16944 | 467 |
| A16905 | A16954 | 385 | A16905 | A17012 | 277 |
| A16905 | A17014 | 412 | A16905 | A17018 | 288 |
| A16905 | A17030 | 445 | A16905 | A17033 | 283 |
| A16905 | A17144 | 266 | A16905 | A17190 | 281 |
| A16913 | A16954 | 341 | A16913 | A17018 | 433 |
| A16913 | A17030 | 358 | A16913 | A17035 | 318 |
| A16913 | A17190 | 430 | A16913 | A17211 | 348 |
| A16918 | A16924 | 63  | A16918 | A16929 | 63  |
| A16918 | A16956 | 63  | A16918 | A16974 | 63  |
| A16924 | A16929 | 63  | A16924 | A16956 | 63  |
| A16924 | A16974 | 63  | A16927 | A16982 | 414 |
| A16929 | A16956 | 63  | A16929 | A16974 | 63  |
| A16930 | A17134 | 474 | A16936 | A17015 | 724 |
| A16936 | A17028 | 725 | A16939 | A17140 | 160 |
| A16941 | A17185 | 63  | A16944 | A17012 | 422 |
| A16944 | A17017 | 328 | A16947 | A16970 | 384 |
| A16954 | A17018 | 318 | A16954 | A17030 | 323 |
| A16954 | A17033 | 313 | A16954 | A17035 | 274 |
| A16954 | A17211 | 411 | A16955 | A17107 | 430 |

|        |        |     |        |        |     |
|--------|--------|-----|--------|--------|-----|
| A16956 | A16974 | 63  | A16959 | A17040 | 318 |
| A16968 | A17007 | 357 | A16968 | A17041 | 463 |
| A16986 | A16987 | 489 | A16994 | A16996 | 373 |
| A17003 | A17051 | 358 | A17006 | A17092 | 400 |
| A17007 | A17041 | 302 | A17012 | A17017 | 307 |
| A17012 | A17033 | 319 | A17013 | A17030 | 265 |
| A17013 | A17033 | 254 | A17013 | A17211 | 489 |
| A17014 | A17015 | 319 | A17014 | A17030 | 435 |
| A17015 | A17028 | 728 | A17015 | A17035 | 245 |
| A17015 | A17114 | 368 | A17018 | A17030 | 335 |
| A17018 | A17035 | 291 | A17018 | A17190 | 328 |
| A17018 | A17211 | 327 | A17020 | A17078 | 201 |
| A17021 | A17221 | 63  | A17028 | A17114 | 383 |
| A17030 | A17190 | 332 | A17035 | A17211 | 285 |
| A17039 | A17071 | 474 | A17040 | A17041 | 236 |
| A17041 | A17089 | 256 | A17043 | A17211 | 363 |
| A17046 | A17051 | 251 | A17046 | A17092 | 412 |
| A17053 | A17113 | 433 | A17054 | A17086 | 436 |
| A17054 | A17087 | 441 | A17059 | A17168 | 216 |
| A17063 | A17198 | 488 | A17077 | A17168 | 311 |
| A17086 | A17087 | 419 | A17099 | A17100 | 469 |
| A17099 | A17101 | 445 | A17100 | A17101 | 447 |
| A17102 | A17198 | 168 | A17107 | A17140 | 176 |
| A17121 | A17126 | 400 | A17128 | A17134 | 263 |
| A17131 | A17135 | 414 | A17133 | A17143 | 469 |
| A17133 | A17144 | 302 | A17134 | A17140 | 491 |
| A17137 | A17140 | 246 | A17139 | A17189 | 329 |
| A17140 | A17146 | 123 | A17140 | A17208 | 393 |
| A17143 | A17144 | 303 | A17178 | A17179 | 452 |
| A17215 | A17216 | 899 | A17215 | A17217 | 899 |
| A17216 | A17217 | 899 | A17225 | A17226 | 63  |
