# Supplementary material for: Predicting Chemical Toxicity Effects Based on Chemical-Chemical Interactions
Source: PubMed Central journal article supplement (PMC3574107; doi:10.1371/journal.pone.0056517), 2013-02-15
Supplement: pone.0056517.s003.pdf [file pone.0056517.s003.pdf]

**Table S3:** SAs (Benigni) and examples matching SAs in our dataset

| SAs                                                                                                                                                     | Examples                                                                                |
|---------------------------------------------------------------------------------------------------------------------------------------------------------|-----------------------------------------------------------------------------------------|
| 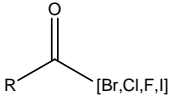 <p>acyl halides</p>                                                   | <p>dimethylcarbamylyl chloride (CID000006598)<br/>benzoyl chloride (CID000007412)</p>   |
|  <p>alkyl (C&lt;5) or benzyl ester of sulphonic or phosphonic acid</p> | <p>trichlorfon (CID000005853)<br/>ethyl p-toluenesulfonate (CID000006638)</p>           |
|  <p>N-methylol derivatives</p>                                         | <p>N-methylolacrylamide (CID000013543)</p>                                              |
|  <p>monohaloalkene</p>                                                | <p>vinyl fluoride (CID000006339)<br/>1-chloro-2-methylpropene (CID000010555)</p>        |
|  <p>S or N mustard</p>                                               | <p>2,2',2''-trichlorotriethylamine (CID000005561)<br/>sulfur mustard (CID000010461)</p> |
|  <p>propiolactones or propiosultones</p>                             | <p>propiolactone (CID000002365)<br/>1,3-propane sultone (CID000014264)</p>              |
|  <p>epoxides and aziridines</p>                                      | <p>3,4-epoxy-1-butene (CID000013586)<br/>aziridine (CID000009033)</p>                   |
|  <p>aliphatic halogens</p>                                           | <p>2-bromobutane (CID000006554)<br/>2-iodobutane (CID000010559)</p>                     |
|  <p>alkyl nitrite</p>                                                | <p>isobutyl nitrite (CID000010958)</p>                                                  |

|                                                                                                                                          |                                                                                                                         |
|------------------------------------------------------------------------------------------------------------------------------------------|-------------------------------------------------------------------------------------------------------------------------|
| 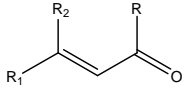 <p><math>\alpha,\beta</math> unsaturated carbonyls</p> | <p>acrylamide (CID000006579)<br/>2-butenal (CID000447466)</p>                                                           |
|  <p>simple aldehyde</p>                                 | <p>acetaldehyde (CID000000177)<br/>bromoacetaldehyde (CID000105131)</p>                                                 |
|  <p>quinones</p>                                        | <p>phenylbenzoquinone (CID000009688)<br/>chloranil (CID000008371)</p>                                                   |
|  <p>hydrazine</p>                                       | <p>1,1-dibutylhydrazine (CID000023902)<br/>hydrazine (CID000009321)</p>                                                 |
|  <p>aliphatic azo and azoxy</p>                         | <p>diazomethane (CID000009550)<br/>methylazoxymethanol acetate (CID005964719)</p>                                       |
|  <p>isocyanate and isothiocyanate groups</p>          | <p>toluene 2,4-diisocyanate (CID000011443)<br/>benzyl isothiocyanate (CID000002346)</p>                                 |
|  <p>alkyl carbamate and thiocarbamate</p>             | <p>ethyl butylcarbamate (CID000011577)<br/>pebulate (CID000014215)</p>                                                  |
| <p>polycyclic aromatic hydrocarbons</p>                                                                                                  | <p>dibenzo(a,i)pyrene (CID000009106)<br/>dibenzo(a,h)pyrene (CID000009108)</p>                                          |
| <p>heterocyclic polycyclic aromatic hydrocarbons</p>                                                                                     | <p>benzo(f)quinoline (CID000006796)<br/>benzo(b)naphtho(2,1-d)thiophene (CID000009198)</p>                              |
|  <p>alkyl and aryl <i>N</i>-nitroso groups</p>        | <p>2-methylnitrosopiperidine (CID000023677)<br/><i>N</i>-nitroso-<i>N</i>-butyl-<i>N</i>-propylamine (CID000032965)</p> |
|  <p>triazene groups</p>                               | <p>zidovudine (CID000035370)</p>                                                                                        |

|                                                                                                                                                                                        |                                                                                                                                                                                                                             |
|----------------------------------------------------------------------------------------------------------------------------------------------------------------------------------------|-----------------------------------------------------------------------------------------------------------------------------------------------------------------------------------------------------------------------------|
| 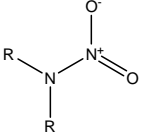 <p>aliphatic <i>N</i>-nitro group</p>                                                                | <p>dimethylnitramine (CID000020120)<br/> <i>N</i>-nitrodiethylamine (CID000023505)</p>                                                                                                                                      |
|  <p><math>\alpha,\beta</math> unsaturated aliphatic alkoxy group</p>                                  | <p>sterigmatocystin (CID005284457)<br/> aflatoxin G1 (CID000014421)</p>                                                                                                                                                     |
|  <p>aromatic nitroso group</p>                                                                        | <p>2-nitrosofluorene (CID000017271)<br/> 3,2'-dimethyl-4-nitrosobiphenyl (CID000051168)</p>                                                                                                                                 |
|  <p>nitro-aromatic</p>                                                                                | <p>4,4'-dinitrobiphenyl (CID000015216)<br/> 4-nitrophenyl (CID000119211)</p>                                                                                                                                                |
|  <p>primary aromatic amine, hydroxyl amine and its derived esters<br/> or amine generating group</p> | <p>4-aminophenyl (CID0000181201)<br/> <i>N</i>-hydroxy-4-aminobiphenyl (CID000081261)<br/> <i>N</i>-acetoxy-4-acetylamino-biphenyl (CID000091584)<br/> toluene 2,4-diisocyanate (CID000011443)<br/> DADI (CID000007069)</p> |
|  <p>aromatic mono- and dialkylamine</p>                                                             | <p><i>N,N,N',N'</i>-tetramethyl-4,4'-methylenedianiline (CID000007567)<br/> 4-dimethylaminostilbene (CID000640024)</p>                                                                                                      |
|  <p>aromatic <i>N</i>-alkyl amine</p>                                                               | <p><i>N,N'</i>-diacetylbenzidine (CID000011942)<br/> 4-acetylamino-biphenyl (CID000019998)</p>                                                                                                                              |
|  <p>coumarins and Furocoumarins</p>                                                                 | <p>6-methylcoumarin (CID000007092)<br/> coumarin (CID000000323)</p>                                                                                                                                                         |
